# Supplementary material for: Genomic and Metabolomic Analyses of the Marine Fungus Emericellopsis cladophorae: Insights into Saltwater Adaptability Mechanisms and Its Biosynthetic Potential
Source: MDPI journal article supplement (doi:10.3390/jof8010031), 2021-12-30

Unknown: Unknown (0.79\_556.8902m/z)  
Compound in Library Factor = 0

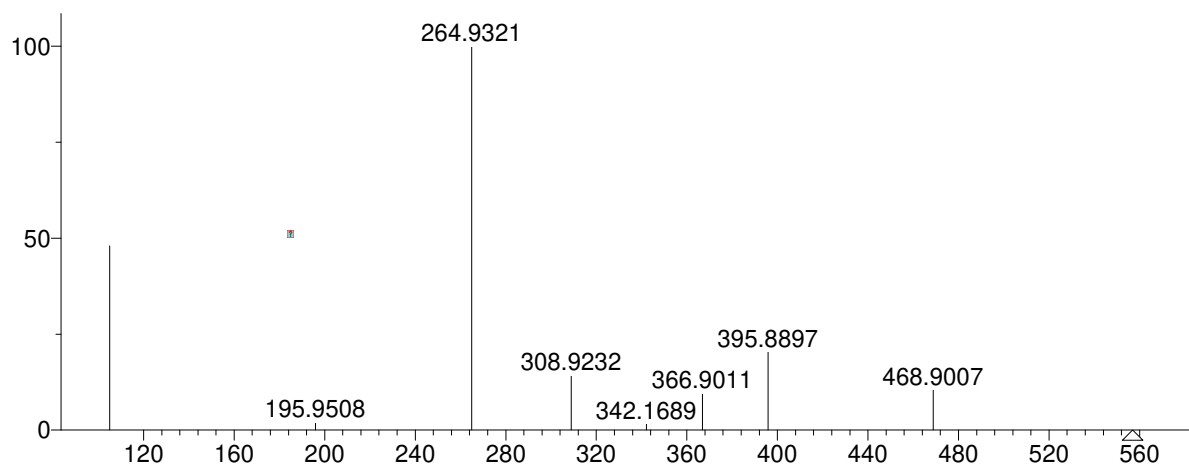

Hit 1 : Benzamide, 5-bromo-2-[(2-chloro-4-iodophenyl)amino]-N-(cyclopropylmethoxy)-3,4-difluoro- [M+H]<sup>+</sup> IT 3  
C<sub>17</sub>H<sub>13</sub>BrClF<sub>2</sub>IN<sub>2</sub>O<sub>2</sub>; MF: 0; RMF: 17; Prob 100.0%; CAS: 212631-67-9; Lib: nist\_msms; ID: 372907.

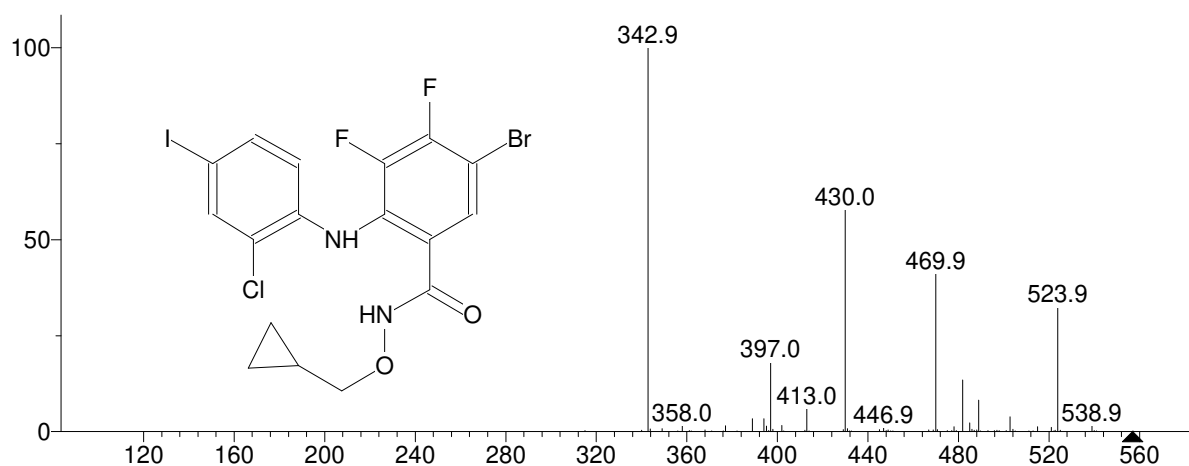

Unknown: Unknown (0.80\_262.9280m/z)  
Compound in Library Factor = 0

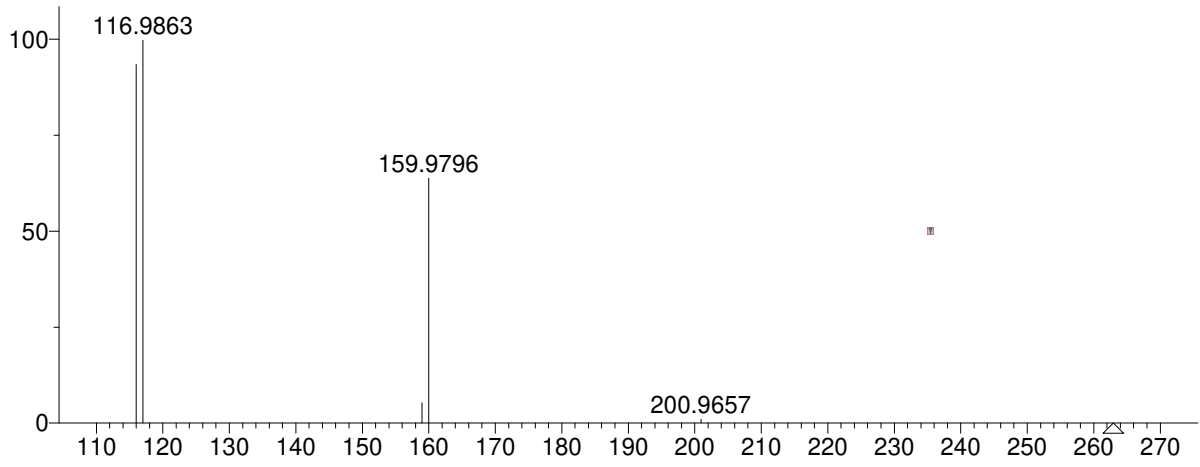



Unknown: Unknown (0.80\_442.9105m/z)  
Compound in Library Factor = 0

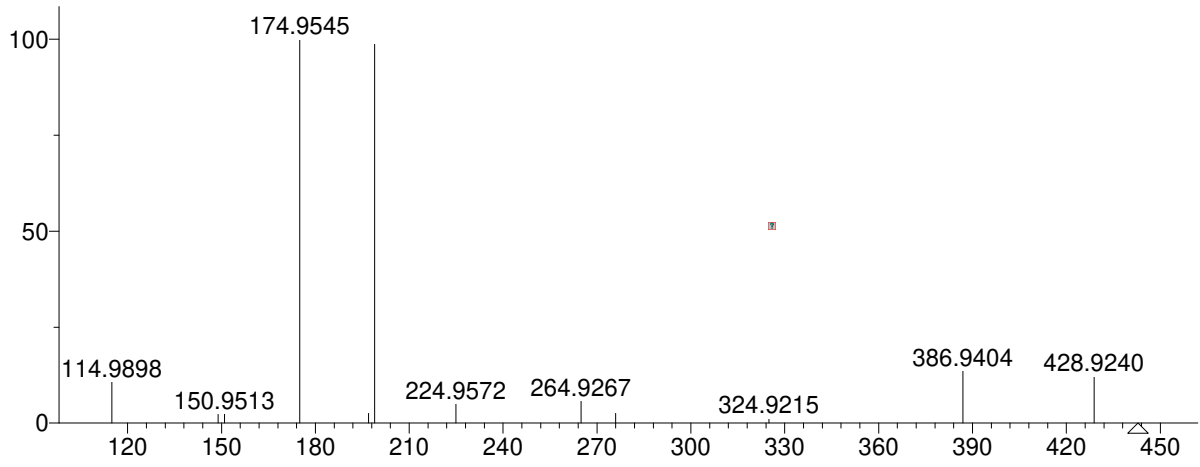

Unknown: Unknown (0.82\_270.9416m/z)  
Compound in Library Factor = -3273

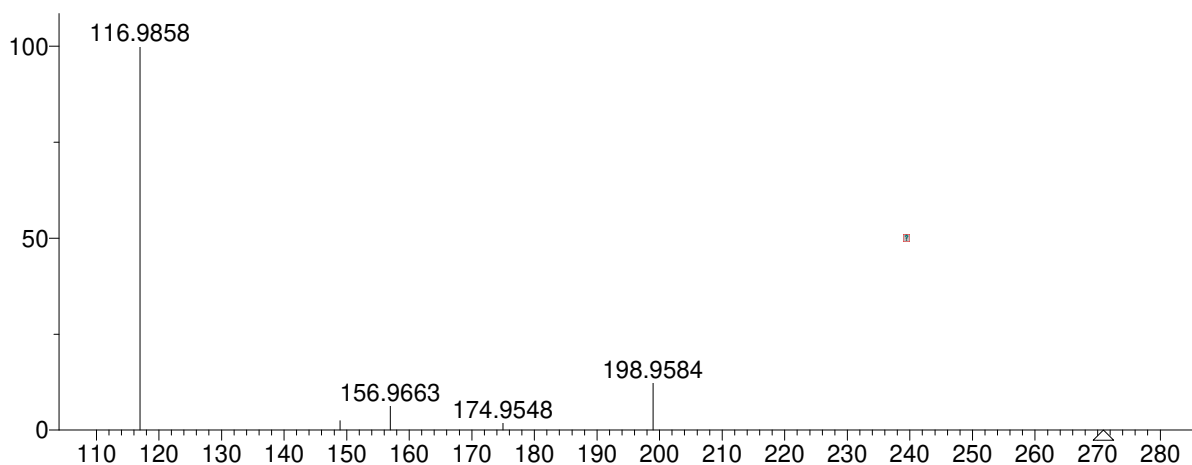

Hit 1 : Tienilic acid [M-H-C<sub>2</sub>H<sub>2</sub>O<sub>2</sub>]- HCD 78V P=270.9  
C<sub>13</sub>H<sub>8</sub>Cl<sub>2</sub>O<sub>4</sub>S; MF: 15; RMF: 478; Prob 100.0%; CAS: 40180-04-9; Lib: nist\_msms; ID: 429843.

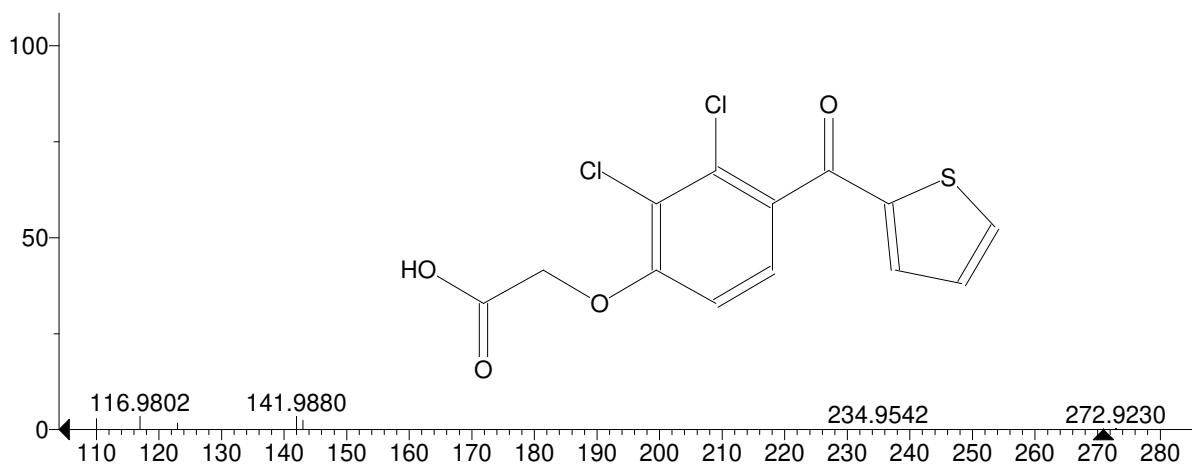

Unknown: Unknown (0.82\_426.9167m/z)  
Compound in Library Factor = 0

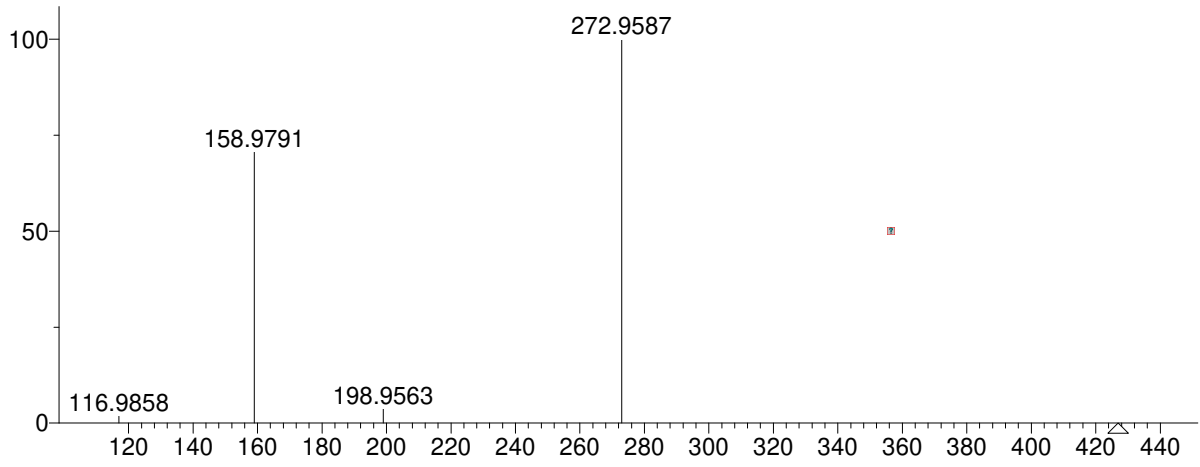

\*\* Search Report Page 1 of 1 \*\*

Unknown: Unknown (0.82\_558.8905m/z)  
Compound in Library Factor = 0

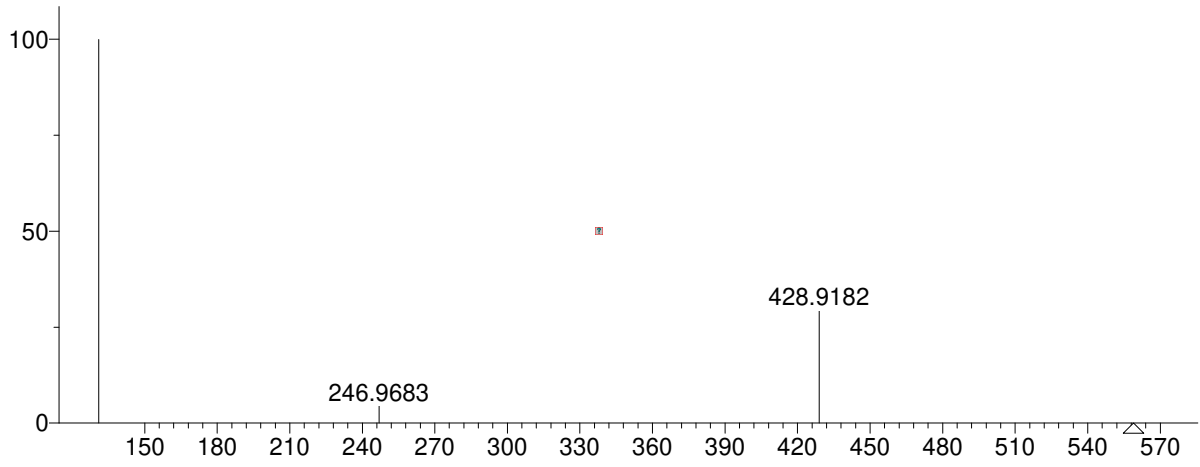

Unknown: Unknown (0.82\_730.8721m/z)  
Compound in Library Factor = -1848

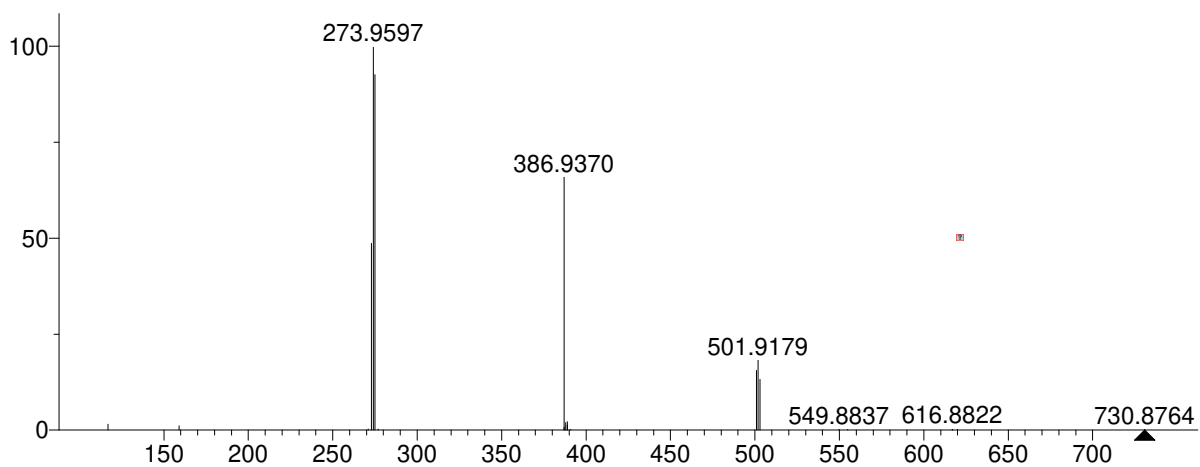

Hit 1 : Proll, DA1a12 Angiotensin (I) [M-2H]2- HCD 26eV P=730.9  
C70H101N19O16; MF: 33; RMF: 585; Prob 100.0%; Lib: nist\_msms2; ID: 76615.

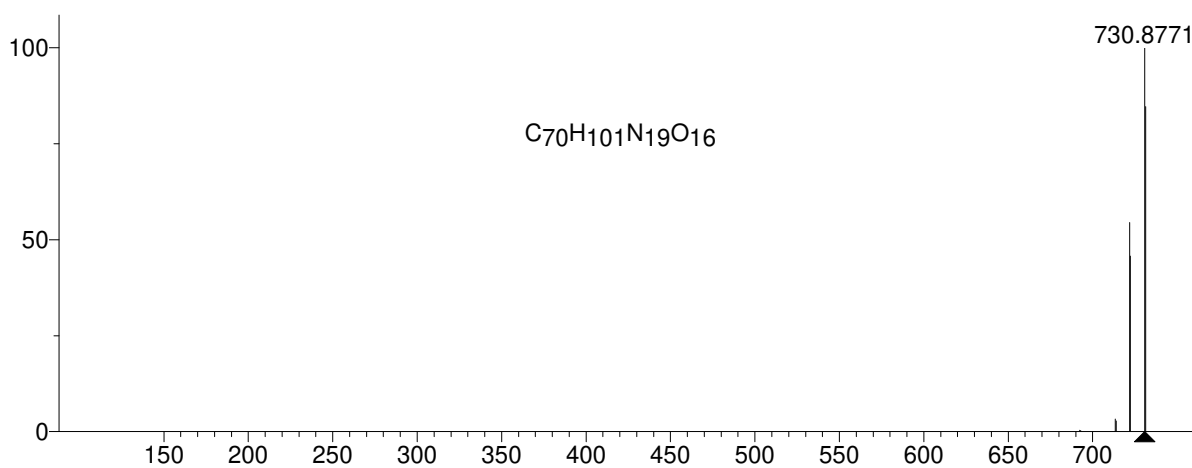

Unknown: Unknown (0.83\_728.8746m/z)  
Compound in Library Factor = 0

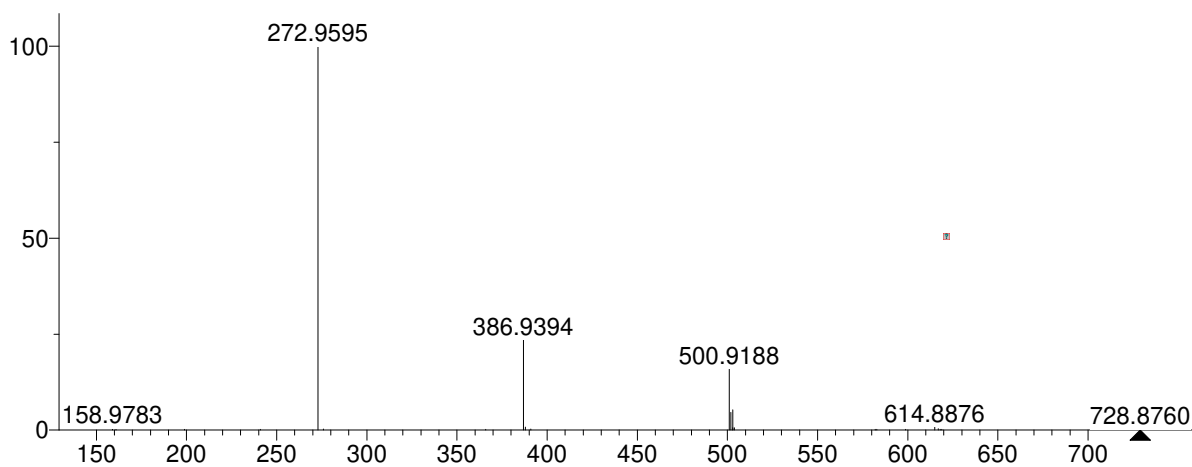

Hit 1 : CART (1-39), human, rat [M+6H]<sup>6+</sup> QTOF 2V P=728.9  
C<sub>188</sub>H<sub>303</sub>N<sub>57</sub>O<sub>63</sub>; MF: 0; RMF: 14; Prob 100.0%; Lib: nist\_msms2; ID: 35836.

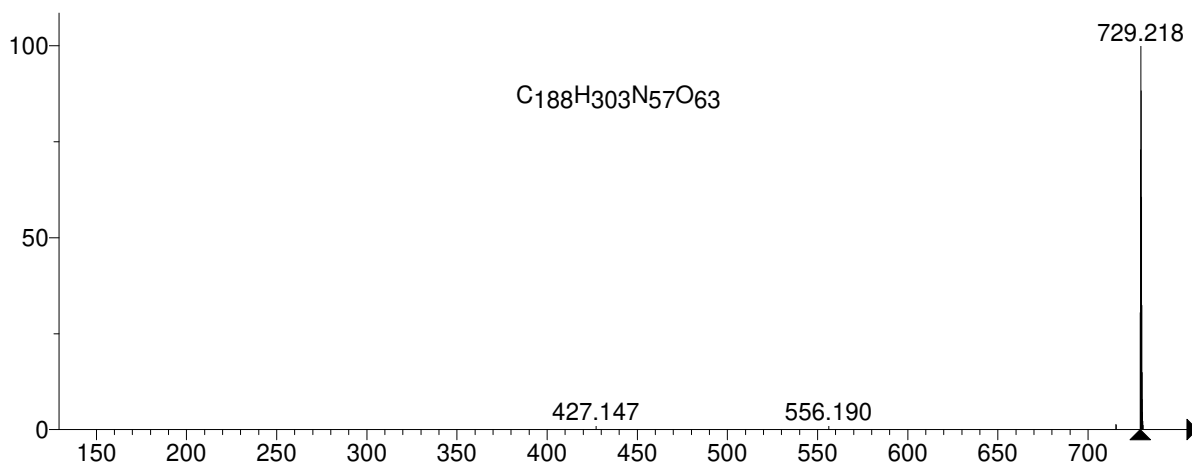

Unknown: Unknown (0.84\_402.9143m/z)  
Compound in Library Factor = 0

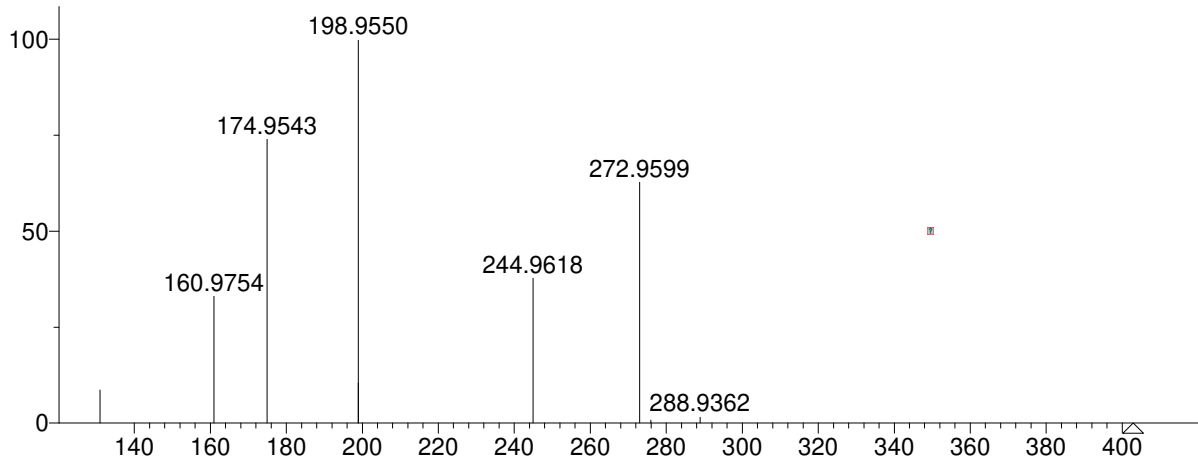

Unknown: Unknown (0.86\_586.9023m/z)  
Compound in Library Factor = 0

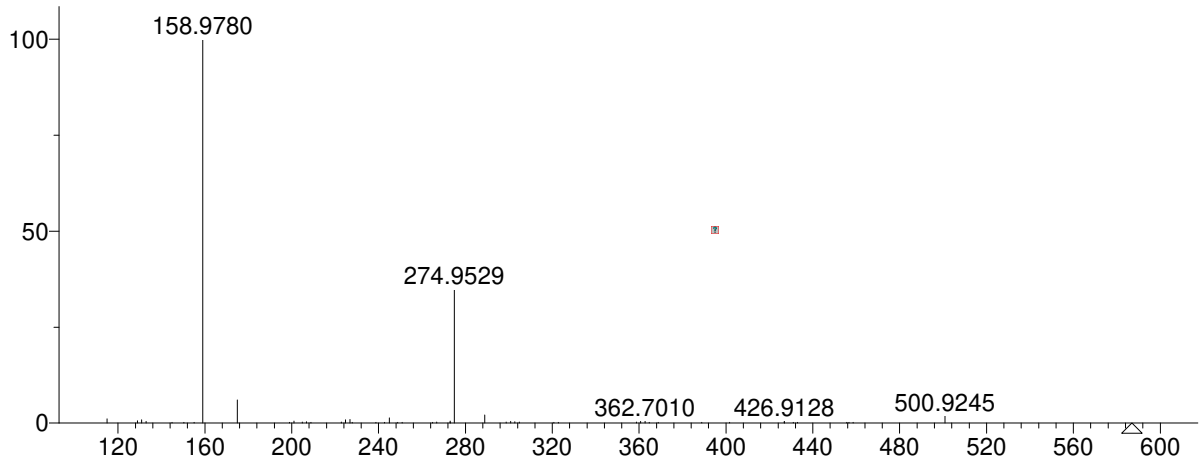



Unknown: Unknown (0.86\_731.8780m/z)  
Compound in Library Factor = 0

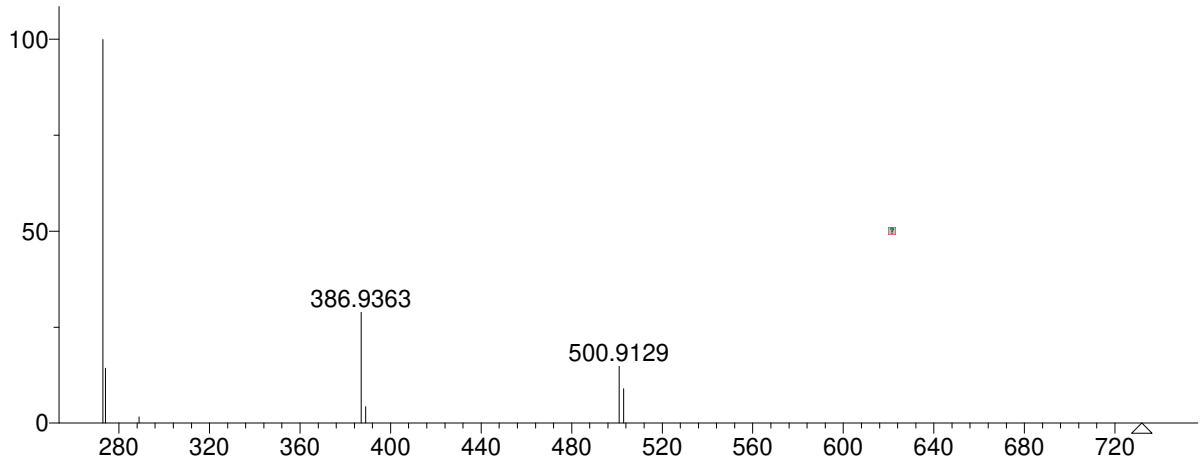

Unknown: Unknown (0.87\_617.8931m/z)  
Compound in Library Factor = 0

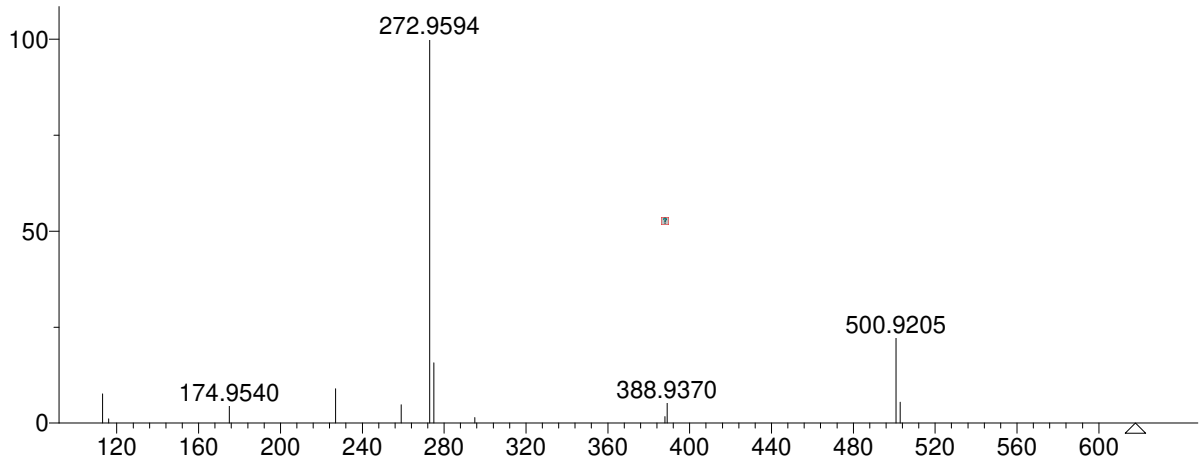

Unknown: Unknown (0.89\_294.9504m/z)  
Compound in Library Factor = 0

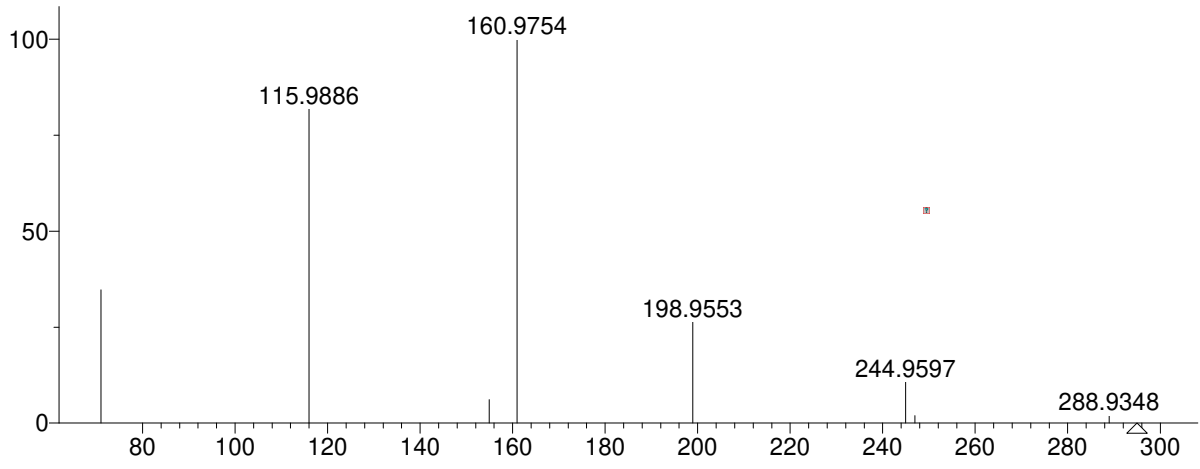

Unknown: Unknown (0.89\_358.9415m/z)  
Compound in Library Factor = 0

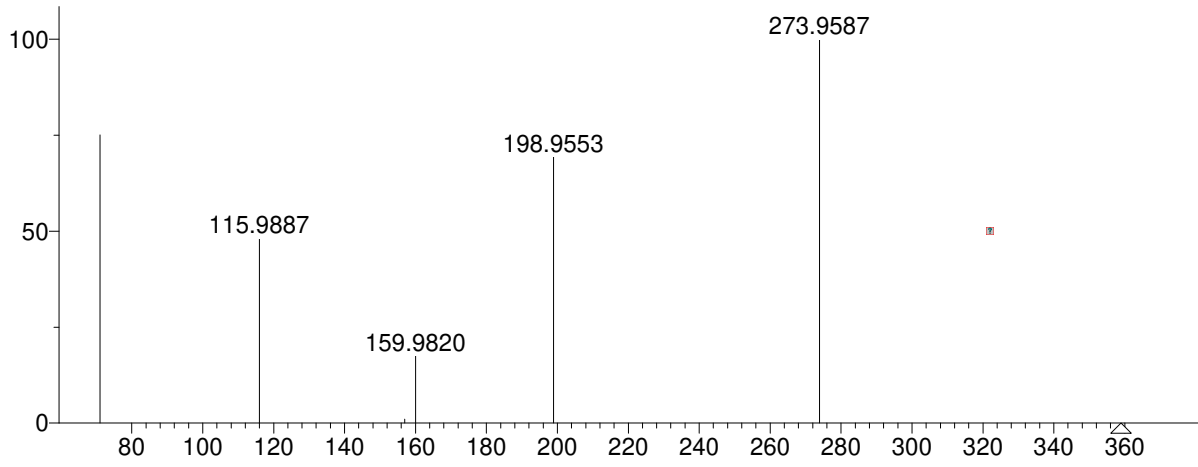

Unknown: Unknown (0.89\_362.9376m/z)  
Compound in Library Factor = 0

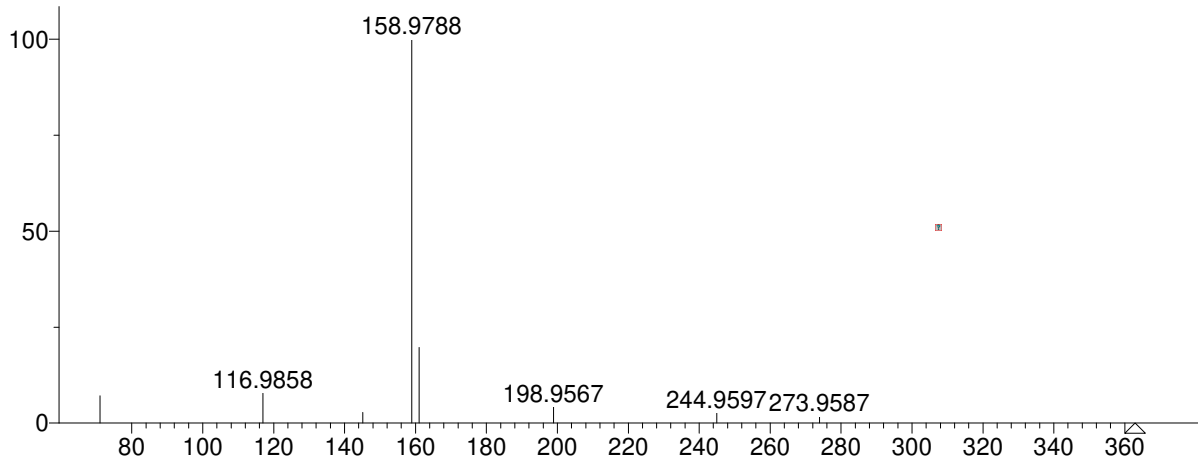

Unknown: Unknown (0.89\_540.8949m/z)  
Compound in Library Factor = 0

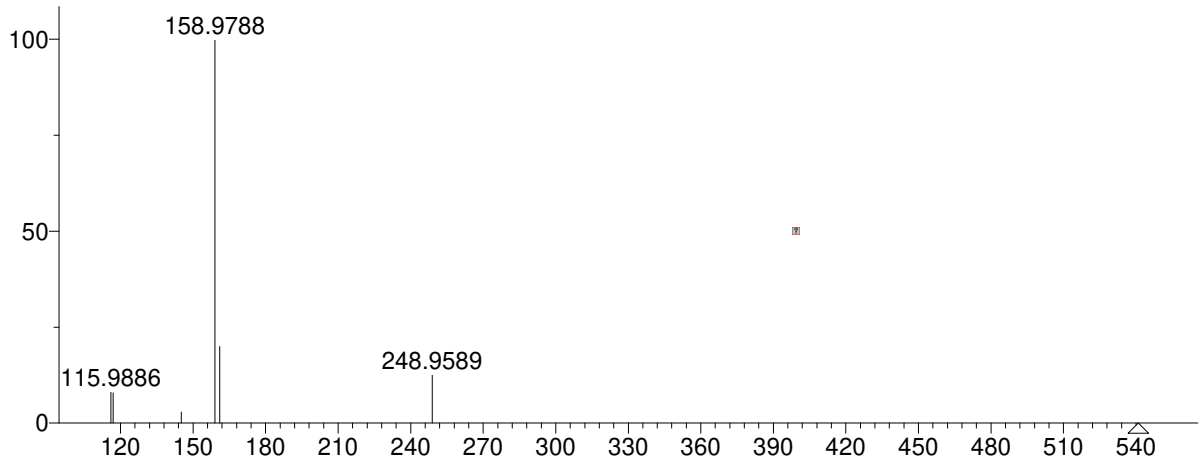

Unknown: Unknown (0.89\_542.8965m/z)  
Compound in Library Factor = 0

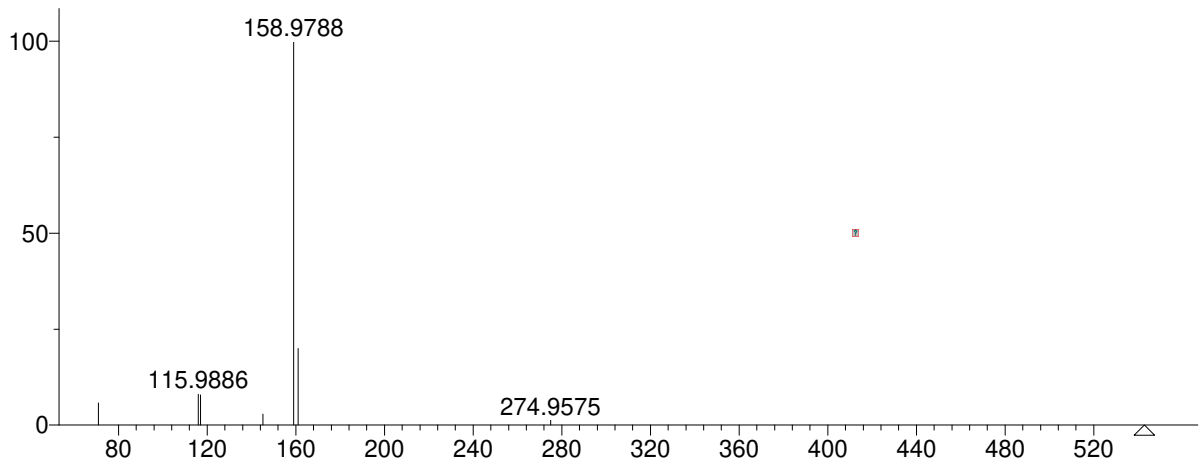

Unknown: Unknown (0.89\_616.8975m/z)  
Compound in Library Factor = 0

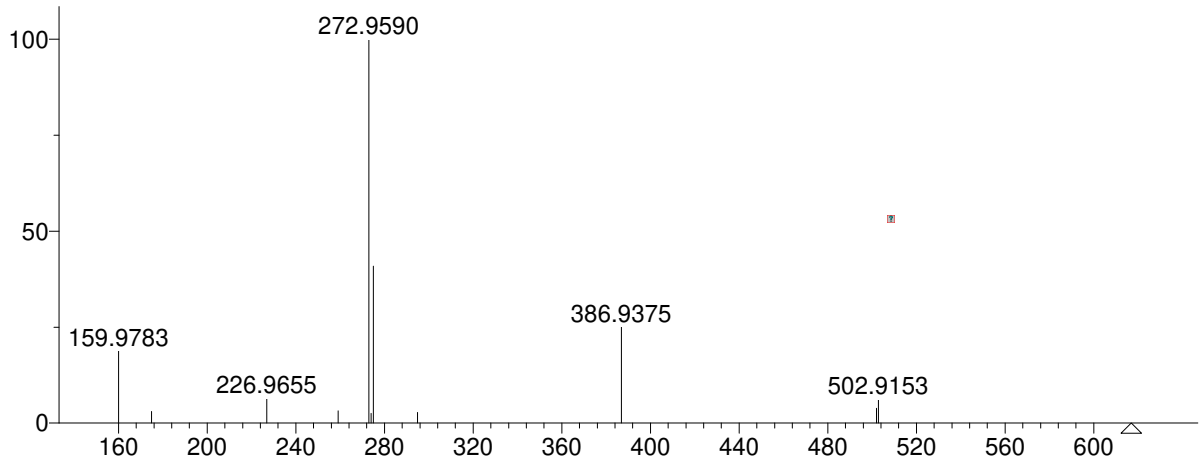



Unknown: Unknown (0.89\_728.8746m/z)  
Compound in Library Factor = 0

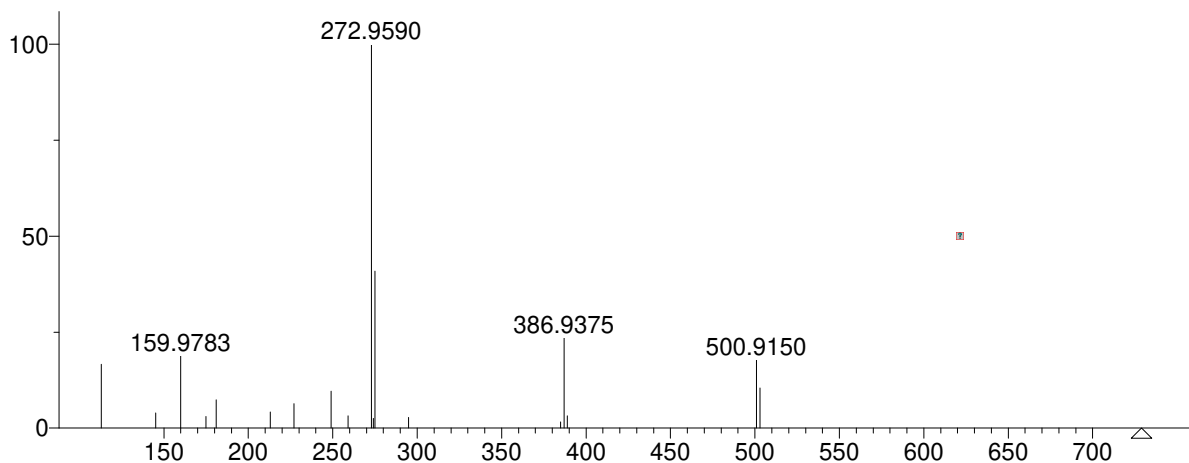

Hit 1 : CART (1-39), human, rat [M+6H]<sup>6+</sup> QTOF 45V P=728.9  
C<sub>188</sub>H<sub>303</sub>N<sub>57</sub>O<sub>63</sub>; MF: 0; RMF: 18; Prob 100.0%; Lib: nist\_msms2; ID: 35851.

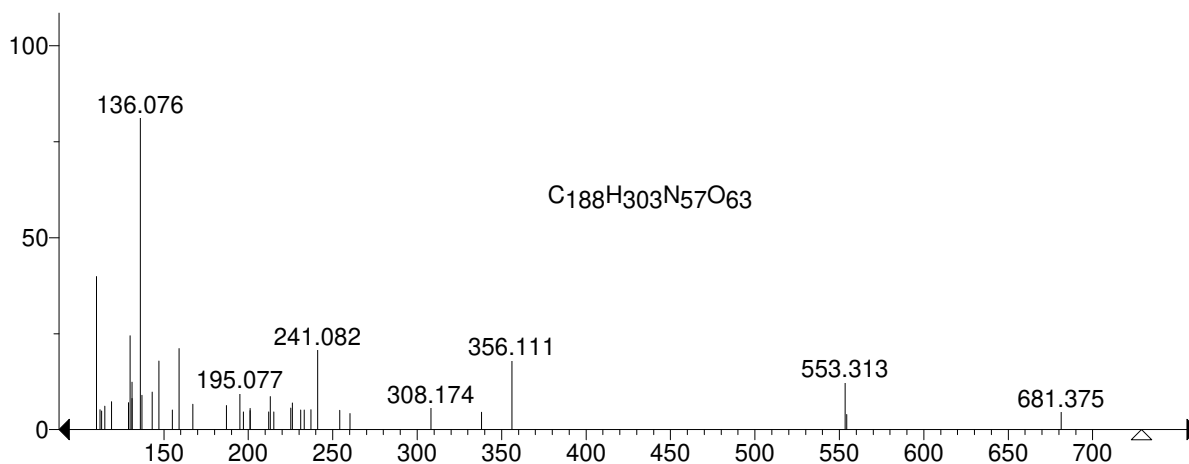

Unknown: Unknown (0.89\_730.8761m/z)  
Compound in Library Factor = 0

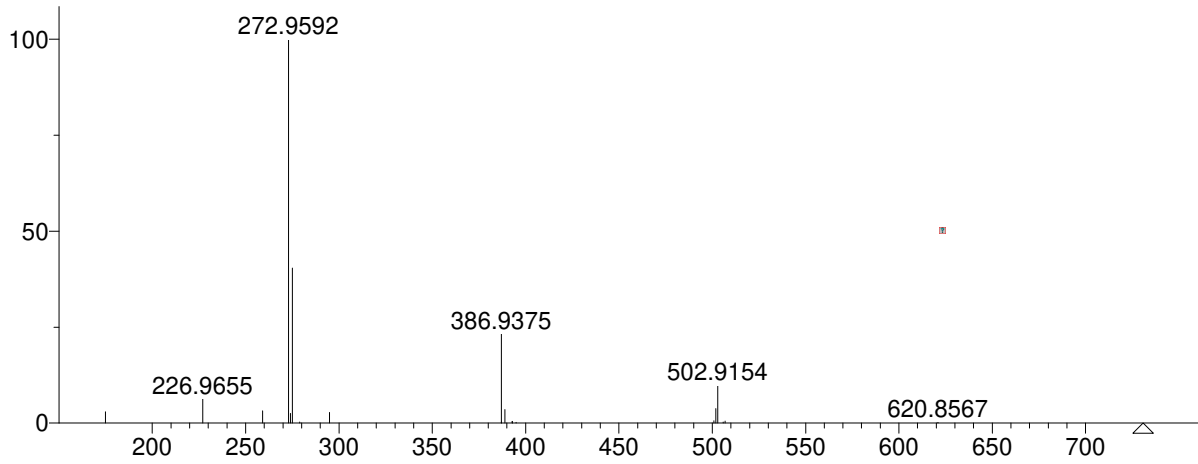

Hit 1 : Proll, DA1a12 Angiotensin (I) [M-2H]<sup>2-</sup> HCD 49eV P=730.9  
C70H101N19O16; MF: 0; RMF: 1; Prob 100.0%; Lib: nist\_msms2; ID: 76619.

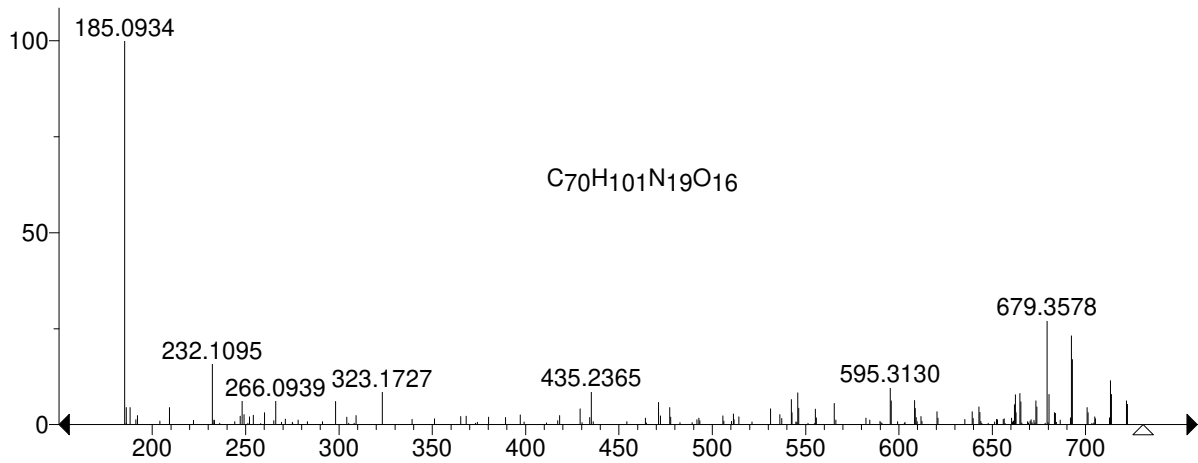

Unknown: Unknown (0.90\_386.9380m/z)  
Compound in Library Factor = 0

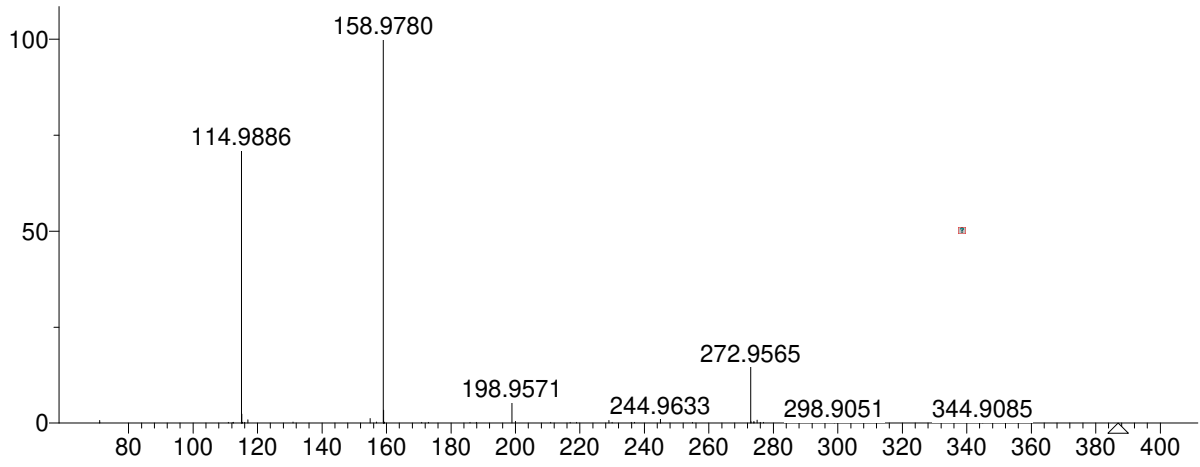

Unknown: Unknown (0.90\_427.9170m/z)  
Compound in Library Factor = 0

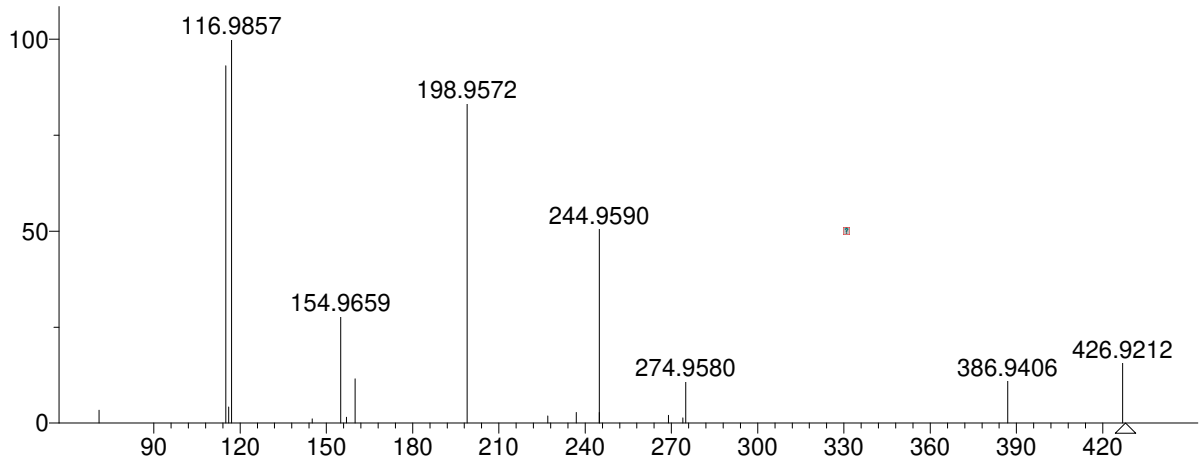

Unknown: Unknown (0.90\_500.9186m/z)  
Compound in Library Factor = 0

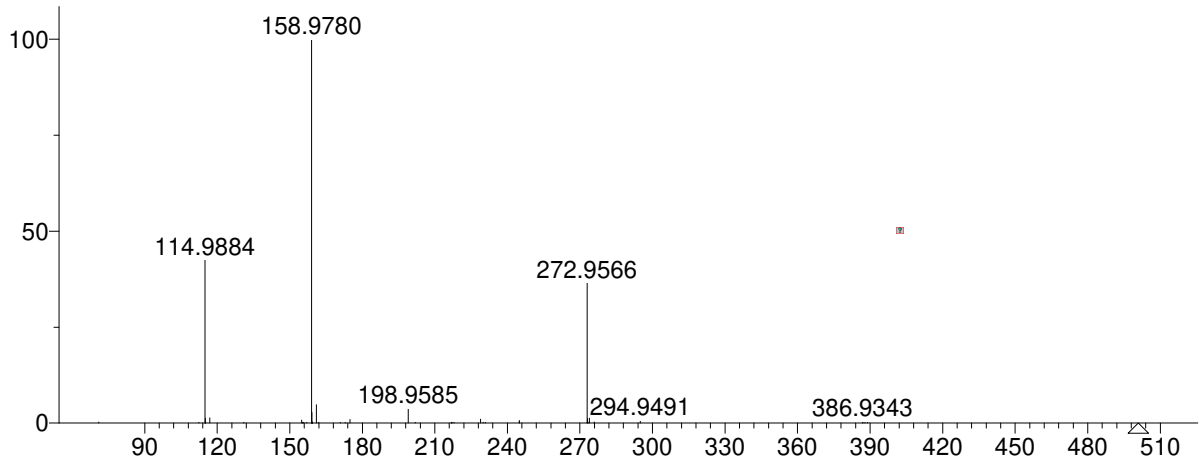

Unknown: Unknown (0.90\_588.8990m/z)  
Compound in Library Factor = 0

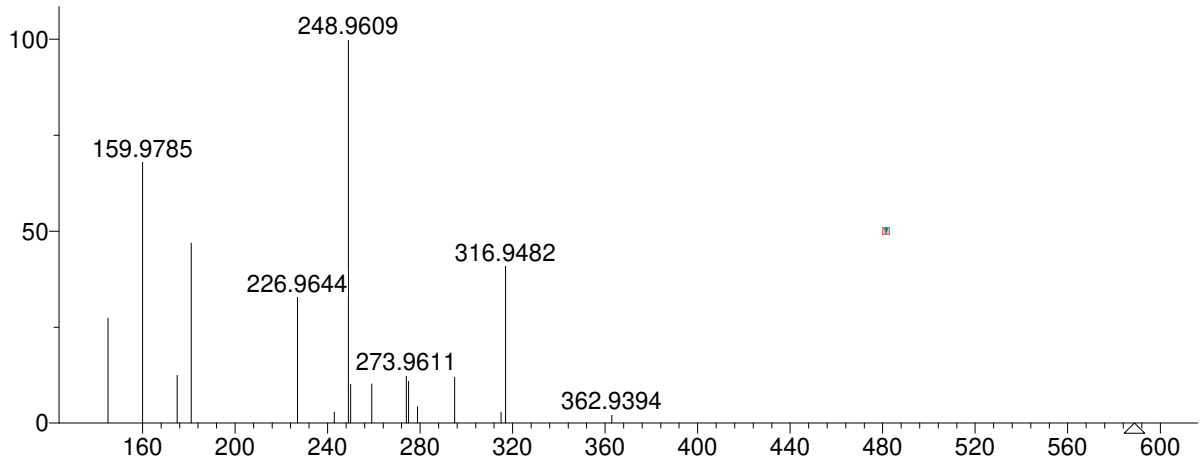

Unknown: Unknown (0.90\_614.8971m/z)  
Compound in Library Factor = 0

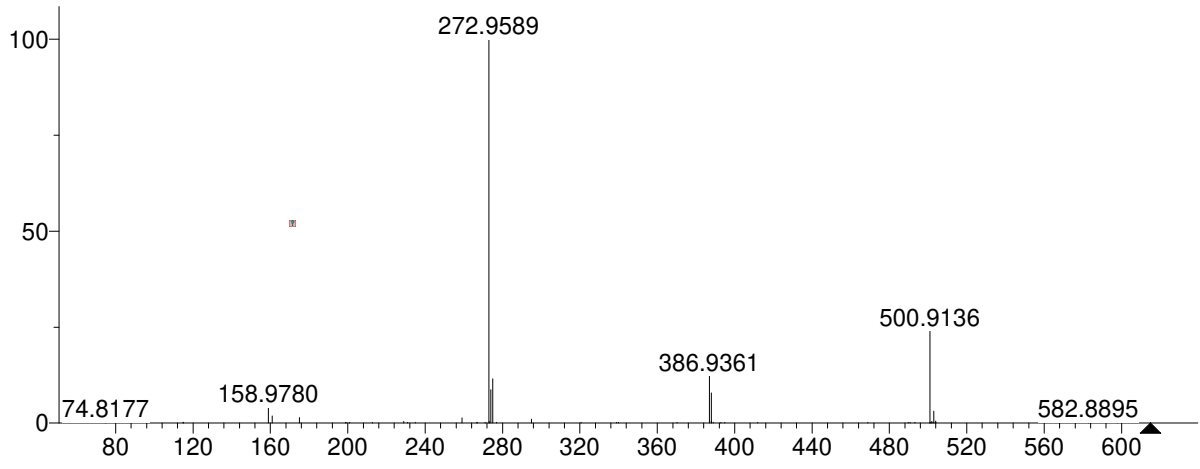

Unknown: Unknown (0.90\_700.8833m/z)  
Compound in Library Factor = 0

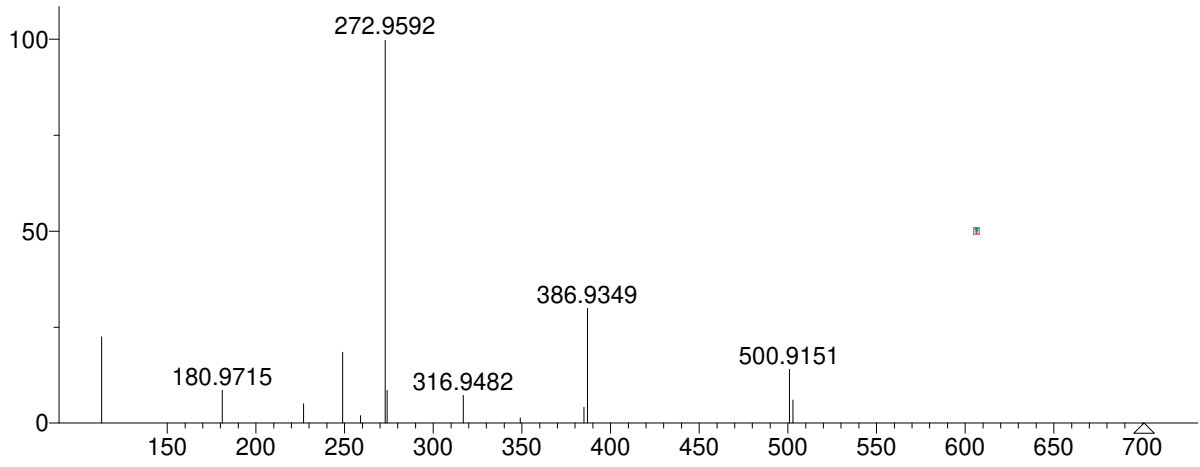



Unknown: Unknown (0.91\_472.9235m/z)  
Compound in Library Factor = 0

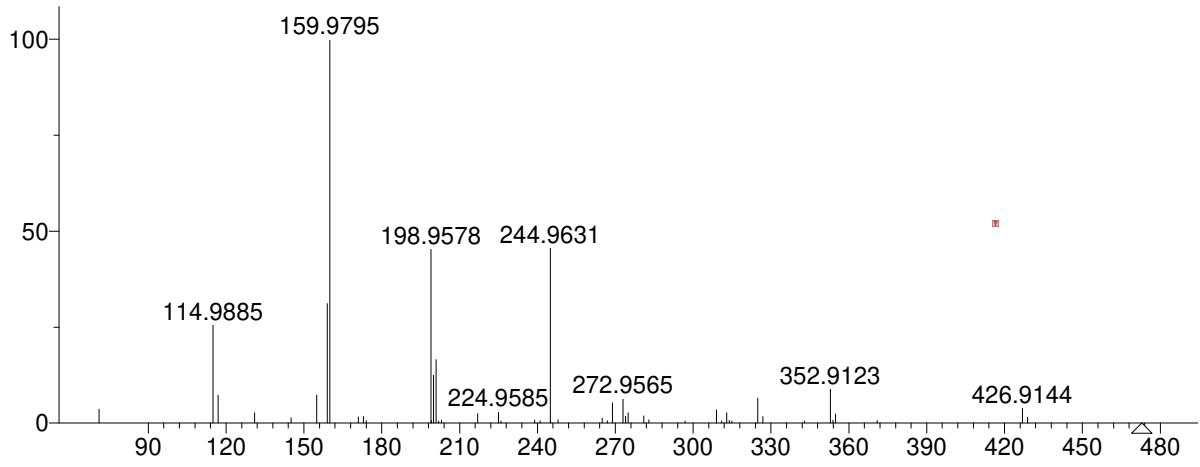

Unknown: Unknown (0.91\_540.8995m/z)  
Compound in Library Factor = 0

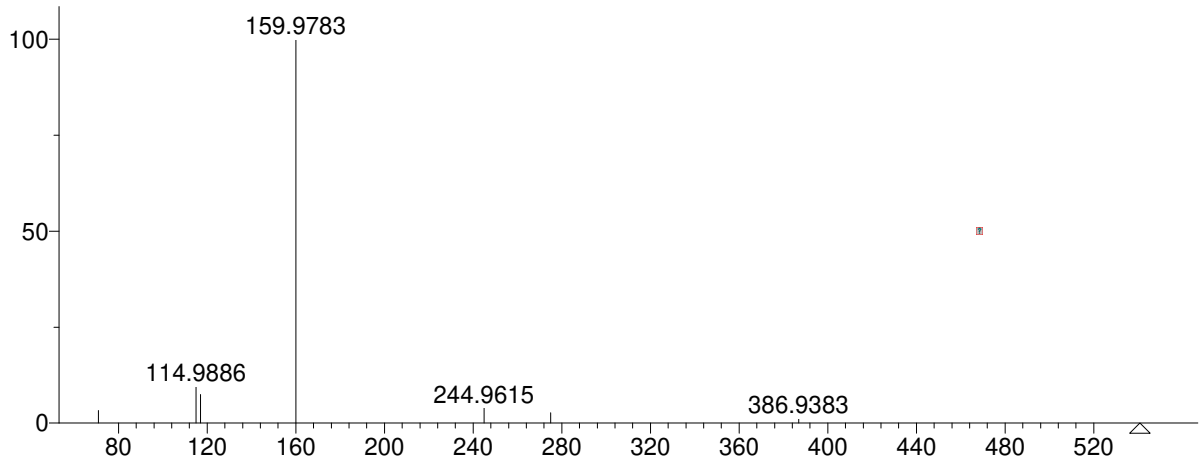

Unknown: Unknown (0.92\_244.9629m/z)  
Compound in Library Factor = 0

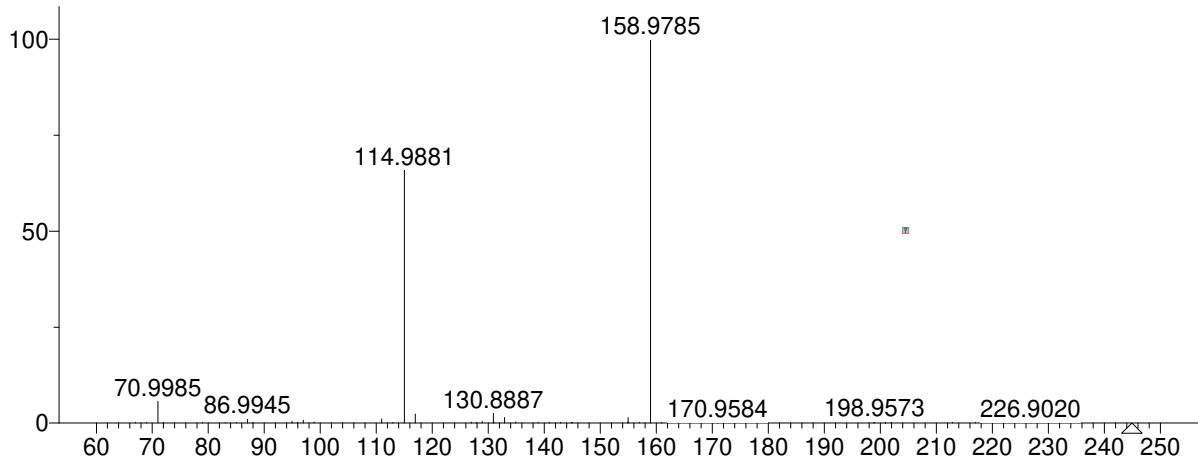

Unknown: Unknown (0.92\_272.9581m/z)  
Compound in Library Factor = 0

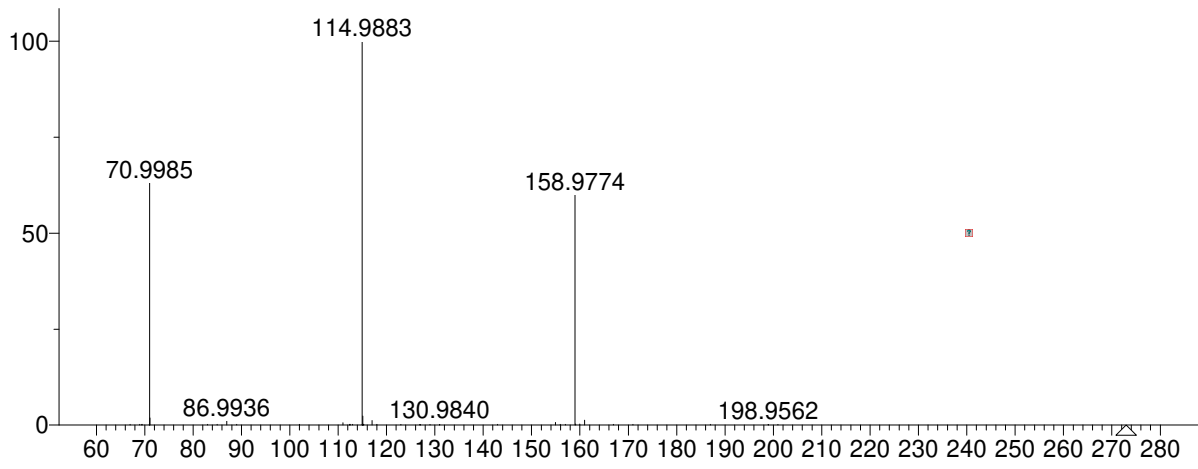

Unknown: Unknown (0.92\_273.1131m/z)  
Compound in Library Factor = 0

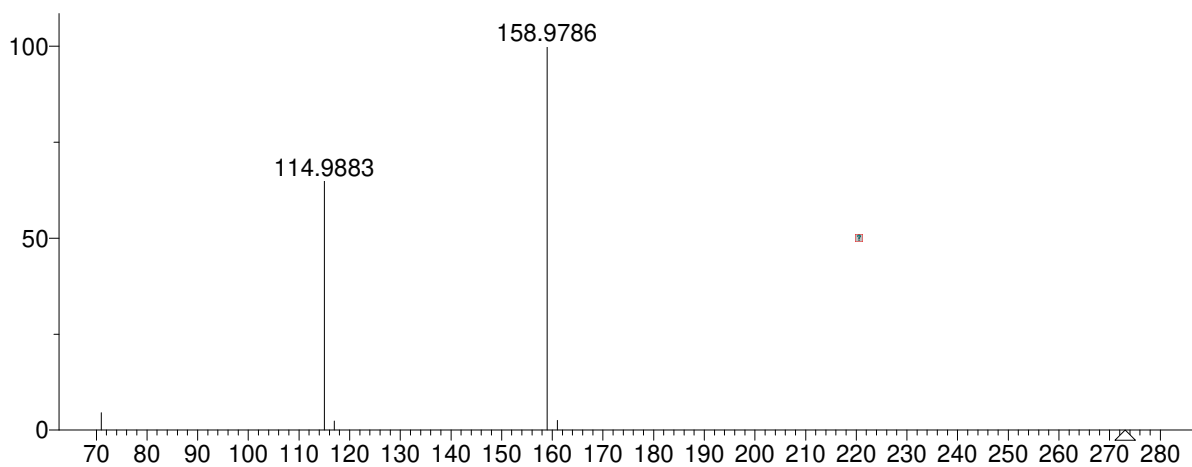

Hit 1 : ANGOLENSIN (R) [M+H]<sup>+</sup> 65HCD P=273.1  
C<sub>16</sub>H<sub>16</sub>O<sub>4</sub>; MF: 0; RMF: 1; Prob 100.0%; Lib: mona-export-vf-npl\_gexactive; ID: 2856.

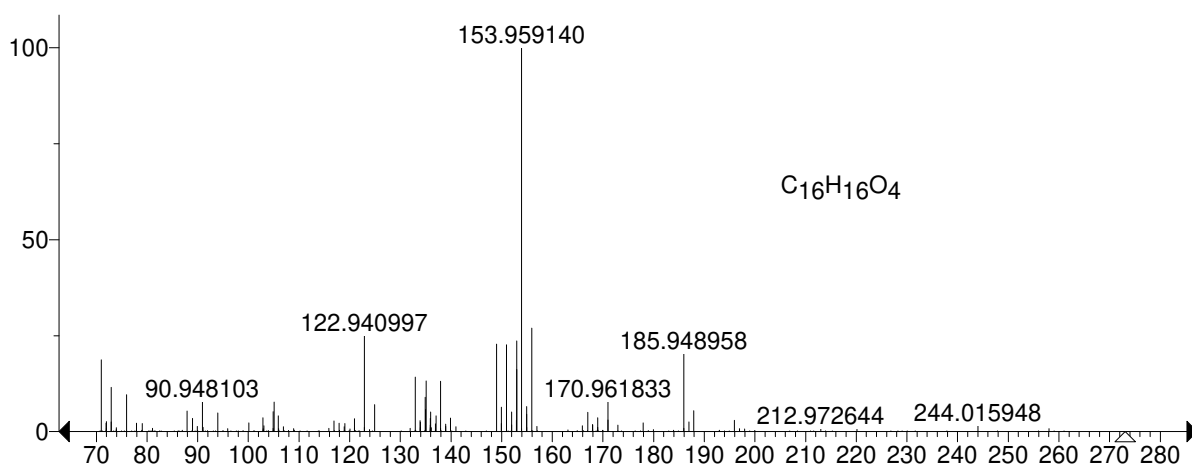

Unknown: Unknown (0.92\_520.9080m/z)  
Compound in Library Factor = 0

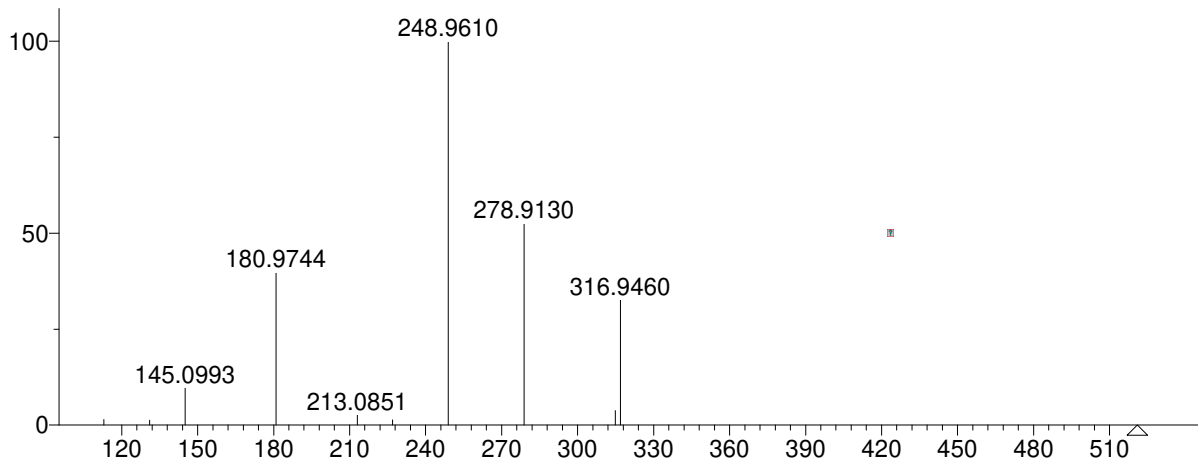

Unknown: Unknown (0.93\_158.9779m/z)  
Compound in Library Factor = 0

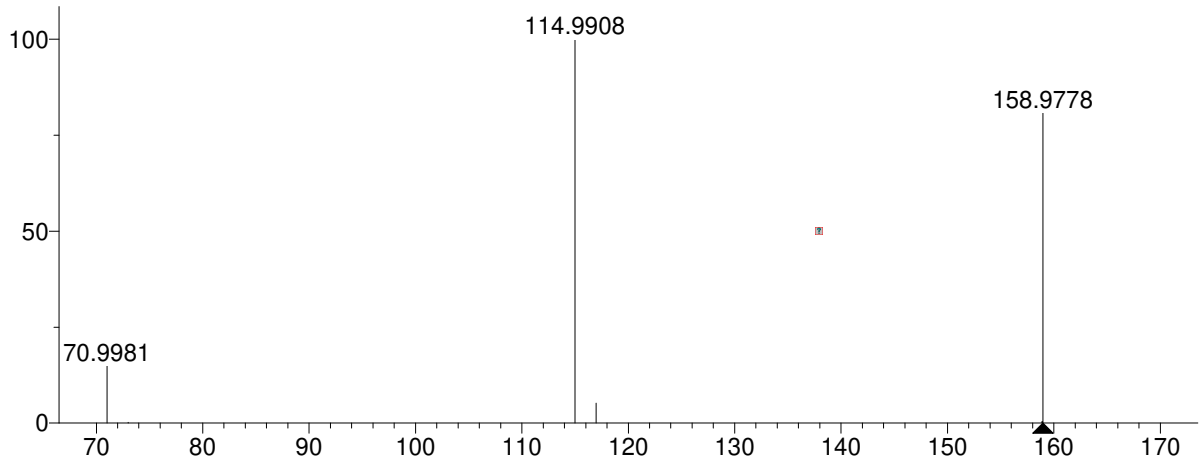

Unknown: Unknown (0.93\_164.9337m/z)  
Compound in Library Factor = 0

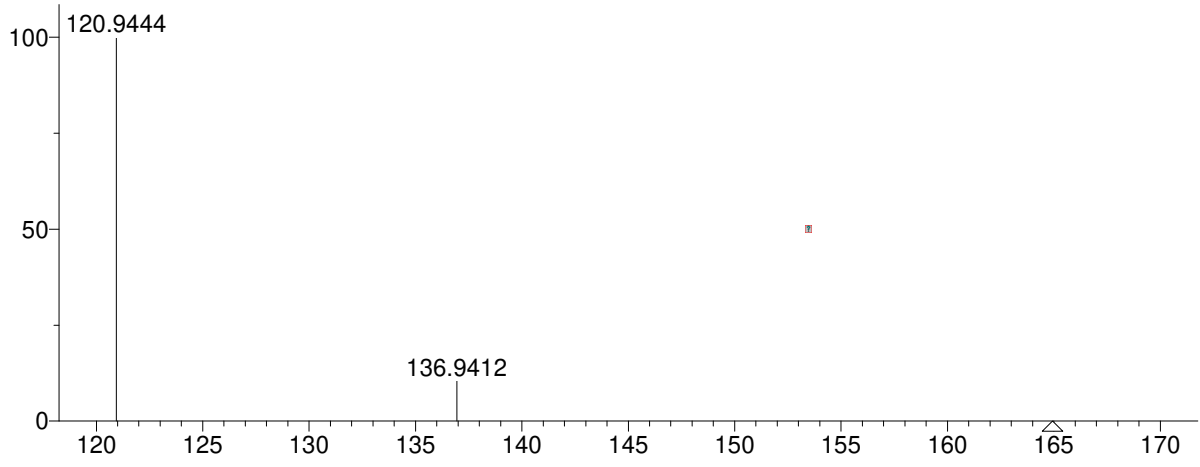



Unknown: Unknown (0.93\_248.9603m/z)  
Compound in Library Factor = 0

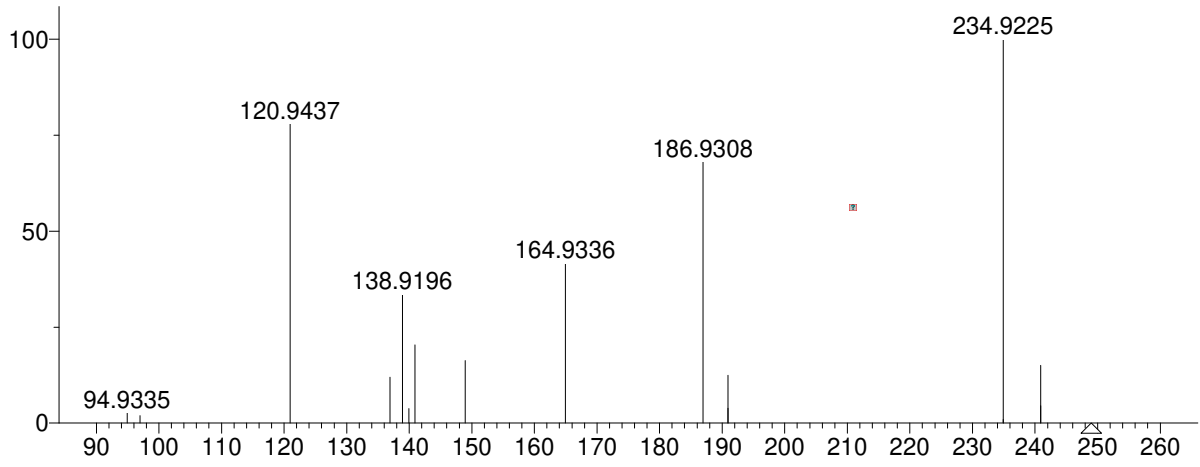

Unknown: Unknown (0.93\_278.9142m/z)  
Compound in Library Factor = 0

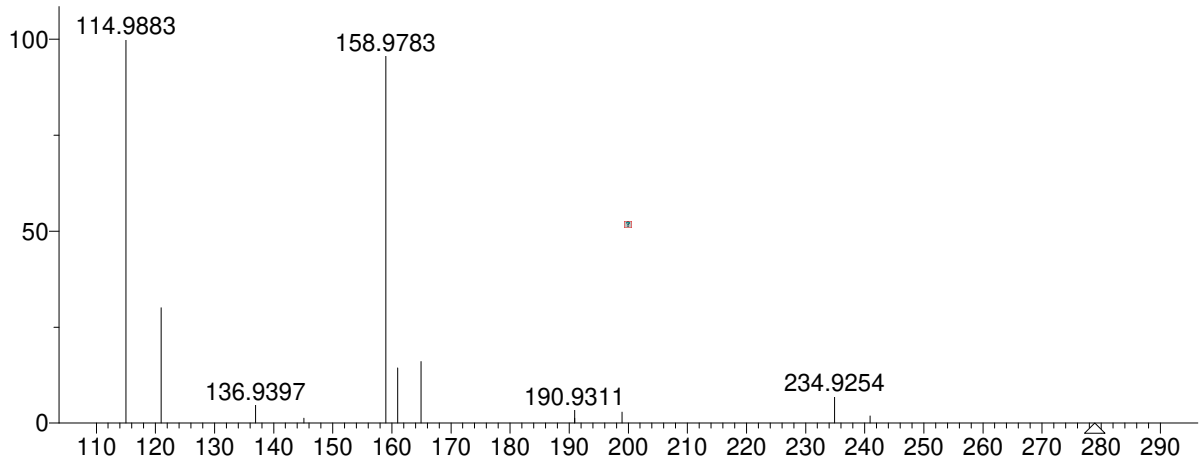

Unknown: Unknown (0.93\_316.9473m/z)  
Compound in Library Factor = 0

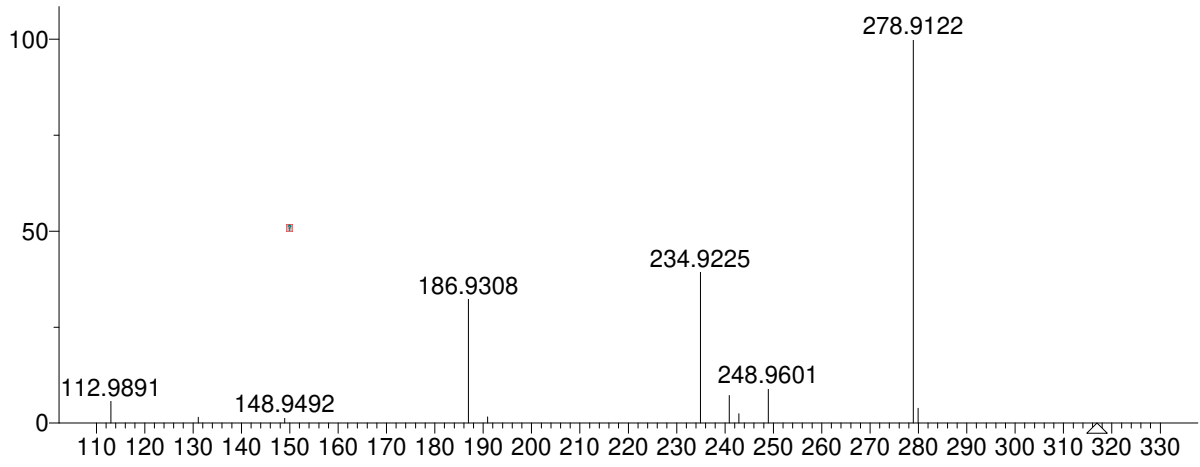

Unknown: Unknown (0.93\_384.9351m/z)  
Compound in Library Factor = 0

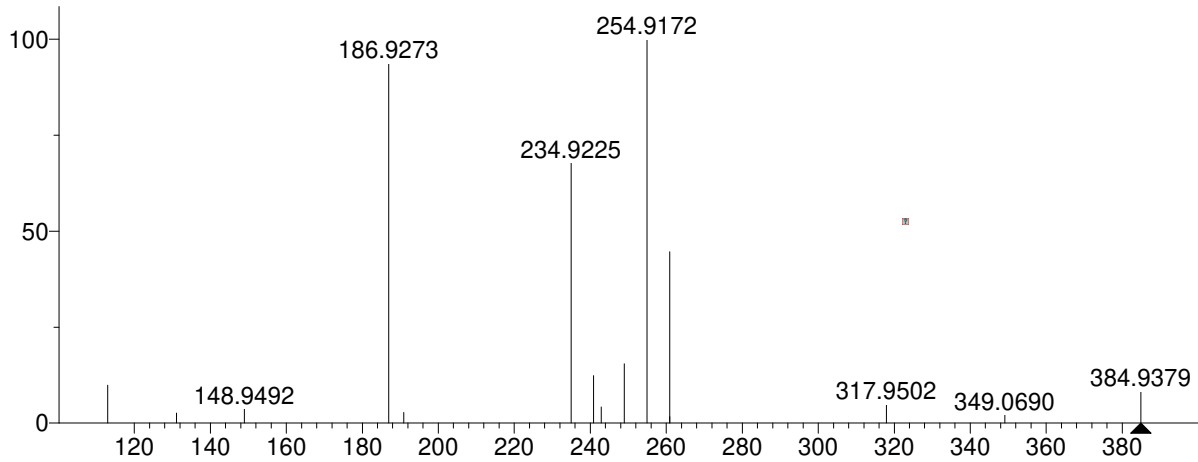

Hit 1 : Chlorfluazuron [M+H-C7H5F2ON+2i]+ HCD 30V P=384.9  
C20H9Cl3F5N3O3; MF: 0; RMF: 87; Prob 100.0%; CAS: 71422-67-8; Lib: nist\_msms; ID: 508071.

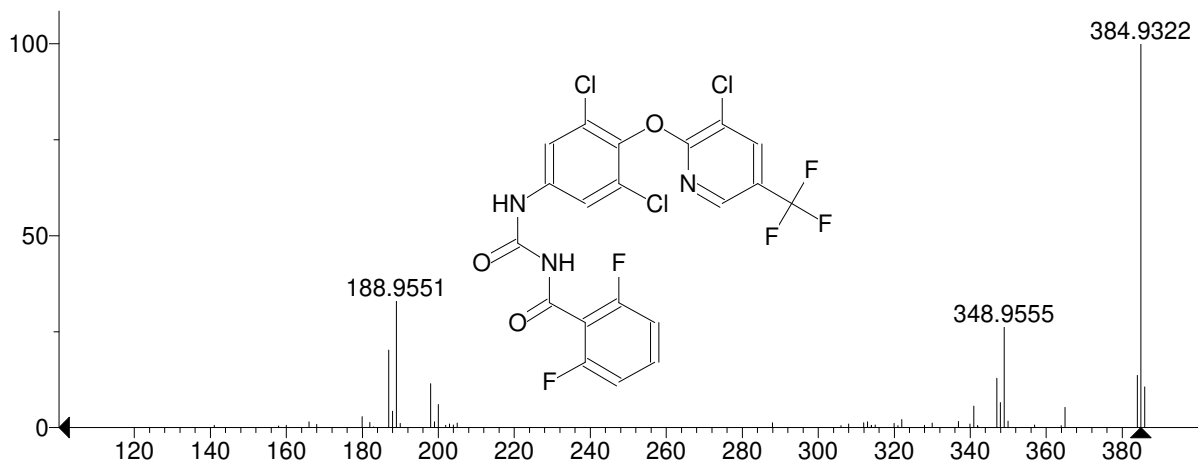

Unknown: Unknown (0.93\_392.8935m/z)  
Compound in Library Factor = 0

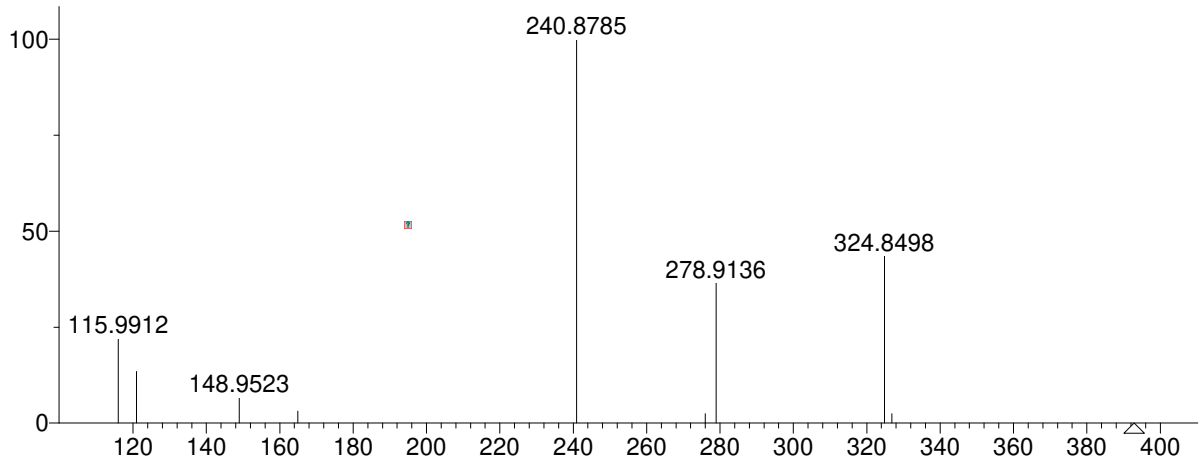

Unknown: Unknown (0.93\_452.9216m/z)  
Compound in Library Factor = 0

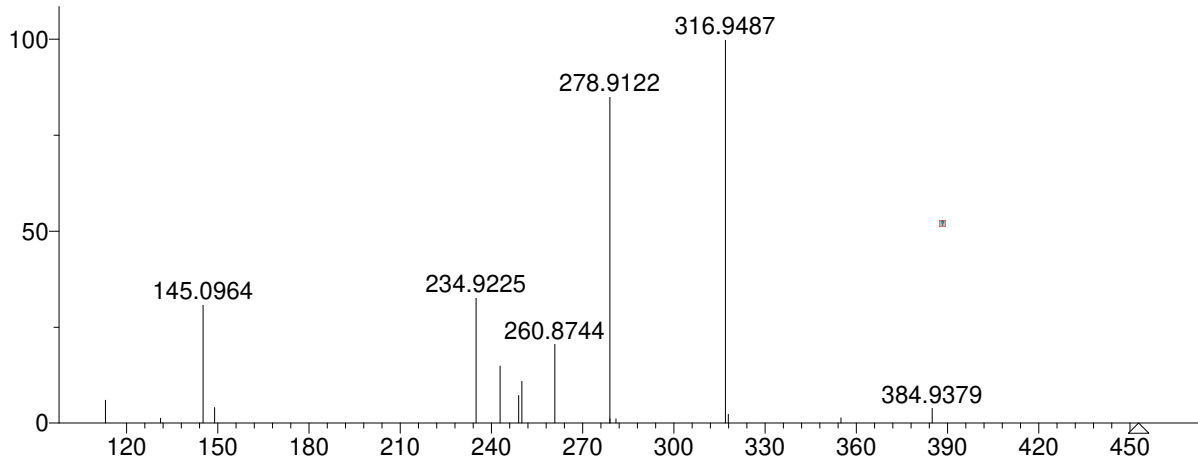

Unknown: Unknown (0.93\_506.8754m/z)  
Compound in Library Factor = 0

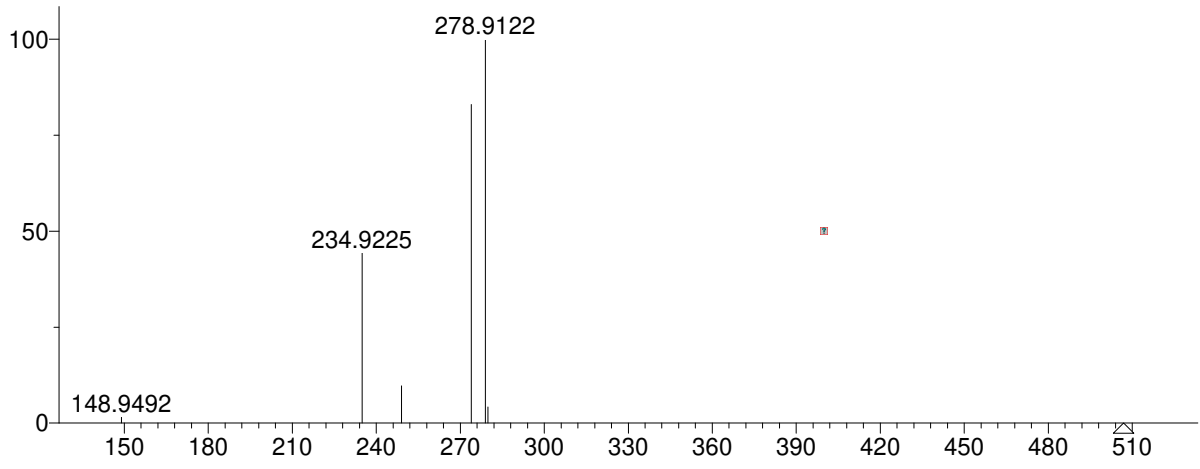

Unknown: Unknown (0.93\_508.8731m/z)  
Compound in Library Factor = 0

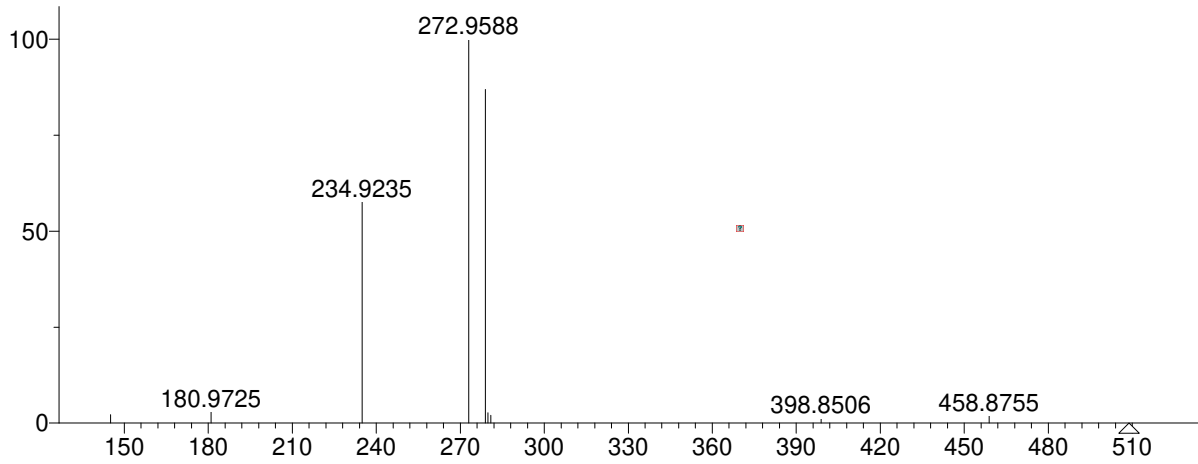

Hit 1 : 3,3'-Diiodo-L-thyronine [M+H-NH3]<sup>+</sup> HCD 61V P=508.9  
C15H13I2NO4; MF: 0; RMF: 119; Prob 100.0%; CAS: 70-40-6; Lib: nist\_msms; ID: 187453.

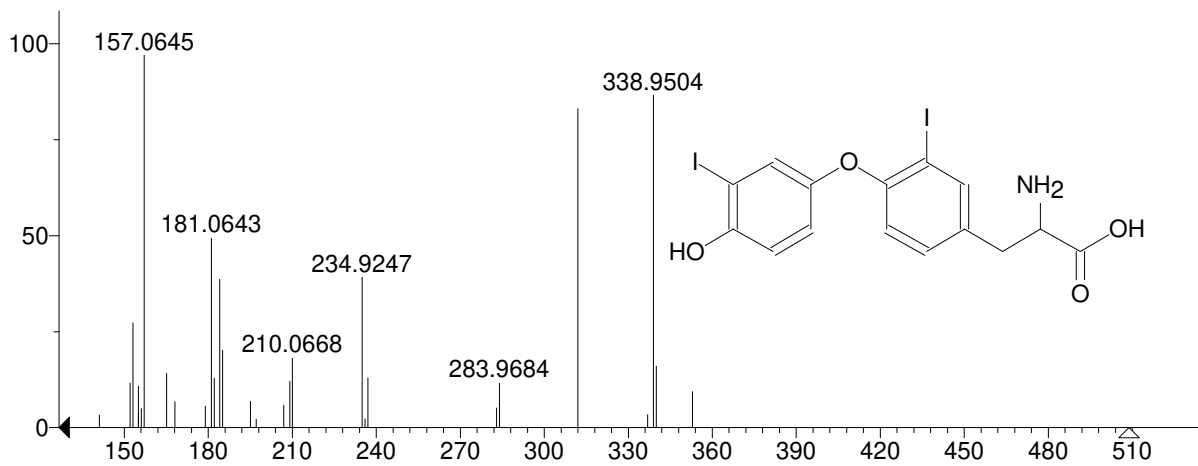



Unknown: Unknown (0.93\_604.8696m/z)  
Compound in Library Factor = 0

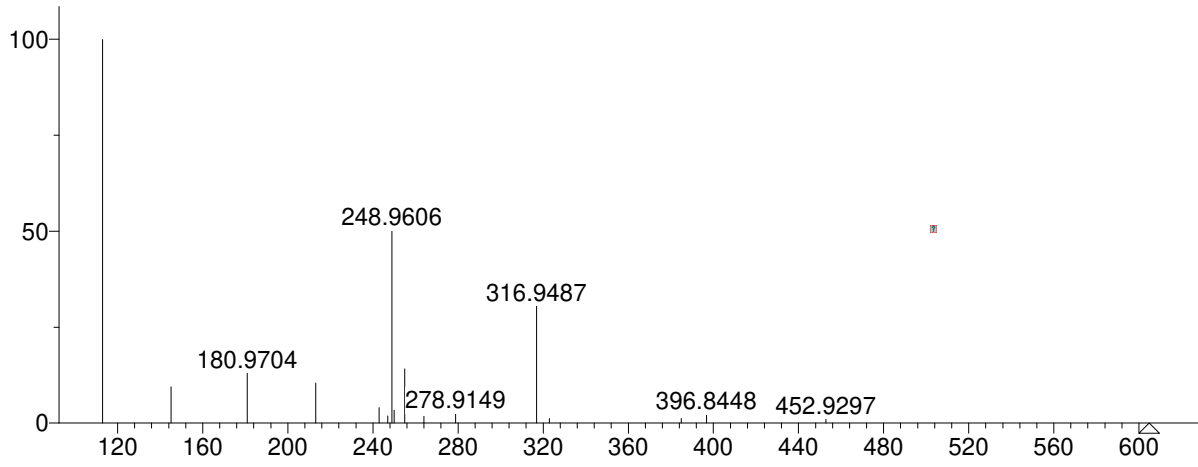

Unknown: Unknown (0.93\_656.8838m/z)  
Compound in Library Factor = 0

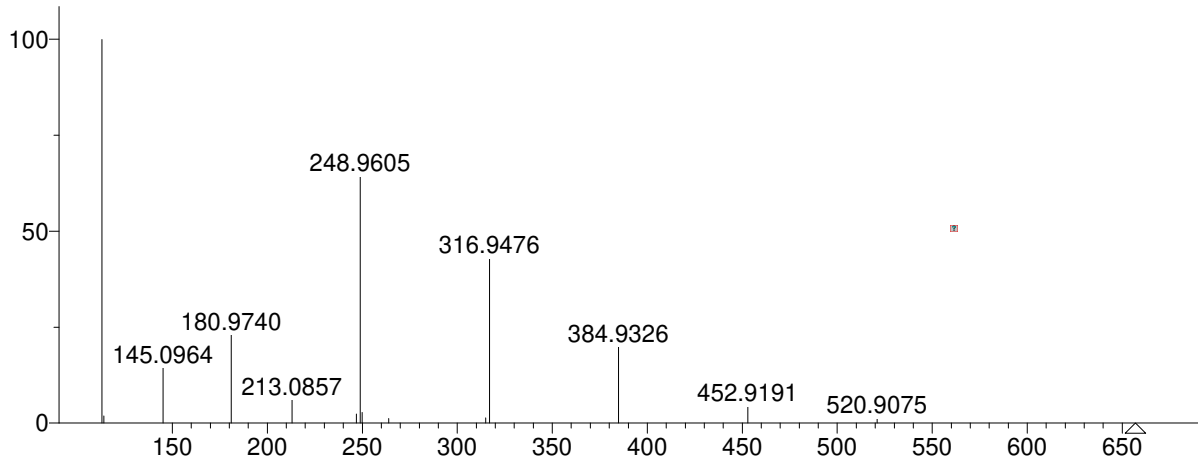

Unknown: Unknown (0.93\_672.8563m/z)  
Compound in Library Factor = 0

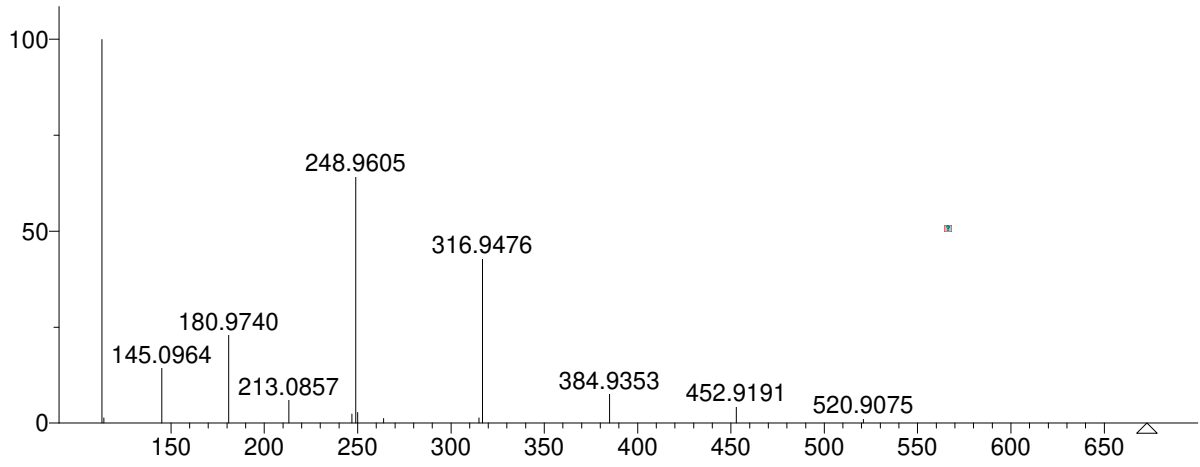

Unknown: Unknown (0.93\_756.8200m/z)  
Compound in Library Factor = 0

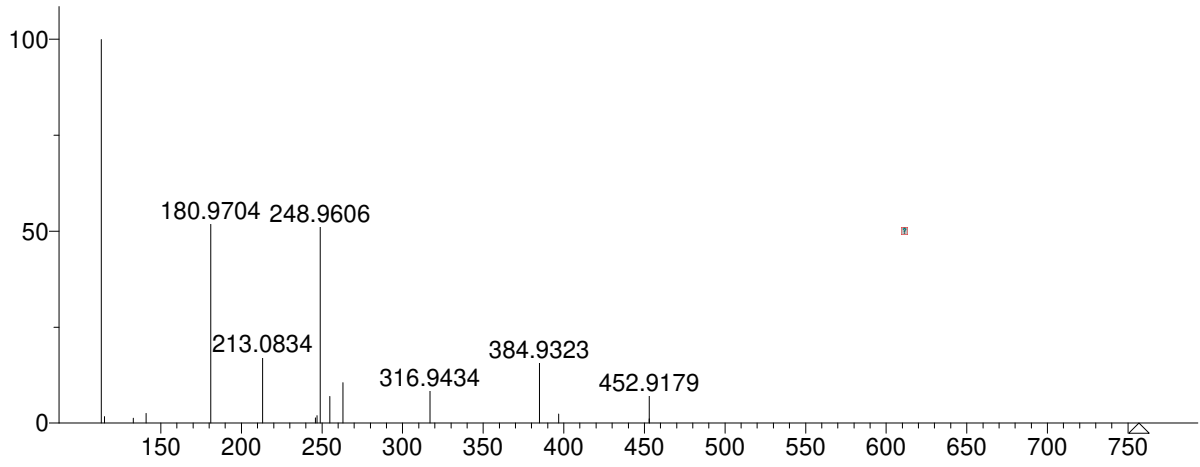

\*\* Search Report Page 1 of 2 \*\*

Unknown: Unknown (0.94\_252.9003m/z)  
Compound in Library Factor = 0

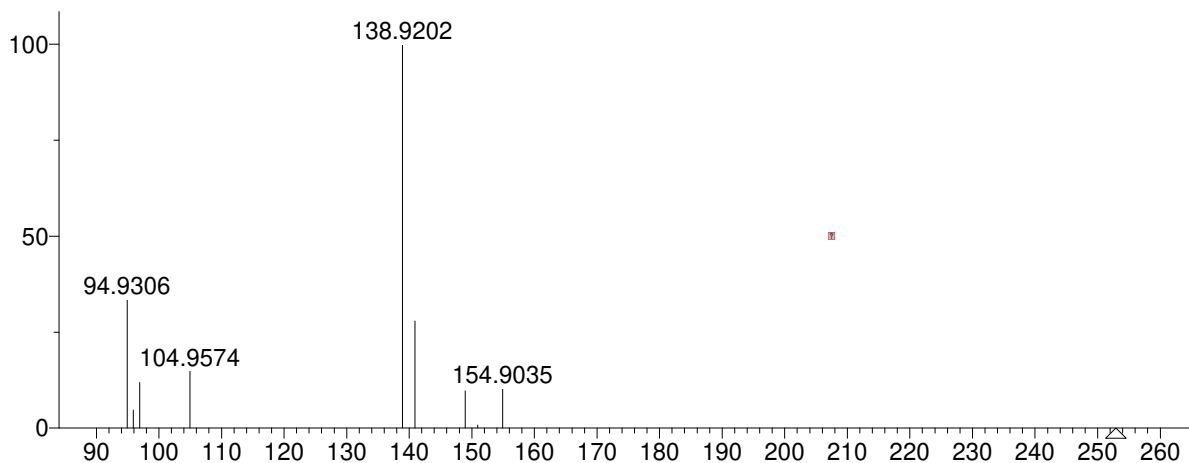

Hit 1 : Sulprofos [M+H]<sup>+</sup>=>294.9=>252.9 IT 35% P=252.9  
C12H19O2PS3; MF: 0; RMF: 8; Prob 33.3%; CAS: 35400-43-2; Lib: nist\_msms; ID: 129596.

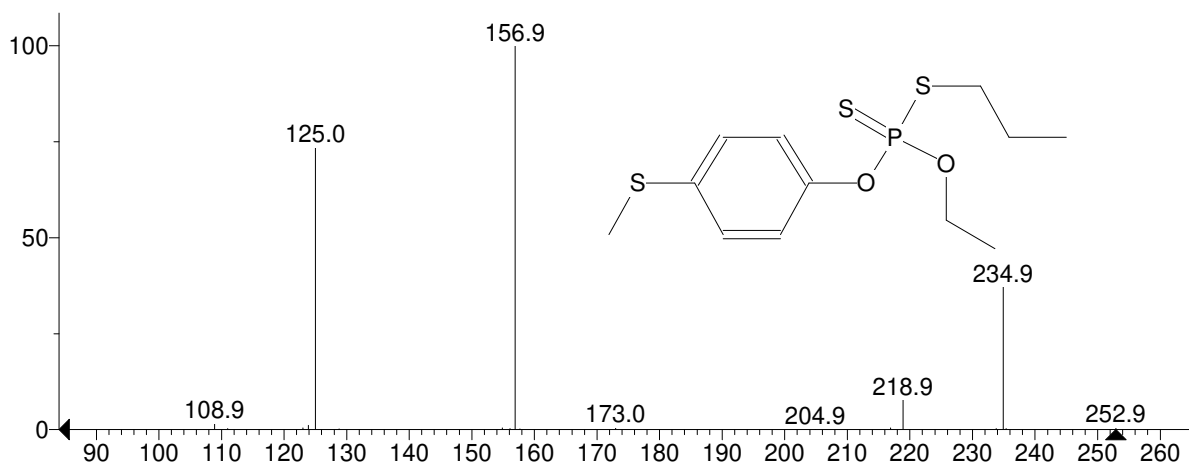

Hit 2 : Fensulfothion [M+H]<sup>+</sup>=>252.9 IT 35% P=252.9  
C11H17O4PS2; MF: 0; RMF: 8; Prob 33.3%; CAS: 115-90-2; Lib: nist\_msms; ID: 483029.

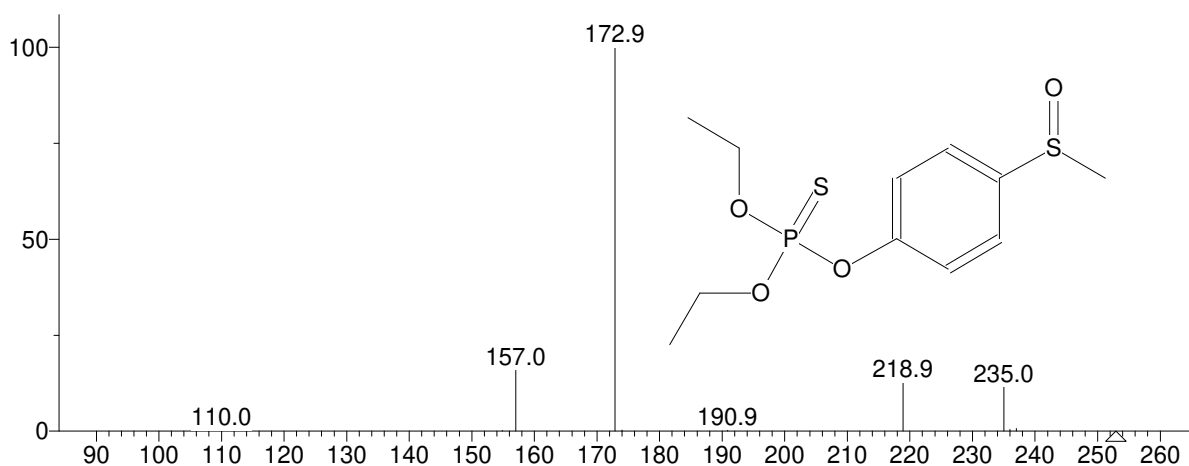

\*\* Search Report Page 2 of 2 \*\*

Hit 3 : Dihydroergotamine [M+H-H<sub>2</sub>O]<sup>+</sup>=>252.9 IT 35% P=252.9  
C<sub>33</sub>H<sub>37</sub>N<sub>5</sub>O<sub>5</sub>; MF: 0; RMF: 5; Prob 33.3%; CAS: 511-12-6; Lib: nist\_msms; ID: 140025.

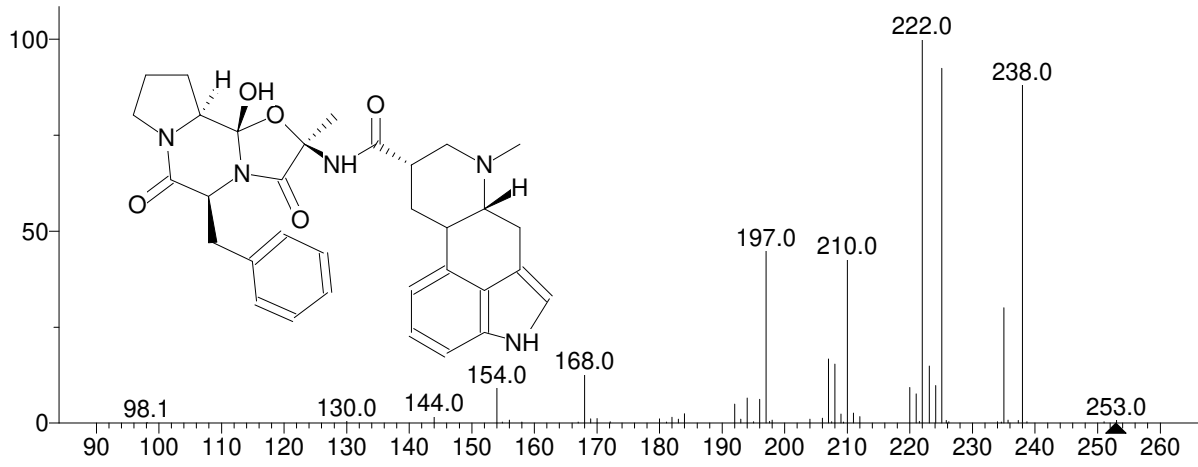

Unknown: Unknown (0.94\_254.8974m/z)  
Compound in Library Factor = 0

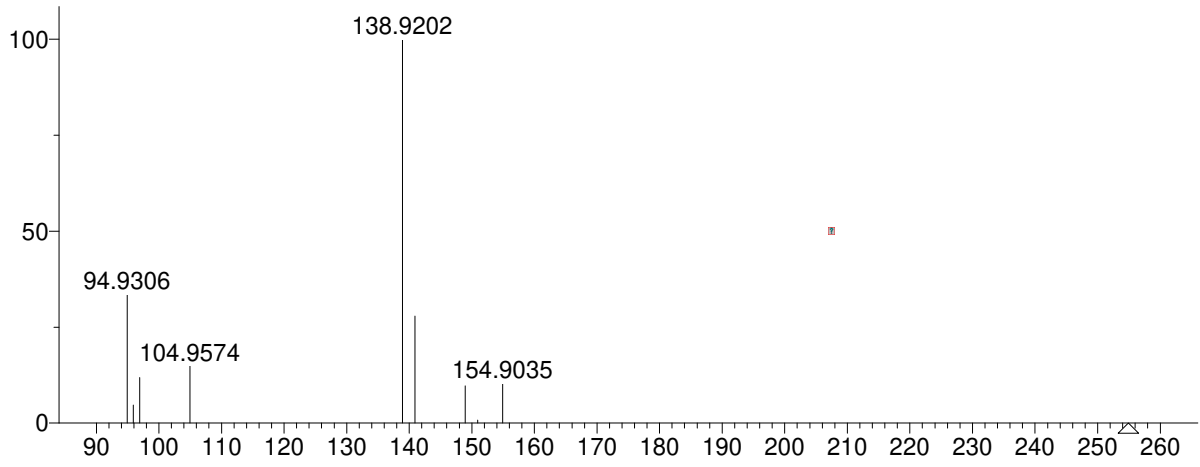

Unknown: Unknown (0.94\_262.9292m/z)  
Compound in Library Factor = 0

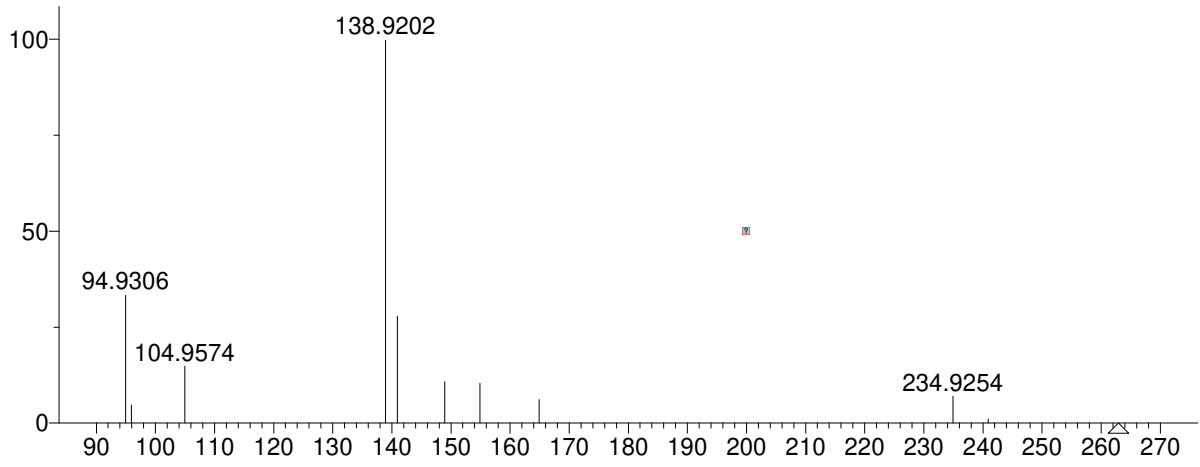



Unknown: Unknown (0.94\_264.9263m/z)  
Compound in Library Factor = 0

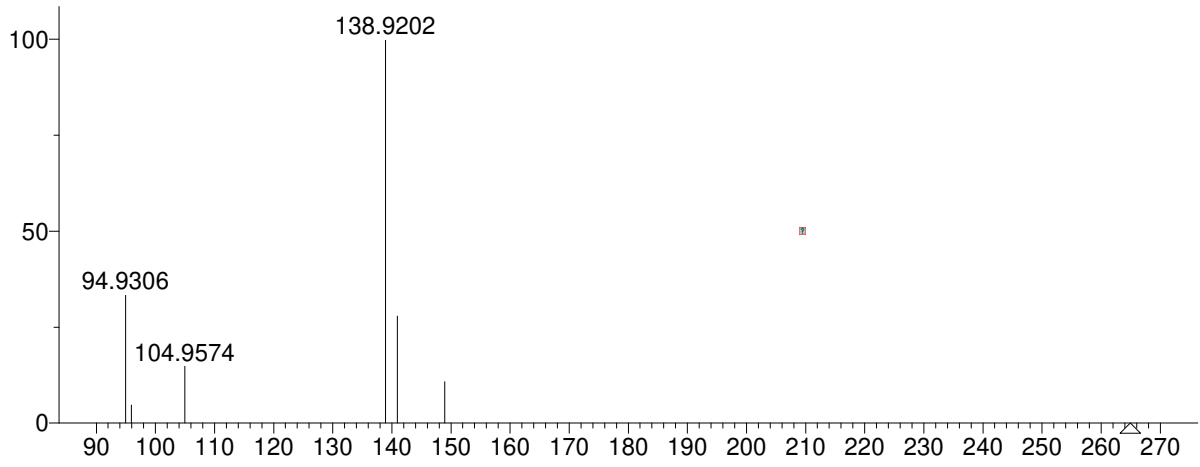

Unknown: Unknown (0.94\_376.9076m/z)  
Compound in Library Factor = 0

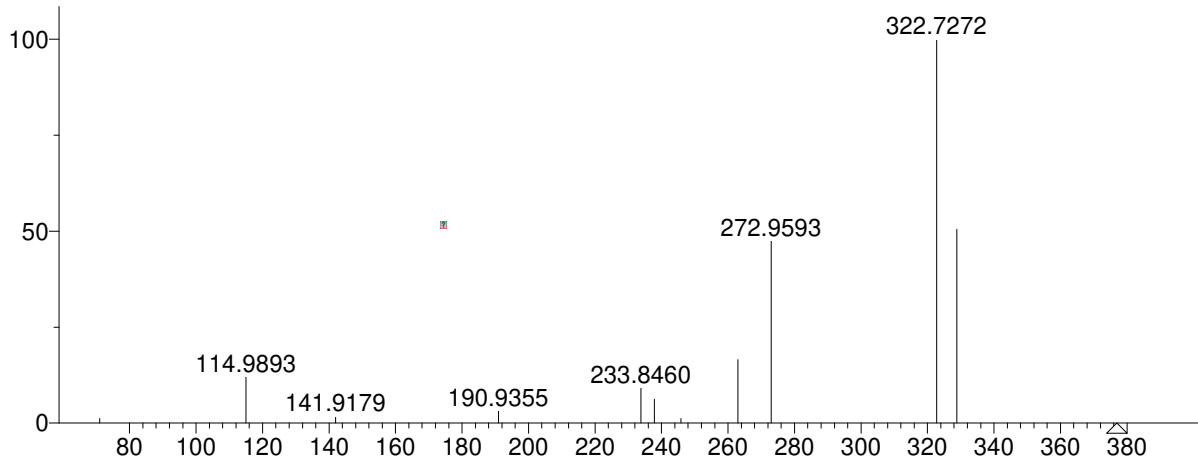

Unknown: Unknown (0.94\_378.9052m/z)  
Compound in Library Factor = 0

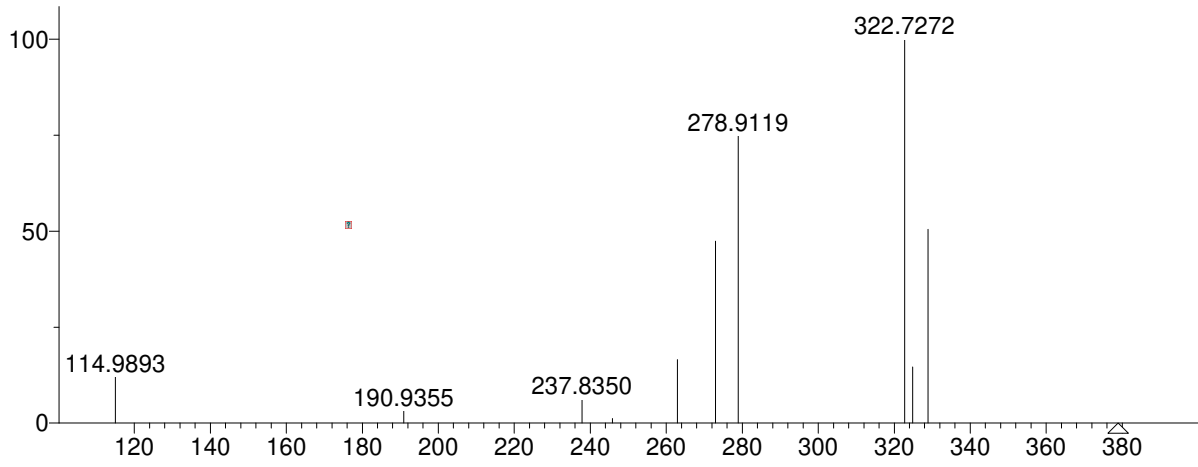

Unknown: Unknown (0.94\_468.8940m/z)  
Compound in Library Factor = 0

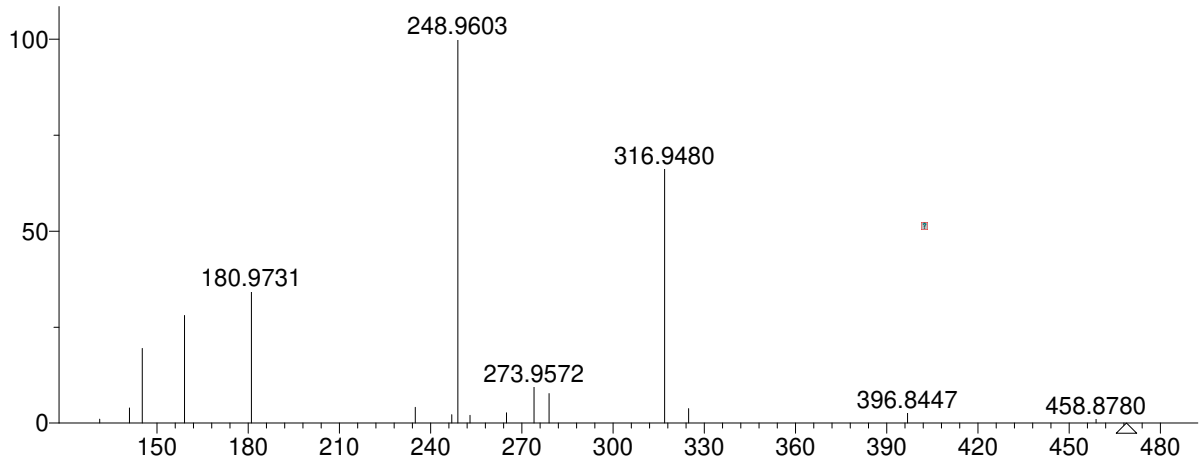

Unknown: Unknown (0.94\_480.8596m/z)  
Compound in Library Factor = 0

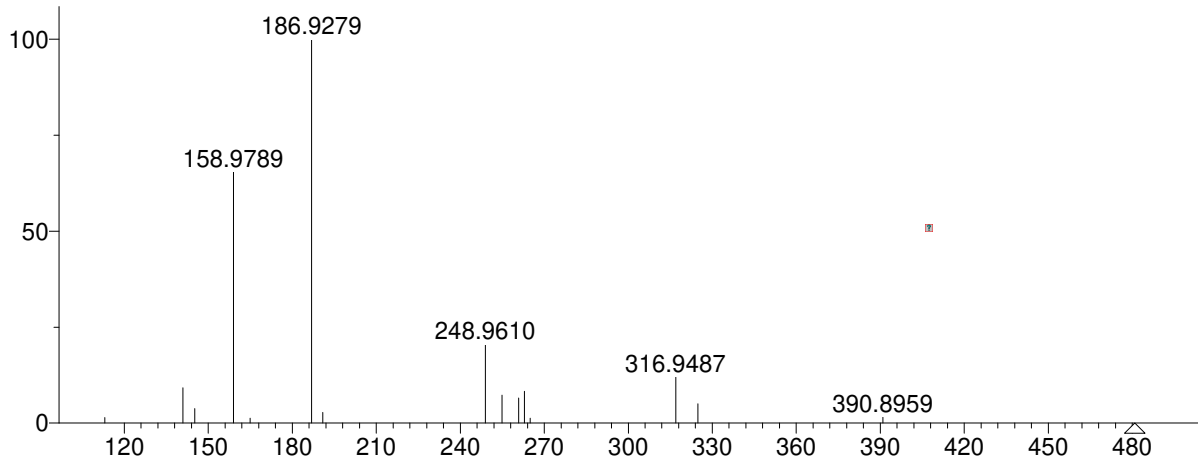

Unknown: Unknown (0.94\_490.8903m/z)  
Compound in Library Factor = 0

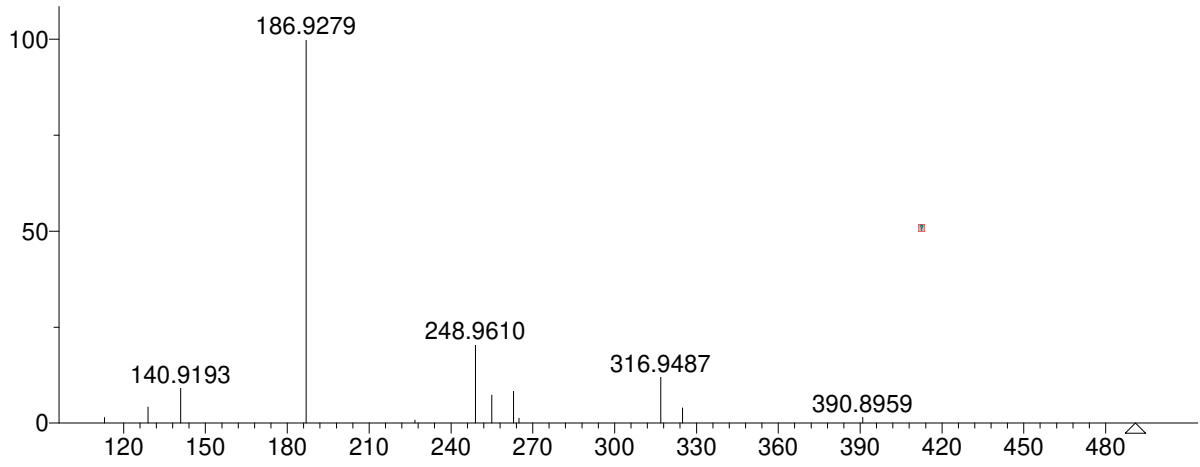

Unknown: Unknown (0.94\_492.8871m/z)  
Compound in Library Factor = 0

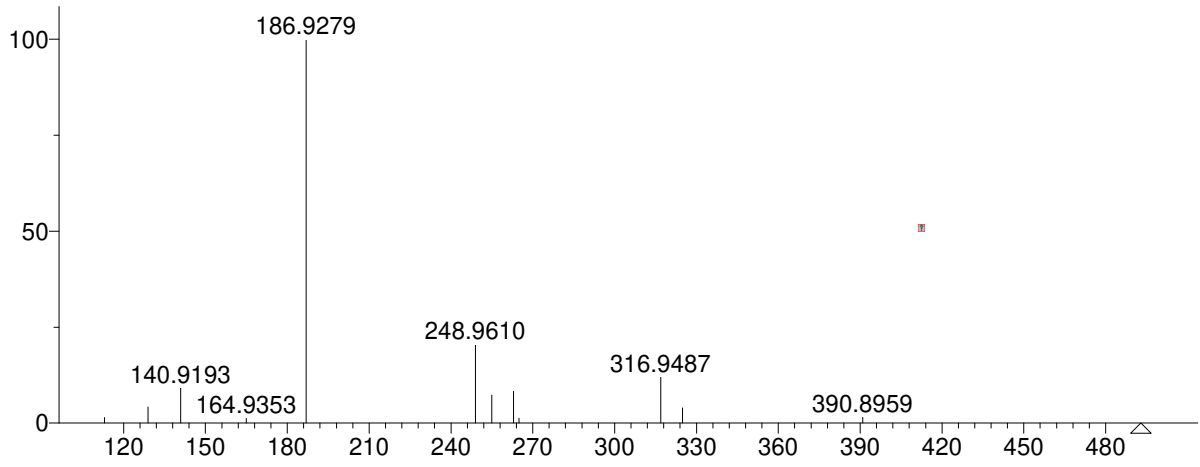

Unknown: Unknown (0.94\_740.8447m/z)  
Compound in Library Factor = 0

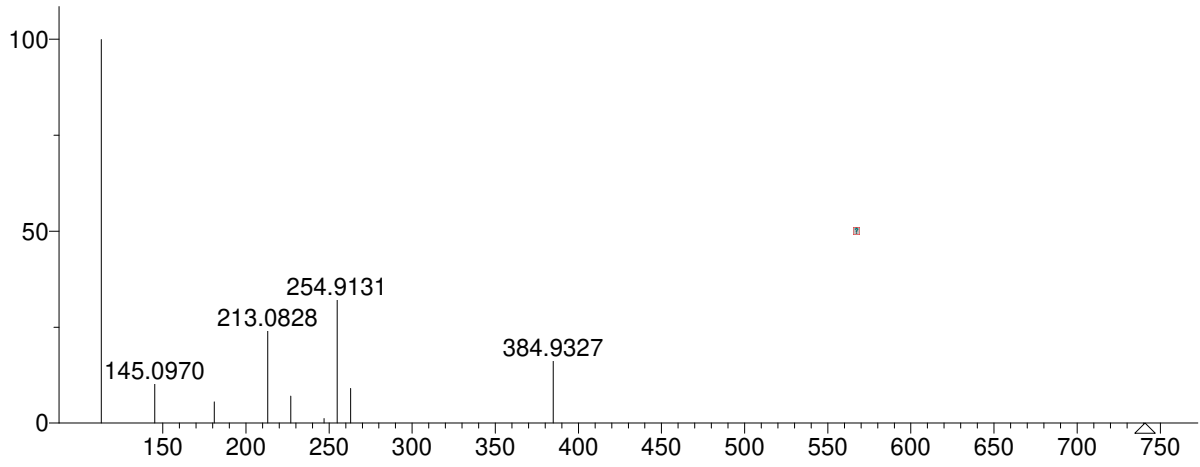



Unknown: Unknown (0.94\_808.8385m/z)  
Compound in Library Factor = 0

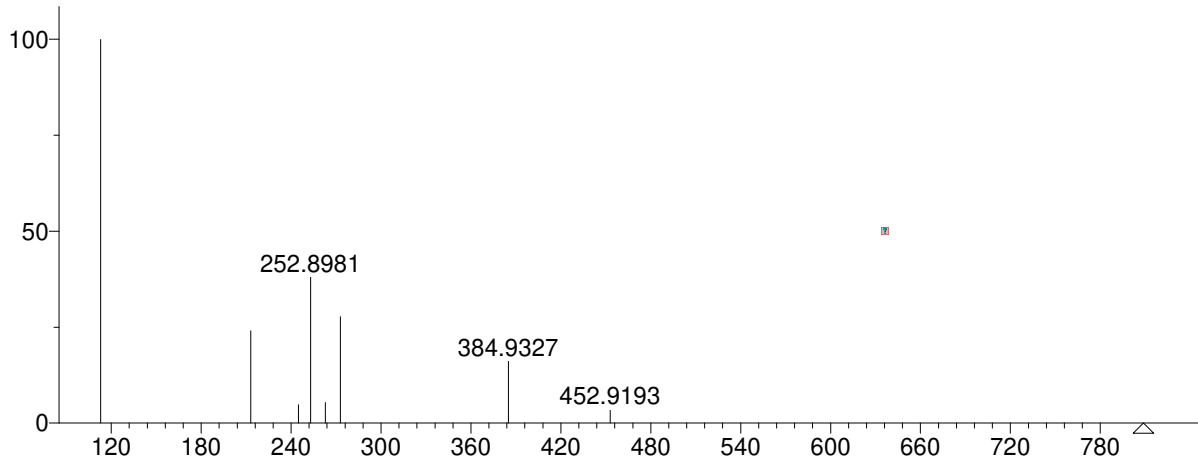

Unknown: Unknown (0.95\_242.8716m/z)  
Compound in Library Factor = 0

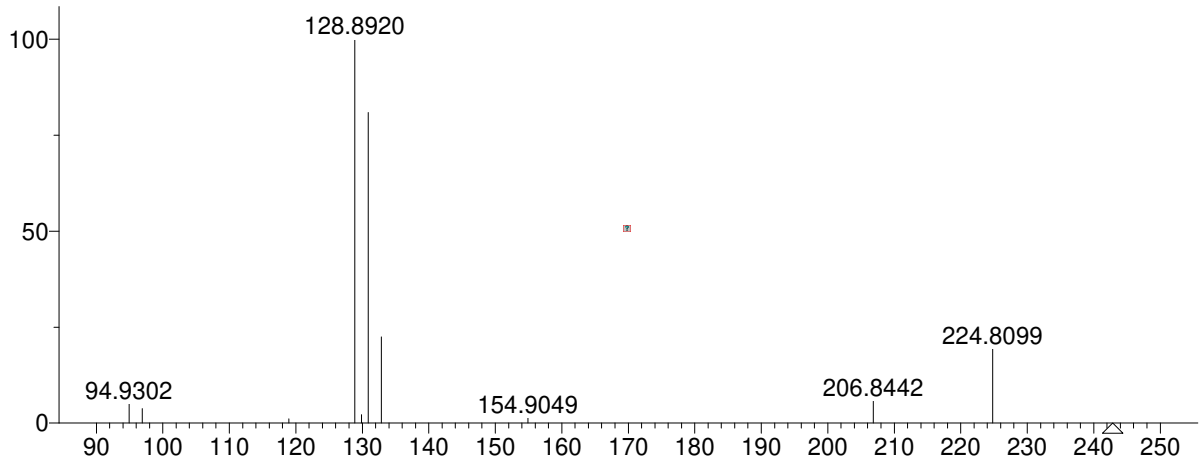

Unknown: Unknown (0.95\_244.8687m/z)  
Compound in Library Factor = 0

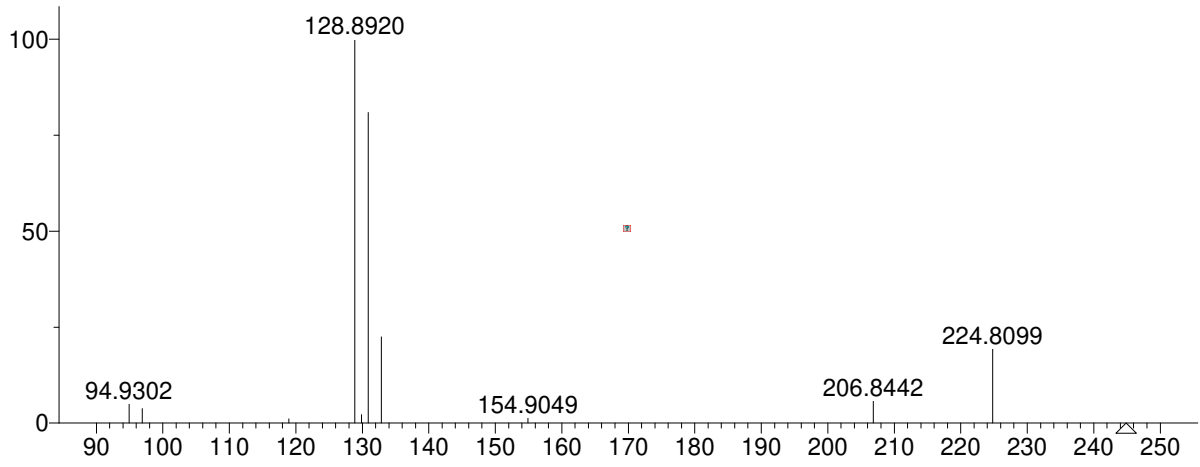

Unknown: Unknown (0.95\_246.8658m/z)  
Compound in Library Factor = 0

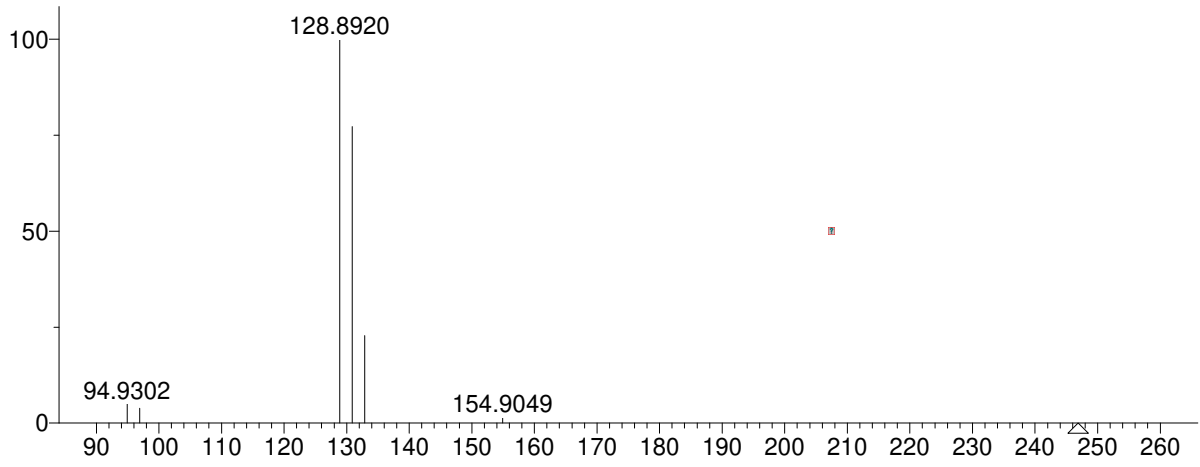

Unknown: Unknown (0.95\_312.7927m/z)  
Compound in Library Factor = 0

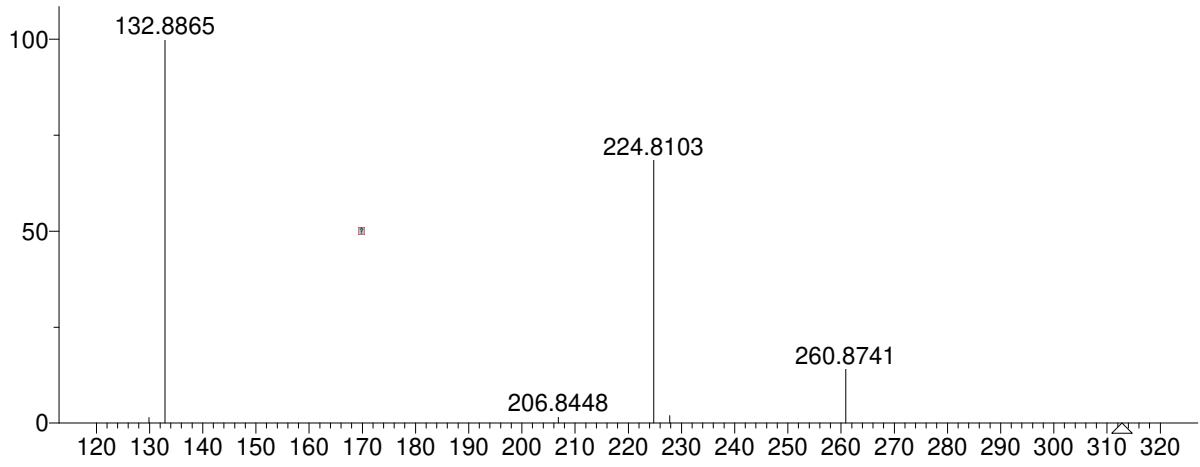

Unknown: Unknown (0.95\_366.8805m/z)  
Compound in Library Factor = 0

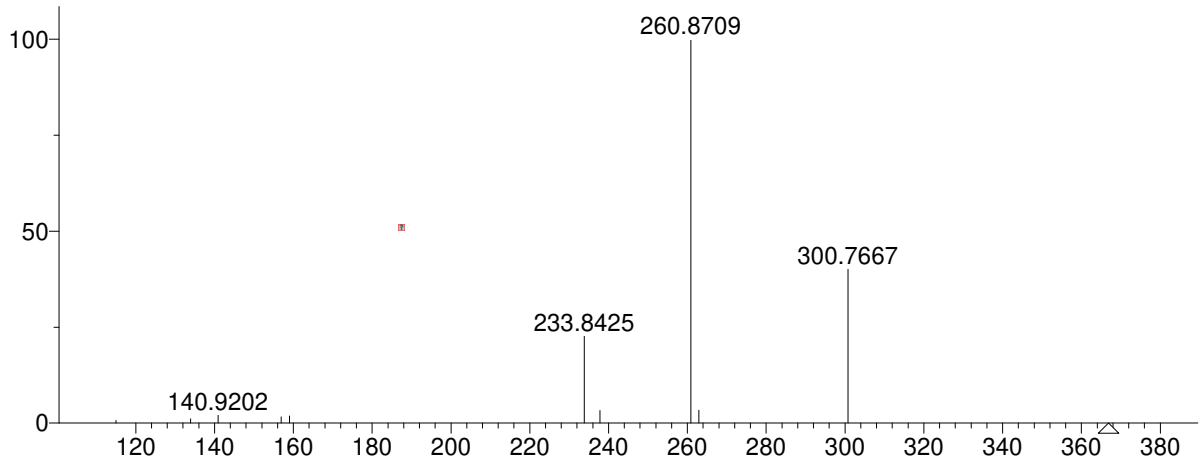

Unknown: Unknown (0.95\_368.8744m/z)  
Compound in Library Factor = 0

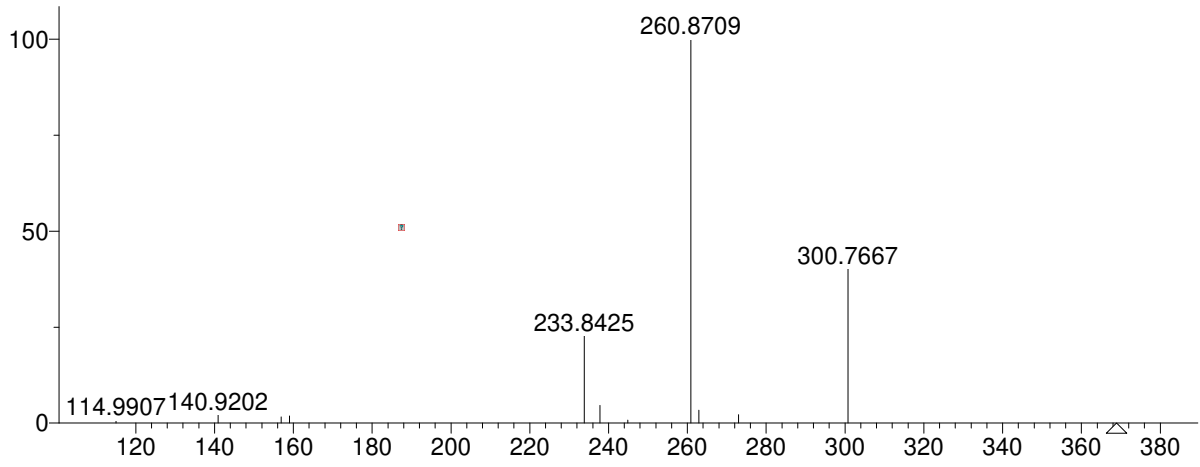

Unknown: Unknown (0.95\_422.6849m/z)  
Compound in Library Factor = 0

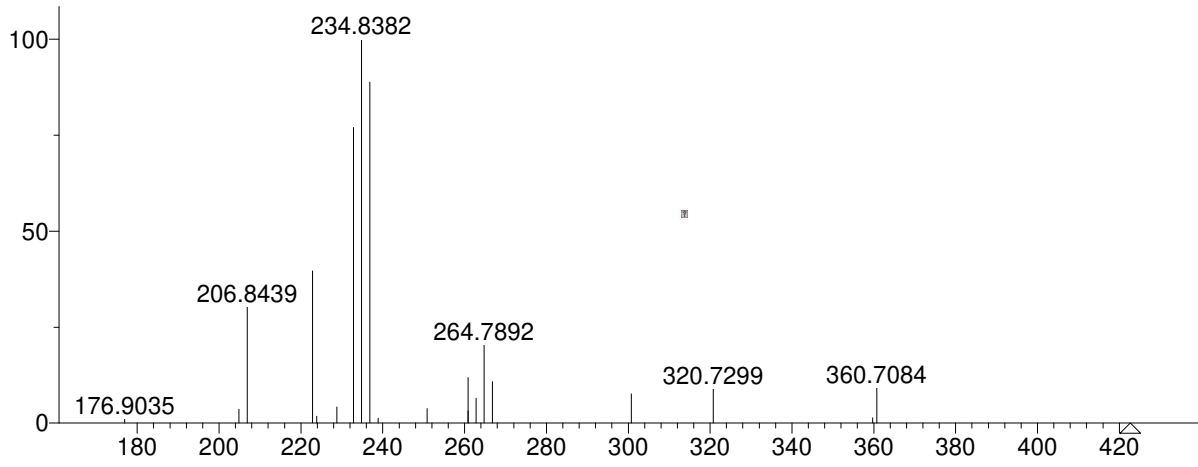



Unknown: Unknown (0.95\_432.7146m/z)  
Compound in Library Factor = 0

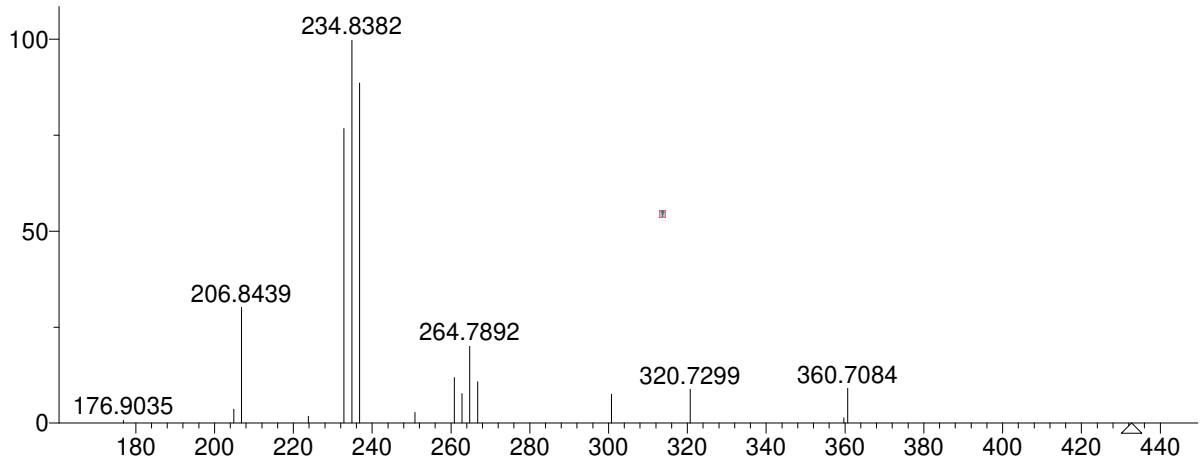

Unknown: Unknown (0.95\_436.7099m/z)  
Compound in Library Factor = 0

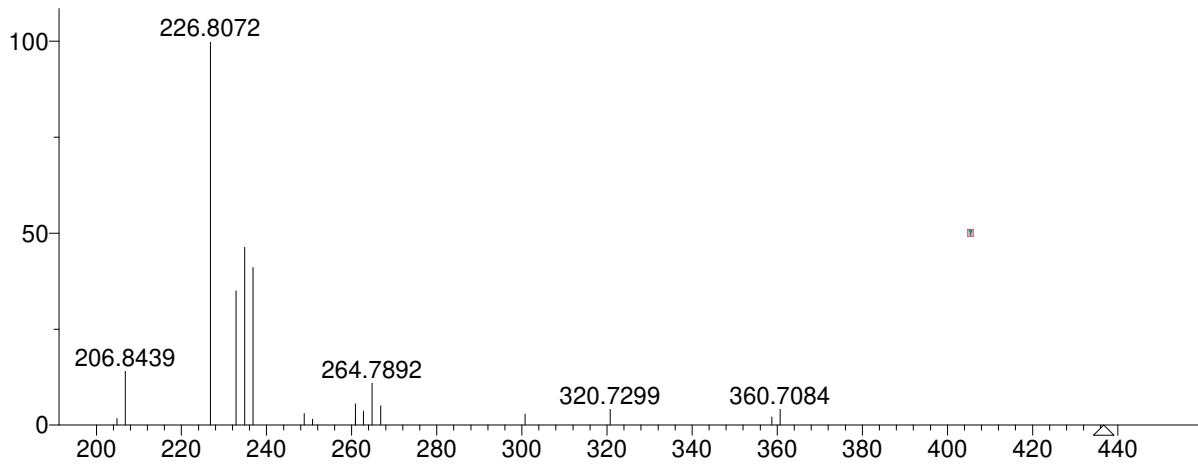

Unknown: Unknown (0.95\_440.7449m/z)  
Compound in Library Factor = 0

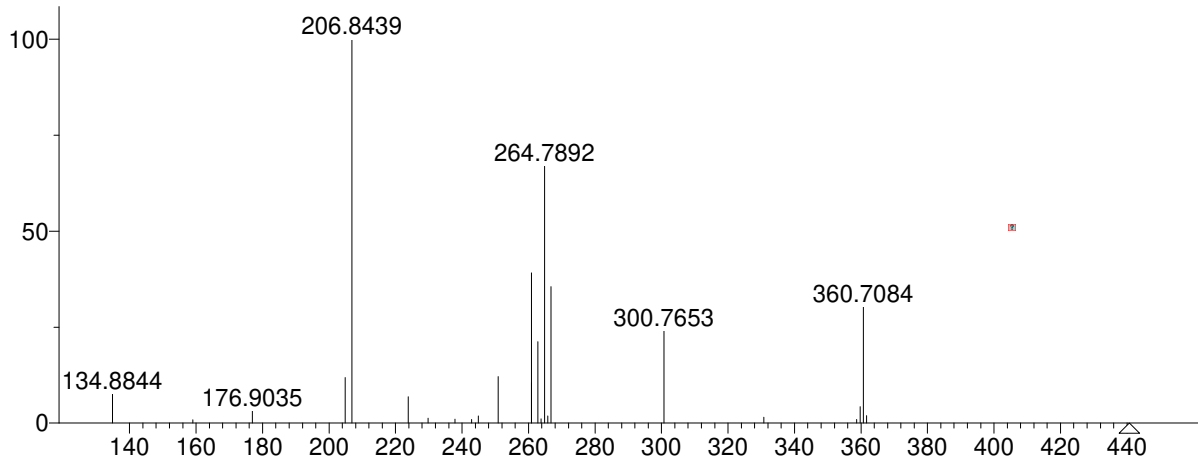

Unknown: Unknown (0.95\_442.7419m/z)  
Compound in Library Factor = 0

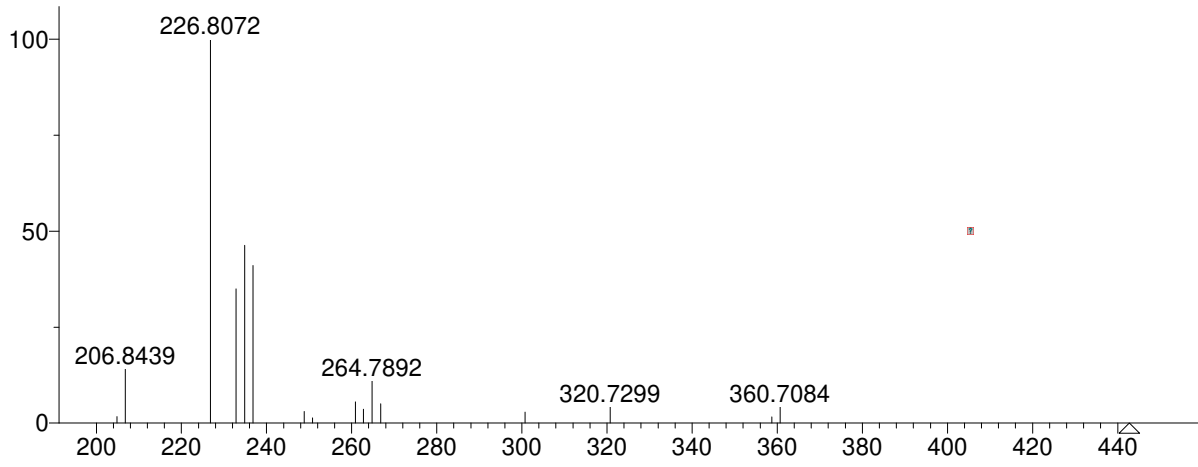

Unknown: Unknown (0.95\_444.7400m/z)  
Compound in Library Factor = 0

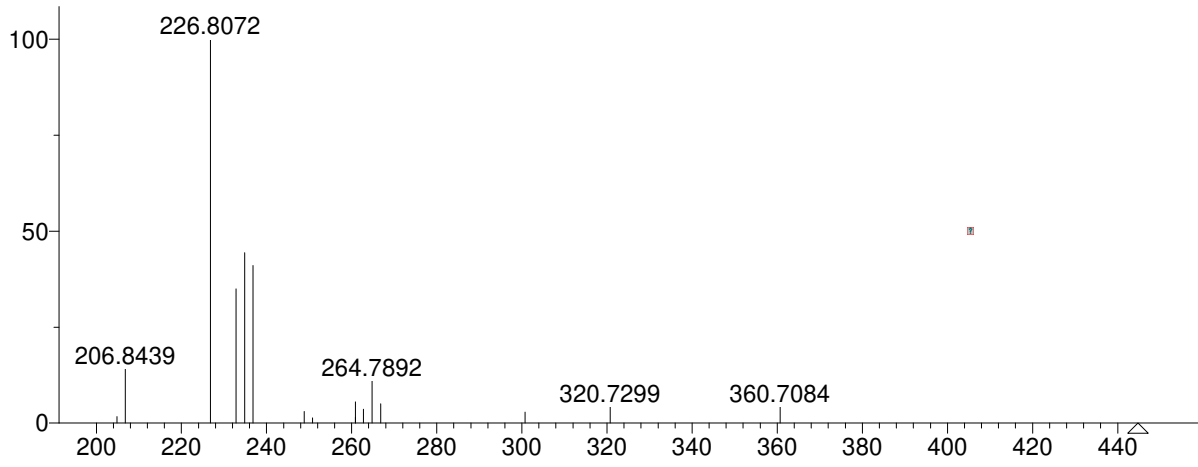

Unknown: Unknown (0.95\_446.7360m/z)  
Compound in Library Factor = 0

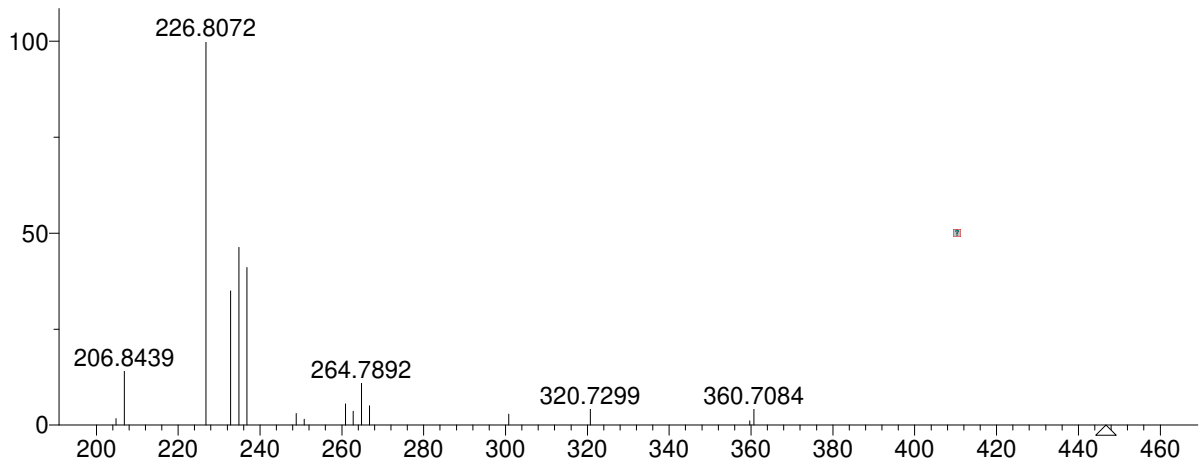

Unknown: Unknown (0.95\_452.7717m/z)  
Compound in Library Factor = 0

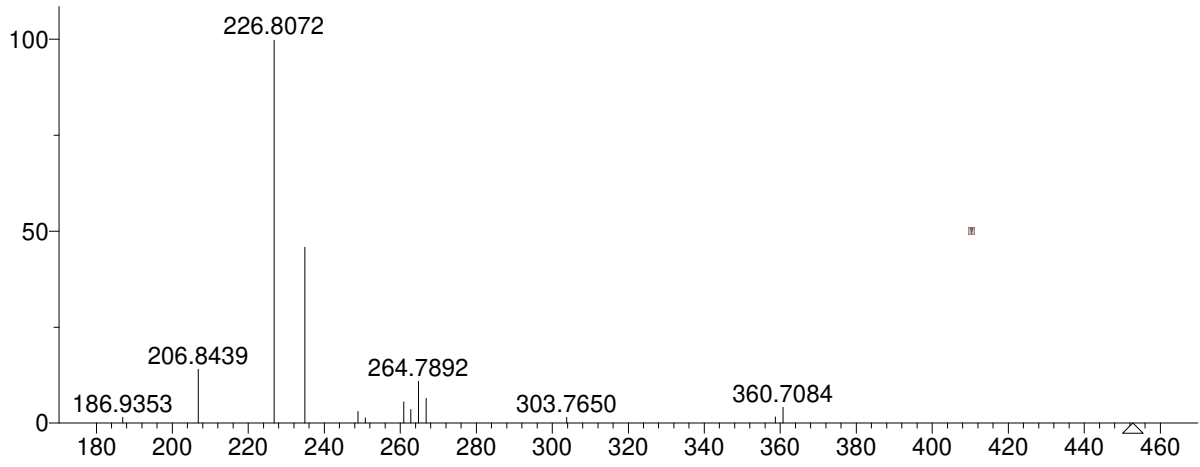

Unknown: Unknown (0.95\_462.8012m/z)  
Compound in Library Factor = 0

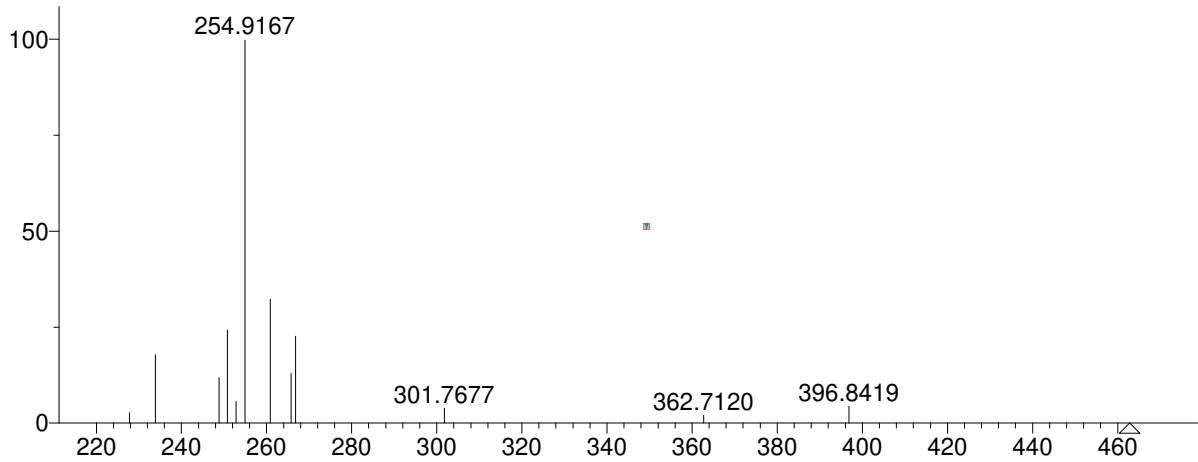

Hit 1 : D-myo-Inositol-1,3,4,5,6-pentaphosphate [M-H]<sup>-</sup>=>480.9=>462.8 IT 35% P=462.8  
C6H17O21P5; MF: 0; RMF: 49; Prob 50.0%; CAS: 20298-95-7; Lib: nist\_msms; ID: 191370.

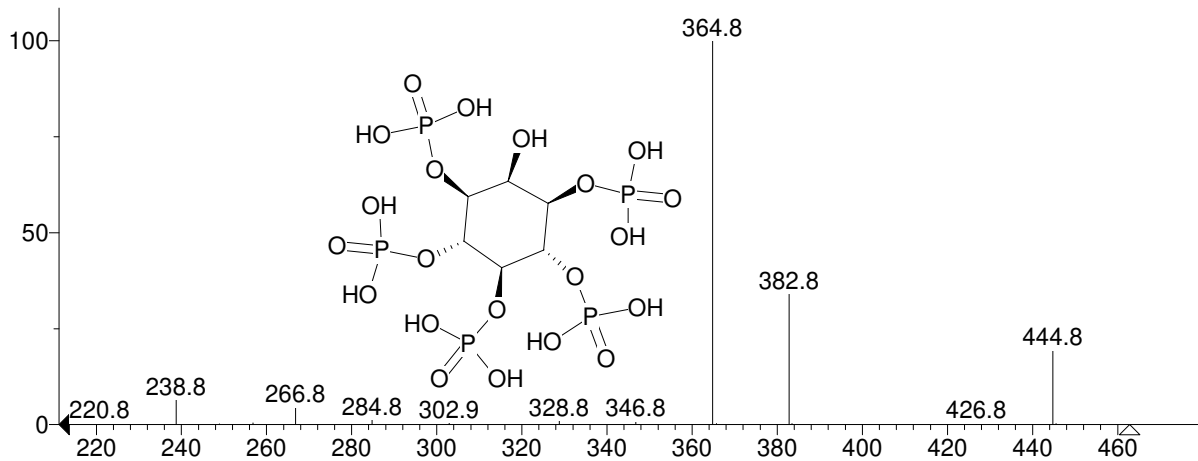

Hit 2 : D-myo-Inositol-1,2,4,5,6-pentaphosphate [M-H]<sup>-</sup>=>480.9=>462.8 IT 35% P=462.8  
C6H17O21P5; MF: 0; RMF: 48; Prob 50.0%; CAS: 26326-86-3; Lib: nist\_msms; ID: 192861.

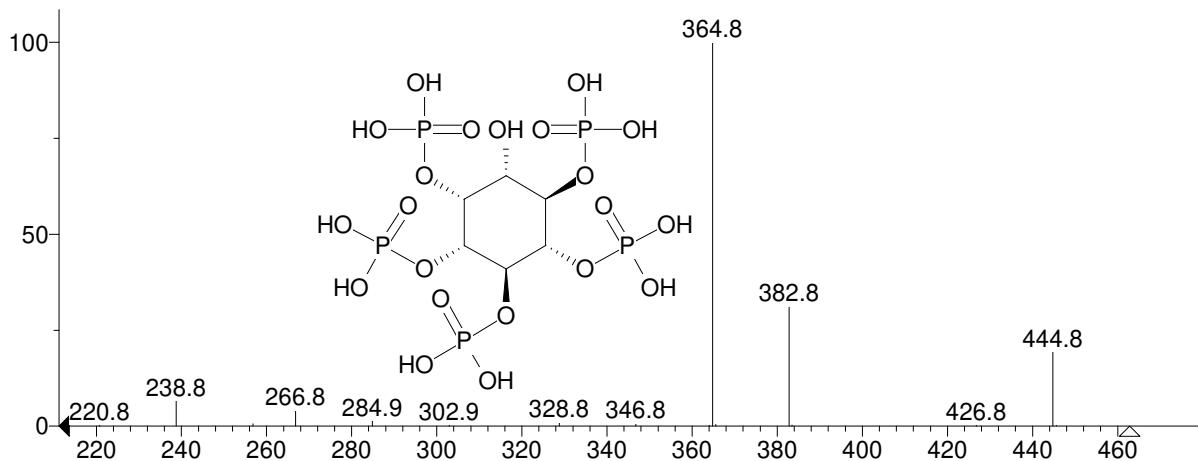



Unknown: Unknown (0.96\_222.8133m/z)  
Compound in Library Factor = 0

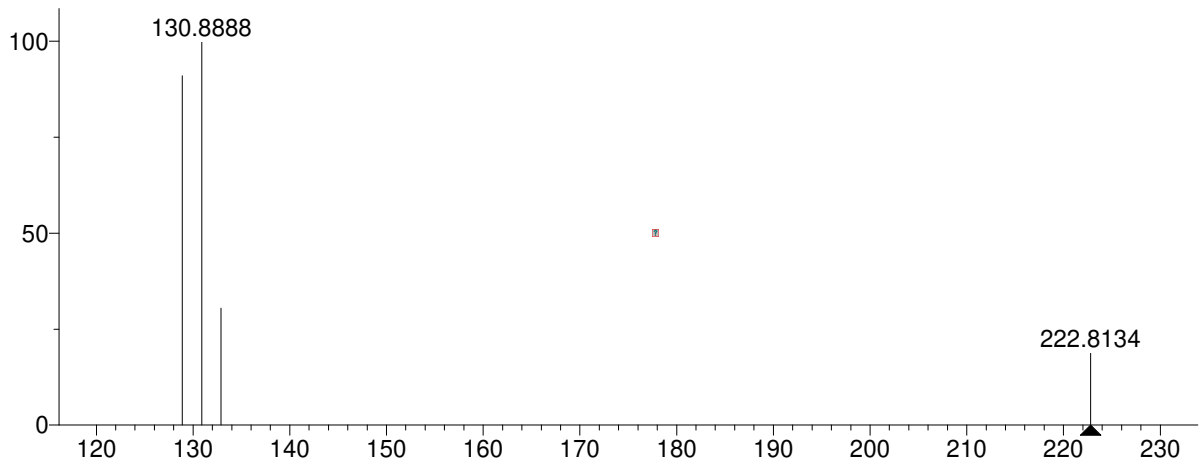

Unknown: Unknown (0.96\_232.8426m/z)  
Compound in Library Factor = 0

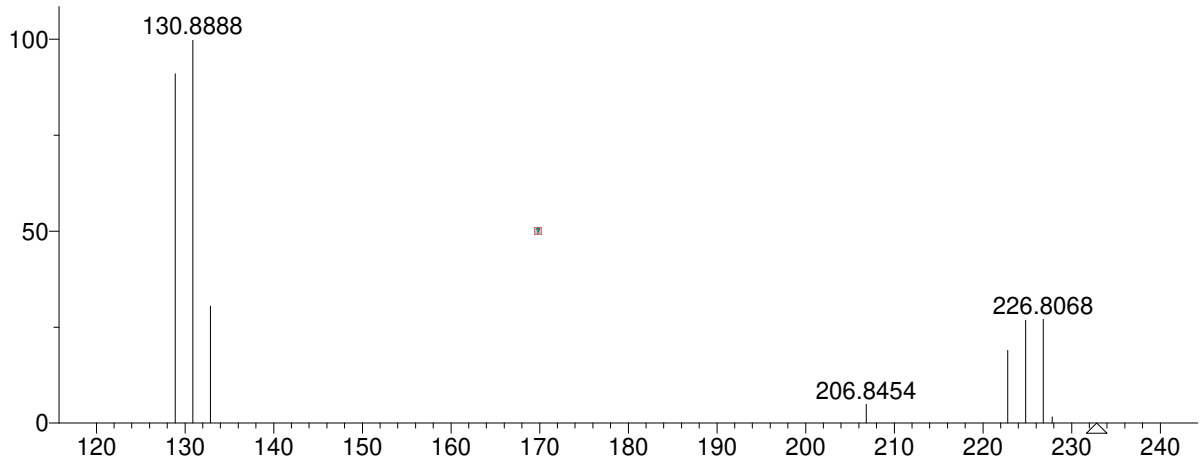

Unknown: Unknown (0.96\_234.8398m/z)  
Compound in Library Factor = 0

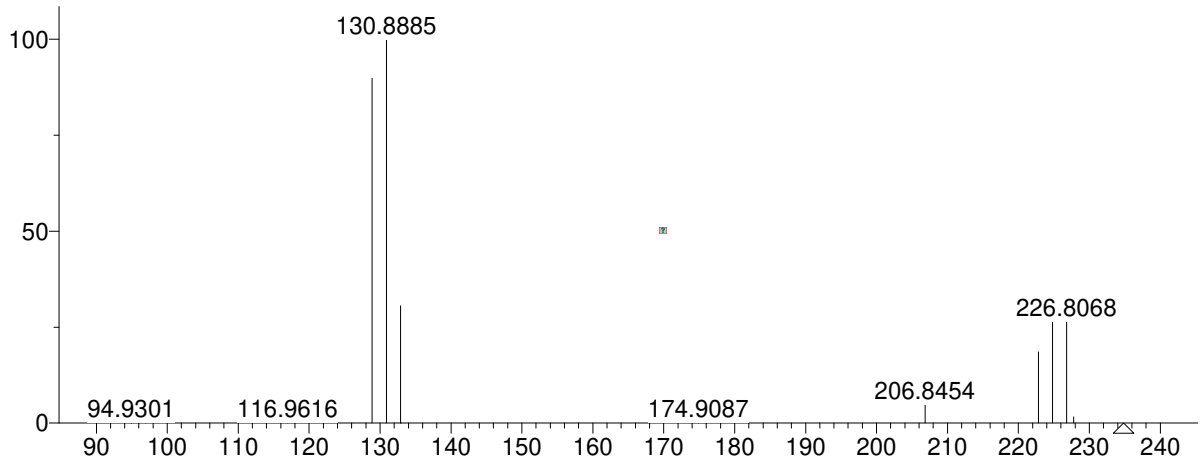

Unknown: Unknown (0.96\_236.8370m/z)  
Compound in Library Factor = 0

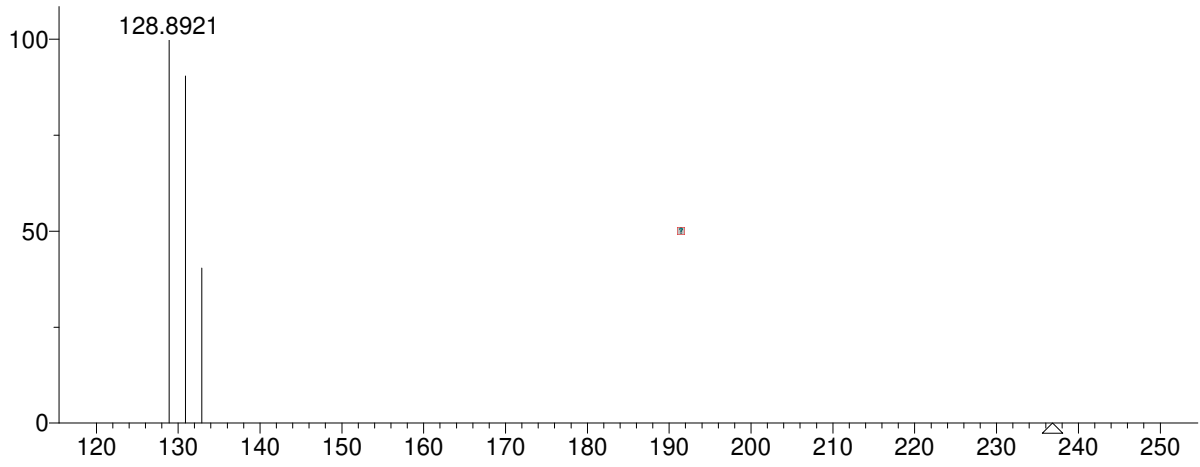

Unknown: Unknown (0.96\_238.8339m/z)  
Compound in Library Factor = 0

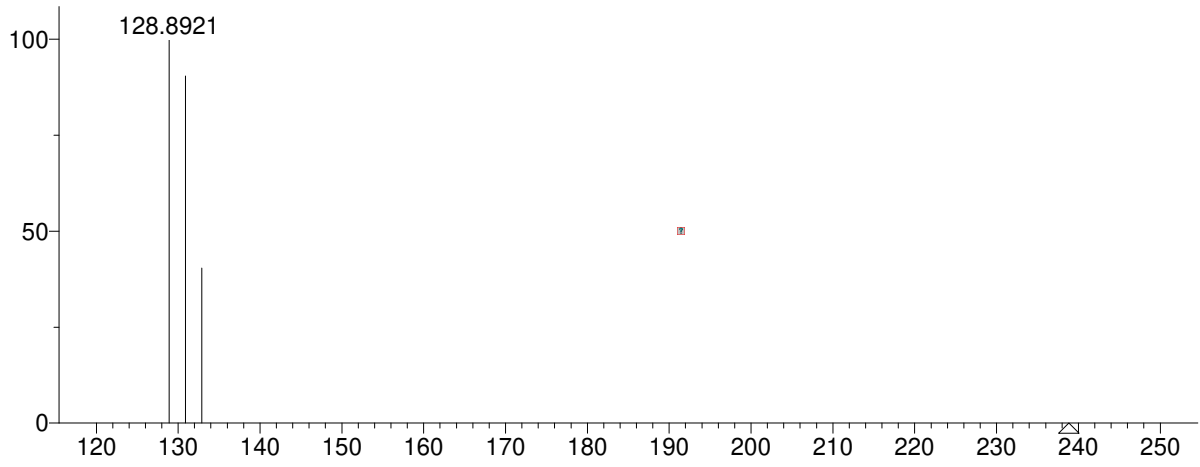

Unknown: Unknown (0.96\_298.7686m/z)  
Compound in Library Factor = 0

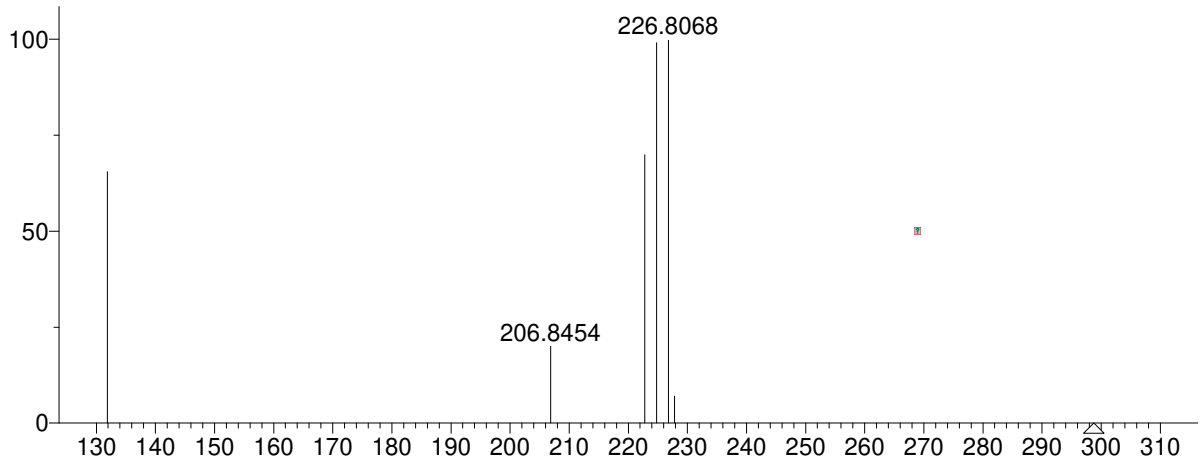

Unknown: Unknown (0.96\_300.7672m/z)  
Compound in Library Factor = 0

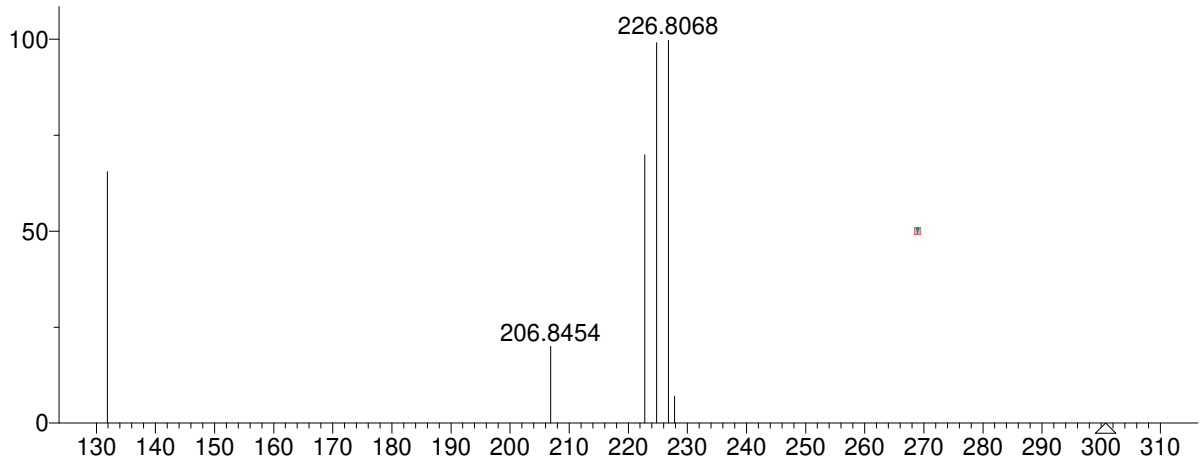

Unknown: Unknown (0.96\_302.7646m/z)  
Compound in Library Factor = 0

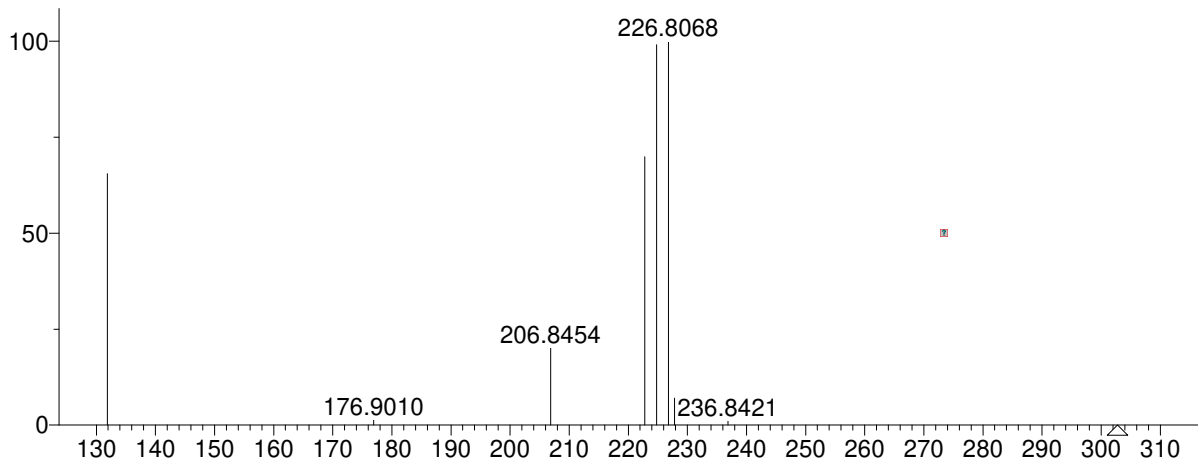



Unknown: Unknown (0.96\_304.7606m/z)  
Compound in Library Factor = 0

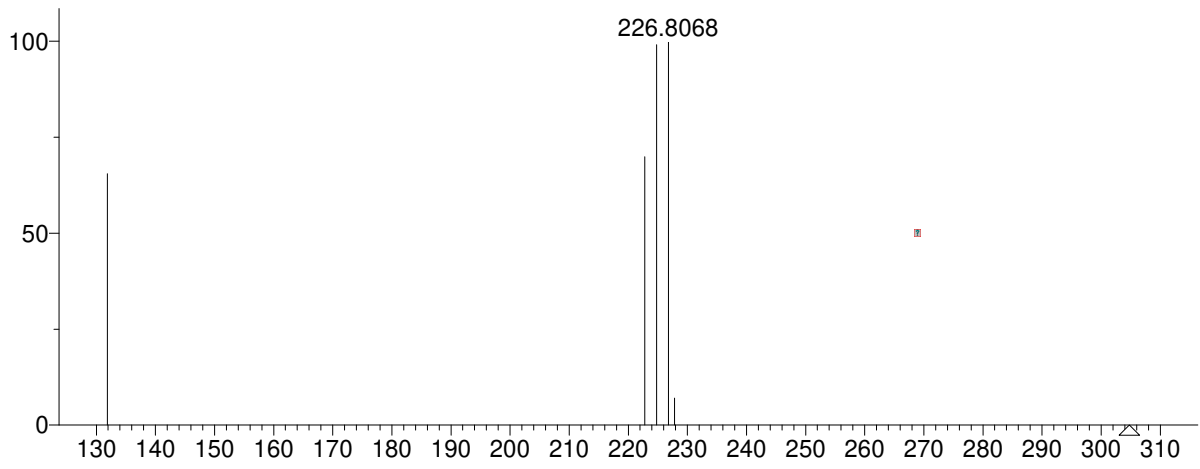

Unknown: Unknown (0.96\_310.7953m/z)  
Compound in Library Factor = 0

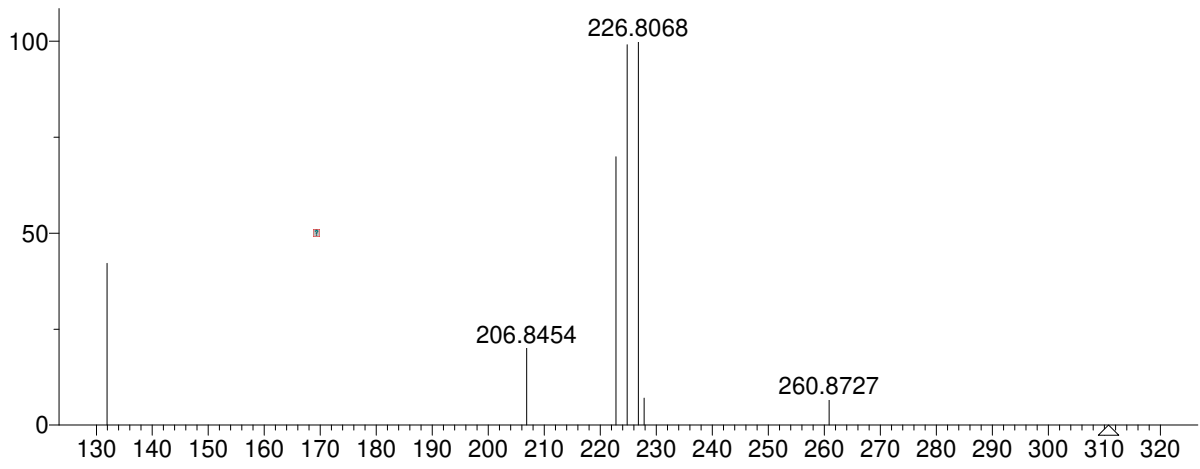

Unknown: Unknown (0.96\_316.7359m/z)  
Compound in Library Factor = 0

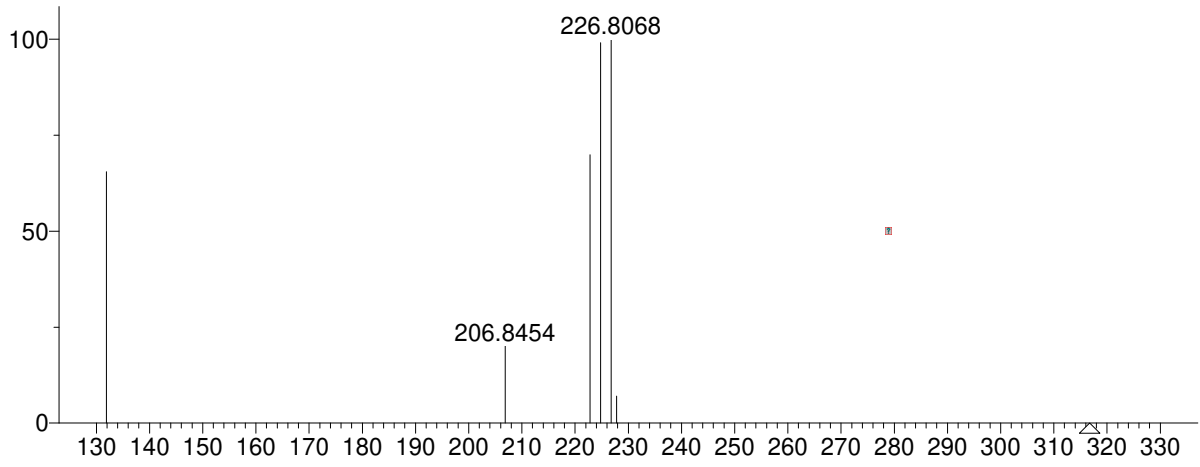

Unknown: Unknown (0.96\_318.7335m/z)  
Compound in Library Factor = 0

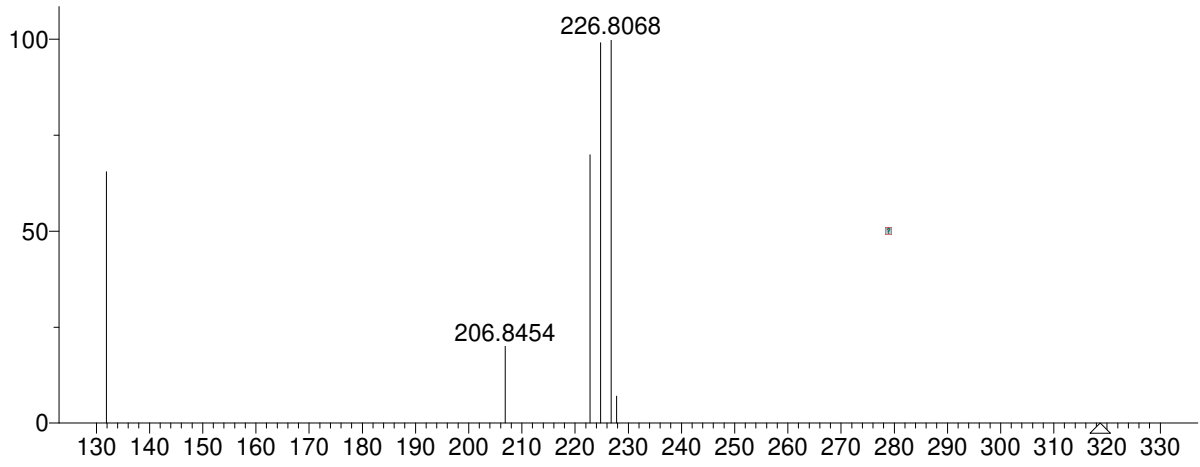

Unknown: Unknown (0.96\_320.7309m/z)  
Compound in Library Factor = 0

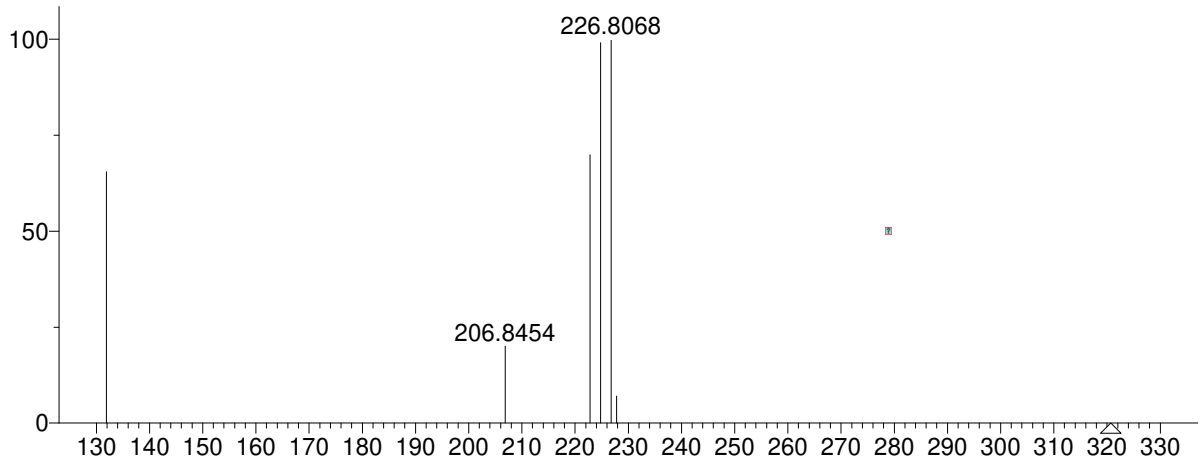

Unknown: Unknown (0.96\_322.7282m/z)  
Compound in Library Factor = 0

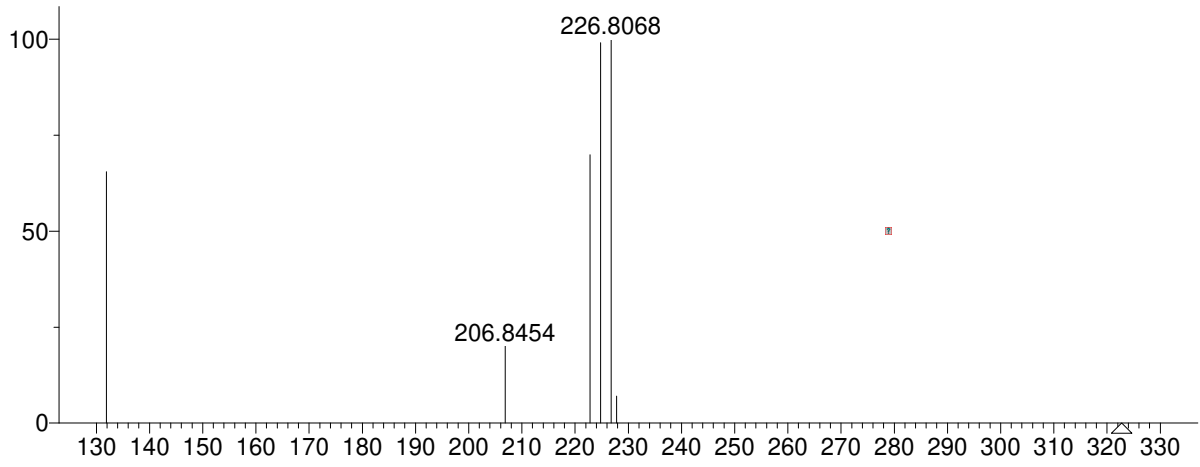

Unknown: Unknown (0.96\_324.7246m/z)  
Compound in Library Factor = 0

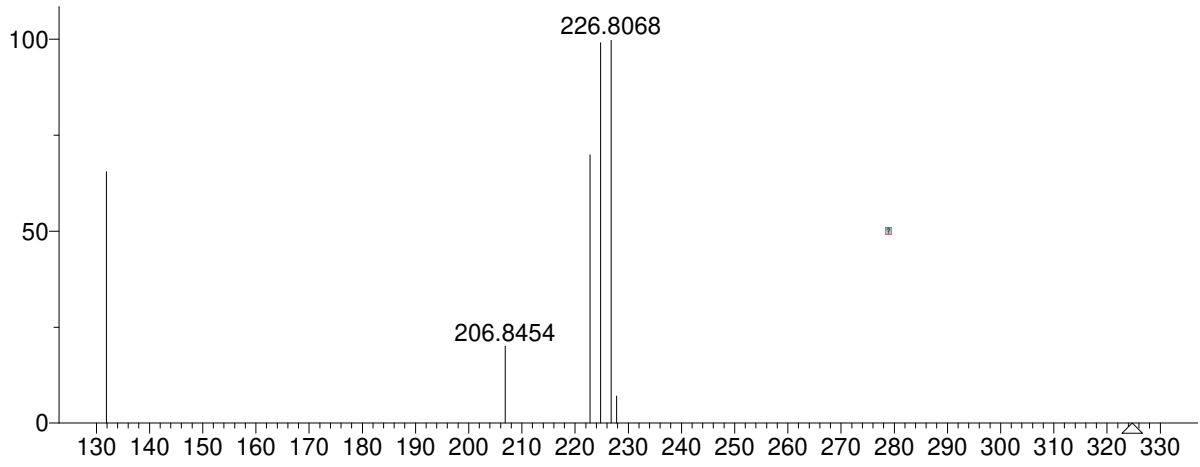

Unknown: Unknown (0.96\_328.7616m/z)  
Compound in Library Factor = 0

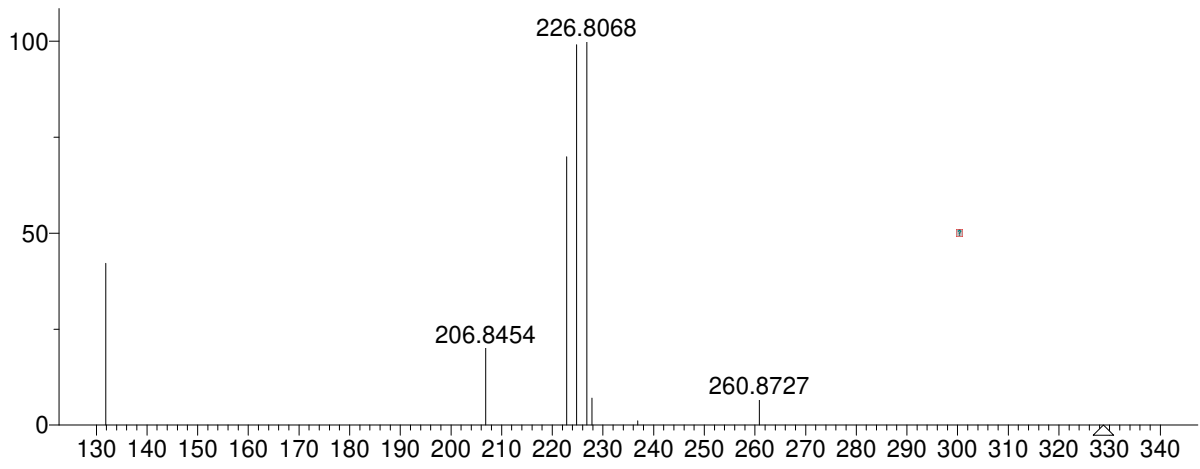



Unknown: Unknown (0.96\_330.7581m/z)  
Compound in Library Factor = 0

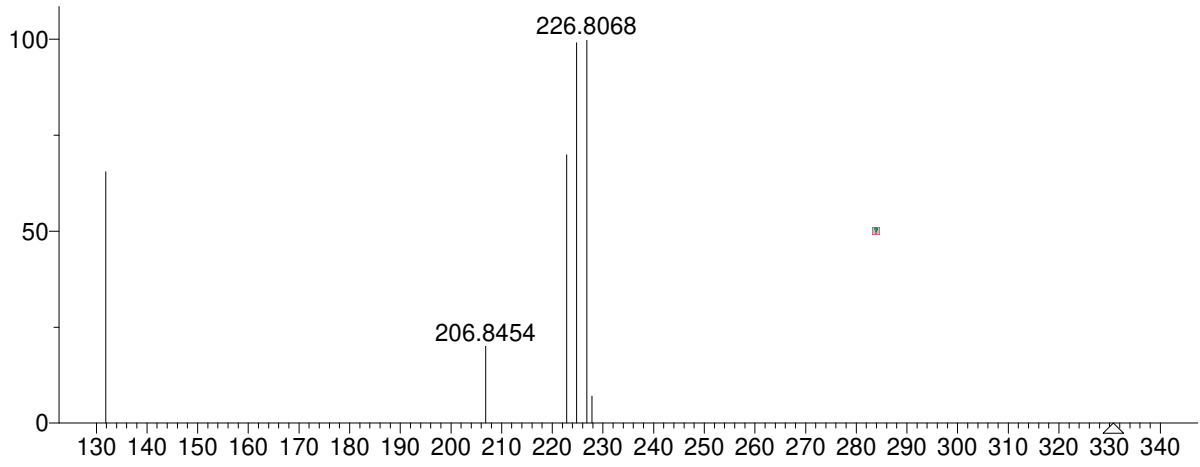

Unknown: Unknown (0.96\_332.7563m/z)  
Compound in Library Factor = 0

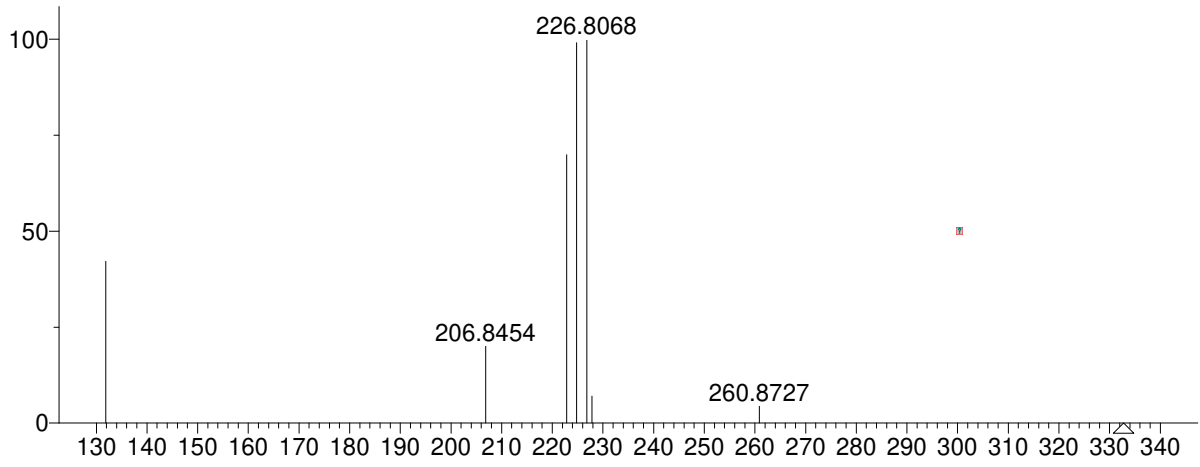

Unknown: Unknown (0.96\_338.7903m/z)  
Compound in Library Factor = 0

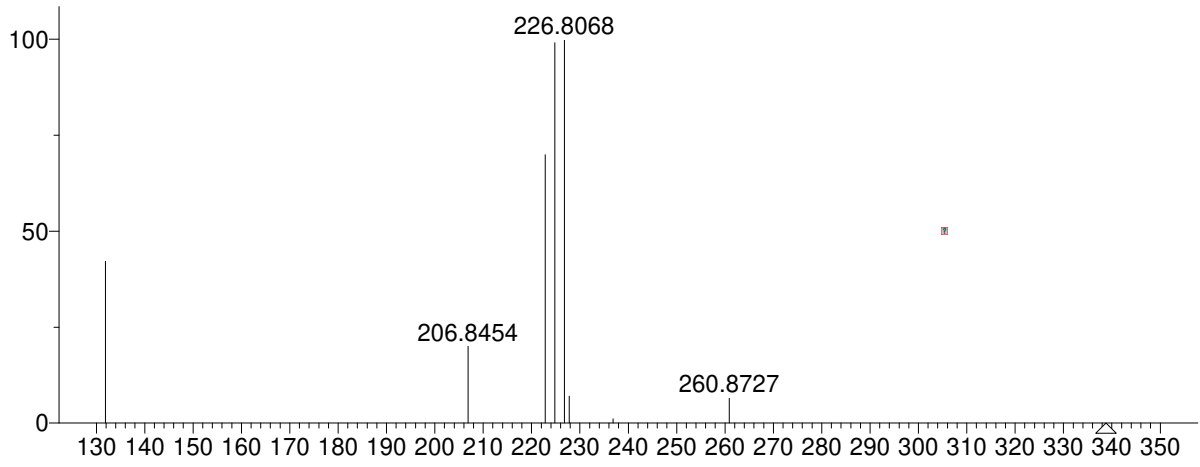

Unknown: Unknown (0.96\_406.7143m/z)  
Compound in Library Factor = 0

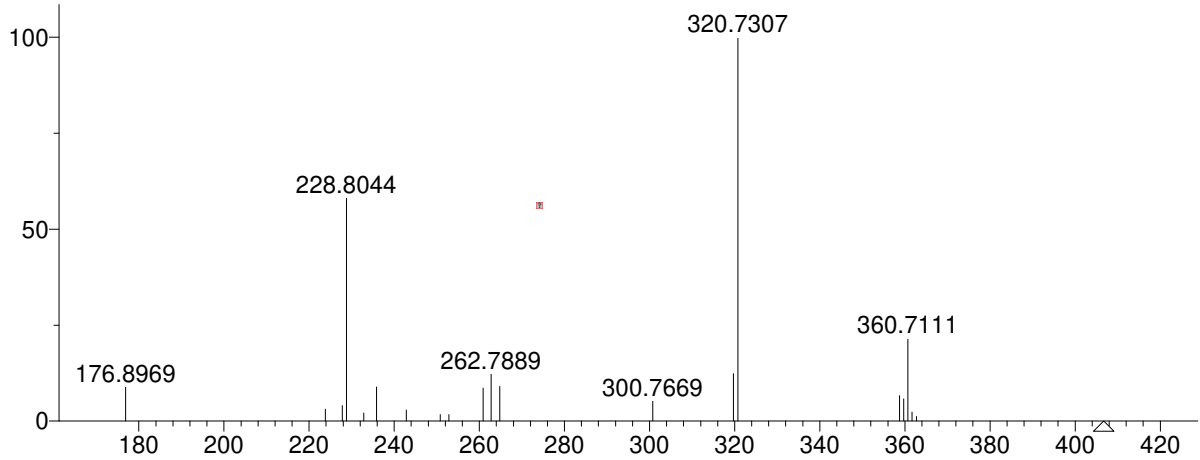

Hit 1 : Bombesin (8-14) [M+2H]<sup>2+</sup> QQQ 12V P=406.7  
C<sub>38</sub>H<sub>57</sub>N<sub>11</sub>O<sub>7</sub>S; MF: 0; RMF: 2; Prob 50.0%; CAS: 55749-98-9; Lib: nist\_msms2; ID: 21234.

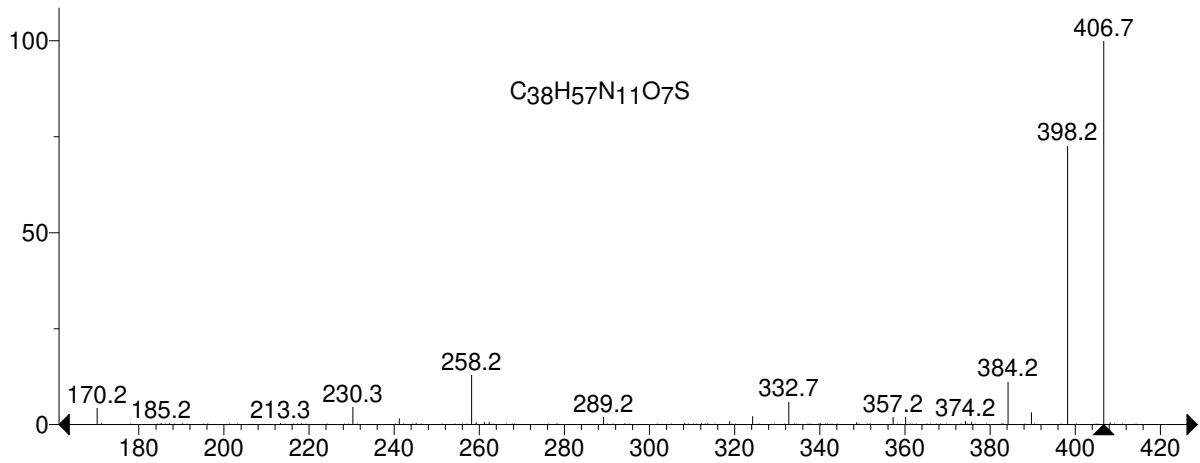

Hit 2 : GTP-Binding Protein Fragment, G alpha [M+4H]<sup>4+</sup> QQQ 13V P=406.7  
C<sub>66</sub>H<sub>118</sub>N<sub>20</sub>O<sub>23</sub>S<sub>2</sub>; MF: 0; RMF: 1; Prob 50.0%; Lib: nist\_msms2; ID: 3203.

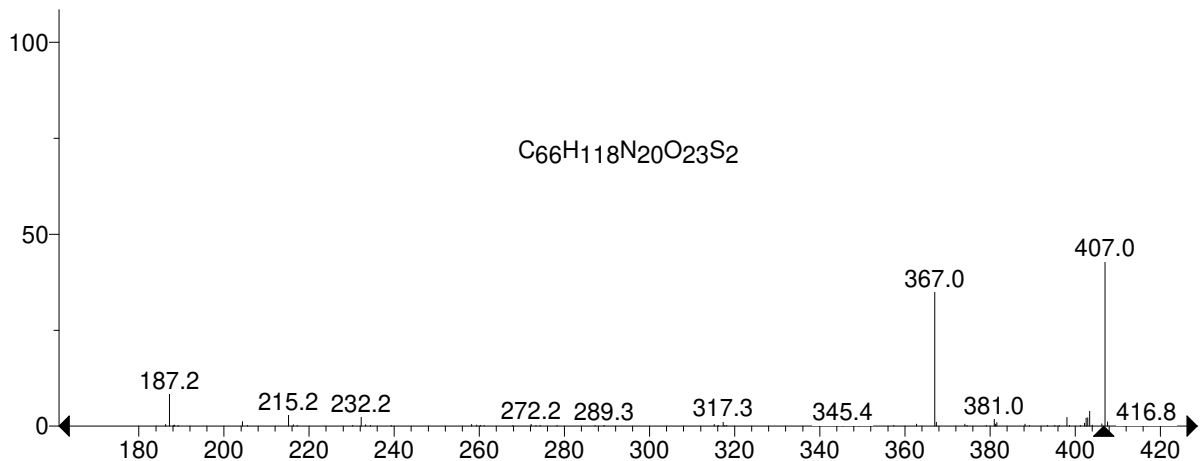

Unknown: Unknown (0.96\_424.6829m/z)  
Compound in Library Factor = 0

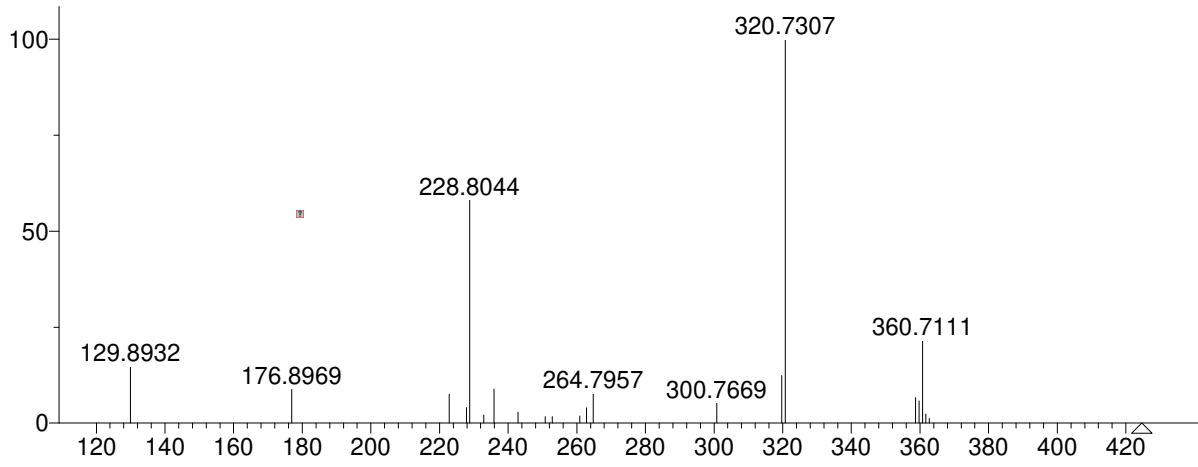

Unknown: Unknown (0.96\_426.6807m/z)  
Compound in Library Factor = 0

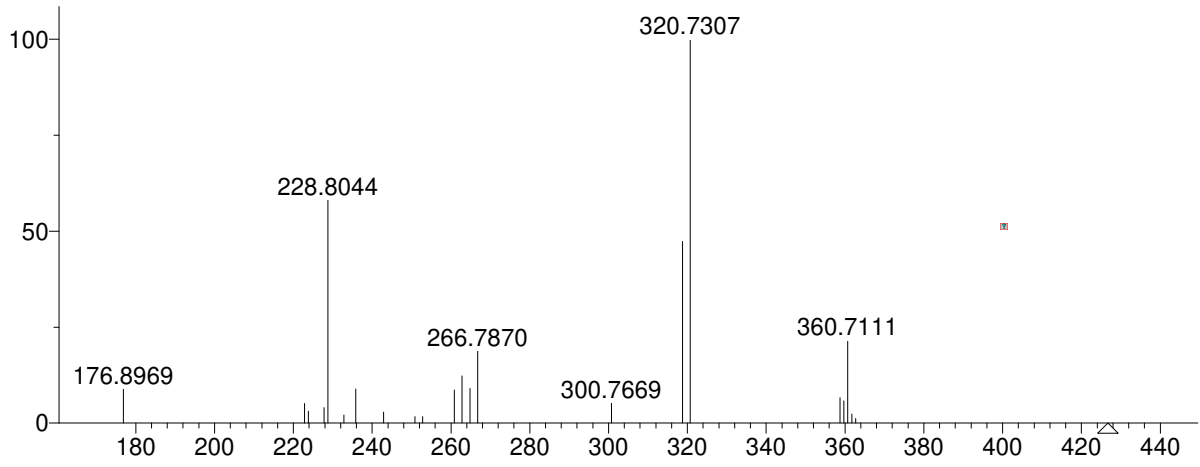

Unknown: Unknown (0.96\_434.7099m/z)  
Compound in Library Factor = 0

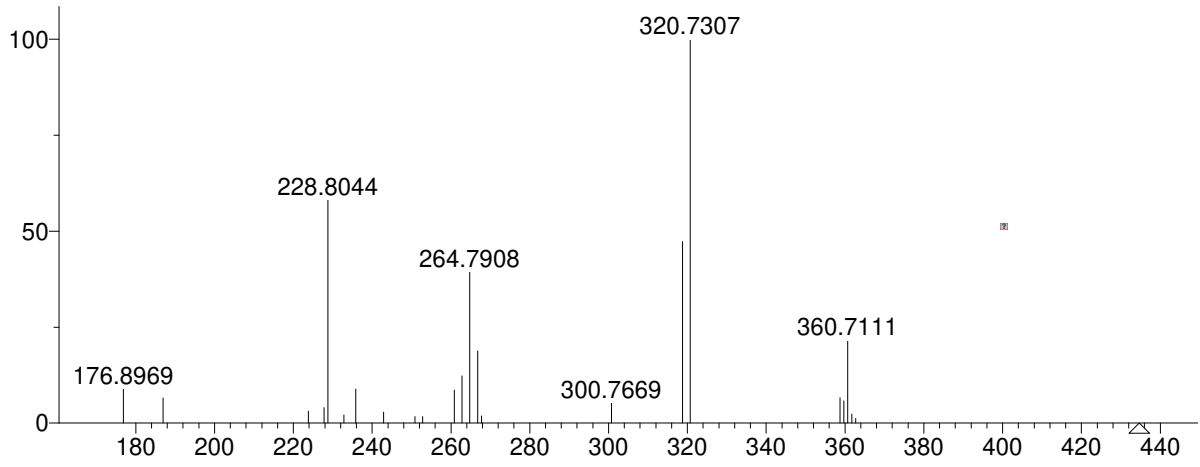

Unknown: Unknown (0.97\_128.8915m/z)  
Compound in Library Factor = 0

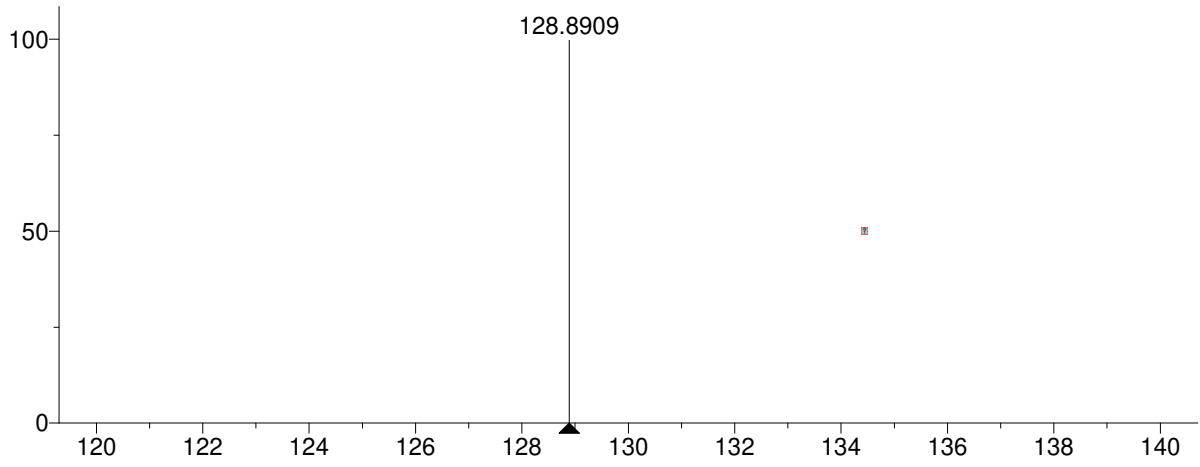



Unknown: Unknown (0.97\_130.8886m/z)  
Compound in Library Factor = 0

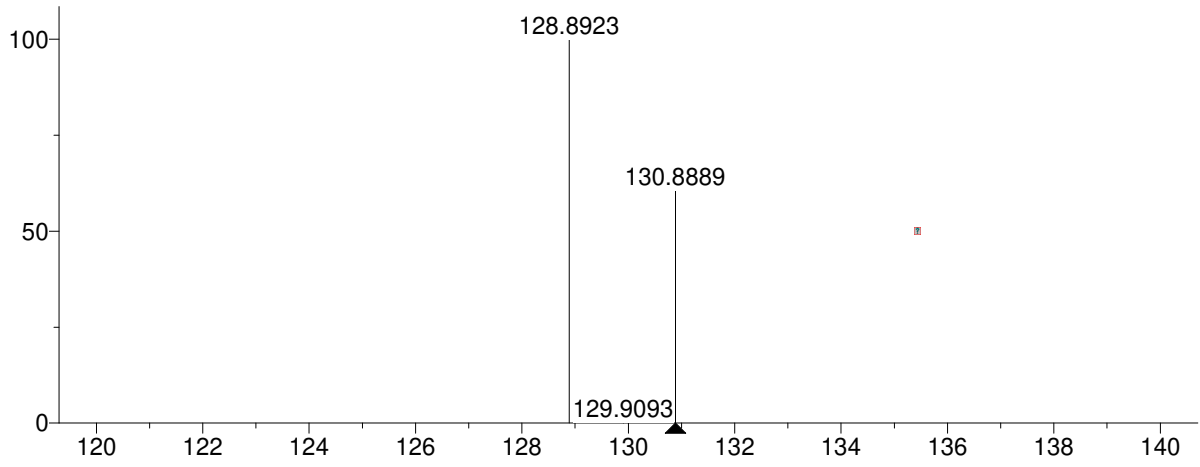

Unknown: Unknown (0.97\_132.8857m/z)  
Compound in Library Factor = 0

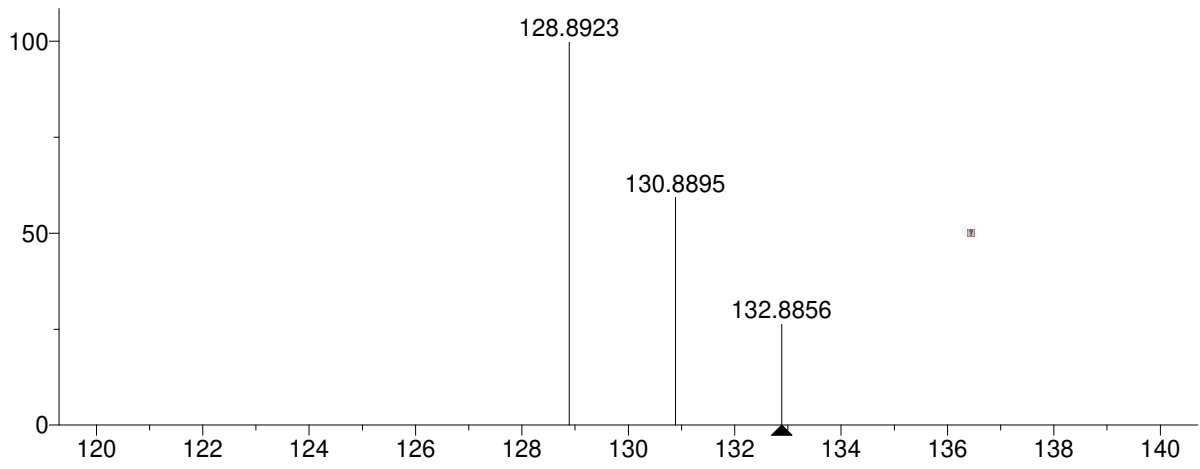

Unknown: Unknown (0.97\_224.8108m/z)  
Compound in Library Factor = 0

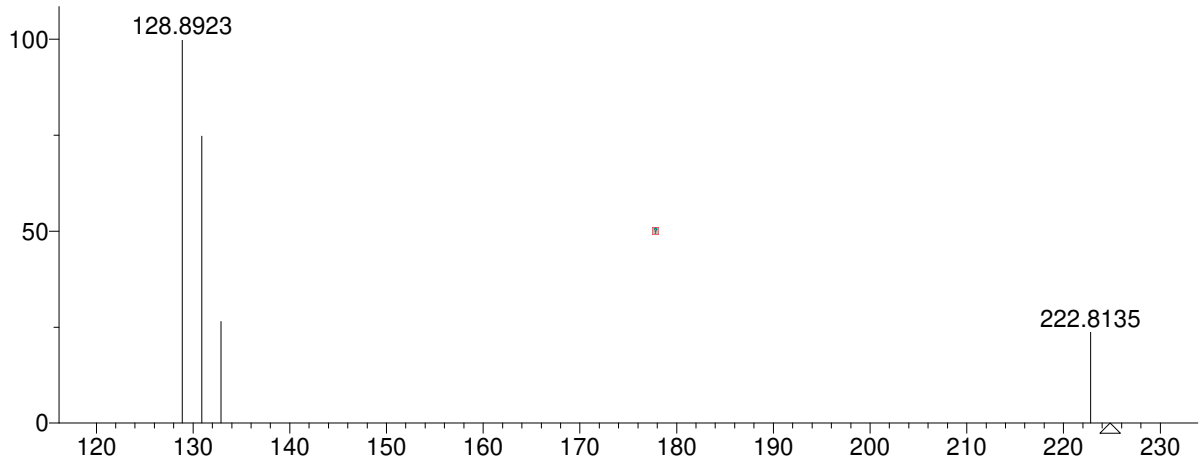

Unknown: Unknown (0.97\_226.8079m/z)  
Compound in Library Factor = 0

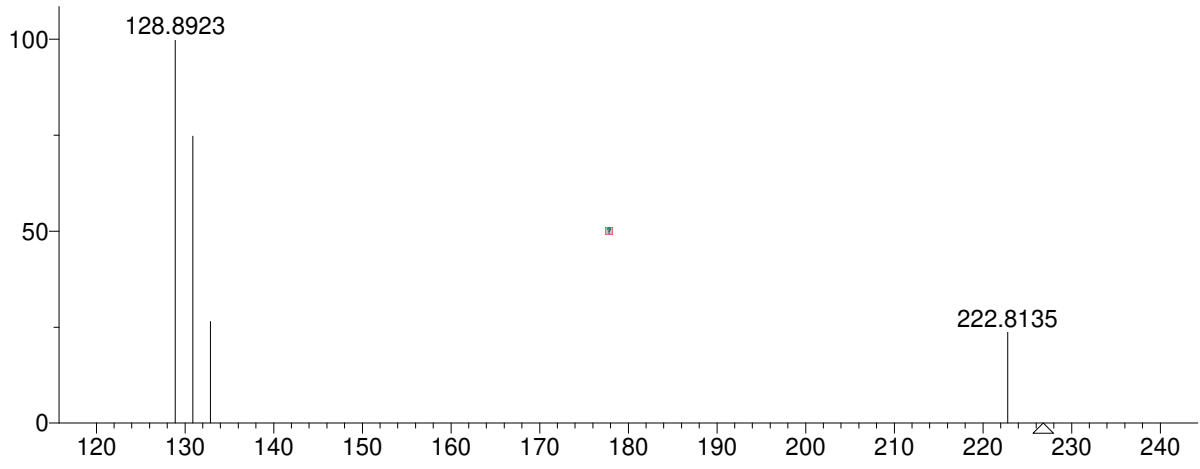

Unknown: Unknown (0.97\_228.8049m/z)  
Compound in Library Factor = 0

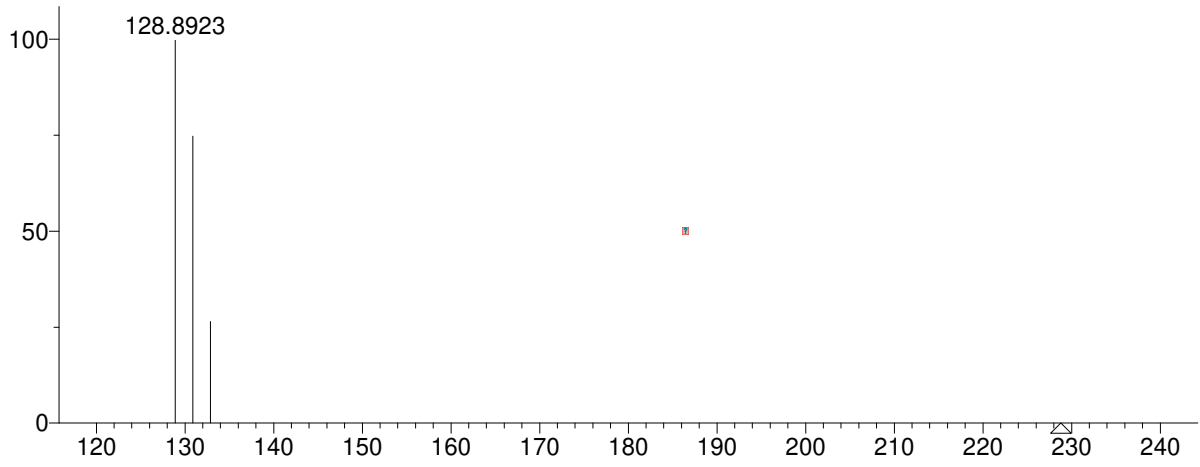

Unknown: Unknown (0.97\_282.7680m/z)  
Compound in Library Factor = 0

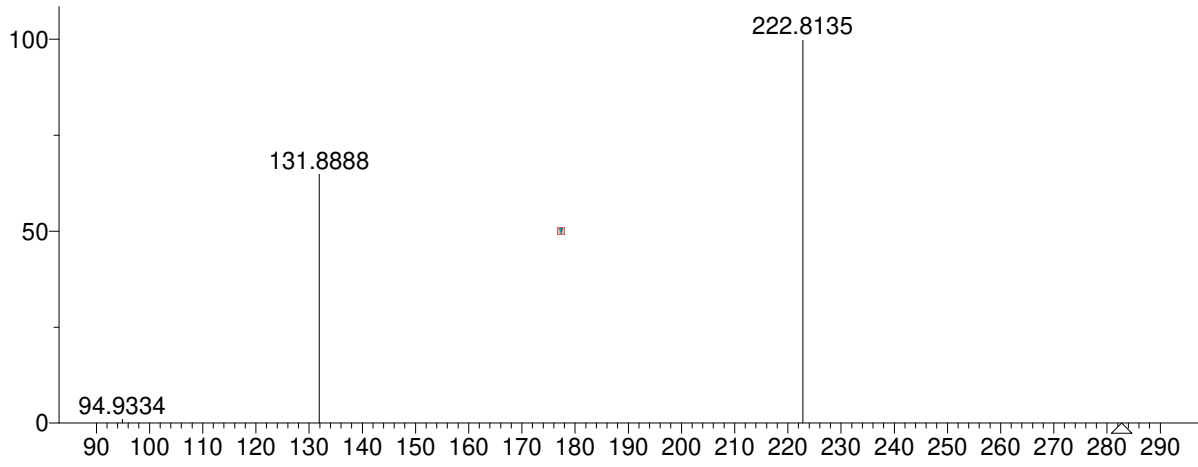

Unknown: Unknown (0.97\_284.7658m/z)  
Compound in Library Factor = 0

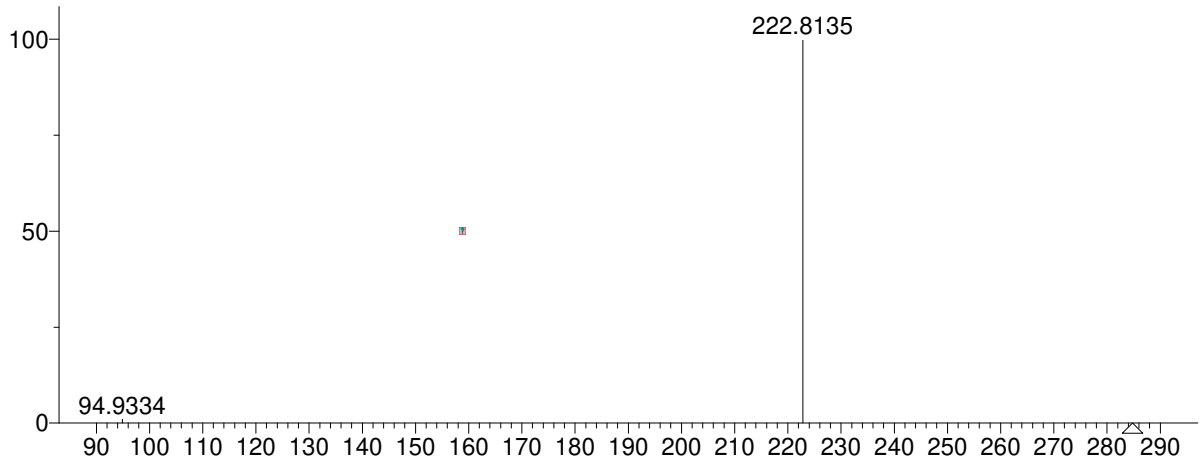

Unknown: Unknown (1.01\_355.0870m/z)  
Compound in Library Factor = 0

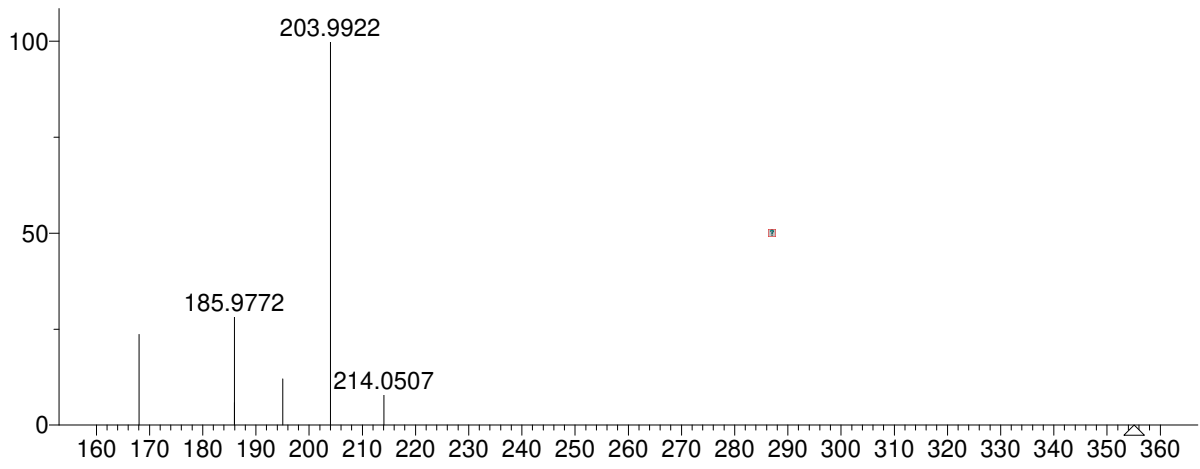



Unknown: Unknown (1.01\_357.1016m/z)  
Compound in Library Factor = -1309

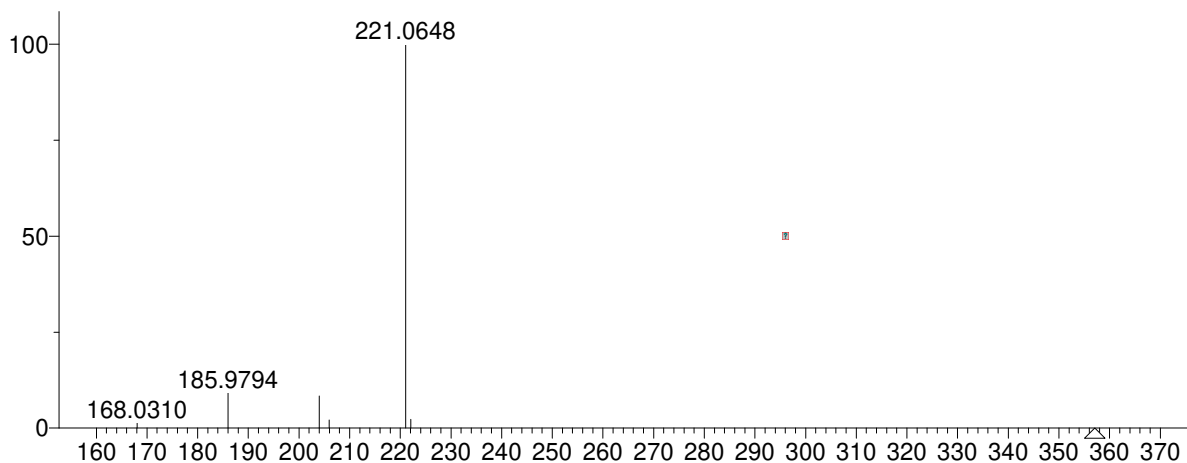

Hit 1 : Lactobionic acid [M-H]<sup>-</sup> HCD 46V P=357.1  
C<sub>12</sub>H<sub>22</sub>O<sub>12</sub>; MF: 61; RMF: 582; Prob 46.3%; CAS: 96-82-2; Lib: nist\_msms; ID: 407492.

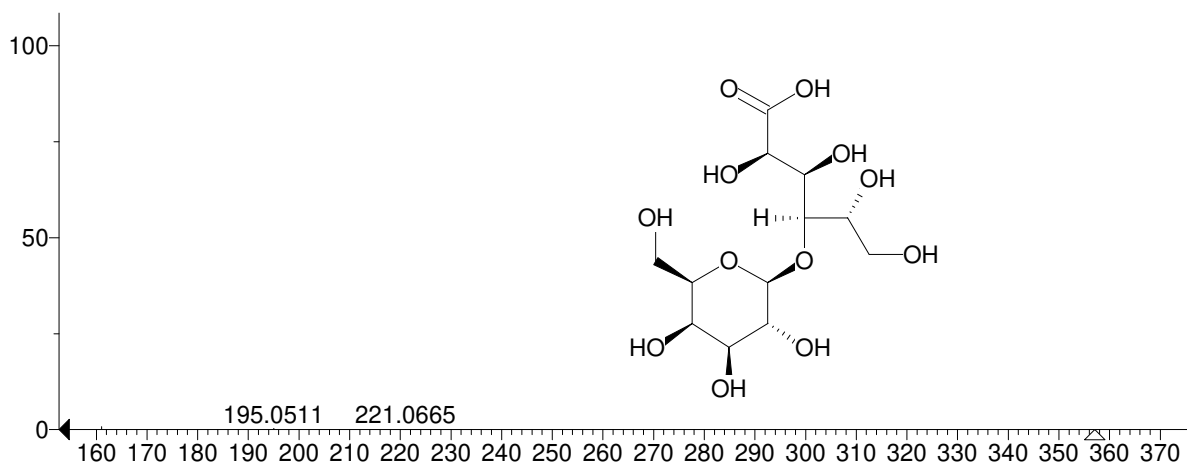

Hit 2 : N-(sec-Butyl)-N-(4-(sec-butyl(trifluoroacetyl)amino)phenyl)-2,2,2-trifluoroacetamide [M+H-C<sub>4</sub>H<sub>8</sub>]<sup>+</sup> HCD 9:  
C<sub>18</sub>H<sub>22</sub>F<sub>6</sub>N<sub>2</sub>O<sub>2</sub>; MF: 3; RMF: 82; Prob 8.52%; CAS: 883829-91-2; Lib: nist\_msms; ID: 199683.

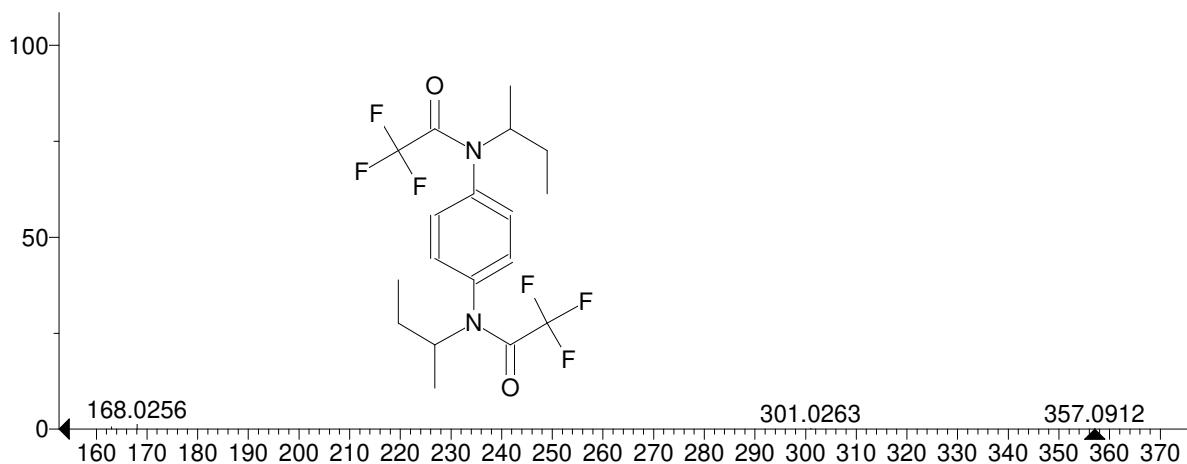

Hit 3 : 3'- $\alpha$ -Sialyl-N-acetylglucosamine [M+H+K]<sup>2+</sup> HCD 19V P=357.1  
C<sub>25</sub>H<sub>42</sub>N<sub>2</sub>O<sub>19</sub>; MF: 0; RMF: 31; Prob 7.53%; CAS: 81693-22-3; Lib: nist\_msms; ID: 182060.

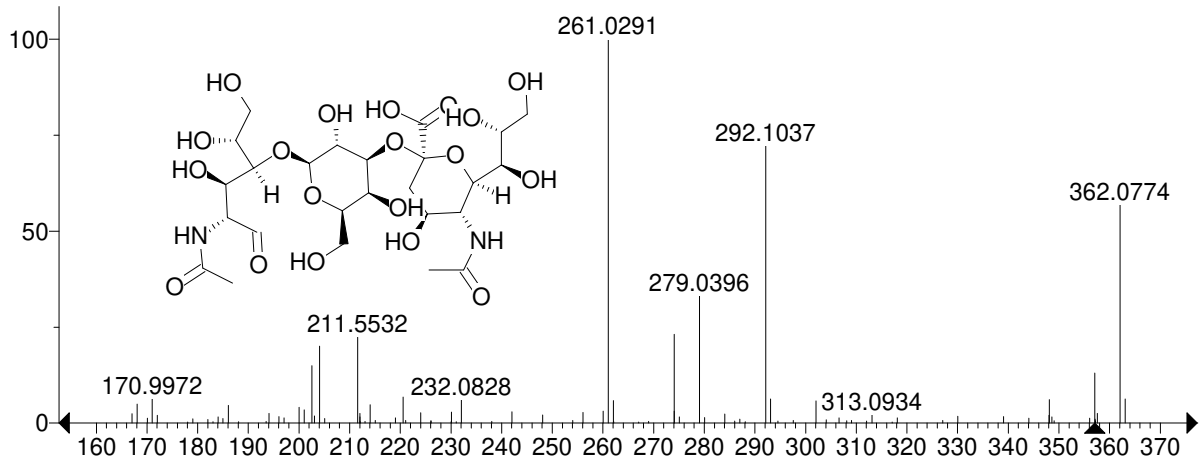

Hit 4 : Trandolapril [M+H]<sup>+</sup> => 357.1 IT 35% P=357.1  
C<sub>24</sub>H<sub>34</sub>N<sub>2</sub>O<sub>5</sub>; MF: 0; RMF: 27; Prob 7.53%; CAS: 87679-37-6; Lib: nist\_msms; ID: 116282.

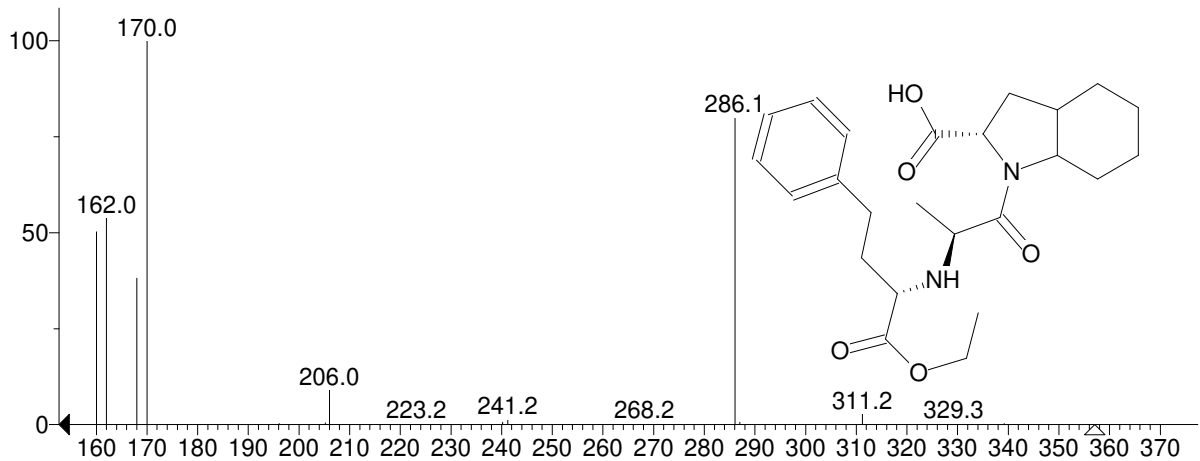

Hit 5 : 6'-Sialyl-N-acetylglucosamine [M+H+K]<sup>2+</sup> HCD 22V P=357.1  
C<sub>25</sub>H<sub>42</sub>N<sub>2</sub>O<sub>19</sub>; MF: 0; RMF: 25; Prob 7.53%; CAS: 78969-47-8; Lib: nist\_msms; ID: 181459.

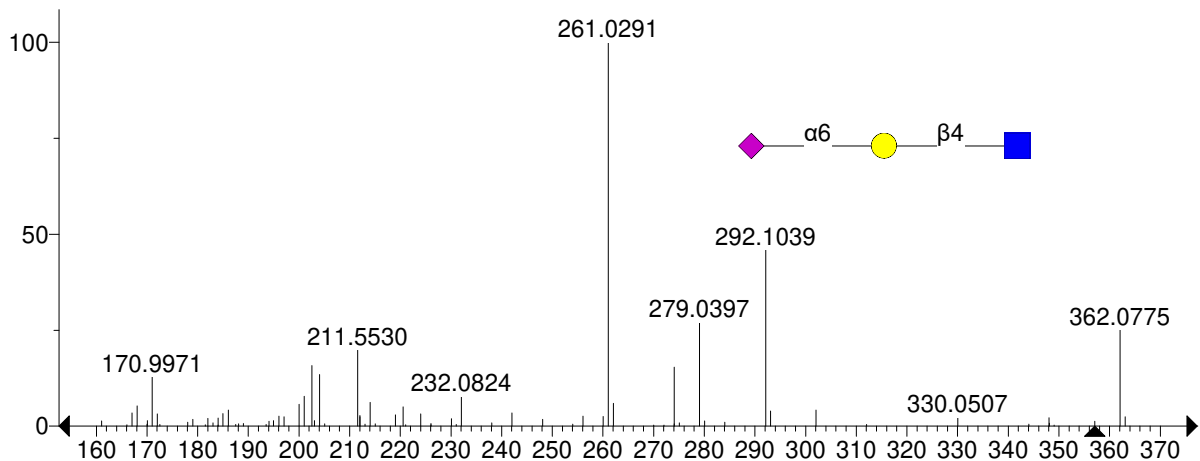

Unknown: Unknown (1.01\_393.0793m/z)  
Compound in Library Factor = 0

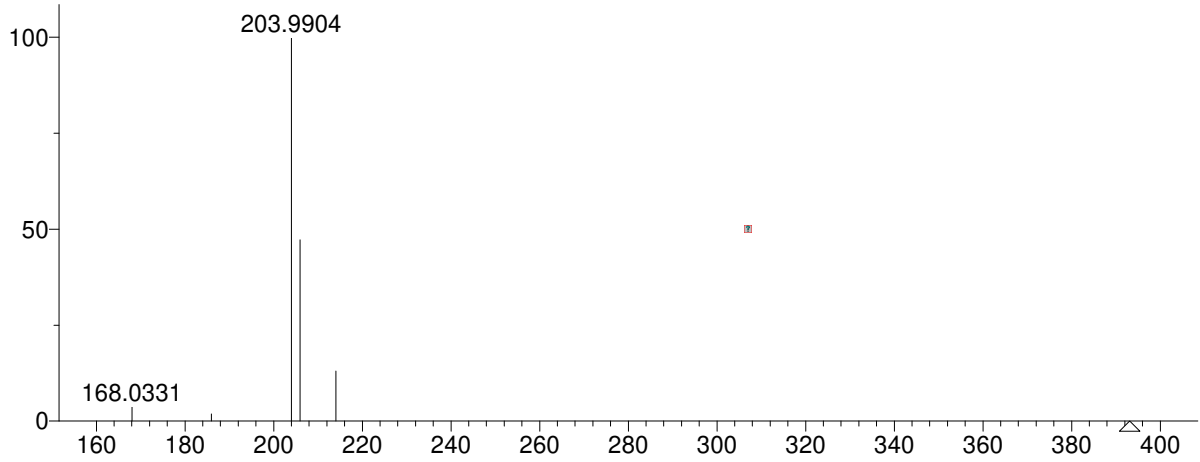

Hit 1 : fraxin [M+Na]<sup>+</sup> 65HCD P=393.1  
C<sub>16</sub>H<sub>18</sub>O<sub>10</sub>; MF: 0; RMF: 47; Prob 50.0%; Lib: mona anthocyanidin-o-glycosides; ID: 3225.

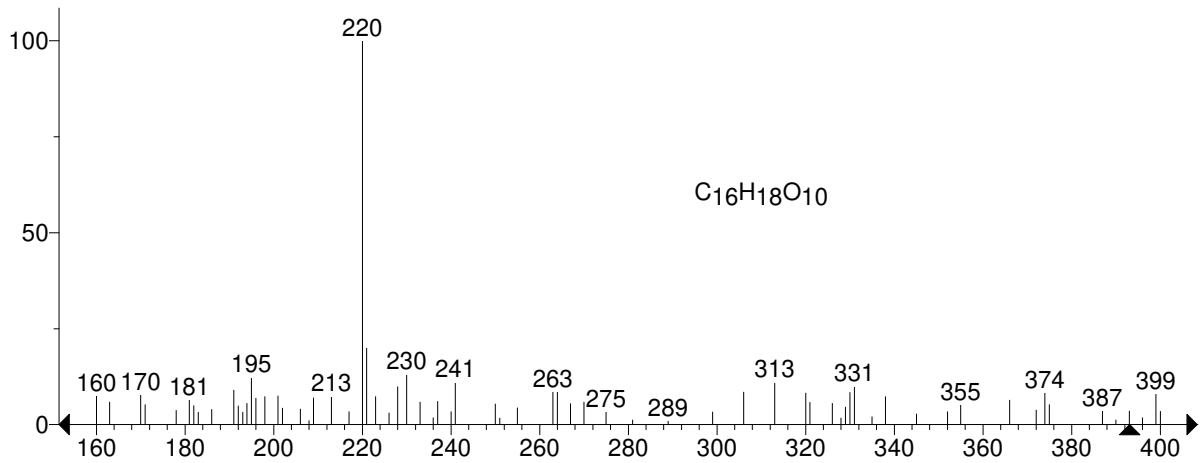

Hit 2 : 8-hydroxy-6-methoxy-7-[(2S,3R,4S,5S,6R)-3,4,5-trihydroxy-6-(hydroxymethyl)oxan-2-yl]oxochromen-2-one  
C<sub>16</sub>H<sub>18</sub>O<sub>10</sub>; MF: 0; RMF: 19; Prob 50.0%; Lib: mona anthocyanidin-o-glycosides; ID: 3231.

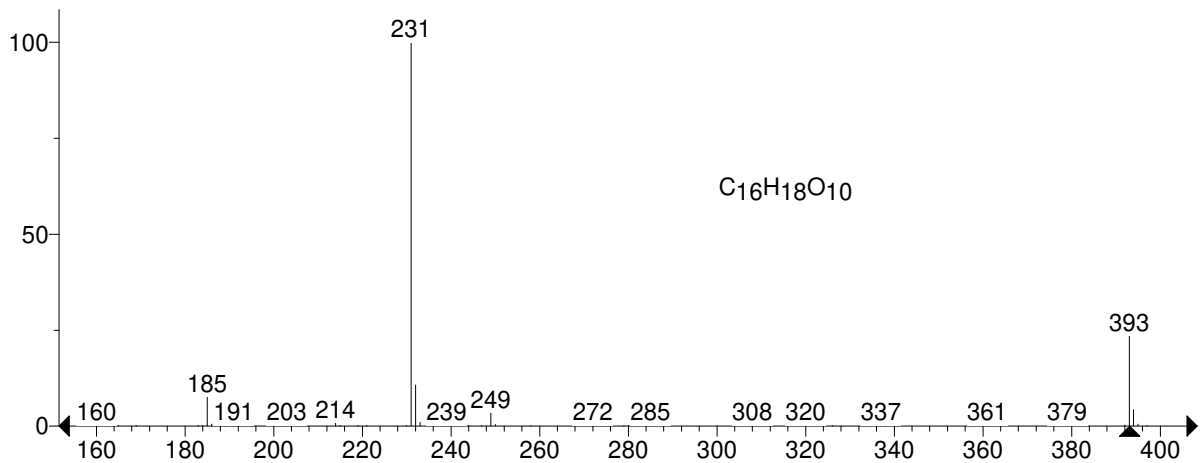

\*\* Search Report Page 1 of 2 \*\*

Unknown: Unknown (1.03\_377.1966m/z)  
Compound in Library Factor = -2176

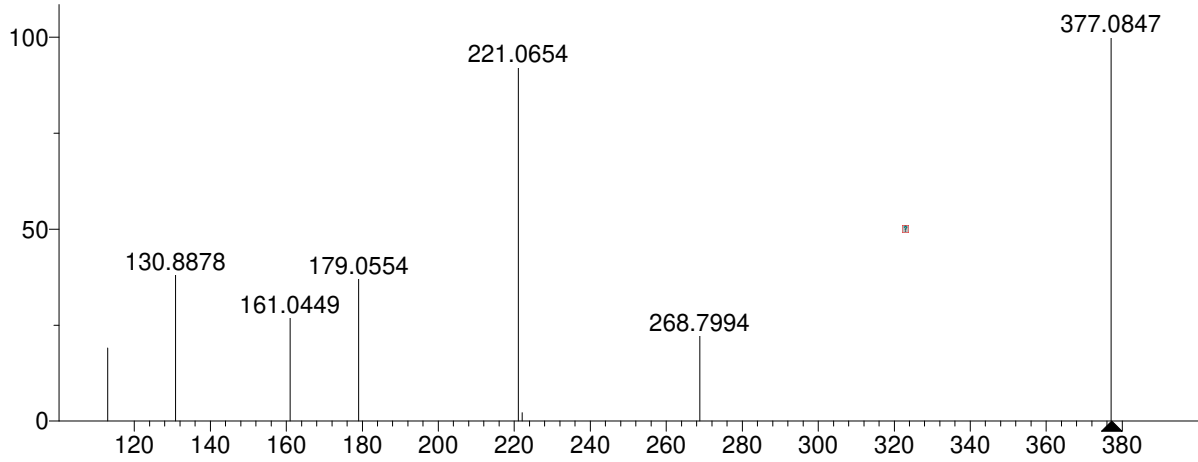

Hit 1 : Ala-Met-Arg [M+H]<sup>+</sup> QQQ 10V P=377.2  
C<sub>14</sub>H<sub>28</sub>N<sub>6</sub>O<sub>4</sub>S; MF: 61; RMF: 556; Prob 38.3%; Lib: nist\_msms; ID: 41633.

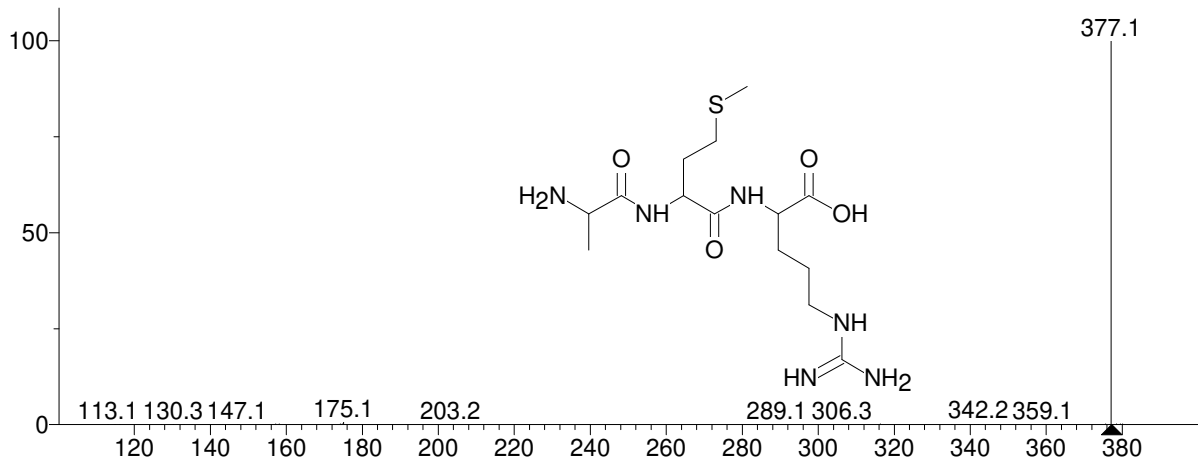

Hit 2 : Tetrahydrocurcumin [M+Na]<sup>+</sup>=>377.2 IT 35% P=377.2  
C<sub>21</sub>H<sub>24</sub>O<sub>6</sub>; MF: 4; RMF: 202; Prob 7.17%; CAS: 36062-04-1; Lib: nist\_msms; ID: 136919.

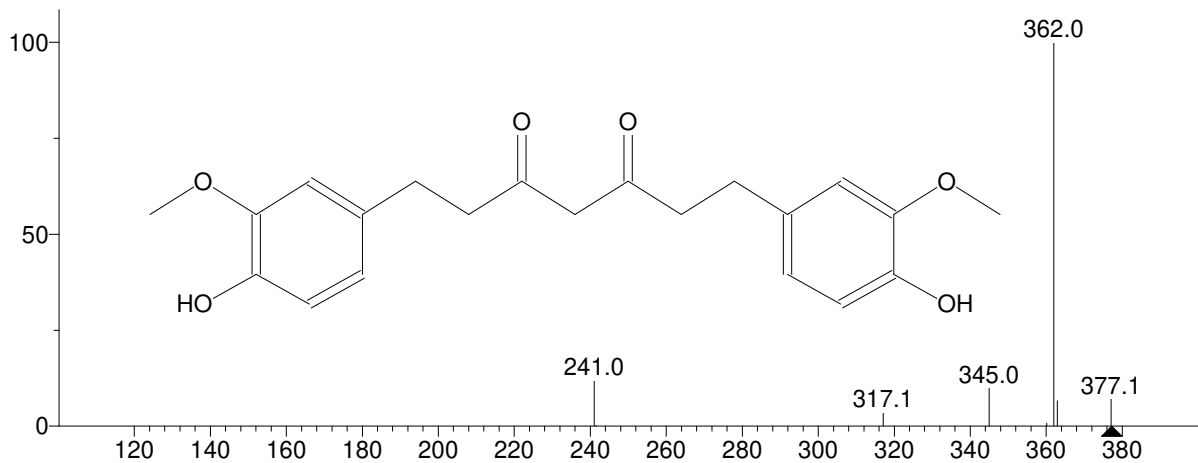

\*\* Search Report Page 2 of 2 \*\*

Hit 3 : 17-Trifluoromethylphenyl-13,14-dihydrotrininorprostaglandin F2 $\alpha$  [M-H-H<sub>2</sub>O] $\rightarrow$ 421.1 $\rightarrow$ 377.2 IT 35% P=3  
C<sub>24</sub>H<sub>33</sub>F<sub>3</sub>O<sub>5</sub>; MF: 0; RMF: 74; Prob 6.06%; CAS: 294856-01-2; Lib: nist\_msms; ID: 93998.

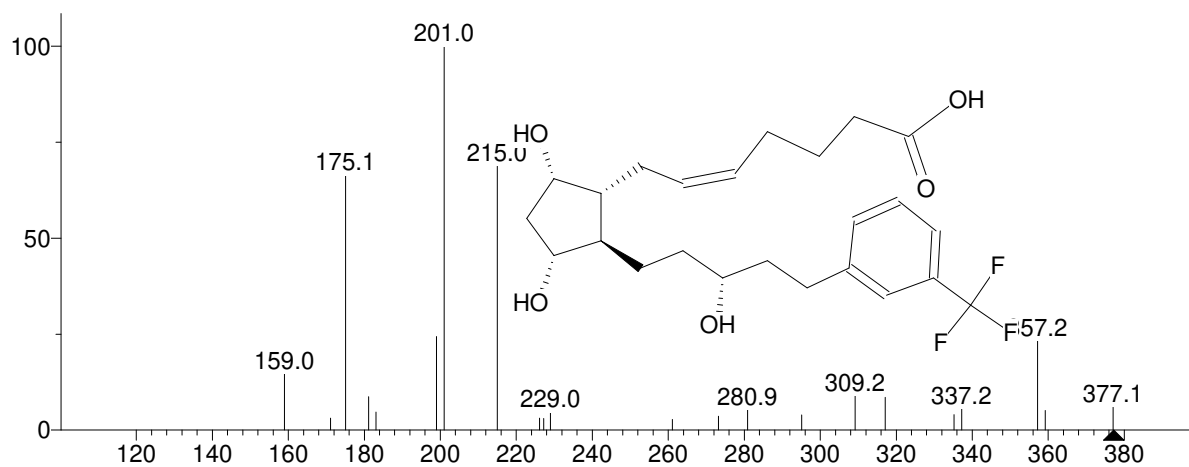

Hit 4 : Sildenafil [M+H] $\rightarrow$ 377.2 IT 35% P=377.2  
C<sub>22</sub>H<sub>30</sub>N<sub>6</sub>O<sub>4</sub>S; MF: 0; RMF: 63; Prob 6.06%; CAS: 139755-83-2; Lib: nist\_msms; ID: 105397.

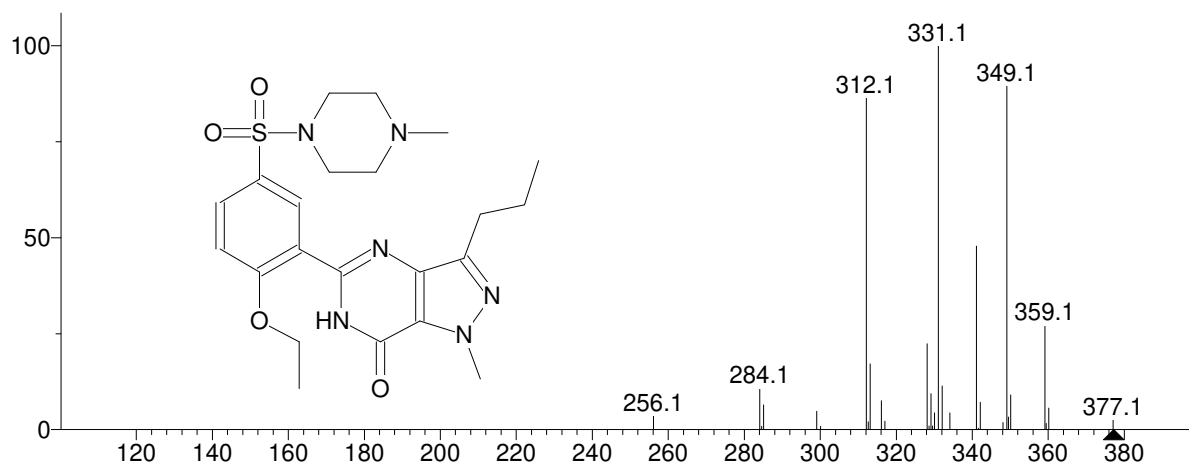

Hit 5 : Bisphenol A bis(2,3-dihydroxypropyl) ether [M+H] $\rightarrow$ 377.2 IT 35% P=377.2  
C<sub>21</sub>H<sub>28</sub>O<sub>6</sub>; MF: 0; RMF: 51; Prob 6.06%; CAS: 5581-32-8; Lib: nist\_msms; ID: 138122.

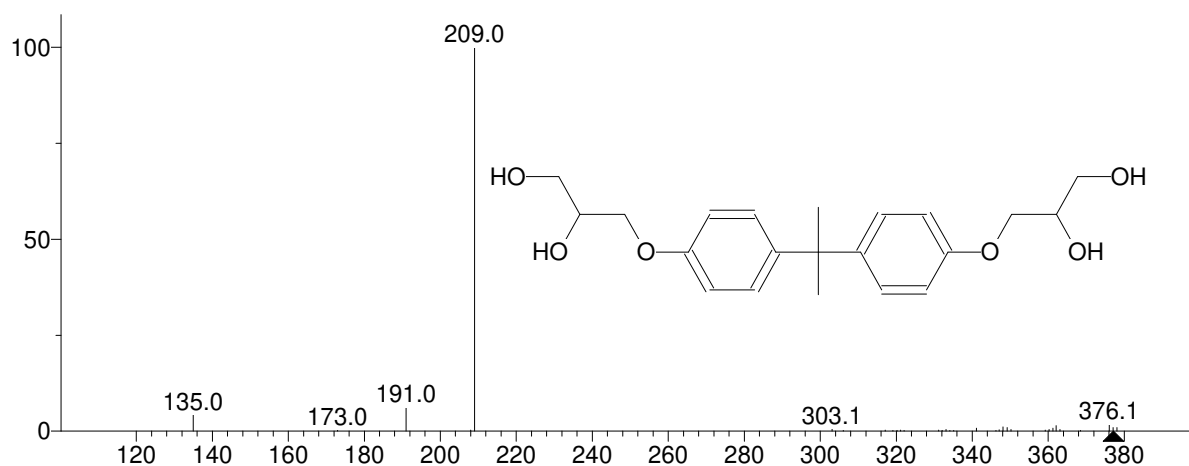

Unknown: Unknown (1.03\_377.6459m/z)  
Compound in Library Factor = 0

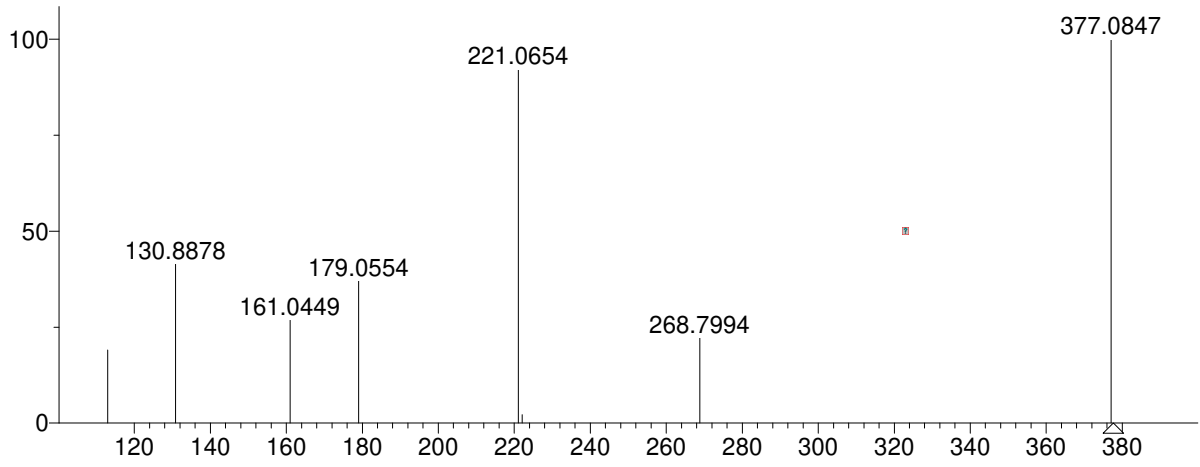

Unknown: Unknown (1.03\_379.2651m/z)  
Compound in Library Factor = 0

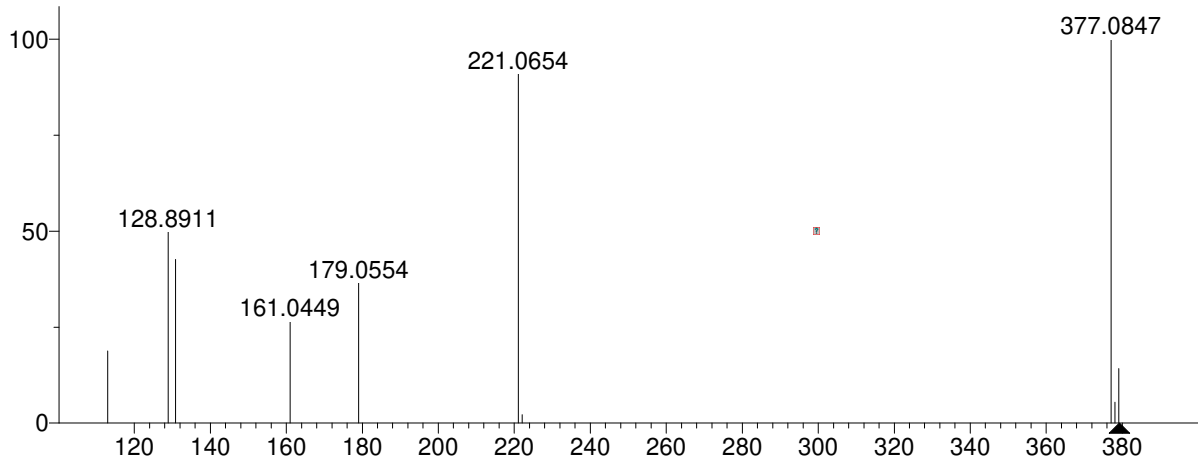

Unknown: Unknown (1.03\_421.0325m/z)  
Compound in Library Factor = 0

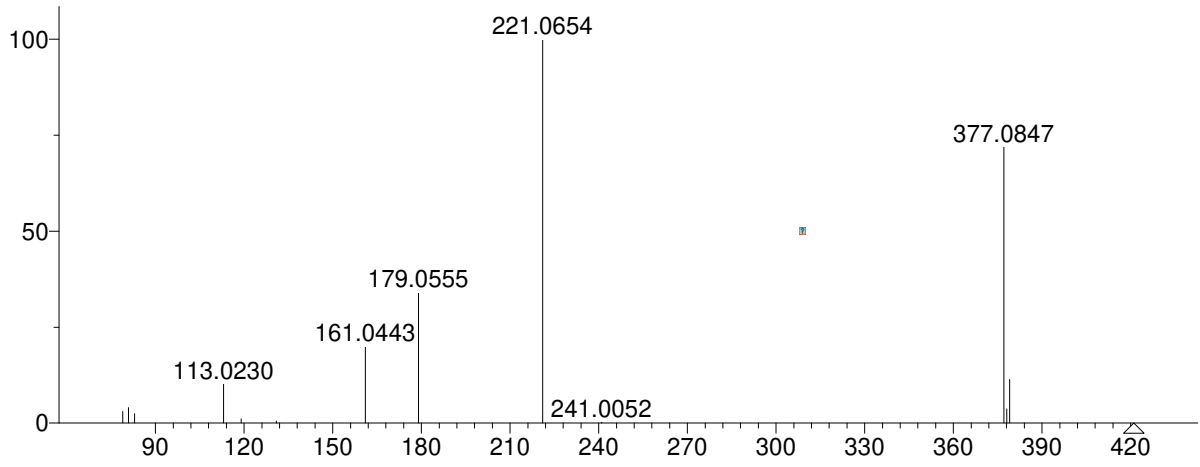



Unknown: Unknown (1.03\_423.0317m/z)  
Compound in Library Factor = 0

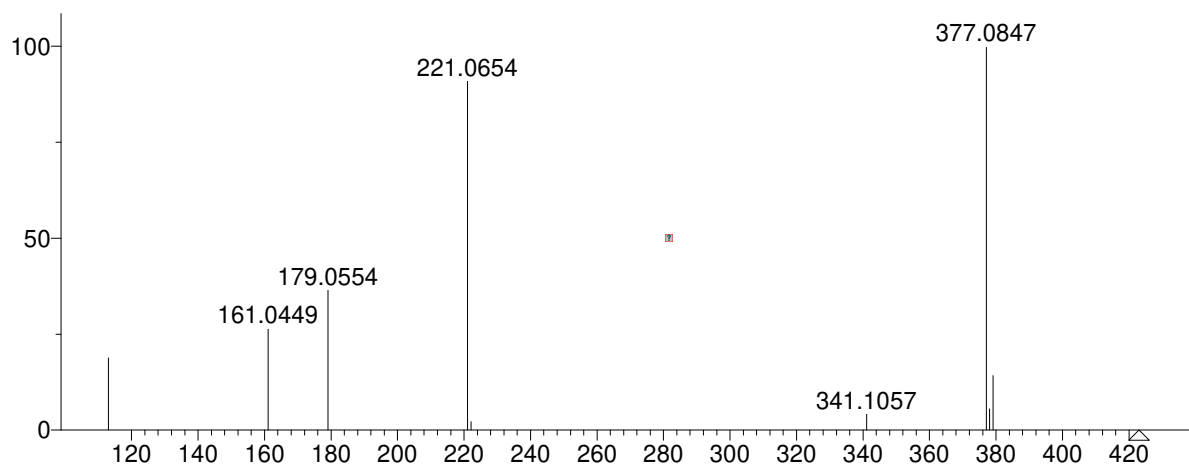

Hit 1 : Chloramphenicol succinate [M+H]<sup>+</sup> IT 35% P=423  
C<sub>15</sub>H<sub>16</sub>Cl<sub>2</sub>N<sub>2</sub>O<sub>8</sub>; MF: 0; RMF: 15; Prob 100.0%; CAS: 3544-94-3; Lib: nist\_msms; ID: 152600.

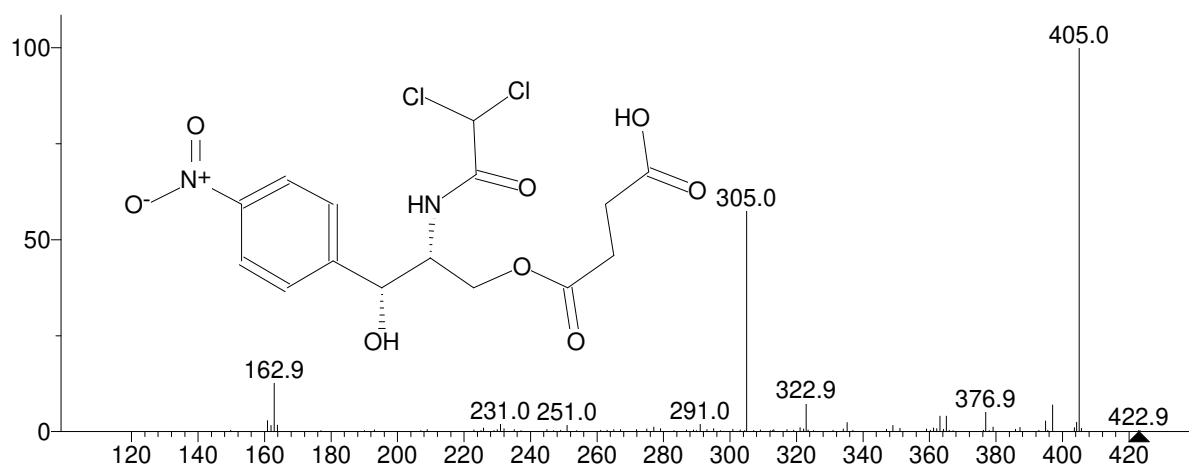

Unknown: Unknown (1.04\_161.0445m/z)  
Compound in Library Factor = -1453

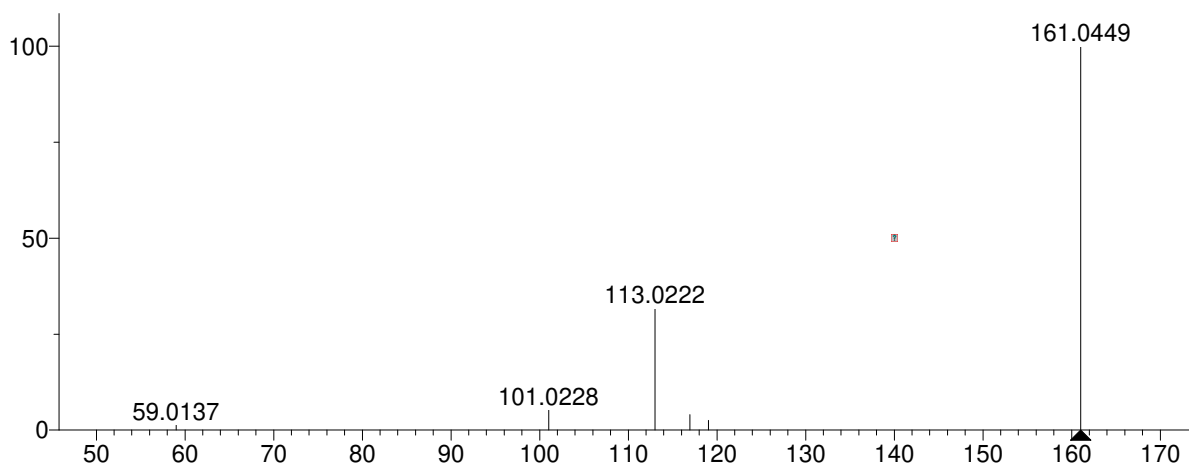

Hit 1 : 1,6-Anhydro- $\beta$ -D-glucose [M-H]<sup>-</sup> HCD 7V P=161  
C6H10O5; MF: 232; RMF: 830; Prob 73.7%; CAS: 498-07-7; Lib: nist\_msms; ID: 289434.

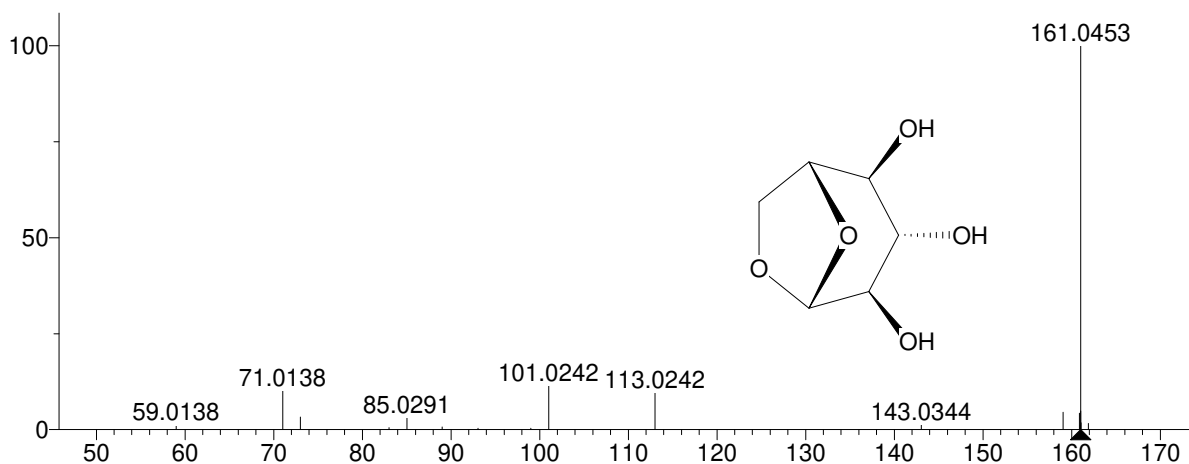

Hit 2 : D-Psicose [M-H-H<sub>2</sub>O]<sup>-</sup> HCD 11V P=161  
C6H12O6; MF: 195; RMF: 834; Prob 17.9%; CAS: 551-68-8; Lib: nist\_msms; ID: 499897.

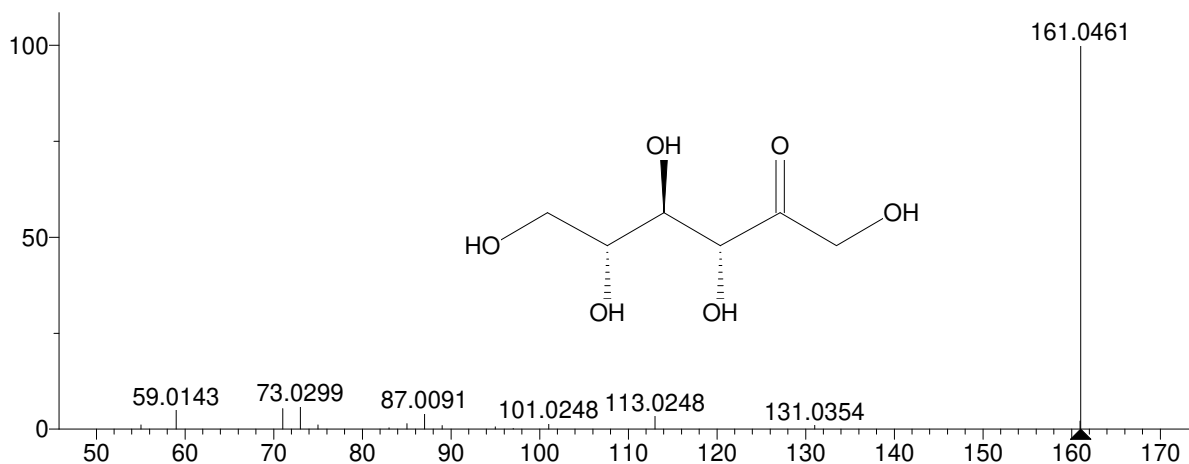

Hit 3 : Hydroxymethylglutaric acid; PlaSMA ID-124 [M-H]<sup>-</sup> P=161  
C<sub>6</sub>H<sub>10</sub>O<sub>5</sub>; MF: 151; RMF: 728; Prob 3.89%; Lib: biomsmms-neg-plasma; ID: 461.

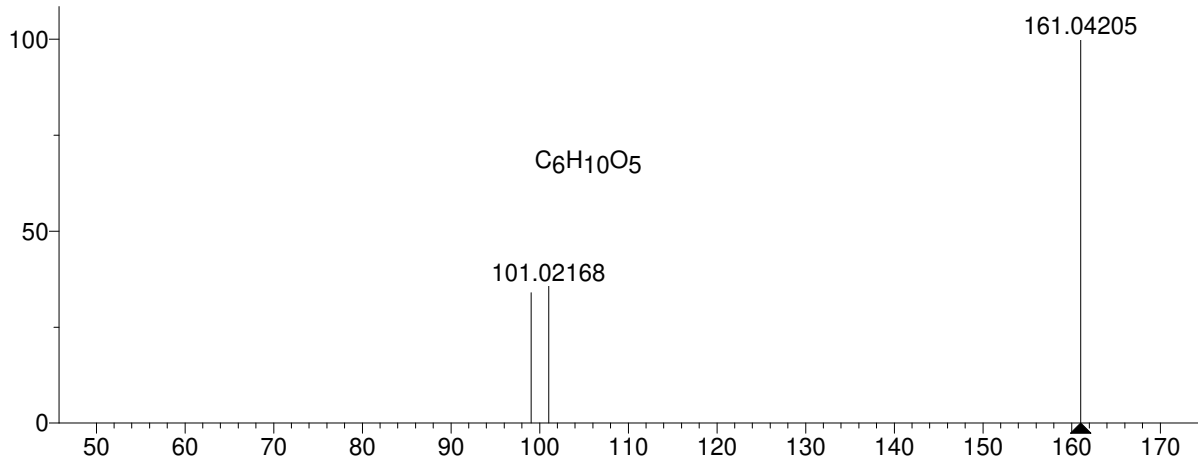

Hit 4 : 3-Hydroxy-3-methylglutaric acid [M-H]<sup>-</sup> HCD 14V P=161  
C<sub>6</sub>H<sub>10</sub>O<sub>5</sub>; MF: 108; RMF: 484; Prob 0.85%; CAS: 503-49-1; Lib: nist\_msms; ID: 313312.

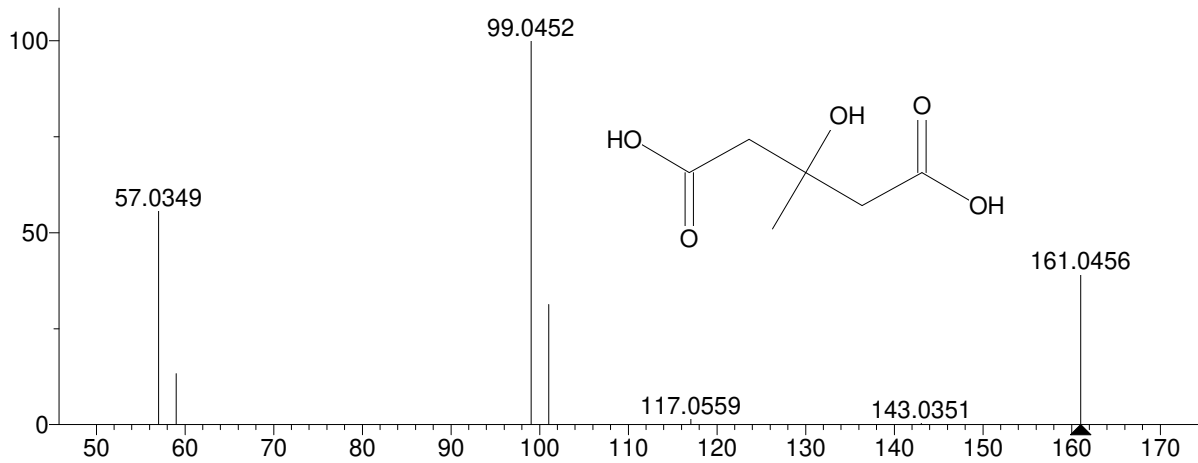

Hit 5 : D-(+)-Cellobiose [M-H-C<sub>6</sub>H<sub>12</sub>O<sub>6</sub>]<sup>-</sup> HCD 8V P=161  
C<sub>12</sub>H<sub>22</sub>O<sub>11</sub>; MF: 102; RMF: 545; Prob 0.67%; CAS: 528-50-7; Lib: nist\_msms; ID: 478378.

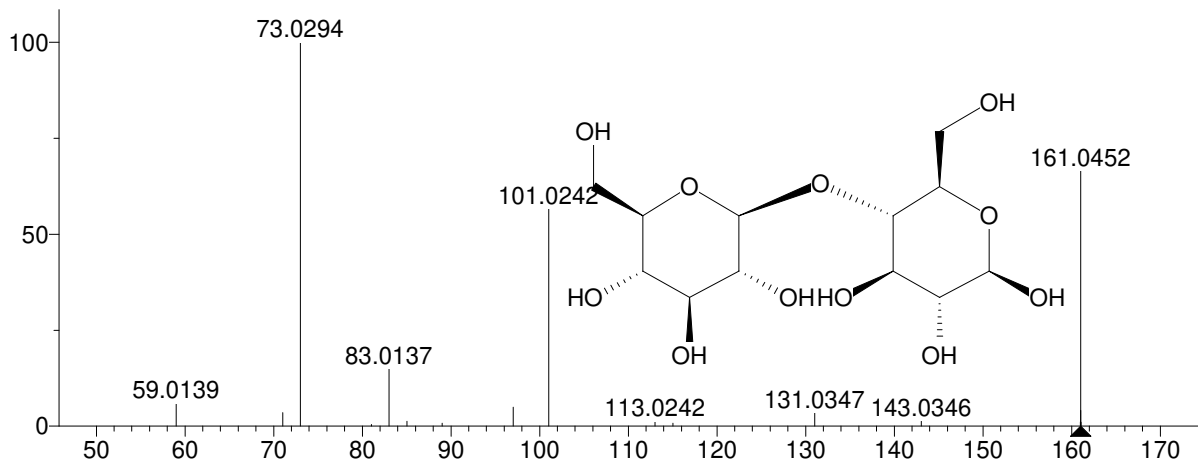

\*\* Search Report Page 1 of 1 \*\*

Unknown: Unknown (1.04\_375.0682m/z)  
Compound in Library Factor = -3273

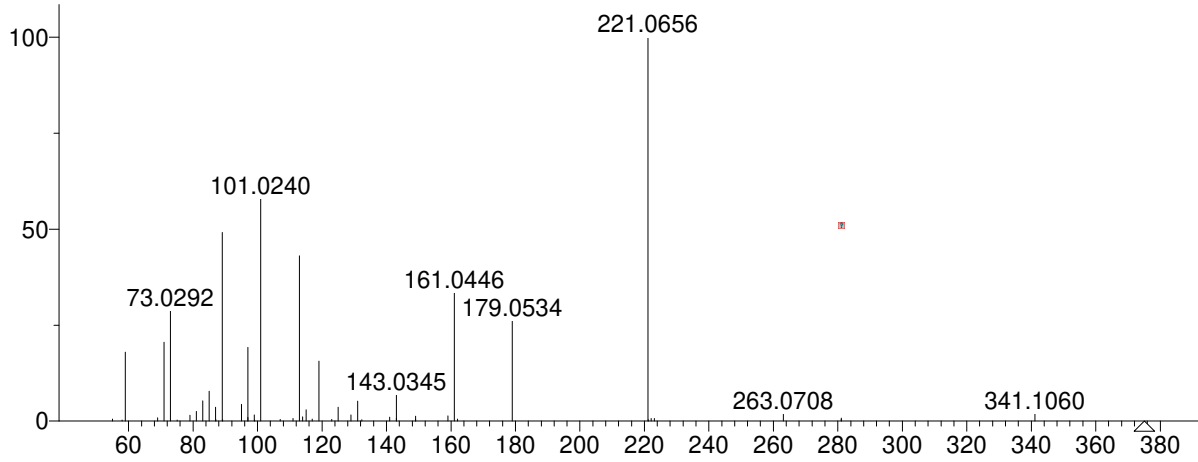

Hit 1 : LPI 2:0; [M-H]<sup>-</sup> [M-H]<sup>-</sup> P=375.1  
C<sub>11</sub>H<sub>21</sub>O<sub>12</sub>P; MF: 2; RMF: 117; Prob 52.0%; Lib: msdial-insilicomsm-lipids-neg; ID: 311142.

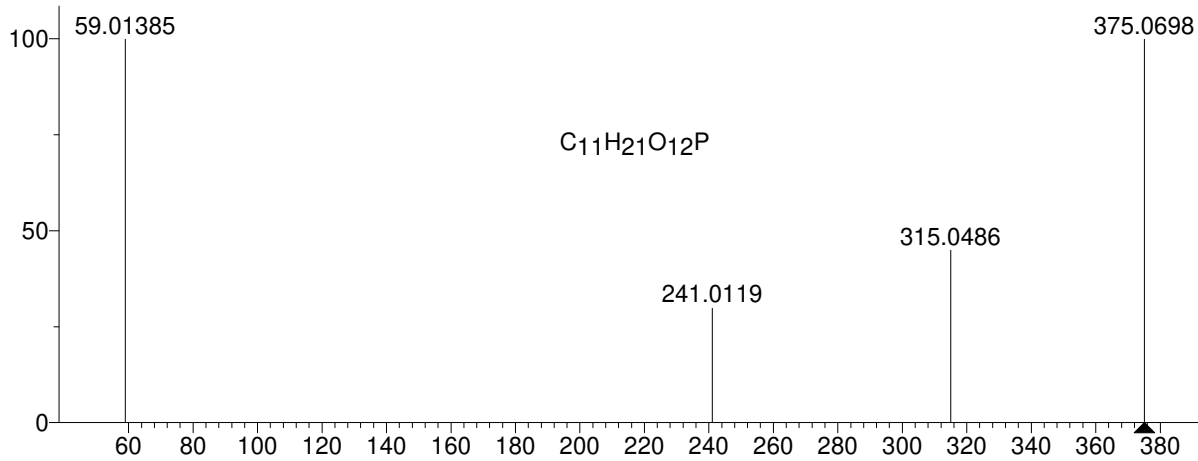

Hit 2 : Mefenpyr-diethyl [M+H+2]<sup>+</sup> HCD 97V P=375.1  
C<sub>16</sub>H<sub>18</sub>Cl<sub>2</sub>N<sub>2</sub>O<sub>4</sub>; MF: 0; RMF: 4; Prob 48.0%; CAS: 135590-91-9; Lib: nist\_msms; ID: 512691.

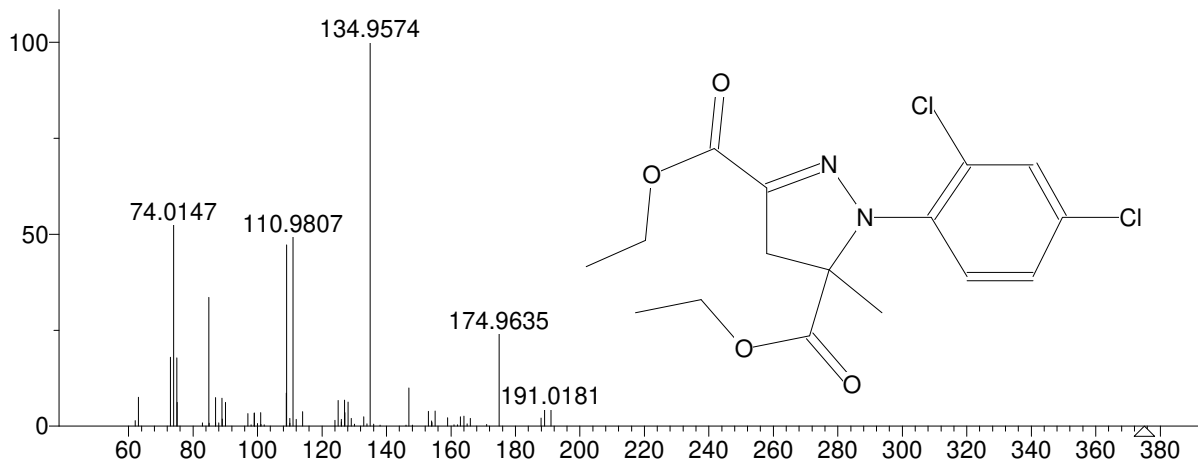

Unknown: Unknown (1.04\_377.0851m/z)  
Compound in Library Factor = 1485

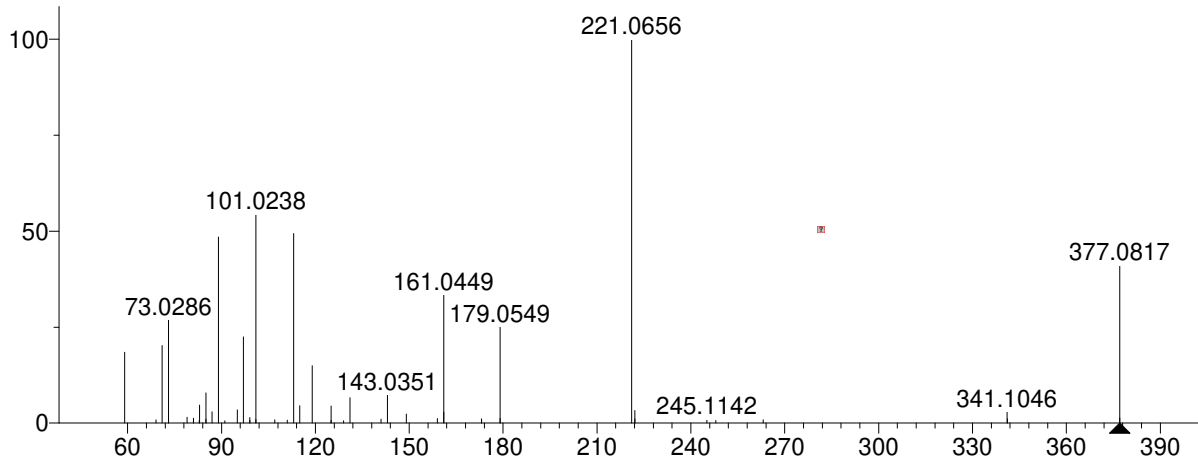

Hit 1 : Lactose [M+Cl]<sup>-</sup> HCD 33V P=377.1  
C<sub>12</sub>H<sub>22</sub>O<sub>11</sub>; MF: 905; RMF: 828; Prob 26.1%; CAS: 63-42-3; Lib: nist\_msms; ID: 500030.

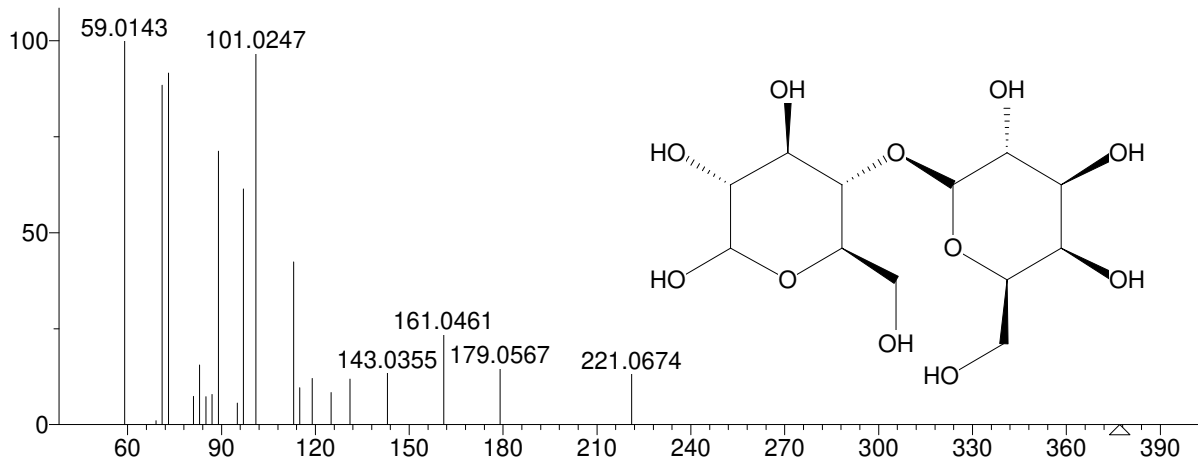

Hit 2 : Maltose [M+Cl]<sup>-</sup> HCD 26V P=377.1  
C<sub>12</sub>H<sub>22</sub>O<sub>11</sub>; MF: 904; RMF: 916; Prob 25.1%; CAS: 69-79-4; Lib: nist\_msms; ID: 479066.

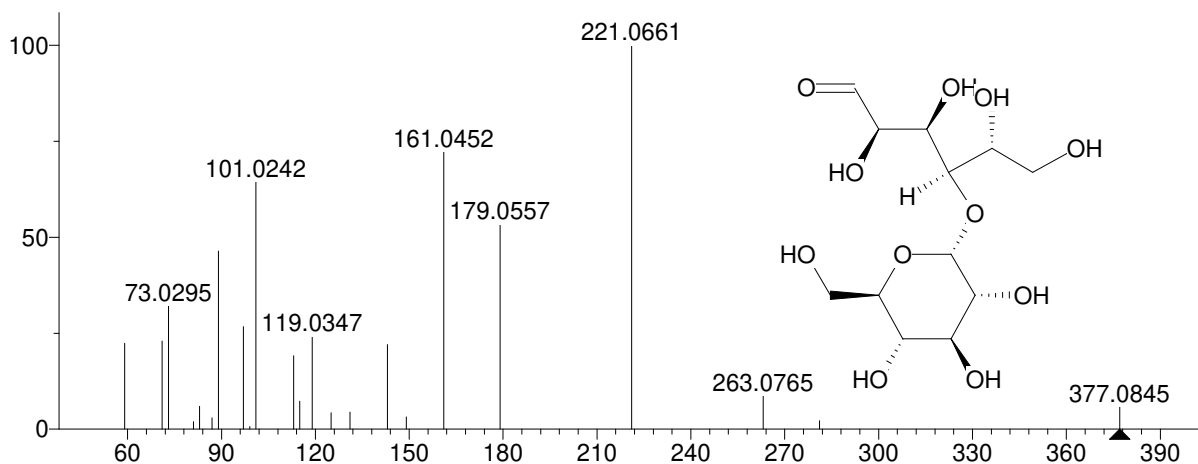

Hit 3 : D-(+)-Cellobiose [M+Cl]<sup>-</sup> HCD 33V P=377.1

C<sub>12</sub>H<sub>22</sub>O<sub>11</sub>; MF: 897; RMF: 864; Prob 19.2%; CAS: 528-50-7; Lib: nist\_msms; ID: 478427.

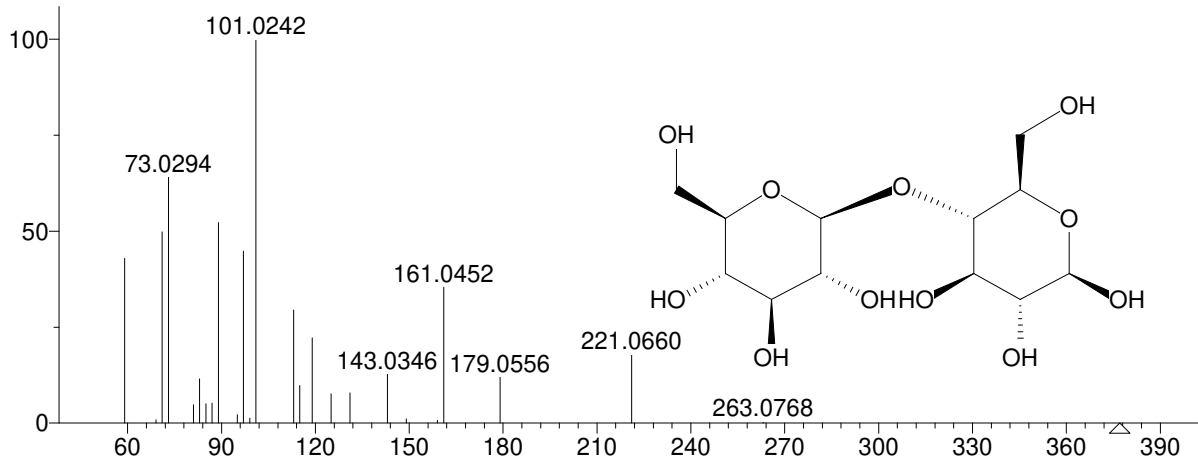

Hit 4 : Isomaltose [M+Cl]<sup>-</sup> HCD 26V P=377.1

C<sub>12</sub>H<sub>22</sub>O<sub>11</sub>; MF: 869; RMF: 885; Prob 5.54%; CAS: 499-40-1; Lib: nist\_msms; ID: 499828.

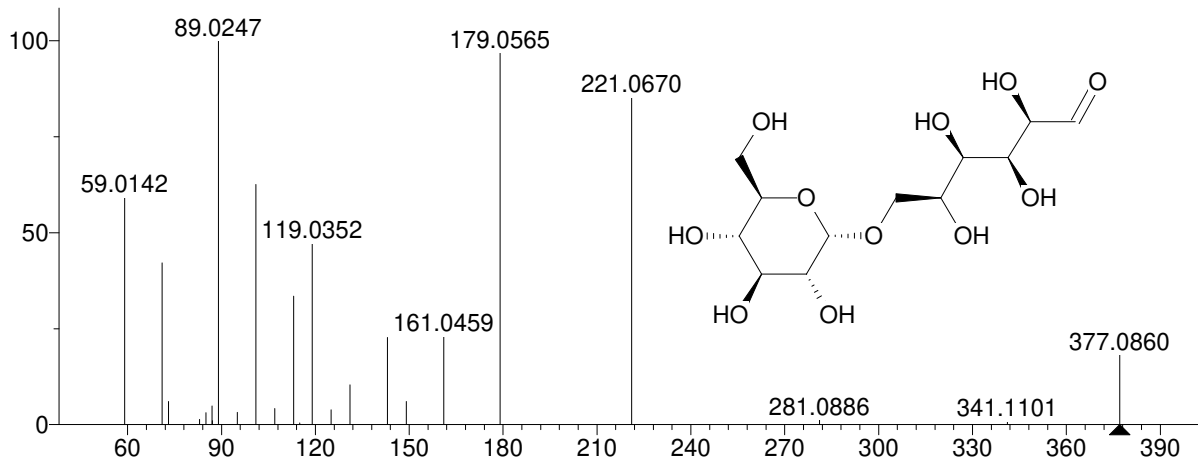

Hit 5 : β-Gentiobiose [M+Cl]<sup>-</sup> HCD 26V P=377.1

C<sub>12</sub>H<sub>22</sub>O<sub>11</sub>; MF: 867; RMF: 878; Prob 5.11%; CAS: 5996-00-9; Lib: nist\_msms; ID: 477704.

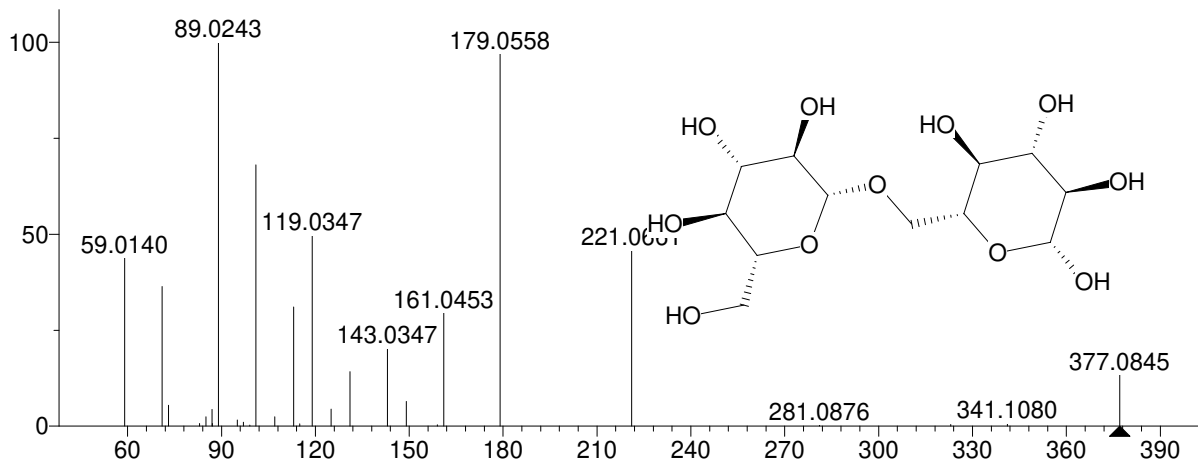

Unknown: Unknown (1.05\_179.0551m/z)  
Compound in Library Factor = 0

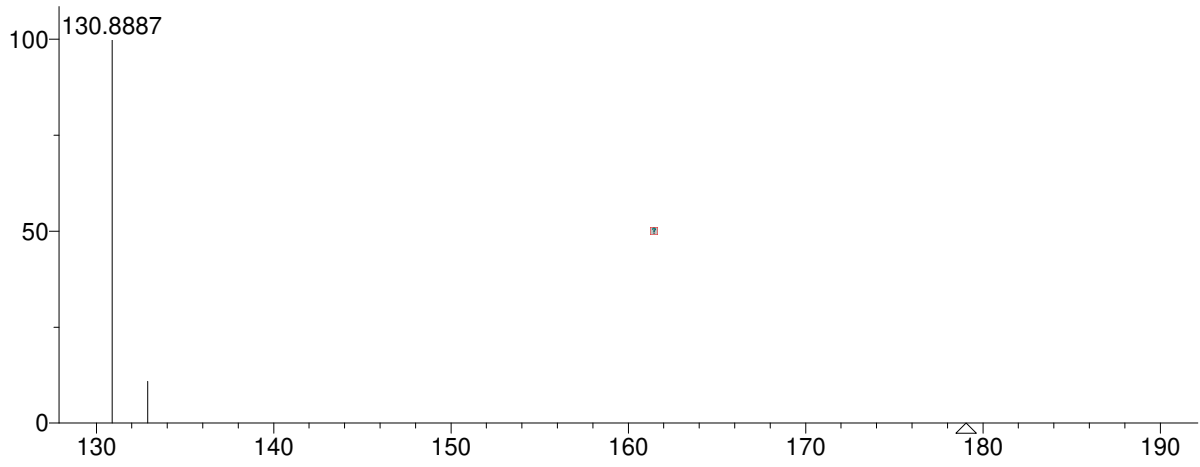

Unknown: Unknown (1.05\_237.0028m/z)  
Compound in Library Factor = 0

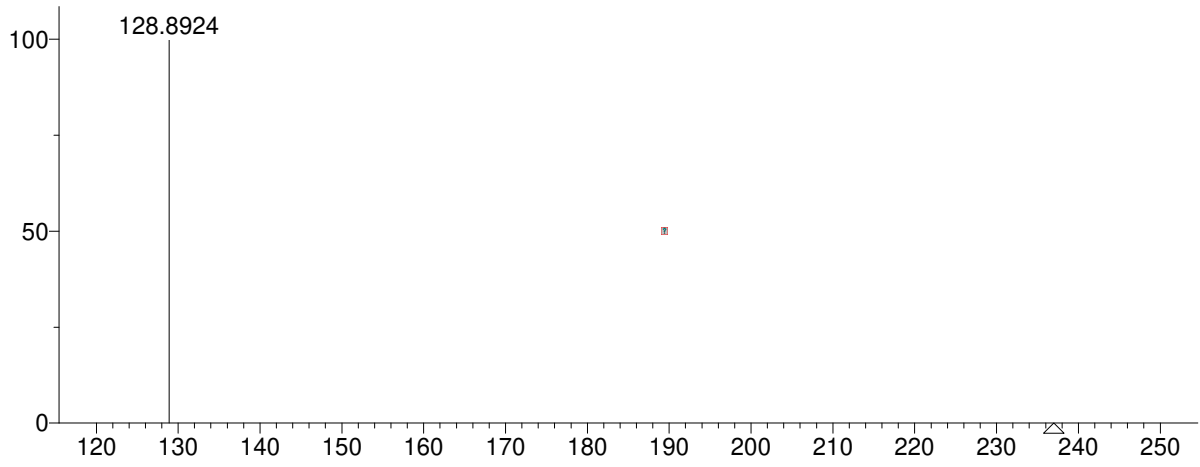



\*\* Search Report Page 1 of 2 \*\*

Unknown: Unknown (1.05\_341.1078m/z)  
Compound in Library Factor = -459

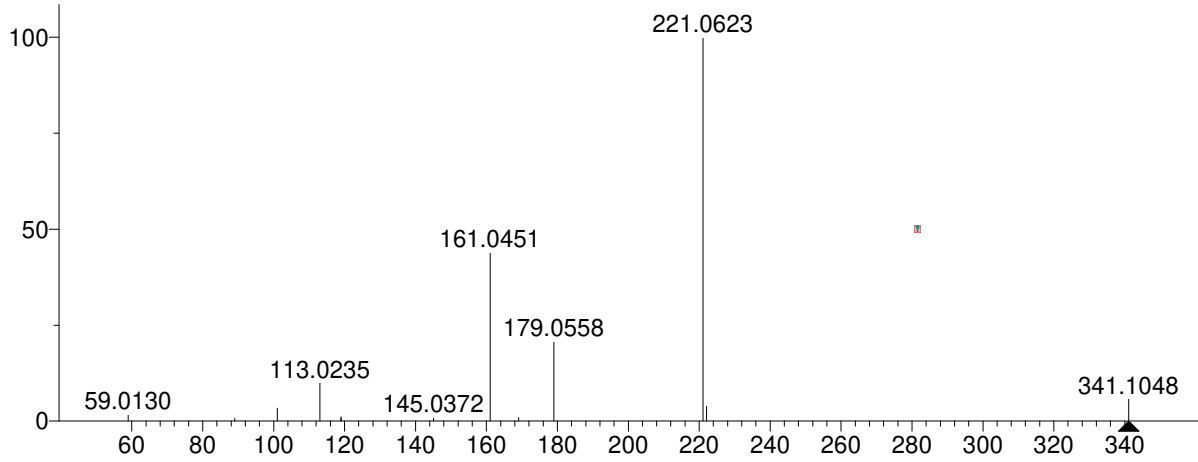

Hit 1 : Palatinose [M-H]<sup>-</sup> 5-60V P=341.1  
C<sub>12</sub>H<sub>22</sub>O<sub>11</sub>; MF: 493; RMF: 637; Prob 31.2%; Lib: mona-export-ic-ms-ms\_negative\_mode; ID: 8796.

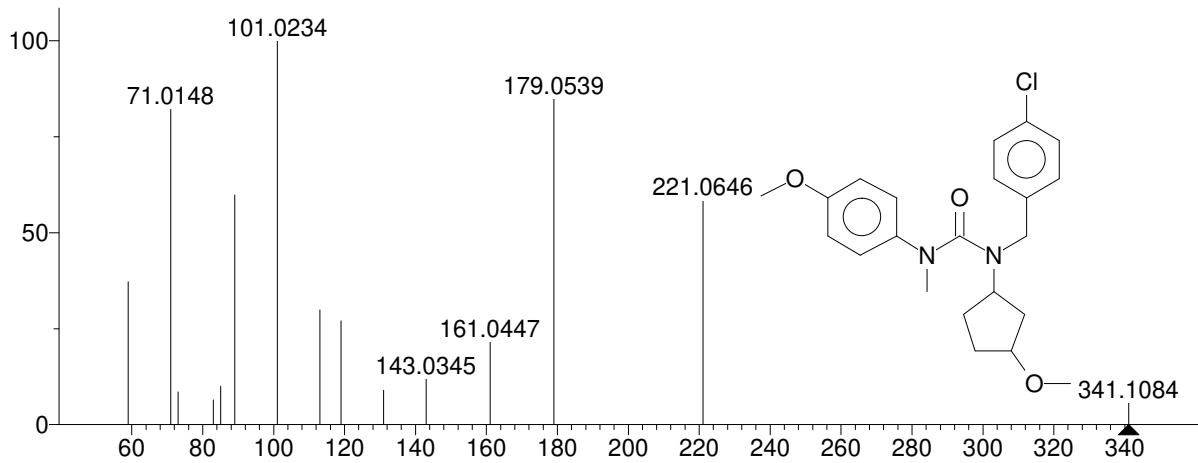

Hit 2 : Palatinose Monohydrate [M-H]<sup>-</sup> QTOF 5-45V P=341.1  
C<sub>12</sub>H<sub>22</sub>O<sub>11</sub>; MF: 493; RMF: 637; Prob 31.2%; Lib: mona-export-ic-ms-ms\_negative\_mode; ID: 11710.

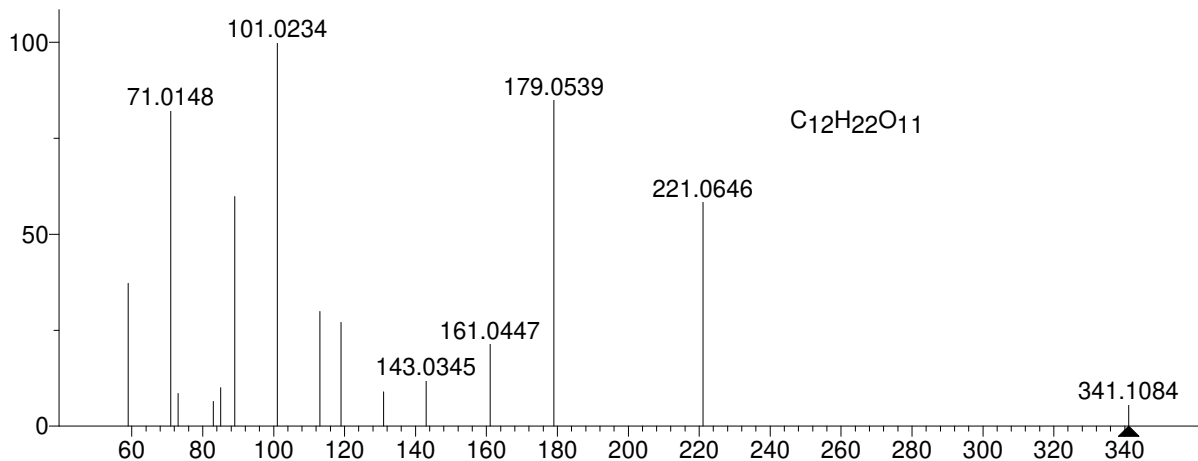

Hit 3 : Palatinose; LC-ESI-QTOF; MS2; CE [M-H]- P=341.1  
C<sub>12</sub>H<sub>22</sub>O<sub>11</sub>; MF: 492; RMF: 637; Prob 30.0%; Lib: msms-neg-massbank; ID: 4681.

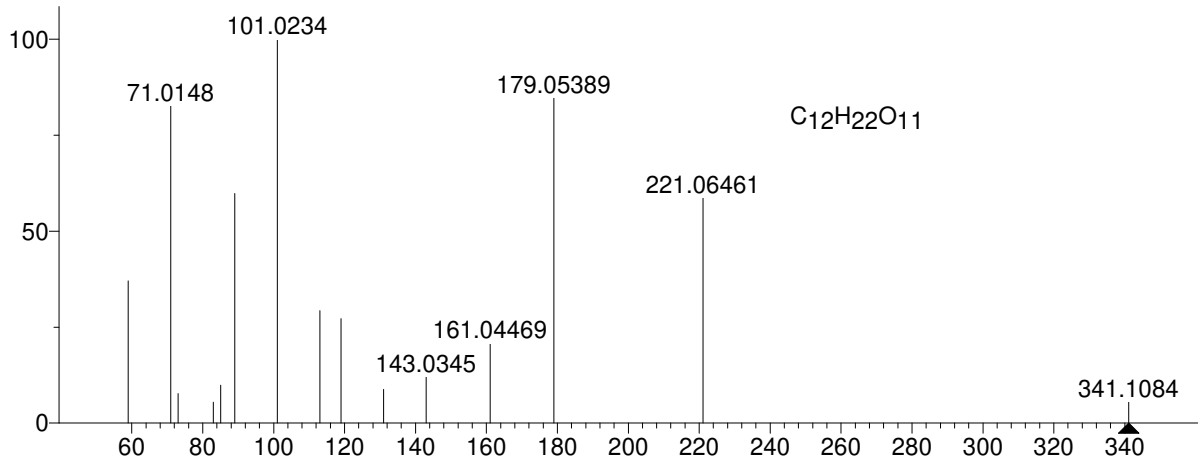

Hit 4 : 4-O-β-Galactopyranosyl-D-mannopyranose [M-H]- HCD 17V P=341.1  
C<sub>12</sub>H<sub>22</sub>O<sub>11</sub>; MF: 381; RMF: 515; Prob 1.89%; CAS: 20869-27-6; Lib: nist\_msms; ID: 479256.

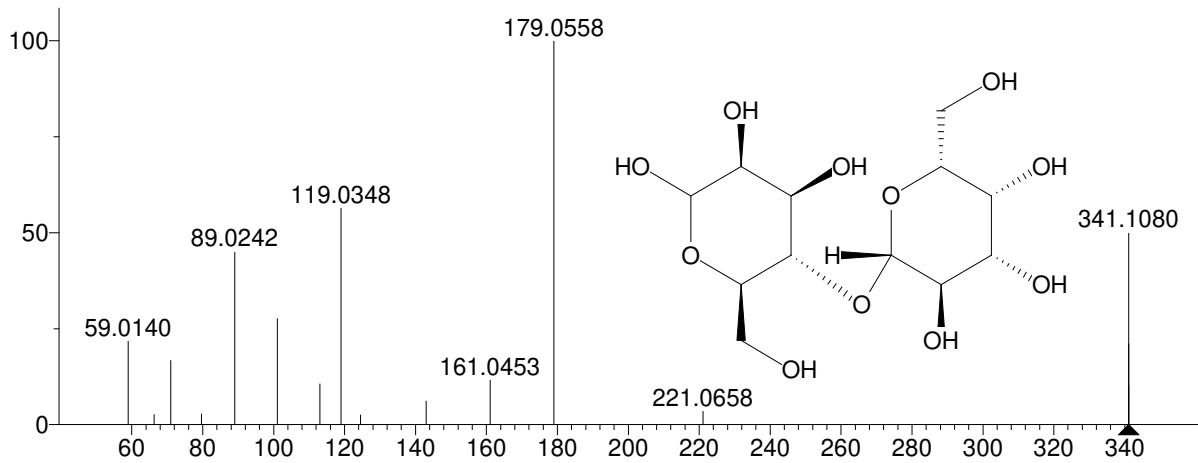

Hit 5 : Turanose [M-H]- 10 P=341.1  
C<sub>12</sub>H<sub>22</sub>O<sub>11</sub>; MF: 375; RMF: 521; Prob 1.49%; Lib: msms neg mona\_ipb\_gnps\_plasma; ID: 204.

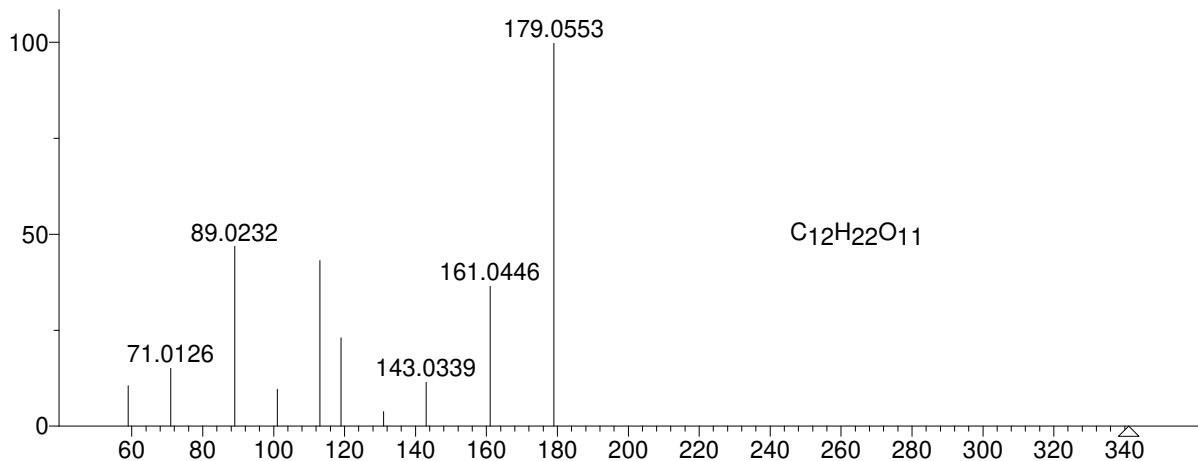

\*\* Search Report Page 1 of 2 \*\*

Unknown: Unknown (1.05\_379.0825m/z)  
Compound in Library Factor = -3273

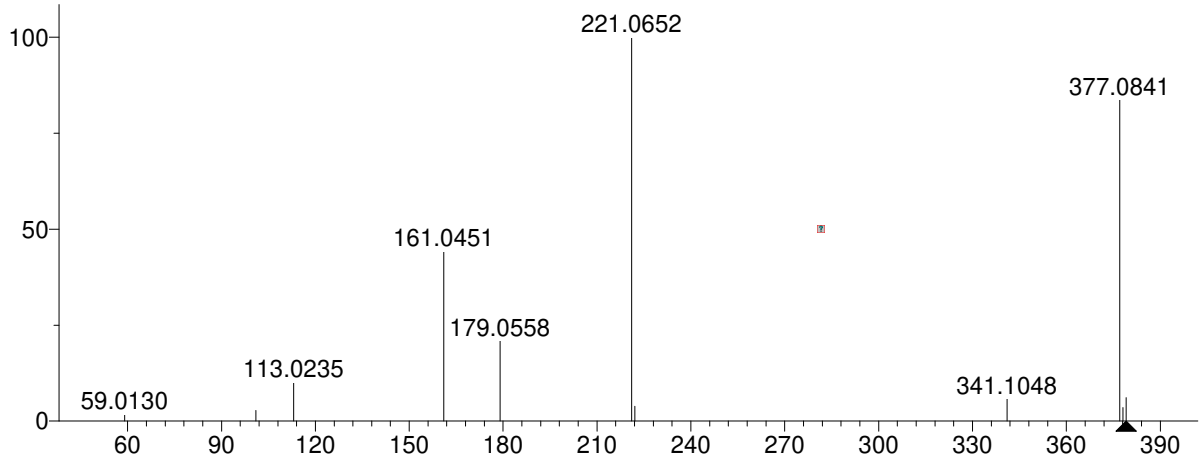

Hit 1 : Doxorubicin [M+H-C6H15NO4]+ HCD 7V P=379.1  
C27H29NO11; MF: 17; RMF: 237; Prob 15.8%; CAS: 23214-92-8; Lib: nist\_msms; ID: 345480.

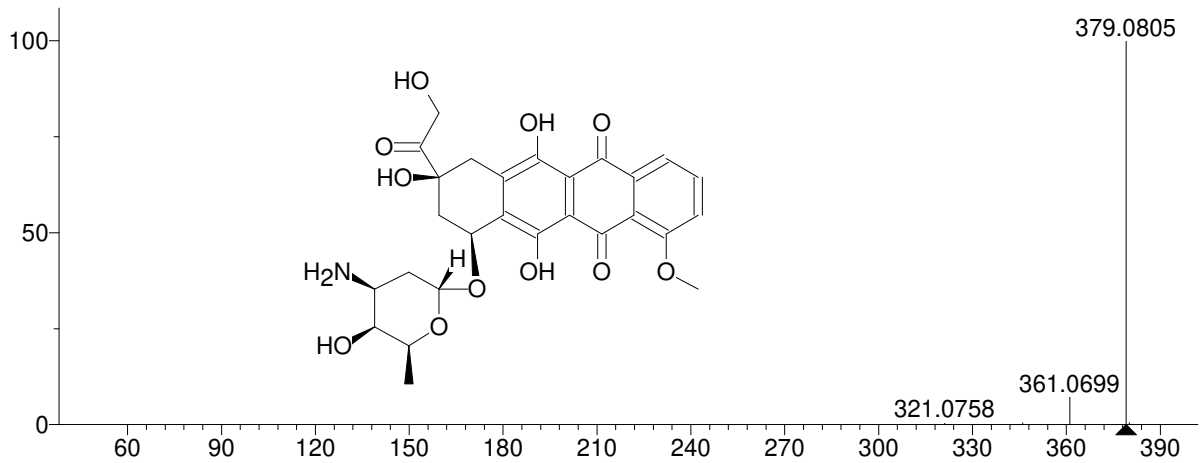

Hit 2 : Doxorubicinone [M+H-2H2O]+ HCD 7V P=379.1  
C21H18O9; MF: 13; RMF: 243; Prob 13.4%; CAS: 24385-10-2; Lib: nist\_msms; ID: 437347.

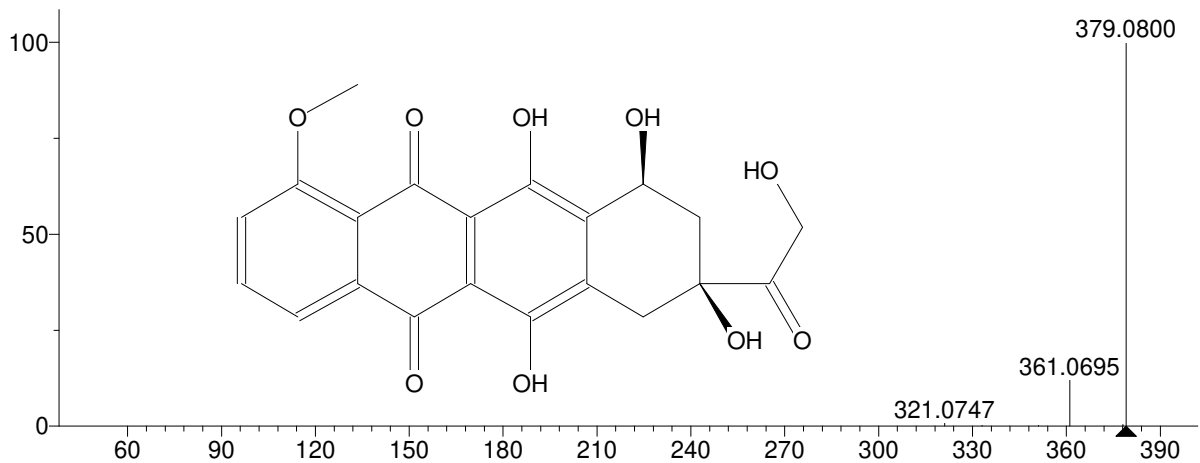

Hit 3 : Daunomycinone [M-H-H<sub>2</sub>O]- HCD 11V P=379.1  
C<sub>27</sub>H<sub>18</sub>O<sub>8</sub>; MF: 13; RMF: 181; Prob 13.4%; CAS: 21794-55-8; Lib: nist\_msms; ID: 450630.

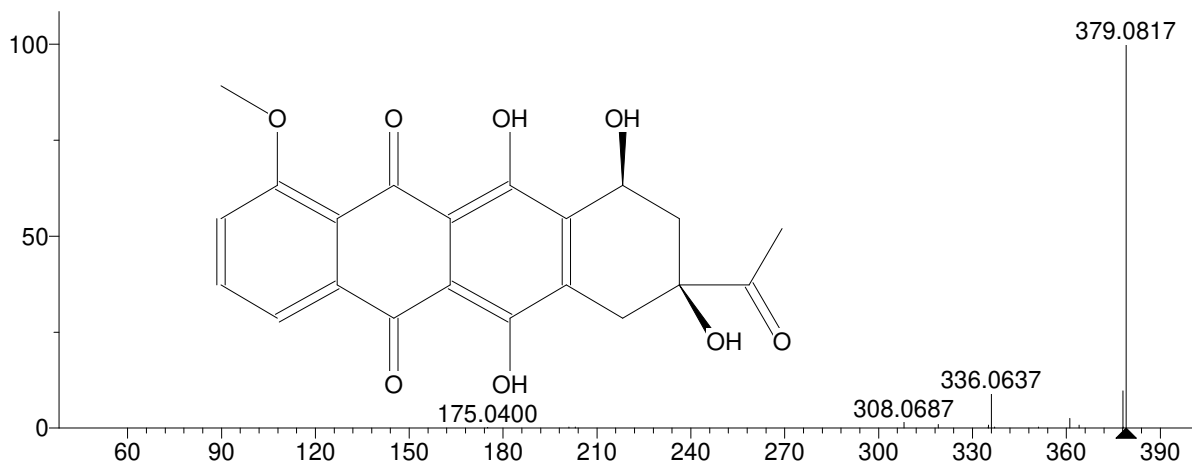

Hit 4 : Daunorubicin [M-H-C<sub>6</sub>H<sub>13</sub>O<sub>3</sub>N]- HCD 18V P=379.1  
C<sub>27</sub>H<sub>29</sub>NO<sub>10</sub>; MF: 12; RMF: 151; Prob 12.8%; CAS: 20830-81-3; Lib: nist\_msms; ID: 283928.

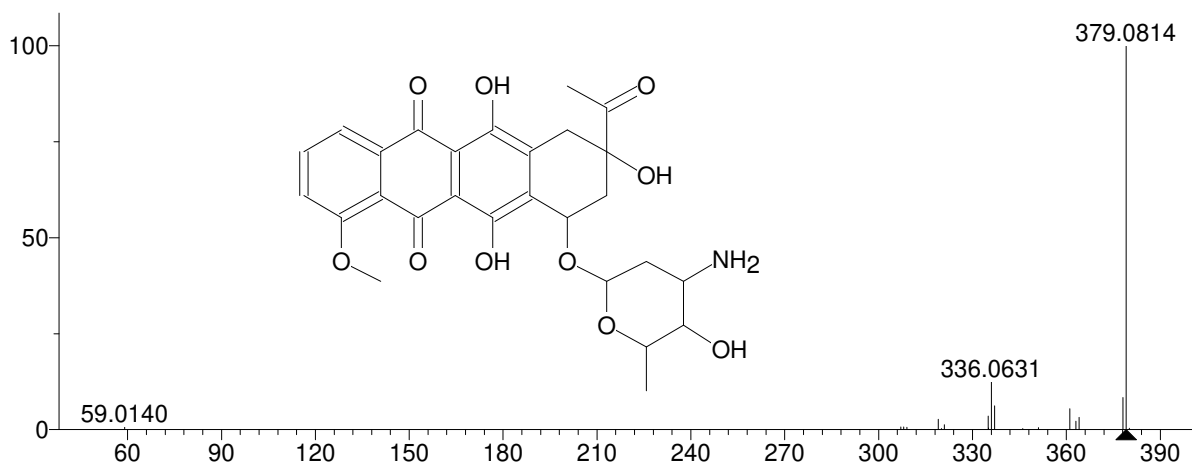

Hit 5 : Taiwanin E methyl ether [M+H]<sup>+</sup> HCD 18V P=379.1  
C<sub>21</sub>H<sub>14</sub>O<sub>7</sub>; MF: 4; RMF: 212; Prob 9.57%; CAS: 30403-00-0; Lib: nist\_msms; ID: 411853.

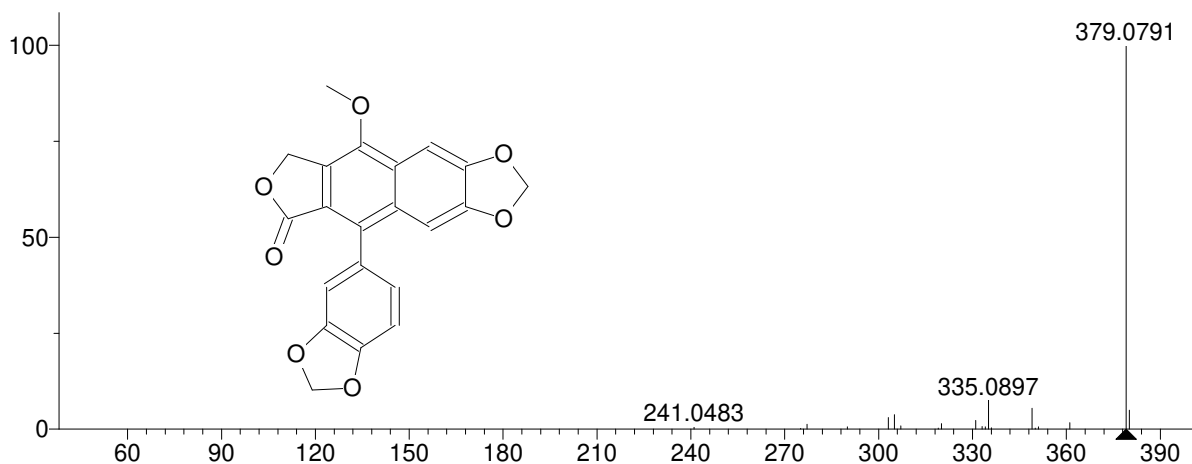

Unknown: Unknown (1.05\_521.1709m/z)  
Compound in Library Factor = 0

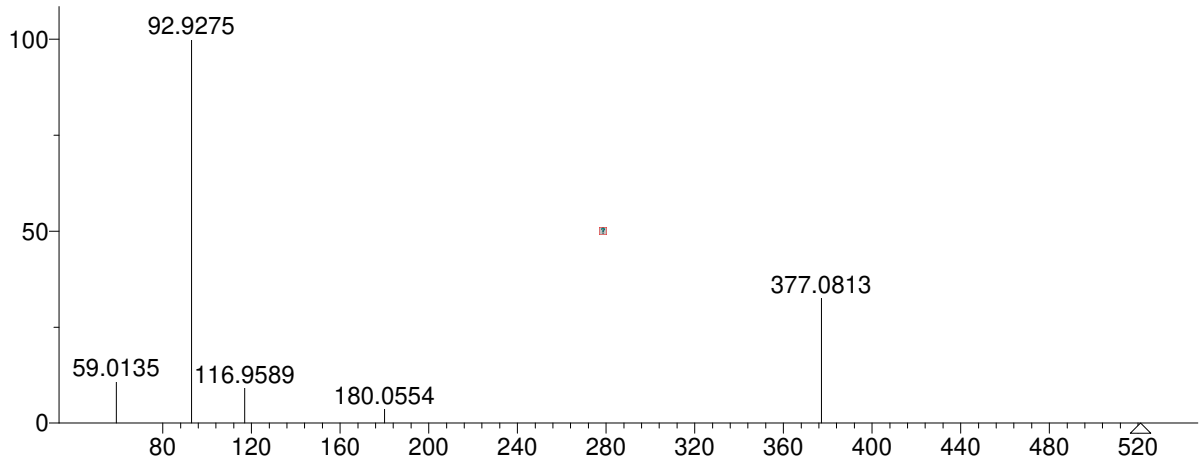

Unknown: Unknown (1.07\_599.0931m/z)  
Compound in Library Factor = 0

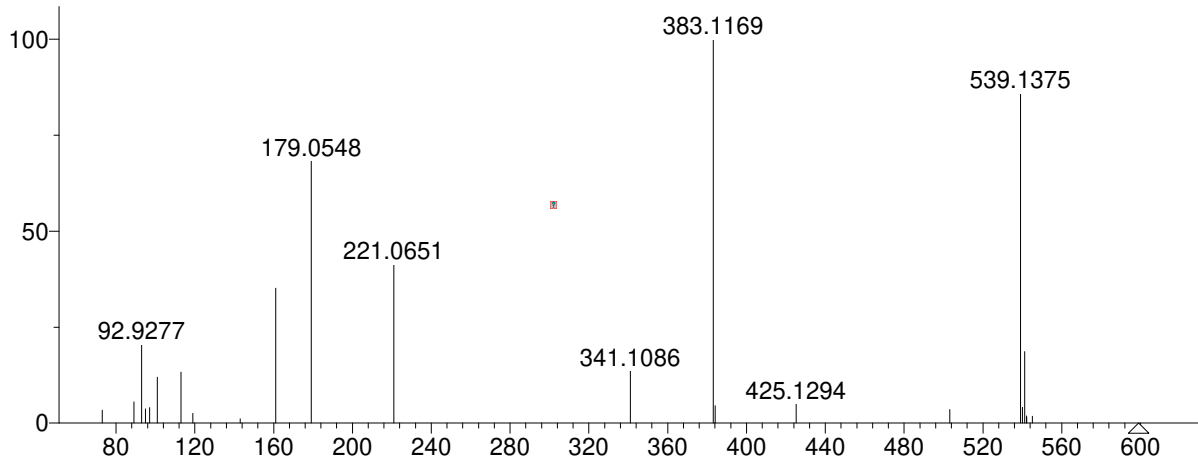

Unknown: Unknown (1.07\_655.0537m/z)  
Compound in Library Factor = 0

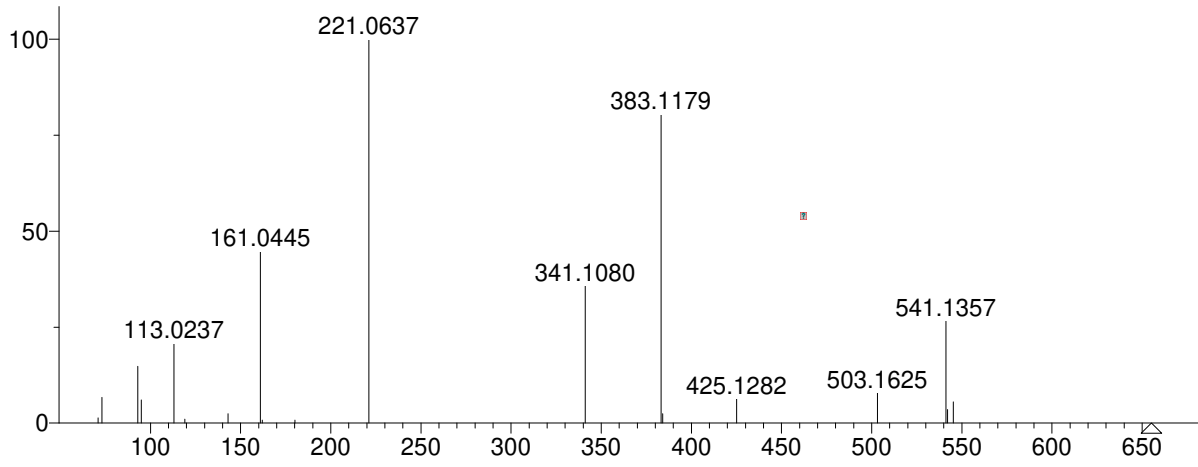

Unknown: Unknown (1.07\_657.0484m/z)  
Compound in Library Factor = 0

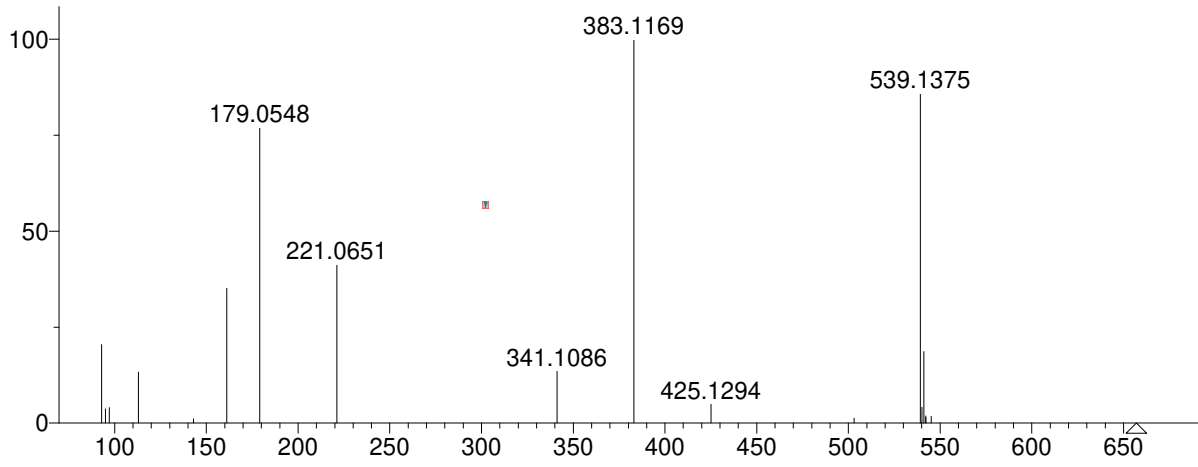



Unknown: Unknown (1.08\_383.1176m/z)  
Compound in Library Factor = -1523

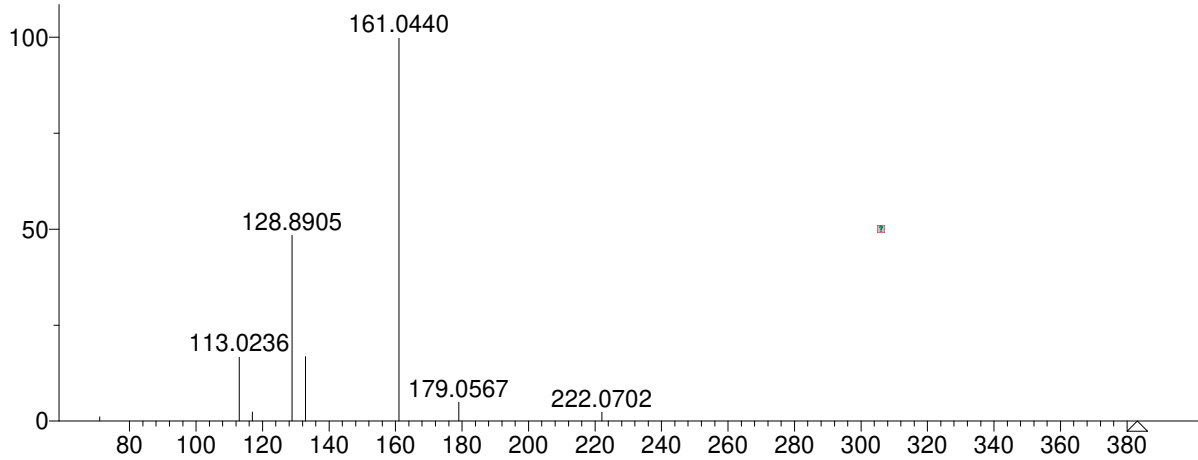

Hit 1 : Maltotetraose [M-H-C10H18O9]- IT-FT 35% P=383.1  
C24H42O21; MF: 48; RMF: 376; Prob 38.8%; CAS: 34612-38-9; Lib: nist\_msms; ID: 499732.

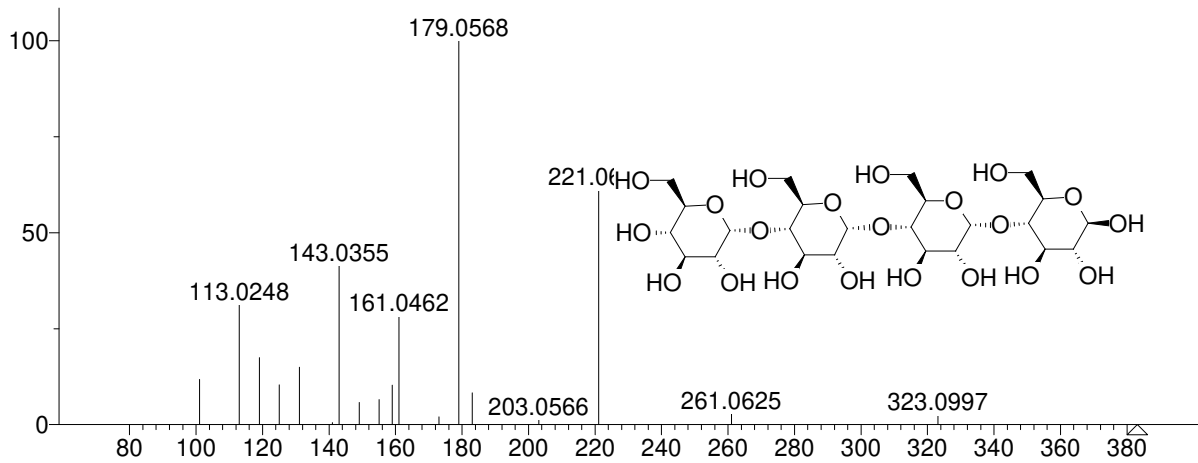

Hit 2 : Sedoheptulosan [2M-H]- HCD 61V P=383.1  
C7H12O6; MF: 2; RMF: 103; Prob 8.20%; CAS: 469-90-9; Lib: nist\_msms; ID: 143898.

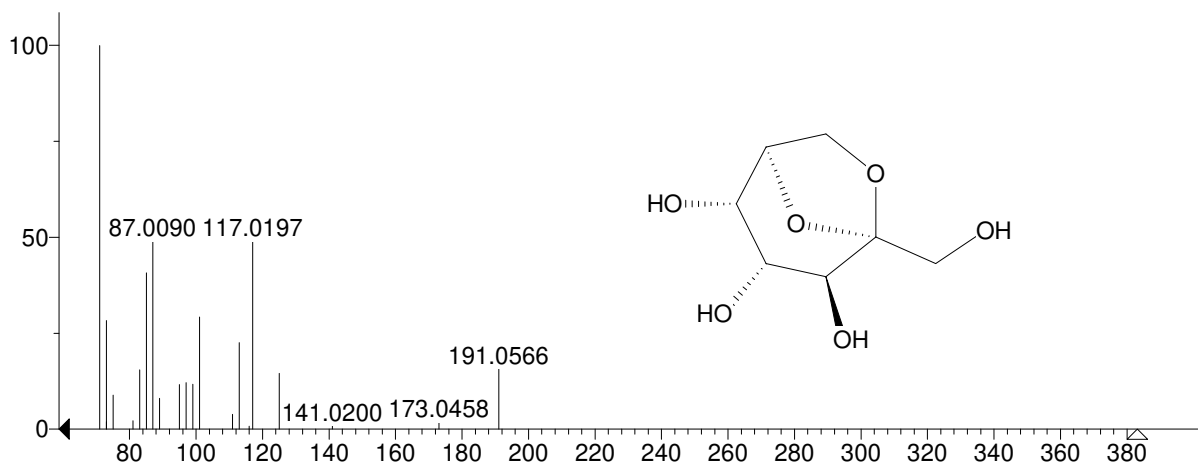

Hit 3 : (-)-Quinic acid [2M-H]- HCD 61V P=383.1  
C7H12O6; MF: 0; RMF: 28; Prob 7.56%; CAS: 77-95-2; Lib: nist\_msms; ID: 288459.

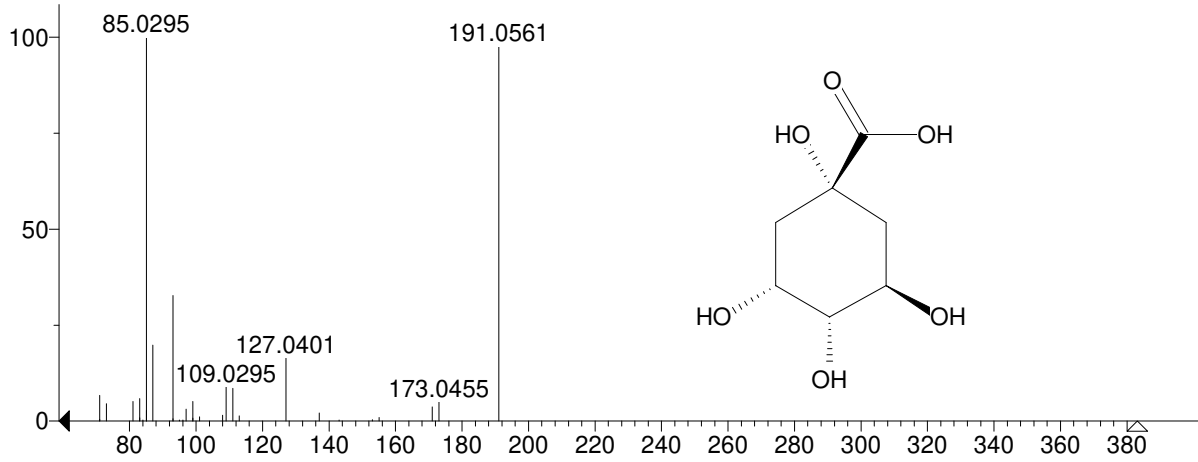

Hit 4 : S-(5'-ADENOSYL)-L-HOMOCYSTEINE [M-H]- P=383.1  
C14H20N6O5S; MF: 0; RMF: 16; Prob 7.56%; Lib: mona-export-gnps; ID: 5663.

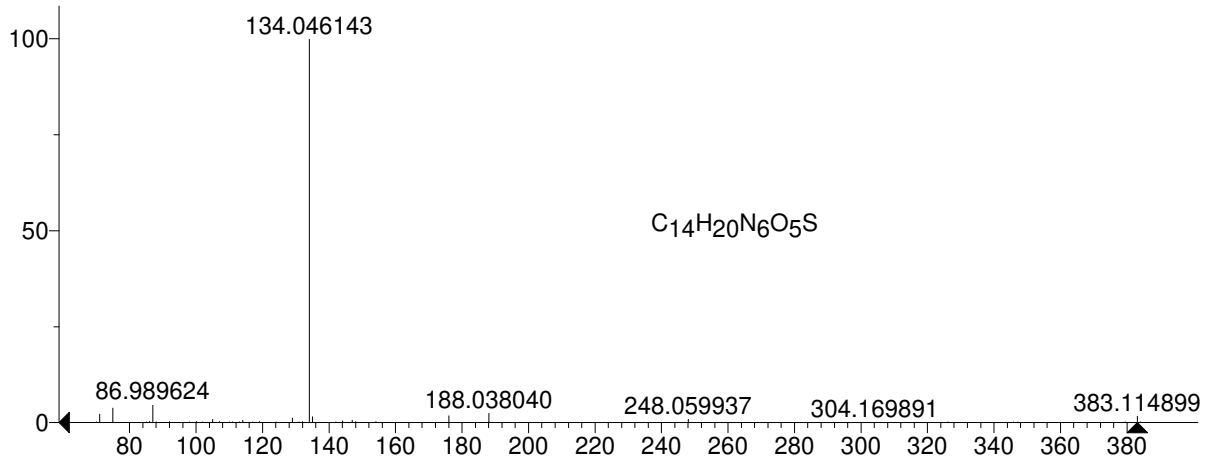

Hit 5 : S-(5#39;-ADENOSYL)-L-HOMOCYSTEINE  
C14H20N6O5S; MF: 0; RMF: 15; Prob 7.56%; Lib: embl neg mcg; ID: 301.

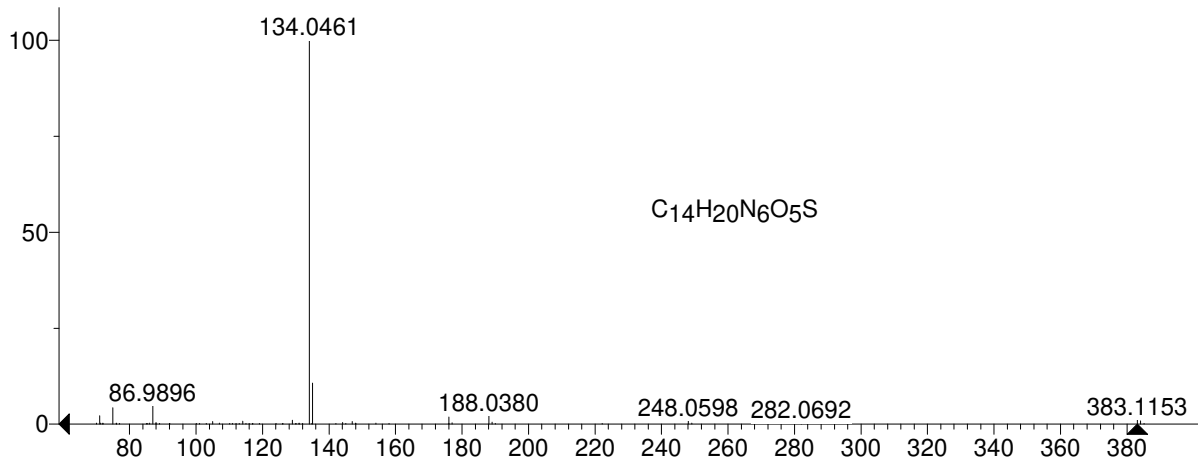

Unknown: Unknown (1.08\_537.1213m/z)  
Compound in Library Factor = 0

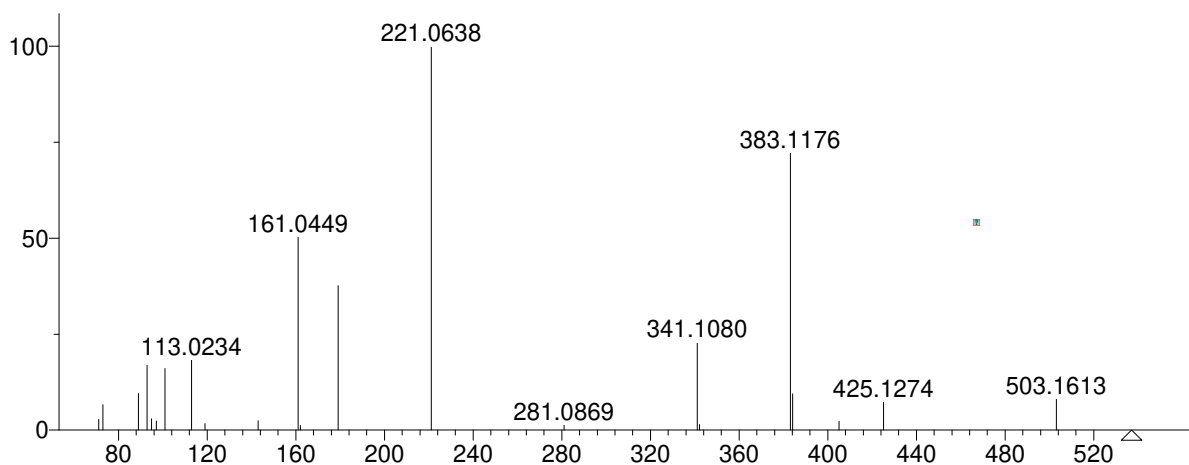

Hit 1 : 6-Oxomometasone furoate [M+H+2i]<sup>+</sup> IT-FT 35% P=537.1  
C<sub>27</sub>H<sub>28</sub>Cl<sub>2</sub>O<sub>7</sub>; MF: 0; RMF: 109; Prob 100.0%; CAS: 1305334-30-8; Lib: nist\_msms; ID: 517601.

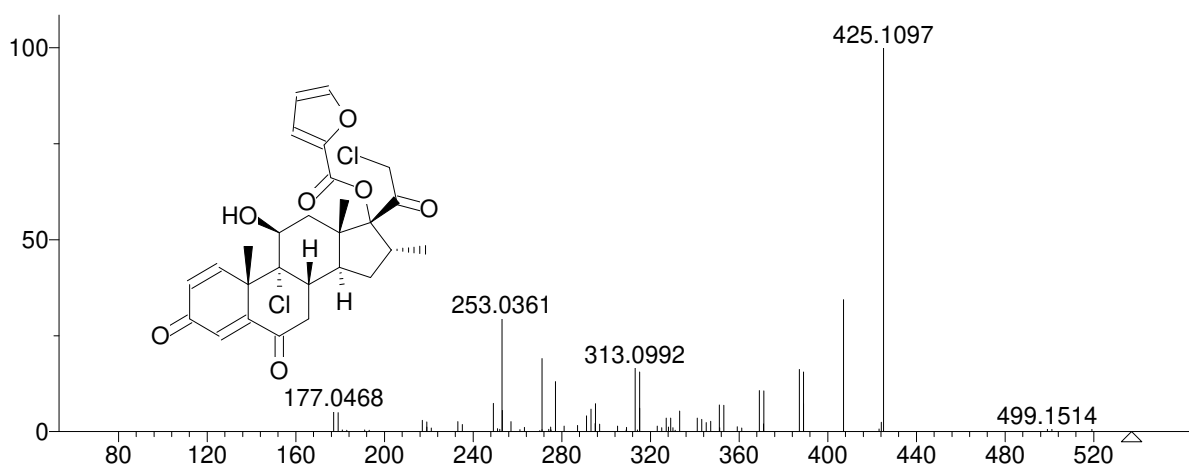

Unknown: Unknown (1.08\_539.1376m/z)  
Compound in Library Factor = 845

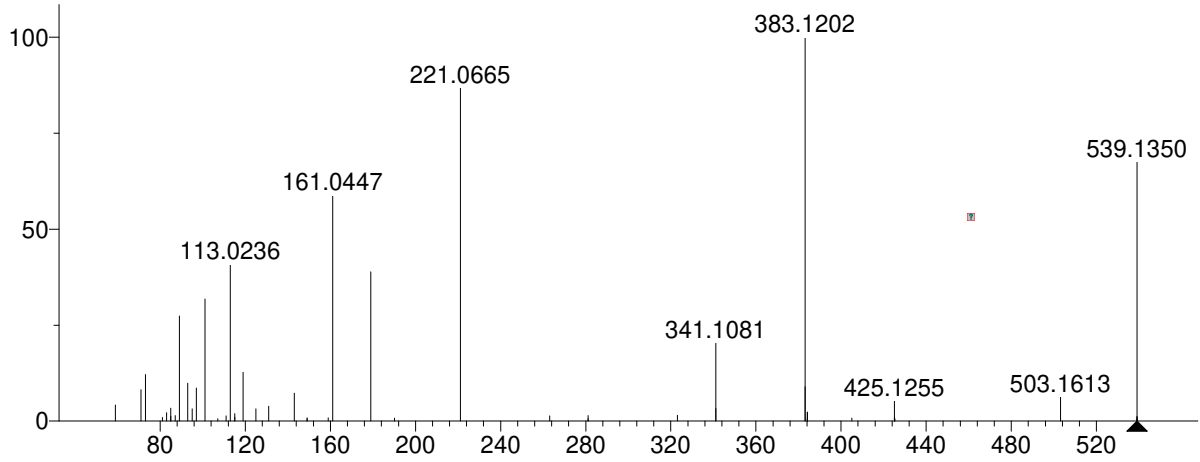

Hit 1 : Maltotriose [M+Cl]<sup>-</sup> HCD 37V P=539.1  
C<sub>18</sub>H<sub>32</sub>O<sub>16</sub>; MF: 866; RMF: 842; Prob 82.2%; CAS: 1109-28-0; Lib: nist\_msms; ID: 478094.

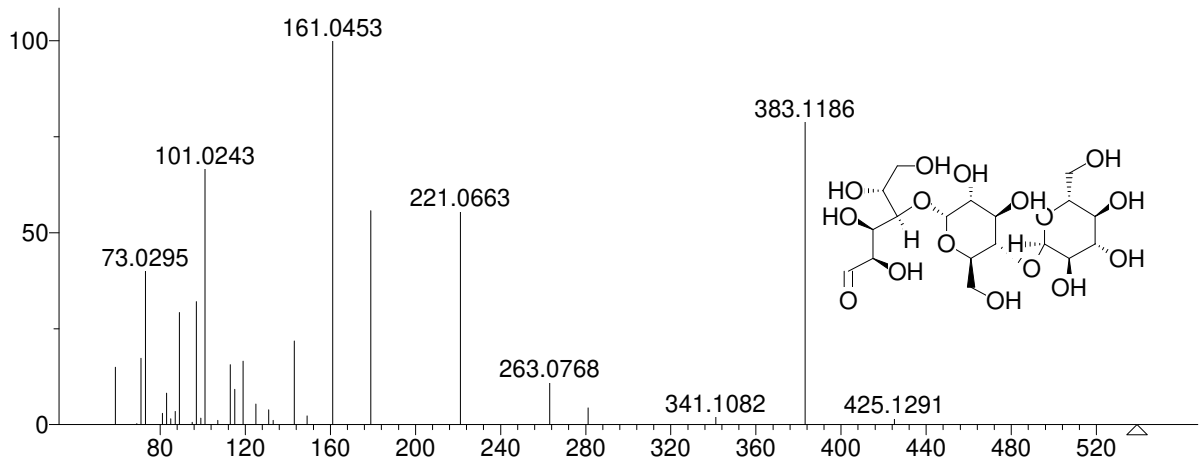

Hit 2 : Mannitriose [M+Cl]<sup>-</sup> HCD 32V P=539.1  
C<sub>18</sub>H<sub>32</sub>O<sub>16</sub>; MF: 804; RMF: 836; Prob 14.0%; CAS: 13382-86-0; Lib: nist\_msms; ID: 531273.

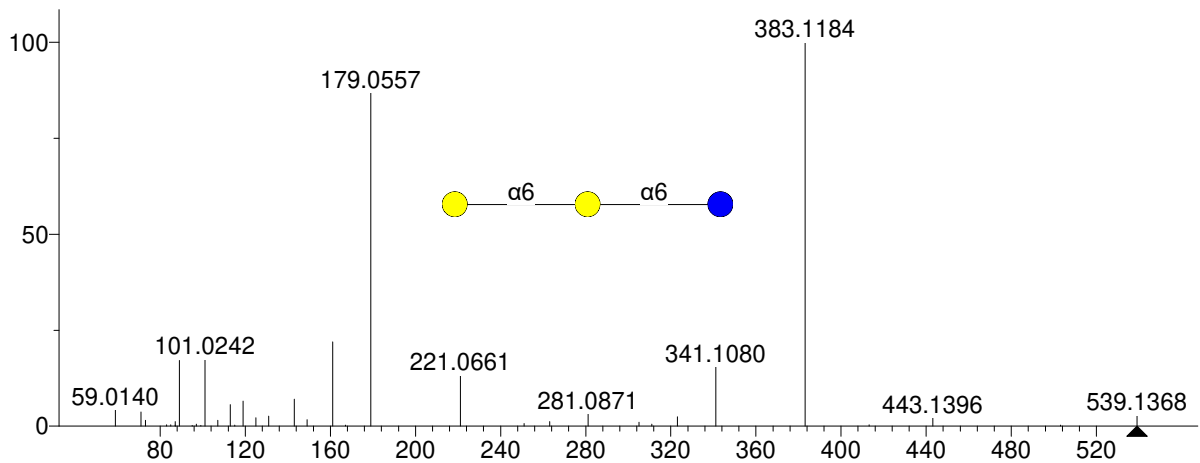

Hit 3 : Erlöse [M+Cl]<sup>-</sup> HCD 37V P=539.1  
C<sub>18</sub>H<sub>32</sub>O<sub>16</sub>; MF: 706; RMF: 742; Prob 1.08%; CAS: 13101-54-7; Lib: nist\_msms; ID: 531028.

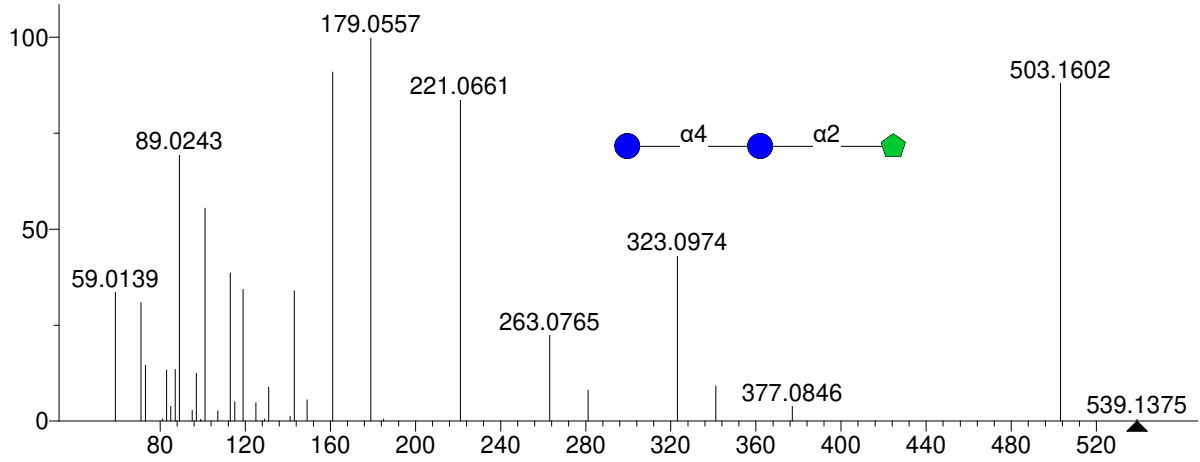

Hit 4 : 3 $\alpha$ ,4 $\beta$ -Galactotriose [M+Cl]<sup>-</sup> HCD 26V P=539.1  
C<sub>18</sub>H<sub>32</sub>O<sub>16</sub>; MF: 704; RMF: 735; Prob 0.99%; CAS: 56038-36-9; Lib: nist\_msms; ID: 527588.

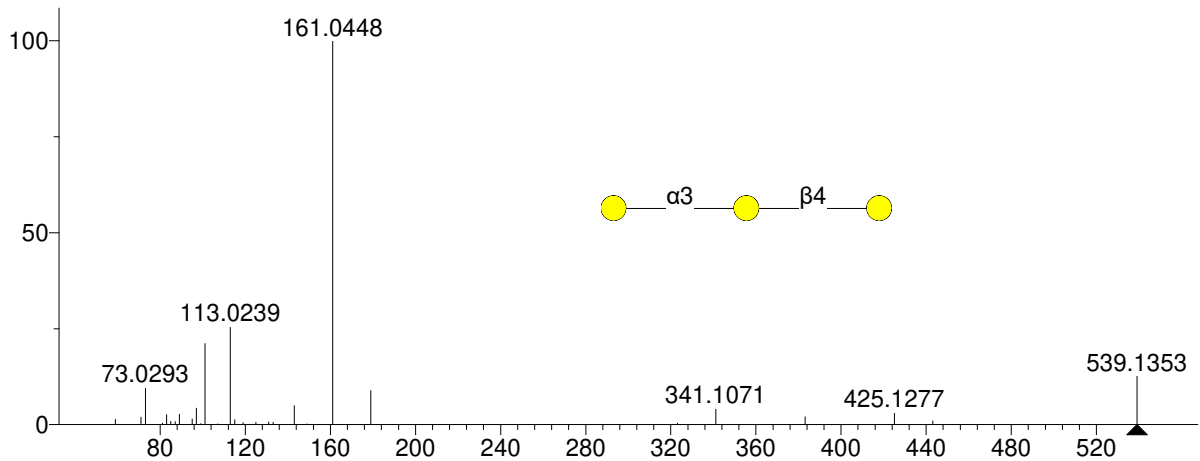

Hit 5 : 3'-Galactosyllactose [M+Cl]<sup>-</sup> HCD 26V P=539.1  
C<sub>18</sub>H<sub>32</sub>O<sub>16</sub>; MF: 703; RMF: 740; Prob 0.96%; CAS: 32694-82-9; Lib: nist\_msms; ID: 533312.

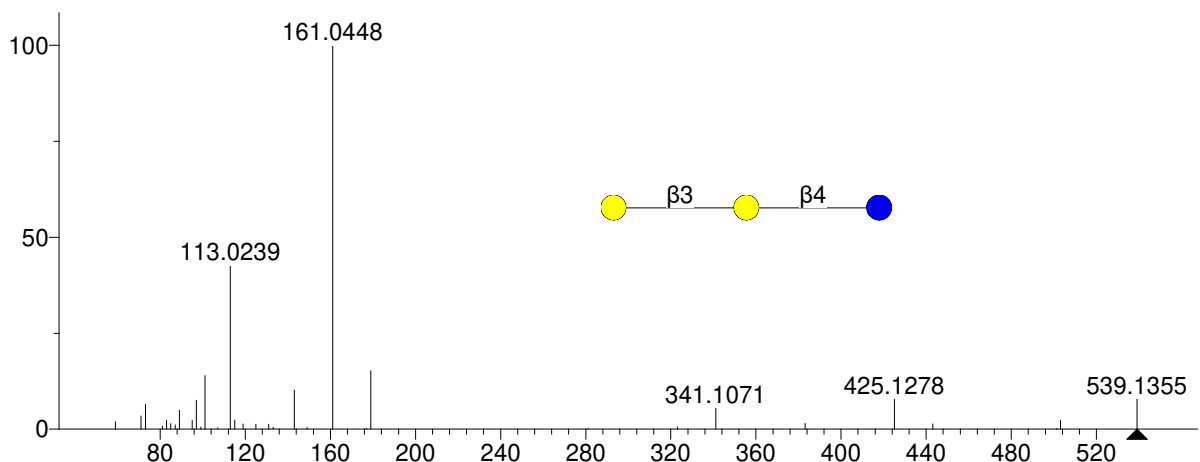

Unknown: Unknown (1.08\_539.3557m/z)  
Compound in Library Factor = 0

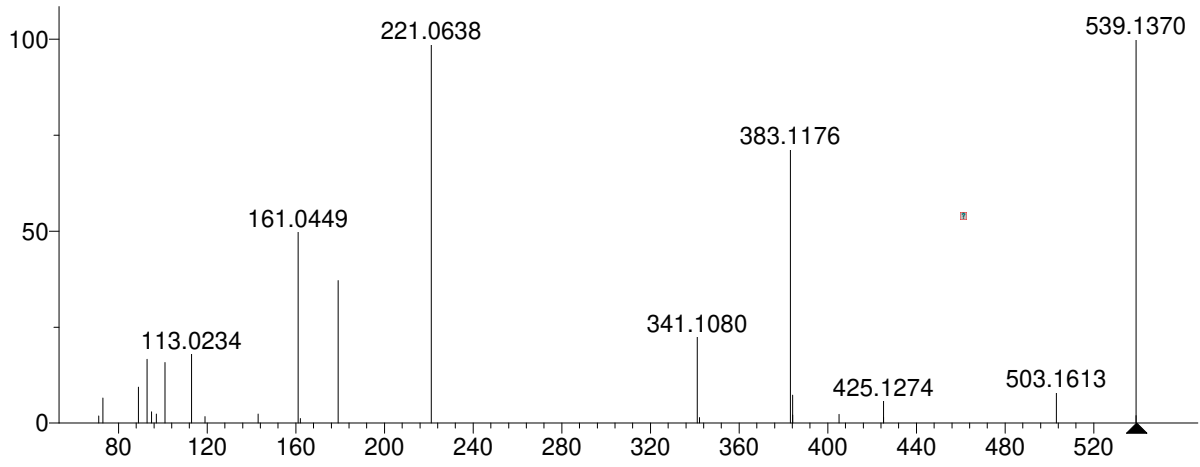

Unknown: Unknown (1.08\_541.1356m/z)  
Compound in Library Factor = 0

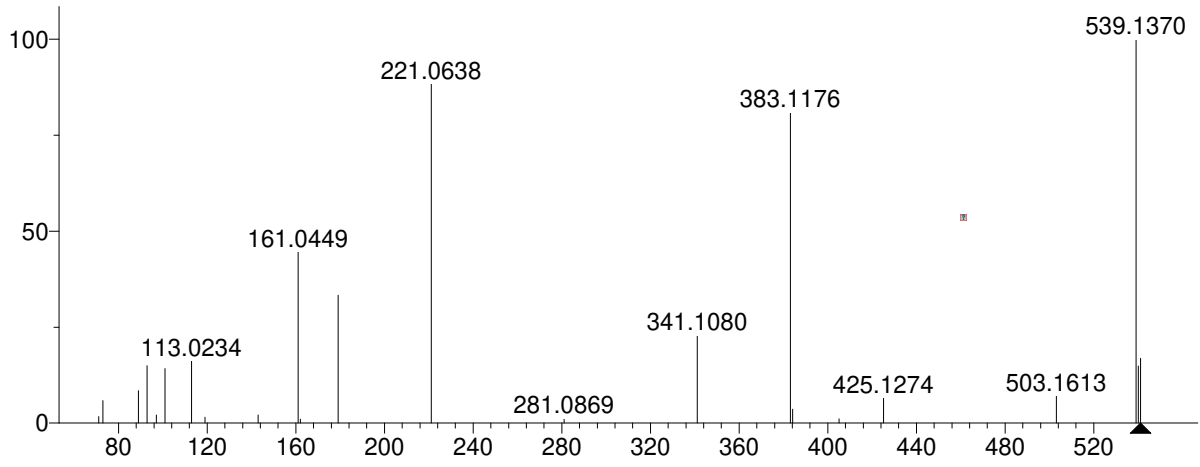

Unknown: Unknown (1.08\_613.0692m/z)  
Compound in Library Factor = 0

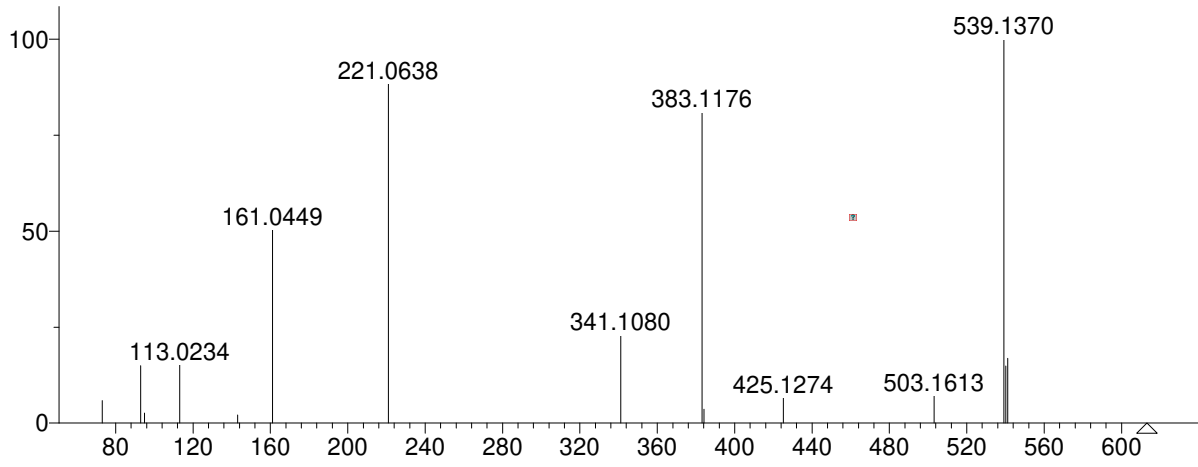



Unknown: Unknown (1.08\_683.2246m/z)  
Compound in Library Factor = -1848

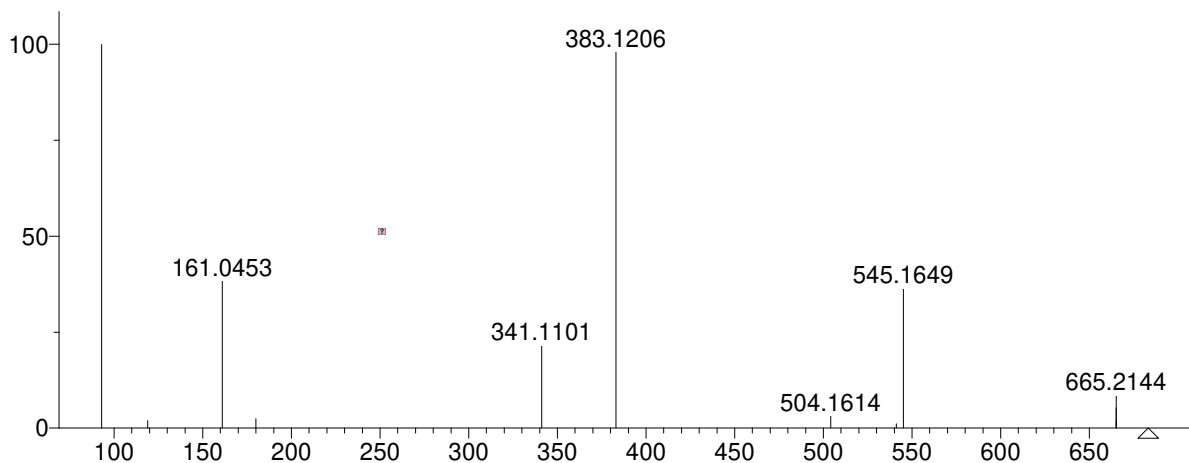

Hit 1 : Lactose [2M-H]- HCD 10V P=683.2  
C12H22O11; MF: 128; RMF: 464; Prob 23.6%; CAS: 63-42-3; Lib: nist\_msms; ID: 500011.

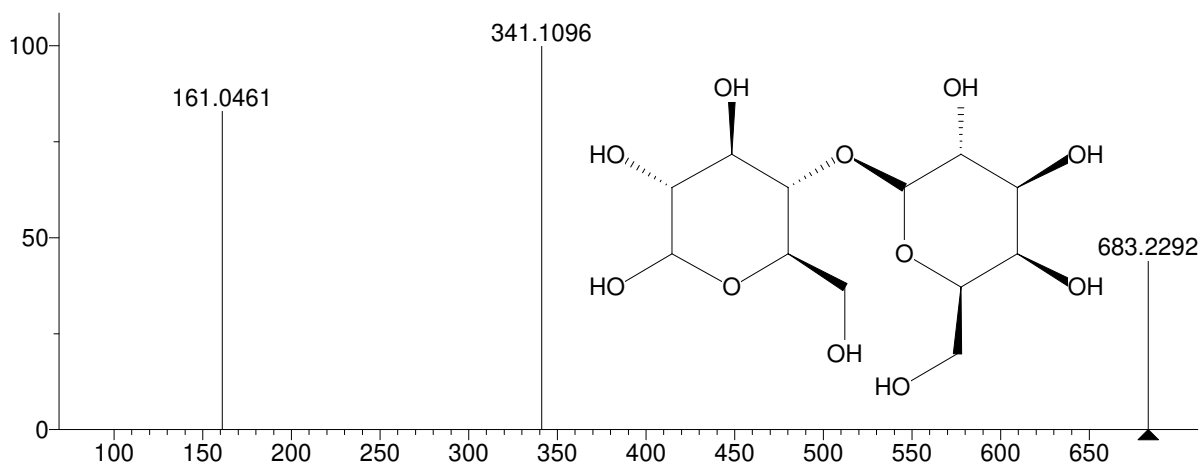

Hit 2 : 4-O-β-Galactopyranosyl-D-mannopyranose [2M-H]- HCD 10V P=683.2  
C12H22O11; MF: 124; RMF: 441; Prob 19.9%; CAS: 20869-27-6; Lib: nist\_msms; ID: 500321.

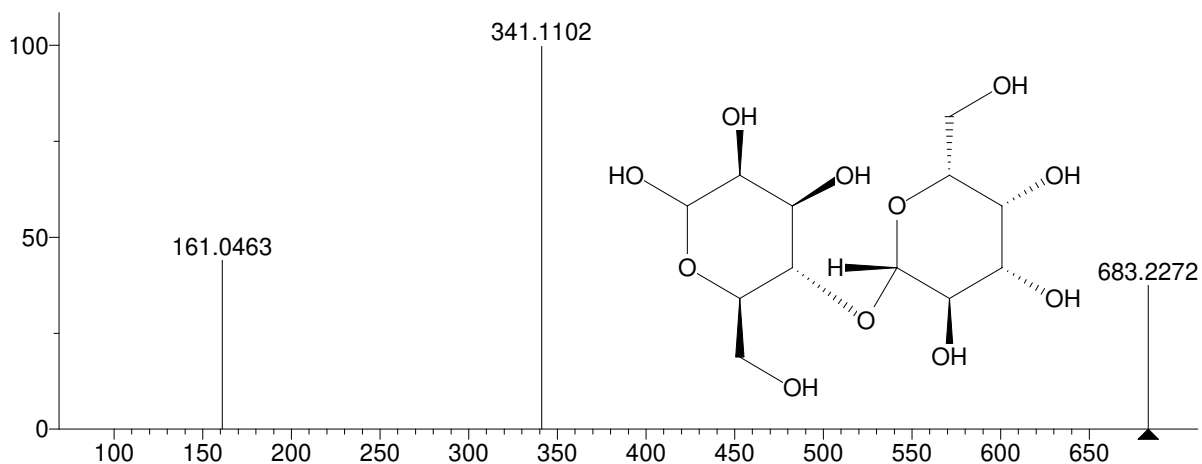

Hit 3 : 4 $\alpha$ -Mannobiose [2M-H]- HCD 20V P=683.2  
C<sub>12</sub>H<sub>22</sub>O<sub>11</sub>; MF: 120; RMF: 479; Prob 16.8%; CAS: 35438-40-5; Lib: nist\_msms; ID: 534314.

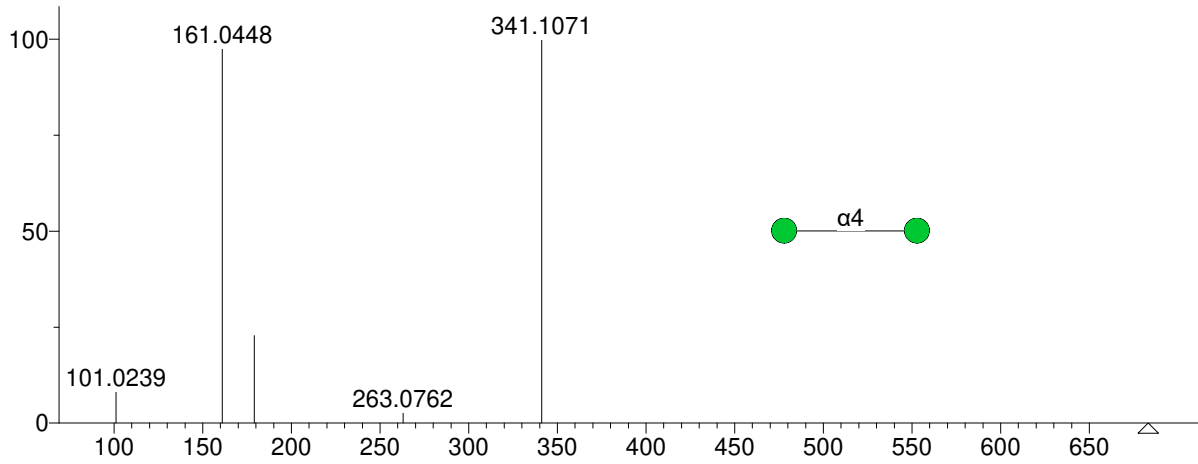

Hit 4 : Lactulose [2M-H]- HCD 13V P=683.2  
C<sub>12</sub>H<sub>22</sub>O<sub>11</sub>; MF: 104; RMF: 457; Prob 9.69%; CAS: 4618-18-2; Lib: nist\_msms; ID: 477980.

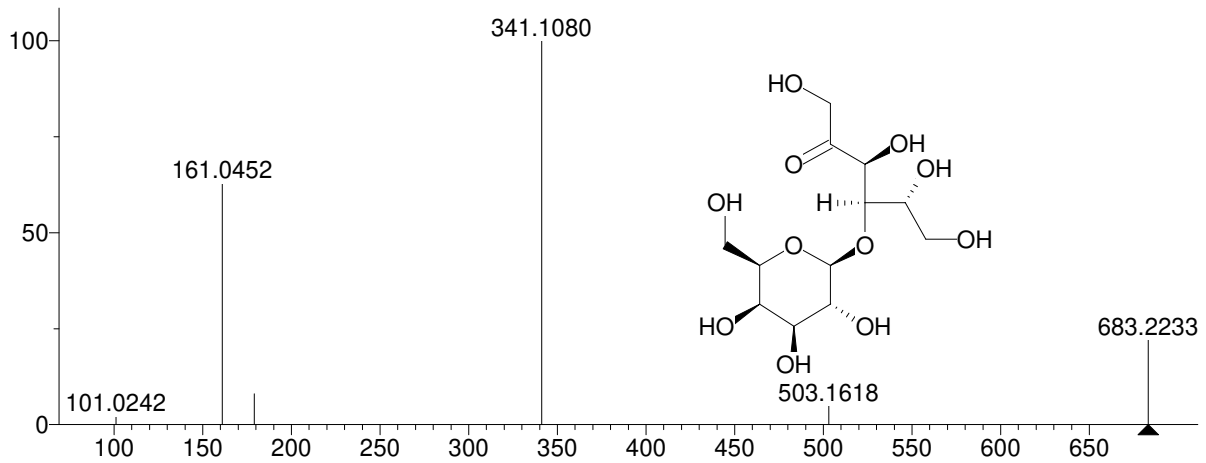

Hit 5 : Galactinol [2M-H]- HCD 27V P=683.2  
C<sub>12</sub>H<sub>22</sub>O<sub>11</sub>; MF: 101; RMF: 283; Prob 8.56%; CAS: 3687-64-7; Lib: nist\_msms; ID: 477813.

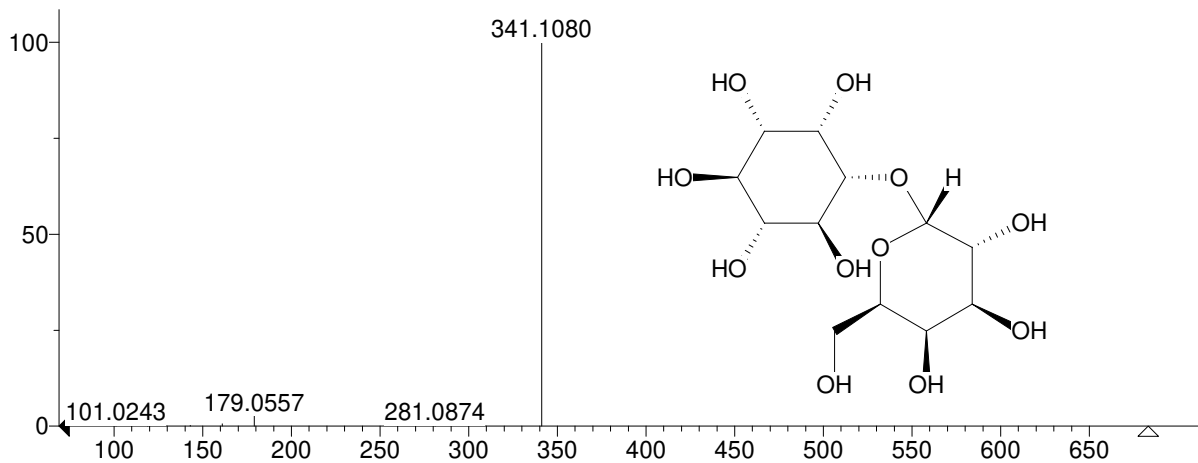

Unknown: Unknown (1.09\_541.3534m/z)  
Compound in Library Factor = 0

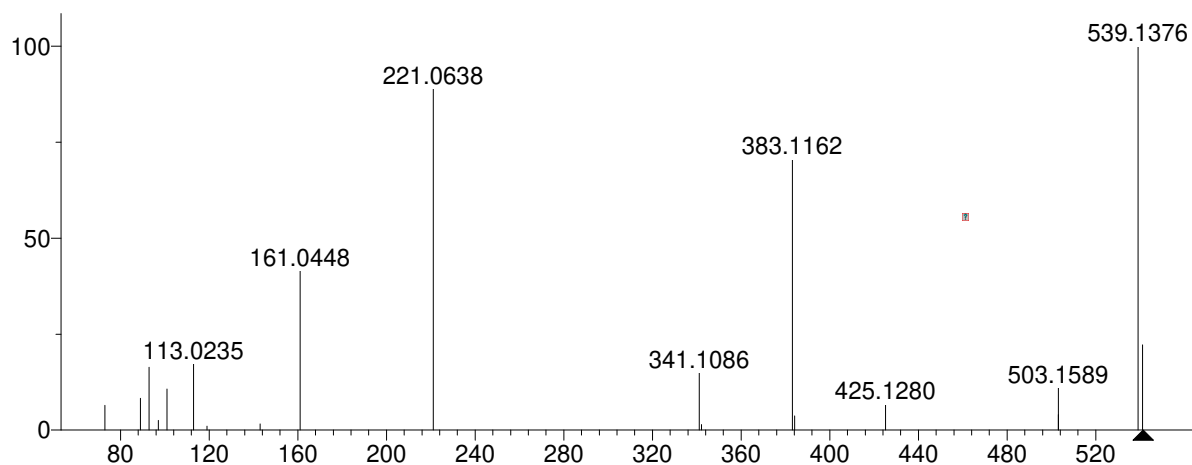

Hit 1 : Leptomycin B [M+H]<sup>+</sup> HCD 32V P=541.4  
C33H48O6; MF: 0; RMF: 8; Prob 100.0%; CAS: 87081-35-4; Lib: nist\_msms; ID: 118131.

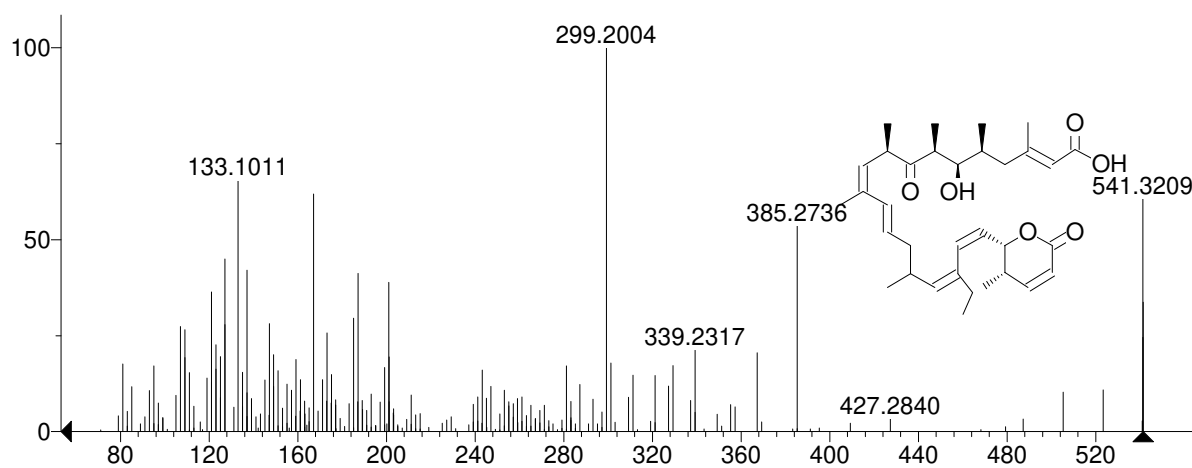

Unknown: Unknown (1.09\_597.0958m/z)  
Compound in Library Factor = 0

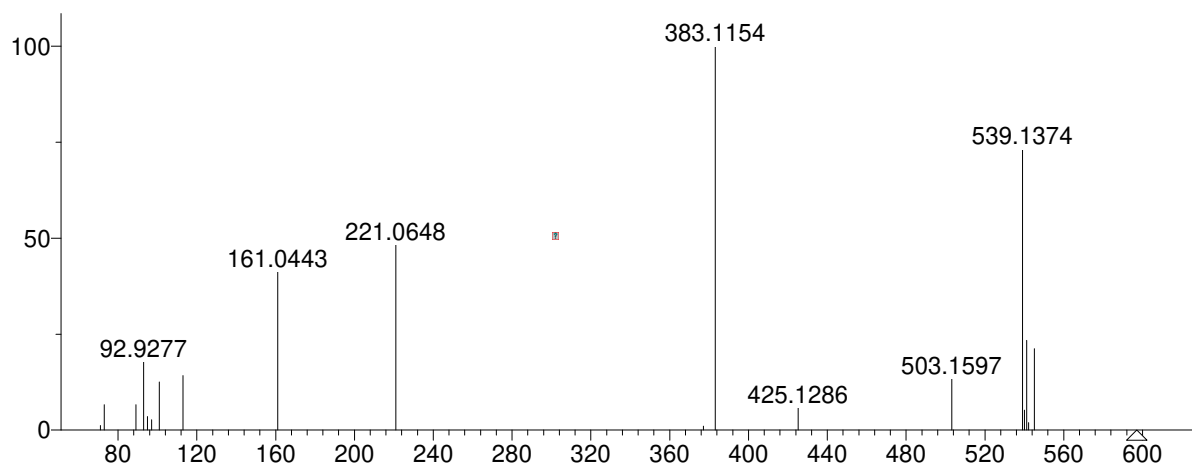

Hit 1 : 3-[5,7-dihydroxy-4-(4-hydroxyphenyl)-2-oxo-3,4-dihydrochromen-3-yl]-5,6,7,8-tetrahydroxy-4-(4-hydroxyphenyl)-2-oxo-3,4-dihydrochromen-3-yl  
C<sub>30</sub>H<sub>22</sub>O<sub>12</sub>; MF: 0; RMF: 20; Prob 100.0%; Lib: mona-export-vf-npl\_qexactive; ID: 25167.

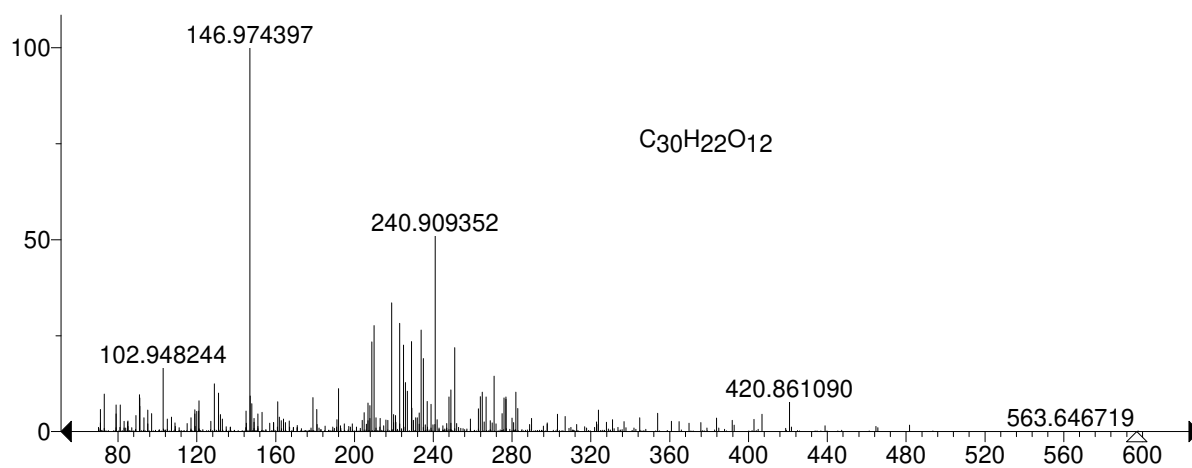

Unknown: Unknown (1.10\_631.0759m/z)  
Compound in Library Factor = 0

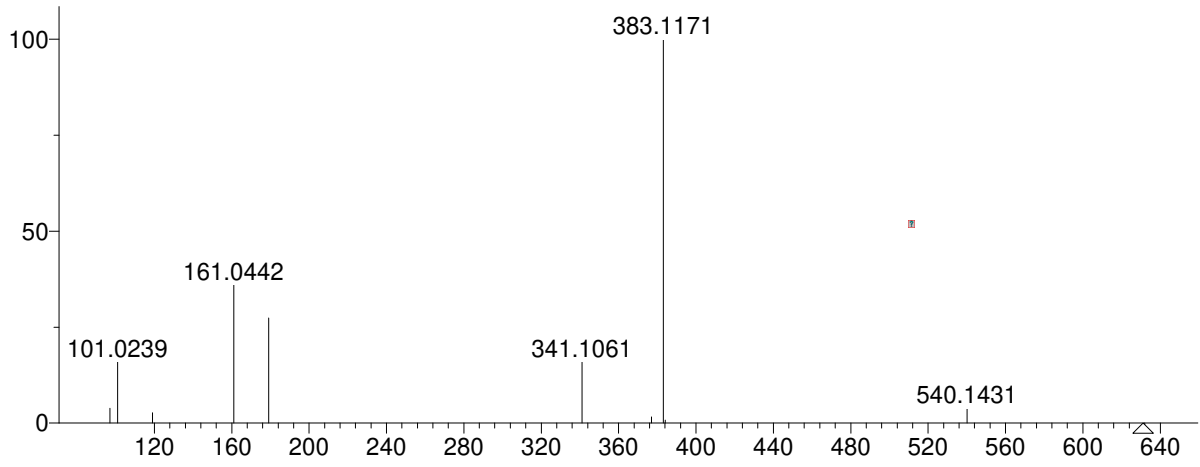

\*\* Search Report Page 1 of 2 \*\*

Unknown: Unknown (1.10\_701.1903m/z)  
Compound in Library Factor = -359

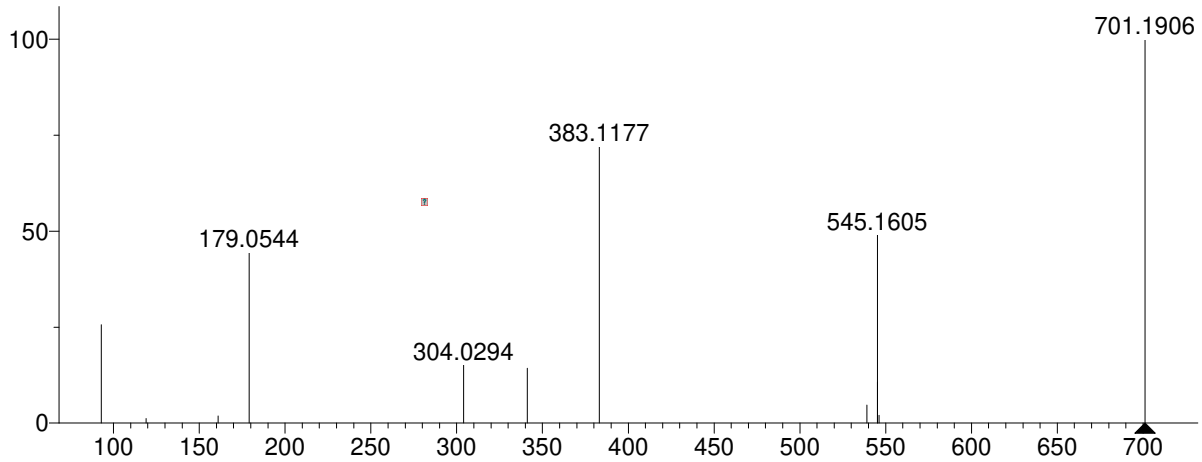

Hit 1 : Laminaritetraose [M+Cl]<sup>-</sup> HCD 10V P=701.2  
C<sub>24</sub>H<sub>42</sub>O<sub>21</sub>; MF: 332; RMF: 957; Prob 81.1%; CAS: 26212-72-6; Lib: nist\_msms; ID: 531112.

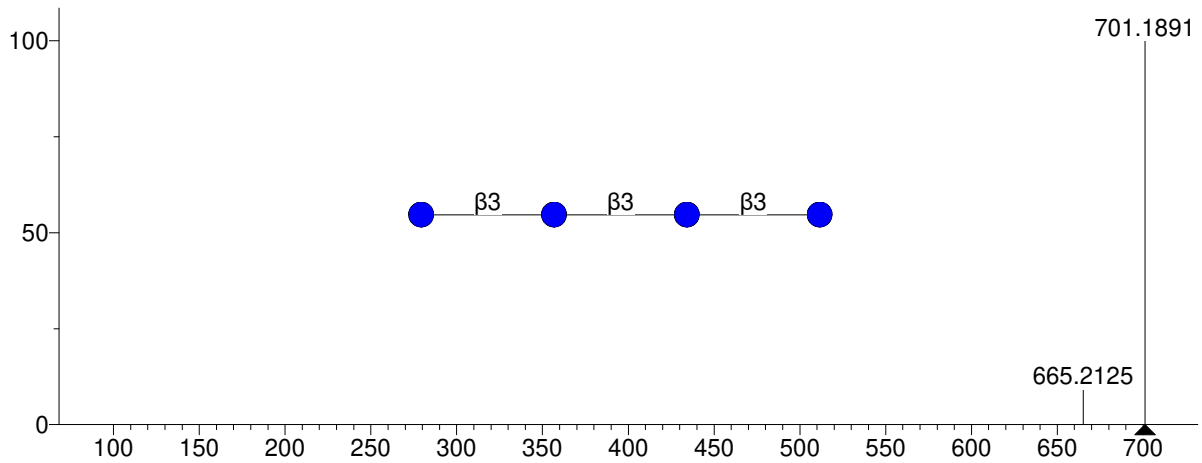

Hit 2 : Maltotetraose [M+Cl]<sup>-</sup> HCD 31V P=701.2  
C<sub>24</sub>H<sub>42</sub>O<sub>21</sub>; MF: 286; RMF: 621; Prob 17.1%; CAS: 34612-38-9; Lib: nist\_msms; ID: 286899.

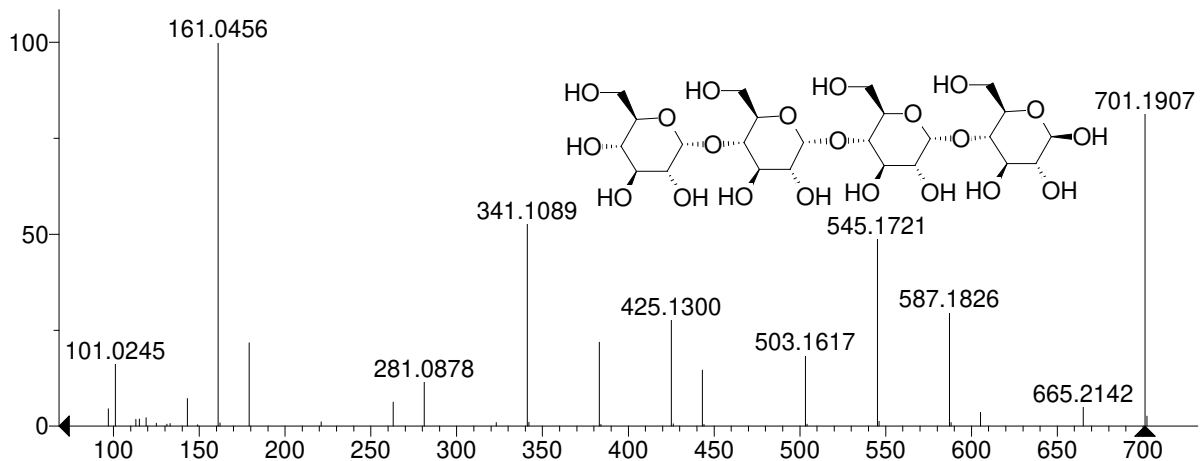

Hit 3 : Cellotetraose [M+Cl]<sup>-</sup> HCD 28V P=701.2  
C<sub>24</sub>H<sub>42</sub>O<sub>21</sub>; MF: 180; RMF: 437; Prob 1.15%; CAS: 38819-01-1; Lib: nist\_msms; ID: 500365.

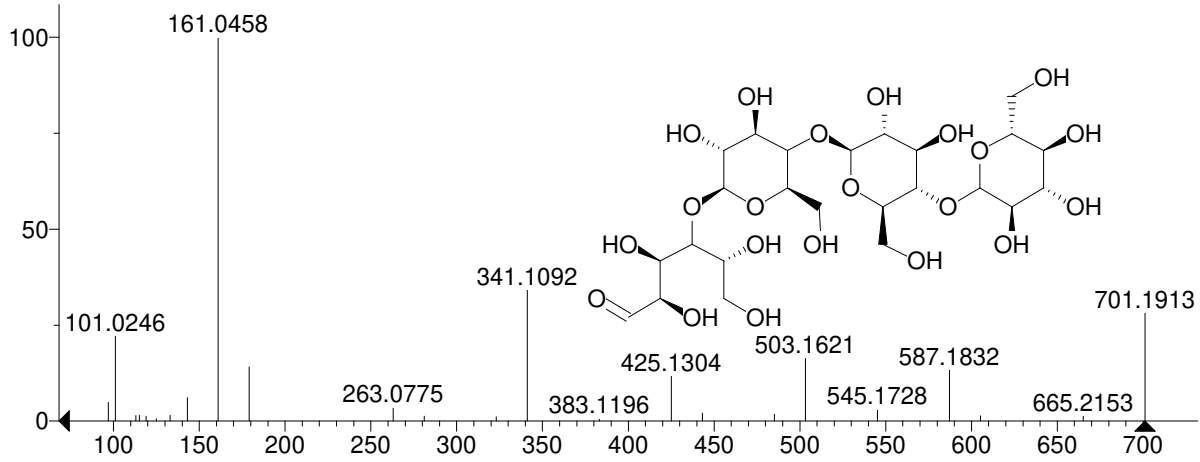

Hit 4 : 3 $\alpha$ ,4 $\beta$ ,3 $\alpha$ -Galactotetraose [M+Cl]<sup>-</sup> HCD 21V P=701.2  
C<sub>24</sub>H<sub>42</sub>O<sub>21</sub>; MF: 162; RMF: 554; Prob 0.59%; CAS: 56038-38-1; Lib: nist\_msms; ID: 530953.

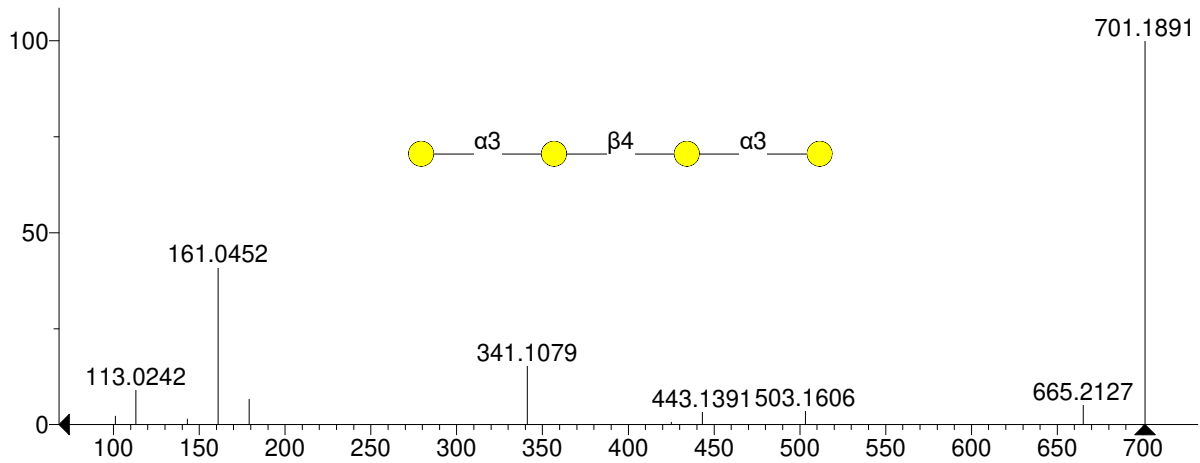

Unknown: Unknown (1.11\_759.1491m/z)  
Compound in Library Factor = 0

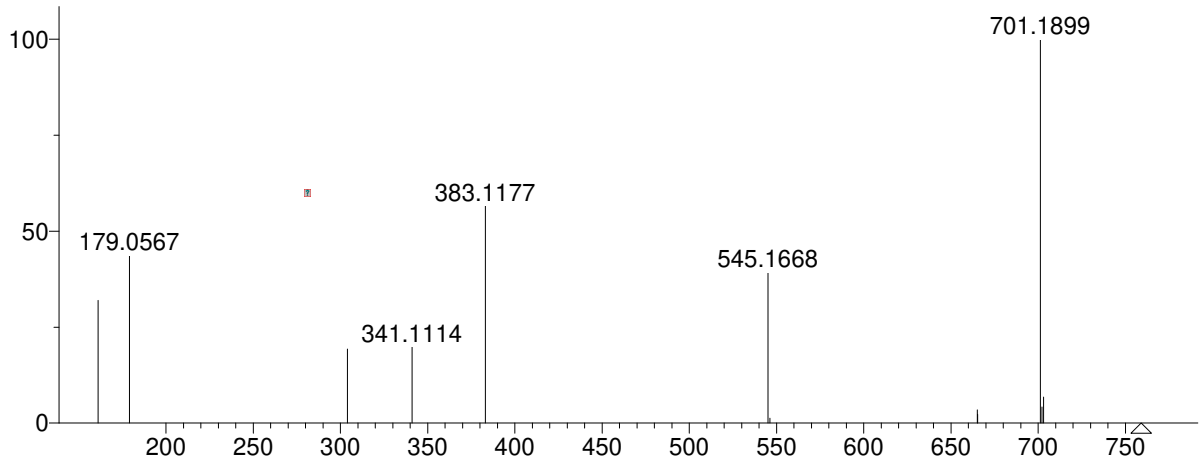



Unknown: Unknown (1.12\_160.8408m/z)  
Compound in Library Factor = 0

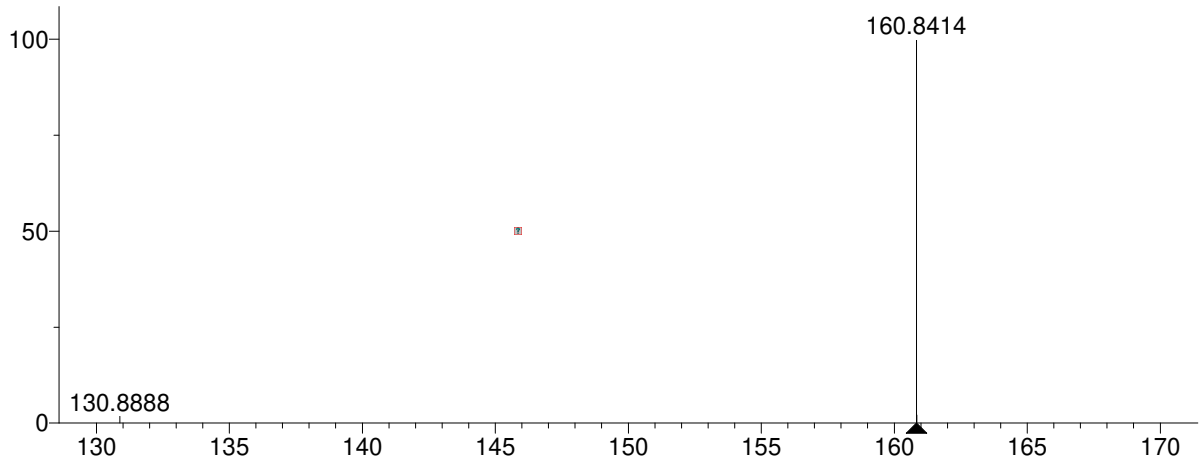

Unknown: Unknown (1.13\_225.0054m/z)  
Compound in Library Factor = 0

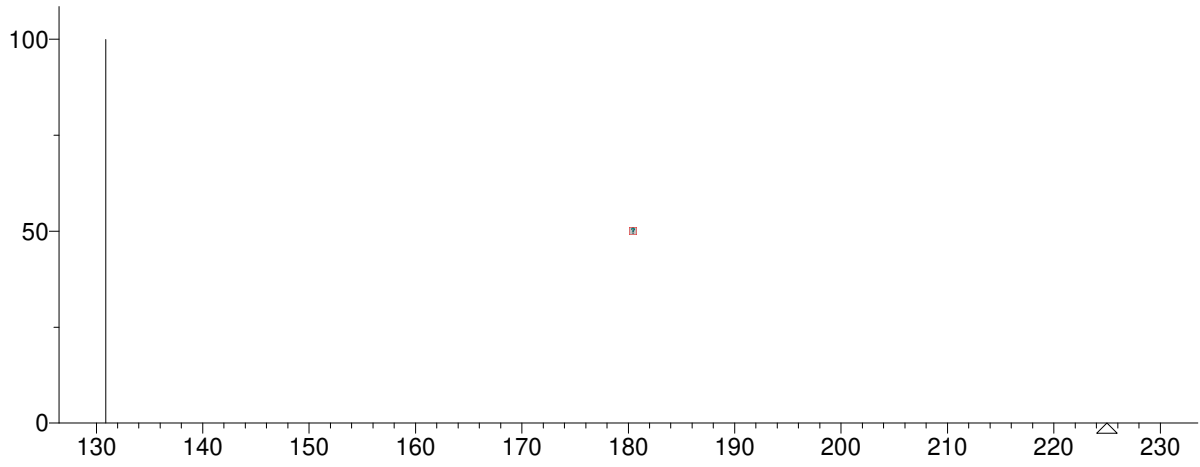

Unknown: Unknown (1.13\_449.1062m/z)  
Compound in Library Factor = 0

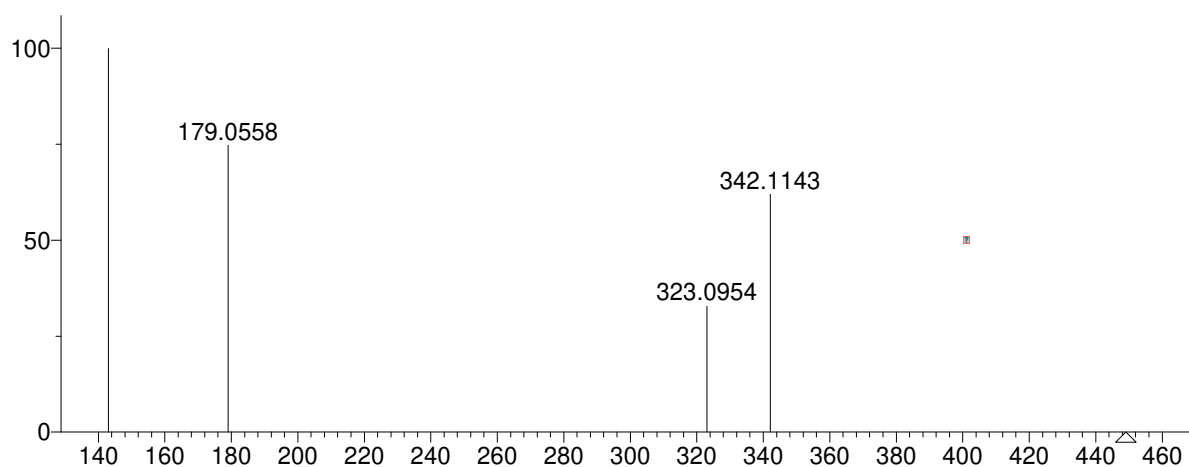

Hit 1 : Orientin [M+H]<sup>+</sup> HCD 116V P=449.1  
C<sub>21</sub>H<sub>20</sub>O<sub>11</sub>; MF: 0; RMF: 75; Prob 5.88%; CAS: 28608-75-5; Lib: nist\_msms; ID: 390755.

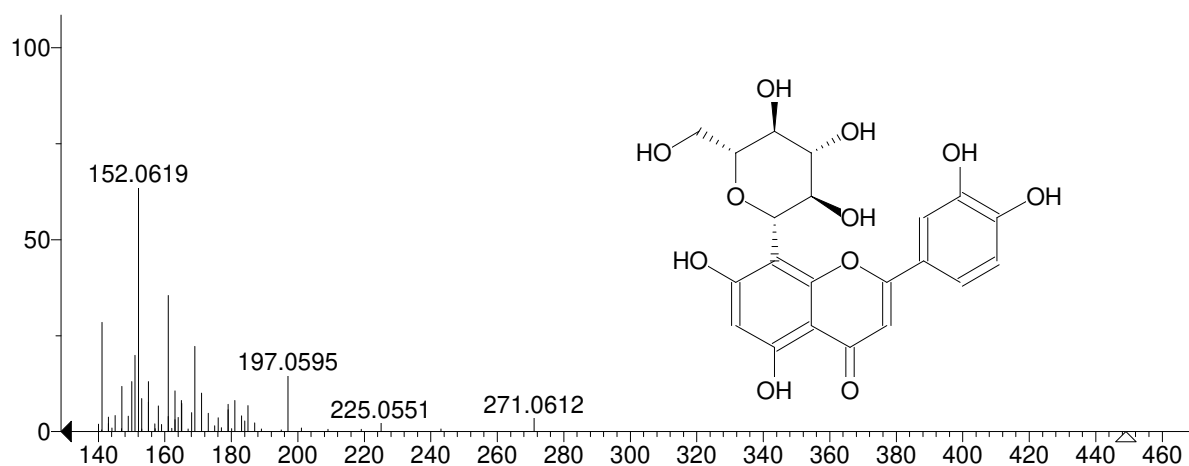

Hit 2 : Maritimein [M+H]<sup>+</sup> HCD 67V P=449.1  
C<sub>21</sub>H<sub>20</sub>O<sub>11</sub>; MF: 0; RMF: 41; Prob 5.88%; CAS: 490-54-0; Lib: nist\_msms; ID: 494967.

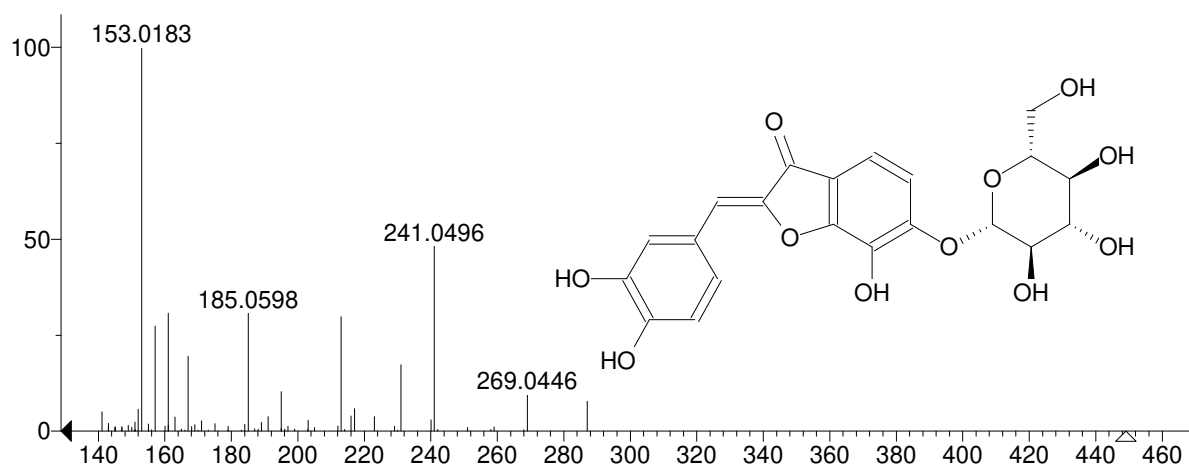

Hit 3 : luteolin-7-glucoside [M+H]<sup>+</sup> 45HCD P=449.1  
C<sub>21</sub>H<sub>20</sub>O<sub>11</sub>; MF: 0; RMF: 31; Prob 5.88%; Lib: anthocyanins mona; ID: 8111.

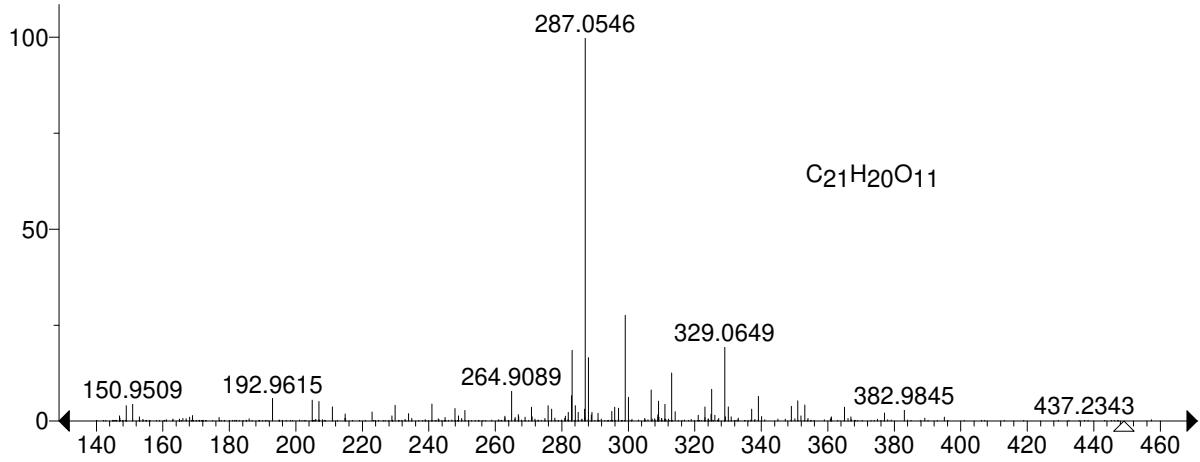

Hit 4 : Luteolin-8-C-glucoside [M+H]<sup>+</sup> 50eV P=449.1  
C<sub>21</sub>H<sub>20</sub>O<sub>11</sub>; MF: 0; RMF: 27; Prob 5.88%; Lib: anthocyanins mona; ID: 1993.

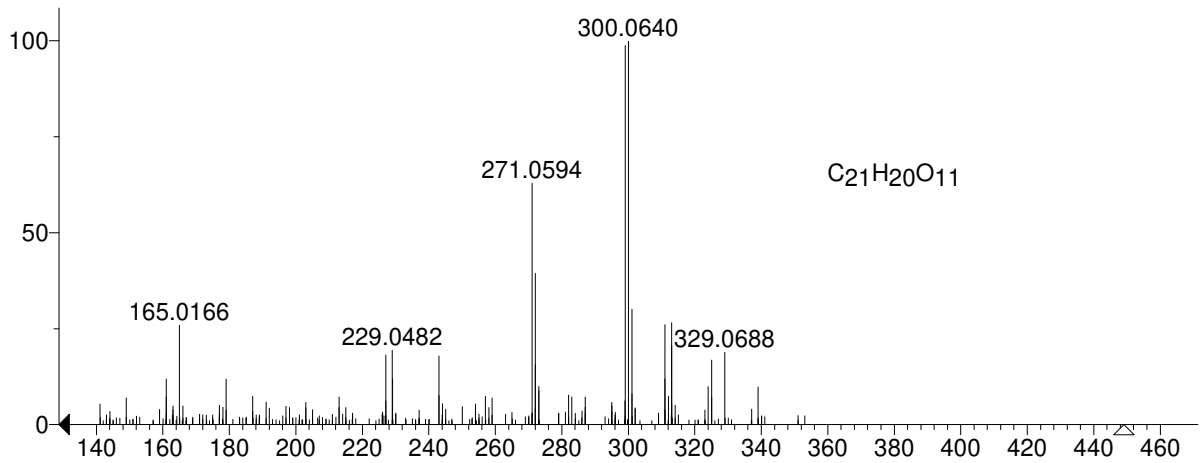

Hit 5 : NP-000286(7) [M+H]<sup>+</sup> 30eV P=449.1  
C<sub>21</sub>H<sub>20</sub>O<sub>11</sub>; MF: 0; RMF: 23; Prob 5.88%; Lib: anthocyanins mona; ID: 2947.

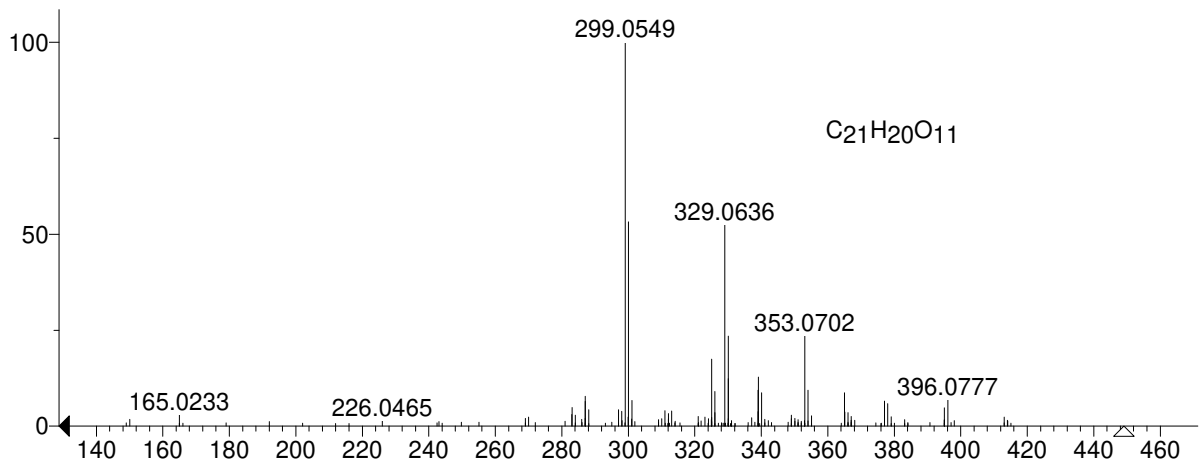

Unknown: Unknown (1.13\_509.1248m/z)  
Compound in Library Factor = 0

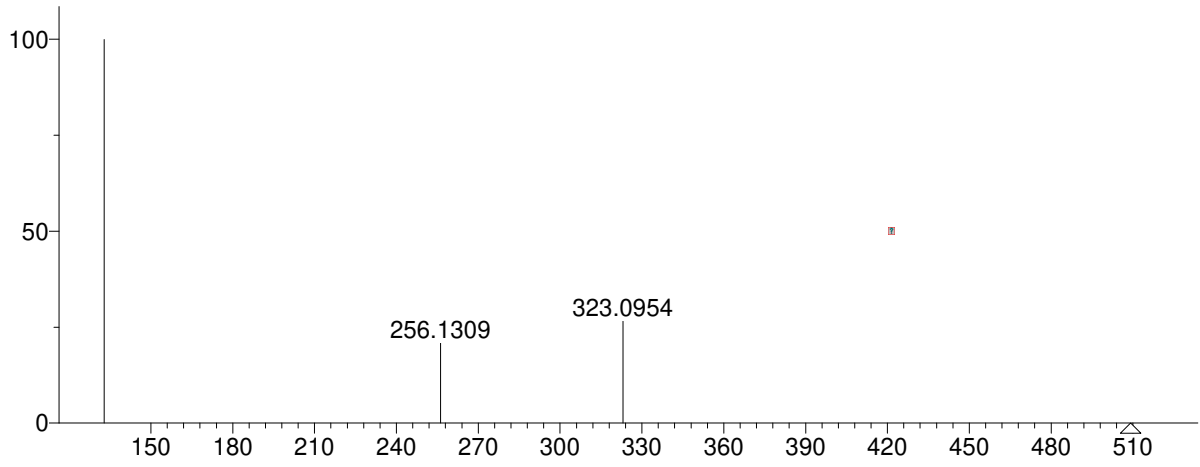

Unknown: Unknown (1.13\_863.2428m/z)  
Compound in Library Factor = 0

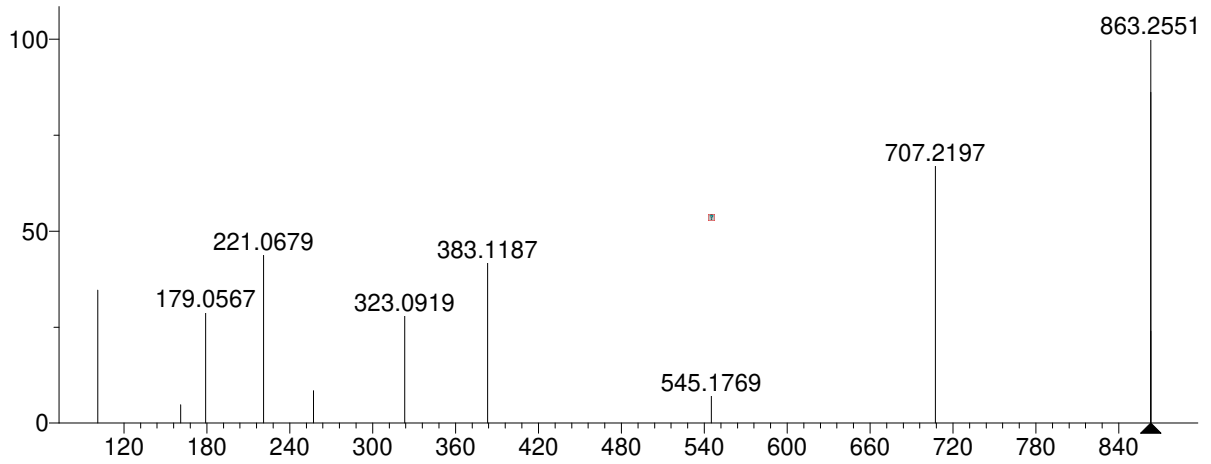

Hit 1 : [Phe10]  $\beta$ -Amyloid (1-40) [M+5H]<sup>5+</sup> QTOF 3V P=863.2  
C<sub>194</sub>H<sub>295</sub>N<sub>53</sub>O<sub>57</sub>S; MF: 0; RMF: 117; Prob 50.0%; Lib: nist\_msms2; ID: 36926.

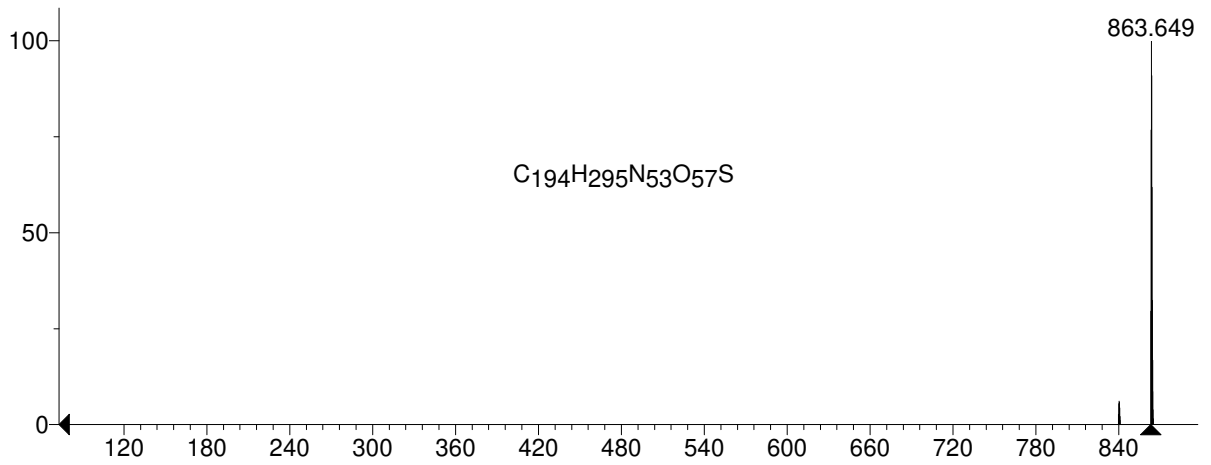

Hit 2 : Genistin [2M-H]<sup>-</sup> 35% P=863.2  
C<sub>21</sub>H<sub>20</sub>O<sub>10</sub>; MF: 0; RMF: 29; Prob 50.0%; Lib: mona-export-itree; ID: 3973.

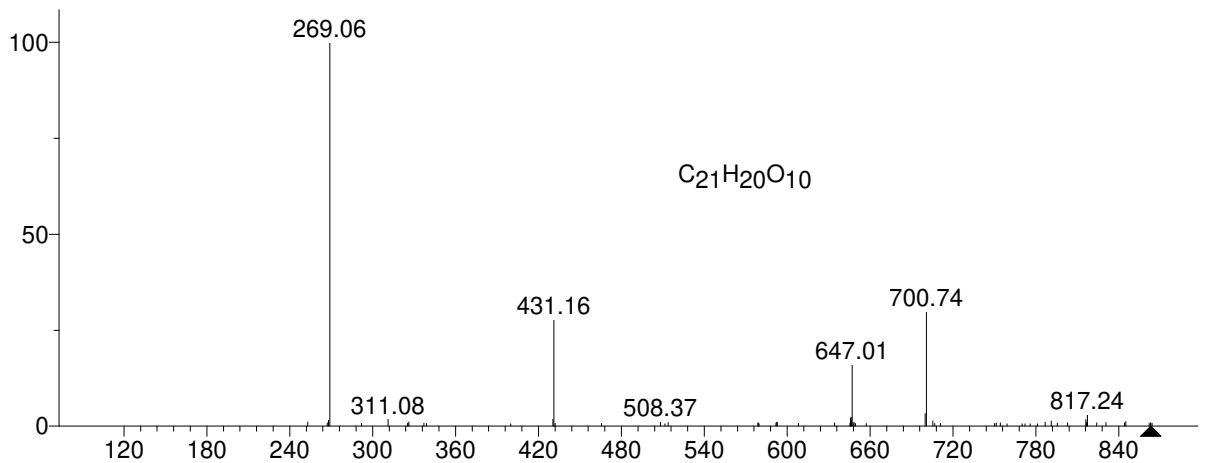

Unknown: Unknown (1.14\_521.1258m/z)  
Compound in Library Factor = 0

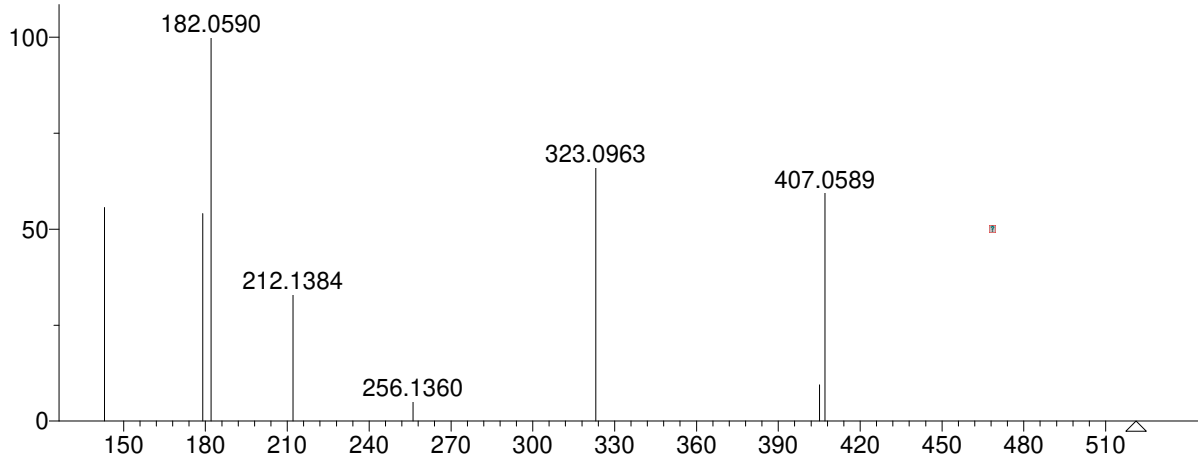

Hit 1 : verproside [M+Na]<sup>+</sup> 65HCD P=521.1  
C<sub>22</sub>H<sub>26</sub>O<sub>13</sub>; MF: 0; RMF: 14; Prob 33.3%; Lib: mona-export-vf-npl\_qexactive; ID: 11988.

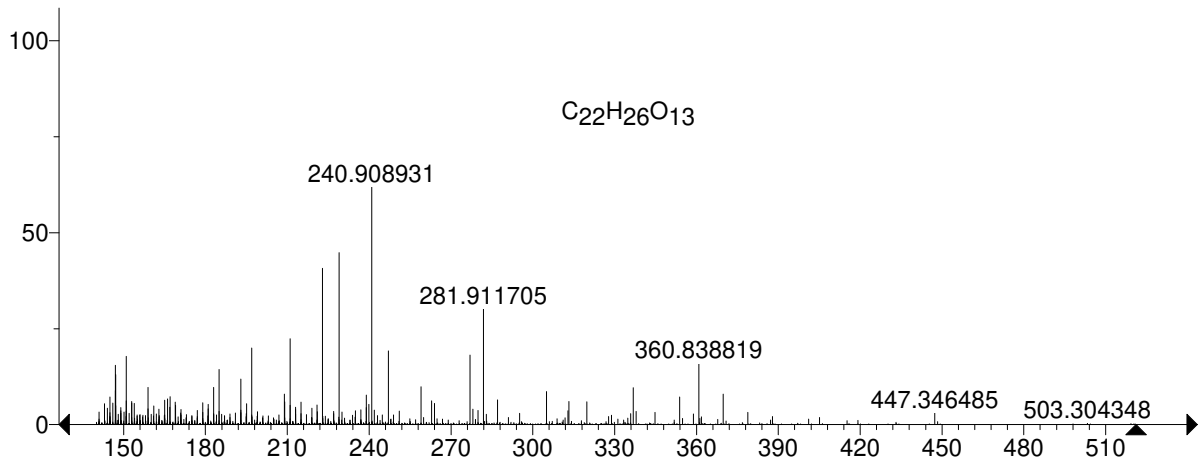

Hit 2 : Deacetoxy(7)-7-Oxokhivorinic Acid [M+H]<sup>+</sup> 35% P=521.1  
C<sub>27</sub>H<sub>36</sub>O<sub>10</sub>; MF: 0; RMF: 4; Prob 33.3%; Lib: mona-export-itree; ID: 1410.

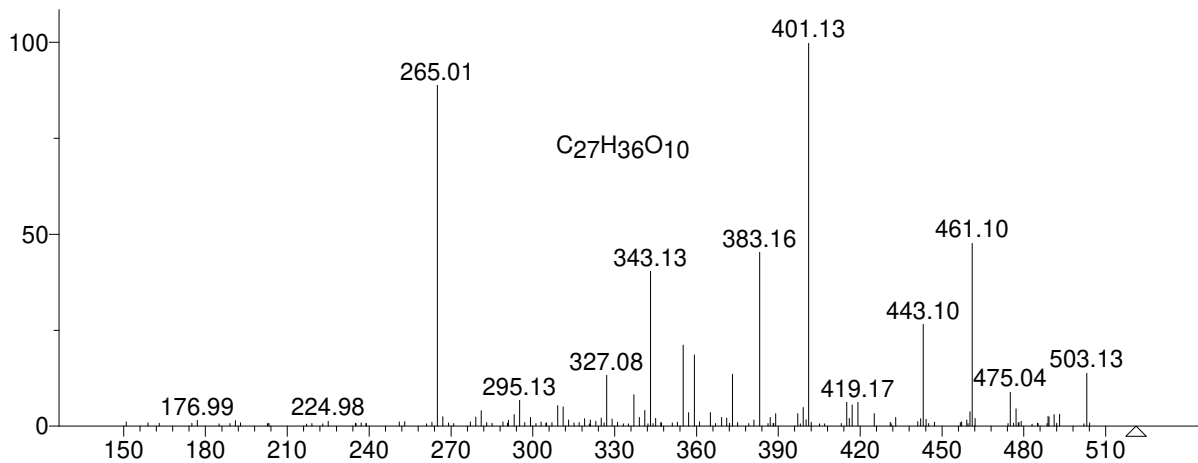

Hit 3 : 5-hydroxy-3-(5-hydroxy-2,4-dimethoxyphenyl)-6-methoxy-7-[3,4,5-trihydroxy-6-(hydroxymethyl)oxan-2-yl]ox  
C<sub>24</sub>H<sub>26</sub>O<sub>13</sub>; MF: 0; RMF: 1; Prob 33.3%; Lib: anthocyanins mona; ID: 9905.

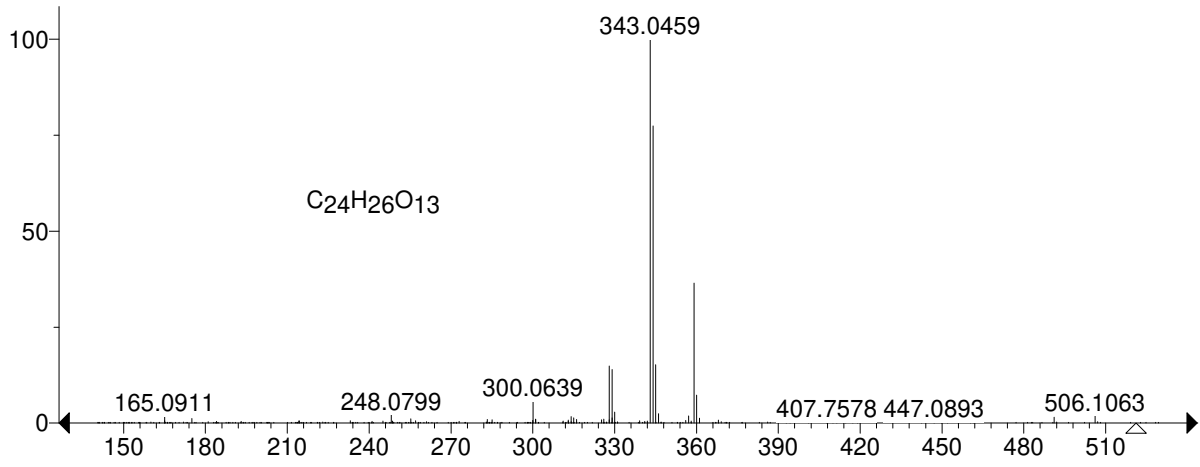



Unknown: Unknown (1.14\_760.2978m/z)  
Compound in Library Factor = 0

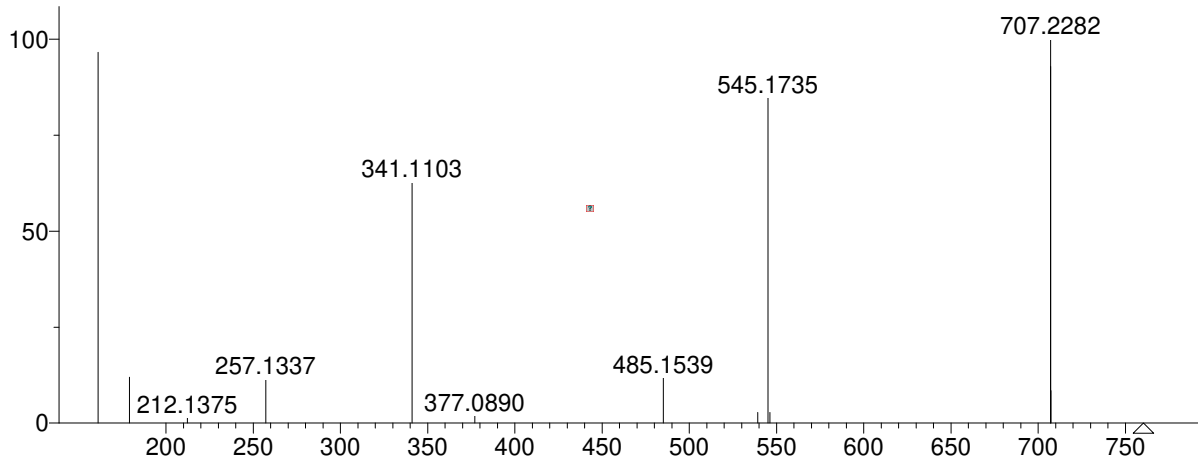

Unknown: Unknown (1.15\_359.0715m/z)  
Compound in Library Factor = 0

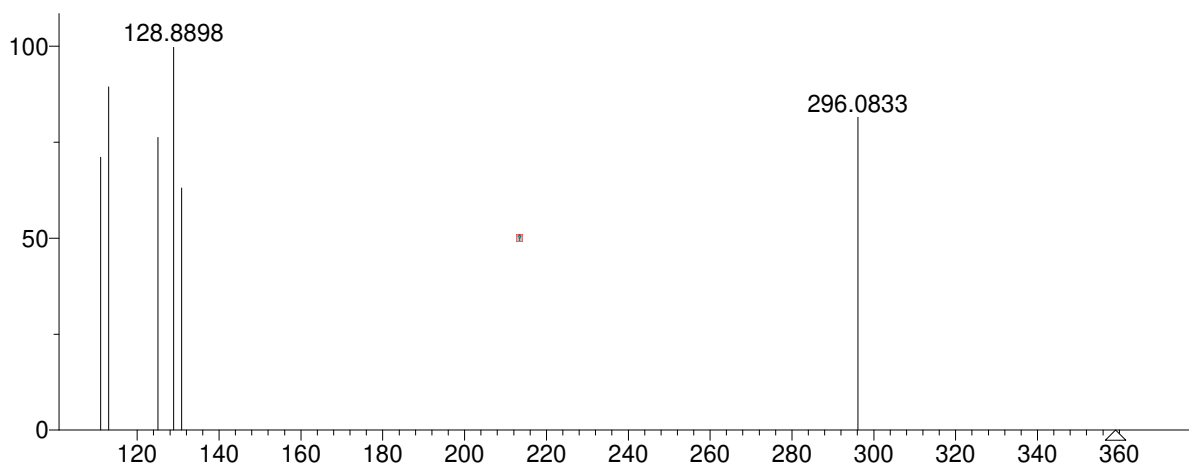

Hit 1 : 2-(4a,9,10a-trihydroxy-1-methyl-5,10-dioxo-3,4-dihydro-1H-benzo[g]isochromen-3-yl)acetic acid [M+Na]<sup>+</sup>  
C<sub>16</sub>H<sub>16</sub>O<sub>8</sub>; MF: 0; RMF: 4; Prob 100.0%; Lib: mona-export-vf-npl\_qexactive; ID: 19106.

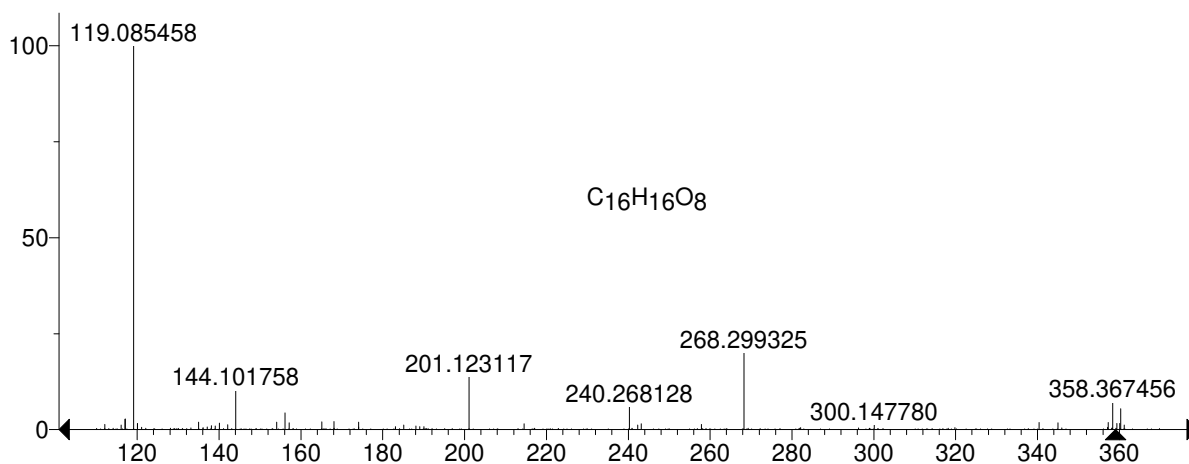

\*\* Search Report Page 1 of 2 \*\*

Unknown: Unknown (1.15\_449.1038m/z)  
Compound in Library Factor = -3273

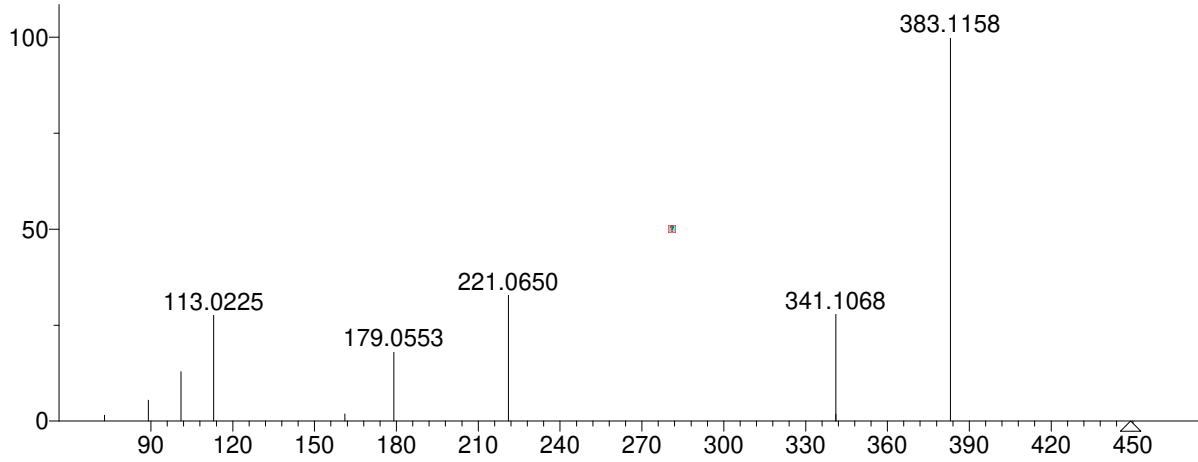

Hit 1 : Orientin [M+H]<sup>+</sup> IT 35% P=449.1  
C<sub>21</sub>H<sub>20</sub>O<sub>11</sub>; MF: 4; RMF: 263; Prob 3.04%; CAS: 28608-75-5; Lib: nist\_msms; ID: 390757.

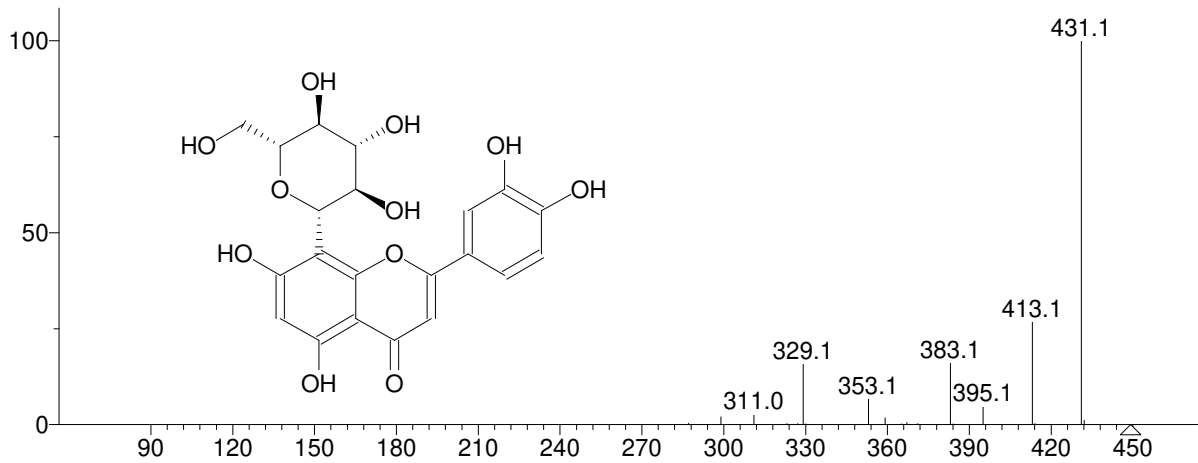

Hit 2 : Datiscin [M+H]<sup>+</sup> =>449.1 IT 35% P=449.1  
C<sub>27</sub>H<sub>30</sub>O<sub>15</sub>; MF: 3; RMF: 231; Prob 2.93%; CAS: 16310-92-2; Lib: nist\_msms; ID: 458608.

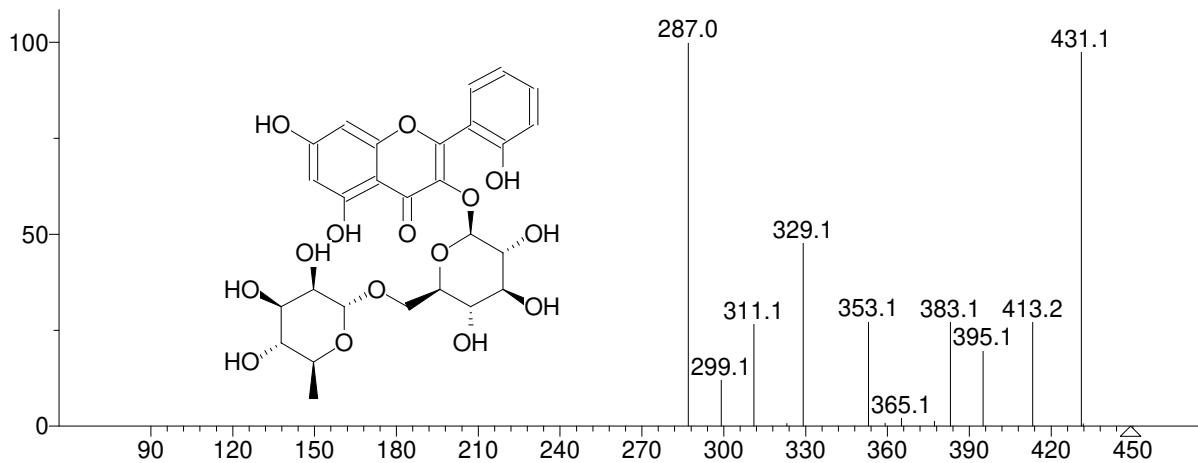

Hit 3 : Astragalin [M+H]<sup>+</sup> IT 35% P=449.1  
C<sub>21</sub>H<sub>20</sub>O<sub>11</sub>; MF: 2; RMF: 168; Prob 2.81%; CAS: 480-10-4; Lib: nist\_msms; ID: 72607.

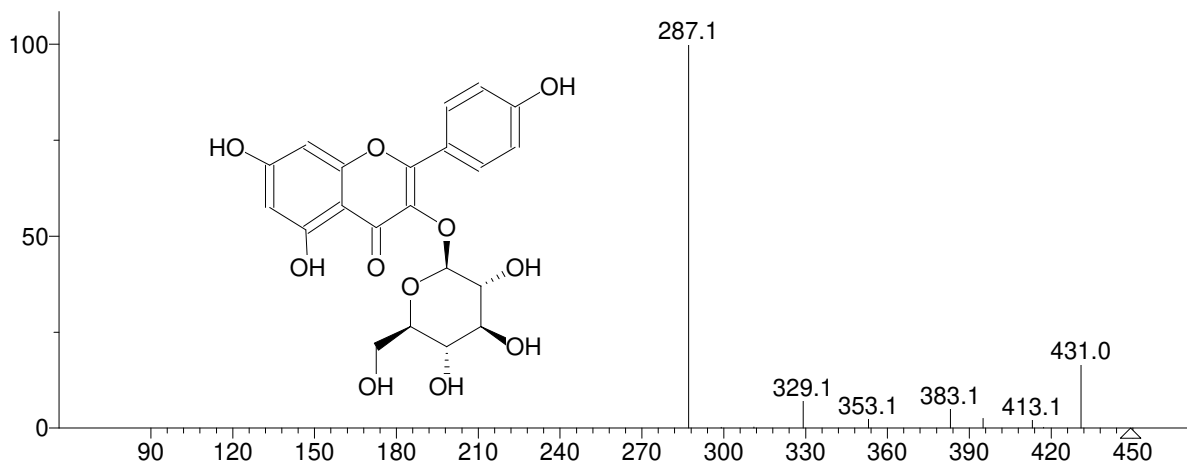

Hit 4 : Naringenin-4'-O-β-D-glucuronide [M+H]<sup>+</sup> HCD 35V P=449.1  
C<sub>21</sub>H<sub>20</sub>O<sub>11</sub>; MF: 1; RMF: 83; Prob 2.70%; CAS: 158196-35-1; Lib: nist\_msms; ID: 96166.

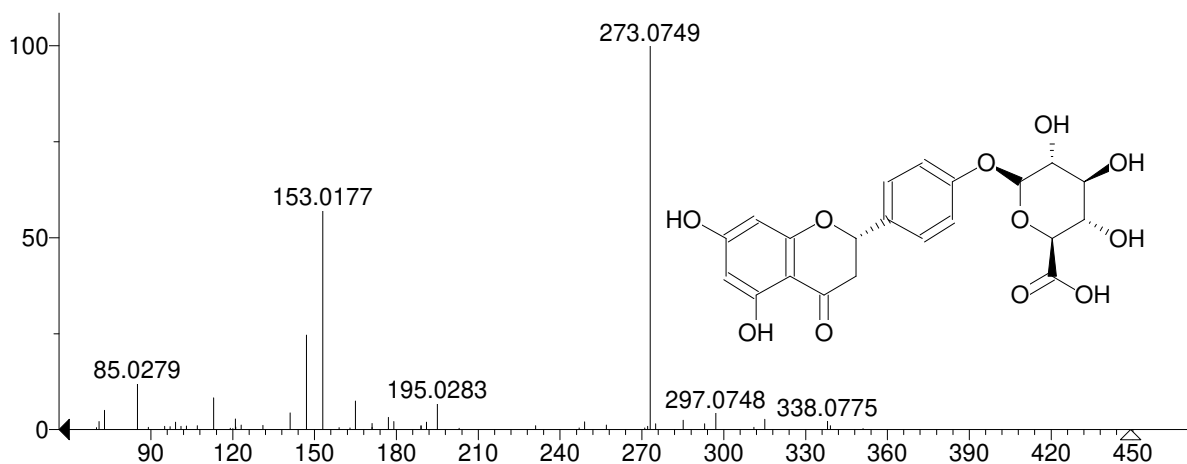

Hit 5 : 6-Oxometasone furoate [M+H-H<sub>2</sub>O]<sup>+</sup> IT 35% P=449.1  
C<sub>27</sub>H<sub>28</sub>Cl<sub>2</sub>O<sub>7</sub>; MF: 0; RMF: 98; Prob 2.60%; CAS: 1305334-30-8; Lib: nist\_msms; ID: 465469.

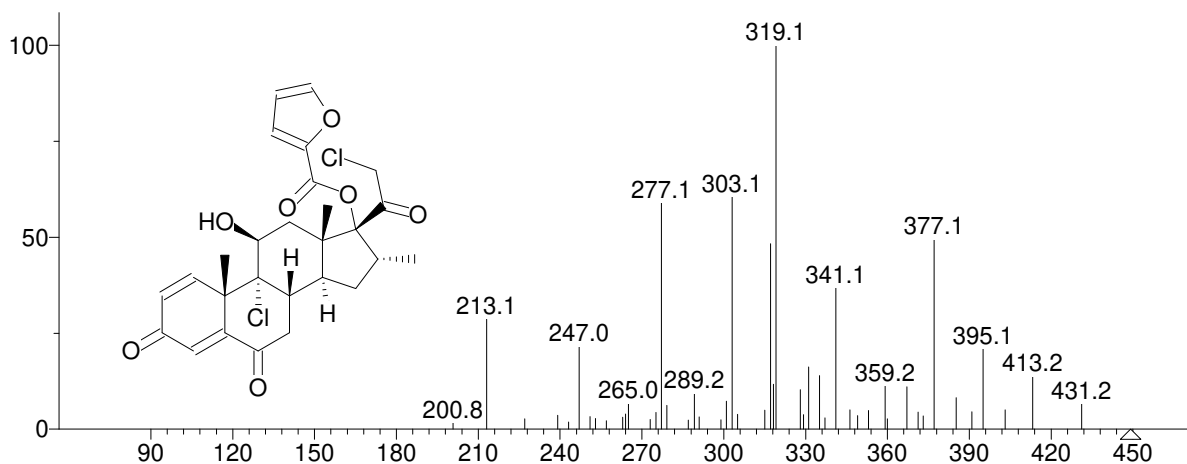

Unknown: Unknown (1.15\_598.2470m/z)  
Compound in Library Factor = 0

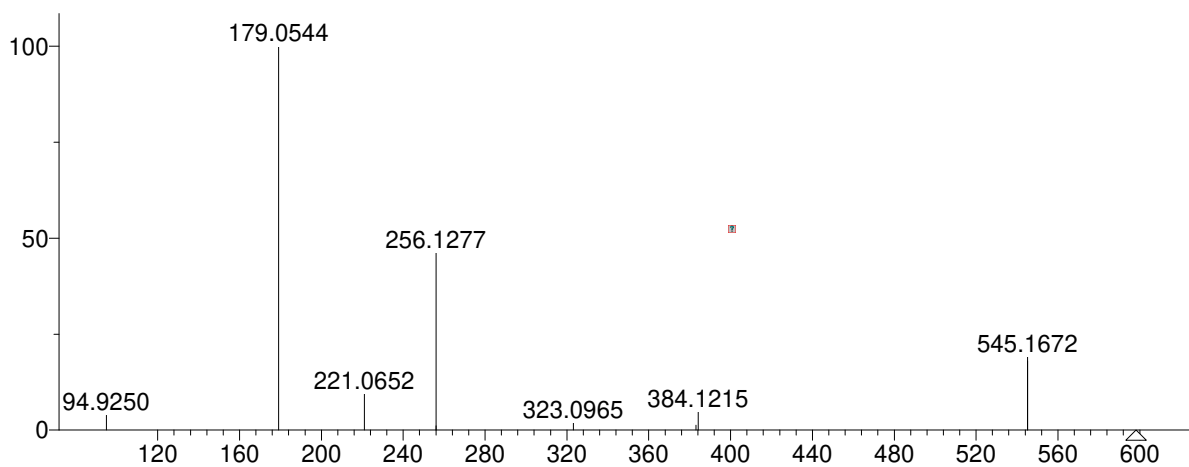

Hit 1 : NCGC00169670-02!(2S,3R,4S,5S,6R)-2-[4-[(3S,3aR,6S,6aR)-3-(4-hydroxy-3,5-dimethoxyphenyl)-1,3,3a,4-C<sub>28</sub>H<sub>36</sub>O<sub>13</sub>; MF: 0; RMF: 11; Prob 100.0%; Lib: mona-export-gnps; ID: 8125.

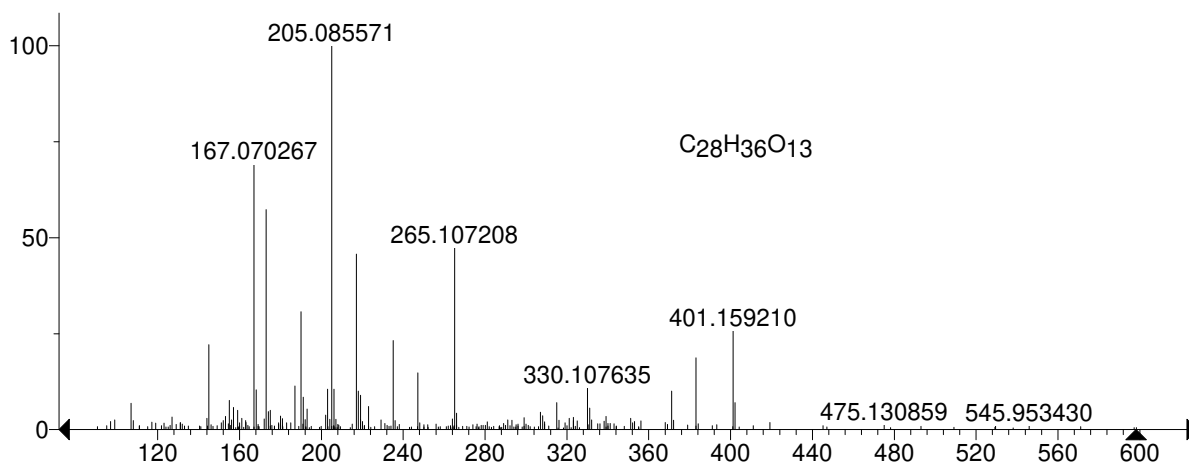

Unknown: Unknown (1.25\_225.0057m/z)  
Compound in Library Factor = -2632

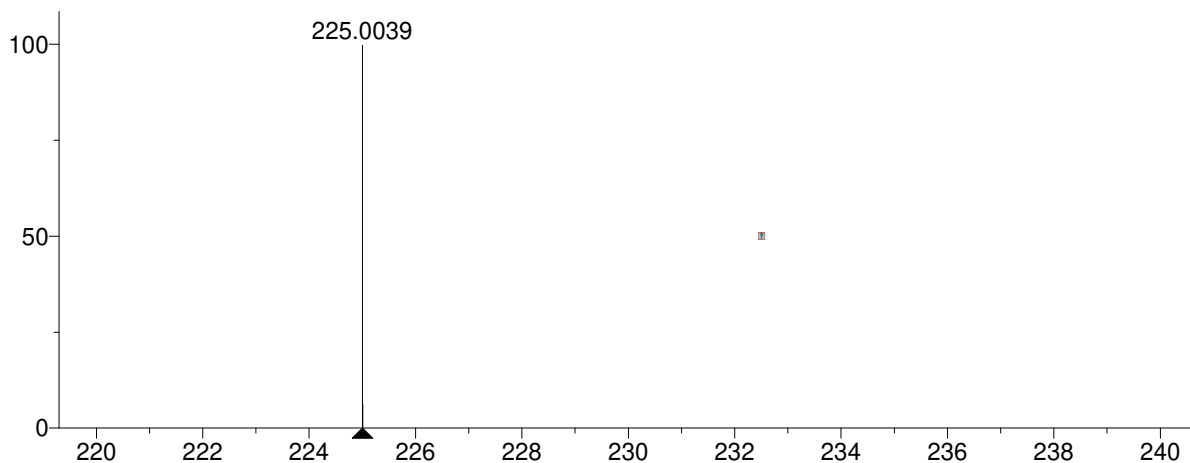

Hit 1 : 2-[[Guanidino (imino)methyl]sulfonyl]ethanesulfonic Acid [M-H]<sup>-</sup> P=225  
C<sub>4</sub>H<sub>10</sub>N<sub>4</sub>O<sub>3</sub>S<sub>2</sub>; MF: 351; RMF: 970; Prob 50.0%; Lib: mona-export-gnps; ID: 2950.

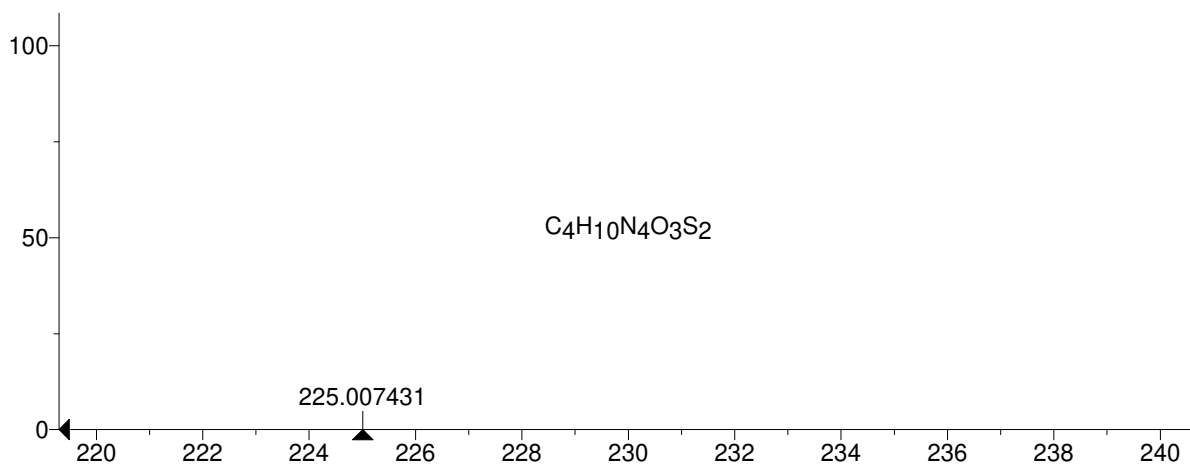

Hit 2 : 2,4,5-Phenoltricarboxylic acid [M-H]<sup>-</sup> QQQ 20V P=225  
C<sub>9</sub>H<sub>6</sub>O<sub>7</sub>; MF: 351; RMF: 970; Prob 50.0%; CAS: 4961-03-9; Lib: nist\_msms; ID: 1650.

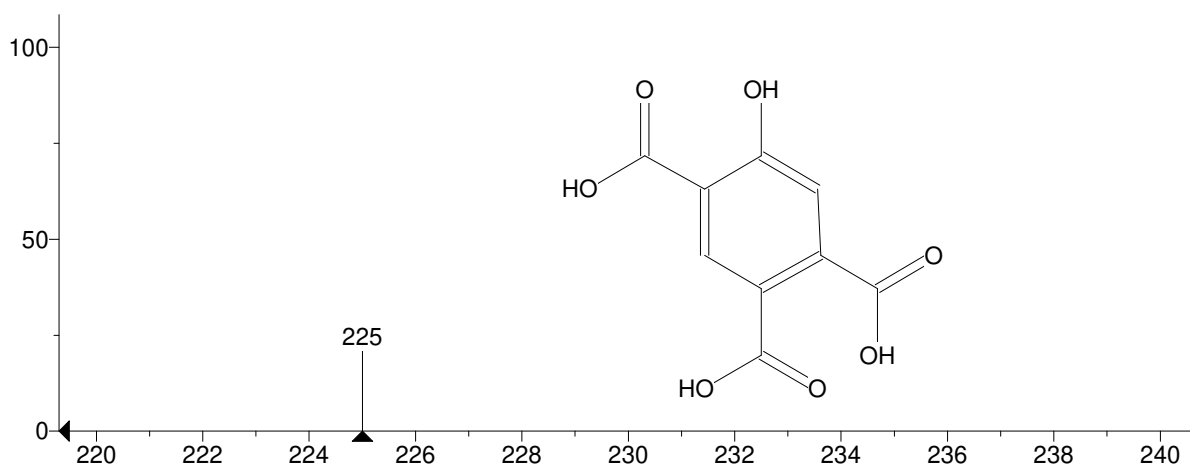

Unknown: Unknown (1.25\_359.0730m/z)  
Compound in Library Factor = 0

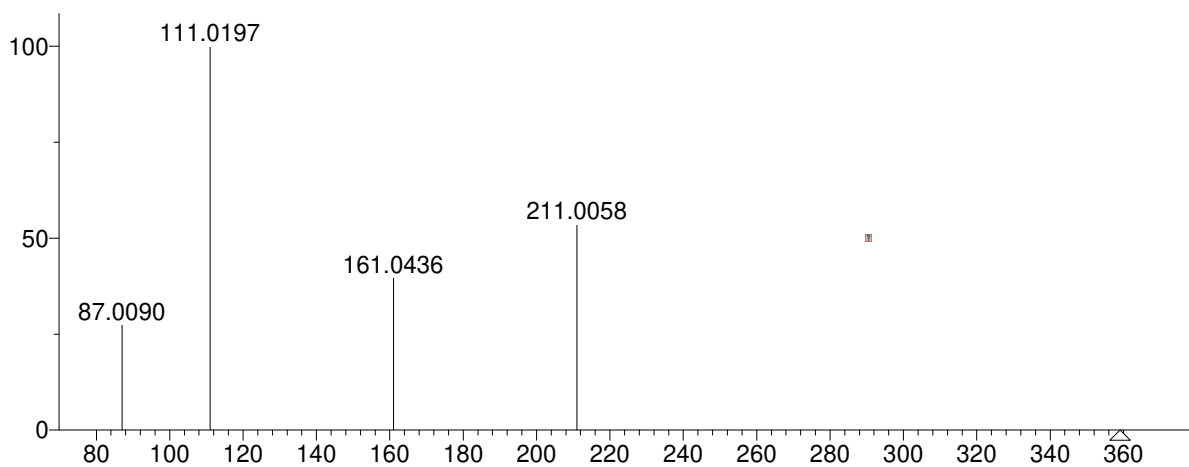

Hit 1 : 1-(3,4-dihydroxyphenyl)-6,7-dihydroxy-1,2-dihydronaphthalene-2,3-dicarboxylic acid [M+H]<sup>+</sup> 65HCD P=3  
C<sub>18</sub>H<sub>14</sub>O<sub>8</sub>; MF: 0; RMF: 6; Prob 100.0%; Lib: mona-export-vf-npl\_gexactive; ID: 24906.

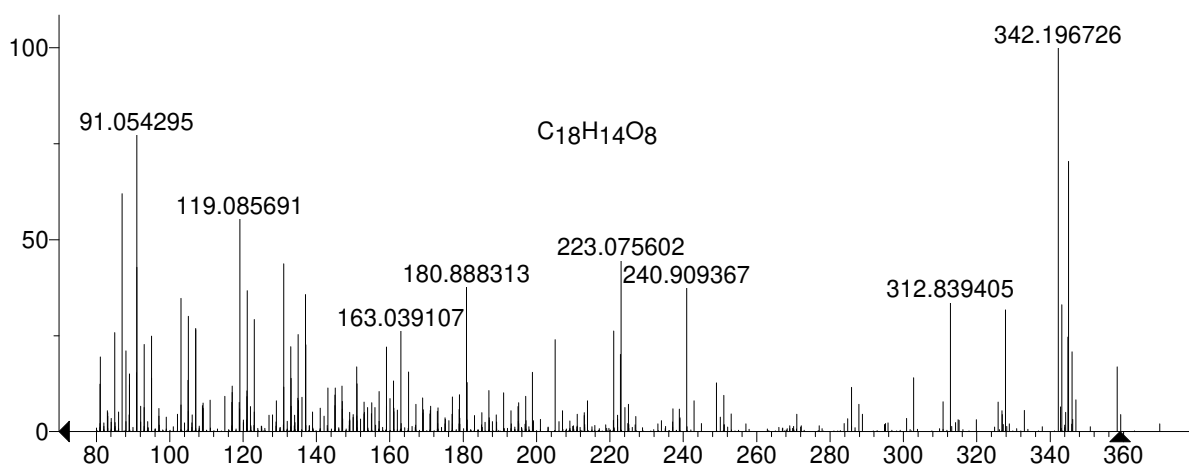

Unknown: Unknown (1.25\_863.2129m/z)  
Compound in Library Factor = 0

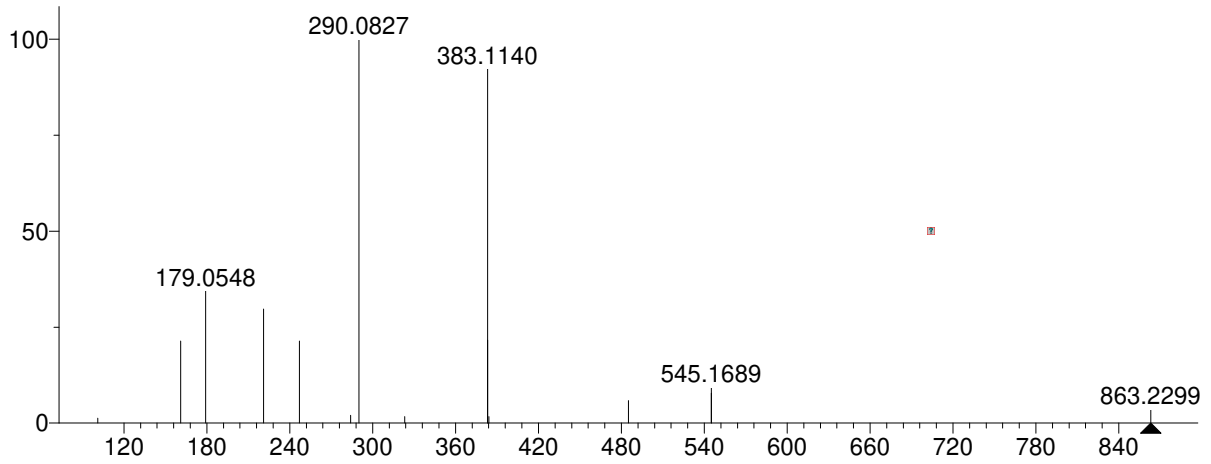

Hit 1 : Unknown (carbon number 42); PlaSMA ID-2121 [M-H]- P=863.2  
C42H40O20; MF: 0; RMF: 9; Prob 100.0%; Lib: biomsms-neg-plasma; ID: 1652.

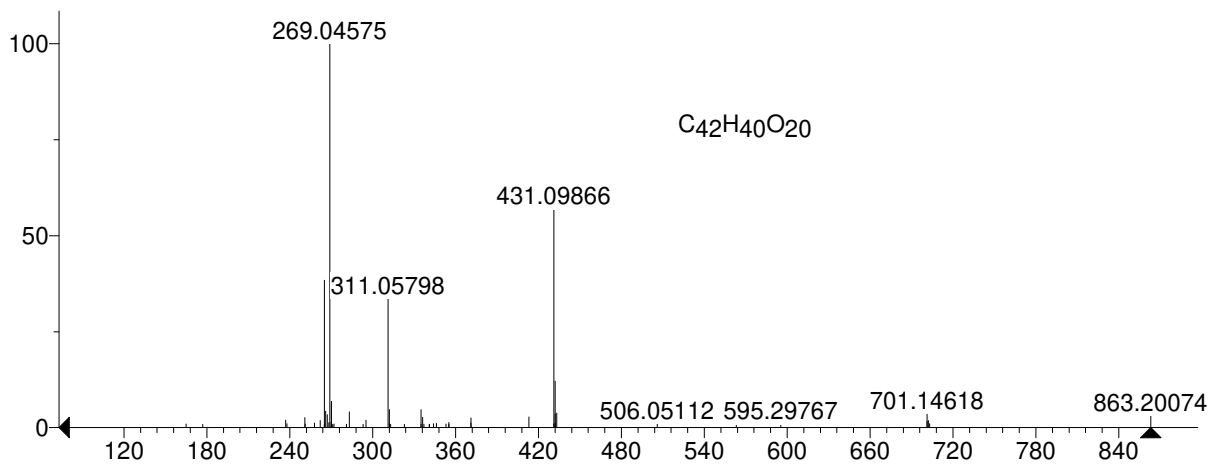



Unknown: Unknown (1.26\_195.8101m/z)  
Compound in Library Factor = 0

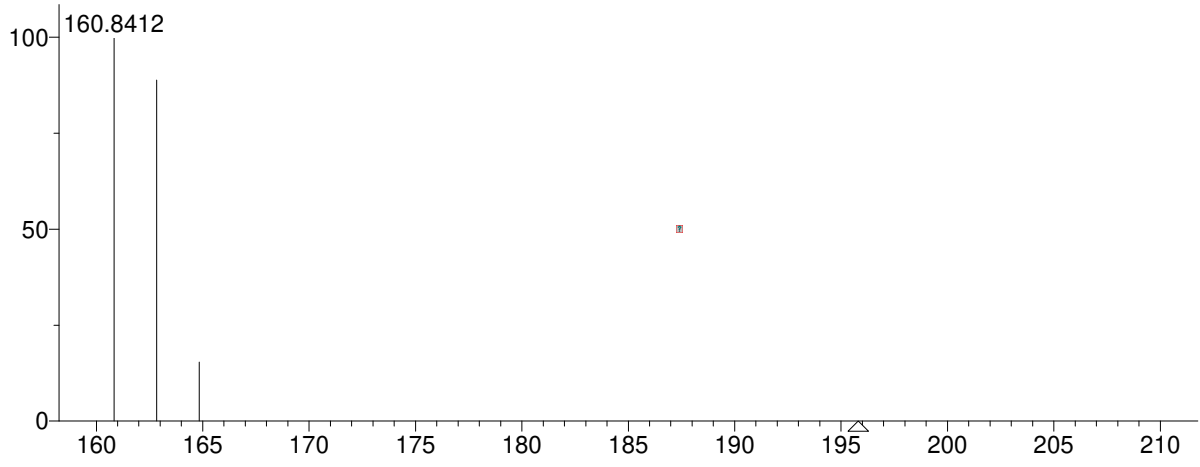

Unknown: Unknown (1.26\_197.8070m/z)  
Compound in Library Factor = 0

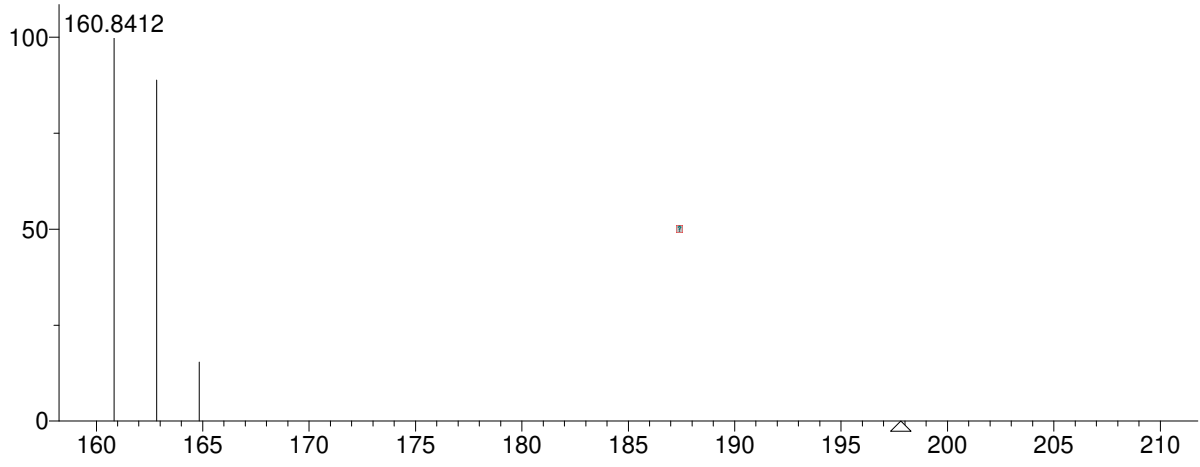

Unknown: Unknown (1.29\_272.0761m/z)  
Compound in Library Factor = -2176

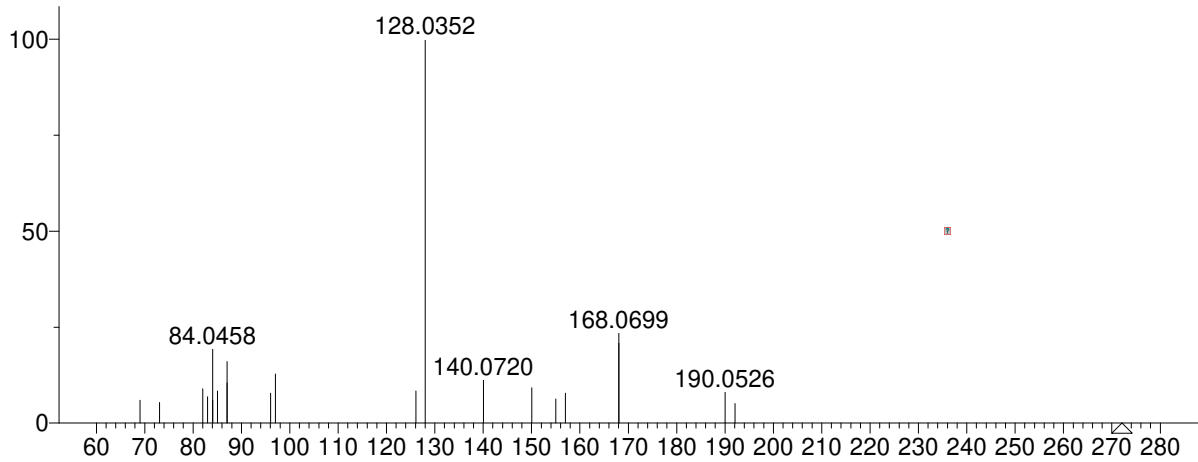

Hit 1 : N-Glycolylneuraminic acid [M+H-3H2O]+ HCD 32V P=272.1  
C11H19NO10; MF: 23; RMF: 203; Prob 73.2%; CAS: 1113-83-3; Lib: nist\_msms; ID: 307281.

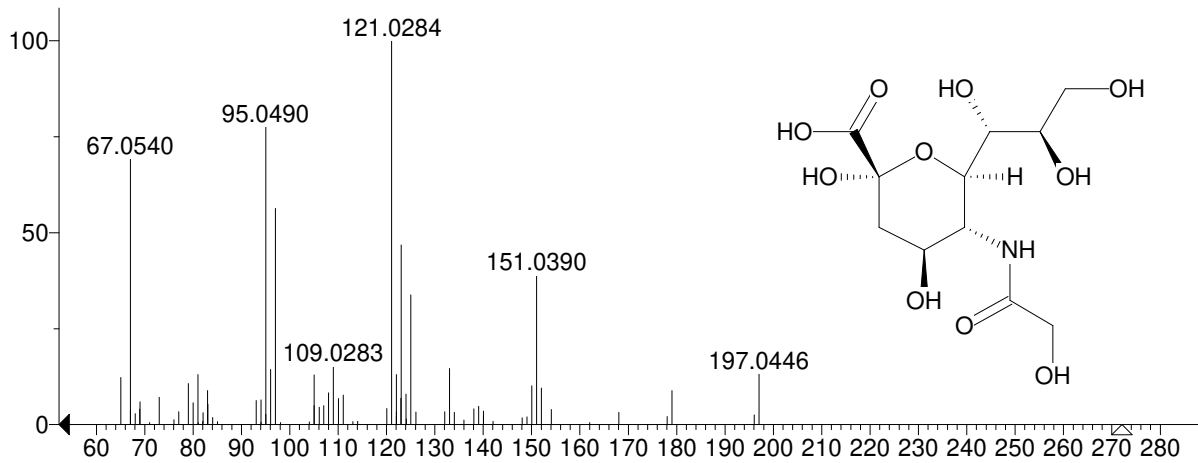

Hit 2 : NCGC00380622-01!3,5-dihydroxy-7-methoxy-6-methyl-1-oxo-3H-2-benzofuran-4-carboxylic acid [M+NH4]  
C11H10O7; MF: 0; RMF: 25; Prob 26.8%; Lib: mona-export-gnps; ID: 8673.

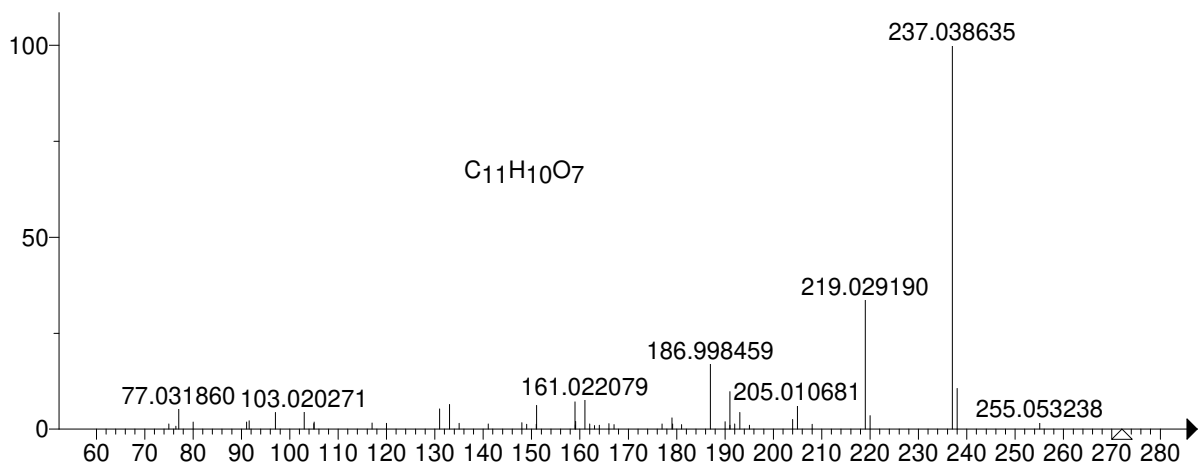

Unknown: Unknown (1.29\_440.1766m/z)  
Compound in Library Factor = 0

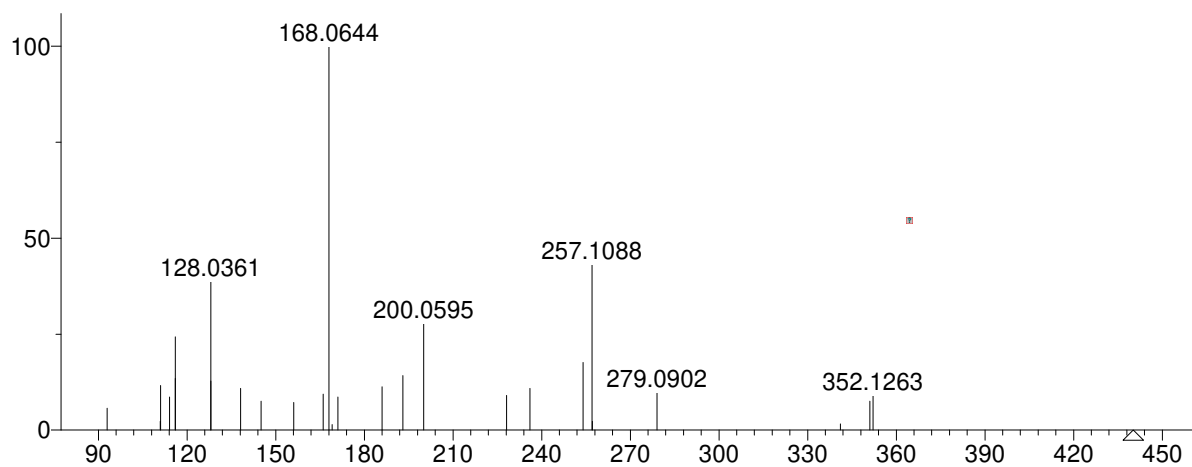

Hit 1 : Quinadoline B\_130007 [M+H]<sup>+</sup> P=440.2  
C<sub>25</sub>H<sub>21</sub>N<sub>5</sub>O<sub>3</sub>; MF: 0; RMF: 24; Prob 100.0%; Lib: mona-export-gnps; ID: 4995.

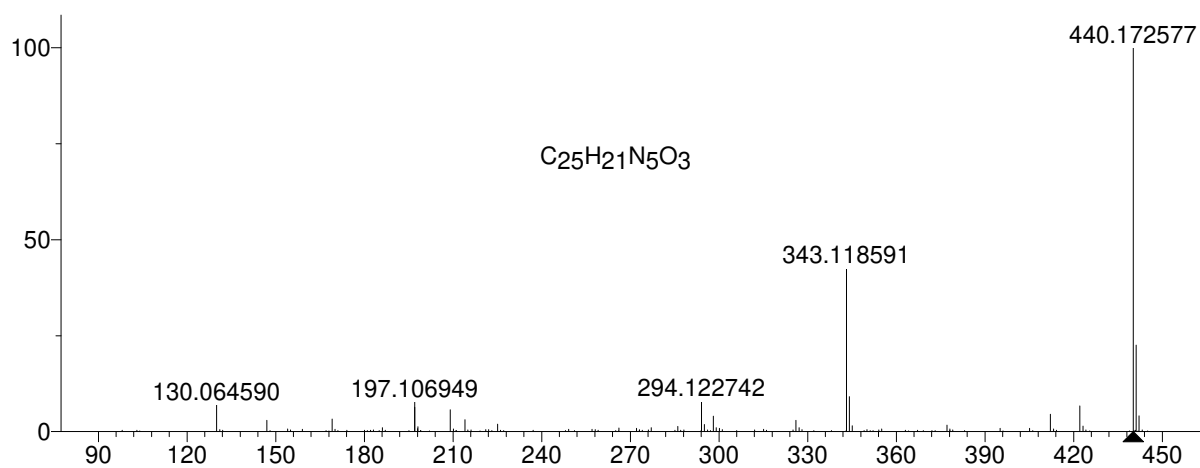

Unknown: Unknown (1.30\_393.1491m/z)  
Compound in Library Factor = 0

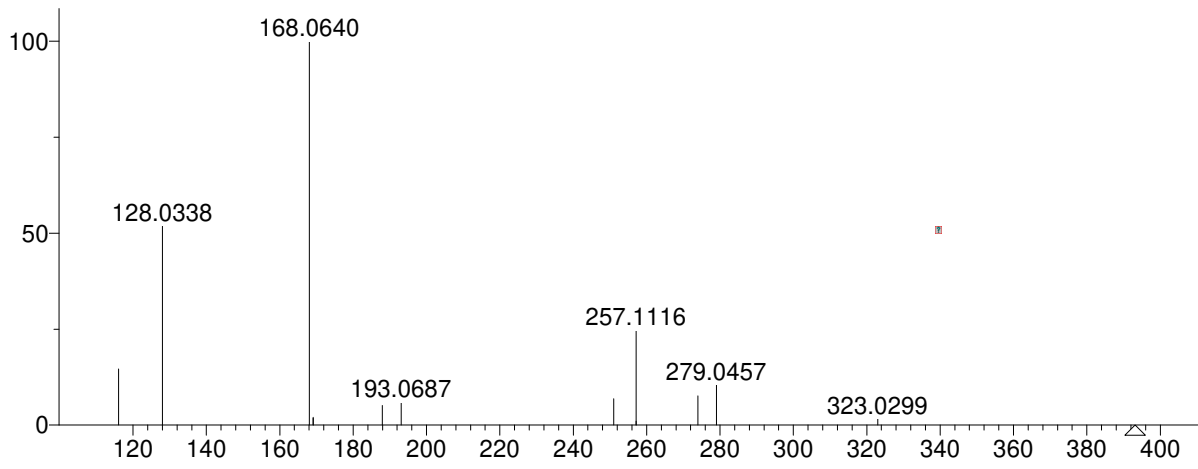

Unknown: Unknown (1.31\_200.0550m/z)  
Compound in Library Factor = -3273

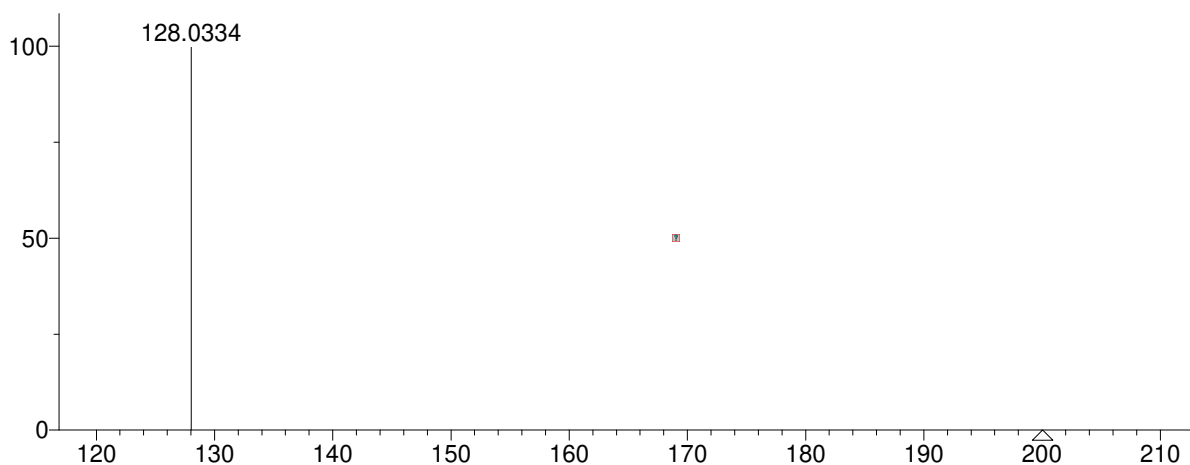

Hit 1 : O-Succinyl-L-homoserine [M-H-H<sub>2</sub>O]- HCD 26V P=200.1  
C<sub>8</sub>H<sub>13</sub>NO<sub>6</sub>; MF: 2; RMF: 190; Prob 100.0%; CAS: 1492-23-5; Lib: nist\_msms; ID: 125941.

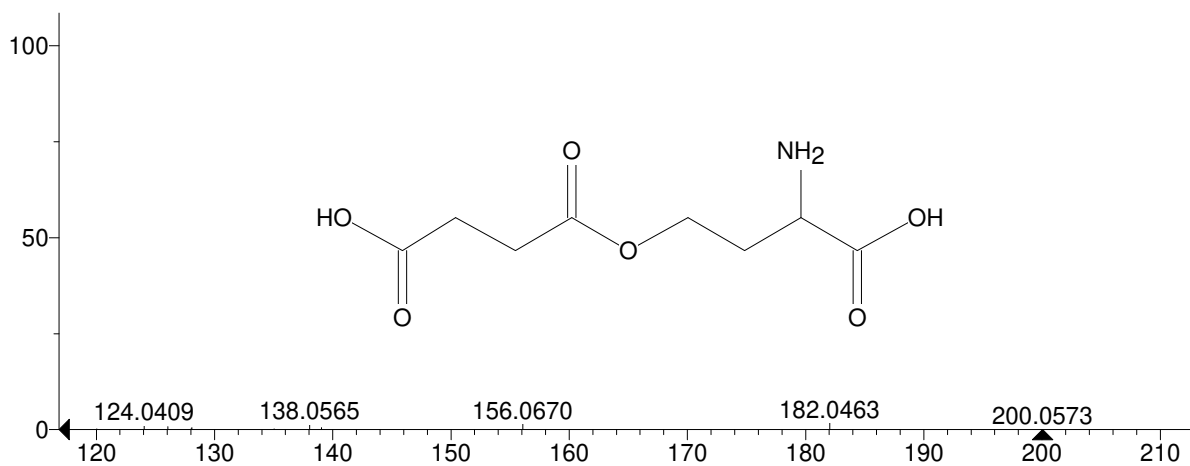

Unknown: Unknown (1.31\_257.1122m/z)  
Compound in Library Factor = -3273

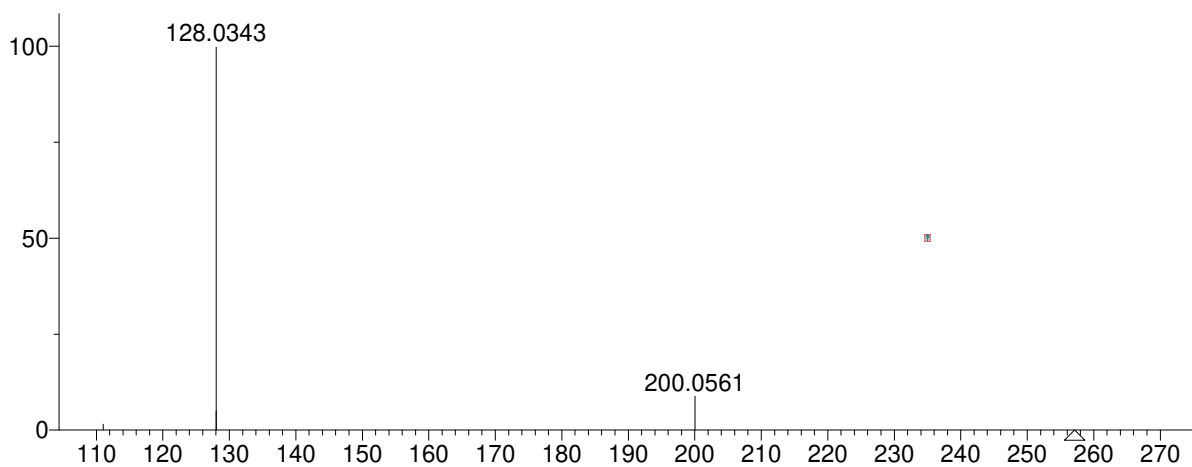

Hit 1 : L-Saccharopine [M-H-H<sub>2</sub>O]- HCD 46V P=257.1  
C<sub>11</sub>H<sub>20</sub>N<sub>2</sub>O<sub>6</sub>; MF: 6; RMF: 405; Prob 100.0%; CAS: 997-68-2; Lib: nist\_msms; ID: 125641.

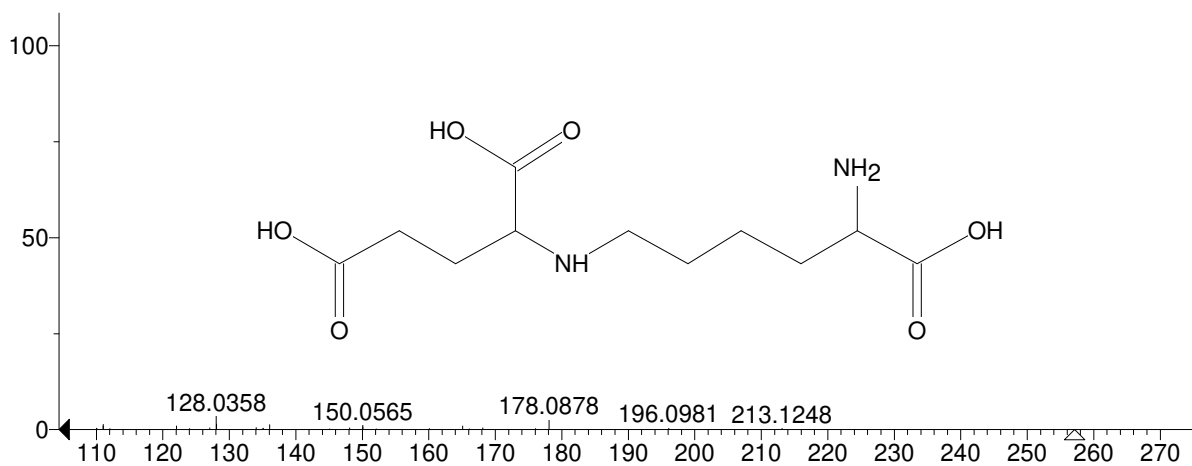

Unknown: Unknown (1.31\_261.0699m/z)  
Compound in Library Factor = 0

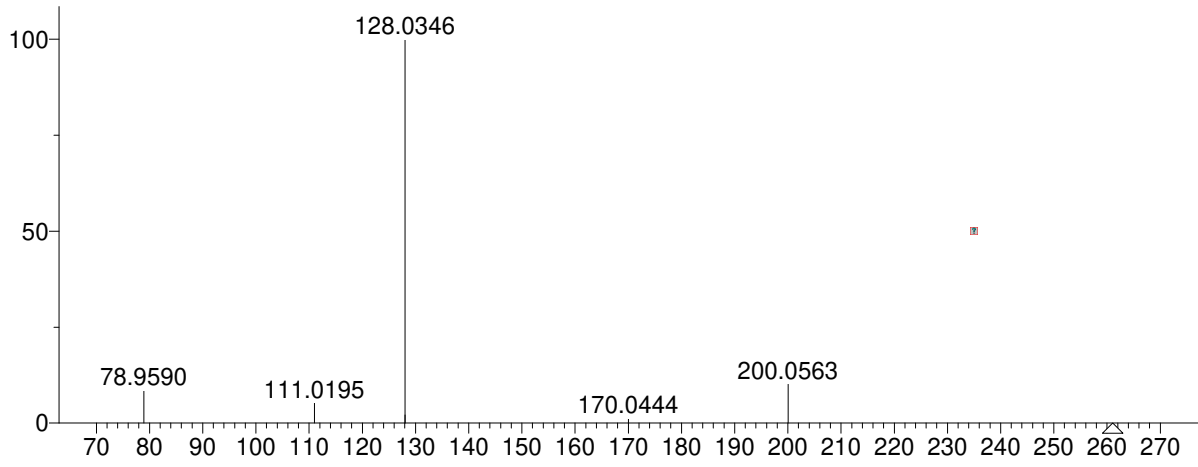



\*\* Search Report Page 1 of 2 \*\*

Unknown: Unknown (1.31\_290.0872m/z)  
Compound in Library Factor = -321

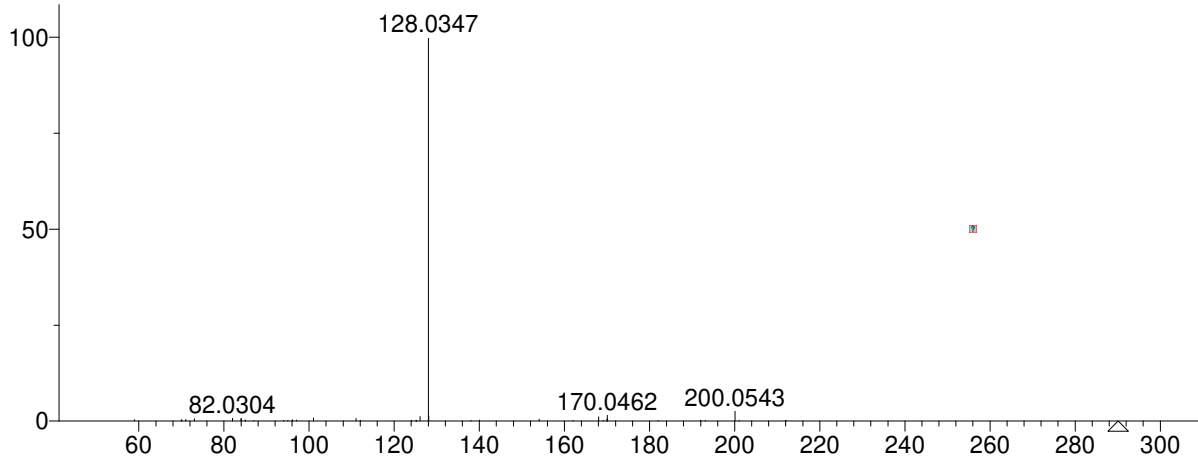

Hit 1 : N-Fructosyl pyroglutamate; PlaSMA ID-534 [M-H]<sup>-</sup> P=290.1  
C<sub>11</sub>H<sub>17</sub>NO<sub>8</sub>; MF: 284; RMF: 801; Prob 98.4%; Lib: biomsms-neg-plasma; ID: 480.

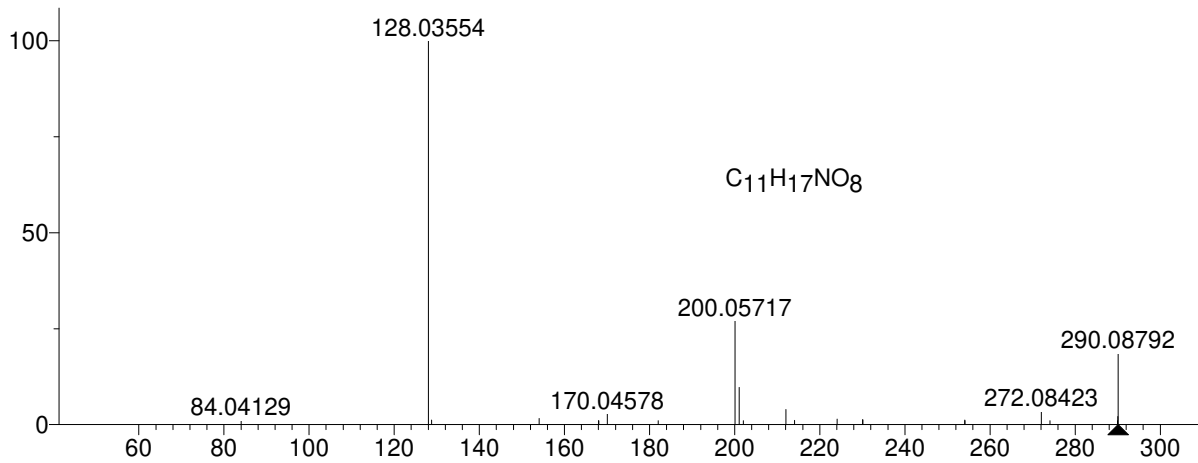

Hit 2 : (-)-N-Acetylneuraminic acid [M-H-H<sub>2</sub>O]<sup>-</sup> IT-FT 35% P=290.1  
C<sub>11</sub>H<sub>19</sub>NO<sub>9</sub>; MF: 81; RMF: 140; Prob 0.98%; CAS: 131-48-6; Lib: nist\_msms; ID: 479648.

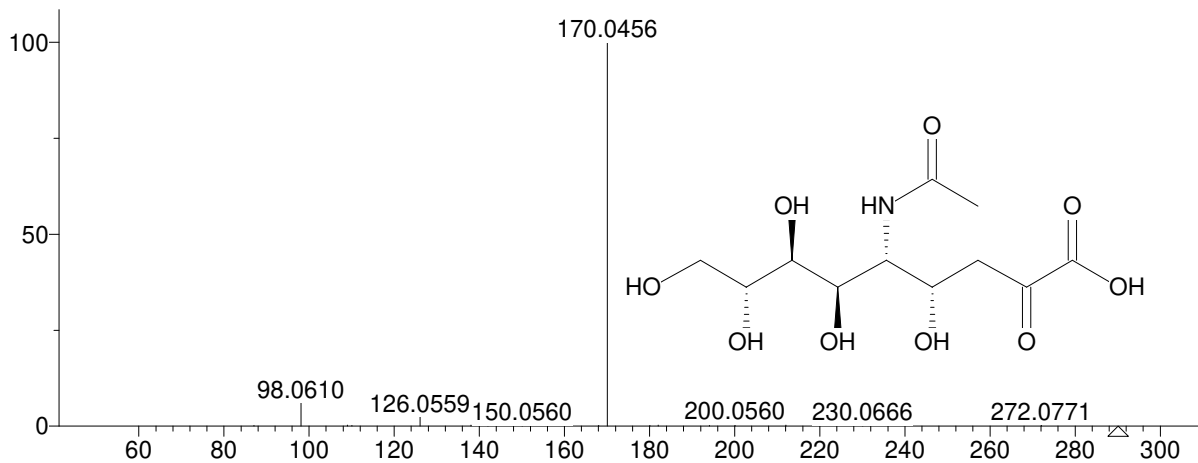

Hit 3 : N-Glycolylneuraminic acid [M+H-2H<sub>2</sub>O]<sup>+</sup> HCD 29V P=290.1  
C<sub>11</sub>H<sub>19</sub>NO<sub>10</sub>; MF: 47; RMF: 178; Prob 0.25%; CAS: 1113-83-3; Lib: nist\_msms; ID: 307260.

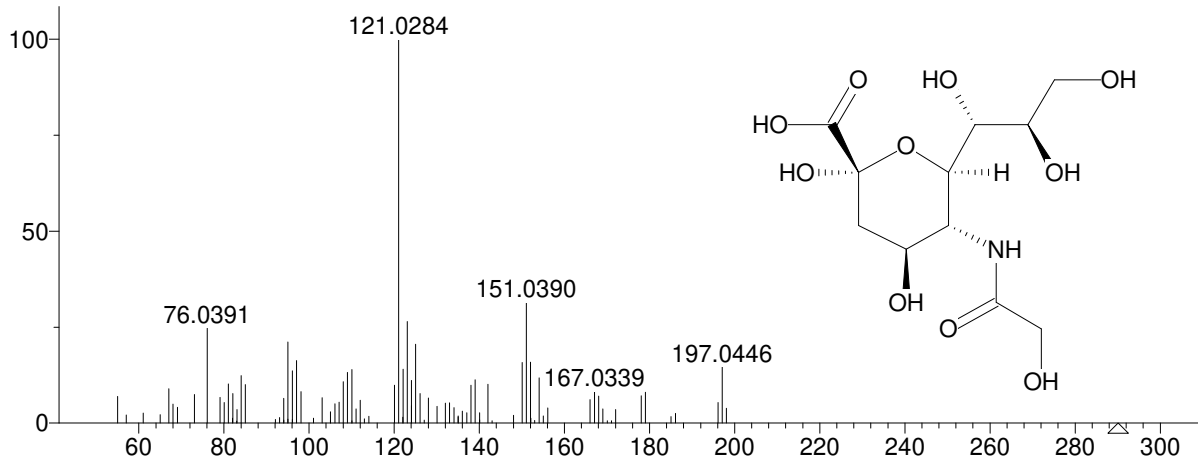

Hit 4 : 3'- $\alpha$ -Sialyl-N-acetylglucosamine [M-H-C<sub>14</sub>H<sub>25</sub>O<sub>11</sub>N]<sup>-</sup> IT-FT 35% P=290.1  
C<sub>25</sub>H<sub>42</sub>N<sub>2</sub>O<sub>19</sub>; MF: 44; RMF: 140; Prob 0.22%; CAS: 81693-22-3; Lib: nist\_msms; ID: 211511.

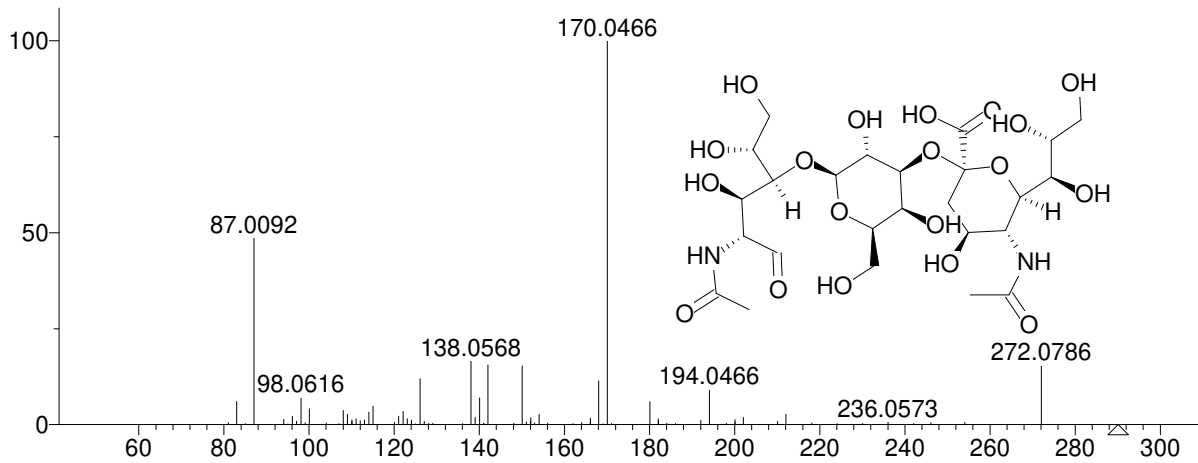

Hit 5 : 2'-Deoxyguanosine [M+Na]<sup>+</sup> HCD 43V P=290.1  
C<sub>10</sub>H<sub>13</sub>N<sub>5</sub>O<sub>4</sub>; MF: 0; RMF: 23; Prob 0.04%; CAS: 961-07-9; Lib: nist\_msms; ID: 303937.

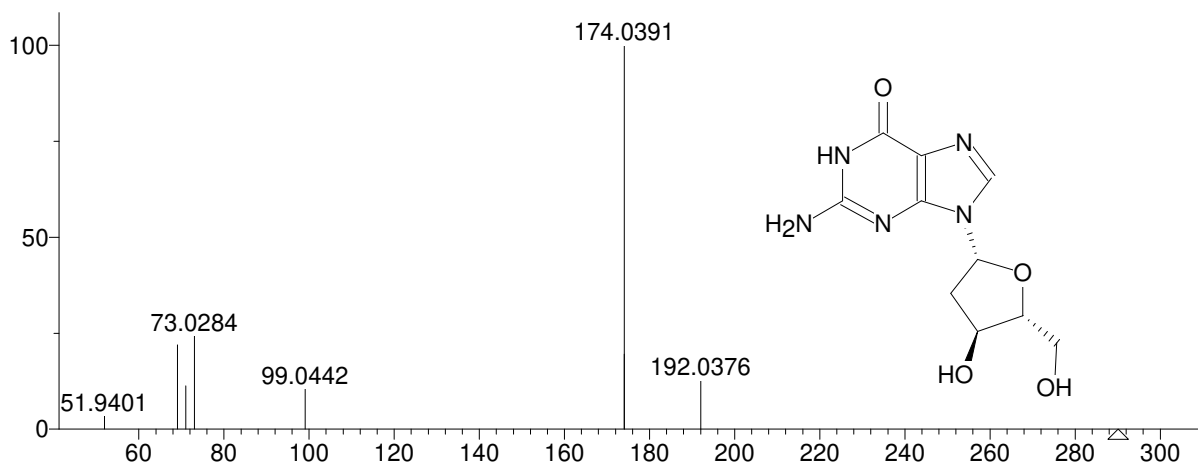

Unknown: Unknown (1.31\_323.0278m/z)  
Compound in Library Factor = -404

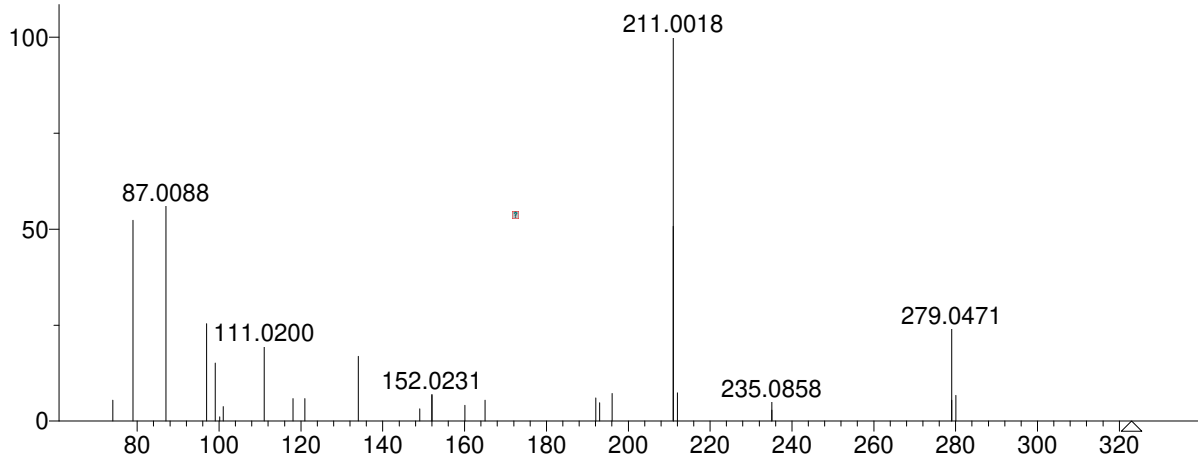

Hit 1 : 1-β-D-Arabinofuranosyluracil 5'-monophosphate [M-H]<sup>-</sup> HCD 35V P=323  
C<sub>9</sub>H<sub>13</sub>N<sub>2</sub>O<sub>9</sub>P; MF: 283; RMF: 526; Prob 42.9%; CAS: 18354-06-8; Lib: nist\_msms; ID: 447572.

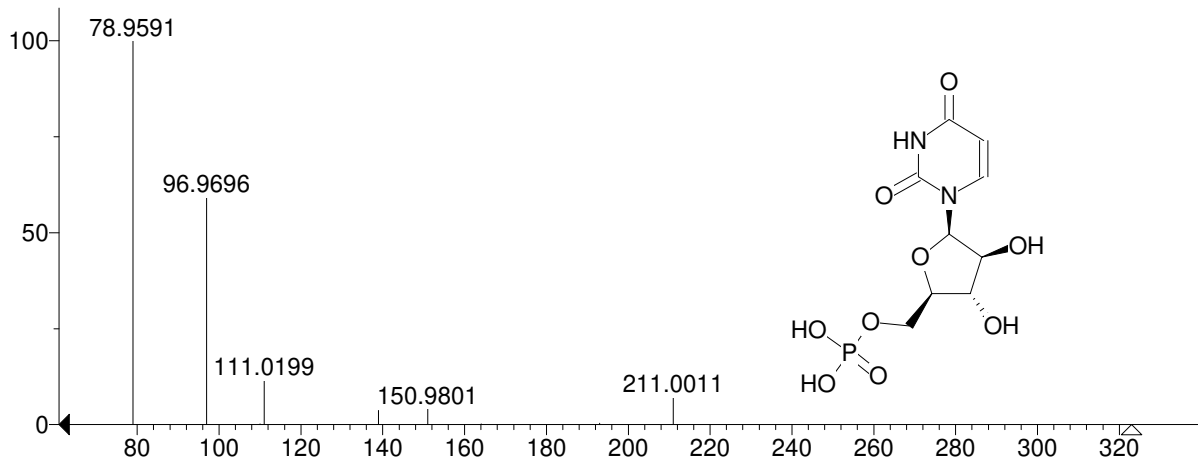

Hit 2 : Uridine 5'-diphosphoglucuronic acid [M-H-C<sub>6</sub>H<sub>9</sub>O<sub>9</sub>P]<sup>-</sup> HCD 41V P=323  
C<sub>15</sub>H<sub>22</sub>N<sub>2</sub>O<sub>18</sub>P<sub>2</sub>; MF: 263; RMF: 476; Prob 19.6%; CAS: 2616-64-0; Lib: nist\_msms; ID: 486425.

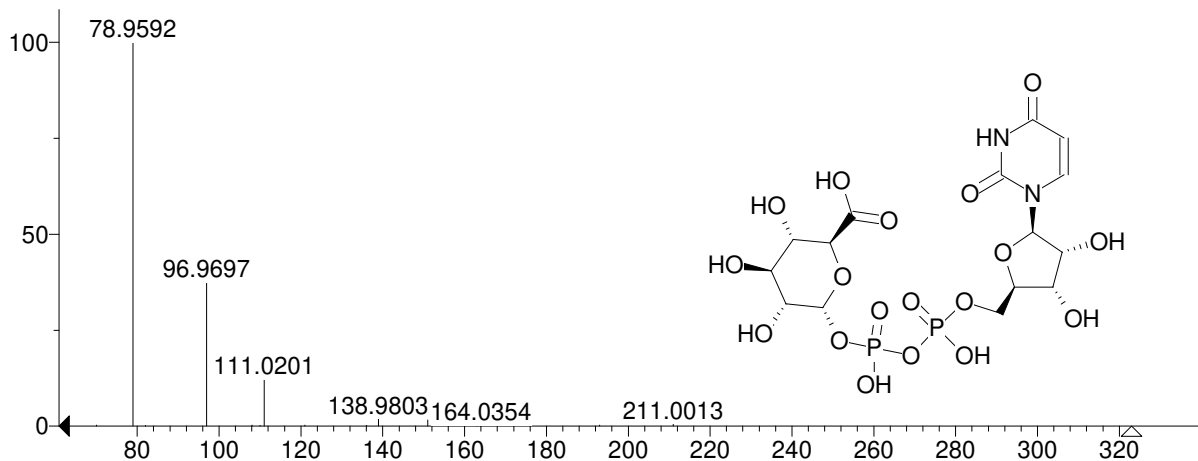

Hit 3 : URIDINE-5-MONOPHOSPHATE

C<sub>9</sub>H<sub>13</sub>N<sub>2</sub>O<sub>9</sub>P; MF: 257; RMF: 520; Prob 15.4%; Lib: embl neg mcg; ID: 631.

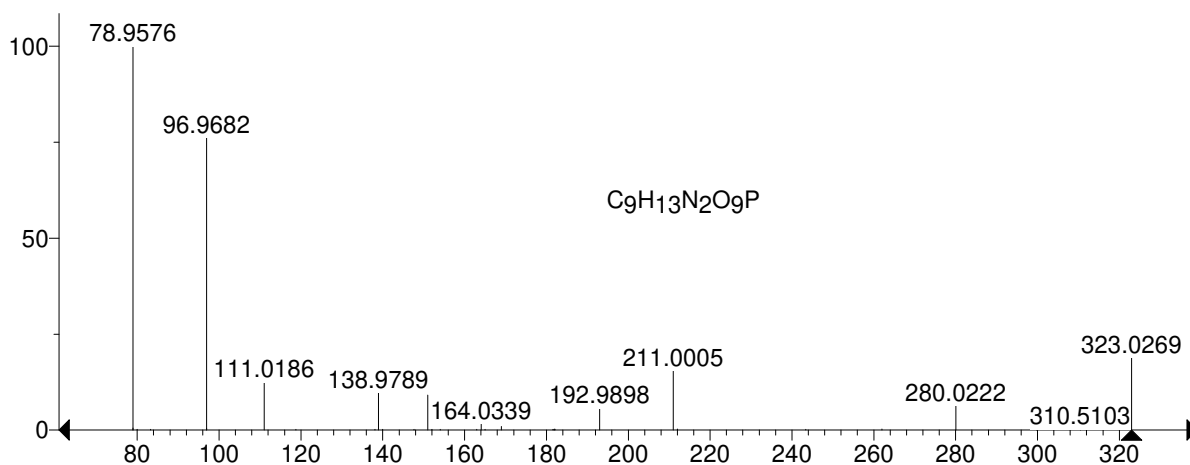

Hit 4 : Uridine 5'-monophosphate [M-H]<sup>-</sup> HCD 41V P=323

C<sub>9</sub>H<sub>13</sub>N<sub>2</sub>O<sub>9</sub>P; MF: 256; RMF: 466; Prob 14.8%; CAS: 58-97-9; Lib: nist\_msms; ID: 126179.

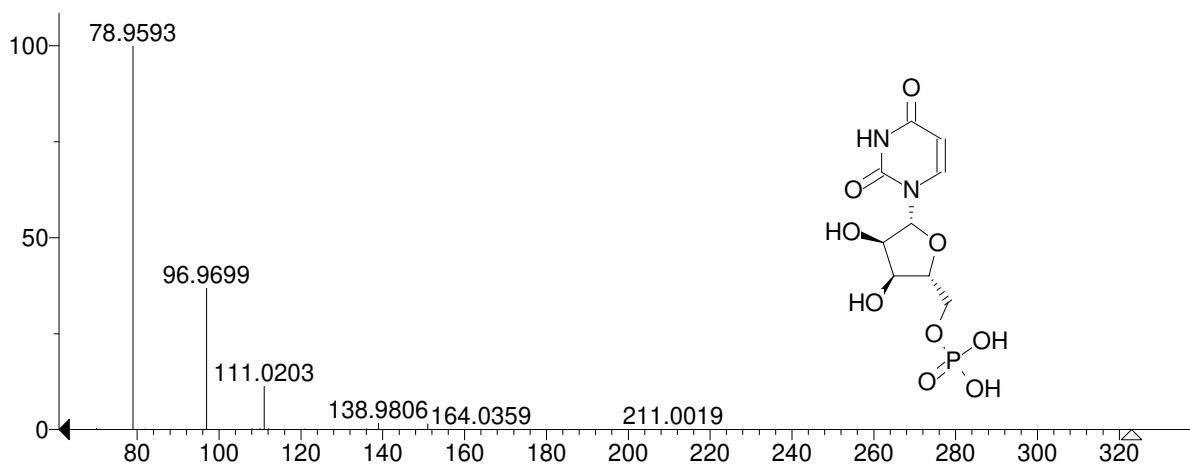

Hit 5 : URIDINE-5-MONOPHOSPHATE [M-H]<sup>-</sup> P=323

C<sub>9</sub>H<sub>13</sub>N<sub>2</sub>O<sub>9</sub>P; MF: 237; RMF: 513; Prob 7.17%; Lib: mona-export-gnps; ID: 5550.

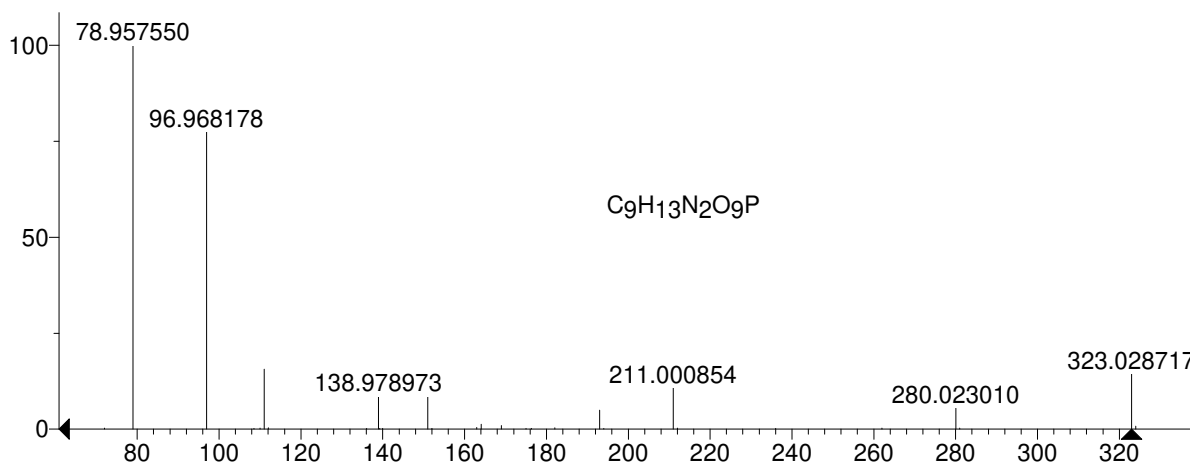

Unknown: Unknown (1.31\_419.1612m/z)  
Compound in Library Factor = 0

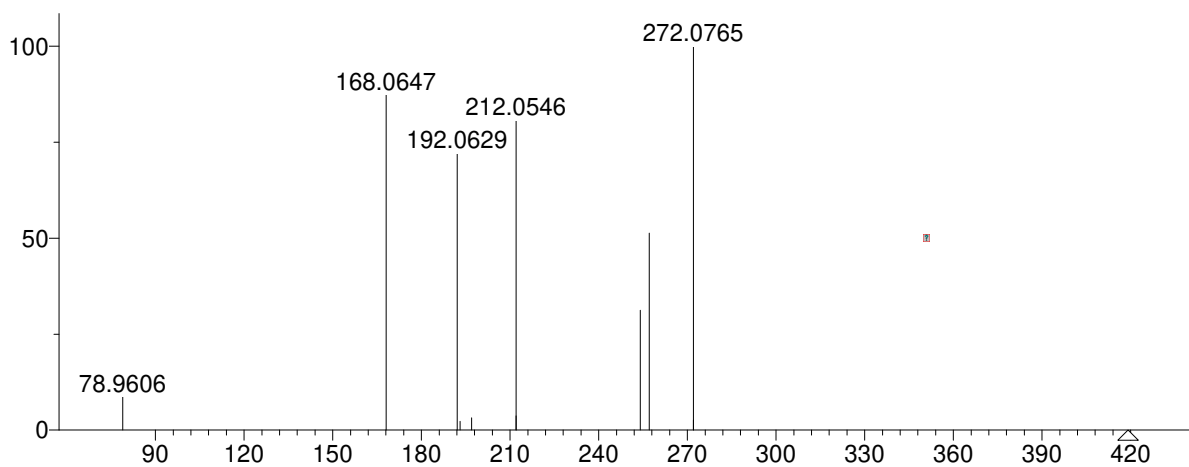

Hit 1 : NCGC00380324-01\_C<sub>23</sub>H<sub>29</sub>ClO<sub>5</sub>\_Benzaldehyde, 3-chloro-4,6-dihydroxy-2-methyl-5-[(2E,6E)-3-methyl-7-C<sub>23</sub>H<sub>29</sub>ClO<sub>5</sub>; MF: 0; RMF: 17; Prob 100.0%; Lib: msms-neg-gnps; ID: 1853.

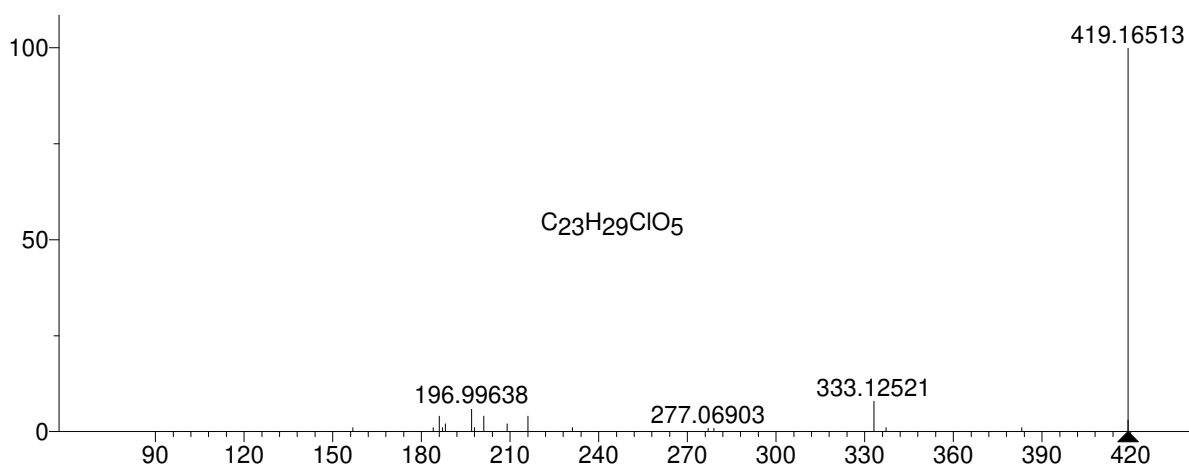

\*\* Search Report Page 1 of 2 \*\*

Unknown: Unknown (1.31\_440.1719m/z)  
Compound in Library Factor = 0

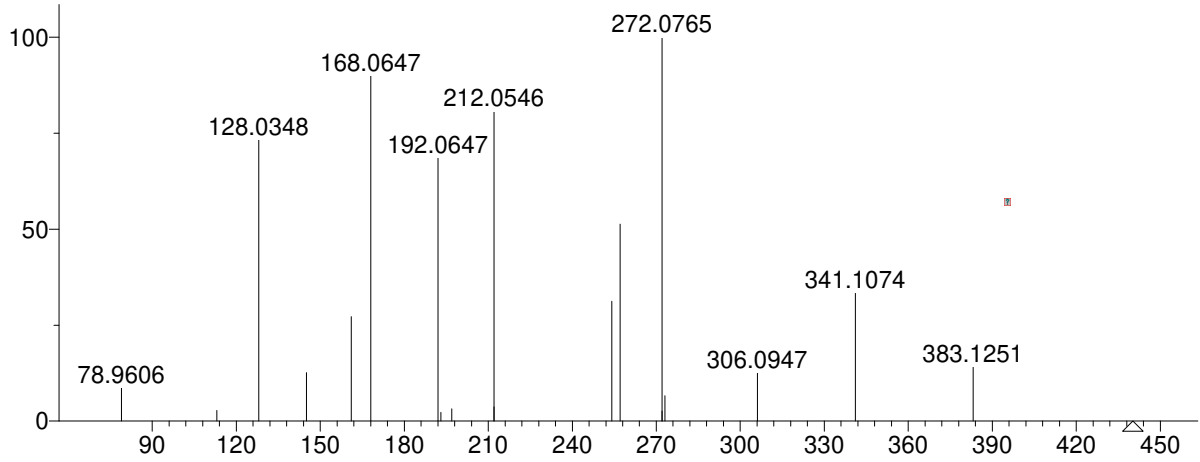

Hit 1 : Quinadoline B\_130007 [M+H]<sup>+</sup> P=440.2  
C<sub>25</sub>H<sub>21</sub>N<sub>5</sub>O<sub>3</sub>; MF: 0; RMF: 35; Prob 25.0%; Lib: mona-export-gnps; ID: 4995.

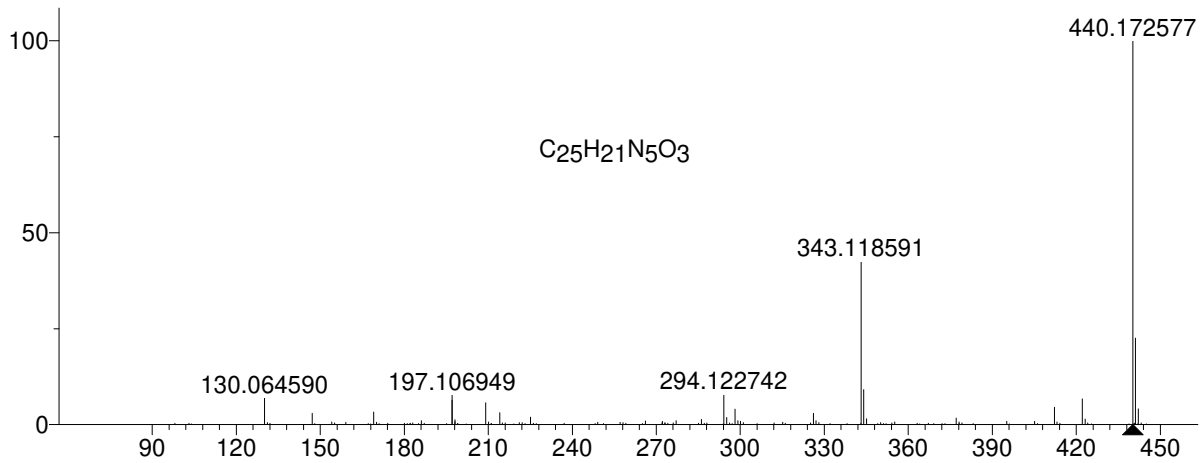

Hit 2 : \_130033 [M+Na]<sup>+</sup> P=440.2  
C<sub>22</sub>H<sub>27</sub>NO<sub>7</sub>; MF: 0; RMF: 26; Prob 25.0%; Lib: mona-export-gnps; ID: 5009.

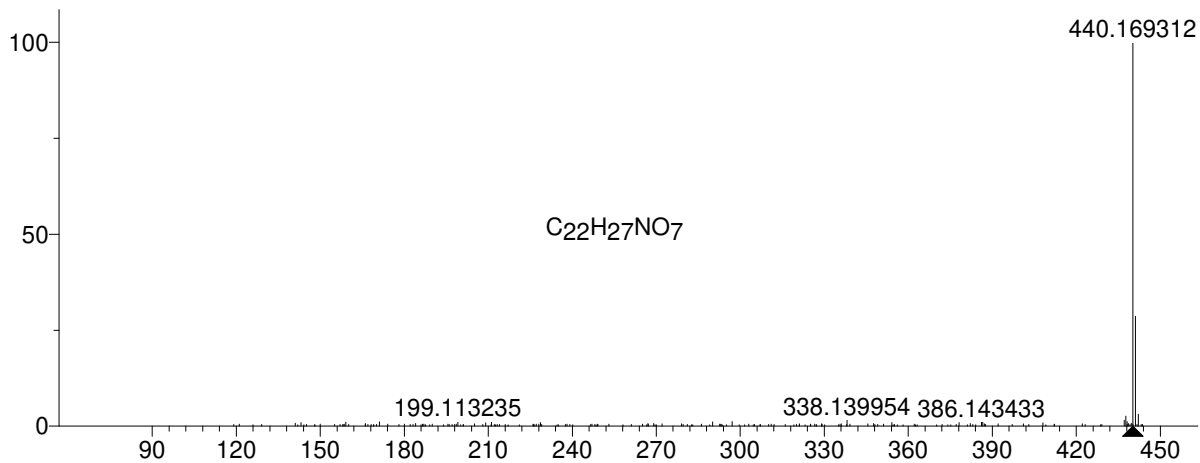

\*\* Search Report Page 2 of 2 \*\*

Hit 3 : Platensimycin [M-H]<sup>-</sup> HCD 57V P=440.2  
C<sub>24</sub>H<sub>27</sub>NO<sub>7</sub>; MF: 0; RMF: 5; Prob 25.0%; CAS: 835876-32-9; Lib: nist\_msms; ID: 265342.

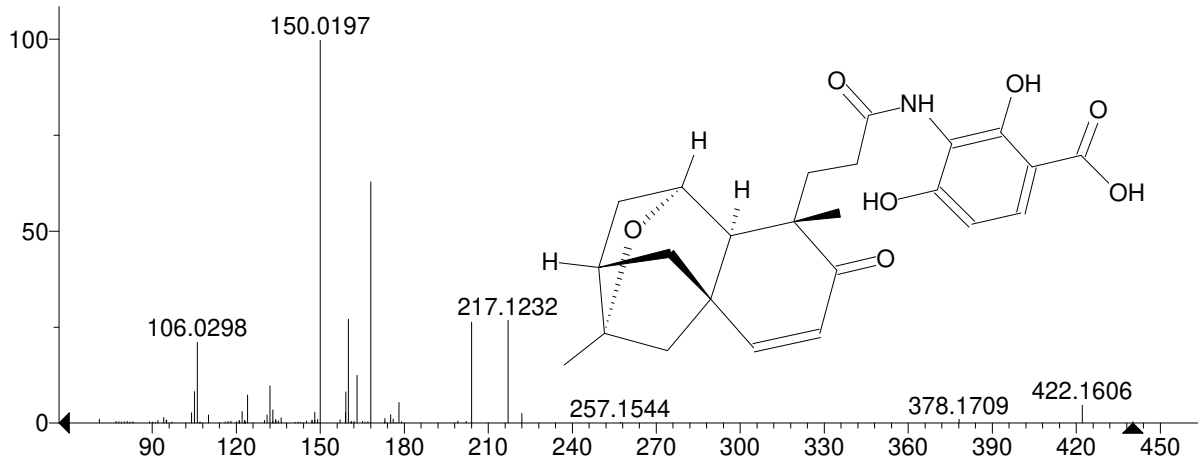

Hit 4 : NCGC00380314-01\_C<sub>22</sub>H<sub>27</sub>NO<sub>7</sub>\_3,5,7,9-Undecatetraenoic acid, 2-ethylidene-11-[4-hydroxy-4-(2-hydroxy)C<sub>22</sub>H<sub>27</sub>NO<sub>7</sub>; MF: 0; RMF: 4; Prob 25.0%; Lib: mona-export-gnps; ID: 12420.

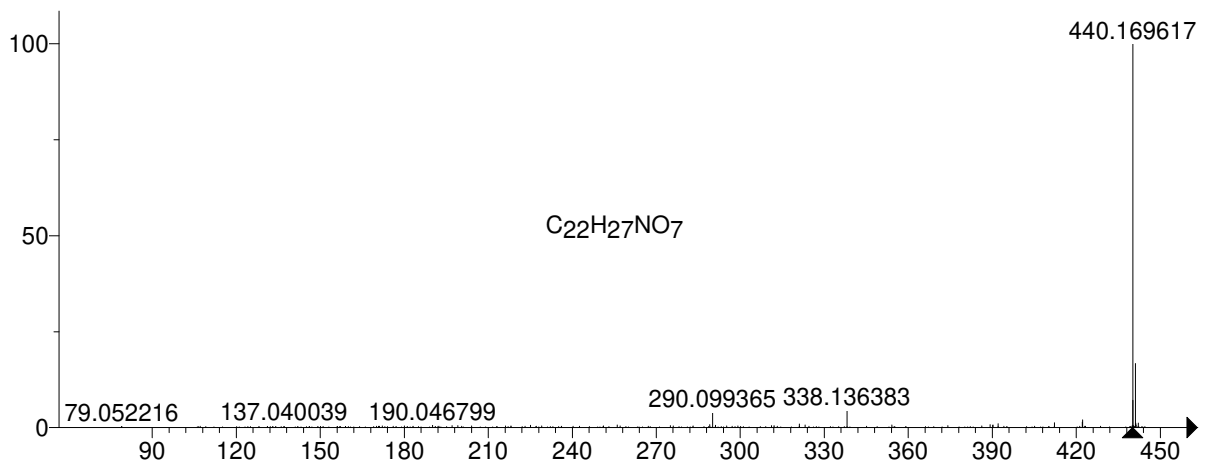

Unknown: Unknown (1.31\_452.1399m/z)  
Compound in Library Factor = 0

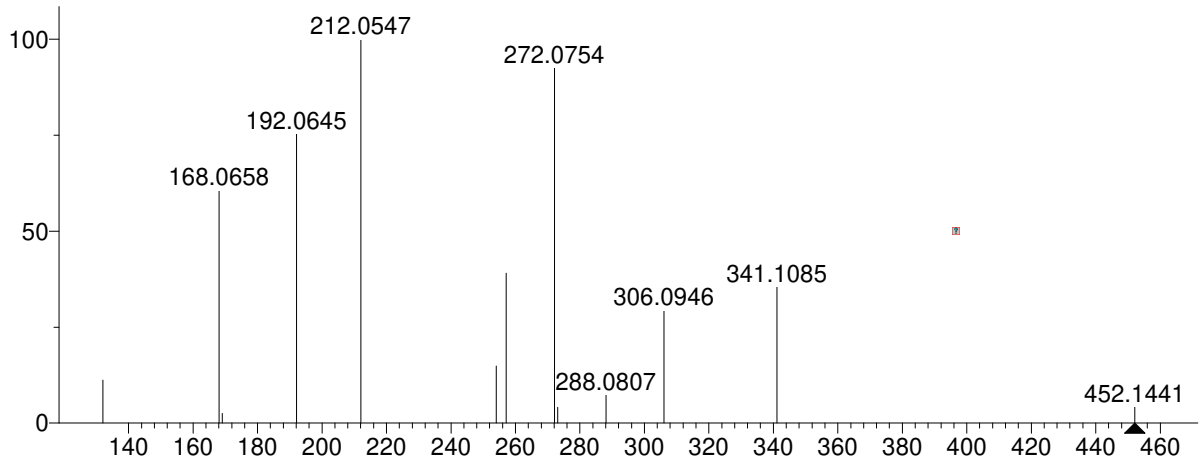



Unknown: Unknown (1.32\_191.0186m/z)  
Compound in Library Factor = -1042

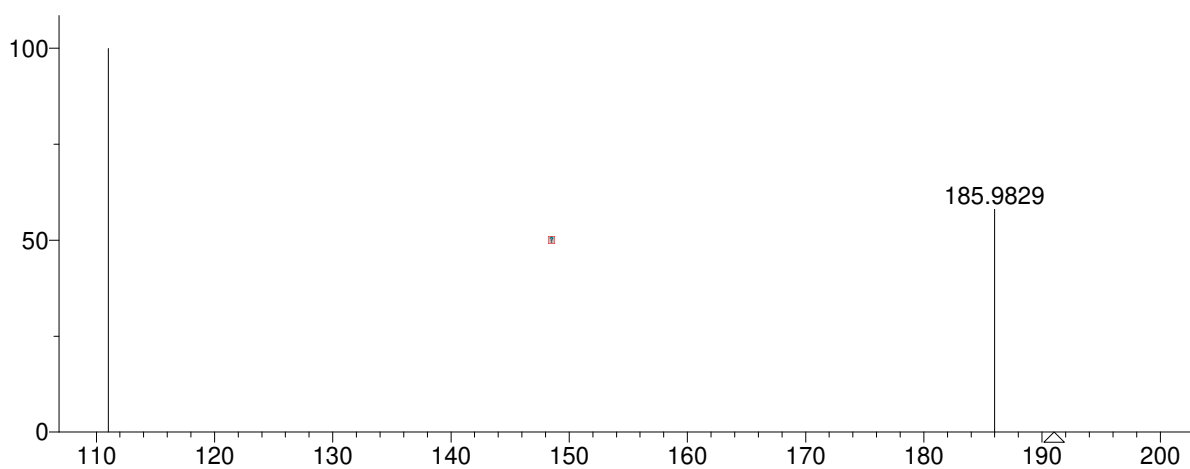

Hit 1 : Citric acid [M-H]- 20 P=191  
C<sub>6</sub>H<sub>8</sub>O<sub>7</sub>; MF: 273; RMF: 795; Prob 90.7%; Lib: msms neg mona\_ipb\_gnps\_plasma; ID: 1053.

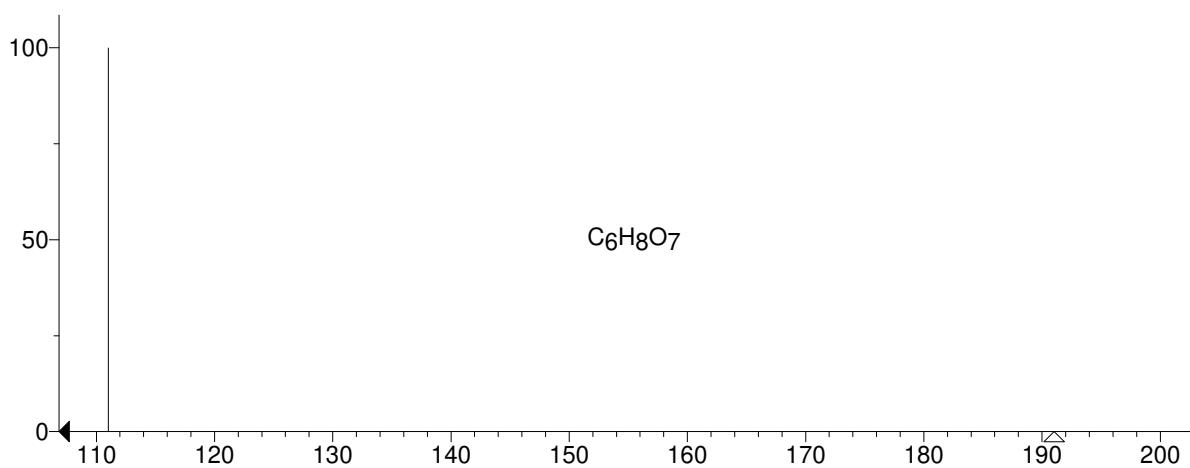

Hit 2 : Mucic acid [M-H-H<sub>2</sub>O]- HCD 30V P=191  
C<sub>6</sub>H<sub>10</sub>O<sub>8</sub>; MF: 152; RMF: 764; Prob 4.62%; CAS: 526-99-8; Lib: nist\_msms; ID: 303359.

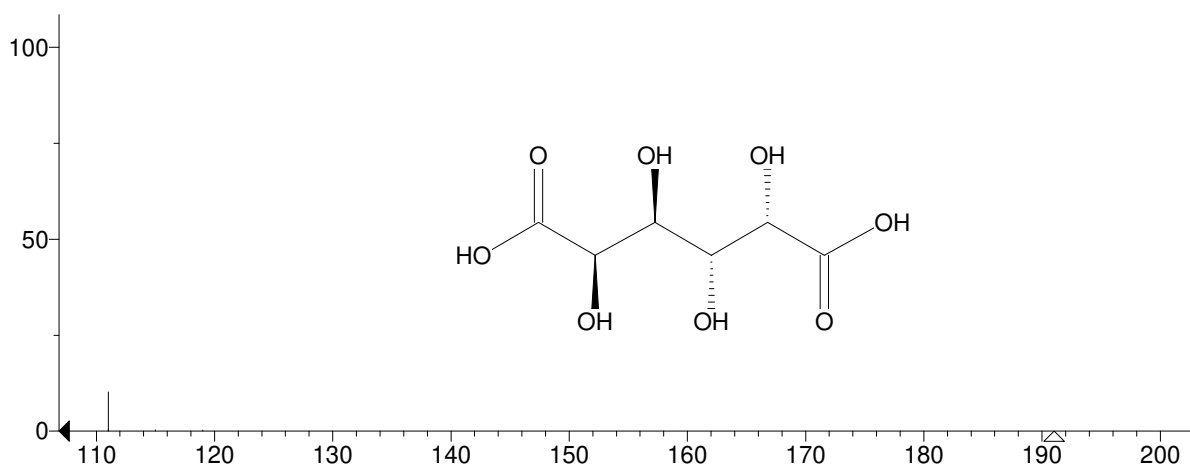

Hit 3 : citric acid [M-H]<sup>-</sup> 15 P=191  
C<sub>6</sub>H<sub>8</sub>O<sub>7</sub>; MF: 117; RMF: 765; Prob 1.16%; Lib: msms neg mona\_ipb\_gnps\_plasma; ID: 1145.

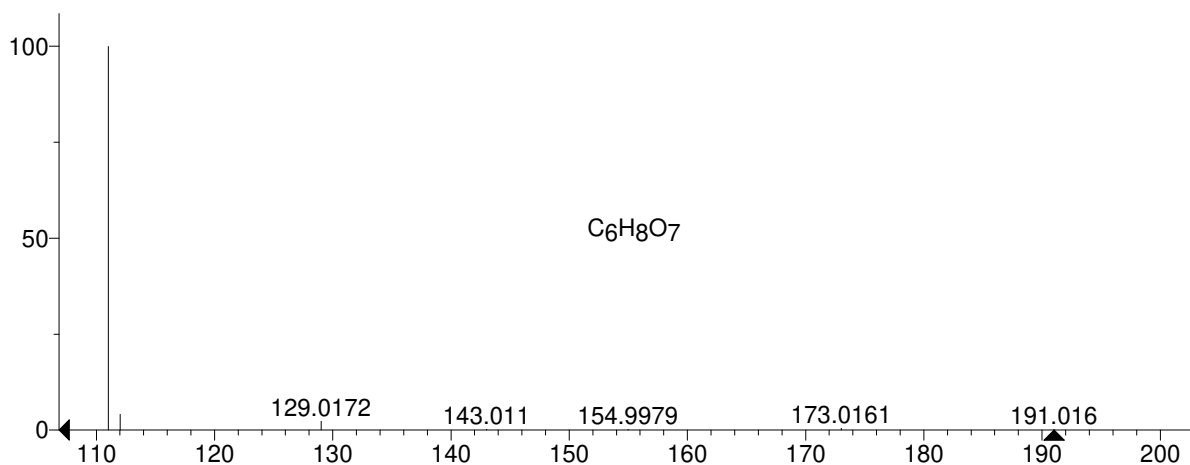

Hit 4 : Citric acid (Not validated, isomer of 228); PlaSMA ID-227 [M-H]<sup>-</sup> P=191  
C<sub>6</sub>H<sub>8</sub>O<sub>7</sub>; MF: 110; RMF: 729; Prob 0.88%; Lib: biomsms-neg-plasma; ID: 463.

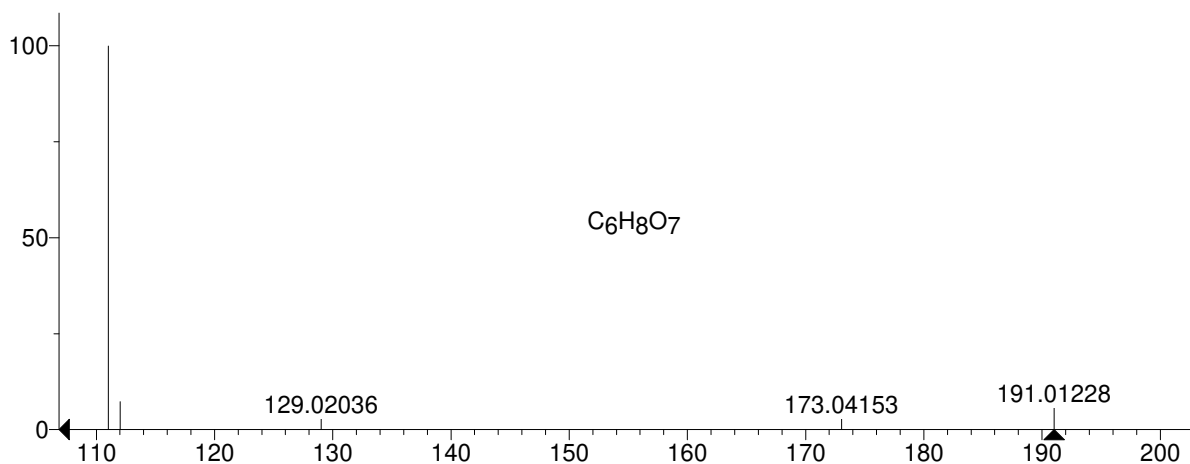

Hit 5 : CITRATE [M-H]<sup>-</sup> P=191  
C<sub>6</sub>H<sub>8</sub>O<sub>7</sub>; MF: 101; RMF: 711; Prob 0.64%; Lib: msms-neg-gnps; ID: 159.

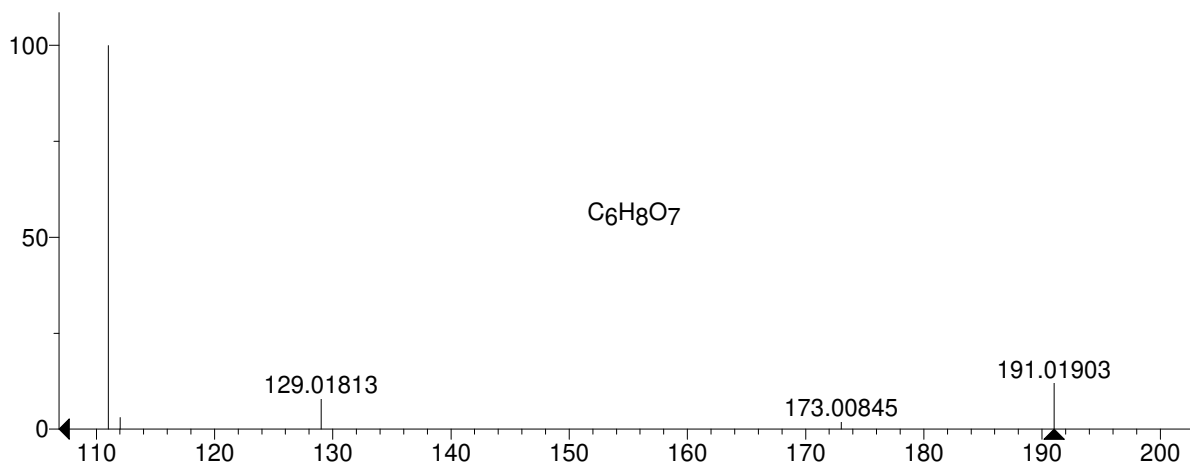

Unknown: Unknown (1.32\_323.0968m/z)  
Compound in Library Factor = 0

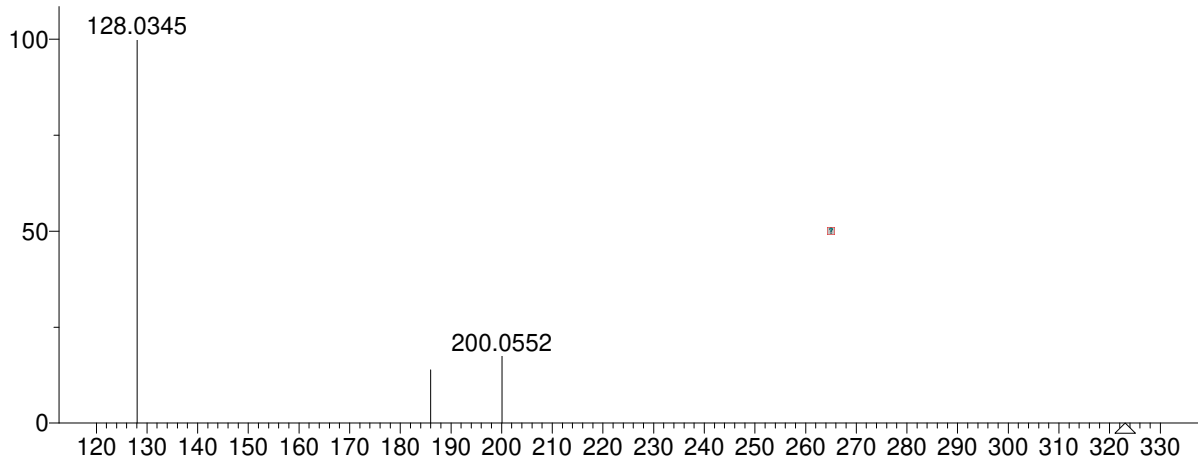

Hit 1 : Dinitramine [M+H]<sup>+</sup> HCD 103V P=323.1  
C<sub>11</sub>H<sub>13</sub>F<sub>3</sub>N<sub>4</sub>O<sub>4</sub>; MF: 0; RMF: 158; Prob 100.0%; CAS: 29091-05-2; Lib: nist\_msms; ID: 100130.

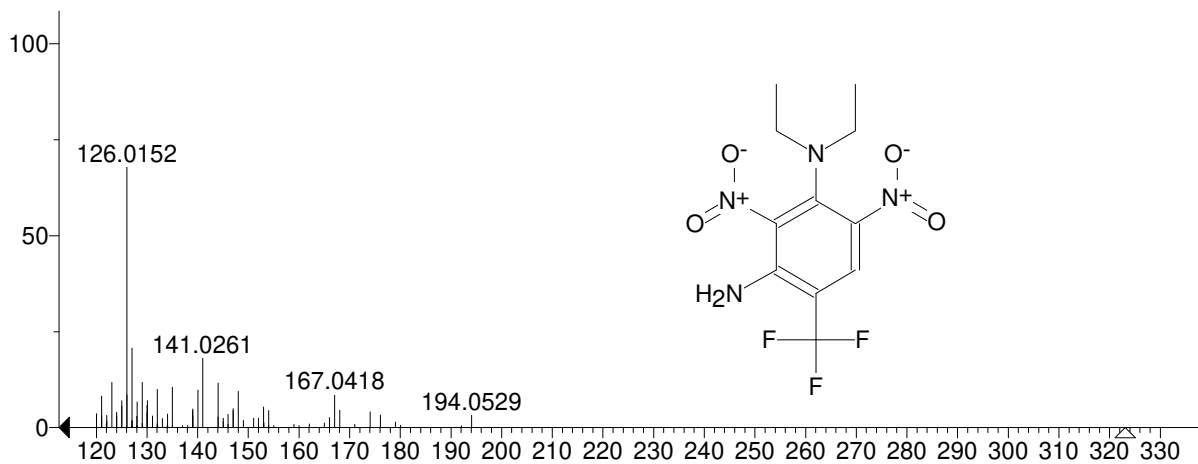

Unknown: Unknown (1.33\_476.1509m/z)  
Compound in Library Factor = 0

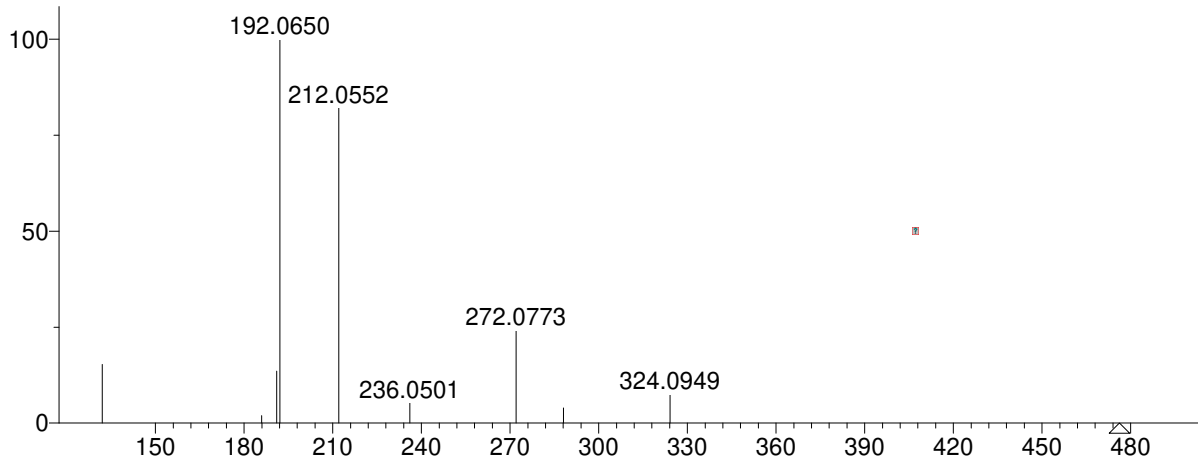

Unknown: Unknown (1.35\_275.0871m/z)  
Compound in Library Factor = 0

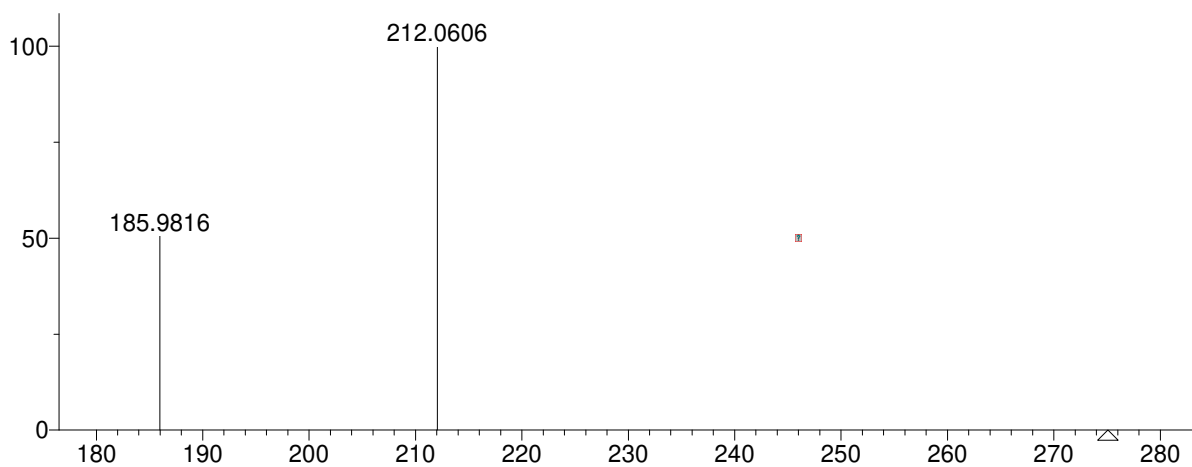

Hit 1 : NCGC00380856-01\_C13H16O5\_8-Methyl-3,4,6,10b-tetrahydropyrano[3,2-c]isochromene-4a,7,9(2H)-triol  
C13H16O5; MF: 0; RMF: 122; Prob 100.0%; Lib: mona-export-gnps; ID: 14363.

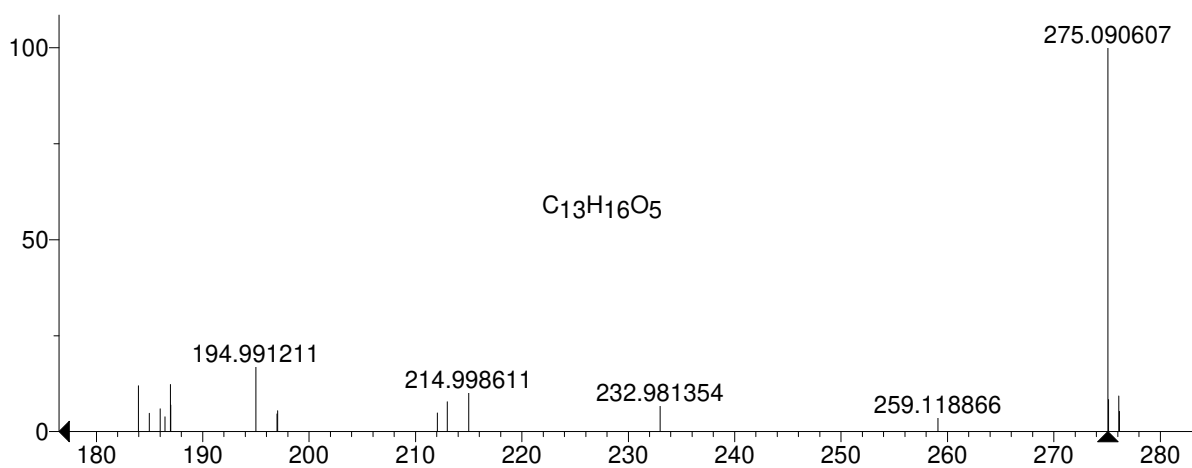

Unknown: Unknown (1.35\_476.1506m/z)  
Compound in Library Factor = 0

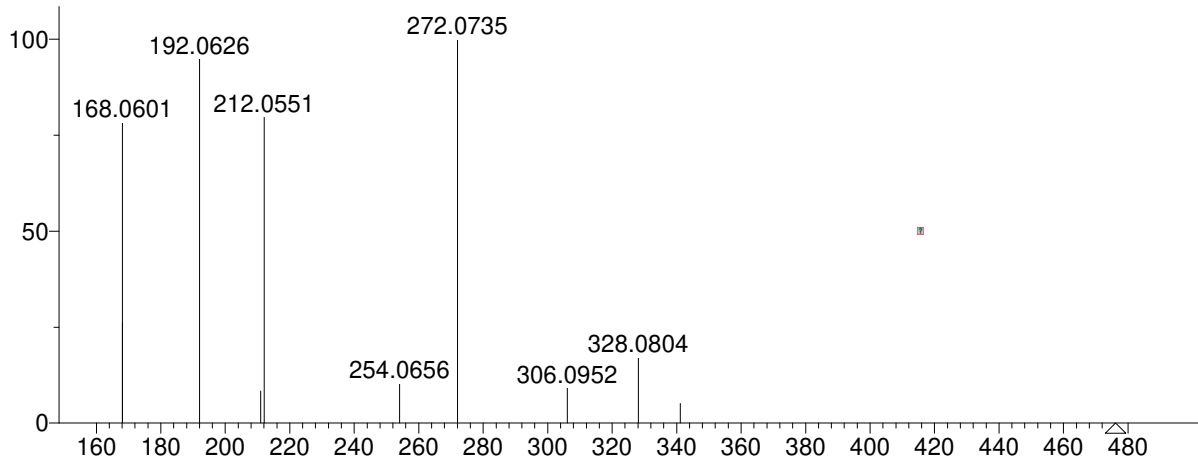

Unknown: Unknown (1.35\_863.2438m/z)  
Compound in Library Factor = -3273

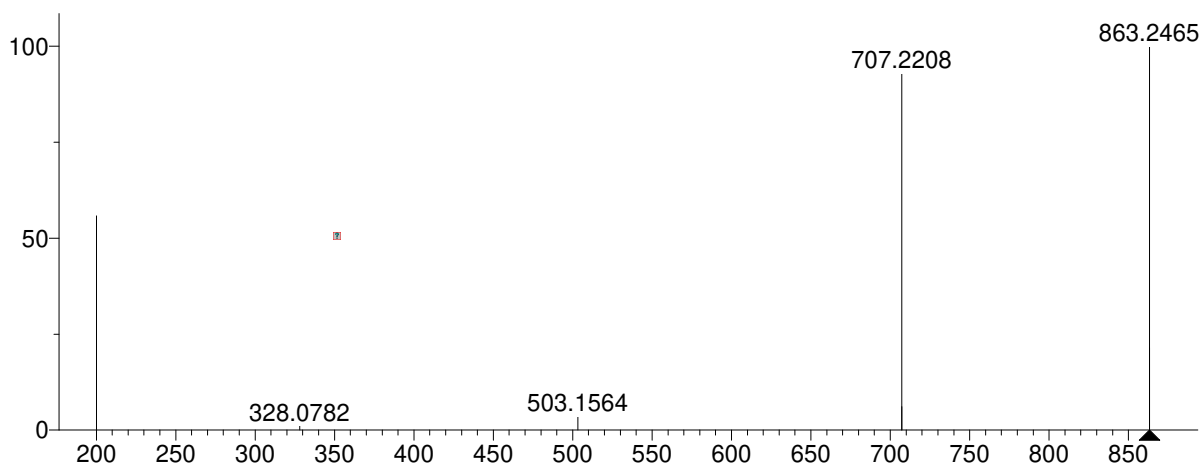

Hit 1 : [Phe10]  $\beta$ -Amyloid (1-40) [M+5H]<sup>5+</sup> QTOF 3V P=863.2  
C<sub>194</sub>H<sub>295</sub>N<sub>53</sub>O<sub>57</sub>S; MF: 1; RMF: 152; Prob 51.0%; Lib: nist\_msms2; ID: 36926.

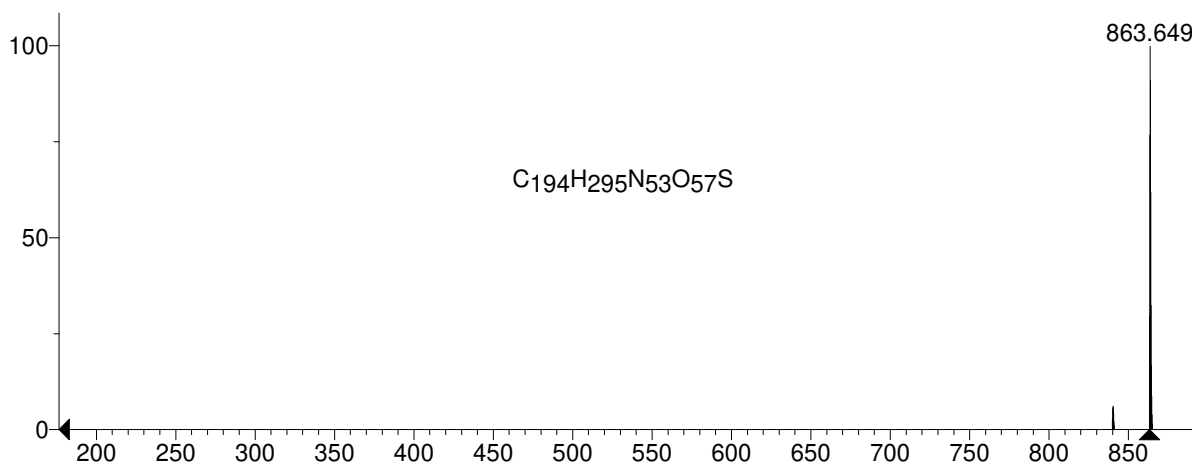

Hit 2 : Genistin [2M-H]<sup>-</sup> 35% P=863.2  
C<sub>21</sub>H<sub>20</sub>O<sub>10</sub>; MF: 0; RMF: 37; Prob 49.0%; Lib: mona-export-itree; ID: 3973.

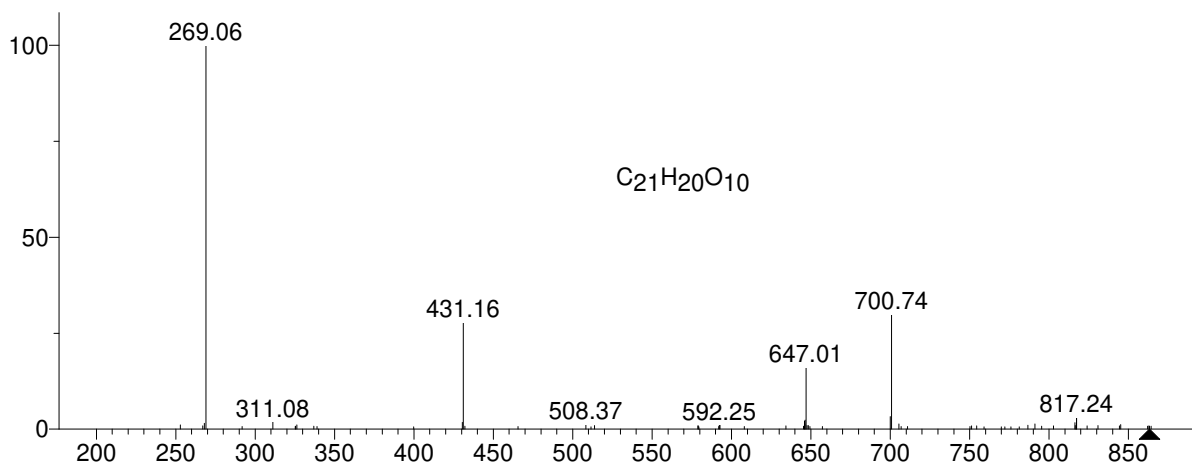

Unknown: Unknown (1.37\_541.1368m/z)  
Compound in Library Factor = 0

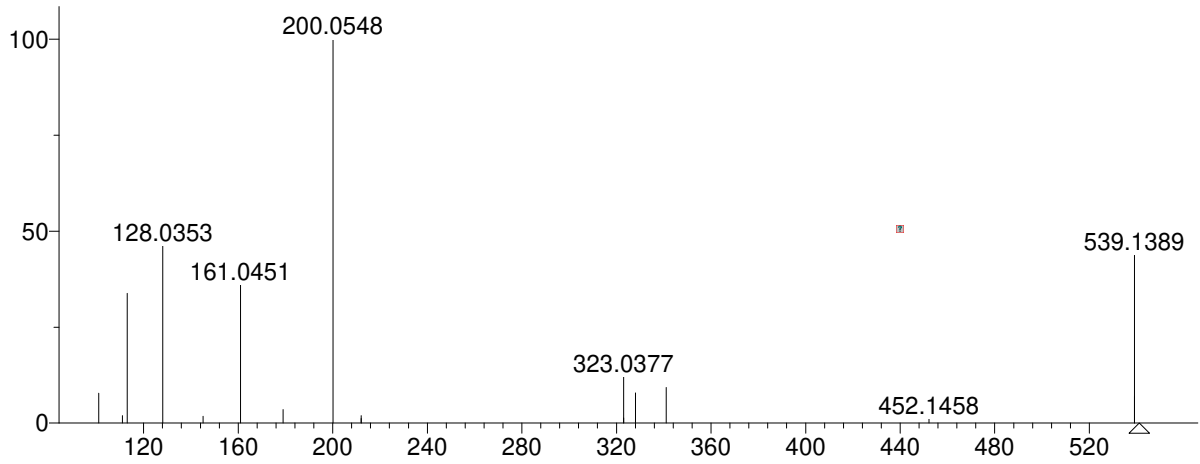





Hit 3 : 7-[3-[(2R,3R,4R)-3,4-dihydroxy-4-(hydroxymethyl)oxolan-2-yl]oxy-4,5-dihydroxy-6-(hydroxymethyl)oxan-2-yl]oxy-4,5-dihydroxy-6-(hydroxymethyl)oxan-2-yl  
C<sub>27</sub>H<sub>30</sub>O<sub>13</sub>; MF: 0; RMF: 2; Prob 31.4%; Lib: mona-export-vf-npl\_qexactive; ID: 17025.

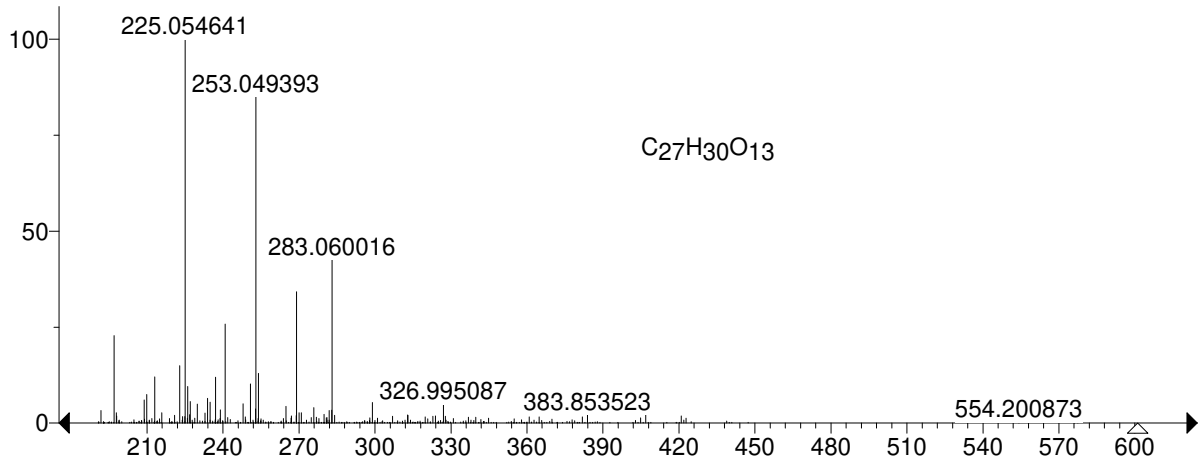

\*\* Search Report Page 1 of 2 \*\*

Unknown: Unknown (1.40\_521.1263m/z)  
Compound in Library Factor = 0

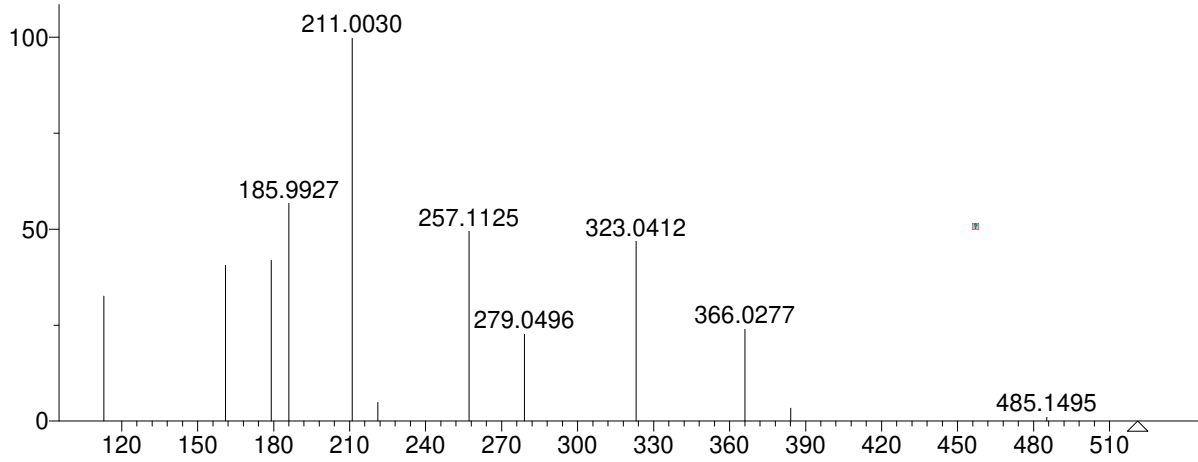

Hit 1 : Iridin [M-H]- 65HCD P=521.1  
C<sub>24</sub>H<sub>26</sub>O<sub>13</sub>; MF: 0; RMF: 37; Prob 14.3%; Lib: mona anthocyanidin-o-glycosides; ID: 4756.

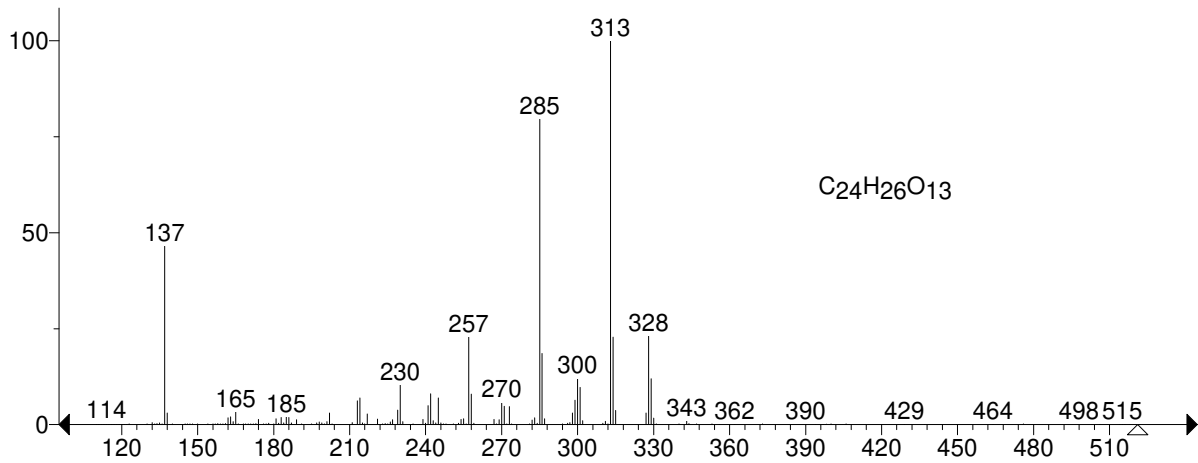

Hit 2 : verproside [M+Na]+ 35HCD P=521.1  
C<sub>22</sub>H<sub>26</sub>O<sub>13</sub>; MF: 0; RMF: 37; Prob 14.3%; Lib: mona-export-vf-npl\_qexactive; ID: 11986.

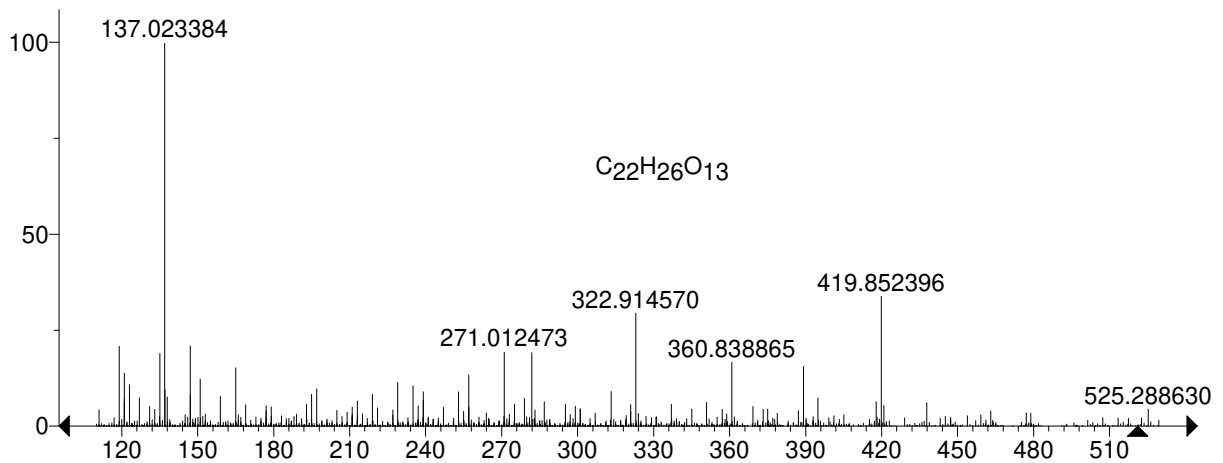

\*\* Search Report Page 2 of 2 \*\*

Hit 3 : 5-hydroxy-3-(5-hydroxy-2,4-dimethoxyphenyl)-6-methoxy-7-[3,4,5-trihydroxy-6-(hydroxymethyl)oxan-2-yl]ox  
C<sub>24</sub>H<sub>26</sub>O<sub>13</sub>; MF: 0; RMF: 30; Prob 14.3%; Lib: mona anthocyanidin-o-glycosides; ID: 9906.

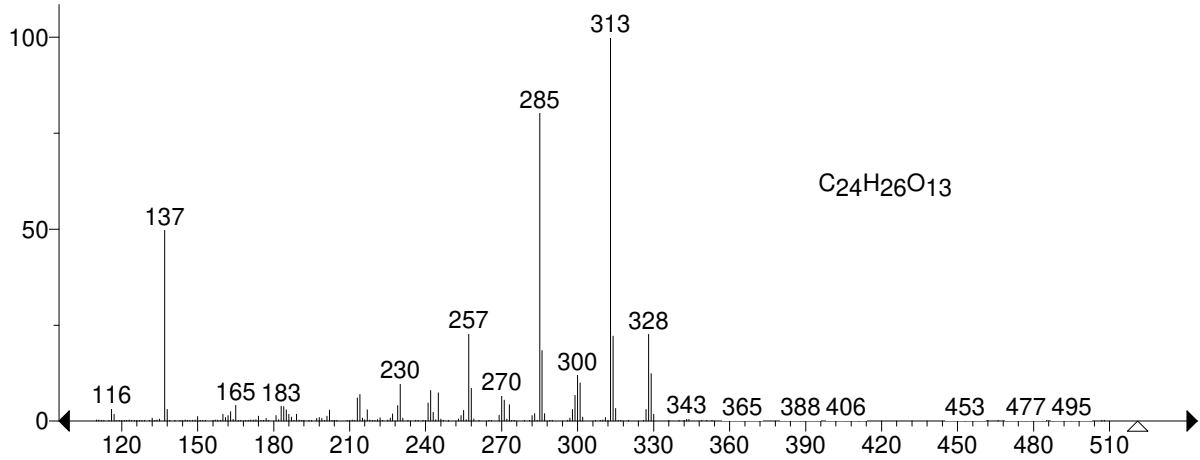

Hit 4 : NCGC00347847-02\_C<sub>22</sub>H<sub>26</sub>O<sub>13</sub>\_(1aS,1bS,2S,5aR,6S,6aS)-2-(beta-D-Glucopyranosyloxy)-1a-(hydroxym  
C<sub>22</sub>H<sub>26</sub>O<sub>13</sub>; MF: 0; RMF: 22; Prob 14.3%; Lib: mona-export-gnps; ID: 10988.

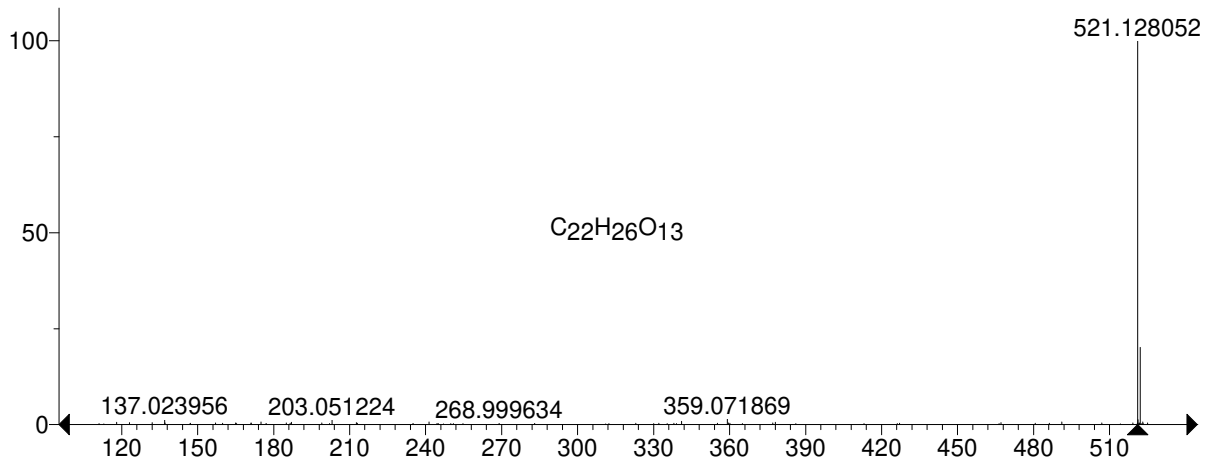

Hit 5 : [2-(3,4-dihydroxyphenyl)-5-hydroxy-7-methoxy-4-oxo-3-[(2S,3R,4R,5R,6S)-3,4,5-trihydroxy-6-methyloxan-2  
C<sub>24</sub>H<sub>24</sub>O<sub>13</sub>; MF: 0; RMF: 20; Prob 14.3%; Lib: mona anthocyanidin-o-glycosides; ID: 9408.

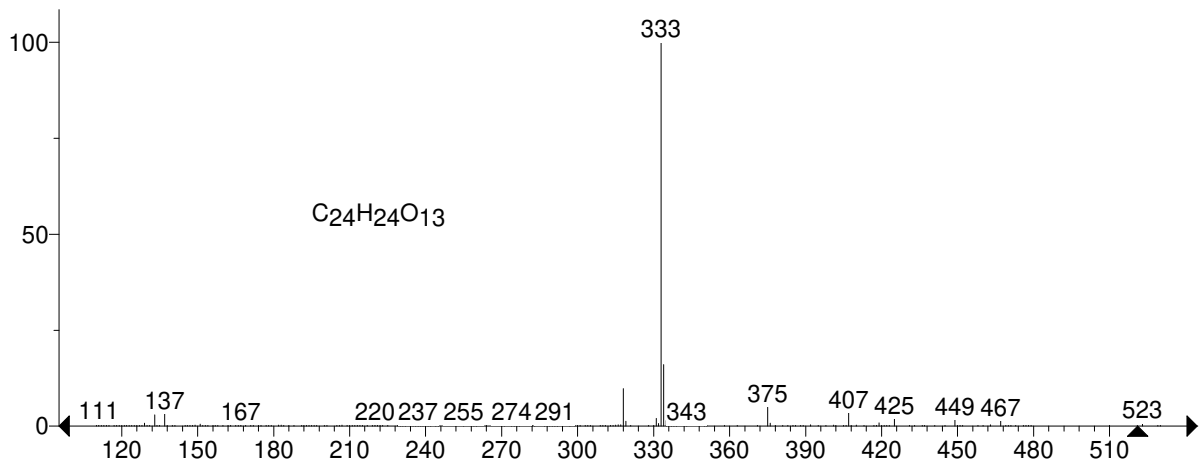

Unknown: Unknown (1.42\_470.1496m/z)  
Compound in Library Factor = 0

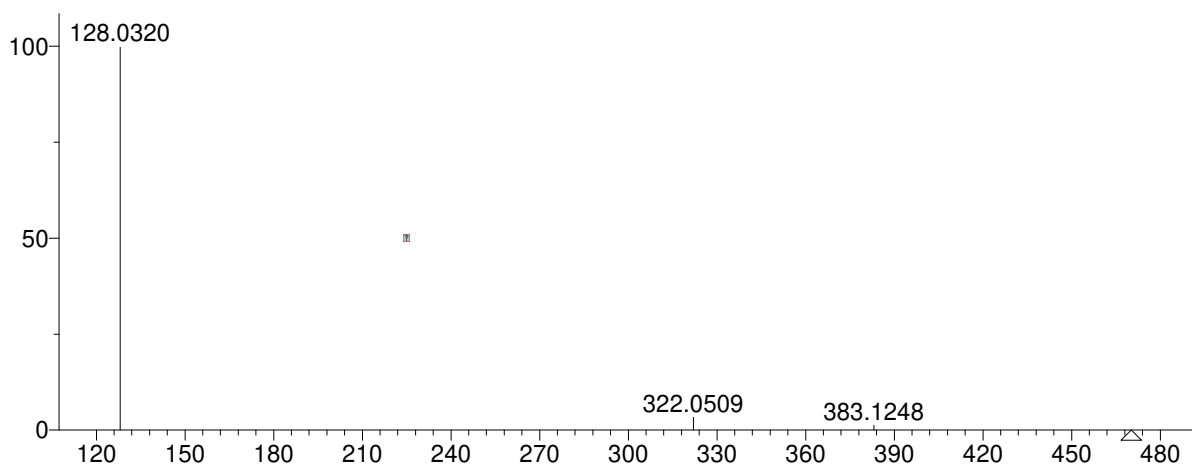

Hit 1 : 6-Sialylgalactose [M-H]<sup>-</sup> HCD 42V P=470.2  
C17H29NO14; MF: 0; RMF: 32; Prob 100.0%; CAS: 35259-23-5; Lib: nist\_msms; ID: 532909.

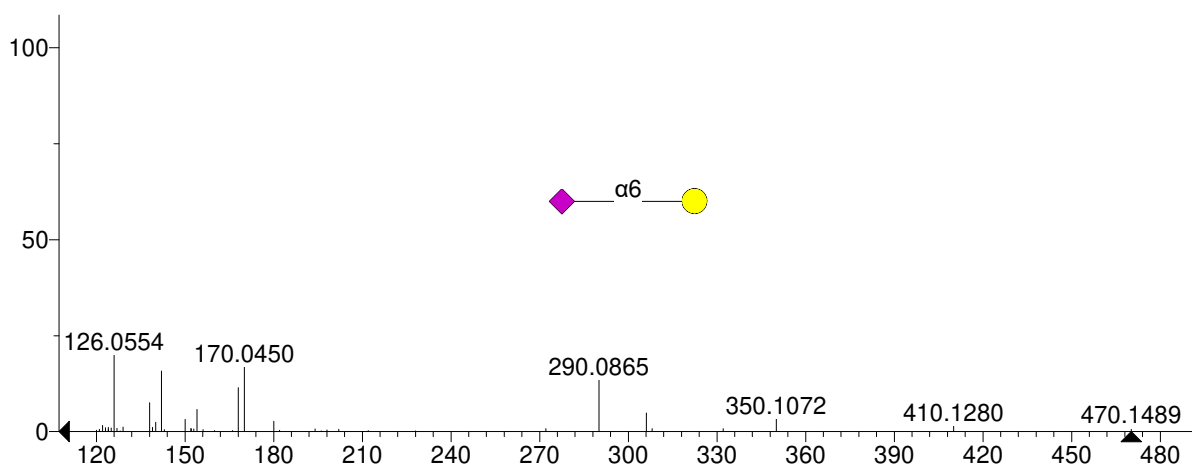

Unknown: Unknown (1.42\_539.1376m/z)  
Compound in Library Factor = 586

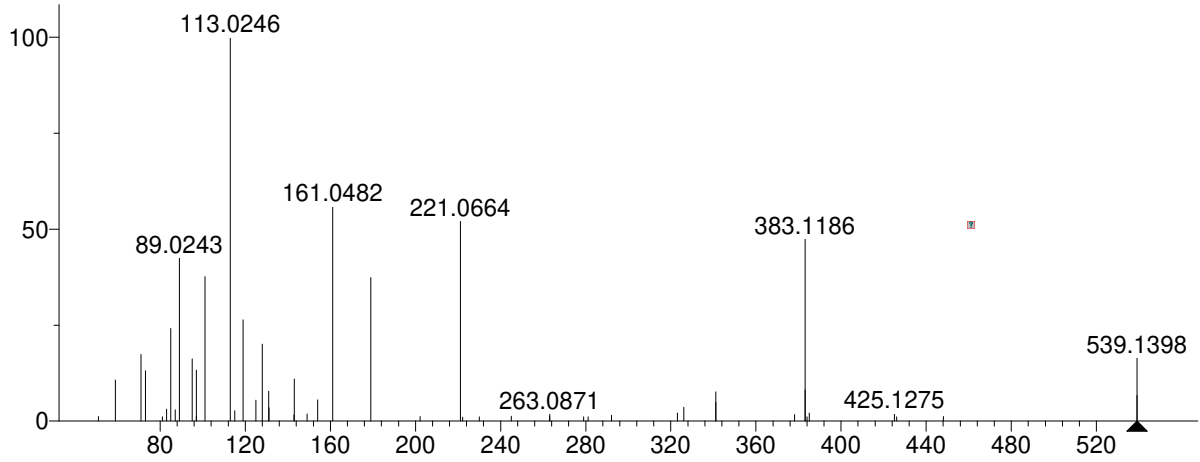

Hit 1 : Maltotriose [M+Cl]<sup>-</sup> HCD 37V P=539.1  
C18H32O16; MF: 811; RMF: 837; Prob 56.0%; CAS: 1109-28-0; Lib: nist\_msms; ID: 478094.



Hit 2 : 3'-Galactosyllactose [M+Cl]<sup>-</sup> HCD 37V P=539.1  
C18H32O16; MF: 779; RMF: 824; Prob 15.0%; CAS: 32694-82-9; Lib: nist\_msms; ID: 533314.

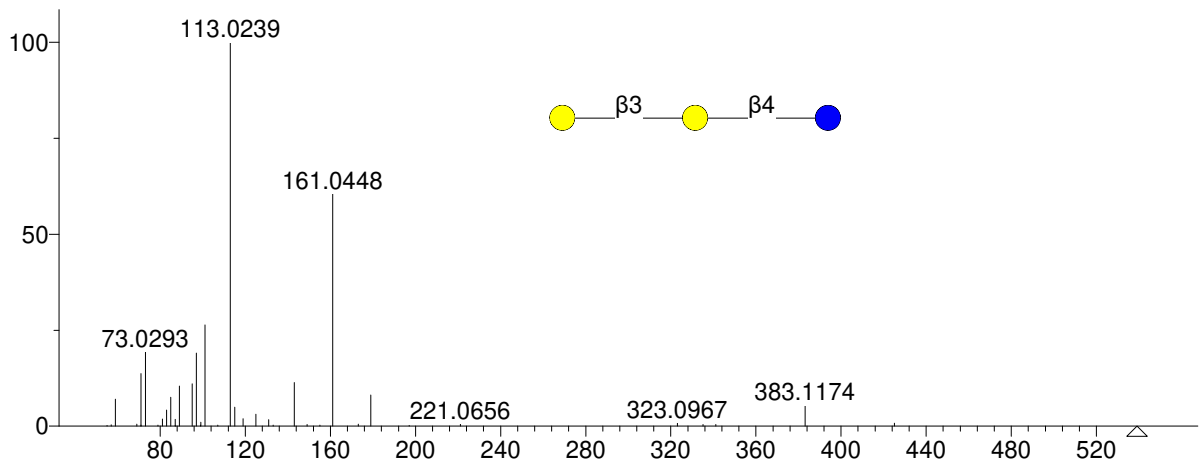

Hit 3 : Manninotriose [M+Cl]<sup>-</sup> HCD 37V P=539.1  
C<sub>18</sub>H<sub>32</sub>O<sub>16</sub>; MF: 767; RMF: 803; Prob 9.96%; CAS: 13382-86-0; Lib: nist\_msms; ID: 531274.

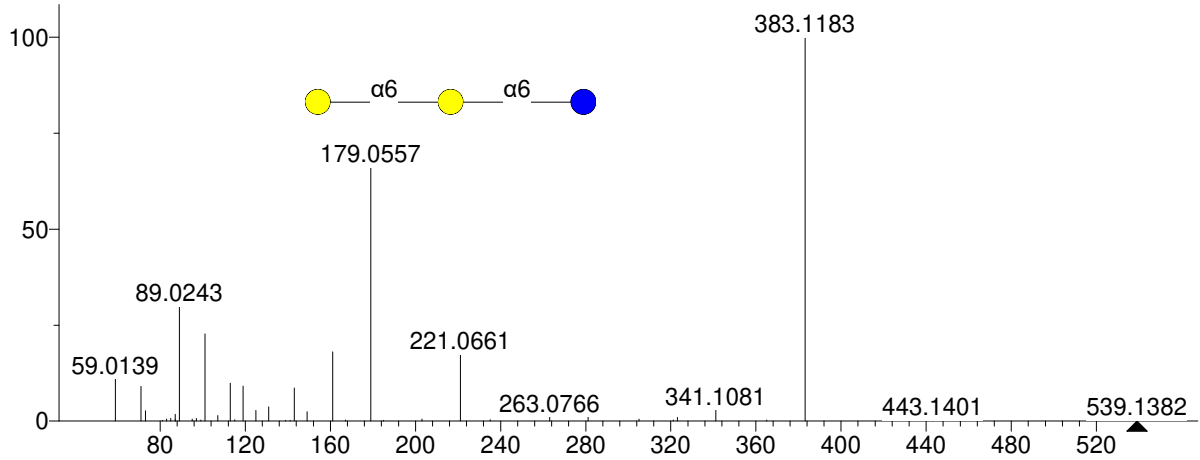

Hit 4 : Erllose [M+Cl]<sup>-</sup> HCD 48V P=539.1  
C<sub>18</sub>H<sub>32</sub>O<sub>16</sub>; MF: 753; RMF: 812; Prob 6.23%; CAS: 13101-54-7; Lib: nist\_msms; ID: 531029.

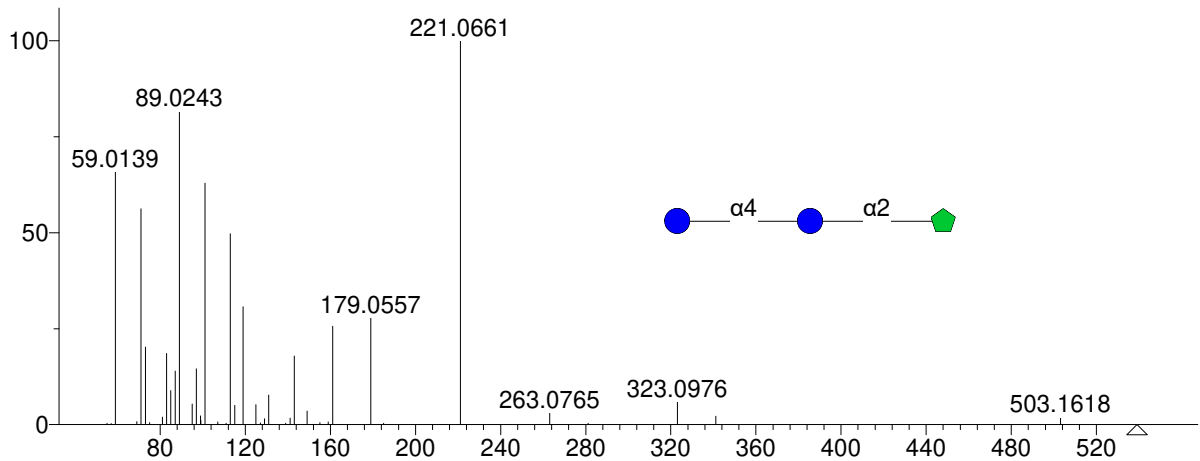

Hit 5 : 3alpha,4beta-Galactotriose [M+Cl]<sup>-</sup> HCD 32V P=539.1  
C<sub>18</sub>H<sub>32</sub>O<sub>16</sub>; MF: 751; RMF: 784; Prob 5.75%; CAS: 56038-36-9; Lib: nist\_msms; ID: 527589.

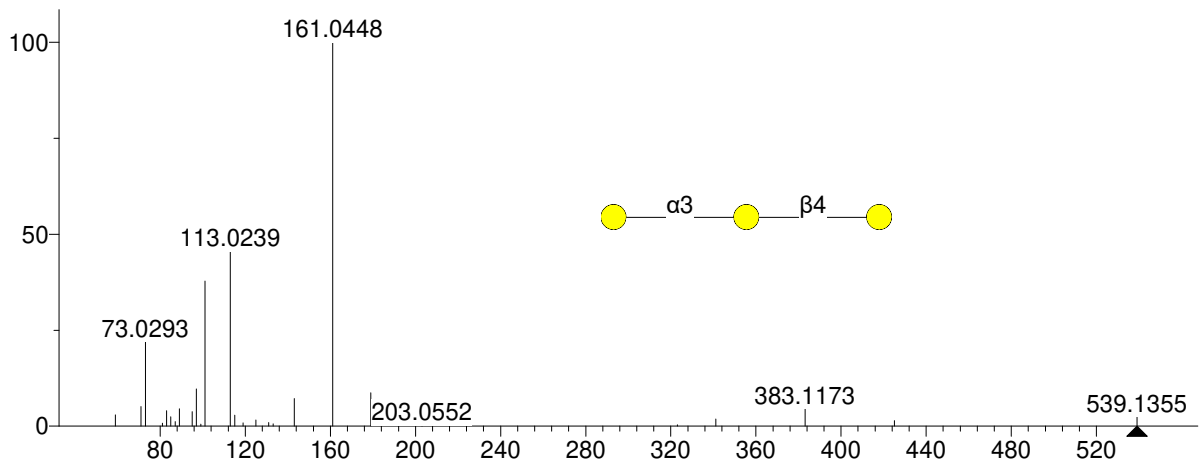

\*\* Search Report Page 1 of 2 \*\*

Unknown: Unknown (1.43\_509.1258m/z)  
Compound in Library Factor = 0

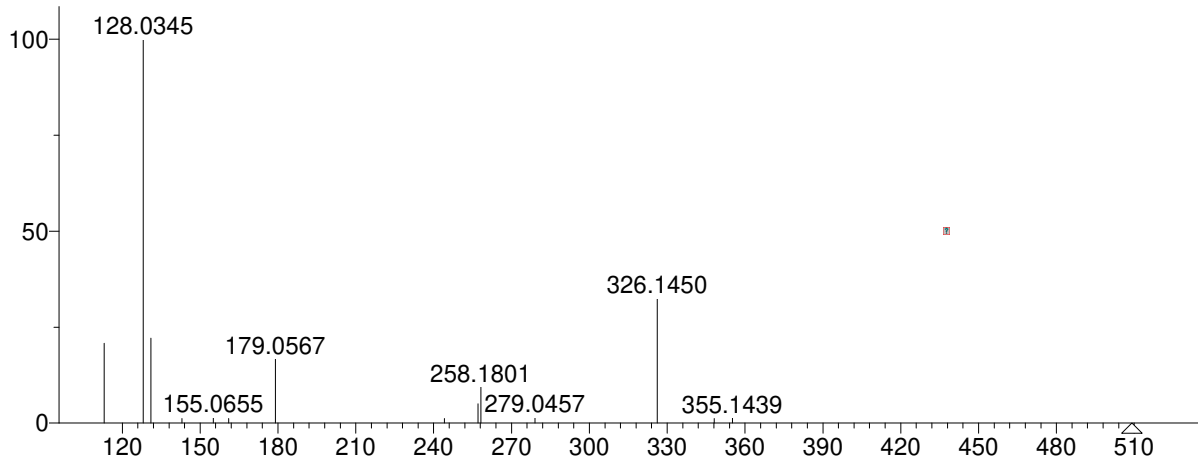

Hit 1 : Syringetin-3-O-glucoside [M+H]<sup>+</sup> 10eV P=509.1  
C<sub>23</sub>H<sub>24</sub>O<sub>13</sub>; MF: 0; RMF: 37; Prob 25.0%; Lib: anthocyanins mona; ID: 908.

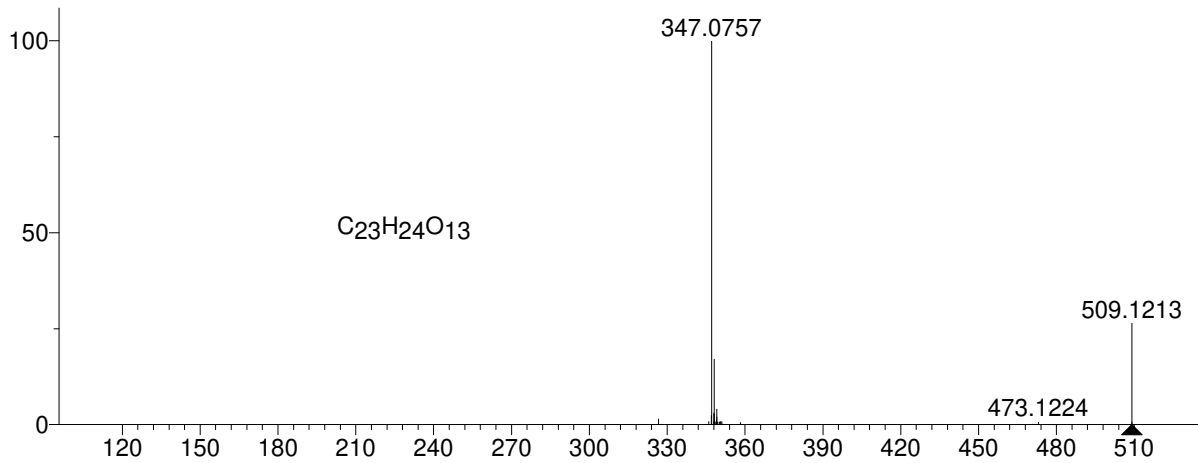

Hit 2 : NCGC00380543-01![(2R,3S,4S,5R,6R)-6-[(5,8-dihydroxy-4-oxo-2,3-dihydro-1H-naphthalen-1-yl)oxy]-3,4,5  
C<sub>23</sub>H<sub>24</sub>O<sub>13</sub>; MF: 0; RMF: 19; Prob 25.0%; Lib: mona-export-gnps; ID: 6437.

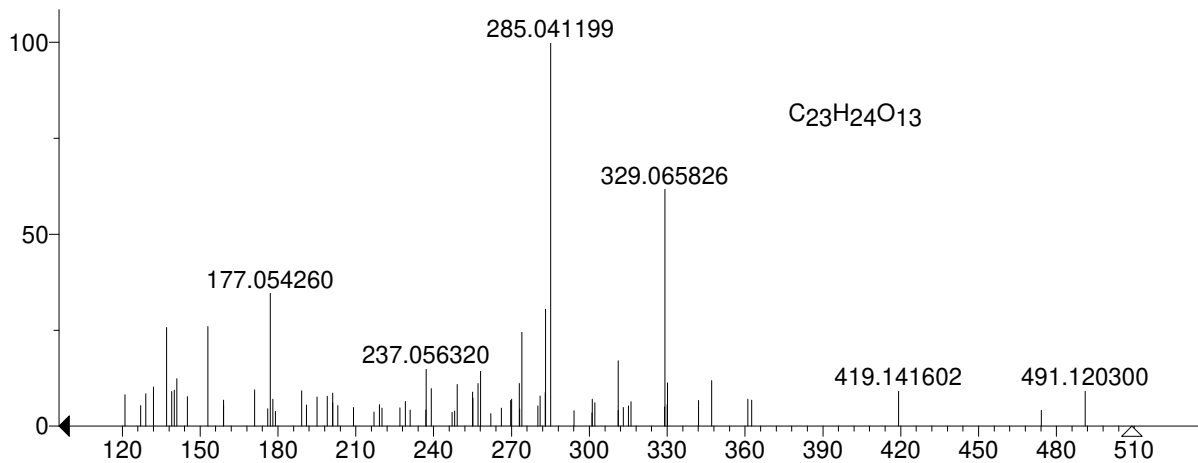



Hit 3 : 5-(1,2,3,4,5,6-hexahydroxyhexoxy)-6-hydroxy-3-methoxy-9-methyl-4,5-dihydro-3H-pyrano[3,4-h][1]benzoxe  
C<sub>21</sub>H<sub>26</sub>O<sub>13</sub>; MF: 0; RMF: 19; Prob 25.0%; Lib: mona-export-vf-npl\_qexactive; ID: 17685.

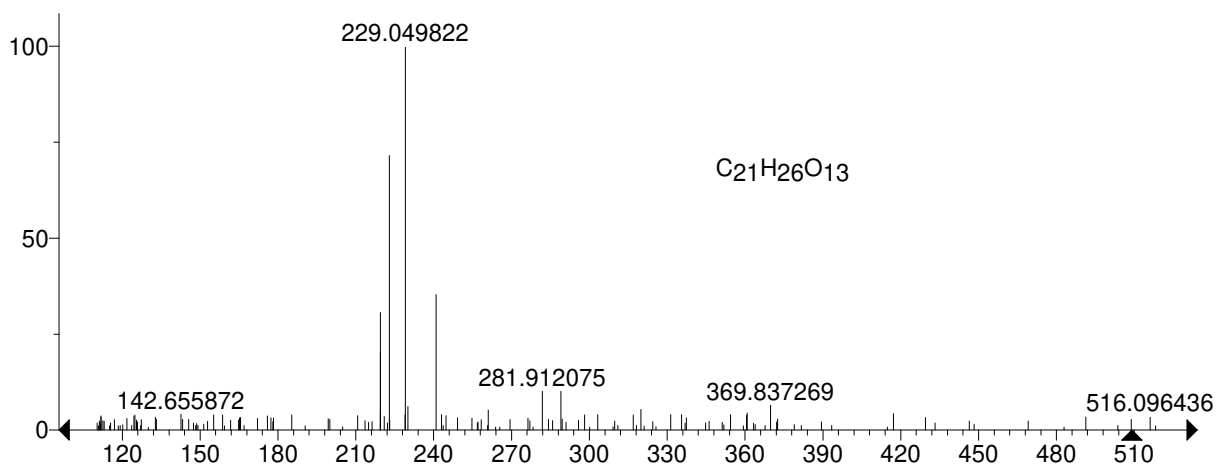

Hit 4 : Malvidin 3,5-diglucoside cation [Cat-2H-C<sub>6</sub>H<sub>8</sub>O<sub>4</sub>]- HCD 35V P=509.1  
C<sub>29</sub>H<sub>35</sub>O<sub>17</sub>; MF: 0; RMF: 6; Prob 25.0%; CAS: 47863-30-9; Lib: nist\_msms; ID: 503071.

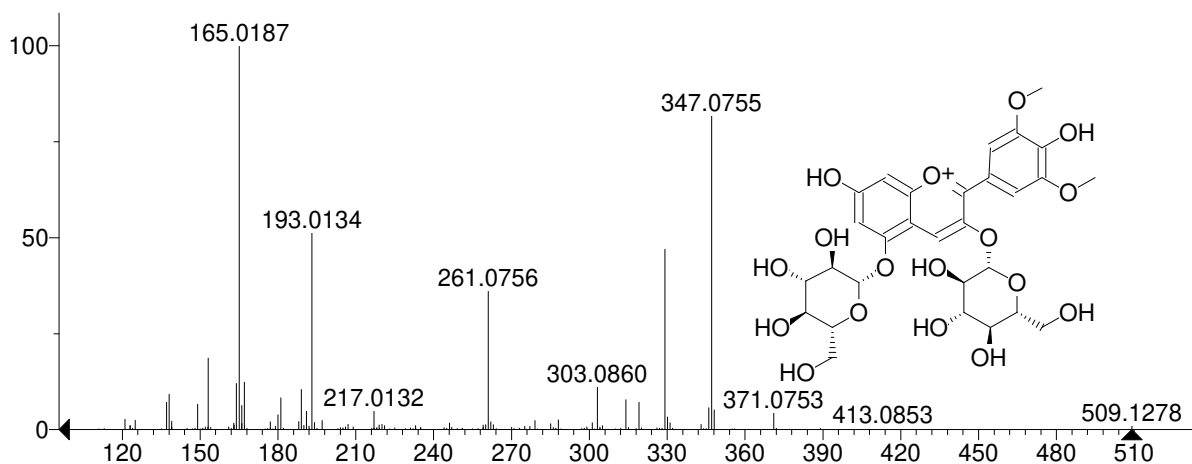

Unknown: Unknown (1.43\_632.2061m/z)  
Compound in Library Factor = 0

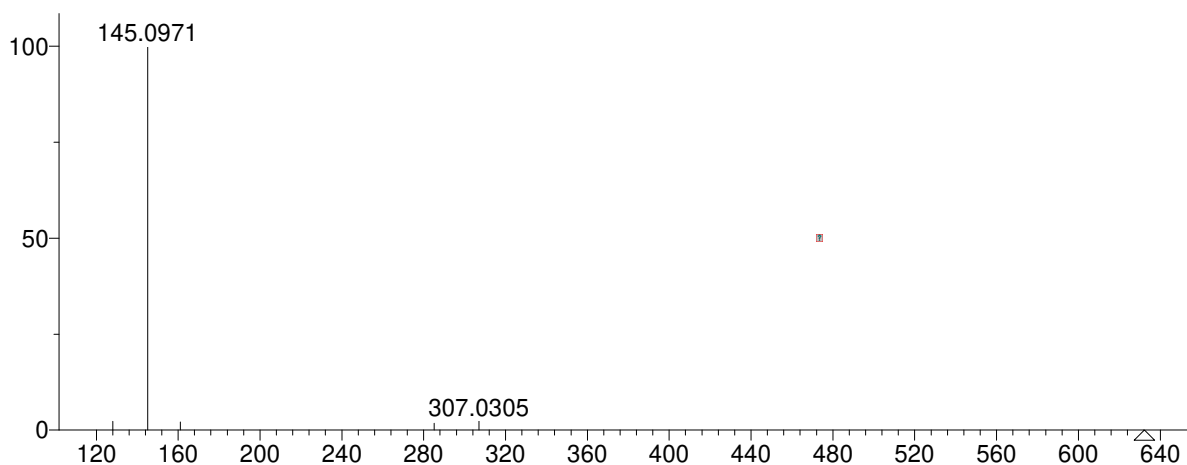

Hit 1 : 6'-Sialyllactose [M-H]<sup>-</sup> HCD 69V P=632.2  
C23H39NO19; MF: 0; RMF: 22; Prob 50.0%; CAS: 74609-39-5; Lib: nist\_msms; ID: 531430.

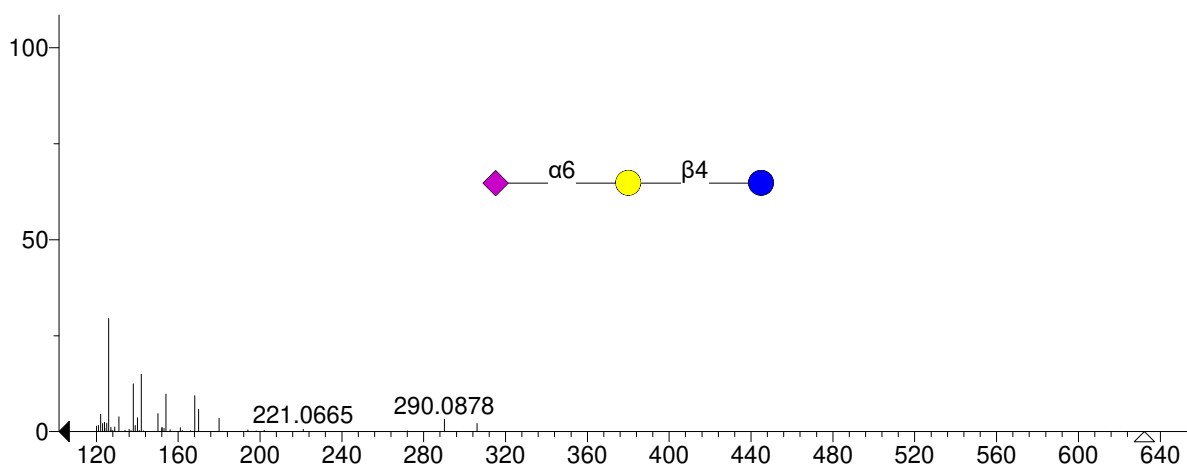

Hit 2 : 3'-Sialyllactose [M-H]<sup>-</sup> HCD 69V P=632.2  
C23H39NO19; MF: 0; RMF: 18; Prob 50.0%; CAS: 35890-38-1; Lib: nist\_msms; ID: 530597.

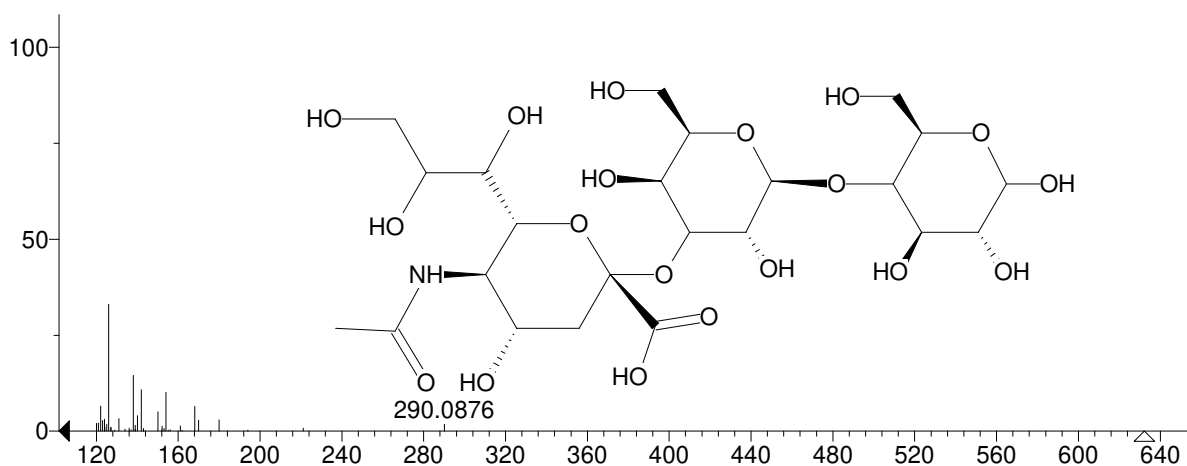

Unknown: Unknown (1.44\_284.1341m/z)  
Compound in Library Factor = 0

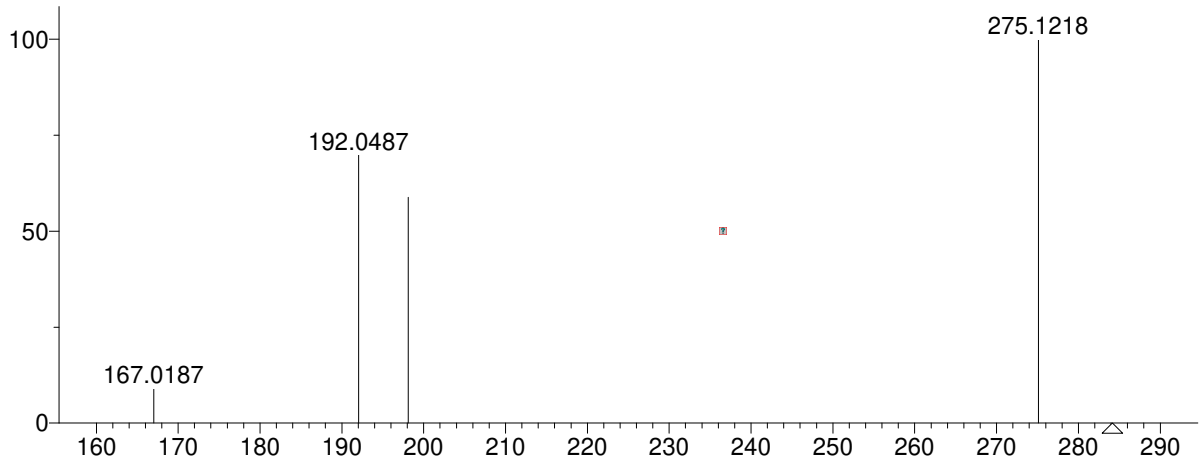

Unknown: Unknown (1.44\_365.1550m/z)  
Compound in Library Factor = 0

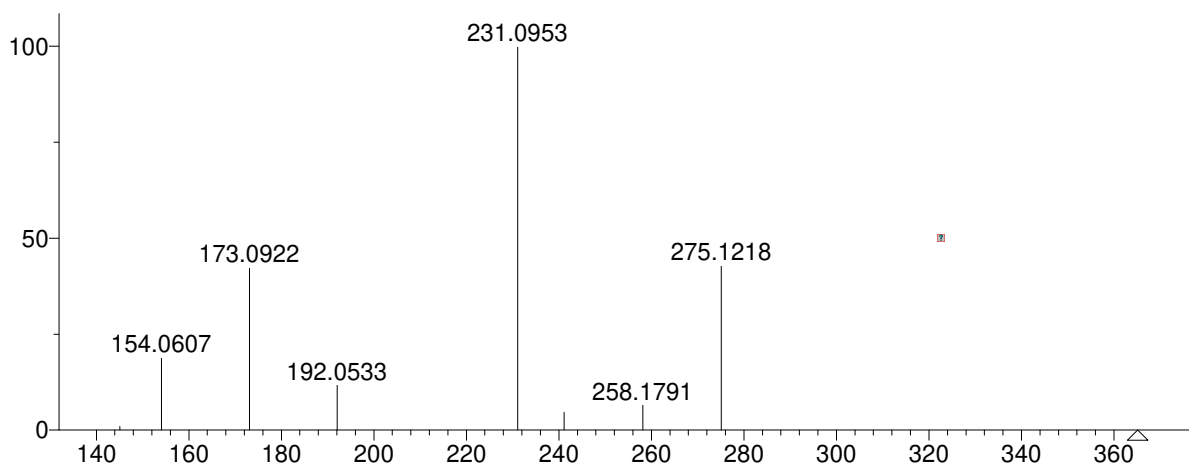

Hit 1 : MMV659004 [M+H]<sup>+</sup> (20-30-40%) P=365.2  
C<sub>21</sub>H<sub>21</sub>ClN<sub>4</sub>; MF: 0; RMF: 2; Prob 100.0%; Lib: mona-export-pathogen\_box; ID: 281.

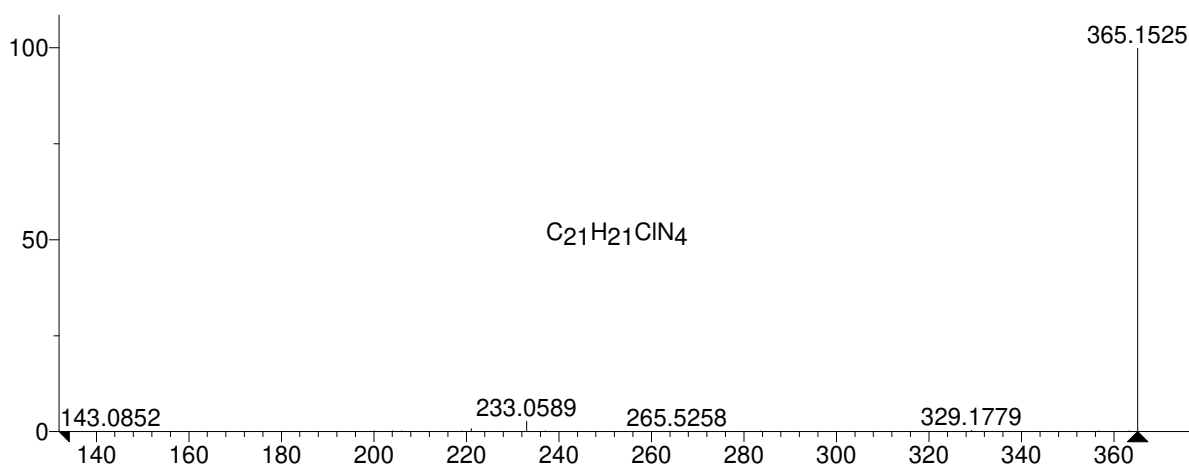

Unknown: Unknown (1.44\_420.2343m/z)  
Compound in Library Factor = 0

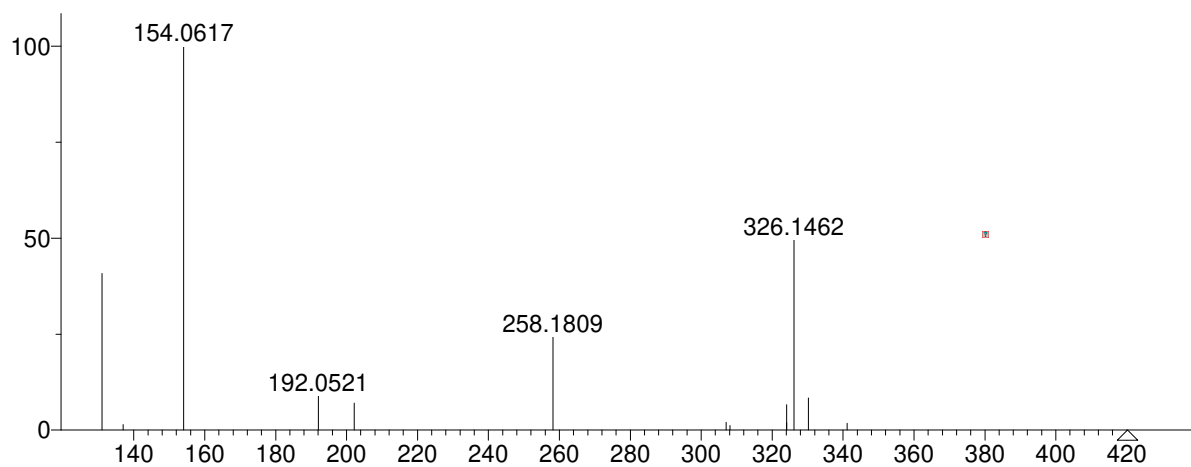

Hit 1 : TNF- $\alpha$  (71-82), human [M+3H]<sup>3+</sup> HCD 35eV P=420.2  
C<sub>51</sub>H<sub>91</sub>N<sub>19</sub>O<sub>18</sub>; MF: 0; RMF: 8; Prob 100.0%; Lib: nist\_msms2; ID: 49961.

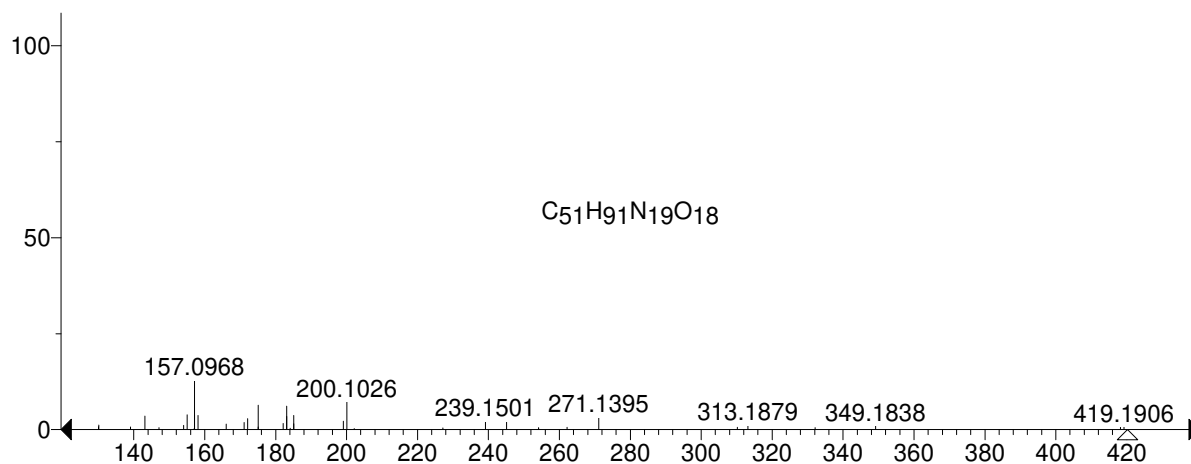

\*\* Search Report Page 1 of 2 \*\*

Unknown: Unknown (1.44\_496.2041m/z)  
Compound in Library Factor = 0

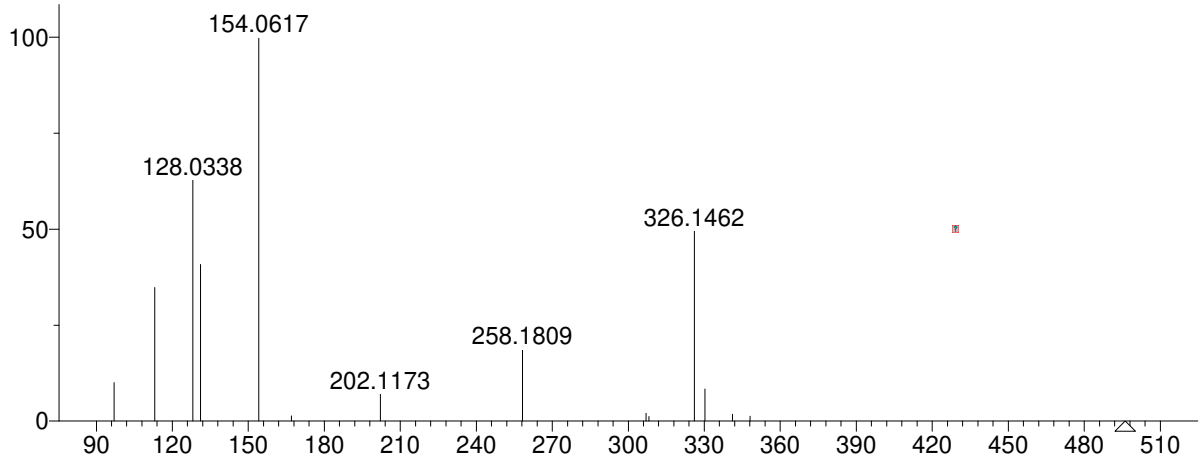

Hit 1 : (2R,3S,4S,5R,6S)-2-[(3,4,5-trihydroxyoxan-2-yl)oxymethyl]-6-(3,4,5-trimethoxyphenoxy)oxane-3,4,5-triol [†]  
C<sub>20</sub>H<sub>30</sub>O<sub>13</sub>; MF: 0; RMF: 192; Prob 25.0%; Lib: mona-export-vf-npl\_qexactive; ID: 9258.

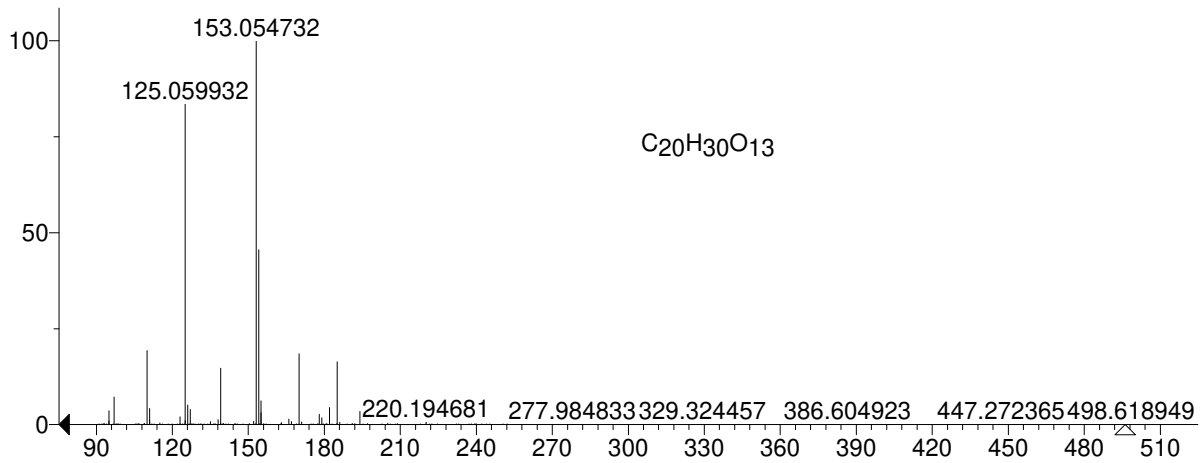

Hit 2 : (2R,3S,4S,5R,6S)-2-[[[(2S,3R,4R)-3,4-dihydroxy-4-(hydroxymethyl)oxolan-2-yl]oxymethyl]-6-(3,4,5-trimethoxyphenoxy)oxane-3,4,5-triol [†]  
C<sub>20</sub>H<sub>30</sub>O<sub>13</sub>; MF: 0; RMF: 179; Prob 25.0%; Lib: mona-export-vf-npl\_qexactive; ID: 9783.

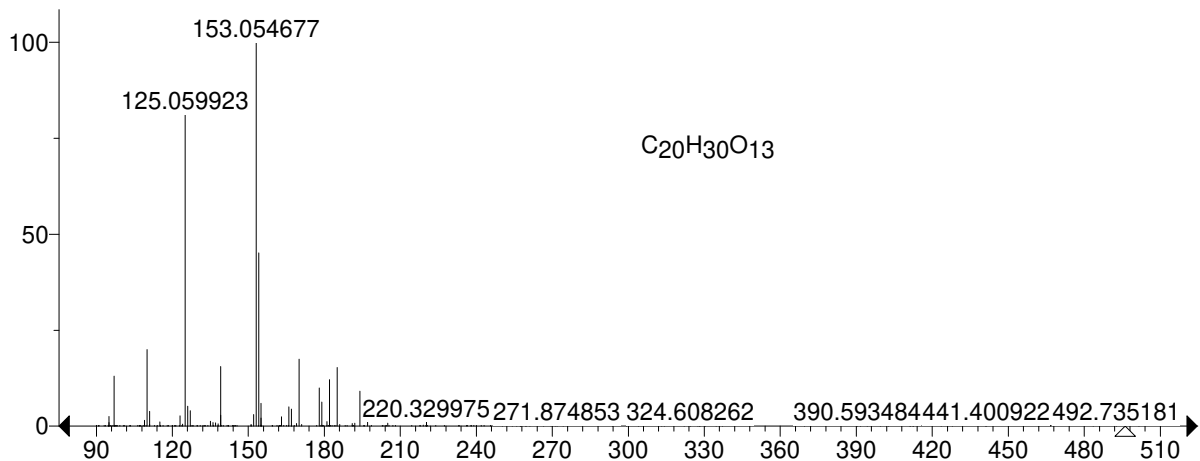



\*\* Search Report Page 1 of 2 \*\*

Unknown: Unknown (1.44\_521.1262m/z)  
Compound in Library Factor = 0

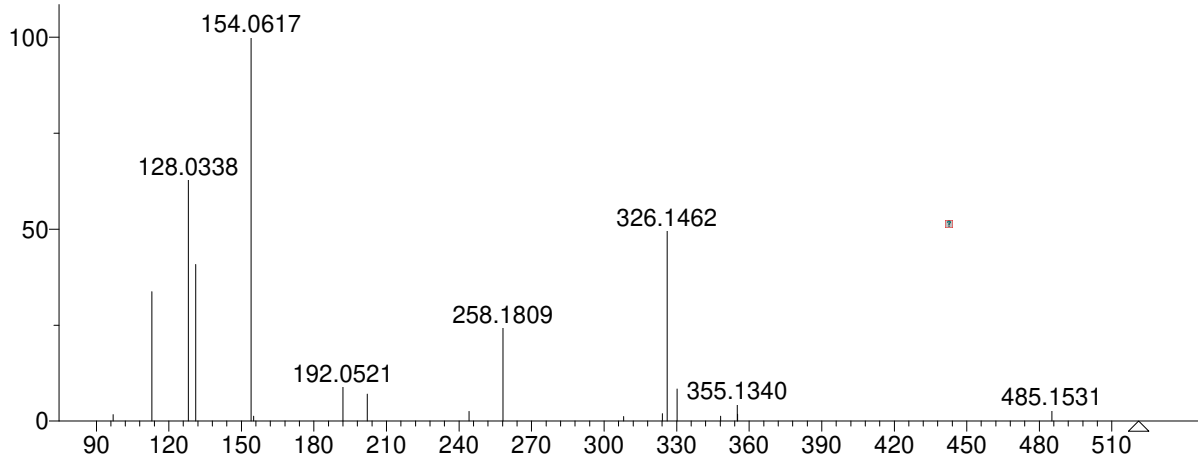

Hit 1 : verproside [M+Na]<sup>+</sup> 65HCD P=521.1  
C<sub>22</sub>H<sub>26</sub>O<sub>13</sub>; MF: 0; RMF: 24; Prob 12.5%; Lib: mona-export-vf-npl\_qexactive; ID: 11988.

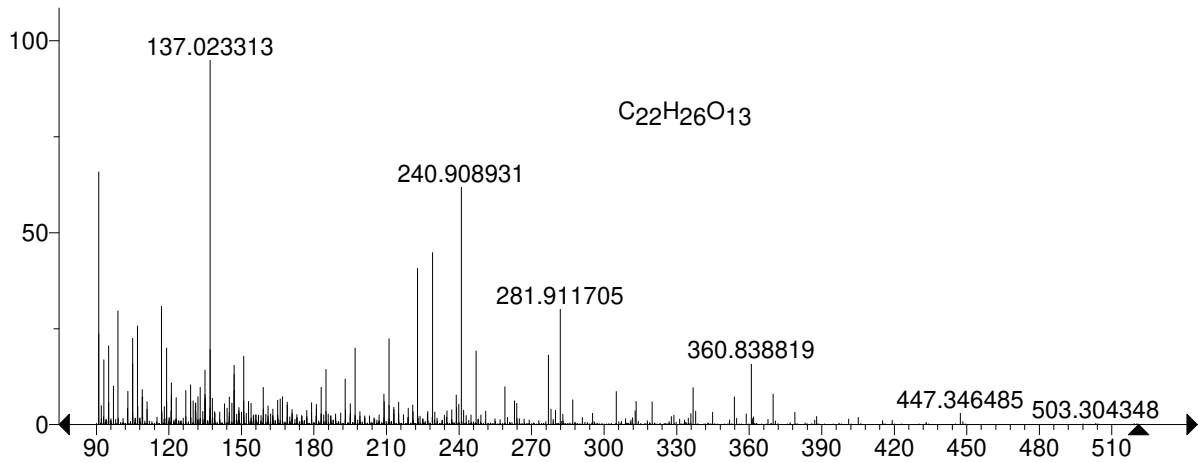

Hit 2 : NCGC00347847-02\_C<sub>22</sub>H<sub>26</sub>O<sub>13</sub>\_(1aS,1bS,2S,5aR,6S,6aS)-2-(beta-D-Glucopyranosyloxy)-1a-(hydroxyrr  
C<sub>22</sub>H<sub>26</sub>O<sub>13</sub>; MF: 0; RMF: 9; Prob 12.5%; Lib: mona-export-gnps; ID: 10988.

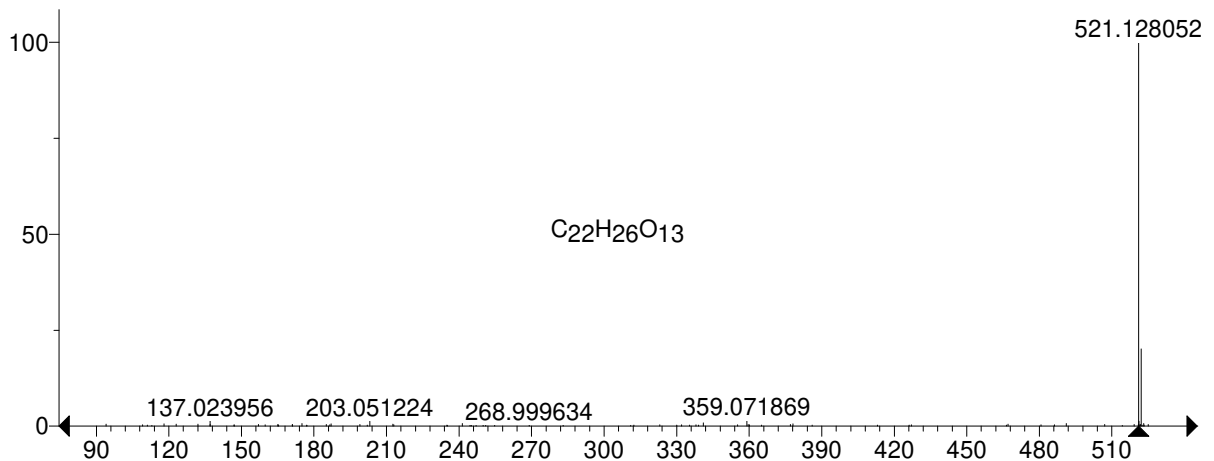



\*\* Search Report Page 2 of 2 \*\*

Hit 3 : 5-hydroxy-3-(5-hydroxy-2,4-dimethoxyphenyl)-6-methoxy-7-[3,4,5-trihydroxy-6-(hydroxymethyl)oxan-2-yl]ox  
C<sub>24</sub>H<sub>26</sub>O<sub>13</sub>; MF: 0; RMF: 7; Prob 12.5%; Lib: anthocyanins mona; ID: 9905.

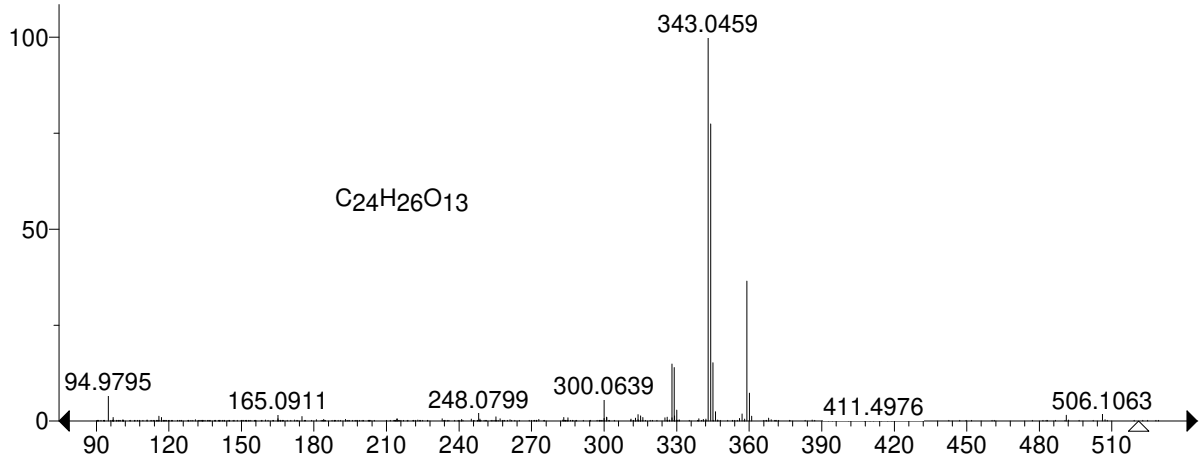

Hit 4 : C<sub>24</sub>H<sub>26</sub>O<sub>13</sub>; PlaSMA ID-1450 [M-H]<sup>-</sup> P=521.1  
C<sub>24</sub>H<sub>26</sub>O<sub>13</sub>; MF: 0; RMF: 6; Prob 12.5%; Lib: biomsms-neg-plasma; ID: 886.

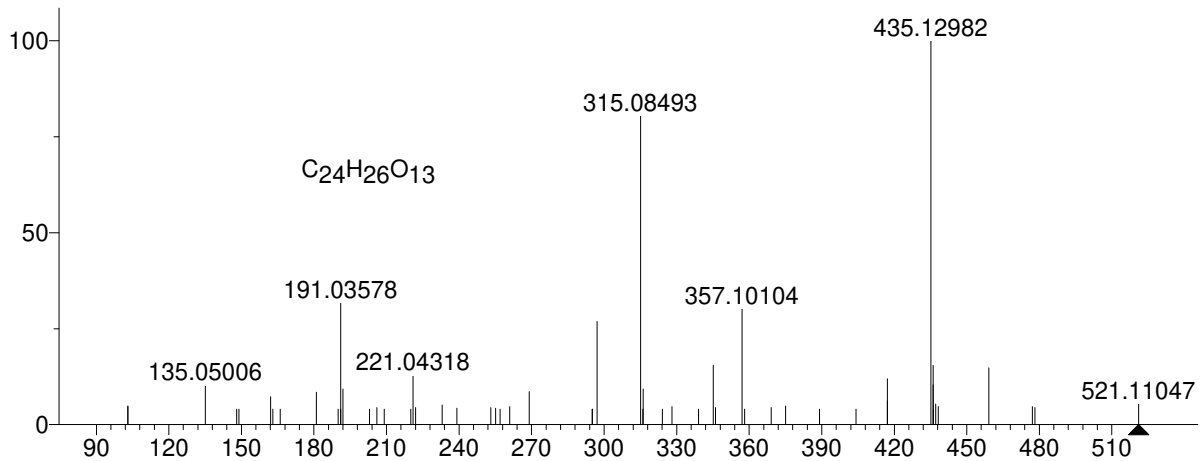

Hit 5 : salviaflaside [M-H]<sup>-</sup> 35HCD P=521.1  
C<sub>24</sub>H<sub>26</sub>O<sub>13</sub>; MF: 0; RMF: 5; Prob 12.5%; Lib: mona-export-lc-ms-ms\_negative\_mode; ID: 22547.

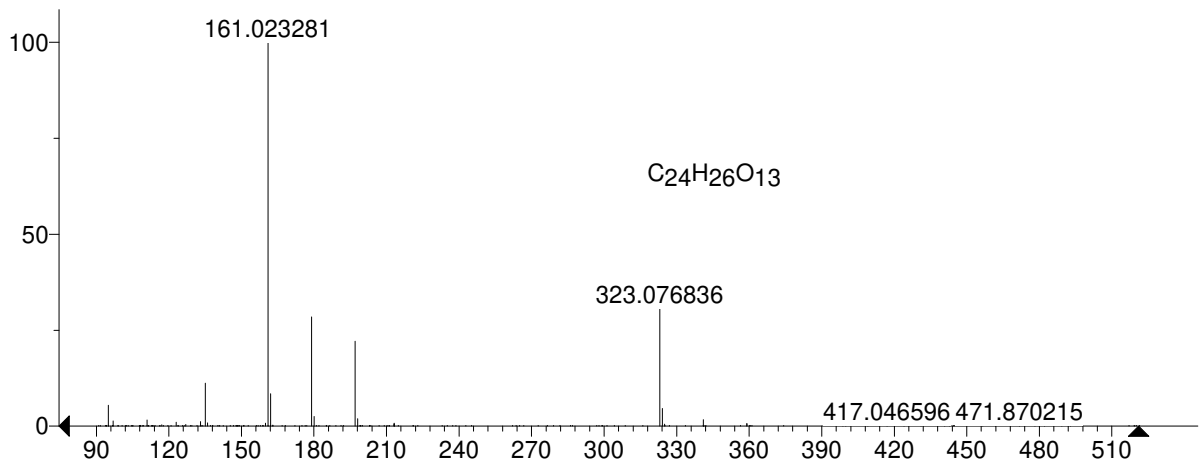

Unknown: Unknown (1.44\_713.1909m/z)  
Compound in Library Factor = -3273

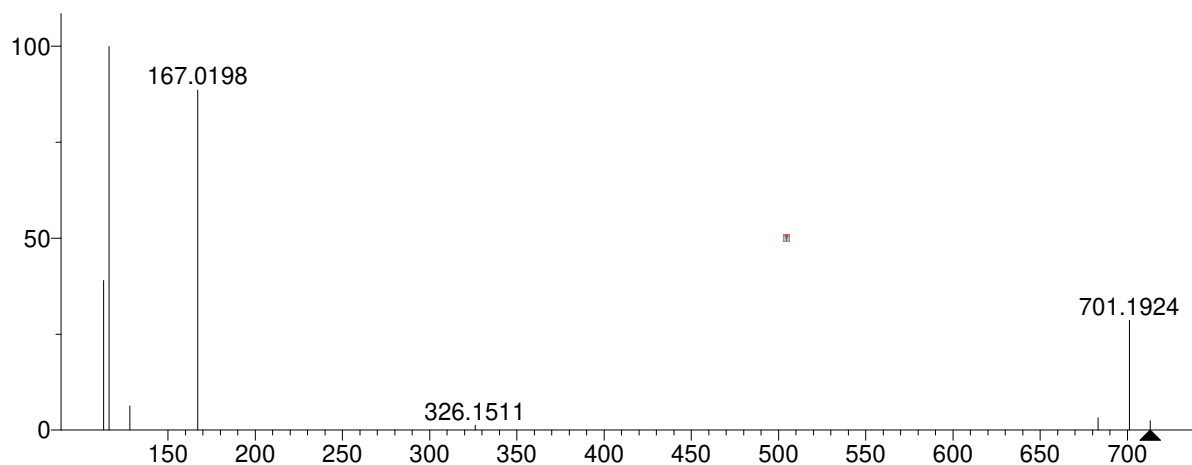

Hit 1 : Sulindac [2M+H]<sup>+</sup> HCD 7V P=713.2  
C<sub>20</sub>H<sub>17</sub>FO<sub>3</sub>S; MF: 19; RMF: 228; Prob 100.0%; CAS: 38194-50-2; Lib: nist\_msms; ID: 316024.

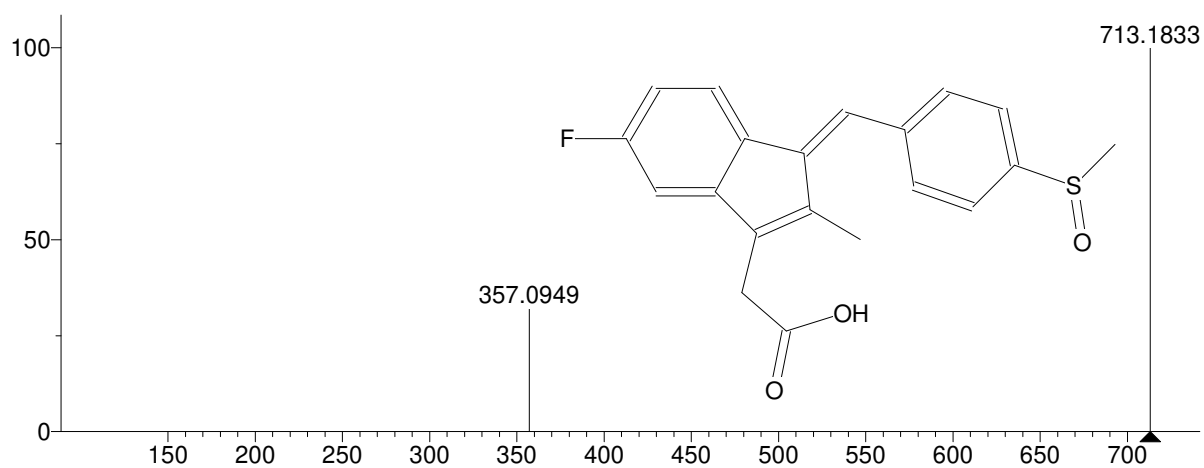

Unknown: Unknown (1.44\_989.3218m/z)  
Compound in Library Factor = 0

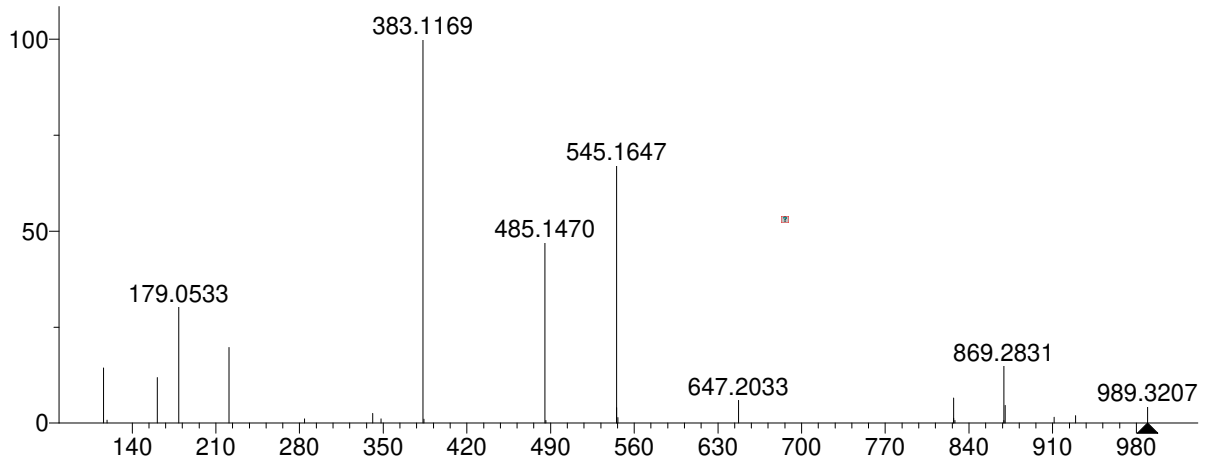

\*\* Search Report Page 1 of 2 \*\*

Unknown: Unknown (1.45\_245.1134m/z)  
Compound in Library Factor = -1615

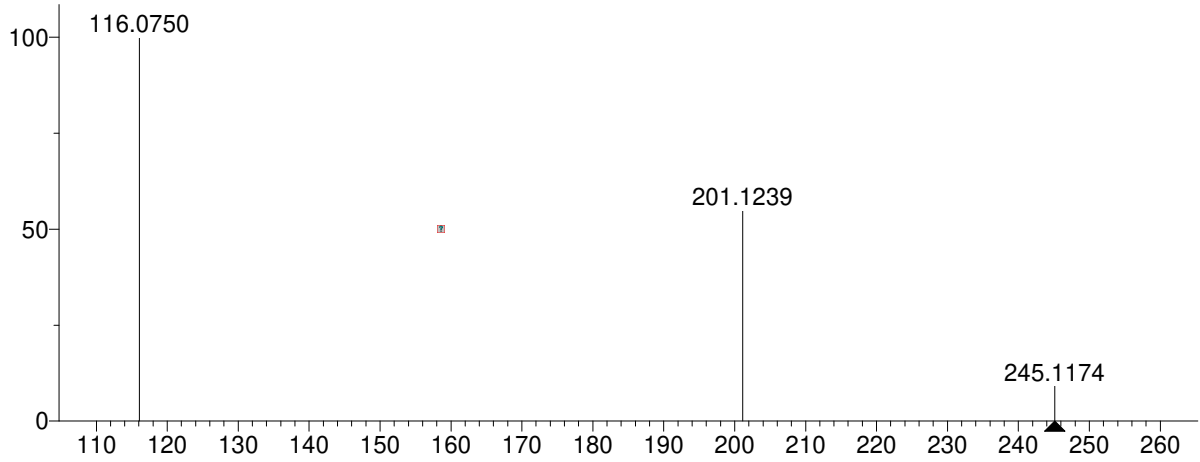

Hit 1 : Val-Glu [M-H]<sup>-</sup> HCD 14eV P=245.1  
C<sub>10</sub>H<sub>18</sub>N<sub>2</sub>O<sub>5</sub>; MF: 290; RMF: 671; Prob 40.7%; Lib: nist\_msms; ID: 571078.

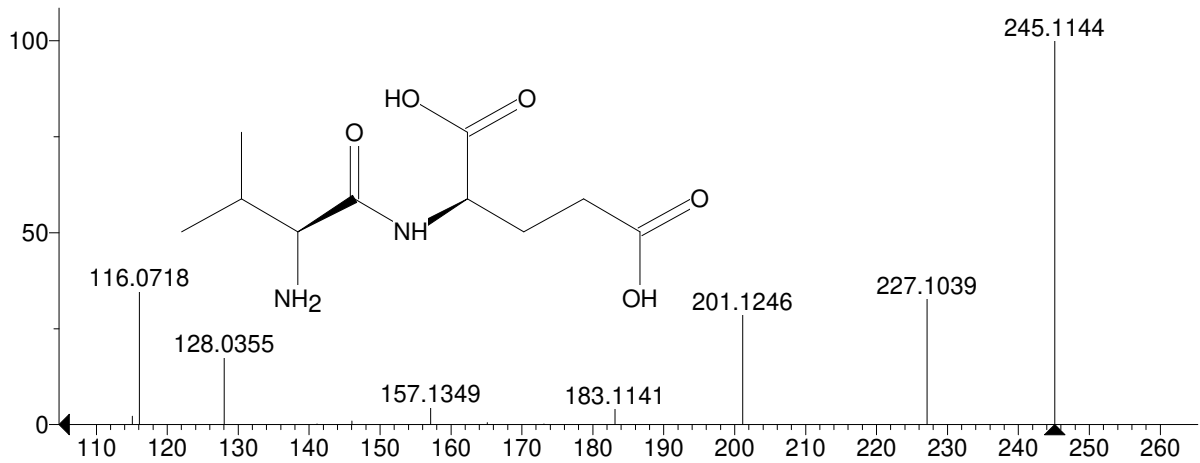

Hit 2 : Val-Glu [M-H]<sup>-</sup> HCD 14eV P=245.1  
C<sub>10</sub>H<sub>18</sub>N<sub>2</sub>O<sub>5</sub>; MF: 290; RMF: 671; Prob 40.7%; CAS: 3062-07-5; Lib: nist\_msms2; ID: 84811.

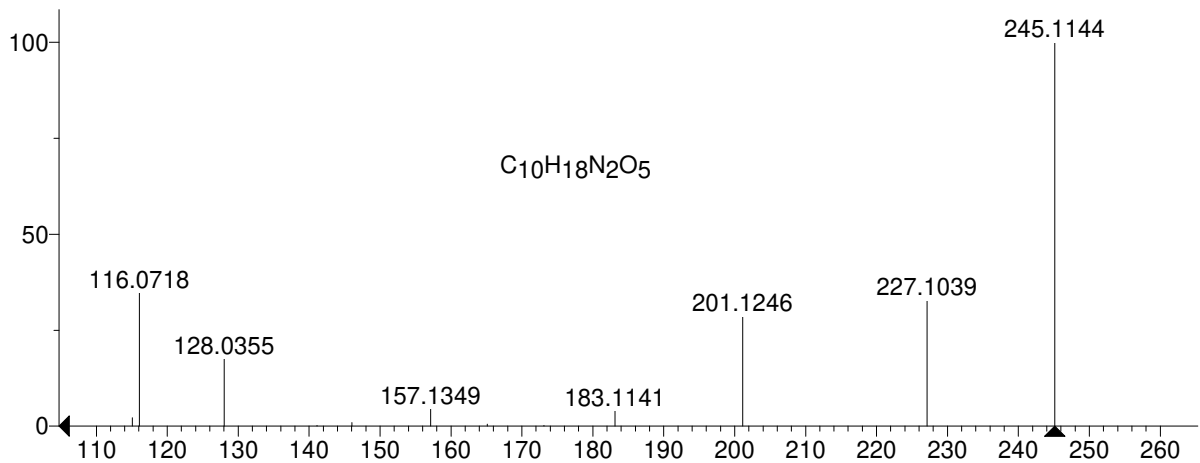

Hit 3 : Glu-Pro [M+H]<sup>+</sup> QTOF 30V P=245.1  
C<sub>10</sub>H<sub>16</sub>N<sub>2</sub>O<sub>5</sub>; MF: 265; RMF: 780; Prob 12.4%; Lib: nist\_msms; ID: 47863.

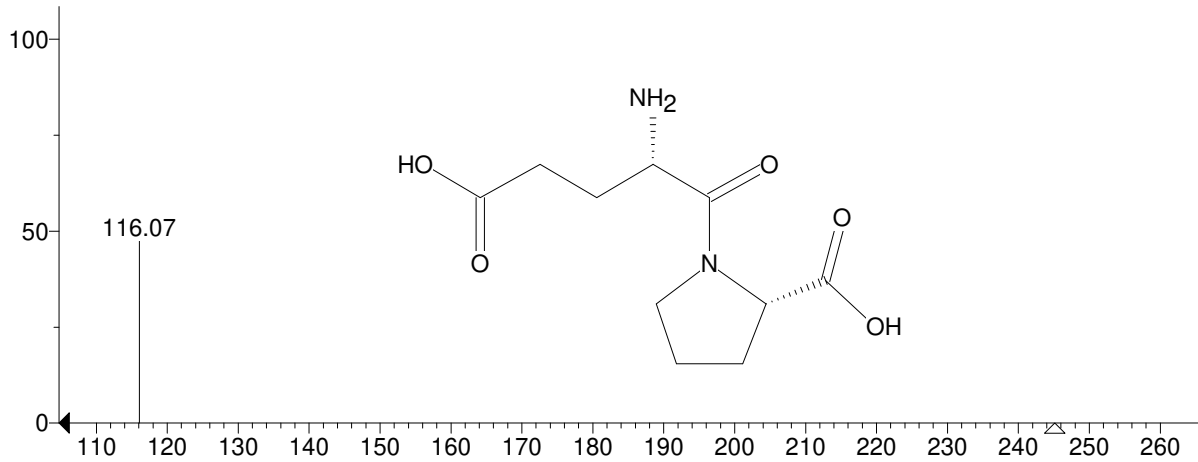

Hit 4 : Glu-Val [M-H]<sup>-</sup> HCD 12eV P=245.1  
C<sub>10</sub>H<sub>18</sub>N<sub>2</sub>O<sub>5</sub>; MF: 210; RMF: 551; Prob 2.41%; Lib: nist\_msms; ID: 567387.

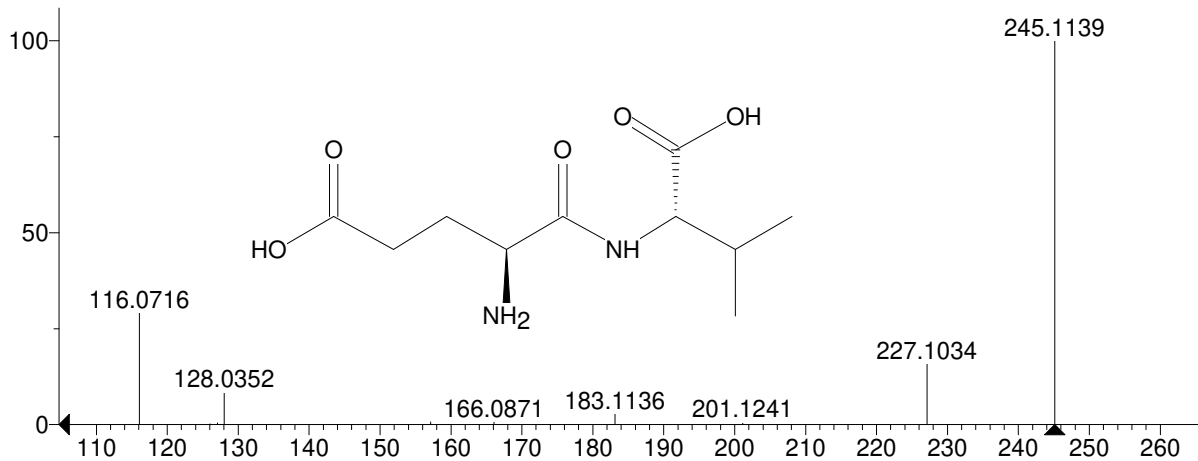

Hit 5 : Glu-Val [M-H]<sup>-</sup> HCD 12eV P=245.1  
C<sub>10</sub>H<sub>18</sub>N<sub>2</sub>O<sub>5</sub>; MF: 210; RMF: 551; Prob 2.41%; CAS: 5879-06-1; Lib: nist\_msms2; ID: 70244.

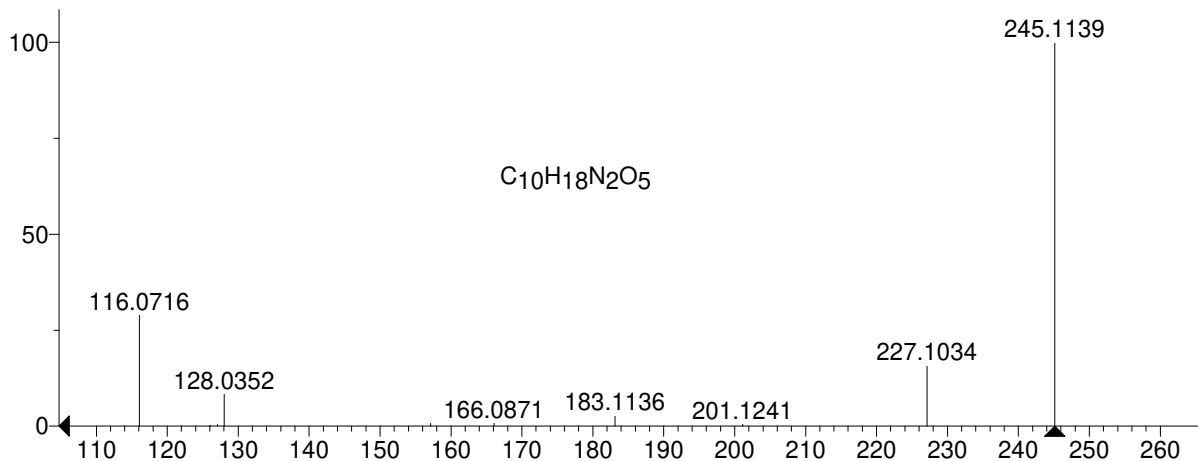

\*\* Search Report Page 1 of 1 \*\*

Unknown: Unknown (1.45\_582.2860m/z)  
Compound in Library Factor = 0

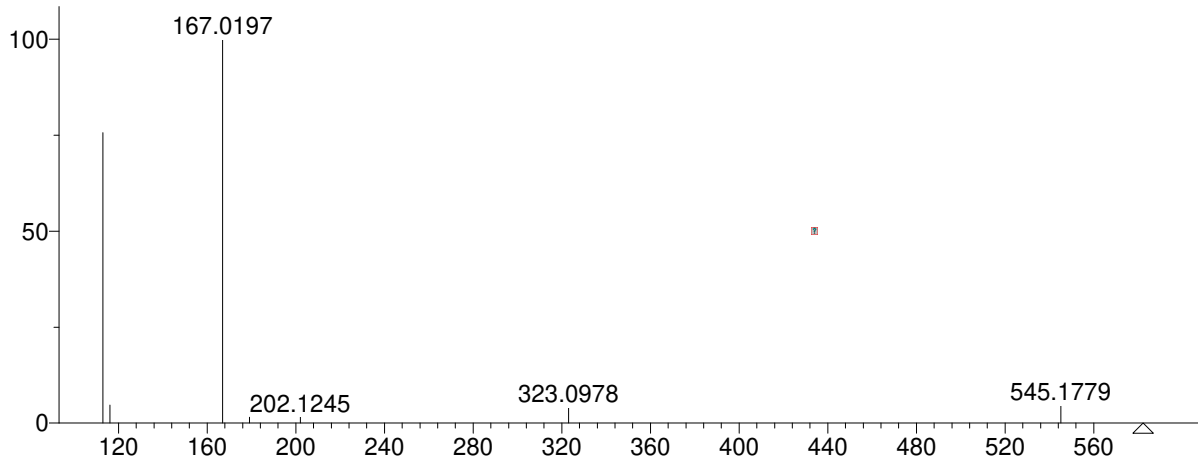

Hit 1 : Dauricine [M+H-C2H5N]+ HCD 186V P=582.3  
C38H44N2O6; MF: 0; RMF: 9; Prob 100.0%; CAS: 524-17-4; Lib: nist\_msms; ID: 236090.

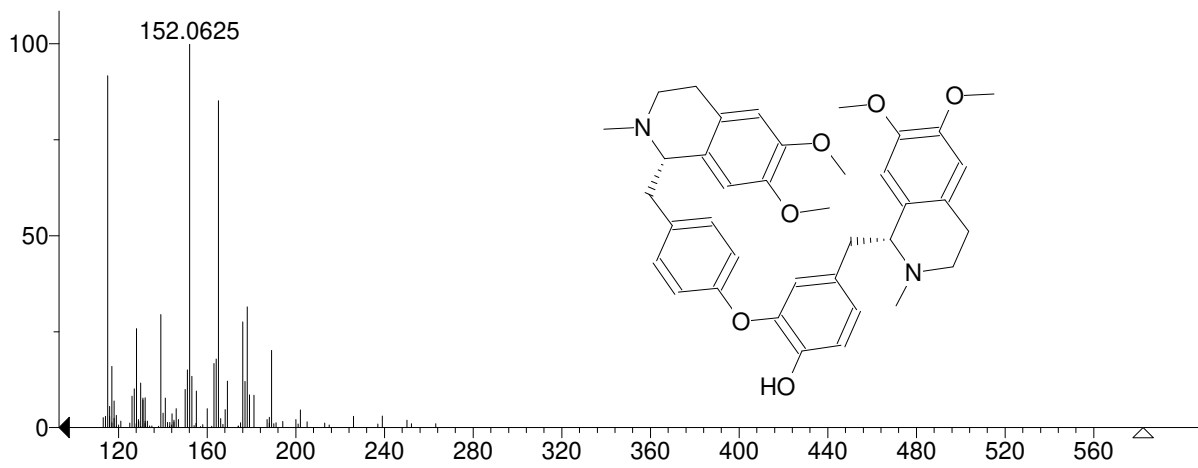

\*\* Search Report Page 1 of 1 \*\*

Unknown: Unknown (1.45\_665.1693m/z)  
Compound in Library Factor = 0

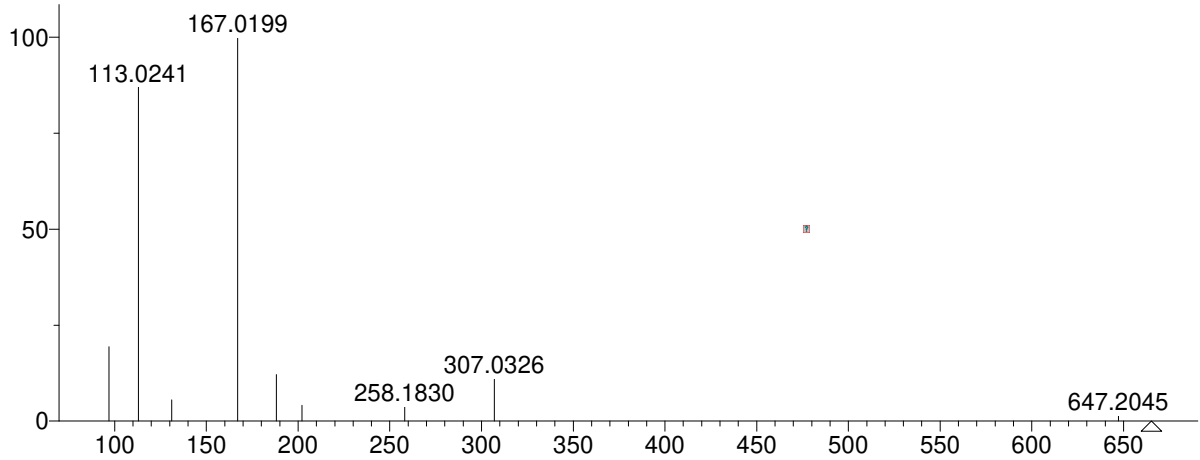

Hit 1 : [(2S,3R,4S,5S,6R)-3,4,5-trihydroxy-6-(hydroxymethyl)oxan-2-yl] (1S,4aR,6aS,6bR,9S,10R,11R,12aR)-1,10-C<sub>36</sub>H<sub>58</sub>O<sub>11</sub>; MF: 0; RMF: 85; Prob 50.0%; Lib: mona-export-itree; ID: 3655.

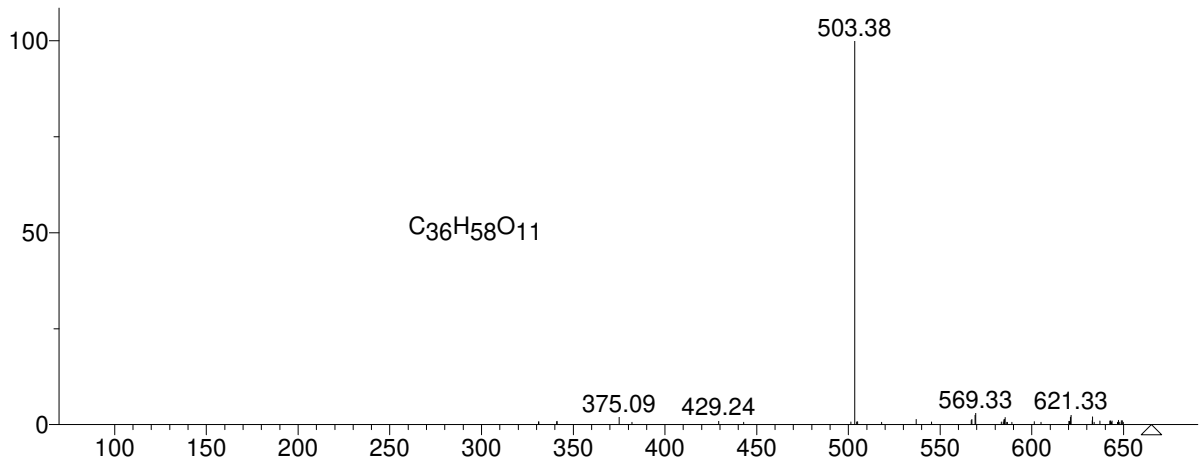

Hit 2 : Gox(8-O-4)feruloyl malate + hexose 2 (LigD) [M-H]<sup>-</sup> P=665.2  
C<sub>30</sub>H<sub>34</sub>O<sub>17</sub>; MF: 0; RMF: 30; Prob 50.0%; Lib: phytofrag2018\_final\_060219; ID: 549.

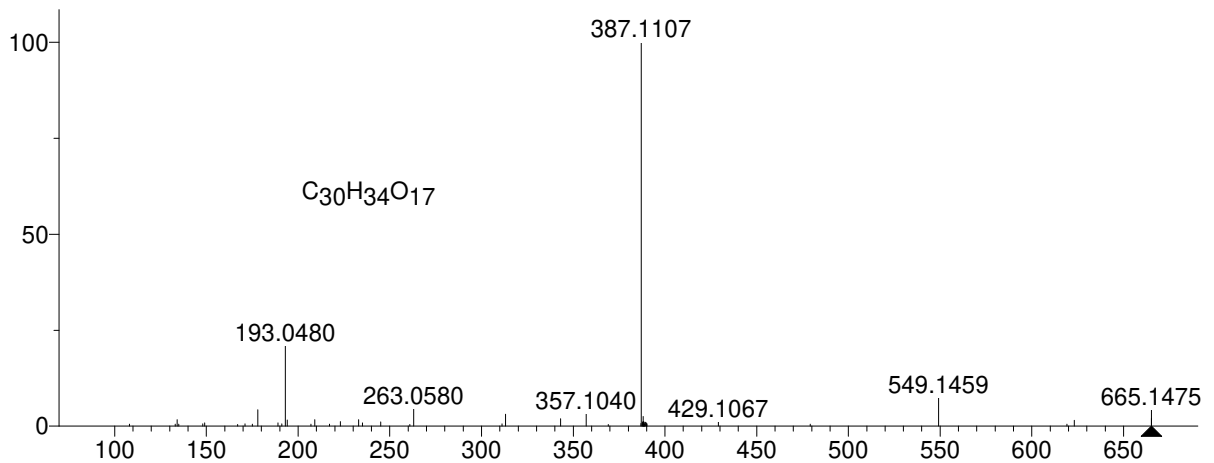

Unknown: Unknown (1.45\_683.1796m/z)  
Compound in Library Factor = 0

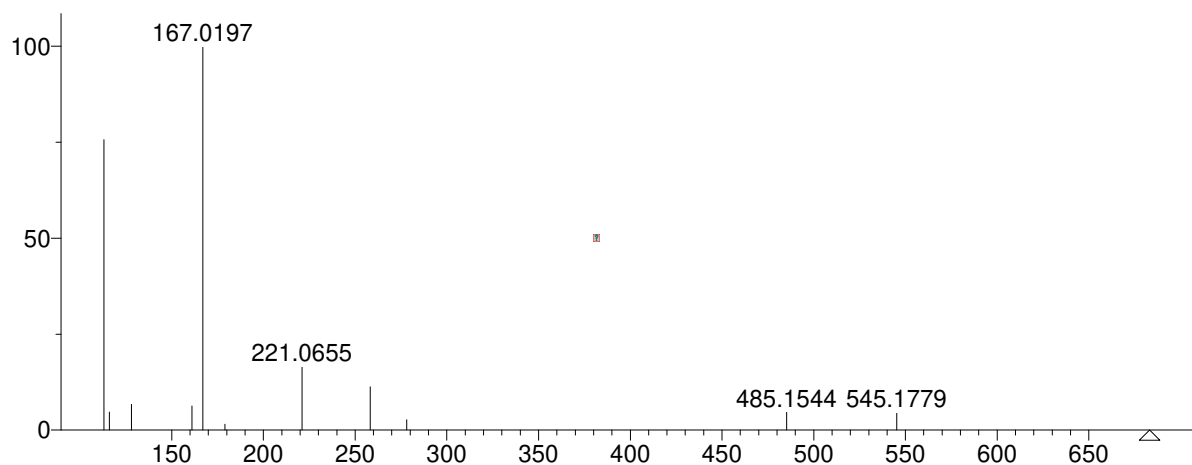

Hit 1 : [(2R,3S,4S,5R,6S)-3,4-dihydroxy-6-[3,7,8-trihydroxy-2-(4-hydroxy-3-methoxyphenyl)-4-oxochromen-5-yl]ox  
C<sub>30</sub>H<sub>34</sub>O<sub>18</sub>; MF: 0; RMF: 3; Prob 100.0%; Lib: anthocyanins mona; ID: 3950.

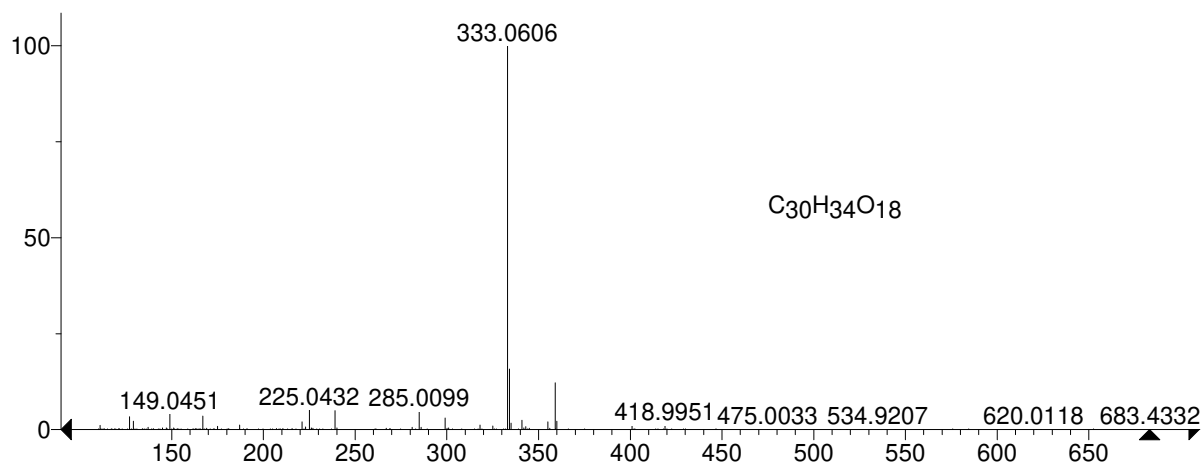



Unknown: Unknown (1.45\_702.1941m/z)  
Compound in Library Factor = 0

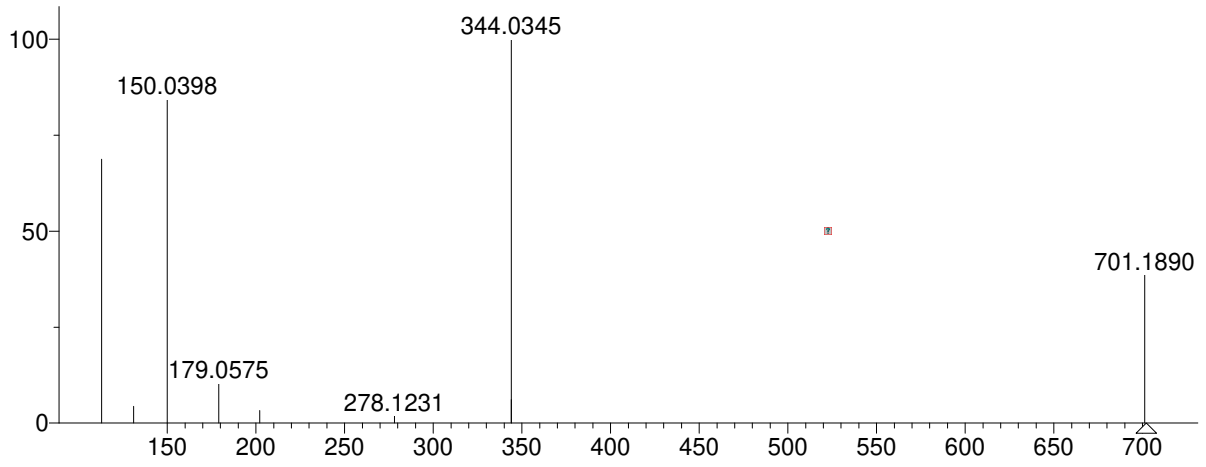

Unknown: Unknown (1.45\_782.2947m/z)  
Compound in Library Factor = 0

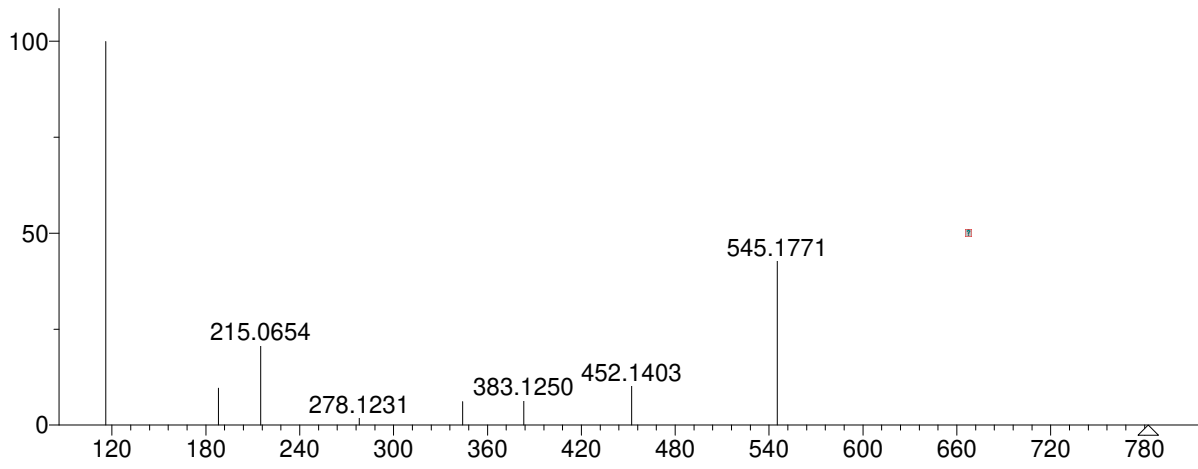

Unknown: Unknown (1.49\_611.0428m/z)  
Compound in Library Factor = 0

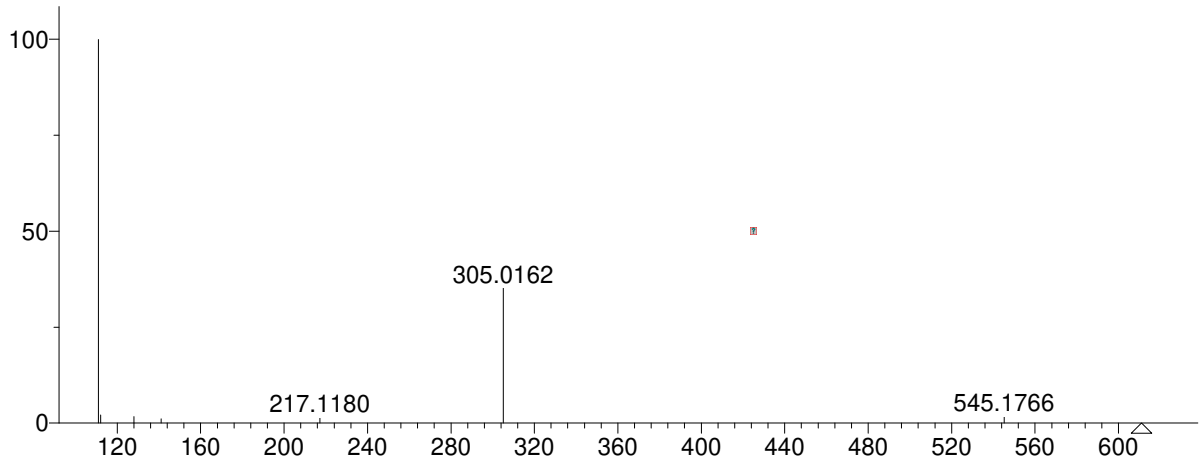

Unknown: Unknown (1.50\_239.1384m/z)  
Compound in Library Factor = 0

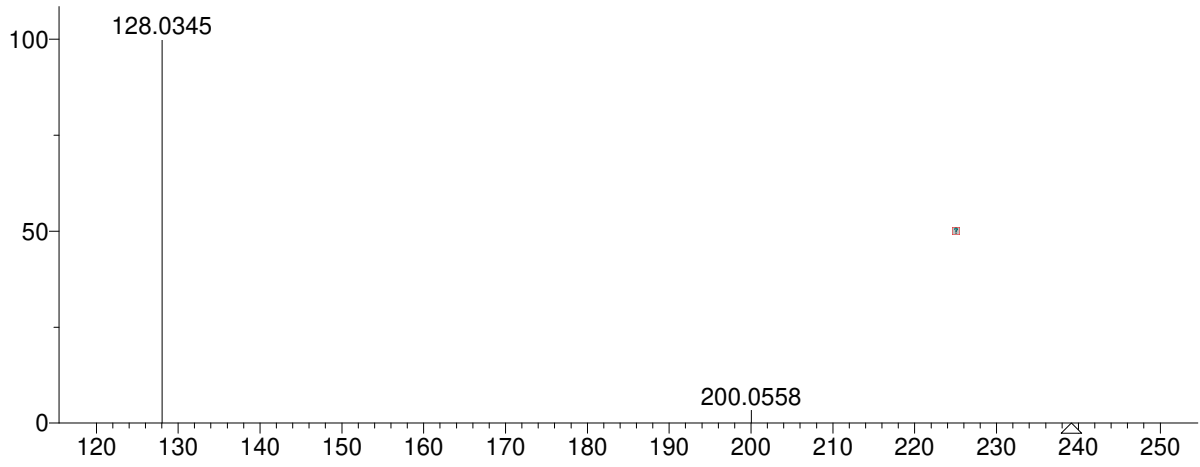

Unknown: Unknown (1.50\_290.0872m/z)  
Compound in Library Factor = -2176

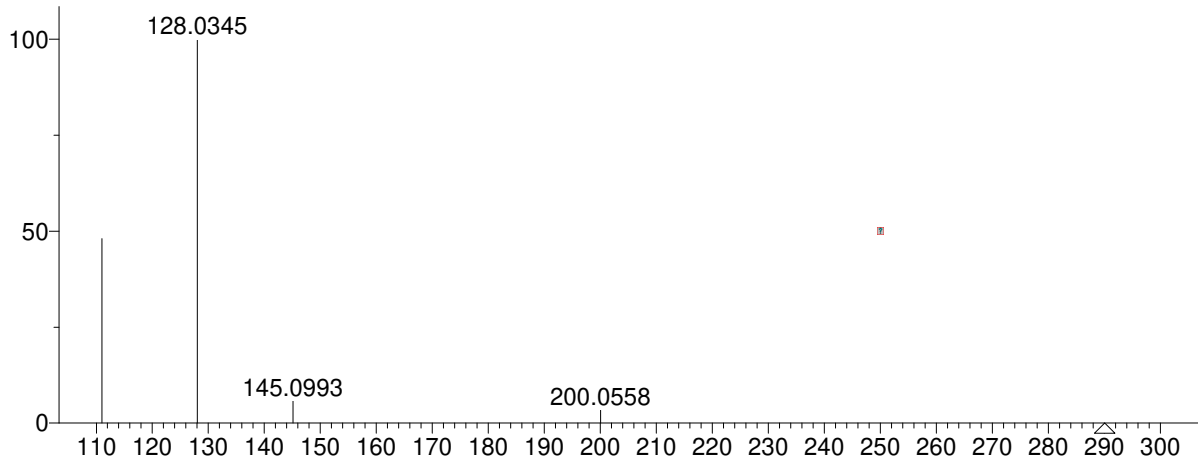

Hit 1 : N-Fructosyl pyroglutamate; PlaSMA ID-534 [M-H]<sup>-</sup> P=290.1  
C<sub>11</sub>H<sub>17</sub>NO<sub>8</sub>; MF: 24; RMF: 645; Prob 49.9%; Lib: biomsms-neg-plasma; ID: 480.

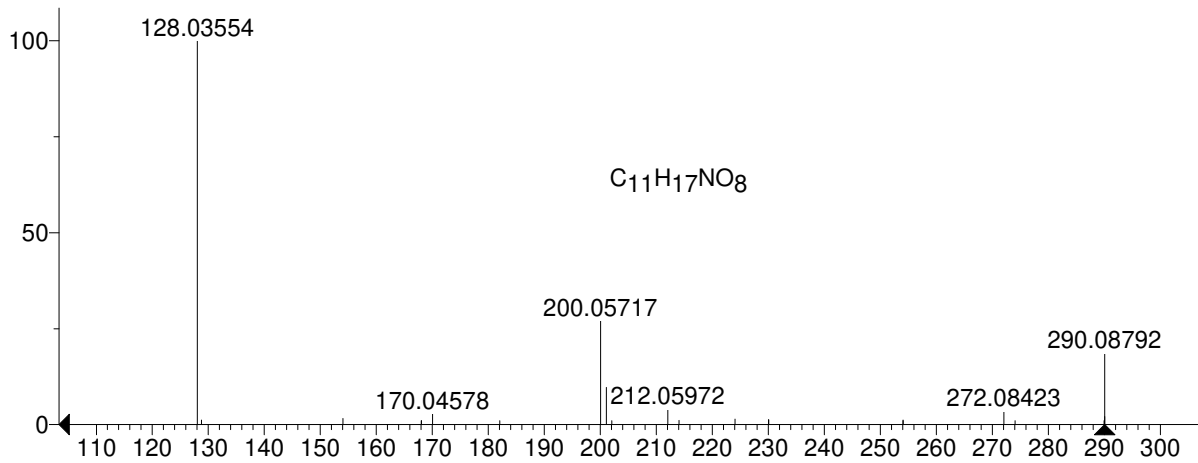

Hit 2 : N-Glycolylneuraminic acid [M+H-2H<sub>2</sub>O]<sup>+</sup> HCD 34V P=290.1  
C<sub>11</sub>H<sub>19</sub>NO<sub>10</sub>; MF: 0; RMF: 100; Prob 16.7%; CAS: 1113-83-3; Lib: nist\_msms; ID: 307261.

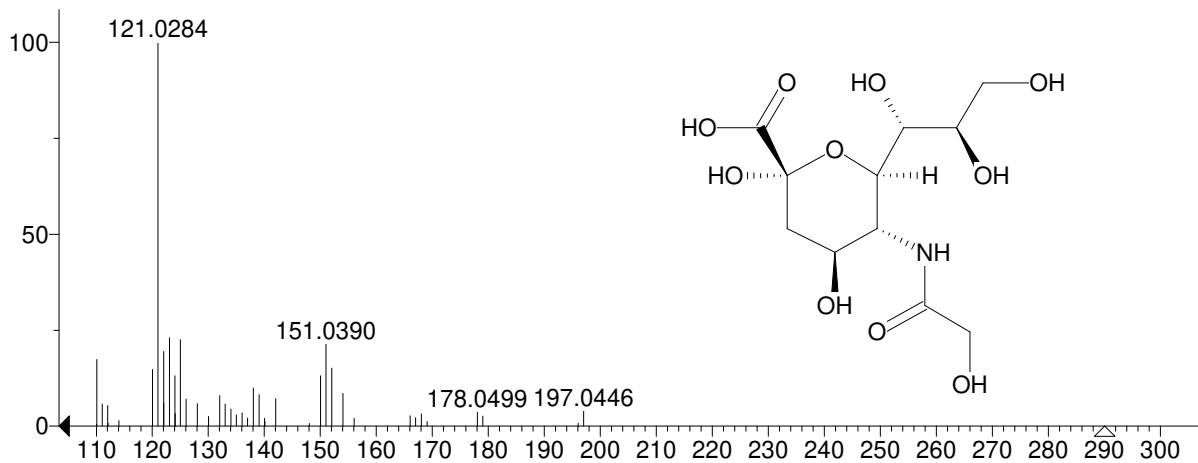

Hit 3 : (-)-N-Acetylneuraminic acid [M-H-H<sub>2</sub>O]- HCD 26V P=290.1  
C<sub>11</sub>H<sub>19</sub>NO<sub>9</sub>; MF: 0; RMF: 31; Prob 16.7%; CAS: 131-48-6; Lib: nist\_msms; ID: 479638.

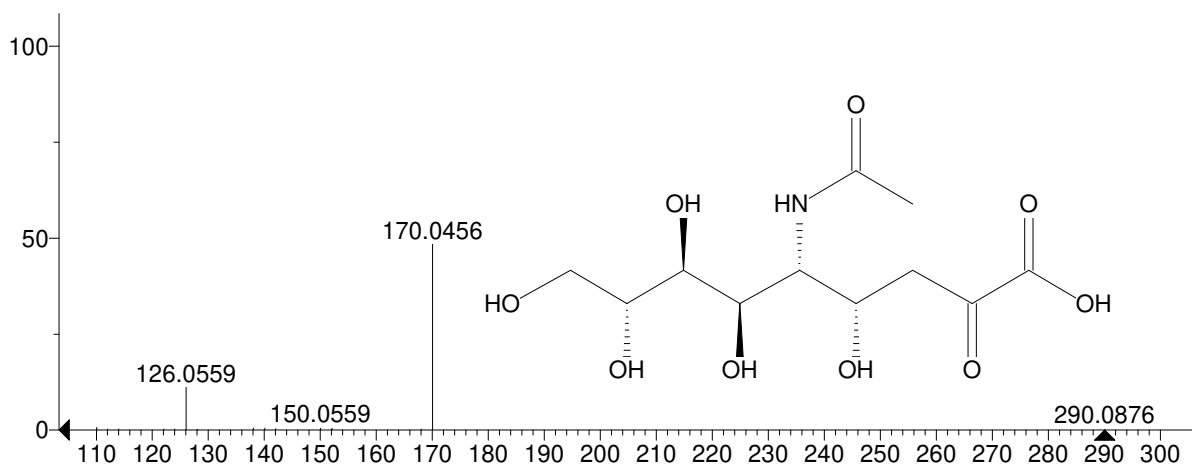

Hit 4 : 3'- $\alpha$ -Sialyl-N-acetyllactosamine [M-H-C<sub>14</sub>H<sub>25</sub>O<sub>11</sub>N]- IT-FT 35% P=290.1  
C<sub>25</sub>H<sub>42</sub>N<sub>2</sub>O<sub>19</sub>; MF: 0; RMF: 6; Prob 16.7%; CAS: 81693-22-3; Lib: nist\_msms; ID: 211511.

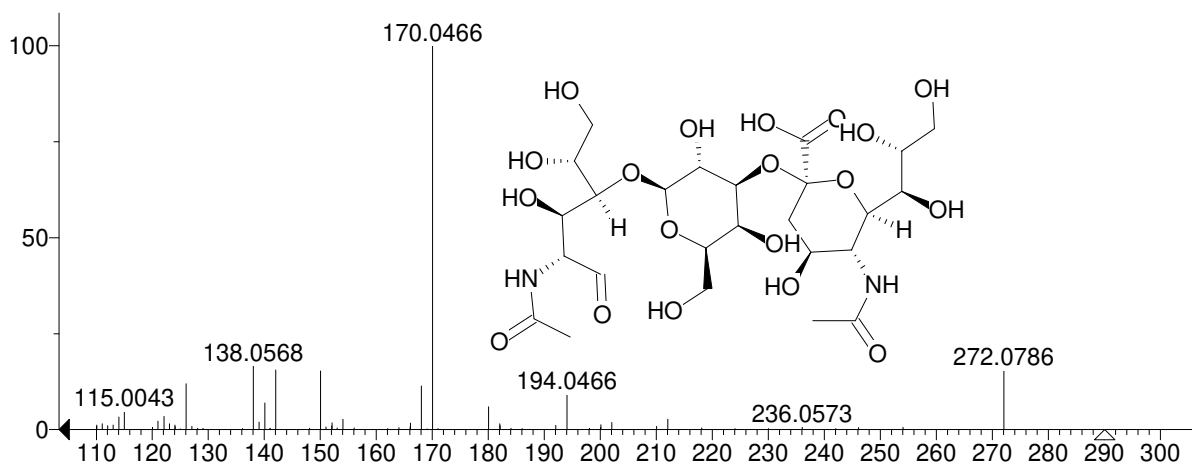

Unknown: Unknown (1.50\_305.0171m/z)  
Compound in Library Factor = 0

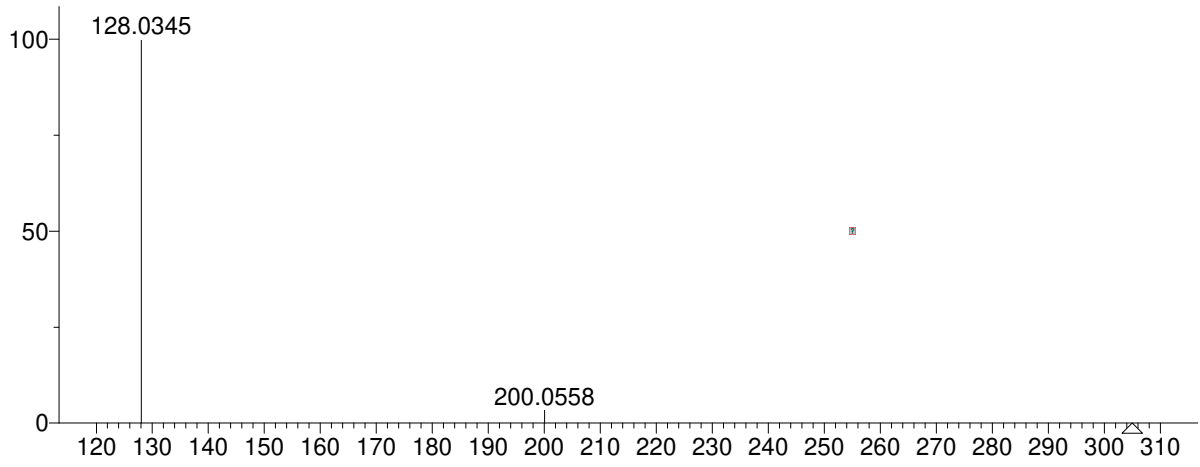

Unknown: Unknown (1.50\_809.1880m/z)  
Compound in Library Factor = 0

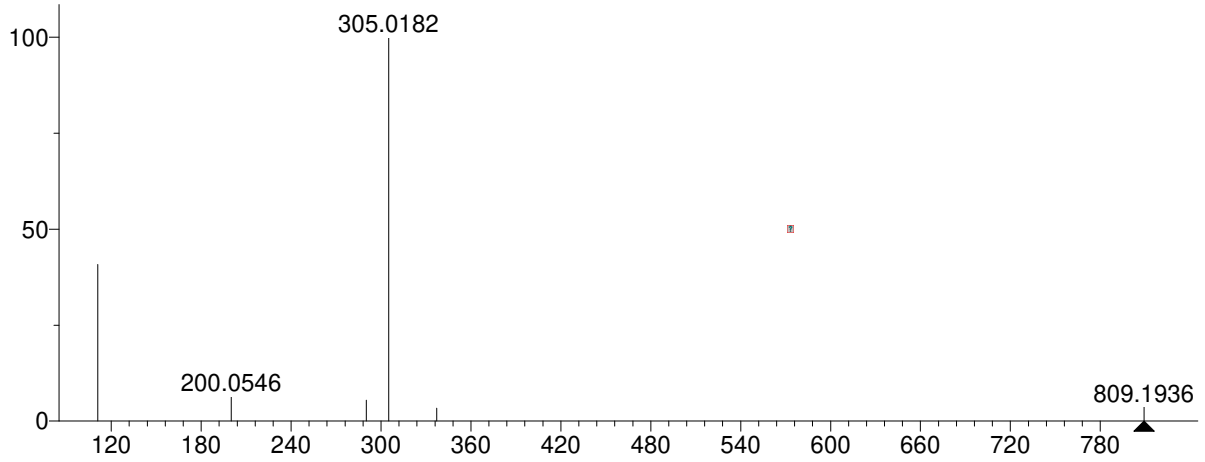

Hit 1 : Xanthorhamnins [M+K]<sup>+</sup> 25HCD P=809.2  
C<sub>34</sub>H<sub>42</sub>O<sub>20</sub>; MF: 0; RMF: 91; Prob 50.0%; Lib: mona-export-vf-npl\_qexactive; ID: 15430.

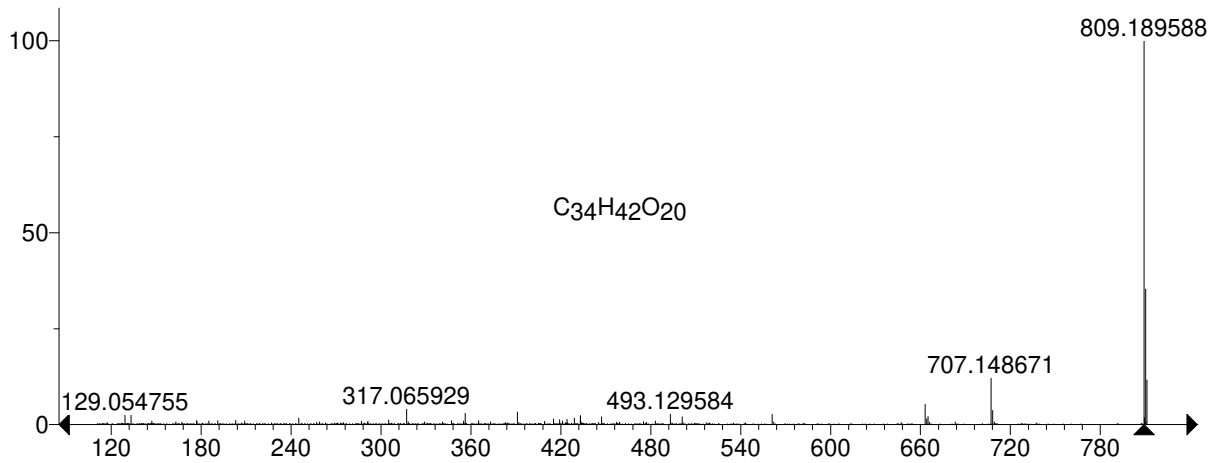

Hit 2 : 3-[(2S,3R,4S,5S,6R)-4,5-dihydroxy-3-[(2R,3R,4R,5R,6S)-3,4,5-trihydroxy-6-methyloxan-2-yl]oxy-6-[[[(2R,3F  
C<sub>34</sub>H<sub>42</sub>O<sub>20</sub>; MF: 0; RMF: 3; Prob 50.0%; Lib: anthocyanins mona; ID: 7686.

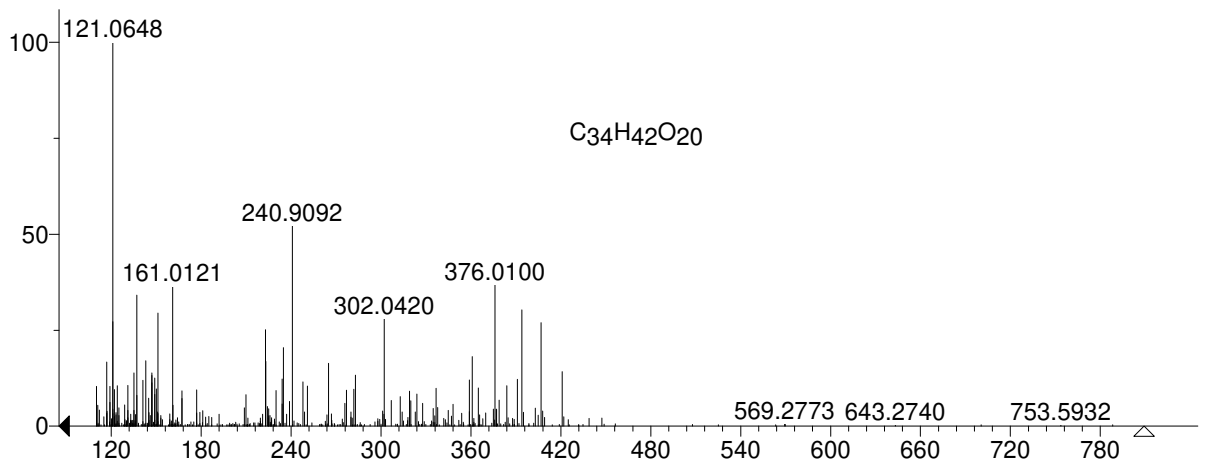



Unknown: Unknown (1.51\_633.0265m/z)  
Compound in Library Factor = 0

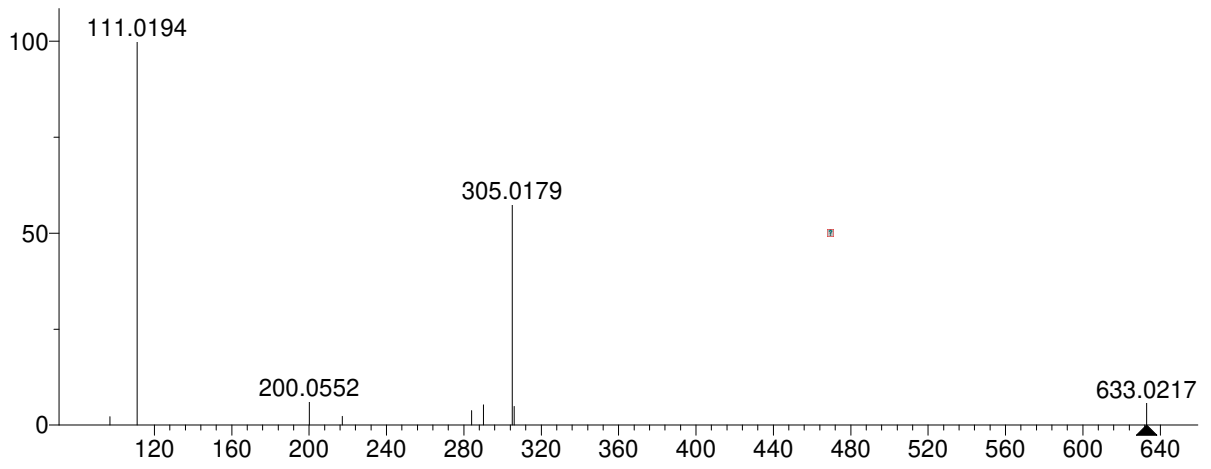

Unknown: Unknown (1.51\_647.1335m/z)  
Compound in Library Factor = 0

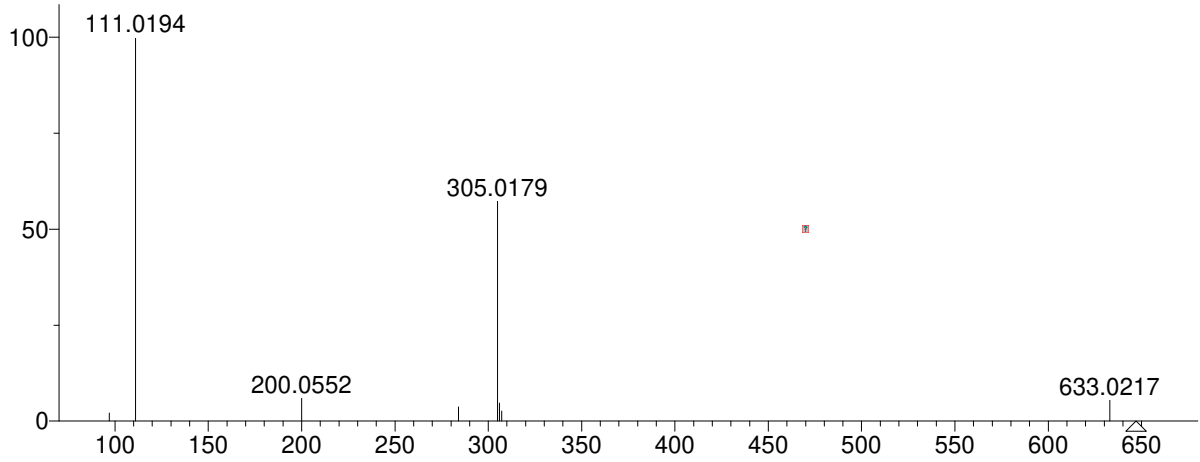

Hit 1 : Diosmin [M+K]<sup>+</sup> 65HCD P=647.1  
C<sub>28</sub>H<sub>32</sub>O<sub>15</sub>; MF: 0; RMF: 4; Prob 50.0%; Lib: mona anthocyanidin-o-glycosides; ID: 2932.

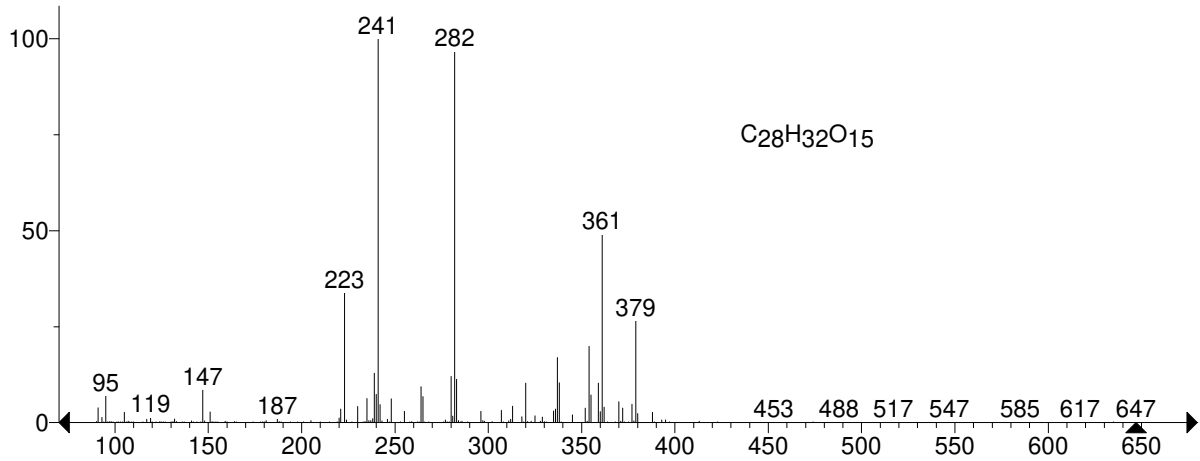

Hit 2 : 5-hydroxy-2-(4-methoxyphenyl)-3-[(2S,3R,4S,5S,6R)-3,4,5-trihydroxy-6-(hydroxymethyl)oxan-2-yl]oxy-7-[(2  
C<sub>28</sub>H<sub>32</sub>O<sub>15</sub>; MF: 0; RMF: 3; Prob 50.0%; Lib: mona anthocyanidin-o-glycosides; ID: 8667.

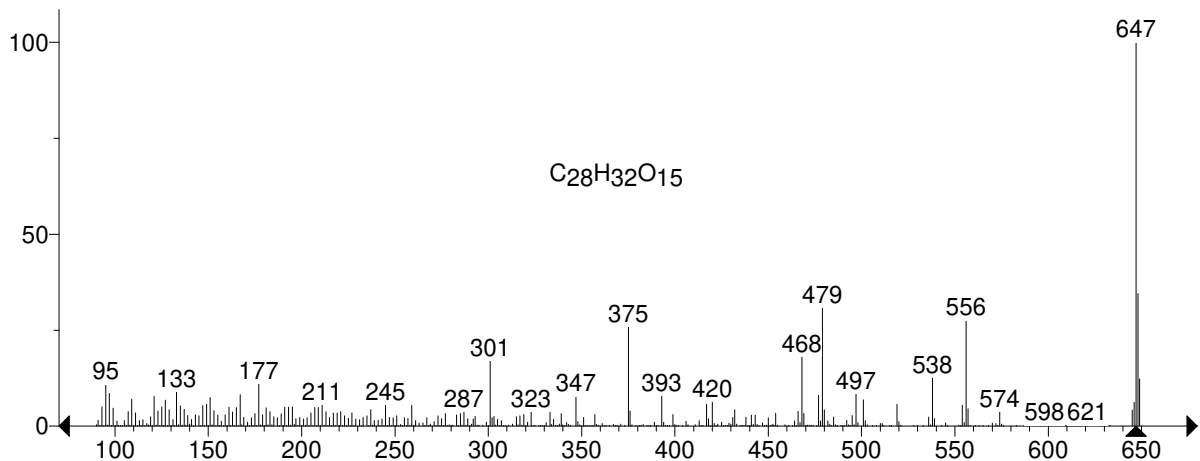

Unknown: Unknown (1.51\_746.2012m/z)  
Compound in Library Factor = 0

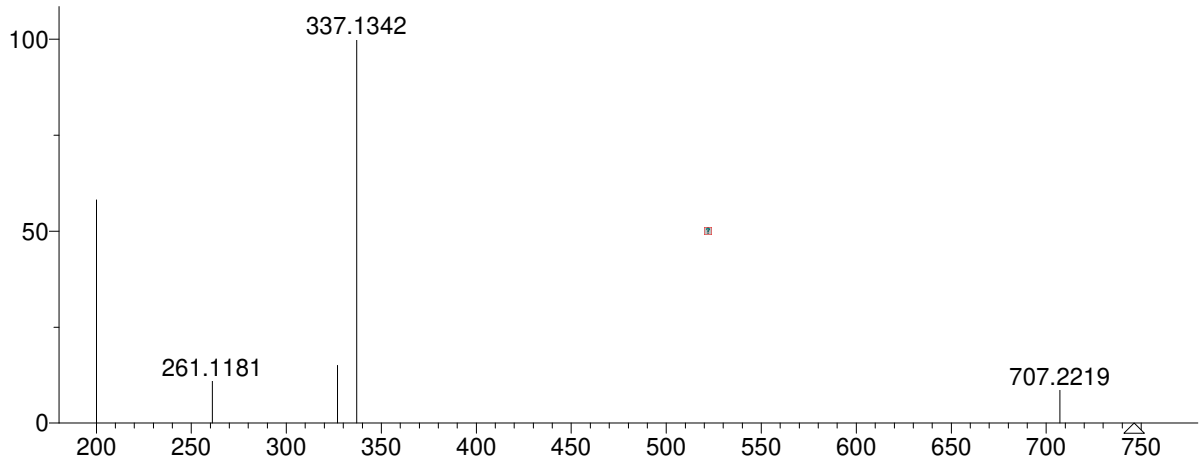

Unknown: Unknown (1.51\_971.2417m/z)  
Compound in Library Factor = 0

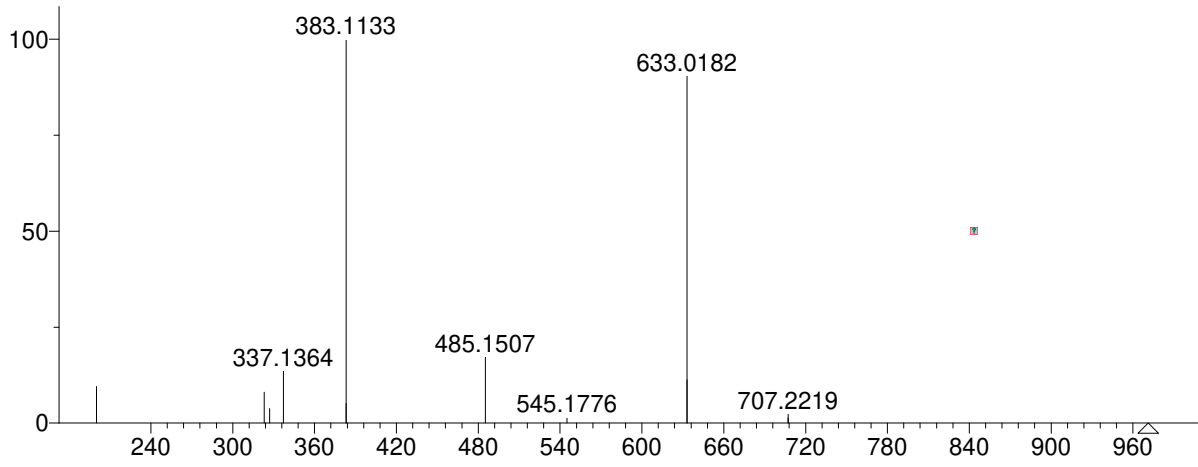

Unknown: Unknown (1.53\_305.0857m/z)  
Compound in Library Factor = -3273

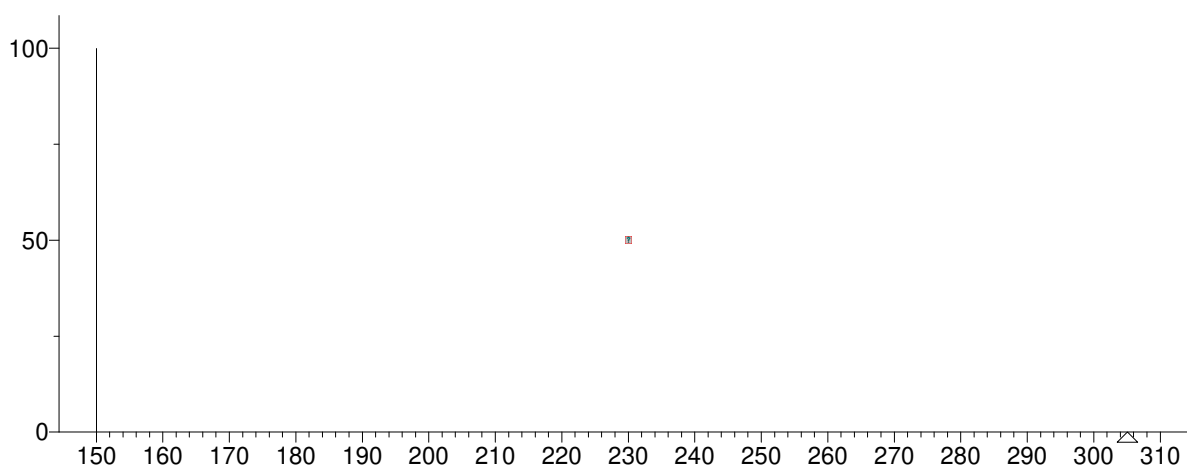

Hit 1 : 2-Hydroxyethylflurazepam [M+H-CO]<sup>+</sup> HCD 97V P=305.1  
C<sub>17</sub>H<sub>14</sub>ClFN<sub>2</sub>O<sub>2</sub>; MF: 1; RMF: 226; Prob 51.0%; CAS: 20971-53-3; Lib: nist\_msms; ID: 195581.

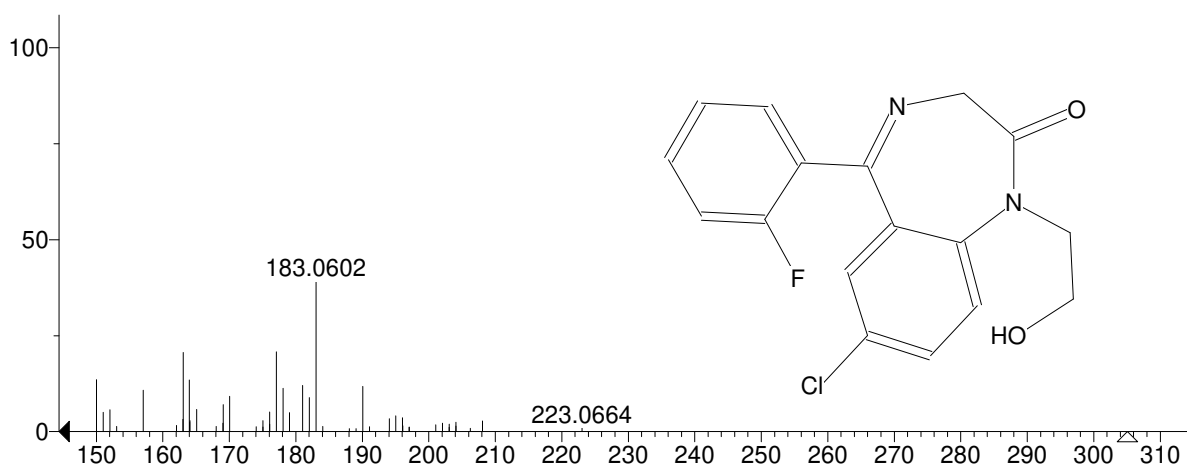

Hit 2 : Dinitramine [M+H-H<sub>2</sub>O]<sup>+</sup> HCD 54V P=305.1  
C<sub>11</sub>H<sub>13</sub>F<sub>3</sub>N<sub>4</sub>O<sub>4</sub>; MF: 0; RMF: 38; Prob 49.0%; CAS: 29091-05-2; Lib: nist\_msms; ID: 100145.

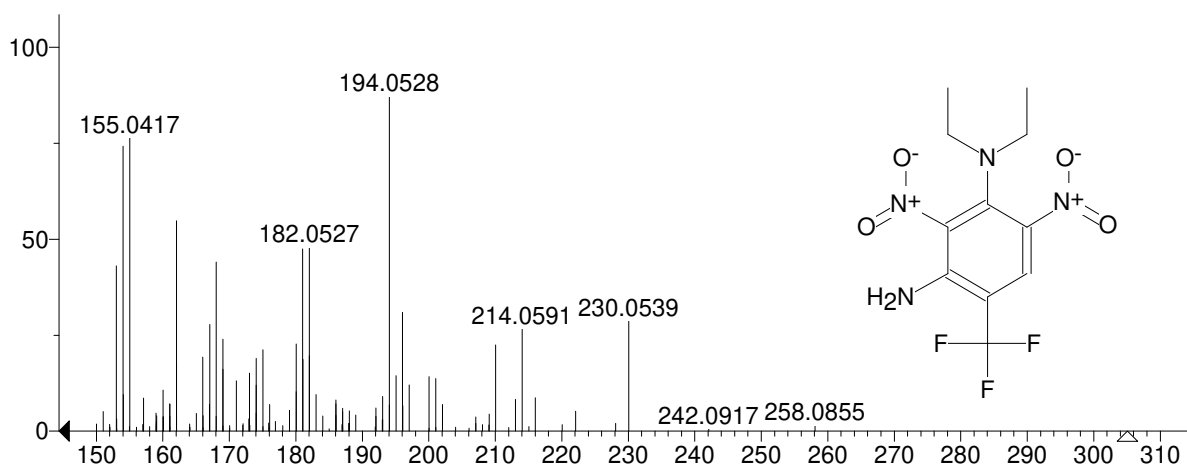

Unknown: Unknown (1.53\_379.1704m/z)  
Compound in Library Factor = 0

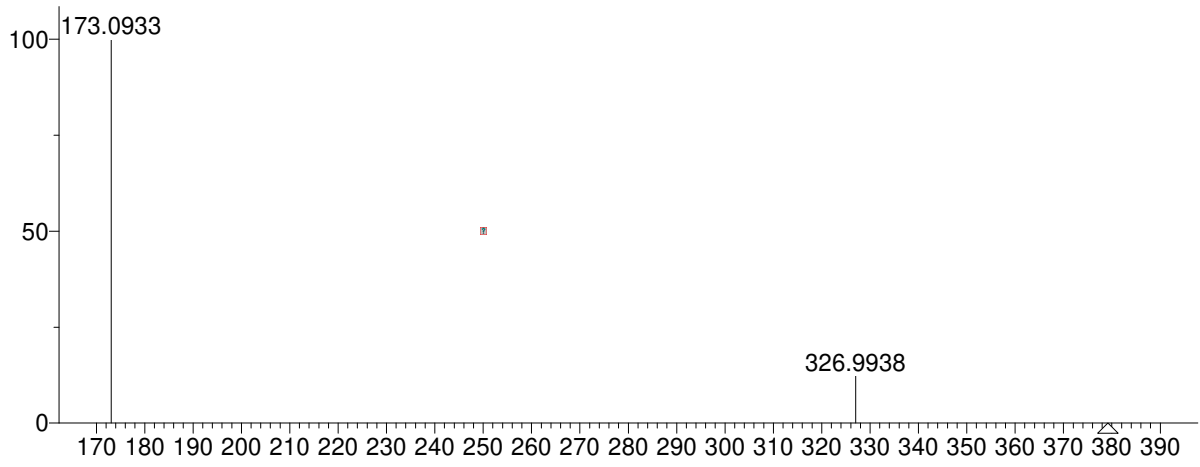

Unknown: Unknown (1.53\_440.1761m/z)  
Compound in Library Factor = 0

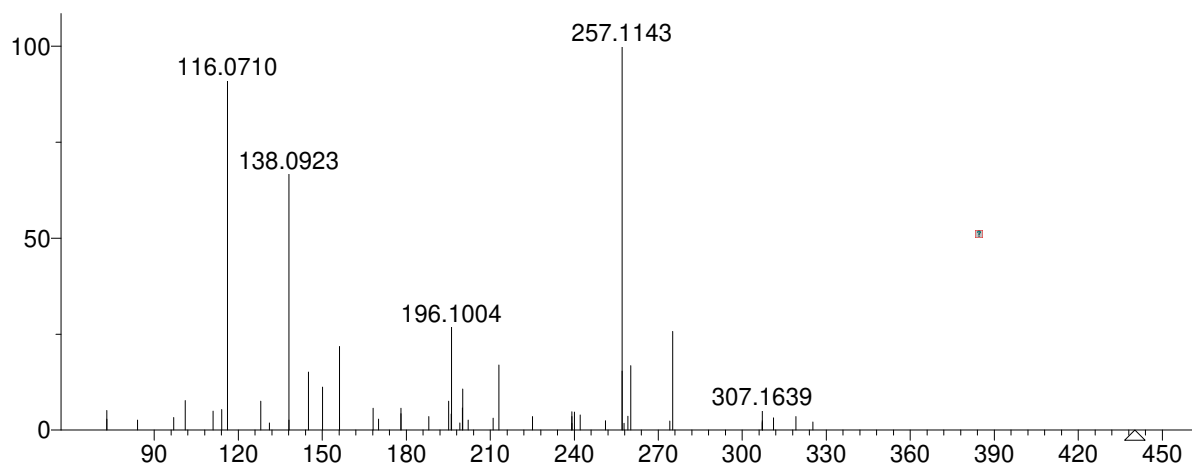

Hit 1 : Quinadoline B\_130007 [M+H]<sup>+</sup> P=440.2  
C<sub>25</sub>H<sub>21</sub>N<sub>5</sub>O<sub>3</sub>; MF: 0; RMF: 20; Prob 100.0%; Lib: mona-export-gnps; ID: 4995.

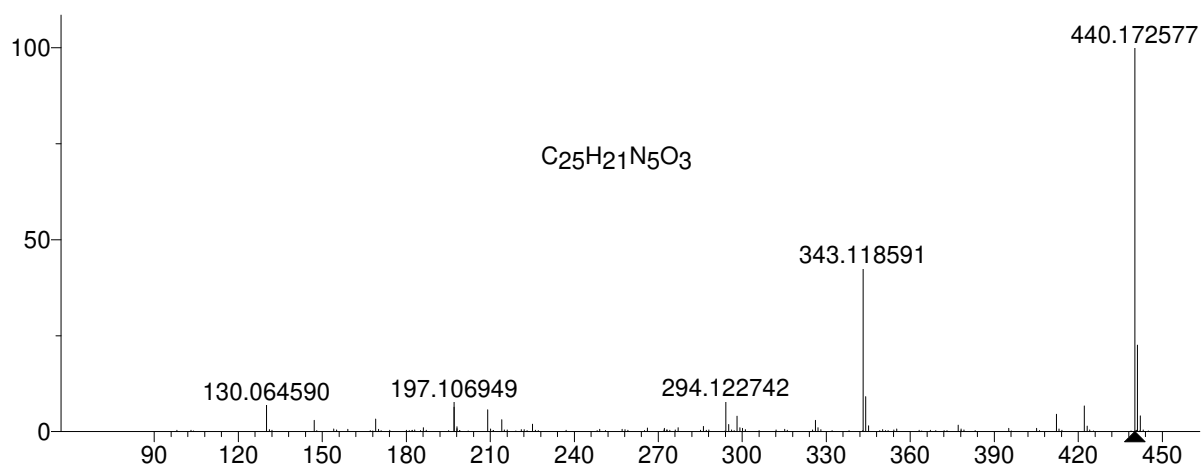

Unknown: Unknown (1.55\_452.1404m/z)  
Compound in Library Factor = 0

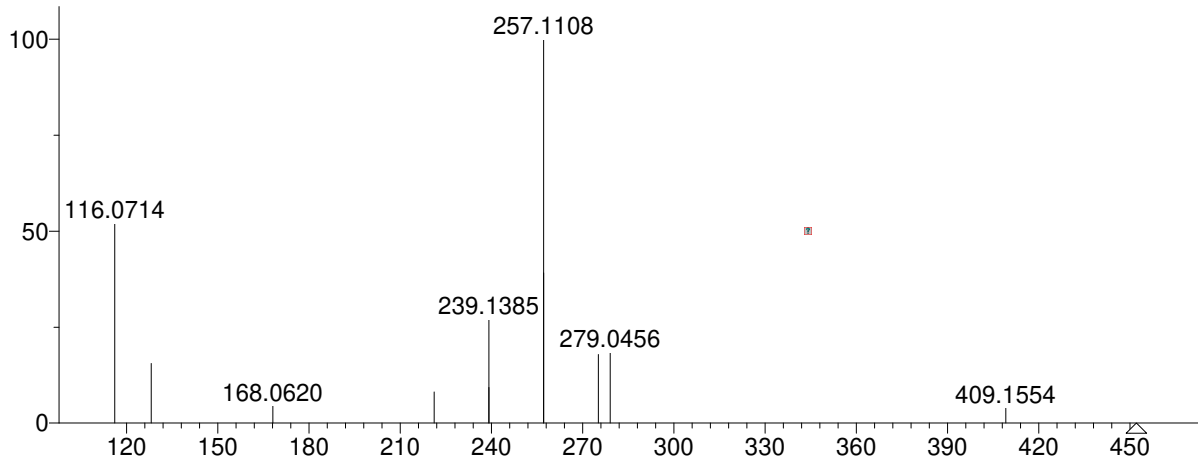



Unknown: Unknown (1.55\_477.2077m/z)  
Compound in Library Factor = 0

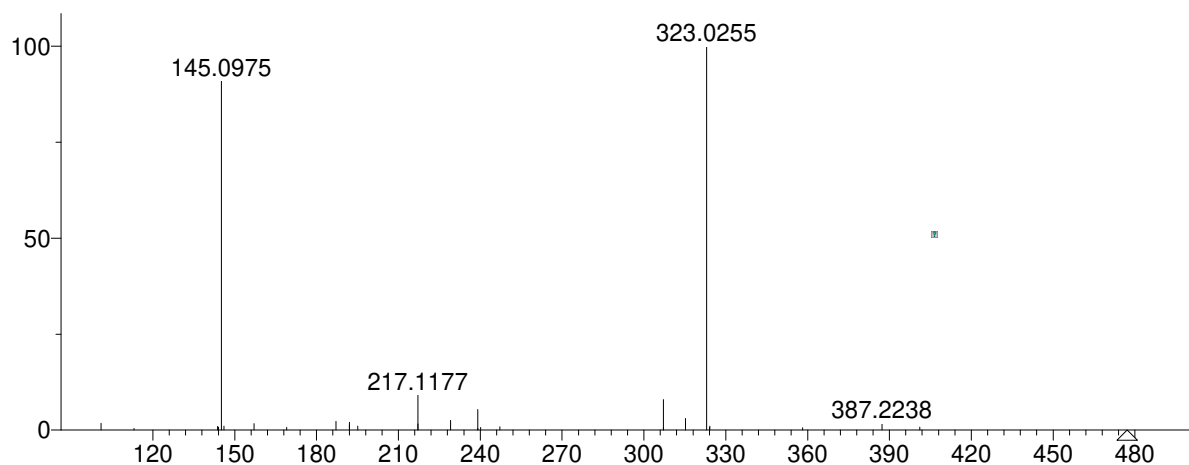

Hit 1 : 4-(2-Hydroxyethyl)piperazine-1-ethanesulfonic acid [2M+H]<sup>+</sup> HCD 86V P=477.2  
C<sub>8</sub>H<sub>18</sub>N<sub>2</sub>O<sub>4</sub>S; MF: 0; RMF: 28; Prob 33.3%; CAS: 7365-45-9; Lib: nist\_msms; ID: 58517.

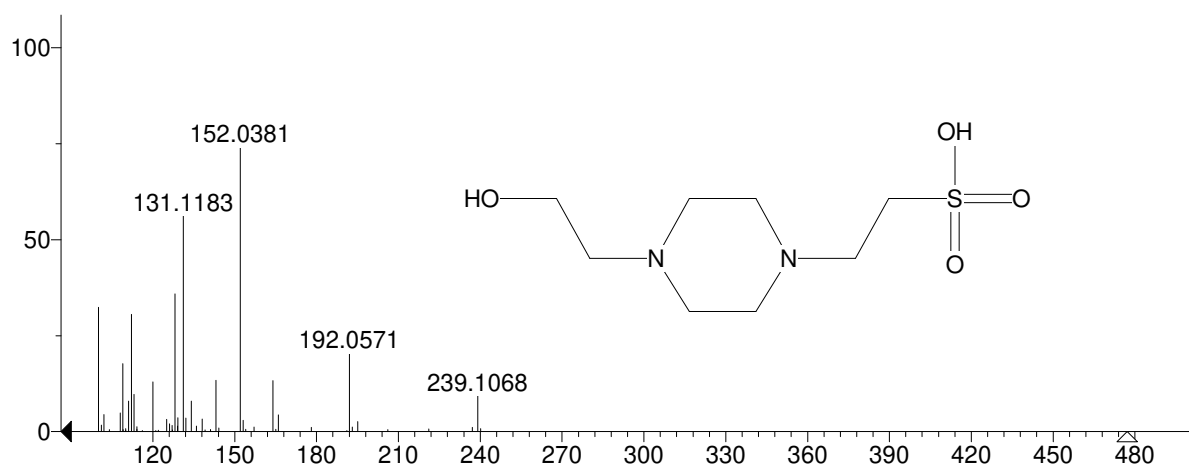

Hit 2 : 5-O-methyllicoricidin [M+K]<sup>+</sup> 65HCD P=477.2  
C<sub>27</sub>H<sub>34</sub>O<sub>5</sub>; MF: 0; RMF: 16; Prob 33.3%; Lib: mona-export-vf-npl\_qexactive; ID: 966.

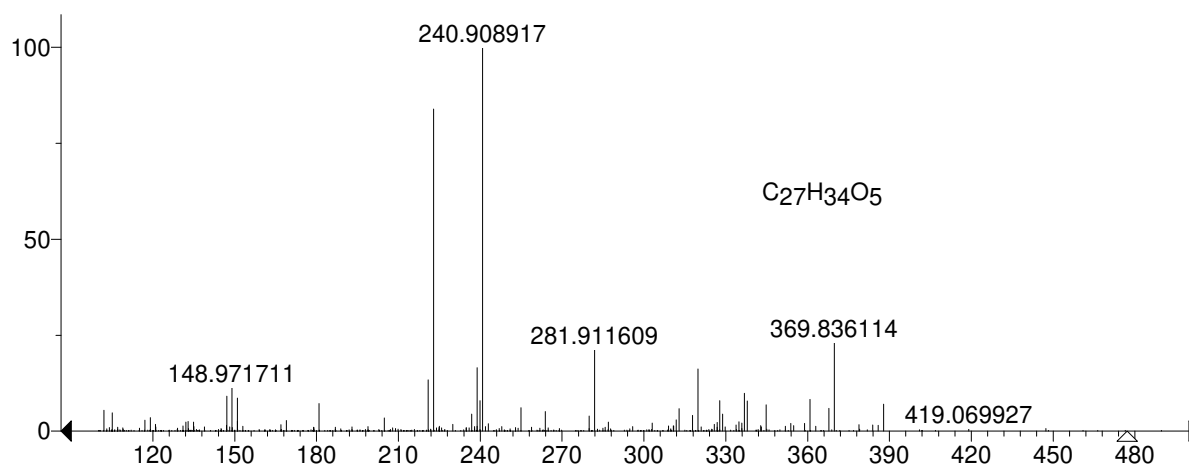

\*\* Search Report Page 2 of 2 \*\*

Hit 3 : 1,7-bis(4-hydroxyphenyl)-5-[(2R,3R,4S,5S,6R)-3,4,5-trihydroxy-6-(hydroxymethyl)oxan-2-yl]oxyheptan-3-or  
C<sub>25</sub>H<sub>32</sub>O<sub>9</sub>; MF: 0; RMF: 3; Prob 33.3%; Lib: mona-export-vf-npl\_qexactive; ID: 7568.

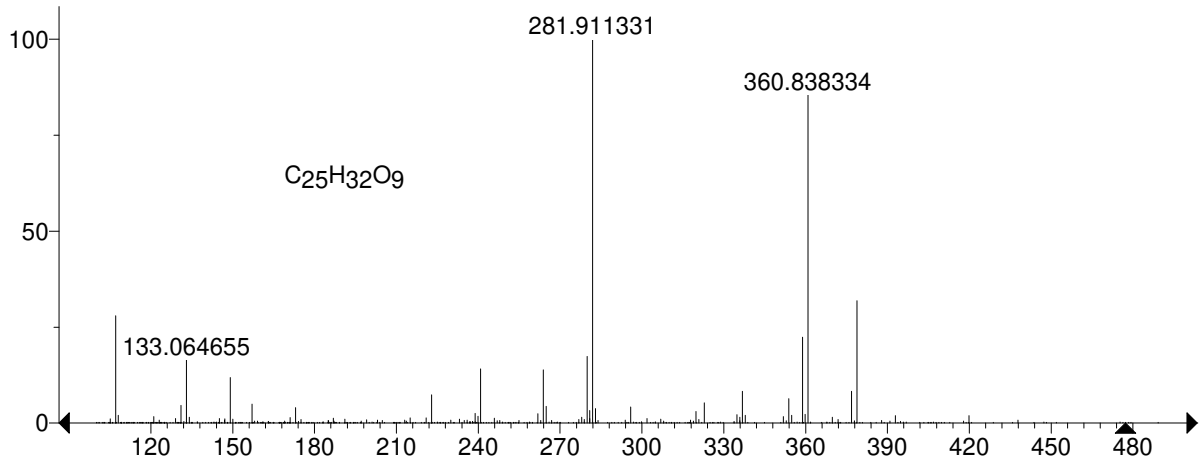

Unknown: Unknown (1.56\_191.0185m/z)  
Compound in Library Factor = -1224

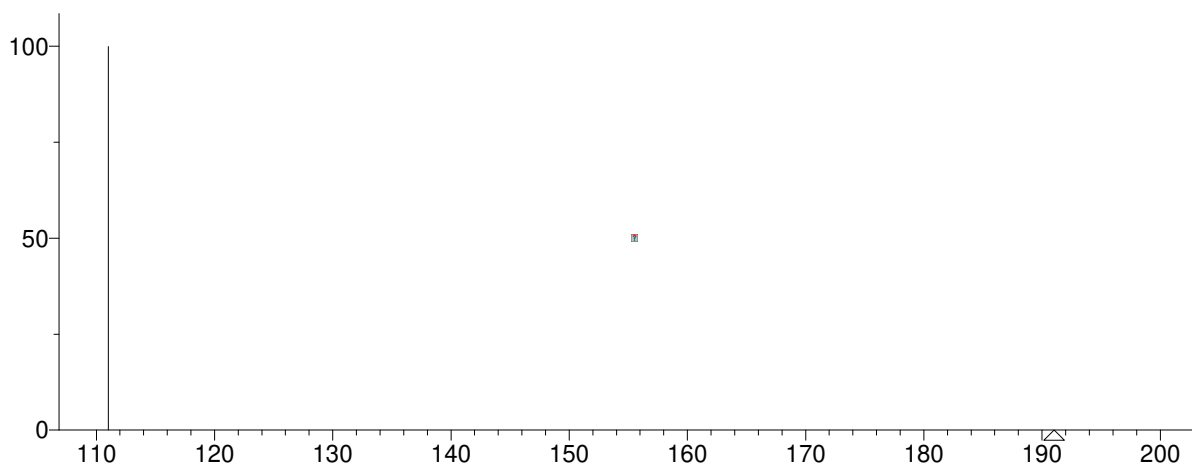

Hit 1 : Citric acid [M-H]- 20 P=191  
C<sub>6</sub>H<sub>8</sub>O<sub>7</sub>; MF: 364; RMF: 999; Prob 74.1%; Lib: msms neg mona\_ipb\_gnps\_plasma; ID: 1053.

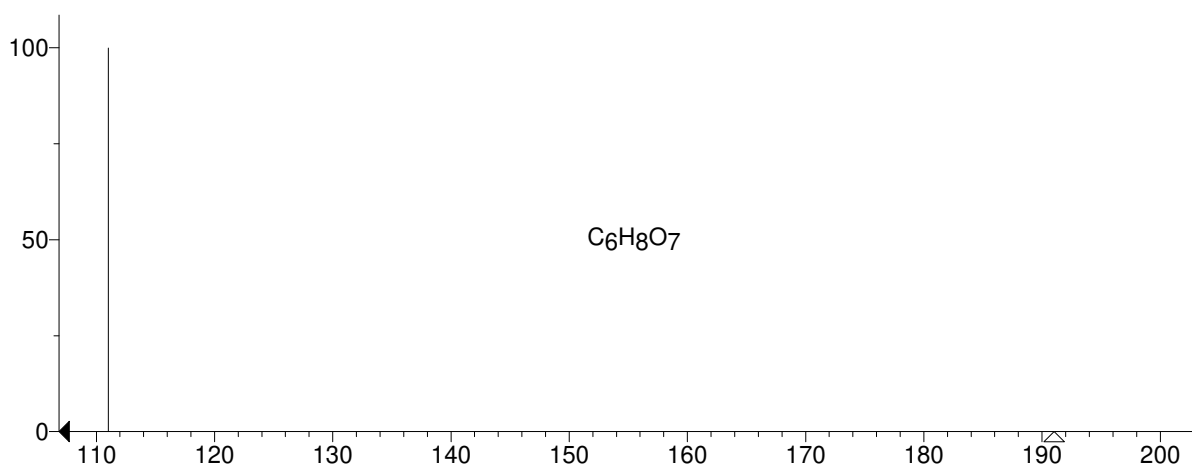

Hit 2 : Mucic acid [M-H-H<sub>2</sub>O]- HCD 30V P=191  
C<sub>6</sub>H<sub>10</sub>O<sub>8</sub>; MF: 318; RMF: 961; Prob 15.6%; CAS: 526-99-8; Lib: nist\_msms; ID: 303359.

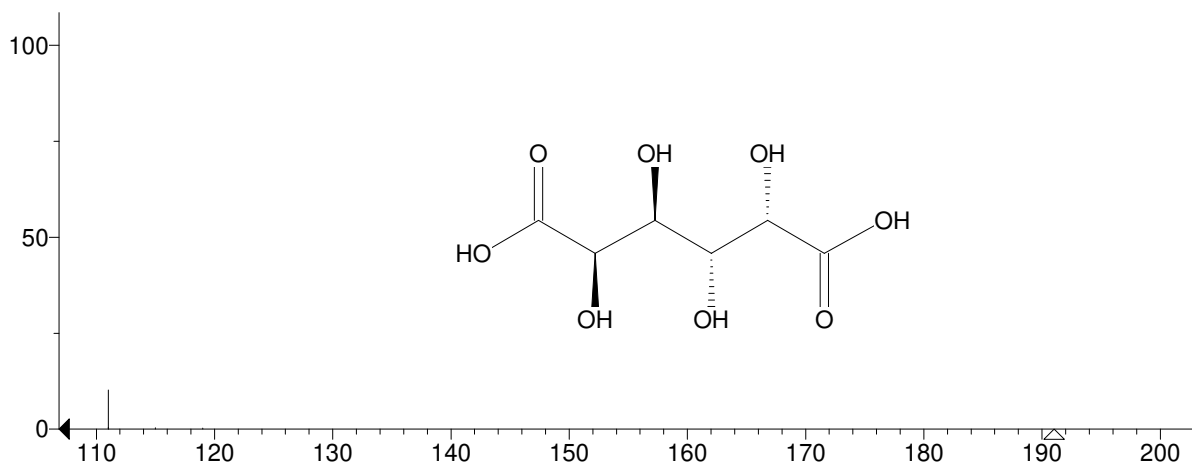

Hit 3 : citric acid [M-H]<sup>-</sup> 15 P=191  
C<sub>6</sub>H<sub>8</sub>O<sub>7</sub>; MF: 299; RMF: 963; Prob 7.59%; Lib: msms neg mona\_ipb\_gnps\_plasma; ID: 1145.

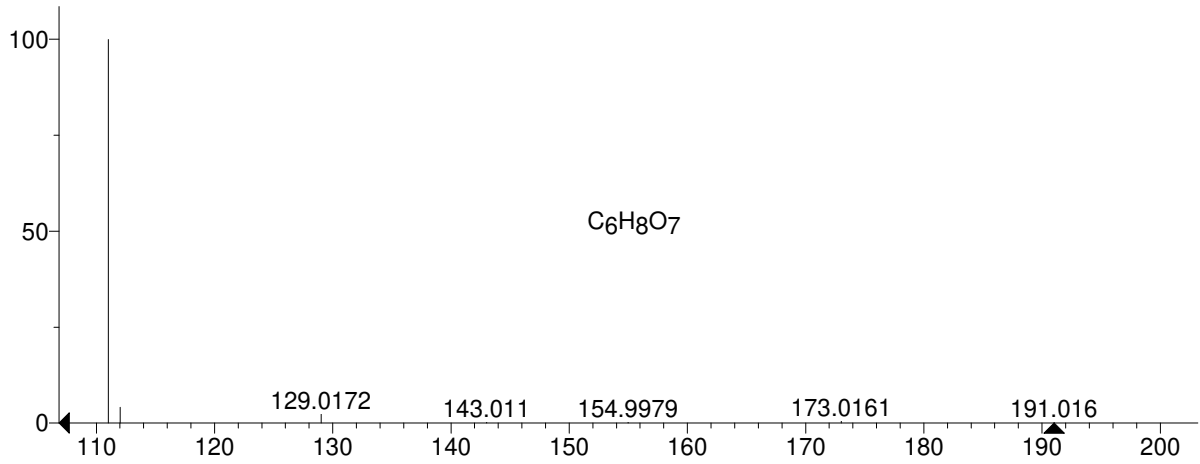

Hit 4 : Citric acid (Not validated, isomer of 228); PlaSMA ID-227 [M-H]<sup>-</sup> P=191  
C<sub>6</sub>H<sub>8</sub>O<sub>7</sub>; MF: 250; RMF: 917; Prob 1.56%; Lib: biomsms-neg-plasma; ID: 463.

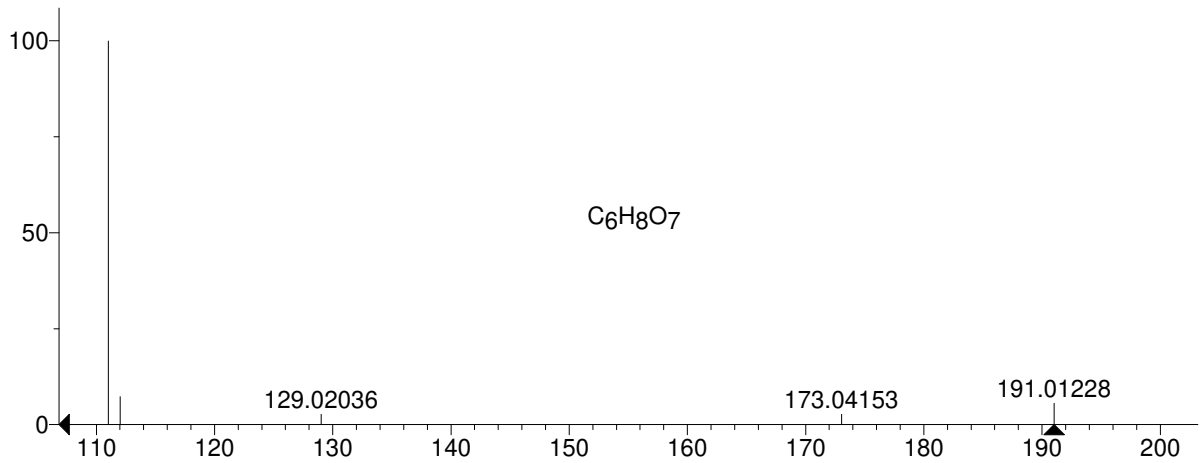

Hit 5 : CITRATE [M-H]<sup>-</sup> P=191  
C<sub>6</sub>H<sub>8</sub>O<sub>7</sub>; MF: 225; RMF: 894; Prob 0.47%; Lib: msms-neg-gnps; ID: 159.

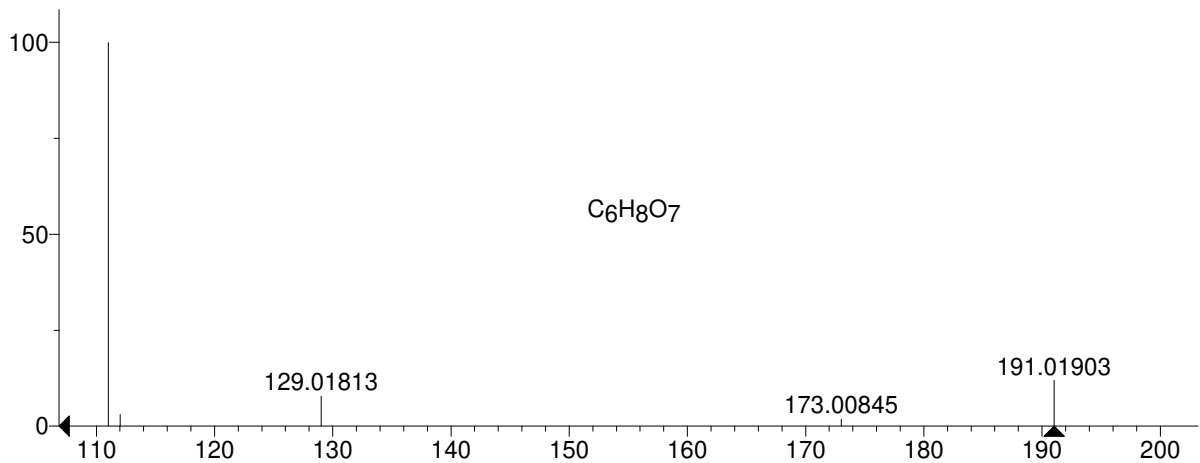

\*\* Search Report Page 1 of 2 \*\*

Unknown: Unknown (1.57\_323.0278m/z)  
Compound in Library Factor = -227

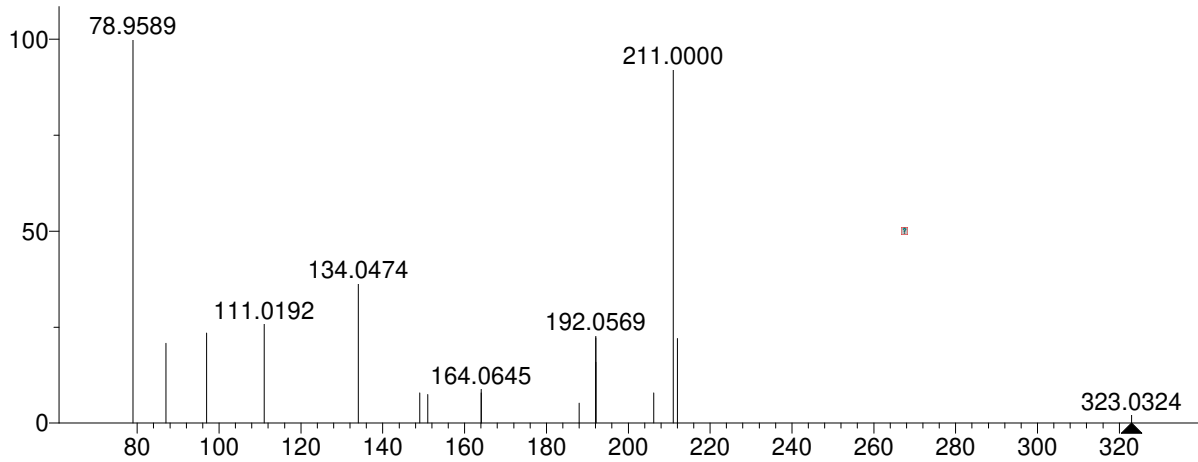

Hit 1 : 1-β-D-Arabinofuranosyluracil 5'-monophosphate [M-H]<sup>-</sup> HCD 29V P=323  
C<sub>9</sub>H<sub>13</sub>N<sub>2</sub>O<sub>9</sub>P; MF: 536; RMF: 695; Prob 87.7%; CAS: 18354-06-8; Lib: nist\_msms; ID: 447571.

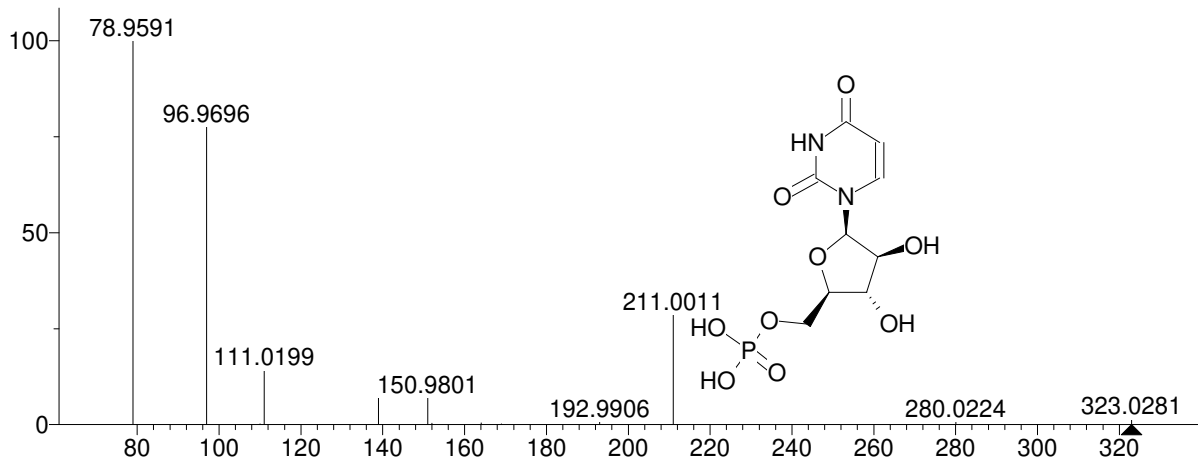

Hit 2 : Uridine 5'-monophosphate [M-H]<sup>-</sup> 20-30-40% P=323  
C<sub>9</sub>H<sub>13</sub>N<sub>2</sub>O<sub>9</sub>P; MF: 437; RMF: 644; Prob 6.64%; Lib: mona-export-fiehn\_hilic; ID: 1559.

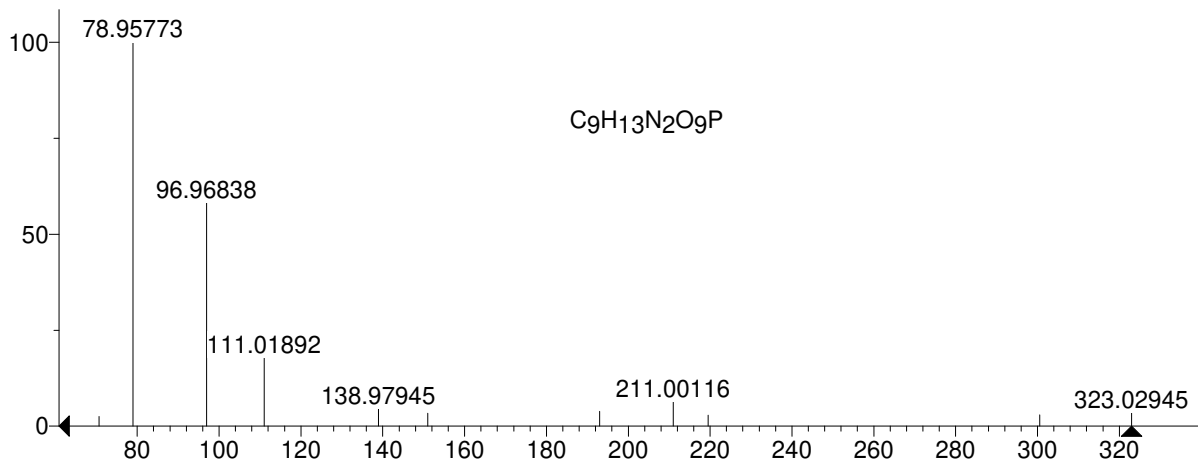

Hit 3 : URIDINE-5-MONOPHOSPHATE

C<sub>9</sub>H<sub>13</sub>N<sub>2</sub>O<sub>9</sub>P; MF: 422; RMF: 644; Prob 4.02%; Lib: embl neg mcg; ID: 631.

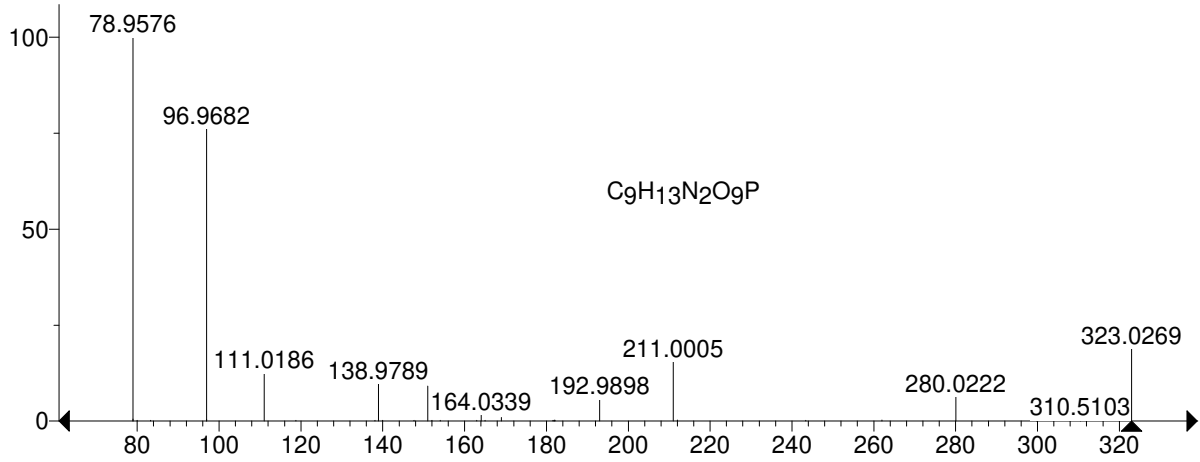

Hit 4 : URIDINE-5-MONOPHOSPHATE [M-H]<sup>-</sup> P=323

C<sub>9</sub>H<sub>13</sub>N<sub>2</sub>O<sub>9</sub>P; MF: 395; RMF: 640; Prob 1.18%; Lib: mona-export-gnps; ID: 5550.

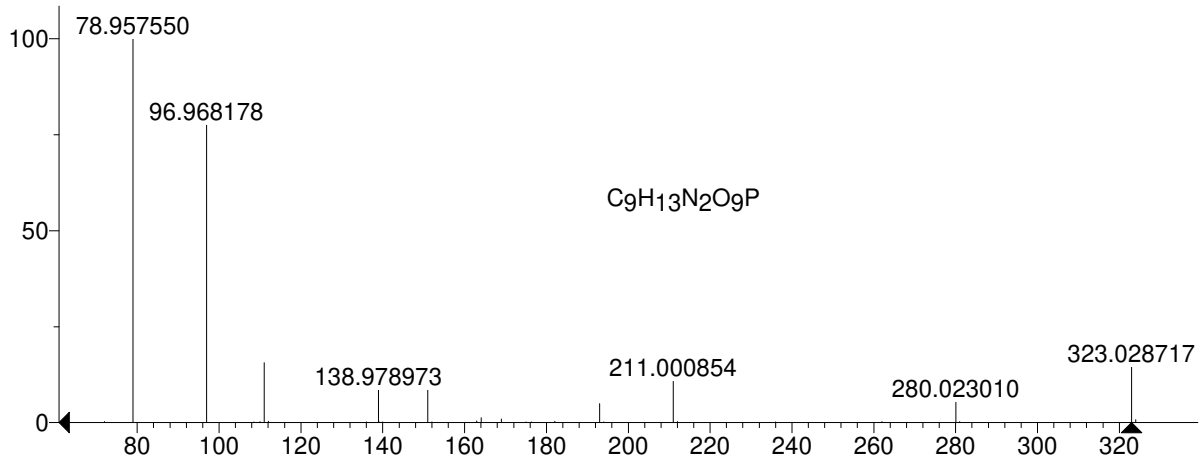

Hit 5 : Uridine 5'-diphosphoglucuronic acid [M-H-C<sub>6</sub>H<sub>9</sub>O<sub>9</sub>P]<sup>-</sup> HCD 29V P=323

C<sub>15</sub>H<sub>22</sub>N<sub>2</sub>O<sub>18</sub>P<sub>2</sub>; MF: 372; RMF: 635; Prob 0.43%; CAS: 2616-64-0; Lib: nist\_msms; ID: 486423.

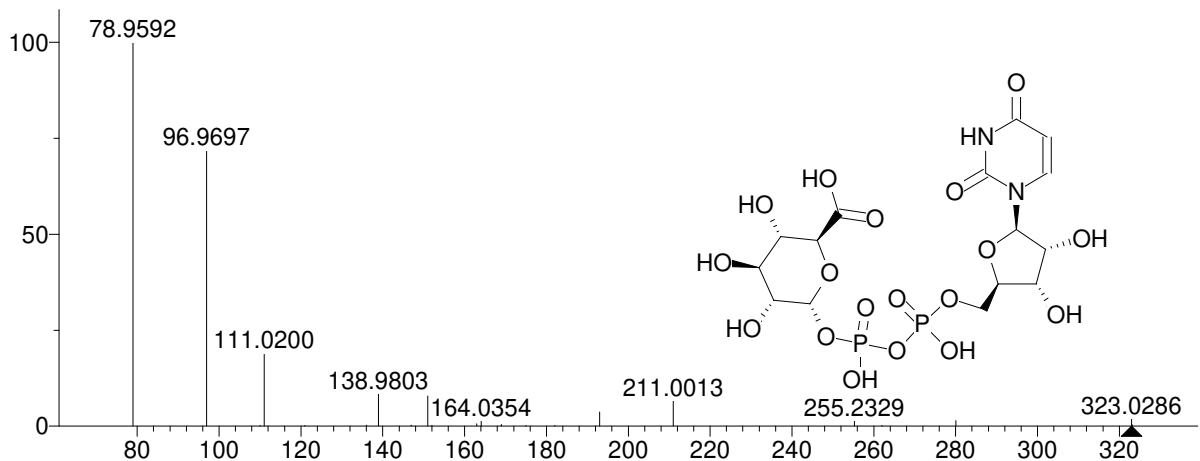

Unknown: Unknown (1.57\_470.1501m/z)  
Compound in Library Factor = 0

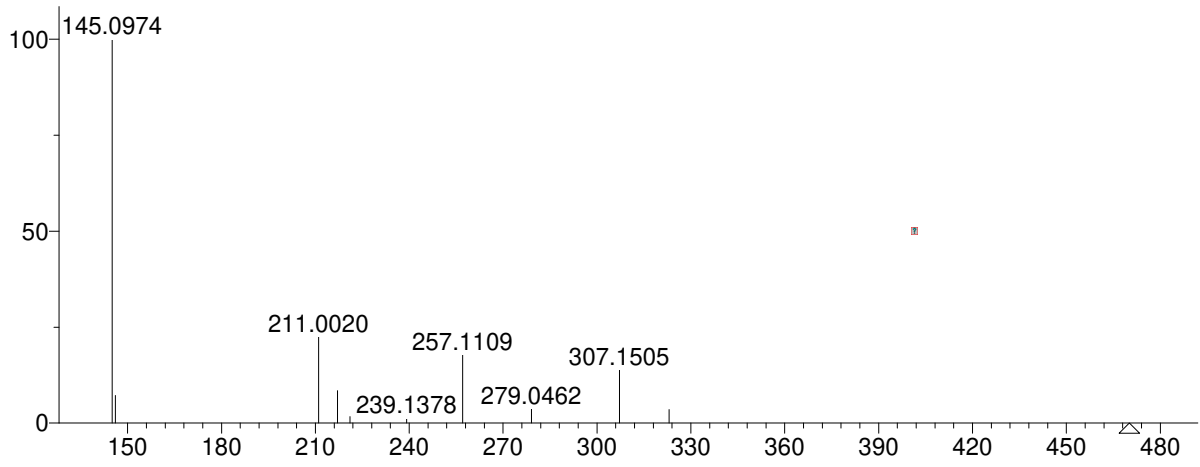

Unknown: Unknown (1.57\_629.0541m/z)  
Compound in Library Factor = 0

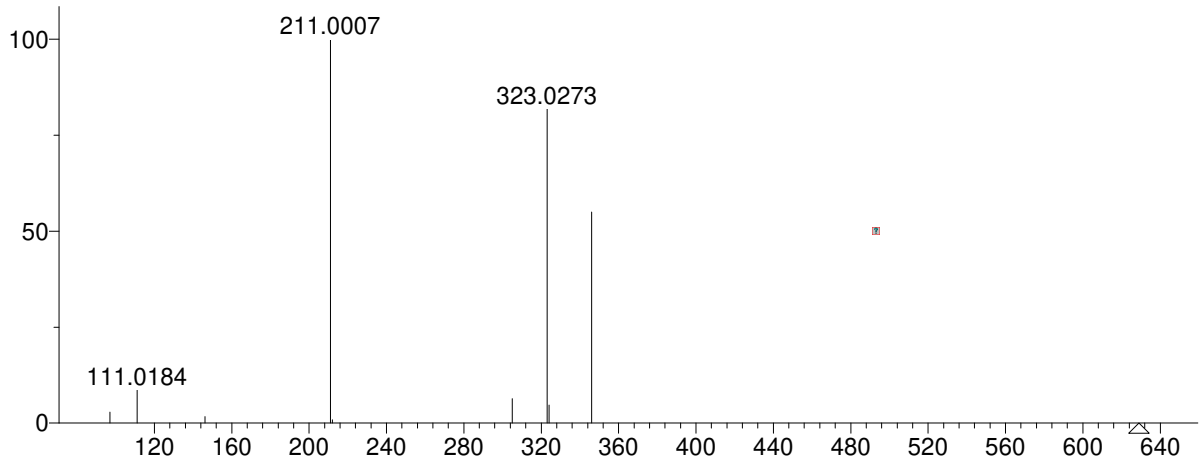



Unknown: Unknown (1.57\_647.0643m/z)  
Compound in Library Factor = -496

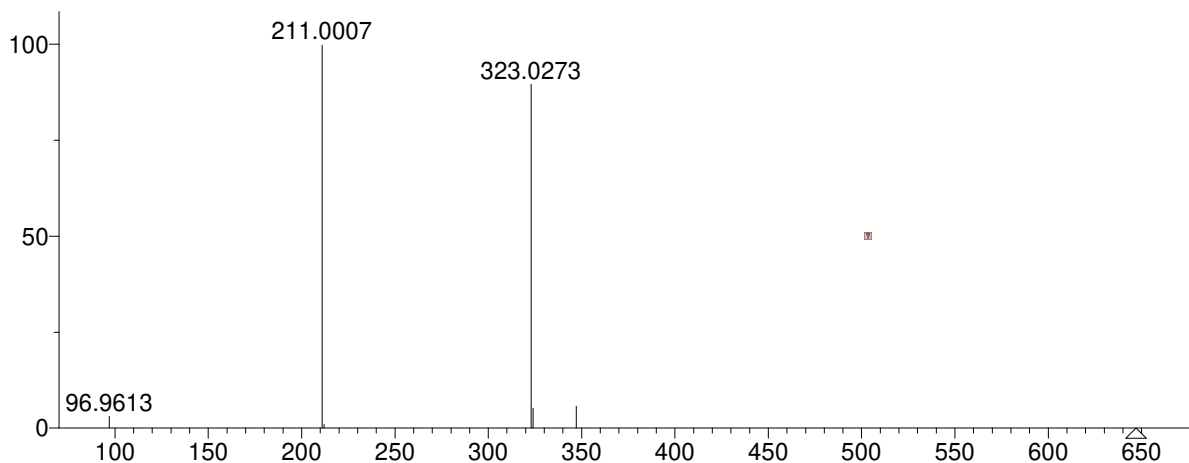

Hit 1 : 1-β-D-Arabinofuranosyluracil 5'-monophosphate [2M-H]- HCD 38V P=647.1  
C<sub>9</sub>H<sub>13</sub>N<sub>2</sub>O<sub>9</sub>P; MF: 385; RMF: 813; Prob 94.9%; CAS: 18354-06-8; Lib: nist\_msms; ID: 447597.

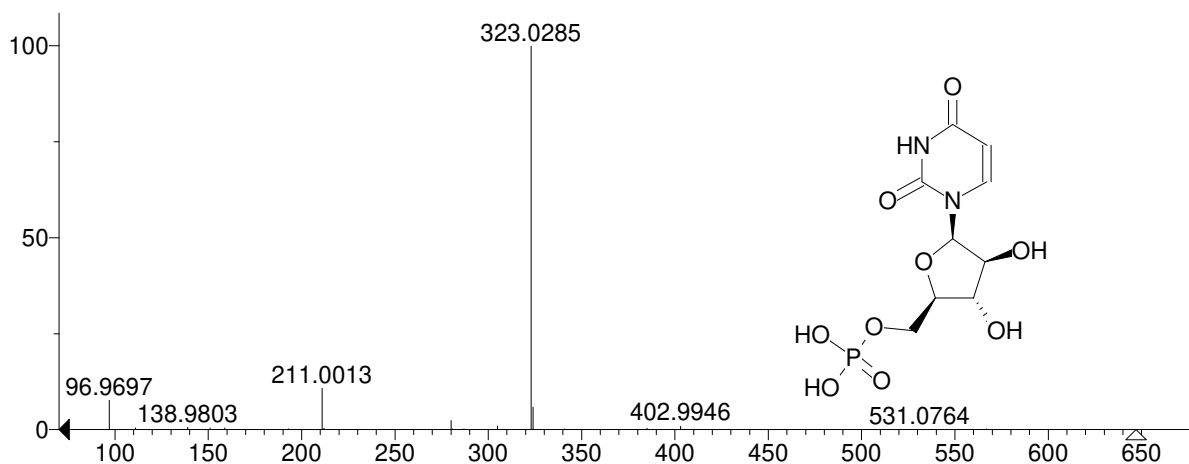

Hit 2 : Uridine 5'-monophosphate [2M-H]- HCD 20V P=647.1  
C<sub>9</sub>H<sub>13</sub>N<sub>2</sub>O<sub>9</sub>P; MF: 266; RMF: 897; Prob 5.12%; CAS: 58-97-9; Lib: nist\_msms; ID: 126136.

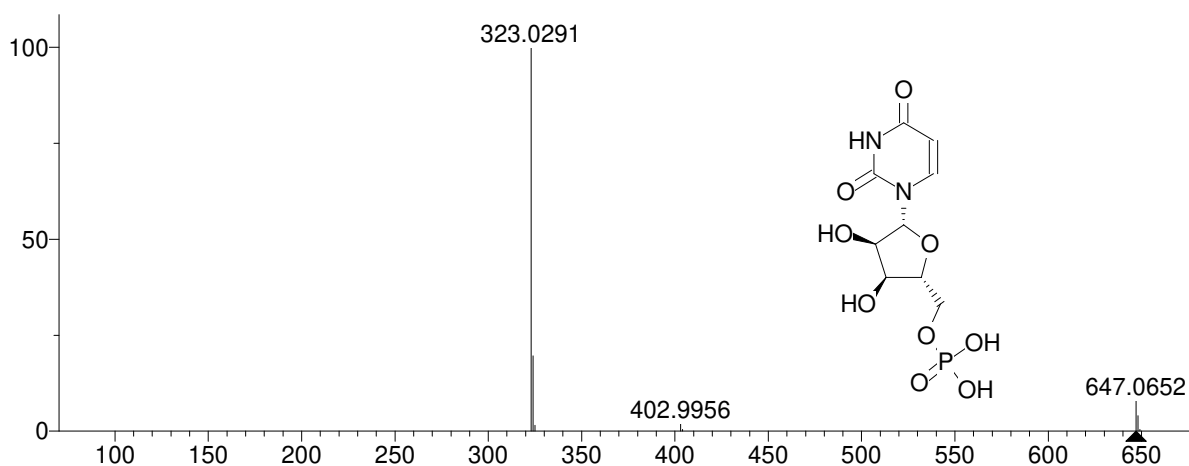

Unknown: Unknown (1.57\_670.0902m/z)  
Compound in Library Factor = 0

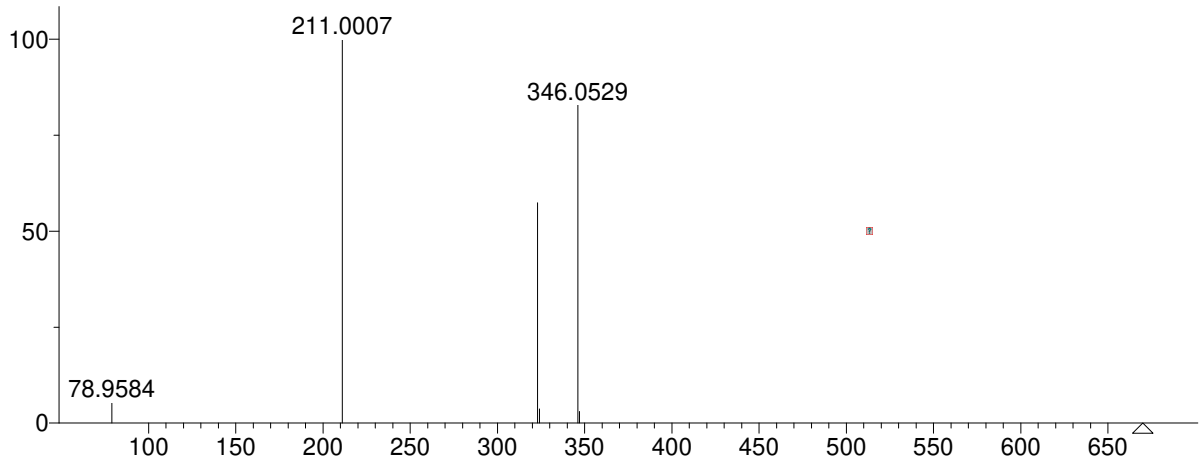

Unknown: Unknown (1.59\_346.0549m/z)  
Compound in Library Factor = -1014

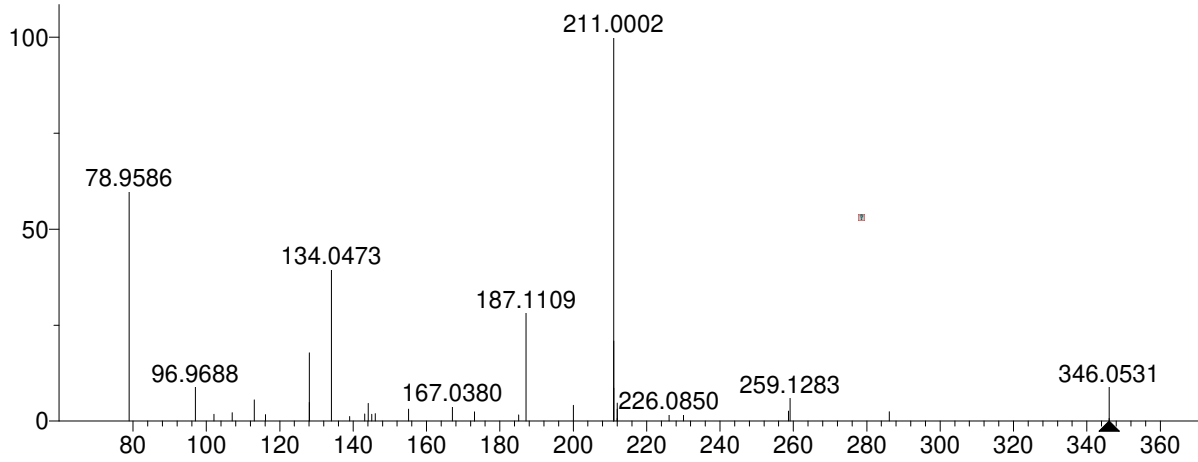

Hit 1 : Adenosine 2'-monophosphate [M-H]<sup>-</sup> HCD 24V P=346.1  
C<sub>10</sub>H<sub>14</sub>N<sub>5</sub>O<sub>7</sub>P; MF: 558; RMF: 766; Prob 33.1%; CAS: 130-49-4; Lib: nist\_msms; ID: 356679.

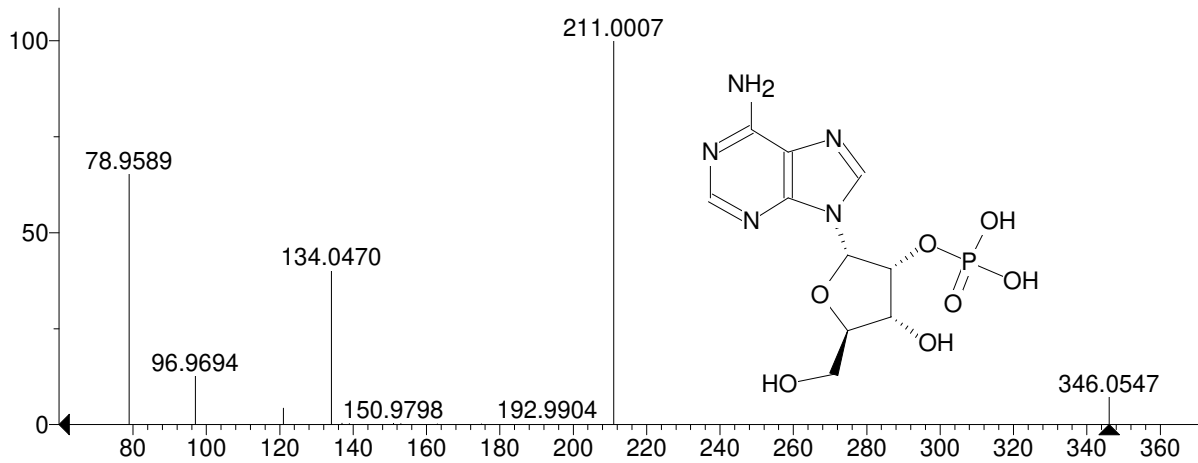

Hit 2 : Adenosine 3'-monophosphate [M-H]<sup>-</sup> HCD 31V P=346.1  
C<sub>10</sub>H<sub>14</sub>N<sub>5</sub>O<sub>7</sub>P; MF: 554; RMF: 694; Prob 28.0%; CAS: 84-21-9; Lib: nist\_msms; ID: 223902.

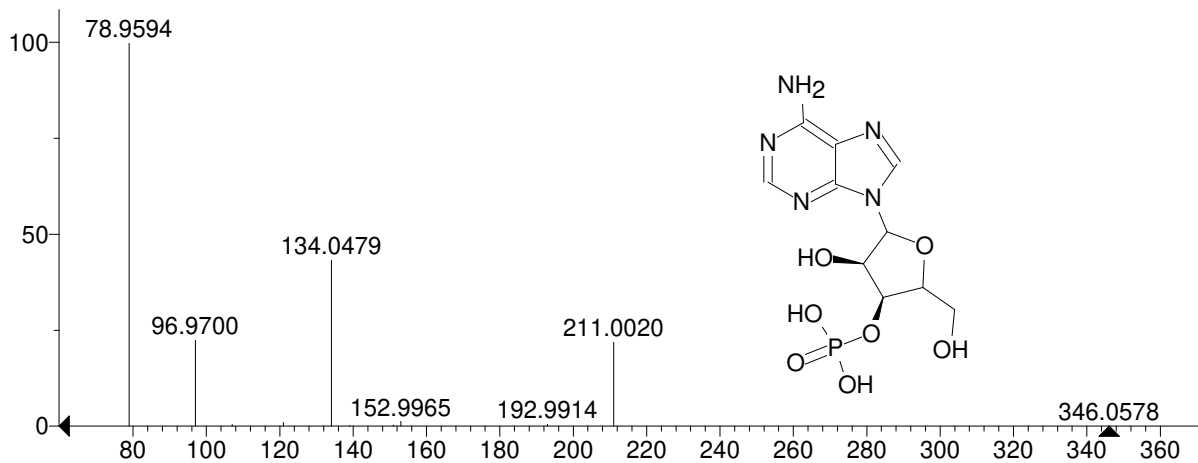

Hit 3 : Adenosine monophosphate [M-H]- HCD 31V P=346.1  
C10H14N5O7P; MF: 544; RMF: 688; Prob 19.8%; Lib: nist\_msms; ID: 207321.

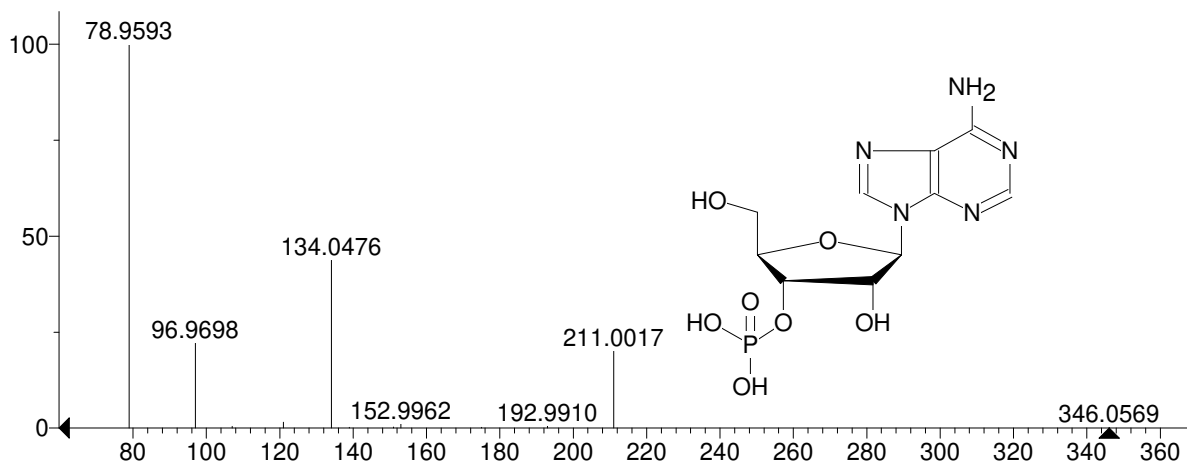

Hit 4 : Adenosine 2',3'-cyclic monophosphate [M+OH]- HCD 25V P=346.1  
C10H12N5O6P; MF: 541; RMF: 744; Prob 17.5%; CAS: 634-01-5; Lib: nist\_msms; ID: 207422.

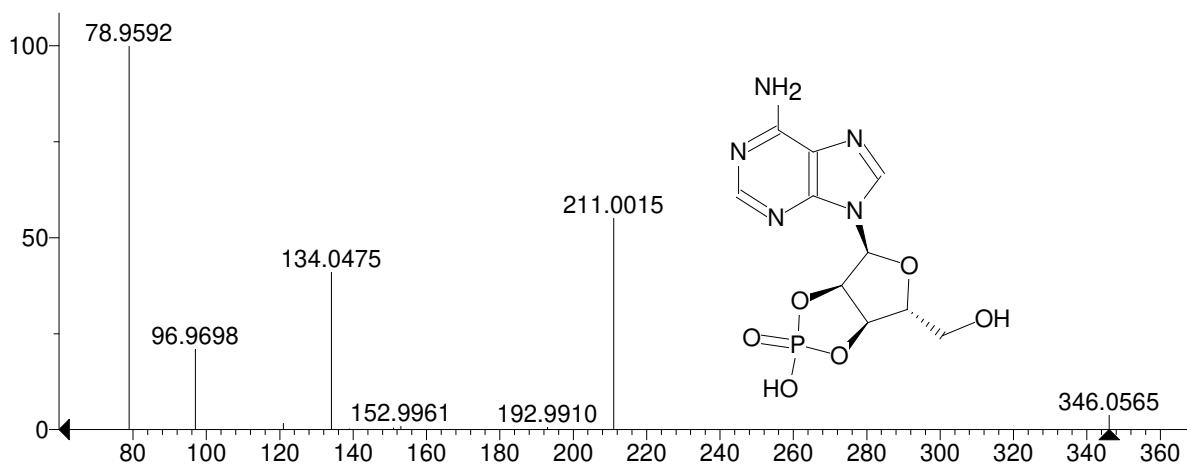

Hit 5 : Adenosine 5'-phosphosulfate [M-H-O3S]- HCD 24V P=346.1  
C10H14N5O10PS; MF: 391; RMF: 599; Prob 0.48%; CAS: 485-84-7; Lib: nist\_msms; ID: 392128.

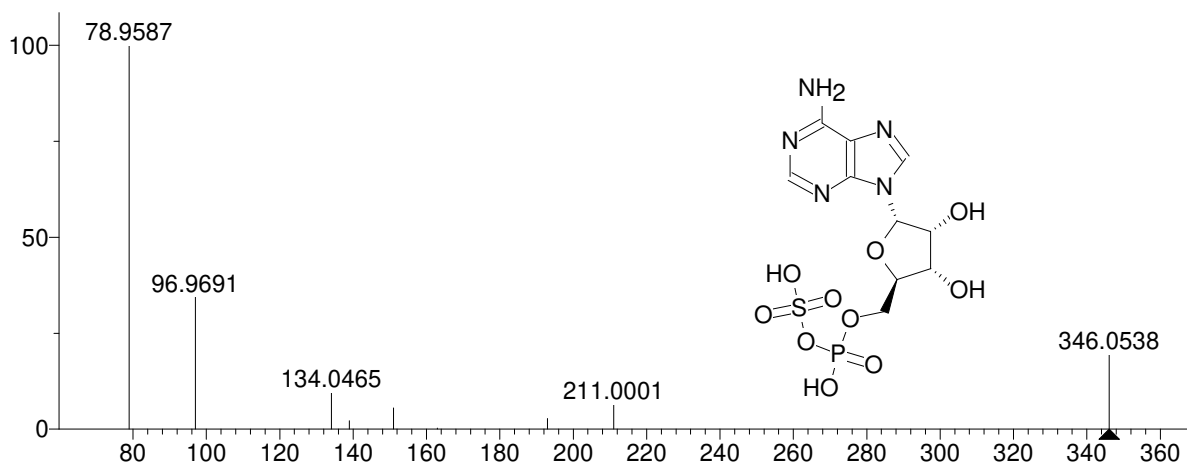

Unknown: Unknown (1.63\_200.0551m/z)  
Compound in Library Factor = -3273

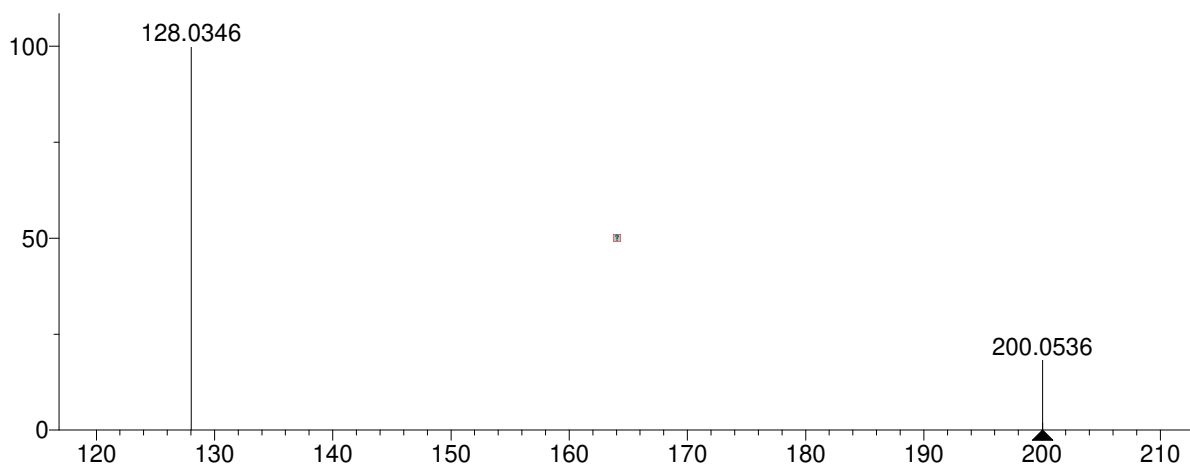

Hit 1 : O-Succinyl-L-homoserine [M-H-H<sub>2</sub>O]- HCD 6V P=200.1  
C<sub>8</sub>H<sub>13</sub>NO<sub>6</sub>; MF: 19; RMF: 352; Prob 100.0%; CAS: 1492-23-5; Lib: nist\_msms; ID: 125934.

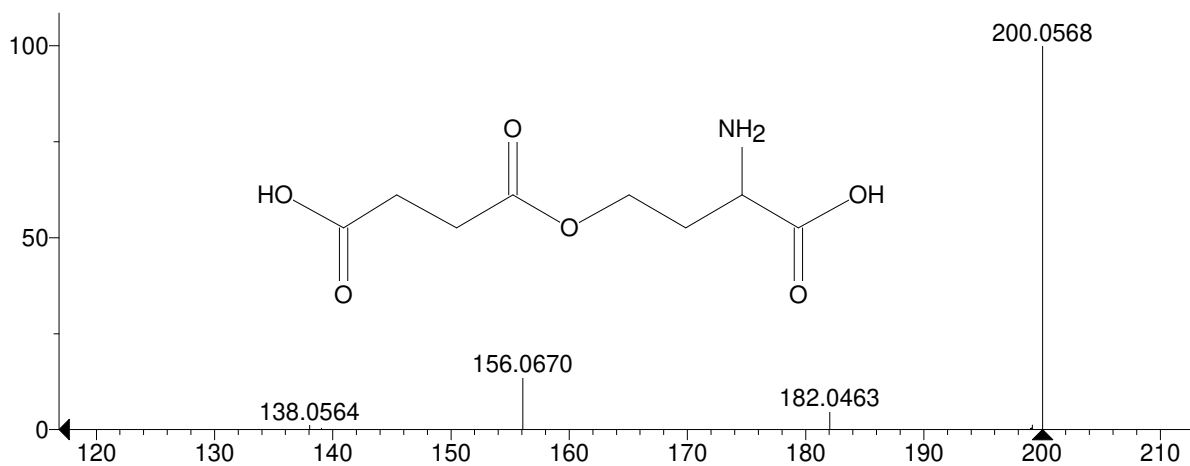

Unknown: Unknown (1.63\_735.2330m/z)  
Compound in Library Factor = 0

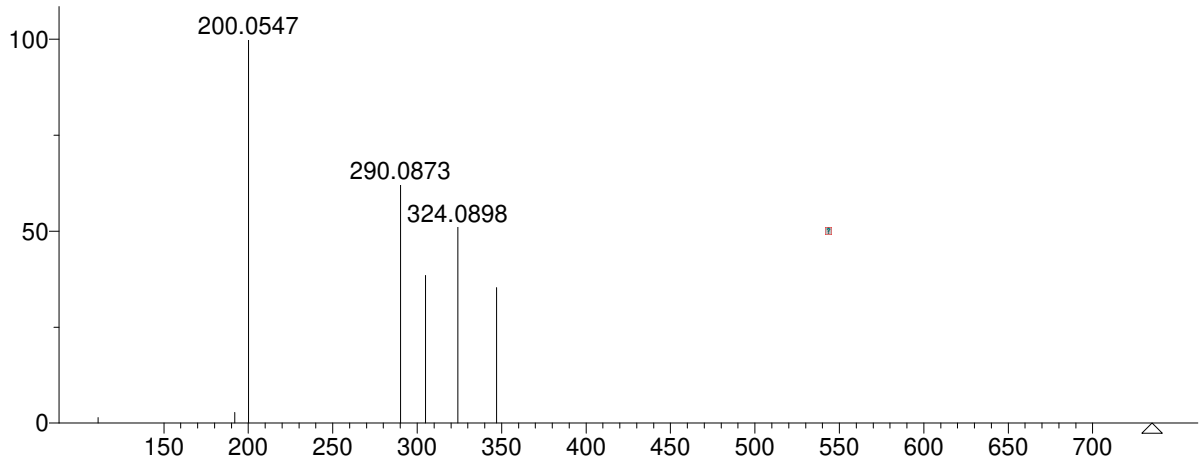

Unknown: Unknown (1.65\_272.0755m/z)  
Compound in Library Factor = 0

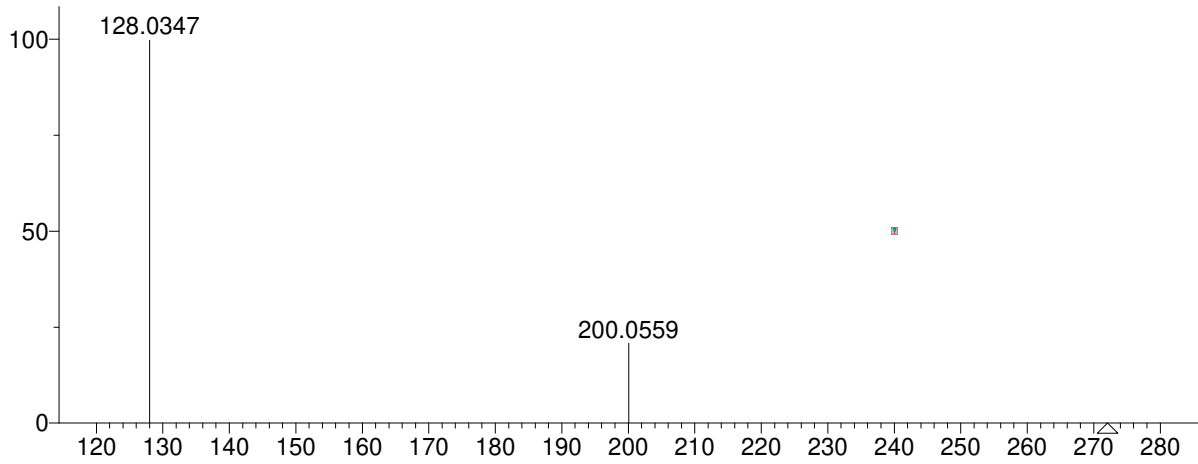

Hit 1 : N-Glycolylneuraminic acid [M+H-3H<sub>2</sub>O]<sup>+</sup> HCD 19V P=272.1  
C<sub>11</sub>H<sub>19</sub>NO<sub>10</sub>; MF: 0; RMF: 44; Prob 100.0%; CAS: 1113-83-3; Lib: nist\_msms; ID: 307277.

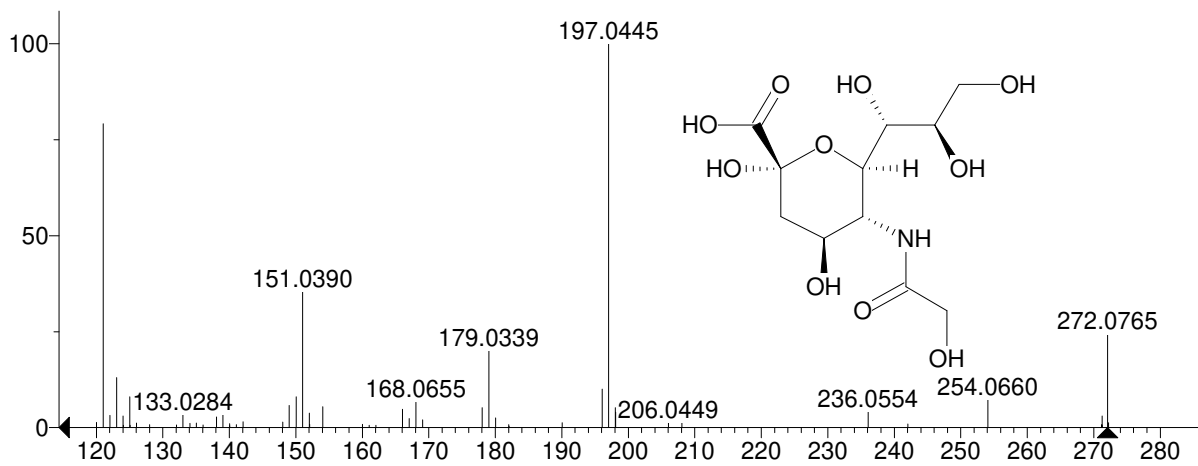

\*\* Search Report Page 1 of 2 \*\*

Unknown: Unknown (1.65\_290.0871m/z)  
Compound in Library Factor = -642

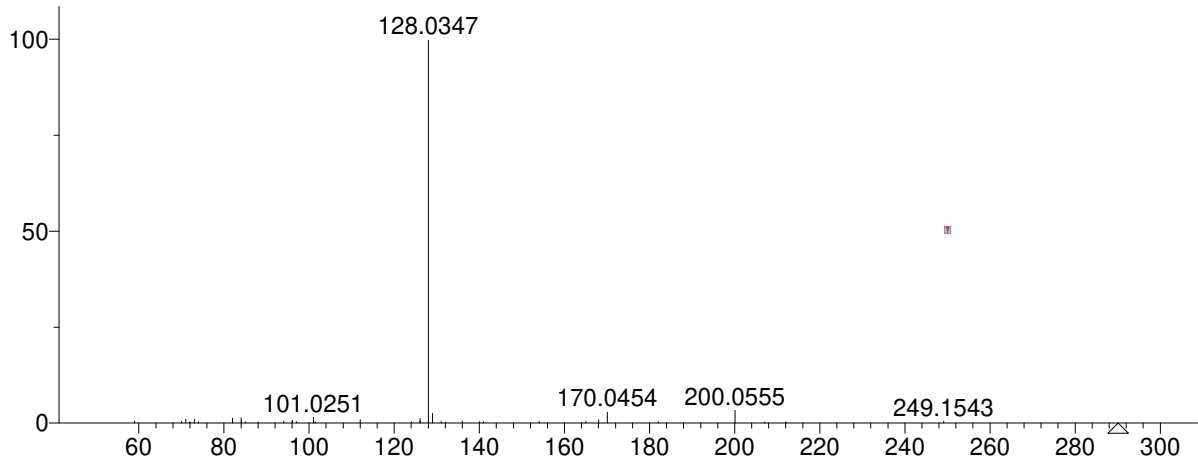

Hit 1 : N-Fructosyl pyroglutamate; PlaSMA ID-534 [M-H]<sup>-</sup> P=290.1  
C<sub>11</sub>H<sub>17</sub>NO<sub>8</sub>; MF: 200; RMF: 778; Prob 92.4%; Lib: biomsmms-neg-plasma; ID: 480.



Hit 2 : (-)-N-Acetylneuraminic acid [M-H-H<sub>2</sub>O]<sup>-</sup> IT-FT 35% P=290.1  
C<sub>11</sub>H<sub>19</sub>NO<sub>9</sub>; MF: 82; RMF: 179; Prob 5.12%; CAS: 131-48-6; Lib: nist\_msms; ID: 479648.





Hit 3 : N-Glycolylneuraminic acid [M+H-2H<sub>2</sub>O]<sup>+</sup> HCD 26V P=290.1  
C<sub>11</sub>H<sub>19</sub>NO<sub>10</sub>; MF: 30; RMF: 177; Prob 1.02%; CAS: 1113-83-3; Lib: nist\_msms; ID: 307259.

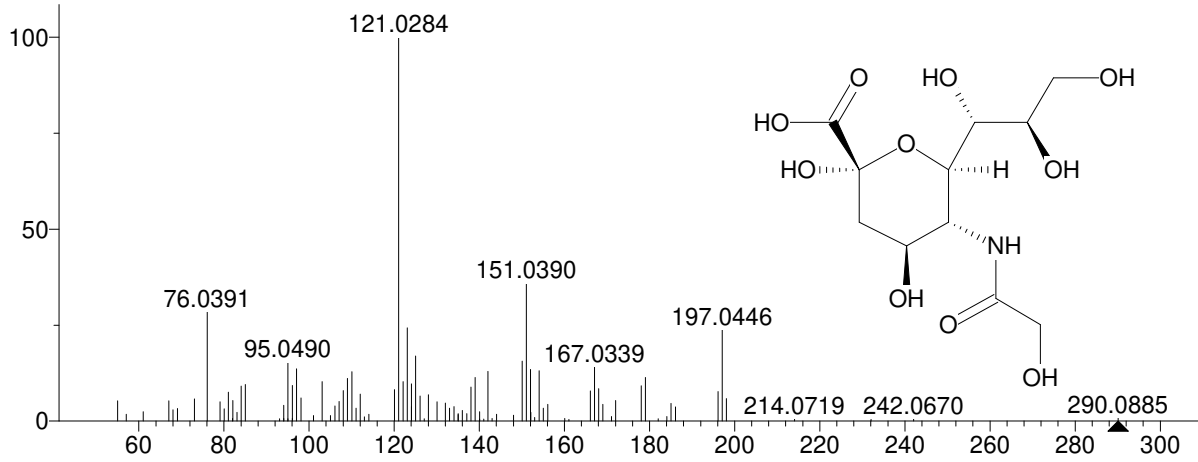

Hit 4 : 3'- $\alpha$ -Sialyl-N-acetyllactosamine [M-H-C<sub>14</sub>H<sub>25</sub>O<sub>11</sub>N]<sup>-</sup> HCD 46V P=290.1  
C<sub>25</sub>H<sub>42</sub>N<sub>2</sub>O<sub>19</sub>; MF: 28; RMF: 149; Prob 0.94%; CAS: 81693-22-3; Lib: nist\_msms; ID: 211510.

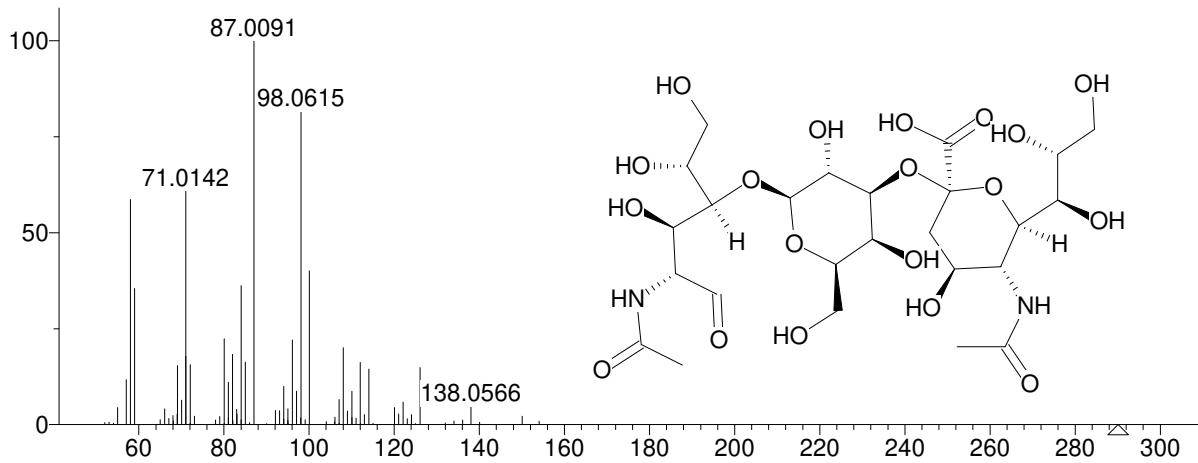

Hit 5 : 2'-Deoxyguanosine [M+Na]<sup>+</sup> HCD 43V P=290.1  
C<sub>10</sub>H<sub>13</sub>N<sub>5</sub>O<sub>4</sub>; MF: 0; RMF: 30; Prob 0.27%; CAS: 961-07-9; Lib: nist\_msms; ID: 303937.



Unknown: Unknown (1.65\_524.1030m/z)  
Compound in Library Factor = 0

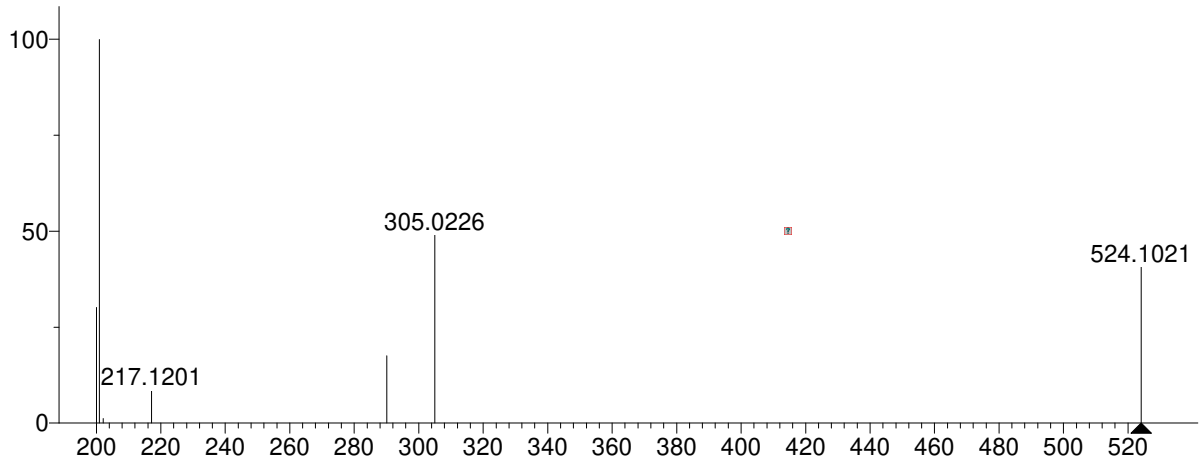

Unknown: Unknown (1.65\_603.1567m/z)  
Compound in Library Factor = 0

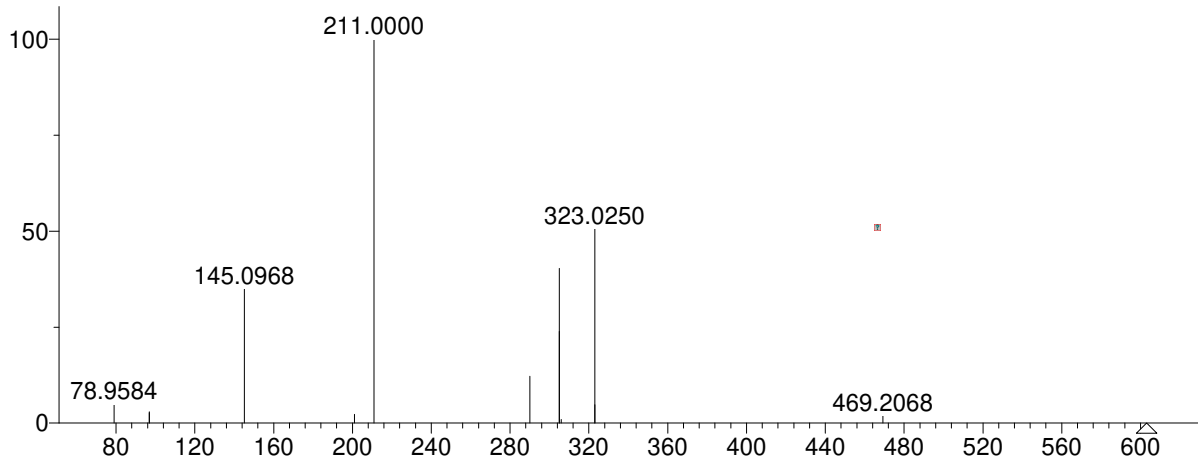

Unknown: Unknown (1.65\_639.2600m/z)  
Compound in Library Factor = 0

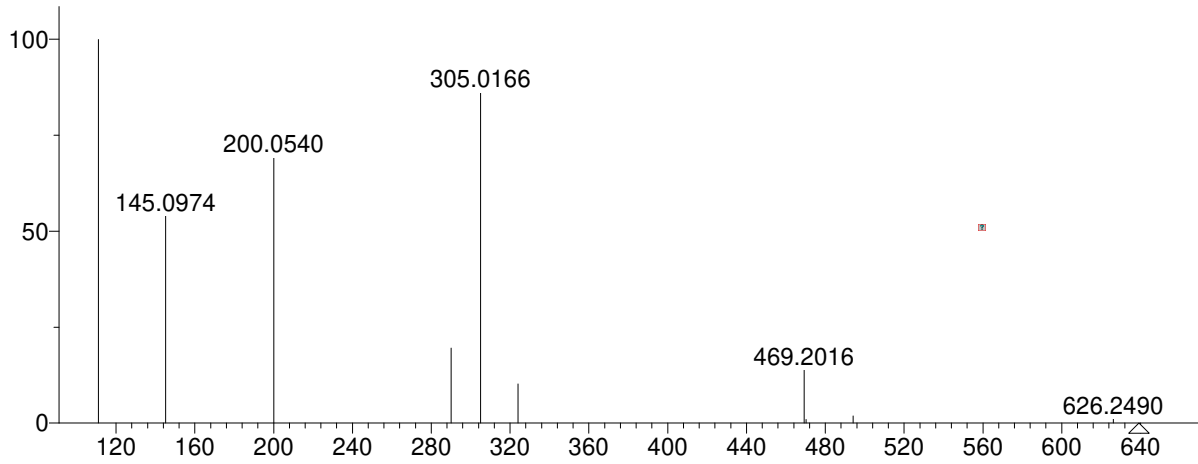

Hit 1 : Caspase 8 Substrate 1, chromogenic [M+H]<sup>+</sup> QTOF 45V P=639.3  
C<sub>27</sub>H<sub>38</sub>N<sub>6</sub>O<sub>12</sub>; MF: 0; RMF: 44; Prob 100.0%; Lib: nist\_msms2; ID: 39470.

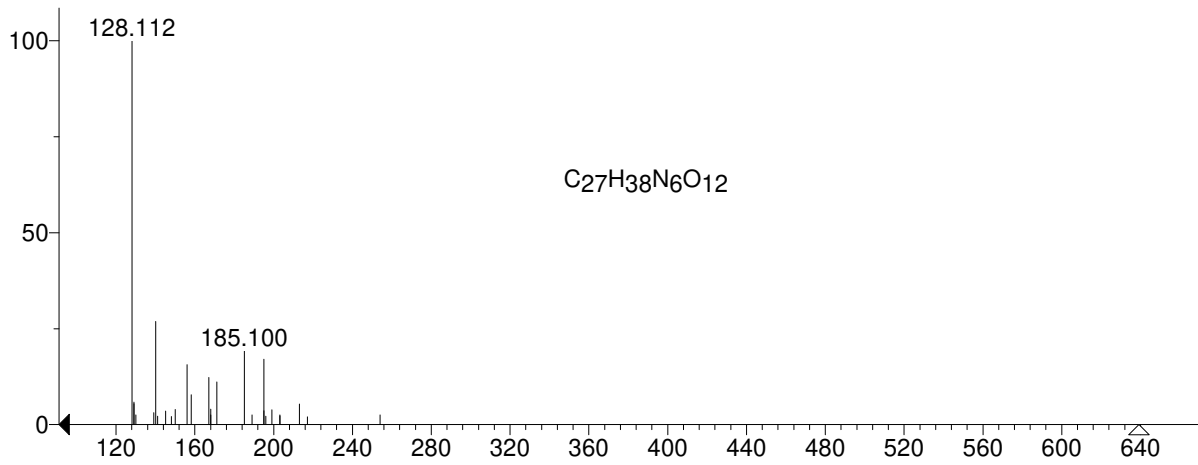

Unknown: Unknown (1.65\_796.2970m/z)  
Compound in Library Factor = 0

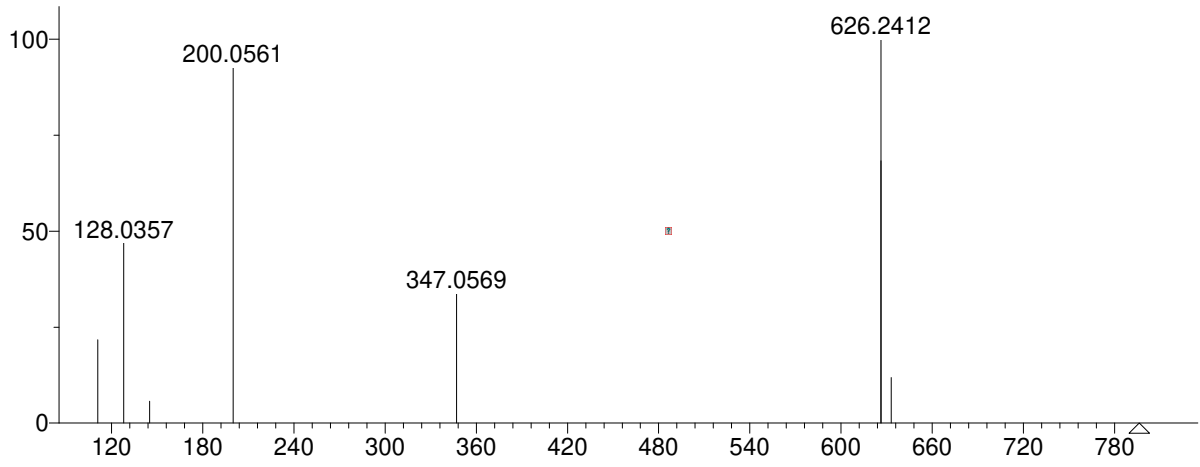

\*\* Search Report Page 1 of 2 \*\*

Unknown: Unknown (1.66\_603.1666m/z)  
Compound in Library Factor = 0

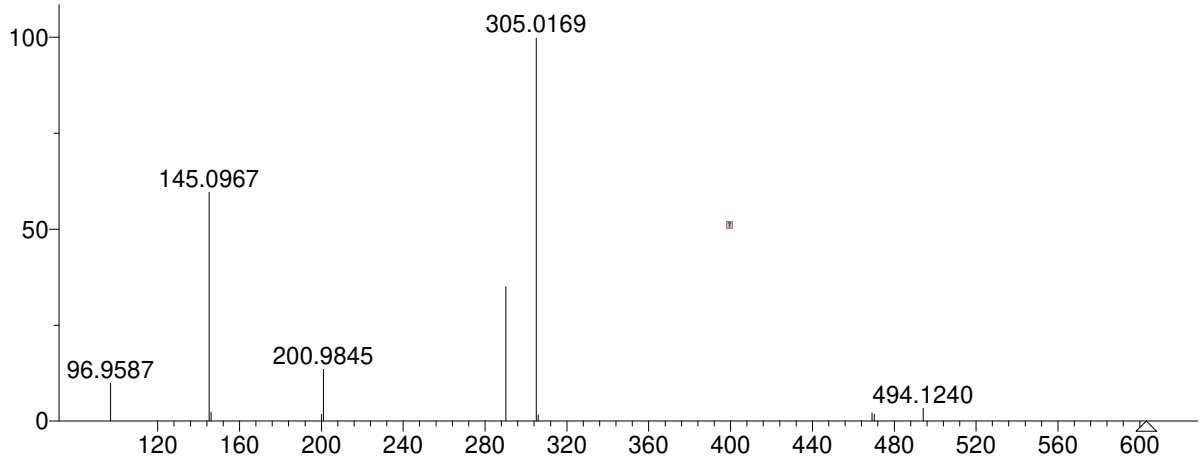

Hit 1 : [3,4,5-trihydroxy-6-[4-hydroxy-2-[(1,2,3,6-tetrahydroxycyclohexanecarbonyl)oxymethyl]phenoxy]oxan-2-yl]n  
C<sub>27</sub>H<sub>32</sub>O<sub>14</sub>; MF: 0; RMF: 31; Prob 25.0%; Lib: mona-export-vf-npl\_qexactive; ID: 24535.

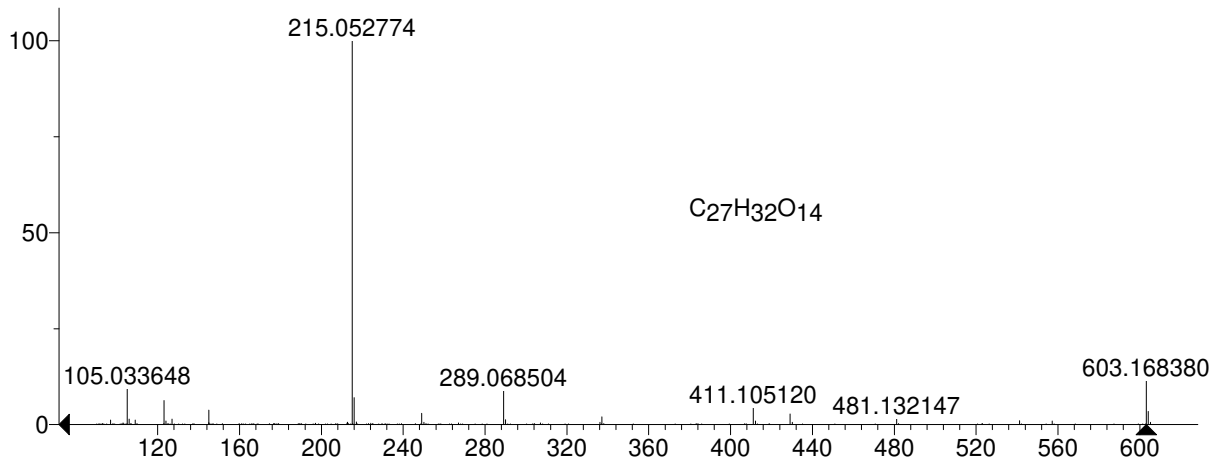

Hit 2 : naringin [M+Na]<sup>+</sup> 45HCD P=603.2  
C<sub>27</sub>H<sub>32</sub>O<sub>14</sub>; MF: 0; RMF: 24; Prob 25.0%; Lib: anthocyanins mona; ID: 7409.

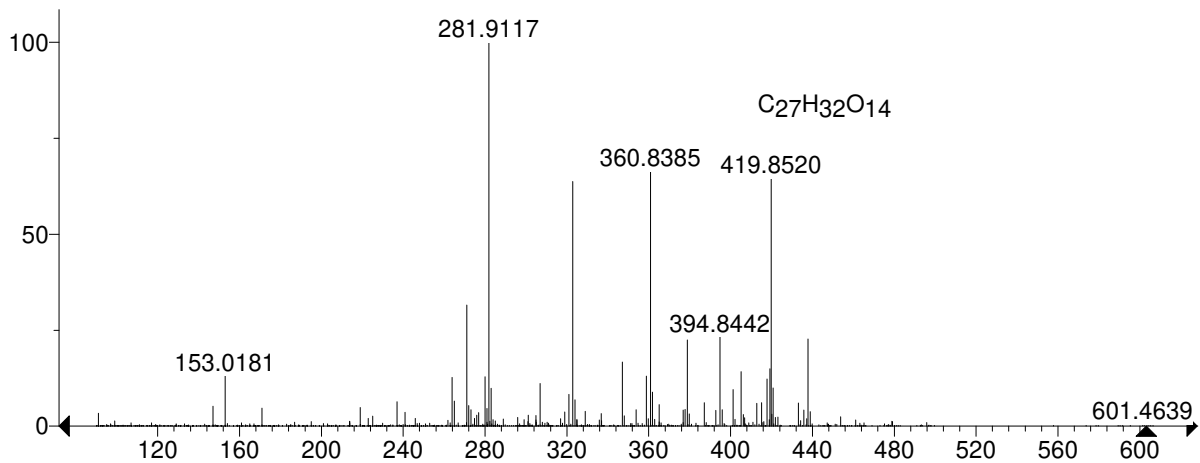

Hit 3 : NCGC00385466-01\_C27H32O14\_(1S,4aS,6S,7aS)-6-Hydroxy-1-((6-O-[(2E)-3-(4-hydroxy-3,5-dimethoxyphenyl)prop-2-enyl]oxy)methyl)oxyoxan-2-yl]oxyoxan-2-yl]c  
C27H32O14; MF: 0; RMF: 17; Prob 25.0%; Lib: mona-export-gnps; ID: 10919.

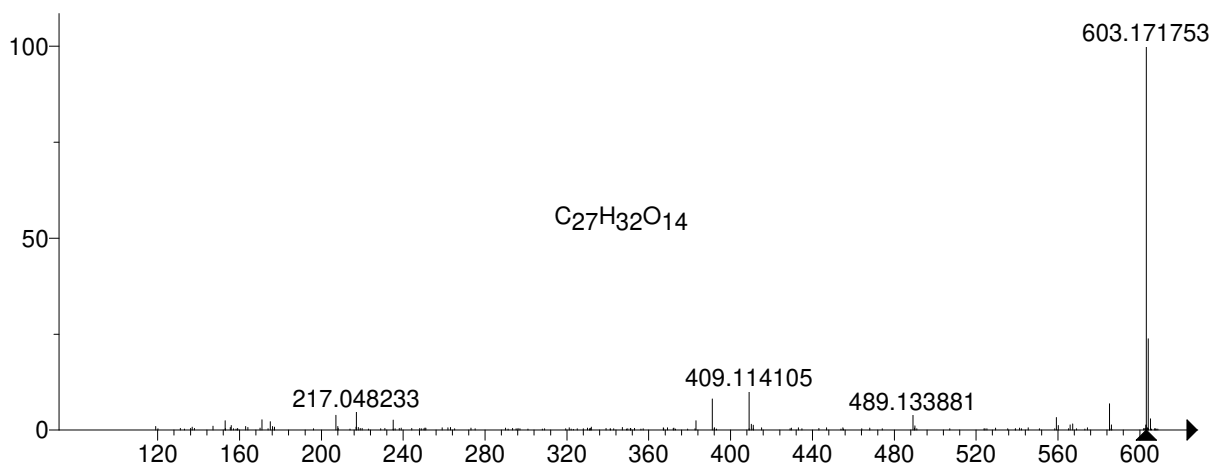

Hit 4 : 7-[4,5-dihydroxy-6-(hydroxymethyl)-3-[(2S,3R,4R,5R,6S)-3,4,5-trihydroxy-6-methyloxan-2-yl]oxyoxan-2-yl]oxyoxan-2-yl]c  
C27H32O14; MF: 0; RMF: 3; Prob 25.0%; Lib: anthocyanins mona; ID: 4728.

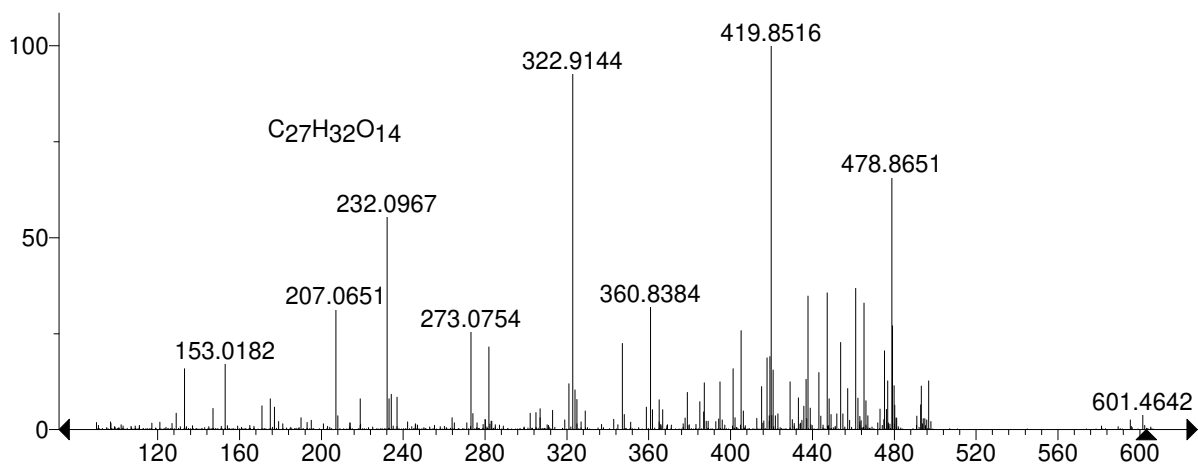

\*\* Search Report Page 1 of 2 \*\*

Unknown: Unknown (1.68\_323.0969m/z)  
Compound in Library Factor = -3273

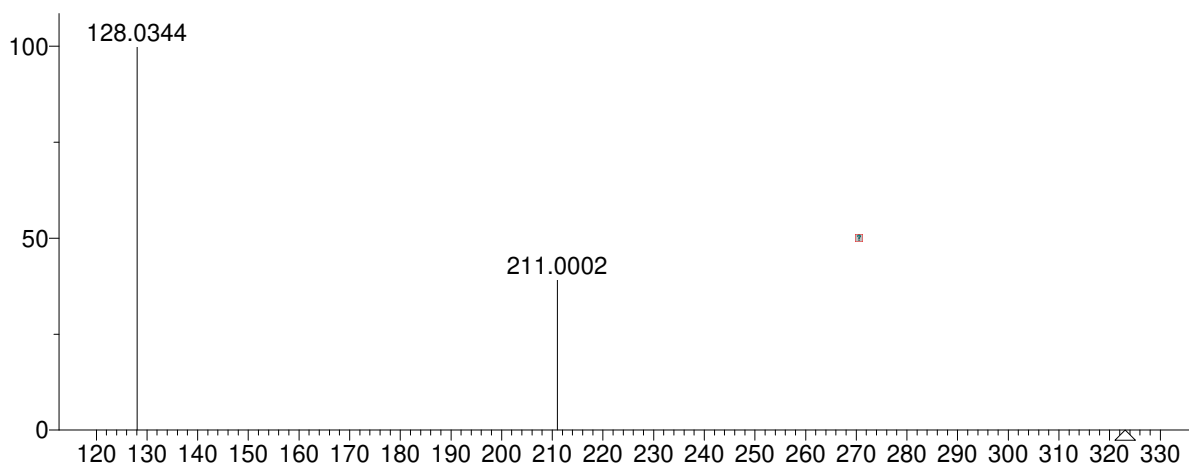

Hit 1 : 1-Piperidinecarboxylic acid, 4-[6-[4-[(methoxycarbonyl)amino]phenyl]-4-(4-morpholinyl)-1H-pyrazolo[3,4-d]]  
C24H29N7O5; MF: 1; RMF: 136; Prob 7.97%; CAS: 1062169-56-5; Lib: nist\_msms; ID: 265735.

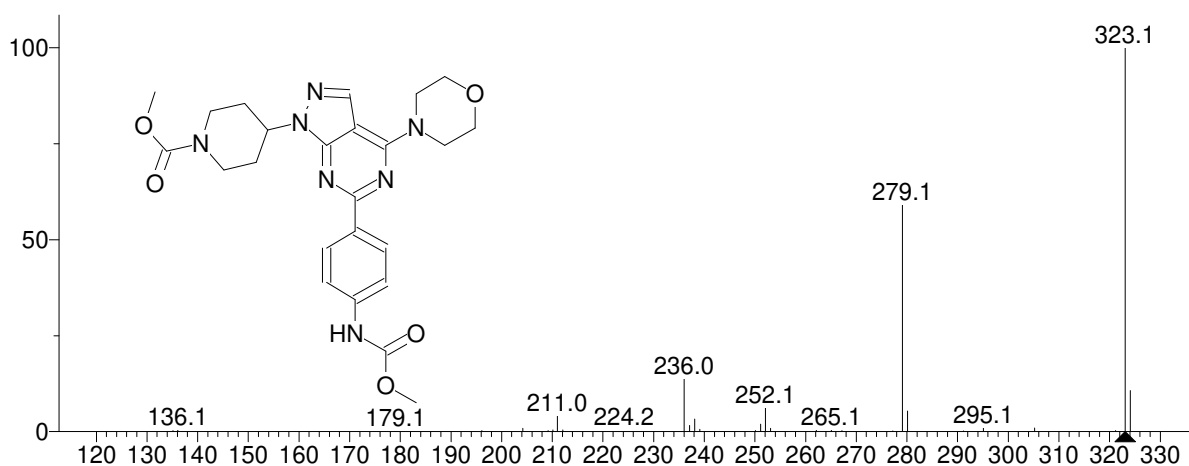

Hit 2 : Dinitramine [M+H]<sup>+</sup> HCD 103V P=323.1  
C11H13F3N4O4; MF: 0; RMF: 153; Prob 7.66%; CAS: 29091-05-2; Lib: nist\_msms; ID: 100130.

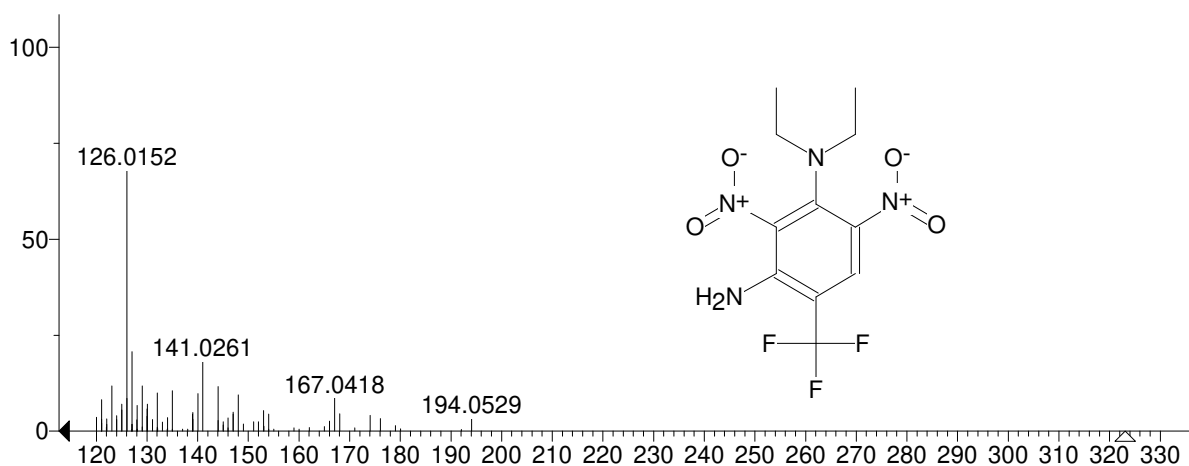



Hit 3 : Fluorometholone [M+H-H<sub>2</sub>O]<sup>+</sup>=>341.1=>323.1 IT 35% P=323.1  
C<sub>22</sub>H<sub>29</sub>FO<sub>4</sub>; MF: 0; RMF: 123; Prob 7.66%; CAS: 426-13-1; Lib: nist\_msms; ID: 119128.

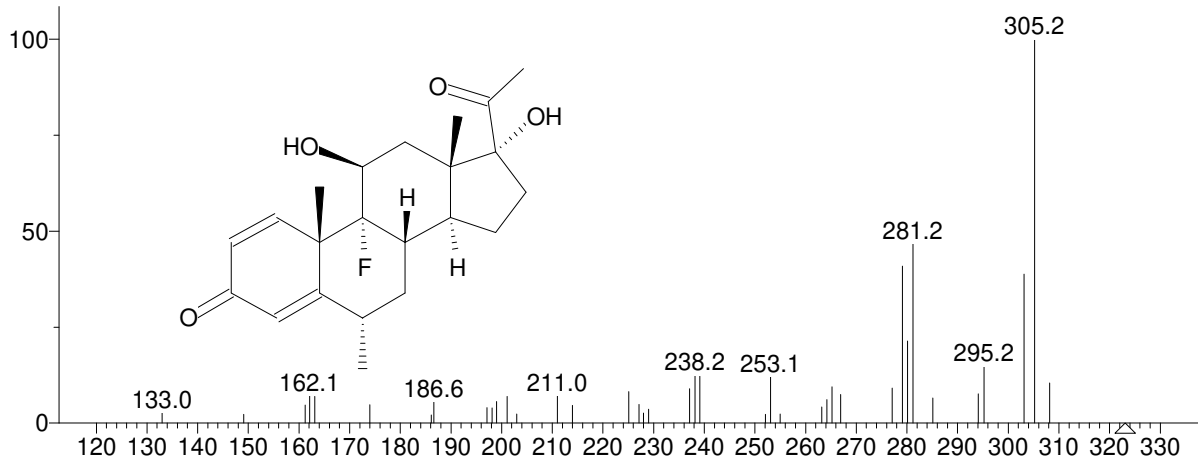

Hit 4 : Indanofan [M+H]<sup>+</sup>=>323.1 IT 35% P=323.1  
C<sub>20</sub>H<sub>17</sub>ClO<sub>3</sub>; MF: 0; RMF: 86; Prob 7.66%; CAS: 133220-30-1; Lib: nist\_msms; ID: 477459.

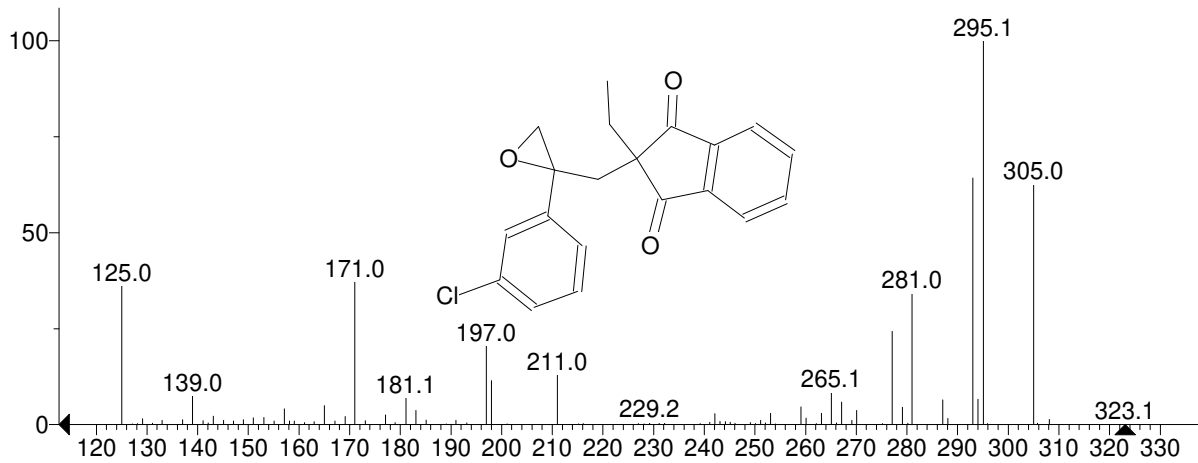

Hit 5 : Prednisone [M+H-H<sub>2</sub>O]<sup>+</sup>=>323.1 IT 35% P=323.1  
C<sub>21</sub>H<sub>26</sub>O<sub>5</sub>; MF: 0; RMF: 81; Prob 7.66%; CAS: 53-03-2; Lib: nist\_msms; ID: 99548.

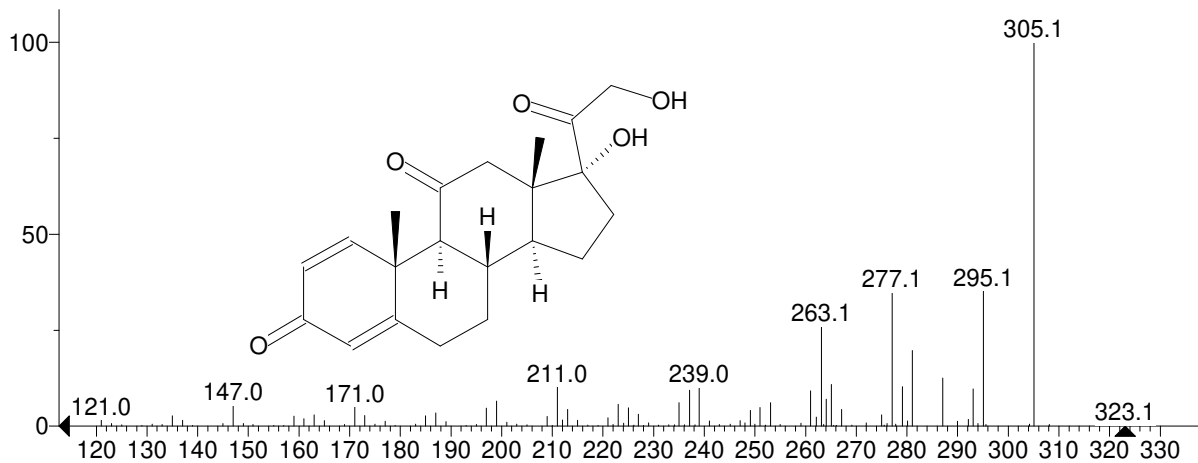

Unknown: Unknown (1.69\_288.1184m/z)  
Compound in Library Factor = -3273

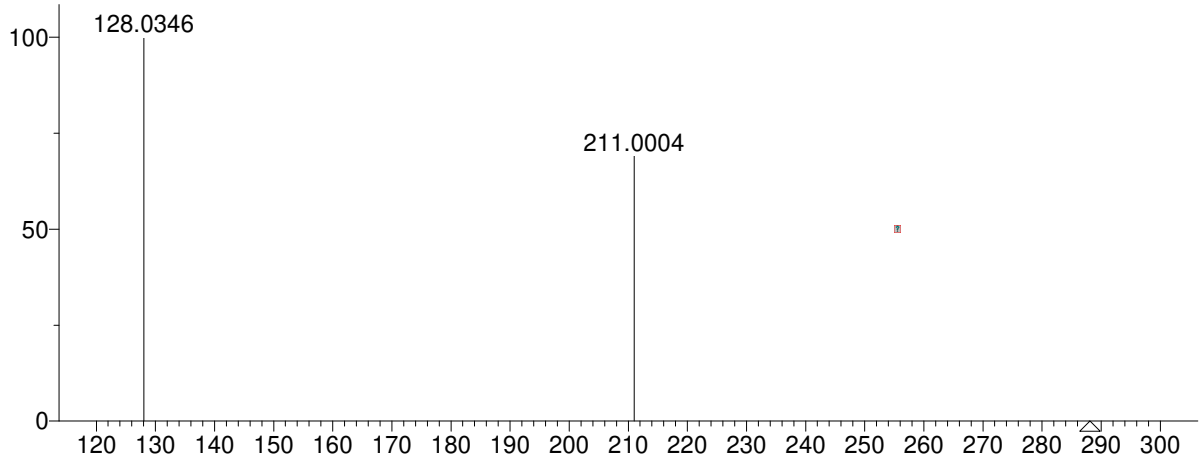

Hit 1 : OPHTHALMIC ACID [M-H]<sup>-</sup> P=288.1  
C<sub>11</sub>H<sub>19</sub>N<sub>3</sub>O<sub>6</sub>; MF: 2; RMF: 252; Prob 34.7%; Lib: msms-neg-gnps; ID: 328.

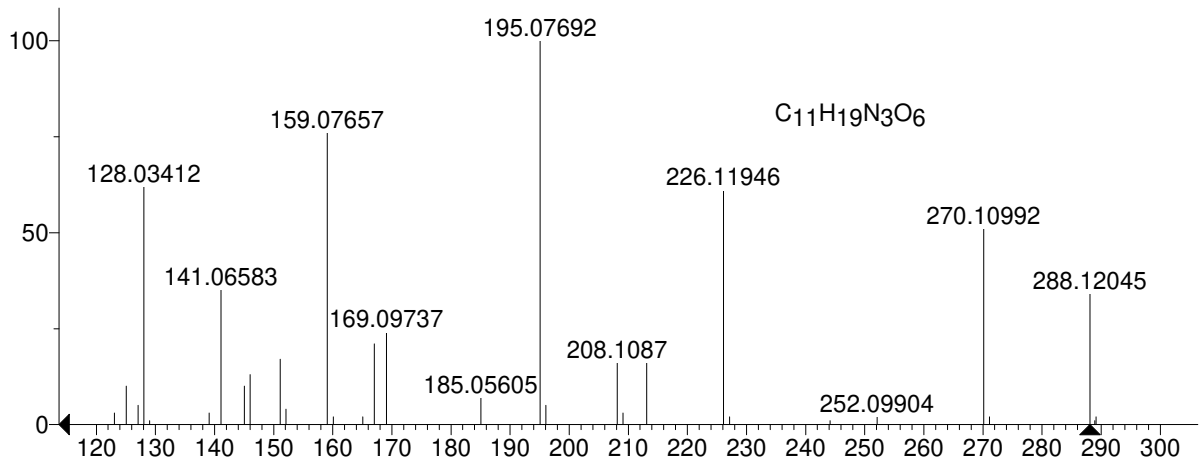

Hit 2 : OPHTHALMIC ACID  
C<sub>11</sub>H<sub>19</sub>N<sub>3</sub>O<sub>6</sub>; MF: 1; RMF: 250; Prob 33.3%; Lib: embl neg mcg; ID: 381.

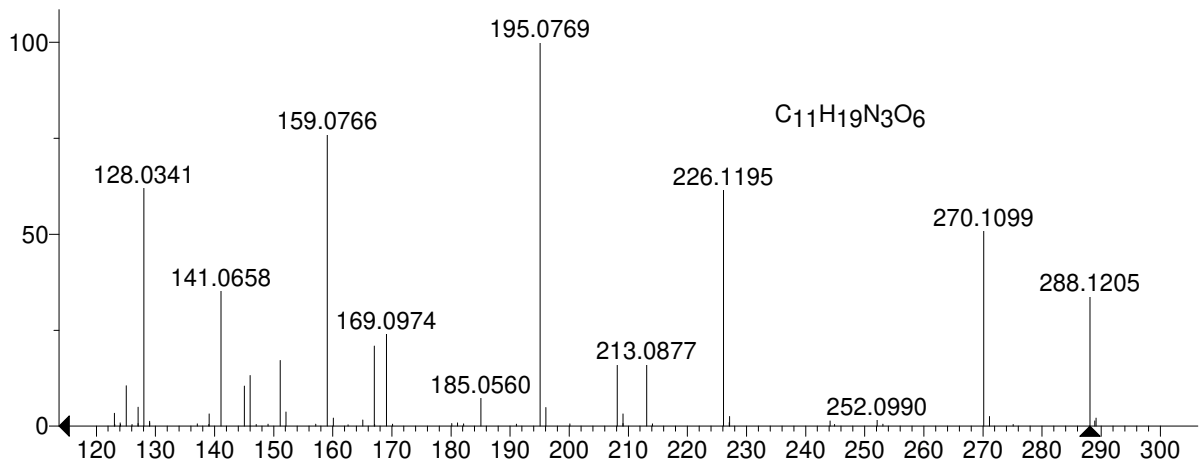

Hit 3 : ANISOMYCIN [M+Na]<sup>+</sup> 65HCD P=288.1  
C<sub>14</sub>H<sub>19</sub>NO<sub>4</sub>; MF: 0; RMF: 24; Prob 32.0%; Lib: mona-export-vf-npl\_qexactive; ID: 27597.

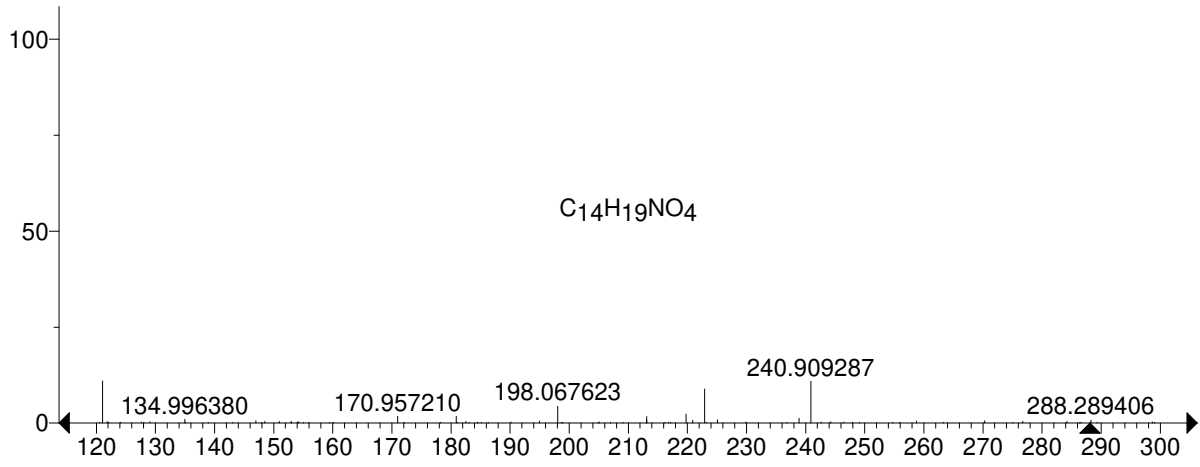

\*\* Search Report Page 1 of 2 \*\*

Unknown: Unknown (1.69\_407.1662m/z)  
Compound in Library Factor = -1848

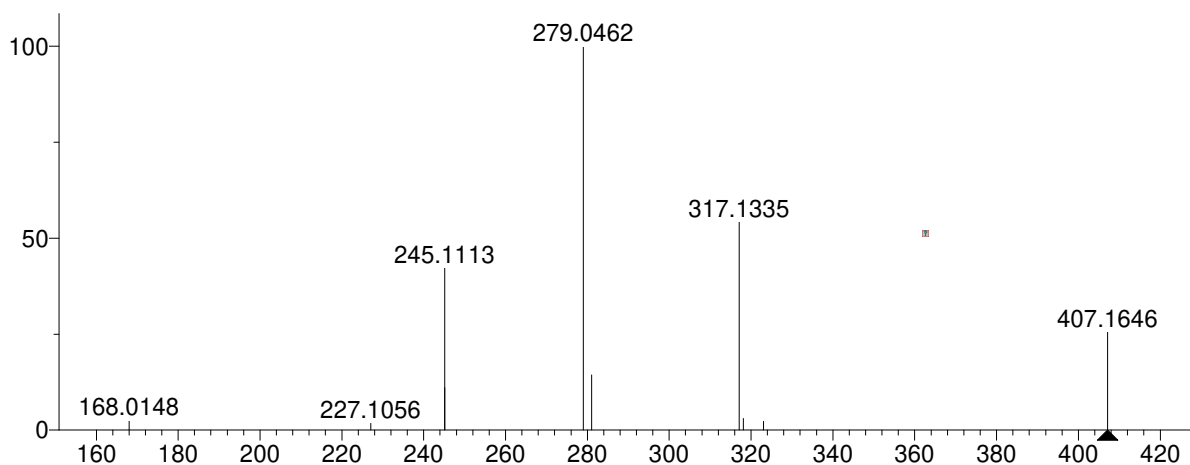

Hit 1 : (2R,3R,4S,6R)-2-((5-hydroxy-2,2-dimethyl-3,4-dihydro-2H-benzo[h]chromen-6-yl)oxy)-6-(hydroxymethyl)tet  
C<sub>21</sub>H<sub>26</sub>O<sub>8</sub>; MF: 52; RMF: 363; Prob 46.6%; Lib: mona-export-gnps; ID: 2855.

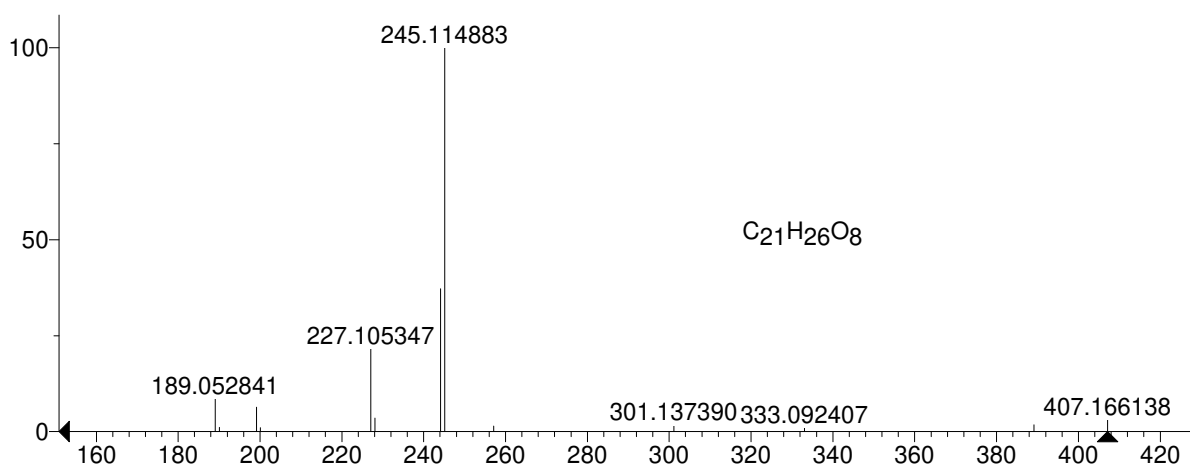

Hit 2 : Artesunate [M+Na]<sup>+</sup> HCD 7V P=407.2  
C<sub>19</sub>H<sub>28</sub>O<sub>8</sub>; MF: 22; RMF: 301; Prob 13.0%; CAS: 88495-63-0; Lib: nist\_msms; ID: 119192.

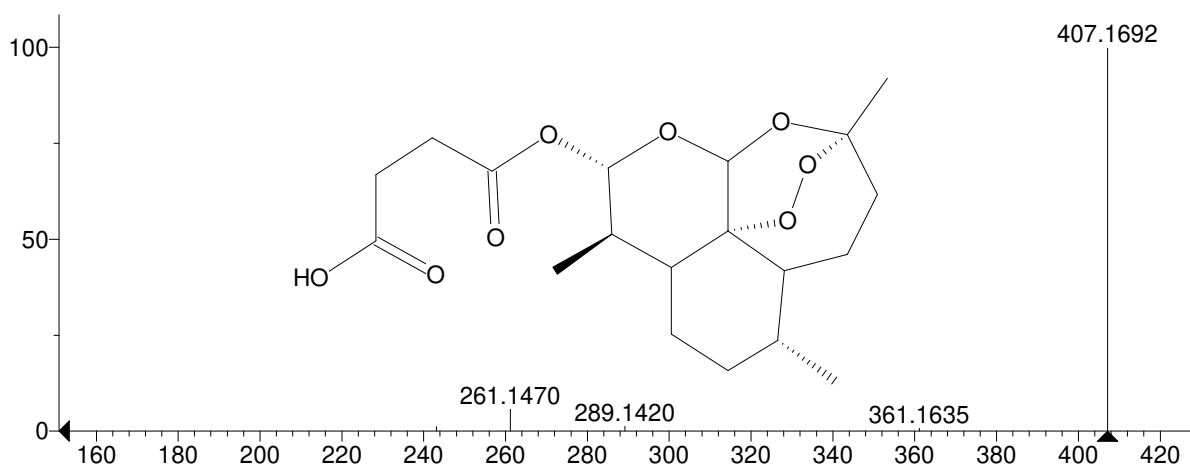

Hit 3 : N,N'-Diacetylchitobiose [M+H-H<sub>2</sub>O]<sup>+</sup> HCD 8V P=407.2  
C<sub>16</sub>H<sub>28</sub>N<sub>2</sub>O<sub>11</sub>; MF: 9; RMF: 251; Prob 8.37%; CAS: 35061-50-8; Lib: nist\_msms; ID: 486176.

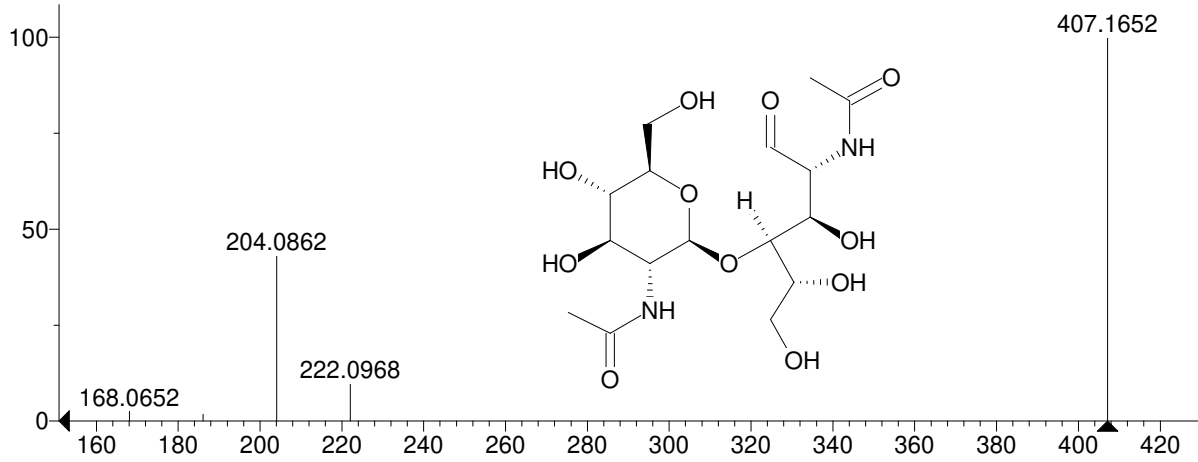

Hit 4 : (2R,3R,4S,6R)-2-((10-hydroxy-2,2-dimethyl-3,4-dihydro-2H-benzo[g]chromen-5-yl)oxy)-6-(hydroxymethyl)tetrahydro-2H-pyran-4-ol  
C<sub>21</sub>H<sub>26</sub>O<sub>8</sub>; MF: 8; RMF: 226; Prob 8.04%; Lib: mona-export-gnps; ID: 2848.

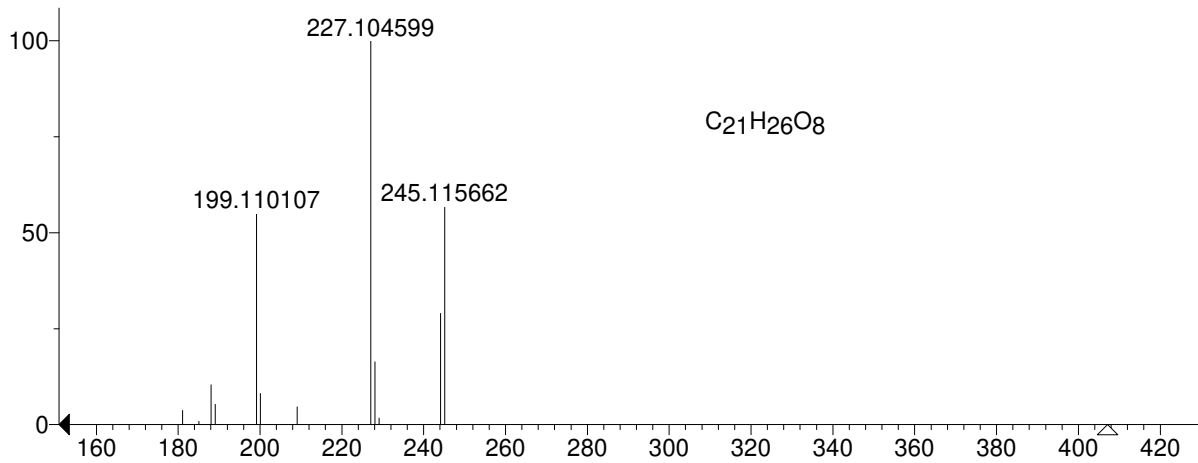

Hit 5 : Beclomethasone [M-H]<sup>-</sup> (20-30-40%) P=407.2  
C<sub>22</sub>H<sub>29</sub>ClO<sub>5</sub>; MF: 3; RMF: 201; Prob 6.48%; Lib: mona-export-fiehn\_hilic; ID: 1084.

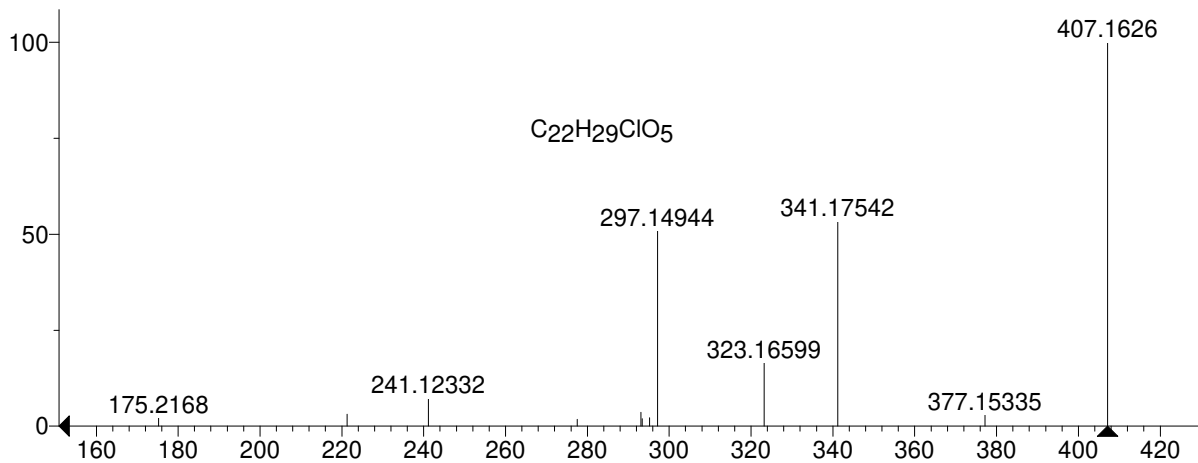

Unknown: Unknown (1.70\_470.1495m/z)  
Compound in Library Factor = 0

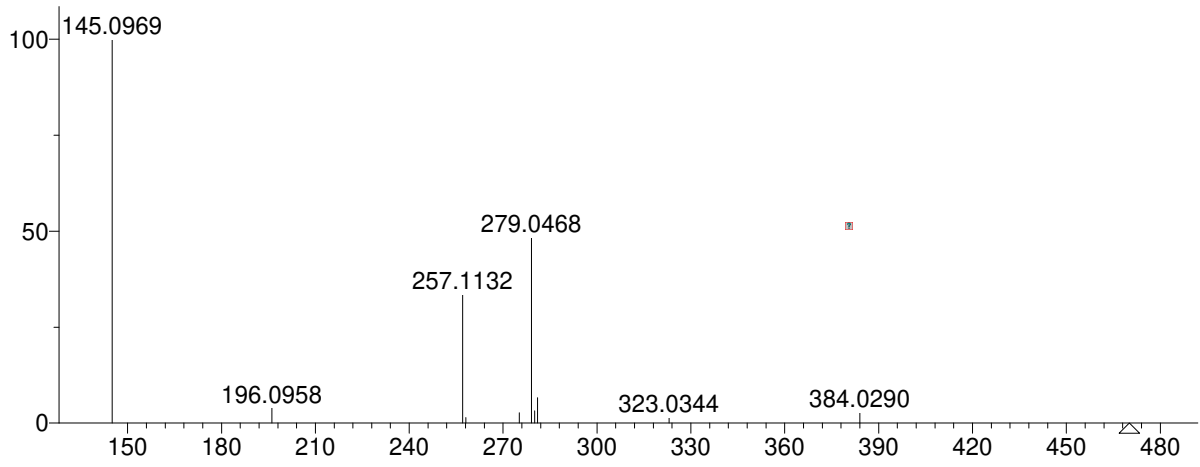

Unknown: Unknown (1.71\_487.2020m/z)  
Compound in Library Factor = 0

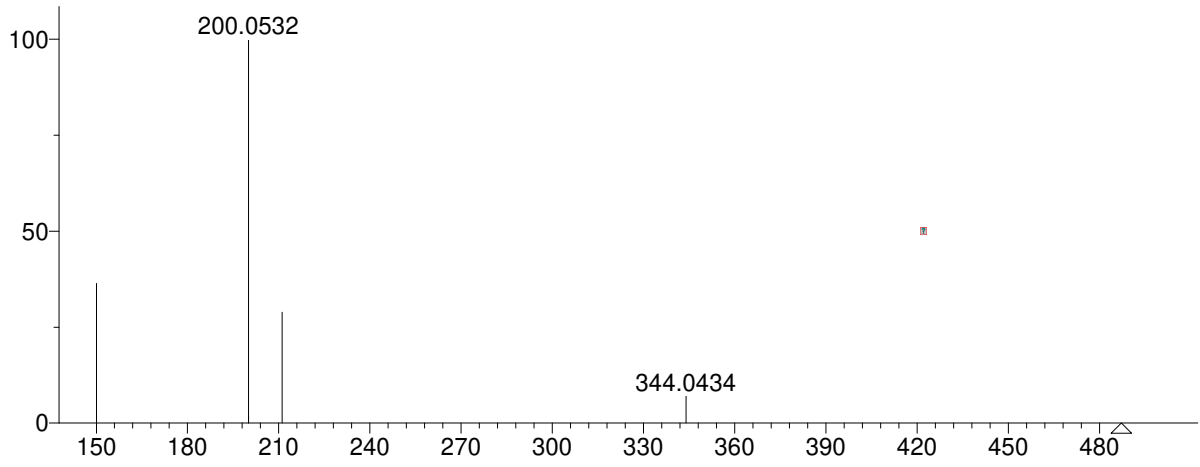

Unknown: Unknown (1.71\_825.2510m/z)  
Compound in Library Factor = 0

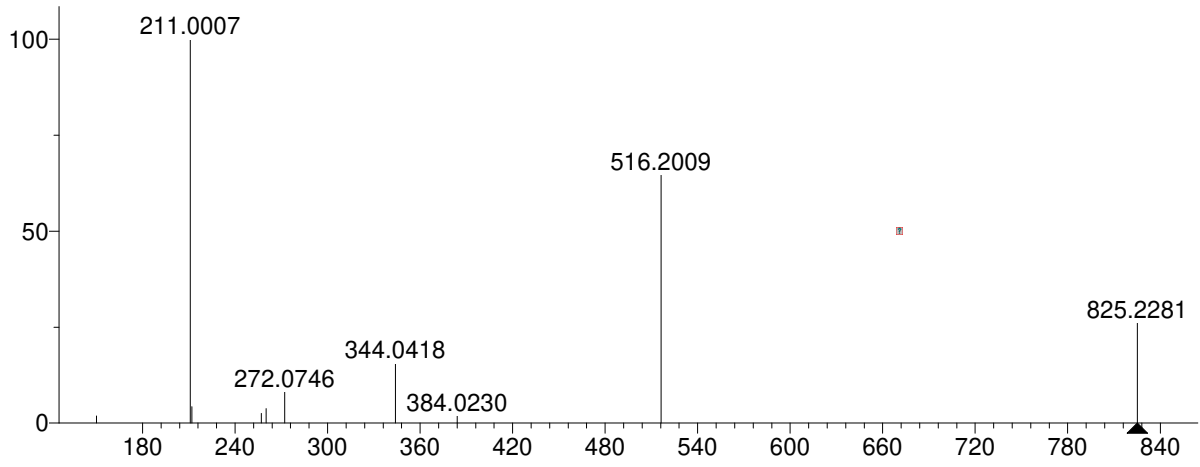



Unknown: Unknown (1.71\_856.3216m/z)  
Compound in Library Factor = 0

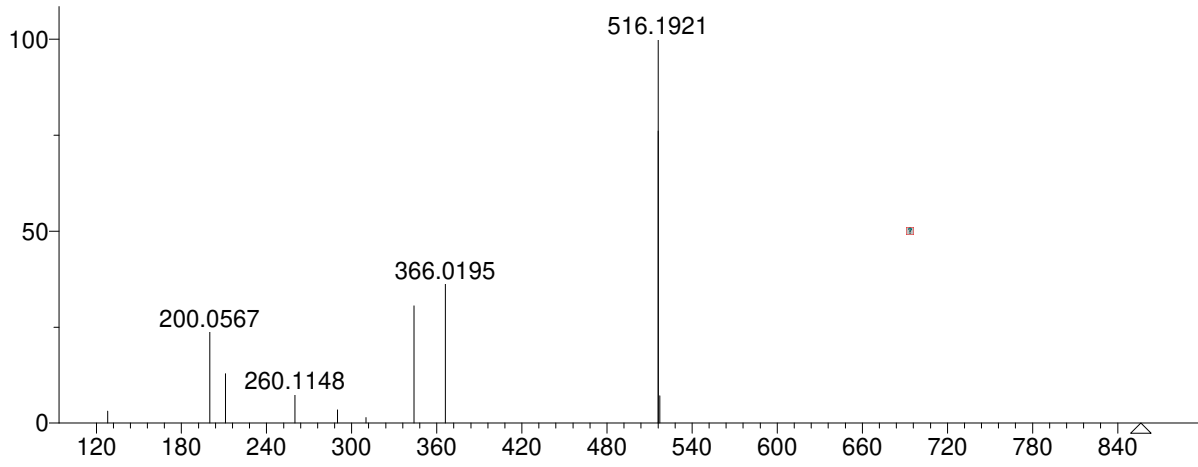

Unknown: Unknown (1.72\_408.0872m/z)  
Compound in Library Factor = 0

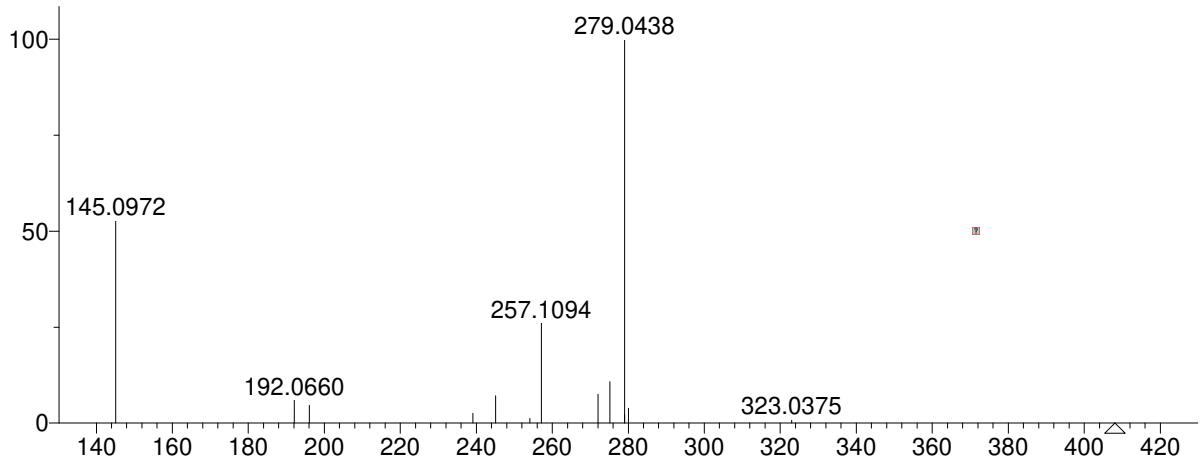

Unknown: Unknown (1.74\_433.1089m/z)  
Compound in Library Factor = -3273

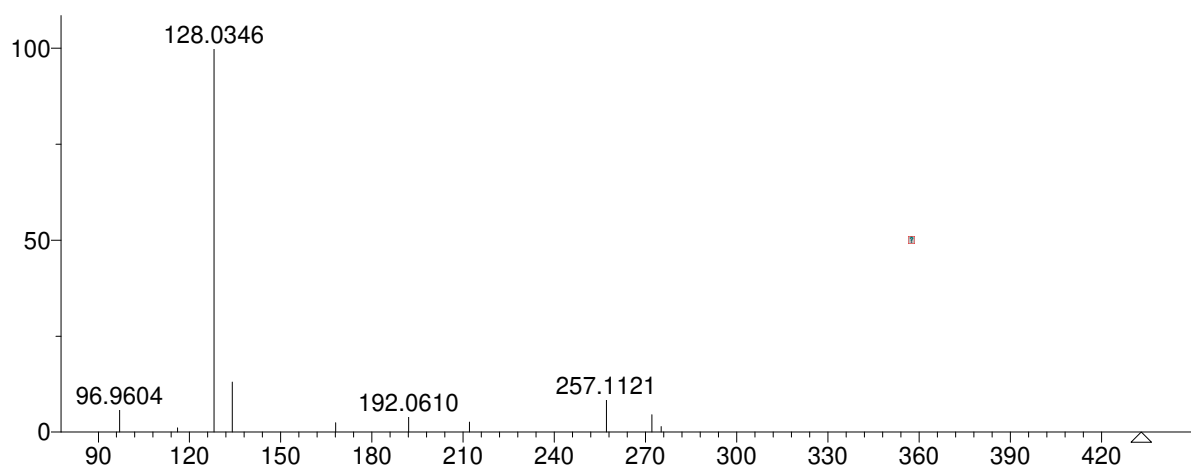

Hit 1 : Pelargonidin 3-glucoside cation [Cat]<sup>+</sup> QTOF 23V P=433.1  
C<sub>21</sub>H<sub>21</sub>O<sub>10</sub>; MF: 18; RMF: 318; Prob 5.33%; CAS: 47684-27-5; Lib: nist\_msms; ID: 71646.

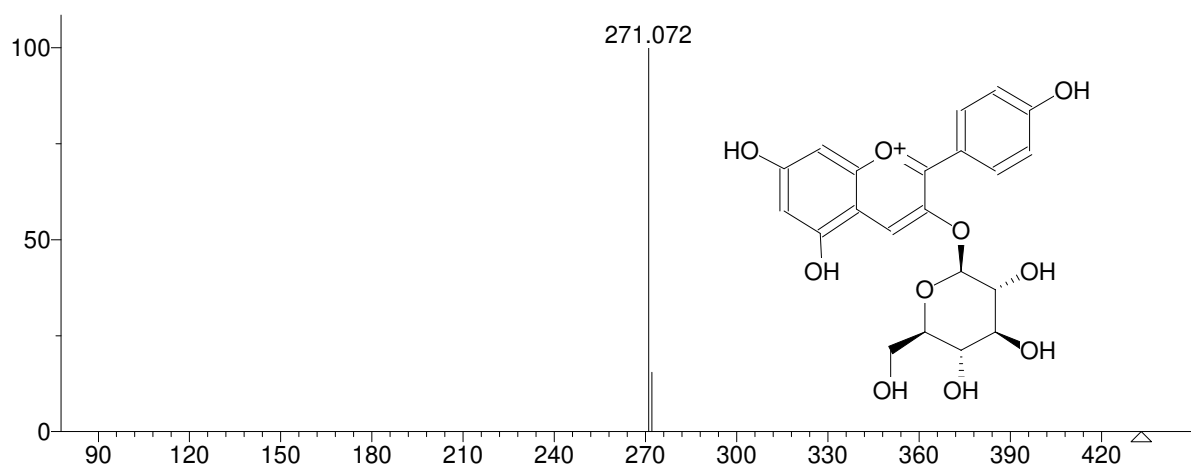

Hit 2 : Apigenin-7-O-glucoside [M+H]<sup>+</sup> 30eV P=433.1  
C<sub>21</sub>H<sub>20</sub>O<sub>10</sub>; MF: 15; RMF: 342; Prob 4.71%; Lib: anthocyanins mona; ID: 770.

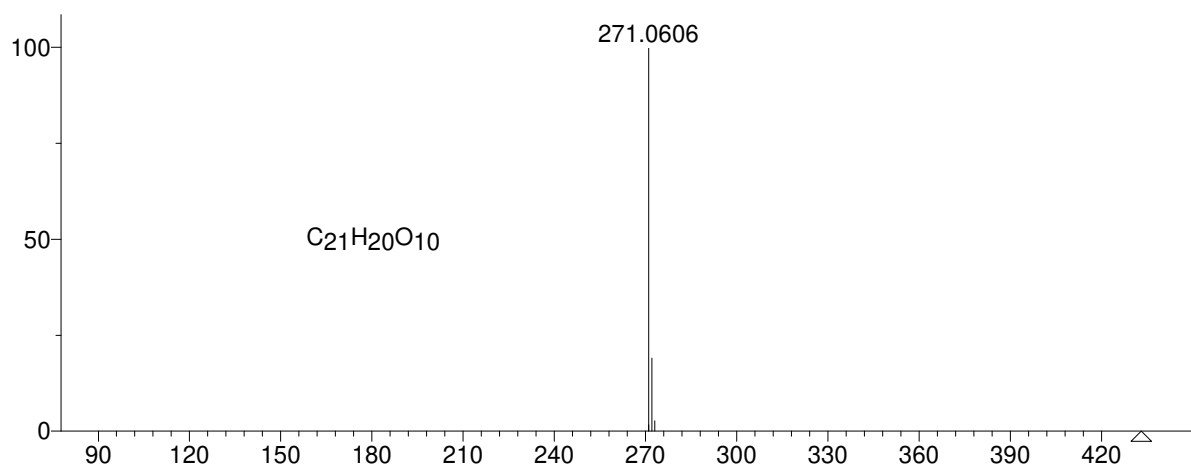

Hit 3 : Pelargonidin-3-O-glucoside [M]<sup>+</sup> 30eV P=433.1  
C<sub>21</sub>H<sub>21</sub>O<sub>10</sub>; MF: 13; RMF: 341; Prob 4.35%; Lib: anthocyanins mona; ID: 75.

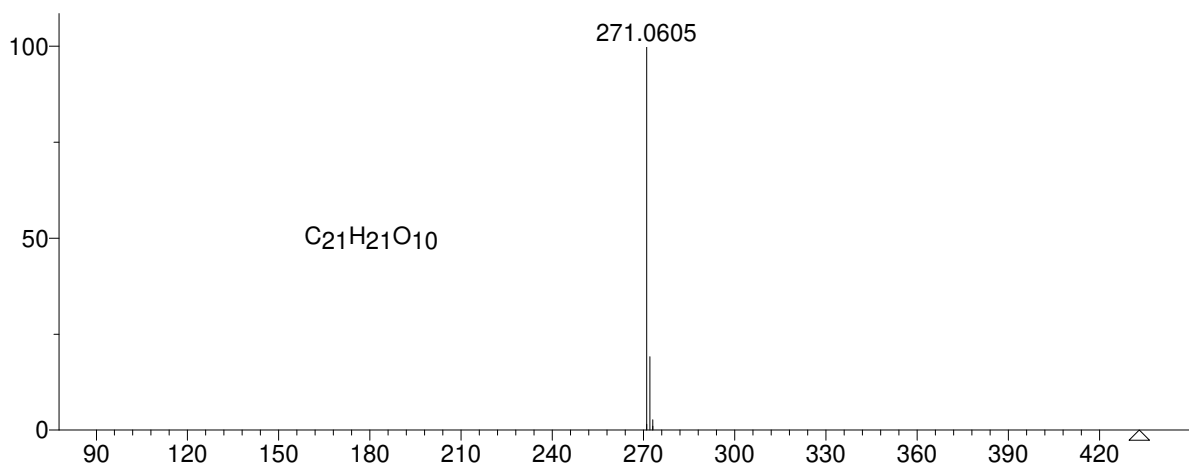

Hit 4 : Prunin [M-H]<sup>-</sup> P=433.1  
C<sub>21</sub>H<sub>22</sub>O<sub>10</sub>; MF: 2; RMF: 166; Prob 2.98%; Lib: mona-export-1c-ms-ms\_negative\_mode; ID: 9036.

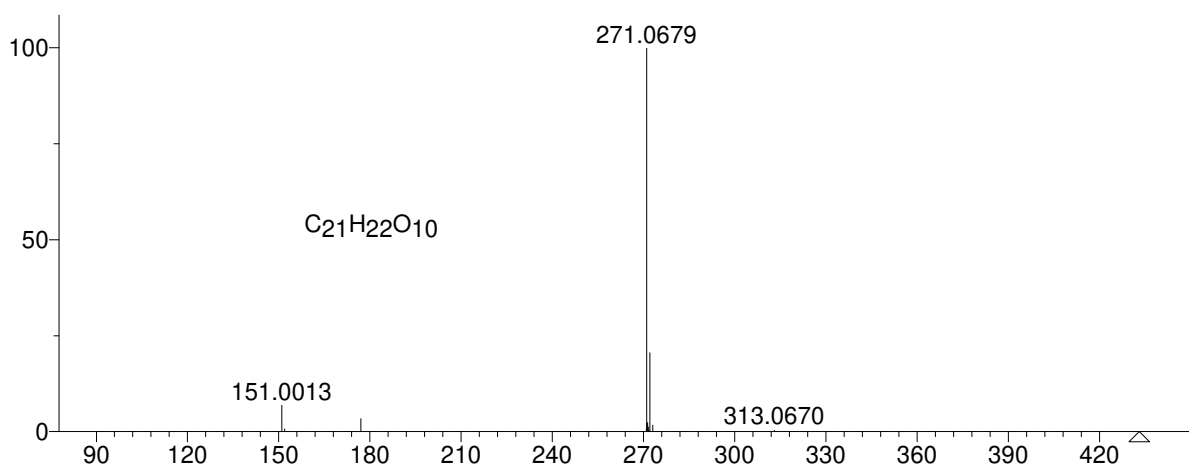

Hit 5 : α-Cypermethrin [M+NH<sub>4</sub>]<sup>+</sup> HCD 64V P=433.1  
C<sub>22</sub>H<sub>19</sub>Cl<sub>2</sub>NO<sub>3</sub>; MF: 0; RMF: 106; Prob 2.75%; CAS: 67375-30-8; Lib: nist\_msms; ID: 474529.

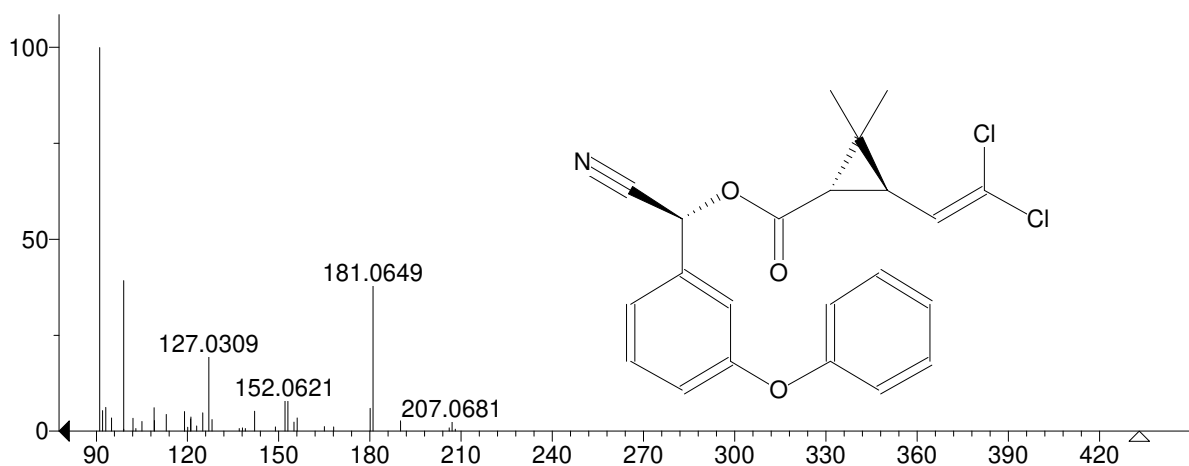

Unknown: Unknown (1.76\_275.0865m/z)  
Compound in Library Factor = 0

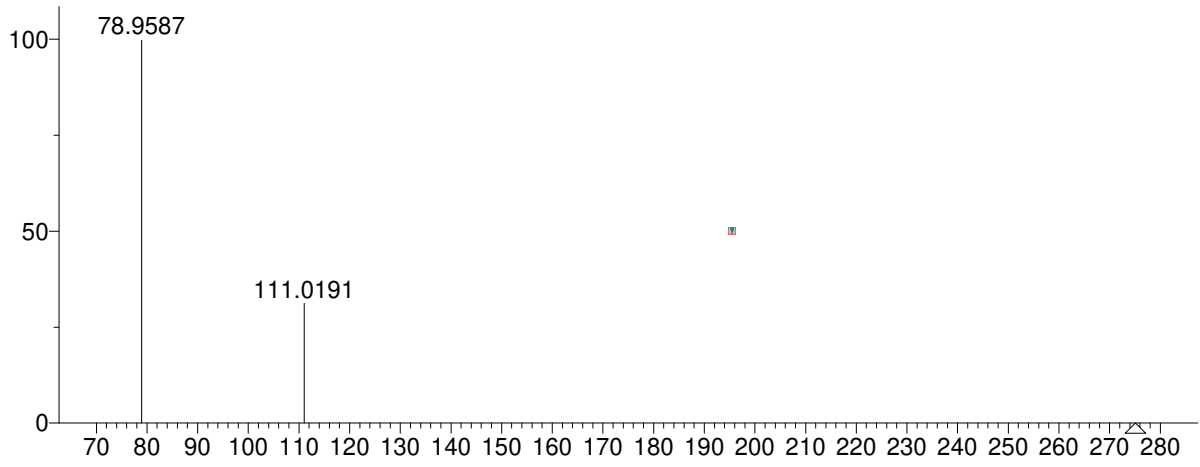

Unknown: Unknown (1.77\_257.1132m/z)  
Compound in Library Factor = -1523

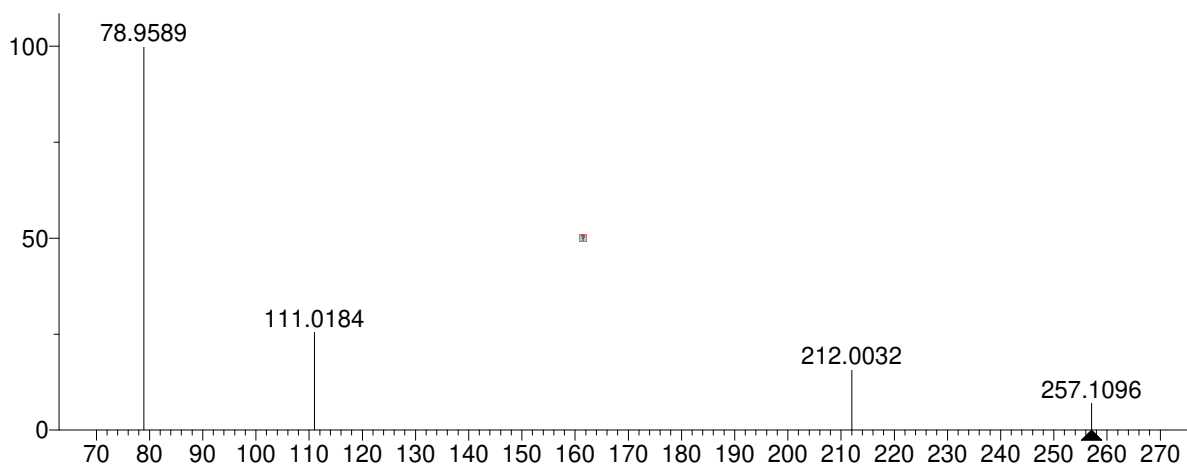

Hit 1 :  $\alpha$ -Cyclohexylmandelic acid [M+Na]<sup>+</sup> HCD 1V P=257.1  
C<sub>14</sub>H<sub>18</sub>O<sub>3</sub>; MF: 65; RMF: 520; Prob 82.2%; CAS: 4335-77-7; Lib: nist\_msms; ID: 492969.

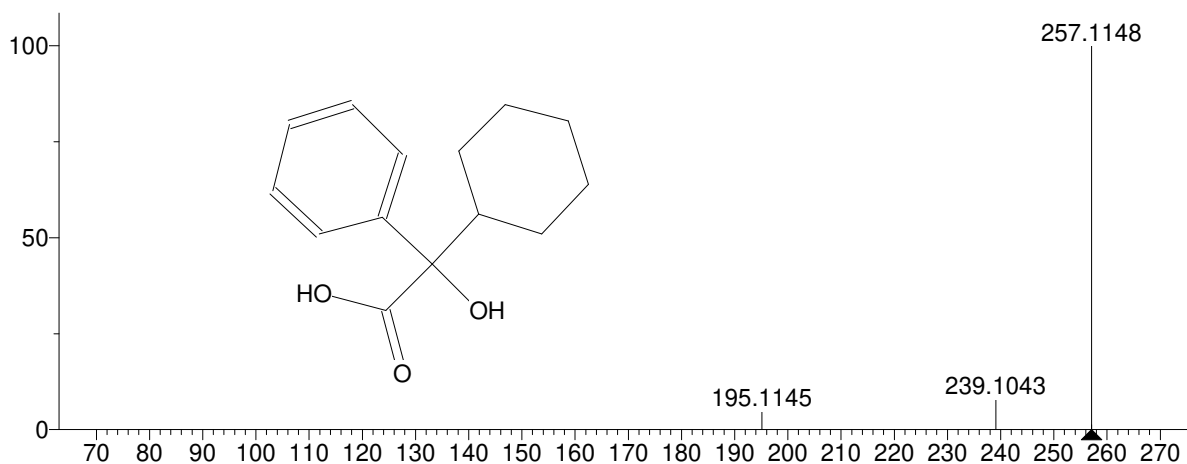

Hit 2 : L-Saccharopine [M-H-H<sub>2</sub>O]<sup>-</sup> HCD 16V P=257.1  
C<sub>11</sub>H<sub>20</sub>N<sub>2</sub>O<sub>6</sub>; MF: 21; RMF: 365; Prob 17.8%; CAS: 997-68-2; Lib: nist\_msms; ID: 125635.

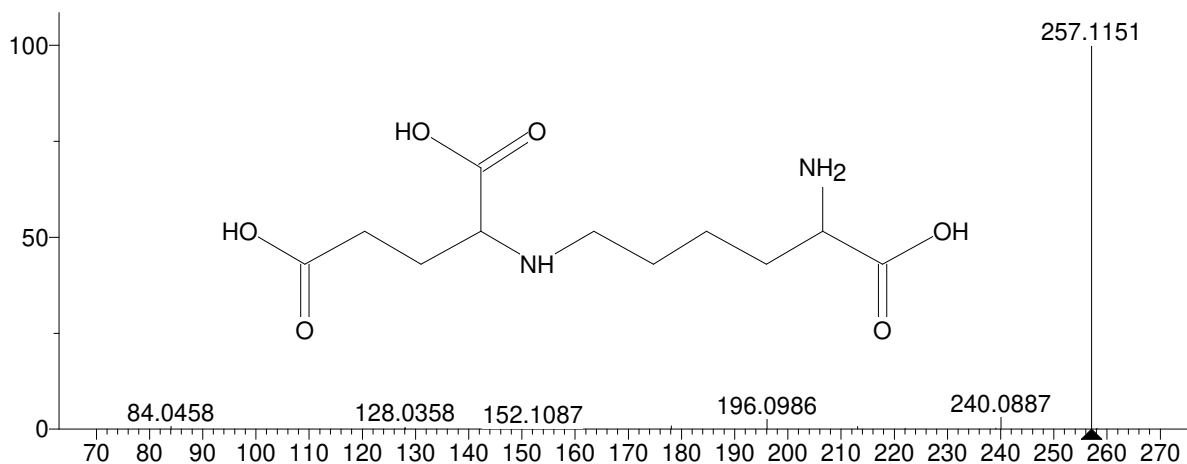

Unknown: Unknown (1.77\_323.0280m/z)  
Compound in Library Factor = -691

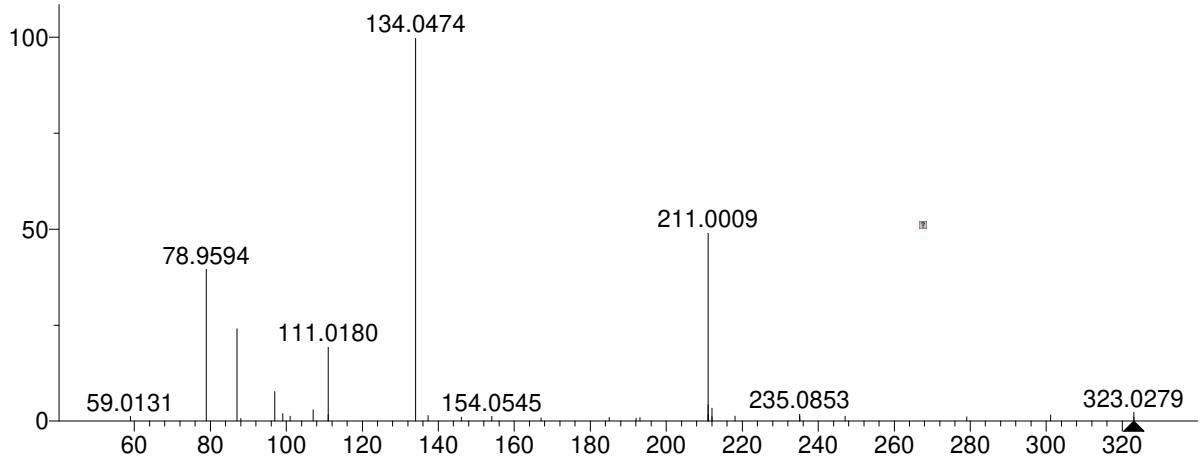

Hit 1 : 1-β-D-Arabinofuranosyluracil 5'-monophosphate [M-H]<sup>-</sup> HCD 29V P=323  
C<sub>9</sub>H<sub>13</sub>N<sub>2</sub>O<sub>9</sub>P; MF: 303; RMF: 557; Prob 64.3%; CAS: 18354-06-8; Lib: nist\_msms; ID: 447571.

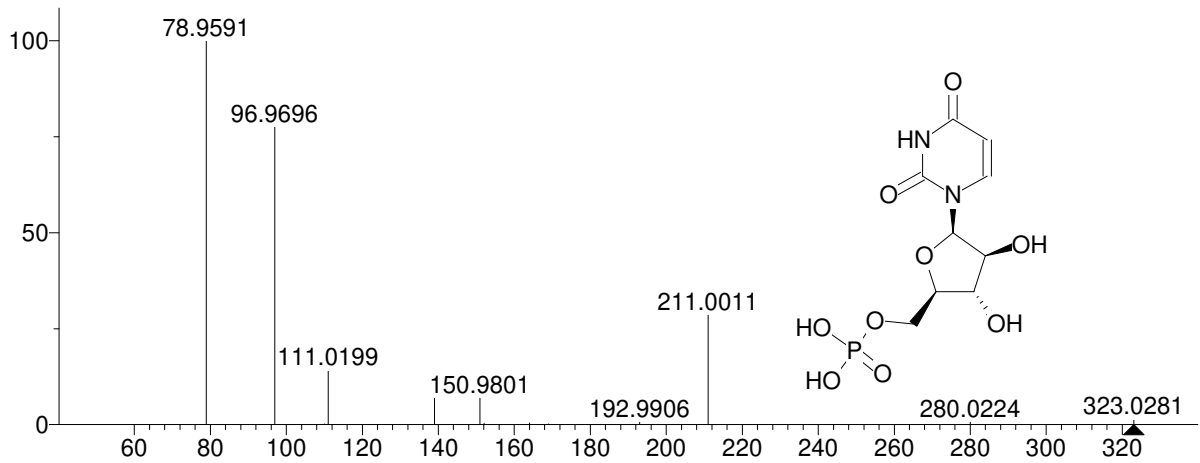

Hit 2 : Uridine 5'-monophosphate [M-H]<sup>-</sup> 20-30-40% P=323  
C<sub>9</sub>H<sub>13</sub>N<sub>2</sub>O<sub>9</sub>P; MF: 262; RMF: 514; Prob 14.7%; Lib: mona-export-fiehn\_hilic; ID: 1559.

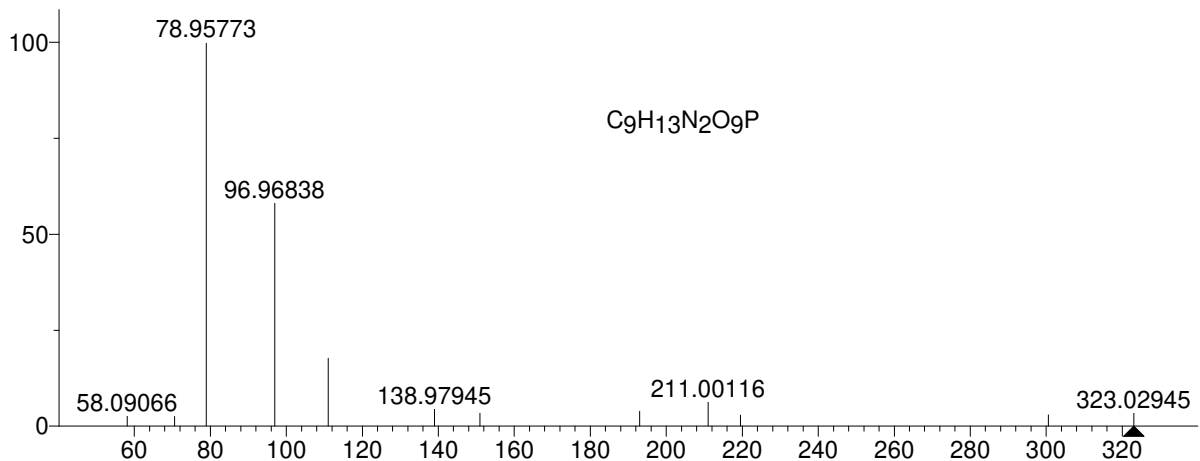

Hit 3 : URIDINE-5-MONOPHOSPHATE

C<sub>9</sub>H<sub>13</sub>N<sub>2</sub>O<sub>9</sub>P; MF: 248; RMF: 513; Prob 9.18%; Lib: embl neg mcg; ID: 631.

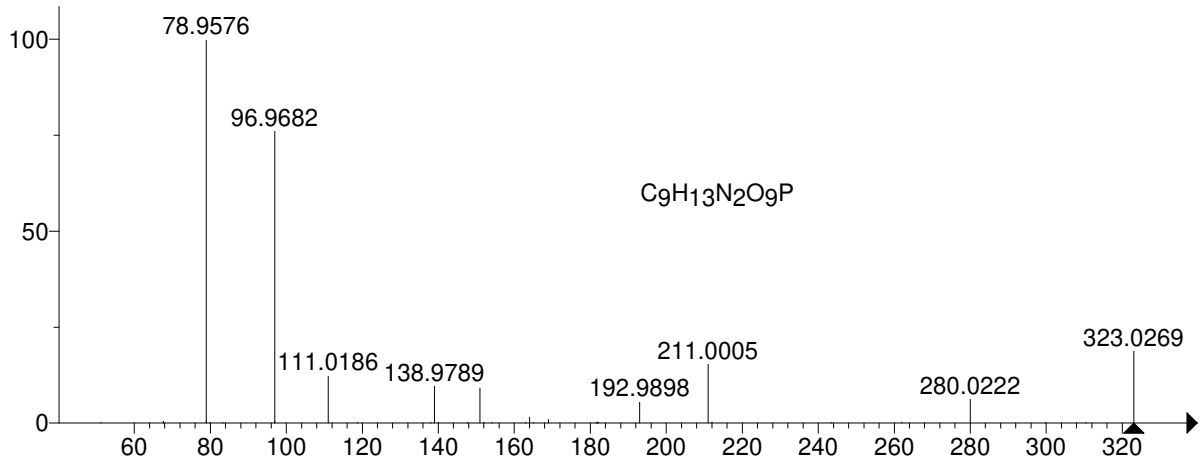

Hit 4 : URIDINE-5-MONOPHOSPHATE [M-H]<sup>-</sup> P=323

C<sub>9</sub>H<sub>13</sub>N<sub>2</sub>O<sub>9</sub>P; MF: 239; RMF: 508; Prob 6.66%; Lib: mona-export-gnps; ID: 5550.

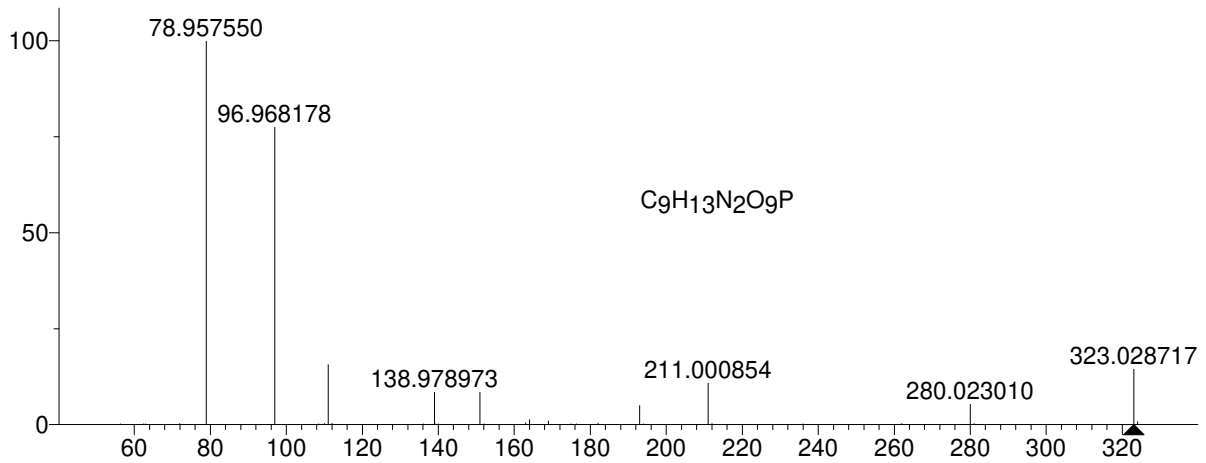

Hit 5 : Uridine 5'-diphosphoglucuronic acid [M-H-C<sub>6</sub>H<sub>9</sub>O<sub>9</sub>P]<sup>-</sup> HCD 22V P=323

C<sub>15</sub>H<sub>22</sub>N<sub>2</sub>O<sub>18</sub>P<sub>2</sub>; MF: 229; RMF: 510; Prob 4.70%; CAS: 2616-64-0; Lib: nist\_msms; ID: 486422.

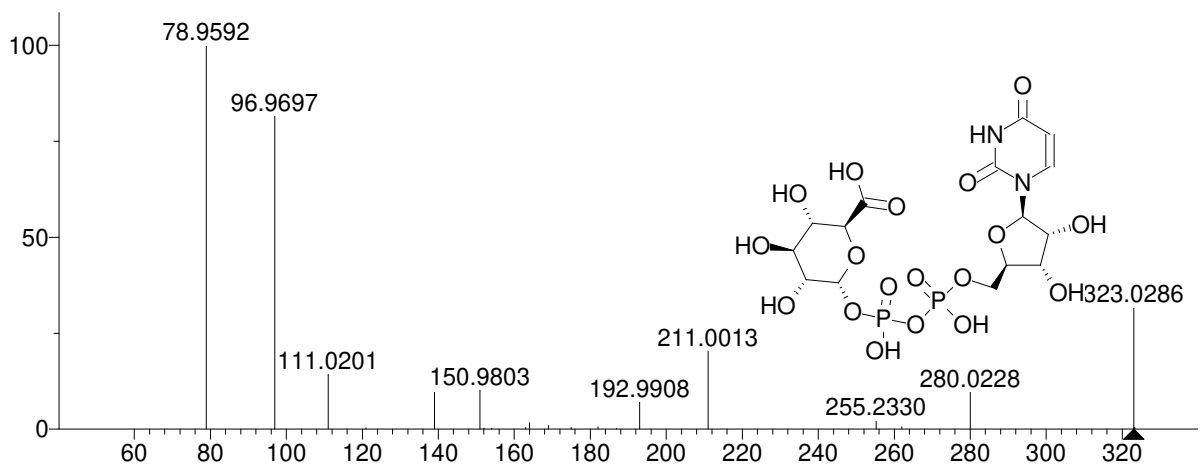



\*\* Search Report Page 1 of 2 \*\*

Unknown: Unknown (1.78\_384.1511m/z)  
Compound in Library Factor = -2176

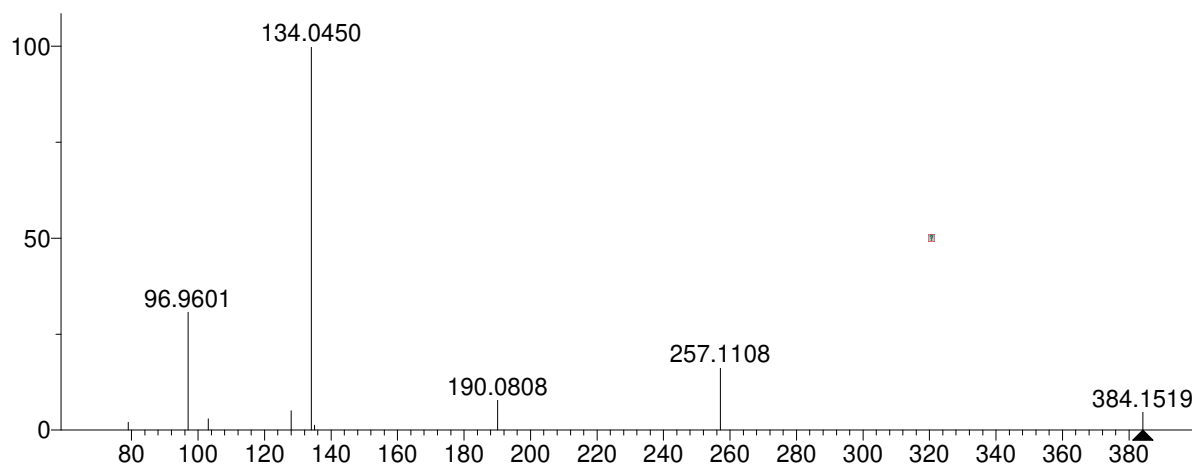

Hit 1 : 2-Acetamido-2-deoxy-3-O-( $\beta$ -D-galactopyranosyl)-D-glucopyranose [M+H]<sup>+</sup> HCD 1V P=384.2  
C<sub>14</sub>H<sub>25</sub>NO<sub>11</sub>; MF: 75; RMF: 467; Prob 61.8%; CAS: 489-52-1; Lib: nist\_msms; ID: 534139.

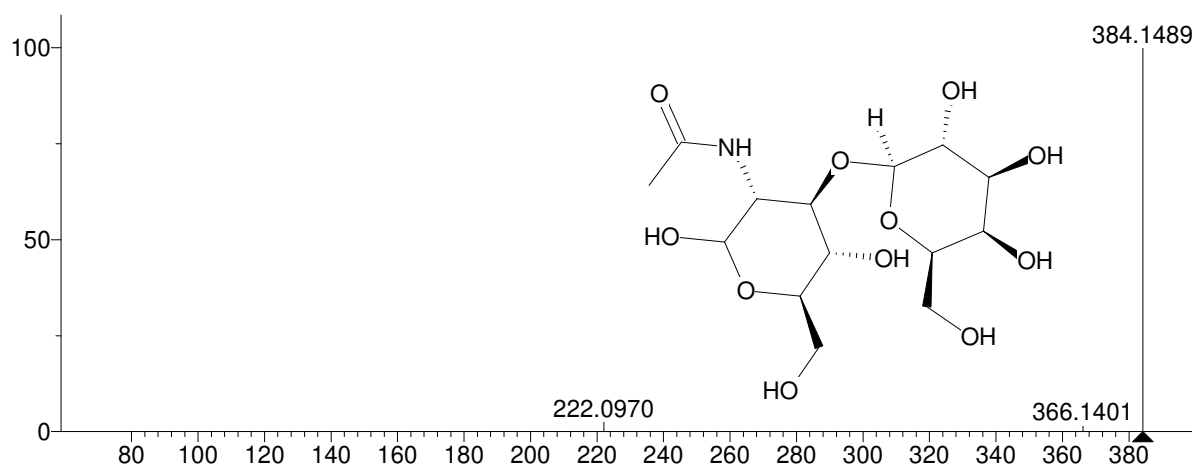

Hit 2 : N-Acetyl-D-lactosamine [M+H]<sup>+</sup> HCD 3V P=384.2  
C<sub>14</sub>H<sub>25</sub>NO<sub>11</sub>; MF: 48; RMF: 441; Prob 18.2%; CAS: 32181-59-2; Lib: nist\_msms; ID: 478584.

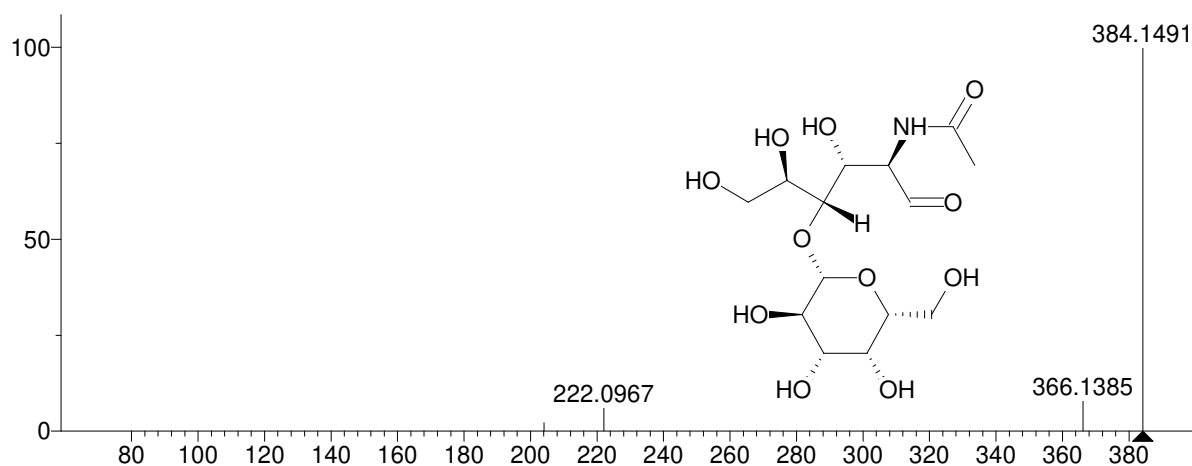

Hit 3 : Tolfenpyrad [M+H]<sup>+</sup> HCD 17V P=384.1  
C<sub>21</sub>H<sub>22</sub>ClN<sub>3</sub>O<sub>2</sub>; MF: 28; RMF: 372; Prob 8.28%; CAS: 129558-76-5; Lib: nist\_msms; ID: 541788.

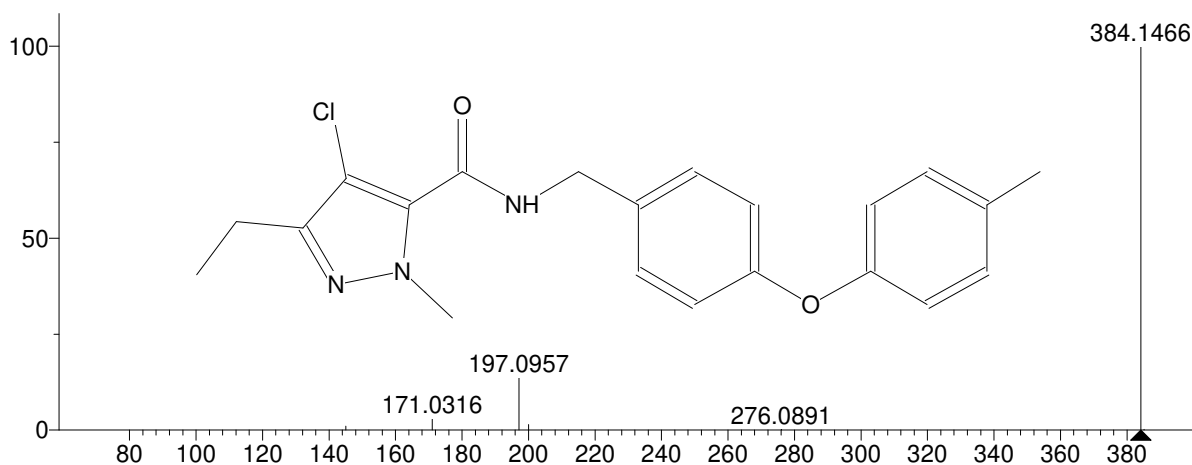

Hit 4 : 3'- $\alpha$ -Sialyl-N-acetyllactosamine [M+H-C<sub>11</sub>H<sub>17</sub>O<sub>8</sub>N]<sup>+</sup> HCD 7V P=384.2  
C<sub>25</sub>H<sub>42</sub>N<sub>2</sub>O<sub>19</sub>; MF: 3; RMF: 138; Prob 2.52%; CAS: 81693-22-3; Lib: nist\_msms; ID: 211442.

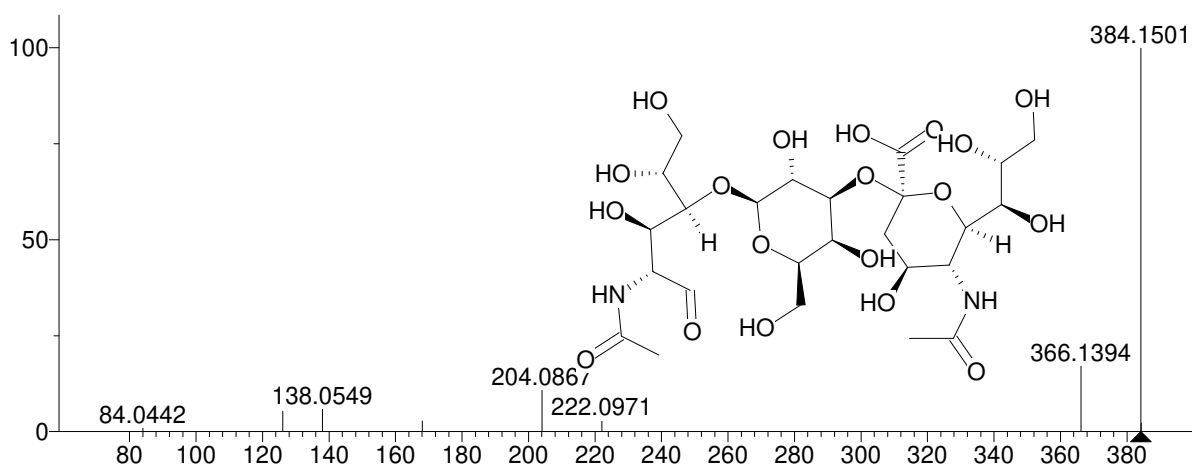

Hit 5 : Lewis X trisaccharide [M+H-C<sub>6</sub>H<sub>10</sub>O<sub>4</sub>]<sup>+</sup> HCD 7V P=384.2  
C<sub>20</sub>H<sub>35</sub>N<sub>3</sub>O<sub>15</sub>; MF: 2; RMF: 132; Prob 2.42%; CAS: 71208-06-5; Lib: nist\_msms; ID: 211230.

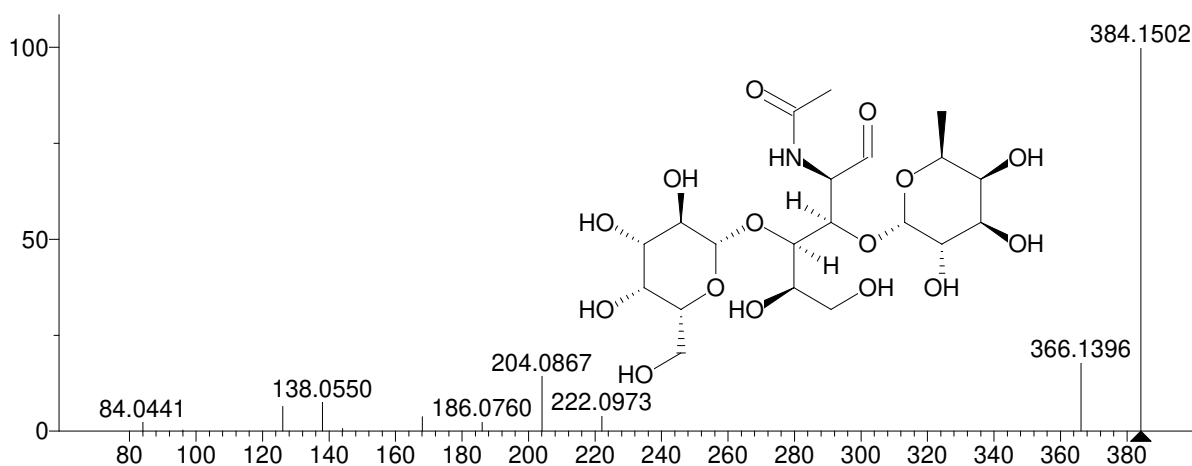

\*\* Search Report Page 1 of 2 \*\*

Unknown: Unknown (1.79\_383.1136m/z)  
Compound in Library Factor = -542

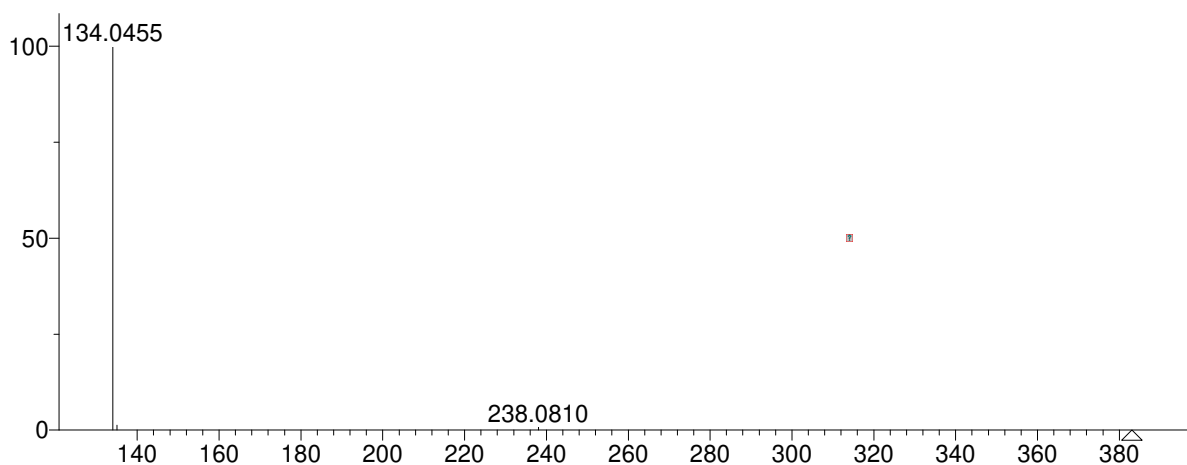

Hit 1 : S-Adenosylhomocysteine [M-H]<sup>-</sup> 40 P=383.1  
C<sub>14</sub>H<sub>20</sub>N<sub>6</sub>O<sub>5</sub>S; MF: 359; RMF: 990; Prob 88.6%; Lib: msms neg mona\_ipb\_gnps\_plasma; ID: 657.

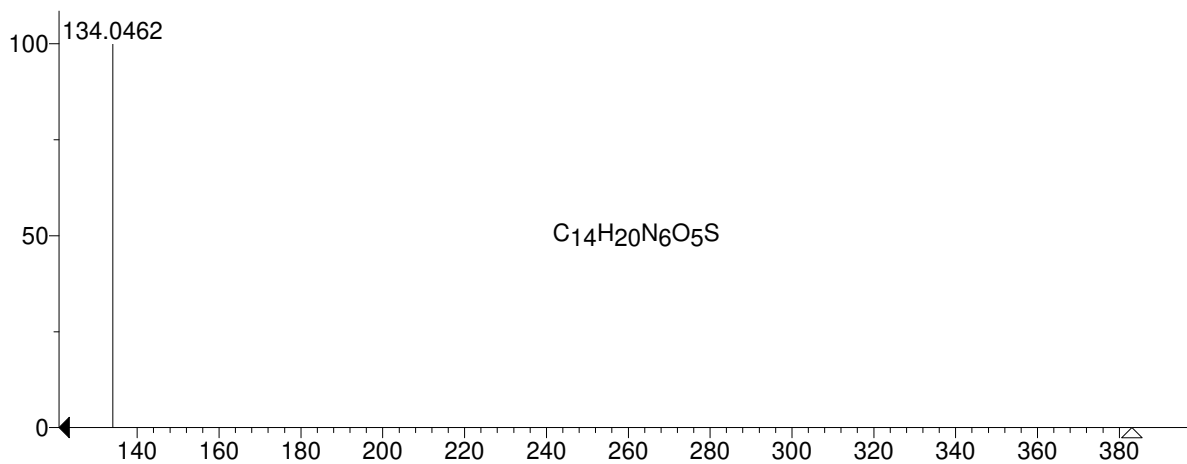

Hit 2 : S-Adenosyl-L-homocysteine [M-H]<sup>-</sup> 5-60V P=383.1  
C<sub>14</sub>H<sub>20</sub>N<sub>6</sub>O<sub>5</sub>S; MF: 238; RMF: 877; Prob 4.52%; Lib: mona-export-lc-ms-ms\_negative\_mode; ID: 8476.

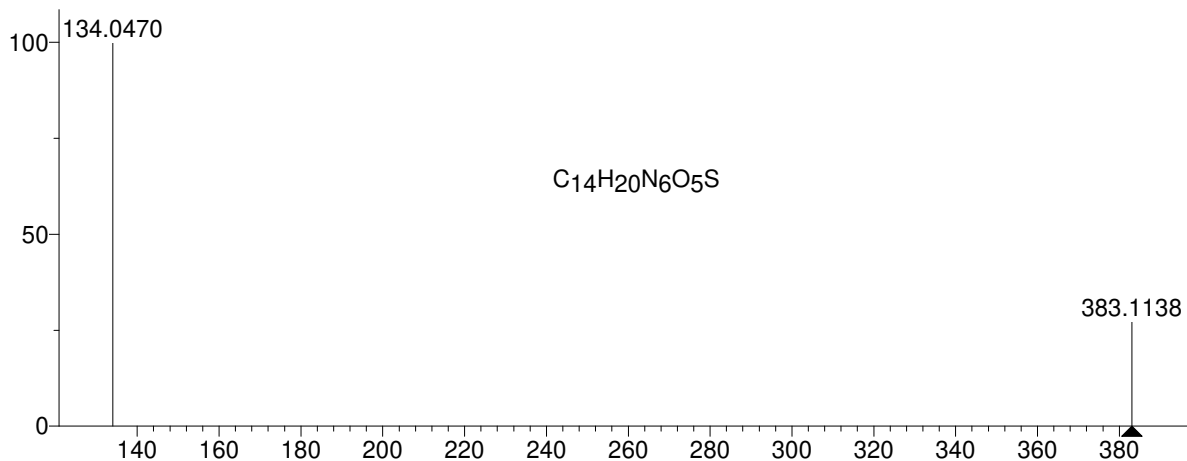

Hit 3 : S-Adenosyl-L-homocysteine; LC-ESI-QTOF; MS2; CE [M-H]<sup>-</sup> P=383.1  
C<sub>14</sub>H<sub>20</sub>N<sub>6</sub>O<sub>5</sub>S; MF: 238; RMF: 877; Prob 4.52%; Lib: msms-neg-massbank; ID: 4374.

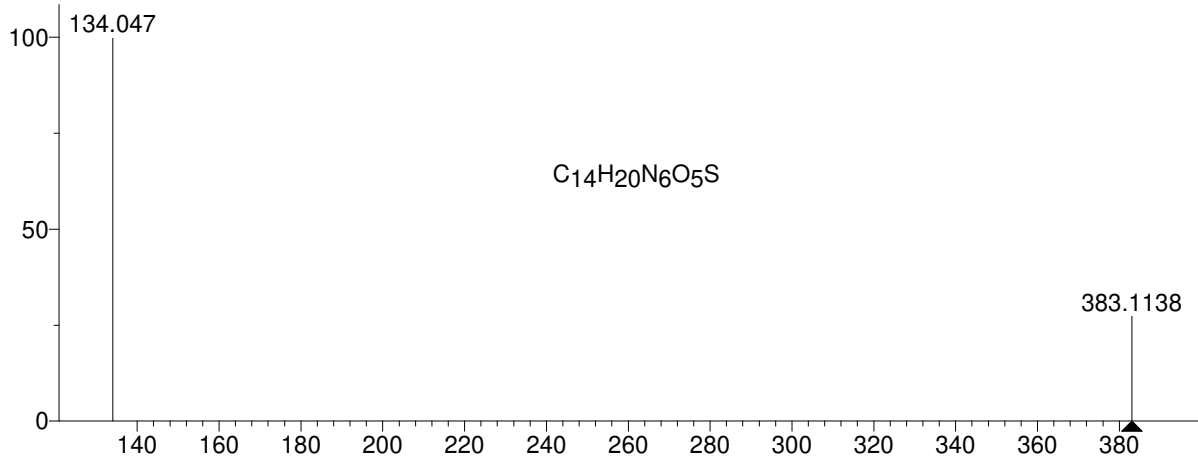

Hit 4 : S-(5#39;-ADENOSYL)-L-HOMOCYSTEINE  
C<sub>14</sub>H<sub>20</sub>N<sub>6</sub>O<sub>5</sub>S; MF: 185; RMF: 936; Prob 0.89%; Lib: embl neg mcg; ID: 301.

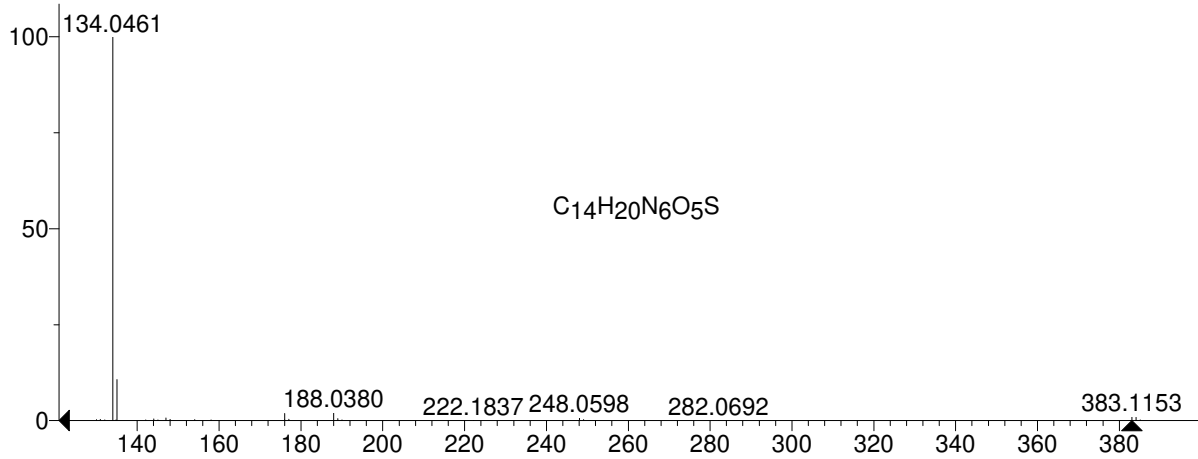

Hit 5 : S-Adenosyl-homocysteine [M-H]<sup>-</sup> 20-30-40%) P=383.1  
C<sub>14</sub>H<sub>20</sub>N<sub>6</sub>O<sub>5</sub>S; MF: 182; RMF: 861; Prob 0.79%; Lib: msms-neg-fiehnlic; ID: 626.

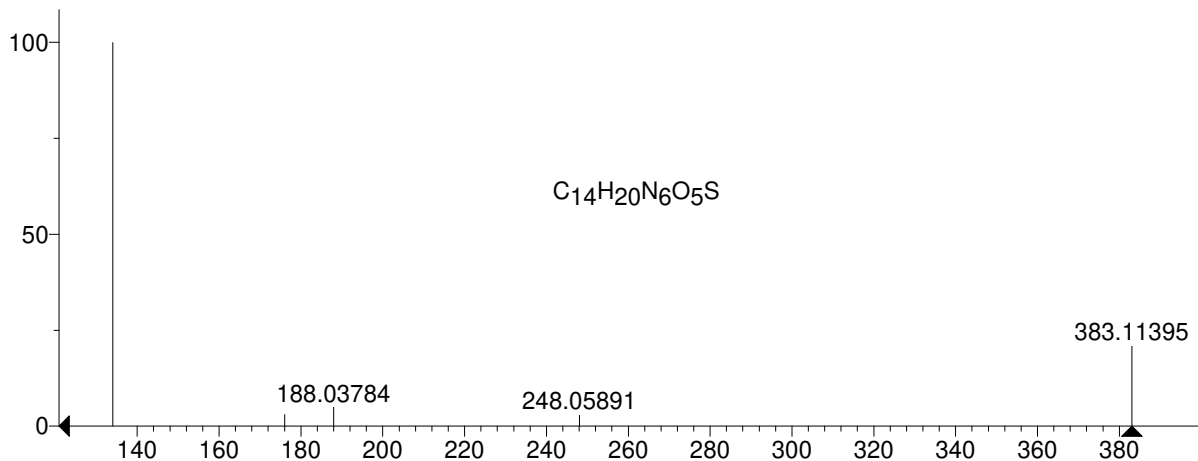

Unknown: Unknown (1.79\_476.1513m/z)  
Compound in Library Factor = 0

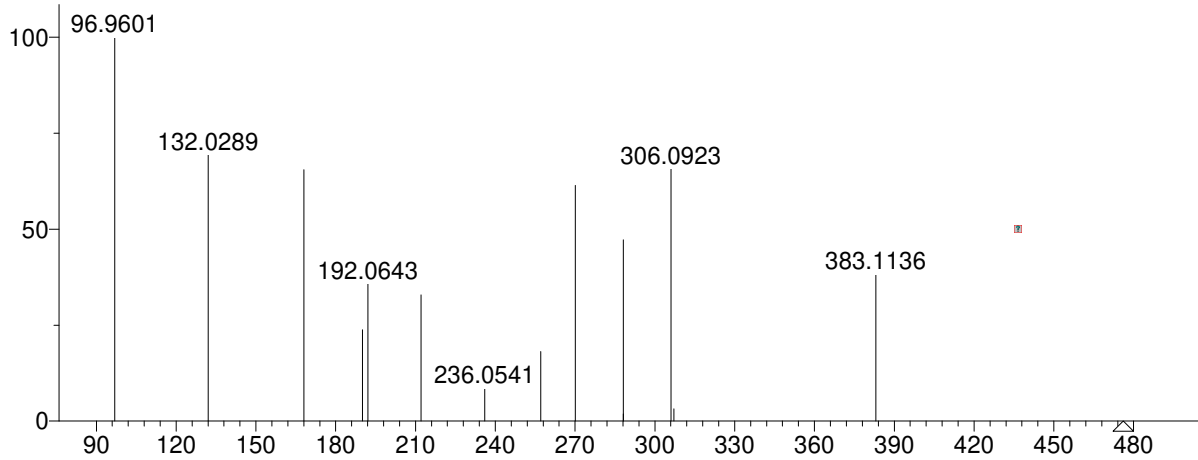

Hit 1 : NCGC00381039-01\_C22H25NO8\_8-Benzoyl-2-[(3Z)-1,2-dihydroxy-3-hexen-1-yl]-9-hydroxy-8-methoxy-3-r  
C22H25NO8; MF: 0; RMF: 106; Prob 50.0%; Lib: mona-export-gnps; ID: 13610.

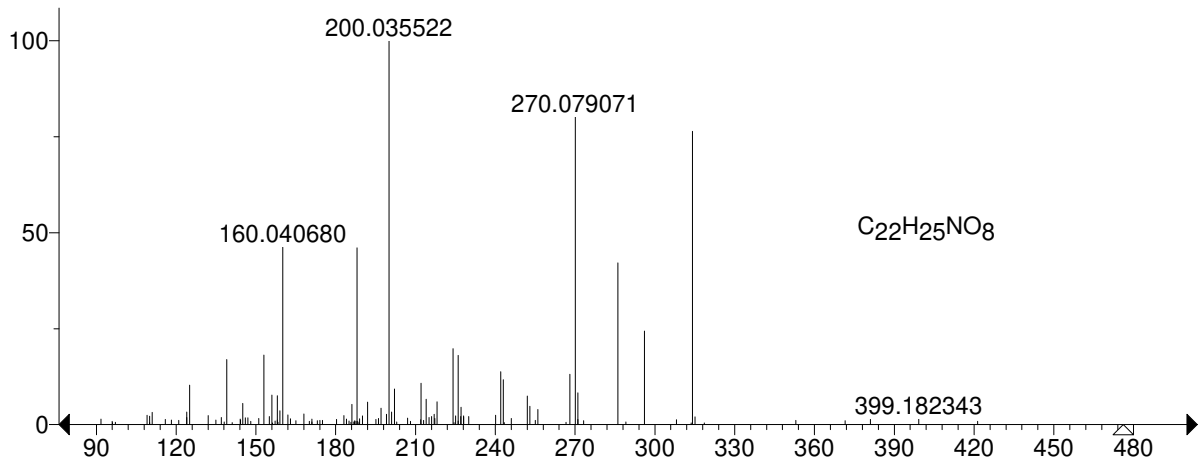

Hit 2 : NCGC00380982-01\_C22H25NO8\_8-Benzoyl-2-[(3E)-1,2-dihydroxy-3-hexen-1-yl]-9-hydroxy-8-methoxy-3-r  
C22H25NO8; MF: 0; RMF: 94; Prob 50.0%; Lib: mona-export-gnps; ID: 12862.

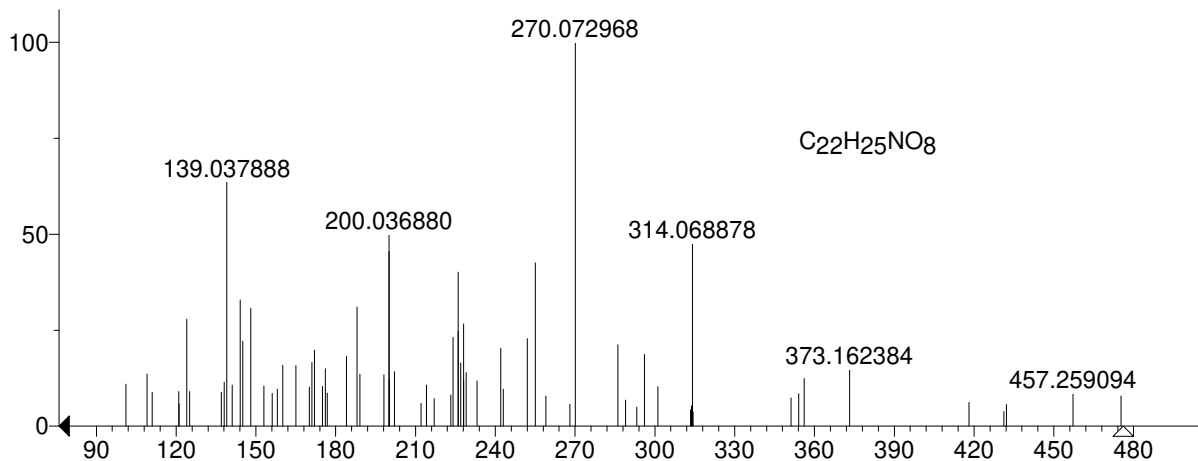

Unknown: Unknown (1.80\_257.0768m/z)  
Compound in Library Factor = -198

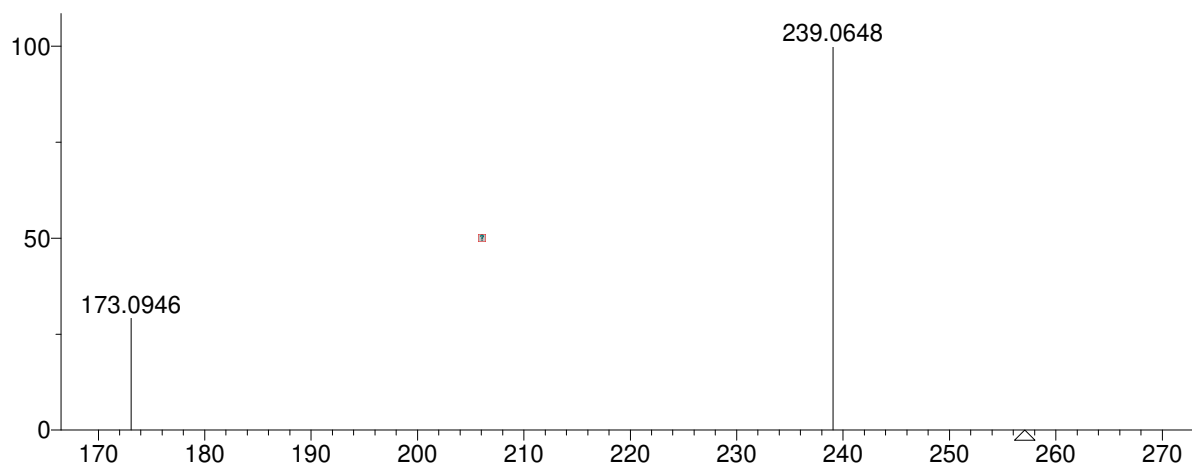

Hit 1 : L-Pyrroglutamic acid [2M-H]- IT-FT 35% P=257.1  
C5H7NO3; MF: 312; RMF: 880; Prob 99.0%; CAS: 98-79-3; Lib: nist\_msms; ID: 296512.

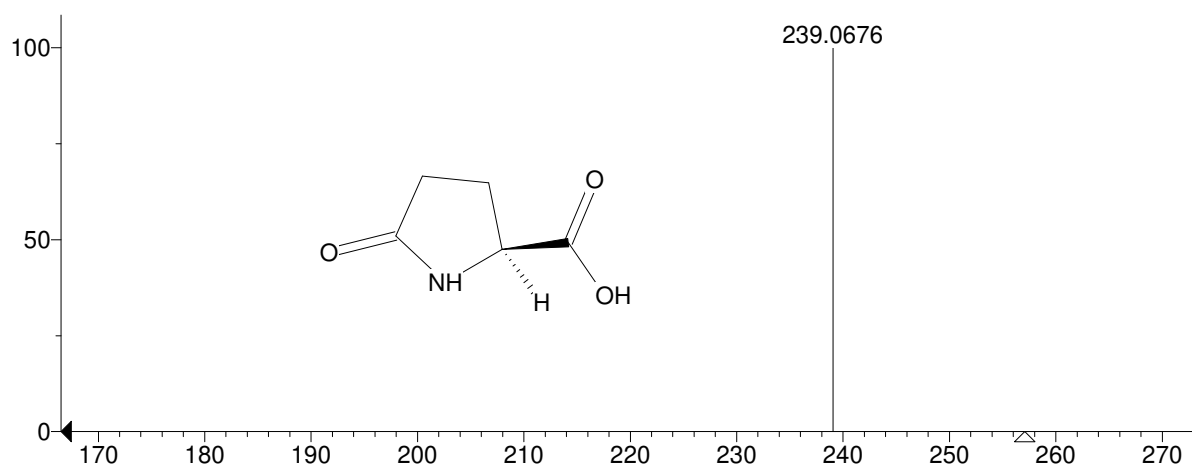

Hit 2 : L-γ-Glutamyl-L-glutamic acid [M-H-H2O]- HCD 16V P=257.1  
C10H16N2O7; MF: 25; RMF: 558; Prob 0.99%; CAS: 1116-22-9; Lib: nist\_msms; ID: 137327.

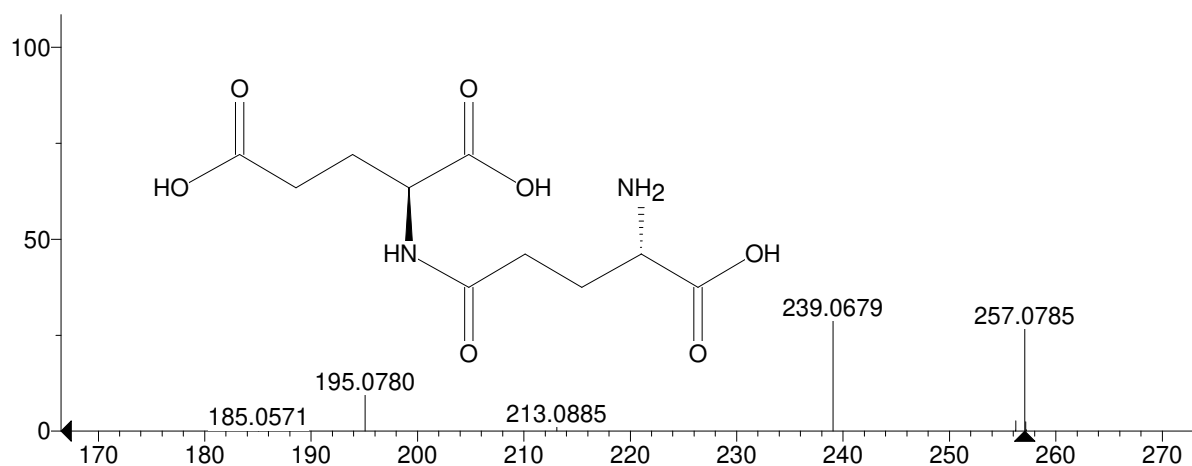

Unknown: Unknown (1.80\_332.1452m/z)  
Compound in Library Factor = 0

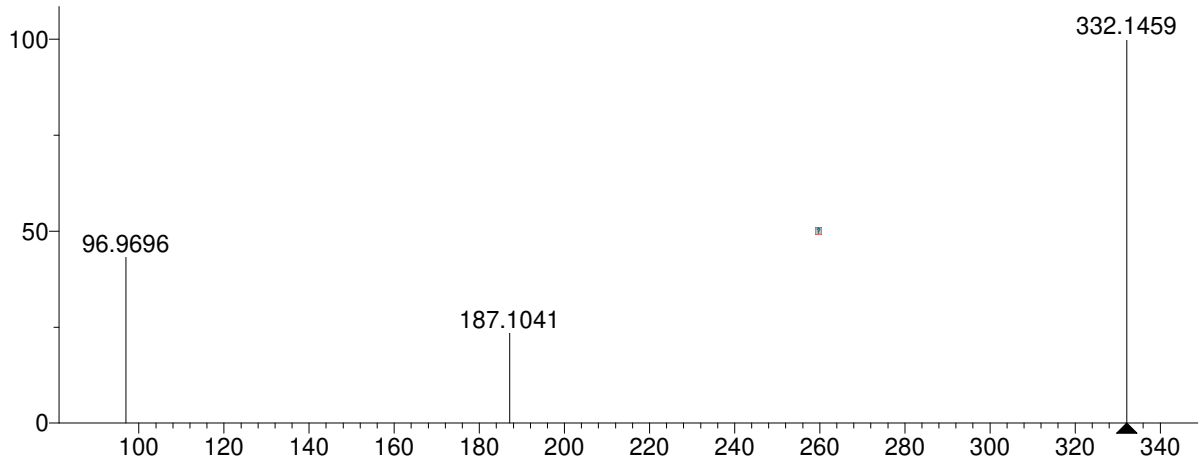

Unknown: Unknown (1.80\_419.1277m/z)  
Compound in Library Factor = 0

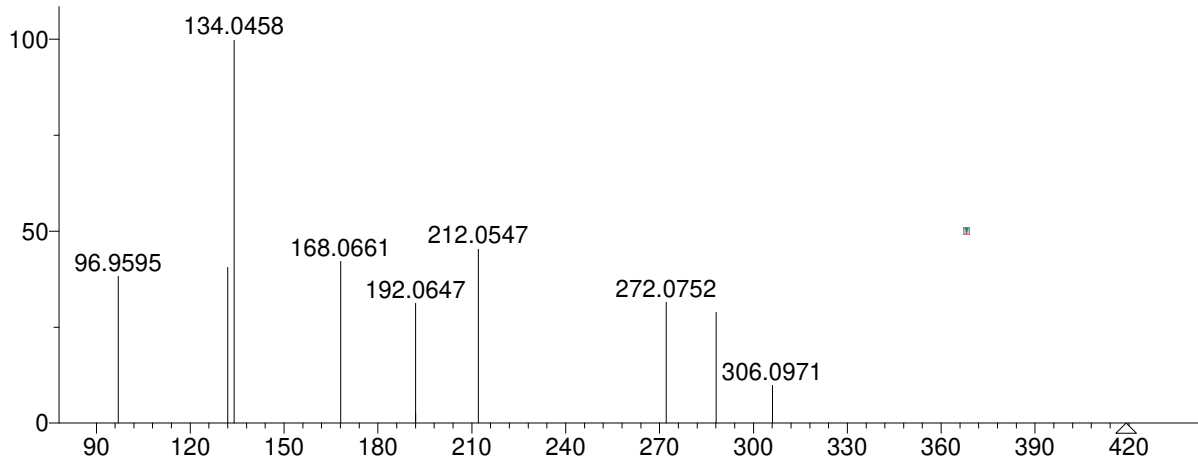



Unknown: Unknown (1.82\_420.2337m/z)  
Compound in Library Factor = 0

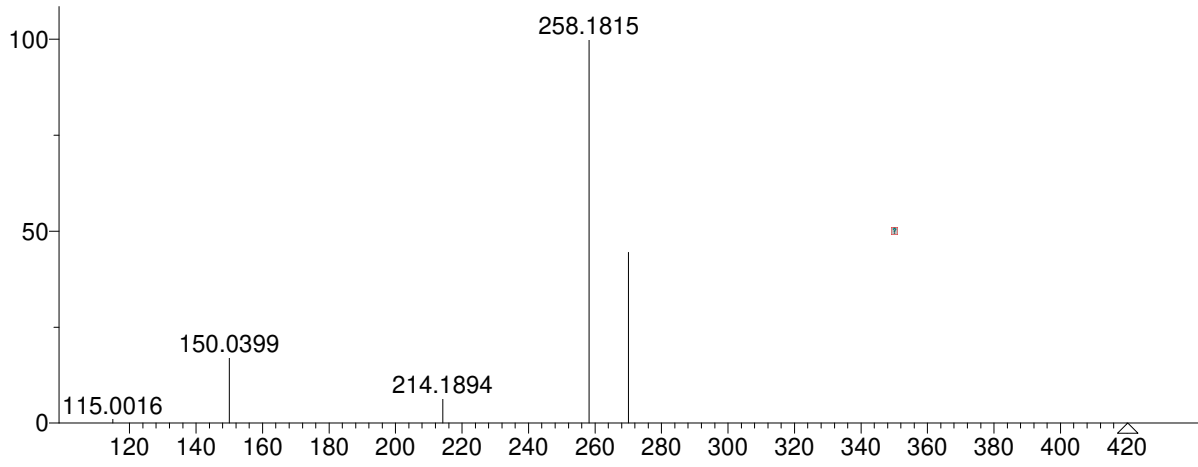

Unknown: Unknown (1.86\_275.0511m/z)  
Compound in Library Factor = 0

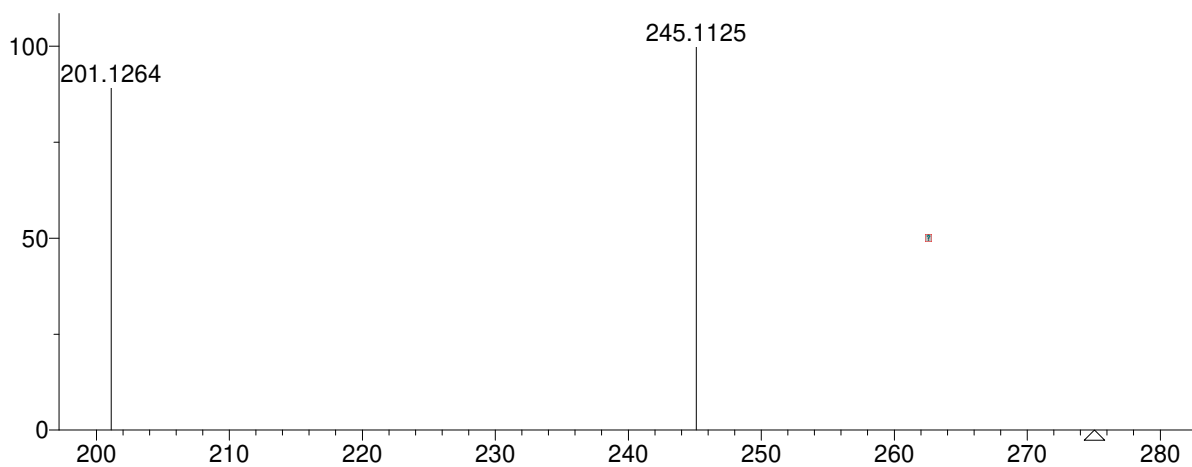

Hit 1 : 1,2,3-Benzenetricarboxylic acid, trimethyl ester [M+Na]<sup>+</sup> IT 35% P=275.1  
C<sub>12</sub>H<sub>12</sub>O<sub>6</sub>; MF: 0; RMF: 97; Prob 100.0%; CAS: 2672-57-3; Lib: nist\_msms; ID: 306560.

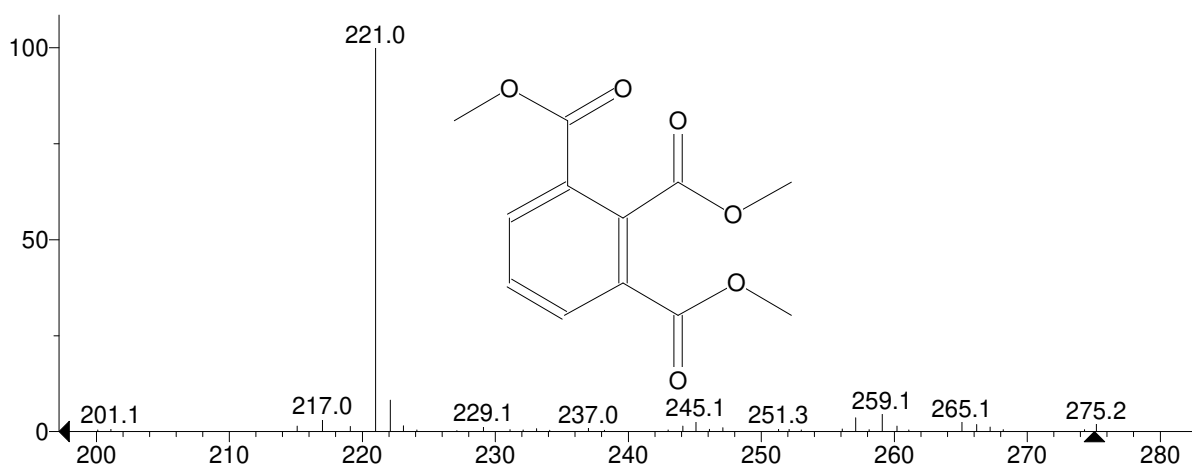

Unknown: Unknown (1.86\_476.1511m/z)  
Compound in Library Factor = 0

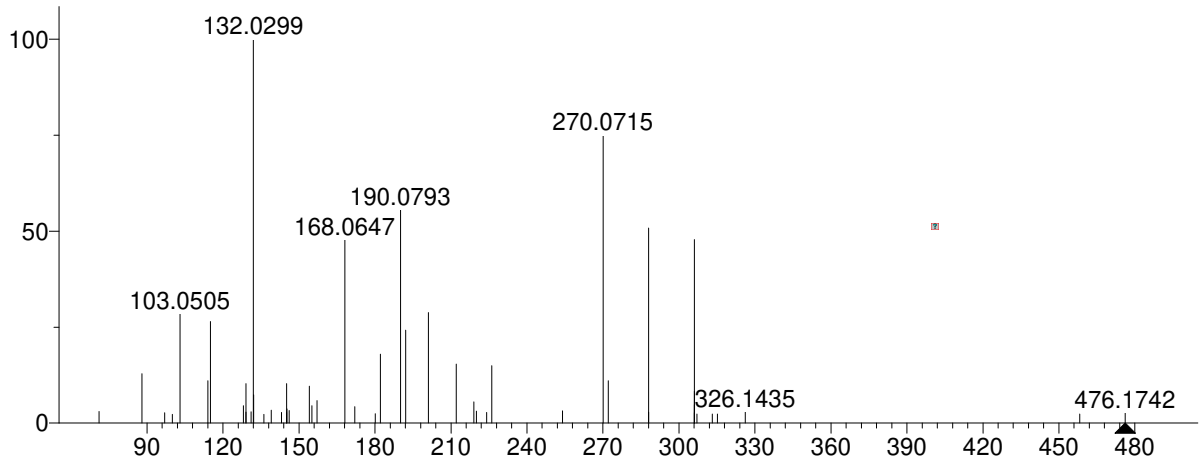

Unknown: Unknown (1.87\_243.0614m/z)  
Compound in Library Factor = -2387

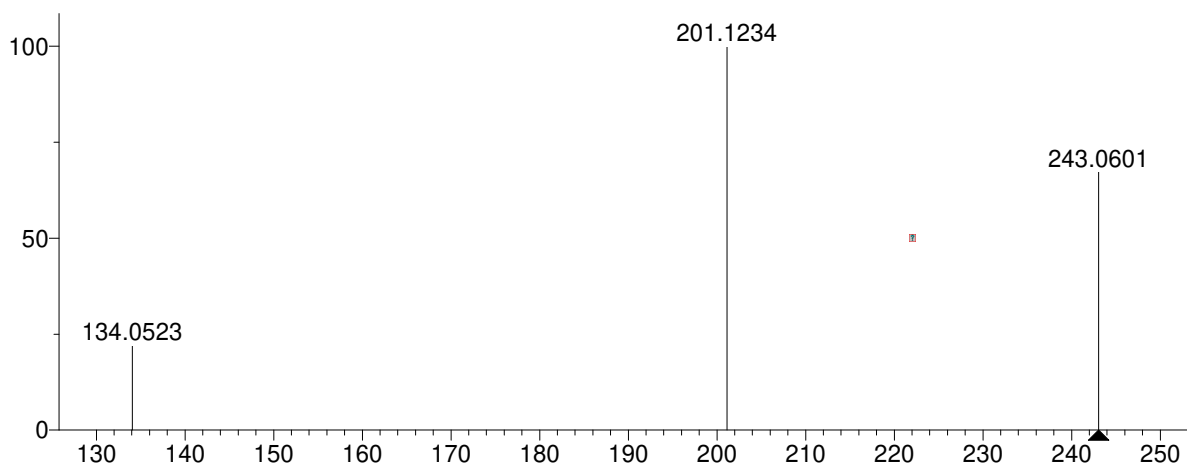

Hit 1 : Prophos [M+H]<sup>+</sup> HCD 7V P=243.1  
C<sub>8</sub>H<sub>19</sub>O<sub>2</sub>PS<sub>2</sub>; MF: 34; RMF: 508; Prob 21.1%; CAS: 13194-48-4; Lib: nist\_msms; ID: 489673.

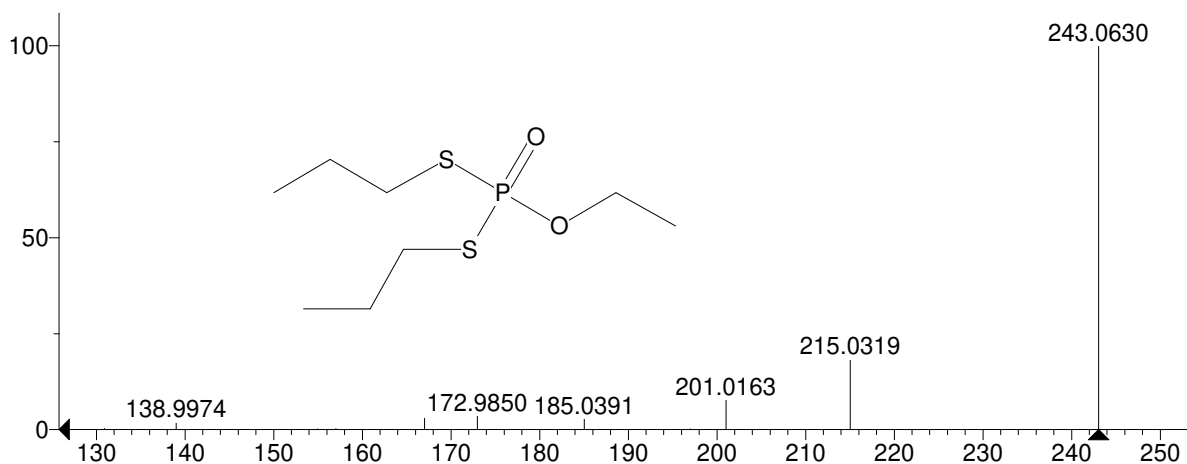

Hit 2 : Uridine [M-H]<sup>-</sup> 5-60V P=243.1  
C<sub>9</sub>H<sub>12</sub>N<sub>2</sub>O<sub>6</sub>; MF: 19; RMF: 394; Prob 12.8%; Lib: mona-export-1c-ms-ms\_negative\_mode; ID: 8487.

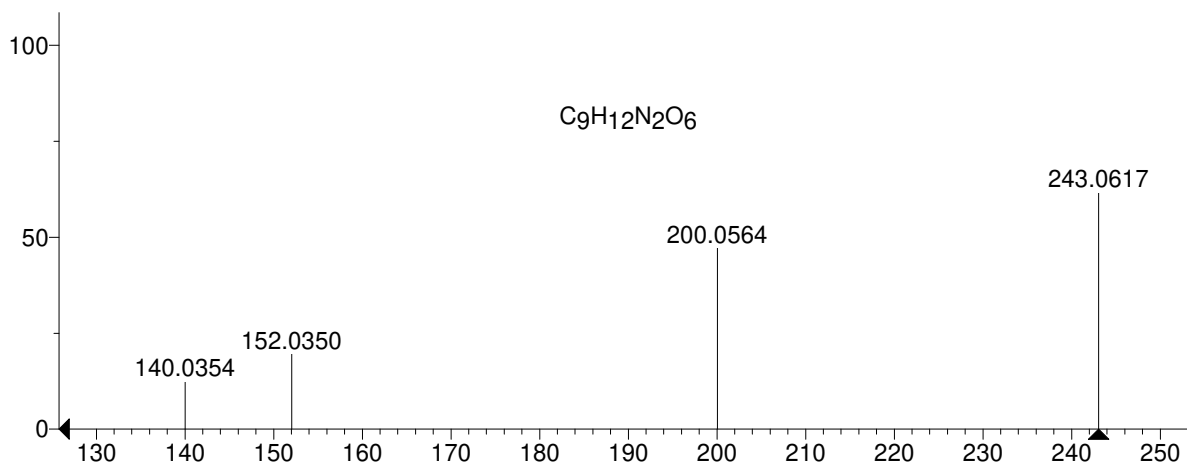

Hit 3 : Uridine; LC-ESI-QTOF; MS2; CE [M-H]- P=243.1  
C<sub>9</sub>H<sub>12</sub>N<sub>2</sub>O<sub>6</sub>; MF: 19; RMF: 394; Prob 12.8%; Lib: msms-neg-massbank; ID: 4384.

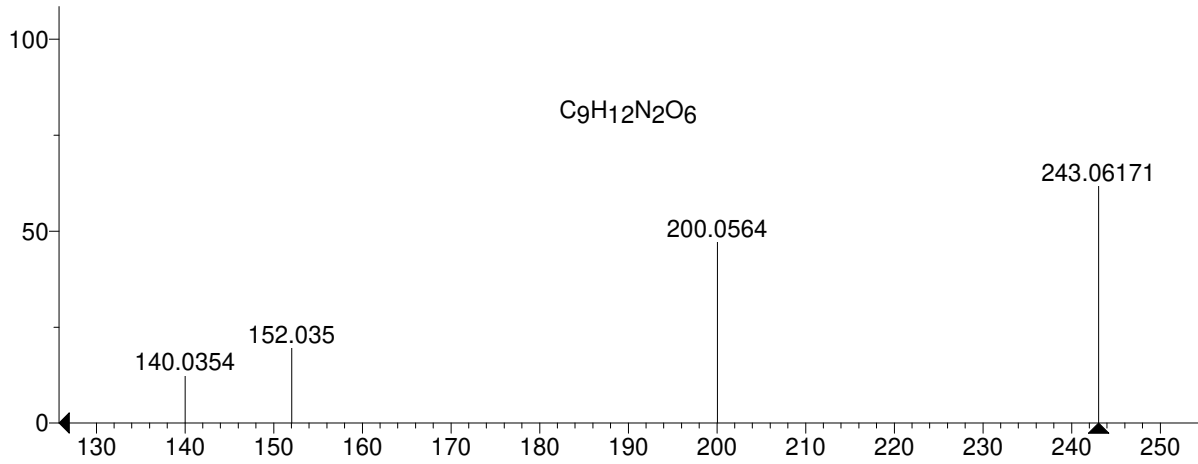

Hit 4 : Uridine (Not validated); PlaSMA ID-371 [M-H]- P=243.1  
C<sub>9</sub>H<sub>12</sub>N<sub>2</sub>O<sub>6</sub>; MF: 8; RMF: 341; Prob 8.78%; Lib: biomsms-neg-plasma; ID: 471.

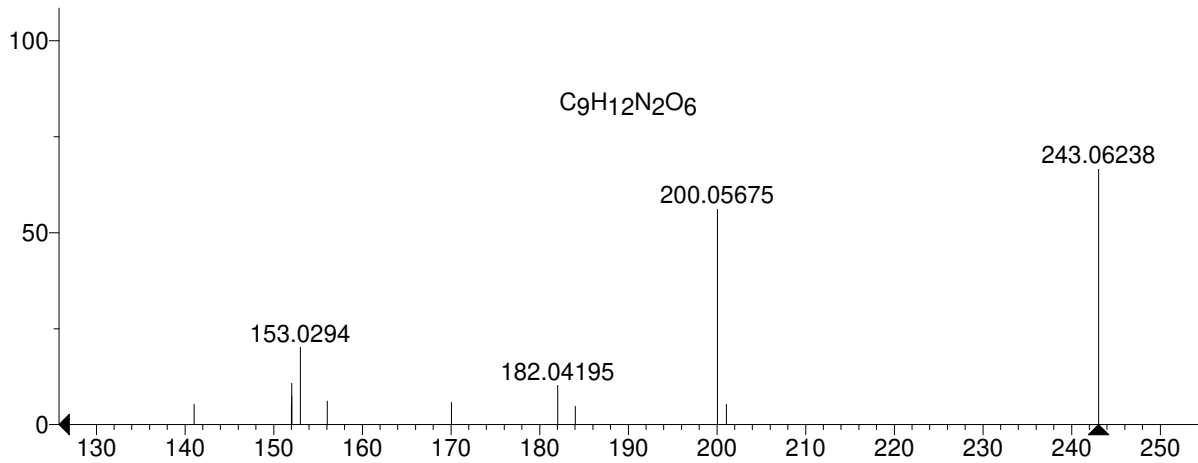

Hit 5 : uridine [M-H]- 50% ( P=243.1  
C<sub>9</sub>H<sub>12</sub>N<sub>2</sub>O<sub>6</sub>; MF: 7; RMF: 346; Prob 8.44%; Lib: mona-export-lc-ms-ms\_negative\_mode; ID: 7486.

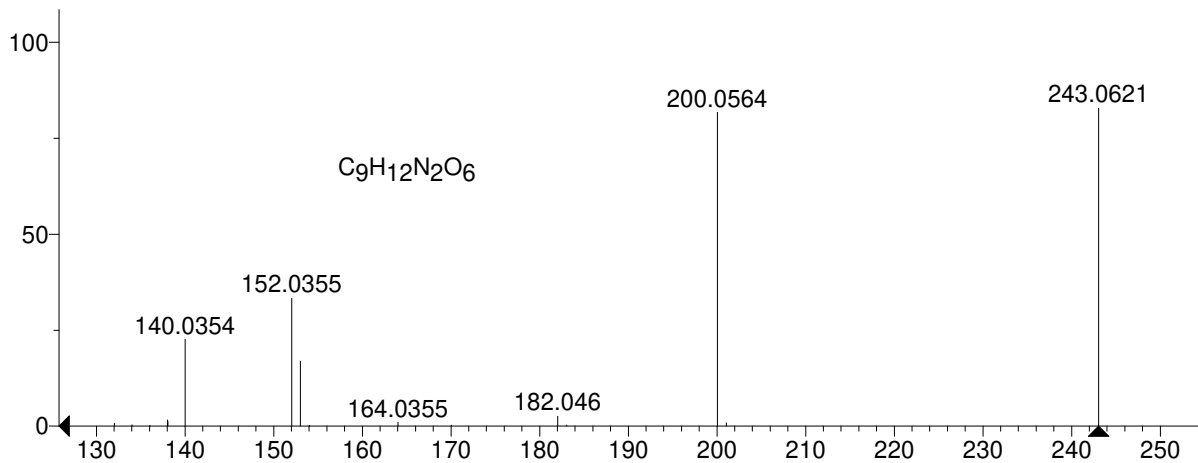

\*\* Search Report Page 1 of 2 \*\*

Unknown: Unknown (1.88\_245.1134m/z)  
Compound in Library Factor = -2387

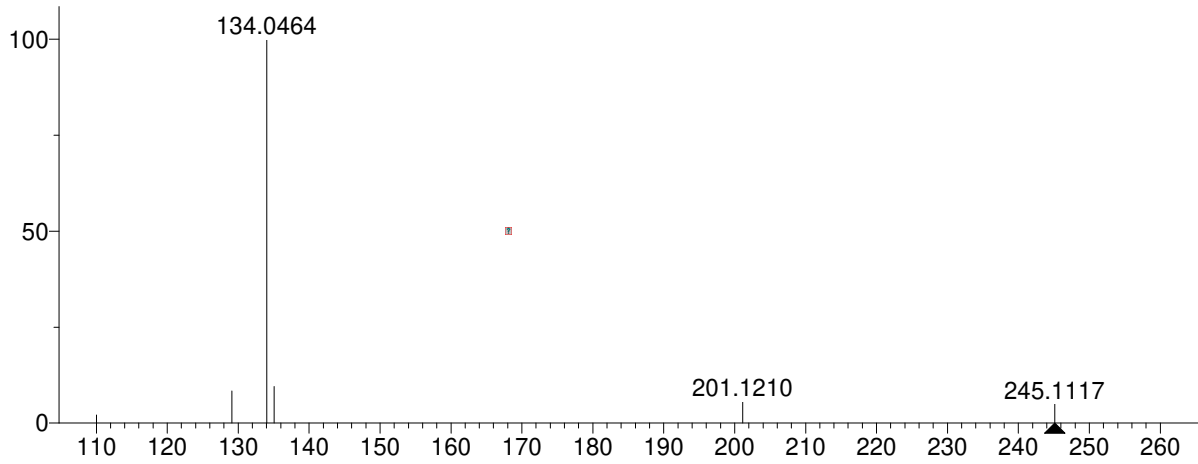

Hit 1 : Ile-Asp [M-H]<sup>-</sup> HCD 9eV P=245.1  
C<sub>10</sub>H<sub>18</sub>N<sub>2</sub>O<sub>5</sub>; MF: 75; RMF: 247; Prob 17.9%; Lib: nist\_msms; ID: 570699.

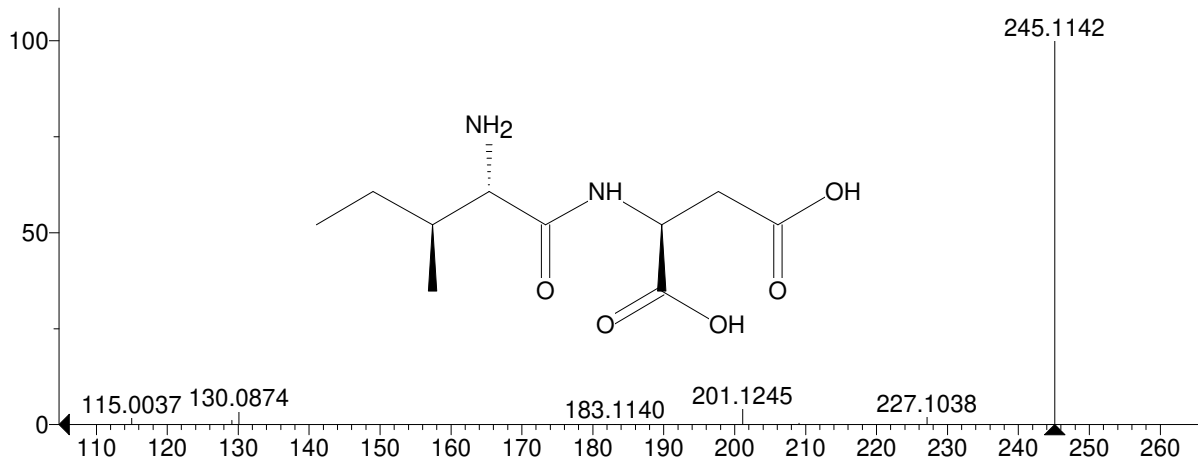

Hit 2 : Ile-Asp [M-H]<sup>-</sup> HCD 9eV P=245.1  
C<sub>10</sub>H<sub>18</sub>N<sub>2</sub>O<sub>5</sub>; MF: 75; RMF: 247; Prob 17.9%; CAS: 54532-76-2; Lib: nist\_msms2; ID: 84432.

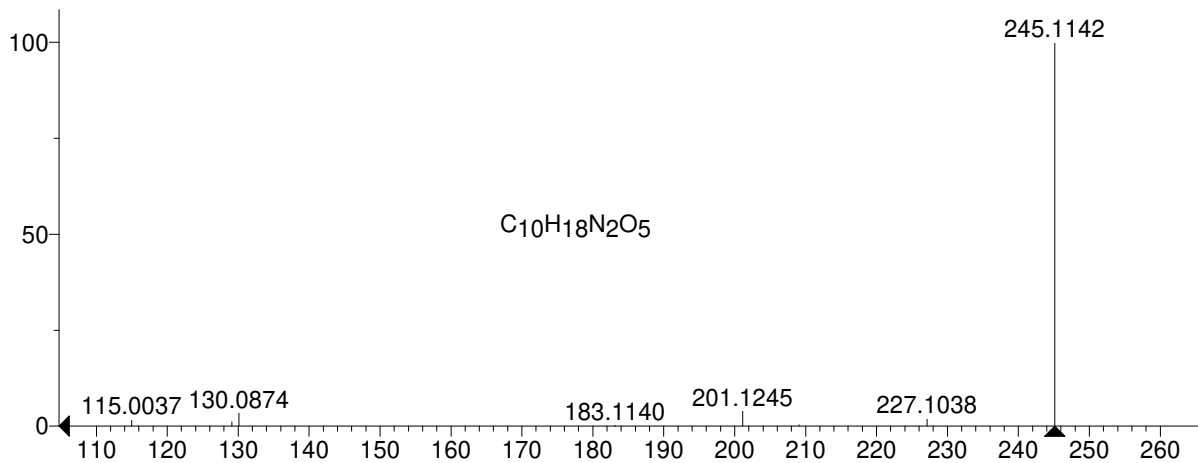

Hit 3 : Leu-Asp [M-H]<sup>-</sup> HCD 9eV P=245.1  
C<sub>10</sub>H<sub>18</sub>N<sub>2</sub>O<sub>5</sub>; MF: 72; RMF: 245; Prob 15.8%; Lib: nist\_msms; ID: 570768.

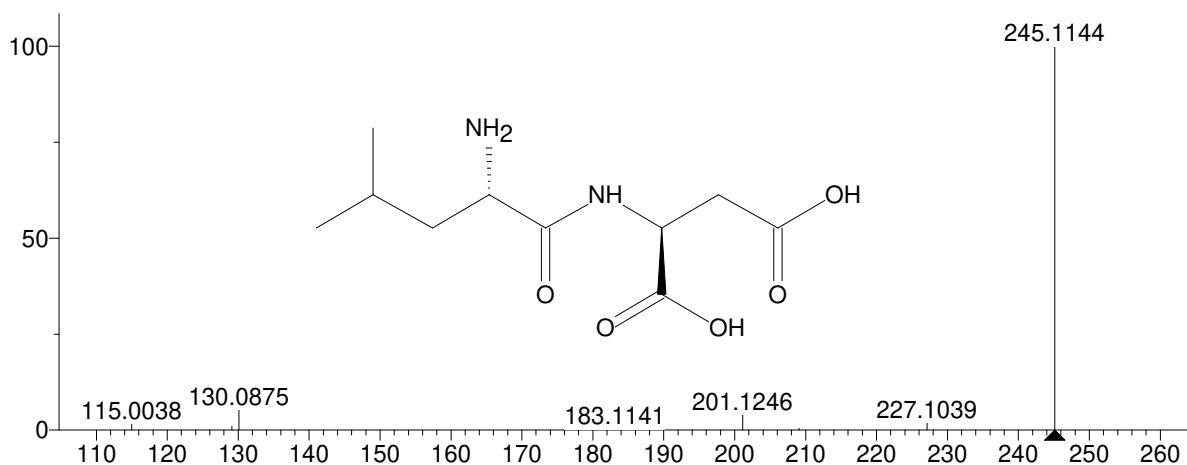

Hit 4 : Leu-Asp [M-H]<sup>-</sup> HCD 9eV P=245.1  
C<sub>10</sub>H<sub>18</sub>N<sub>2</sub>O<sub>5</sub>; MF: 72; RMF: 245; Prob 15.8%; CAS: 32949-40-9; Lib: nist\_msms2; ID: 84501.

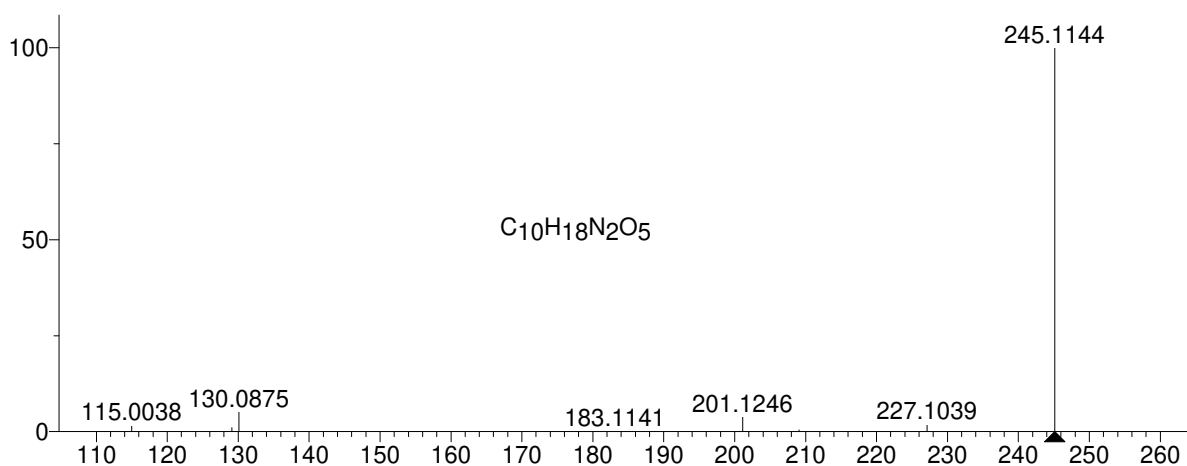

Hit 5 : Glu-Pro [M+H]<sup>+</sup> QQQ 1V P=245.1  
C<sub>10</sub>H<sub>16</sub>N<sub>2</sub>O<sub>5</sub>; MF: 23; RMF: 194; Prob 3.24%; Lib: nist\_msms; ID: 37429.

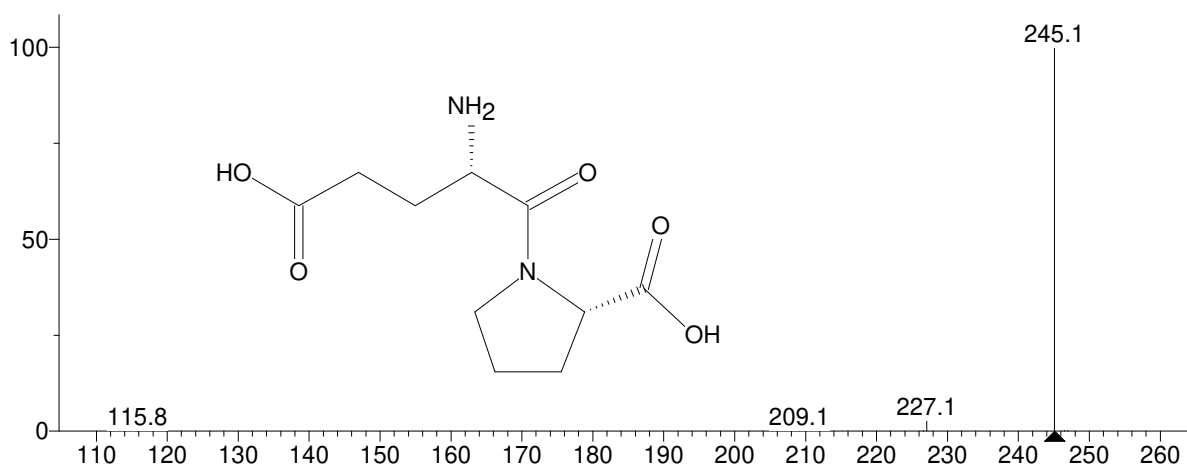

Unknown: Unknown (1.88\_279.0380m/z)  
Compound in Library Factor = 0

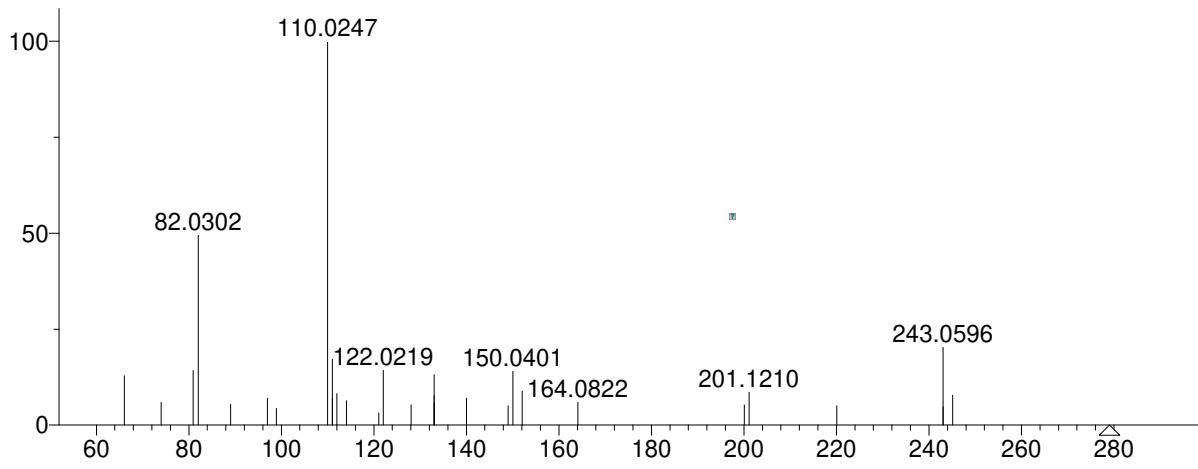



Unknown: Unknown (1.88\_419.1652m/z)  
Compound in Library Factor = 0

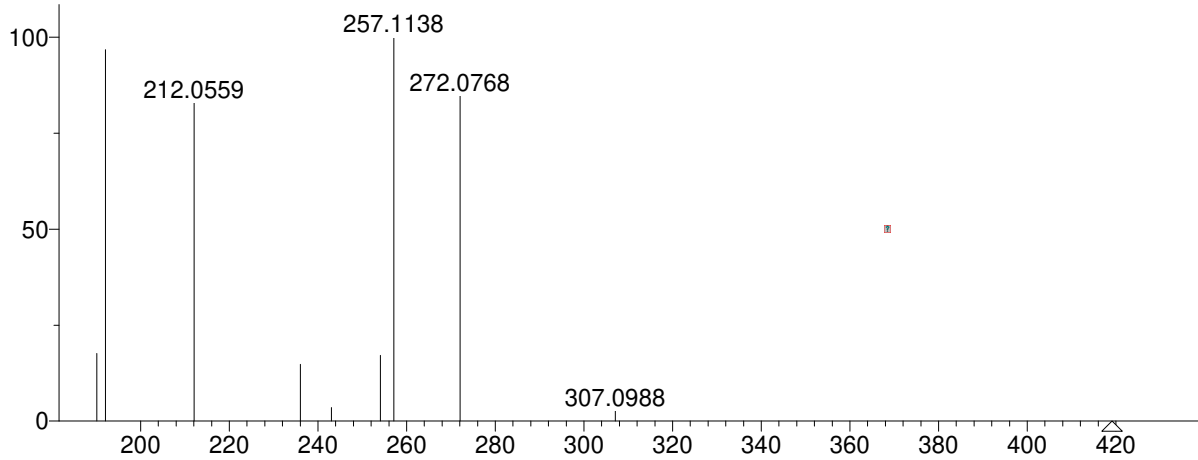

Hit 1 : (2S,3S,9R,12R,13R,14S,15R,16R,17S)-3,12,13,15,16-pentahydroxy-2,6,14,17-tetramethyl-10-oxatetracyc  
C<sub>20</sub>H<sub>28</sub>O<sub>8</sub>; MF: 0; RMF: 17; Prob 50.0%; Lib: mona-export-vf-npl\_gexactive; ID: 23233.

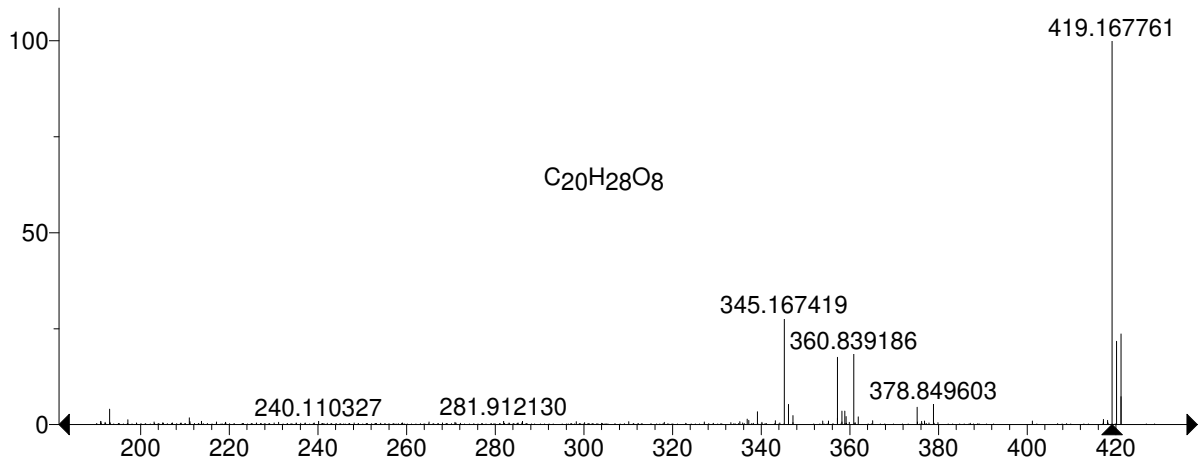

Hit 2 : Glp-His-Pro-Gly [M-H]<sup>-</sup> IT-FT 35% P=419.2  
C<sub>18</sub>H<sub>24</sub>N<sub>6</sub>O<sub>6</sub>; MF: 0; RMF: 7; Prob 50.0%; Lib: nist\_msms2; ID: 74068.

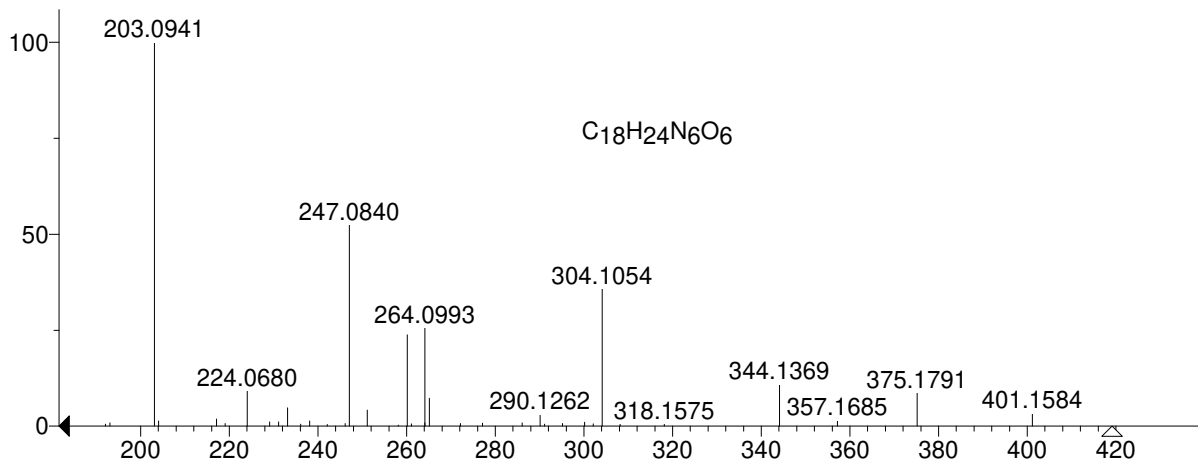

Unknown: Unknown (1.88\_424.1348m/z)  
Compound in Library Factor = 0

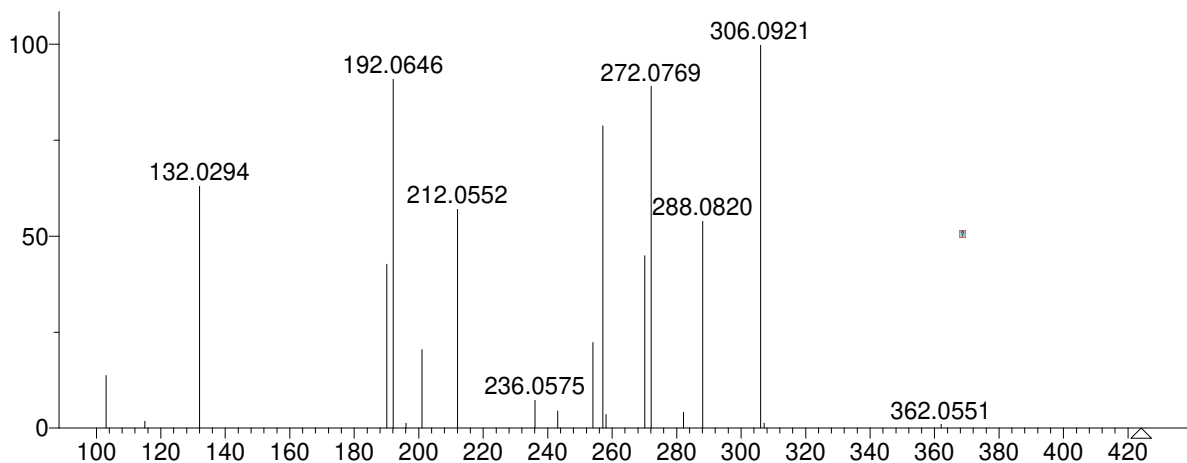

Hit 1 : Flumiclorac-pentyl [M+H]<sup>+</sup> HCD 38V P=424.1  
C21H23ClFNO5; MF: 0; RMF: 35; Prob 100.0%; CAS: 87546-18-7; Lib: nist\_msms; ID: 483534.

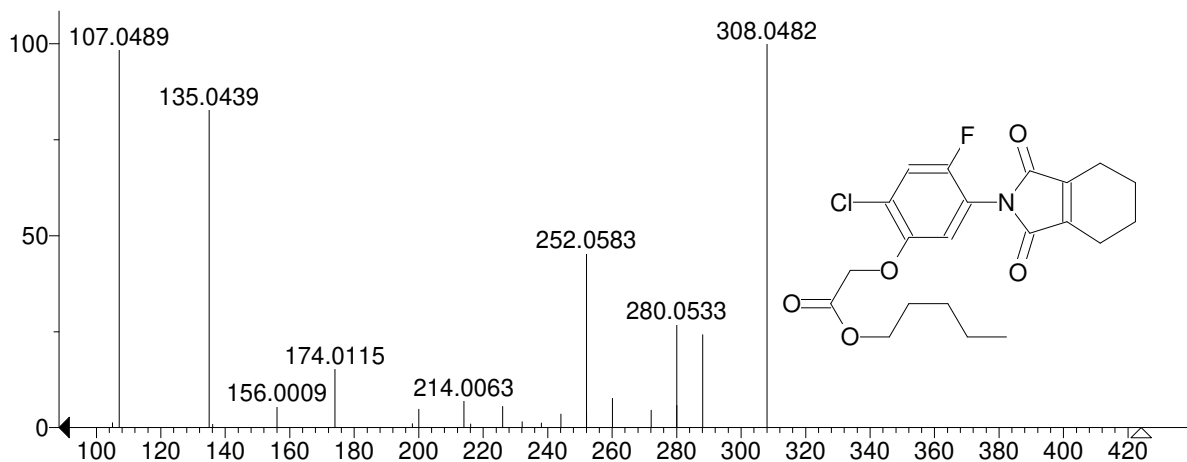

Unknown: Unknown (1.88\_529.0628m/z)  
Compound in Library Factor = 0

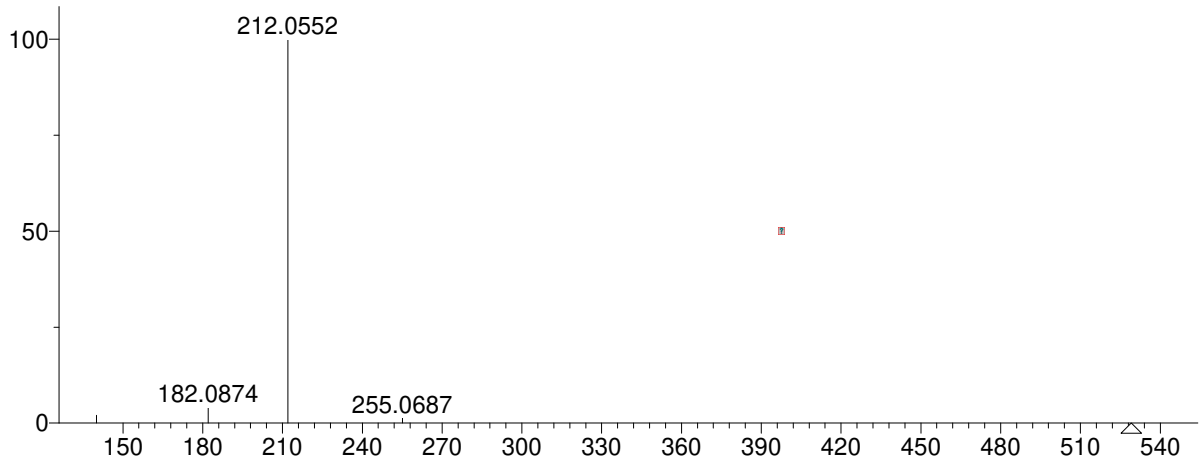

Unknown: Unknown (1.89\_259.0541m/z)  
Compound in Library Factor = 0

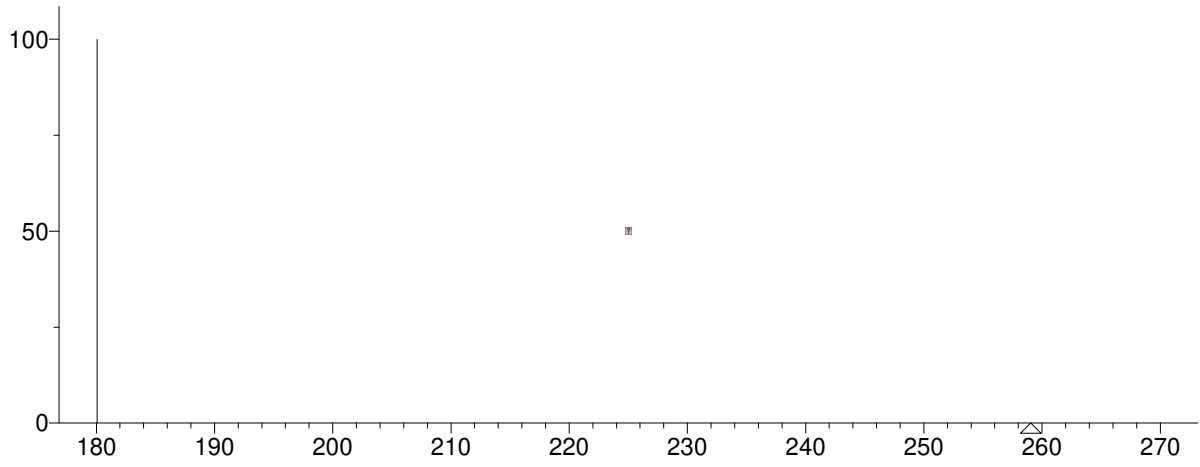

Unknown: Unknown (1.89\_328.0442m/z)  
Compound in Library Factor = -517

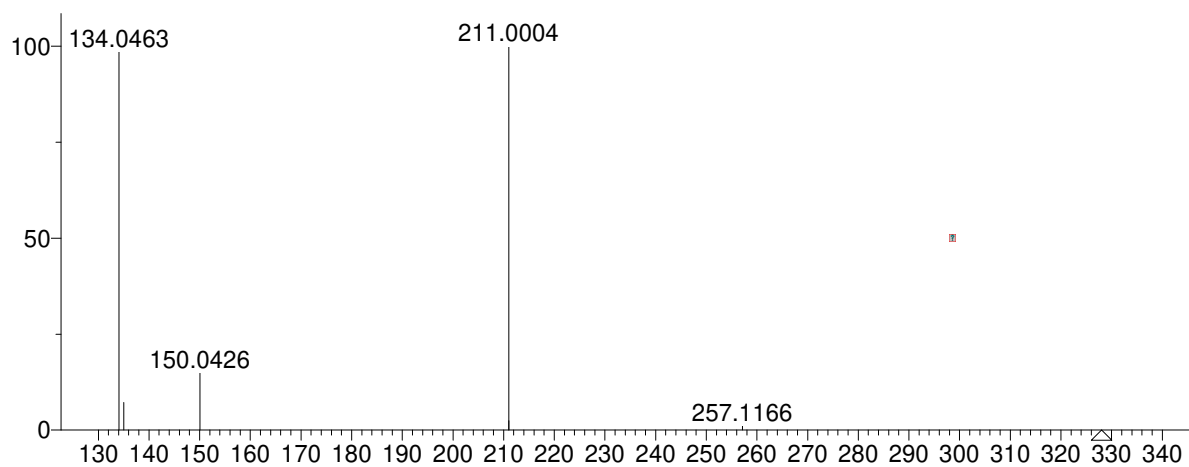

Hit 1 : Adenosine 2',3'-cyclic monophosphate [M-H]<sup>-</sup> HCD 52V P=328  
C<sub>10</sub>H<sub>12</sub>N<sub>5</sub>O<sub>6</sub>P; MF: 209; RMF: 663; Prob 80.9%; CAS: 634-01-5; Lib: nist\_msms; ID: 207400.

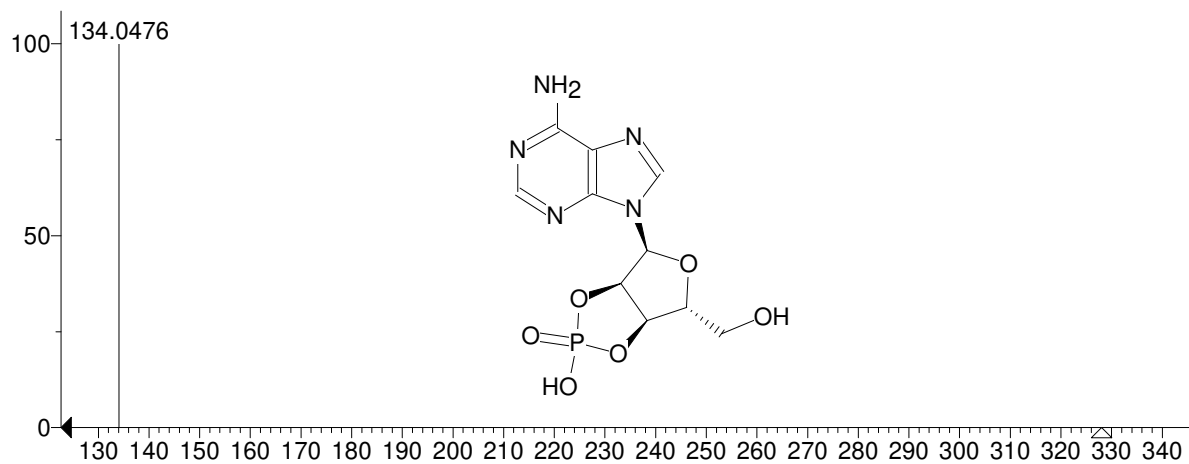

Hit 2 : Adenosine 3',5'-cyclic monophosphate [M-H]<sup>-</sup> HCD 59V P=328  
C<sub>10</sub>H<sub>12</sub>N<sub>5</sub>O<sub>6</sub>P; MF: 162; RMF: 661; Prob 16.9%; CAS: 60-92-4; Lib: nist\_msms; ID: 130593.

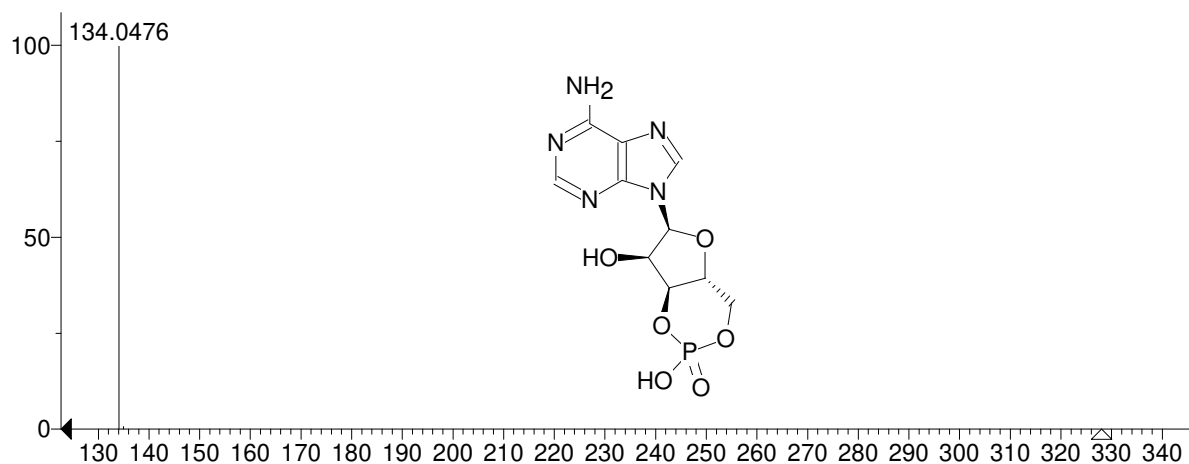

Hit 3 : cAMP [M-H]<sup>-</sup> P=328

C<sub>10</sub>H<sub>12</sub>N<sub>5</sub>O<sub>6</sub>P<sup>-</sup>; MF: 36; RMF: 574; Prob 0.75%; Lib: msms neg mona\_ipb\_gnps\_plasma; ID: 1463.

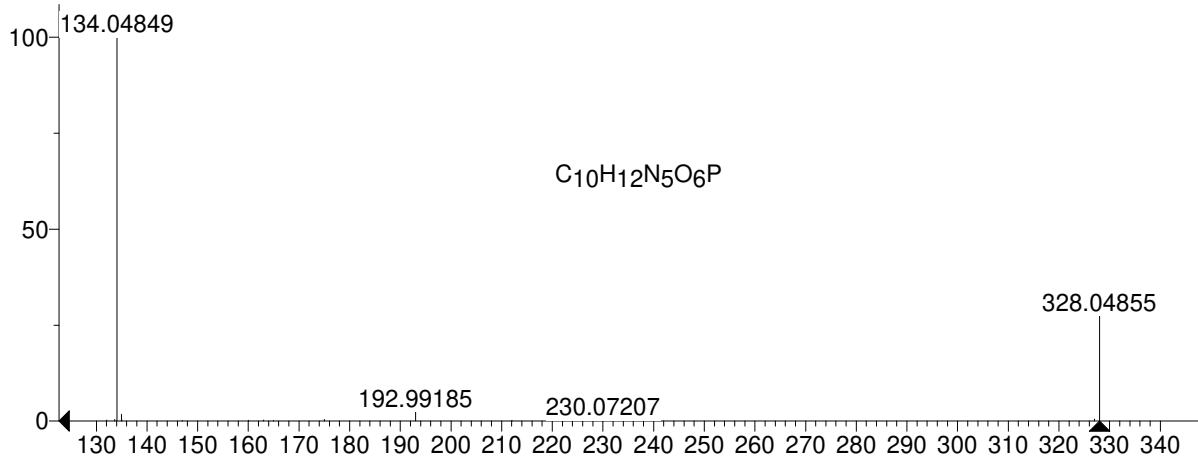

Hit 4 : ADENOSINE 3',5'-CYCLIC MONOPHOSPHATE [M-H]<sup>-</sup> P=328

C<sub>10</sub>H<sub>12</sub>N<sub>5</sub>O<sub>6</sub>P<sup>-</sup>; MF: 14; RMF: 570; Prob 0.29%; Lib: msms-neg-gnps; ID: 274.

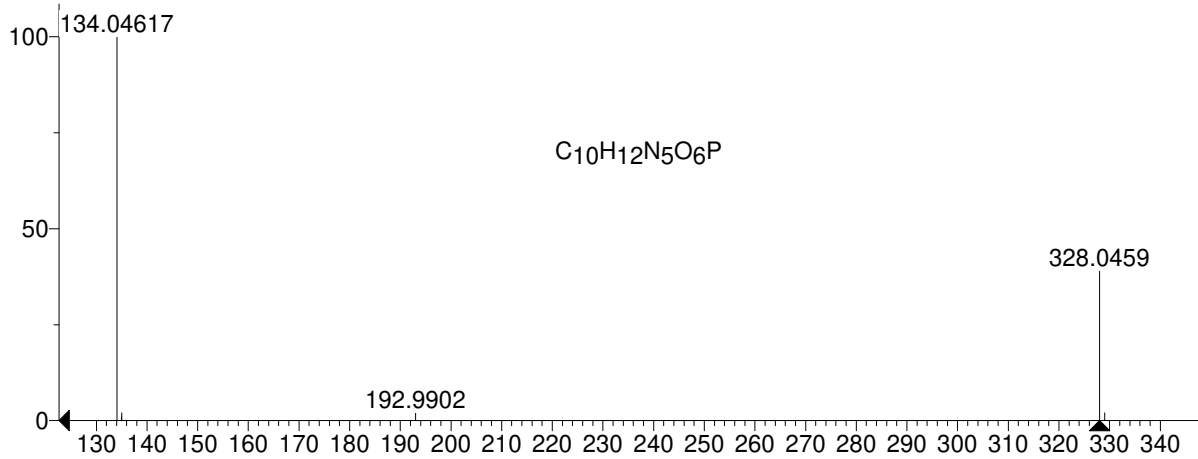

Hit 5 : 3',5'-CYCLIC AMP [M-H]<sup>-</sup> P=328

C<sub>10</sub>H<sub>12</sub>N<sub>5</sub>O<sub>6</sub>P<sup>-</sup>; MF: 14; RMF: 566; Prob 0.29%; Lib: msms-neg-gnps; ID: 317.

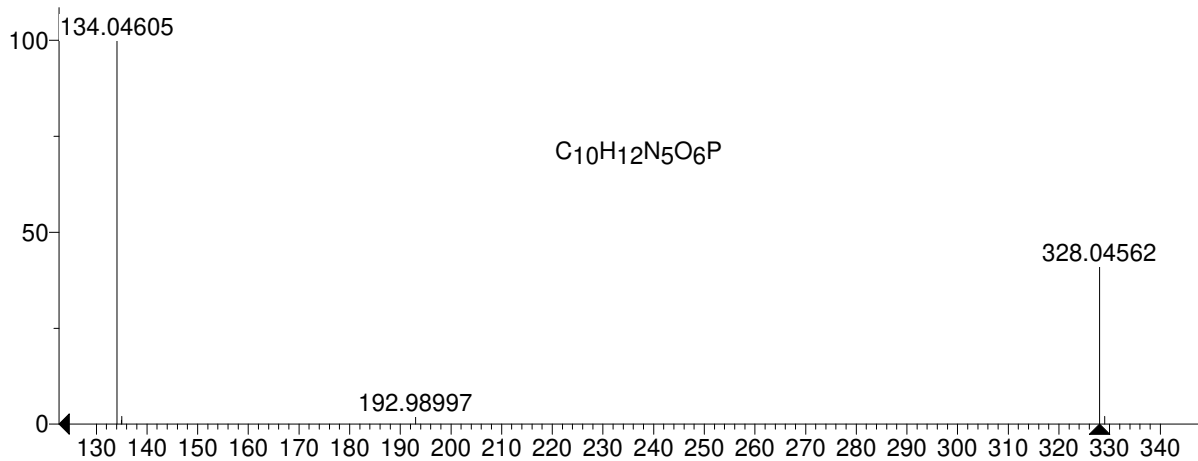

Unknown: Unknown (1.90\_281.0345m/z)  
Compound in Library Factor = 0

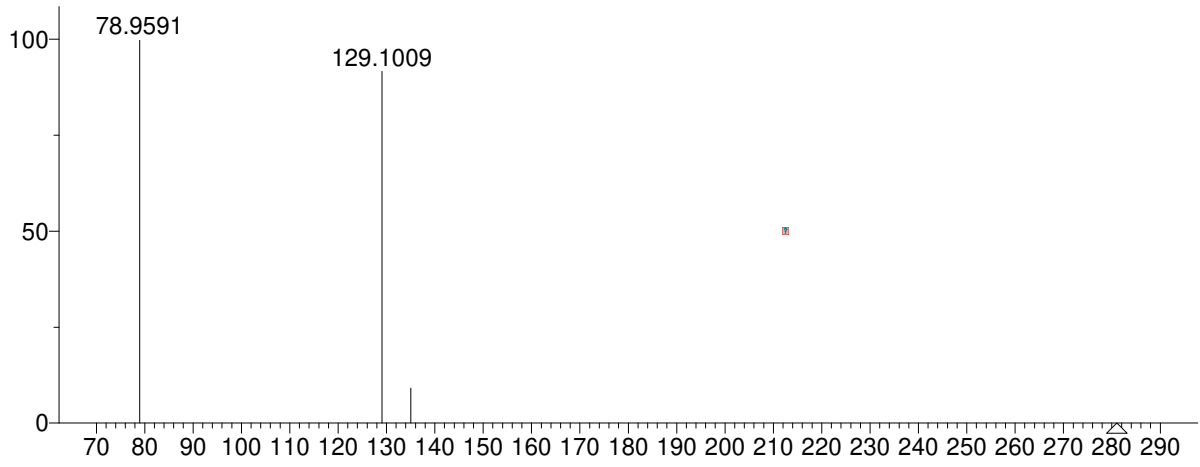

\*\* Search Report Page 1 of 2 \*\*

Unknown: Unknown (1.90\_323.0973m/z)  
Compound in Library Factor = 0

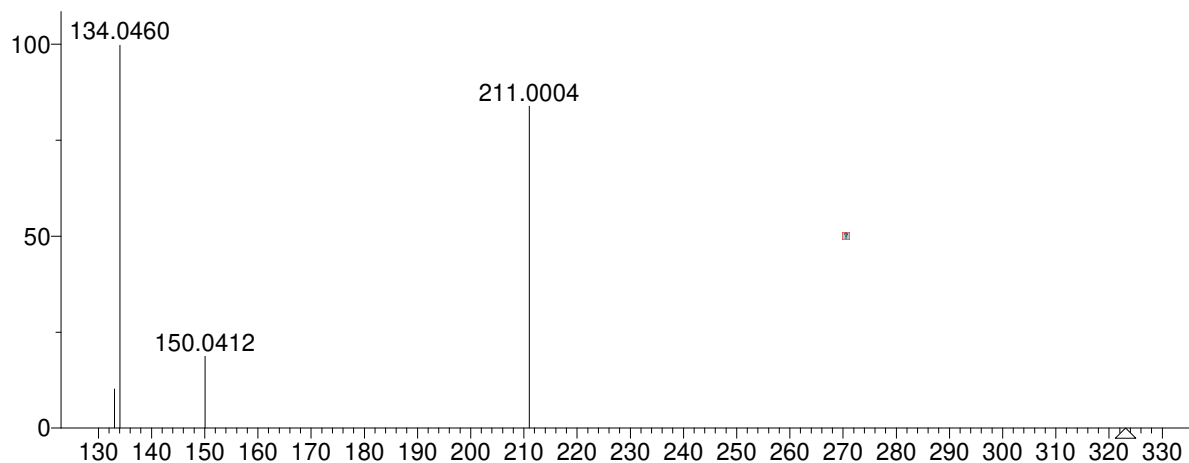

Hit 1 : 1-Piperidinecarboxylic acid, 4-[6-[4-[(methoxycarbonyl)amino]phenyl]-4-(4-morpholinyl)-1H-pyrazolo[3,4-d]]  
C<sub>24</sub>H<sub>29</sub>N<sub>7</sub>O<sub>5</sub>; MF: 0; RMF: 123; Prob 7.69%; CAS: 1062169-56-5; Lib: nist\_msms; ID: 265735.

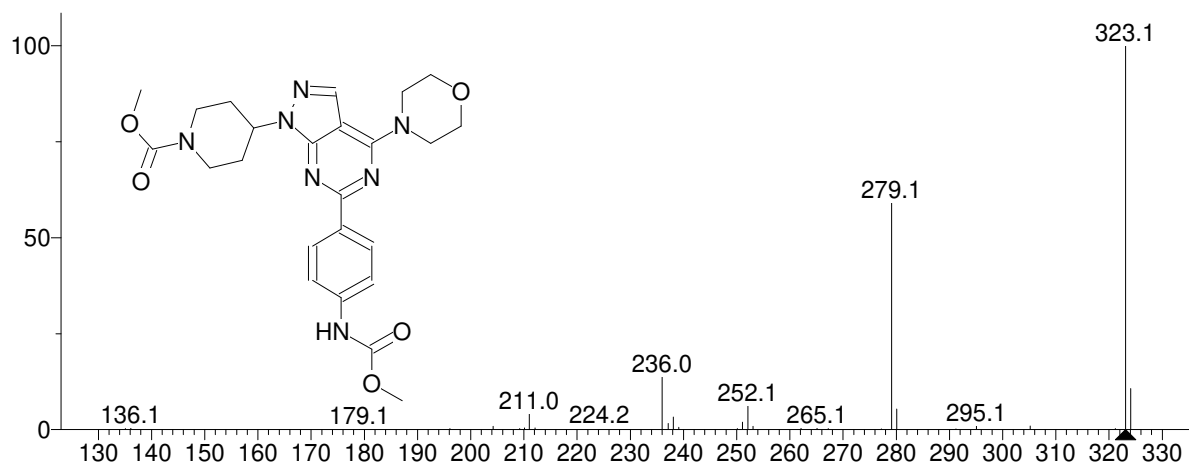

Hit 2 : Indanofan [M+H]<sup>+</sup>=>323.1 IT 35% P=323.1  
C<sub>20</sub>H<sub>17</sub>ClO<sub>3</sub>; MF: 0; RMF: 102; Prob 7.69%; CAS: 133220-30-1; Lib: nist\_msms; ID: 477459.

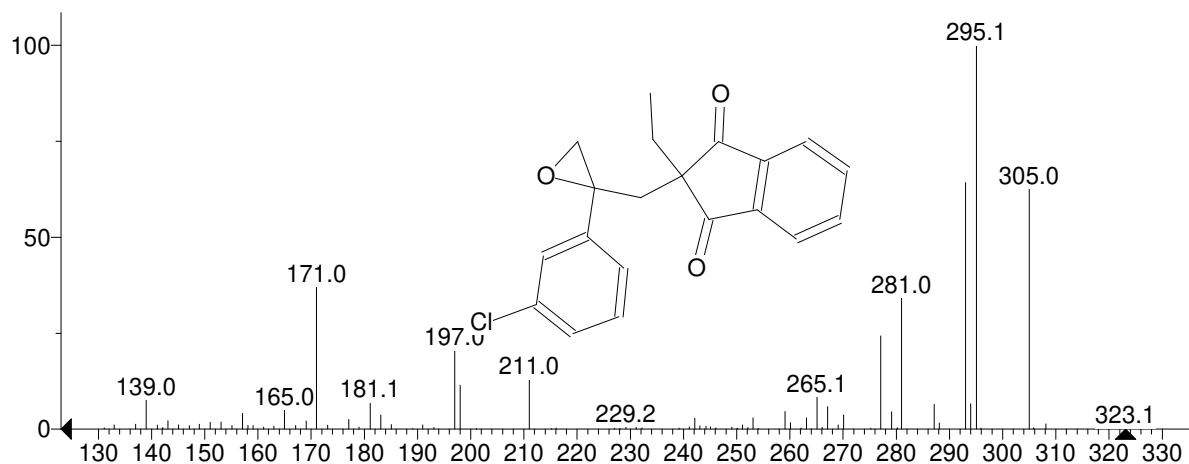



Hit 3 : Prednisone [M+H-H<sub>2</sub>O]<sup>+</sup>=>323.1 IT 35% P=323.1  
C<sub>21</sub>H<sub>26</sub>O<sub>5</sub>; MF: 0; RMF: 97; Prob 7.69%; CAS: 53-03-2; Lib: nist\_msms; ID: 99548.

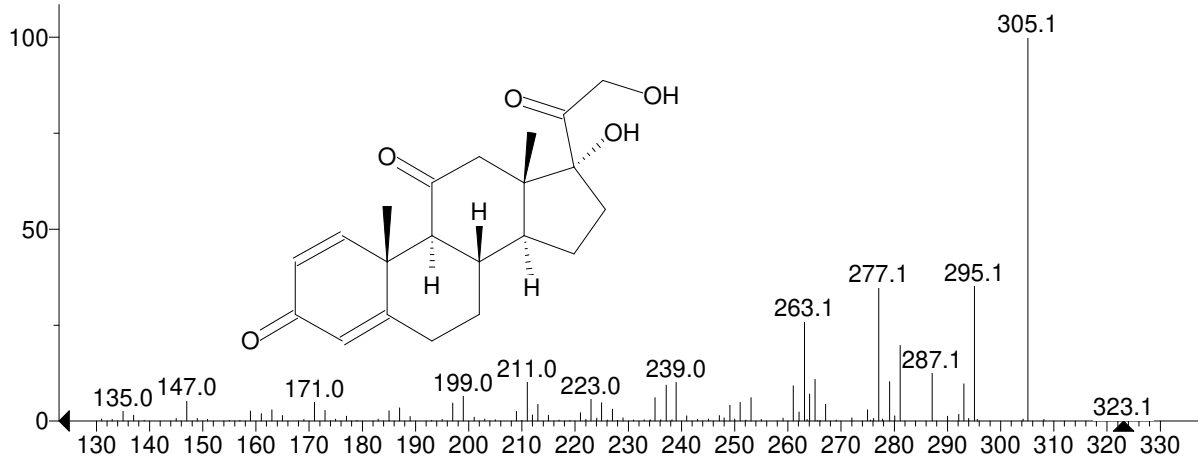

Hit 4 : Fluorometholone [M+H-H<sub>2</sub>O]<sup>+</sup>=>341.1=>323.1 IT 35% P=323.1  
C<sub>22</sub>H<sub>29</sub>FO<sub>4</sub>; MF: 0; RMF: 77; Prob 7.69%; CAS: 426-13-1; Lib: nist\_msms; ID: 119128.

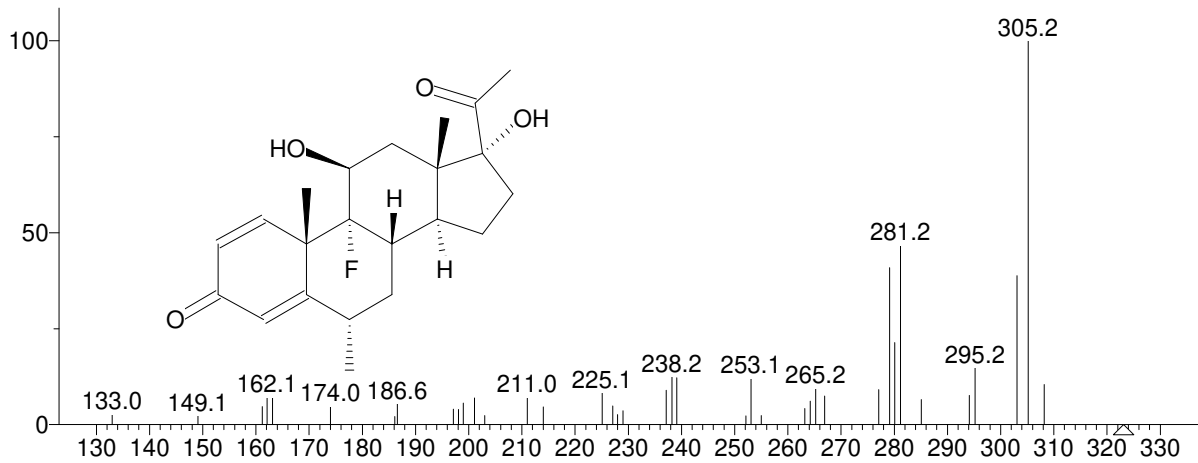

Hit 5 : Dinitramine [M+H]<sup>+</sup> HCD 103V P=323.1  
C<sub>11</sub>H<sub>13</sub>F<sub>3</sub>N<sub>4</sub>O<sub>4</sub>; MF: 0; RMF: 70; Prob 7.69%; CAS: 29091-05-2; Lib: nist\_msms; ID: 100130.

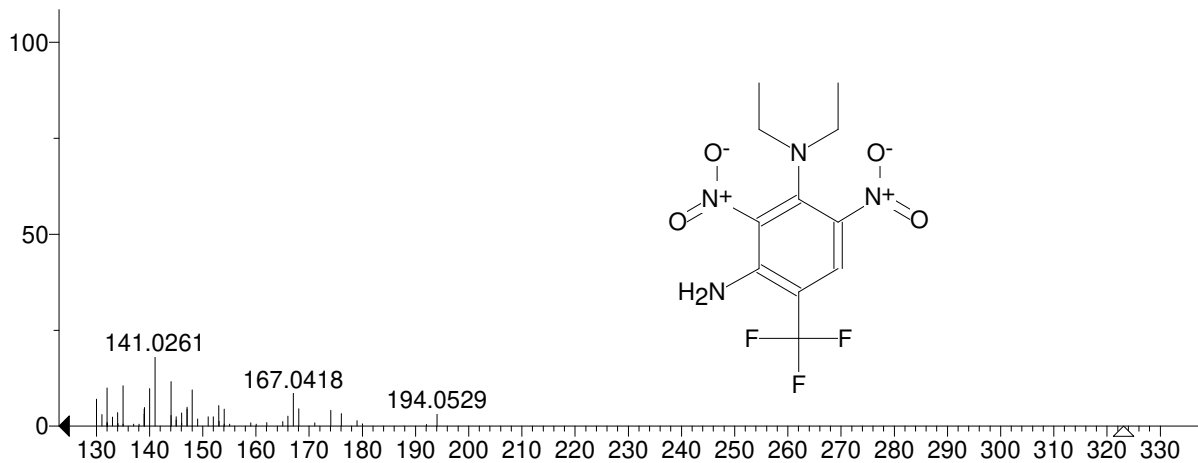

Unknown: Unknown (1.90\_362.0497m/z)  
Compound in Library Factor = -516

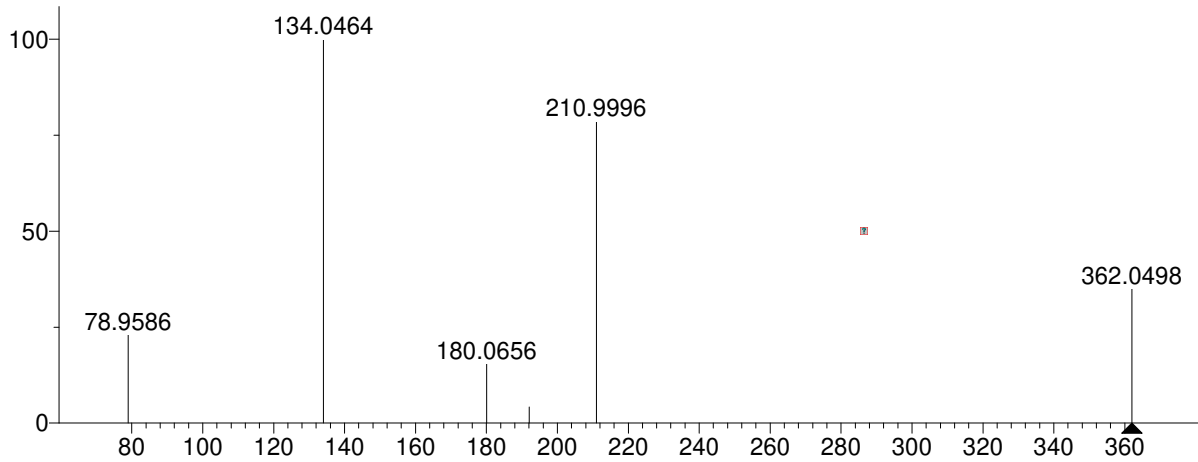

Hit 1 : Guanosine 5'-diphospho-β-L-fucose [M-H-C6H11O7P]- HCD 14V P=362.1  
C16H25N5O15P2; MF: 370; RMF: 560; Prob 86.8%; CAS: 15839-70-0; Lib: nist\_msms; ID: 557145.

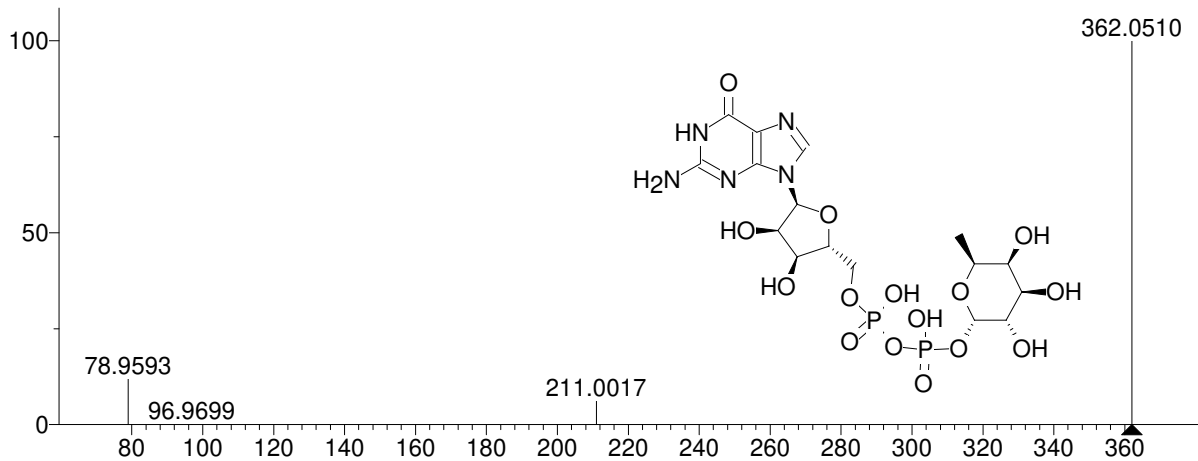

Hit 2 : Guanosine 5'-monophosphate [M-H]- HCD 14V P=362.1  
C10H14N5O8P; MF: 295; RMF: 484; Prob 11.3%; CAS: 85-32-5; Lib: nist\_msms; ID: 311057.

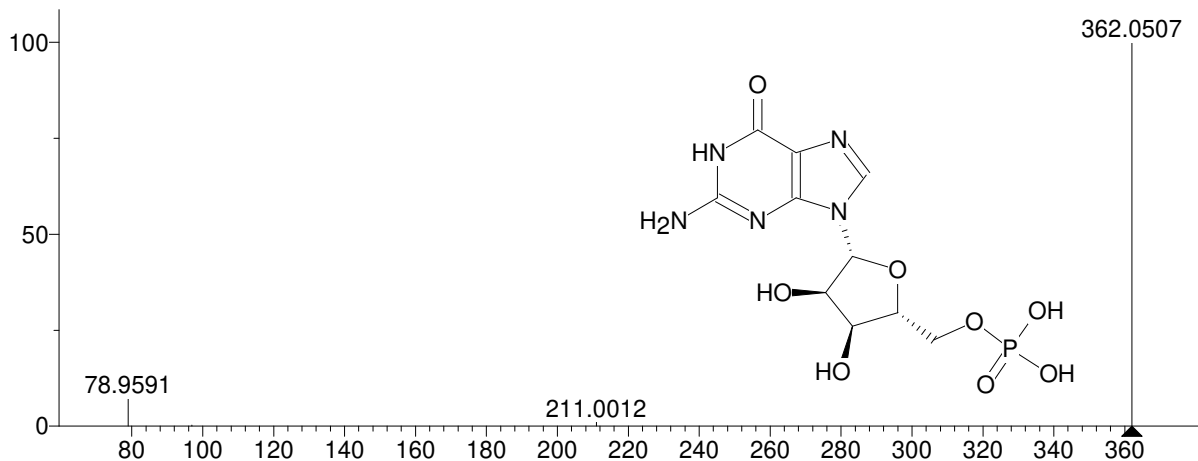

Hit 3 : Guanosine-5'-monophosphate [M-H]- 20-30-40%) P=362.1  
C<sub>10</sub>H<sub>14</sub>N<sub>5</sub>O<sub>8</sub>P; MF: 229; RMF: 563; Prob 1.78%; Lib: mona-export-fiehn\_hilic; ID: 1240.

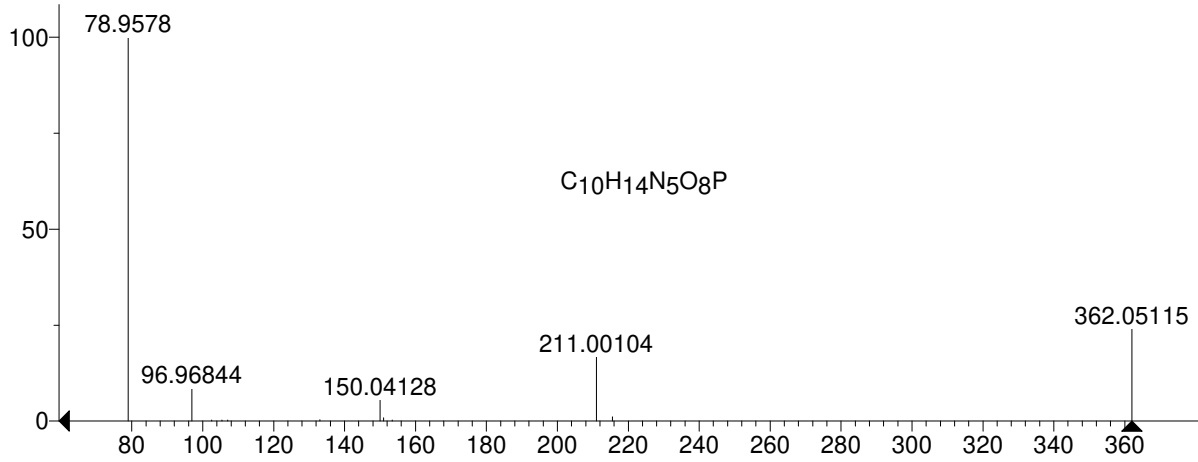

Hit 4 : GUANOSINE 5'-MONOPHOSPHATE [M-H]- P=362.1  
C<sub>10</sub>H<sub>14</sub>N<sub>5</sub>O<sub>8</sub>P; MF: 112; RMF: 493; Prob 0.10%; Lib: mona-export-gnps; ID: 5674.

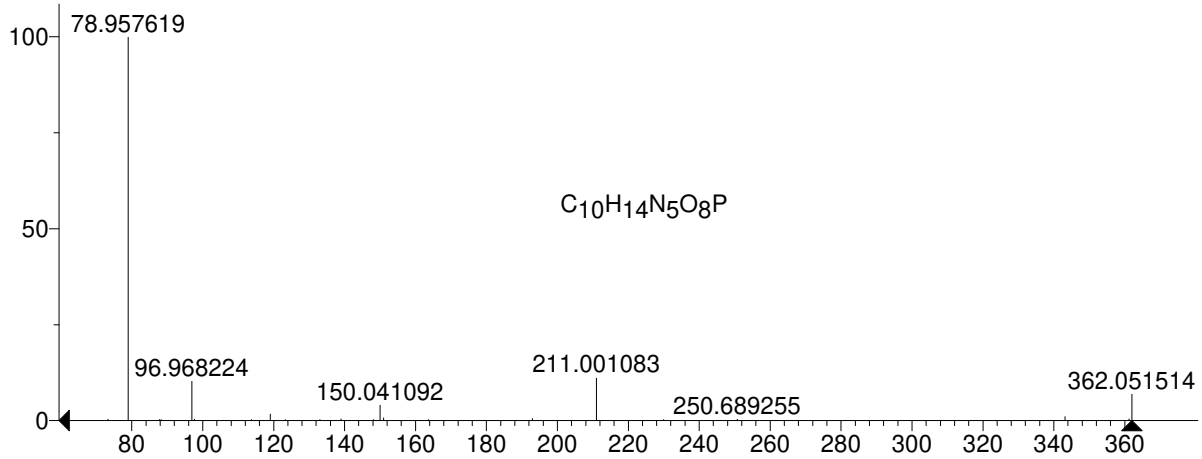

Hit 5 : Guanosine monophosphate [M-H]- 10 P=362.1  
C<sub>10</sub>H<sub>14</sub>N<sub>5</sub>O<sub>8</sub>P; MF: 79; RMF: 454; Prob 0.02%; Lib: msms neg mona\_ipb\_gnps\_plasma; ID: 592.

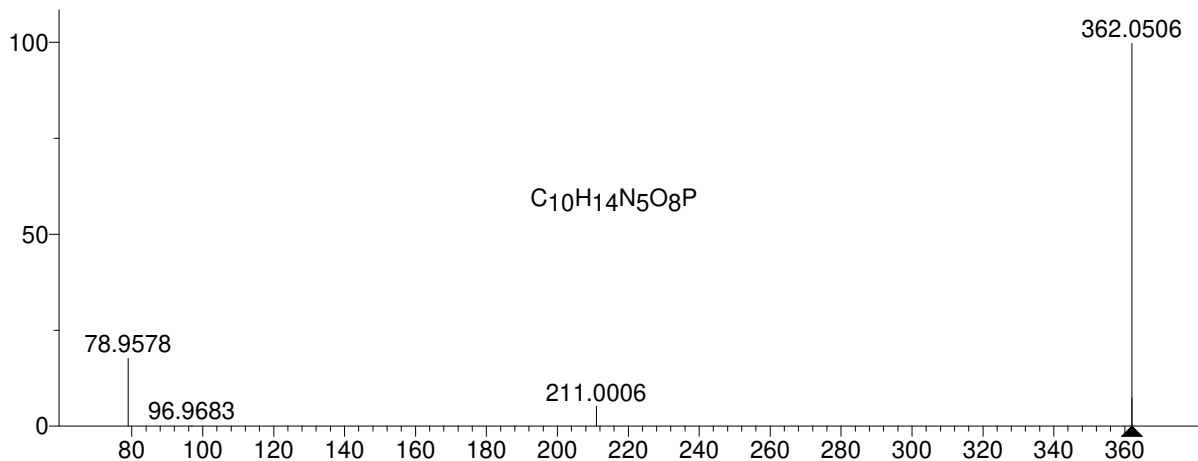

Unknown: Unknown (1.90\_452.1398m/z)  
Compound in Library Factor = 0

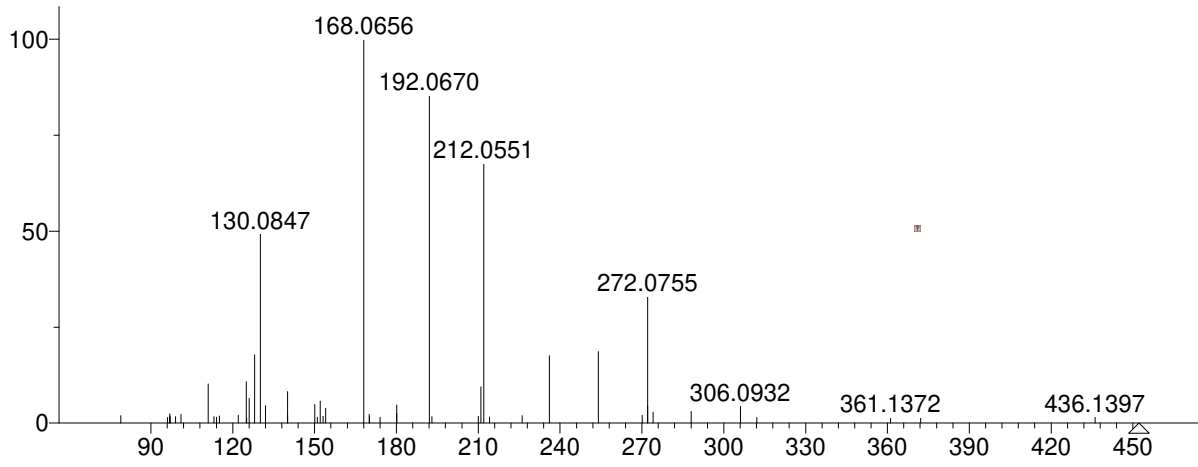

Unknown: Unknown (1.92\_420.2337m/z)  
Compound in Library Factor = -3273

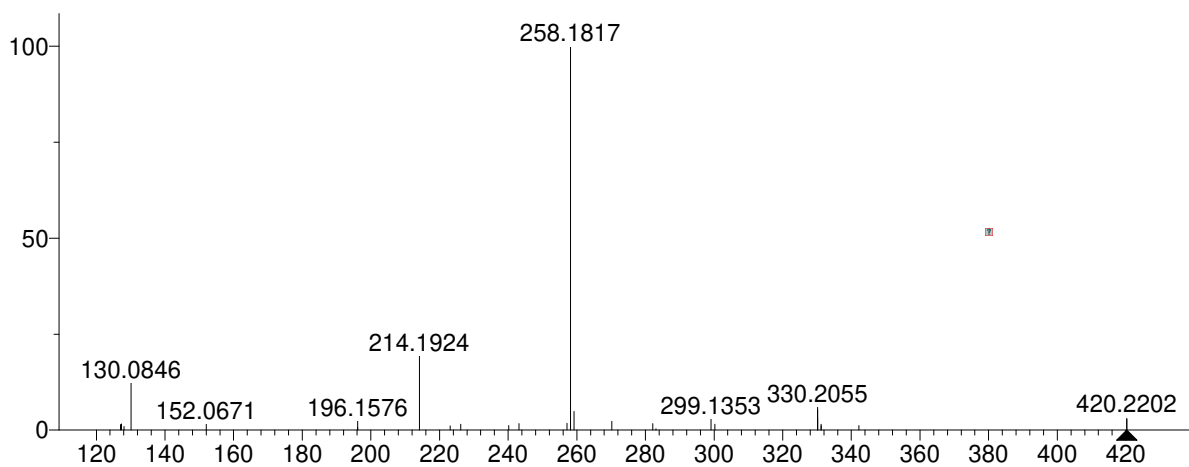

Hit 1 : TNF- $\alpha$  (71-82), human [M+3H]<sup>3+</sup> HCD 10eV P=420.2  
C<sub>51</sub>H<sub>91</sub>N<sub>19</sub>O<sub>18</sub>; MF: 1; RMF: 80; Prob 100.0%; Lib: nist\_msms2; ID: 49954.

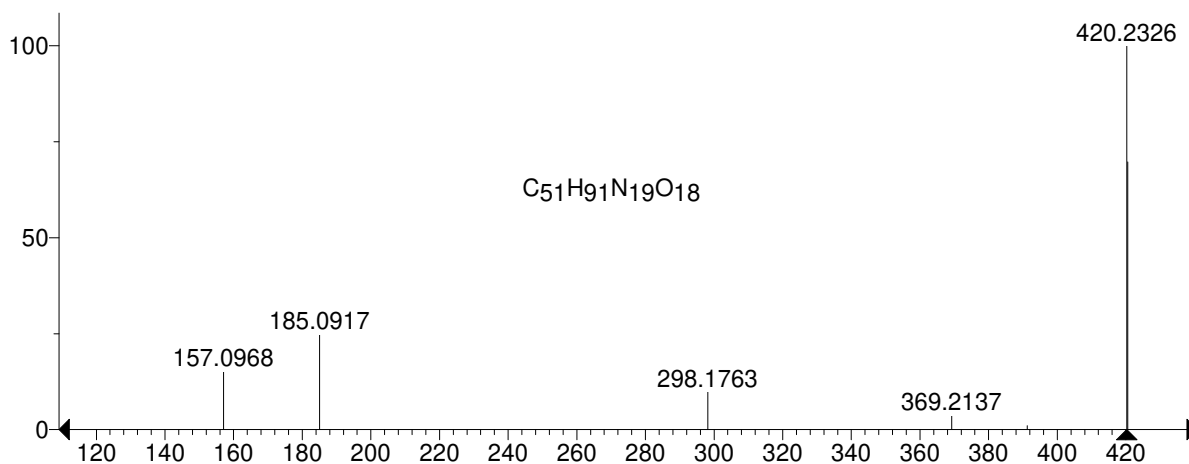

Unknown: Unknown (1.92\_485.1519m/z)  
Compound in Library Factor = 0

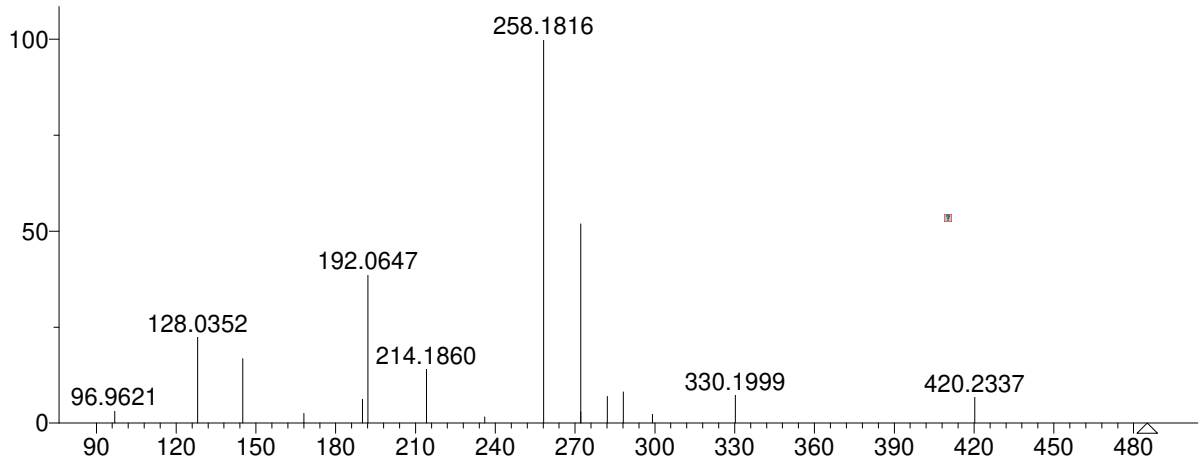

Unknown: Unknown (1.93\_450.1712m/z)  
Compound in Library Factor = 0

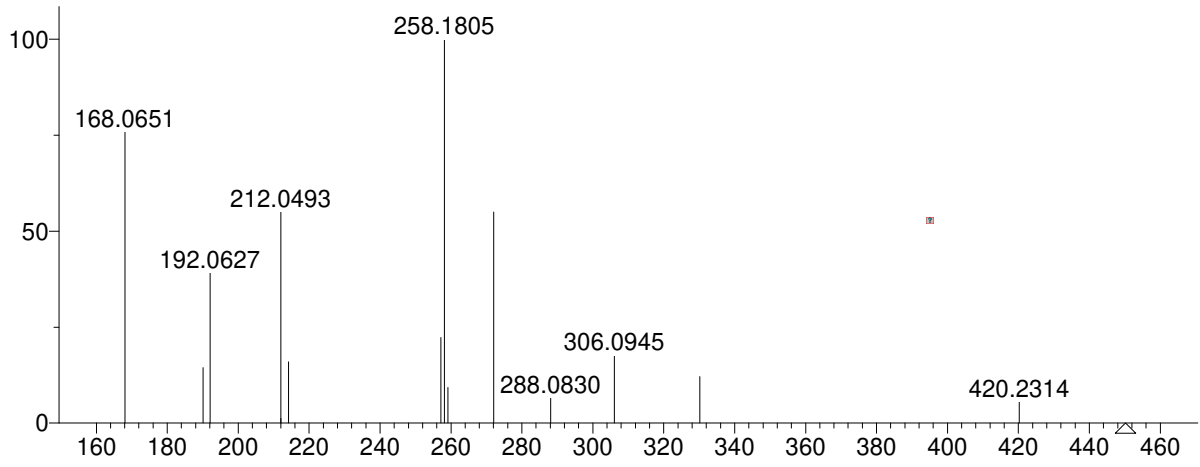

Unknown: Unknown (1.94\_487.2023m/z)  
Compound in Library Factor = 0

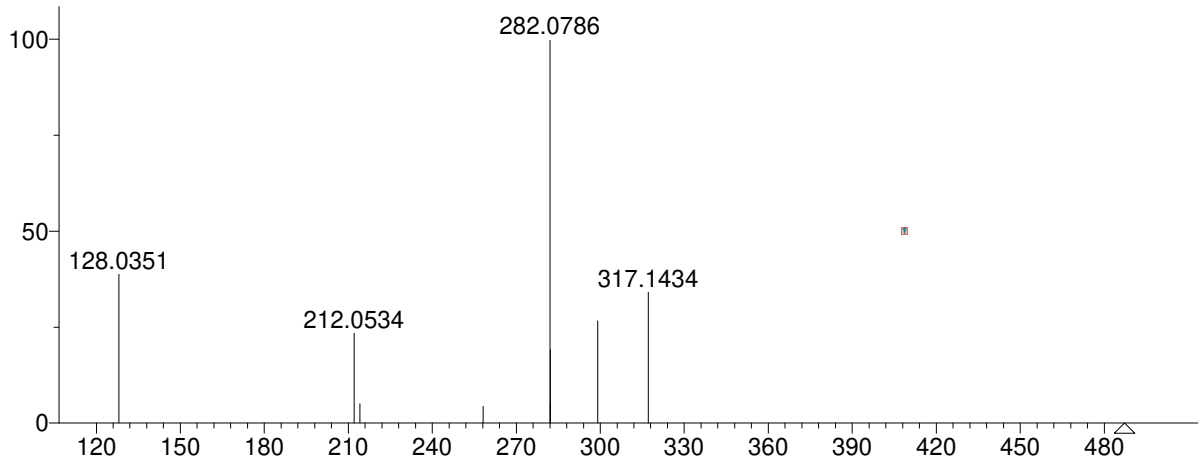



Unknown: Unknown (1.94\_510.1836m/z)  
Compound in Library Factor = 0

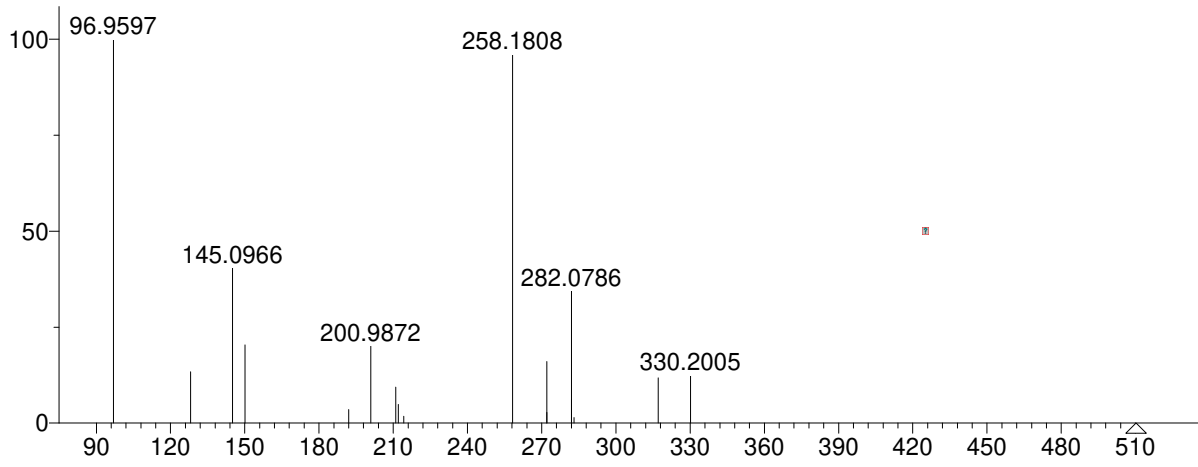

Unknown: Unknown (1.95\_269.1232m/z)  
Compound in Library Factor = 0

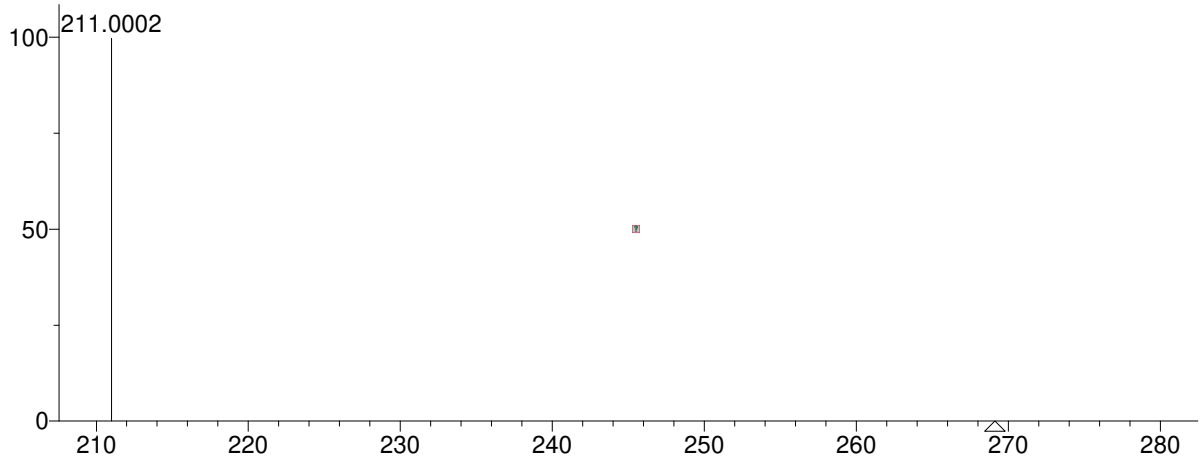

Unknown: Unknown (1.96\_614.1927m/z)  
Compound in Library Factor = 0

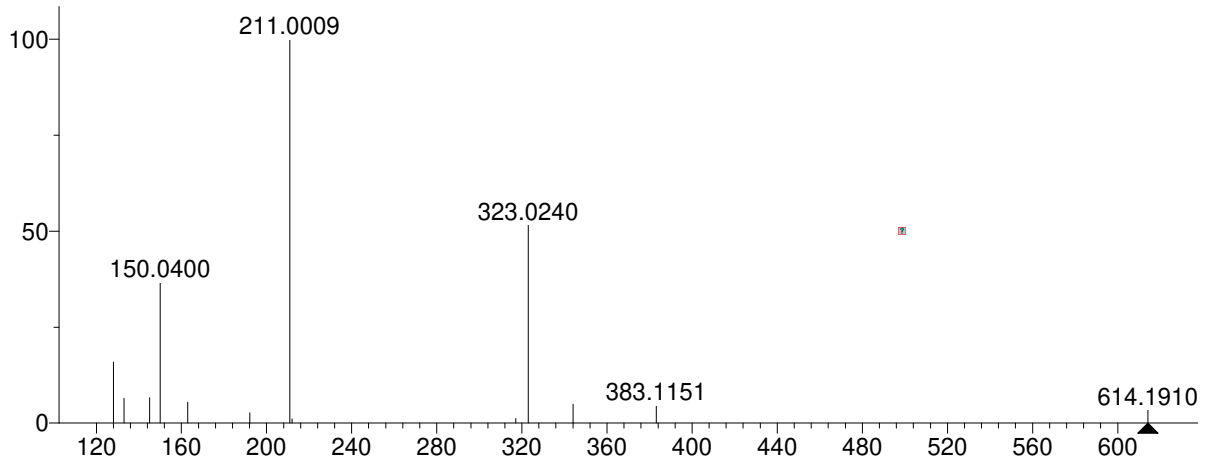

Unknown: Unknown (1.96\_856.3202m/z)  
Compound in Library Factor = 0

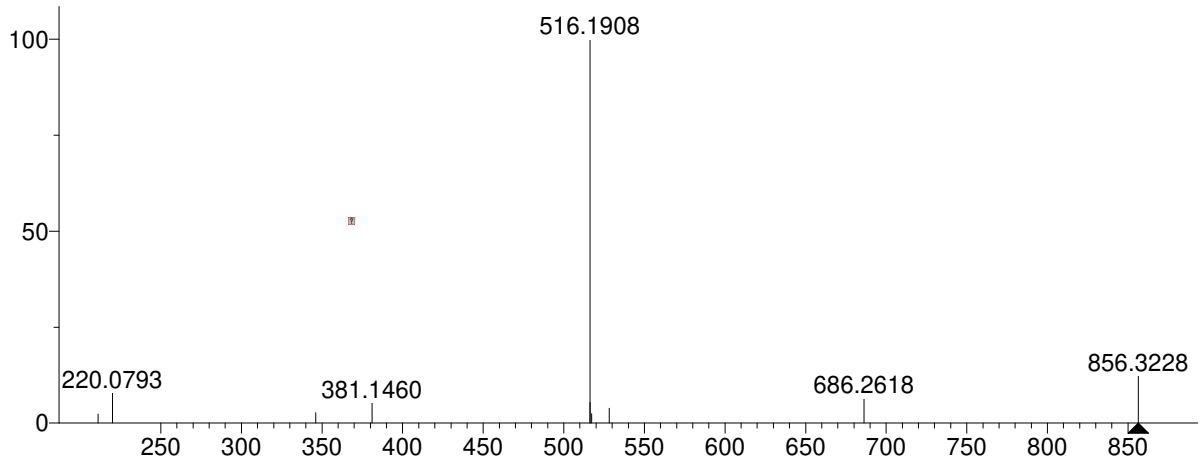

Unknown: Unknown (1.98\_510.1830m/z)  
Compound in Library Factor = 0

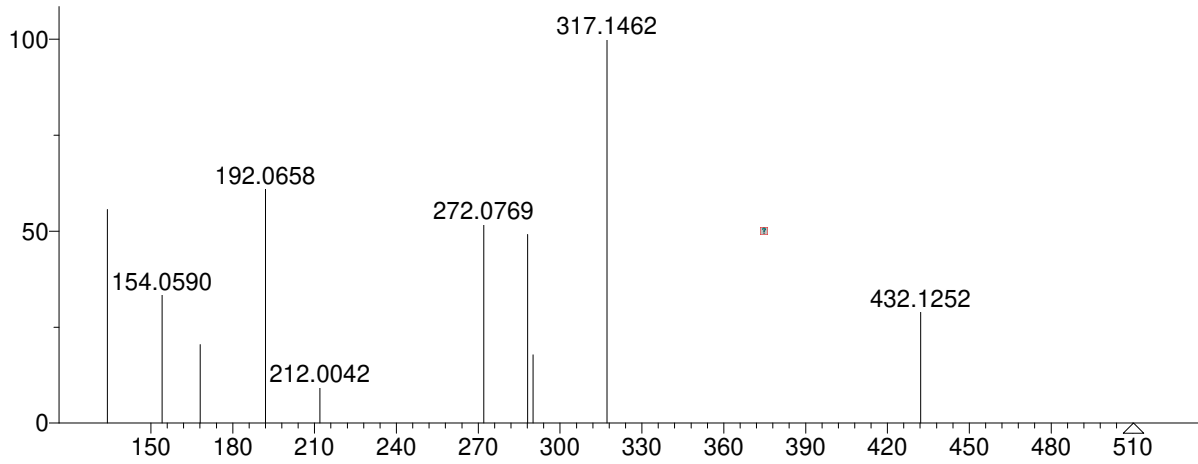

Unknown: Unknown (1.98\_649.0812m/z)  
Compound in Library Factor = 0

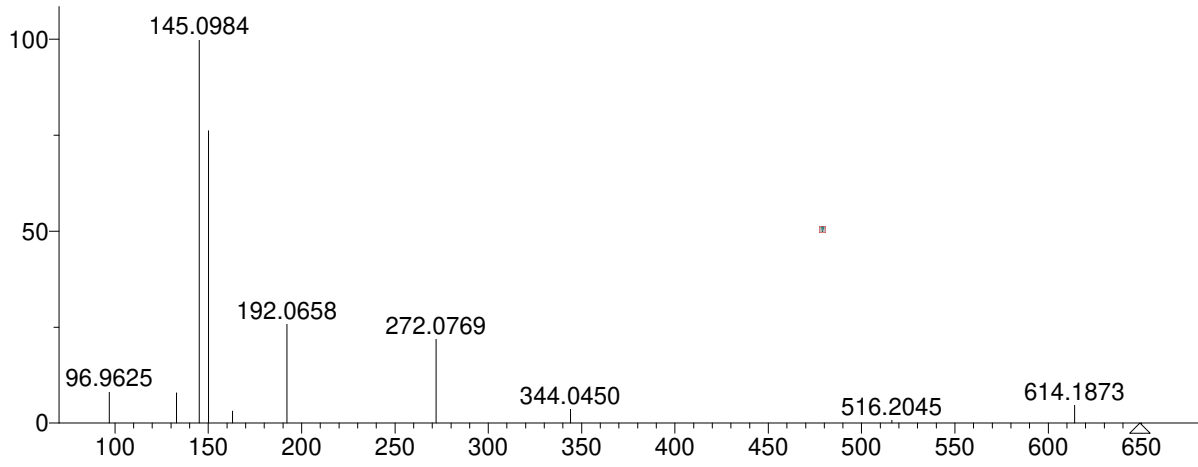

Unknown: Unknown (10.00\_338.1710m/z)  
Compound in Library Factor = 0

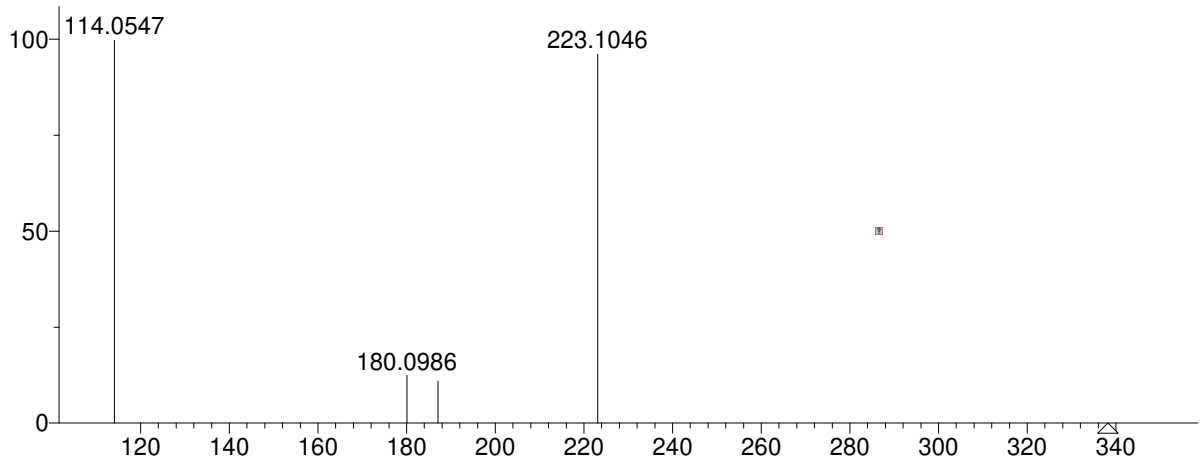

Unknown: Unknown (10.02\_401.1895m/z)  
Compound in Library Factor = 0

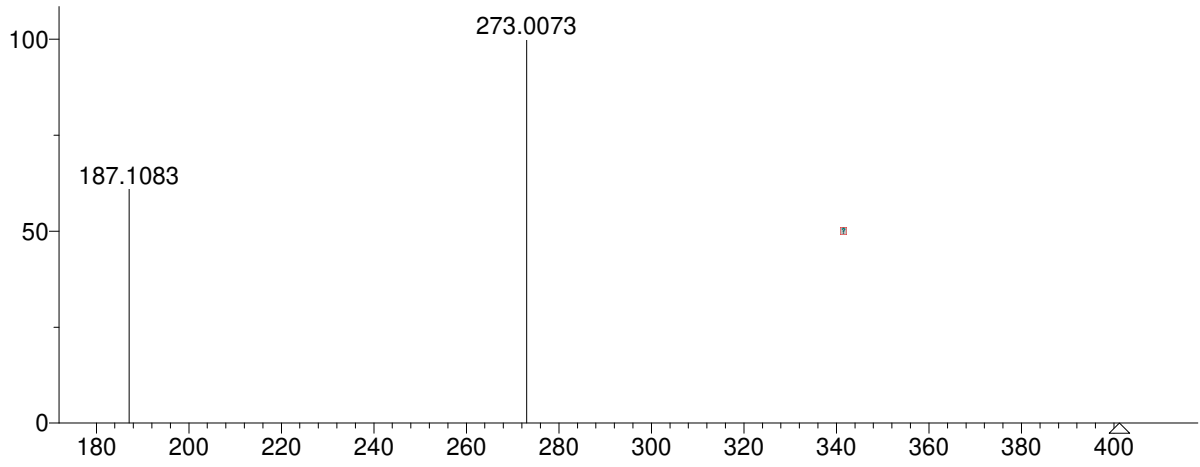



Unknown: Unknown (10.03\_569.0026m/z)  
Compound in Library Factor = 0

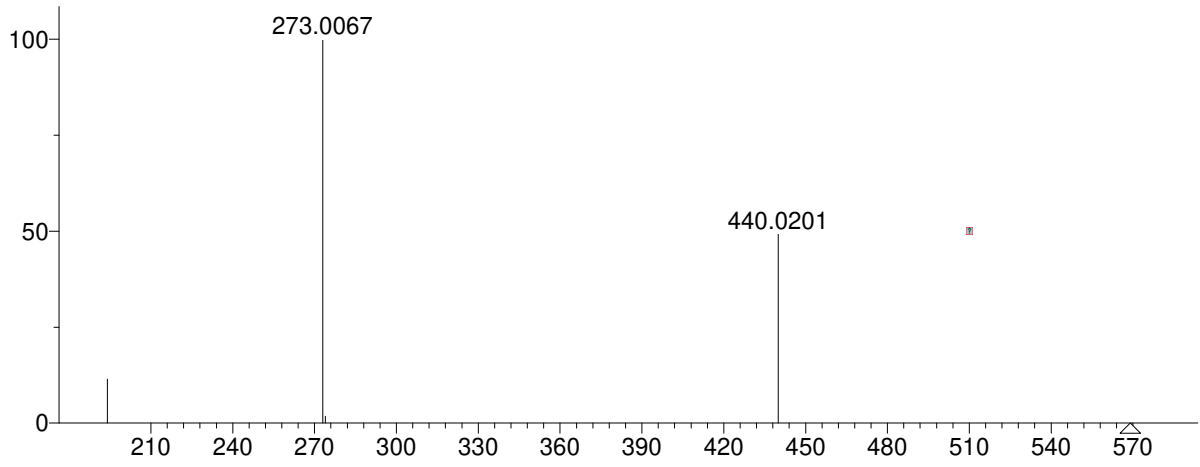

\*\* Search Report Page 1 of 2 \*\*

Unknown: Unknown (10.04\_193.0498m/z)  
Compound in Library Factor = 420

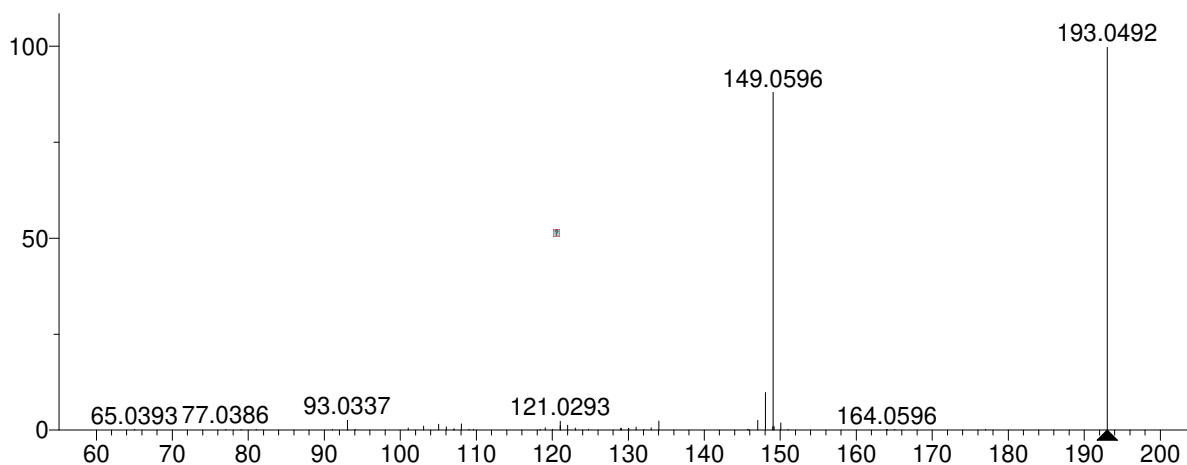

Hit 1 : Carbidopa [M-H-H4N2]- HCD 3V P=193.1  
C10H14N2O4; MF: 898; RMF: 937; Prob 87.2%; CAS: 28860-95-9; Lib: nist\_msms; ID: 313796.

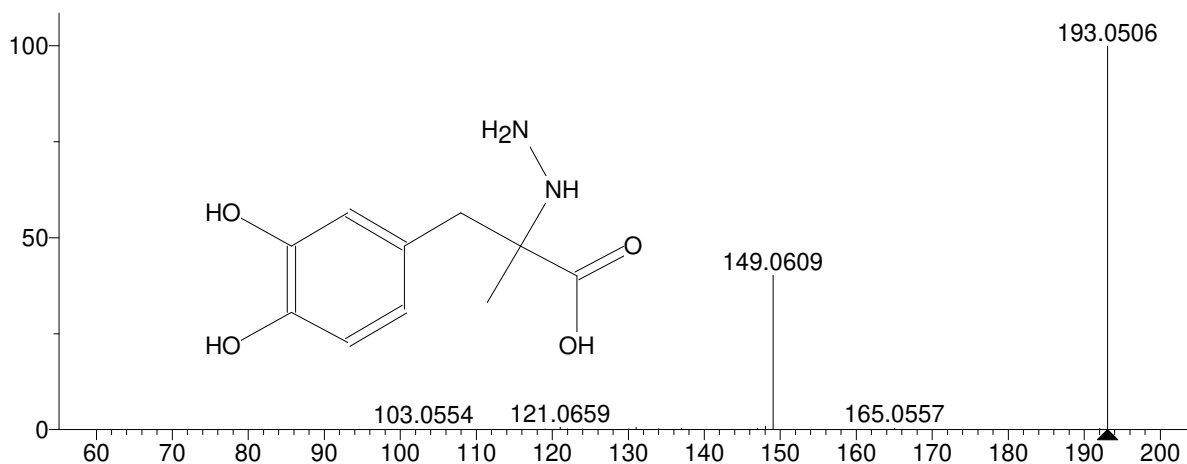

Hit 2 : Methylidopa [M-H-NH3]- HCD 14V P=193.1  
C10H13NO4; MF: 827; RMF: 915; Prob 12.4%; CAS: 555-30-6; Lib: nist\_msms; ID: 96914.

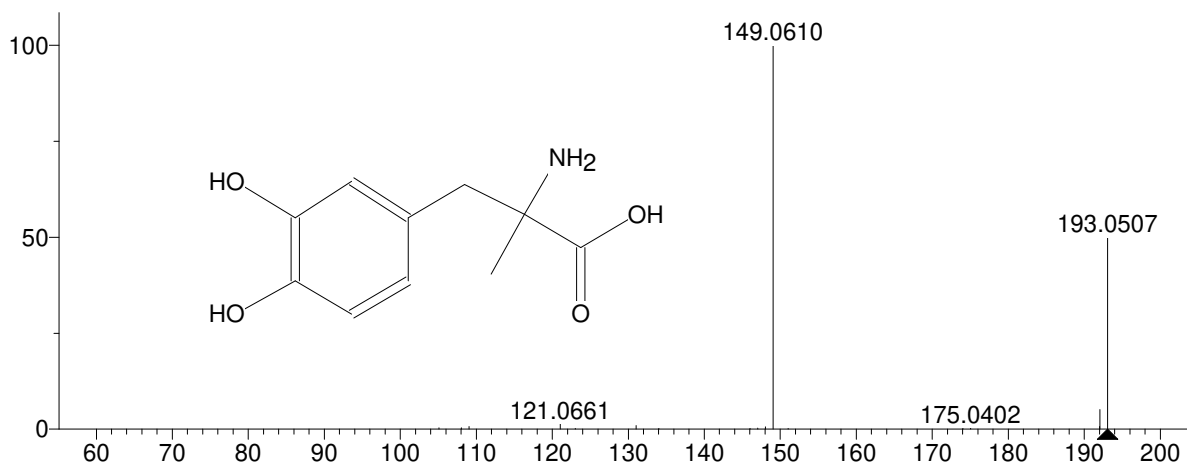

Hit 3 : Monoethyl phthalate [M-H]- HCD 7V P=193.1  
C10H10O4; MF: 631; RMF: 813; Prob 0.17%; CAS: 2306-33-4; Lib: nist\_msms; ID: 206557.

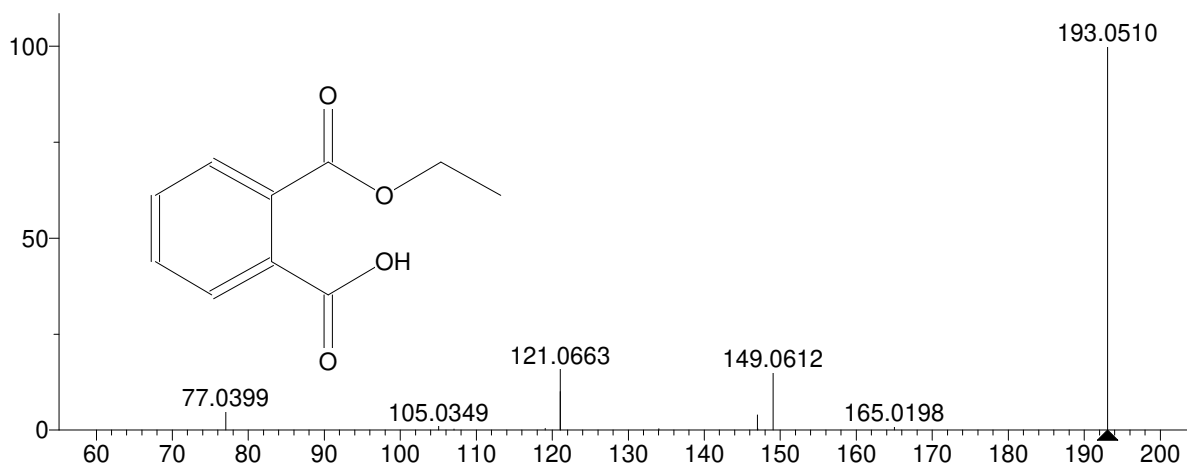

Hit 4 : Prohexadione [M-H-H2O]- HCD 11V P=193.1  
C10H12O5; MF: 627; RMF: 841; Prob 0.14%; CAS: 88805-35-0; Lib: nist\_msms; ID: 489541.

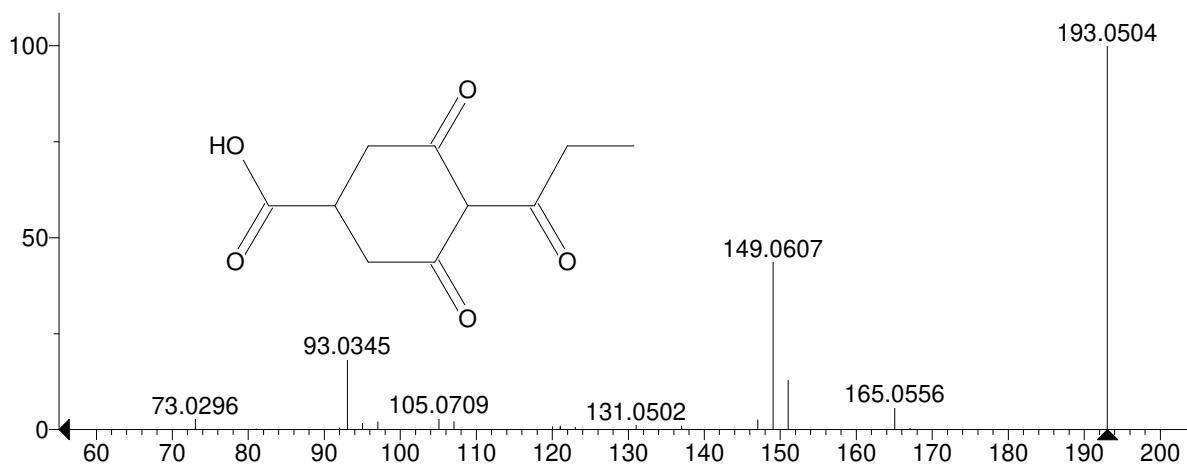

Hit 5 : trans-Ferulic acid [M-H]- HCD 7V P=193.1  
C10H10O4; MF: 495; RMF: 820; Prob 0.00%; CAS: 537-98-4; Lib: nist\_msms; ID: 300551.

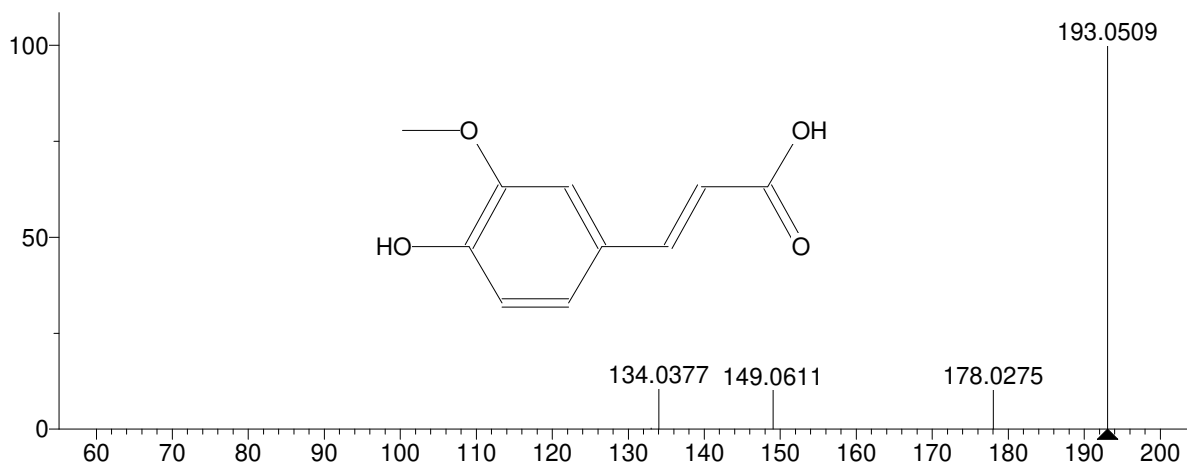

\*\* Search Report Page 1 of 2 \*\*

Unknown: Unknown (10.07\_399.2117m/z)  
Compound in Library Factor = -2176

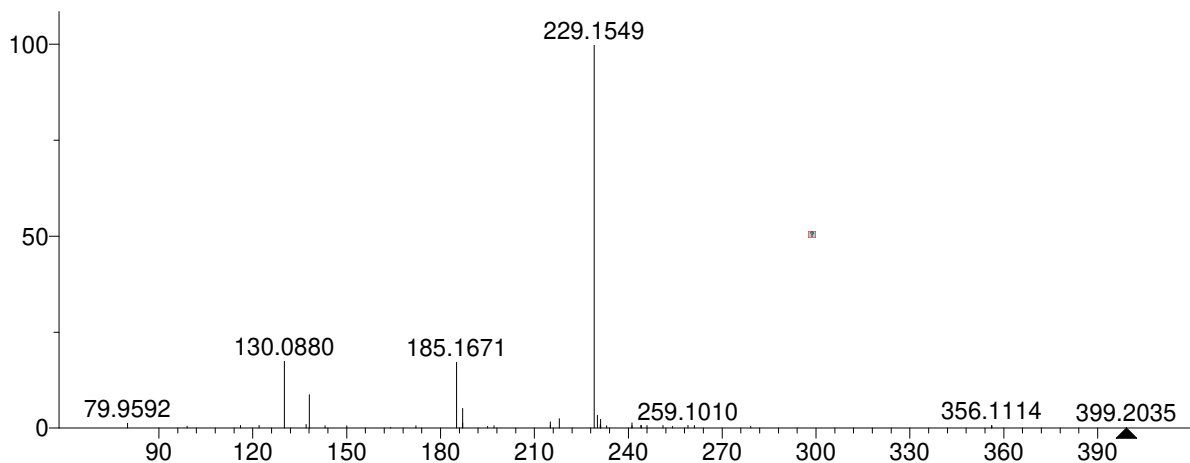

Hit 1 : Resolvin D2 [M+Na]<sup>+</sup> HCD 15V P=399.2  
C<sub>22</sub>H<sub>32</sub>O<sub>5</sub>; MF: 31; RMF: 435; Prob 38.1%; CAS: 810668-37-2; Lib: nist\_msms; ID: 118154.

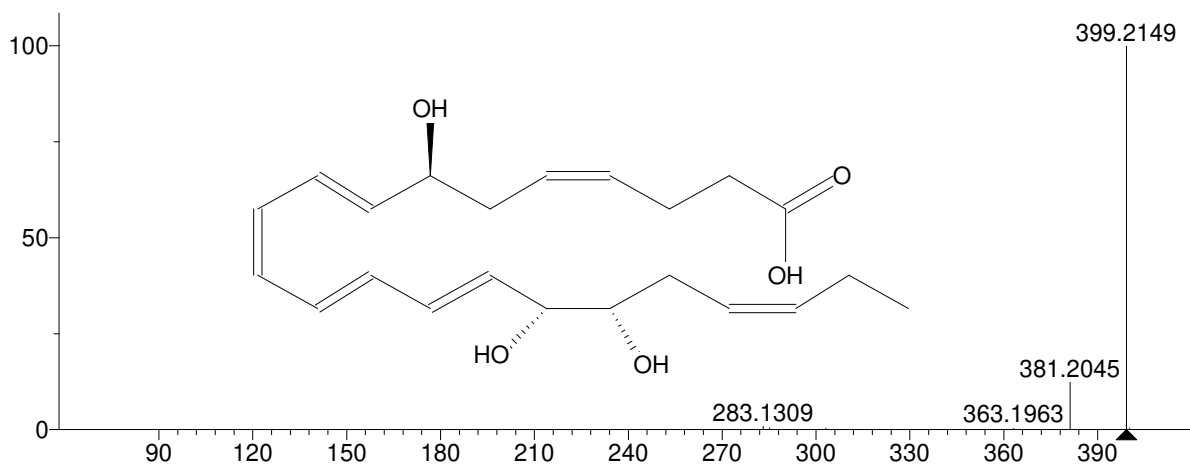

Hit 2 : N-Desmethylvinblastine [M+2H]<sup>2+</sup> HCD 14V P=399.2  
C<sub>45</sub>H<sub>56</sub>N<sub>4</sub>O<sub>9</sub>; MF: 7; RMF: 350; Prob 12.8%; CAS: 18172-50-4; Lib: nist\_msms; ID: 435586.

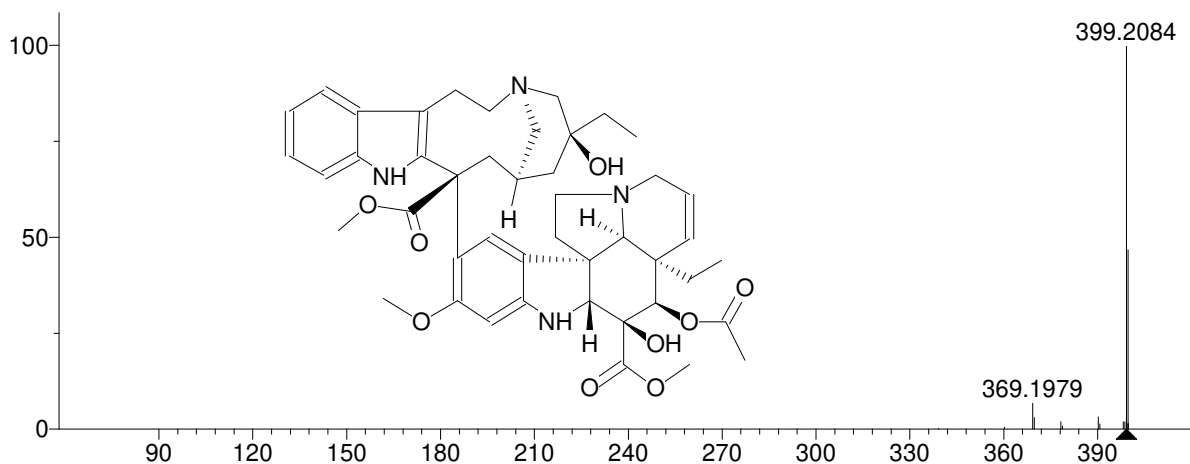

\*\* Search Report Page 2 of 2 \*\*

Hit 3 : 7S,8,17S-Trihydroxydocosa-4Z,9E,11E,13Z,15E,19Z-hexaenoic acid [M+Na]<sup>+</sup> HCD 15V P=399.2  
C<sub>22</sub>H<sub>32</sub>O<sub>5</sub>; MF: 1; RMF: 46; Prob 10.0%; CAS: 872993-05-0; Lib: nist\_msms; ID: 118170.

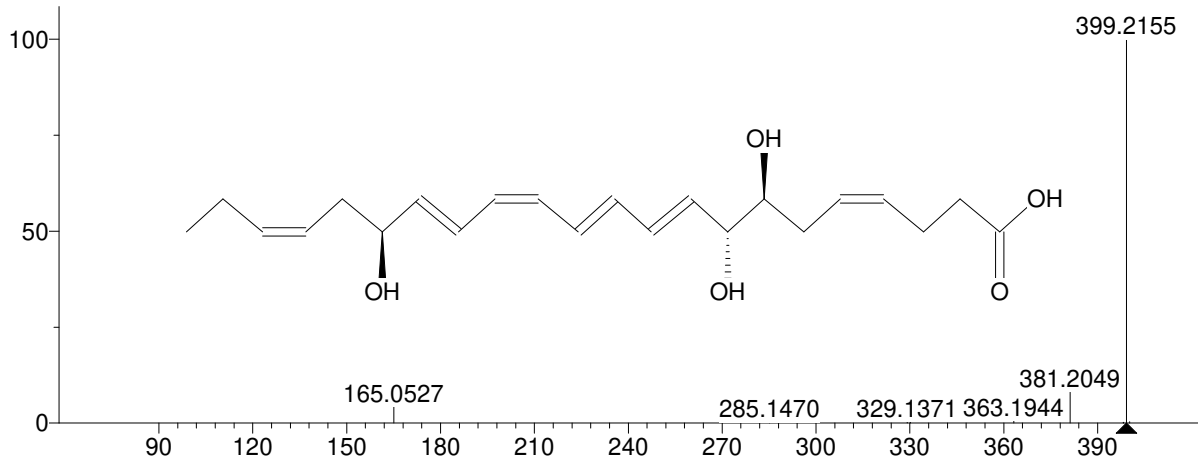

Hit 4 : NCGC00380576-01\_C<sub>22</sub>H<sub>32</sub>O<sub>5</sub>\_2-Pentenoic acid, 3-[(acetyloxy)methyl]-5-[(1S,4aR,8aR)-2-formyl-1,4,4a,  
C<sub>22</sub>H<sub>32</sub>O<sub>5</sub>; MF: 1; RMF: 44; Prob 10.0%; Lib: mona-export-gnps; ID: 13905.

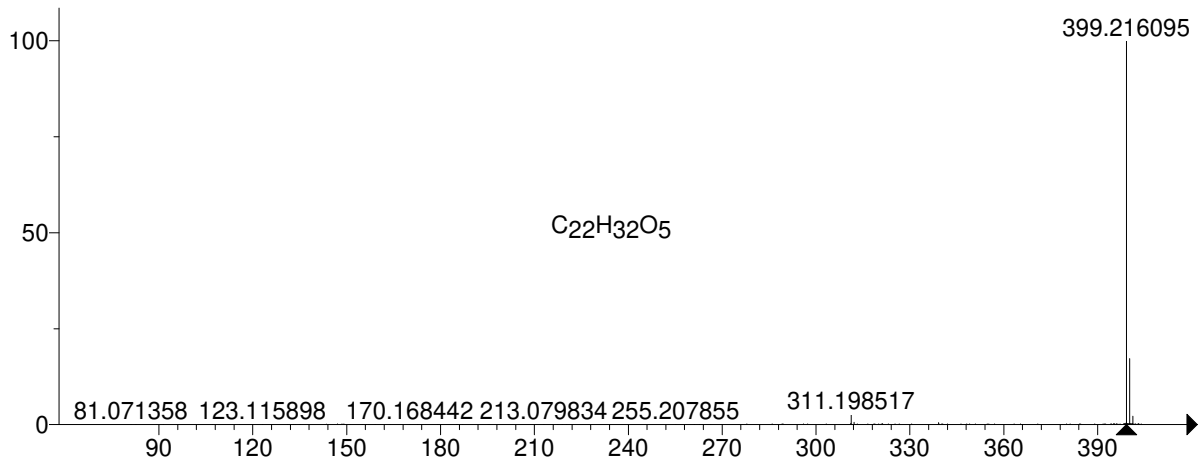

Hit 5 : His-Ser-Arg [M+H]<sup>+</sup> QTOF 10V P=399.2  
C<sub>15</sub>H<sub>26</sub>N<sub>8</sub>O<sub>5</sub>; MF: 0; RMF: 40; Prob 9.65%; Lib: nist\_msms; ID: 51157.

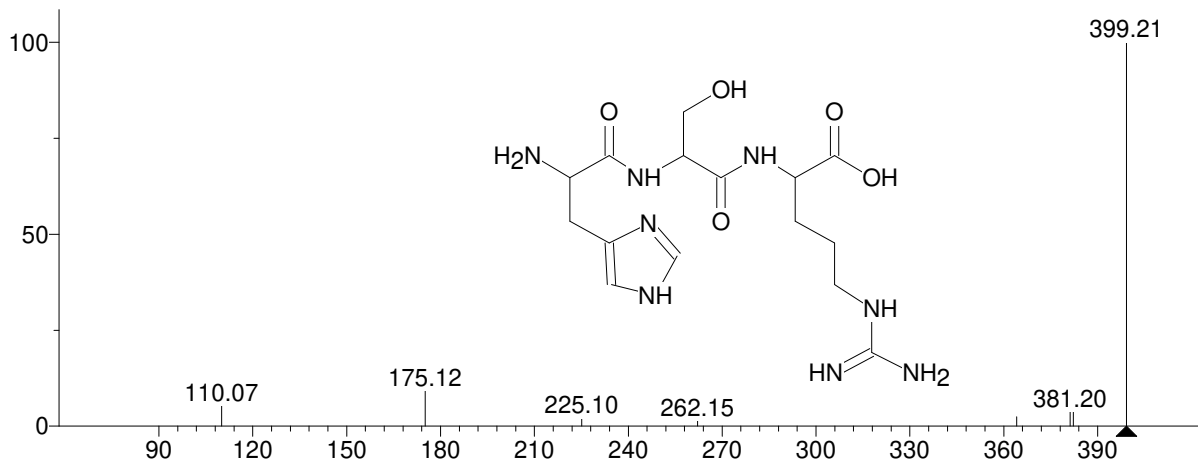

Unknown: Unknown (10.09\_276.0858m/z)  
Compound in Library Factor = 0

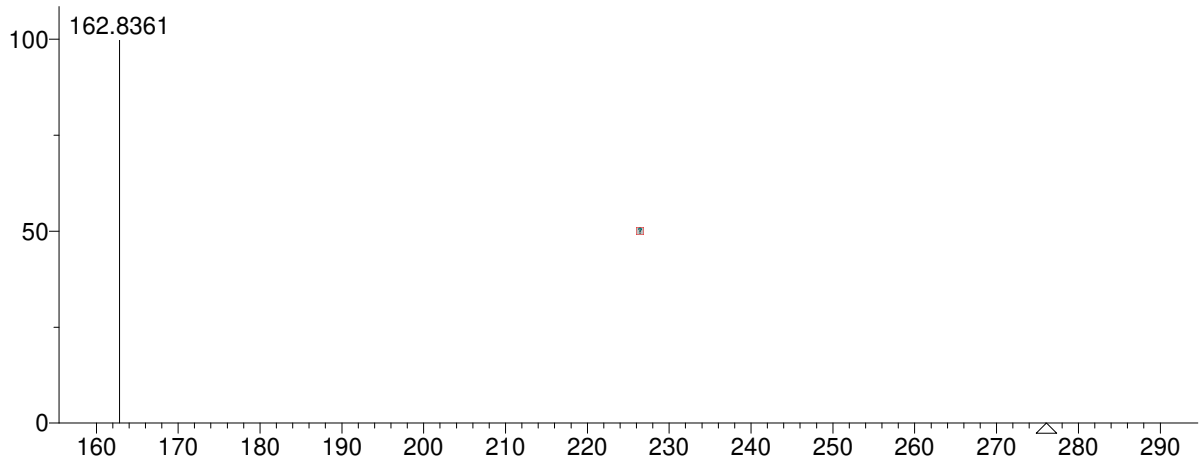

Unknown: Unknown (10.09\_415.1713m/z)  
Compound in Library Factor = 0

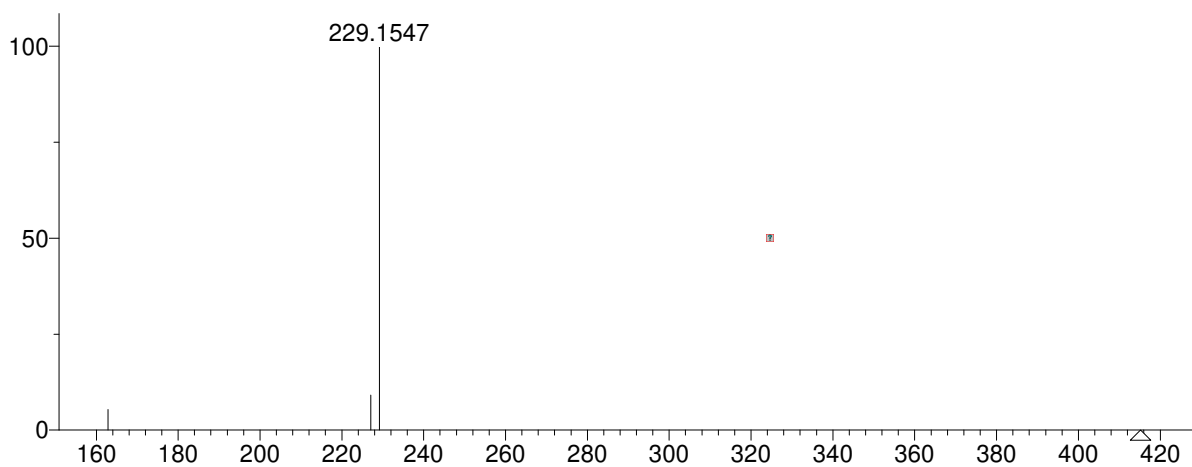

Hit 1 : 6-formyl-10-(hydroxymethyl)-5-methoxy-3-methylidene-2-oxo-2H,3H,3aH,4H,5H,8H,9H,11aH-cyclodeca[b]furan  
C<sub>21</sub>H<sub>28</sub>O<sub>7</sub>; MF: 0; RMF: 15; Prob 100.0%; Lib: mona-export-vf-npl\_qexactive; ID: 16435.

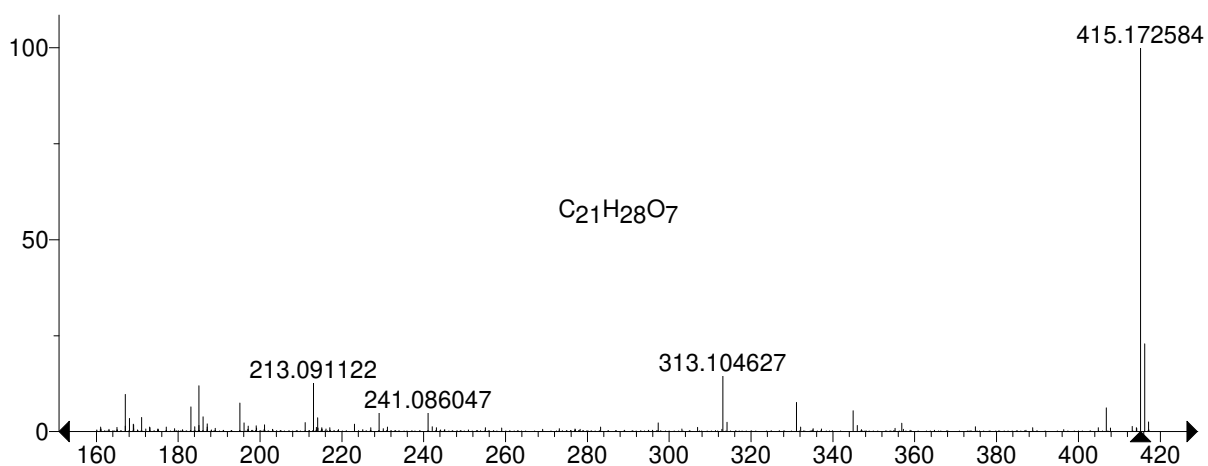

Unknown: Unknown (10.10\_535.1915m/z)  
Compound in Library Factor = 0

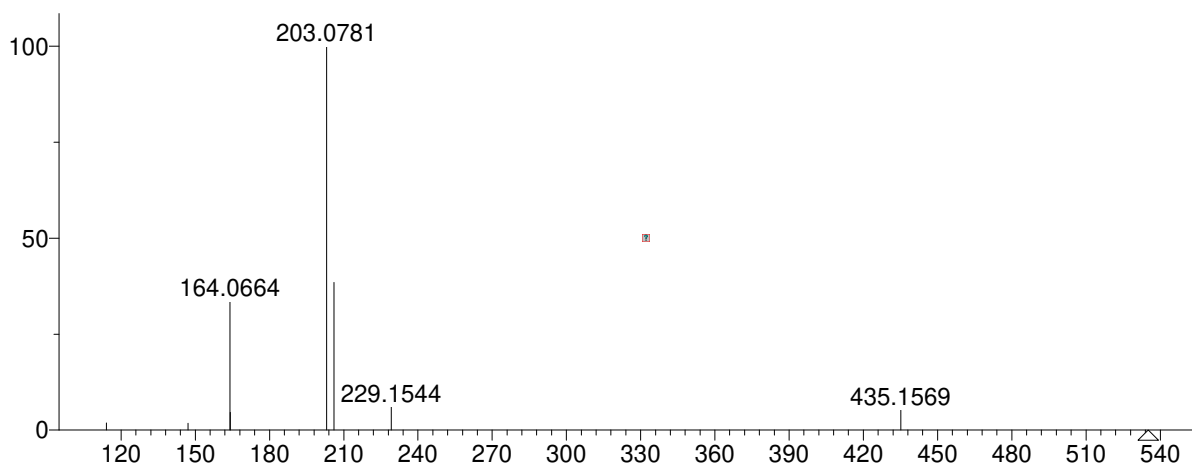

Hit 1 : NCGC00347745-02! [M-H<sub>2</sub>O+H]<sup>+</sup> P=535.2  
C<sub>30</sub>H<sub>32</sub>O<sub>10</sub>; MF: 0; RMF: 57; Prob 100.0%; Lib: mona-export-gnps; ID: 6471.

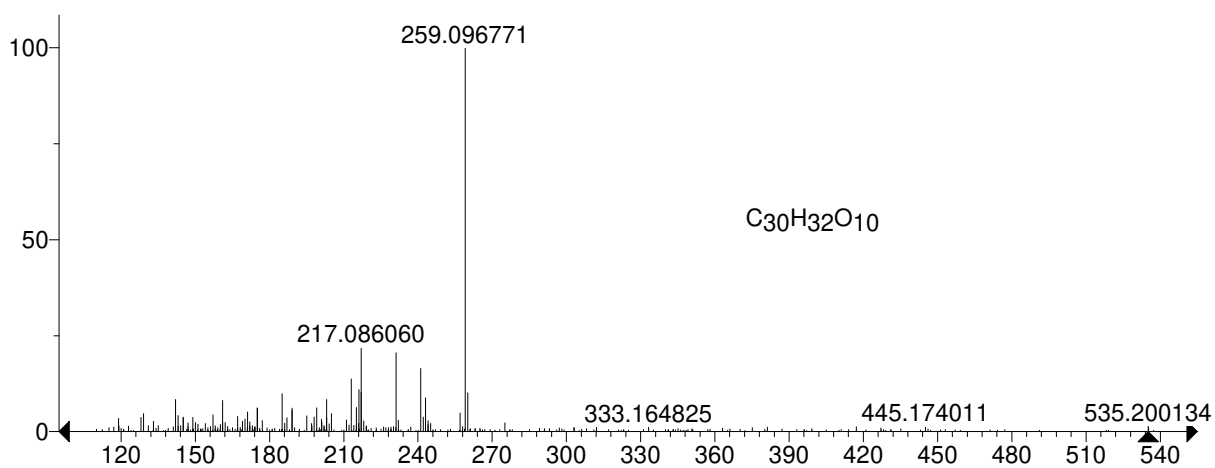



Unknown: Unknown (10.11\_206.0814m/z)  
Compound in Library Factor = -285

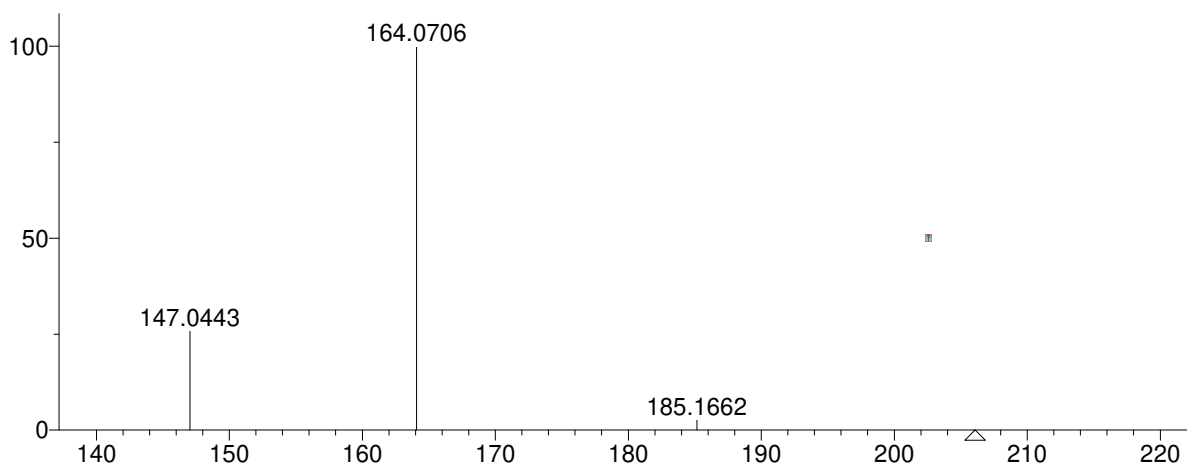

Hit 1 : N-Acetyl-L-phenylalanine [M-H]<sup>-</sup> IT-FT 35% P=206.1  
C<sub>11</sub>H<sub>13</sub>NO<sub>3</sub>; MF: 559; RMF: 970; Prob 95.2%; CAS: 2018-61-3; Lib: nist\_msms; ID: 290371.

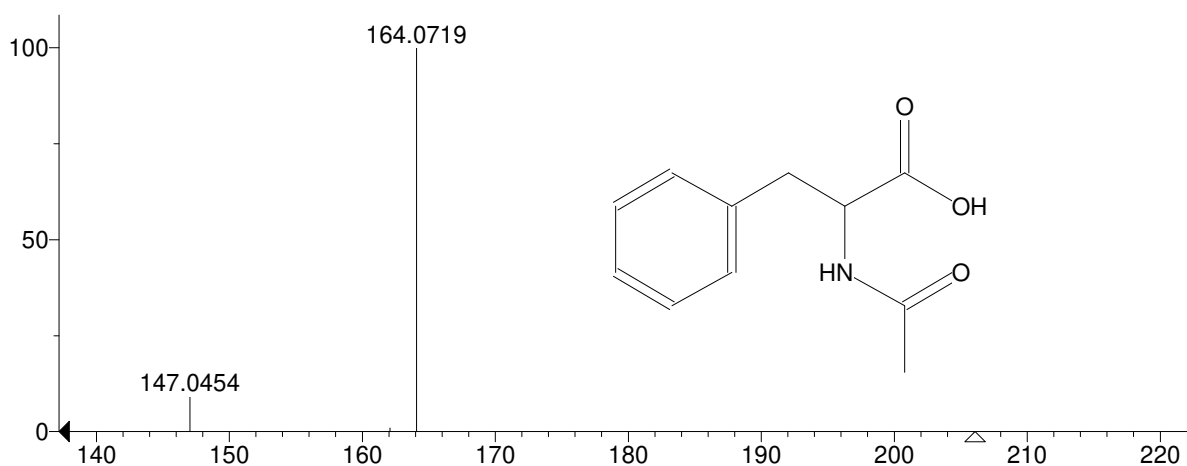

Hit 2 : N-ACETYL-L-PHENYLALANINE  
C<sub>11</sub>H<sub>13</sub>NO<sub>3</sub>; MF: 425; RMF: 910; Prob 3.68%; Lib: embl neg mcg; ID: 419.

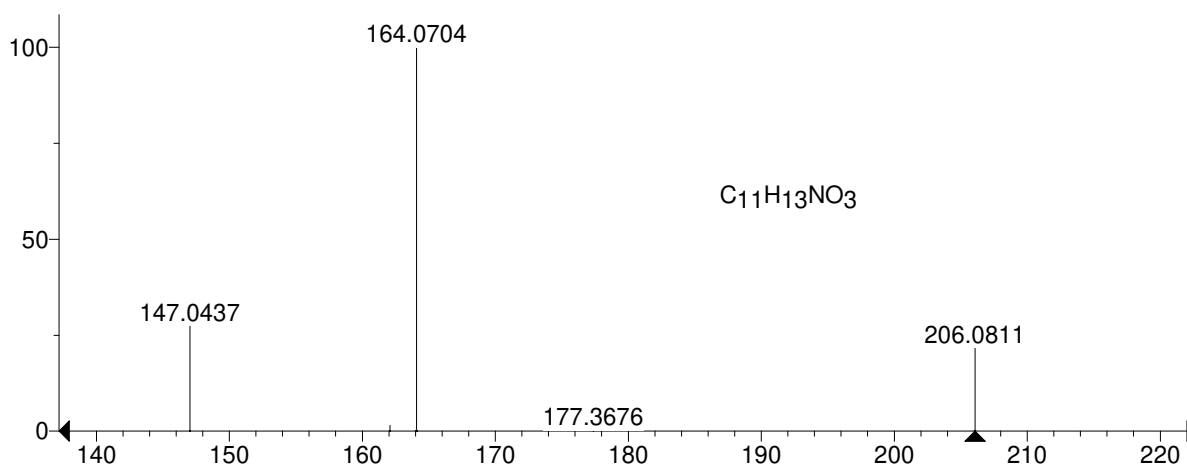

Hit 3 : N-acetylphenylalanine [M-H]<sup>-</sup> 45HCD P=206.1  
C<sub>11</sub>H<sub>13</sub>NO<sub>3</sub>; MF: 372; RMF: 913; Prob 0.72%; Lib: mona-export-ic-ms-ms\_negative\_mode; ID: 17697.

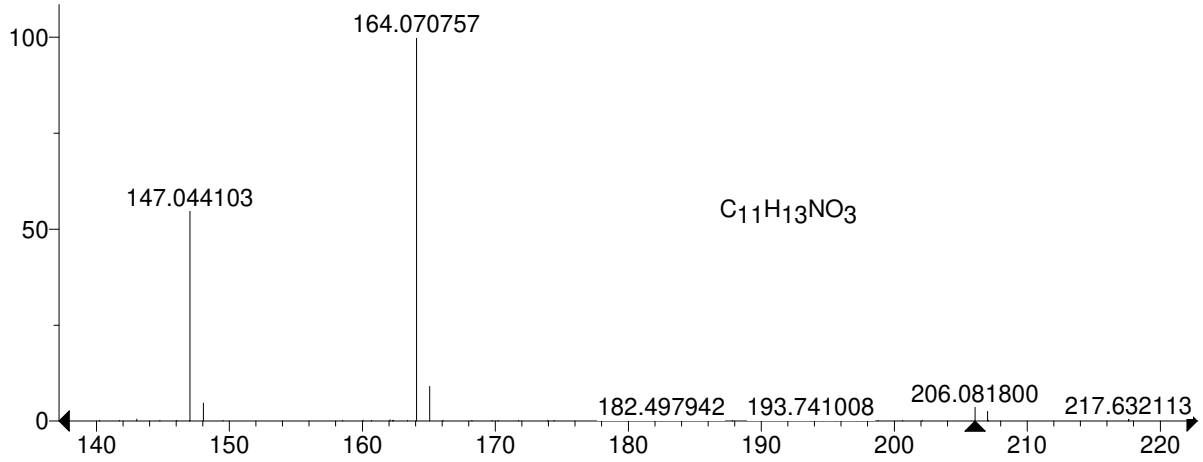

Hit 4 : N-Acetylphenylalanine [M-H]<sup>-</sup> 35eV P=206.1  
C<sub>11</sub>H<sub>13</sub>NO<sub>3</sub>; MF: 354; RMF: 901; Prob 0.37%; Lib: msms-neg-fiehnhilic; ID: 1131.

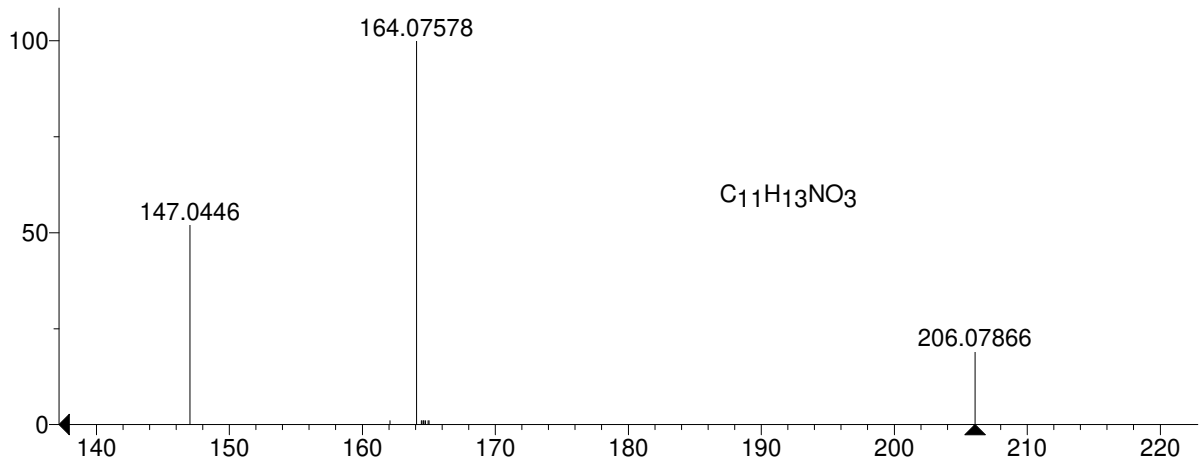

Hit 5 : N-acetylphenylalanine (CCR vessel) [M-H]<sup>-</sup> P=206.1  
C<sub>11</sub>H<sub>13</sub>NO<sub>3</sub>; MF: 125; RMF: 835; Prob 0.00%; Lib: phytofrag2018\_final\_060219; ID: 969.

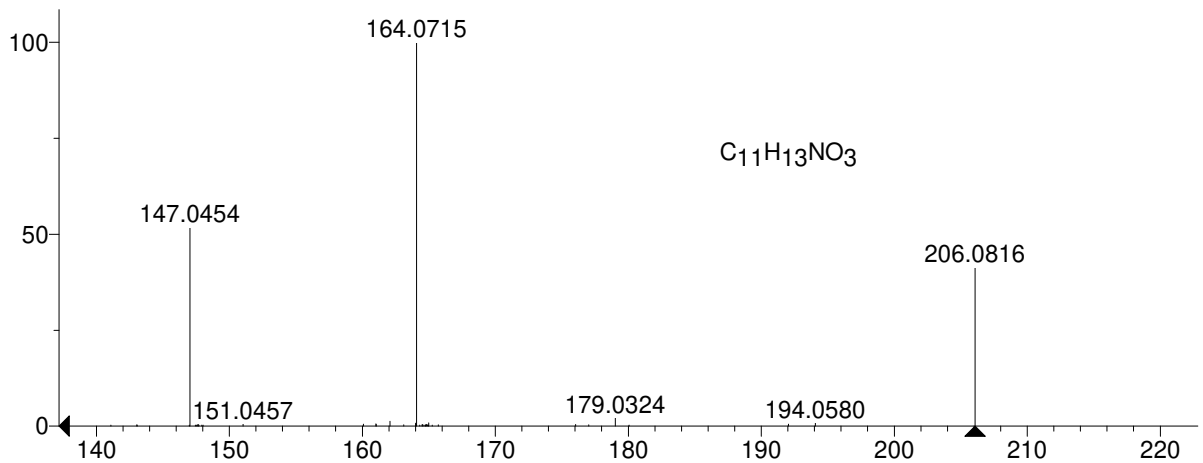

\*\* Search Report Page 1 of 2 \*\*

Unknown: Unknown (10.12\_283.1542m/z)  
Compound in Library Factor = -300

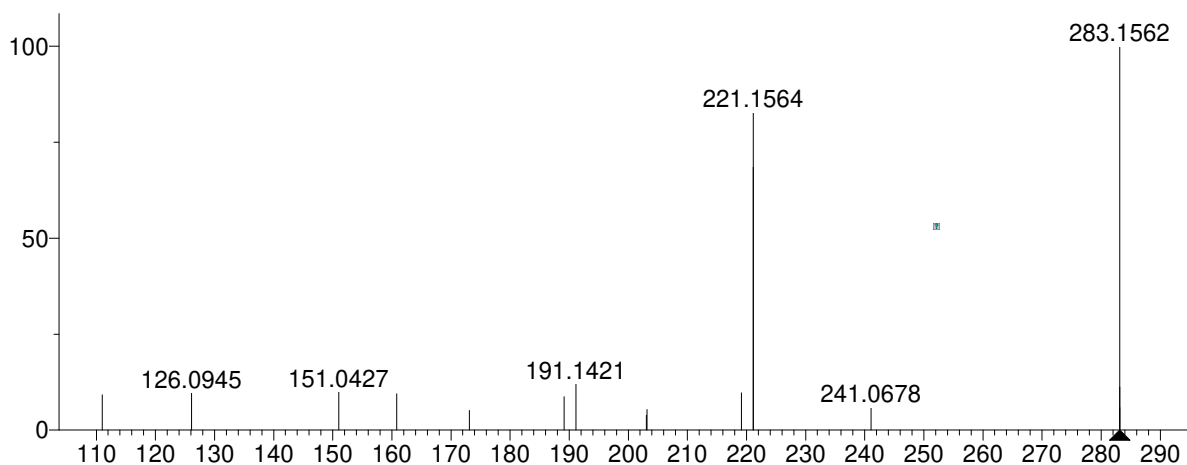

Hit 1 : Artemisinin [M+H]<sup>+</sup> HCD 2V P=283.2  
C<sub>15</sub>H<sub>22</sub>O<sub>5</sub>; MF: 246; RMF: 940; Prob 91.7%; CAS: 63968-64-9; Lib: nist\_msms; ID: 118848.

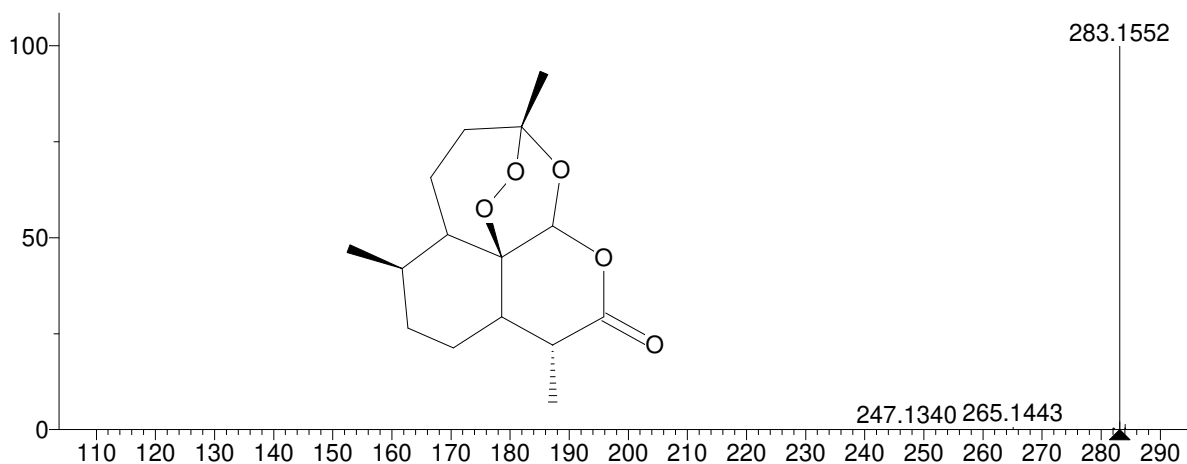

Hit 2 : isomer of dihydrophaseic acid [M+H]<sup>+</sup> P=283.2  
C<sub>15</sub>H<sub>22</sub>O<sub>5</sub>; MF: 18; RMF: 449; Prob 0.91%; Lib: mona-export-gnps; ID: 14793.

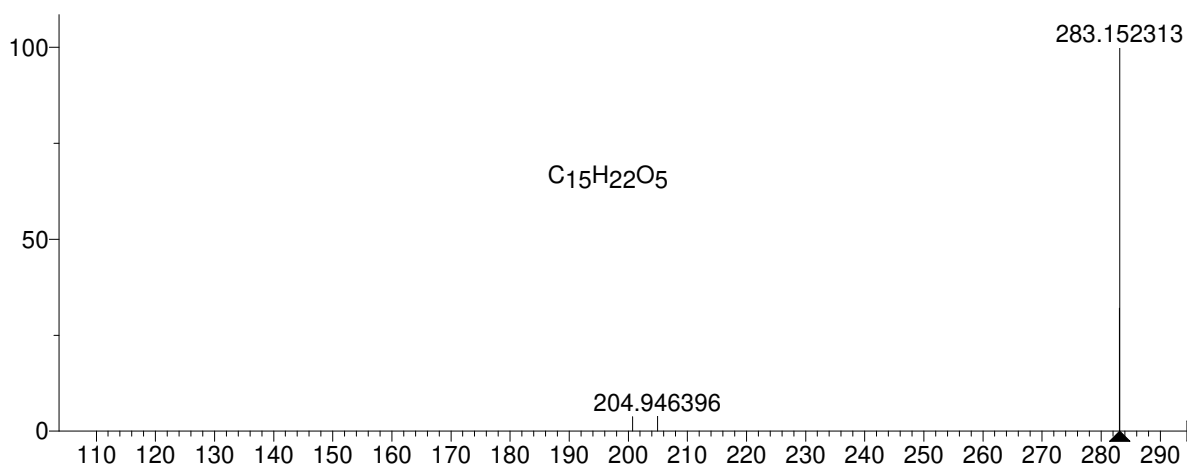

Hit 3 : Octyl gallate [M+H]<sup>+</sup> HCD 1V P=283.2  
C<sub>15</sub>H<sub>22</sub>O<sub>5</sub>; MF: 16; RMF: 511; Prob 0.84%; CAS: 1034-01-1; Lib: nist\_msms; ID: 138058.

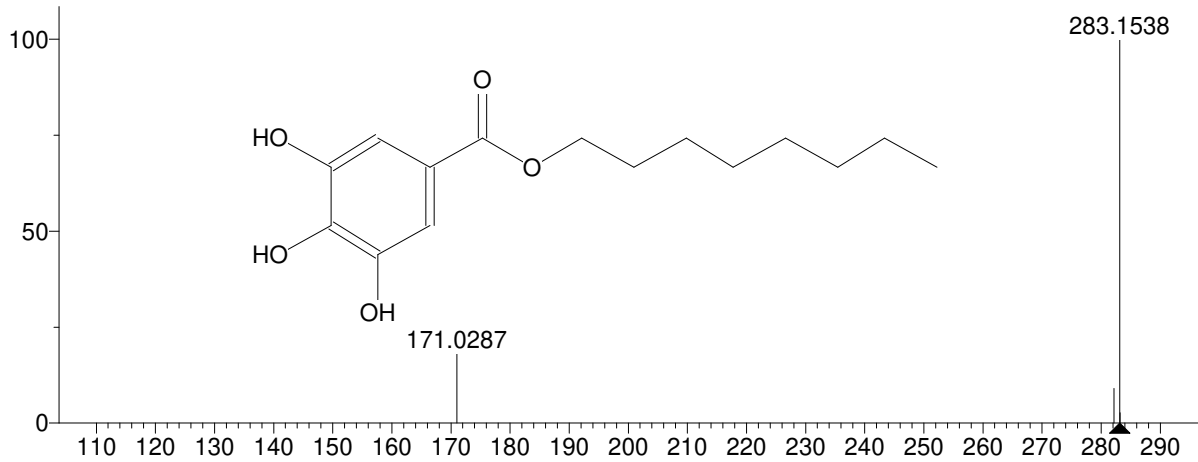

Hit 4 : (4E,6E)-2-(hydroxymethyl)-3-(3-methoxy-3-oxopropyl)deca-4,6-dienoic acid [M-H]<sup>-</sup> 35HCD P=283.2  
C<sub>15</sub>H<sub>24</sub>O<sub>5</sub>; MF: 10; RMF: 140; Prob 0.66%; Lib: mona-export-1c-ms-ms\_negative\_mode; ID: 22052.

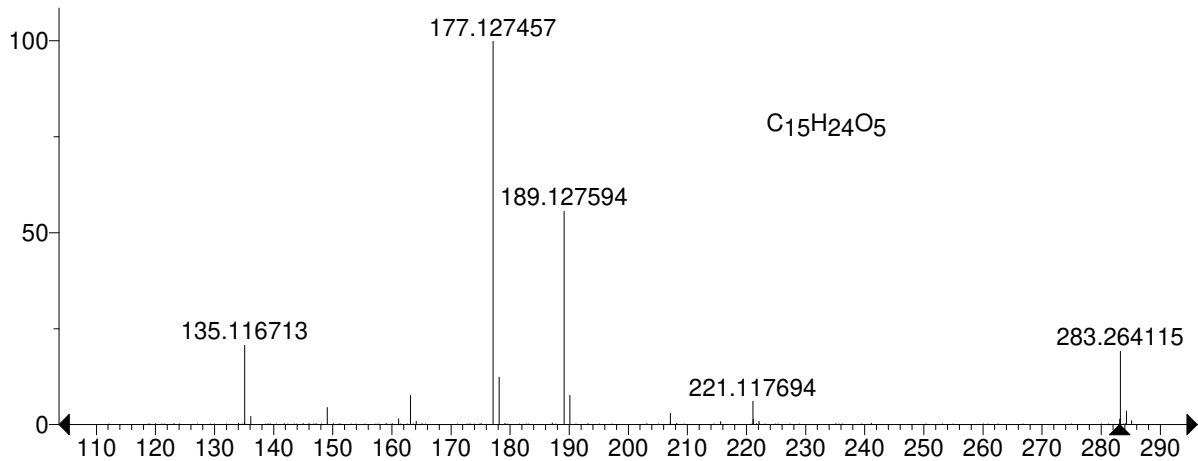

Hit 5 : 5,9-dihydroxy-7-(hydroxymethyl)-5,7-dimethyl-4,5a,6,8,8a,9-hexahydro-1H-azuleno[5,6-c]furan-3-one [M+]  
C<sub>15</sub>H<sub>22</sub>O<sub>5</sub>; MF: 4; RMF: 185; Prob 0.52%; Lib: mona-export-vf-npl\_qexactive; ID: 4198.

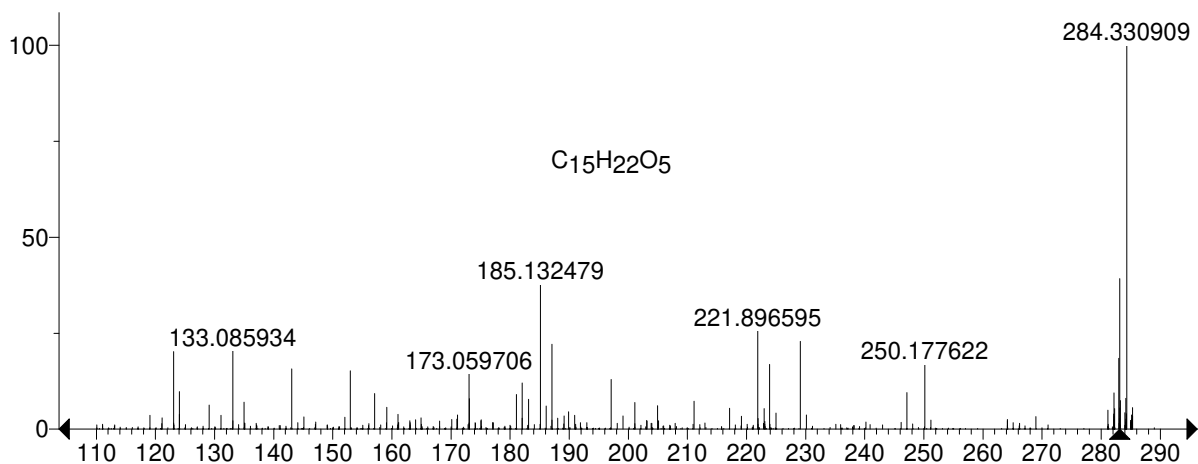

Unknown: Unknown (10.17\_421.1590m/z)  
Compound in Library Factor = -3273

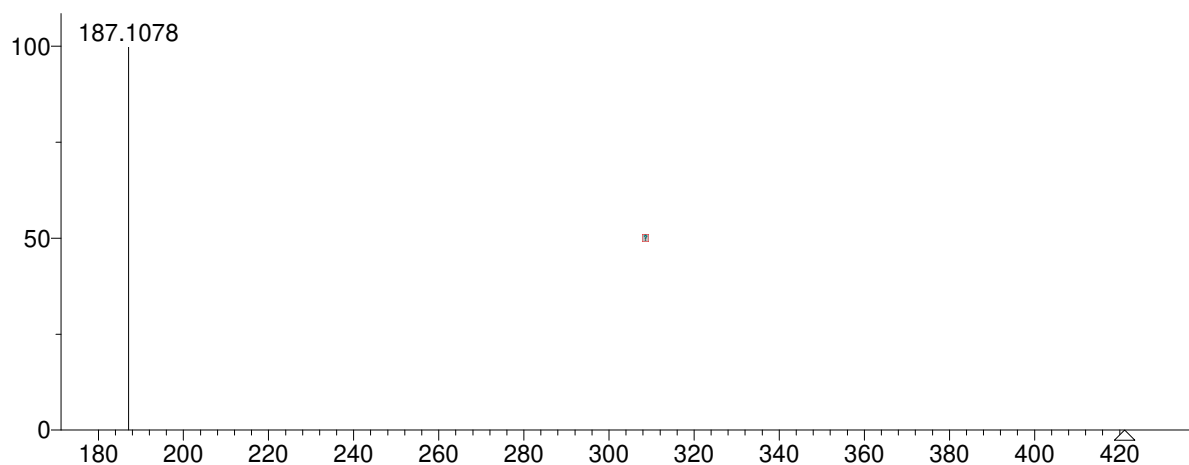

Hit 1 : 13(R),14(R)-Epoxyfluprostenol isopropyl ester [M+H-C3H12O3]+ HCD 50V P=421.2  
C26H35F3O7; MF: 6; RMF: 353; Prob 55.4%; Lib: nist\_msms; ID: 254116.

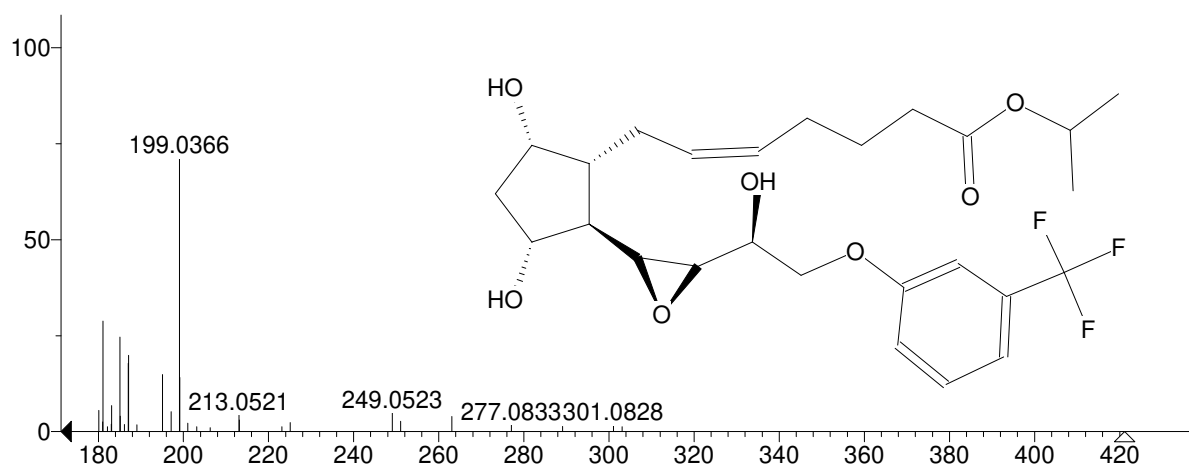

Hit 2 : Losartan [M-H]- 35eV P=421.2  
C22H23ClN6O; MF: 1; RMF: 84; Prob 44.6%; Lib: msms-neg-fiehnlic; ID: 1086.

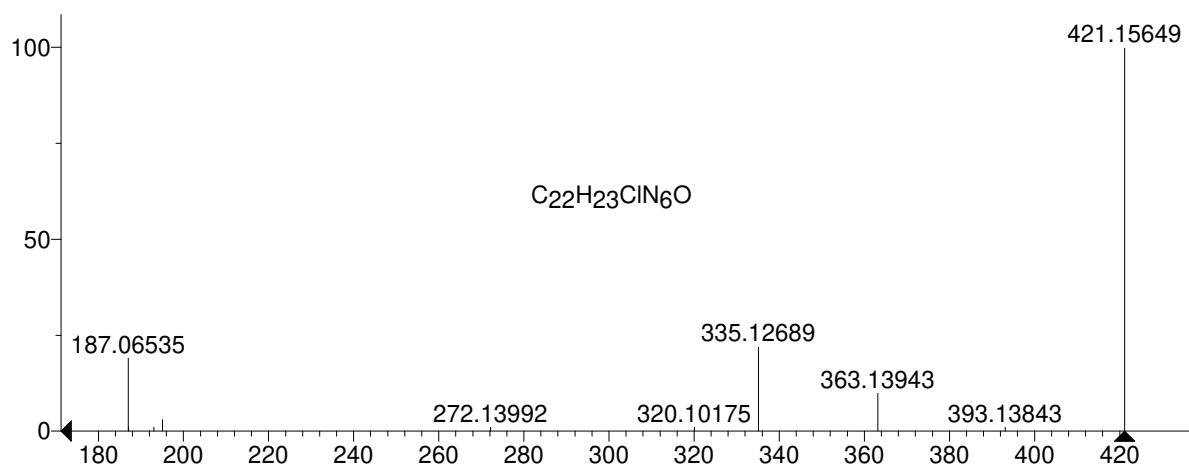

\*\* Search Report Page 1 of 2 \*\*

Unknown: Unknown (10.18\_763.4355m/z)  
Compound in Library Factor = -462

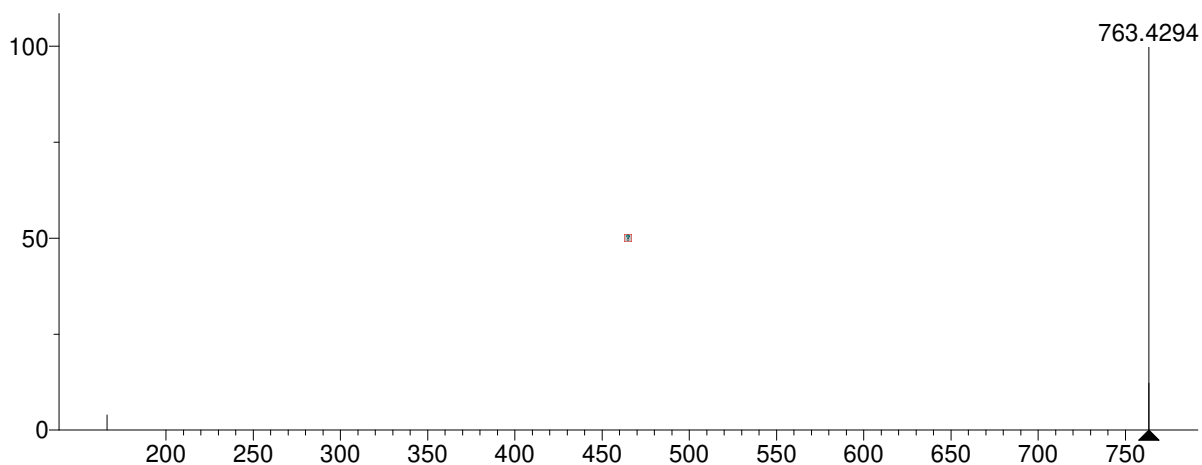

Hit 1 : MGDG 34:9 [M+Na]<sup>+</sup> 25eV P=763.4  
C<sub>43</sub>H<sub>64</sub>O<sub>10</sub>; MF: 185; RMF: 828; Prob 73.7%; Lib: mona-export-in-silico\_spectra; ID: 50055.

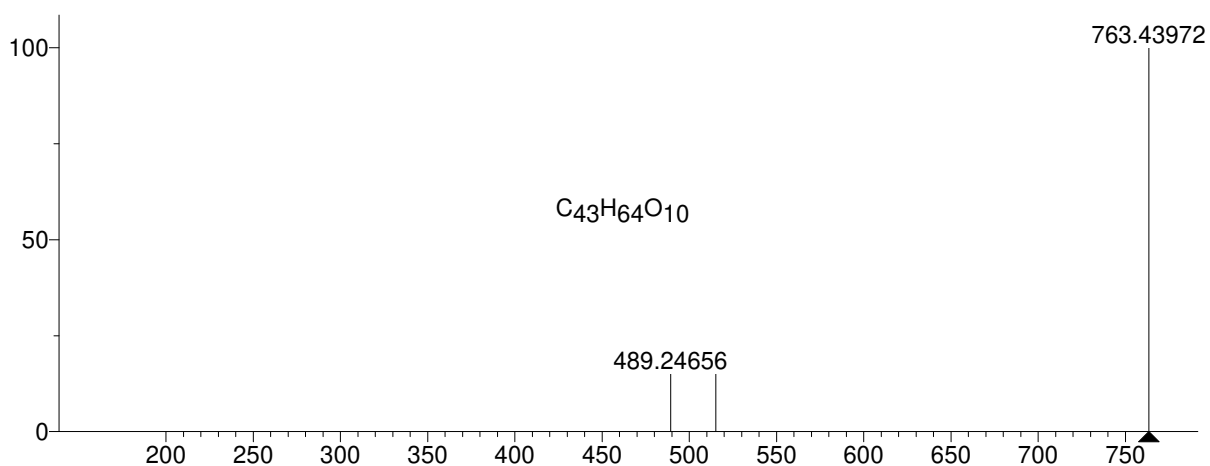

Hit 2 : PI 29:2; PI 3:0-26:2; [M-H]<sup>-</sup> [M-H]<sup>-</sup> P=763.4  
C<sub>38</sub>H<sub>69</sub>O<sub>13</sub>P; MF: 44; RMF: 656; Prob 2.44%; Lib: msdial-insilicomsmms-lipids-neg; ID: 326575.

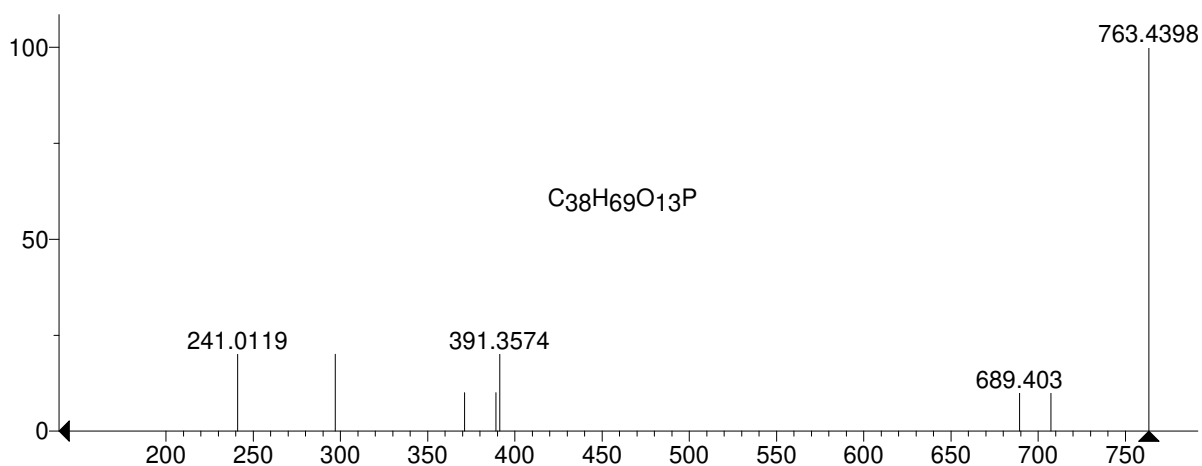

Hit 3 : PI 29:2; PI 5:0-24:2; [M-H]<sup>-</sup> [M-H]<sup>-</sup> P=763.4  
C<sub>38</sub>H<sub>69</sub>O<sub>13</sub>P; MF: 44; RMF: 656; Prob 2.44%; Lib: msdial-insilicomsm-lipids-neg; ID: 326687.

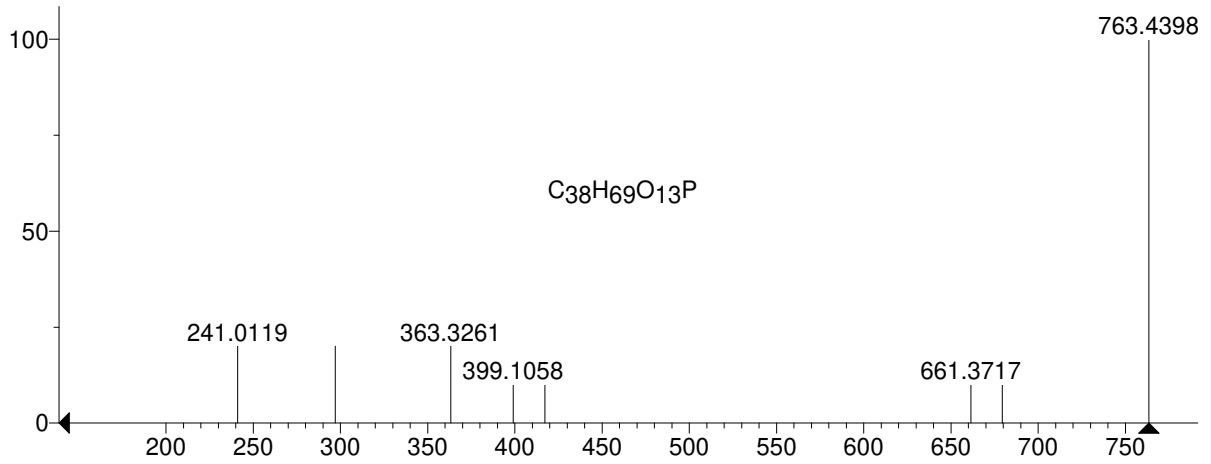

Hit 4 : PI 29:2; PI 7:0-22:2; [M-H]<sup>-</sup> [M-H]<sup>-</sup> P=763.4  
C<sub>38</sub>H<sub>69</sub>O<sub>13</sub>P; MF: 44; RMF: 656; Prob 2.44%; Lib: msdial-insilicomsm-lipids-neg; ID: 326792.

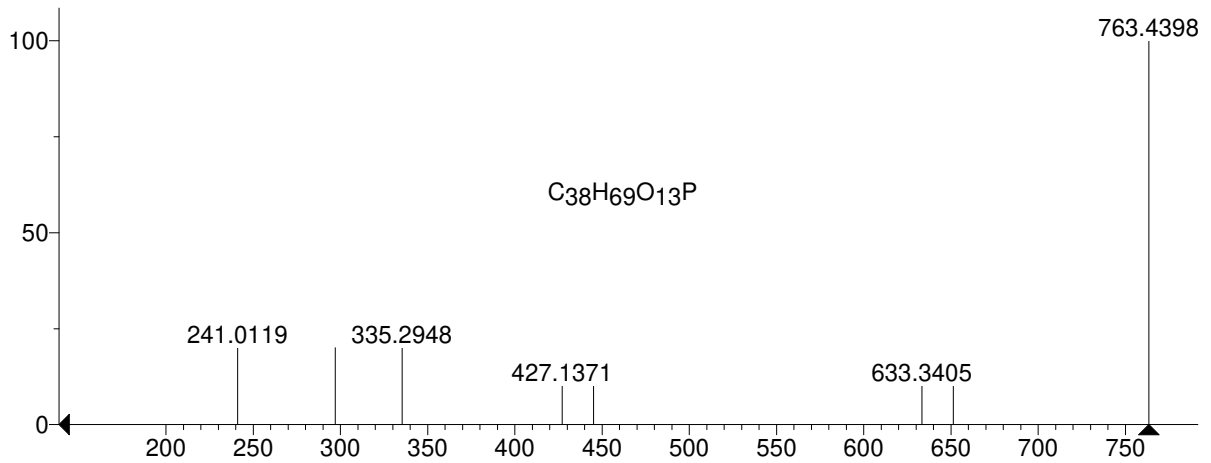

Hit 5 : PI 29:2; PI 8:0-21:2; [M-H]<sup>-</sup> [M-H]<sup>-</sup> P=763.4  
C<sub>38</sub>H<sub>69</sub>O<sub>13</sub>P; MF: 44; RMF: 656; Prob 2.44%; Lib: msdial-insilicomsm-lipids-neg; ID: 326844.

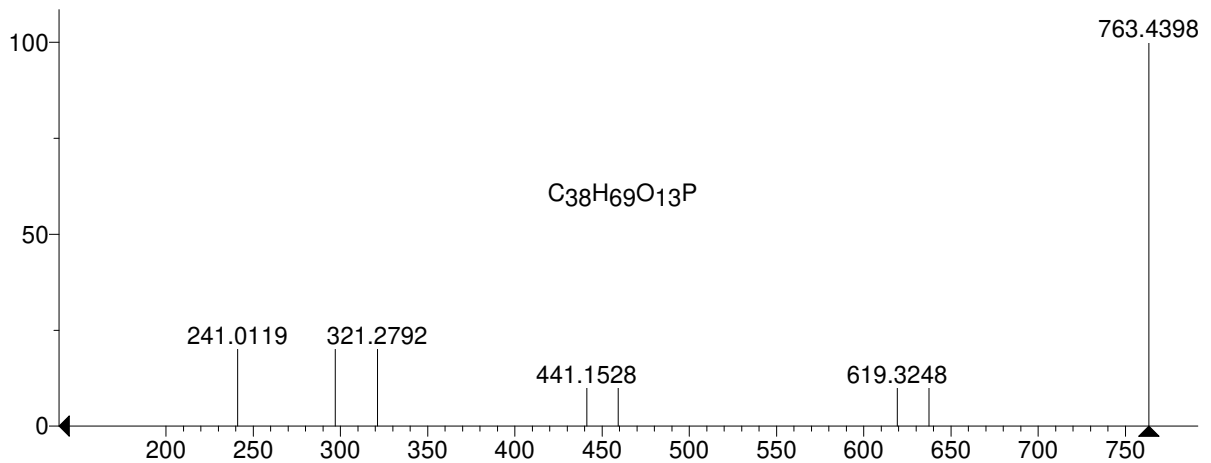

Unknown: Unknown (10.22\_314.1138m/z)  
Compound in Library Factor = 1575

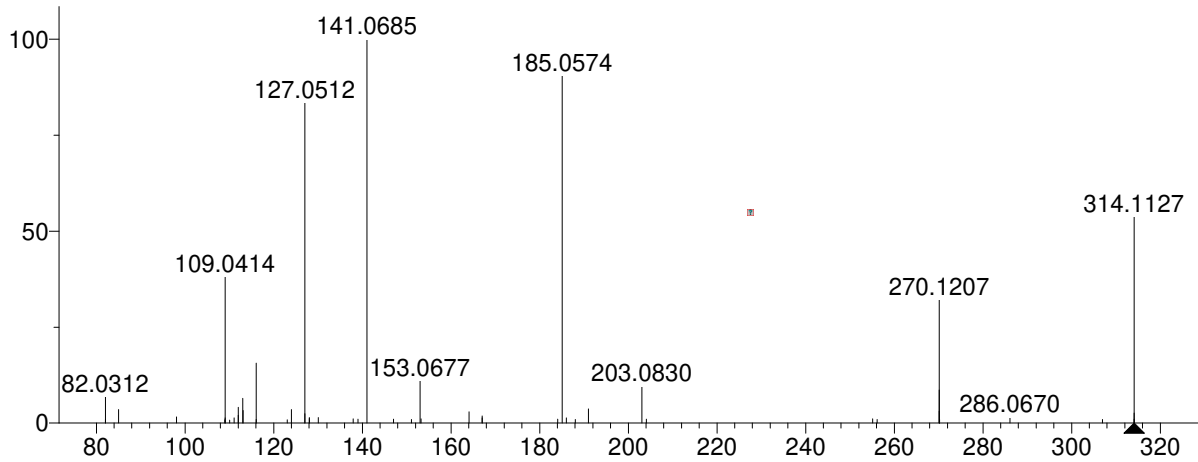

Hit 1 : PyroGlu-Trp [M-H]- HCD 23eV P=314.1  
C16H17N3O4; MF: 899; RMF: 922; Prob 99.0%; CAS: 35937-24-7; Lib: nist\_msms; ID: 568957.

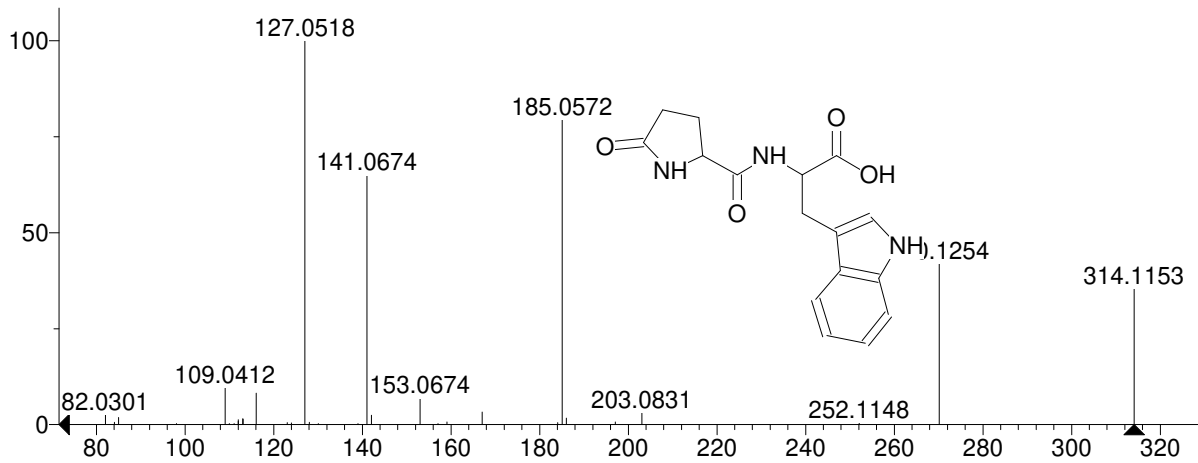

Hit 2 : Flunitrazepam [M+H]+ 20-30-40%) P=314.1  
C16H12FN3O3; MF: 5; RMF: 215; Prob 0.99%; Lib: mona-export-fiehn\_hilic; ID: 366.

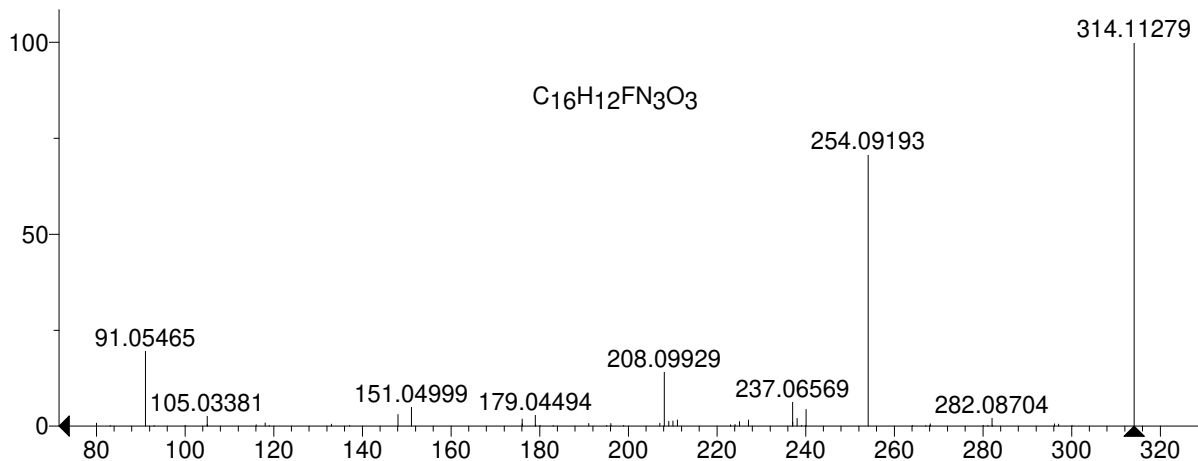



Unknown: Unknown (10.26\_463.2041m/z)  
Compound in Library Factor = 0

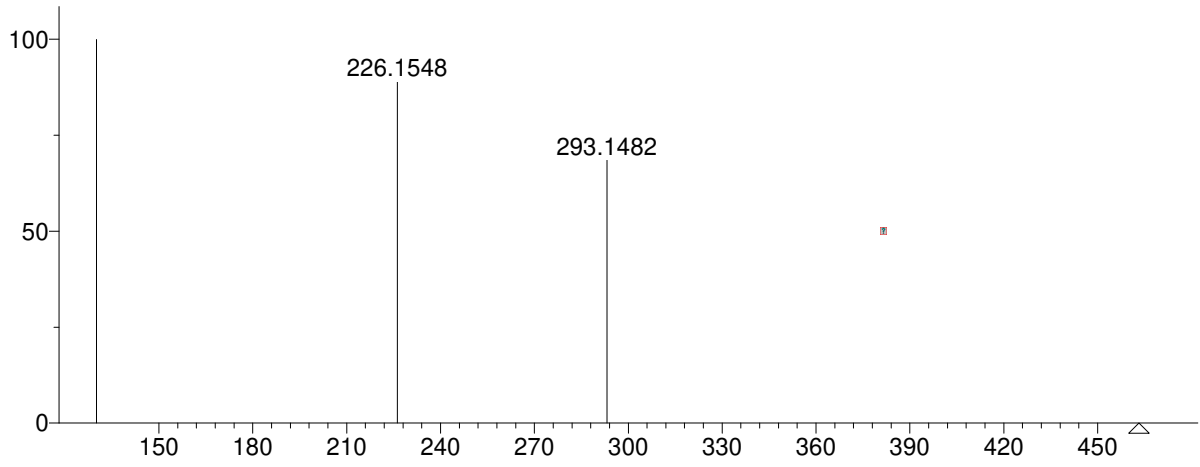

Unknown: Unknown (10.33\_463.1704m/z)  
Compound in Library Factor = 0

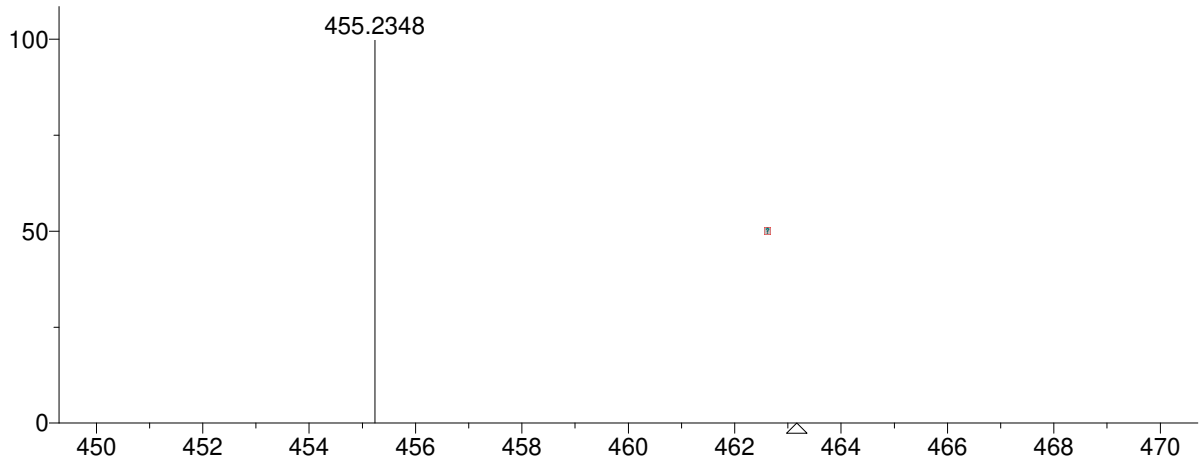

Unknown: Unknown (10.34\_740.3923m/z)  
Compound in Library Factor = 0

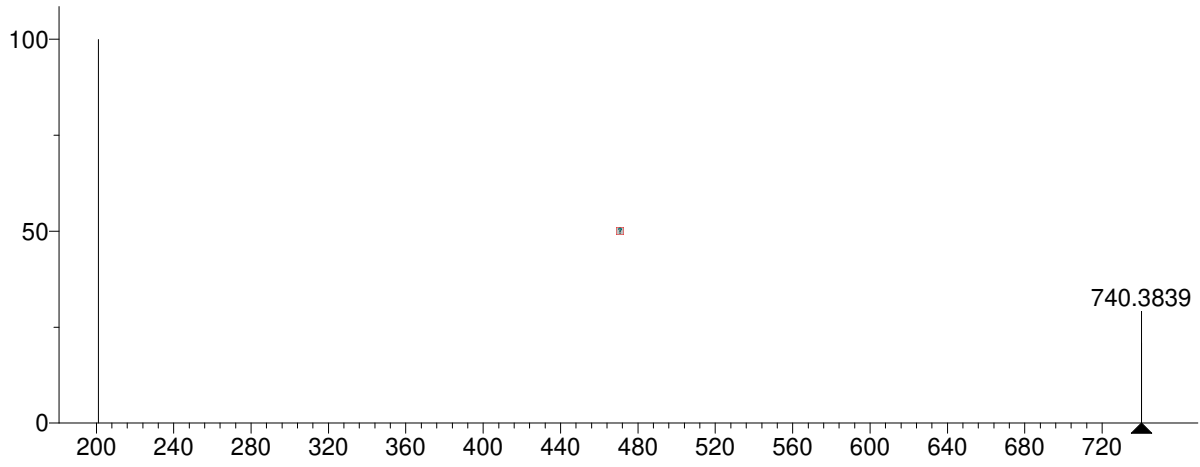

Unknown: Unknown (10.37\_674.3727m/z)  
Compound in Library Factor = -1848

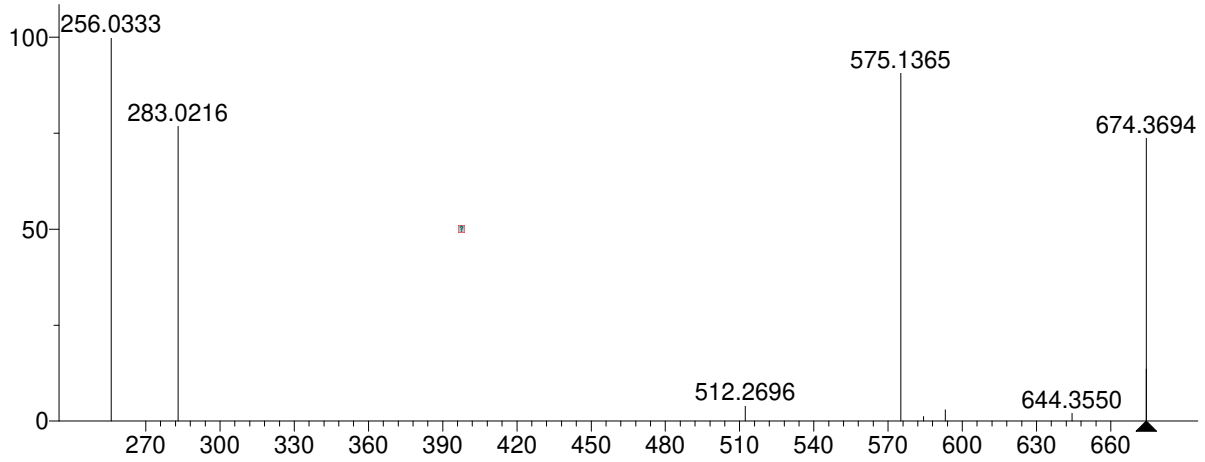

Hit 1 : Substance P reversed sequence [M+2H]<sup>2+</sup> QQQ 10V P=674.4  
C<sub>63</sub>H<sub>98</sub>N<sub>18</sub>O<sub>13</sub>S; MF: 96; RMF: 448; Prob 92.6%; Lib: nist\_msms2; ID: 13465.

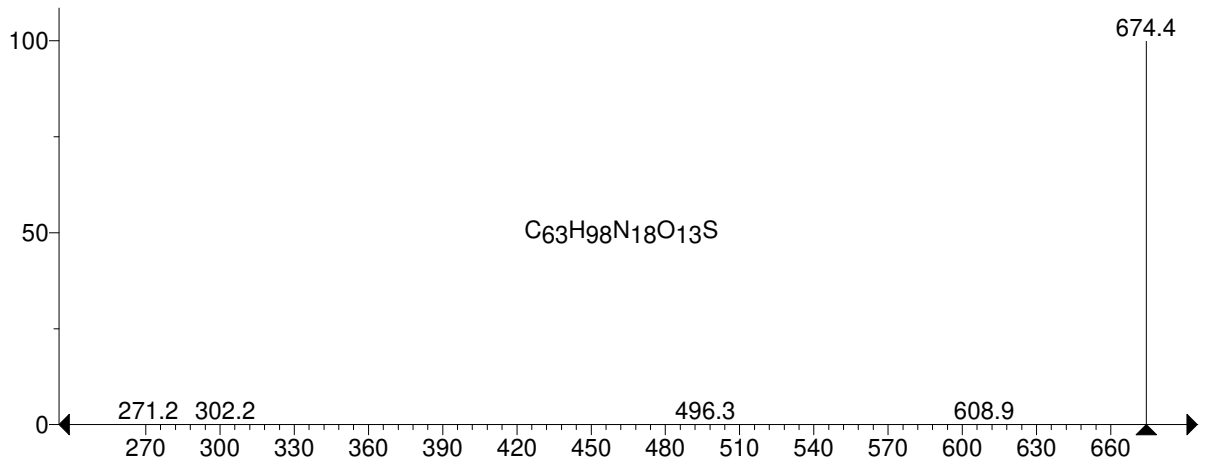

Hit 2 : Substance P [M+H]<sup>+</sup> P=674.4  
C<sub>63</sub>H<sub>98</sub>N<sub>18</sub>O<sub>13</sub>S; MF: 0; RMF: 88; Prob 7.38%; Lib: mona-export-gnps; ID: 5240.

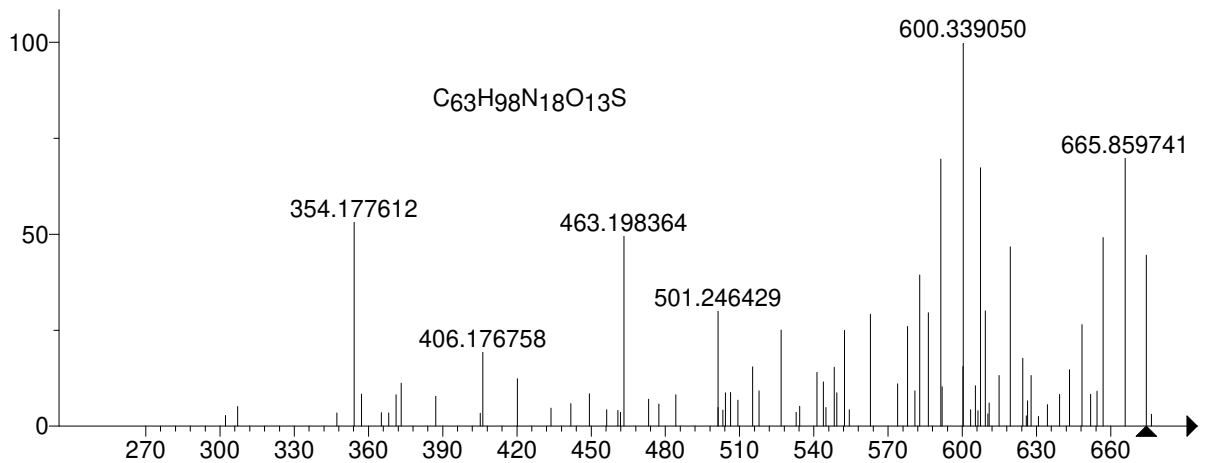

Unknown: Unknown (10.38\_563.2444m/z)  
Compound in Library Factor = 0

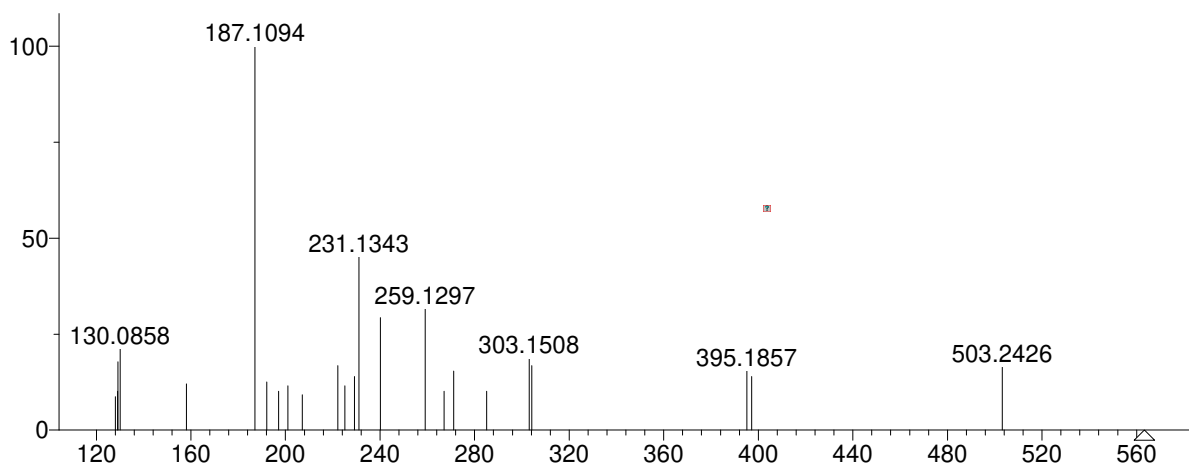

Hit 1 : Elastase Substrate IV, Colorimetric [M+H]<sup>+</sup> QTOF 33V P=563.2  
C<sub>25</sub>H<sub>34</sub>N<sub>6</sub>O<sub>9</sub>; MF: 0; RMF: 12; Prob 100.0%; Lib: nist\_msms2; ID: 39070.

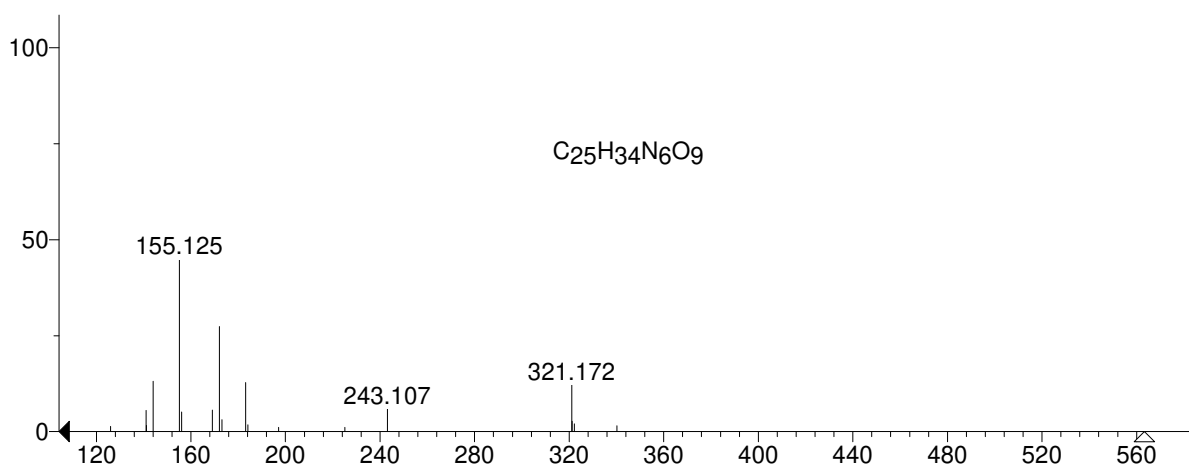

\*\* Search Report Page 1 of 2 \*\*

Unknown: Unknown (10.39\_725.1934m/z)  
Compound in Library Factor = -1194

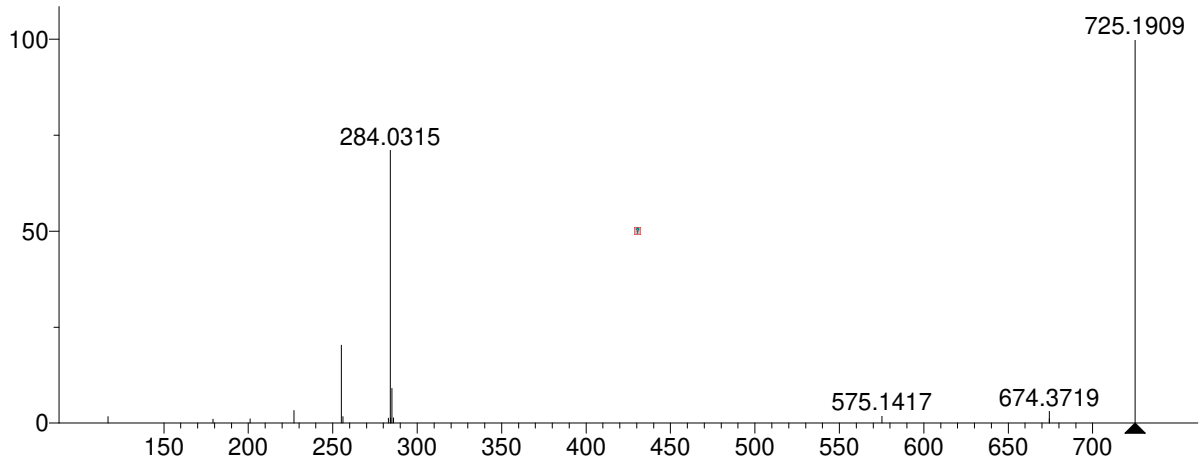

Hit 1 : NCGC00385688-0113-[(2S,3R,4S,5S,6R)-3-[(2S,3R,4R)-3,4-dihydroxy-4-(hydroxymethyl)oxolan-2-yl]oxy-4-C32H38O19; MF: 266; RMF: 550; Prob 77.3%; Lib: msms-neg-gnps; ID: 1013.

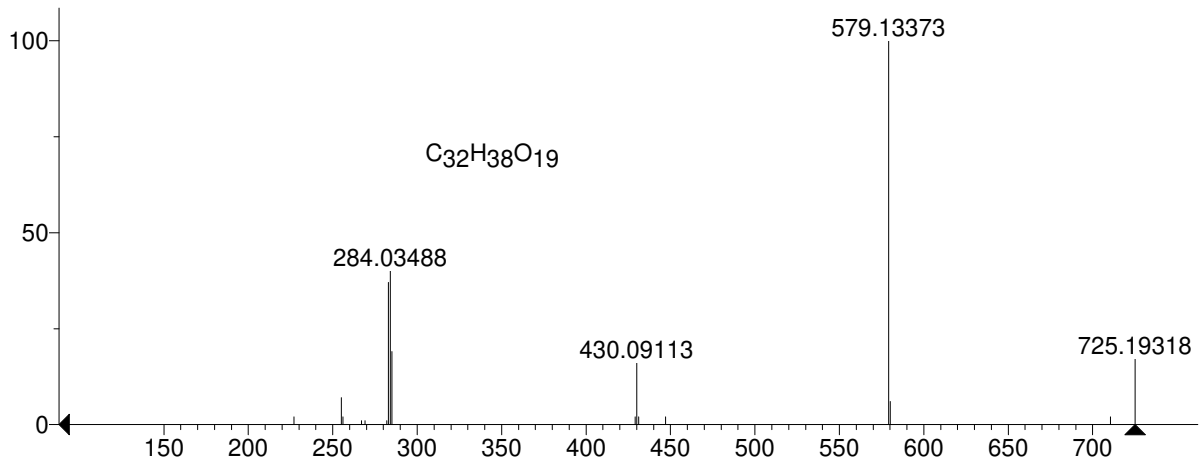

Hit 2 : Unknown (carbon number 32); PlaSMA ID-1951 [M-H]<sup>-</sup> P=725.2  
C<sub>32</sub>H<sub>38</sub>O<sub>19</sub>; MF: 222; RMF: 721; Prob 16.8%; Lib: biomsms-neg-plasma; ID: 1610.

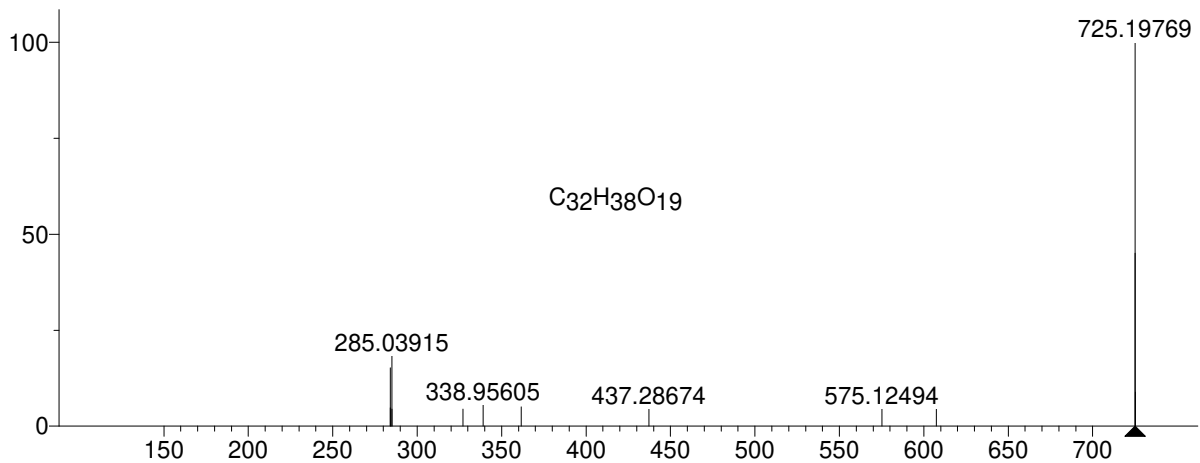

\*\* Search Report Page 2 of 2 \*\*

Hit 3 : NCGC00380680-0115-hydroxy-3-[(2S,3R,4R,5S)-3-hydroxy-5-(hydroxymethyl)-4-[(2S,3R,4S,5S,6R)-3,4,5-1  
C<sub>32</sub>H<sub>38</sub>O<sub>19</sub>; MF: 173; RMF: 457; Prob 3.44%; Lib: msms-neg-gnps; ID: 1331.

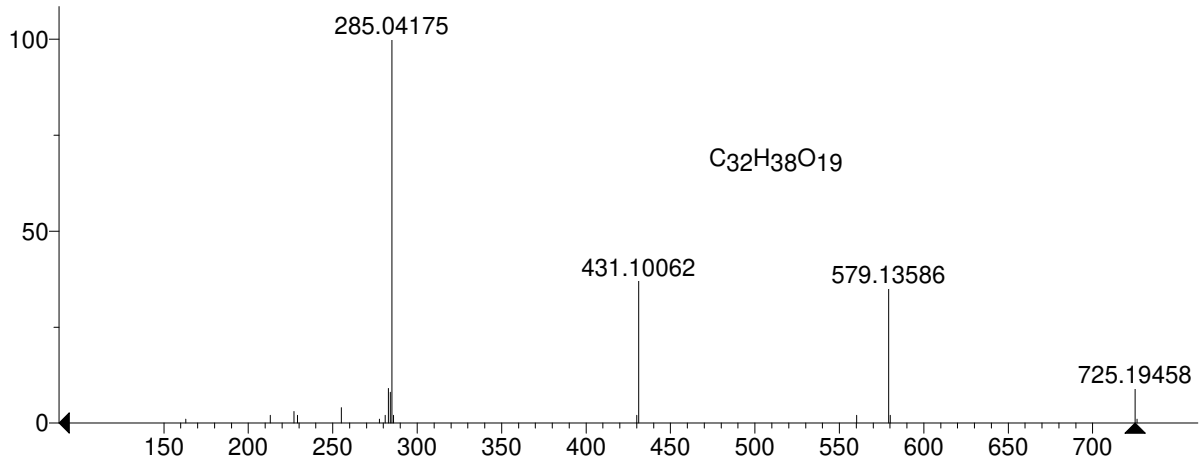

Hit 4 : 5-hydroxy-3-[(2S,3R,4R,5S)-3-hydroxy-5-(hydroxymethyl)-4-[(2S,3R,4S,5S,6R)-3,4,5-trihydroxy-6-(hydroxy  
C<sub>32</sub>H<sub>38</sub>O<sub>19</sub>; MF: 161; RMF: 428; Prob 2.29%; Lib: anthocyanins mona; ID: 5277.

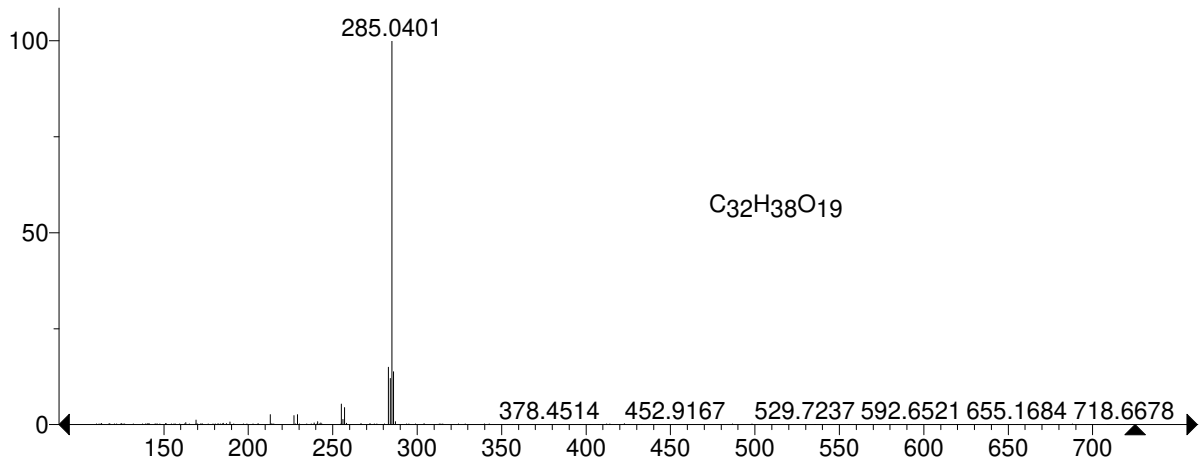

Hit 5 : apigenin 6/8C-hexoside-8/6C-pentoside + hexose (flavonoid) [M-H]<sup>-</sup> P=725.2  
C<sub>32</sub>H<sub>38</sub>O<sub>19</sub>; MF: 12; RMF: 569; Prob 0.06%; Lib: phytofrag2018\_final\_060219; ID: 142.

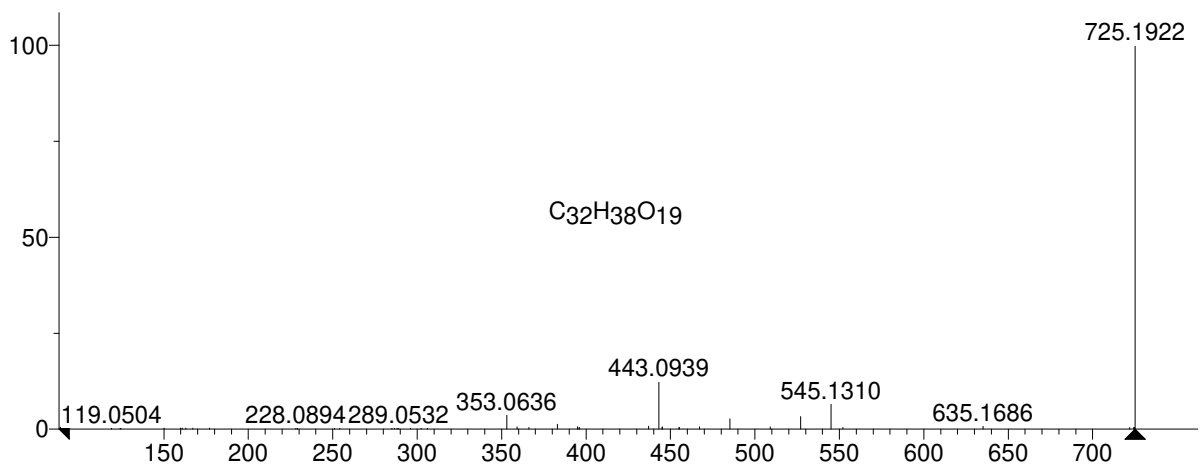

\*\* Search Report Page 1 of 1 \*\*

Unknown: Unknown (10.40\_340.1857m/z)  
Compound in Library Factor = -246

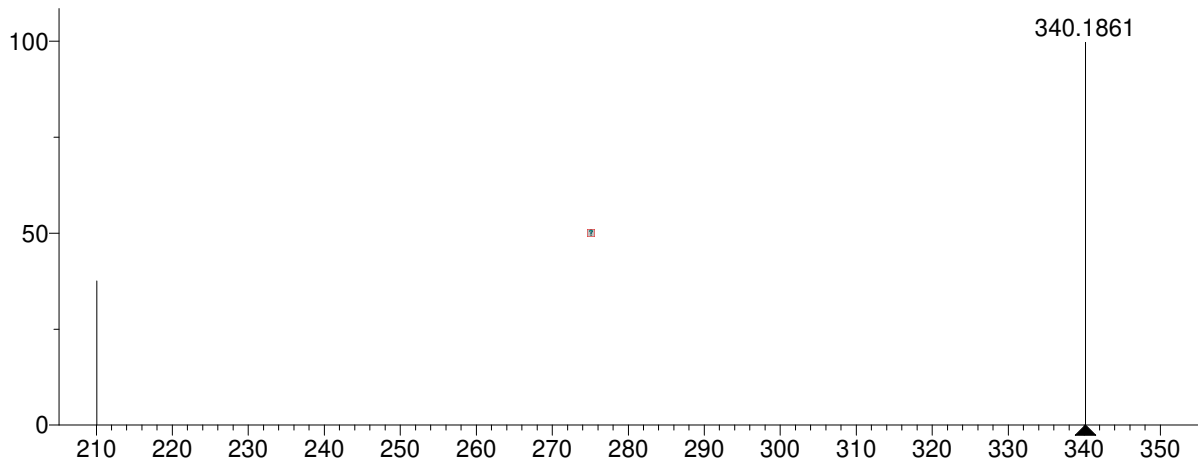

Hit 1 : Cyclohexanecarboxylic acid, 1-phenyl-, 2-(4-morpholinyl)ethyl ester [M+Na]<sup>+</sup> HCD 13V P=340.2  
C<sub>19</sub>H<sub>27</sub>NO<sub>3</sub>; MF: 266; RMF: 851; Prob 100.0%; CAS: 138847-85-5; Lib: nist\_msms; ID: 423006.

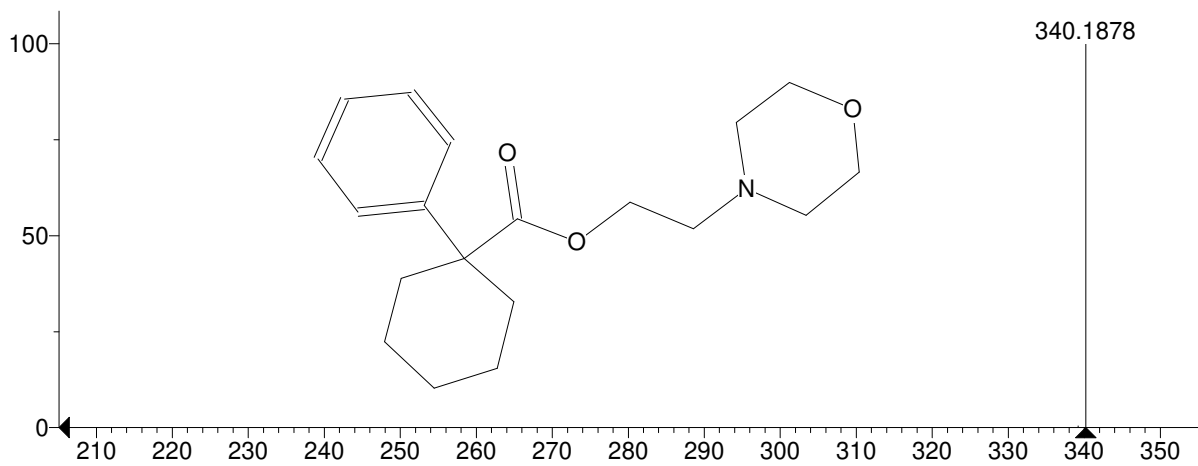



Unknown: Unknown (10.41\_401.0530m/z)  
Compound in Library Factor = 0

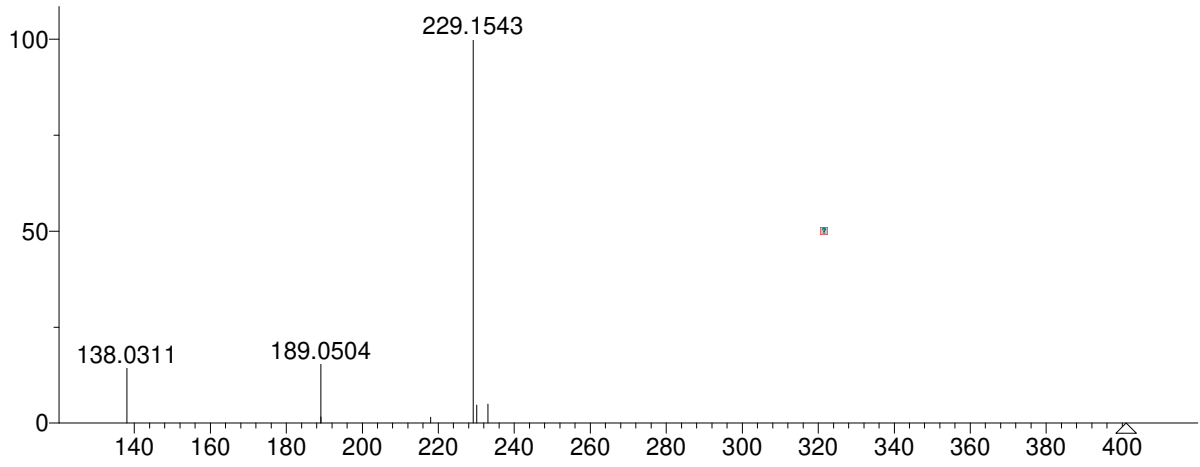

Unknown: Unknown (10.43\_311.1390m/z)  
Compound in Library Factor = -1848

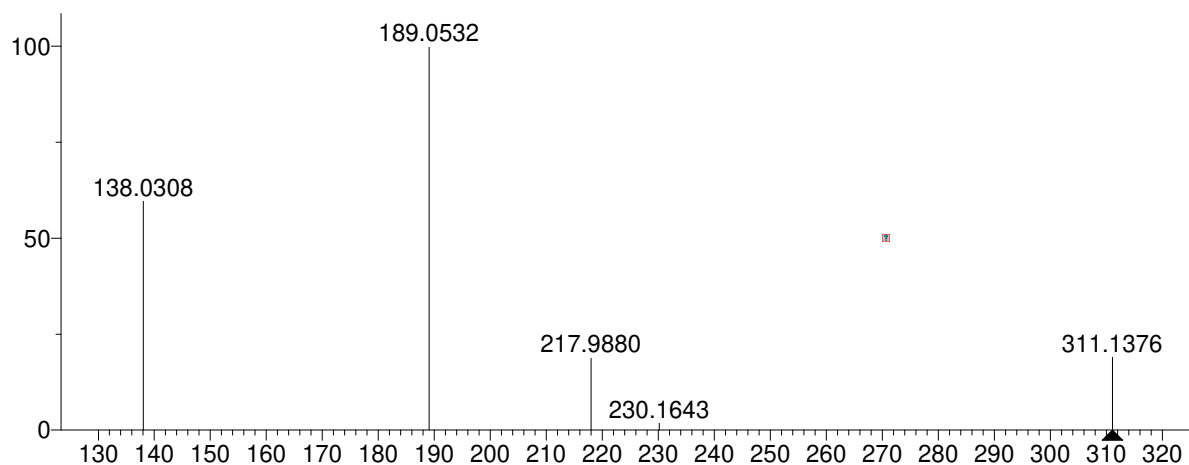

Hit 1 : Dodecyl phosphate [M-H+2Na]<sup>+</sup> HCD 12V P=311.1  
C<sub>12</sub>H<sub>27</sub>O<sub>4</sub>P; MF: 54; RMF: 308; Prob 62.4%; CAS: 2627-35-2; Lib: nist\_msms; ID: 216267.

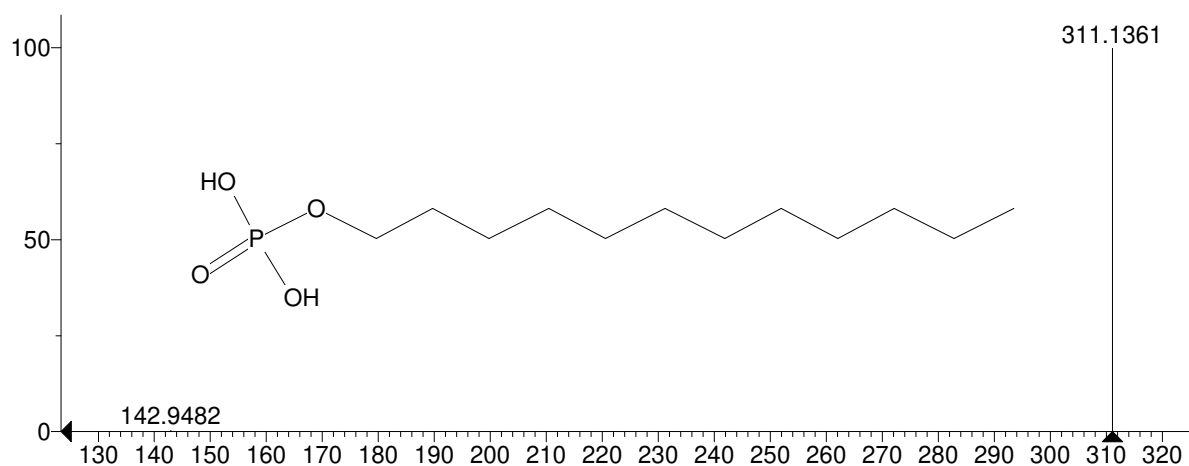

Hit 2 : 1H-Pyrrole-3-propanoic acid, 5-[(1,2-dihydro-2-oxo-3H-indol-3-ylidene)methyl]-2,4-dimethyl- [M+H]<sup>+</sup> HCD  
C<sub>18</sub>H<sub>18</sub>N<sub>2</sub>O<sub>3</sub>; MF: 24; RMF: 290; Prob 17.4%; CAS: 252916-29-3; Lib: nist\_msms; ID: 419355.

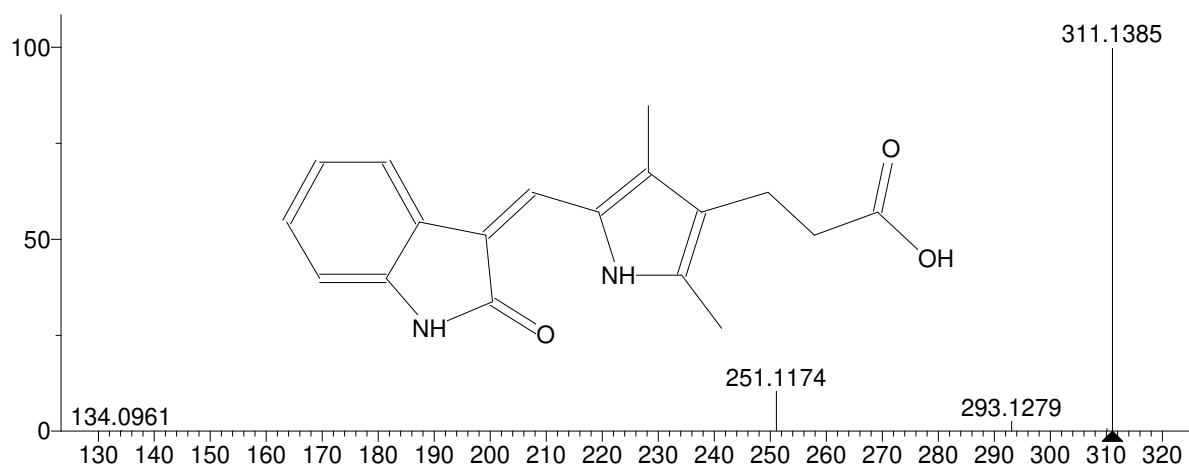

\*\* Search Report Page 2 of 2 \*\*

Hit 3 : Phe-Phe [M-H]<sup>-</sup> HCD 14eV P=311.1  
C<sub>18</sub>H<sub>20</sub>N<sub>2</sub>O<sub>3</sub>; MF: 15; RMF: 293; Prob 12.6%; CAS: 2577-40-4; Lib: nist\_msms; ID: 570068.

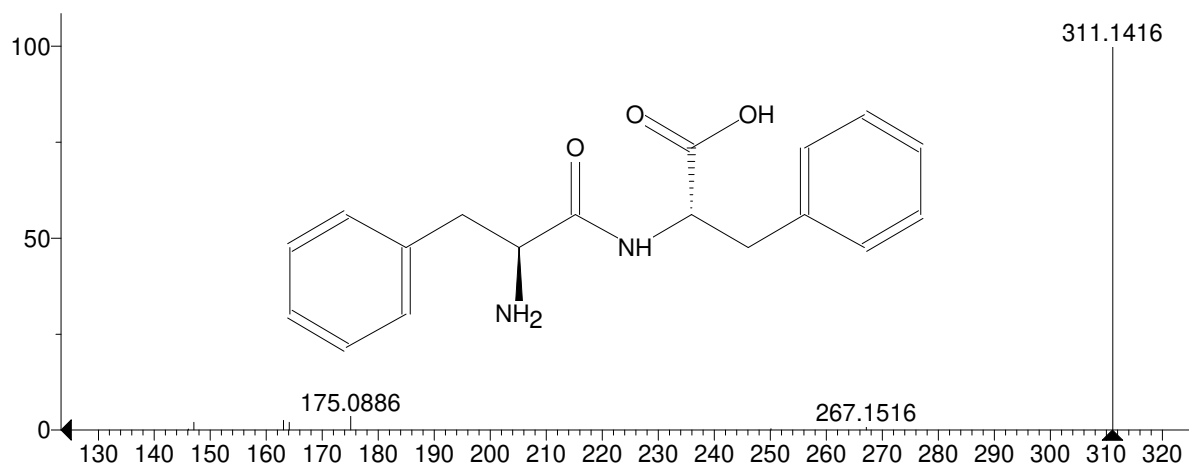

Hit 4 : Lipothiazole C [M+H]<sup>+</sup> P=311.1  
C<sub>15</sub>H<sub>22</sub>N<sub>2</sub>O<sub>3</sub>S; MF: 0; RMF: 50; Prob 7.63%; Lib: mona-export-gnps; ID: 4834.

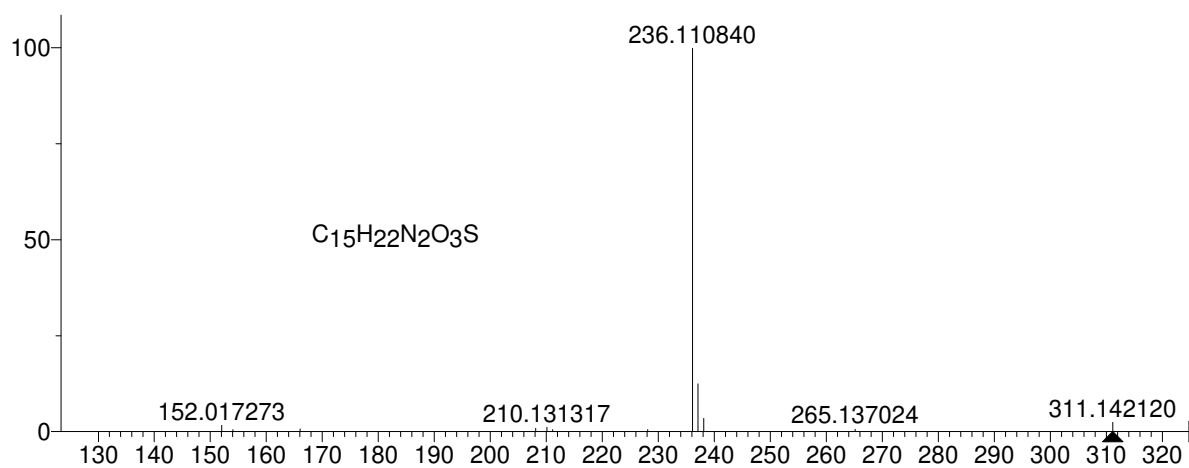

Unknown: Unknown (10.43\_399.2120m/z)  
Compound in Library Factor = -3273

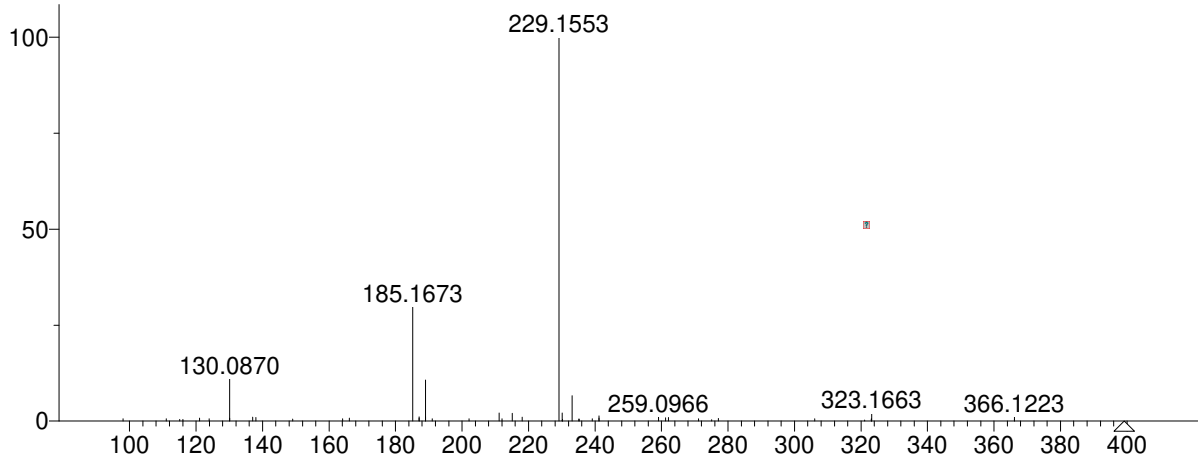

Hit 1 : His-Ser-Arg [M+H]<sup>+</sup> QTOF 40V P=399.2  
C15H26N8O5; MF: 1; RMF: 25; Prob 25.7%; Lib: nist\_msms; ID: 51161.

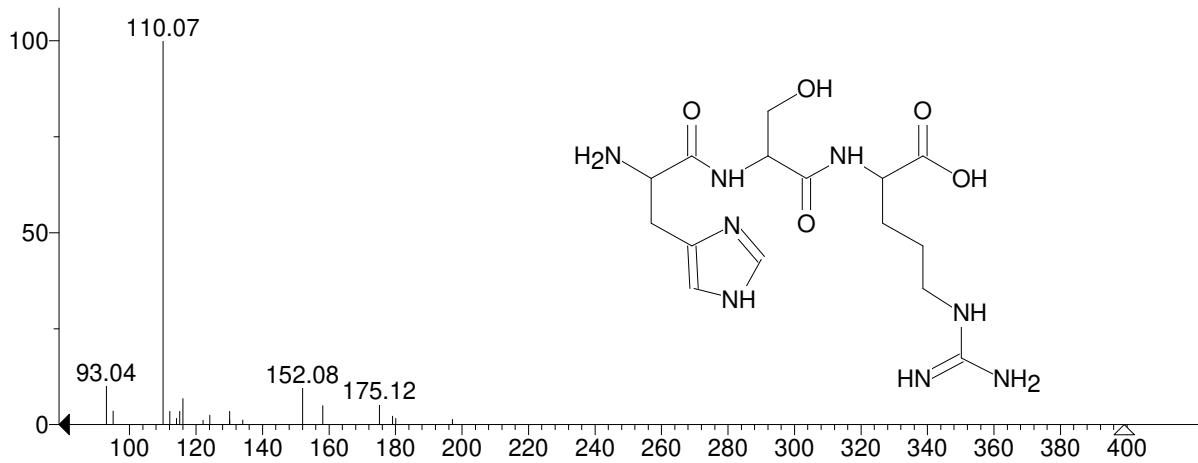

Hit 2 : N-Desmethylvinblastine [M+2H]<sup>2+</sup> HCD 114V P=399.2  
C45H56N4O9; MF: 0; RMF: 33; Prob 24.8%; CAS: 18172-50-4; Lib: nist\_msms; ID: 435598.

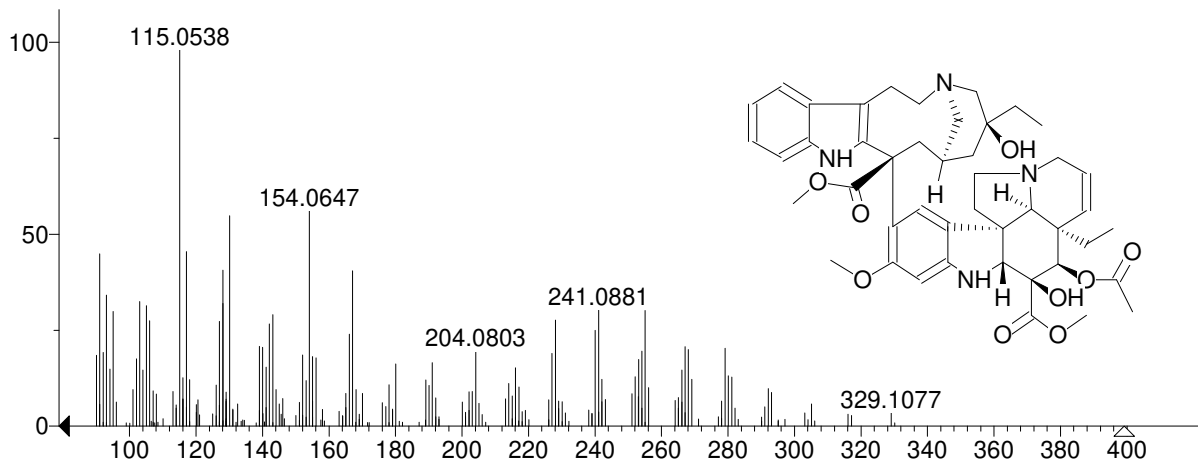

Hit 3 : Ser-His-Arg [M+H]<sup>+</sup> QTOF 30V P=399.2  
C<sub>15</sub>H<sub>26</sub>N<sub>8</sub>O<sub>5</sub>; MF: 0; RMF: 21; Prob 24.8%; Lib: nist\_msms; ID: 53772.

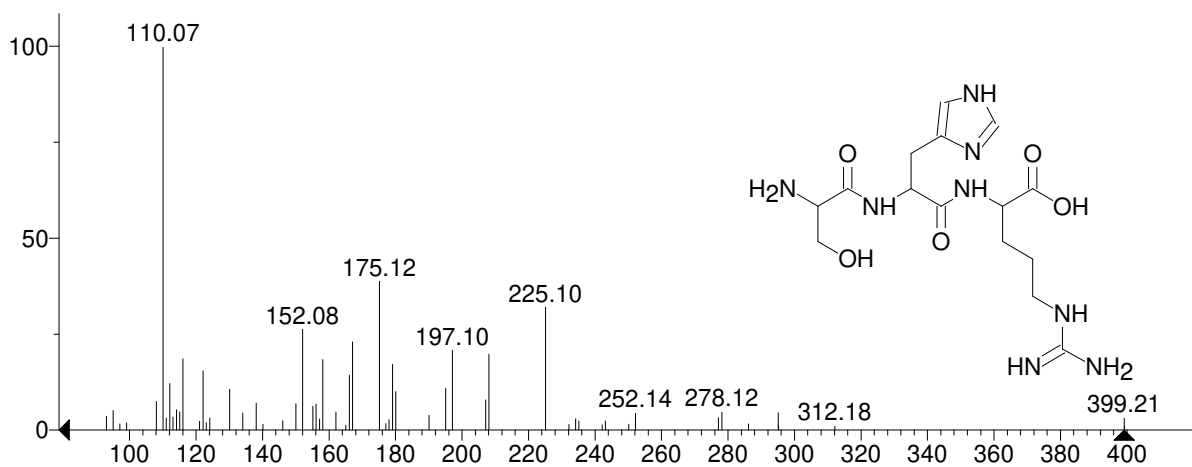

Hit 4 : NCGC00380576-01\_C<sub>22</sub>H<sub>32</sub>O<sub>5</sub>\_2-Pentenoic acid, 3-[(acetyloxy)methyl]-5-[(1S,4aR,8aR)-2-formyl-1,4,4a,

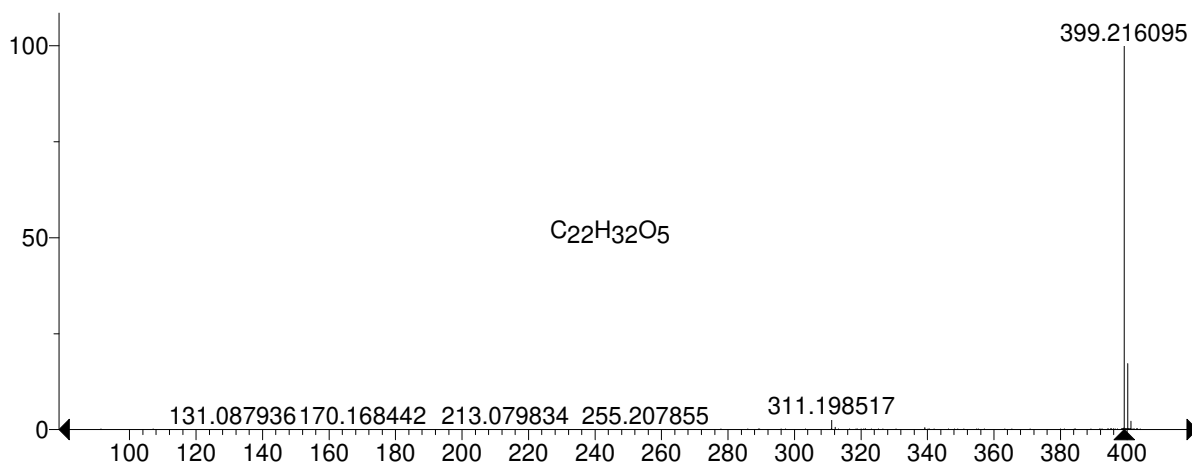

Unknown: Unknown (10.44\_419.0640m/z)  
Compound in Library Factor = -3273

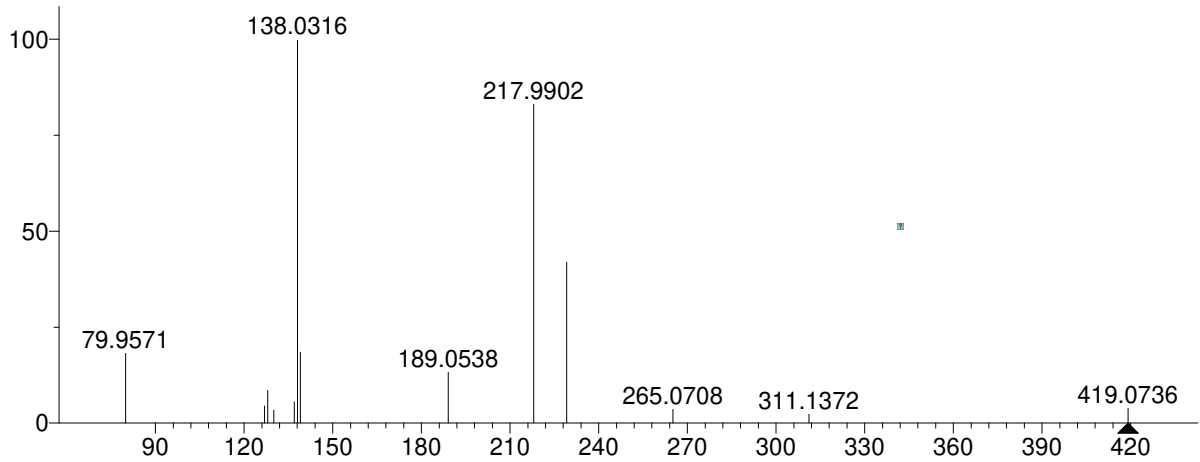

Hit 1 : D-Saccharic acid [2M-H]- HCD 2V P=419.1  
C6H10O8; MF: 10; RMF: 156; Prob 57.9%; CAS: 87-73-0; Lib: nist\_msms; ID: 303445.

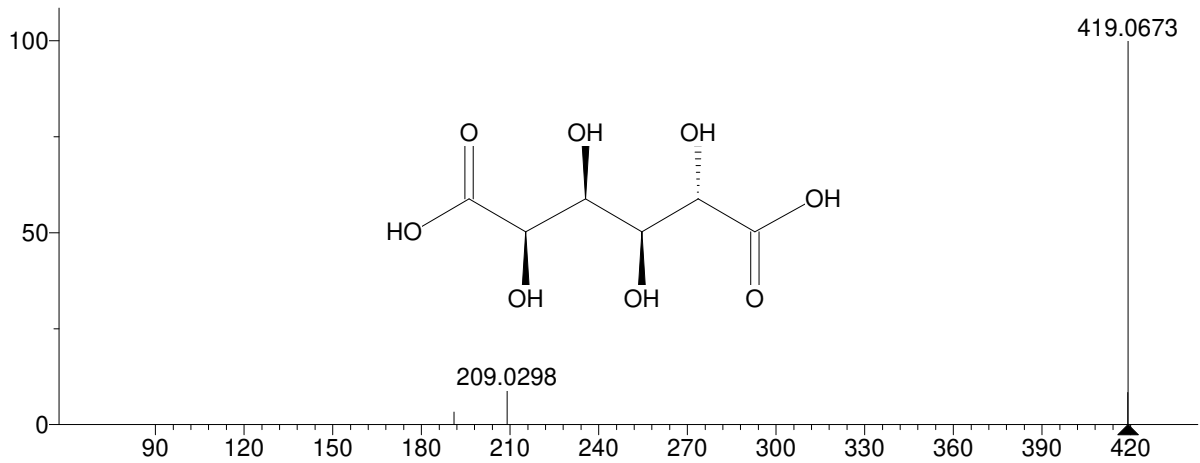

Hit 2 : Tefluthrin [M+H]+ HCD 8V P=419.1  
C17H14ClF7O2; MF: 1; RMF: 100; Prob 42.1%; CAS: 79538-32-2; Lib: nist\_msms; ID: 474592.

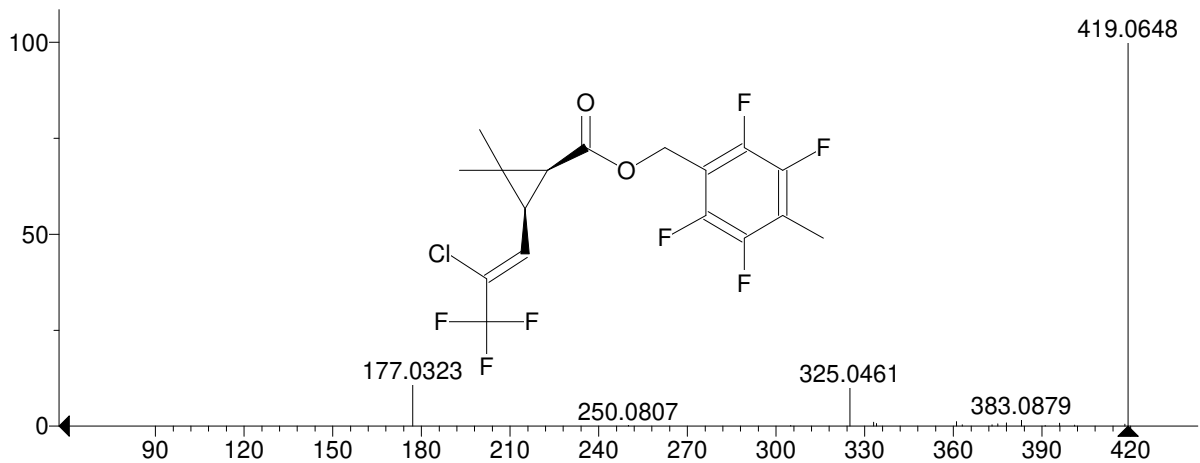

Unknown: Unknown (10.44\_435.1747m/z)  
Compound in Library Factor = 0

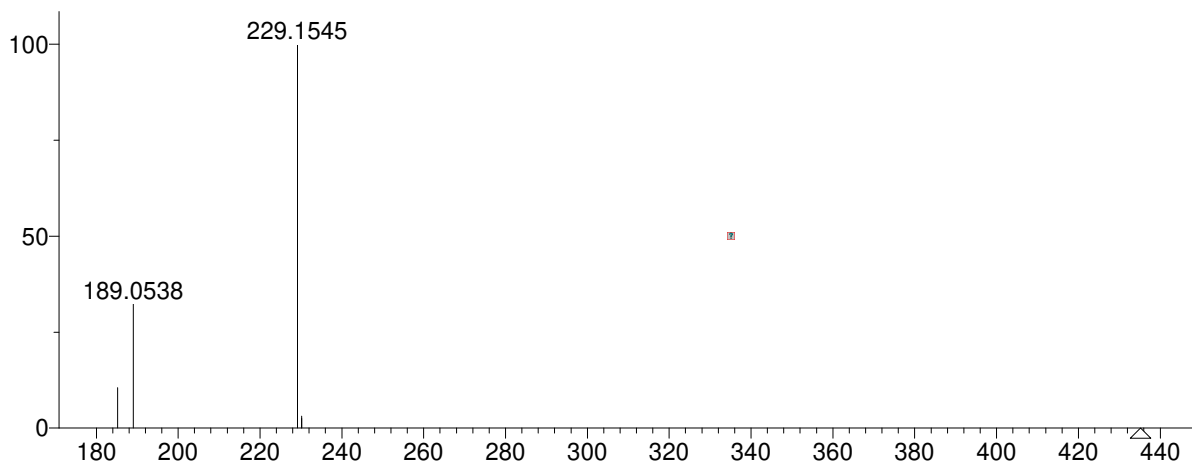

Hit 1 : 2,4-dihydroxy-5-methoxy-1",6",8"-trimethylspiro[bis(oxolane)-3,2':5',7"-[3]oxatricyclo[6.3.1.0a^",A^1A^2]c  
C<sub>21</sub>H<sub>32</sub>O<sub>7</sub>; MF: 0; RMF: 78; Prob 100.0%; Lib: mona-export-vf-npl\_qexactive; ID: 10625.

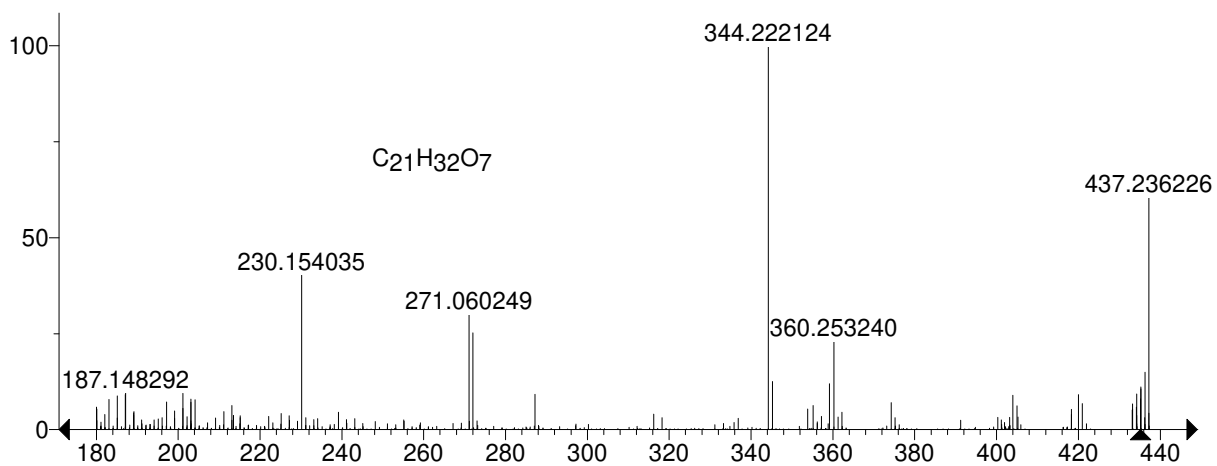

Unknown: Unknown (10.45\_443.1559m/z)  
Compound in Library Factor = 0

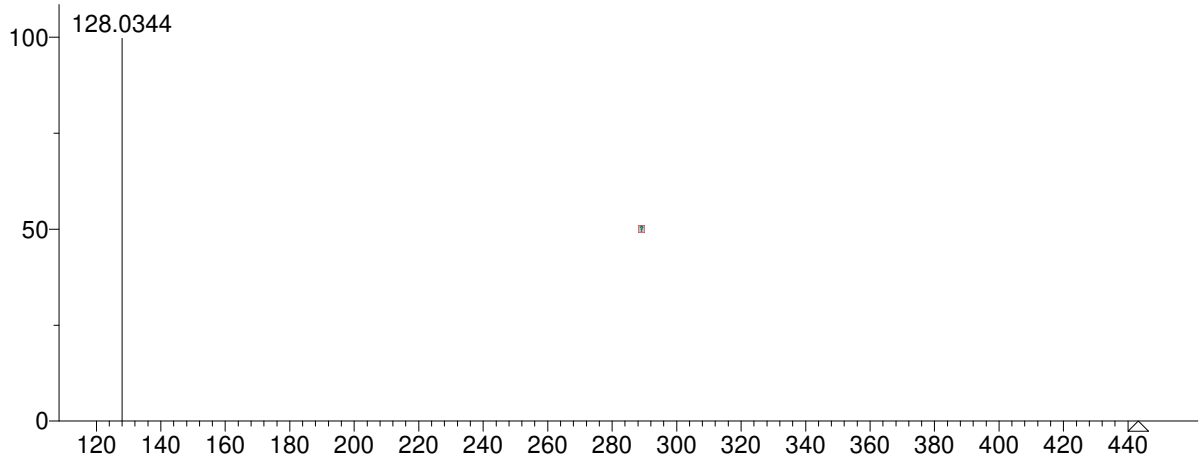



\*\* Search Report Page 1 of 2 \*\*

Unknown: Unknown (10.47\_307.0484m/z)  
Compound in Library Factor = -885

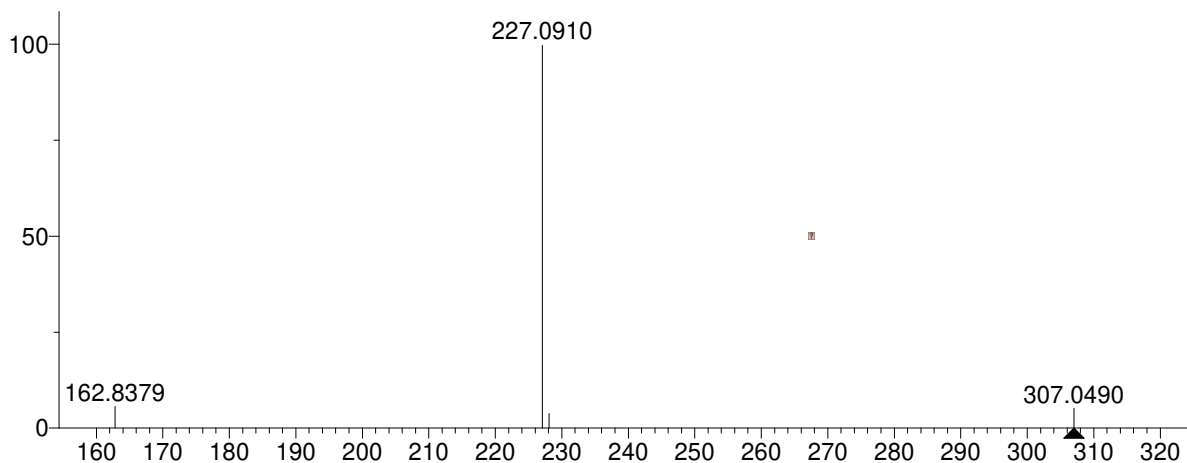

Hit 1 : 2"-Galloylhyperin [M-2H]2- HCD 6V P=307  
C28H24O16; MF: 143; RMF: 839; Prob 89.4%; CAS: 53209-27-1; Lib: nist\_msms; ID: 241484.

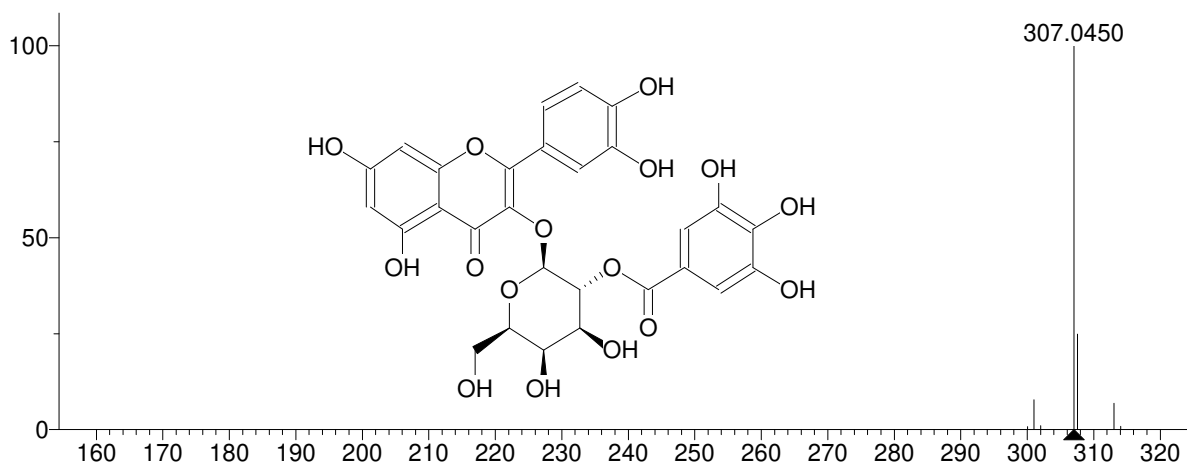

Hit 2 : 3,5-Dihydroxybenzoic acid [2M-H]- HCD 1V P=307  
C7H6O4; MF: 54; RMF: 212; Prob 7.72%; CAS: 99-10-5; Lib: nist\_msms; ID: 297168.

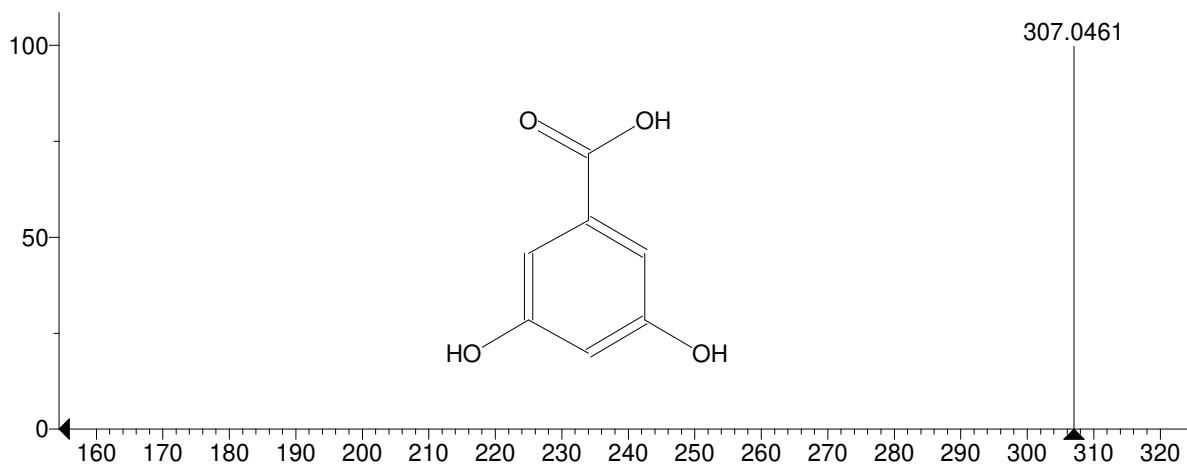

Hit 3 : Taurolidine [M+Na]<sup>+</sup> HCD 6V P=307.1  
C<sub>7</sub>H<sub>16</sub>N<sub>4</sub>O<sub>4</sub>S<sub>2</sub>; MF: 16; RMF: 202; Prob 1.84%; CAS: 19388-87-5; Lib: nist\_msms; ID: 548490.

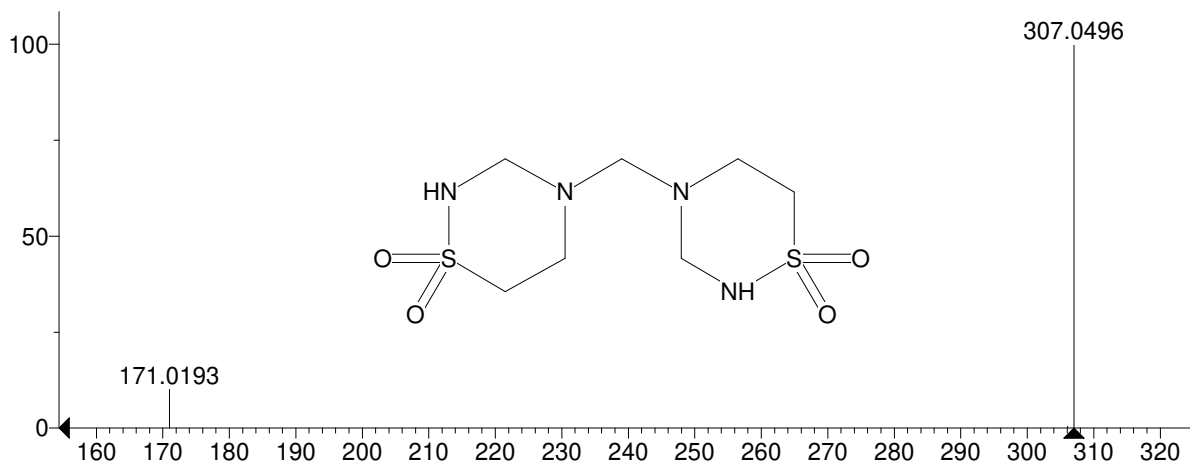

Hit 4 : methyl 1-oxo-4-(1H-pyrrol-2-yl)-2H-isoquinoline-3-carboxylate [M+K]<sup>+</sup> 35HCD P=307  
C<sub>15</sub>H<sub>12</sub>N<sub>2</sub>O<sub>3</sub>; MF: 0; RMF: 9; Prob 1.06%; Lib: mona-export-vf-npl\_qexactive; ID: 19435.

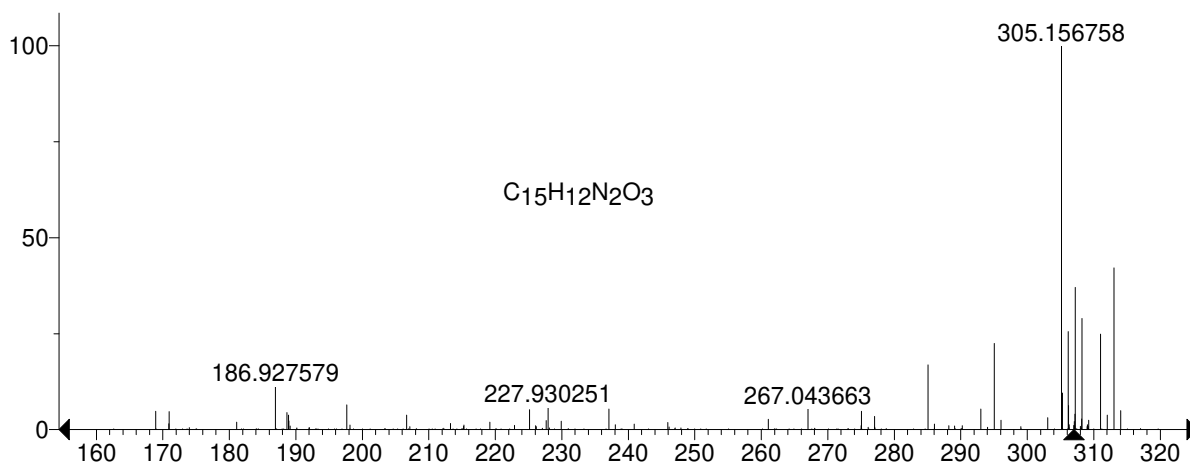

Unknown: Unknown (10.48\_387.0741m/z)  
Compound in Library Factor = -2176

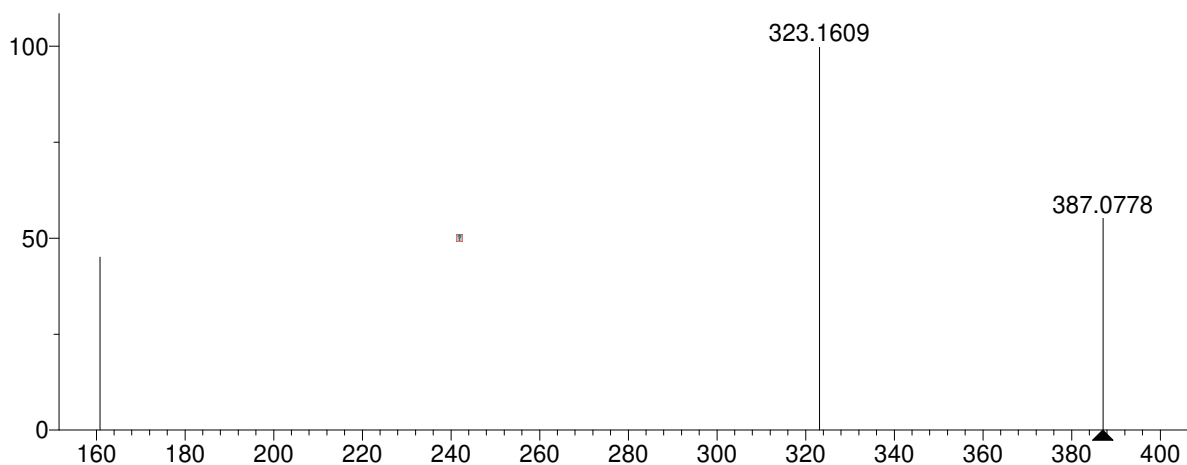

Hit 1 : Sulfometuron methyl [M+Na]<sup>+</sup> HCD 7V P=387.1  
C<sub>15</sub>H<sub>16</sub>N<sub>4</sub>O<sub>5</sub>S; MF: 50; RMF: 503; Prob 77.3%; CAS: 74222-97-2; Lib: nist\_msms; ID: 490853.

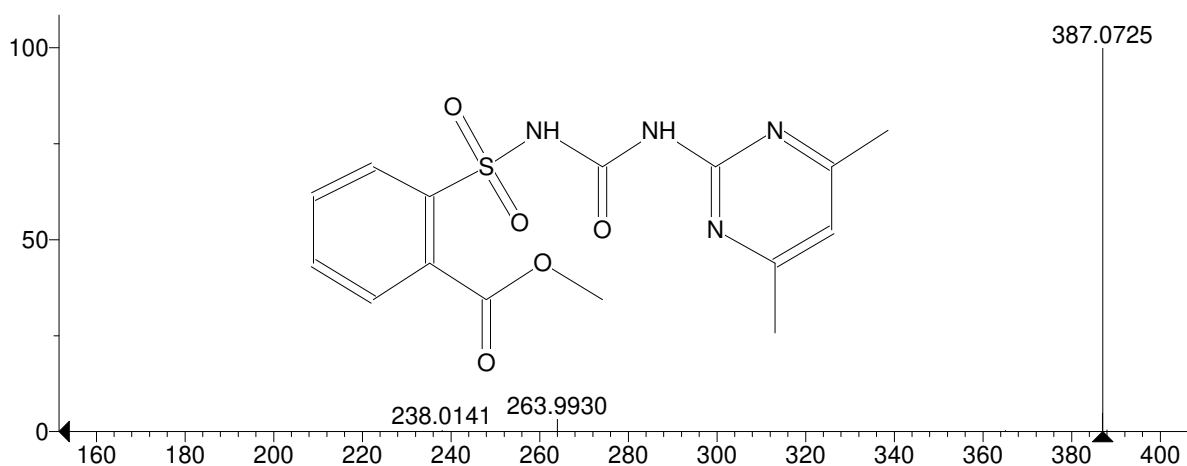

Hit 2 : 3-Isoxazolecarboxamide, 5-(5-chloro-2,4-dihydroxyphenyl)-N-ethyl-4-(4-methoxyphenyl)- [M-H]<sup>-</sup> HCD 11V  
C<sub>19</sub>H<sub>17</sub>ClN<sub>2</sub>O<sub>5</sub>; MF: 23; RMF: 480; Prob 22.7%; CAS: 747413-08-7; Lib: nist\_msms; ID: 274834.

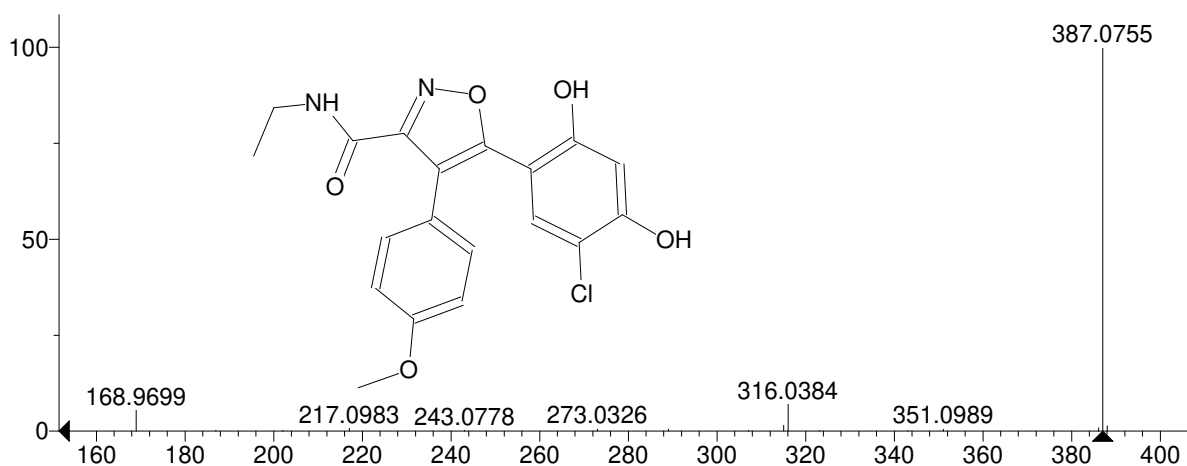

Unknown: Unknown (10.48\_749.3129m/z)  
Compound in Library Factor = 0

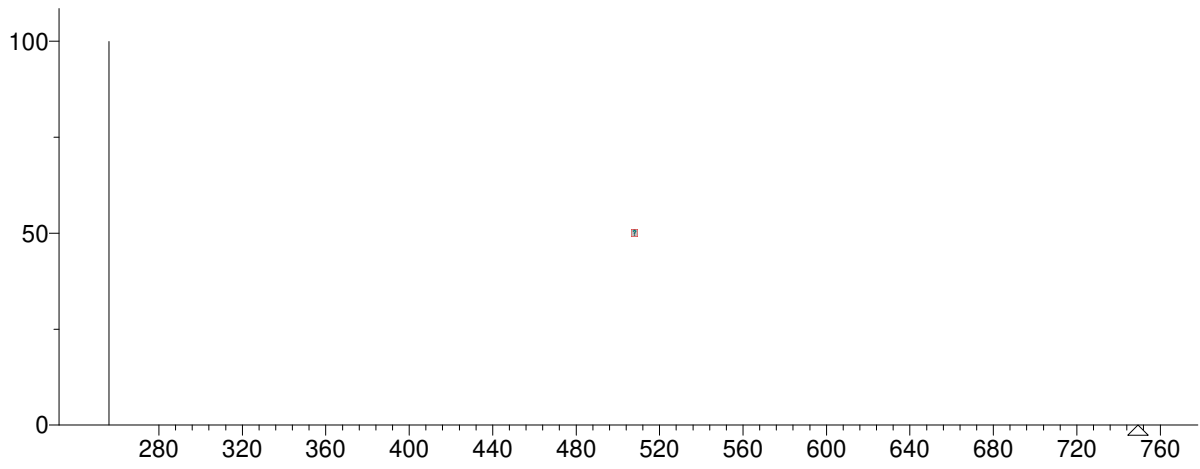

Unknown: Unknown (10.49\_298.1278m/z)  
Compound in Library Factor = 0

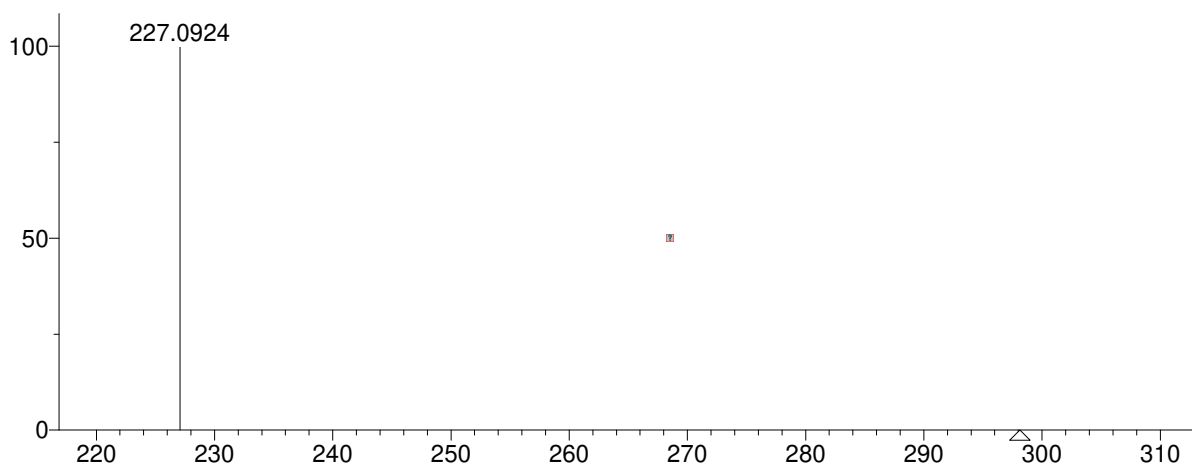

Hit 1 : (3,4,5-trihydroxy-6-methyloxan-2-yl) 2-(methylamino)benzoate [M+H]<sup>+</sup> 35HCD P=298.1  
C<sub>14</sub>H<sub>19</sub>NO<sub>6</sub>; MF: 0; RMF: 16; Prob 100.0%; Lib: mona-export-vf-npl\_qexactive; ID: 19189.

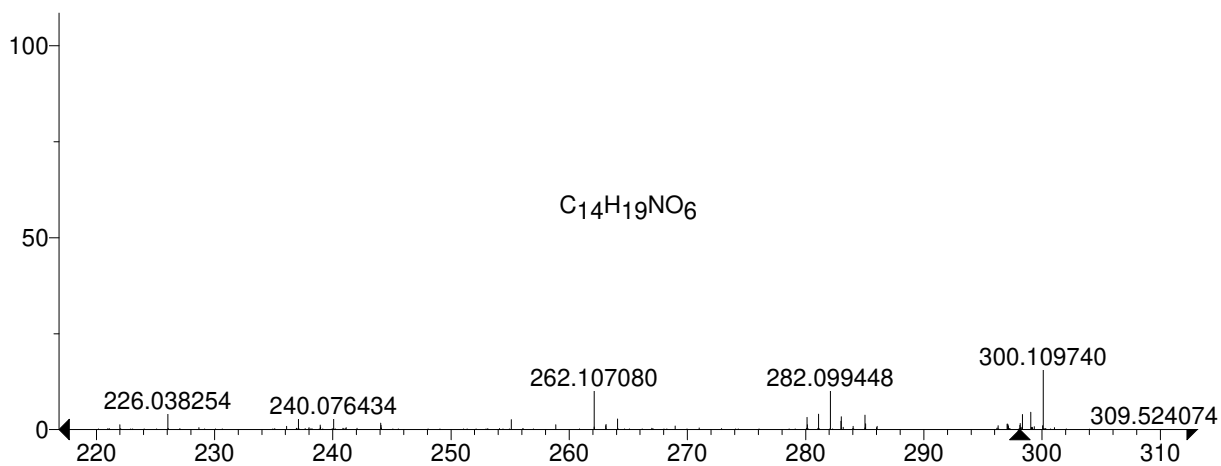

Unknown: Unknown (10.49\_358.1971m/z)  
Compound in Library Factor = 0

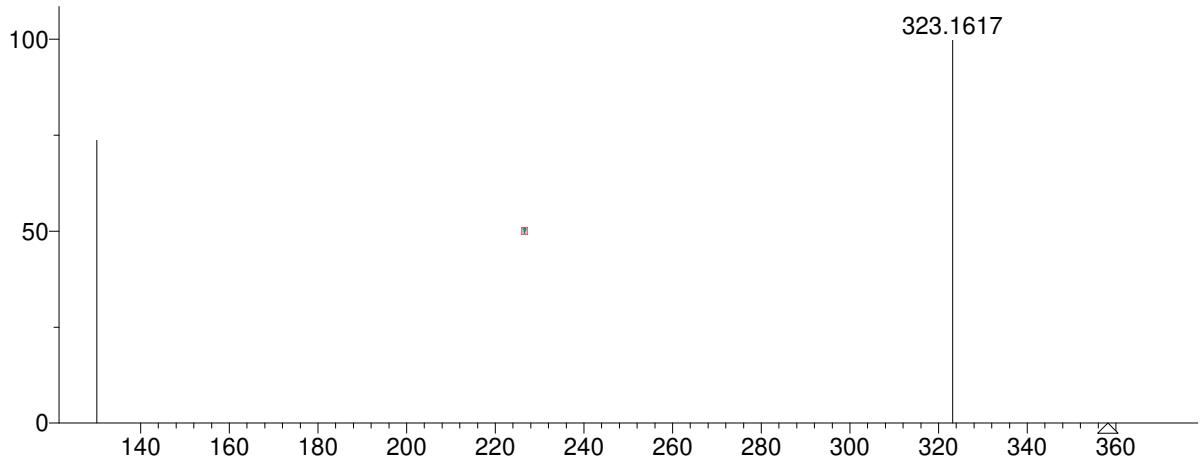

Unknown: Unknown (10.51\_528.2541m/z)  
Compound in Library Factor = 0

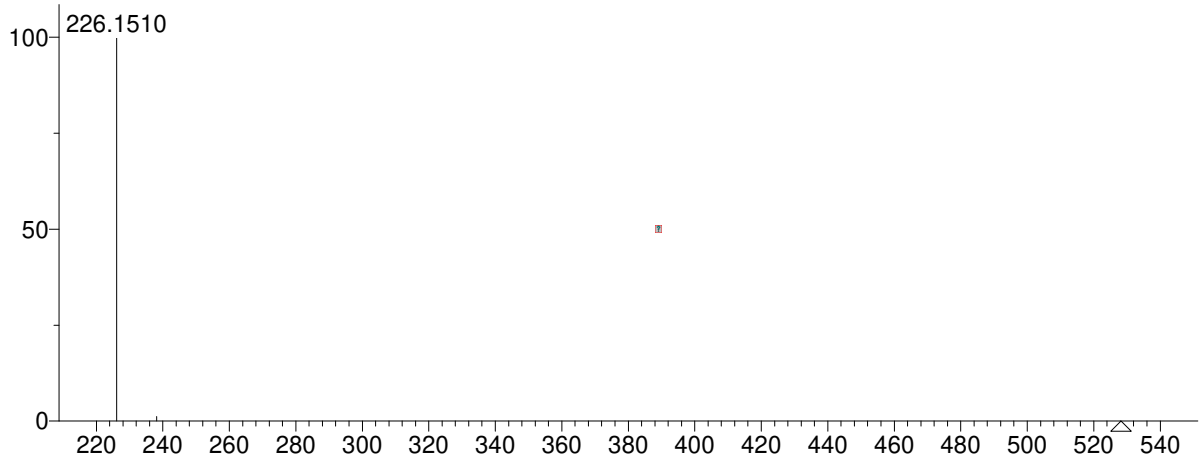

Unknown: Unknown (10.54\_338.1711m/z)  
Compound in Library Factor = -3273

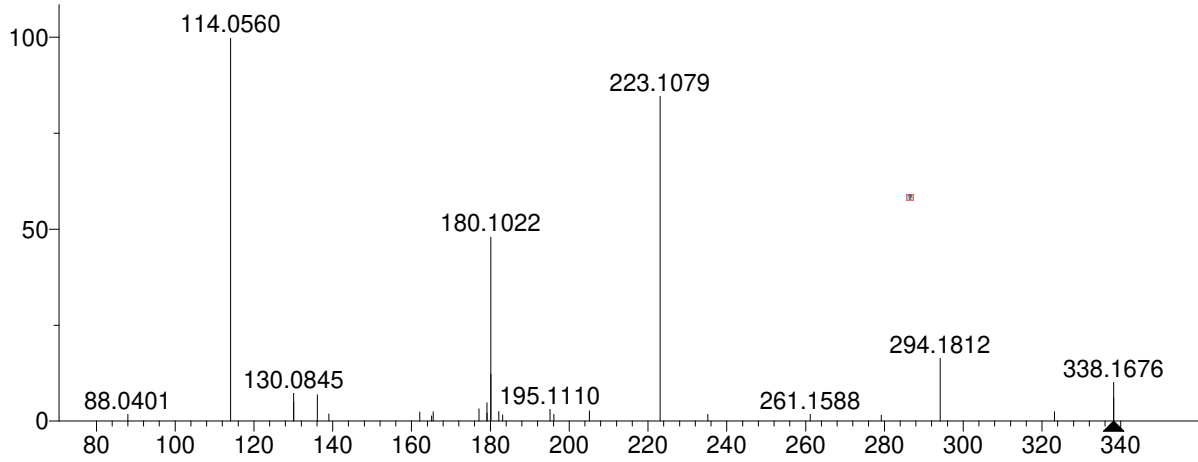

Hit 1 : DTyr-Val-Gly [M+H]<sup>+</sup> HCD 6eV P=338.2  
C<sub>16</sub>H<sub>23</sub>N<sub>3</sub>O<sub>5</sub>; MF: 6; RMF: 154; Prob 50.0%; CAS: 86030-52-6; Lib: nist\_msms; ID: 564526.

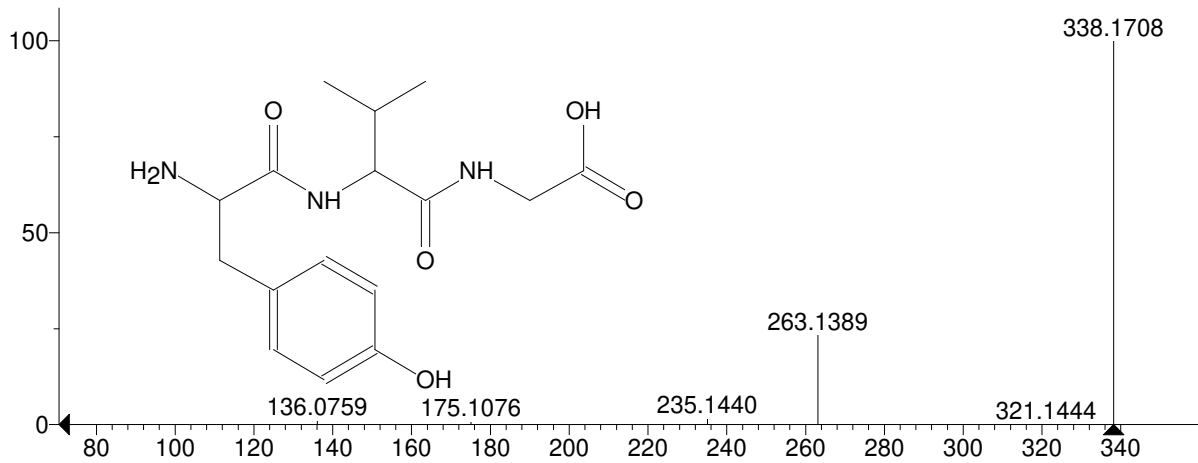

Hit 2 : DTyr-Val-Gly [M+H]<sup>+</sup> HCD 6eV P=338.2  
C<sub>16</sub>H<sub>23</sub>N<sub>3</sub>O<sub>5</sub>; MF: 6; RMF: 154; Prob 50.0%; Lib: nist\_msms2; ID: 56843.

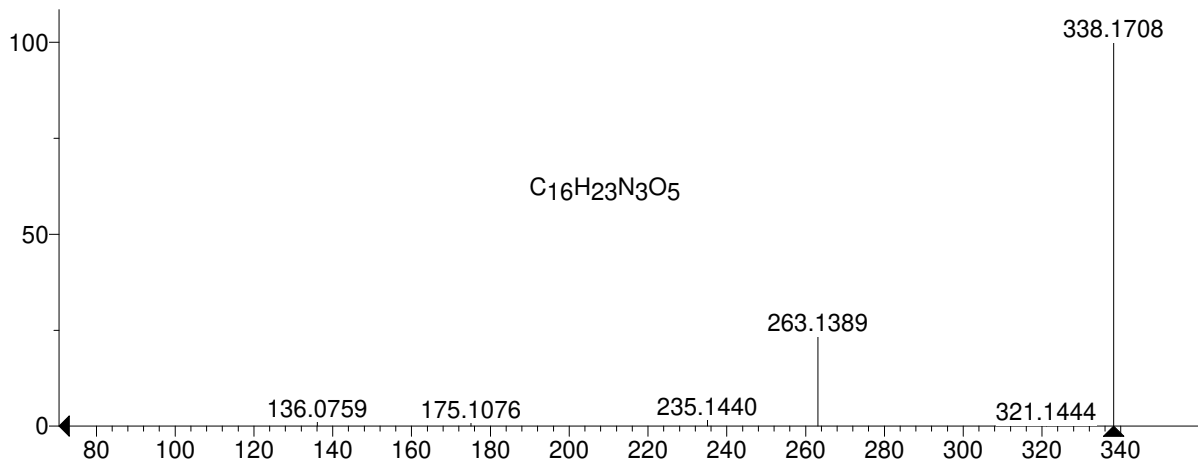



\*\* Search Report Page 1 of 2 \*\*

Unknown: Unknown (10.56\_249.0751m/z)  
Compound in Library Factor = -295

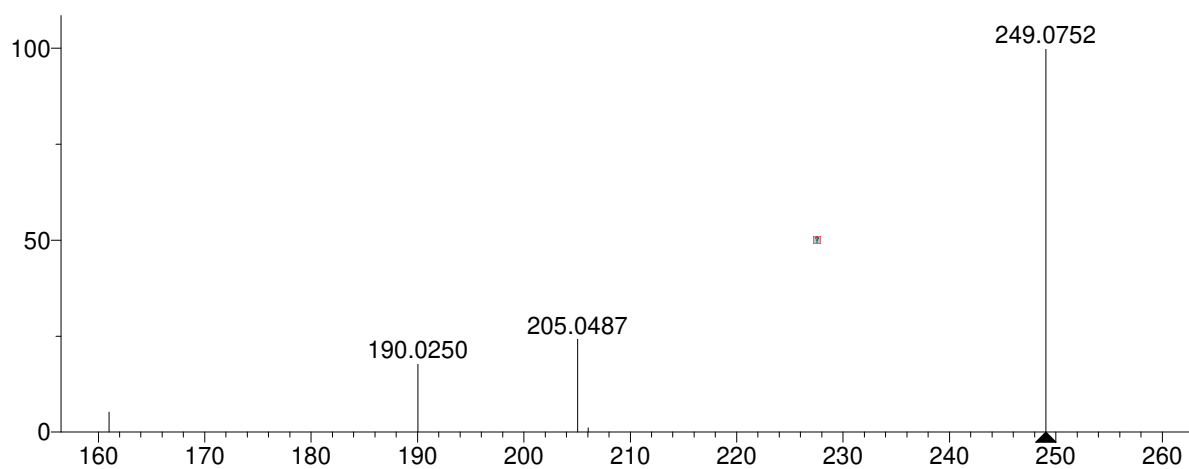

Hit 1 : Genipin [M+Na]<sup>+</sup> HCD 2V P=249.1  
C<sub>11</sub>H<sub>14</sub>O<sub>5</sub>; MF: 362; RMF: 997; Prob 98.5%; CAS: 6902-77-8; Lib: nist\_msms; ID: 163060.

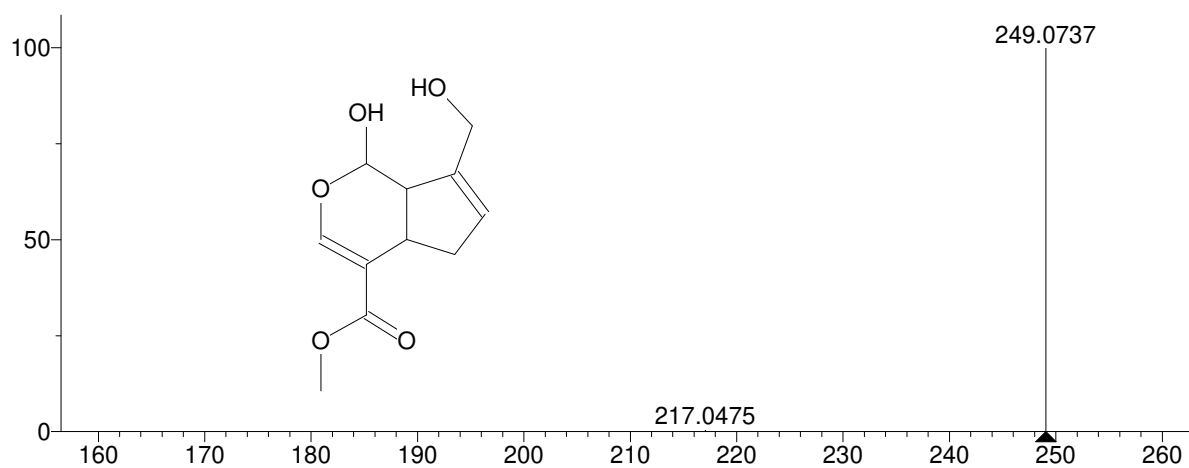

Hit 2 : Ethyl 8-methoxycoumarin-3-carboxylate [M+H]<sup>+</sup> HCD 4V P=249.1  
C<sub>13</sub>H<sub>12</sub>O<sub>5</sub>; MF: 159; RMF: 779; Prob 0.98%; CAS: 1729-02-8; Lib: nist\_msms; ID: 111106.

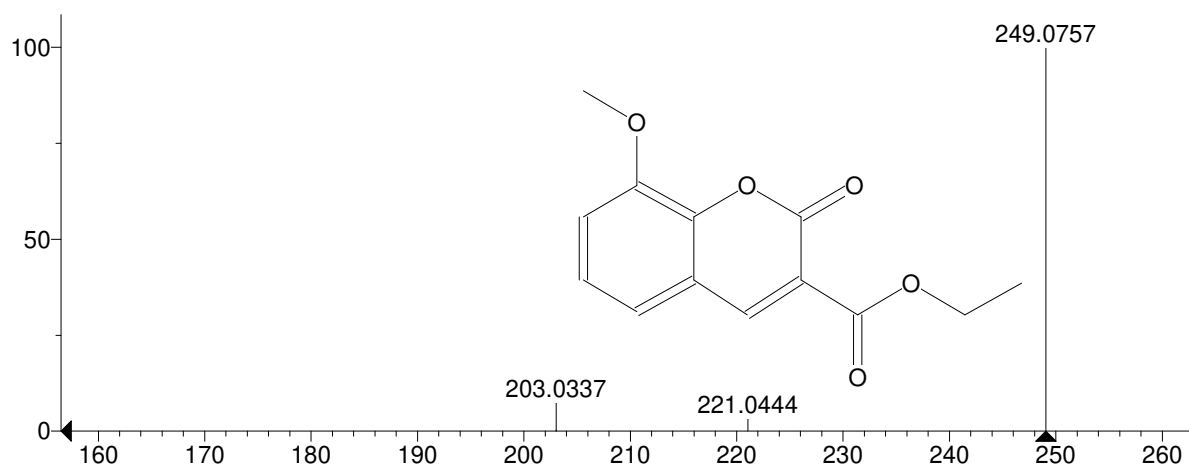

\*\* Search Report Page 2 of 2 \*\*

Hit 3 : Methyl 7-methoxycoumarin-4-acetate [M+H]<sup>+</sup> HCD 14V P=249.1  
C<sub>13</sub>H<sub>12</sub>O<sub>5</sub>; MF: 113; RMF: 778; Prob 0.20%; CAS: 62935-73-3; Lib: nist\_msms; ID: 111496.

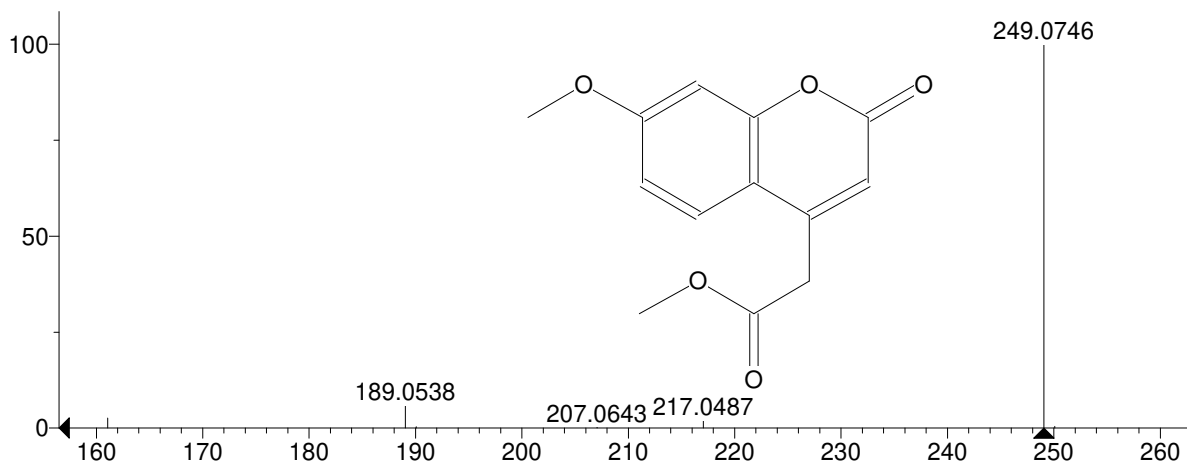

Hit 4 : 8-Acetyl-6,7-dimethoxycoumarin [M+H]<sup>+</sup> HCD 9V P=249.1  
C<sub>13</sub>H<sub>12</sub>O<sub>5</sub>; MF: 101; RMF: 760; Prob 0.13%; CAS: 263271-48-3; Lib: nist\_msms; ID: 483878.

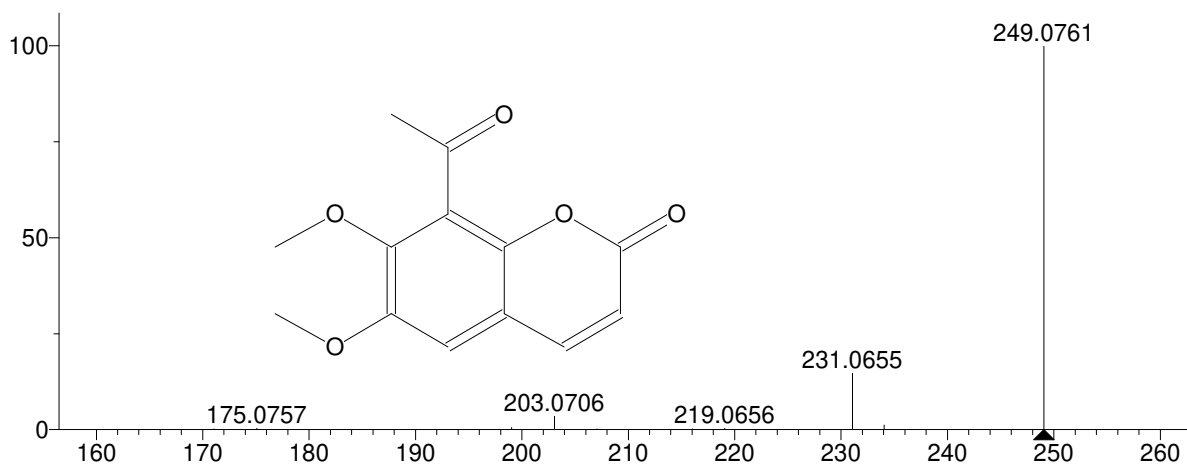

Hit 5 : p-Tolyl-β-D-glucuronide [M+H-2H<sub>2</sub>O]<sup>+</sup> HCD 4V P=249.1  
C<sub>13</sub>H<sub>16</sub>O<sub>7</sub>; MF: 82; RMF: 763; Prob 0.06%; CAS: 17680-99-8; Lib: nist\_msms; ID: 299068.

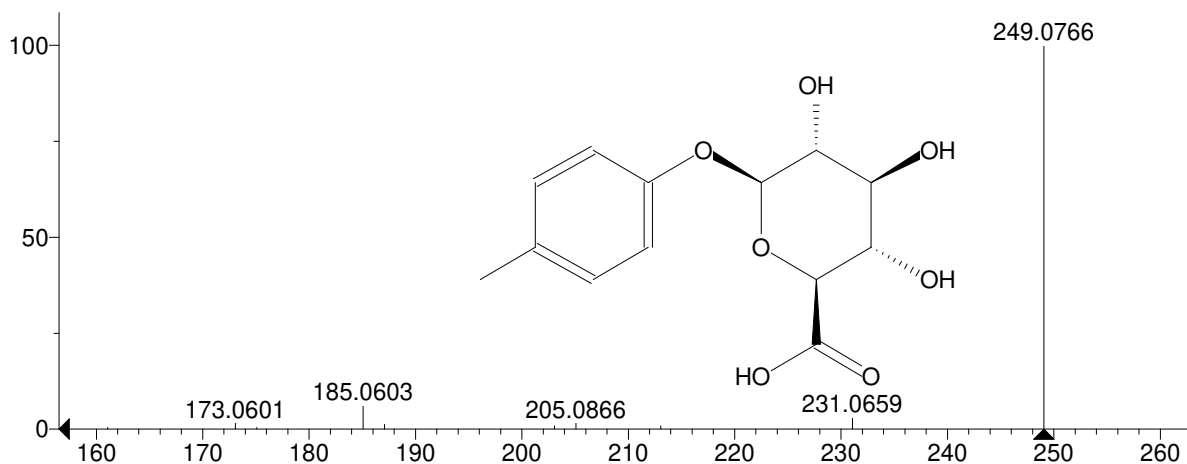

Unknown: Unknown (10.56\_329.0326m/z)  
Compound in Library Factor = 0

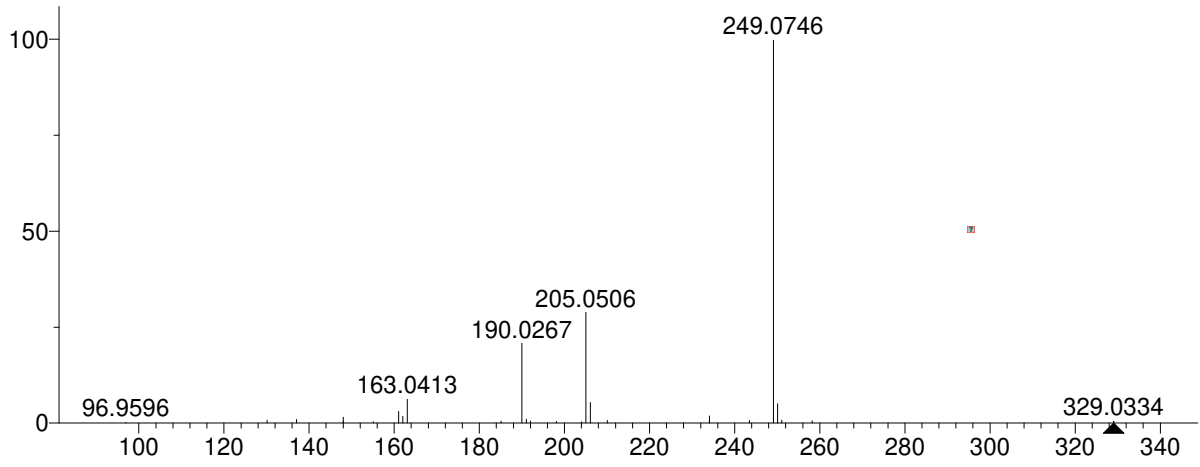

Unknown: Unknown (10.56\_417.1856m/z)  
Compound in Library Factor = 0

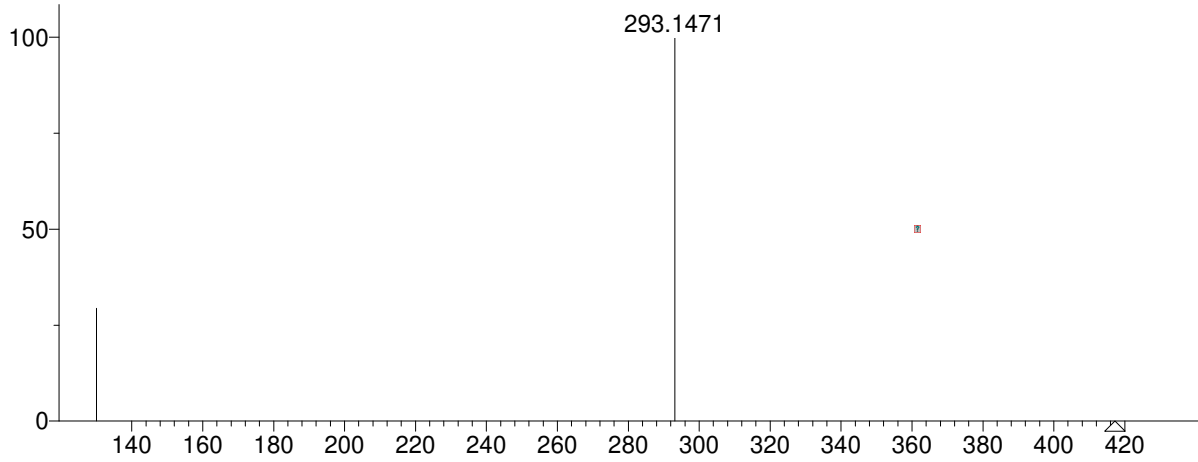

Hit 1 : Cyproterone acetate [M+H]<sup>+</sup> IT-FT 35% P=417.2  
C<sub>24</sub>H<sub>29</sub>ClO<sub>4</sub>; MF: 0; RMF: 40; Prob 50.0%; CAS: 427-51-0; Lib: nist\_msms; ID: 152587.

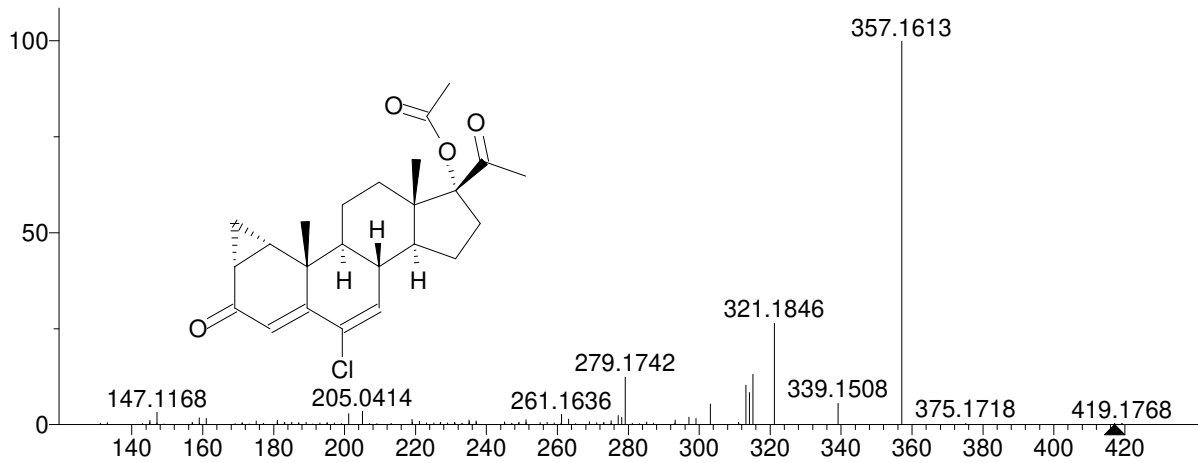

Hit 2 : MLS000859908-01!Cyproterone acetate [M+H]<sup>+</sup> P=417.2  
C<sub>24</sub>H<sub>29</sub>ClO<sub>4</sub>; MF: 0; RMF: 12; Prob 50.0%; Lib: mona-export-gnps; ID: 3413.

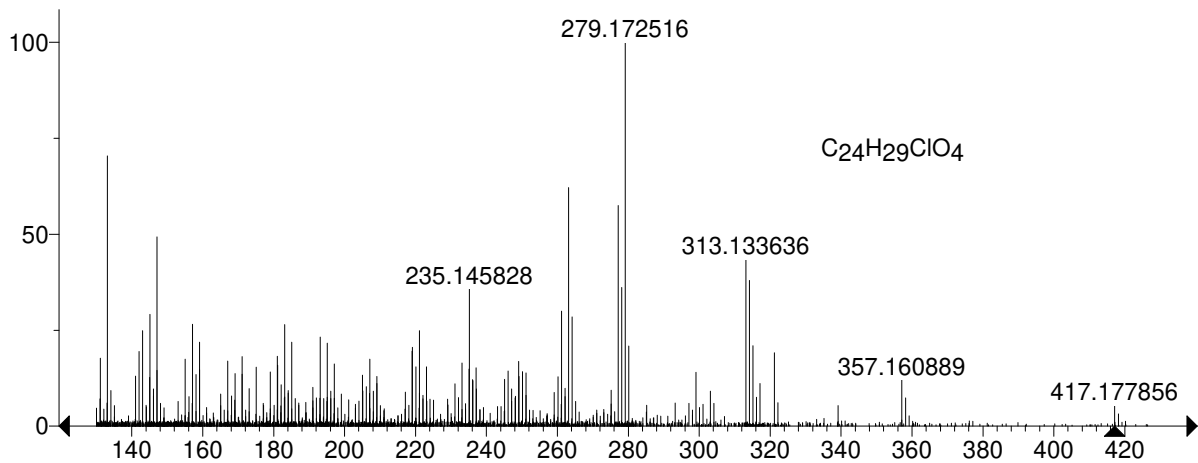

Unknown: Unknown (10.57\_387.9970m/z)  
Compound in Library Factor = 0

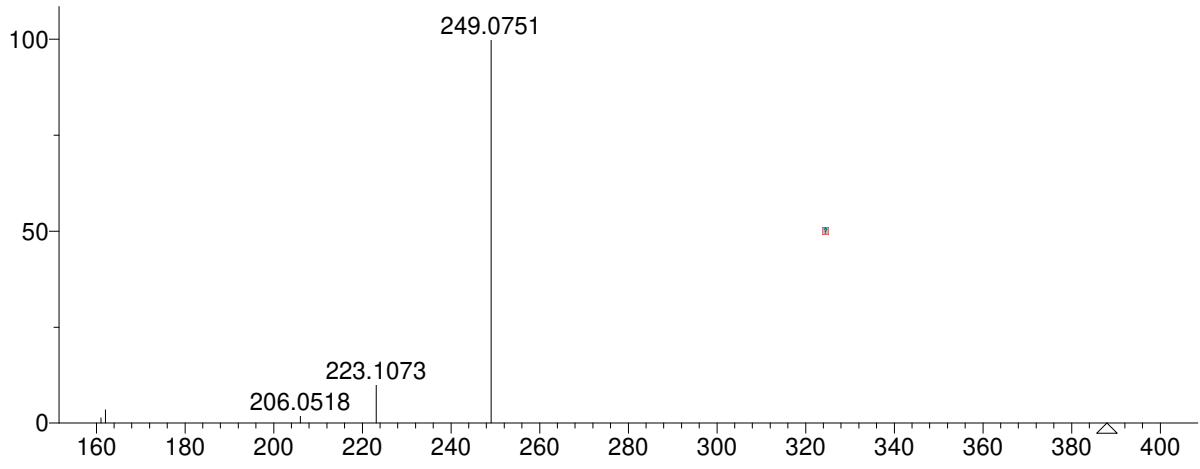

Unknown: Unknown (10.57\_463.2061m/z)  
Compound in Library Factor = 0

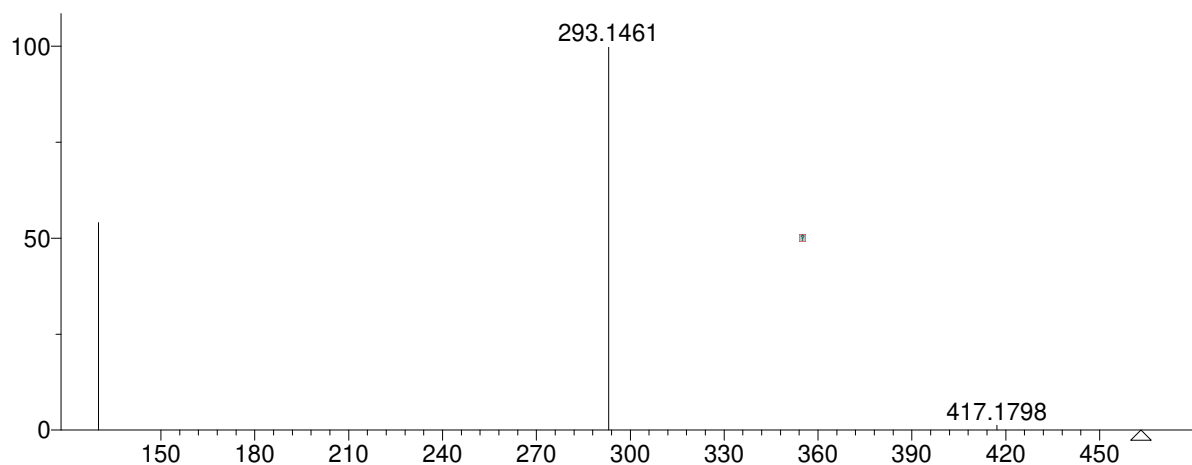

Hit 1 : 13(R),14(R)-Epoxyfluprostenol isopropyl ester [M+H-3H<sub>2</sub>O]<sup>+</sup> IT 35% P=463.2  
C<sub>26</sub>H<sub>35</sub>F<sub>3</sub>O<sub>7</sub>; MF: 0; RMF: 2; Prob 100.0%; Lib: nist\_msms; ID: 254087.

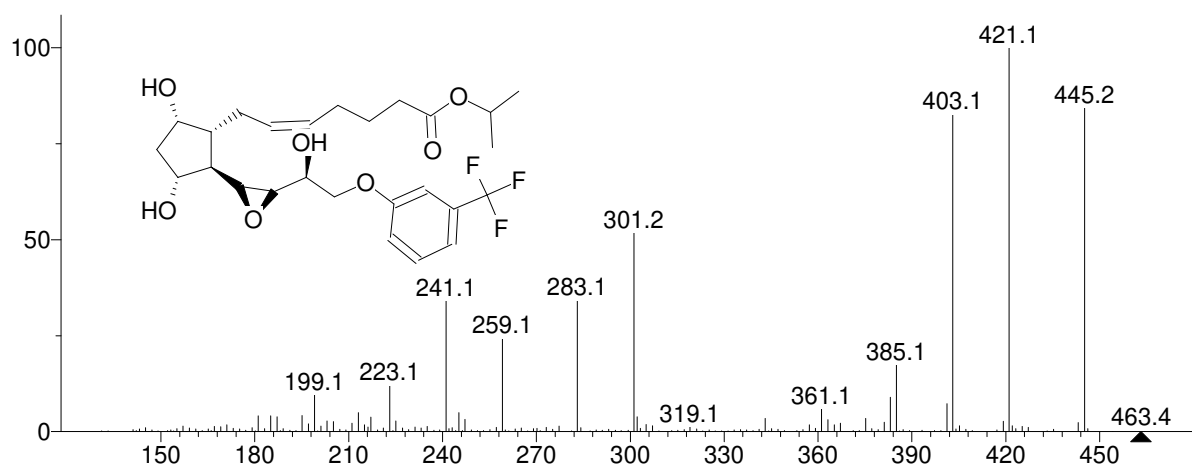

Unknown: Unknown (10.60\_863.2076m/z)  
Compound in Library Factor = 0

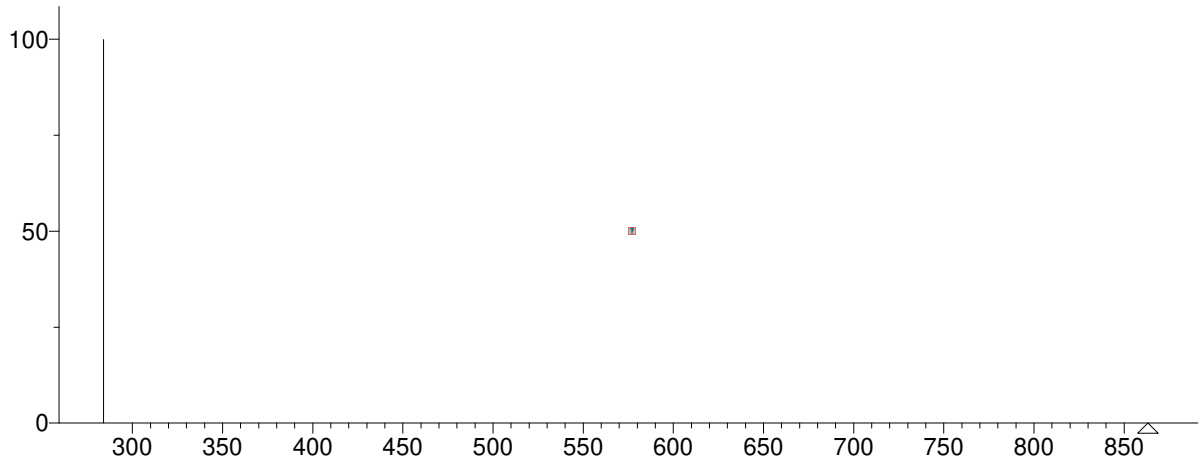

Unknown: Unknown (10.62\_450.1742m/z)  
Compound in Library Factor = 0

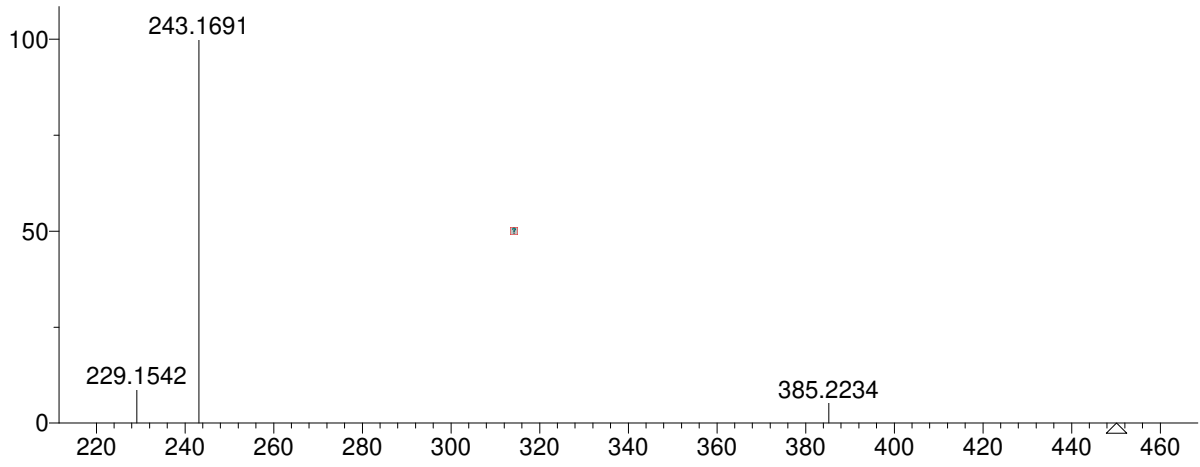



\*\* Search Report Page 1 of 2 \*\*

Unknown: Unknown (10.65\_413.2277m/z)  
Compound in Library Factor = -1309

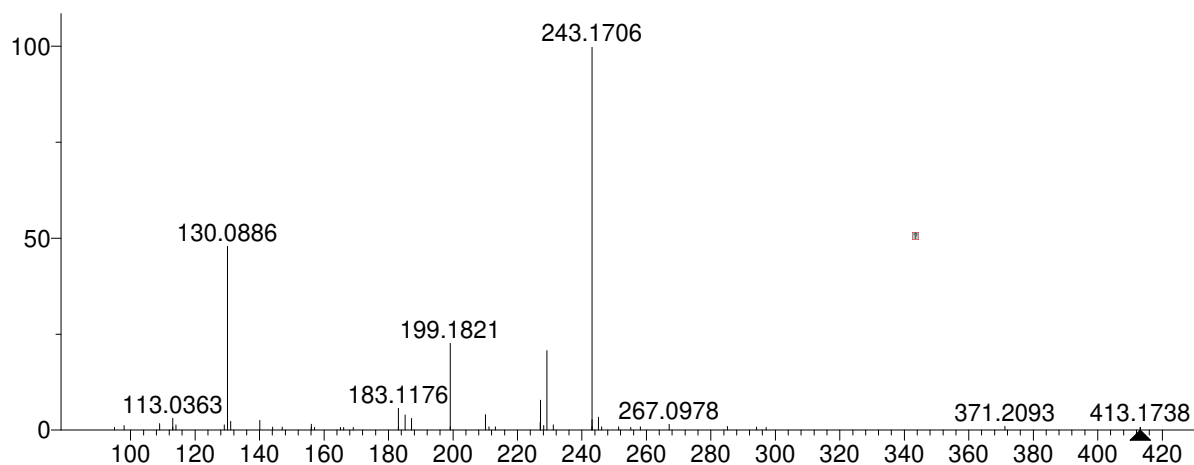

Hit 1 : Mevastatin [M+Na]<sup>+</sup> HCD 20V P=413.2  
C<sub>23</sub>H<sub>34</sub>O<sub>5</sub>; MF: 55; RMF: 419; Prob 36.9%; CAS: 73573-88-3; Lib: nist\_msms; ID: 165105.

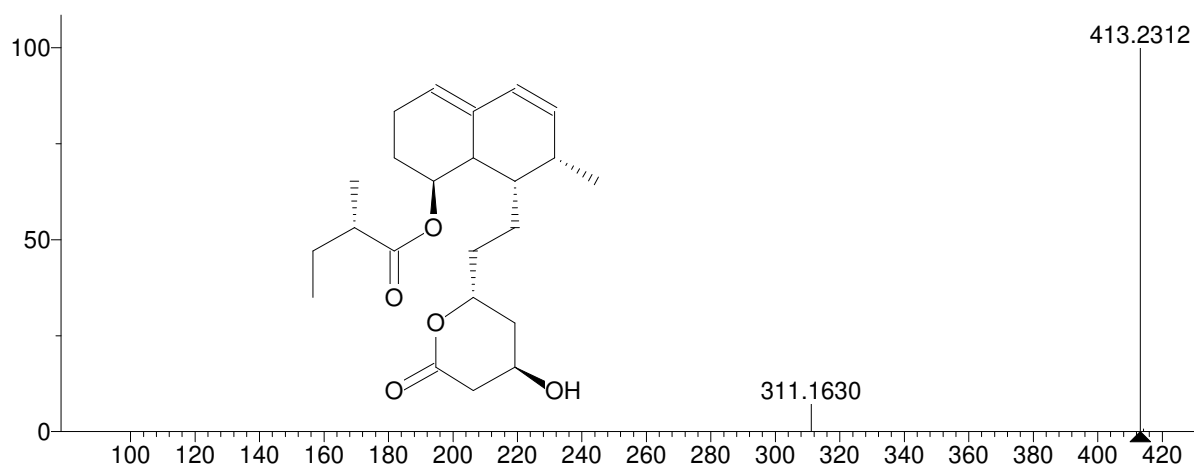

Hit 2 : Resolvin D2 methyl ester [M+Na]<sup>+</sup> HCD 37V P=413.2  
C<sub>23</sub>H<sub>34</sub>O<sub>5</sub>; MF: 1; RMF: 47; Prob 7.22%; CAS: 810668-53-2; Lib: nist\_msms; ID: 378655.

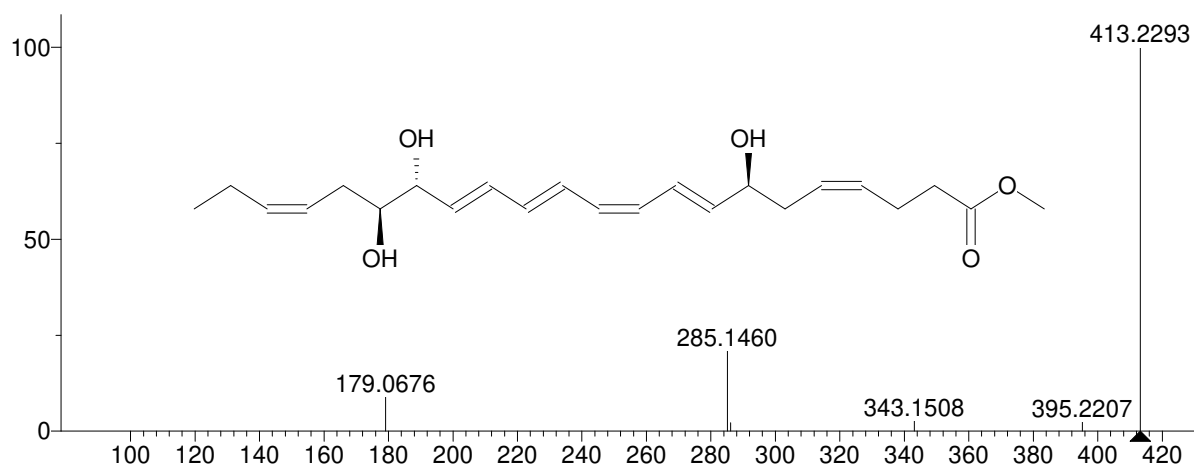

Hit 3 : Tussilagonone [M+Na]<sup>+</sup> HCD 33V P=413.2  
C<sub>23</sub>H<sub>34</sub>O<sub>5</sub>; MF: 1; RMF: 36; Prob 7.22%; CAS: 104012-37-5; Lib: nist\_msms; ID: 425581.

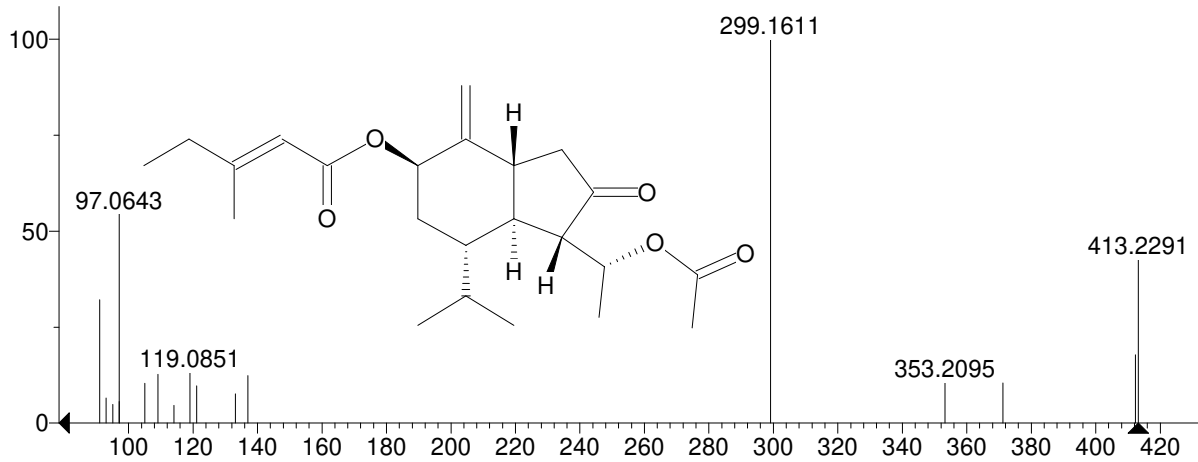

Hit 4 : 17(R)-Resolvin D1 methyl ester [M+Na]<sup>+</sup> HCD 37V P=413.2  
C<sub>23</sub>H<sub>34</sub>O<sub>5</sub>; MF: 0; RMF: 44; Prob 6.94%; CAS: 937738-64-2; Lib: nist\_msms; ID: 378599.

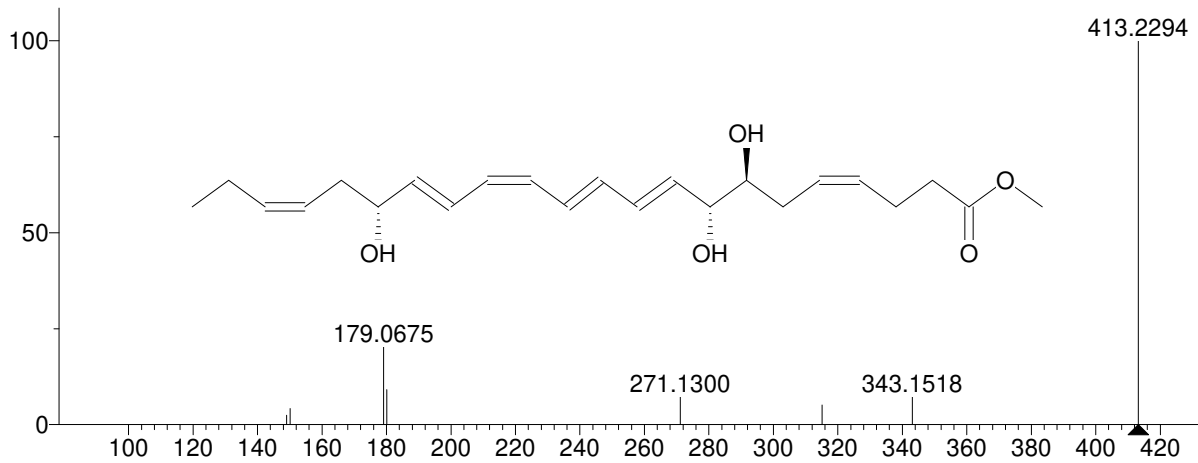

Hit 5 : Thr-His-Arg [M+H]<sup>+</sup> QTOF 10V P=413.2  
C<sub>16</sub>H<sub>28</sub>N<sub>8</sub>O<sub>5</sub>; MF: 0; RMF: 43; Prob 6.94%; Lib: nist\_msms; ID: 54061.

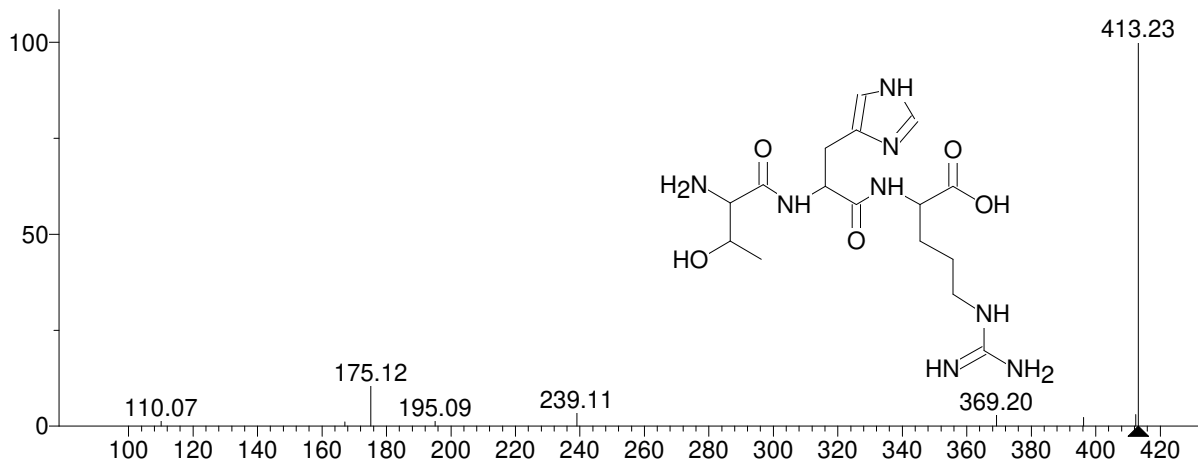

Unknown: Unknown (10.65\_463.1713m/z)  
Compound in Library Factor = 0

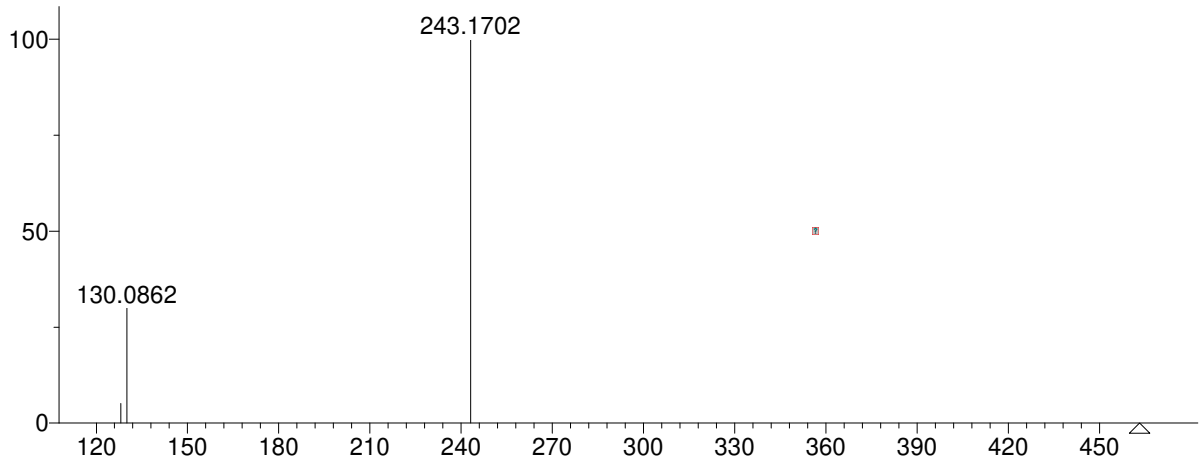

Unknown: Unknown (10.67\_415.1703m/z)  
Compound in Library Factor = 0

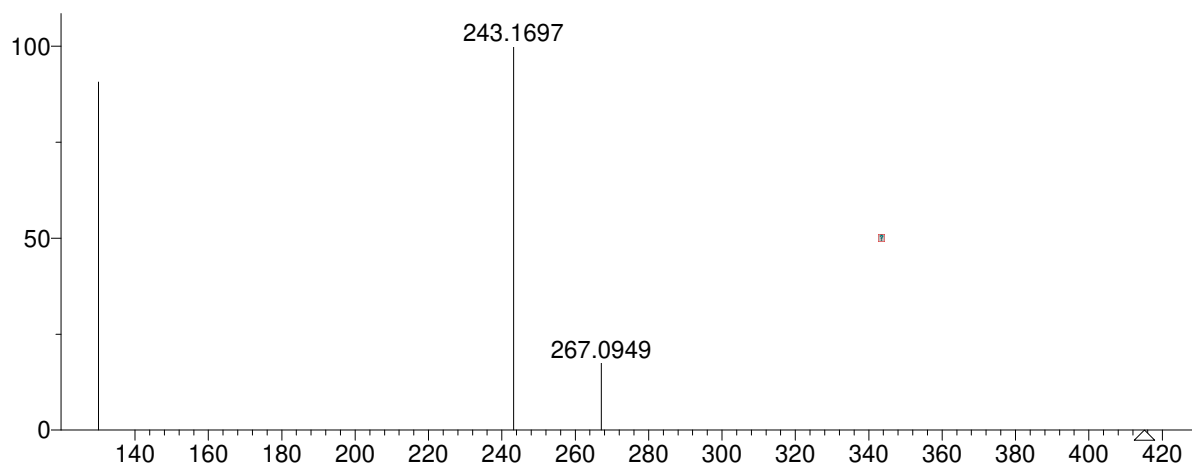

Hit 1 : NCGC00347525-02!2-amino-5-[2-[[2,3-dihydroxy-2-(1-hydroxyethyl)butanoyl]oxymethyl]-4-hydroxyanilino]-C<sub>18</sub>H<sub>26</sub>N<sub>2</sub>O<sub>9</sub>; MF: 0; RMF: 6; Prob 50.0%; Lib: mona-export-gnps; ID: 6270.

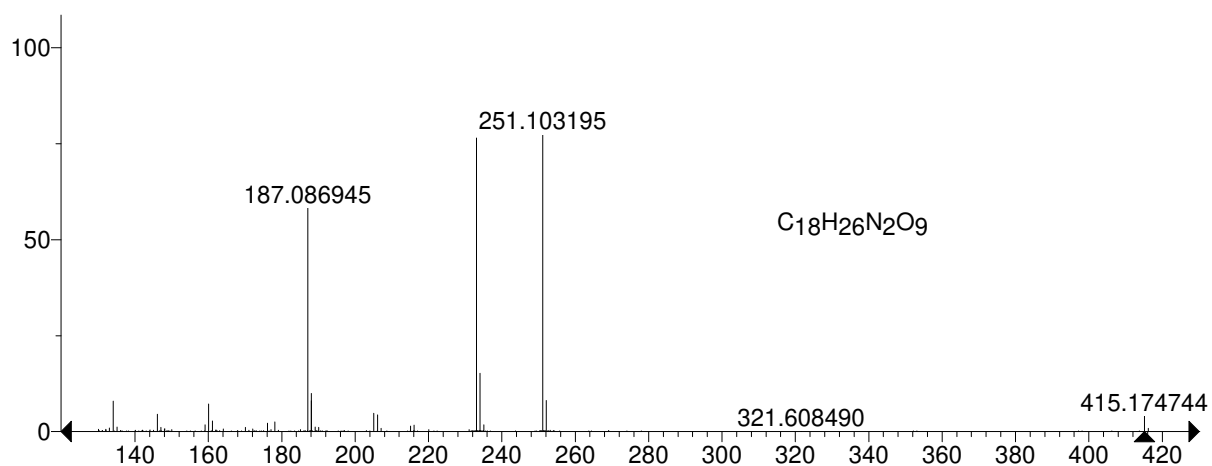

Hit 2 : 6-formyl-10-(hydroxymethyl)-5-methoxy-3-methylidene-2-oxo-2H,3H,3aH,4H,5H,8H,9H,11aH-cyclodeca[b]C<sub>21</sub>H<sub>28</sub>O<sub>7</sub>; MF: 0; RMF: 1; Prob 50.0%; Lib: mona-export-vf-npl\_qexactive; ID: 16435.

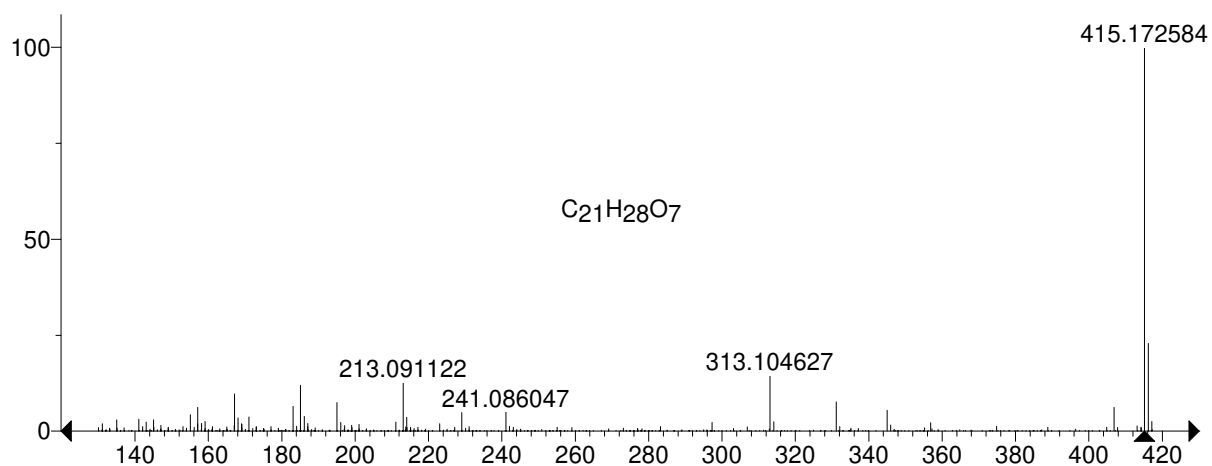

Unknown: Unknown (10.68\_358.1965m/z)  
Compound in Library Factor = 0

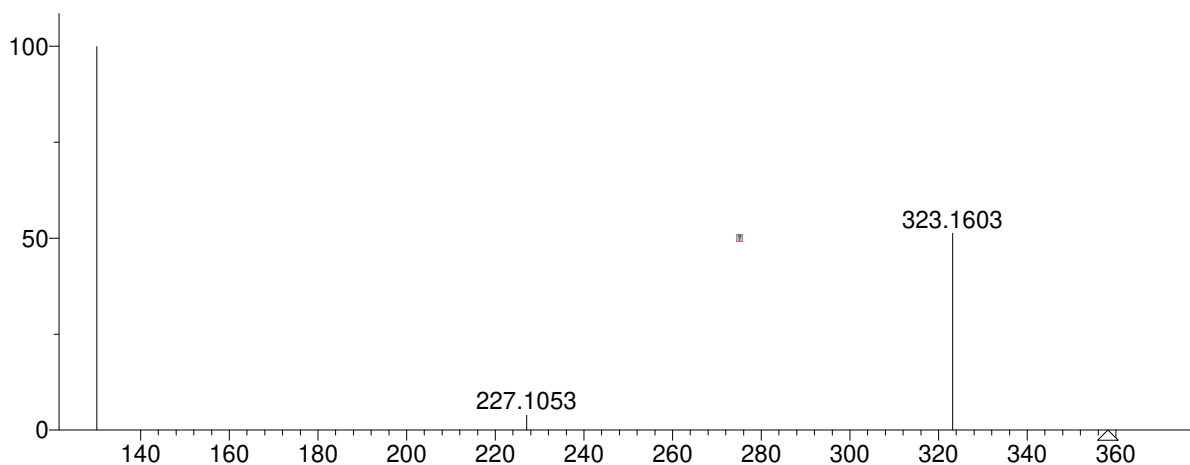

Hit 1 : Nobiletin [M+H]<sup>+</sup>=>373.2=>358.2 IT 35% P=358.2  
C21H22O8; MF: 0; RMF: 7; Prob 50.0%; CAS: 478-01-3; Lib: nist\_msms; ID: 178354.

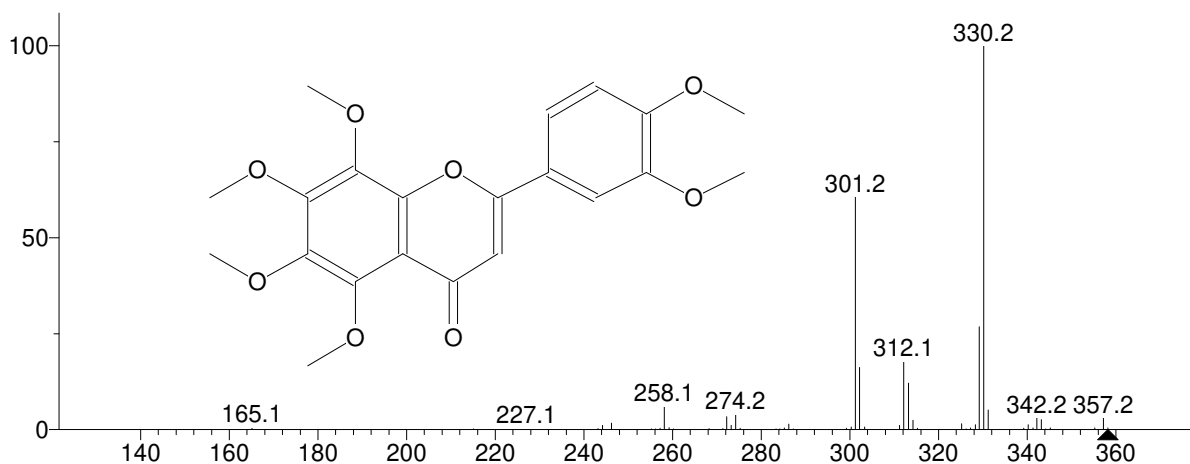

Hit 2 : cis-Moxifloxacin acyl-β-D-glucuronide [M+H-C6H8O6]<sup>+</sup>=>358.2 IT 35% P=358.2  
C27H32FN3O10; MF: 0; RMF: 3; Prob 50.0%; CAS: 733002-61-4; Lib: nist\_msms; ID: 463735.

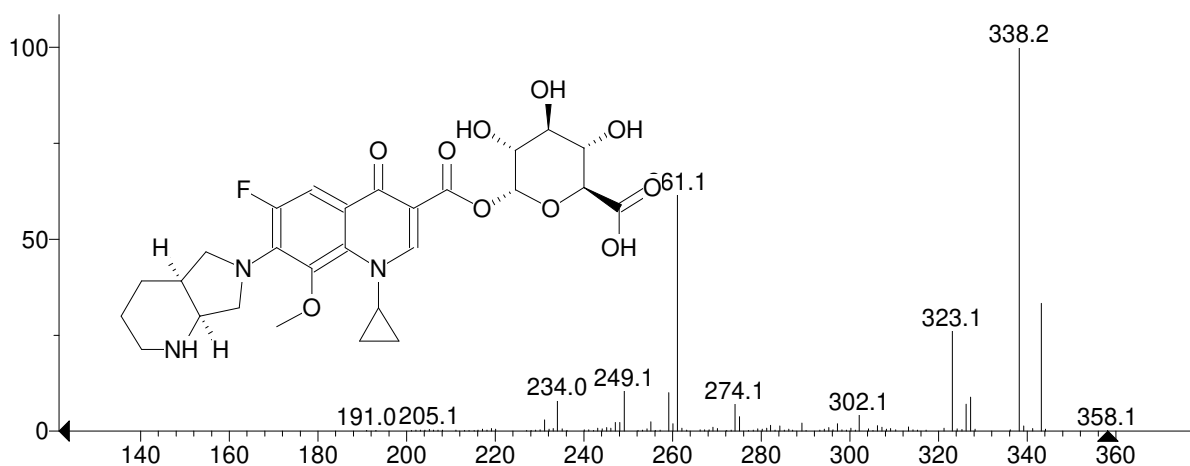

Unknown: Unknown (10.73\_247.0275m/z)  
Compound in Library Factor = 0

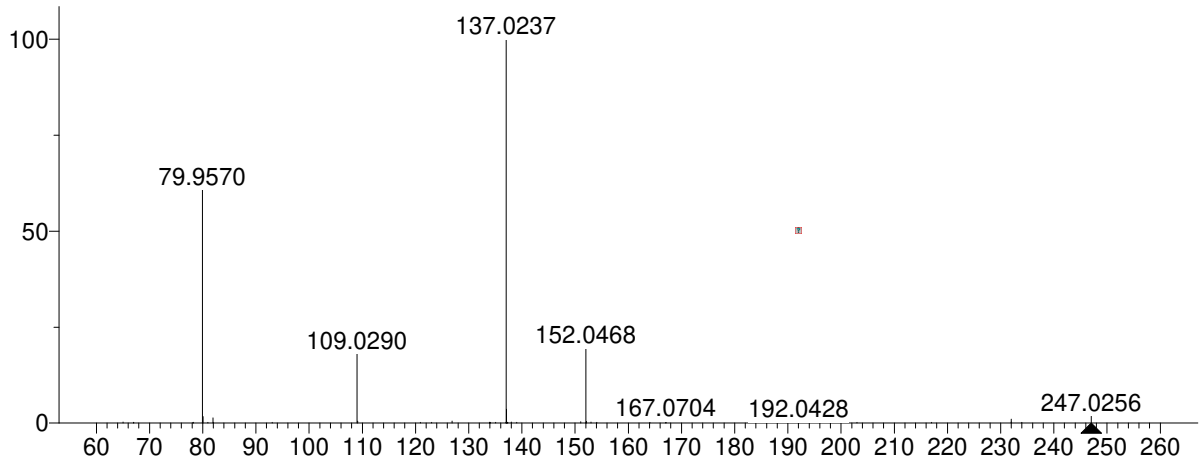

Unknown: Unknown (10.73\_263.0216m/z)  
Compound in Library Factor = 0

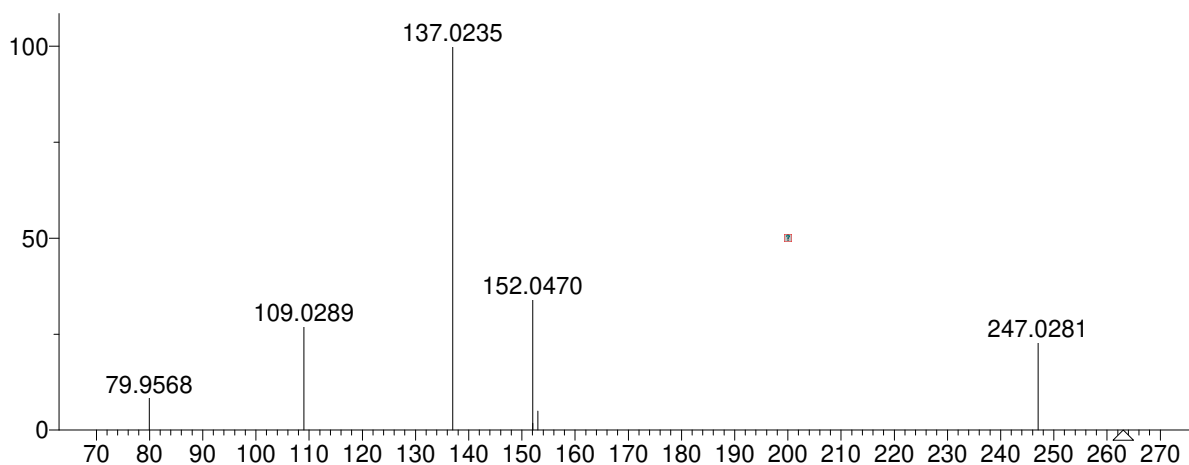

Hit 1 : 3-Methoxy-4-hydroxyphenylglycol sulfate [M-H]<sup>-</sup> QTOF 20V P=263  
C<sub>9</sub>H<sub>12</sub>O<sub>7</sub>S; MF: 0; RMF: 49; Prob 100.0%; CAS: 3415-67-6; Lib: nist\_msms; ID: 29981.

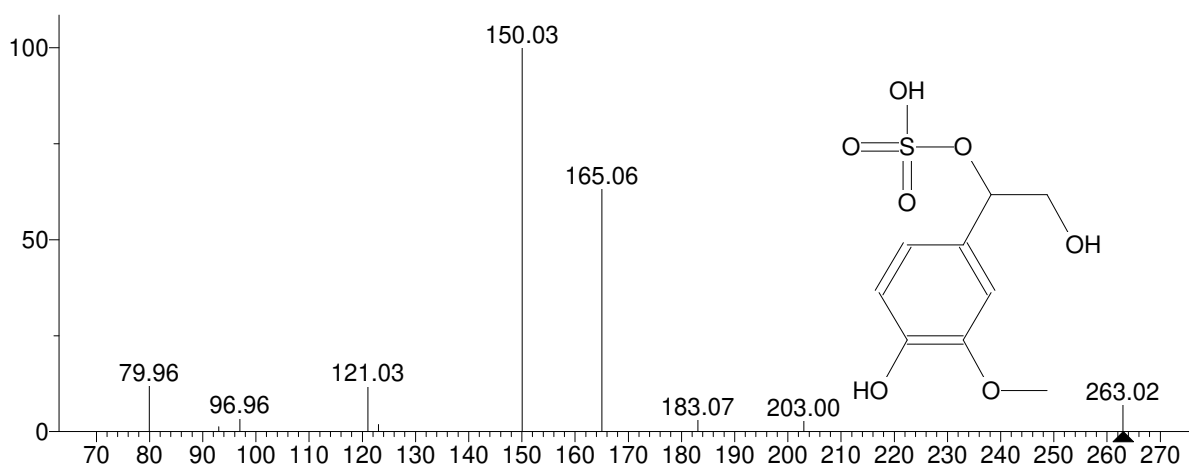

Unknown: Unknown (10.74\_247.1755m/z)  
Compound in Library Factor = 0

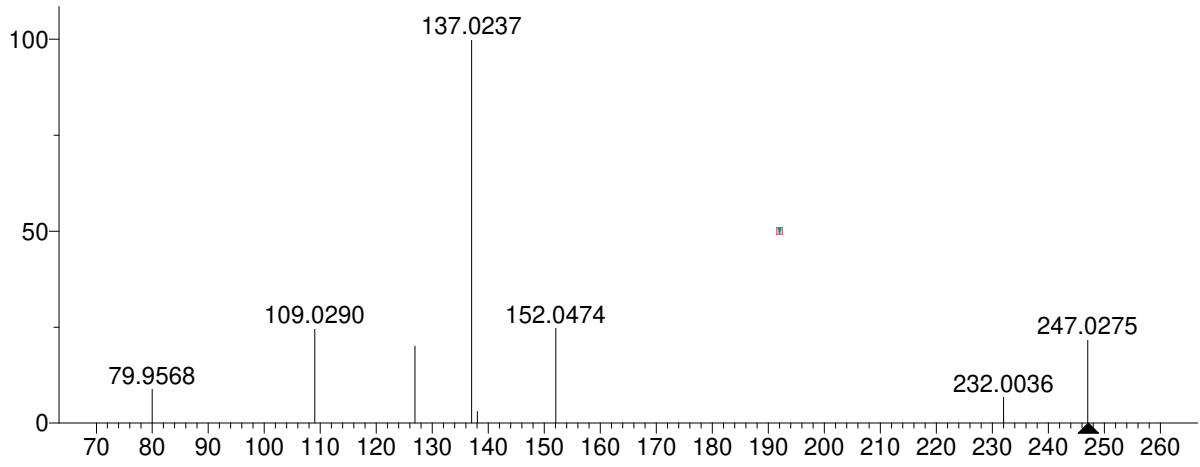



Unknown: Unknown (10.75\_306.9464m/z)  
Compound in Library Factor = -3273

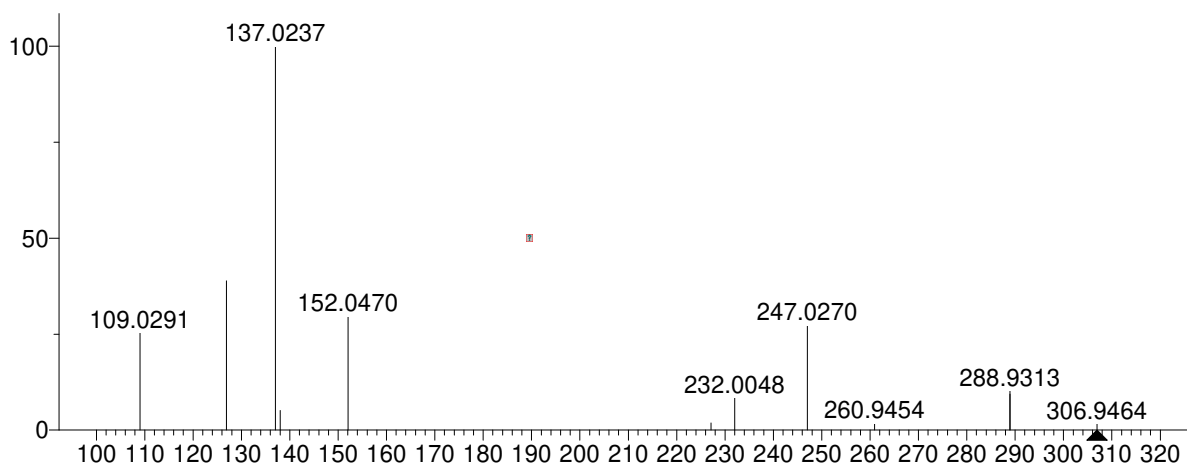

Hit 1 : 5'-Iodoresiniferatoxin [M-H-C28H30O5]- HCD 6V P=306.9  
C37H39IO9; MF: 49; RMF: 346; Prob 100.0%; CAS: 535974-91-5; Lib: nist\_msms; ID: 357926.

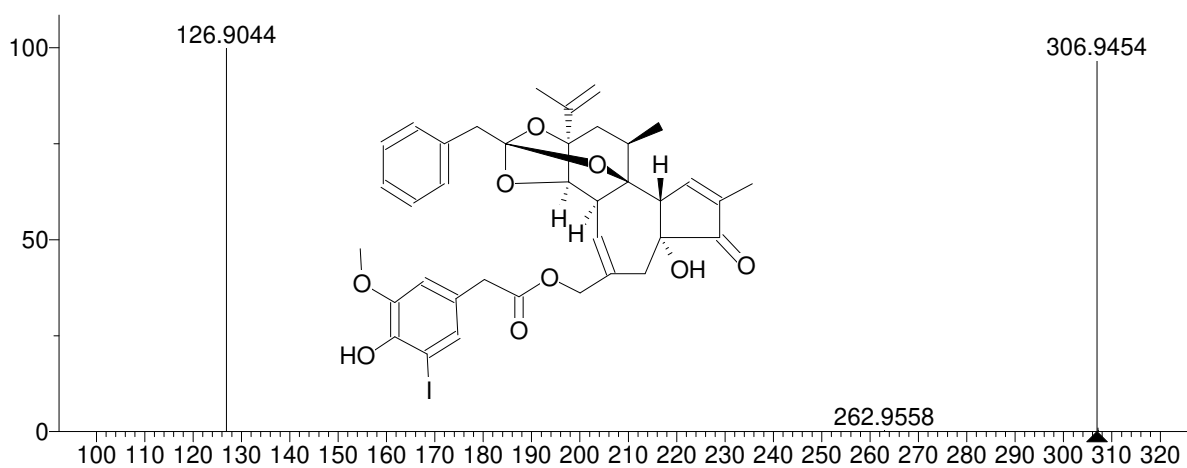

Unknown: Unknown (10.75\_347.9724m/z)  
Compound in Library Factor = 0

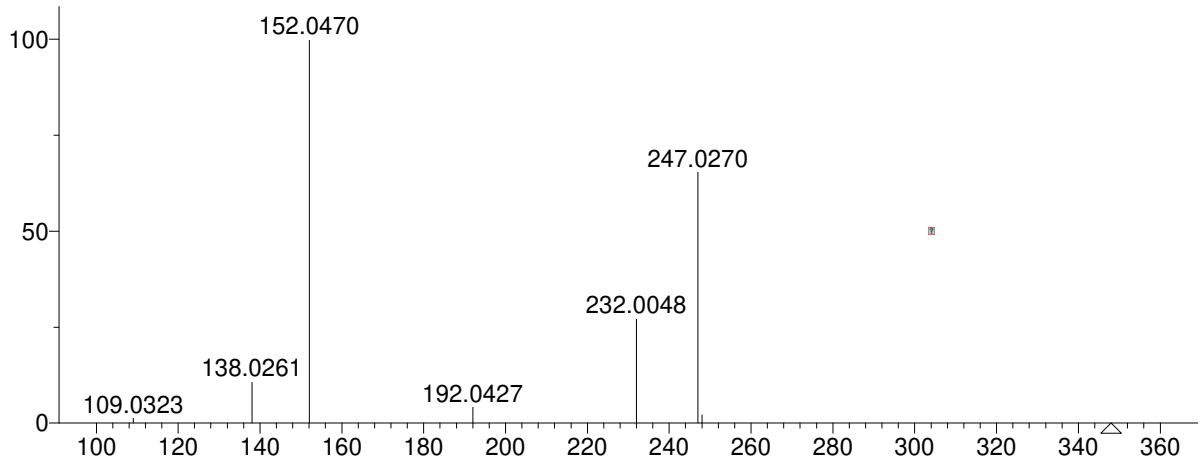

\*\* Search Report Page 1 of 2 \*\*

Unknown: Unknown (10.81\_221.0444m/z)  
Compound in Library Factor = -199

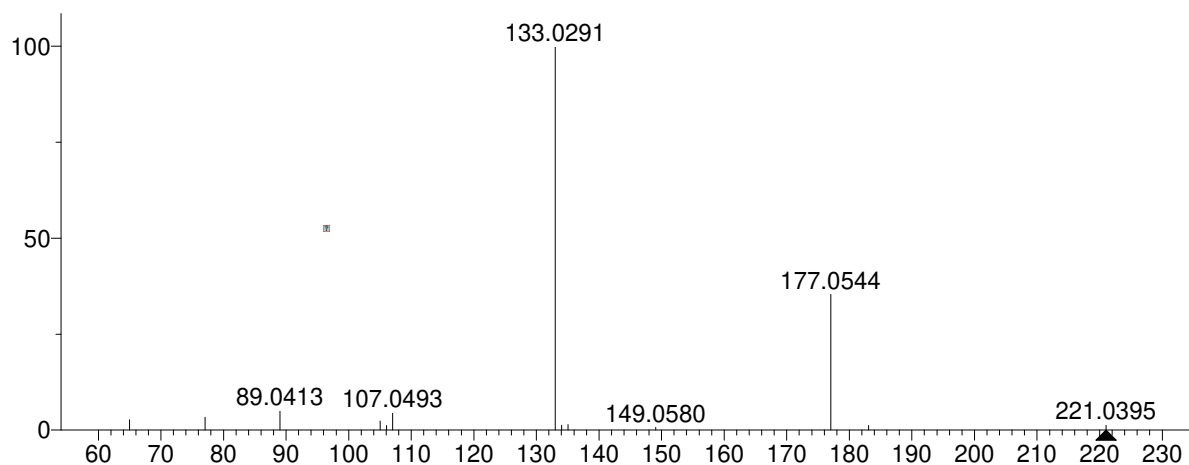

Hit 1 : 8-Methoxycoumarin-3-carboxylic acid [M+H]<sup>+</sup> HCD 0V P=221  
C<sub>11</sub>H<sub>8</sub>O<sub>5</sub>; MF: 352; RMF: 982; Prob 56.6%; CAS: 2555-20-6; Lib: nist\_msms; ID: 178797.

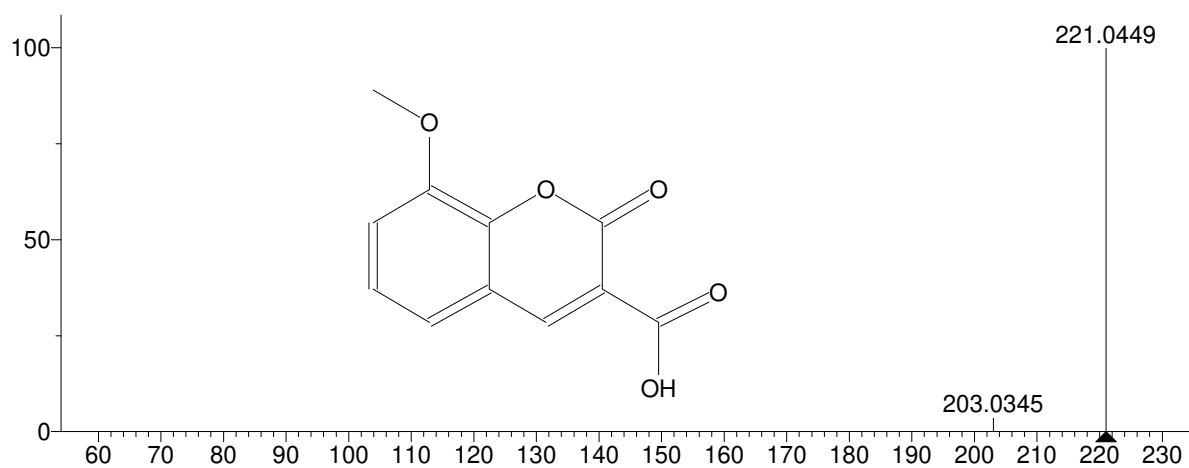

Hit 2 : Isofraxidin [M-H]<sup>-</sup> HCD 6V P=221  
C<sub>11</sub>H<sub>10</sub>O<sub>5</sub>; MF: 344; RMF: 971; Prob 42.3%; CAS: 486-21-5; Lib: nist\_msms; ID: 466238.

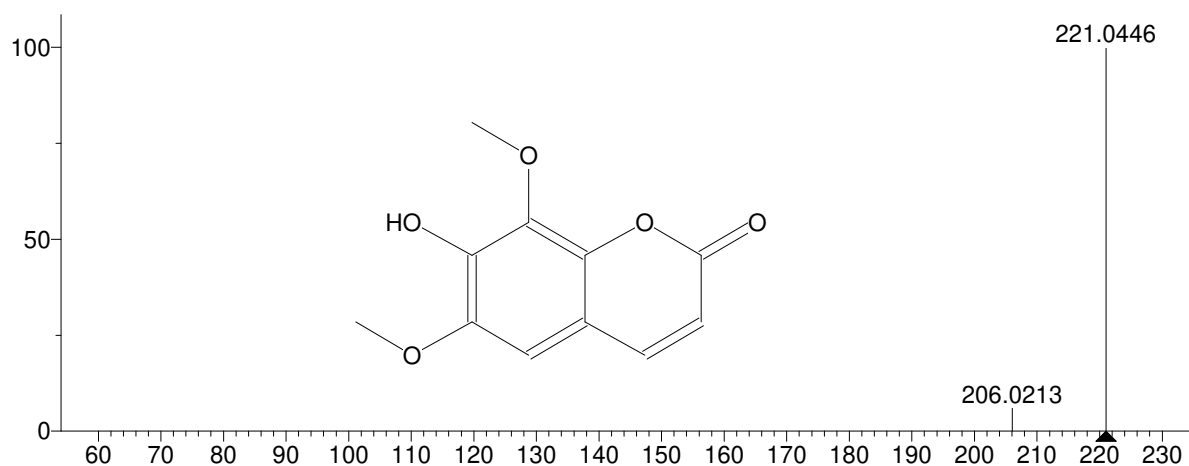

\*\* Search Report Page 2 of 2 \*\*

Hit 3 : 7-Hydroxycoumarin-4-acetic acid [M+H]<sup>+</sup> HCD 11V P=221  
C<sub>11</sub>H<sub>8</sub>O<sub>5</sub>; MF: 53; RMF: 249; Prob 0.42%; CAS: 6950-82-9; Lib: nist\_msms; ID: 177551.

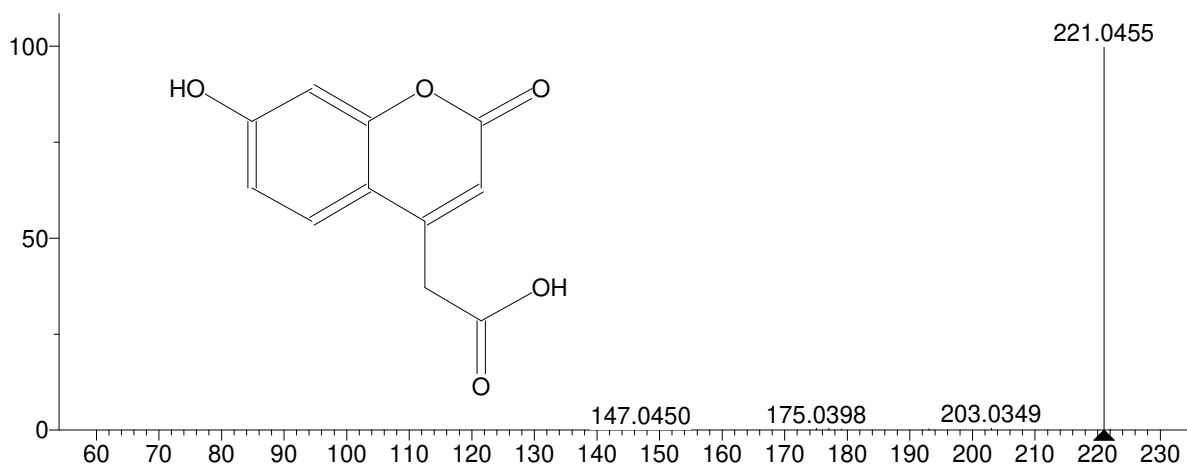

Hit 4 : Unknown (carbon number 11); PlaSMA ID-316 [M-H]<sup>-</sup> P=221  
C<sub>11</sub>H<sub>10</sub>O<sub>5</sub>; MF: 13; RMF: 131; Prob 0.09%; Lib: biomsms-neg-plasma; ID: 1061.

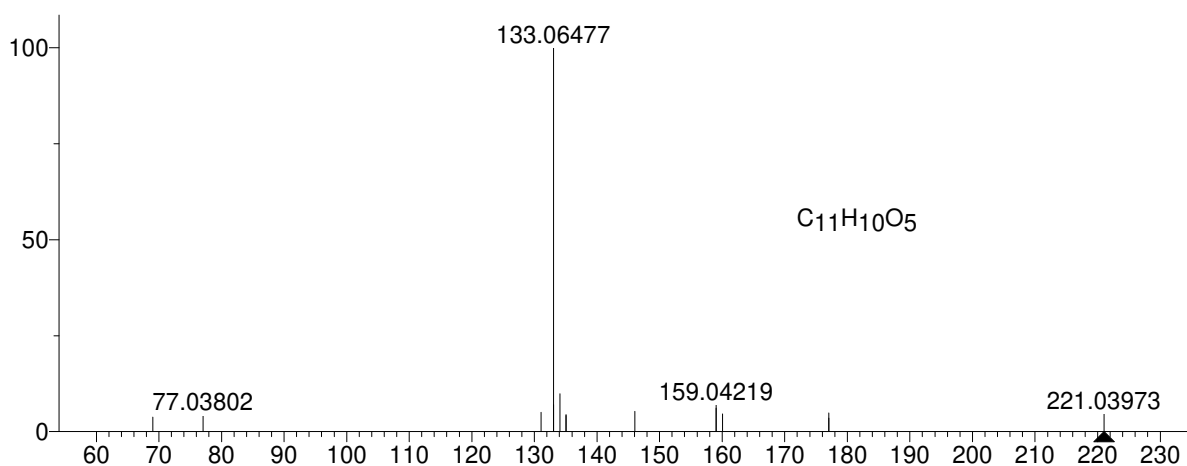

Hit 5 : Umckalin [M-H]<sup>-</sup> HCD 8V P=221  
C<sub>11</sub>H<sub>10</sub>O<sub>5</sub>; MF: 5; RMF: 91; Prob 0.07%; CAS: 43053-62-9; Lib: nist\_msms; ID: 234879.

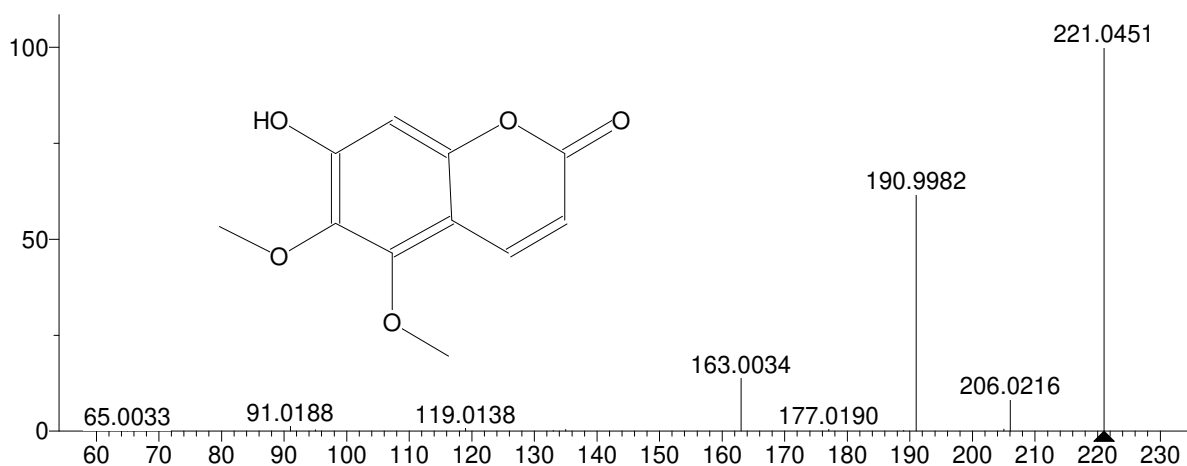

Unknown: Unknown (10.82\_534.2222m/z)  
Compound in Library Factor = 0

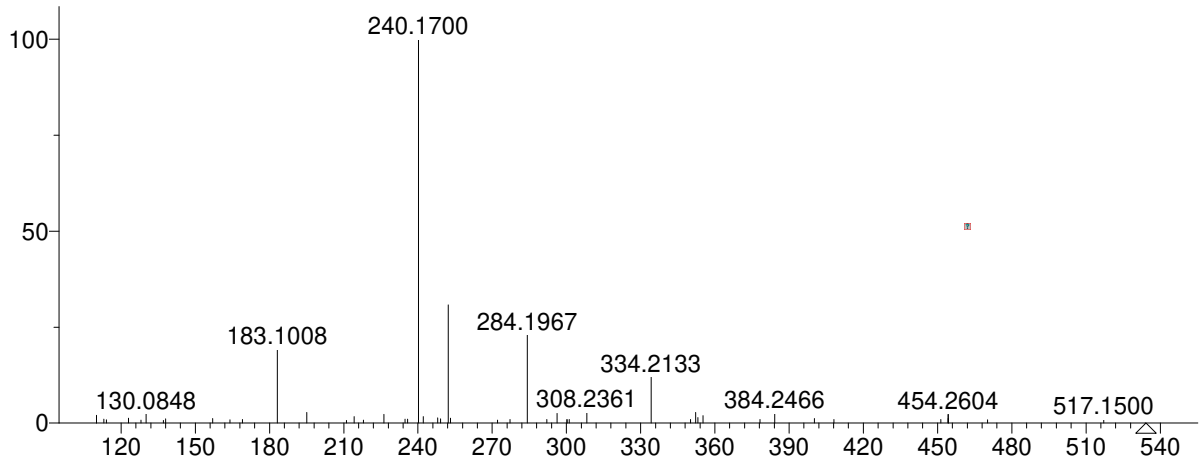

Unknown: Unknown (10.83\_401.0536m/z)  
Compound in Library Factor = 0

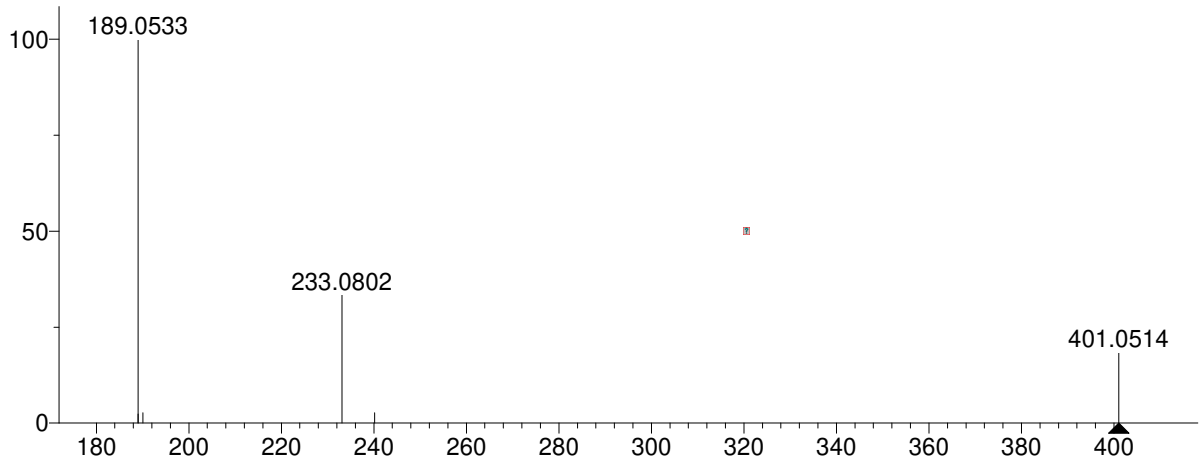

Unknown: Unknown (10.83\_454.2543m/z)  
Compound in Library Factor = 0

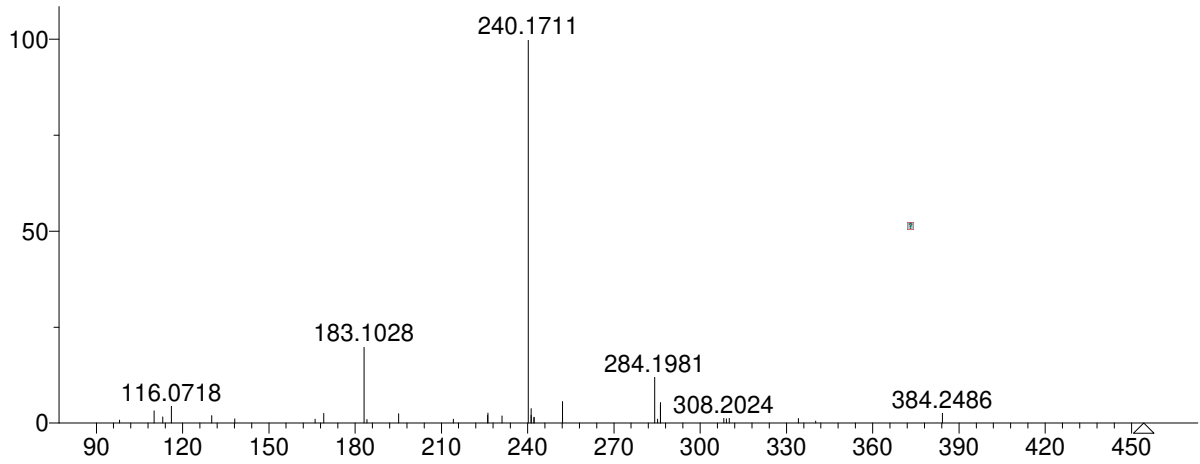

\*\* Search Report Page 1 of 1 \*\*

Unknown: Unknown (10.84\_373.1386m/z)  
Compound in Library Factor = 0

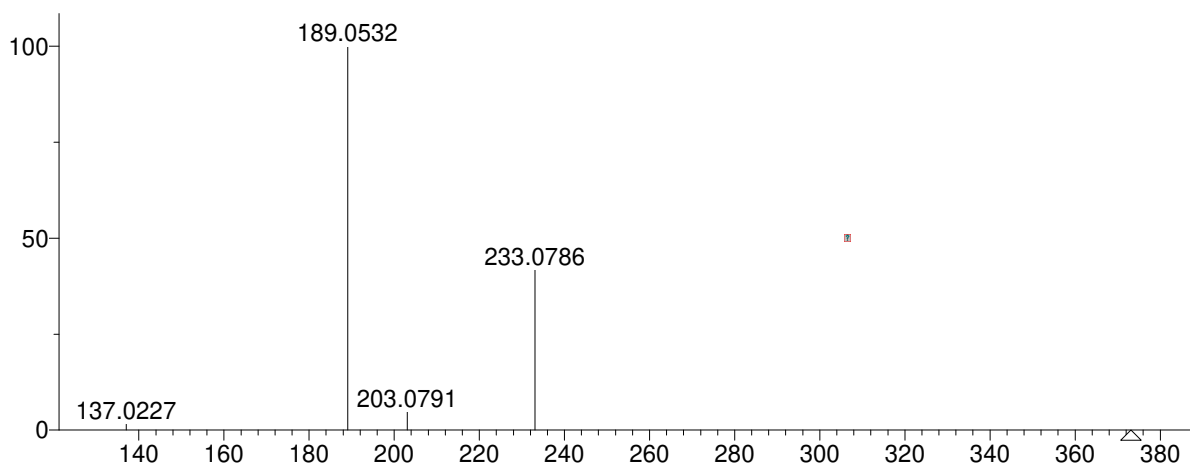

Hit 1 : [(1S,3aR,5R,5aR,8aR,9S,9aR)-1,5,8a-trimethyl-2,8-dioxo-3a,4,5,5a,9,9a-hexahydro-1H-azuleno[6,5-b]fura  
C<sub>19</sub>H<sub>26</sub>O<sub>5</sub>; MF: 0; RMF: 18; Prob 100.0%; Lib: mona-export-vf-npl\_qexactive; ID: 7291.

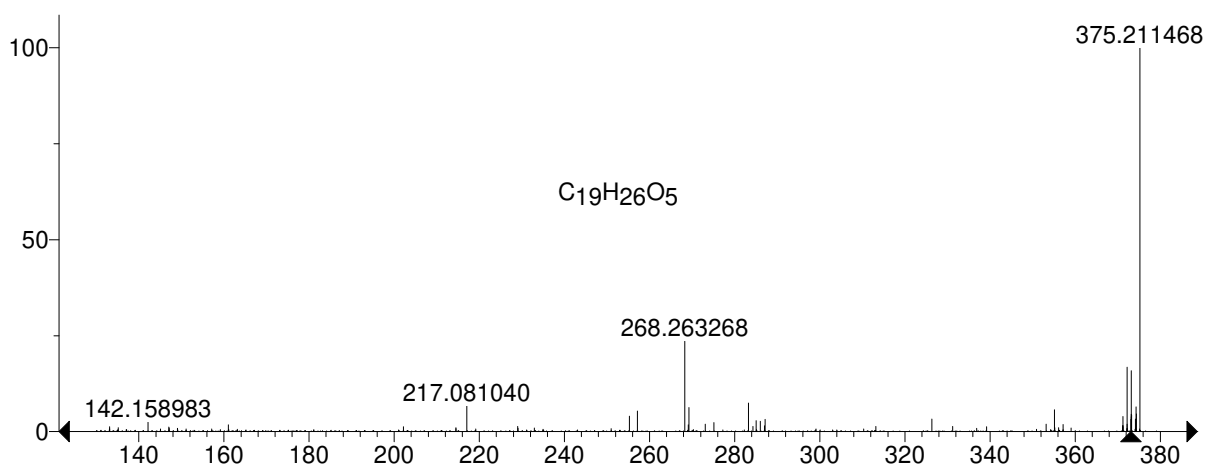



Unknown: Unknown (10.86\_463.2059m/z)  
Compound in Library Factor = 0

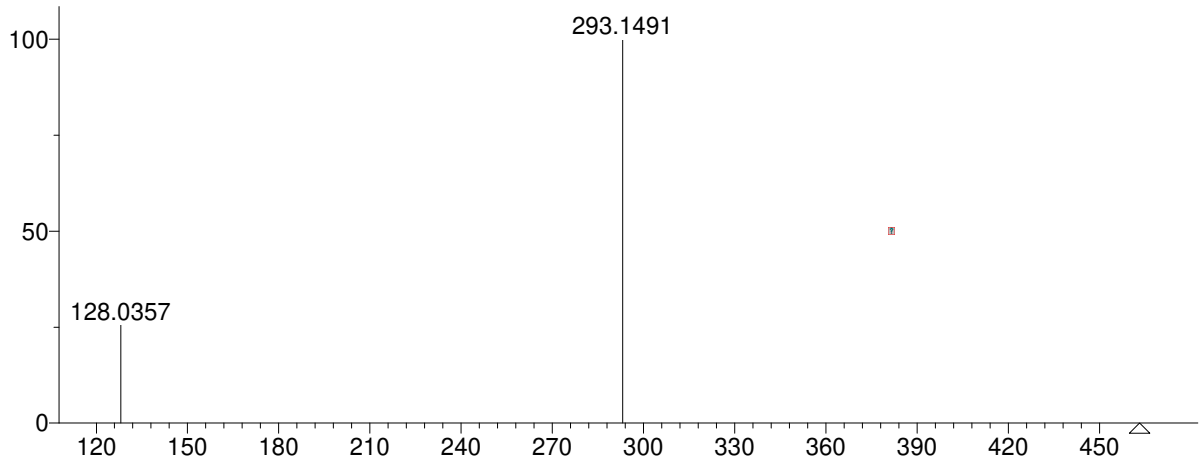

Unknown: Unknown (10.87\_528.2524m/z)  
Compound in Library Factor = 0

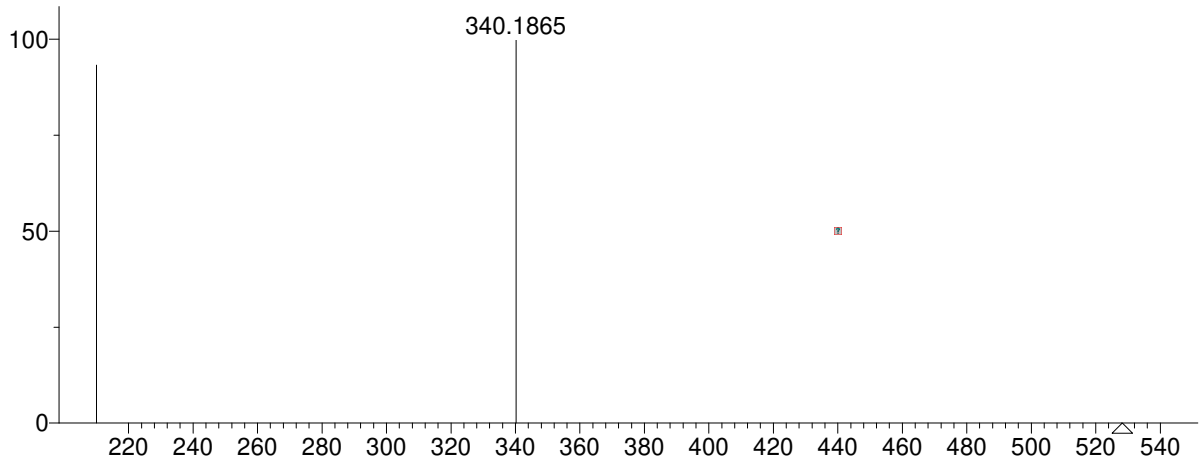

Unknown: Unknown (10.89\_449.1583m/z)  
Compound in Library Factor = 0

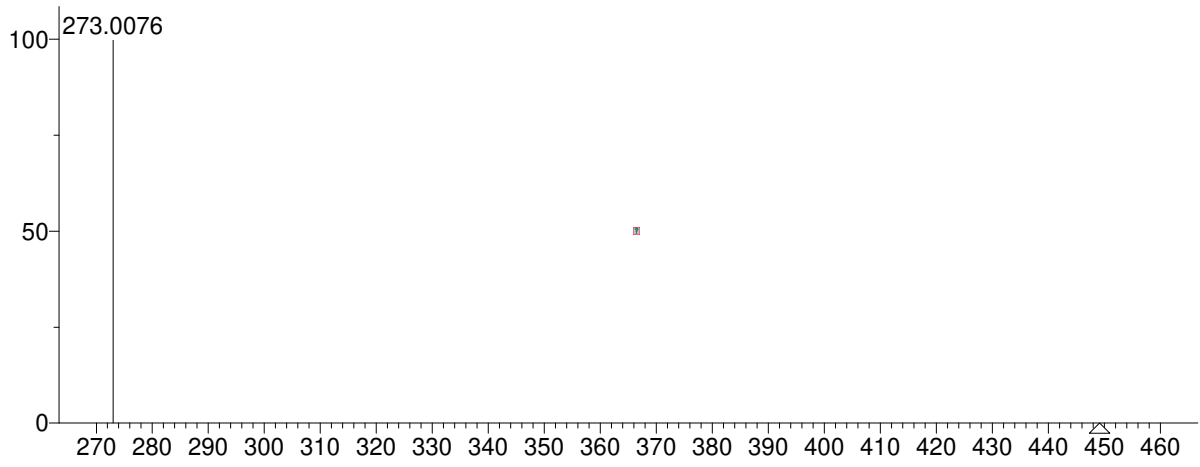

\*\* Search Report Page 1 of 1 \*\*

Unknown: Unknown (10.92\_753.4147m/z)  
Compound in Library Factor = -246

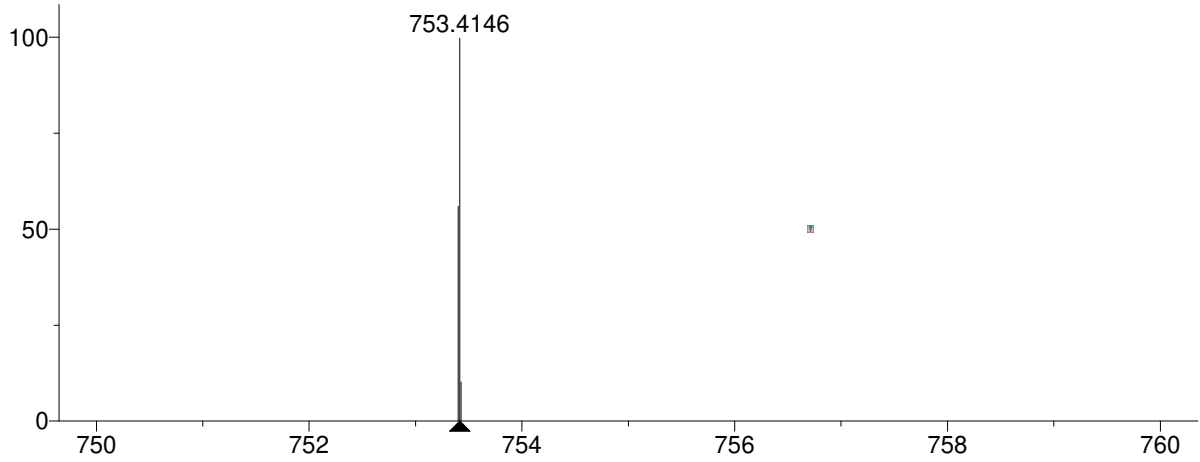

Hit 1 : GlcADG 34:9; GlcADG 16:4-18:5; [M-H]<sup>-</sup> [M-H]<sup>-</sup> P=753.4  
C<sub>43</sub>H<sub>62</sub>O<sub>11</sub>; MF: 263; RMF: 775; Prob 100.0%; Lib: msdial-insilicomsms-lipids-neg; ID: 275003.

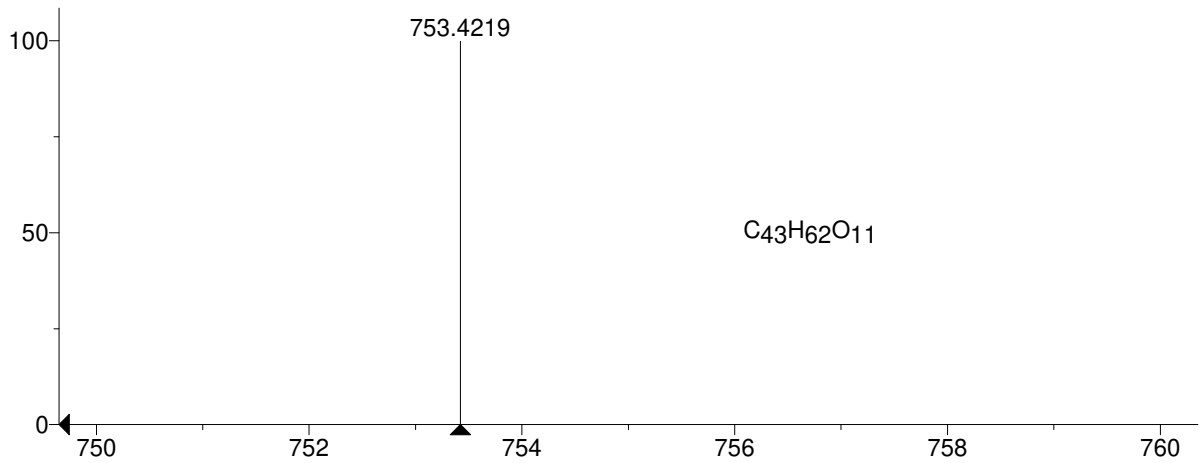

Unknown: Unknown (10.93\_273.4840m/z)  
Compound in Library Factor = 0

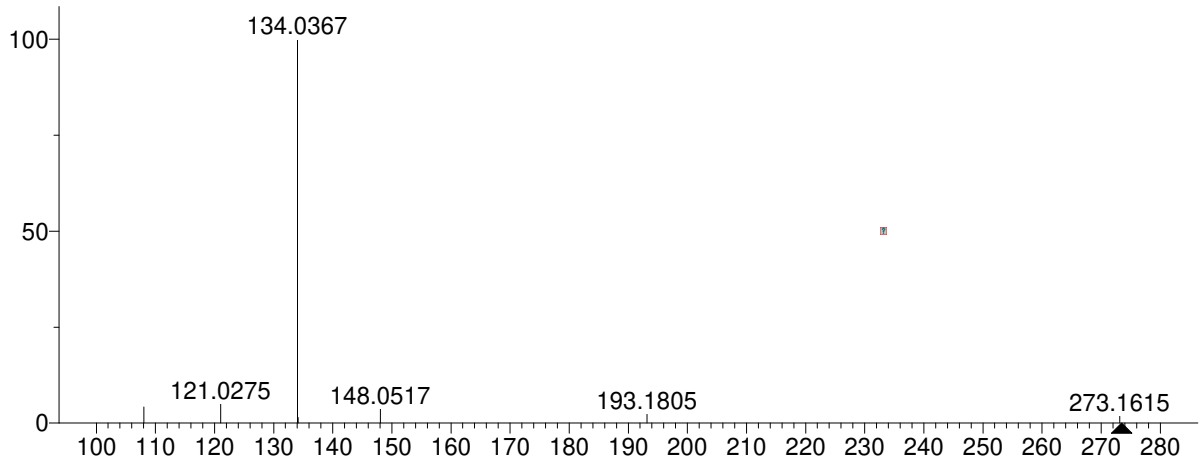

Unknown: Unknown (10.94\_569.0031m/z)  
Compound in Library Factor = 0

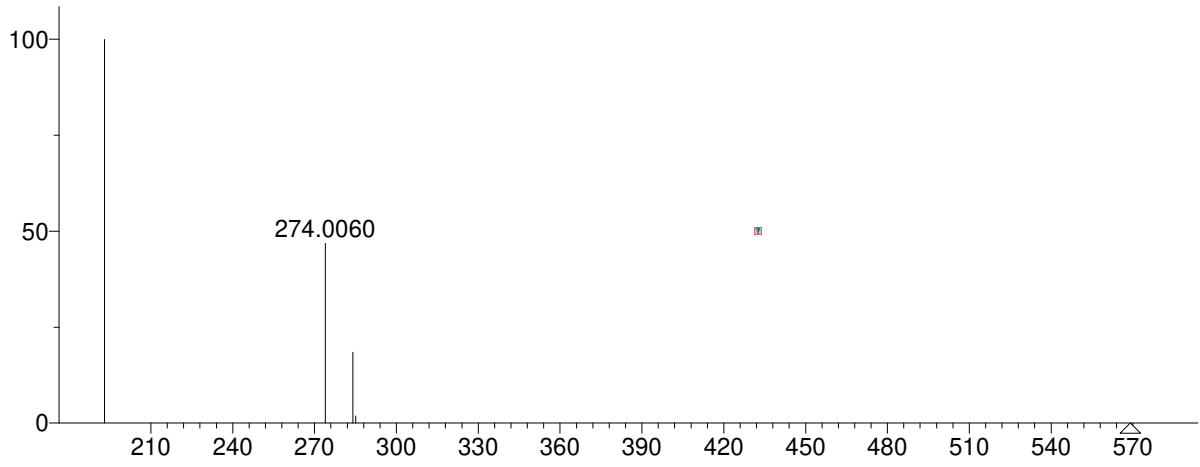

Unknown: Unknown (10.96\_415.1700m/z)  
Compound in Library Factor = 0

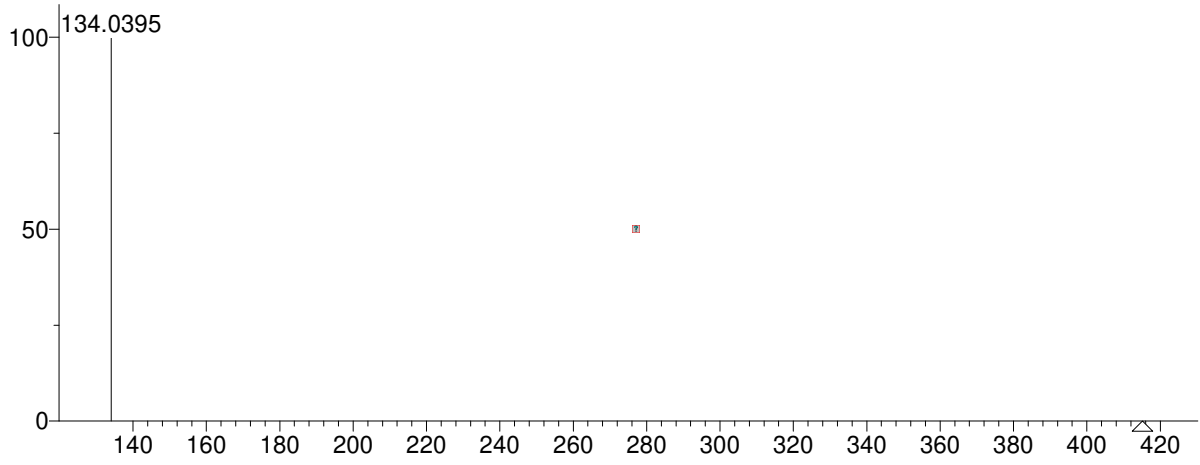

\*\* Search Report Page 1 of 2 \*\*

Unknown: Unknown (10.97\_413.2276m/z)  
Compound in Library Factor = -185

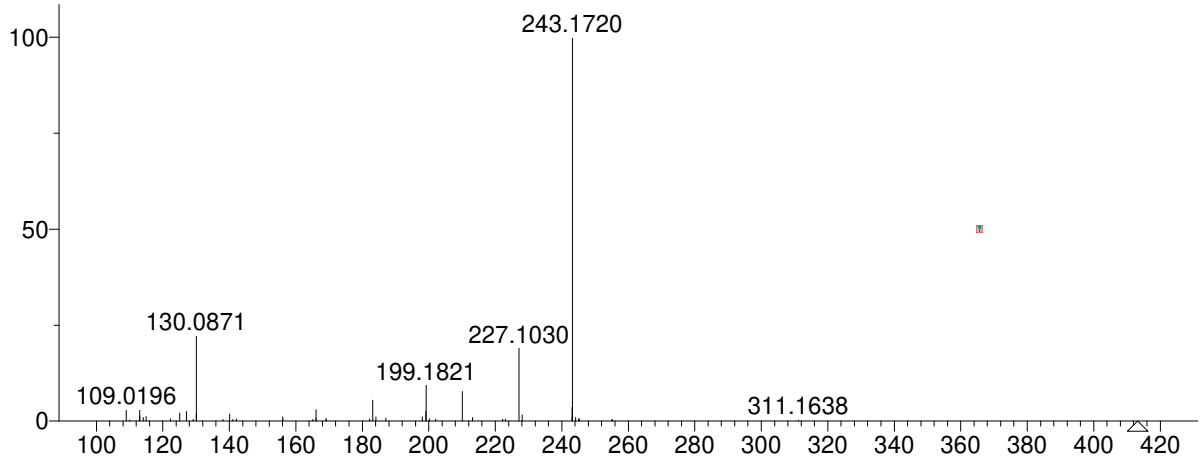

Hit 1 : Mevastatin [M+Na]<sup>+</sup> IT-FT 35% P=413.2  
C<sub>23</sub>H<sub>34</sub>O<sub>5</sub>; MF: 313; RMF: 970; Prob 93.6%; CAS: 73573-88-3; Lib: nist\_msms; ID: 165122.

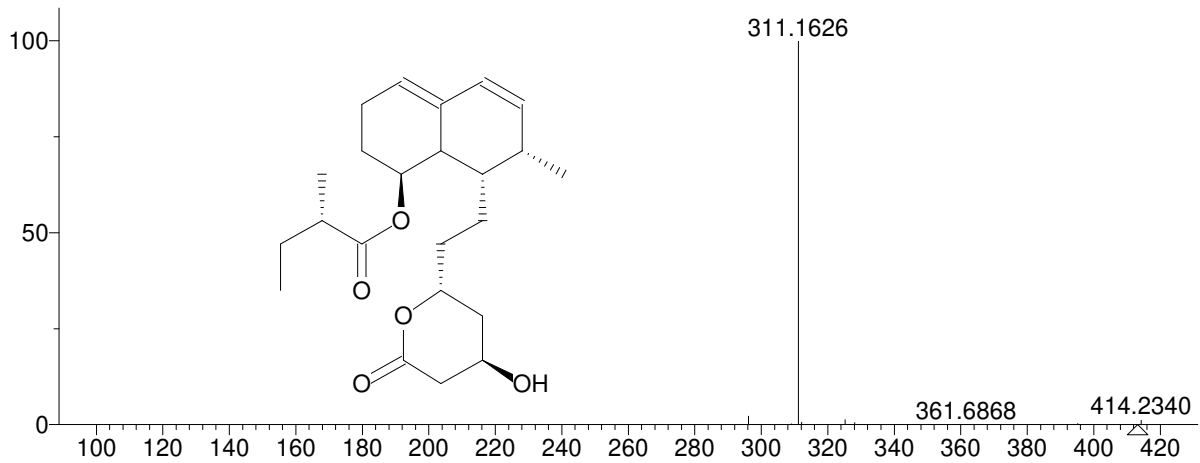

Hit 2 : His-Thr-Arg [M+H]<sup>+</sup> QTOF 40V P=413.2  
C<sub>16</sub>H<sub>28</sub>N<sub>8</sub>O<sub>5</sub>; MF: 5; RMF: 58; Prob 0.93%; Lib: nist\_msms; ID: 51182.

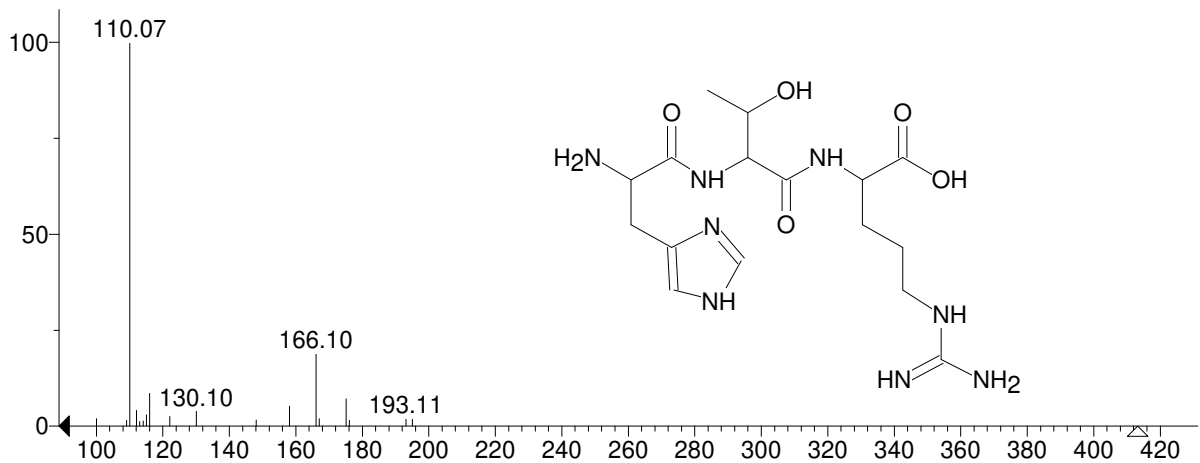



Hit 3 : 15-Deoxy-.DELTA.12,14-prostaglandin J2, 2-glycerol ester [M+Na]<sup>+</sup> HCD 41V P=413.2  
C<sub>23</sub>H<sub>34</sub>O<sub>5</sub>; MF: 3; RMF: 66; Prob 0.86%; CAS: 1176540-68-3; Lib: nist\_msms; ID: 87746.

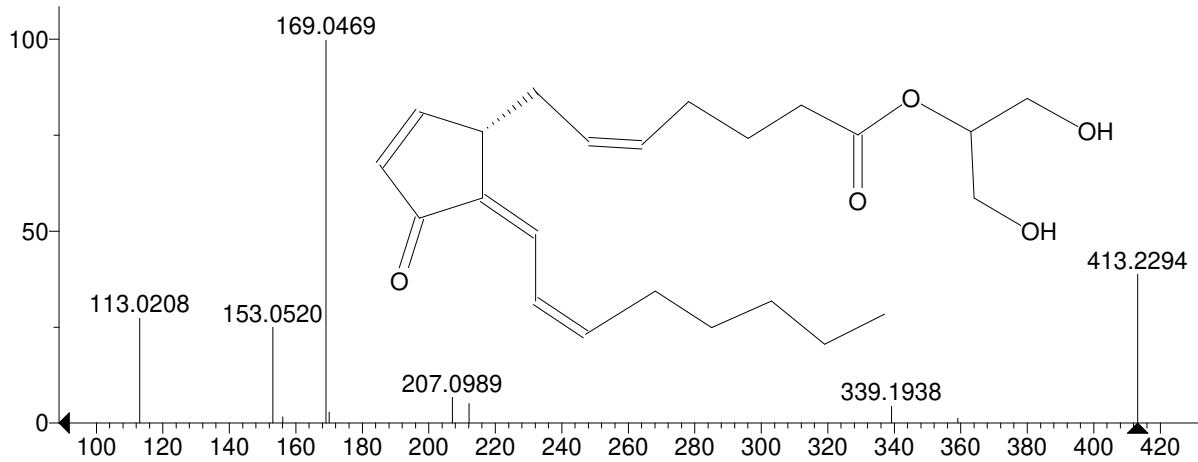

Hit 4 : Thr-His-Arg [M+H]<sup>+</sup> QTOF 30V P=413.2  
C<sub>16</sub>H<sub>28</sub>N<sub>8</sub>O<sub>5</sub>; MF: 0; RMF: 33; Prob 0.76%; Lib: nist\_msms; ID: 54064.

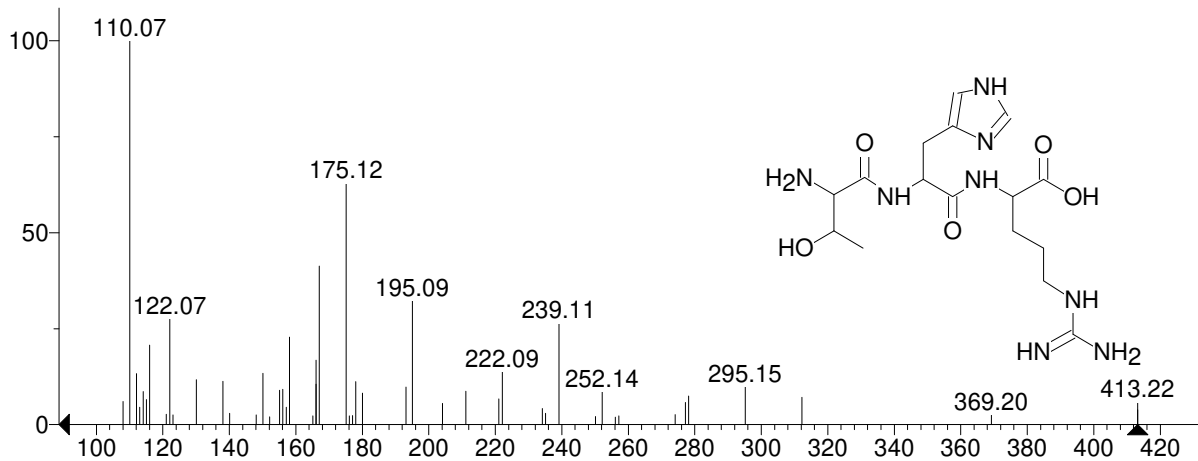

Hit 5 : Tussilagone [M+Na]<sup>+</sup> HCD 61V P=413.2  
C<sub>23</sub>H<sub>34</sub>O<sub>5</sub>; MF: 0; RMF: 11; Prob 0.76%; CAS: 104012-37-5; Lib: nist\_msms; ID: 425582.

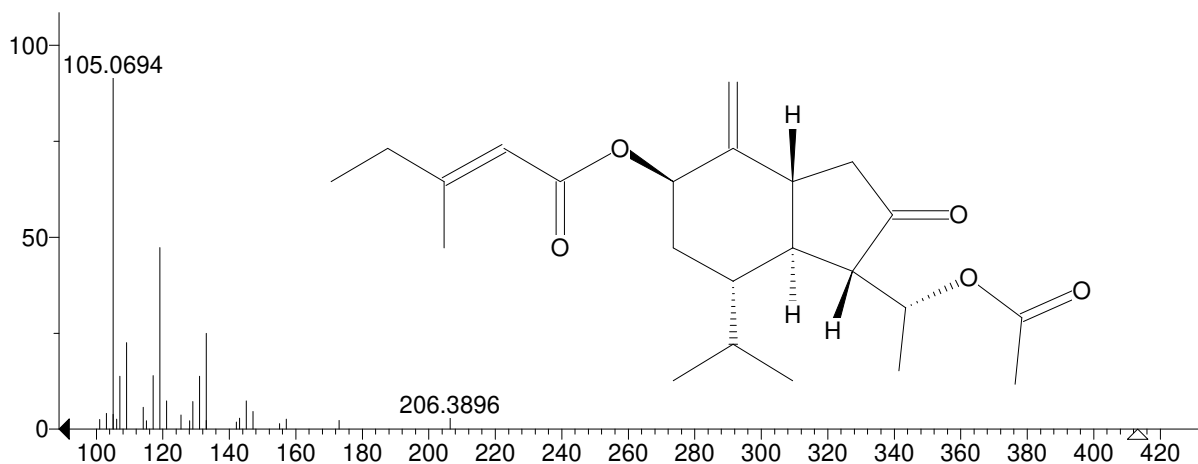

Unknown: Unknown (11.08\_245.0924m/z)  
Compound in Library Factor = -279

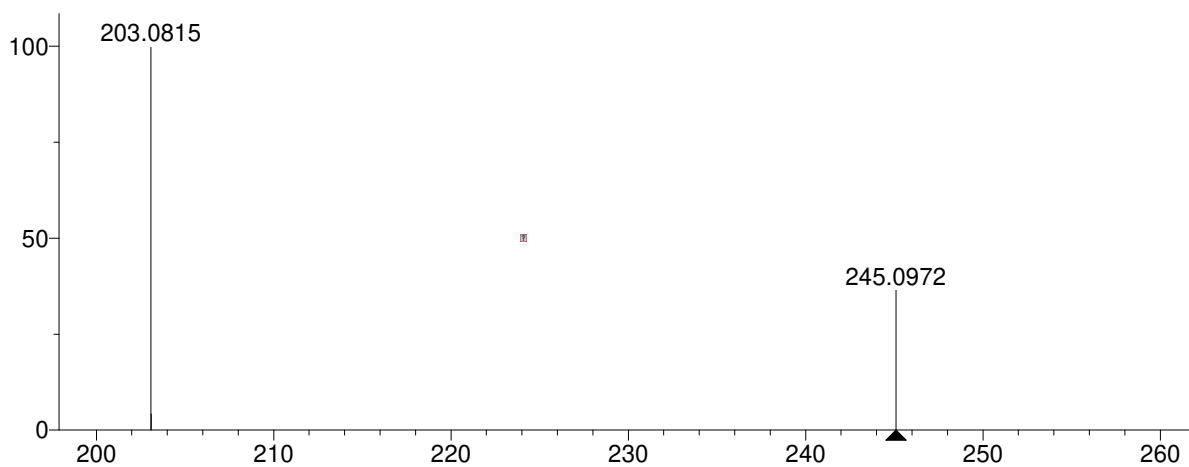

Hit 1 : N-Acetyltryptophan [M-H]<sup>-</sup> (20-30-40%) P=245.1  
C<sub>13</sub>H<sub>14</sub>N<sub>2</sub>O<sub>3</sub>; MF: 581; RMF: 971; Prob 84.7%; Lib: msms-neg-fiehnhilic; ID: 488.

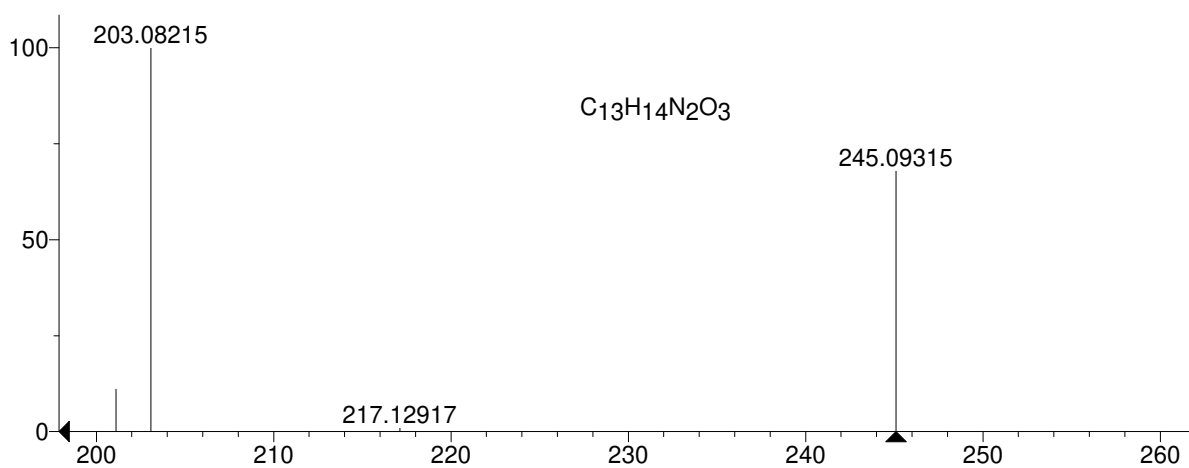

Hit 2 : N-ACETYL-D-TRYPTOPHAN  
C<sub>13</sub>H<sub>14</sub>N<sub>2</sub>O<sub>3</sub>; MF: 495; RMF: 951; Prob 7.54%; Lib: embl neg mcg; ID: 175.

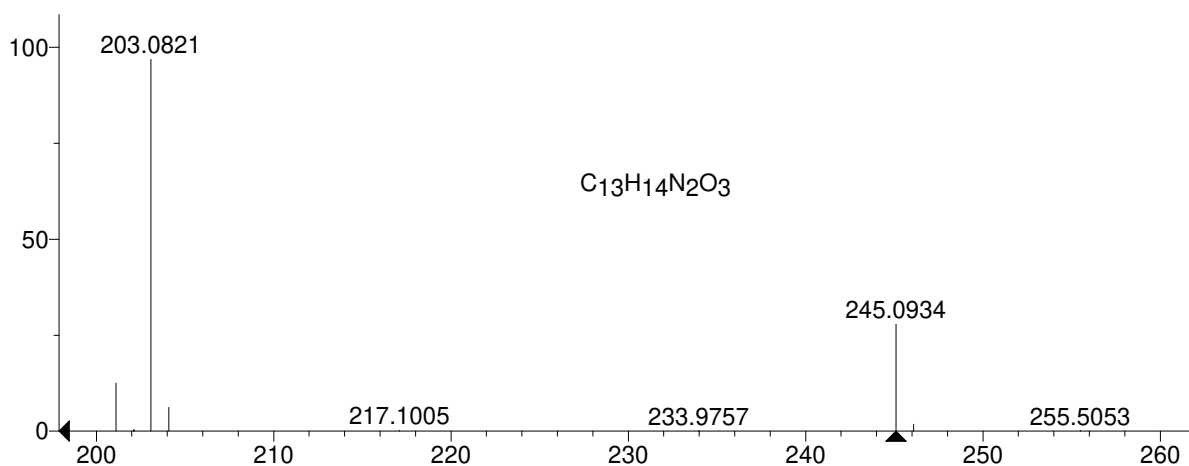

Hit 3 : N-ACETYL-D-TRYPTOPHAN [M-H]<sup>-</sup> P=245.1  
C<sub>13</sub>H<sub>14</sub>N<sub>2</sub>O<sub>3</sub>; MF: 495; RMF: 951; Prob 7.54%; Lib: msms neg mona\_ipb\_gnps\_plasma; ID: 22858.

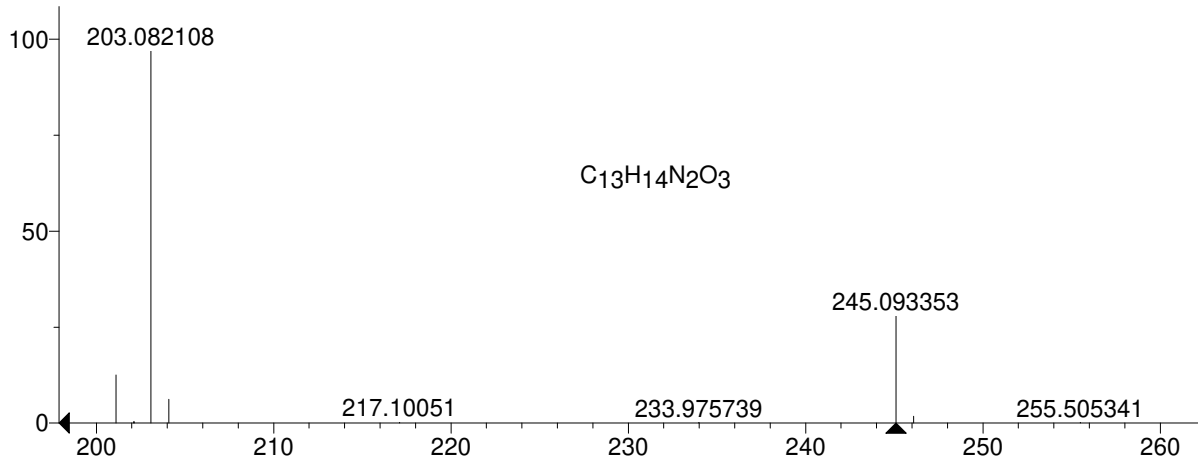

Hit 4 : N-acetyltryptophan [M-H]<sup>-</sup> 35HCD P=245.1  
C<sub>13</sub>H<sub>14</sub>N<sub>2</sub>O<sub>3</sub>; MF: 343; RMF: 911; Prob 0.20%; Lib: mona-export-lc-ms-ms\_negative\_mode; ID: 17702.

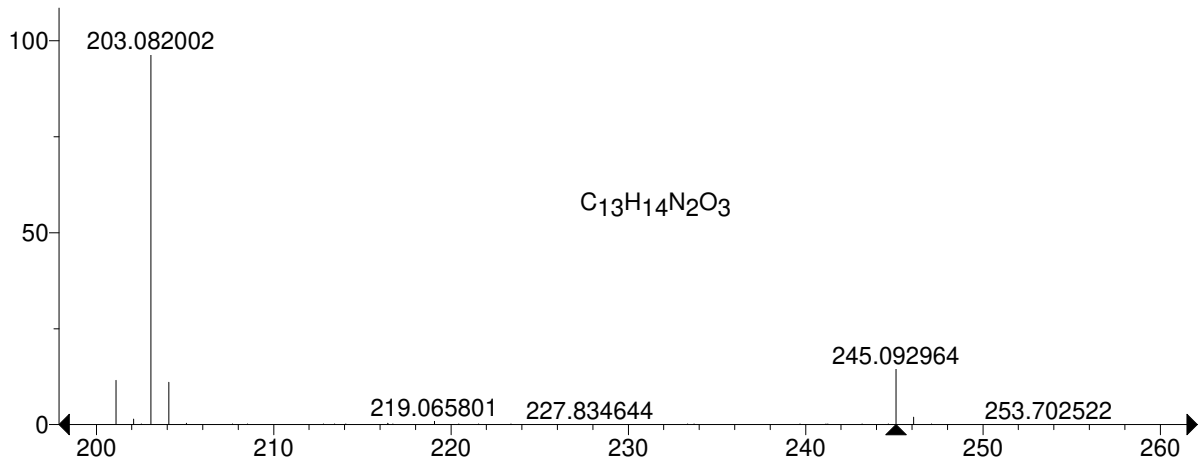

Hit 5 : Indole-3-acetyl-L-alanine [M-H]<sup>-</sup> 10 P=245.1  
C<sub>13</sub>H<sub>14</sub>N<sub>2</sub>O<sub>3</sub>; MF: 156; RMF: 509; Prob 0.00%; Lib: msms neg mona\_ipb\_gnps\_plasma; ID: 22060.

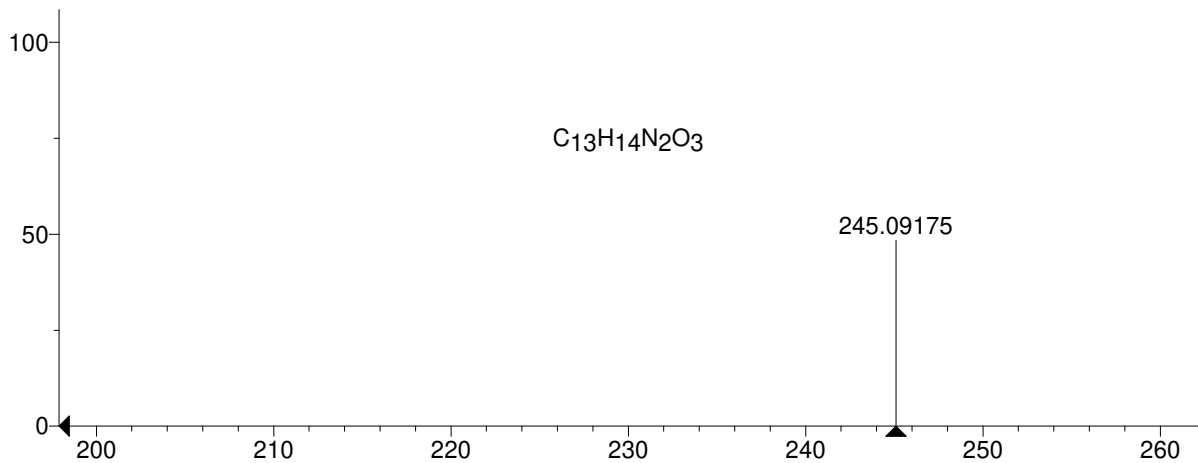

Unknown: Unknown (11.08\_435.1751 m/z)  
Compound in Library Factor = 0

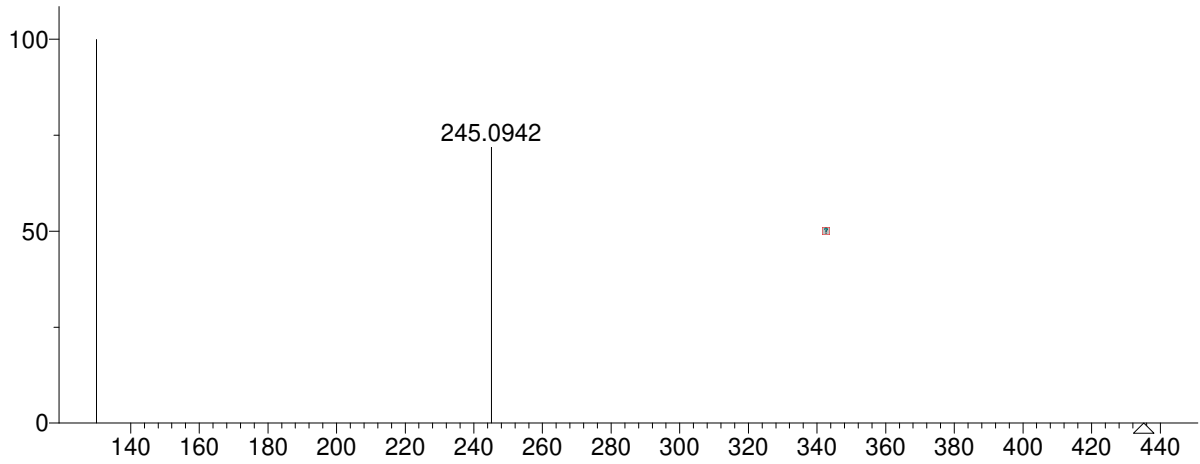

Hit 1 : 2,4-dihydroxy-5-methoxy-1'',6'',8''-trimethyldispiro[bis(oxolane)-3,2':5',7''-[3]oxatricyclo[6.3.1.0a'',A''1A''2]c  
C<sub>21</sub>H<sub>32</sub>O<sub>7</sub>; MF: 0; RMF: 25; Prob 100.0%; Lib: mona-export-vf-npl\_qexactive; ID: 10624.

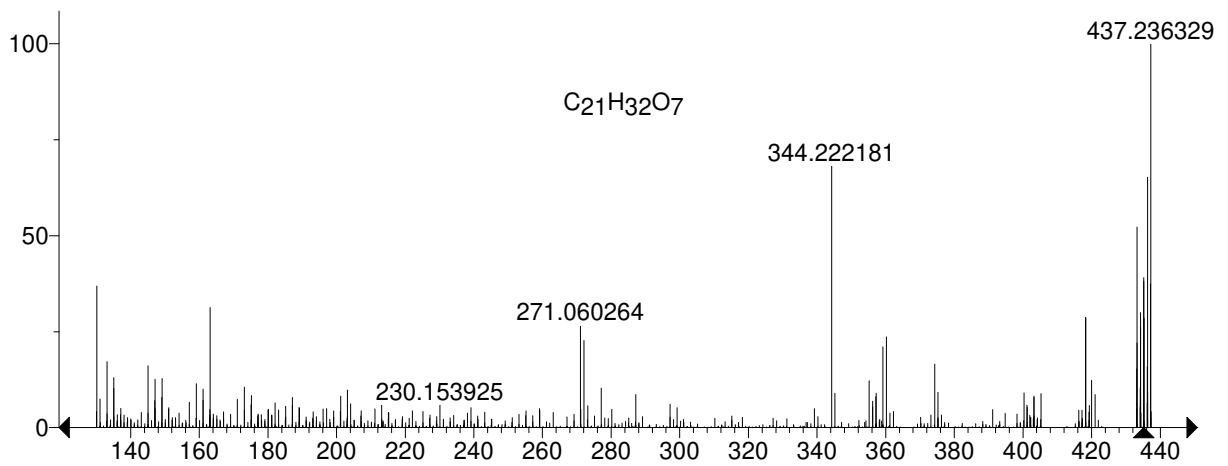

Unknown: Unknown (11.11\_390.1541m/z)  
Compound in Library Factor = 0

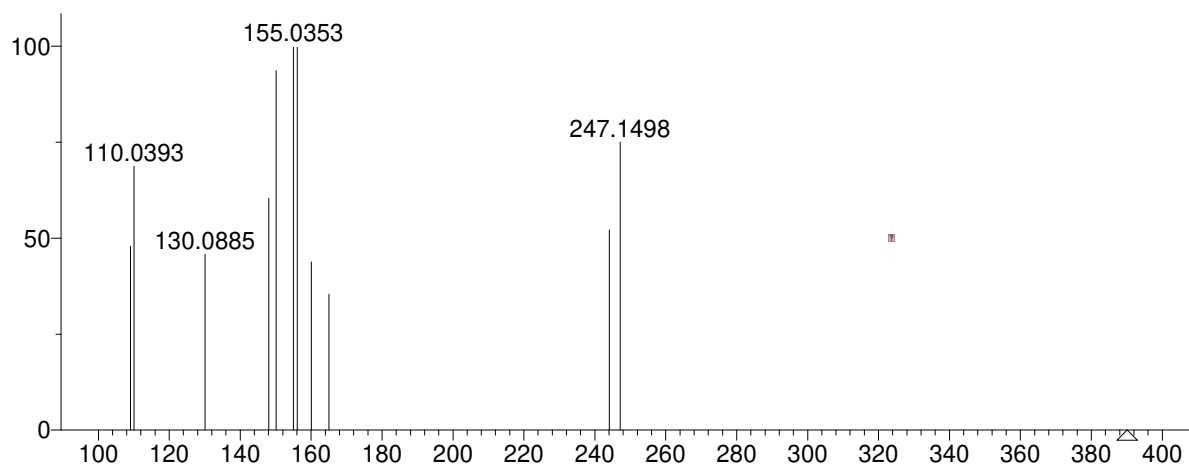

Hit 1 : [3-(4-hydroxy-3-methoxybenzoyl)-2,3-dimethyloxiran-2-yl]-(4-hydroxy-3-methoxyphenyl)methanone [M+NH<sup>+</sup>C<sub>20</sub>H<sub>20</sub>O<sub>7</sub>; MF: 0; RMF: 30; Prob 50.0%; Lib: mona-export-vf-npl\_qexactive; ID: 19626.

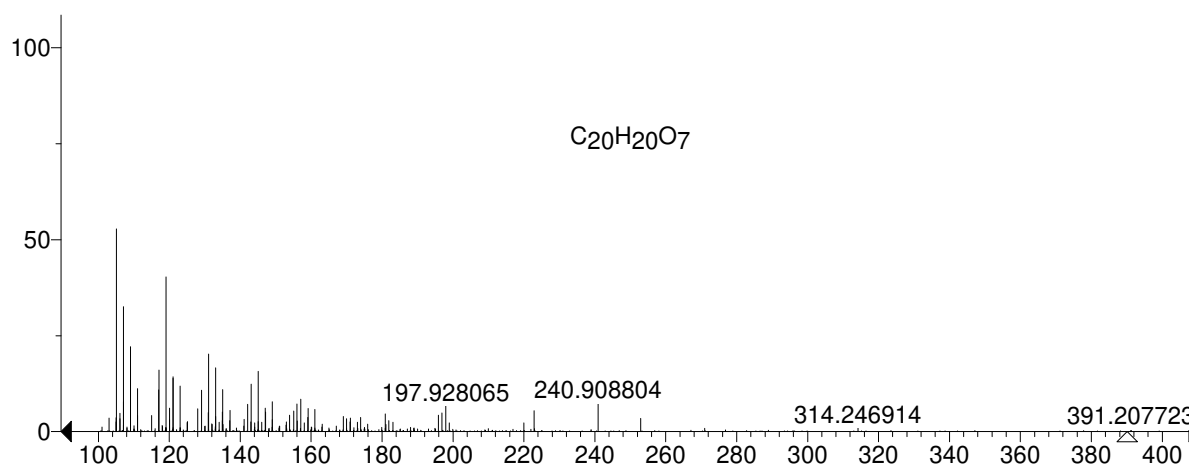

Hit 2 : (+)-Fluprostenol lactone diol [M+NH<sub>4</sub>]<sup>+</sup> HCD 85V P=390.2  
C<sub>18</sub>H<sub>19</sub>F<sub>3</sub>O<sub>5</sub>; MF: 0; RMF: 25; Prob 50.0%; CAS: 53872-60-9; Lib: nist\_msms; ID: 544834.

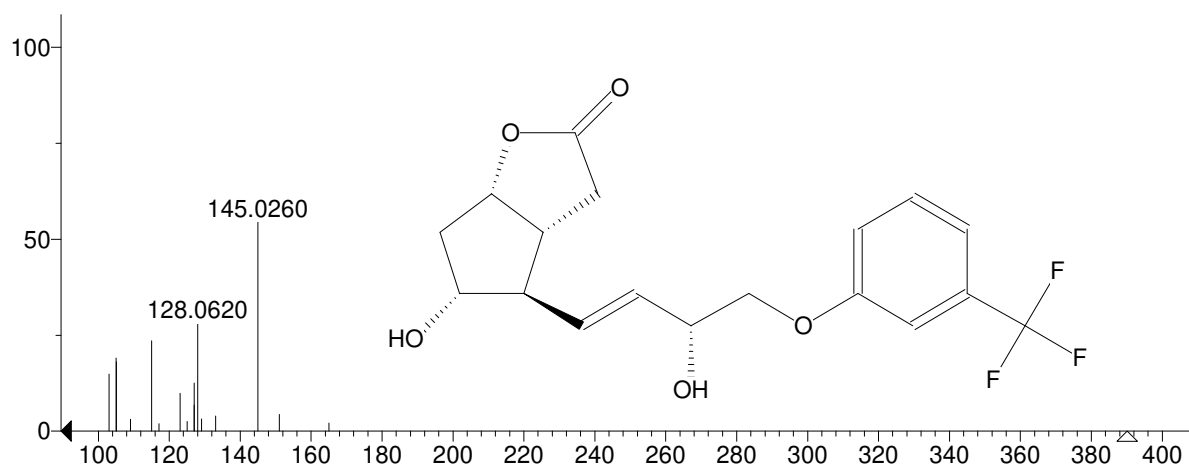

Unknown: Unknown (11.11\_413.2275m/z)  
Compound in Library Factor = 0

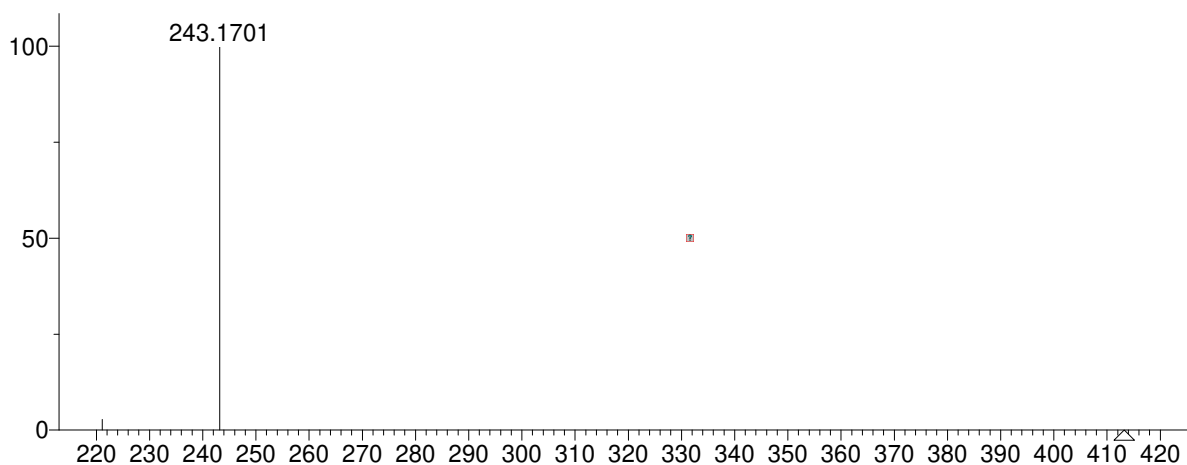

Hit 1 : His-Thr-Arg [M+H]<sup>+</sup> QTOF 30V P=413.2  
C<sub>16</sub>H<sub>28</sub>N<sub>8</sub>O<sub>5</sub>; MF: 0; RMF: 58; Prob 25.0%; Lib: nist\_msms; ID: 51181.

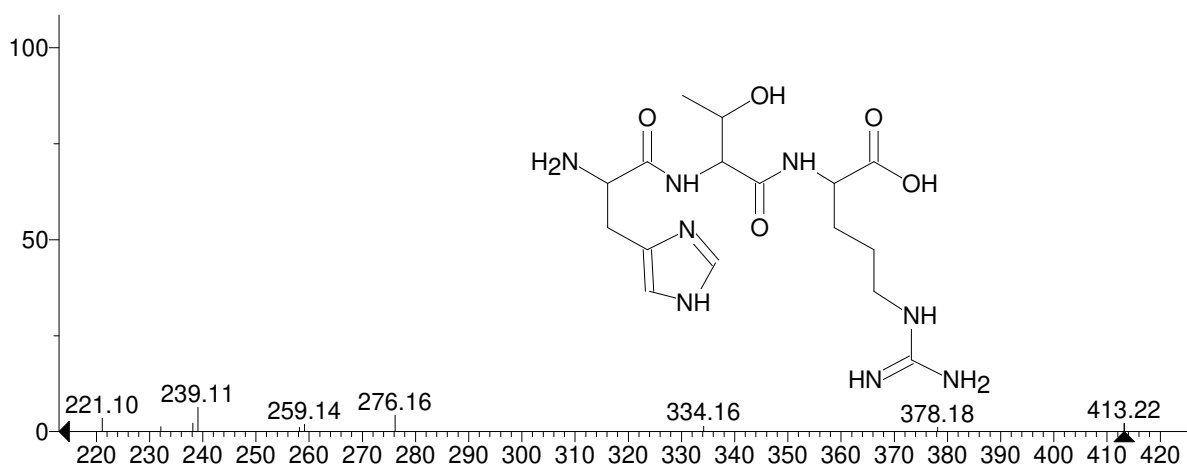

Hit 2 : Thr-His-Arg [M+H]<sup>+</sup> QTOF 30V P=413.2  
C<sub>16</sub>H<sub>28</sub>N<sub>8</sub>O<sub>5</sub>; MF: 0; RMF: 39; Prob 25.0%; Lib: nist\_msms; ID: 54064.

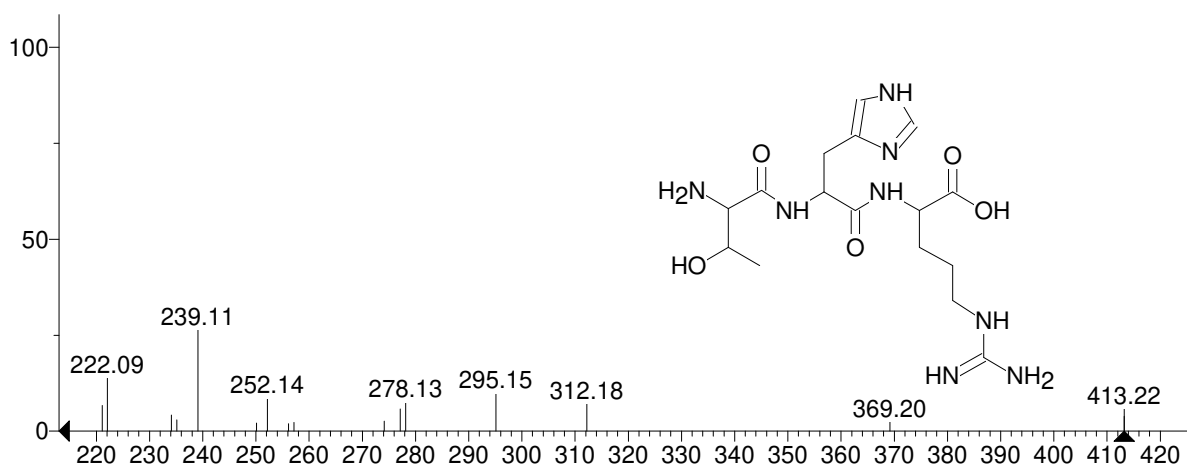

\*\* Search Report Page 2 of 2 \*\*

Hit 3 : 17(R)-Resolvin D1 methyl ester [M+Na]<sup>+</sup> IT 35% P=413.2  
C<sub>23</sub>H<sub>34</sub>O<sub>5</sub>; MF: 0; RMF: 4; Prob 25.0%; CAS: 937738-64-2; Lib: nist\_msms; ID: 378601.

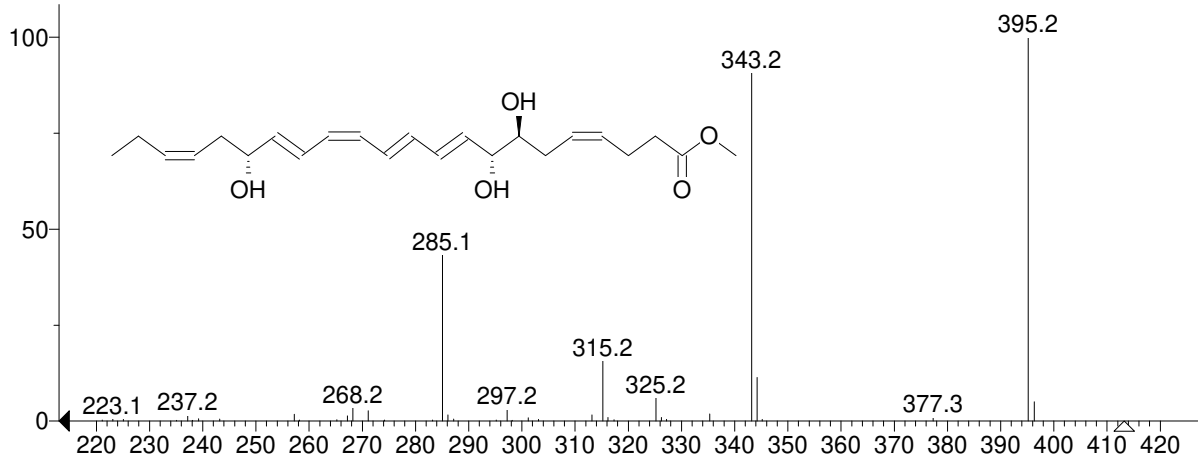

Hit 4 : Digoxigenin [M+Na]<sup>+</sup> IT 35% P=413.2  
C<sub>23</sub>H<sub>34</sub>O<sub>5</sub>; MF: 0; RMF: 3; Prob 25.0%; CAS: 1672-46-4; Lib: nist\_msms; ID: 308680.

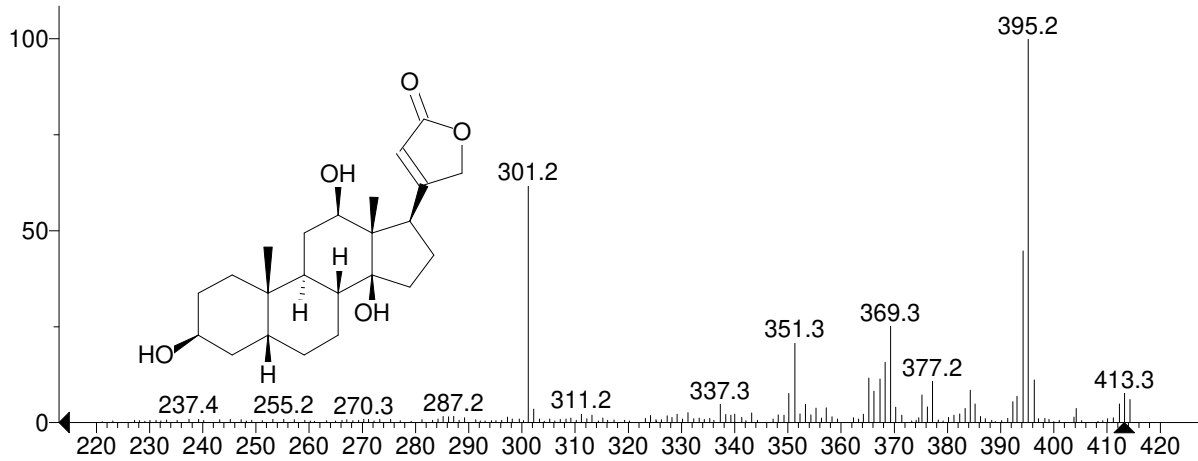

Unknown: Unknown (11.16\_463.2062m/z)  
Compound in Library Factor = -3273

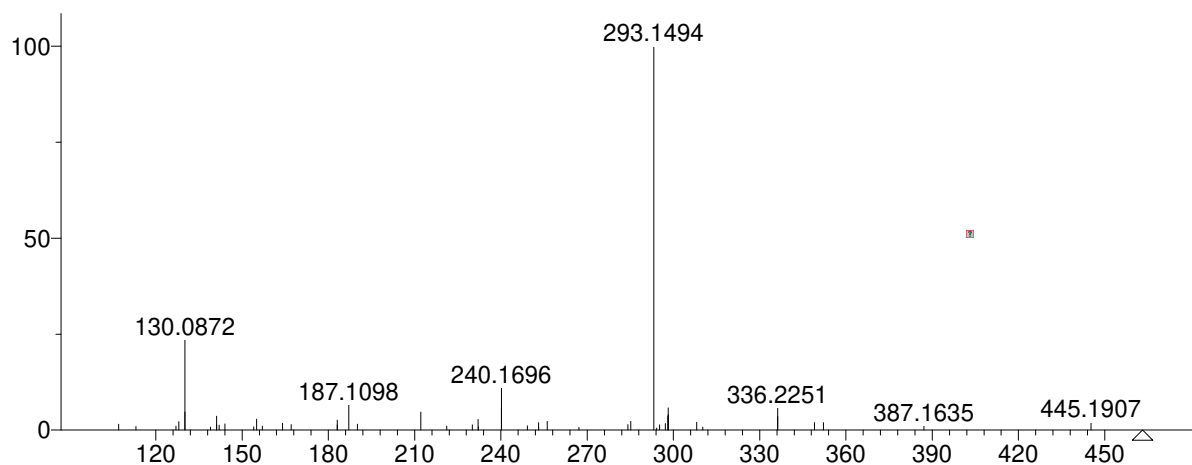

Hit 1 : 13(R),14(R)-Epoxyfluprostenol isopropyl ester [M+H-3H<sub>2</sub>O]<sup>+</sup> HCD 83V P=463.2  
C<sub>26</sub>H<sub>35</sub>F<sub>3</sub>O<sub>7</sub>; MF: 8; RMF: 95; Prob 100.0%; Lib: nist\_msms; ID: 254084.

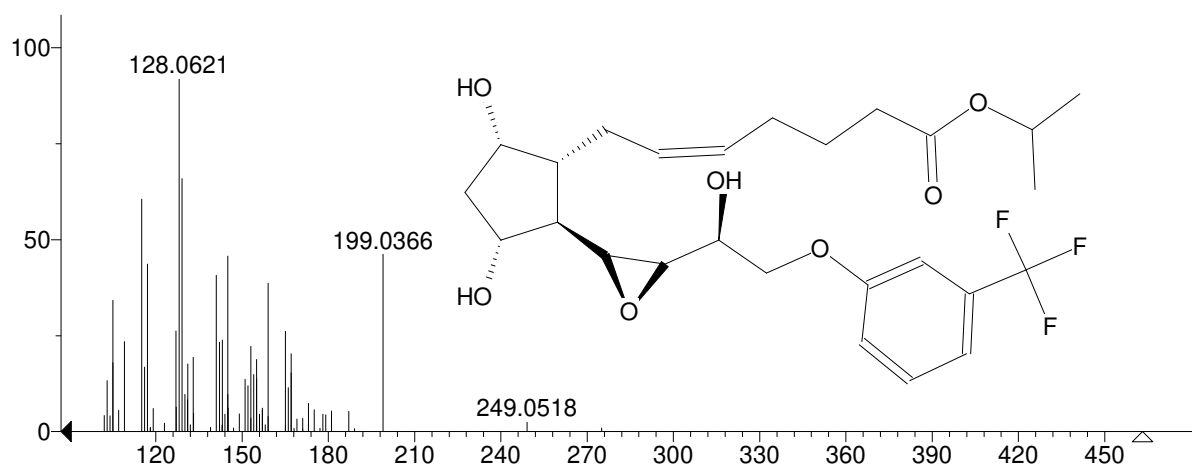



Unknown: Unknown (11.28\_413.2277m/z)  
Compound in Library Factor = 0

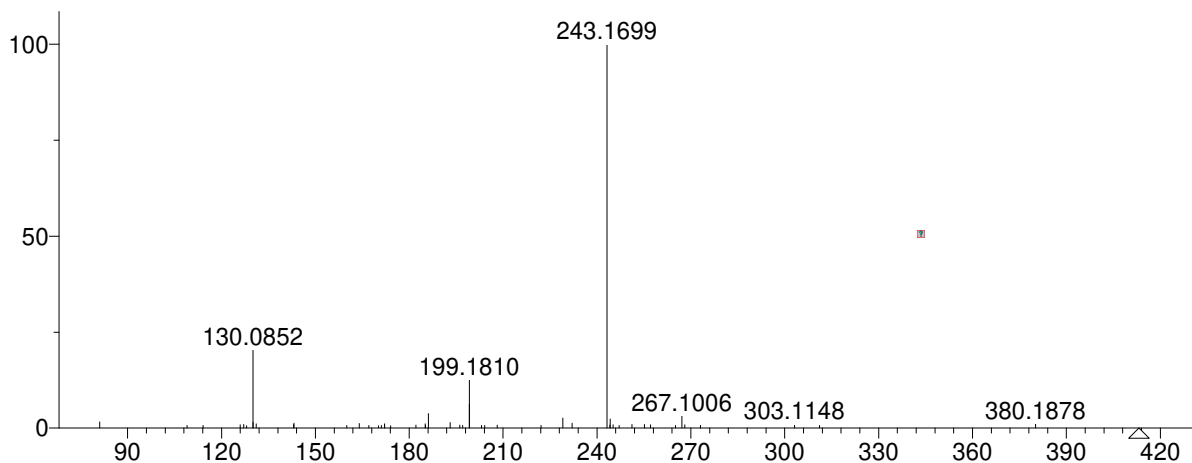

Hit 1 : Mevastatin [M+Na]<sup>+</sup> HCD 161V P=413.2  
C<sub>23</sub>H<sub>34</sub>O<sub>5</sub>; MF: 0; RMF: 17; Prob 16.7%; CAS: 73573-88-3; Lib: nist\_msms; ID: 165121.

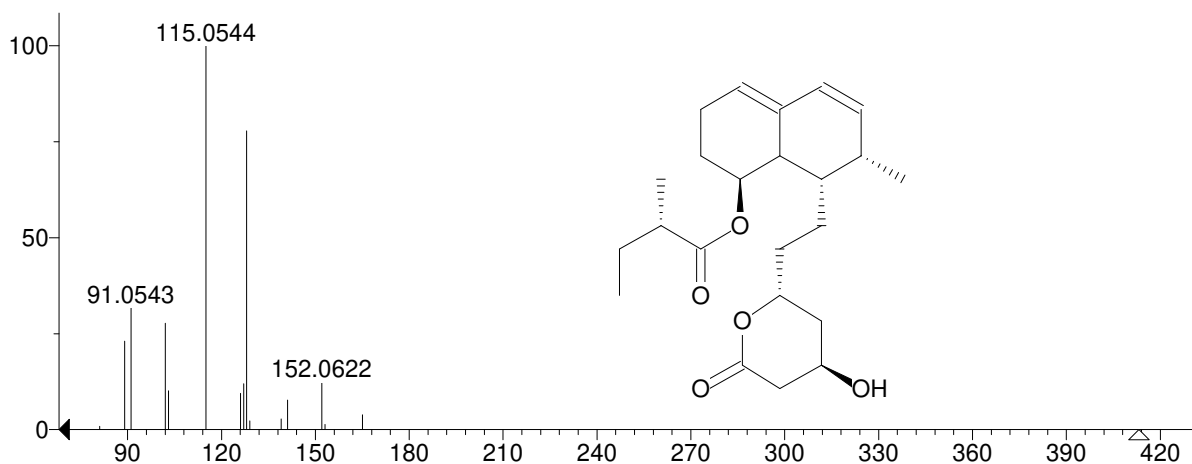

Hit 2 : Digoxigenin [M+Na]<sup>+</sup> IT 35% P=413.2  
C<sub>23</sub>H<sub>34</sub>O<sub>5</sub>; MF: 0; RMF: 16; Prob 16.7%; CAS: 1672-46-4; Lib: nist\_msms; ID: 308680.

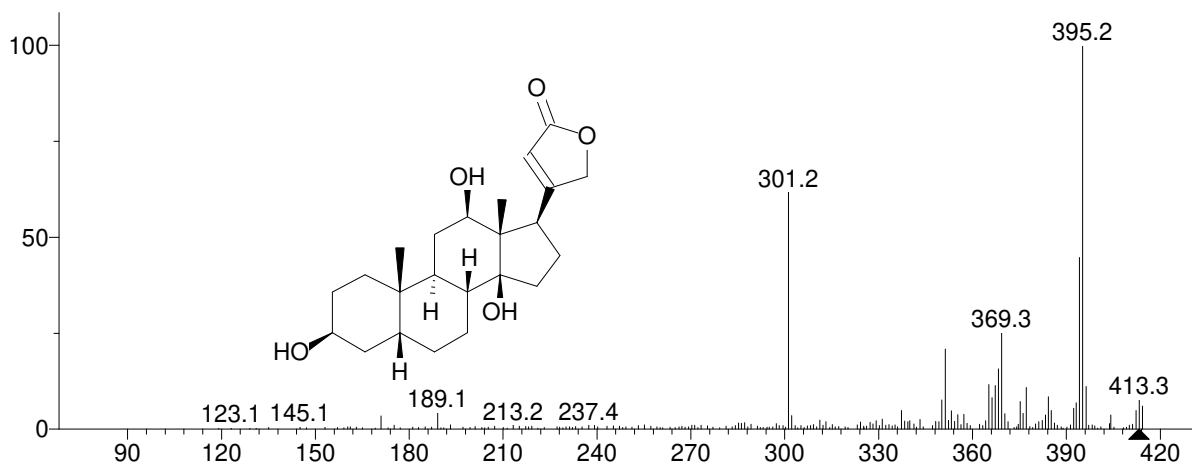

Hit 3 : Thr-His-Arg [M+H]<sup>+</sup> QTOF 20V P=413.2  
C<sub>16</sub>H<sub>28</sub>N<sub>8</sub>O<sub>5</sub>; MF: 0; RMF: 8; Prob 16.7%; Lib: nist\_msms; ID: 54063.

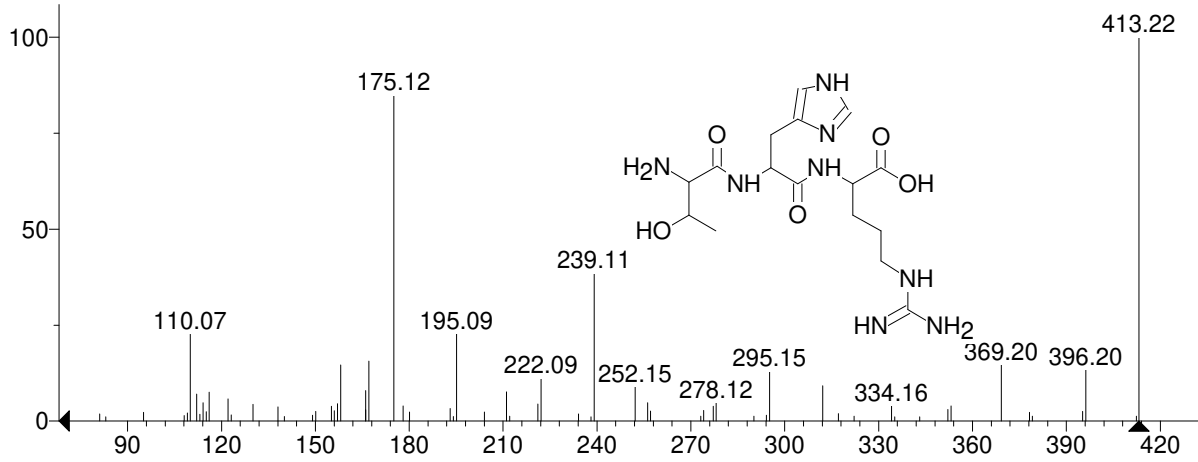

Hit 4 : Tussilagonone [M+Na]<sup>+</sup> HCD 33V P=413.2  
C<sub>23</sub>H<sub>34</sub>O<sub>5</sub>; MF: 0; RMF: 6; Prob 16.7%; CAS: 104012-37-5; Lib: nist\_msms; ID: 425581.

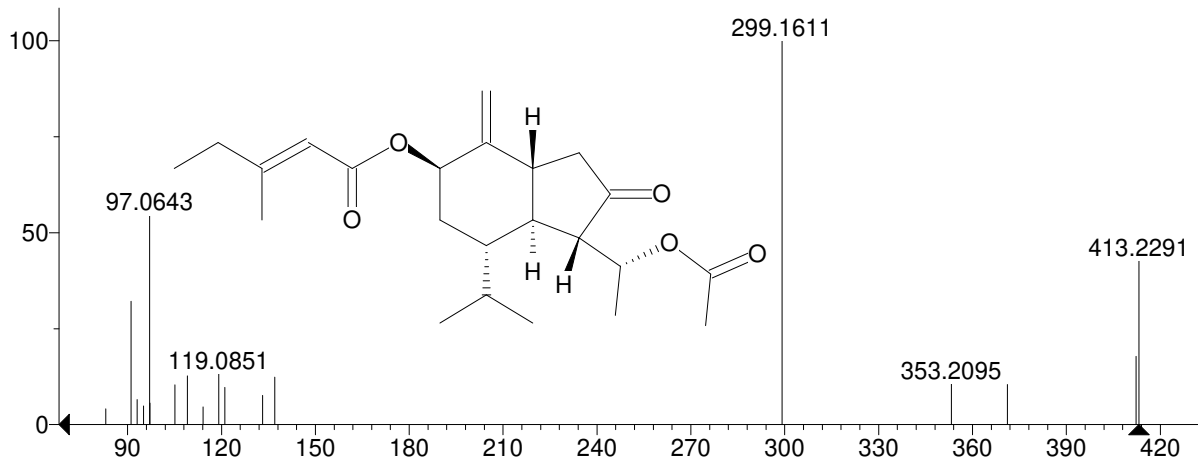

Hit 5 : 17(R)-Resolvin D1 methyl ester [M+Na]<sup>+</sup> IT 35% P=413.2  
C<sub>23</sub>H<sub>34</sub>O<sub>5</sub>; MF: 0; RMF: 2; Prob 16.7%; CAS: 937738-64-2; Lib: nist\_msms; ID: 378601.

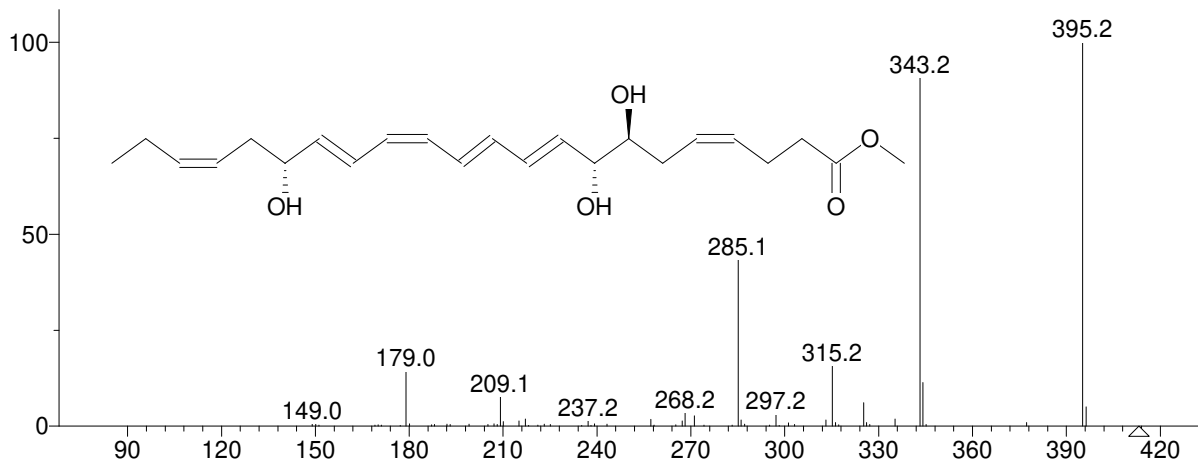

Unknown: Unknown (11.29\_437.1910m/z)  
Compound in Library Factor = 0

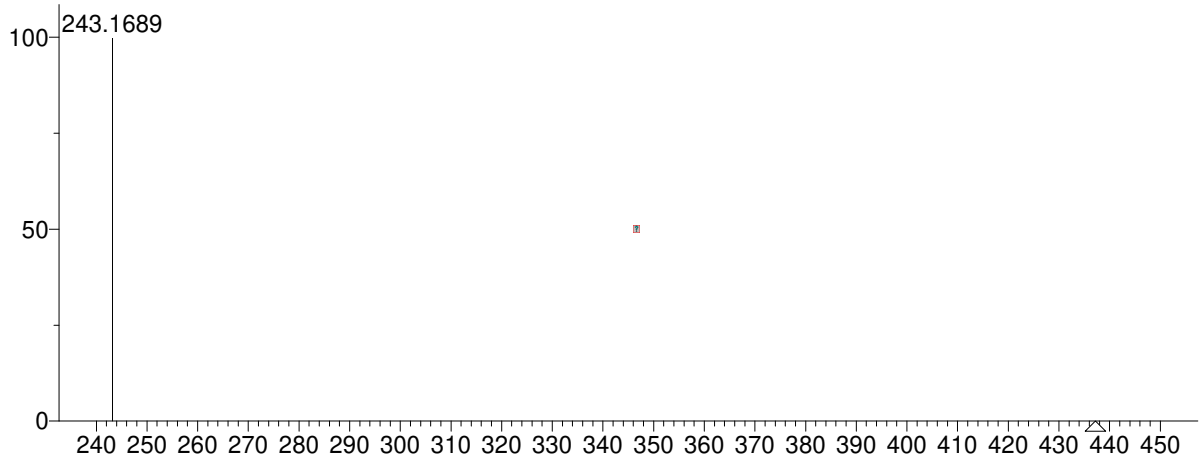

Unknown: Unknown (11.30\_787.3152m/z)  
Compound in Library Factor = 0

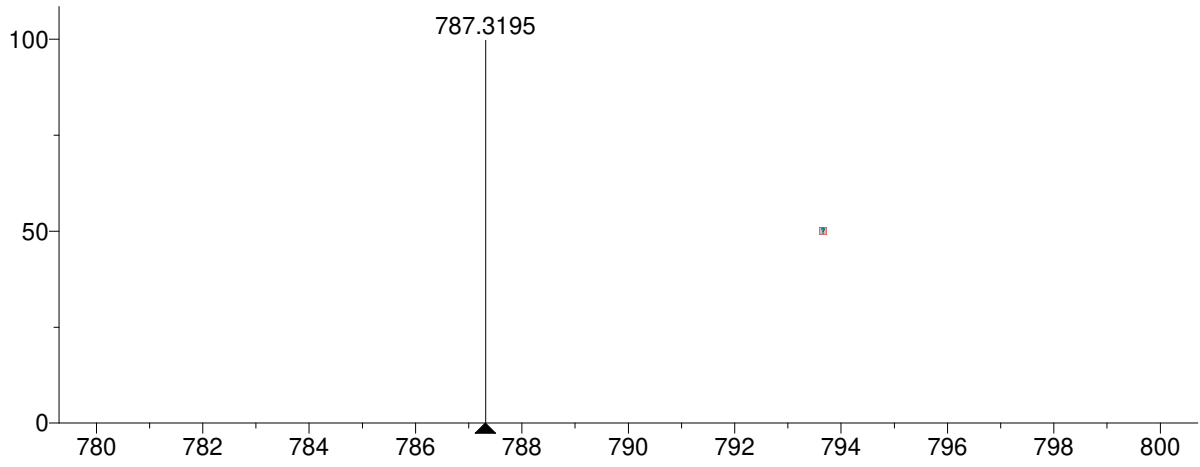

\*\* Search Report Page 1 of 1 \*\*

Unknown: Unknown (11.31\_373.0223m/z)  
Compound in Library Factor = -3273

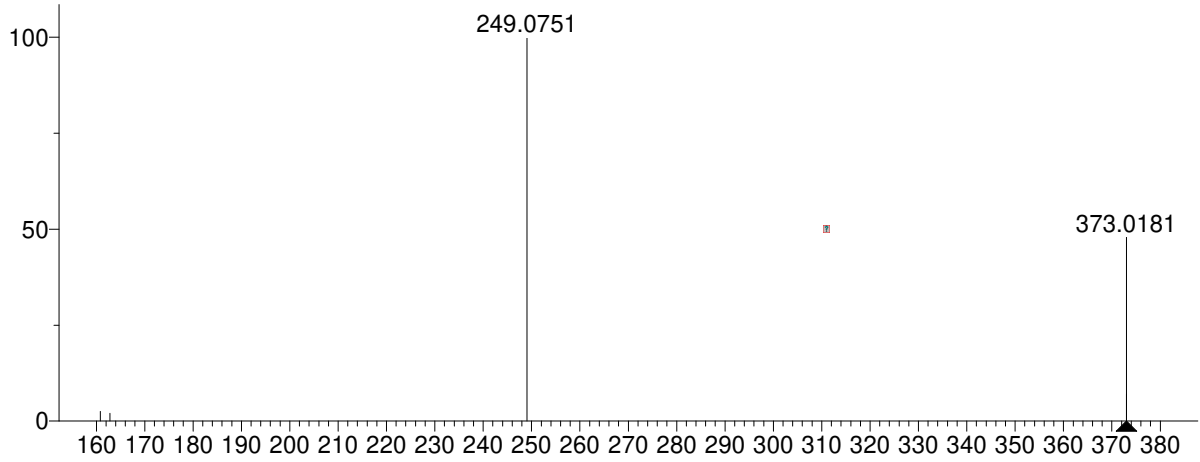

Hit 1 : Transfluthrin [M+H+2i]+ HCD 13V P=373  
C15H12Cl2F4O2; MF: 2; RMF: 346; Prob 100.0%; CAS: 118712-89-3; Lib: nist\_msms; ID: 521809.

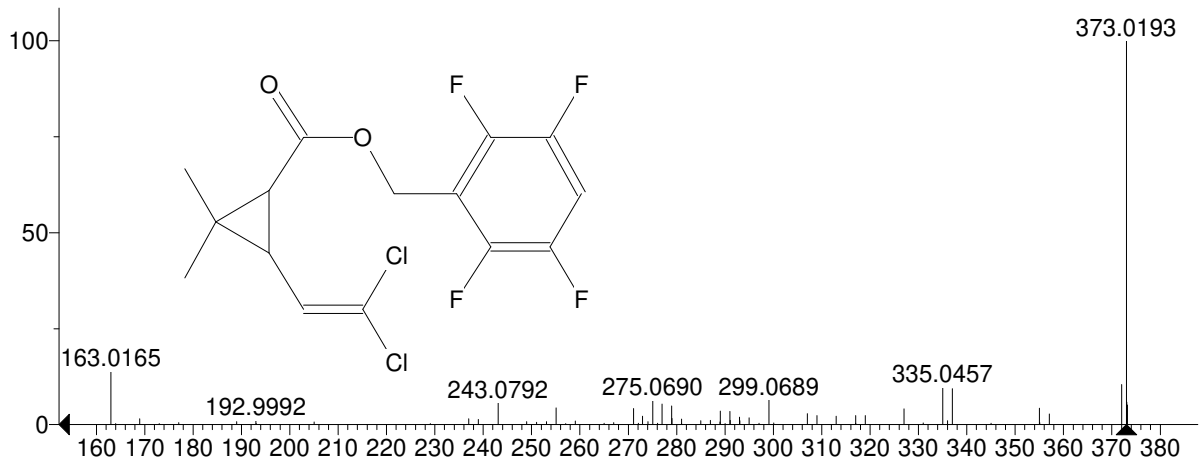

Unknown: Unknown (11.40\_413.2280m/z)  
Compound in Library Factor = 0

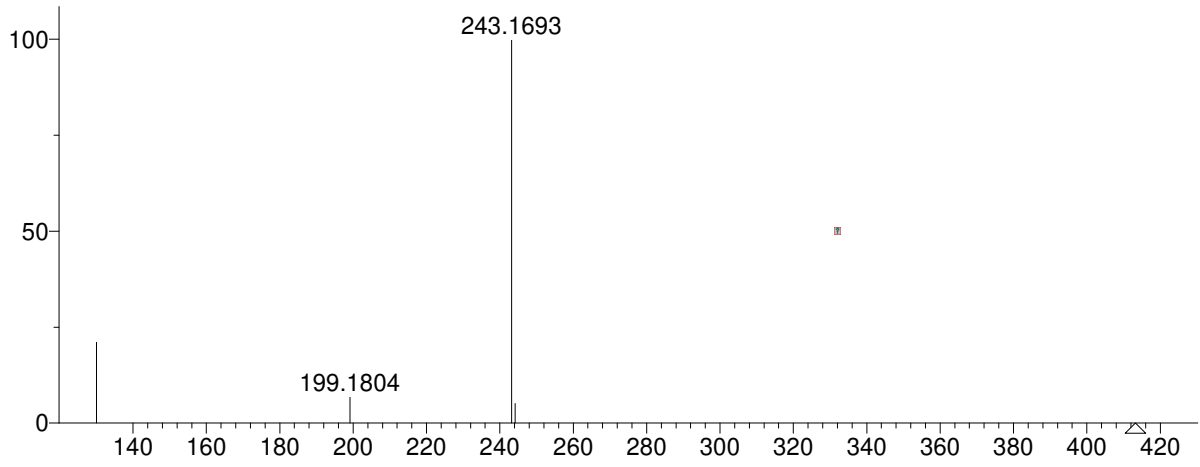

Unknown: Unknown (11.41\_789.3679m/z)  
Compound in Library Factor = 0

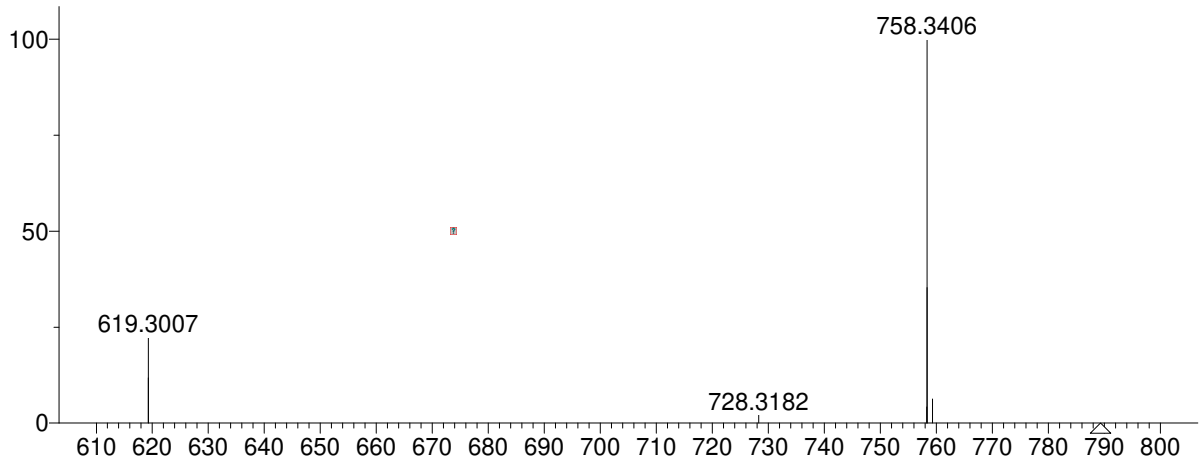

Unknown: Unknown (11.42\_417.1751 m/z)  
Compound in Library Factor = 0

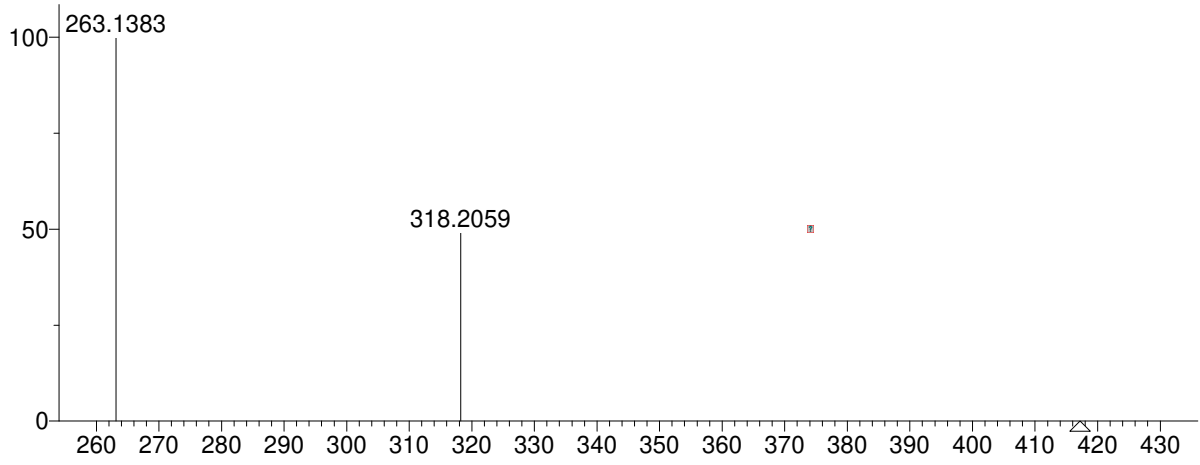



Unknown: Unknown (11.42\_433.1952m/z)  
Compound in Library Factor = 0

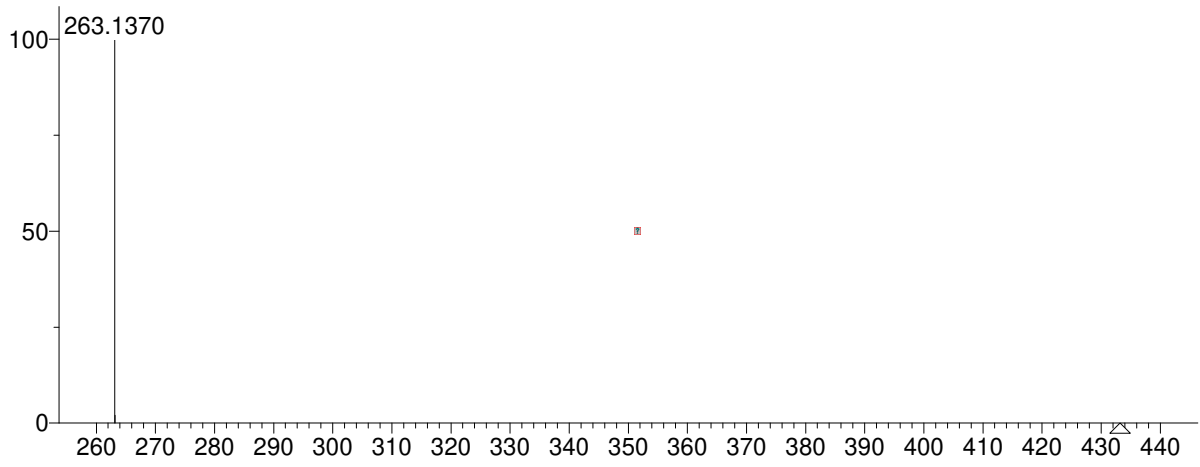

Unknown: Unknown (11.42\_601.9156m/z)  
Compound in Library Factor = 0

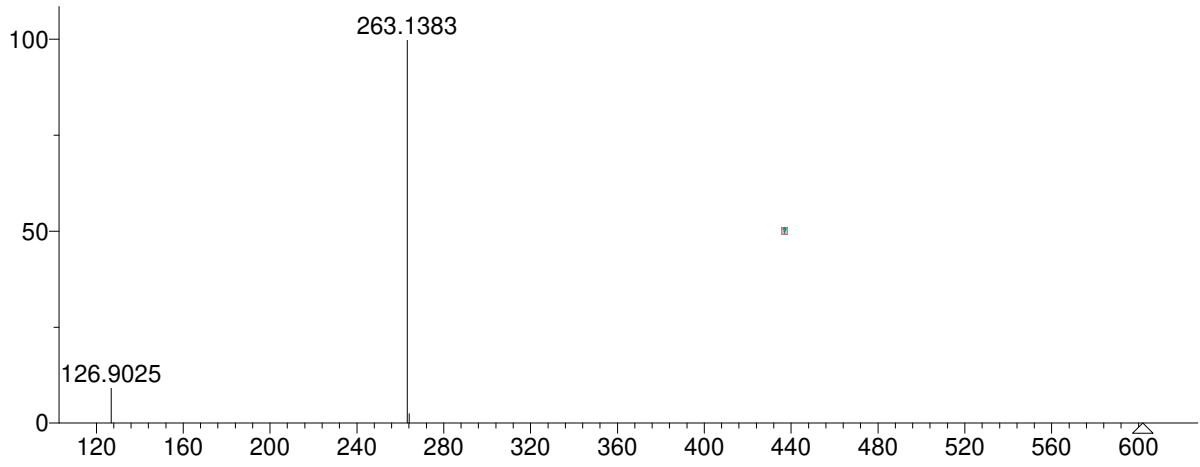

Unknown: Unknown (11.43\_500.2240m/z)  
Compound in Library Factor = 0

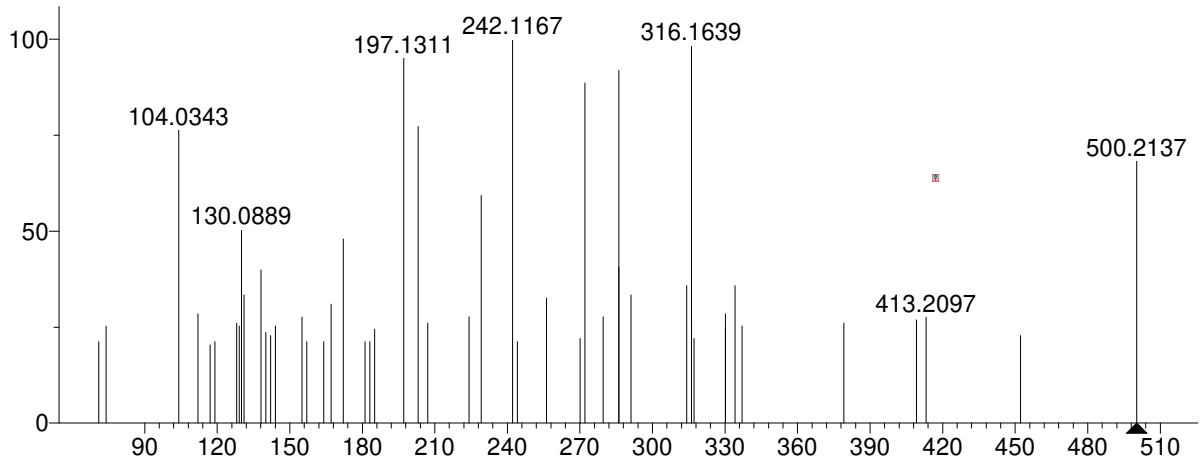

Unknown: Unknown (11.43\_758.3476m/z)  
Compound in Library Factor = 0

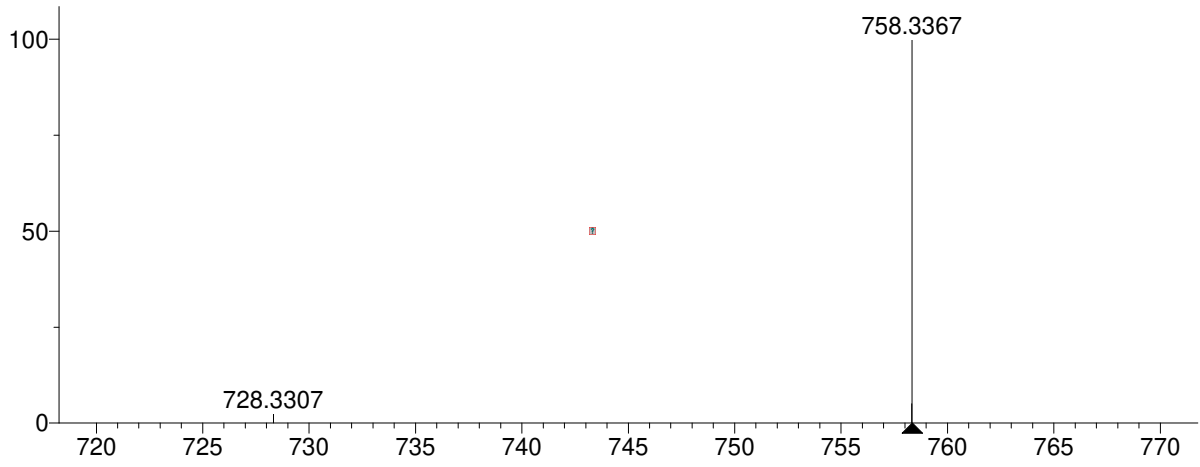

\*\* Search Report Page 1 of 2 \*\*

Unknown: Unknown (11.45\_275.0546m/z)  
Compound in Library Factor = 100

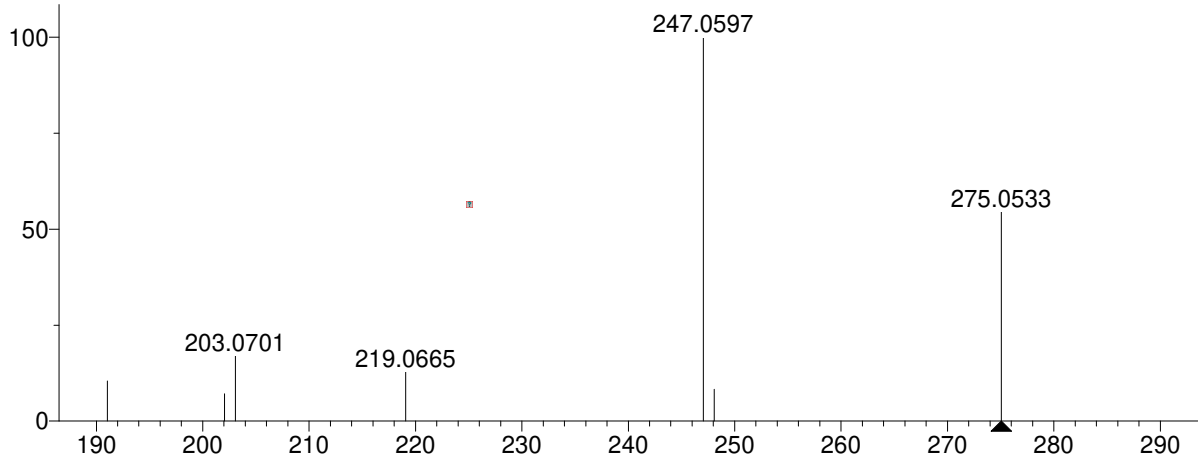

Hit 1 : Dihydromyricetin [M+H-CH<sub>2</sub>O<sub>2</sub>]<sup>+</sup> HCD 13V P=275.1  
C<sub>15</sub>H<sub>12</sub>O<sub>8</sub>; MF: 473; RMF: 765; Prob 97.7%; CAS: 27200-12-0; Lib: nist\_msms; ID: 385122.

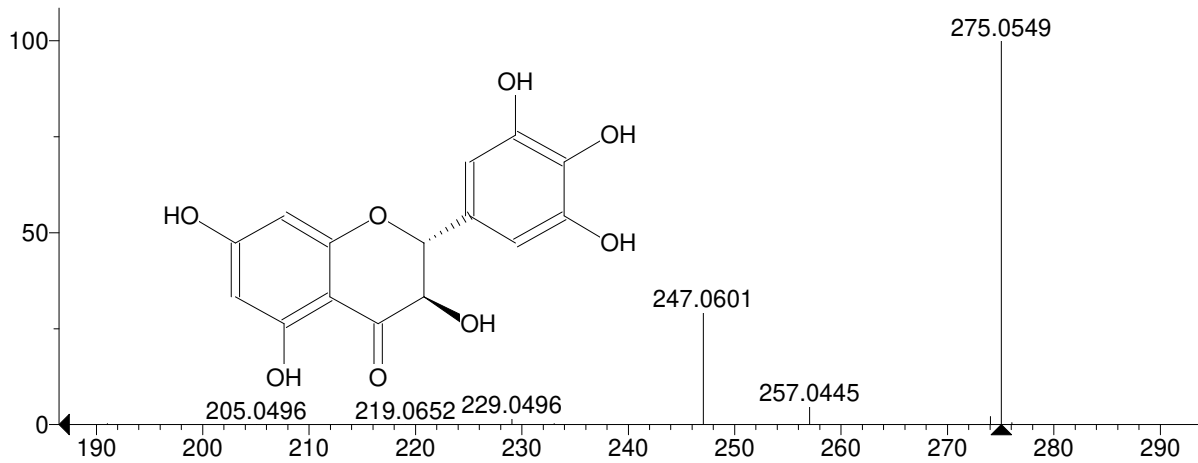

Hit 2 : 1,2,3-Benzenetricarboxylic acid, trimethyl ester [M+Na]<sup>+</sup> HCD 16V P=275.1  
C<sub>12</sub>H<sub>12</sub>O<sub>6</sub>; MF: 60; RMF: 493; Prob 0.97%; CAS: 2672-57-3; Lib: nist\_msms; ID: 306556.

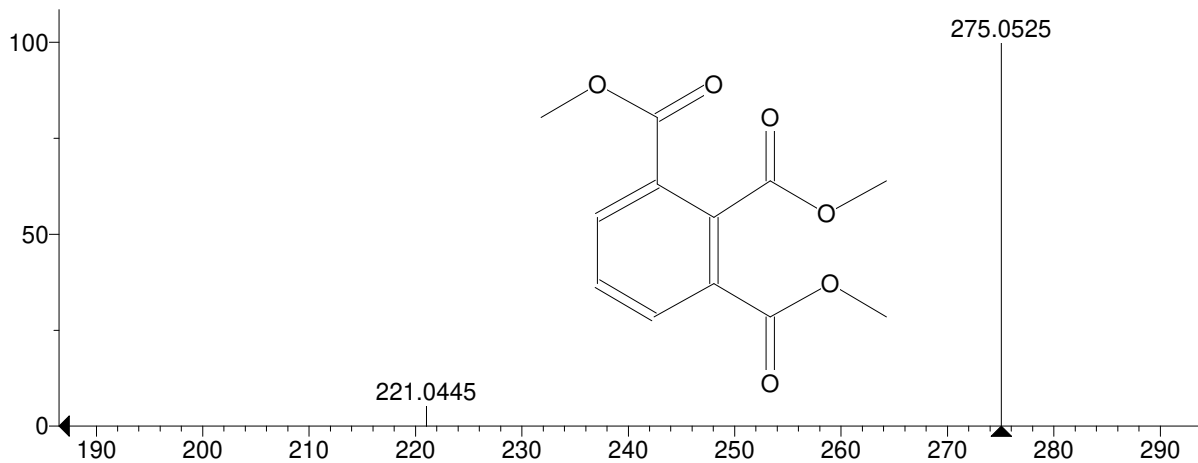

Hit 3 : Terbufos sulfone [M+H-CH<sub>2</sub>S]<sup>+</sup> HCD 5V P=275.1  
C<sub>9</sub>H<sub>21</sub>O<sub>4</sub>PS<sub>3</sub>; MF: 43; RMF: 461; Prob 0.53%; CAS: 56070-16-7; Lib: nist\_msms; ID: 496673.

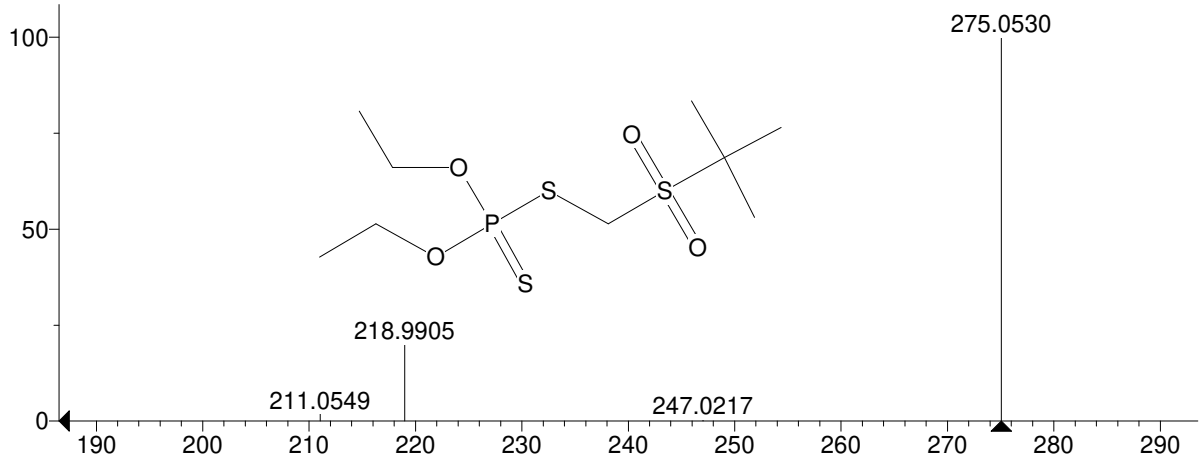

Hit 4 : NCGC00381160-01\_C<sub>14</sub>H<sub>12</sub>O<sub>6</sub>\_Spiro[cyclopent-4-ene-1,1'(3'H)-isobenzofuran]-3,3'-dione, 2,4'-dihydroxy  
C<sub>14</sub>H<sub>12</sub>O<sub>6</sub>; MF: 31; RMF: 376; Prob 0.35%; Lib: mona-export-gnps; ID: 12305.

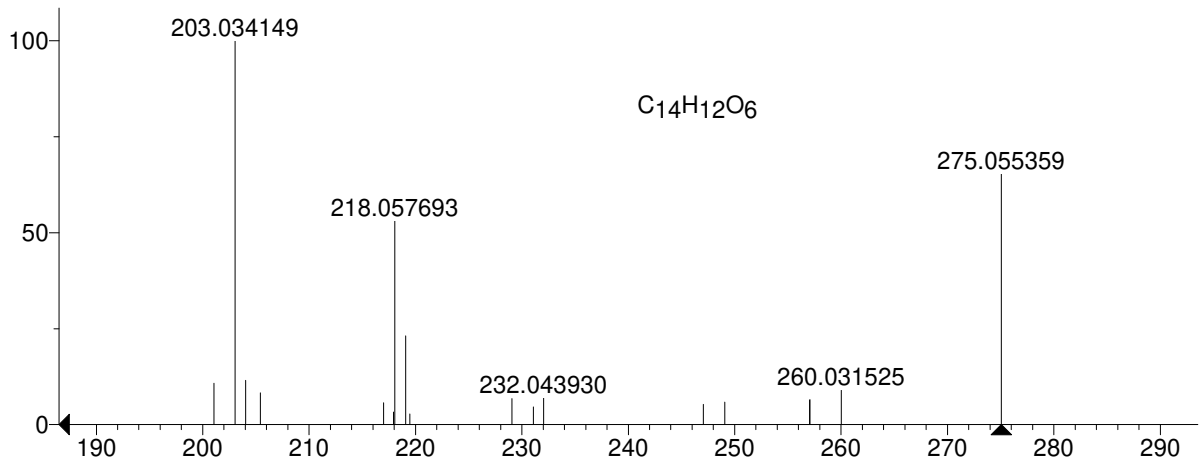

Hit 5 : NCGC00381290-01!2,3,6,8-tetrahydroxy-1-methylxanthen-9-one [M+H]<sup>+</sup> P=275.1  
C<sub>14</sub>H<sub>10</sub>O<sub>6</sub>; MF: 29; RMF: 392; Prob 0.32%; Lib: mona-export-gnps; ID: 7277.

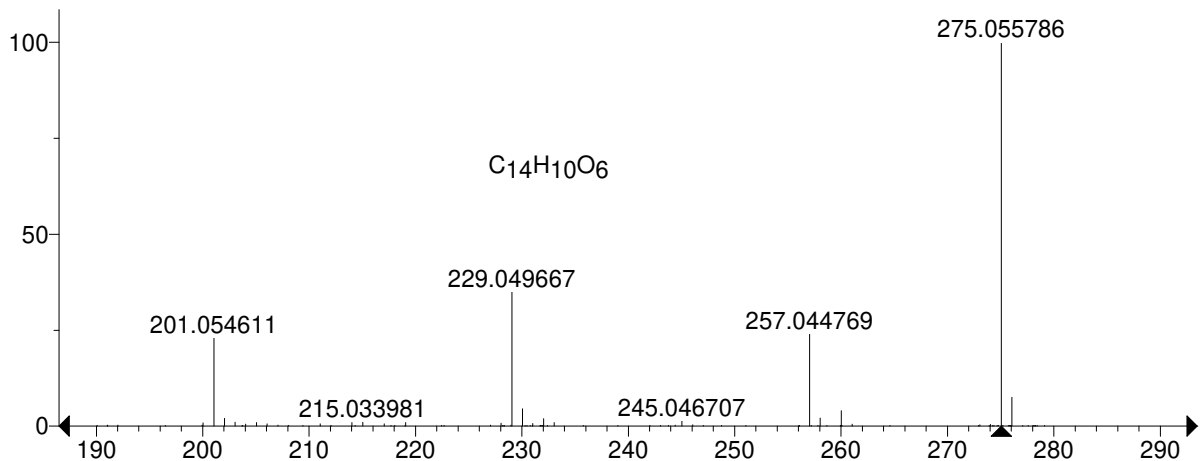

Unknown: Unknown (11.45\_355.0120m/z)  
Compound in Library Factor = 0

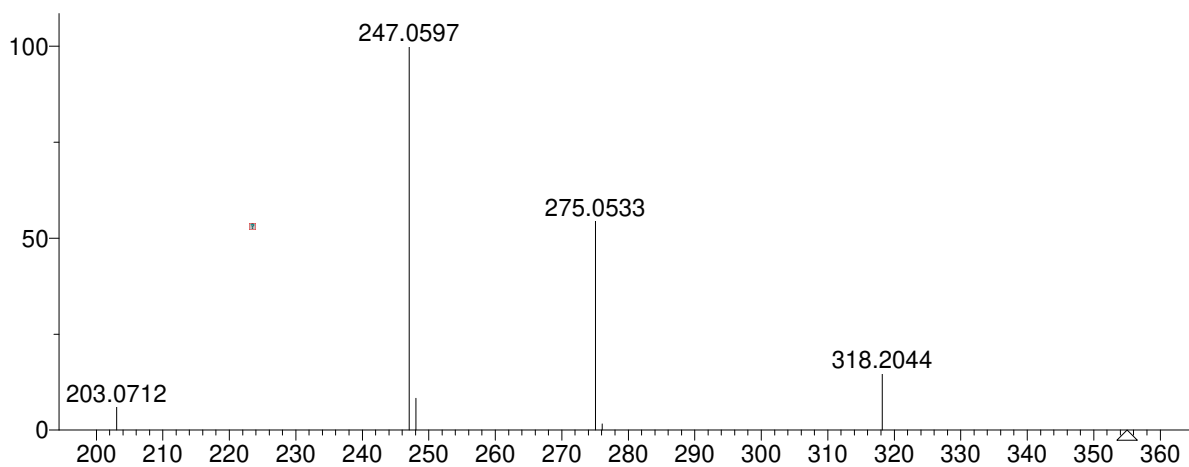

Hit 1 : 3-(3,3-dichloro-2-hydroxypropyl)-6,8-dimethoxyisochromen-1-one [M+Na]<sup>+</sup> 35HCD P=355  
C<sub>14</sub>H<sub>14</sub>Cl<sub>2</sub>O<sub>5</sub>; MF: 0; RMF: 7; Prob 100.0%; Lib: mona-export-vf-npl\_qexactive; ID: 18490.

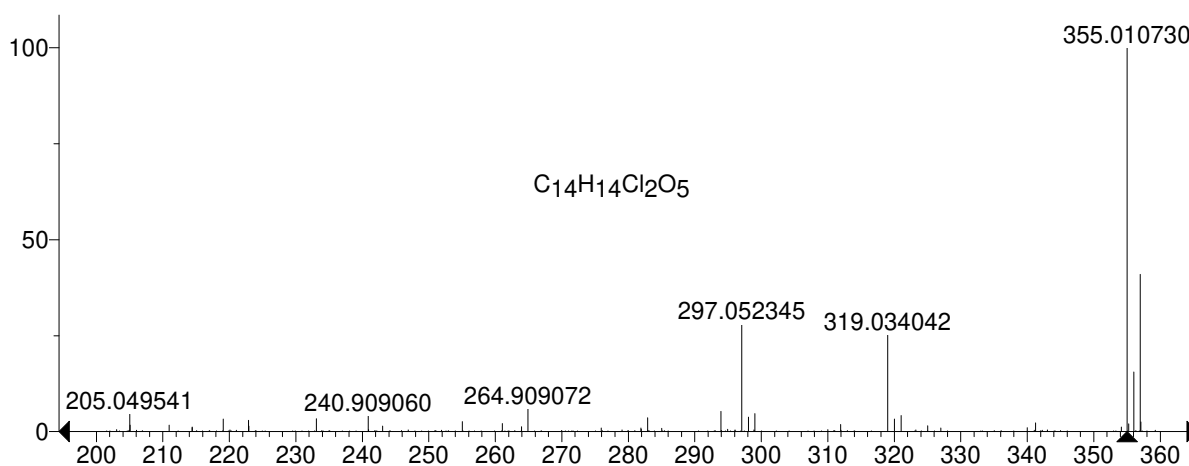

\*\* Search Report Page 1 of 2 \*\*

Unknown: Unknown (11.46\_318.2056m/z)  
Compound in Library Factor = -166

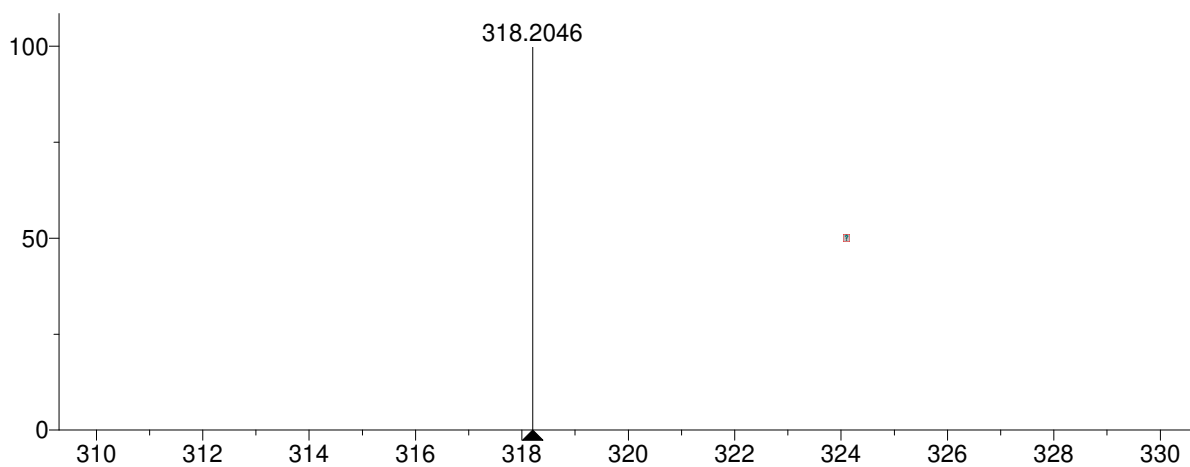

Hit 1 : Nateglinide [M+H]<sup>+</sup> 20-30-40%) P=318.2  
C<sub>19</sub>H<sub>27</sub>NO<sub>3</sub>; MF: 364; RMF: 999; Prob 33.2%; Lib: mona-export-fiehn\_hilic; ID: 603.

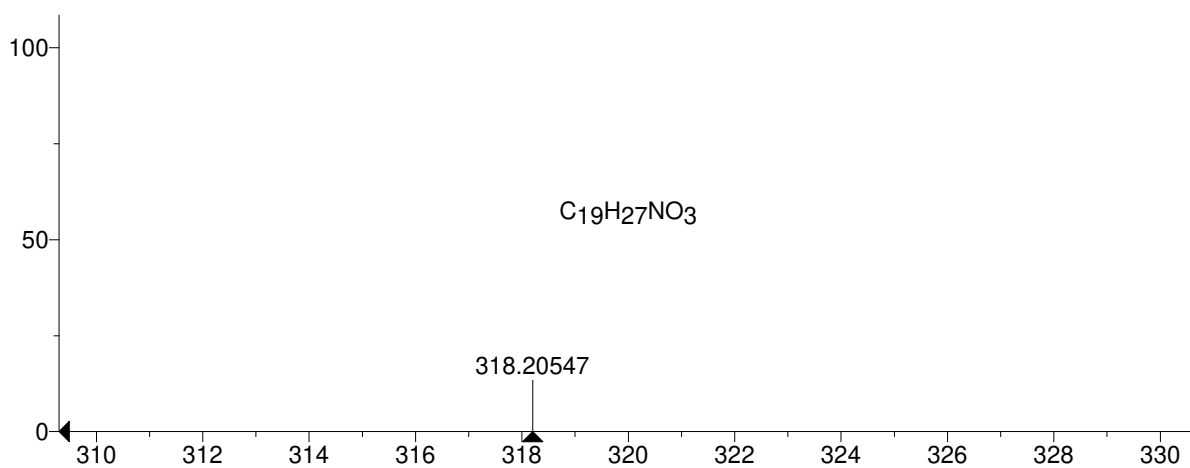

Hit 2 : Cyclohexanecarboxylic acid, 1-phenyl-, 2-(4-morpholinyl)ethyl ester [M+H]<sup>+</sup> HCD 25V P=318.2  
C<sub>19</sub>H<sub>27</sub>NO<sub>3</sub>; MF: 364; RMF: 999; Prob 33.2%; CAS: 138847-85-5; Lib: nist\_msms; ID: 422975.

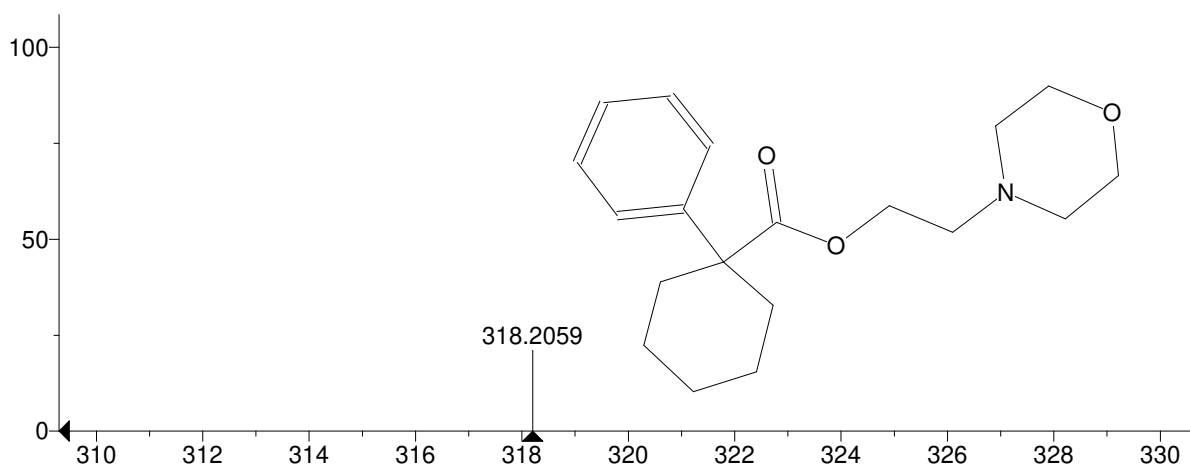



Hit 3 : Tetrabenazine [M+H]<sup>+</sup> HCD 41V P=318.2  
C<sub>19</sub>H<sub>27</sub>NO<sub>3</sub>; MF: 364; RMF: 999; Prob 33.2%; CAS: 58-46-8; Lib: nist\_msms; ID: 122078.

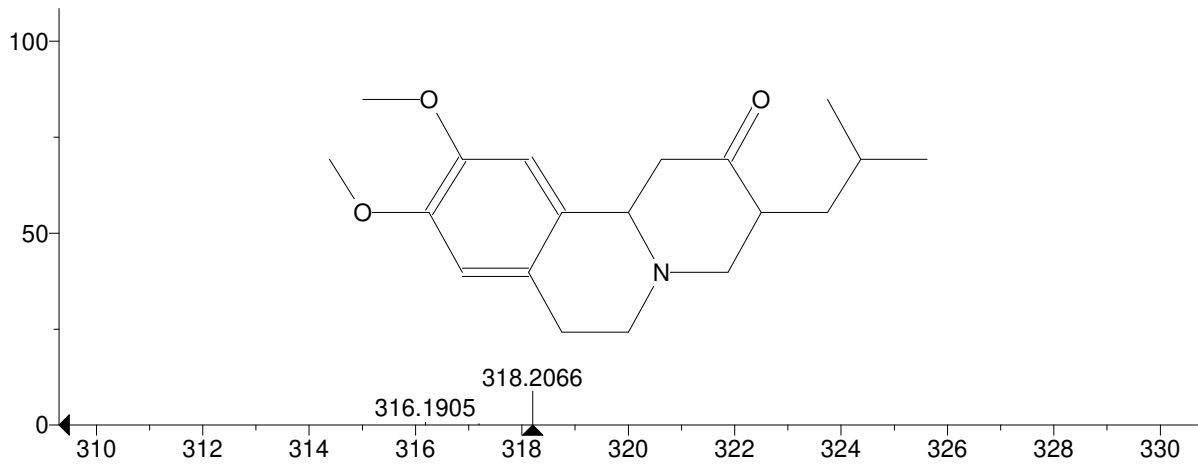

Hit 4 : Nateglinide (Starlix) [M+H]<sup>+</sup> P=318.2  
C<sub>19</sub>H<sub>27</sub>NO<sub>3</sub>; MF: 32; RMF: 723; Prob 0.33%; Lib: mona-export-gnps; ID: 815.

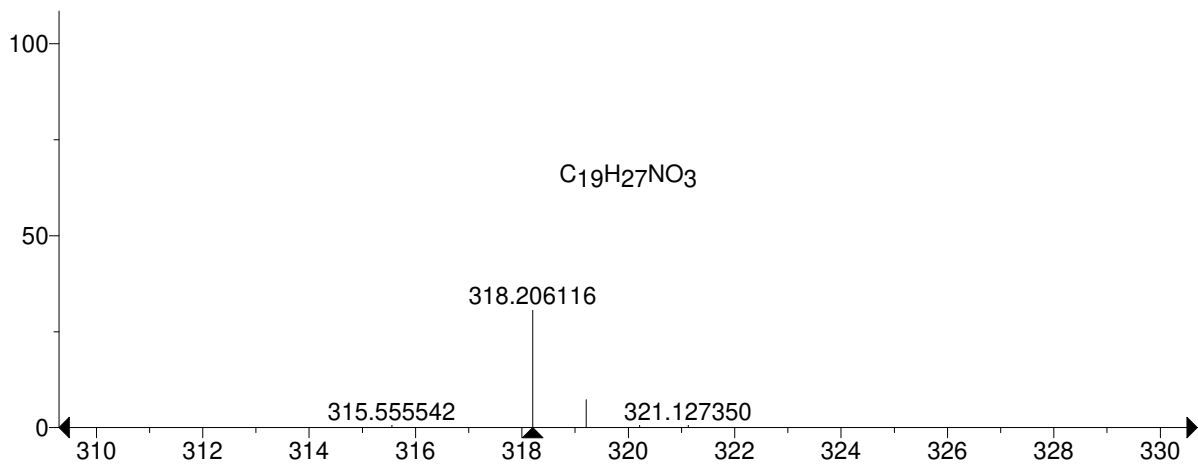

Unknown: Unknown (11.50\_412.9334m/z)  
Compound in Library Factor = 0

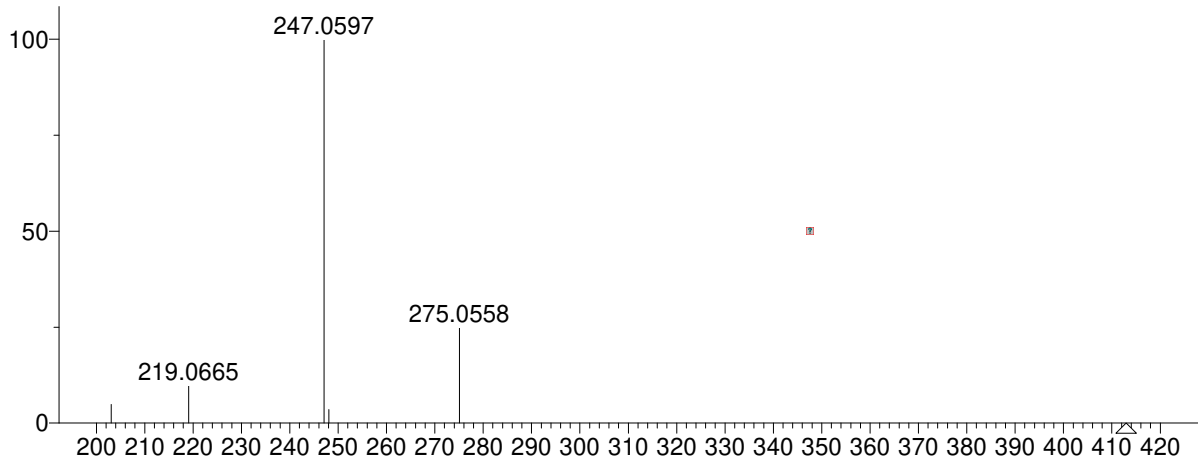

Unknown: Unknown (11.52\_525.2663m/z)  
Compound in Library Factor = -3273

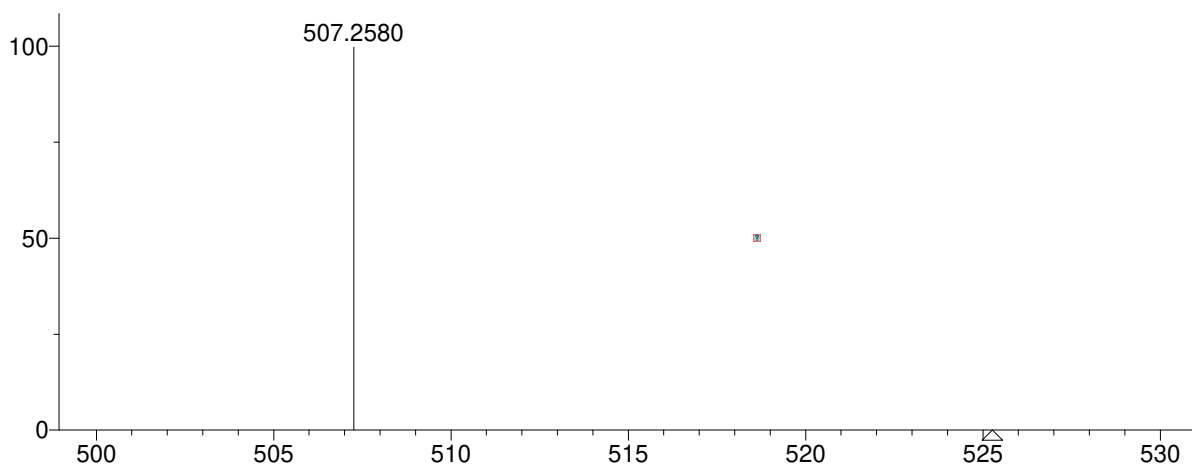

Hit 1 : FMRF Amide-Like Peptide I, lobster [M-2H]<sup>2-</sup> IT-FT 35% P=525.3  
C<sub>47</sub>H<sub>72</sub>N<sub>16</sub>O<sub>12</sub>; MF: 1; RMF: 192; Prob 100.0%; Lib: nist\_msms2; ID: 79293.

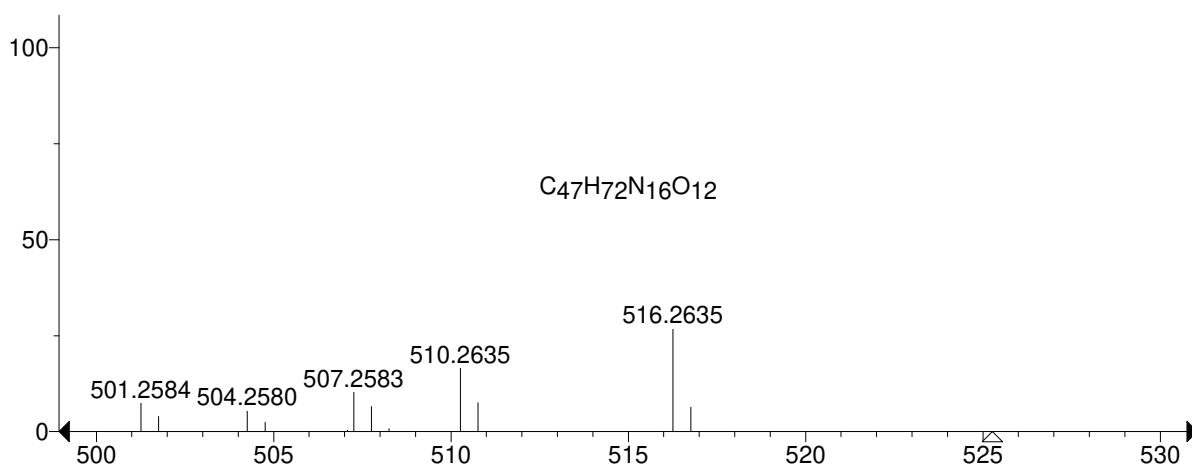

Unknown: Unknown (11.56\_348.1435m/z)  
Compound in Library Factor = 0

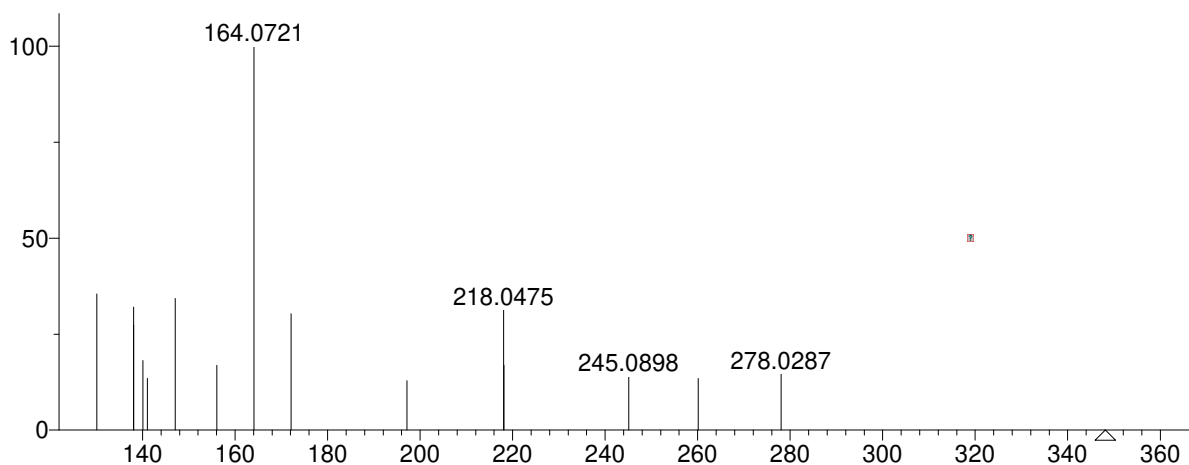

Hit 1 : 3-Pyridinecarboxamide, 6-amino-N-[3-[4-(4-morpholinyl)pyrido[3',2':4,5]furo[3,2-d]pyrimidin-2-yl]phenyl]- [C<sub>25</sub>H<sub>21</sub>N<sub>7</sub>O<sub>3</sub>; MF: 0; RMF: 71; Prob 14.3%; CAS: 371942-69-7; Lib: nist\_msms; ID: 262104.

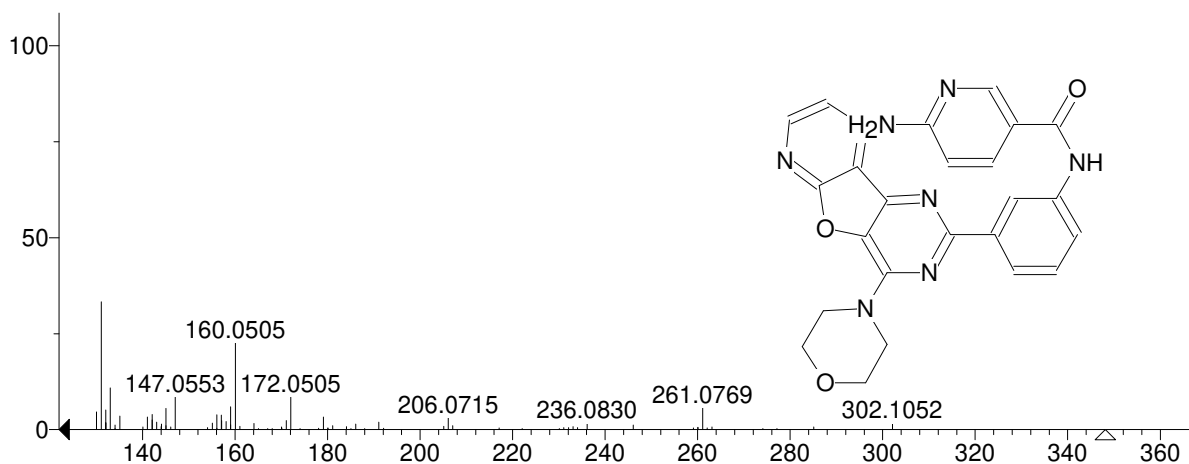

Hit 2 : 4,5-dihydroxy-4,5,6-trimethyl-2,8-dioxa-13-azatricyclo[8.5.1.0A''1A''3,A''1a''1P]hexadec-10-ene-3,7-dione C<sub>16</sub>H<sub>23</sub>NO<sub>6</sub>; MF: 0; RMF: 40; Prob 14.3%; Lib: mona-export-vf-npl\_qexactive; ID: 24611.

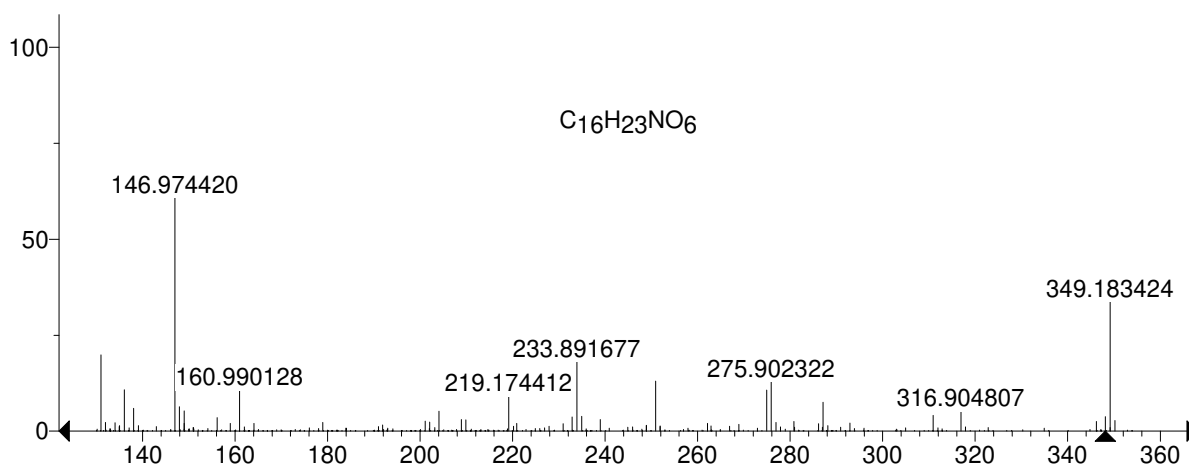

\*\* Search Report Page 2 of 2 \*\*

Hit 3 : Nafamostat mesylate [M+H]<sup>+</sup> P=348.1  
C<sub>21</sub>H<sub>25</sub>N<sub>5</sub>O<sub>8</sub>S<sub>2</sub>; MF: 0; RMF: 34; Prob 14.3%; Lib: mona-export-gnps; ID: 457.

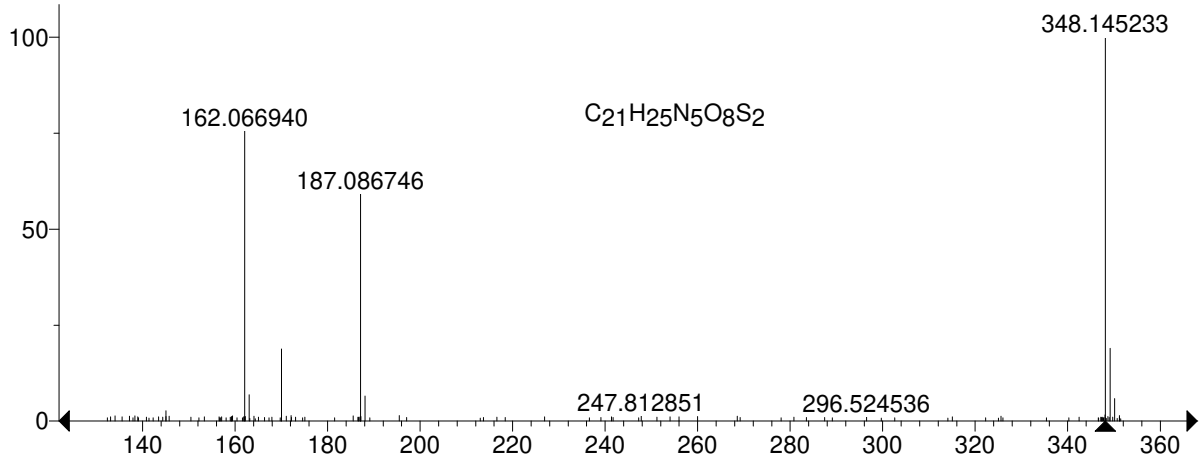

Hit 4 : Nafamostat [M+H]<sup>+</sup> HCD 90V P=348.1  
C<sub>19</sub>H<sub>17</sub>N<sub>5</sub>O<sub>2</sub>; MF: 0; RMF: 14; Prob 14.3%; CAS: 81525-10-2; Lib: nist\_msms; ID: 343734.

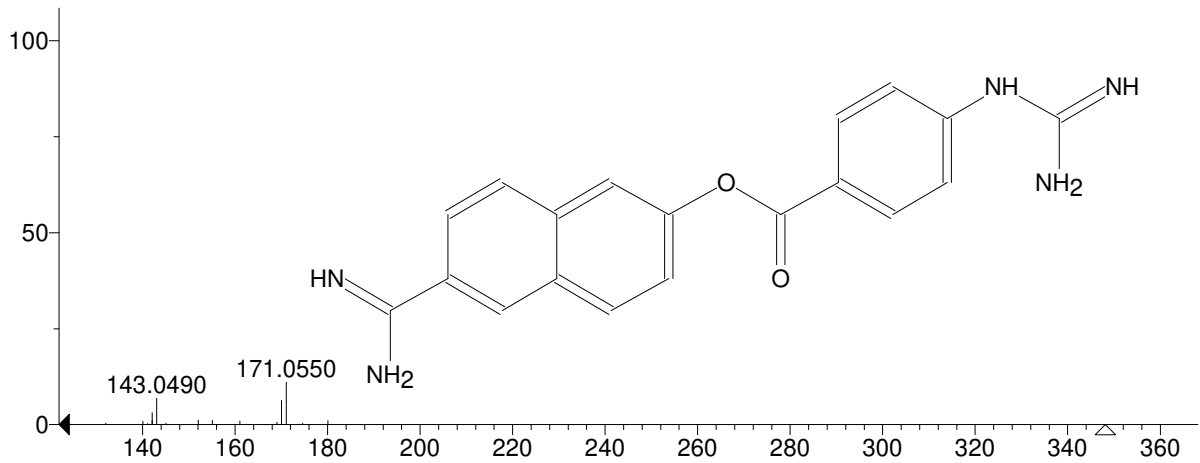

Hit 5 : His-Gly-His [M-H]<sup>-</sup> IT-FT 35% P=348.1  
C<sub>14</sub>H<sub>19</sub>N<sub>7</sub>O<sub>4</sub>; MF: 0; RMF: 3; Prob 14.3%; Lib: nist\_msms; ID: 574339.

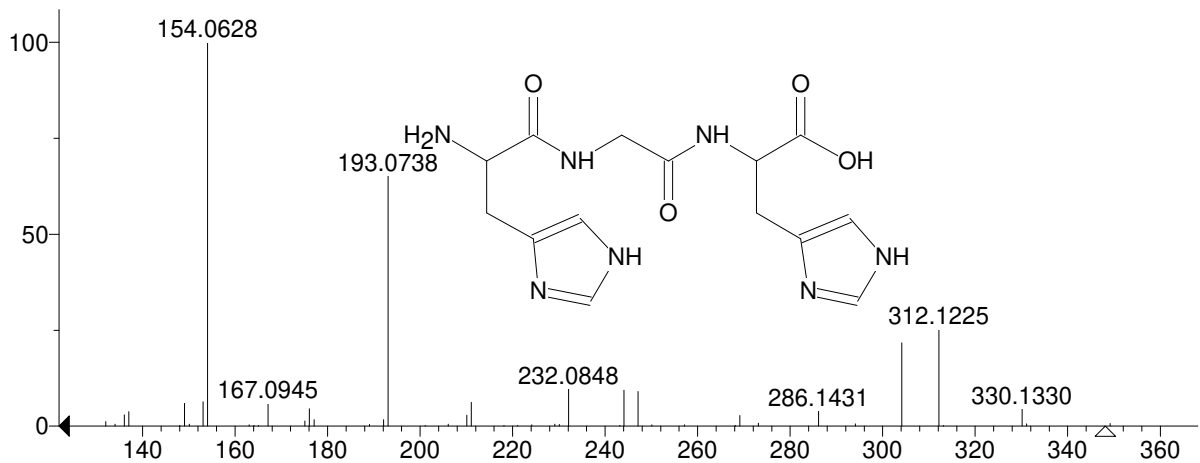

Unknown: Unknown (11.64\_325.0917m/z)  
Compound in Library Factor = 0

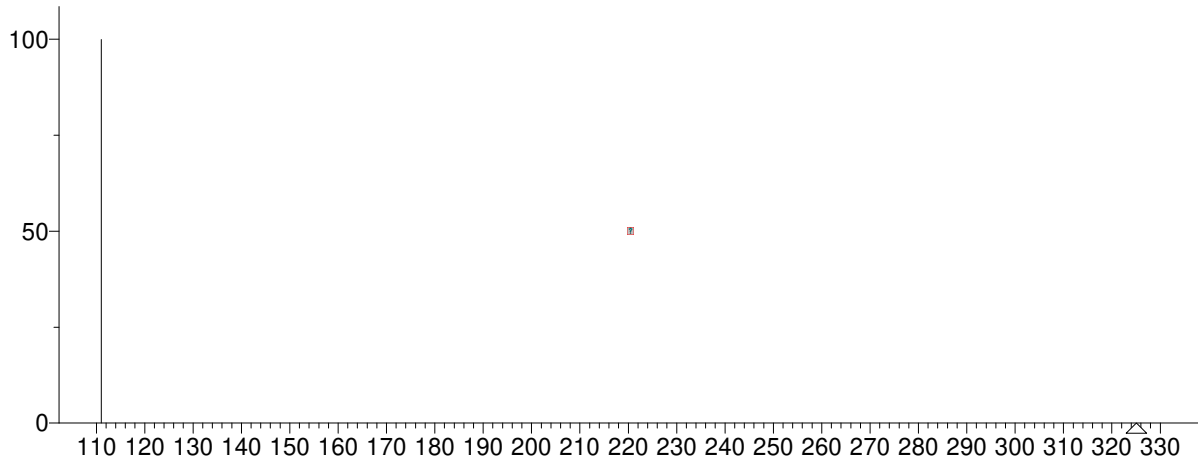

Hit 1 : 2-(3-hydroxy-5-methoxyphenoxy)-6-(hydroxymethyl)oxane-3,4,5-triol [M+Na]<sup>+</sup> 65HCD P=325.1  
C<sub>13</sub>H<sub>18</sub>O<sub>8</sub>; MF: 0; RMF: 26; Prob 50.0%; Lib: mona-export-vf-npl\_gexactive; ID: 22425.

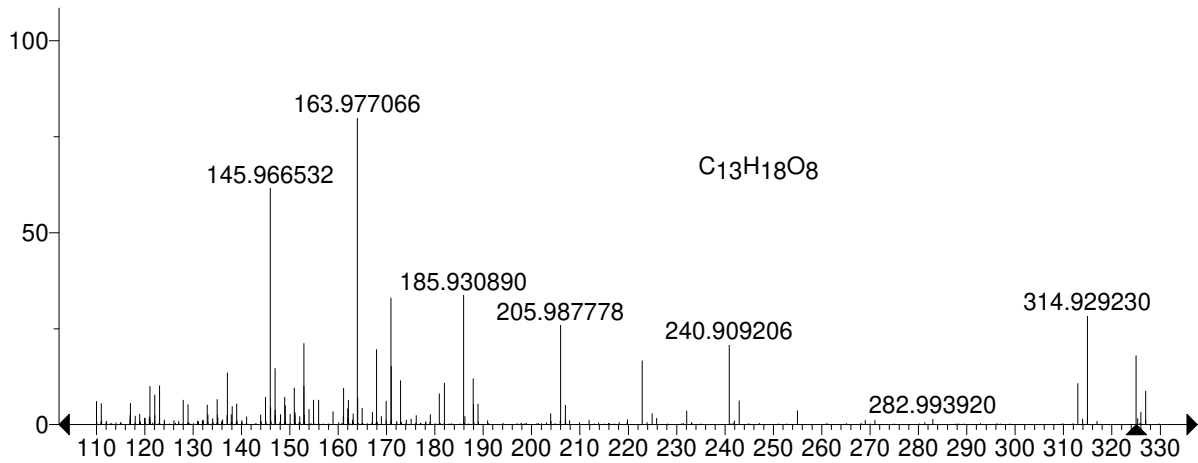

Hit 2 : (1S,4R,7S,8S,11S)-9-tert-butyl-7,9-dihydroxy-3,5,12-trioxatetracyclo[6.6.0.0A<sup>1</sup>,A<sup>1</sup>A<sup>1</sup>0a<sup>1</sup>,a<sup>1</sup>,,]tetradec  
C<sub>15</sub>H<sub>18</sub>O<sub>8</sub>; MF: 0; RMF: 6; Prob 50.0%; Lib: mona-export-lc-ms-ms\_negative\_mode; ID: 19424.

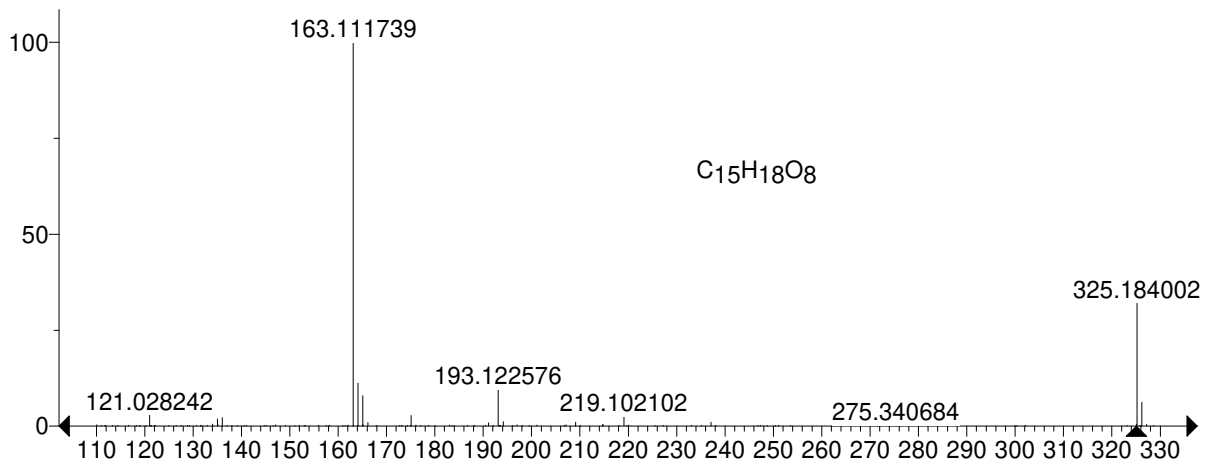

Unknown: Unknown (11.68\_560.2122m/z)  
Compound in Library Factor = -3273

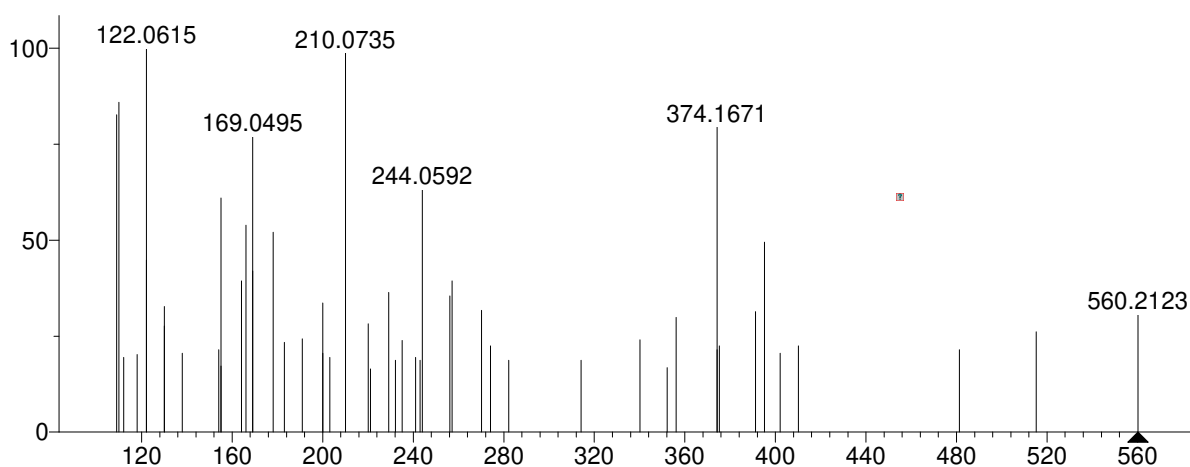

Hit 1 : 2,3,9,10,11,12-Hexahydro-10S-hydroxy-9-methyl-1-oxo-9R,12S-epoxy-1H-diindolo[1,2,3-fg:3',2',1'-kl]pyrrol  
C32H31N3O5; MF: 25; RMF: 283; Prob 100.0%; CAS: 108068-98-0; Lib: nist\_msms; ID: 86206.

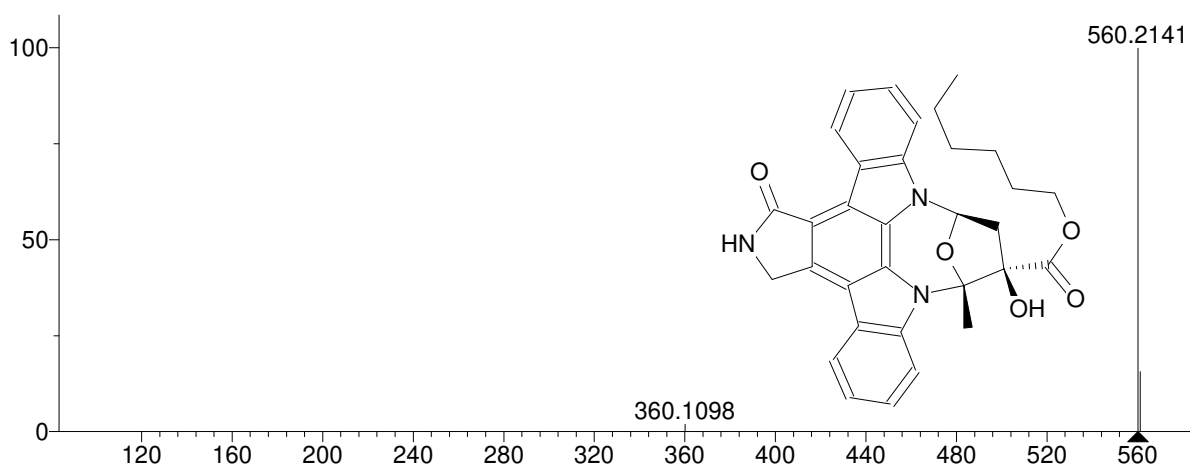

Unknown: Unknown (11.69\_528.2504m/z)  
Compound in Library Factor = 0

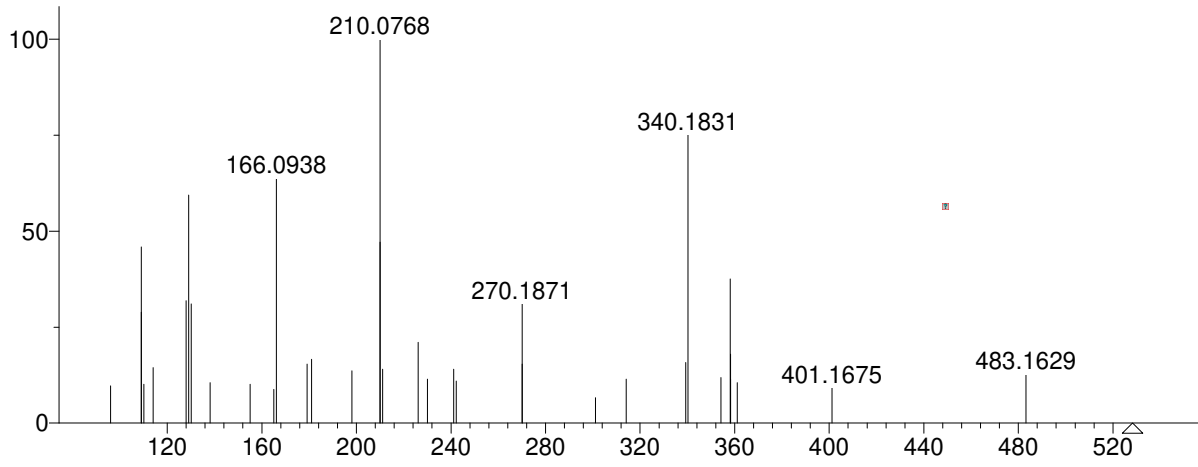



Unknown: Unknown (11.71\_433.0798m/z)  
Compound in Library Factor = 0

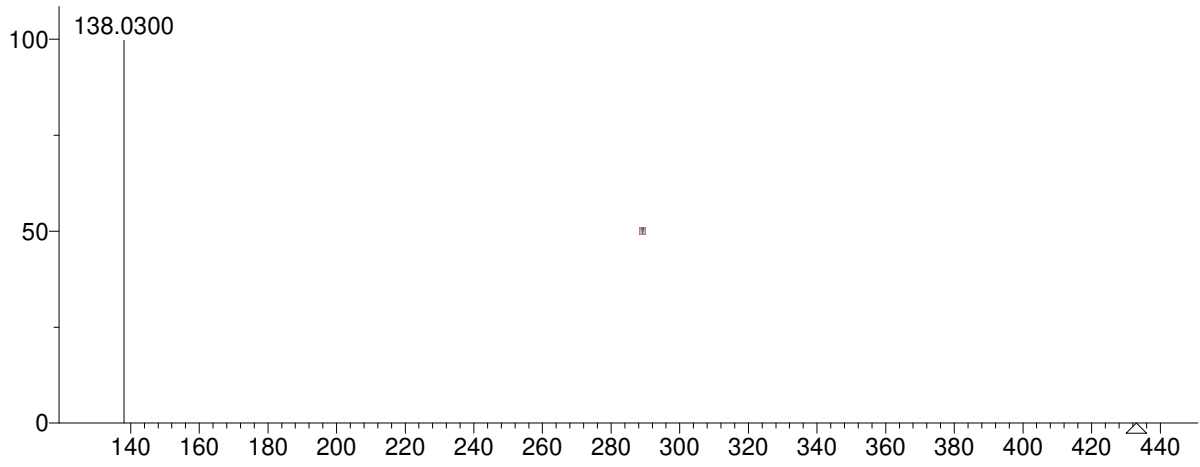

Unknown: Unknown (11.72\_443.1995m/z)  
Compound in Library Factor = 0

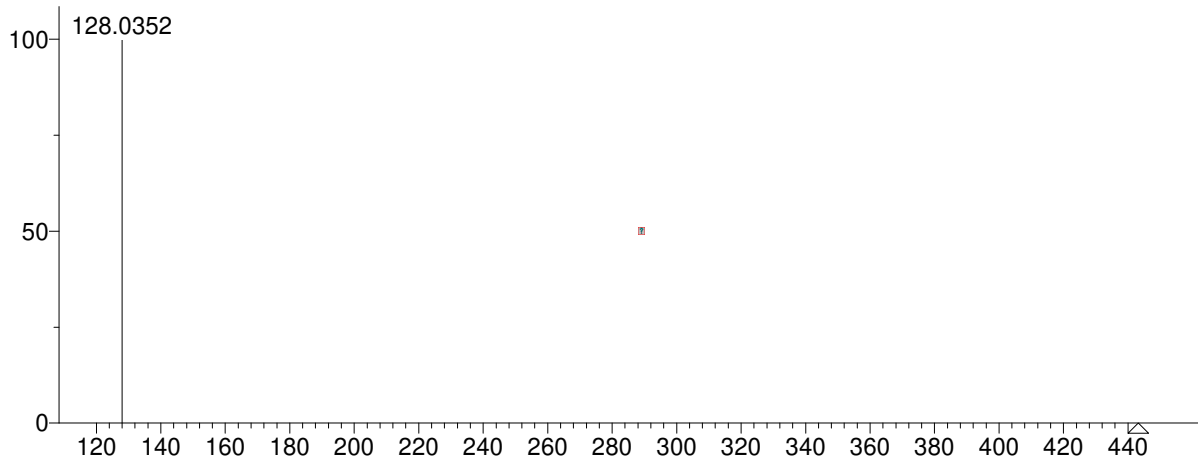

\*\* Search Report Page 1 of 2 \*\*

Unknown: Unknown (11.76\_417.1764m/z)  
Compound in Library Factor = 0

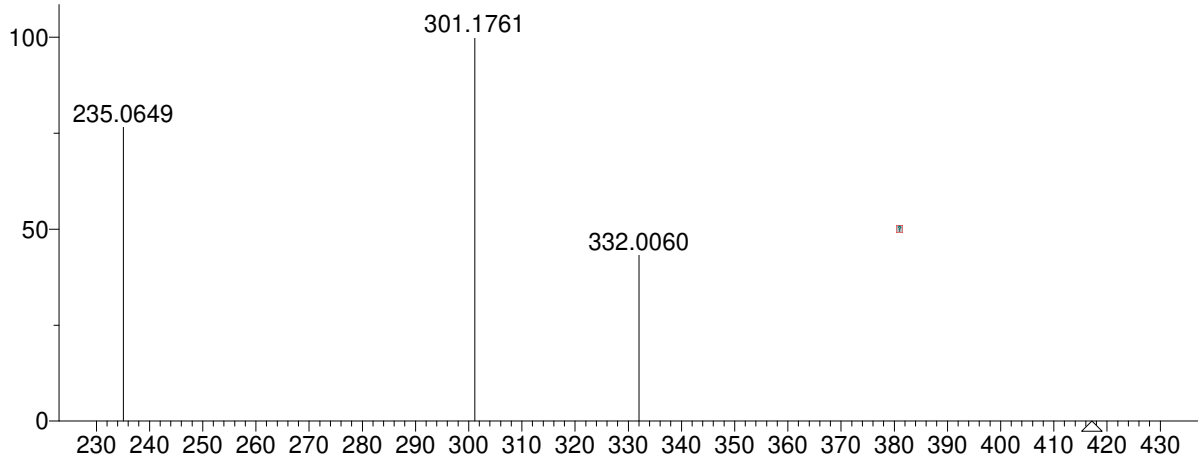

Hit 1 : (2R,3S,4S,5R,6R)-5-[(2S,3R,4R)-3,4-dihydroxy-4-(hydroxymethyl)oxolan-2-yl]oxy-2-(hydroxymethyl)-6-(2-p  
C<sub>19</sub>H<sub>28</sub>O<sub>10</sub>; MF: 0; RMF: 89; Prob 33.3%; Lib: mona-export-vf-npl\_qexactive; ID: 6423.

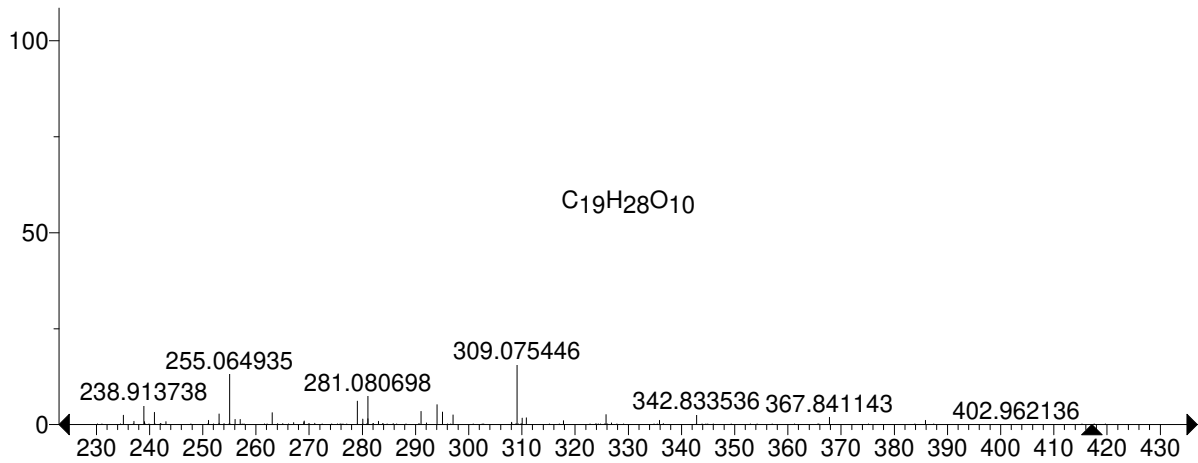

Hit 2 : (2S,3R,4S,5R)-2-[(2R,3R,4S,5S,6R)-4,5-dihydroxy-6-(hydroxymethyl)-2-(2-phenylethoxy)oxan-3-yl]oxyoxar  
C<sub>19</sub>H<sub>28</sub>O<sub>10</sub>; MF: 0; RMF: 47; Prob 33.3%; Lib: mona-export-vf-npl\_qexactive; ID: 8025.

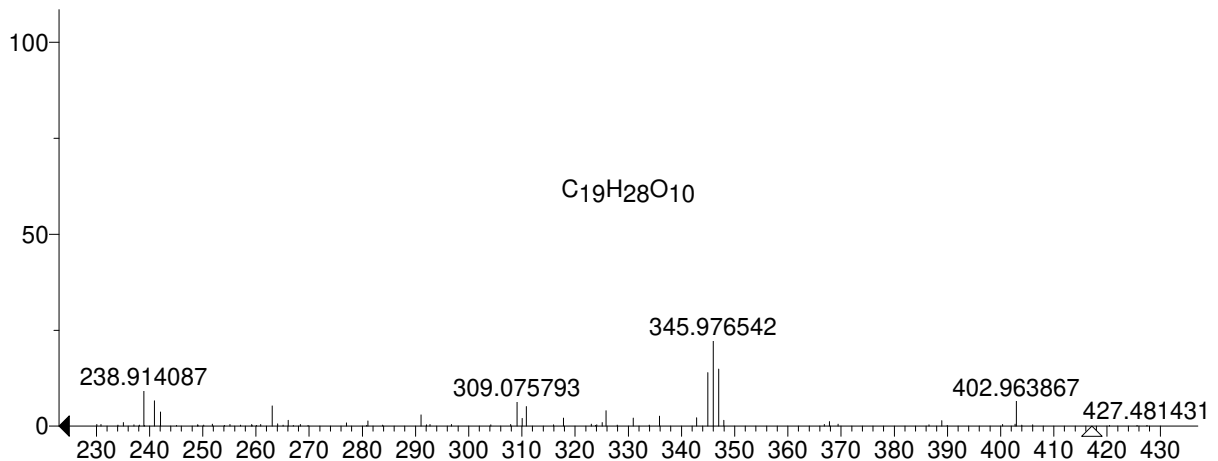

\*\* Search Report Page 2 of 2 \*\*

Hit 3 : (2R,3S,4S,5R,6R)-2-[[[(2S,3R,4R)-3,4-dihydroxy-4-(hydroxymethyl)oxolan-2-yl]oxymethyl]-6-(2-phenylethoxy) C<sub>19</sub>H<sub>28</sub>O<sub>10</sub>; MF: 0; RMF: 30; Prob 33.3%; Lib: mona-export-vf-npl\_qexactive; ID: 24964.

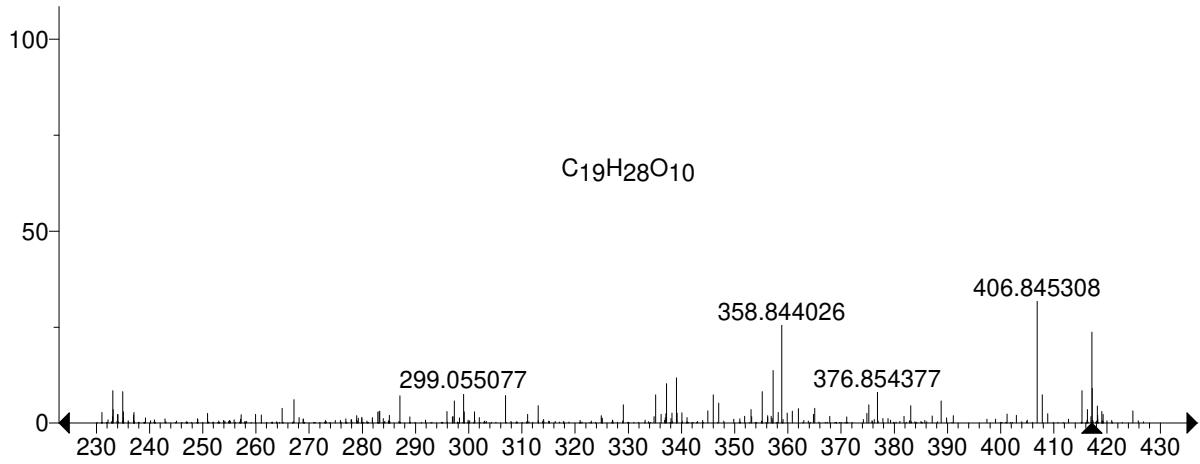

\*\* Search Report Page 1 of 2 \*\*

Unknown: Unknown (11.77\_449.1547m/z)  
Compound in Library Factor = 0

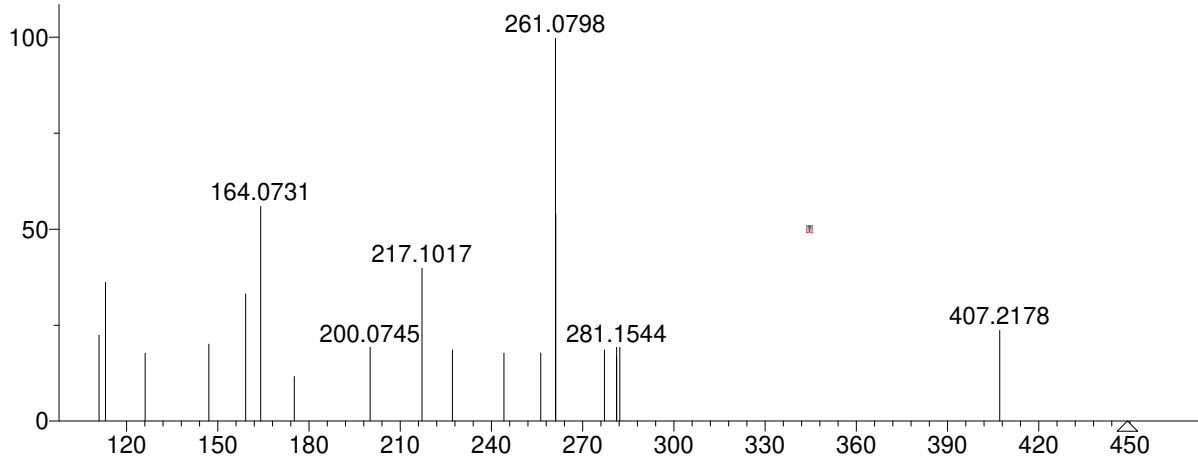

Hit 1 : [8,8-dimethyl-9-(3-methylbut-2-enoyloxy)-2-oxo-9,10-dihydropyrano[2,3-f]chromen-10-yl] 3-methylbut-2-en-  
C<sub>24</sub>H<sub>26</sub>O<sub>7</sub>; MF: 0; RMF: 51; Prob 25.0%; Lib: mona-export-vf-npl\_qexactive; ID: 4542.

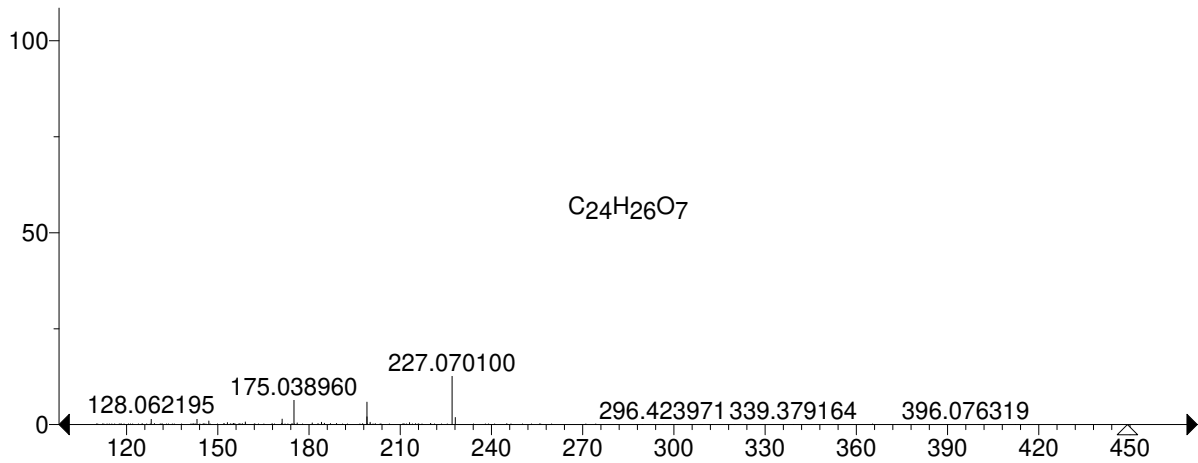

Hit 2 : NCGC00385098-01! [8,8-dimethyl-9-(3-methylbut-2-enoyloxy)-2-oxo-9,10-dihydropyrano[2,3-f]chromen-10-  
C<sub>24</sub>H<sub>26</sub>O<sub>7</sub>; MF: 0; RMF: 29; Prob 25.0%; Lib: mona-export-gnps; ID: 7369.

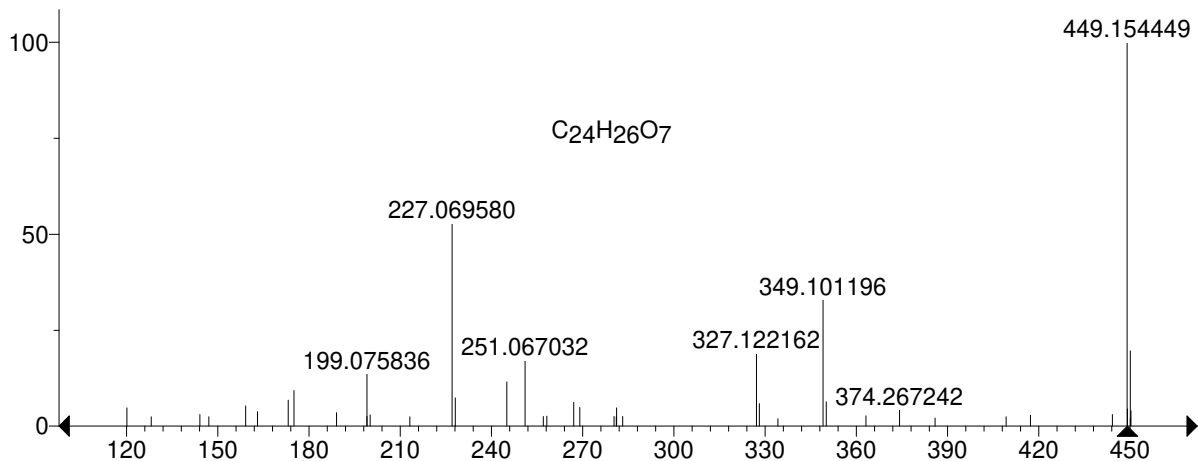

Hit 3 : Archangelicine [M+Na]<sup>+</sup> 65HCD P=449.2  
C<sub>24</sub>H<sub>26</sub>O<sub>7</sub>; MF: 0; RMF: 22; Prob 25.0%; Lib: mona-export-vf-npl\_qexactive; ID: 5187.

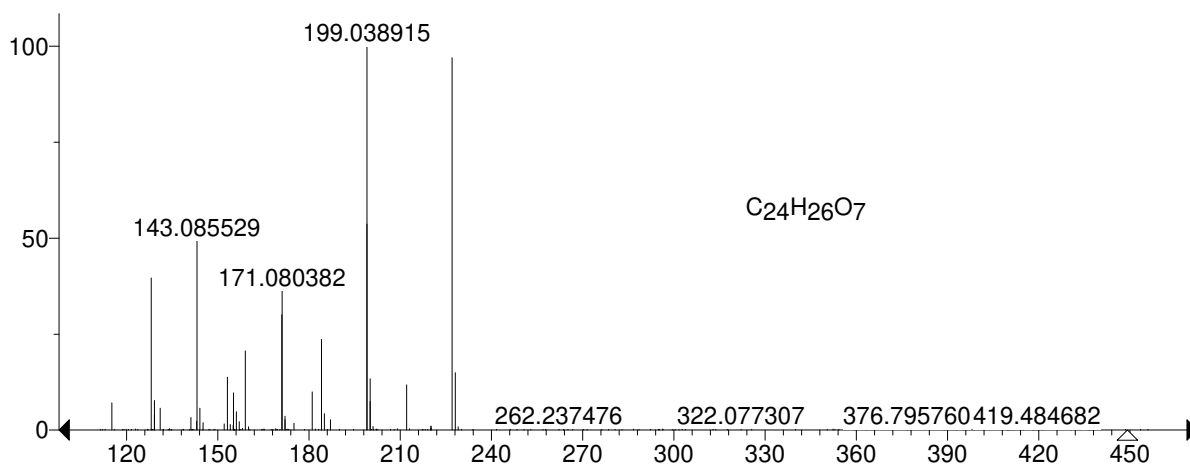

Hit 4 : NCGC00385035-01! [8-[2-(3-methylbut-2-enyloxy)propan-2-yl]-2-oxo-8,9-dihydrofuro[2,3-h]chromen-9-yl]  
C<sub>24</sub>H<sub>26</sub>O<sub>7</sub>; MF: 0; RMF: 21; Prob 25.0%; Lib: mona-export-gnps; ID: 6527.

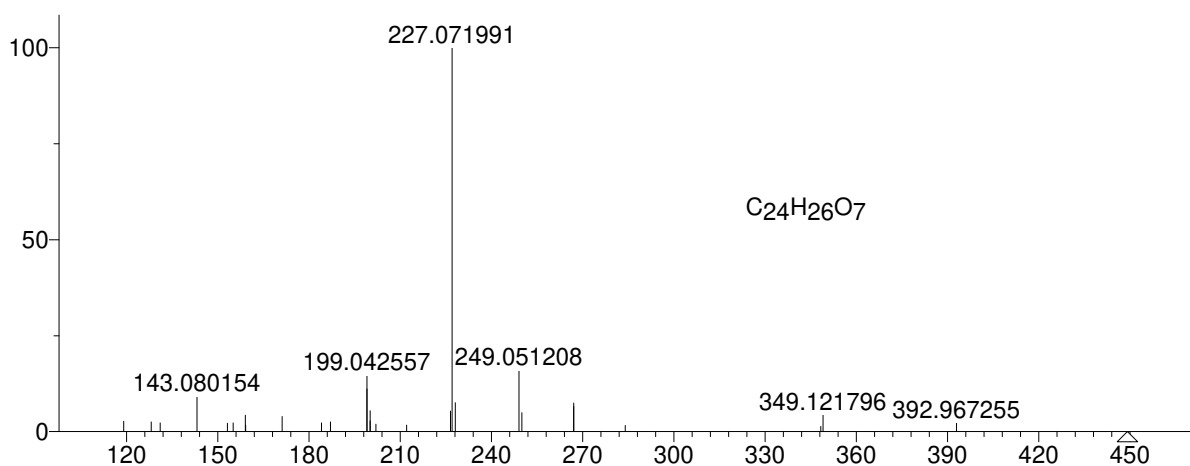

Unknown: Unknown (11.83\_498.2398m/z)  
Compound in Library Factor = 0

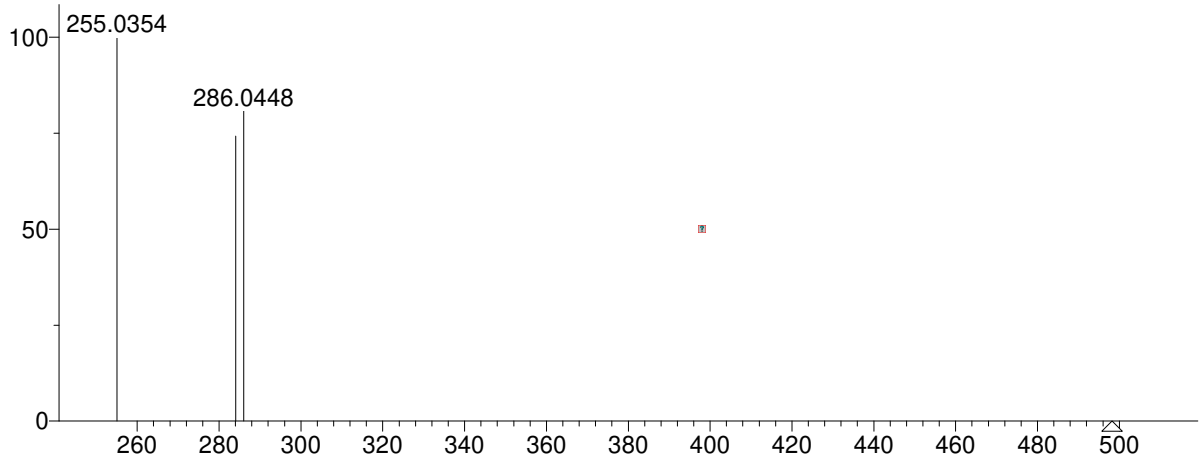

Unknown: Unknown (11.85\_337.0918m/z)  
Compound in Library Factor = -428

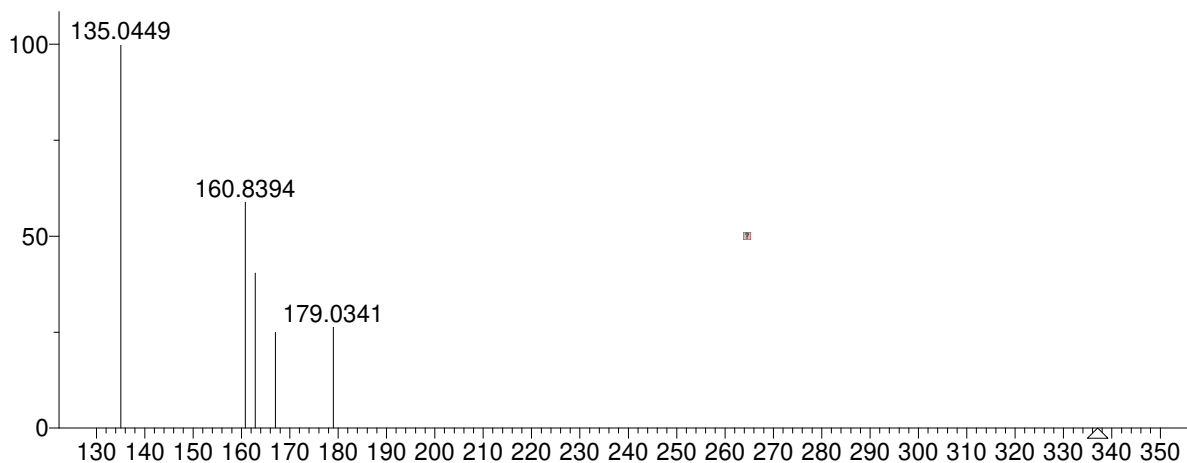

Hit 1 : Chlorogenic acid [M+H-H<sub>2</sub>O]<sup>+</sup> HCD 87V P=337.1  
C<sub>16</sub>H<sub>18</sub>O<sub>9</sub>; MF: 195; RMF: 631; Prob 93.7%; CAS: 327-97-9; Lib: nist\_msms; ID: 100727.

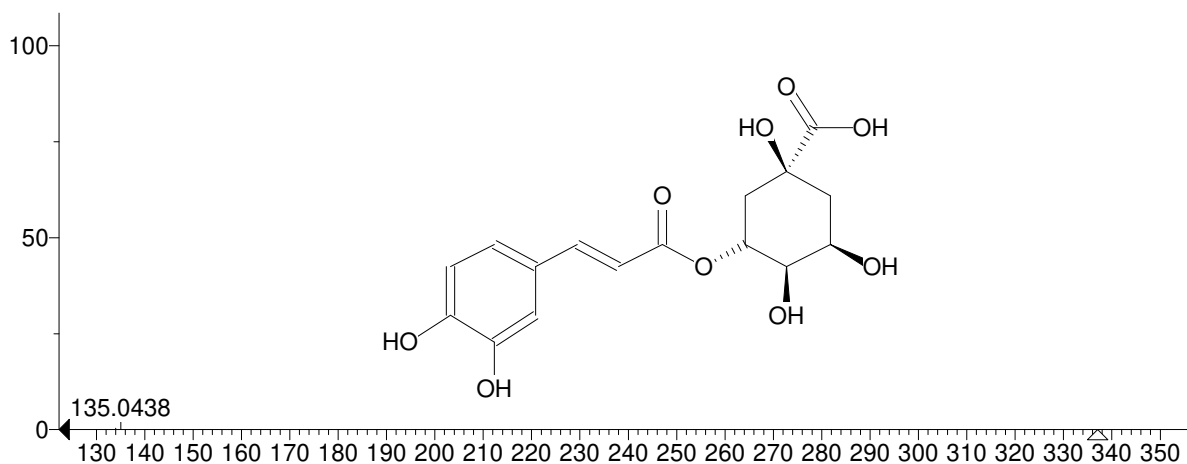

Hit 2 : Neochlorogenic acid [M+H-H<sub>2</sub>O]<sup>+</sup> HCD 87V P=337.1  
C<sub>16</sub>H<sub>18</sub>O<sub>9</sub>; MF: 32; RMF: 507; Prob 2.28%; CAS: 906-33-2; Lib: nist\_msms; ID: 239450.

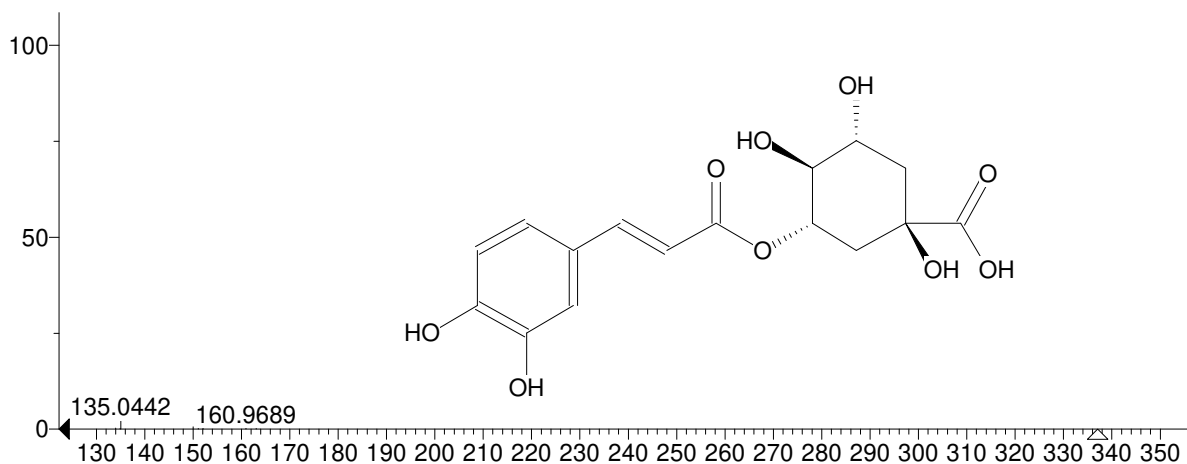



\*\* Search Report Page 2 of 2 \*\*

Hit 3 : NCGC00180823-02!(3R,4R,5R)-5-[(E)-3-(3,4-dihydroxyphenyl)prop-2-enoyl]oxy-3,4-dihydroxycyclohexene  
C<sub>16</sub>H<sub>16</sub>O<sub>8</sub>; MF: 4; RMF: 312; Prob 0.66%; Lib: mona-export-gnps; ID: 9151.

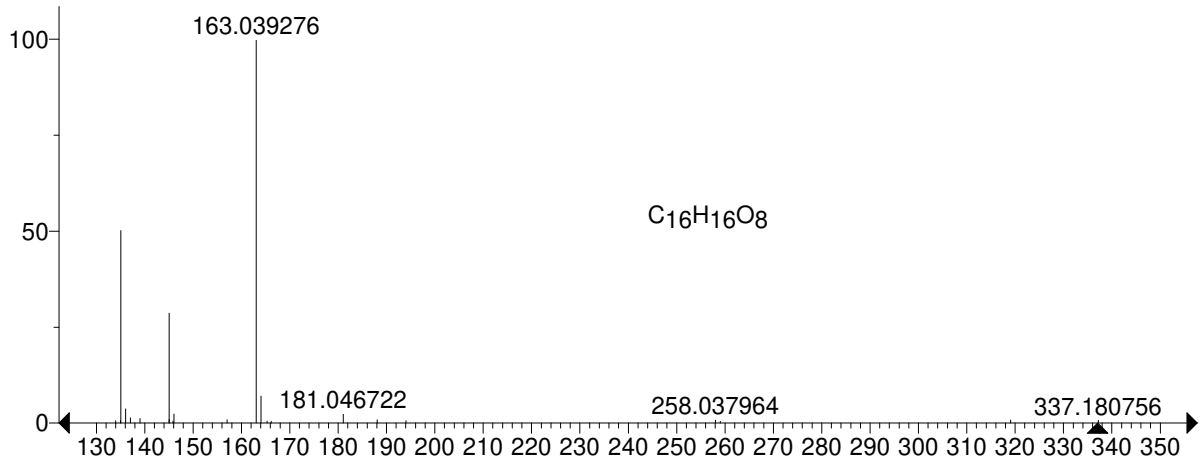

Hit 4 : NCGC00380360-01!7-methoxy-6-[(2S,3R,4S,5S,6R)-3,4,5-trihydroxy-6-(hydroxymethyl)oxan-2-yl]oxychron  
C<sub>16</sub>H<sub>18</sub>O<sub>9</sub>; MF: 0; RMF: 39; Prob 0.55%; Lib: mona-export-gnps; ID: 9547.

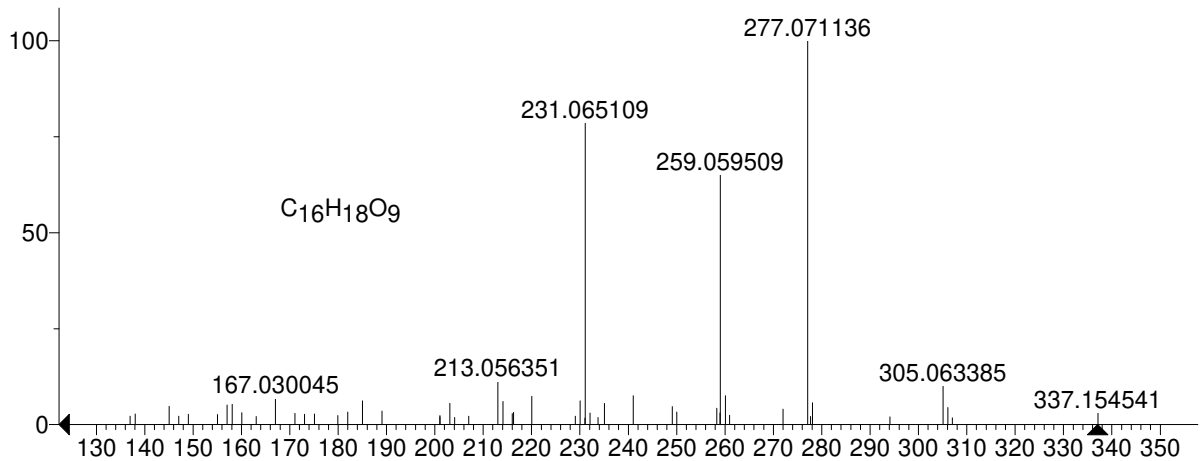

Hit 5 : 2-(4a,9,10a-trihydroxy-1-methyl-5,10-dioxo-3,4-dihydro-1H-benzo[g]isochromen-3-yl)acetic acid [M+H]<sup>+</sup>  
C<sub>16</sub>H<sub>16</sub>O<sub>8</sub>; MF: 0; RMF: 27; Prob 0.55%; Lib: mona-export-vf-npl\_qexactive; ID: 19101.

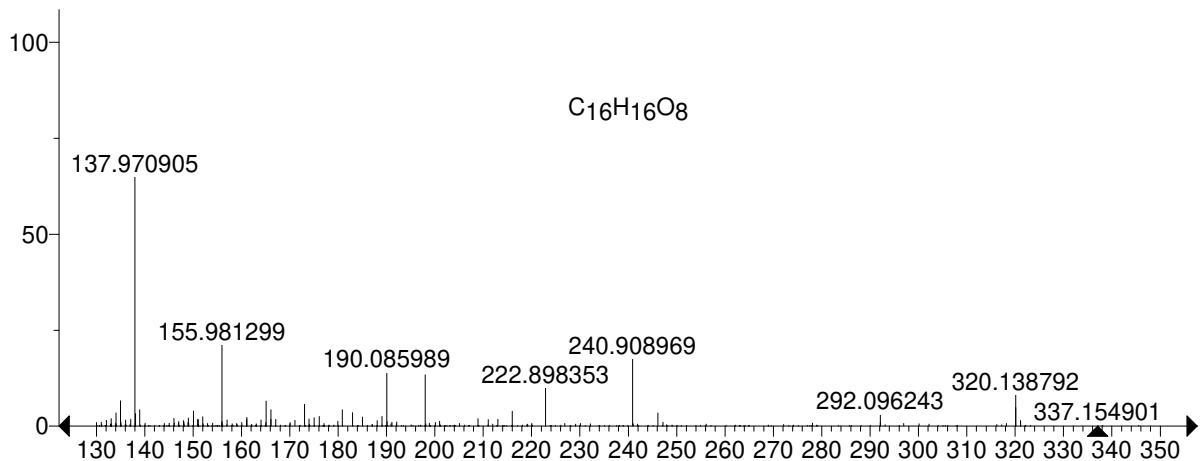

Unknown: Unknown (11.86\_265.1075m/z)  
Compound in Library Factor = -2387

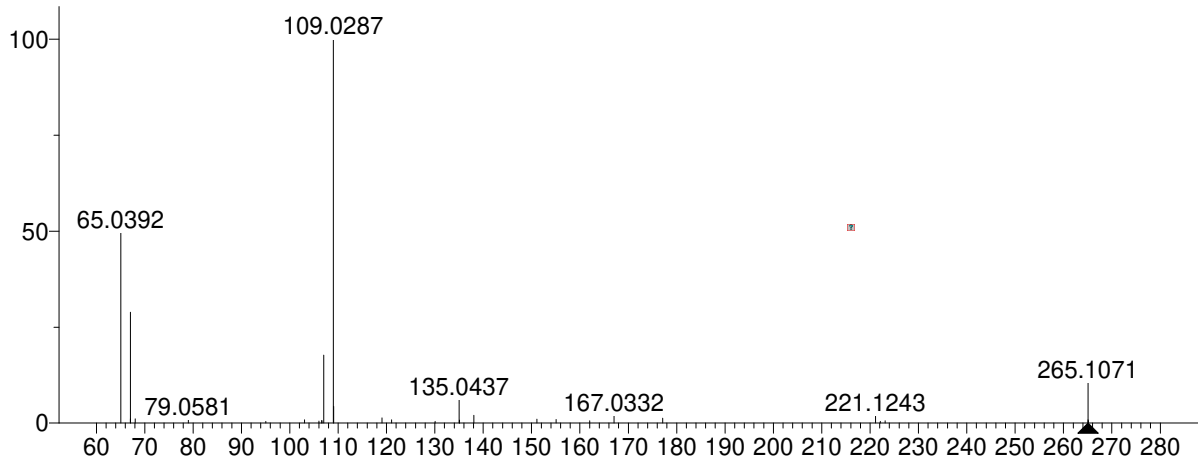

Hit 1 : Anisatin [M+H-CH<sub>4</sub>O<sub>3</sub>]<sup>+</sup> HCD 13V P=265.1  
C<sub>15</sub>H<sub>20</sub>O<sub>8</sub>; MF: 18; RMF: 201; Prob 24.0%; CAS: 5230-87-5; Lib: nist\_msms; ID: 394626.

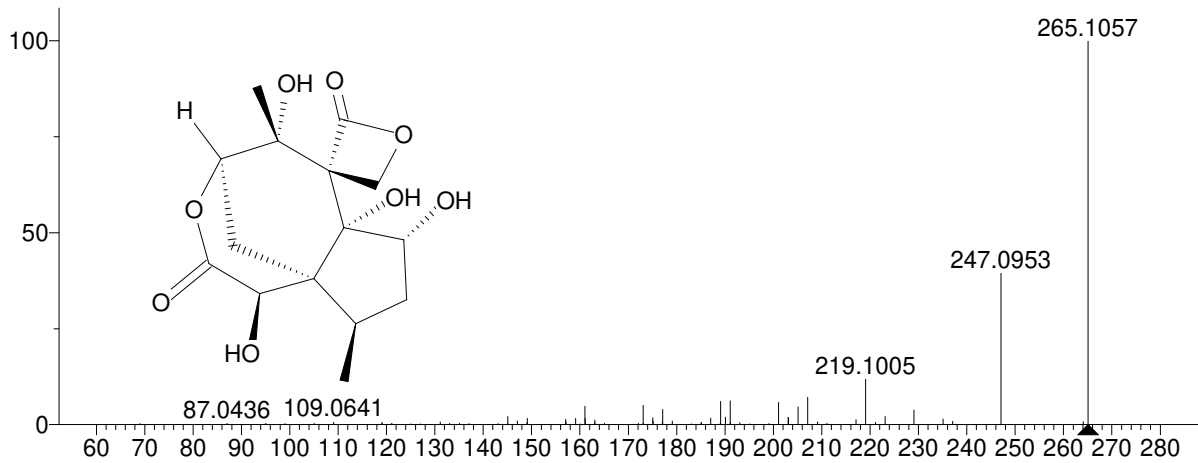

Hit 2 : 4,7,8-trimethoxy-3,5-dimethylchromen-2-one [M+H]<sup>+</sup> 35HCD P=265.1  
C<sub>14</sub>H<sub>16</sub>O<sub>5</sub>; MF: 8; RMF: 164; Prob 16.9%; Lib: mona-export-vf-npl\_qexactive; ID: 23347.

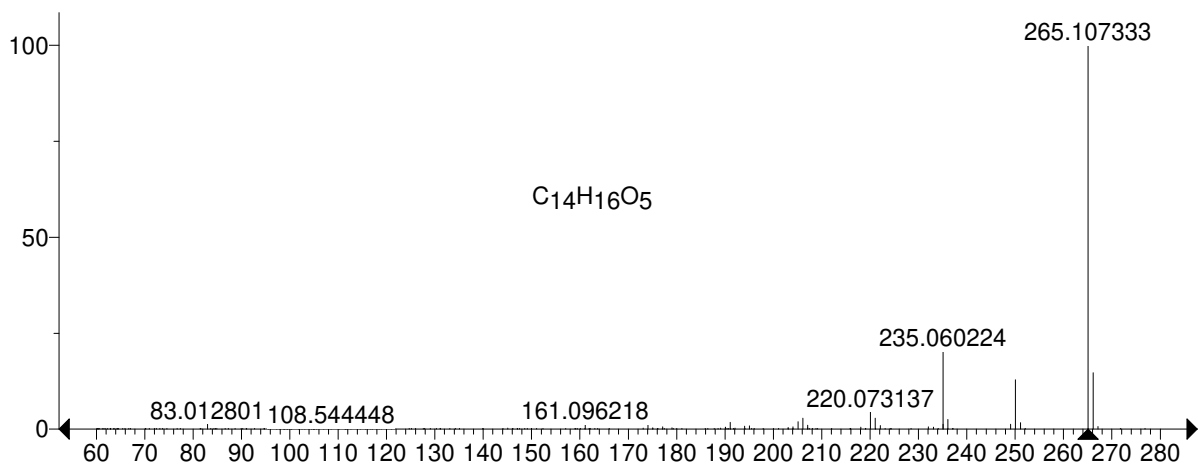

\*\* Search Report Page 2 of 2 \*\*

Hit 3 : NCGC00380472-0114,7,8-trimethoxy-3,5-dimethylchromen-2-one [M+H]<sup>+</sup> P=265.1  
C<sub>14</sub>H<sub>16</sub>O<sub>5</sub>; MF: 7; RMF: 165; Prob 16.3%; Lib: mona-export-gnps; ID: 6739.

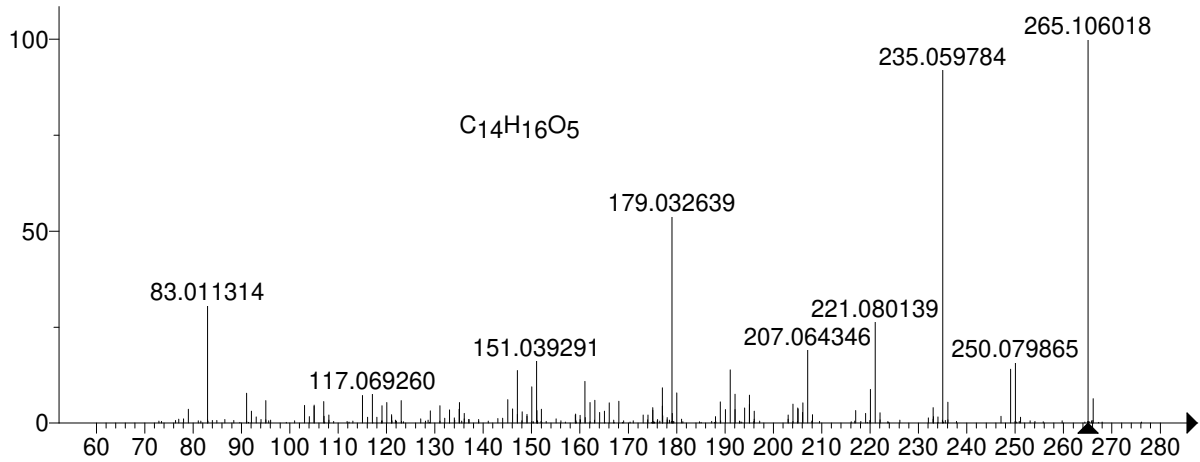

Hit 4 : NCGC00381087-0113-(2-hydroxypropyl)-6,8-dimethoxyisochromen-1-one [M+H]<sup>+</sup> P=265.1  
C<sub>14</sub>H<sub>16</sub>O<sub>5</sub>; MF: 6; RMF: 125; Prob 15.6%; Lib: mona-export-gnps; ID: 7812.

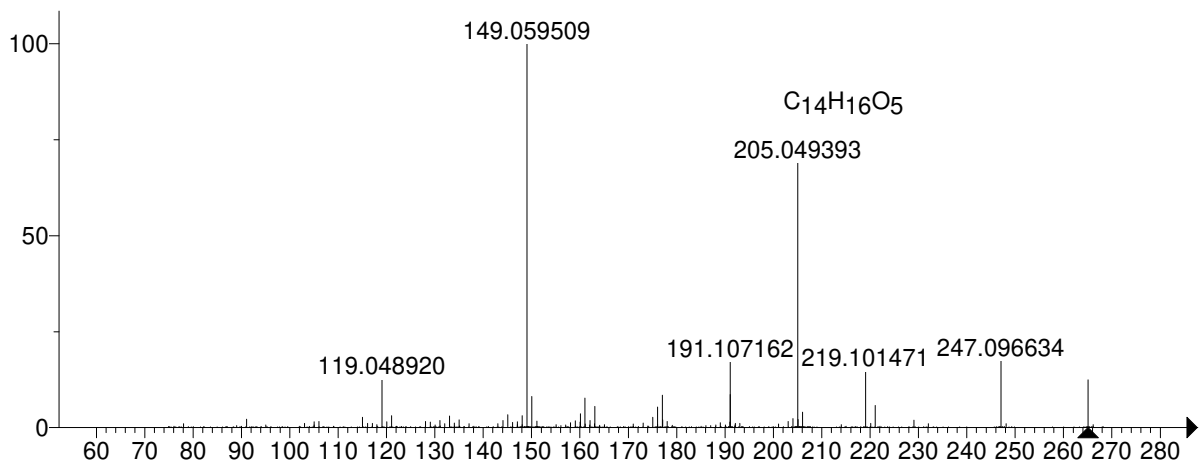

Hit 5 : (E)-5-(4-methoxy-5-methyl-6-oxopyran-2-yl)-3-methylhex-4-enoic acid [M-H]<sup>-</sup> 35HCD P=265.1  
C<sub>14</sub>H<sub>18</sub>O<sub>5</sub>; MF: 5; RMF: 52; Prob 15.0%; Lib: mona-export-lc-ms-ms\_negative\_mode; ID: 22802.

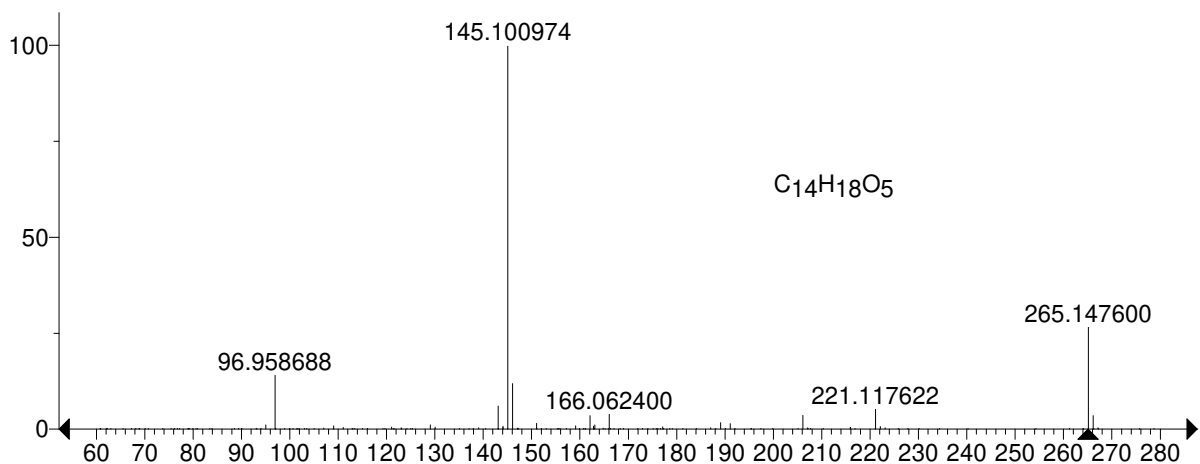

Unknown: Unknown (11.87\_460.1823m/z)  
Compound in Library Factor = 0

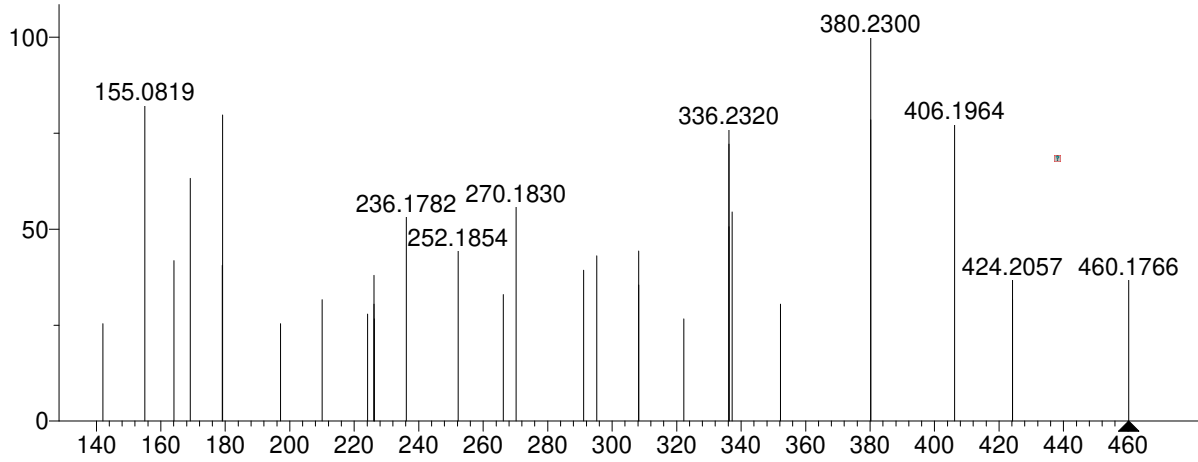

Hit 1 :  $\alpha$ -Amanitin [M+2H]<sup>2+</sup> HCD 12V P=460.2  
C39H54N10O14S; MF: 0; RMF: 26; Prob 100.0%; CAS: 23109-05-9; Lib: nist\_msms; ID: 225453.

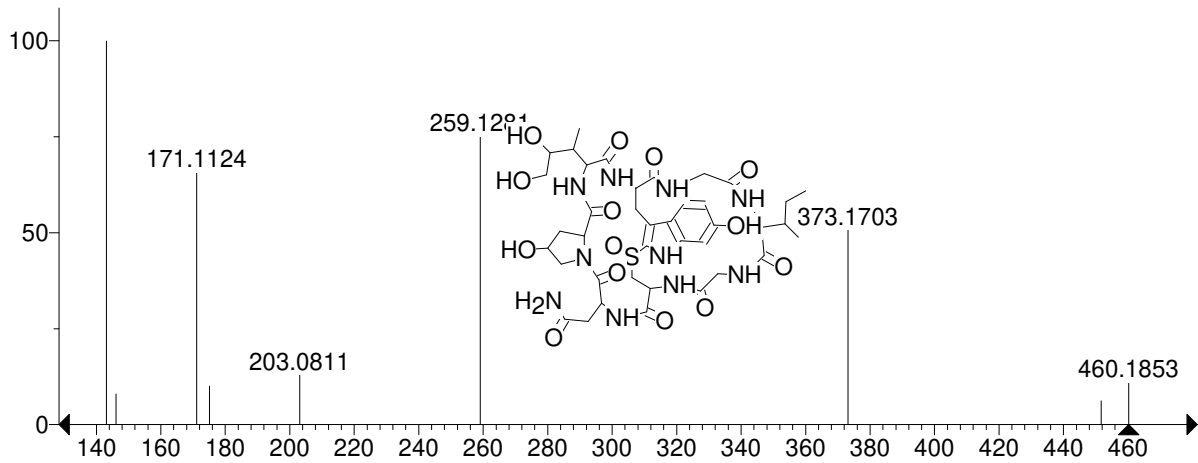

Unknown: Unknown (11.89\_325.0919m/z)  
Compound in Library Factor = 0

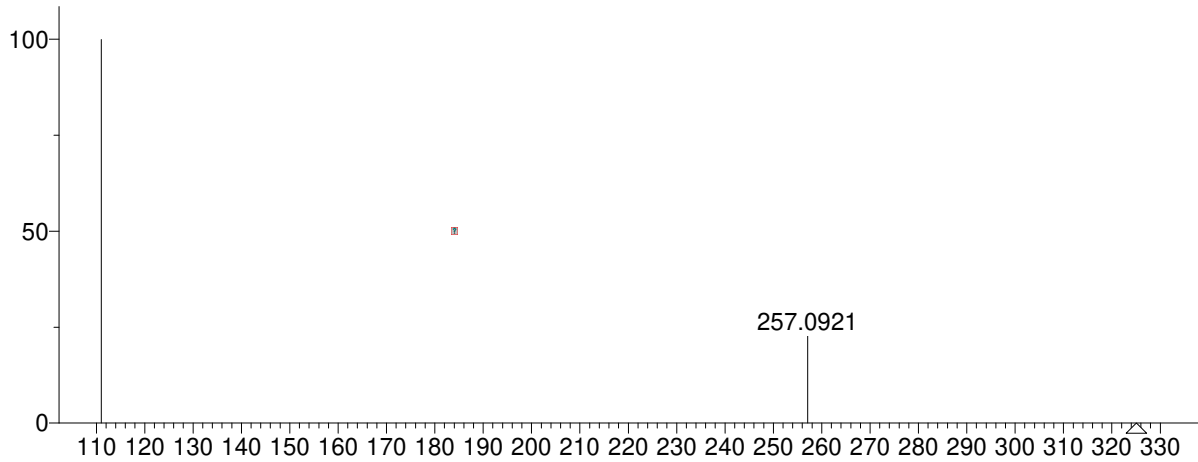

Hit 1 : 2-(3-hydroxy-5-methoxyphenoxy)-6-(hydroxymethyl)oxane-3,4,5-triol [M+Na]<sup>+</sup> 65HCD P=325.1  
C<sub>13</sub>H<sub>18</sub>O<sub>8</sub>; MF: 0; RMF: 24; Prob 50.0%; Lib: mona-export-vf-npl\_gexactive; ID: 22425.



Hit 2 : (1S,4R,7S,8S,11S)-9-tert-butyl-7,9-dihydroxy-3,5,12-trioxatetracyclo[6.6.0.0A<sup>1</sup>,A<sup>1</sup>A<sup>1</sup>.0a<sup>1</sup>,a<sup>1</sup>,,]tetradec  
C<sub>15</sub>H<sub>18</sub>O<sub>8</sub>; MF: 0; RMF: 6; Prob 50.0%; Lib: mona-export-lc-ms-ms\_negative\_mode; ID: 19424.



Unknown: Unknown (11.90\_926.4372m/z)  
Compound in Library Factor = 0

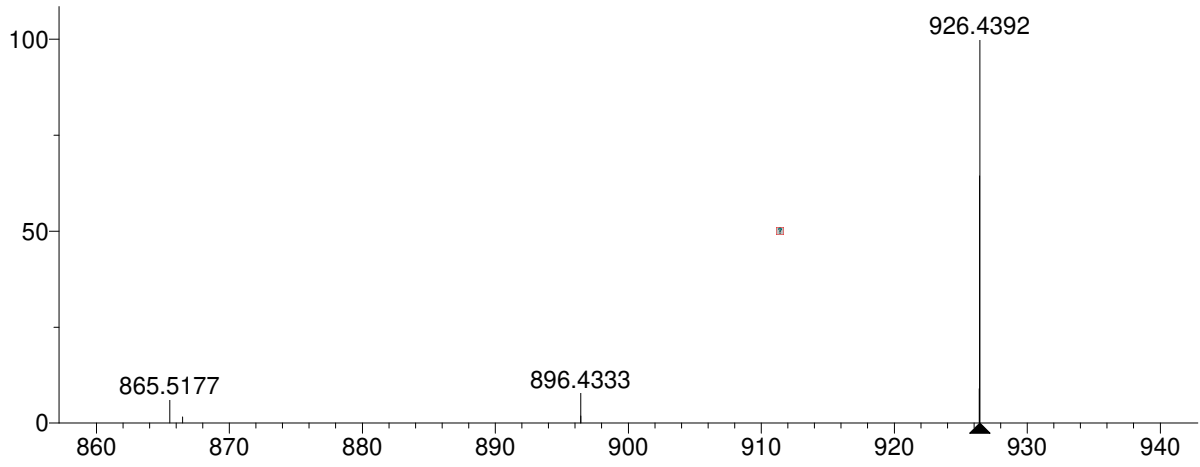

Unknown: Unknown (11.92\_926.4005m/z)  
Compound in Library Factor = 0

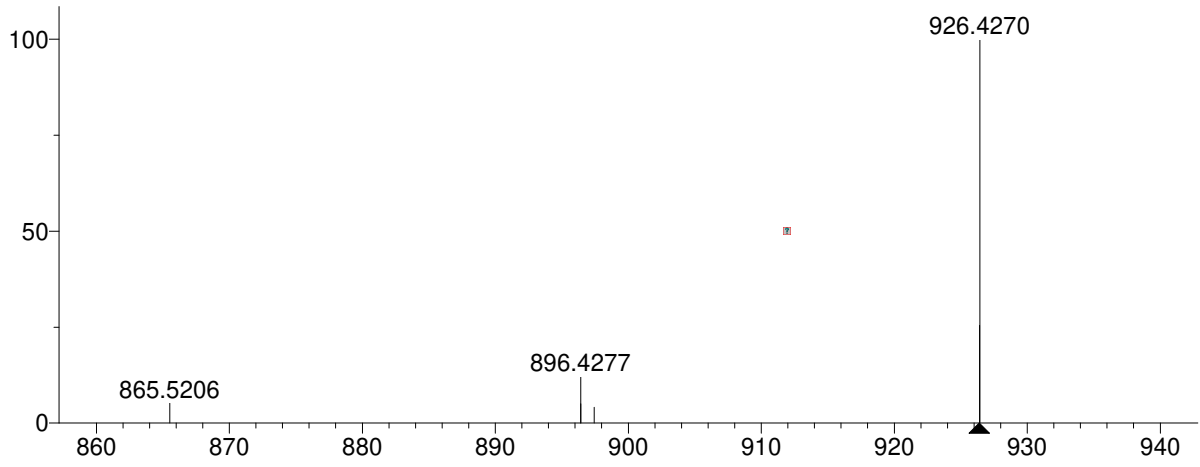

Unknown: Unknown (11.92\_926.4369m/z)  
Compound in Library Factor = 0

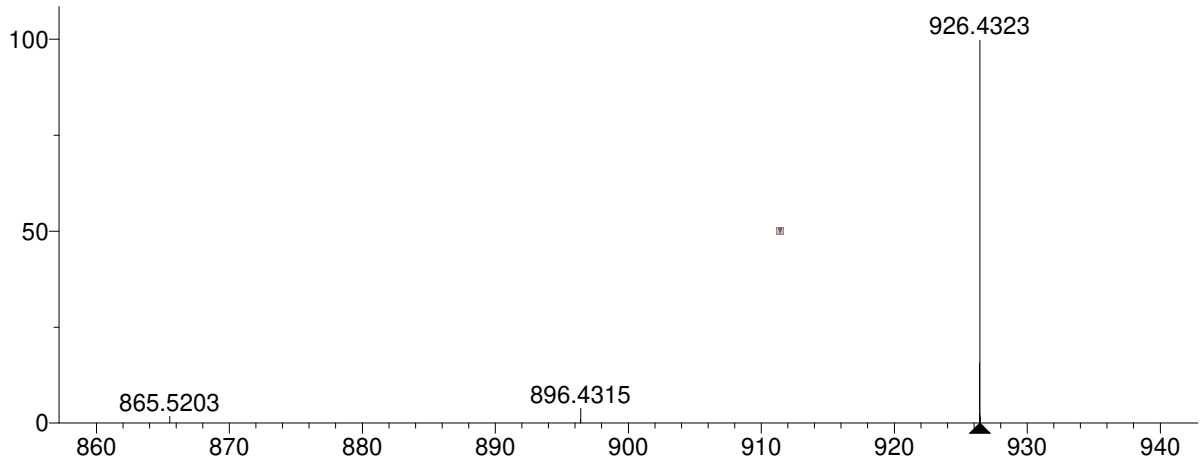



Unknown: Unknown (11.93\_663.2141 m/z)  
Compound in Library Factor = 0

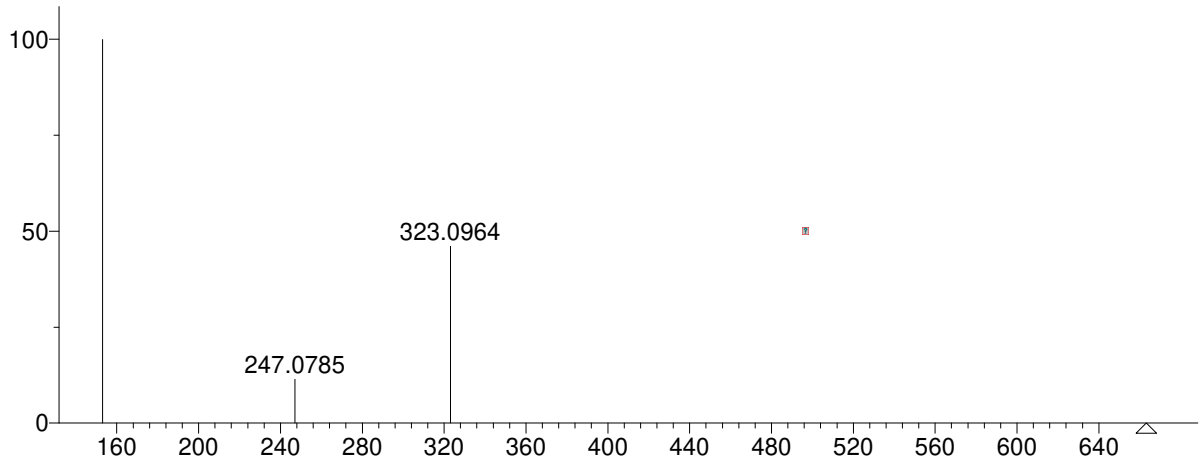

Unknown: Unknown (11.94\_351.1065m/z)  
Compound in Library Factor = 0

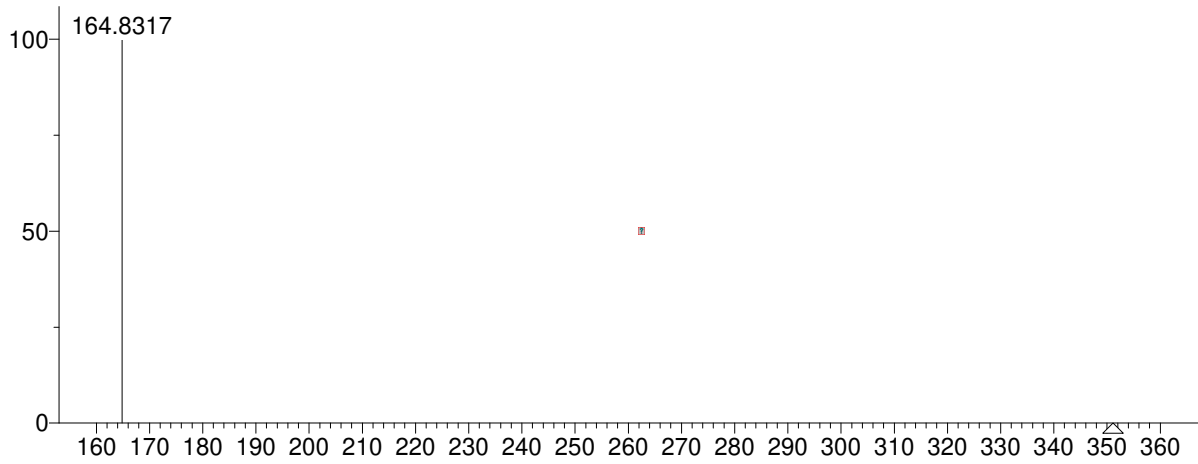

Hit 1 : 1-(4-hydroxyphenyl)-3-[(2R,3R,4S,5S,6R)-3,4,5-trihydroxy-6-(hydroxymethyl)oxan-2-yl]oxypropan-1-one [M  
C<sub>15</sub>H<sub>20</sub>O<sub>8</sub>; MF: 0; RMF: 9; Prob 100.0%; Lib: anthocyanins mona; ID: 3643.

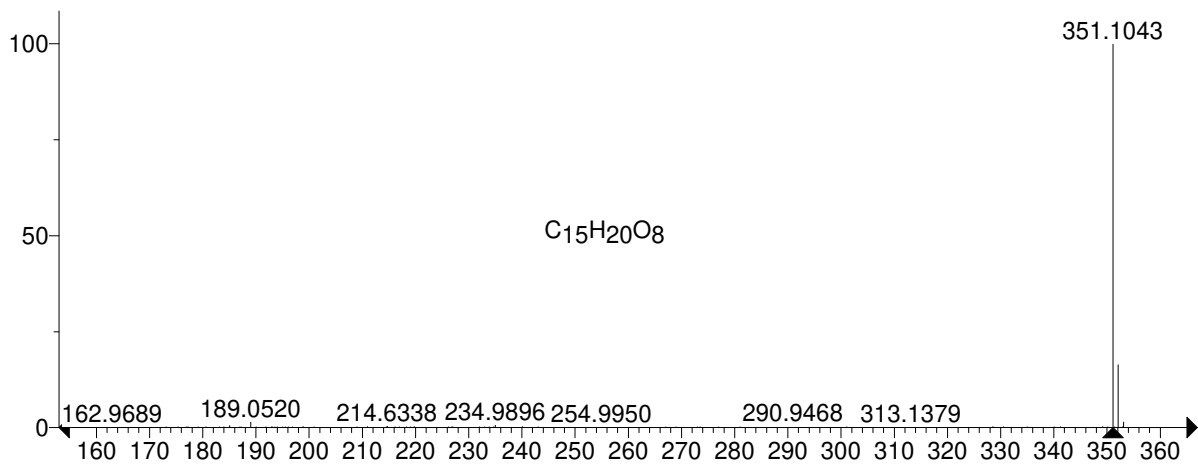

Unknown: Unknown (11.99\_265.1075m/z)  
Compound in Library Factor = -2387

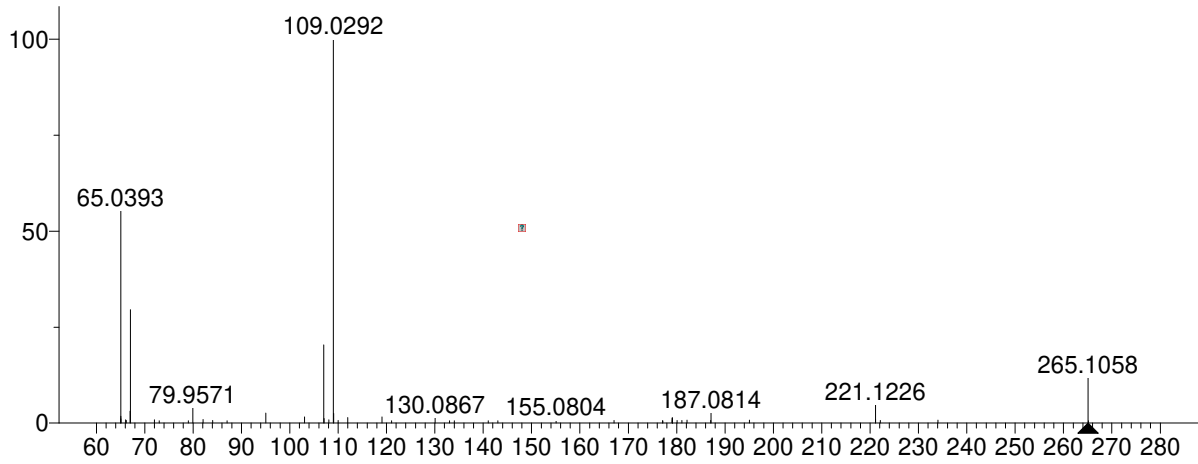

Hit 1 : Anisatin [M+H-CH4O3]+ HCD 10V P=265.1  
C15H20O8; MF: 27; RMF: 477; Prob 31.5%; CAS: 5230-87-5; Lib: nist\_msms; ID: 394625.

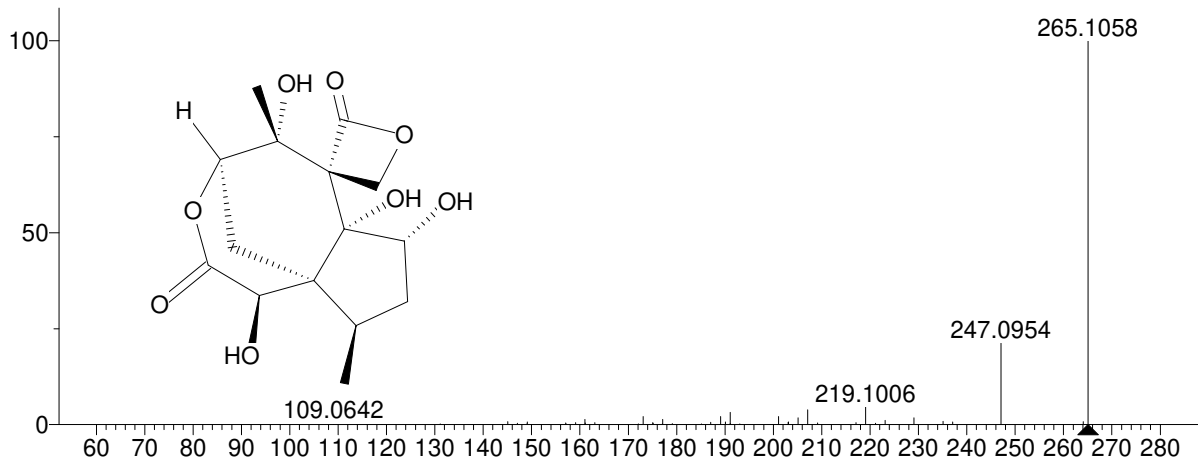

Hit 2 : NCGC00380472-0114,7,8-trimethoxy-3,5-dimethylchromen-2-one [M+H]+ P=265.1  
C14H16O5; MF: 8; RMF: 167; Prob 15.3%; Lib: mona-export-gnps; ID: 6739.

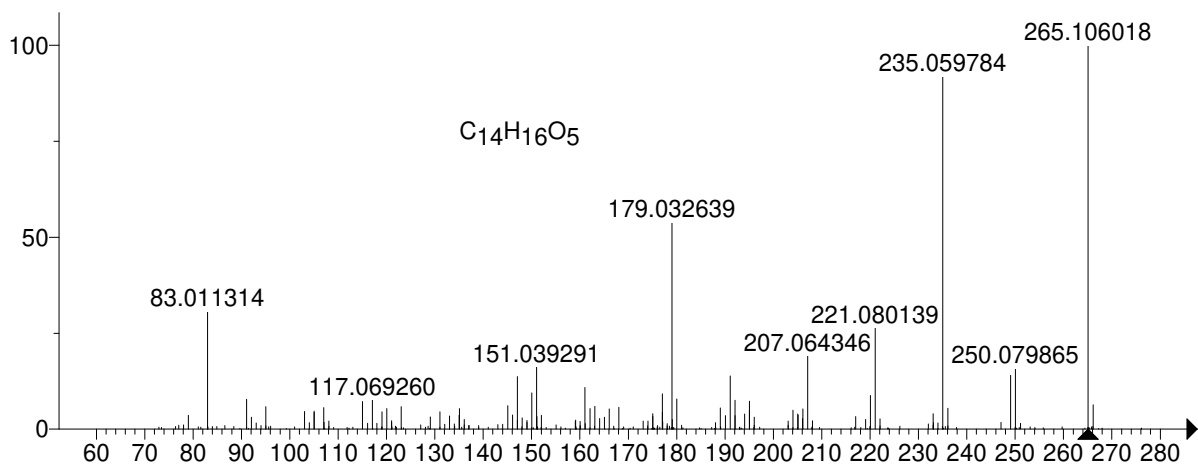

Hit 3 : 4,7,8-trimethoxy-3,5-dimethylchromen-2-one [M+H]<sup>+</sup> 35HCD P=265.1  
C<sub>14</sub>H<sub>16</sub>O<sub>5</sub>; MF: 8; RMF: 164; Prob 15.3%; Lib: mona-export-vf-npl\_qexactive; ID: 23347.

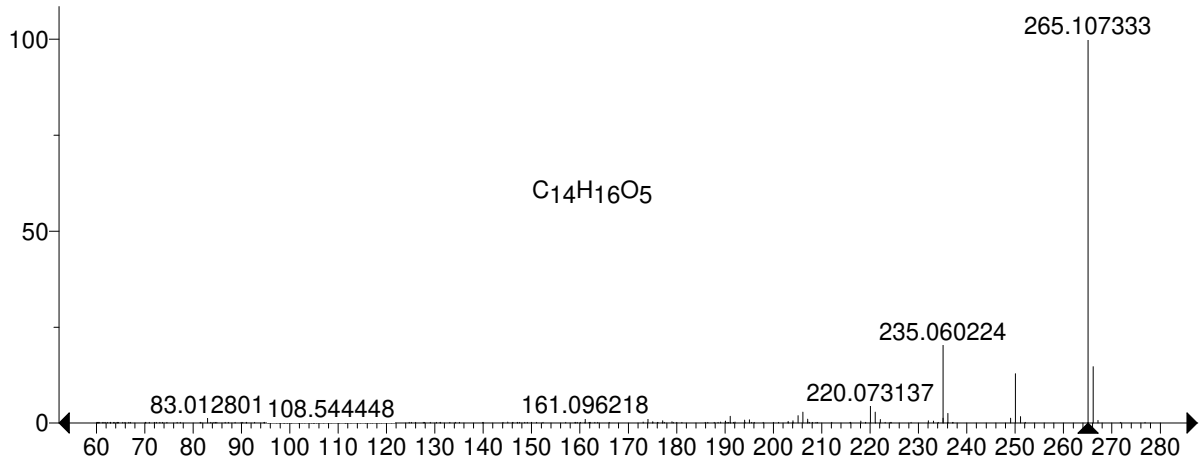

Hit 4 : NCGC00381087-01!3-(2-hydroxypropyl)-6,8-dimethoxyisochromen-1-one [M+H]<sup>+</sup> P=265.1  
C<sub>14</sub>H<sub>16</sub>O<sub>5</sub>; MF: 5; RMF: 103; Prob 13.5%; Lib: mona-export-gnps; ID: 7812.

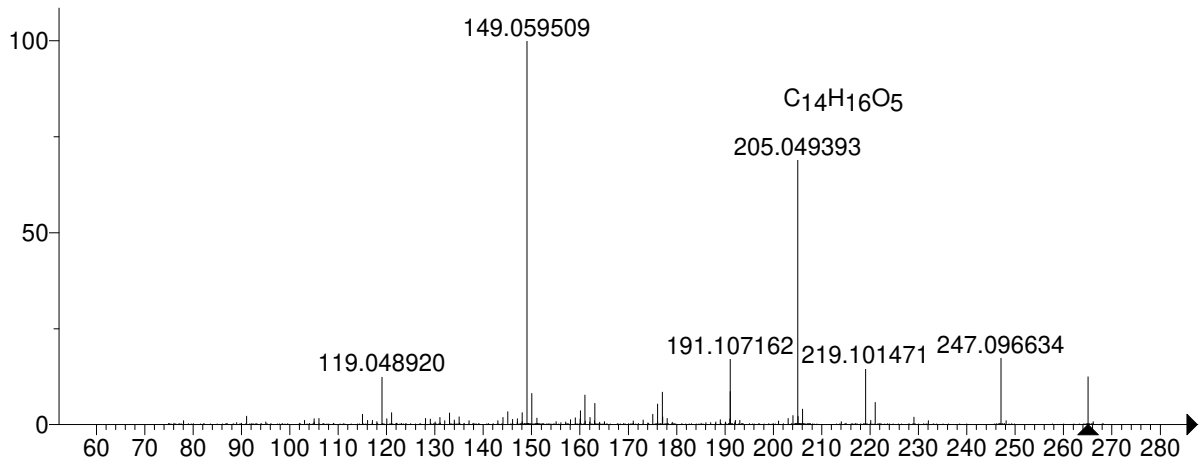

Hit 5 : (E)-5-(4-methoxy-5-methyl-6-oxopyran-2-yl)-3-methylhex-4-enoic acid [M-H]<sup>-</sup> 35HCD P=265.1  
C<sub>14</sub>H<sub>18</sub>O<sub>5</sub>; MF: 5; RMF: 62; Prob 13.5%; Lib: mona-export-lc-ms-ms\_negative\_mode; ID: 22802.

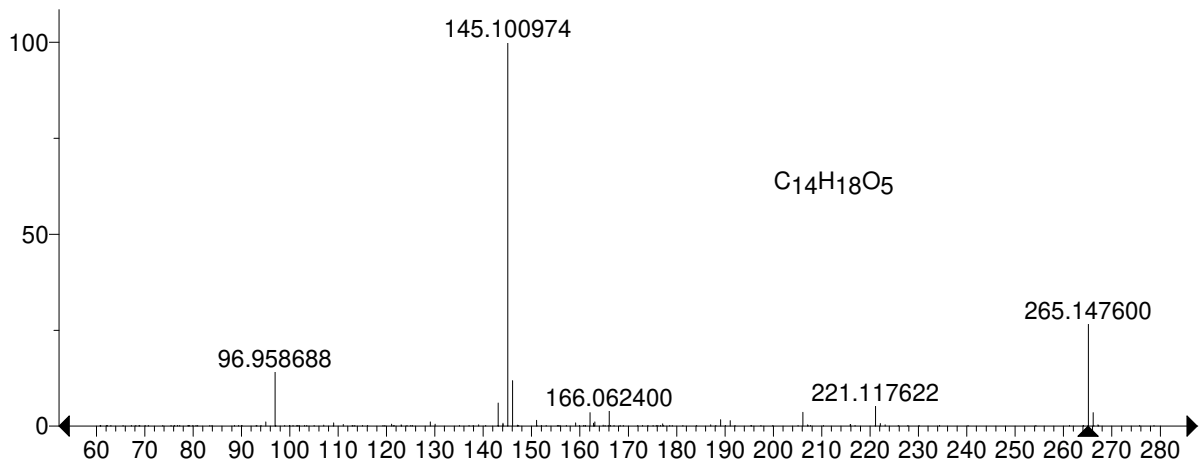

Unknown: Unknown (11.99\_443.2020m/z)  
Compound in Library Factor = -3273

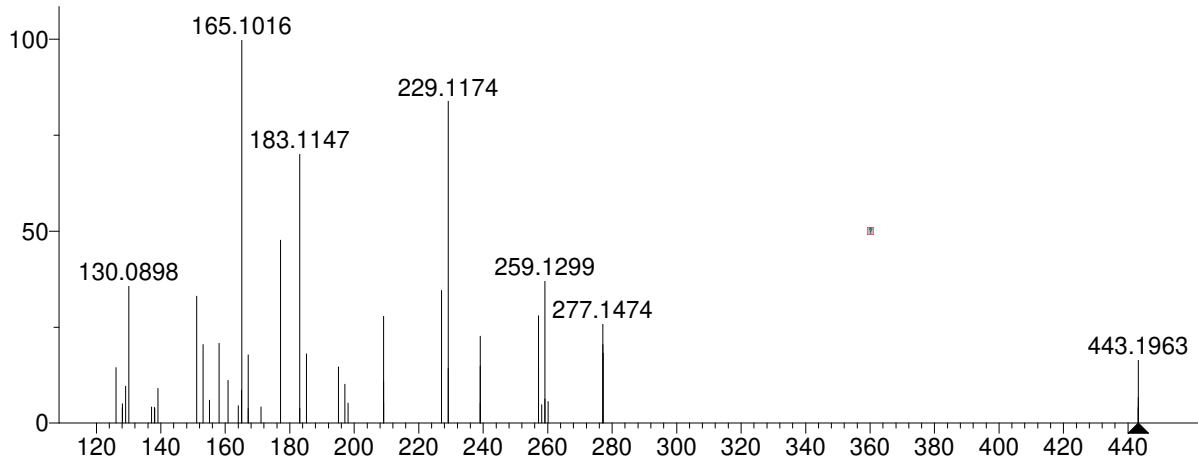

Hit 1 : Monensin [M+Na]<sup>+</sup>=>479.5=>443.2 IT 35% P=443.2  
C36H62O11; MF: 6; RMF: 320; Prob 8.58%; CAS: 17090-79-8; Lib: nist\_msms; ID: 145060.

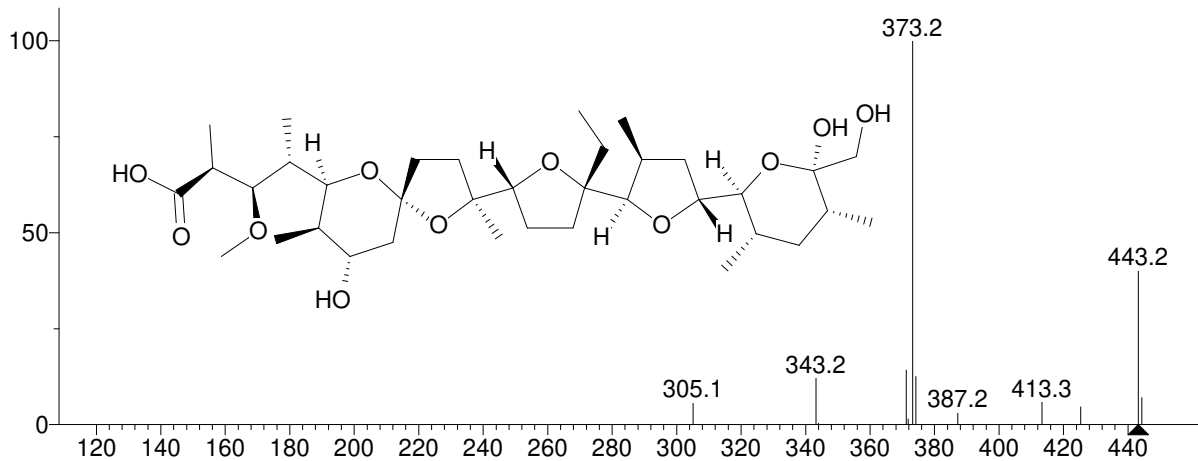

Hit 2 : Apixaban [M+H]<sup>+</sup>=>443.2 IT 35% P=443.2  
C25H25N5O4; MF: 4; RMF: 80; Prob 7.92%; CAS: 503612-47-3; Lib: nist\_msms; ID: 369698.

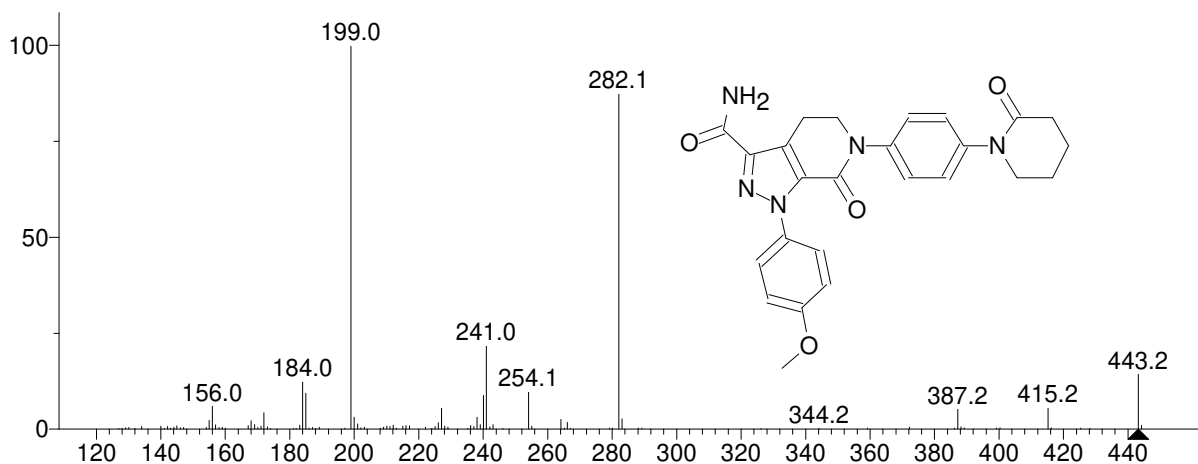

Hit 3 : NCGC00380442-01\_C25H30O7\_3H-5,13b-Methano-1H-furo[3',4':6,7]heptaleno[3,2-c]pyran-1,4,9(3aH,7H), C25H30O7; MF: 3; RMF: 171; Prob 7.61%; Lib: mona-export-gnps; ID: 13756.

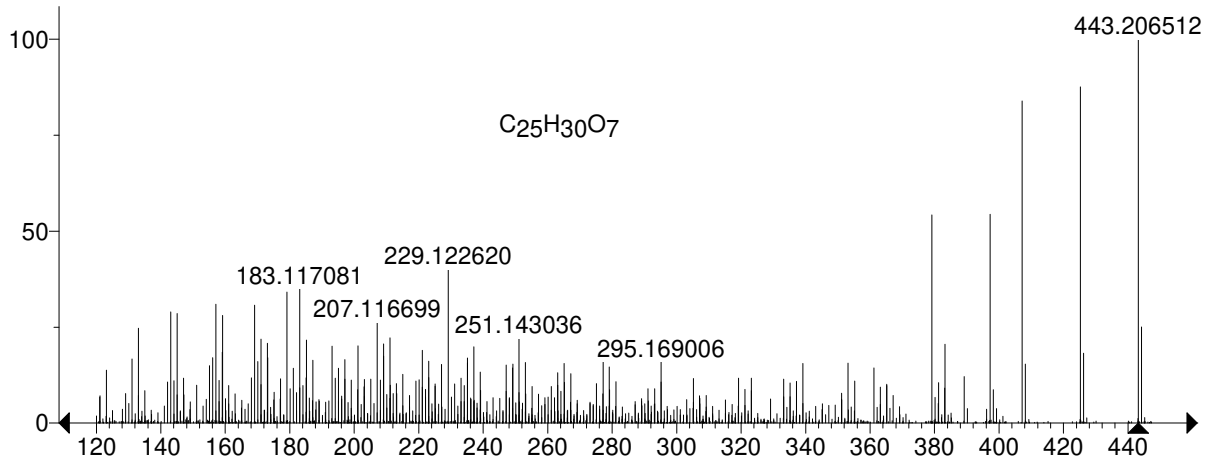

Hit 4 : Poliumoside [M-H]-=>607.3=>443.2 IT 35% P=443.2 C35H46O19; MF: 1; RMF: 86; Prob 7.02%; CAS: 94079-81-9; Lib: nist\_msms; ID: 425676.

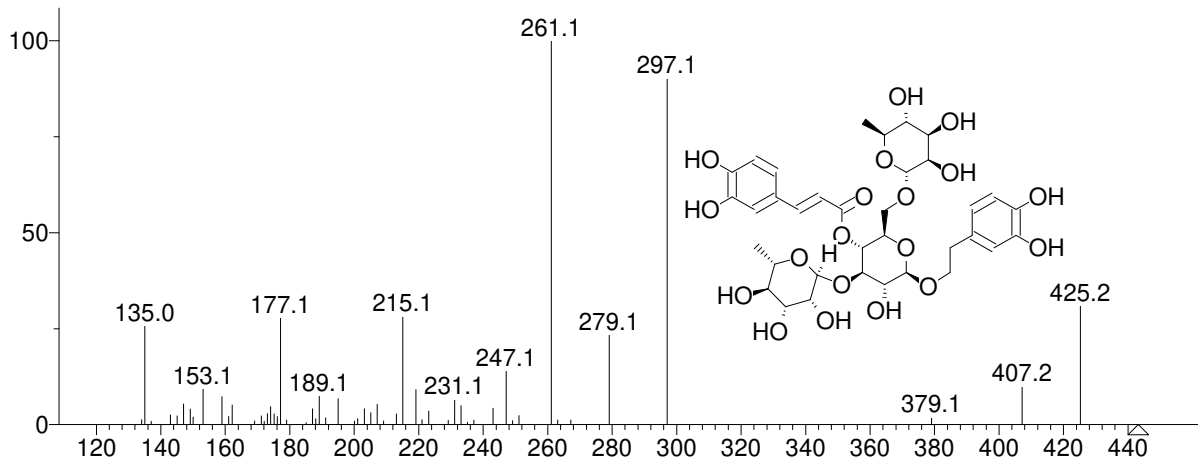

Hit 5 : NCGC00380176-01\_C25H32O8\_5a-Hydroxy-9-(hydroxymethyl)-13-methoxy-5,5,7a,14b-tetramethyl-1,2,5c C25H32O8; MF: 1; RMF: 66; Prob 7.02%; Lib: mona-export-gnps; ID: 10060.

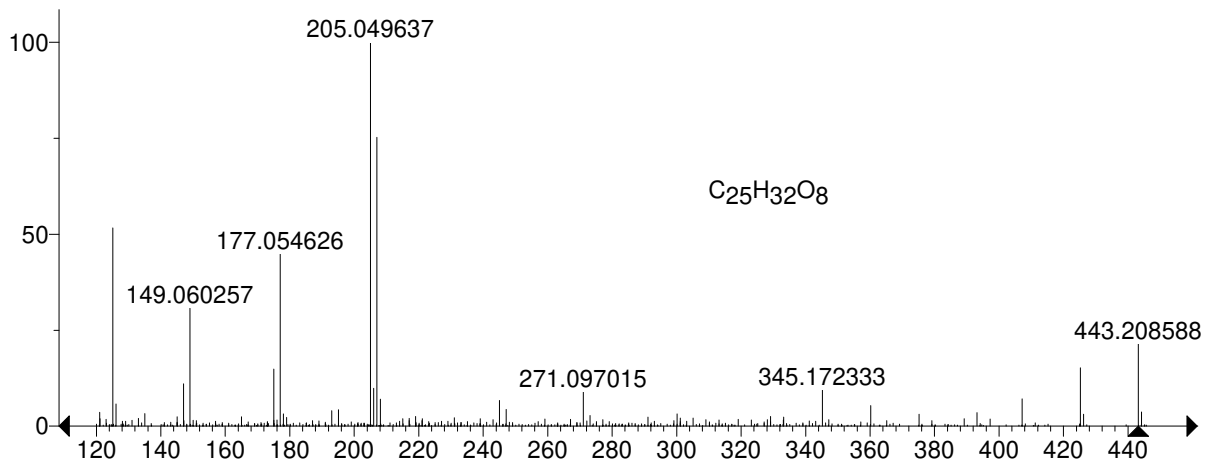

Unknown: Unknown (12.00\_433.0796m/z)  
Compound in Library Factor = 0

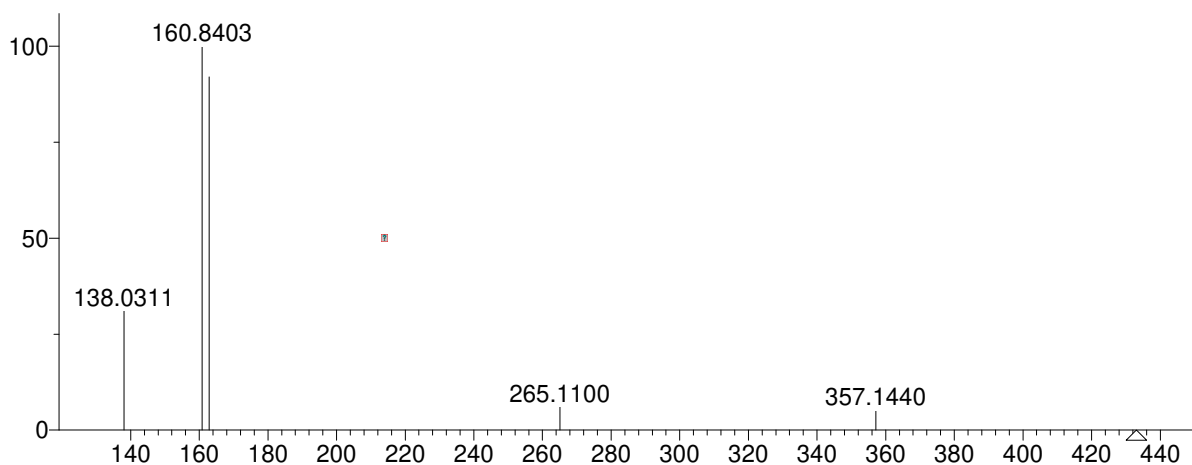

Hit 1 : avicularin [M-H]<sup>-</sup> 45HCD P=433.1  
C<sub>20</sub>H<sub>18</sub>O<sub>11</sub>; MF: 0; RMF: 1; Prob 100.0%; Lib: anthocyanins mona; ID: 5373.

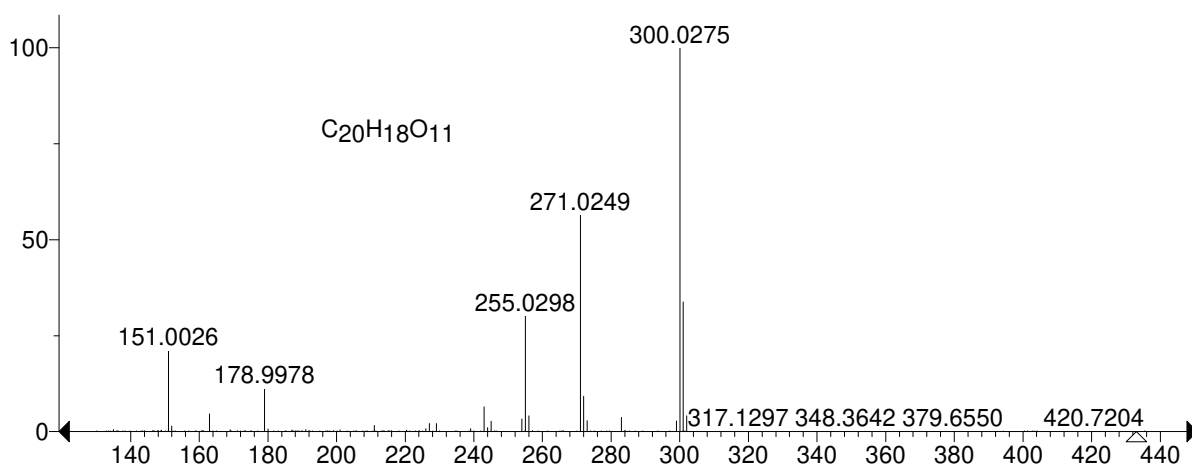

Unknown: Unknown (12.06\_372.0745m/z)  
Compound in Library Factor = 0

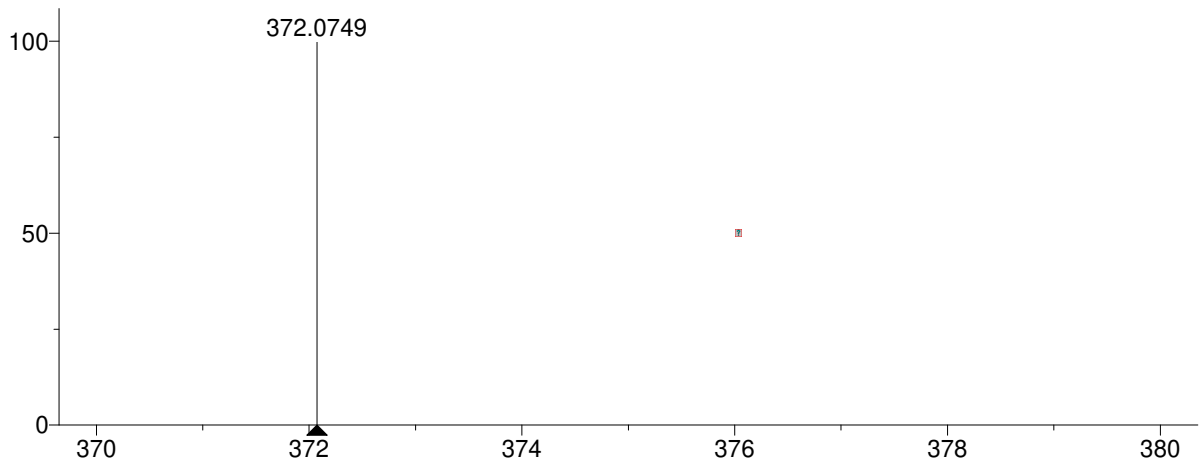



Unknown: Unknown (12.06\_413.1911m/z)  
Compound in Library Factor = 0

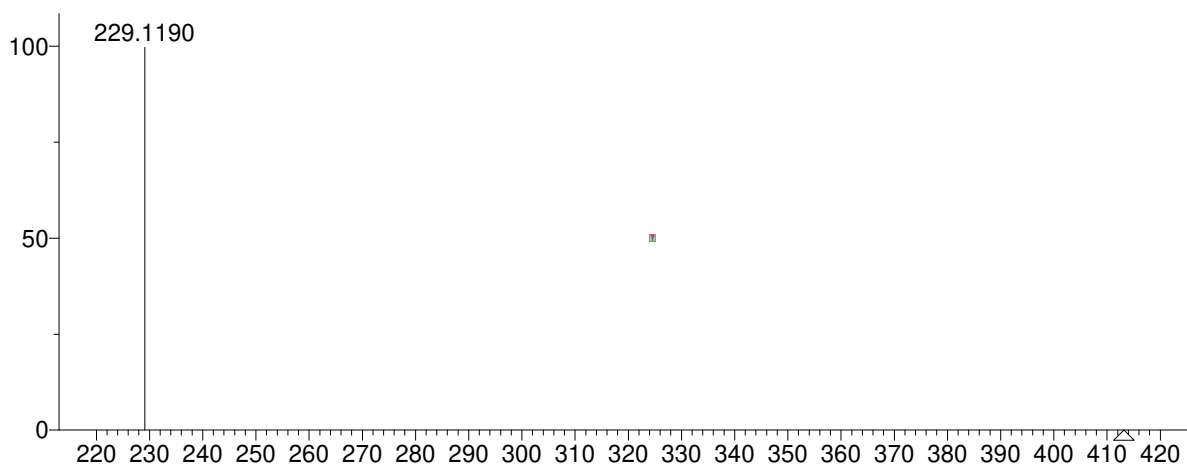

Hit 1 : 16-Phenoxytetranorprostaglandin F2 $\alpha$  [M+Na]<sup>+</sup> IT-FT 35% P=413.2  
C22H30O6; MF: 0; RMF: 94; Prob 50.0%; CAS: 51705-19-2; Lib: nist\_msms; ID: 173044.

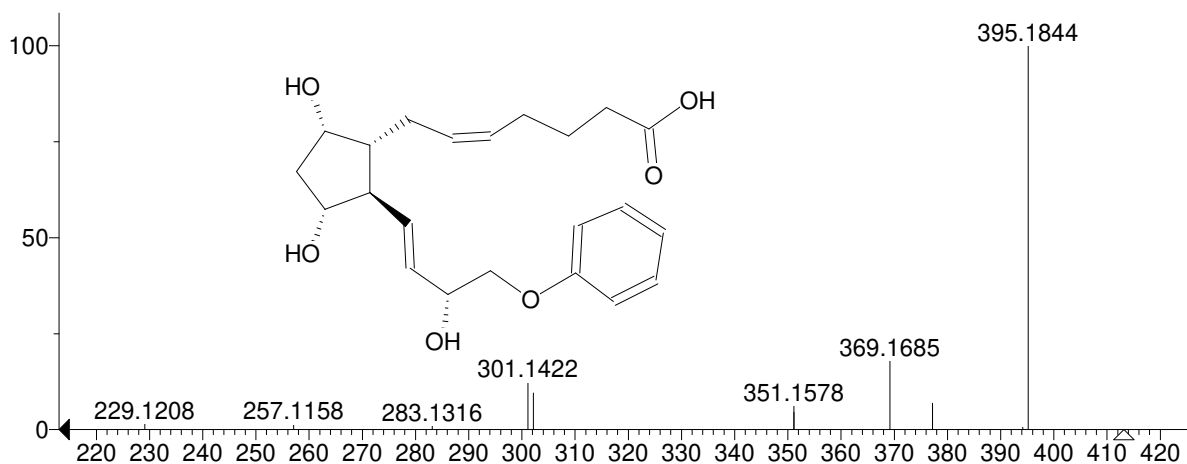

Hit 2 : (2R,3S,4S,5R,6R)-2-(hydroxymethyl)-6-[4-(4-hydroxy-2,6,6-trimethylcyclohexen-1-yl)butan-2-yloxy]oxane-3  
C19H34O7; MF: 0; RMF: 27; Prob 50.0%; Lib: mona-export-vf-npl\_qexactive; ID: 23533.

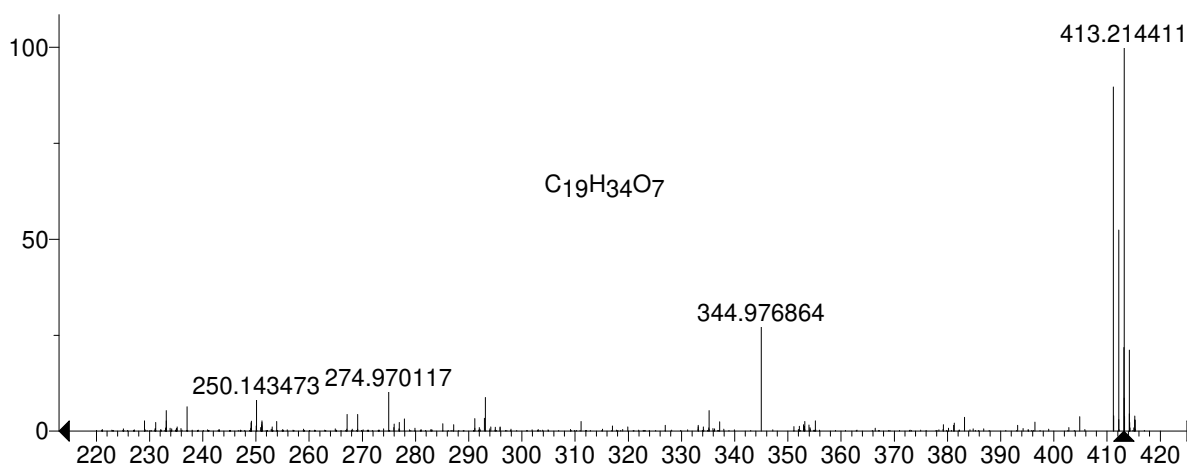

Unknown: Unknown (12.09\_498.2428m/z)  
Compound in Library Factor = 0

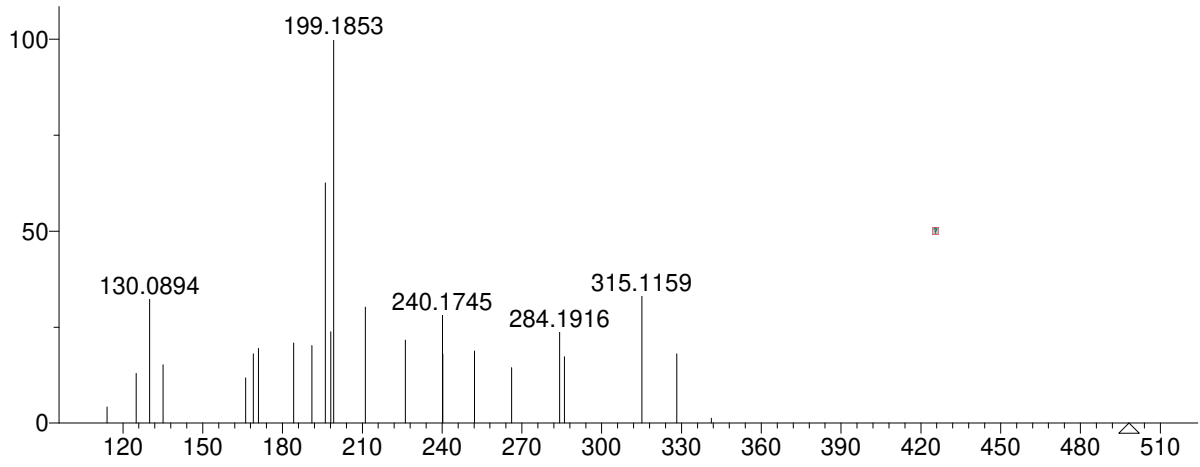

Unknown: Unknown (12.11\_468.8093m/z)  
Compound in Library Factor = 0

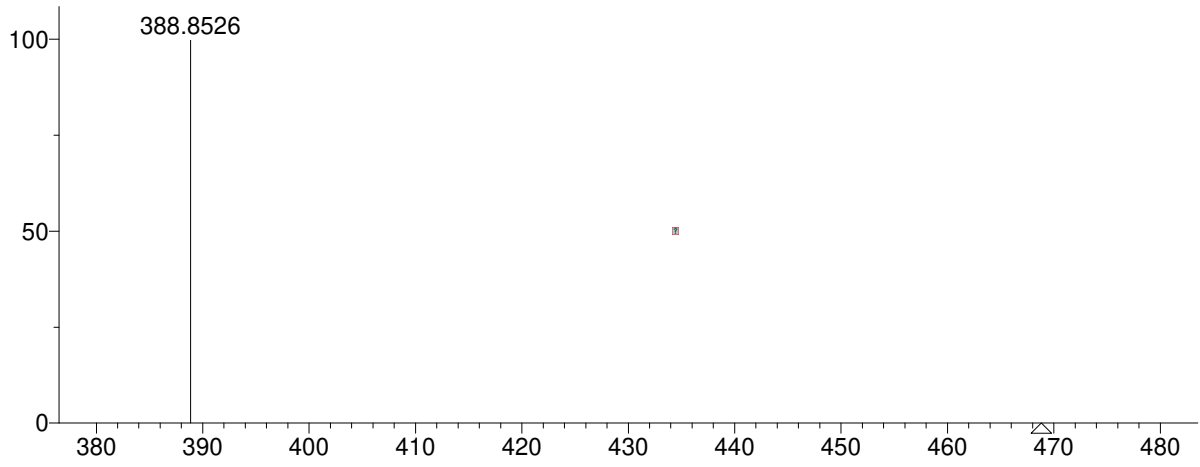

Unknown: Unknown (12.17\_775.3385m/z)  
Compound in Library Factor = 0

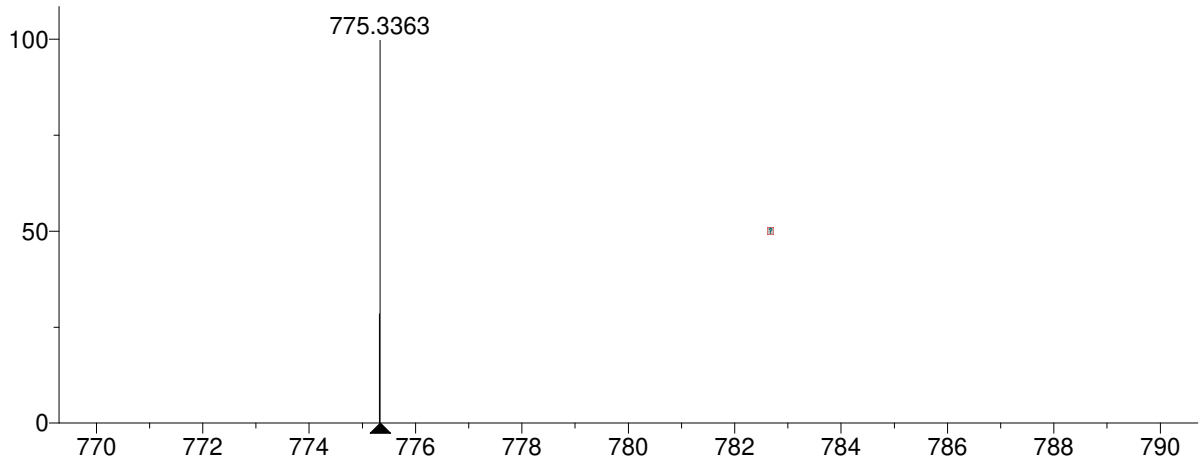

Unknown: Unknown (12.18\_528.2548m/z)  
Compound in Library Factor = 0

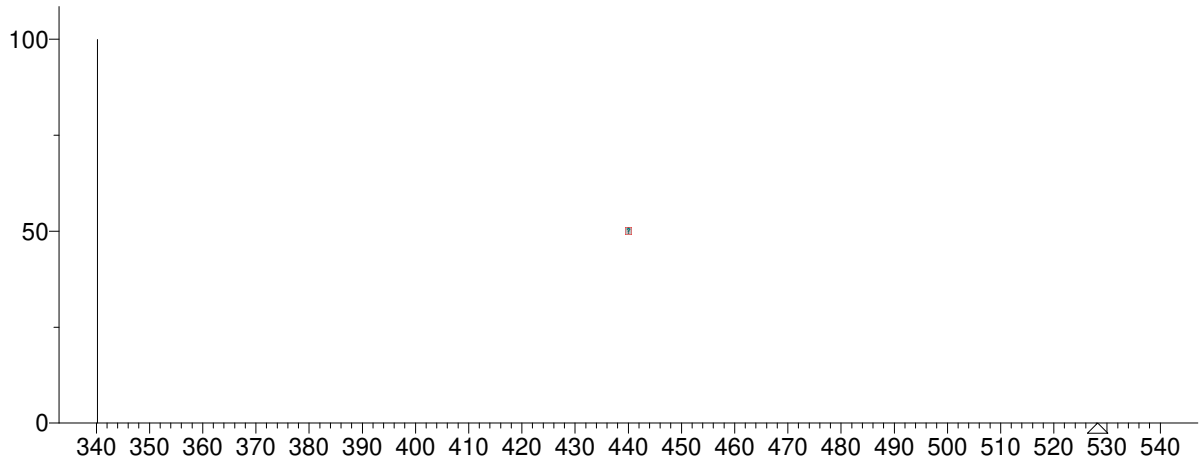

Unknown: Unknown (12.18\_839.4066m/z)  
Compound in Library Factor = -1090

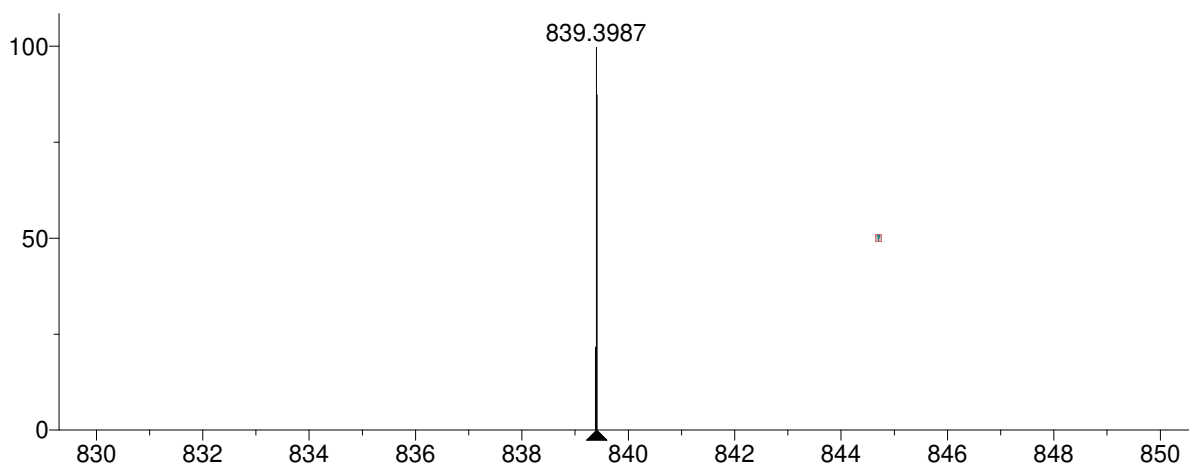

Hit 1 : Licoricesaponin G2 [M+H]<sup>+</sup> 10eV P=839.4  
C<sub>42</sub>H<sub>62</sub>O<sub>17</sub>; MF: 226; RMF: 691; Prob 32.6%; Lib: anthocyanins mona; ID: 3887.

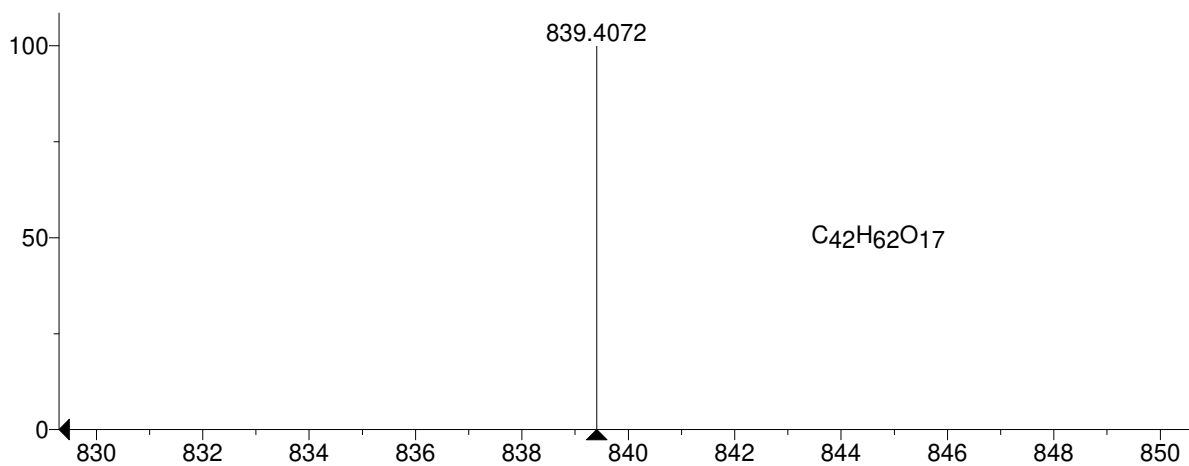

Hit 2 : Unknown (carbon number 42); PlaSMA ID-2098 [M-H]<sup>-</sup> P=839.4  
C<sub>42</sub>H<sub>64</sub>O<sub>17</sub>; MF: 226; RMF: 691; Prob 32.6%; Lib: biomsmms-neg-plasma; ID: 1648.

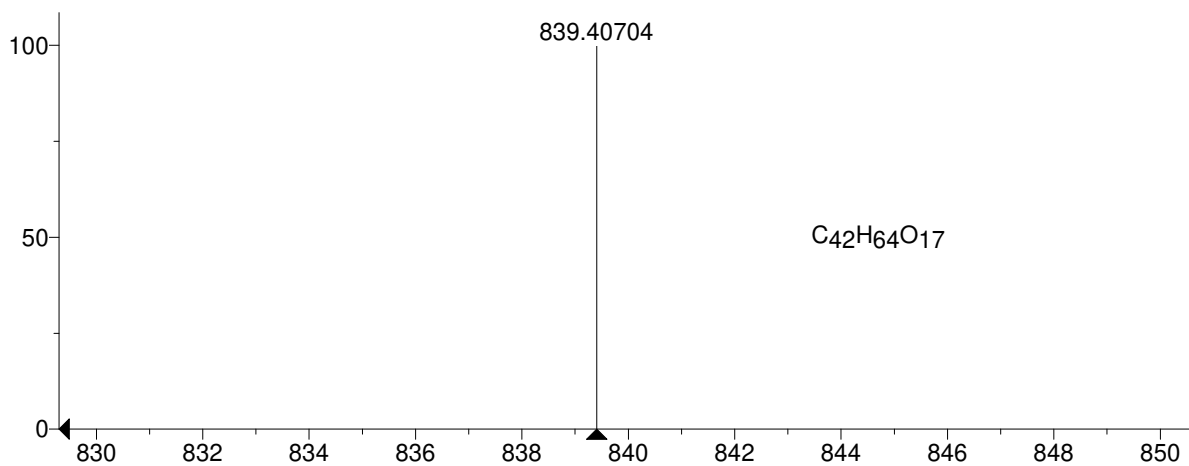

Hit 3 : DGDG 26:7 [M+FA-H]- 40eV P=839.4  
C<sub>41</sub>H<sub>62</sub>O<sub>15</sub>; MF: 226; RMF: 691; Prob 32.6%; Lib: mona-export-in-silico\_spectra; ID: 9785.

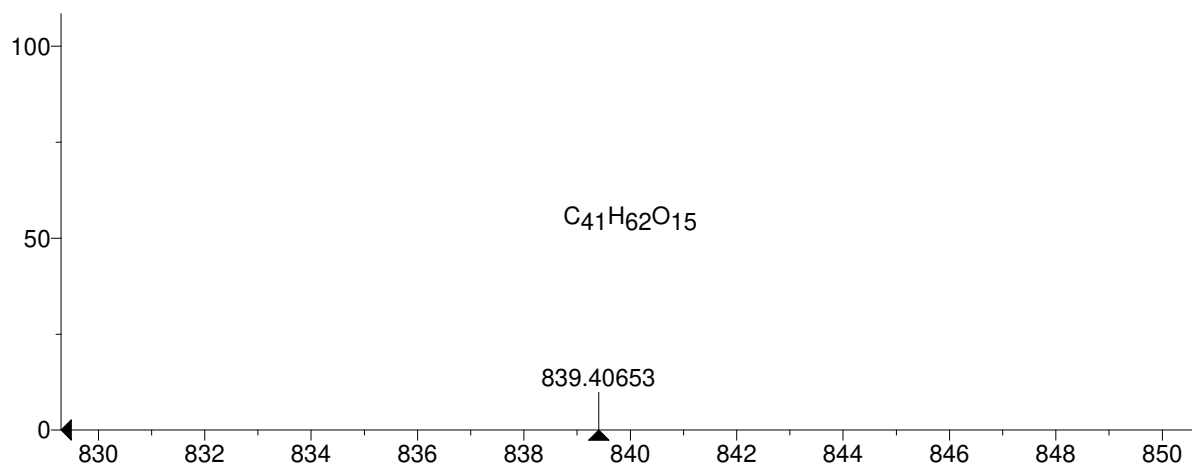

Hit 4 : NCGC00381024-01\_C<sub>42</sub>H<sub>64</sub>O<sub>17</sub>\_beta-D-Glucopyranose, 1-O-[(2E)-6-[[3,4-bis-O-[(2E)-6-hydroxy-2,6-dimethyl-2,5-dihydro-3-furanyl]oxy]hex-2-en-1-yl]oxy]hex-2-en-1-yl D-glucopyranose  
C<sub>42</sub>H<sub>64</sub>O<sub>17</sub>; MF: 111; RMF: 628; Prob 1.95%; Lib: msms-neg-gnps; ID: 1748.

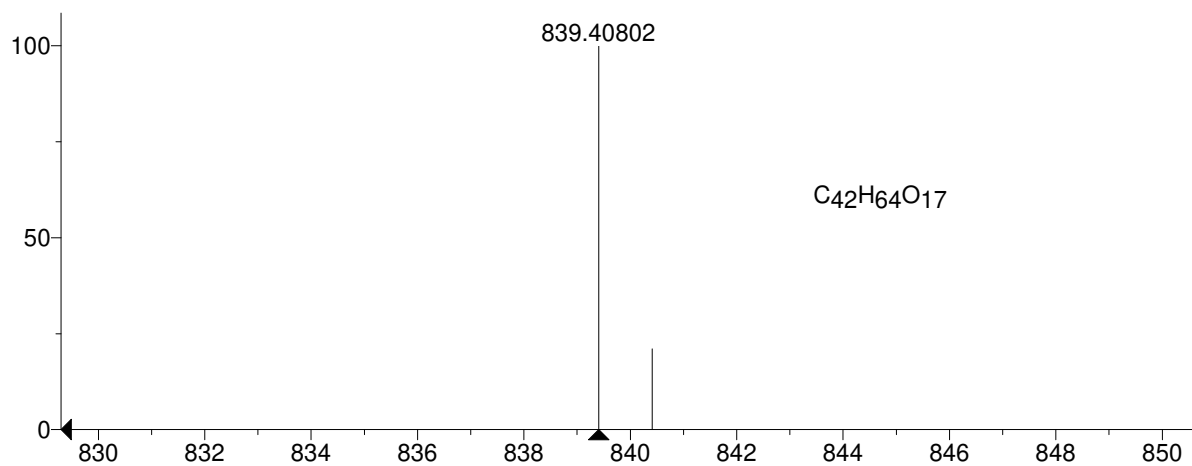

Hit 5 : 9,13-Dimethyl-17-oxo-14-(5-oxo-2,5-dihydro-3-furanyl)tetracyclo[11.3.1.0.1,10.0.4,9]heptadec-6-yl I<sup>2</sup>-D-glu  
C<sub>42</sub>H<sub>64</sub>O<sub>17</sub>; MF: 36; RMF: 545; Prob 0.25%; Lib: mona-export-ic-ms-ms\_negative\_mode; ID: 21212.

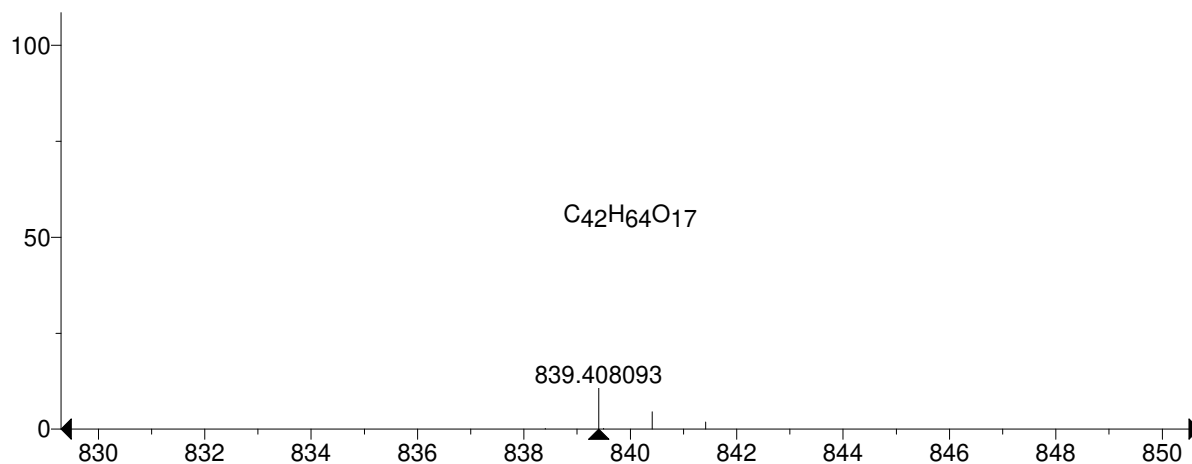

Unknown: Unknown (12.21\_555.2308m/z)  
Compound in Library Factor = 0

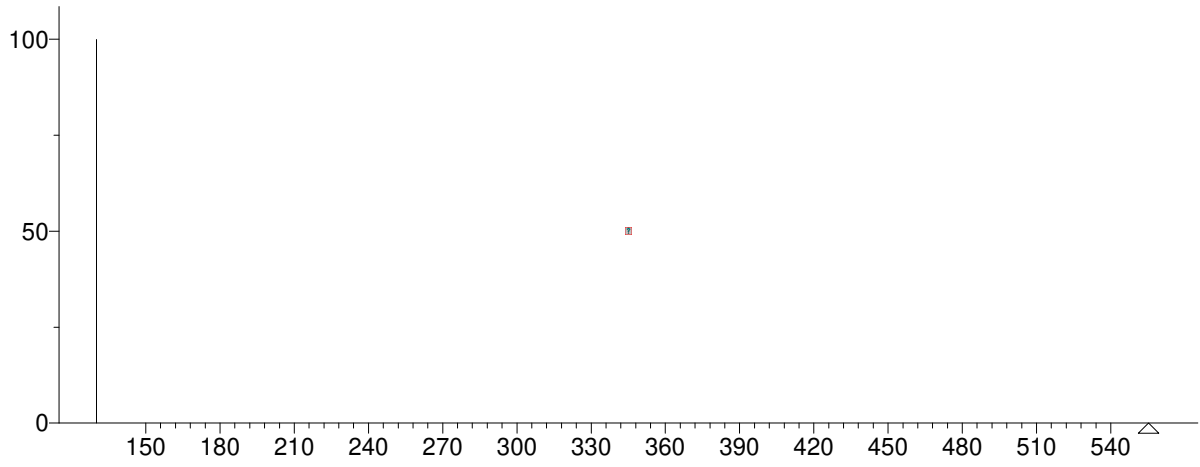



Unknown: Unknown (12.23\_620.1085m/z)  
Compound in Library Factor = 0

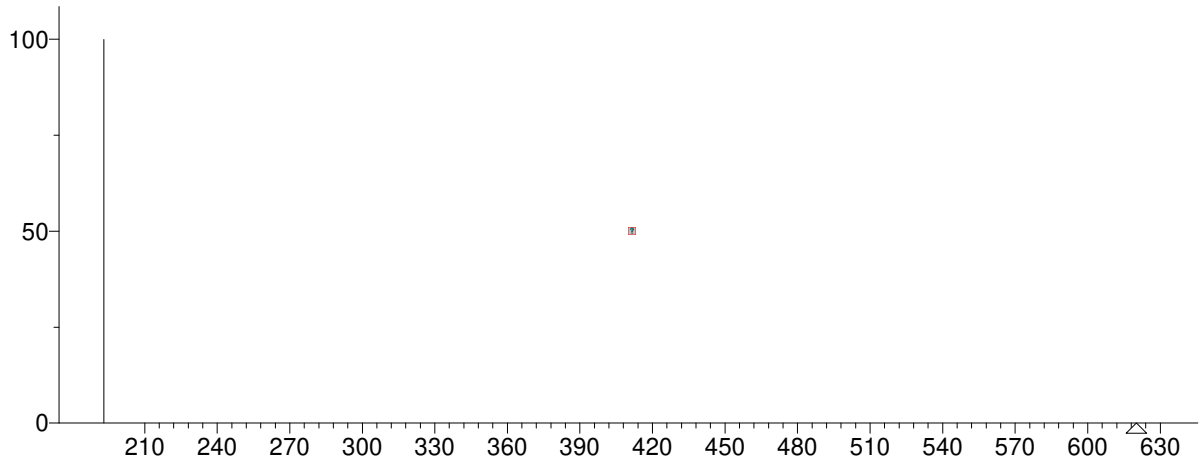

Unknown: Unknown (12.24\_319.9115m/z)  
Compound in Library Factor = 0

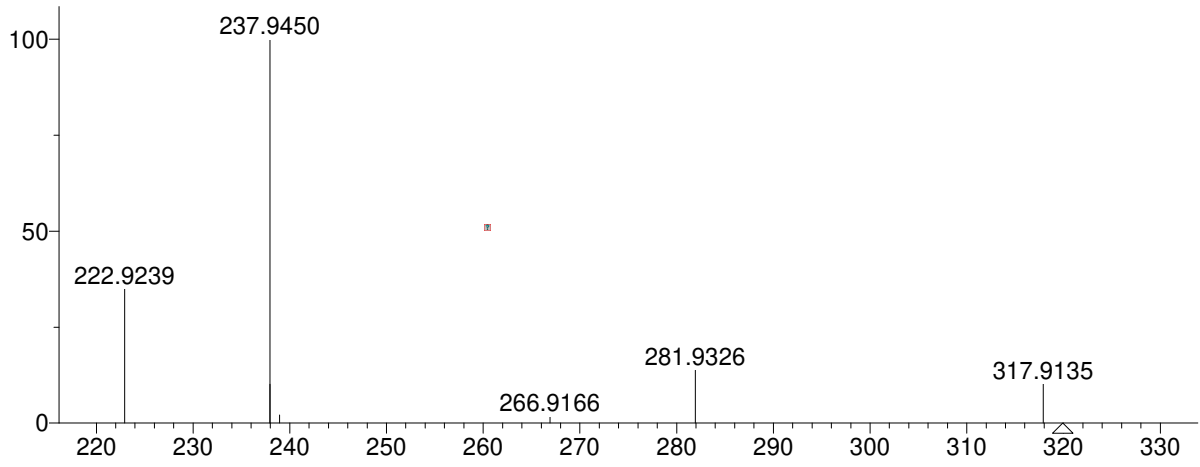

Unknown: Unknown (12.24\_560.2121m/z)  
Compound in Library Factor = -2860

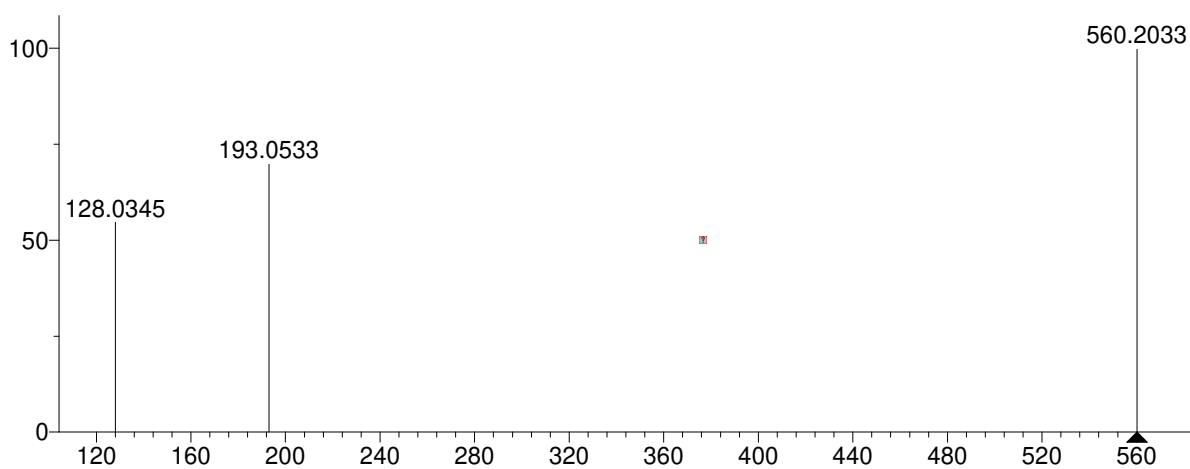

Hit 1 : 2,3,9,10,11,12-Hexahydro-10S-hydroxy-9-methyl-1-oxo-9R,12S-epoxy-1H-diindolo[1,2,3-fg:3',2',1'-kl]pyrrol  
C32H31N3O5; MF: 286; RMF: 922; Prob 100.0%; CAS: 108068-98-0; Lib: nist\_msms; ID: 86206.

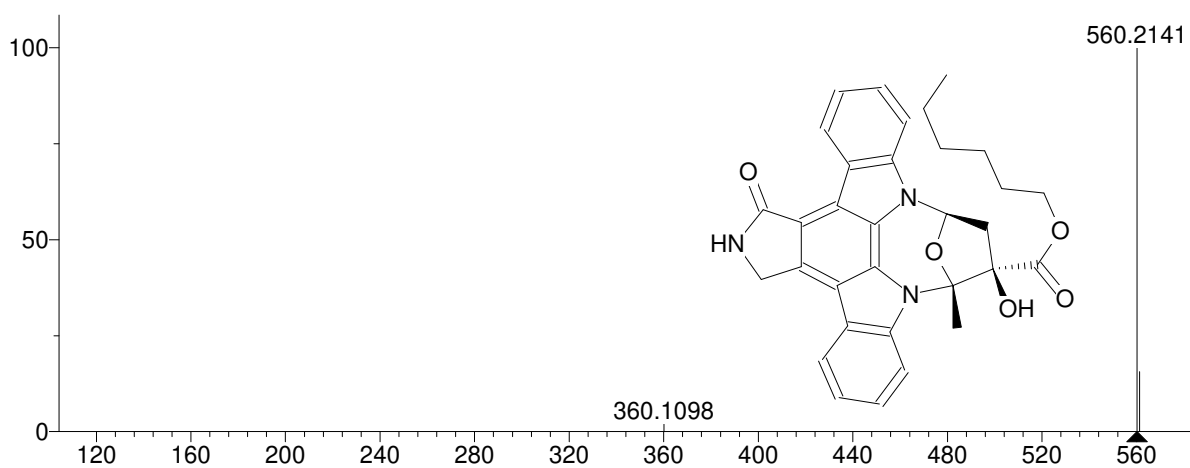

\*\* Search Report Page 1 of 2 \*\*

Unknown: Unknown (12.27\_149.0598m/z)  
Compound in Library Factor = -588

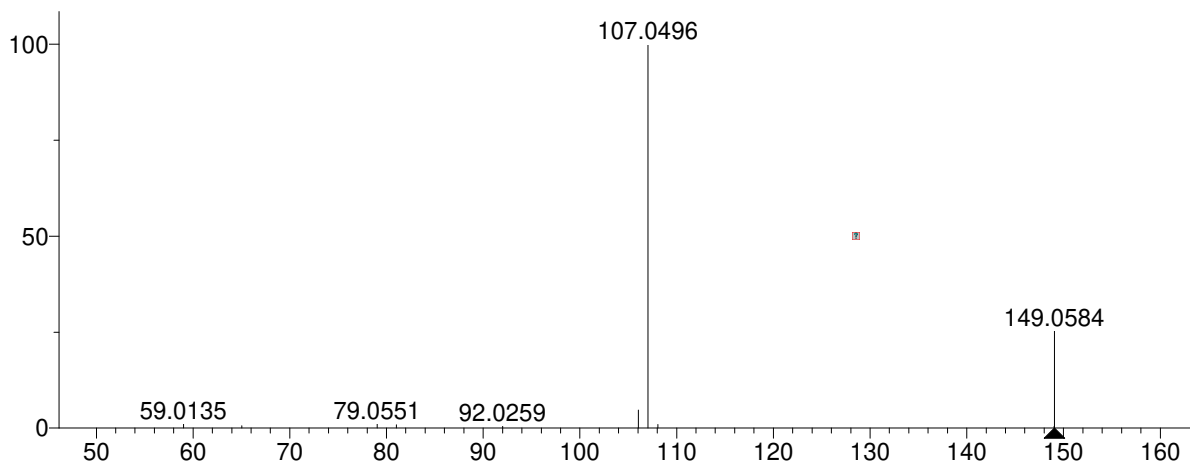

Hit 1 : 4-Chromanone [M+H]<sup>+</sup> HCD 13V P=149.1  
C<sub>9</sub>H<sub>8</sub>O<sub>2</sub>; MF: 450; RMF: 811; Prob 41.8%; CAS: 491-37-2; Lib: nist\_msms; ID: 178506.

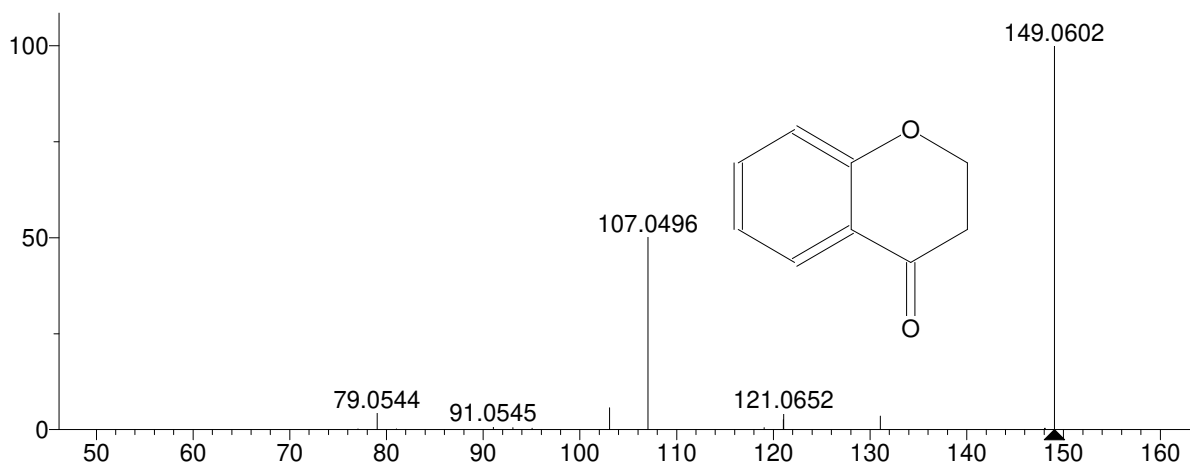

Hit 2 : 3,4-Dihydrocoumarin [M+H]<sup>+</sup> HCD 11V P=149.1  
C<sub>9</sub>H<sub>8</sub>O<sub>2</sub>; MF: 440; RMF: 794; Prob 29.5%; CAS: 119-84-6; Lib: nist\_msms; ID: 111744.

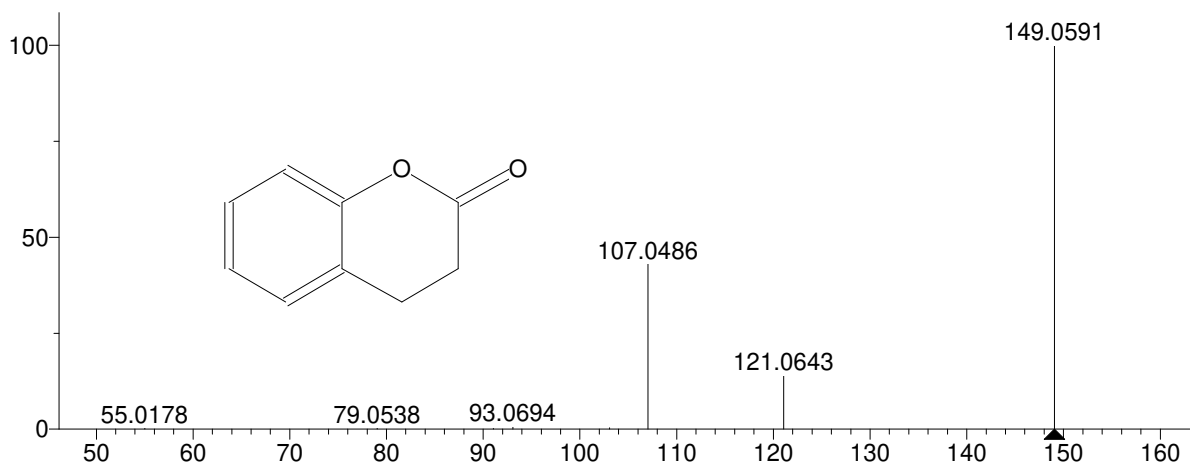

Hit 3 : 3-(2-Hydroxyphenyl)propionic acid [M+H-H<sub>2</sub>O]<sup>+</sup> HCD 11V P=149.1  
C<sub>9</sub>H<sub>10</sub>O<sub>3</sub>; MF: 430; RMF: 787; Prob 20.9%; CAS: 495-78-3; Lib: nist\_msms; ID: 488257.

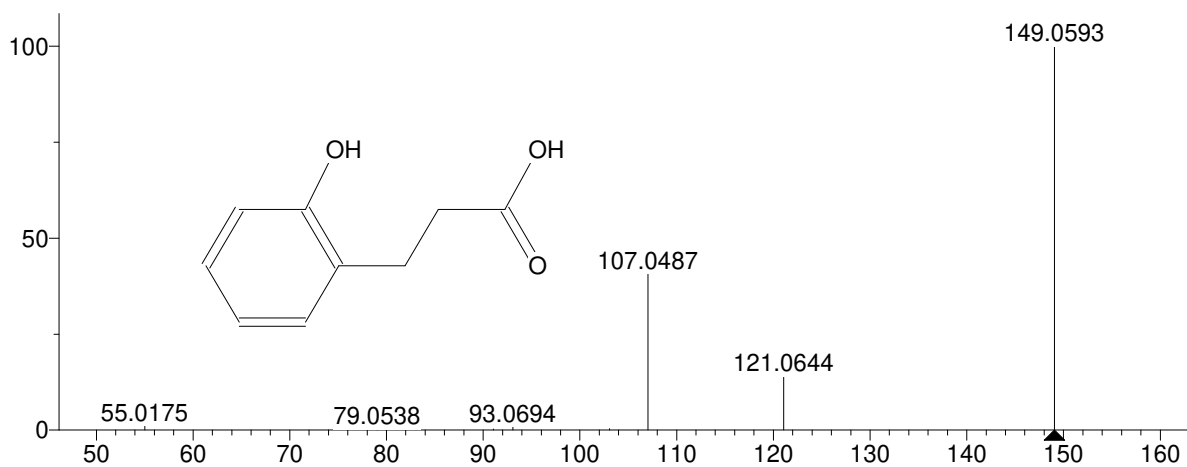

Hit 4 : 3-Phenoxypropionic acid [M+H-H<sub>2</sub>O]<sup>+</sup> HCD 11V P=149.1  
C<sub>9</sub>H<sub>10</sub>O<sub>3</sub>; MF: 405; RMF: 772; Prob 6.36%; CAS: 7170-38-9; Lib: nist\_msms; ID: 149769.

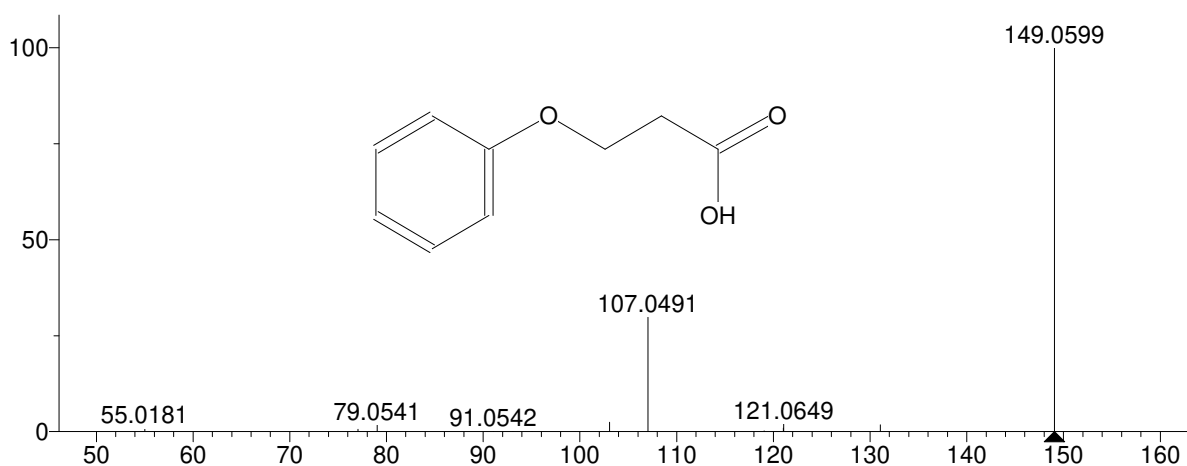

Hit 5 : Hydrocinnamic acid [M-H]<sup>-</sup> 35eV P=149.1  
C<sub>9</sub>H<sub>10</sub>O<sub>2</sub>; MF: 311; RMF: 887; Prob 0.52%; Lib: mona-export-fiehn\_hilic; ID: 2754.

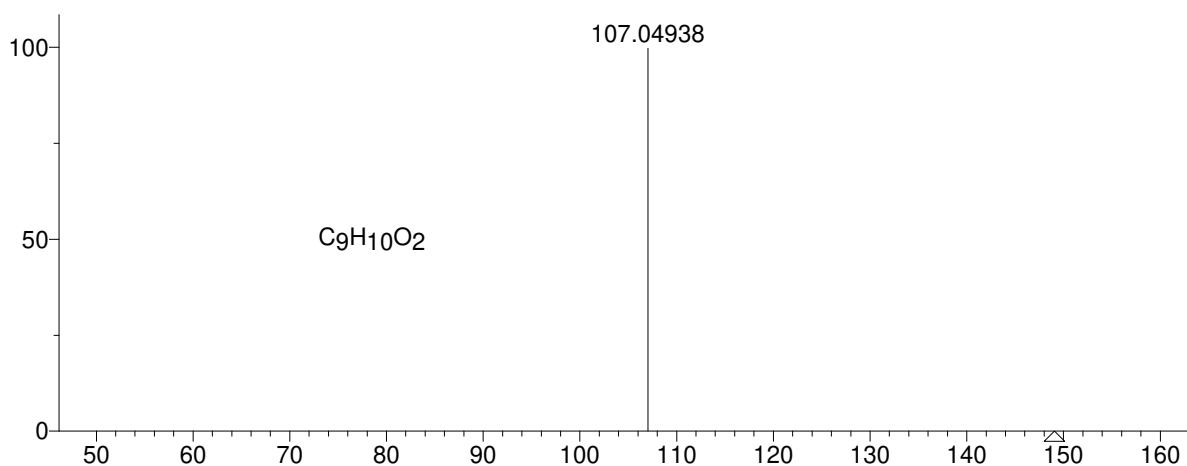

Unknown: Unknown (12.27\_317.9143m/z)  
Compound in Library Factor = 0

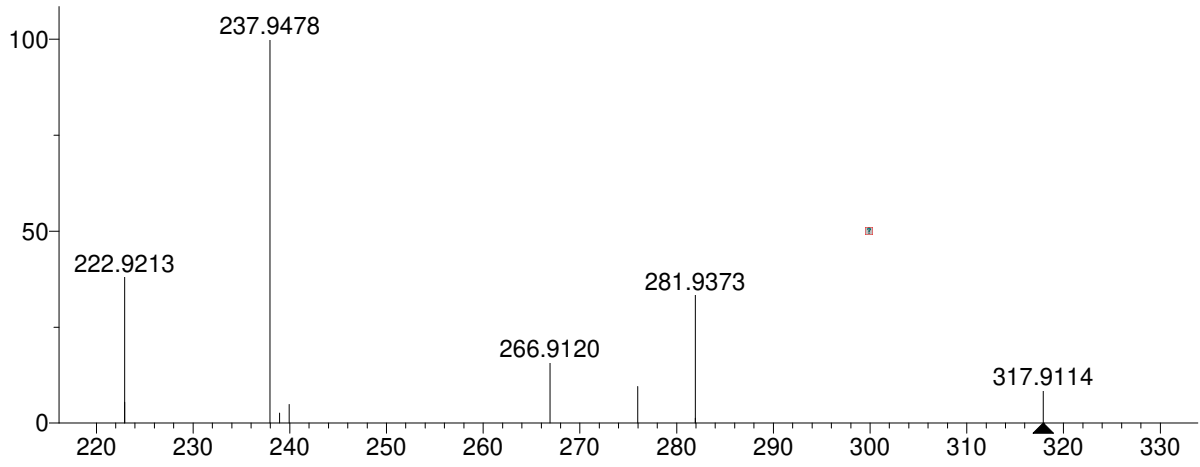

Unknown: Unknown (12.27\_440.0190m/z)  
Compound in Library Factor = -3273

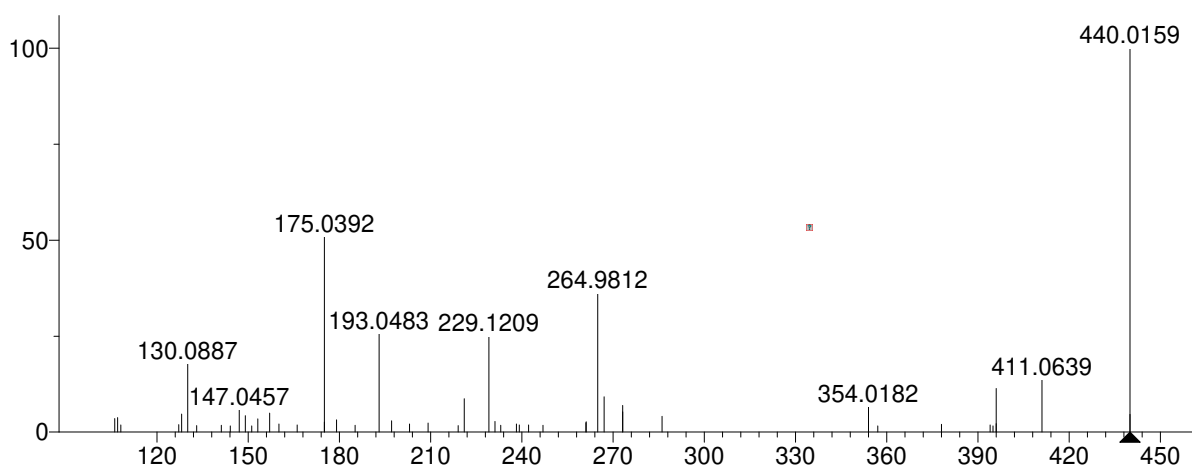

Hit 1 : Triasulfuron [M+K]<sup>+</sup> HCD 4V P=440  
C<sub>14</sub>H<sub>16</sub>ClN<sub>5</sub>O<sub>5</sub>S; MF: 77; RMF: 562; Prob 100.0%; CAS: 82097-50-5; Lib: nist\_msms; ID: 541983.

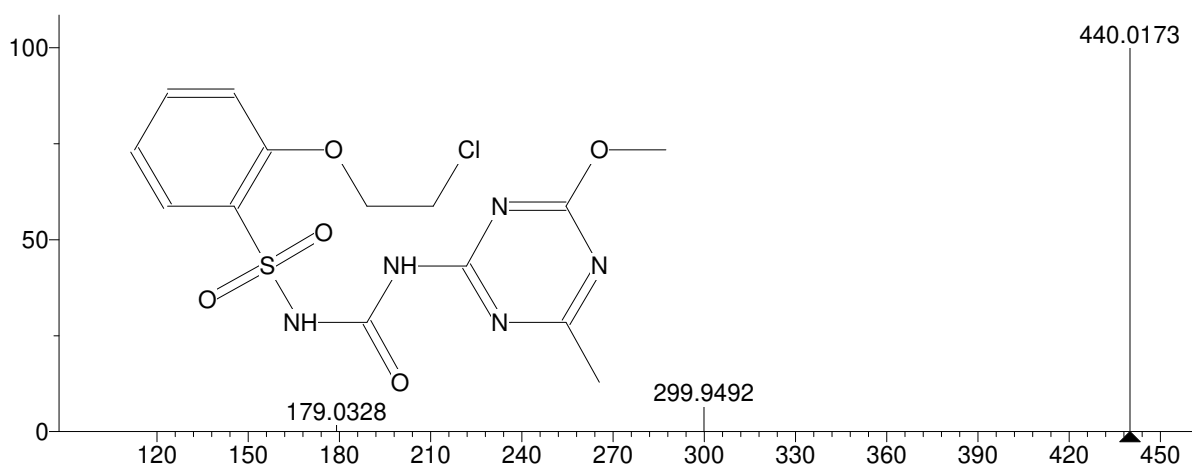

\*\* Search Report Page 1 of 1 \*\*

Unknown: Unknown (12.27\_452.0187m/z)  
Compound in Library Factor = 0

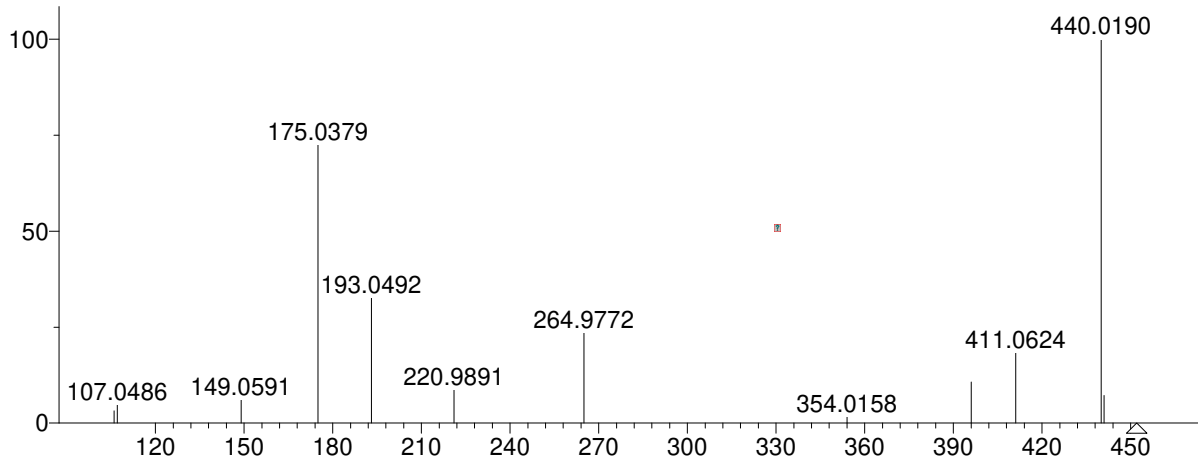



\*\* Search Report Page 1 of 2 \*\*

Unknown: Unknown (12.28\_193.0500m/z)  
Compound in Library Factor = -741

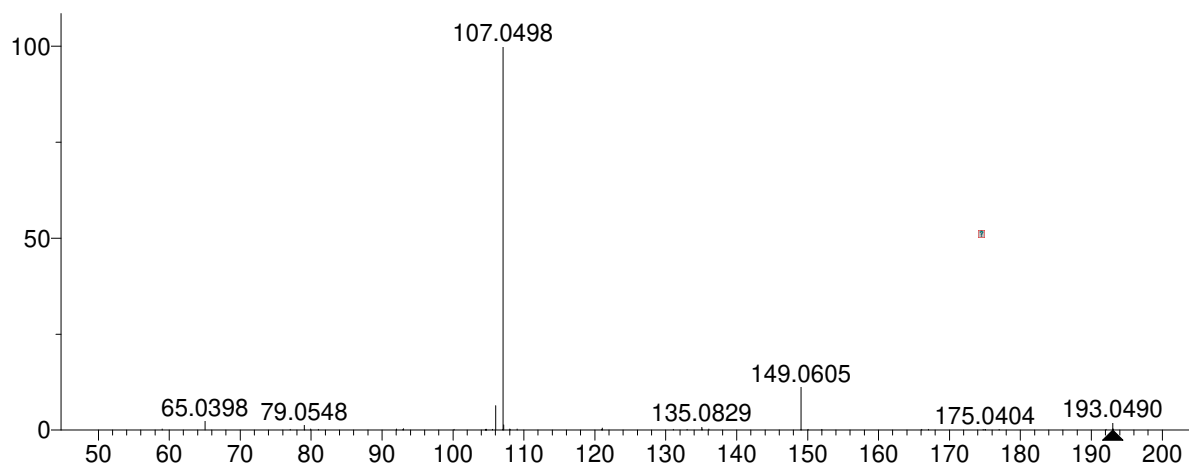

Hit 1 : Methyldopa [M-H-NH3]- HCD 9V P=193.1  
C10H13NO4; MF: 338; RMF: 722; Prob 87.1%; CAS: 555-30-6; Lib: nist\_msms; ID: 96911.

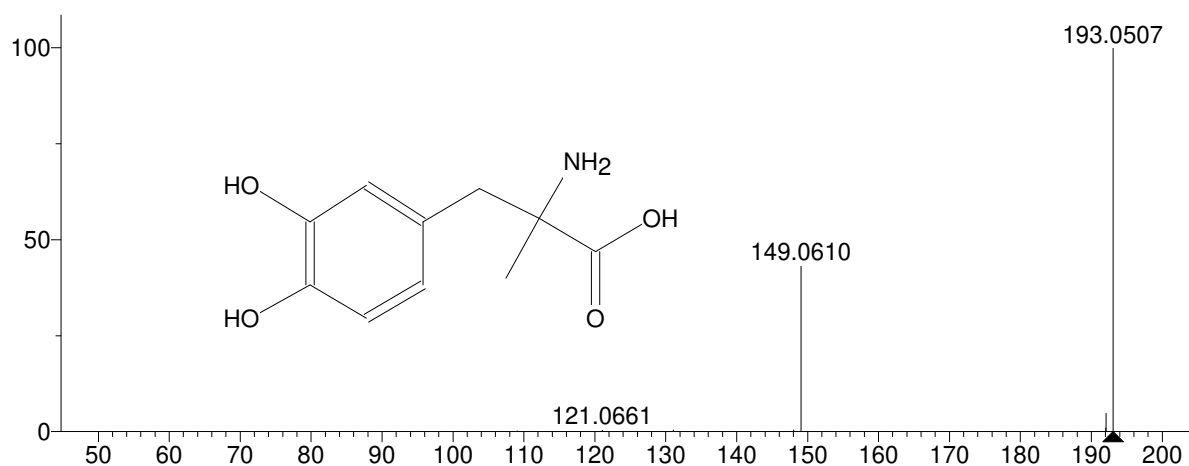

Hit 2 : Prohexadione [M-H-H2O]- HCD 17V P=193.1  
C10H12O5; MF: 256; RMF: 438; Prob 8.88%; CAS: 88805-35-0; Lib: nist\_msms; ID: 489543.

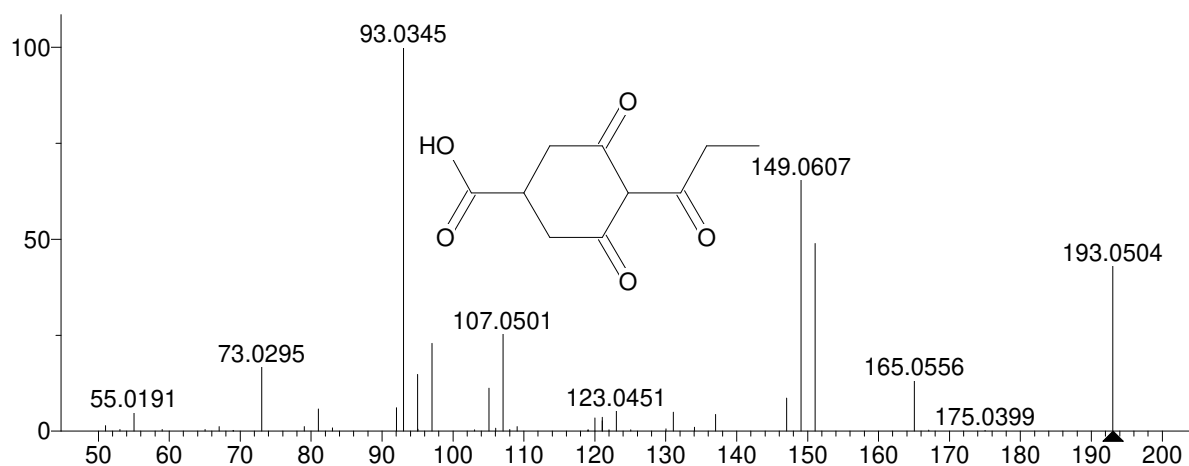

Hit 3 : trans-Ferulic acid [M-H]- HCD 8V P=193.1  
C<sub>10</sub>H<sub>10</sub>O<sub>4</sub>; MF: 223; RMF: 565; Prob 2.32%; CAS: 537-98-4; Lib: nist\_msms; ID: 300552.

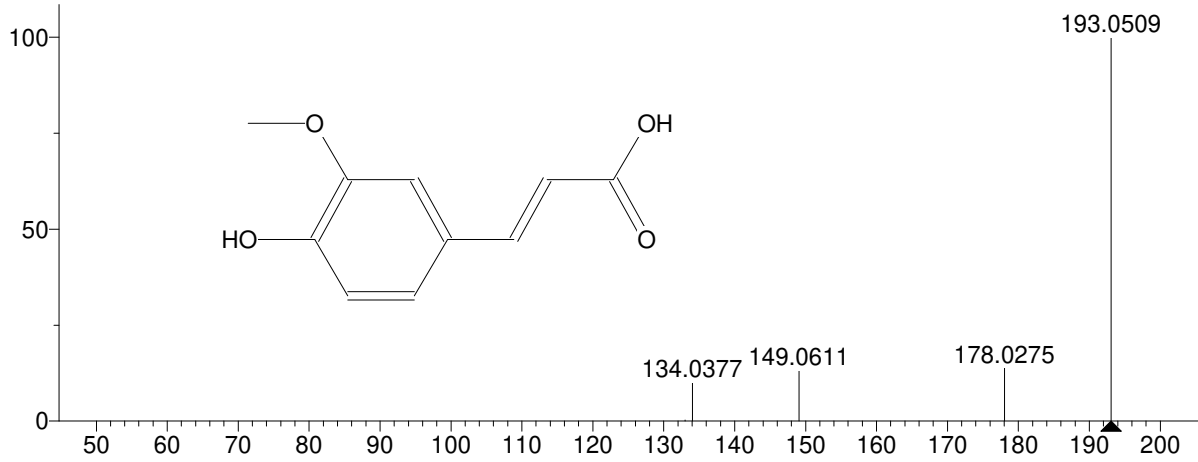

Hit 4 : Carbidopa [M-H-H<sub>4</sub>N<sub>2</sub>]- HCD 19V P=193.1  
C<sub>10</sub>H<sub>14</sub>N<sub>2</sub>O<sub>4</sub>; MF: 189; RMF: 356; Prob 0.59%; CAS: 28860-95-9; Lib: nist\_msms; ID: 313803.

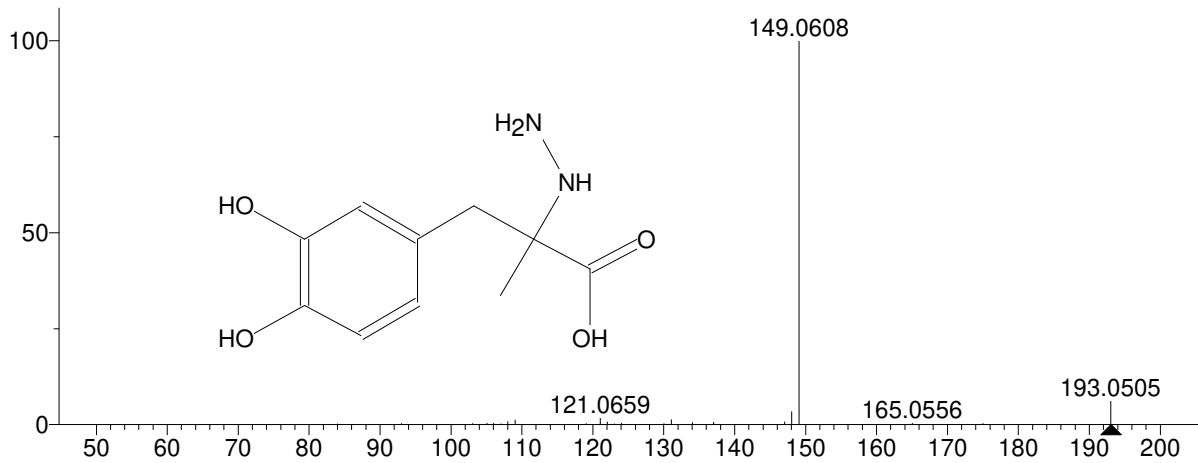

Hit 5 : Monoethyl phthalate [M-H]- 35(no P=193.1  
C<sub>10</sub>H<sub>10</sub>O<sub>4</sub>; MF: 169; RMF: 643; Prob 0.27%; Lib: mona-export-ic-ms-ms\_negative\_mode; ID: 13731.

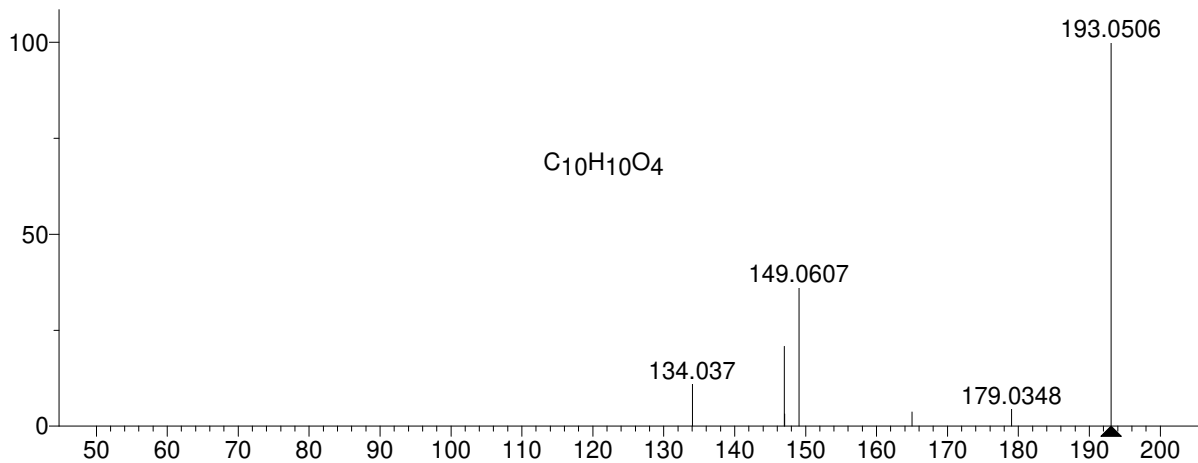

Unknown: Unknown (12.28\_292.9740m/z)  
Compound in Library Factor = 0

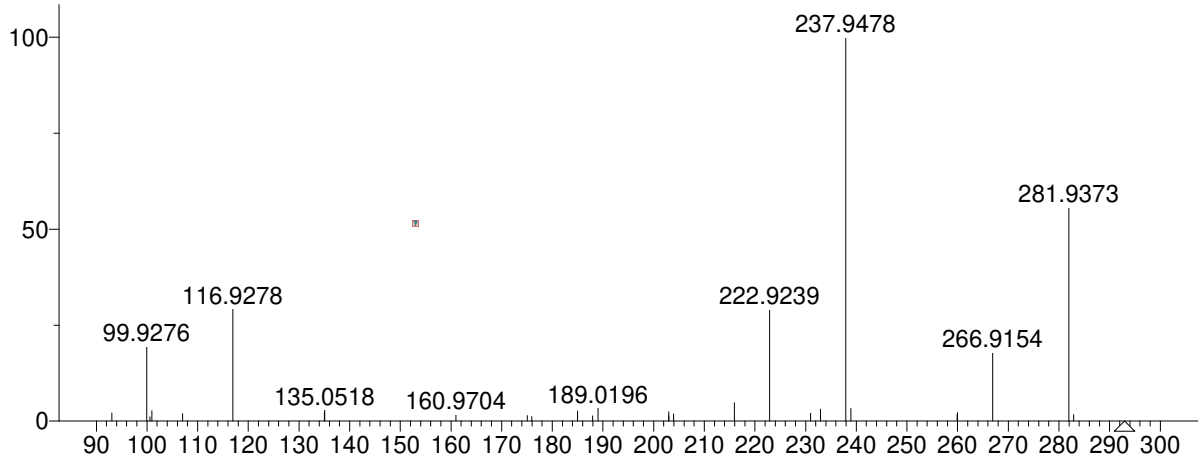

Hit 1 : Prepro-ANF (104-116), human [M+5H]<sup>5+</sup> QQQ 11V P=293  
C<sub>61</sub>H<sub>113</sub>N<sub>21</sub>O<sub>20</sub>; MF: 0; RMF: 1; Prob 100.0%; Lib: nist\_msms2; ID: 18925.

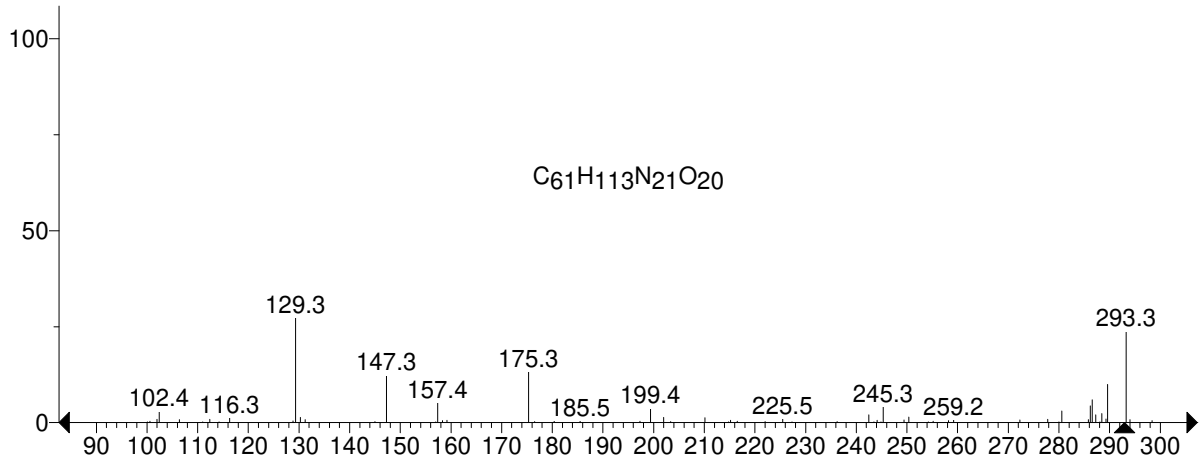

Unknown: Unknown (12.28\_411.0648m/z)  
Compound in Library Factor = -1848

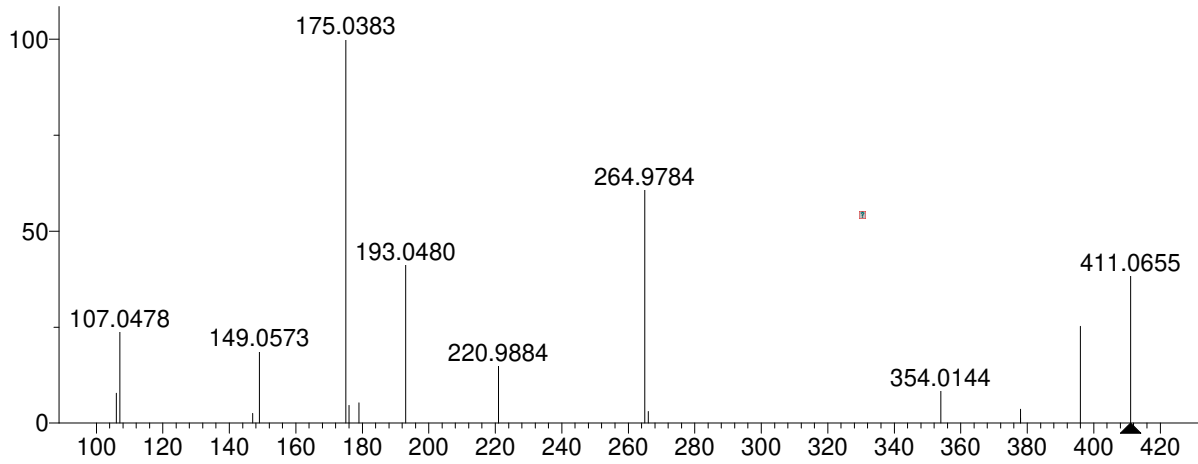

Hit 1 : Metrafenone [M+H+2i]+ HCD 4V P=411.1  
C19H21BrO5; MF: 39; RMF: 430; Prob 80.9%; CAS: 220899-03-6; Lib: nist\_msms; ID: 511890.

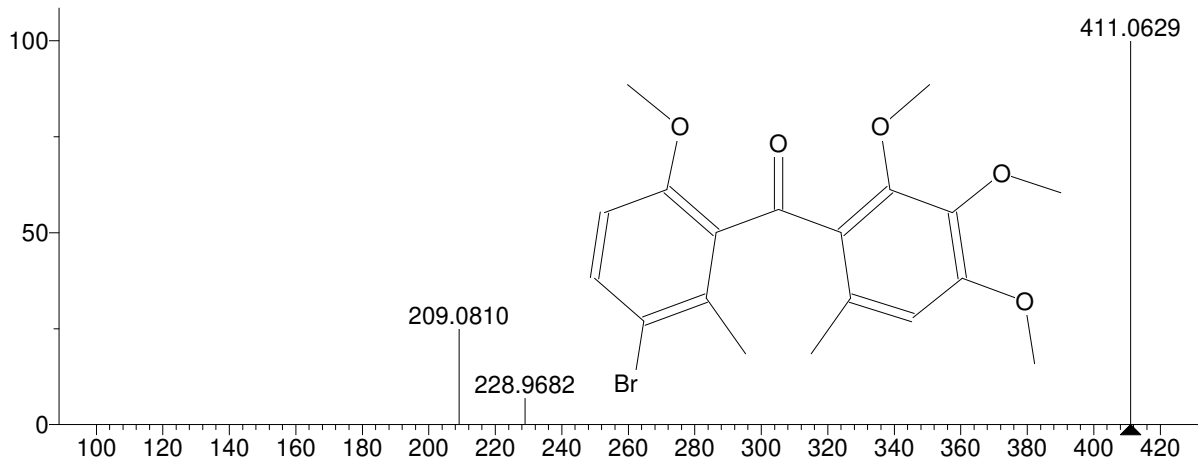

Hit 2 : (2S,3S,4S,5R,6R)-6-(3-benzoyloxy-2-hydroxypropoxy)-3,4,5-trihydroxyoxane-2-carboxylic acid [M+K]+ 65  
C16H20O10; MF: 0; RMF: 14; Prob 19.1%; Lib: mona-export-vf-npl\_qexactive; ID: 19893.

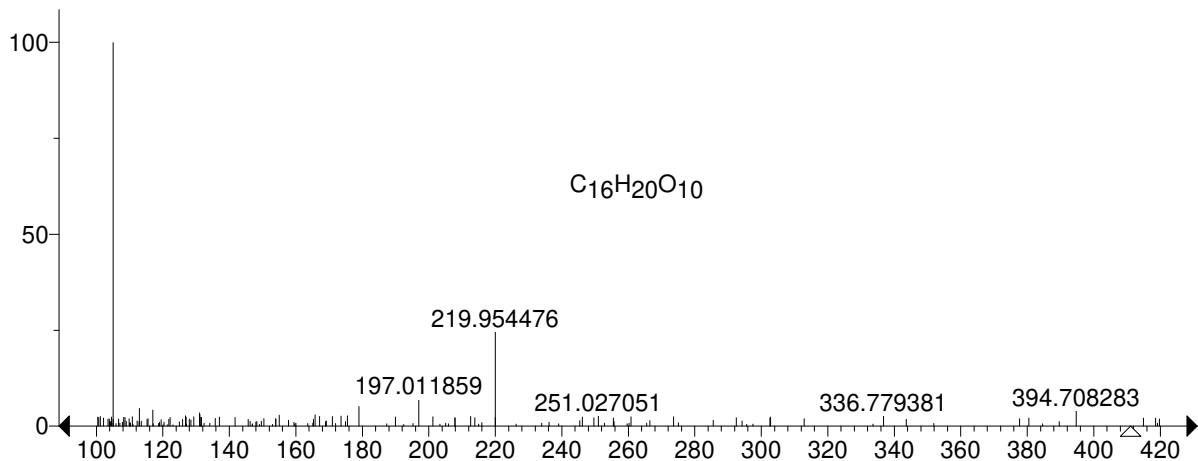

Unknown: Unknown (12.28\_475.9953m/z)  
Compound in Library Factor = 0

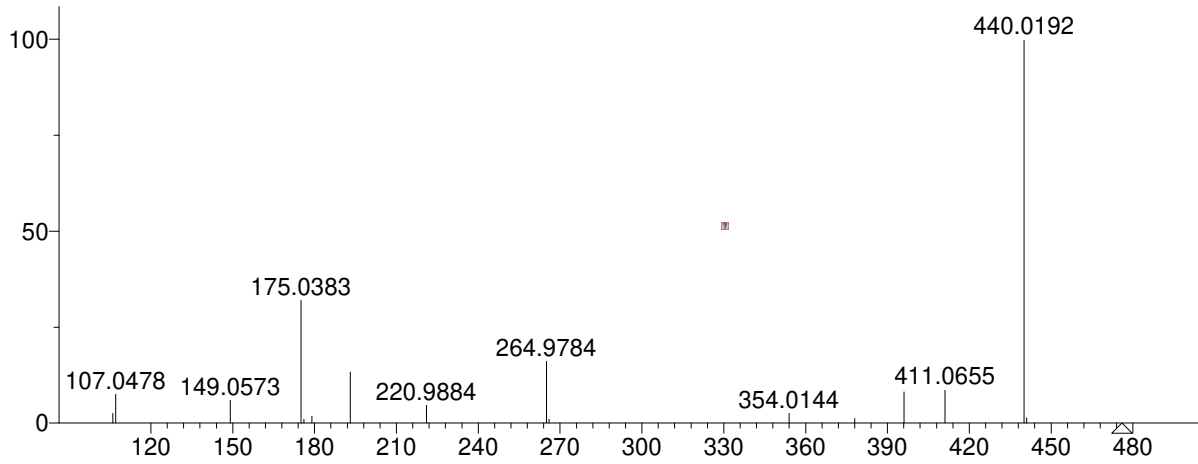

Unknown: Unknown (12.29\_275.9707m/z)  
Compound in Library Factor = 0

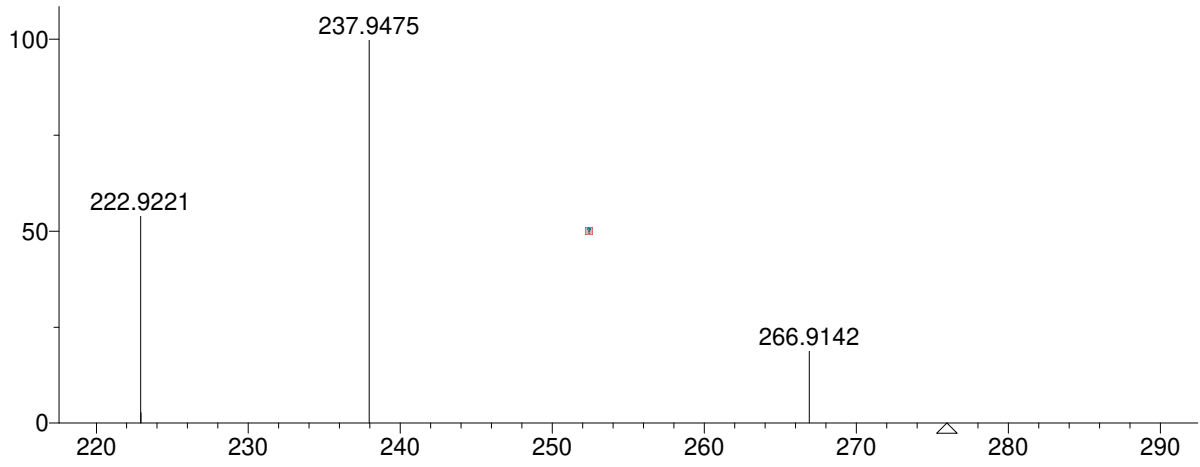

Unknown: Unknown (12.29\_409.0890m/z)  
Compound in Library Factor = 0

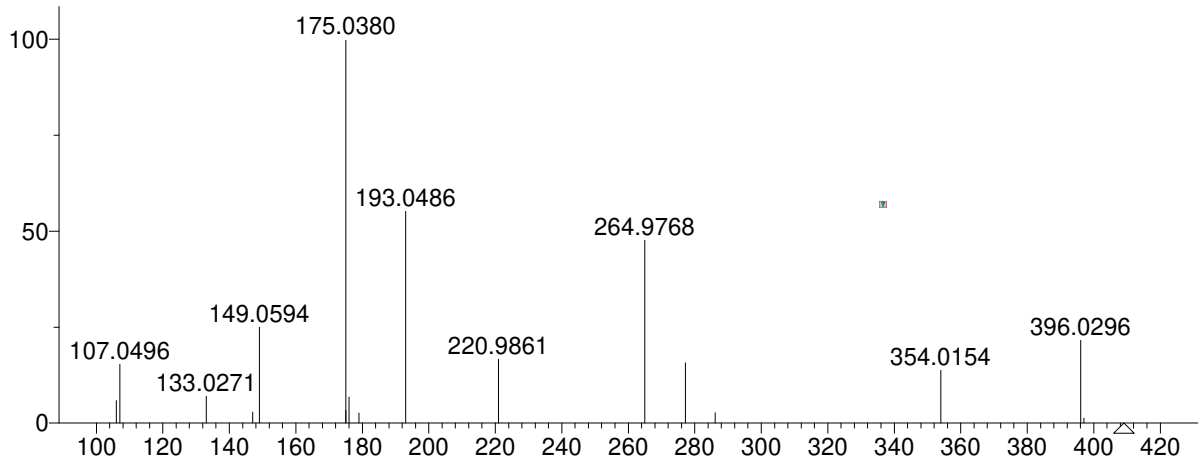

Unknown: Unknown (12.29\_637.0876m/z)  
Compound in Library Factor = 0

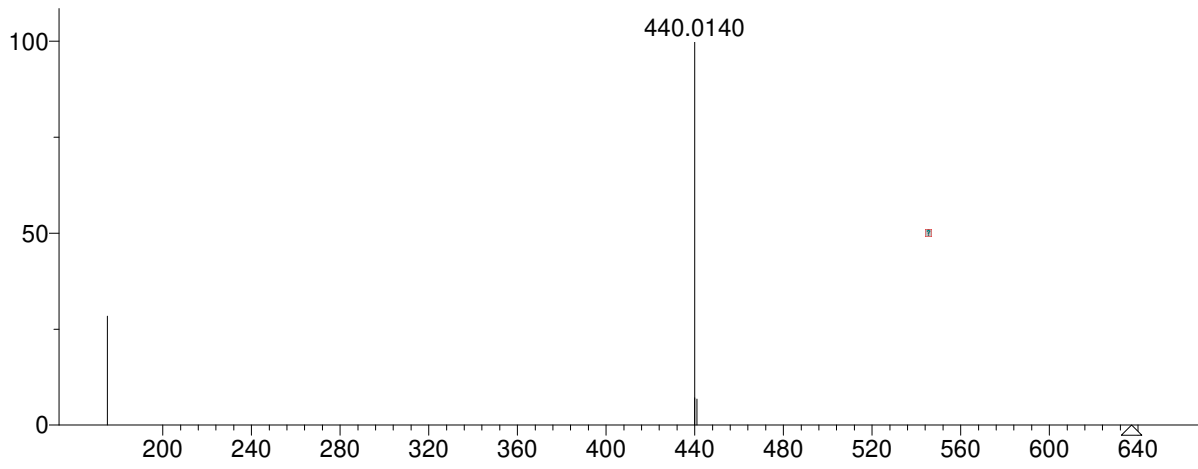



Unknown: Unknown (12.30\_355.0117m/z)  
Compound in Library Factor = 0

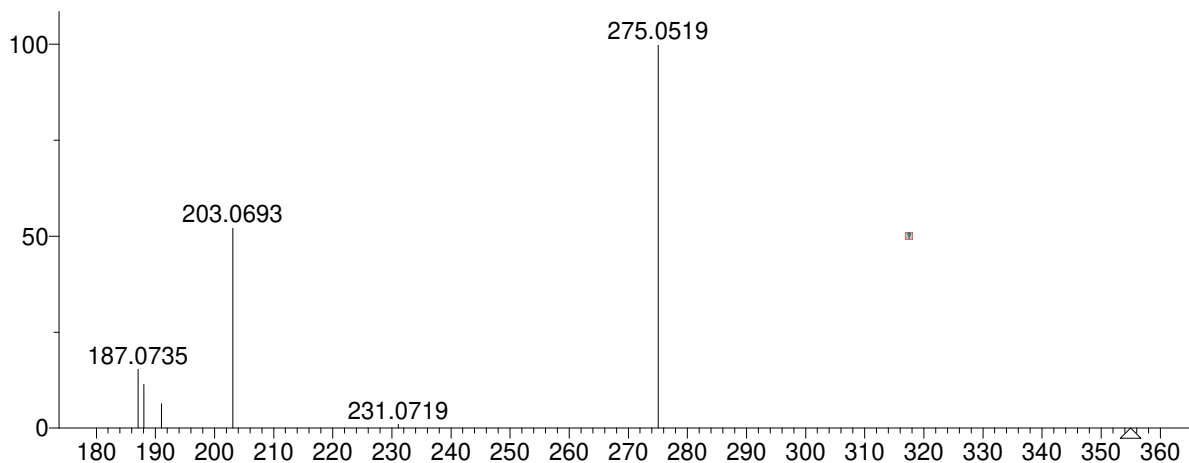

Hit 1 : 3-(3,3-dichloro-2-hydroxypropyl)-6,8-dimethoxyisochromen-1-one [M+Na]<sup>+</sup> 35HCD P=355  
C<sub>14</sub>H<sub>14</sub>Cl<sub>2</sub>O<sub>5</sub>; MF: 0; RMF: 19; Prob 100.0%; Lib: mona-export-vf-npl\_qexactive; ID: 18490.

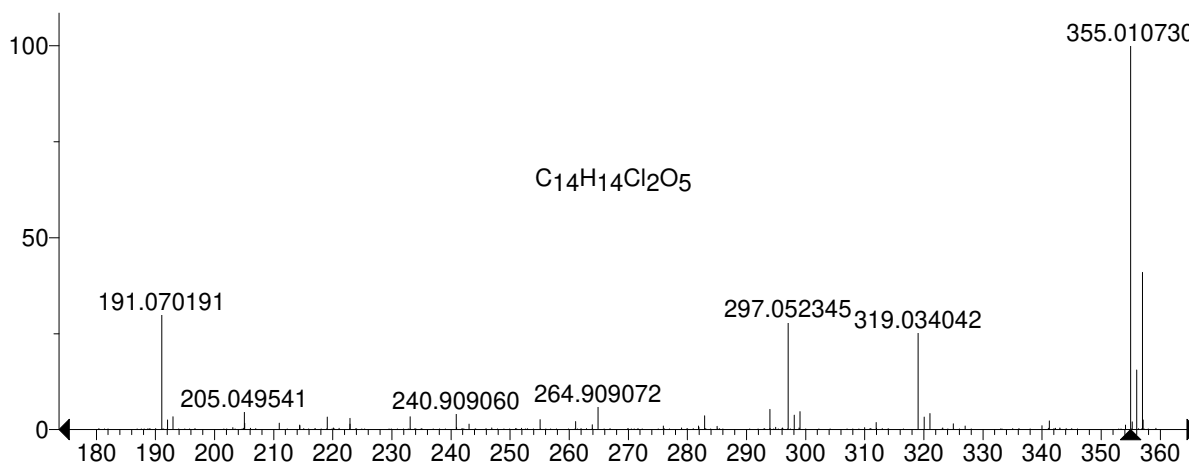

Unknown: Unknown (12.30\_447.2123m/z)  
Compound in Library Factor = 0

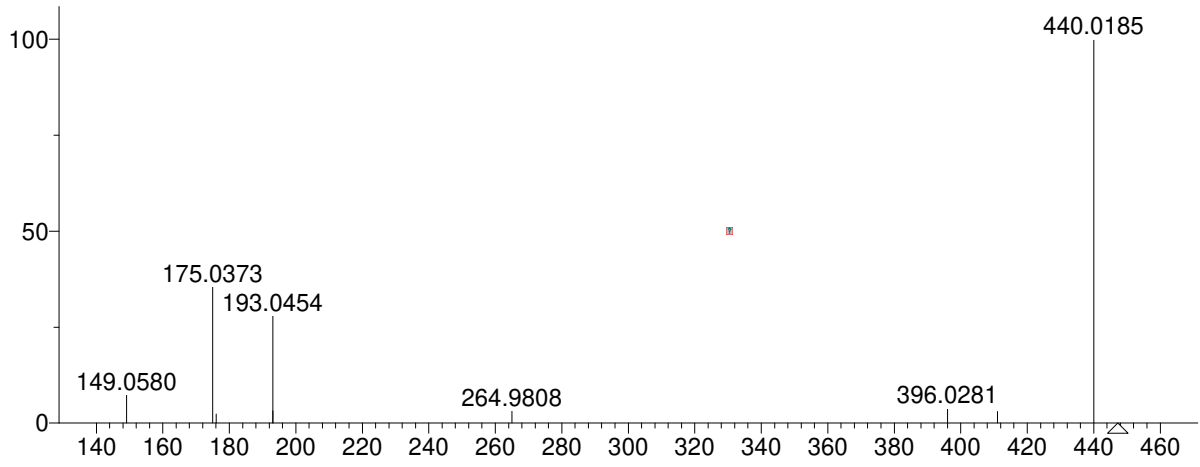

Unknown: Unknown (12.30\_500.2232m/z)  
Compound in Library Factor = 0

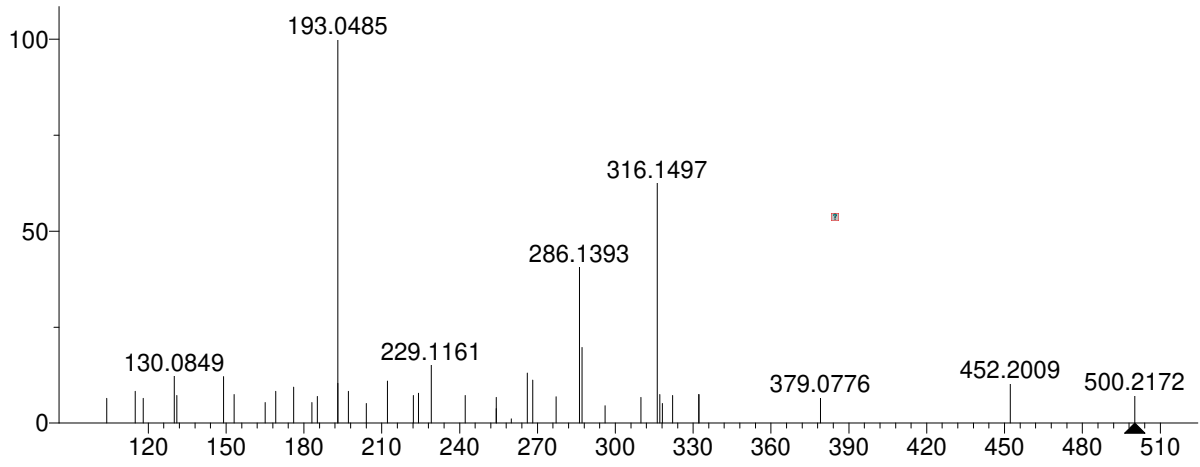

Unknown: Unknown (12.32\_337.9714m/z)  
Compound in Library Factor = 0

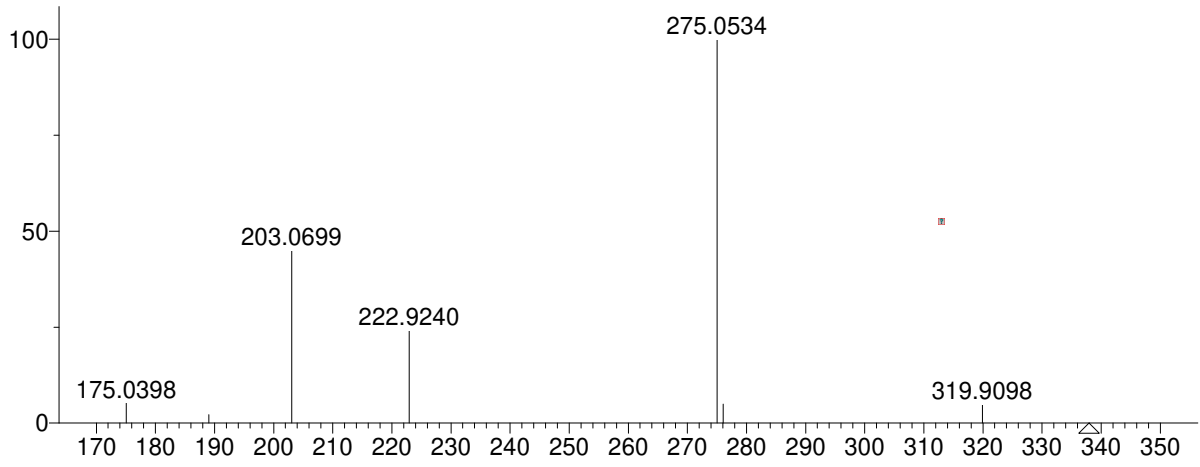

Unknown: Unknown (12.36\_387.1531m/z)  
Compound in Library Factor = 0

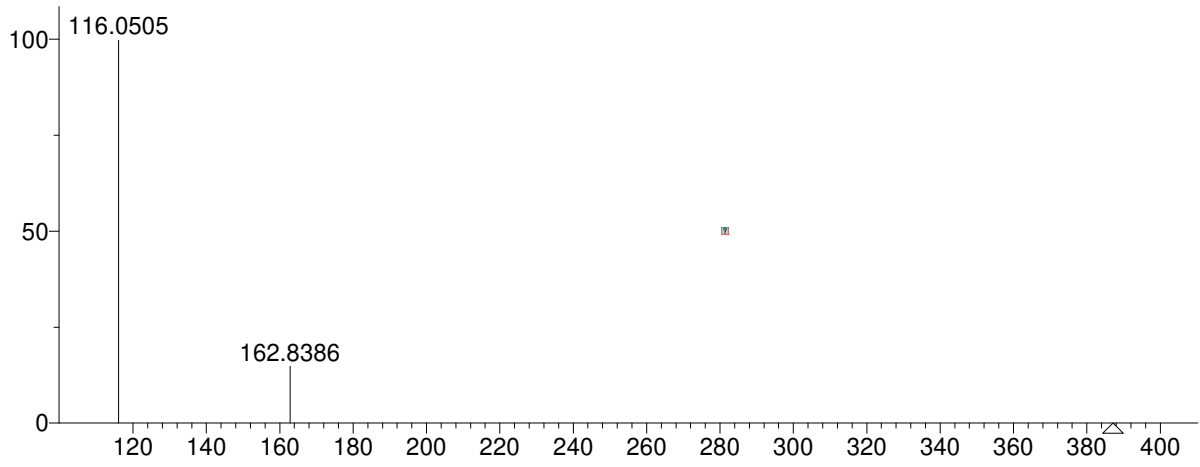

\*\* Search Report Page 1 of 2 \*\*

Unknown: Unknown (12.40\_392.1816m/z)  
Compound in Library Factor = -376

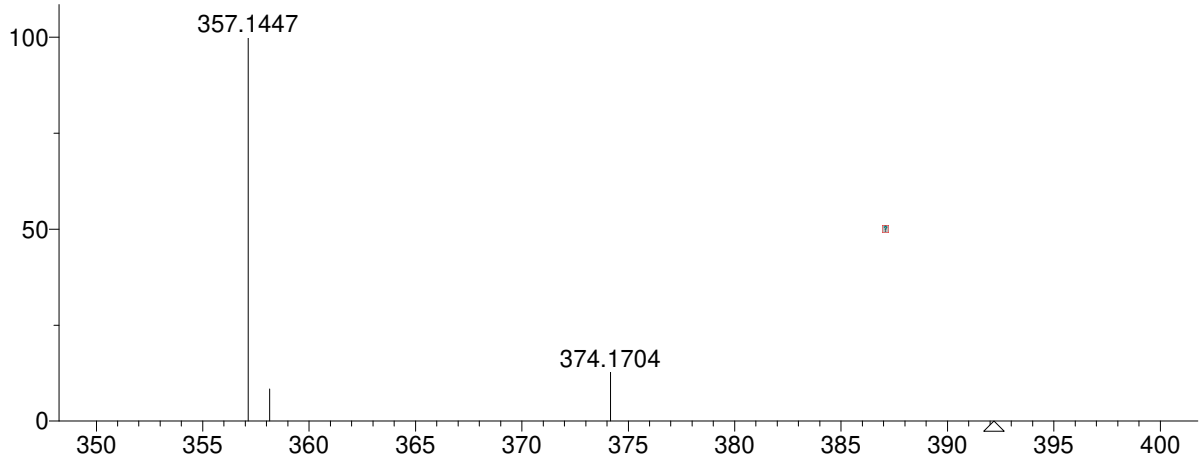

Hit 1 : Glu-Val-Phe [M-H]<sup>-</sup> IT-FT 35% P=392.2  
C19H27N3O6; MF: 196; RMF: 402; Prob 96.7%; CAS: 31461-61-7; Lib: nist\_msms; ID: 568009.

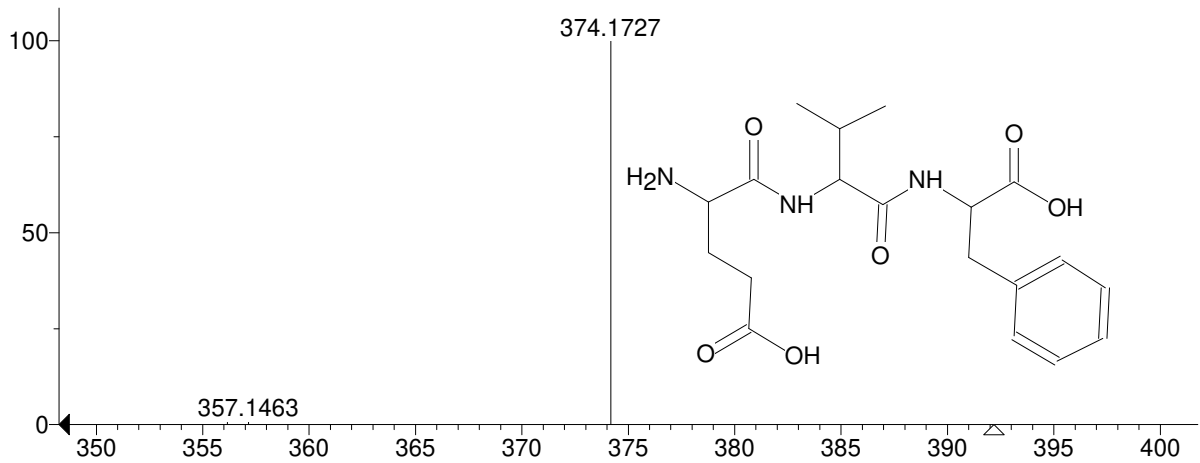

Hit 2 : lysoPE 10:0 [M+Na]<sup>+</sup> 25eV P=392.2  
C15H32NO7P; MF: 14; RMF: 229; Prob 1.66%; Lib: mona-export-in-silico\_spectra; ID: 35899.

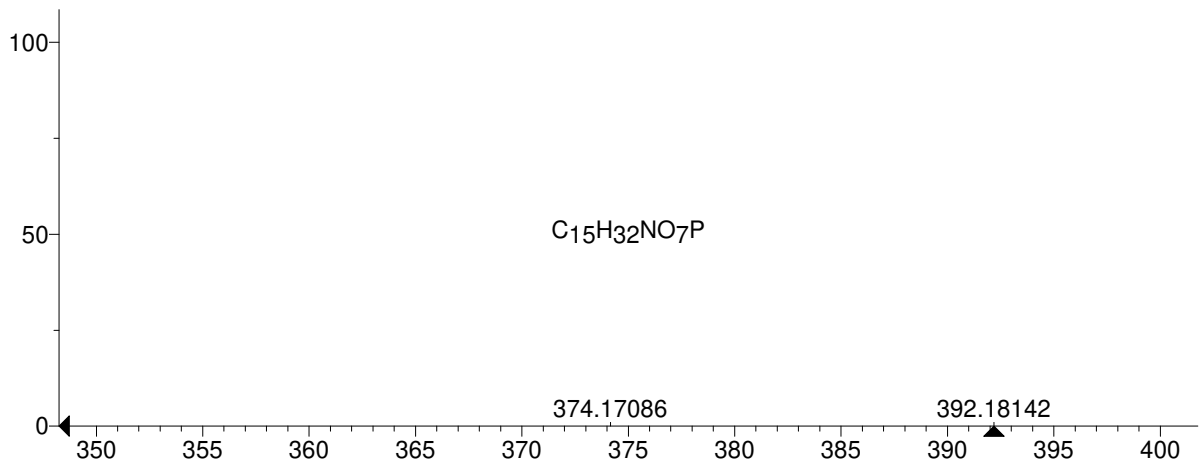

Hit 3 : Hexylglutathione [M+H]<sup>+</sup> IT-FT 35% P=392.2  
C<sub>16</sub>H<sub>29</sub>N<sub>3</sub>O<sub>6</sub>S; MF: 13; RMF: 255; Prob 1.59%; CAS: 24425-56-7; Lib: nist\_msms; ID: 121555.

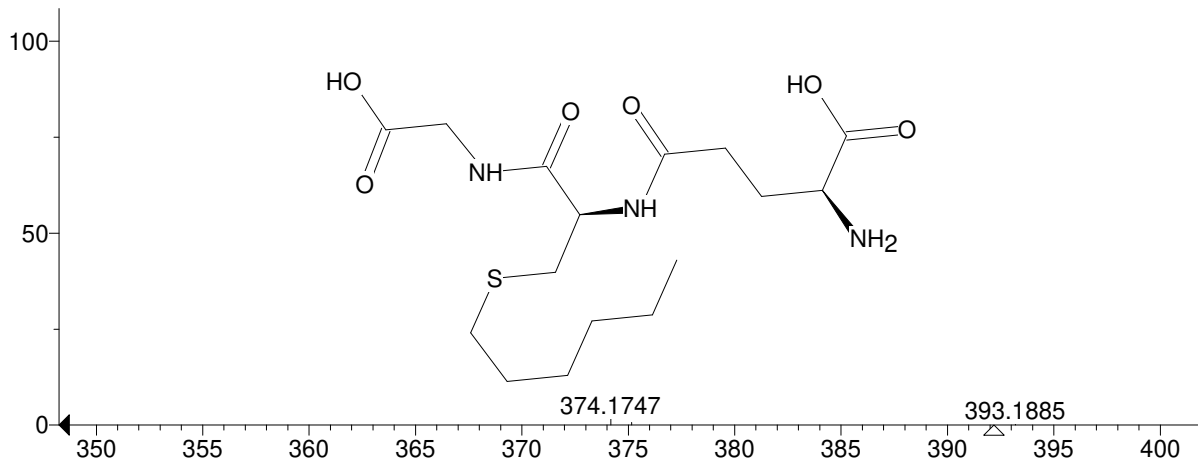

Unknown: Unknown (12.42\_560.2124m/z)  
Compound in Library Factor = 0

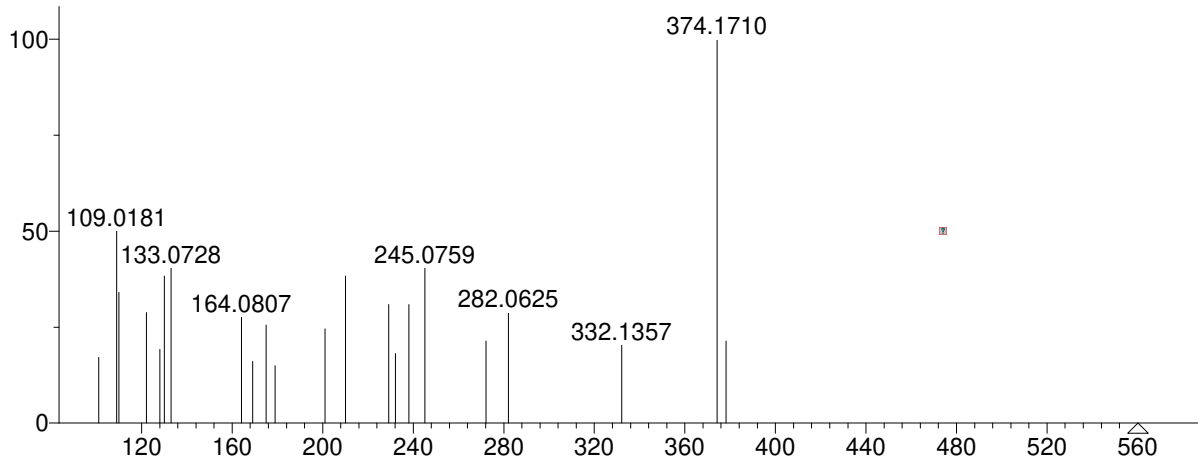



\*\* Search Report Page 1 of 2 \*\*

Unknown: Unknown (12.49\_351.1076m/z)  
Compound in Library Factor = -3273

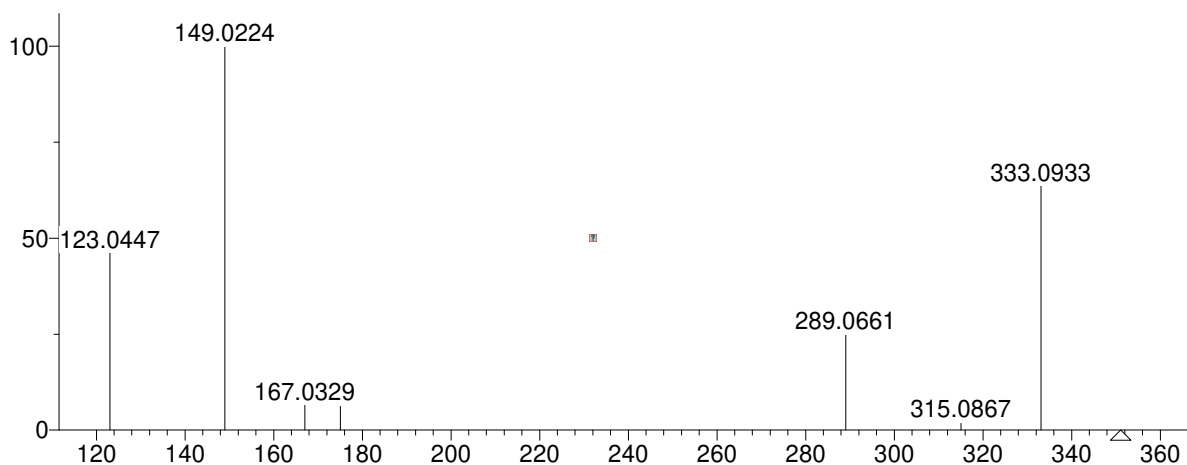

Hit 1 : Anisatin [M+Na]<sup>+</sup> IT-FT 35% P=351.1  
C<sub>15</sub>H<sub>20</sub>O<sub>8</sub>; MF: 2; RMF: 70; Prob 21.3%; CAS: 5230-87-5; Lib: nist\_msms; ID: 394674.

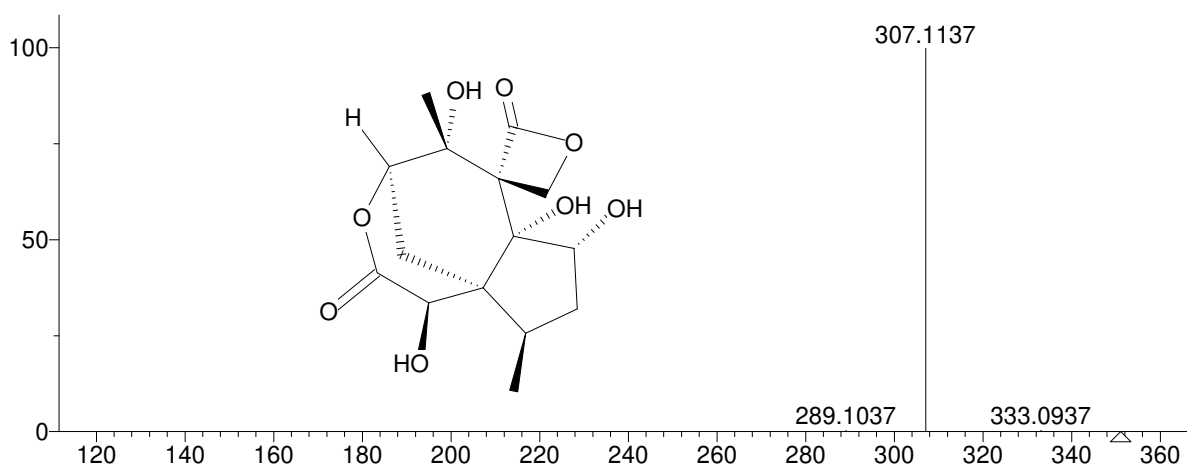

Hit 2 : Acetamide, N-[4-[5-(1,3-benzodioxol-5-yl)-3-methoxy-1H-1,2,4-triazol-1-yl]phenyl]-2-(phenylthio)- [M+H-C<sub>6</sub>]  
C<sub>24</sub>H<sub>20</sub>N<sub>4</sub>O<sub>4</sub>S; MF: 0; RMF: 60; Prob 19.7%; CAS: 853625-60-2; Lib: nist\_msms; ID: 375962.

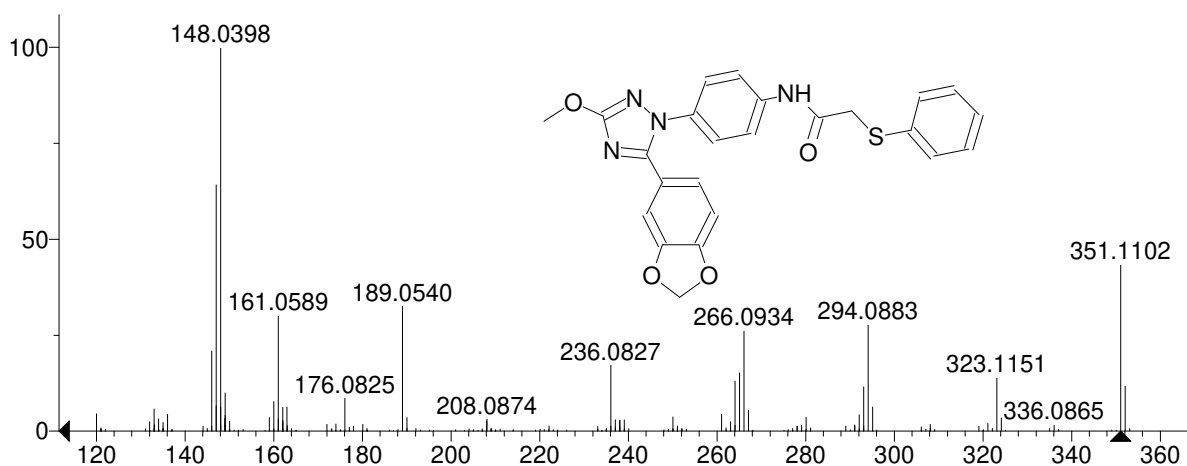

Hit 3 : methyl 2-(4a,6,10a-trihydroxy-1-methyl-5,10-dioxo-3,4-dihydro-1H-benzo[g]isochromen-3-yl)acetate [M+H]  
C<sub>17</sub>H<sub>18</sub>O<sub>8</sub>; MF: 0; RMF: 26; Prob 19.7%; Lib: mona-export-vf-npl\_qexactive; ID: 20964.

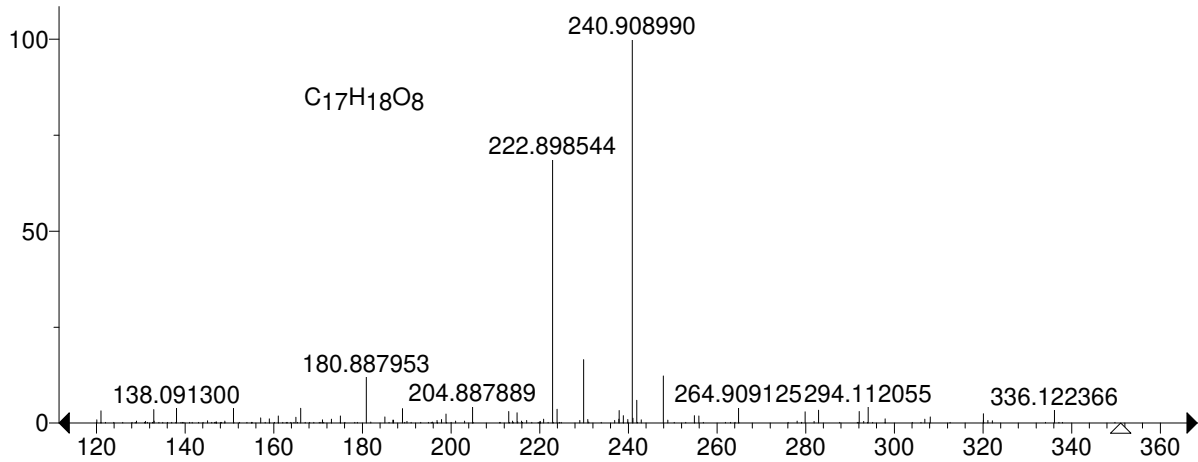

Hit 4 : N-(4-Cyanophenyl)glycine [2M-H]<sup>-</sup> IT 35% P=351.1  
C<sub>9</sub>H<sub>8</sub>N<sub>2</sub>O<sub>2</sub>; MF: 0; RMF: 25; Prob 19.7%; CAS: 42288-26-6; Lib: nist\_msms; ID: 202522.

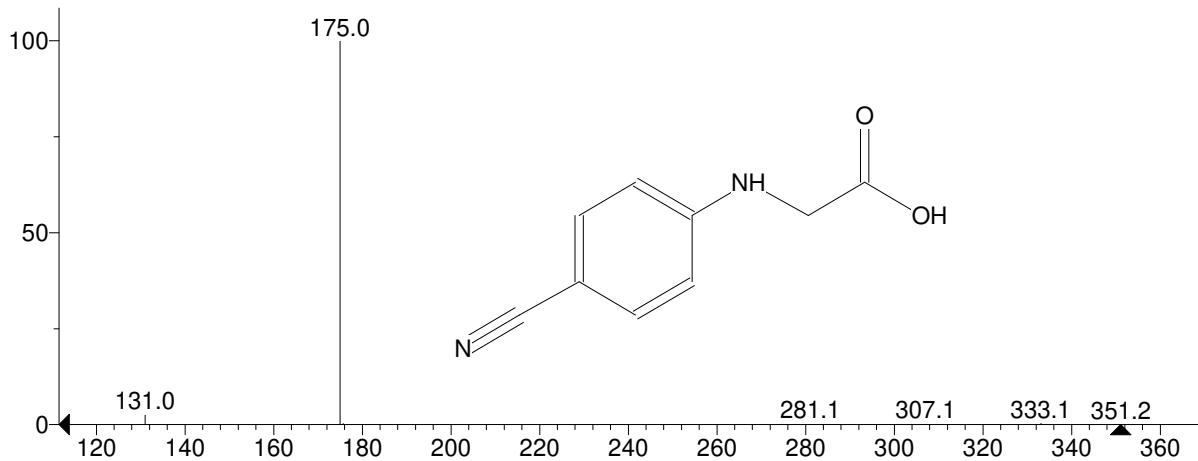

Hit 5 : 1-[2-hydroxy-6-methyl-4-[(2S,3R,4S,5S,6R)-3,4,5-trihydroxy-6-(hydroxymethyl)oxan-2-yl]oxyphenyl]ethanol  
C<sub>15</sub>H<sub>20</sub>O<sub>8</sub>; MF: 0; RMF: 20; Prob 19.7%; Lib: mona-export-vf-npl\_qexactive; ID: 25137.

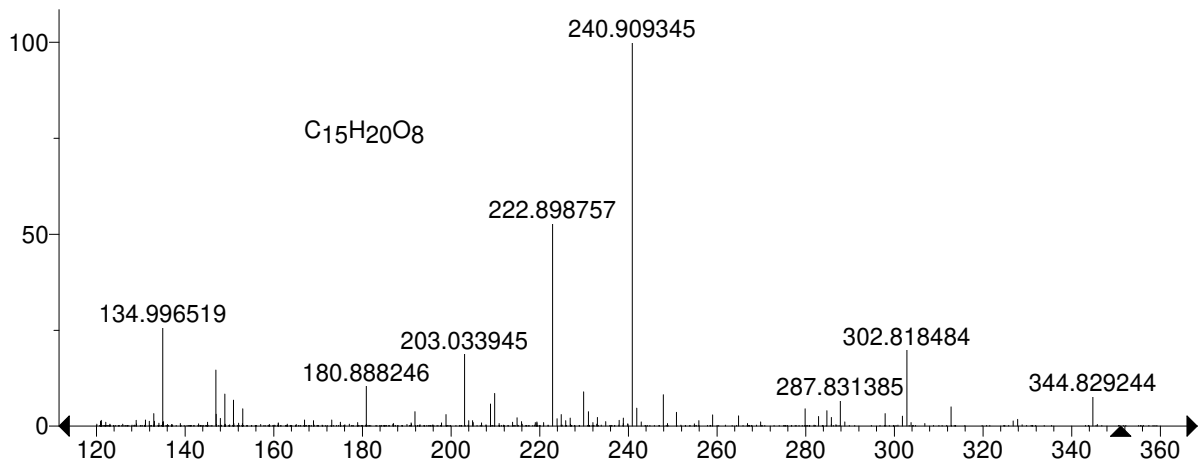

Unknown: Unknown (12.53\_605.2810m/z)  
Compound in Library Factor = 0

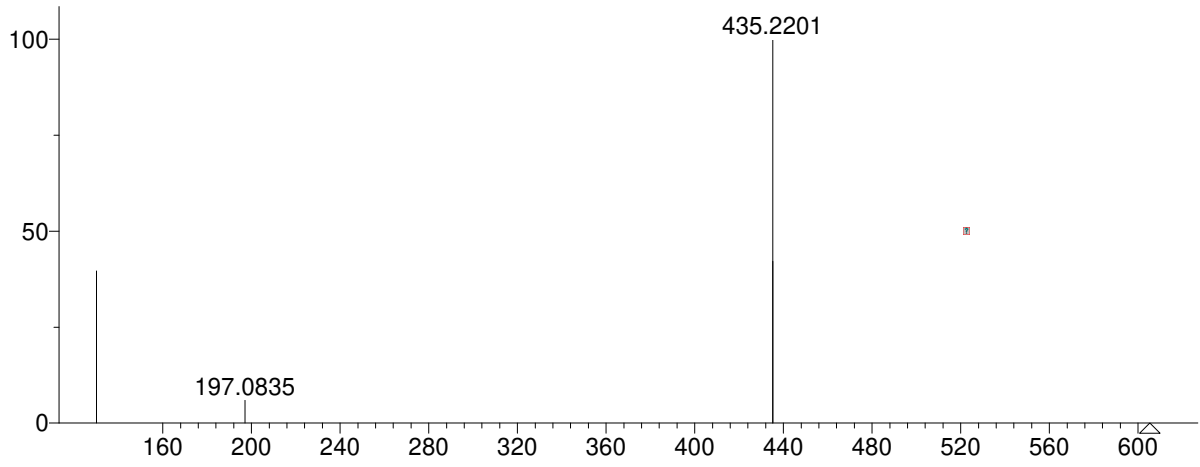

\*\* Search Report Page 1 of 1 \*\*

Unknown: Unknown (12.54\_512.2244m/z)  
Compound in Library Factor = 0

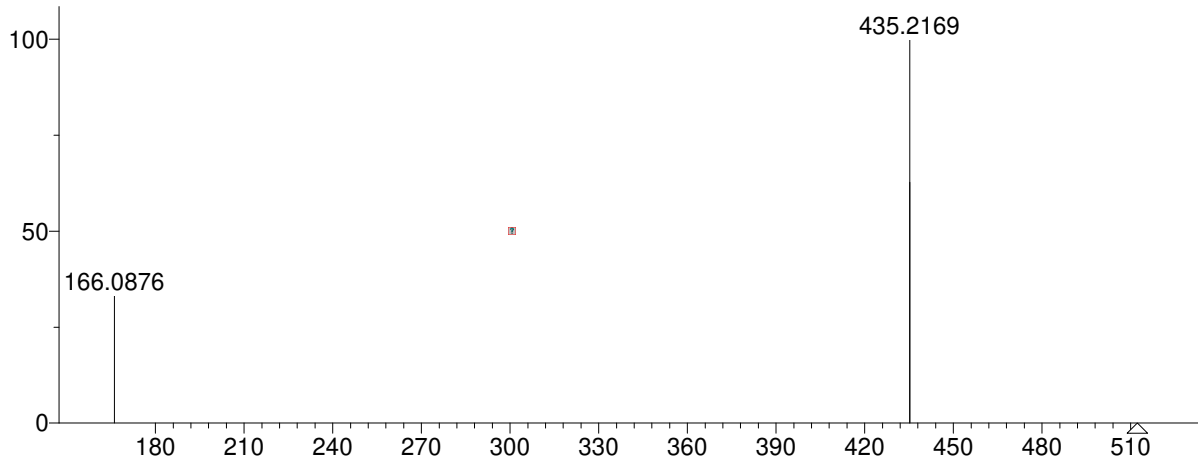

Hit 1 : 4-Heptenoic acid, 7-[(1R,2R,5S)-5-([1,1'-biphenyl]-4-ylmethoxy)-2-(4-morpholinyl)-3-oxocyclopentyl]-, (4Z)-  
C29H35NO5; MF: 0; RMF: 57; Prob 100.0%; CAS: 81443-73-4; Lib: nist\_msms; ID: 360435.

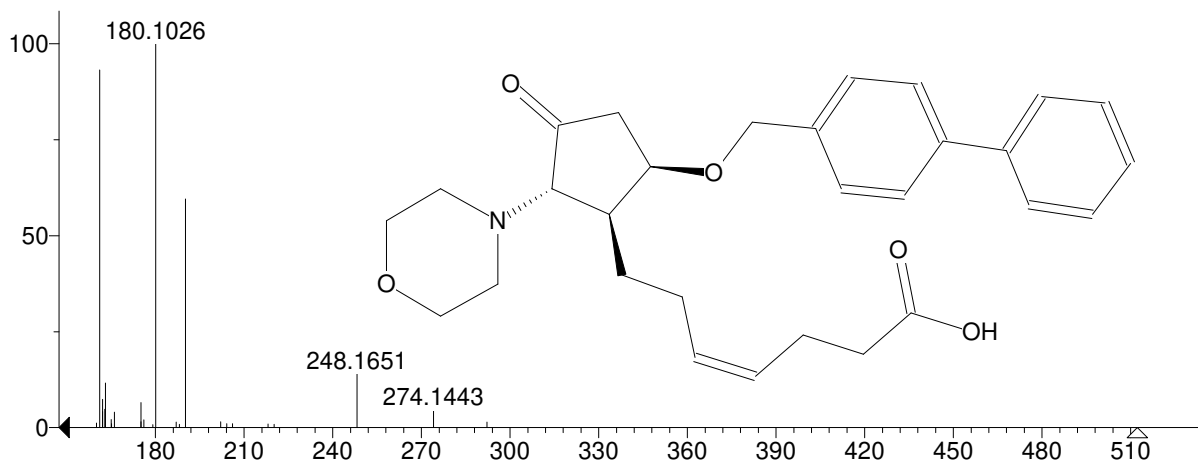

Unknown: Unknown (12.56\_546.2202m/z)  
Compound in Library Factor = 0

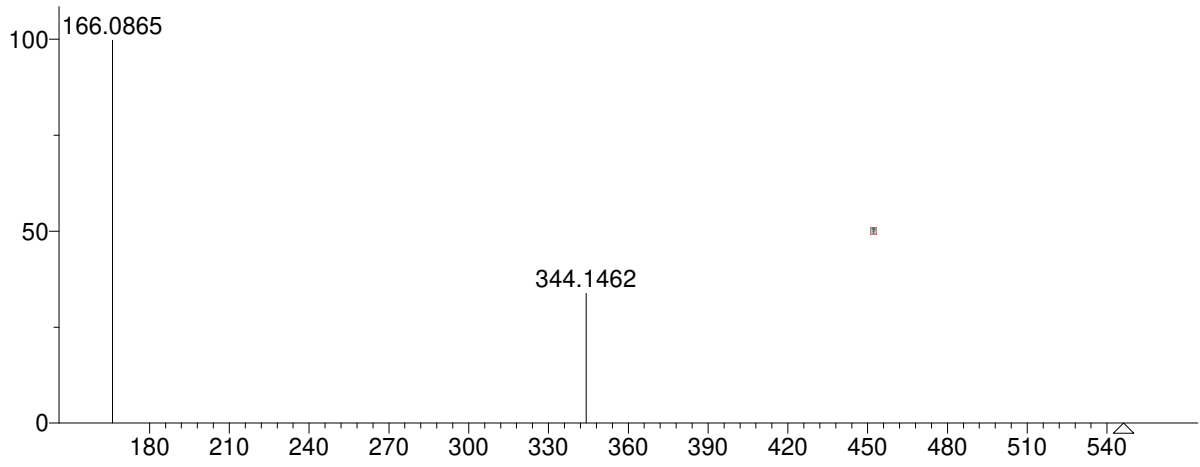

Unknown: Unknown (12.59\_447.2129m/z)  
Compound in Library Factor = 0

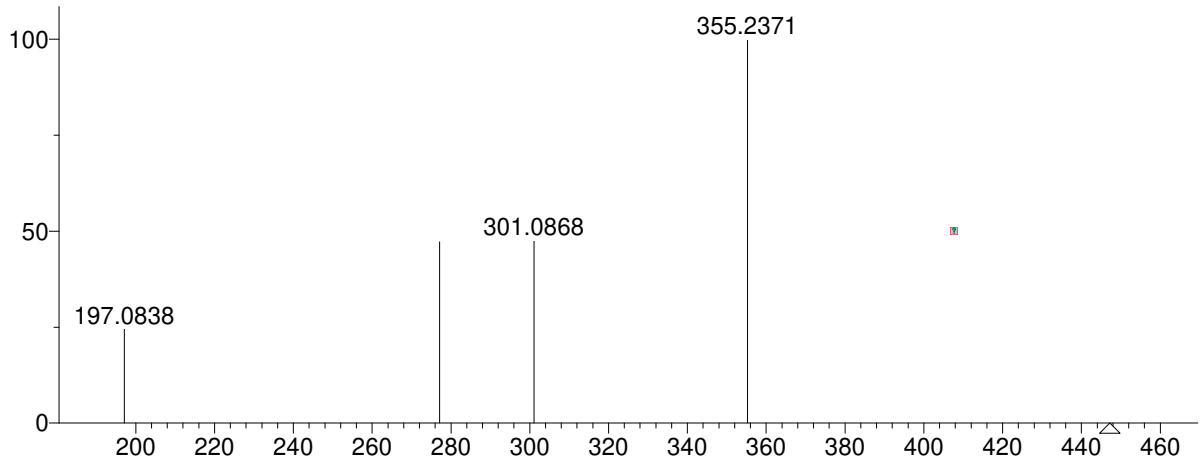

Unknown: Unknown (12.60\_526.2499m/z)  
Compound in Library Factor = 0

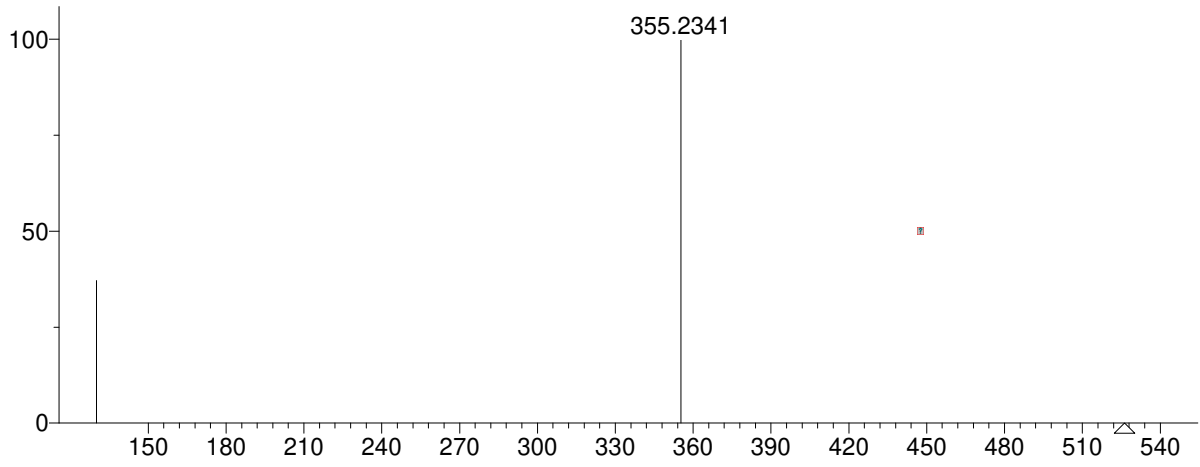

\*\* Search Report Page 1 of 2 \*\*

Unknown: Unknown (12.64\_438.2231m/z)  
Compound in Library Factor = -2387

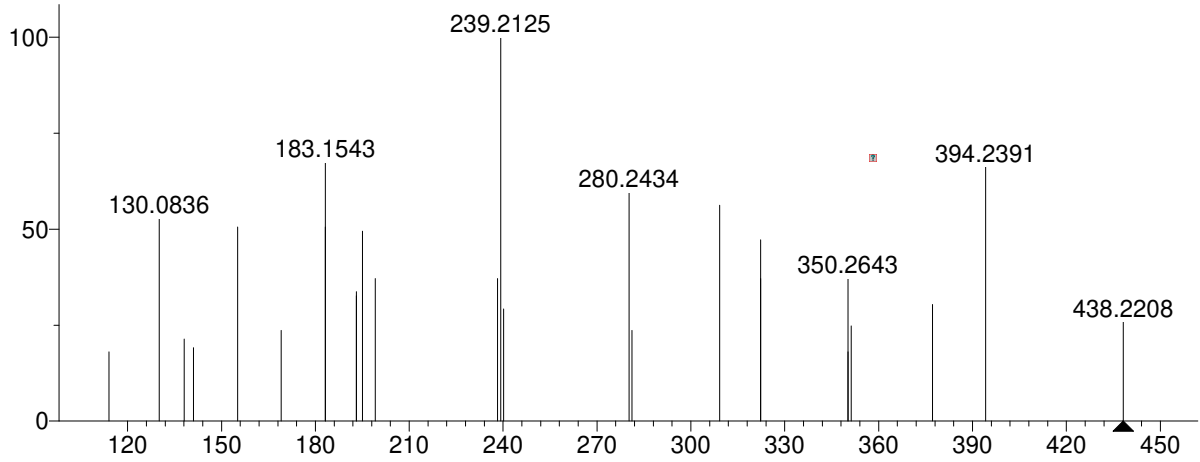

Hit 1 : Triparanol [M+H]<sup>+</sup> QTOF 5V P=438.2  
C<sub>27</sub>H<sub>32</sub>ClNO<sub>2</sub>; MF: 12; RMF: 153; Prob 19.6%; CAS: 78-41-1; Lib: nist\_msms; ID: 18551.

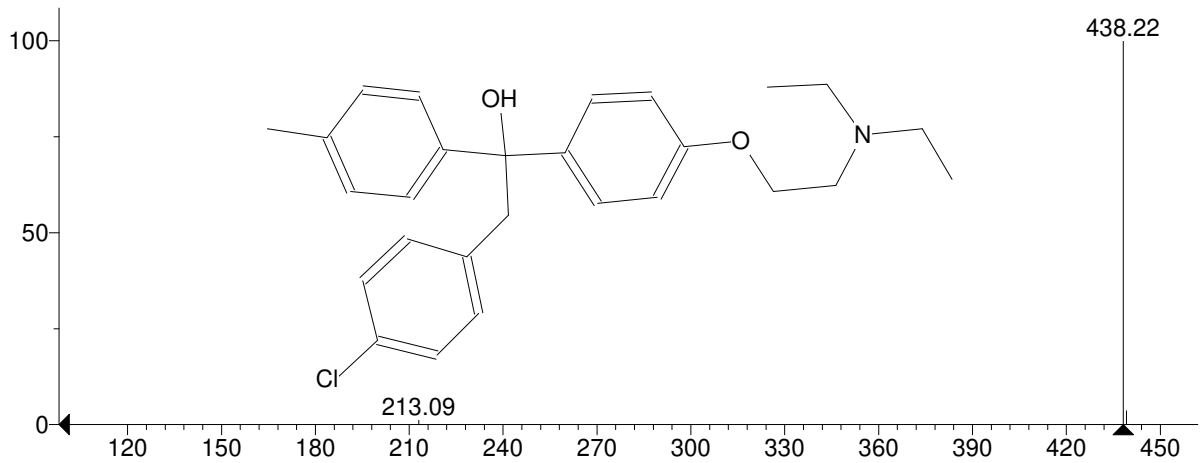

Hit 2 : PE 14:0; PE 7:0-7:0; [M-H]<sup>-</sup> [M-H]<sup>-</sup> P=438.2  
C<sub>19</sub>H<sub>38</sub>NO<sub>8</sub>P; MF: 2; RMF: 96; Prob 13.8%; Lib: msdial-insilicomsmms-lipids-neg; ID: 322970.

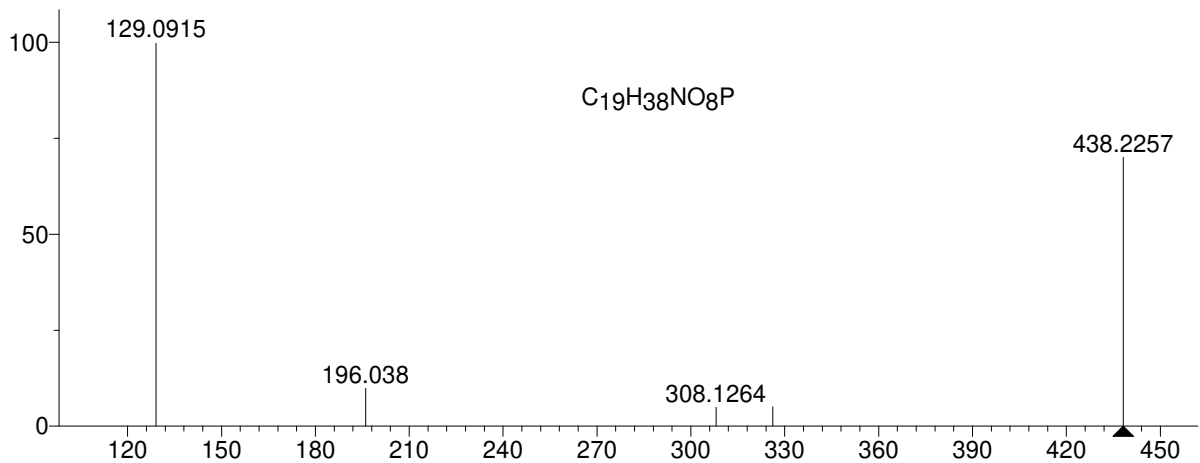



\*\* Search Report Page 2 of 2 \*\*

Hit 3 : PE 14:0; PE 2:0-12:0; [M-H]<sup>-</sup> [M-H]<sup>-</sup> P=438.2  
C<sub>19</sub>H<sub>38</sub>NO<sub>8</sub>P; MF: 1; RMF: 92; Prob 13.3%; Lib: msdial-insilicomsm-lipids-neg; ID: 322685.

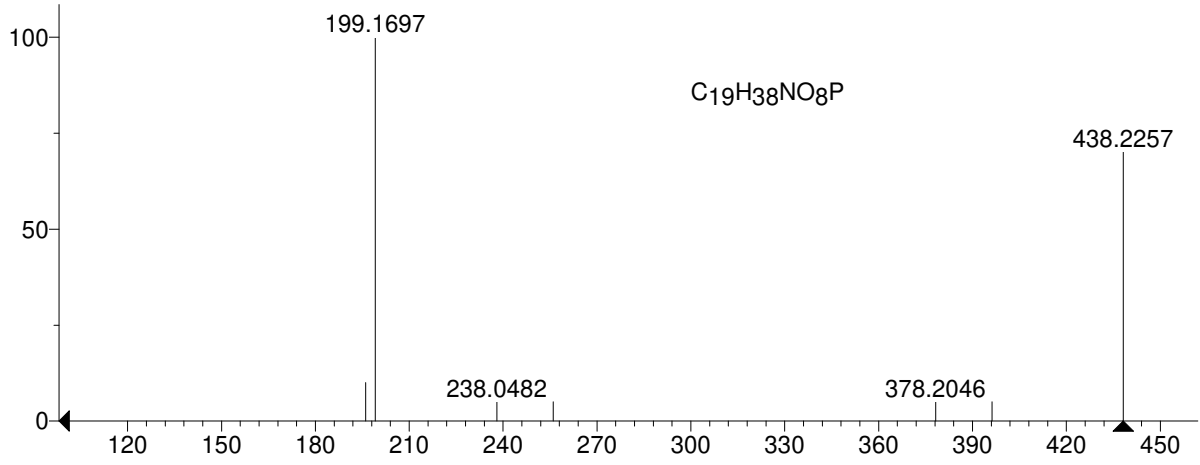

Hit 4 : PE 14:0; PE 3:0-11:0; [M-H]<sup>-</sup> [M-H]<sup>-</sup> P=438.2  
C<sub>19</sub>H<sub>38</sub>NO<sub>8</sub>P; MF: 1; RMF: 92; Prob 13.3%; Lib: msdial-insilicomsm-lipids-neg; ID: 322744.

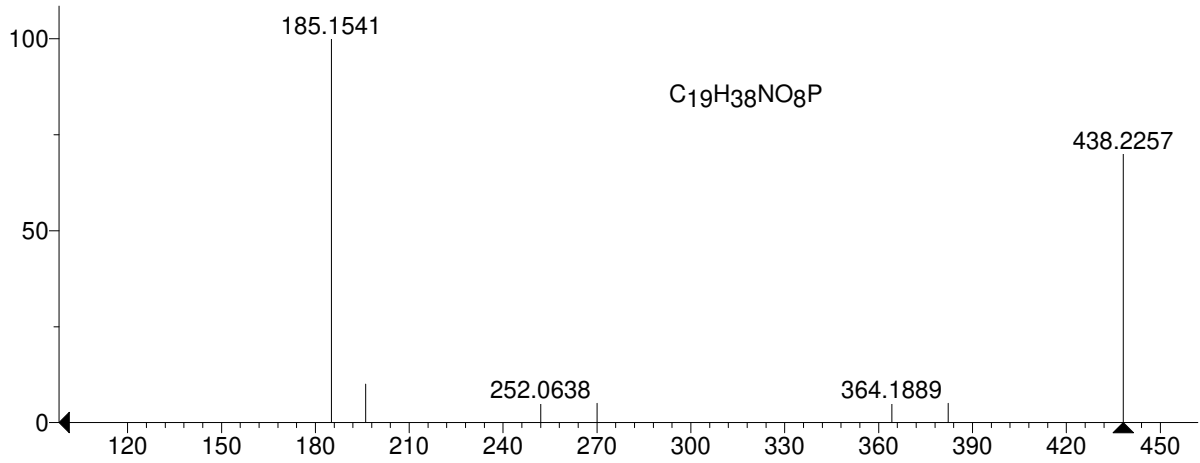

Hit 5 : PE 14:0; PE 4:0-10:0; [M-H]<sup>-</sup> [M-H]<sup>-</sup> P=438.2  
C<sub>19</sub>H<sub>38</sub>NO<sub>8</sub>P; MF: 1; RMF: 92; Prob 13.3%; Lib: msdial-insilicomsm-lipids-neg; ID: 322802.

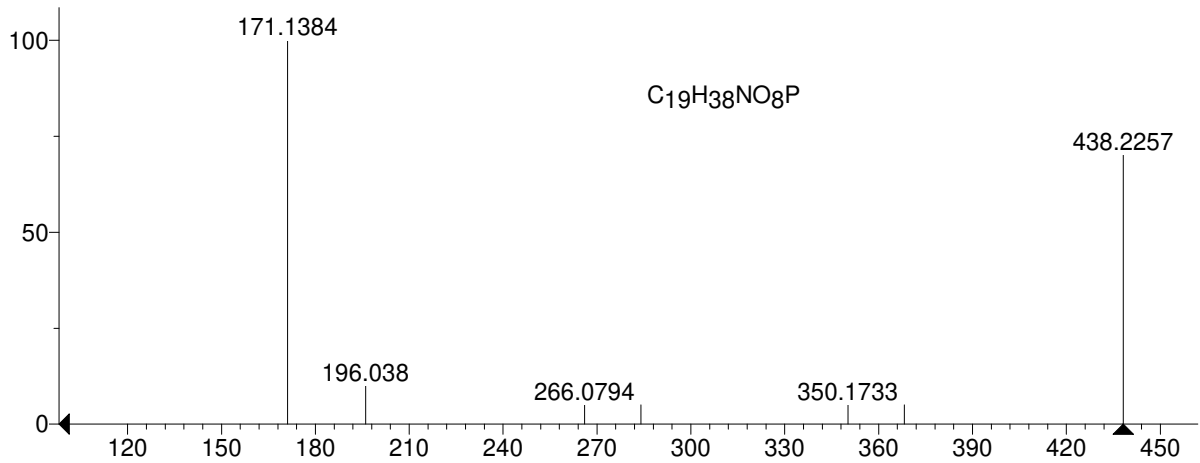

Unknown: Unknown (12.67\_585.2281m/z)  
Compound in Library Factor = -3273

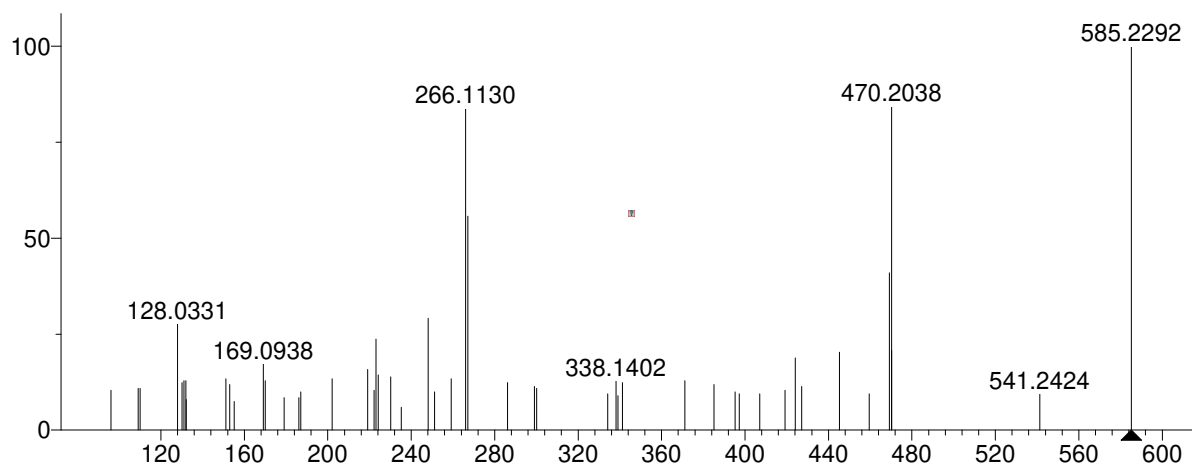

Hit 1 : Azadirachtin B [M+H-C2H6O3]+ IT 35% P=585.2  
C33H42O14; MF: 2; RMF: 57; Prob 100.0%; CAS: 95507-03-2; Lib: nist\_msms; ID: 223433.

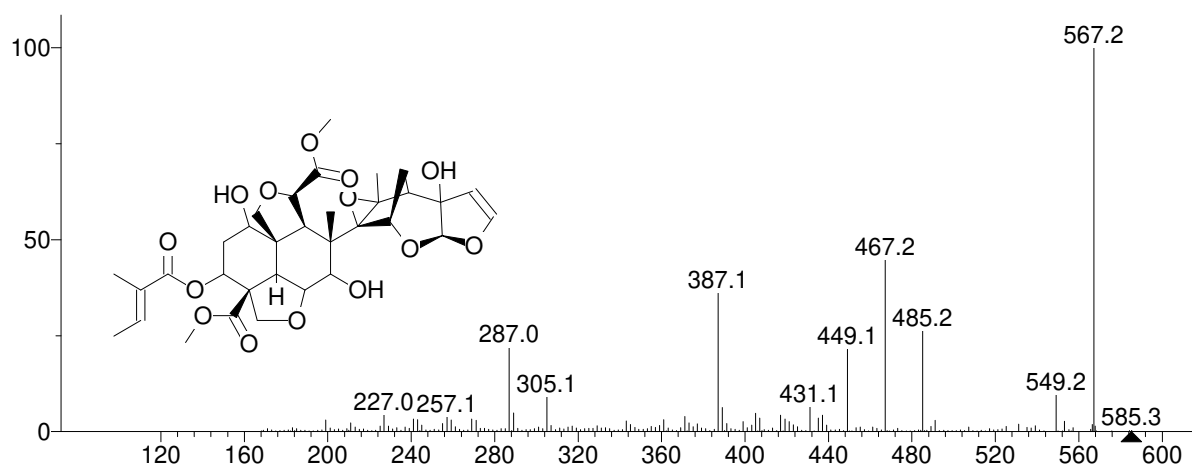

Unknown: Unknown (12.74\_704.1336m/z)  
Compound in Library Factor = 0

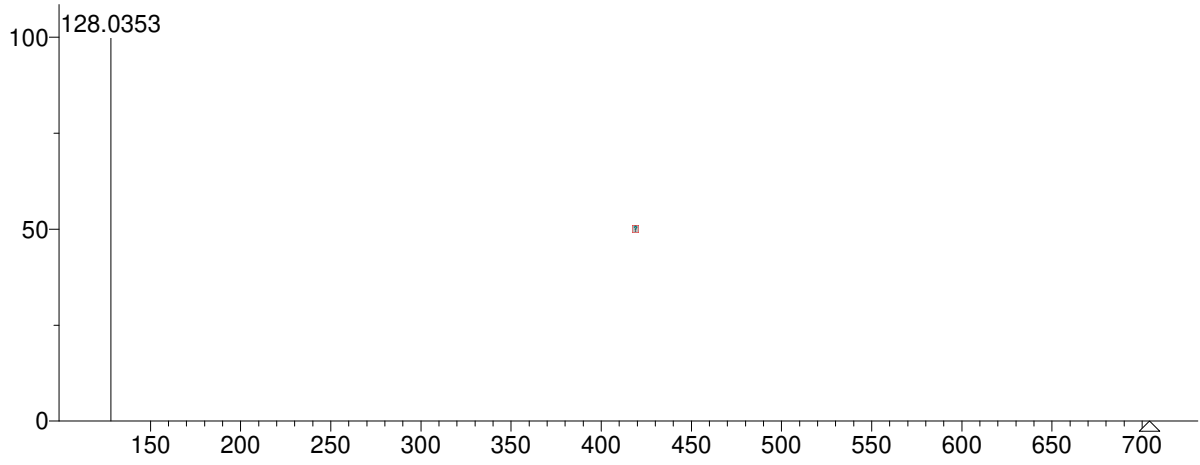

Unknown: Unknown (12.82\_438.2224m/z)  
Compound in Library Factor = 0

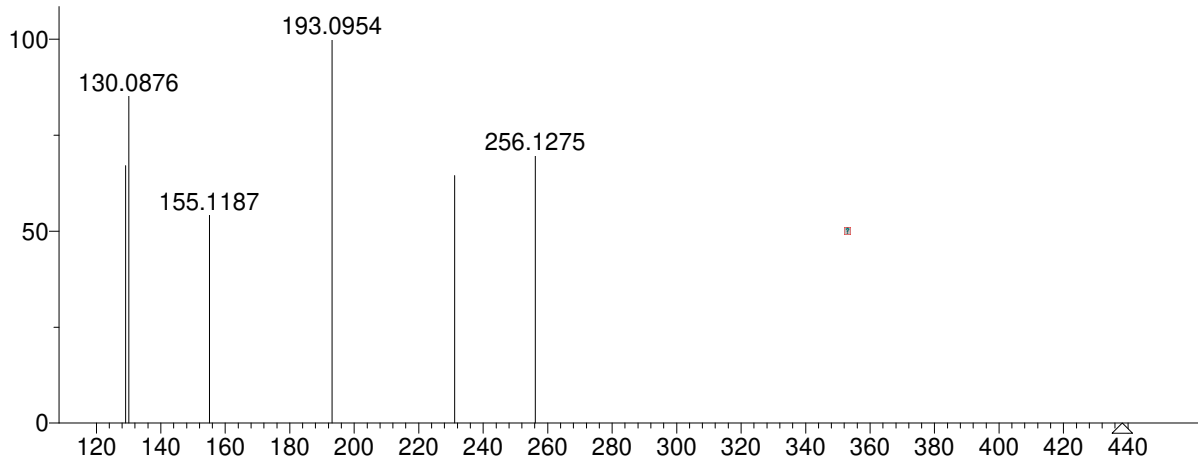

\*\* Search Report Page 1 of 2 \*\*

Unknown: Unknown (12.83\_253.1185m/z)  
Compound in Library Factor = -3273

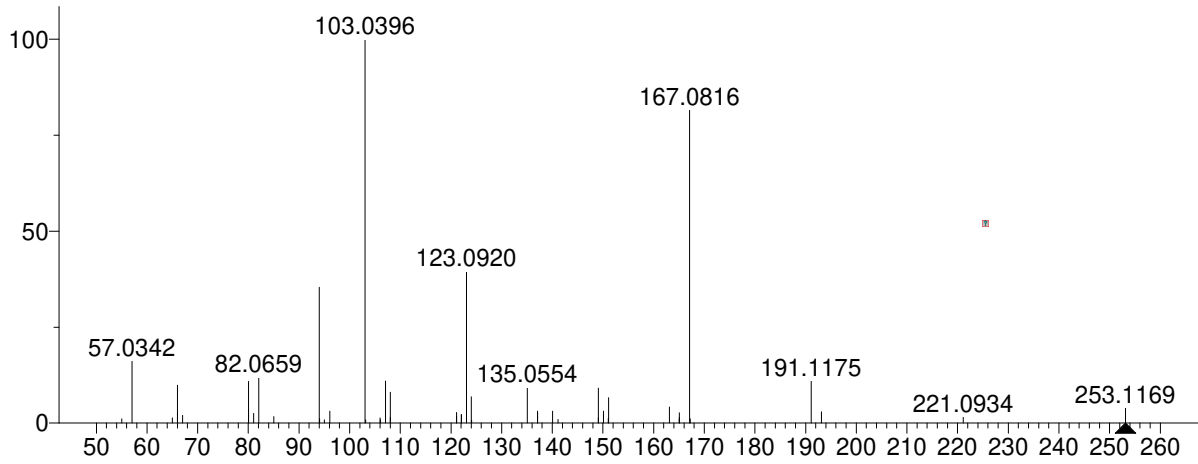

Hit 1 : Ala-Tyr [M+H]<sup>+</sup> HCD 5eV P=253.1  
C<sub>12</sub>H<sub>16</sub>N<sub>2</sub>O<sub>4</sub>; MF: 7; RMF: 151; Prob 11.8%; CAS: 3061-88-9; Lib: nist\_msms2; ID: 89140.

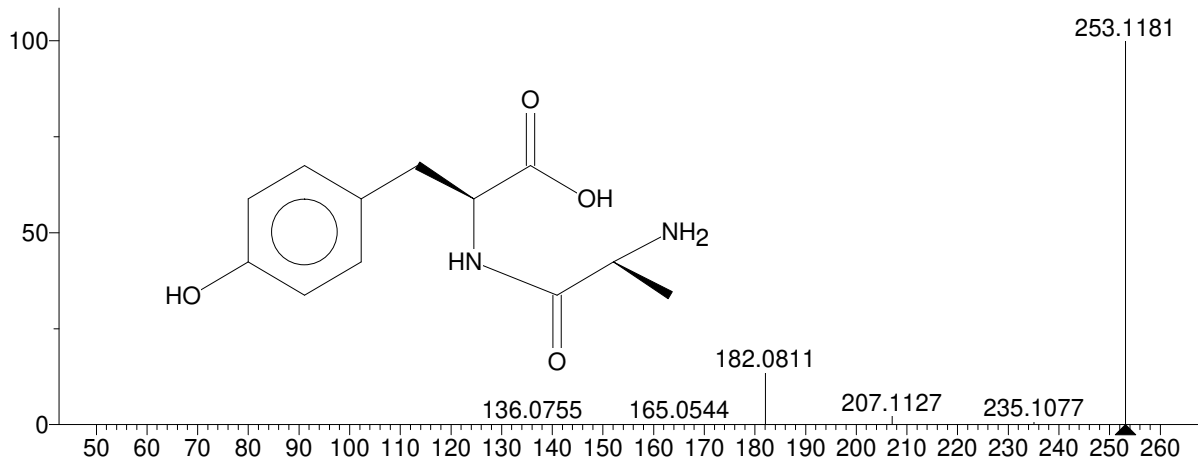

Hit 2 : Tyr-Ala [M+H]<sup>+</sup> HCD 5eV P=253.1  
C<sub>12</sub>H<sub>16</sub>N<sub>2</sub>O<sub>4</sub>; MF: 5; RMF: 96; Prob 10.9%; CAS: 730-08-5; Lib: nist\_msms; ID: 564059.

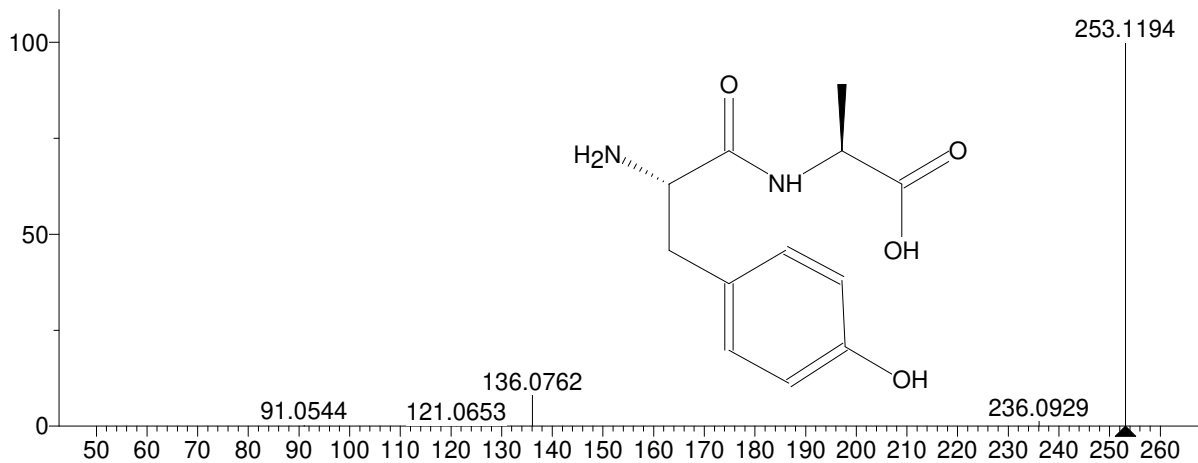

Hit 3 : Ser-Phe [M+H]<sup>+</sup> HCD 5eV P=253.1  
C<sub>12</sub>H<sub>16</sub>N<sub>2</sub>O<sub>4</sub>; MF: 4; RMF: 93; Prob 10.4%; Lib: nist\_msms; ID: 571662.

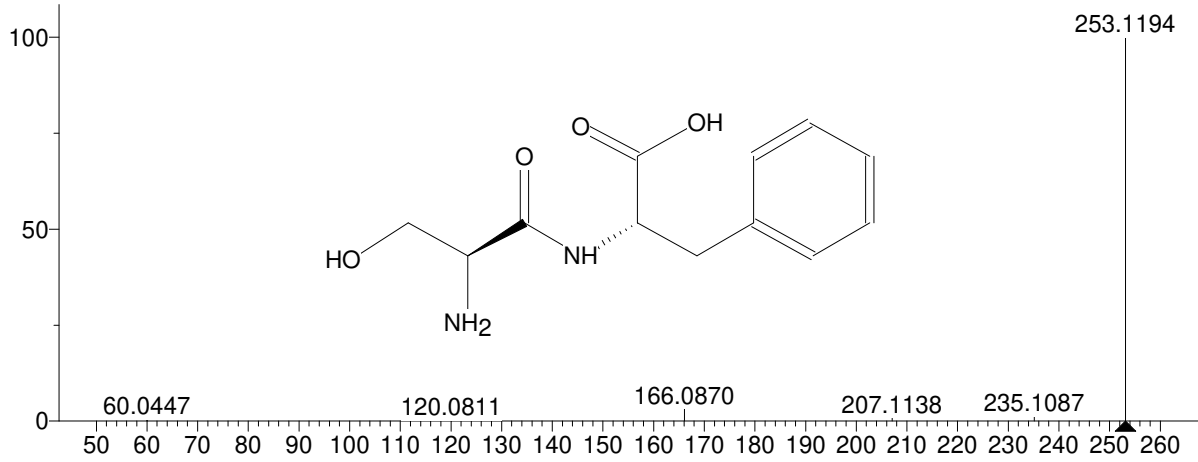

Hit 4 : Ser-Phe [M+H]<sup>+</sup> HCD 5eV P=253.1  
C<sub>12</sub>H<sub>16</sub>N<sub>2</sub>O<sub>4</sub>; MF: 4; RMF: 93; Prob 10.4%; CAS: 16875-28-8; Lib: nist\_msms2; ID: 85420.

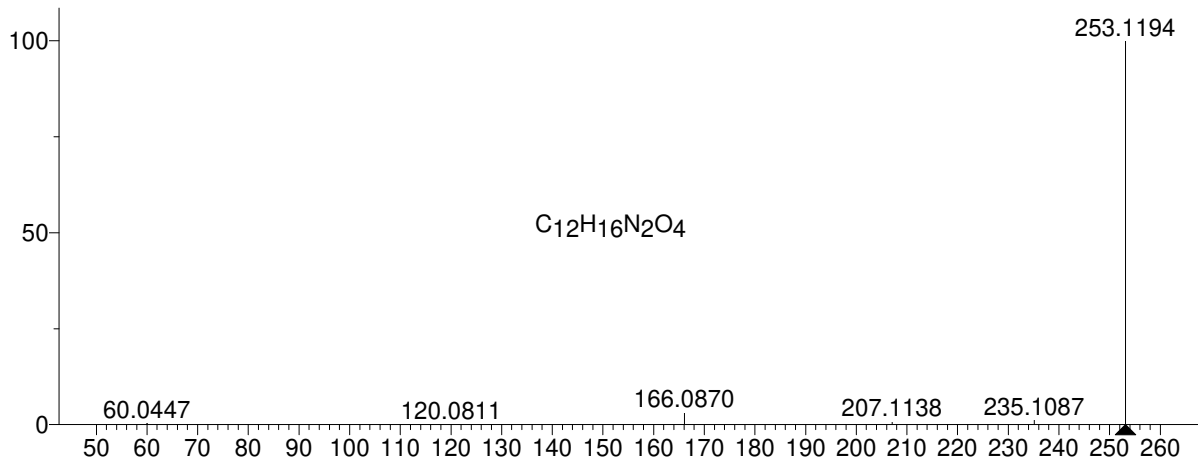

Hit 5 : Palythazine [M+H]<sup>+</sup> P=253.1  
C<sub>12</sub>H<sub>16</sub>N<sub>2</sub>O<sub>4</sub>; MF: 3; RMF: 99; Prob 10.1%; Lib: mona-export-gnps; ID: 5292.

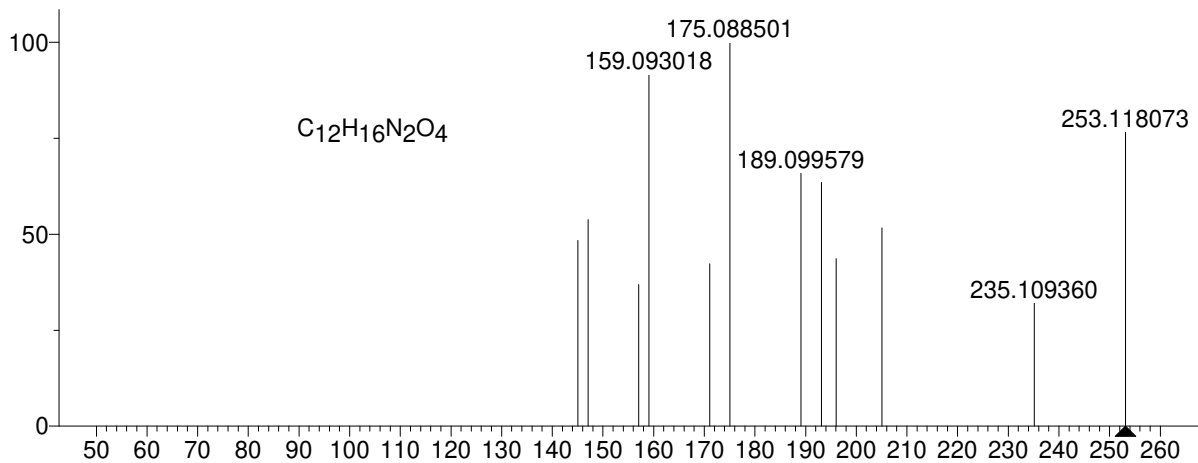

Unknown: Unknown (12.84\_338.8676m/z)  
Compound in Library Factor = 0

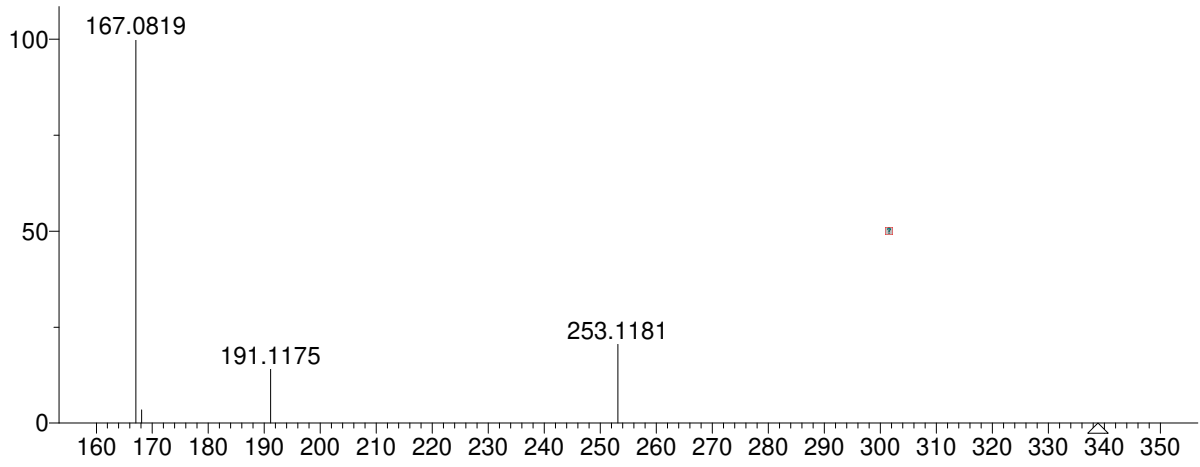

Unknown: Unknown (12.84\_596.1336m/z)  
Compound in Library Factor = 0

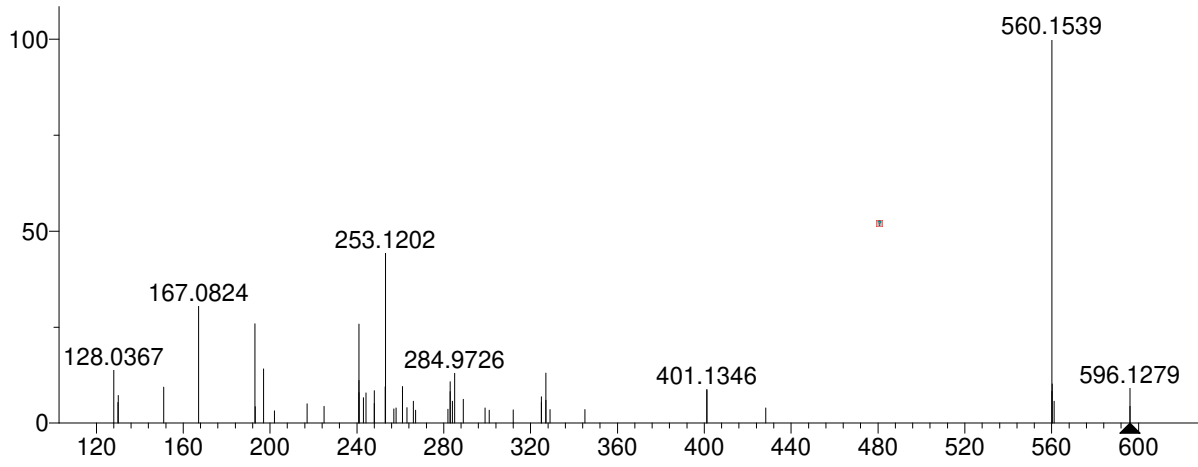



Unknown: Unknown (12.84\_799.3187m/z)  
Compound in Library Factor = 0

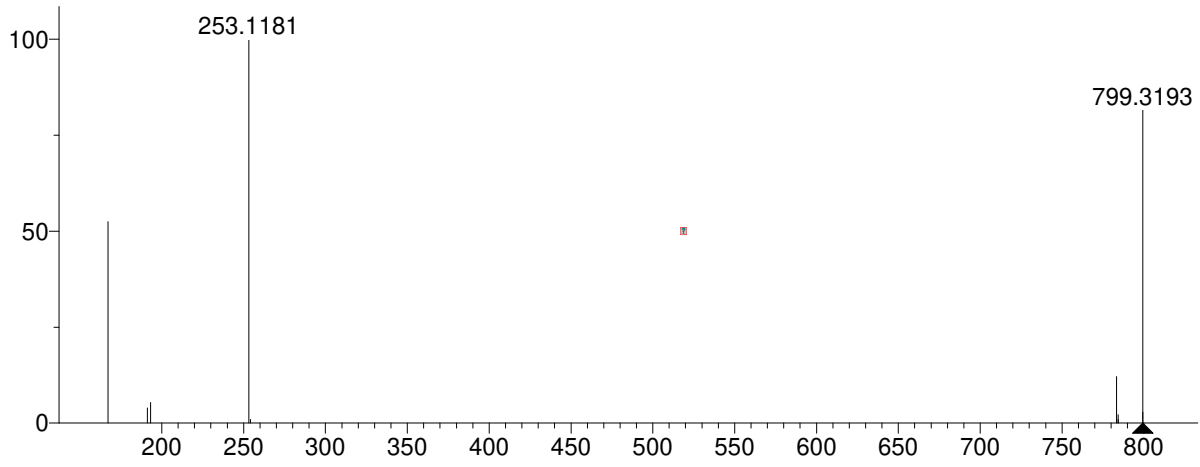

\*\* Search Report Page 1 of 1 \*\*

Unknown: Unknown (12.84\_814.2902m/z)  
Compound in Library Factor = -3273

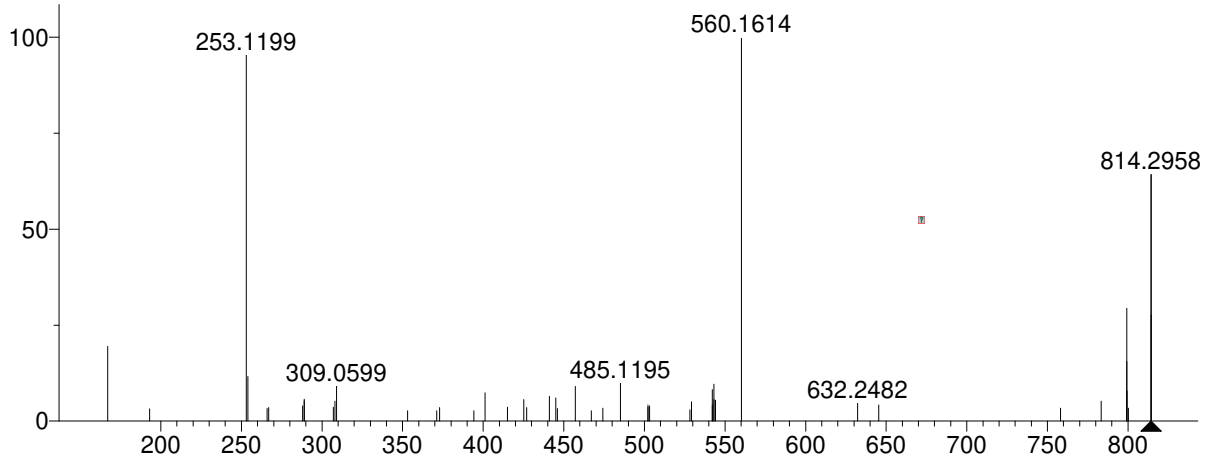

Hit 1 : NCGC00380923-0112-[4-[4-[3,5-dihydroxy-4-[3,4,5-trihydroxy-6-(hydroxymethyl)oxan-2-yl]phenyl]-2,5-bis(4

C<sub>40</sub>H<sub>44</sub>O<sub>17</sub>; MF: 1; RMF: 71; Prob 51.0%; Lib: mona-export-gnps; ID: 7654.

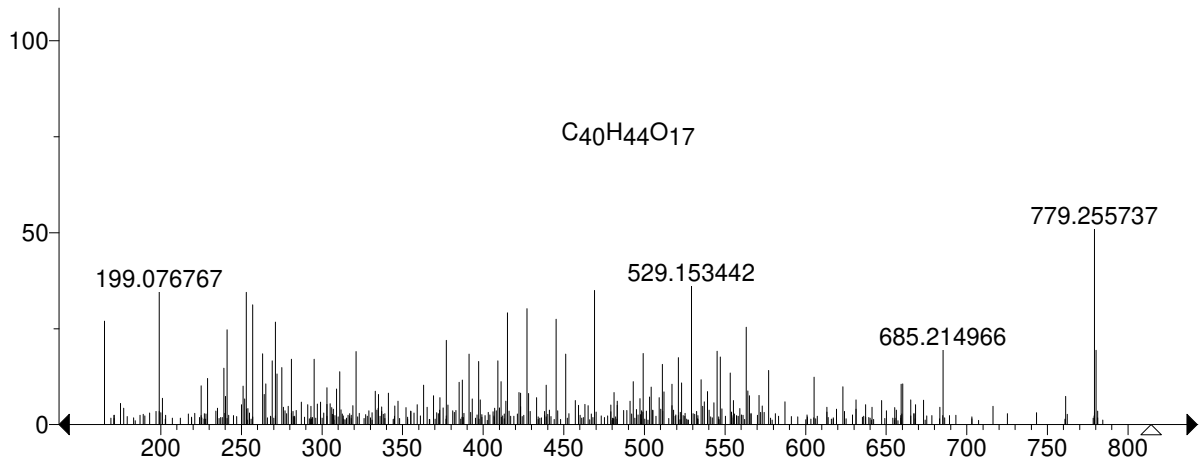

Hit 2 : 2-[4-[4-[3,5-dihydroxy-4-[3,4,5-trihydroxy-6-(hydroxymethyl)oxan-2-yl]phenyl]-2,5-bis(4-hydroxyphenyl)oxol:

C<sub>40</sub>H<sub>44</sub>O<sub>17</sub>; MF: 0; RMF: 39; Prob 49.0%; Lib: anthocyanins mona; ID: 7292.

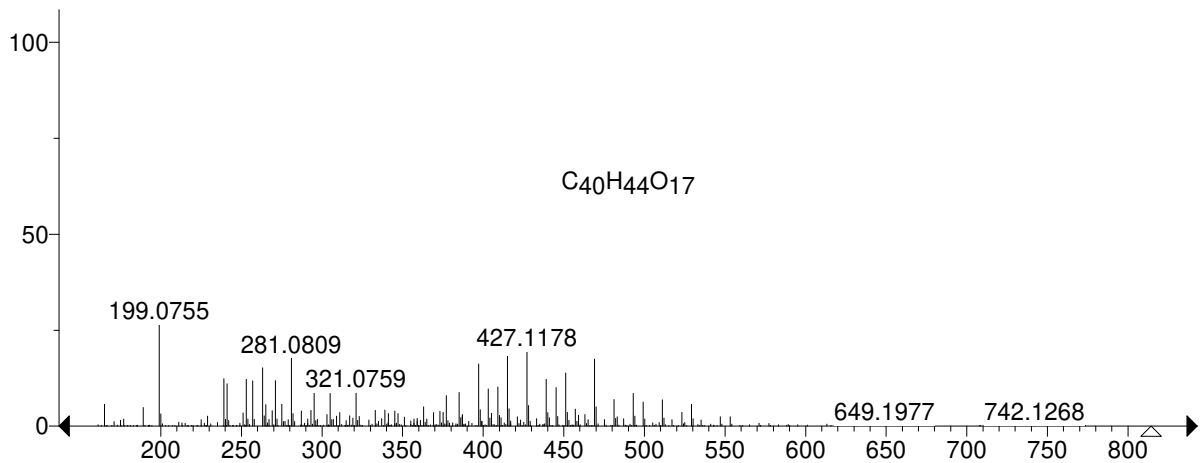

Unknown: Unknown (12.85\_817.2939m/z)  
Compound in Library Factor = 0

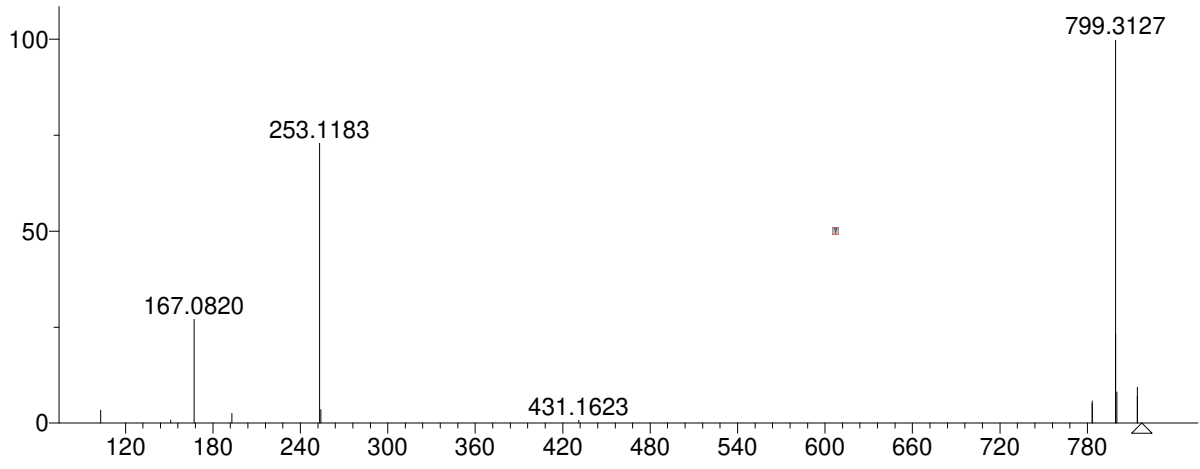

Unknown: Unknown (12.86\_560.1568m/z)  
Compound in Library Factor = -2176

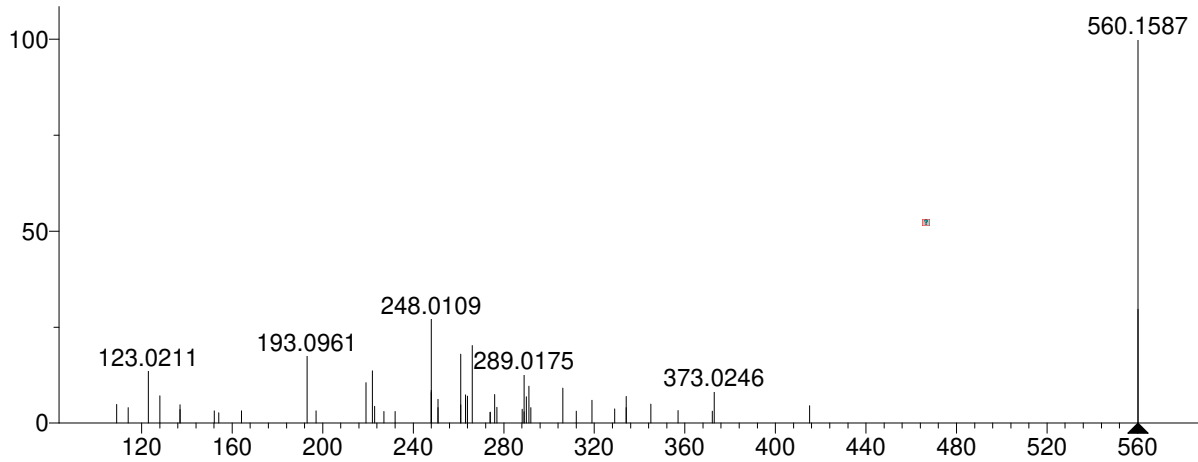

Hit 1 : Desmethylbosentan [M+Na]<sup>+</sup> HCD 22V P=560.2  
C<sub>26</sub>H<sub>27</sub>N<sub>5</sub>O<sub>6</sub>S; MF: 20; RMF: 459; Prob 30.5%; CAS: 253688-61-8; Lib: nist\_msms; ID: 451527.

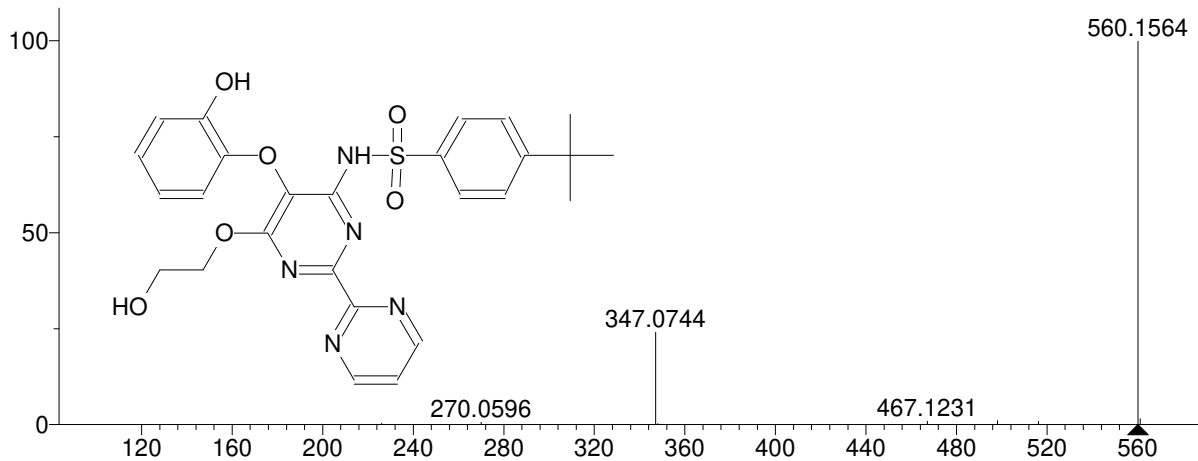

Hit 2 : (2S)-6-[(2S)-5,7-dihydroxy-2-(4-hydroxyphenyl)-4-oxo-2,3-dihydrochromen-8-yl]-5,7-dihydroxy-2-(4-hydroxy) C<sub>30</sub>H<sub>22</sub>O<sub>10</sub>; MF: 0; RMF: 55; Prob 13.9%; Lib: mona-export-vf-npl\_qexactive; ID: 19141.

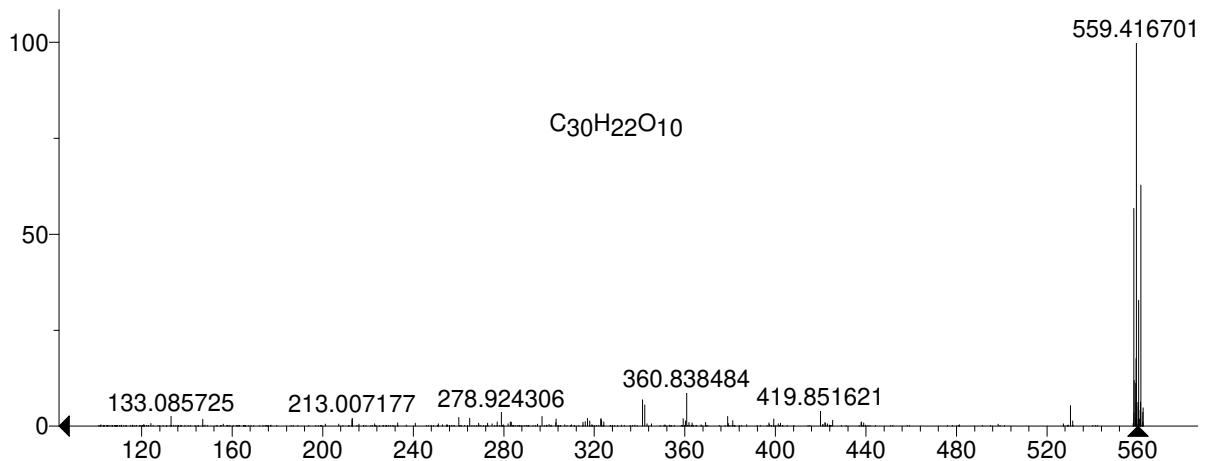

Hit 3 : (3S,4R)-3-[(3S,4R)-5,7-dihydroxy-4-(4-hydroxyphenyl)-2-oxo-3,4-dihydrochromen-3-yl]-5,7-dihydroxy-4-(4-l  
C<sub>30</sub>H<sub>22</sub>O<sub>10</sub>; MF: 0; RMF: 40; Prob 13.9%; Lib: mona-export-vf-npl\_qexactive; ID: 20569.

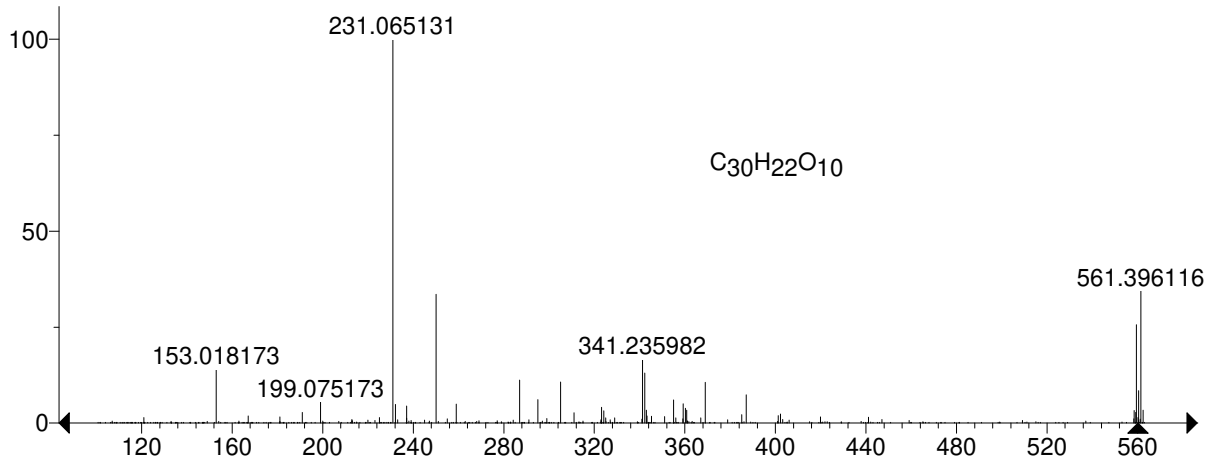

Hit 4 : 3-[1,1-bis(4-hydroxyphenyl)-3-oxo-3-(2,4,6-trihydroxyphenyl)propan-2-yl]-5,7-dihydroxychromen-4-one [M-  
C<sub>30</sub>H<sub>22</sub>O<sub>10</sub>; MF: 0; RMF: 17; Prob 13.9%; Lib: mona-export-vf-npl\_qexactive; ID: 22699.

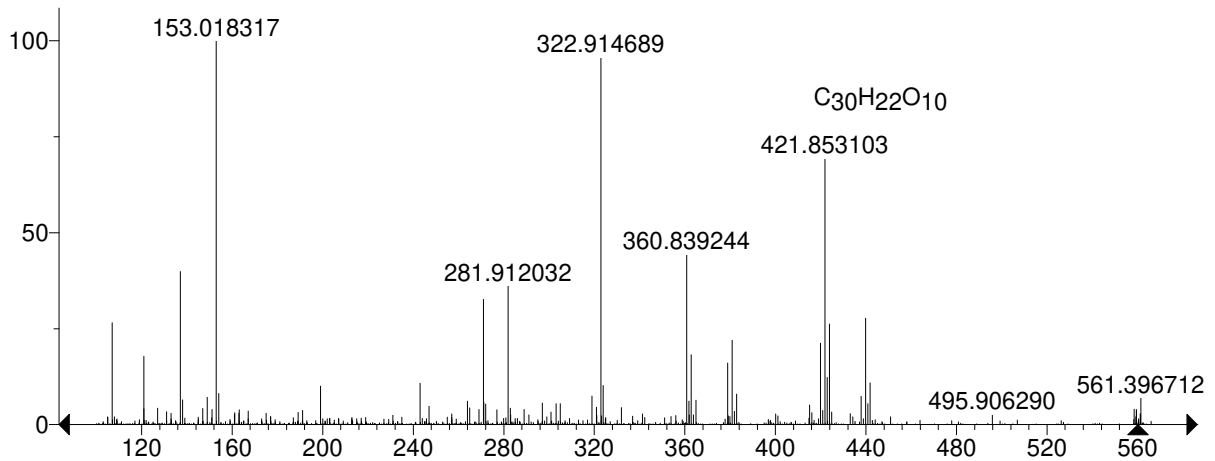

Hit 5 : NCGC00380474-0115-hydroxy-2-(4-hydroxyphenyl)-7-[[[(2R,3S)-3,5,8-trihydroxy-2-(4-hydroxyphenyl)-3,4-di  
C<sub>30</sub>H<sub>22</sub>O<sub>10</sub>; MF: 0; RMF: 9; Prob 13.9%; Lib: mona-export-gnps; ID: 9344.

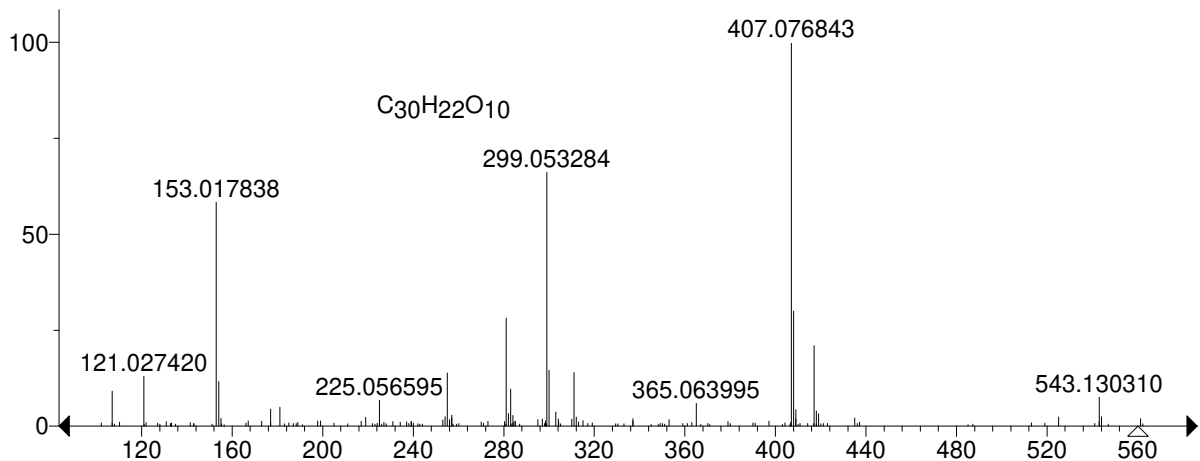

Unknown: Unknown (12.87\_339.1064m/z)  
Compound in Library Factor = 0

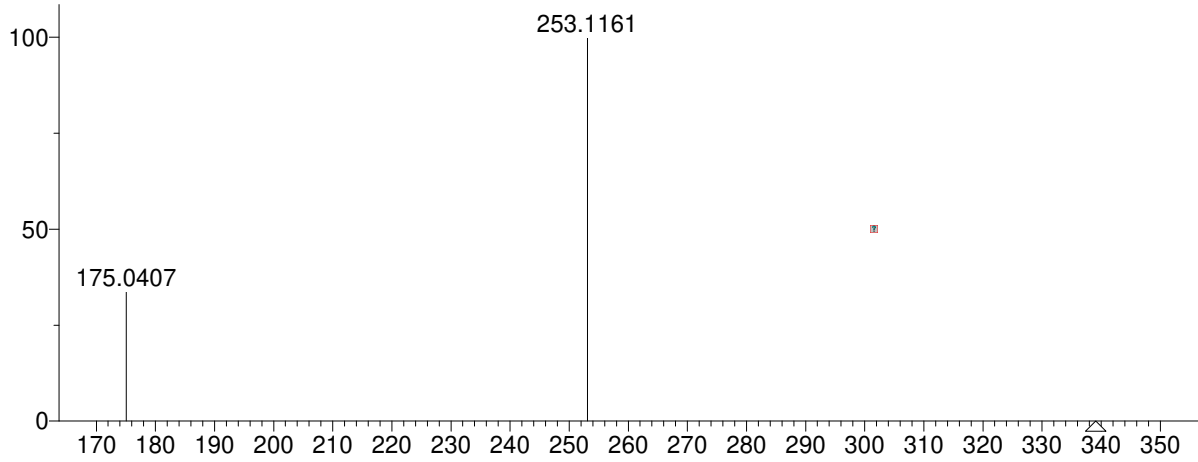

Hit 1 : NCGC00385147-01\_C16H18O8\_beta-D-Glucopyranoside, 4,8-dihydroxy-1-naphthalenyl [M+H]<sup>+</sup> P=339.  
C16H18O8; MF: 0; RMF: 75; Prob 50.0%; Lib: mona-export-gnps; ID: 10535.

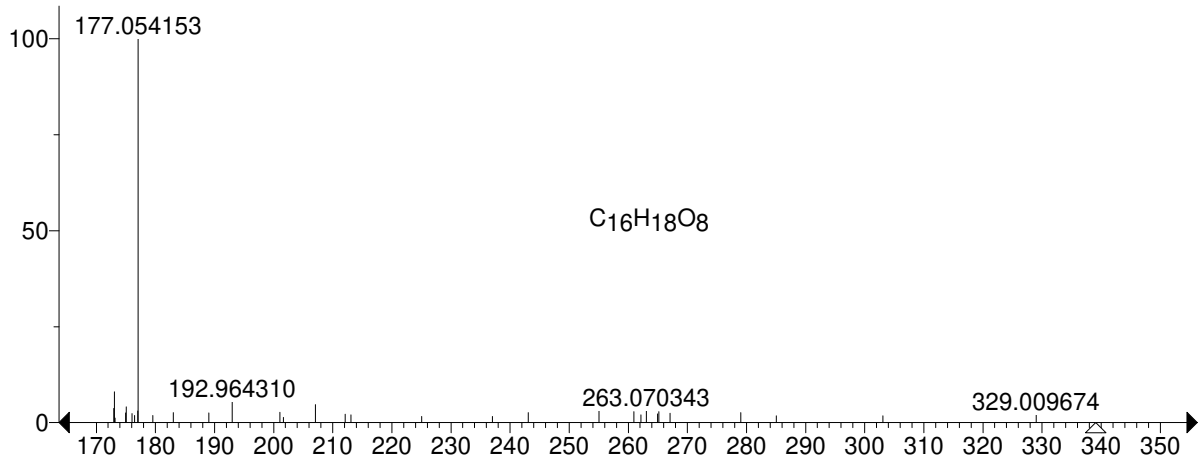

Hit 2 : (1R,3R,4S,5R)-1,3,4-trihydroxy-5-[(E)-3-(4-hydroxyphenyl)prop-2-enoyl]oxycyclohexane-1-carboxylic acid  
C16H18O8; MF: 0; RMF: 20; Prob 50.0%; Lib: mona-export-vf-npl\_qexactive; ID: 6316.

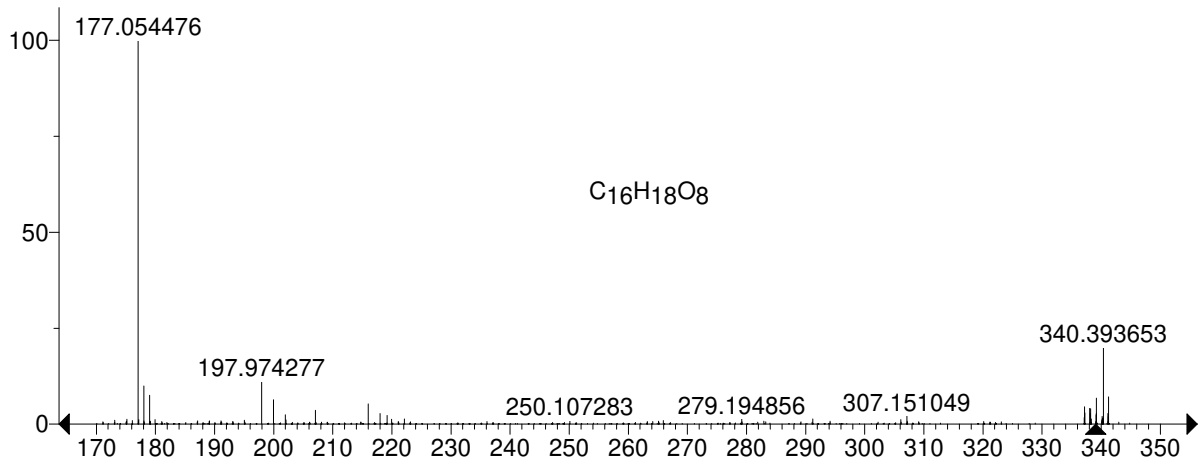

\*\* Search Report Page 1 of 2 \*\*

Unknown: Unknown (12.87\_401.1444m/z)  
Compound in Library Factor = -613

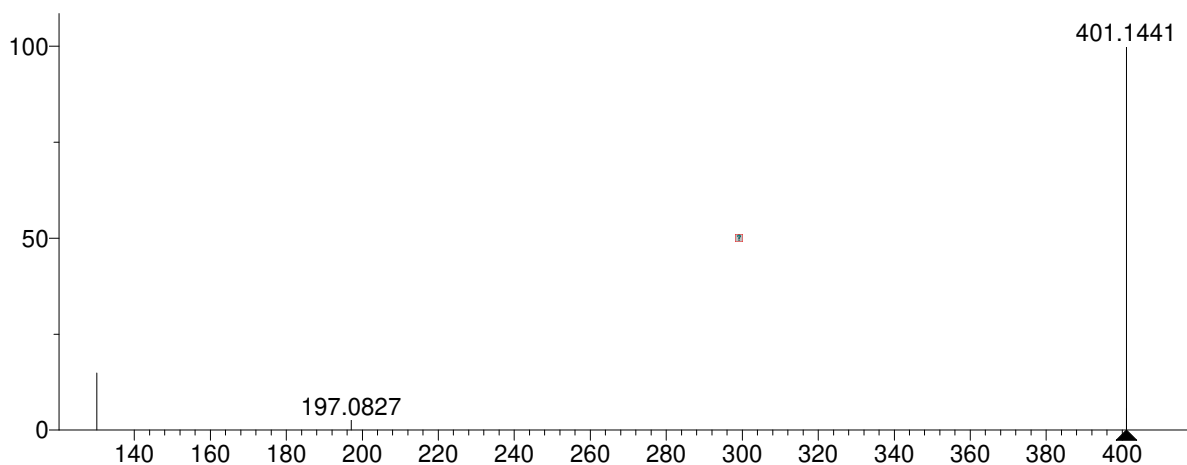

Hit 1 : Methanone, [4-amino-1-[(4-chlorophenyl)methyl]-2-methyl-5-phenyl-1H-pyrrol-3-yl]phenyl- [M+H]<sup>+</sup> HCD 1  
C25H21ClN2O; MF: 215; RMF: 887; Prob 91.7%; CAS: 1132922-57-6; Lib: nist\_msms; ID: 415414.

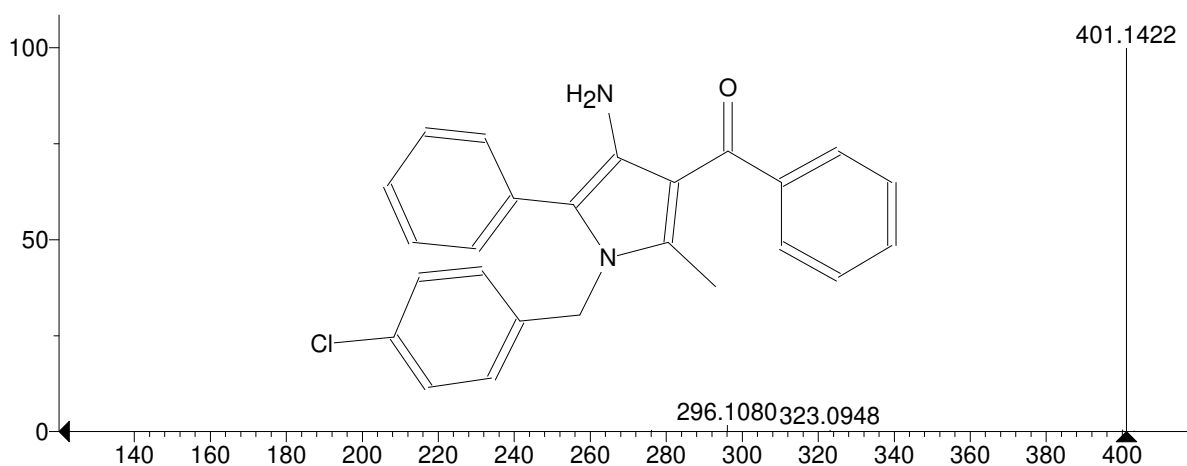

Hit 2 : cis-Clopenthixol [M+H]<sup>+</sup> HCD 24V P=401.1  
C22H25ClN2OS; MF: 100; RMF: 825; Prob 5.50%; CAS: 53772-83-1; Lib: nist\_msms; ID: 135821.

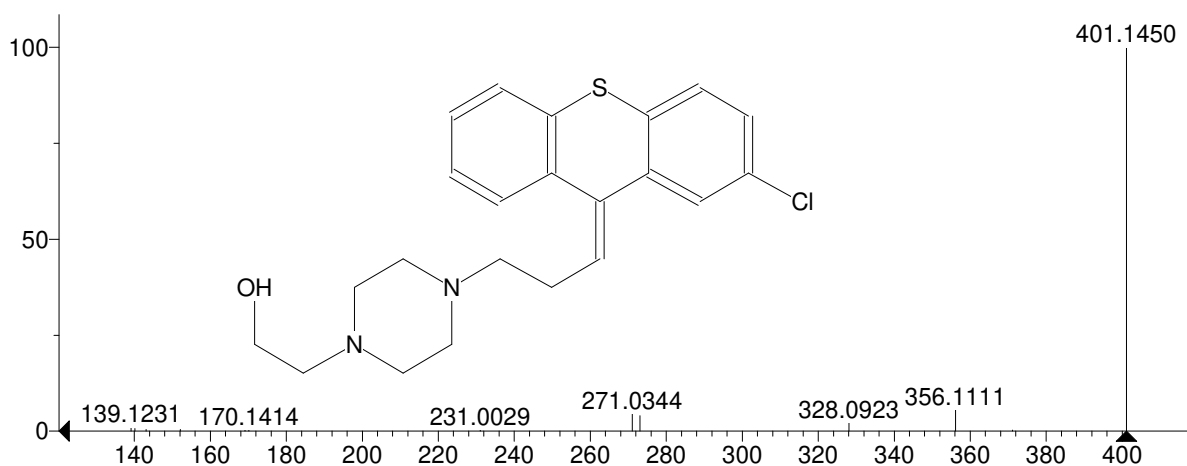

Hit 3 : Unknown (carbon number 18); PlaSMA ID-1017 [M-H]<sup>-</sup> P=401.1  
C<sub>18</sub>H<sub>26</sub>O<sub>10</sub>; MF: 49; RMF: 629; Prob 1.10%; Lib: biomsms-neg-plasma; ID: 1347.

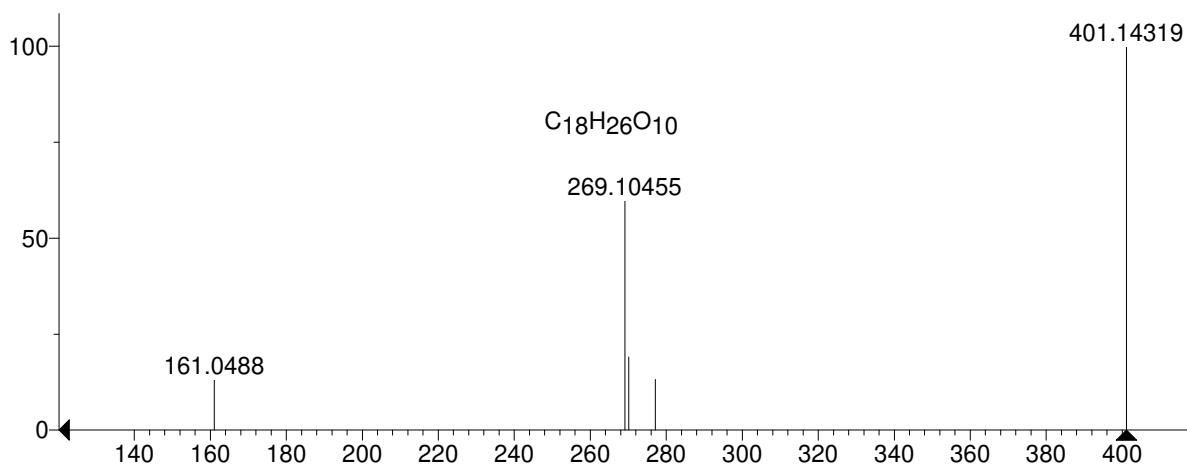

Hit 4 : Benzyl alcohol + Hex-Pen; PlaSMA ID-1015 [M-H]<sup>-</sup> P=401.1  
C<sub>18</sub>H<sub>26</sub>O<sub>10</sub>; MF: 48; RMF: 668; Prob 1.06%; Lib: biomsms-neg-plasma; ID: 753.

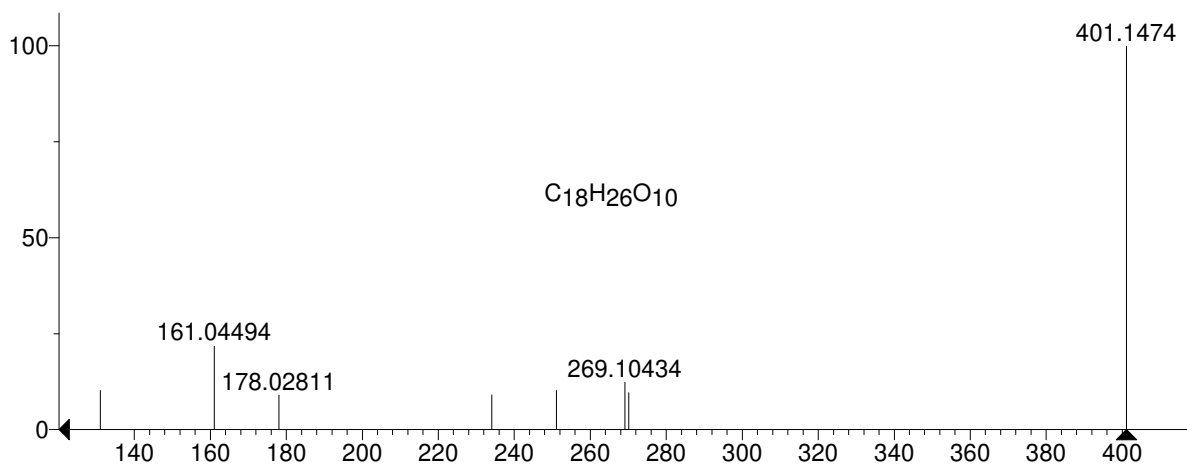

Hit 5 : Unknown (carbon number 18); PlaSMA ID-1016 [M-H]<sup>-</sup> P=401.1  
C<sub>18</sub>H<sub>26</sub>O<sub>10</sub>; MF: 15; RMF: 397; Prob 0.27%; Lib: biomsms-neg-plasma; ID: 1346.

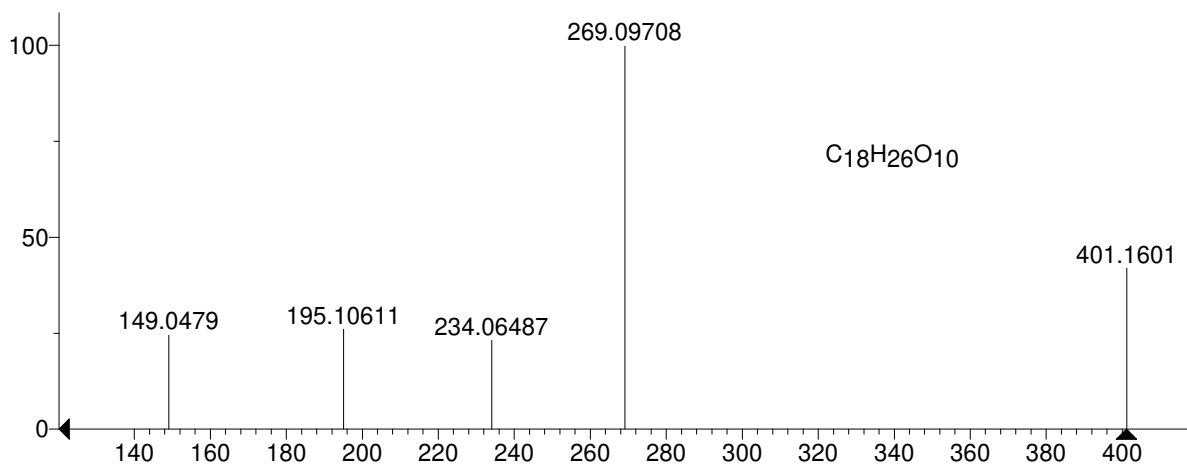



Unknown: Unknown (12.87\_599.2324m/z)  
Compound in Library Factor = 0

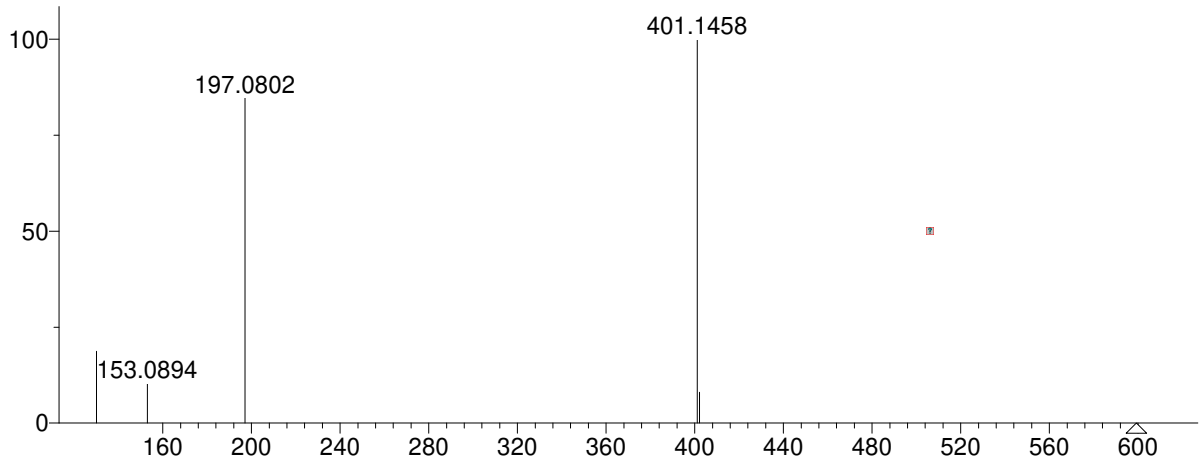

Unknown: Unknown (12.87\_606.1614m/z)  
Compound in Library Factor = 0

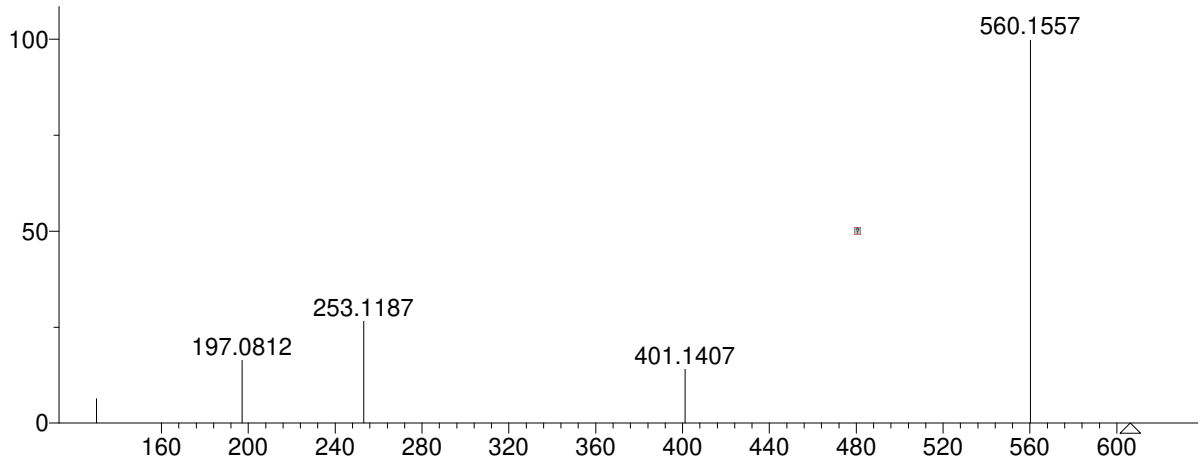

Unknown: Unknown (12.90\_800.3191m/z)  
Compound in Library Factor = 0

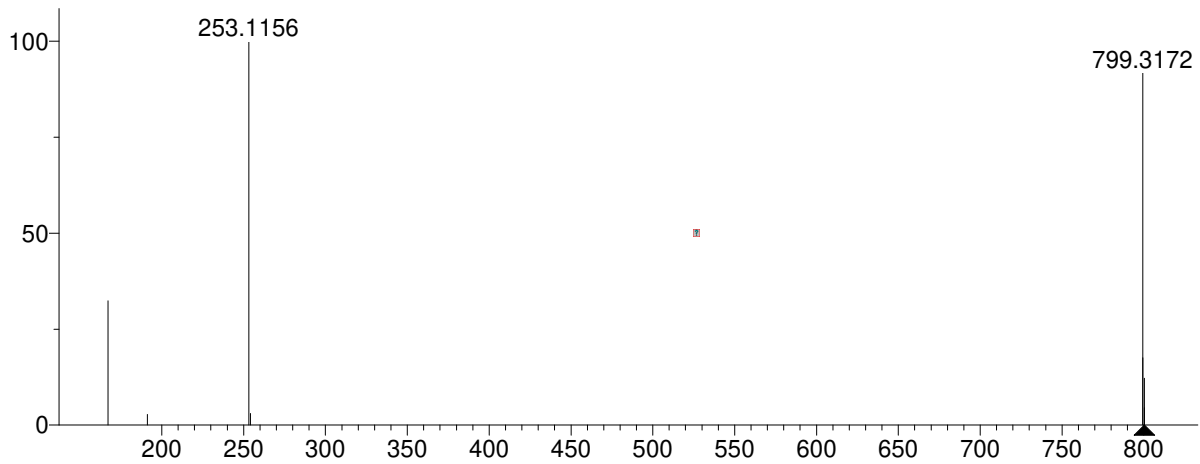

Hit 1 : NCGC00381336-01\_C33H50O21\_2,6-Anhydro-5-O-[4-({6-O-[4-(beta-D-glucopyranosyloxy)-2-methylenebr  
C33H50O21; MF: 0; RMF: 7; Prob 100.0%; Lib: mona-export-gnps; ID: 11305.

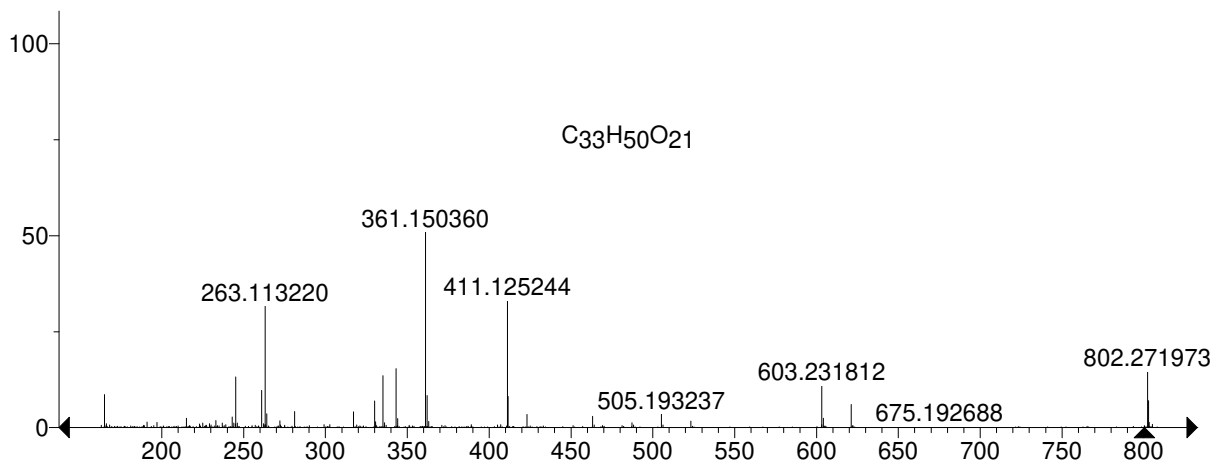

Unknown: Unknown (12.91\_557.2132m/z)  
Compound in Library Factor = 0

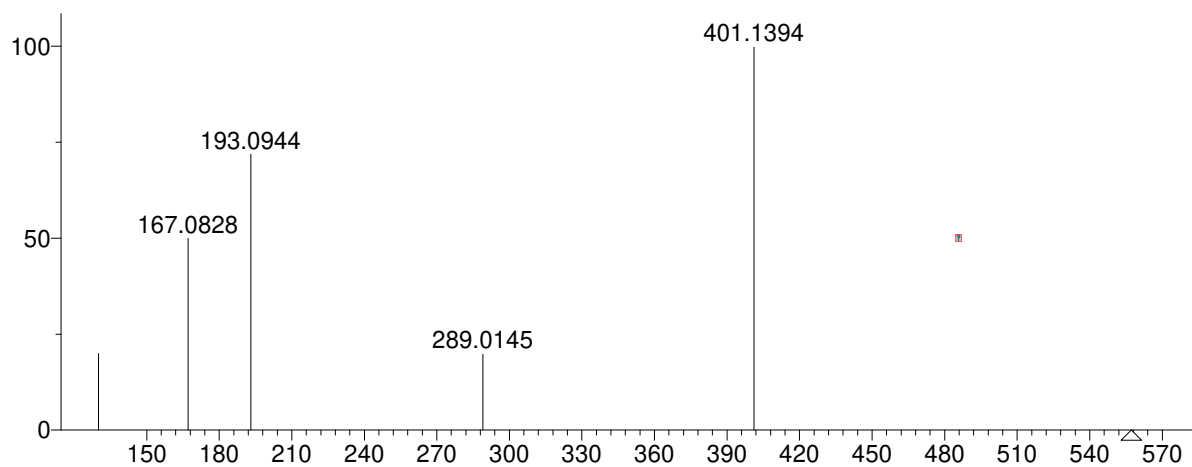

Hit 1 : (2R,3R,4S,5S,6R)-2-[(E)-3-[3,5-dimethoxy-4-[(2S,3R,4S,5S,6R)-3,4,5-trihydroxy-6-(hydroxymethyl)oxan-2-C<sub>23</sub>H<sub>34</sub>O<sub>14</sub>; MF: 0; RMF: 31; Prob 100.0%; Lib: mona anthocyanidin-o-glycosides; ID: 2755.

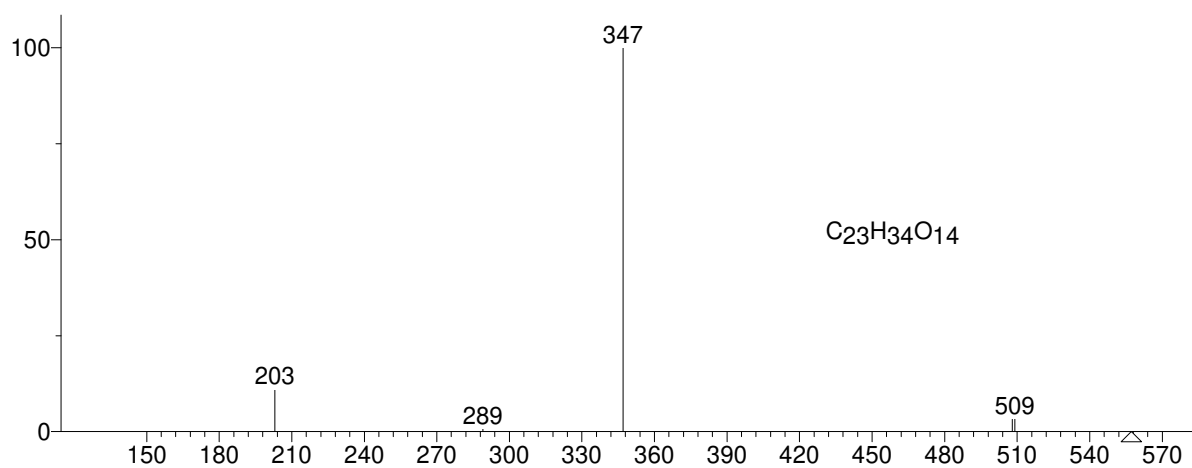

\*\* Search Report Page 1 of 2 \*\*

Unknown: Unknown (12.91\_560.1560m/z)  
Compound in Library Factor = -1072

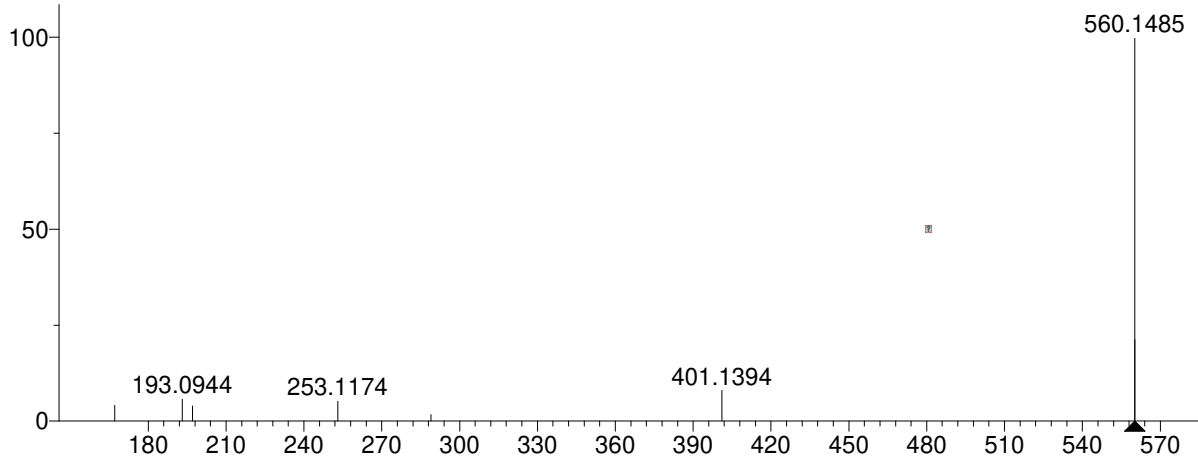

Hit 1 : Desmethylbosentan [M+Na]<sup>+</sup> HCD 22V P=560.2  
C<sub>26</sub>H<sub>27</sub>N<sub>5</sub>O<sub>6</sub>S; MF: 79; RMF: 753; Prob 74.5%; CAS: 253688-61-8; Lib: nist\_msms; ID: 451527.

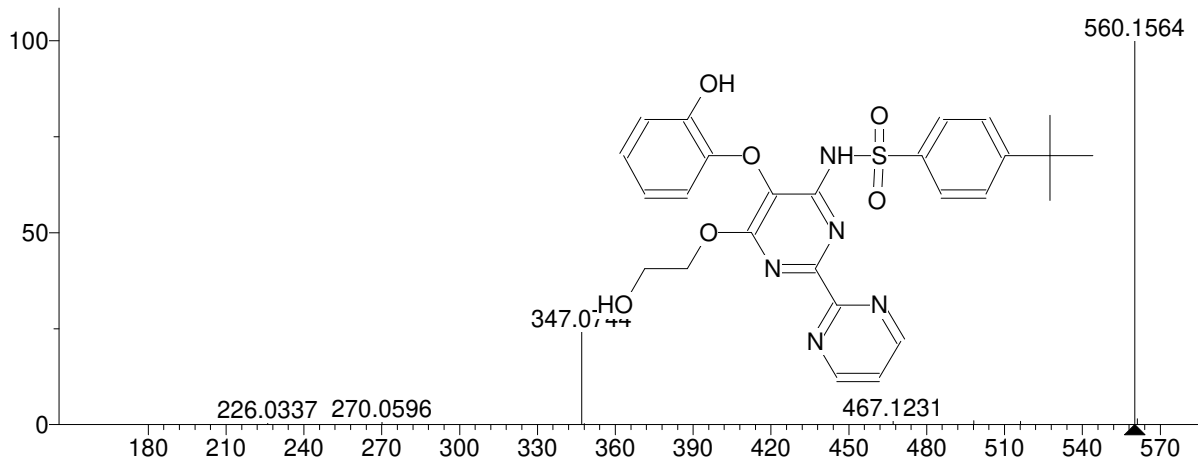

Hit 2 : (2S)-6-[(2S)-5,7-dihydroxy-2-(4-hydroxyphenyl)-4-oxo-2,3-dihydrochromen-8-yl]-5,7-dihydroxy-2-(4-hydroxyphenyl)-4-oxo-2,3-dihydrochromen-8-yl  
C<sub>30</sub>H<sub>22</sub>O<sub>10</sub>; MF: 0; RMF: 105; Prob 8.49%; Lib: mona-export-vf-npl\_qexactive; ID: 19141.

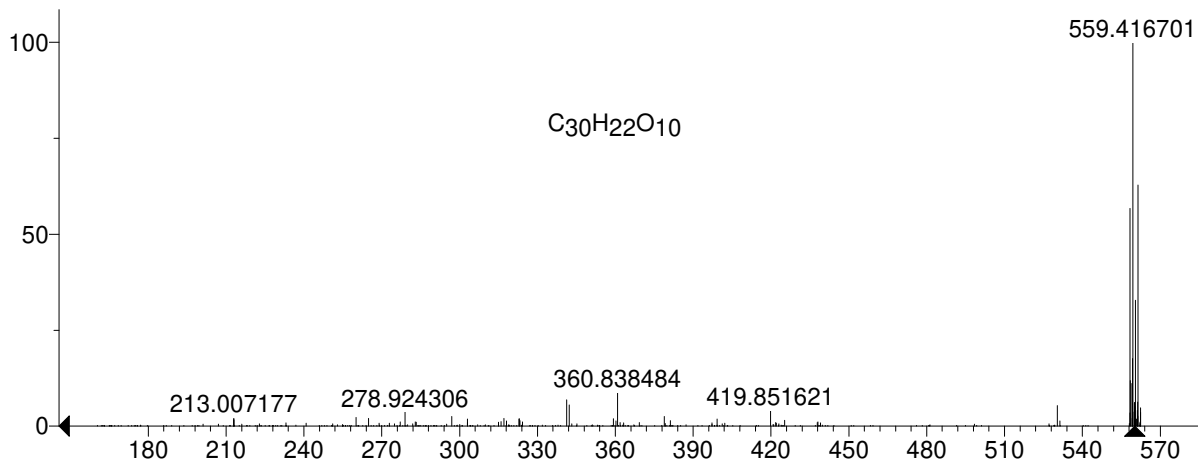

Hit 3 : (3S,4R)-3-[(3S,4R)-5,7-dihydroxy-4-(4-hydroxyphenyl)-2-oxo-3,4-dihydrochromen-3-yl]-5,7-dihydroxy-4-(4-  
C<sub>30</sub>H<sub>22</sub>O<sub>10</sub>; MF: 0; RMF: 47; Prob 8.49%; Lib: mona-export-vf-npl\_qexactive; ID: 20569.

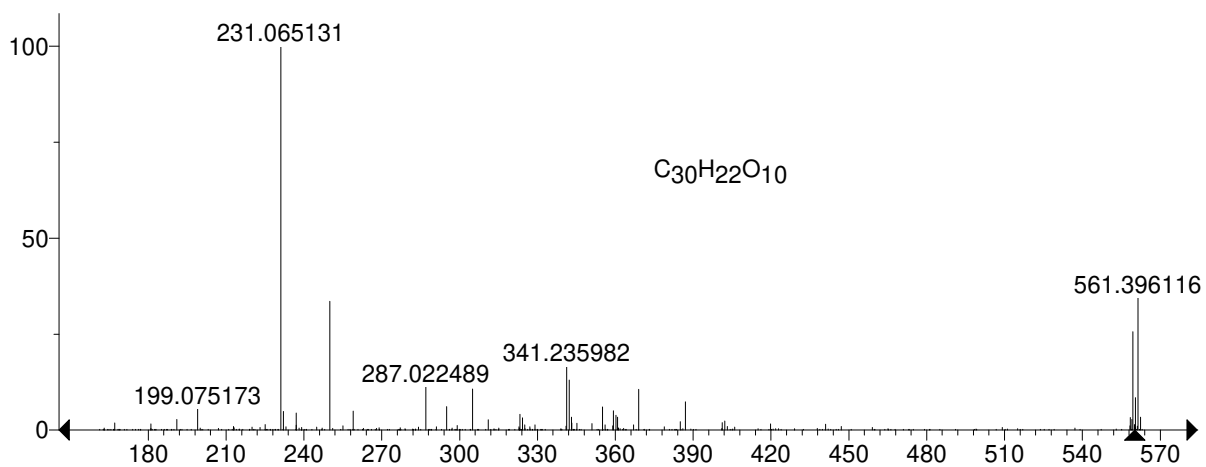

Hit 4 : 3-[1,1-bis(4-hydroxyphenyl)-3-oxo-3-(2,4,6-trihydroxyphenyl)propan-2-yl]-5,7-dihydroxychromen-4-one [M-  
C<sub>30</sub>H<sub>22</sub>O<sub>10</sub>; MF: 0; RMF: 8; Prob 8.49%; Lib: mona-export-vf-npl\_qexactive; ID: 22699.

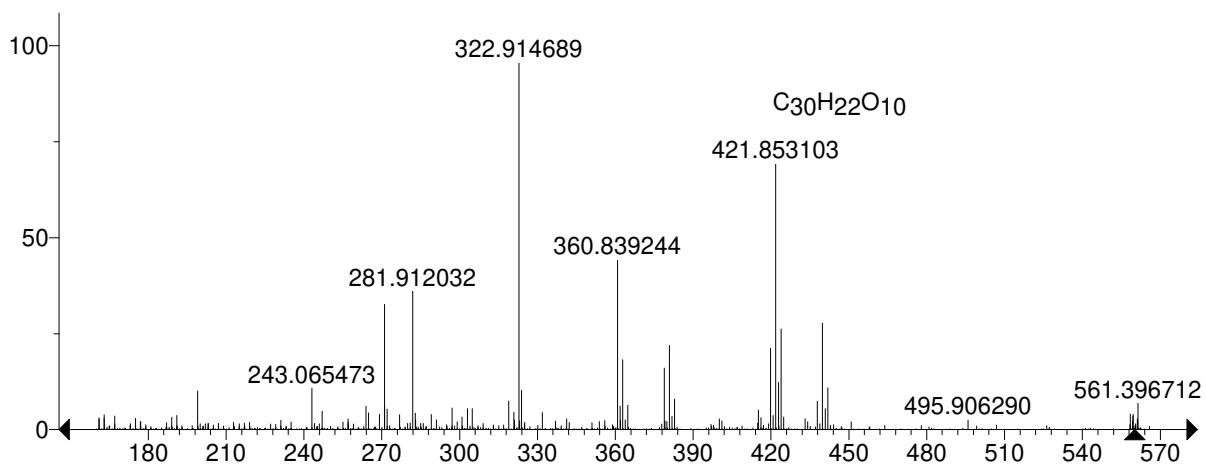

Unknown: Unknown (12.95\_398.0383m/z)  
Compound in Library Factor = 0

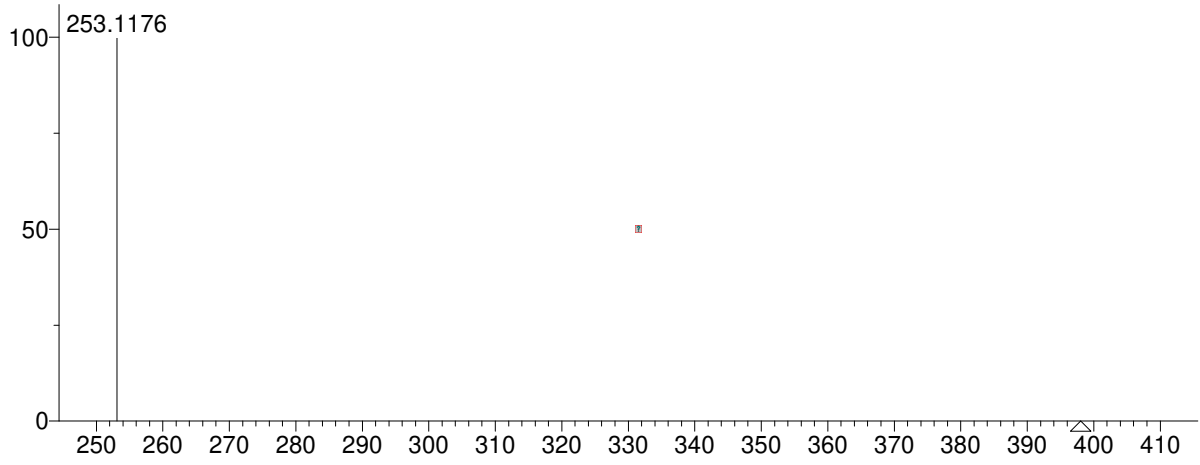

Unknown: Unknown (12.98\_472.0569m/z)  
Compound in Library Factor = 0

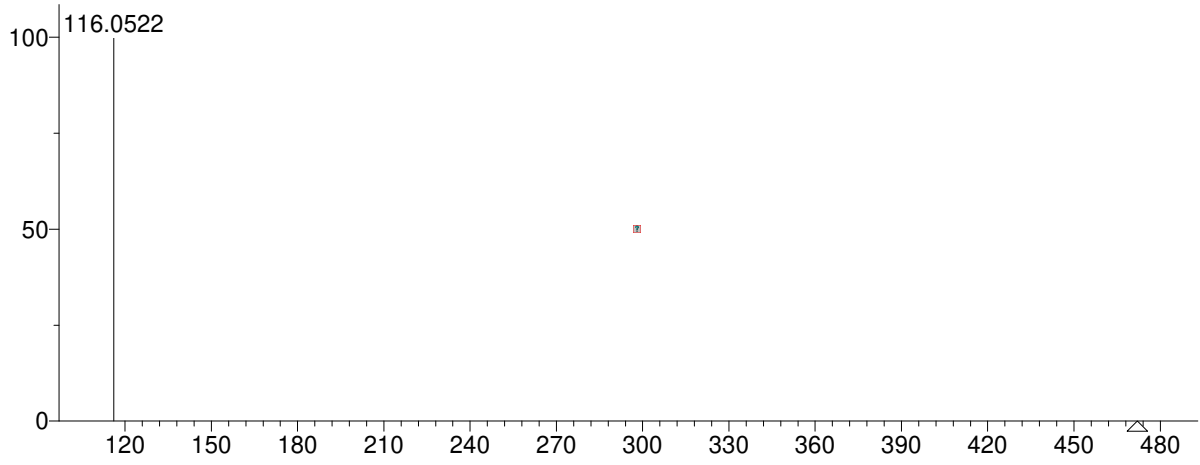



Unknown: Unknown (13.00\_560.2137m/z)  
Compound in Library Factor = 0

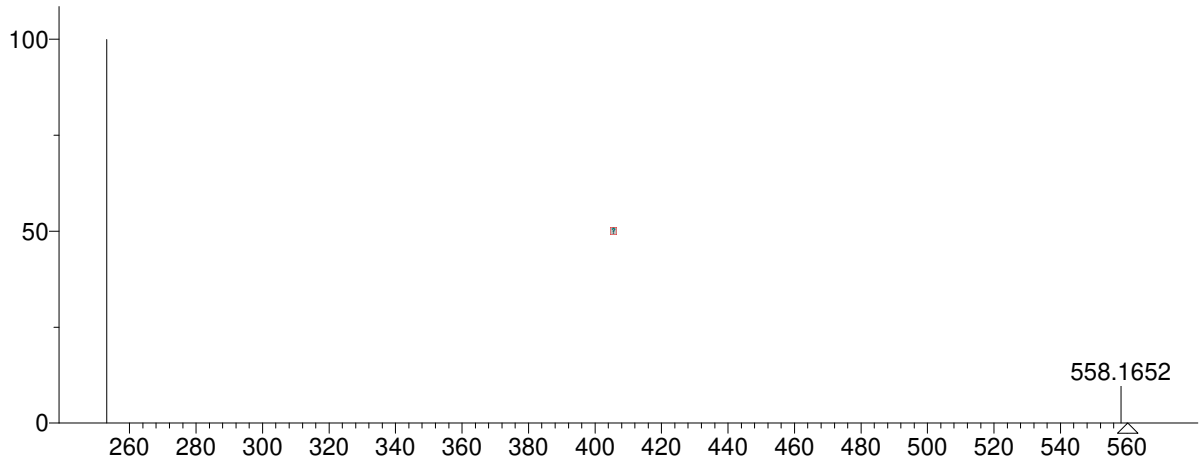

Unknown: Unknown (13.05\_542.2326m/z)  
Compound in Library Factor = 0

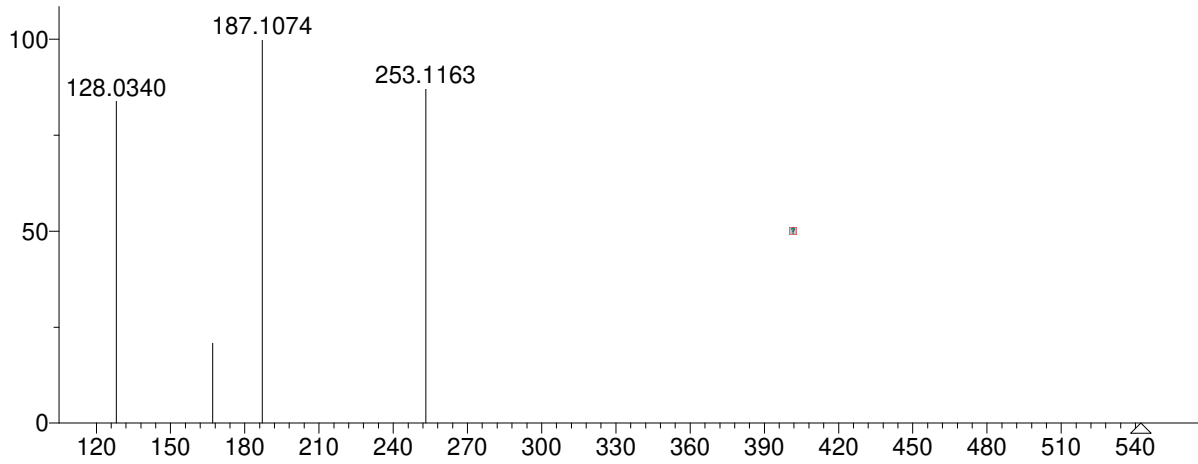

Hit 1 : NCGC00380192-01! [M+H]<sup>+</sup> P=542.2  
C<sub>29</sub>H<sub>35</sub>NO<sub>9</sub>; MF: 0; RMF: 51; Prob 100.0%; Lib: mona-export-gnps; ID: 8431.

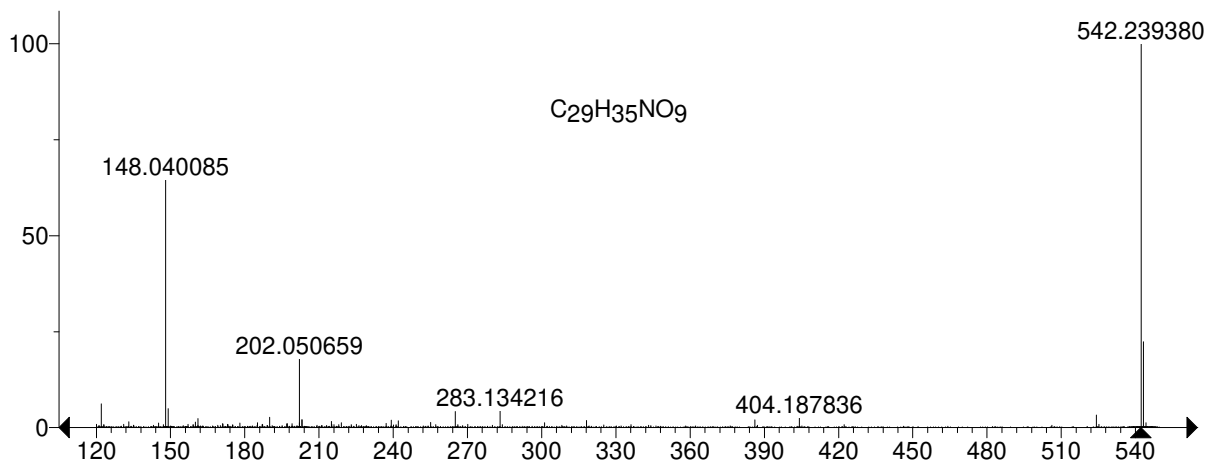

Unknown: Unknown (13.12\_276.9356m/z)  
Compound in Library Factor = 0

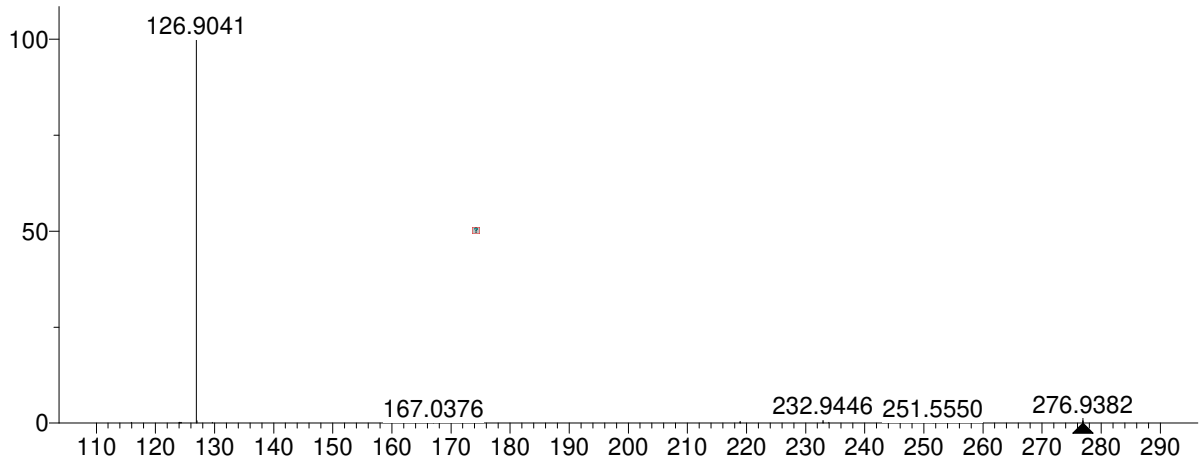

Unknown: Unknown (13.18\_543.1971m/z)  
Compound in Library Factor = 0

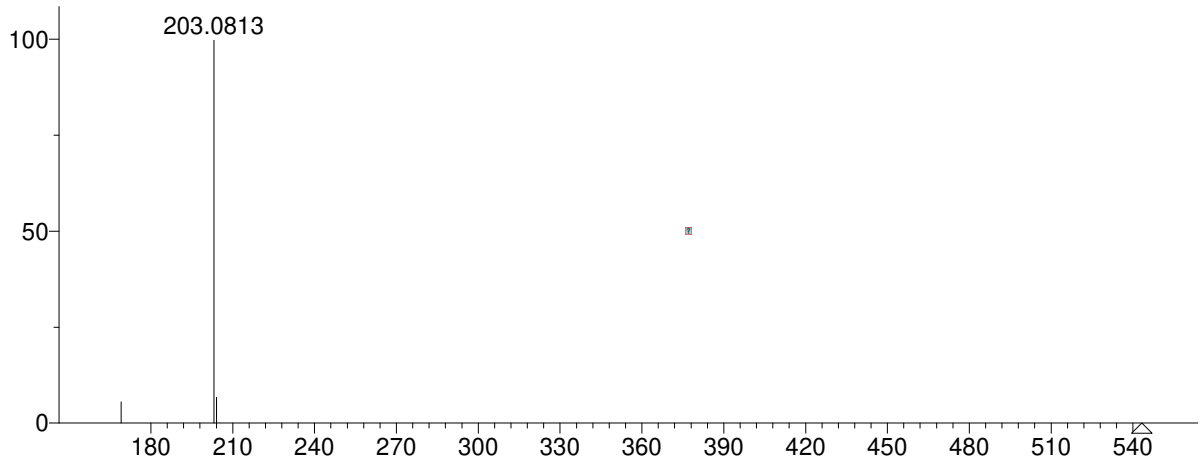

Hit 1 : NCGC00385982-01\_C27H30N2O10\_ [M+H]<sup>+</sup> P=543.2  
C27H30N2O10; MF: 0; RMF: 8; Prob 100.0%; Lib: mona-export-gnps; ID: 10901.

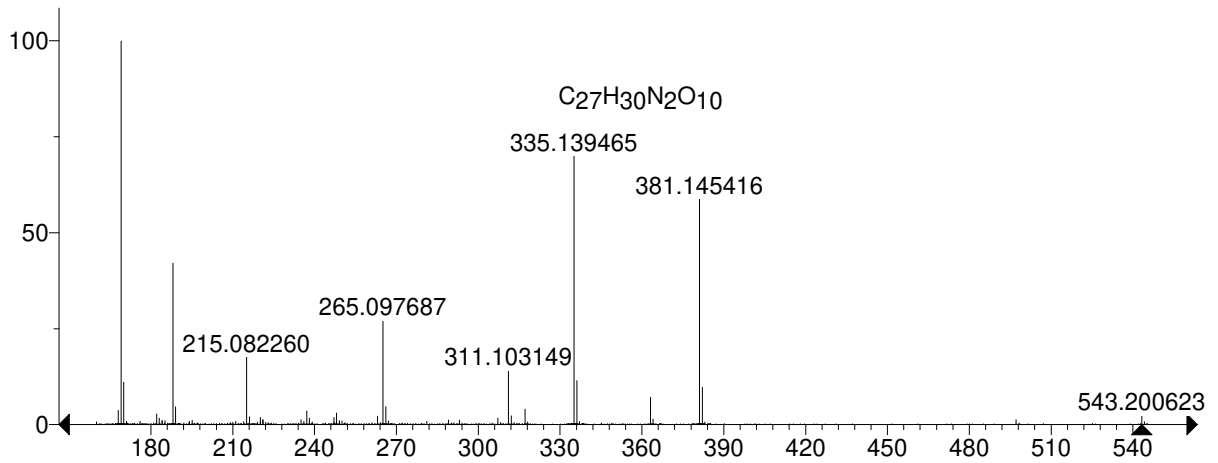

Unknown: Unknown (13.20\_387.9955m/z)  
Compound in Library Factor = 0

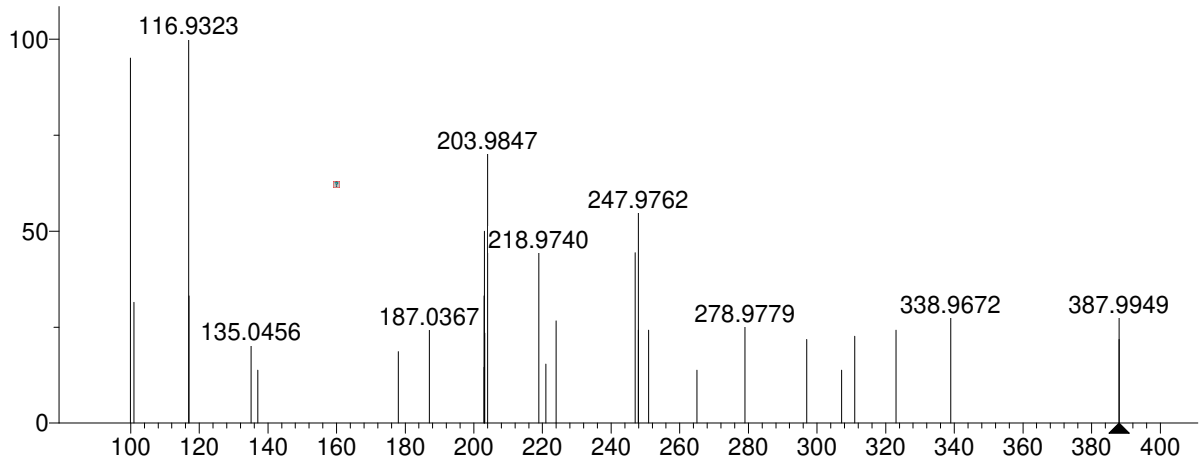

Unknown: Unknown (13.21\_432.9916m/z)  
Compound in Library Factor = 0

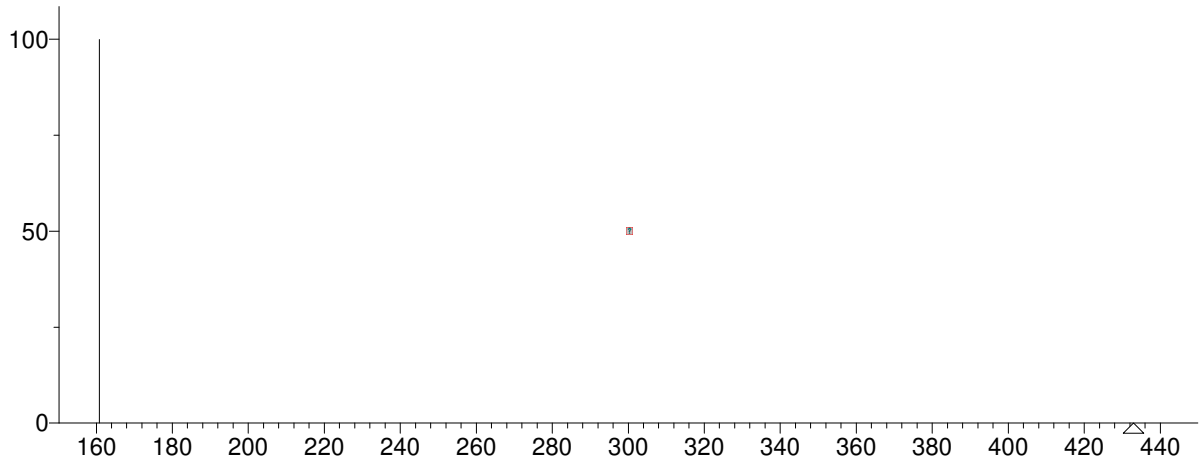

\*\* Search Report Page 1 of 2 \*\*

Unknown: Unknown (13.21\_514.2391m/z)  
Compound in Library Factor = -1142

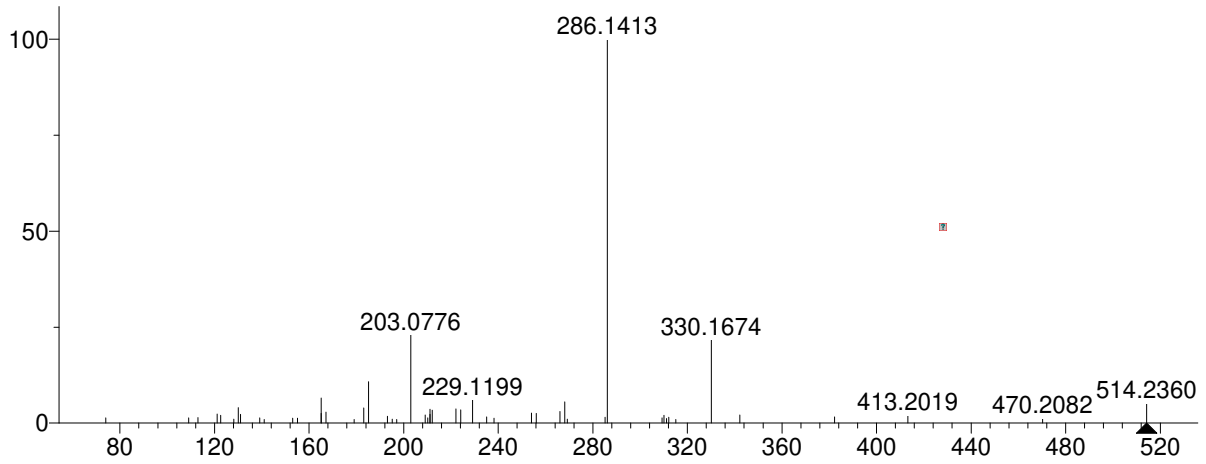

Hit 1 : Benzoic acid, 3-[[[(3-carboxycyclohexyl)amino]carbonyl]-4-[3-[4-[4-(cyclohexyloxy)butoxy]phenyl]propoxy]-C34H45NO8; MF: 82; RMF: 669; Prob 60.8%; CAS: 712313-35-4; Lib: nist\_msms; ID: 190540.

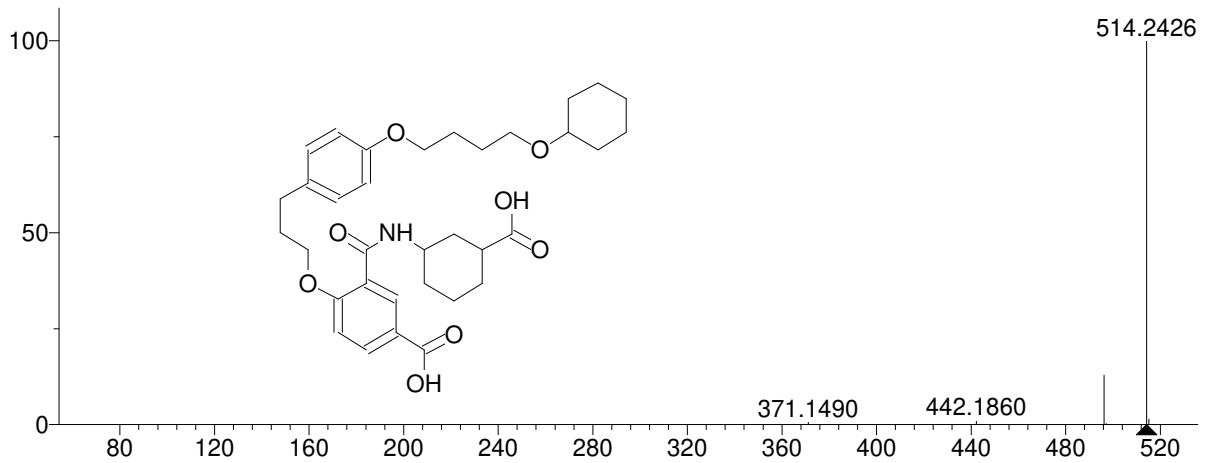

Hit 2 : 1,2-Bis(heptanoylthio) glycerophosphocholine [M+H]<sup>+</sup> HCD 9V P=514.2  
C22H44NO6PS2; MF: 14; RMF: 150; Prob 9.22%; CAS: 89019-63-6; Lib: nist\_msms; ID: 171124.

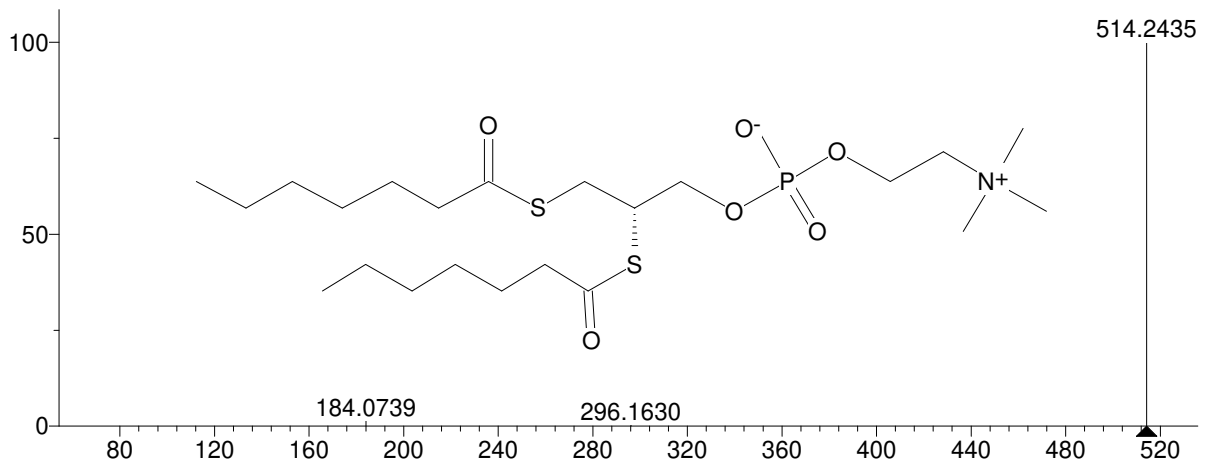

Hit 3 : Harringtonine [M+H-H<sub>2</sub>O]<sup>+</sup> HCD 23V P=514.2  
C<sub>28</sub>H<sub>37</sub>NO<sub>9</sub>; MF: 9; RMF: 152; Prob 7.43%; CAS: 26833-85-2; Lib: nist\_msms; ID: 359989.

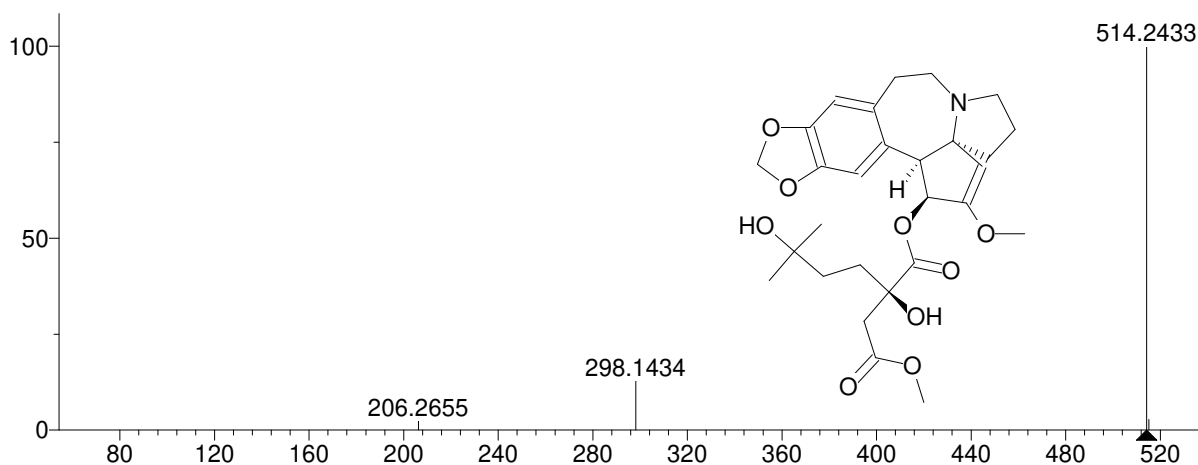

Hit 4 : (1R,4S,7R,8S)-7-[(2E,4E)-hexa-2,4-dienoyl]-3-hydroxy-8-[(2S)-3-hydroxy-2,4-dimethyl-5-oxo-2,5-dihydrofuran-2-yl]octan-3-ol  
C<sub>28</sub>H<sub>32</sub>O<sub>8</sub>; MF: 6; RMF: 87; Prob 6.56%; Lib: mona-export-vf-npl\_qexactive; ID: 21801.

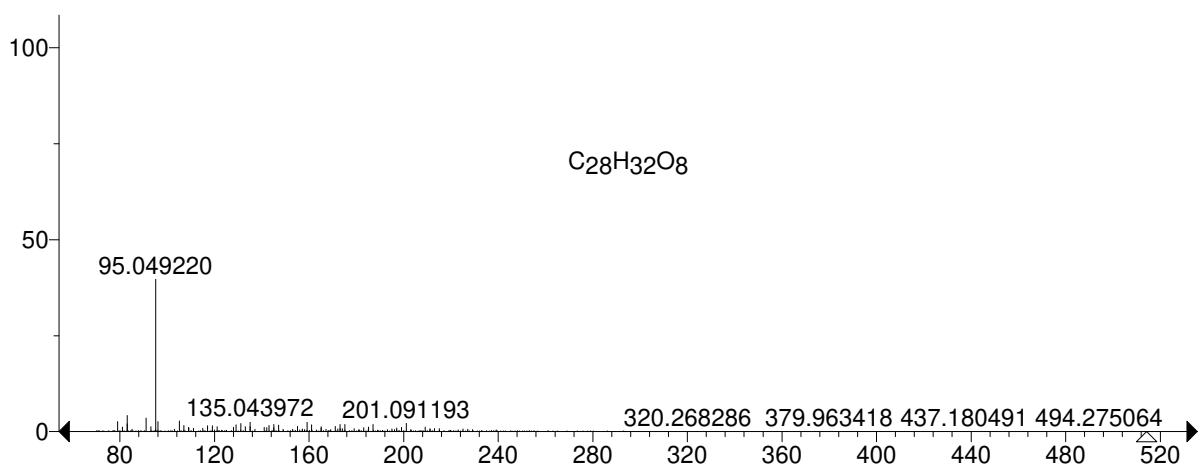

Hit 5 : Fluprostenol serinolamide [M+H-H<sub>2</sub>O]<sup>+</sup> HCD 15V P=514.2  
C<sub>26</sub>H<sub>36</sub>F<sub>3</sub>NO<sub>7</sub>; MF: 2; RMF: 116; Prob 5.54%; CAS: 1176658-85-7; Lib: nist\_msms; ID: 339463.

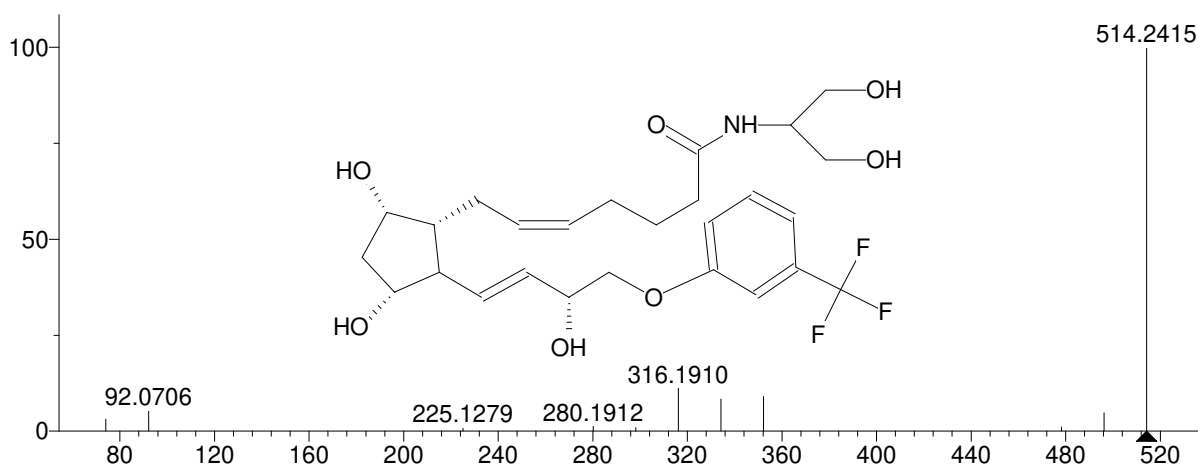



Unknown: Unknown (13.22\_448.9147m/z)  
Compound in Library Factor = 0

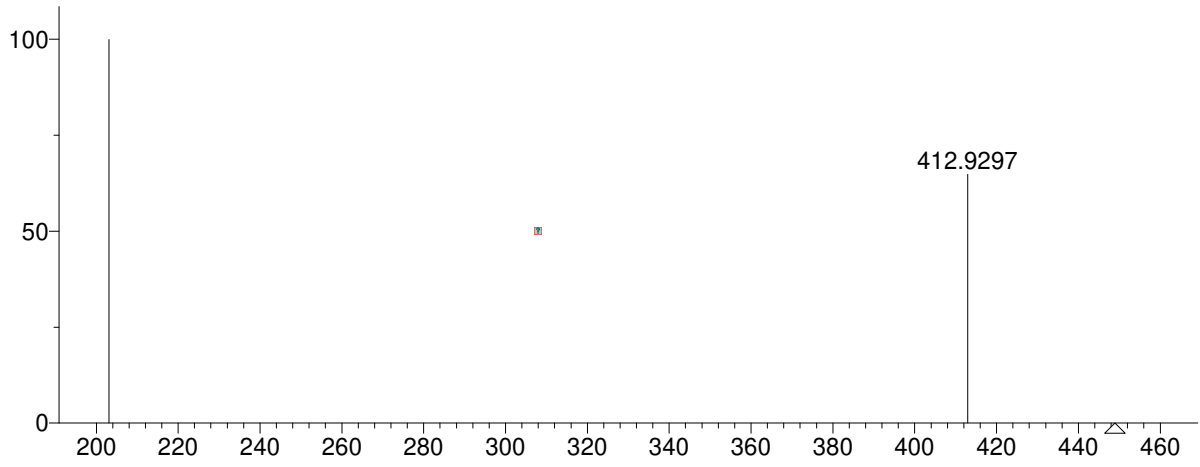

\*\* Search Report Page 1 of 2 \*\*

Unknown: Unknown (13.23\_543.1980m/z)  
Compound in Library Factor = 0

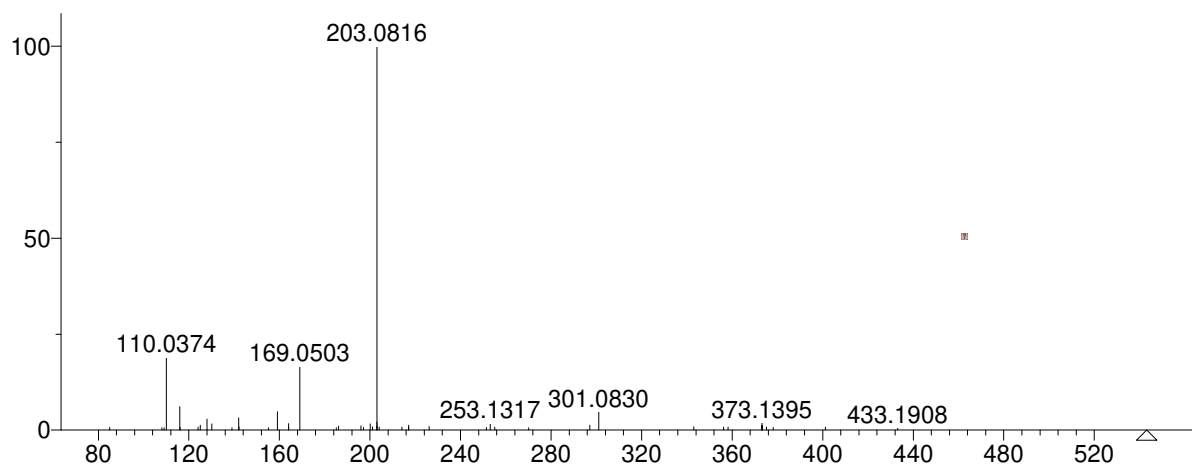

Hit 1 : NCGC00385982-01\_C27H30N2O10\_ [M+H]<sup>+</sup> P=543.2  
C27H30N2O10; MF: 0; RMF: 25; Prob 33.3%; Lib: mona-export-gnps; ID: 10901.

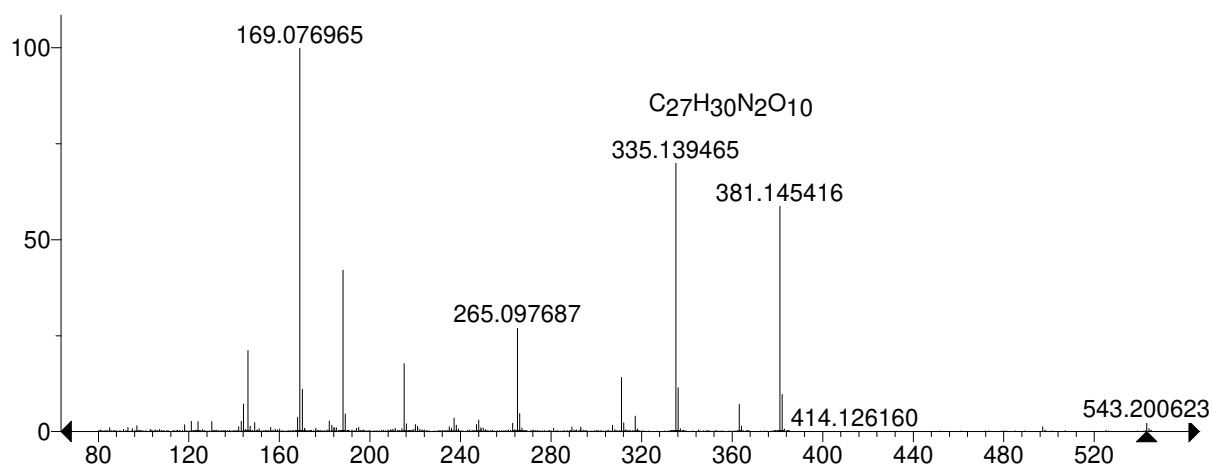

Hit 2 : 2',6'-Dihydroxy 4'-methoxydihydrochalcone [2M-H]<sup>-</sup> HCD 59V P=543.2  
C<sub>16</sub>H<sub>16</sub>O<sub>4</sub>; MF: 0; RMF: 6; Prob 33.3%; CAS: 35241-55-5; Lib: nist\_msms; ID: 241376.

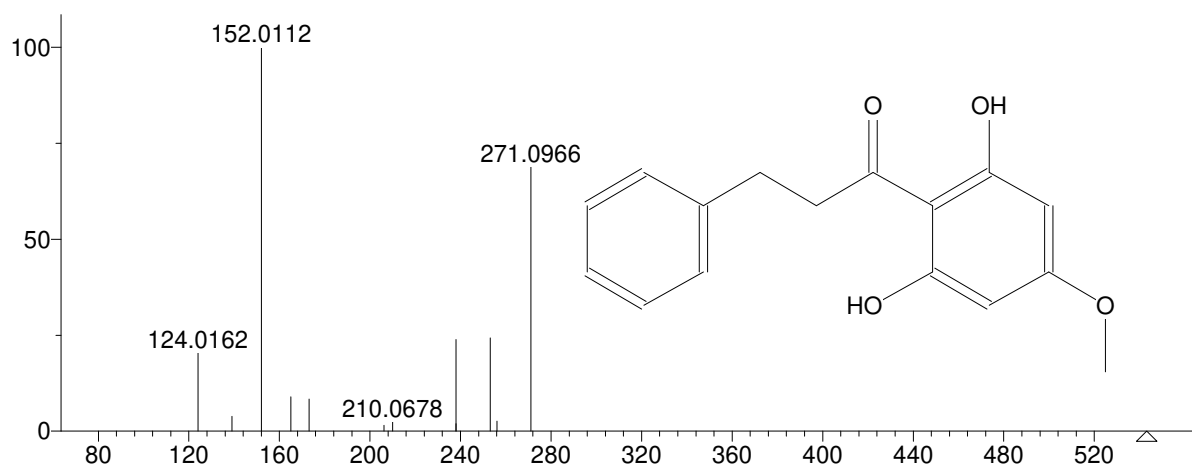

\*\* Search Report Page 2 of 2 \*\*

Hit 3 : Prostaglandin F2 $\alpha$ -biotinamide [M+Na] $\Rightarrow$ 643.4 $\Rightarrow$ 543.2 IT 35% P=543.2  
C<sub>35</sub>H<sub>60</sub>N<sub>4</sub>O<sub>6</sub>S; MF: 0; RMF: 2; Prob 33.3%; Lib: nist\_msms; ID: 95551.

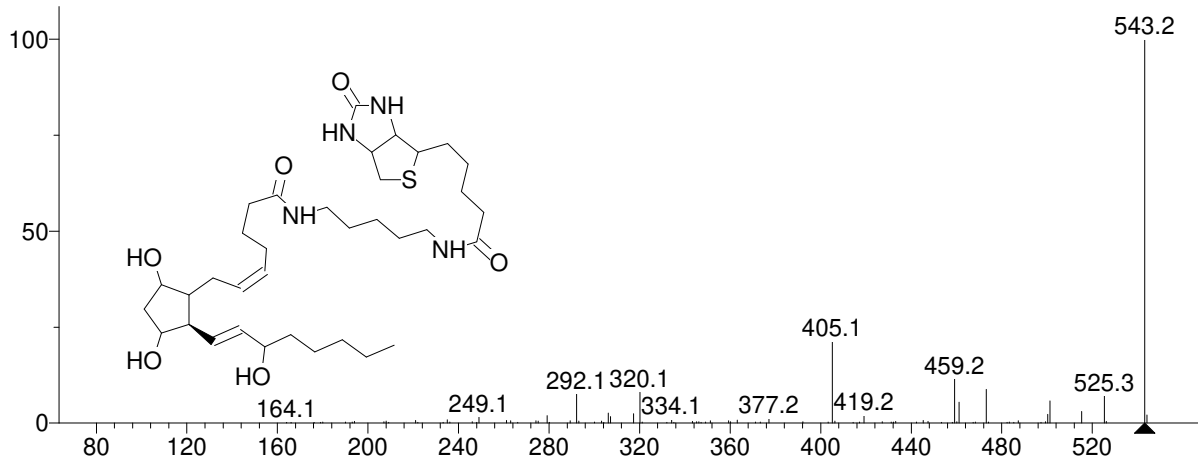

\*\* Search Report Page 1 of 2 \*\*

Unknown: Unknown (13.26\_289.2008m/z)  
Compound in Library Factor = -2176

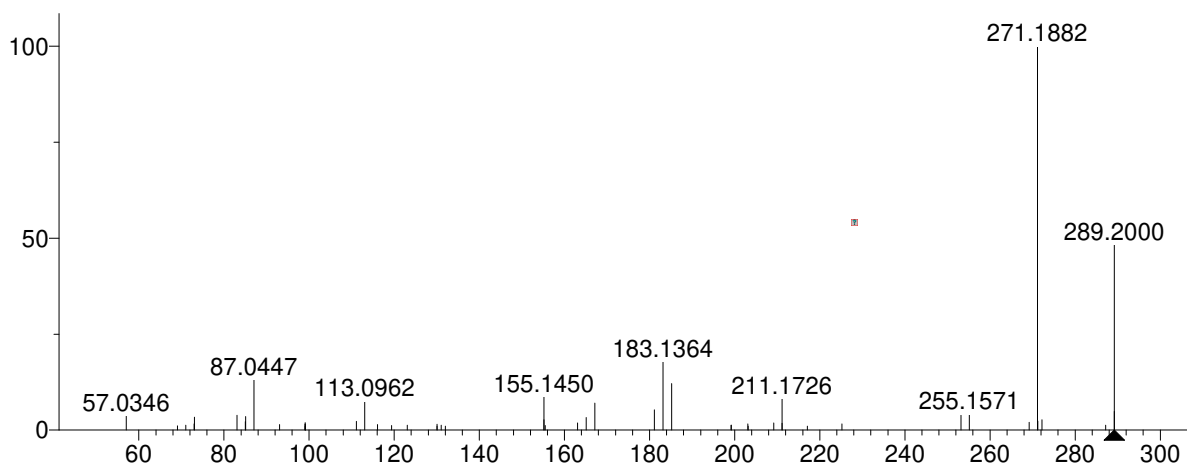

Hit 1 : 9-Oxo-11 $\alpha$ ,16R-dihydroxy-17-cyclobutyl-5Z,13E-dien-1-oic acid [M+Na] $\Rightarrow$ 289.2 IT 35% P=289.2  
C<sub>23</sub>H<sub>36</sub>O<sub>5</sub>; MF: 47; RMF: 530; Prob 10.7%; CAS: 212310-16-2; Lib: nist\_msms; ID: 172350.

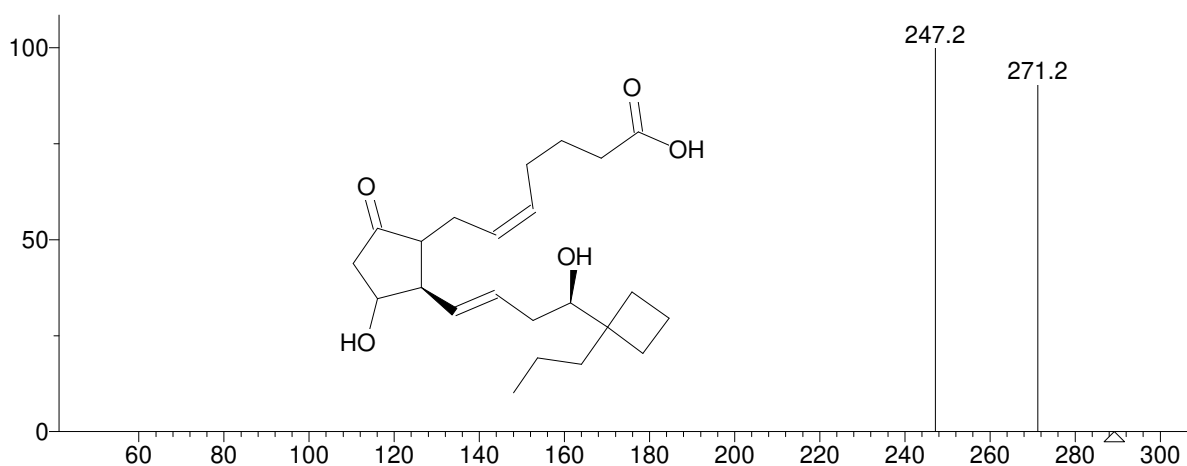

Hit 2 : Tubastatin A [M+H] $\Rightarrow$ 307.2 $\Rightarrow$ 289.2 IT 35% P=289.2  
C<sub>20</sub>H<sub>21</sub>N<sub>3</sub>O<sub>2</sub>; MF: 22; RMF: 319; Prob 3.26%; CAS: 1252003-15-8; Lib: nist\_msms; ID: 168849.

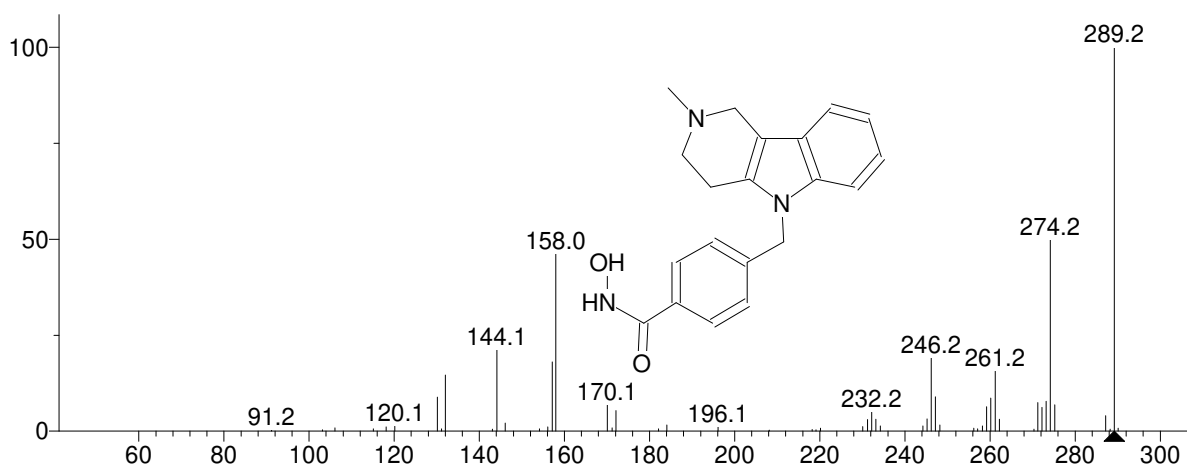

Hit 3 : 5(S),6(R),15(R)-Lipoxin A4 [M-H]<sup>-</sup>=>289.2 IT 35% P=289.2  
C<sub>20</sub>H<sub>32</sub>O<sub>5</sub>; MF: 16; RMF: 388; Prob 2.56%; CAS: 171030-11-8; Lib: nist\_msms; ID: 91802.

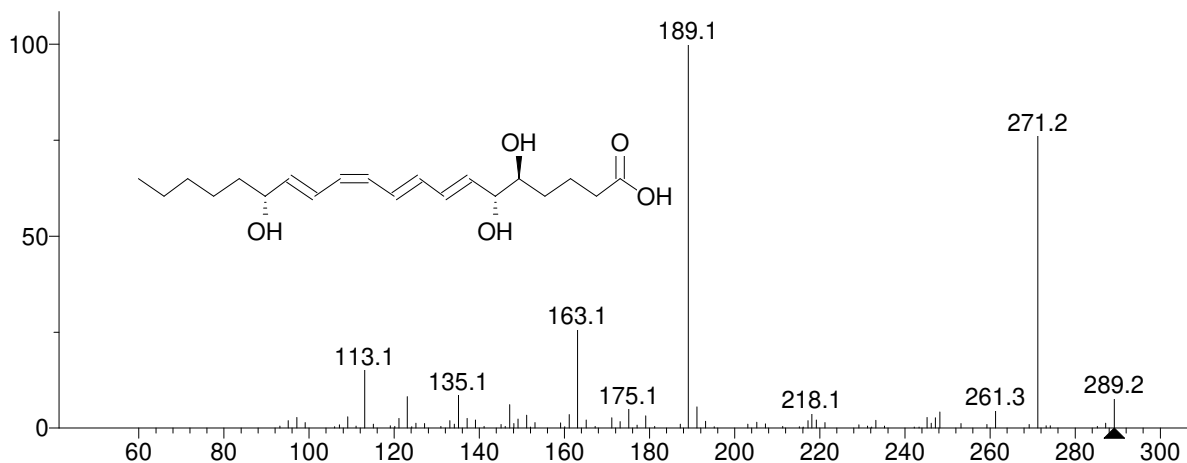

Hit 4 : 5-trans-Prostaglandin D2 [M-H-H<sub>2</sub>O]<sup>-</sup>=>289.2 IT 35% P=289.2  
C<sub>20</sub>H<sub>32</sub>O<sub>5</sub>; MF: 10; RMF: 396; Prob 2.01%; Lib: nist\_msms; ID: 341164.

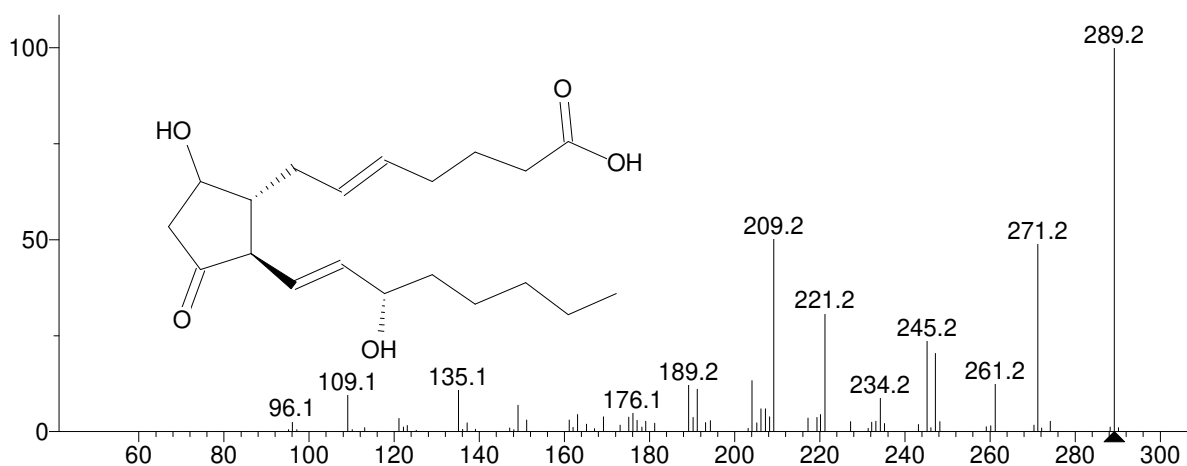

Hit 5 : 8-iso-Prostaglandin A2 [M-H]<sup>-</sup>=>289.2 IT 35% P=289.2  
C<sub>20</sub>H<sub>30</sub>O<sub>4</sub>; MF: 9; RMF: 354; Prob 1.94%; CAS: 474391-66-7; Lib: nist\_msms; ID: 319265.

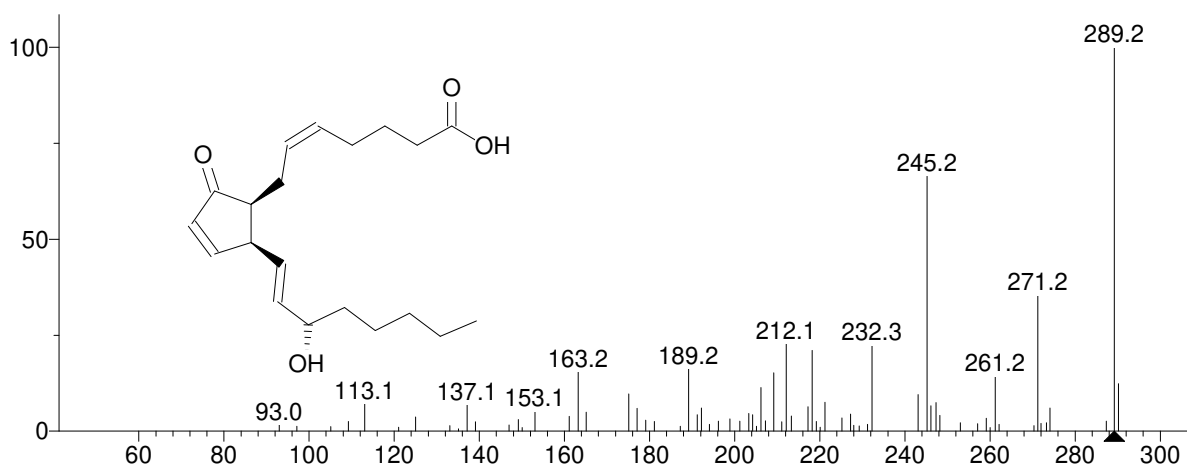

Unknown: Unknown (13.26\_511.2483m/z)  
Compound in Library Factor = 0

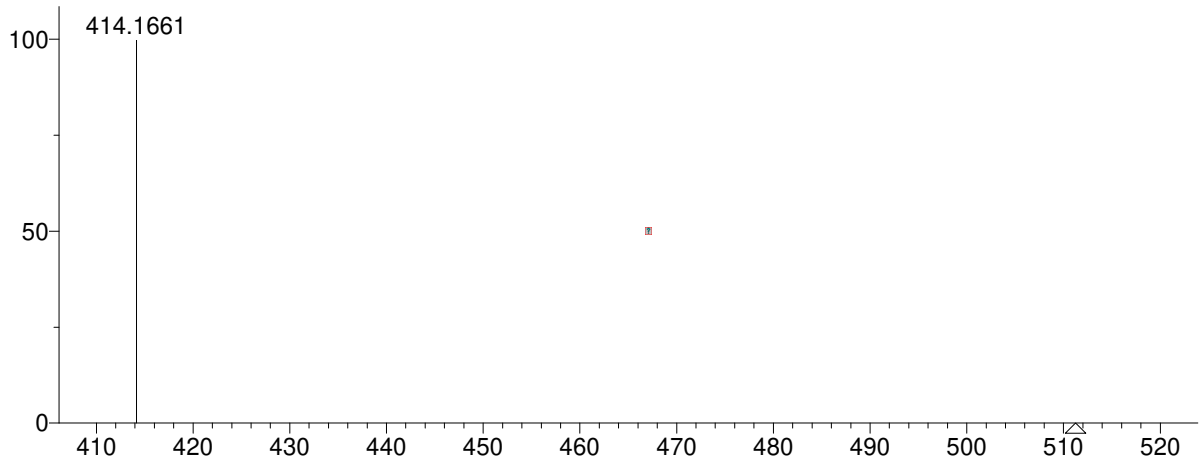

\*\* Search Report Page 1 of 2 \*\*

Unknown: Unknown (13.29\_371.1240m/z)  
Compound in Library Factor = -3273

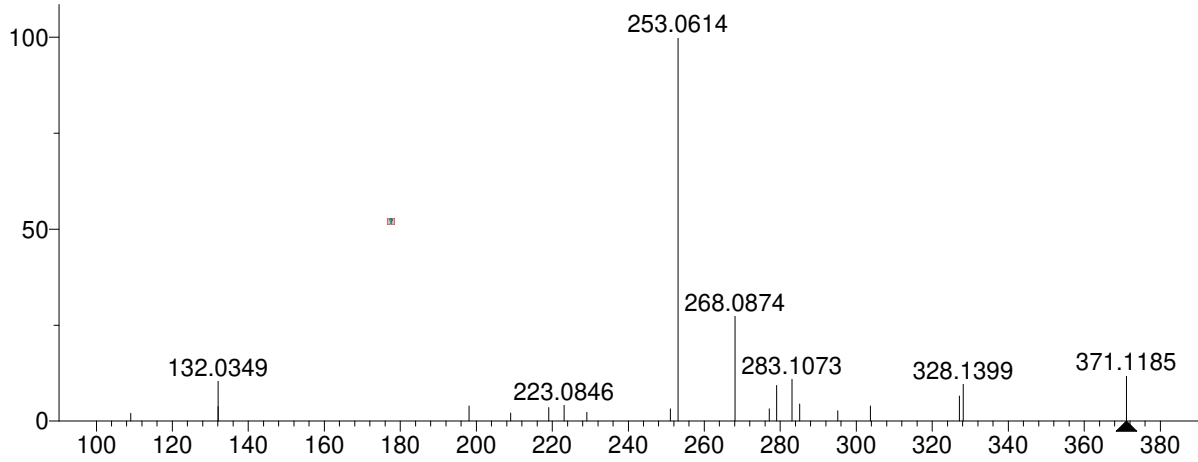

Hit 1 : 7,8-dihydroxy-3-[(1E,3E)-7-hydroxy-3,5-dimethylhepta-1,3-dienyl]-7-methyl-8H-isochromen-6-one [M+K]+  
C19H24O5; MF: 1; RMF: 51; Prob 20.6%; Lib: mona-export-vf-npl\_qexactive; ID: 16498.

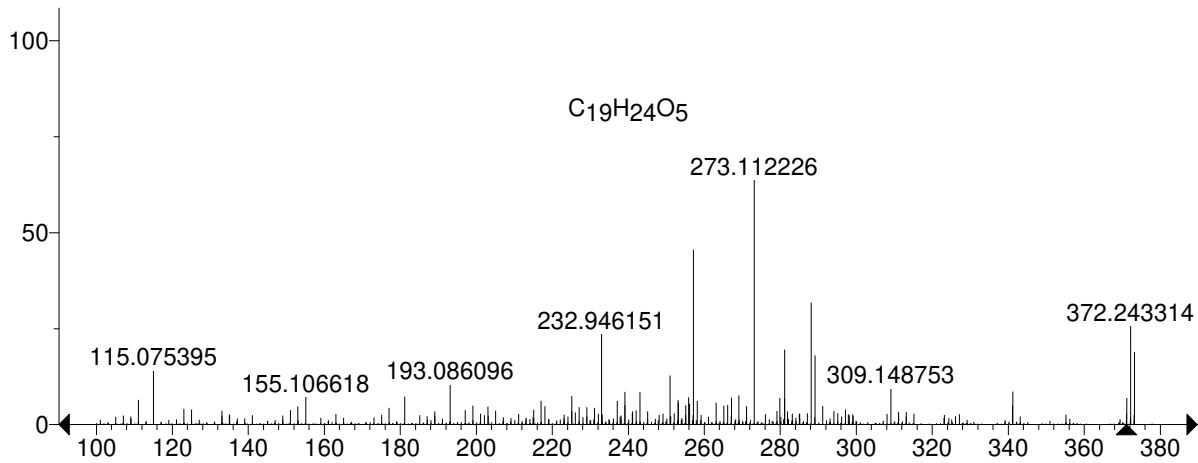

Hit 2 : G(8-O-4)5HFA'2 () [M-H]- P=371.1  
C20H20O7; MF: 0; RMF: 38; Prob 19.8%; Lib: phytofrag2018\_final\_060219; ID: 368.

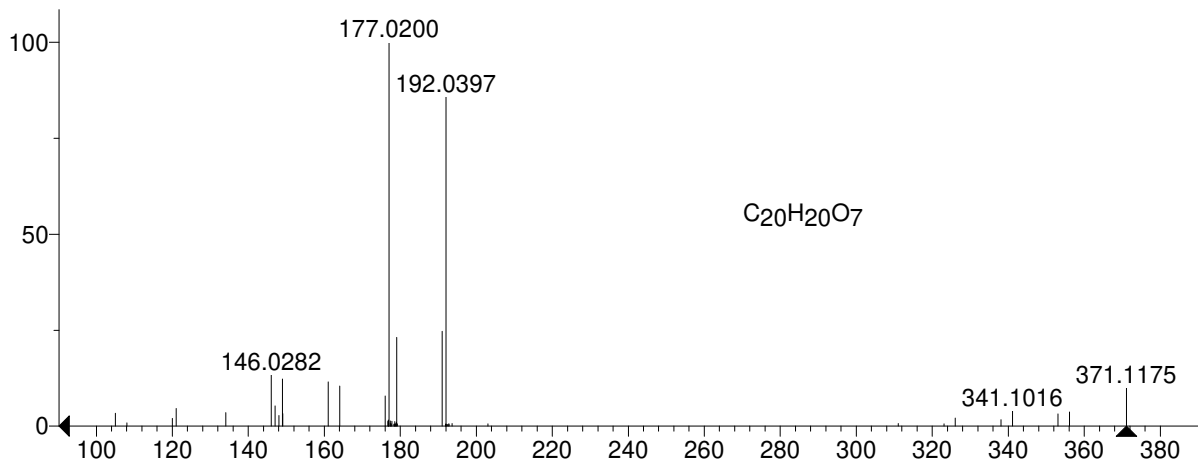

Hit 3 : Arnicolide D [M+K]<sup>+</sup> 45HCD P=371.1  
C<sub>19</sub>H<sub>24</sub>O<sub>5</sub>; MF: 0; RMF: 30; Prob 19.8%; Lib: mona-export-vf-npl\_qexactive; ID: 4088.

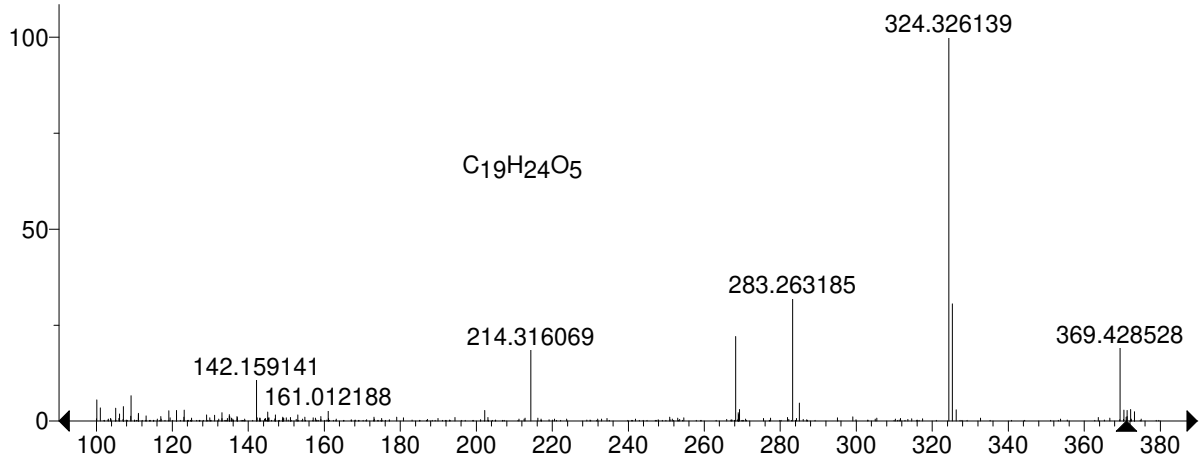

Hit 4 : 1-[2-hydroxy-4-(3-hydroxy-5-methylphenoxy)-6-methylphenyl]-3-methylbutane-2,3-diol [M+K]<sup>+</sup> 35HCD P=  
C<sub>19</sub>H<sub>24</sub>O<sub>5</sub>; MF: 0; RMF: 26; Prob 19.8%; Lib: mona-export-vf-npl\_qexactive; ID: 22291.

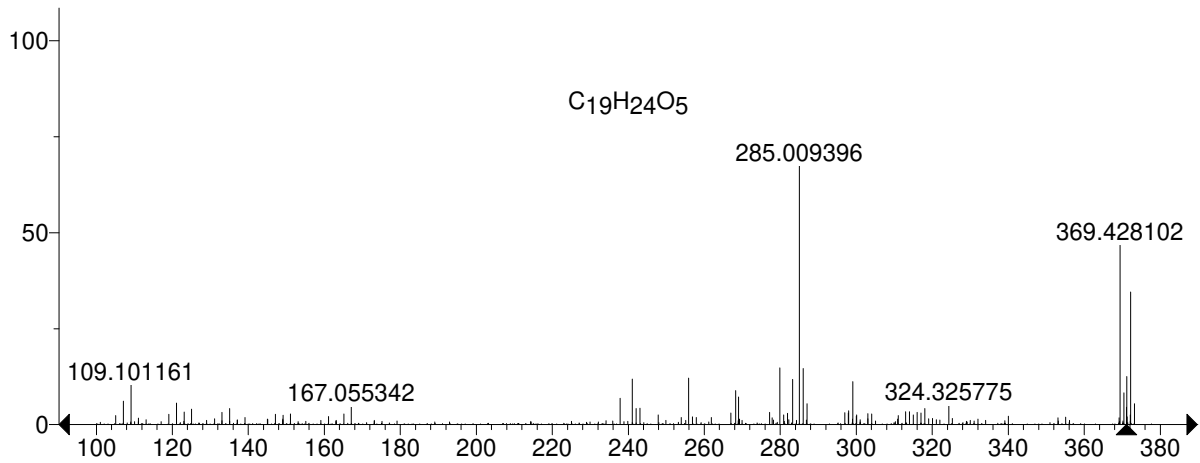

Hit 5 : methyl (2E)-3-(4-hydroxy-3-methoxyphenyl)-2-(hydroxymethyl)-3,4-dihydro-1,4-benzodioxin-6-yl  
C<sub>20</sub>H<sub>20</sub>O<sub>7</sub>; MF: 0; RMF: 24; Prob 19.8%; Lib: phytofrag2018\_final\_060219; ID: 705.

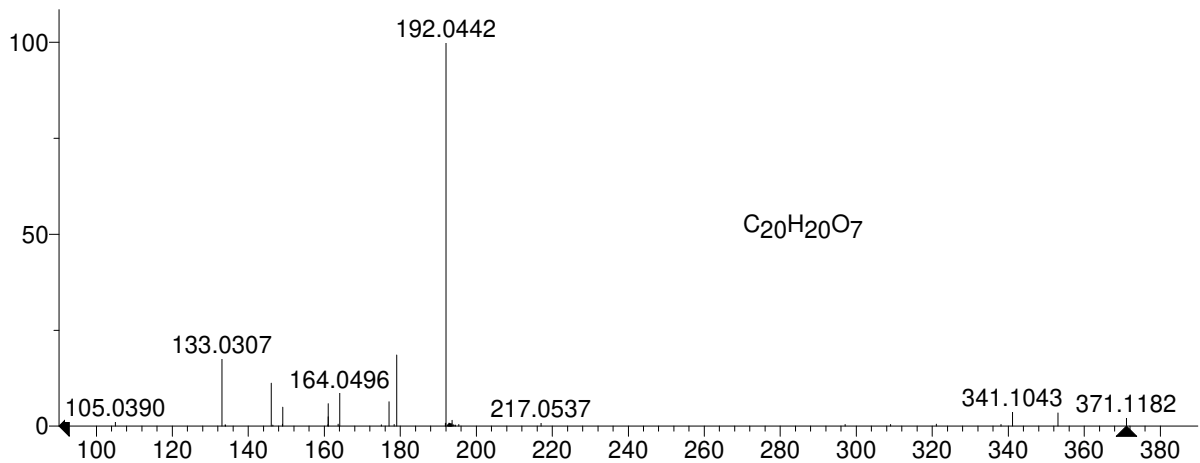



\*\* Search Report Page 1 of 2 \*\*

Unknown: Unknown (13.29\_474.1999m/z)  
Compound in Library Factor = -3273

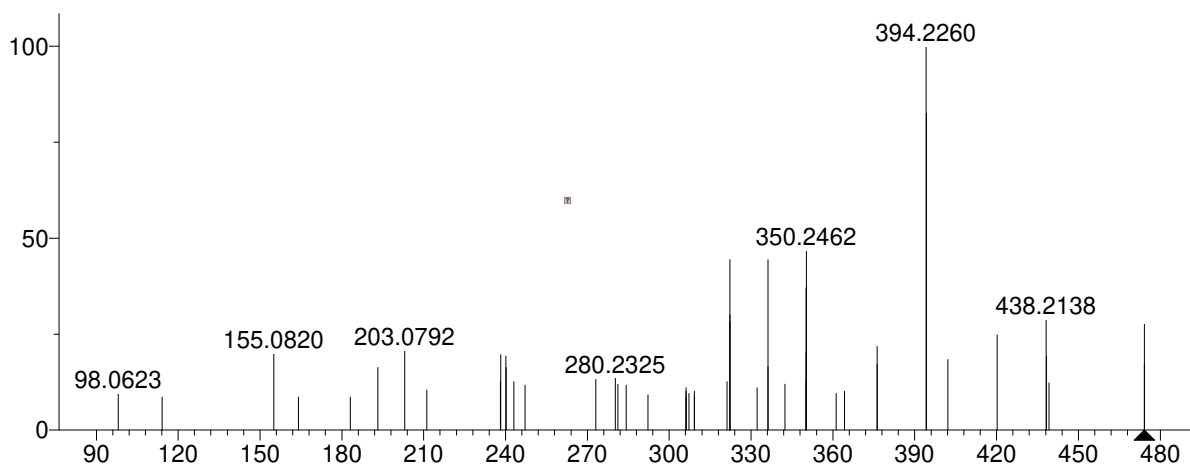

Hit 1 : Ampkinone [M-H]-=>474.2 IT 35% P=474.2  
C31H23NO6; MF: 1; RMF: 69; Prob 33.8%; CAS: 1233082-79-5; Lib: nist\_msms; ID: 265948.

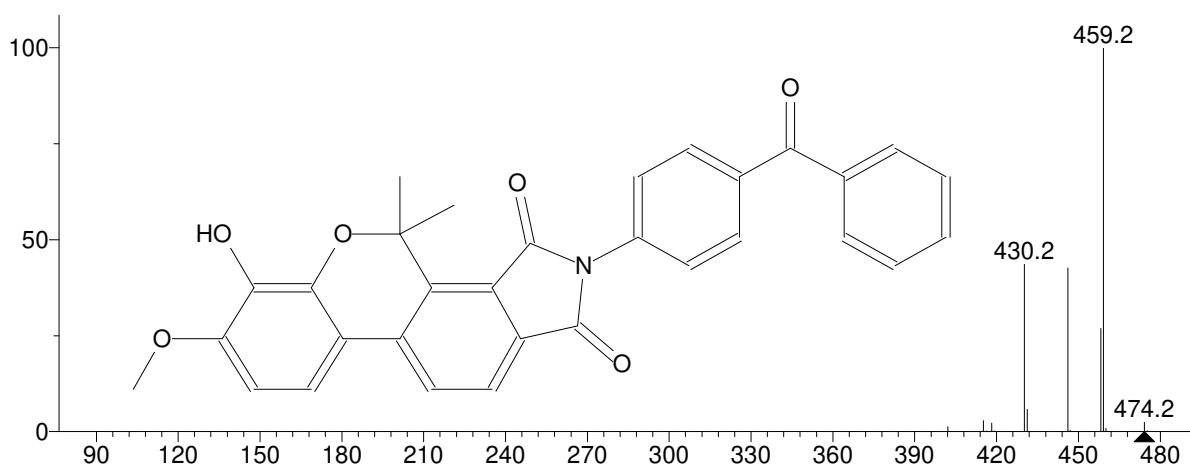

Hit 2 : 1H-Indole-3,5-dicarboxylic acid, 1-[3-[4-(decyloxy)phenoxy]-2-oxopropyl]-, 3-methyl ester [M+H-CH4O]+=>  
C30H37NO7; MF: 1; RMF: 57; Prob 33.8%; CAS: 888320-29-4; Lib: nist\_msms; ID: 374594.

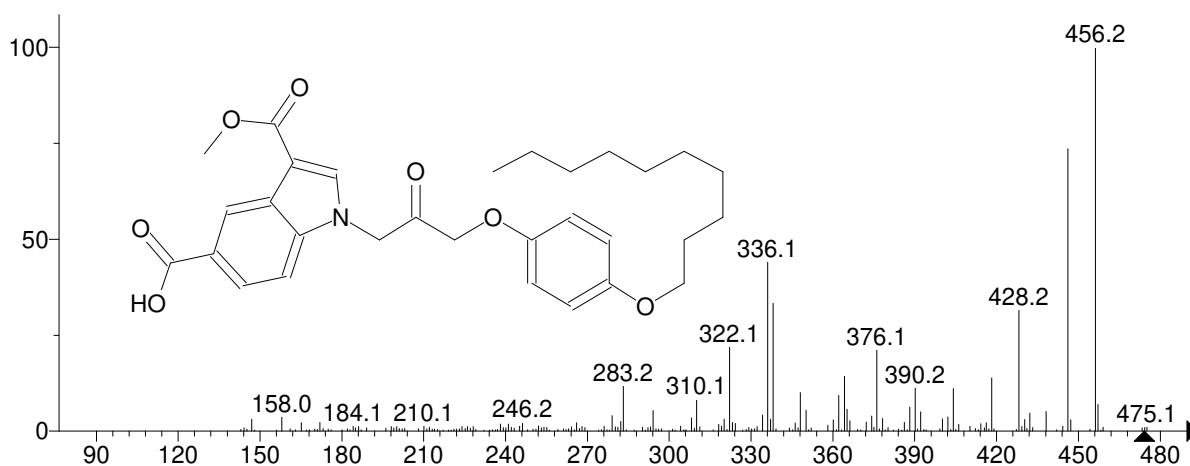

\*\* Search Report Page 2 of 2 \*\*

Hit 3 : NCGC00385631-0116-[2,3-dihydroxy-3-methyl-1-[(2R,3R,4S,5S,6R)-3,4,5-trihydroxy-6-(hydroxymethyl)oxa  
C<sub>21</sub>H<sub>28</sub>O<sub>11</sub>; MF: 0; RMF: 7; Prob 32.5%; Lib: mona-export-gnps; ID: 7947.

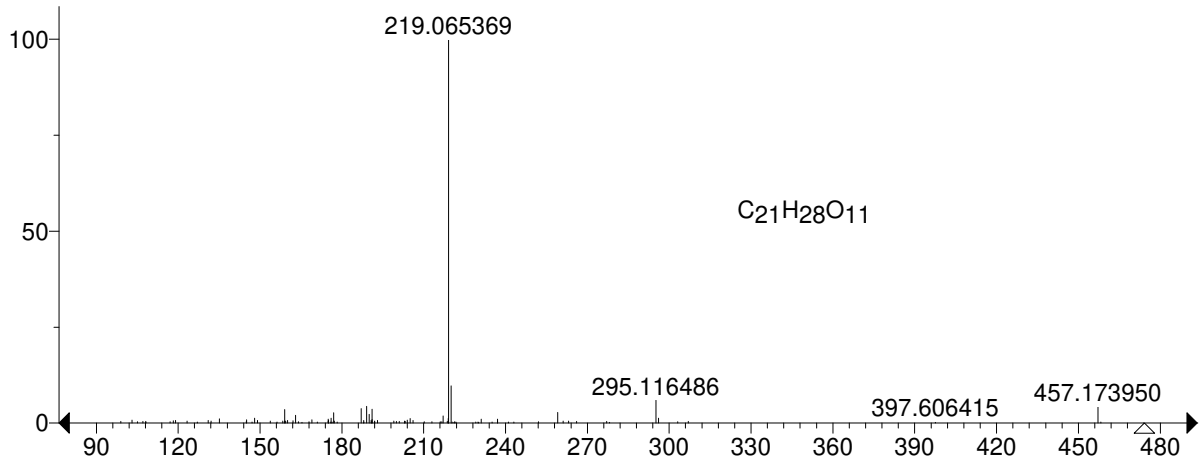

Unknown: Unknown (13.31\_270.9908m/z)  
Compound in Library Factor = 0

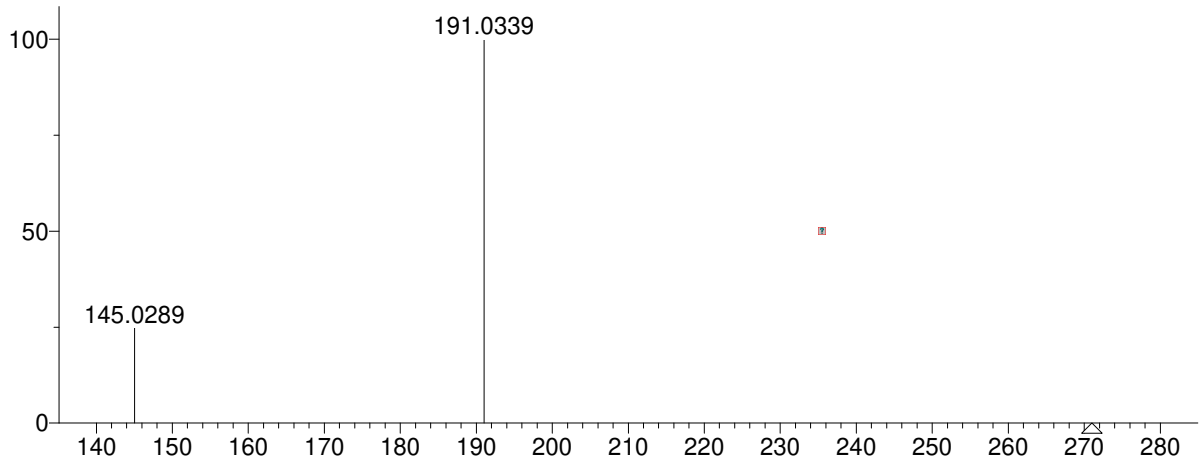

Unknown: Unknown (13.31\_470.9574m/z)  
Compound in Library Factor = 0

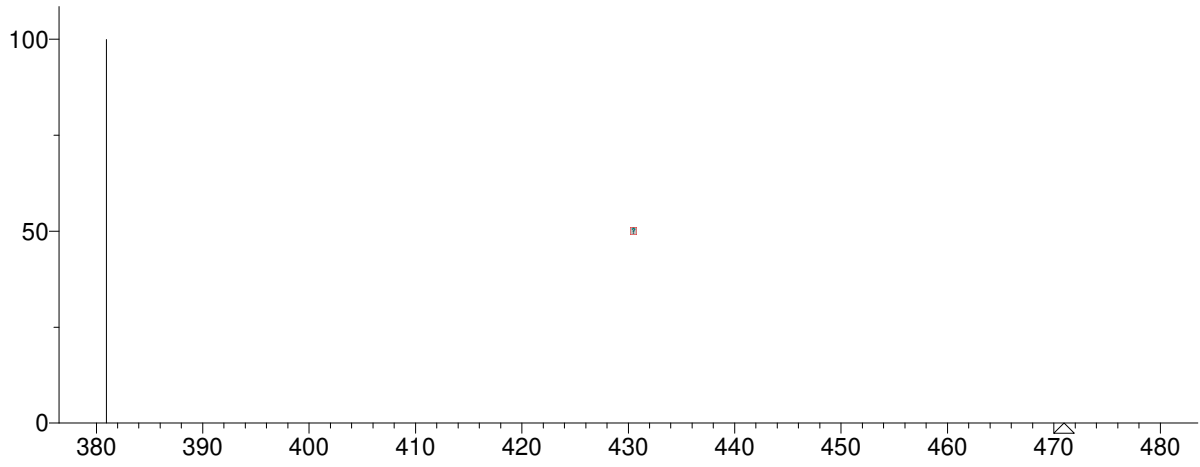

Unknown: Unknown (13.37\_619.2963m/z)  
Compound in Library Factor = 0

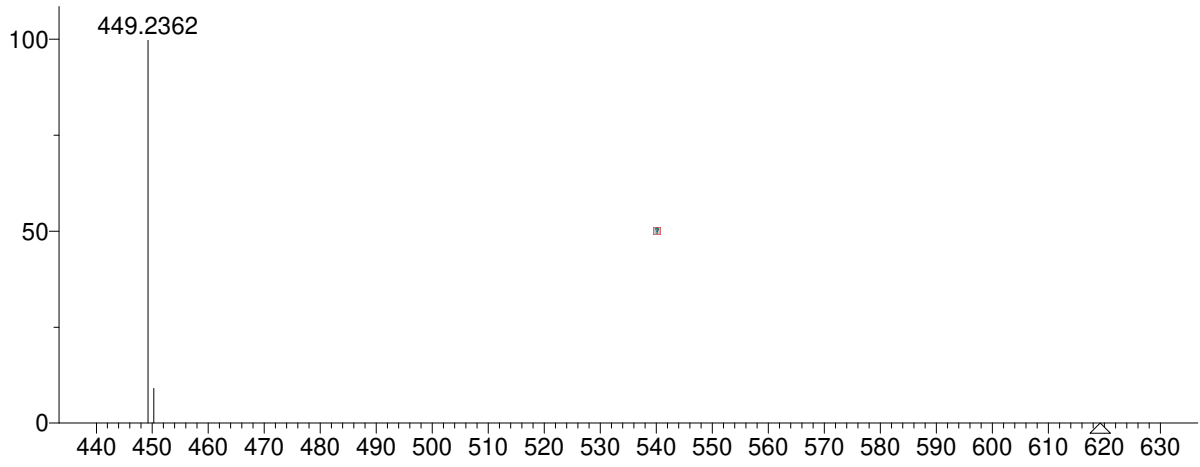

Unknown: Unknown (13.39\_357.1366m/z)  
Compound in Library Factor = -302

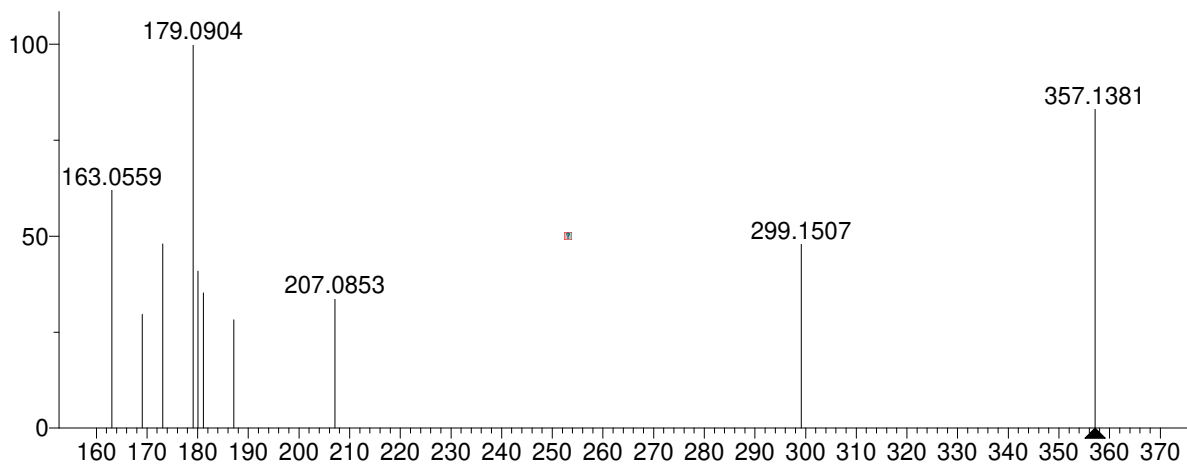

Hit 1 : Matairesinol [M-H]<sup>-</sup> 10 P=357.1  
C<sub>20</sub>H<sub>22</sub>O<sub>6</sub>; MF: 362; RMF: 997; Prob 97.8%; Lib: msms neg mona\_ipb\_gnps\_plasma; ID: 21759.

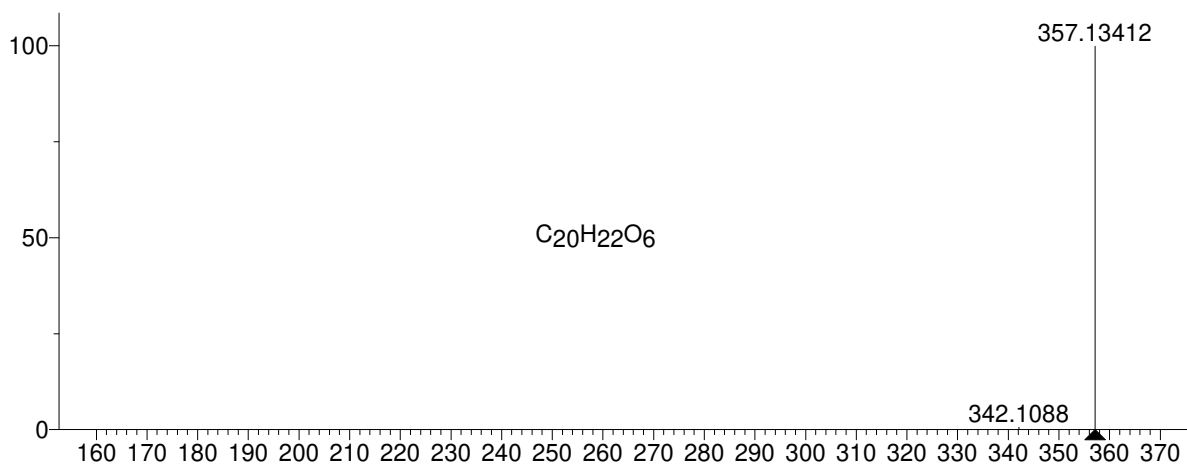

Hit 2 : Schisandrol B [M+H-C<sub>3</sub>H<sub>8</sub>O]<sup>+</sup> HCD 14V P=357.1  
C<sub>23</sub>H<sub>28</sub>O<sub>7</sub>; MF: 77; RMF: 772; Prob 0.97%; CAS: 58546-54-6; Lib: nist\_msms; ID: 384792.

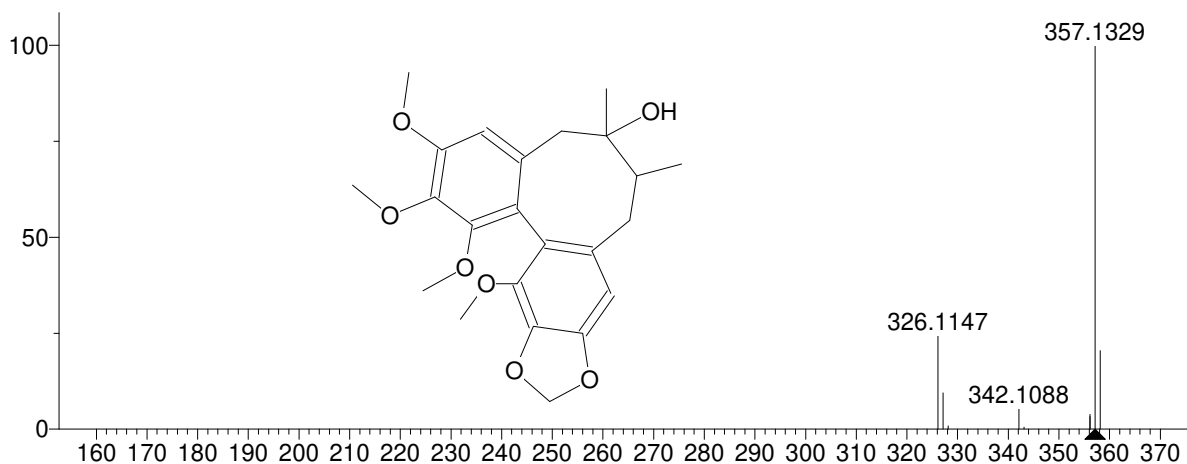

Hit 3 : (+)-Pinoresinol [M-H]<sup>-</sup> HCD 12V P=357.1  
C<sub>20</sub>H<sub>22</sub>O<sub>6</sub>; MF: 51; RMF: 401; Prob 0.29%; CAS: 487-36-5; Lib: nist\_msms; ID: 234442.

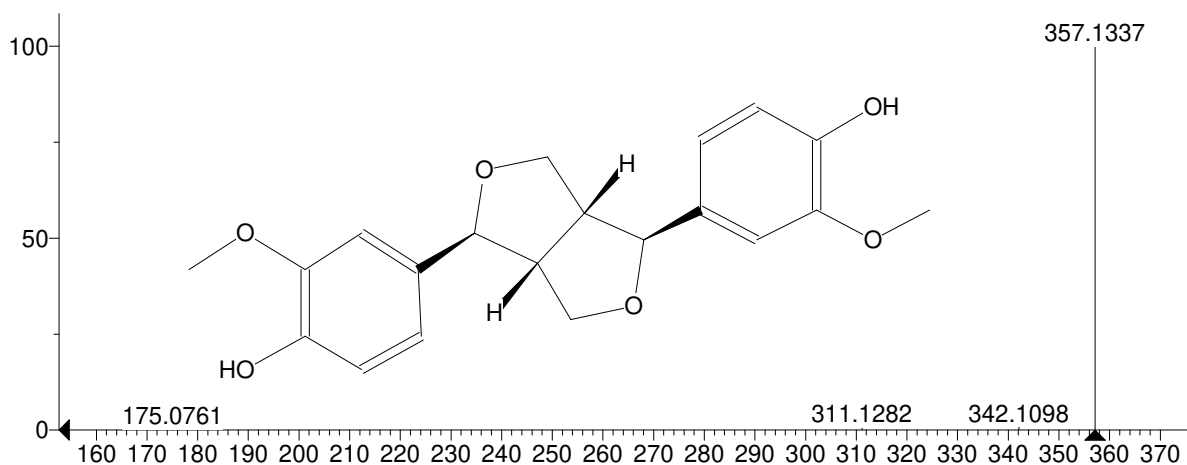

Hit 4 : Pinoresinol [M-H]<sup>-</sup> 10 P=357.1  
C<sub>20</sub>H<sub>22</sub>O<sub>6</sub>; MF: 45; RMF: 388; Prob 0.23%; Lib: msms neg mona\_ipb\_gnps\_plasma; ID: 21801.

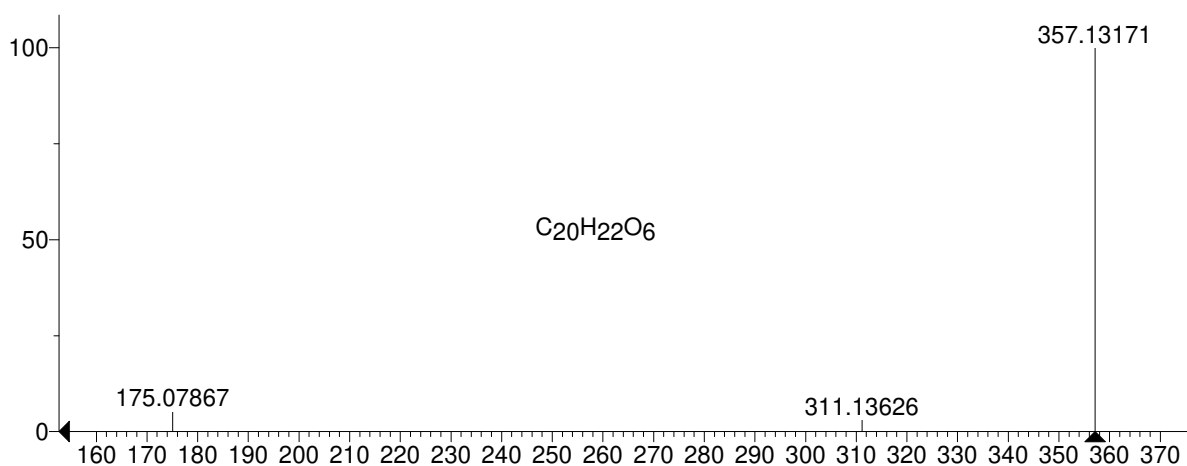

Hit 5 : (-)-Hydroxymatairesinol [M+H-H<sub>2</sub>O]<sup>+</sup> HCD 10V P=357.1  
C<sub>20</sub>H<sub>22</sub>O<sub>7</sub>; MF: 21; RMF: 384; Prob 0.07%; CAS: 81623-30-5; Lib: nist\_msms; ID: 235736.

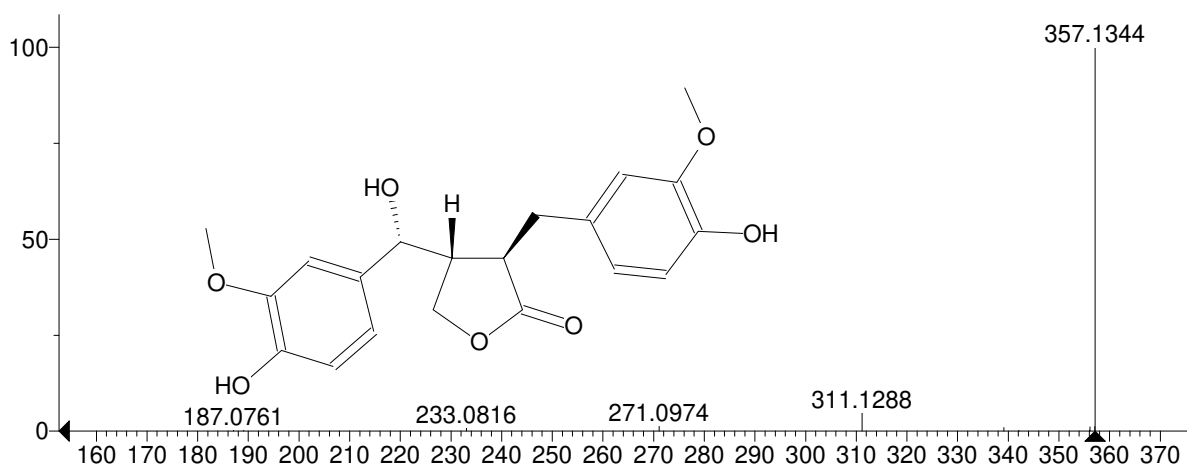

\*\* Search Report Page 1 of 2 \*\*

Unknown: Unknown (13.40\_281.1010m/z)  
Compound in Library Factor = -3273

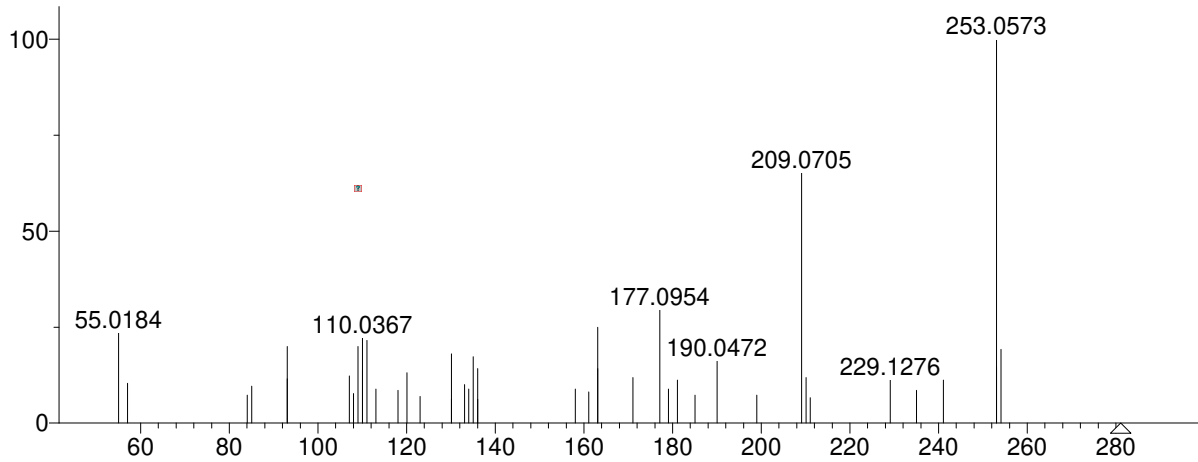

Hit 1 : methyl 3-(3,4-dihydroxy-5-phenyloxolan-2-yl)-3-hydroxypropanoate [M-H]<sup>-</sup> 65HCD P=281.1  
C<sub>14</sub>H<sub>18</sub>O<sub>6</sub>; MF: 11; RMF: 160; Prob 1.85%; Lib: mona-export-1c-ms-ms\_negative\_mode; ID: 23317.

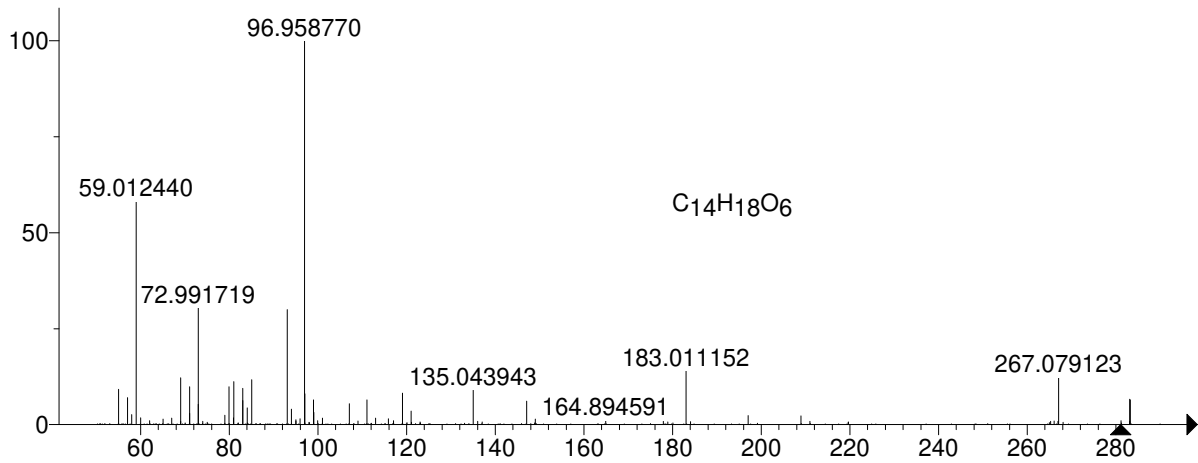

Hit 2 : 1-Palmitoyl-2-(4-ketododec-3-enediol)phosphatidylcholine [M+Na]<sup>+</sup>=>559.4=>281.1 IT 35% P=281.1  
C<sub>36</sub>H<sub>66</sub>NO<sub>11</sub>P; MF: 0; RMF: 47; Prob 1.27%; CAS: 439904-34-4; Lib: nist\_msms; ID: 94575.

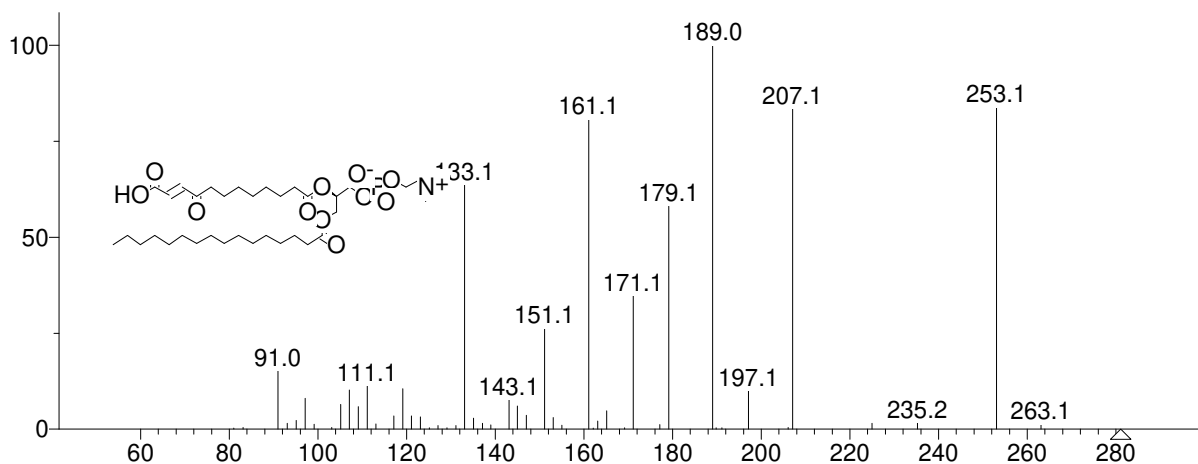



Hit 3 : N-(2,4-Dinitrophenyl)-L-leucine [M+H-HO]<sup>+</sup> HCD 42V P=281.1  
C<sub>12</sub>H<sub>15</sub>N<sub>3</sub>O<sub>6</sub>; MF: 0; RMF: 40; Prob 1.27%; CAS: 1655-57-8; Lib: nist\_msms; ID: 202888.

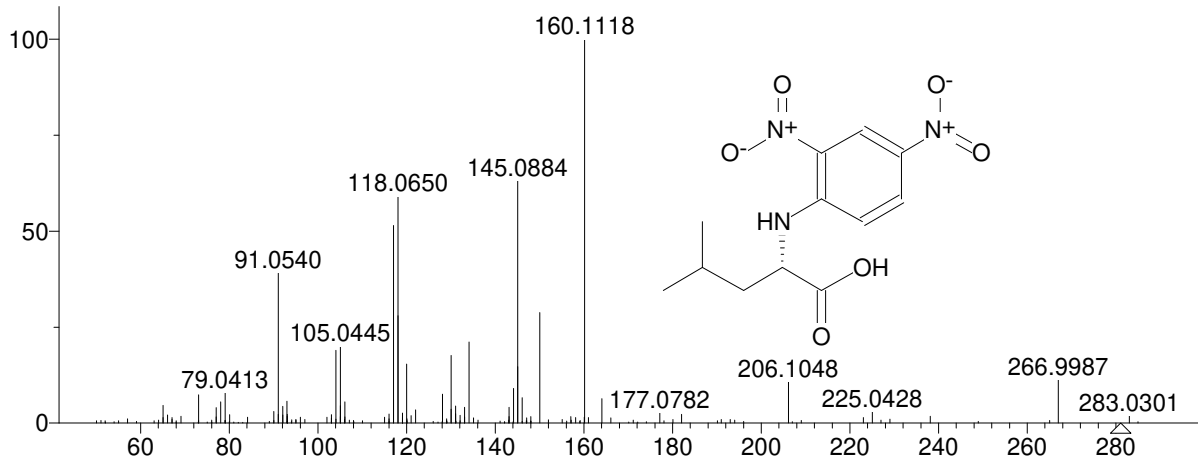

Hit 4 : Pemetrexed [M+H-C<sub>5</sub>H<sub>9</sub>NO<sub>4</sub>]<sup>+</sup> HCD 42V P=281.1  
C<sub>20</sub>H<sub>21</sub>N<sub>5</sub>O<sub>6</sub>; MF: 0; RMF: 35; Prob 1.27%; CAS: 137281-23-3; Lib: nist\_msms; ID: 349969.

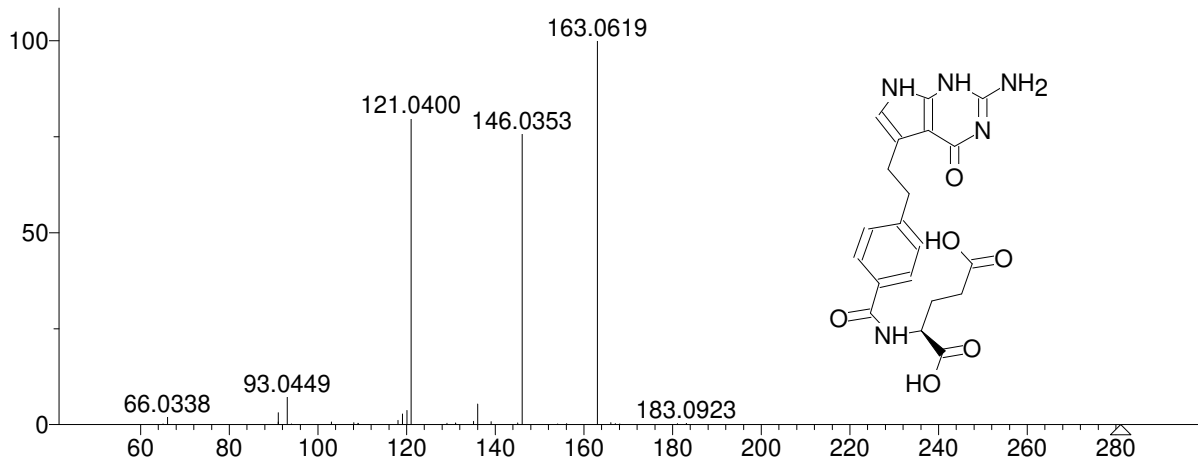

Hit 5 : Turkesterone [M+H-3H<sub>2</sub>O]<sup>+</sup> =>299.1=>281.1 IT 35% P=281.1  
C<sub>27</sub>H<sub>44</sub>O<sub>8</sub>; MF: 0; RMF: 30; Prob 1.27%; CAS: 41451-87-0; Lib: nist\_msms; ID: 412084.

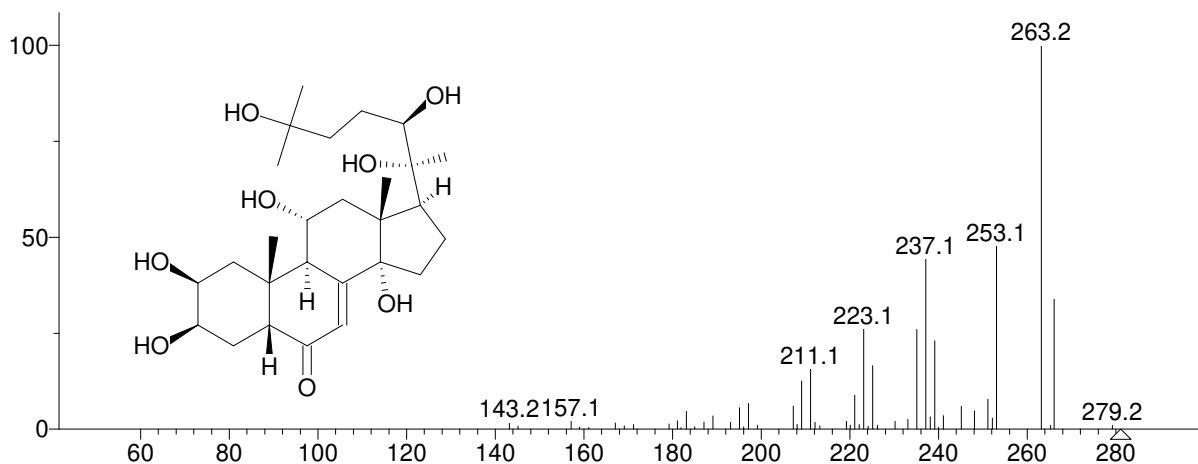

\*\* Search Report Page 1 of 2 \*\*

Unknown: Unknown (13.43\_371.1234m/z)  
Compound in Library Factor = 0

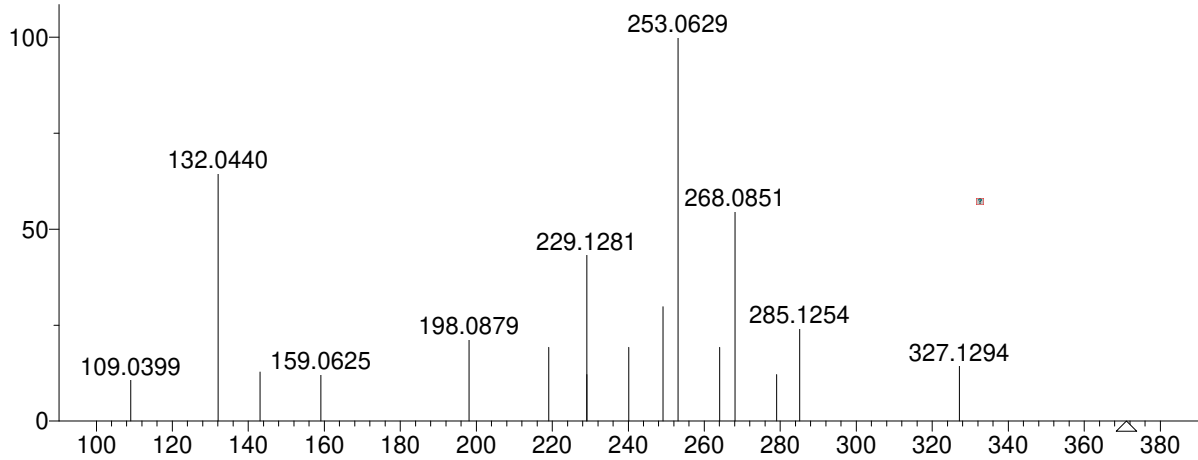

Hit 1 : 7,8-dihydroxy-3-[(1E,3E)-7-hydroxy-3,5-dimethylhepta-1,3-dienyl]-7-methyl-8H-isochromen-6-one [M+K]+  
C19H24O5; MF: 0; RMF: 46; Prob 33.3%; Lib: mona-export-vf-npl\_qexactive; ID: 16498.

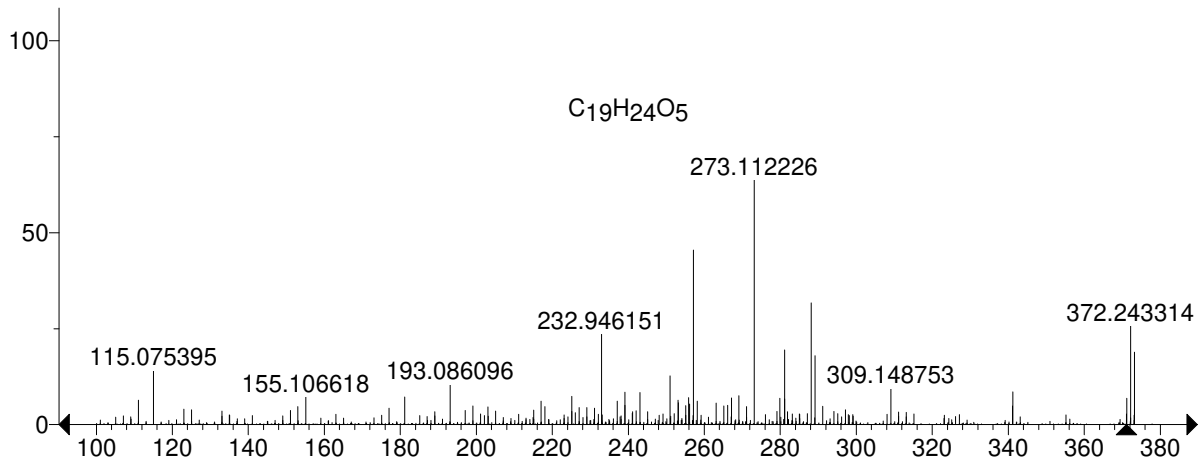

Hit 2 : Arnicolide D [M+K]+ 35HCD P=371.1  
C19H24O5; MF: 0; RMF: 23; Prob 33.3%; Lib: mona-export-vf-npl\_qexactive; ID: 4087.

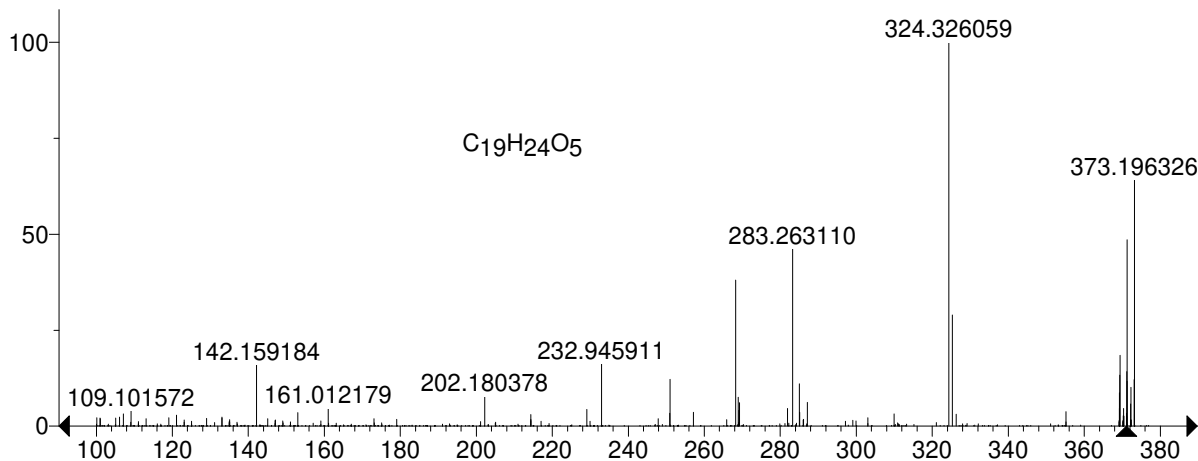

\*\* Search Report Page 2 of 2 \*\*

Hit 3 : 1-[2-hydroxy-4-(3-hydroxy-5-methylphenoxy)-6-methylphenyl]-3-methylbutane-2,3-diol [M+K]<sup>+</sup> 35HCD P-  
C<sub>19</sub>H<sub>24</sub>O<sub>5</sub>; MF: 0; RMF: 6; Prob 33.3%; Lib: mona-export-vf-npl\_qexactive; ID: 22291.

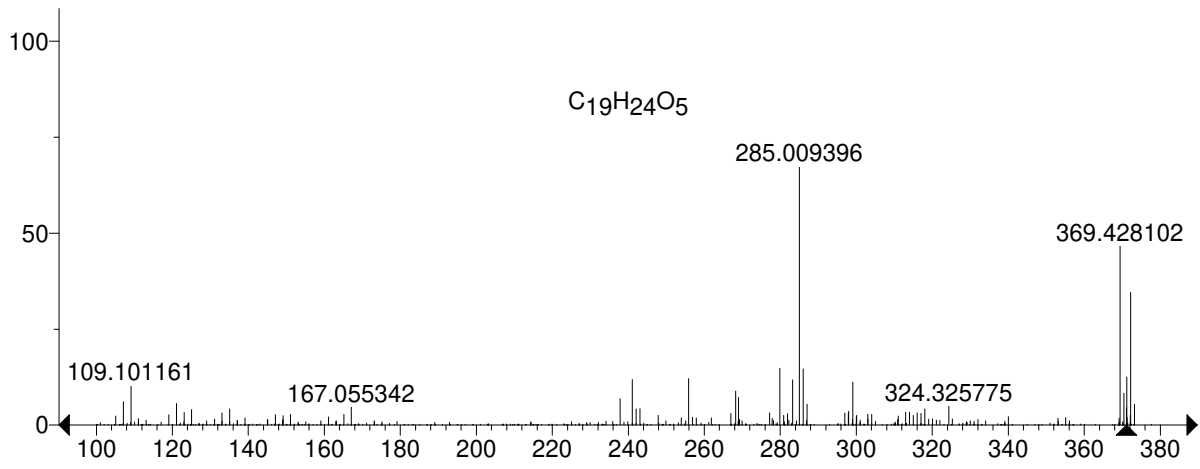

Unknown: Unknown (13.44\_355.0117m/z)  
Compound in Library Factor = 0

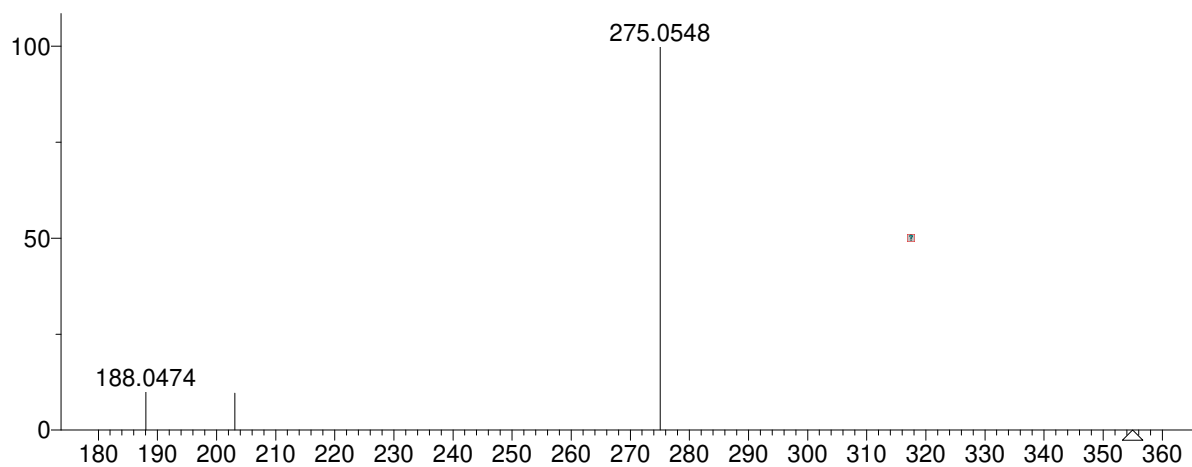

Hit 1 : 3-(3,3-dichloro-2-hydroxypropyl)-6,8-dimethoxyisochromen-1-one [M+Na]<sup>+</sup> 35HCD P=355  
C<sub>14</sub>H<sub>14</sub>Cl<sub>2</sub>O<sub>5</sub>; MF: 0; RMF: 14; Prob 100.0%; Lib: mona-export-vf-npl\_qexactive; ID: 18490.

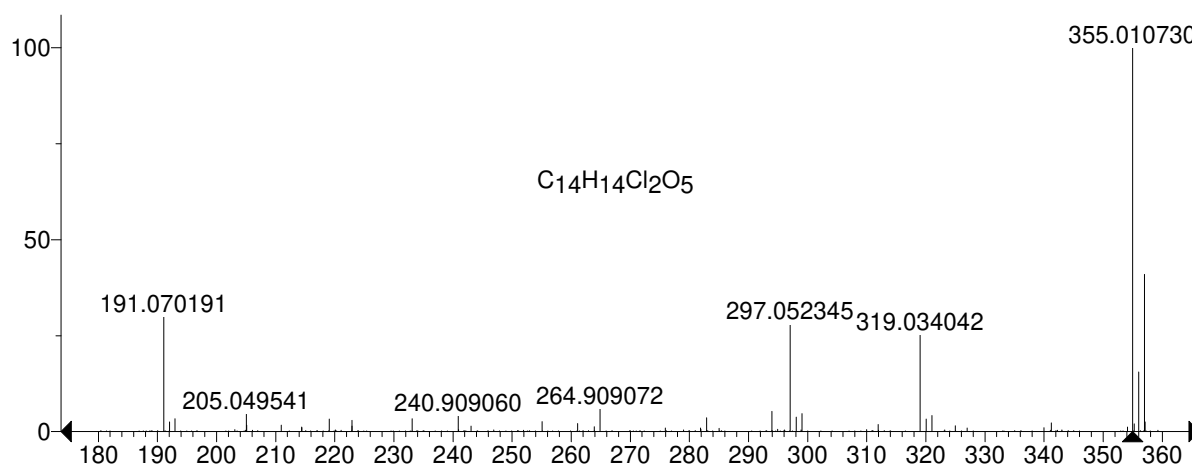

Unknown: Unknown (13.50\_619.2961m/z)  
Compound in Library Factor = 0

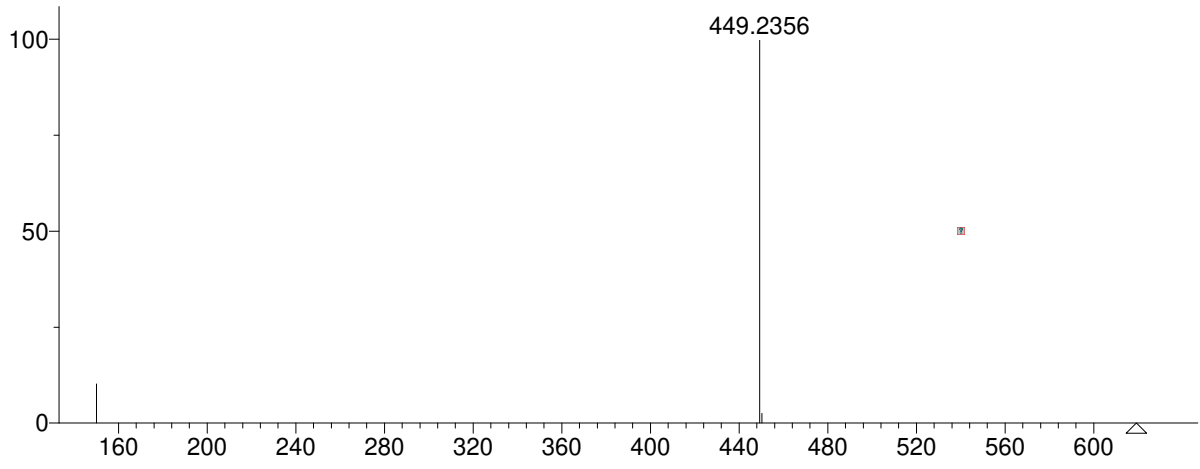

Unknown: Unknown (13.52\_562.2388m/z)  
Compound in Library Factor = 0

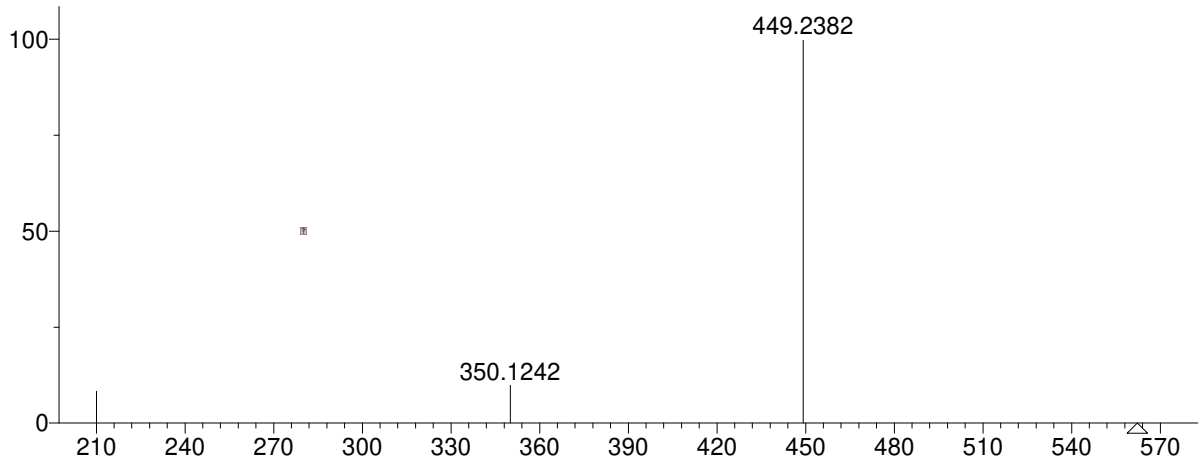

\*\* Search Report Page 1 of 2 \*\*

Unknown: Unknown (13.53\_484.2295m/z)  
Compound in Library Factor = -3273

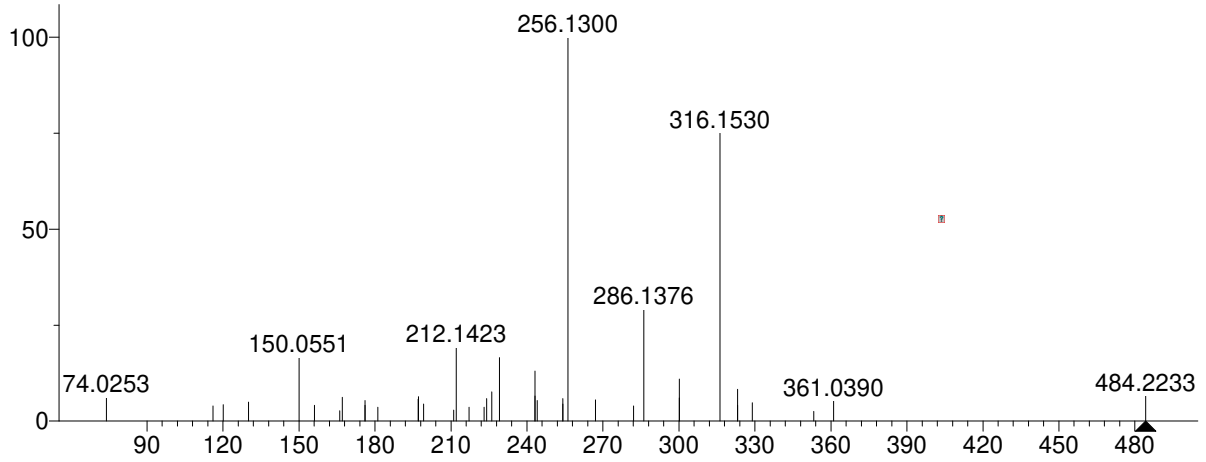

Hit 1 : PC 10:0; PC 5:0-5:0; [M+Hac-H]- [M+Hac-H]- P=484.2  
C<sub>18</sub>H<sub>36</sub>NO<sub>8</sub>P; MF: 2; RMF: 65; Prob 11.3%; Lib: msdial-insilicomsm-lipids-neg; ID: 319638.

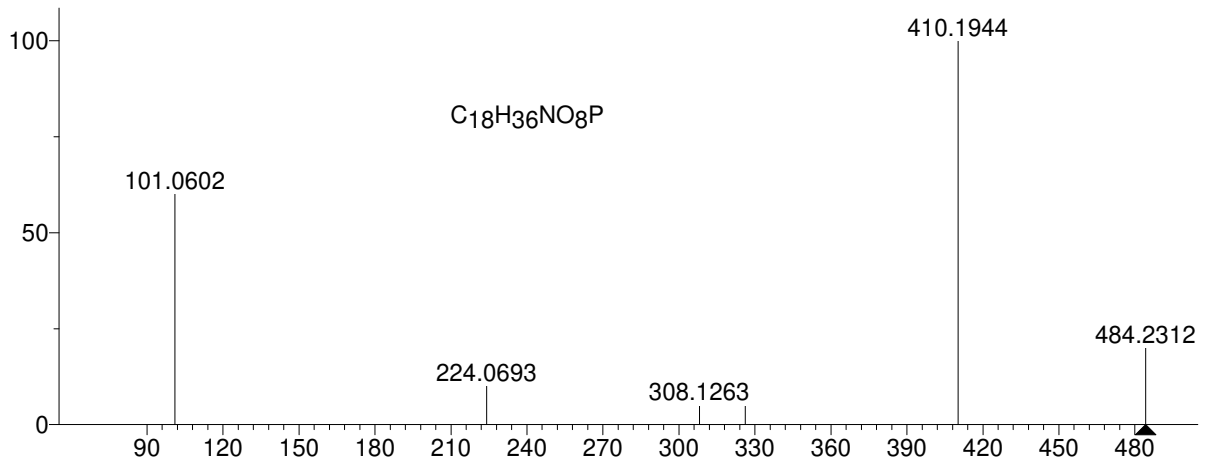

Hit 2 : PC 11:0; PC 2:0-9:0; [M+FA-H]- [M+FA-H]- P=484.2  
C<sub>19</sub>H<sub>38</sub>NO<sub>8</sub>P; MF: 2; RMF: 63; Prob 11.3%; Lib: msdial-insilicomsm-lipids-neg; ID: 317574.

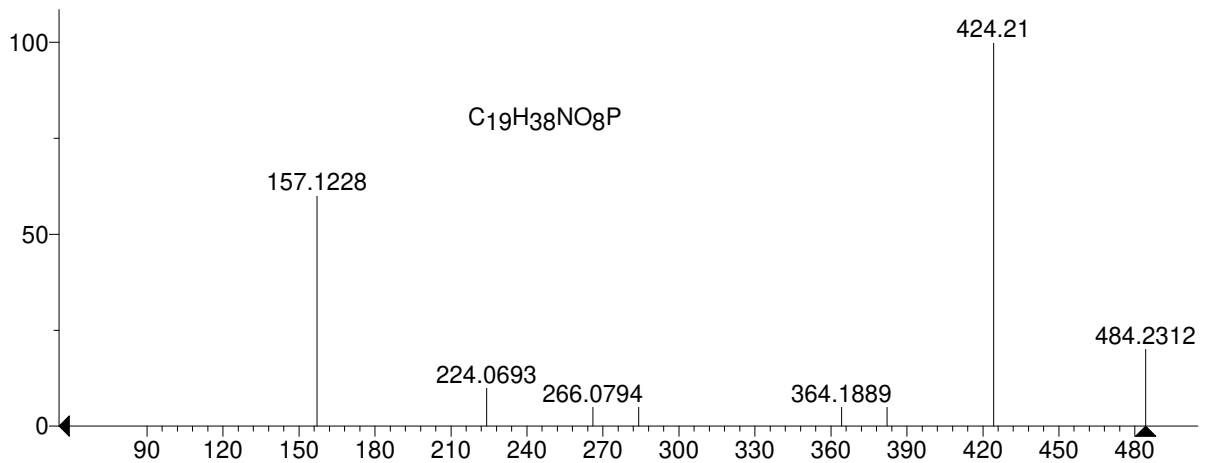

Hit 3 : PC 11:0; PC 3:0-8:0; [M+FA-H]- [M+FA-H]- P=484.2  
C<sub>19</sub>H<sub>38</sub>NO<sub>8</sub>P; MF: 2; RMF: 63; Prob 11.3%; Lib: msdial-insilicomsm-lipids-neg; ID: 317633.

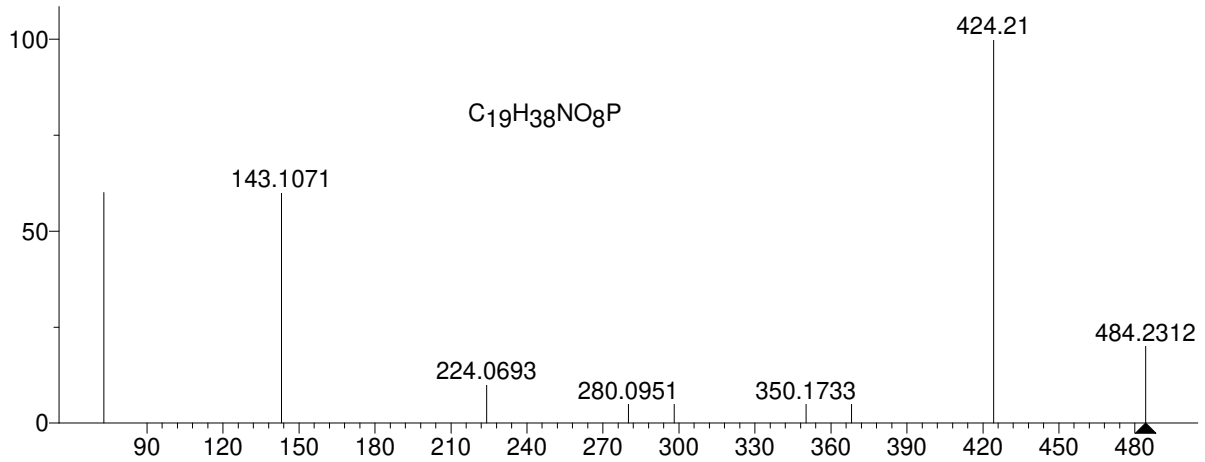

Hit 4 : PC 10:0; PC 2:0-8:0; [M+Hac-H]- [M+Hac-H]- P=484.2  
C<sub>18</sub>H<sub>36</sub>NO<sub>8</sub>P; MF: 2; RMF: 63; Prob 11.3%; Lib: msdial-insilicomsm-lipids-neg; ID: 319464.

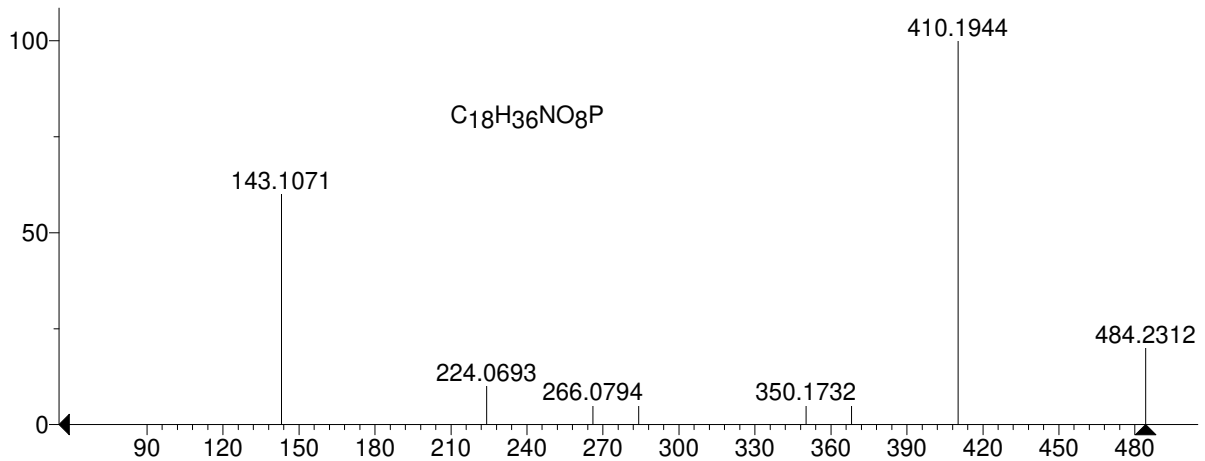

Hit 5 : PC 10:0; PC 3:0-7:0; [M+Hac-H]- [M+Hac-H]- P=484.2  
C<sub>18</sub>H<sub>36</sub>NO<sub>8</sub>P; MF: 2; RMF: 63; Prob 11.3%; Lib: msdial-insilicomsm-lipids-neg; ID: 319523.

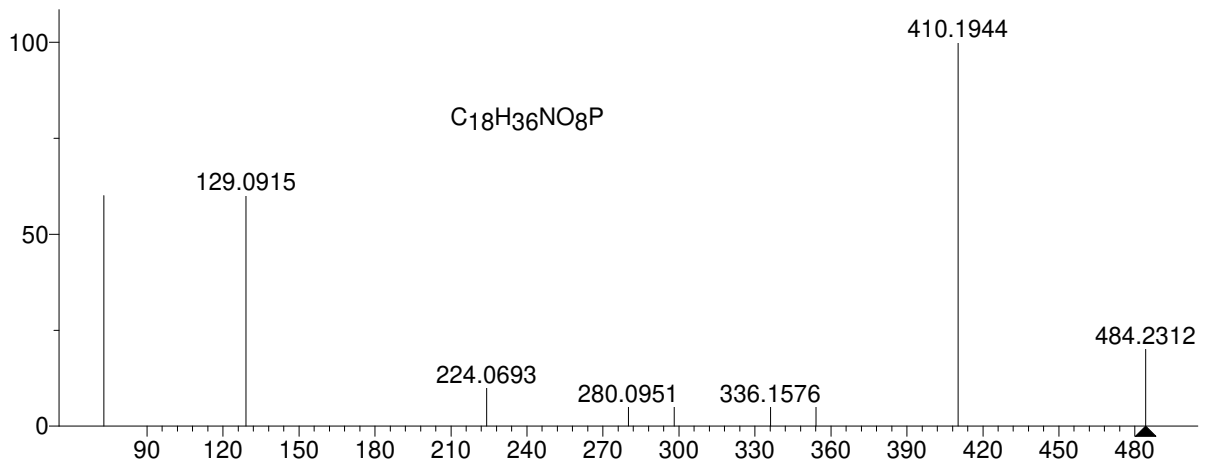



\*\* Search Report Page 1 of 2 \*\*

Unknown: Unknown (13.54\_357.1359m/z)  
Compound in Library Factor = -302

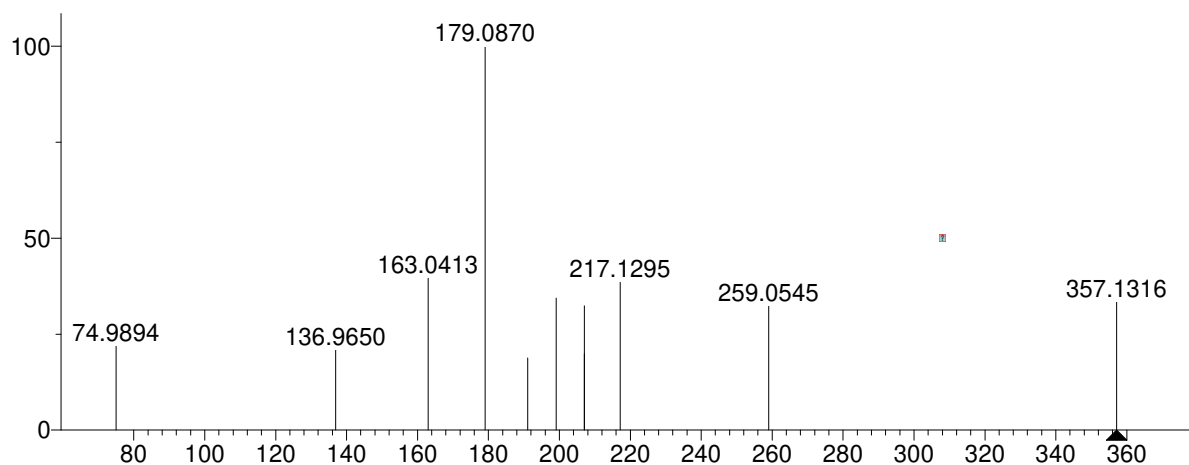

Hit 1 : Matairesinol [M-H]<sup>-</sup> 10 P=357.1  
C<sub>20</sub>H<sub>22</sub>O<sub>6</sub>; MF: 362; RMF: 997; Prob 80.9%; Lib: msms neg mona\_ipb\_gnps\_plasma; ID: 21759.

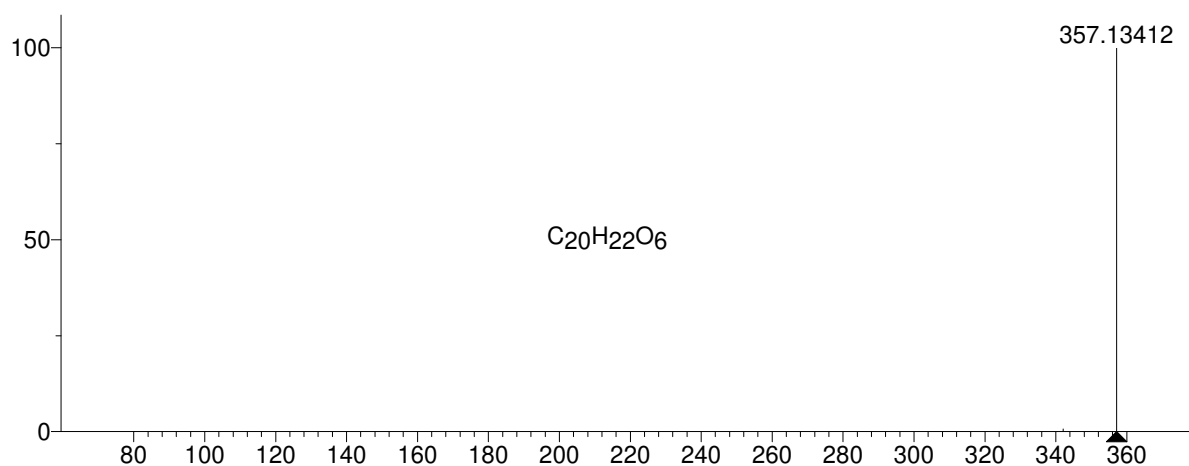

Hit 2 : Topiramate [M+NH<sub>4</sub>]<sup>+</sup> HCD 3V P=357.1  
C<sub>12</sub>H<sub>21</sub>NO<sub>8</sub>S; MF: 321; RMF: 969; Prob 18.5%; CAS: 97240-79-4; Lib: nist\_msms; ID: 317944.

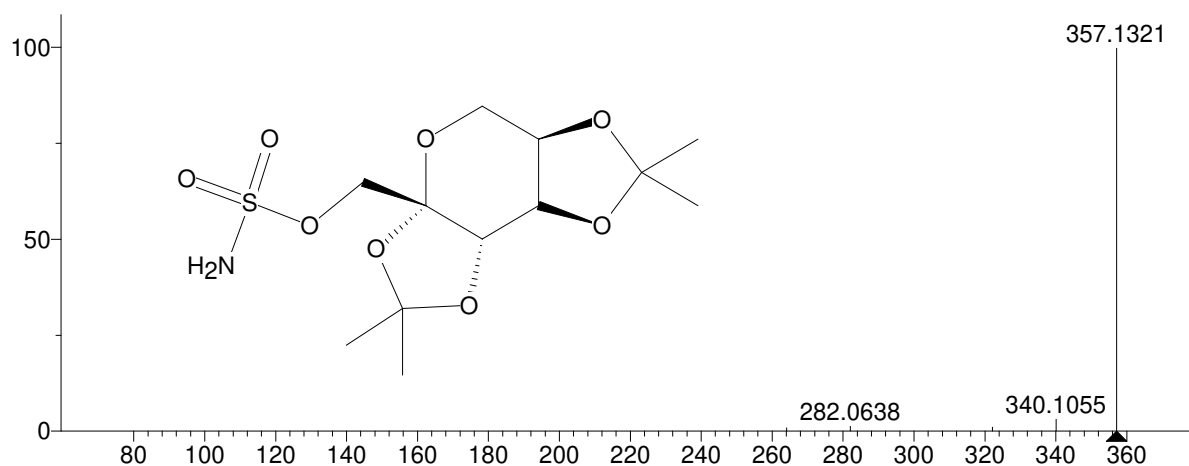

Hit 3 : Schisandrol B [M+H-C3H8O]+ HCD 14V P=357.1  
C23H28O7; MF: 77; RMF: 772; Prob 0.18%; CAS: 58546-54-6; Lib: nist\_msms; ID: 384792.

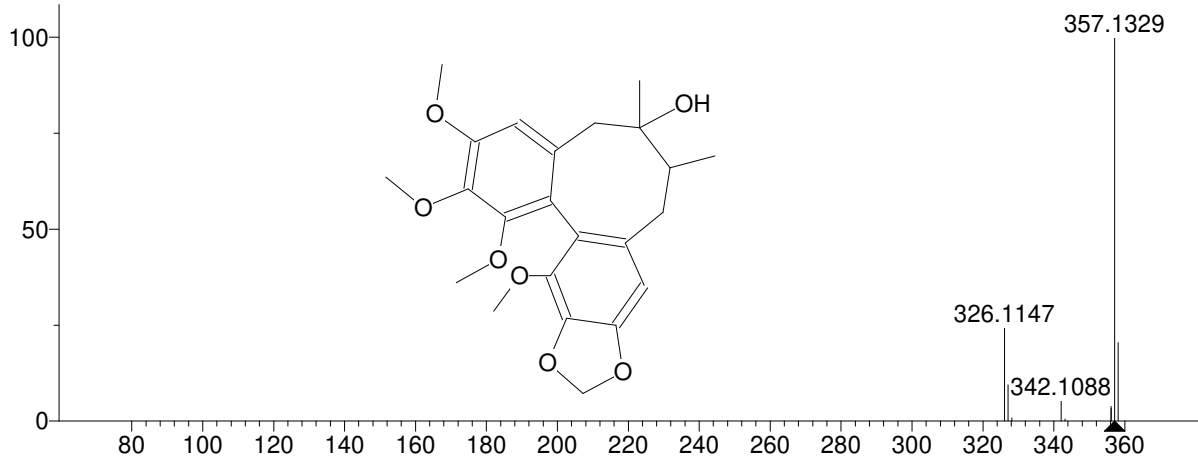

Hit 4 : (+)-Pinoresinol [M-H]- HCD 12V P=357.1  
C20H22O6; MF: 20; RMF: 281; Prob 0.03%; CAS: 487-36-5; Lib: nist\_msms; ID: 234442.

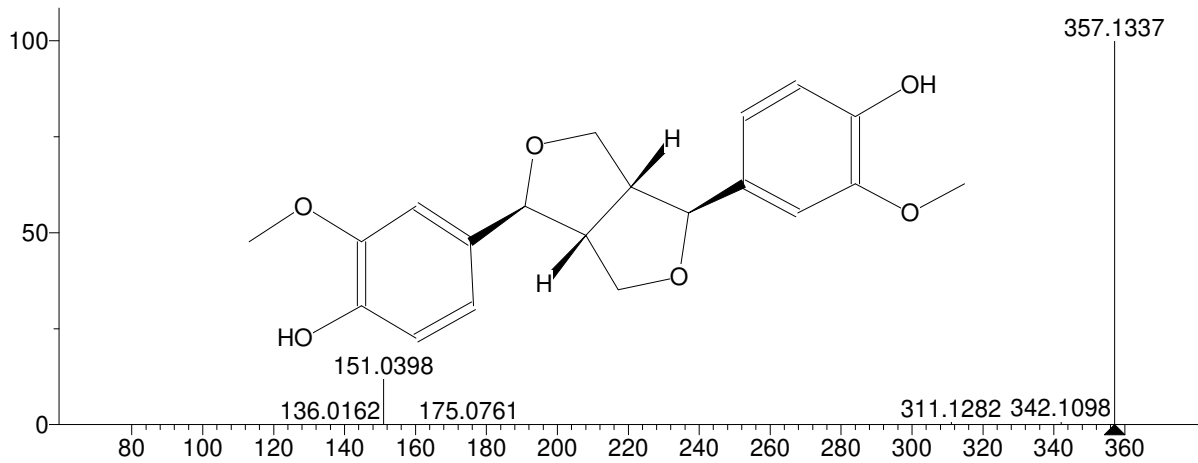

Hit 5 : Pinoresinol [M-H]- 10 P=357.1  
C20H22O6; MF: 16; RMF: 272; Prob 0.02%; Lib: msms neg mona\_ipb\_gnps\_plasma; ID: 21801.

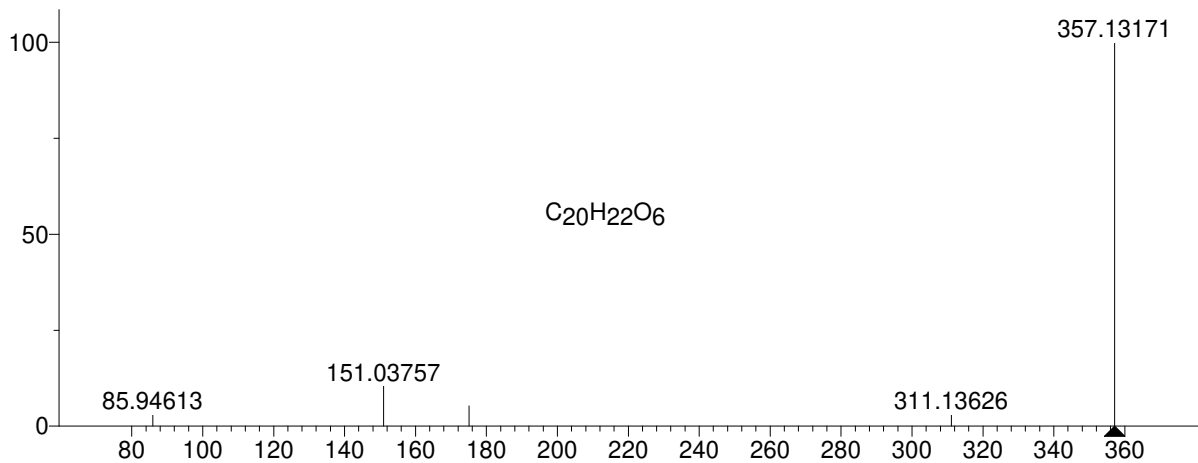

Unknown: Unknown (13.54\_548.2124m/z)  
Compound in Library Factor = 0

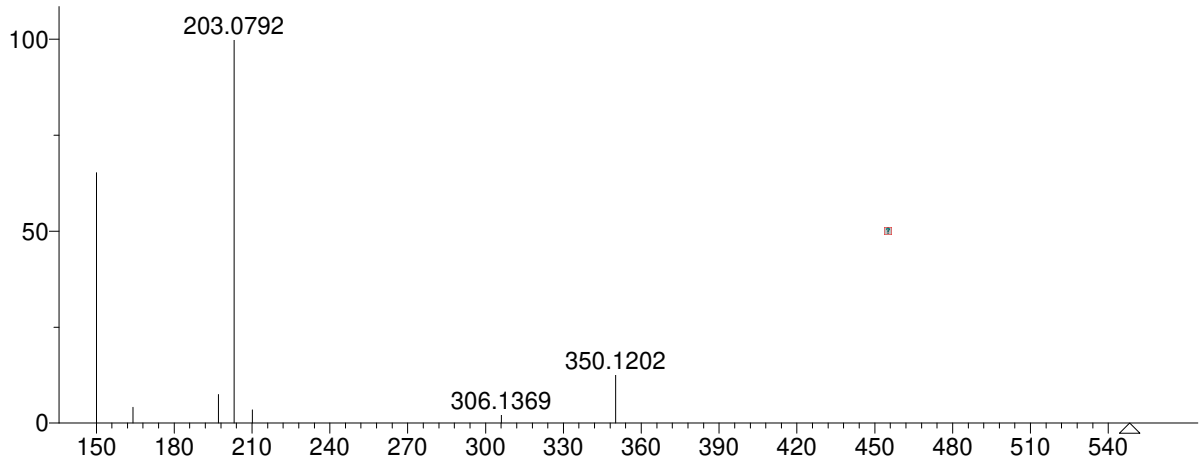

\*\* Search Report Page 1 of 2 \*\*

Unknown: Unknown (13.55\_543.1976m/z)  
Compound in Library Factor = -3273

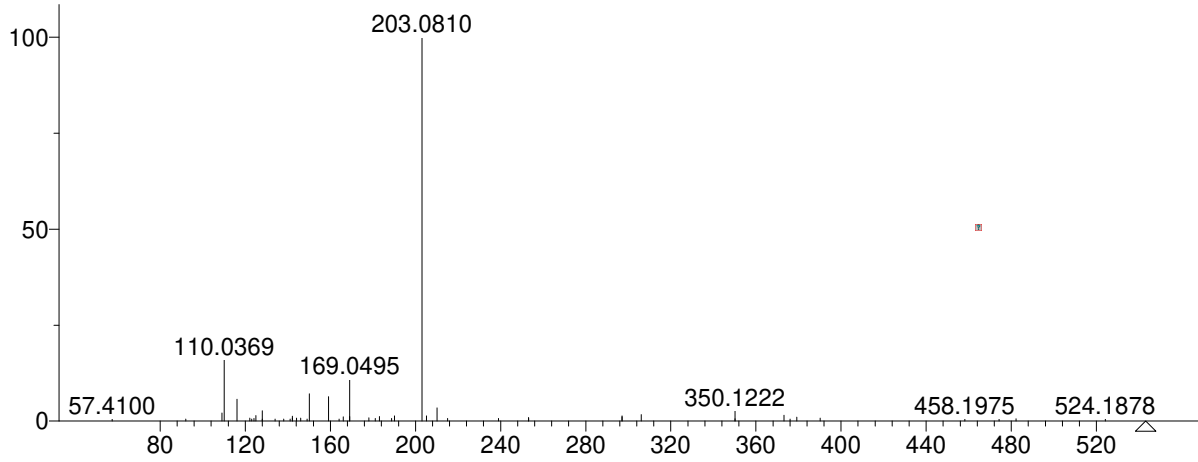

Hit 1 : NCGC00385982-01\_C27H30N2O10\_ [M+H]<sup>+</sup> P=543.2  
C27H30N2O10; MF: 1; RMF: 51; Prob 25.7%; Lib: mona-export-gnps; ID: 10901.

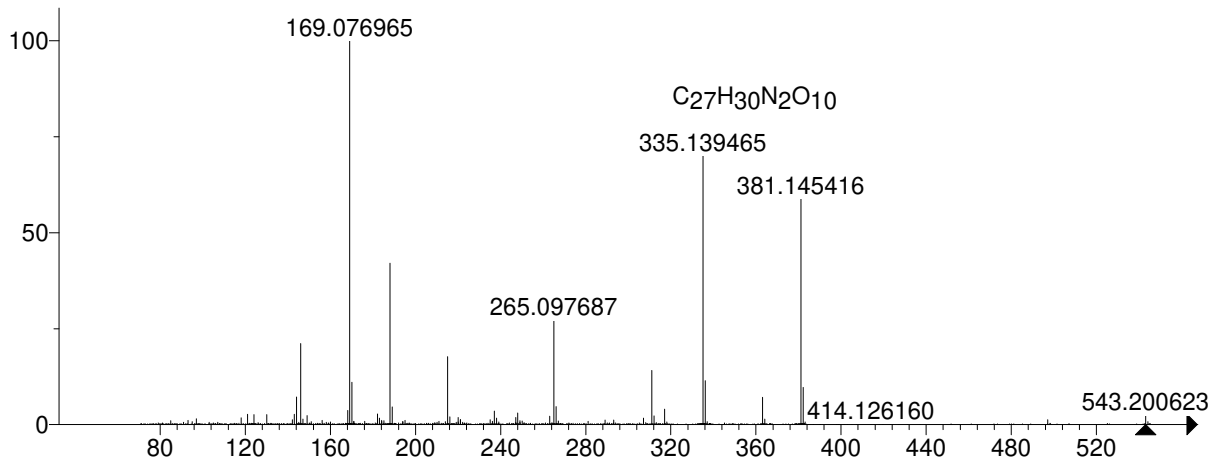

Hit 2 : 2',6'-Dihydroxy 4'-methoxydihydrochalcone [2M-H]<sup>-</sup> HCD 59V P=543.2  
C<sub>16</sub>H<sub>16</sub>O<sub>4</sub>; MF: 0; RMF: 13; Prob 24.8%; CAS: 35241-55-5; Lib: nist\_msms; ID: 241376.

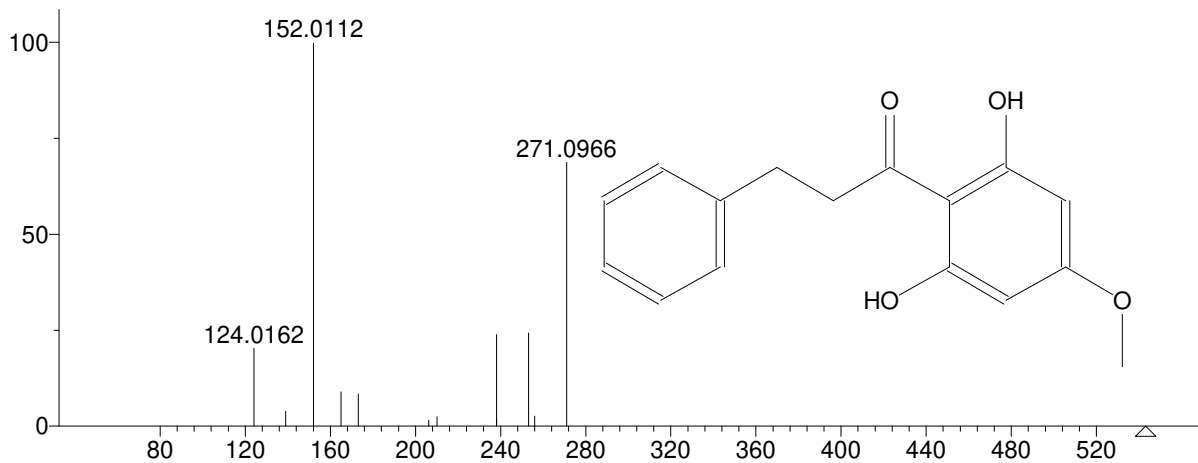

Hit 3 : 2'SLeXLeX [M+2Na]<sup>2+</sup> =>543.2 IT 35% P=543.2  
C<sub>51</sub>H<sub>85</sub>N<sub>3</sub>O<sub>37</sub>; MF: 0; RMF: 2; Prob 24.8%; Lib: nist\_msms; ID: 523603.

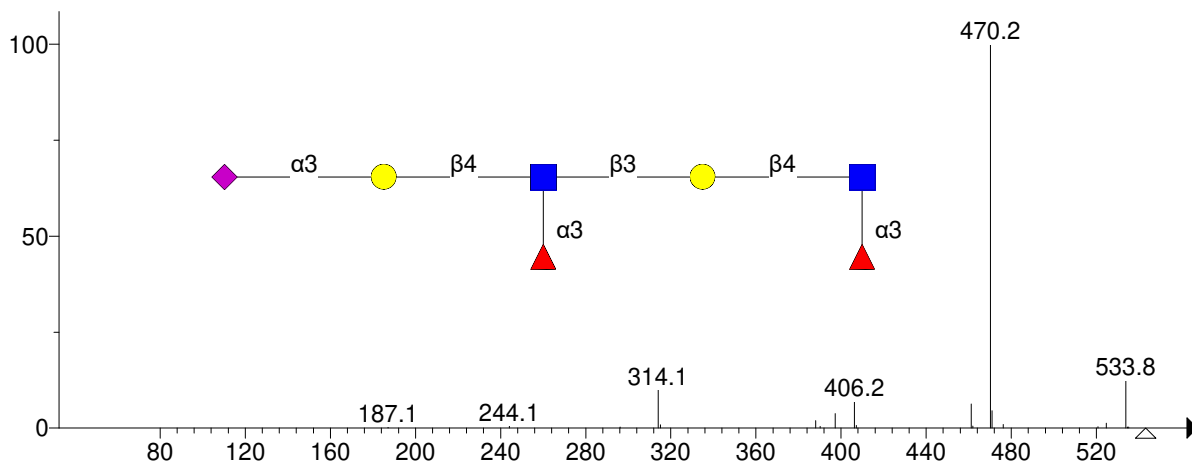

Hit 4 : Prostaglandin F<sub>2</sub> $\alpha$ -biotinamide [M+Na]<sup>+</sup> =>643.4 =>543.2 IT 35% P=543.2  
C<sub>35</sub>H<sub>60</sub>N<sub>4</sub>O<sub>6</sub>S; MF: 0; RMF: 1; Prob 24.8%; Lib: nist\_msms; ID: 95551.

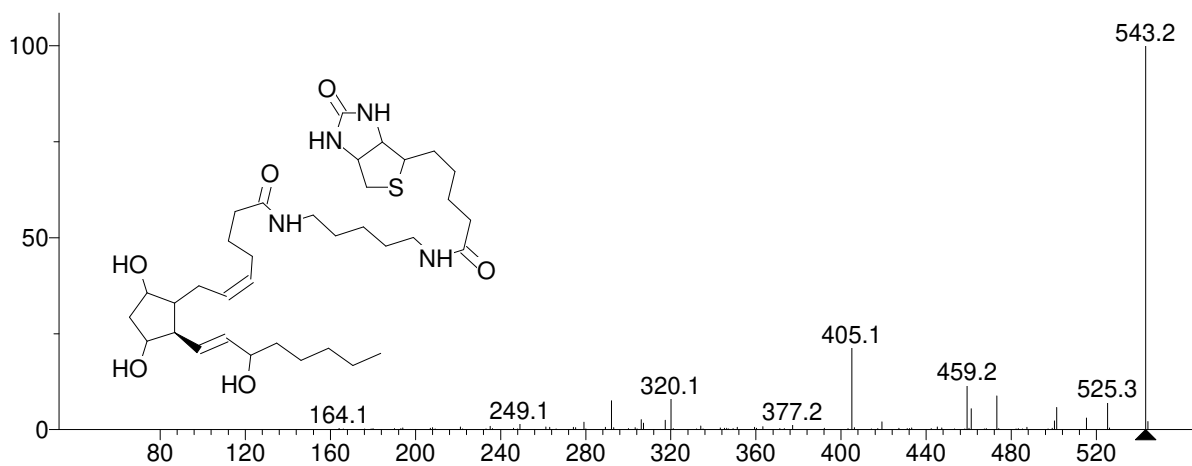

Unknown: Unknown (13.59\_548.2134m/z)  
Compound in Library Factor = 0

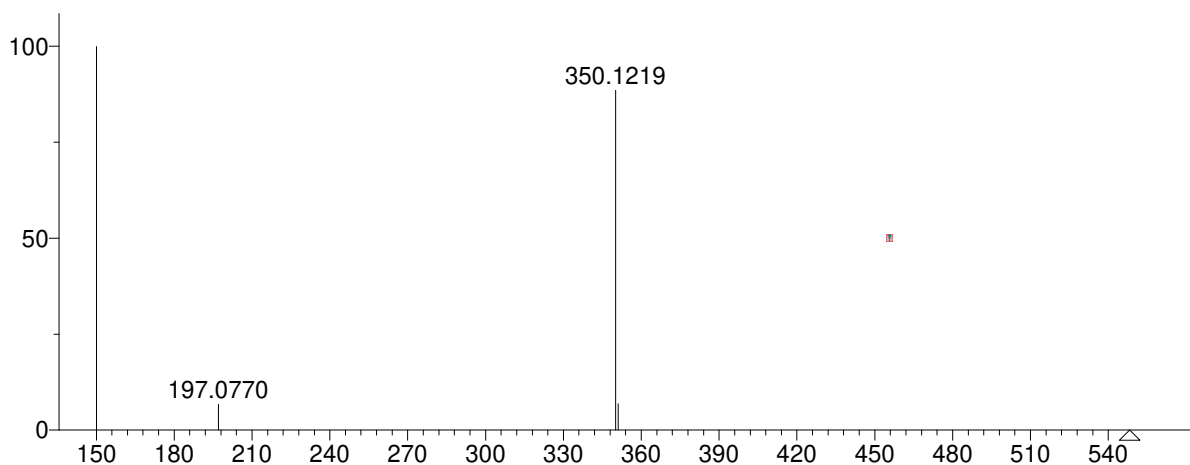

Hit 1 : [1,1'-Biphenyl]-2-carboxylic acid, 4'-[[[2,3-dimethyl-5-[[[(1S)-1-(4-nitrophenyl)ethyl]amino]carbonyl]-1H-indol-3-yl]methyl]phenyl]acetic acid  
C33H29N3O5; MF: 0; RMF: 107; Prob 100.0%; CAS: 1338259-05-4; Lib: nist\_msms; ID: 253410.

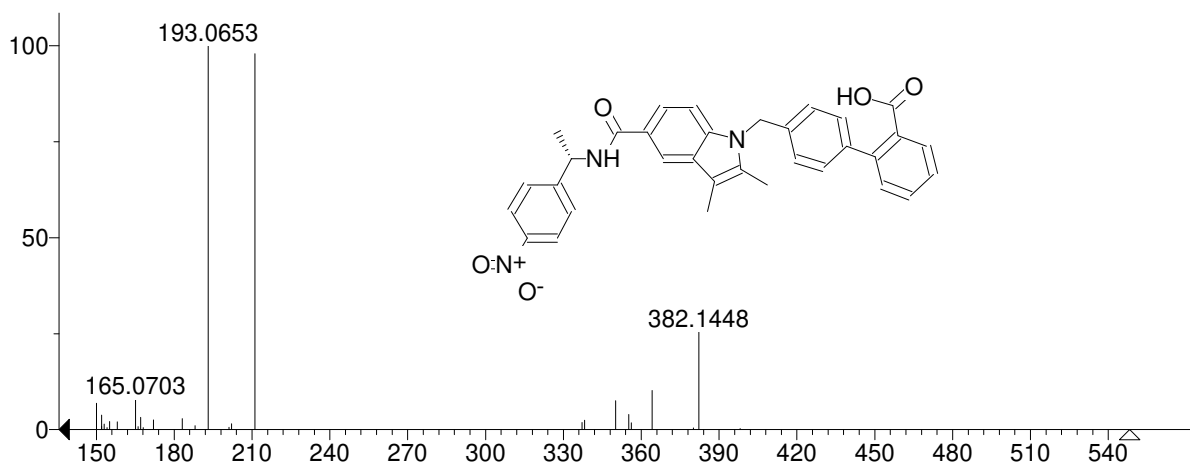

Unknown: Unknown (13.59\_562.2395m/z)  
Compound in Library Factor = 0

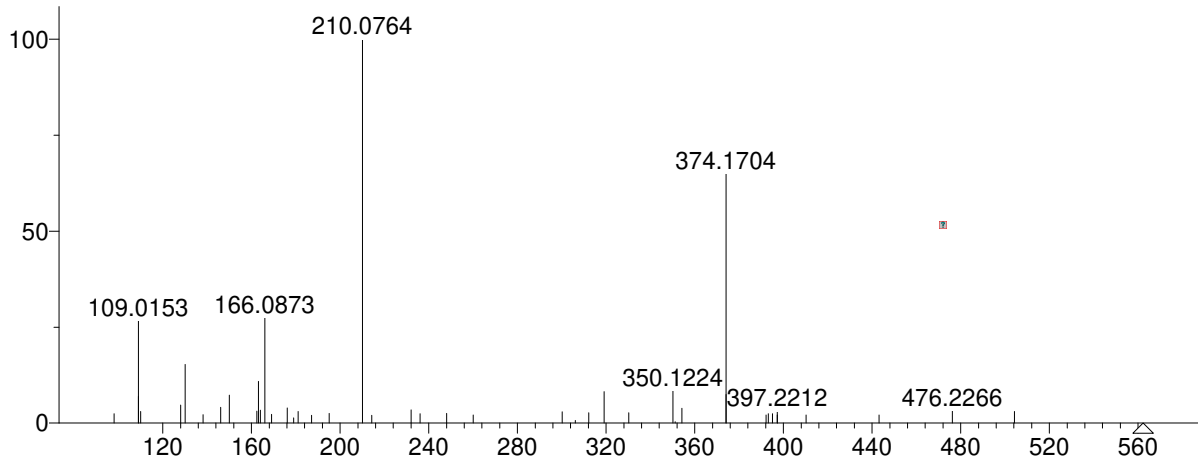

Unknown: Unknown (13.60\_351.1074m/z)  
Compound in Library Factor = 0

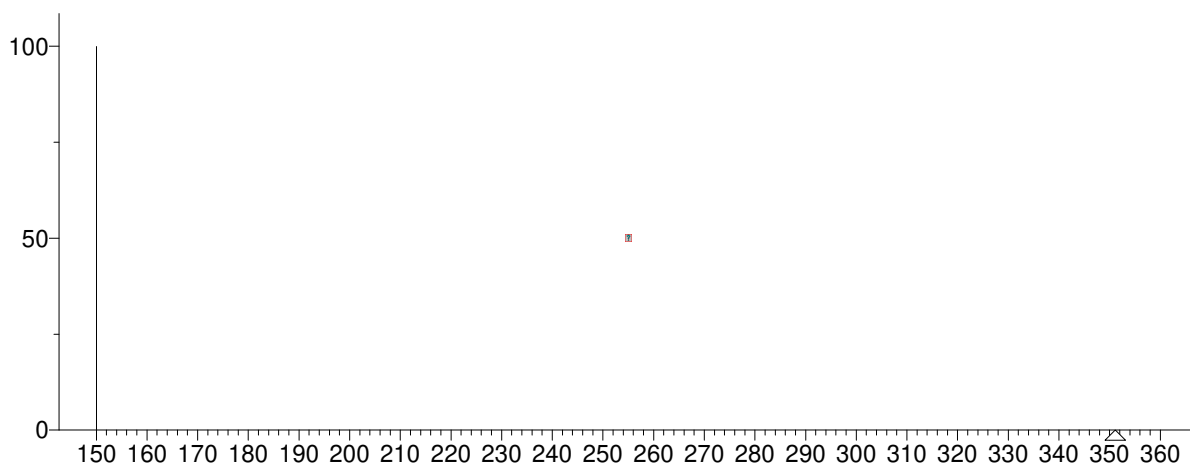

Hit 1 : Acetamide, N-[4-[5-(1,3-benzodioxol-5-yl)-3-methoxy-1H-1,2,4-triazol-1-yl]phenyl]-2-(phenylthio)- [M+H-C6  
C24H20N4O4S; MF: 0; RMF: 169; Prob 100.0%; CAS: 853625-60-2; Lib: nist\_msms; ID: 375967.

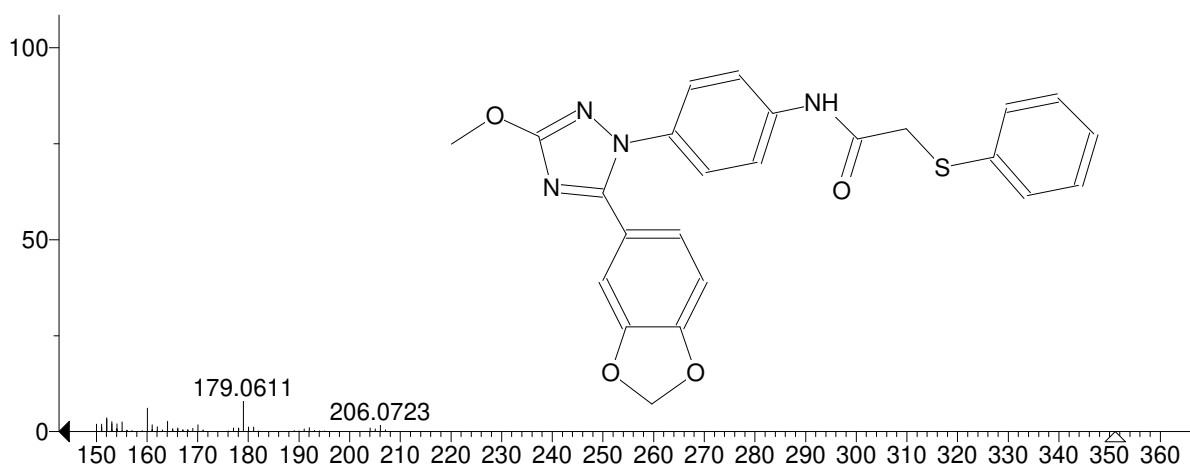



\*\* Search Report Page 1 of 2 \*\*

Unknown: Unknown (13.66\_543.1982m/z)  
Compound in Library Factor = -3273

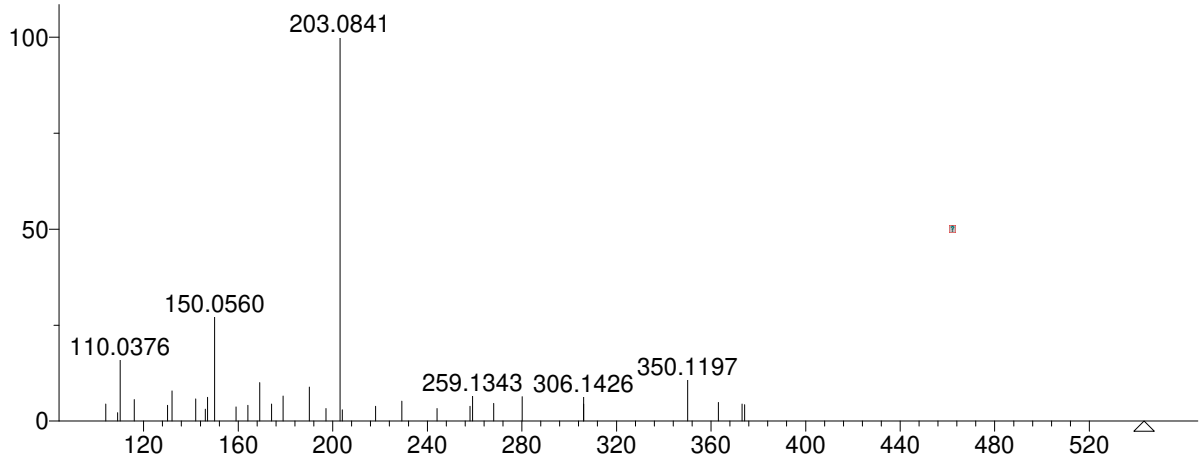

Hit 1 : NCGC00385982-01\_C27H30N2O10\_ [M+H]<sup>+</sup> P=543.2  
C27H30N2O10; MF: 1; RMF: 59; Prob 25.7%; Lib: mona-export-gnps; ID: 10901.

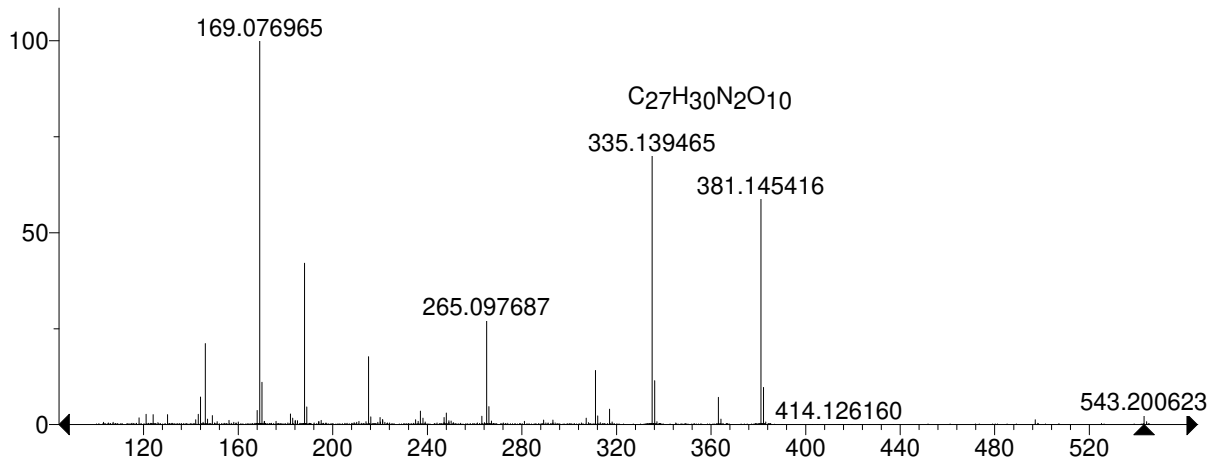

Hit 2 : Strictosamide; PlaSMA ID-1490 [M+FA-H]<sup>-</sup> P=543.2  
C<sub>26</sub>H<sub>30</sub>N<sub>2</sub>O<sub>8</sub>; MF: 0; RMF: 16; Prob 24.8%; Lib: biomsms-neg-plasma; ID: 708.

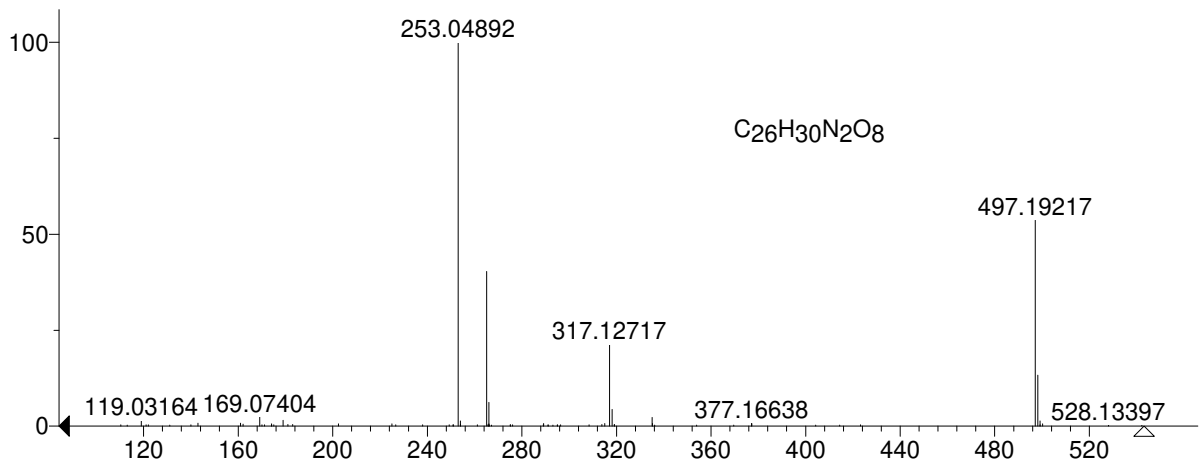

\*\* Search Report Page 2 of 2 \*\*

Hit 3 : Prostaglandin F2 $\alpha$ -biotinamide [M+Na] $\Rightarrow$ 643.4 $\Rightarrow$ 543.2 IT 35% P=543.2  
C35H60N4O6S; MF: 0; RMF: 4; Prob 24.8%; Lib: nist\_msms; ID: 95551.

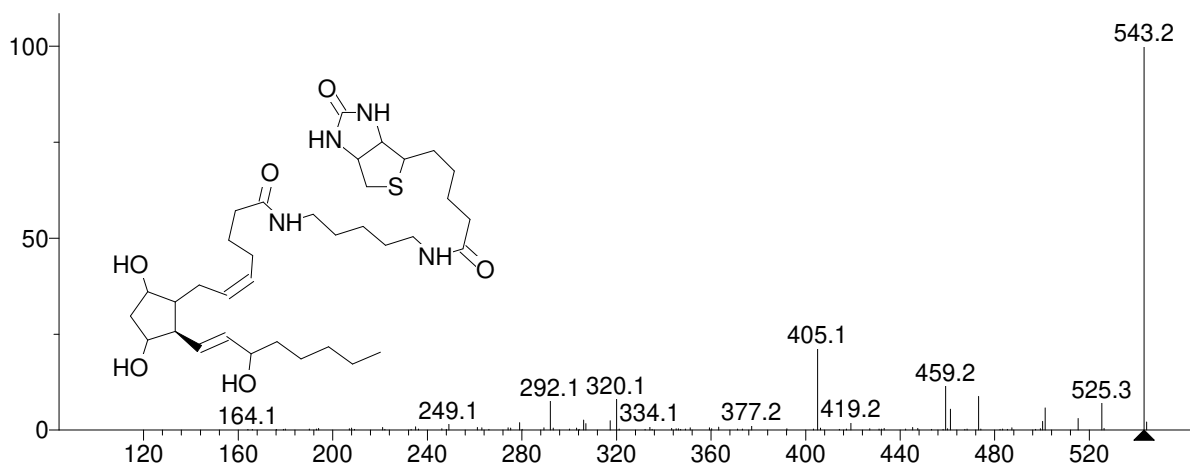

Hit 4 : Chloramphenicol palmitate [M+H] $\Rightarrow$ 543.2 IT 35% P=543.2  
C27H42Cl2N2O6; MF: 0; RMF: 4; Prob 24.8%; CAS: 530-43-8; Lib: nist\_msms; ID: 153359.

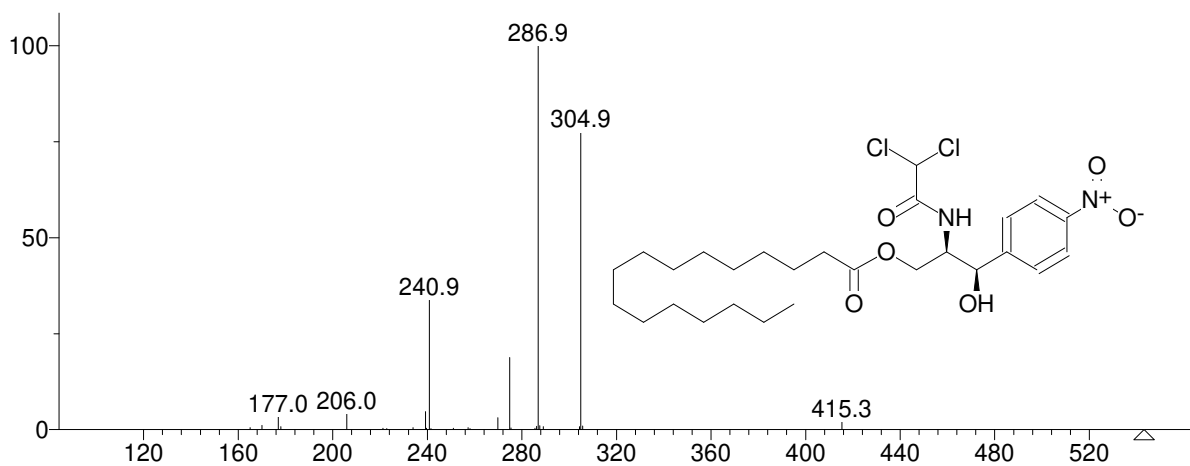

Unknown: Unknown (13.69\_490.1697m/z)  
Compound in Library Factor = 0

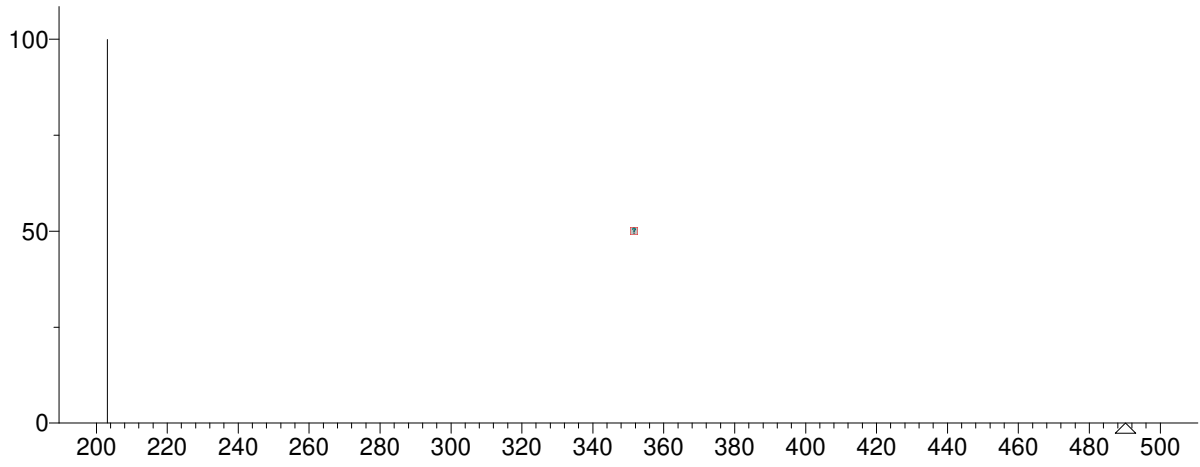

\*\* Search Report Page 1 of 2 \*\*

Unknown: Unknown (13.78\_289.0709m/z)  
Compound in Library Factor = -3273

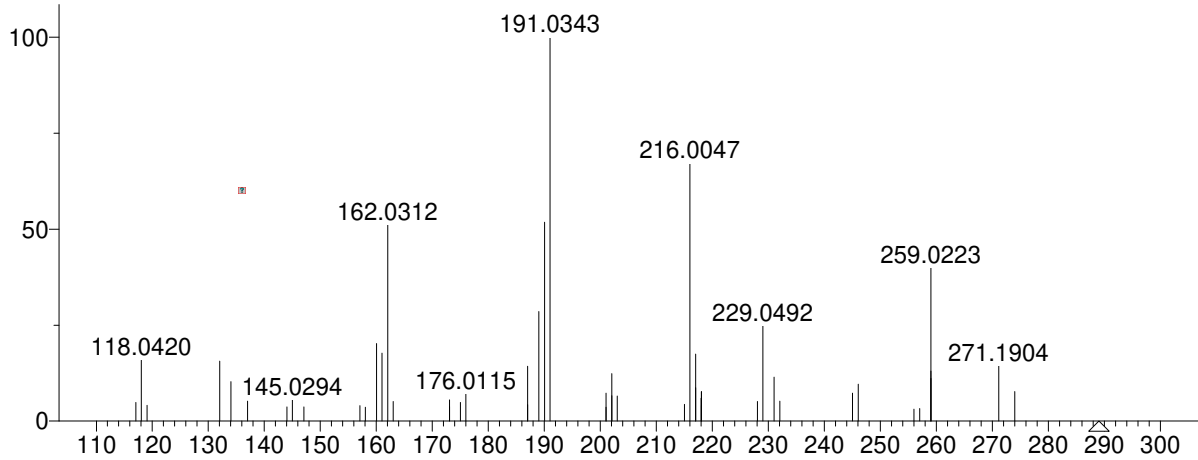

Hit 1 : (-)-Catechin gallate [M-H-C7H4O4]- HCD 92V P=289.1  
C22H18O10; MF: 41; RMF: 184; Prob 5.81%; CAS: 130405-40-2; Lib: nist\_msms; ID: 552328.

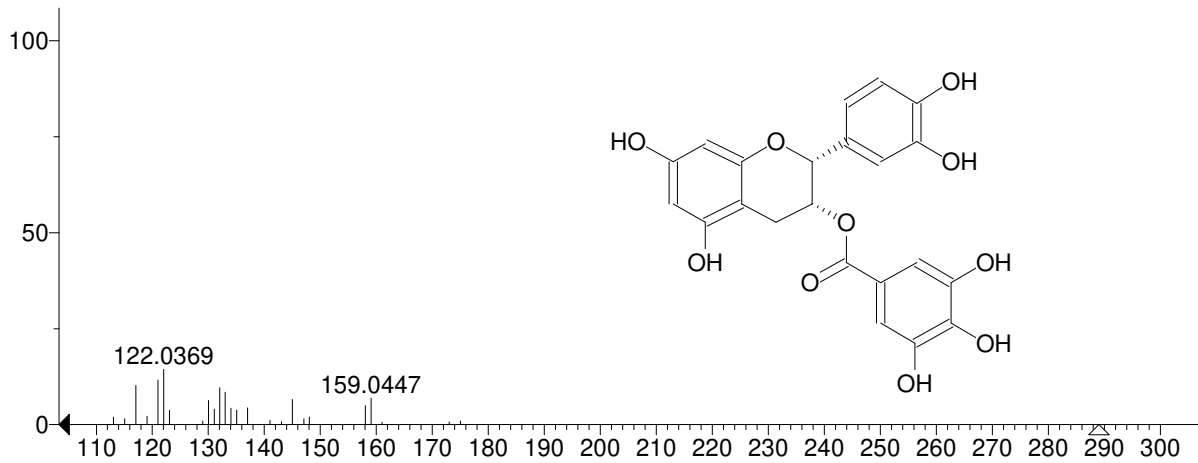

Hit 2 : NCGC00385805-0117-methoxy-6-[(1R,4R,5S)-1-methyl-2-oxo-3,6-dioxabicyclo[3.1.0]hexan-4-yl]chromen-2  
C15H12O6; MF: 34; RMF: 236; Prob 4.45%; Lib: mona-export-gnps; ID: 9447.

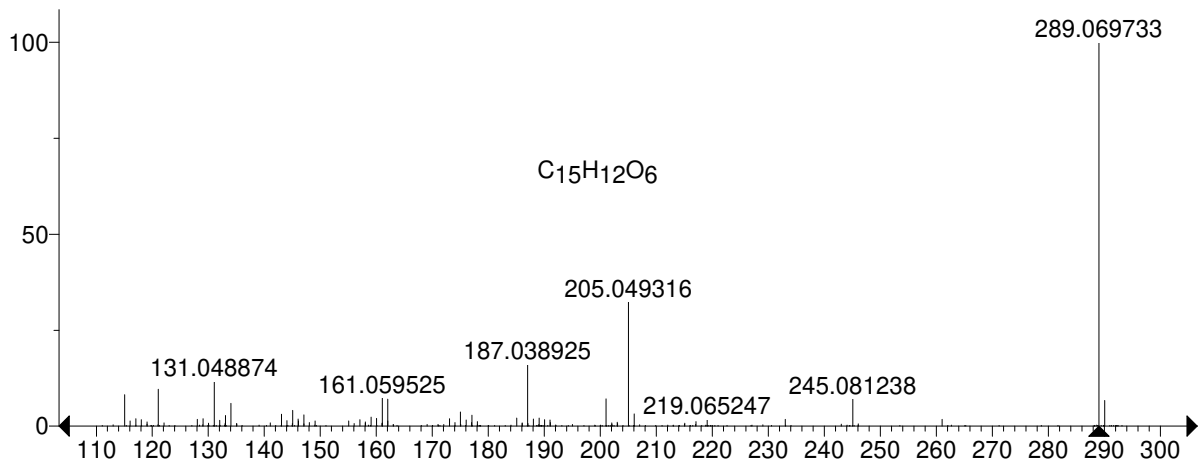

Hit 3 : (-)-Epicatechin gallate [M-H-C7H4O4]- HCD 46V P=289.1  
C22H18O10; MF: 32; RMF: 201; Prob 4.10%; CAS: 1257-08-5; Lib: nist\_msms; ID: 459014.

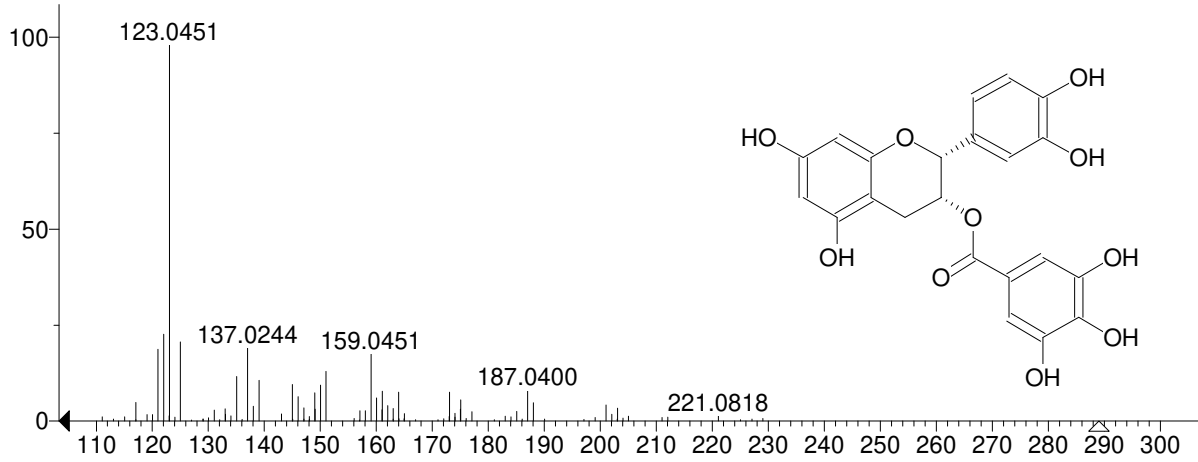

Hit 4 : Catechin [M-H]- 40 P=289.1  
C15H14O6; MF: 32; RMF: 189; Prob 4.10%; Lib: mona-export-lc-ms-ms\_negative\_mode; ID: 27849.

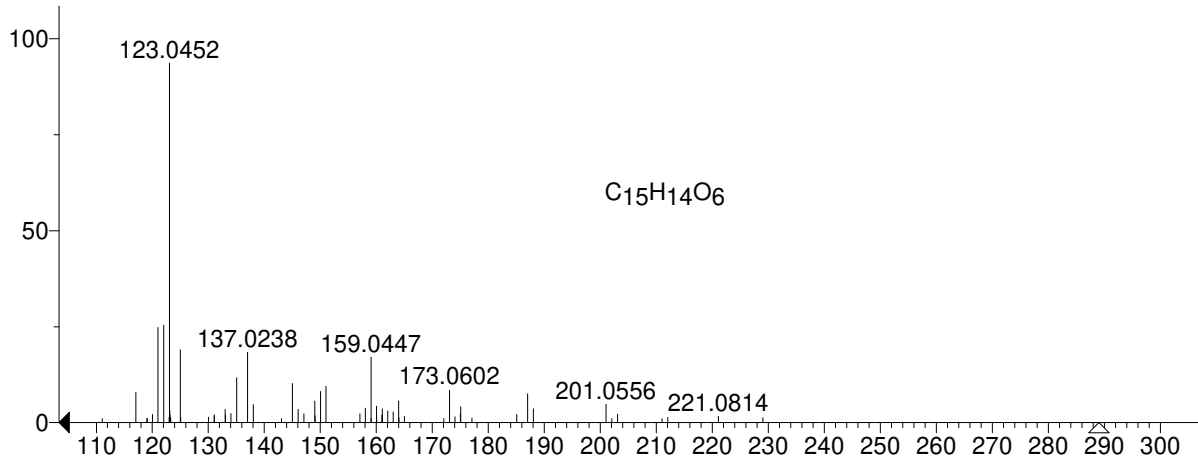

Hit 5 : Catechin; LC-ESI-QTOF; MS2; CE [M-H]- 55 P=289.1  
C15H14O6; MF: 31; RMF: 175; Prob 3.94%; Lib: msms-neg-massbank; ID: 3584.

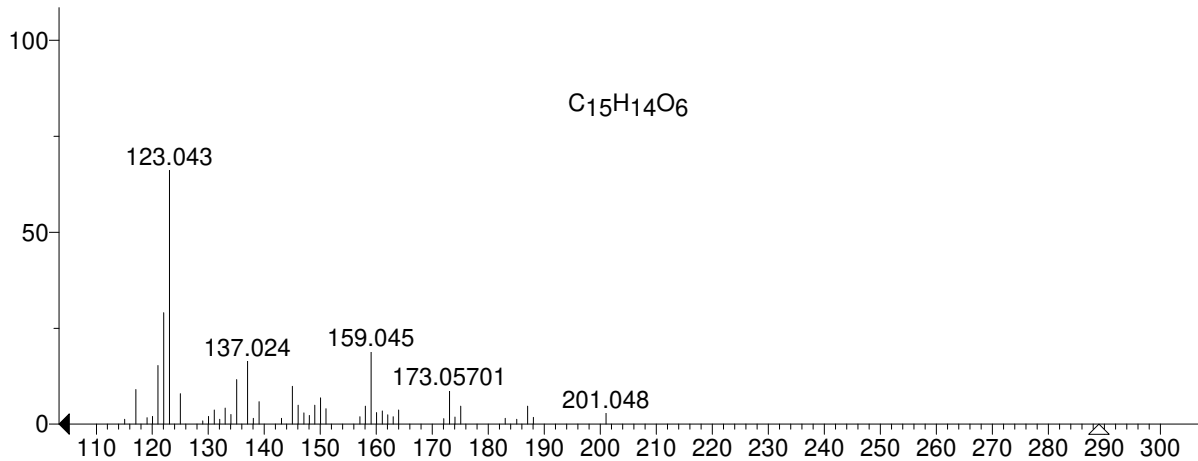

Unknown: Unknown (13.83\_445.1611 m/z)  
Compound in Library Factor = 0

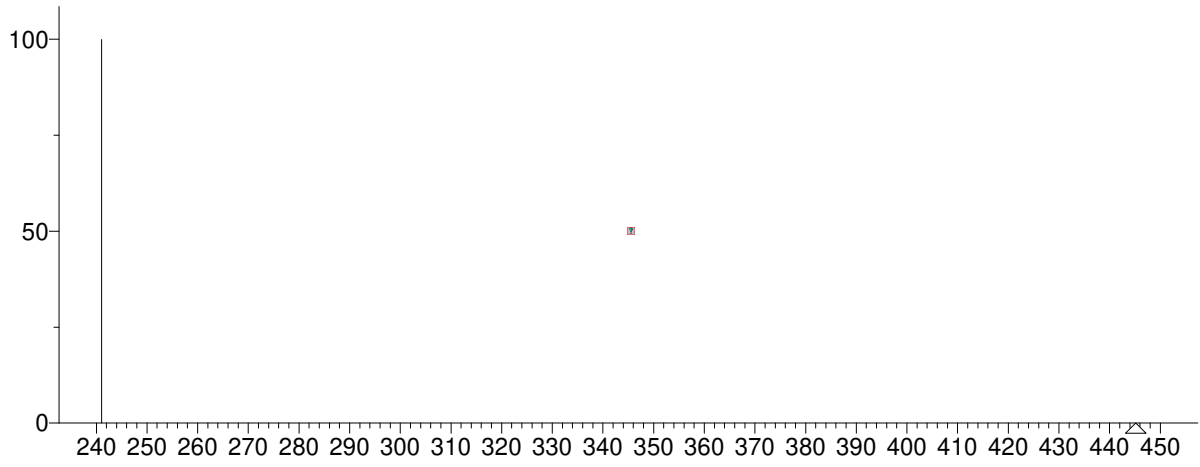

\*\* Search Report Page 1 of 1 \*\*

Unknown: Unknown (13.83\_527.1936m/z)  
Compound in Library Factor = 0

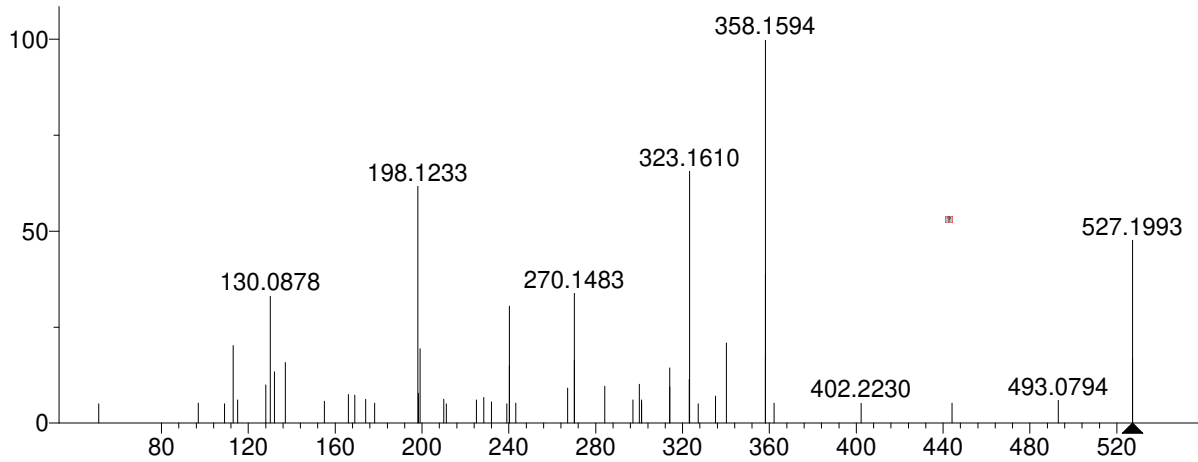

Hit 1 : (2R,7S,13R,14R,16S,19R,20S)-19-(furan-3-yl)-9,9,13,20-tetramethyl-5,12,17-trioxo-4,8,15,18-tetraoxahex:  
C<sub>28</sub>H<sub>32</sub>O<sub>10</sub>; MF: 0; RMF: 31; Prob 50.0%; Lib: mona-export-1c-ms-ms\_negative\_mode; ID: 23168.

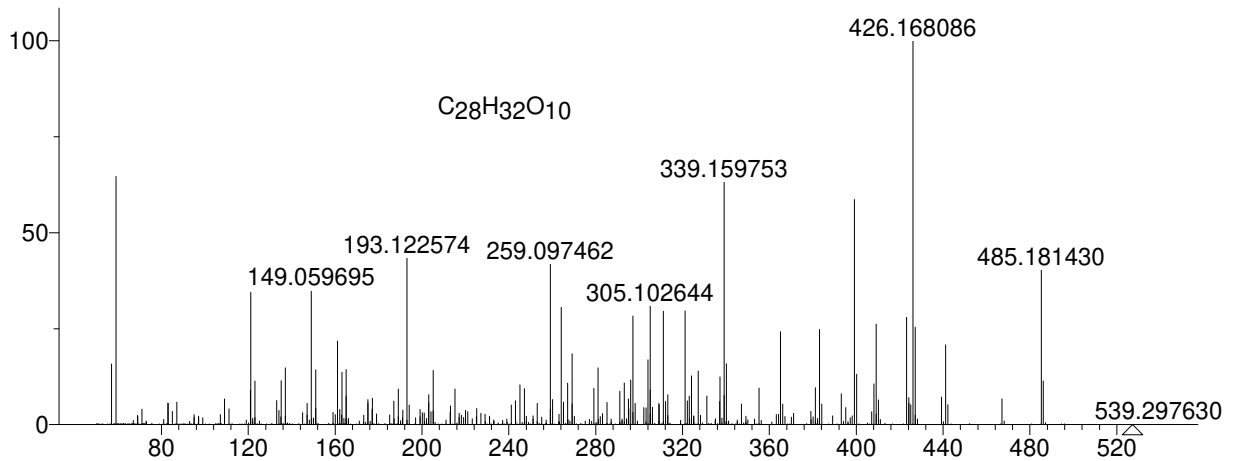

Hit 2 : Azadirachtin B [M+H-C<sub>5</sub>H<sub>12</sub>O<sub>4</sub>]<sup>+</sup> IT 35% P=527.2  
C<sub>33</sub>H<sub>42</sub>O<sub>14</sub>; MF: 0; RMF: 22; Prob 50.0%; CAS: 95507-03-2; Lib: nist\_msms; ID: 223448.

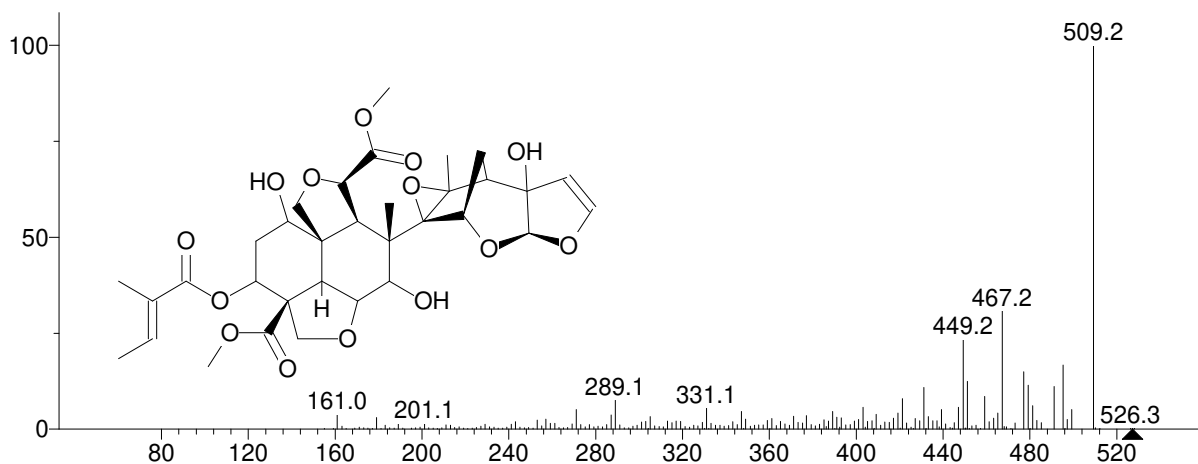

Unknown: Unknown (13.87\_369.1176m/z)  
Compound in Library Factor = 0

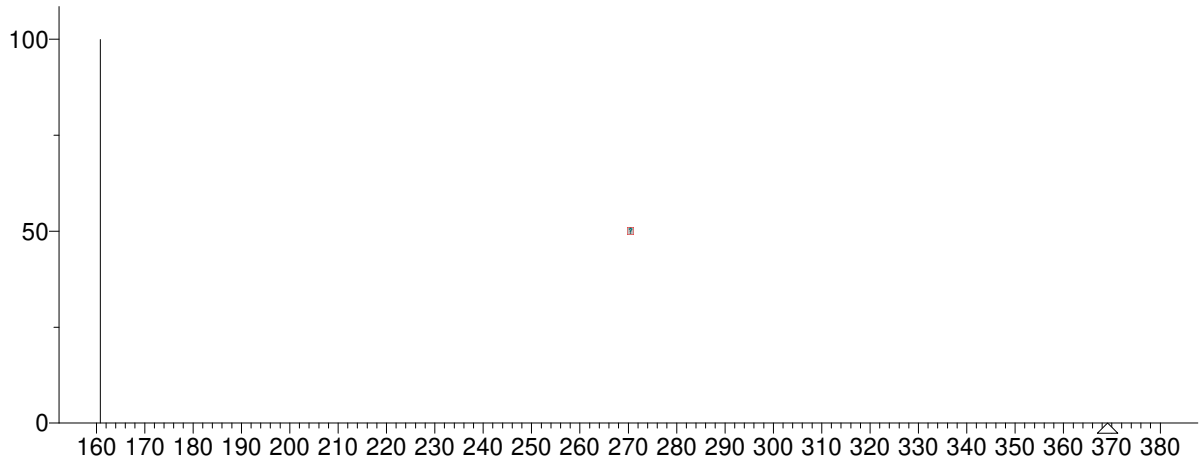



\*\* Search Report Page 1 of 2 \*\*

Unknown: Unknown (13.90\_451.2066m/z)  
Compound in Library Factor = -2176

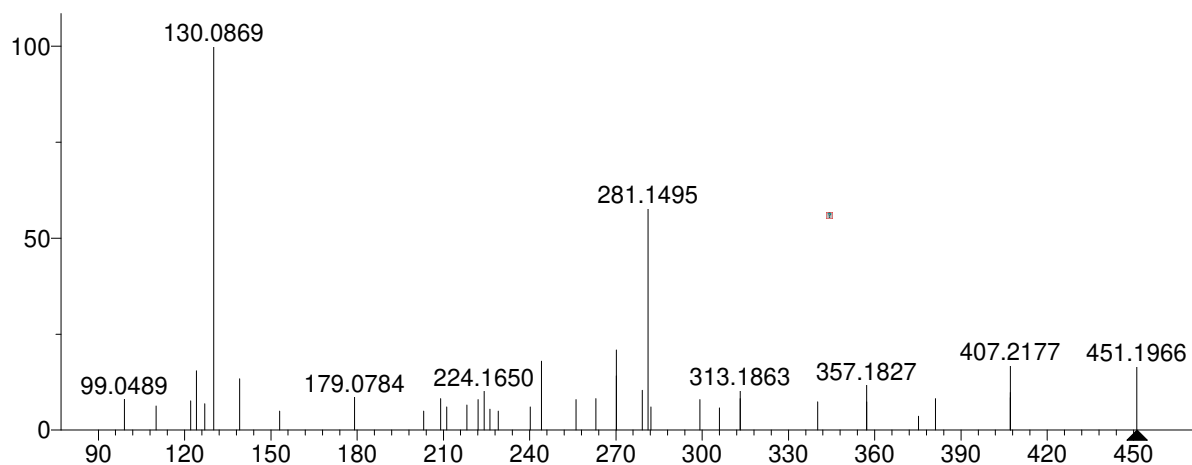

Hit 1 : Betamethasone 9,11-epoxide 17-propionate [M+Na]<sup>+</sup> HCD 9V P=451.2  
C<sub>25</sub>H<sub>32</sub>O<sub>6</sub>; MF: 37; RMF: 450; Prob 42.0%; CAS: 79578-39-5; Lib: nist\_msms; ID: 448292.

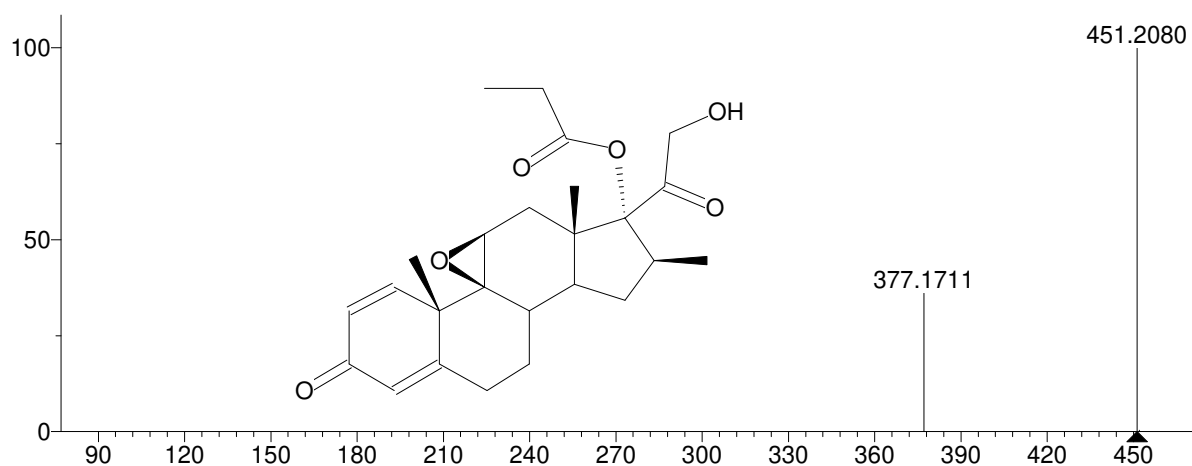

Hit 2 : L-Carnosine [2M-H]<sup>-</sup> HCD 2V P=451.2  
C<sub>9</sub>H<sub>14</sub>N<sub>4</sub>O<sub>3</sub>; MF: 29; RMF: 236; Prob 31.4%; CAS: 305-84-0; Lib: nist\_msms; ID: 287986.

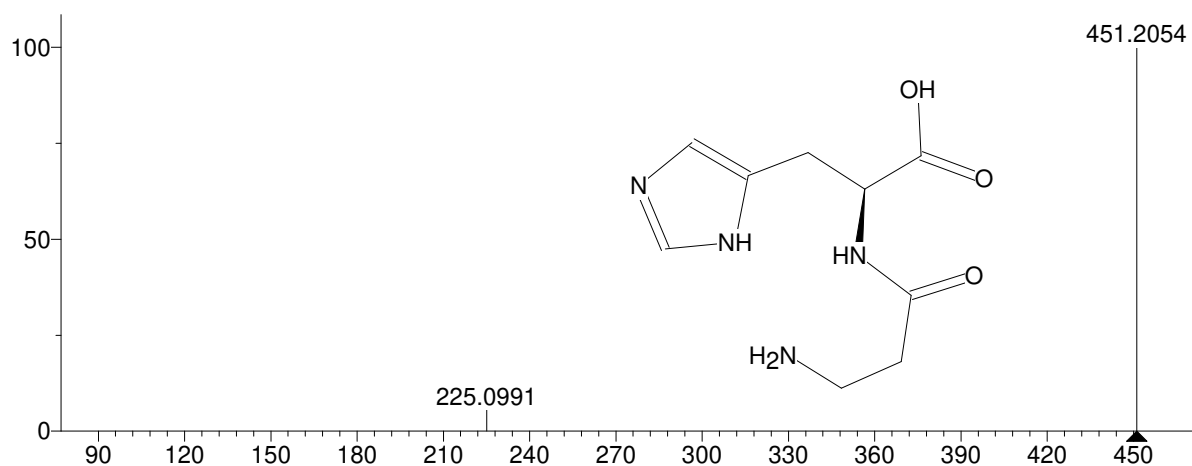

Hit 3 : Grayanotoxin I [M+K]<sup>+</sup> 35HCD P=451.2  
C<sub>22</sub>H<sub>36</sub>O<sub>7</sub>; MF: 2; RMF: 122; Prob 9.22%; Lib: mona-export-vf-npl\_qexactive; ID: 21286.

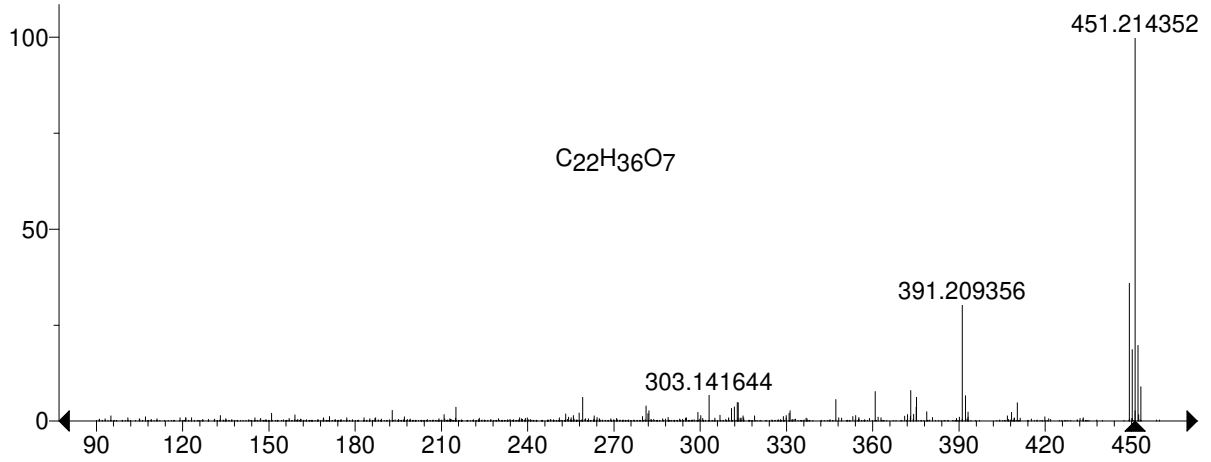

Hit 4 : 2-Naphthalenecarboxamide, N-[2-(4-oxo-1-phenyl-1,3,8-triazaspiro[4.5]dec-8-yl)ethyl]- [M+Na]<sup>+</sup> HCD 40'  
C<sub>26</sub>H<sub>28</sub>N<sub>4</sub>O<sub>2</sub>; MF: 1; RMF: 165; Prob 8.86%; CAS: 1130067-34-3; Lib: nist\_msms; ID: 261179.

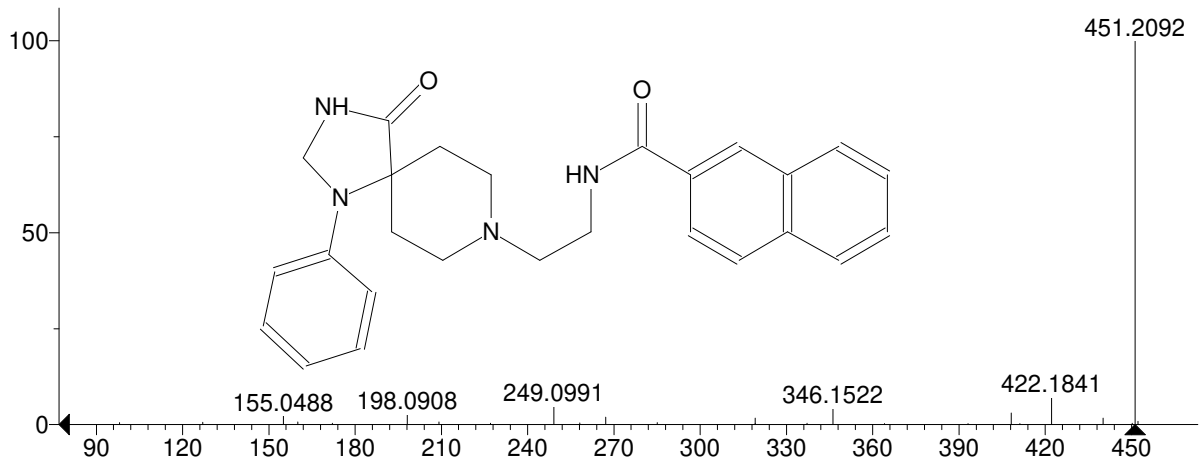

Hit 5 : Grayanotoxin I M-H 35 P=451.2  
C<sub>22</sub>H<sub>36</sub>O<sub>7</sub>; MF: 0; RMF: 49; Prob 8.52%; Lib: mona-export-vf-npl\_ltq; ID: 4523.

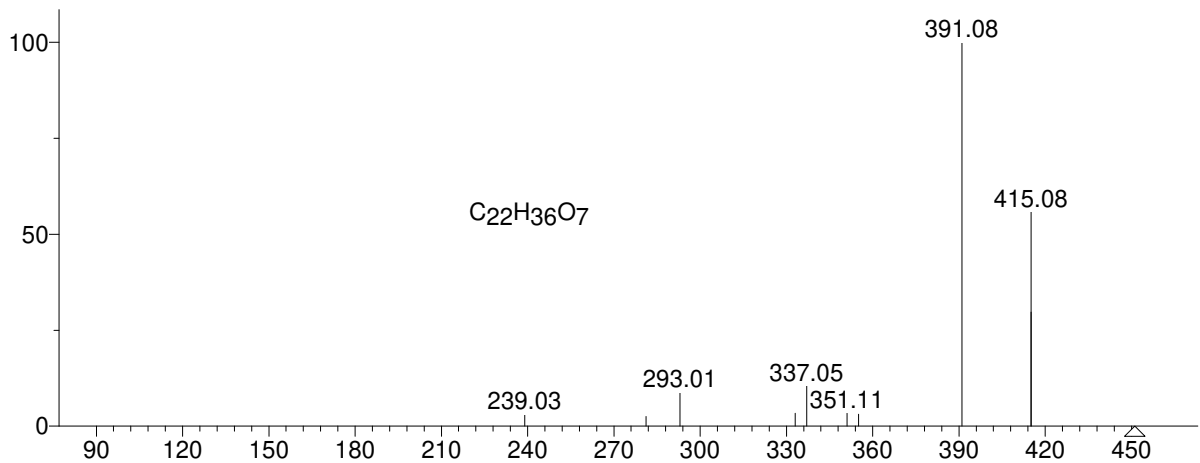

Unknown: Unknown (13.96\_200.1283m/z)  
Compound in Library Factor = 0

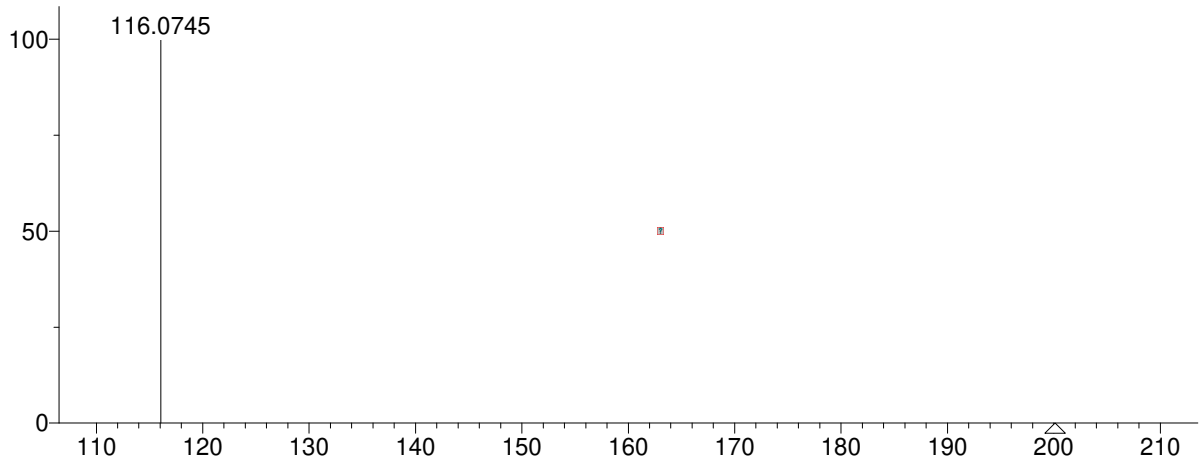

Unknown: Unknown (13.98\_633.7975m/z)  
Compound in Library Factor = 0

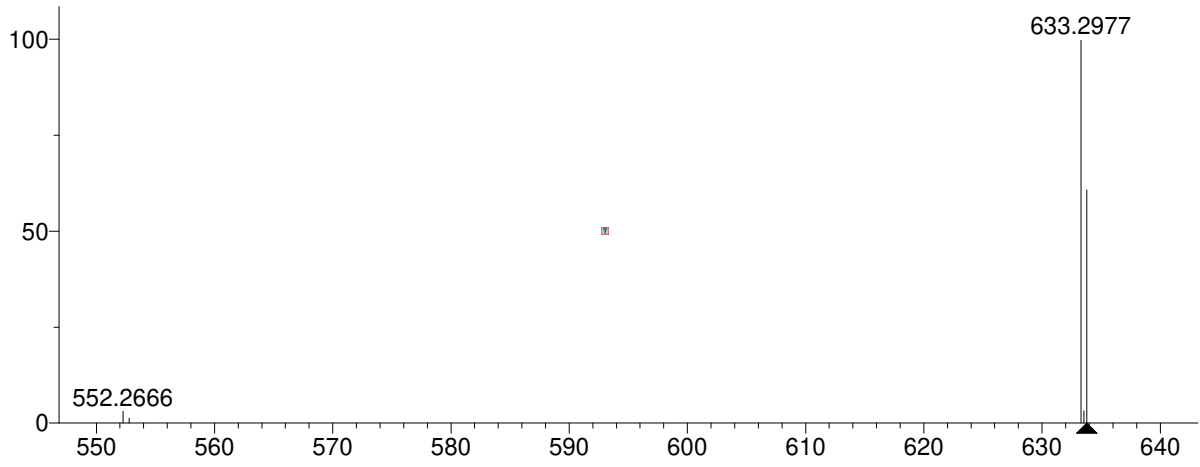

Unknown: Unknown (13.99\_633.2960m/z)  
Compound in Library Factor = -2387

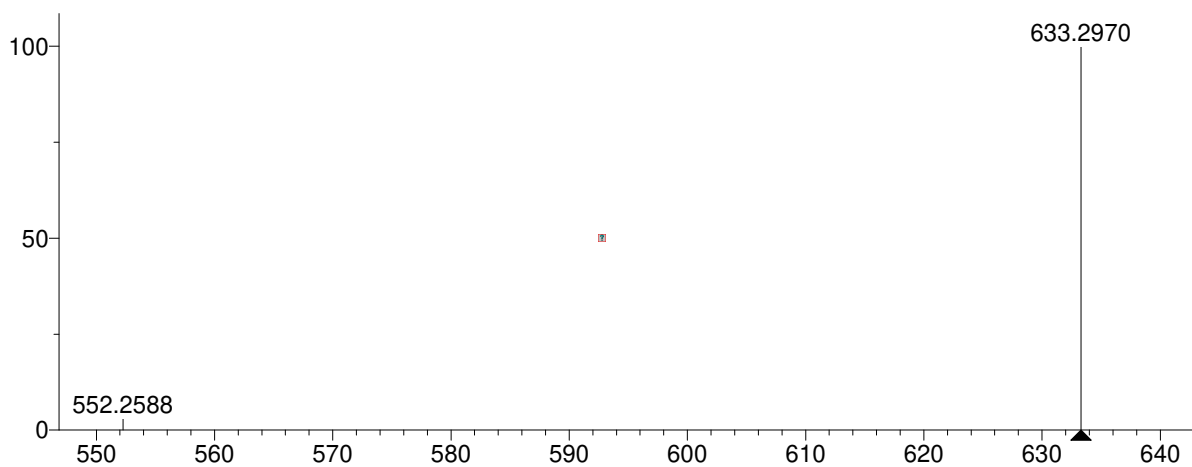

Hit 1 : Alloferon 1 [M+2H]<sup>2+</sup> HCD 28eV P=633.3  
C<sub>52</sub>H<sub>76</sub>N<sub>22</sub>O<sub>16</sub>; MF: 20; RMF: 697; Prob 100.0%; Lib: nist\_msms2; ID: 49643.

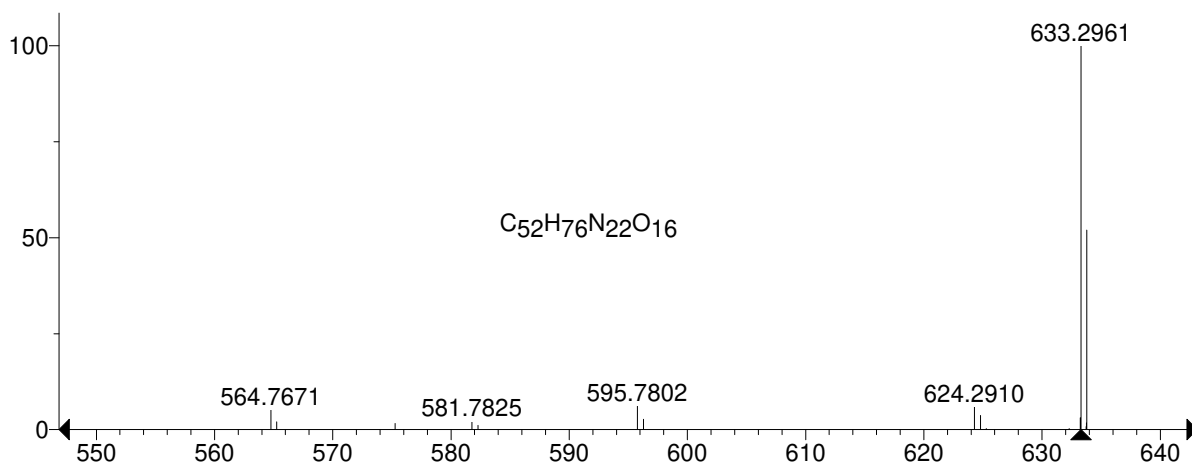

Unknown: Unknown (13.99\_656.2993m/z)  
Compound in Library Factor = 0

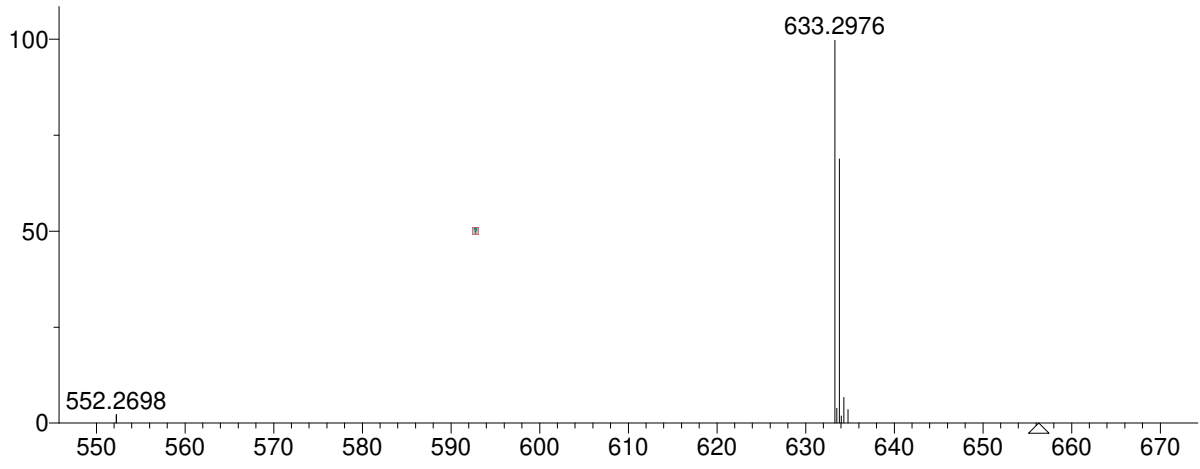

Unknown: Unknown (13.99\_656.8009m/z)  
Compound in Library Factor = 0

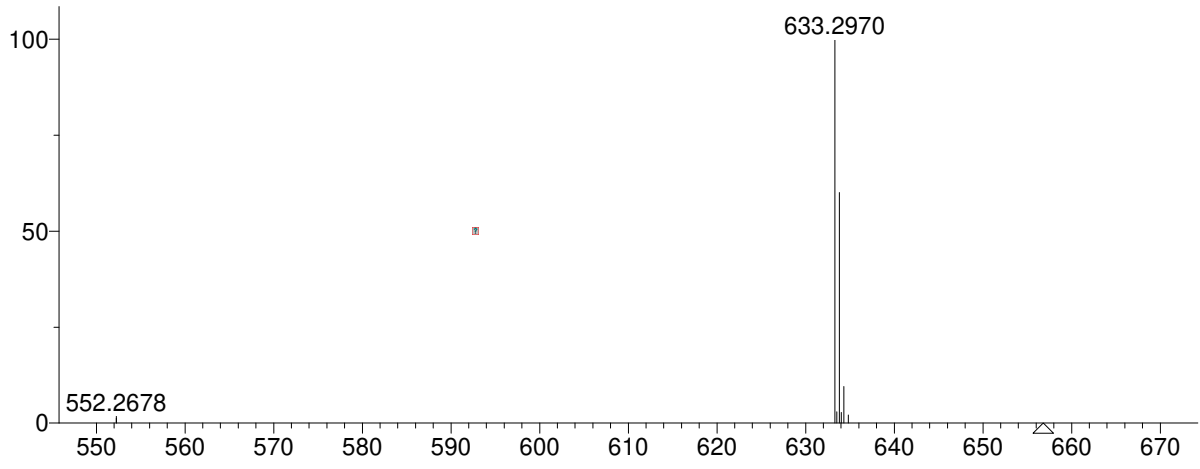

Unknown: Unknown (14.00\_651.2860m/z)  
Compound in Library Factor = 0

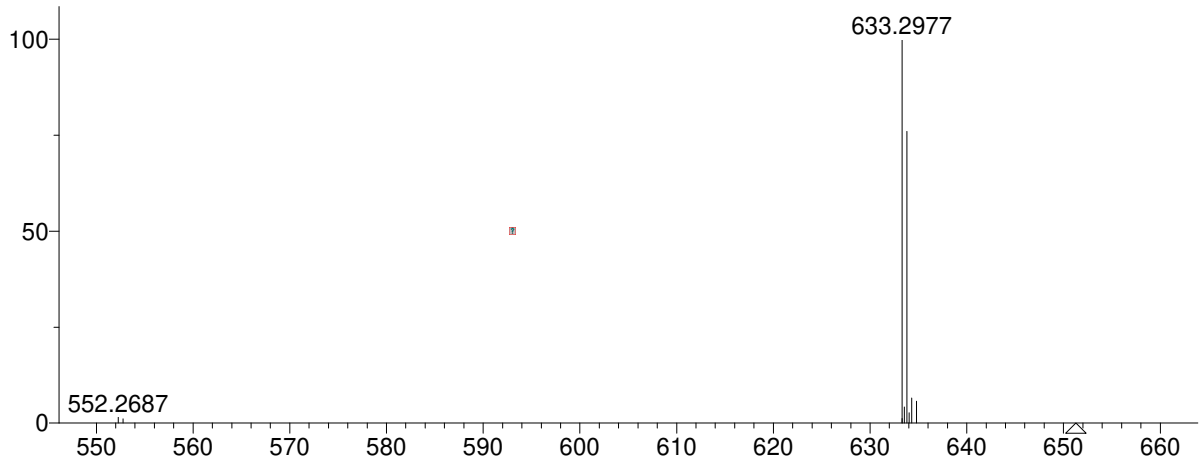



Unknown: Unknown (14.08\_475.1714m/z)  
Compound in Library Factor = 0

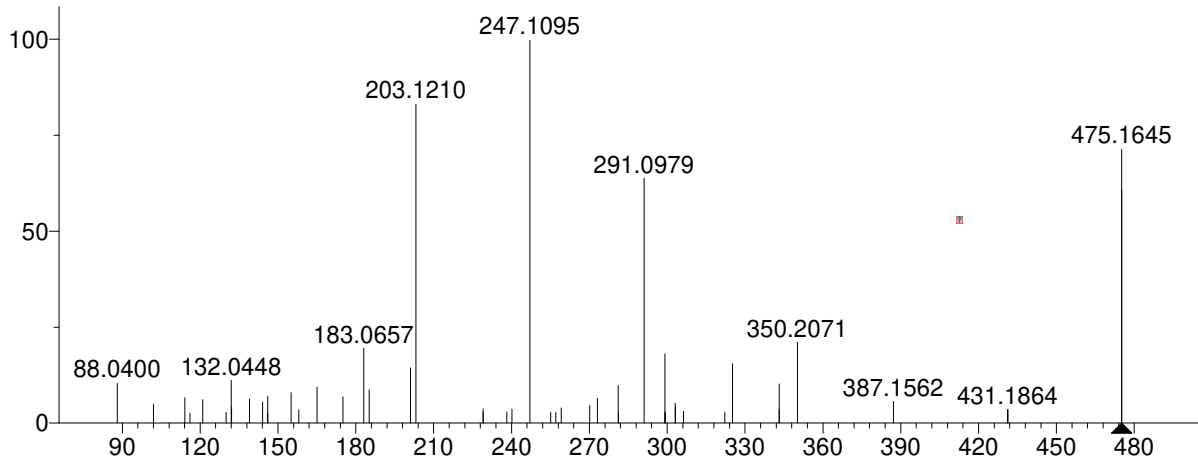

Unknown: Unknown (14.10\_622.2971m/z)  
Compound in Library Factor = 0

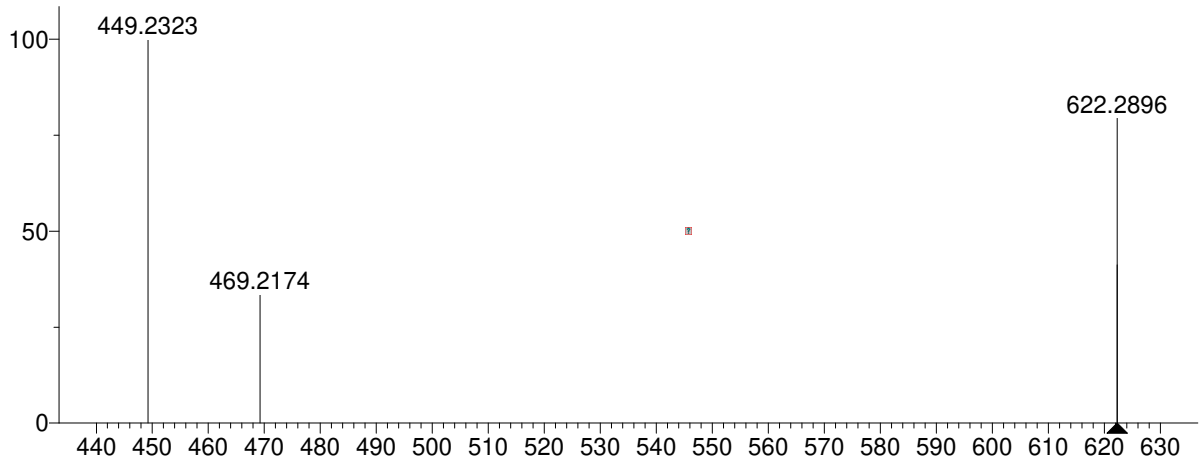

Unknown: Unknown (14.11\_578.2730m/z)  
Compound in Library Factor = 0

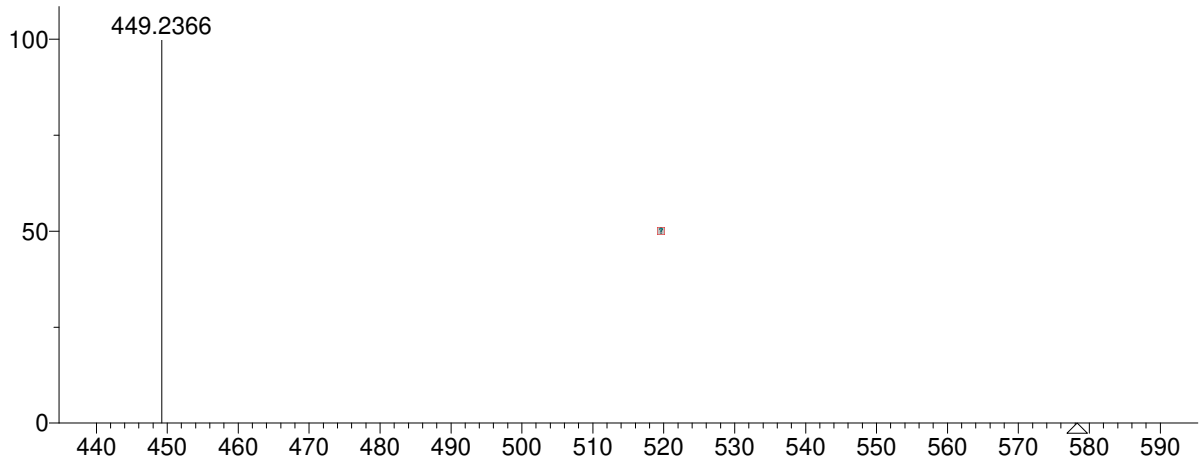

Unknown: Unknown (14.11\_633.3105m/z)  
Compound in Library Factor = -3273

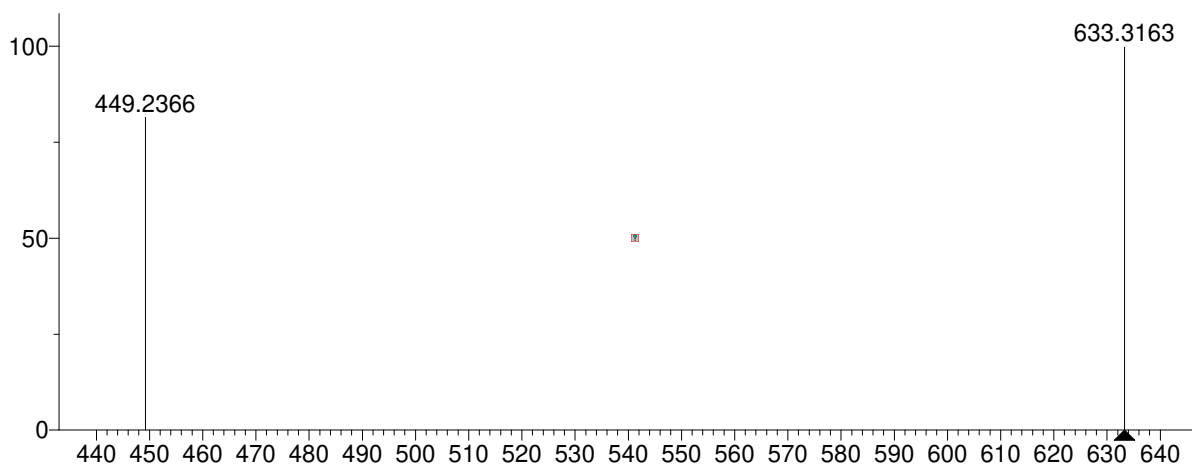

Hit 1 : [(t-Bu)DSer6, (Aza)Gly10]-LH-RH [M-2H]2- HCD 22eV P=633.3  
C<sub>59</sub>H<sub>84</sub>N<sub>18</sub>O<sub>14</sub>; MF: 9; RMF: 488; Prob 100.0%; Lib: nist\_msms2; ID: 80477.

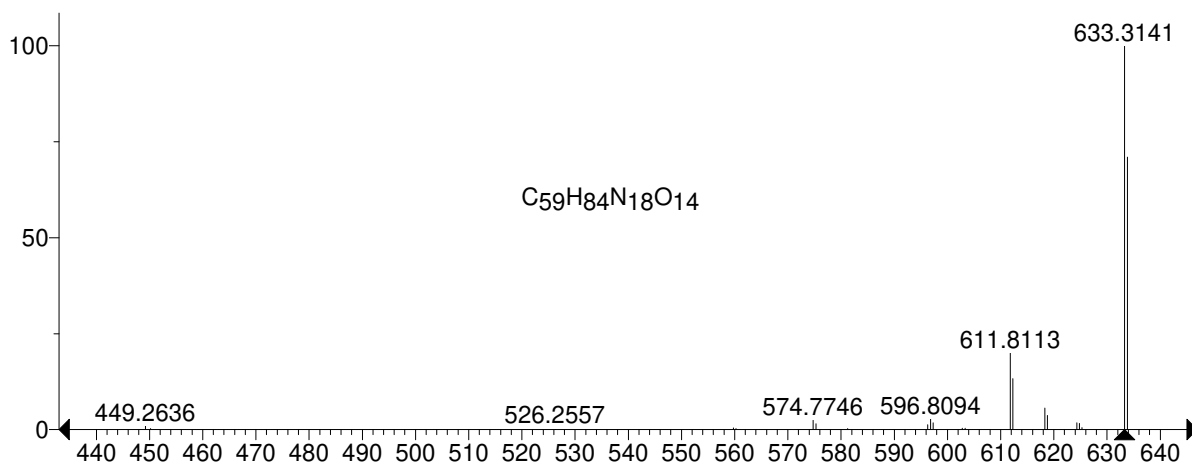

\*\* Search Report Page 1 of 2 \*\*

Unknown: Unknown (14.18\_200.1283m/z)  
Compound in Library Factor = -258

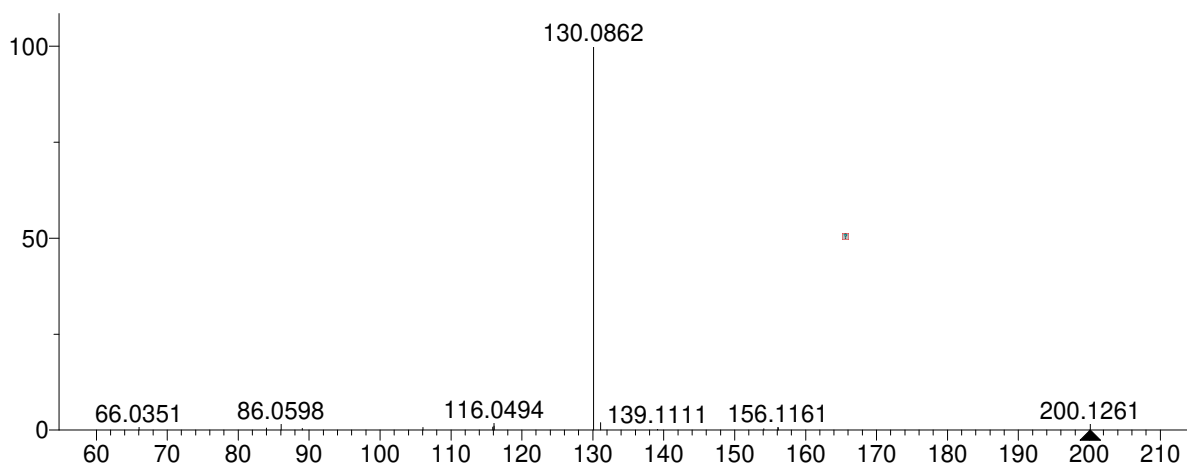

Hit 1 : Ecgonine-methyl-ester (EME) [M+H]<sup>+</sup> 10eV P=200.1  
C<sub>10</sub>H<sub>17</sub>NO<sub>3</sub>; MF: 252; RMF: 921; Prob 96.5%; Lib: mona-export-massbank; ID: 564.

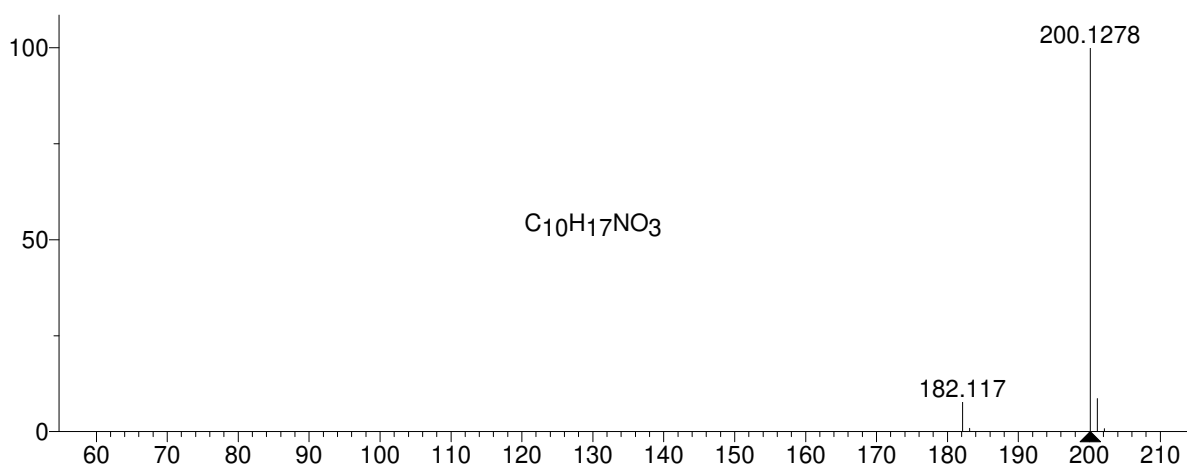

Hit 2 : N-Hexanoyl-L-homoserine lactone [M+H]<sup>+</sup> HCD 0V P=200.1  
C<sub>10</sub>H<sub>17</sub>NO<sub>3</sub>; MF: 5; RMF: 111; Prob 0.96%; CAS: 147852-83-3; Lib: nist\_msms; ID: 164664.

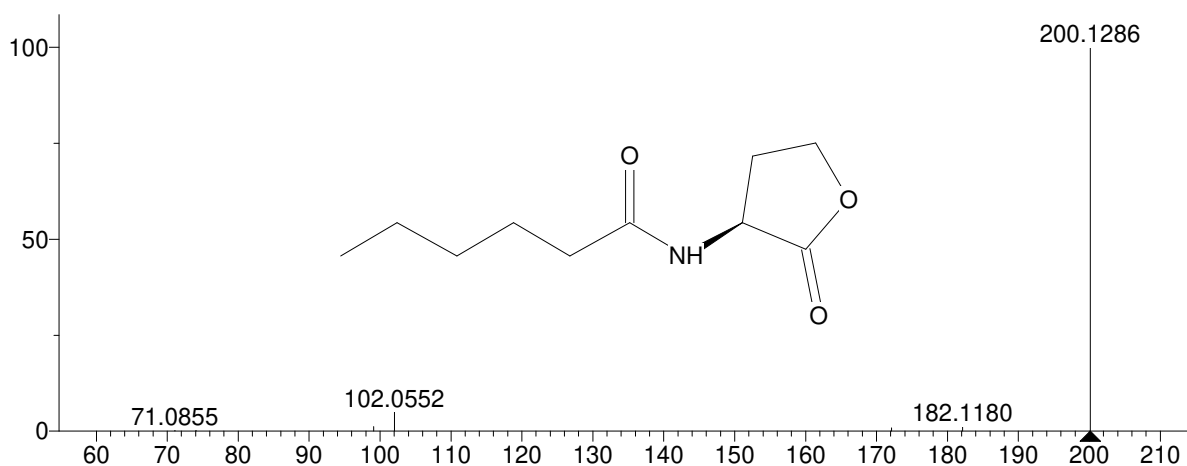

Hit 3 : N-Hexanoyl-DL-homoserine lactone [M+H]<sup>+</sup> HCD 2V P=200.1  
C<sub>10</sub>H<sub>17</sub>NO<sub>3</sub>; MF: 4; RMF: 106; Prob 0.92%; CAS: 106983-28-2; Lib: nist\_msms; ID: 295469.

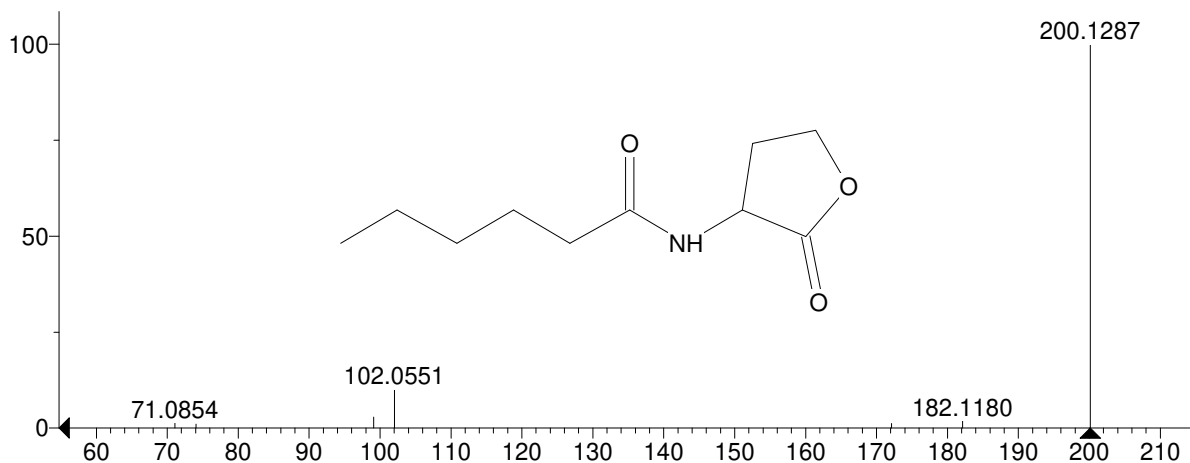

Hit 4 : Methylecgonine [M+H]<sup>+</sup> HCD 6V P=200.1  
C<sub>10</sub>H<sub>17</sub>NO<sub>3</sub>; MF: 2; RMF: 101; Prob 0.85%; CAS: 7143-09-1; Lib: nist\_msms; ID: 370464.

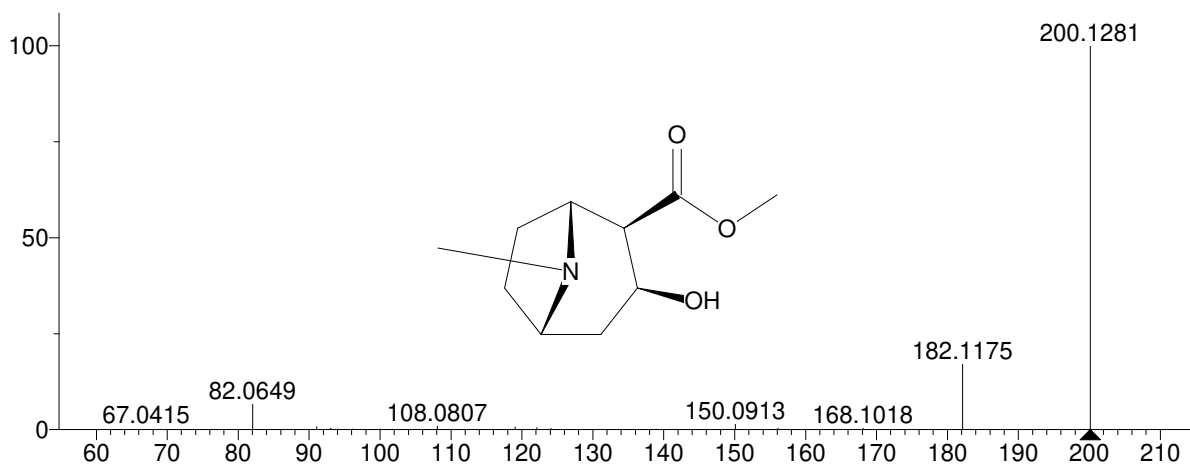

Hit 5 : Ecgonine methylester [M+H]<sup>+</sup> 35eV P=200.1  
C<sub>10</sub>H<sub>17</sub>NO<sub>3</sub>; MF: 0; RMF: 51; Prob 0.78%; Lib: mona-export-fiehn\_hilic; ID: 1907.

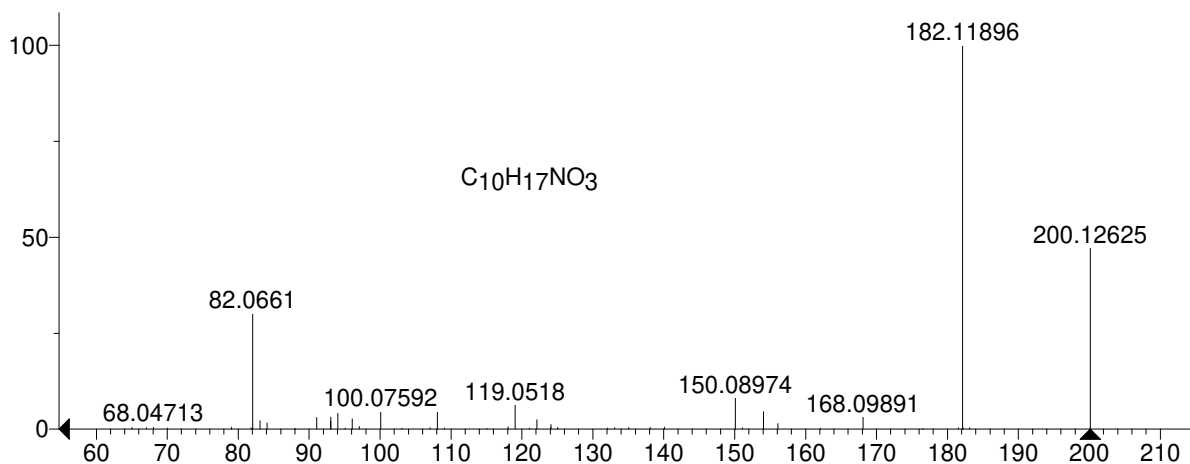

Unknown: Unknown (14.19\_337.0919m/z)  
Compound in Library Factor = -3273

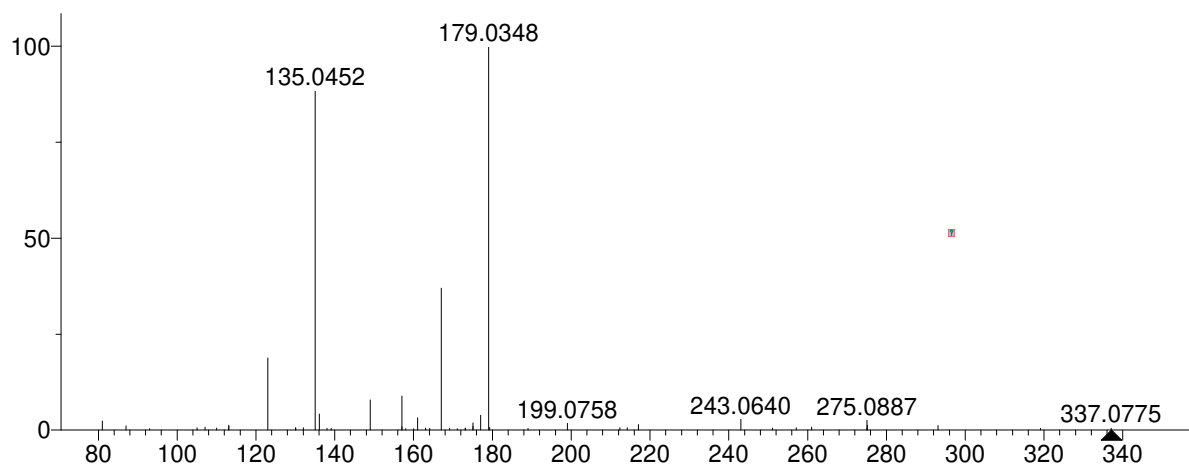

Hit 1 : Neochlorogenic acid [M+H-H<sub>2</sub>O]<sup>+</sup> HCD 74V P=337.1  
C<sub>16</sub>H<sub>18</sub>O<sub>9</sub>; MF: 18; RMF: 153; Prob 14.6%; CAS: 906-33-2; Lib: nist\_msms; ID: 239449.

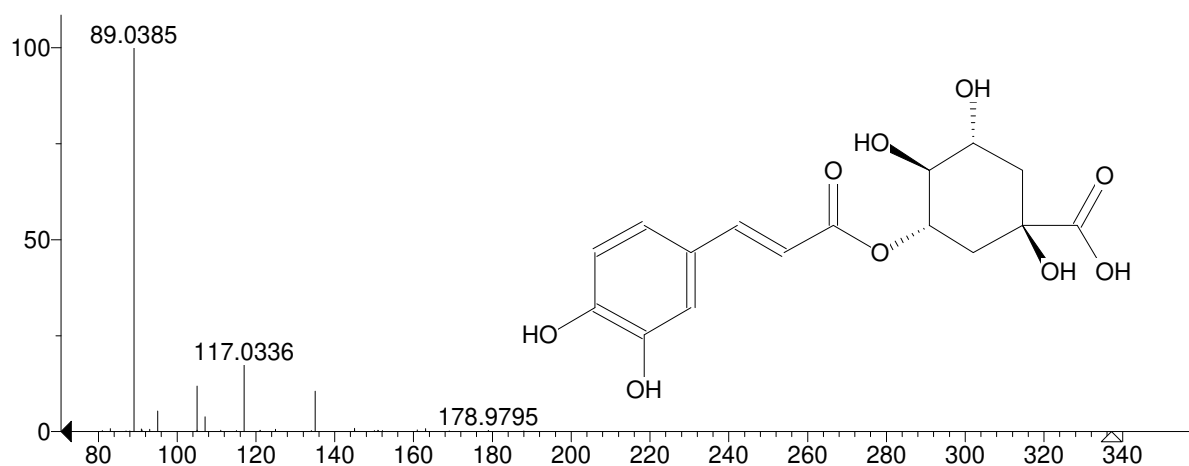

Hit 2 : Chlorogenic acid [M+H-H<sub>2</sub>O]<sup>+</sup> HCD 33V P=337.1  
C<sub>16</sub>H<sub>18</sub>O<sub>9</sub>; MF: 13; RMF: 147; Prob 11.8%; CAS: 327-97-9; Lib: nist\_msms; ID: 100722.

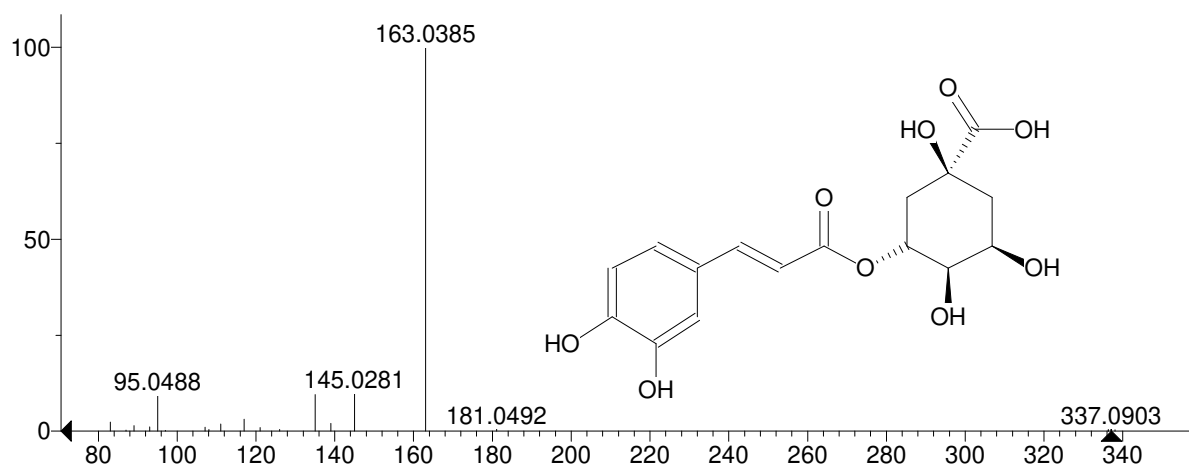

\*\* Search Report Page 2 of 2 \*\*

Hit 3 : NCGC00180823-02!(3R,4R,5R)-5-[(E)-3-(3,4-dihydroxyphenyl)prop-2-enoyl]oxy-3,4-dihydroxycyclohexene  
C<sub>16</sub>H<sub>16</sub>O<sub>8</sub>; MF: 7; RMF: 253; Prob 9.27%; Lib: mona-export-gnps; ID: 9151.

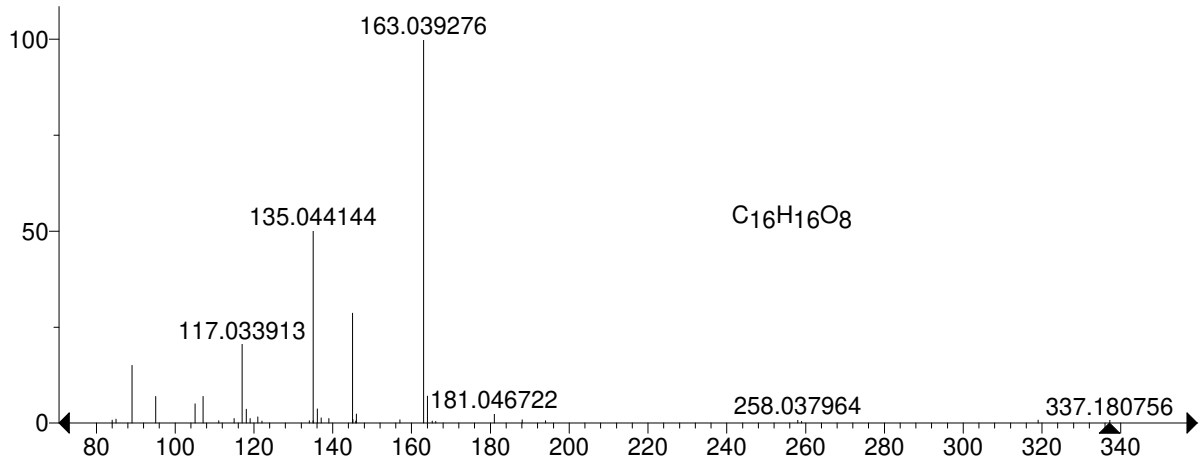

Hit 4 : NCGC00380360-01!7-methoxy-6-[(2S,3R,4S,5S,6R)-3,4,5-trihydroxy-6-(hydroxymethyl)oxan-2-yl]oxychron  
C<sub>16</sub>H<sub>18</sub>O<sub>9</sub>; MF: 3; RMF: 72; Prob 7.83%; Lib: mona-export-gnps; ID: 9547.

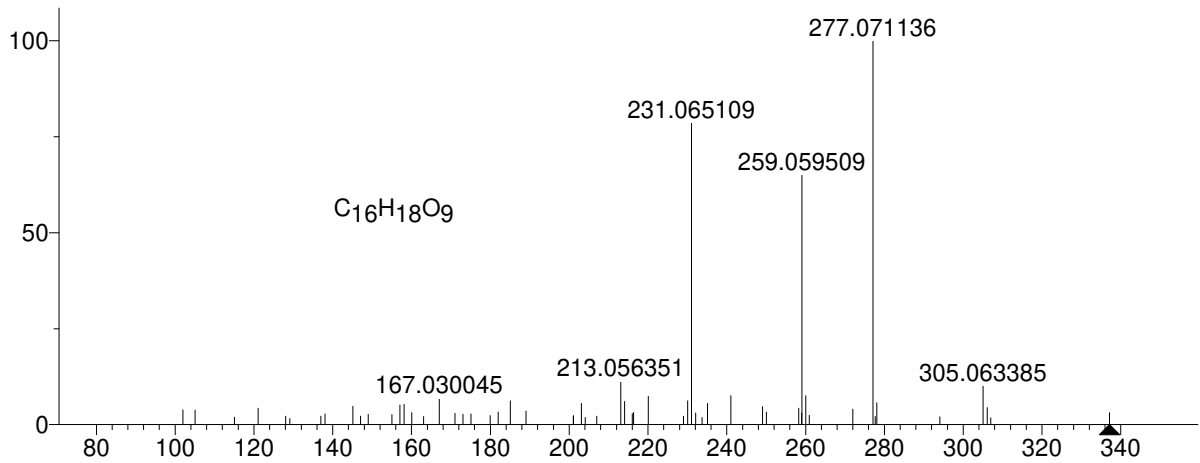

Hit 5 : 2-(4a,9,10a-trihydroxy-1-methyl-5,10-dioxo-3,4-dihydro-1H-benzo[g]isochromen-3-yl)acetic acid [M+H]<sup>+</sup>  
C<sub>16</sub>H<sub>16</sub>O<sub>8</sub>; MF: 1; RMF: 44; Prob 7.22%; Lib: mona-export-vf-npl\_qexactive; ID: 19101.

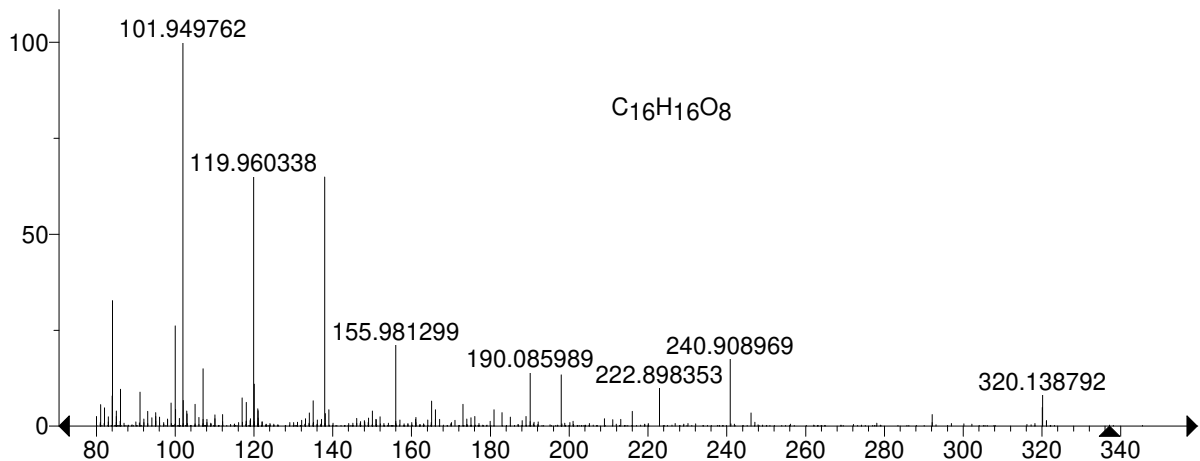



Unknown: Unknown (14.19\_436.0086m/z)  
Compound in Library Factor = 0

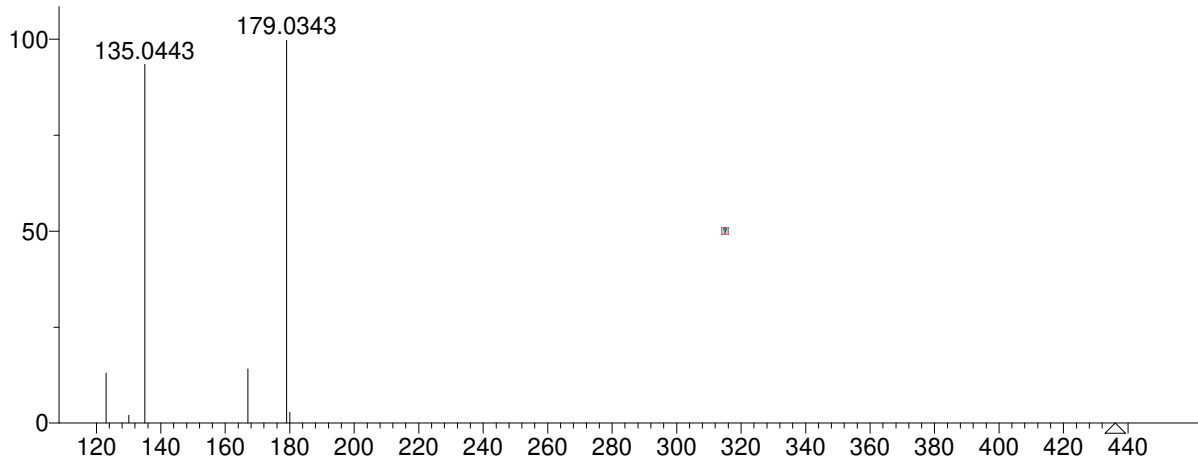

Unknown: Unknown (14.20\_461.9564m/z)  
Compound in Library Factor = 0

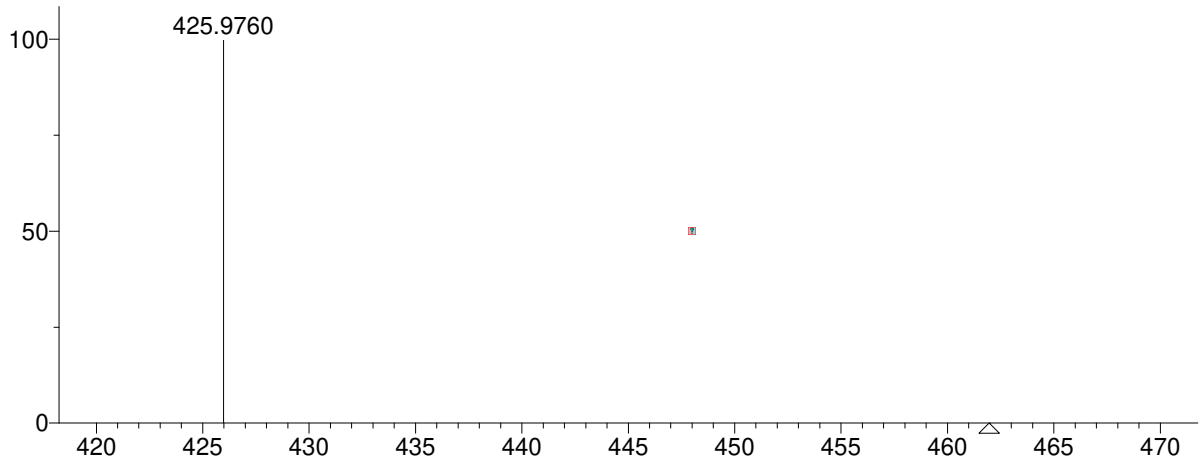

\*\* Search Report Page 1 of 2 \*\*

Unknown: Unknown (14.21\_625.2980m/z)  
Compound in Library Factor = -1309

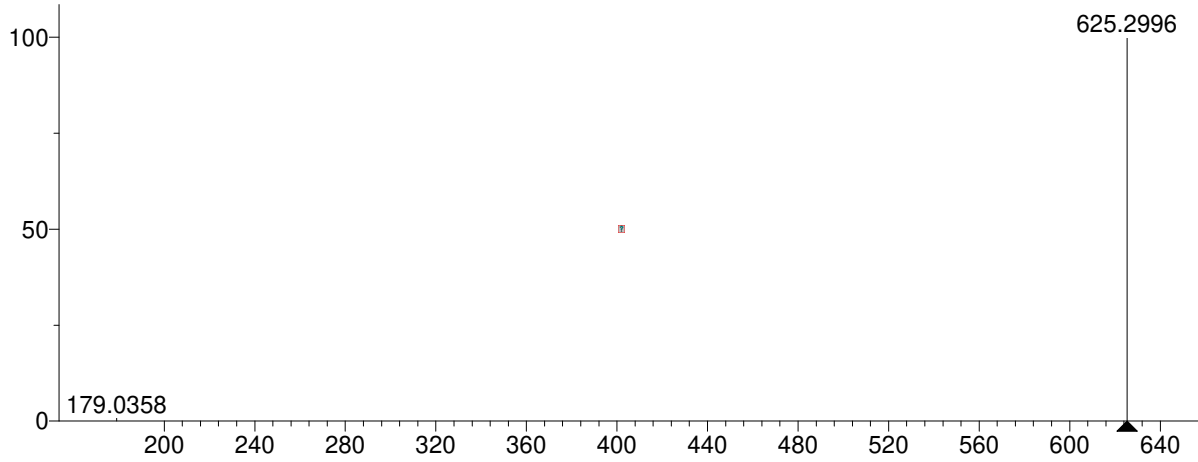

Hit 1 : PI 19:1; PI 2:0-17:1; [M-H]<sup>-</sup> [M-H]<sup>-</sup> P=625.3  
C<sub>28</sub>H<sub>51</sub>O<sub>13</sub>P; MF: 57; RMF: 704; Prob 18.6%; Lib: msdial-insilicomsm-lipids-neg; ID: 326480.

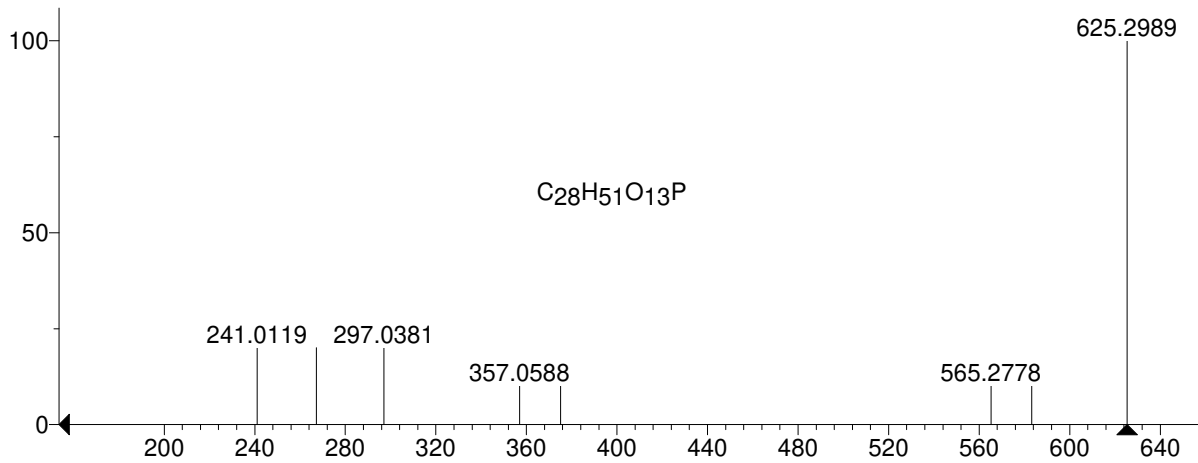

Hit 2 : PI 19:1; PI 3:0-16:1; [M-H]<sup>-</sup> [M-H]<sup>-</sup> P=625.3  
C<sub>28</sub>H<sub>51</sub>O<sub>13</sub>P; MF: 57; RMF: 704; Prob 18.6%; Lib: msdial-insilicomsm-lipids-neg; ID: 326535.

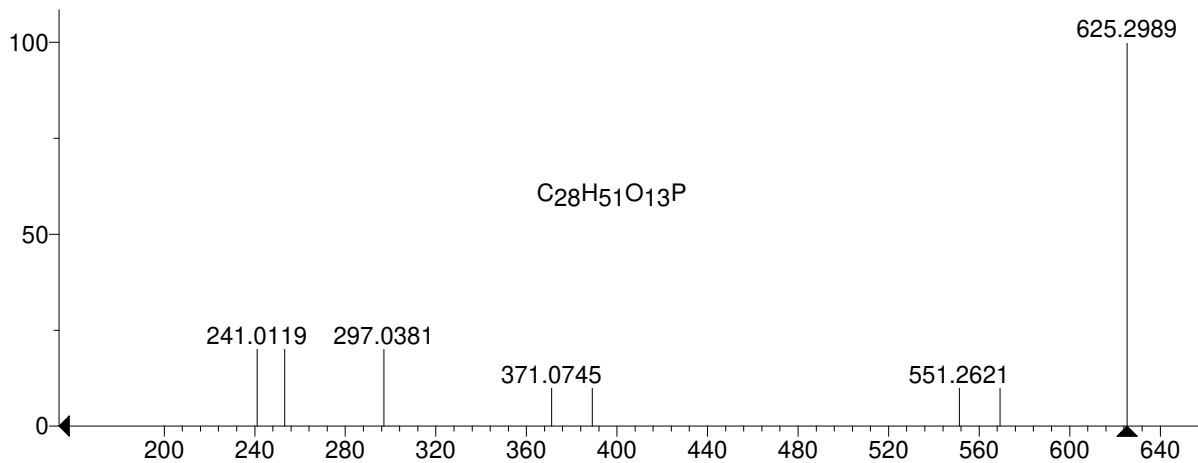

\*\* Search Report Page 2 of 2 \*\*

Hit 3 : PI 19:1; PI 4:0-15:1; [M-H]<sup>-</sup> [M-H]<sup>-</sup> P=625.3  
C<sub>28</sub>H<sub>51</sub>O<sub>13</sub>P; MF: 57; RMF: 704; Prob 18.6%; Lib: msdial-insilicomsm-lipids-neg; ID: 326592.

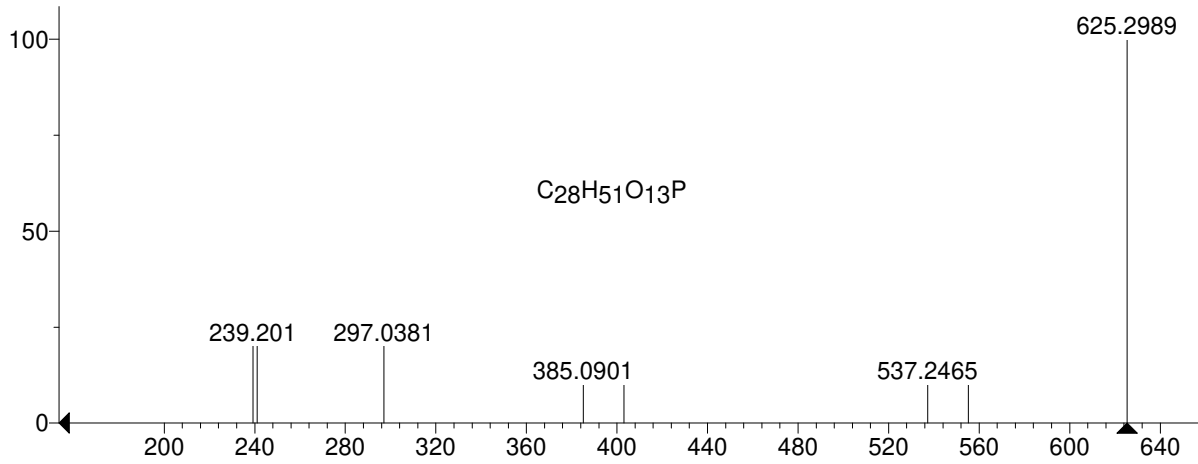

Hit 4 : PI 19:1; PI 5:0-14:1; [M-H]<sup>-</sup> [M-H]<sup>-</sup> P=625.3  
C<sub>28</sub>H<sub>51</sub>O<sub>13</sub>P; MF: 57; RMF: 704; Prob 18.6%; Lib: msdial-insilicomsm-lipids-neg; ID: 326648.

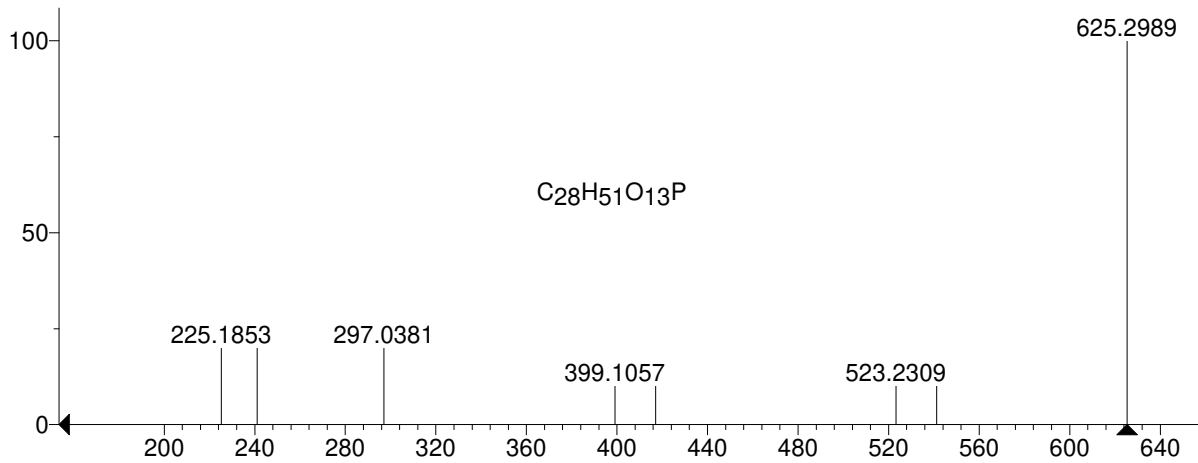

Hit 5 : PI 19:1; PI 6:0-13:1; [M-H]<sup>-</sup> [M-H]<sup>-</sup> P=625.3  
C<sub>28</sub>H<sub>51</sub>O<sub>13</sub>P; MF: 57; RMF: 704; Prob 18.6%; Lib: msdial-insilicomsm-lipids-neg; ID: 326703.

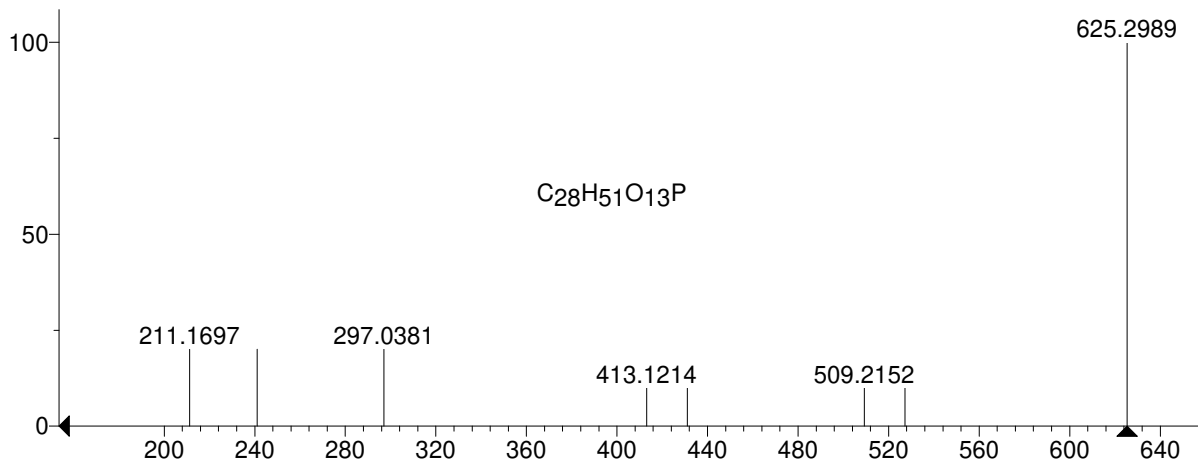

Unknown: Unknown (14.22\_648.3015m/z)  
Compound in Library Factor = 0

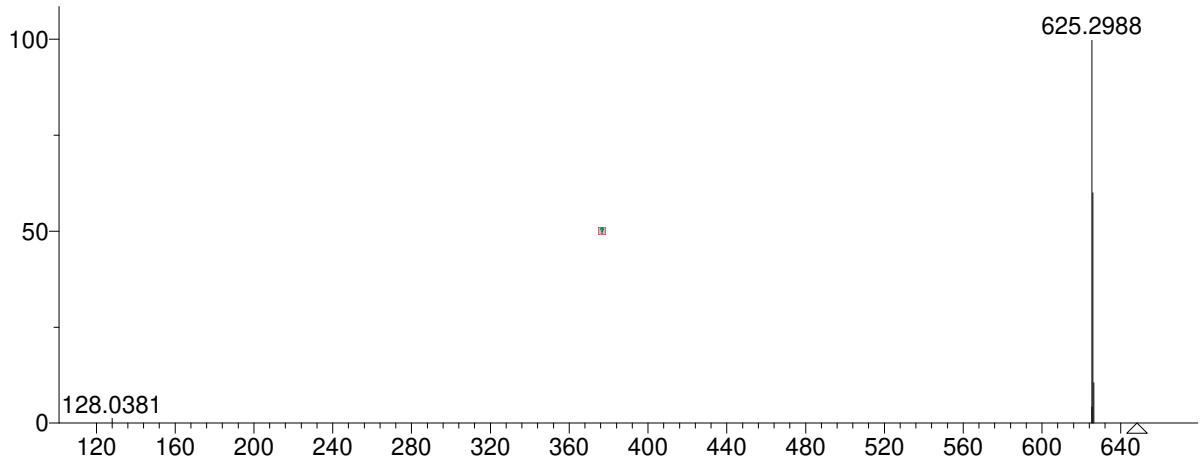

Unknown: Unknown (14.22\_648.8027m/z)  
Compound in Library Factor = 0

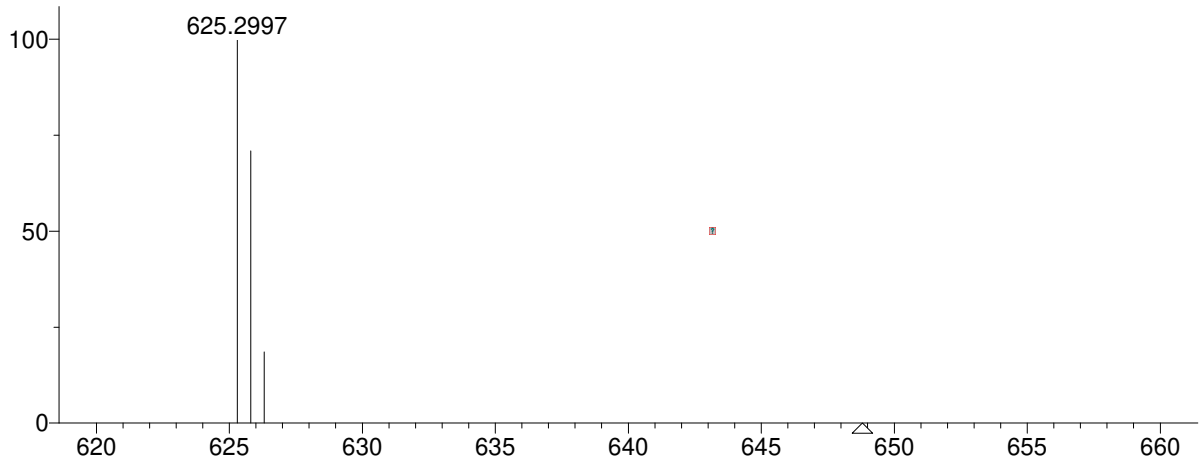

Unknown: Unknown (14.31\_401.0525m/z)  
Compound in Library Factor = 0

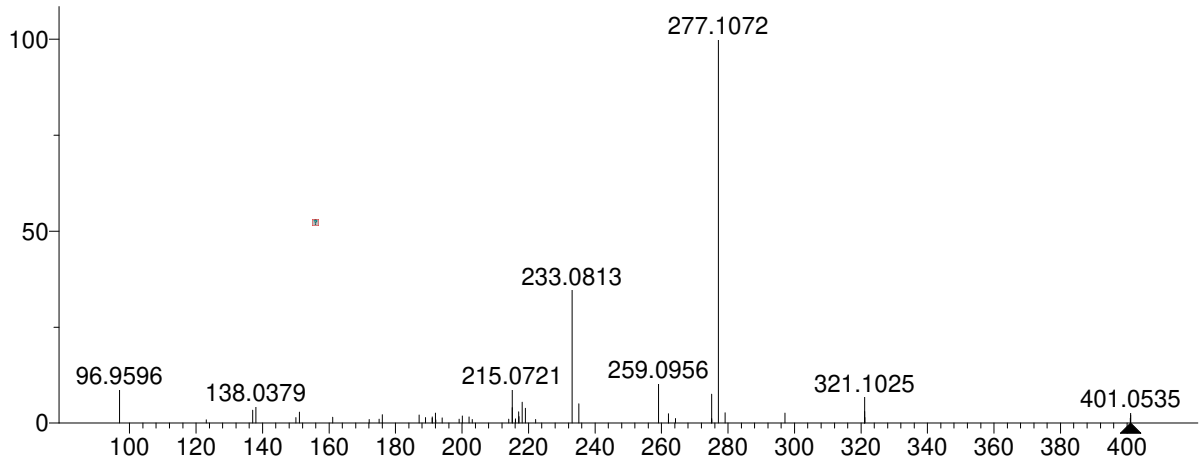

\*\* Search Report Page 1 of 2 \*\*

Unknown: Unknown (14.32\_243.1584m/z)  
Compound in Library Factor = -329

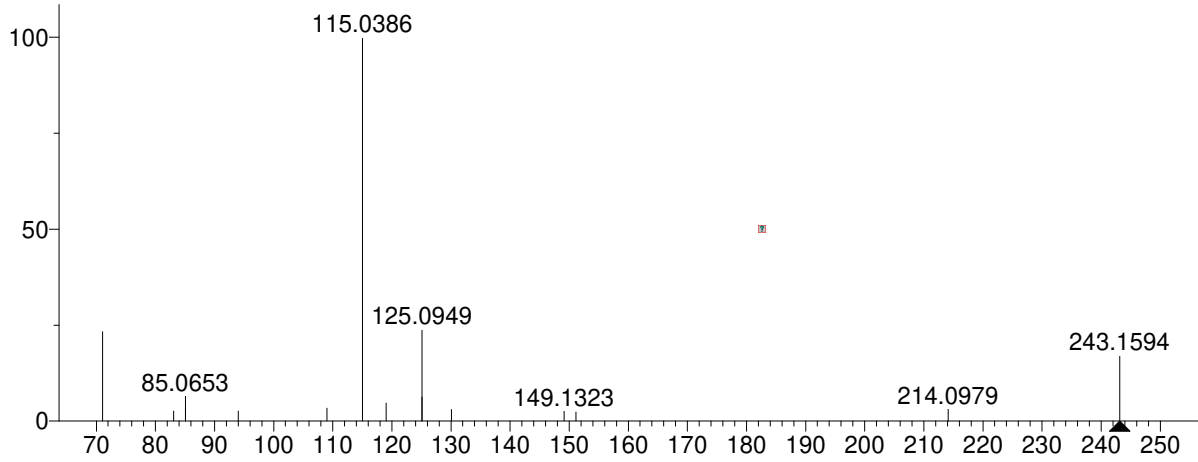

Hit 1 : 1,11-Undecanedicarboxylic acid [M-H]<sup>-</sup> HCD 14V P=243.2  
C<sub>13</sub>H<sub>24</sub>O<sub>4</sub>; MF: 226; RMF: 861; Prob 98.3%; CAS: 505-52-2; Lib: nist\_msms; ID: 151094.

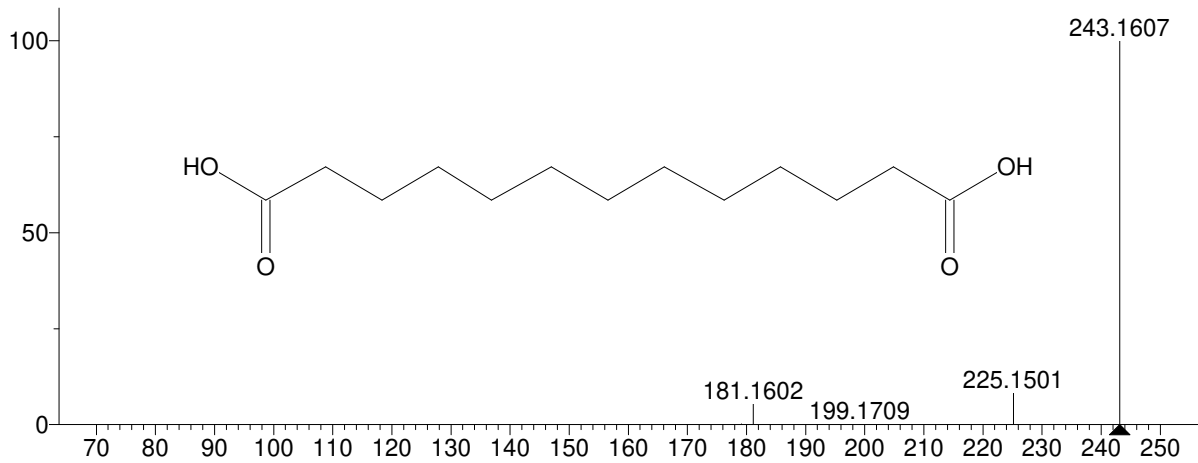

Hit 2 : Amprolium cation [Cat]<sup>+</sup> HCD 0V P=243.2  
C<sub>14</sub>H<sub>19</sub>N<sub>4</sub>; MF: 13; RMF: 273; Prob 0.98%; CAS: 13082-85-4; Lib: nist\_msms; ID: 151491.

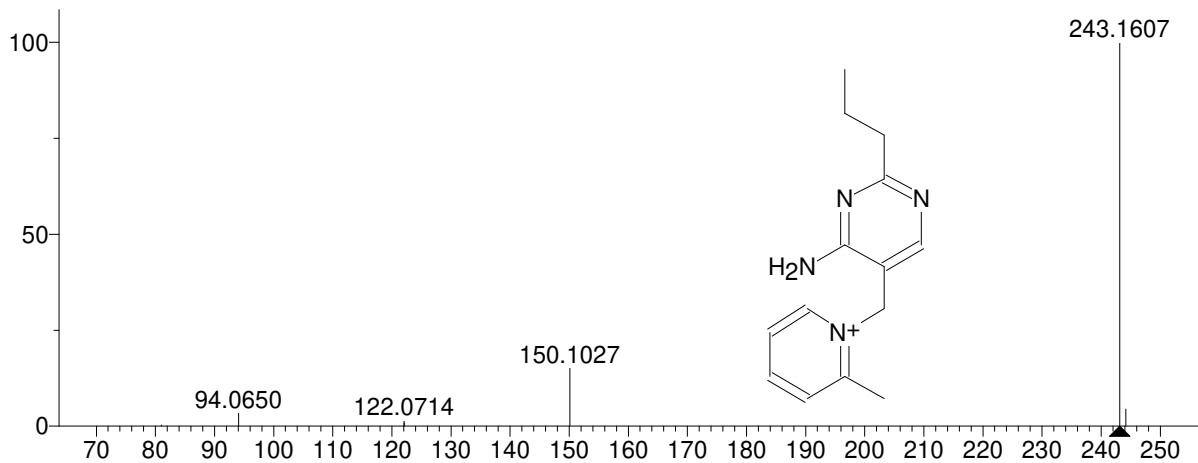



Hit 3 : (Z)-2-octylpent-2-enedioic acid [M+H]<sup>+</sup> 35HCD P=243.2  
C<sub>13</sub>H<sub>22</sub>O<sub>4</sub>; MF: 2; RMF: 129; Prob 0.67%; Lib: mona-export-vf-npl\_qexactive; ID: 22777.

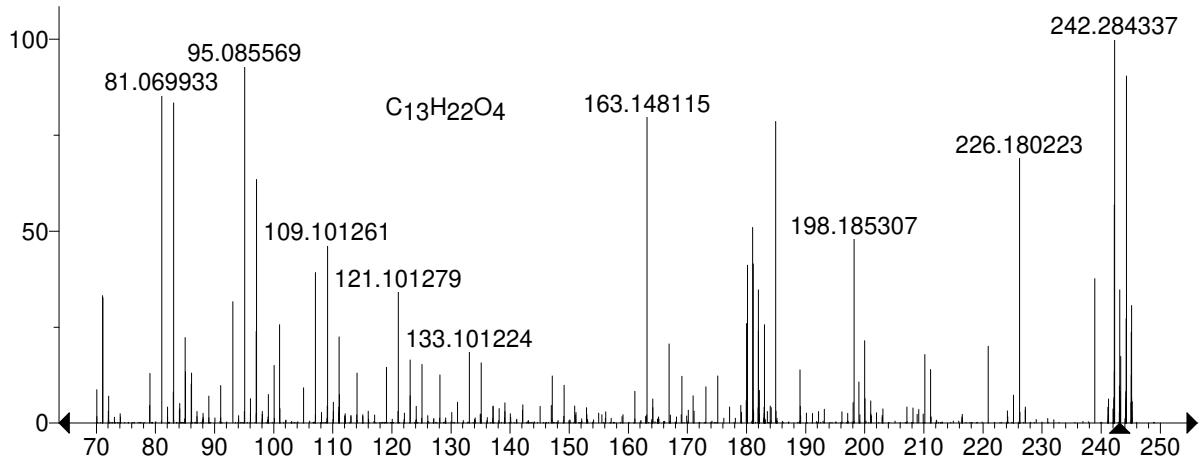

Unknown: Unknown (14.33\_292.9303m/z)  
Compound in Library Factor = 0

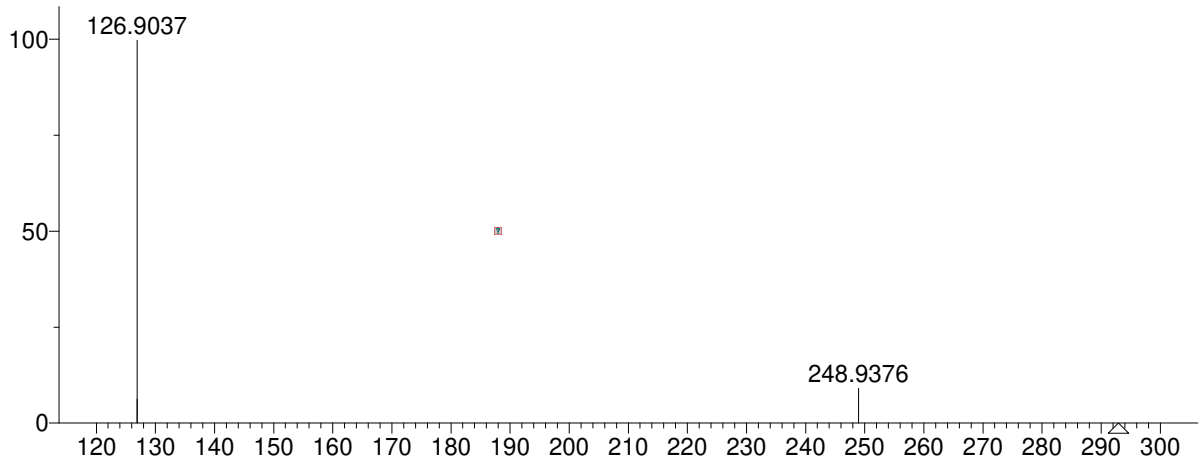

Unknown: Unknown (14.34\_500.2237m/z)  
Compound in Library Factor = 0

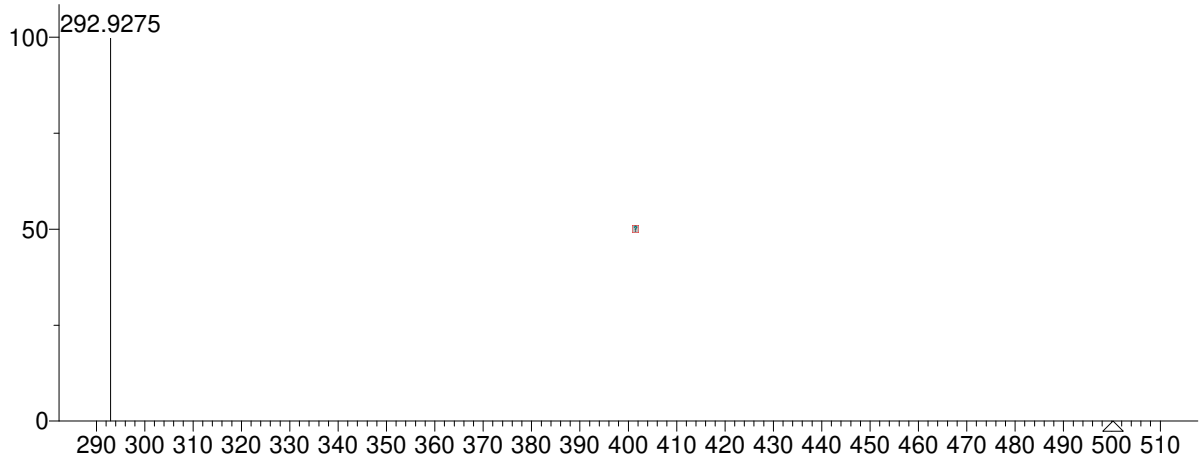

Unknown: Unknown (14.44\_757.3808m/z)  
Compound in Library Factor = 0

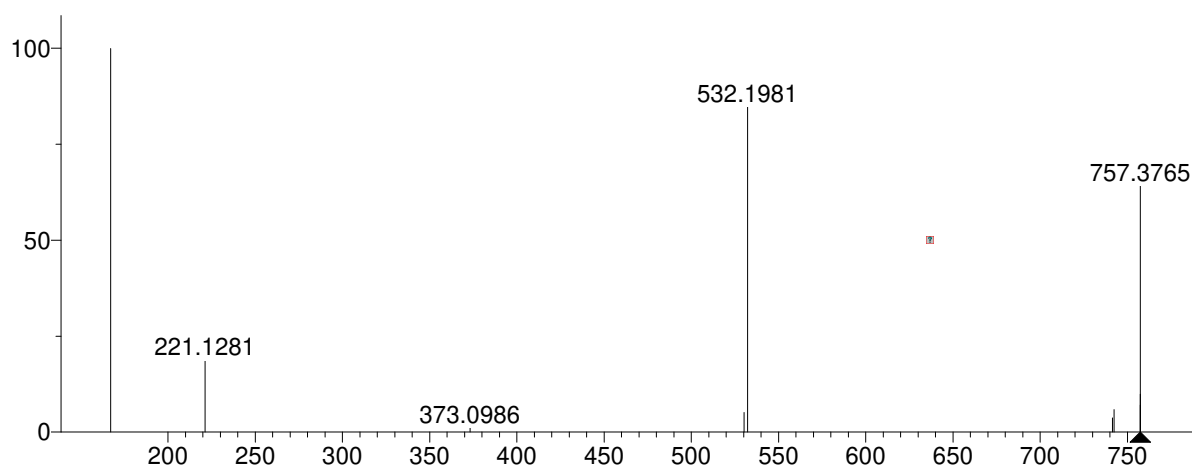

Hit 1 : ACTH (1-39), human [M+6H]<sup>6+</sup> HCD 17eV P=757.4  
C<sub>207</sub>H<sub>308</sub>N<sub>56</sub>O<sub>58</sub>S; MF: 0; RMF: 92; Prob 100.0%; CAS: 12279-41-3; Lib: nist\_msms2; ID: 51586.

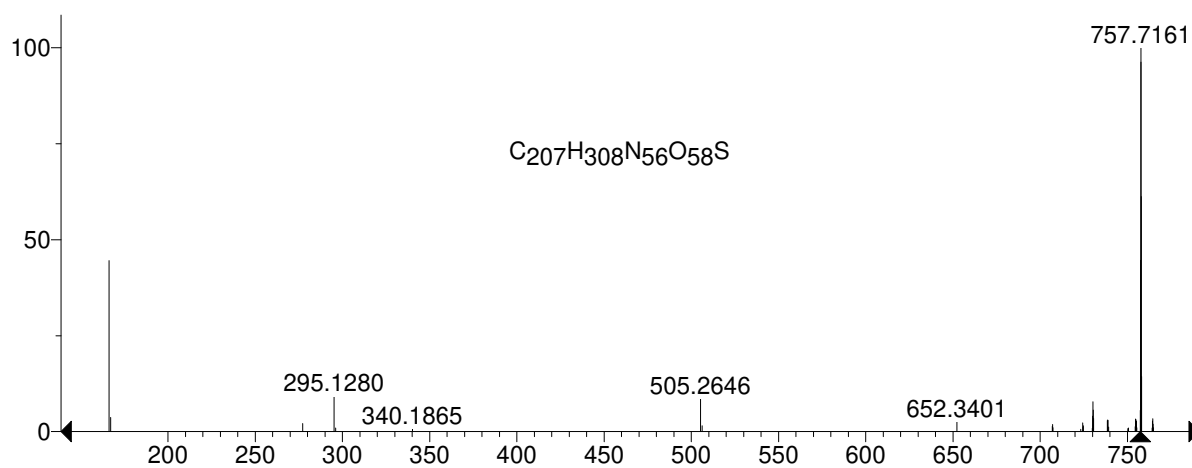

\*\* Search Report Page 1 of 2 \*\*

Unknown: Unknown (14.45\_532.1979m/z)  
Compound in Library Factor = -791

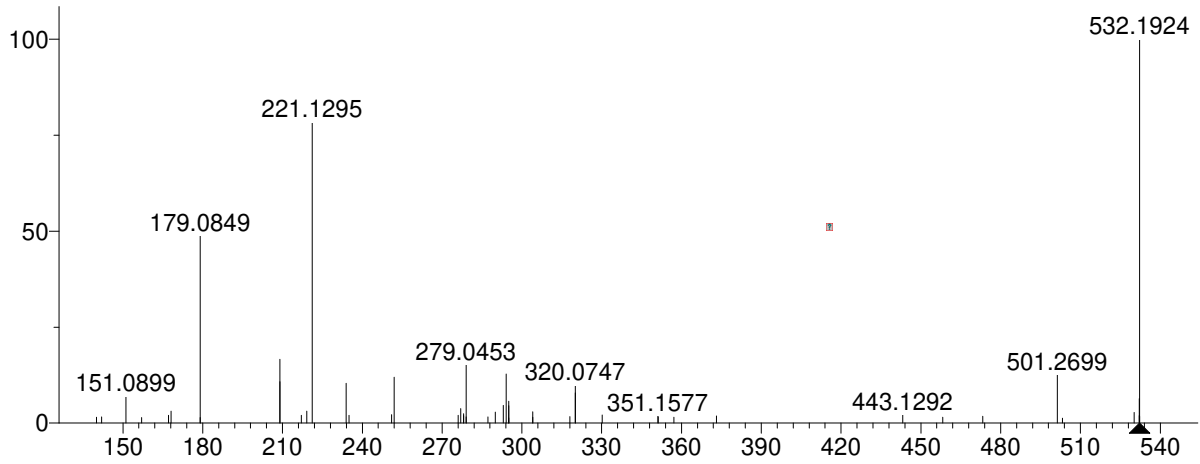

Hit 1 : LeaLeX [M+H+Na]<sup>2+</sup> HCD 9V P=532.2  
C<sub>40</sub>H<sub>68</sub>N<sub>2</sub>O<sub>29</sub>; MF: 103; RMF: 844; Prob 87.6%; Lib: nist\_msms; ID: 523740.

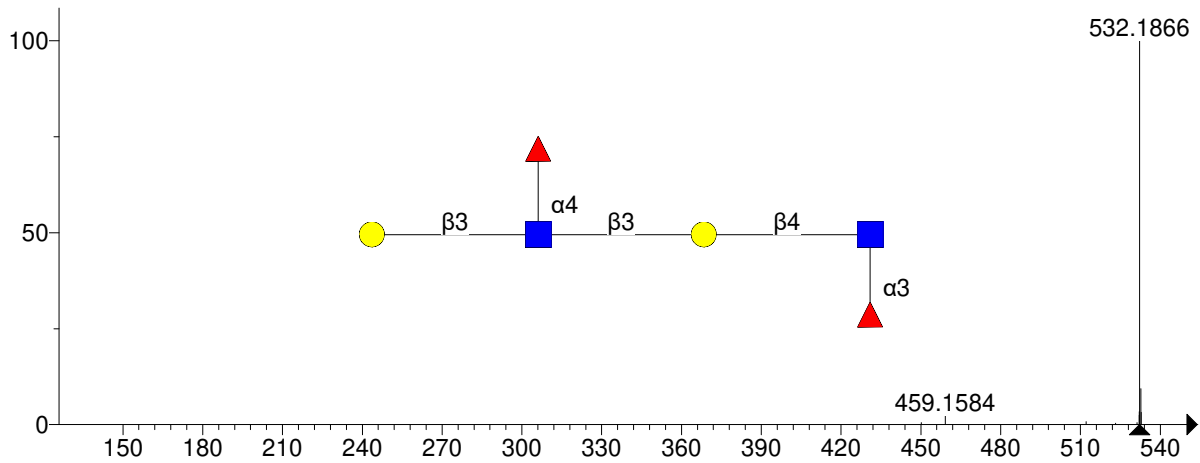

Hit 2 : [(2R,3S,4S,5R,6R)-6-[(2S,3S,4S,5R)-4-acetyloxy-3-hydroxy-2,5-bis(hydroxymethyl)oxolan-2-yl]oxy-3,4,5-tri  
C<sub>23</sub>H<sub>30</sub>O<sub>13</sub>; MF: 1; RMF: 62; Prob 6.30%; Lib: mona-export-vf-npl\_qexactive; ID: 12471.

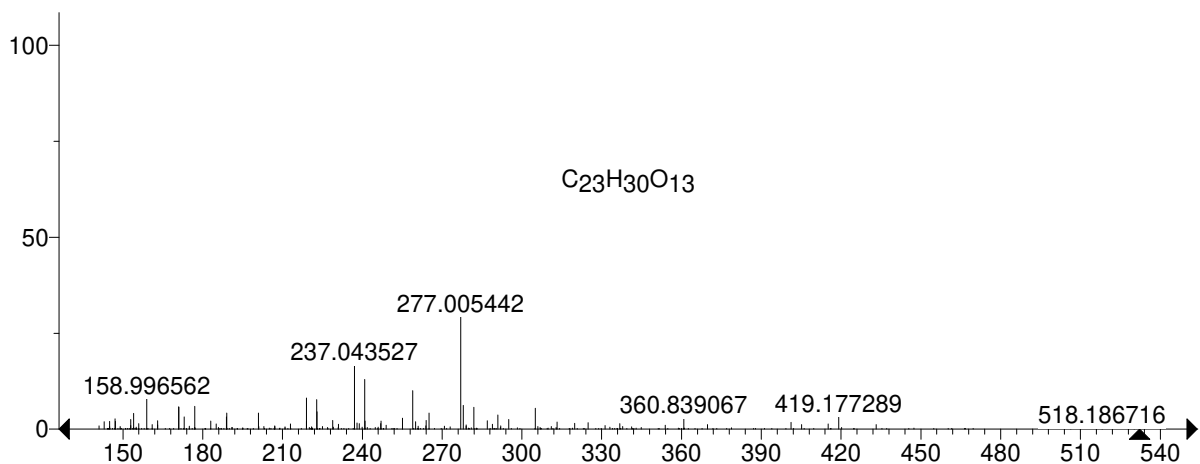

\*\* Search Report Page 2 of 2 \*\*

Hit 3 : NCGC00380580-01\_C23H30O13\_alpha-D-Glucopyranoside, 4-O-acetyl-beta-D-fructofuranosyl 6-O-[(2E)-C23H30O13; MF: 0; RMF: 55; Prob 6.05%; Lib: mona-export-gnps; ID: 13204.

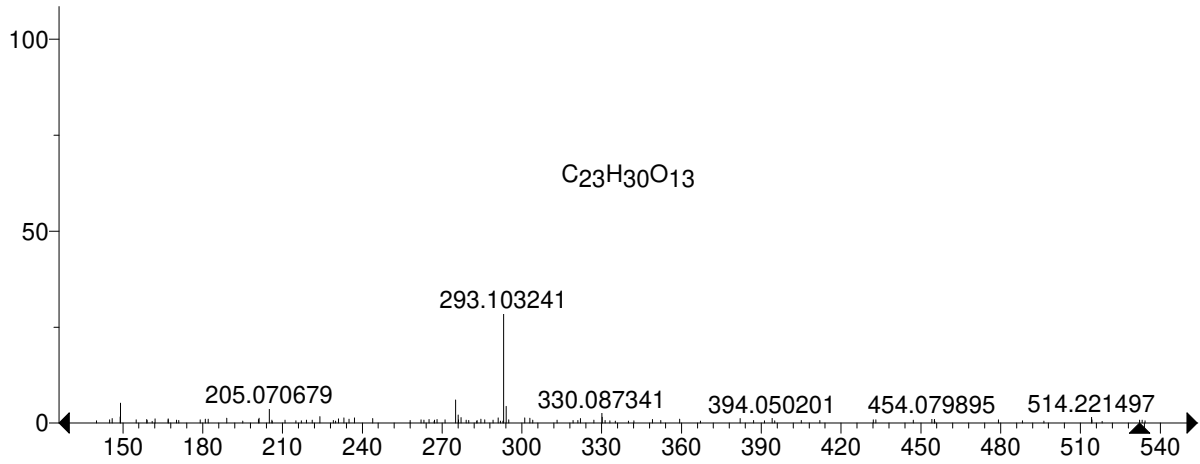

\*\* Search Report Page 1 of 2 \*\*

Unknown: Unknown (14.46\_167.0817m/z)  
Compound in Library Factor = -3273

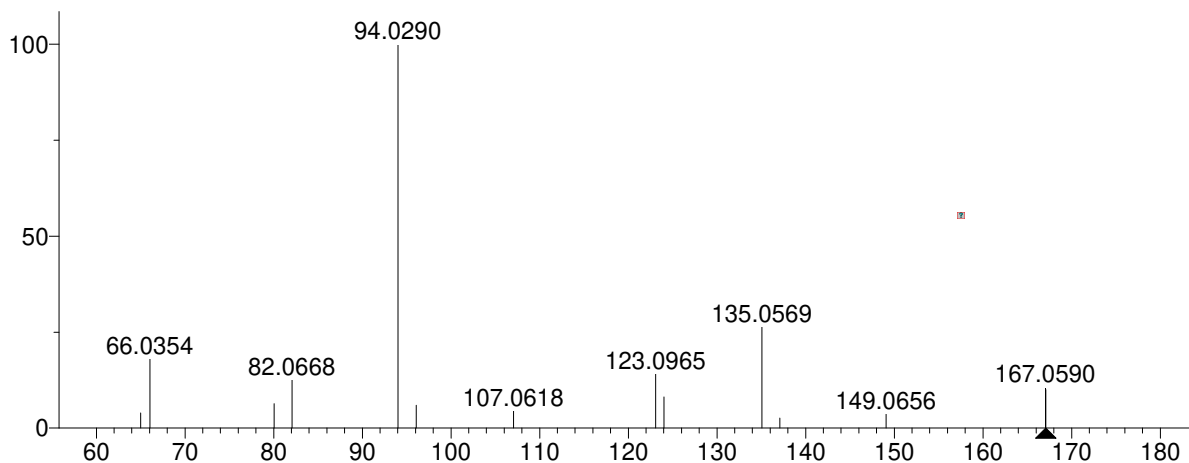

Hit 1 : Isouron [M+H-C<sub>2</sub>H<sub>7</sub>N]<sup>+</sup> HCD 16V P=167.1  
C<sub>10</sub>H<sub>17</sub>N<sub>3</sub>O<sub>2</sub>; MF: 24; RMF: 233; Prob 18.0%; CAS: 55861-78-4; Lib: nist\_msms; ID: 471161.

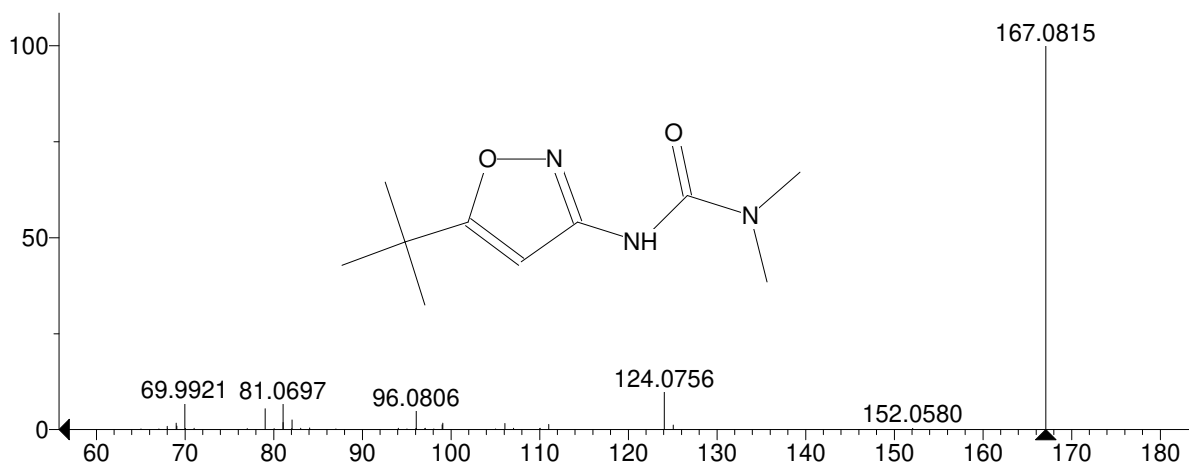

Hit 2 : Diethyl ethylphosphonate [M+H]<sup>+</sup> HCD 1V P=167.1  
C<sub>6</sub>H<sub>15</sub>O<sub>3</sub>P; MF: 17; RMF: 221; Prob 13.8%; CAS: 78-38-6; Lib: nist\_msms; ID: 106000.

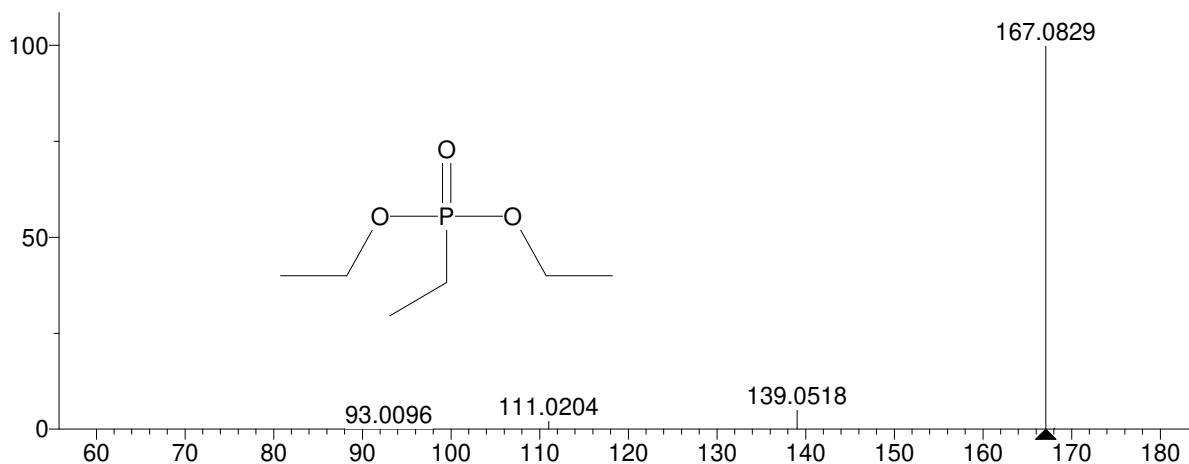

Hit 3 : PYRIDOXAMINE [M-H]<sup>-</sup> P=167.1  
C<sub>8</sub>H<sub>12</sub>N<sub>2</sub>O<sub>2</sub>; MF: 16; RMF: 222; Prob 13.2%; Lib: msms-neg-gnps; ID: 278.

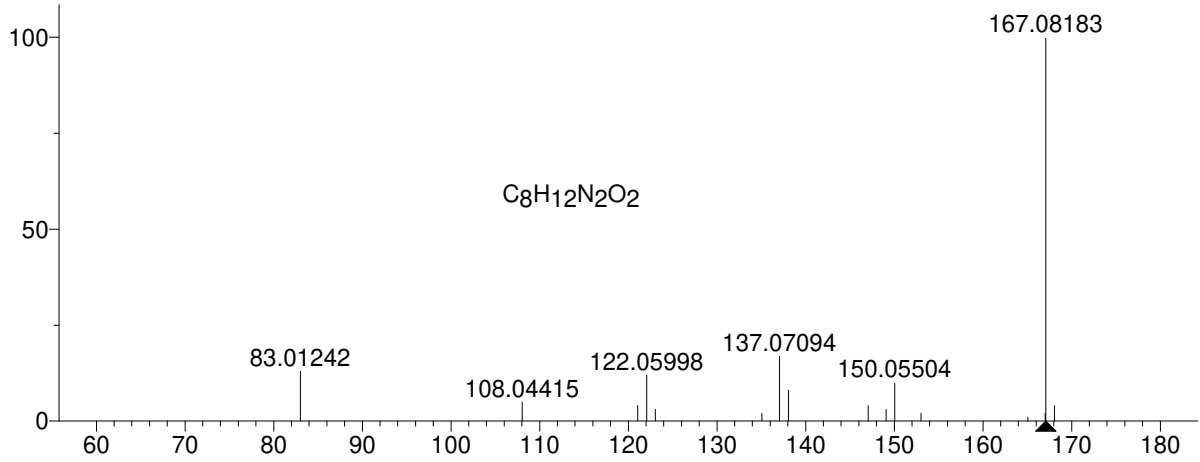

Hit 4 : Pyridoxamine; LC-ESI-QTOF; MS2; CE [M-H]<sup>-</sup> P=167.1  
C<sub>8</sub>H<sub>12</sub>N<sub>2</sub>O<sub>2</sub>; MF: 11; RMF: 293; Prob 10.7%; Lib: msms-neg-massbank; ID: 4286.

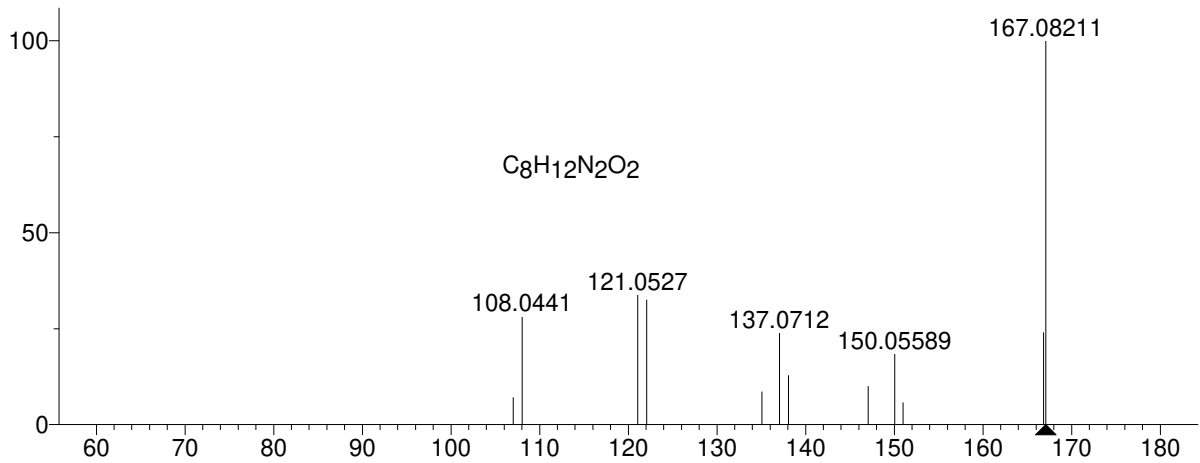

Hit 5 : Pyridoxamine [M-H]<sup>-</sup> 5-60V P=167.1  
C<sub>8</sub>H<sub>12</sub>N<sub>2</sub>O<sub>2</sub>; MF: 11; RMF: 291; Prob 10.7%; Lib: mona-export-lc-ms-ms\_negative\_mode; ID: 8384.

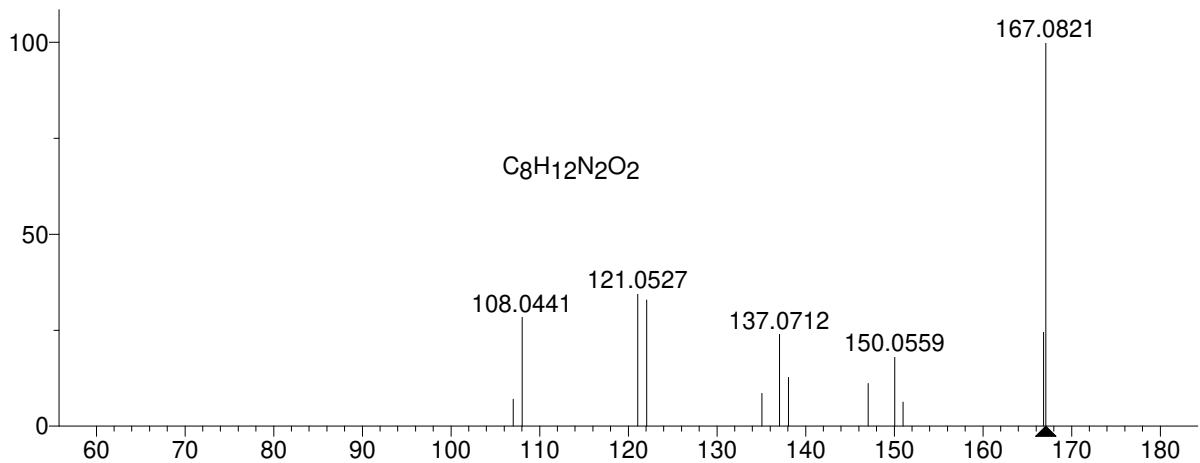



Unknown: Unknown (14.46\_501.2681m/z)  
Compound in Library Factor = -2387

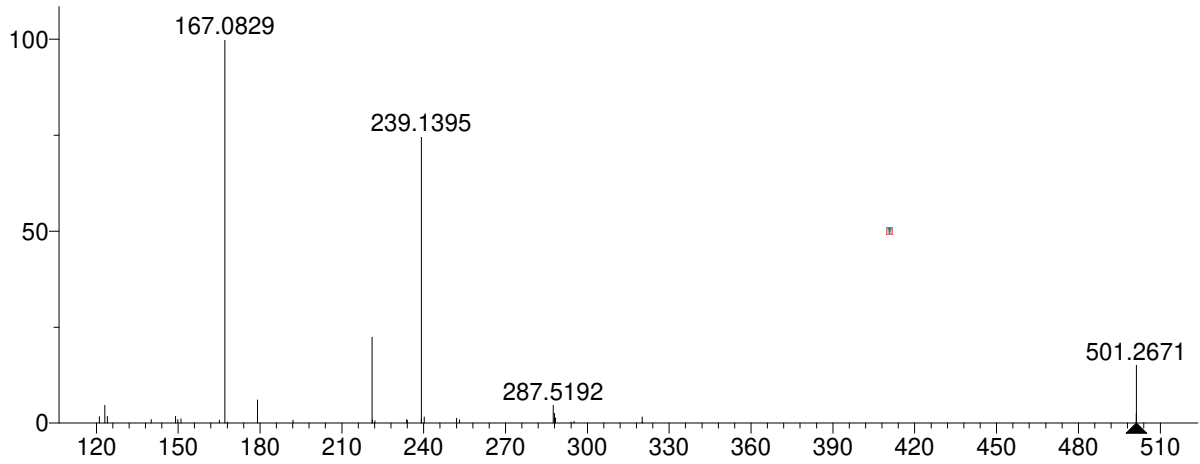

Hit 1 : Ikarugamycin [M+Na]<sup>+</sup> HCD 35V P=501.3  
C<sub>29</sub>H<sub>38</sub>N<sub>2</sub>O<sub>4</sub>; MF: 10; RMF: 292; Prob 58.6%; CAS: 36531-78-9; Lib: nist\_msms; ID: 264701.

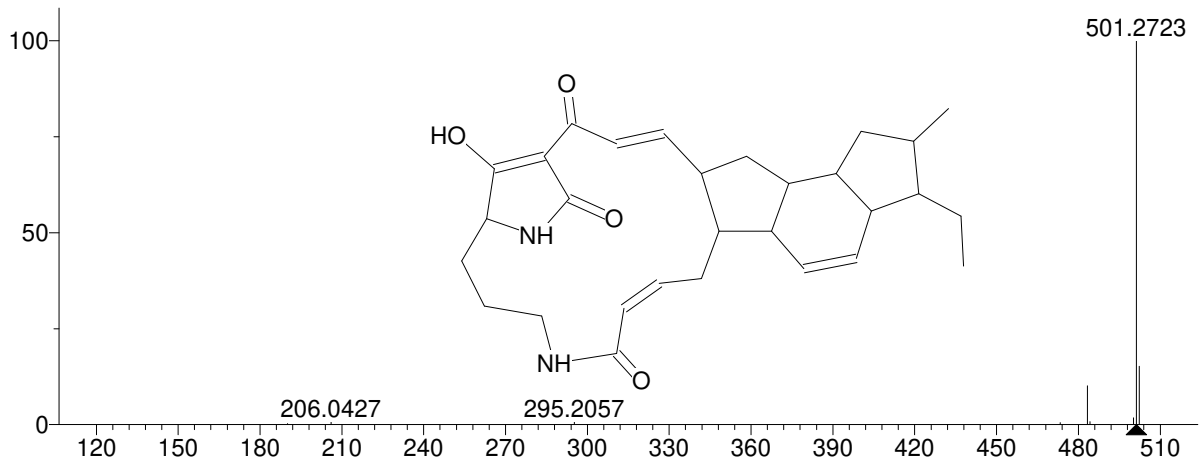

Hit 2 : 2-[(6,7-dimethoxy-3,4-dihydroisoquinolin-1-yl)methyl]-3-ethyl-9,10-dimethoxy-2,3,4,6,7,11b-hexahydro-1H-I  
C<sub>29</sub>H<sub>38</sub>N<sub>2</sub>O<sub>4</sub>; MF: 0; RMF: 35; Prob 41.4%; Lib: mona-export-vf-npl\_qexactive; ID: 22963.

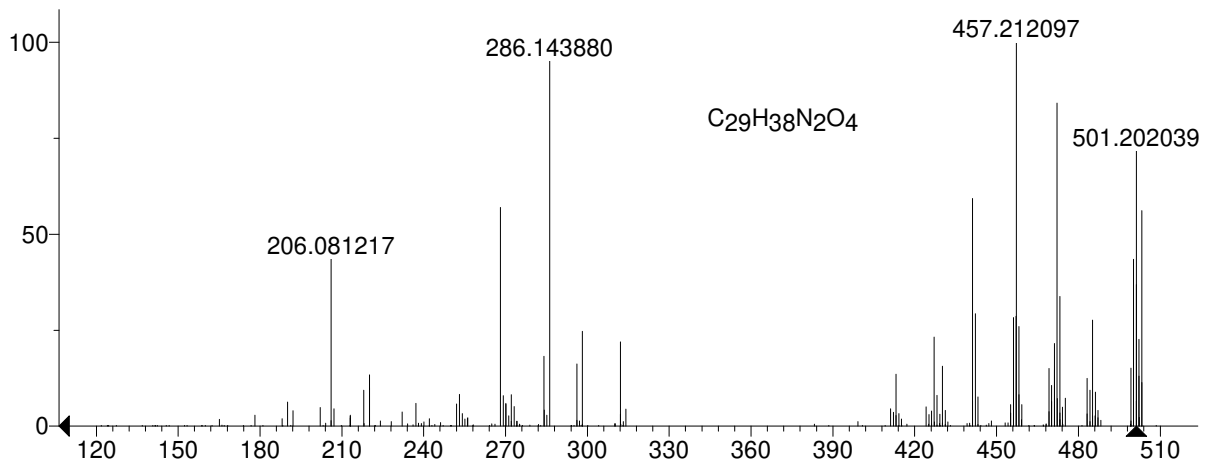

Unknown: Unknown (14.47\_239.1392m/z)  
Compound in Library Factor = -3273

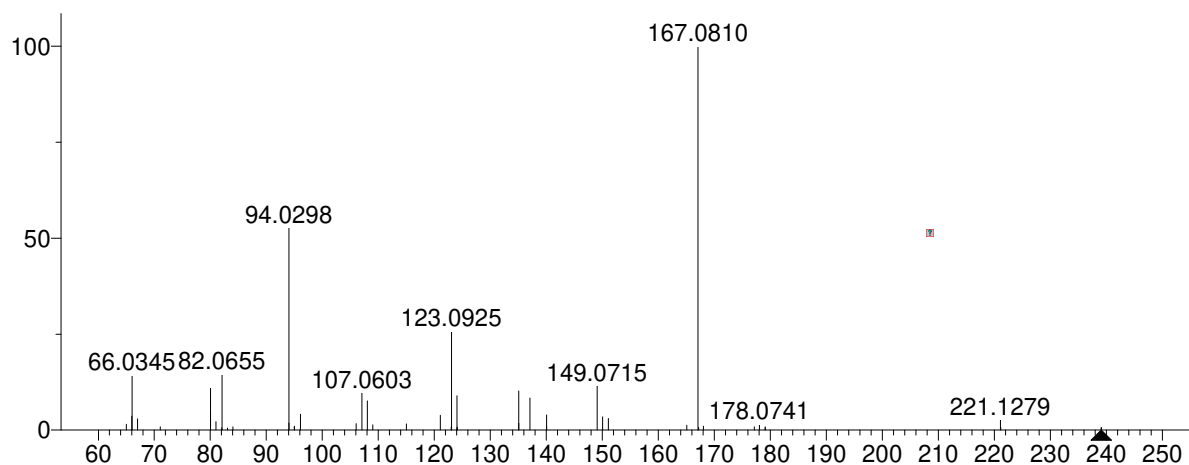

Hit 1 : Heptanedioic acid, 1-(2-cyclopentylidenehydrazide) [M-H]<sup>-</sup> HCD 14V P=239.1  
C<sub>12</sub>H<sub>20</sub>N<sub>2</sub>O<sub>3</sub>; MF: 8; RMF: 59; Prob 40.0%; CAS: 1136466-93-7; Lib: nist\_msms; ID: 263653.

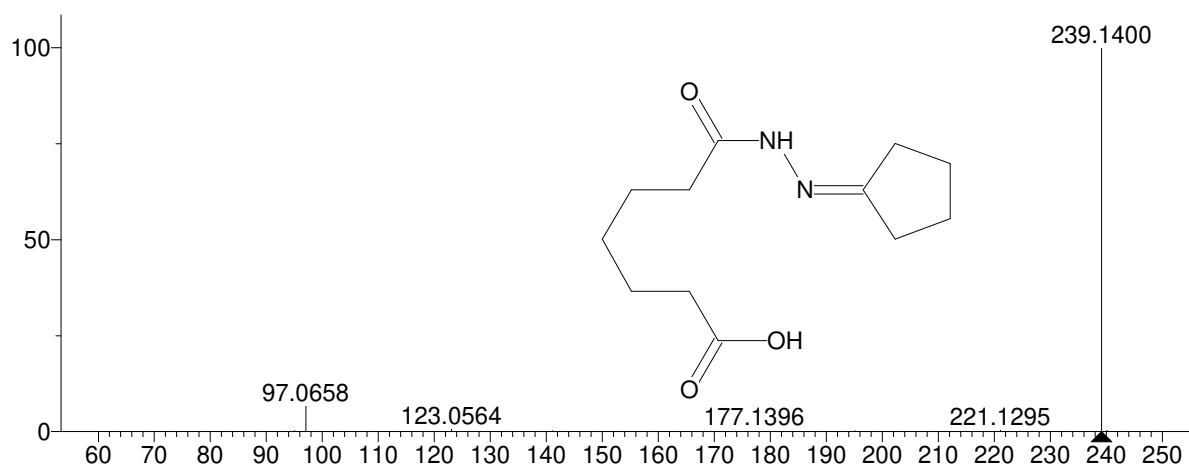

Hit 2 : Secobarbital [M+H]<sup>+</sup> HCD 0V P=239.1  
C<sub>12</sub>H<sub>18</sub>N<sub>2</sub>O<sub>3</sub>; MF: 1; RMF: 50; Prob 30.6%; CAS: 76-73-3; Lib: nist\_msms; ID: 198372.

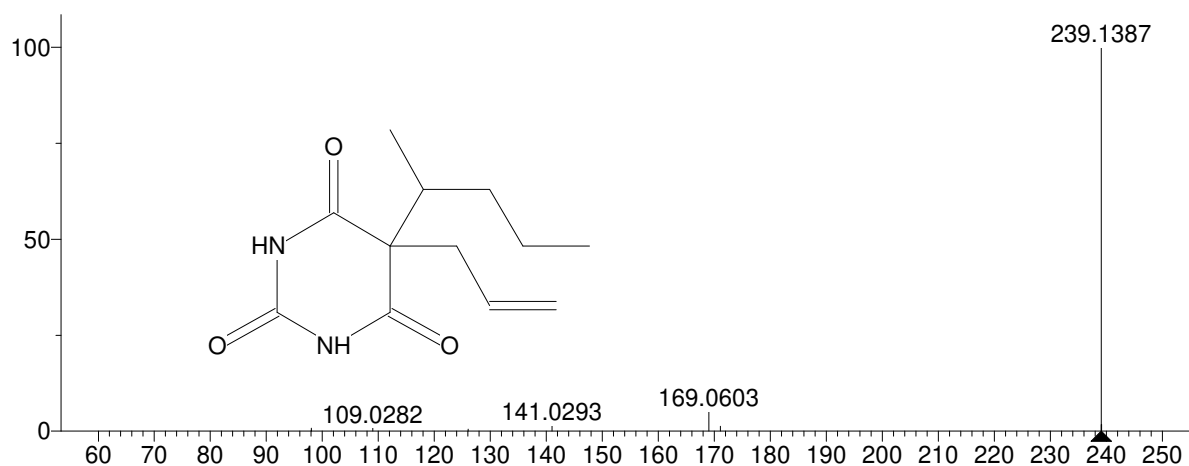

Hit 3 : CMPF [M-H]<sup>-</sup> 35% P=239.1  
C<sub>12</sub>H<sub>16</sub>O<sub>5</sub>; MF: 0; RMF: 22; Prob 29.4%; Lib: mona-export-itree; ID: 3748.

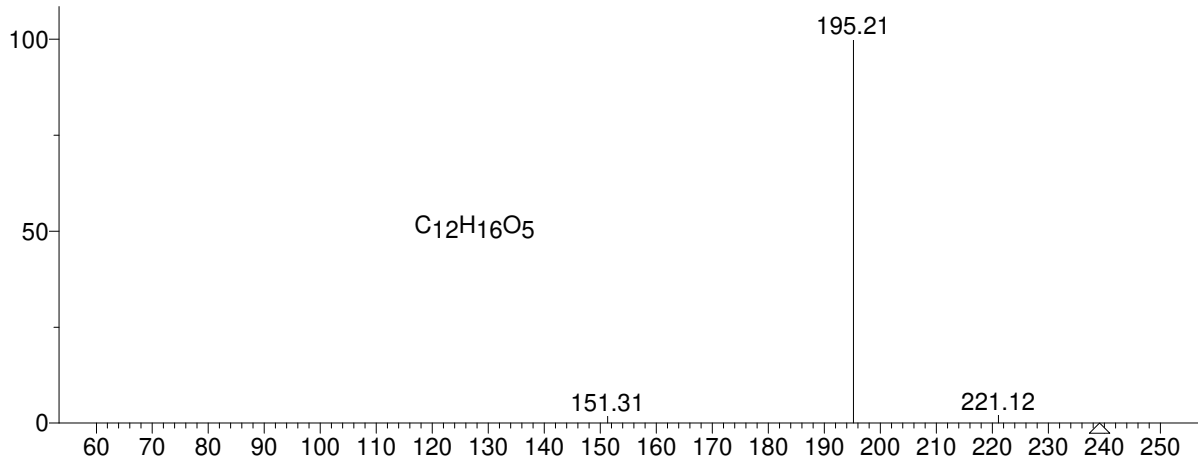

Unknown: Unknown (14.47\_741.4041m/z)  
Compound in Library Factor = 0

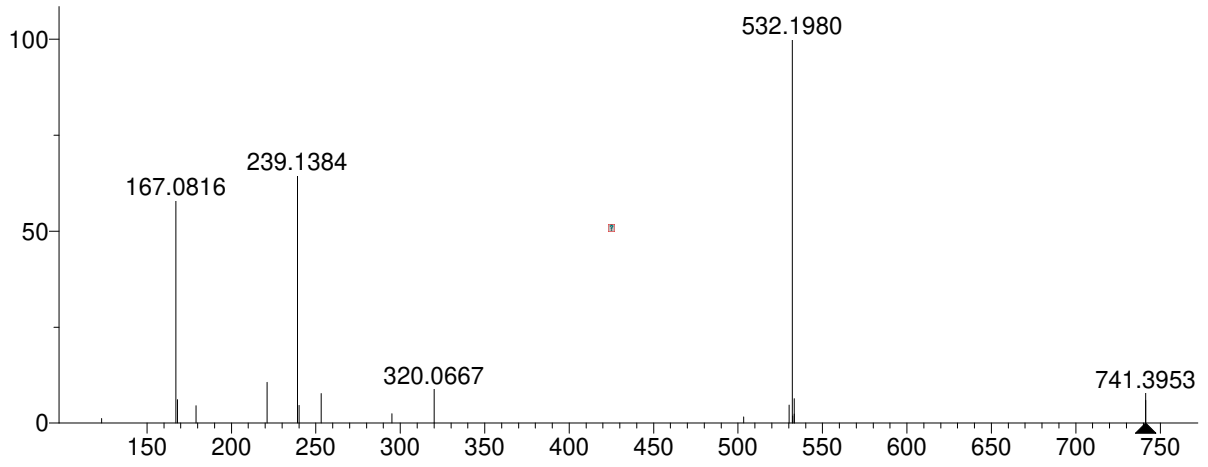

Unknown: Unknown (14.47\_775.3532m/z)  
Compound in Library Factor = 0

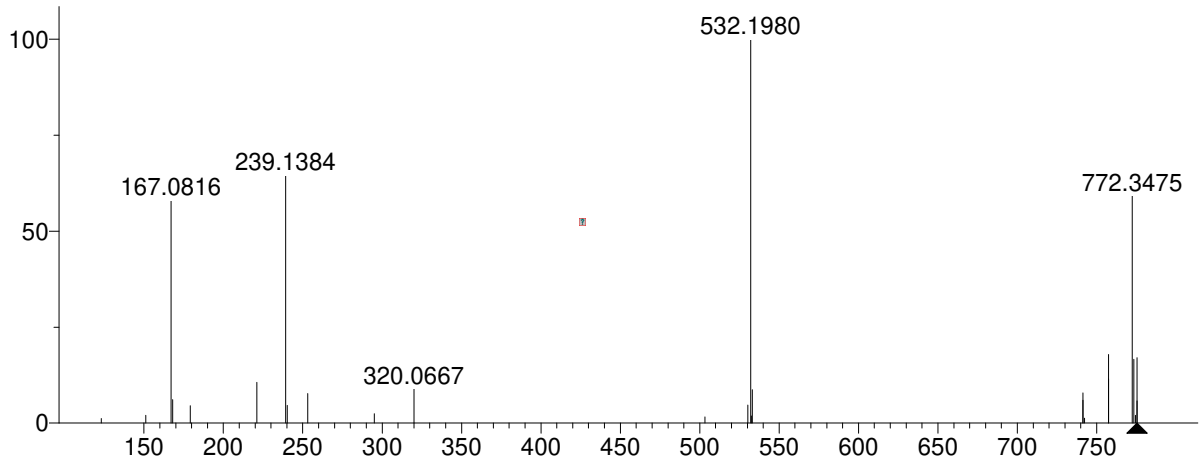

Unknown: Unknown (14.48\_757.3842m/z)  
Compound in Library Factor = 0

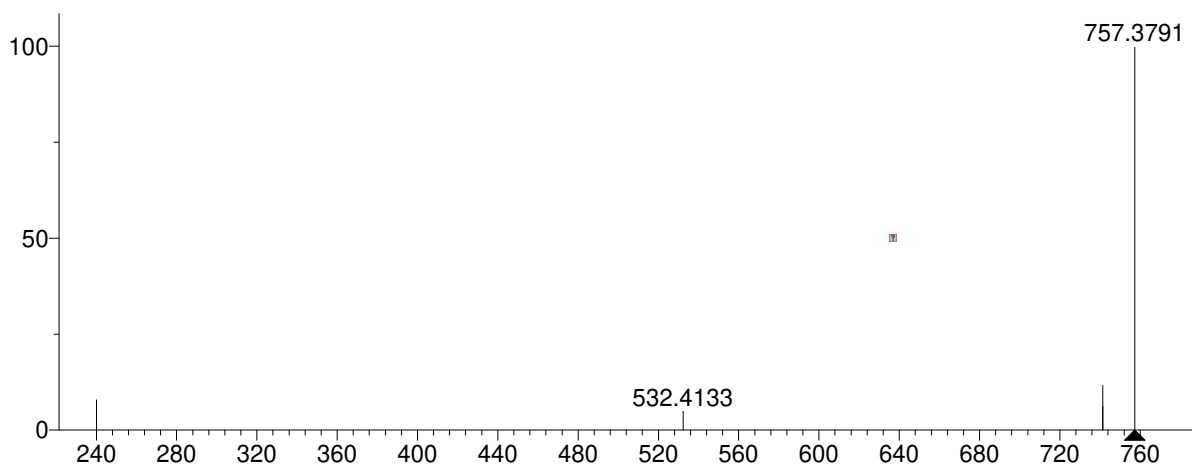

Hit 1 : ACTH (1-39), human [M+6H]<sup>6+</sup> HCD 17eV P=757.4  
C<sub>207</sub>H<sub>308</sub>N<sub>56</sub>O<sub>58</sub>S; MF: 0; RMF: 87; Prob 100.0%; CAS: 12279-41-3; Lib: nist\_msms2; ID: 51586.

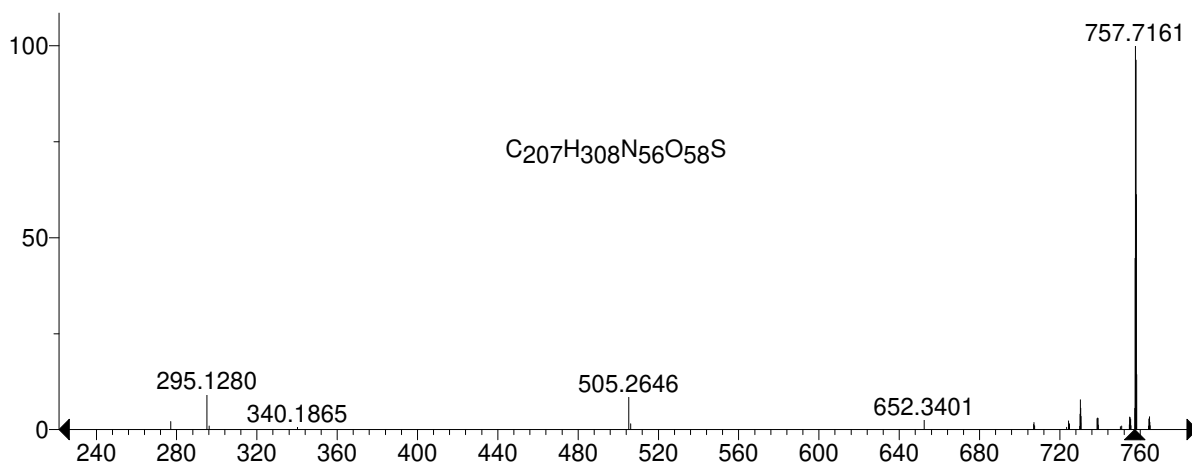

Unknown: Unknown (14.49\_772.3468m/z)  
Compound in Library Factor = 0

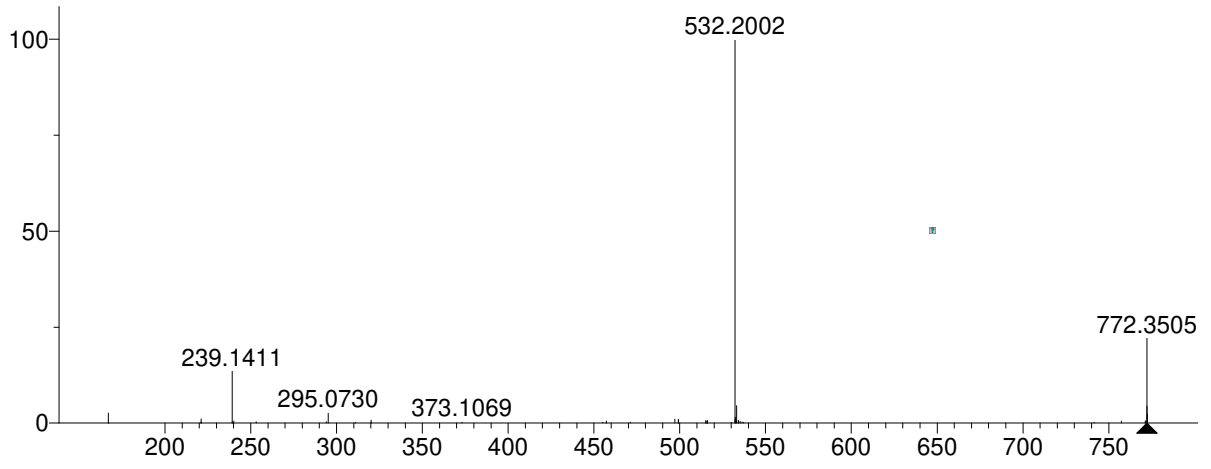

\*\* Search Report Page 1 of 1 \*\*

Unknown: Unknown (14.50\_568.1749m/z)  
Compound in Library Factor = -3273

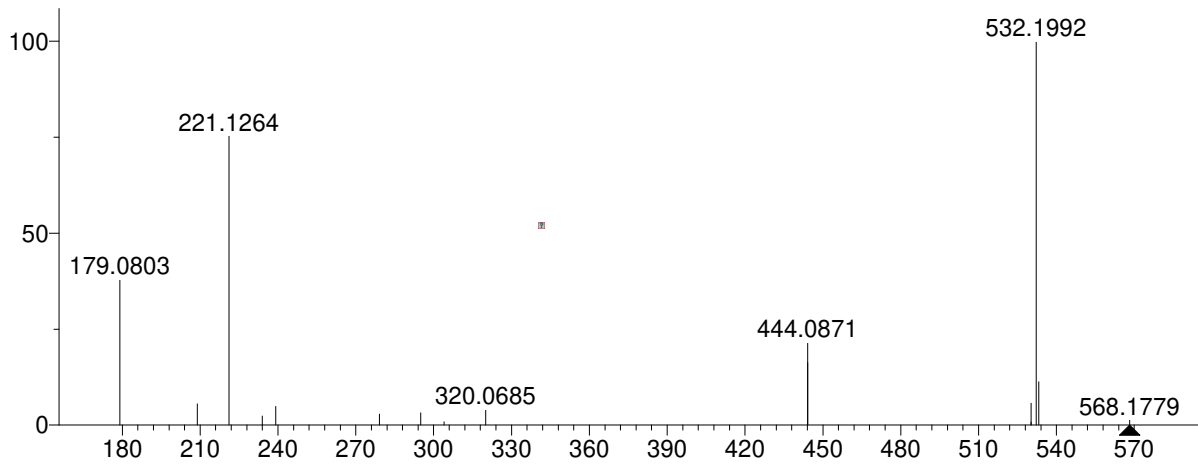

Hit 1 : 1H-Indole-5-sulfonamide, N-(3-chlorophenyl)-3-[[[3,5-dimethyl-4-[(4-methyl-1-piperazinyl)carbonyl]-1H-pyrro

C28H30ClN5O4S; MF: 5; RMF: 97; Prob 100.0%; CAS: 658084-23-2; Lib: nist\_msms; ID: 347758.

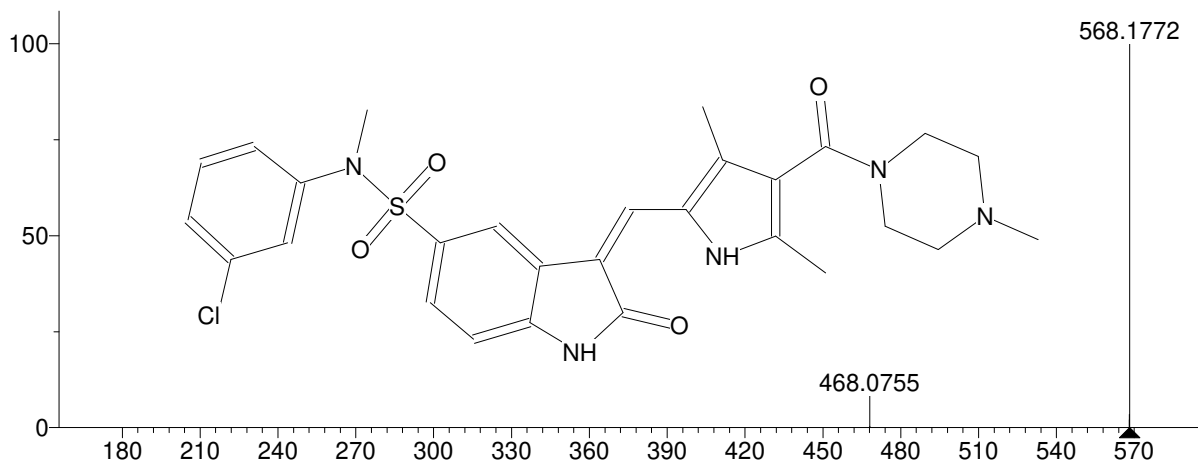



Unknown: Unknown (14.50\_578.2033m/z)  
Compound in Library Factor = 0

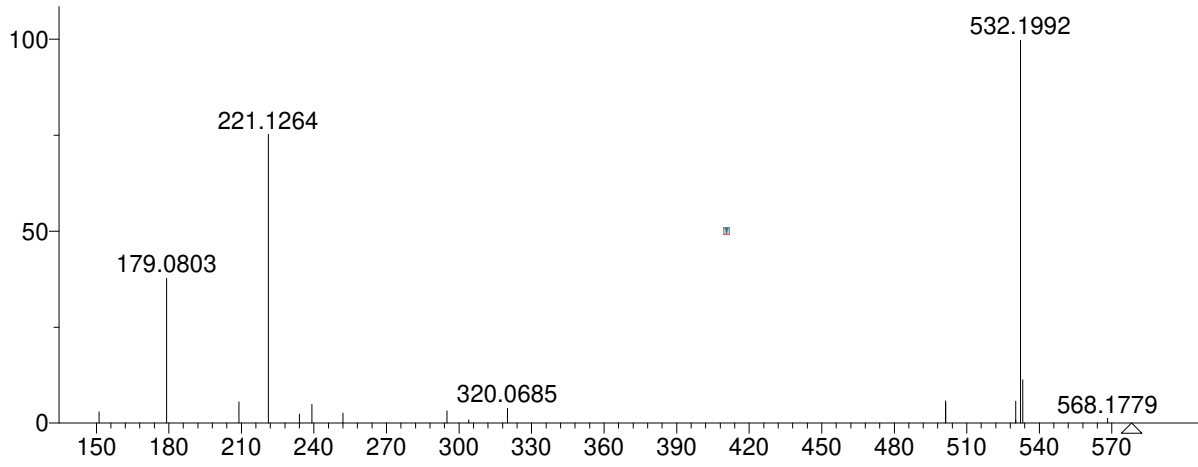

Unknown: Unknown (14.51\_151.0391m/z)  
Compound in Library Factor = -349

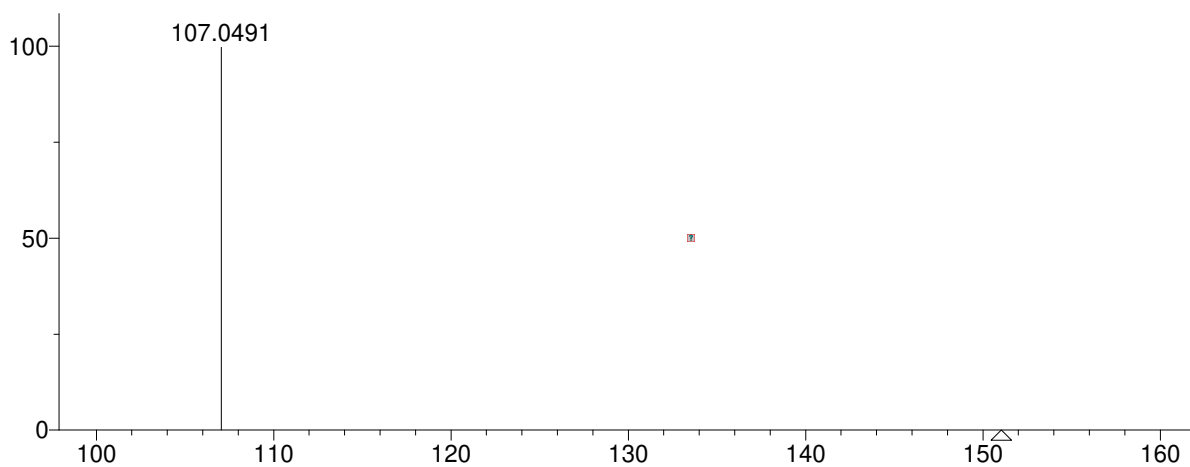

Hit 1 : p-Hydroxyphenylacetic acid [M-H]<sup>-</sup> 30 P=151  
C<sub>8</sub>H<sub>8</sub>O<sub>3</sub>; MF: 364; RMF: 999; Prob 9.41%; Lib: msms neg mona\_ipb\_gnps\_plasma; ID: 556.

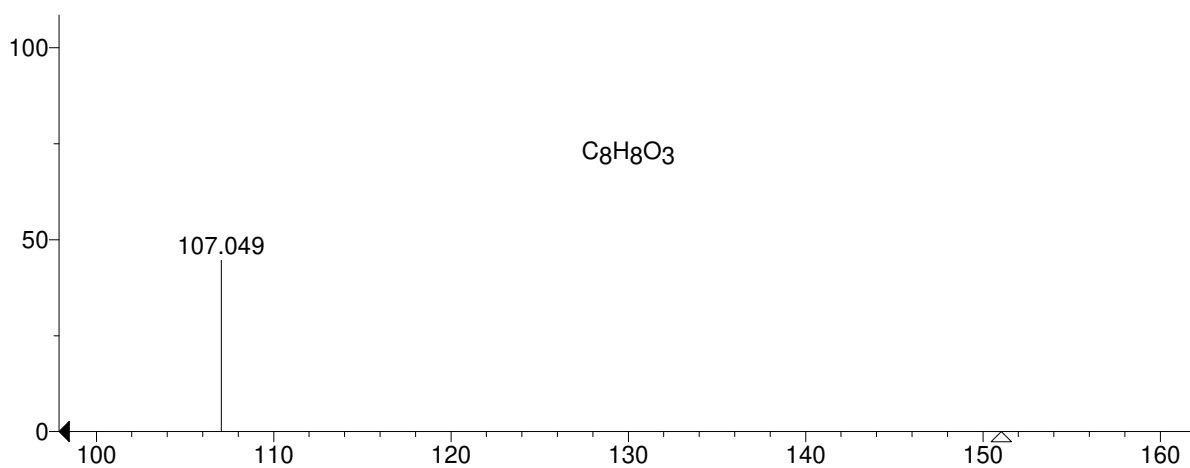

Hit 2 : 4-hydroxyphenylacetic acid [M-H]<sup>-</sup> 15 P=151  
C<sub>8</sub>H<sub>8</sub>O<sub>3</sub>; MF: 364; RMF: 999; Prob 9.41%; Lib: msms neg mona\_ipb\_gnps\_plasma; ID: 1183.

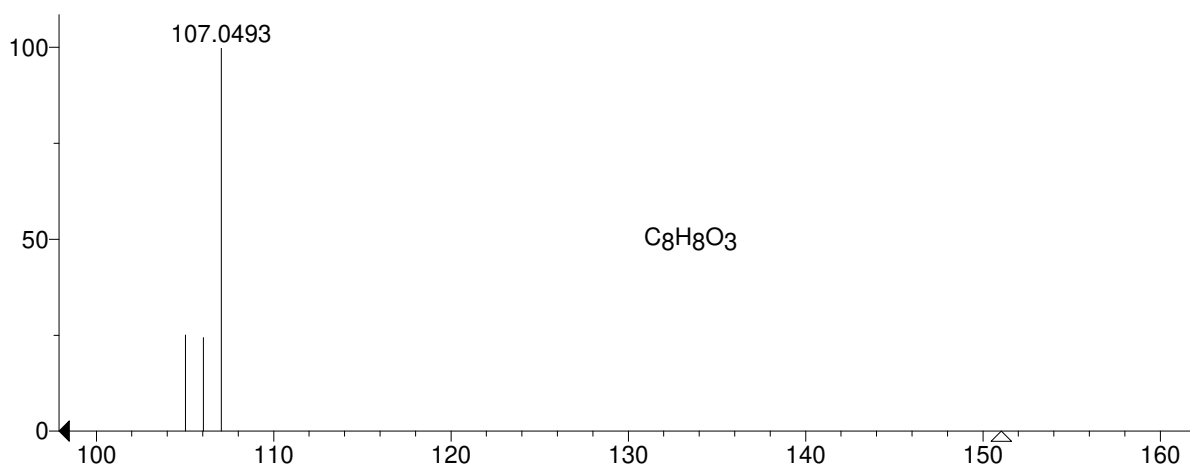

Hit 3 : 4-Hydroxyphenylacetic acid [M-H]<sup>-</sup> 35eV P=151  
C<sub>8</sub>H<sub>8</sub>O<sub>3</sub>; MF: 364; RMF: 999; Prob 9.41%; Lib: msms-neg-fiehnlib; ID: 813.

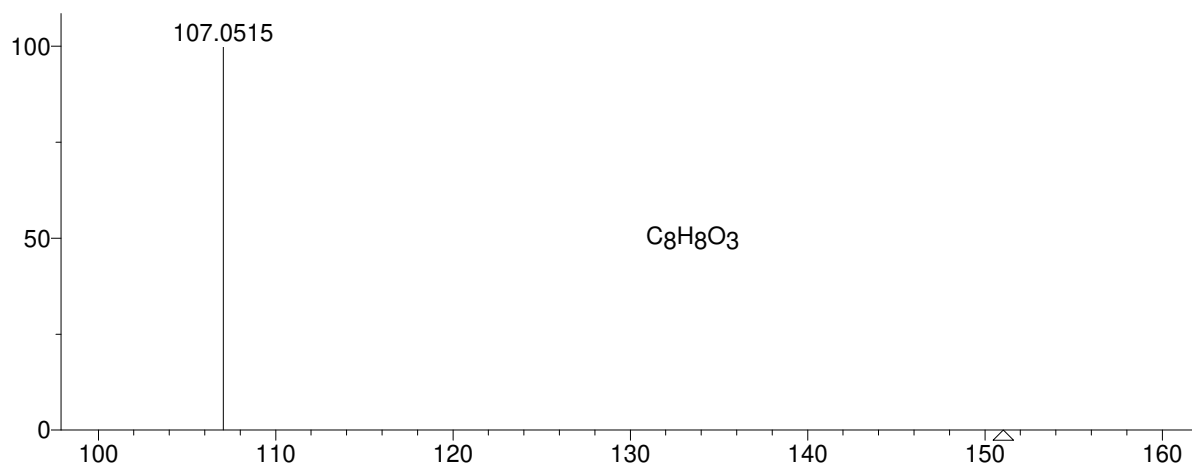

Hit 4 : 4-Hydroxy-3-methylbenzoic acid [M-H]<sup>-</sup> QTOF 20V P=151  
C<sub>8</sub>H<sub>8</sub>O<sub>3</sub>; MF: 364; RMF: 999; Prob 9.41%; CAS: 499-76-3; Lib: nist\_msms; ID: 29862.

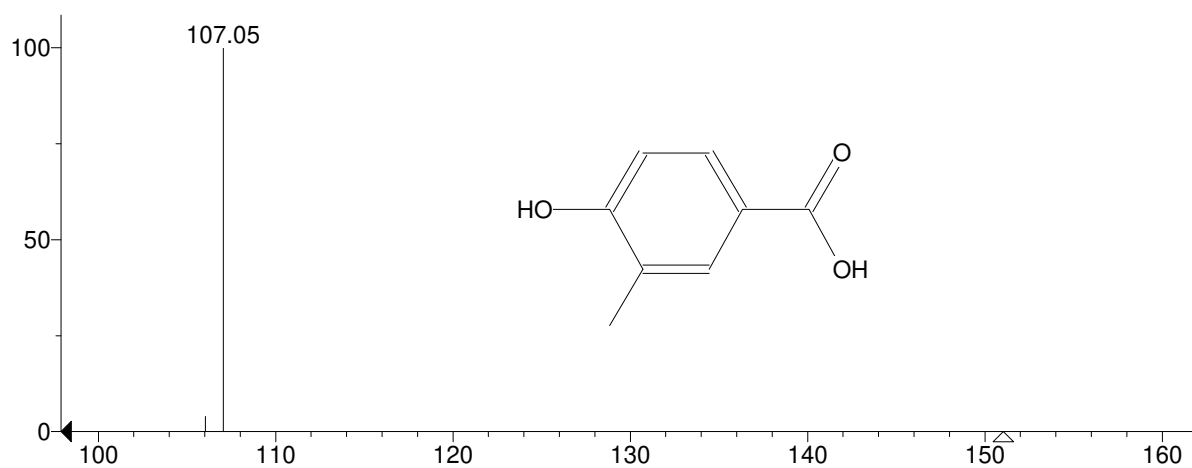

Hit 5 : 2-Methoxybenzoic acid [M-H]<sup>-</sup> HCD 33V P=151  
C<sub>8</sub>H<sub>8</sub>O<sub>3</sub>; MF: 364; RMF: 999; Prob 9.41%; CAS: 579-75-9; Lib: nist\_msms; ID: 554171.

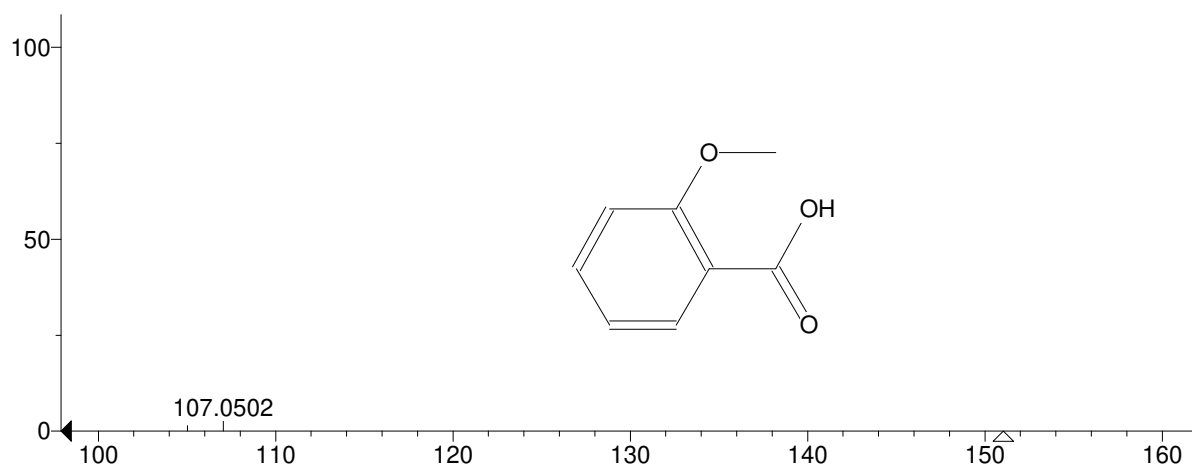

Unknown: Unknown (14.51\_684.2458m/z)  
Compound in Library Factor = 0

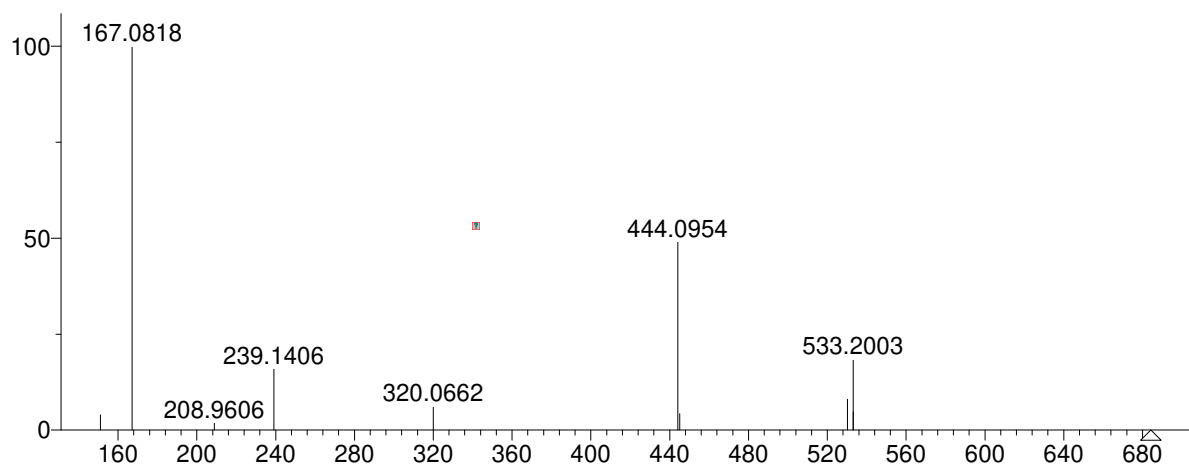

Hit 1 : 6-Acetylacteoside [M+NH4]<sup>+</sup> IT 35% P=684.2  
C31H38O16; MF: 0; RMF: 11; Prob 100.0%; CAS: 441769-43-3; Lib: nist\_msms; ID: 234549.

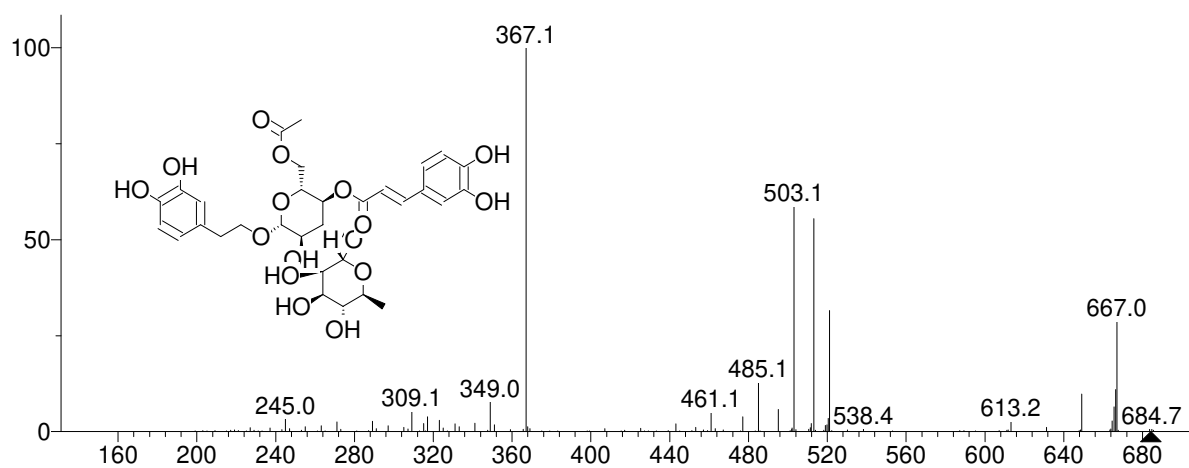

Unknown: Unknown (14.52\_444.0959m/z)  
Compound in Library Factor = -1072

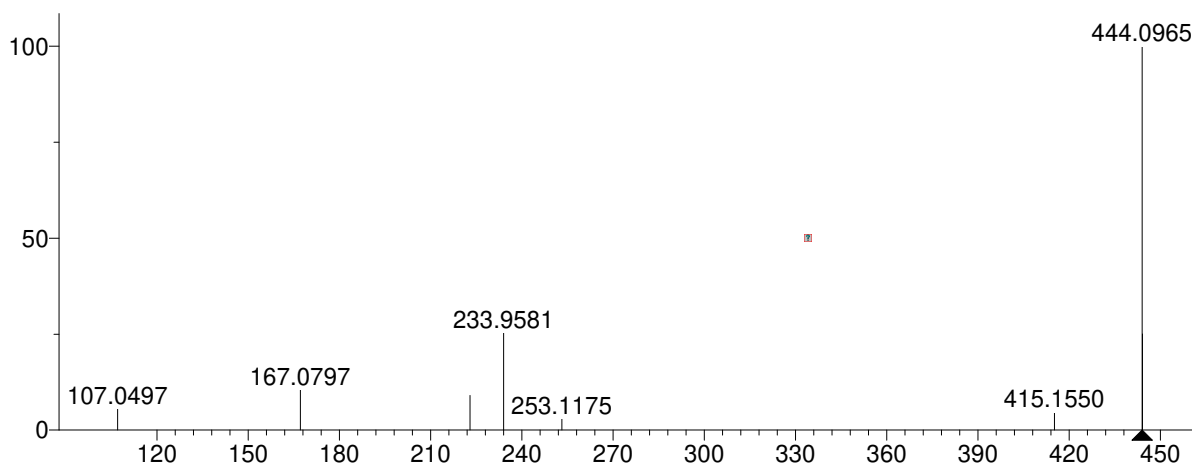

Hit 1 : Cyclosulfamuron [M+Na]<sup>+</sup> HCD 8V P=444.1  
C17H19N5O6S; MF: 75; RMF: 686; Prob 88.5%; CAS: 136849-15-5; Lib: nist\_msms; ID: 294026.

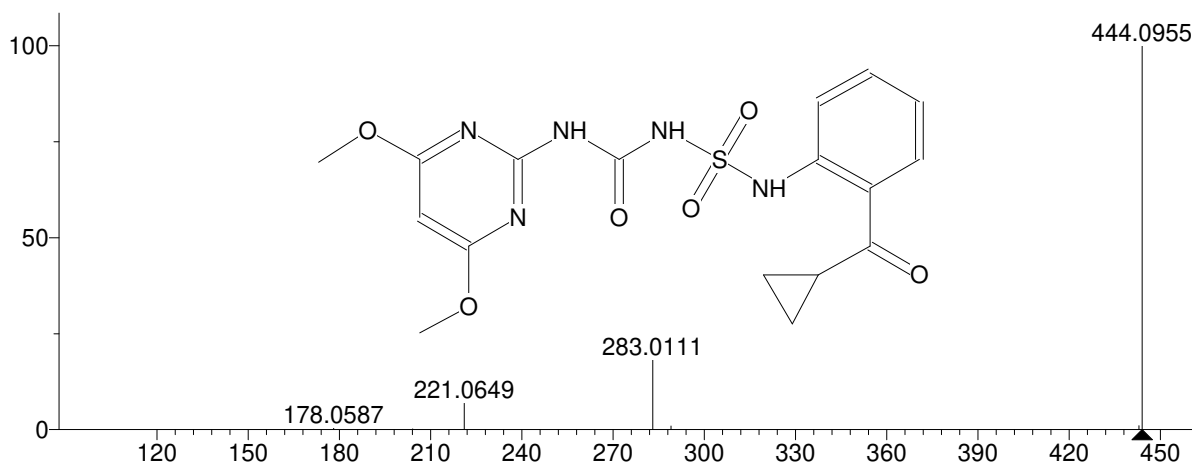

Hit 2 : Penoxsulam [M+H]<sup>+</sup>=>444.1 IT 35% P=444.1  
C16H14F5N5O5S; MF: 0; RMF: 22; Prob 11.5%; CAS: 219714-96-2; Lib: nist\_msms; ID: 481769.

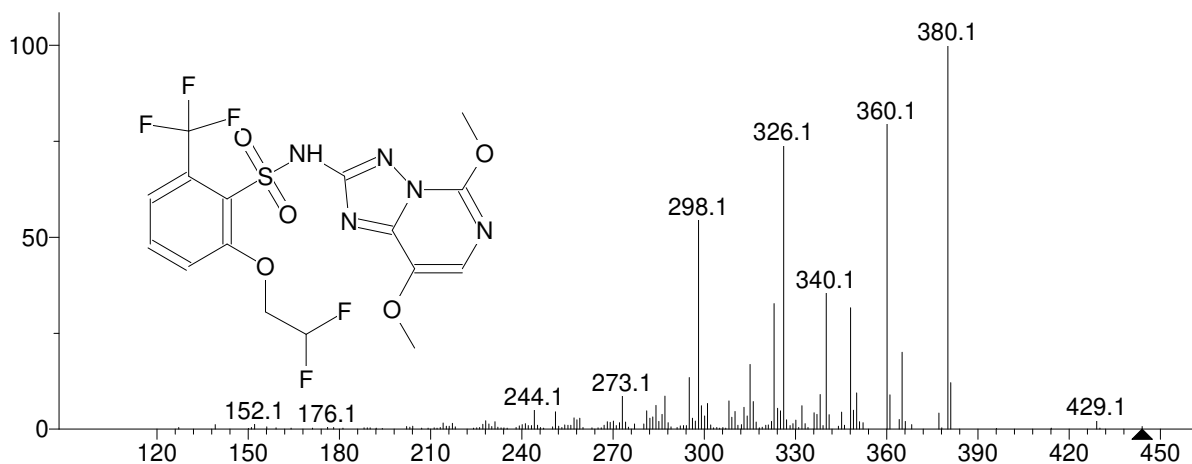

\*\* Search Report Page 1 of 2 \*\*

Unknown: Unknown (14.57\_541.2393m/z)  
Compound in Library Factor = -3273

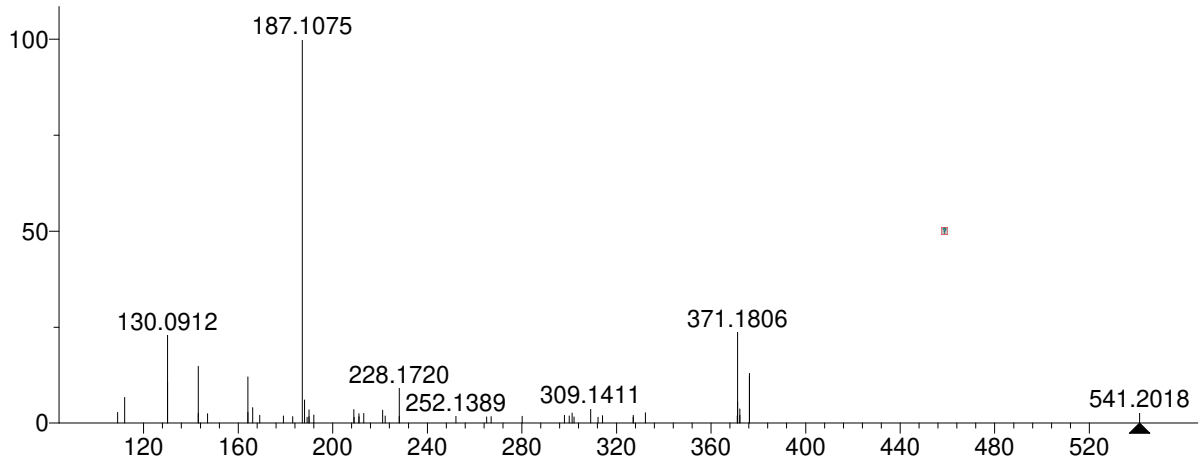

Hit 1 : methyl (1S,2R,4R,8R,9S,10R,13R,15R)-2-(acetyloxy)-13-(furan-3-yl)-9-(2-methoxy-2-oxoethyl)-4,8,10,12-t  
C<sub>30</sub>H<sub>36</sub>O<sub>9</sub>; MF: 4; RMF: 152; Prob 27.6%; Lib: mona-export-vf-npl\_qexactive; ID: 20633.

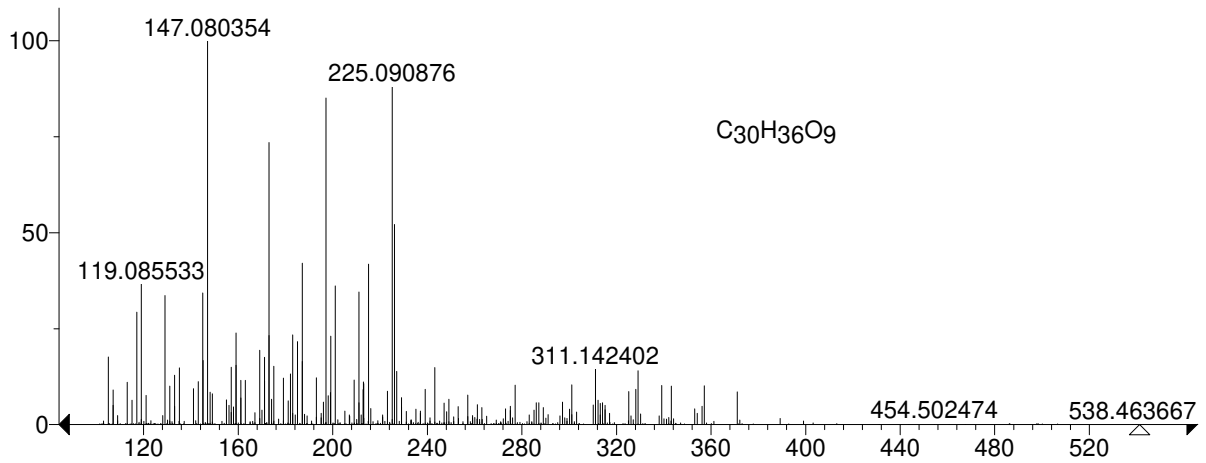

Hit 2 : NCGC00169906-03\_C30H36O9\_2H-Cyclopenta[b]naphtho[2,3-d]furan-10-acetic acid, 5-(acetyloxy)-2-(3-f  
C<sub>30</sub>H<sub>36</sub>O<sub>9</sub>; MF: 1; RMF: 115; Prob 24.4%; Lib: mona-export-gnps; ID: 13758.

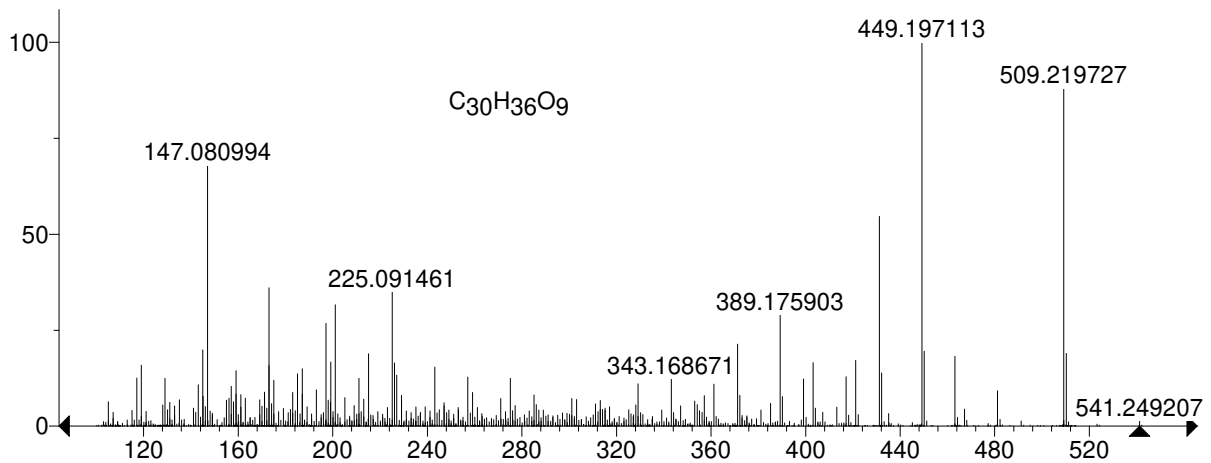

\*\* Search Report Page 2 of 2 \*\*

Hit 3 : 7-Deacetoxy-7-Oxokhivorin [M-H]<sup>-</sup> 35HCD P=541.2  
C<sub>30</sub>H<sub>38</sub>O<sub>9</sub>; MF: 1; RMF: 55; Prob 24.4%; Lib: mona-export-1c-ms-ms\_negative\_mode; ID: 20717.

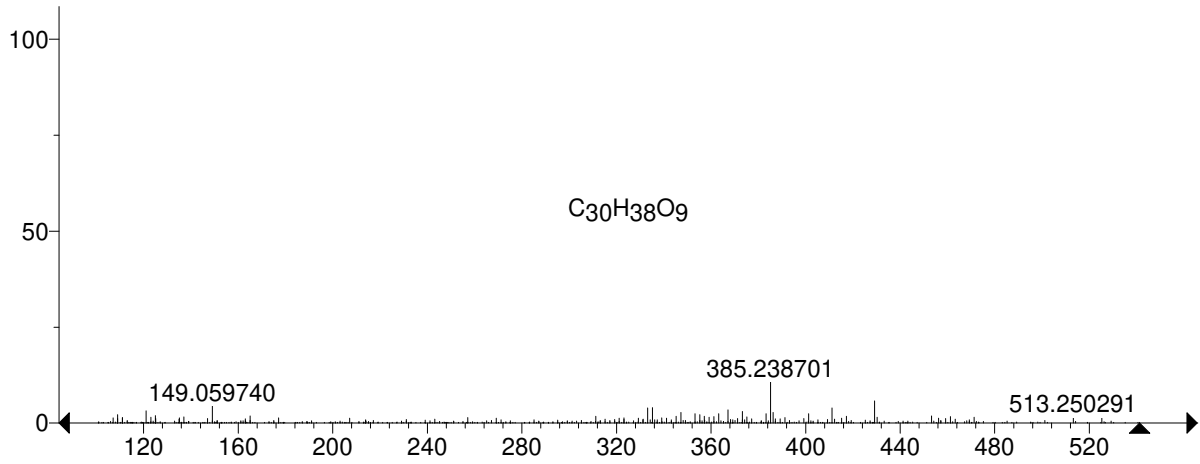

Hit 4 : Nimbin [M+H]<sup>+</sup> IT 35% P=541.2  
C<sub>30</sub>H<sub>36</sub>O<sub>9</sub>; MF: 0; RMF: 58; Prob 23.5%; CAS: 5945-86-8; Lib: nist\_msms; ID: 226918.

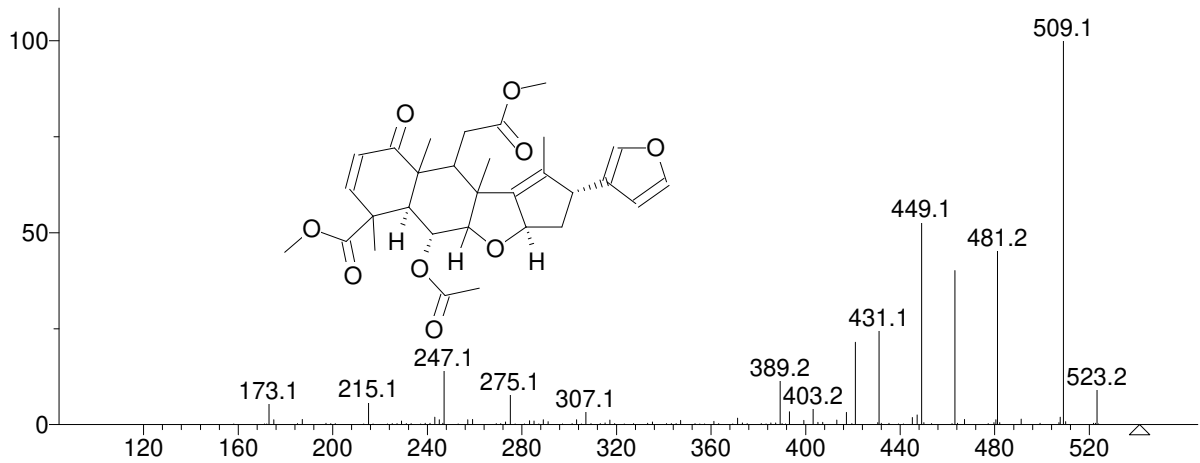

Unknown: Unknown (14.59\_757.3816m/z)  
Compound in Library Factor = 0

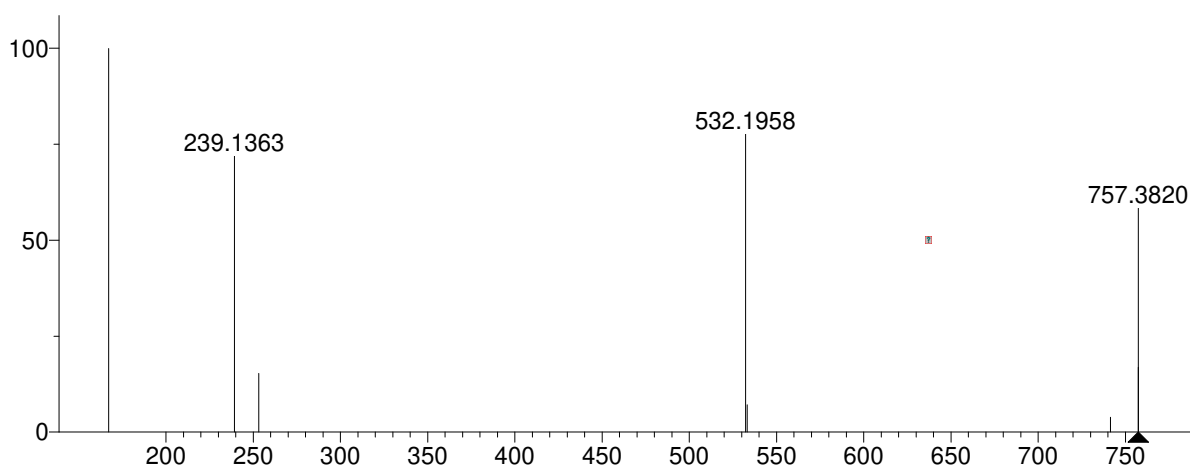

Hit 1 : ACTH (1-39), human [M+6H]<sup>6+</sup> HCD 17eV P=757.4  
C<sub>207</sub>H<sub>308</sub>N<sub>56</sub>O<sub>58</sub>S; MF: 0; RMF: 40; Prob 100.0%; CAS: 12279-41-3; Lib: nist\_msms2; ID: 51586.

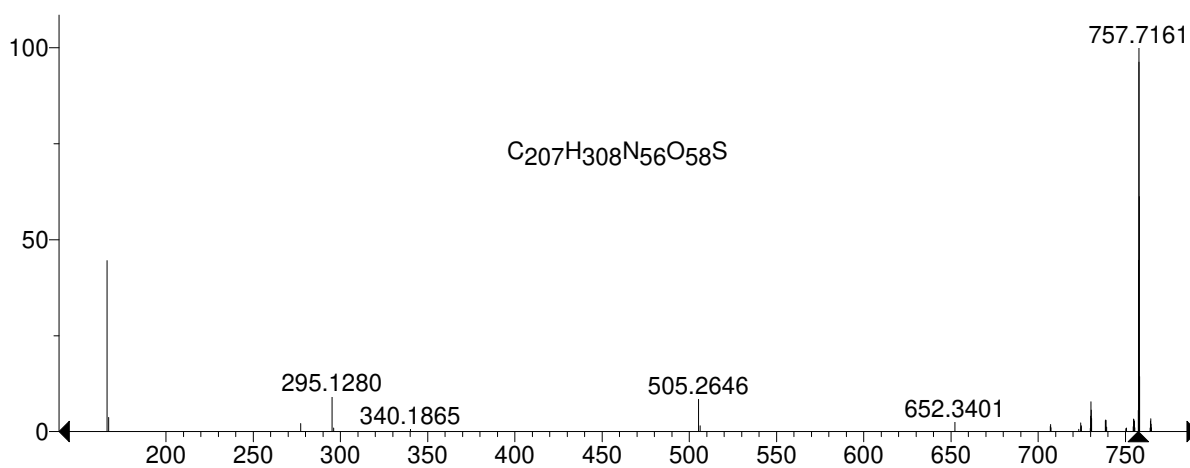



\*\* Search Report Page 1 of 1 \*\*

Unknown: Unknown (14.60\_384.0613m/z)  
Compound in Library Factor = -3273

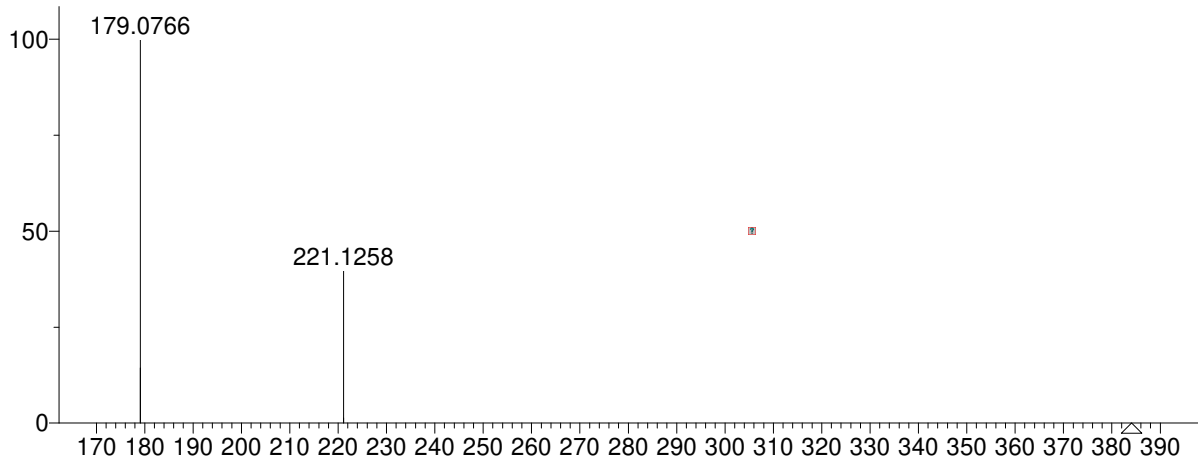

Hit 1 : Dehydrofelodipine [M+H+2i]+ HCD 122V P=384.1  
C18H17Cl2NO4; MF: 3; RMF: 287; Prob 100.0%; CAS: 96382-71-7; Lib: nist\_msms; ID: 517312.

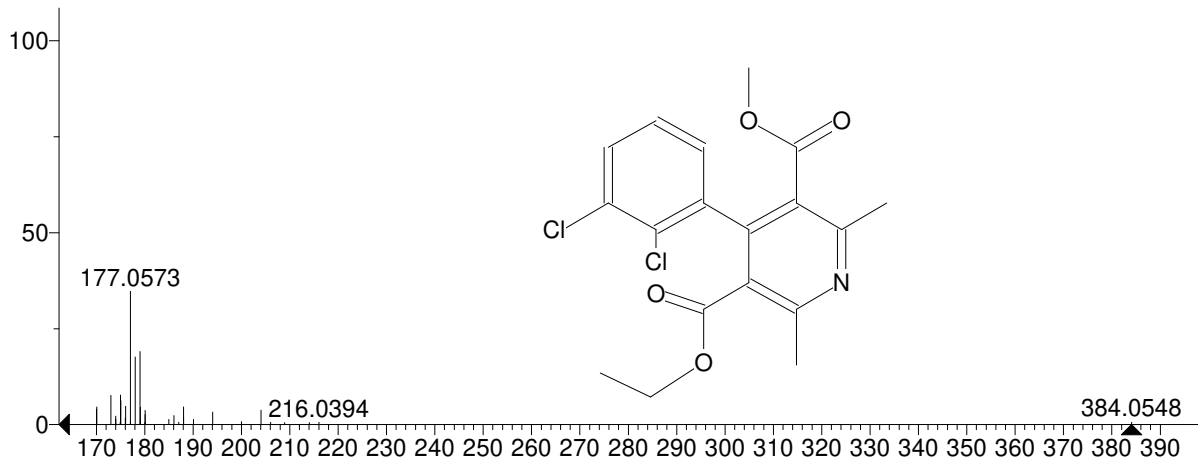

Unknown: Unknown (14.60\_772.3507m/z)  
Compound in Library Factor = 0

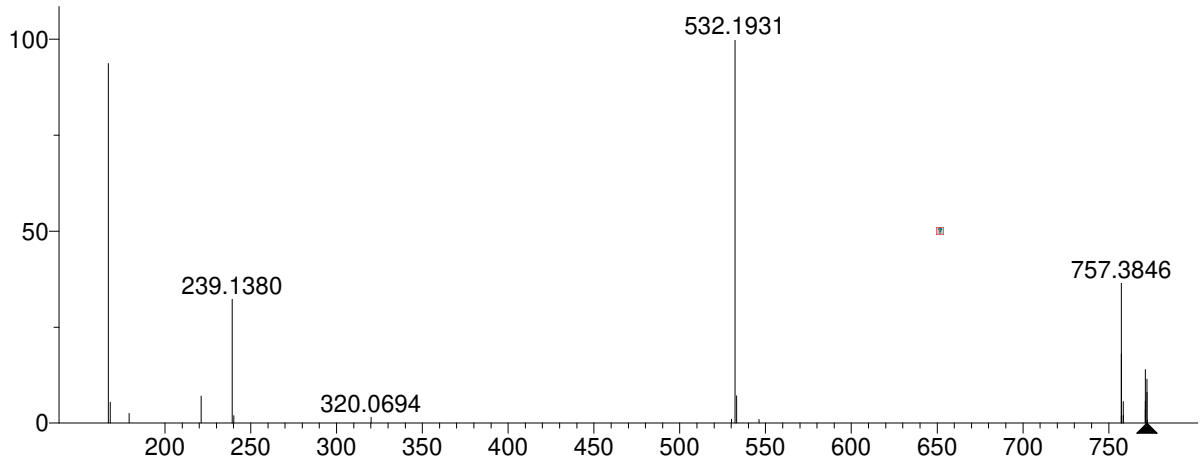

Unknown: Unknown (14.68\_380.1697m/z)  
Compound in Library Factor = -1142

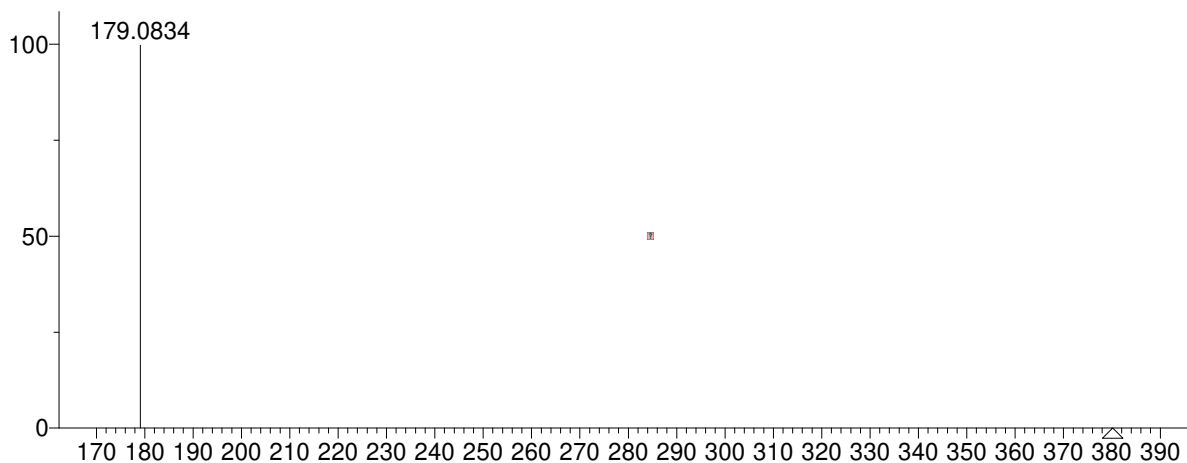

Hit 1 : Janerin [M+NH4]<sup>+</sup> HCD 68V P=380.2  
C<sub>19</sub>H<sub>22</sub>O<sub>7</sub>; MF: 62; RMF: 612; Prob 66.1%; CAS: 64205-84-1; Lib: nist\_msms; ID: 225025.

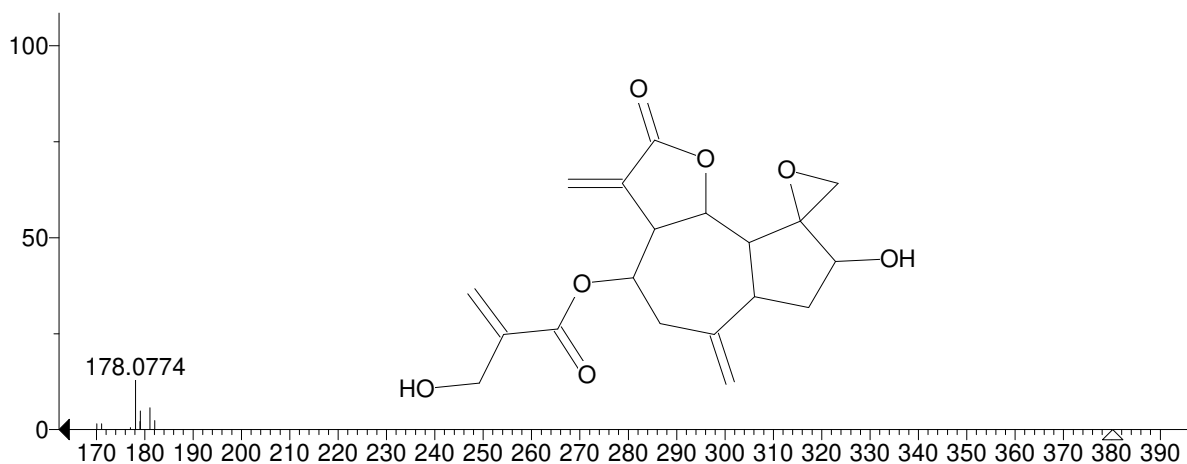

Hit 2 : [(3aS,4S,5S,6E,10Z,11aR)-6-formyl-5-hydroxy-10-(hydroxymethyl)-3-methylidene-2-oxo-3a,4,5,8,9,11a-hexahydro-2H-benzofuran-2-ylidene]methanol  
C<sub>19</sub>H<sub>22</sub>O<sub>7</sub>; MF: 0; RMF: 134; Prob 11.3%; Lib: mona-export-vf-npl\_qexactive; ID: 9198.

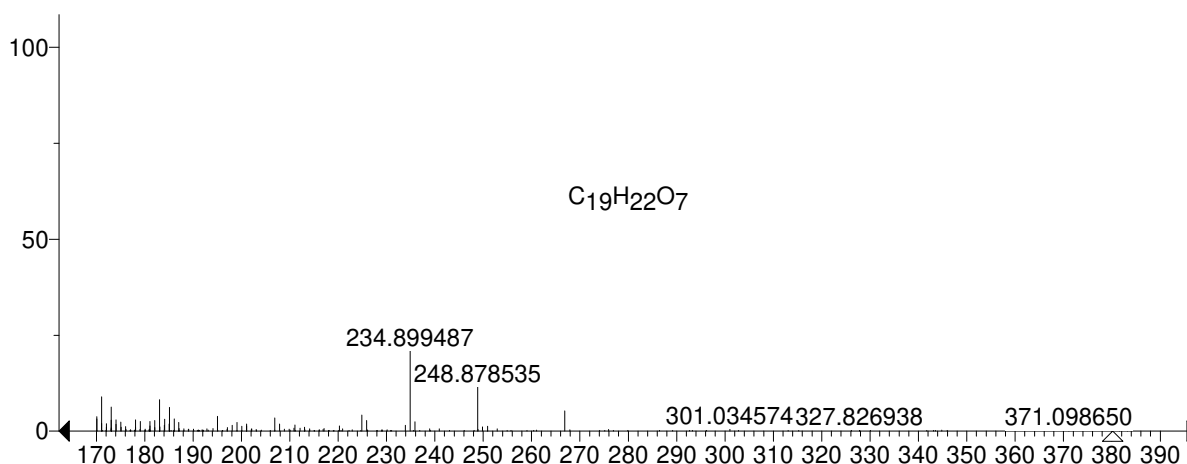

Hit 3 : Repin [M+NH4]<sup>+</sup> IT-FT 35% P=380.2  
C<sub>19</sub>H<sub>22</sub>O<sub>7</sub>; MF: 0; RMF: 47; Prob 11.3%; CAS: 11024-67-2; Lib: nist\_msms; ID: 224746.

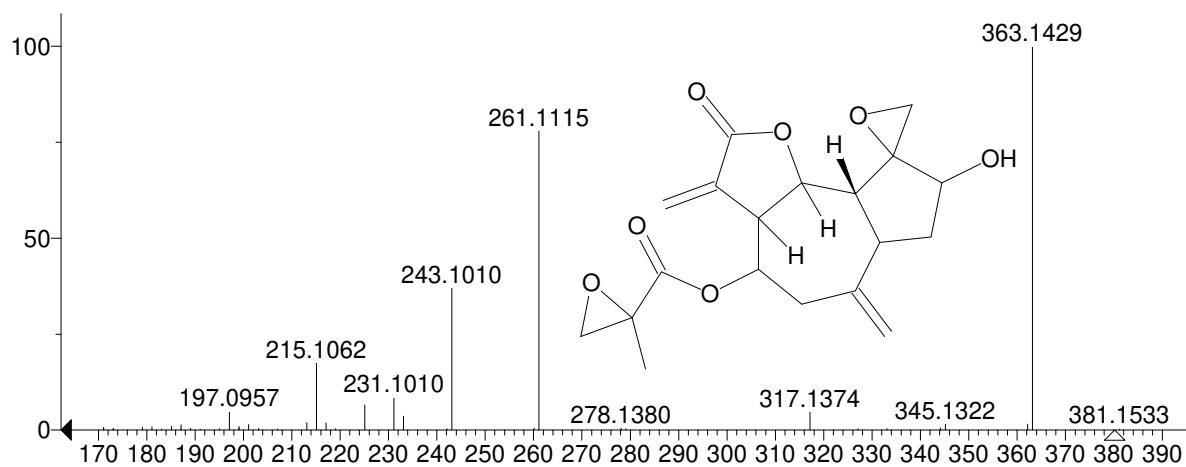

Hit 4 : Sinefungin [M-H]<sup>-</sup> IT-FT 35% P=380.2  
C<sub>15</sub>H<sub>23</sub>N<sub>7</sub>O<sub>5</sub>; MF: 0; RMF: 35; Prob 11.3%; CAS: 58944-73-3; Lib: nist\_msms; ID: 308141.

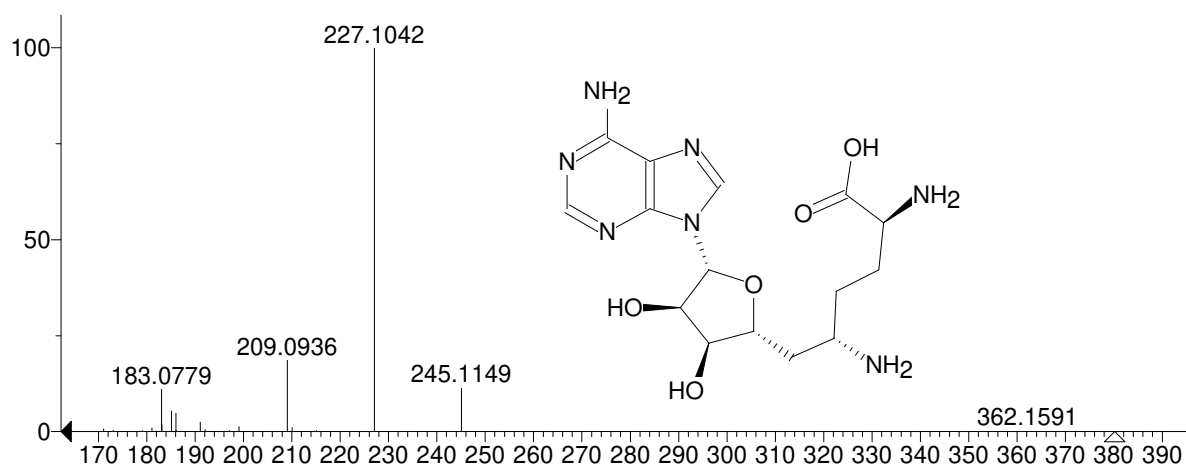

\*\* Search Report Page 1 of 2 \*\*

Unknown: Unknown (14.75\_541.2387m/z)  
Compound in Library Factor = -3273

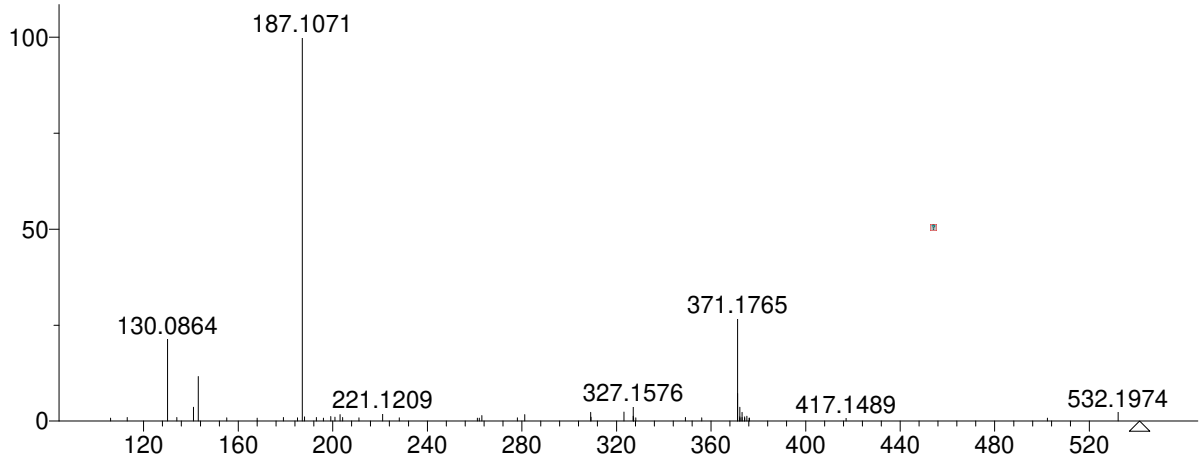

Hit 1 : methyl (1S,2R,4R,8R,9S,10R,13R,15R)-2-(acetyloxy)-13-(furan-3-yl)-9-(2-methoxy-2-oxoethyl)-4,8,10,12-t  
C30H36O9; MF: 8; RMF: 198; Prob 38.0%; Lib: mona-export-vf-npl\_qexactive; ID: 20632.

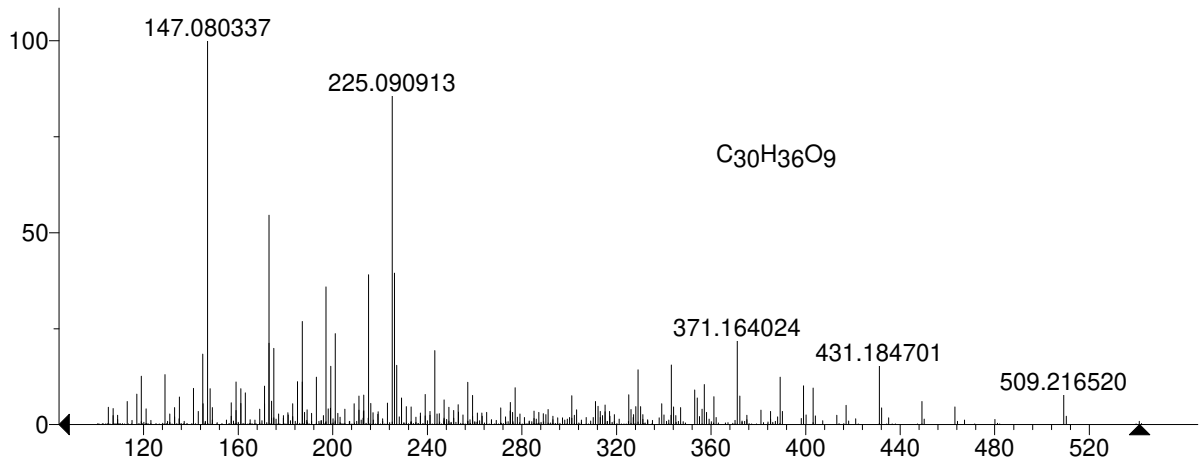

Hit 2 : NCGC00169906-03\_C30H36O9\_2H-Cyclopenta[b]naphtho[2,3-d]furan-10-acetic acid, 5-(acetyloxy)-2-(3-f  
C30H36O9; MF: 5; RMF: 162; Prob 33.6%; Lib: mona-export-gnps; ID: 13758.

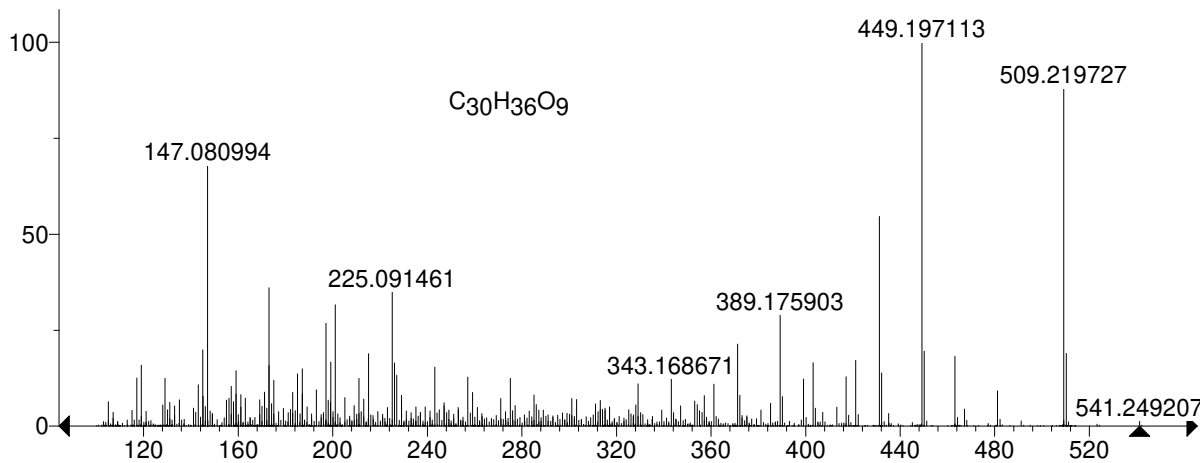

\*\* Search Report Page 2 of 2 \*\*

Hit 3 : Nimbin [M+H]<sup>+</sup> IT-FT 35% P=541.2  
C<sub>30</sub>H<sub>36</sub>O<sub>9</sub>; MF: 1; RMF: 63; Prob 28.4%; CAS: 5945-86-8; Lib: nist\_msms; ID: 226917.

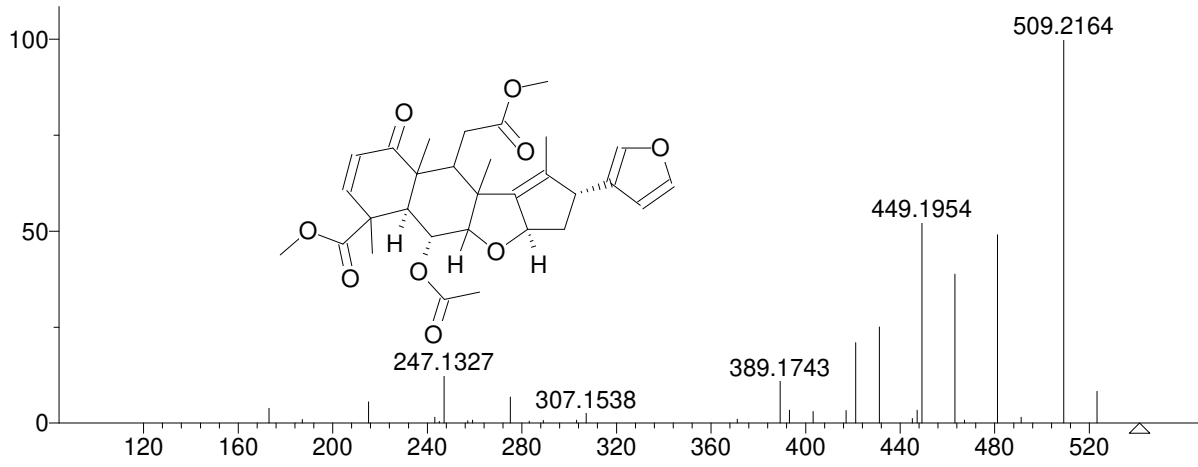

Unknown: Unknown (14.75\_676.2891m/z)  
Compound in Library Factor = -1072

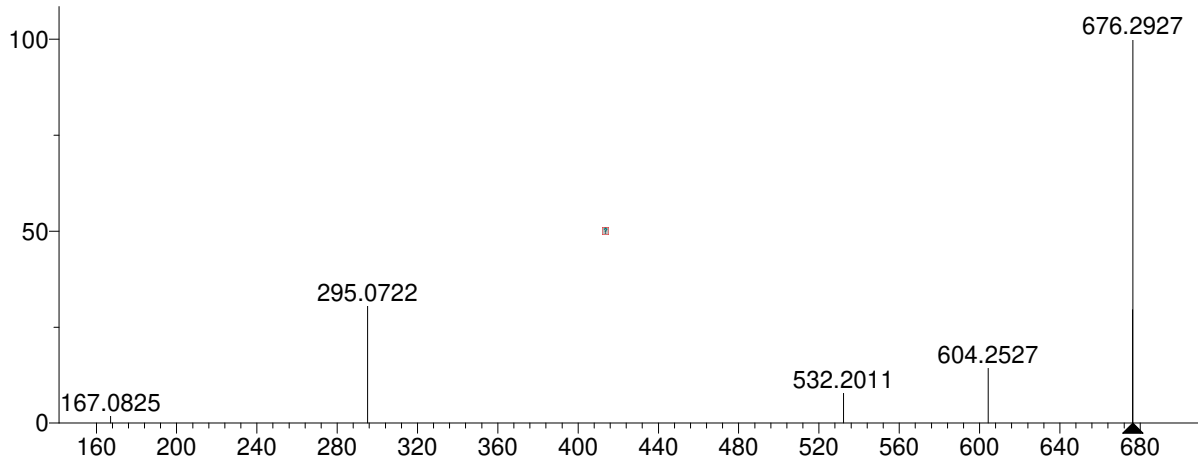

Hit 1 : Caspase-3 Precursor Protease Substrates [M+H]<sup>+</sup> HCD 6eV P=676.3  
C<sub>31</sub>H<sub>41</sub>N<sub>5</sub>O<sub>12</sub>; MF: 113; RMF: 702; Prob 100.0%; Lib: nist\_msms2; ID: 54204.

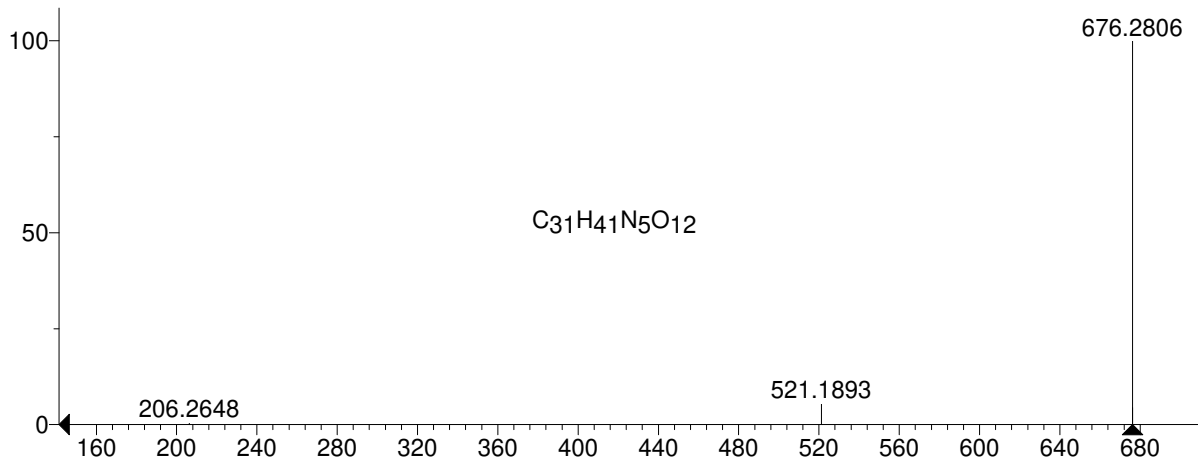

Unknown: Unknown (14.76\_357.1891m/z)  
Compound in Library Factor = 0

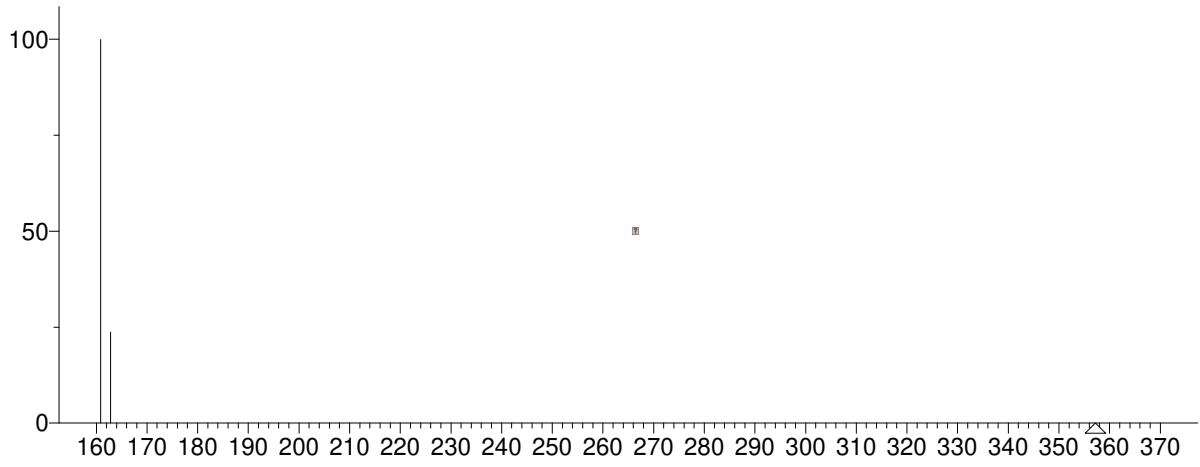



Unknown: Unknown (14.76\_604.2437m/z)  
Compound in Library Factor = 0

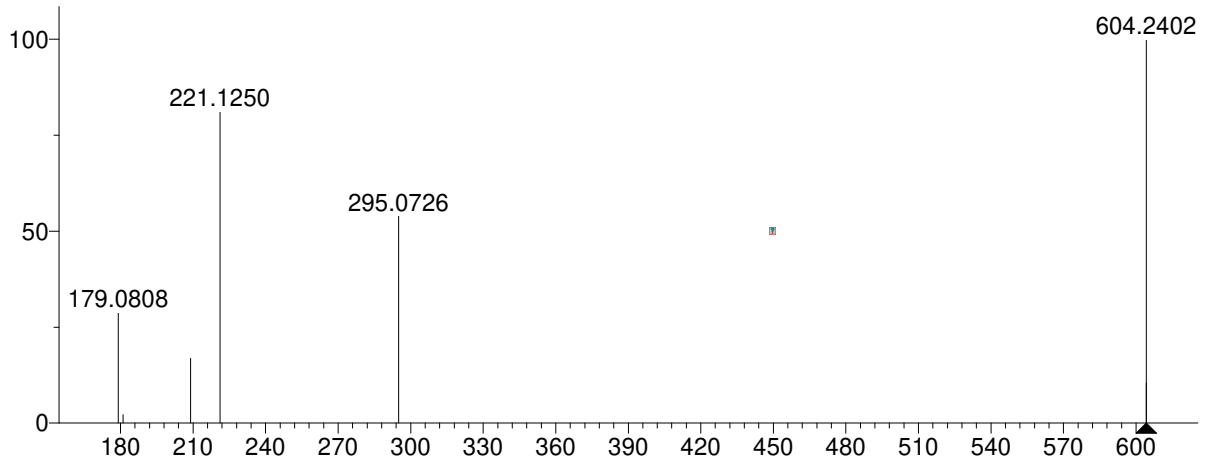

Hit 1 : NCGC00381267-01![(2S,3S,4R,5R,6R)-3,5-dihydroxy-2-methyl-6-[[[(2R,3S,4S,5R,6S)-3,4,5-trihydroxy-6-[(f C30H34O12; MF: 0; RMF: 13; Prob 50.0%; Lib: mona-export-gnps; ID: 9388.

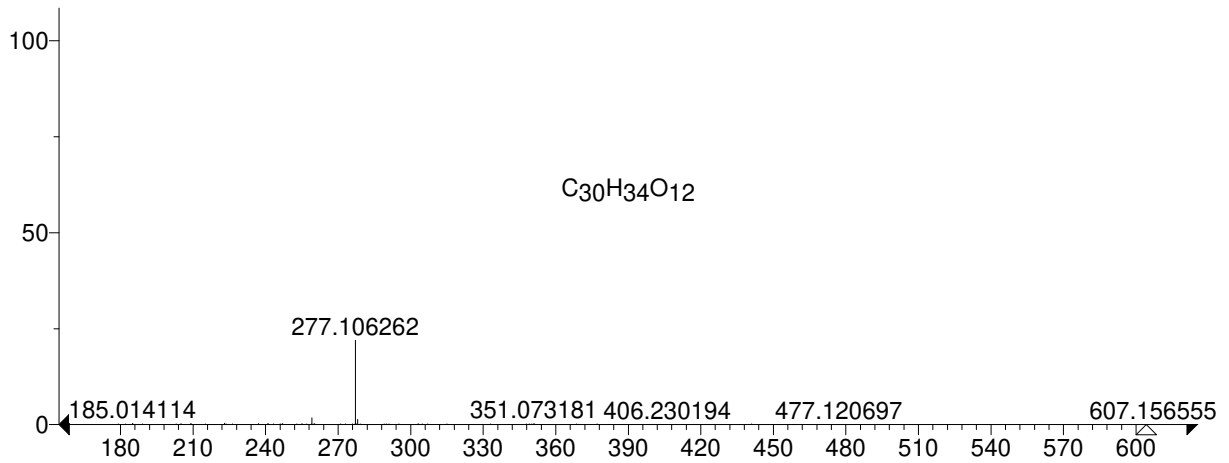

Hit 2 : NCGC00381132-01\_C23H38O17\_ [M+NH4]<sup>+</sup> P=604.2  
C<sub>23</sub>H<sub>38</sub>O<sub>17</sub>; MF: 0; RMF: 10; Prob 50.0%; Lib: mona-export-gnps; ID: 12990.

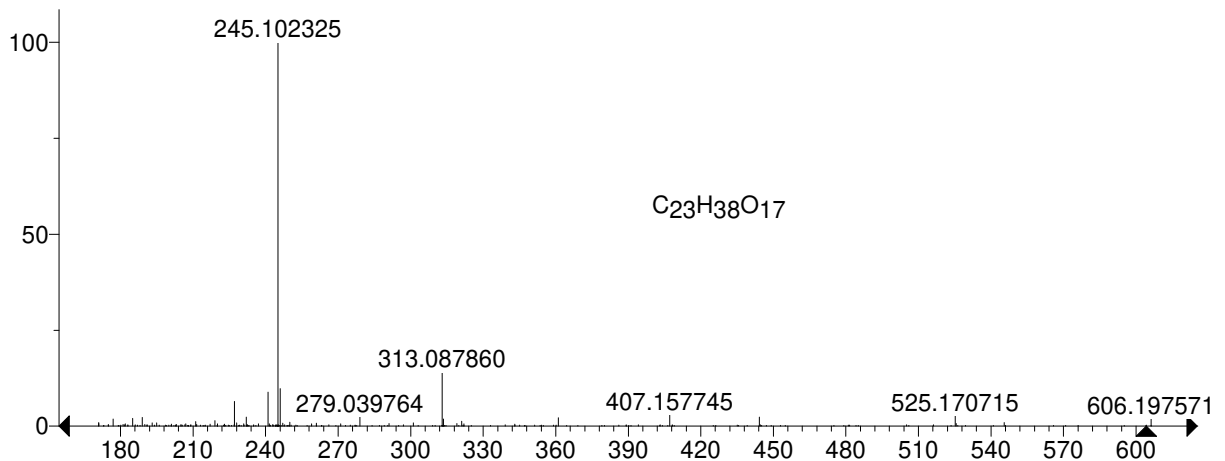

Unknown: Unknown (14.78\_506.0884m/z)  
Compound in Library Factor = 0

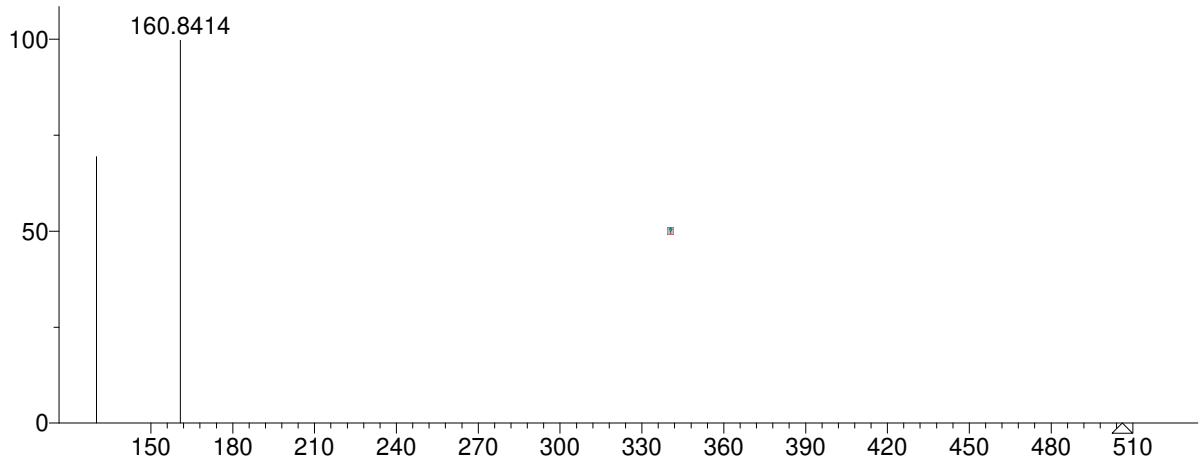

Unknown: Unknown (14.79\_475.1705m/z)  
Compound in Library Factor = 0

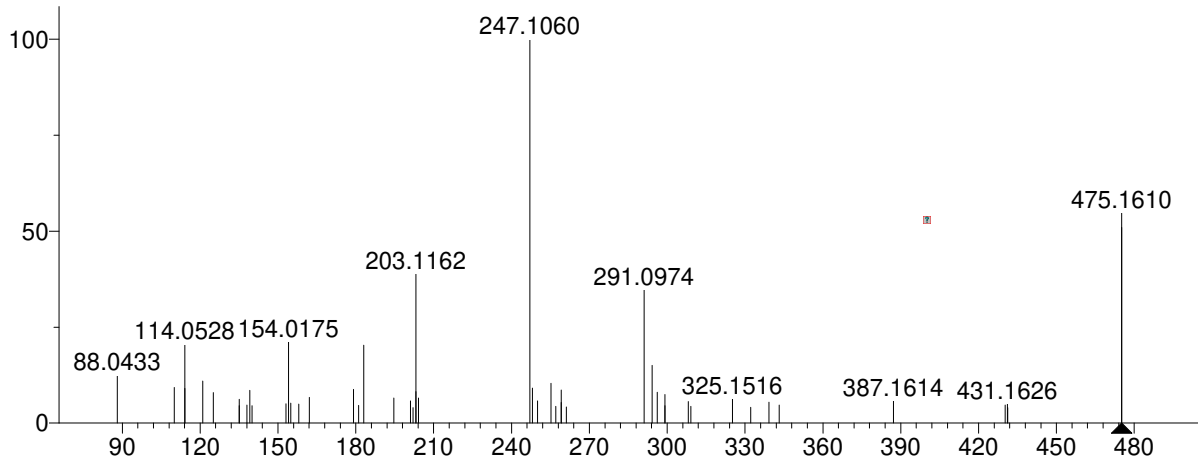

Unknown: Unknown (14.80\_633.2947m/z)  
Compound in Library Factor = 0

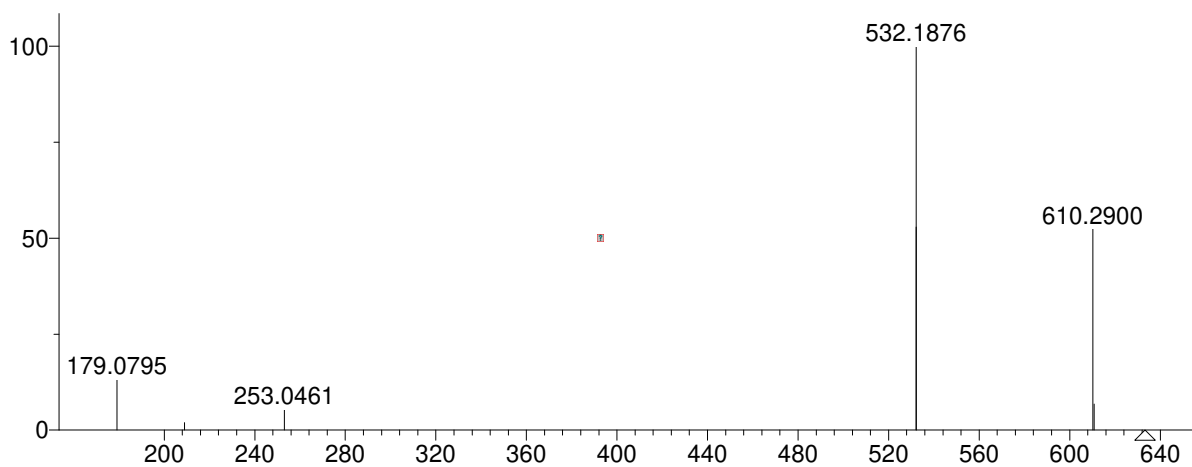

Hit 1 : Alloferon 1 [M+2H]<sup>2+</sup> IT-FT 35% P=633.3  
C<sub>52</sub>H<sub>76</sub>N<sub>22</sub>O<sub>16</sub>; MF: 0; RMF: 15; Prob 100.0%; Lib: nist\_msms2; ID: 49652.

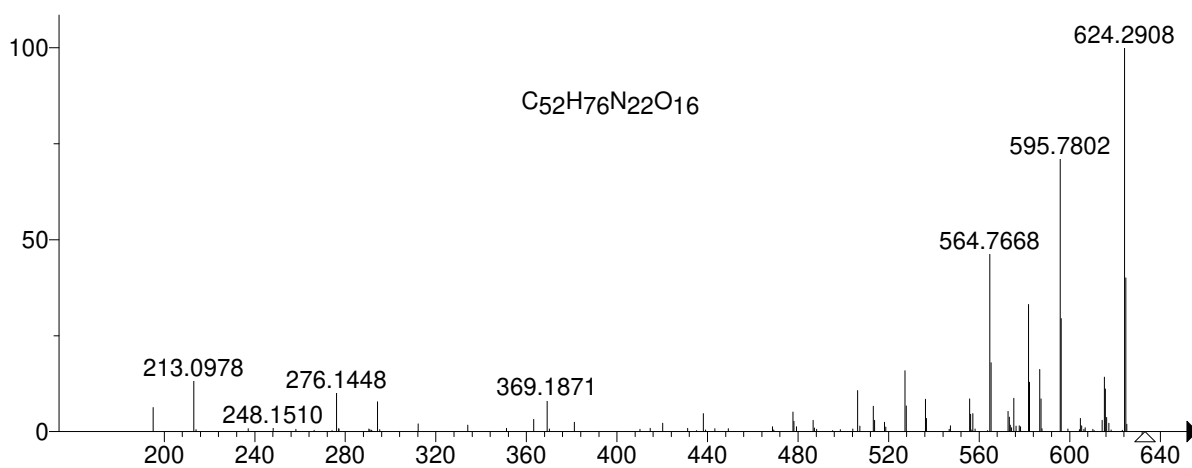

\*\* Search Report Page 1 of 2 \*\*

Unknown: Unknown (14.82\_221.0808m/z)  
Compound in Library Factor = -228

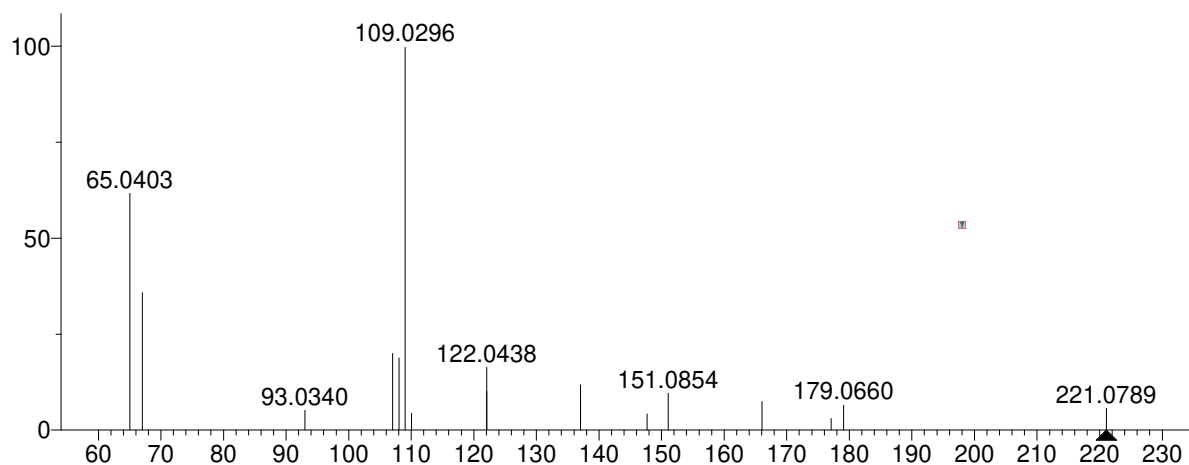

Hit 1 : 4-Ethoxy-7-methoxycoumarin [M+H]<sup>+</sup> HCD 6V P=221.1  
C<sub>12</sub>H<sub>12</sub>O<sub>4</sub>; MF: 356; RMF: 988; Prob 47.0%; CAS: 29064-32-2; Lib: nist\_msms; ID: 177196.

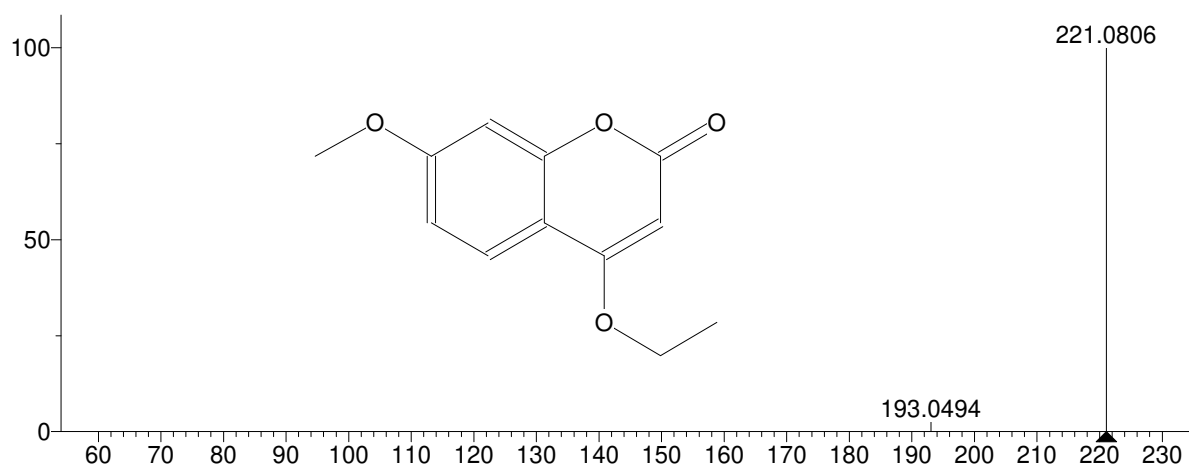

Hit 2 : 4-Ethoxy-6-methoxycoumarin [M+H]<sup>+</sup> HCD 6V P=221.1  
C<sub>12</sub>H<sub>12</sub>O<sub>4</sub>; MF: 353; RMF: 983; Prob 41.6%; CAS: 720676-54-0; Lib: nist\_msms; ID: 177270.

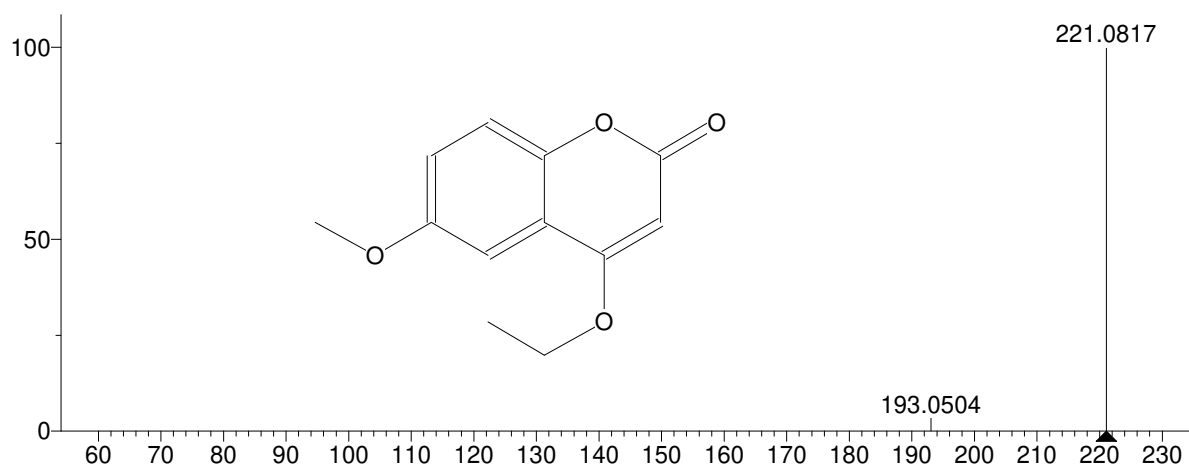

\*\* Search Report Page 2 of 2 \*\*

Hit 3 : Ferulic acid ethyl ester [M-H]<sup>-</sup> HCD 8V P=221.1  
C<sub>12</sub>H<sub>14</sub>O<sub>4</sub>; MF: 321; RMF: 945; Prob 11.1%; CAS: 4046-02-0; Lib: nist\_msms; ID: 408260.

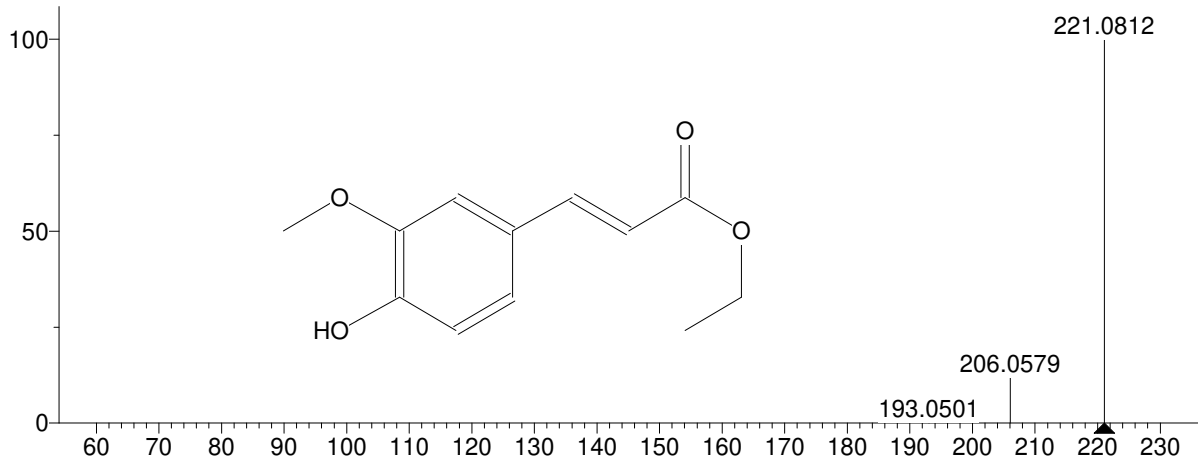

Hit 4 : Unknown (carbon number 12); PlaSMA ID-319 [M-H]<sup>-</sup> P=221.1  
C<sub>12</sub>H<sub>14</sub>O<sub>4</sub>; MF: 76; RMF: 298; Prob 0.11%; Lib: biomsmms-neg-plasma; ID: 1062.

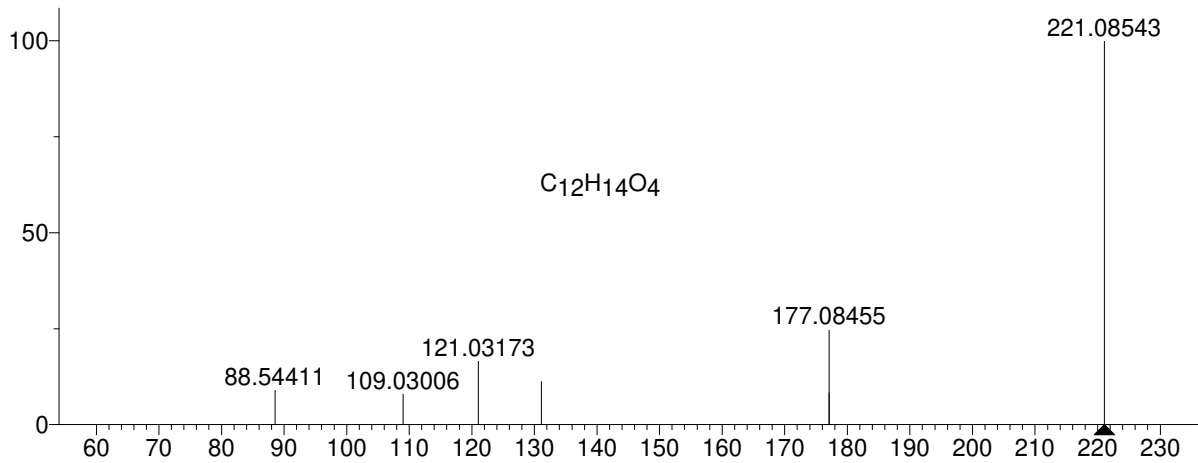

Hit 5 : 5,7-Dimethoxy-4-methylcoumarin [M+H]<sup>+</sup> HCD 17V P=221.1  
C<sub>12</sub>H<sub>12</sub>O<sub>4</sub>; MF: 20; RMF: 185; Prob 0.02%; CAS: 6093-80-7; Lib: nist\_msms; ID: 110250.

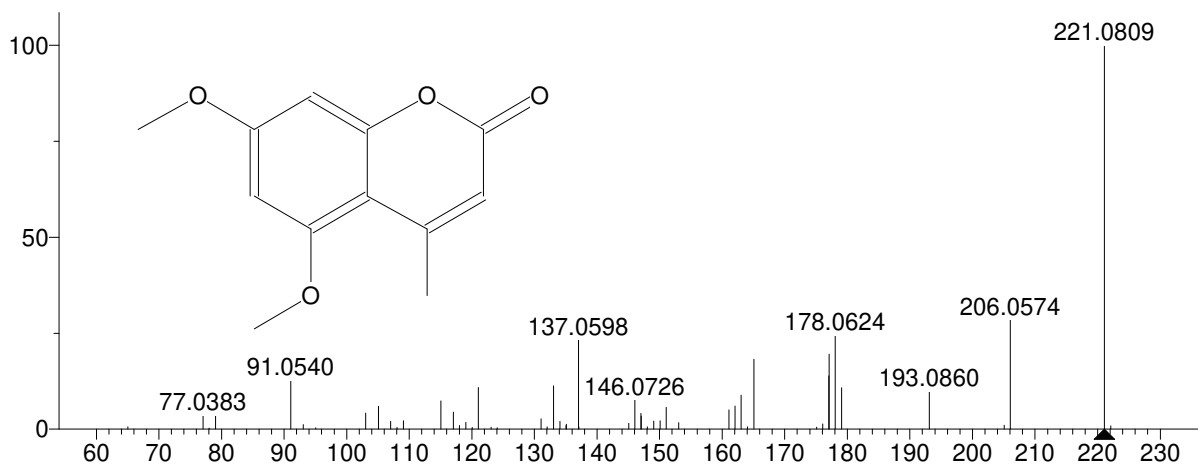

\*\* Search Report Page 1 of 2 \*\*

Unknown: Unknown (14.82\_253.0498m/z)  
Compound in Library Factor = -781

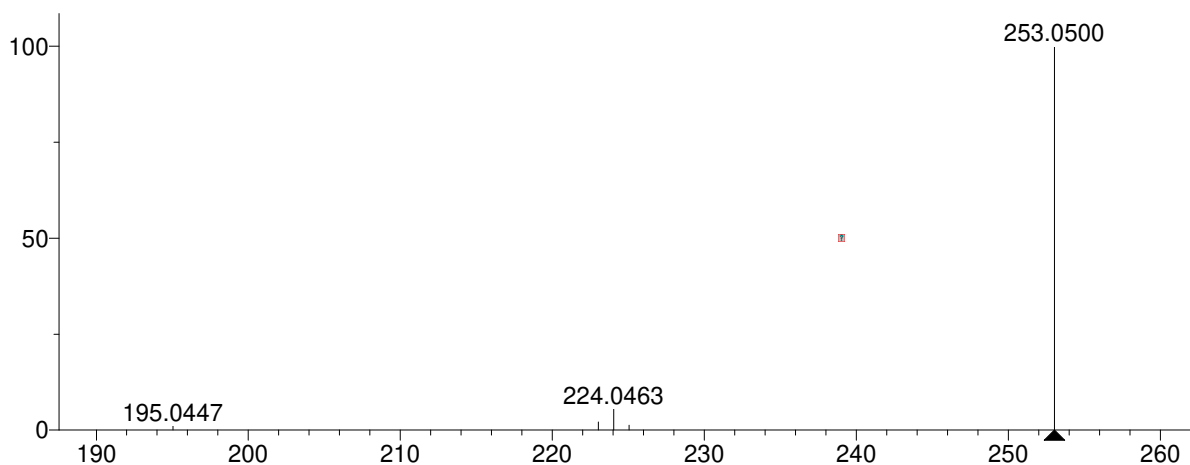

Hit 1 : Daidzein; LC-ESI-QTOF; MS2; CE [M-H]- P=253.1  
C15H10O4; MF: 649; RMF: 941; Prob 77.2%; Lib: msms-neg-massbank; ID: 4125.

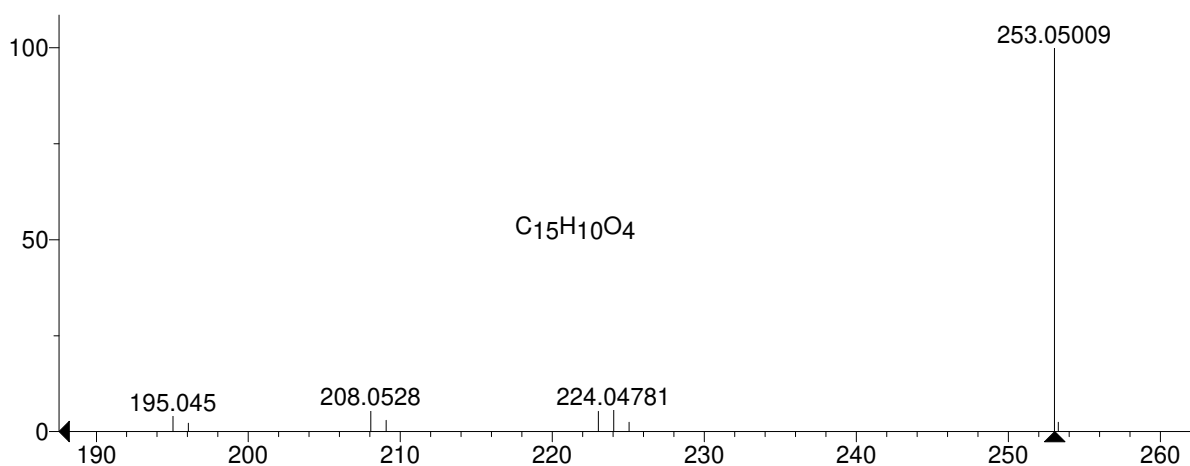

Hit 2 : Daidzein [M-H]- 10 P=253.1  
C15H10O4; MF: 603; RMF: 952; Prob 16.3%; Lib: msms neg mona\_ipb\_gnps\_plasma; ID: 20109.

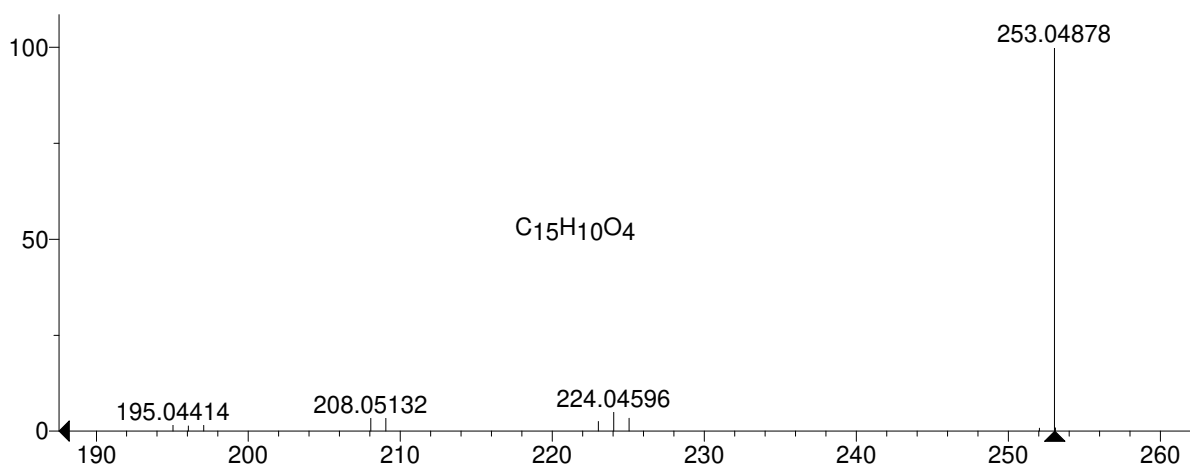

Hit 3 : 3,3'-Dihydroxyflavone [M-H]<sup>-</sup> 10ev P=253.1

C<sub>15</sub>H<sub>10</sub>O<sub>4</sub>; MF: 564; RMF: 919; Prob 3.84%; Lib: mona-export-ic-ms-ms\_negative\_mode; ID: 9141.

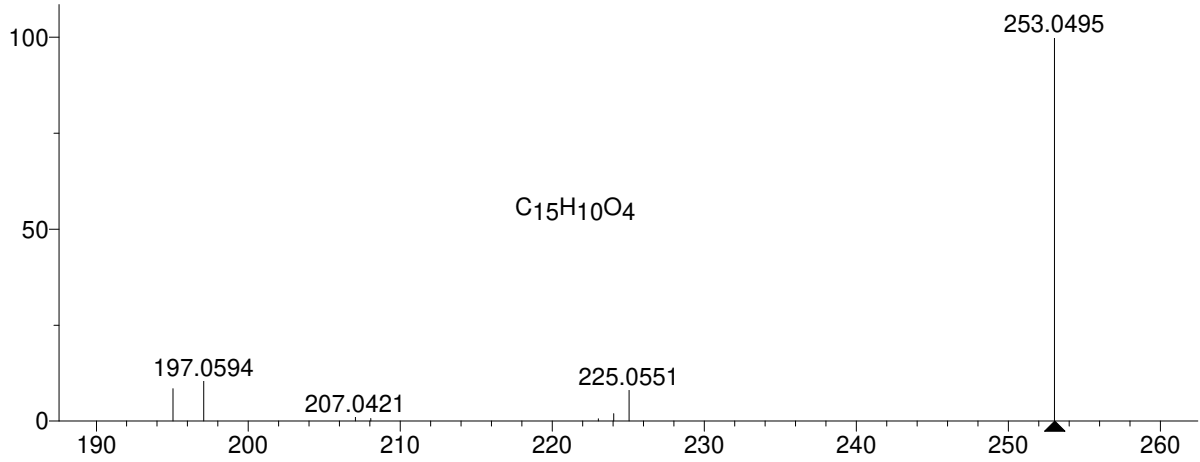

Hit 4 : Flavonol base + 1O [M-H]<sup>-</sup> 6V P=253

C<sub>15</sub>H<sub>10</sub>O<sub>4</sub>; MF: 513; RMF: 912; Prob 0.77%; Lib: anthocyanins mona; ID: 6876.

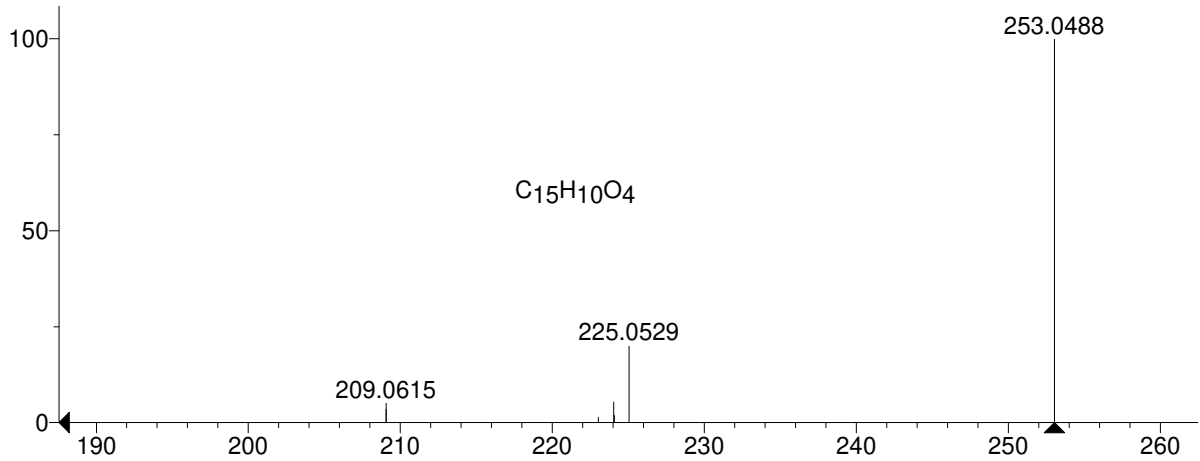

Hit 5 : Flavonol base + 1O; PlaSMA ID-410 [M-H]<sup>-</sup> P=253

C<sub>15</sub>H<sub>10</sub>O<sub>4</sub>; MF: 513; RMF: 912; Prob 0.77%; Lib: biomsms-neg-plasma; ID: 555.

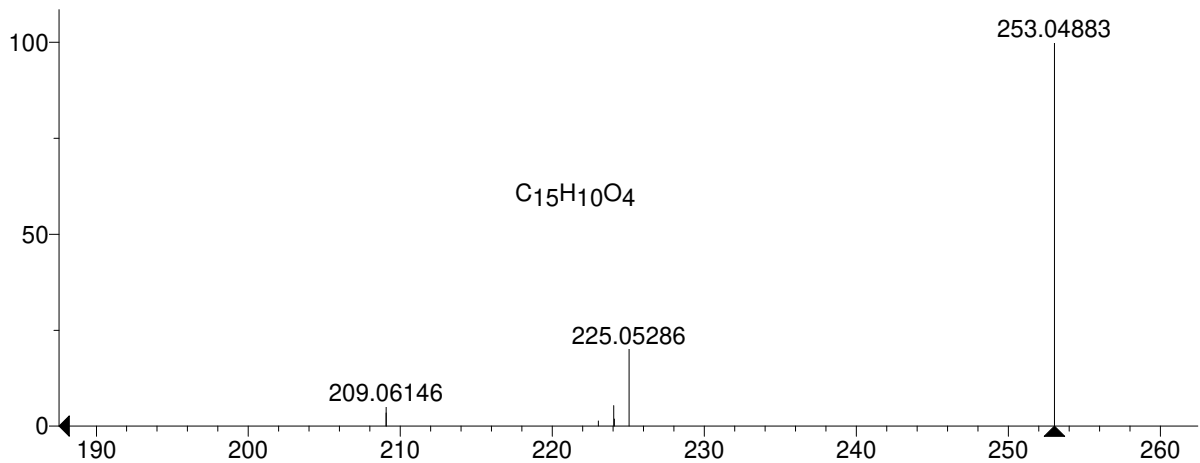



Unknown: Unknown (14.95\_191.0336m/z)  
Compound in Library Factor = -459

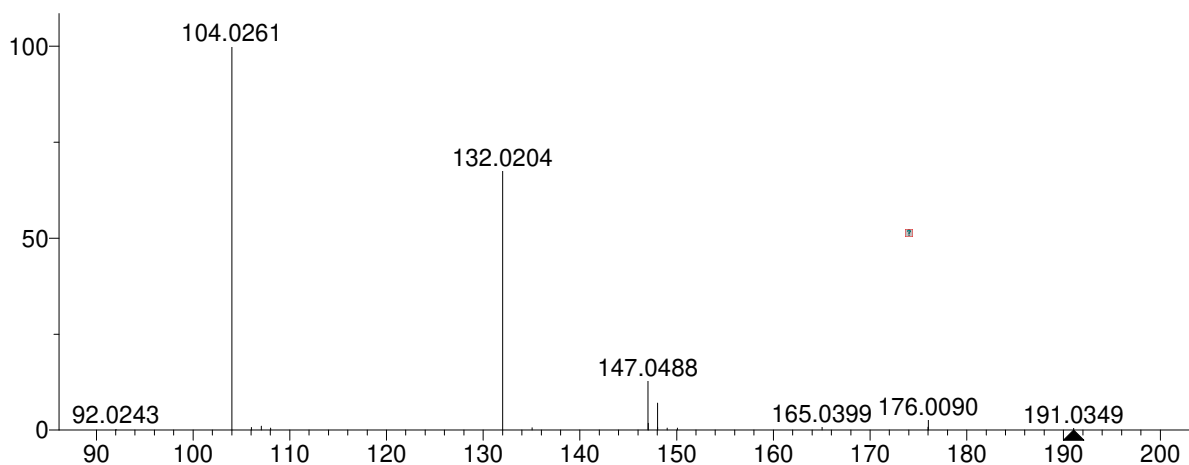

Hit 1 : Scopoletin [M-H]<sup>-</sup> HCD 9V P=191  
C<sub>10</sub>H<sub>8</sub>O<sub>4</sub>; MF: 478; RMF: 785; Prob 94.0%; CAS: 92-61-5; Lib: nist\_msms; ID: 552763.

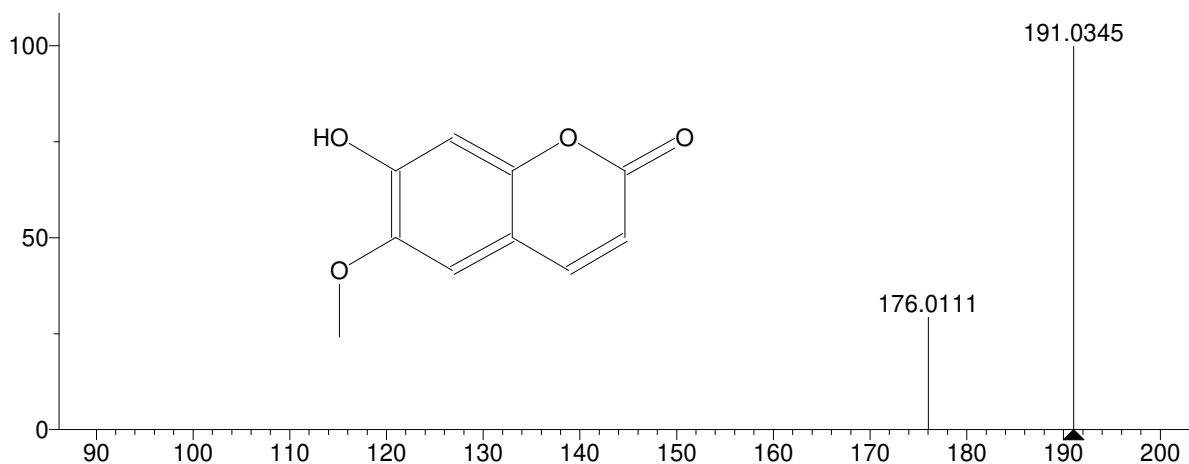

Hit 2 : 6-Hydroxy-7-methoxycoumarin [M-H]<sup>-</sup> HCD 24V P=191  
C<sub>10</sub>H<sub>8</sub>O<sub>4</sub>; MF: 359; RMF: 520; Prob 5.07%; CAS: 776-86-3; Lib: nist\_msms; ID: 106577.

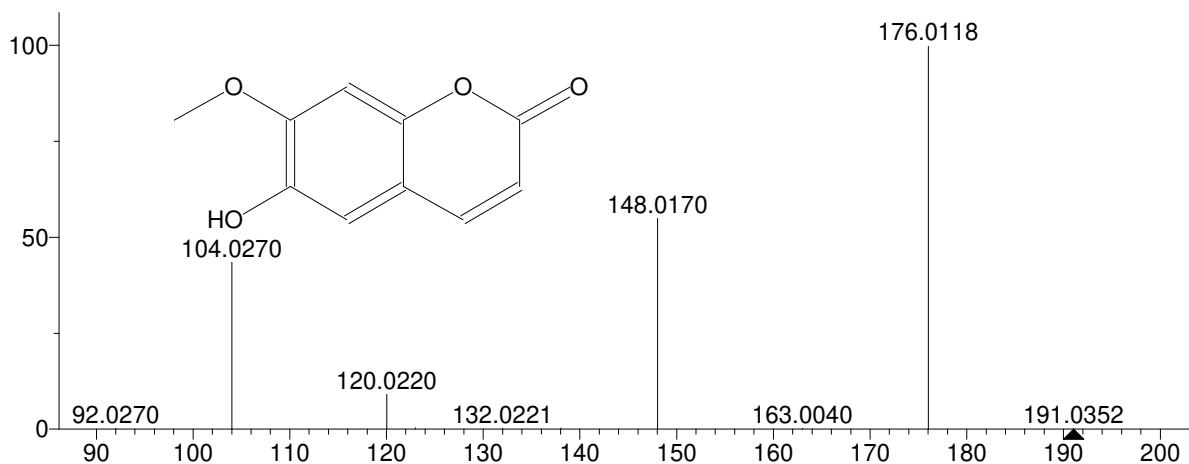

\*\* Search Report Page 2 of 2 \*\*

Hit 3 : Scopoletin; LC-ESI-QTOF; MS2; CE [M-H]<sup>-</sup> P=191  
C<sub>10</sub>H<sub>8</sub>O<sub>4</sub>; MF: 282; RMF: 458; Prob 0.61%; Lib: msms-neg-massbank; ID: 4682.

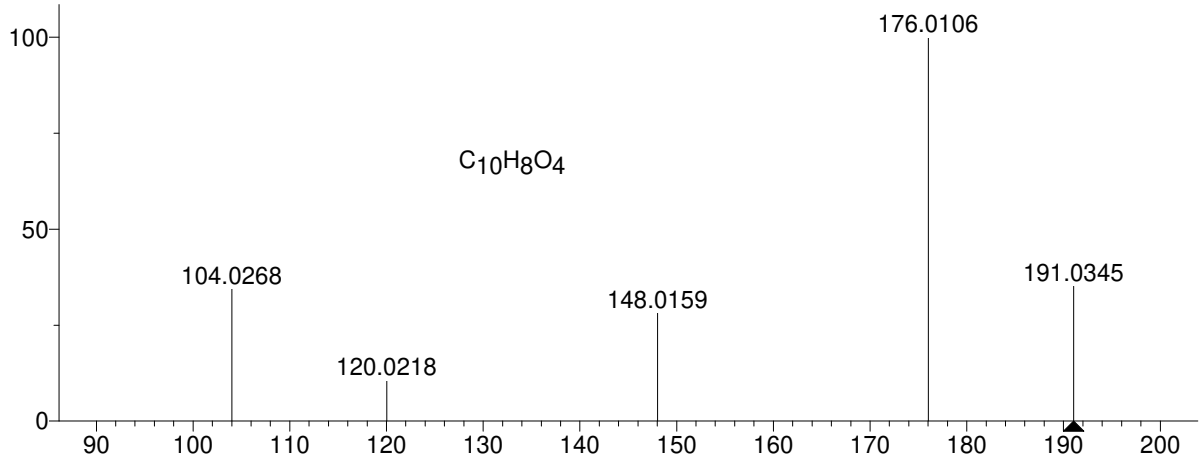

Hit 4 : Coumarin base + 1O, 1MeO; PlaSMA ID-233 [M-H]<sup>-</sup> P=191  
C<sub>10</sub>H<sub>8</sub>O<sub>4</sub>; MF: 258; RMF: 798; Prob 0.20%; Lib: biomsms-neg-plasma; ID: 683.

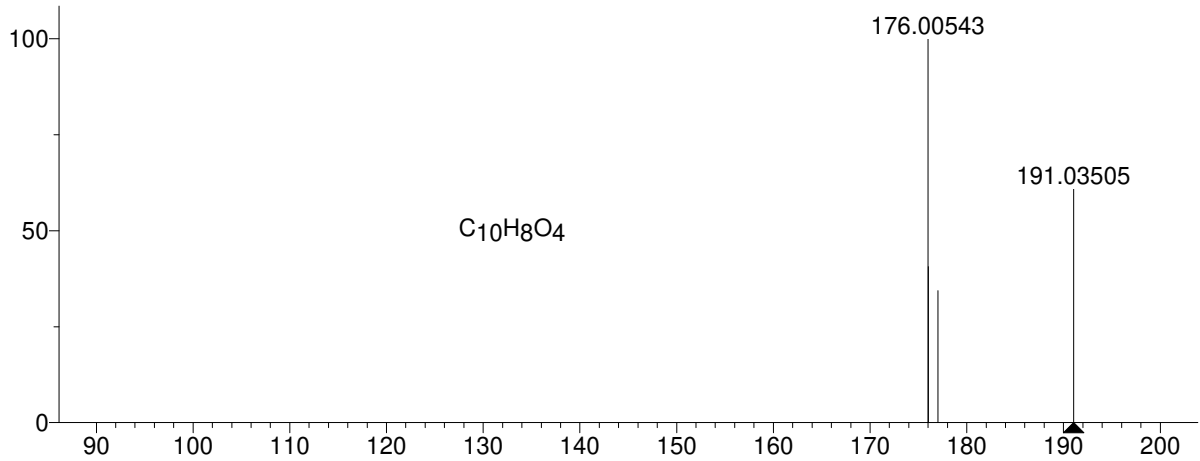

Hit 5 : 6-Methoxy-7-hydroxycoumarin [M-H]<sup>-</sup> 10 P=191  
C<sub>10</sub>H<sub>8</sub>O<sub>4</sub>; MF: 223; RMF: 387; Prob 0.05%; Lib: msms neg mona\_ipb\_gnps\_plasma; ID: 20632.

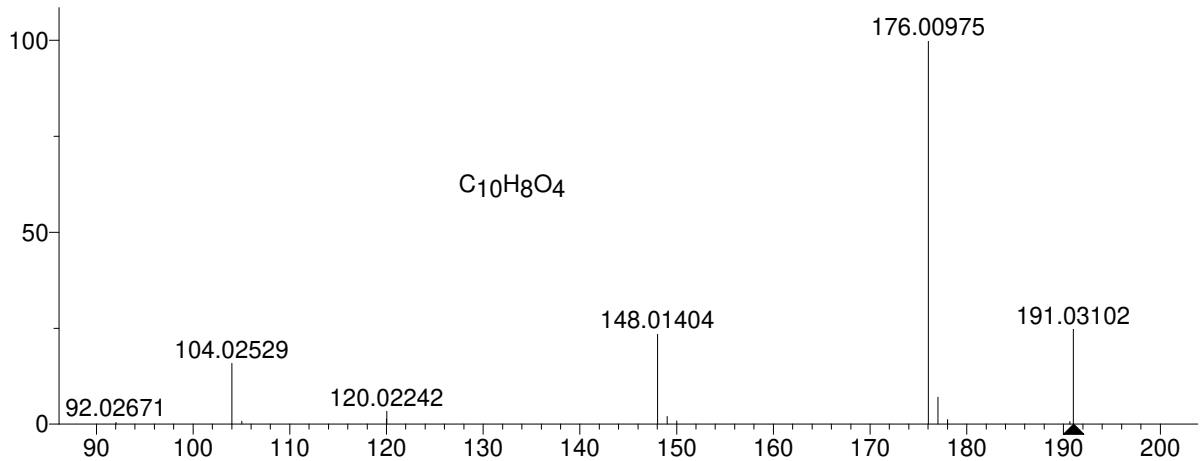

Unknown: Unknown (15.03\_264.1233m/z)  
Compound in Library Factor = -2387

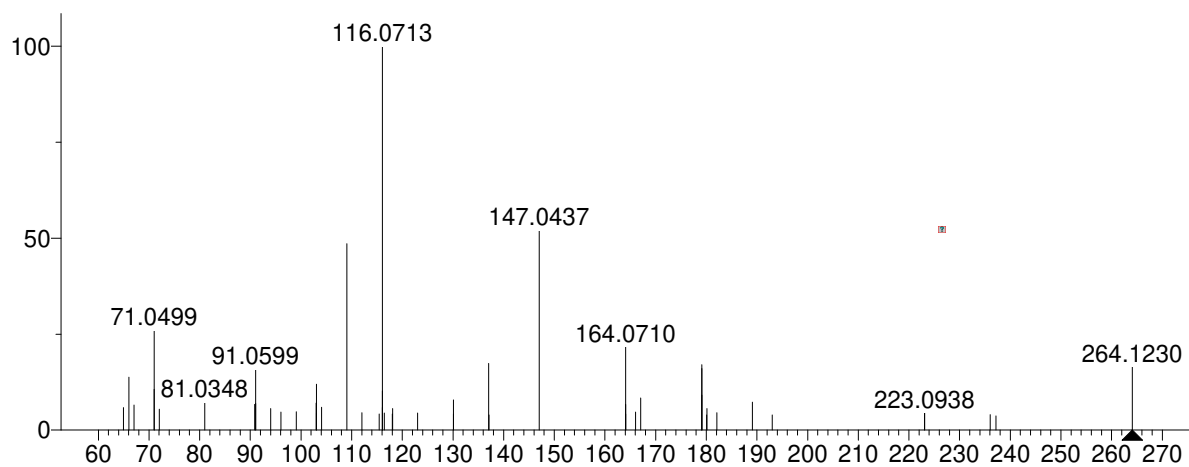

Hit 1 : N- $\alpha$ -(tert-Butoxycarbonyl)-L-phenylalanine [M-H]<sup>-</sup> HCD 1V P=264.1  
C<sub>14</sub>H<sub>19</sub>NO<sub>4</sub>; MF: 50; RMF: 523; Prob 27.5%; CAS: 13734-34-4; Lib: nist\_msms; ID: 306371.

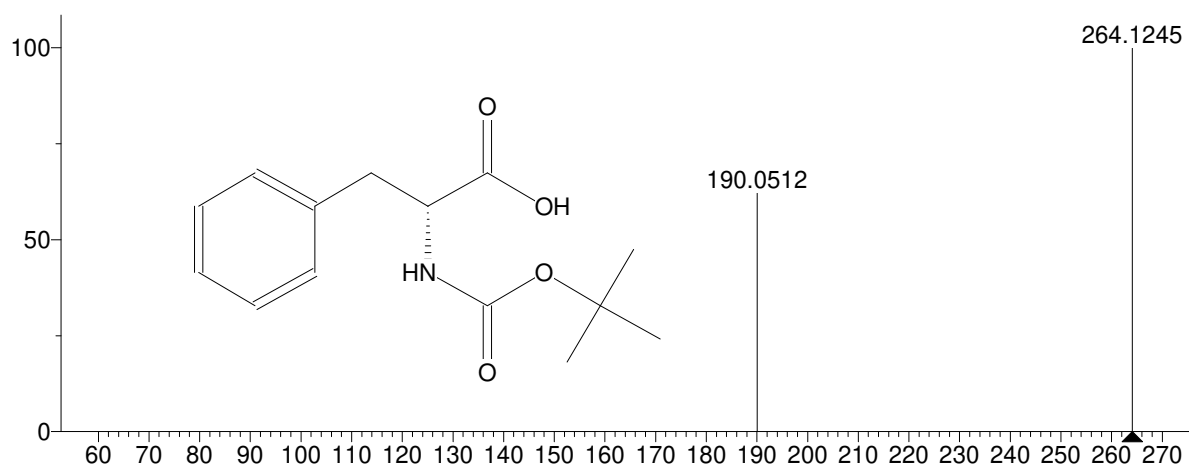

Hit 2 : 6-Benzyloxycarbonylaminohexanoic acid [M-H]<sup>-</sup> HCD 0V P=264.1  
C<sub>14</sub>H<sub>19</sub>NO<sub>4</sub>; MF: 43; RMF: 323; Prob 21.1%; CAS: 1947-00-8; Lib: nist\_msms; ID: 127720.

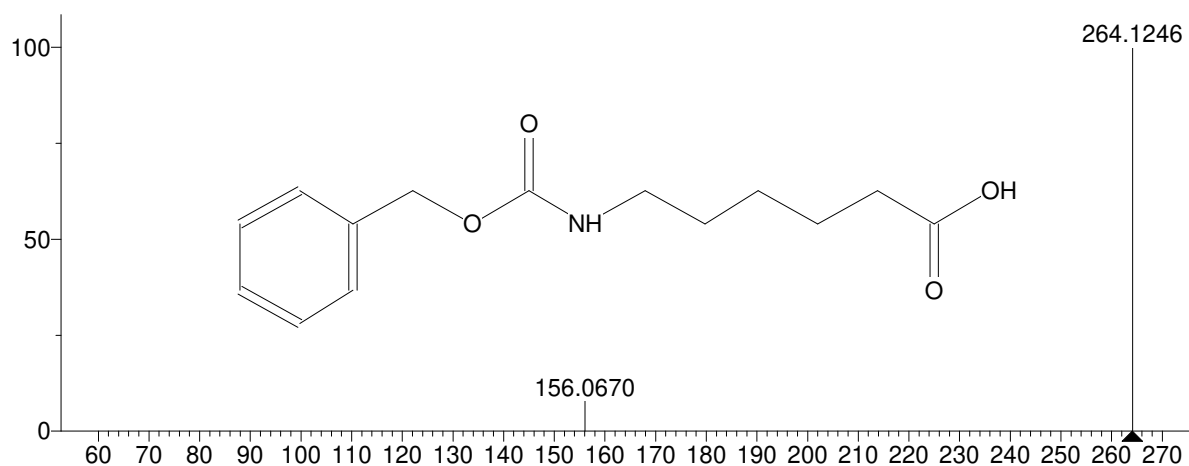

Hit 3 : Alachlor OA [M-H]- HCD 1V P=264.1

C<sub>14</sub>H<sub>19</sub>NO<sub>4</sub>; MF: 24; RMF: 317; Prob 10.2%; CAS: 171262-17-2; Lib: nist\_msms; ID: 473262.

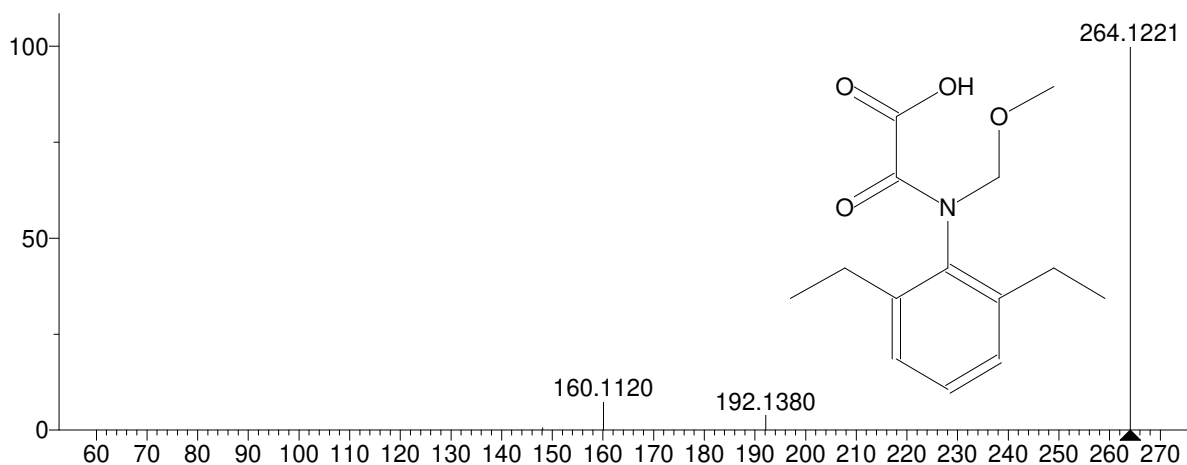

Hit 4 : Zaleplon [M+H-C<sub>2</sub>H<sub>2</sub>O]<sup>+</sup> HCD 15V P=264.1

C<sub>17</sub>H<sub>15</sub>N<sub>5</sub>O; MF: 18; RMF: 316; Prob 8.03%; CAS: 151319-34-5; Lib: nist\_msms; ID: 329246.

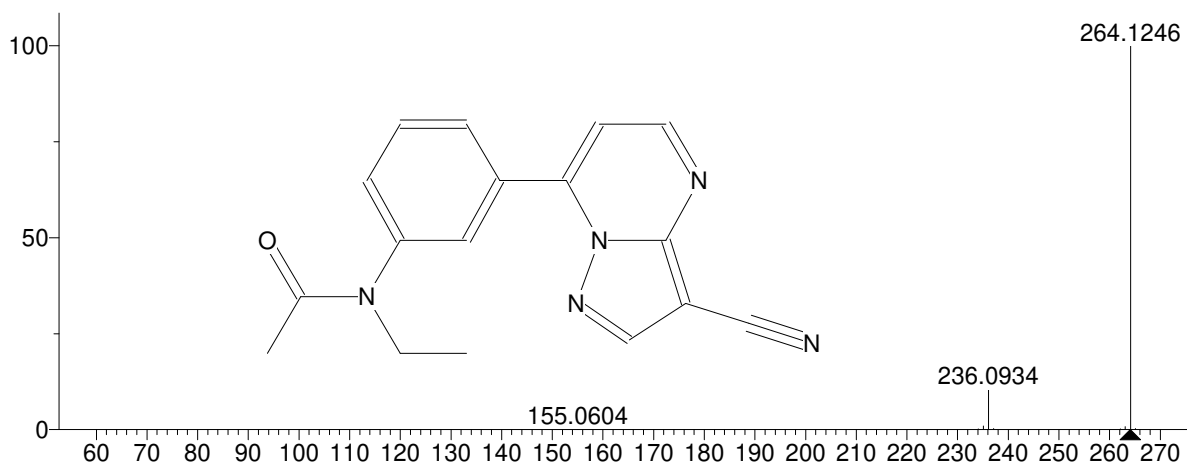

Hit 5 : CGA62826 (2-[2,6-dimethylphenyl]-methoxyacetyl-amino)propionic acid [M-H]- 15(no P=264.1

C<sub>14</sub>H<sub>19</sub>NO<sub>4</sub>; MF: 0; RMF: 97; Prob 4.14%; Lib: mona-export-ic-ms-ms\_negative\_mode; ID: 4254.

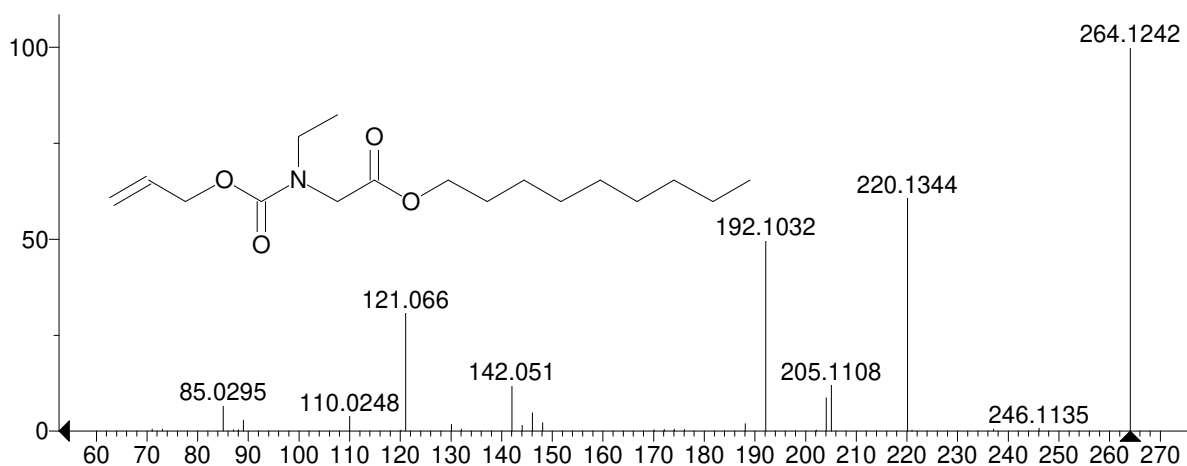

\*\* Search Report Page 1 of 1 \*\*

Unknown: Unknown (15.03\_552.2688m/z)  
Compound in Library Factor = -1848

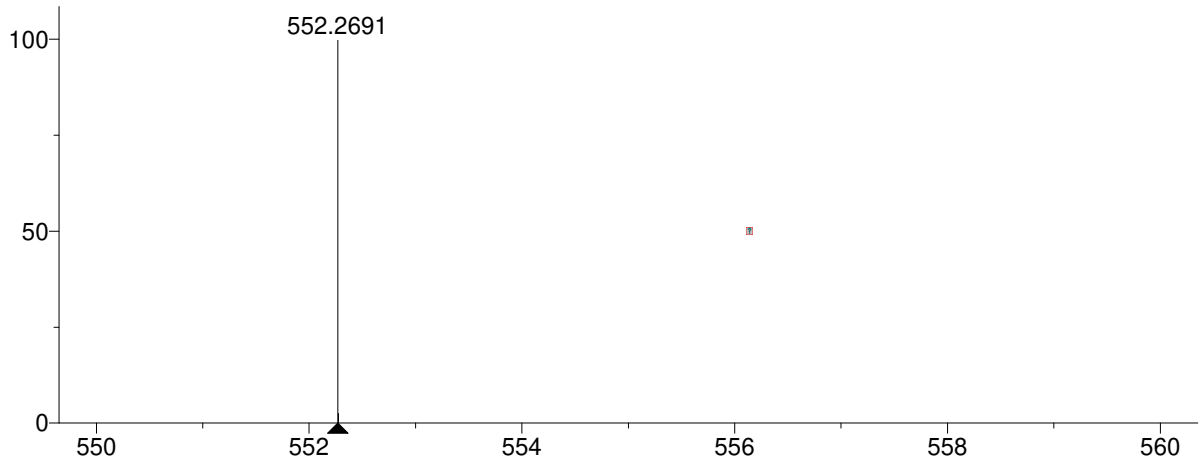

Hit 1 : Big Endothelin-2 (22-37), human [M+3H]<sup>3+</sup> HCD 9eV P=552.3  
C<sub>73</sub>H<sub>111</sub>N<sub>19</sub>O<sub>25</sub>; MF: 51; RMF: 739; Prob 100.0%; Lib: nist\_msms2; ID: 61869.

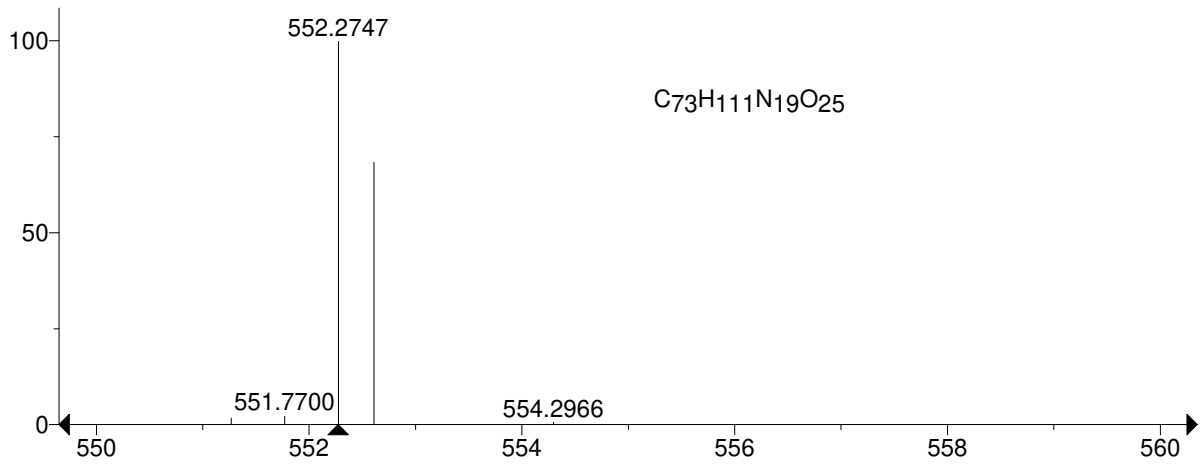

Unknown: Unknown (15.03\_575.7736m/z)  
Compound in Library Factor = 0

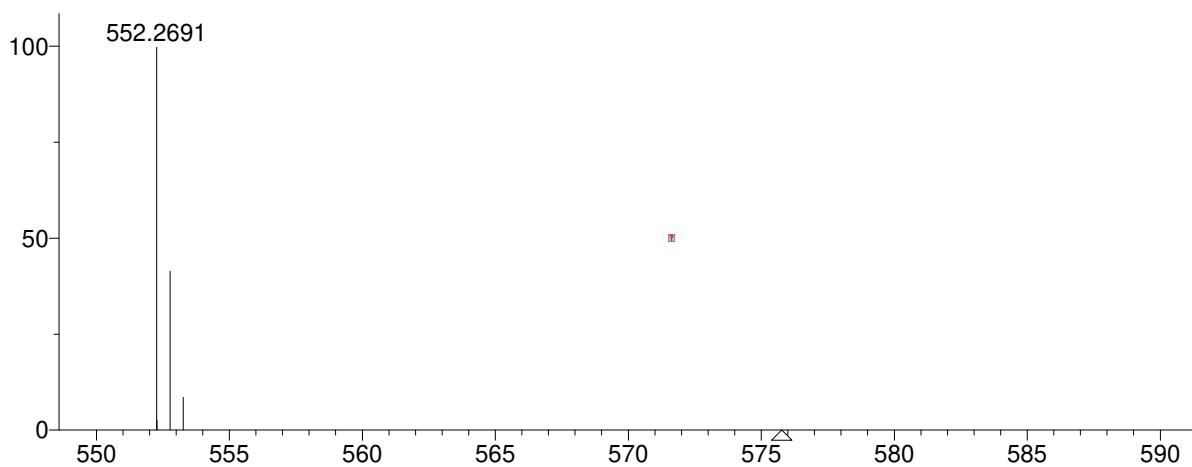

Hit 1 : [Lys8] LH-RH [M-2H]2- HCD 31eV P=575.8  
C<sub>55</sub>H<sub>75</sub>N<sub>15</sub>O<sub>13</sub>; MF: 0; RMF: 74; Prob 100.0%; Lib: nist\_msms2; ID: 80377.

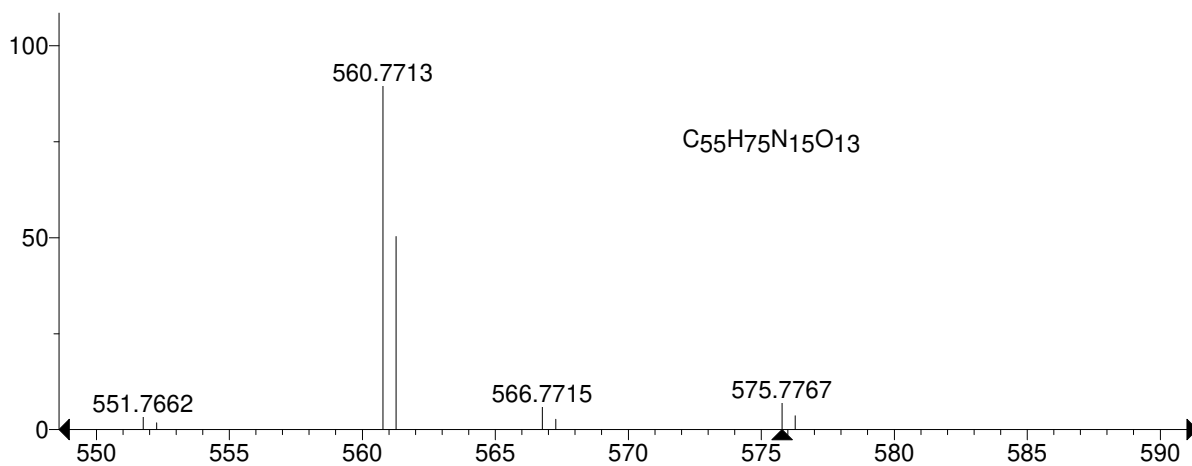

Unknown: Unknown (15.04\_575.2722m/z)  
Compound in Library Factor = 0

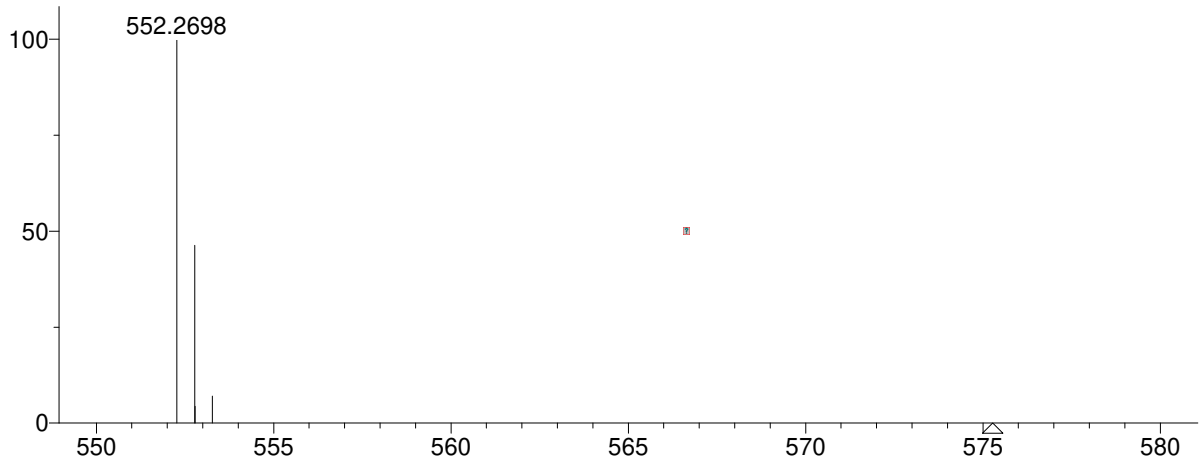

Unknown: Unknown (15.12\_711.3673m/z)  
Compound in Library Factor = 0

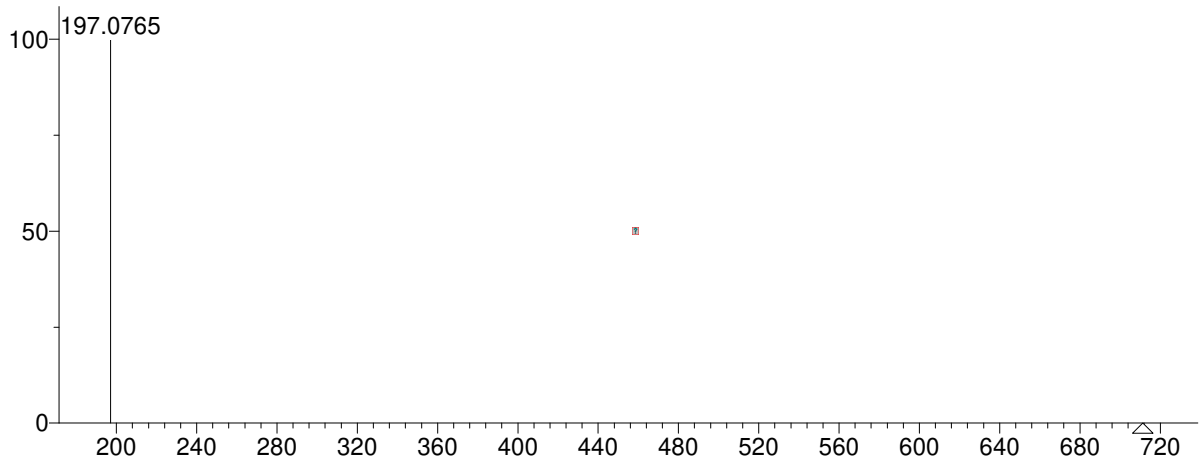



Unknown: Unknown (15.14\_677.8063m/z)  
Compound in Library Factor = 0

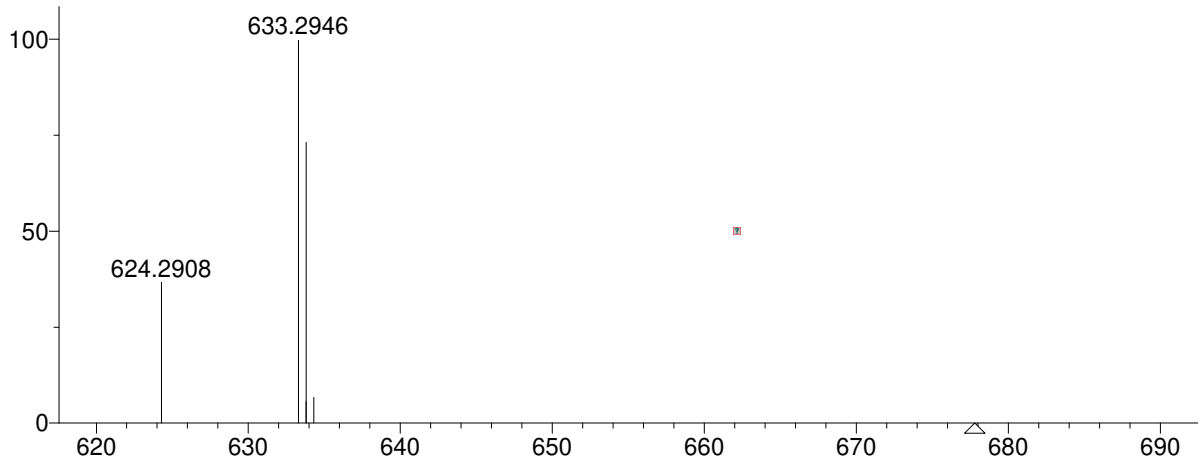

Unknown: Unknown (15.15\_575.2709m/z)  
Compound in Library Factor = 0

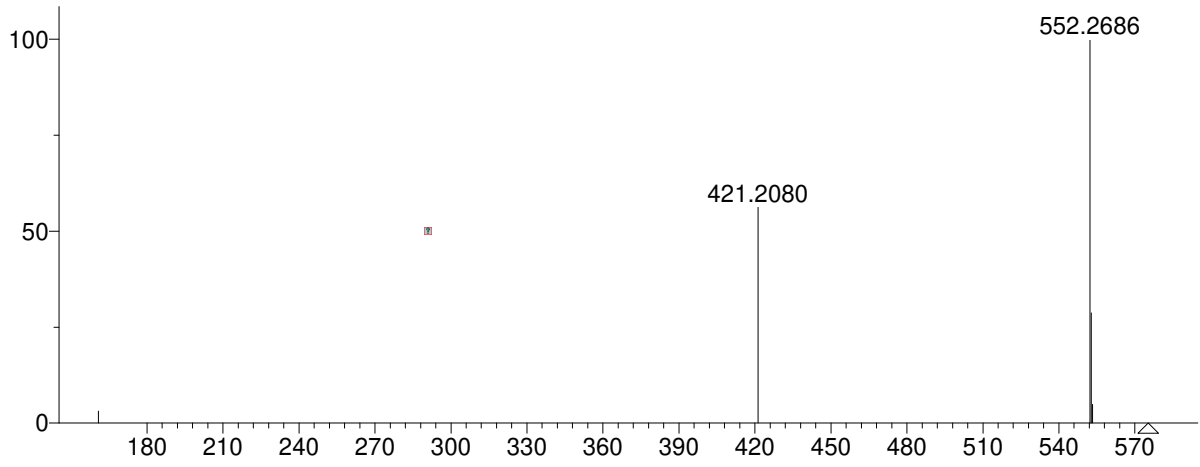

Unknown: Unknown (15.15\_677.3046m/z)  
Compound in Library Factor = 0

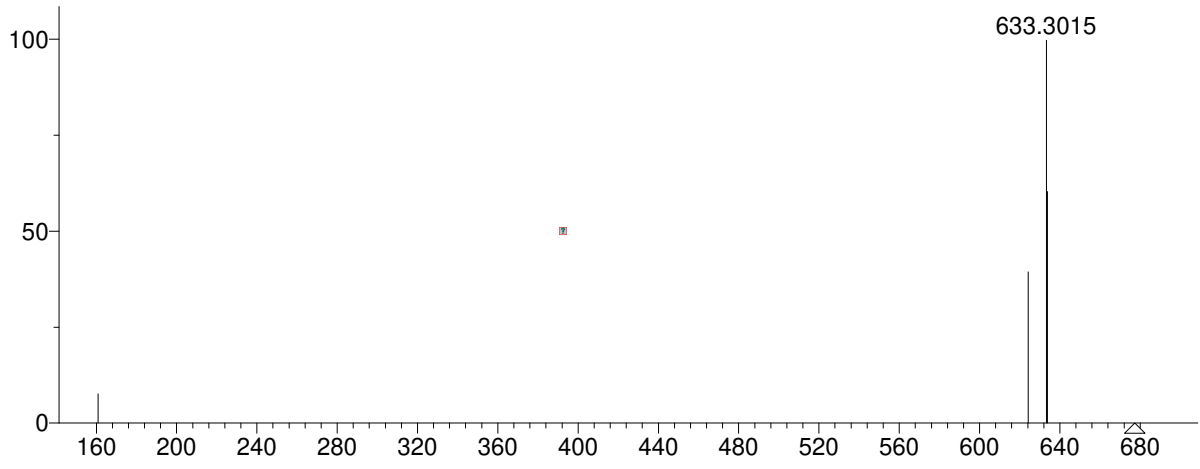

\*\* Search Report Page 1 of 2 \*\*

Unknown: Unknown (15.16\_467.2124m/z)  
Compound in Library Factor = -2176

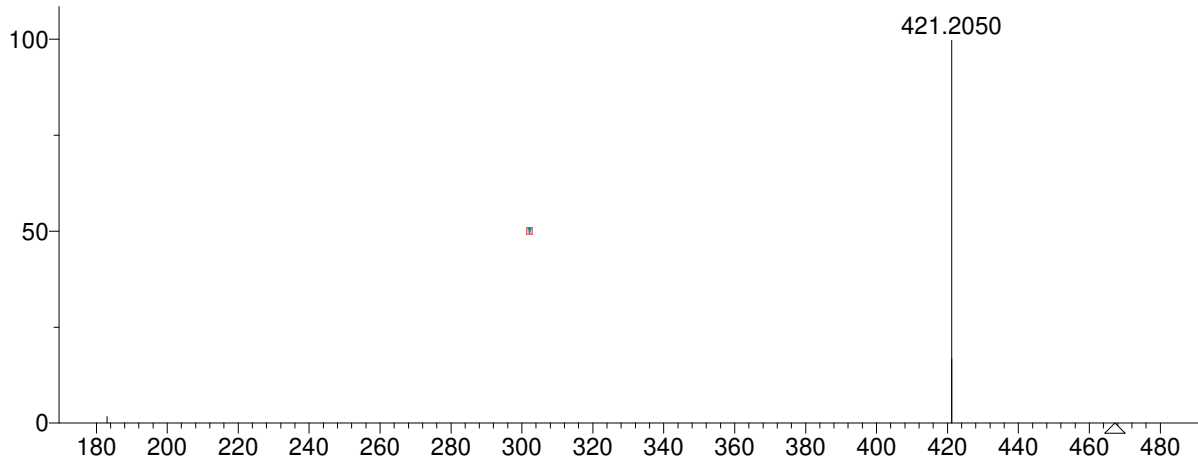

Hit 1 : NCGC00385558-01!(2R,3S,4S,5R,6R)-2-[[[(2R,3R,4R)-3,4-dihydroxy-4-(hydroxymethyl)oxolan-2-yl]oxymet  
C19H34O10; MF: 55; RMF: 740; Prob 46.9%; Lib: msms-neg-gnps; ID: 939.

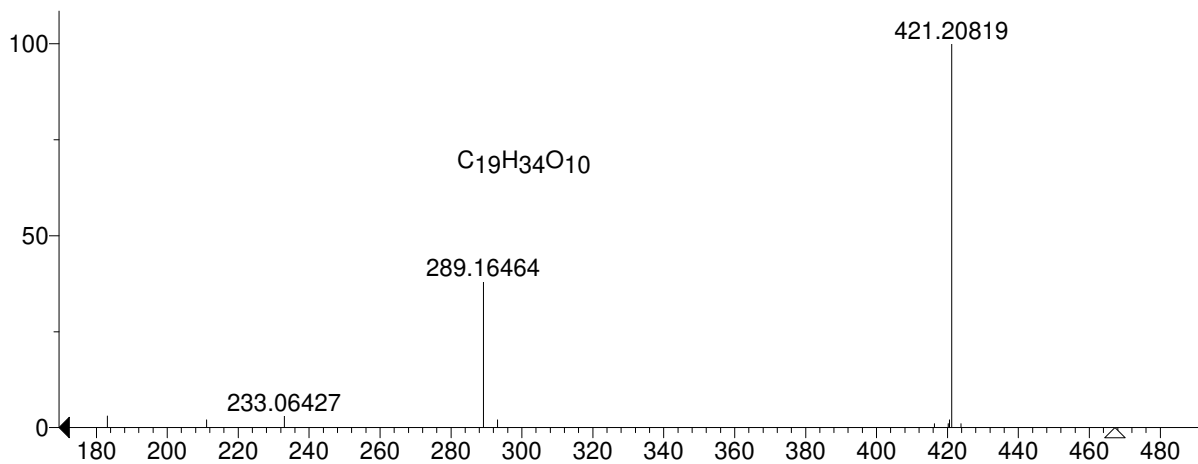

Hit 2 : MGDG 10:0; MGDG 5:0-5:0; [M+FA-H]- [M+FA-H]- P=467.2  
C19H34O10; MF: 20; RMF: 411; Prob 11.8%; Lib: msdial-insilicomsmms-lipids-neg; ID: 311444.

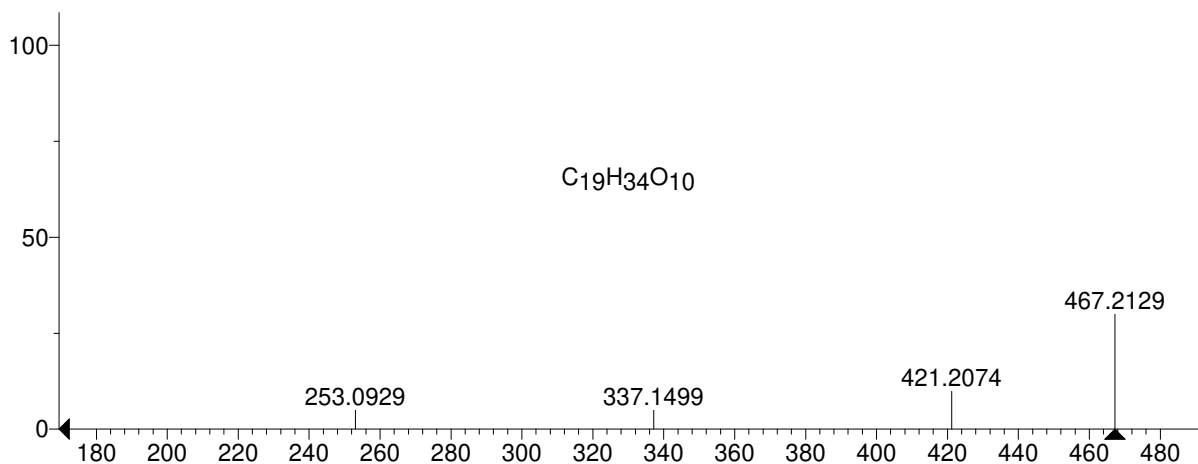

\*\* Search Report Page 2 of 2 \*\*

Hit 3 : NCGC00169122-02|2-oct-1-en-3-yloxy-6-[(3,4,5-trihydroxyoxan-2-yl)oxymethyl]oxane-3,4,5-triol [M+FA-H]  
C<sub>19</sub>H<sub>34</sub>O<sub>10</sub>; MF: 19; RMF: 566; Prob 11.3%; Lib: mona-export-gnps; ID: 7249.

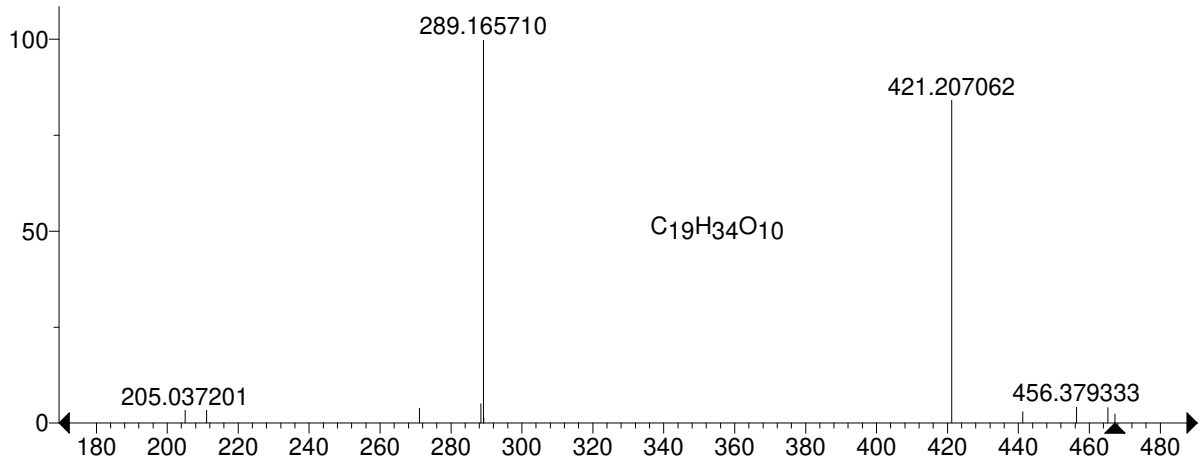

Hit 4 : MGDG 10:0; MGDG 2:0-8:0; [M+FA-H]- [M+FA-H]- P=467.2  
C<sub>19</sub>H<sub>34</sub>O<sub>10</sub>; MF: 16; RMF: 392; Prob 9.99%; Lib: msdial-insilicomsm-lipids-neg; ID: 311270.

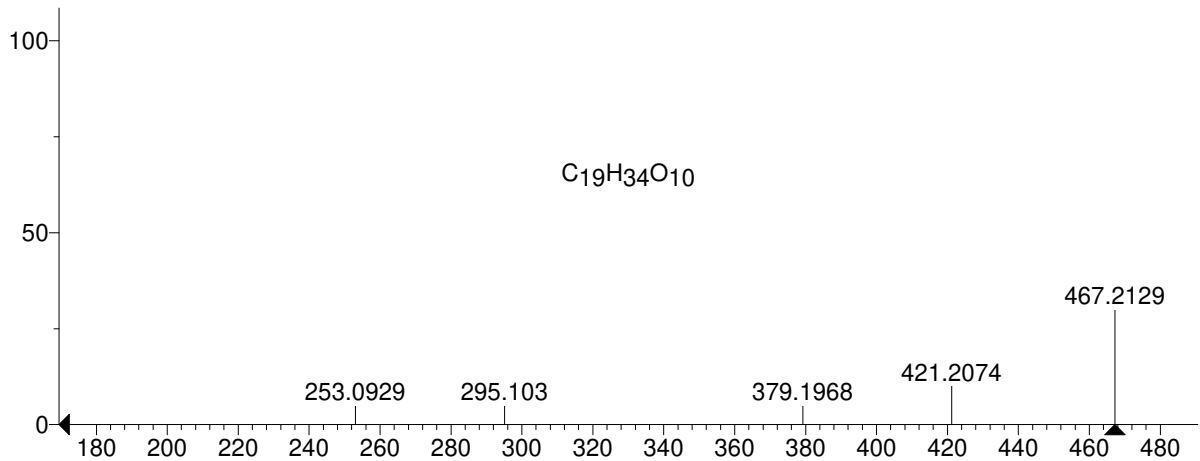

Hit 5 : MGDG 10:0; MGDG 3:0-7:0; [M+FA-H]- [M+FA-H]- P=467.2  
C<sub>19</sub>H<sub>34</sub>O<sub>10</sub>; MF: 16; RMF: 392; Prob 9.99%; Lib: msdial-insilicomsm-lipids-neg; ID: 311329.

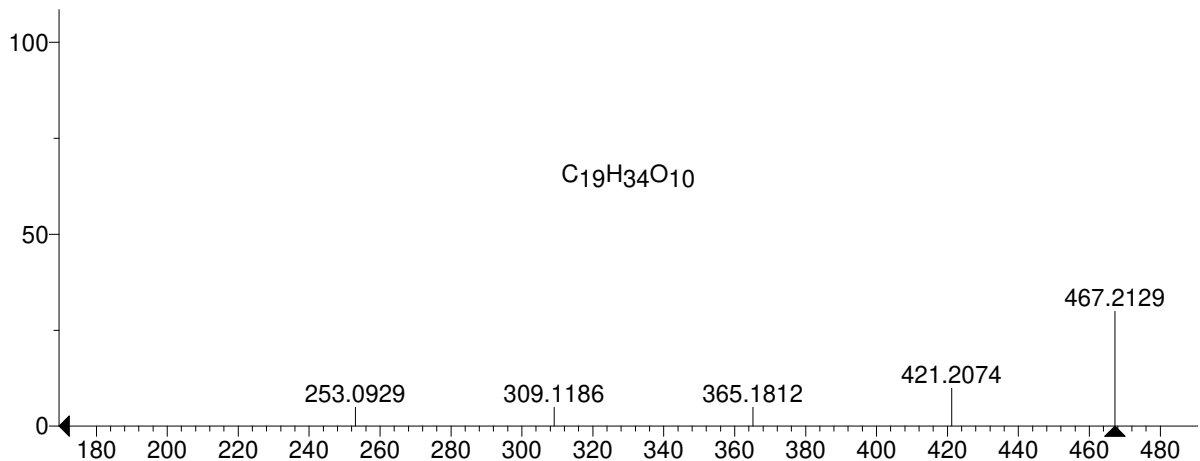

\*\* Search Report Page 1 of 2 \*\*

Unknown: Unknown (15.19\_351.1616m/z)  
Compound in Library Factor = -885

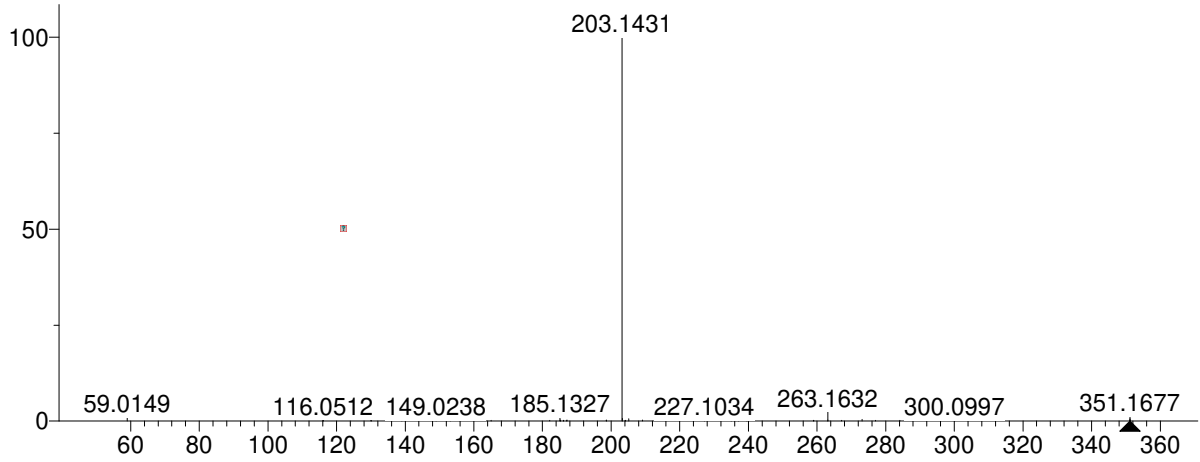

Hit 1 : Dienestrol diacetate [M+H]<sup>+</sup> HCD 3V P=351.2  
C<sub>22</sub>H<sub>22</sub>O<sub>4</sub>; MF: 88; RMF: 659; Prob 73.3%; CAS: 84-19-5; Lib: nist\_msms; ID: 284291.

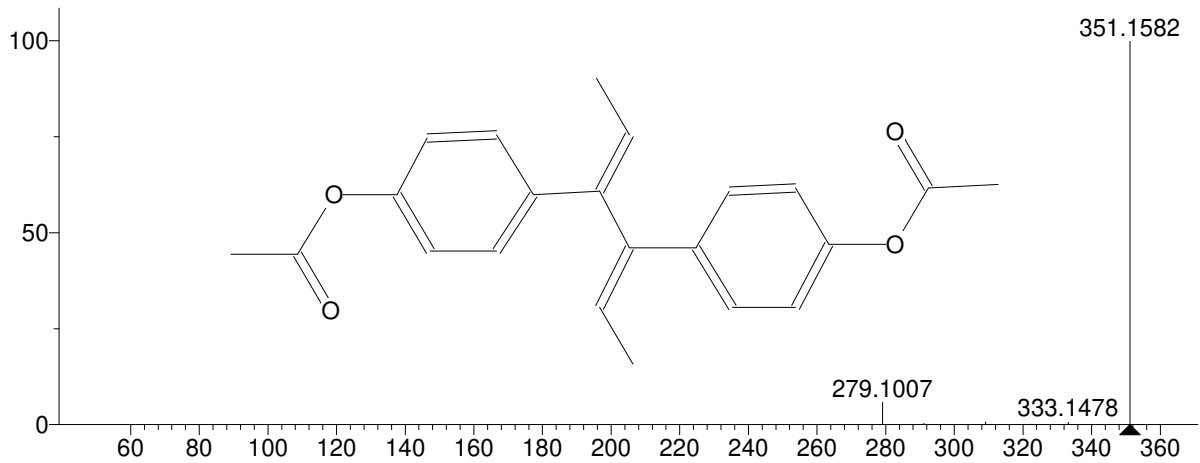

Hit 2 : 3-Dehydroepiandrosterone sulfate [M+H-H<sub>2</sub>O]<sup>+</sup> HCD 14V P=351.2  
C<sub>19</sub>H<sub>28</sub>O<sub>5</sub>S; MF: 8; RMF: 83; Prob 8.06%; CAS: 651-48-9; Lib: nist\_msms; ID: 102169.

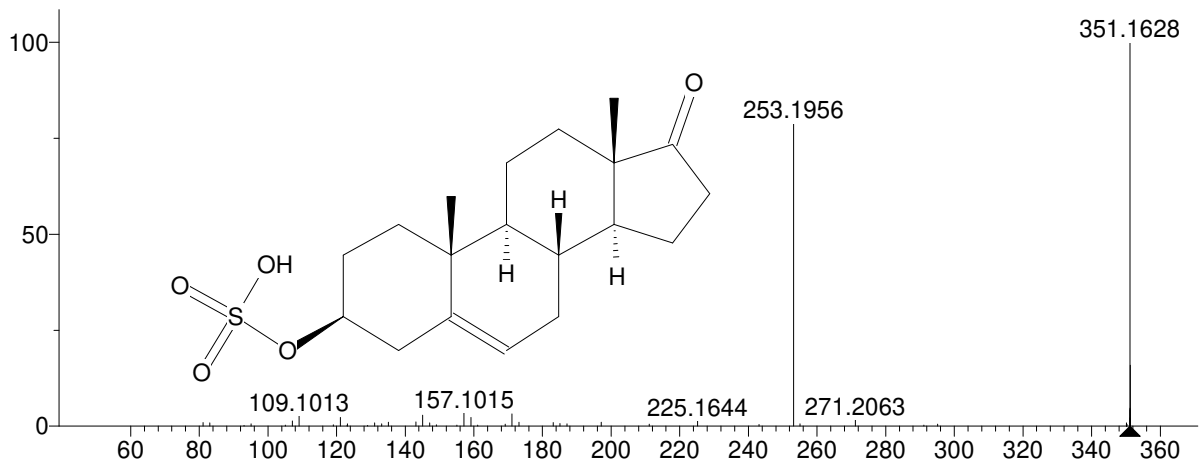

Hit 3 : 16-Phenoxytetranorprostaglandin A2 [M-H-H<sub>2</sub>O]- HCD 15V P=351.2  
C<sub>22</sub>H<sub>26</sub>O<sub>5</sub>; MF: 5; RMF: 85; Prob 7.12%; CAS: 51639-10-2; Lib: nist\_msms; ID: 319582.

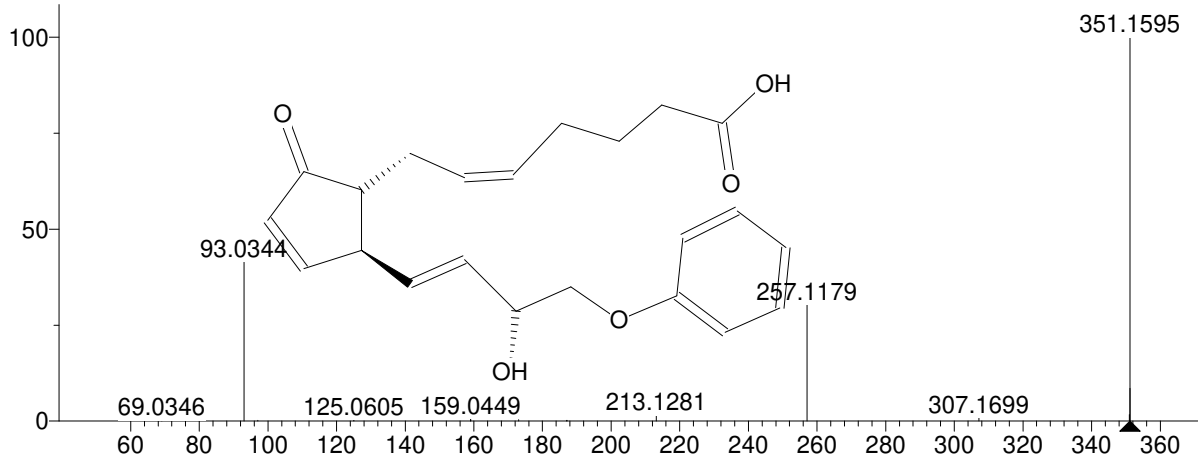

Hit 4 : (2-acetyloxy-3,6-diphenylcyclohexyl) acetate [M-H]- 35HCD P=351.2  
C<sub>22</sub>H<sub>24</sub>O<sub>4</sub>; MF: 0; RMF: 15; Prob 5.74%; Lib: mona-export-lc-ms-ms\_negative\_mode; ID: 22883.

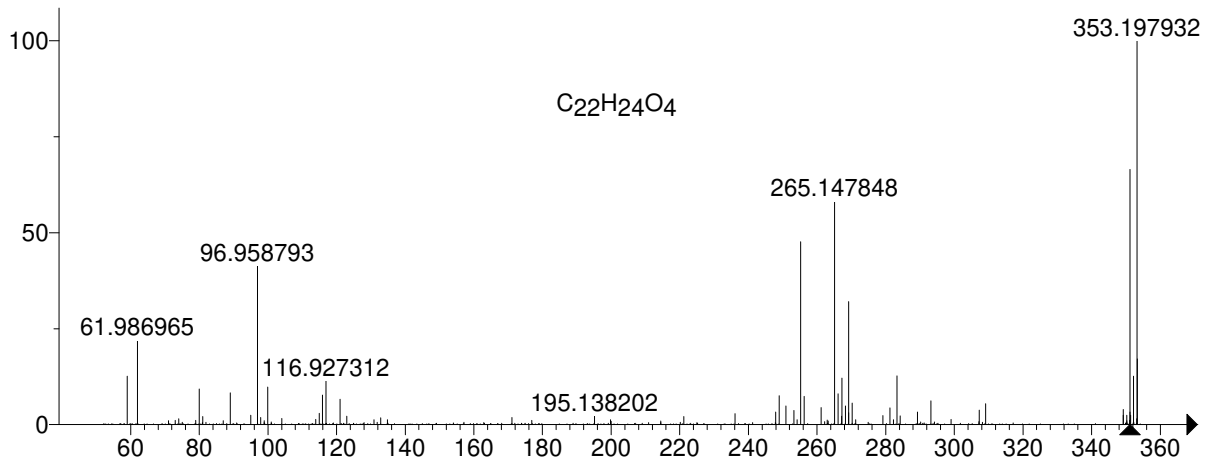

Hit 5 : candidone [M-H]- 35HCD P=351.2  
C<sub>22</sub>H<sub>24</sub>O<sub>4</sub>; MF: 0; RMF: 10; Prob 5.74%; Lib: mona-export-lc-ms-ms\_negative\_mode; ID: 18584.

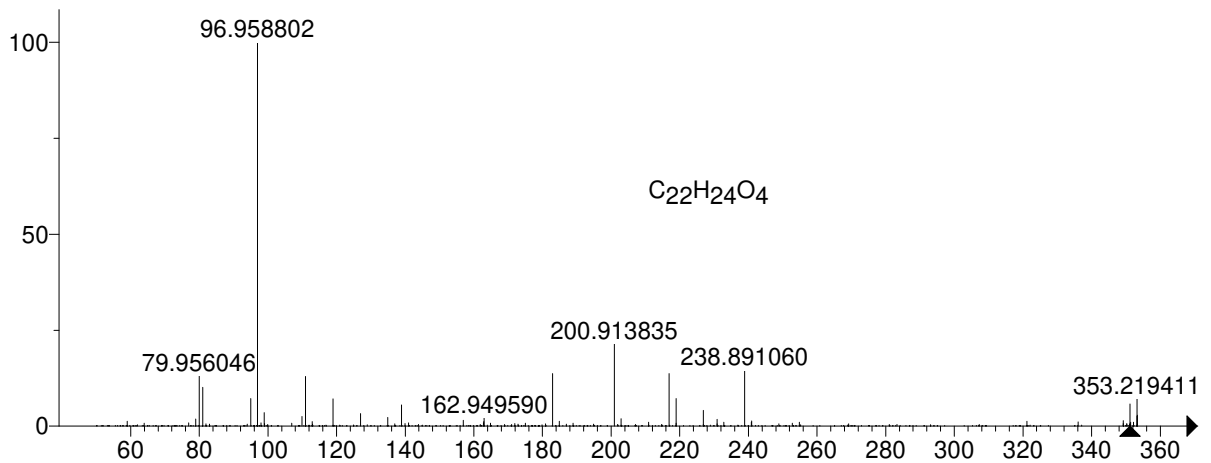

\*\* Search Report Page 1 of 2 \*\*

Unknown: Unknown (15.26\_238.1075m/z)  
Compound in Library Factor = 0

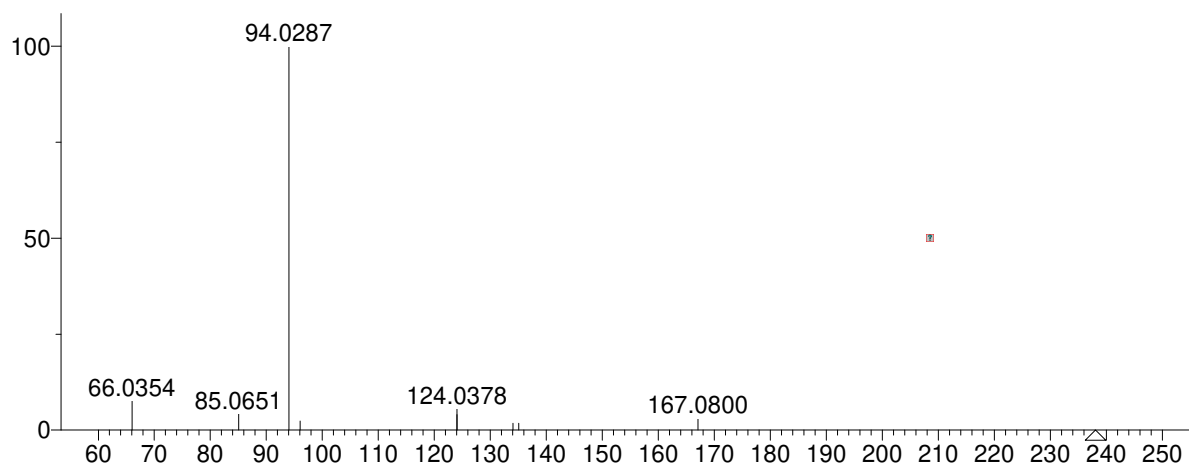

Hit 1 : Sildenafil [M+2H]<sup>2+</sup> HCD 77V P=238.1  
C<sub>22</sub>H<sub>30</sub>N<sub>6</sub>O<sub>4</sub>S; MF: 0; RMF: 61; Prob 20.0%; CAS: 139755-83-2; Lib: nist\_msms; ID: 135220.

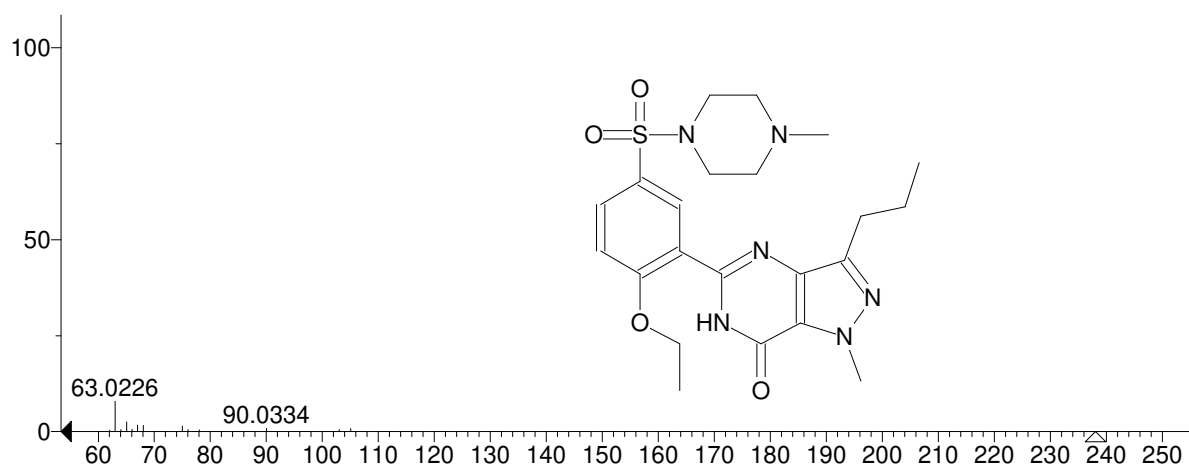

Hit 2 : 5-Methoxymethylone [M+H]<sup>+</sup> HCD 42V P=238.1  
C<sub>12</sub>H<sub>15</sub>NO<sub>4</sub>; MF: 0; RMF: 18; Prob 20.0%; Lib: nist\_msms; ID: 547136.

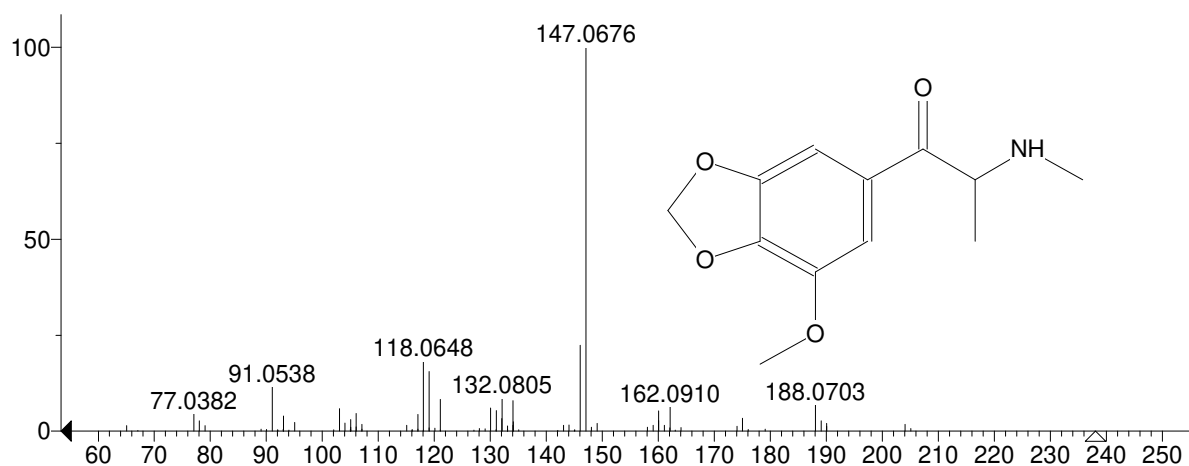



Hit 3 : NCGC00384987-01\_C12H15NO4\_N-Acetyl-O-methyltyrosine [M+H]<sup>+</sup> P=238.1  
C12H15NO4; MF: 0; RMF: 11; Prob 20.0%; Lib: mona-export-gnps; ID: 10703.

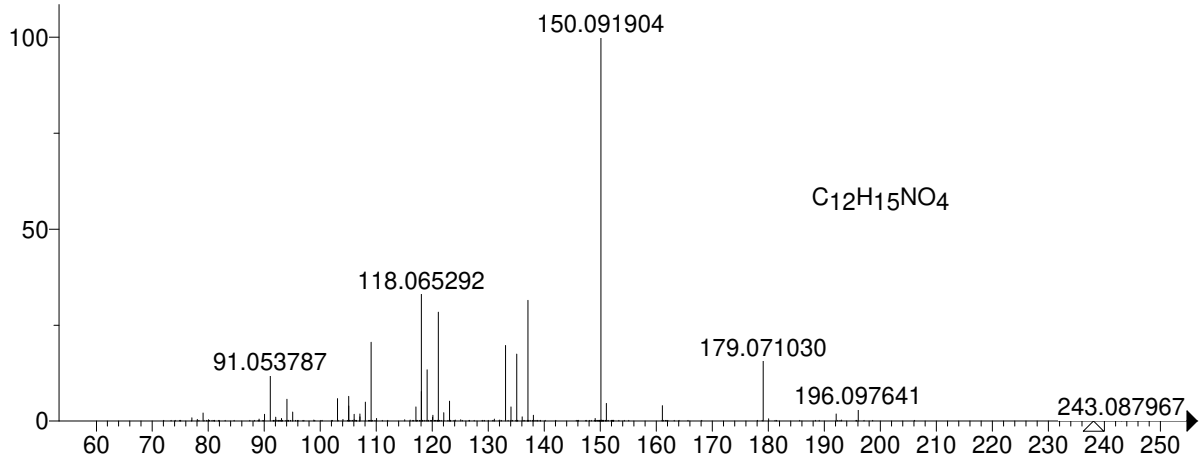

Hit 4 : Pesticide3\_3-Hydroxycarbofuran\_C12H15NO4\_3,7-Benzofurandiyl, 2,3-dihydro-2,2-dimethyl-, 7-(methylce  
C12H15NO4; MF: 0; RMF: 5; Prob 20.0%; Lib: mona-export-gnps; ID: 13869.

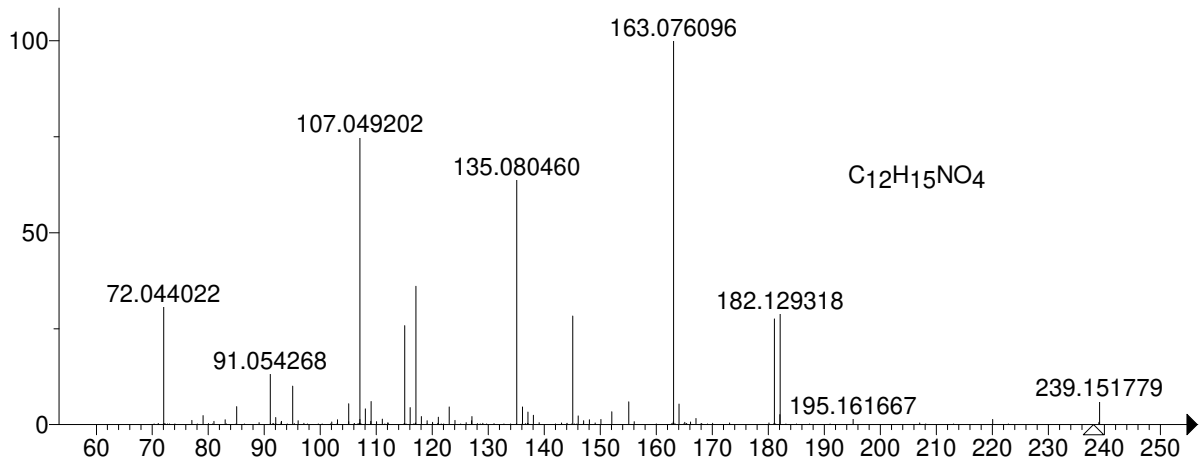

Hit 5 : N-acetyl-O-methyltyrosine [M+H]<sup>+</sup> 45HCD P=238.1  
C12H15NO4; MF: 0; RMF: 5; Prob 20.0%; Lib: mona-export-vf-npl\_qexactive; ID: 1169.

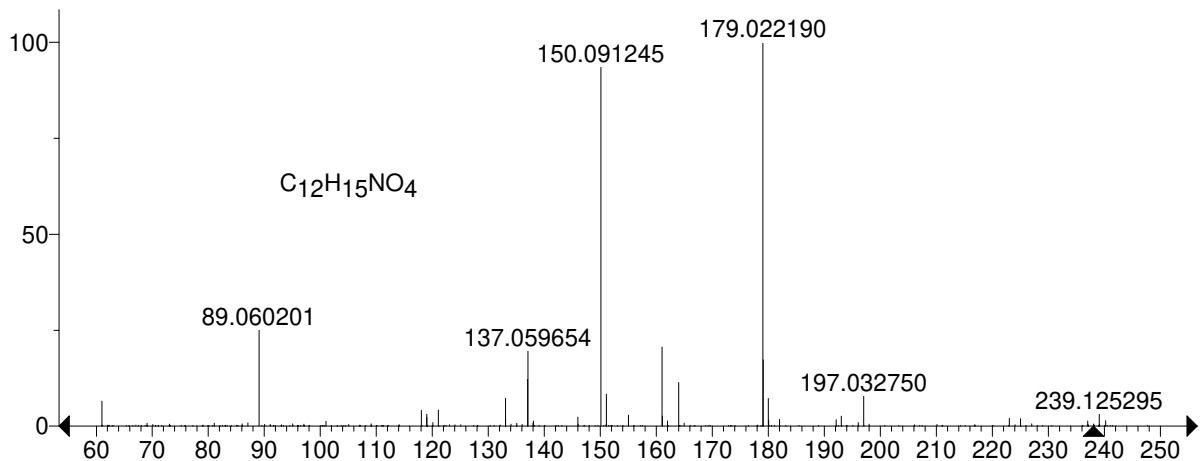

Unknown: Unknown (15.27\_325.1286m/z)  
Compound in Library Factor = -3273

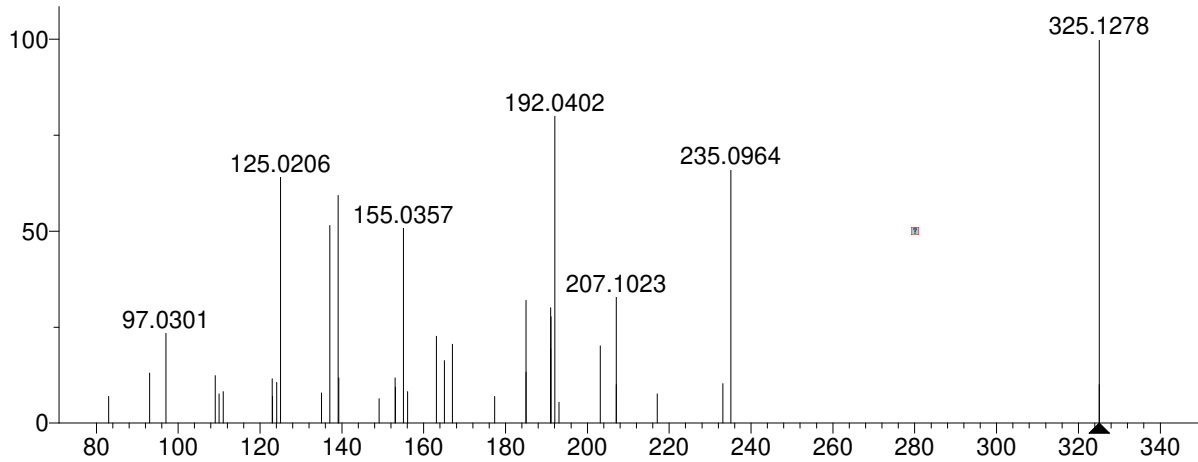

Hit 1 : Uridine 5\_-monophosphate [M+H]<sup>+</sup> P=325.1  
C<sub>9</sub>H<sub>13</sub>N<sub>2</sub>O<sub>9</sub>P; MF: 9; RMF: 174; Prob 57.9%; Lib: mona-export-gnps; ID: 5232.

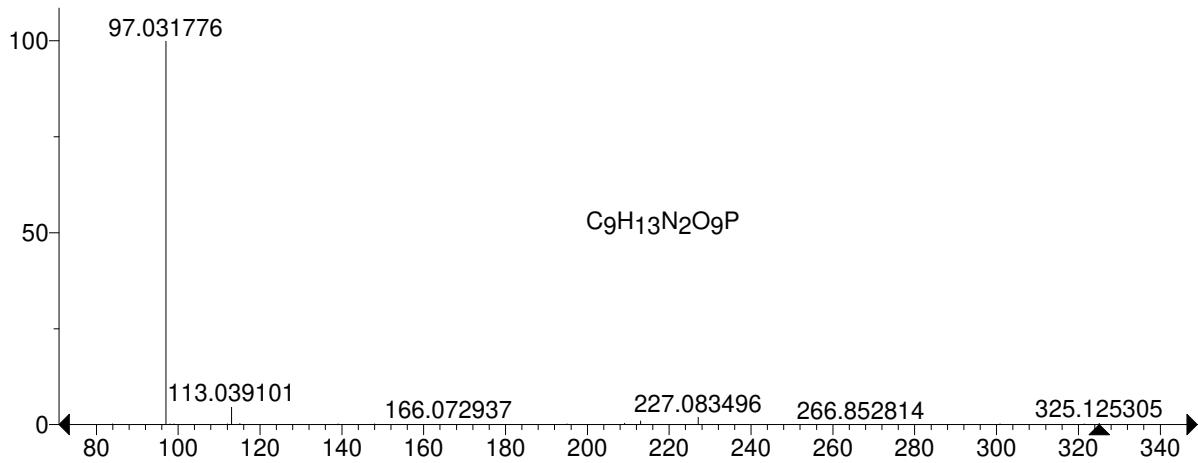

Hit 2 : [(4E)-7-acetyloxy-6-hydroxy-2-methyl-10-oxo-2,3,6,7,8,9-hexahydrooxecin-3-yl] (E)-but-2-enoate [M-H]<sup>-</sup> 3  
C<sub>16</sub>H<sub>22</sub>O<sub>7</sub>; MF: 0; RMF: 1; Prob 42.1%; Lib: mona-export-lc-ms-ms\_negative\_mode; ID: 17951.

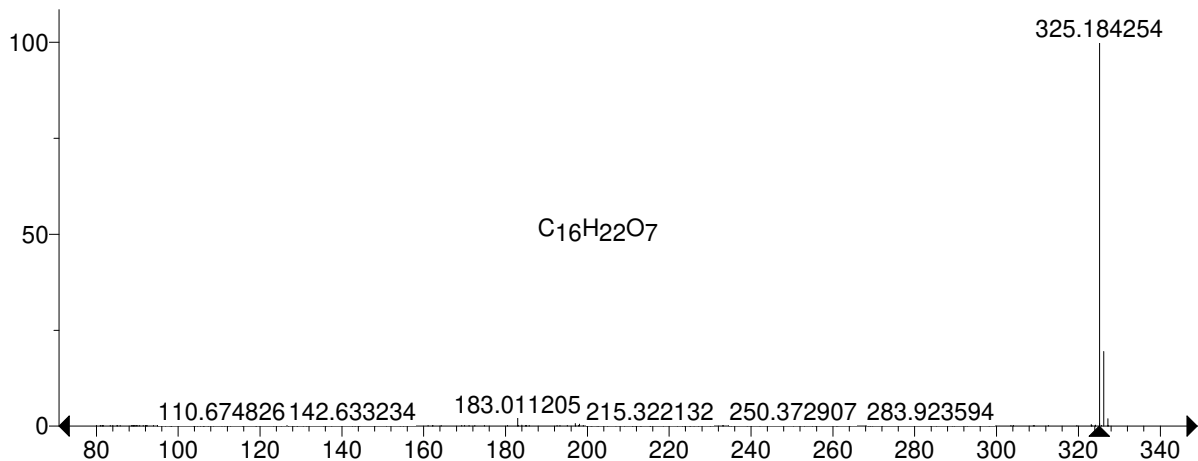

Unknown: Unknown (15.27\_405.0488m/z)  
Compound in Library Factor = 0

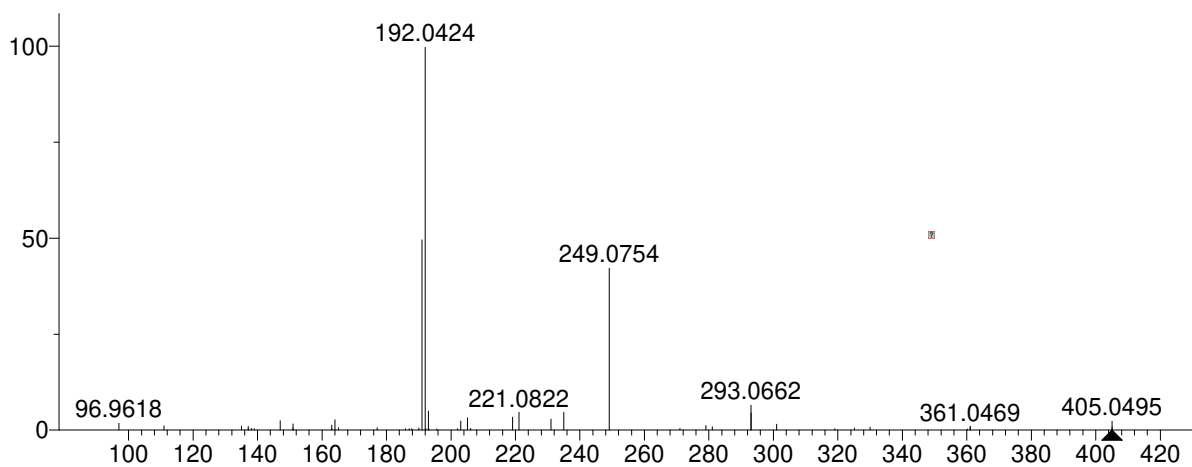

Hit 1 : [(6E,10Z)-10-(acetyloxymethyl)-6-formyl-3-methylidene-2-oxo-3a,4,5,8,9,11a-hexahydrocyclodeca[b]furan-C<sub>22</sub>H<sub>28</sub>O<sub>7</sub>; MF: 0; RMF: 23; Prob 100.0%; Lib: mona-export-vf-npl\_itq; ID: 4842.

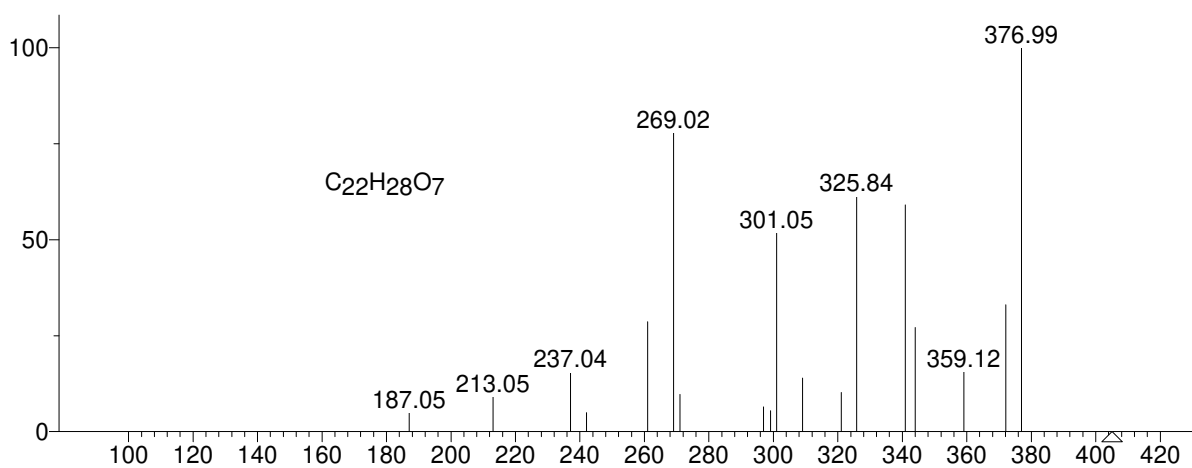

Unknown: Unknown (15.29\_560.2671 m/z)  
Compound in Library Factor = 0

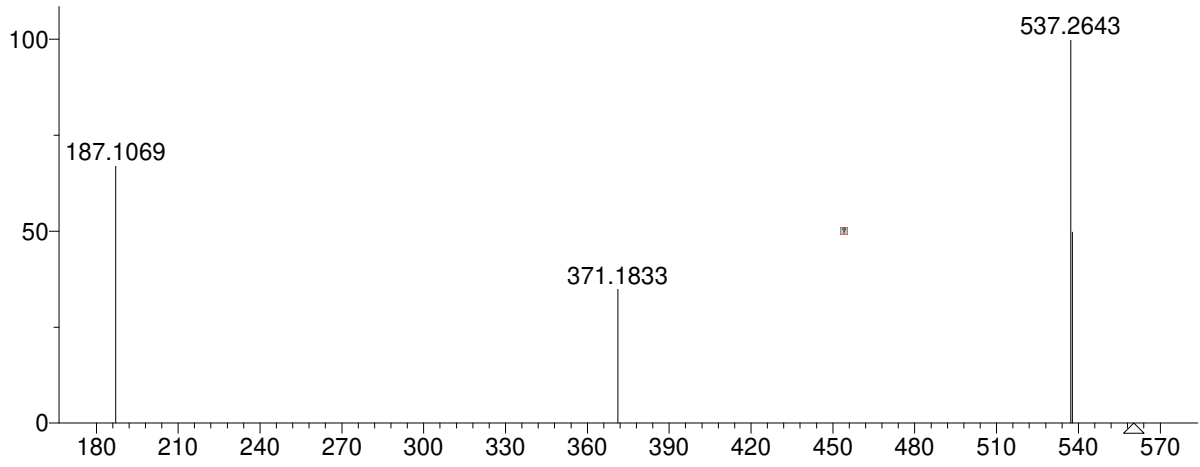

Unknown: Unknown (15.30\_541.2398m/z)  
Compound in Library Factor = -3273

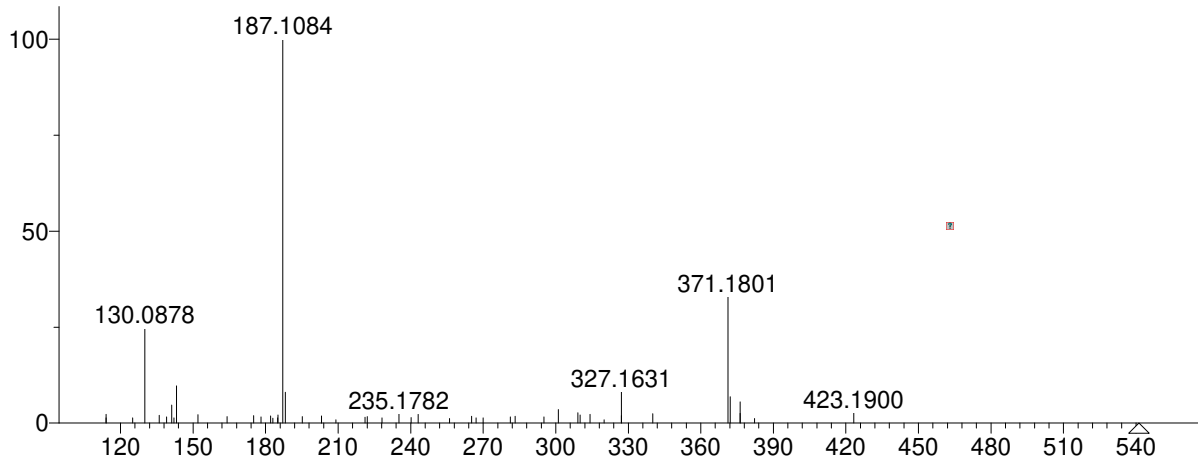

Hit 1 : methyl (1S,2R,4R,8R,9S,10R,13R,15R)-2-(acetyloxy)-13-(furan-3-yl)-9-(2-methoxy-2-oxoethyl)-4,8,10,12-t  
C<sub>30</sub>H<sub>36</sub>O<sub>9</sub>; MF: 4; RMF: 171; Prob 27.0%; Lib: mona-export-vf-npl\_qexactive; ID: 20632.

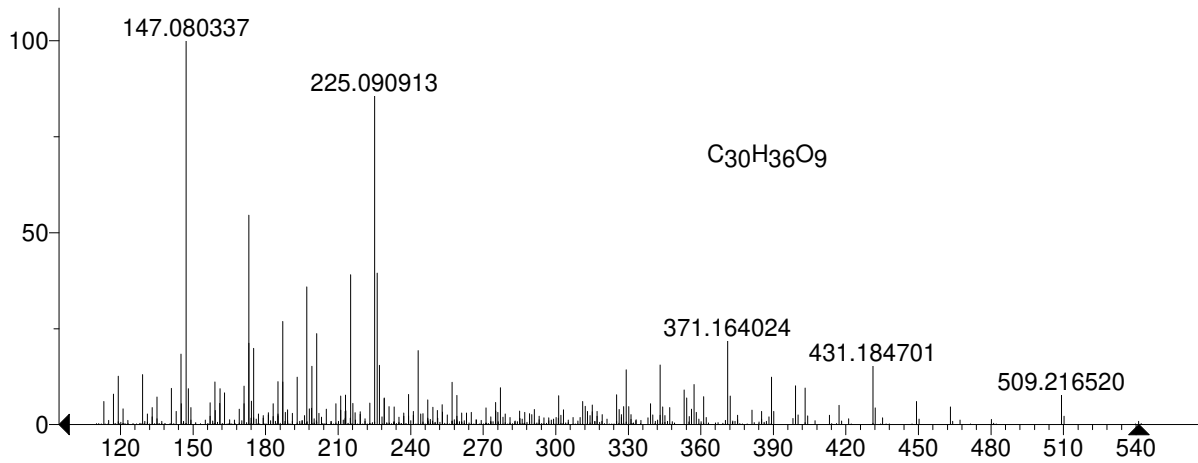

Hit 2 : NCGC00169906-03\_C30H36O9\_2H-Cyclopenta[b]naphtho[2,3-d]furan-10-acetic acid, 5-(acetyloxy)-2-(3-f  
C<sub>30</sub>H<sub>36</sub>O<sub>9</sub>; MF: 3; RMF: 139; Prob 26.0%; Lib: mona-export-gnps; ID: 13758.

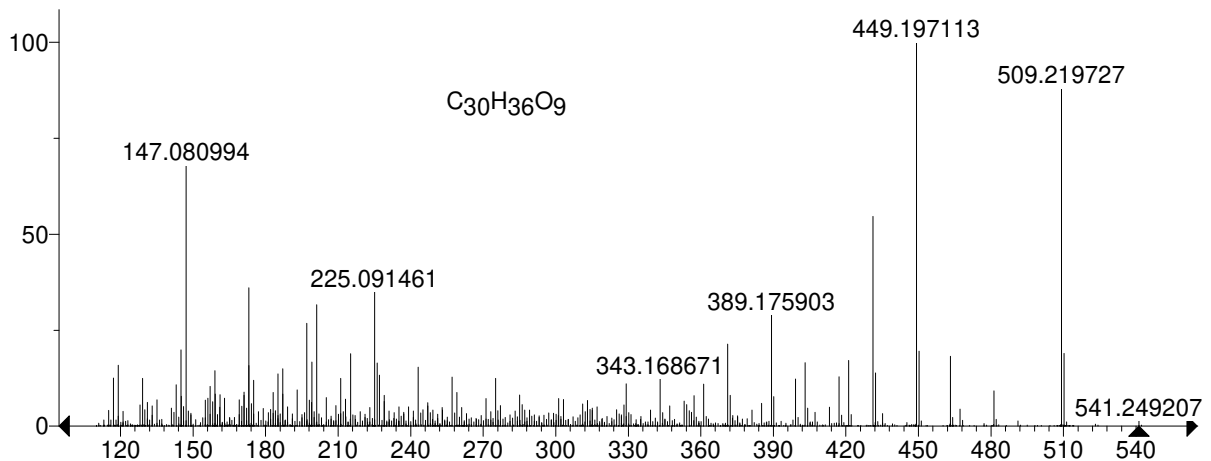

Hit 3 : 7-Deacetoxy-7-Oxokhivorin [M-H]<sup>-</sup> 35HCD P=541.2  
C<sub>30</sub>H<sub>38</sub>O<sub>9</sub>; MF: 1; RMF: 60; Prob 24.0%; Lib: mona-export-1c-ms-ms\_negative\_mode; ID: 20717.

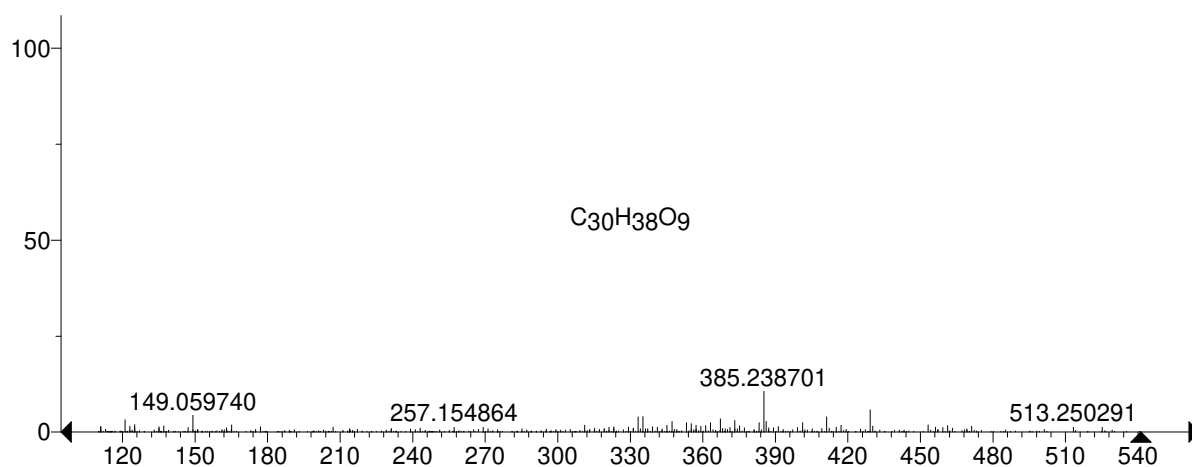

Hit 4 : Nimbin [M+H]<sup>+</sup> IT 35% P=541.2  
C<sub>30</sub>H<sub>36</sub>O<sub>9</sub>; MF: 0; RMF: 65; Prob 23.0%; CAS: 5945-86-8; Lib: nist\_msms; ID: 226918.

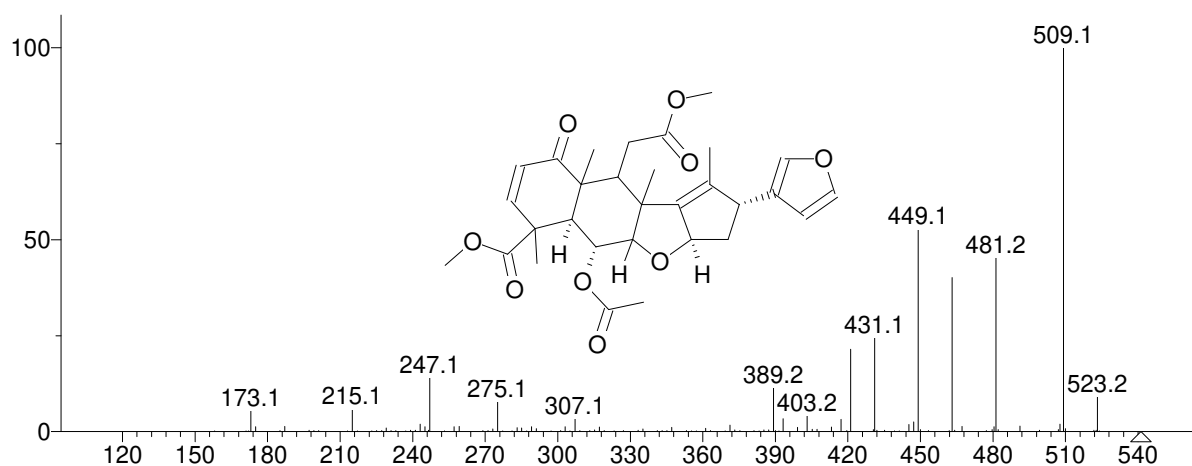

Unknown: Unknown (15.32\_677.3037m/z)  
Compound in Library Factor = 0

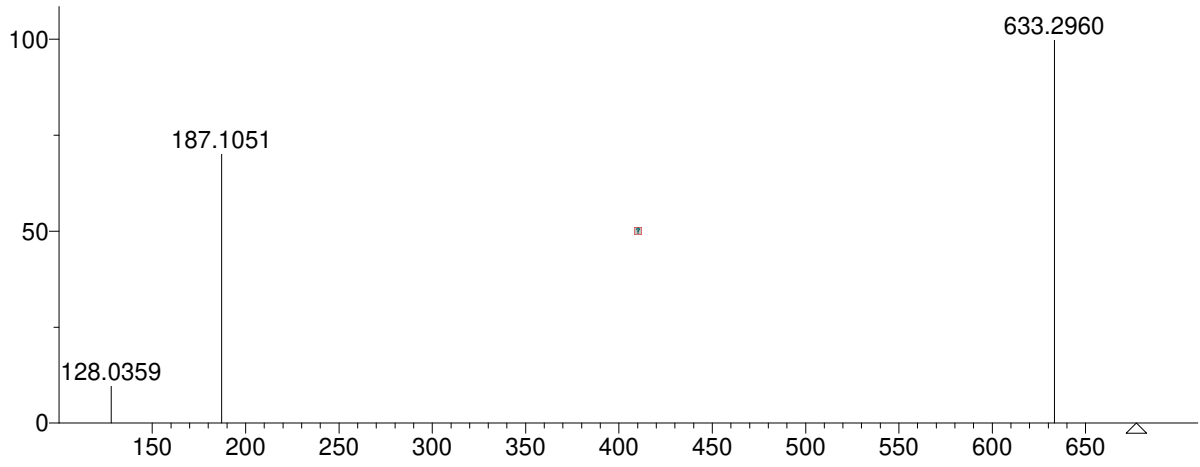

\*\* Search Report Page 1 of 2 \*\*

Unknown: Unknown (15.34\_394.1860m/z)  
Compound in Library Factor = -2387

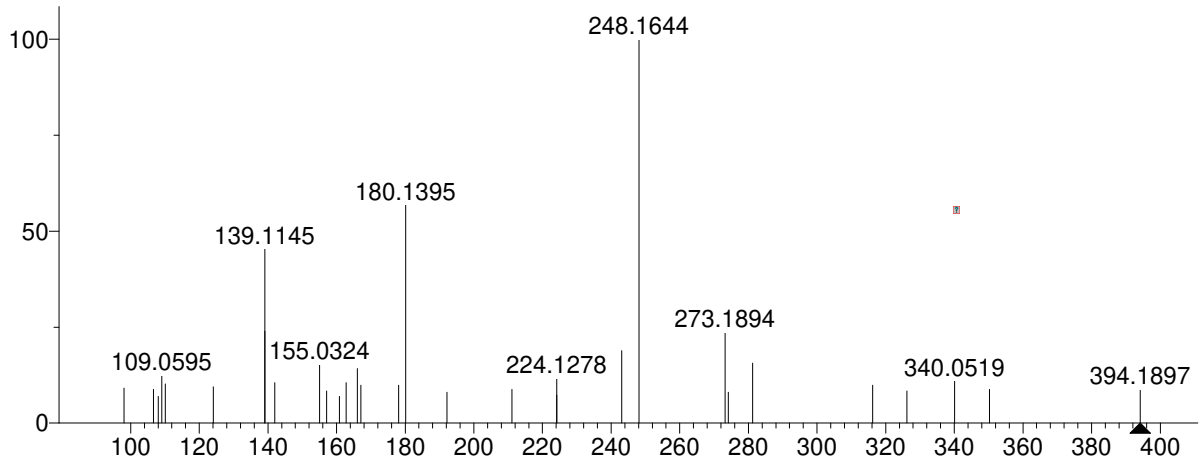

Hit 1 : 3',4',5'-Trimethoxycocaine [M+H]<sup>+</sup> HCD 15V P=394.2  
C<sub>20</sub>H<sub>27</sub>NO<sub>7</sub>; MF: 18; RMF: 177; Prob 14.7%; CAS: 156301-59-6; Lib: nist\_msms; ID: 383469.

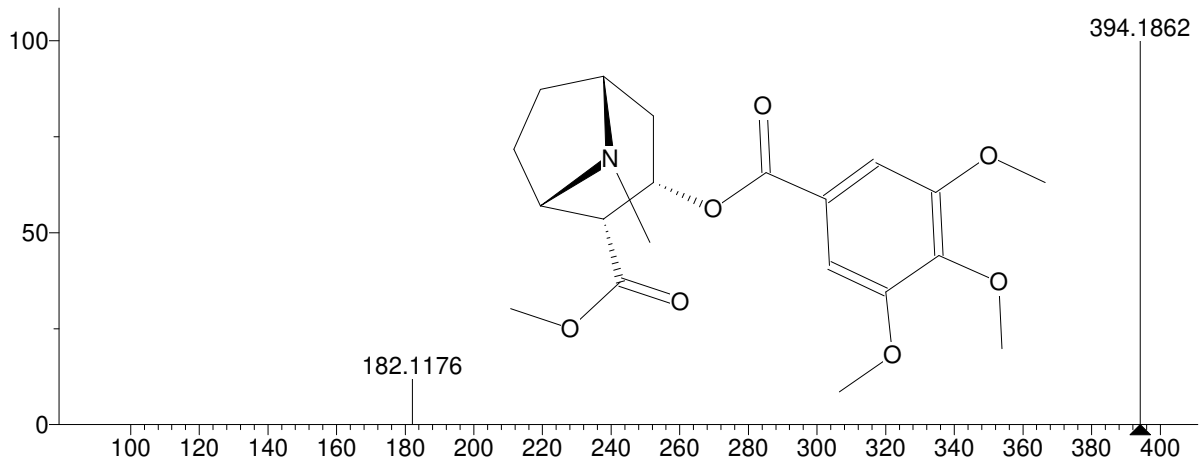

Hit 2 : [1,3-dihydroxy-1-(7-methoxy-2-oxochromen-6-yl)-3-methylbutan-2-yl] 3-methylbut-2-enoate [M+NH<sub>4</sub>]<sup>+</sup> 35  
C<sub>20</sub>H<sub>24</sub>O<sub>7</sub>; MF: 1; RMF: 60; Prob 8.03%; Lib: mona-export-vf-npl\_qexactive; ID: 24781.

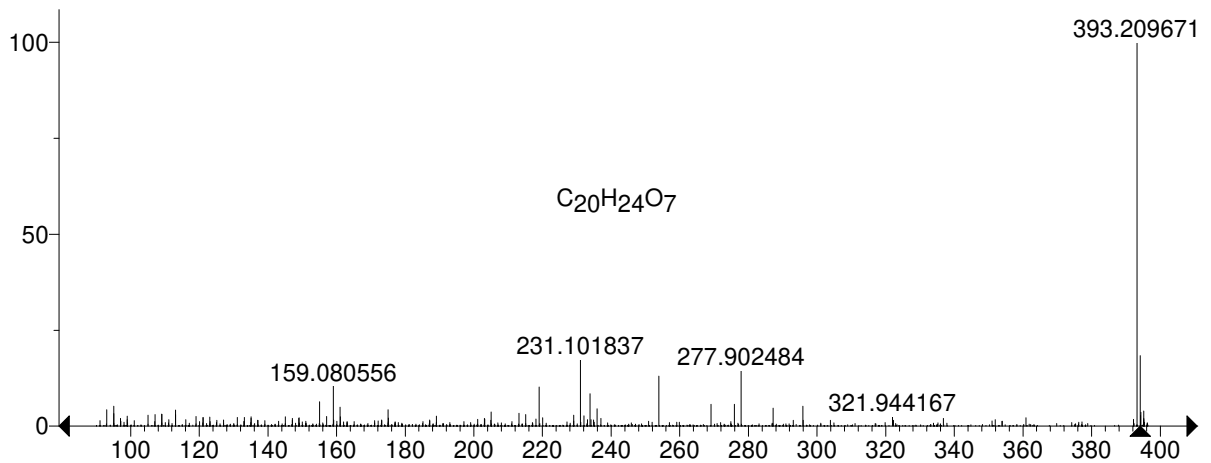



\*\* Search Report Page 2 of 2 \*\*

Hit 3 : rac-N,N-Didesmethyl-O-desmethylvenlafaxine glucuronide [M+H-H<sub>2</sub>O]<sup>+</sup> HCD 11V P=394.2  
C<sub>20</sub>H<sub>29</sub>NO<sub>8</sub>; MF: 0; RMF: 106; Prob 7.72%; CAS: 1799830-07-1; Lib: nist\_msms; ID: 436197.

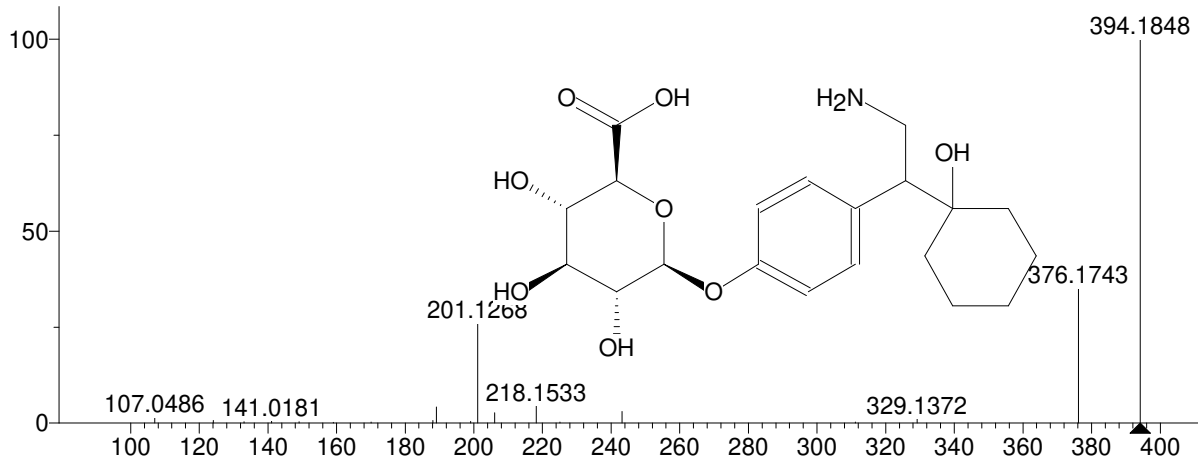

Hit 4 : NCGC00381074-01! [1,3-dihydroxy-1-(7-methoxy-2-oxochromen-6-yl)-3-methylbutan-2-yl] 3-methylbut-2-er  
C<sub>20</sub>H<sub>24</sub>O<sub>7</sub>; MF: 0; RMF: 44; Prob 7.72%; Lib: mona-export-gnps; ID: 8644.

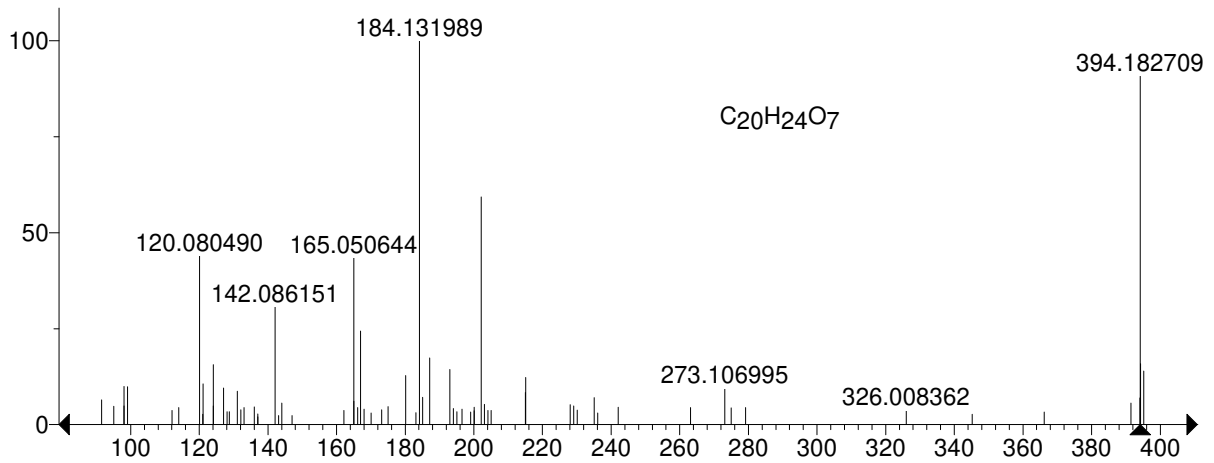

Hit 5 : 4-[4-[hydroxy-(4-hydroxy-3-methoxyphenyl)methyl]-3-(hydroxymethyl)oxolan-2-yl]-2-methoxyphenol [M+H]<sup>+</sup>  
C<sub>20</sub>H<sub>24</sub>O<sub>7</sub>; MF: 0; RMF: 42; Prob 7.72%; Lib: mona-export-vf-npl\_qexactive; ID: 7279.

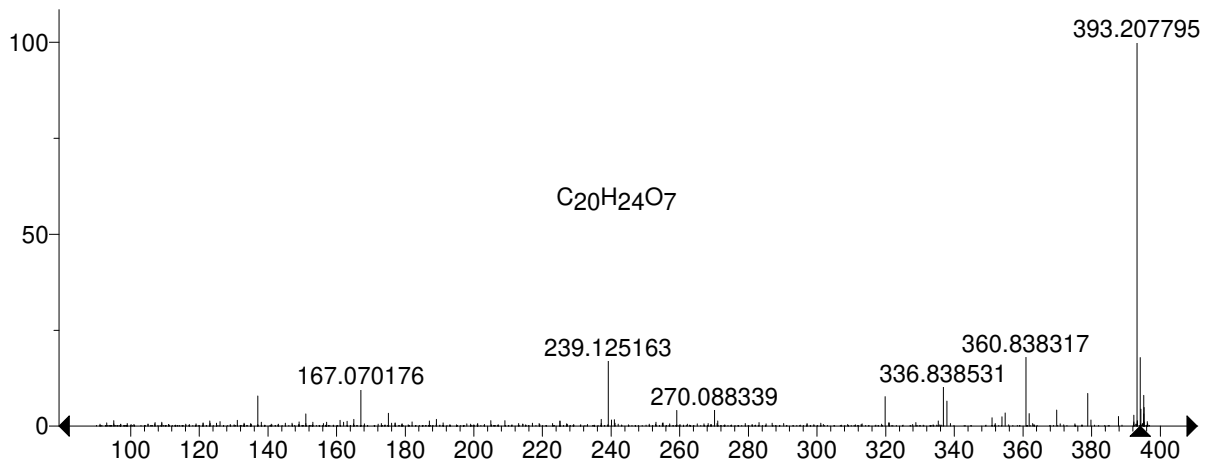

Unknown: Unknown (15.38\_610.3200m/z)  
Compound in Library Factor = 0

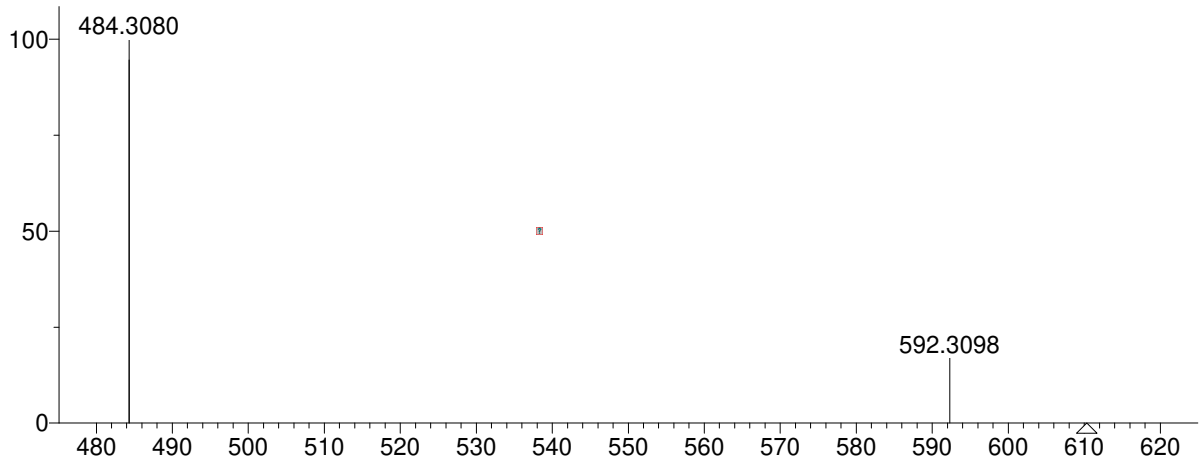

Unknown: Unknown (15.42\_654.3022m/z)  
Compound in Library Factor = -3273

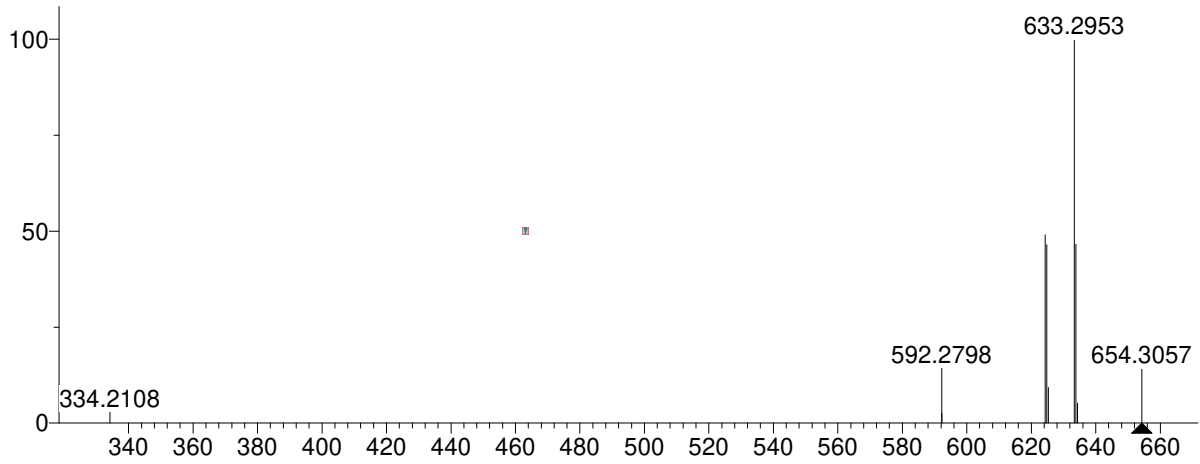

Hit 1 : [DTrp6]-LH-RH, amide [M-2H]2- HCD 20eV P=654.3  
C<sub>64</sub>H<sub>82</sub>N<sub>18</sub>O<sub>13</sub>; MF: 4; RMF: 162; Prob 100.0%; Lib: nist\_msms2; ID: 80487.

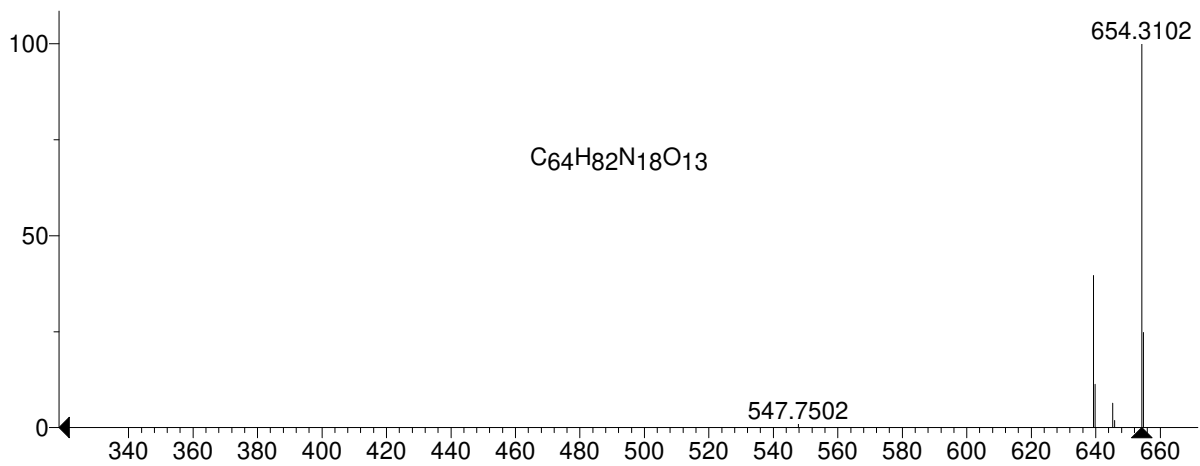

Unknown: Unknown (15.43\_592.2858m/z)  
Compound in Library Factor = -1309

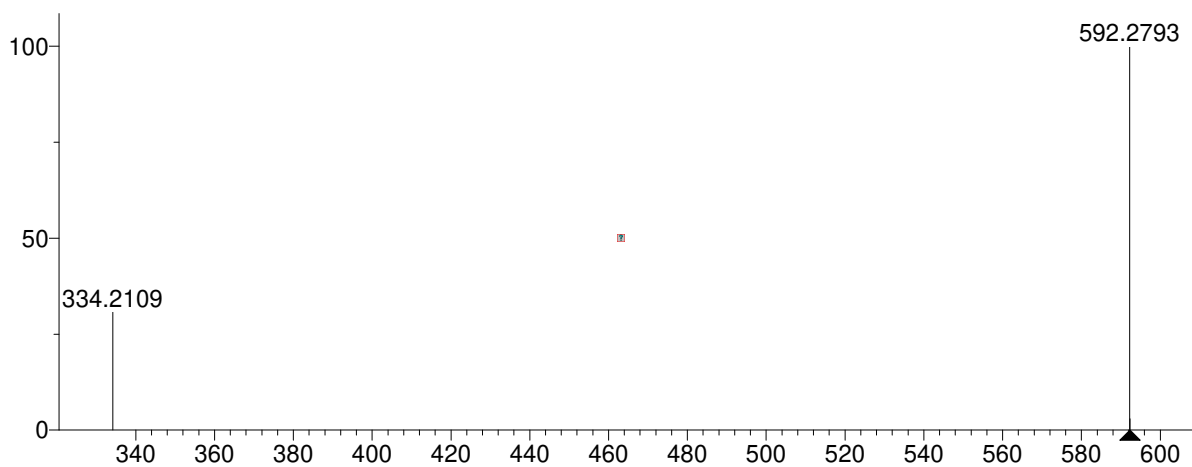

Hit 1 : LH-RH, free acid [M+2H]<sup>2+</sup> QTOF 7V P=592.3  
C<sub>55</sub>H<sub>74</sub>N<sub>16</sub>O<sub>14</sub>; MF: 56; RMF: 697; Prob 100.0%; Lib: nist\_msms2; ID: 38405.

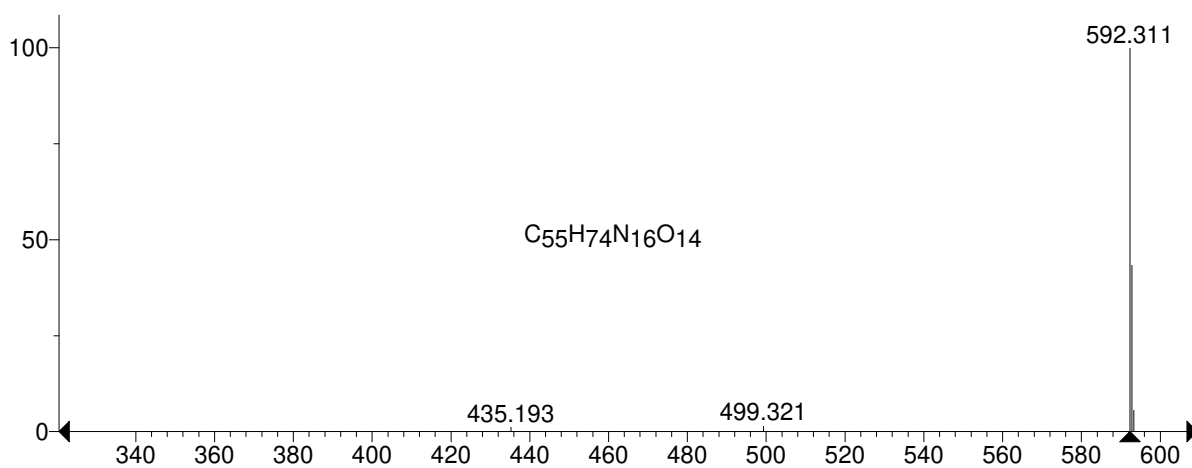

Unknown: Unknown (15.44\_677.3040m/z)  
Compound in Library Factor = 0

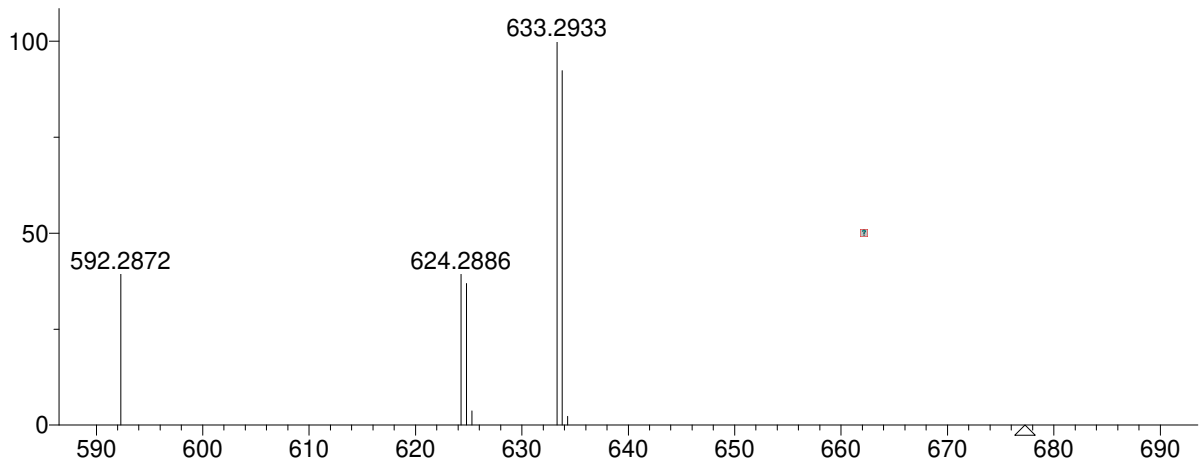

Unknown: Unknown (15.44\_677.8047m/z)  
Compound in Library Factor = 0

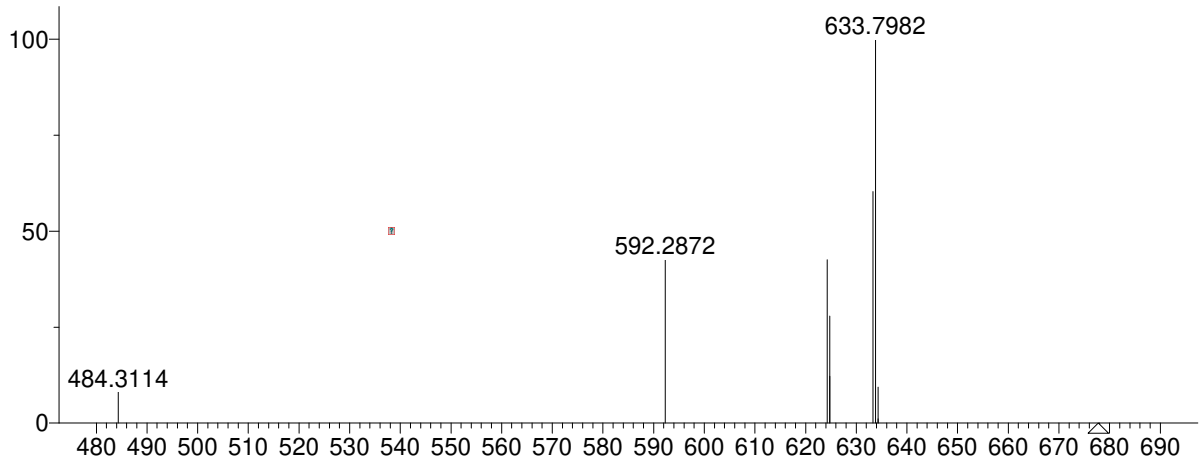

\*\* Search Report Page 1 of 2 \*\*

Unknown: Unknown (15.48\_223.1441m/z)  
Compound in Library Factor = -2387

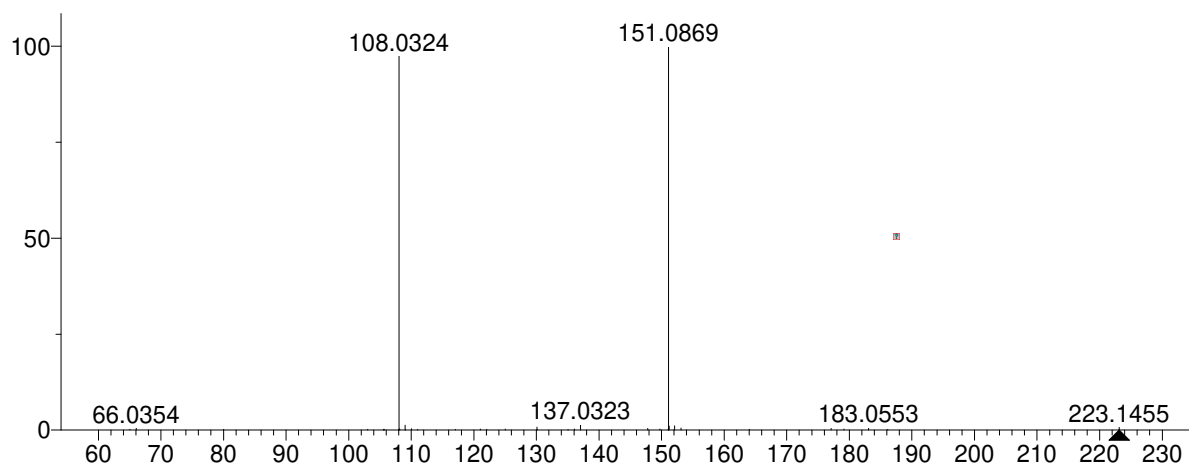

Hit 1 : Zectran [M+H]<sup>+</sup> HCD 6V P=223.1  
C<sub>12</sub>H<sub>18</sub>N<sub>2</sub>O<sub>2</sub>; MF: 18; RMF: 381; Prob 36.9%; CAS: 315-18-4; Lib: nist\_msms; ID: 542422.

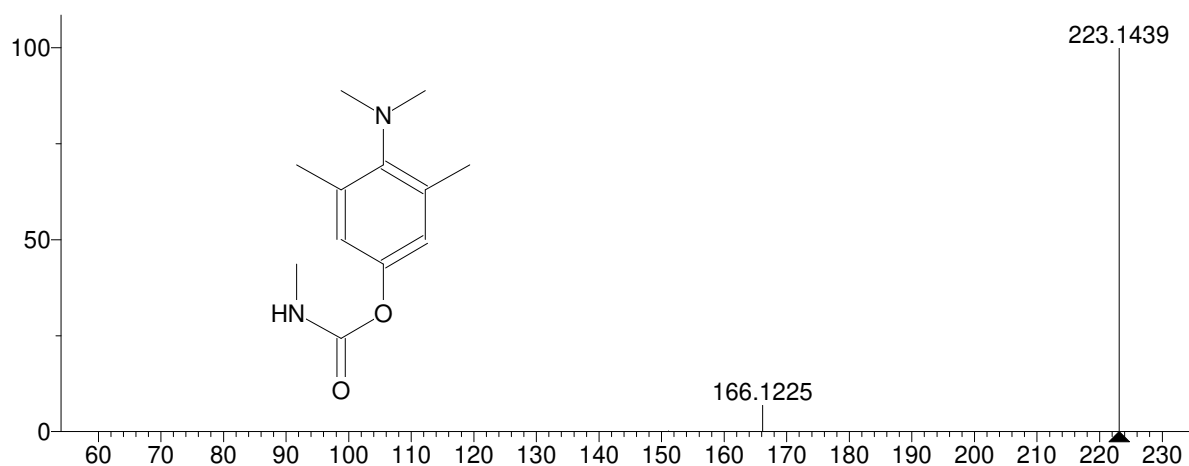

Hit 2 : Pesticide9\_Mexacarbate\_C12H18N2O2\_4-(Dimethylamino)-3,5-dimethylphenyl methylcarbamate [M+H]<sup>+</sup>  
C<sub>12</sub>H<sub>18</sub>N<sub>2</sub>O<sub>2</sub>; MF: 6; RMF: 79; Prob 24.5%; Lib: mona-export-gnps; ID: 11521.

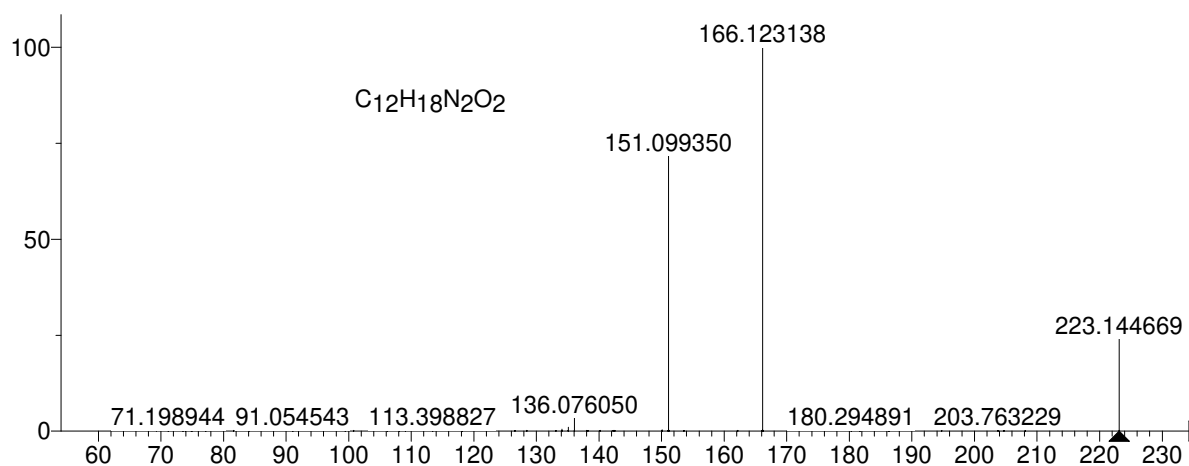

Hit 3 : Neostigmine cation [Cat]<sup>+</sup> HCD 13V P=223.1  
C<sub>12</sub>H<sub>19</sub>N<sub>2</sub>O<sub>2</sub>; MF: 0; RMF: 57; Prob 19.3%; CAS: 59-99-4; Lib: nist\_msms; ID: 221803.

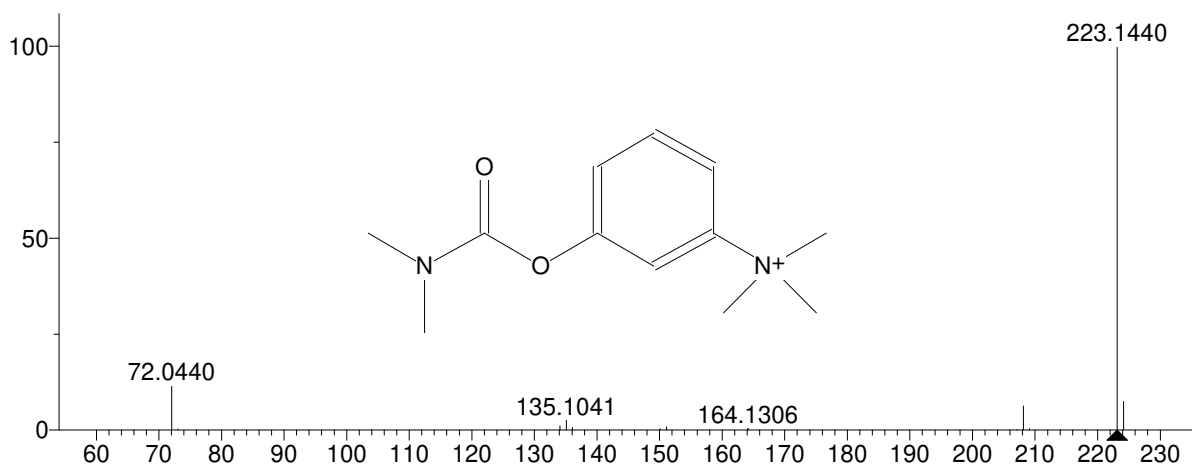

Hit 4 : Heptanedioic acid, 1-(2-cyclopentylidenehydrazide) [M+H-H<sub>2</sub>O]<sup>+</sup> HCD 2V P=223.1  
C<sub>12</sub>H<sub>20</sub>N<sub>2</sub>O<sub>3</sub>; MF: 0; RMF: 44; Prob 19.3%; CAS: 1136466-93-7; Lib: nist\_msms; ID: 263606.

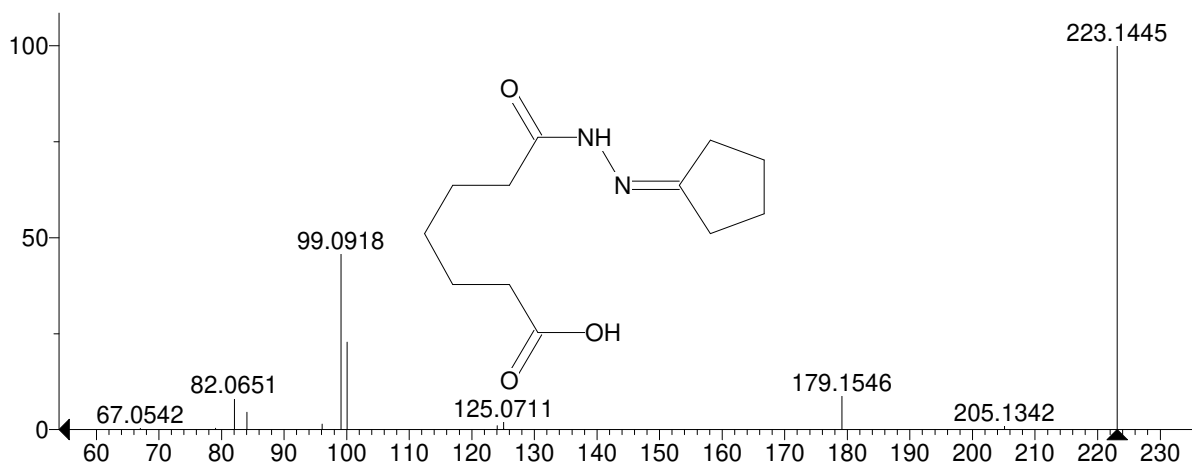



\*\* Search Report Page 1 of 2 \*\*

Unknown: Unknown (15.49\_339.1078m/z)  
Compound in Library Factor = -3273

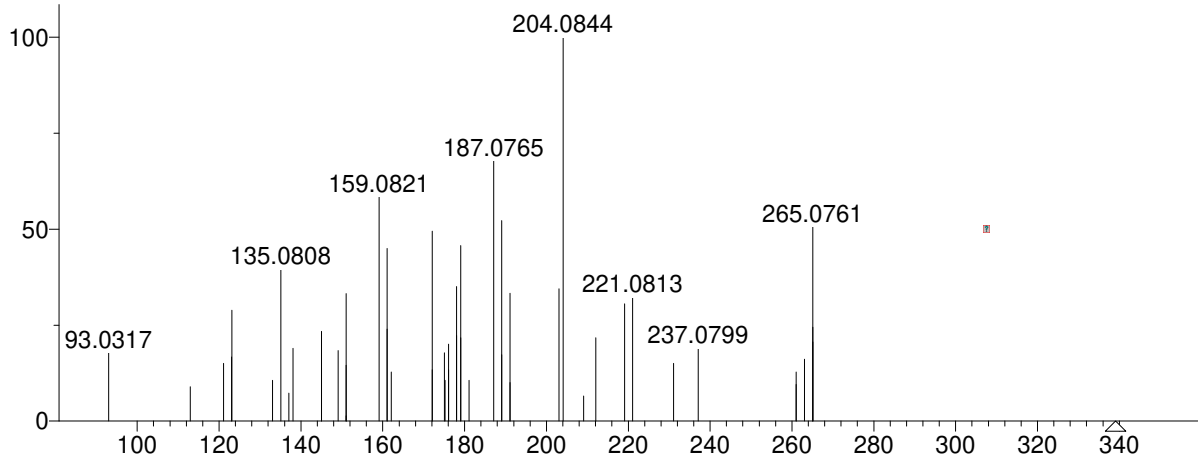

Hit 1 : gerberinside [M+H]<sup>+</sup> 35HCD P=339.1  
C<sub>16</sub>H<sub>18</sub>O<sub>8</sub>; MF: 9; RMF: 96; Prob 9.51%; Lib: mona-export-vf-npl\_qexactive; ID: 17899.

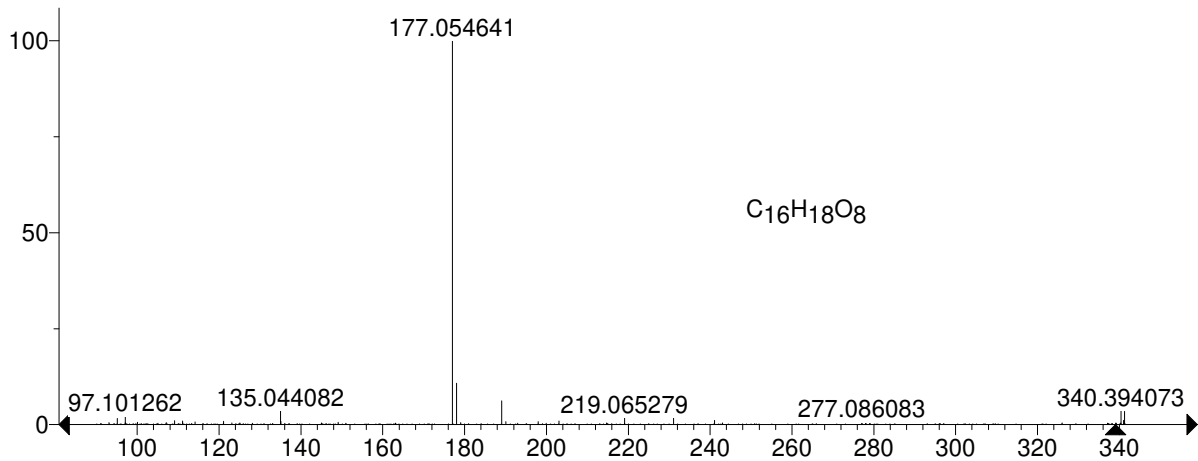

Hit 2 : (1R,3R,4S,5R)-1,3,4-trihydroxy-5-[(E)-3-(4-hydroxyphenyl)prop-2-enoyl]oxycyclohexane-1-carboxylic acid  
C<sub>16</sub>H<sub>18</sub>O<sub>8</sub>; MF: 7; RMF: 98; Prob 8.77%; Lib: mona-export-vf-npl\_qexactive; ID: 6317.

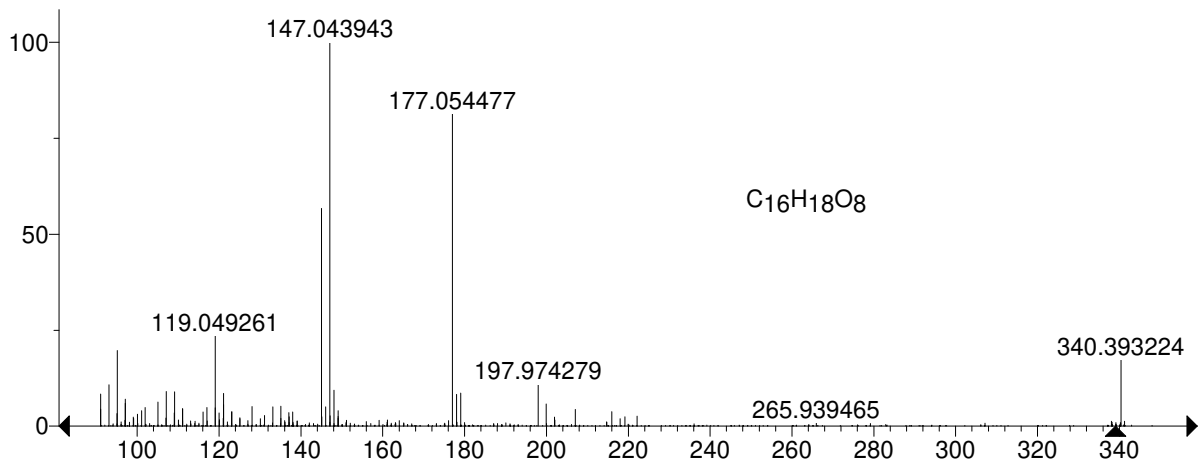

Hit 3 : NCGC00385147-01\_C16H18O8\_beta-D-Glucopyranoside, 4,8-dihydroxy-1-naphthalenyl [M+H]<sup>+</sup> P=339.1  
C16H18O8; MF: 6; RMF: 113; Prob 8.43%; Lib: mona-export-gnps; ID: 10535.

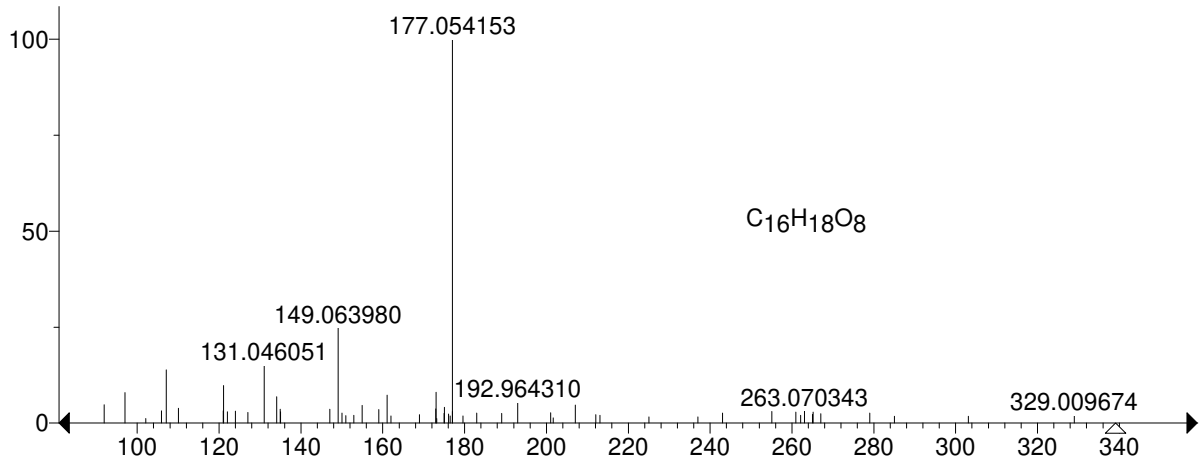

Hit 4 : 4-Methylumbelliferyl β-D-glucopyranoside [M+H]<sup>+</sup> HCD 50V P=339.1  
C16H18O8; MF: 3; RMF: 73; Prob 7.45%; CAS: 18997-57-4; Lib: nist\_msms; ID: 460021.

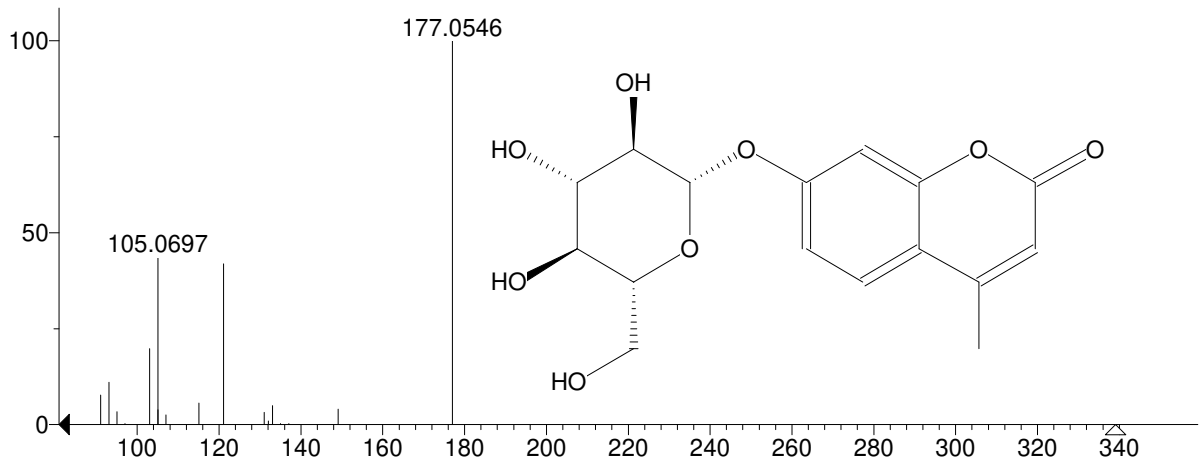

Hit 5 : 4-Demethylsimmondsin 2'-ferulate [M+H-C9H13O4N]<sup>+</sup> HCD 50V P=339.1  
C25H31NO12; MF: 0; RMF: 52; Prob 6.58%; CAS: 162290-39-3; Lib: nist\_msms; ID: 217717.

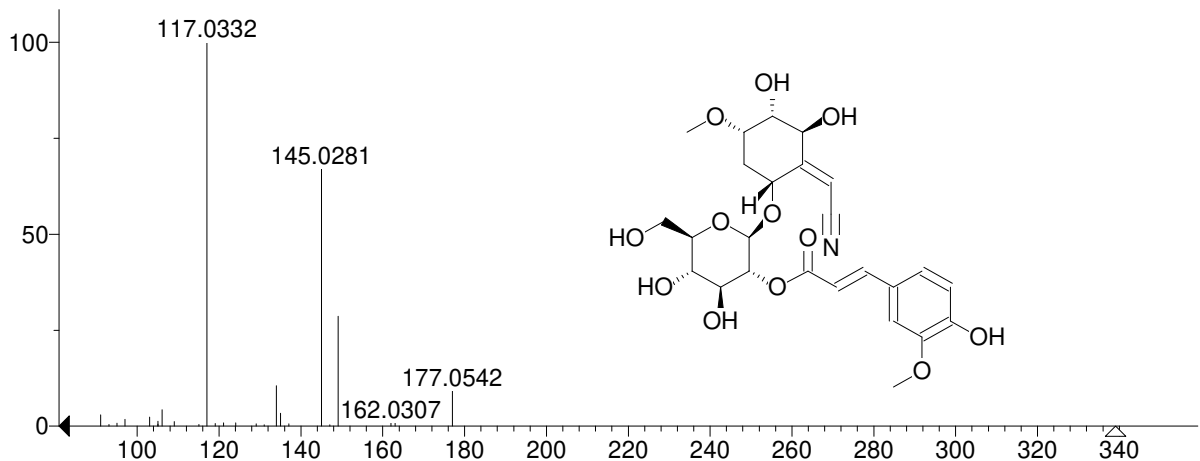

Unknown: Unknown (15.51\_669.3061m/z)  
Compound in Library Factor = 0

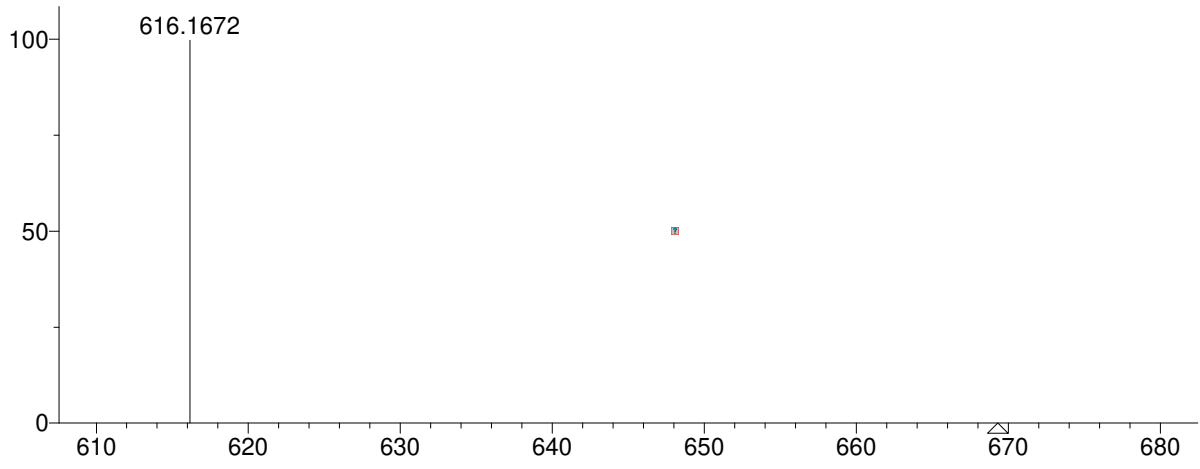

Unknown: Unknown (15.52\_234.1125m/z)  
Compound in Library Factor = -1309

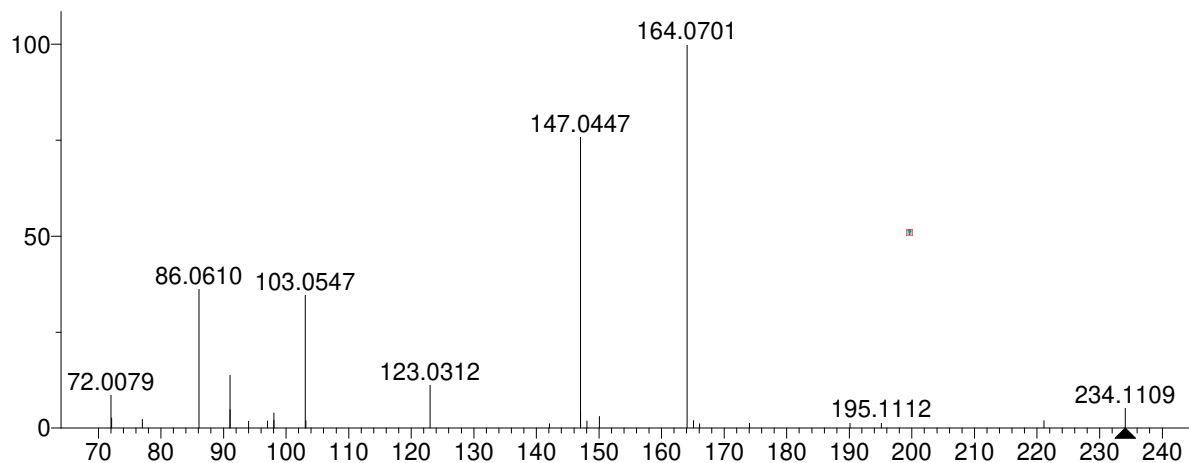

Hit 1 : Benzyl-L-glutamine methyl ester [M+H-NH3]<sup>+</sup> HCD 11V P=234.1  
C<sub>13</sub>H<sub>18</sub>N<sub>2</sub>O<sub>3</sub>; MF: 59; RMF: 235; Prob 66.3%; CAS: 727973-94-6; Lib: nist\_msms; ID: 203918.

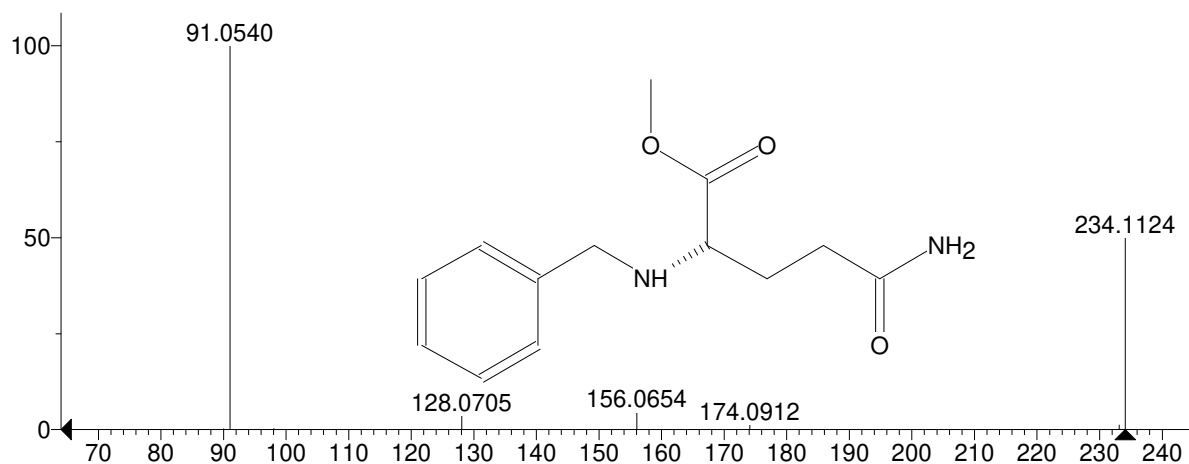

Hit 2 : Alloxydim [M+H-C<sub>4</sub>H<sub>10</sub>O<sub>2</sub>]<sup>+</sup> HCD 35V P=234.1  
C<sub>17</sub>H<sub>25</sub>NO<sub>5</sub>; MF: 8; RMF: 132; Prob 13.4%; CAS: 115263-07-5; Lib: nist\_msms; ID: 543478.

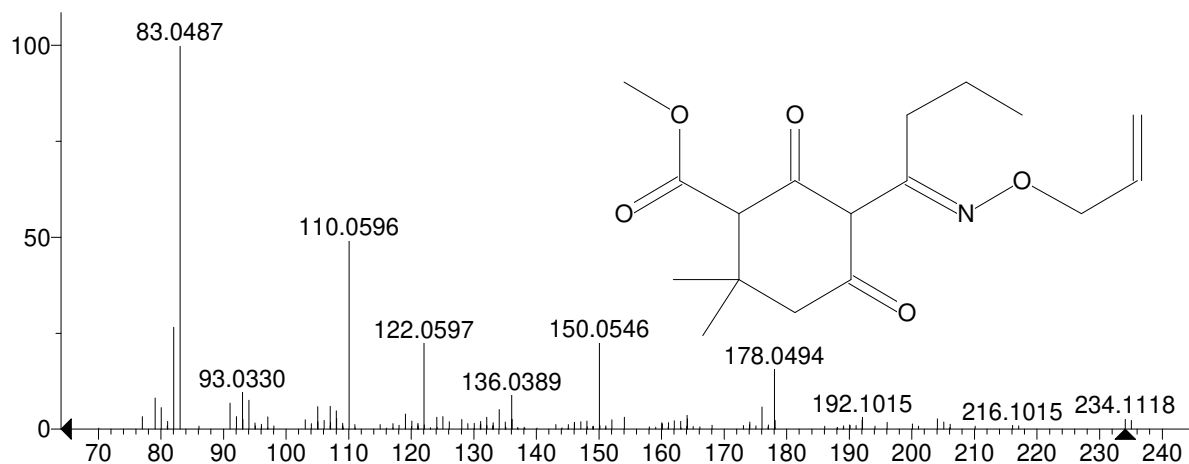

Hit 3 : Mecarbinat [M+H]<sup>+</sup> P=234.1  
C<sub>13</sub>H<sub>15</sub>NO<sub>3</sub>; MF: 3; RMF: 110; Prob 10.8%; Lib: mona-export-gnps; ID: 746.

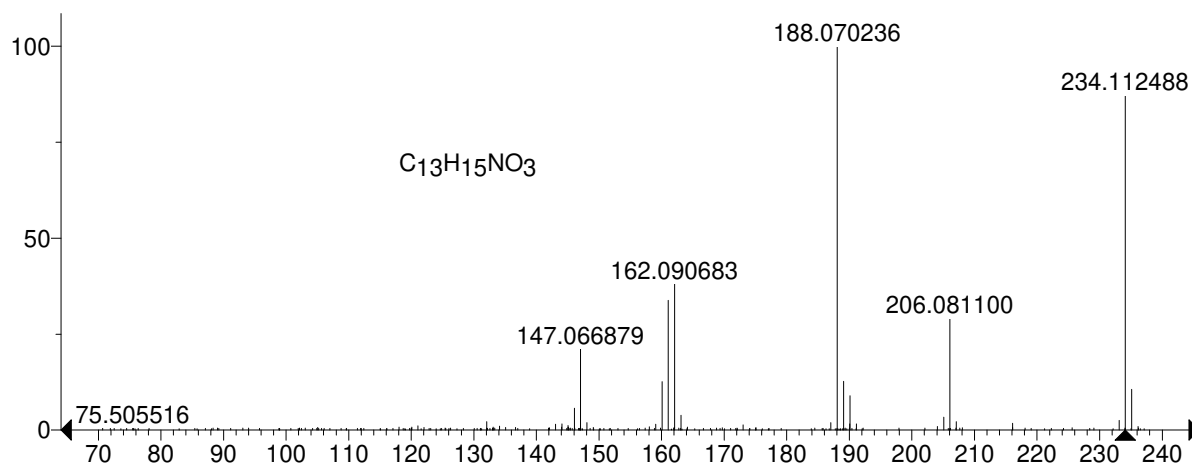

Hit 4 : Euparin [M+NH<sub>4</sub>]<sup>+</sup> 65HCD P=234.1  
C<sub>13</sub>H<sub>12</sub>O<sub>3</sub>; MF: 0; RMF: 52; Prob 9.52%; Lib: mona-export-vf-npl\_gexactive; ID: 26061.

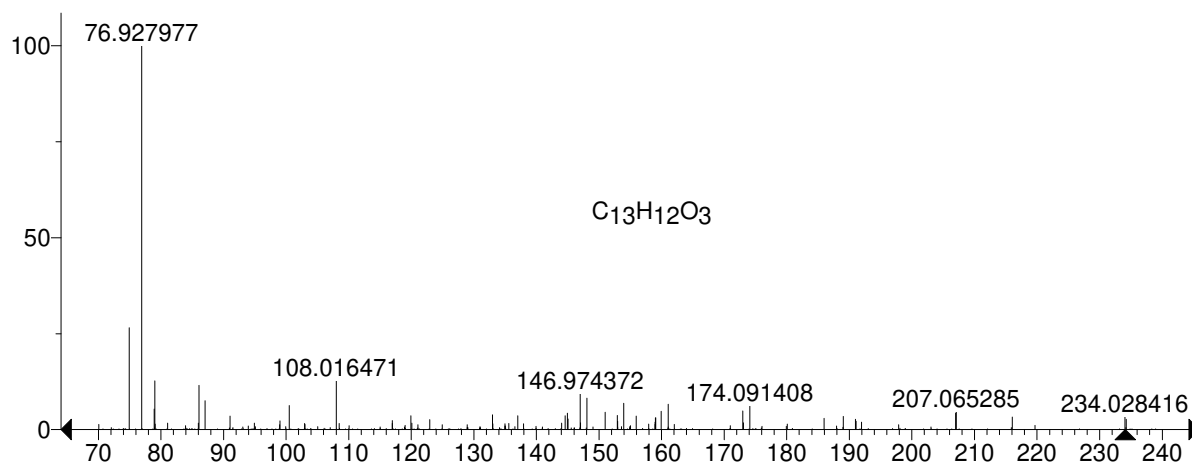

Unknown: Unknown (15.54\_442.1697m/z)  
Compound in Library Factor = 0

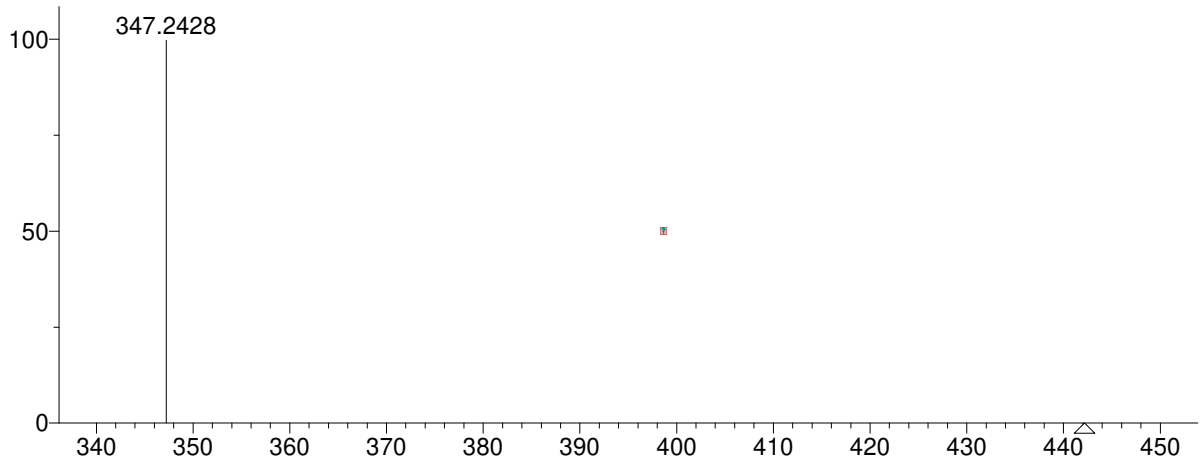

Unknown: Unknown (15.56\_346.2378m/z)  
Compound in Library Factor = -2632

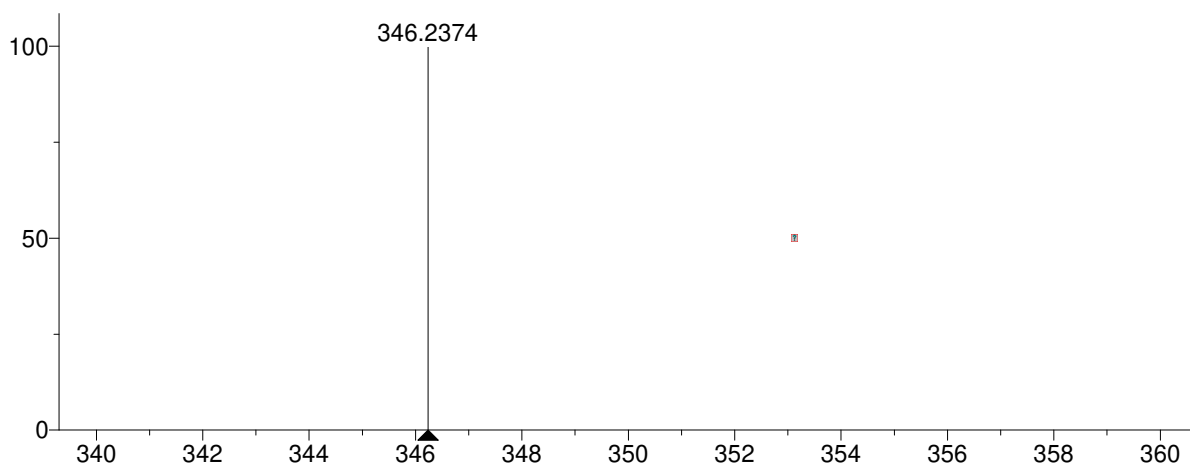

Hit 1 : 1-Pyrrolidineheptanoic acid, 2-[(1E,3S,4S)-3-hydroxy-4-methyl-1-nonen-6-yn-1-yl]-5-oxo-, (2R)- [M+H-H<sub>2</sub>O]  
C<sub>21</sub>H<sub>33</sub>NO<sub>4</sub>; MF: 364; RMF: 999; Prob 50.0%; CAS: 1628759-75-0; Lib: nist\_msms; ID: 361796.

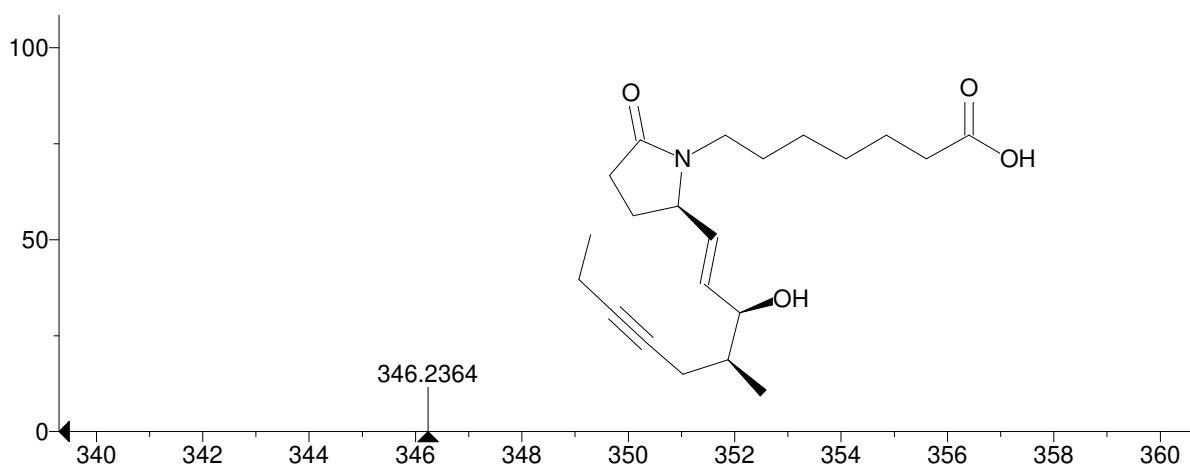

Hit 2 : Octanoic acid, 4-[(1-oxo-7-phenylheptyl)amino]-, (4R)- [M-H]- HCD 17V P=346.2  
C<sub>21</sub>H<sub>33</sub>NO<sub>3</sub>; MF: 364; RMF: 999; Prob 50.0%; CAS: 1101136-50-8; Lib: nist\_msms; ID: 415067.

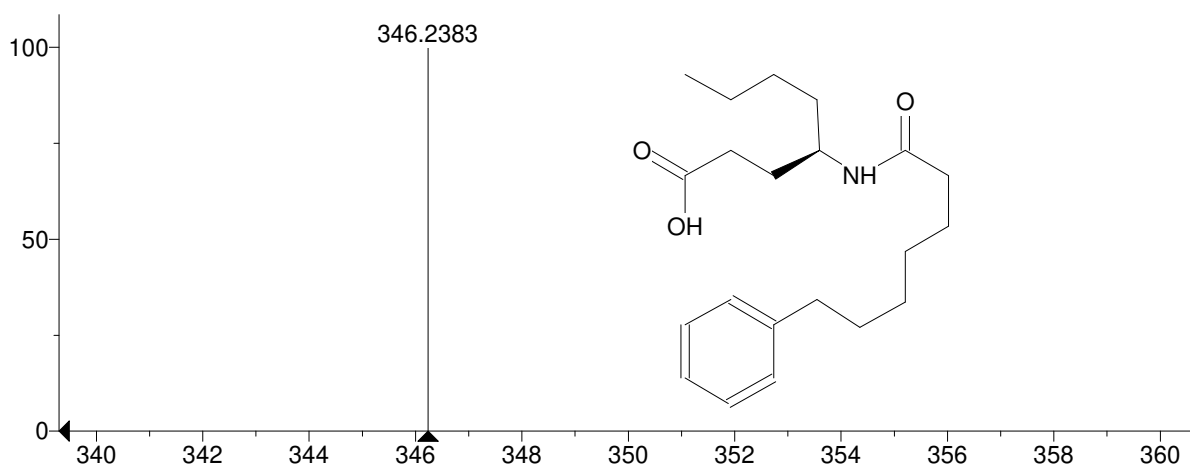

\*\* Search Report Page 1 of 1 \*\*

Unknown: Unknown (15.62\_592.2869m/z)  
Compound in Library Factor = -3273

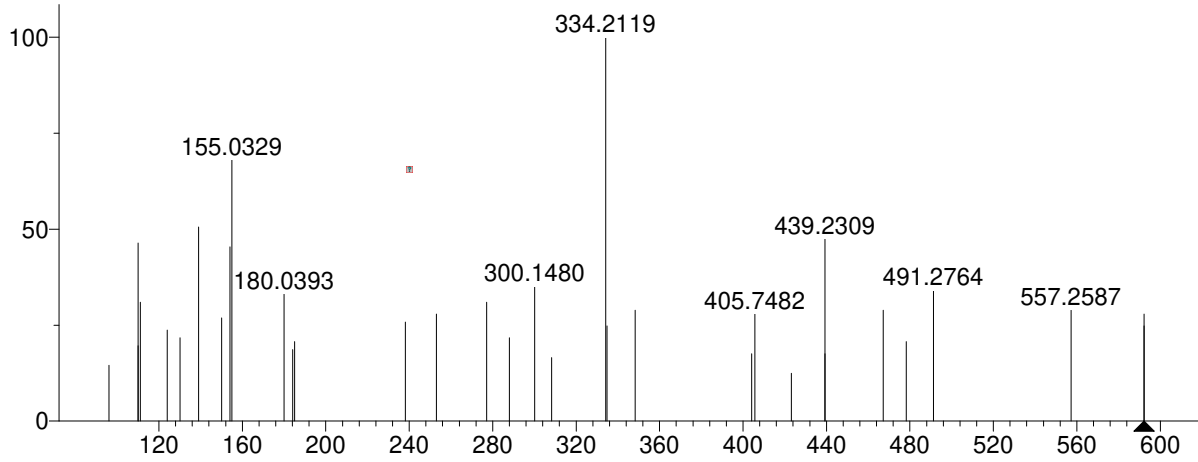

Hit 1 : Ergocristine [M+H-H<sub>2</sub>O]<sup>+</sup> HCD 17V P=592.3  
C<sub>35</sub>H<sub>39</sub>N<sub>5</sub>O<sub>5</sub>; MF: 6; RMF: 182; Prob 54.2%; CAS: 511-08-0; Lib: nist\_msms; ID: 239281.

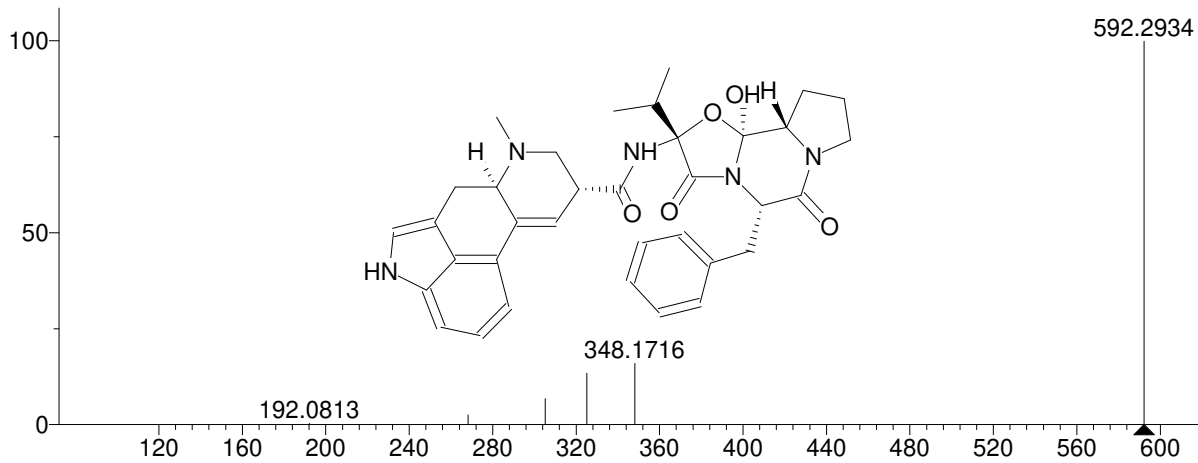

Hit 2 : LH-RH, free acid [M+2H]<sup>2+</sup> QTOF 7V P=592.3  
C<sub>55</sub>H<sub>74</sub>N<sub>16</sub>O<sub>14</sub>; MF: 2; RMF: 160; Prob 45.8%; Lib: nist\_msms2; ID: 38405.

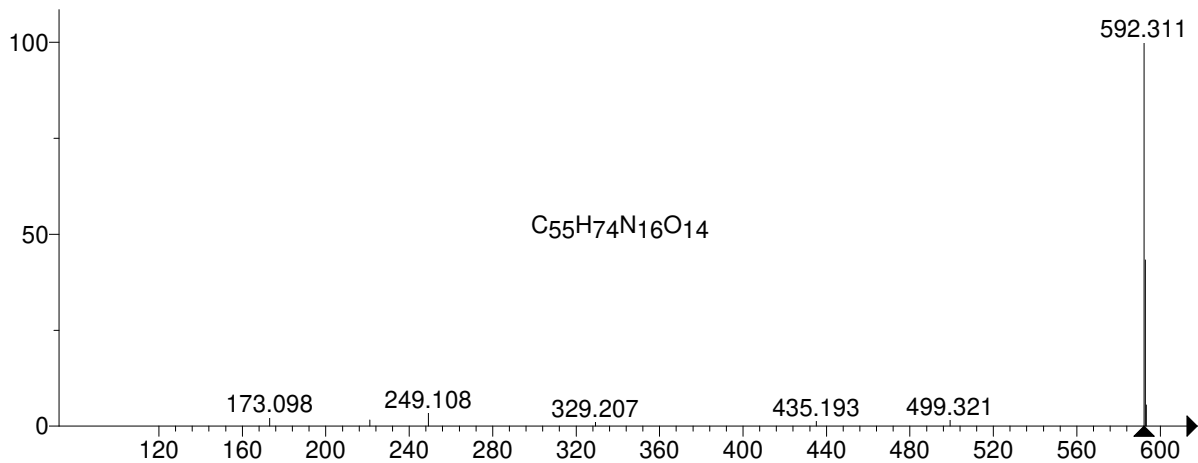



Unknown: Unknown (15.70\_432.8428m/z)  
Compound in Library Factor = 0

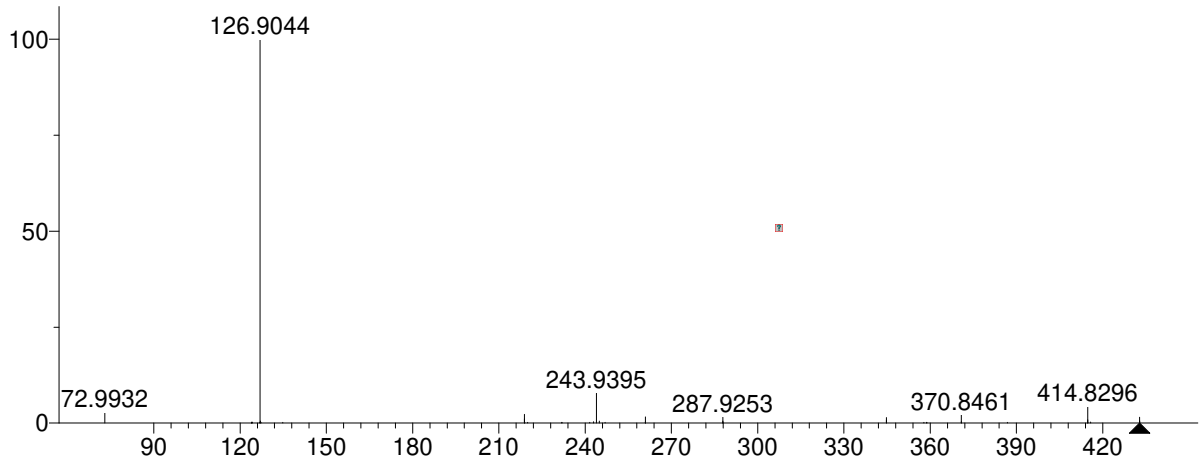

Unknown: Unknown (15.71\_281.1012m/z)  
Compound in Library Factor = 0

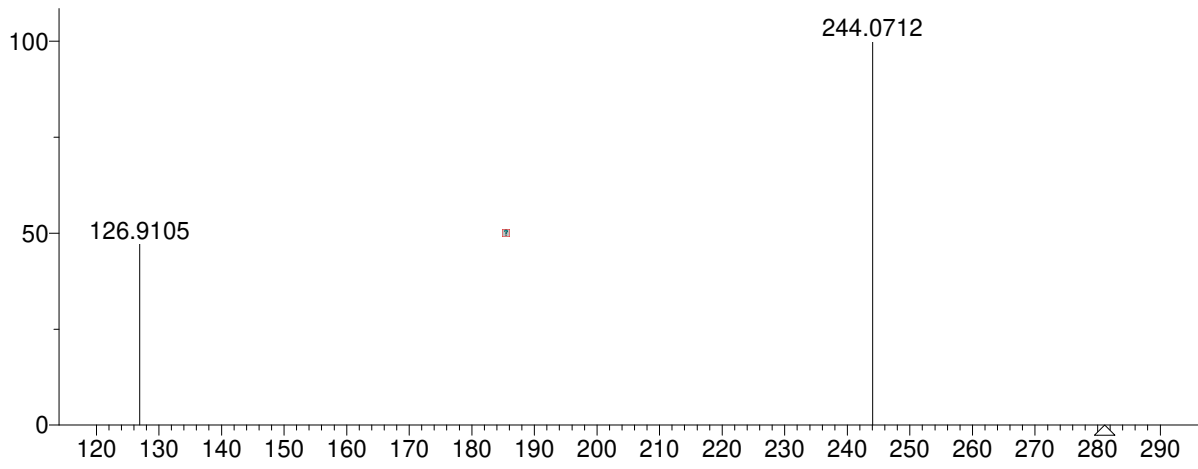

Unknown: Unknown (15.71\_557.7089m/z)  
Compound in Library Factor = 0

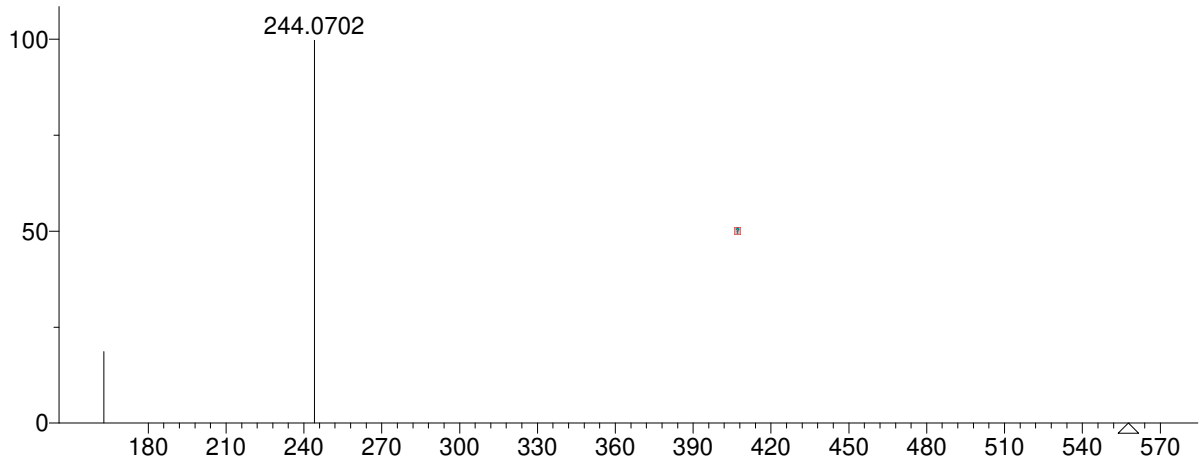

\*\* Search Report Page 1 of 2 \*\*

Unknown: Unknown (15.77\_246.9240m/z)  
Compound in Library Factor = 116

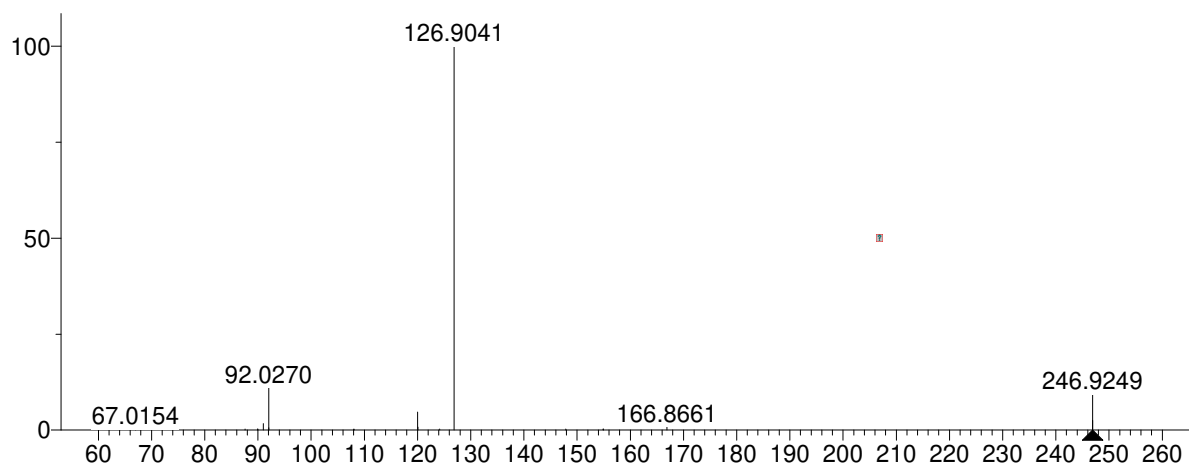

Hit 1 : 3-Iodobenzoic acid [M-H]<sup>-</sup> HCD 16V P=246.9  
C<sub>7</sub>H<sub>5</sub>IO<sub>2</sub>; MF: 560; RMF: 979; Prob 99.0%; CAS: 618-51-9; Lib: nist\_msms; ID: 128592.

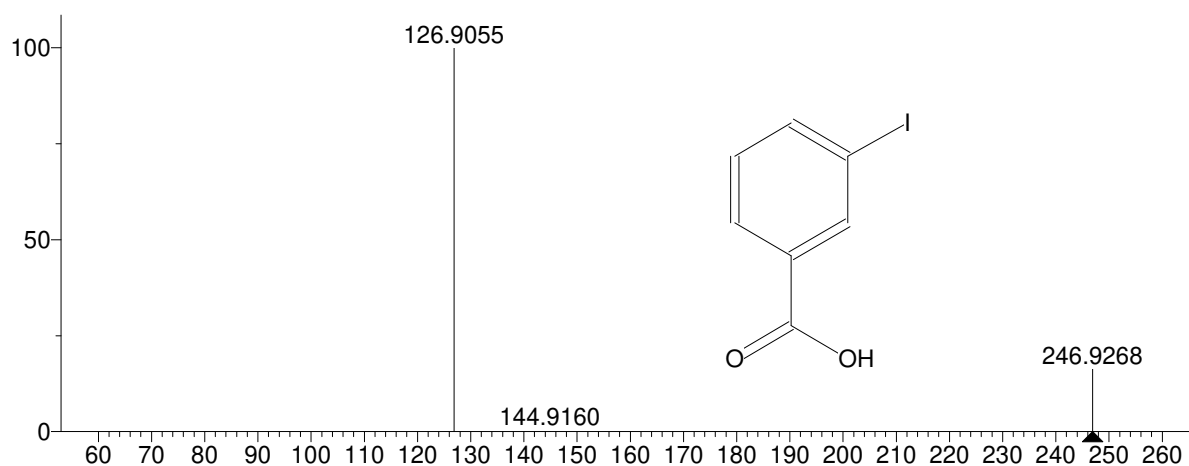

Hit 2 : Terrazole [M+H]<sup>+</sup> HCD 4V P=246.9  
C<sub>5</sub>H<sub>5</sub>Cl<sub>3</sub>N<sub>2</sub>OS; MF: 130; RMF: 785; Prob 0.98%; CAS: 2593-15-9; Lib: nist\_msms; ID: 471720.

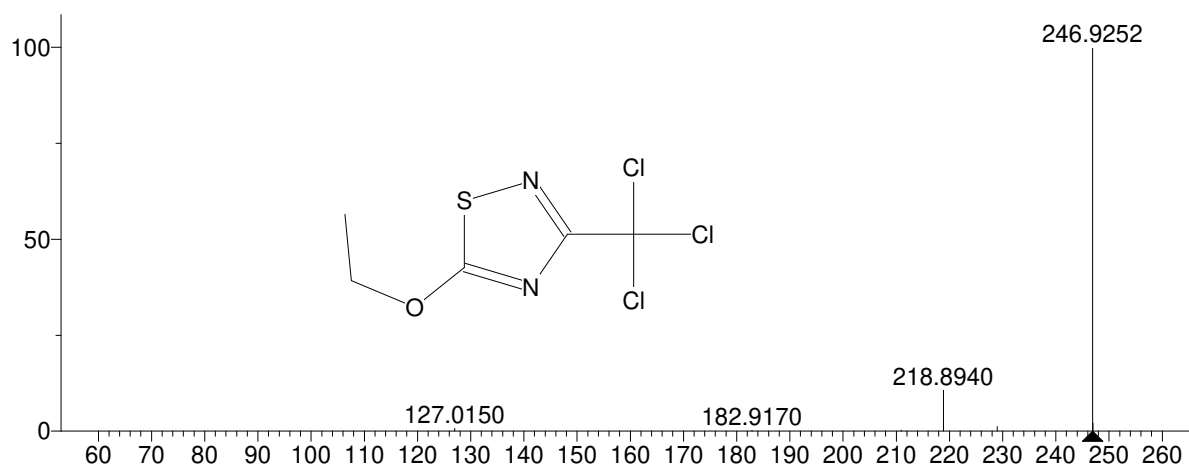

Hit 3 : p-iodobenzoic acid (Van de Wouwer et al./Van de Wouwer et al.) [M-H]<sup>-</sup> P=246.9  
C<sub>7</sub>H<sub>5</sub>IO<sub>2</sub>; MF: 5; RMF: 372; Prob 0.04%; Lib: phytofrag2018\_final\_060219; ID: 762.

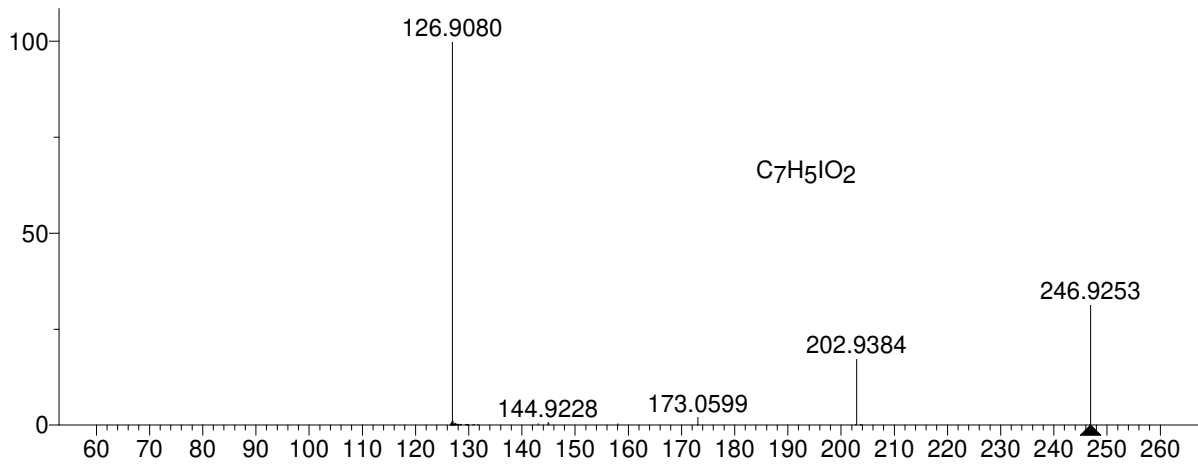

Unknown: Unknown (15.78\_358.0592m/z)  
Compound in Library Factor = 0

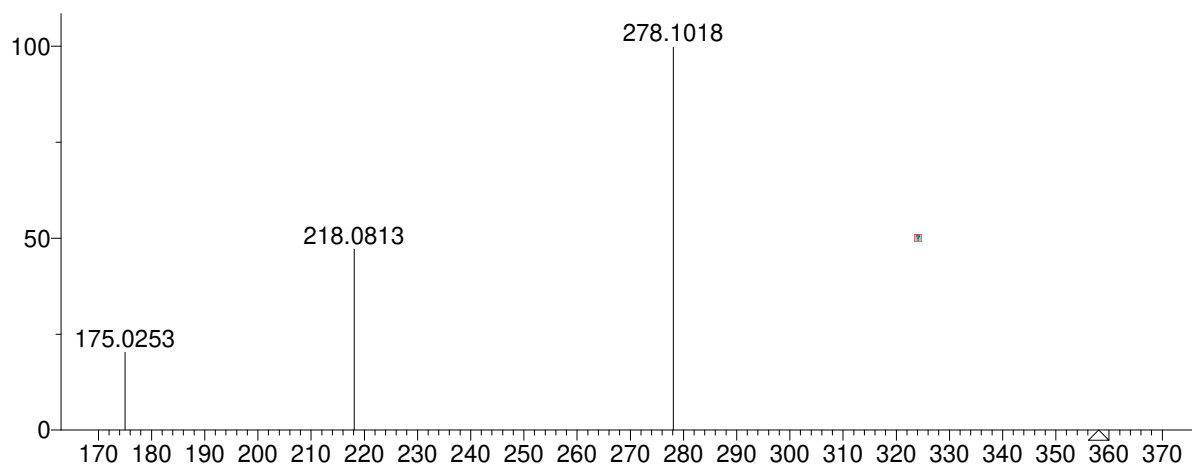

Hit 1 : Urea, N-[2-chloro-4-[(6,7-dimethoxy-4-quinazolinyloxy]phenyl]-N'-propyl- [M+H-C3H9N]+ HCD 66V P=3  
C20H21ClN4O4; MF: 0; RMF: 25; Prob 100.0%; CAS: 286370-15-8; Lib: nist\_msms; ID: 344081.

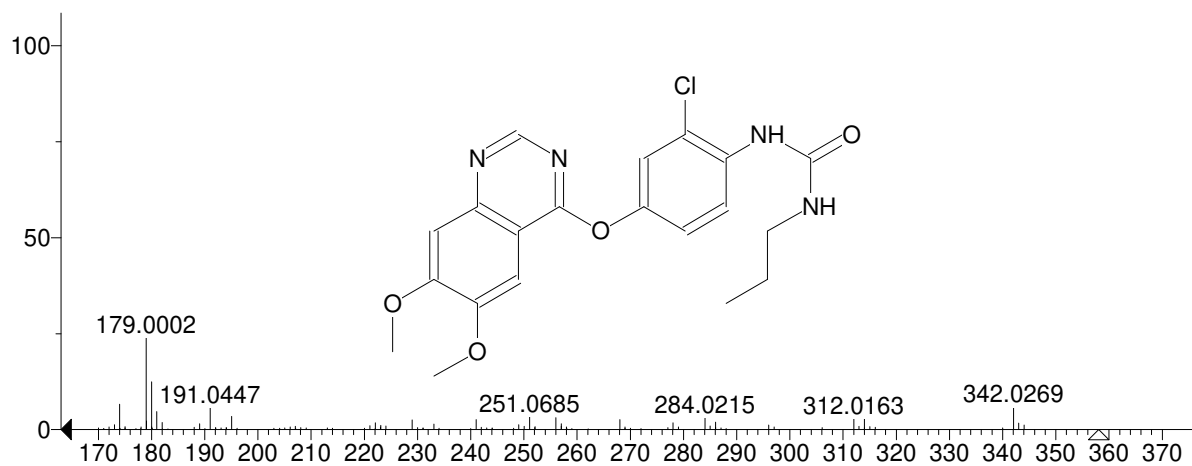

\*\* Search Report Page 1 of 2 \*\*

Unknown: Unknown (15.85\_371.1243m/z)  
Compound in Library Factor = -3273

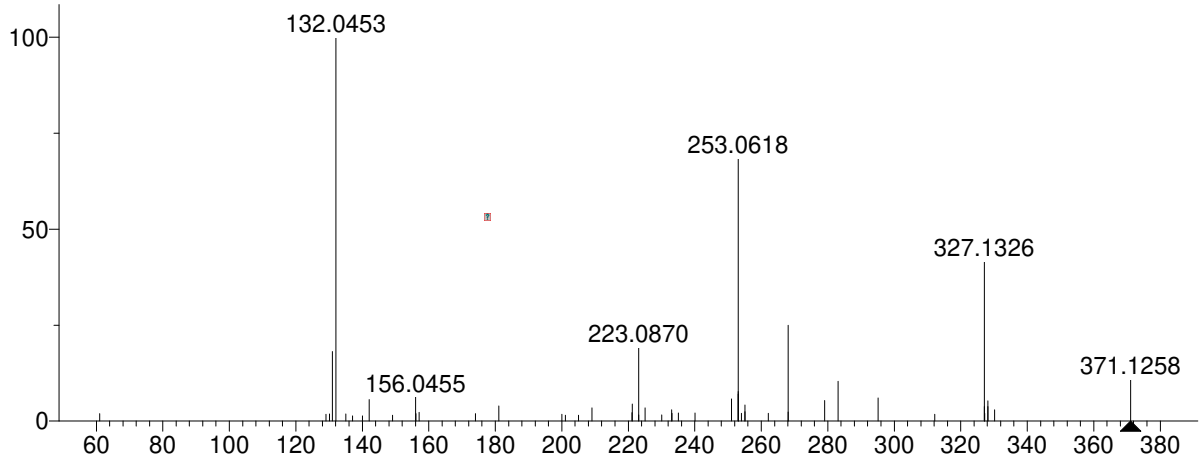

Hit 1 : 7,8-dihydroxy-3-[(1E,3E)-7-hydroxy-3,5-dimethylhepta-1,3-dienyl]-7-methyl-8H-isochromen-6-one [M+K]+  
C<sub>19</sub>H<sub>24</sub>O<sub>5</sub>; MF: 2; RMF: 66; Prob 21.3%; Lib: mona-export-vf-npl\_qexactive; ID: 16498.

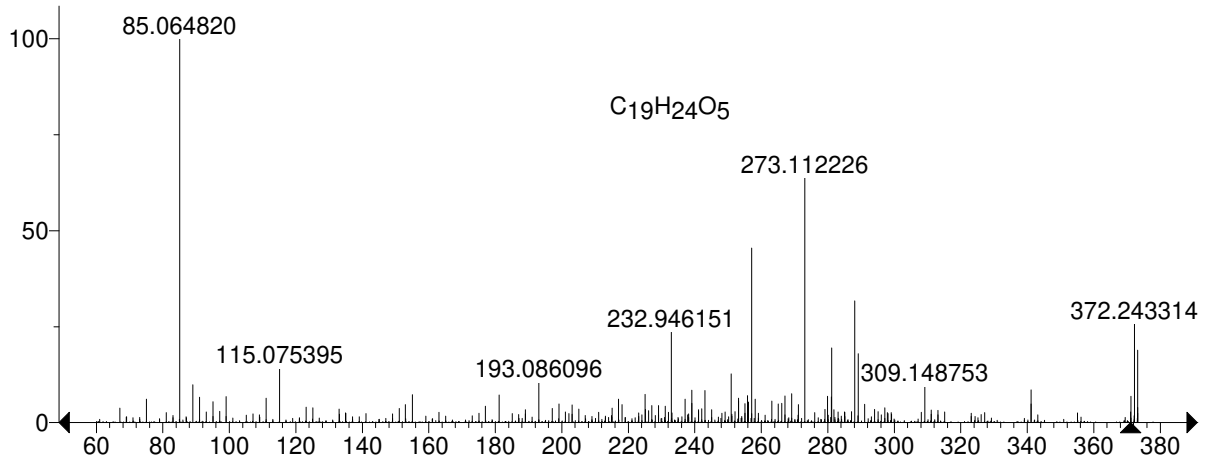

Hit 2 : G(8-O-4)5HFA'2 () [M-H]- P=371.1  
C<sub>20</sub>H<sub>20</sub>O<sub>7</sub>; MF: 0; RMF: 32; Prob 19.7%; Lib: phytofrag2018\_final\_060219; ID: 368.

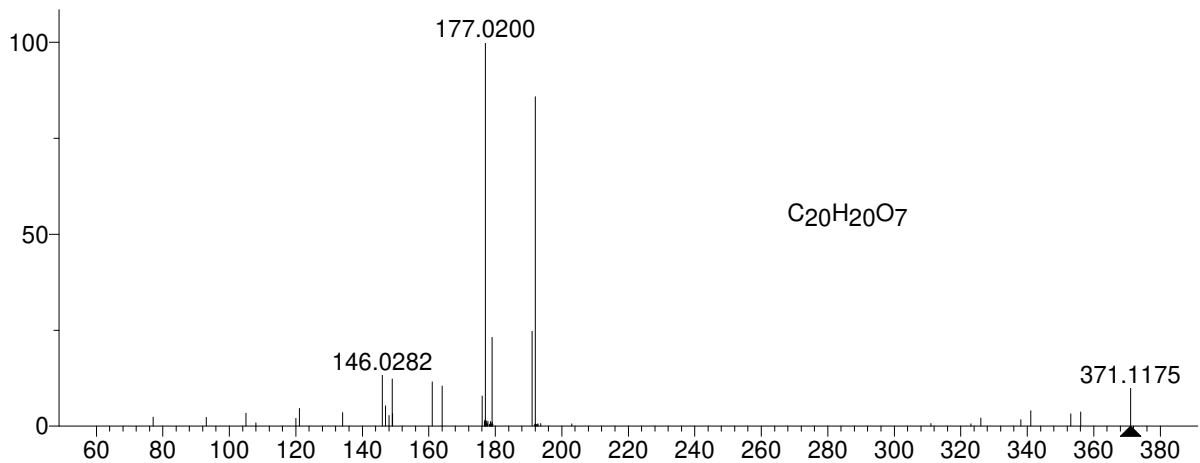

\*\* Search Report Page 2 of 2 \*\*

Hit 3 : methyl (2E)-3-(4-hydroxy-3-methoxyphenyl)-2-(hydroxymethyl)-3,4-dihydro-1,4-benzodioxin-6-yl  
C<sub>20</sub>H<sub>20</sub>O<sub>7</sub>; MF: 0; RMF: 26; Prob 19.7%; Lib: phytofrag2018\_final\_060219; ID: 705.

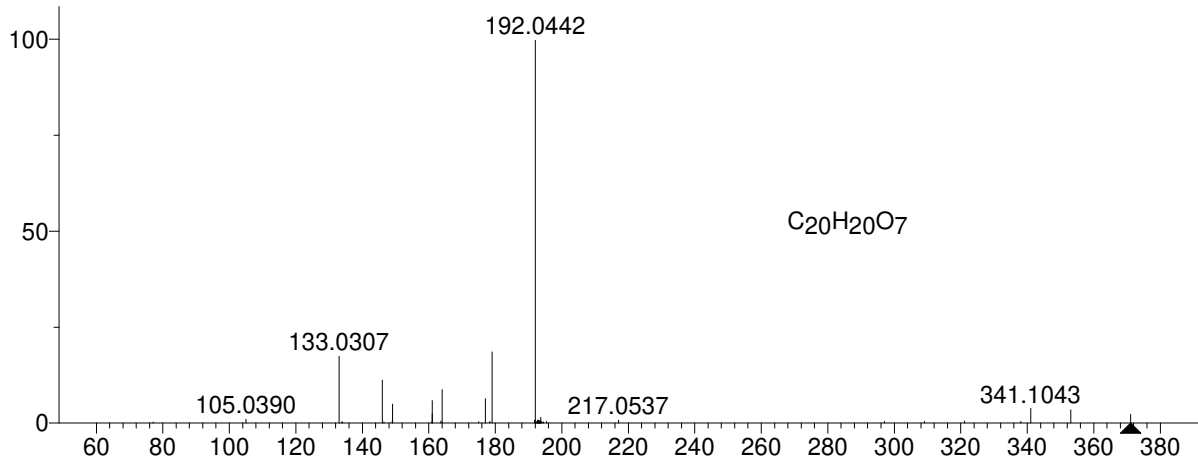

Hit 4 : 1-[2-hydroxy-4-(3-hydroxy-5-methylphenoxy)-6-methylphenyl]-3-methylbutane-2,3-diol [M+K]<sup>+</sup> 35HCD P-  
C<sub>19</sub>H<sub>24</sub>O<sub>5</sub>; MF: 0; RMF: 22; Prob 19.7%; Lib: mona-export-vf-npl\_qexactive; ID: 22291.

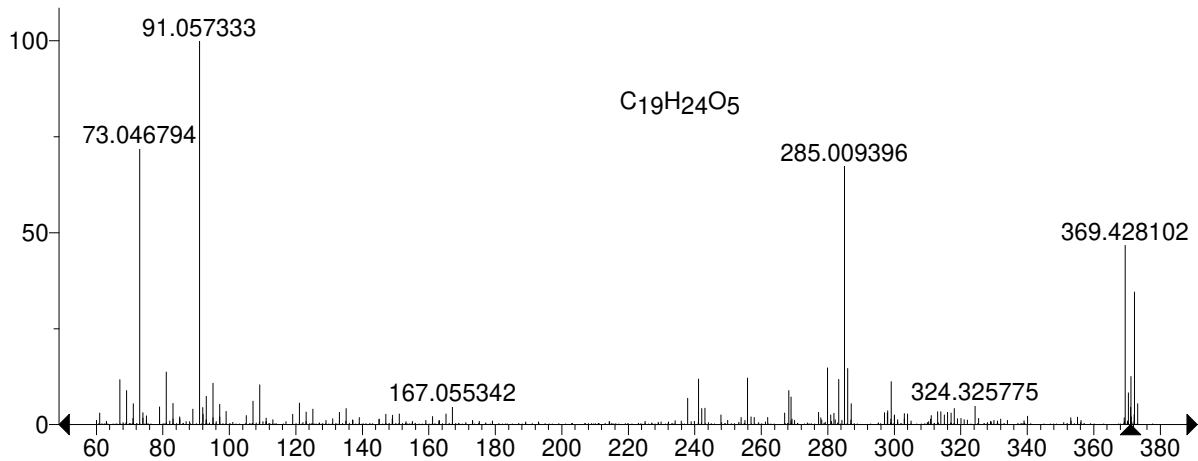

Hit 5 : Arnicolide D [M+K]<sup>+</sup> 45HCD P=371.1  
C<sub>19</sub>H<sub>24</sub>O<sub>5</sub>; MF: 0; RMF: 19; Prob 19.7%; Lib: mona-export-vf-npl\_qexactive; ID: 4088.

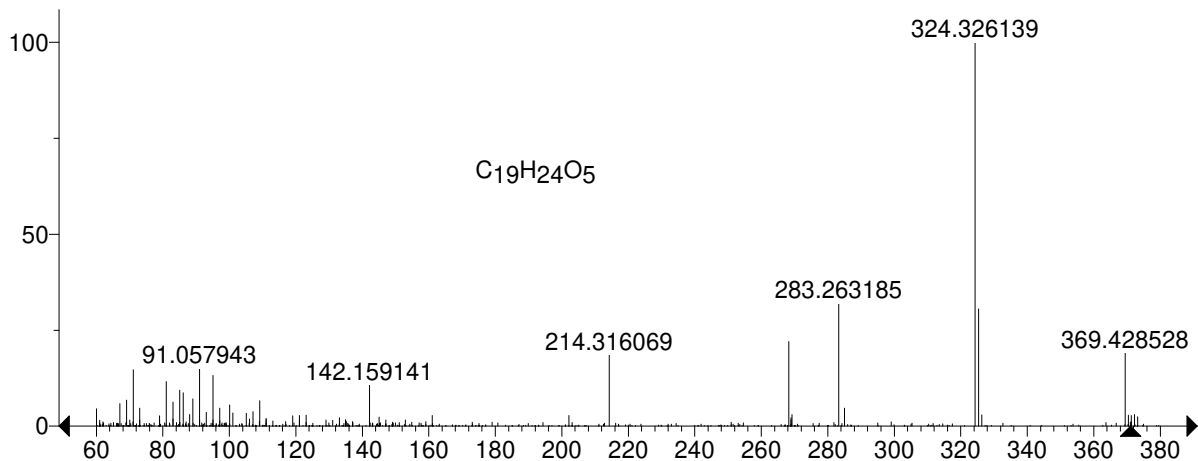



Unknown: Unknown (15.86\_428.1708m/z)  
Compound in Library Factor = -3273

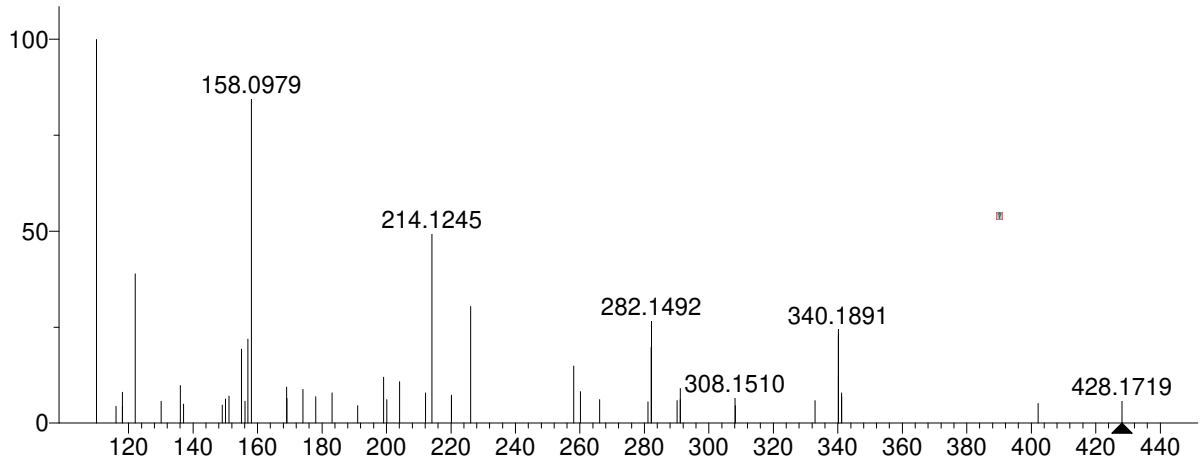

Hit 1 : (2s,6as,12as)-6a-hydroxy-8,9-dimethoxy-2-(prop-1-en-2-yl)-1,2,12,12a-tetrahydrochromeno[3,4-b]furo[2,3-C23H22O7; MF: 1; RMF: 45; Prob 14.8%; Lib: mona-export-vf-npl\_qexactive; ID: 4286.

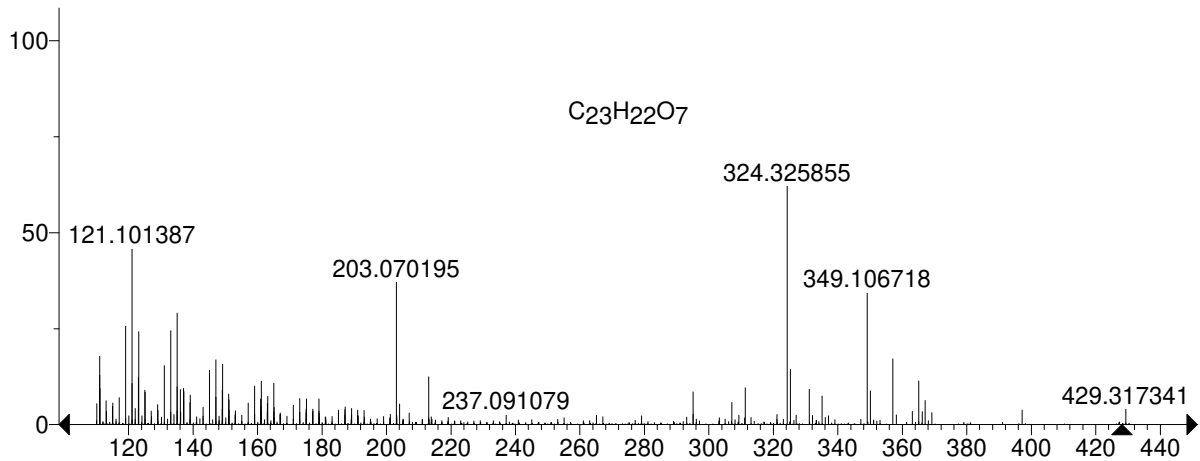

Hit 2 : tephrosin [M+NH<sub>4</sub>]<sup>+</sup> 65HCD P=428.2  
C<sub>23</sub>H<sub>22</sub>O<sub>7</sub>; MF: 0; RMF: 34; Prob 14.2%; Lib: mona-export-vf-npl\_qexactive; ID: 4047.

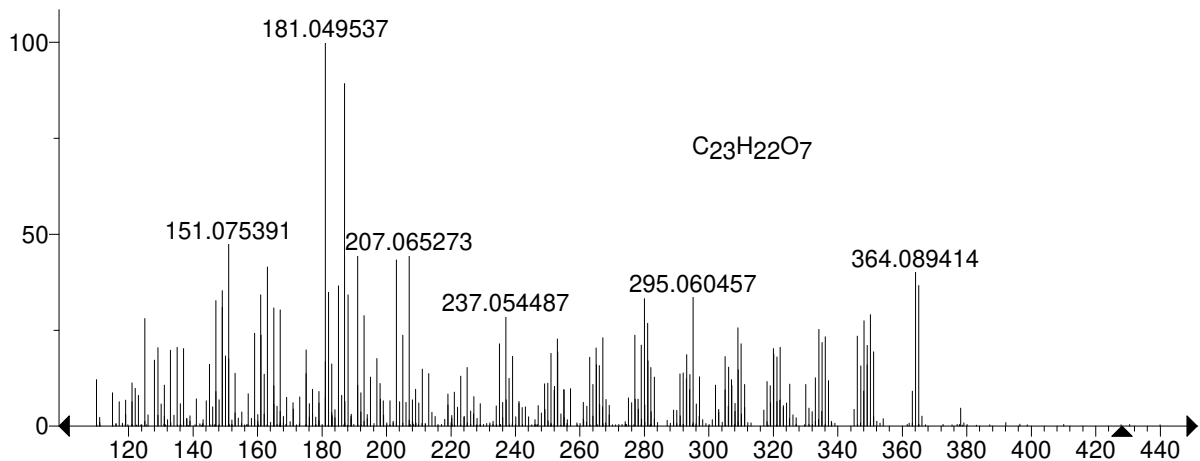

\*\* Search Report Page 2 of 2 \*\*

Hit 3 : PC 6:0; PC 3:0-3:0; [M+Hac-H]- [M+Hac-H]- P=428.2  
C14H28NO8P; MF: 0; RMF: 33; Prob 14.2%; Lib: msdial-insilicomsm-lipids-neg; ID: 319519.

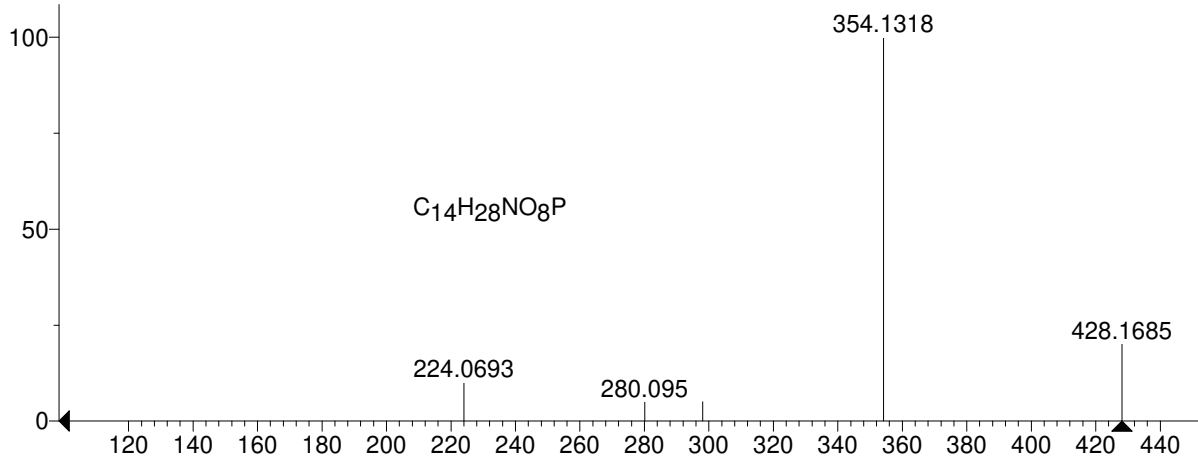

Hit 4 : PC 7:0; PC 2:0-5:0; [M+FA-H]- [M+FA-H]- P=428.2  
C15H30NO8P; MF: 0; RMF: 32; Prob 14.2%; Lib: msdial-insilicomsm-lipids-neg; ID: 317570.

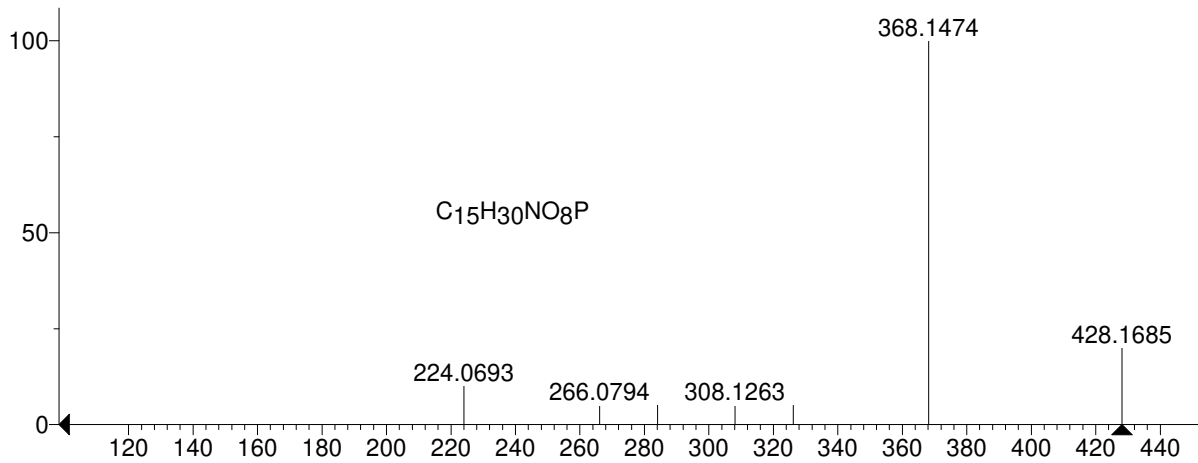

Hit 5 : PC 7:0; PC 3:0-4:0; [M+FA-H]- [M+FA-H]- P=428.2  
C15H30NO8P; MF: 0; RMF: 32; Prob 14.2%; Lib: msdial-insilicomsm-lipids-neg; ID: 317629.

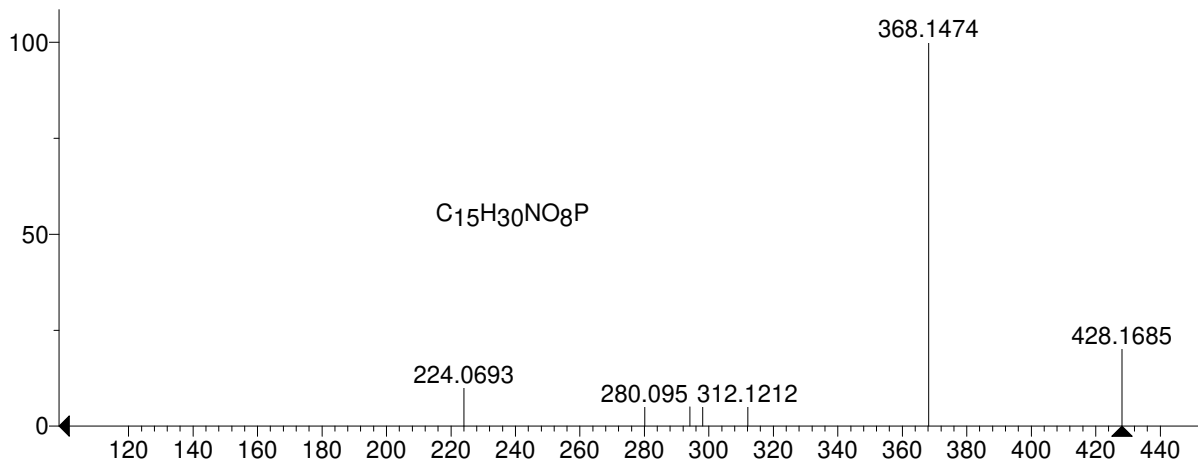

Unknown: Unknown (15.90\_291.0537m/z)  
Compound in Library Factor = -321

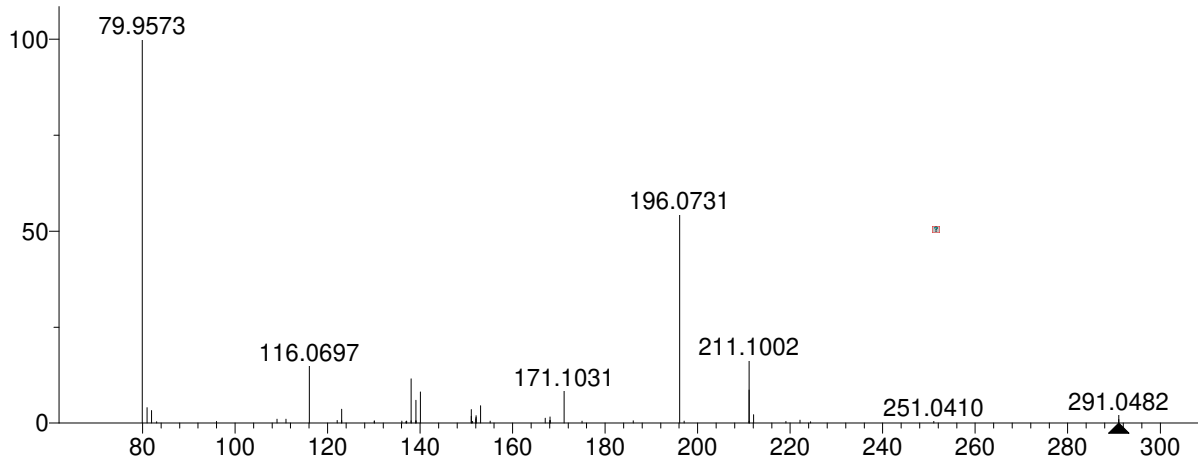

Hit 1 : N4-Acetylsulfadiazine [M-H]<sup>-</sup> 15% ( P=291.1  
C<sub>12</sub>H<sub>12</sub>N<sub>4</sub>O<sub>3</sub>S; MF: 294; RMF: 840; Prob 92.0%; Lib: mona-export-lc-ms-ms\_negative\_mode; ID: 2464.

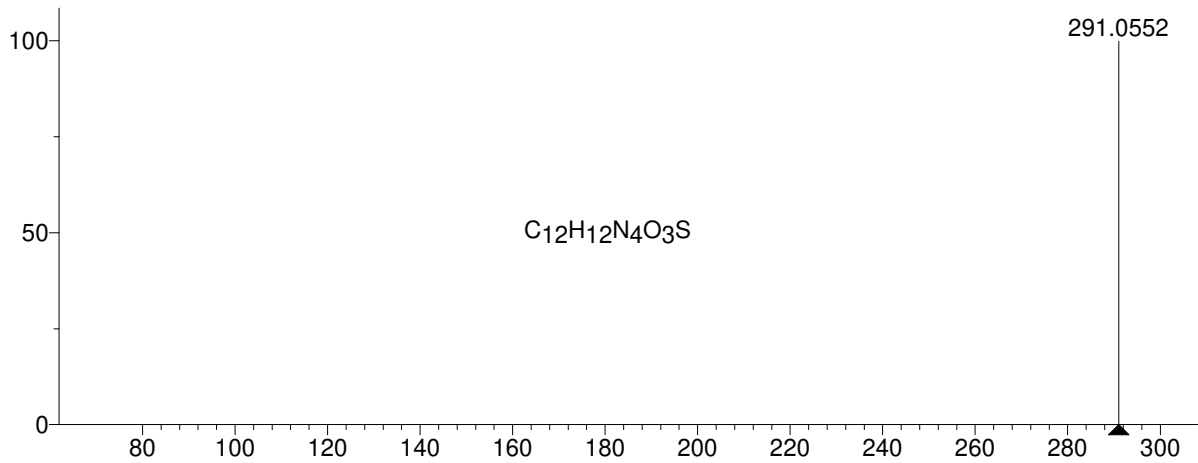

Hit 2 : N4-Acetylsulfadiazine; LC-ESI-ITFT; MS2; CE [M-H]<sup>-</sup> 15 P=291.1  
C<sub>12</sub>H<sub>12</sub>N<sub>4</sub>O<sub>3</sub>S; MF: 206; RMF: 762; Prob 8.02%; Lib: msms-neg-massbank; ID: 2282.

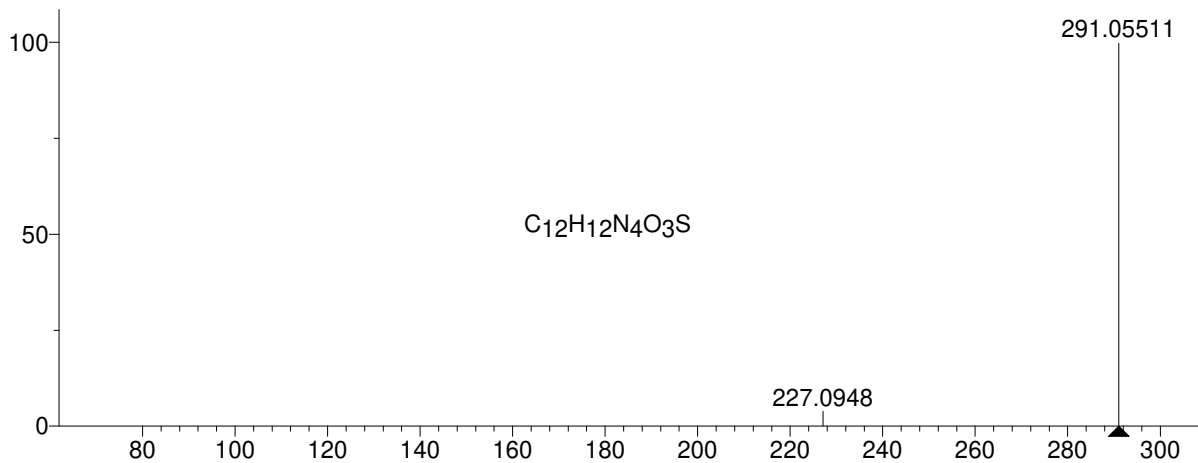

Unknown: Unknown (15.91\_314.1962m/z)  
Compound in Library Factor = -3273

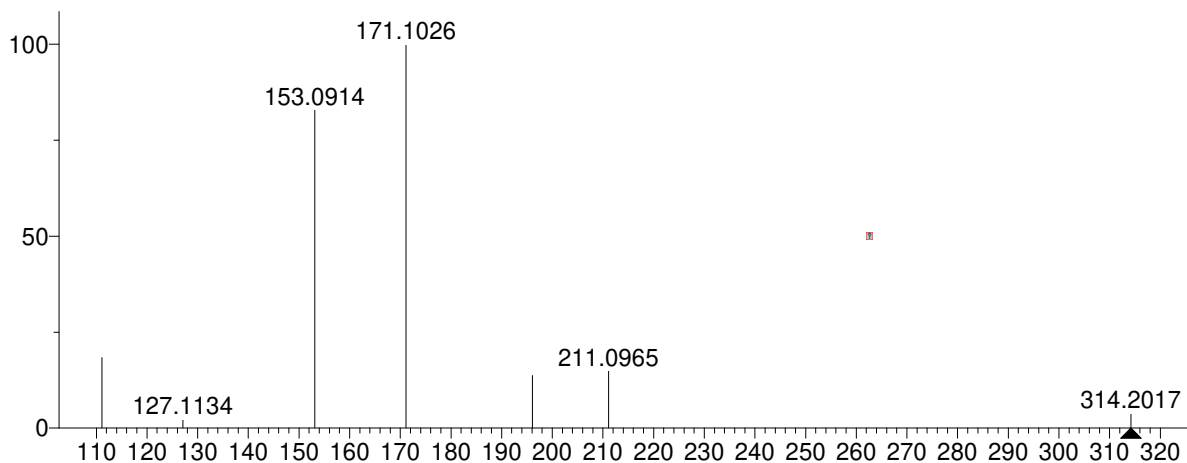

Hit 1 : Heliotrine [M+H]<sup>+</sup> HCD 15V P=314.2  
C<sub>16</sub>H<sub>27</sub>NO<sub>5</sub>; MF: 7; RMF: 120; Prob 56.6%; CAS: 303-33-3; Lib: nist\_msms; ID: 236012.

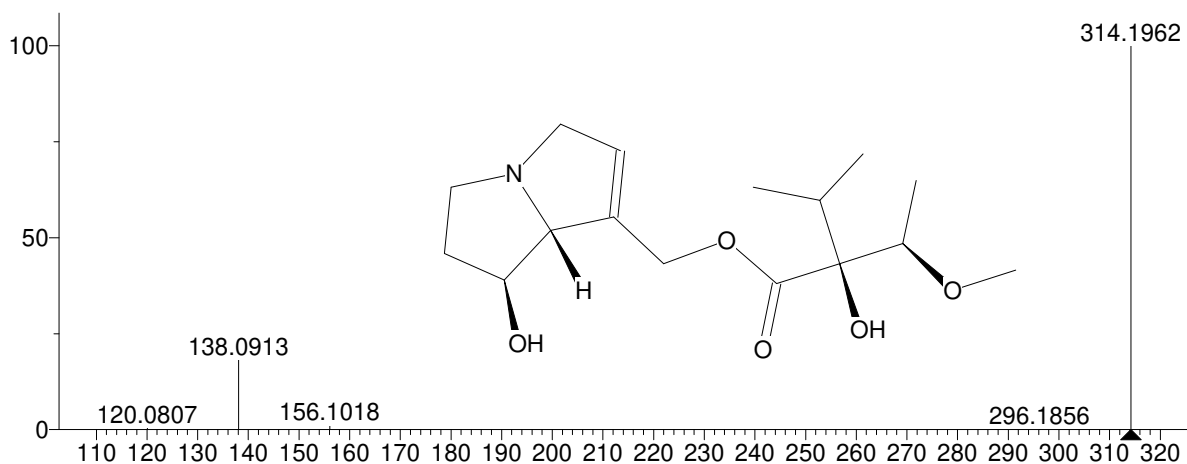

Hit 2 : NCGC00385977-01\_C<sub>16</sub>H<sub>24</sub>O<sub>5</sub>\_4-Hydroxy-5-methoxy-4-[2-methyl-3-(3-methyl-2-buten-1-yl)-2-oxiranyl]-1  
C<sub>16</sub>H<sub>24</sub>O<sub>5</sub>; MF: 0; RMF: 70; Prob 43.4%; Lib: mona-export-gnps; ID: 12532.

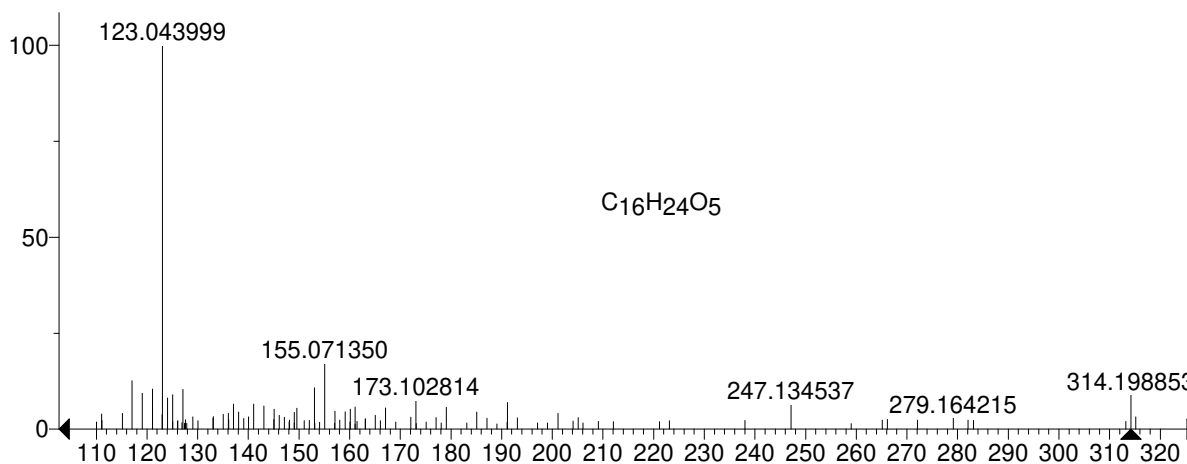

Unknown: Unknown (15.99\_498.1061m/z)  
Compound in Library Factor = 0

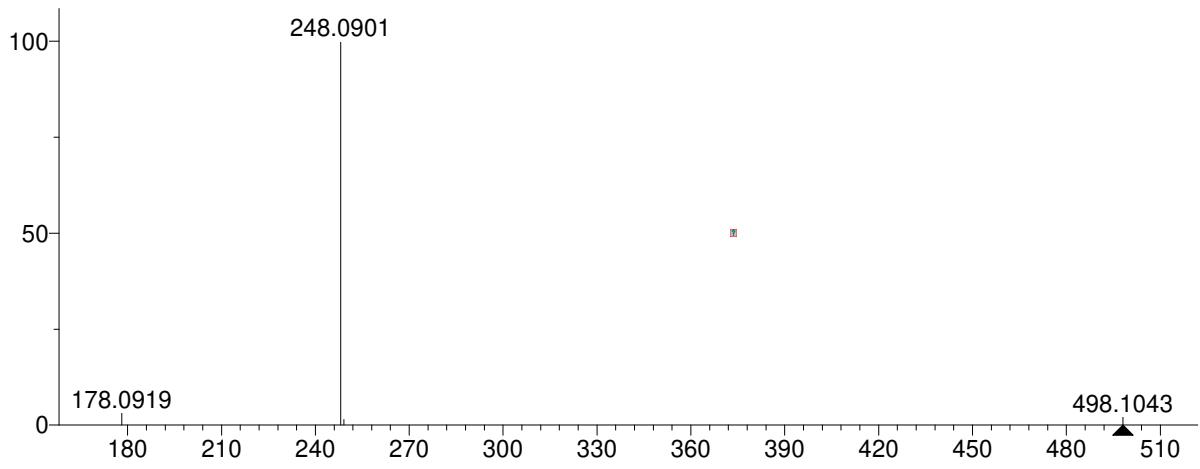

\*\* Search Report Page 1 of 2 \*\*

Unknown: Unknown (16.08\_272.0916m/z)  
Compound in Library Factor = 0

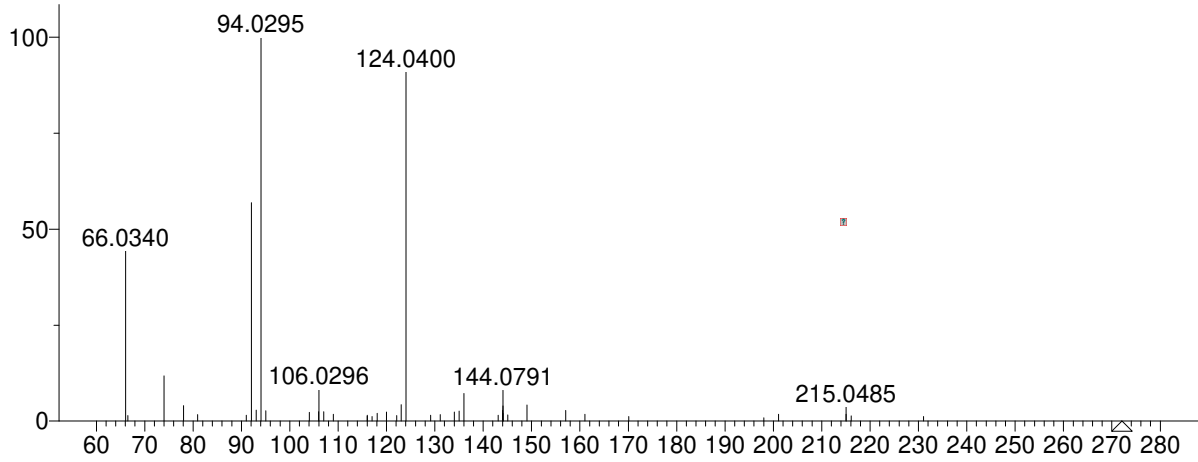

Hit 1 : 5-Hydroxymethylcytidine [M-H]- 20-30-40%) P=272.1  
C<sub>10</sub>H<sub>15</sub>N<sub>3</sub>O<sub>6</sub>; MF: 0; RMF: 43; Prob 33.3%; Lib: mona-export-fiehn\_hilic; ID: 1015.

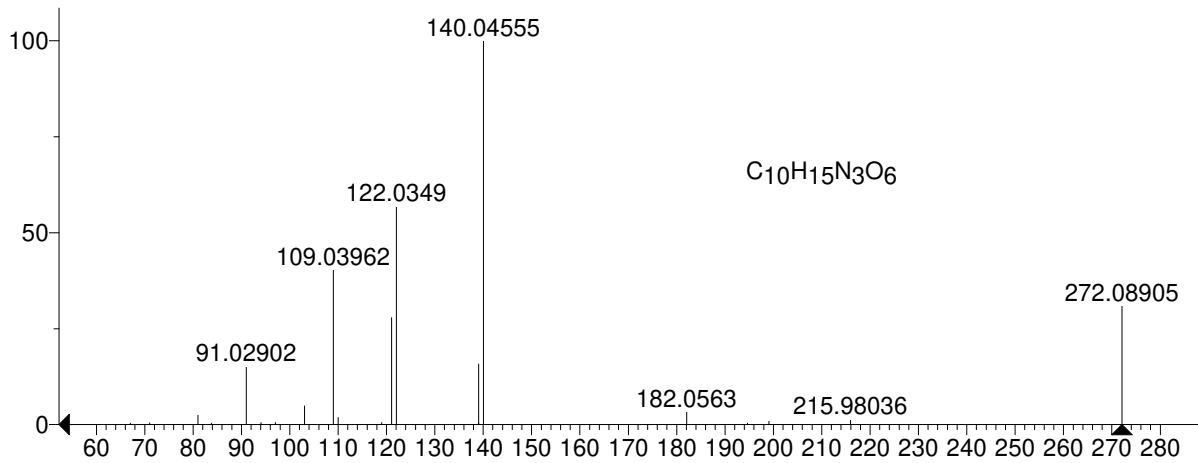

Hit 2 : L-Thyronine [M-H]- HCD 35V P=272.1  
C<sub>15</sub>H<sub>15</sub>NO<sub>4</sub>; MF: 0; RMF: 25; Prob 33.3%; CAS: 1596-67-4; Lib: nist\_msms; ID: 277919.

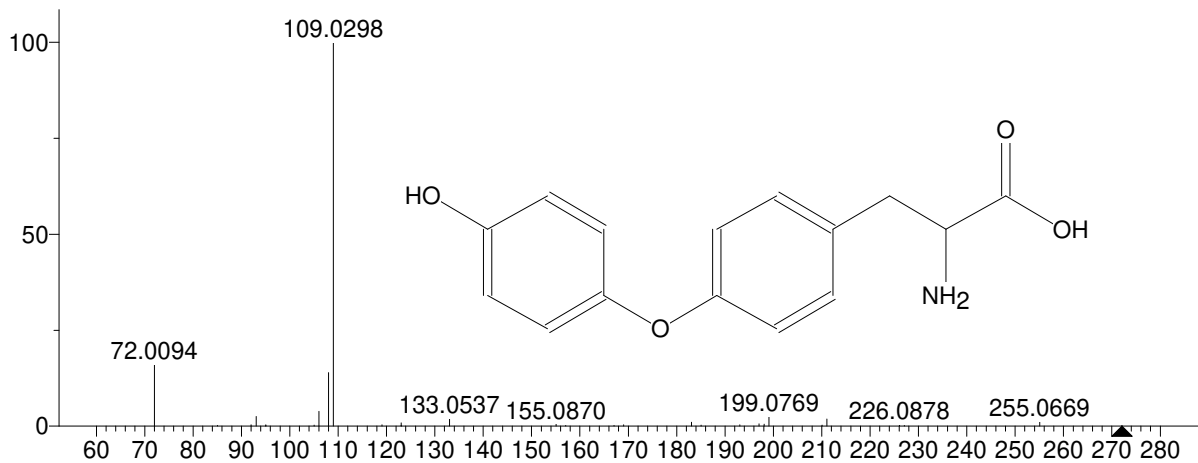

Hit 3 : rubiadin [M+NH4]<sup>+</sup> 65HCD P=272.1  
C<sub>15</sub>H<sub>10</sub>O<sub>4</sub>; MF: 0; RMF: 13; Prob 33.3%; Lib: mona-export-vf-npl\_qexactive; ID: 3999.

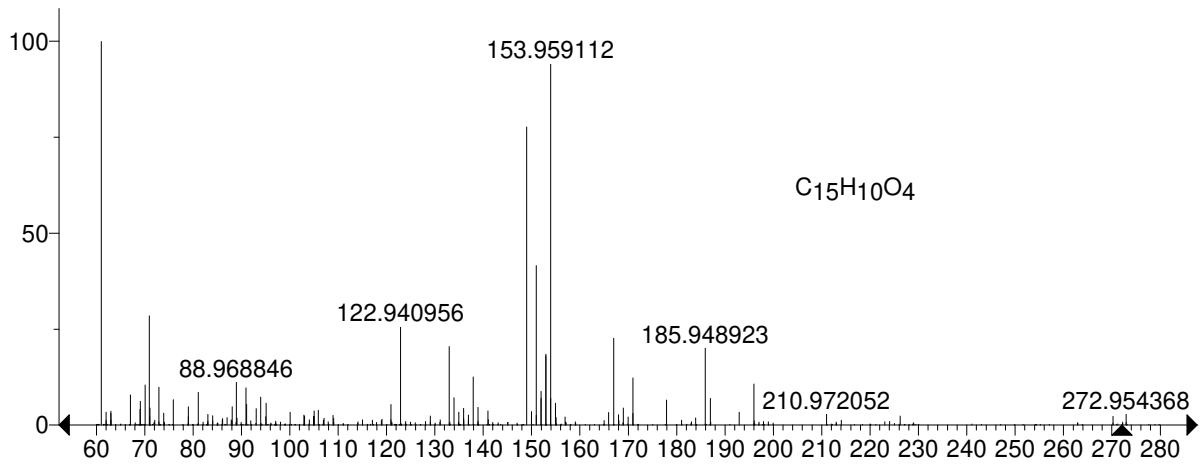

Unknown: Unknown (16.08\_272.1496m/z)  
Compound in Library Factor = 0

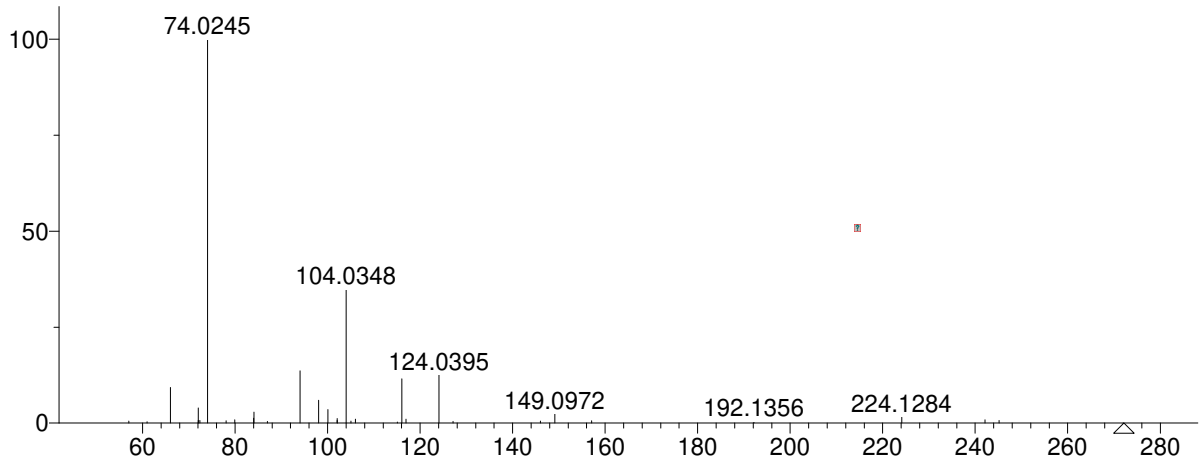



Unknown: Unknown (16.19\_320.1129m/z)  
Compound in Library Factor = -3273

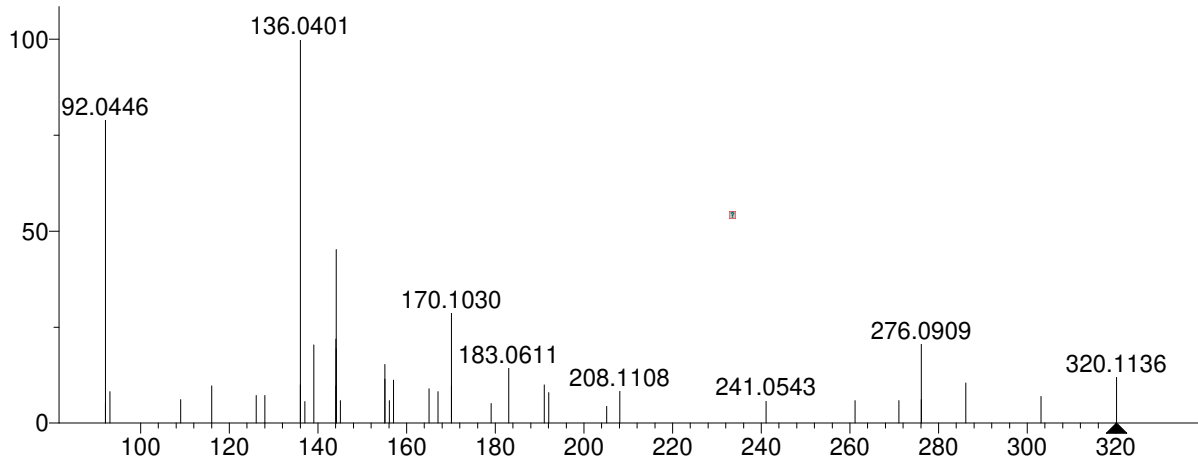

Hit 1 : (2R)-5,8-dihydroxy-2-(2-hydroxyphenyl)-7-methoxy-2,3-dihydrochromen-4-one [M+NH<sub>4</sub>]<sup>+</sup> 65HCD P=320  
C<sub>16</sub>H<sub>14</sub>O<sub>6</sub>; MF: 1; RMF: 55; Prob 34.2%; Lib: mona-export-vf-npl\_qexactive; ID: 9708.

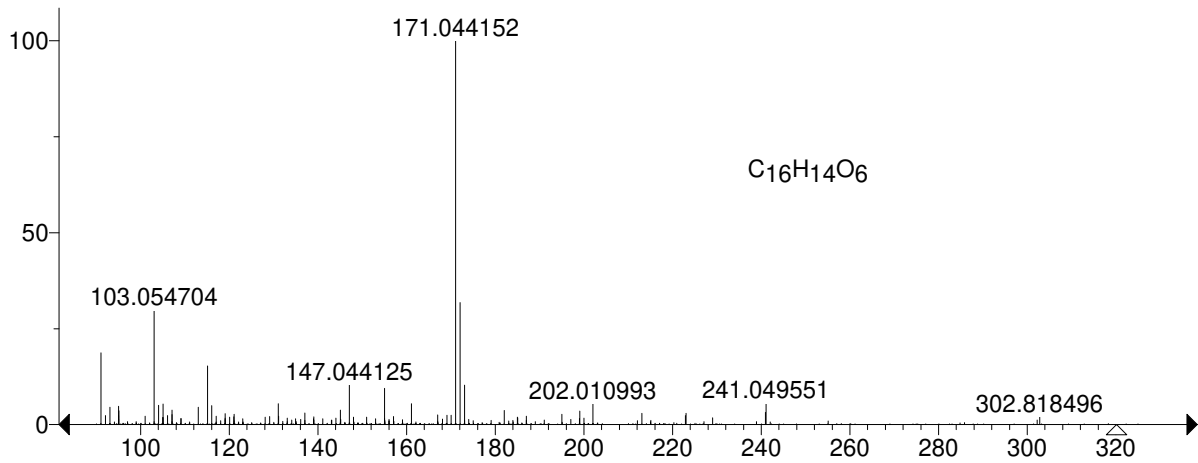

Hit 2 : (3,4,5-trihydroxy-6-methyloxan-2-yl) 2-(methylamino)benzoate [M+Na]<sup>+</sup> 35HCD P=320.1  
C<sub>14</sub>H<sub>19</sub>NO<sub>6</sub>; MF: 0; RMF: 26; Prob 32.9%; Lib: mona-export-vf-npl\_qexactive; ID: 19195.

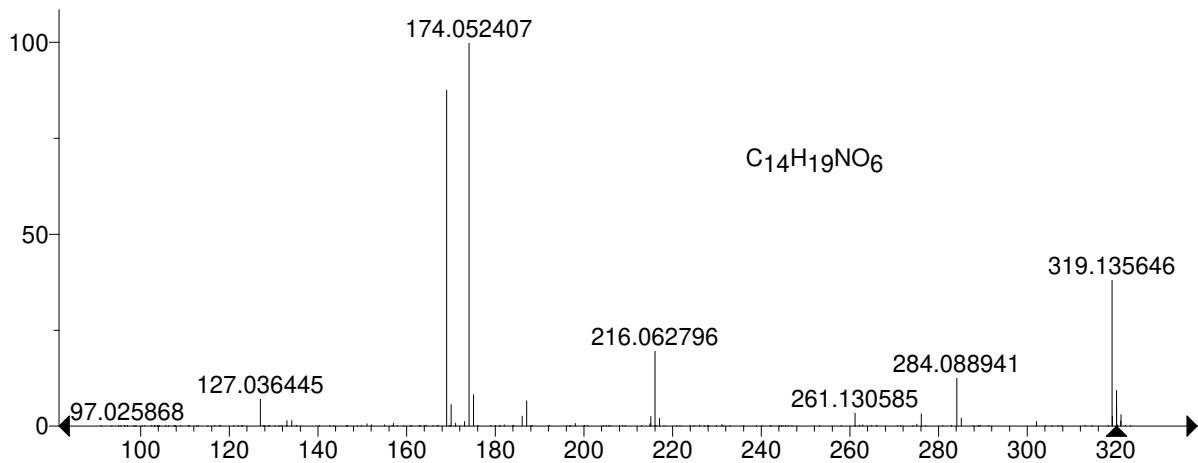

Hit 3 : Hematoxylin [M+NH4]<sup>+</sup> 45HCD P=320.1  
C<sub>16</sub>H<sub>14</sub>O<sub>6</sub>; MF: 0; RMF: 18; Prob 32.9%; Lib: mona-export-vf-npl\_gexactive; ID: 17570.

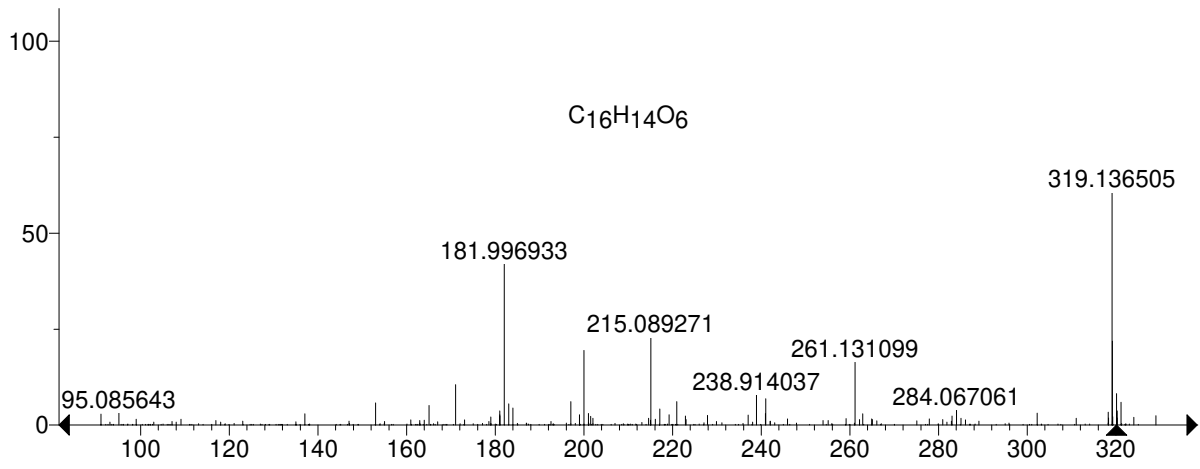

Unknown: Unknown (16.26\_275.0216m/z)  
Compound in Library Factor = 0

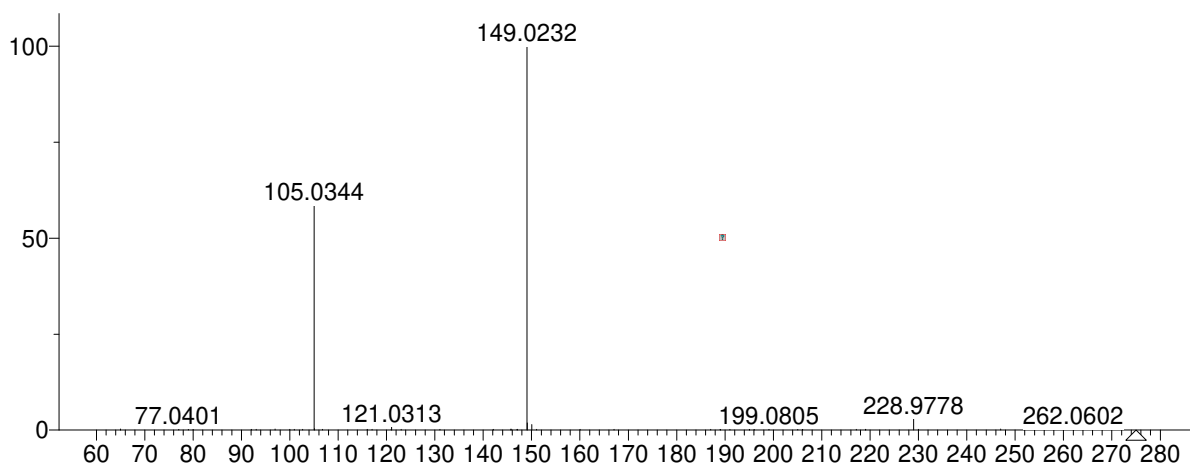

Hit 1 : 2-Thiophenemethanol, 5,5'-(2,5-furandiyl)bis- [M+H-H<sub>2</sub>O]<sup>+</sup> HCD 60V P=275  
C<sub>14</sub>H<sub>12</sub>O<sub>3</sub>S<sub>2</sub>; MF: 0; RMF: 13; Prob 100.0%; CAS: 213261-59-7; Lib: nist\_msms; ID: 418063.

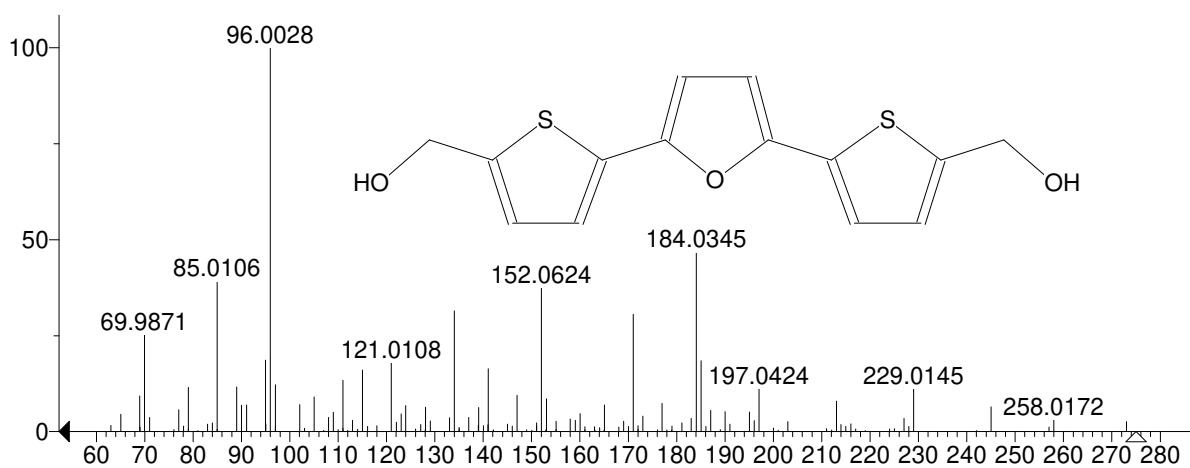

Unknown: Unknown (16.26\_498.1056m/z)  
Compound in Library Factor = 0

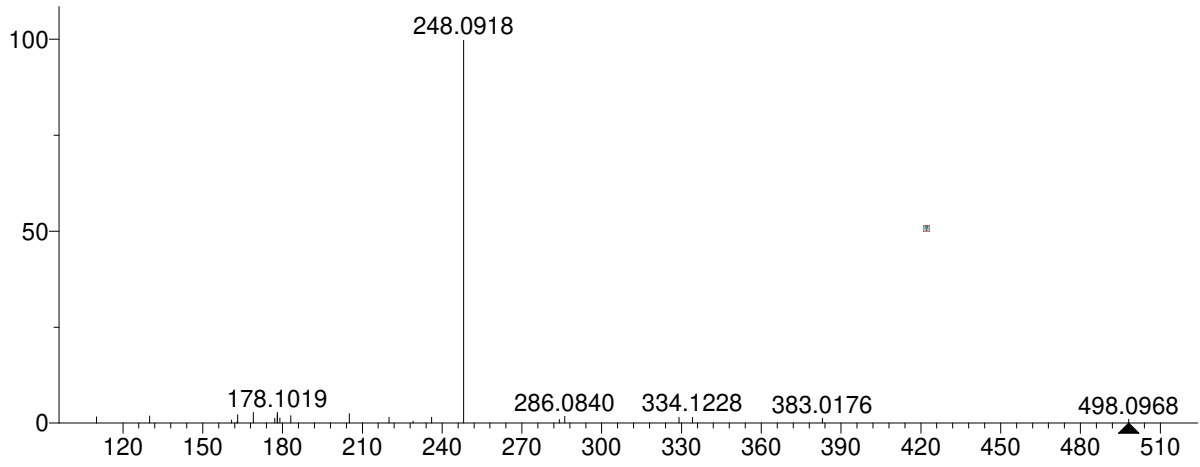

Unknown: Unknown (16.26\_711.3686m/z)  
Compound in Library Factor = 0

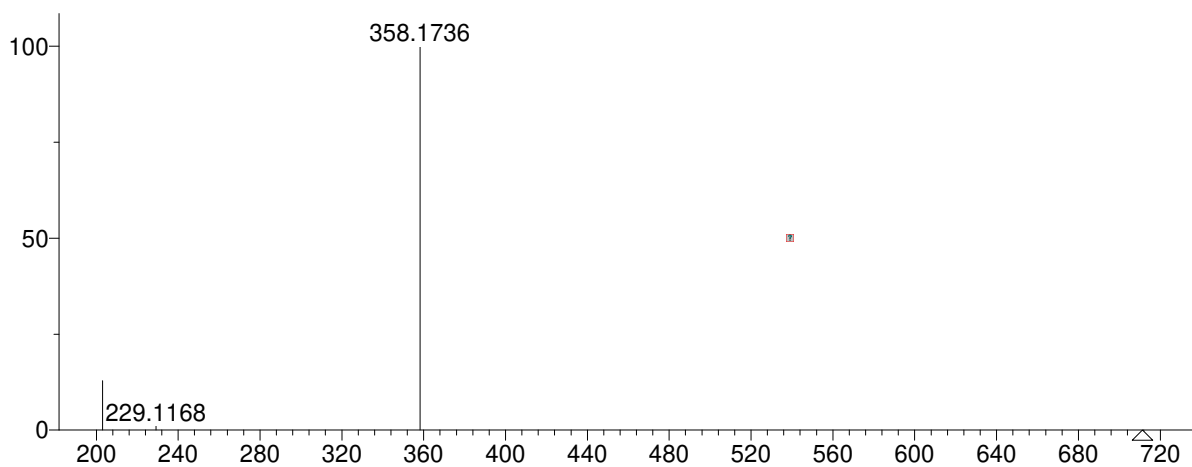

Hit 1 : Gastric Inhibitory Peptide, porcine [M+7H]<sup>7+</sup> QTOF 30V P=711.4  
C<sub>225</sub>H<sub>342</sub>N<sub>60</sub>O<sub>66</sub>S; MF: 0; RMF: 72; Prob 100.0%; CAS: 11063-17-5; Lib: nist\_msms2; ID: 36869.

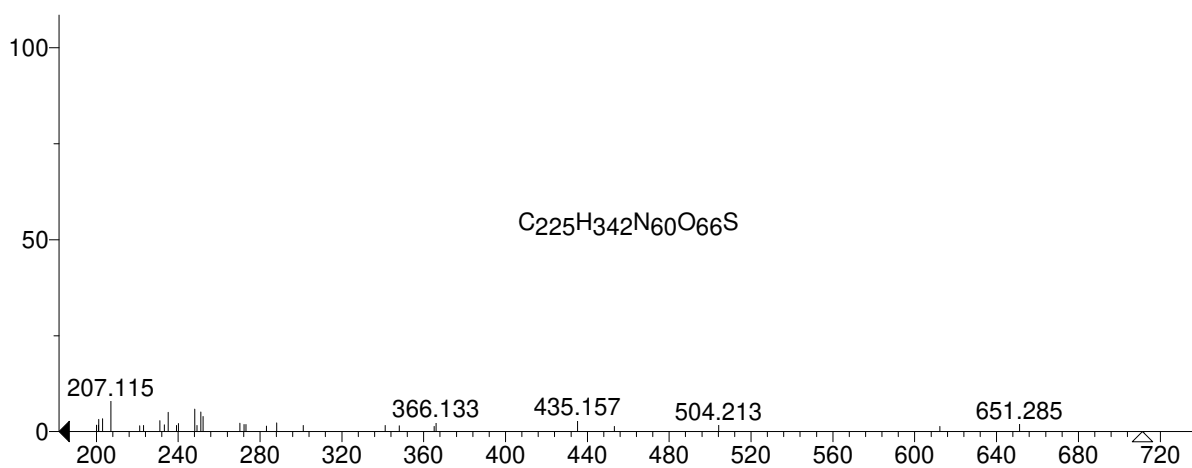

Unknown: Unknown (16.27\_549.1035m/z)  
Compound in Library Factor = 0

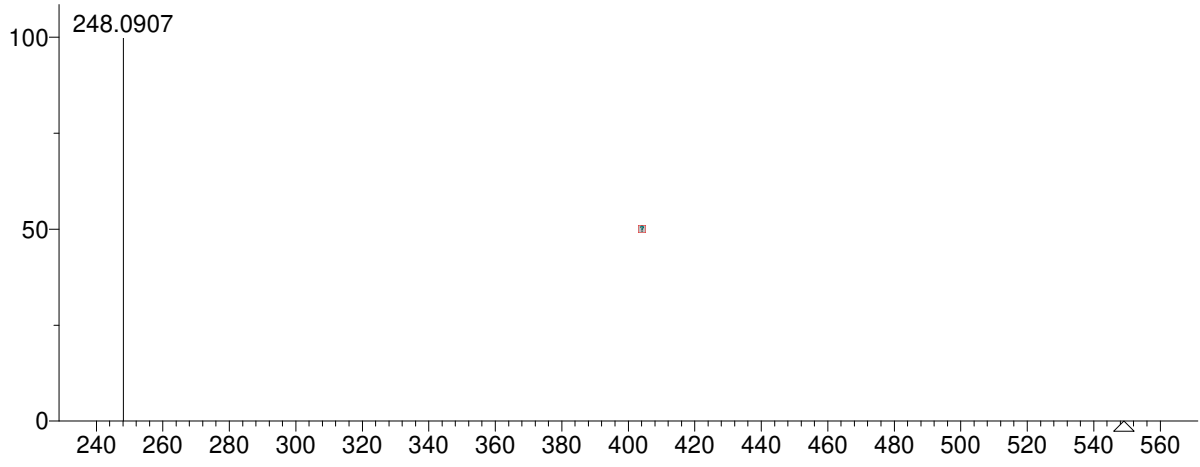

Unknown: Unknown (16.29\_458.0991m/z)  
Compound in Library Factor = 0

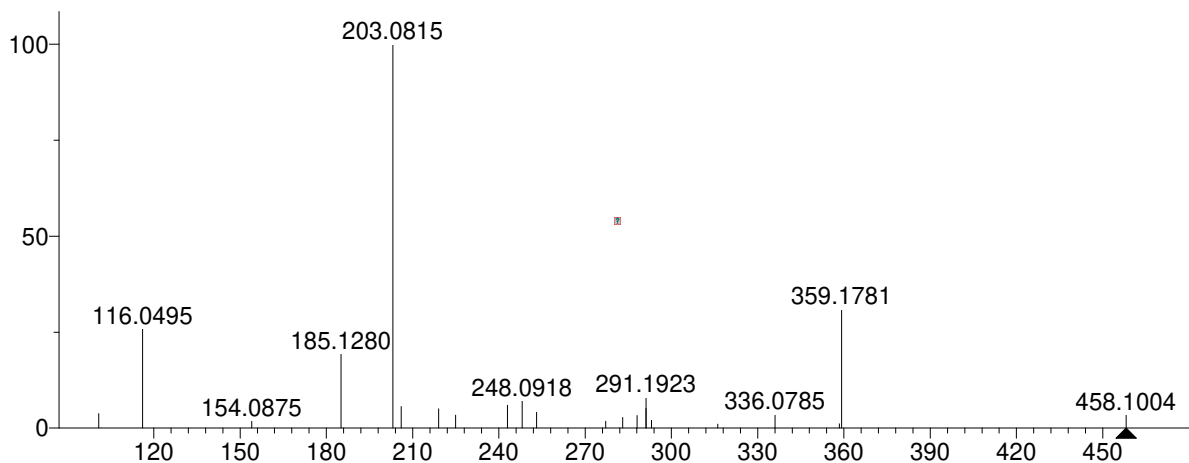

Hit 1 : Desmethylbosentan [M-H]<sup>-</sup>=>474.1=>458.1 IT 35% P=458.1  
C26H27N5O6S; MF: 0; RMF: 88; Prob 25.0%; CAS: 253688-61-8; Lib: nist\_msms; ID: 451556.

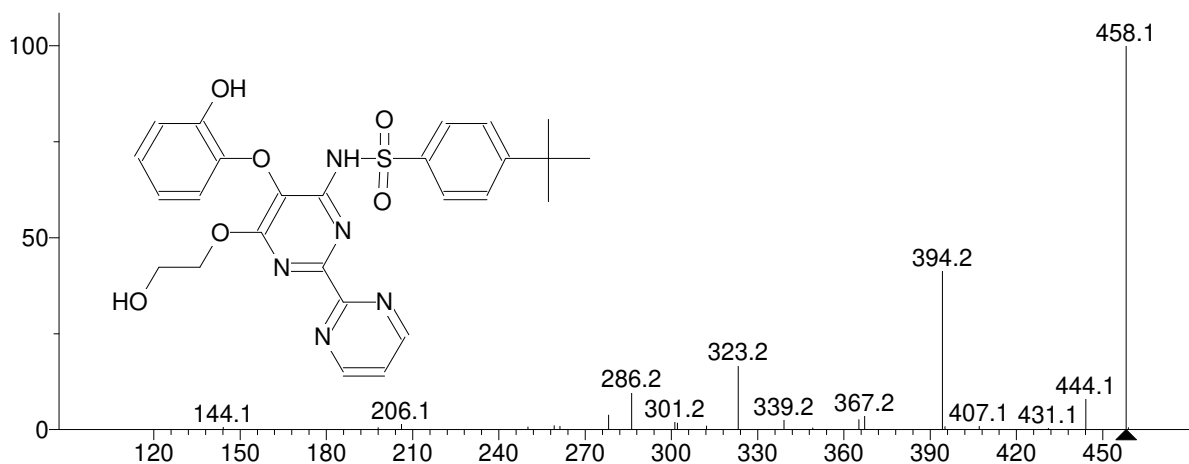

Hit 2 : Lapatinib [M+H]<sup>+</sup>=>458.1 IT 35% P=458.1  
C29H26ClFN4O4S; MF: 0; RMF: 63; Prob 25.0%; CAS: 231277-92-2; Lib: nist\_msms; ID: 254911.

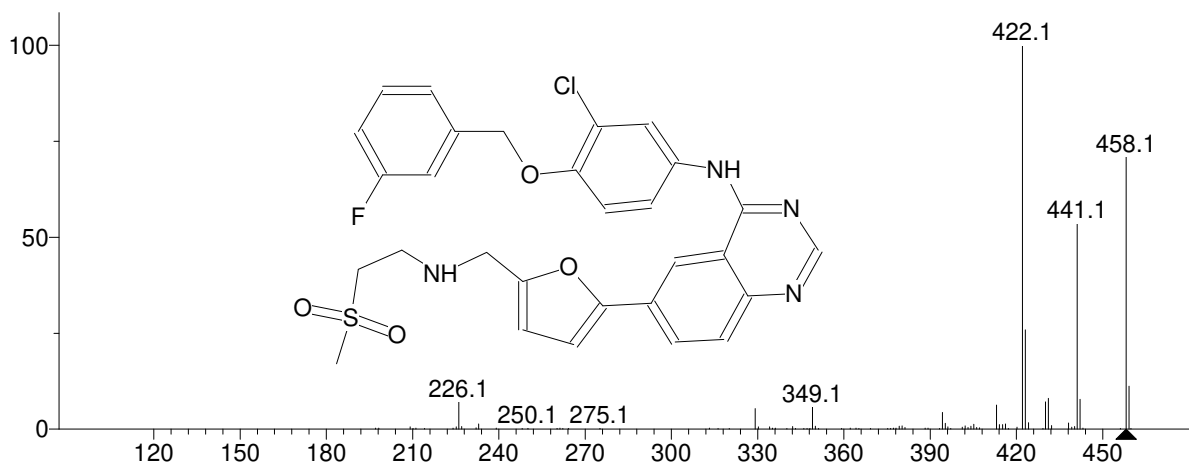

Hit 3 : Sialyl Lewis A [M+Na-H2O]<sup>+</sup>=>476.1=>458.1 IT 35% P=458.1  
C<sub>31</sub>H<sub>52</sub>N<sub>2</sub>O<sub>23</sub>; MF: 0; RMF: 48; Prob 25.0%; CAS: 92448-22-1; Lib: nist\_msms; ID: 533705.

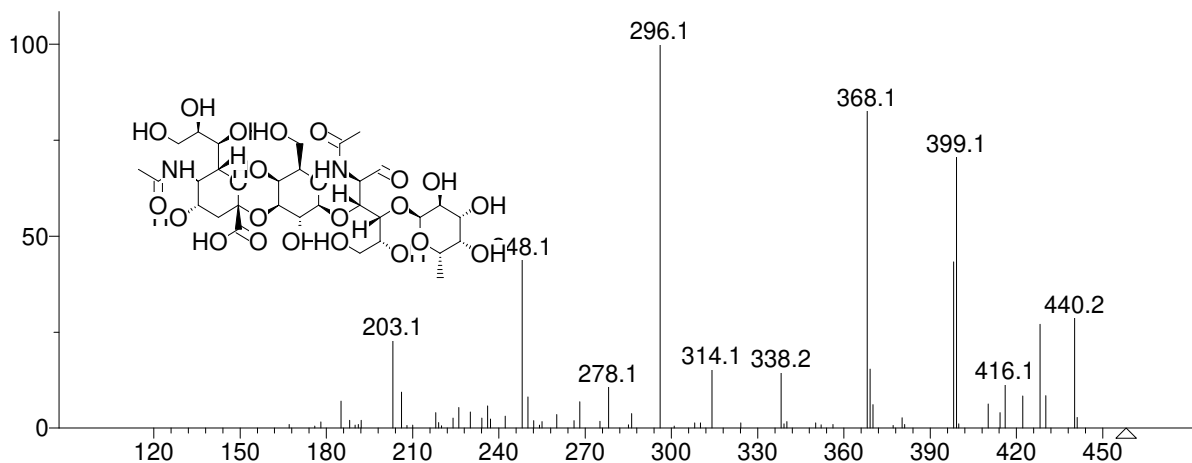

Hit 4 : Gossypol [M+H-H2O]<sup>+</sup>=>473.2=>458.1 IT 35% P=458.1  
C<sub>30</sub>H<sub>30</sub>O<sub>8</sub>; MF: 0; RMF: 9; Prob 25.0%; CAS: 303-45-7; Lib: nist\_msms; ID: 406557.

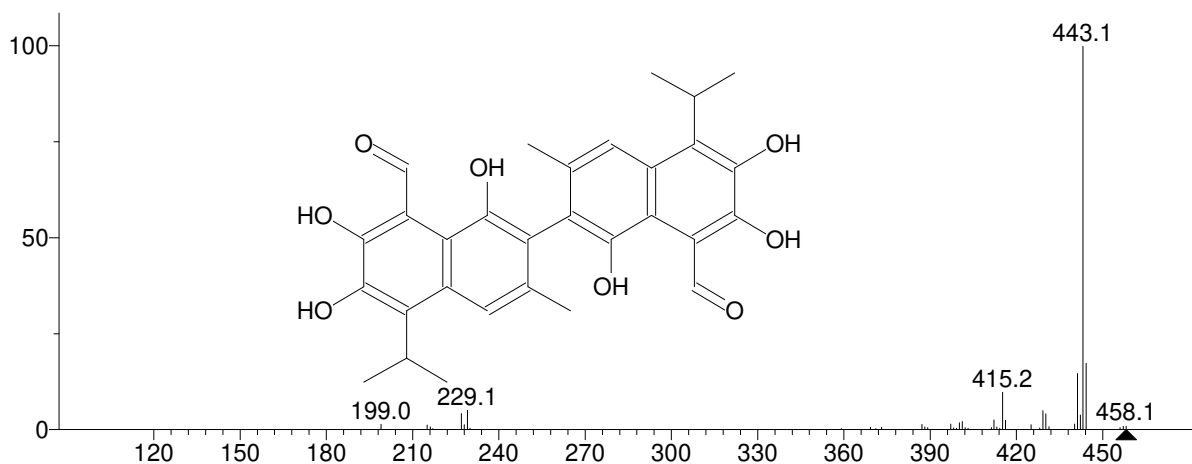



Unknown: Unknown (16.29\_519.0171m/z)  
Compound in Library Factor = 0

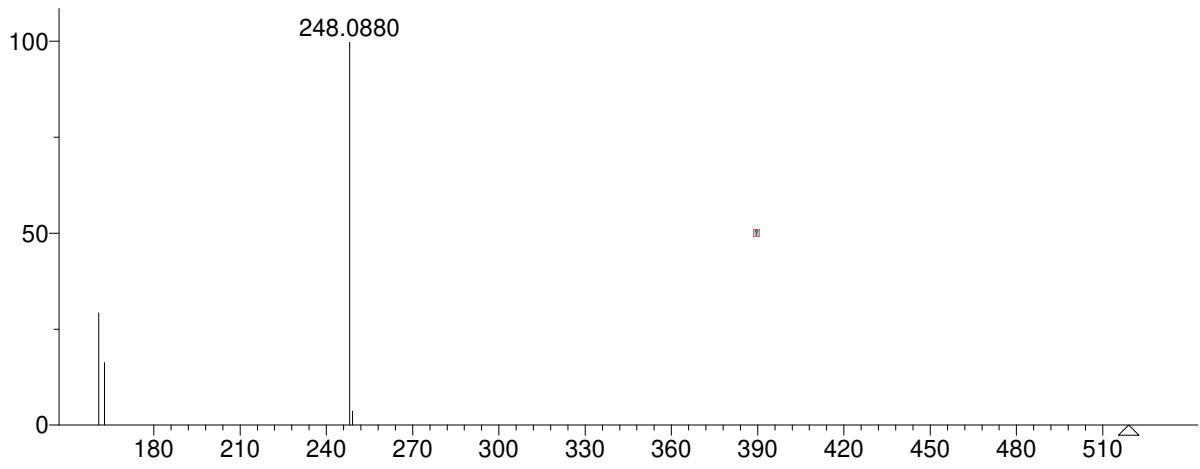

\*\* Search Report Page 1 of 2 \*\*

Unknown: Unknown (16.31\_358.1766m/z)  
Compound in Library Factor = -674

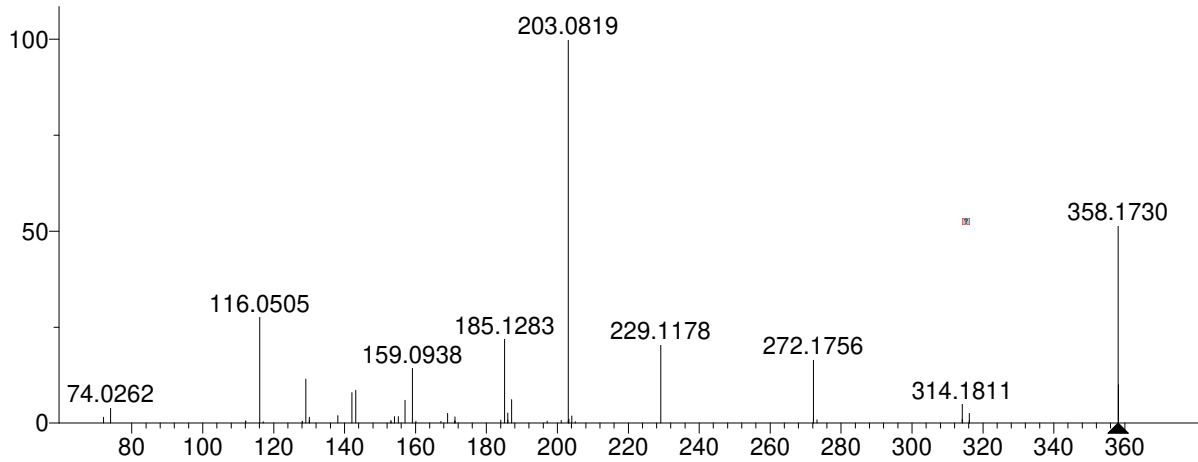

Hit 1 : 1H-Indazole-1-pentanoic acid, 3-[[[1-(aminocarbonyl)-2,2-dimethylpropyl]amino]carbonyl]- [M+H-NH3]<sup>+</sup> H  
C<sub>19</sub>H<sub>26</sub>N<sub>4</sub>O<sub>4</sub>; MF: 129; RMF: 696; Prob 91.2%; Lib: nist\_msms; ID: 258958.

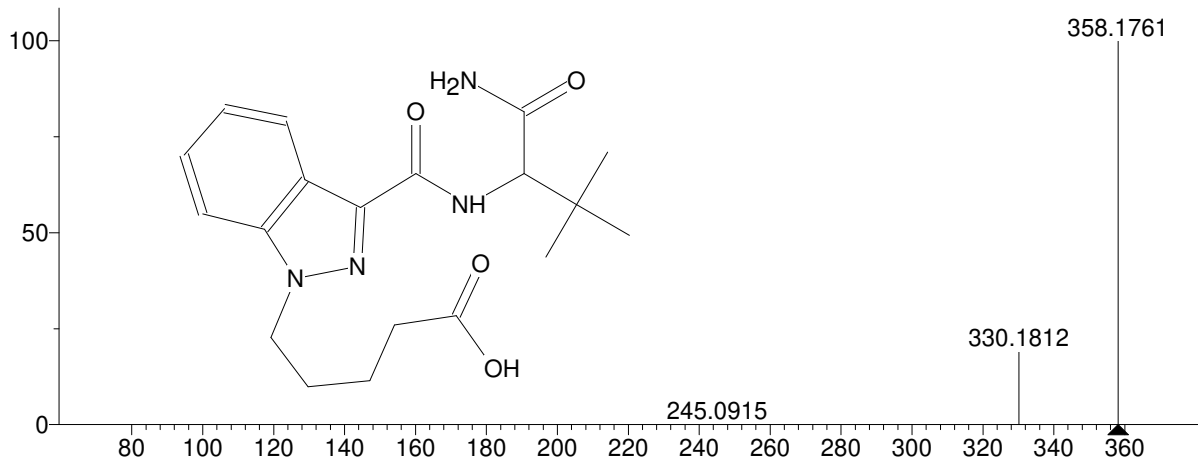

Hit 2 : NCGC00380403-01\_C<sub>19</sub>H<sub>23</sub>N<sub>3</sub>O<sub>4</sub>\_2H-Pyrazino[1',2':1,5]pyrrolo[2,3-b]indole-1,4(3H,5aH)-dione, 6-acetyl-  
C<sub>19</sub>H<sub>23</sub>N<sub>3</sub>O<sub>4</sub>; MF: 16; RMF: 217; Prob 5.61%; Lib: mona-export-gnps; ID: 10237.

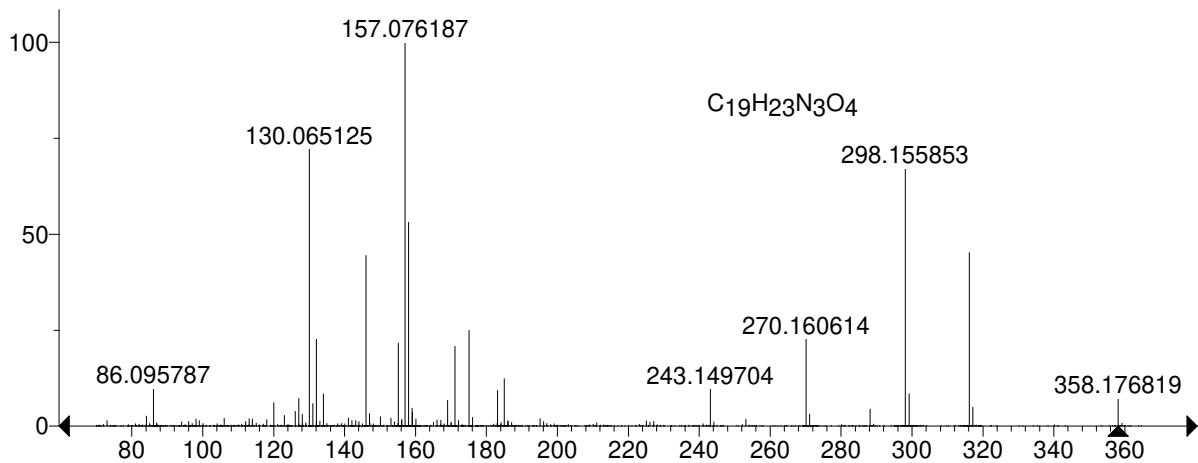

Hit 3 : AMG-073 HCl (Cinacalcet hydrochloride) [M+H]<sup>+</sup> P=358.2  
C<sub>22</sub>H<sub>23</sub>ClF<sub>3</sub>N; MF: 0; RMF: 48; Prob 3.23%; Lib: mona-export-gnps; ID: 403.

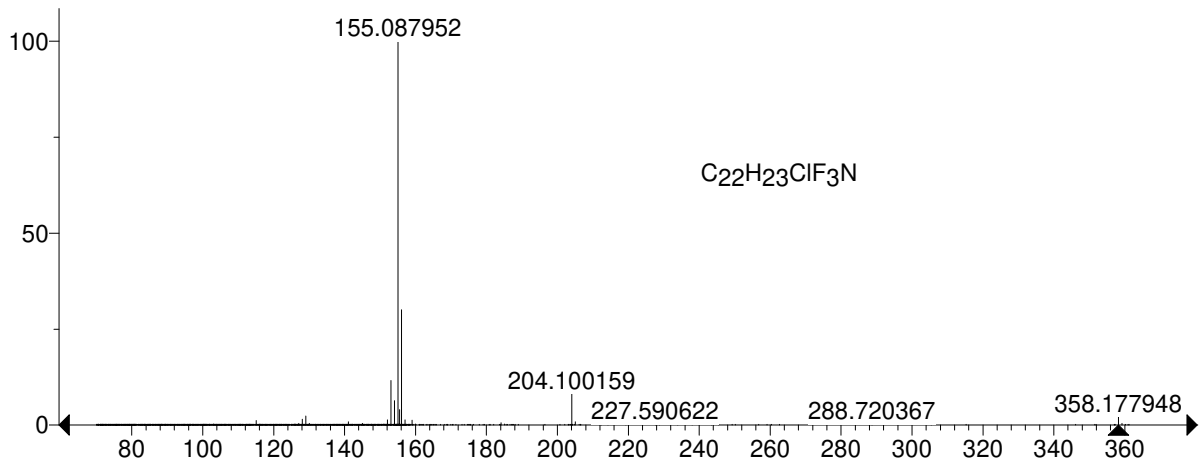

Unknown: Unknown (16.31\_358.3541m/z)  
Compound in Library Factor = 0

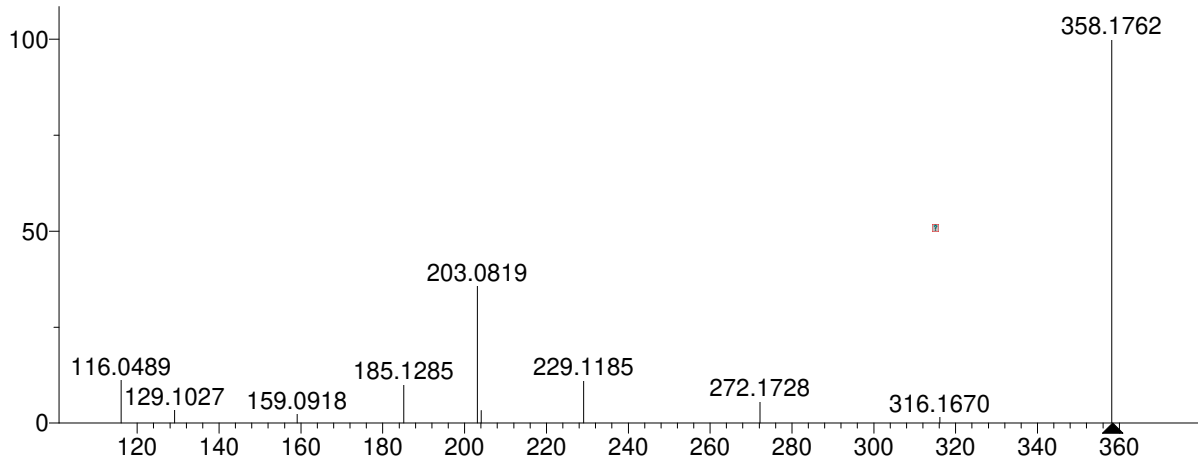

Unknown: Unknown (16.32\_739.3442m/z)  
Compound in Library Factor = 0

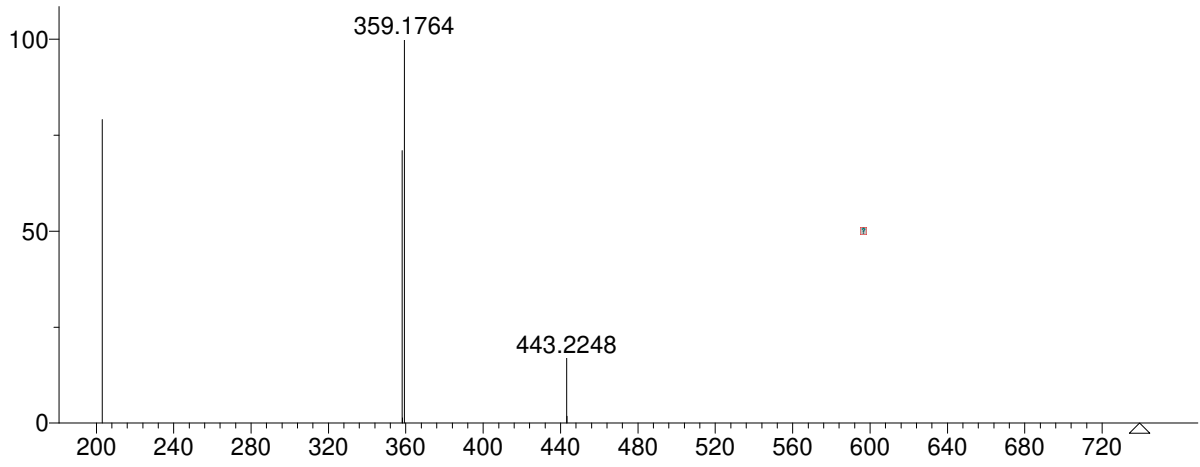

Unknown: Unknown (16.33\_458.1003m/z)  
Compound in Library Factor = -3273

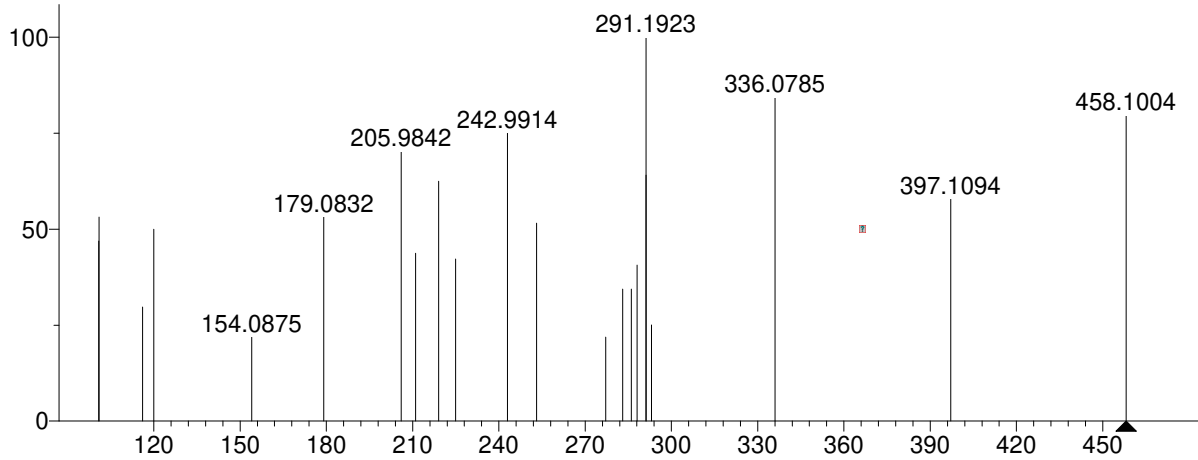

Hit 1 : Desmethylbosentan [M-H]<sup>-</sup>=>474.1=>458.1 IT 35% P=458.1  
C26H27N5O6S; MF: 2; RMF: 203; Prob 35.1%; CAS: 253688-61-8; Lib: nist\_msms; ID: 451556.

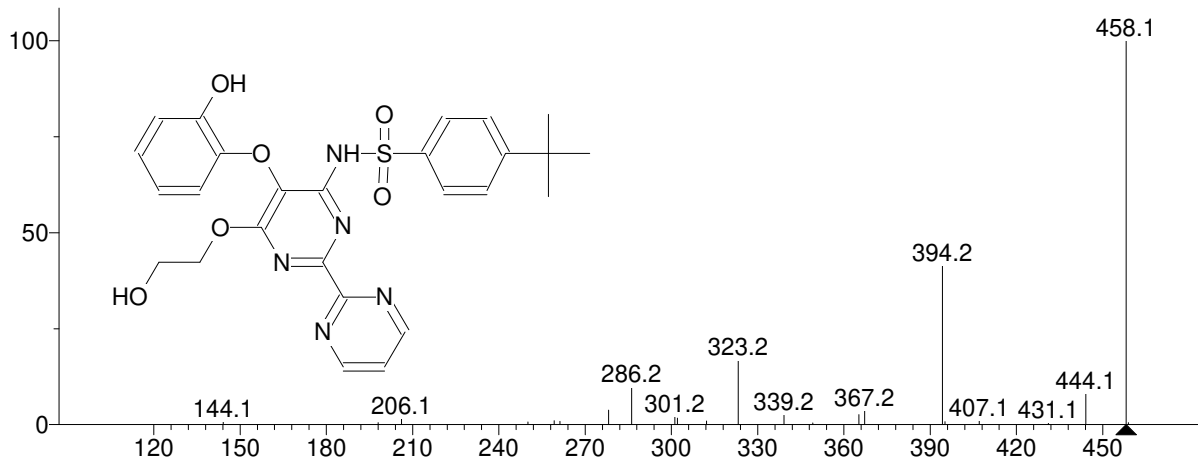

Hit 2 : Lapatinib [M+H]<sup>+</sup>=>458.1 IT 35% P=458.1  
C29H26ClFN4O4S; MF: 0; RMF: 136; Prob 32.4%; CAS: 231277-92-2; Lib: nist\_msms; ID: 254911.

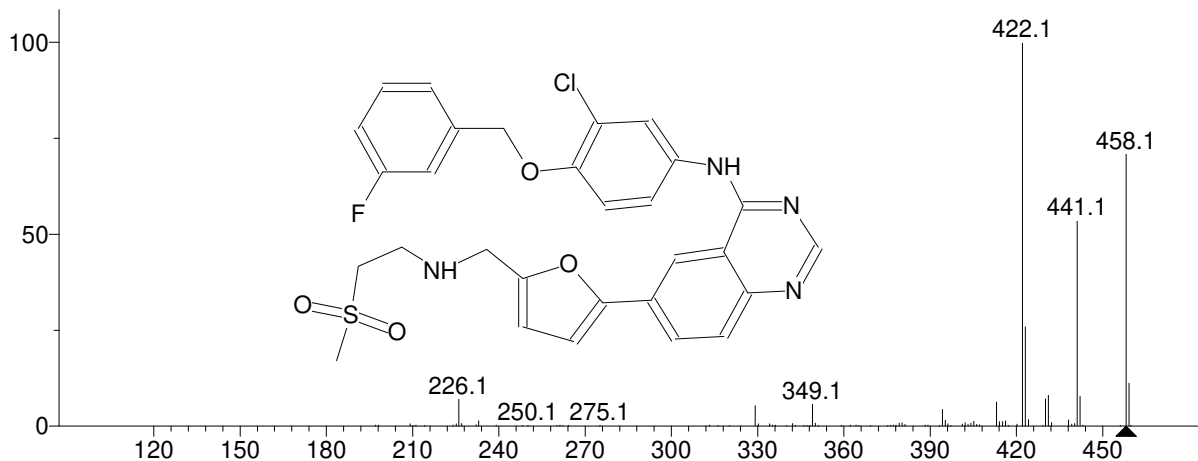

\*\* Search Report Page 2 of 2 \*\*

Hit 3 : Gossypol [M+H-H<sub>2</sub>O]<sup>+</sup>=>473.2=>458.1 IT 35% P=458.1  
C<sub>30</sub>H<sub>30</sub>O<sub>8</sub>; MF: 0; RMF: 43; Prob 32.4%; CAS: 303-45-7; Lib: nist\_msms; ID: 406557.

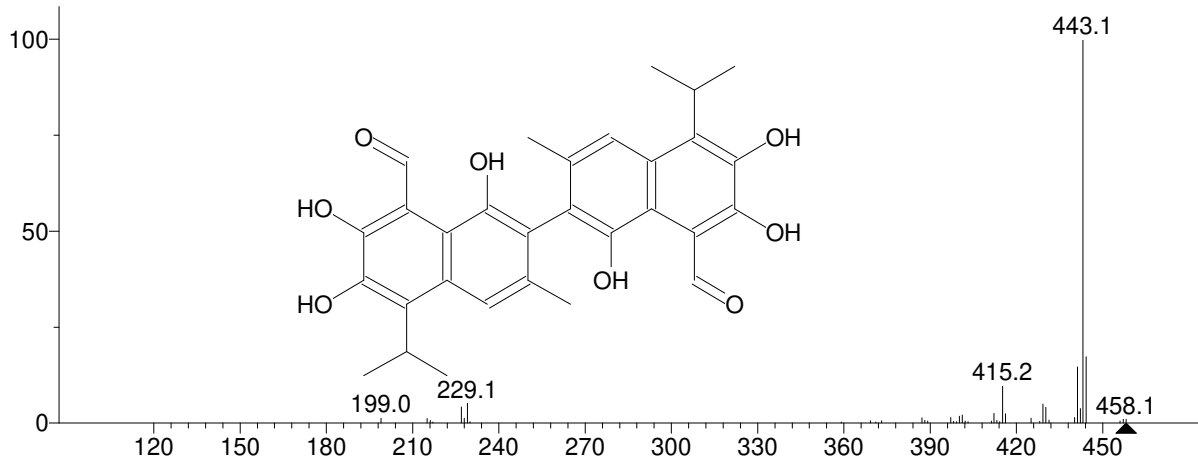

Unknown: Unknown (16.33\_487.2547m/z)  
Compound in Library Factor = 0

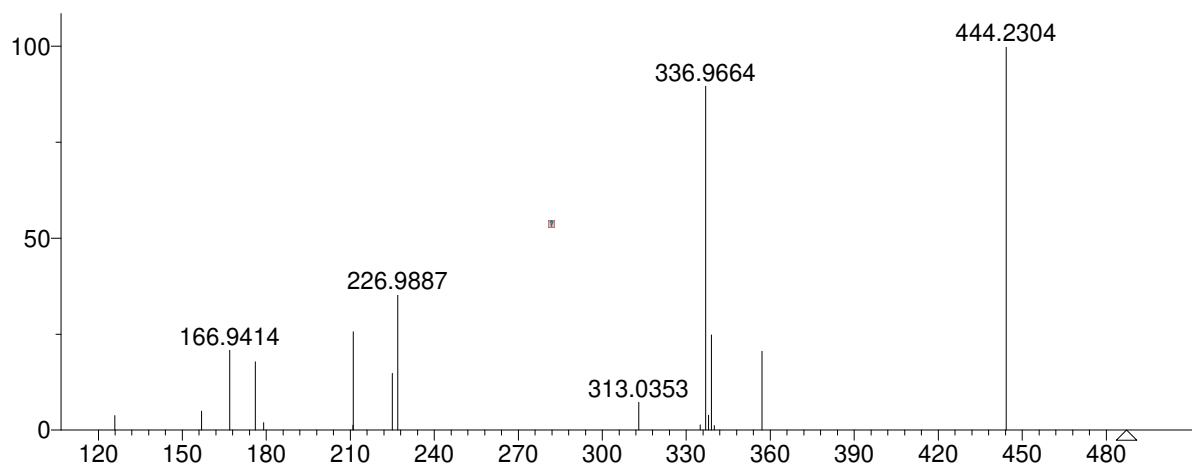

Hit 1 : 1-[[[(2S,3R,11bR)-3-ethyl-9,10-dimethoxy-2,3,4,6,7,11b-hexahydro-1H-benzo[a]quinolizin-2-yl]methyl]-7-me  
C<sub>28</sub>H<sub>36</sub>N<sub>2</sub>O<sub>4</sub>; MF: 0; RMF: 30; Prob 100.0%; Lib: mona-export-vf-npl\_qexactive; ID: 19092.

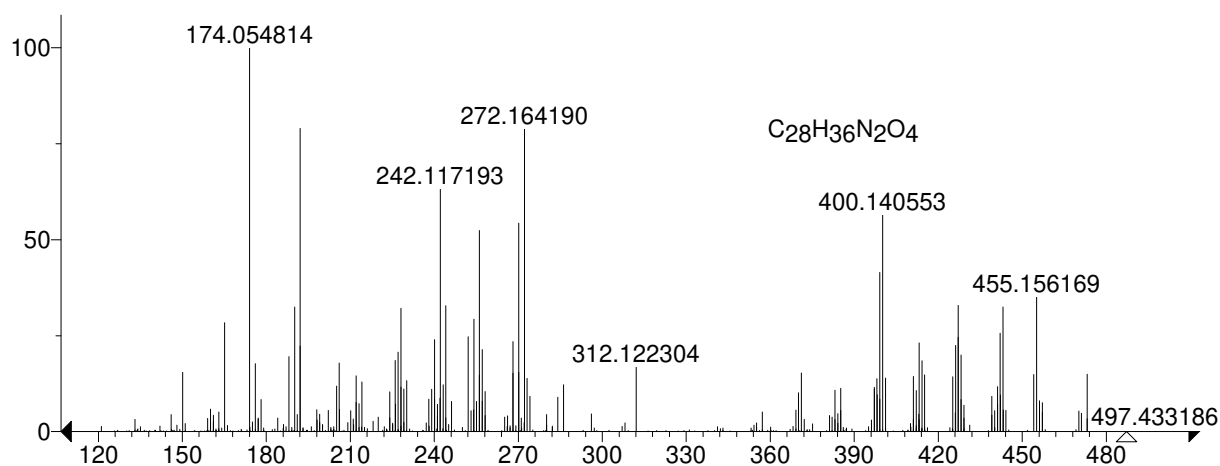



\*\* Search Report Page 1 of 2 \*\*

Unknown: Unknown (16.34\_443.2291m/z)  
Compound in Library Factor = -1523

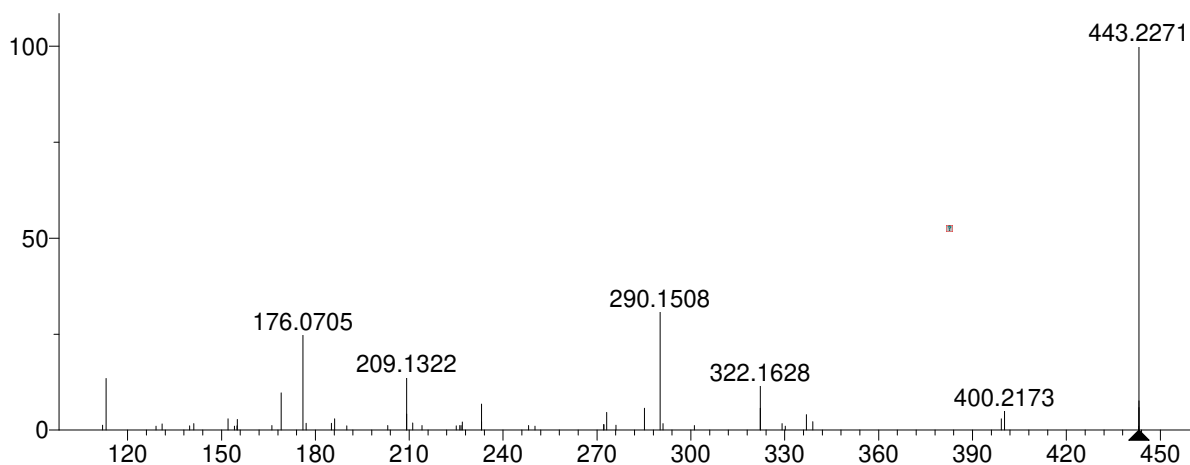

Hit 1 : Rhodamine B cation [Cat]+ IT-FT 35% P=443.2  
C28H31N2O3; MF: 117; RMF: 789; Prob 72.1%; CAS: 64381-98-2; Lib: nist\_msms; ID: 493932.

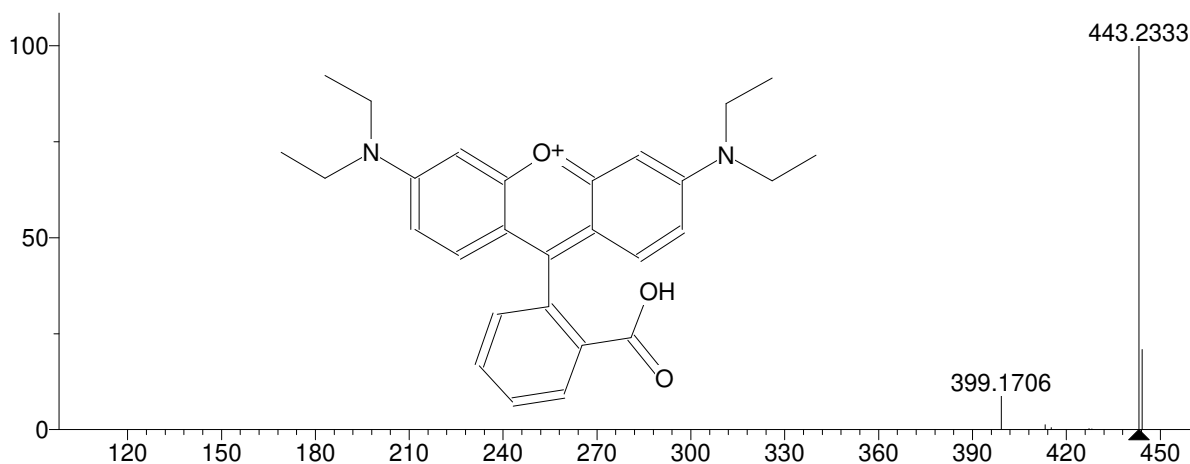

Hit 2 : L-Valinamide, N-(4-methoxy-1,4-dioxobutyl)-L-alanyl-L-alanyl-L-prolyl-N-(4-methyl-2-oxo-2H-1-benzopyran-3-yl)-L-valinamide  
C31H41N5O9; MF: 68; RMF: 369; Prob 14.8%; CAS: 72252-90-5; Lib: nist\_msms; ID: 548181.

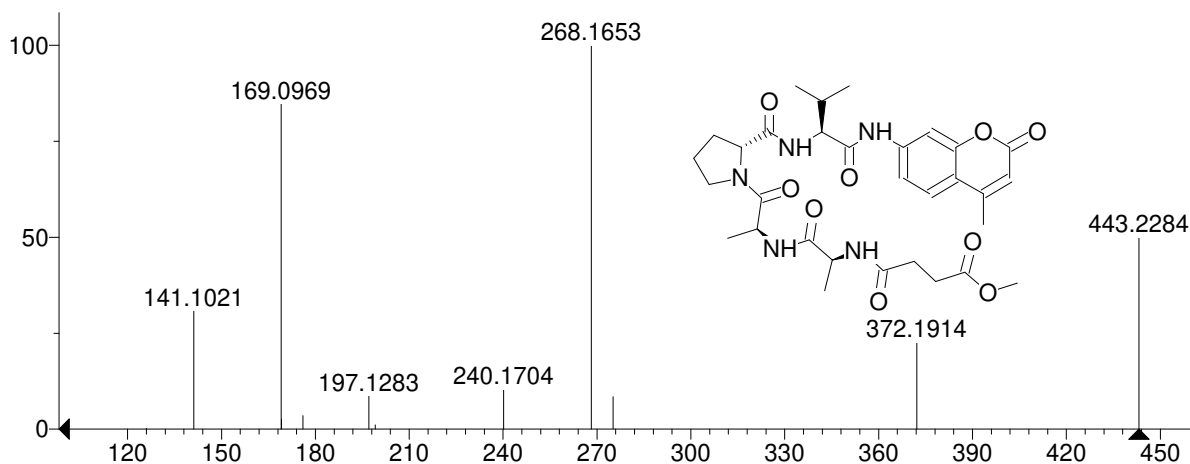

\*\* Search Report Page 2 of 2 \*\*

Hit 3 : Rhodamine 6G cation [Cat]<sup>+</sup> HCD 31V P=443.2  
C<sub>28</sub>H<sub>31</sub>N<sub>2</sub>O<sub>3</sub>; MF: 58; RMF: 847; Prob 10.4%; CAS: 47724-48-1; Lib: nist\_msms; ID: 278957.

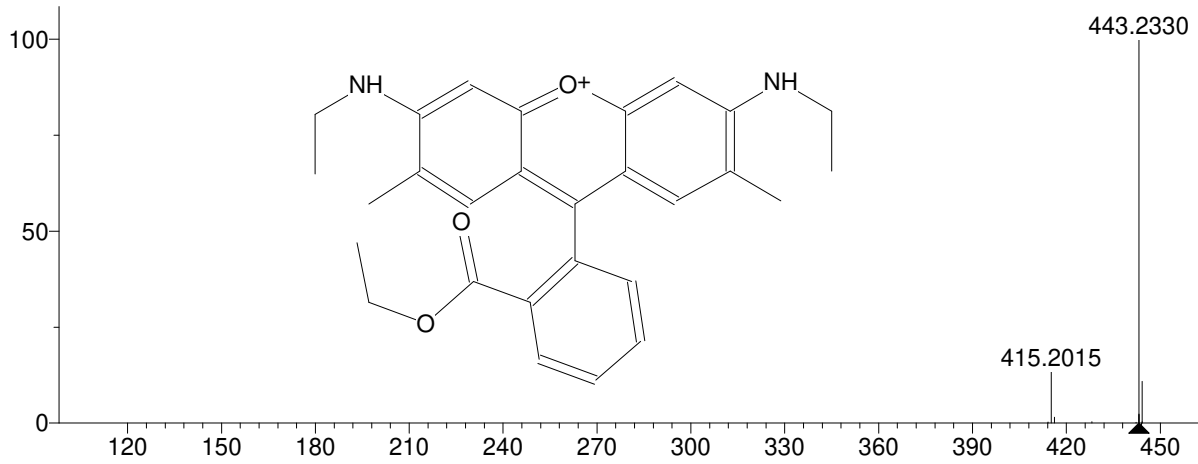

Hit 4 : O-Desmethylastemizole [M-H]<sup>-</sup> HCD 26V P=443.2  
C<sub>27</sub>H<sub>29</sub>FN<sub>4</sub>O; MF: 23; RMF: 527; Prob 2.62%; CAS: 73736-50-2; Lib: nist\_msms; ID: 451450.

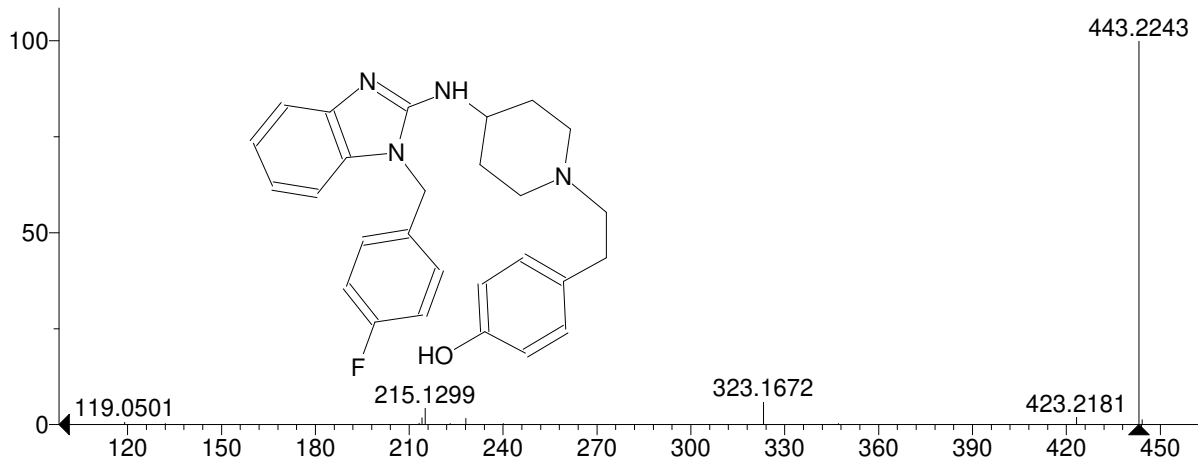

Unknown: Unknown (16.34\_846.4412m/z)  
Compound in Library Factor = 0

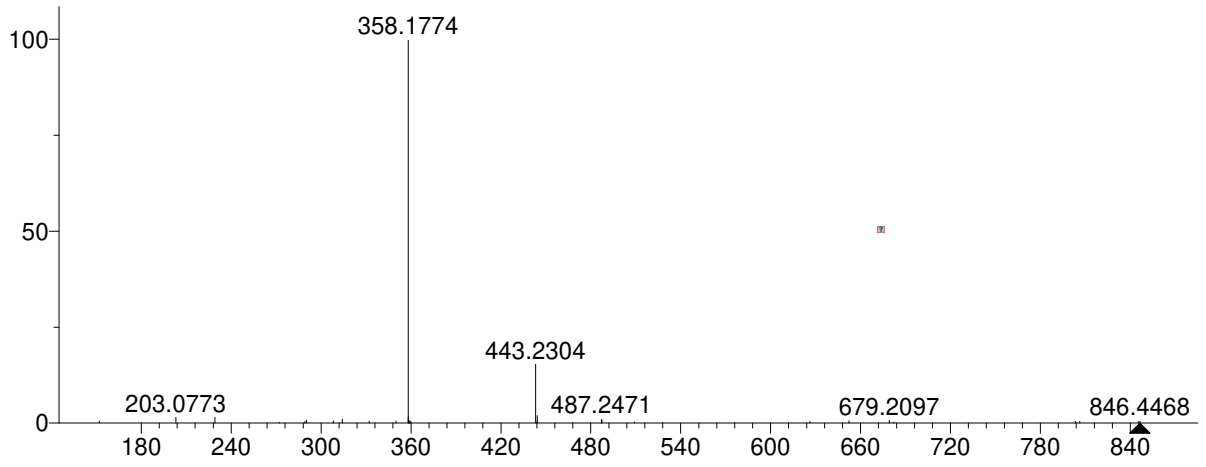

Unknown: Unknown (16.35\_373.9351 m/z)  
Compound in Library Factor = 0

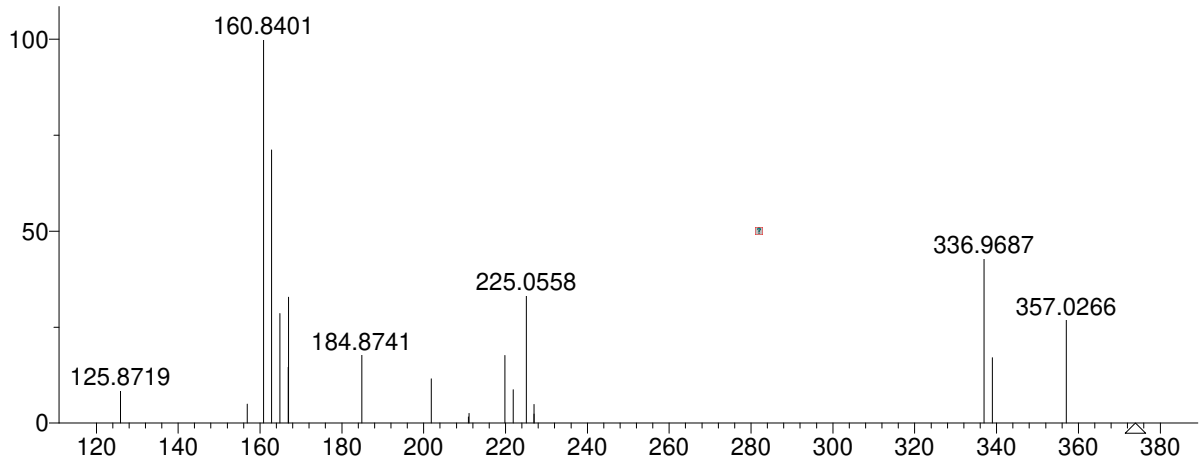

Unknown: Unknown (16.35\_383.9638m/z)  
Compound in Library Factor = 0

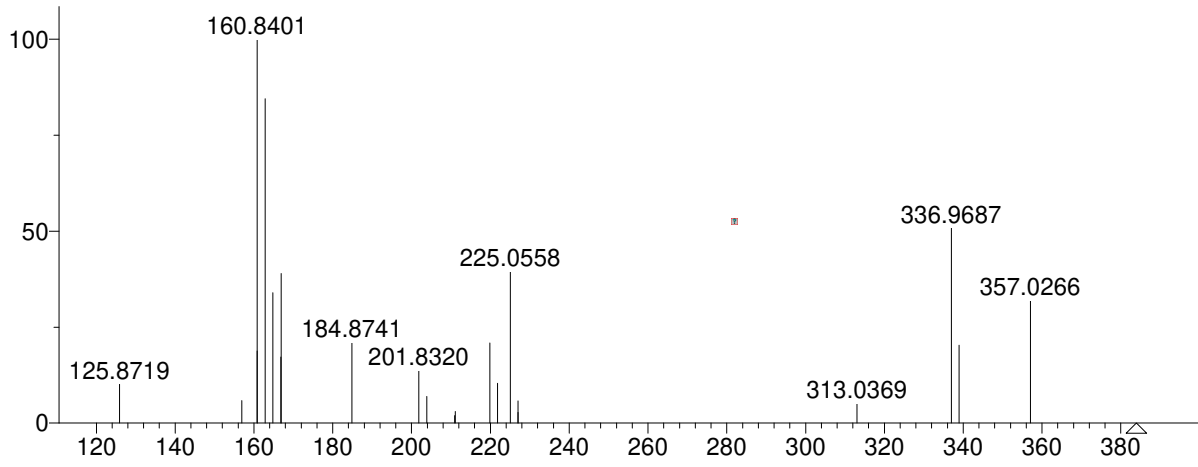

Unknown: Unknown (16.35\_391.9956m/z)  
Compound in Library Factor = 0

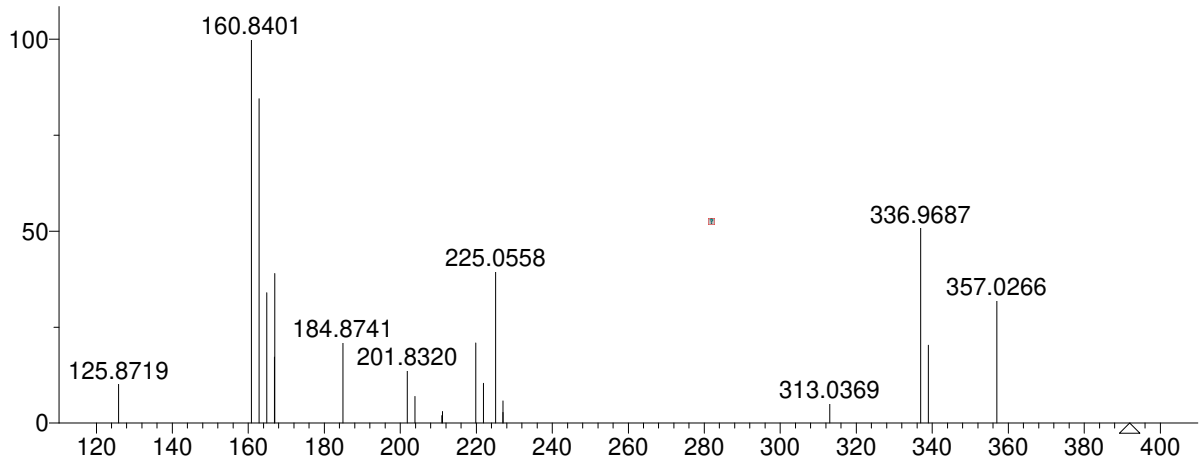

Unknown: Unknown (16.35\_402.0246m/z)  
Compound in Library Factor = 0

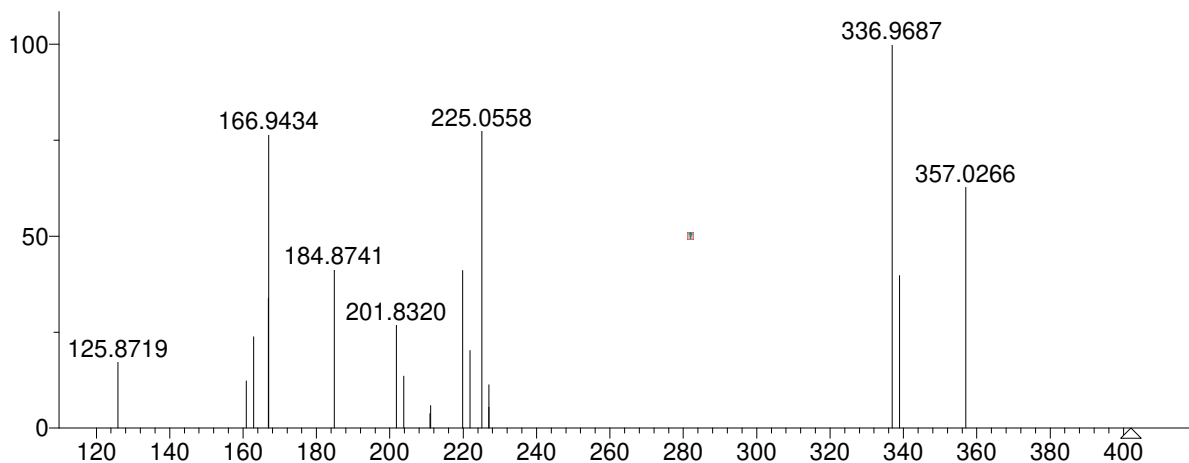

Hit 1 : Benzenesulfonamide, 4-[5-(4-chlorophenyl)-3-(trifluoromethyl)-1H-pyrazol-1-yl]- [M+H]<sup>+</sup> HCD 60V P=40;  
C16H11ClF3N3O2S; MF: 0; RMF: 7; Prob 100.0%; CAS: 170569-86-5; Lib: nist\_msms; ID: 427054.

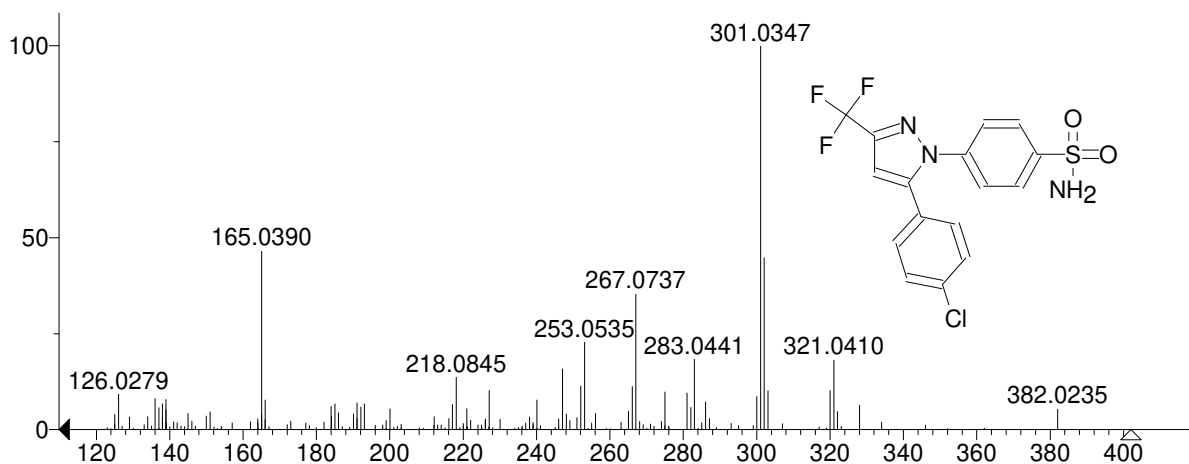

Unknown: Unknown (16.35\_558.0951 m/z)  
Compound in Library Factor = -2387

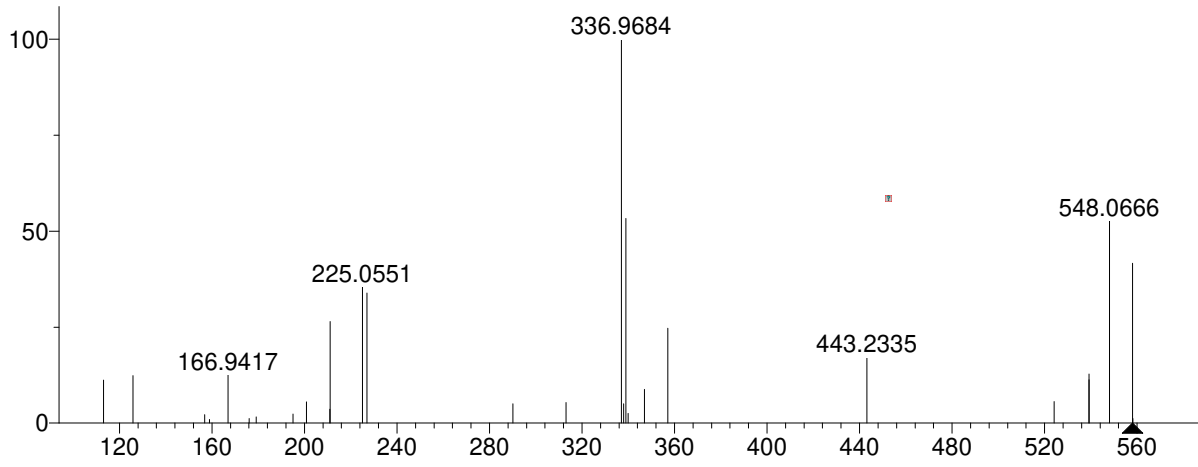

Hit 1 : Ergocryptine [in-source] QIT 25->3 P=558.1  
C<sub>32</sub>H<sub>41</sub>N<sub>5</sub>O<sub>5</sub>; MF: 10; RMF: 264; Prob 100.0%; Lib: mona-export-respect; ID: 6090.

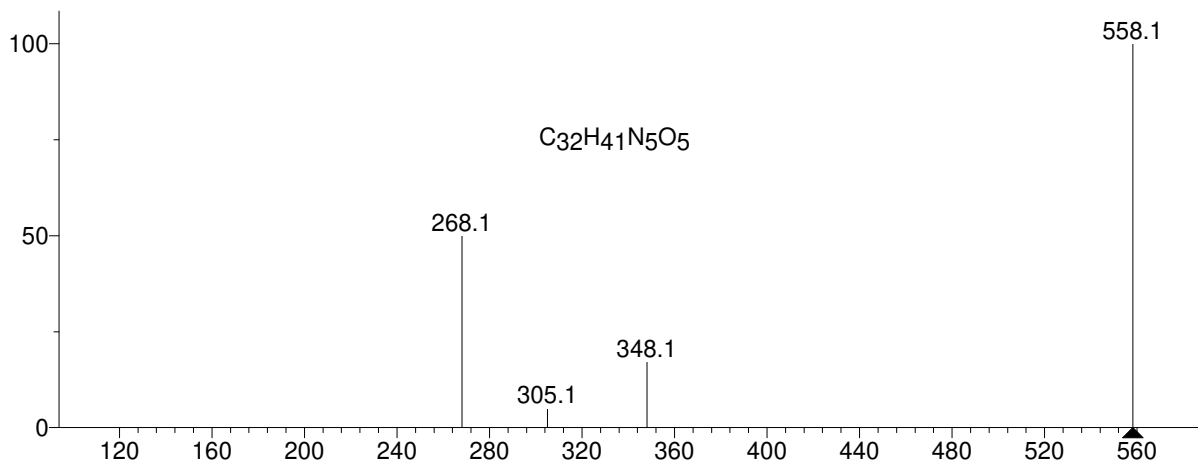



Unknown: Unknown (16.36\_381.9669m/z)  
Compound in Library Factor = 0

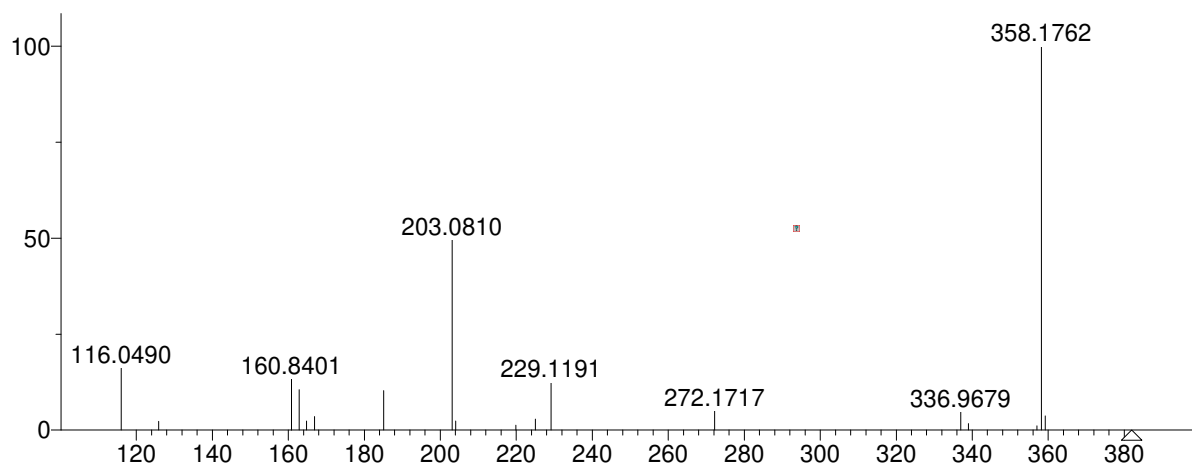

Hit 1 : 3,3'-Diiodo-L-thyronine [M+H<sub>3</sub>N]<sup>+</sup> IT-FT 35% P=382  
C<sub>15</sub>H<sub>13</sub>I<sub>2</sub>NO<sub>4</sub>; MF: 0; RMF: 64; Prob 100.0%; CAS: 70-40-6; Lib: nist\_msms; ID: 187503.

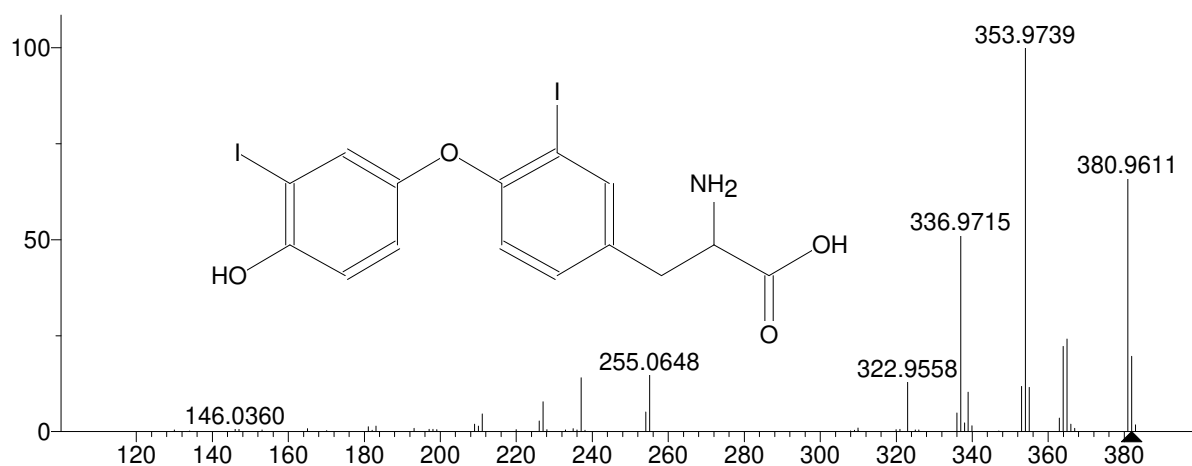

Unknown: Unknown (16.36\_568.1242m/z)  
Compound in Library Factor = 0

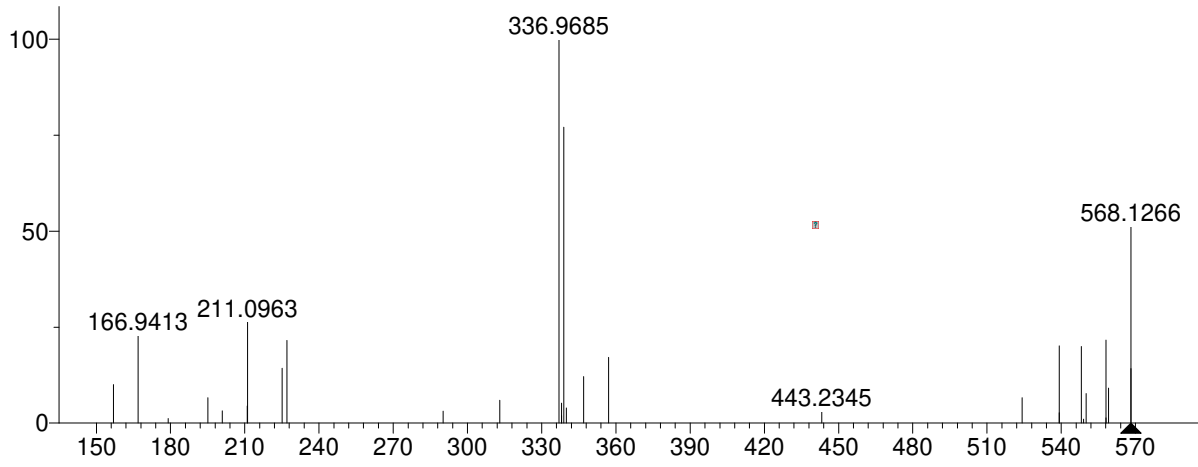

Unknown: Unknown (16.37\_371.9378m/z)  
Compound in Library Factor = 0

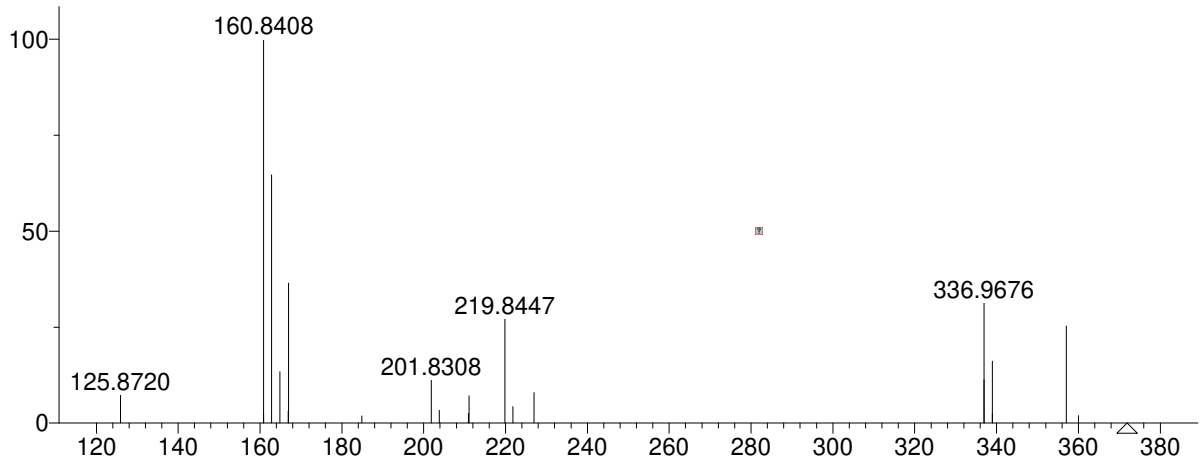

Unknown: Unknown (16.37\_452.0063m/z)  
Compound in Library Factor = 0

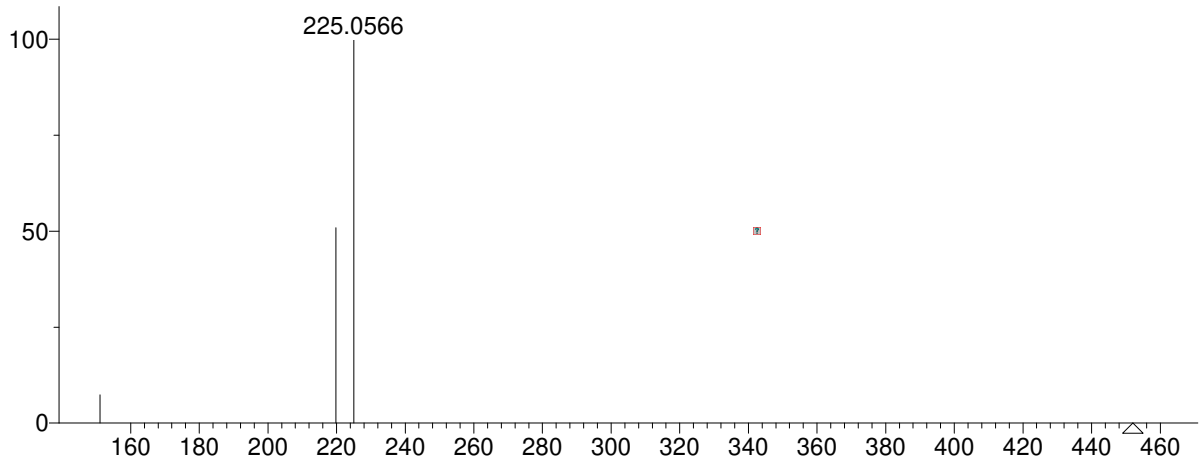

Unknown: Unknown (16.37\_548.0664m/z)  
Compound in Library Factor = 0

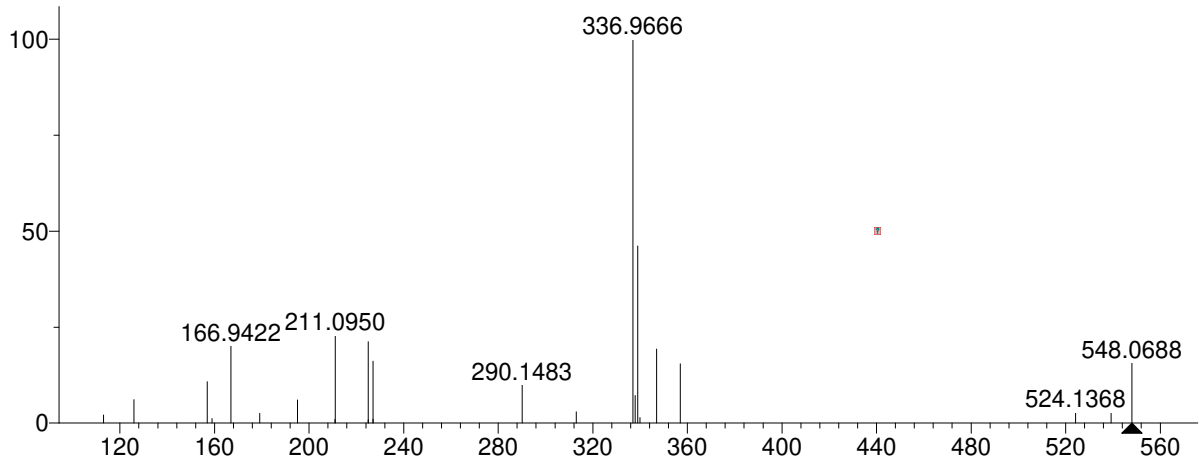

Unknown: Unknown (16.41\_346.1284m/z)  
Compound in Library Factor = 0

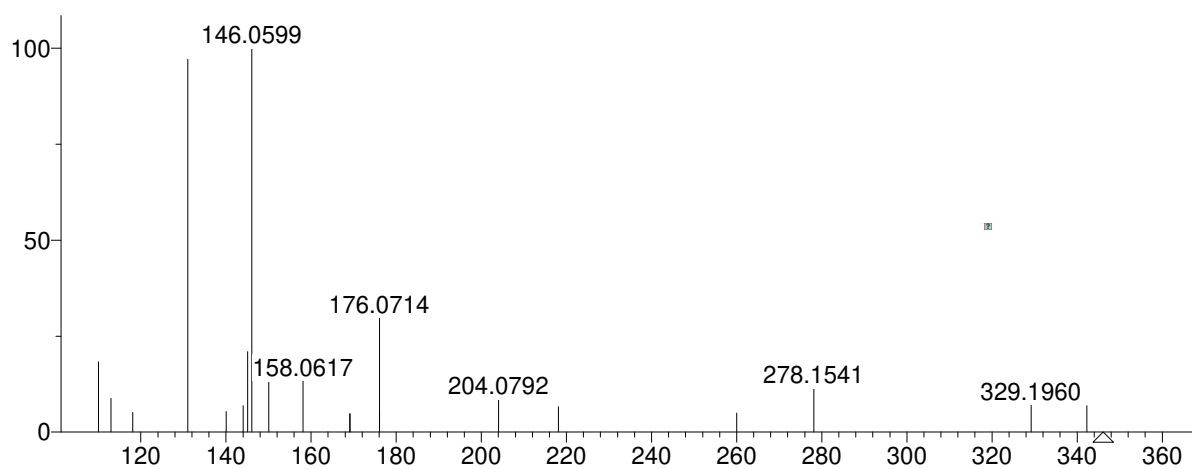

Hit 1 : Deoxyguanylic acid [M-H]<sup>-</sup> 35% P=346.1  
C<sub>10</sub>H<sub>14</sub>N<sub>5</sub>O<sub>7</sub>P; MF: 0; RMF: 32; Prob 100.0%; Lib: mona-export-itree; ID: 316.

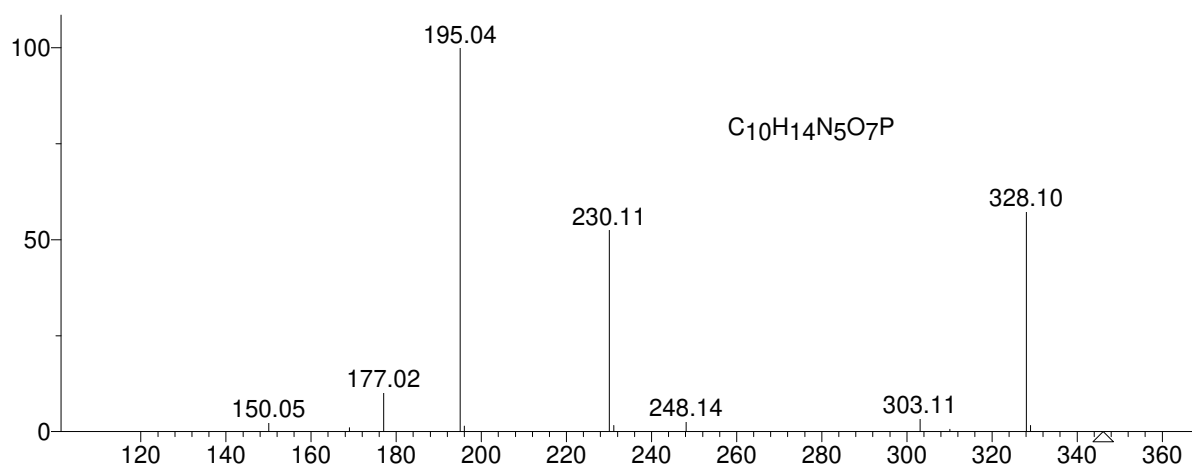

\*\* Search Report Page 1 of 2 \*\*

Unknown: Unknown (16.46\_413.2183m/z)  
Compound in Library Factor = -434

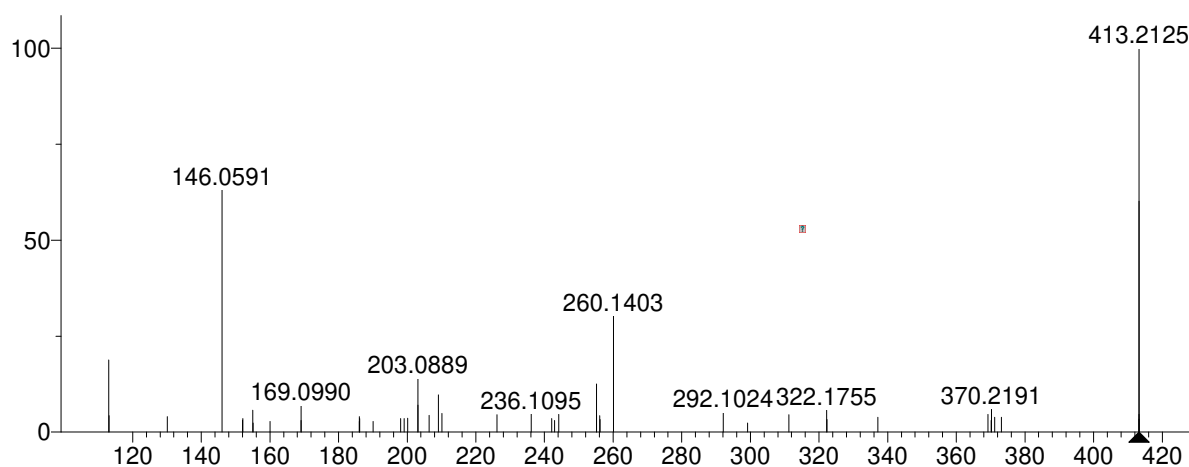

Hit 1 : Unknown (carbon number 21); PlaSMA ID-1051 [M-H]- P=413.2  
C<sub>21</sub>H<sub>34</sub>O<sub>8</sub>; MF: 163; RMF: 539; Prob 87.0%; Lib: biomsms-neg-plasma; ID: 1355.

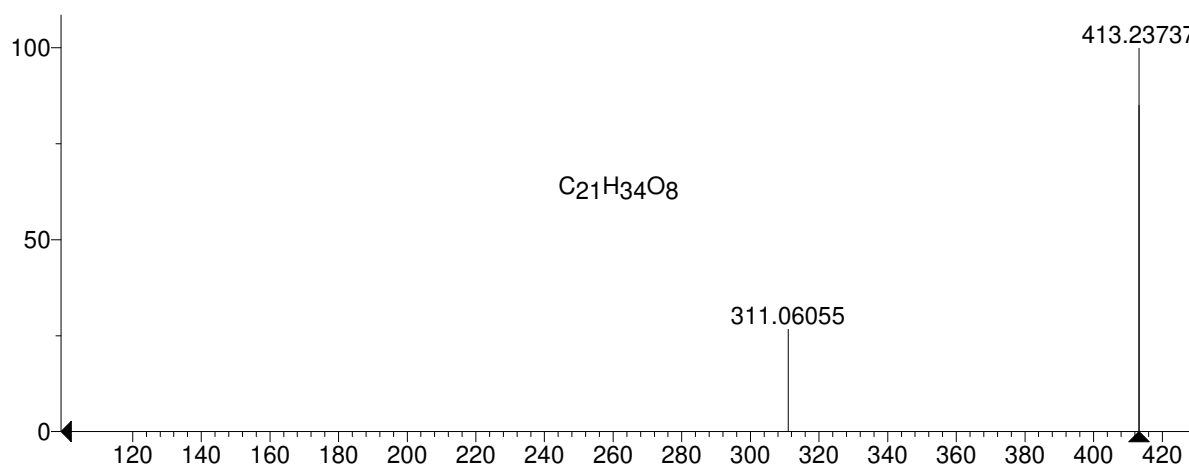

Hit 2 : L-Arginine, N2-[2-(2,2-diphenylethoxy)acetyl]- [M+H]<sup>+</sup> HCD 28V P=413.2  
C<sub>22</sub>H<sub>28</sub>N<sub>4</sub>O<sub>4</sub>; MF: 13; RMF: 253; Prob 2.43%; CAS: 259218-28-5; Lib: nist\_msms; ID: 355405.

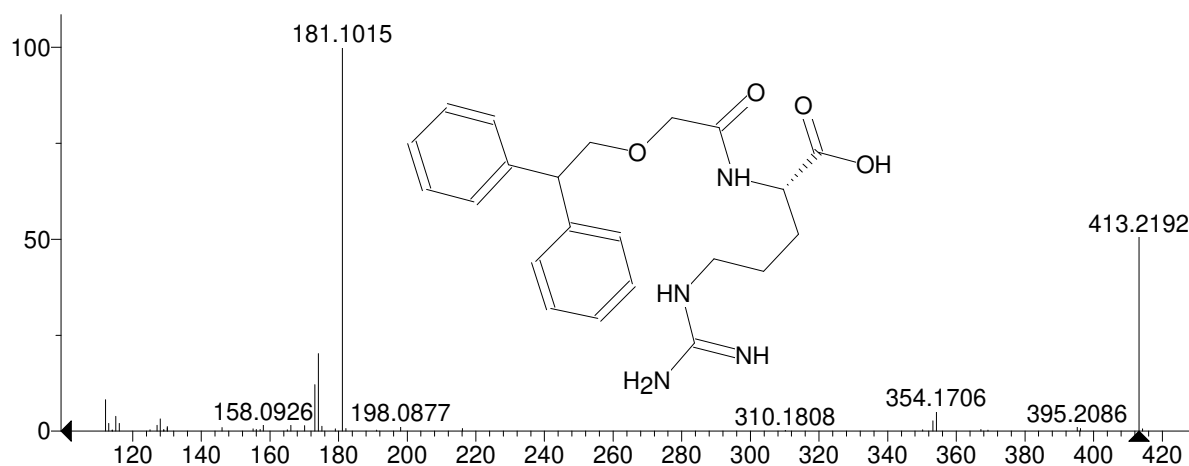

Hit 3 : His-Glu-Lys [M+H]<sup>+</sup> QTOF 10V P=413.2  
C<sub>17</sub>H<sub>28</sub>N<sub>6</sub>O<sub>6</sub>; MF: 10; RMF: 368; Prob 2.15%; Lib: nist\_msms; ID: 50934.

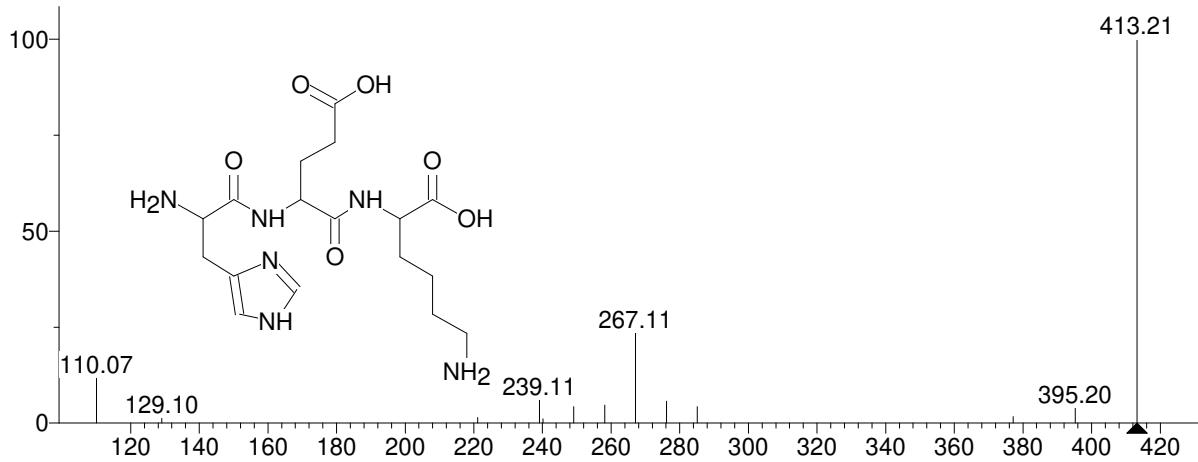

Hit 4 : Unknown (carbon number 21); PlaSMA ID-1052 [M-H]<sup>-</sup> P=413.2  
C<sub>21</sub>H<sub>34</sub>O<sub>8</sub>; MF: 9; RMF: 302; Prob 2.06%; Lib: biomsms-neg-plasma; ID: 1356.

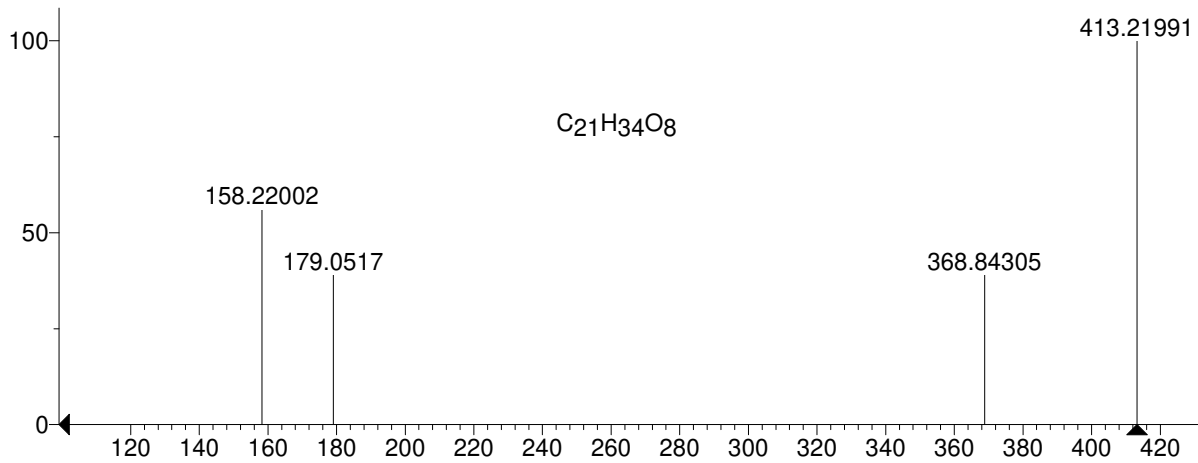

Hit 5 : (2R,3R,4S,5S,6R)-2-[6-hydroxy-3-[(E)-3-hydroxybut-1-enyl]-2,4,4-trimethylcyclohexyl]oxy-6-(hydroxymethyl)  
C<sub>19</sub>H<sub>34</sub>O<sub>8</sub>; MF: 6; RMF: 380; Prob 1.82%; Lib: anthocyanins mona; ID: 5985.

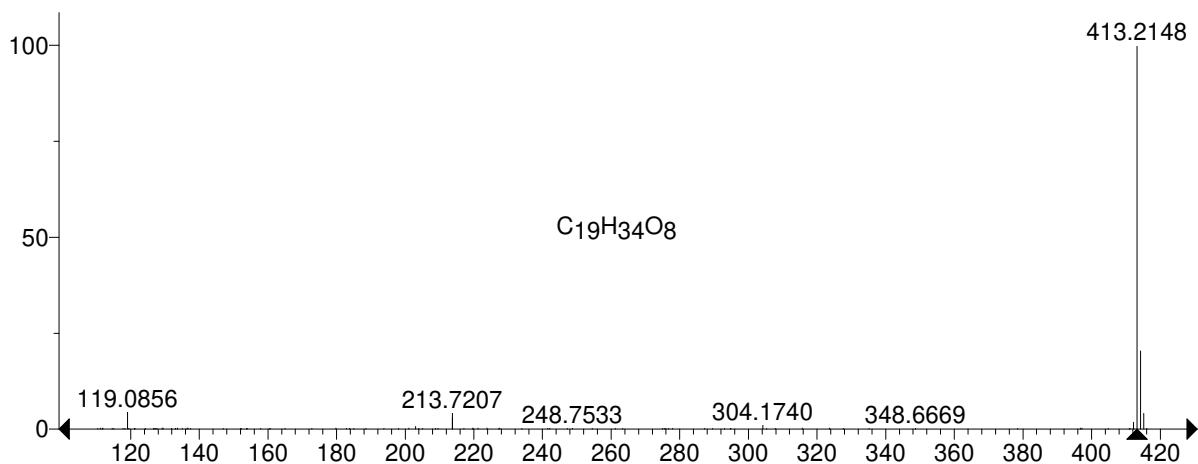



Unknown: Unknown (16.46\_596.2778m/z)  
Compound in Library Factor = 0

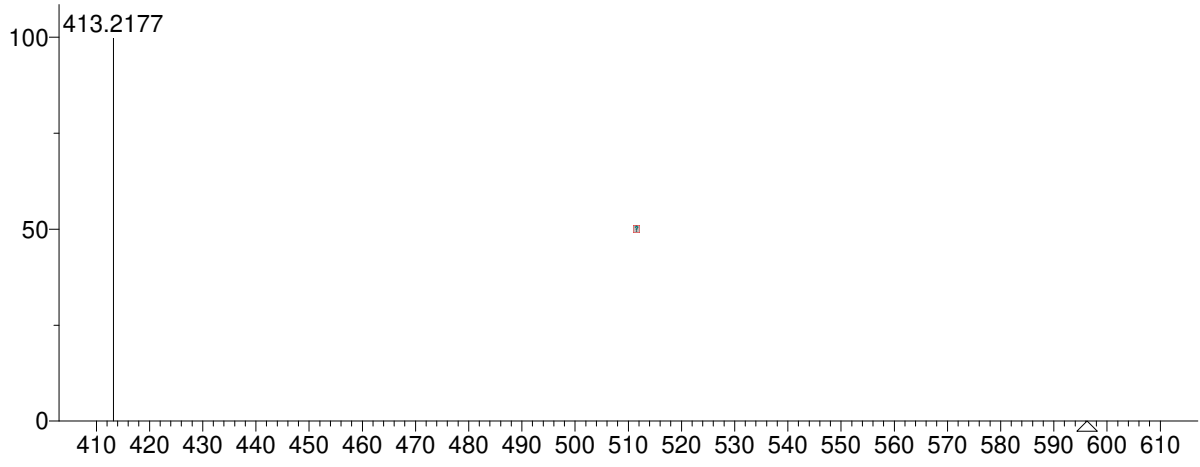

Unknown: Unknown (16.67\_535.2398m/z)  
Compound in Library Factor = 0

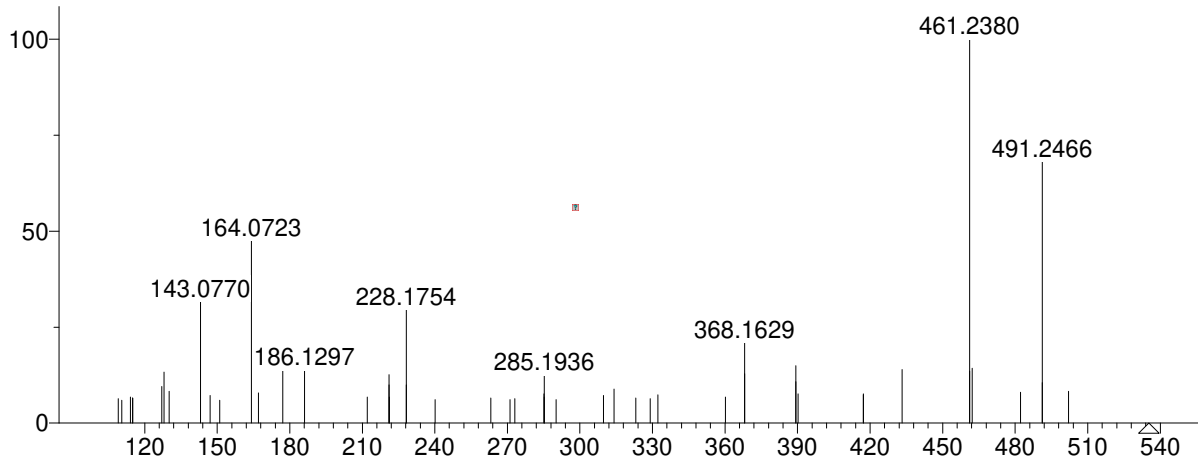

Hit 1 : 3,6-dibenzyl-9-[(2,3-diamino-1,2-dihydroindol-3-yl)methyl]-1,4,7-triazonane-2,5,8-trione [M+Na]<sup>+</sup> 35HCD  
C<sub>29</sub>H<sub>32</sub>N<sub>6</sub>O<sub>3</sub>; MF: 0; RMF: 6; Prob 100.0%; Lib: mona-export-vf-npl\_qexactive; ID: 18547.

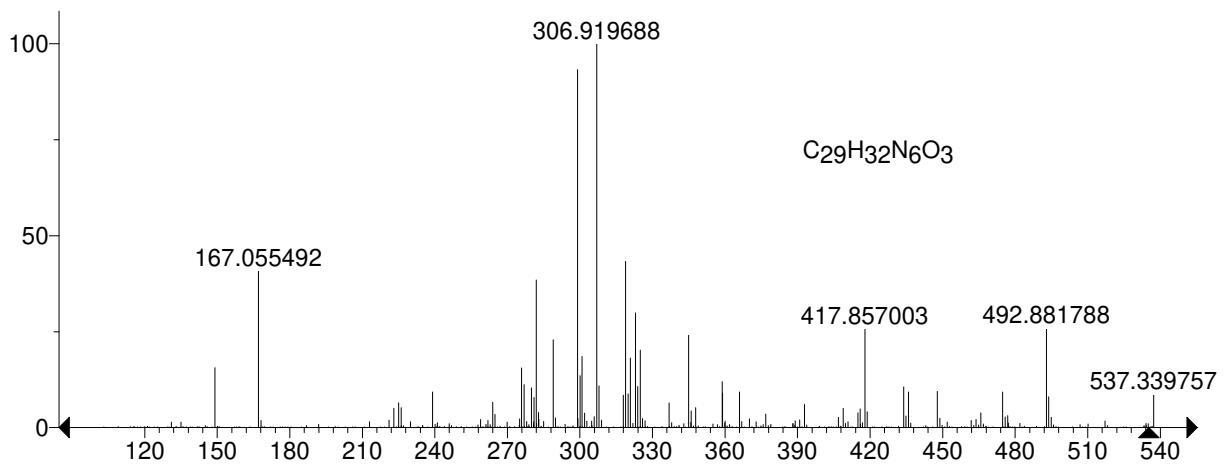

Unknown: Unknown (16.71\_416.1319m/z)  
Compound in Library Factor = 0

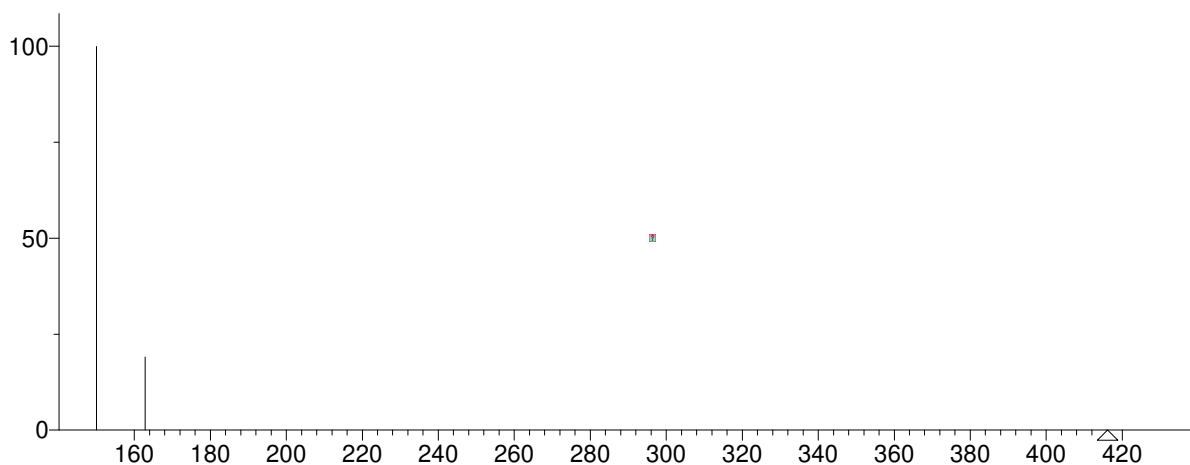

Hit 1 : NCGC00380250-01\_C21H23NO8\_(2E)-4-(((3S,3aR,4E,7aS)-7-Hydroxy-4-[(2E,4E)-1-hydroxy-2,4-hexadie  
C21H23NO8; MF: 0; RMF: 95; Prob 50.0%; Lib: mona-export-gnps; ID: 11477.

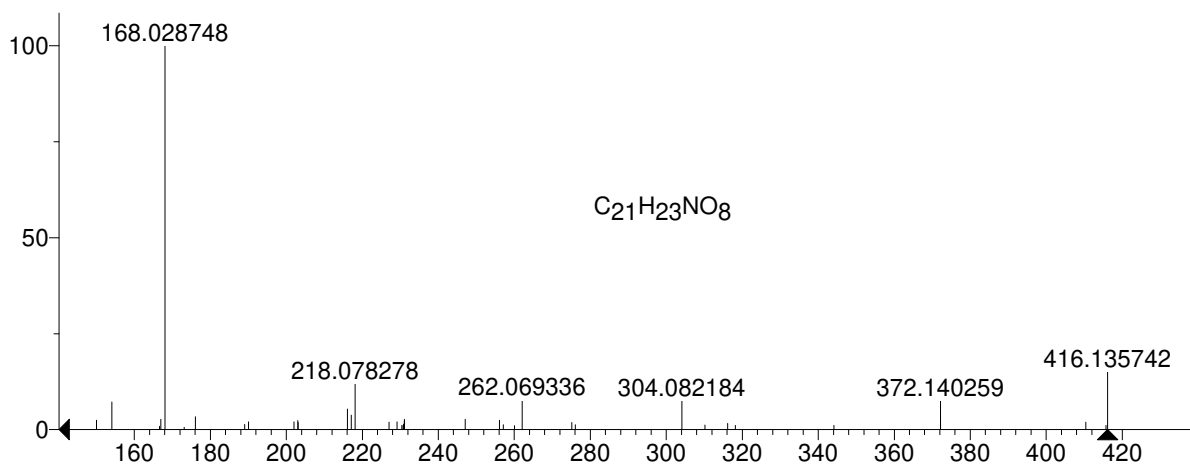

Hit 2 : Oxytetracycline [M-H-CHNO]- HCD 54V P=416.1  
C22H24N2O9; MF: 0; RMF: 17; Prob 50.0%; CAS: 79-57-2; Lib: nist\_msms; ID: 481718.

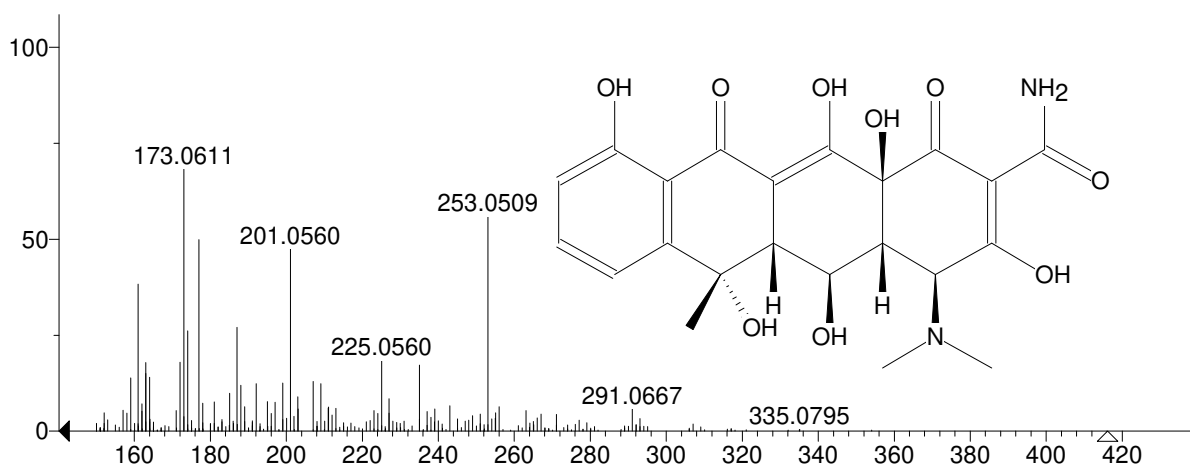

\*\* Search Report Page 1 of 2 \*\*

Unknown: Unknown (16.77\_209.0938m/z)  
Compound in Library Factor = -3273

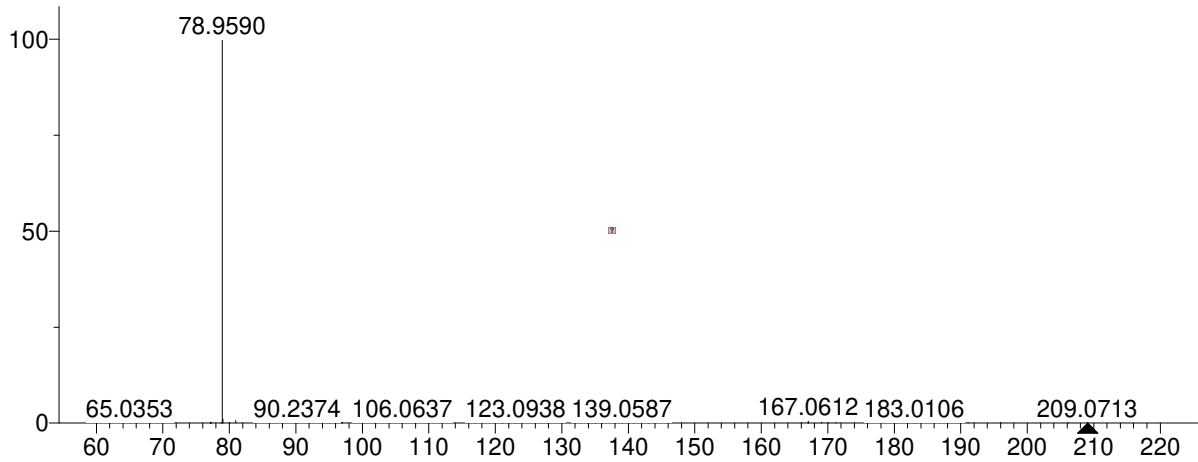

Hit 1 : Bromazepam [M+H-CBrO]<sup>+</sup> HCD 20V P=209.1  
C<sub>14</sub>H<sub>10</sub>BrN<sub>3</sub>O; MF: 6; RMF: 134; Prob 19.8%; CAS: 1812-30-2; Lib: nist\_msms; ID: 194115.

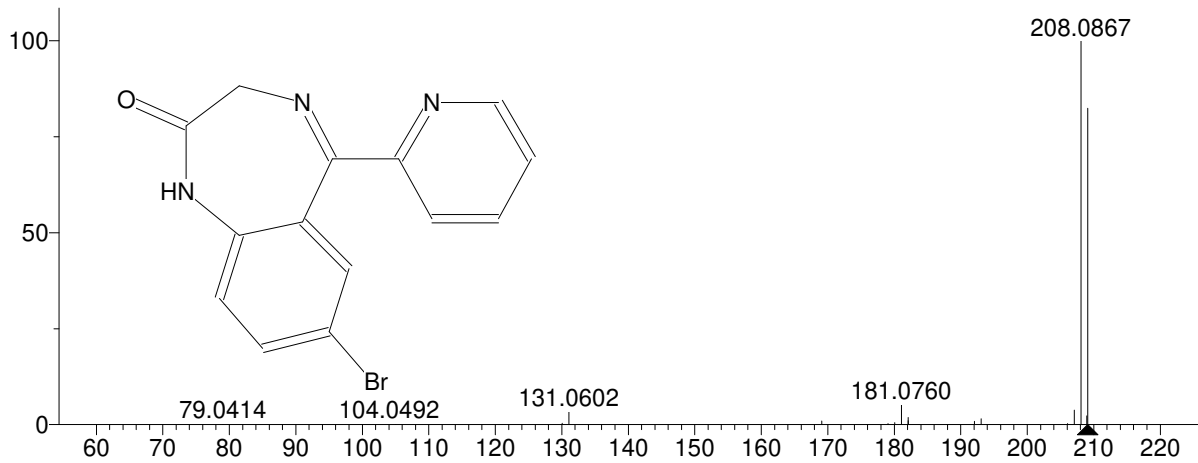

Hit 2 : Aprobarbital [M-H]<sup>-</sup> 20-30-40%) P=209.1  
C<sub>10</sub>H<sub>14</sub>N<sub>2</sub>O<sub>3</sub>; MF: 3; RMF: 171; Prob 17.5%; Lib: msms-neg-fiehnhilic; ID: 198.

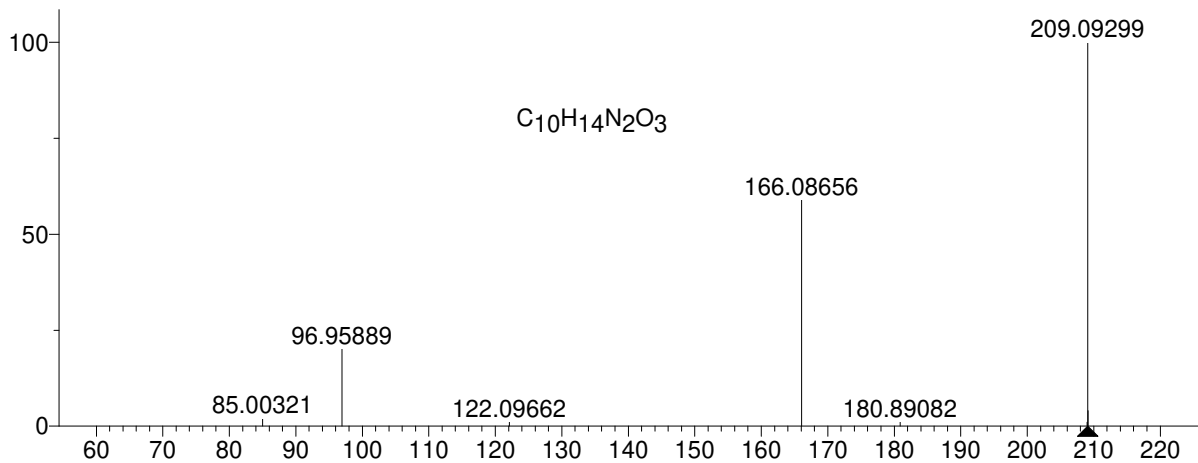

Hit 3 : Kynurenine [M+H]<sup>+</sup> 10eV P=209.1  
C<sub>10</sub>H<sub>12</sub>N<sub>2</sub>O<sub>3</sub>; MF: 1; RMF: 107; Prob 16.1%; Lib: mona-export-massbank; ID: 27196.

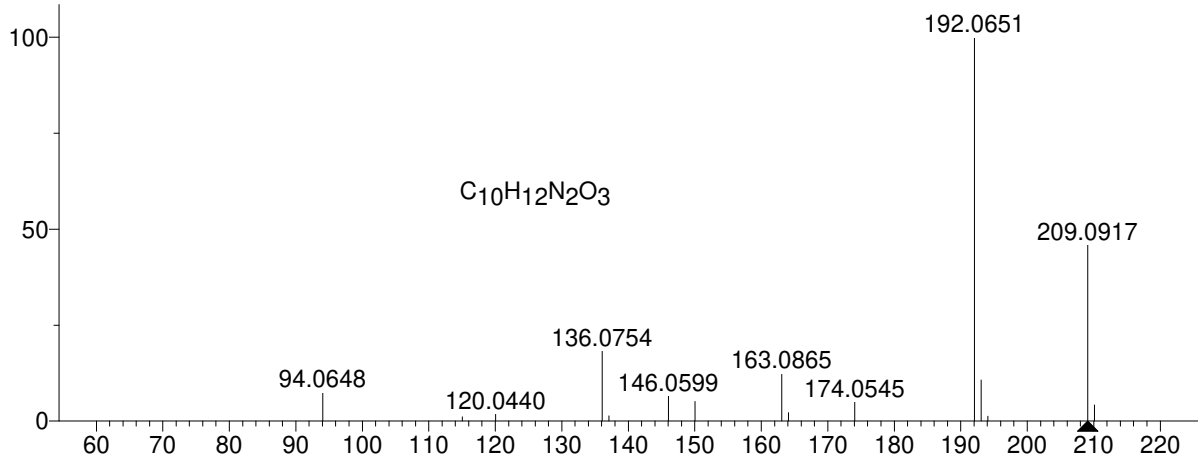

Hit 4 : L-Kynurenine [M+H]<sup>+</sup> HCD 0V P=209.1  
C<sub>10</sub>H<sub>12</sub>N<sub>2</sub>O<sub>3</sub>; MF: 0; RMF: 21; Prob 15.5%; CAS: 2922-83-0; Lib: nist\_msms; ID: 288000.

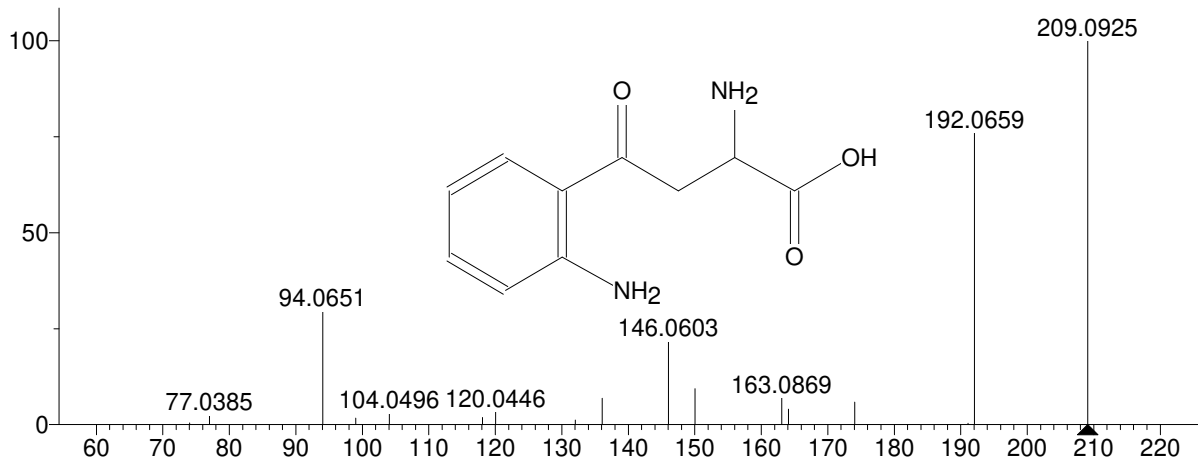

Hit 5 : L-kynurenine [M+H]<sup>+</sup> 25HCD P=209.1  
C<sub>10</sub>H<sub>12</sub>N<sub>2</sub>O<sub>3</sub>; MF: 0; RMF: 7; Prob 15.5%; Lib: mona-export-vf-npl\_qexactive; ID: 154.

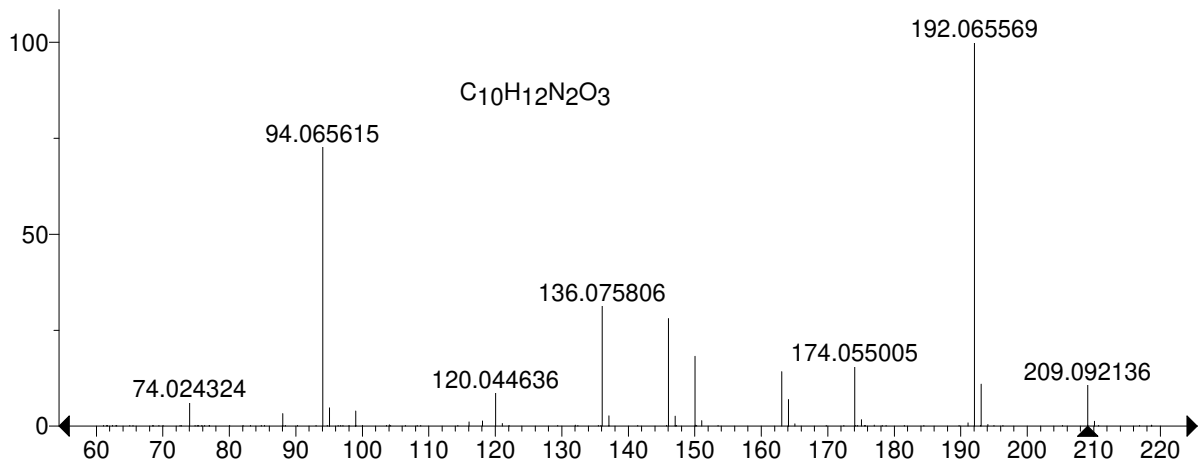

Unknown: Unknown (16.78\_401.0533m/z)  
Compound in Library Factor = 0

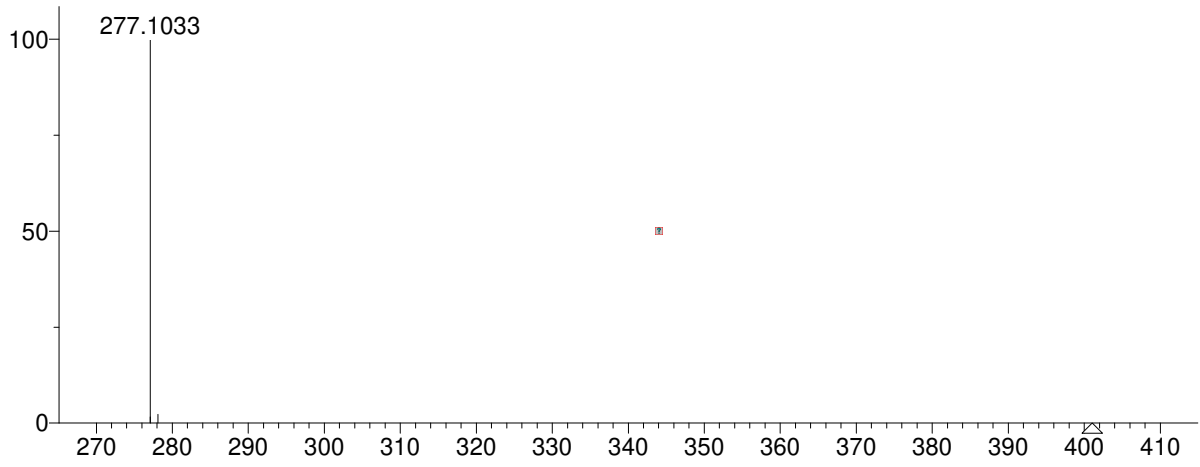

Unknown: Unknown (16.80\_577.1493m/z)  
Compound in Library Factor = 0

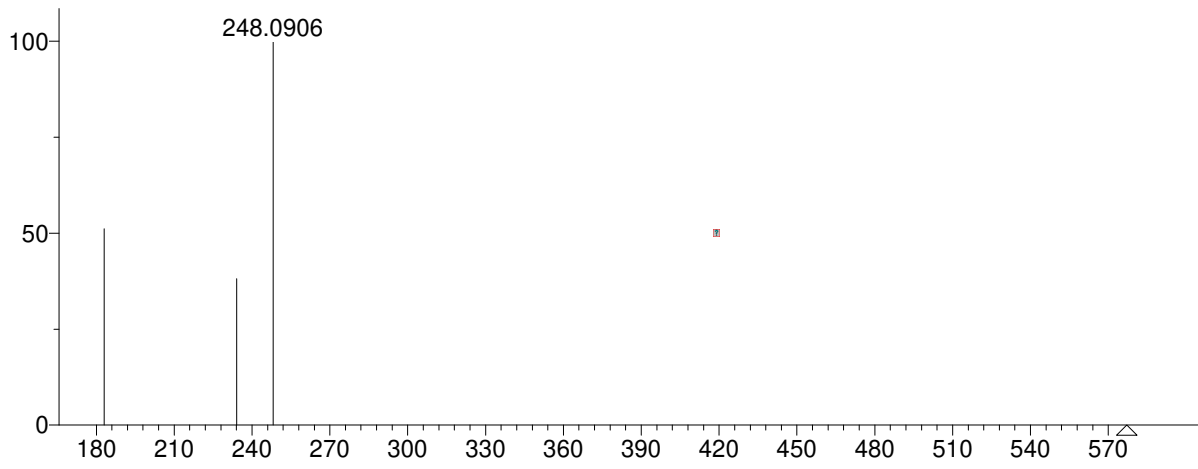

Unknown: Unknown (16.97\_239.1386m/z)  
Compound in Library Factor = -3273

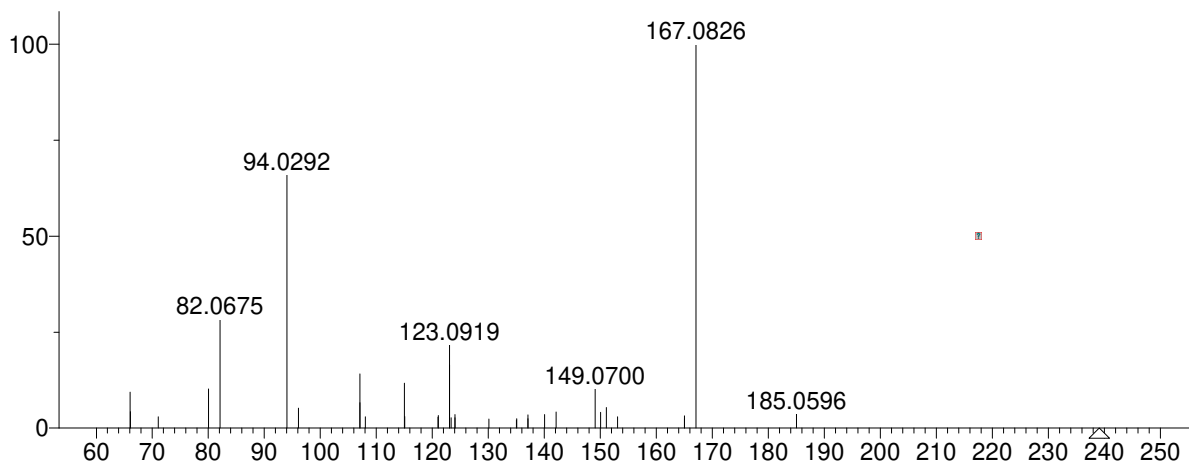

Hit 1 : Heptanedioic acid, 1-(2-cyclopentylidenehydrazide) [M-H]<sup>-</sup> HCD 45V P=239.1  
C<sub>12</sub>H<sub>20</sub>N<sub>2</sub>O<sub>3</sub>; MF: 1; RMF: 30; Prob 51.0%; CAS: 1136466-93-7; Lib: nist\_msms; ID: 263660.

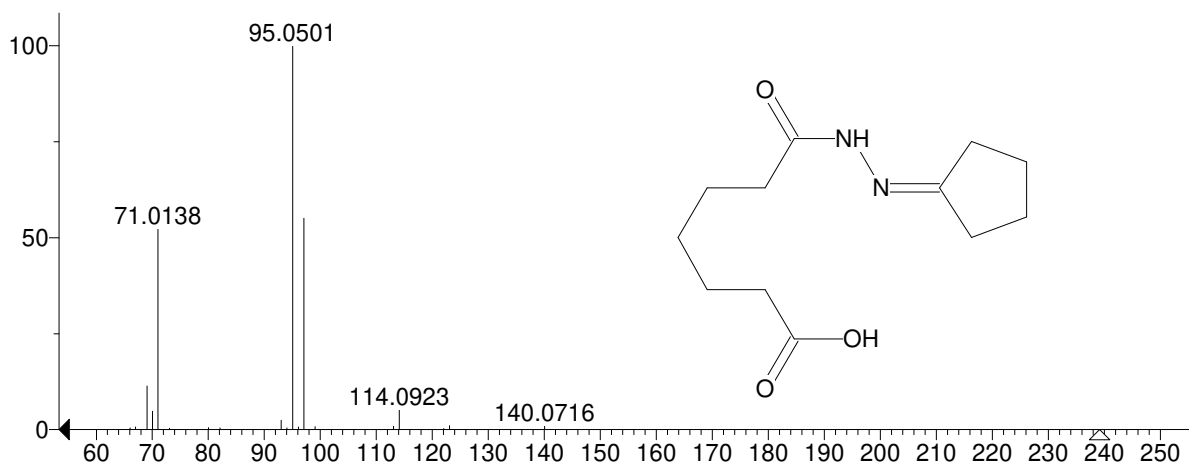

Hit 2 : Secobarbital [M+H]<sup>+</sup> HCD 43V P=239.1  
C<sub>12</sub>H<sub>18</sub>N<sub>2</sub>O<sub>3</sub>; MF: 0; RMF: 17; Prob 49.0%; CAS: 76-73-3; Lib: nist\_msms; ID: 198385.

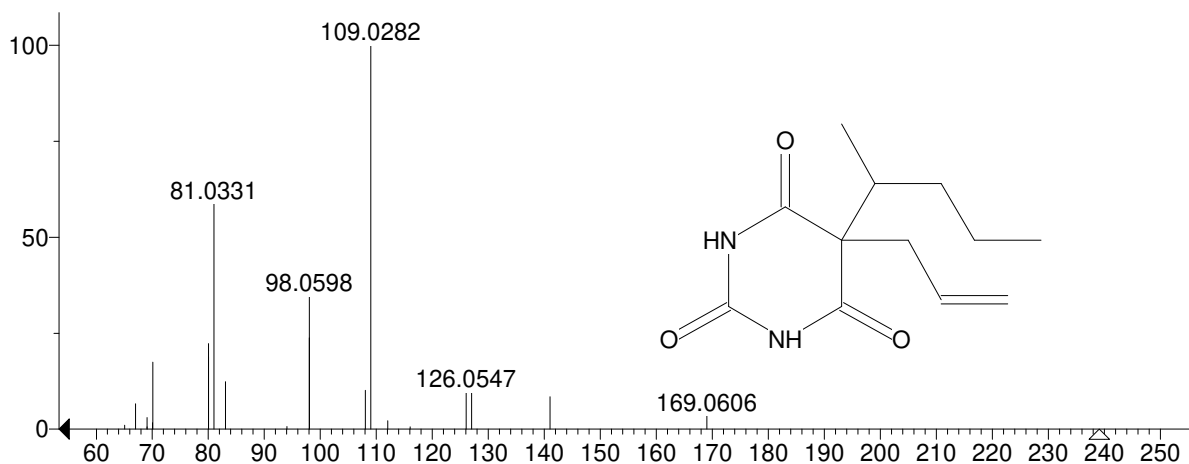



Unknown: Unknown (17.00\_610.3193m/z)  
Compound in Library Factor = 0

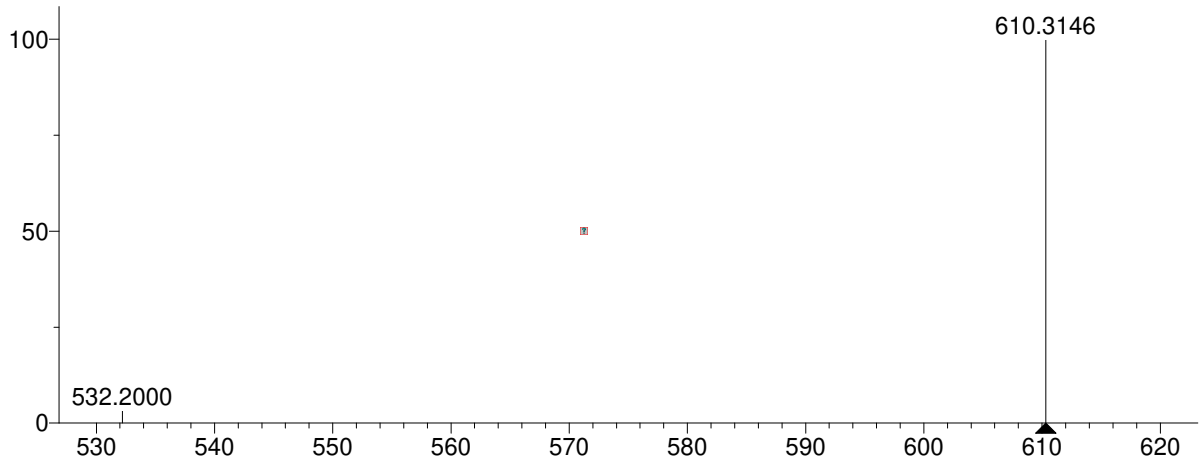

\*\* Search Report Page 1 of 2 \*\*

Unknown: Unknown (17.01\_264.0863m/z)  
Compound in Library Factor = -2387

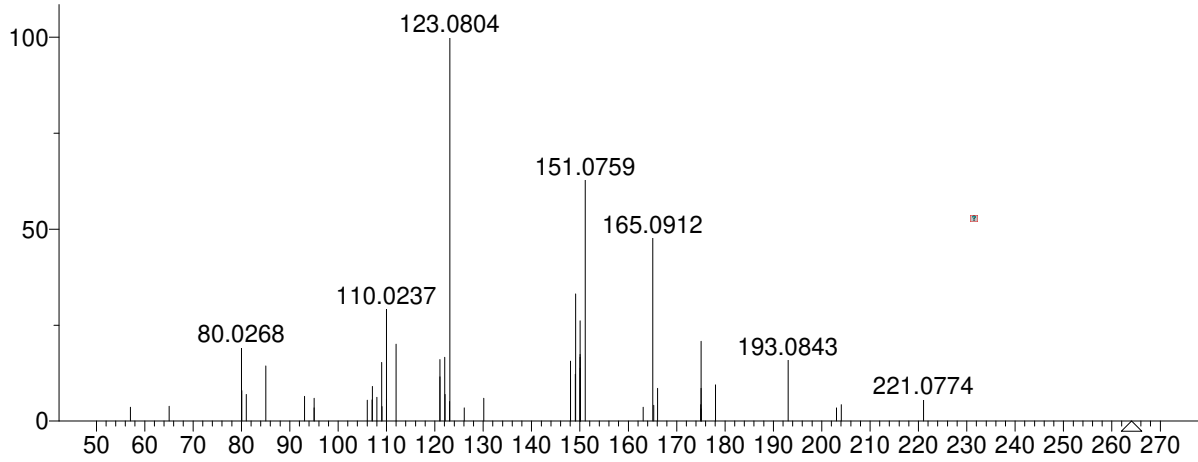

Hit 1 : 3,4-Dihydroxycinnamic acid (L-alanine methyl ester) amide [M-H]<sup>-</sup> HCD 50V P=264.1  
C<sub>13</sub>H<sub>15</sub>NO<sub>5</sub>; MF: 18; RMF: 119; Prob 46.1%; CAS: 778624-05-8; Lib: nist\_msms; ID: 548704.

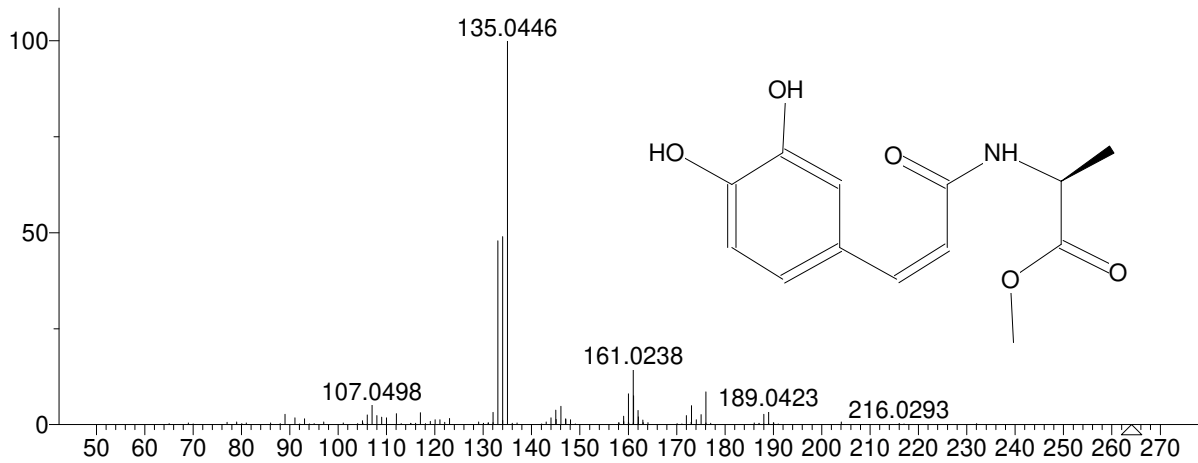

Hit 2 : 2,3',4,6-Tetrahydroxybenzophenone [M+NH<sub>4</sub>]<sup>+</sup> 65HCD P=264.1  
C<sub>13</sub>H<sub>10</sub>O<sub>5</sub>; MF: 5; RMF: 91; Prob 29.8%; Lib: mona-export-vf-npl\_qexactive; ID: 4668.

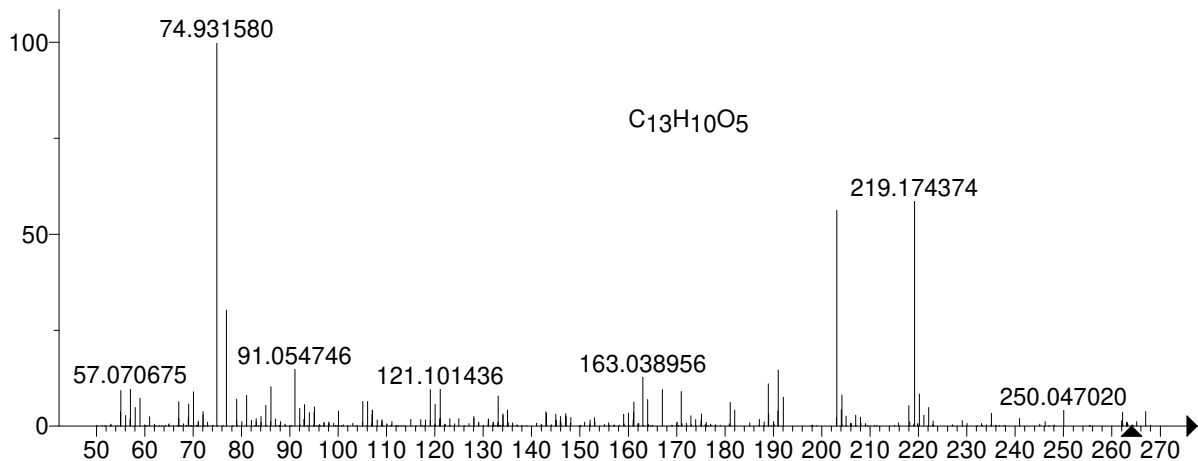

\*\* Search Report Page 2 of 2 \*\*

Hit 3 : NCGC00095569-05!4,9-dimethoxyfuro[3,2-g]chromen-7-one [M+NH4]<sup>+</sup> P=264.1  
C<sub>13</sub>H<sub>10</sub>O<sub>5</sub>; MF: 0; RMF: 14; Prob 24.0%; Lib: mona-export-gnps; ID: 8525.

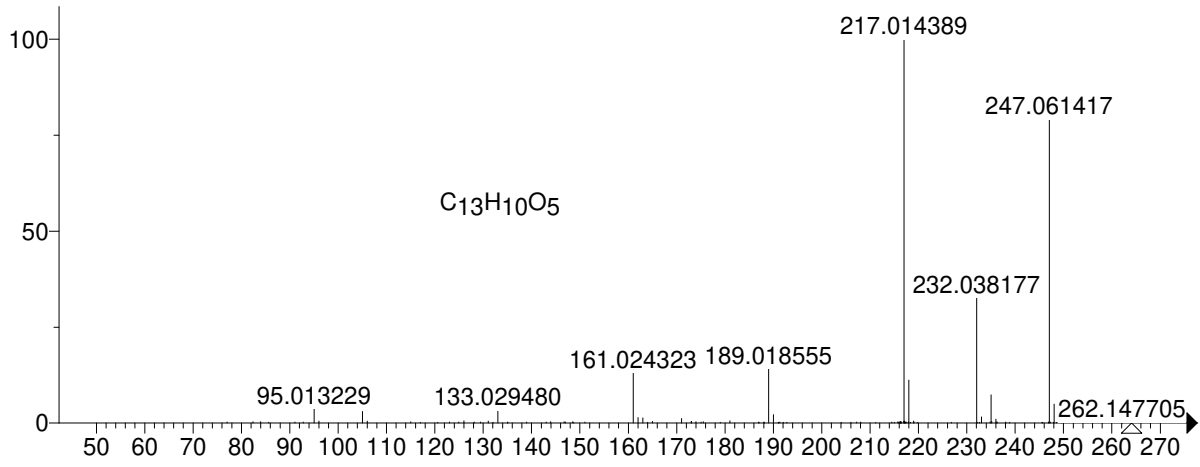

\*\* Search Report Page 1 of 2 \*\*

Unknown: Unknown (17.04\_369.1355m/z)  
Compound in Library Factor = -885

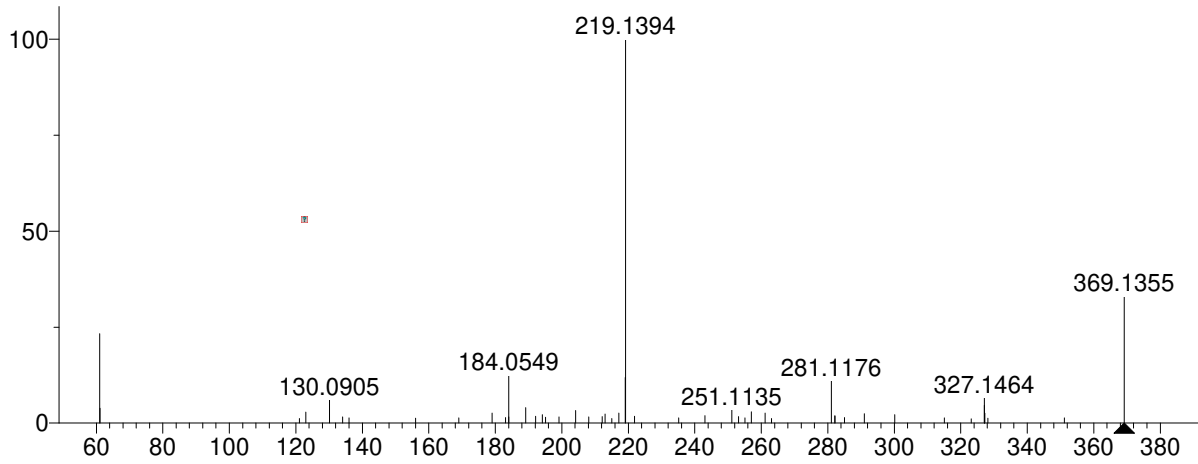

Hit 1 : Epimedin B [M+H-C17H28O13]+ HCD 18V P=369.1  
C38H48O19; MF: 145; RMF: 744; Prob 20.7%; CAS: 110623-73-9; Lib: nist\_msms; ID: 257878.

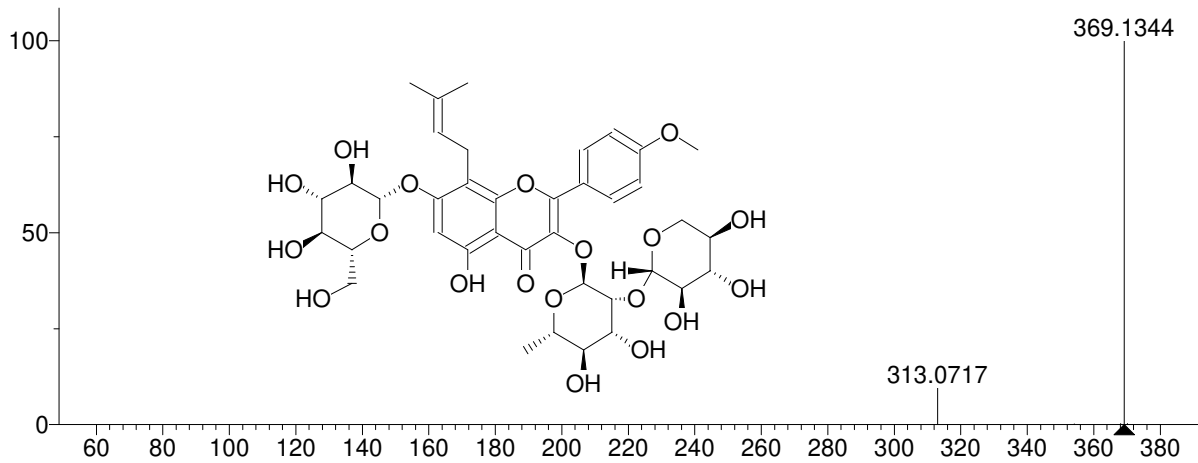

Hit 2 : Epimedin C [M+H-C18H30O13]+ HCD 18V P=369.1  
C39H50O19; MF: 145; RMF: 744; Prob 20.7%; CAS: 110642-44-9; Lib: nist\_msms; ID: 257938.

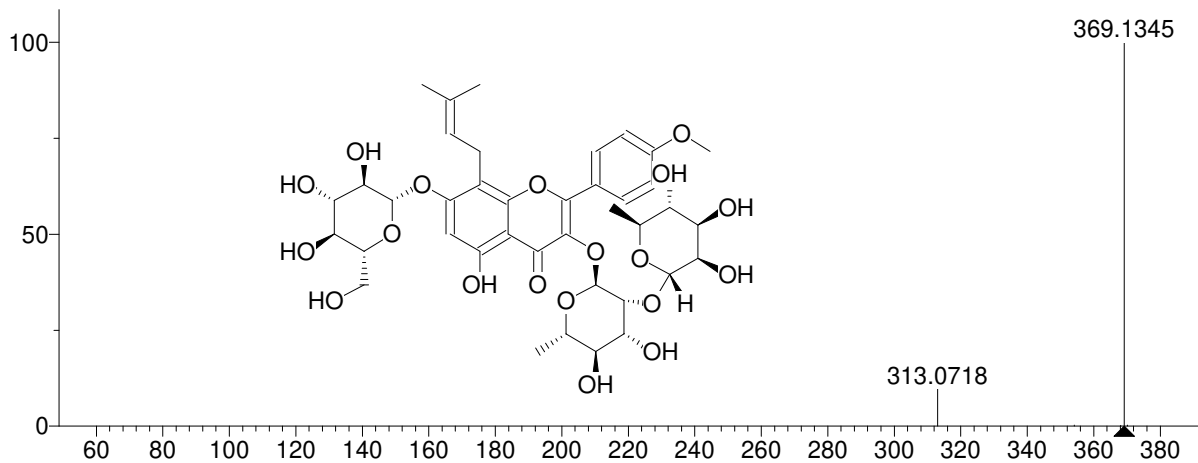

Hit 3 : Epimedin A [M+H-C<sub>18</sub>H<sub>30</sub>O<sub>14</sub>]<sup>+</sup> HCD 18V P=369.1  
C<sub>27</sub>H<sub>50</sub>O<sub>20</sub>; MF: 143; RMF: 744; Prob 19.1%; CAS: 110623-72-8; Lib: nist\_msms; ID: 257761.

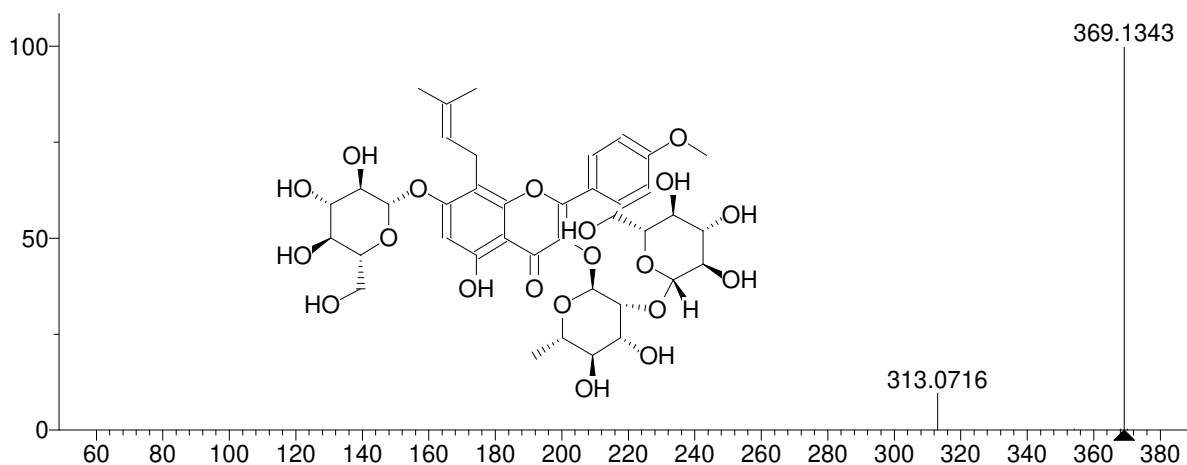

Hit 4 : Icariside I [M+H-C<sub>6</sub>H<sub>10</sub>O<sub>5</sub>]<sup>+</sup> HCD 18V P=369.1  
C<sub>27</sub>H<sub>30</sub>O<sub>11</sub>; MF: 128; RMF: 745; Prob 11.6%; CAS: 56725-99-6; Lib: nist\_msms; ID: 232874.

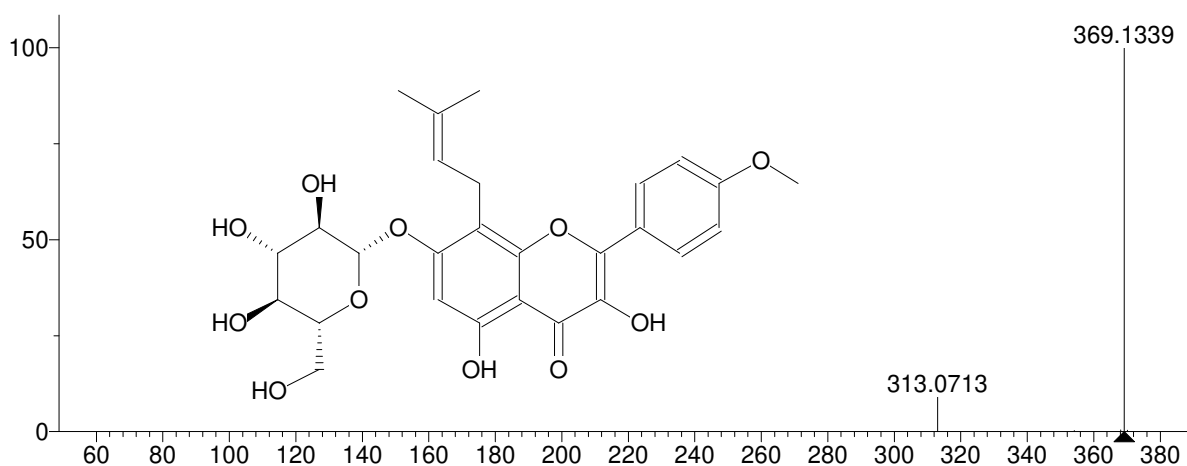

Hit 5 : Icariside II [M+H-C<sub>6</sub>H<sub>10</sub>O<sub>4</sub>]<sup>+</sup> HCD 18V P=369.1  
C<sub>27</sub>H<sub>30</sub>O<sub>10</sub>; MF: 123; RMF: 739; Prob 9.33%; CAS: 113558-15-9; Lib: nist\_msms; ID: 232522.

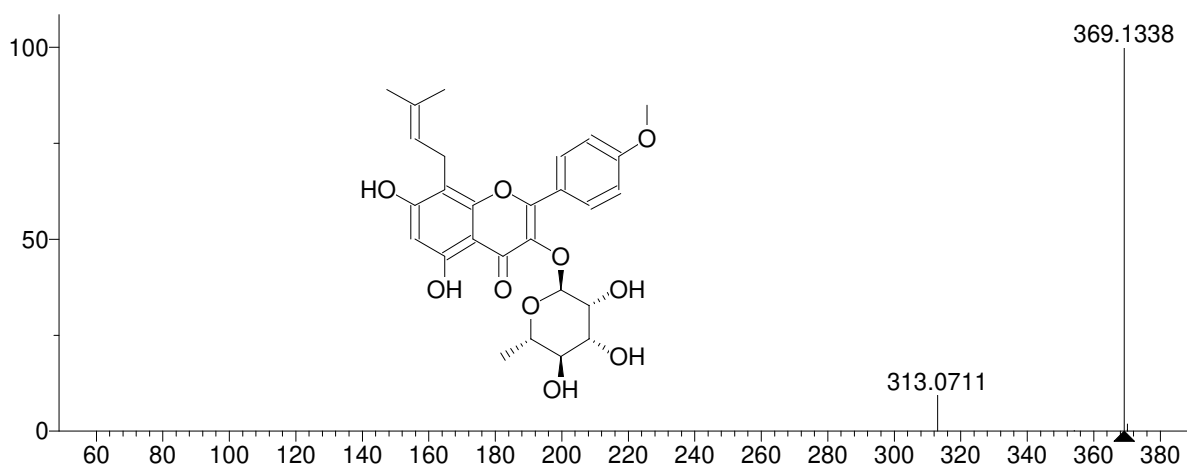

\*\* Search Report Page 1 of 2 \*\*

Unknown: Unknown (17.10\_431.1372m/z)  
Compound in Library Factor = -3273

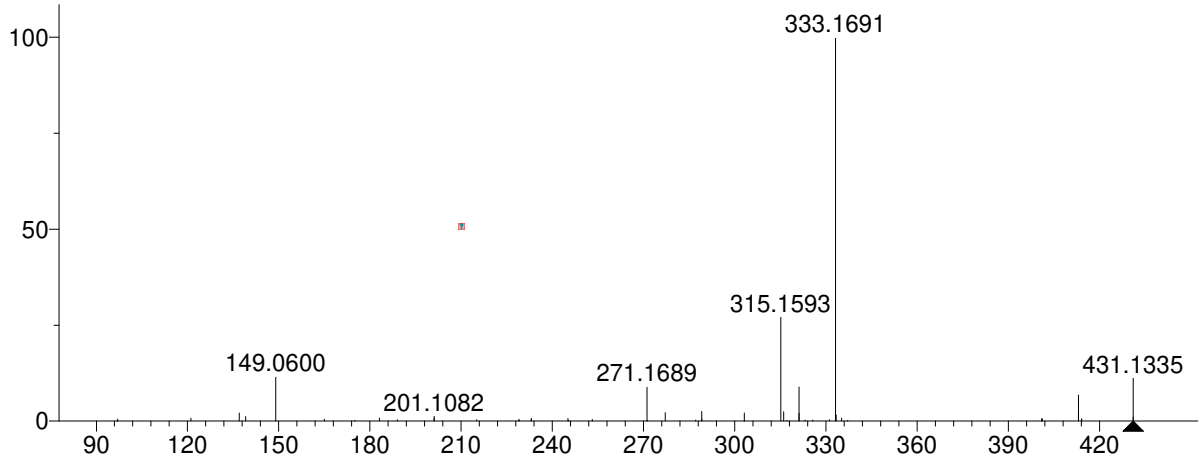

Hit 1 : Agnuside [M+H-2H<sub>2</sub>O]<sup>+</sup> HCD 12V P=431.1  
C<sub>22</sub>H<sub>26</sub>O<sub>11</sub>; MF: 14; RMF: 194; Prob 10.7%; CAS: 11027-63-7; Lib: nist\_msms; ID: 389578.

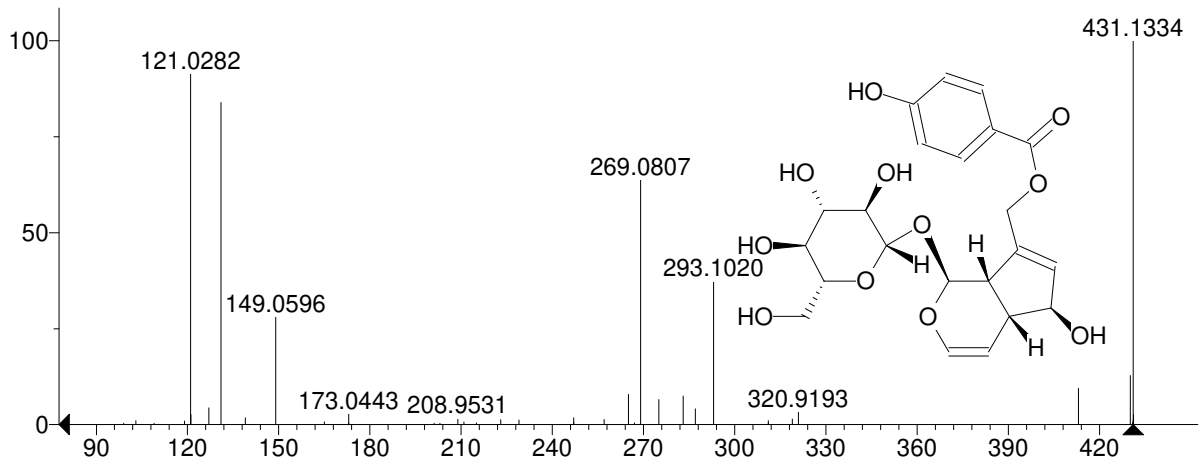

Hit 2 : Ononin [M+H]<sup>+</sup> 15eV P=431.1  
C<sub>22</sub>H<sub>22</sub>O<sub>9</sub>; MF: 7; RMF: 158; Prob 8.23%; Lib: mona-export-massbank; ID: 28099.

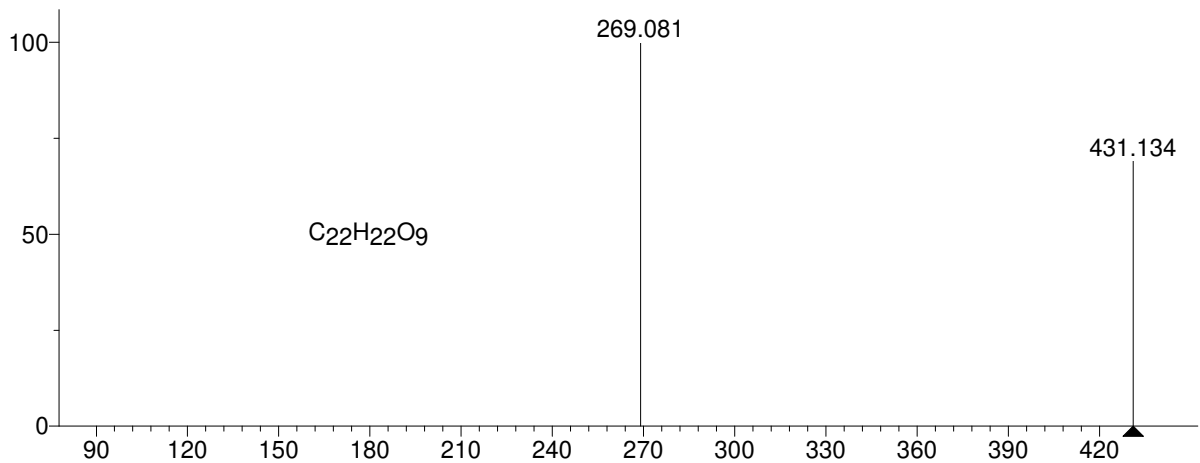

Hit 3 : Formononetin-7-O-glucoside [M+H]<sup>+</sup> 10eV P=431.1  
C<sub>22</sub>H<sub>22</sub>O<sub>9</sub>; MF: 4; RMF: 179; Prob 7.27%; Lib: anthocyanins mona; ID: 1117.

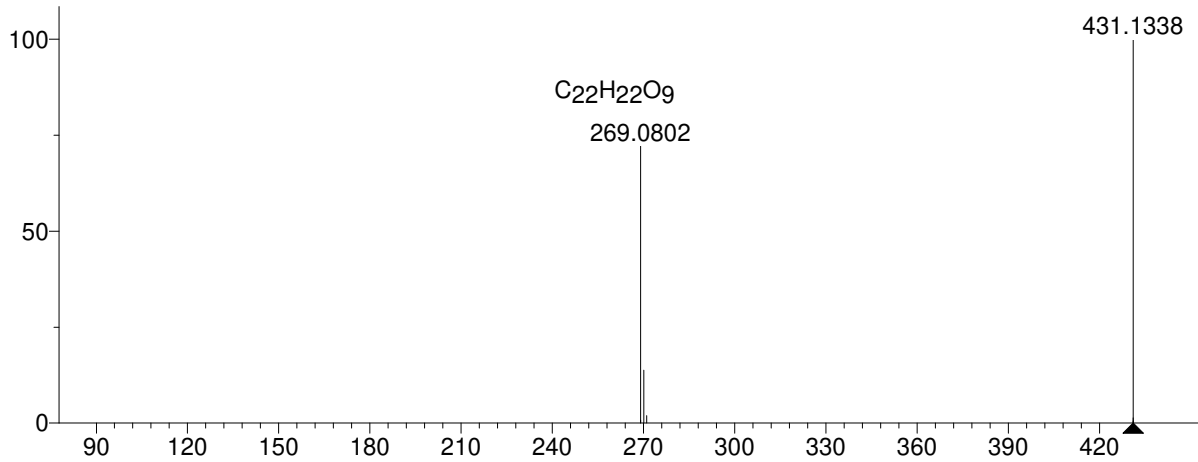

Hit 4 : populoside B2 (pubchem) [M-H]<sup>-</sup> P=431.1  
C<sub>22</sub>H<sub>24</sub>O<sub>9</sub>; MF: 0; RMF: 88; Prob 6.14%; Lib: phytofrag2018\_final\_060219; ID: 779.

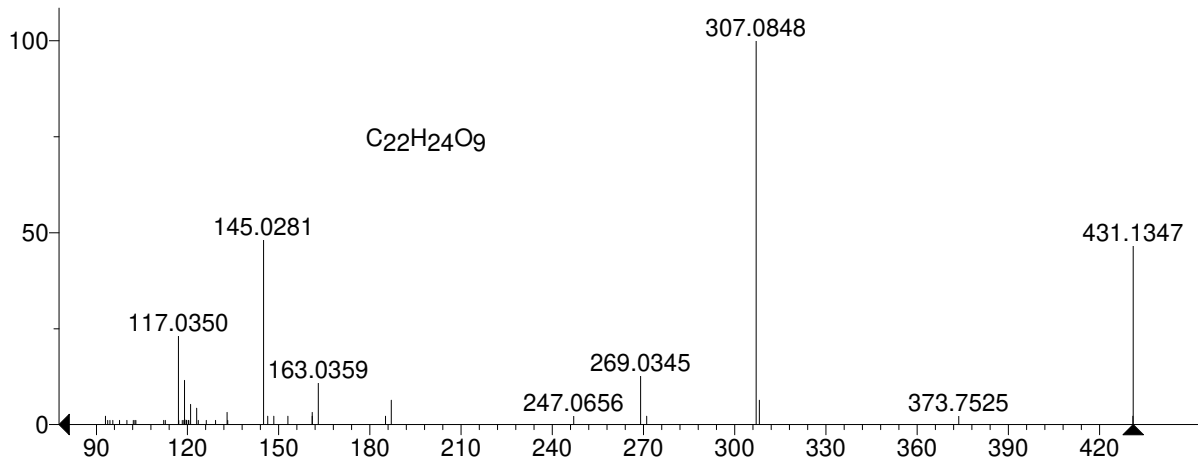

Hit 5 : populoside B4 (pubchem) [M-H]<sup>-</sup> P=431.1  
C<sub>22</sub>H<sub>24</sub>O<sub>9</sub>; MF: 0; RMF: 82; Prob 6.14%; Lib: phytofrag2018\_final\_060219; ID: 781.

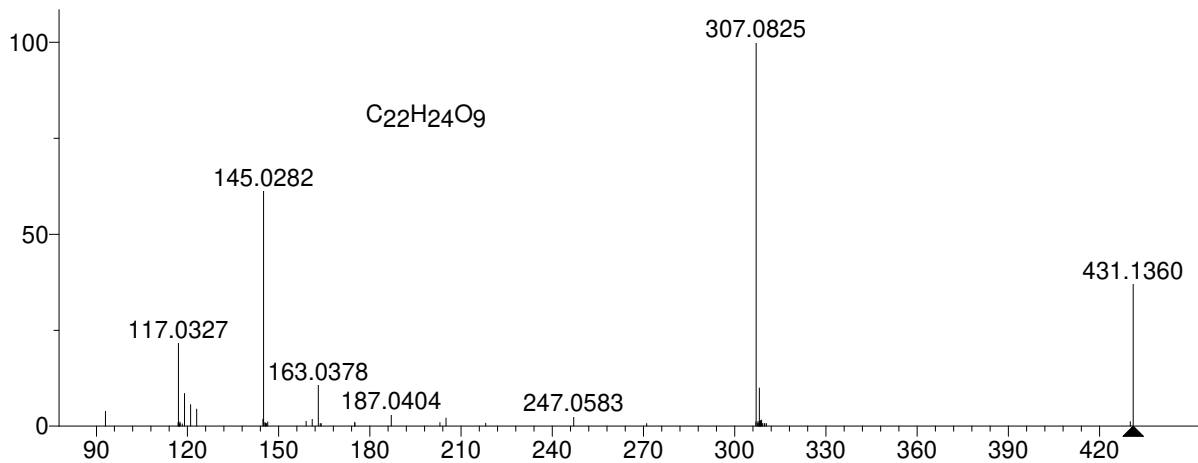

\*\* Search Report Page 1 of 2 \*\*

Unknown: Unknown (17.20\_214.1441m/z)  
Compound in Library Factor = -2387

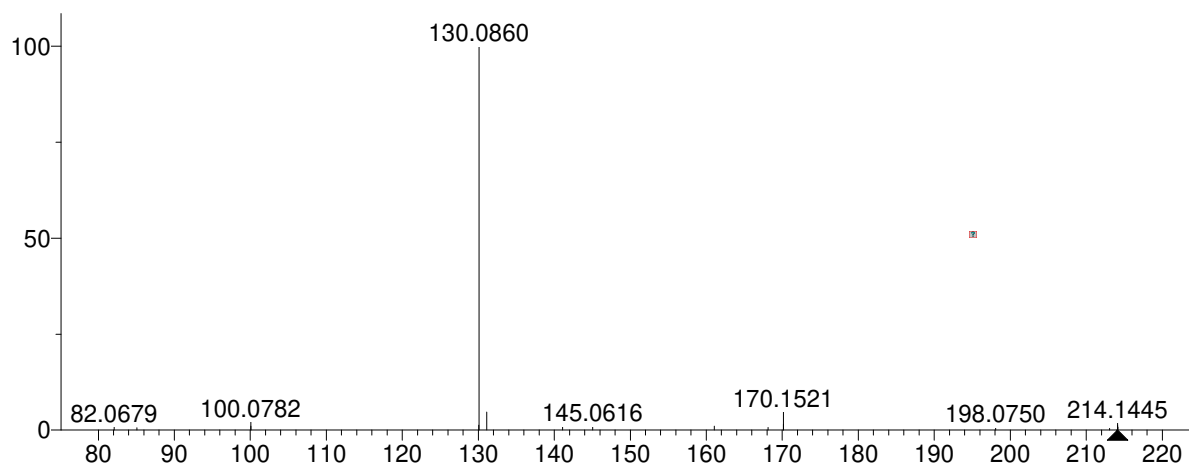

Hit 1 : Ecgonine ethyl ester [M+H]<sup>+</sup> HCD 4V P=214.1  
C<sub>11</sub>H<sub>19</sub>NO<sub>3</sub>; MF: 15; RMF: 128; Prob 43.4%; CAS: 70939-97-8; Lib: nist\_msms; ID: 195186.

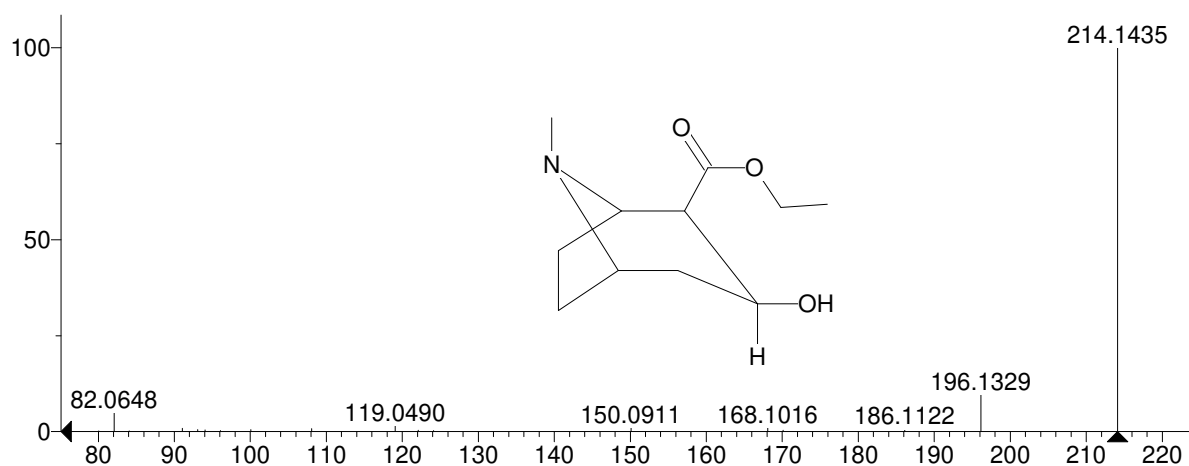

Hit 2 : N-Heptanoyl-L-homoserine lactone [M+H]<sup>+</sup> HCD 0V P=214.1  
C<sub>11</sub>H<sub>19</sub>NO<sub>3</sub>; MF: 5; RMF: 112; Prob 30.7%; CAS: 177158-20-2; Lib: nist\_msms; ID: 165292.

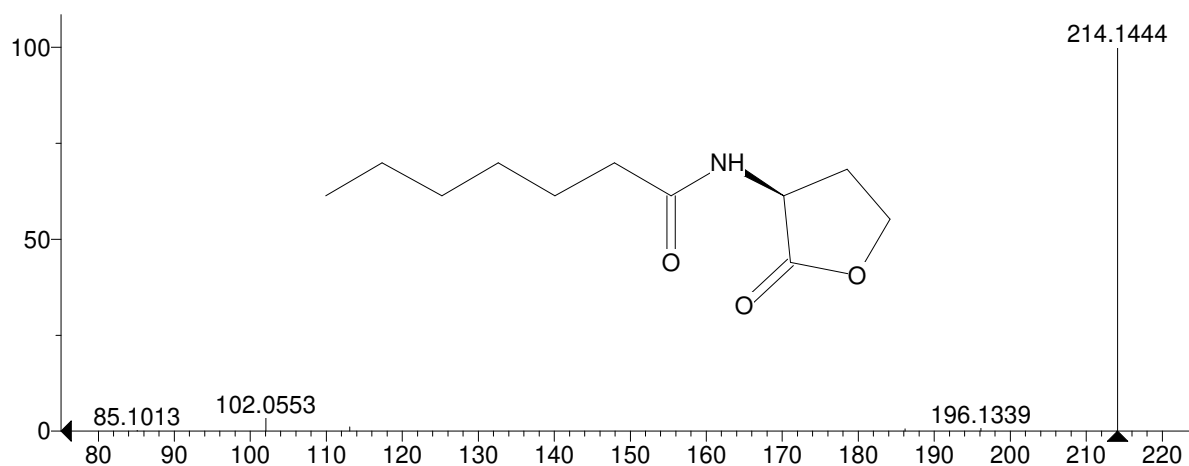



\*\* Search Report Page 2 of 2 \*\*

Hit 3 : N-Heptanoyl-DL-homoserine lactone [M+H]<sup>+</sup> QTOF 3V P=214.1  
C<sub>11</sub>H<sub>19</sub>NO<sub>3</sub>; MF: 1; RMF: 72; Prob 25.9%; CAS: 106983-26-0; Lib: nist\_msms; ID: 23507.

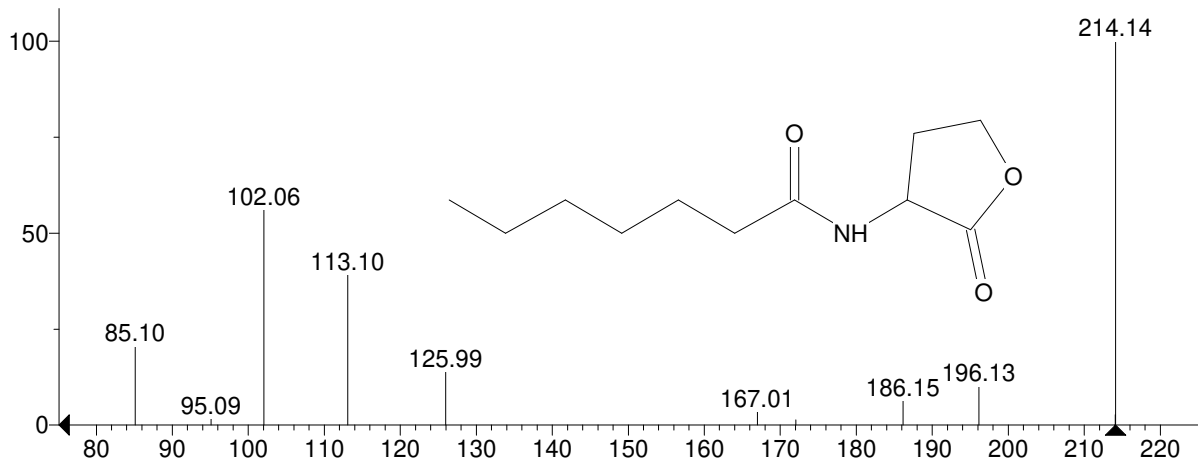

Unknown: Unknown (17.20\_484.2537m/z)  
Compound in Library Factor = 0

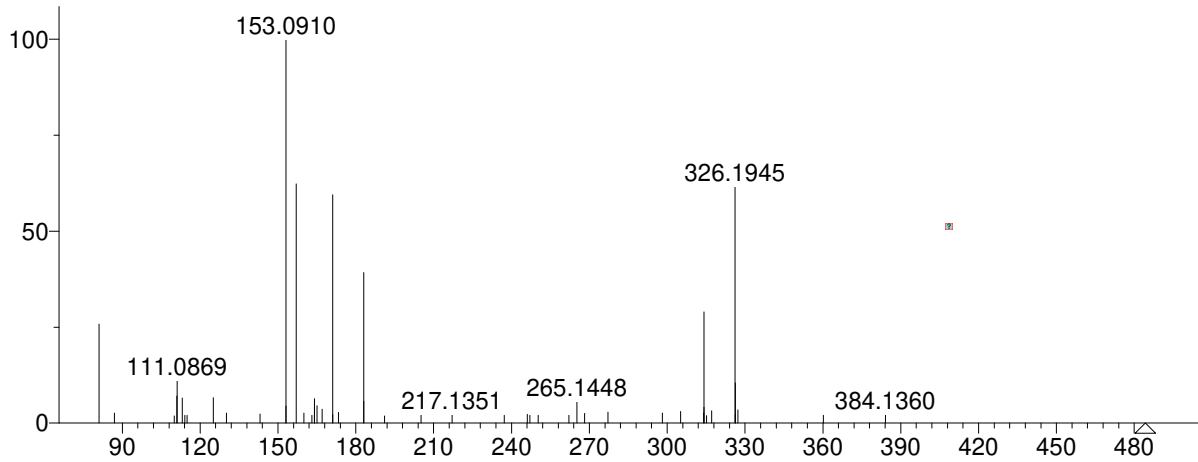

Hit 1 : 2-[2,6-bis(3-methylbut-2-enyl)-4-[(2S,3R,4S,5S,6R)-3,4,5-trihydroxy-6-(hydroxymethyl)oxan-2-yl]oxyphenyl]  
C<sub>24</sub>H<sub>34</sub>O<sub>9</sub>; MF: 0; RMF: 50; Prob 50.0%; Lib: mona-export-vf-npl\_qexactive; ID: 21829.

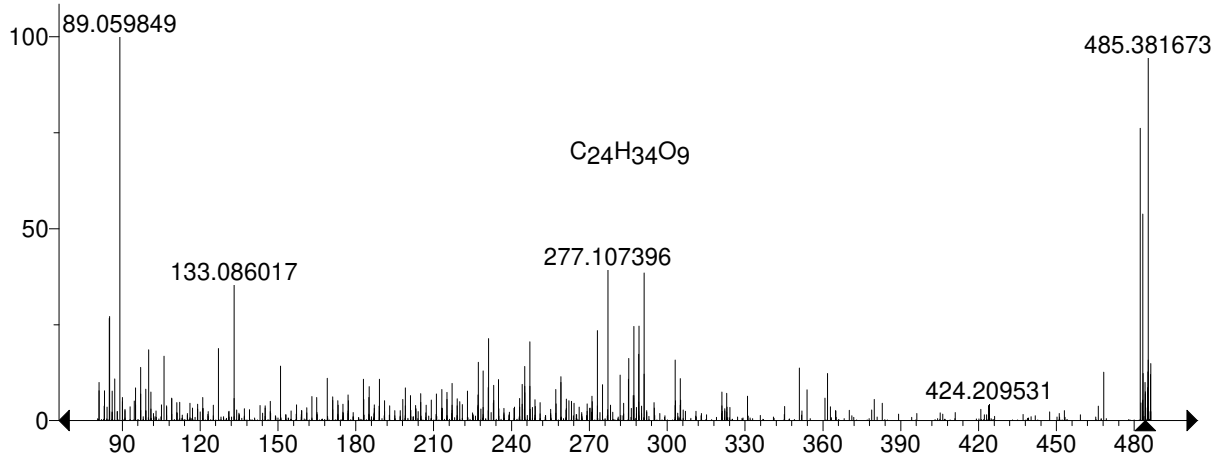

Hit 2 : NCGC00169100-02|2-[2,6-bis(3-methylbut-2-enyl)-4-[(2S,3R,4S,5S,6R)-3,4,5-trihydroxy-6-(hydroxymethyl)  
C<sub>24</sub>H<sub>34</sub>O<sub>9</sub>; MF: 0; RMF: 21; Prob 50.0%; Lib: mona-export-gnps; ID: 6241.

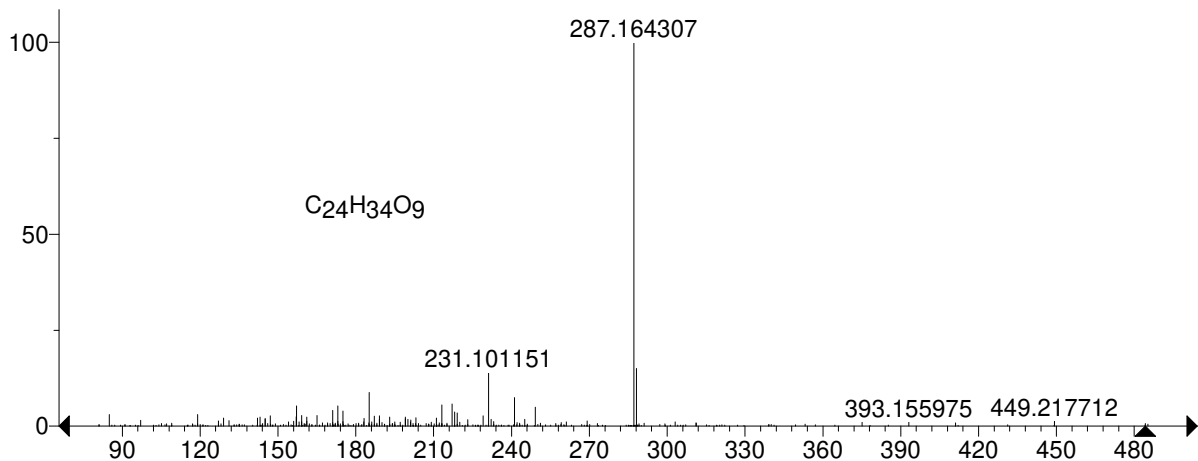

\*\* Search Report Page 1 of 2 \*\*

Unknown: Unknown (17.24\_394.1856m/z)  
Compound in Library Factor = 0

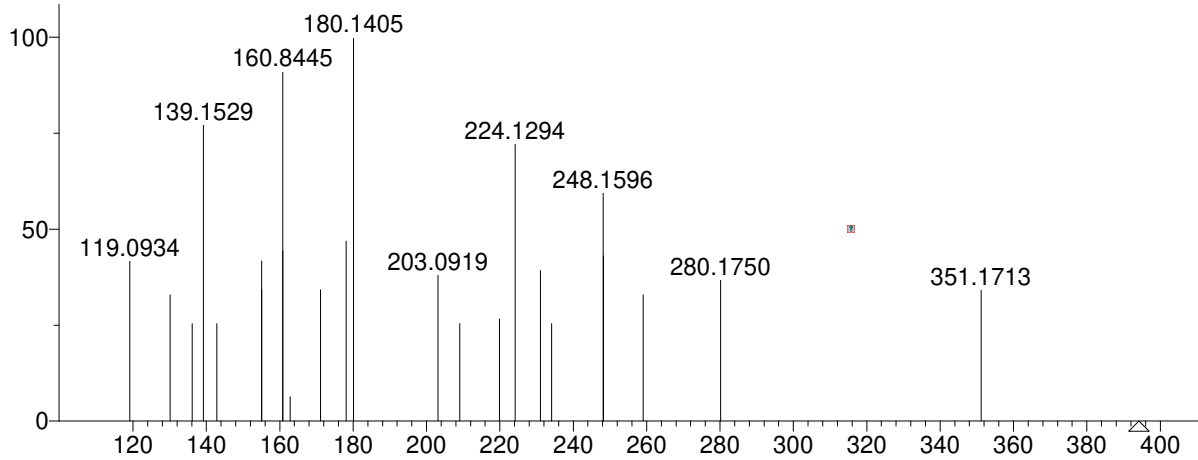

Hit 1 : NCGC00381047-01\_C20H24O7\_ [M+NH4]<sup>+</sup> P=394.2  
C20H24O7; MF: 0; RMF: 59; Prob 9.09%; Lib: mona-export-gnps; ID: 11699.

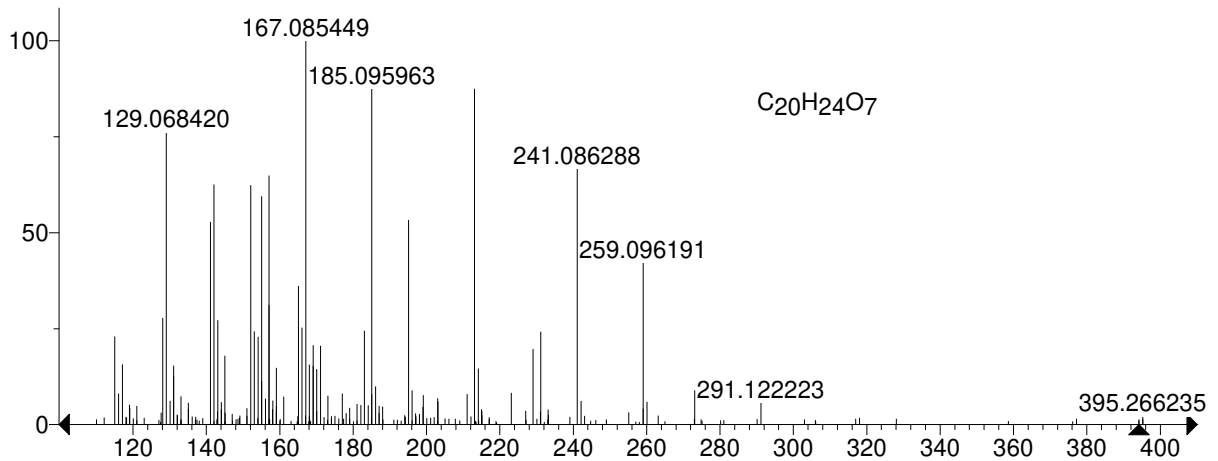

Hit 2 : [1,3-dihydroxy-1-(7-methoxy-2-oxochromen-6-yl)-3-methylbutan-2-yl] 3-methylbut-2-enoate [M+NH4]<sup>+</sup> 351  
C20H24O7; MF: 0; RMF: 37; Prob 9.09%; Lib: mona-export-vf-npl\_qexactive; ID: 24781.

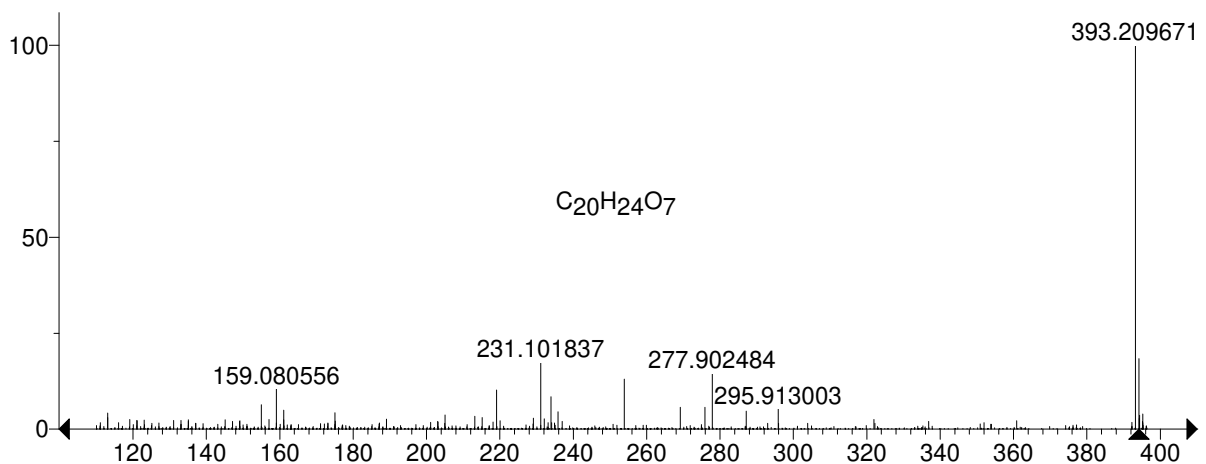

\*\* Search Report Page 2 of 2 \*\*

Hit 3 : [2,3-dihydroxy-1-(7-methoxy-2-oxochromen-6-yl)-3-methylbutyl] (Z)-2-methylbut-2-enoate [M+NH4]<sup>+</sup> 35H  
C<sub>20</sub>H<sub>24</sub>O<sub>7</sub>; MF: 0; RMF: 25; Prob 9.09%; Lib: mona-export-vf-npl\_qexactive; ID: 5716.

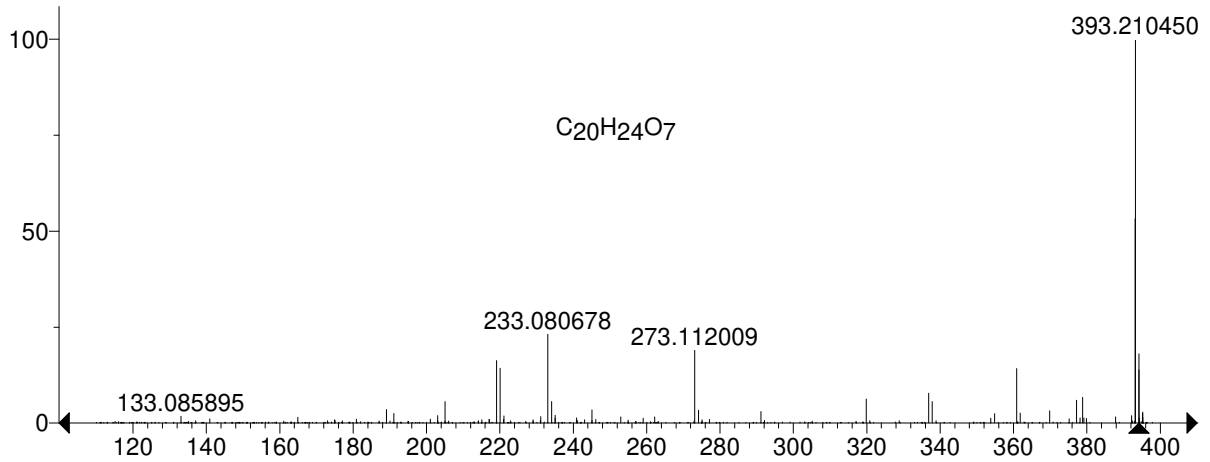

Hit 4 : NCGC00180381-03\_C<sub>20</sub>H<sub>24</sub>O<sub>7</sub>\_2-Butenoic acid, 2-methyl-, (1aR,1bS,2aS,4R,4aS,7aR,8S)-dodecahydro  
C<sub>20</sub>H<sub>24</sub>O<sub>7</sub>; MF: 0; RMF: 23; Prob 9.09%; Lib: mona-export-gnps; ID: 10736.

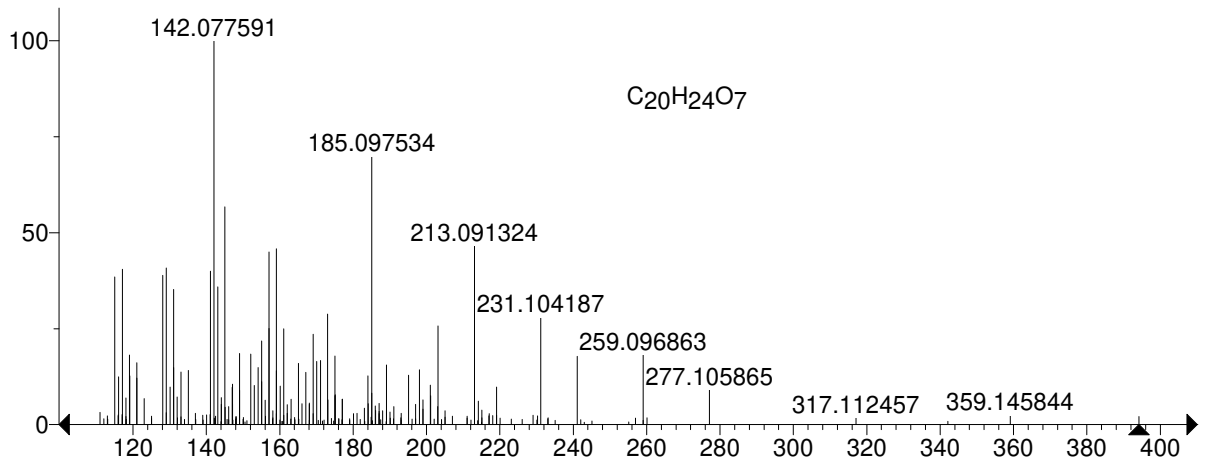

Hit 5 : [1,3-dihydroxy-1-(7-methoxy-2-oxochromen-6-yl)-3-methylbutan-2-yl] (E)-2-methylbut-2-enoate [M+NH4]<sup>+</sup>  
C<sub>20</sub>H<sub>24</sub>O<sub>7</sub>; MF: 0; RMF: 22; Prob 9.09%; Lib: mona-export-vf-npl\_qexactive; ID: 5462.

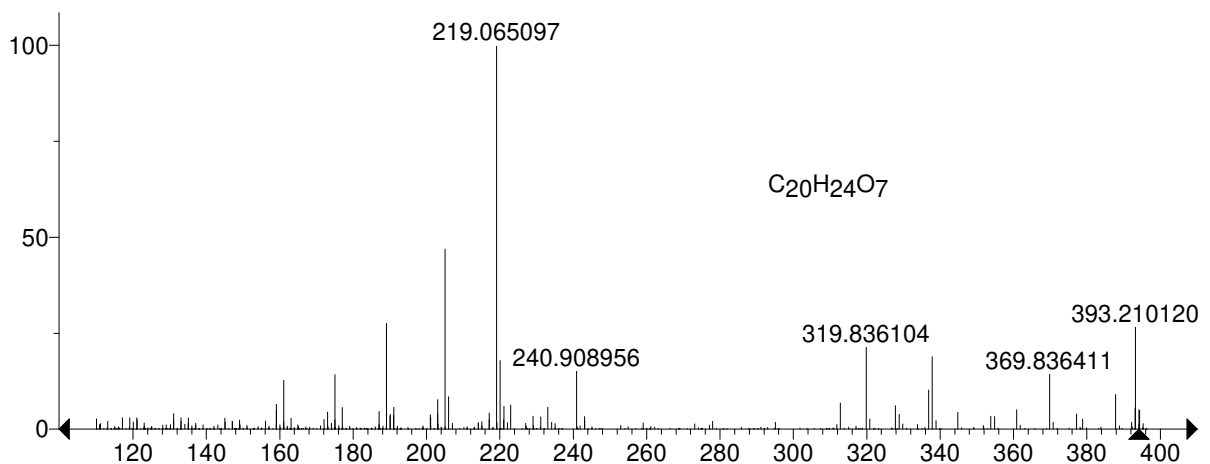

\*\* Search Report Page 1 of 2 \*\*

Unknown: Unknown (17.28\_501.1760m/z)  
Compound in Library Factor = 0

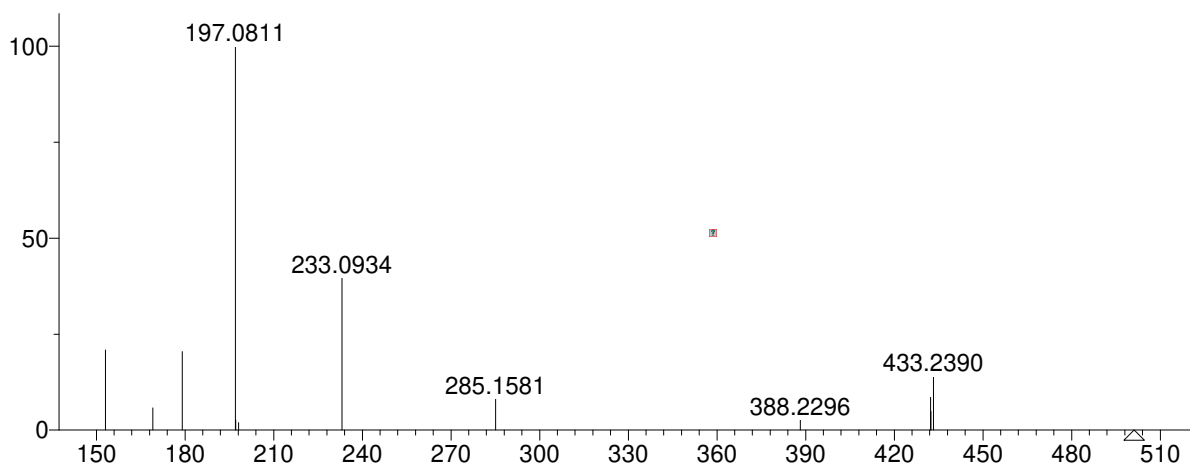

Hit 1 : (1R,4S,7S,8S,9R,12E,20R,21R,22S,23S)-7,8,21,22,23-pentahydroxy-12,16-dimethyl-3,5,10,19,24-pentaoxocane; MF: 0; RMF: 60; Prob 33.3%; Lib: mona-export-vf-npl\_qexactive; ID: 19953.

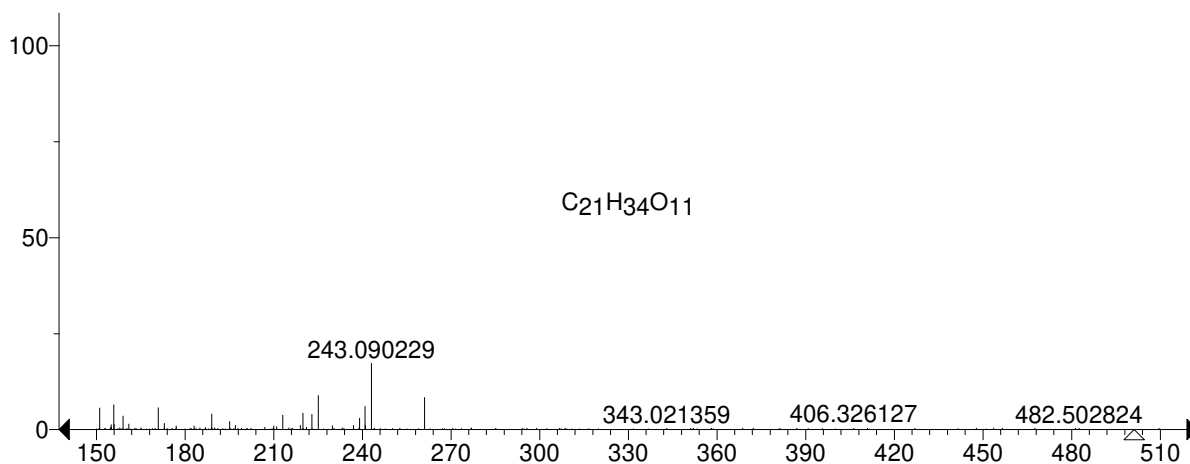

Hit 2 : (2S,3R,4S,5R)-2-[4-[7-hydroxy-3-(hydroxymethyl)-5-(3-hydroxypropyl)-2,3-dihydro-1-benzofuran-2-yl]-2-methoxyphenyl]propanoic acid; MF: 0; RMF: 40; Prob 33.3%; Lib: mona-export-vf-npl\_qexactive; ID: 1942.

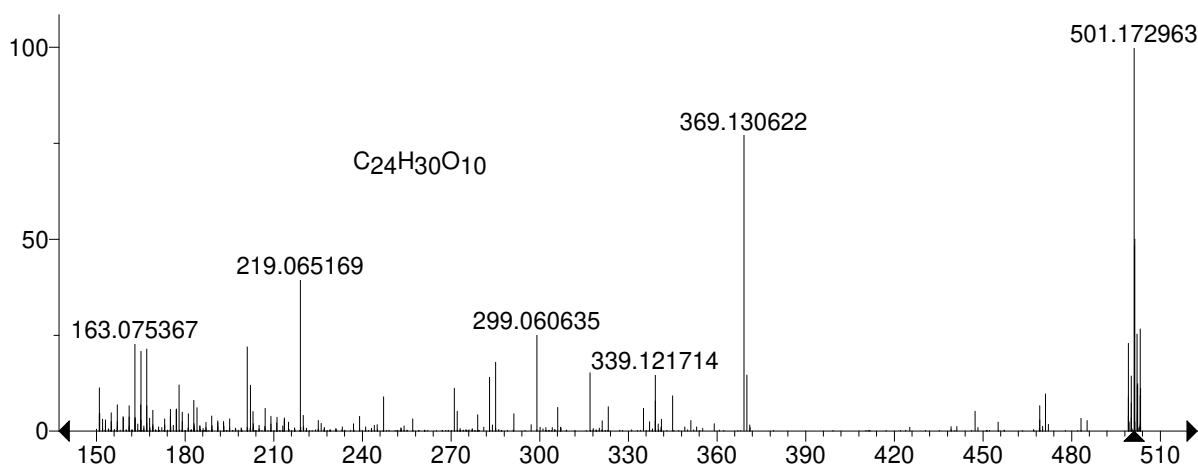

\*\* Search Report Page 2 of 2 \*\*

Hit 3 : (1R,4R,7S,11E,15S,19R,20R,21S,22S,24R)-7,20,21,22,24-pentahydroxy-11,15-dimethyl-3,5,9,18,23-pentac  
C<sub>21</sub>H<sub>34</sub>O<sub>11</sub>; MF: 0; RMF: 24; Prob 33.3%; Lib: mona-export-vf-npl\_qexactive; ID: 22606.

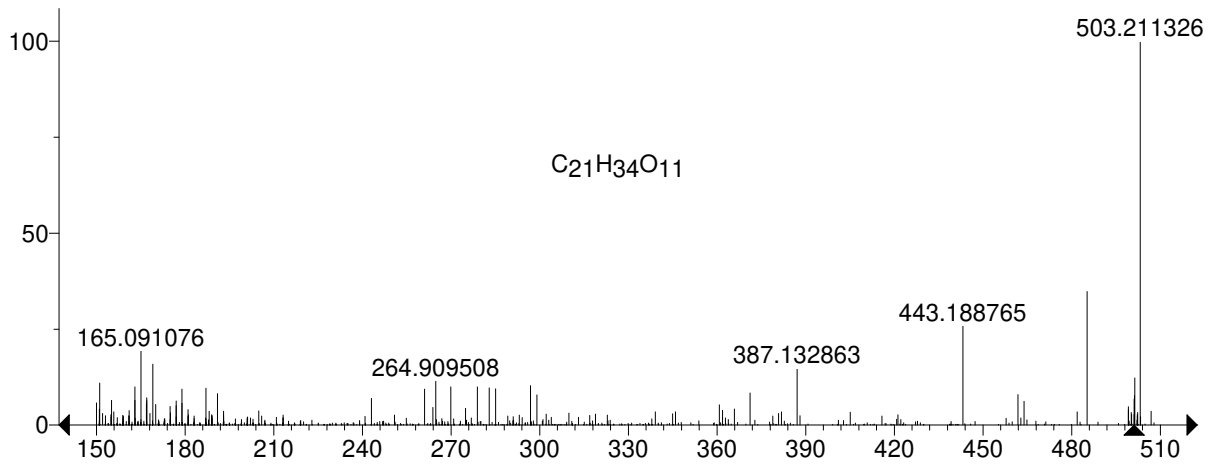

Unknown: Unknown (17.28\_620.1776m/z)  
Compound in Library Factor = 0

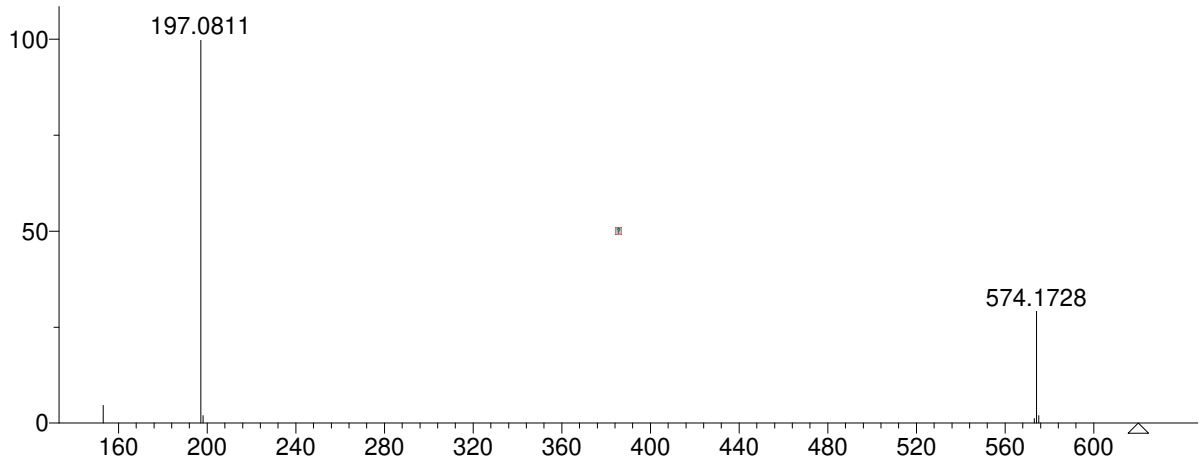

Hit 1 : BEKANAMYCIN SULFATE [M+K]<sup>+</sup> 35% P=620.2  
C<sub>18</sub>H<sub>39</sub>N<sub>5</sub>O<sub>14</sub>S; MF: 0; RMF: 2; Prob 100.0%; Lib: mona-export-itree; ID: 1511.

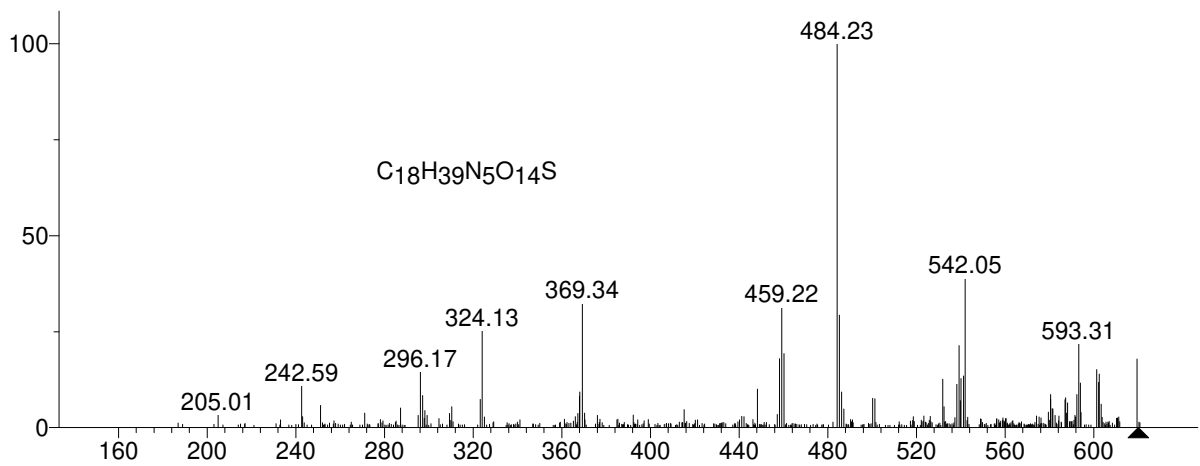

Unknown: Unknown (17.30\_431.4242m/z)  
Compound in Library Factor = 0

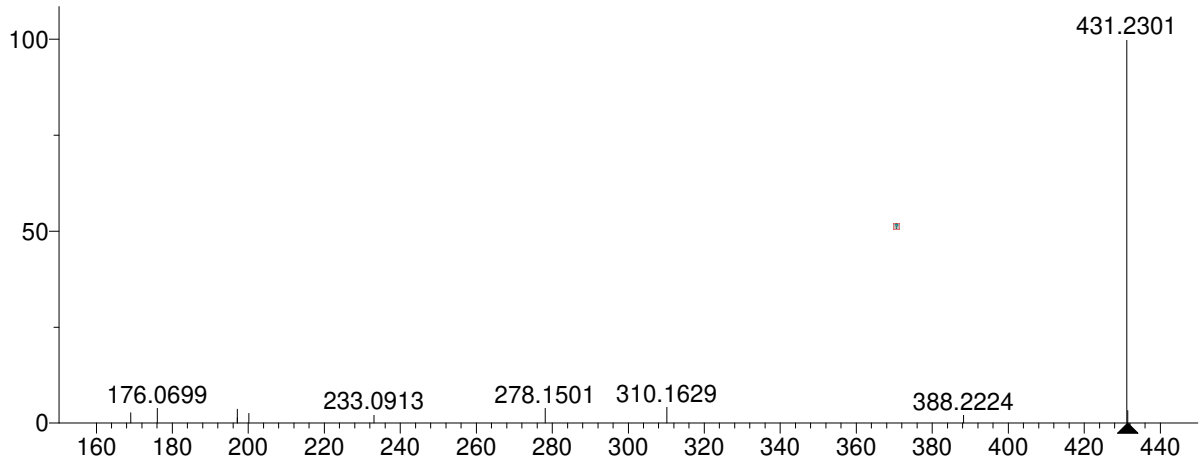



Unknown: Unknown (17.30\_636.0978m/z)  
Compound in Library Factor = 0

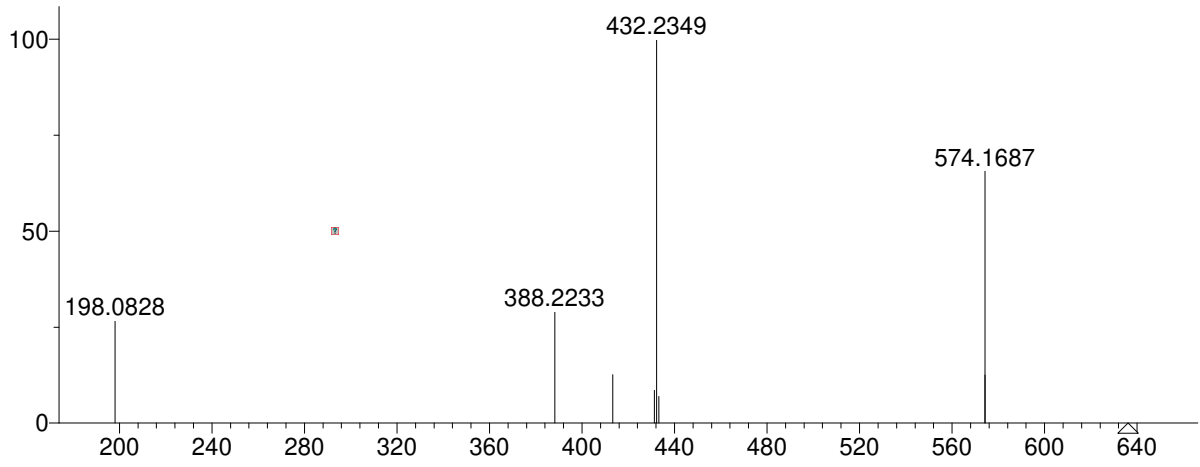

Unknown: Unknown (17.32\_659.2451 m/z)  
Compound in Library Factor = 0

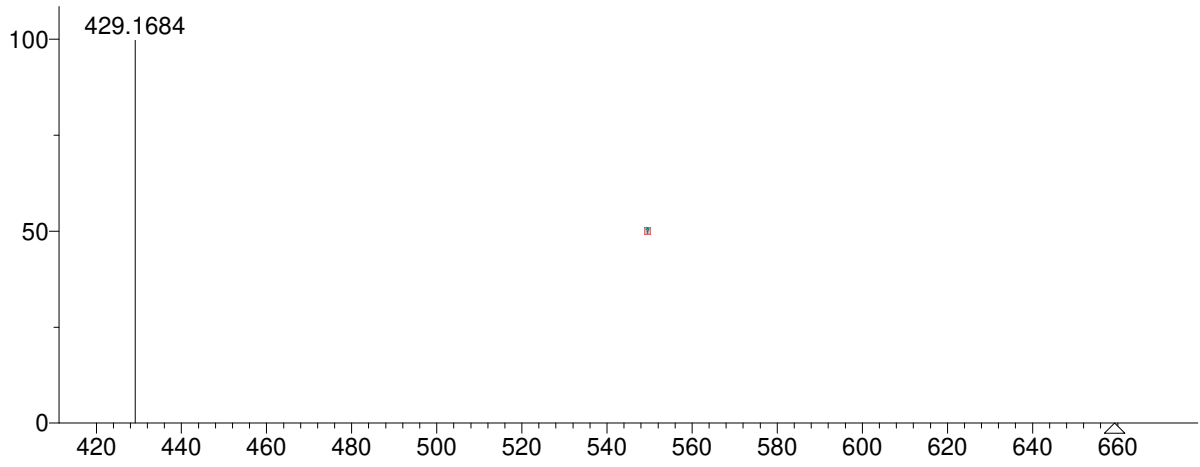

Unknown: Unknown (17.34\_267.1594m/z)  
Compound in Library Factor = -1309

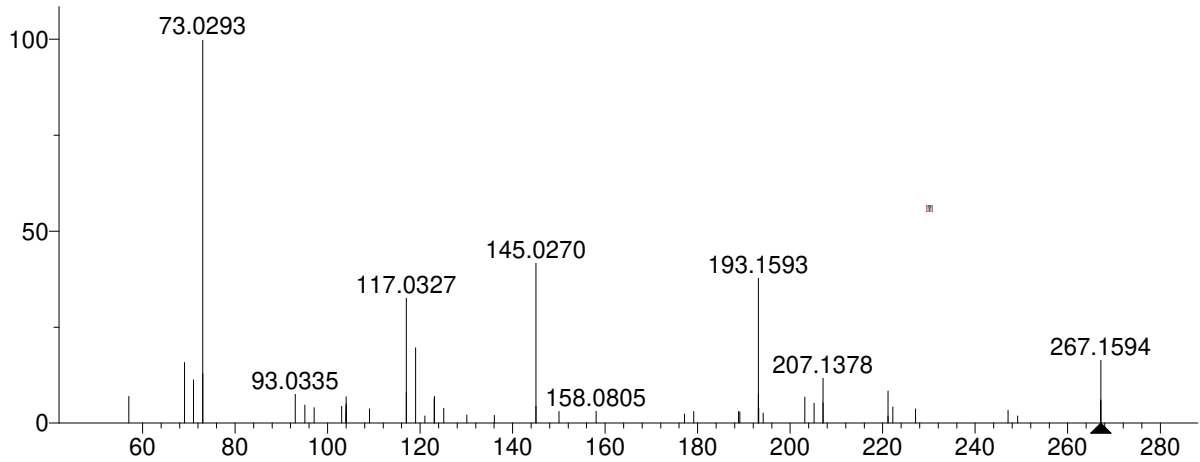

Hit 1 : Dihydroartemisinin [M+H-H<sub>2</sub>O]<sup>+</sup> HCD 7V P=267.2  
C<sub>15</sub>H<sub>24</sub>O<sub>5</sub>; MF: 67; RMF: 264; Prob 25.4%; CAS: 71939-50-9; Lib: nist\_msms; ID: 121293.

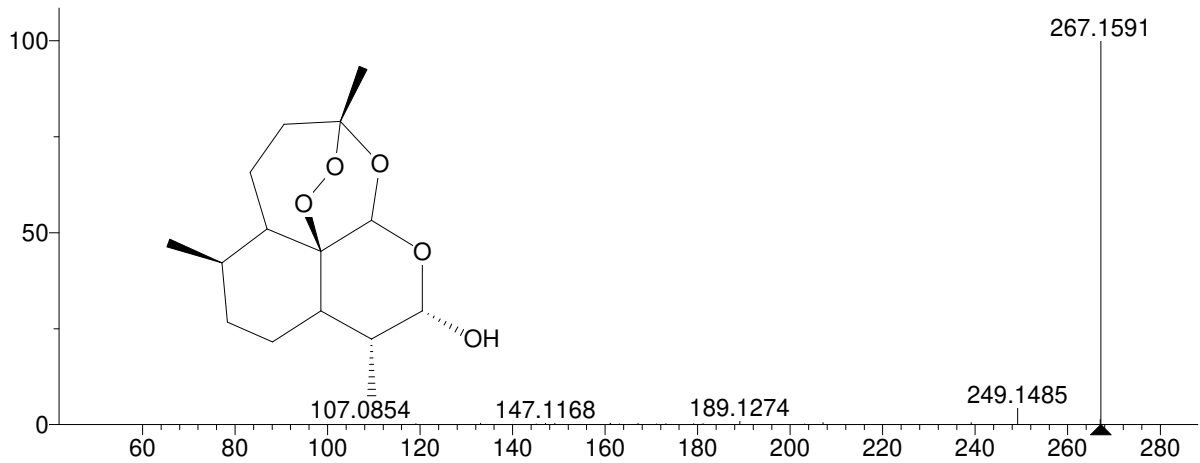

Hit 2 : NCGC00381369-01\_C<sub>15</sub>H<sub>22</sub>O<sub>4</sub>\_3a,7-Ethano-3aH-indene-4-carboxylic acid, octahydro-6-hydroxy-3,8,8-tri  
C<sub>15</sub>H<sub>22</sub>O<sub>4</sub>; MF: 8; RMF: 137; Prob 4.59%; Lib: mona-export-gnps; ID: 10301.

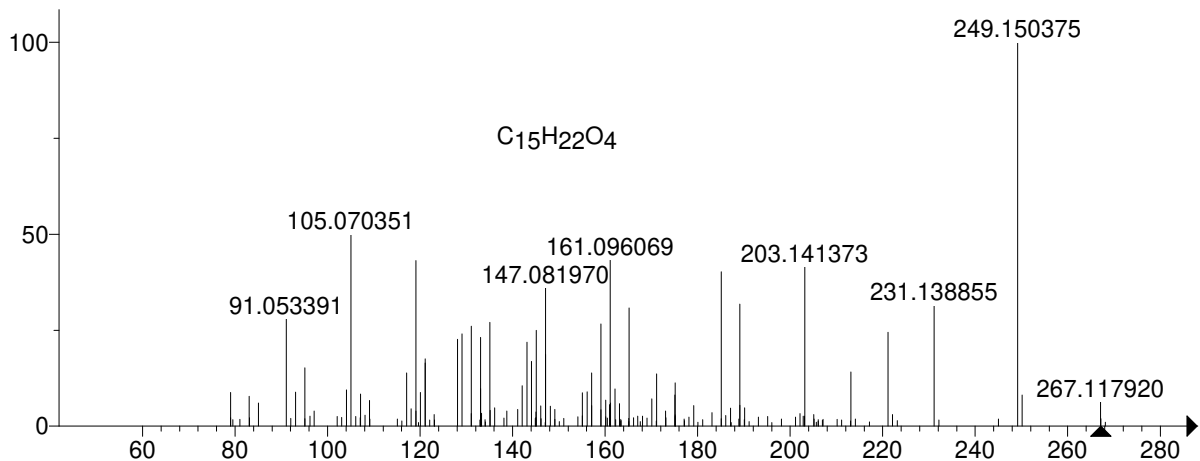

\*\* Search Report Page 2 of 2 \*\*

Hit 3 : NCGC00380735-01\_C15H22O4\_Naphtho[2,3-b]furan-2(4H)-one, 4a,5,6,7,8,8a,9,9a-octahydro-9,9a-dihyd  
C15H22O4; MF: 8; RMF: 136; Prob 4.59%; Lib: mona-export-gnps; ID: 11971.

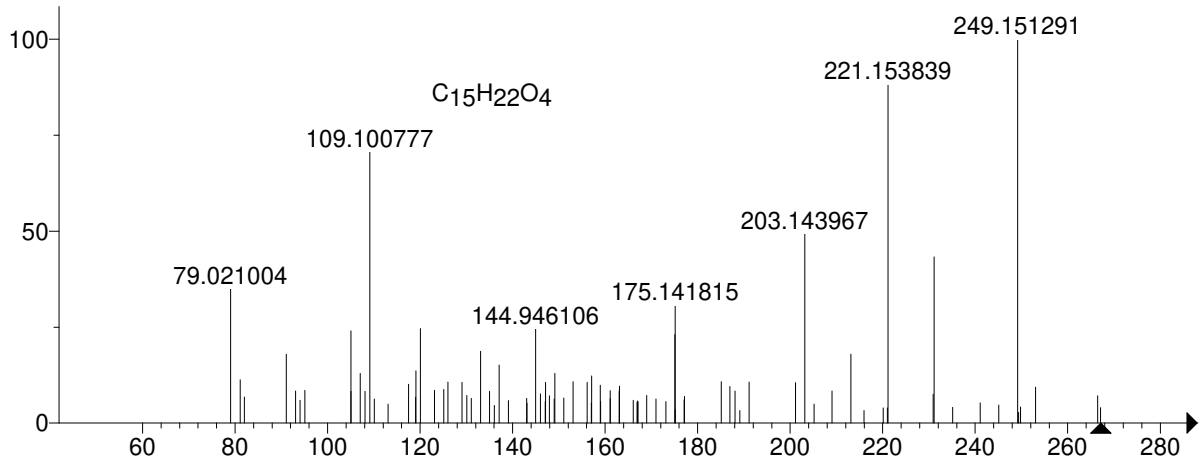

Hit 4 : NCGC00385633-01\_C15H22O4\_Naphtho[1,2-c]furan-3(1H)-one, 5,5a,6,7,8,9,9a,9b-octahydro-5-hydroxy-  
C15H22O4; MF: 7; RMF: 140; Prob 4.41%; Lib: mona-export-gnps; ID: 13883.

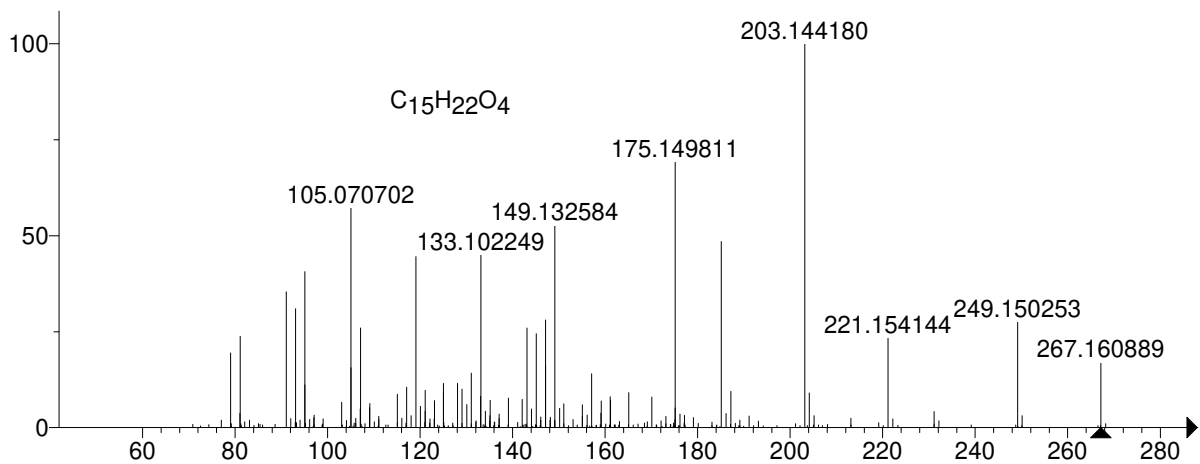

Hit 5 : 1,4-dihydroxy-6,6,9a-trimethyl-4,5,5a,7,8,9-hexahydro-1H-benzo[e][2]benzofuran-3-one [M+H]<sup>+</sup> 35HCD I  
C15H22O4; MF: 7; RMF: 136; Prob 4.41%; Lib: mona-export-vf-npl\_qexactive; ID: 10777.

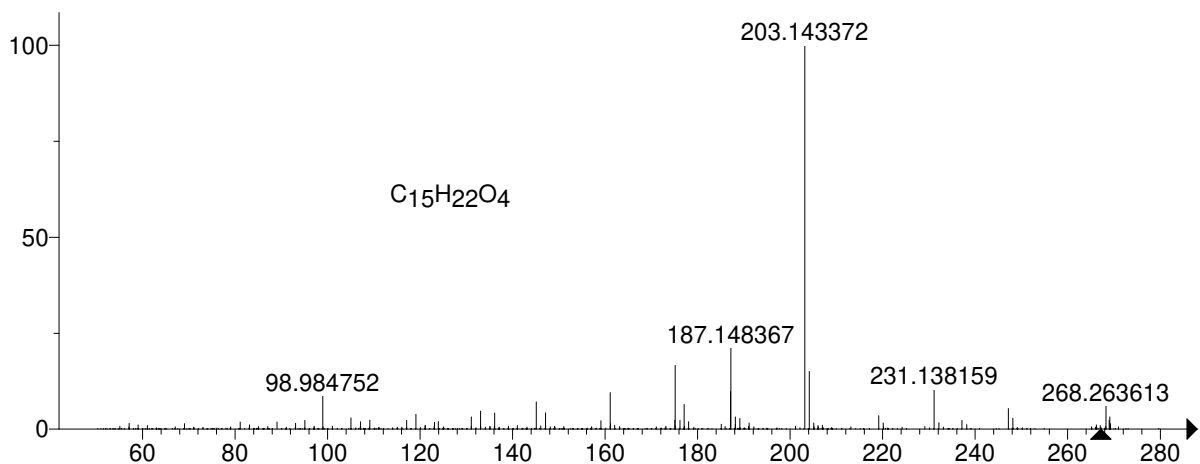

Unknown: Unknown (17.36\_445.2446m/z)  
Compound in Library Factor = 0

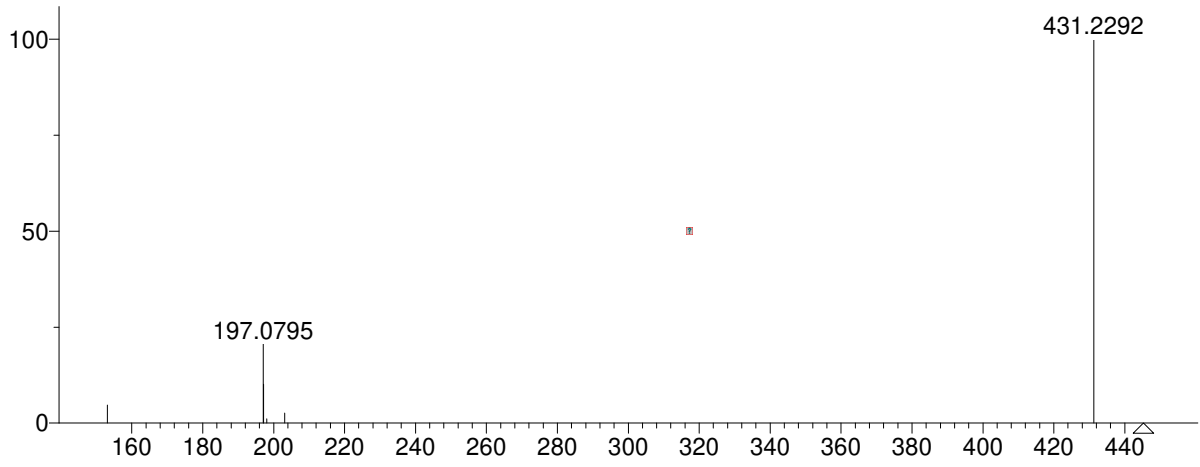

Unknown: Unknown (17.37\_401.2186m/z)  
Compound in Library Factor = -2387

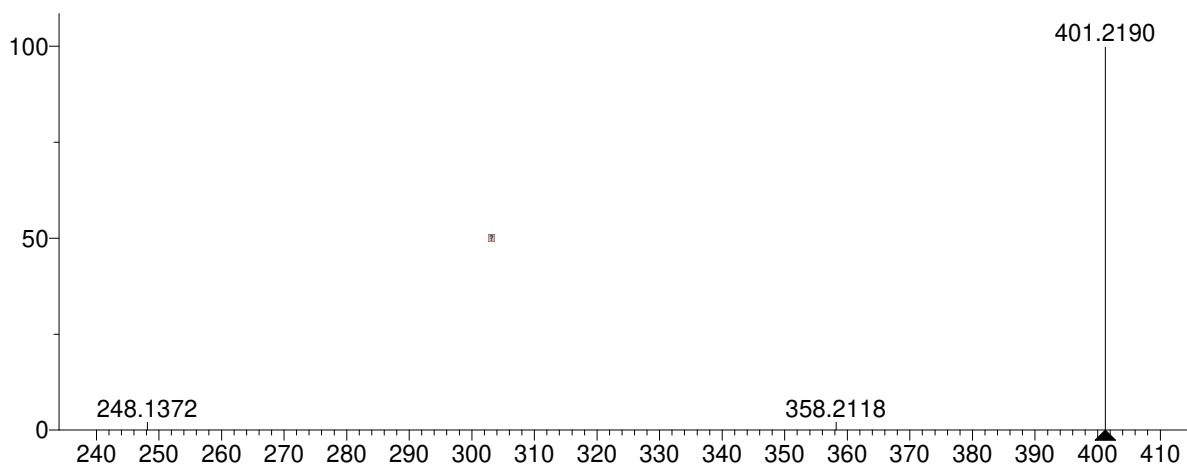

Hit 1 : GTP-Binding Protein Fragment, Gs alpha [M+5H]<sup>5+</sup> HCD 12eV P=401.2  
C<sub>85</sub>H<sub>144</sub>N<sub>30</sub>O<sub>24</sub>S; MF: 17; RMF: 540; Prob 100.0%; Lib: nist\_msms2; ID: 57649.

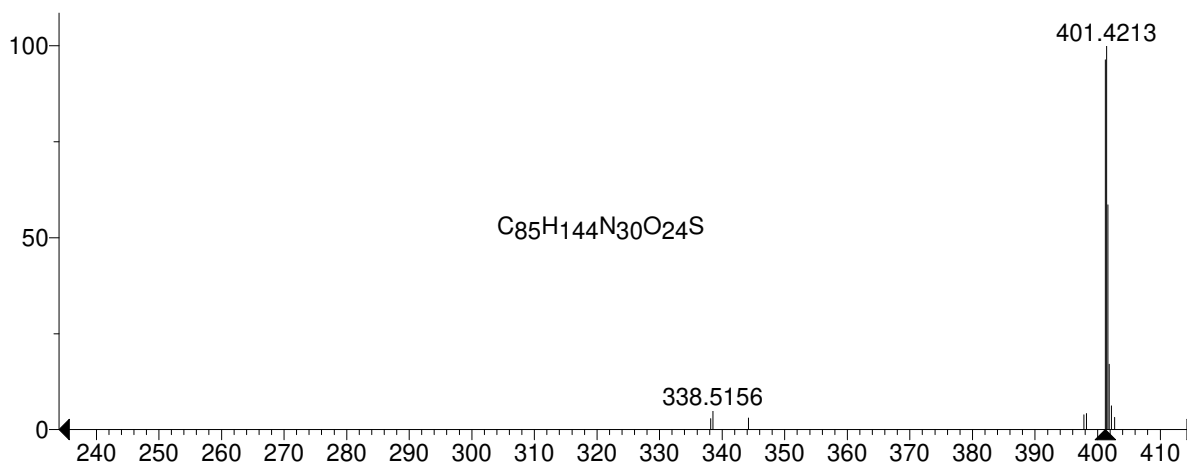

Unknown: Unknown (17.37\_501.1762m/z)  
Compound in Library Factor = 0

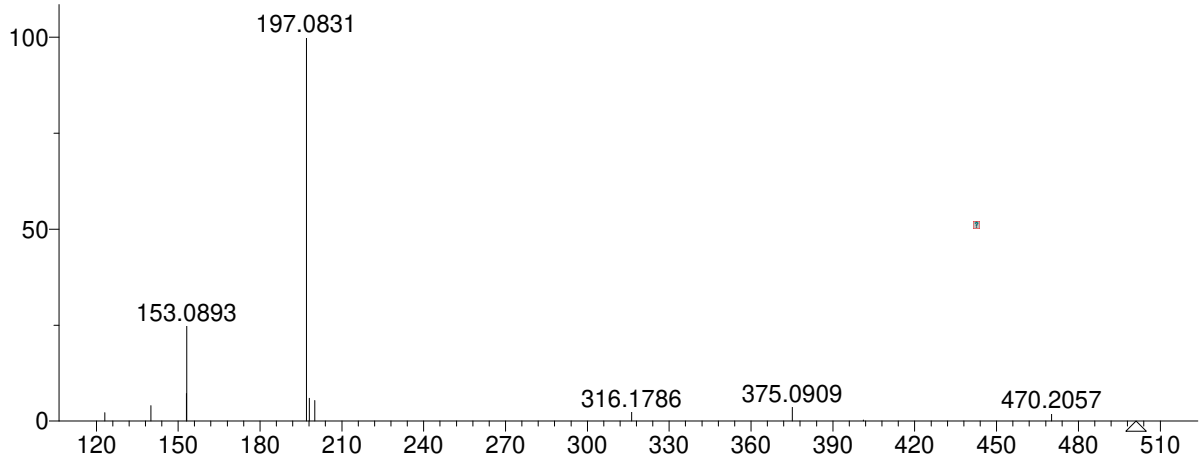

Hit 1 : (1R,4S,7S,8S,9R,12E,20R,21R,22S,23S)-7,8,21,22,23-pentahydroxy-12,16-dimethyl-3,5,10,19,24-pentaoxocane; MF: 0; RMF: 64; Prob 33.3%; Lib: mona-export-vf-npl\_qexactive; ID: 19953.

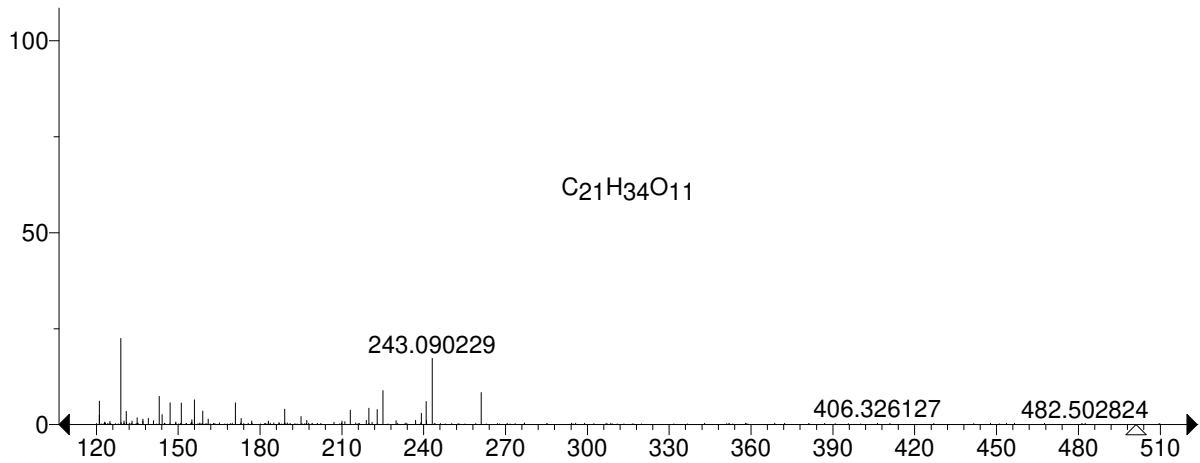

Hit 2 : (2S,3R,4S,5R)-2-[4-[7-hydroxy-3-(hydroxymethyl)-5-(3-hydroxypropyl)-2,3-dihydro-1-benzofuran-2-yl]-2-methoxyphenyl]propanoic acid; MF: 0; RMF: 43; Prob 33.3%; Lib: mona-export-vf-npl\_qexactive; ID: 1942.

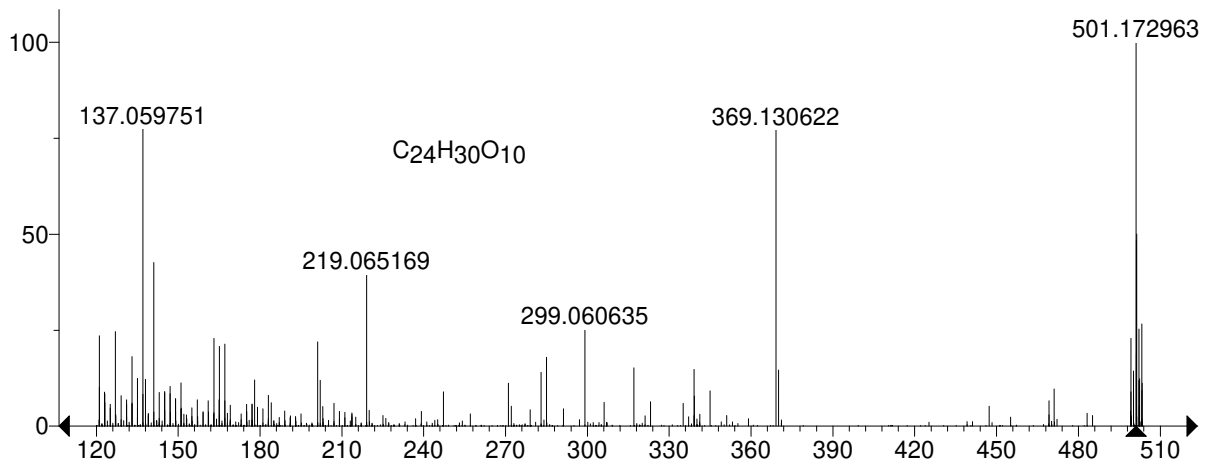

Hit 3 : (1R,4R,7S,11E,15S,19R,20R,21S,22S,24R)-7,20,21,22,24-pentahydroxy-11,15-dimethyl-3,5,9,18,23-pentac  
C<sub>21</sub>H<sub>34</sub>O<sub>11</sub>; MF: 0; RMF: 32; Prob 33.3%; Lib: mona-export-vf-npl\_qexactive; ID: 22608.

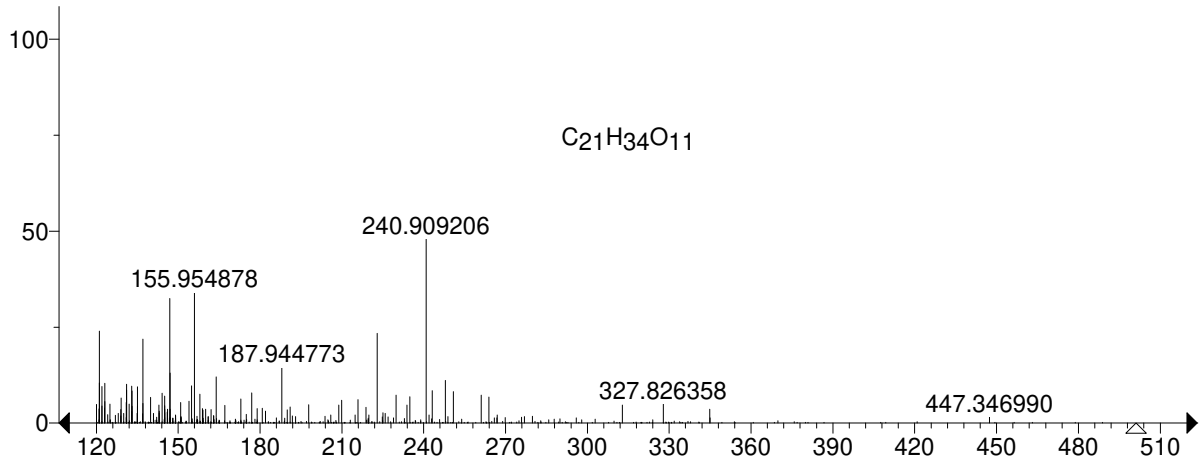



\*\* Search Report Page 1 of 2 \*\*

Unknown: Unknown (17.39\_394.1859m/z)  
Compound in Library Factor = -2387

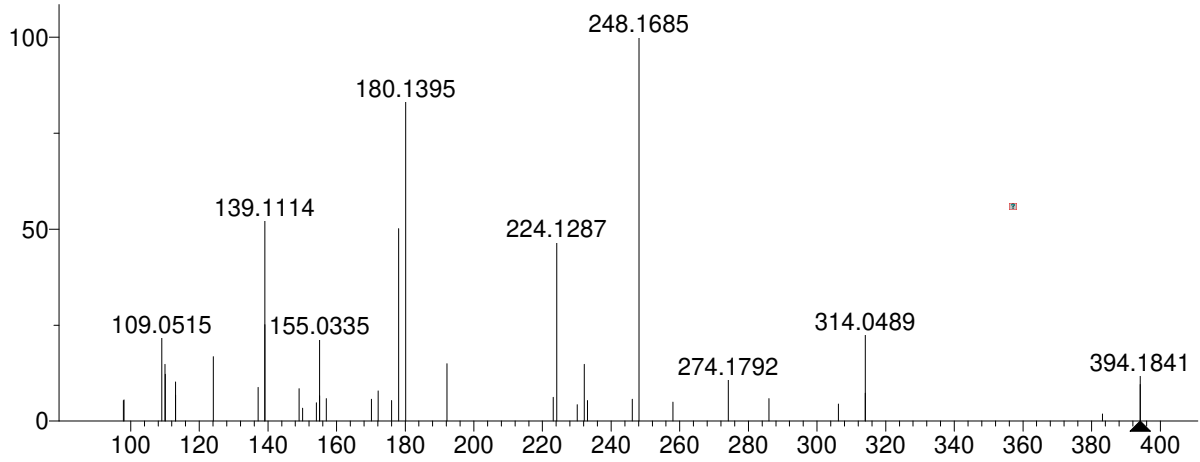

Hit 1 : 3',4',5'-Trimethoxycocaine [M+H]<sup>+</sup> HCD 15V P=394.2  
C<sub>20</sub>H<sub>27</sub>NO<sub>7</sub>; MF: 21; RMF: 194; Prob 15.5%; CAS: 156301-59-6; Lib: nist\_msms; ID: 383469.



Hit 2 : [1,3-dihydroxy-1-(7-methoxy-2-oxochromen-6-yl)-3-methylbutan-2-yl] 3-methylbut-2-enoate [M+NH<sub>4</sub>]<sup>+</sup> 35  
C<sub>20</sub>H<sub>24</sub>O<sub>7</sub>; MF: 2; RMF: 96; Prob 7.54%; Lib: mona-export-vf-npl\_qexactive; ID: 24781.

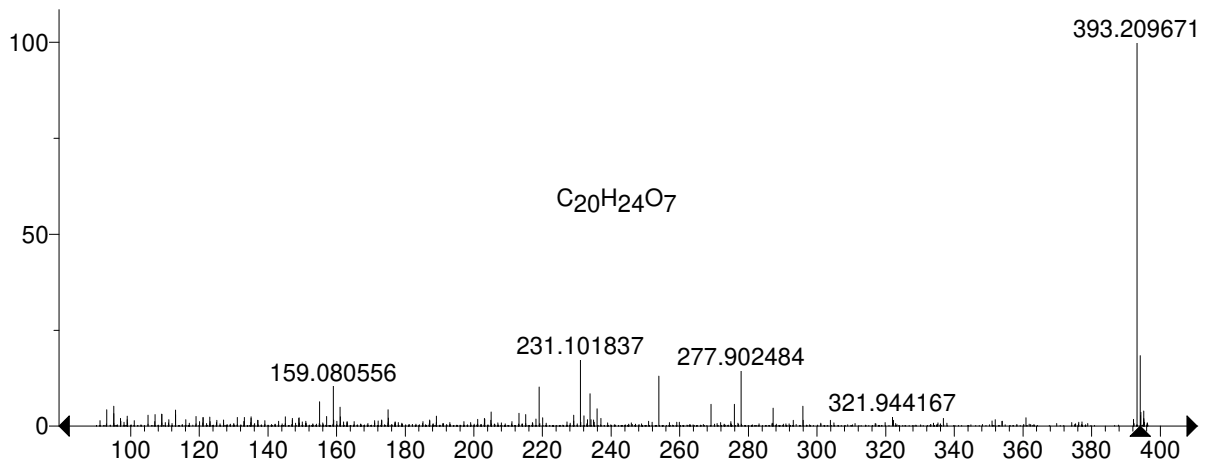

\*\* Search Report Page 2 of 2 \*\*

Hit 3 : [1,3-dihydroxy-1-(7-methoxy-2-oxochromen-6-yl)-3-methylbutan-2-yl] (E)-2-methylbut-2-enoate [M+NH4]<sup>+</sup> C<sub>20</sub>H<sub>24</sub>O<sub>7</sub>; MF: 1; RMF: 61; Prob 7.24%; Lib: mona-export-vf-npl\_qexactive; ID: 5461.

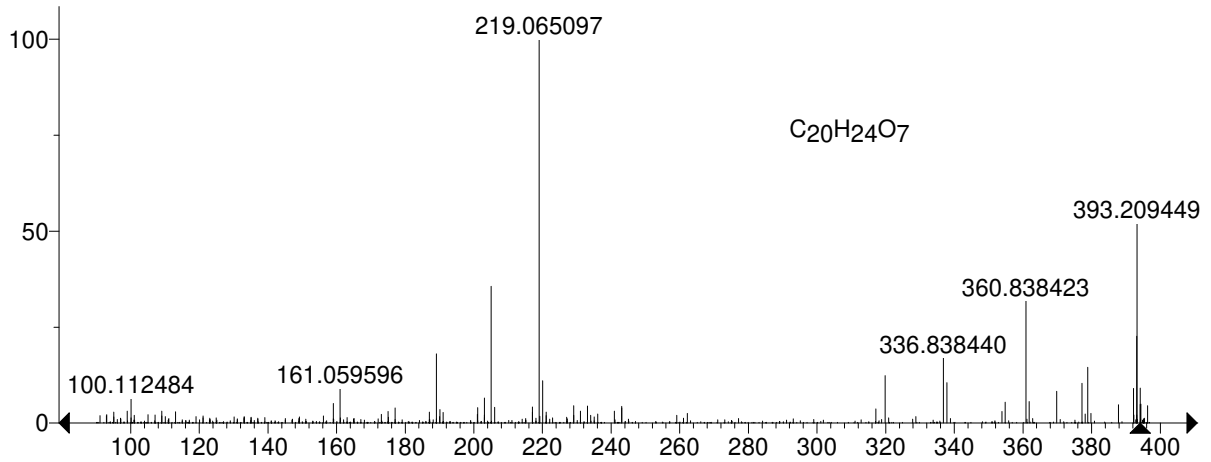

Hit 4 : rac-N,N-Didesmethyl-O-desmethylvenlafaxine glucuronide [M+H-H<sub>2</sub>O]<sup>+</sup> HCD 11V P=394.2 C<sub>20</sub>H<sub>29</sub>NO<sub>8</sub>; MF: 0; RMF: 108; Prob 6.96%; CAS: 1799830-07-1; Lib: nist\_msms; ID: 436197.

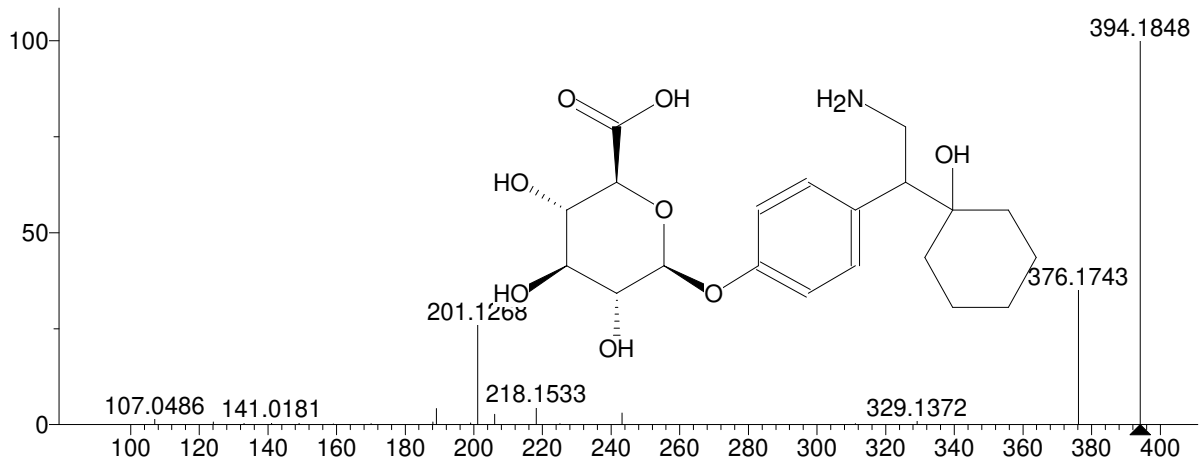

Hit 5 : NCGC00381074-01! [1,3-dihydroxy-1-(7-methoxy-2-oxochromen-6-yl)-3-methylbutan-2-yl] 3-methylbut-2-er C<sub>20</sub>H<sub>24</sub>O<sub>7</sub>; MF: 0; RMF: 57; Prob 6.96%; Lib: mona-export-gnps; ID: 8644.

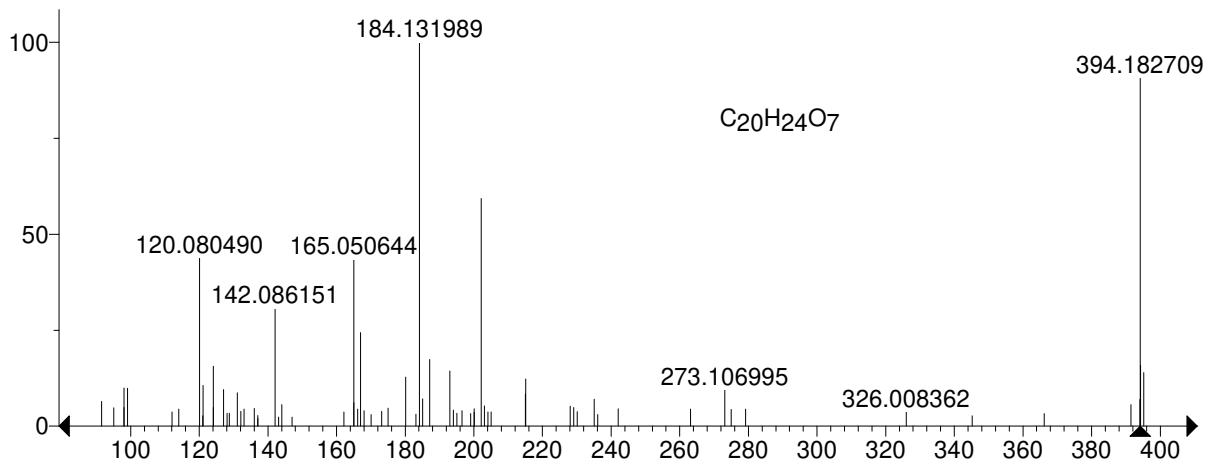

Unknown: Unknown (17.45\_423.2128m/z)  
Compound in Library Factor = -3273

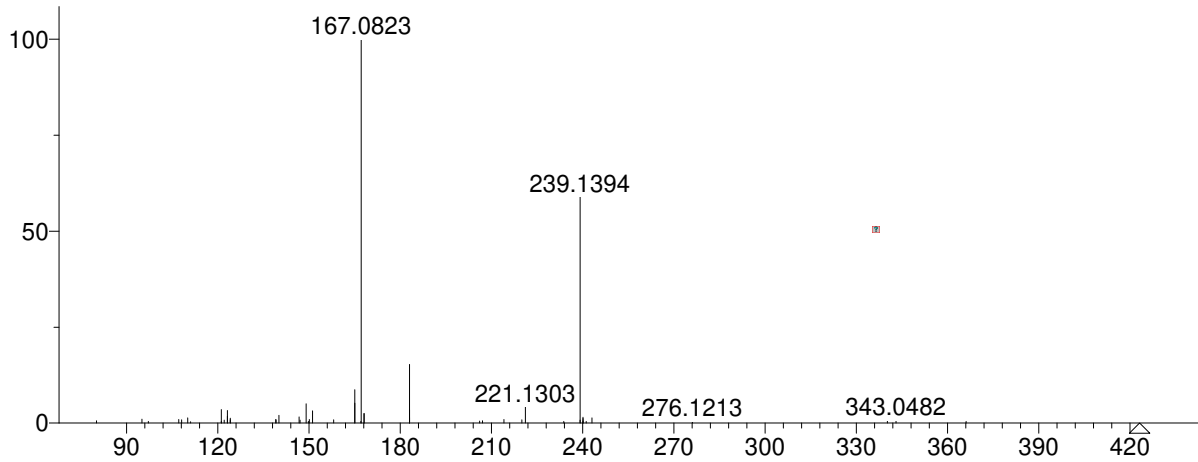

Hit 1 : Cinobufotalin [M+H-2H<sub>2</sub>O]<sup>+</sup> HCD 50V P=423.2  
C<sub>26</sub>H<sub>34</sub>O<sub>7</sub>; MF: 4; RMF: 98; Prob 22.1%; CAS: 1108-68-5; Lib: nist\_msms; ID: 391346.

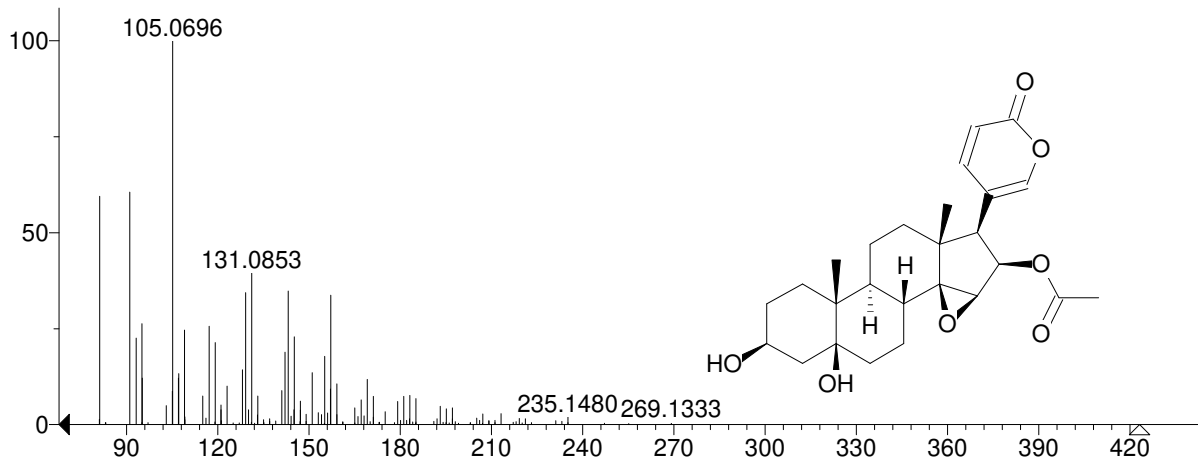

Hit 2 : [4,5-dihydroxy-3,4-bis(hydroxymethyl)-4a,8,8-trimethyl-5,6,7,8a-tetrahydro-1H-naphthalen-1-yl] hexanoate  
C<sub>21</sub>H<sub>36</sub>O<sub>6</sub>; MF: 2; RMF: 84; Prob 20.4%; Lib: mona-export-vf-npl\_qexactive; ID: 8154.

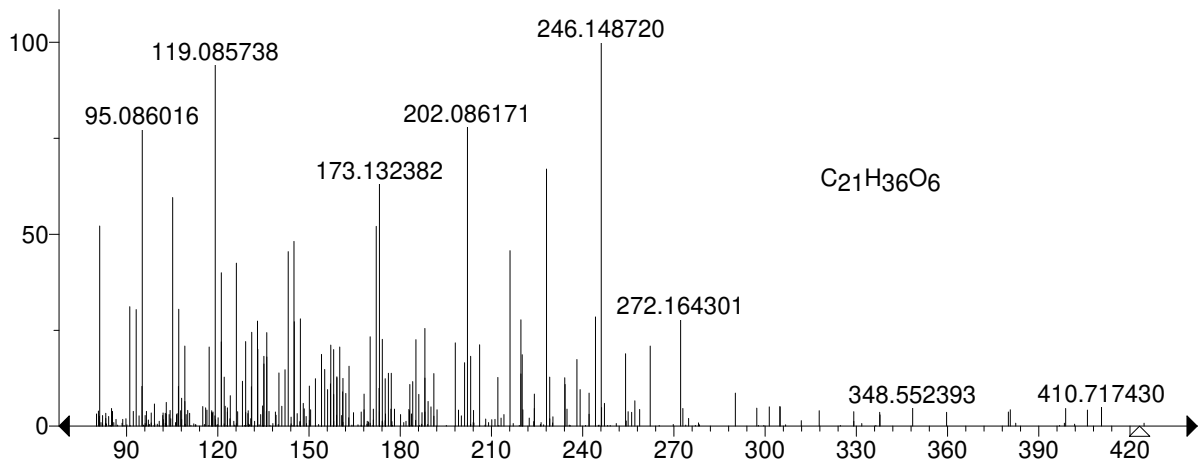

Hit 3 : 4-Methylabysynone V [M+H]<sup>+</sup> 65HCD P=423.2  
C<sub>26</sub>H<sub>30</sub>O<sub>5</sub>; MF: 1; RMF: 40; Prob 19.6%; Lib: mona-export-vf-npl\_gexactive; ID: 6033.

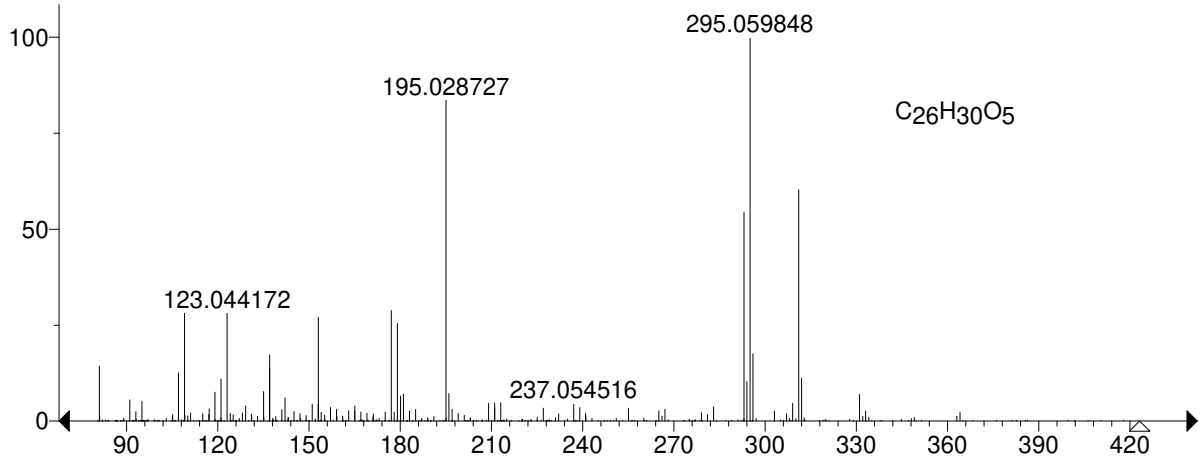

Hit 4 : NCGC00384666-01!(2S)-5,7-dihydroxy-2-[4-methoxy-3,5-bis(3-methylbut-2-enyl)phenyl]-2,3-dihydrochrom  
C<sub>26</sub>H<sub>30</sub>O<sub>5</sub>; MF: 0; RMF: 38; Prob 18.9%; Lib: mona-export-gnps; ID: 7800.

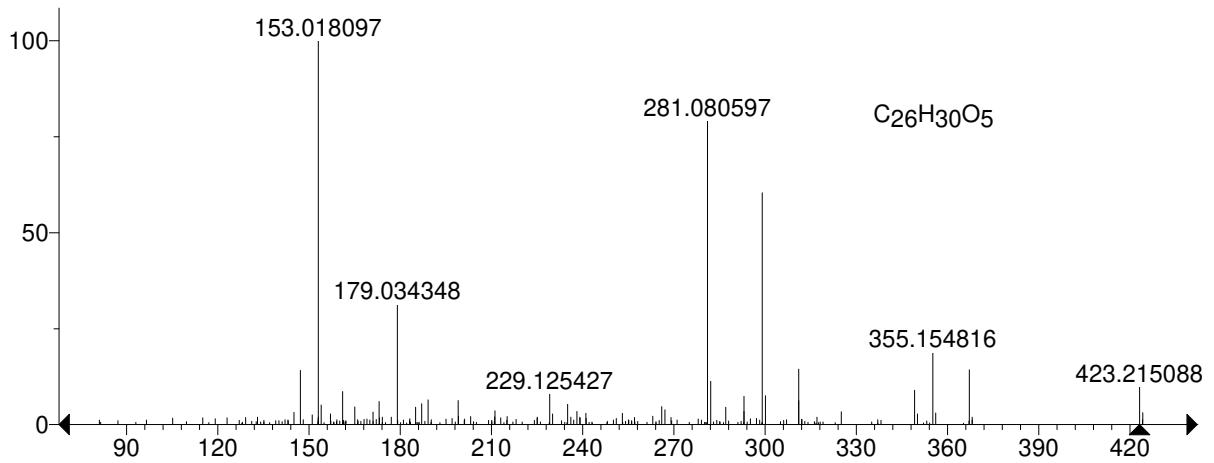

Hit 5 : PyroGlu-His-Arg [M+H]<sup>+</sup> QTOF 20V P=423.2  
C<sub>17</sub>H<sub>26</sub>N<sub>8</sub>O<sub>5</sub>; MF: 0; RMF: 12; Prob 18.9%; Lib: nist\_msms; ID: 53165.

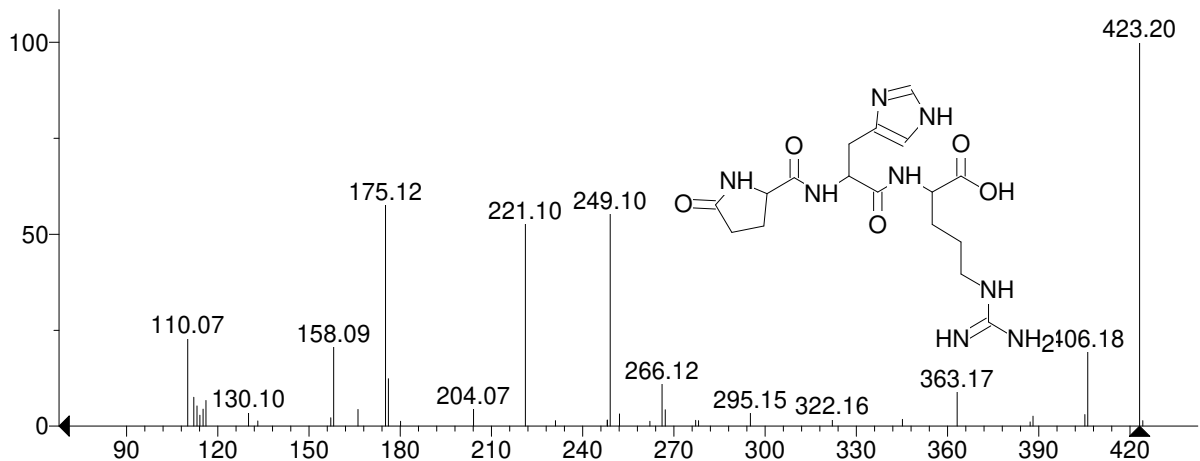

Unknown: Unknown (17.46\_568.1343m/z)  
Compound in Library Factor = 0

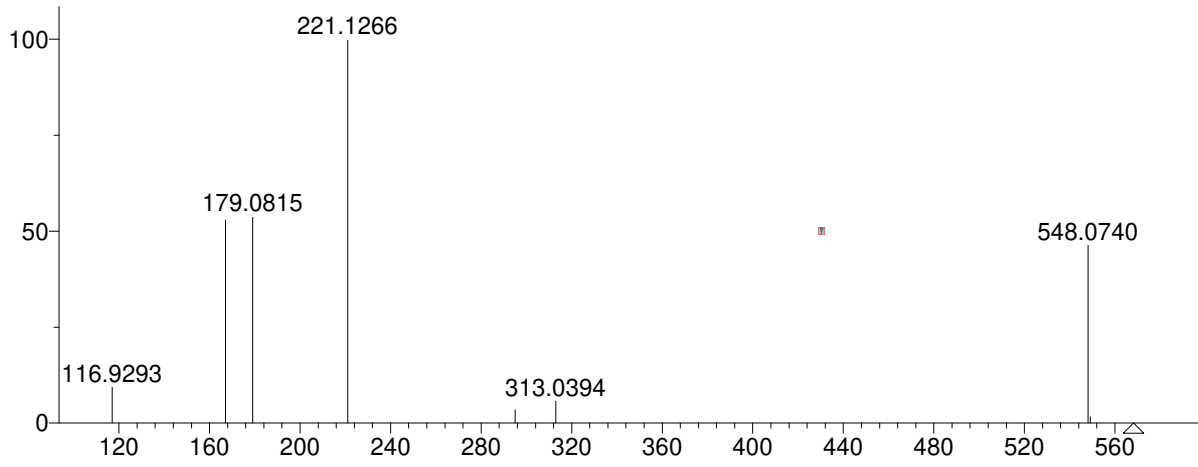

Unknown: Unknown (17.50\_267.1589m/z)  
Compound in Library Factor = -3273

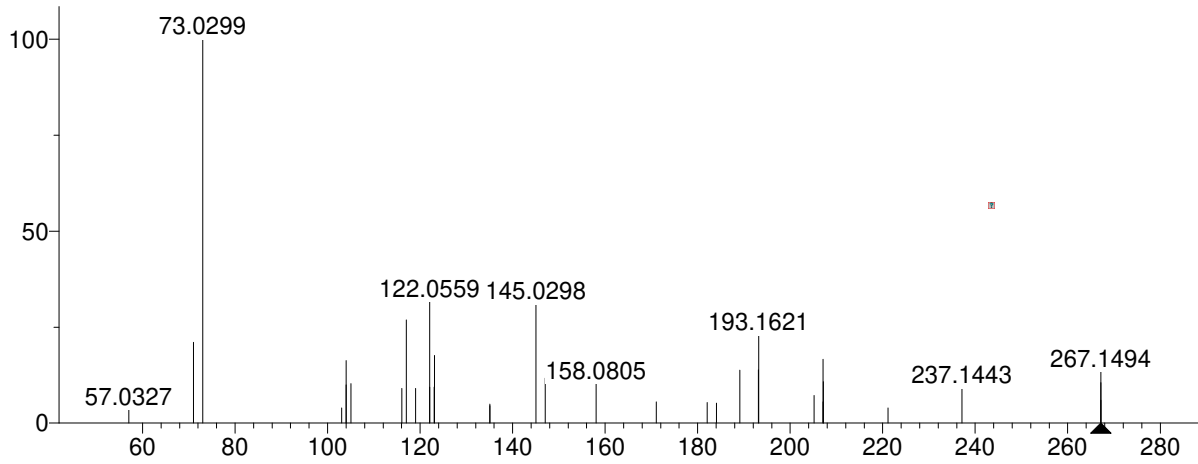

Hit 1 : Dihydroartemisinin [M+H-H<sub>2</sub>O]<sup>+</sup> HCD 10V P=267.2  
C<sub>15</sub>H<sub>24</sub>O<sub>5</sub>; MF: 9; RMF: 195; Prob 6.72%; CAS: 71939-50-9; Lib: nist\_msms; ID: 121294.

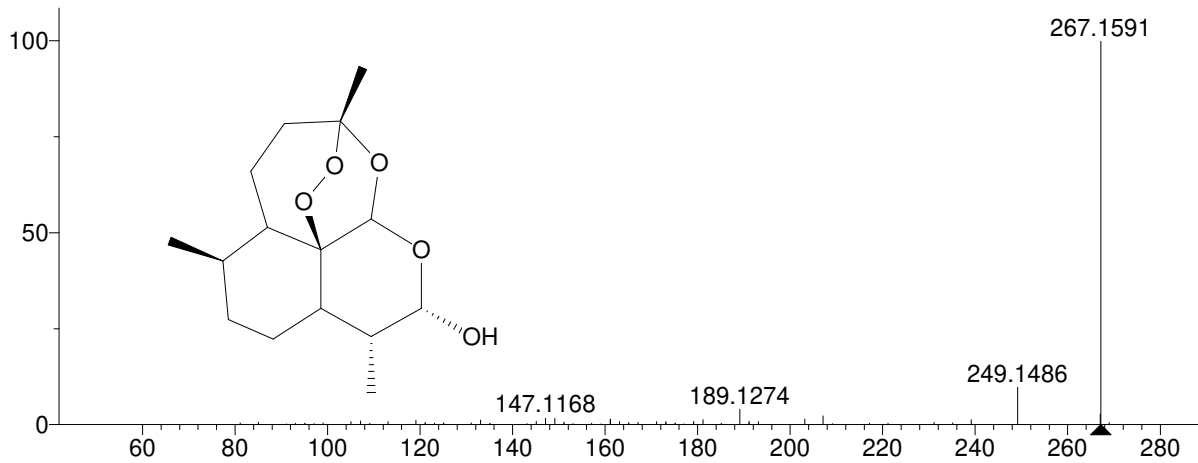

Hit 2 : 4,6-dihydroxy-4-(hydroxymethyl)-3,4a,8,8-tetramethyl-5,6,7,8a-tetrahydronaphthalen-1-one [M-H]<sup>-</sup> 35HCl  
C<sub>15</sub>H<sub>24</sub>O<sub>4</sub>; MF: 4; RMF: 122; Prob 5.42%; Lib: mona-export-1c-ms-ms\_negative\_mode; ID: 19568.

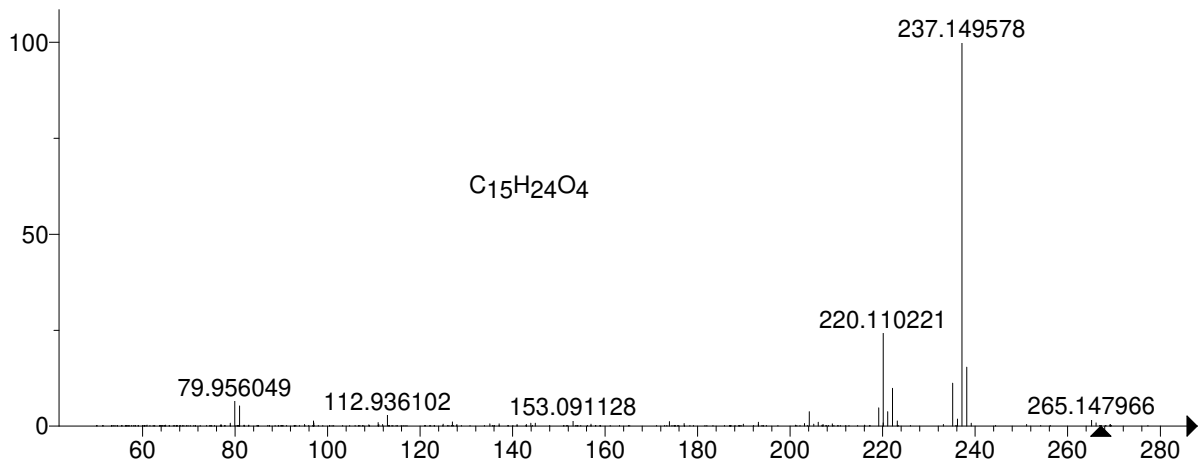

\*\* Search Report Page 2 of 2 \*\*

Hit 3 : NCGC00385871-01\_C15H22O4\_2,8-Dihydroxy-5,5,8-trimethyl-11-oxatetracyclo[7.3.1.0~1,9~.0~3,7~]tridecane  
C15H22O4; MF: 3; RMF: 71; Prob 5.21%; Lib: mona-export-gnps; ID: 10011.

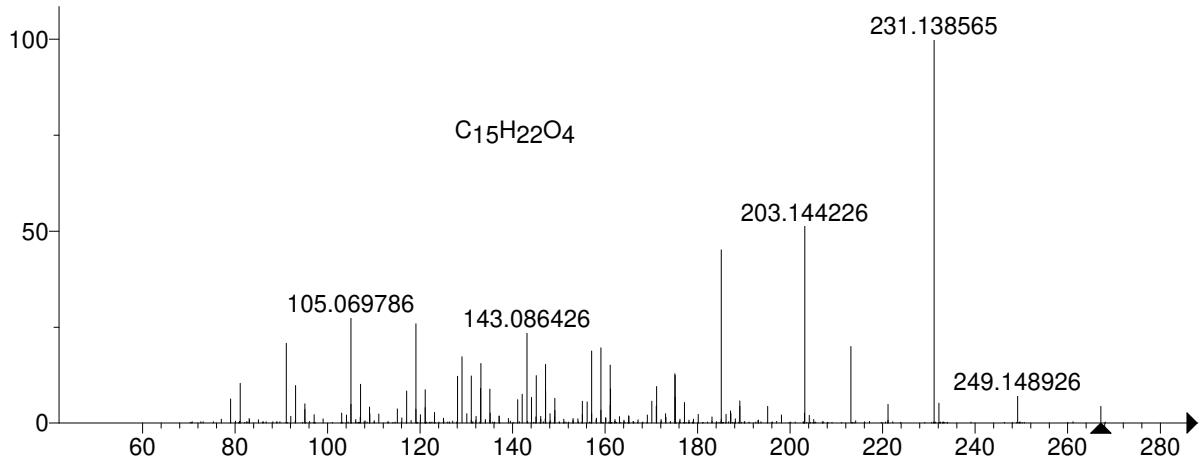

Hit 4 : NCGC00385923-01\_C15H22O4\_2-[(1E,3E)-1,3-Hexadien-1-yl]-5-(3-hydroxy-2-methoxypropyl)-2-methyl-3  
C15H22O4; MF: 2; RMF: 94; Prob 5.00%; Lib: mona-export-gnps; ID: 14368.

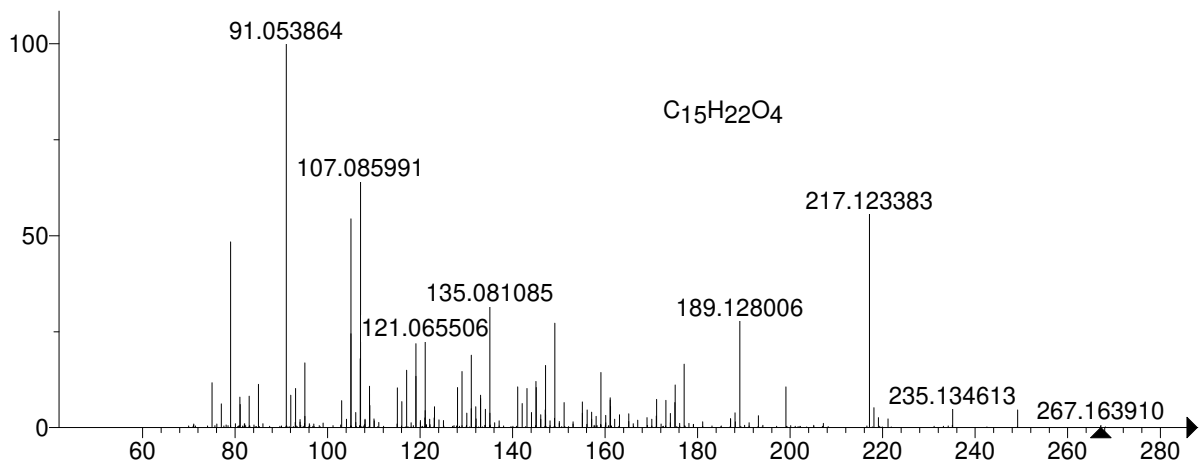

Hit 5 : (4aR,5S)-9,9a-dihydroxy-3,4a,5-trimethyl-5,6,7,8,8a,9-hexahydro-4H-benzo[f][1]benzofuran-2-one [M+H]<sup>+</sup>  
C15H22O4; MF: 2; RMF: 91; Prob 5.00%; Lib: mona-export-vf-npl\_qexactive; ID: 1837.

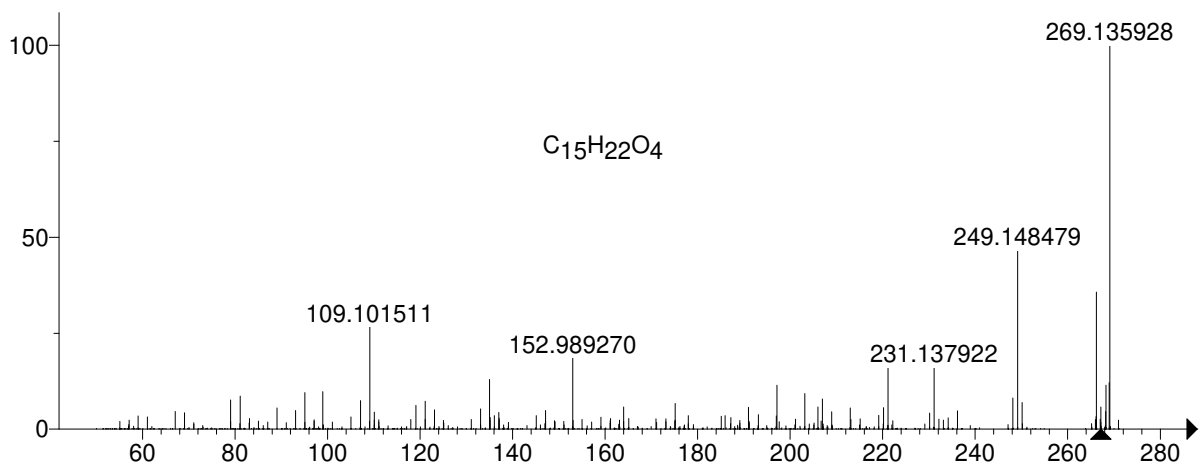

Unknown: Unknown (17.52\_418.1486m/z)  
Compound in Library Factor = 0

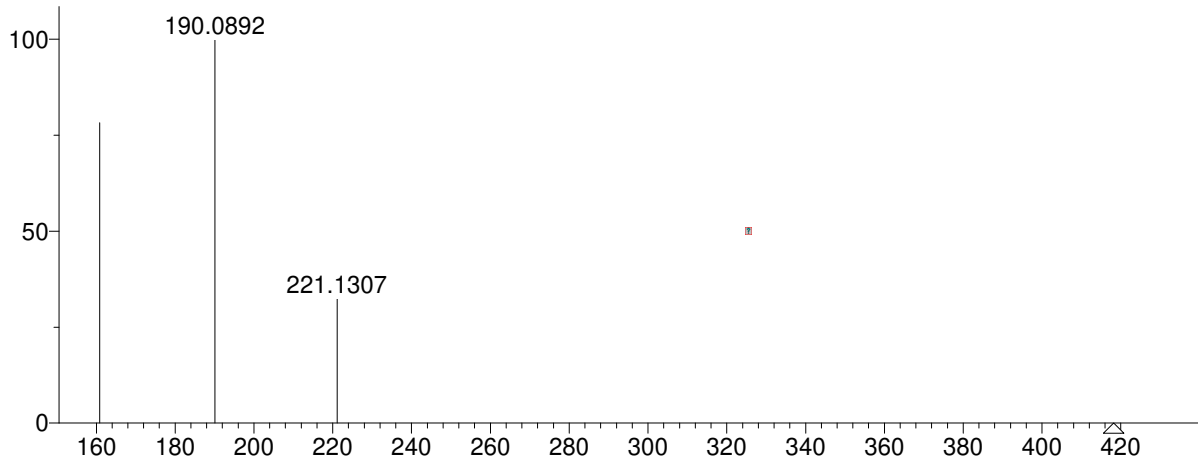

Hit 1 : NCGC00380250-01\_C21H23NO8\_(2E)-4-(((3S,3aR,4E,7aS)-7-Hydroxy-4-[(2E,4E)-1-hydroxy-2,4-hexadie  
C21H23NO8; MF: 0; RMF: 69; Prob 50.0%; Lib: mona-export-gnps; ID: 11631.

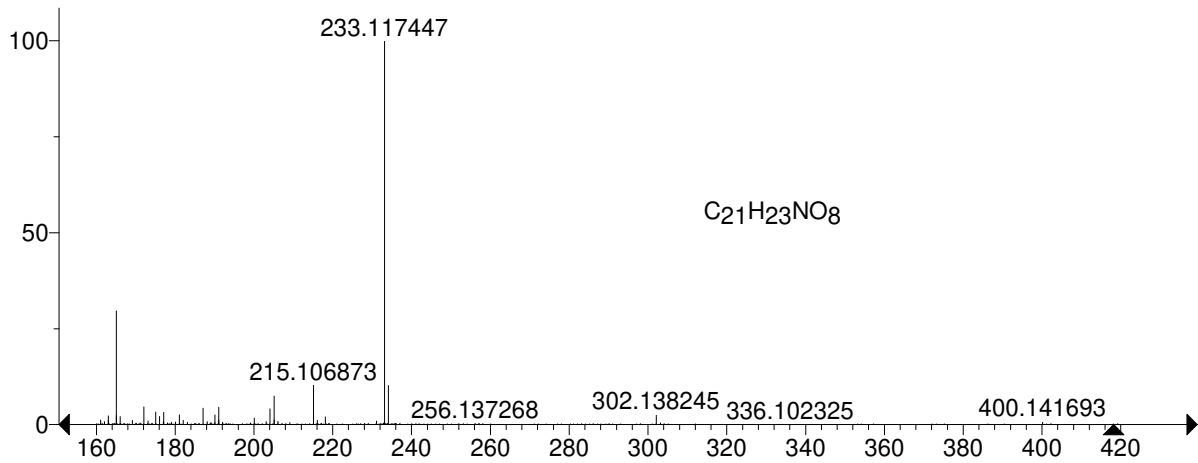

Hit 2 : 3,8-dihydroxy-7,14-dimethoxy-17-methyl-12,16,21-trioxapentacyclo[15.3.1.0A<sup>2</sup>,A<sup>1</sup>a<sup>u</sup>.0a<sup>u</sup>,A<sup>1</sup>A<sup>3</sup>.0a  
C21H20O8; MF: 0; RMF: 2; Prob 50.0%; Lib: mona-export-vf-npl\_qexactive; ID: 17720.

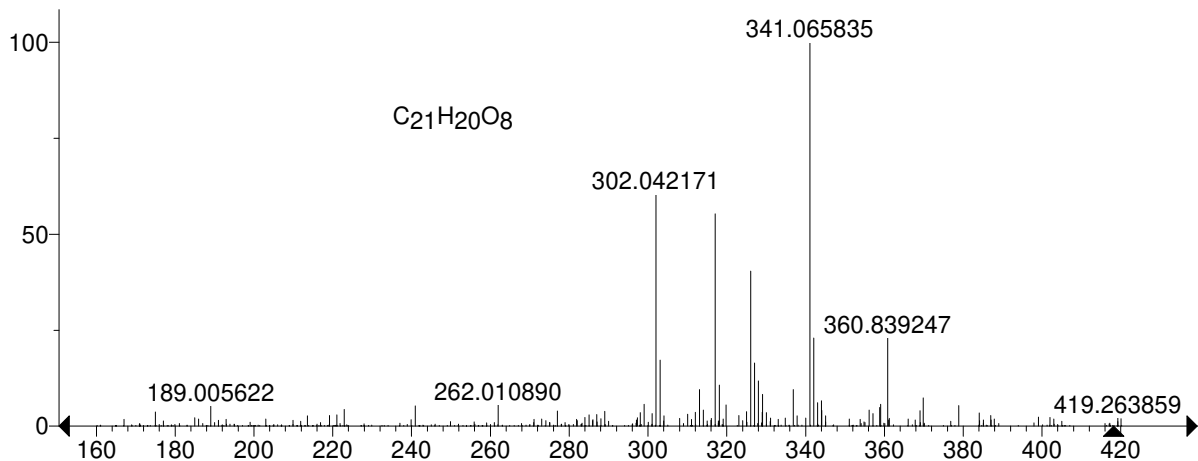



Unknown: Unknown (17.54\_370.9883m/z)  
Compound in Library Factor = 0

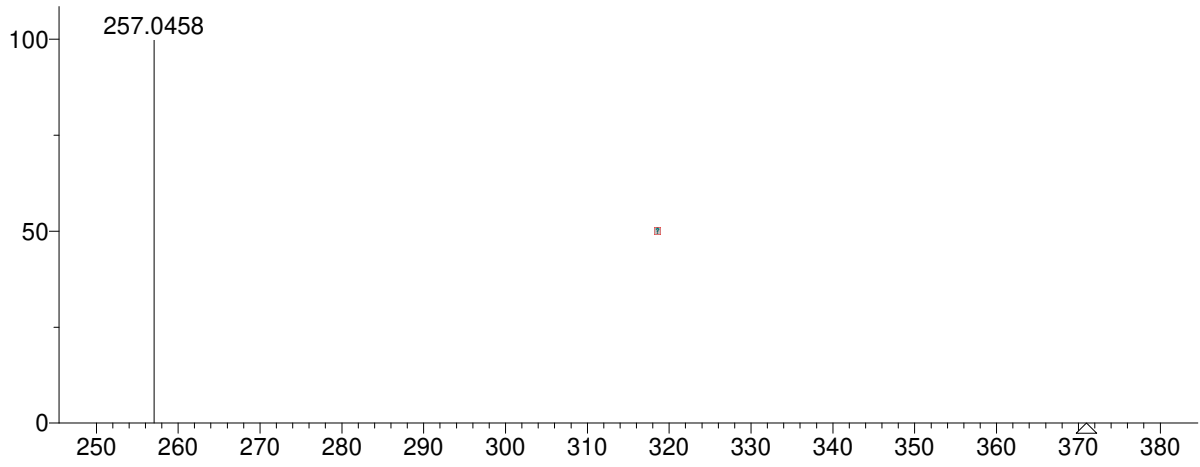

Unknown: Unknown (17.56\_394.1856m/z)  
Compound in Library Factor = -2387

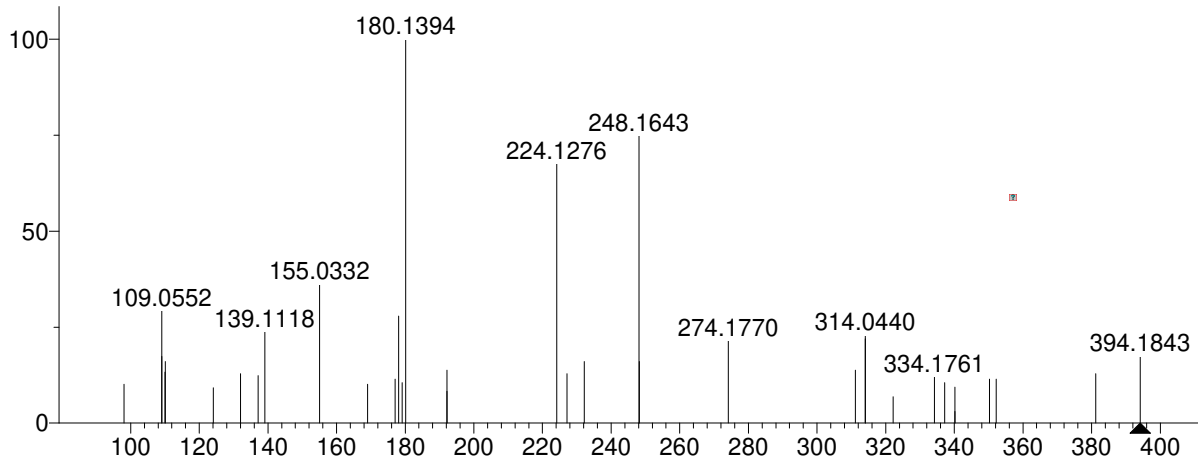

Hit 1 : 3',4',5'-Trimethoxycocaine [M+H]<sup>+</sup> HCD 15V P=394.2  
C<sub>20</sub>H<sub>27</sub>NO<sub>7</sub>; MF: 22; RMF: 201; Prob 15.3%; CAS: 156301-59-6; Lib: nist\_msms; ID: 383469.

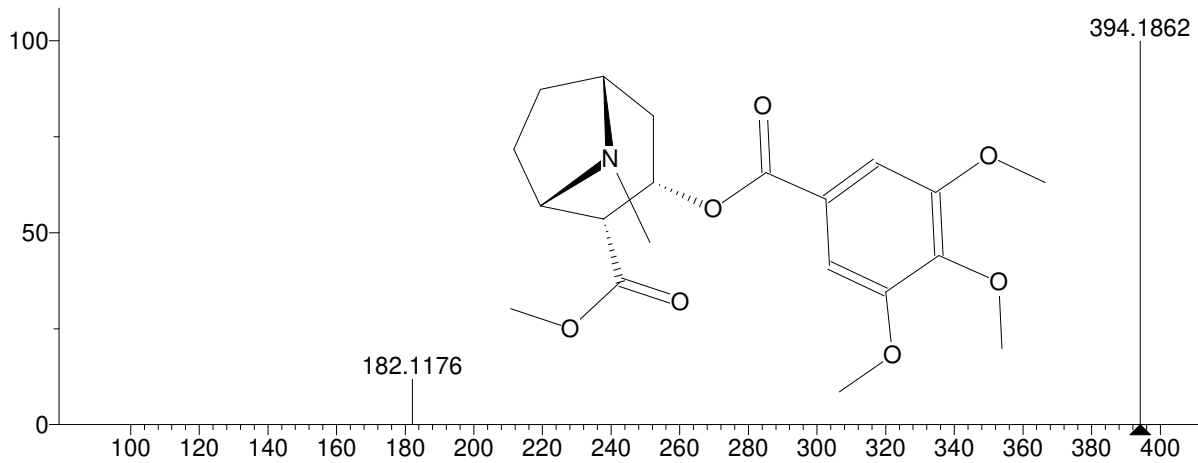

Hit 2 : rac-N,N-Didesmethyl-O-desmethylvenlafaxine glucuronide [M+H-H<sub>2</sub>O]<sup>+</sup> HCD 11V P=394.2  
C<sub>20</sub>H<sub>29</sub>NO<sub>8</sub>; MF: 6; RMF: 126; Prob 8.83%; CAS: 1799830-07-1; Lib: nist\_msms; ID: 436197.

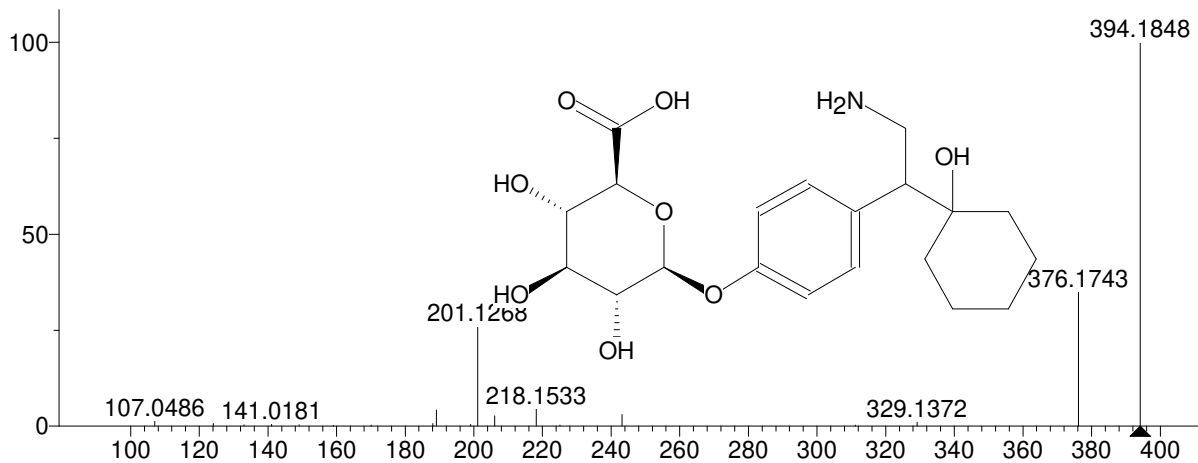

Hit 3 : [1,3-dihydroxy-1-(7-methoxy-2-oxochromen-6-yl)-3-methylbutan-2-yl] 3-methylbut-2-enoate [M+NH4]<sup>+</sup> 45!  
C<sub>20</sub>H<sub>24</sub>O<sub>7</sub>; MF: 1; RMF: 63; Prob 7.11%; Lib: mona-export-vf-npl\_qexactive; ID: 24782.

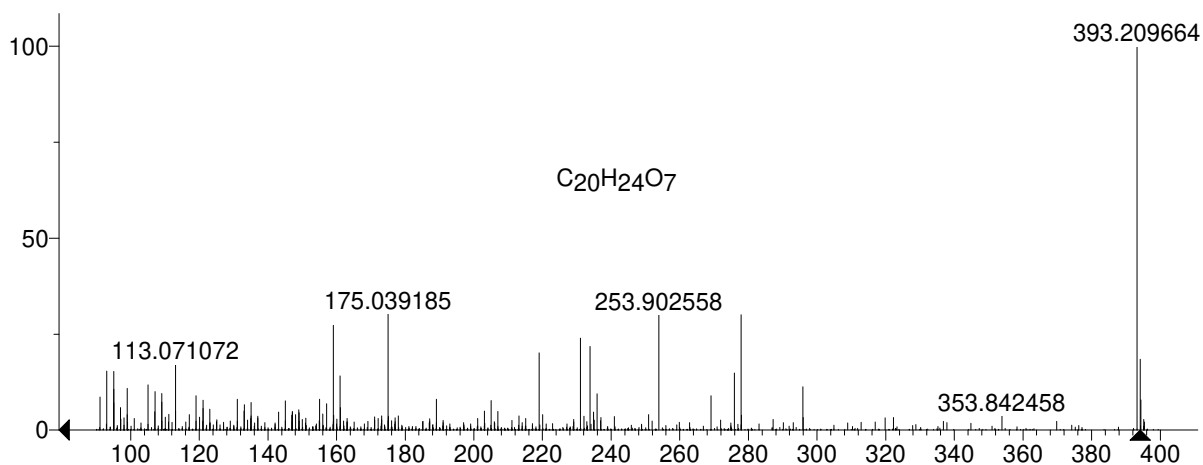

Hit 4 : [1,3-dihydroxy-1-(7-methoxy-2-oxochromen-6-yl)-3-methylbutan-2-yl] (E)-2-methylbut-2-enoate [M+NH4]<sup>+</sup>  
C<sub>20</sub>H<sub>24</sub>O<sub>7</sub>; MF: 1; RMF: 49; Prob 7.11%; Lib: mona-export-vf-npl\_qexactive; ID: 5461.

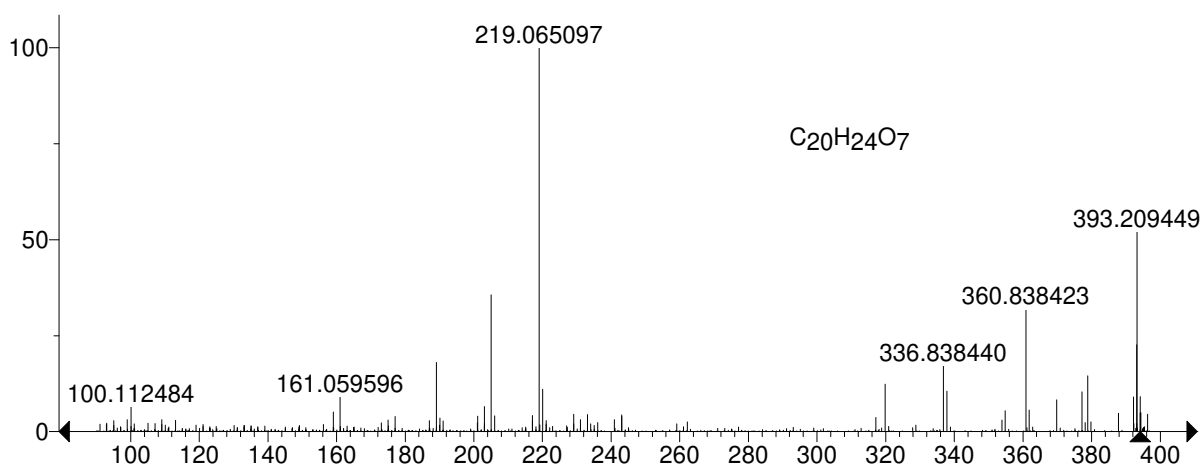

Hit 5 : NCGC00381074-01! [1,3-dihydroxy-1-(7-methoxy-2-oxochromen-6-yl)-3-methylbutan-2-yl] 3-methylbut-2-er  
C<sub>20</sub>H<sub>24</sub>O<sub>7</sub>; MF: 0; RMF: 59; Prob 6.84%; Lib: mona-export-gnps; ID: 8644.

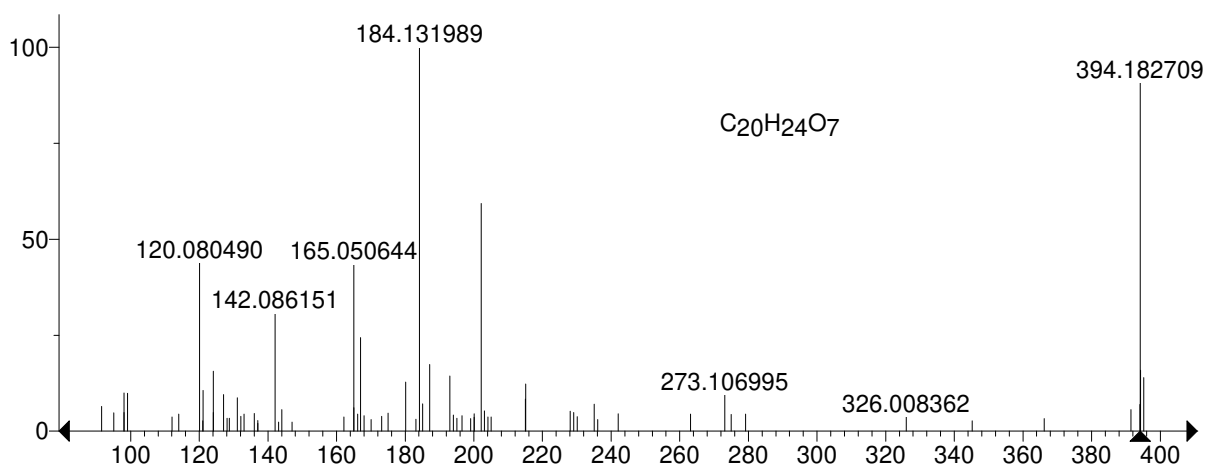

\*\* Search Report Page 1 of 2 \*\*

Unknown: Unknown (17.57\_428.1707m/z)  
Compound in Library Factor = -3273

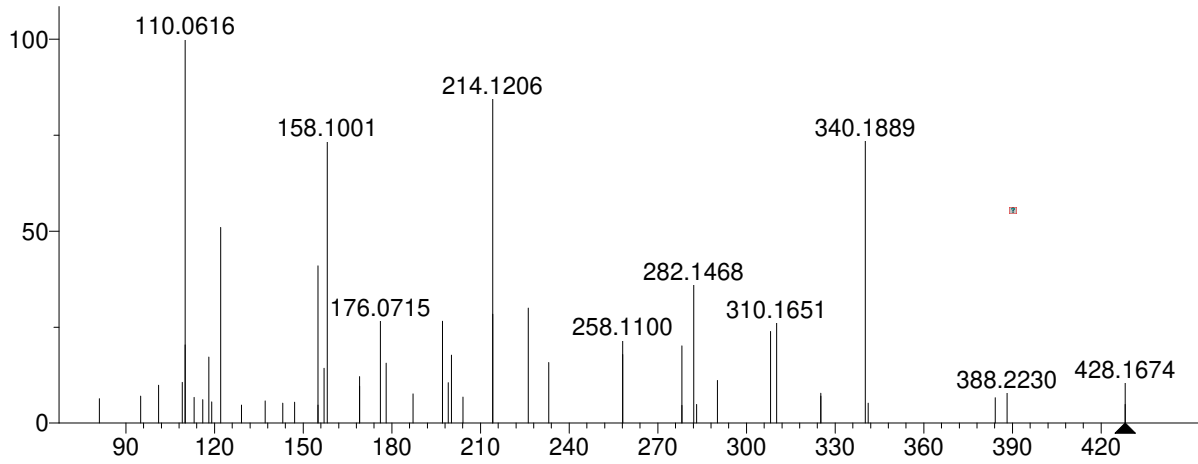

Hit 1 : (2s,6as,12as)-6a-hydroxy-8,9-dimethoxy-2-(prop-1-en-2-yl)-1,2,12,12a-tetrahydrochromeno[3,4-b]furo[2,3-C23H22O7; MF: 2; RMF: 57; Prob 15.3%; Lib: mona-export-vf-npl\_gexactive; ID: 4287.

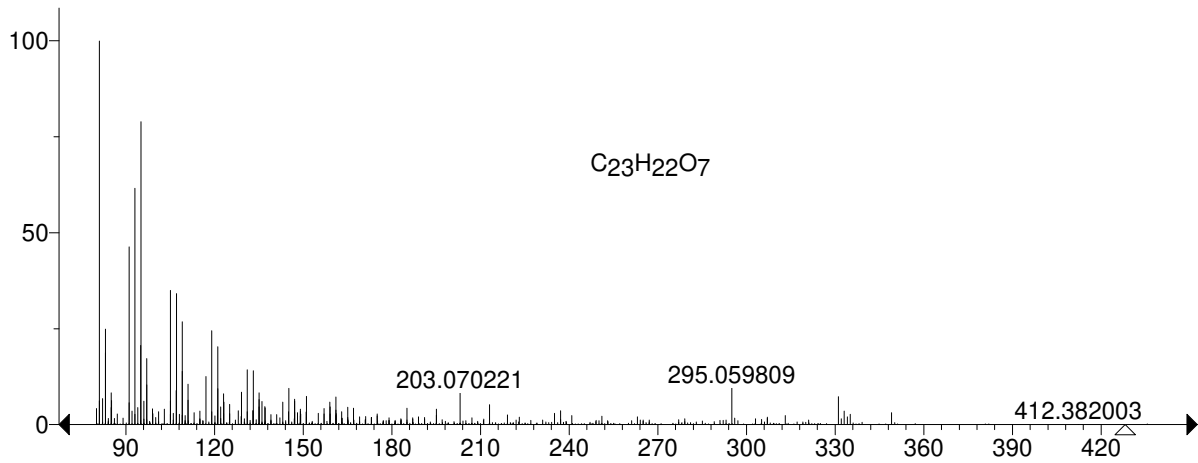

Hit 2 : PC 6:0; PC 3:0-3:0; [M+Hac-H]- [M+Hac-H]- P=428.2  
C14H28NO8P; MF: 0; RMF: 39; Prob 14.1%; Lib: msdial-insilicomsm-lipids-neg; ID: 319519.

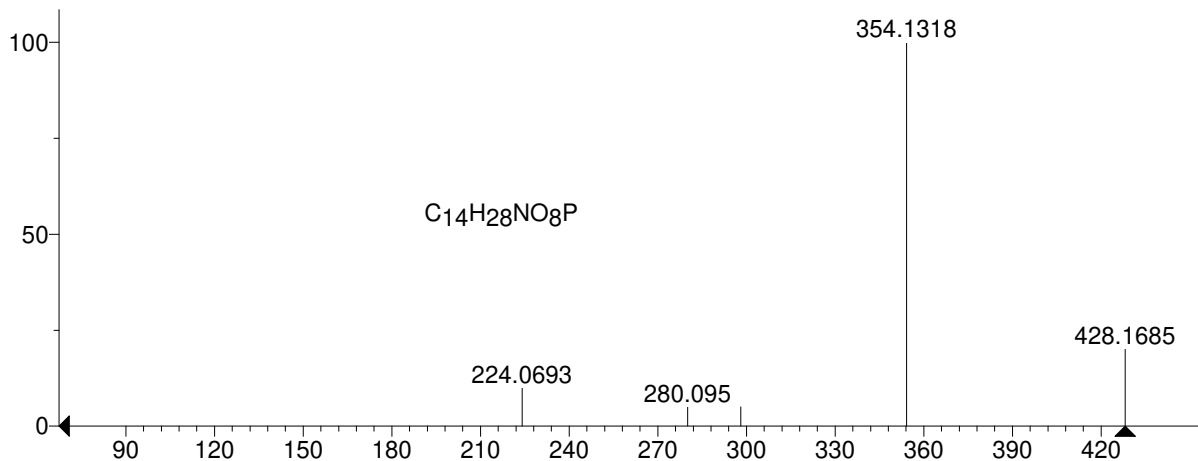

\*\* Search Report Page 2 of 2 \*\*

Hit 3 : NCGC00380614-01\_C24H23N5O4\_2H-Pyrazino[2,1-b]quinazoline-3,6(1H,4H)-dione, 1-methyl-4-[[[(2S,9S, C24H23N5O4; MF: 0; RMF: 33; Prob 14.1%; Lib: mona-export-gnps; ID: 10706.

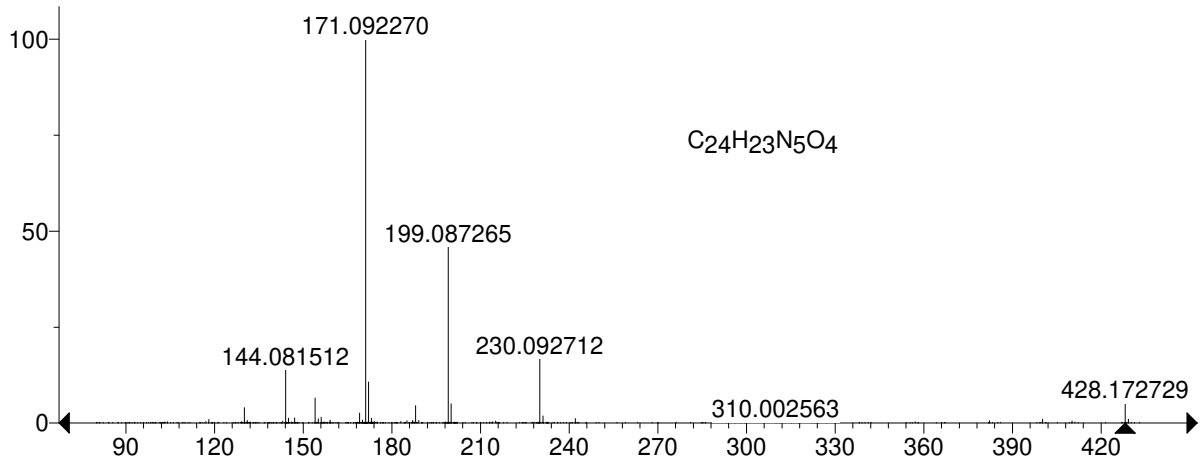

Hit 4 : tephrosin [M+NH<sub>4</sub>]<sup>+</sup> 65HCD P=428.2  
C<sub>23</sub>H<sub>22</sub>O<sub>7</sub>; MF: 0; RMF: 33; Prob 14.1%; Lib: mona-export-vf-npl\_gexactive; ID: 4047.

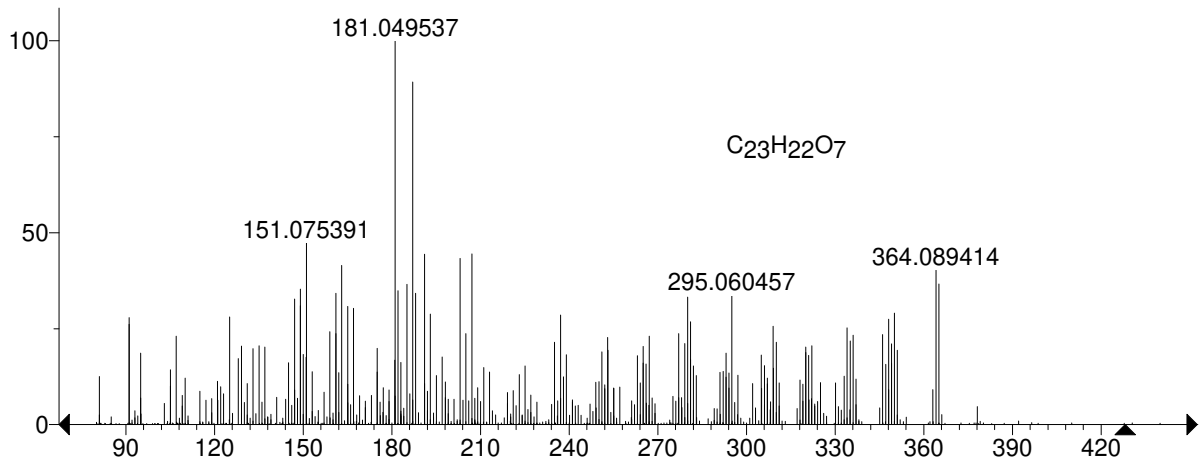

Hit 5 : PC 7:0; PC 2:0-5:0; [M+FA-H]<sup>-</sup> [M+FA-H]<sup>-</sup> P=428.2  
C<sub>15</sub>H<sub>30</sub>NO<sub>8</sub>P; MF: 0; RMF: 31; Prob 14.1%; Lib: msdial-insilicomsm-lipids-neg; ID: 317570.

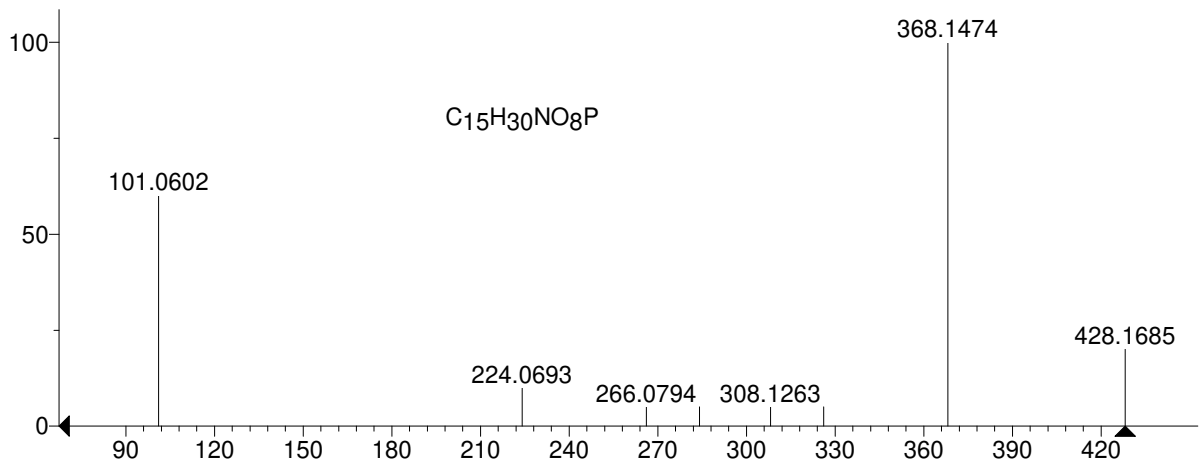

\*\* Search Report Page 1 of 2 \*\*

Unknown: Unknown (17.60\_411.1758m/z)  
Compound in Library Factor = 0

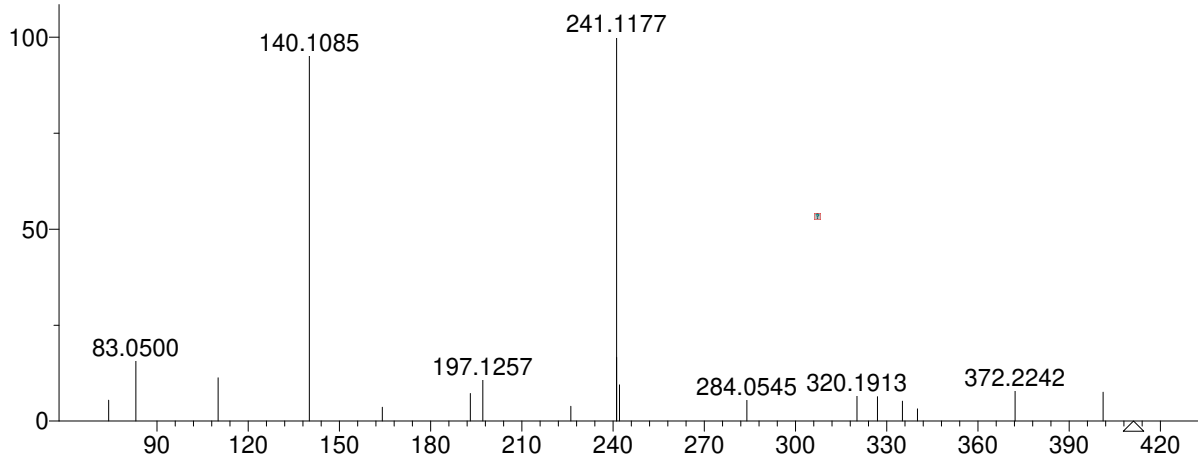

Hit 1 : Quassin [M+Na]<sup>+</sup> 65HCD P=411.2  
C<sub>22</sub>H<sub>28</sub>O<sub>6</sub>; MF: 0; RMF: 31; Prob 20.0%; Lib: mona-export-vf-npl\_qexactive; ID: 26442.

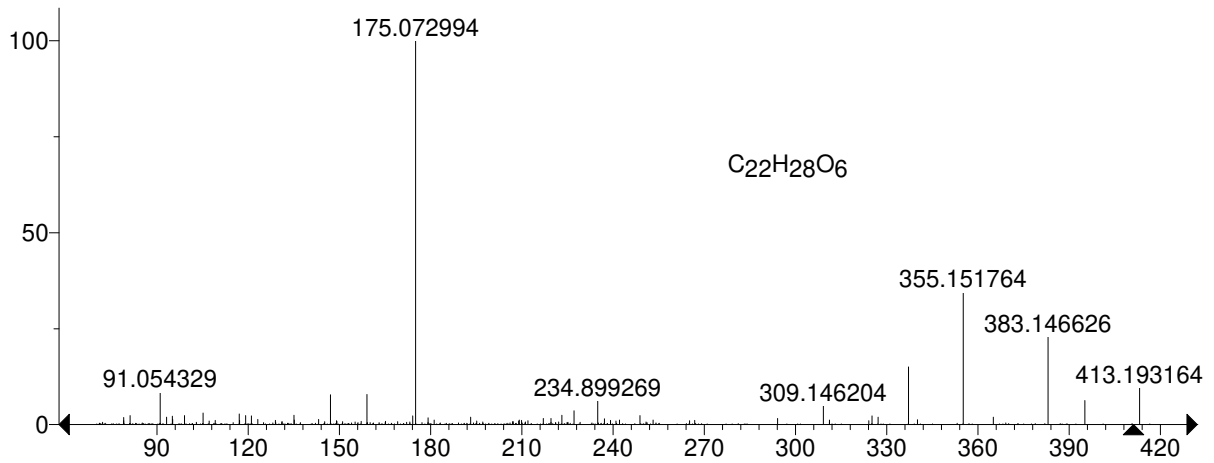

Hit 2 : 3-(5-hydroxy-2,2,7,8-tetramethyl-6-oxo-7,8-dihydropyrano[3,2-g]chromen-10-yl)hexanoic acid [M+Na]<sup>+</sup> 3E  
C<sub>22</sub>H<sub>28</sub>O<sub>6</sub>; MF: 0; RMF: 21; Prob 20.0%; Lib: mona-export-vf-npl\_qexactive; ID: 982.

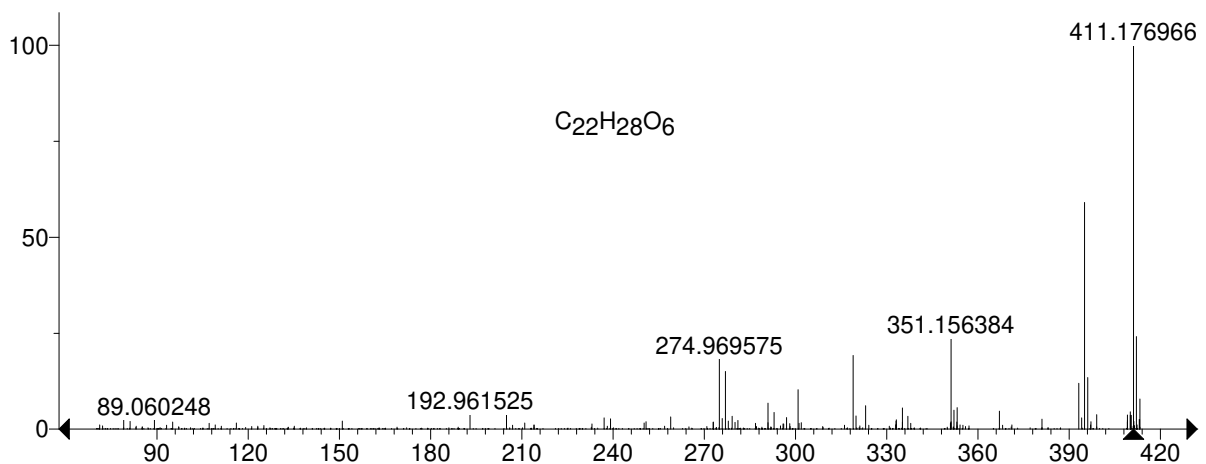

\*\* Search Report Page 2 of 2 \*\*

Hit 3 : [9b-hydroxy-6-(hydroxymethyl)-6,9a-dimethyl-3-oxo-1,3a,4,5,5a,7,8,9-octahydrobenzo[e][2]benzofuran-5-yl] C<sub>22</sub>H<sub>28</sub>O<sub>6</sub>; MF: 0; RMF: 15; Prob 20.0%; Lib: mona-export-vf-npl\_qexactive; ID: 18077.

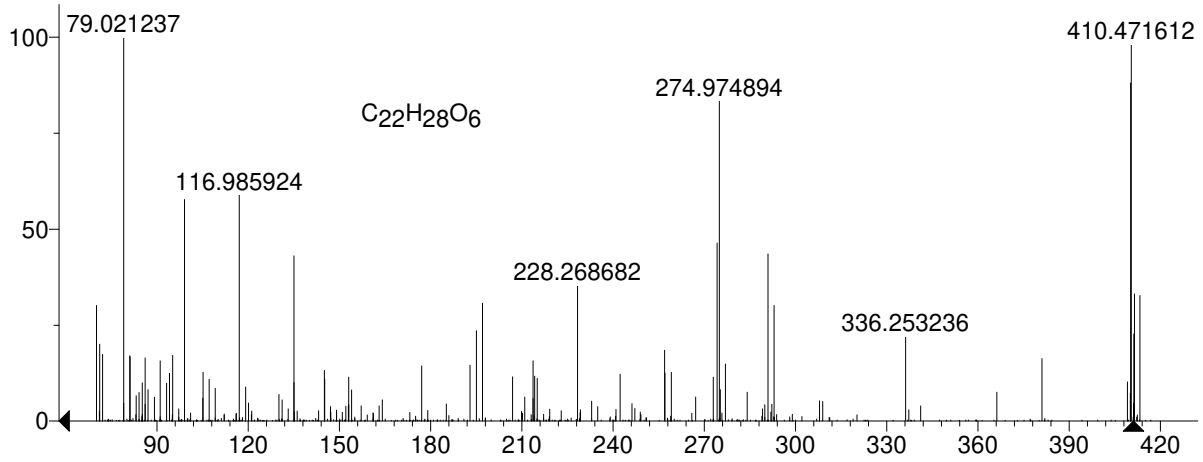

Hit 4 : (4E,8E)-10-(4-hydroxy-6-methoxy-7-methyl-3-oxo-1H-2-benzofuran-5-yl)-4,8-dimethyldeca-4,8-dienoic acid C<sub>22</sub>H<sub>28</sub>O<sub>6</sub>; MF: 0; RMF: 14; Prob 20.0%; Lib: mona-export-vf-npl\_qexactive; ID: 19695.

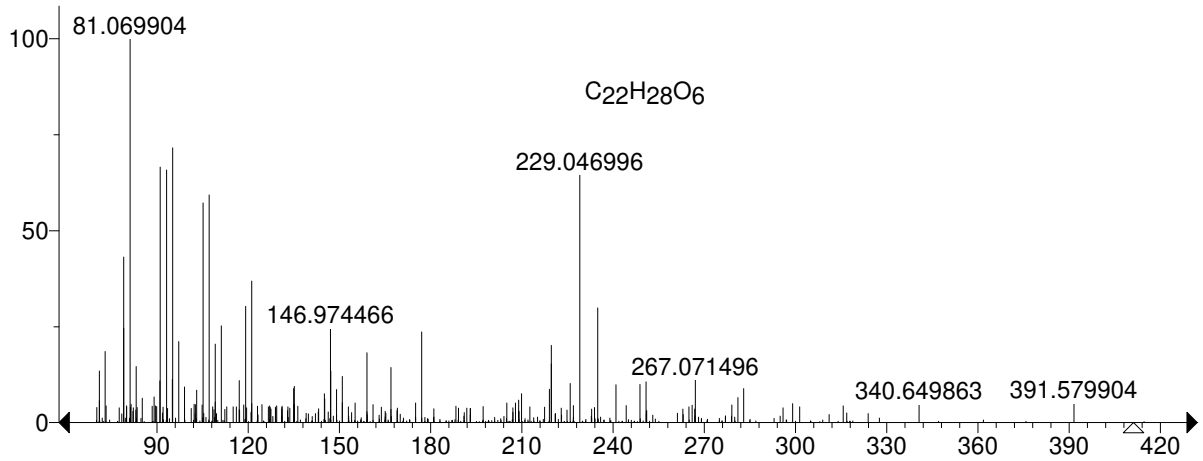

Hit 5 : NCGC00380628-01\_C<sub>22</sub>H<sub>28</sub>O<sub>6</sub>\_(4E,8E)-10-(4-Hydroxy-6-methoxy-7-methyl-3-oxo-1,3-dihydro-2-benzofuran-5-yl) C<sub>22</sub>H<sub>28</sub>O<sub>6</sub>; MF: 0; RMF: 5; Prob 20.0%; Lib: mona-export-gnps; ID: 13319.

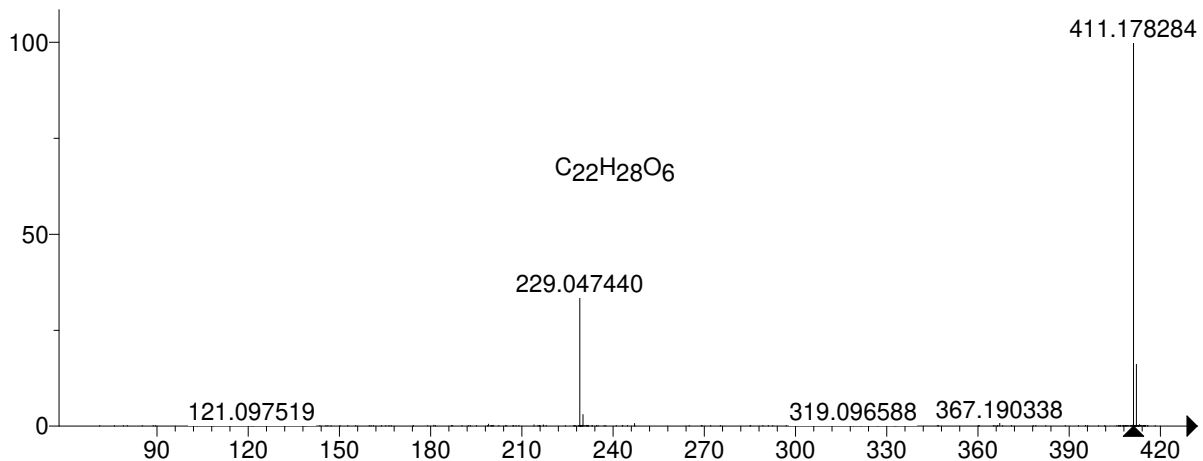

Unknown: Unknown (17.66\_239.1392m/z)  
Compound in Library Factor = -2387

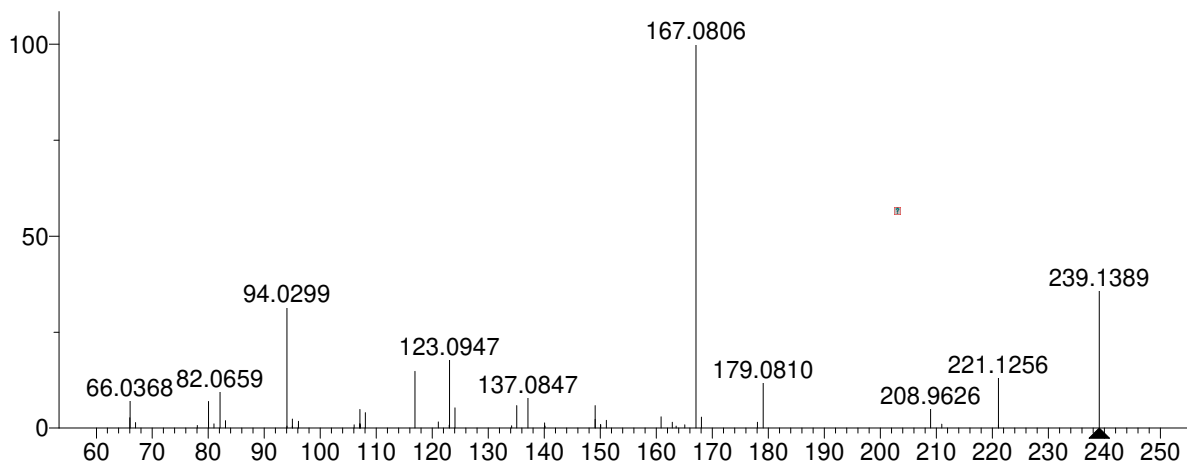

Hit 1 : Secobarbital [M+H]<sup>+</sup> HCD 4V P=239.1  
C<sub>12</sub>H<sub>18</sub>N<sub>2</sub>O<sub>3</sub>; MF: 14; RMF: 338; Prob 38.1%; CAS: 76-73-3; Lib: nist\_msms; ID: 198374.

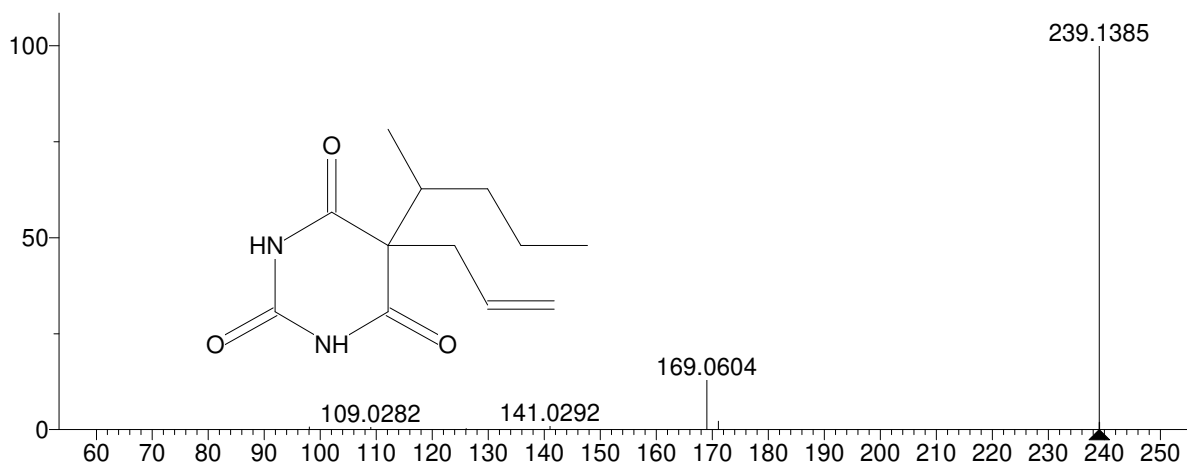

Hit 2 : Heptanedioic acid, 1-(2-cyclopentylidenehydrazide) [M-H]<sup>-</sup> HCD 21V P=239.1  
C<sub>12</sub>H<sub>20</sub>N<sub>2</sub>O<sub>3</sub>; MF: 14; RMF: 245; Prob 38.1%; CAS: 1136466-93-7; Lib: nist\_msms; ID: 263655.

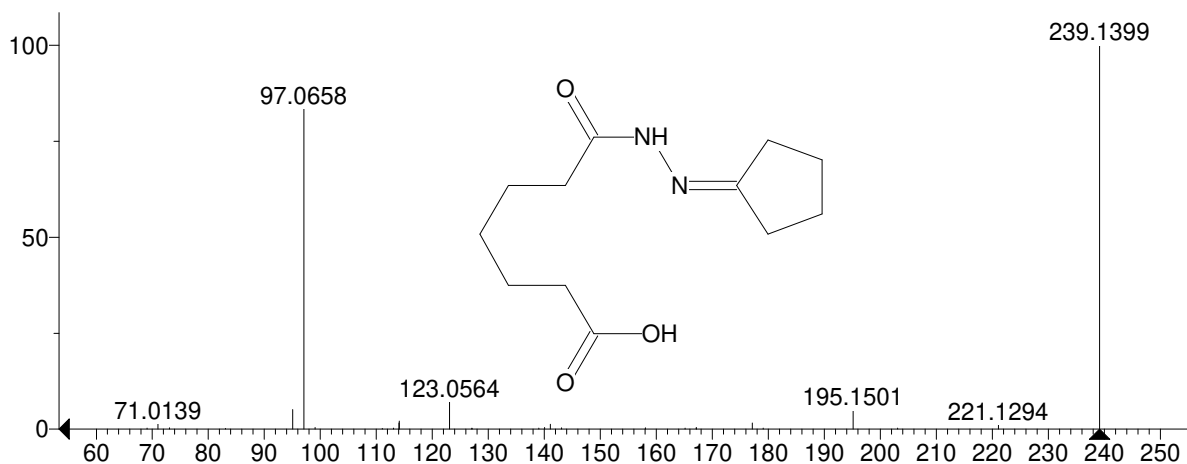



Hit 3 : CMPF [M-H]<sup>-</sup> 35% P=239.1  
C<sub>12</sub>H<sub>16</sub>O<sub>5</sub>; MF: 0; RMF: 38; Prob 23.8%; Lib: mona-export-itree; ID: 3748.



Unknown: Unknown (17.67\_214.1441m/z)  
Compound in Library Factor = 0

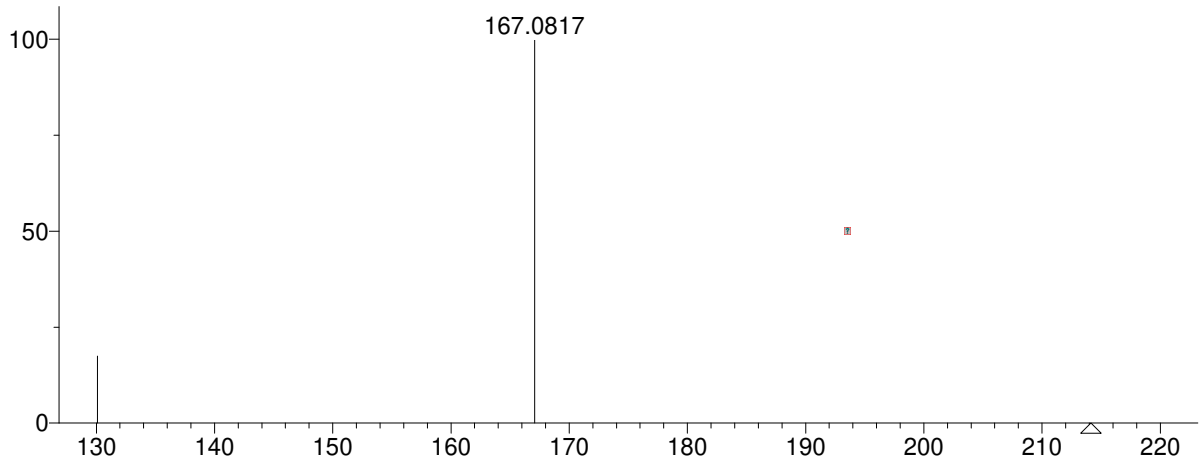

\*\* Search Report Page 1 of 2 \*\*

Unknown: Unknown (17.67\_239.1392m/z)  
Compound in Library Factor = -2387

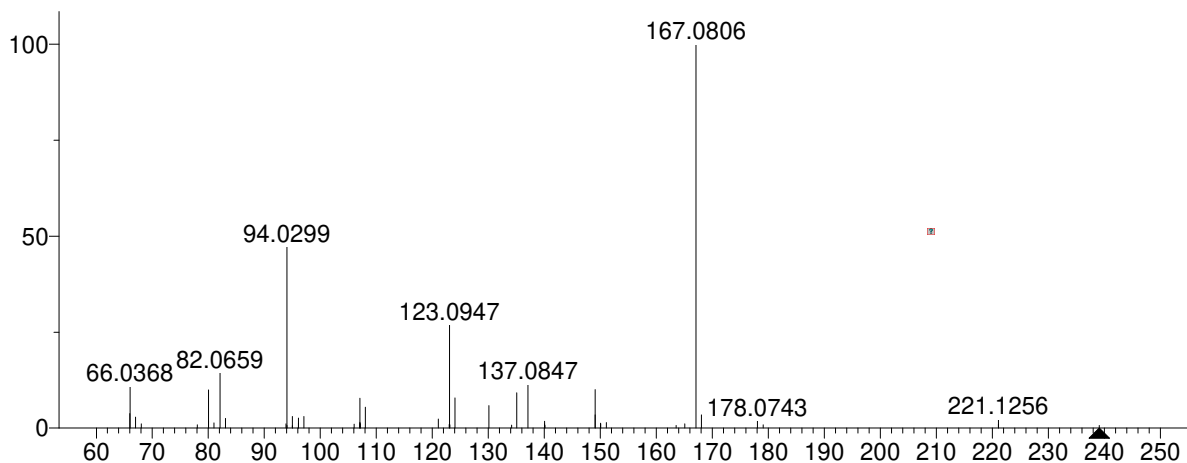

Hit 1 : Heptanedioic acid, 1-(2-cyclopentylidenehydrazide) [M-H]<sup>-</sup> HCD 26V P=239.1  
C<sub>12</sub>H<sub>20</sub>N<sub>2</sub>O<sub>3</sub>; MF: 19; RMF: 109; Prob 49.7%; CAS: 1136466-93-7; Lib: nist\_msms; ID: 263656.

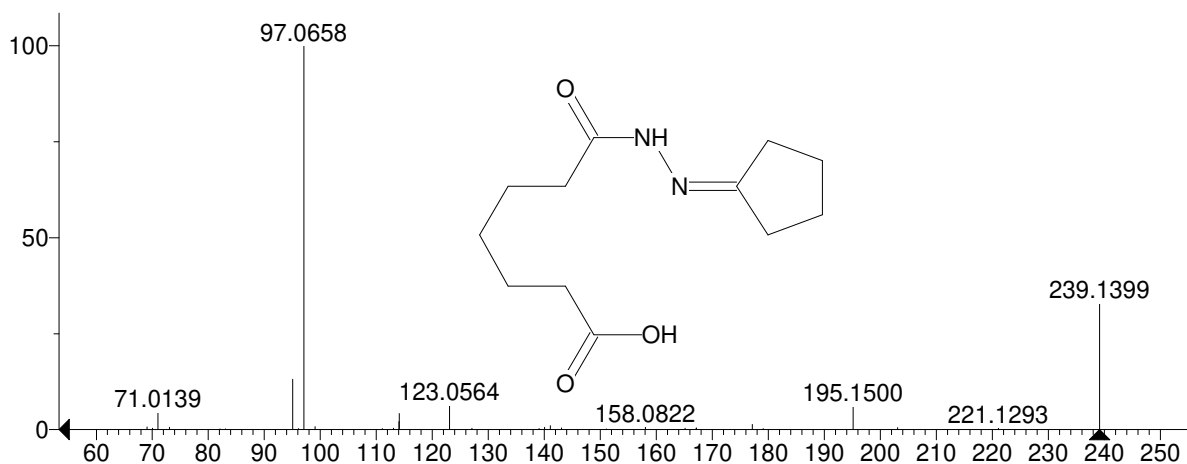

Hit 2 : Secobarbital [M+H]<sup>+</sup> HCD 0V P=239.1  
C<sub>12</sub>H<sub>18</sub>N<sub>2</sub>O<sub>3</sub>; MF: 1; RMF: 51; Prob 25.6%; CAS: 76-73-3; Lib: nist\_msms; ID: 198372.

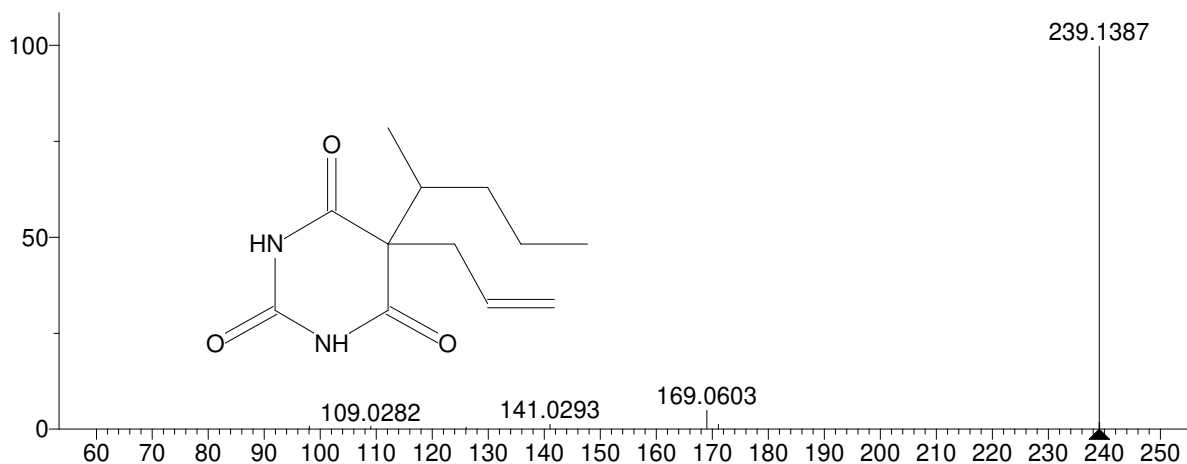

Hit 3 : CMPF [M-H]<sup>-</sup> 35% P=239.1  
C<sub>12</sub>H<sub>16</sub>O<sub>5</sub>; MF: 0; RMF: 20; Prob 24.6%; Lib: mona-export-itree; ID: 3748.



\*\* Search Report Page 1 of 2 \*\*

Unknown: Unknown (17.68\_349.0920m/z)  
Compound in Library Factor = -2387

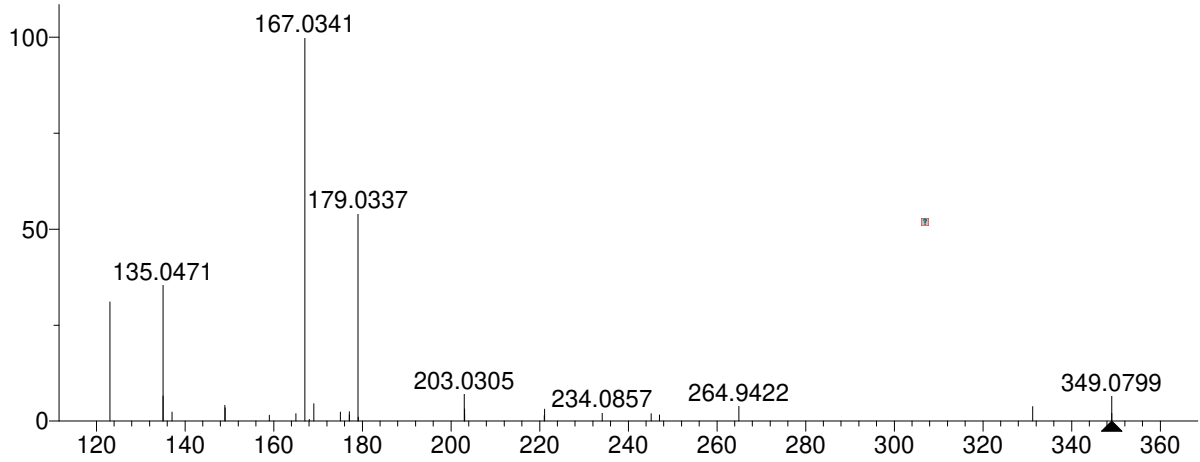

Hit 1 : Hydroxysulochrin\_120241 [M+H]<sup>+</sup> P=349.1  
C<sub>17</sub>H<sub>16</sub>O<sub>8</sub>; MF: 16; RMF: 184; Prob 14.7%; Lib: mona-export-gnps; ID: 4987.

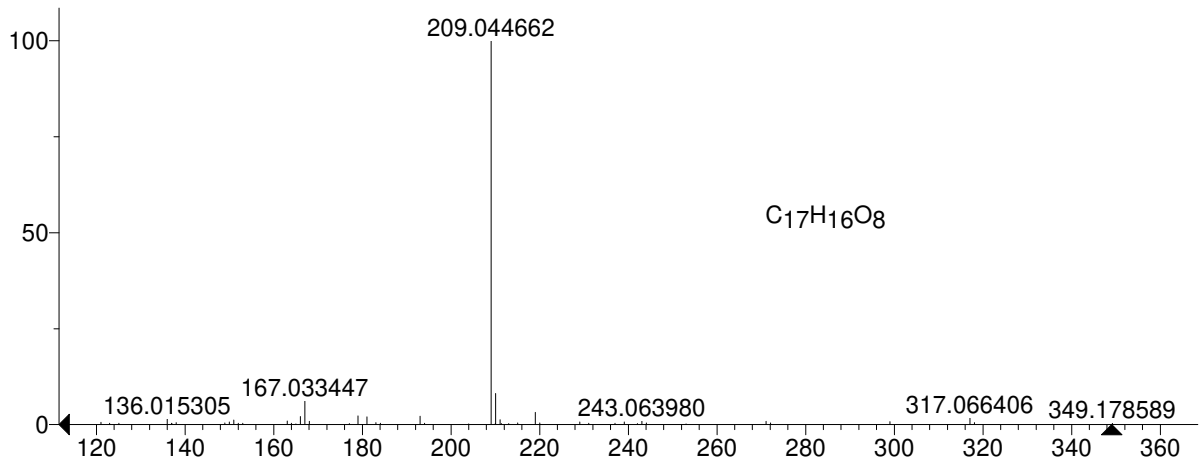

Hit 2 : methyl 2-(4a,6,10a-trihydroxy-1-methyl-5,10-dioxo-3,4-dihydro-1H-benzo[g]isochromen-3-yl)acetate [M-H]  
C<sub>17</sub>H<sub>18</sub>O<sub>8</sub>; MF: 4; RMF: 80; Prob 9.75%; Lib: mona-export-lc-ms-ms\_negative\_mode; ID: 22564.

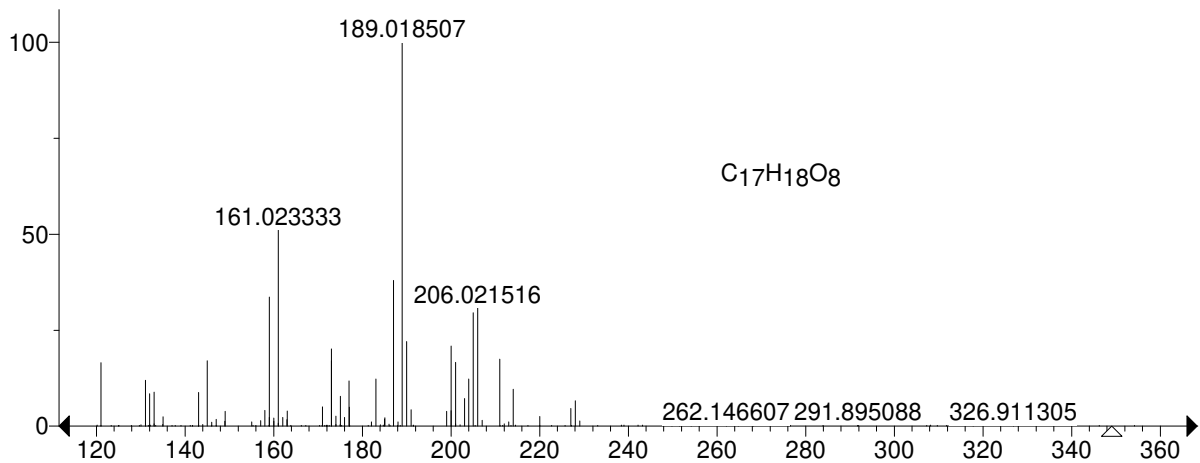

\*\* Search Report Page 2 of 2 \*\*

Hit 3 : (1S,4R,7S,8S,11S)-9-tert-butyl-7,9-dihydroxy-3,5,12-trioxatetracyclo[6.6.0.0A<sup>1</sup>.A<sup>1</sup>A<sup>1</sup>.0a<sup>1</sup>,a<sup>1</sup>,,]tetradec  
C<sub>15</sub>H<sub>18</sub>O<sub>8</sub>; MF: 1; RMF: 95; Prob 8.62%; Lib: mona-export-vf-npl\_qexactive; ID: 8436.

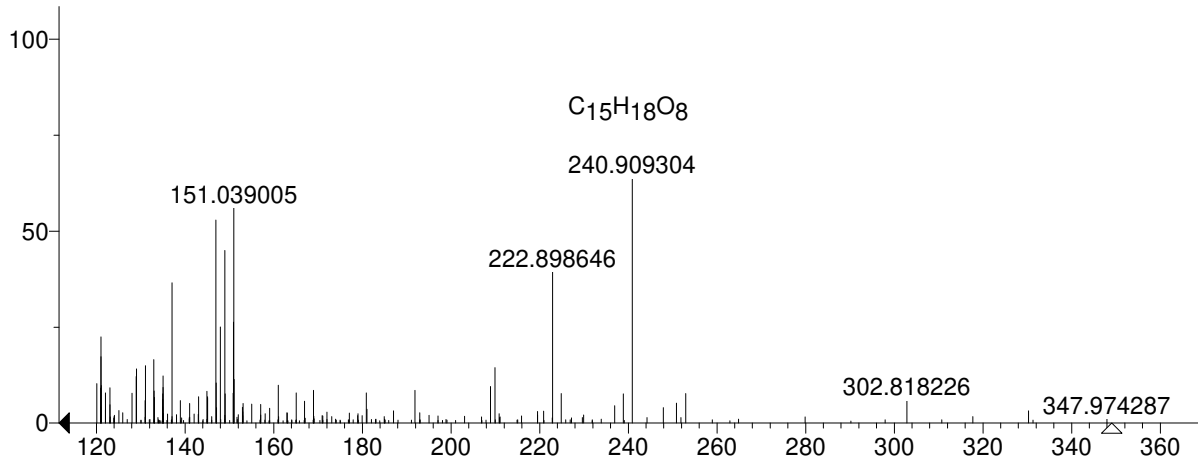

Hit 4 : (E)-3-[2-[(2S,3R,4S,5S,6R)-3,4,5-trihydroxy-6-(hydroxymethyl)oxan-2-yl]oxyphenyl]prop-2-enoic acid [M+N  
C<sub>15</sub>H<sub>18</sub>O<sub>8</sub>; MF: 1; RMF: 79; Prob 8.62%; Lib: mona-export-vf-npl\_qexactive; ID: 5110.

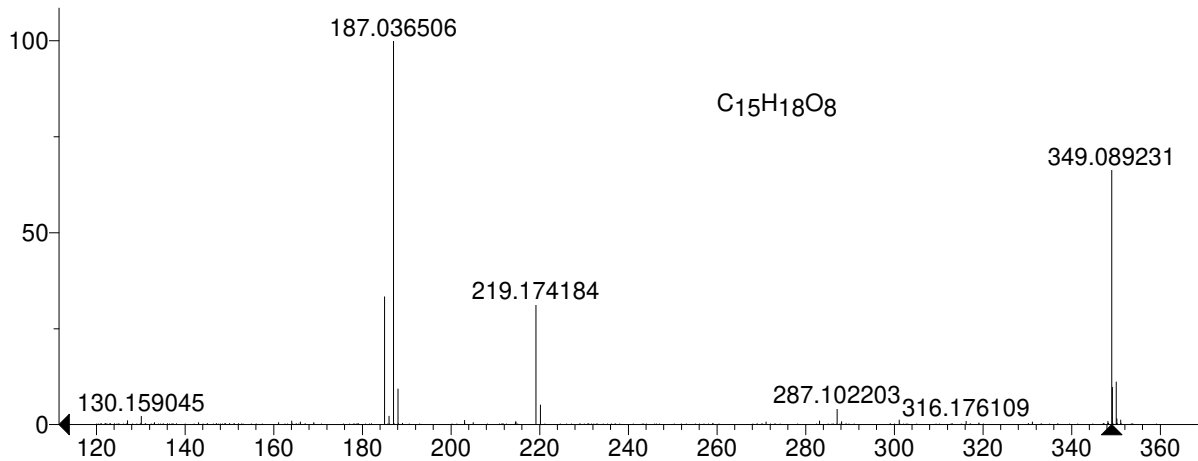

Hit 5 : NCGC00381013-0115-hydroxy-2-(3-hydroxy-2-methoxycarbonyl-5-methylphenoxy)-3-methoxybenzoic acid  
C<sub>17</sub>H<sub>16</sub>O<sub>8</sub>; MF: 1; RMF: 41; Prob 8.62%; Lib: mona-export-gnps; ID: 9371.

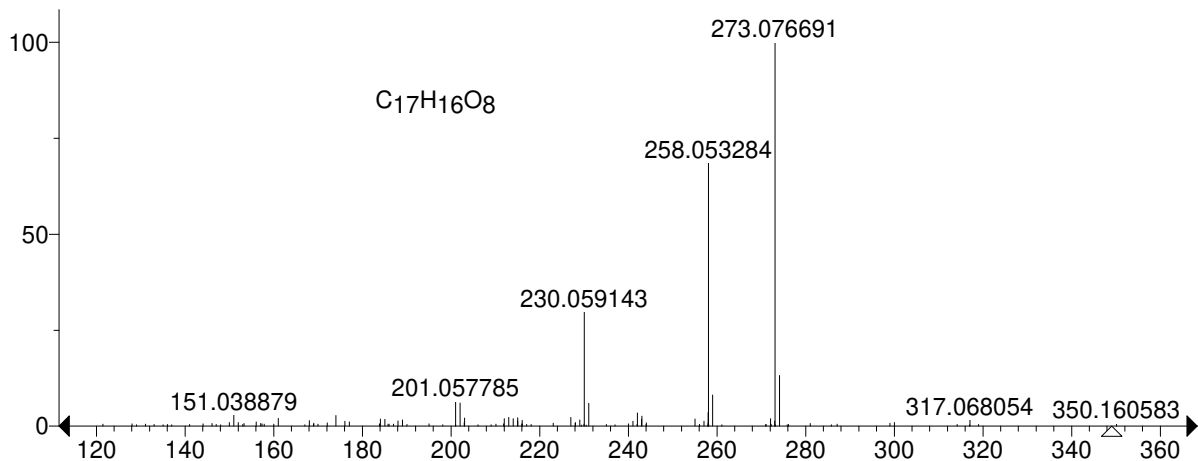

Unknown: Unknown (17.68\_491.1998m/z)  
Compound in Library Factor = -3273

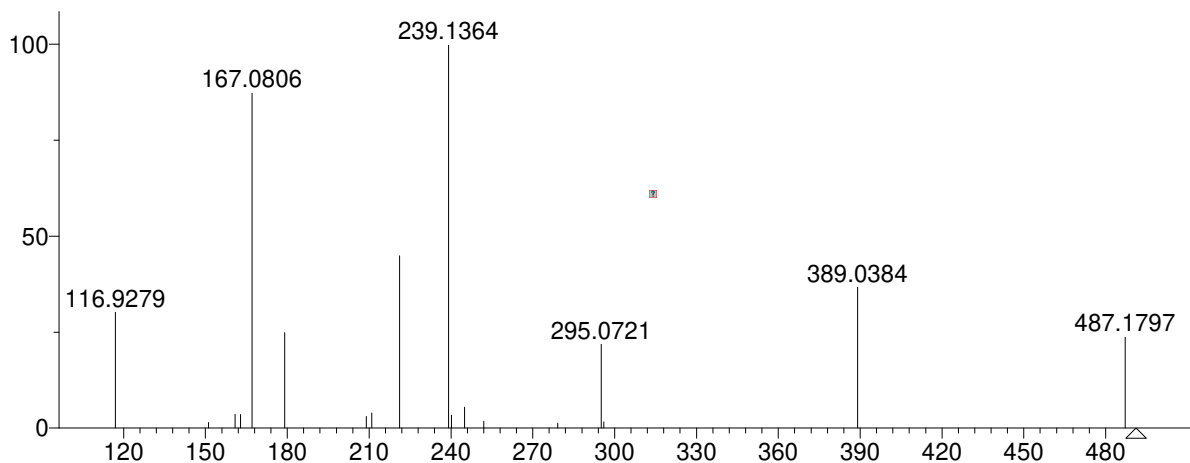

Hit 1 : [(1S,2R,4aR,8aR)-1-acetyloxy-1,4a-dimethyl-6-oxo-7-propan-2-ylidene-2,3,4,5,8,8a-hexahydronaphthalen-C<sub>24</sub>H<sub>36</sub>O<sub>8</sub>; MF: 3; RMF: 168; Prob 53.1%; Lib: mona-export-vf-npl\_qexactive; ID: 23071.

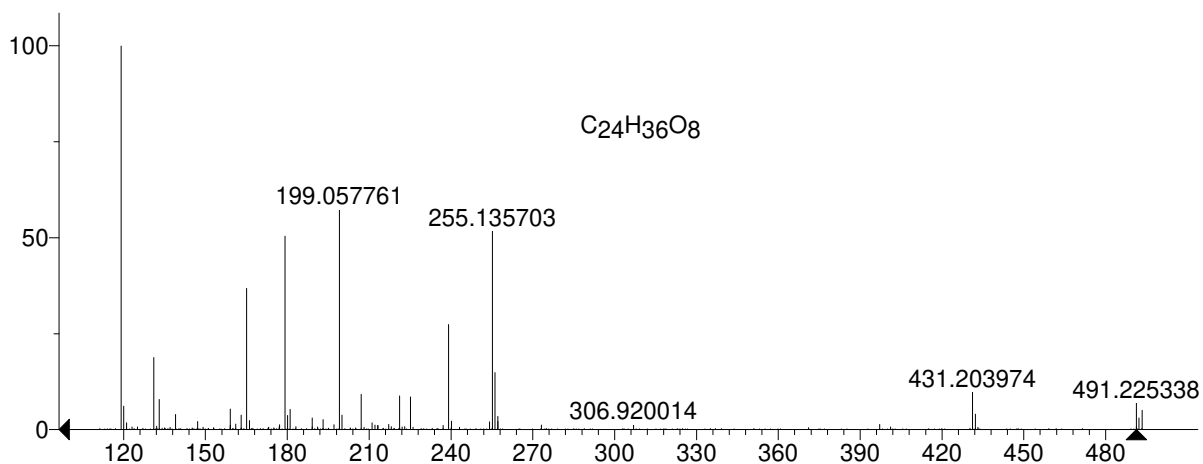

Hit 2 : Paprottrain [2M+H]<sup>+</sup> HCD 108V P=491.2  
C<sub>16</sub>H<sub>11</sub>N<sub>3</sub>; MF: 0; RMF: 79; Prob 46.9%; CAS: 57046-73-8; Lib: nist\_msms; ID: 247753.

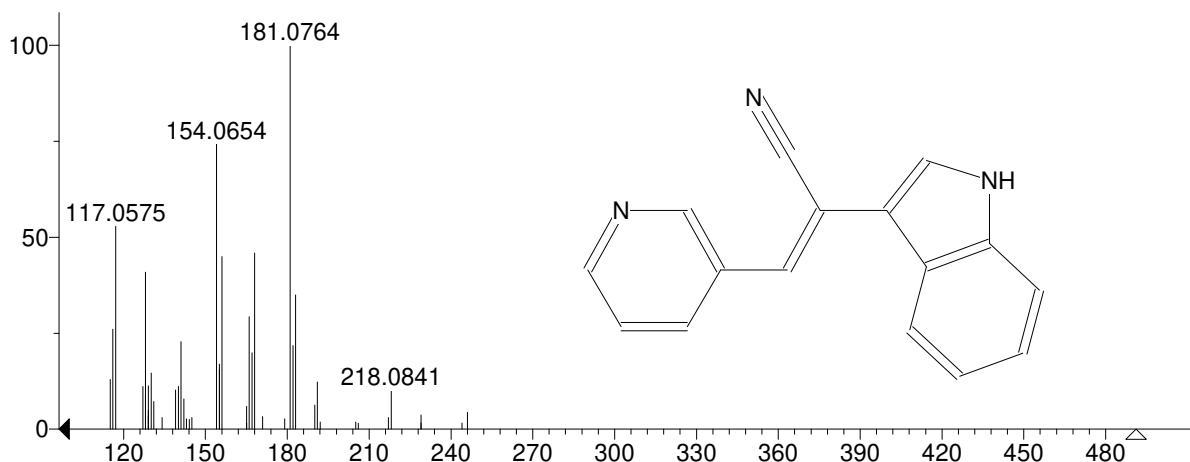

Unknown: Unknown (17.68\_522.1302m/z)  
Compound in Library Factor = 0

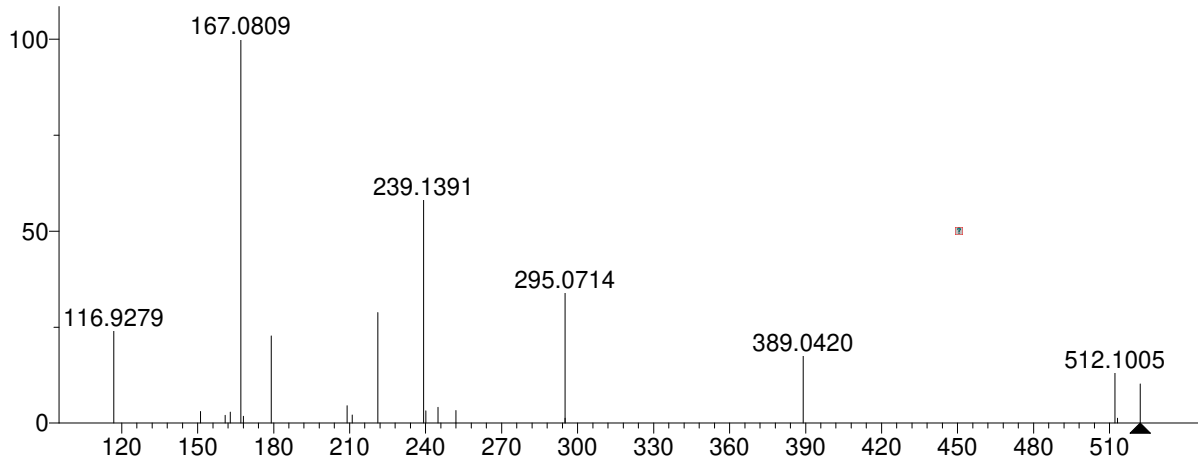



\*\* Search Report Page 1 of 2 \*\*

Unknown: Unknown (17.69\_487.1814m/z)  
Compound in Library Factor = -1142

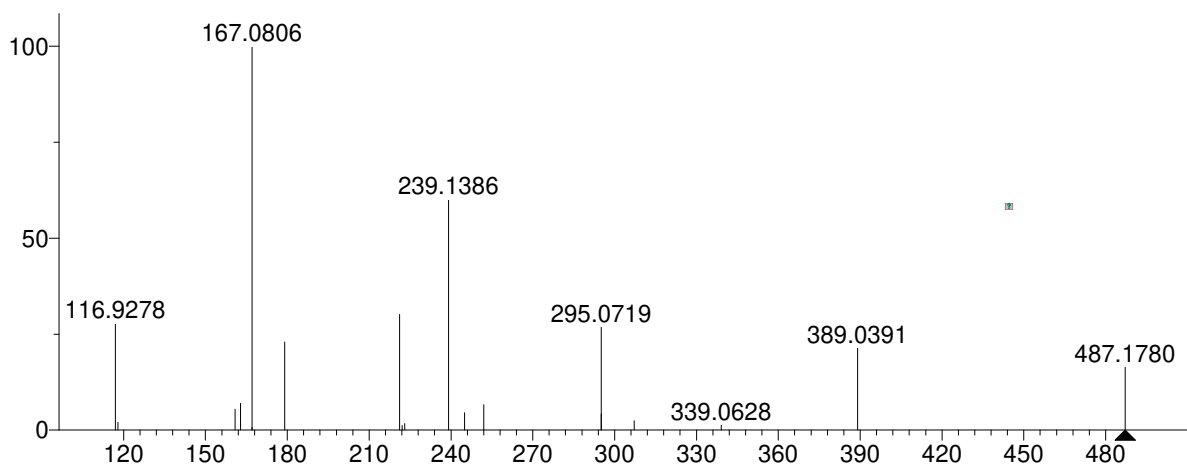

Hit 1 : Beclomethasone 21-propionate [M+Na]<sup>+</sup> HCD 9V P=487.2  
C<sub>25</sub>H<sub>33</sub>ClO<sub>6</sub>; MF: 123; RMF: 820; Prob 78.1%; CAS: 69224-79-9; Lib: nist\_msms; ID: 447840.

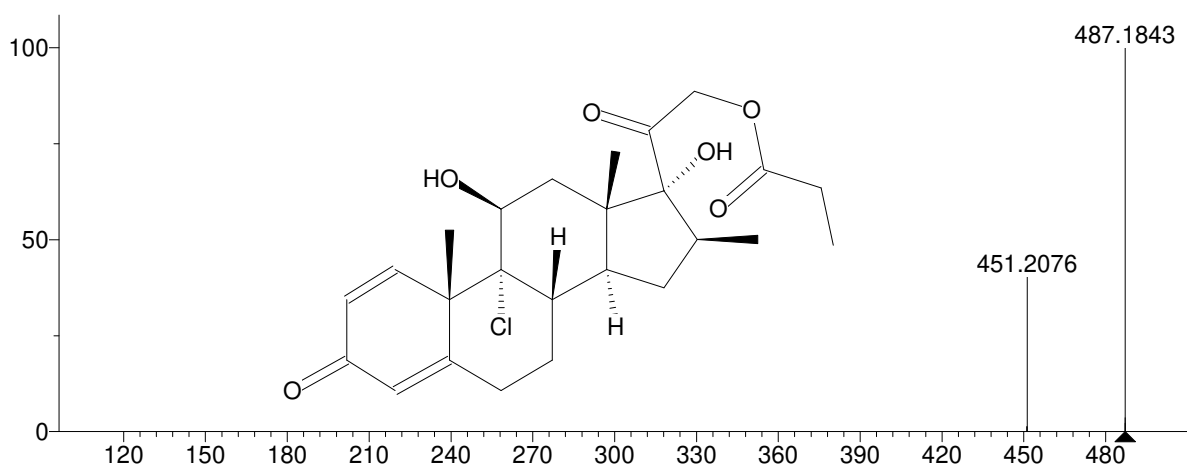

Hit 2 : Beclomethasone 17-propionate [M+Na]<sup>+</sup> HCD 9V P=487.2  
C<sub>25</sub>H<sub>33</sub>ClO<sub>6</sub>; MF: 77; RMF: 611; Prob 16.5%; CAS: 5534-18-9; Lib: nist\_msms; ID: 447795.

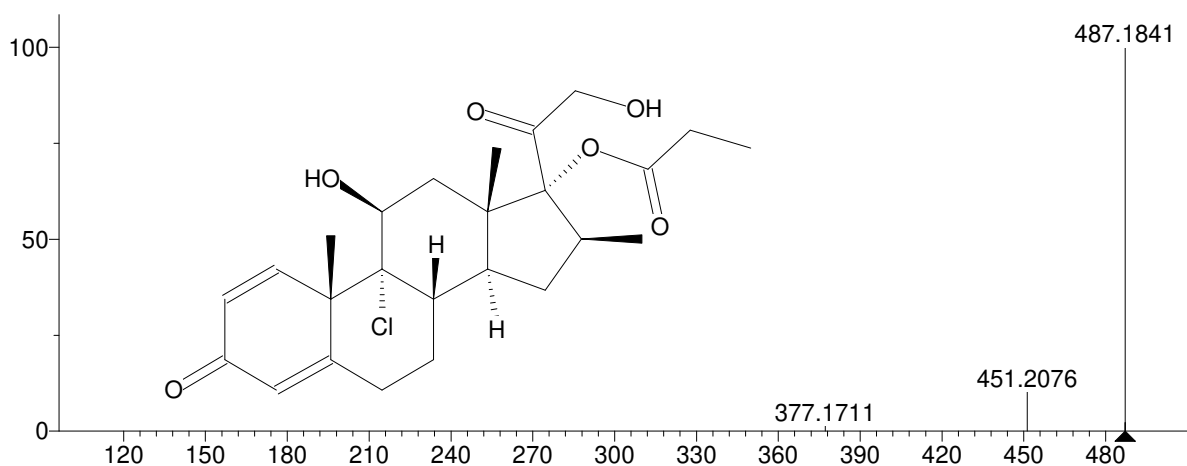

\*\* Search Report Page 2 of 2 \*\*

Hit 3 : Cytidine [2M+H]<sup>+</sup> HCD 4V P=487.2  
C<sub>9</sub>H<sub>13</sub>N<sub>3</sub>O<sub>5</sub>; MF: 17; RMF: 208; Prob 2.92%; CAS: 65-46-3; Lib: nist\_msms; ID: 228109.

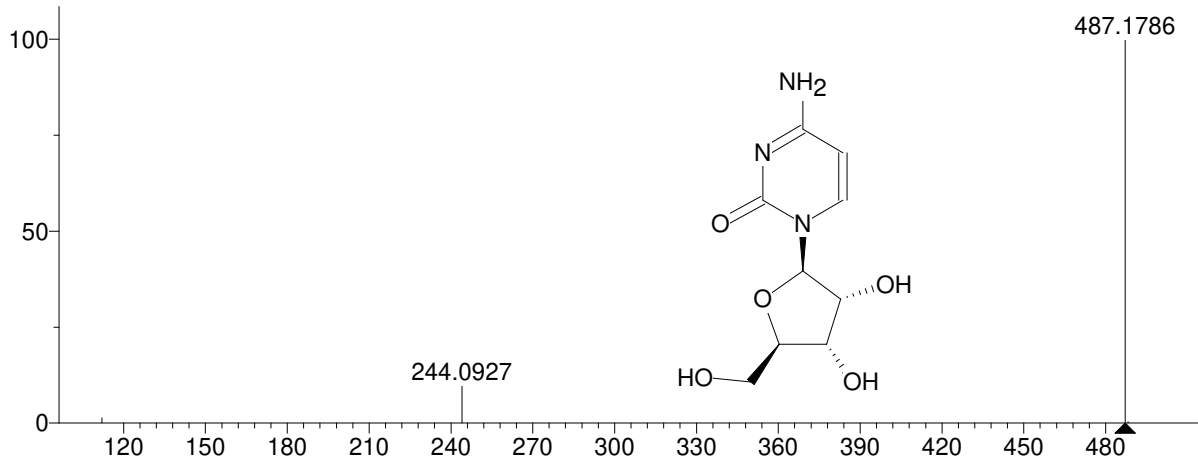

Hit 4 : Cytarabine [2M+H]<sup>+</sup> HCD 4V P=487.2  
C<sub>9</sub>H<sub>13</sub>N<sub>3</sub>O<sub>5</sub>; MF: 13; RMF: 204; Prob 2.47%; CAS: 147-94-4; Lib: nist\_msms; ID: 120706.

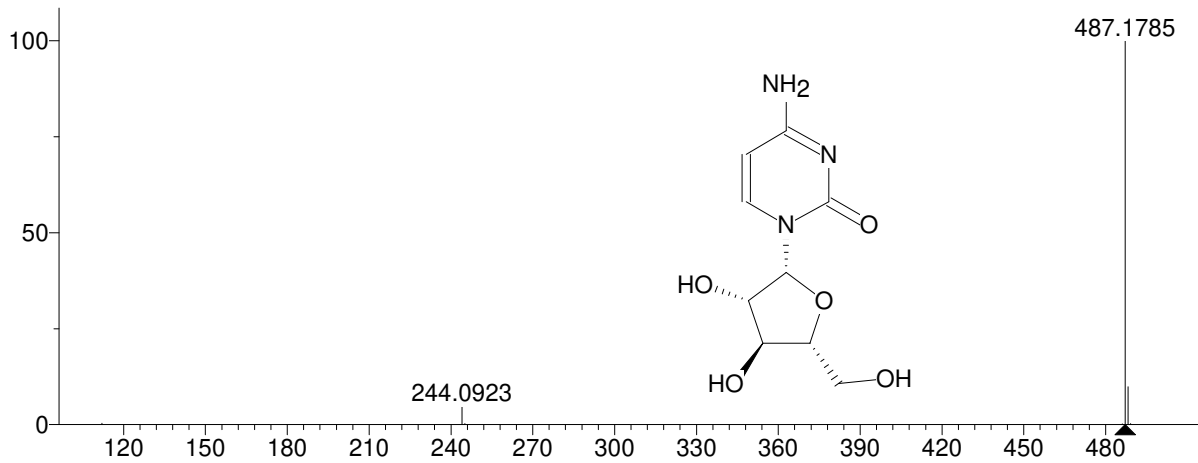

\*\* Search Report Page 1 of 2 \*\*

Unknown: Unknown (17.82\_487.1812m/z)  
Compound in Library Factor = -422

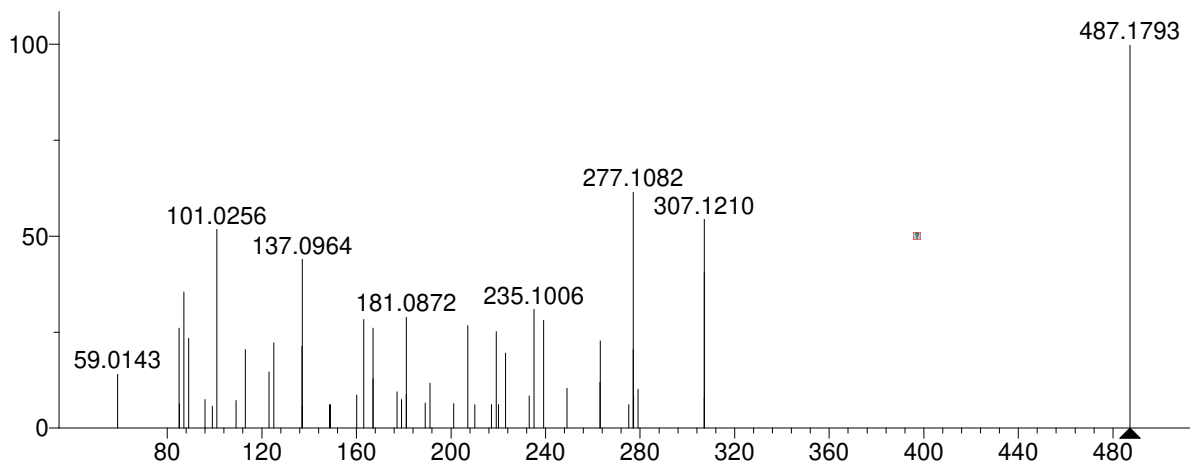

Hit 1 : Beclomethasone 17-propionate [M+Na]<sup>+</sup> HCD 9V P=487.2  
C<sub>25</sub>H<sub>33</sub>ClO<sub>6</sub>; MF: 267; RMF: 928; Prob 96.6%; CAS: 5534-18-9; Lib: nist\_msms; ID: 447795.

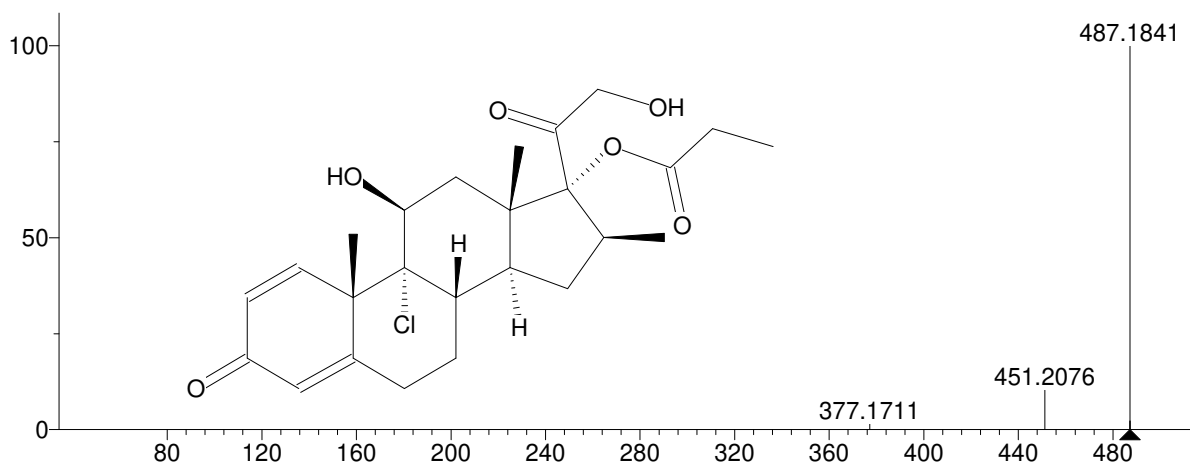

Hit 2 : Beclomethasone 21-propionate [M+Na]<sup>+</sup> HCD 9V P=487.2  
C<sub>25</sub>H<sub>33</sub>ClO<sub>6</sub>; MF: 123; RMF: 820; Prob 2.97%; CAS: 69224-79-9; Lib: nist\_msms; ID: 447840.

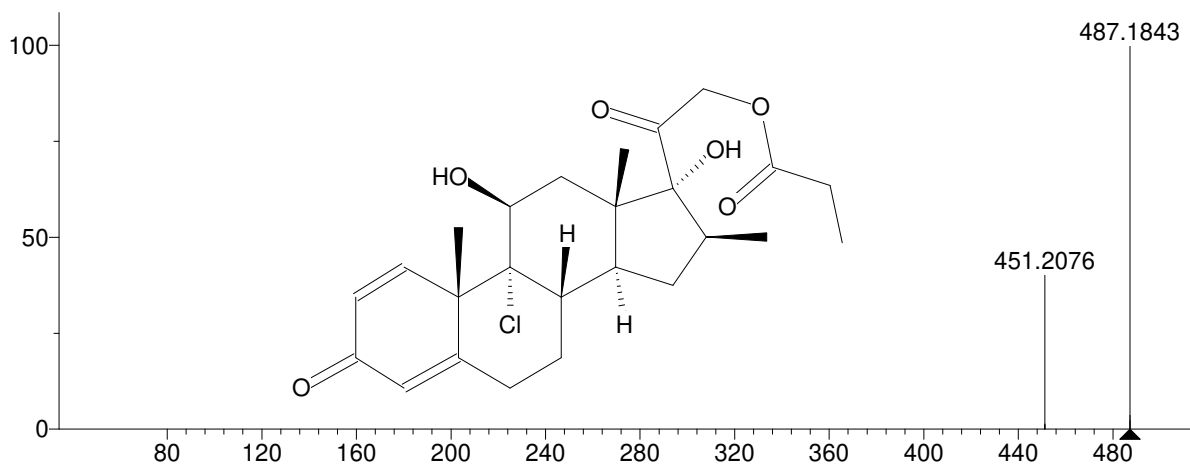

Hit 3 : Cytidine [2M+H]<sup>+</sup> HCD 4V P=487.2  
C<sub>9</sub>H<sub>13</sub>N<sub>3</sub>O<sub>5</sub>; MF: 24; RMF: 332; Prob 0.22%; CAS: 65-46-3; Lib: nist\_msms; ID: 228109.

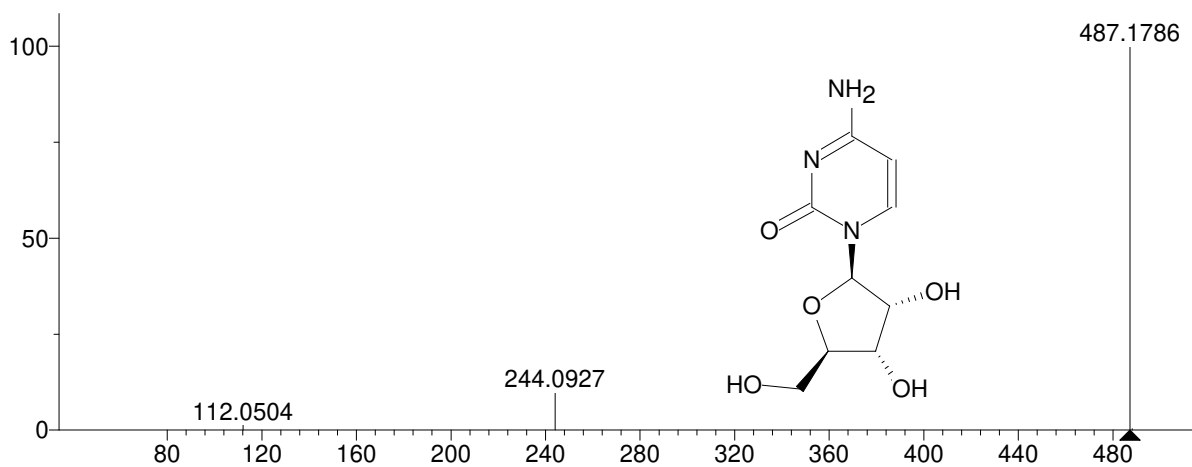

Hit 4 : Cytarabine [2M+H]<sup>+</sup> HCD 4V P=487.2  
C<sub>9</sub>H<sub>13</sub>N<sub>3</sub>O<sub>5</sub>; MF: 20; RMF: 326; Prob 0.19%; CAS: 147-94-4; Lib: nist\_msms; ID: 120706.

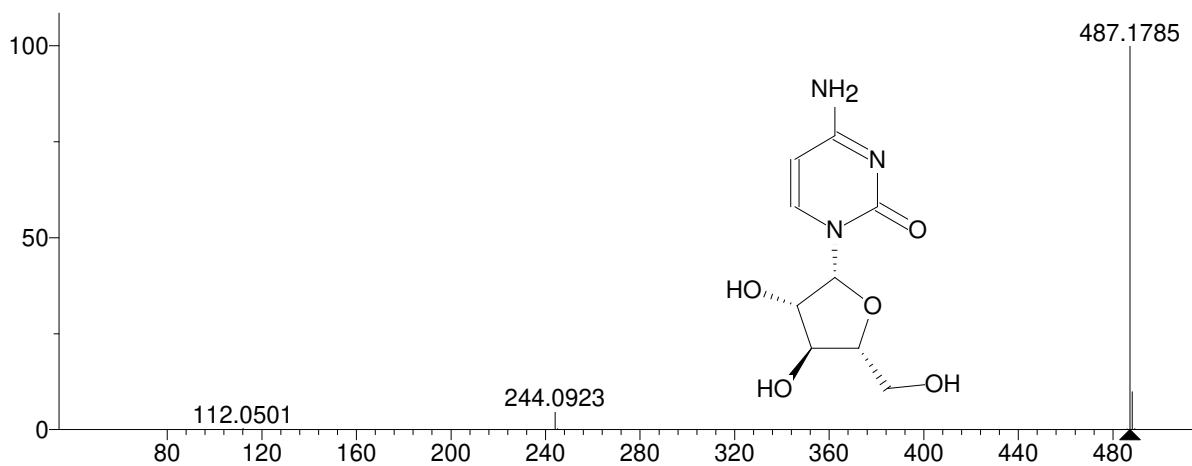

\*\* Search Report Page 1 of 2 \*\*

Unknown: Unknown (17.88\_325.1648m/z)  
Compound in Library Factor = -3273

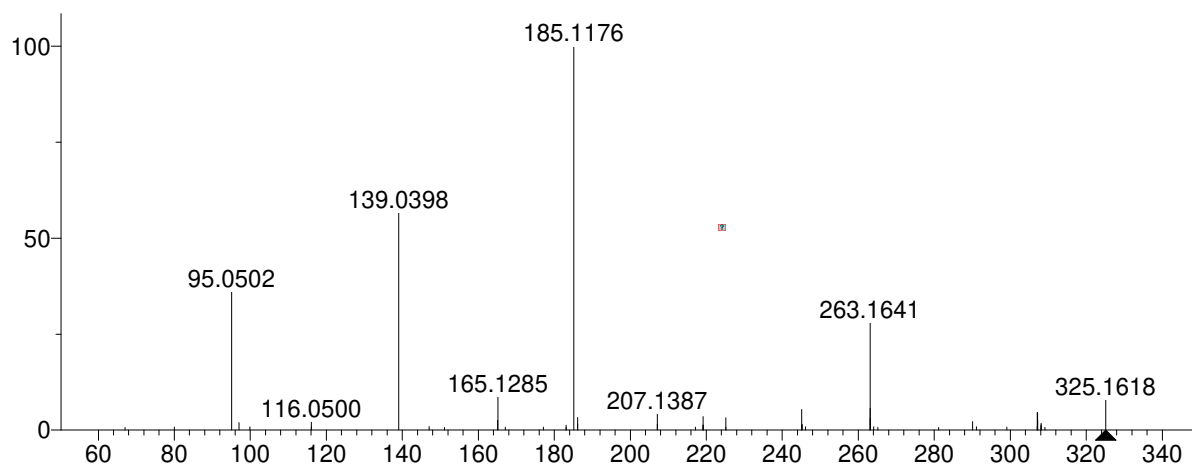

Hit 1 : Chamissonolide [M+H]<sup>+</sup> HCD 1V P=325.2  
C17H24O6; MF: 8; RMF: 160; Prob 15.5%; CAS: 78853-98-2; Lib: nist\_msms; ID: 500759.

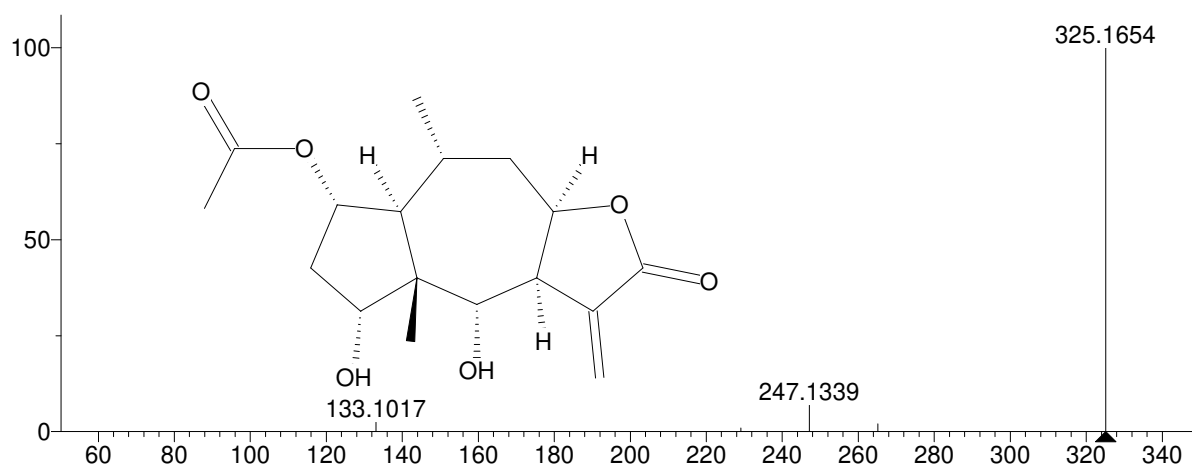

Hit 2 : Tributyrin [M+Na]<sup>+</sup> HCD 13V P=325.2  
C15H26O6; MF: 8; RMF: 148; Prob 15.5%; CAS: 60-01-5; Lib: nist\_msms; ID: 144821.

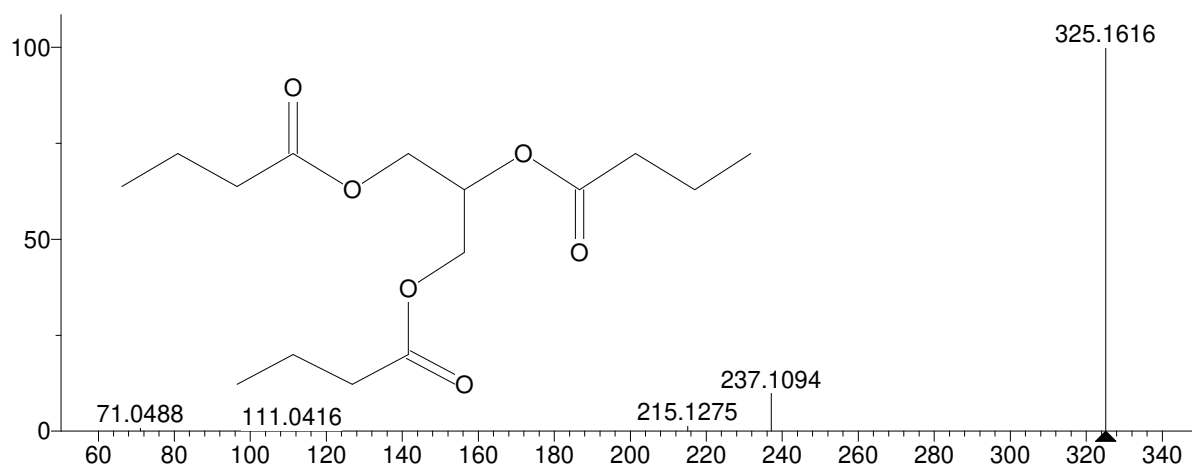

\*\* Search Report Page 2 of 2 \*\*

Hit 3 : MMV023985 [M+H]<sup>+</sup> 20-30-40%) P=325.2  
C<sub>18</sub>H<sub>20</sub>N<sub>4</sub>O<sub>2</sub>; MF: 3; RMF: 139; Prob 12.5%; Lib: mona-export-pathogen\_box; ID: 292.

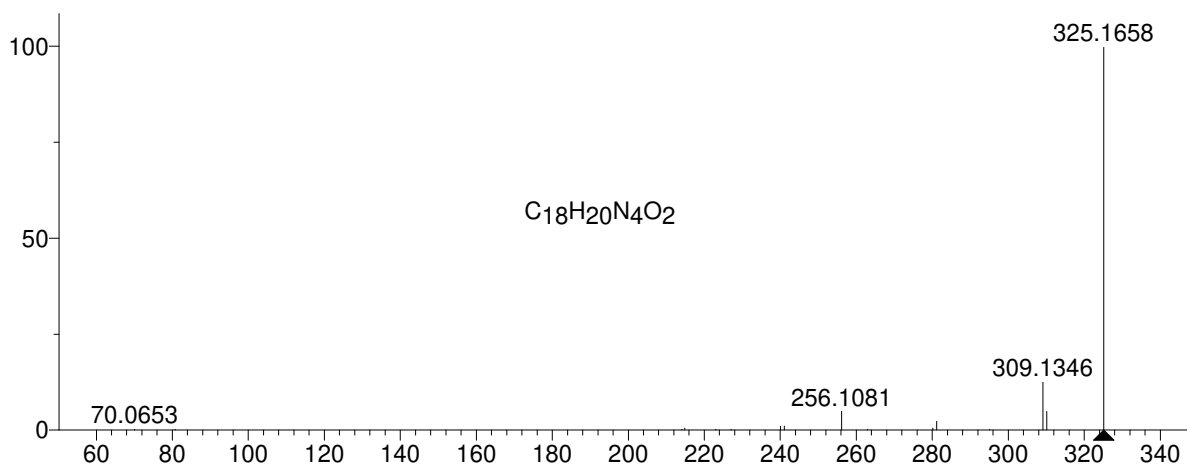

Hit 4 : 2H-Benzimidazol-2-one, 1-ethyl-1,3-dihydro- [2M+H]<sup>+</sup> HCD 3V P=325.2  
C<sub>9</sub>H<sub>10</sub>N<sub>2</sub>O; MF: 2; RMF: 92; Prob 12.0%; CAS: 10045-45-1; Lib: nist\_msms; ID: 364753.

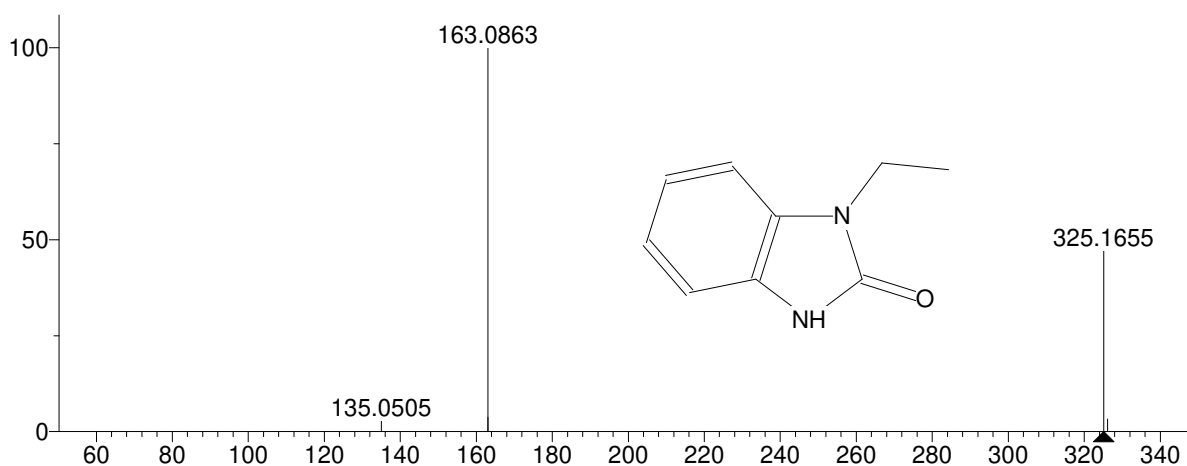

Hit 5 : NCGC00180769-03\_C17H24O6\_2-Butenoic acid, 2-methyl-, (1S,5R,6S)-5-(acetyloxy)-3-(hydroxymethyl)-  
C<sub>17</sub>H<sub>24</sub>O<sub>6</sub>; MF: 0; RMF: 85; Prob 11.1%; Lib: mona-export-gnps; ID: 12444.

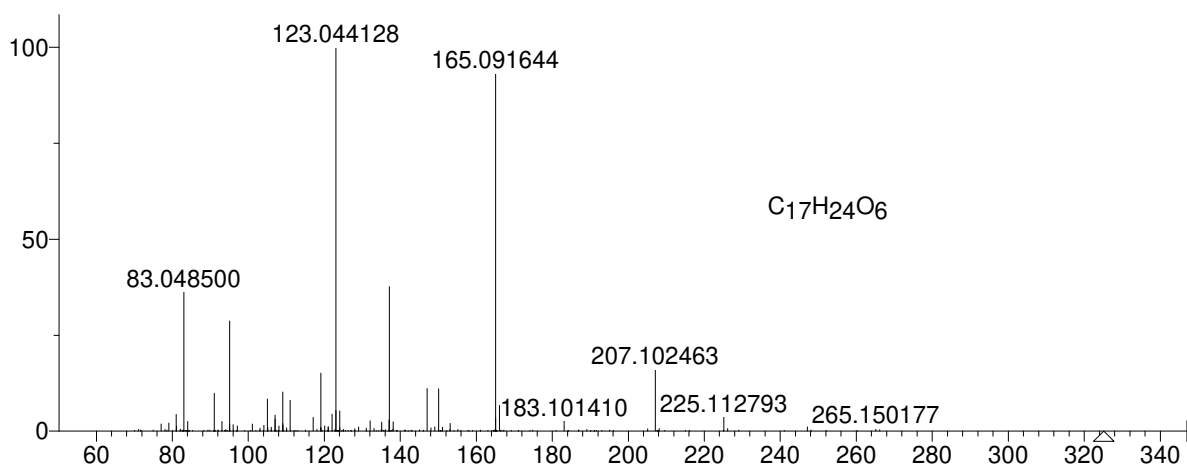

Unknown: Unknown (18.00\_265.1072m/z)  
Compound in Library Factor = -1848

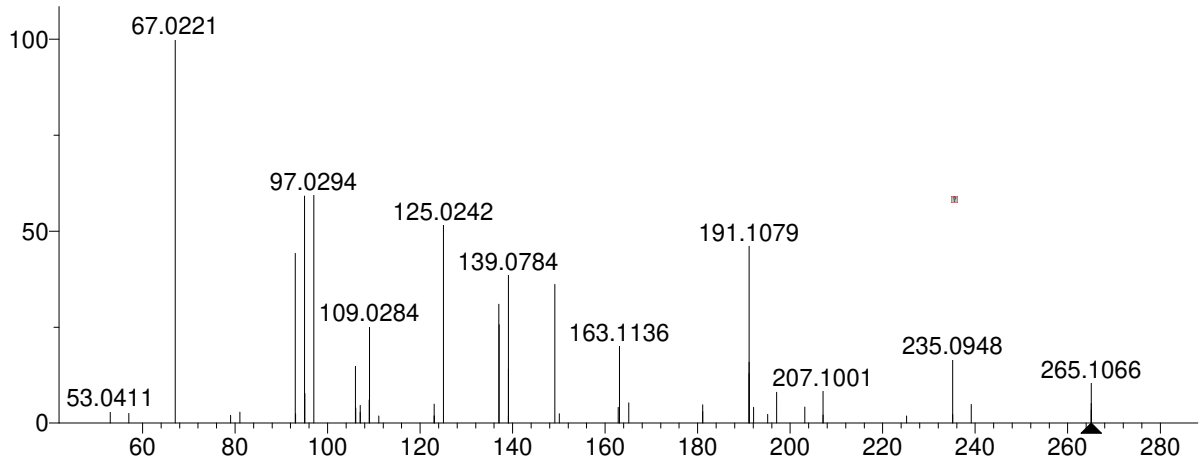

Hit 1 : Anisatin [M+H-CH4O3]+ HCD 10V P=265.1  
C15H20O8; MF: 44; RMF: 244; Prob 47.6%; CAS: 5230-87-5; Lib: nist\_msms; ID: 394625.

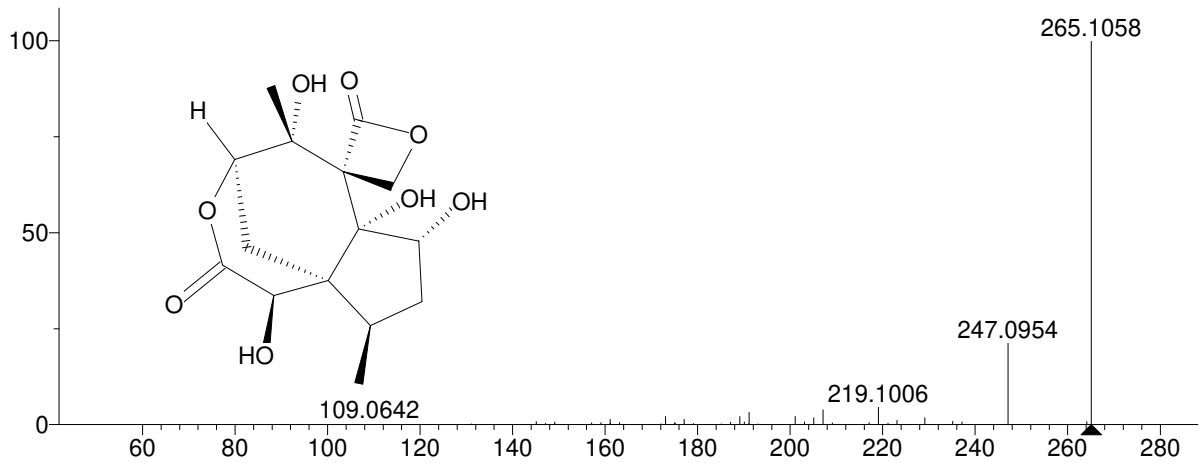

Hit 2 : D- $\alpha$ -Tocopherol succinate [M+H-C19H38]+ IT-FT 35% P=265.1  
C33H54O5; MF: 6; RMF: 105; Prob 11.4%; CAS: 4345-03-3; Lib: nist\_msms; ID: 308331.

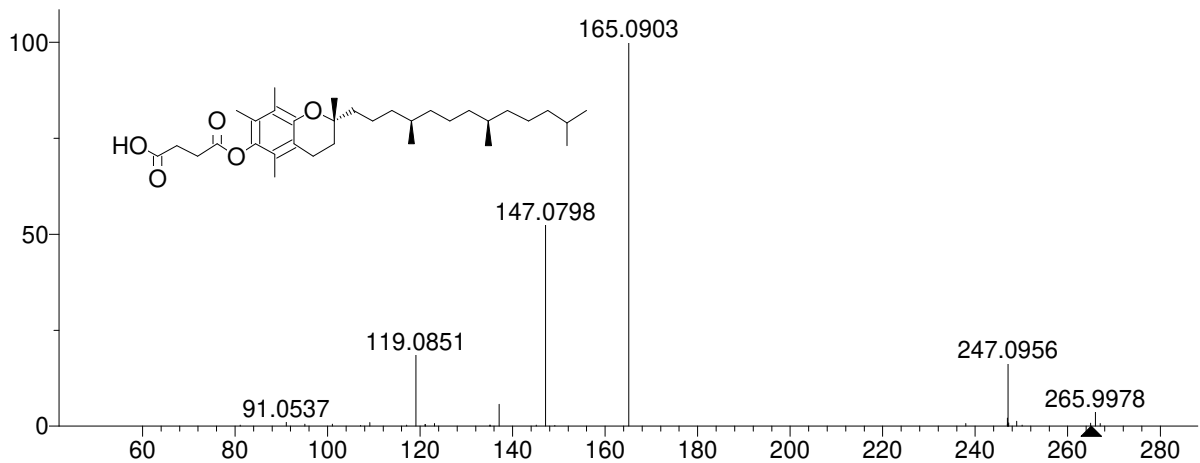

\*\* Search Report Page 2 of 2 \*\*

Hit 3 : 4,7,8-trimethoxy-3,5-dimethylchromen-2-one [M+H]<sup>+</sup> 35HCD P=265.1  
C<sub>14</sub>H<sub>16</sub>O<sub>5</sub>; MF: 5; RMF: 113; Prob 11.0%; Lib: mona-export-vf-npl\_qexactive; ID: 23347.

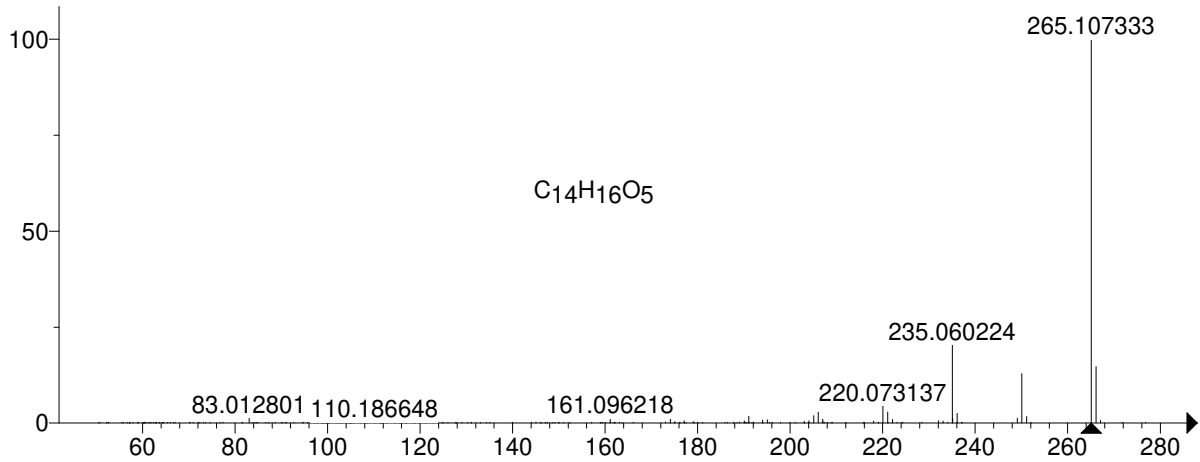

Hit 4 : NCGC00381087-01!3-(2-hydroxypropyl)-6,8-dimethoxyisochromen-1-one [M+H]<sup>+</sup> P=265.1  
C<sub>14</sub>H<sub>16</sub>O<sub>5</sub>; MF: 4; RMF: 121; Prob 10.5%; Lib: mona-export-gnps; ID: 7812.

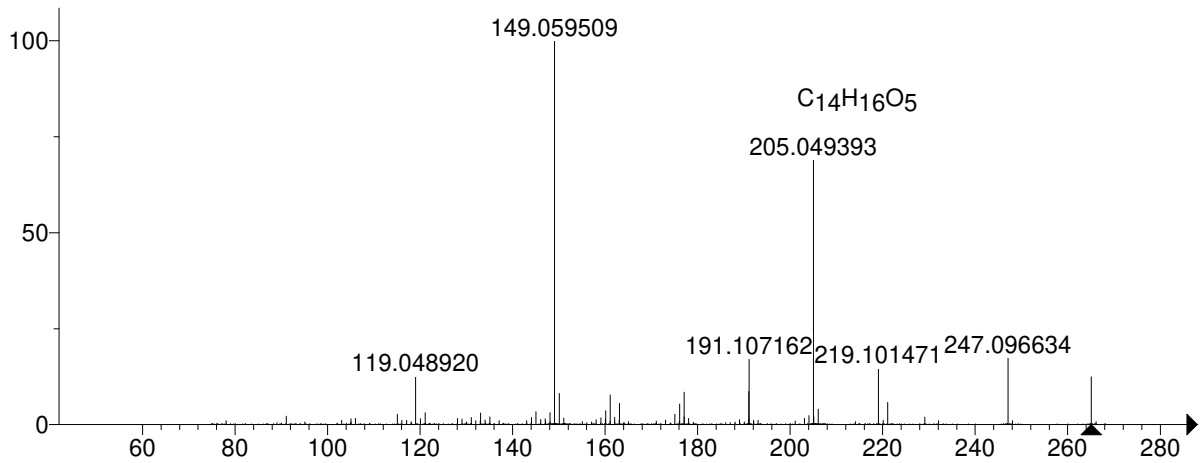

Hit 5 : (E)-5-(4-methoxy-5-methyl-6-oxopyran-2-yl)-3-methylhex-4-enoic acid [M-H]<sup>-</sup> 35HCD P=265.1  
C<sub>14</sub>H<sub>18</sub>O<sub>5</sub>; MF: 3; RMF: 47; Prob 10.1%; Lib: mona-export-lc-ms-ms\_negative\_mode; ID: 22802.

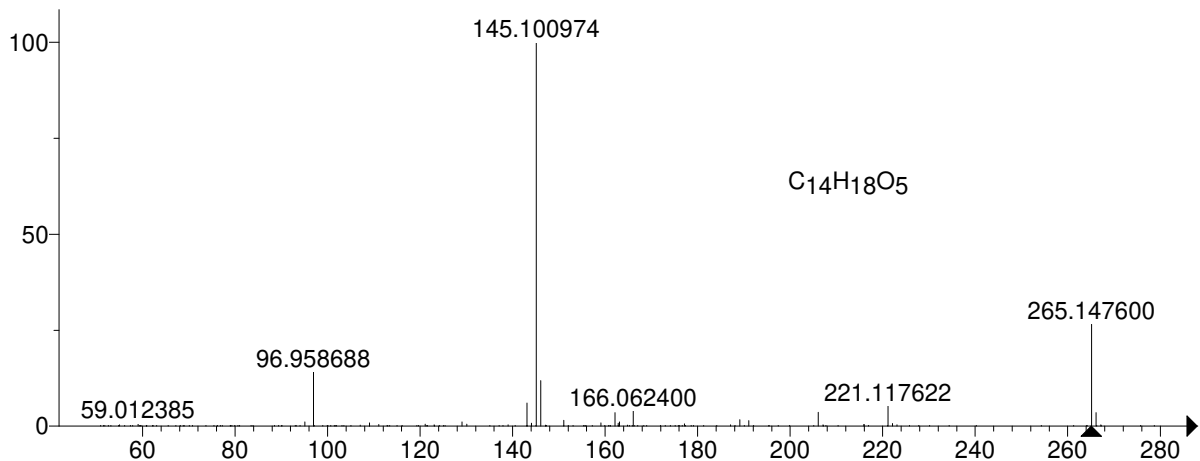



Unknown: Unknown (18.05\_484.2537m/z)  
Compound in Library Factor = -3273

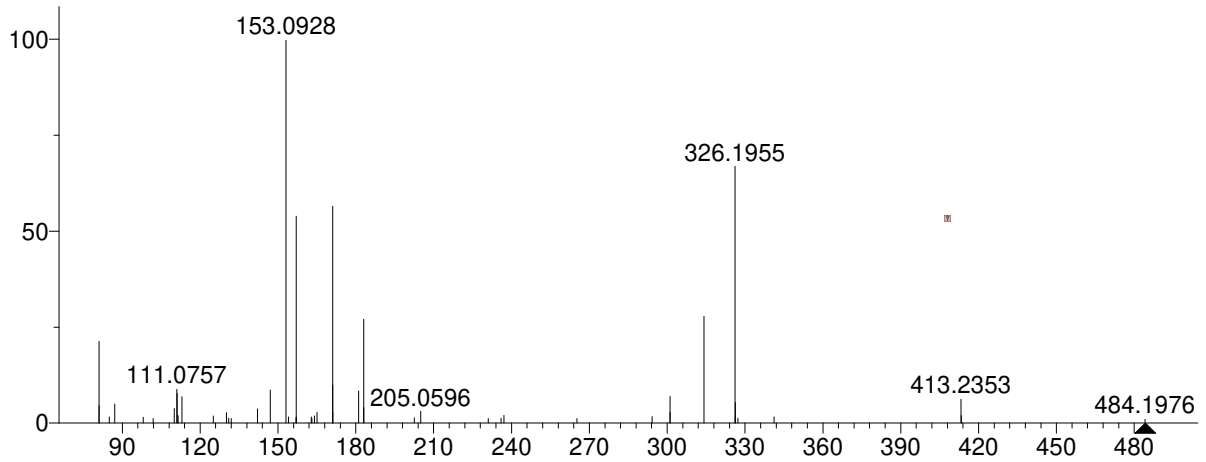

Hit 1 : 2-[2,6-bis(3-methylbut-2-enyl)-4-[(2S,3R,4S,5S,6R)-3,4,5-trihydroxy-6-(hydroxymethyl)oxan-2-yl]oxyphenyl]  
C<sub>24</sub>H<sub>34</sub>O<sub>9</sub>; MF: 1; RMF: 80; Prob 50.0%; Lib: mona-export-vf-npl\_qexactive; ID: 21831.

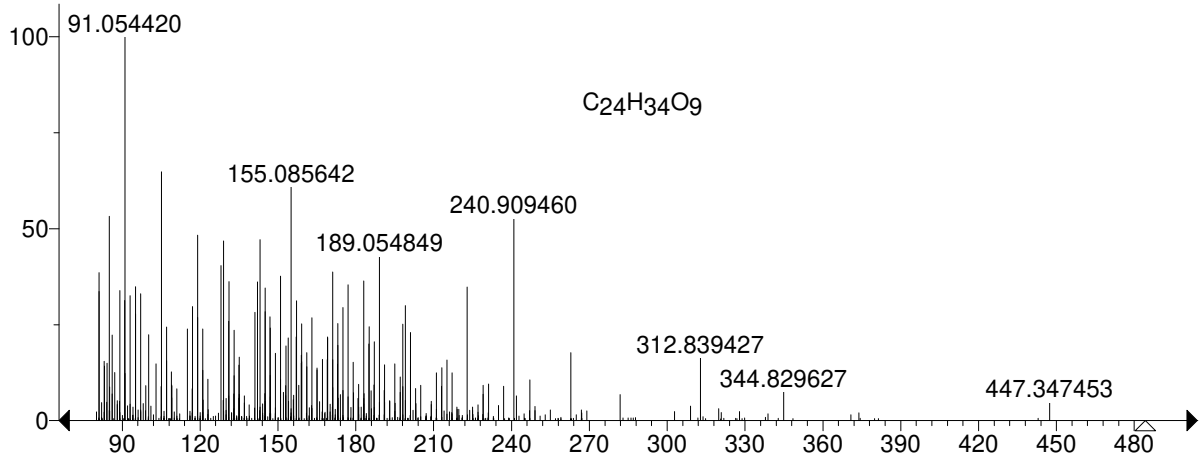

Hit 2 : NCGC00169100-02|2-[2,6-bis(3-methylbut-2-enyl)-4-[(2S,3R,4S,5S,6R)-3,4,5-trihydroxy-6-(hydroxymethyl)  
C<sub>24</sub>H<sub>34</sub>O<sub>9</sub>; MF: 1; RMF: 49; Prob 50.0%; Lib: mona-export-gnps; ID: 6241.

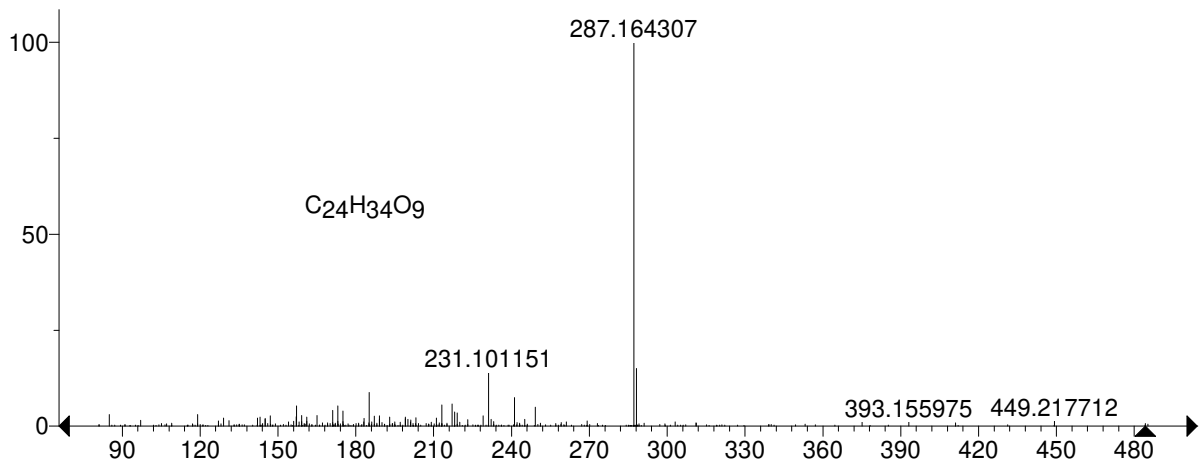

Unknown: Unknown (18.10\_647.8122m/z)  
Compound in Library Factor = 0

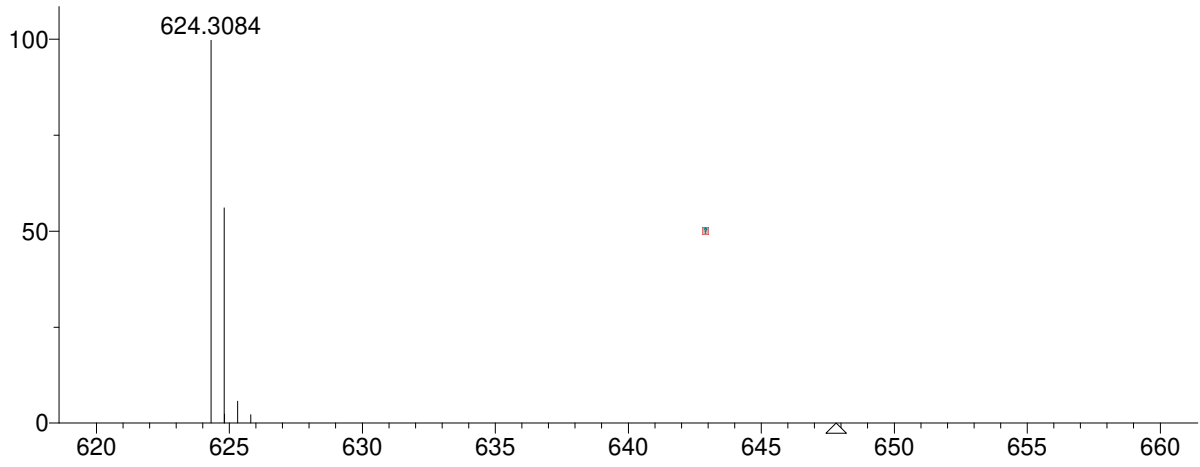

Unknown: Unknown (18.12\_647.3119m/z)  
Compound in Library Factor = 0

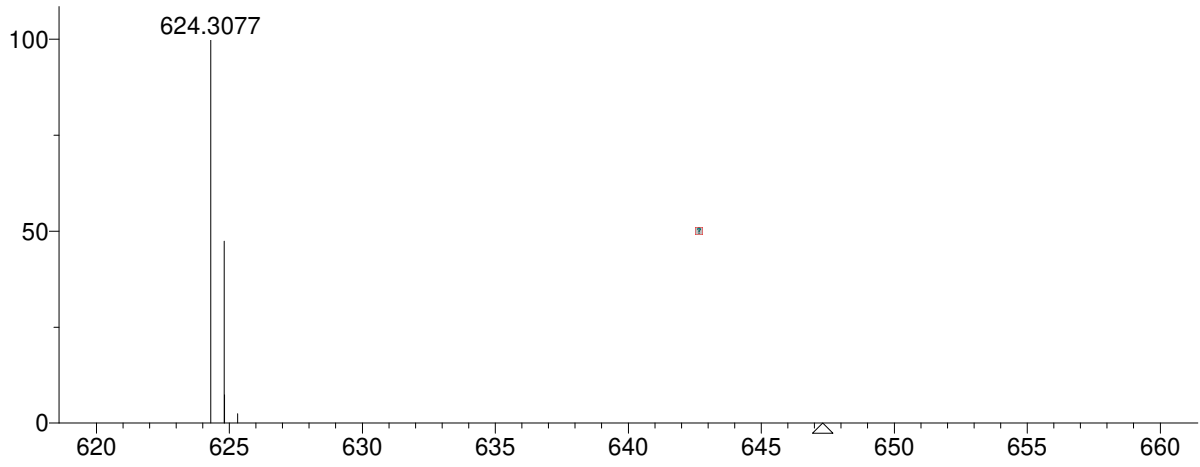

\*\* Search Report Page 1 of 2 \*\*

Unknown: Unknown (18.14\_394.1862m/z)  
Compound in Library Factor = -2176

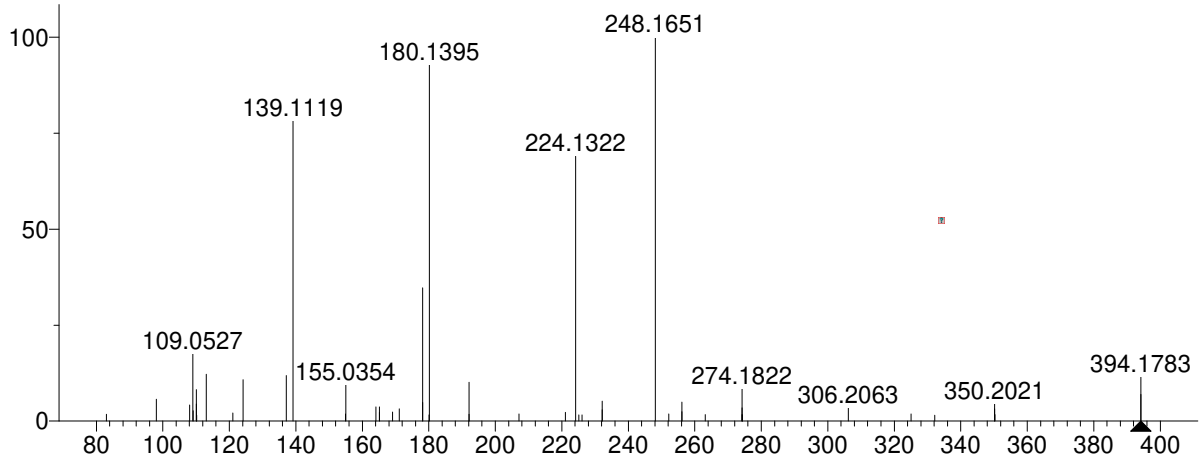

Hit 1 : 3',4',5'-Trimethoxycocaine [M+H]<sup>+</sup> HCD 15V P=394.2  
C<sub>20</sub>H<sub>27</sub>NO<sub>7</sub>; MF: 21; RMF: 199; Prob 15.9%; CAS: 156301-59-6; Lib: nist\_msms; ID: 383469.

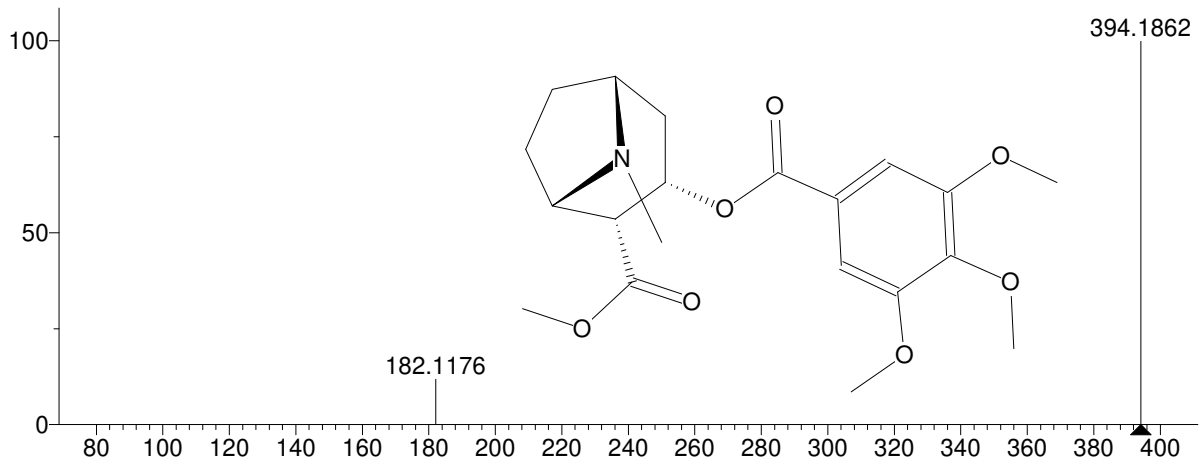

Hit 2 : [1,3-dihydroxy-1-(7-methoxy-2-oxochromen-6-yl)-3-methylbutan-2-yl] 3-methylbut-2-enoate [M+NH<sub>4</sub>]<sup>+</sup> 35  
C<sub>20</sub>H<sub>24</sub>O<sub>7</sub>; MF: 1; RMF: 73; Prob 7.24%; Lib: mona-export-vf-npl\_qexactive; ID: 24781.

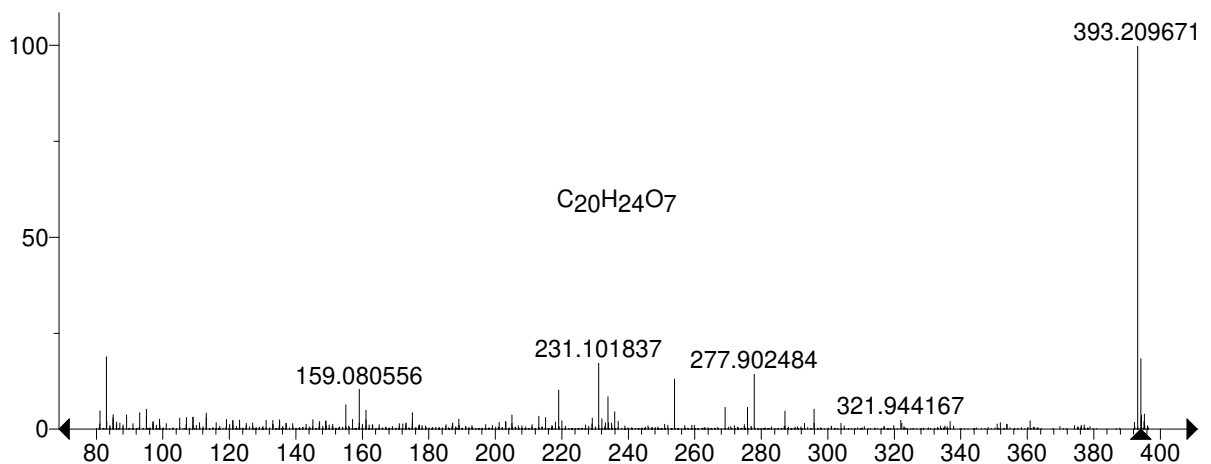

\*\* Search Report Page 2 of 2 \*\*

Hit 3 : [1,3-dihydroxy-1-(7-methoxy-2-oxochromen-6-yl)-3-methylbutan-2-yl] (E)-2-methylbut-2-enoate [M+NH4]<sup>+</sup>  
C<sub>20</sub>H<sub>24</sub>O<sub>7</sub>; MF: 1; RMF: 58; Prob 7.24%; Lib: mona-export-vf-npl\_qexactive; ID: 5461.

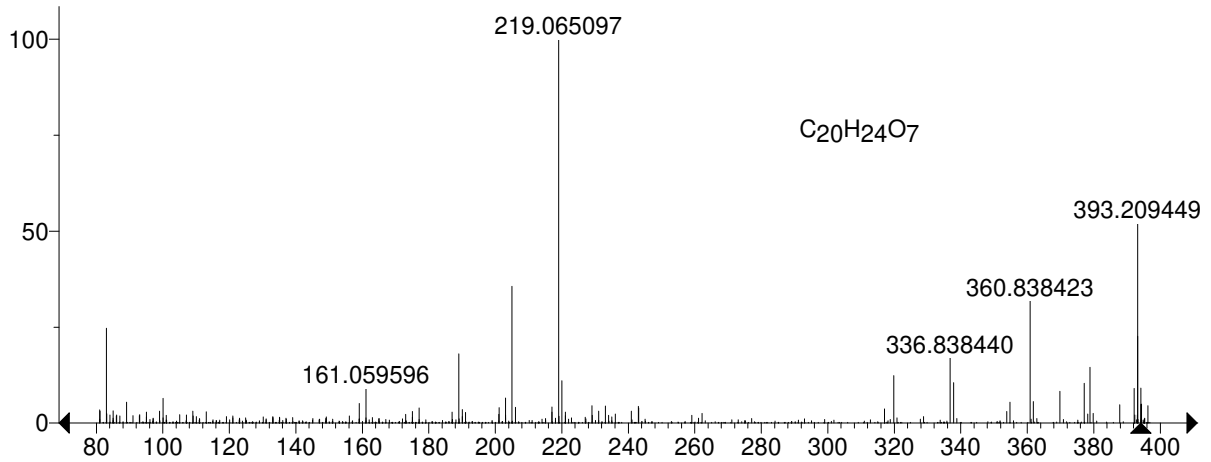

Hit 4 : rac-N,N-Didesmethyl-O-desmethylvenlafaxine glucuronide [M+H-H<sub>2</sub>O]<sup>+</sup> HCD 11V P=394.2  
C<sub>20</sub>H<sub>29</sub>NO<sub>8</sub>; MF: 0; RMF: 112; Prob 6.96%; CAS: 1799830-07-1; Lib: nist\_msms; ID: 436197.

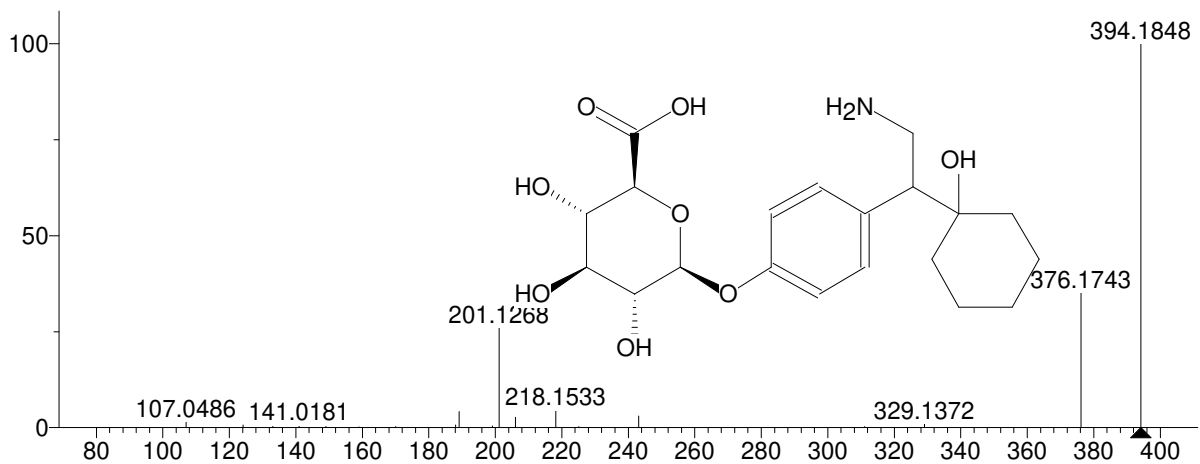

Hit 5 : NCGC00381074-01! [1,3-dihydroxy-1-(7-methoxy-2-oxochromen-6-yl)-3-methylbutan-2-yl] 3-methylbut-2-er  
C<sub>20</sub>H<sub>24</sub>O<sub>7</sub>; MF: 0; RMF: 54; Prob 6.96%; Lib: mona-export-gnps; ID: 8644.

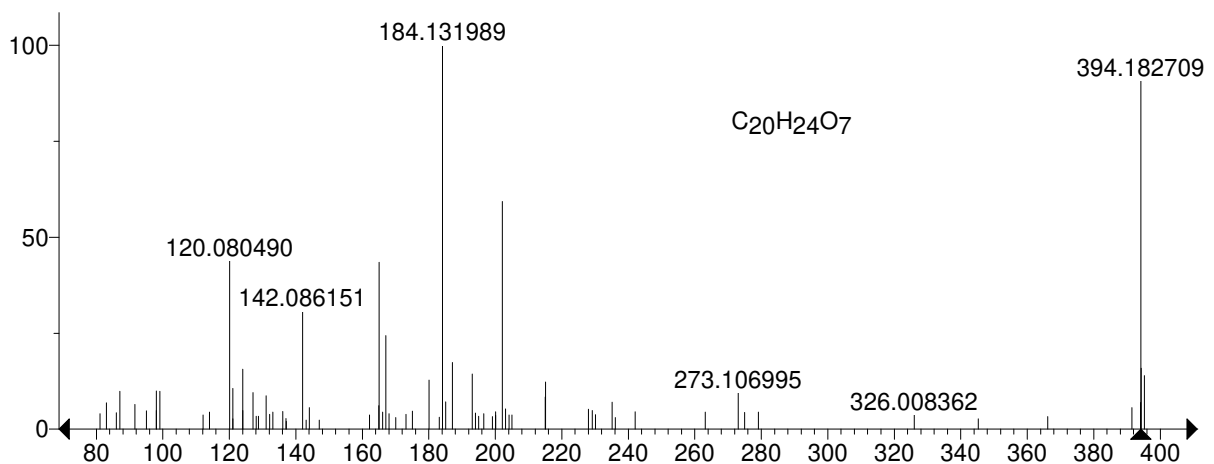

Unknown: Unknown (18.15\_402.8321m/z)  
Compound in Library Factor = 0

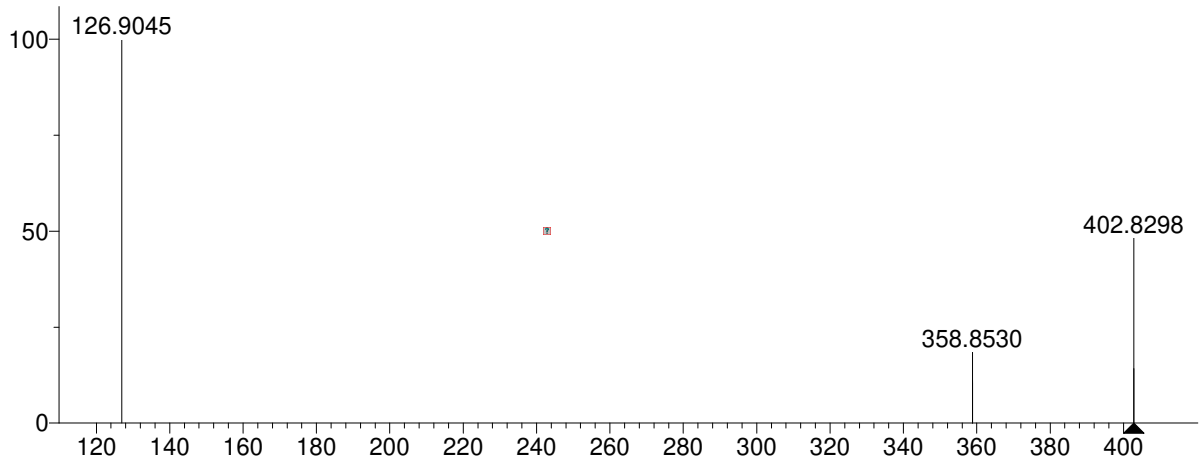

Unknown: Unknown (18.26\_520.0691 m/z)  
Compound in Library Factor = 0

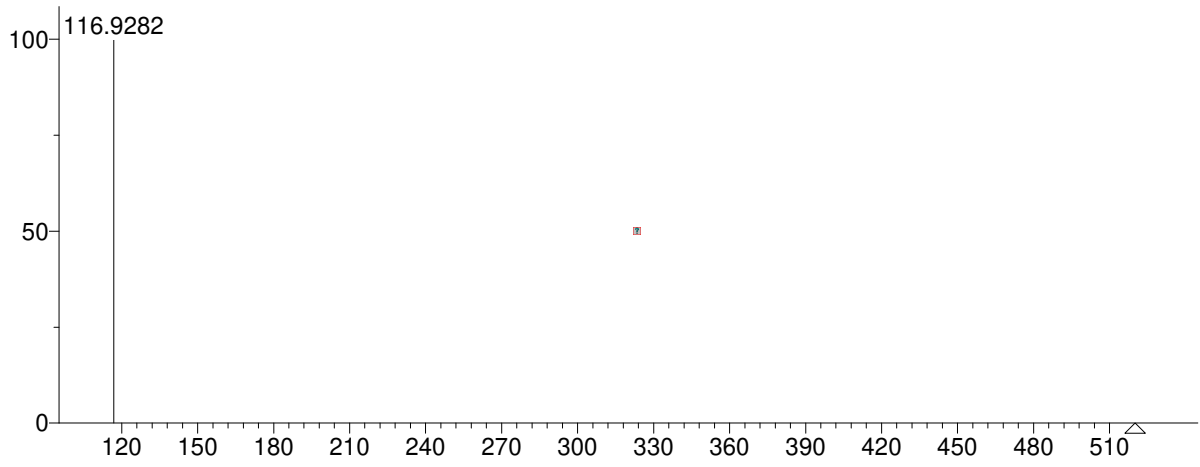

\*\* Search Report Page 1 of 2 \*\*

Unknown: Unknown (18.27\_673.3202m/z)  
Compound in Library Factor = -2387

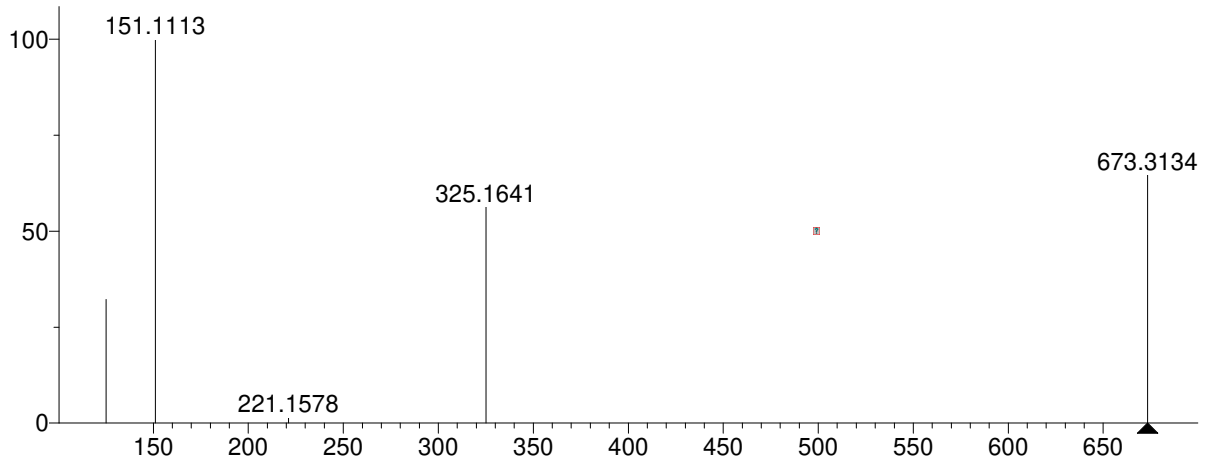

Hit 1 : Thapsigargin [M+Na]<sup>+</sup> HCD 20V P=673.3  
C<sub>34</sub>H<sub>50</sub>O<sub>12</sub>; MF: 18; RMF: 439; Prob 48.3%; CAS: 67526-95-8; Lib: nist\_msms; ID: 247695.

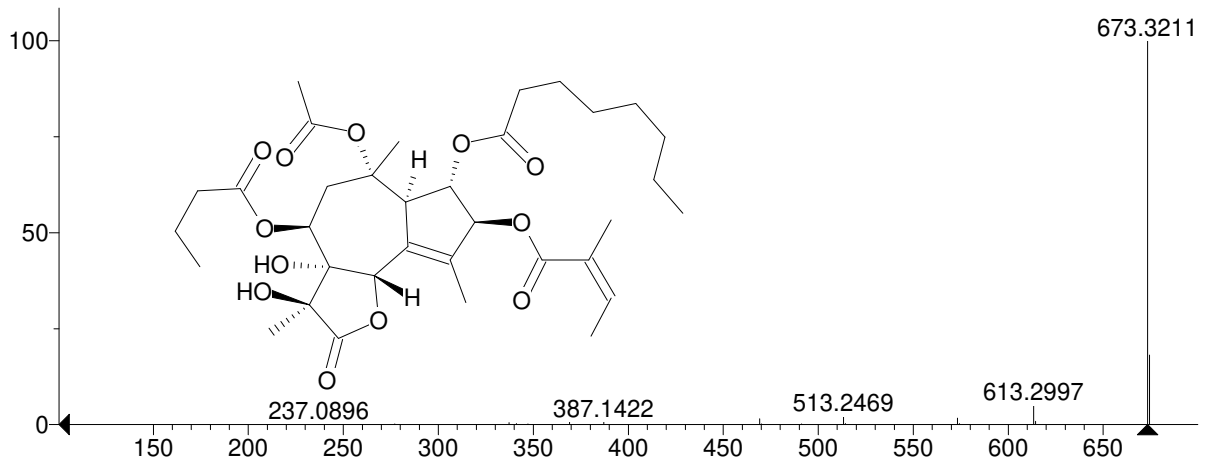

Hit 2 : 7,13,17-O-Triacetyl-5-O-(2-methylbutyryl)-3-O-propanoyl-14-oxopremyrinsol [M+Na]<sup>+</sup> P=673.3  
C<sub>34</sub>H<sub>50</sub>O<sub>12</sub>; MF: 1; RMF: 164; Prob 26.4%; Lib: mona-export-gnps; ID: 5960.

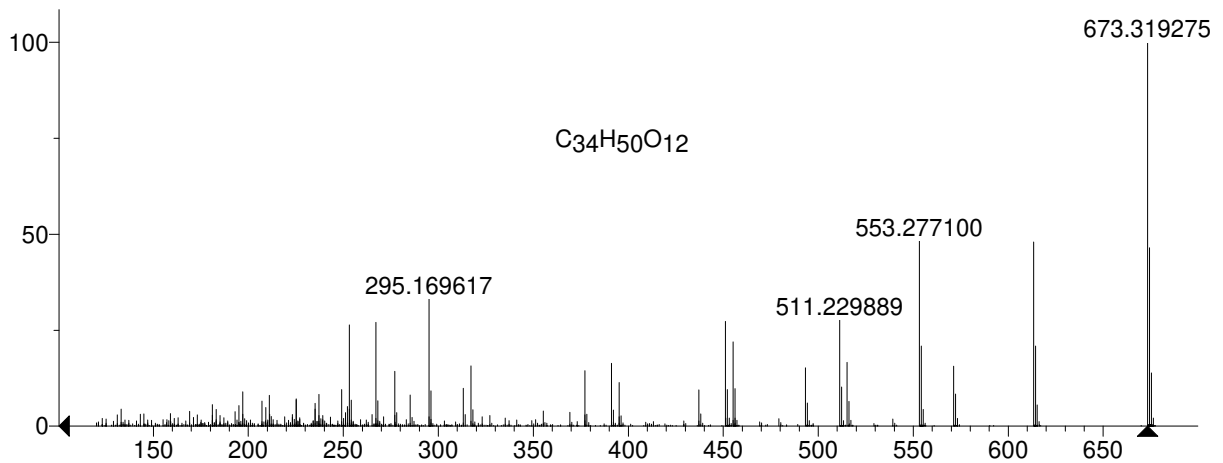



Hit 3 : [6-acetyloxy-4-butanoyloxy-3,3a-dihydroxy-3,6,9-trimethyl-8-[(E)-2-methylbut-2-enoyl]oxy-2-oxo-4,5,6a,7,8, C<sub>34</sub>H<sub>50</sub>O<sub>12</sub>; MF: 0; RMF: 12; Prob 25.3%; Lib: mona-export-vf-npl\_qexactive; ID: 18161.

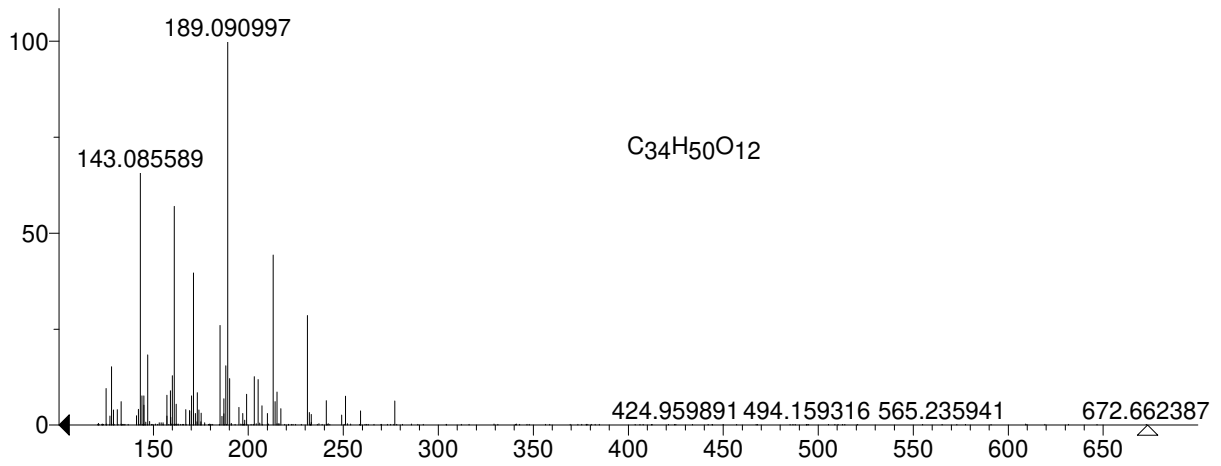

\*\* Search Report Page 1 of 2 \*\*

Unknown: Unknown (18.28\_151.1115m/z)  
Compound in Library Factor = -144

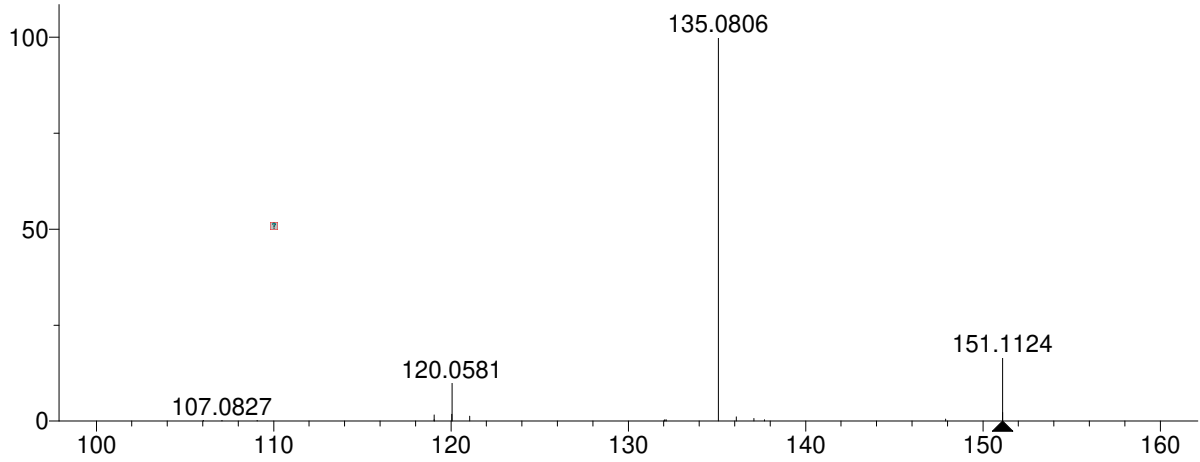

Hit 1 : 2-Furanpropanoic acid, 3-carboxy-4-methyl-5-propyl- [M-H-C2O4]- HCD 16V P=151.1  
C12H16O5; MF: 454; RMF: 655; Prob 94.1%; CAS: 86879-39-2; Lib: nist\_msms; ID: 428346.

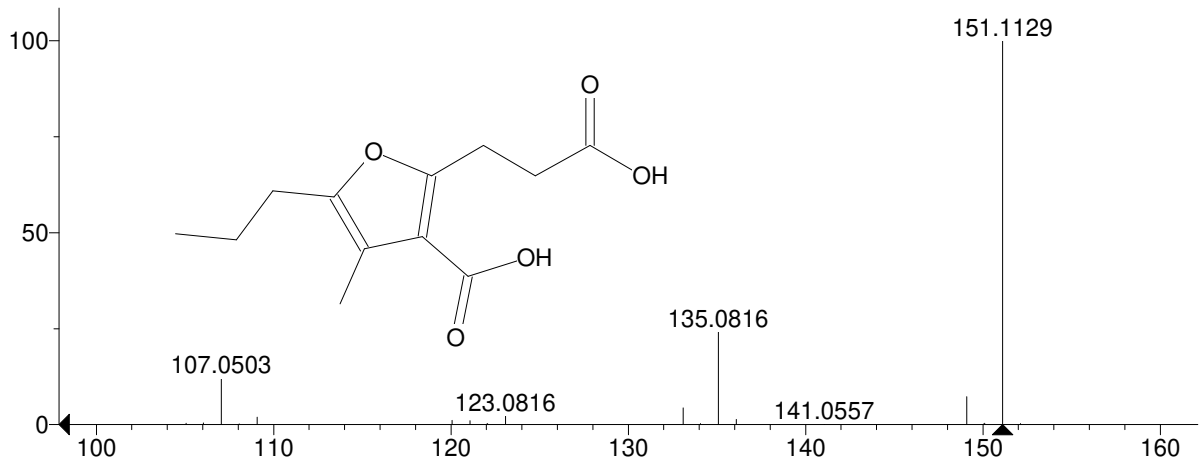

Hit 2 : L-Carvone [M+H]+ HCD 6V P=151.1  
C10H14O; MF: 102; RMF: 342; Prob 0.94%; CAS: 6485-40-1; Lib: nist\_msms; ID: 145173.

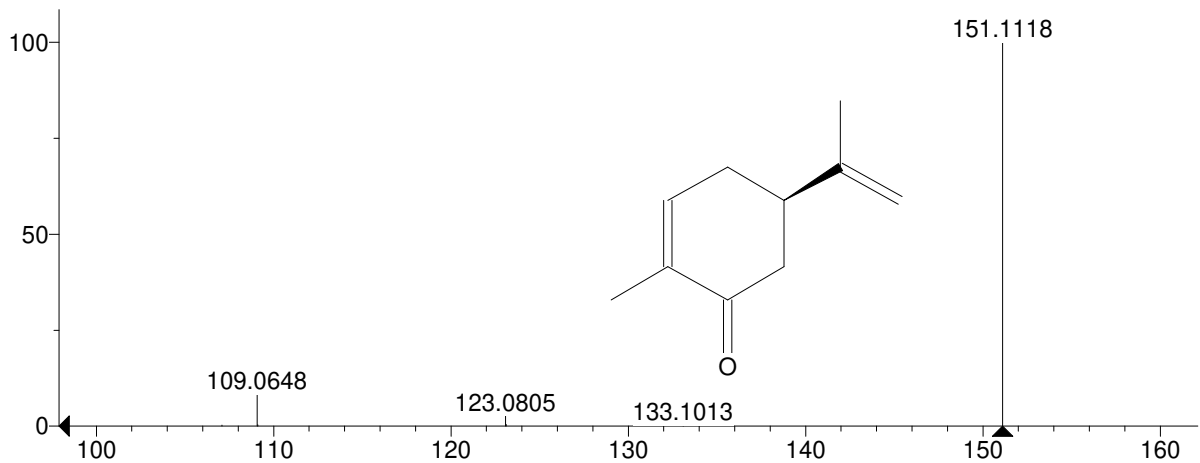

Hit 3 : (-)-Verbenone [M+H]<sup>+</sup> HCD 3V P=151.1  
C<sub>10</sub>H<sub>14</sub>O; MF: 96; RMF: 341; Prob 0.73%; CAS: 1196-01-6; Lib: nist\_msms; ID: 143387.

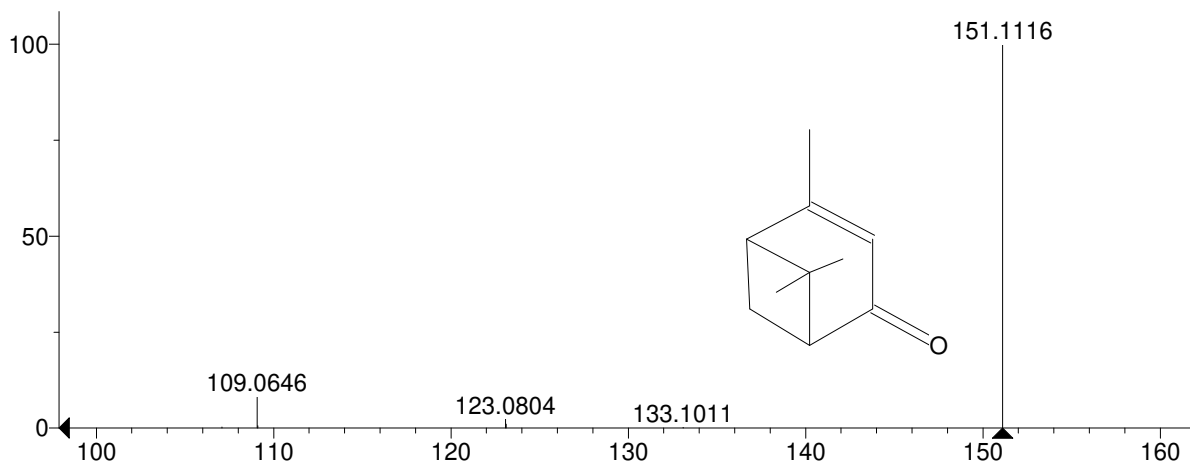

Hit 4 : 2-Adamantanone [M+H]<sup>+</sup> HCD 18V P=151.1  
C<sub>10</sub>H<sub>14</sub>O; MF: 96; RMF: 339; Prob 0.73%; CAS: 700-58-3; Lib: nist\_msms; ID: 395499.

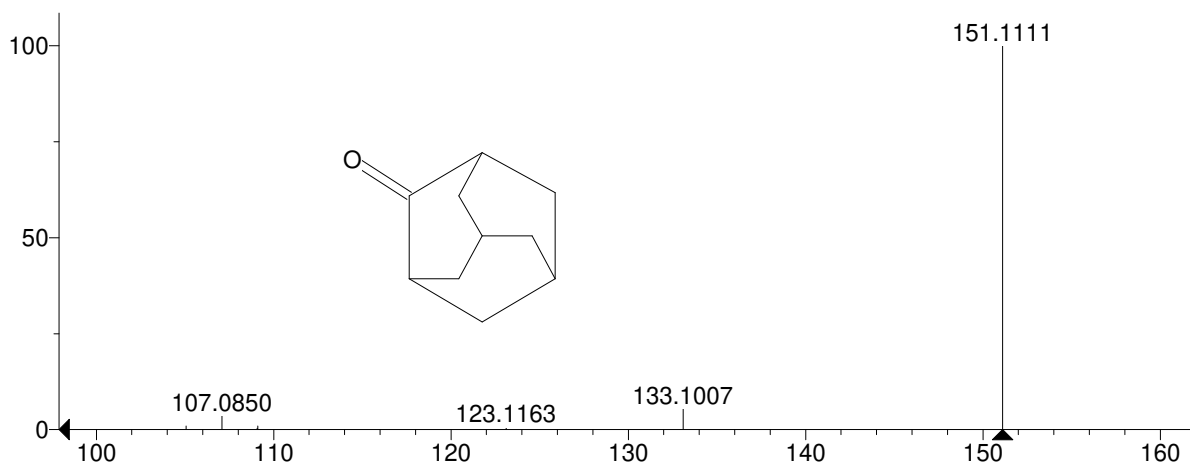

Hit 5 : (+)-Carvone [M+H]<sup>+</sup> HCD 6V P=151.1  
C<sub>10</sub>H<sub>14</sub>O; MF: 89; RMF: 336; Prob 0.56%; CAS: 2244-16-8; Lib: nist\_msms; ID: 384974.

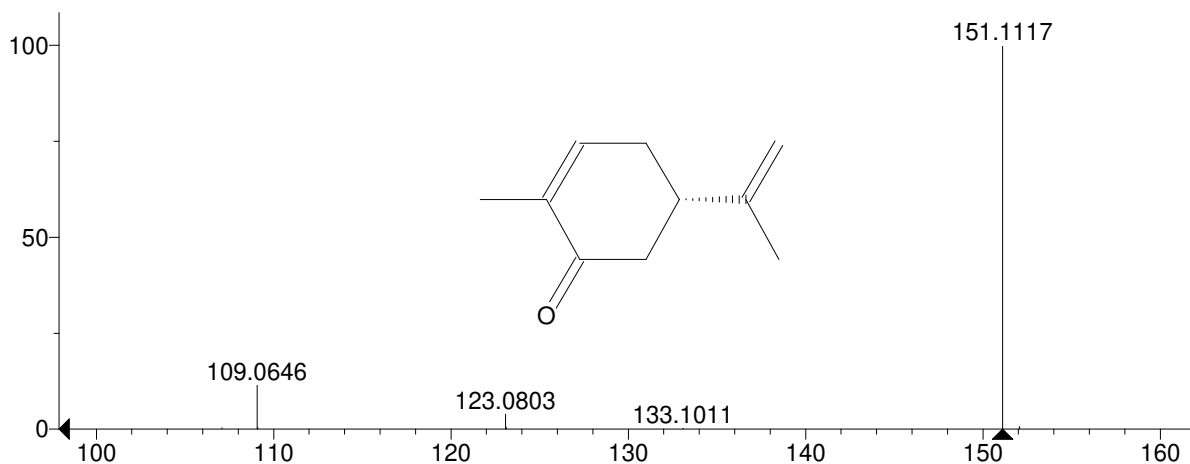

Unknown: Unknown (18.28\_221.1529m/z)  
Compound in Library Factor = -3273

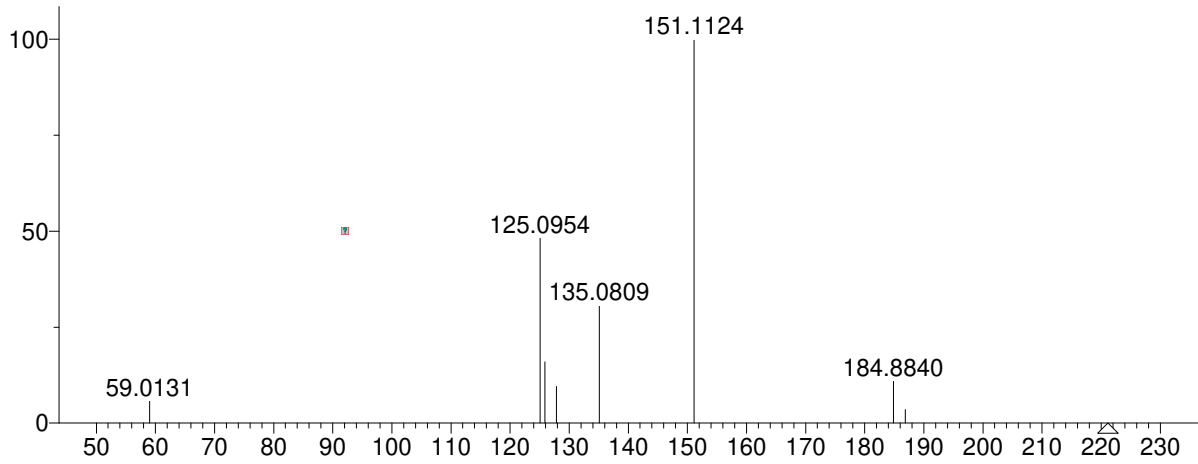

Hit 1 : 2,6-Di-tert-butylbenzoquinone [M+H]<sup>+</sup> HCD 26V P=221.2  
C<sub>14</sub>H<sub>20</sub>O<sub>2</sub>; MF: 3; RMF: 186; Prob 12.4%; CAS: 719-22-2; Lib: nist\_msms; ID: 144841.

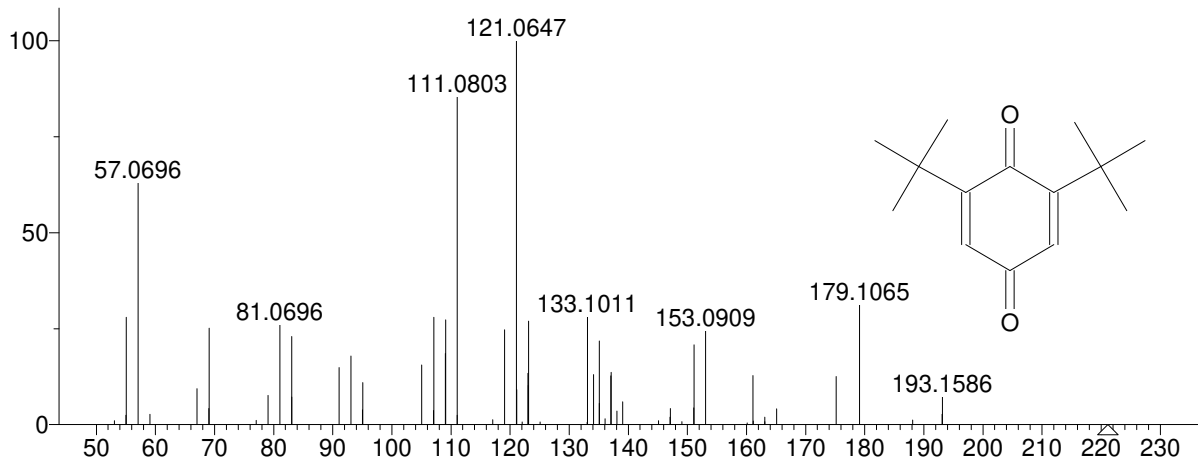

Hit 2 : 2,5-Di-tert-butyl-1,4-benzoquinone [M+H]<sup>+</sup> HCD 26V P=221.2  
C<sub>14</sub>H<sub>20</sub>O<sub>2</sub>; MF: 0; RMF: 153; Prob 10.9%; CAS: 2460-77-7; Lib: nist\_msms; ID: 141999.

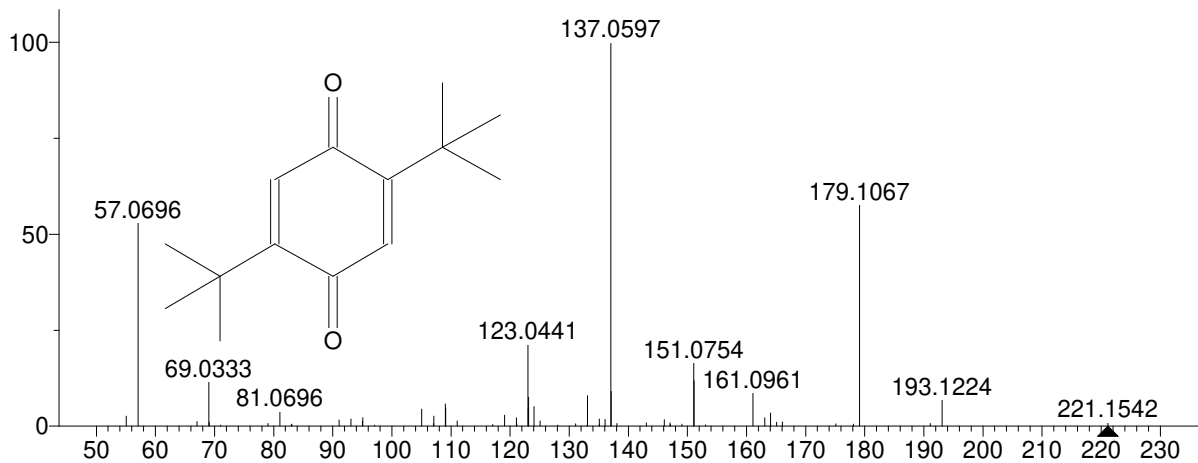

\*\* Search Report Page 2 of 2 \*\*

Hit 3 : 8,11-Tridecadienoic acid, 13-(3-pentyl-2-oxiranyl)-, (8Z,11Z)- [M-H-C6H12O]- HCD 19V P=221.2  
C20H34O3; MF: 0; RMF: 92; Prob 10.9%; CAS: 351533-80-7; Lib: nist\_msms; ID: 428462.

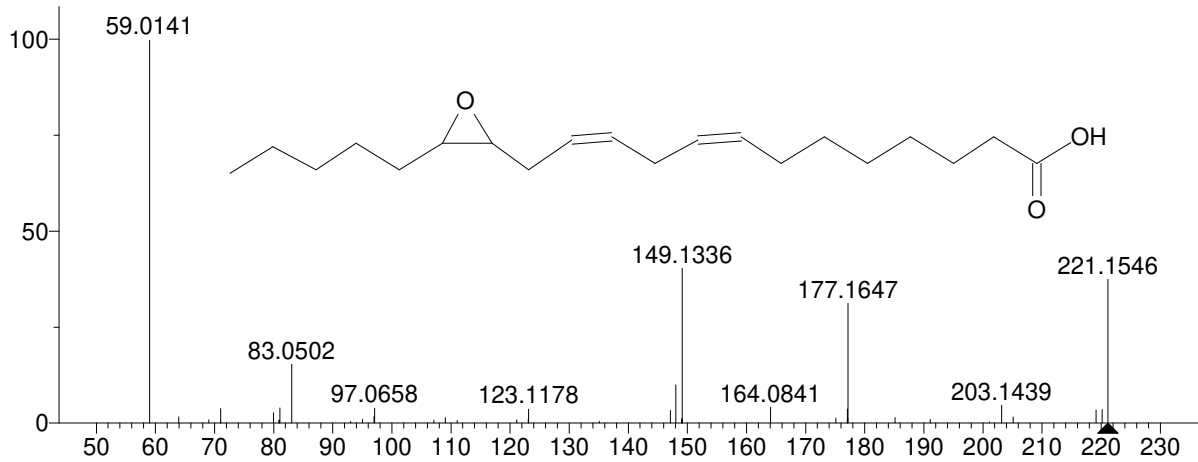

Hit 4 : NCGC00381404-01\_C14H22O3\_2-Naphthalenecarboxylic acid, 3,4,4a,5,6,7,8,8a-octahydro-3-hydroxy-5,5  
C14H22O3; MF: 0; RMF: 60; Prob 10.9%; Lib: mona-export-gnps; ID: 13406.

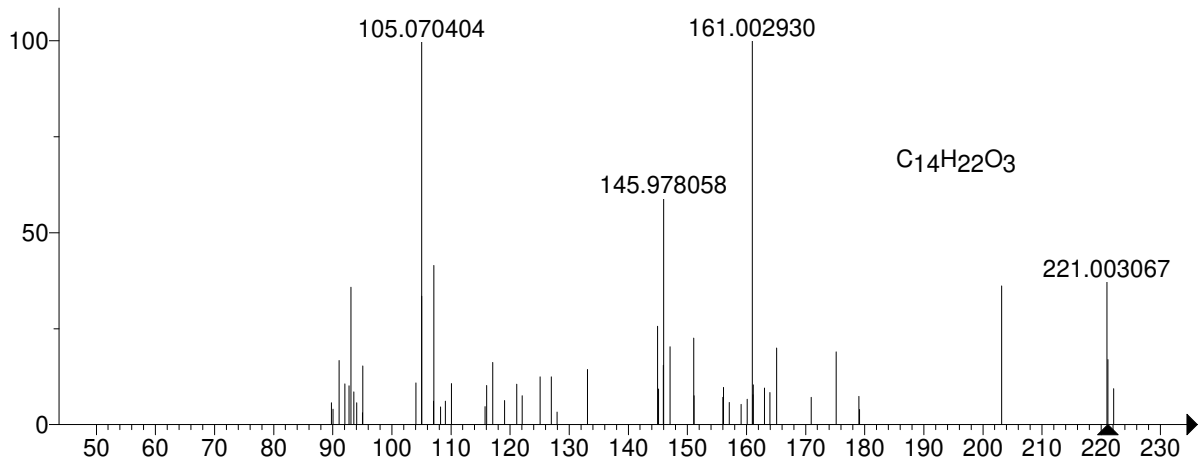

Hit 5 : RhodinyI Acetate [M+Na]+ 35HCD P=221.2  
C12H22O2; MF: 0; RMF: 33; Prob 10.9%; Lib: mona-export-vf-npl\_qexactive; ID: 26275.

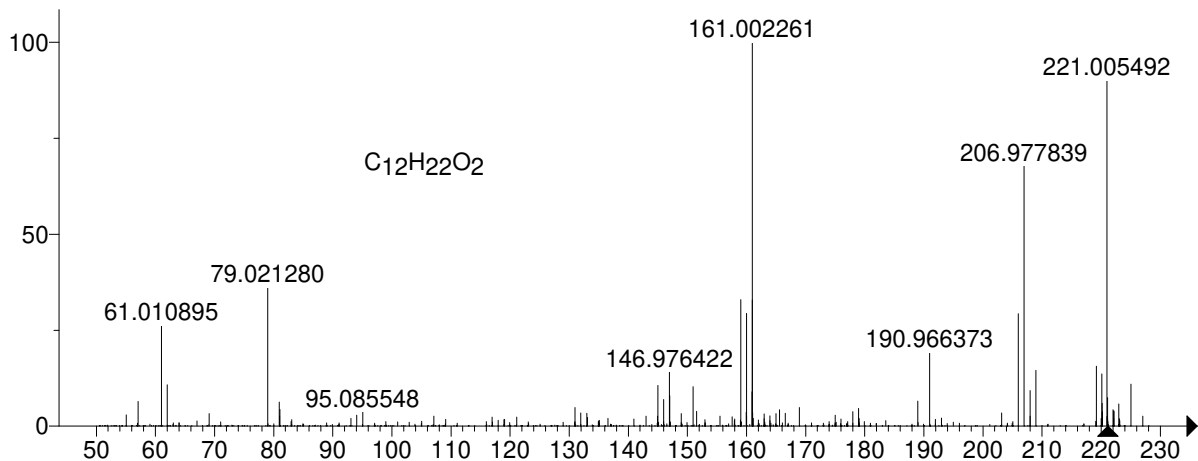

\*\* Search Report Page 1 of 2 \*\*

Unknown: Unknown (18.28\_325.1652m/z)  
Compound in Library Factor = -3273

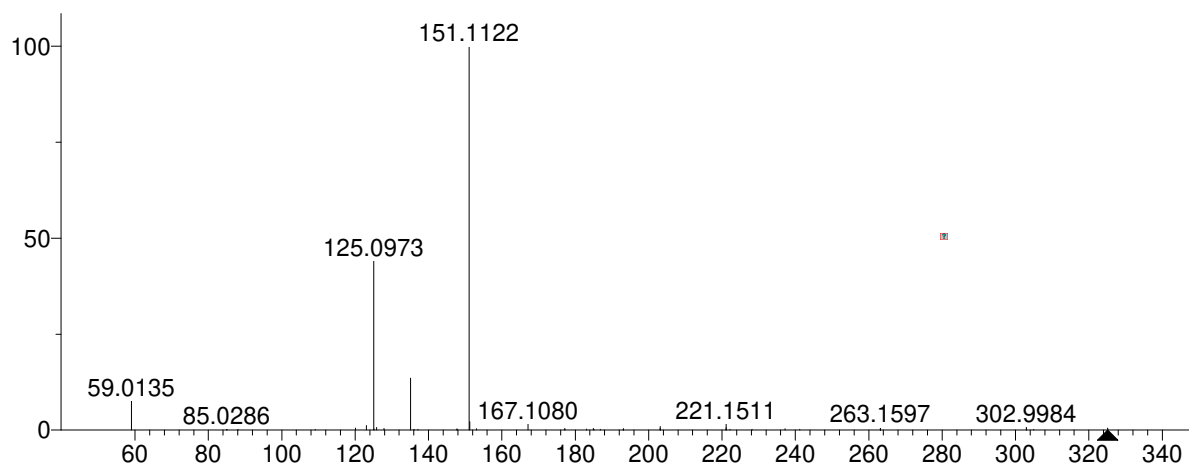

Hit 1 : Chamissonolide [M+H]<sup>+</sup> HCD 1V P=325.2  
C<sub>17</sub>H<sub>24</sub>O<sub>6</sub>; MF: 2; RMF: 57; Prob 14.9%; CAS: 78853-98-2; Lib: nist\_msms; ID: 500759.

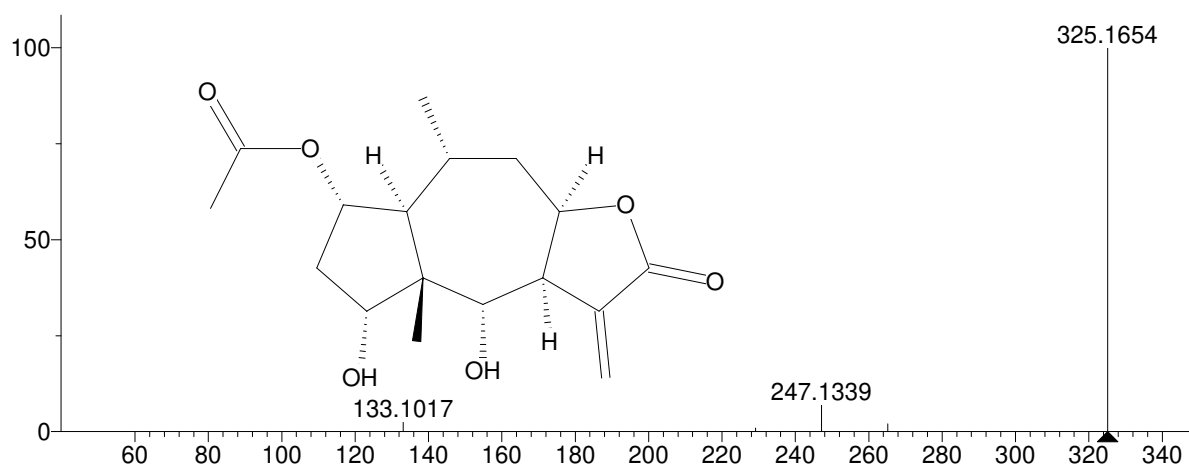

Hit 2 : Tributyrin [M+Na]<sup>+</sup> HCD 13V P=325.2  
C<sub>15</sub>H<sub>26</sub>O<sub>6</sub>; MF: 2; RMF: 49; Prob 14.9%; CAS: 60-01-5; Lib: nist\_msms; ID: 144821.

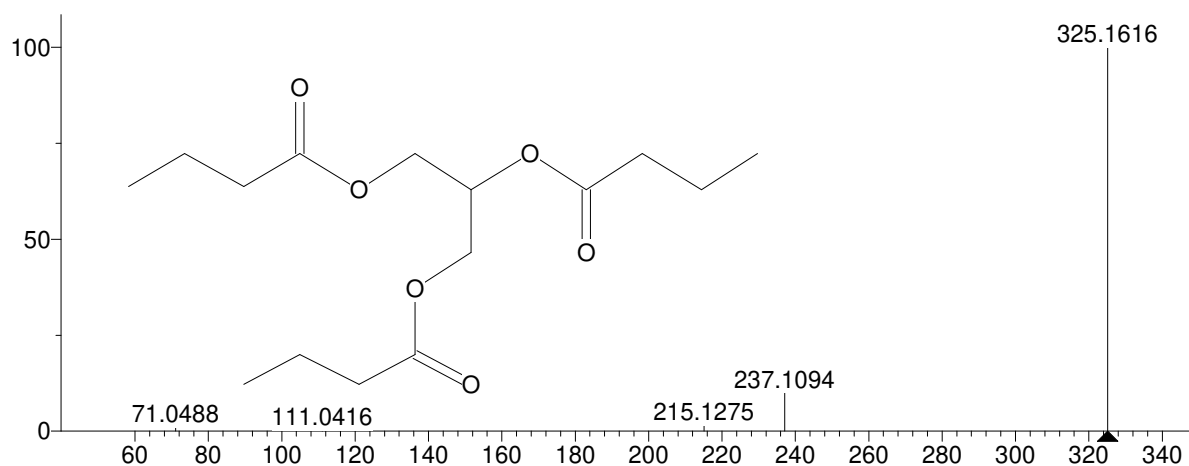

\*\* Search Report Page 2 of 2 \*\*

Hit 3 : NCGC00180769-03\_C17H24O6 2-Butenoic acid, 2-methyl-, (1S,5R,6S)-5-(acetyloxy)-3-(hydroxymethyl)-  
C17H24O6; MF: 2; RMF: 38; Prob 14.9%; Lib: mona-export-gnps; ID: 12444.

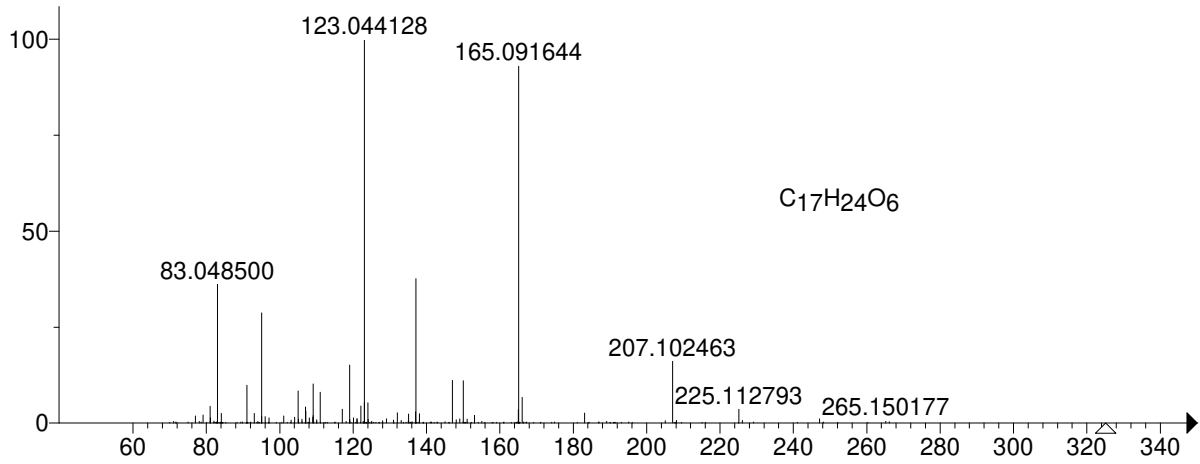

Hit 4 : 2H-Benzimidazol-2-one, 1-ethyl-1,3-dihydro- [2M+H]<sup>+</sup> HCD 6V P=325.2  
C<sub>9</sub>H<sub>10</sub>N<sub>2</sub>O; MF: 1; RMF: 55; Prob 14.3%; CAS: 10045-45-1; Lib: nist\_msms; ID: 364754.

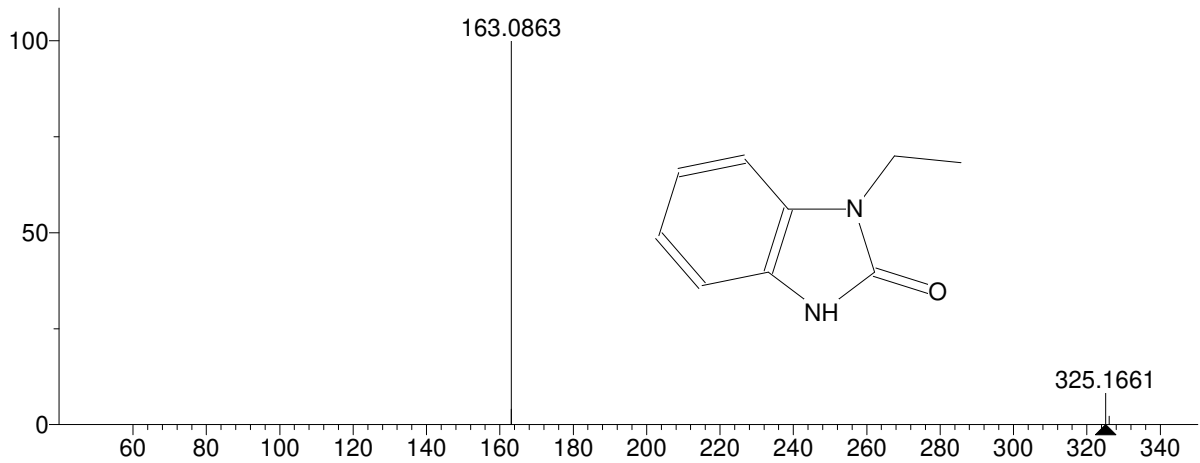

Hit 5 : MMV023985 [M+H]<sup>+</sup> 20-30-40%) P=325.2  
C<sub>18</sub>H<sub>20</sub>N<sub>4</sub>O<sub>2</sub>; MF: 0; RMF: 46; Prob 13.7%; Lib: mona-export-pathogen\_box; ID: 292.

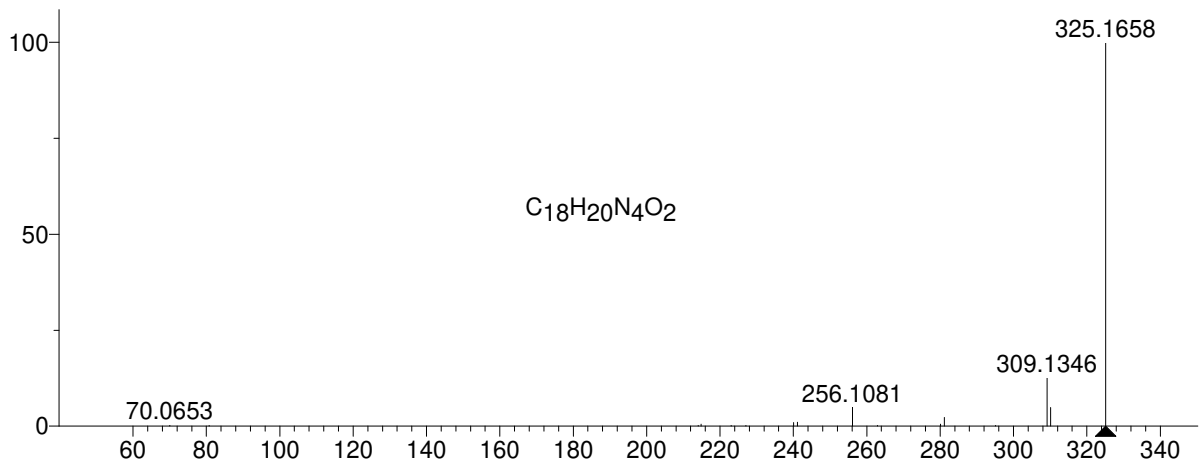

Unknown: Unknown (18.29\_325.3344m/z)  
Compound in Library Factor = 0

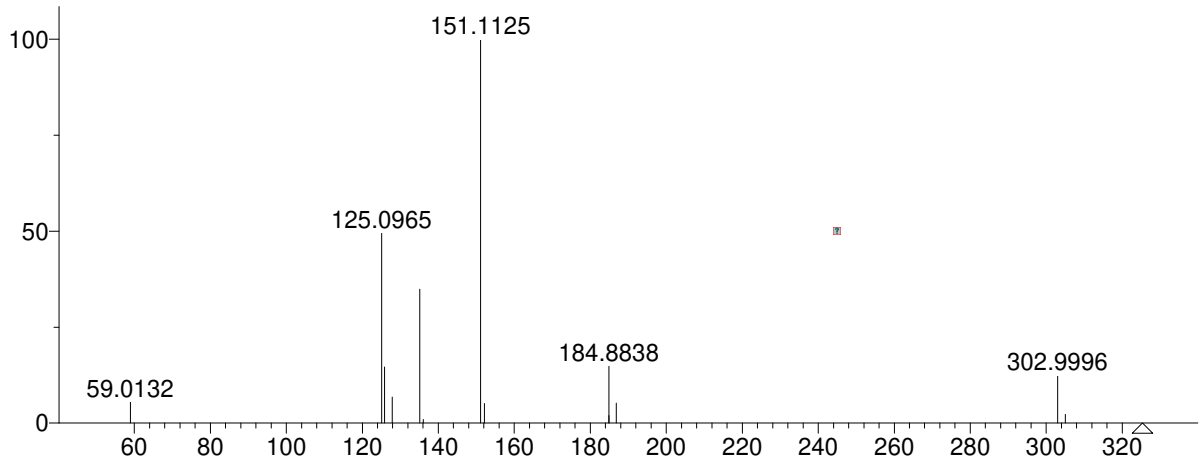



Unknown: Unknown (18.29\_408.0852m/z)  
Compound in Library Factor = 0

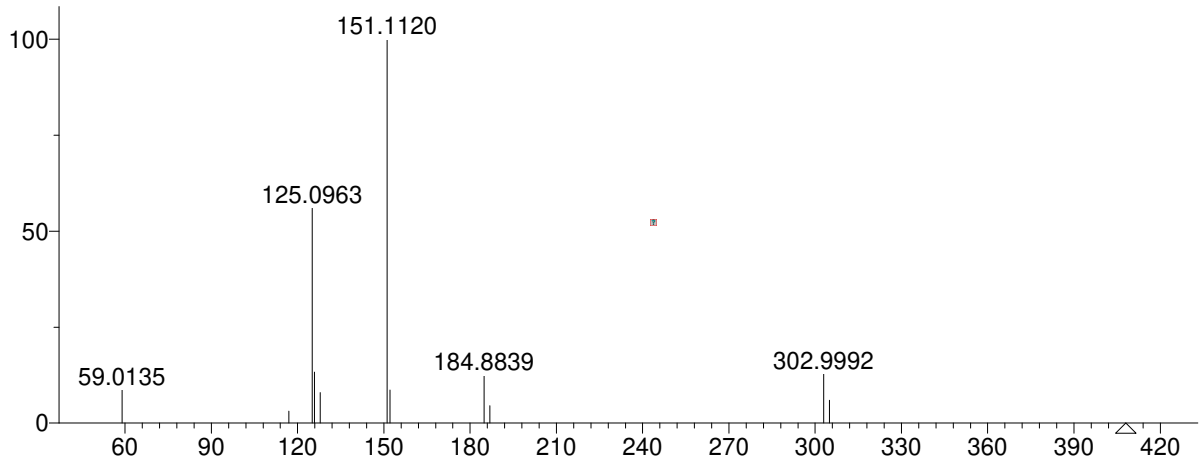

Unknown: Unknown (18.29\_460.0563m/z)  
Compound in Library Factor = 0

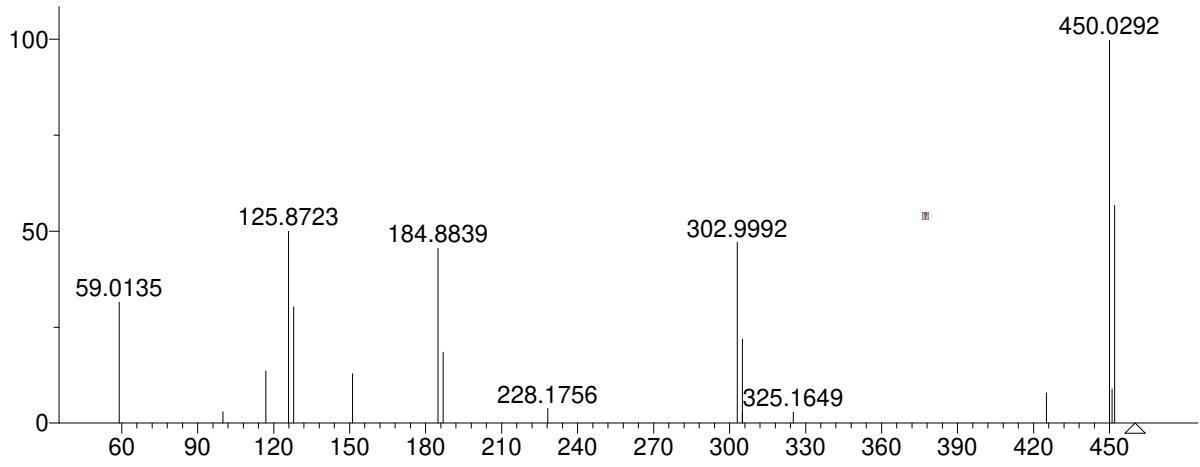

Unknown: Unknown (18.29\_660.2601m/z)  
Compound in Library Factor = 0

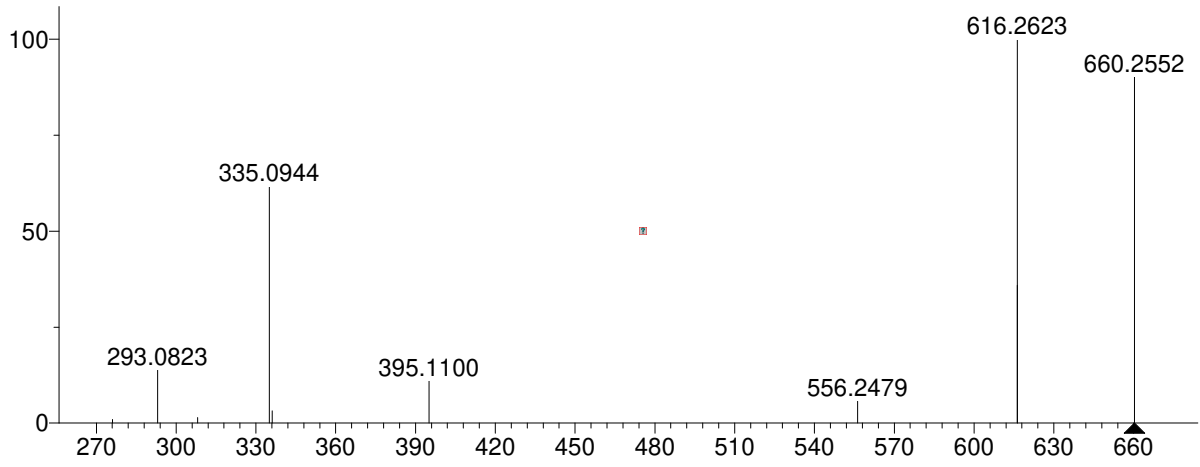

Unknown: Unknown (18.29\_704.2502m/z)  
Compound in Library Factor = 0

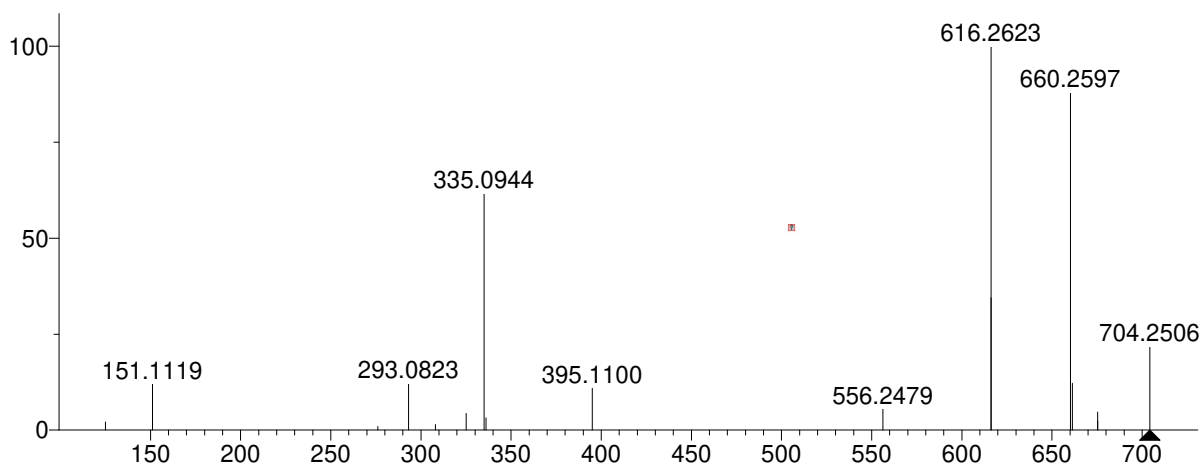

Hit 1 : DFLNHc [M-H+HCO<sub>2</sub>]<sup>2-</sup> IT 35% P=704.2  
C<sub>52</sub>H<sub>88</sub>N<sub>2</sub>O<sub>39</sub>; MF: 0; RMF: 20; Prob 100.0%; Lib: nist\_msms; ID: 532655.

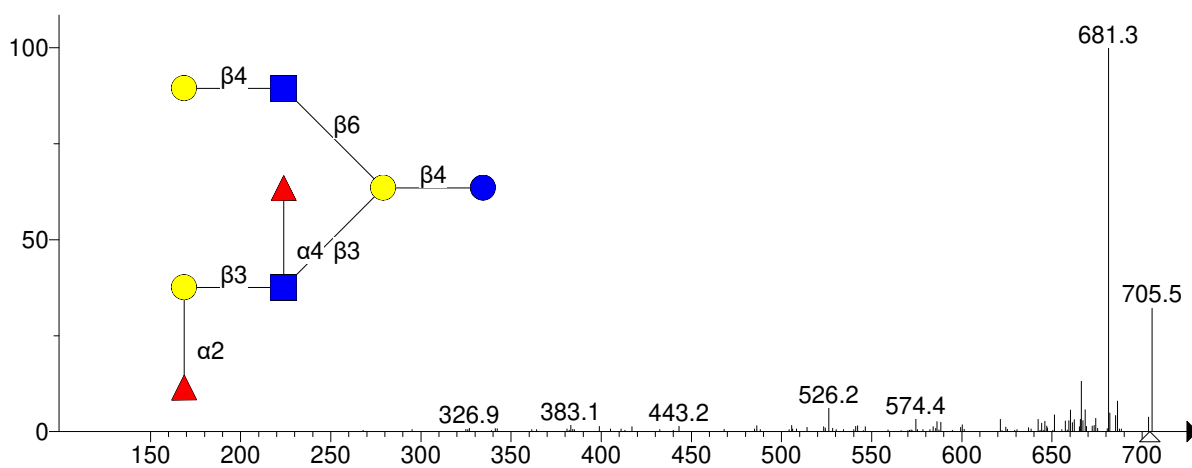

Unknown: Unknown (18.29\_740.2263m/z)  
Compound in Library Factor = 0

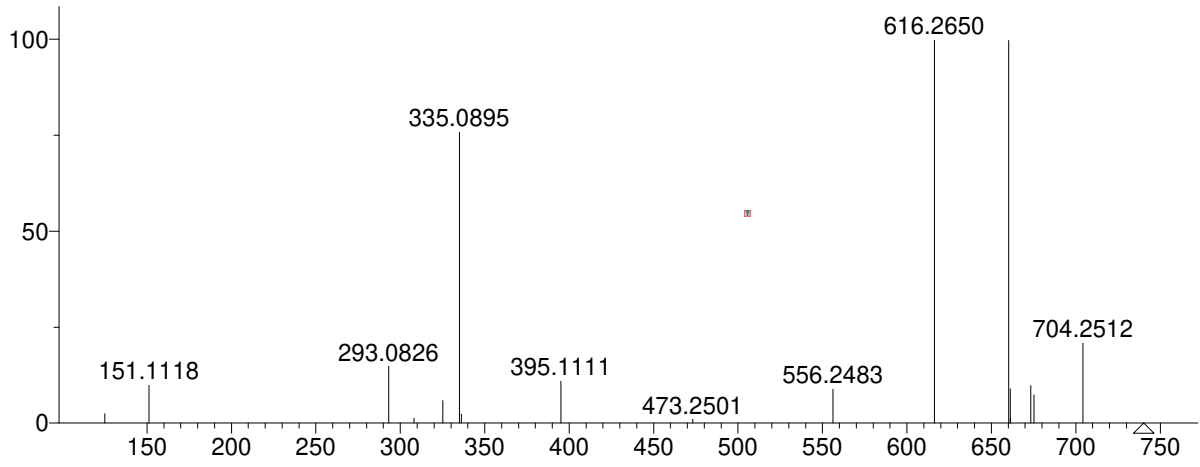

Unknown: Unknown (18.30\_675.2961m/z)  
Compound in Library Factor = 0

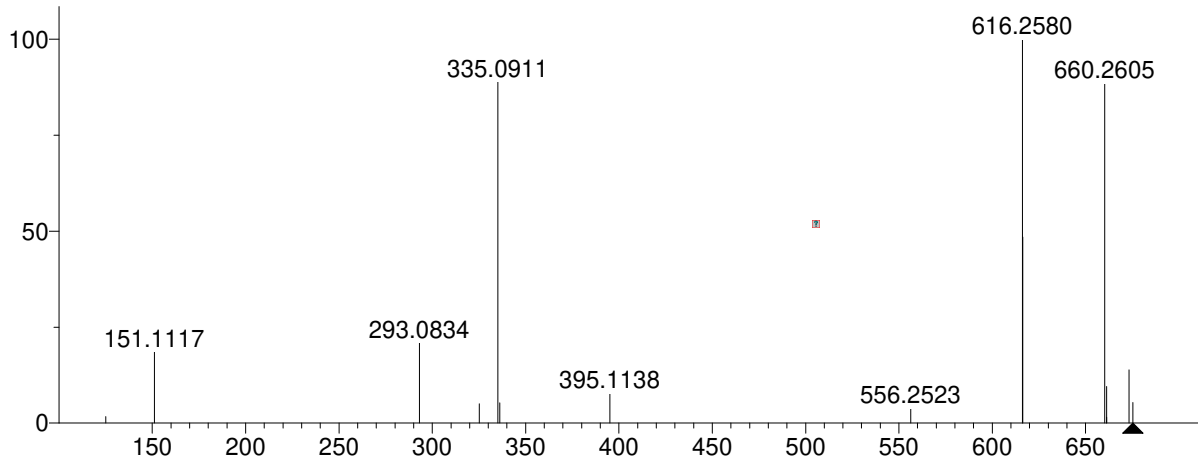

Hit 1 : ATROPINE SULFATE [M-H]- 35HCD P=675.3  
C<sub>34</sub>H<sub>48</sub>N<sub>2</sub>O<sub>10</sub>S; MF: 0; RMF: 25; Prob 100.0%; Lib: mona-export-ic-ms-ms\_negative\_mode; ID: 23921.

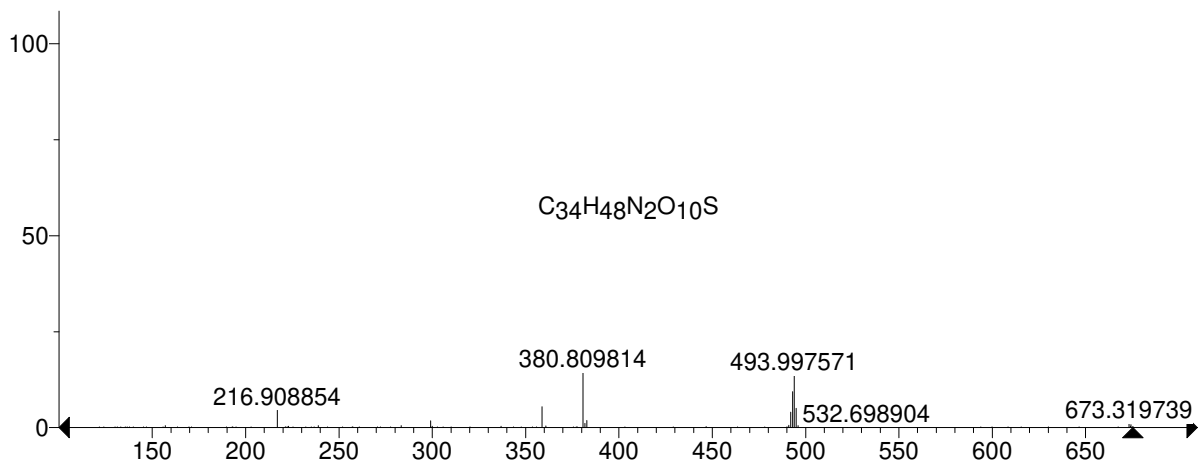

Unknown: Unknown (18.31\_371.1962m/z)  
Compound in Library Factor = -3273

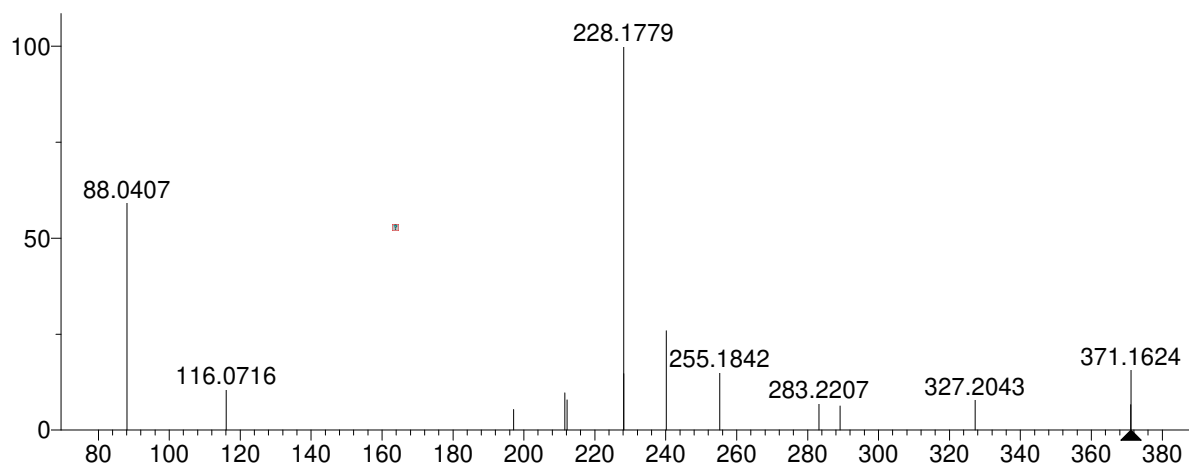

Hit 1 : N,N-Diacetyl-Lys-DAla-DAla [M-H]<sup>-</sup> HCD 36eV P=371.2  
C<sub>16</sub>H<sub>28</sub>N<sub>4</sub>O<sub>6</sub>; MF: 4; RMF: 297; Prob 100.0%; Lib: nist\_msms2; ID: 75619.

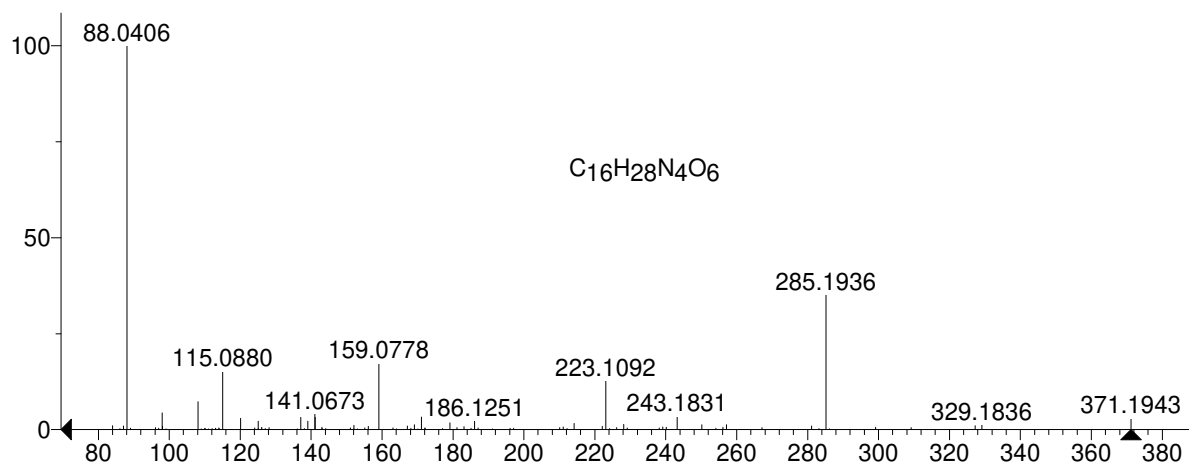

\*\* Search Report Page 1 of 2 \*\*

Unknown: Unknown (18.31\_415.1858m/z)  
Compound in Library Factor = 0

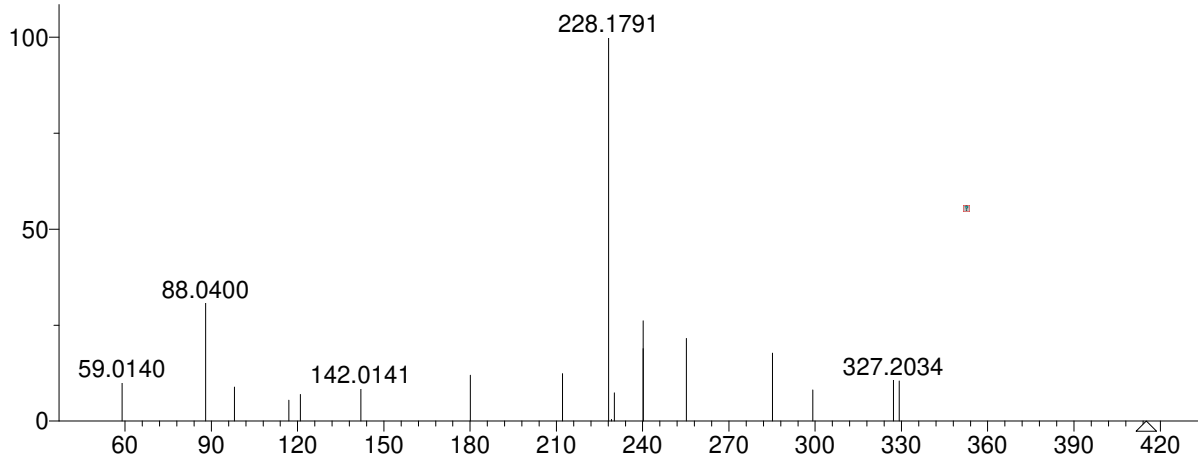

Hit 1 : Dexamethasone [M+Na]<sup>+</sup> IT 35% P=415.2  
C<sub>22</sub>H<sub>29</sub>FO<sub>5</sub>; MF: 0; RMF: 17; Prob 20.0%; CAS: 50-02-2; Lib: nist\_msms; ID: 310175.

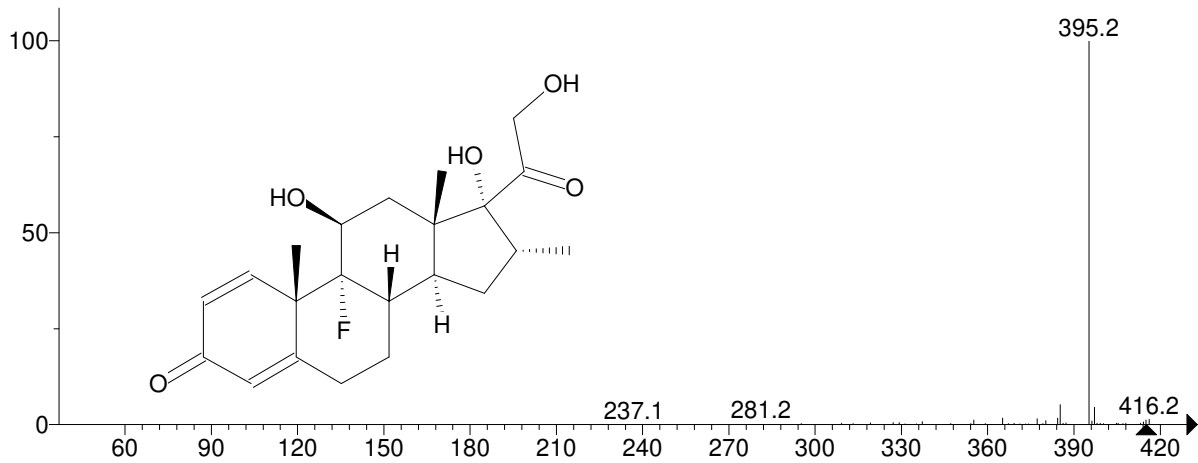

Hit 2 : His-Cys-Arg [M+H]<sup>+</sup> IT 35% P=415.2  
C<sub>15</sub>H<sub>26</sub>N<sub>8</sub>O<sub>4</sub>S; MF: 0; RMF: 16; Prob 20.0%; Lib: nist\_msms; ID: 47288.

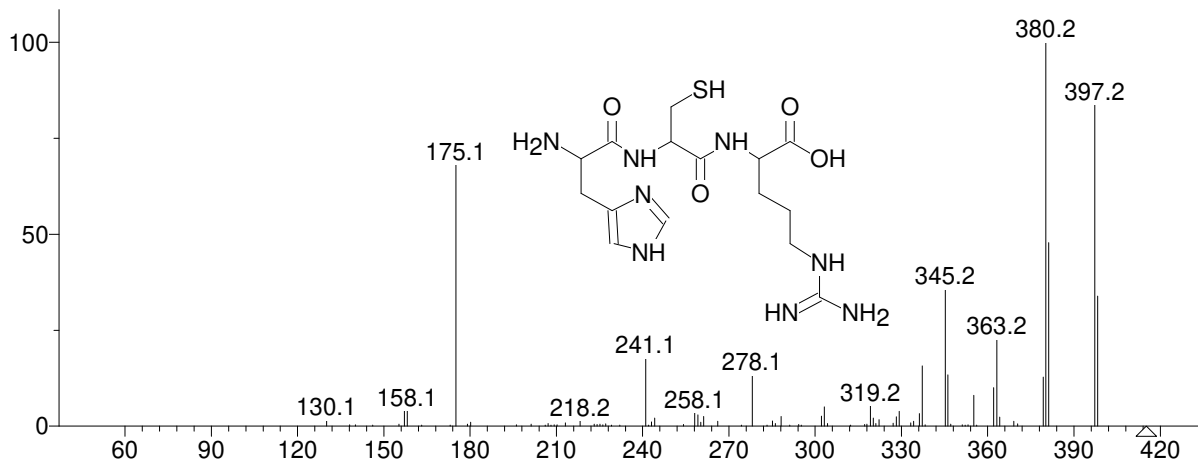



Hit 3 : Cys-His-Arg [M+H]<sup>+</sup> QTOF 20V P=415.2  
C<sub>15</sub>H<sub>26</sub>N<sub>8</sub>O<sub>4</sub>S; MF: 0; RMF: 10; Prob 20.0%; Lib: nist\_msms; ID: 49596.

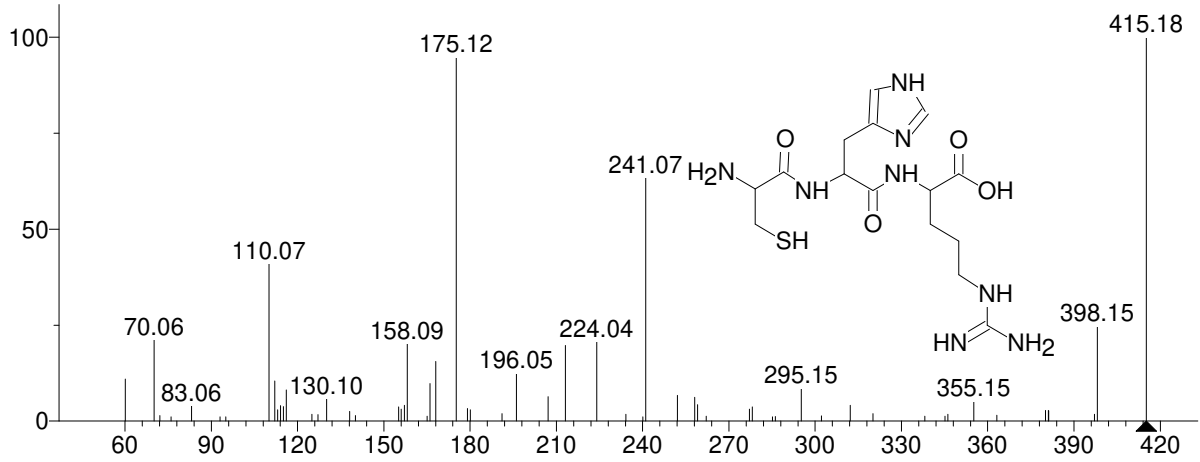

Hit 4 : Betamethasone [M+Na]<sup>+</sup> IT 35% P=415.2  
C<sub>22</sub>H<sub>29</sub>FO<sub>5</sub>; MF: 0; RMF: 9; Prob 20.0%; CAS: 378-44-9; Lib: nist\_msms; ID: 409066.

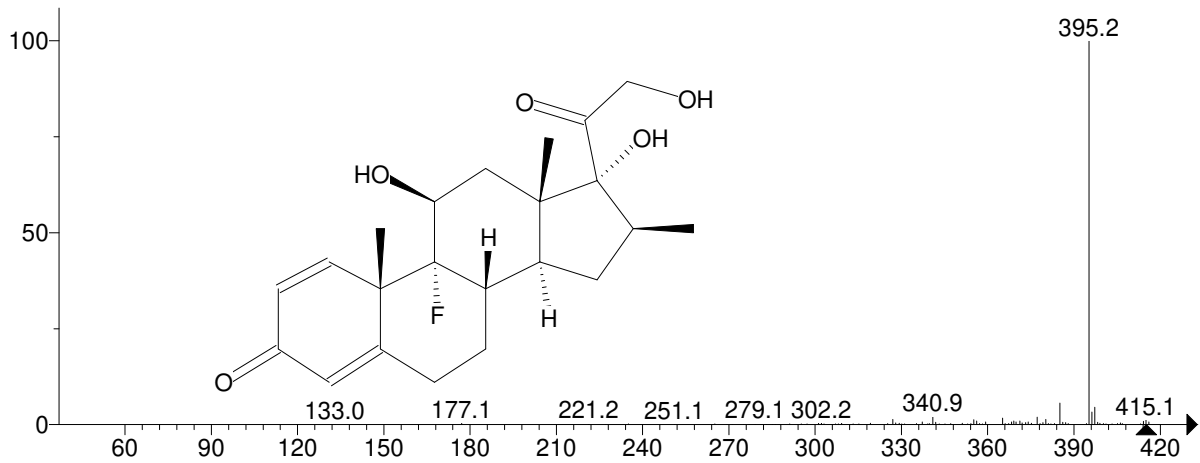

Hit 5 : 2-methoxy-3,5-dimethyl-6-[(4Z)-4-[(E)-2-methyl-3-(4-nitrophenyl)prop-2-enylidene]oxolan-2-yl]pyran-4-one  
C<sub>22</sub>H<sub>23</sub>NO<sub>6</sub>; MF: 0; RMF: 3; Prob 20.0%; Lib: mona-export-vf-npl\_qexactive; ID: 24481.

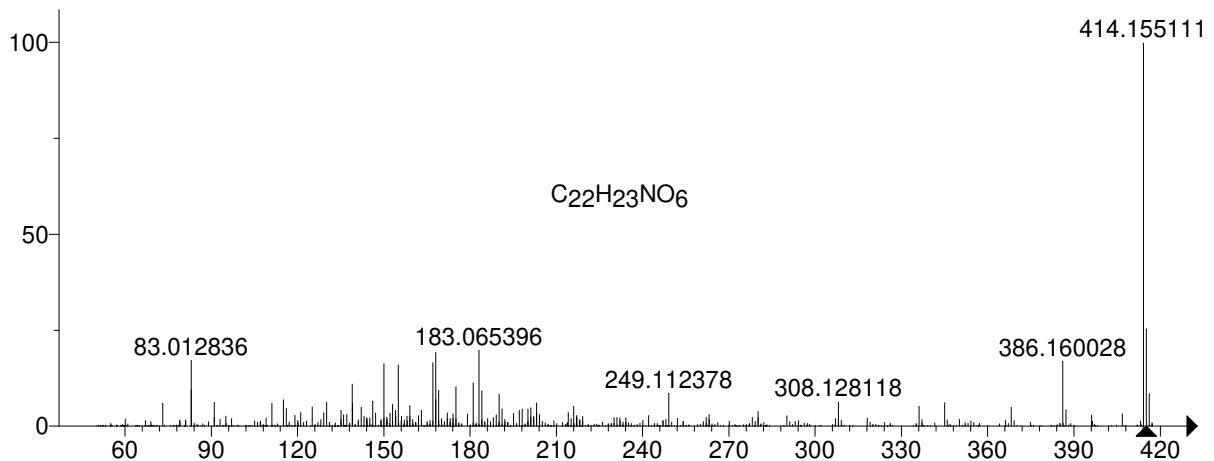

Unknown: Unknown (18.35\_706.2631 m/z)  
Compound in Library Factor = 0

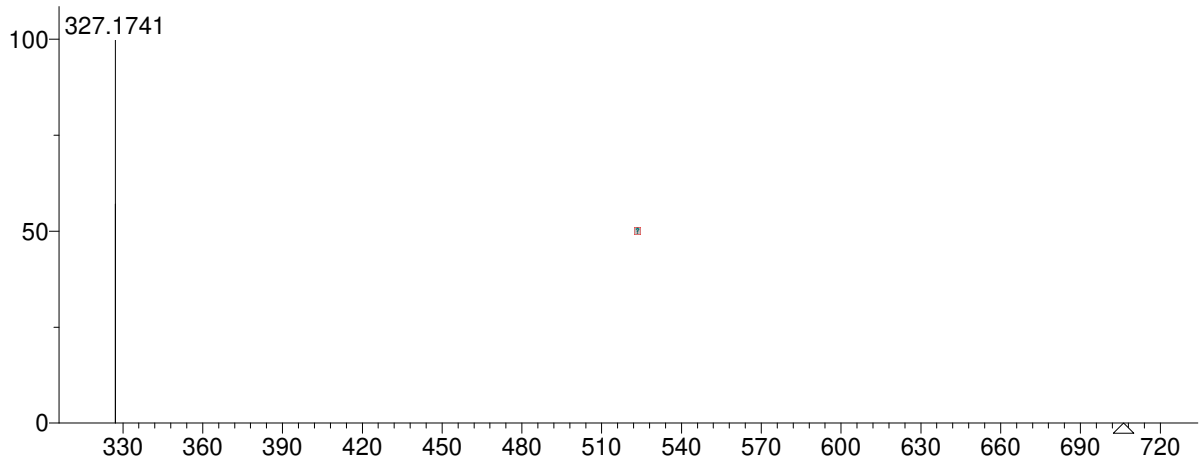

Unknown: Unknown (18.37\_311.1853m/z)  
Compound in Library Factor = -1848

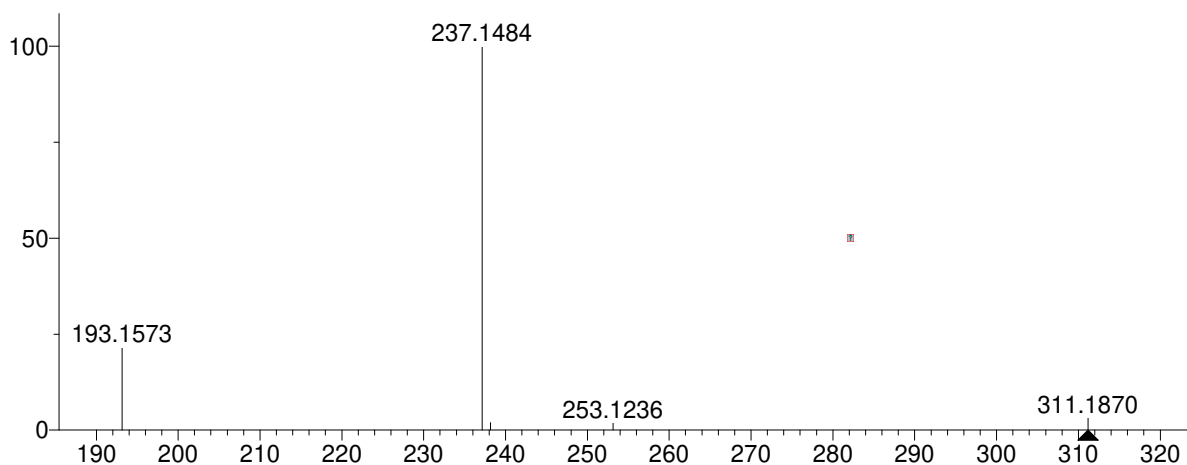

Hit 1 : 1,2-Dihexanoyl-sn-glycerol [M+Na]<sup>+</sup> HCD 31V P=311.2  
C15H28O5; MF: 37; RMF: 155; Prob 67.4%; CAS: 30403-47-5; Lib: nist\_msms; ID: 87073.

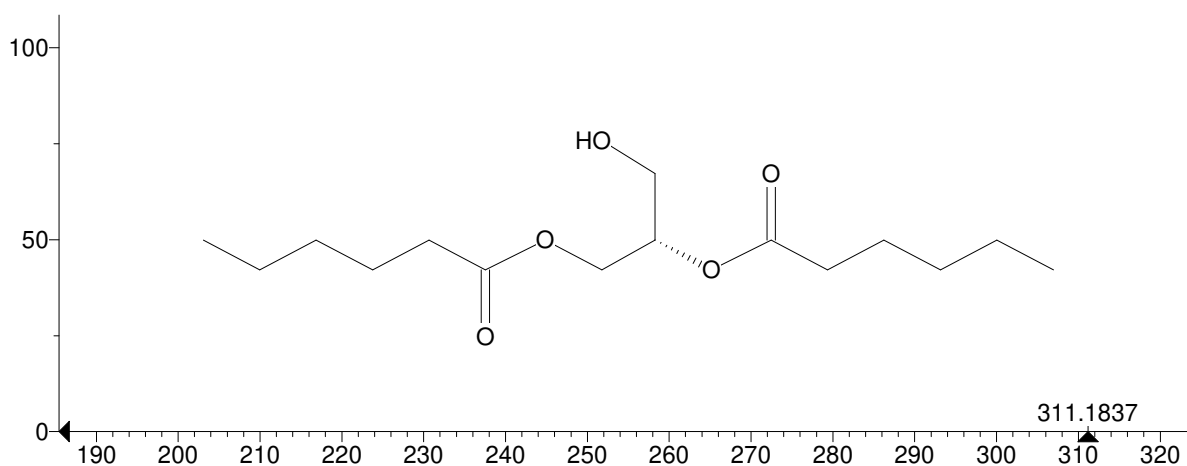

Hit 2 : Gly-Pro-Arg-Pro-amide [M+H-C5H10ON2]<sup>+</sup> HCD 15V P=311.2  
C18H32N8O4; MF: 3; RMF: 140; Prob 17.3%; CAS: 126047-75-4; Lib: nist\_msms; ID: 200731.

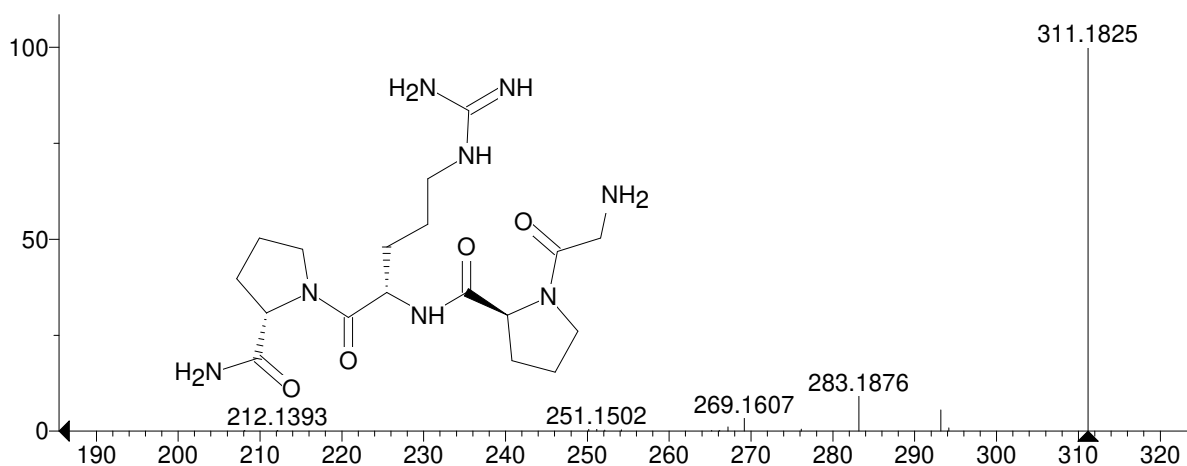

Hit 3 : 2-decyl-3-hydroxypentanedioic acid [M+Na]<sup>+</sup> 35HCD P=311.2  
C<sub>15</sub>H<sub>28</sub>O<sub>5</sub>; MF: 0; RMF: 34; Prob 15.3%; Lib: mona-export-vf-npl\_qexactive; ID: 8950.

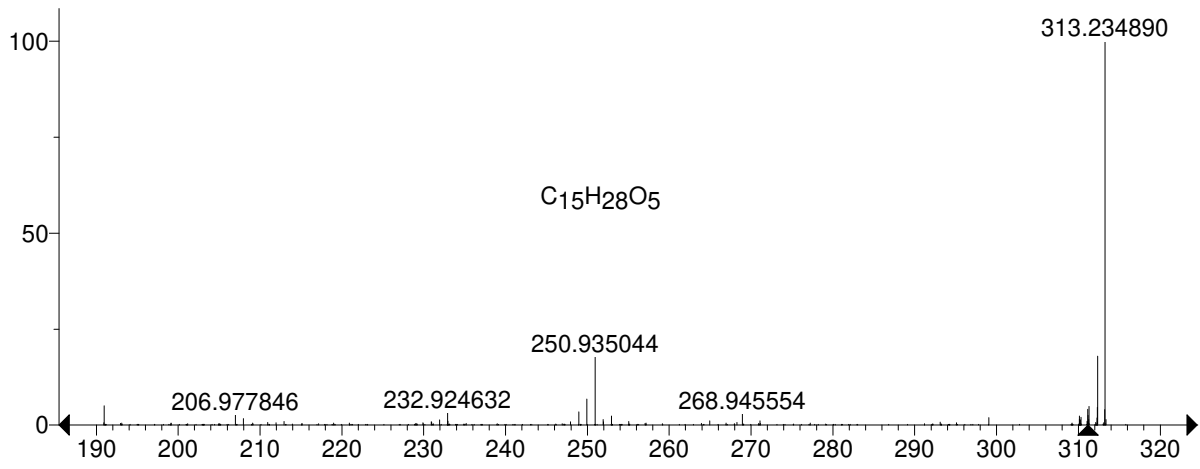

Unknown: Unknown (18.38\_327.3501m/z)  
Compound in Library Factor = 0

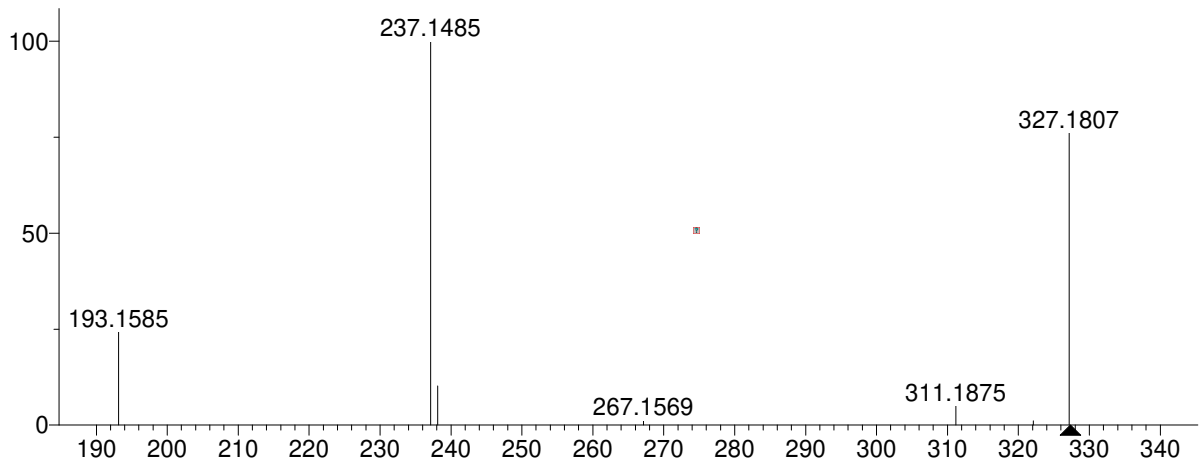

\*\* Search Report Page 1 of 2 \*\*

Unknown: Unknown (18.38\_341.1418m/z)  
Compound in Library Factor = -1523

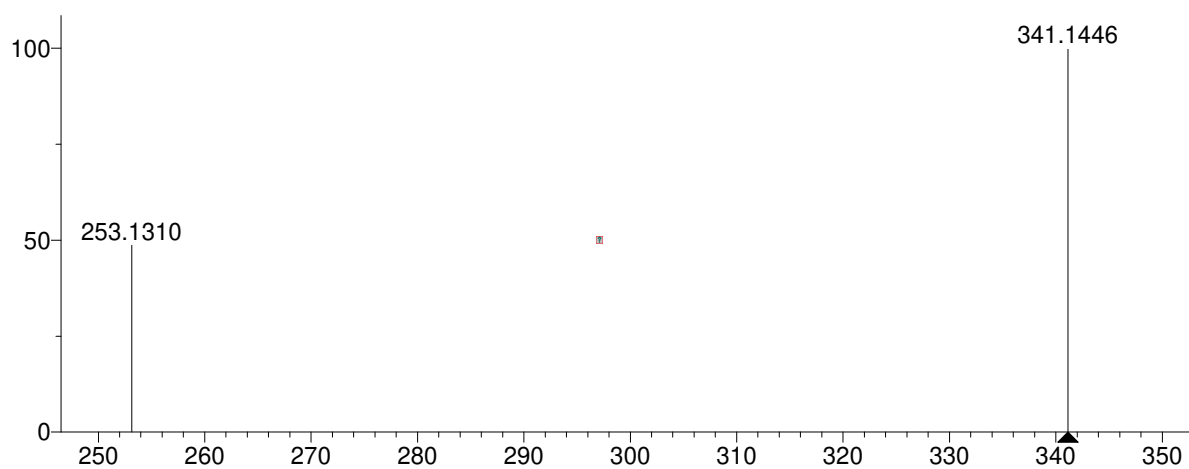

Hit 1 : Matairesinol [M+H-H<sub>2</sub>O]<sup>+</sup> HCD 13V P=341.1  
C<sub>20</sub>H<sub>22</sub>O<sub>6</sub>; MF: 130; RMF: 777; Prob 45.6%; CAS: 580-72-3; Lib: nist\_msms; ID: 339853.

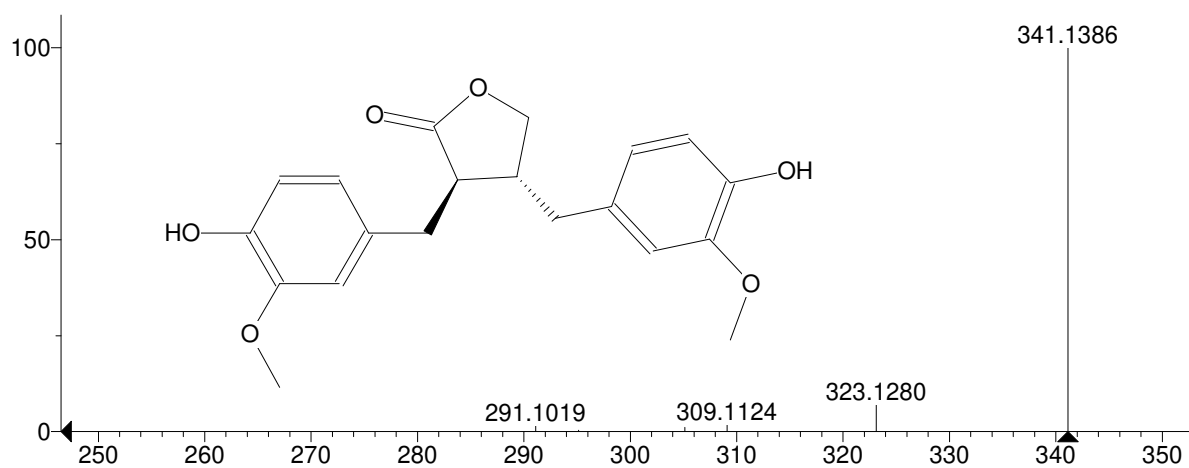

Hit 2 : 4H-Pyrrolo[3,2-c]pyridin-4-one, 1,5,6,7-tetrahydro-2-[2-(3-quinoliny)-4-pyridinyl]- [M+H]<sup>+</sup> HCD 34V P=341.1385  
C<sub>21</sub>H<sub>16</sub>N<sub>4</sub>O; MF: 125; RMF: 862; Prob 36.7%; CAS: 724711-21-1; Lib: nist\_msms; ID: 421538.

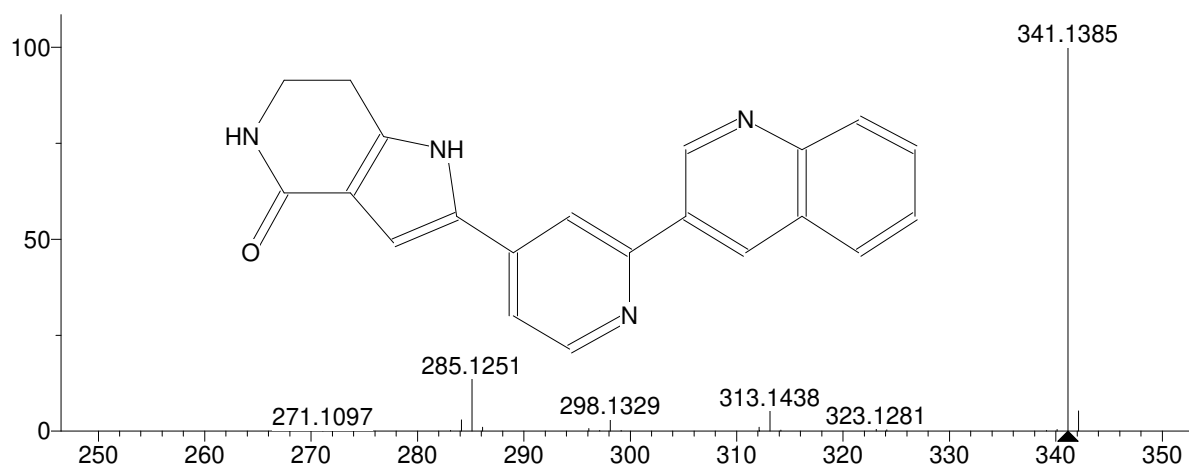

Hit 3 : 2',3,4,5,6'-Pentamethoxychalcone [M+H-H<sub>2</sub>O]<sup>+</sup> HCD 17V P=341.1  
C<sub>20</sub>H<sub>22</sub>O<sub>6</sub>; MF: 83; RMF: 718; Prob 8.24%; CAS: 944447-14-7; Lib: nist\_msms; ID: 111167.

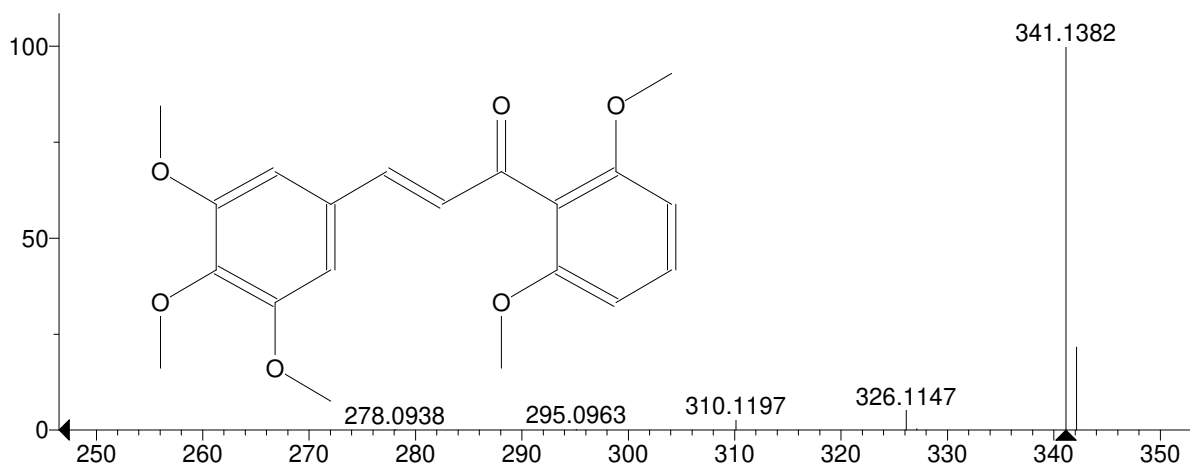

Hit 4 : (+)-Pinoresinol [M+H-H<sub>2</sub>O]<sup>+</sup> HCD 10V P=341.1  
C<sub>20</sub>H<sub>22</sub>O<sub>6</sub>; MF: 76; RMF: 741; Prob 6.31%; CAS: 487-36-5; Lib: nist\_msms; ID: 234395.

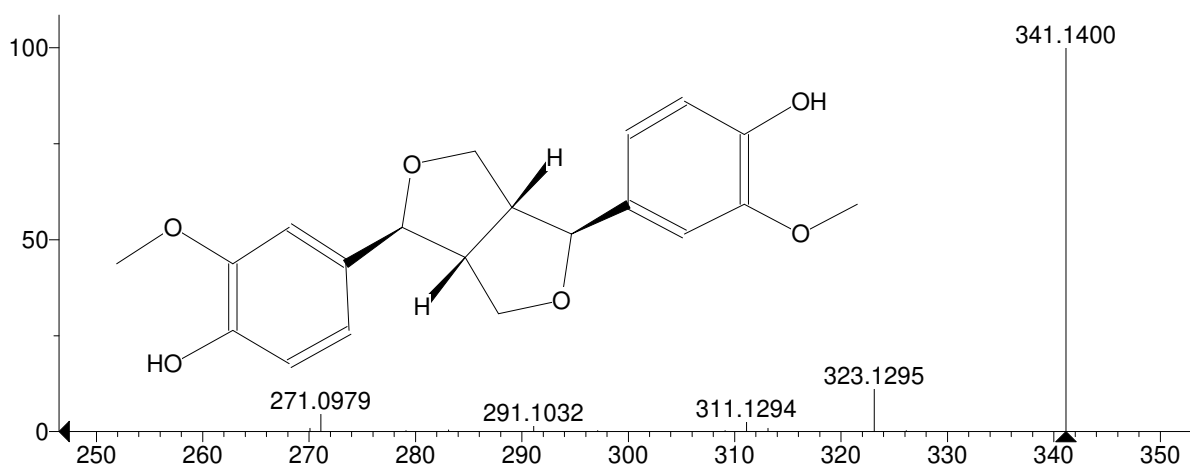

Hit 5 : 3-(3,4-Dimethoxyphenyl)-6-ethoxy-4-methylcoumarin [M+H]<sup>+</sup> HCD 88V P=341.1  
C<sub>20</sub>H<sub>20</sub>O<sub>5</sub>; MF: 43; RMF: 482; Prob 1.65%; CAS: 720674-30-6; Lib: nist\_msms; ID: 109799.

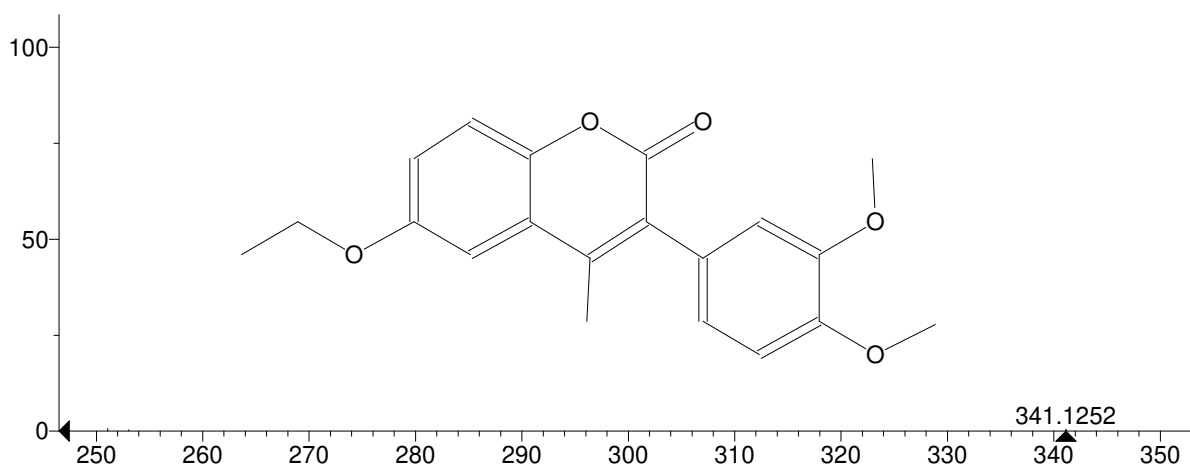

Unknown: Unknown (18.38\_395.1668m/z)  
Compound in Library Factor = 0

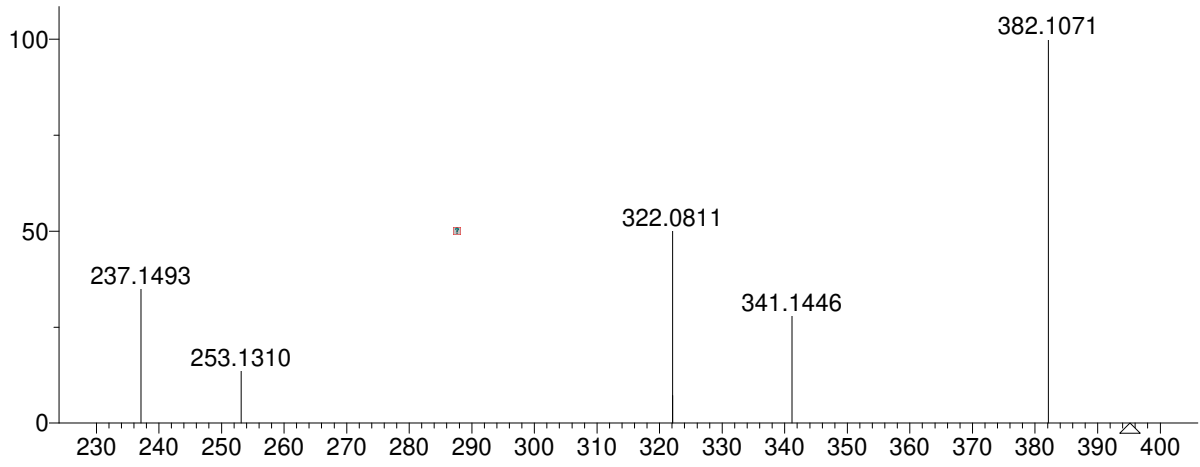



\*\* Search Report Page 1 of 2 \*\*

Unknown: Unknown (18.45\_405.1214m/z)  
Compound in Library Factor = -3273

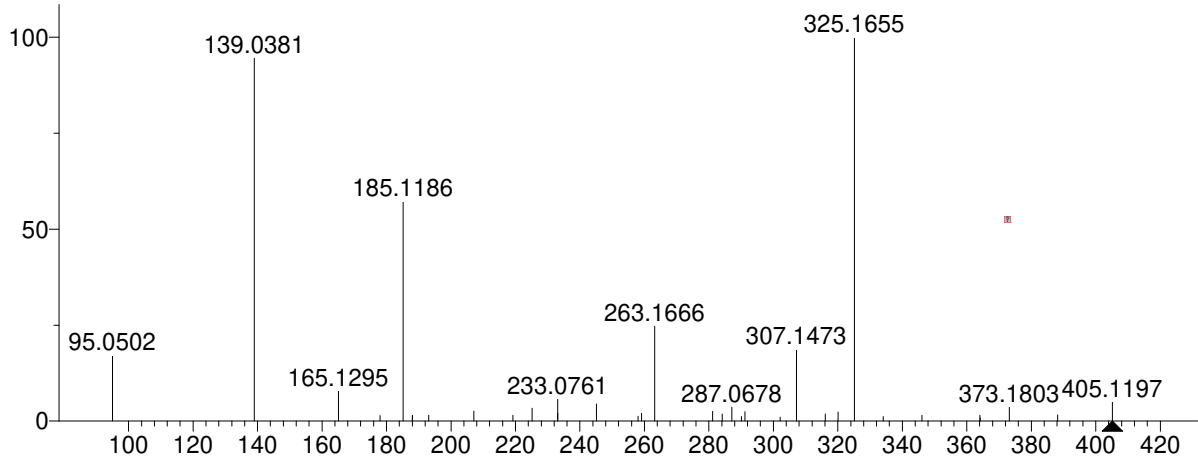

Hit 1 : 2,3,4',5-Tetrahydroxystilbene 2-glucoside [M-H]<sup>-</sup> HCD 12V P=405.1  
C<sub>20</sub>H<sub>22</sub>O<sub>9</sub>; MF: 11; RMF: 143; Prob 11.8%; CAS: 82373-94-2; Lib: nist\_msms; ID: 240828.

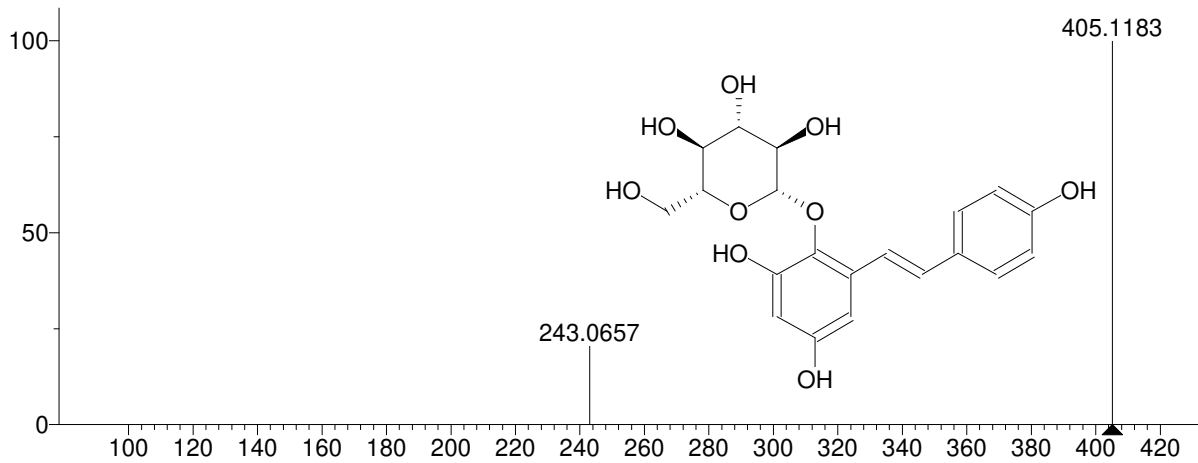

Hit 2 : 7-[3,4-dihydroxy-5-(hydroxymethyl)oxolan-2-yl]oxy-2-(4-hydroxyphenyl)-3,4-dihydro-2H-chromene-3,5-diol  
C<sub>20</sub>H<sub>22</sub>O<sub>9</sub>; MF: 2; RMF: 125; Prob 8.58%; Lib: anthocyanins mona; ID: 2182.

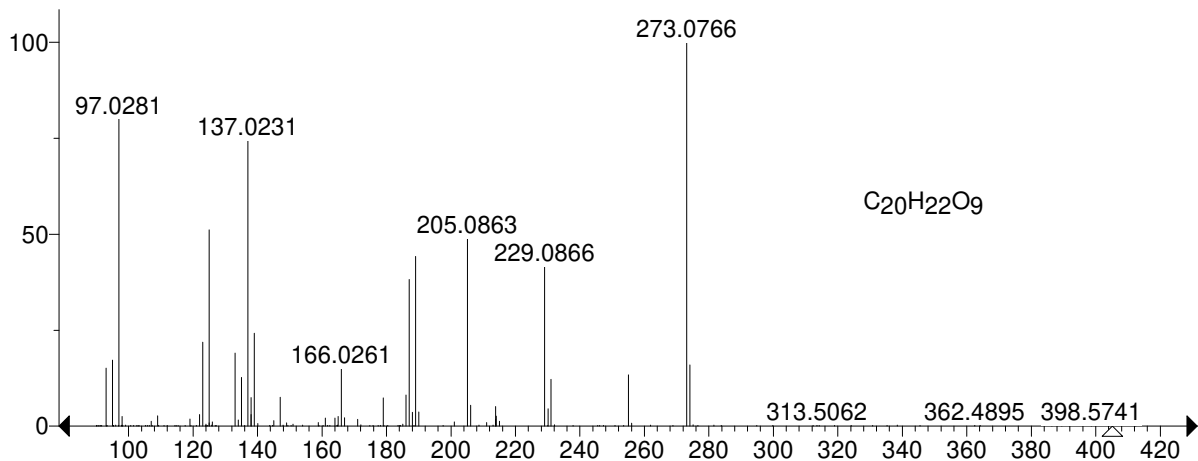

Hit 3 : Resveratrol 4'-O-D-glucuronide [M+H]<sup>+</sup> HCD 8V P=405.1  
C<sub>23</sub>H<sub>20</sub>O<sub>9</sub>; MF: 1; RMF: 99; Prob 8.24%; CAS: 387372-20-5; Lib: nist\_msms; ID: 189809.

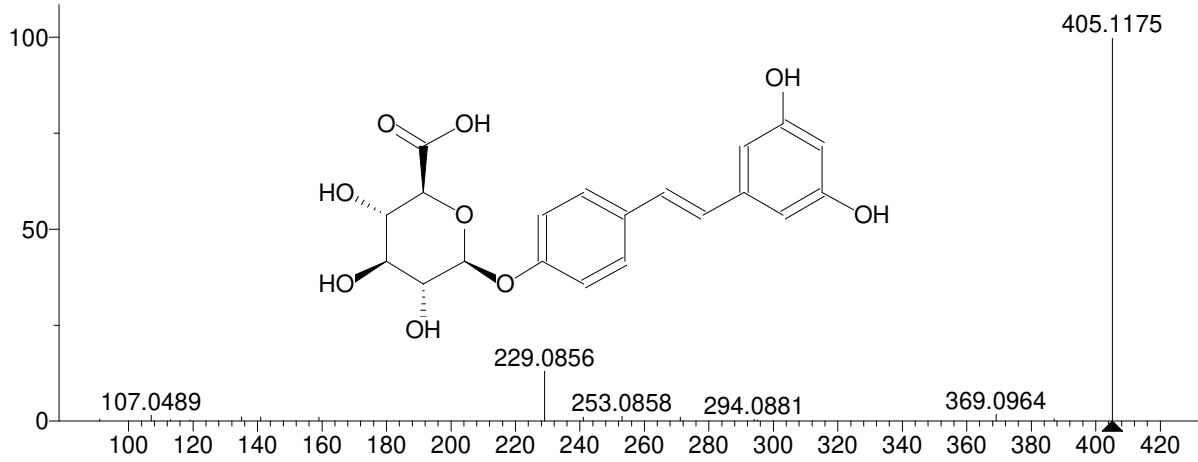

Hit 4 : Strophanthidin [M+H]<sup>+</sup> 35% P=405.1  
C<sub>23</sub>H<sub>32</sub>O<sub>6</sub>; MF: 0; RMF: 74; Prob 7.92%; Lib: mona-export-itree; ID: 988.

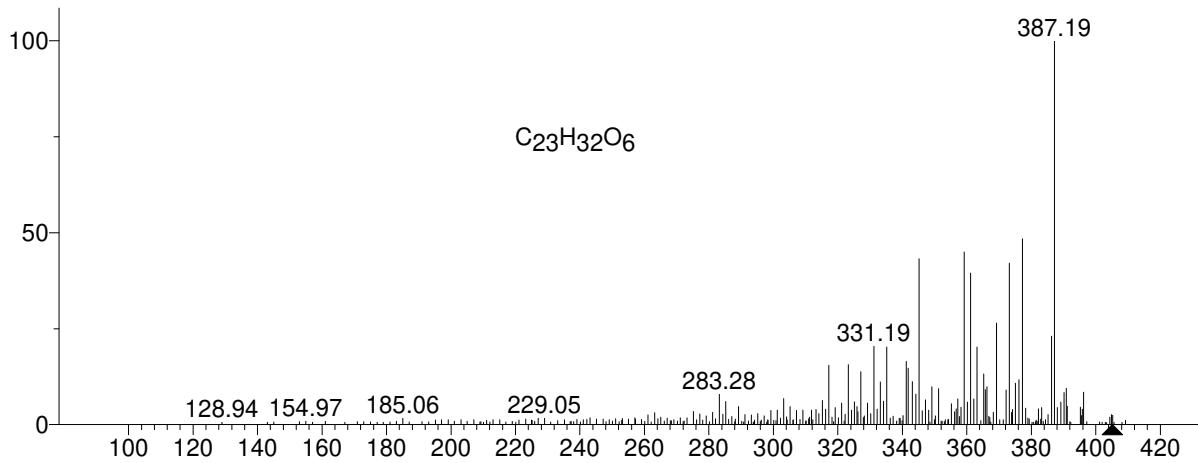

Hit 5 : 5,7-dihydroxy-3,6-dimethoxy-2-(3,4,5-trimethoxyphenyl)-4H-chromen-4-one [M+H]<sup>+</sup> P=405.1  
C<sub>20</sub>H<sub>20</sub>O<sub>9</sub>; MF: 0; RMF: 46; Prob 7.92%; Lib: mona-export-gnps; ID: 4640.

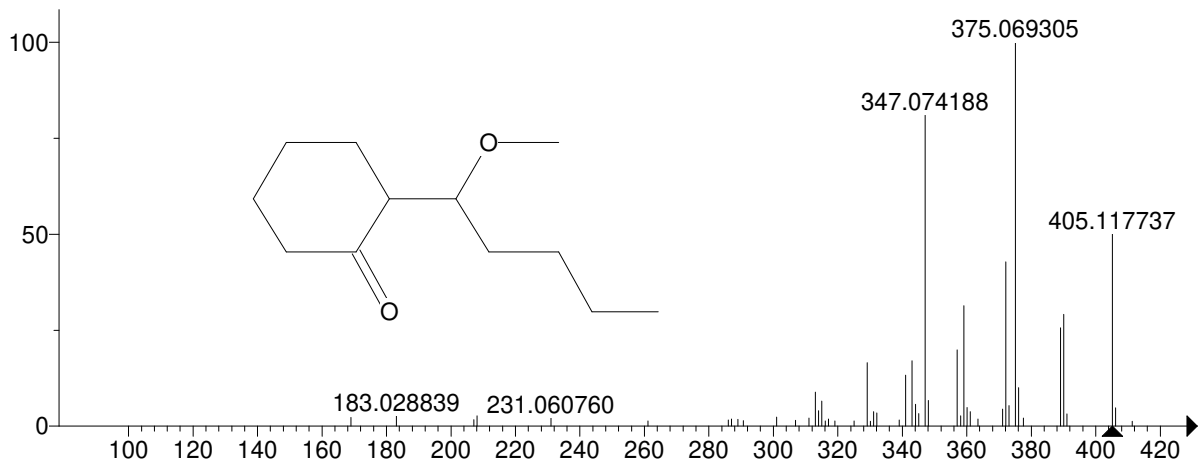

\*\* Search Report Page 1 of 2 \*\*

Unknown: Unknown (18.45\_437.1921m/z)  
Compound in Library Factor = -3273

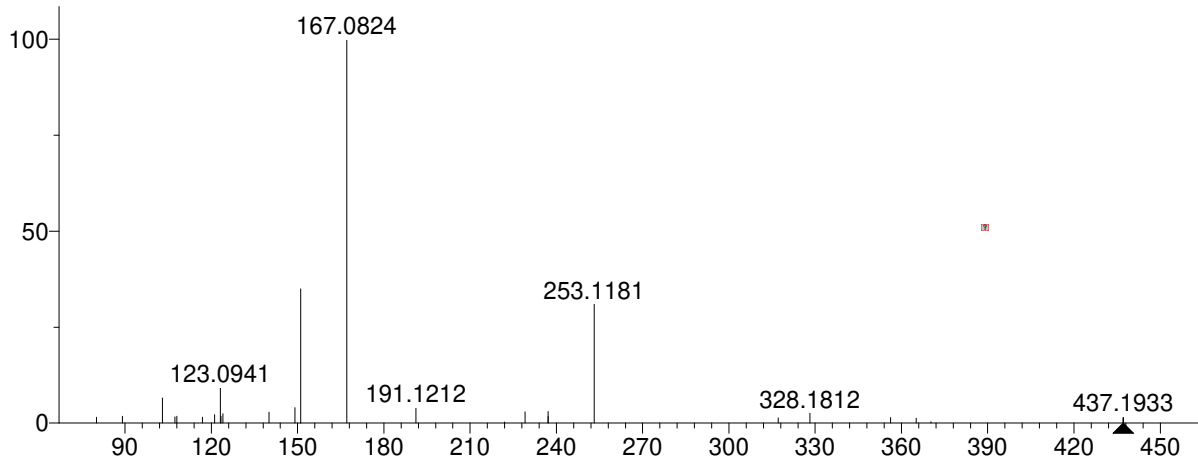

Hit 1 : Ethynylestradiol 17- $\beta$ -D-glucuronide [M+H-2H<sub>2</sub>O]<sup>+</sup> HCD 13V P=437.2  
C<sub>26</sub>H<sub>32</sub>O<sub>8</sub>; MF: 5; RMF: 88; Prob 22.0%; CAS: 75803-39-3; Lib: nist\_msms; ID: 438306.

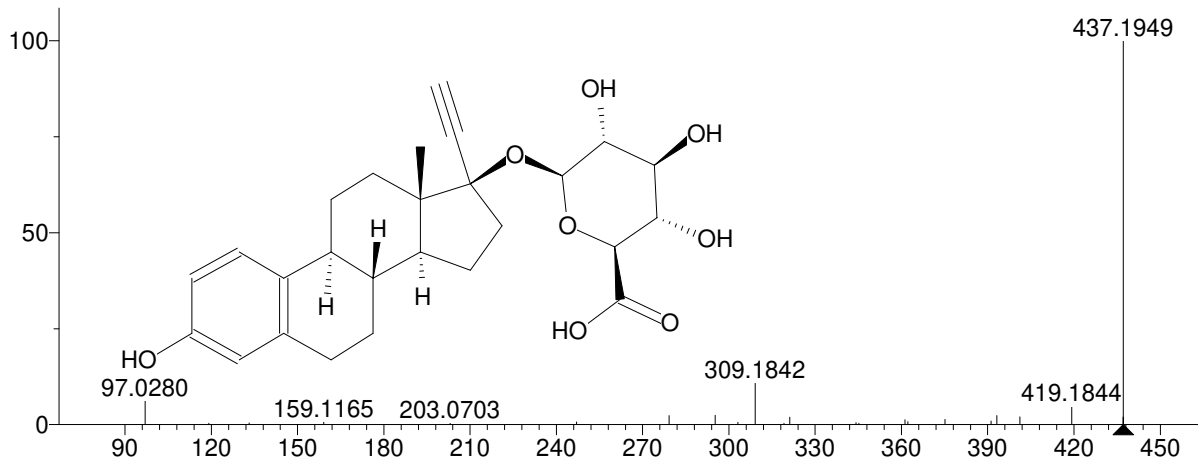

Hit 2 : Ethynylestradiol 3- $\beta$ -D-glucuronide [M+H-2H<sub>2</sub>O]<sup>+</sup> HCD 13V P=437.2  
C<sub>26</sub>H<sub>32</sub>O<sub>8</sub>; MF: 5; RMF: 85; Prob 22.0%; CAS: 60134-76-1; Lib: nist\_msms; ID: 438189.

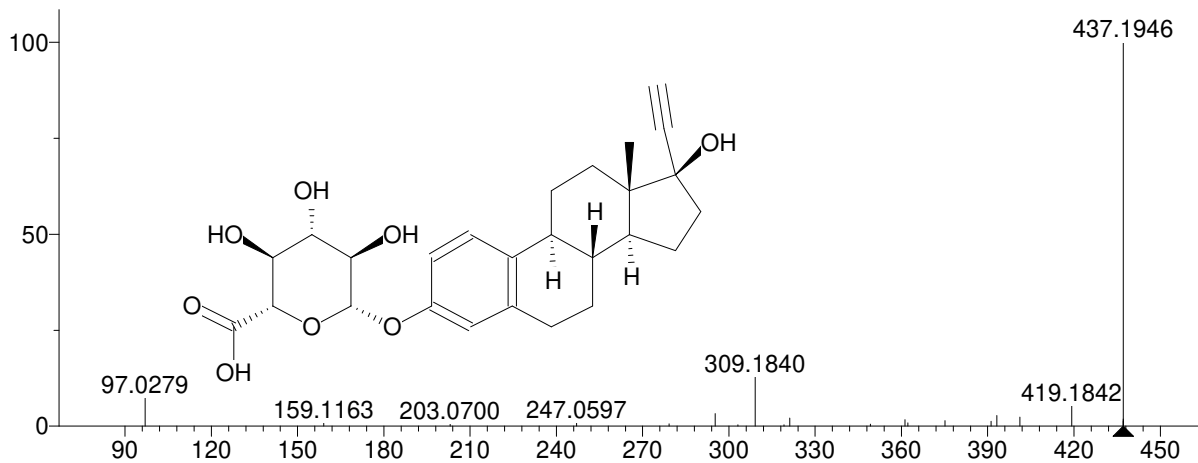

Hit 3 : 17-Trifluoromethylphenyltrilorprostaglandin F2 $\alpha$  [M-H-H<sub>2</sub>O]- HCD 17V P=437.2  
C<sub>24</sub>H<sub>31</sub>F<sub>3</sub>O<sub>5</sub>; MF: 2; RMF: 95; Prob 19.4%; CAS: 221246-34-0; Lib: nist\_msms; ID: 93923.

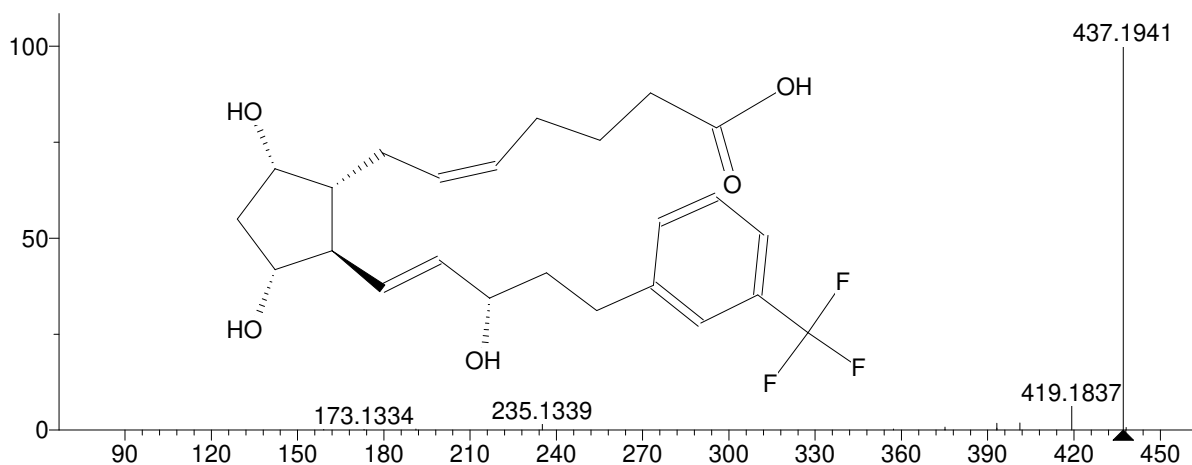

Hit 4 : NCGC00381156-01\_C<sub>24</sub>H<sub>30</sub>O<sub>6</sub>\_Methyl 3-[(1E,3E)-3,5-dimethyl-1,3-heptadien-1-yl]-8-hydroxy-6a,8-dimethyl-2,2,4,4-tetrahydro-2H-pyridine-6-carboxylate  
C<sub>24</sub>H<sub>30</sub>O<sub>6</sub>; MF: 1; RMF: 78; Prob 18.7%; Lib: mona-export-gnps; ID: 13910.

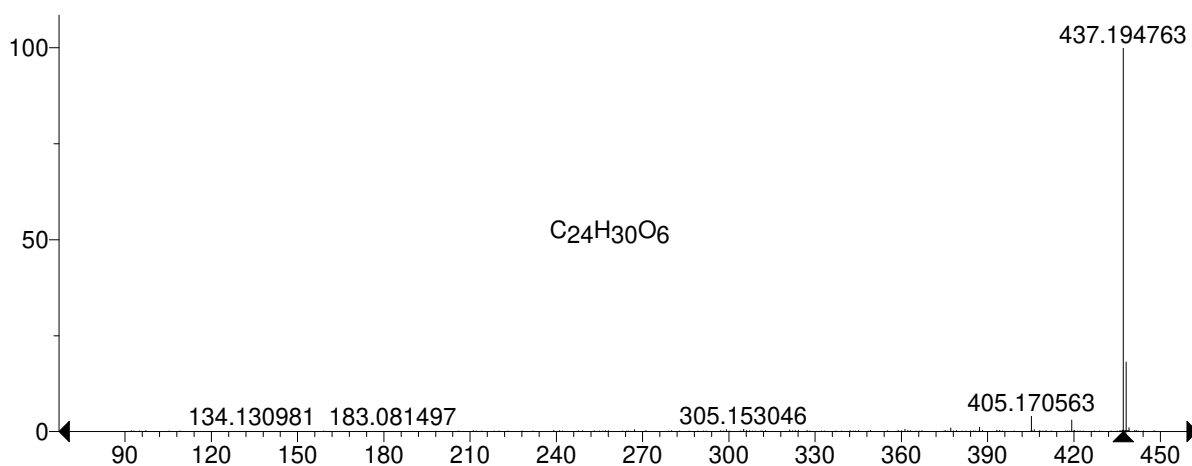

Hit 5 : NCGC00384865-0115-hydroxy-7-[4-hydroxy-2-methoxy-3-(3-methylbut-2-enyl)phenyl]-2,2-dimethyl-7,8-dihydro-2H-pyridine-6-carboxylate  
C<sub>26</sub>H<sub>28</sub>O<sub>6</sub>; MF: 0; RMF: 14; Prob 17.9%; Lib: mona-export-gnps; ID: 7877.

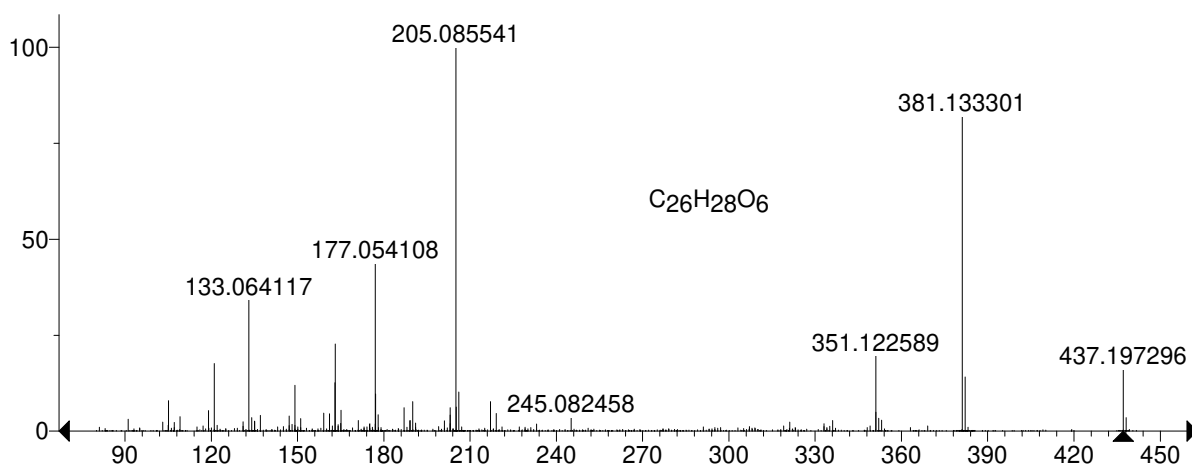

Unknown: Unknown (18.53\_373.0225m/z)  
Compound in Library Factor = -3273

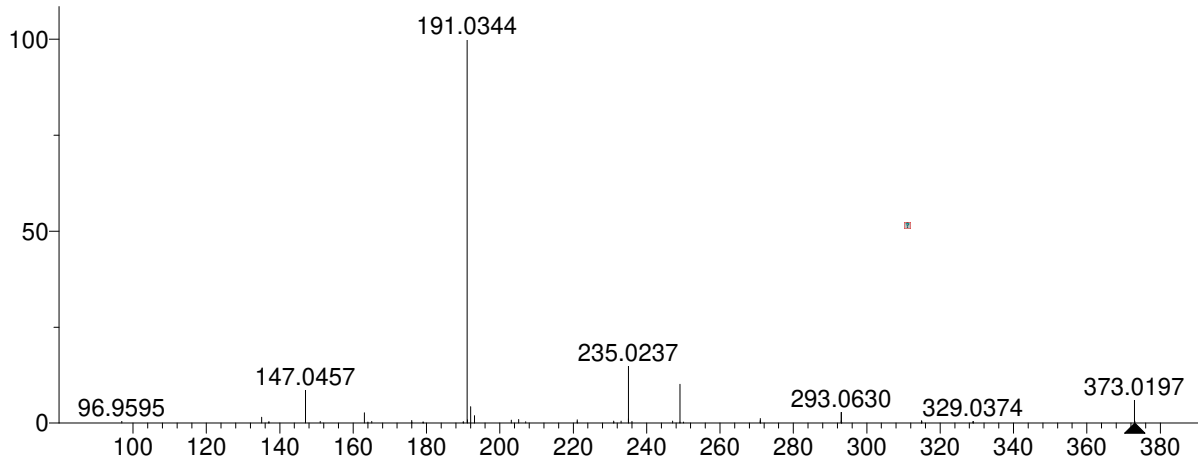

Hit 1 : Transfluthrin [M+H+2i]+ HCD 13V P=373  
C15H12Cl2F4O2; MF: 2; RMF: 128; Prob 100.0%; CAS: 118712-89-3; Lib: nist\_msms; ID: 521809.

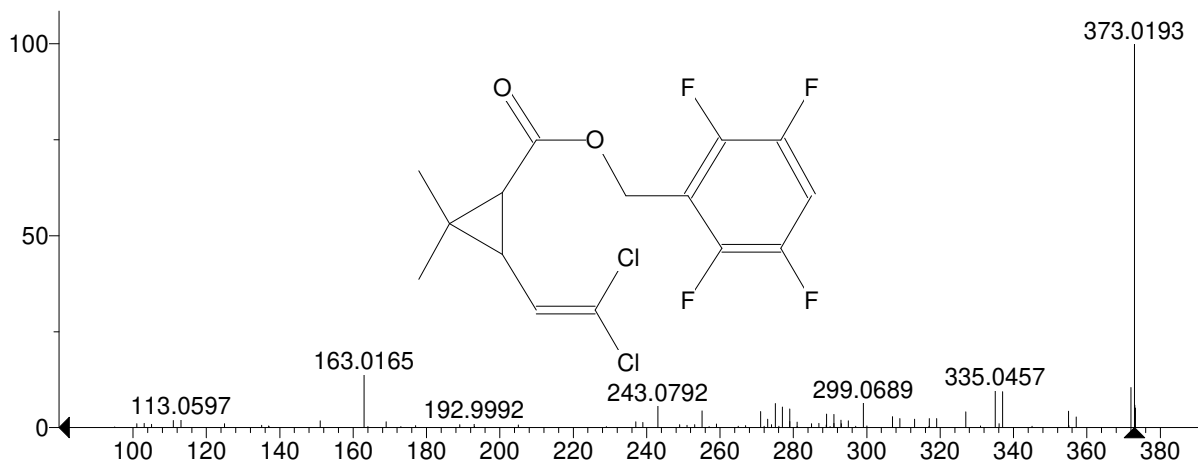

Unknown: Unknown (18.53\_544.2282m/z)  
Compound in Library Factor = 0

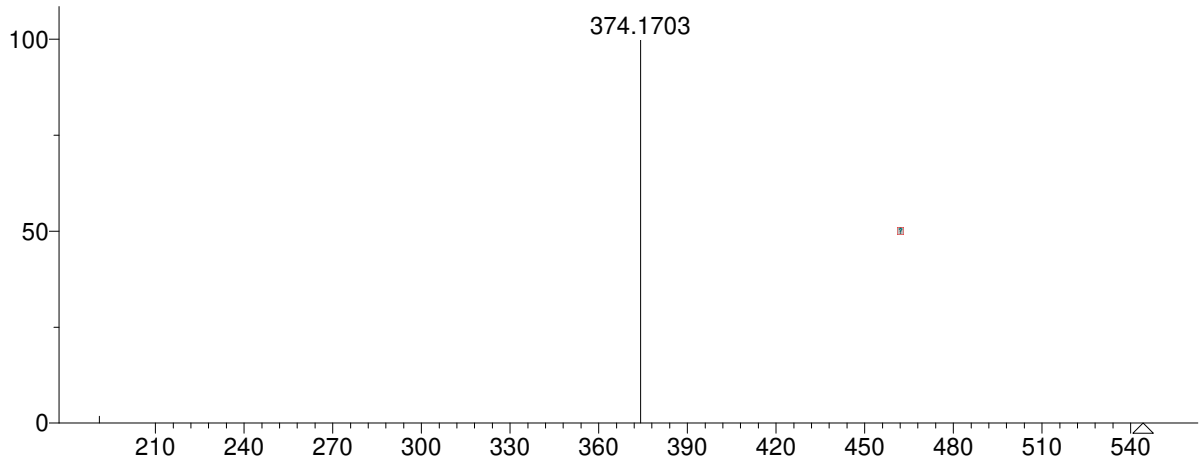

Unknown: Unknown (18.62\_423.2127m/z)  
Compound in Library Factor = -3273

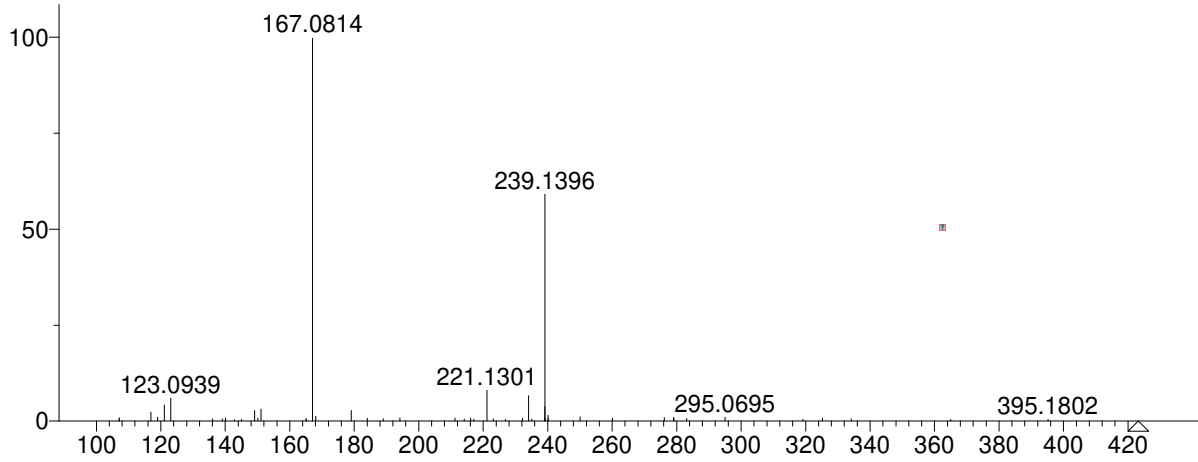

Hit 1 : Cinobufotalin [M+H-2H<sub>2</sub>O]<sup>+</sup> HCD 63V P=423.2  
C<sub>26</sub>H<sub>34</sub>O<sub>7</sub>; MF: 7; RMF: 141; Prob 20.6%; CAS: 1108-68-5; Lib: nist\_msms; ID: 391347.

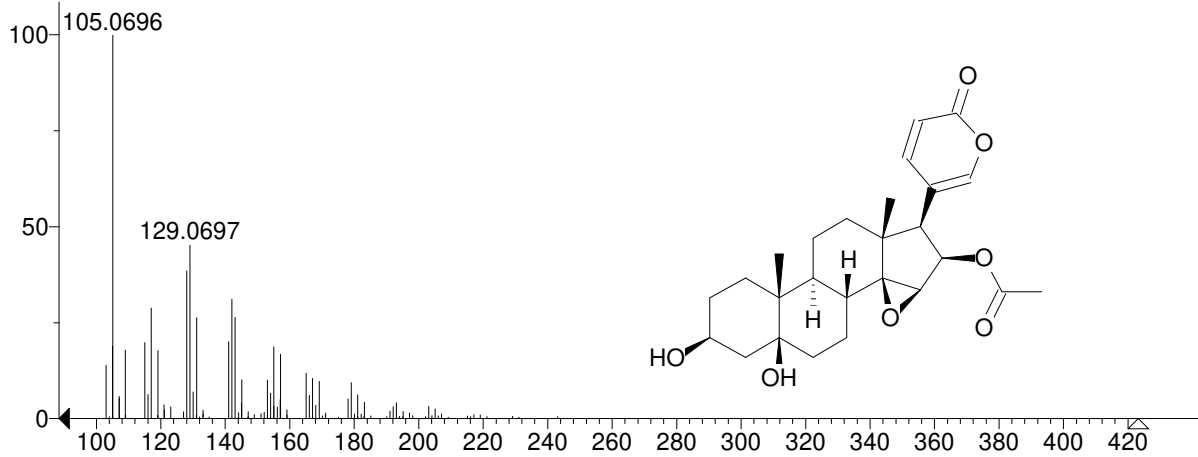

Hit 2 : [4,5-dihydroxy-3,4-bis(hydroxymethyl)-4a,8,8-trimethyl-5,6,7,8a-tetrahydro-1H-naphthalen-1-yl] hexanoate  
C<sub>21</sub>H<sub>36</sub>O<sub>6</sub>; MF: 2; RMF: 85; Prob 16.6%; Lib: mona-export-vf-npl\_qexactive; ID: 8154.

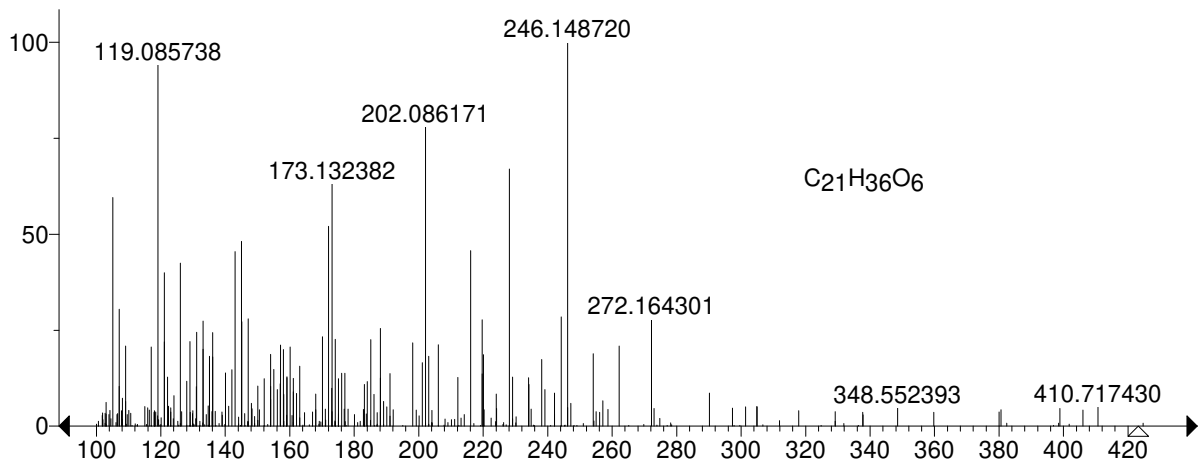

Hit 3 : 4-Methylabysynone V [M+H]<sup>+</sup> 65HCD P=423.2  
C<sub>26</sub>H<sub>30</sub>O<sub>5</sub>; MF: 1; RMF: 58; Prob 16.0%; Lib: mona-export-vf-npl\_gexactive; ID: 6033.

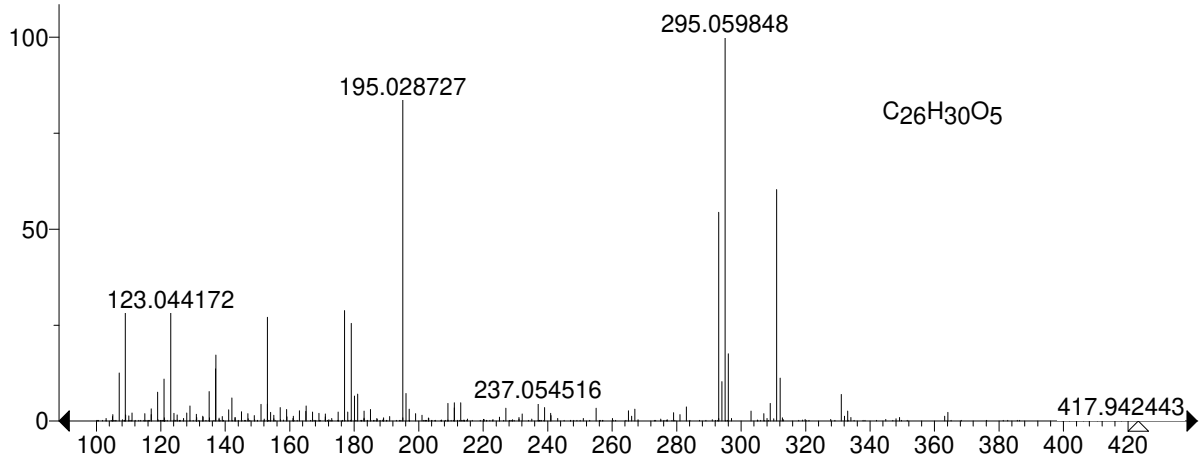

Hit 4 : NCGC00384666-01!(2S)-5,7-dihydroxy-2-[4-methoxy-3,5-bis(3-methylbut-2-enyl)phenyl]-2,3-dihydrochrom  
C<sub>26</sub>H<sub>30</sub>O<sub>5</sub>; MF: 1; RMF: 43; Prob 16.0%; Lib: mona-export-gnps; ID: 7800.

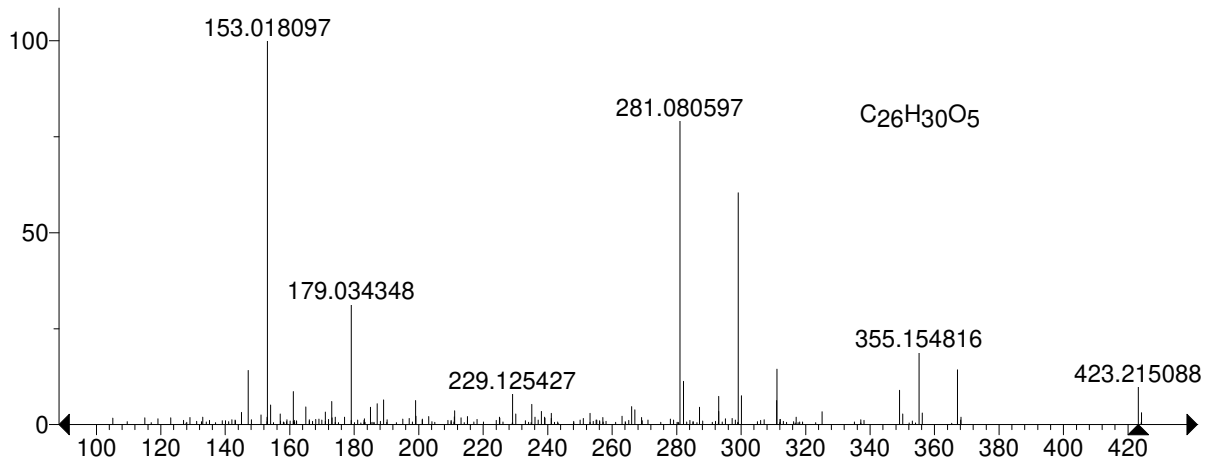

Hit 5 : PA 16:0; PA 7:0-9:0; [M-H]<sup>-</sup> [M-H]<sup>-</sup> P=423.2  
C<sub>19</sub>H<sub>37</sub>O<sub>8</sub>P; MF: 0; RMF: 9; Prob 15.4%; Lib: msdial-insilicomsm-lipids-neg; ID: 315973.

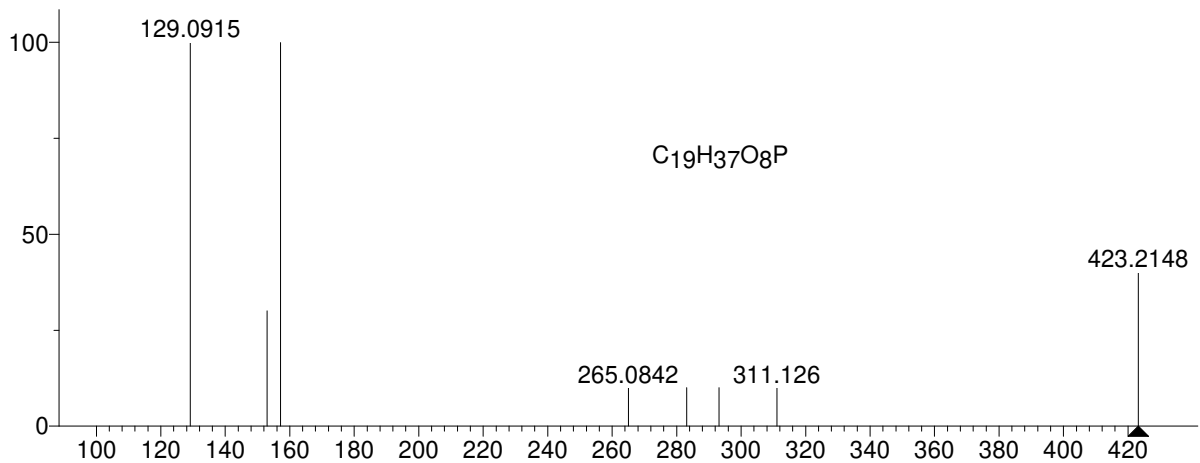



\*\* Search Report Page 1 of 1 \*\*

Unknown: Unknown (18.62\_523.1368m/z)  
Compound in Library Factor = 0

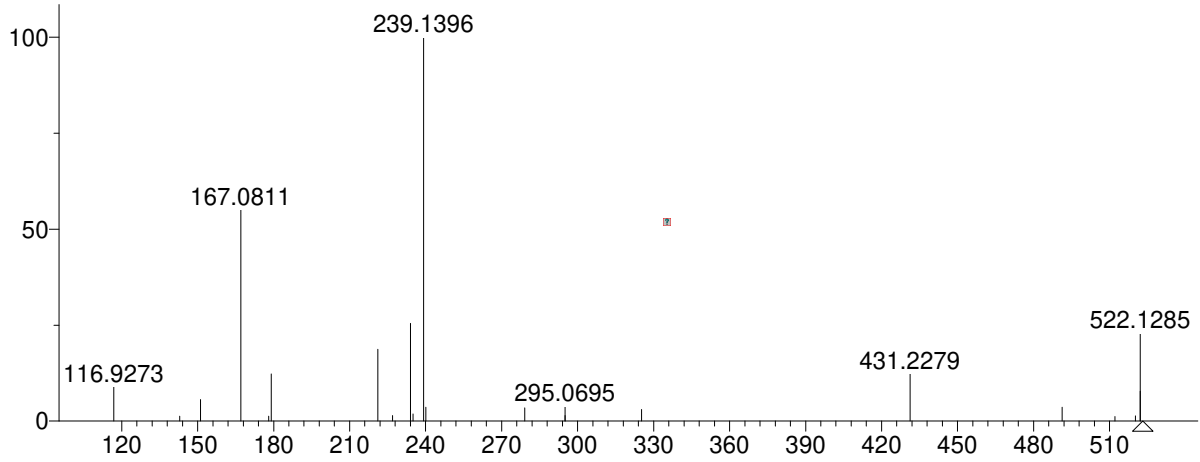

Hit 1 : (2R,7S,13R,14R,16S,19R,20S)-19-(furan-3-yl)-11-hydroxy-9,9,13,20-tetramethyl-4,8,15,18-tetraoxahexacyclopentane; MF: 0; RMF: 52; Prob 50.0%; Lib: mona-export-vf-npl\_qexactive; ID: 9555.

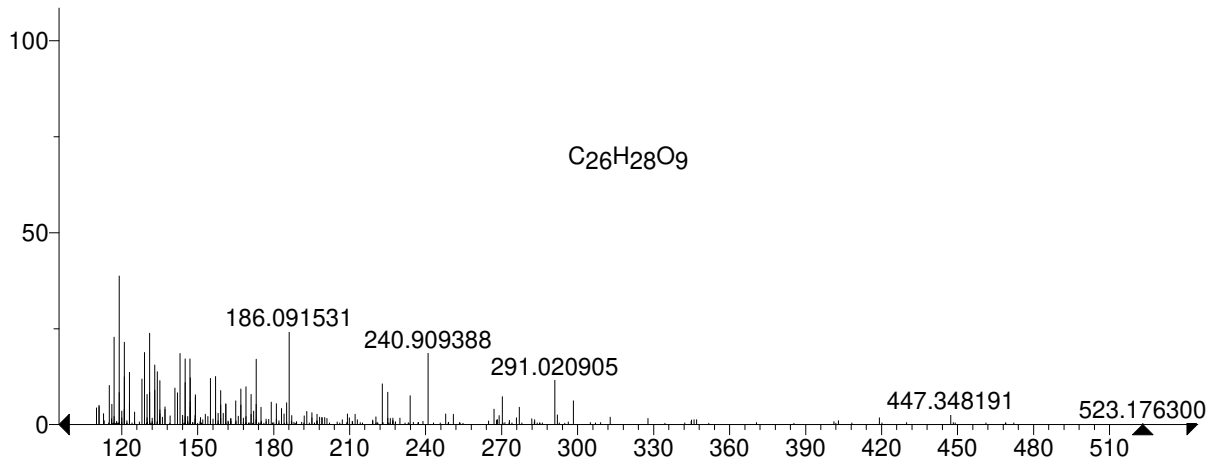

Hit 2 : [(2R,3S,4S,5R,6R)-3,4,5-trihydroxy-6-[2-(3-hydroxy-5-oxoxolan-3-yl)propoxy]oxan-2-yl]methyl (E)-3-(3,4-cyclohexadien-1-yl)propanoate; MF: 0; RMF: 2; Prob 50.0%; Lib: mona-export-itree; ID: 2069.

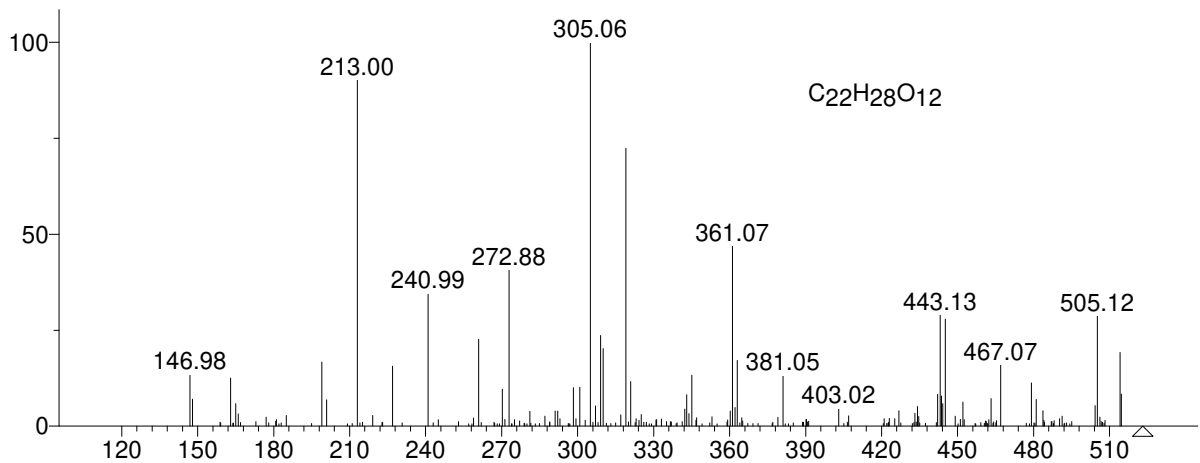

Unknown: Unknown (18.62\_548.0781m/z)  
Compound in Library Factor = 0

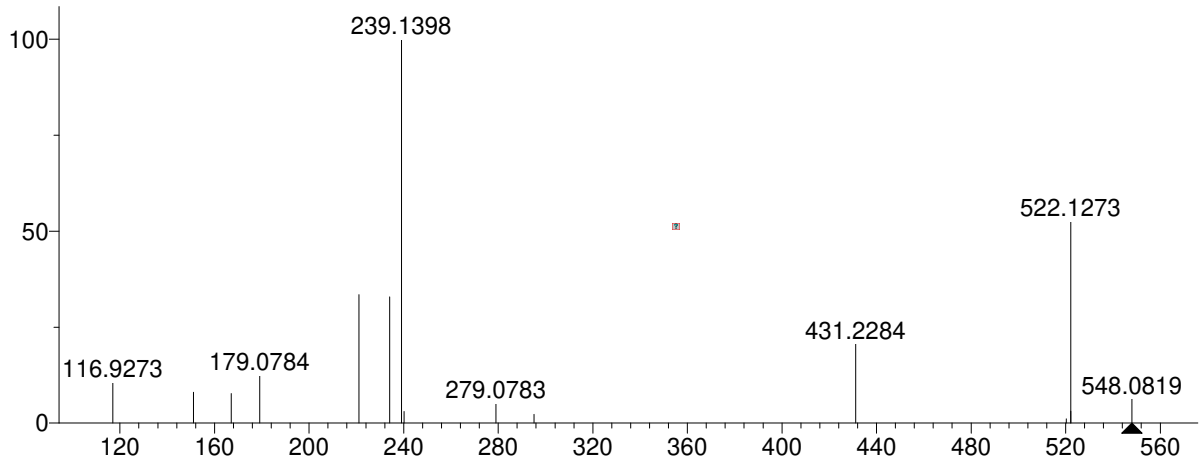

\*\* Search Report Page 1 of 2 \*\*

Unknown: Unknown (18.63\_239.1393m/z)  
Compound in Library Factor = -2387

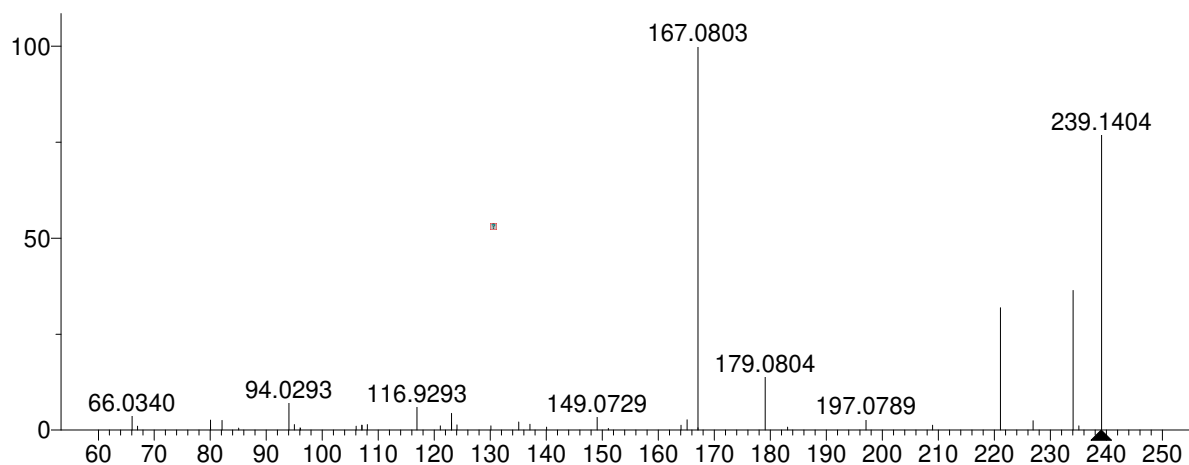

Hit 1 : Secobarbital [M+H]<sup>+</sup> HCD 0V P=239.1  
C<sub>12</sub>H<sub>18</sub>N<sub>2</sub>O<sub>3</sub>; MF: 23; RMF: 476; Prob 43.2%; CAS: 76-73-3; Lib: nist\_msms; ID: 198372.

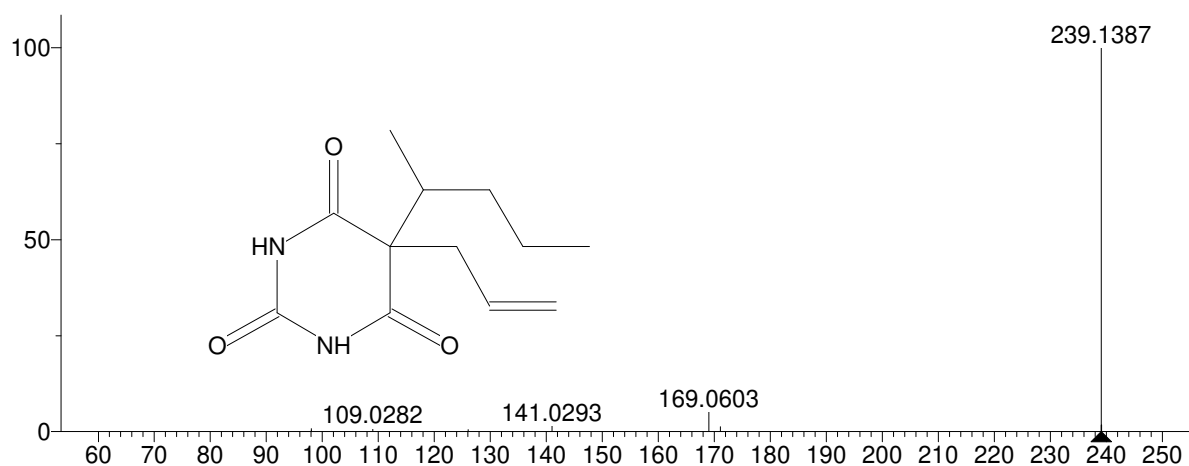

Hit 2 : Heptanedioic acid, 1-(2-cyclopentylidenehydrazide) [M-H]<sup>-</sup> HCD 14V P=239.1  
C<sub>12</sub>H<sub>20</sub>N<sub>2</sub>O<sub>3</sub>; MF: 20; RMF: 502; Prob 38.2%; CAS: 1136466-93-7; Lib: nist\_msms; ID: 263653.

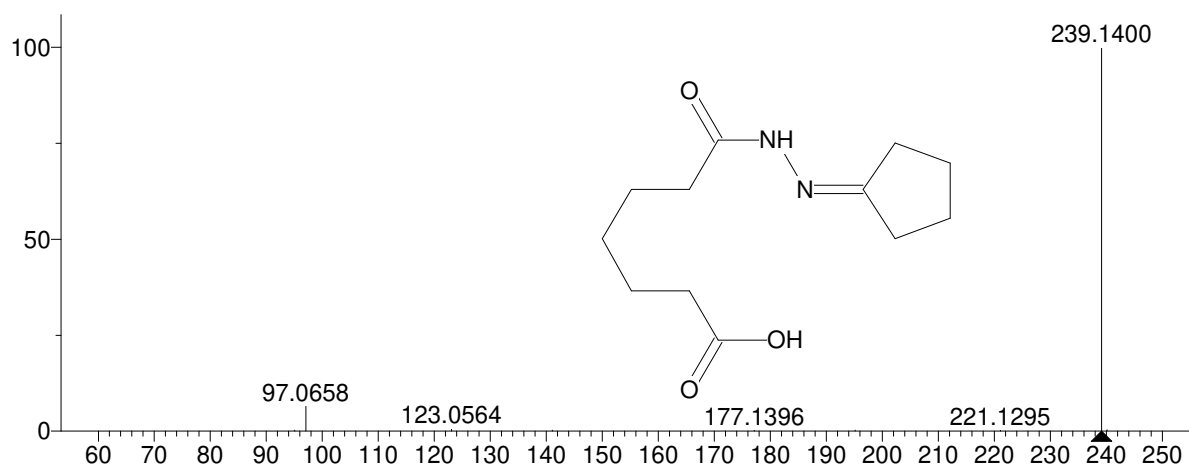

Hit 3 : CMPF [M-H]<sup>-</sup> 35% P=239.1  
C<sub>12</sub>H<sub>16</sub>O<sub>5</sub>; MF: 1; RMF: 49; Prob 18.6%; Lib: mona-export-itree; ID: 3748.



Unknown: Unknown (18.63\_568.1349m/z)  
Compound in Library Factor = 0

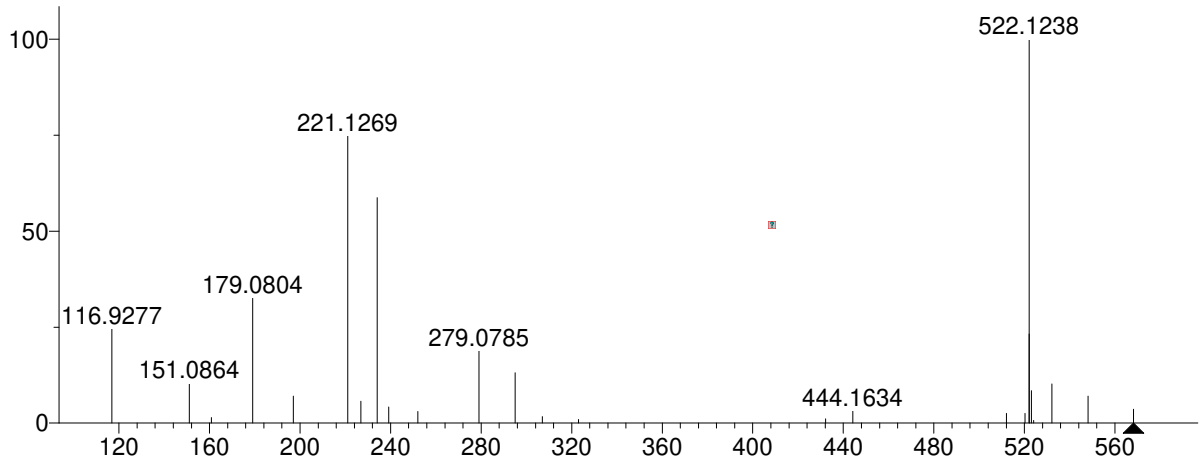

Unknown: Unknown (18.64\_239.1387m/z)  
Compound in Library Factor = -2387

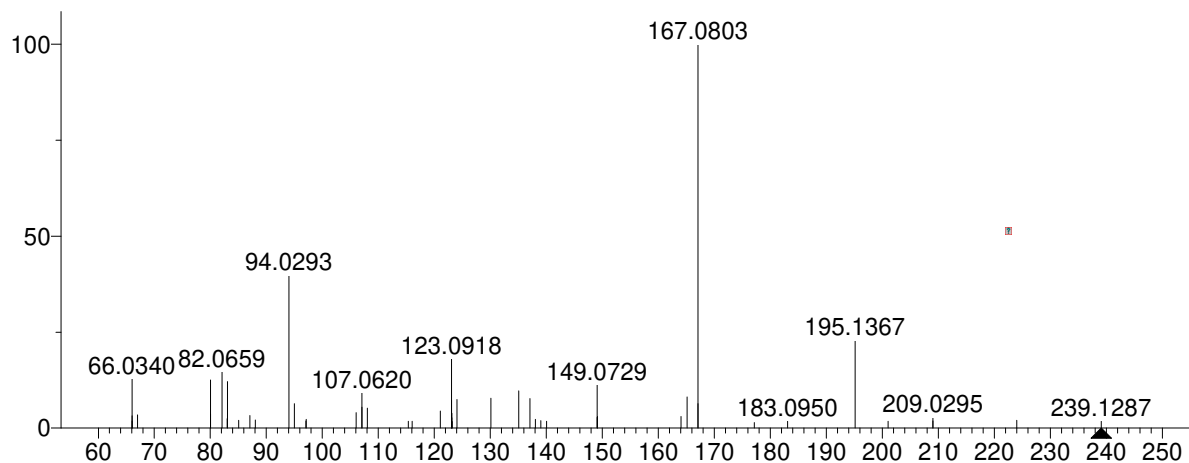

Hit 1 : Heptanedioic acid, 1-(2-cyclopentylidenehydrazide) [M-H]<sup>-</sup> HCD 21V P=239.1  
C<sub>12</sub>H<sub>20</sub>N<sub>2</sub>O<sub>3</sub>; MF: 15; RMF: 97; Prob 61.5%; CAS: 1136466-93-7; Lib: nist\_msms; ID: 263655.

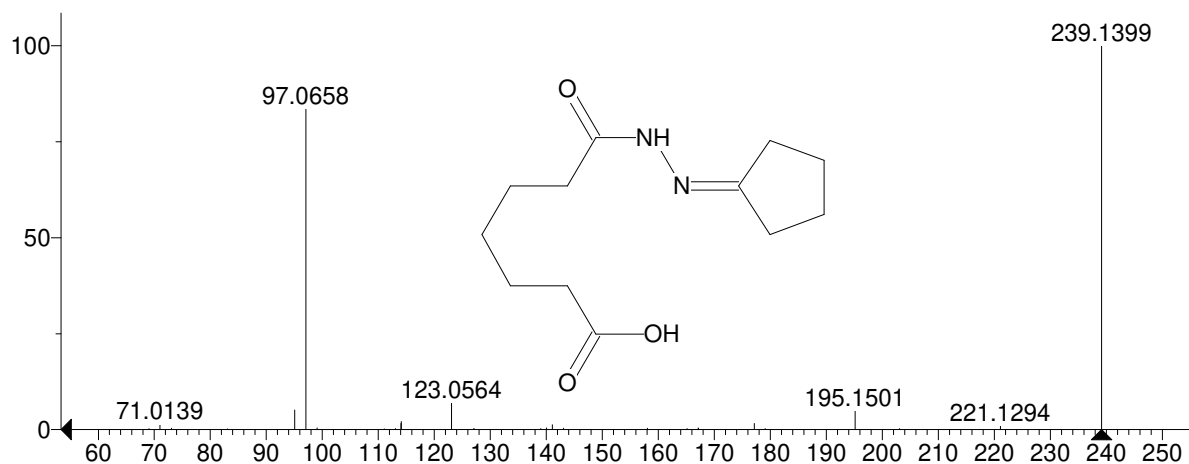

Hit 2 : Secobarbital [M+H]<sup>+</sup> HCD 0V P=239.1  
C<sub>12</sub>H<sub>18</sub>N<sub>2</sub>O<sub>3</sub>; MF: 1; RMF: 73; Prob 38.5%; CAS: 76-73-3; Lib: nist\_msms; ID: 198372.



\*\* Search Report Page 1 of 2 \*\*

Unknown: Unknown (18.64\_444.1652m/z)  
Compound in Library Factor = -3273

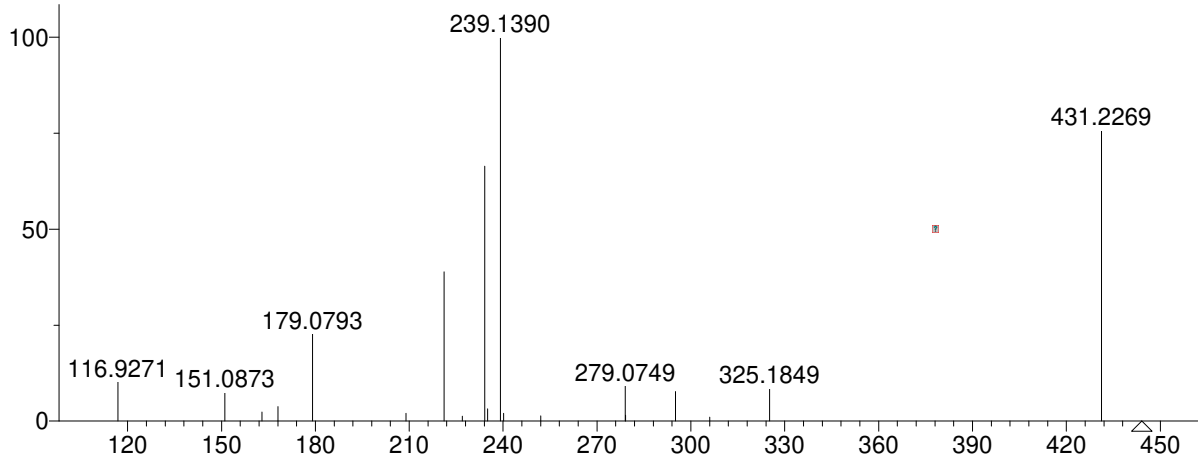

Hit 1 : dabinalol [M+NH4]<sup>+</sup> 65HCD P=444.2  
C23H22O8; MF: 1; RMF: 73; Prob 14.8%; Lib: mona-export-vf-npl\_gexactive; ID: 10569.

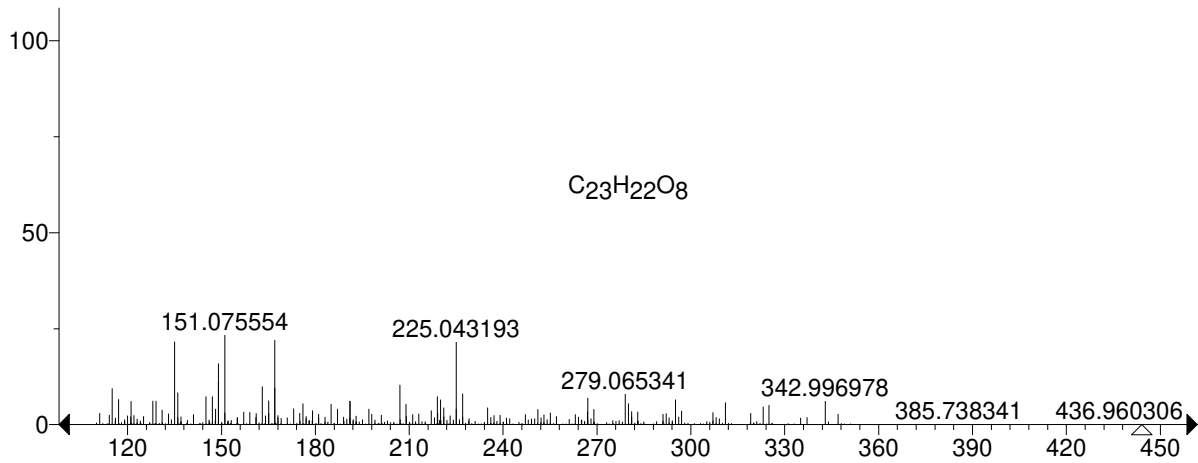

Hit 2 : Dihydrofolic acid [M+H]<sup>+</sup> HCD 53V P=444.2  
C19H21N7O6; MF: 0; RMF: 113; Prob 14.2%; CAS: 4033-27-6; Lib: nist\_msms; ID: 205208.

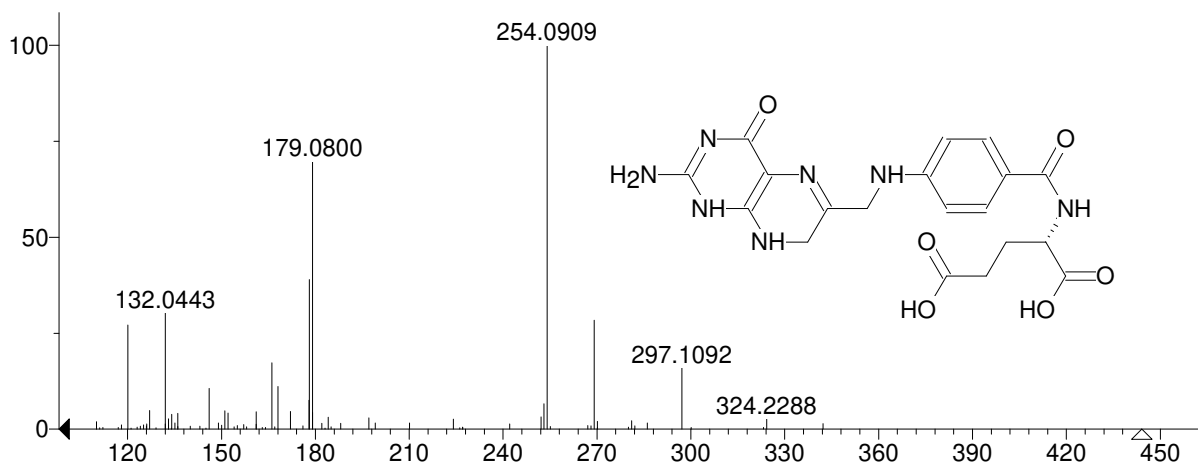

Hit 3 : 6-Hydroxysumatriptan [M+NH4]<sup>+</sup> 45HCD P=444.2  
C<sub>23</sub>H<sub>22</sub>O<sub>8</sub>; MF: 0; RMF: 37; Prob 14.2%; Lib: mona-export-vf-npl\_gexactive; ID: 7100.

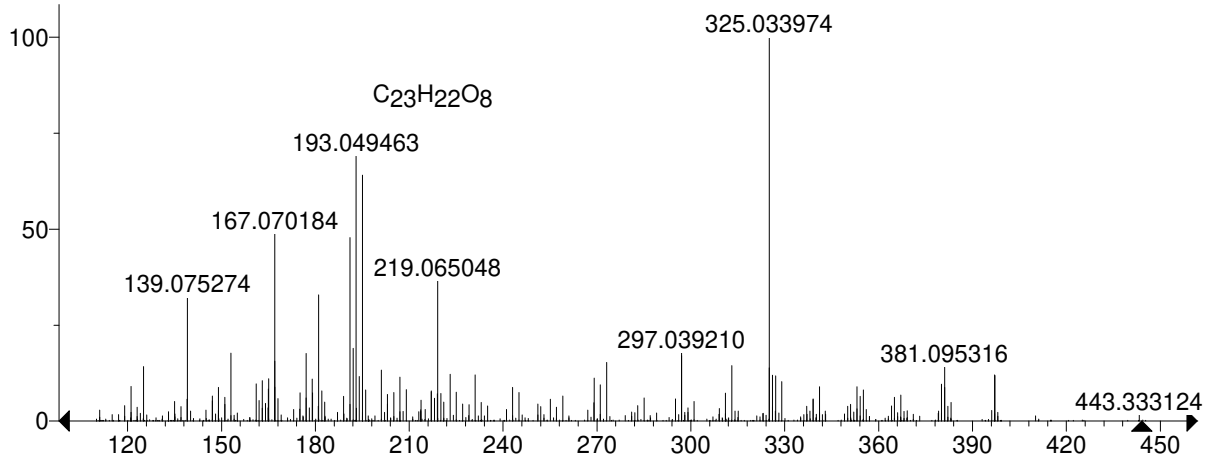

Hit 4 : Morphine-6-glucuronide [M+H-H<sub>2</sub>O]<sup>+</sup> HCD 53V P=444.2  
C<sub>23</sub>H<sub>27</sub>NO<sub>9</sub>; MF: 0; RMF: 33; Prob 14.2%; CAS: 20290-10-2; Lib: nist\_msms; ID: 324980.

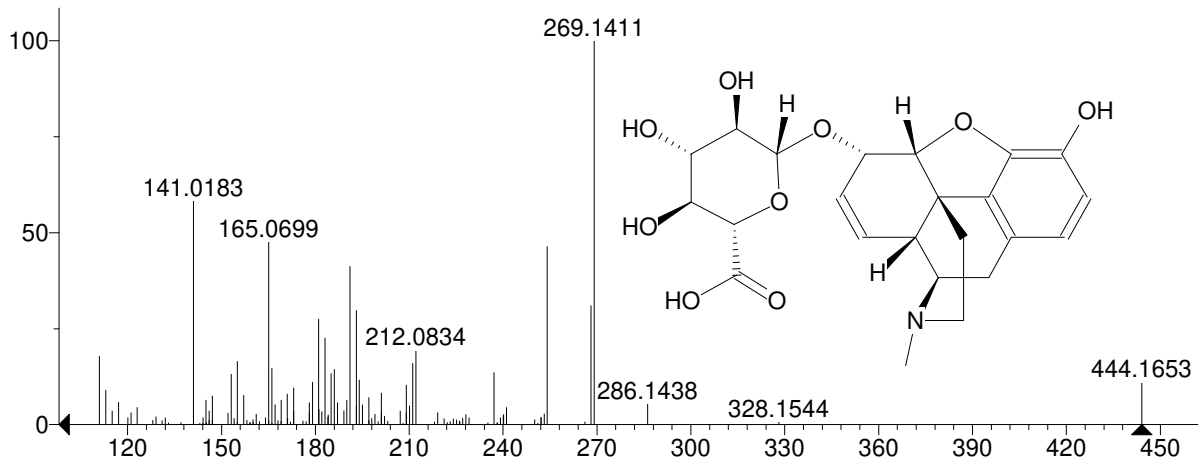

Hit 5 : NCGC00380154-01! [M+H]<sup>+</sup> P=444.2  
C<sub>24</sub>H<sub>21</sub>N<sub>5</sub>O<sub>4</sub>; MF: 0; RMF: 11; Prob 14.2%; Lib: mona-export-gnps; ID: 6697.

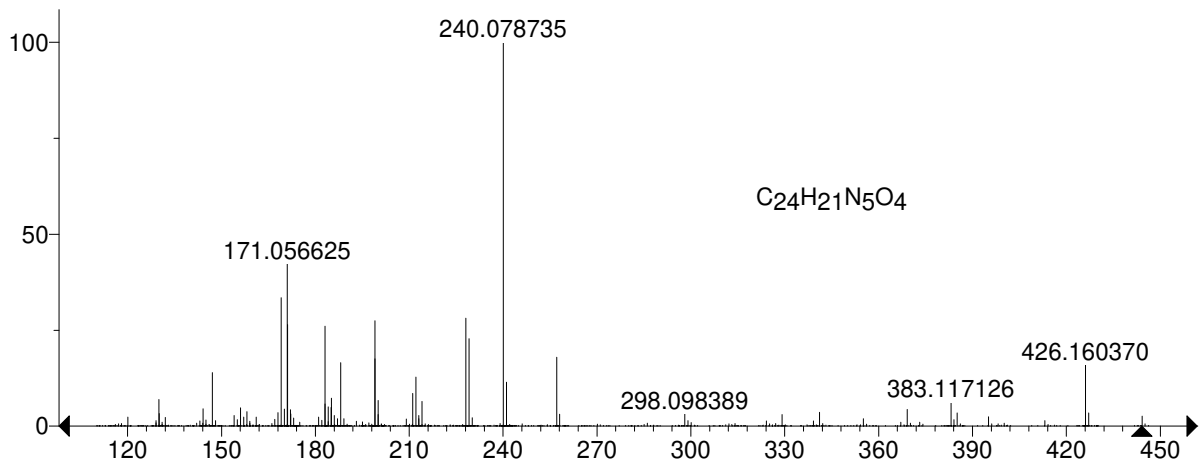



\*\* Search Report Page 1 of 2 \*\*

Unknown: Unknown (18.66\_431.2284m/z)  
Compound in Library Factor = -3273

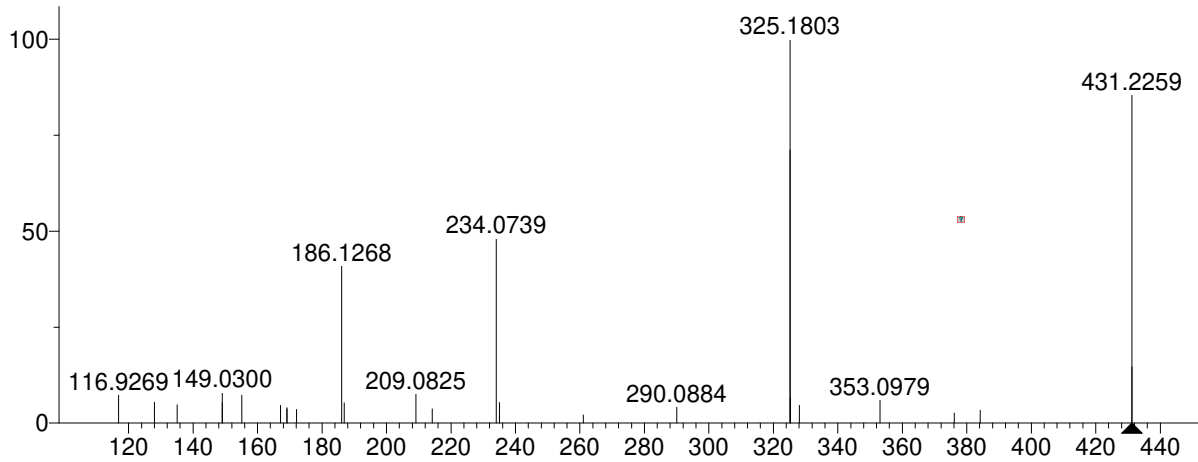

Hit 1 : 4-Piperidinecarboxylic acid, 1-[4-(acetylamino)phenyl]methyl]-4-(2-phenylethyl)-, ethyl ester [M+Na]<sup>+</sup> HC  
C25H32N2O3; MF: 6; RMF: 330; Prob 38.1%; CAS: 1069498-96-9; Lib: nist\_msms; ID: 420451.

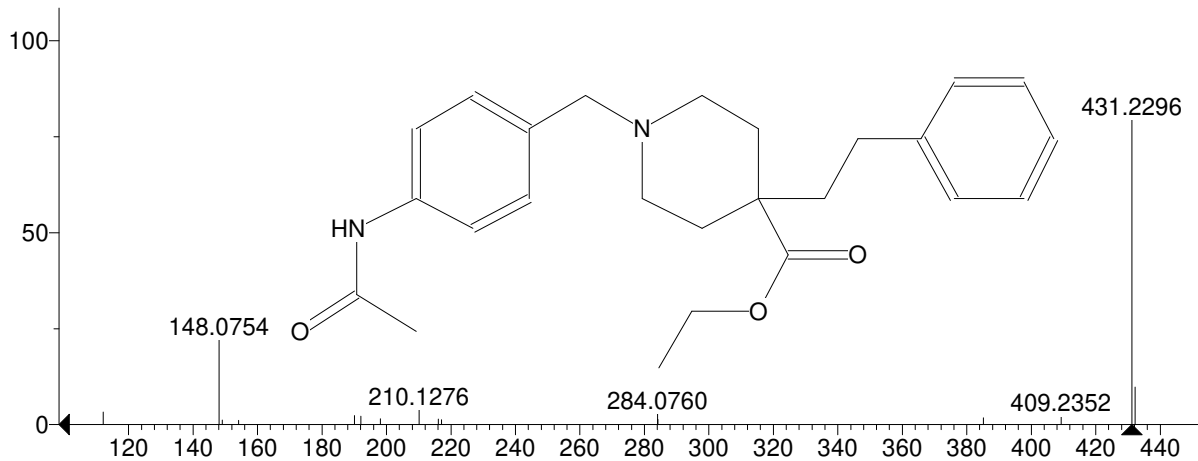

Hit 2 : Acetyl-(Lys0,Nle3)-γ2-MSH, amide [M+4H]<sup>4+</sup> HCD 13eV P=431.2  
C83H116N24O17; MF: 2; RMF: 239; Prob 32.2%; CAS: 237761-41-0; Lib: nist\_msms2; ID: 49099.

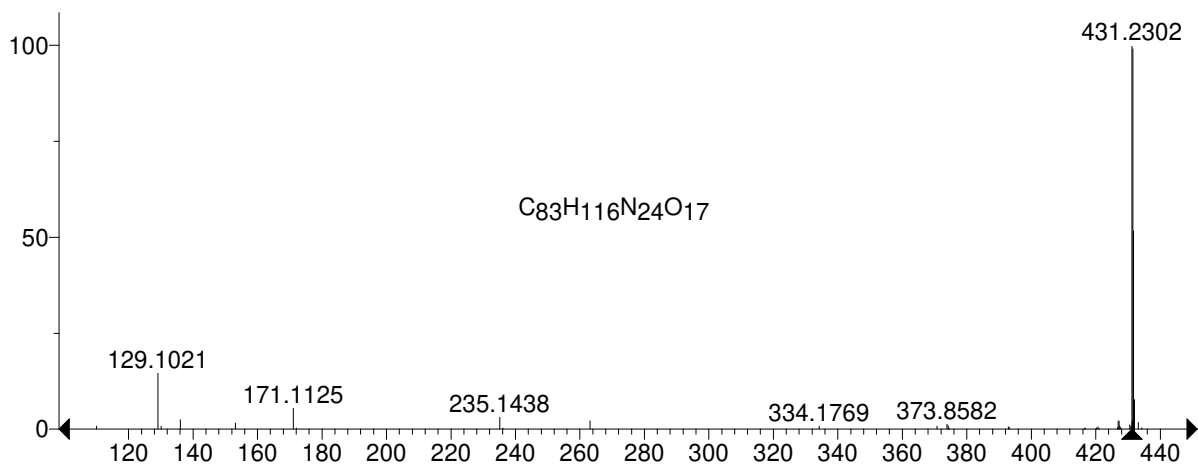

Hit 3 : NCGC00384740-01\_C21H34O9\_2(1H)-Azulenone, 6-(beta-D-glucopyranosyloxy)-4,5,6,7,8,8a-hexahydro-C21H34O9; MF: 0; RMF: 10; Prob 29.7%; Lib: mona-export-gnps; ID: 10841.

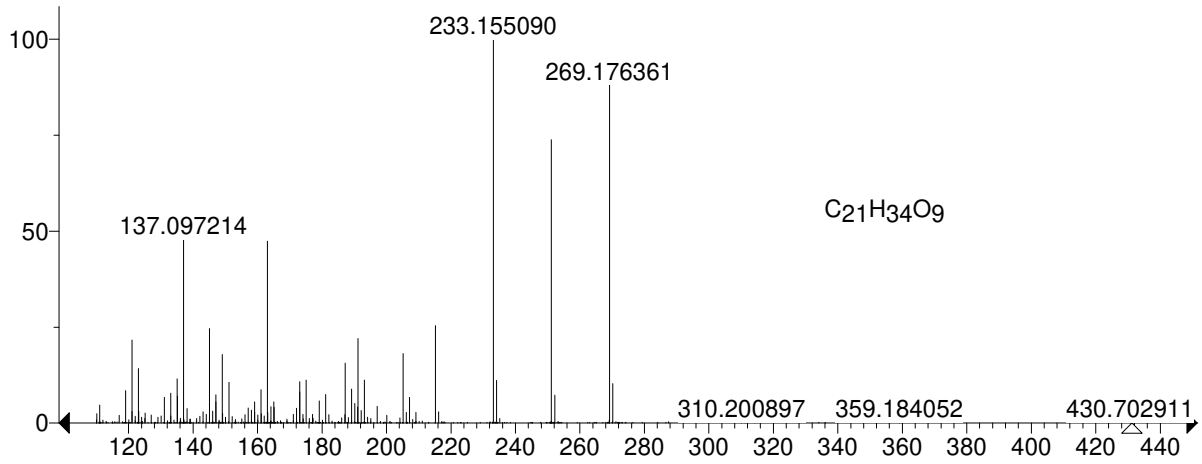

\*\* Search Report Page 1 of 2 \*\*

Unknown: Unknown (18.73\_296.1489m/z)  
Compound in Library Factor = -3273

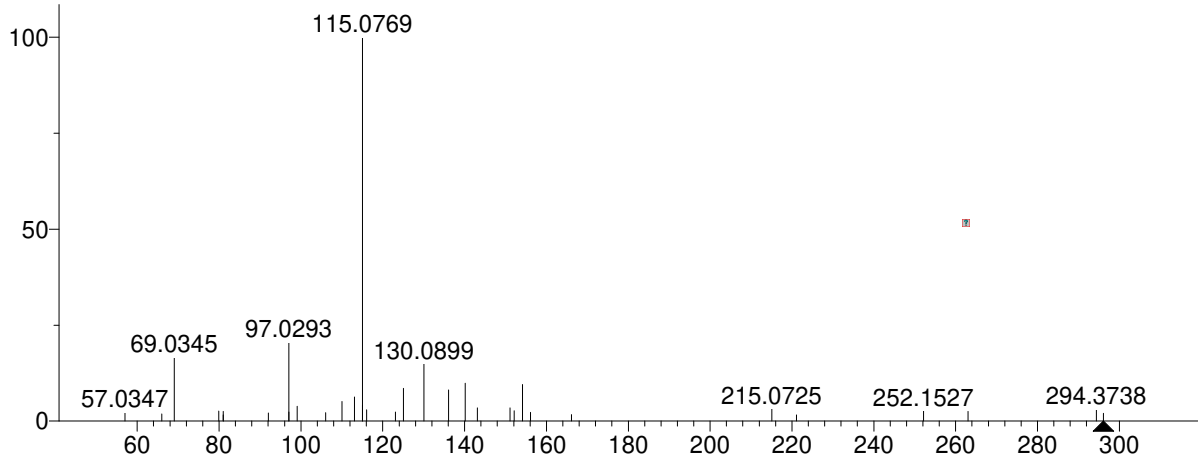

Hit 1 : [Met5,Arg6] Enkephalin-Arg [M+3H]<sup>3+</sup> HCD 5eV P=296.1  
C<sub>39</sub>H<sub>59</sub>N<sub>13</sub>O<sub>9</sub>S; MF: 2; RMF: 184; Prob 11.8%; Lib: nist\_msms2; ID: 59110.

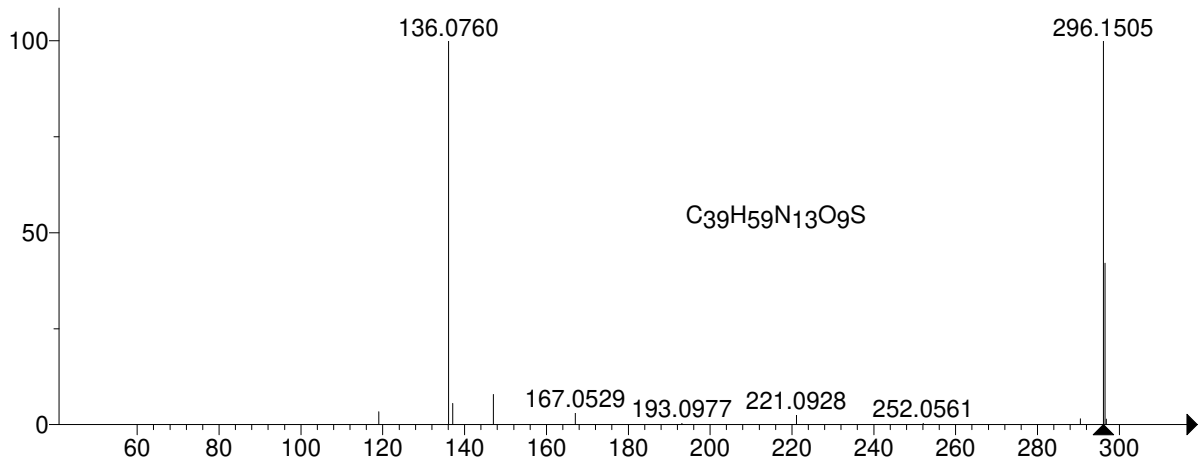

Hit 2 : (3aR,4R,6E,10Z,11aR)-4-hydroxy-10-(hydroxymethyl)-3-methylidene-2-oxo-3a,4,5,8,9,11a-hexahydrocyclo  
C<sub>15</sub>H<sub>18</sub>O<sub>5</sub>; MF: 1; RMF: 53; Prob 11.4%; Lib: mona-export-vf-npl\_qexactive; ID: 19378.

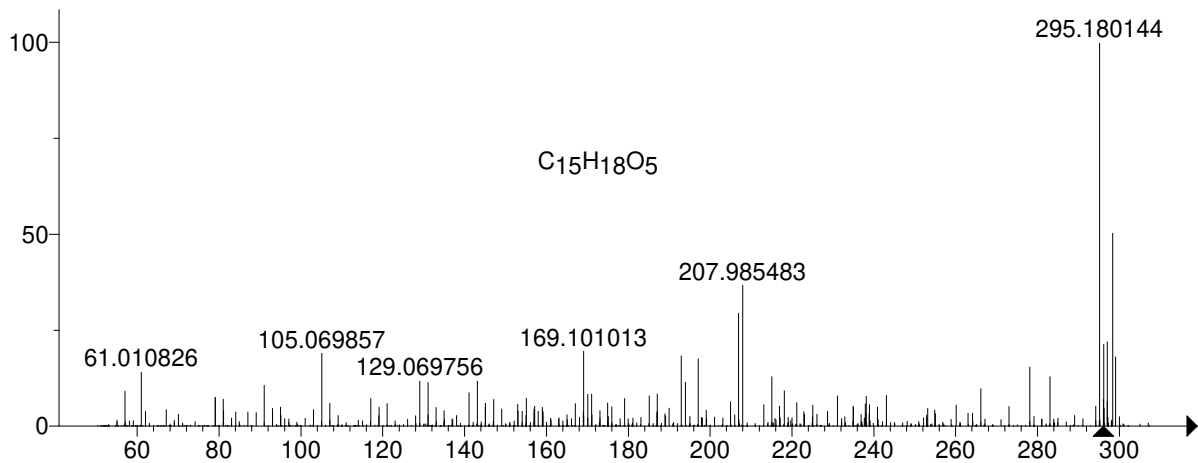

\*\* Search Report Page 2 of 2 \*\*

Hit 3 : (2S,3S,4S)-3,4-dihydroxy-6-methoxy-3-methyl-7-methylidene-2-pentyl-2,4-dihydropyrano[2,3-c]pyrrol-5-one  
C<sub>15</sub>H<sub>23</sub>NO<sub>5</sub>; MF: 1; RMF: 49; Prob 11.4%; Lib: mona-export-lc-ms-ms\_negative\_mode; ID: 22789.

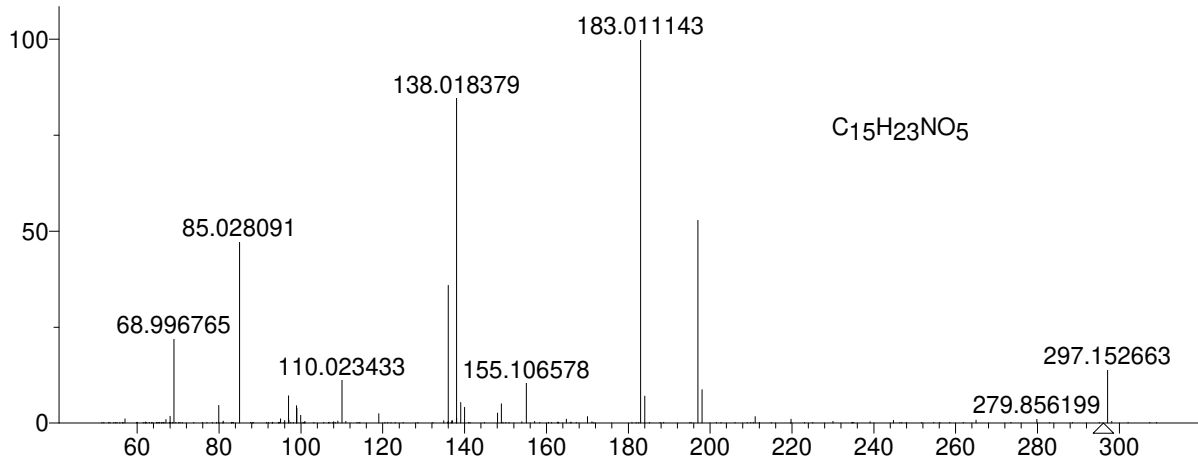

Hit 4 : NCGC00385487-01\_C<sub>15</sub>H<sub>21</sub>NO<sub>5</sub> [M+H]<sup>+</sup> P=296.1  
C<sub>15</sub>H<sub>21</sub>NO<sub>5</sub>; MF: 0; RMF: 51; Prob 10.9%; Lib: mona-export-gnps; ID: 10113.

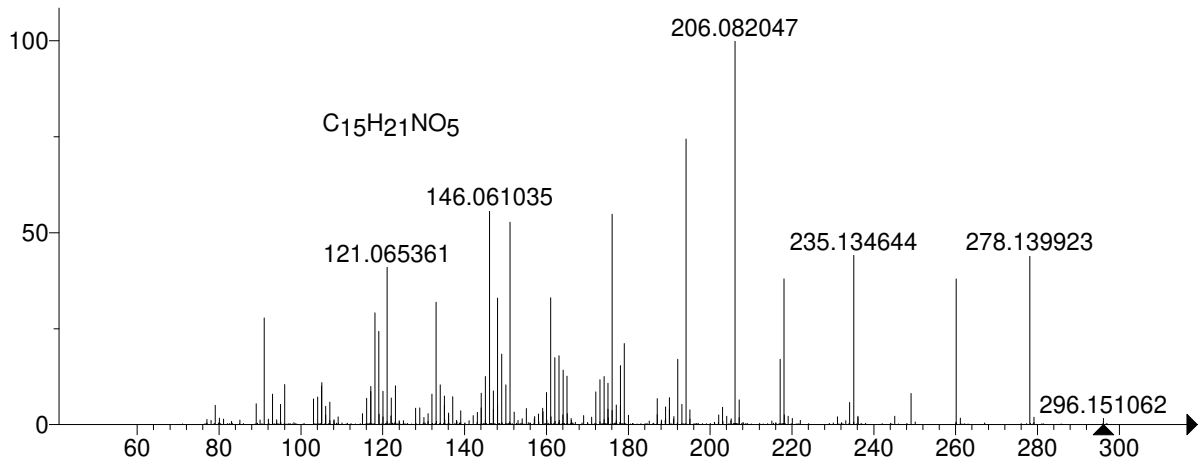

Hit 5 : Dothiepin [M+H]<sup>+</sup> HCD 76V P=296.1  
C<sub>19</sub>H<sub>21</sub>NS; MF: 0; RMF: 32; Prob 10.9%; CAS: 113-53-1; Lib: nist\_msms; ID: 198884.

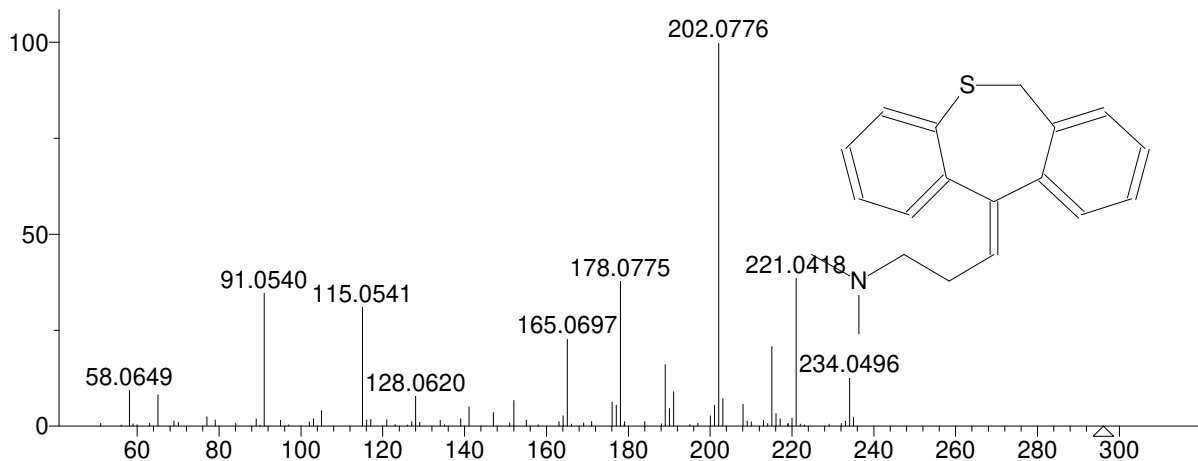

\*\* Search Report Page 1 of 2 \*\*

Unknown: Unknown (18.82\_511.1988m/z)  
Compound in Library Factor = -3273

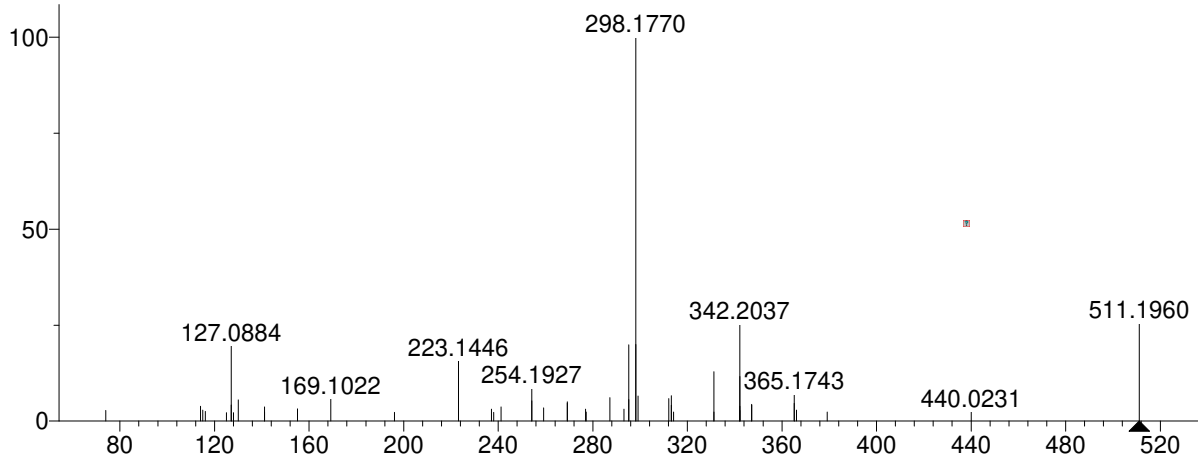

Hit 1 : Ganciclovir [2M+H]<sup>+</sup> HCD 5V P=511.2  
C<sub>9</sub>H<sub>13</sub>N<sub>5</sub>O<sub>4</sub>; MF: 6; RMF: 182; Prob 29.8%; CAS: 82410-32-0; Lib: nist\_msms; ID: 263891.

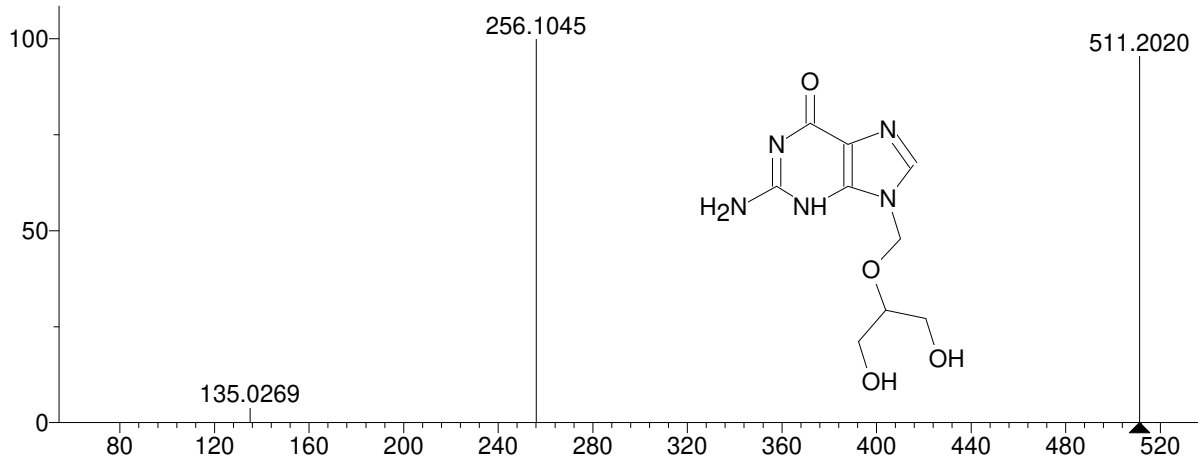

Hit 2 : NCGC00381012-01\_C<sub>26</sub>H<sub>32</sub>O<sub>9</sub>\_4aH-Phenanthro[2,1-c]pyran-4a-carboxylic acid, 1,3,4,4b,5,7,8,9,10,10a,  
C<sub>26</sub>H<sub>32</sub>O<sub>9</sub>; MF: 0; RMF: 79; Prob 23.4%; Lib: mona-export-gnps; ID: 14259.

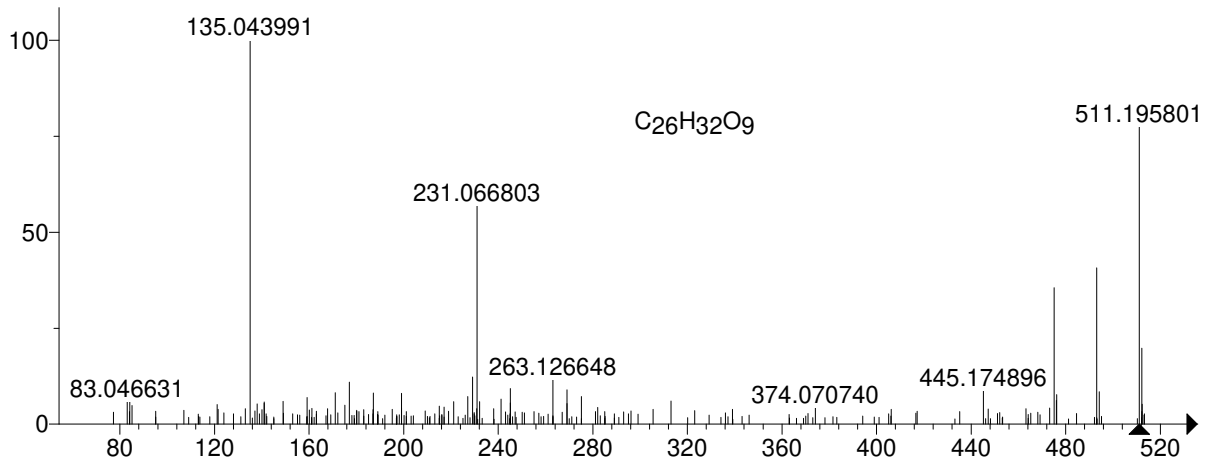

\*\* Search Report Page 2 of 2 \*\*

Hit 3 : Dutasteride [M+H]<sup>+</sup>=>511.2 IT 35% P=511.2  
C<sub>27</sub>H<sub>30</sub>F<sub>6</sub>N<sub>2</sub>O<sub>2</sub>; MF: 0; RMF: 46; Prob 23.4%; CAS: 164656-23-9; Lib: nist\_msms; ID: 356310.

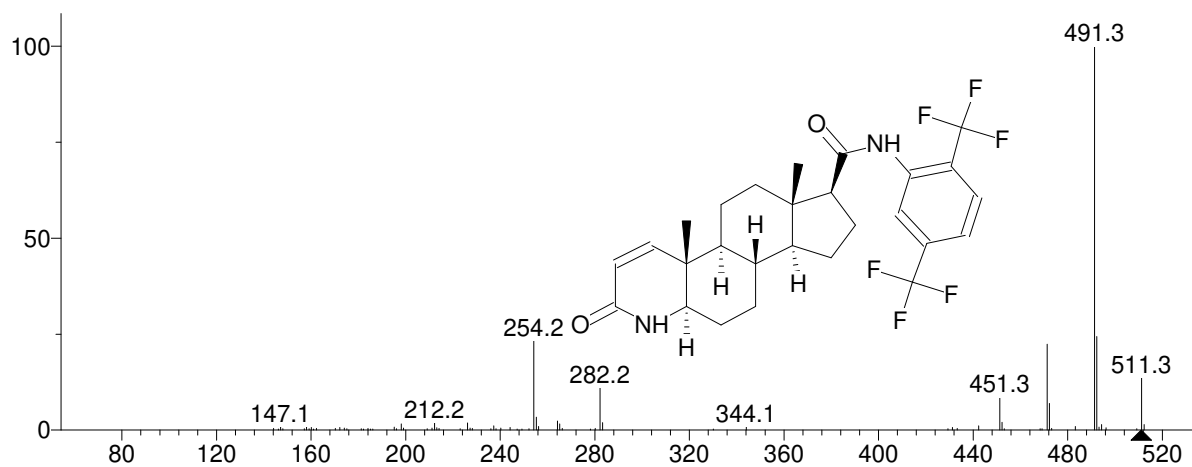

Hit 4 : Pluripotin [M+H]<sup>+</sup>=>511.2 IT 35% P=511.2  
C<sub>27</sub>H<sub>25</sub>F<sub>3</sub>N<sub>8</sub>O<sub>2</sub>; MF: 0; RMF: 17; Prob 23.4%; CAS: 839707-37-8; Lib: nist\_msms; ID: 156609.

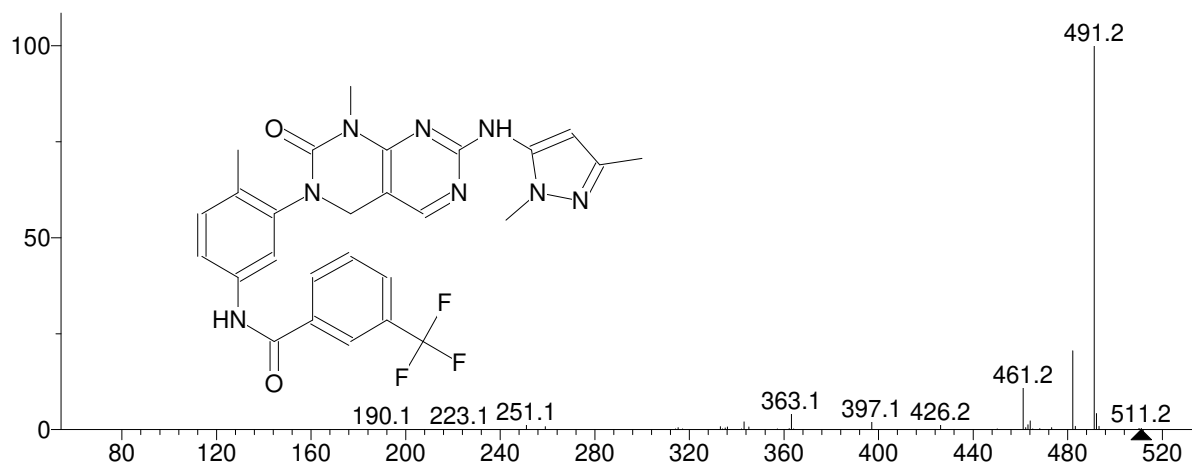

\*\* Search Report Page 1 of 2 \*\*

Unknown: Unknown (18.84\_248.1287m/z)  
Compound in Library Factor = -462

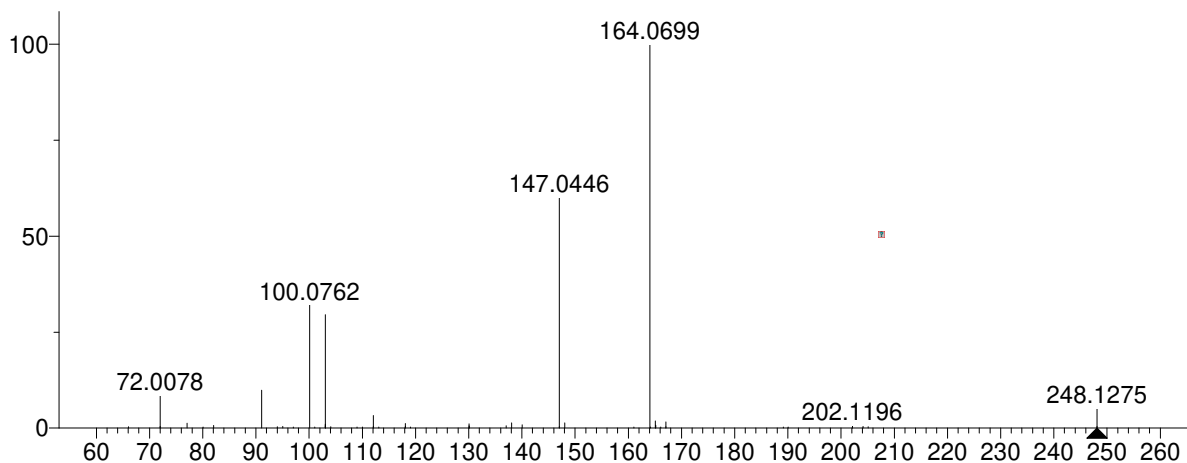

Hit 1 : Mefenoxam [M+H-CH4O]<sup>+</sup> HCD 2V P=248.1  
C15H21NO4; MF: 195; RMF: 797; Prob 94.7%; CAS: 70630-17-0; Lib: nist\_msms; ID: 397662.

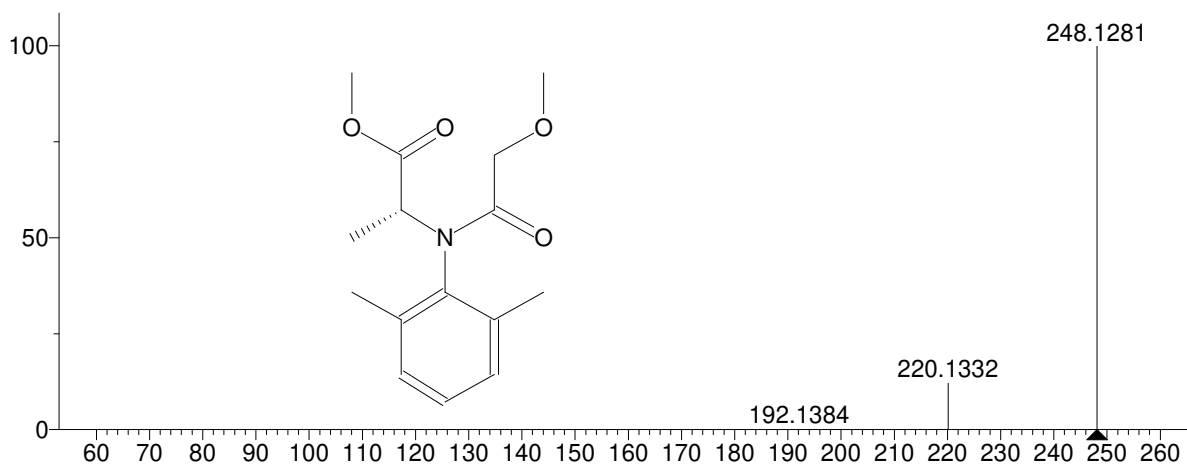

Hit 2 : 3',4'-Methylenedioxy- $\alpha$ -pyrrolidinopropiophenone [M+H]<sup>+</sup> HCD 54V P=248.1  
C14H17NO3; MF: 48; RMF: 260; Prob 2.76%; CAS: 783241-66-7; Lib: nist\_msms; ID: 325332.

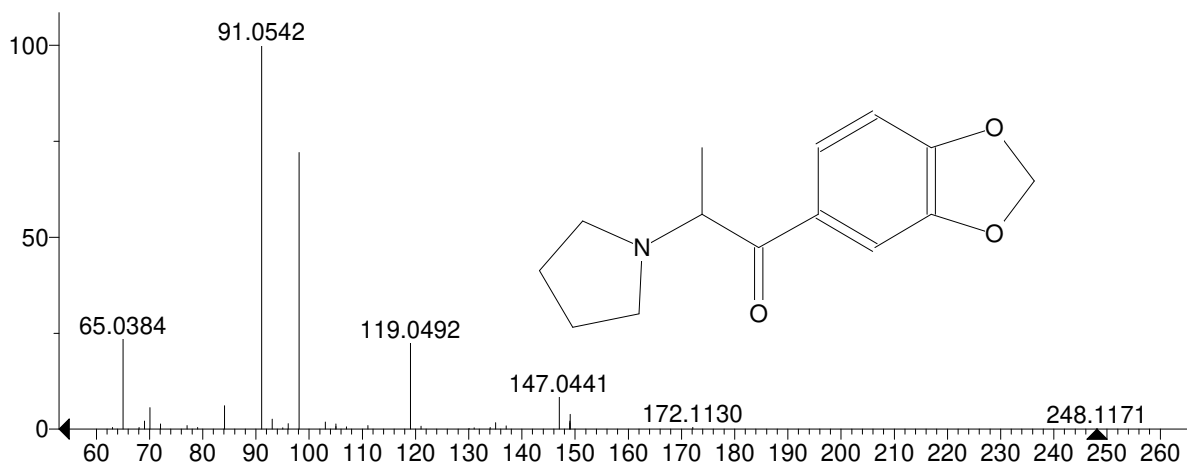

Hit 3 : Metolachlor OA [M+H-CH4O]<sup>+</sup> HCD 79V P=248.1  
C<sub>15</sub>H<sub>21</sub>NO<sub>4</sub>; MF: 30; RMF: 223; Prob 1.42%; CAS: 152019-73-3; Lib: nist\_msms; ID: 473391.

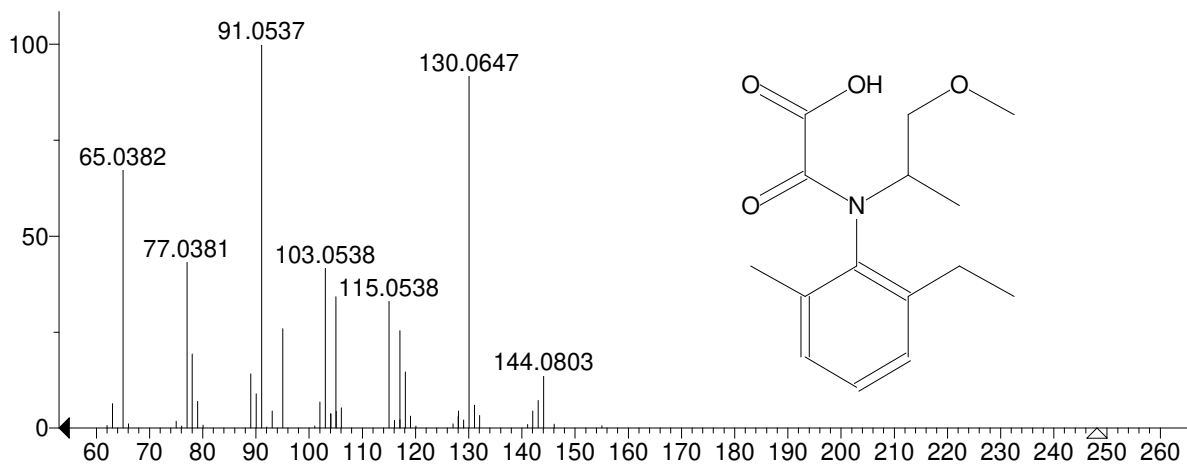

Hit 4 : 6-Benzyloxycarbonylaminohexanoic acid [M+H-H<sub>2</sub>O]<sup>+</sup> HCD 6V P=248.1  
C<sub>14</sub>H<sub>19</sub>NO<sub>4</sub>; MF: 24; RMF: 142; Prob 1.12%; CAS: 1947-00-8; Lib: nist\_msms; ID: 127702.

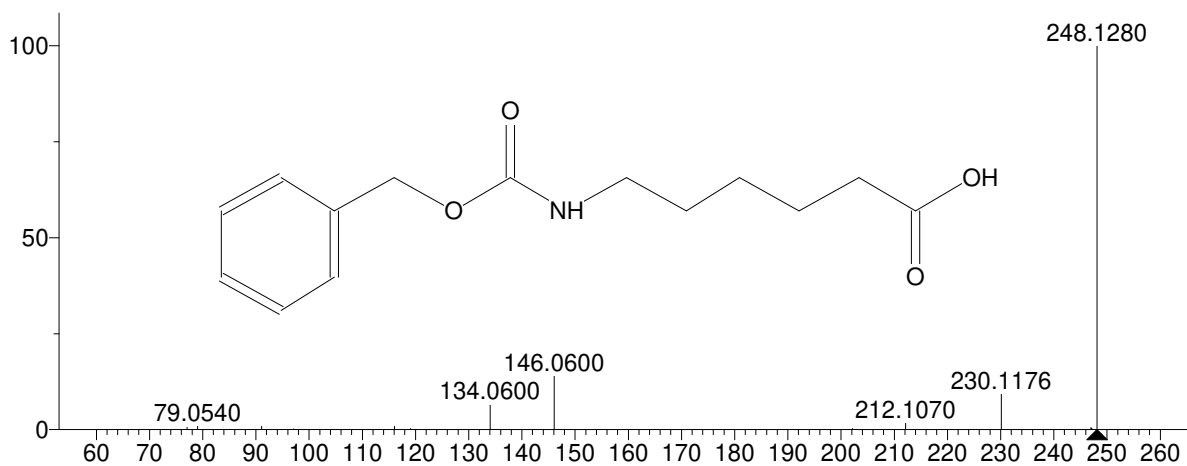



Unknown: Unknown (18.96\_411.1763m/z)  
Compound in Library Factor = -3273

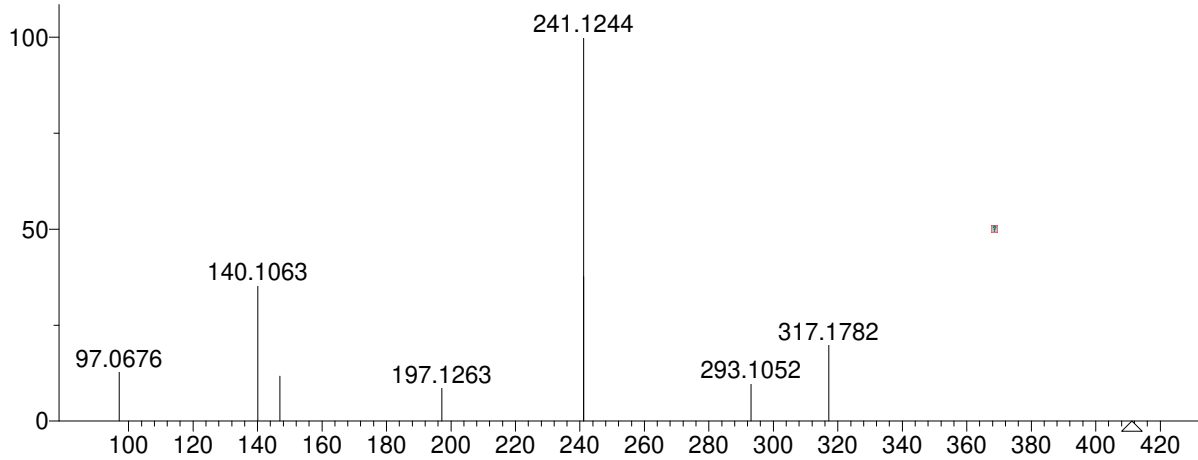

Hit 1 : 21-Carboxylic acid triamcinolone acetone [M+H-H<sub>3</sub>FO]<sup>+</sup> HCD 28V P=411.2  
C<sub>24</sub>H<sub>29</sub>FO<sub>7</sub>; MF: 1; RMF: 93; Prob 17.2%; CAS: 53962-41-7; Lib: nist\_msms; ID: 449235.

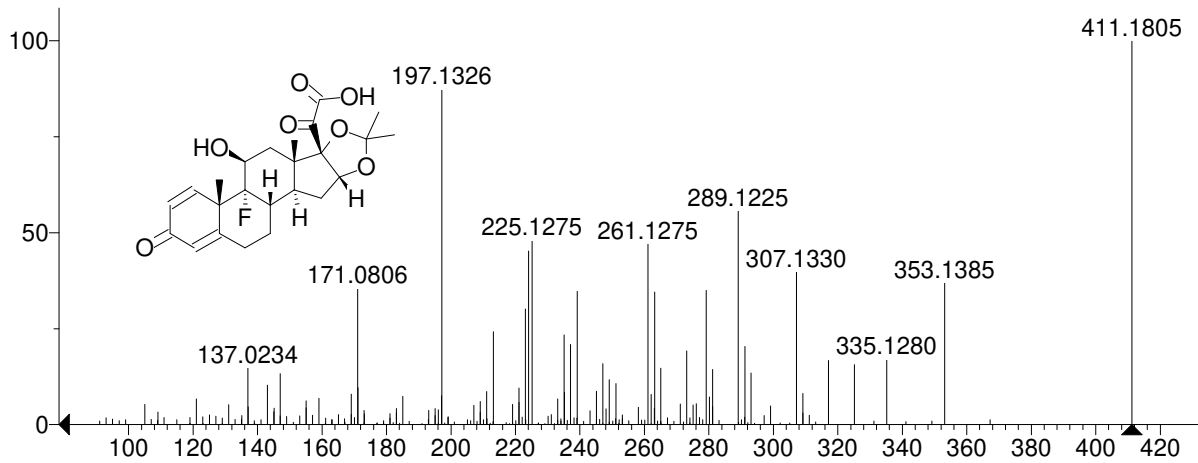

Hit 2 : (4E,8E)-10-(4-hydroxy-6-methoxy-7-methyl-3-oxo-1H-2-benzofuran-5-yl)-4,8-dimethyldeca-4,8-dienoic acid  
C<sub>22</sub>H<sub>28</sub>O<sub>6</sub>; MF: 0; RMF: 31; Prob 16.6%; Lib: mona-export-vf-npl\_qexactive; ID: 19695.

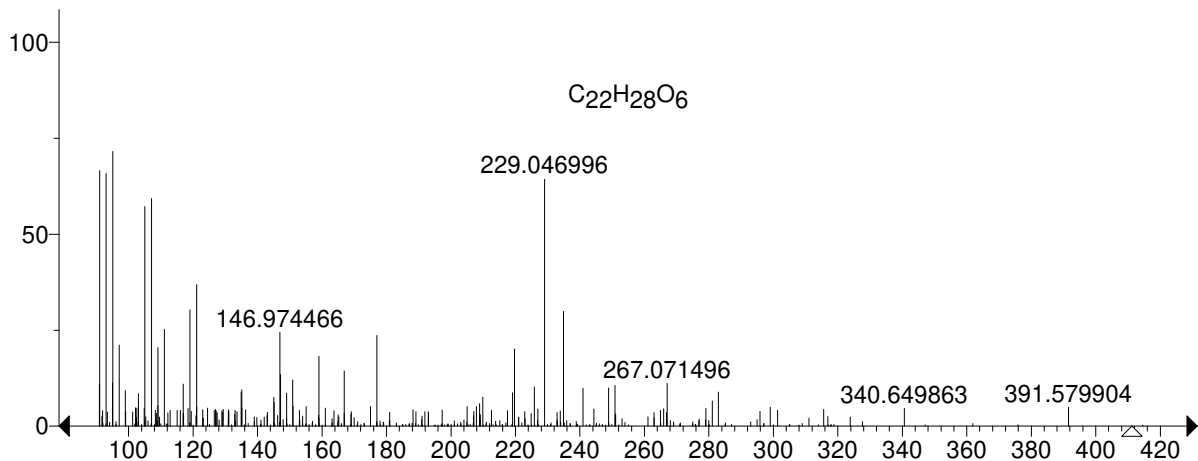

Hit 3 : Mangostine [M+H]<sup>+</sup> QQQ 42V P=411.2  
C<sub>24</sub>H<sub>26</sub>O<sub>6</sub>; MF: 0; RMF: 31; Prob 16.6%; CAS: 6147-11-1; Lib: nist\_msms; ID: 79870.

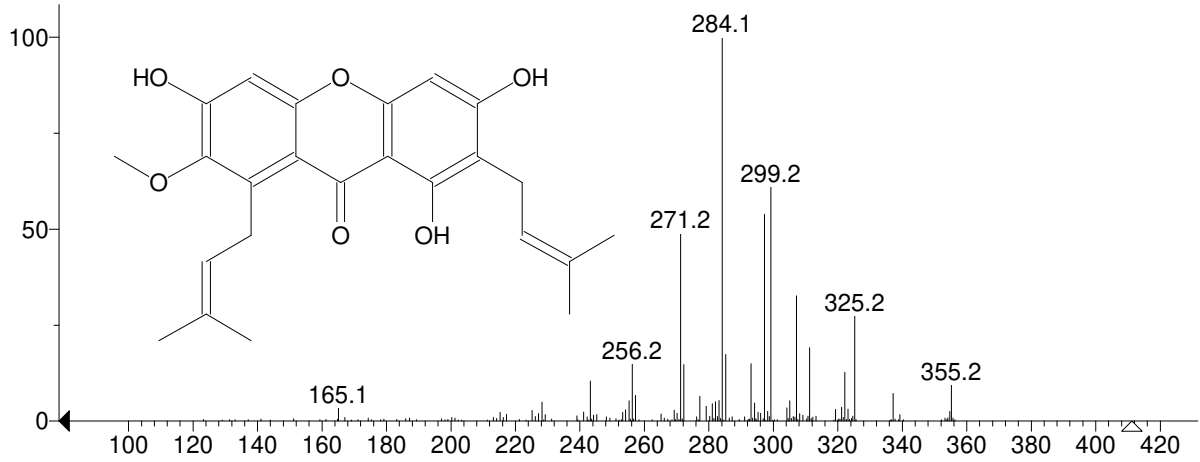

Hit 4 : Quassin [M+Na]<sup>+</sup> 65HCD P=411.2  
C<sub>22</sub>H<sub>28</sub>O<sub>6</sub>; MF: 0; RMF: 25; Prob 16.6%; Lib: mona-export-vf-npl\_qexactive; ID: 26442.

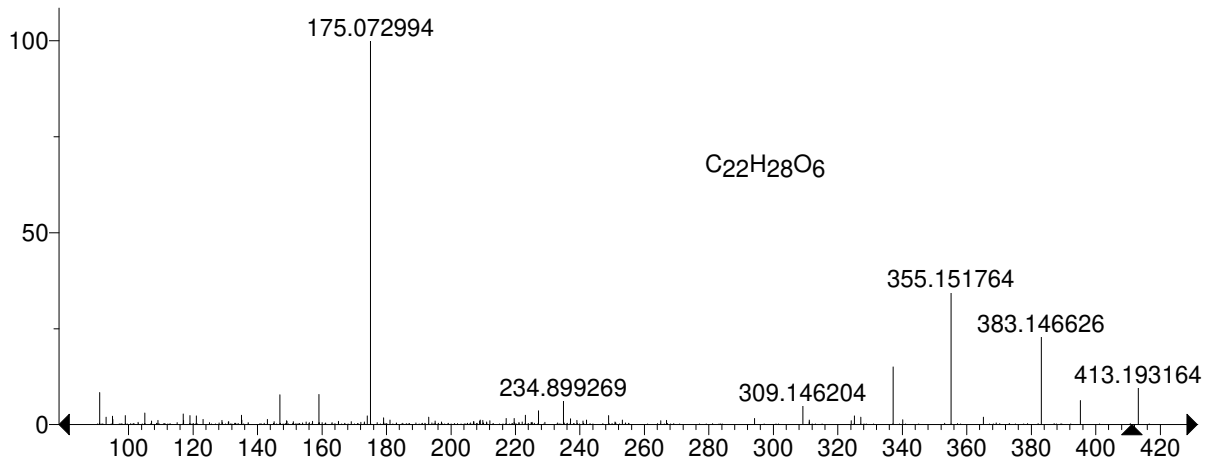

Hit 5 : 3-(5-hydroxy-2,2,7,8-tetramethyl-6-oxo-7,8-dihydropyrano[3,2-g]chromen-10-yl)hexanoic acid [M+Na]<sup>+</sup> 4E  
C<sub>22</sub>H<sub>28</sub>O<sub>6</sub>; MF: 0; RMF: 11; Prob 16.6%; Lib: mona-export-vf-npl\_qexactive; ID: 983.

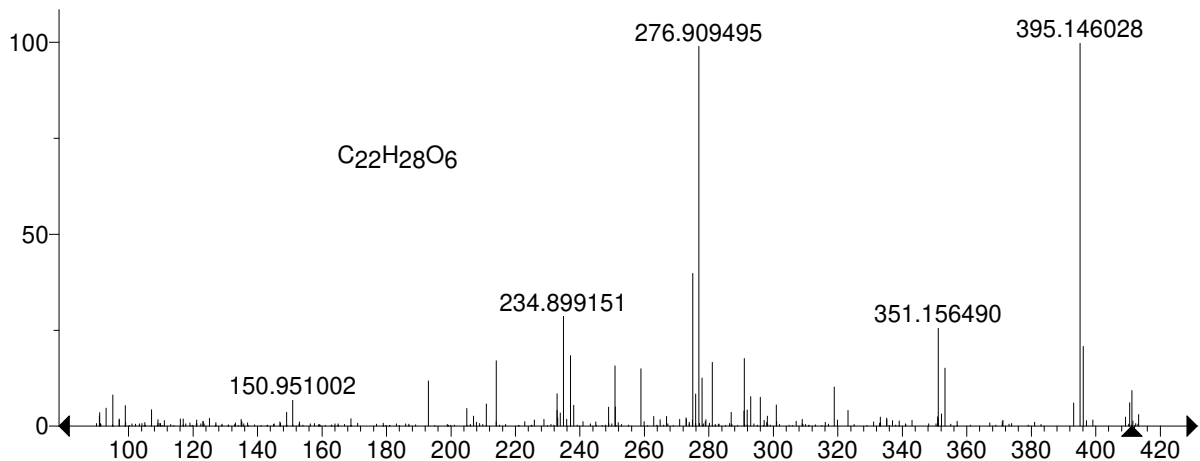

\*\* Search Report Page 1 of 2 \*\*

Unknown: Unknown (19.02\_237.1234m/z)  
Compound in Library Factor = -246

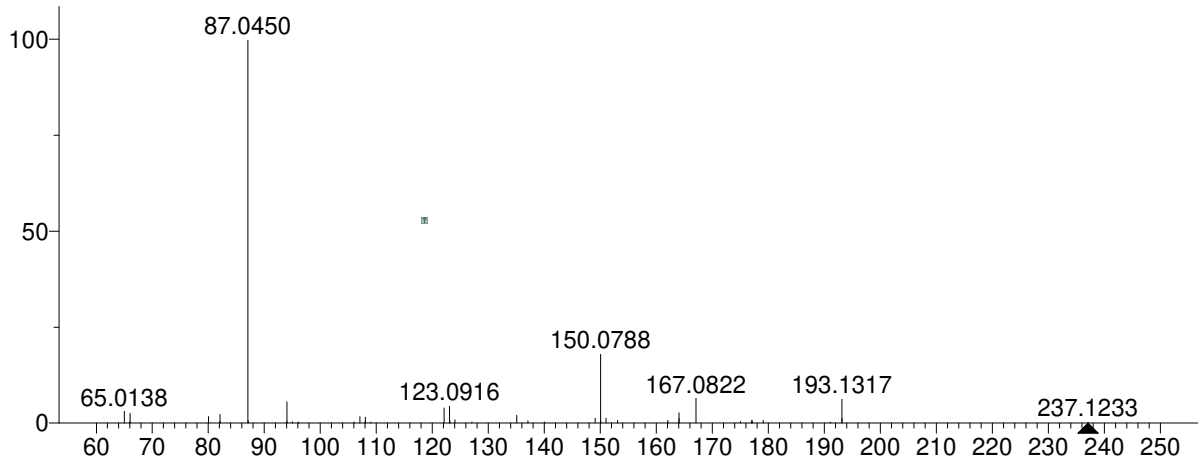

Hit 1 : Secobarbital [M-H]<sup>-</sup> 35(no P=237.1)  
C<sub>12</sub>H<sub>18</sub>N<sub>2</sub>O<sub>3</sub>; MF: 279; RMF: 907; Prob 93.8%; Lib: mona-export-1c-ms-ms\_negative\_mode; ID: 13759.

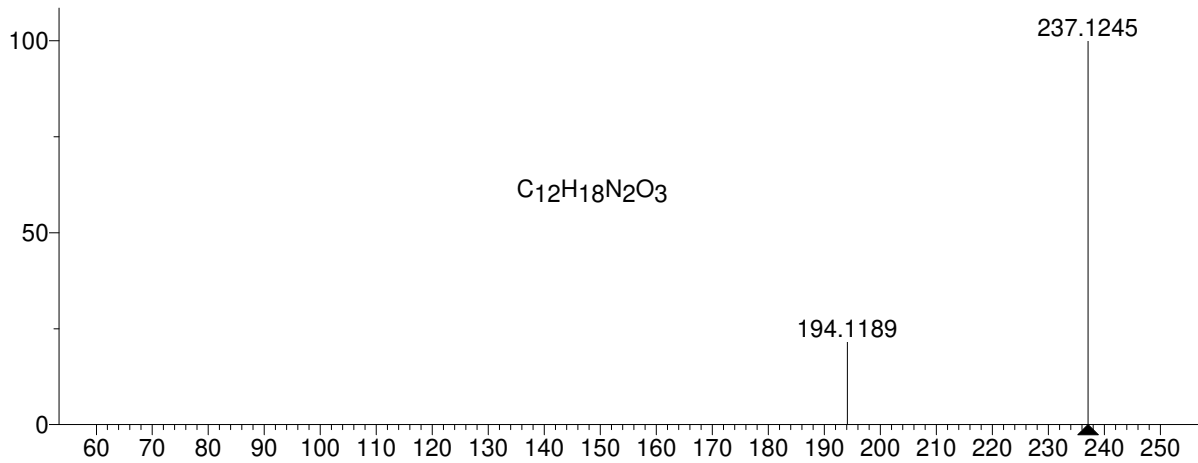

Hit 2 : Ala-Phe [M+H]<sup>+</sup> HCD 2eV P=237.1  
C<sub>12</sub>H<sub>16</sub>N<sub>2</sub>O<sub>3</sub>; MF: 10; RMF: 147; Prob 0.93%; CAS: 3061-90-3; Lib: nist\_msms2; ID: 89123.

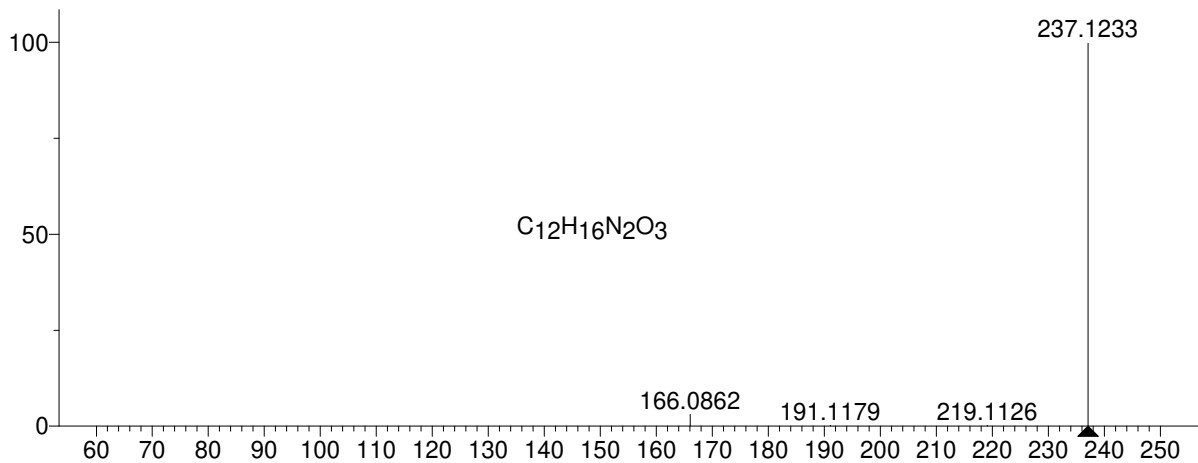

Hit 3 : Carbetamide [M+H]<sup>+</sup> HCD 0V P=237.1  
C<sub>12</sub>H<sub>16</sub>N<sub>2</sub>O<sub>3</sub>; MF: 2; RMF: 53; Prob 0.69%; CAS: 16118-49-3; Lib: nist\_msms; ID: 282730.

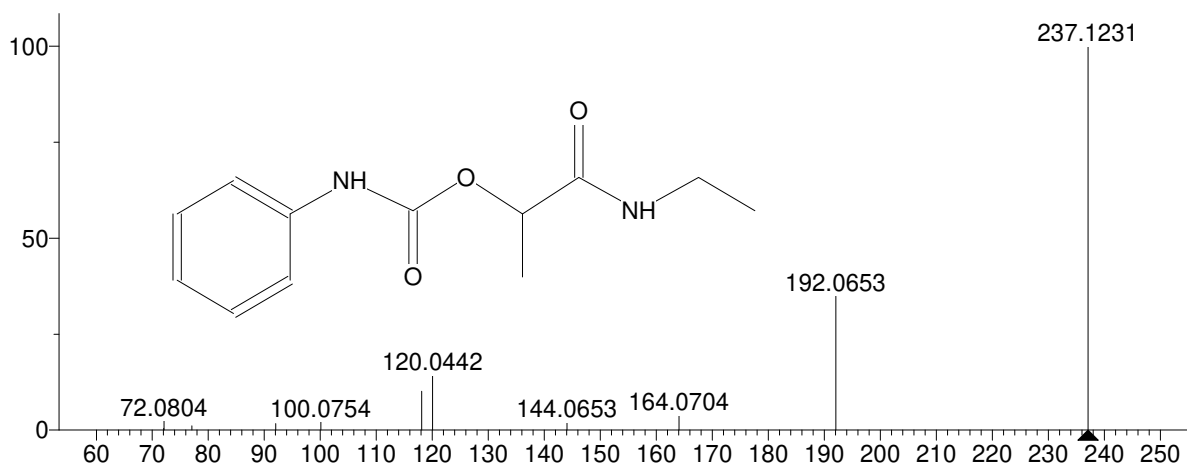

Hit 4 : Phe-Ala [M+H]<sup>+</sup> HCD 4eV P=237.1  
C<sub>12</sub>H<sub>16</sub>N<sub>2</sub>O<sub>3</sub>; MF: 1; RMF: 77; Prob 0.67%; CAS: 3918-87-4; Lib: nist\_msms; ID: 571919.

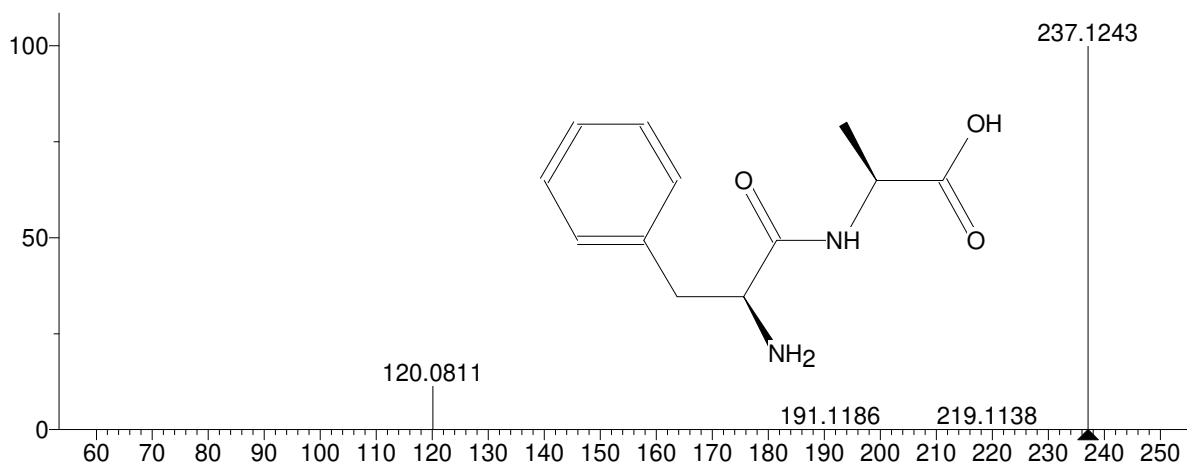

Hit 5 : Hexobarbital [M+H]<sup>+</sup> HCD 4V P=237.1  
C<sub>12</sub>H<sub>16</sub>N<sub>2</sub>O<sub>3</sub>; MF: 1; RMF: 43; Prob 0.67%; CAS: 56-29-1; Lib: nist\_msms; ID: 195763.

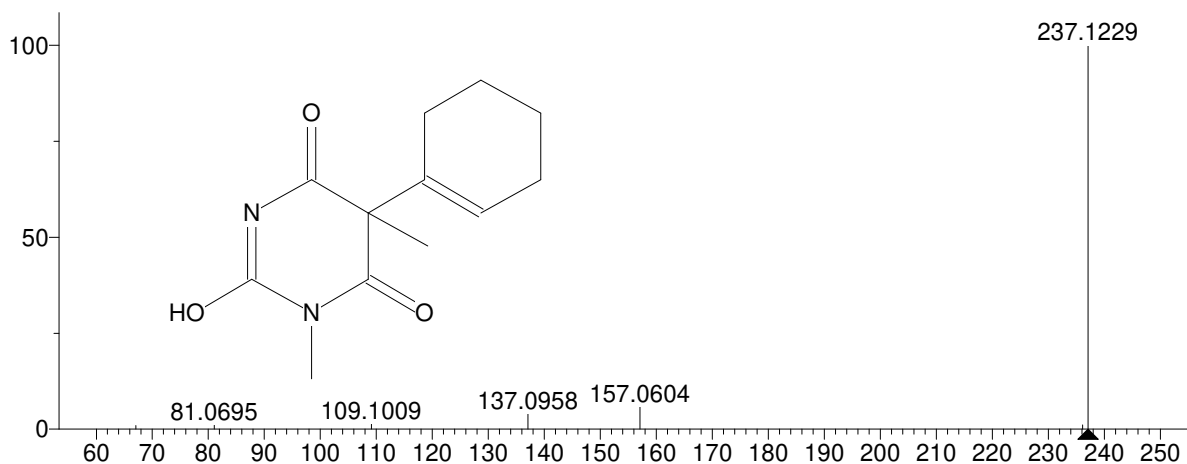

Unknown: Unknown (19.03\_428.0514m/z)  
Compound in Library Factor = 0

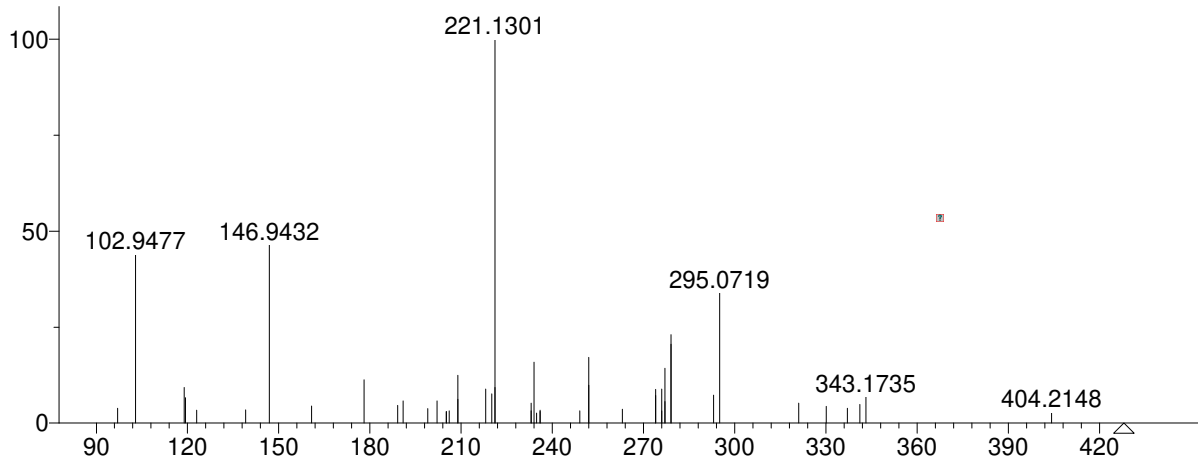

Unknown: Unknown (19.10\_501.1959m/z)  
Compound in Library Factor = 0

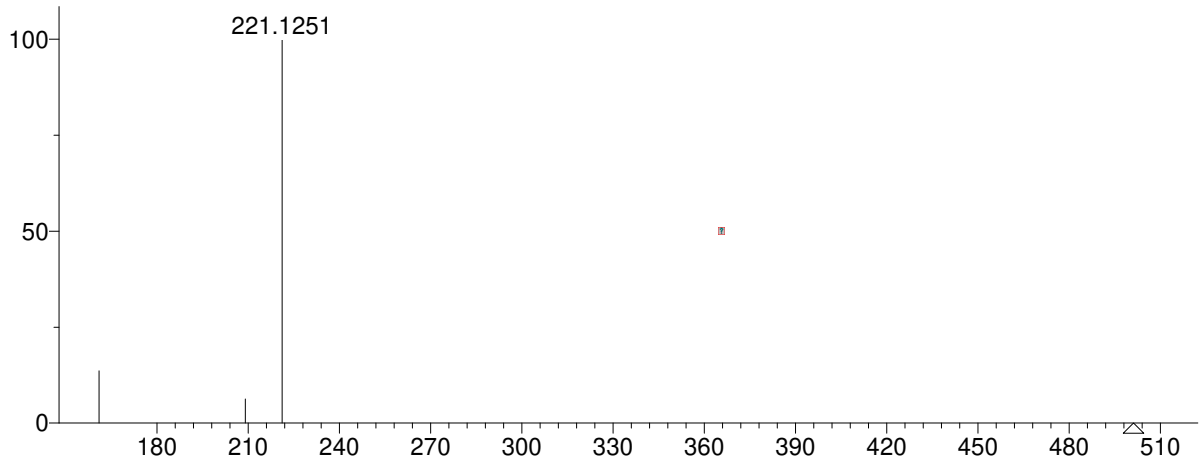

Hit 1 : "Fluticasone propionate (Flonase, Veramyst)" [M+H]<sup>+</sup> P=501.2  
C<sub>25</sub>H<sub>31</sub>F<sub>3</sub>O<sub>5</sub>S; MF: 0; RMF: 18; Prob 100.0%; Lib: mona-export-gnps; ID: 701.

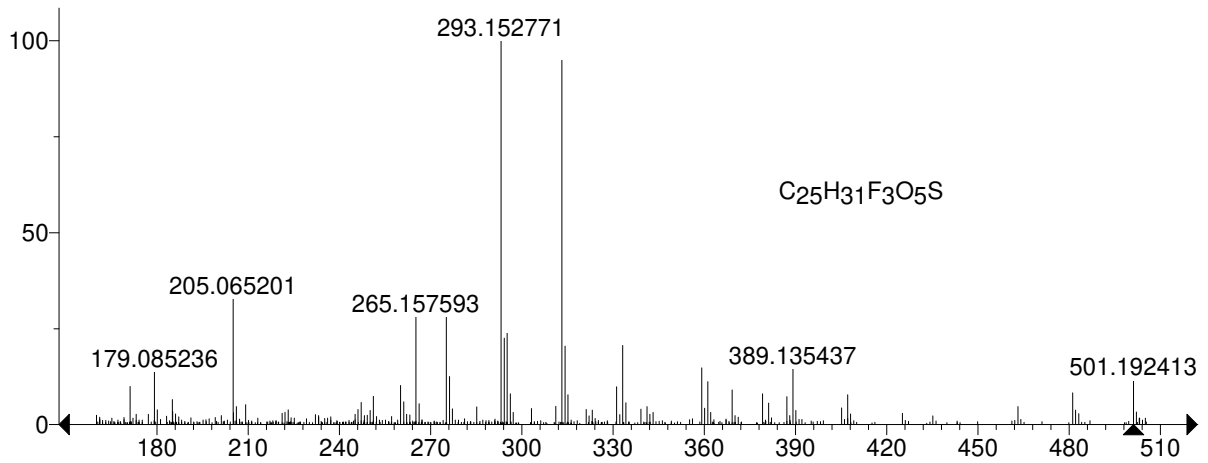

\*\* Search Report Page 1 of 2 \*\*

Unknown: Unknown (19.11\_454.1859m/z)  
Compound in Library Factor = -3273

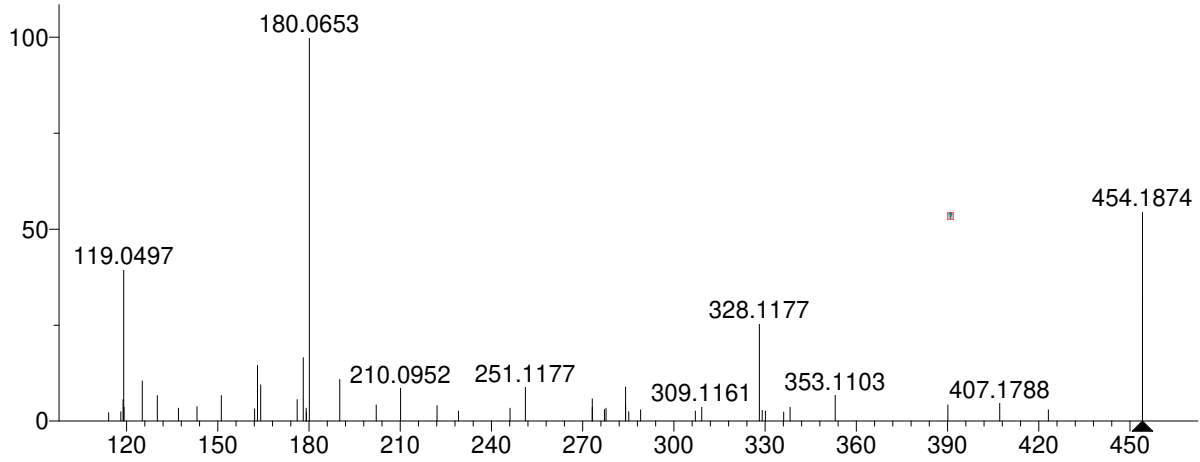

Hit 1 : PS 12:0; PS 6:0-6:0; [M-H]<sup>-</sup> [M-H]<sup>-</sup> P=454.2  
C18H34NO10P; MF: 3; RMF: 154; Prob 17.2%; Lib: msdial-insilicomsm-lipids-neg; ID: 329913.

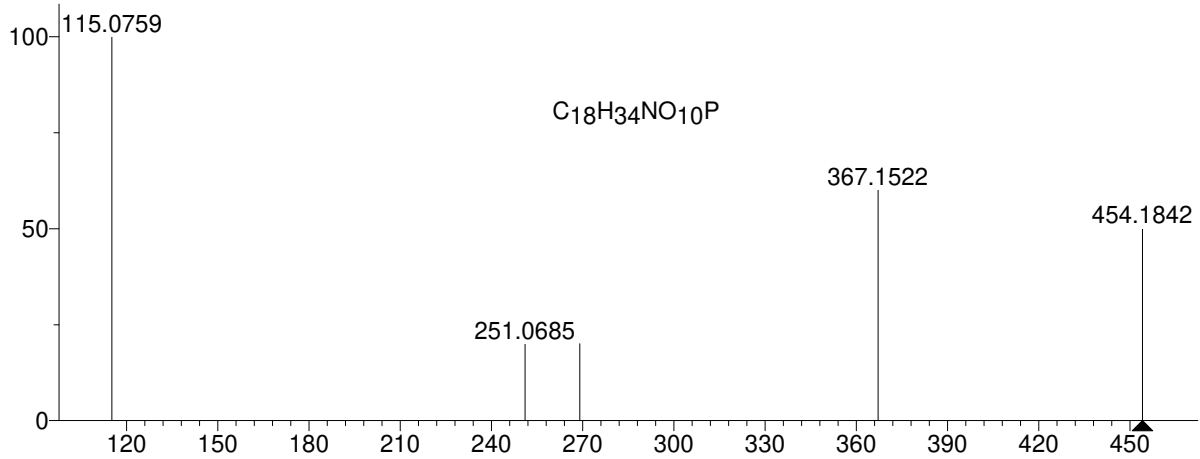

Hit 2 : PS 12:0; PS 2:0-10:0; [M-H]<sup>-</sup> [M-H]<sup>-</sup> P=454.2  
C18H34NO10P; MF: 2; RMF: 142; Prob 16.6%; Lib: msdial-insilicomsm-lipids-neg; ID: 329683.

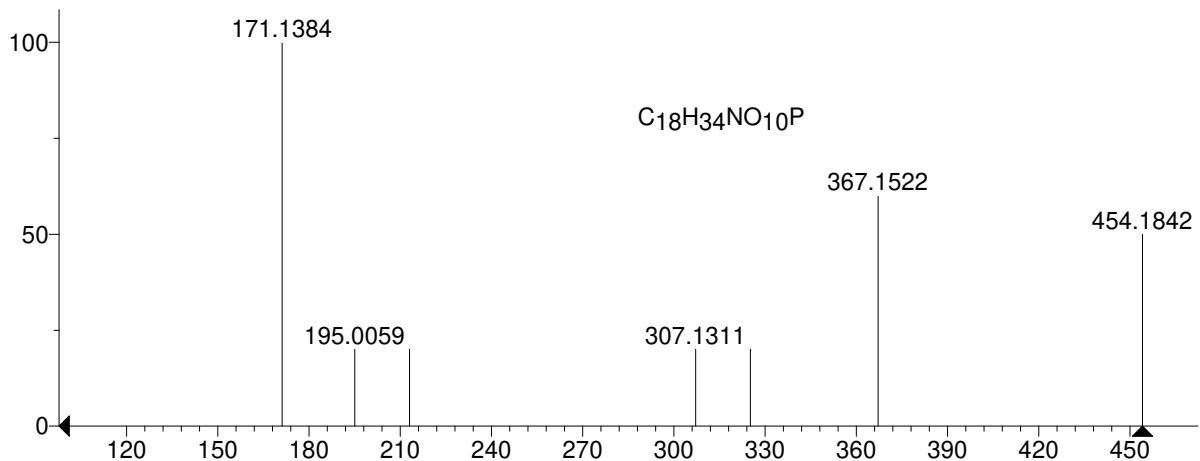

Hit 3 : PS 12:0; PS 3:0-9:0; [M-H]<sup>-</sup> [M-H]<sup>-</sup> P=454.2  
C<sub>18</sub>H<sub>34</sub>NO<sub>10</sub>P; MF: 2; RMF: 142; Prob 16.6%; Lib: msdial-insilicomsm-lipids-neg; ID: 329742.

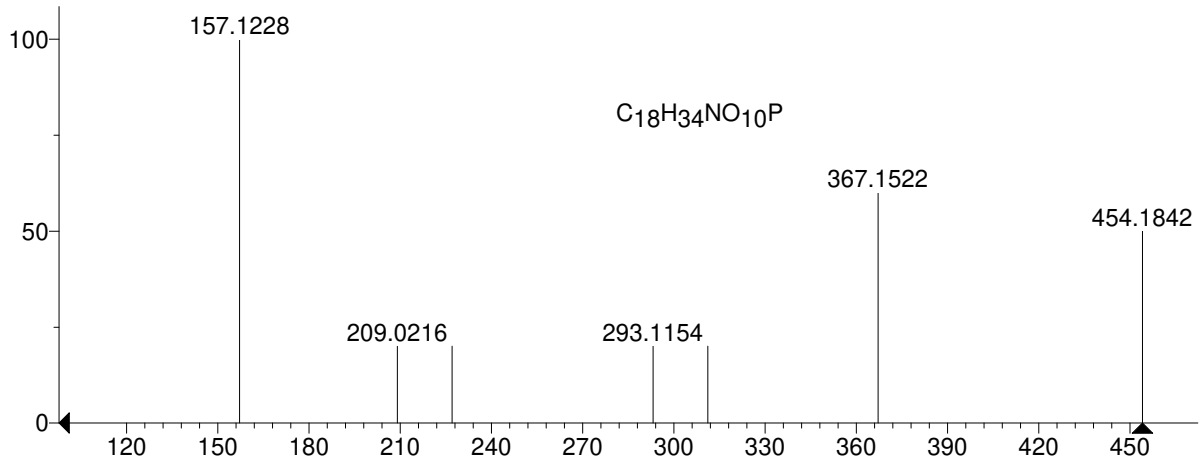

Hit 4 : PS 12:0; PS 4:0-8:0; [M-H]<sup>-</sup> [M-H]<sup>-</sup> P=454.2  
C<sub>18</sub>H<sub>34</sub>NO<sub>10</sub>P; MF: 2; RMF: 142; Prob 16.6%; Lib: msdial-insilicomsm-lipids-neg; ID: 329800.

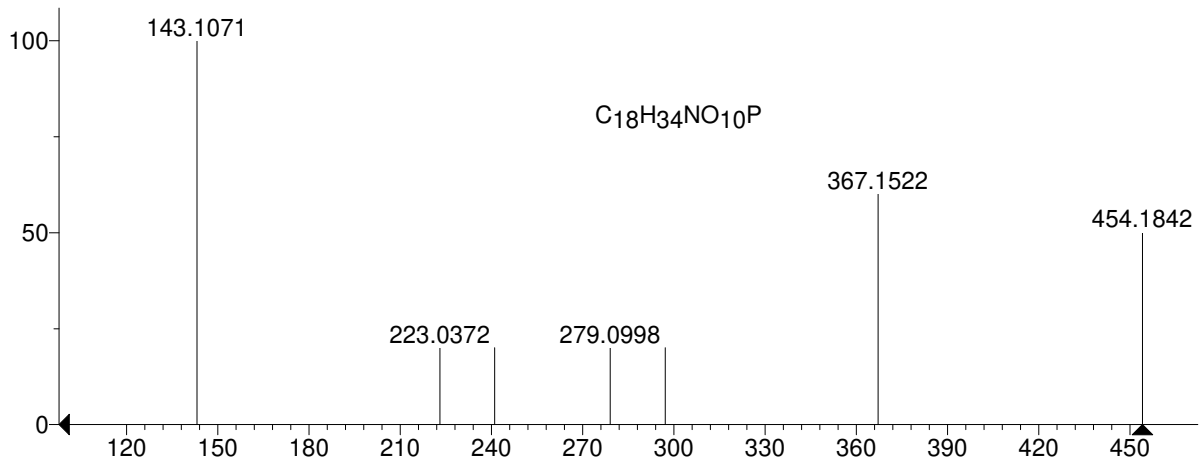

Hit 5 : PS 12:0; PS 5:0-7:0; [M-H]<sup>-</sup> [M-H]<sup>-</sup> P=454.2  
C<sub>18</sub>H<sub>34</sub>NO<sub>10</sub>P; MF: 2; RMF: 142; Prob 16.6%; Lib: msdial-insilicomsm-lipids-neg; ID: 329857.

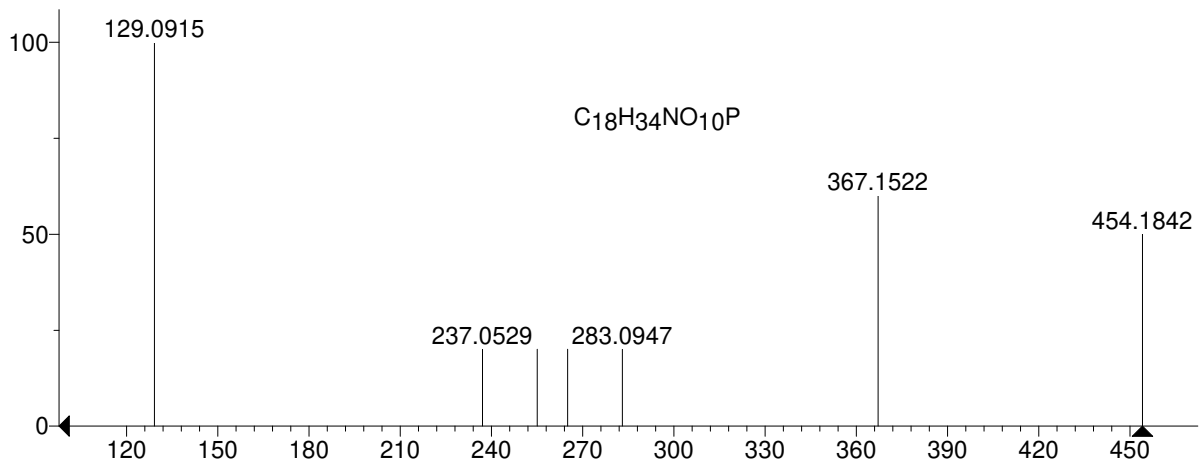



Unknown: Unknown (19.13\_530.2987m/z)  
Compound in Library Factor = 0

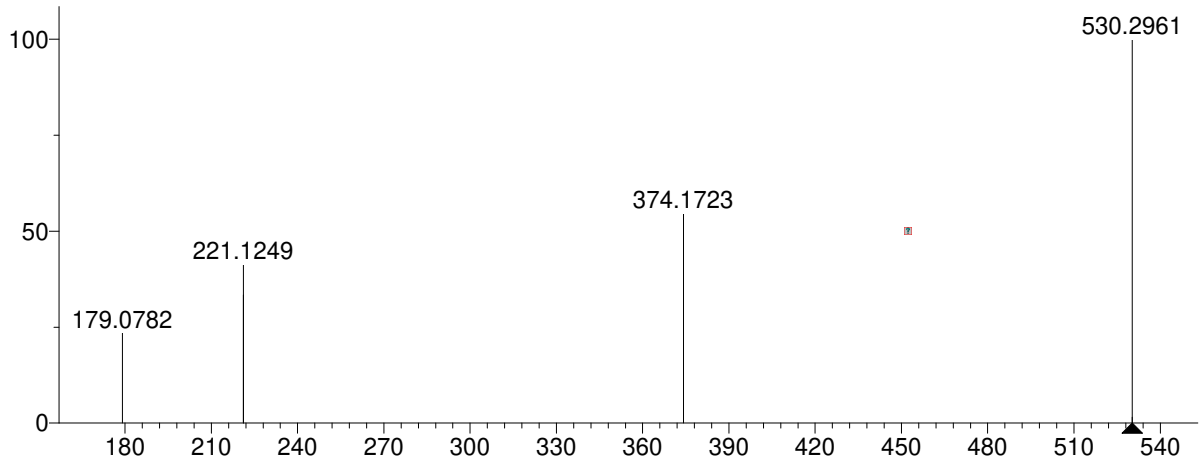

\*\* Search Report Page 1 of 2 \*\*

Unknown: Unknown (19.18\_308.1855m/z)  
Compound in Library Factor = -199

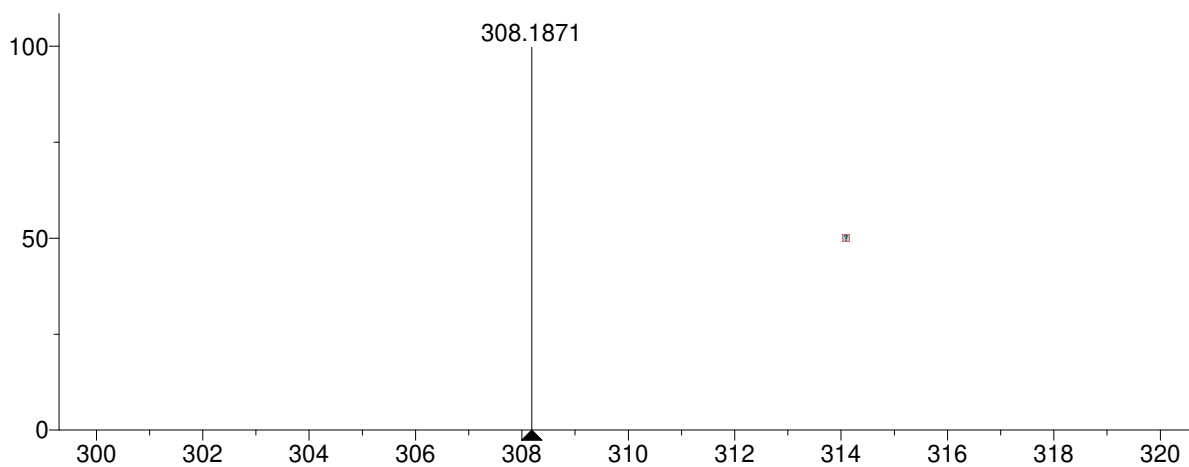

Hit 1 : Buflomedil [M+H]<sup>+</sup> 20-30-40%) P=308.2  
C<sub>17</sub>H<sub>25</sub>NO<sub>4</sub>; MF: 364; RMF: 999; Prob 49.7%; Lib: mona-export-fiehn\_hilic; ID: 241.

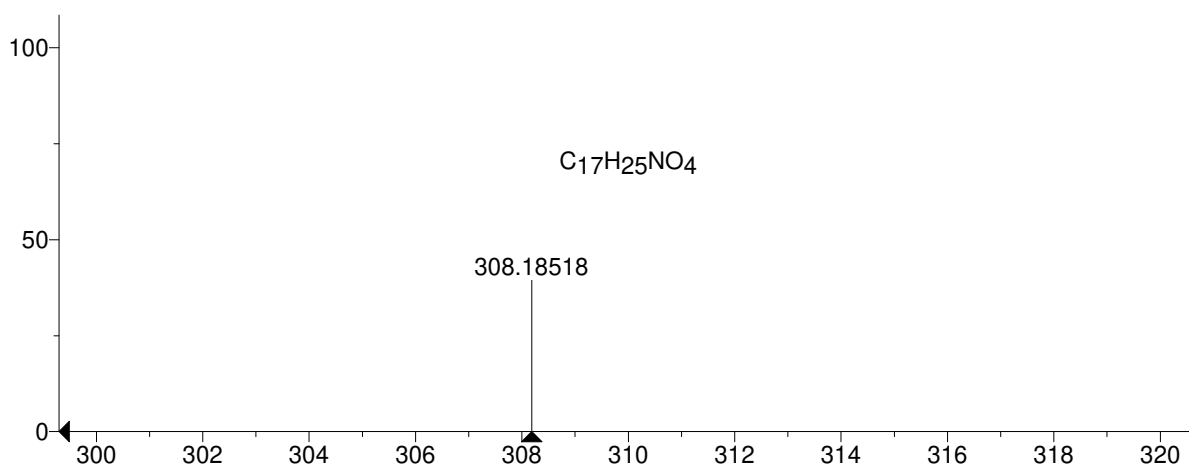

Hit 2 : Senecionine [M+H-CO]<sup>+</sup> HCD 36V P=308.2  
C<sub>18</sub>H<sub>25</sub>NO<sub>5</sub>; MF: 364; RMF: 999; Prob 49.7%; CAS: 130-01-8; Lib: nist\_msms; ID: 219415.

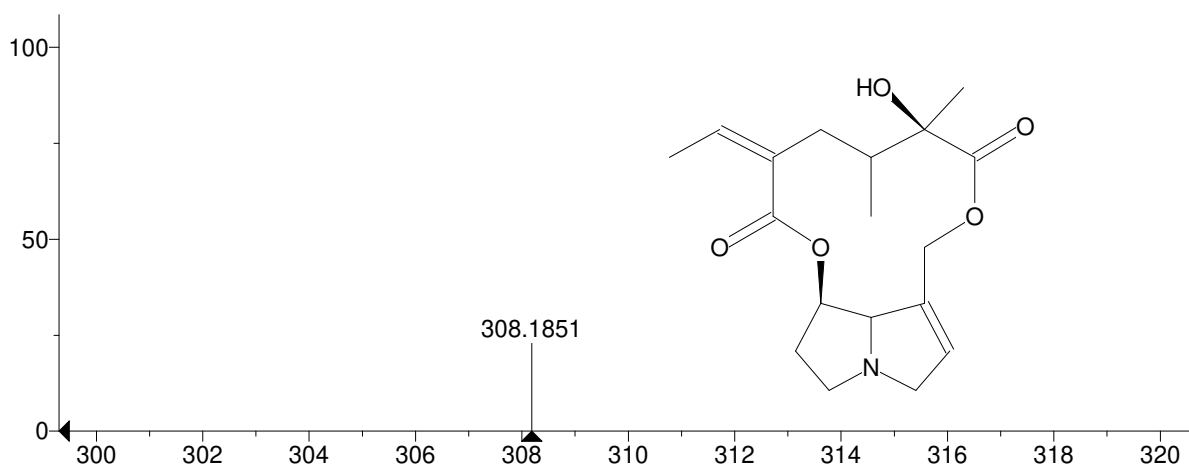

\*\* Search Report Page 2 of 2 \*\*

Hit 3 : Buflomedil HCl [M+H]<sup>+</sup> P=308.2  
C<sub>17</sub>H<sub>26</sub>ClNO<sub>4</sub>; MF: 87; RMF: 750; Prob 0.49%; Lib: mona-export-gnps; ID: 856.

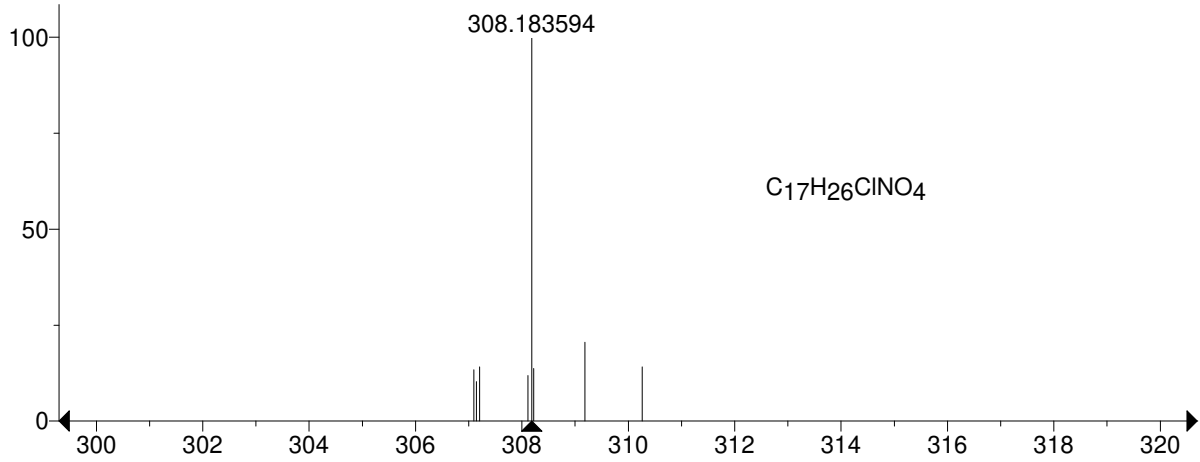

Hit 4 : Protein Kinase C (19-36) Peptide [M+7H]<sup>7+</sup> HCD 9eV P=308.2  
C<sub>93</sub>H<sub>159</sub>N<sub>35</sub>O<sub>24</sub>; MF: 4; RMF: 486; Prob 0.04%; Lib: nist\_msms2; ID: 47643.

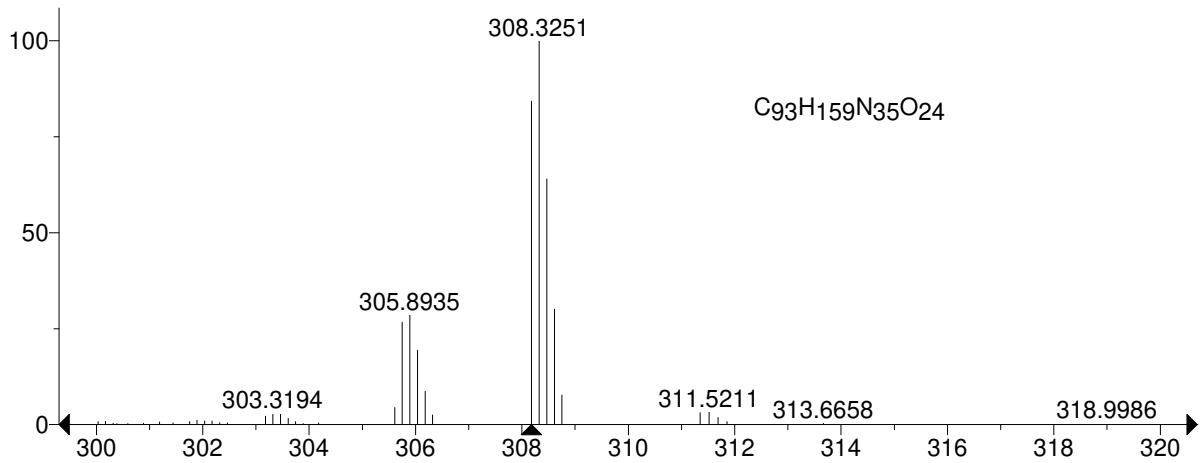

Hit 5 : Tulipinolide [M+NH<sub>4</sub>]<sup>+</sup> 35HCD P=308.2  
C<sub>17</sub>H<sub>22</sub>O<sub>4</sub>; MF: 1; RMF: 171; Prob 0.04%; Lib: mona-export-vf-npl\_qexactive; ID: 5902.

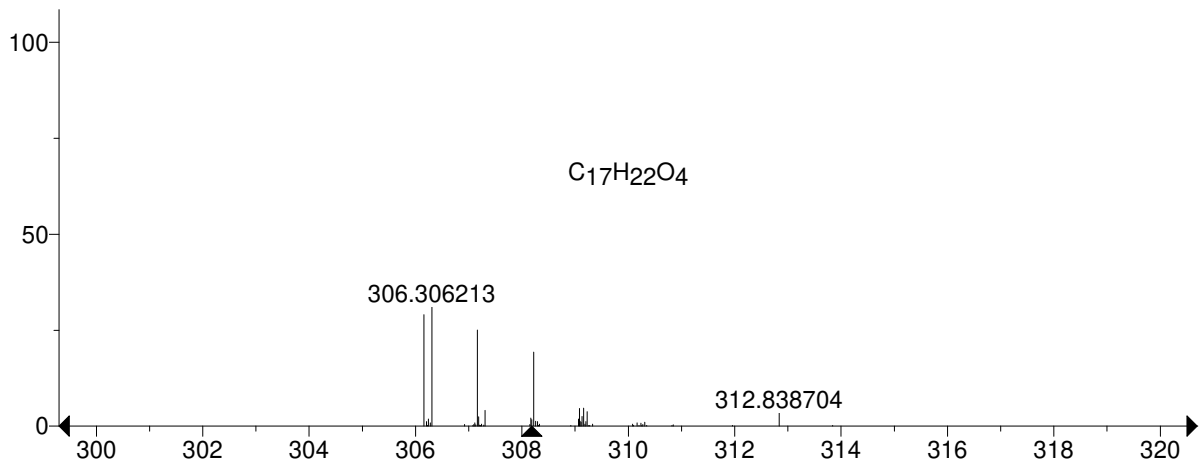

Unknown: Unknown (19.21\_365.1051m/z)  
Compound in Library Factor = -1523

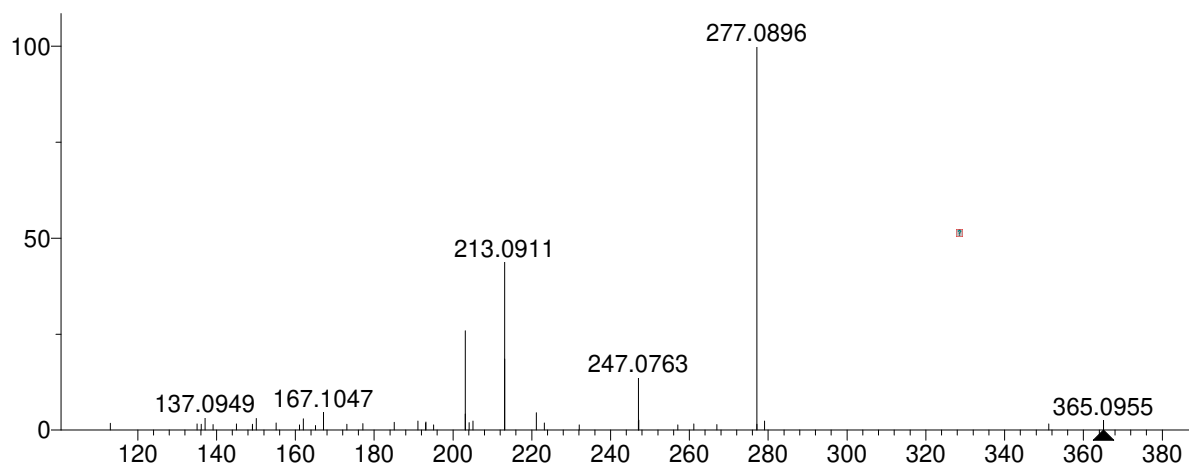

Hit 1 : Lactose [M+Na]<sup>+</sup> QTOF 16V P=365.1  
C<sub>12</sub>H<sub>22</sub>O<sub>11</sub>; MF: 123; RMF: 559; Prob 40.3%; CAS: 63-42-3; Lib: nist\_msms; ID: 28960.

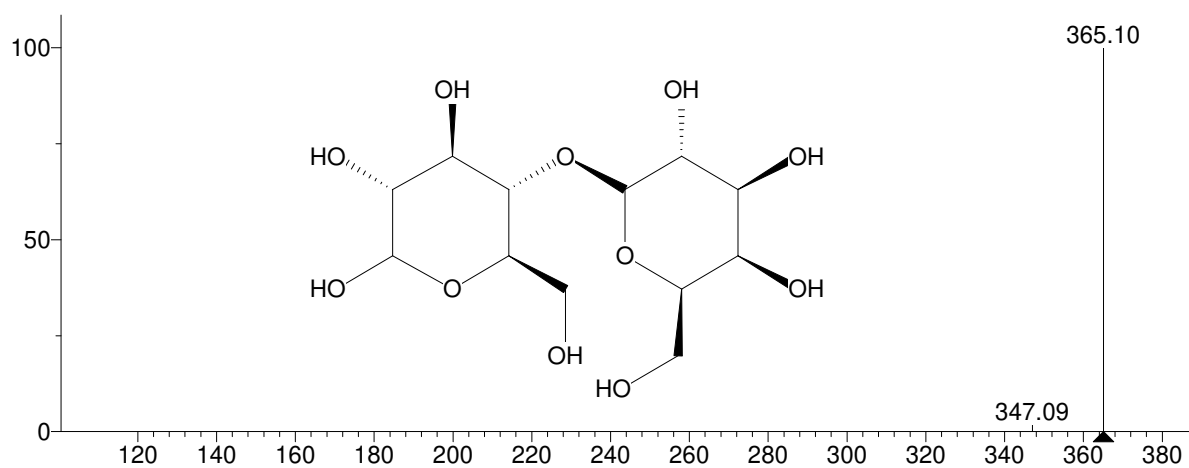

Hit 2 : Lactulose [M+Na]<sup>+</sup> QTOF 6V P=365.1  
C<sub>12</sub>H<sub>22</sub>O<sub>11</sub>; MF: 110; RMF: 547; Prob 26.0%; CAS: 4618-18-2; Lib: nist\_msms; ID: 30110.

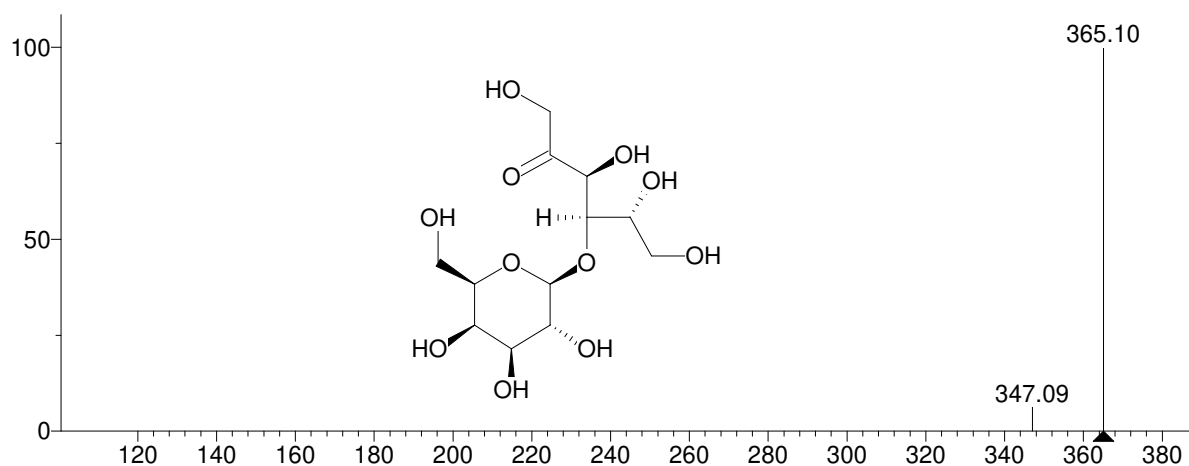

Hit 3 : 2 $\alpha$ -Mannobiose [M+Na]<sup>+</sup> QQQ 40V P=365.1  
C<sub>12</sub>H<sub>22</sub>O<sub>11</sub>; MF: 78; RMF: 265; Prob 6.95%; CAS: 15548-39-7; Lib: nist\_msms; ID: 59256.

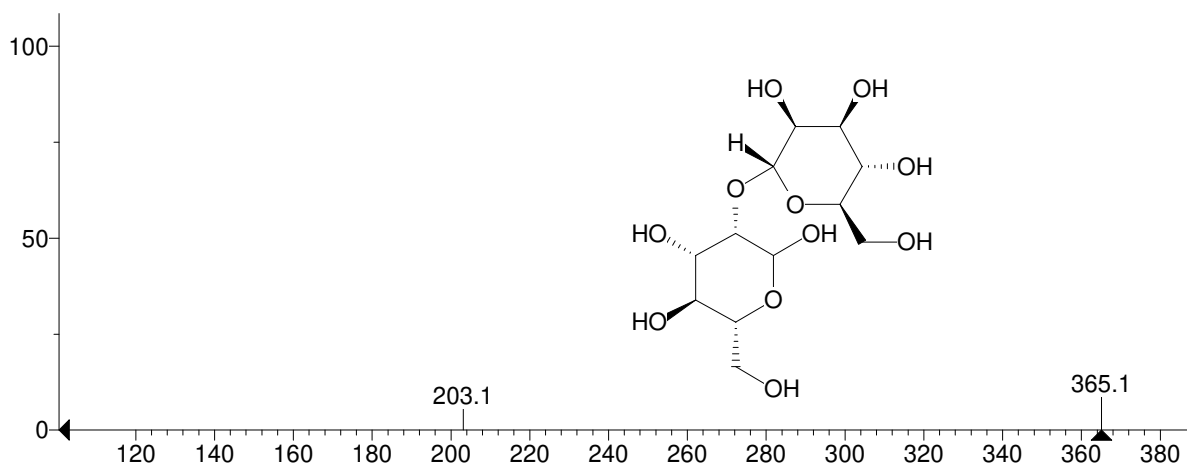

Hit 4 : Palatinose [M+Na]<sup>+</sup> QQQ 40V P=365.1  
C<sub>12</sub>H<sub>22</sub>O<sub>11</sub>; MF: 77; RMF: 281; Prob 6.68%; CAS: 13718-94-0; Lib: nist\_msms; ID: 58882.

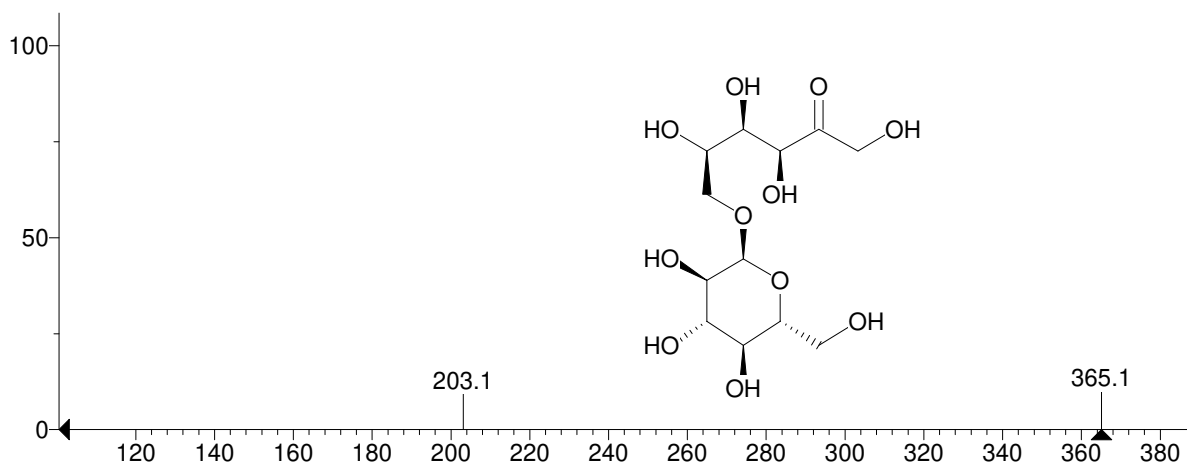

Hit 5 : D-(+)-Trehalose [M+Na]<sup>+</sup> QQQ 36V P=365.1  
C<sub>12</sub>H<sub>22</sub>O<sub>11</sub>; MF: 73; RMF: 308; Prob 5.64%; CAS: 99-20-7; Lib: nist\_msms; ID: 59149.

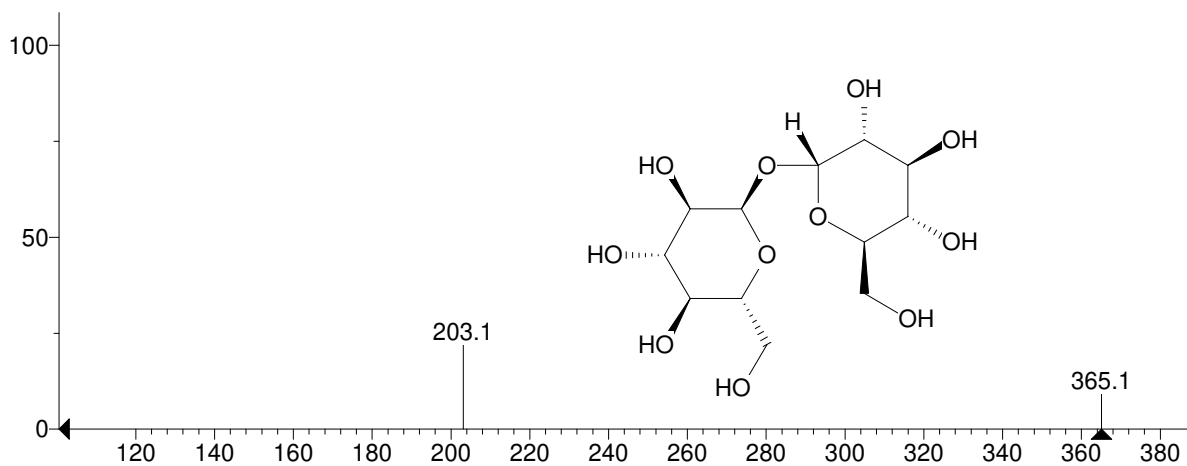

\*\* Search Report Page 1 of 2 \*\*

Unknown: Unknown (19.52\_407.1701m/z)  
Compound in Library Factor = 0

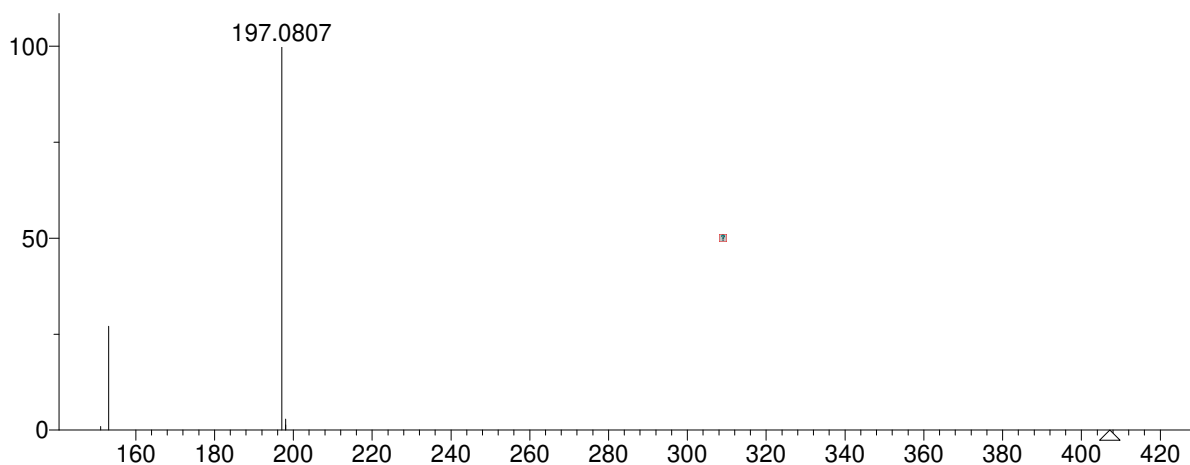

Hit 1 : [5-chloro-3-[(1E,3E)-3,5-dimethylhepta-1,3-dienyl]-7-methyl-6,8-dioxo-2H-isoquinolin-7-yl] acetate [M+NH<sub>4</sub><sup>+</sup>]  
C<sub>21</sub>H<sub>24</sub>ClNO<sub>4</sub>; MF: 0; RMF: 55; Prob 25.0%; Lib: mona-export-vf-npl\_qexactive; ID: 25203.

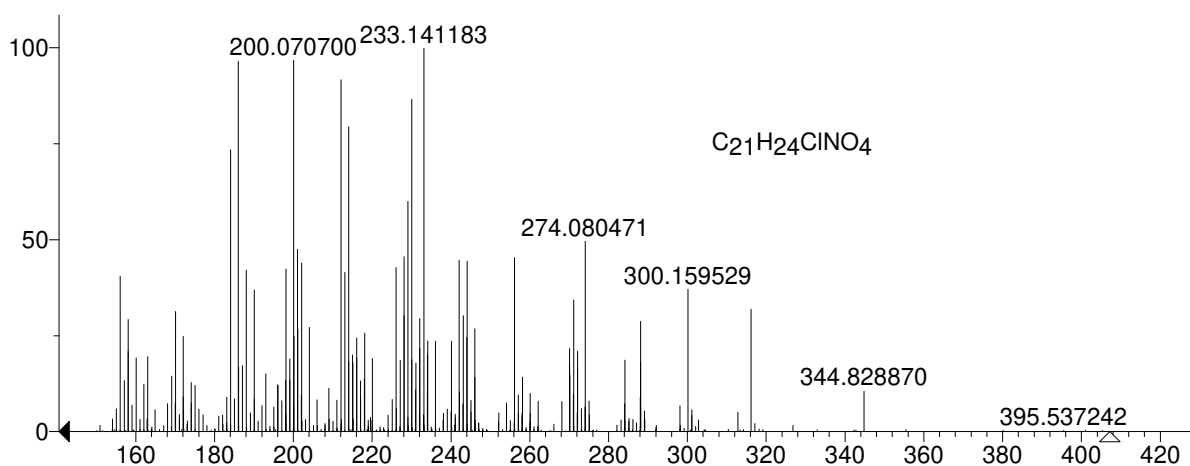

Hit 2 : Artesunate [M+Na]<sup>+</sup> HCD 32V P=407.2  
C<sub>19</sub>H<sub>28</sub>O<sub>8</sub>; MF: 0; RMF: 13; Prob 25.0%; CAS: 88495-63-0; Lib: nist\_msms; ID: 119196.

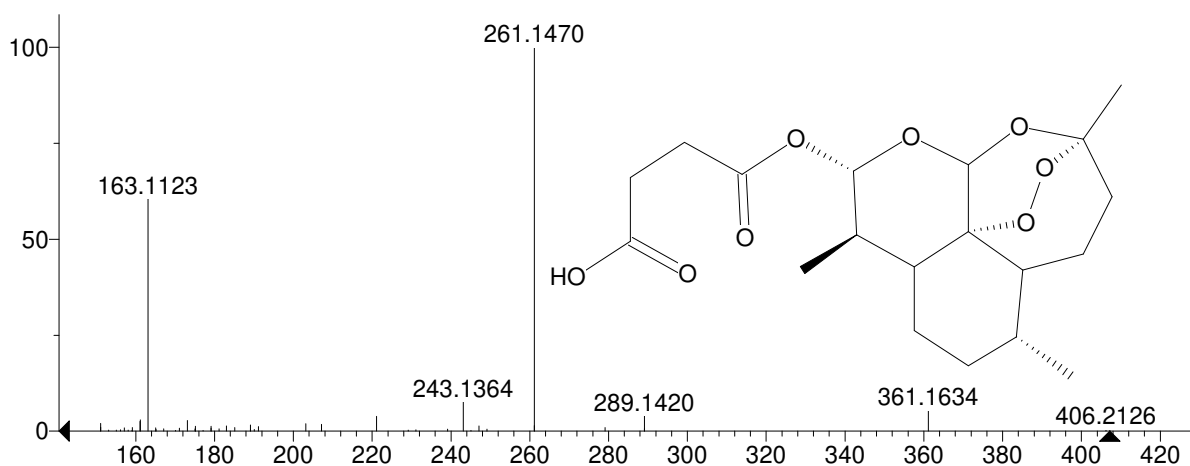

Hit 3 : Cys-Glu-Arg [M+H]<sup>+</sup> QTOF 30V P=407.2  
C<sub>14</sub>H<sub>26</sub>N<sub>6</sub>O<sub>6</sub>S; MF: 0; RMF: 12; Prob 25.0%; Lib: nist\_msms; ID: 49547.

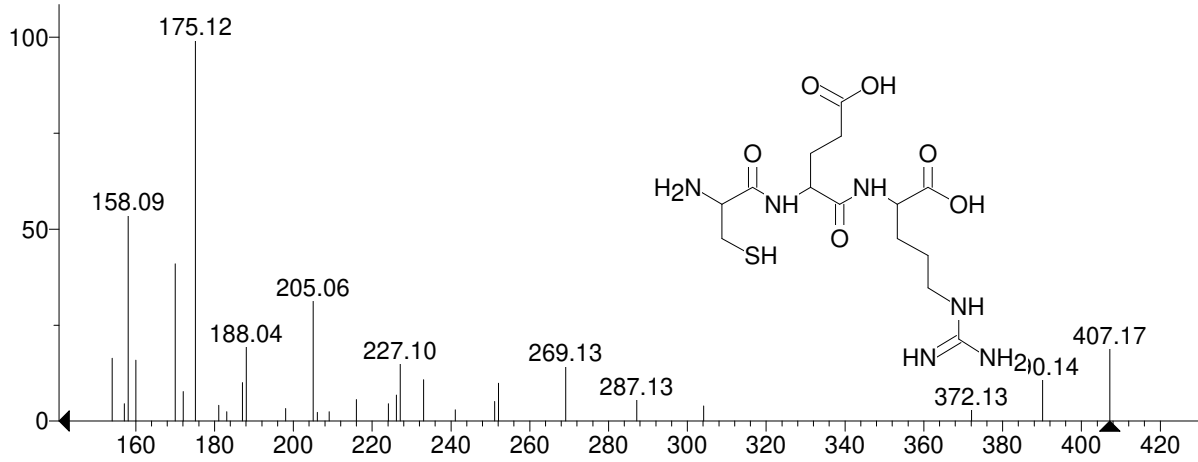

Hit 4 : Glu-Cys-Arg [M+H]<sup>+</sup> QTOF 27V P=407.2  
C<sub>14</sub>H<sub>26</sub>N<sub>6</sub>O<sub>6</sub>S; MF: 0; RMF: 10; Prob 25.0%; Lib: nist\_msms; ID: 55676.

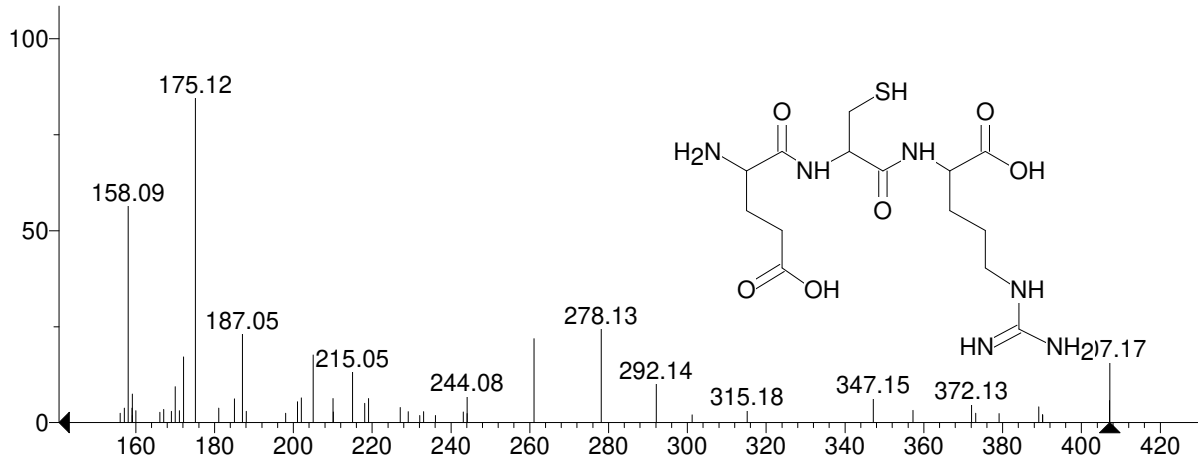

Unknown: Unknown (19.56\_459.2589m/z)  
Compound in Library Factor = -226

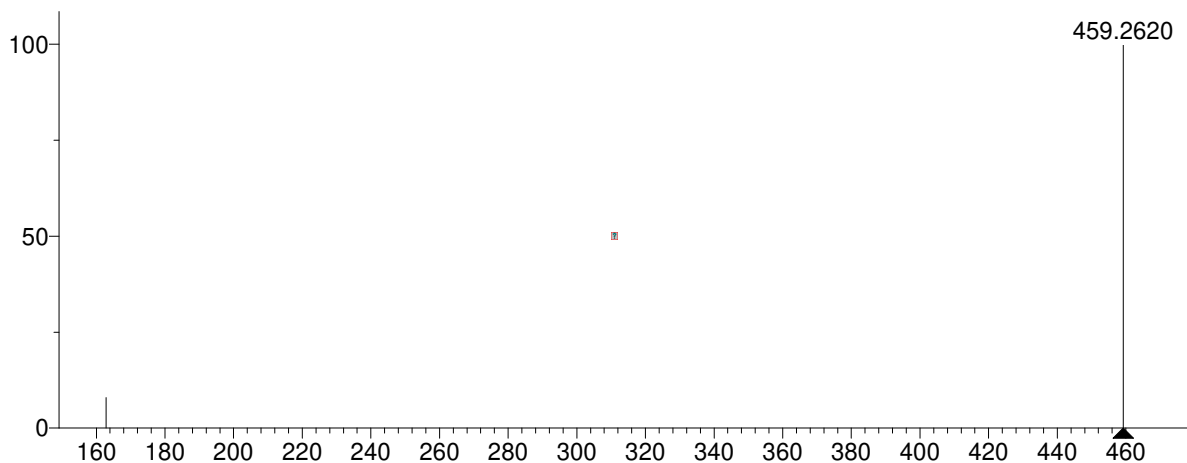

Hit 1 :  $\beta$ -Lipotropin (88-91) [M-H]<sup>-</sup> HCD 16eV P=459.3  
C<sub>19</sub>H<sub>36</sub>N<sub>6</sub>O<sub>7</sub>; MF: 316; RMF: 950; Prob 99.0%; CAS: 72189-84-5; Lib: nist\_msms2; ID: 72157.

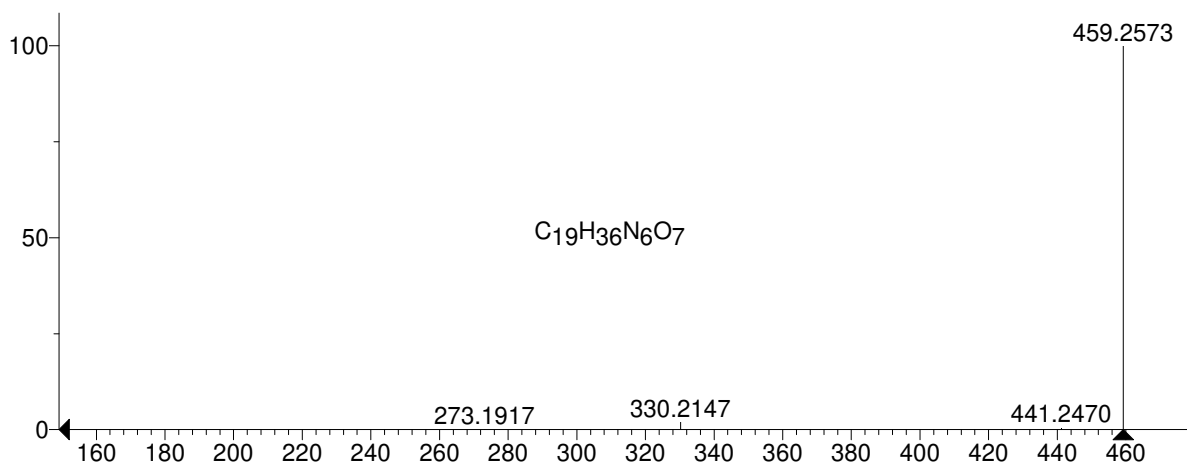

Hit 2 : Astemizole [M+H]<sup>+</sup> HCD 24V P=459.3  
C<sub>28</sub>H<sub>31</sub>N<sub>4</sub>O; MF: 55; RMF: 753; Prob 0.99%; CAS: 68844-77-9; Lib: nist\_msms; ID: 129929.

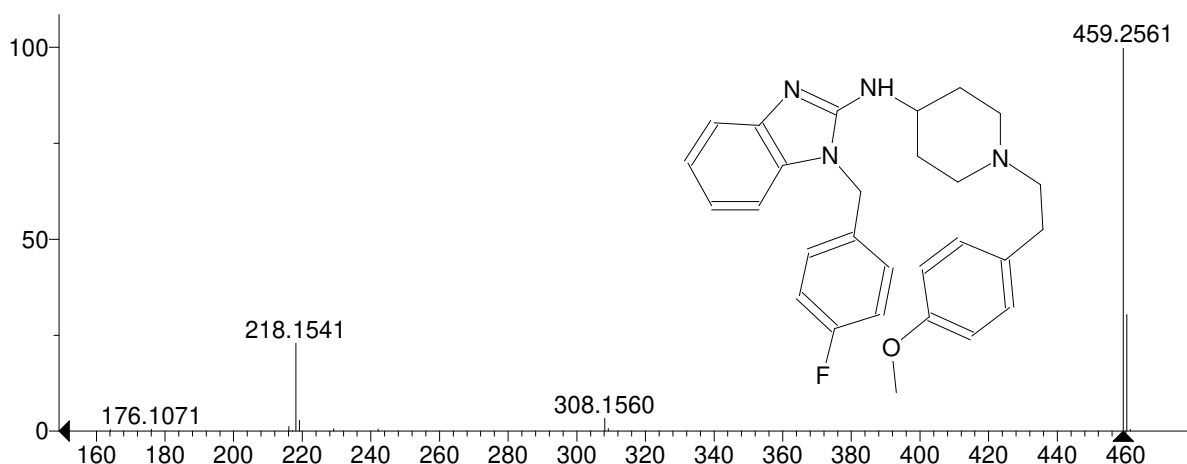



\*\* Search Report Page 1 of 2 \*\*

Unknown: Unknown (19.67\_511.2001m/z)  
Compound in Library Factor = -3273

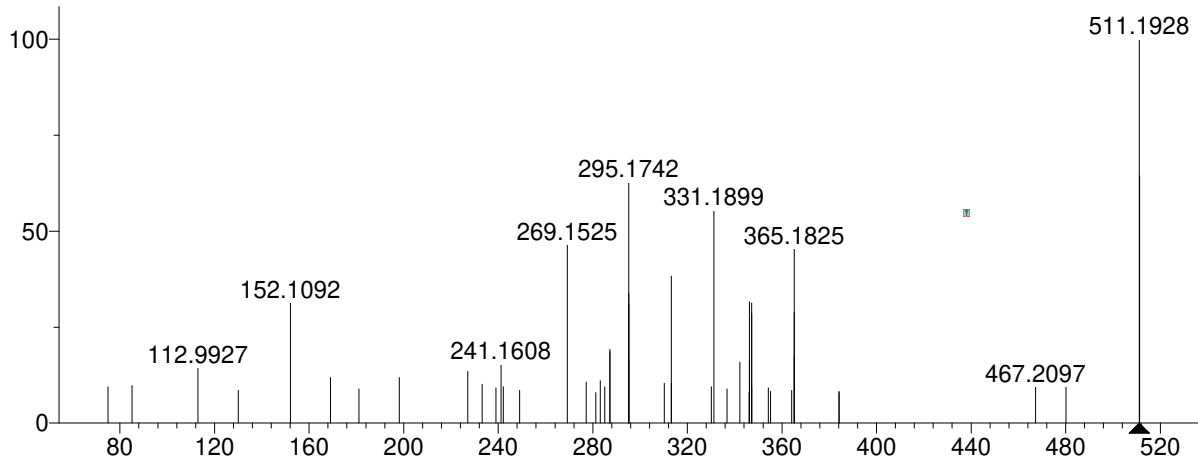

Hit 1 : Ganciclovir [2M+H]<sup>+</sup> HCD 5V P=511.2  
C<sub>9</sub>H<sub>13</sub>N<sub>5</sub>O<sub>4</sub>; MF: 8; RMF: 220; Prob 40.1%; CAS: 82410-32-0; Lib: nist\_msms; ID: 263891.

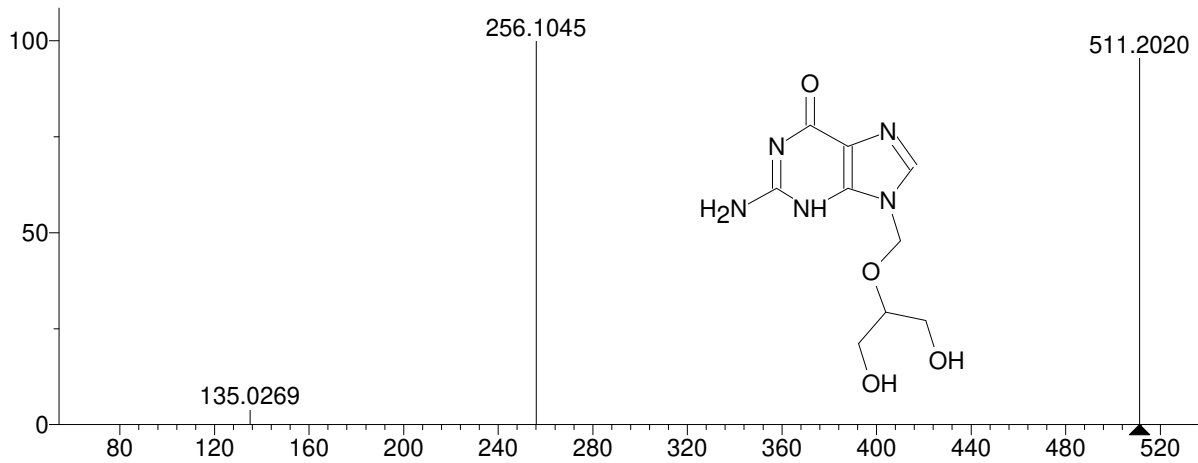

Hit 2 : Pluripotin [M+H]<sup>+</sup>=>511.2 IT 35% P=511.2  
C<sub>27</sub>H<sub>25</sub>F<sub>3</sub>N<sub>8</sub>O<sub>2</sub>; MF: 0; RMF: 18; Prob 29.9%; CAS: 839707-37-8; Lib: nist\_msms; ID: 156609.

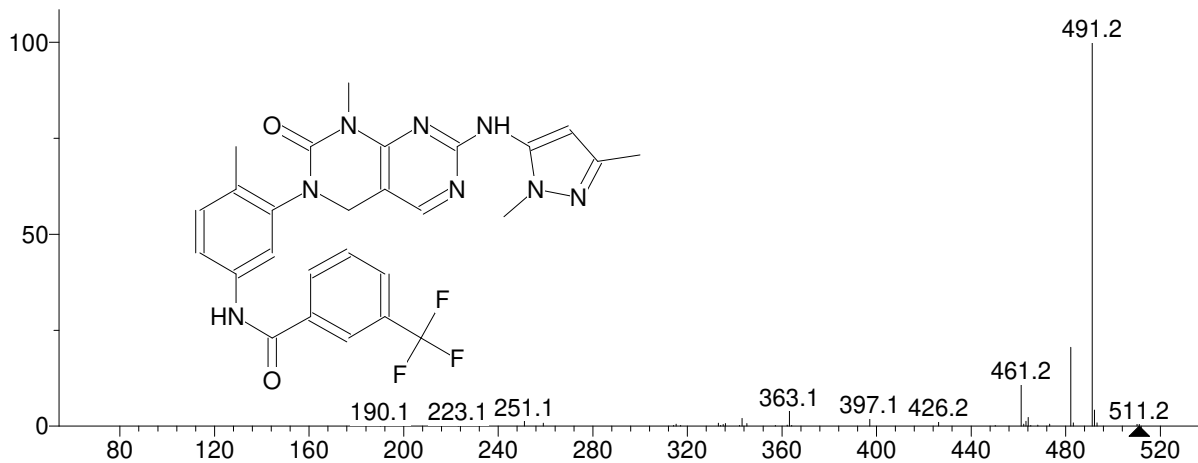

\*\* Search Report Page 2 of 2 \*\*

Hit 3 : 5-Heptenoic acid, 7-[(1R,2R,3R,5S)-3,5-dihydroxy-2-[(3R)-3-hydroxy-5-phenylpentyl]cyclopentyl]-, 4-(3-thio-  
C<sub>32</sub>H<sub>38</sub>O<sub>5</sub>S<sub>3</sub>; MF: 0; RMF: 14; Prob 29.9%; CAS: 1088434-86-9; Lib: nist\_msms; ID: 262366.

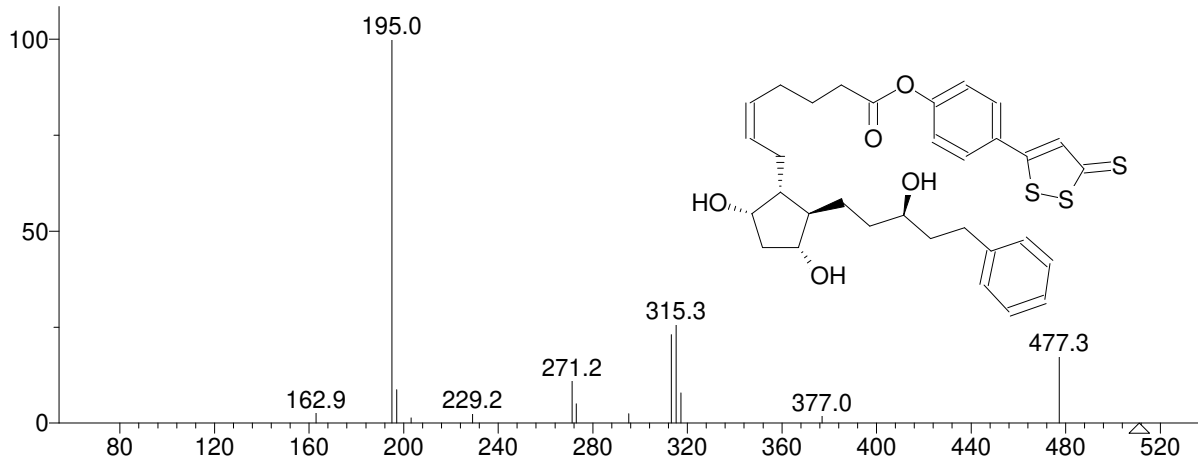

\*\* Search Report Page 1 of 2 \*\*

Unknown: Unknown (19.68\_291.1227m/z)  
Compound in Library Factor = -1523

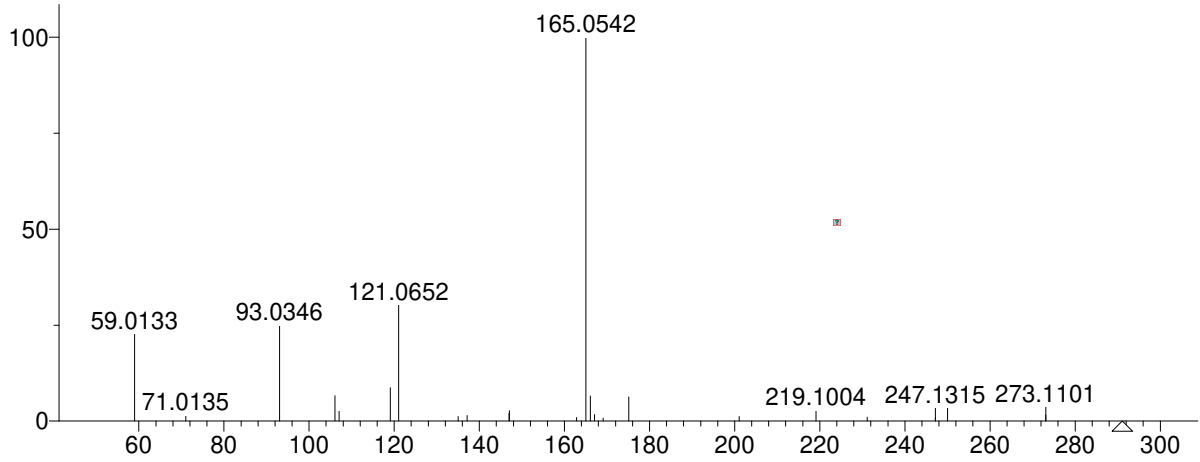

Hit 1 : 2-Cyclopentene-1-octanoic acid, 5-(2-carboxyethyl)- $\epsilon$ ,4-dioxo-, (1S,5R)- [M-H-H<sub>2</sub>O]- IT-FT 35% P=291.1  
C<sub>16</sub>H<sub>22</sub>O<sub>6</sub>; MF: 68; RMF: 256; Prob 30.5%; CAS: 52510-53-9; Lib: nist\_msms; ID: 551876.

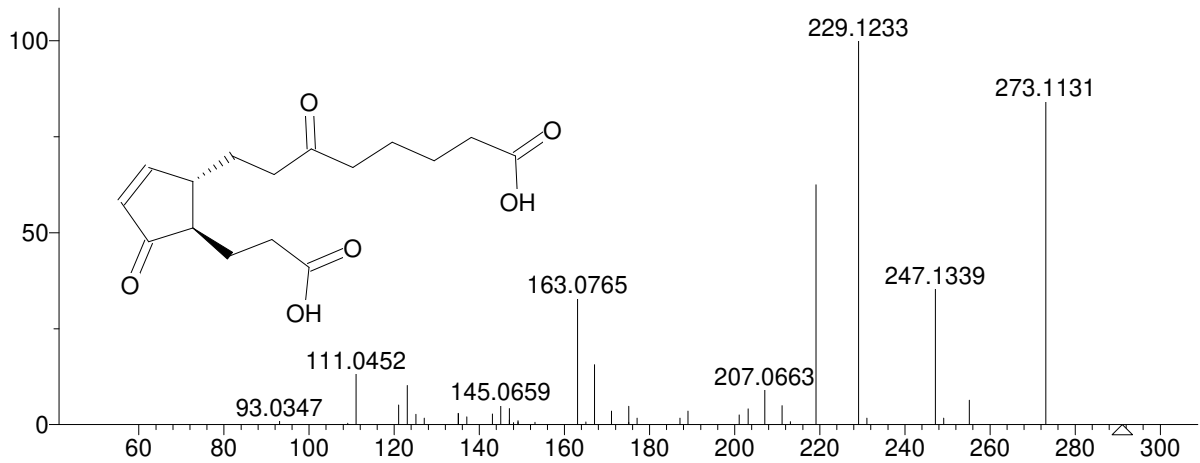

Hit 2 : Cyclopenta[b]pyran-5-octanoic acid, octahydro- $\epsilon$ ,2,6-trioxo-, (4aR,5R,7aS)- [M-H-H<sub>2</sub>O]- HCD 32V P=29  
C<sub>16</sub>H<sub>22</sub>O<sub>6</sub>; MF: 27; RMF: 217; Prob 6.95%; Lib: nist\_msms; ID: 377569.

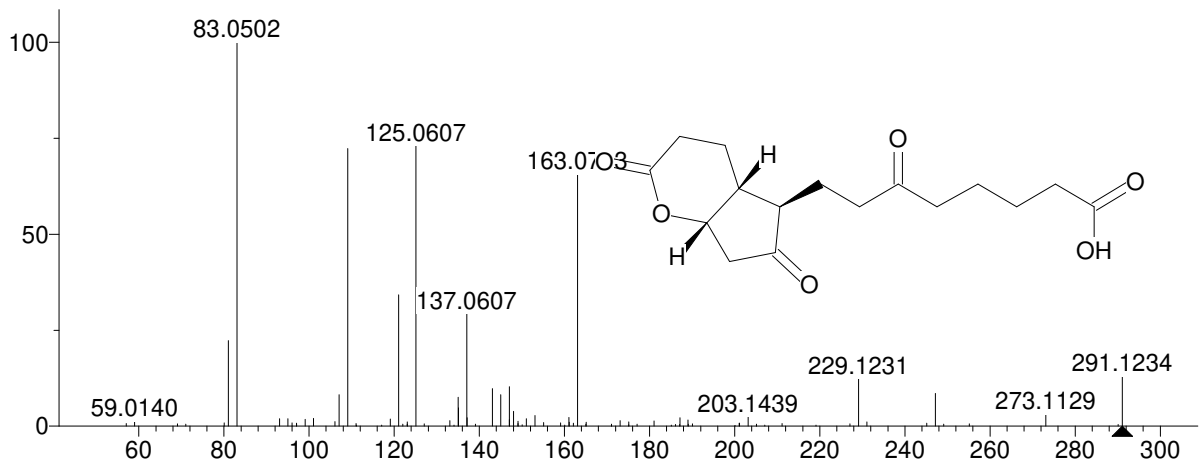

Hit 3 : Tetranorprostaglandin J2 [M-H-H<sub>2</sub>O]- HCD 26V P=291.1  
C<sub>16</sub>H<sub>22</sub>O<sub>6</sub>; MF: 27; RMF: 210; Prob 6.95%; CAS: 1352751-83-7; Lib: nist\_msms; ID: 377420.

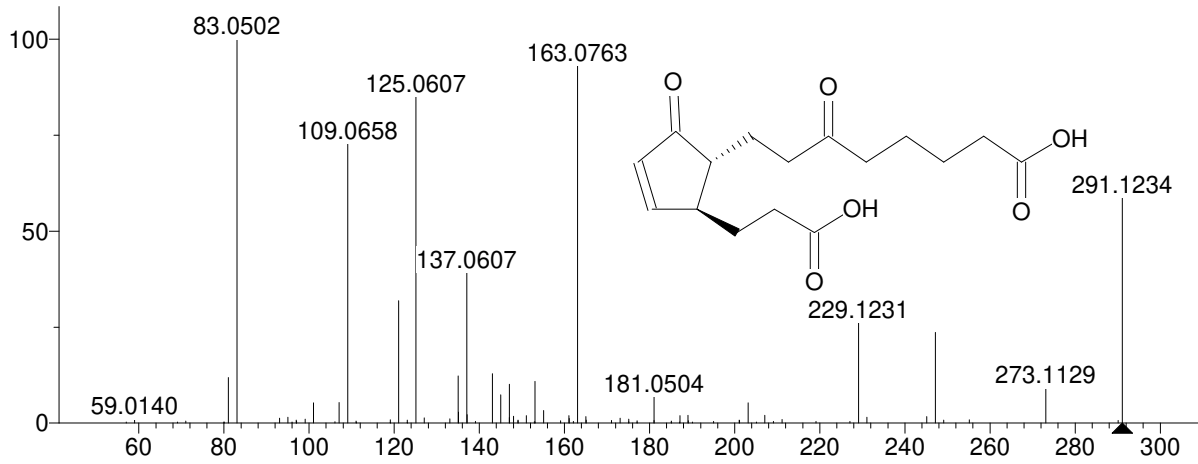

Hit 4 : 8-(2-hydroxy-3-methoxy-3-methylbutyl)-7-methoxychromen-2-one [M-H]- 35HCD P=291.1  
C<sub>16</sub>H<sub>20</sub>O<sub>5</sub>; MF: 23; RMF: 242; Prob 5.87%; Lib: mona-export-1c-ms-ms\_negative\_mode; ID: 19661.

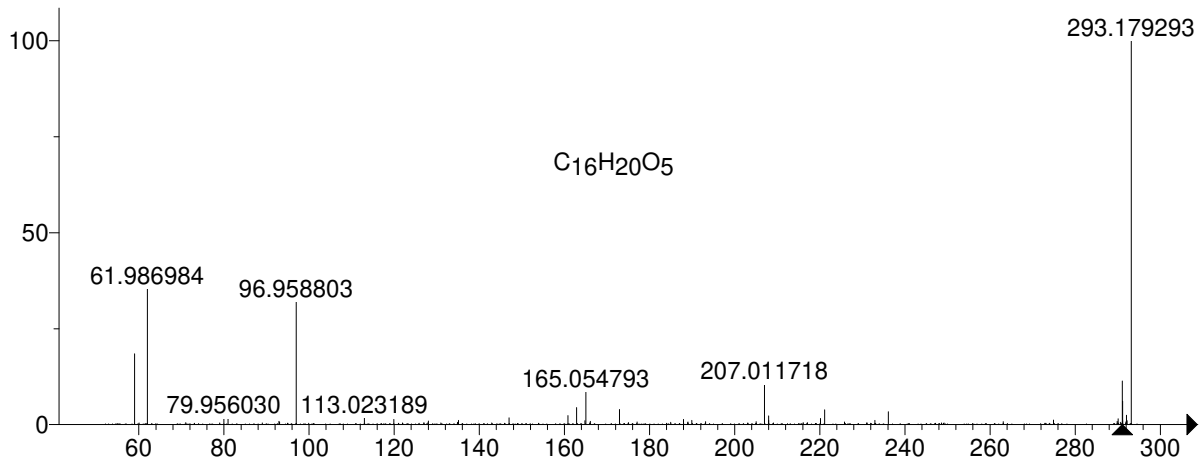

Hit 5 : 4'-O-β-D-Glucosyl-5-O-methylvisamminol [M+H-C<sub>6</sub>H<sub>10</sub>O<sub>5</sub>]+ IT 35% P=291.1  
C<sub>22</sub>H<sub>28</sub>O<sub>10</sub>; MF: 10; RMF: 170; Prob 3.79%; CAS: 84272-85-5; Lib: nist\_msms; ID: 236324.

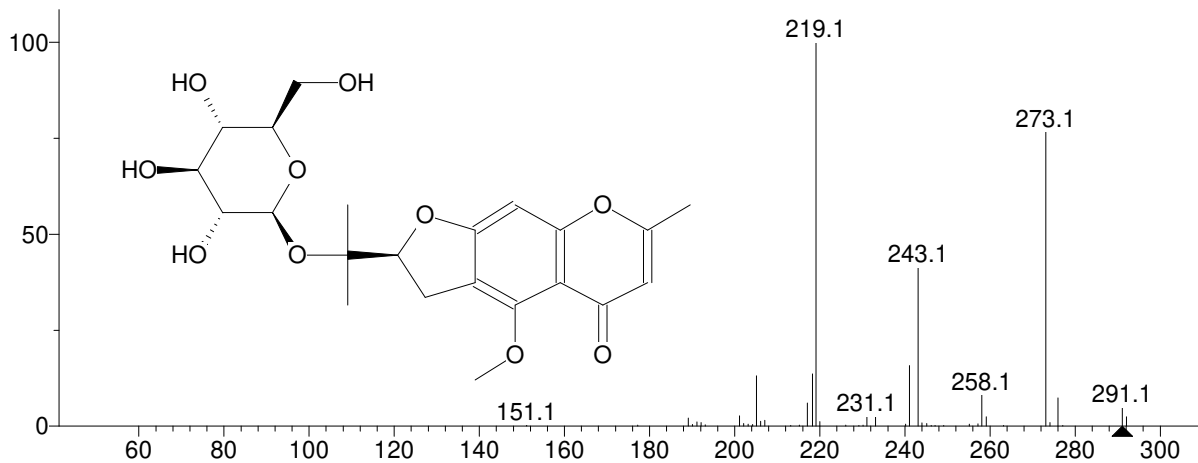

Unknown: Unknown (19.78\_400.1751m/z)  
Compound in Library Factor = -301

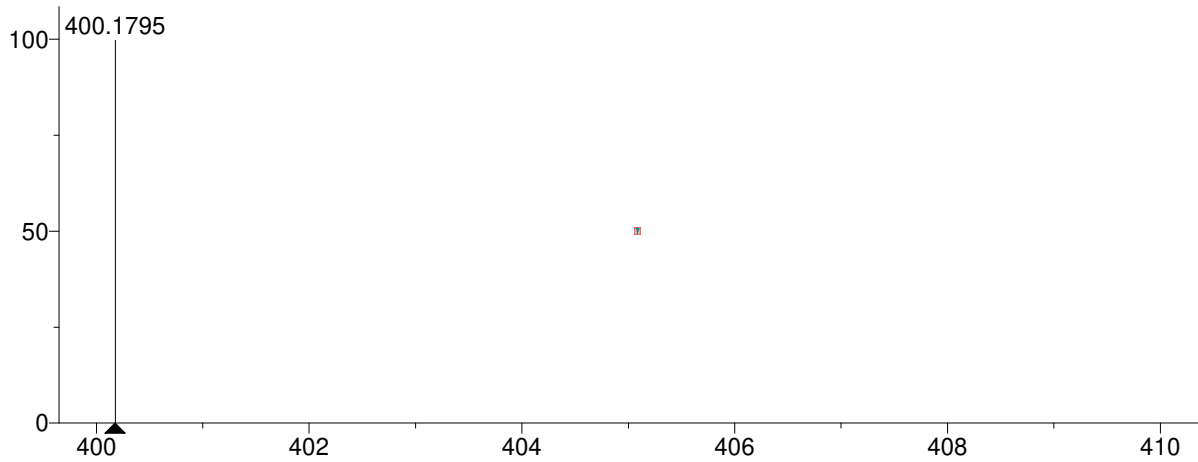

Hit 1 : LPC 6:0; [M+FA-H]- [M+FA-H]- P=400.2  
C<sub>14</sub>H<sub>30</sub>NO<sub>7</sub>P; MF: 364; RMF: 999; Prob 33.1%; Lib: msdial-insilicomsm-lipids-neg; ID: 310902.

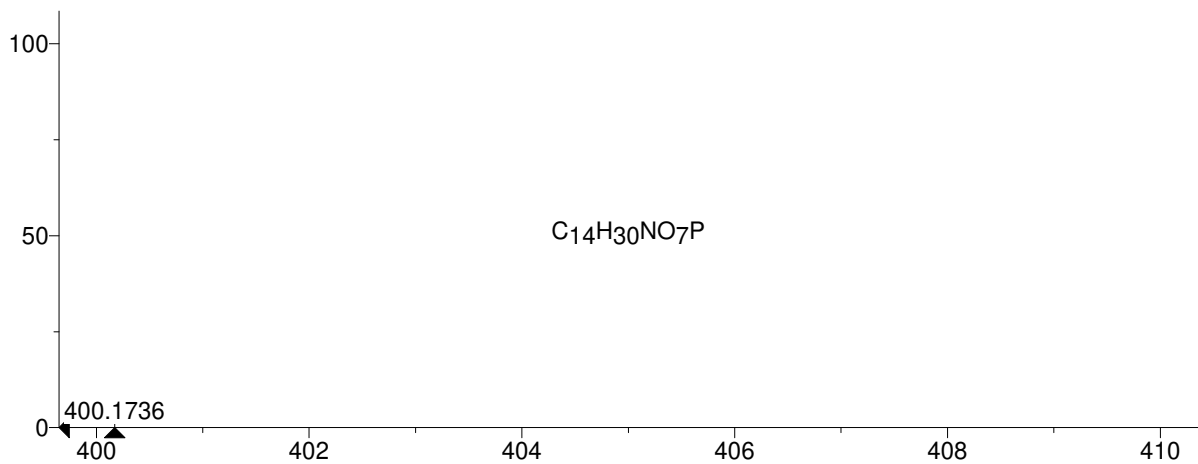

Hit 2 : LPC 5:0; [M+Hac-H]- [M+Hac-H]- P=400.2  
C<sub>13</sub>H<sub>28</sub>NO<sub>7</sub>P; MF: 364; RMF: 999; Prob 33.1%; Lib: msdial-insilicomsm-lipids-neg; ID: 310962.

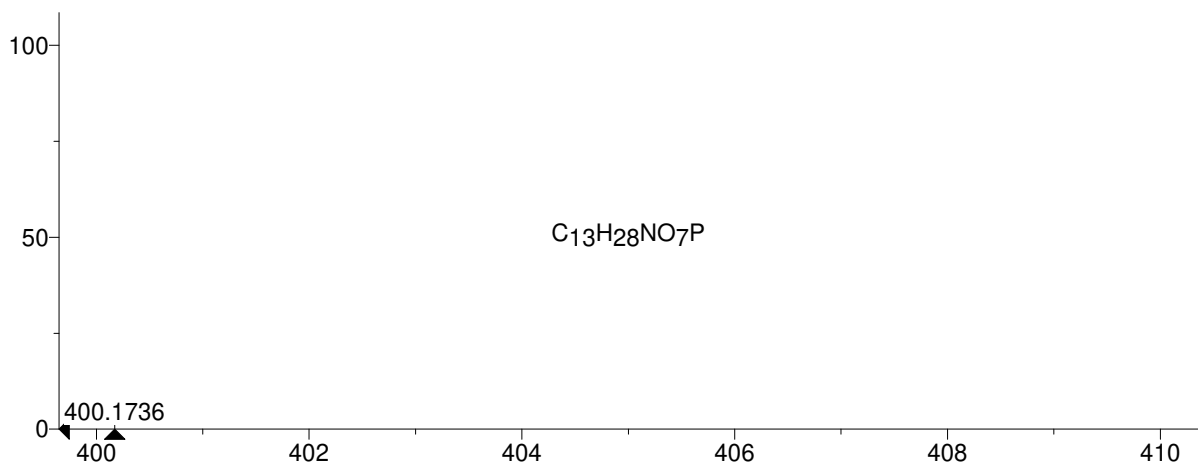

Hit 3 : Colchicine [M+H]<sup>+</sup> HCD 40V P=400.2  
C<sub>22</sub>H<sub>25</sub>NO<sub>6</sub>; MF: 364; RMF: 999; Prob 33.1%; CAS: 64-86-8; Lib: nist\_msms; ID: 126601.

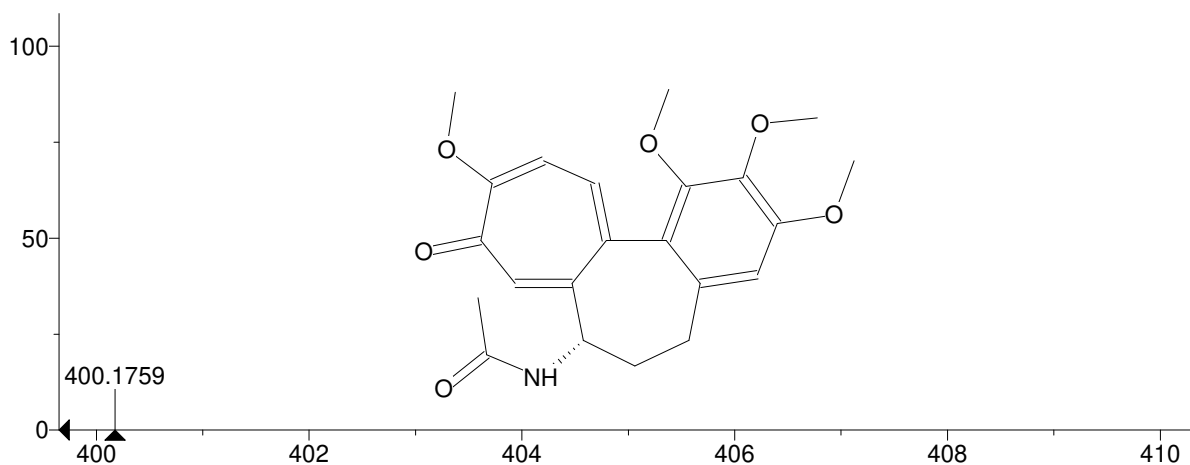

Hit 4 : NCGC00025125-21!N-[(7S)-1,2,3,10-tetramethoxy-9-oxo-6,7-dihydro-5H-benzo[a]heptalen-7-yl]acetamide  
C<sub>22</sub>H<sub>25</sub>NO<sub>6</sub>; MF: 195; RMF: 918; Prob 0.74%; Lib: mona-export-gnps; ID: 6932.

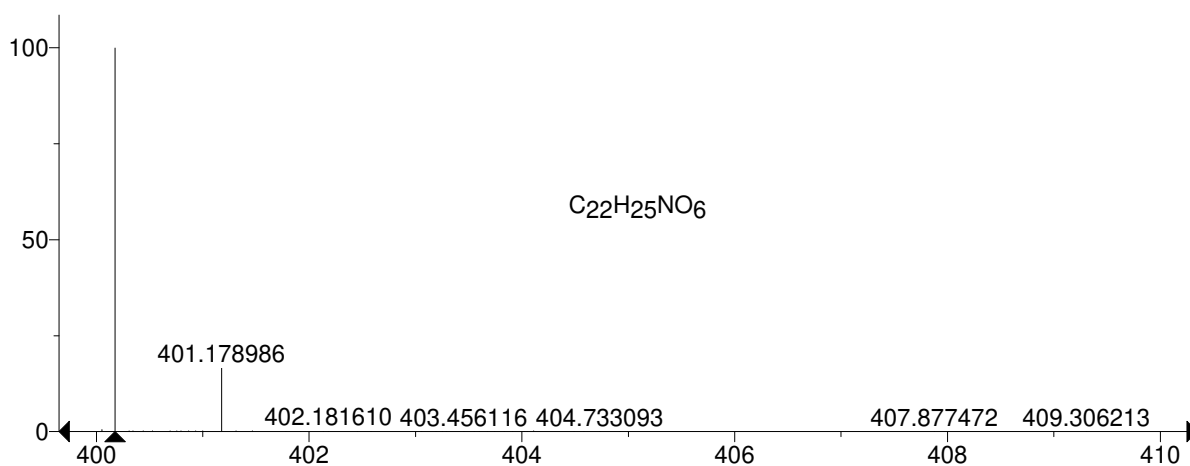

Hit 5 : NCGC00380314-01\_C<sub>22</sub>H<sub>27</sub>NO<sub>7</sub>\_3,5,7,9-Undecatetraenoic acid, 2-ethylidene-11-[4-hydroxy-4-(2-hydroxy)]  
C<sub>22</sub>H<sub>27</sub>NO<sub>7</sub>; MF: 2; RMF: 239; Prob 0.01%; Lib: mona-export-gnps; ID: 10356.

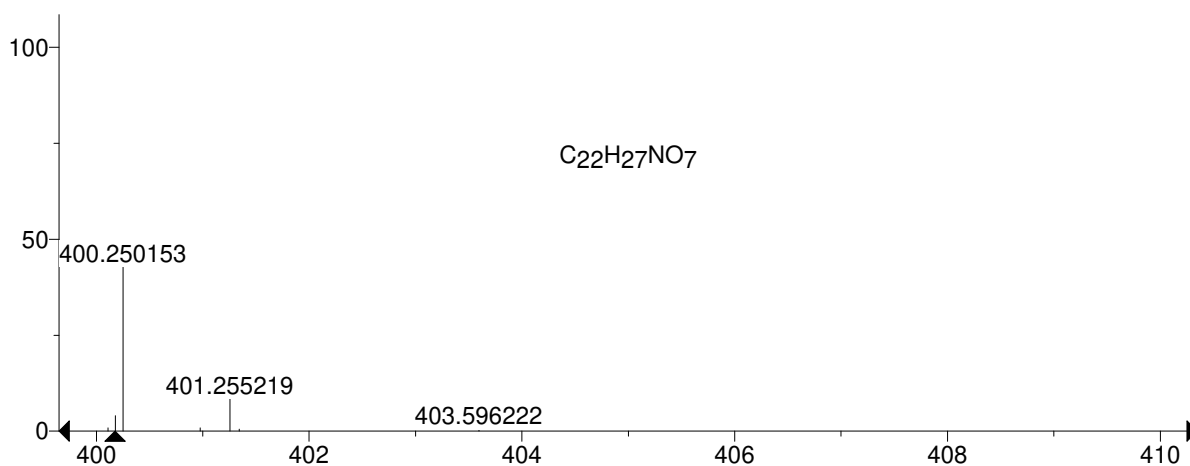

\*\* Search Report Page 1 of 2 \*\*

Unknown: Unknown (19.84\_303.2169m/z)  
Compound in Library Factor = -2176

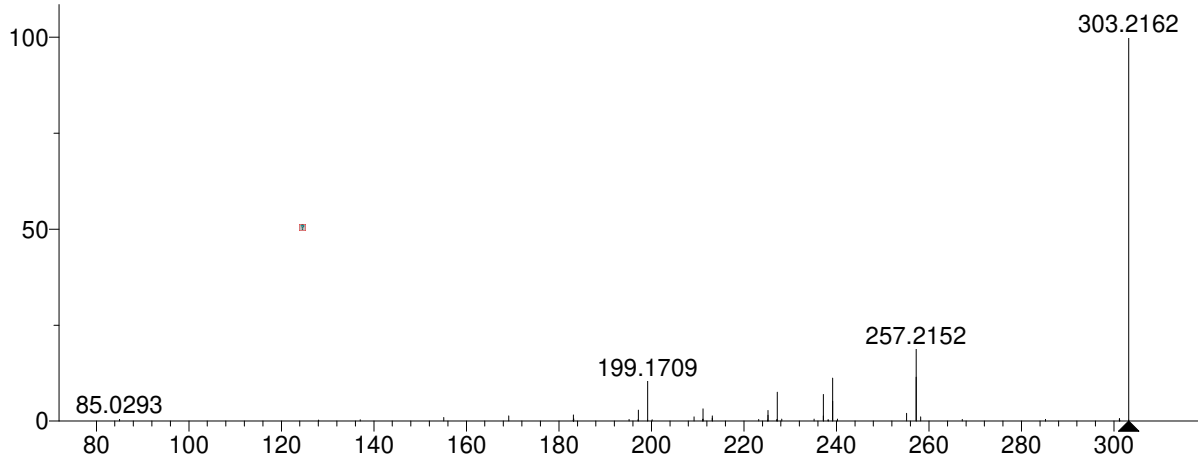

Hit 1 : Aleuritic acid [M-H]<sup>-</sup> IT-FT 35% P=303.2  
C<sub>16</sub>H<sub>32</sub>O<sub>5</sub>; MF: 58; RMF: 232; Prob 55.7%; CAS: 533-87-9; Lib: nist\_msms; ID: 411121.

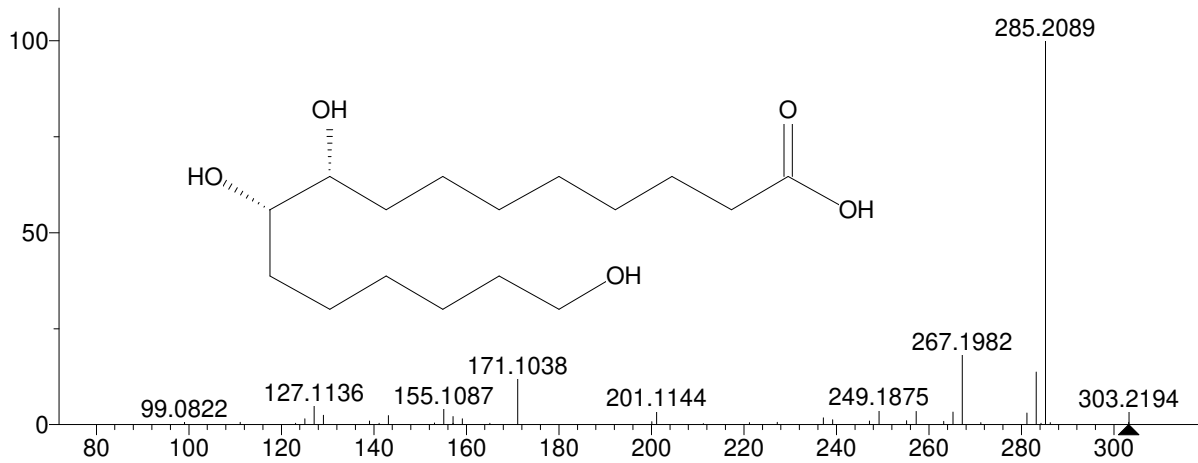

Hit 2 : Arg-Lys [M+H]<sup>+</sup> QTOF 5V P=303.2  
C<sub>12</sub>H<sub>26</sub>N<sub>6</sub>O<sub>3</sub>; MF: 30; RMF: 592; Prob 16.1%; CAS: 40968-46-5; Lib: nist\_msms; ID: 55168.

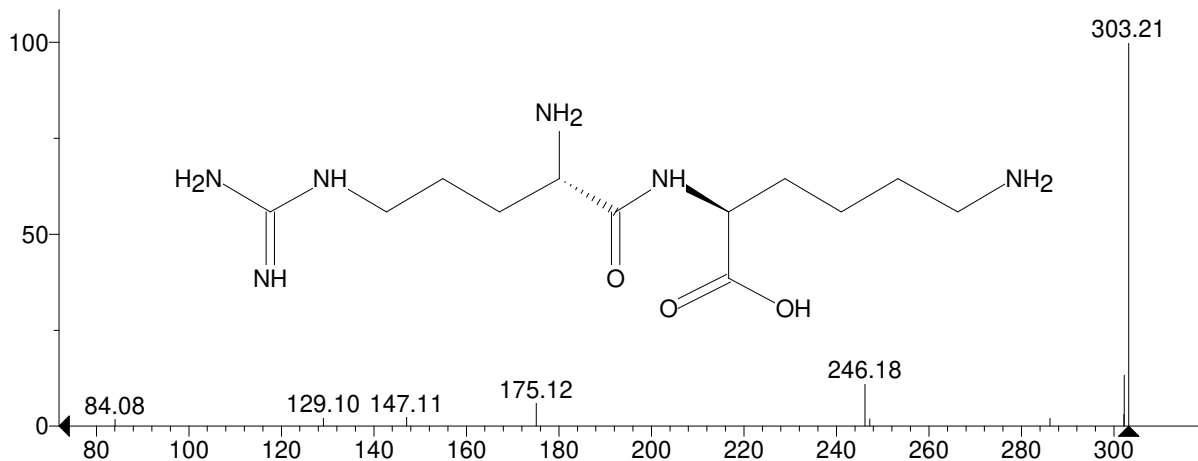

Hit 3 : Aleuretic Acid [M-H]- 35HCD P=303.2

C<sub>16</sub>H<sub>32</sub>O<sub>5</sub>; MF: 28; RMF: 609; Prob 14.9%; Lib: mona-export-lc-ms-ms\_negative\_mode; ID: 20798.

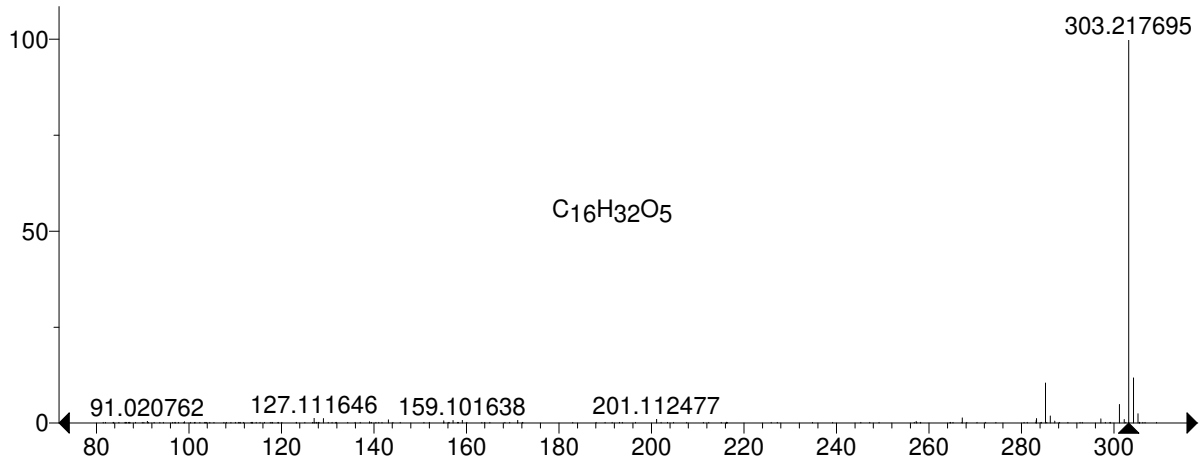

Hit 4 : Lys-Arg [M+H]+ QTOF 8V P=303.2

C<sub>12</sub>H<sub>26</sub>N<sub>6</sub>O<sub>3</sub>; MF: 9; RMF: 669; Prob 7.21%; Lib: nist\_msms; ID: 48416.

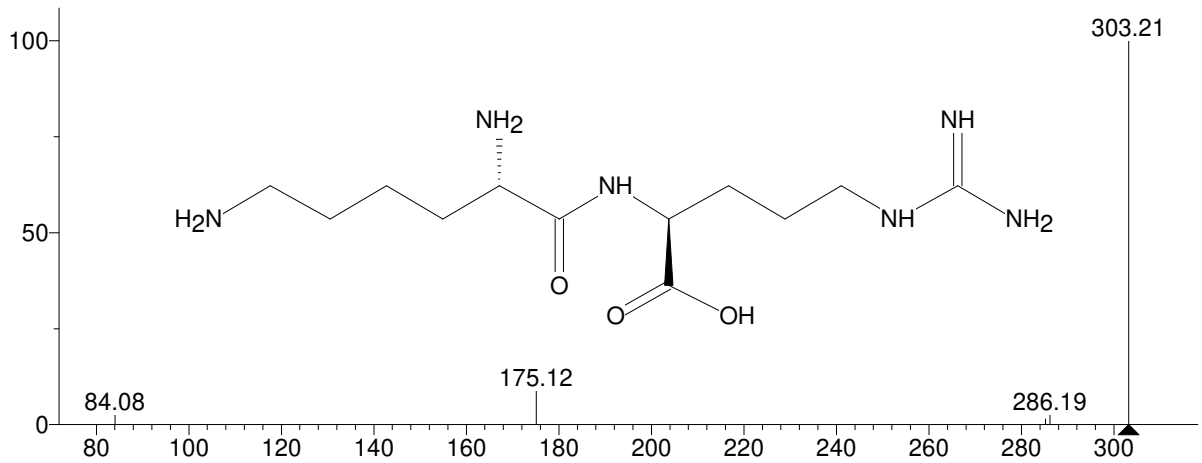

Hit 5 : Lys-Arg [M+H]+ IT-FT 35% P=303.2

C<sub>12</sub>H<sub>26</sub>N<sub>6</sub>O<sub>3</sub>; MF: 5; RMF: 119; Prob 6.09%; CAS: 29586-66-1; Lib: nist\_msms2; ID: 41410.

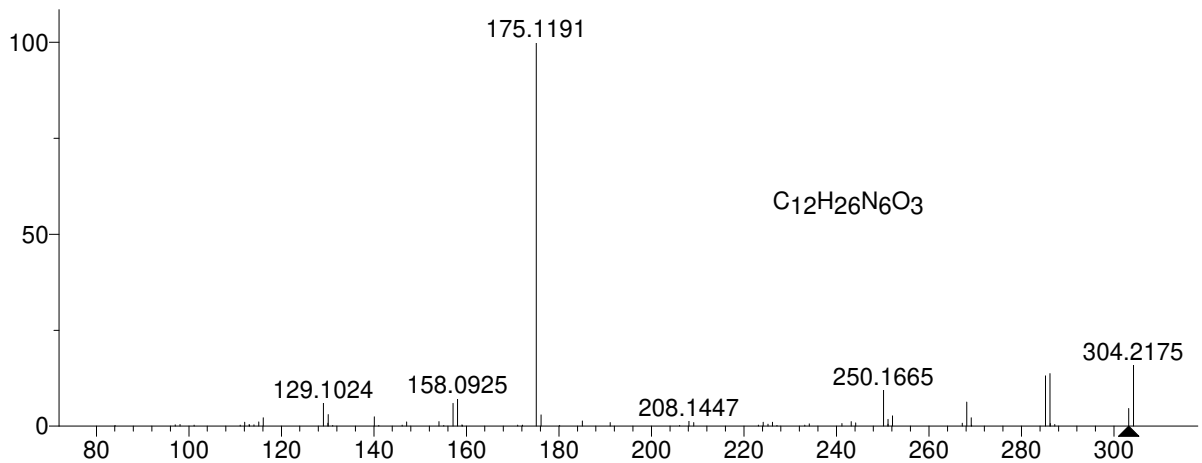



\*\* Search Report Page 1 of 2 \*\*

Unknown: Unknown (19.85\_351.0895m/z)  
Compound in Library Factor = -1142

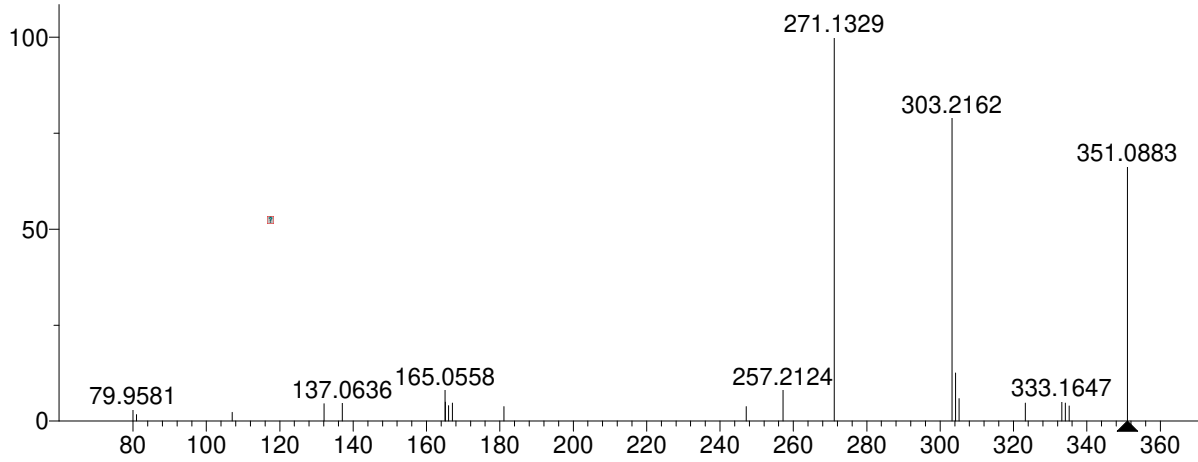

Hit 1 : Spinosine [M+H-C8H18O9]+ HCD 21V P=351.1  
C28H32O15; MF: 77; RMF: 730; Prob 79.4%; CAS: 72063-39-9; Lib: nist\_msms; ID: 237126.

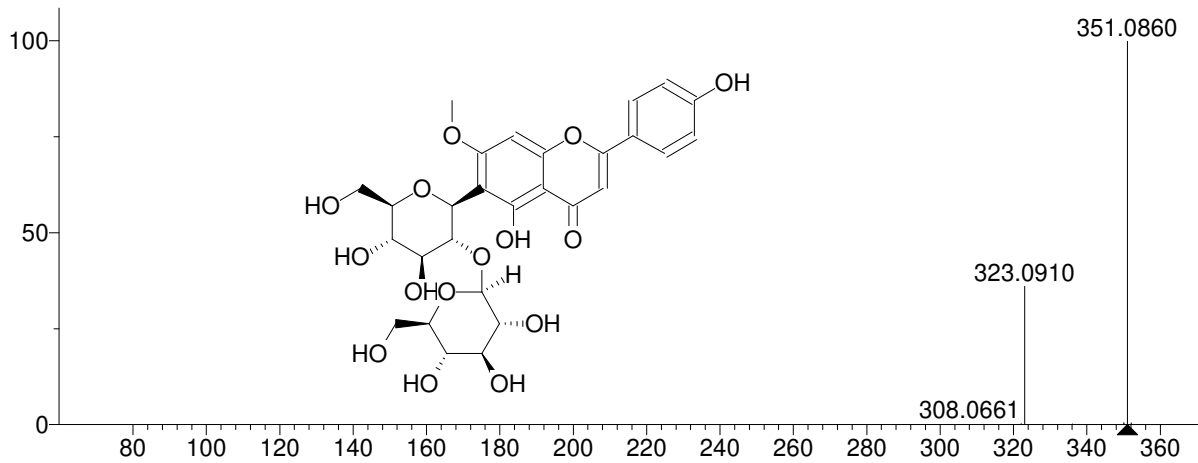

Hit 2 : NCGC00169972-02!3,6-dihydroxy-8-methoxy-3-methyl-2,4-dihydrobenzo[a]anthracene-1,7,12-trione [M-H  
C20H16O6; MF: 8; RMF: 364; Prob 11.8%; Lib: mona-export-gnps; ID: 7860.

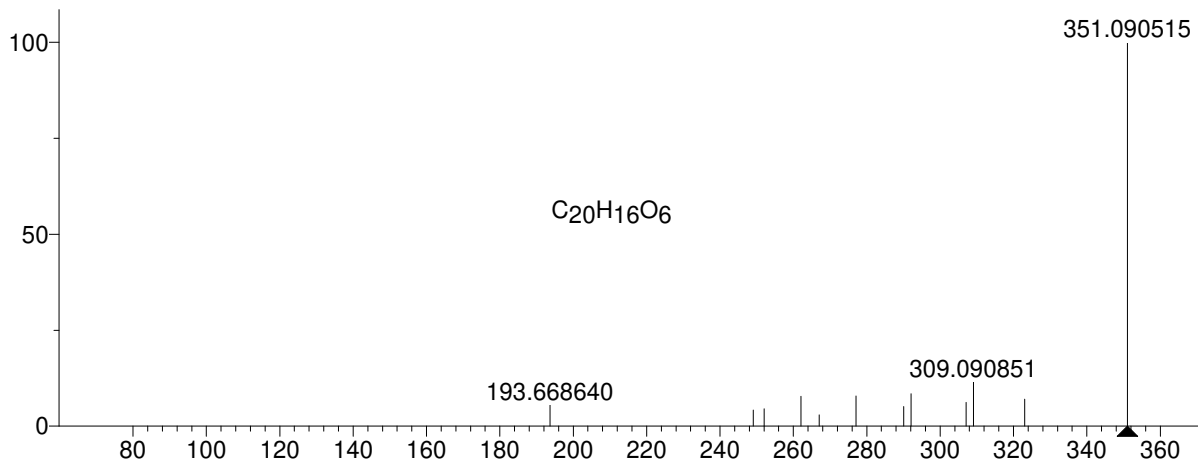

\*\* Search Report Page 2 of 2 \*\*

Hit 3 : 2',4',11-trioxaspiro[tricyclo[4.4.1.0A<sup>1</sup>,a<sup>1</sup>P]undecane-2,3'-tricyclo[7.3.1.0a<sup>u</sup>,A<sup>1</sup>A<sup>3</sup>]tridecane]-1'(12'),3,  
C<sub>20</sub>H<sub>16</sub>O<sub>6</sub>; MF: 0; RMF: 30; Prob 8.80%; Lib: mona-export-ic-ms-ms\_negative\_mode; ID: 22757.

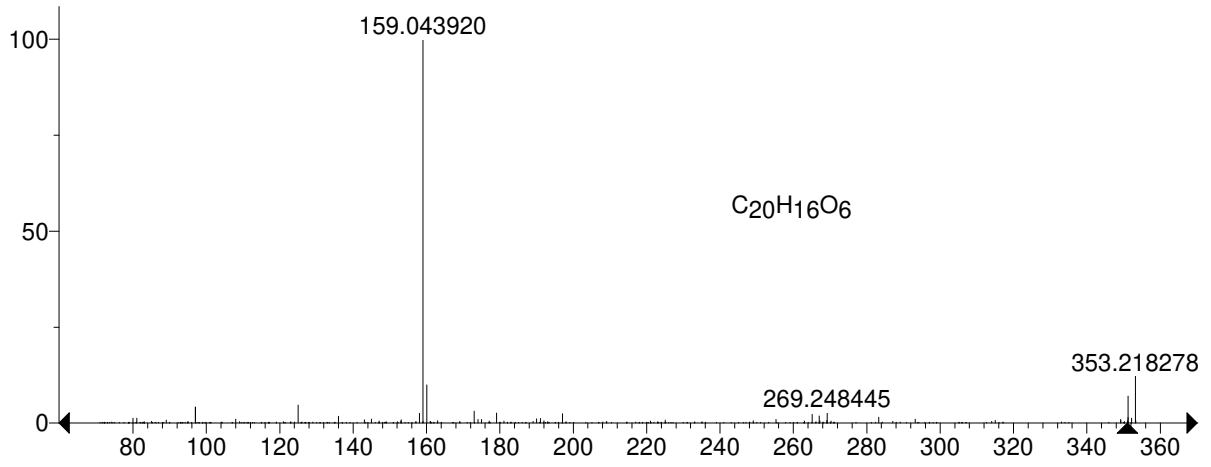

\*\* Search Report Page 1 of 2 \*\*

Unknown: Unknown (19.96\_303.2163m/z)  
Compound in Library Factor = -1848

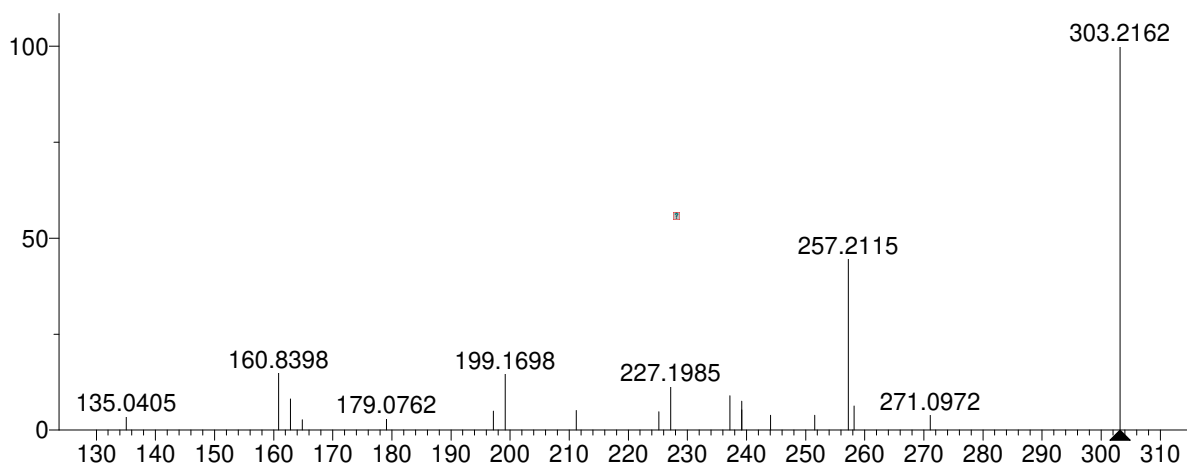

Hit 1 : Lys-Arg [M+H]<sup>+</sup> QTOF 8V P=303.2  
C<sub>12</sub>H<sub>26</sub>N<sub>6</sub>O<sub>3</sub>; MF: 71; RMF: 588; Prob 45.7%; Lib: nist\_msms; ID: 48416.

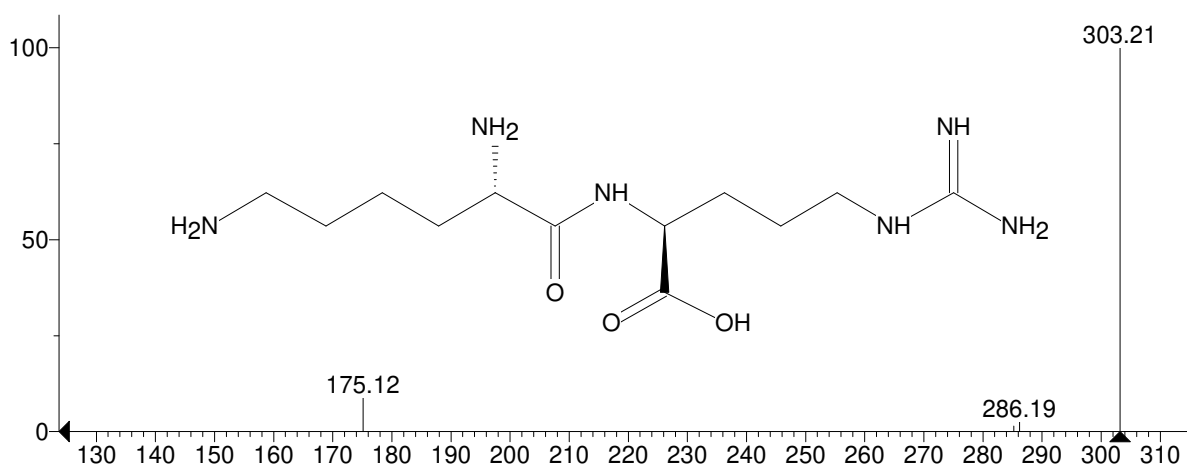

Hit 2 : Arg-Lys [M+H]<sup>+</sup> HCD 13eV P=303.2  
C<sub>12</sub>H<sub>26</sub>N<sub>6</sub>O<sub>3</sub>; MF: 64; RMF: 607; Prob 35.0%; CAS: 40968-46-5; Lib: nist\_msms; ID: 565904.

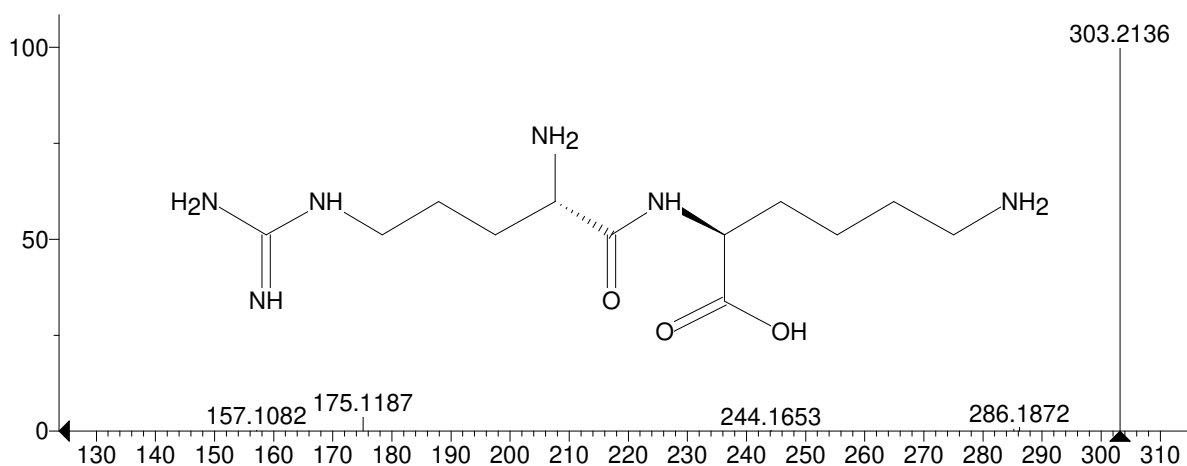

Hit 3 : Lys-Arg [M+H]<sup>+</sup> HCD 15eV P=303.2  
C<sub>12</sub>H<sub>26</sub>N<sub>6</sub>O<sub>3</sub>; MF: 32; RMF: 571; Prob 9.34%; CAS: 29586-66-1; Lib: nist\_msms2; ID: 41398.

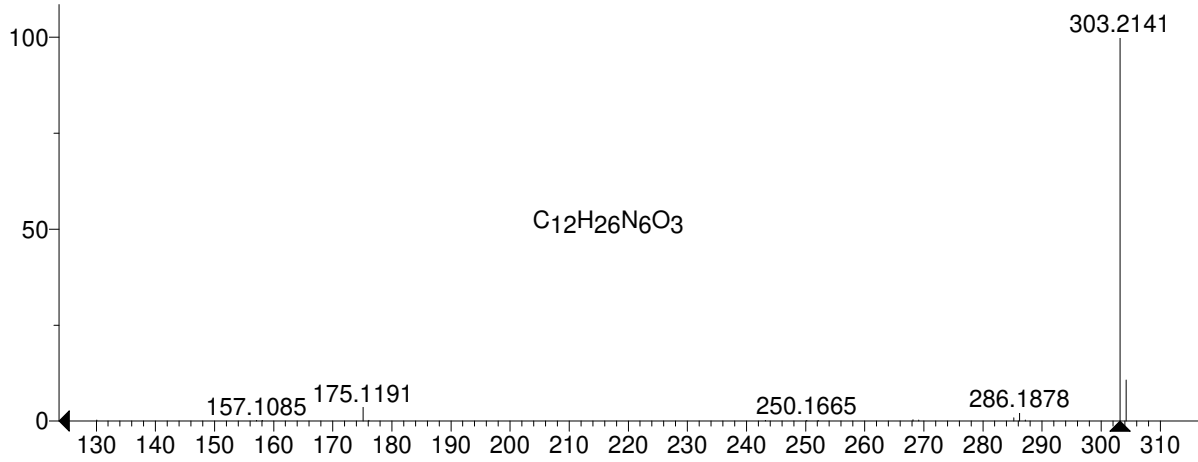

Hit 4 : Aleuritic acid [M-H]<sup>-</sup> IT-FT 35% P=303.2  
C<sub>16</sub>H<sub>32</sub>O<sub>5</sub>; MF: 22; RMF: 183; Prob 6.59%; CAS: 533-87-9; Lib: nist\_msms; ID: 411121.

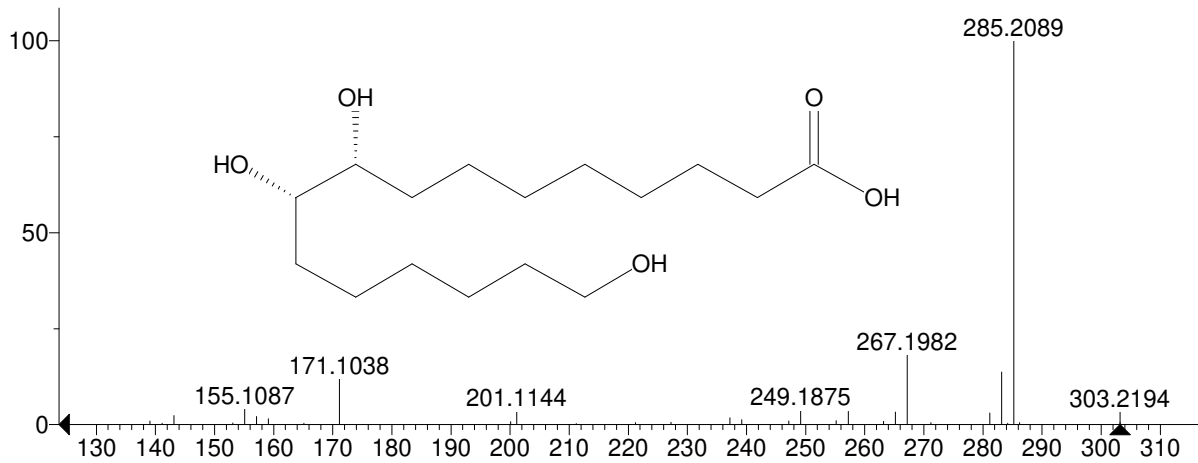

Hit 5 : Aleuritic Acid [M-H]<sup>-</sup> 45HCD P=303.2  
C<sub>16</sub>H<sub>32</sub>O<sub>5</sub>; MF: 4; RMF: 419; Prob 3.40%; Lib: mona-export-lc-ms-ms\_negative\_mode; ID: 20799.

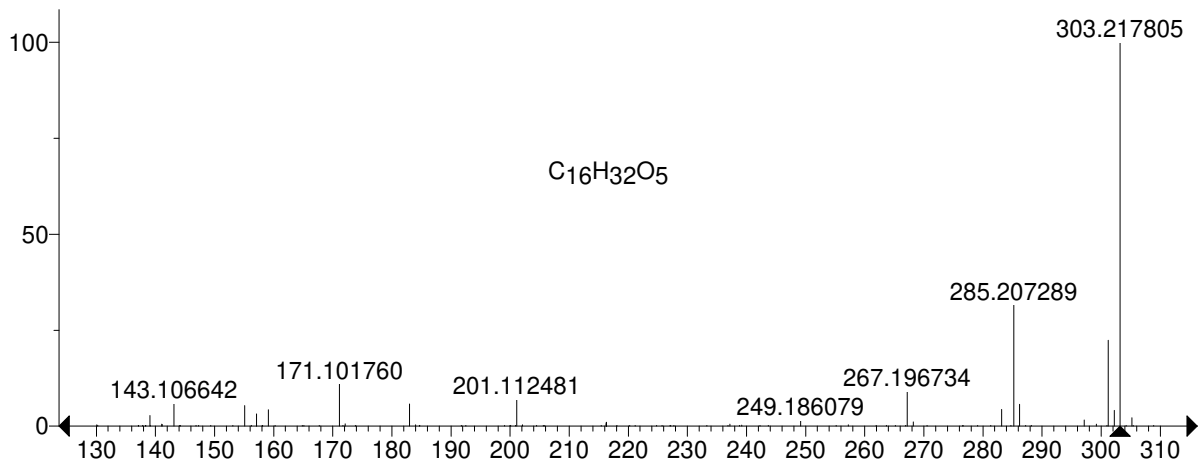

Unknown: Unknown (19.99\_181.0863m/z)  
Compound in Library Factor = -3273

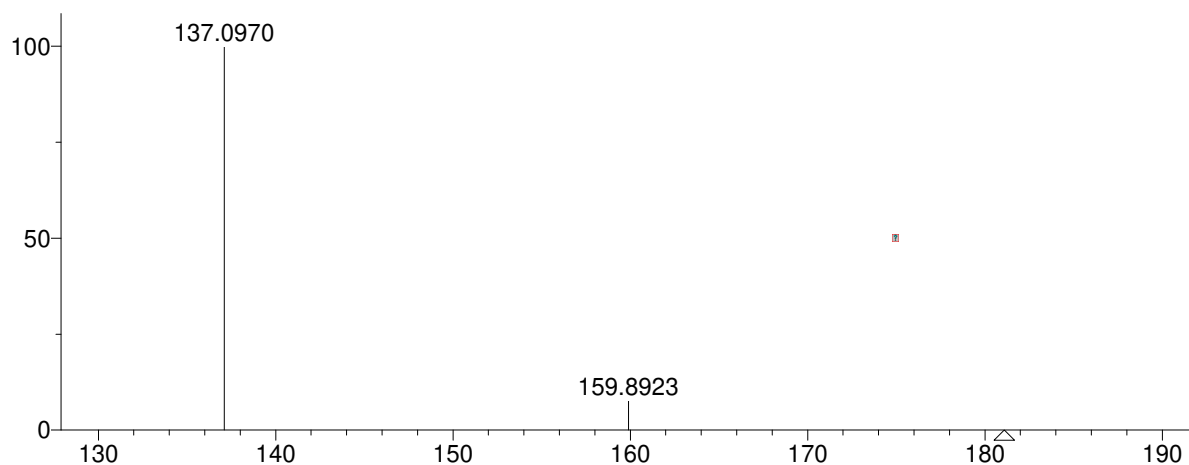

Hit 1 : Benzeneethanamine, 4-chloro-2,5-dimethoxy-N-[(3,4,5-trimethoxyphenyl)methyl]- [M+H-C10H14ClNO2]+ C20H26ClNO5; MF: 4; RMF: 251; Prob 19.1%; CAS: 1445574-98-0; Lib: nist\_msms; ID: 351623.

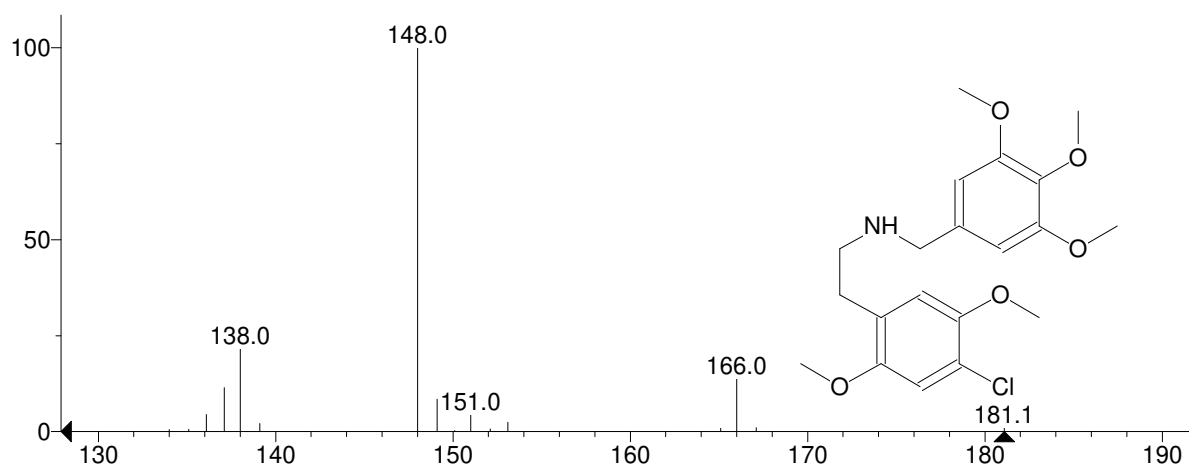

Hit 2 : 3-Oxo-1,8-octanedicarboxylic acid [M+H-2H2O]+ IT 35% P=181.1 C10H16O5; MF: 0; RMF: 67; Prob 16.2%; CAS: 114212-45-2; Lib: nist\_msms; ID: 301941.

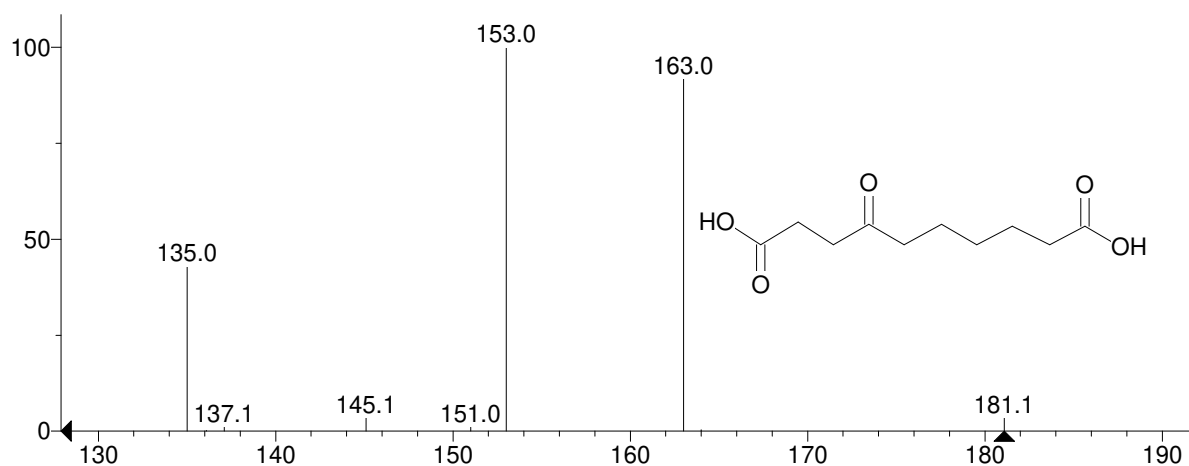

Hit 3 :  $\beta$ -Asarone [M+H-C<sub>2</sub>H<sub>4</sub>]<sup>+</sup> IT 35% P=181.1  
C<sub>12</sub>H<sub>16</sub>O<sub>3</sub>; MF: 0; RMF: 59; Prob 16.2%; CAS: 5273-86-9; Lib: nist\_msms; ID: 234667.

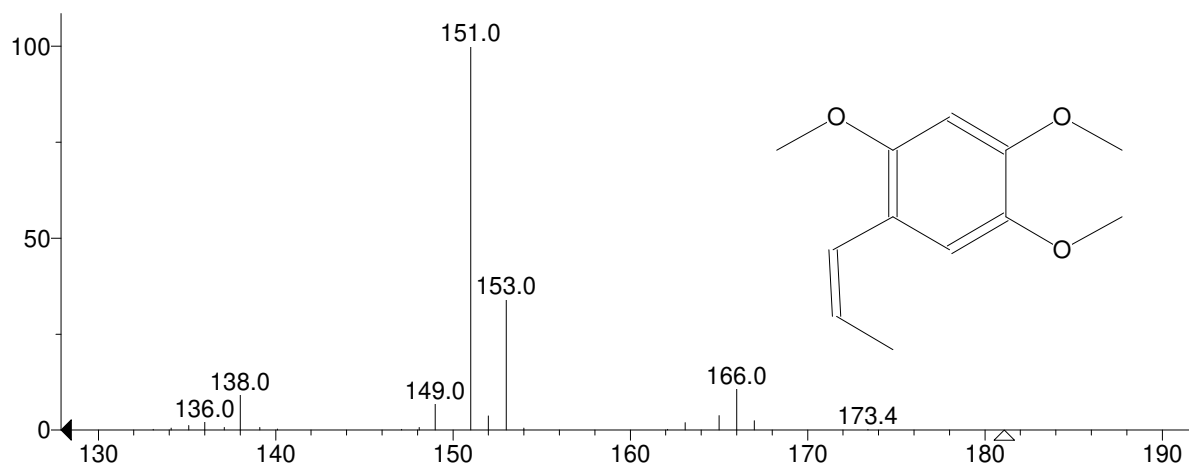

Hit 4 : Escaline [M+H-C<sub>2</sub>H<sub>7</sub>N]<sup>+</sup> IT 35% P=181.1  
C<sub>12</sub>H<sub>19</sub>NO<sub>3</sub>; MF: 0; RMF: 55; Prob 16.2%; CAS: 39201-82-6; Lib: nist\_msms; ID: 364356.

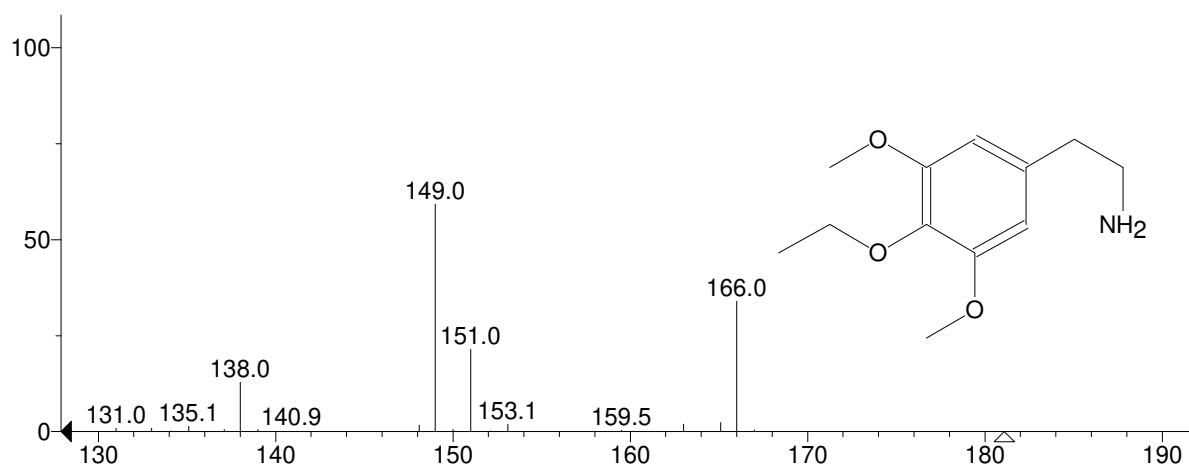

Hit 5 :  $\alpha$ -Asarone [M+H-C<sub>2</sub>H<sub>4</sub>]<sup>+</sup> IT 35% P=181.1  
C<sub>12</sub>H<sub>16</sub>O<sub>3</sub>; MF: 0; RMF: 42; Prob 16.2%; CAS: 2883-98-9; Lib: nist\_msms; ID: 234607.

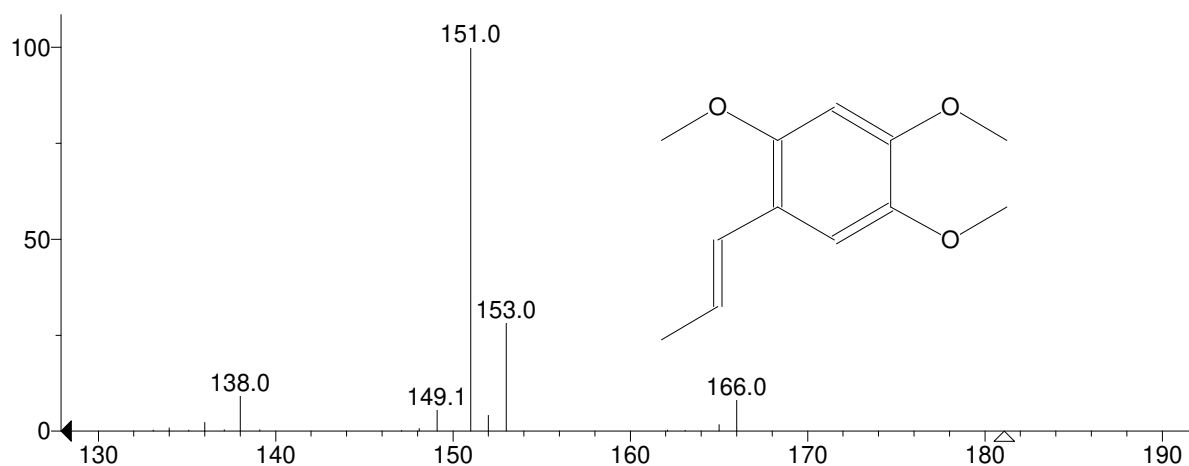

\*\* Search Report Page 1 of 2 \*\*

Unknown: Unknown (2.02\_275.1236m/z)  
Compound in Library Factor = 534

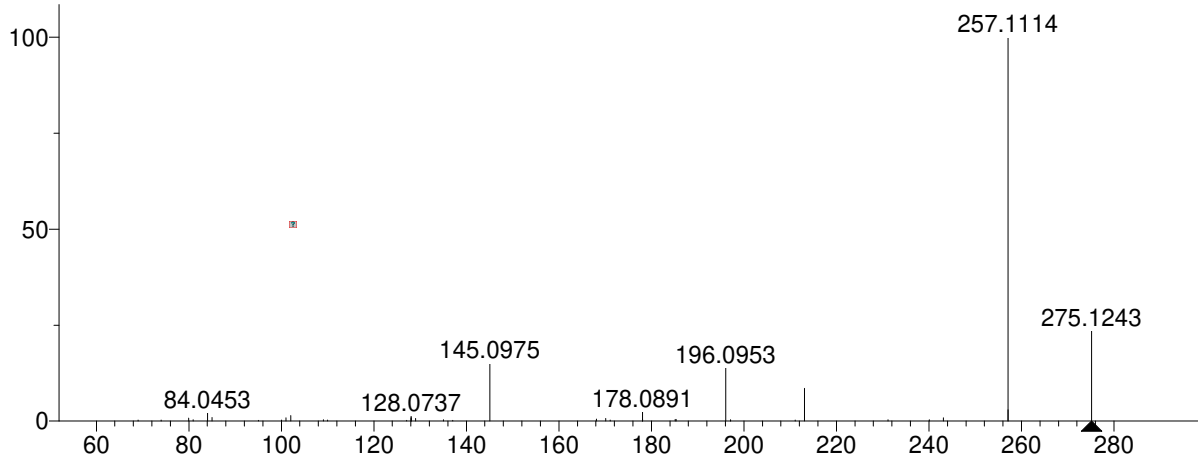

Hit 1 : L-Saccharopine [M-H]- 5-60V P=275.1  
C<sub>11</sub>H<sub>20</sub>N<sub>2</sub>O<sub>6</sub>; MF: 879; RMF: 967; Prob 31.7%; Lib: mona-export-ic-ms-ms\_negative\_mode; ID: 8572.

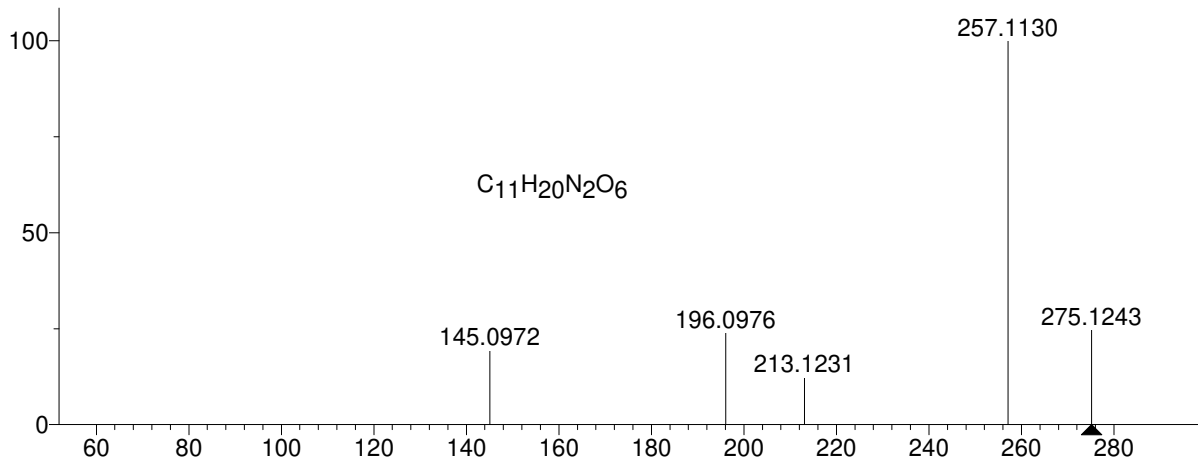

Hit 2 : L-saccharopine [M-H]- QTOF 5-45V P=275.1  
C<sub>11</sub>H<sub>20</sub>N<sub>2</sub>O<sub>6</sub>; MF: 879; RMF: 967; Prob 31.7%; Lib: mona-export-ic-ms-ms\_negative\_mode; ID: 11459.

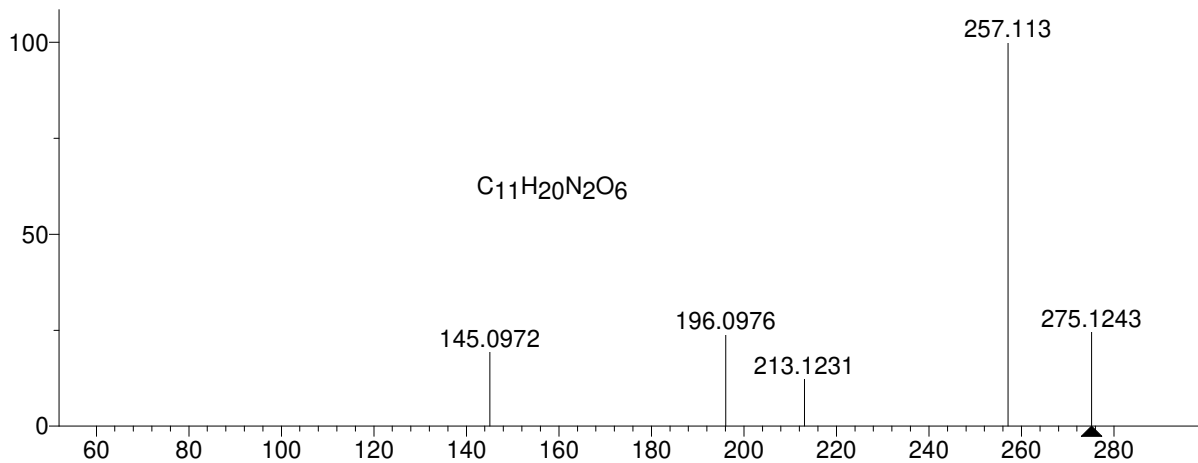

Hit 3 : L-Saccharopine; LC-ESI-QTOF; MS2; CE [M-H]- P=275.1  
C<sub>11</sub>H<sub>20</sub>N<sub>2</sub>O<sub>6</sub>; MF: 879; RMF: 967; Prob 31.7%; Lib: msms-neg-massbank; ID: 4468.

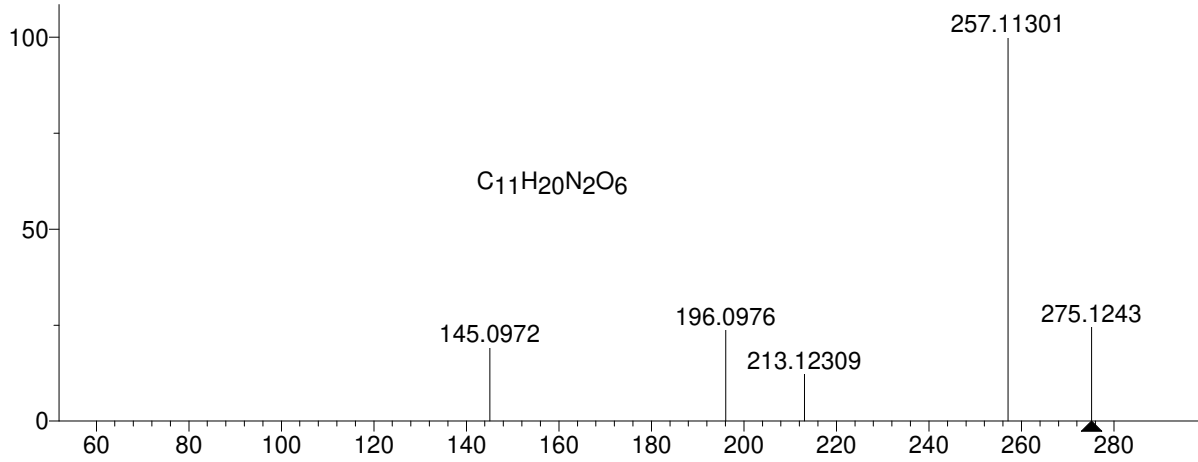

Hit 4 : Saccharopine [M-H]- 10 P=275.1  
C<sub>11</sub>H<sub>20</sub>N<sub>2</sub>O<sub>6</sub>; MF: 812; RMF: 904; Prob 4.90%; Lib: msms neg mona\_ipb\_gnps\_plasma; ID: 537.

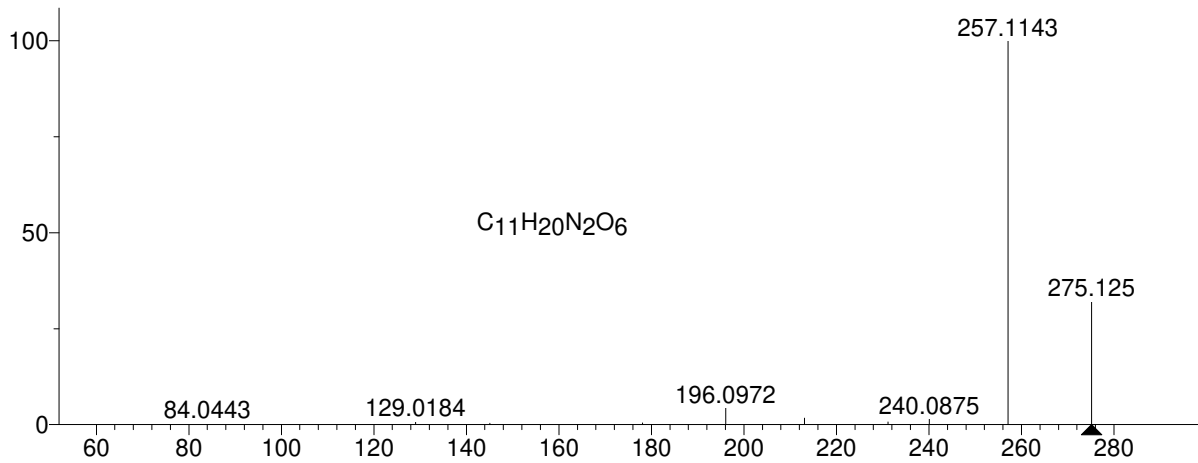

Hit 5 : NCGC00169882-02\_C<sub>14</sub>H<sub>20</sub>O<sub>4</sub>\_(8aR,12S,12aR)-12-Hydroxy-4-methyl-4,5,6,7,8,8a,12,12a-octahydro-2H  
C<sub>14</sub>H<sub>20</sub>O<sub>4</sub>; MF: 18; RMF: 358; Prob 0.04%; Lib: mona-export-gnps; ID: 11517.

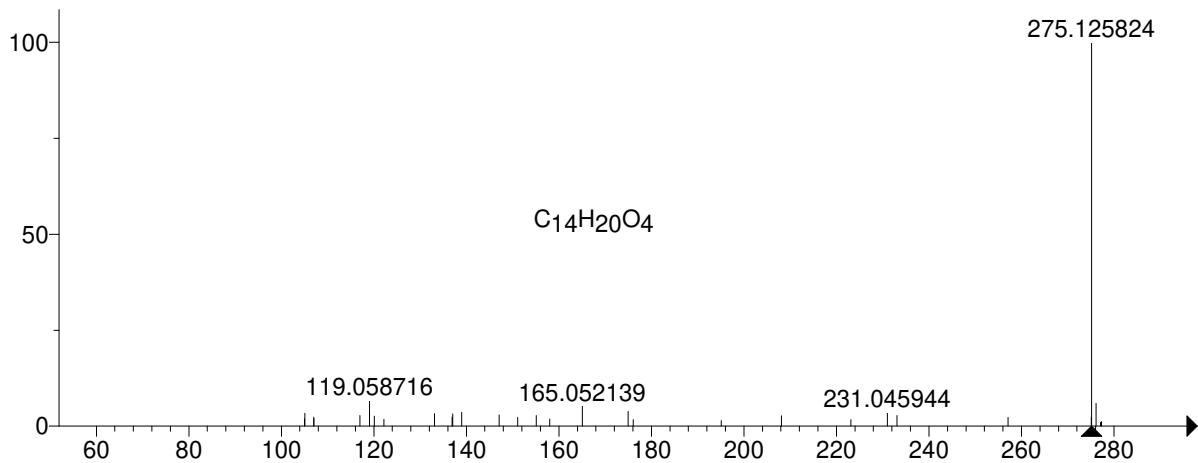



\*\* Search Report Page 1 of 2 \*\*

Unknown: Unknown (2.02\_379.1702m/z)  
Compound in Library Factor = 0

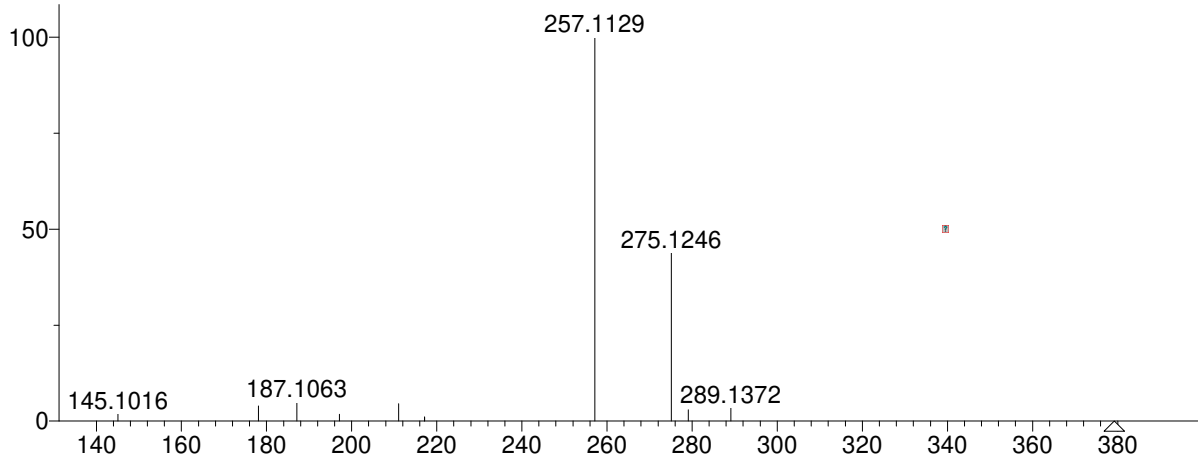

Hit 1 : [Glu1] TRH [M-H]- IT-FT 35% P=379.2  
C16H24N6O5; MF: 0; RMF: 19; Prob 33.3%; CAS: 51826-17-6; Lib: nist\_msms; ID: 569038.

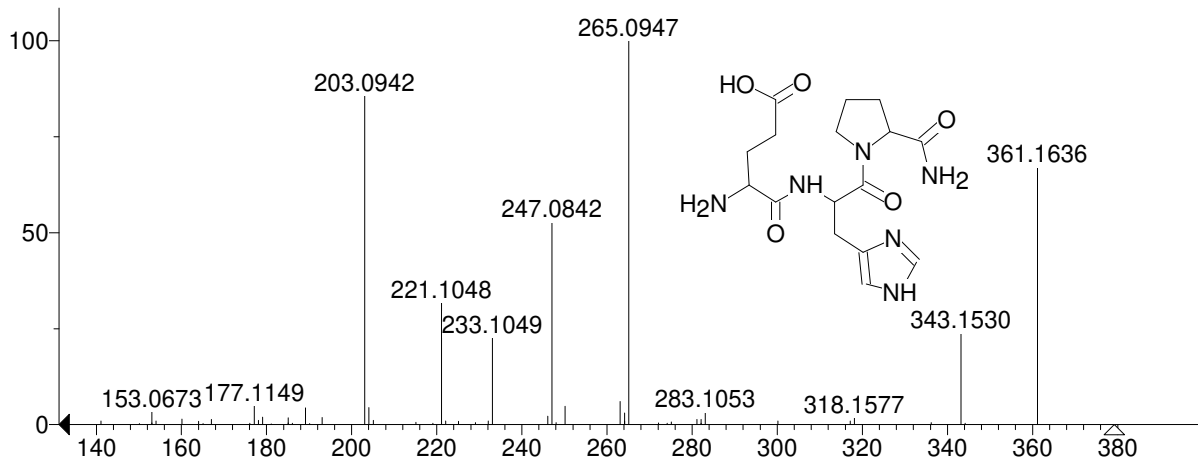

Hit 2 : [Glu1] TRH [M-H]- IT-FT 35% P=379.2  
C16H24N6O5; MF: 0; RMF: 19; Prob 33.3%; Lib: nist\_msms2; ID: 74030.

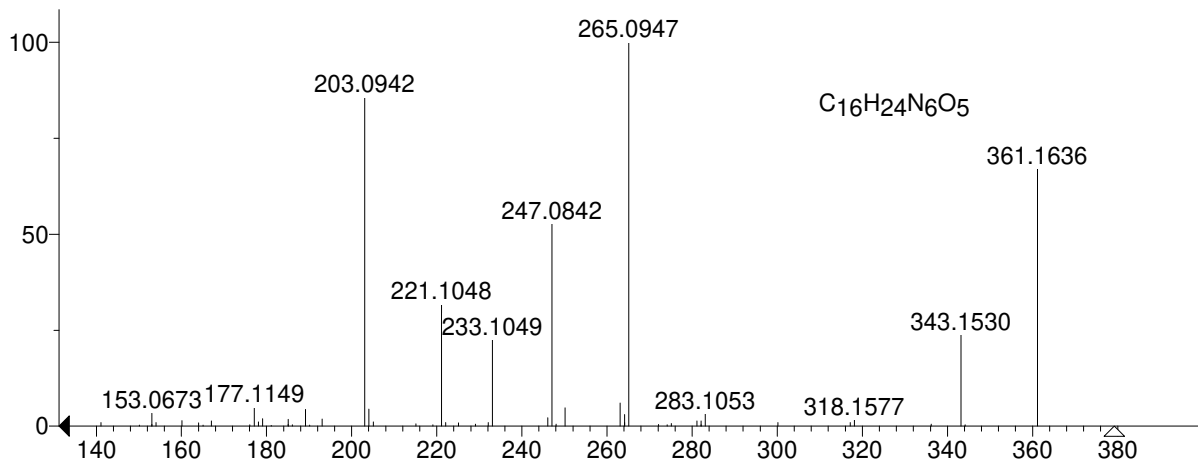

\*\* Search Report Page 2 of 2 \*\*

Hit 3 : 11-Nor-9-carboxy-.DELTA.9-tetrahydrocannabinol [M+Cl]<sup>-</sup> HCD 60V P=379.2  
C<sub>21</sub>H<sub>28</sub>O<sub>4</sub>; MF: 0; RMF: 4; Prob 33.3%; CAS: 56354-06-4; Lib: nist\_msms; ID: 187080.

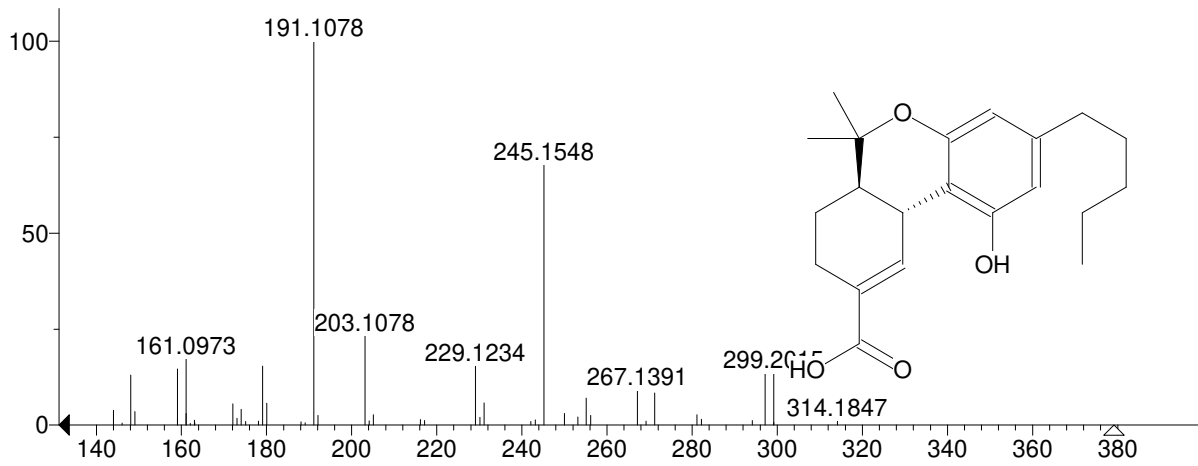

\*\* Search Report Page 1 of 2 \*\*

Unknown: Unknown (2.03\_275.1239m/z)  
Compound in Library Factor = -151

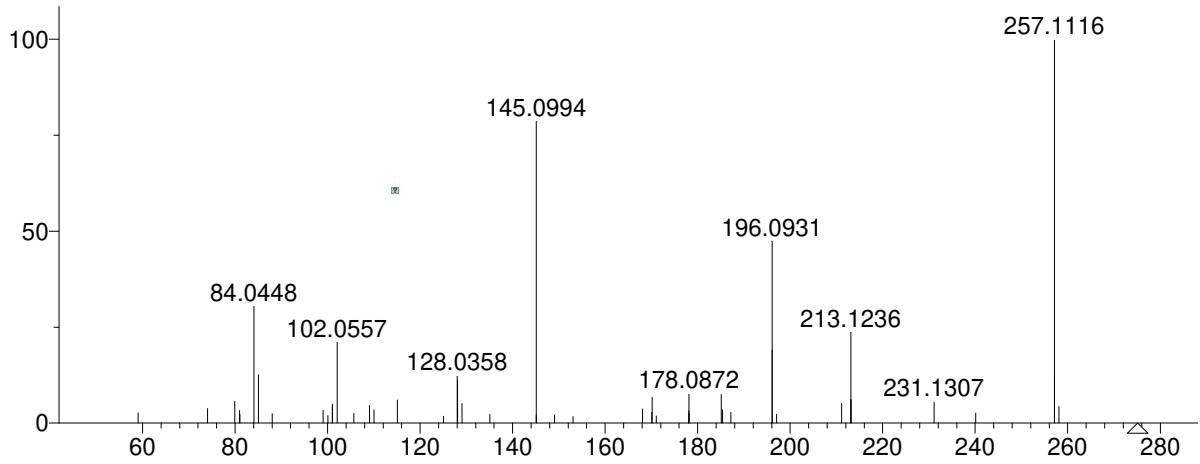

Hit 1 : Saccharopine [M-H]- 20 P=275.1  
C<sub>11</sub>H<sub>20</sub>N<sub>2</sub>O<sub>6</sub>; MF: 701; RMF: 760; Prob 80.4%; Lib: msms neg mona\_ipb\_gnps\_plasma; ID: 578.

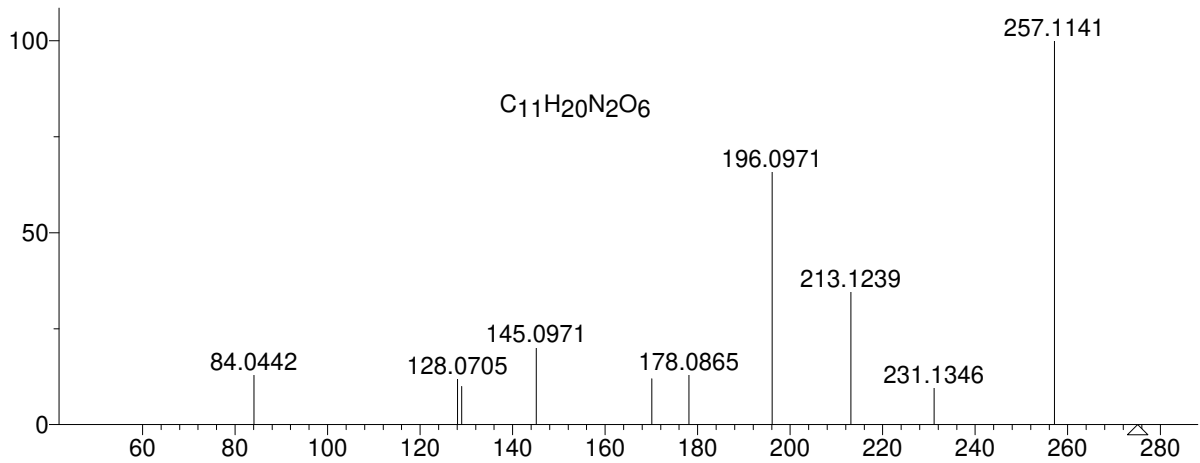

Hit 2 : L-Saccharopine [M-H]- HCD 26V P=275.1  
C<sub>11</sub>H<sub>20</sub>N<sub>2</sub>O<sub>6</sub>; MF: 662; RMF: 792; Prob 19.0%; CAS: 997-68-2; Lib: nist\_msms; ID: 125655.

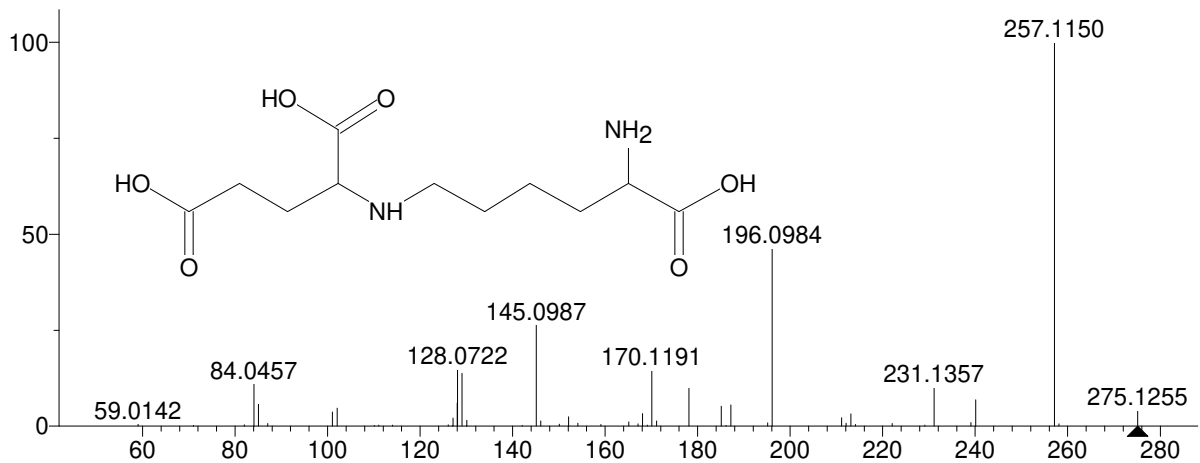

Hit 3 : L-saccharopine [M-H]<sup>-</sup> QTOF 5-45V P=275.1  
C<sub>11</sub>H<sub>20</sub>N<sub>2</sub>O<sub>6</sub>; MF: 477; RMF: 745; Prob 0.30%; Lib: mona-export-lc-ms-ms\_negative\_mode; ID: 11459.

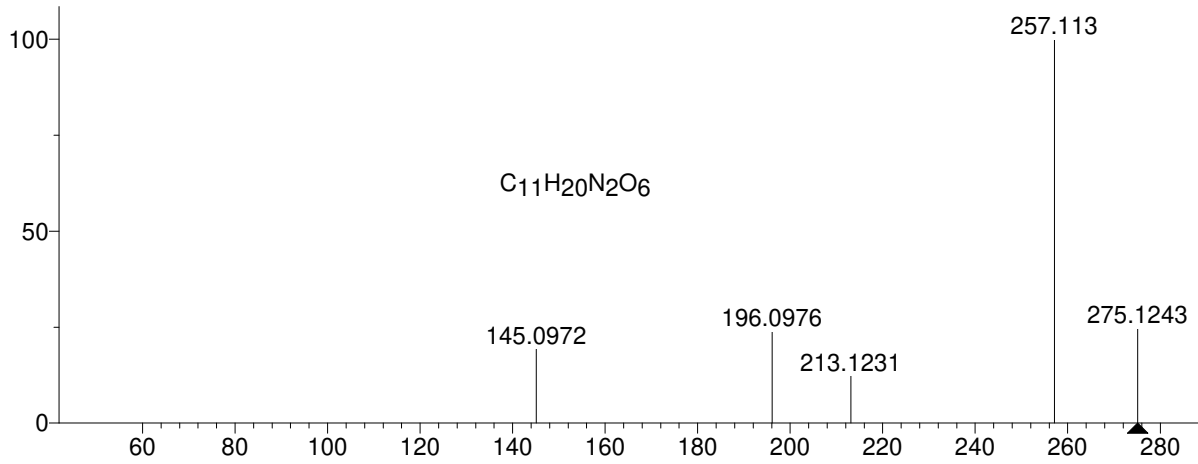

Hit 4 : L-Saccharopine; LC-ESI-QTOF; MS2; CE [M-H]<sup>-</sup> P=275.1  
C<sub>11</sub>H<sub>20</sub>N<sub>2</sub>O<sub>6</sub>; MF: 477; RMF: 745; Prob 0.30%; Lib: msms-neg-massbank; ID: 4468.

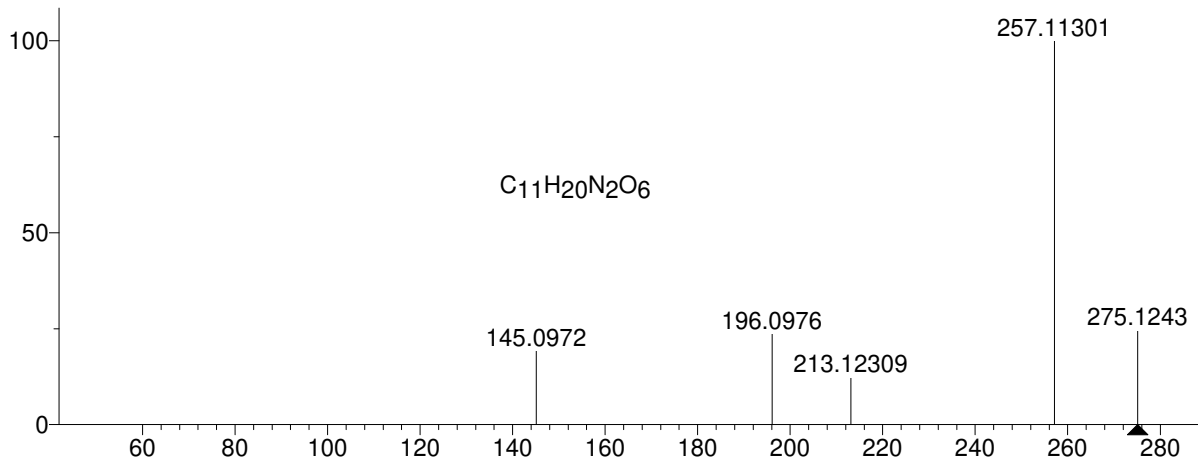

Hit 5 : NCGC00169882-02\_C<sub>14</sub>H<sub>20</sub>O<sub>4</sub>\_(8aR,12S,12aR)-12-Hydroxy-4-methyl-4,5,6,7,8,8a,12,12a-octahydro-2H  
C<sub>14</sub>H<sub>20</sub>O<sub>4</sub>; MF: 0; RMF: 53; Prob 0.00%; Lib: mona-export-gnps; ID: 11517.

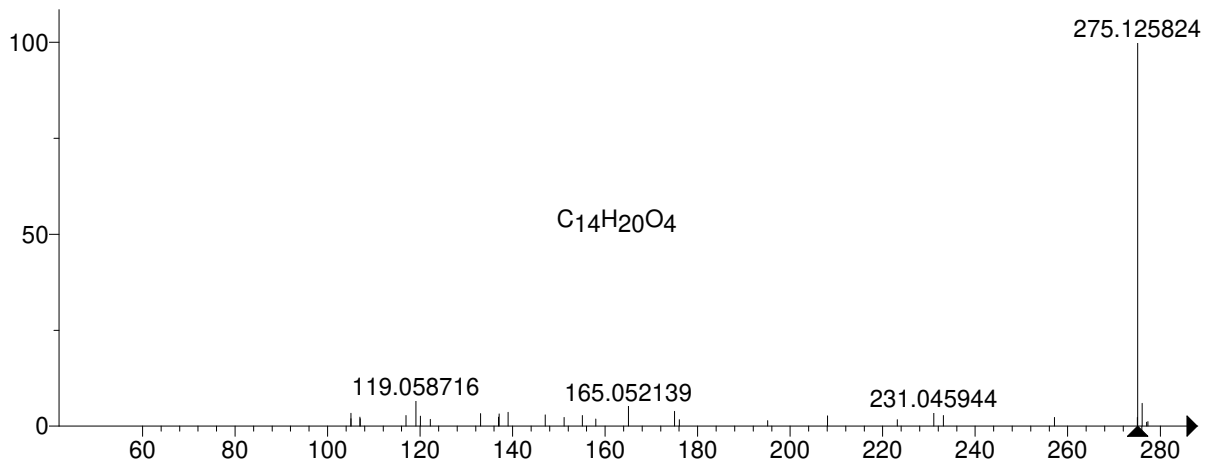

\*\* Search Report Page 1 of 2 \*\*

Unknown: Unknown (2.03\_445.1817m/z)  
Compound in Library Factor = -3273

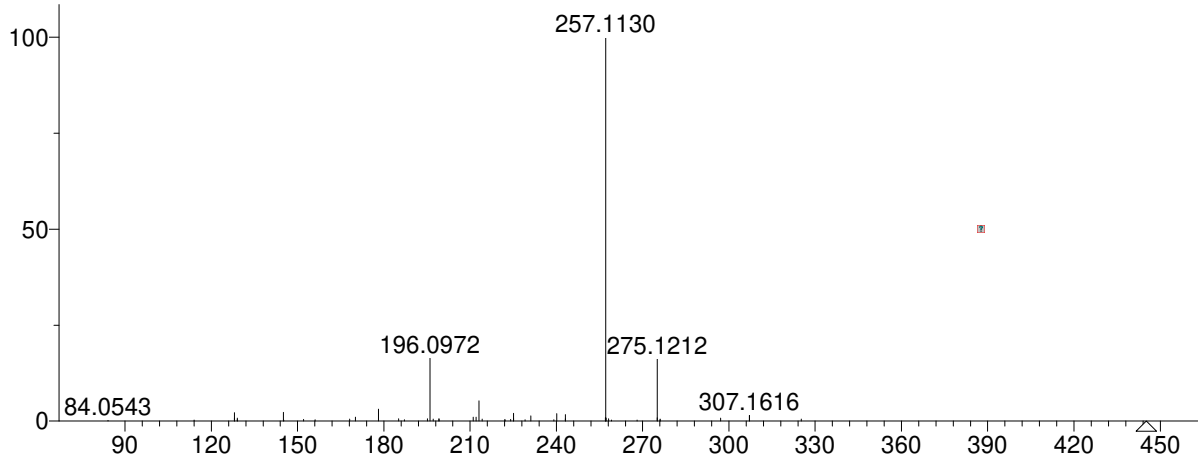

Hit 1 : Difenacoum [M+H]<sup>+</sup> IT 35% P=445.2  
C<sub>31</sub>H<sub>24</sub>O<sub>3</sub>; MF: 9; RMF: 517; Prob 21.2%; CAS: 56073-07-5; Lib: nist\_msms; ID: 399396.

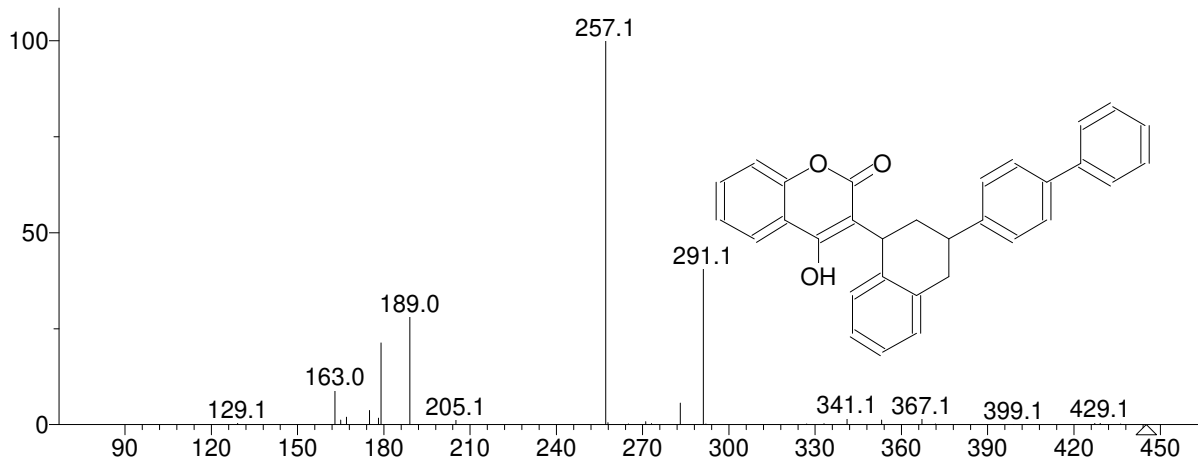

Hit 2 : 11-(hydroxymethyl)-2,6,6,14,19-pentamethyl-7,16,18-trioxapentacyclo[12.6.1.0A<sup>2</sup>,A<sup>1</sup>1A<sup>2</sup>.0a<sup>u</sup>,A<sup>1</sup>1a<sup>c</sup>  
C<sub>24</sub>H<sub>28</sub>O<sub>8</sub>; MF: 5; RMF: 110; Prob 17.9%; Lib: mona-export-vf-npl\_qexactive; ID: 21173.

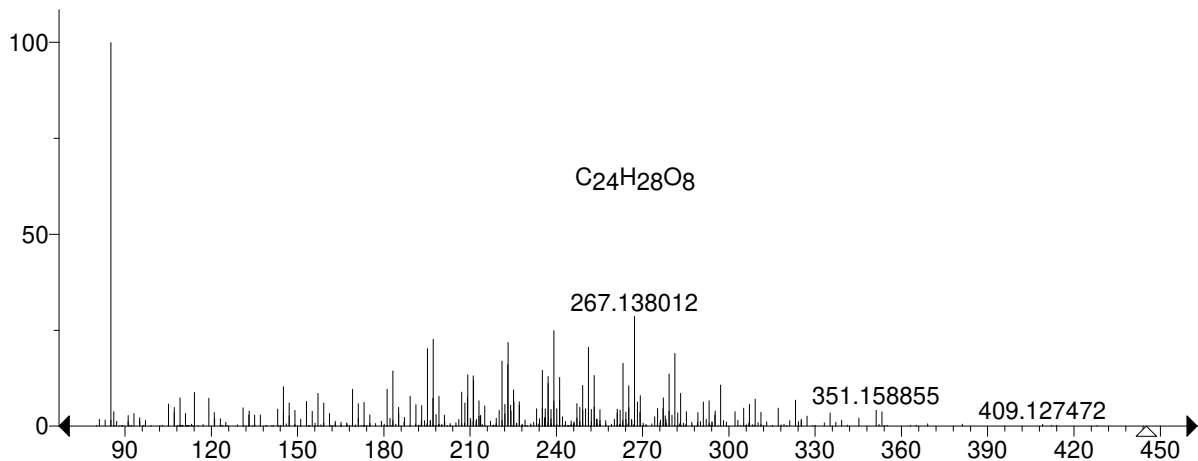

\*\* Search Report Page 2 of 2 \*\*

Hit 3 : NCGC00381216-01\_C24H28O8\_Furo[4,3,2-ij]pyrano[4',3':4,5]cyclohepta[1,2-f][2]benzopyran-1,5,9,13(2H, C24H28O8; MF: 3; RMF: 116; Prob 16.5%; Lib: mona-export-gnps; ID: 11597.

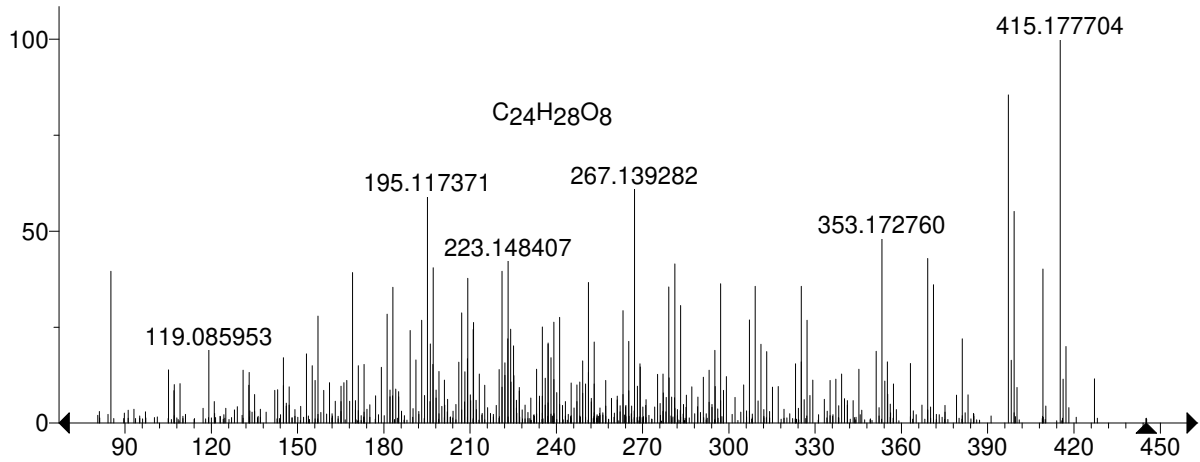

Hit 4 : [(6Z,10Z)-6-(acetyloxymethyl)-10-(hydroperoxymethyl)-3-methylidene-2-oxo-3a,4,5,8,9,11a-hexahydrocyclo C22H30O8; MF: 1; RMF: 61; Prob 15.2%; Lib: mona-export-vf-npl\_gexactive; ID: 19873.

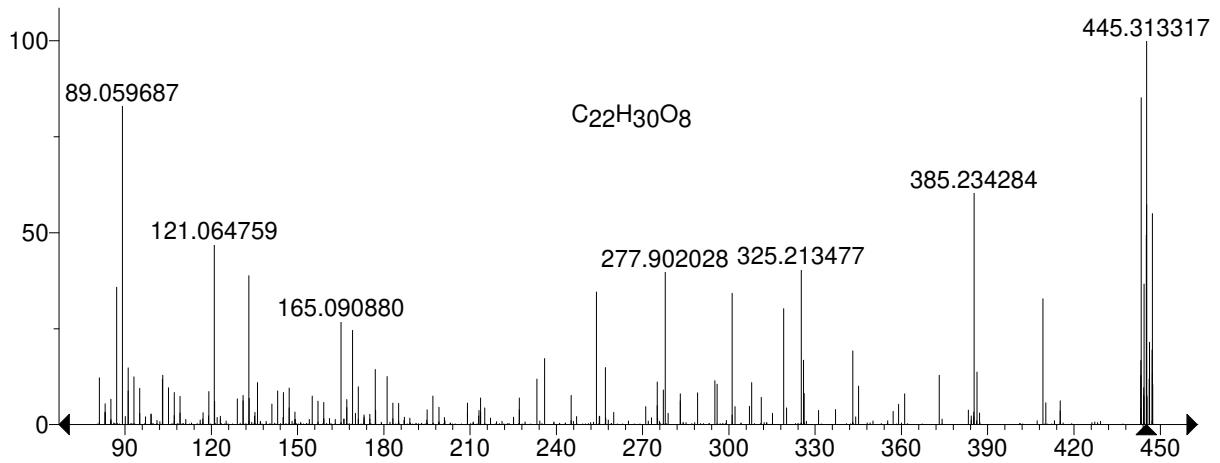

Hit 5 : NCGC00381245-01\_C22H30O8\_2-[6-{{[(2Z)-4-Acetoxy-2-methyl-2-butenoyl]oxy}-2-hydroxy-3-(3-hydroxy-1 C22H30O8; MF: 0; RMF: 15; Prob 14.6%; Lib: mona-export-gnps; ID: 10571.

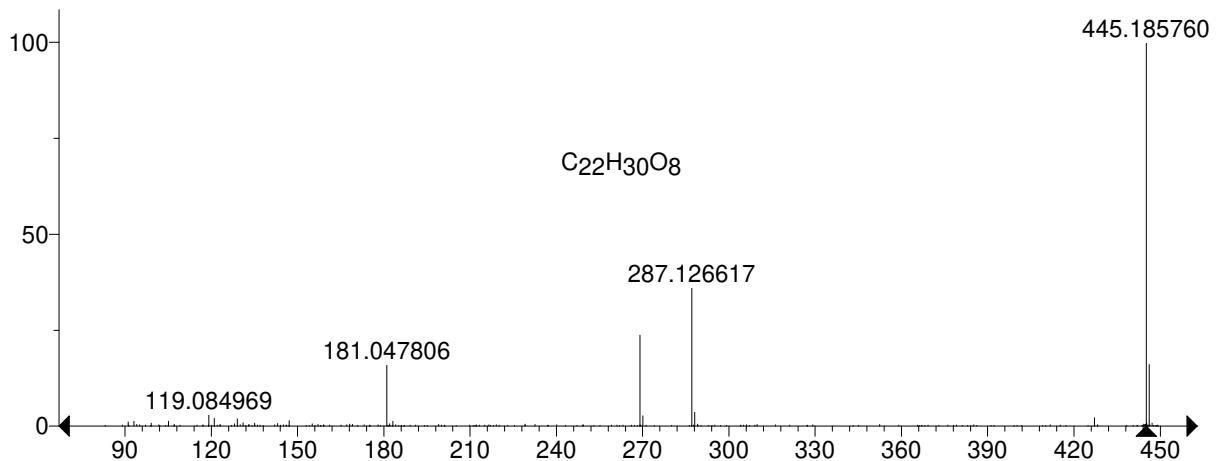

Unknown: Unknown (2.03\_504.1708m/z)  
Compound in Library Factor = 0

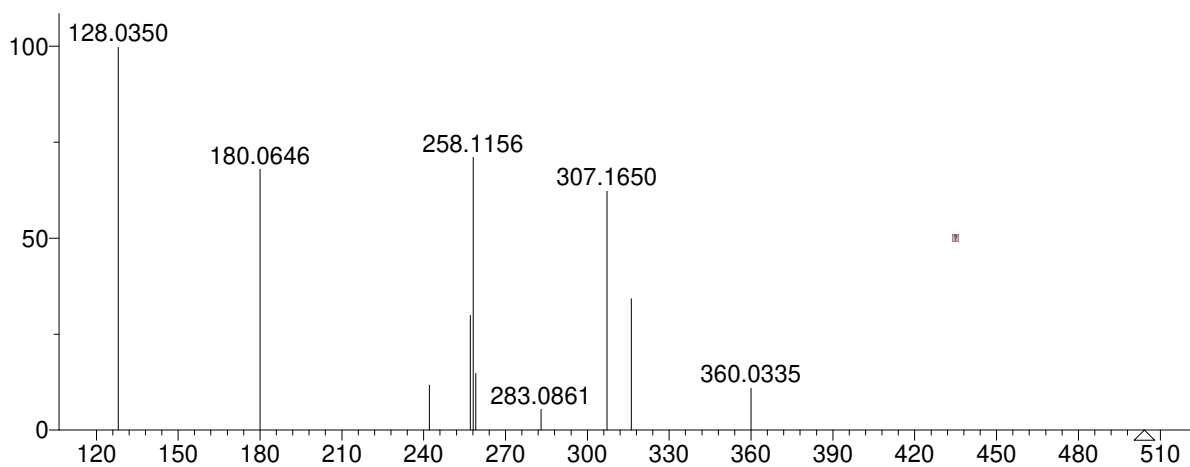

Hit 1 : 5-(1,2,3,4,5,6-hexahydroxyhexoxy)-6-hydroxy-3-methoxy-9-methyl-4,5-dihydro-3H-pyrano[3,4-h][1]benzoxe  
C<sub>21</sub>H<sub>26</sub>O<sub>13</sub>; MF: 0; RMF: 7; Prob 100.0%; Lib: mona-export-vf-npl\_qexactive; ID: 17689.

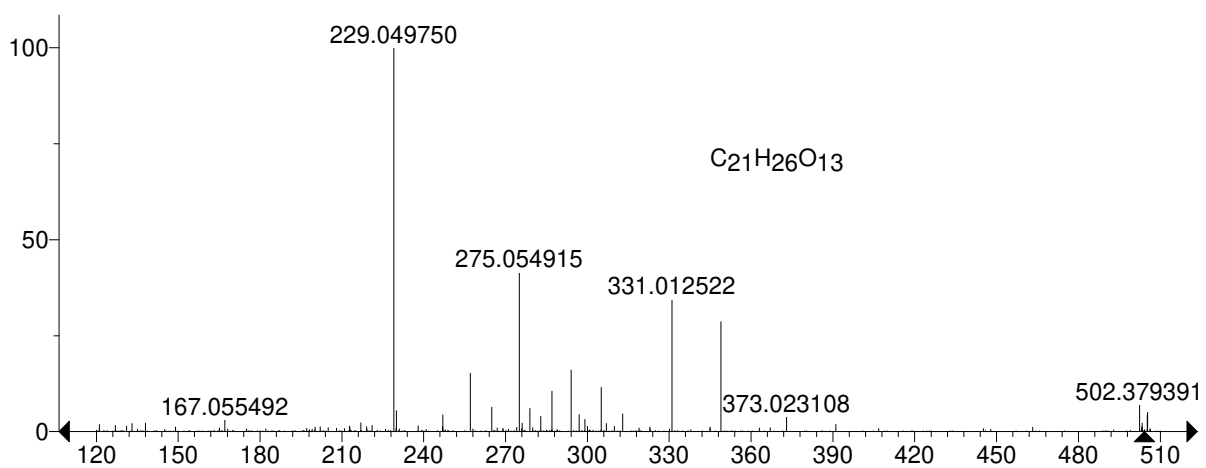

Unknown: Unknown (2.04\_602.1827m/z)  
Compound in Library Factor = 0

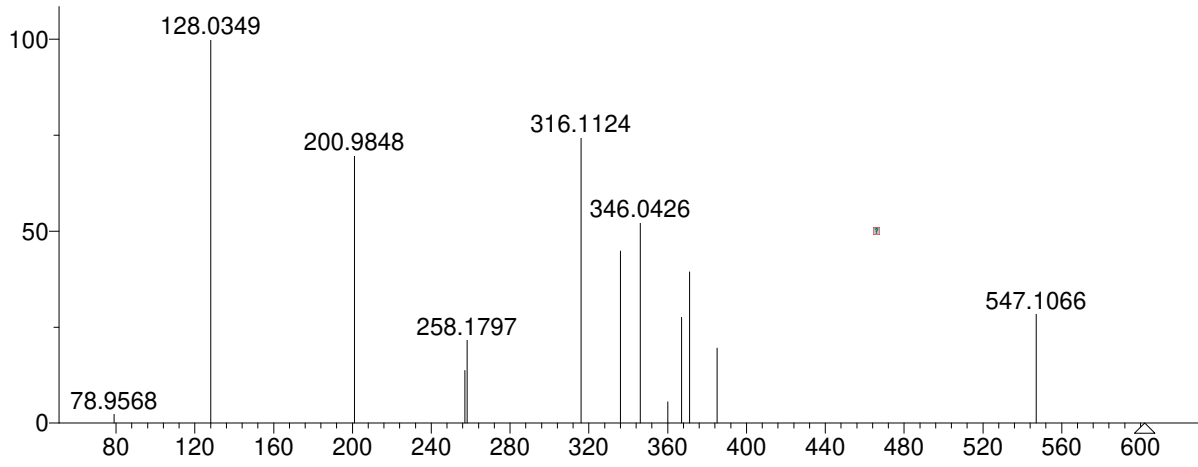



Unknown: Unknown (2.04\_610.0586m/z)  
Compound in Library Factor = 0

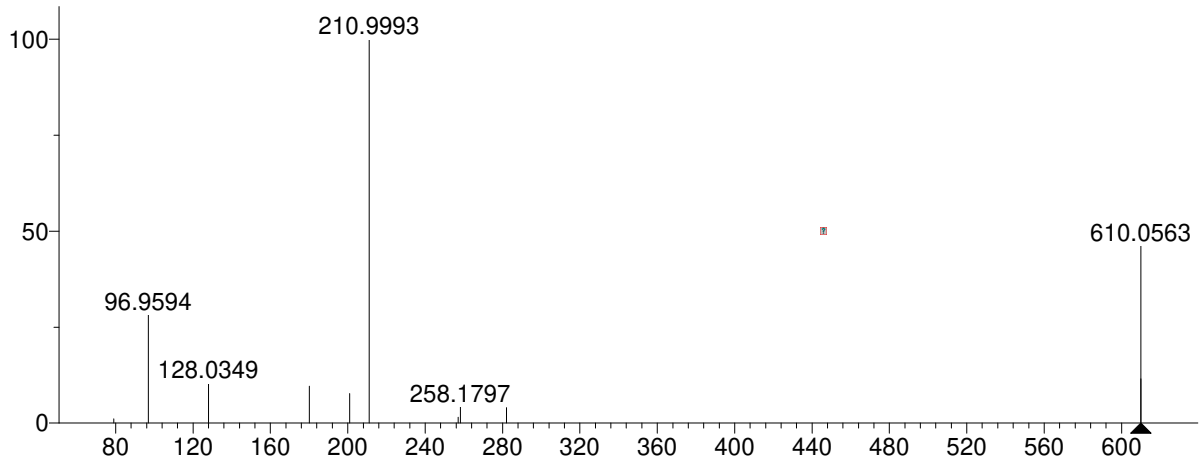

Unknown: Unknown (2.06\_385.1355m/z)  
Compound in Library Factor = 0

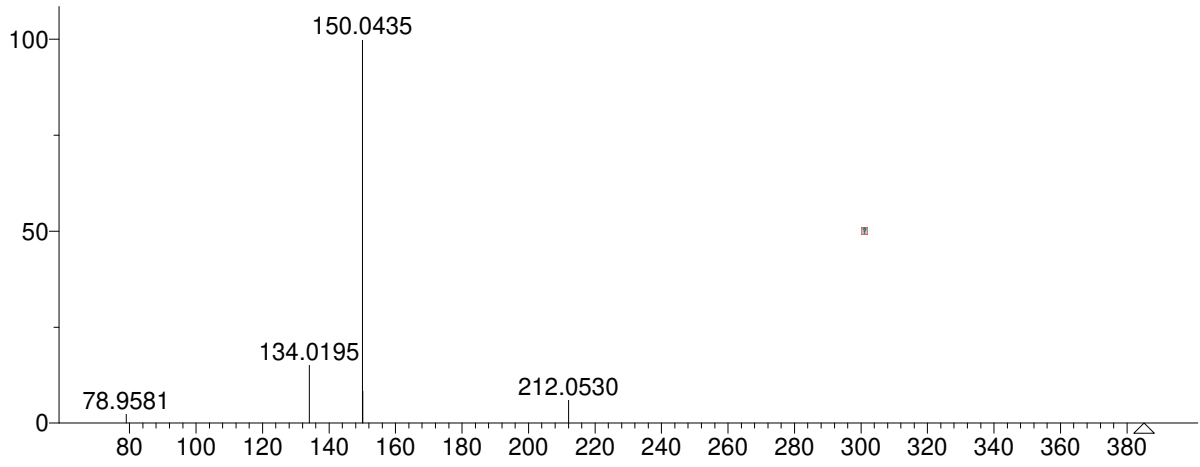

Unknown: Unknown (2.06\_602.1252m/z)  
Compound in Library Factor = 0

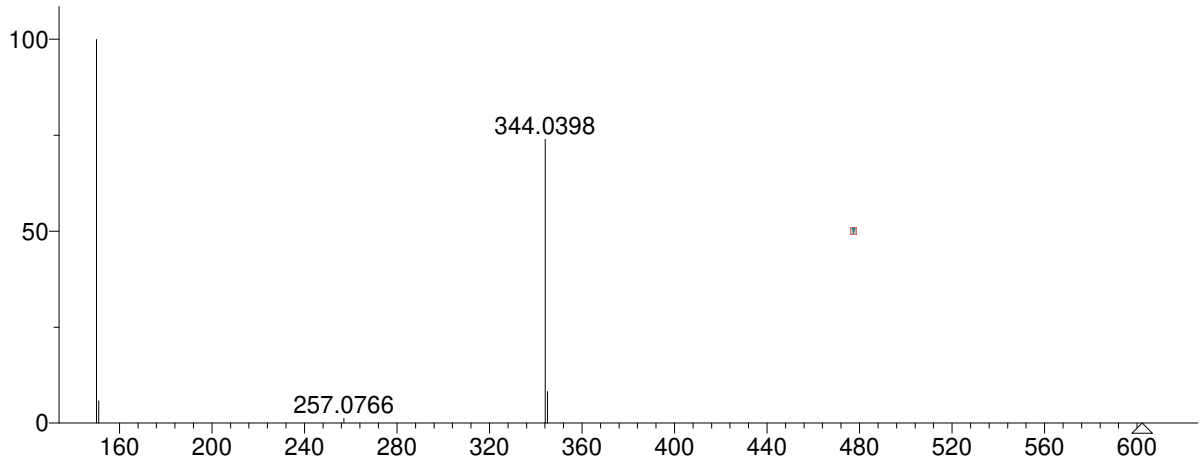

Unknown: Unknown (2.07\_344.0396m/z)  
Compound in Library Factor = -294

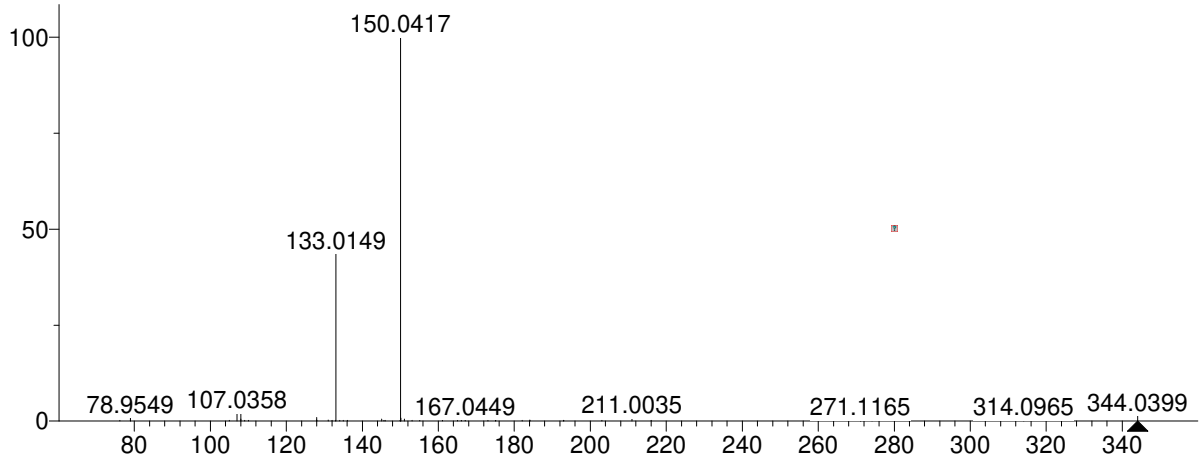

Hit 1 : cyclic gmp [M-H]<sup>-</sup> P=344  
C<sub>10</sub>H<sub>12</sub>N<sub>5</sub>O<sub>7</sub>P; MF: 545; RMF: 658; Prob 45.0%; Lib: msms neg mona\_ipb\_gnps\_plasma; ID: 1423.

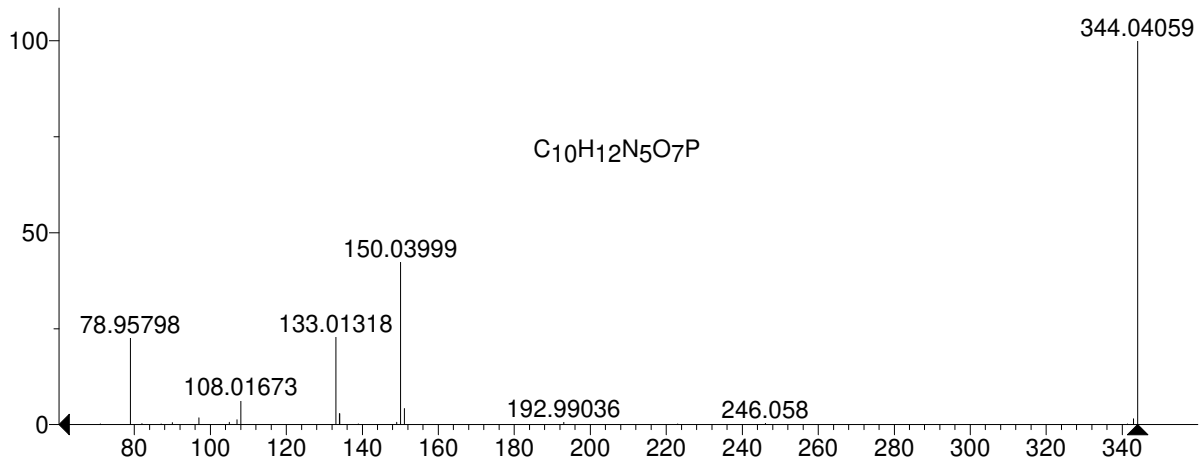

Hit 2 : Guanosine-3',5'-cyclic monophosphate [M-H]<sup>-</sup> 5-60V P=344  
C<sub>10</sub>H<sub>12</sub>N<sub>5</sub>O<sub>7</sub>P; MF: 524; RMF: 757; Prob 19.2%; Lib: mona-export-lc-ms-ms\_negative\_mode; ID: 8435.

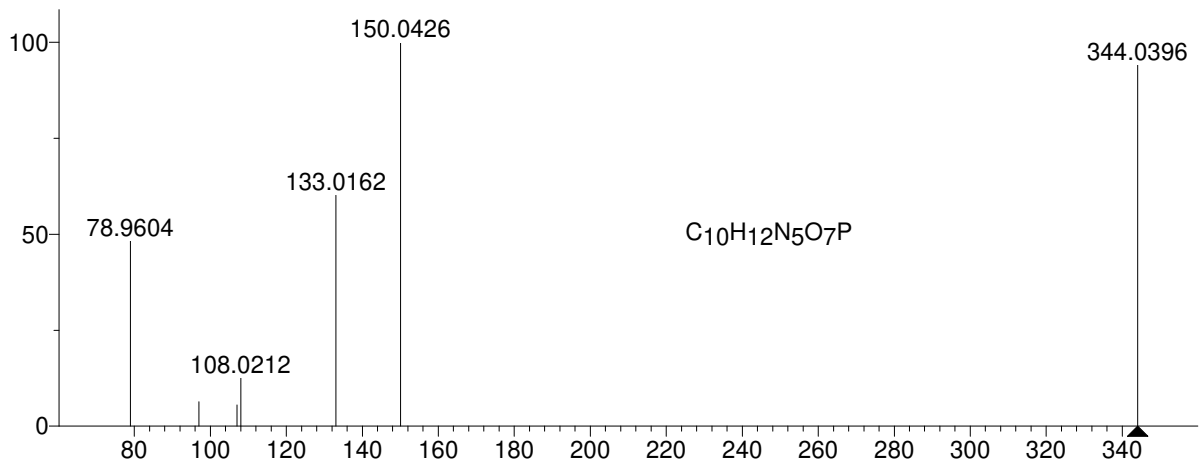

Hit 3 : Guanosine-3',5'-cyclic monophosphate; LC-ESI-QTOF; MS2; CE [M-H]<sup>-</sup> P=344  
C<sub>10</sub>H<sub>12</sub>N<sub>5</sub>O<sub>7</sub>P; MF: 524; RMF: 757; Prob 19.2%; Lib: msms-neg-massbank; ID: 4337.

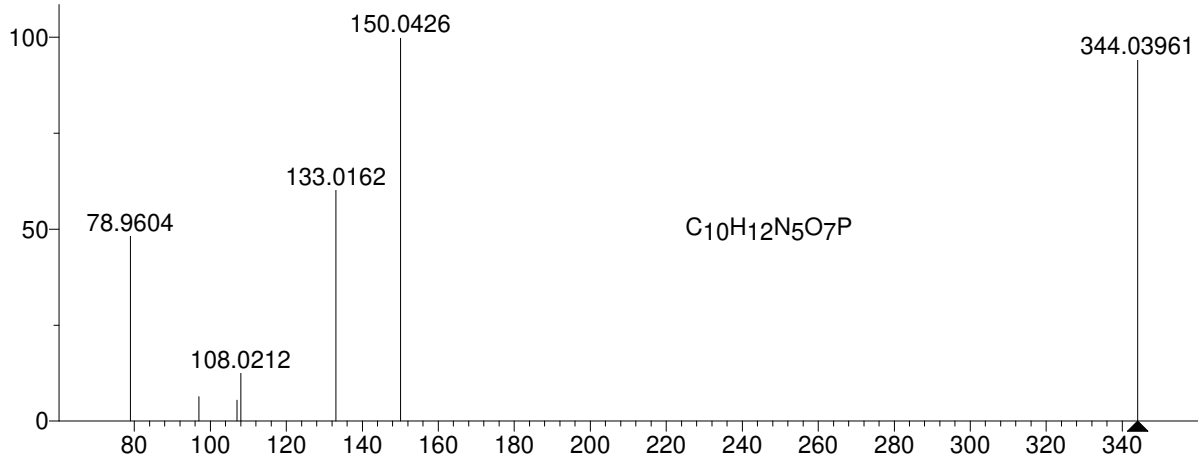

Hit 4 : 3',5'-cyclic GMP [M-H]<sup>-</sup> 35 P=344  
C<sub>10</sub>H<sub>12</sub>N<sub>5</sub>O<sub>7</sub>P; MF: 503; RMF: 717; Prob 8.15%; Lib: msms neg mona\_ipb\_gnps\_plasma; ID: 1249.

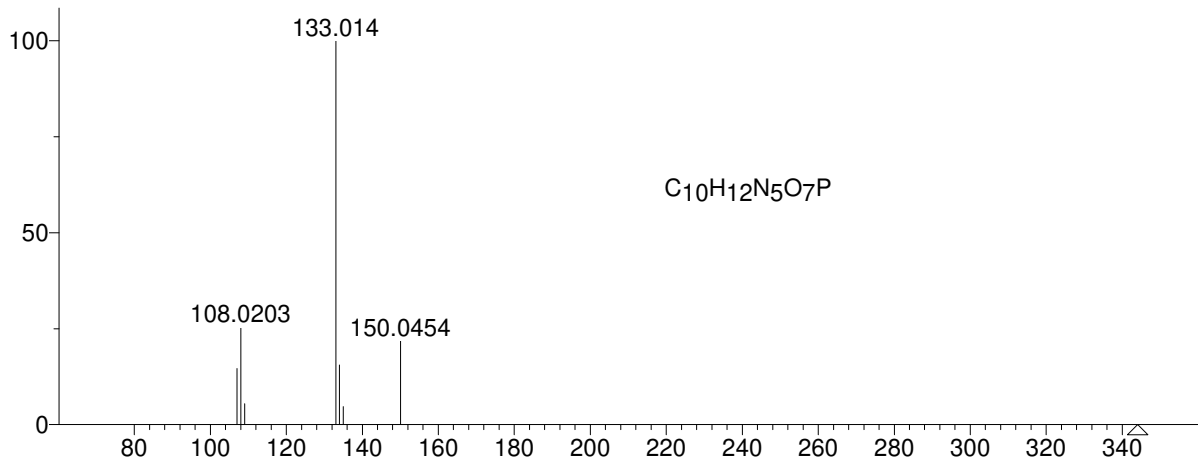

Hit 5 : Guanosine cyclic monophosphate [M-H]<sup>-</sup> 45HCD P=344  
C<sub>10</sub>H<sub>12</sub>N<sub>5</sub>O<sub>7</sub>P; MF: 501; RMF: 817; Prob 7.52%; Lib: mona-export-lc-ms-ms\_negative\_mode; ID: 17508.

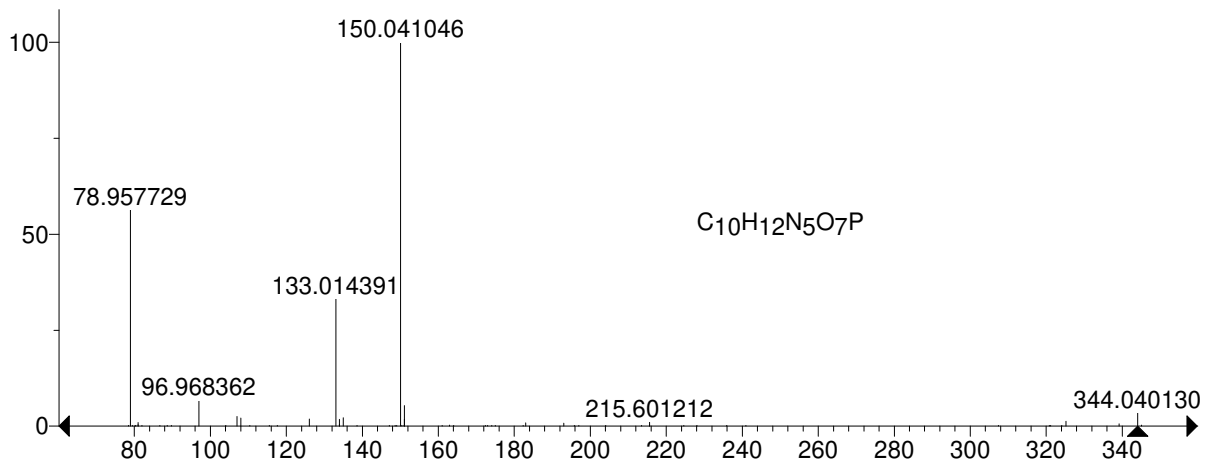

Unknown: Unknown (2.07\_689.0870m/z)  
Compound in Library Factor = -1679

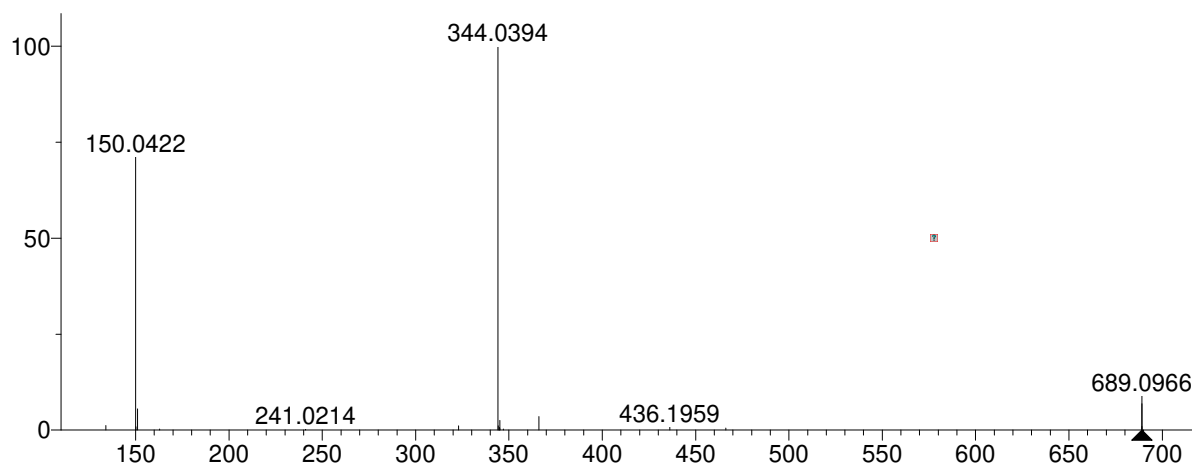

Hit 1 : Guanosine 3',5'-cyclic monophosphate [2M-H]<sup>-</sup> HCD 65V P=689.1  
C<sub>10</sub>H<sub>12</sub>N<sub>5</sub>O<sub>7</sub>P; MF: 649; RMF: 884; Prob 100.0%; CAS: 7665-99-8; Lib: nist\_msms; ID: 132119.

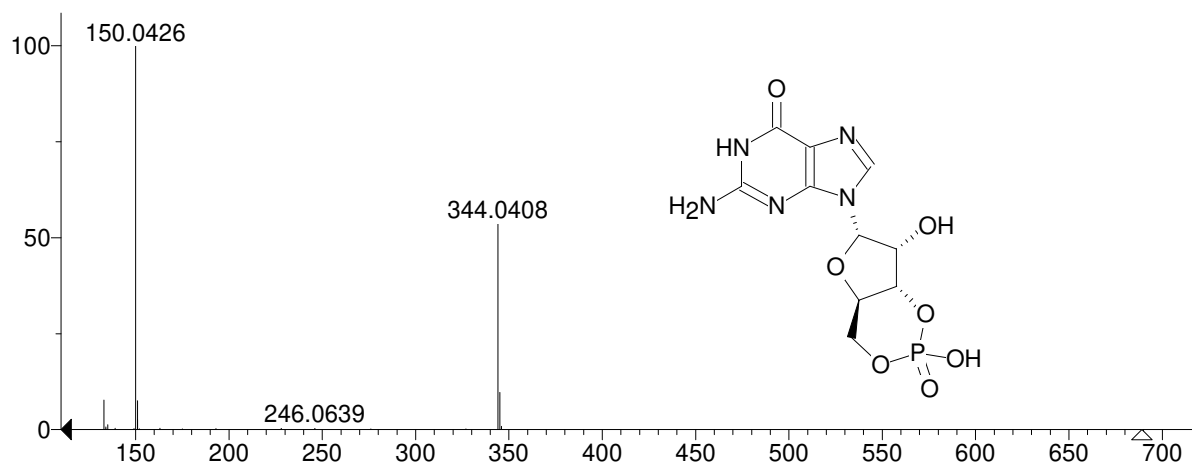

Unknown: Unknown (2.08\_344.2135m/z)  
Compound in Library Factor = 0

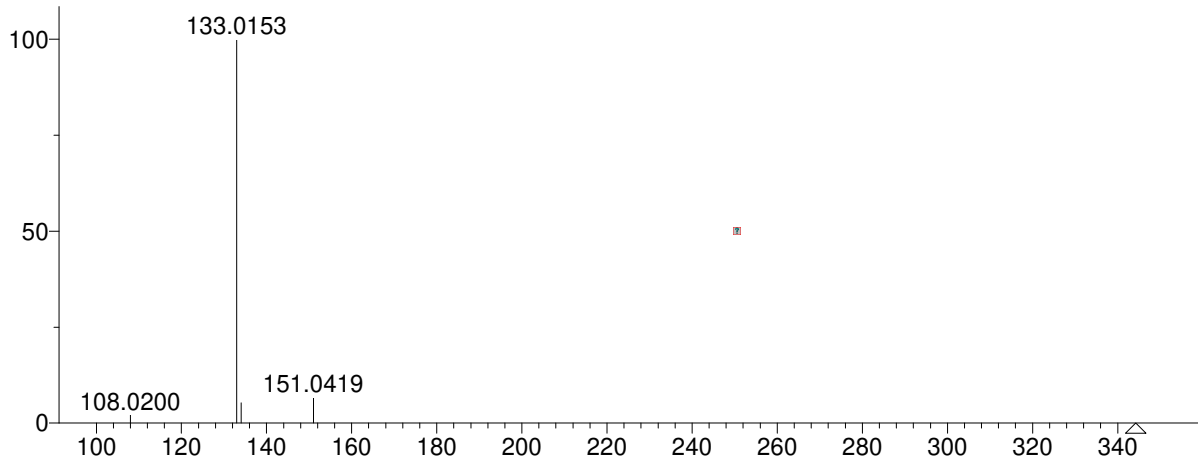

Unknown: Unknown (2.08\_606.2486m/z)  
Compound in Library Factor = 0

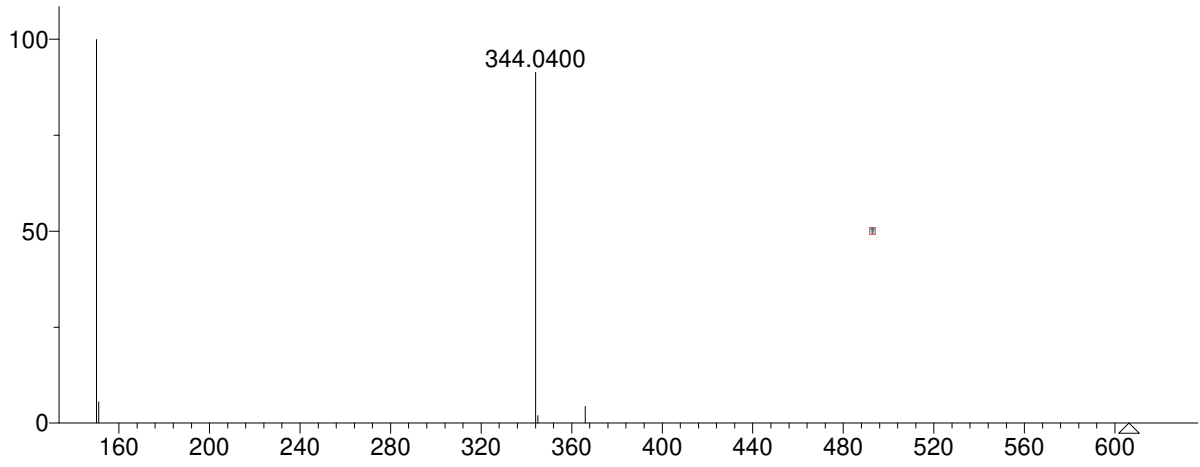



Unknown: Unknown (2.09\_711.0709m/z)  
Compound in Library Factor = 0

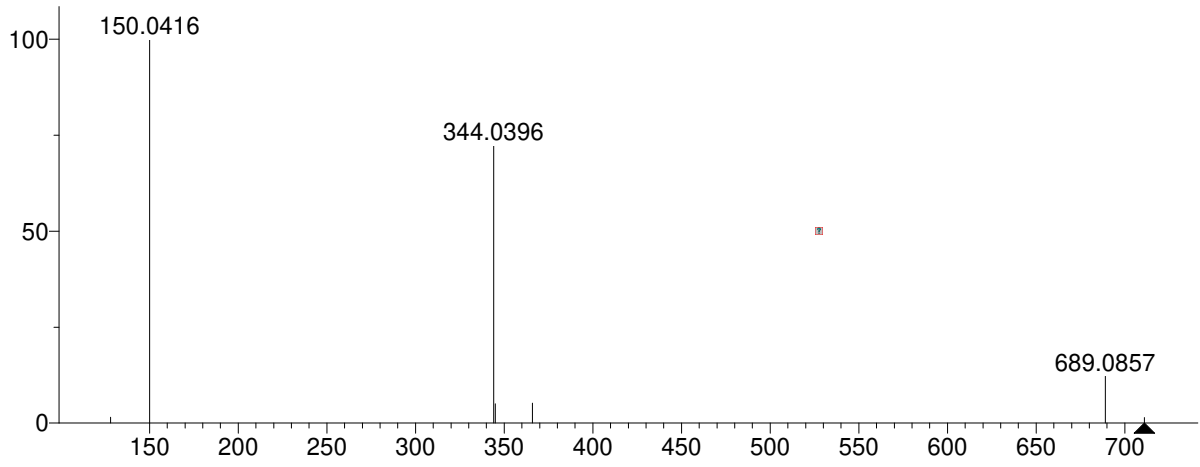

Unknown: Unknown (2.10\_330.1184m/z)  
Compound in Library Factor = 0

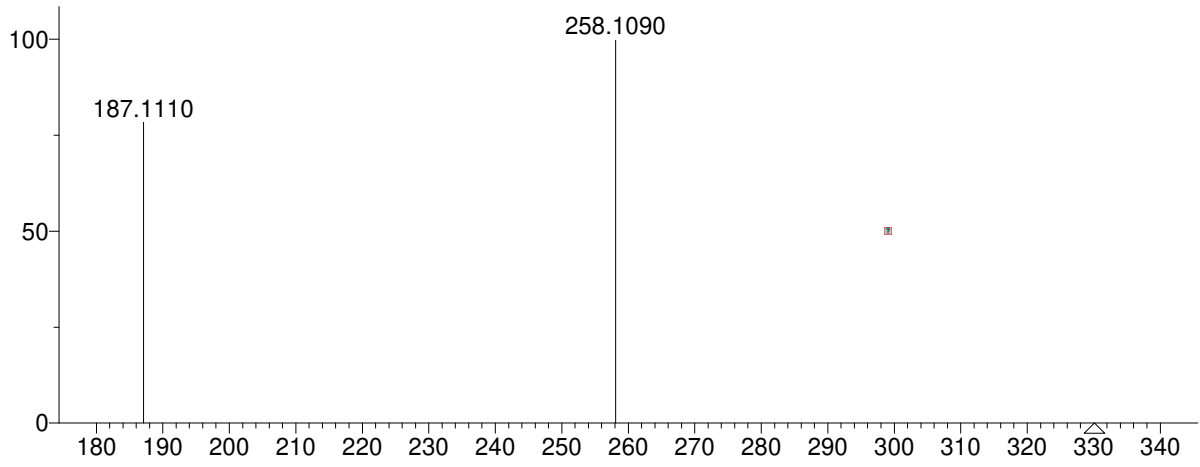

Unknown: Unknown (2.11\_134.0466m/z)  
Compound in Library Factor = -218

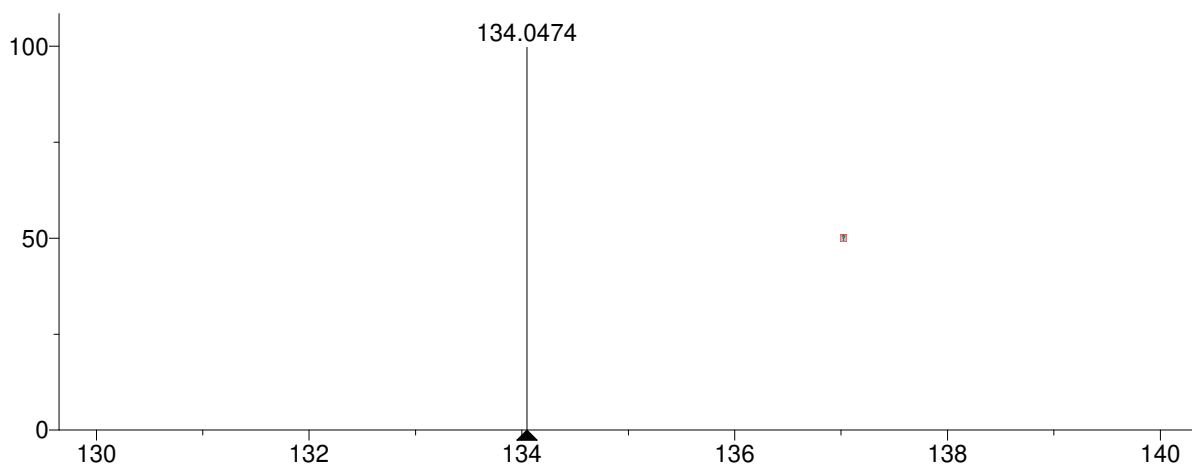

Hit 1 : Adenine [M-H]<sup>-</sup> 30V P=134  
C<sub>5</sub>H<sub>5</sub>N<sub>5</sub>; MF: 364; RMF: 999; Prob 8.56%; Lib: mona-export-1c-ms-ms\_negative\_mode; ID: 8364.

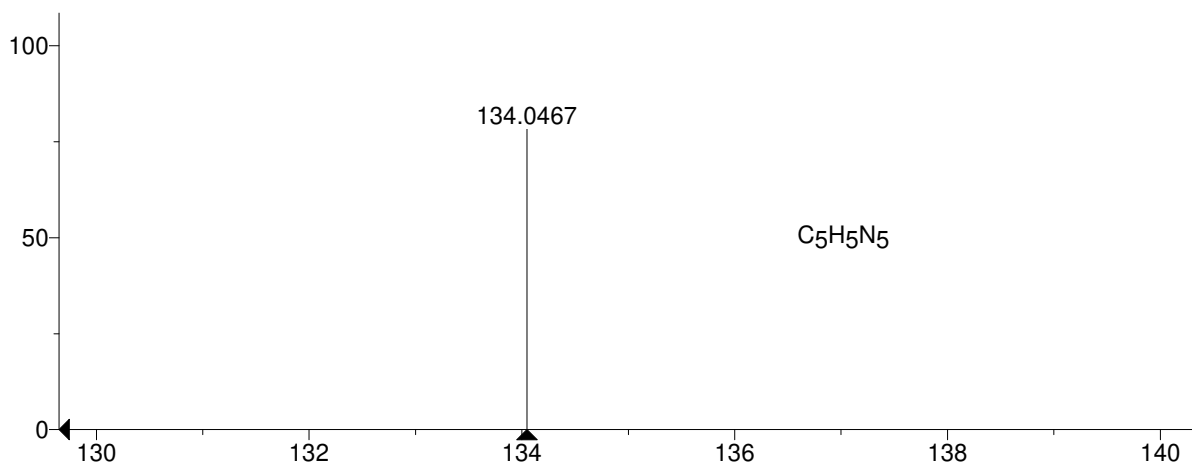

Hit 2 : C<sub>5</sub>H<sub>5</sub>N<sub>5</sub>; PlaSMA ID-63 [M-H]<sup>-</sup> P=134  
C<sub>5</sub>H<sub>5</sub>N<sub>5</sub>; MF: 364; RMF: 999; Prob 8.56%; Lib: biomsms-neg-plasma; ID: 936.

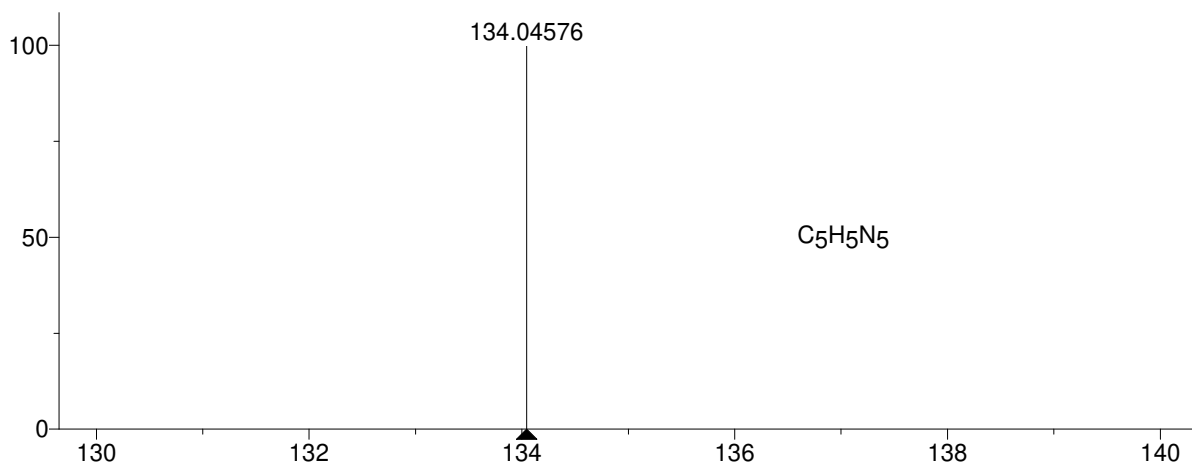

Hit 3 : adenine [M-H]<sup>-</sup> P=134  
C<sub>5</sub>H<sub>5</sub>N<sub>5</sub>; MF: 364; RMF: 999; Prob 8.56%; Lib: msms neg mona\_ipb\_gnps\_plasma; ID: 1503.

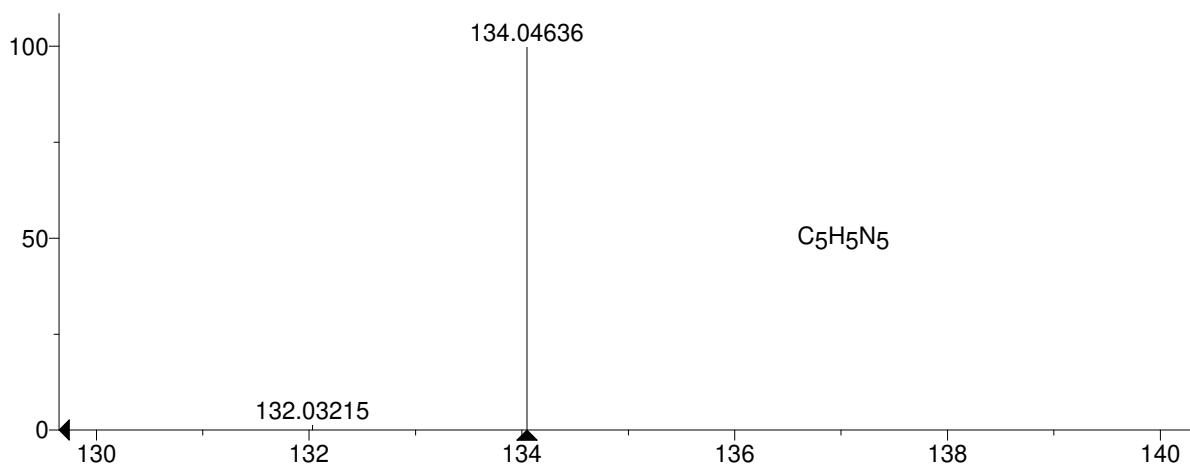

Hit 4 : Adenine; LC-ESI-QTOF; MS2; CE [M-H]<sup>-</sup> P=134  
C<sub>5</sub>H<sub>5</sub>N<sub>5</sub>; MF: 364; RMF: 999; Prob 8.56%; Lib: msms-neg-massbank; ID: 4268.

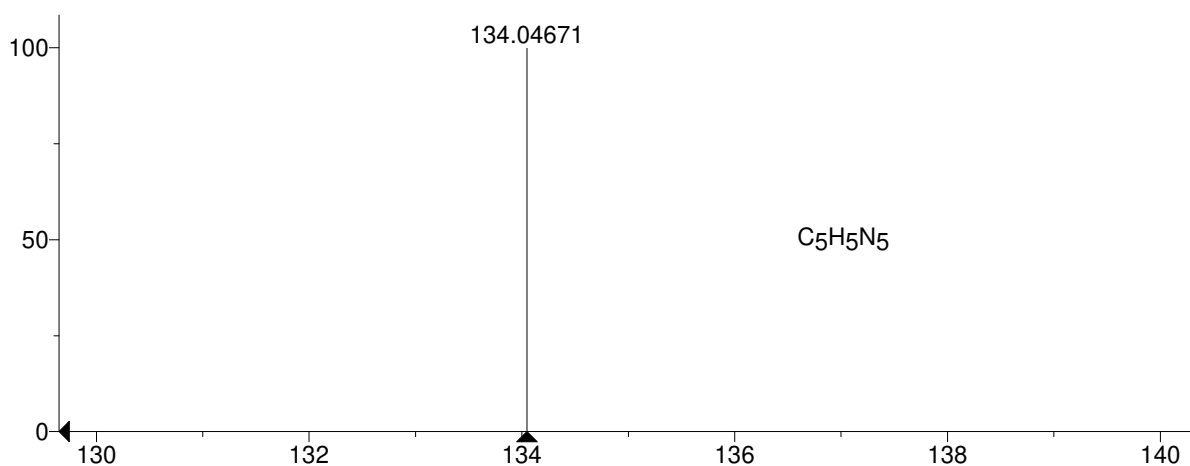

Hit 5 : 6-Chloroguanine [M+H-HCl]<sup>+</sup> HCD 34V P=134  
C<sub>5</sub>H<sub>4</sub>ClN<sub>5</sub>; MF: 364; RMF: 999; Prob 8.56%; CAS: 10310-21-1; Lib: nist\_msms; ID: 285585.

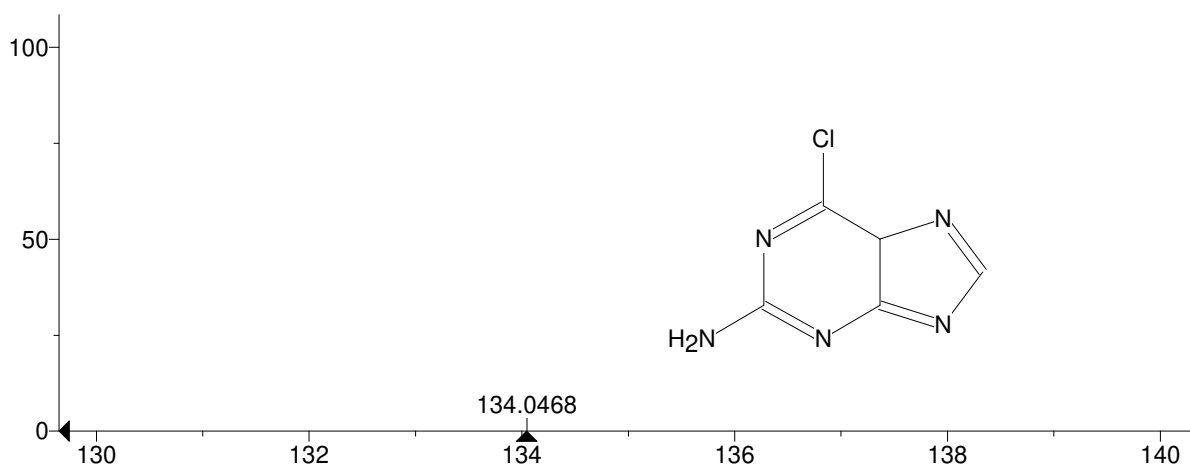

Unknown: Unknown (2.11\_459.1930m/z)  
Compound in Library Factor = 0

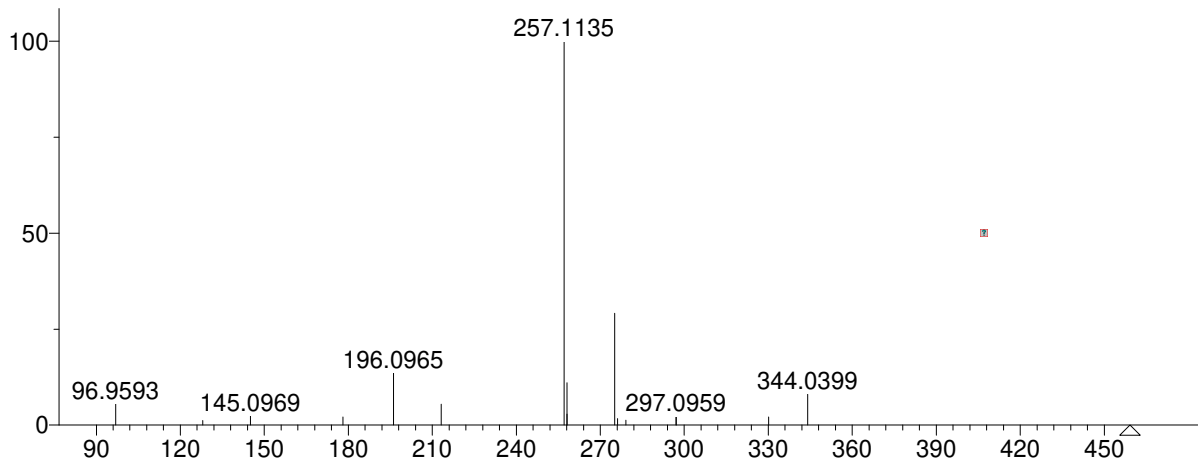

Unknown: Unknown (2.12\_257.1134m/z)  
Compound in Library Factor = -289

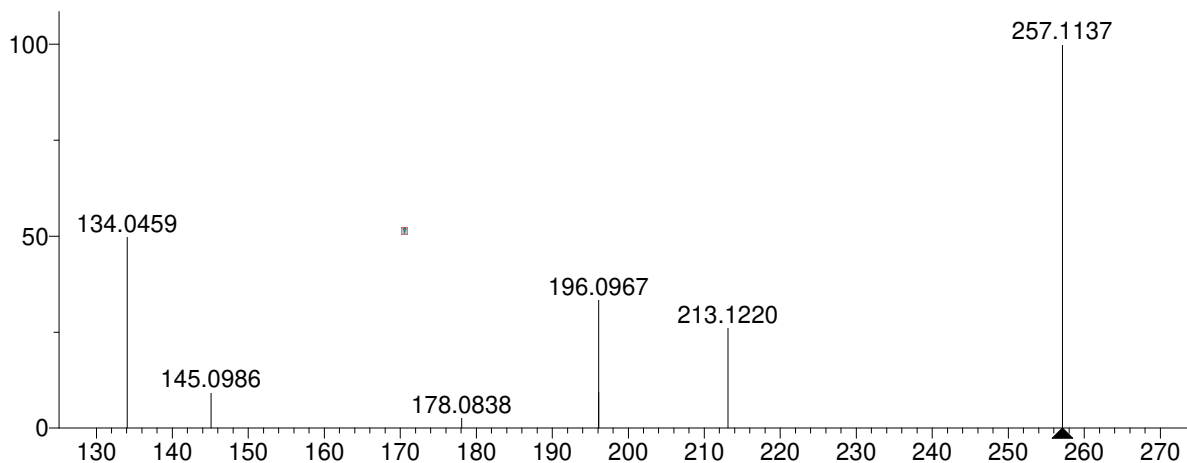

Hit 1 : L-Saccharopine [M-H-H<sub>2</sub>O]- HCD 24V P=257.1  
C<sub>11</sub>H<sub>20</sub>N<sub>2</sub>O<sub>6</sub>; MF: 332; RMF: 767; Prob 99.0%; CAS: 997-68-2; Lib: nist\_msms; ID: 125637.

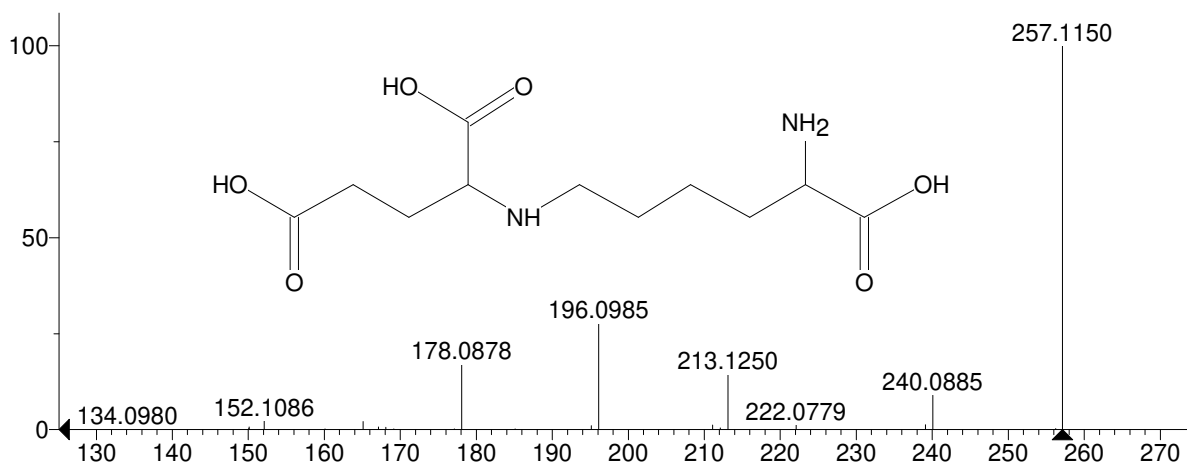

Hit 2 :  $\alpha$ -Cyclohexylmandelic acid [M+Na]<sup>+</sup> HCD 1V P=257.1  
C<sub>14</sub>H<sub>18</sub>O<sub>3</sub>; MF: 122; RMF: 722; Prob 0.99%; CAS: 4335-77-7; Lib: nist\_msms; ID: 492969.

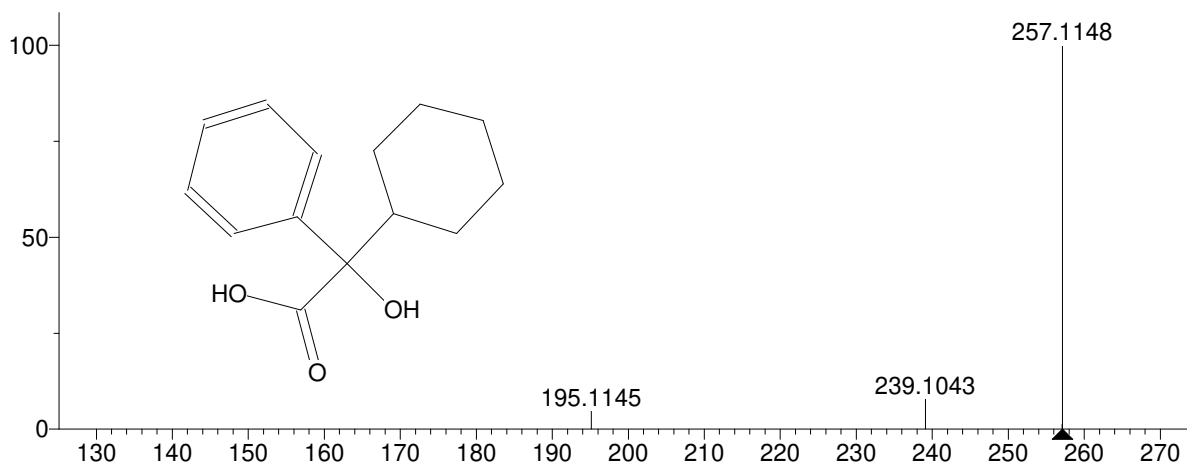

Unknown: Unknown (2.12\_376.1349m/z)  
Compound in Library Factor = 0

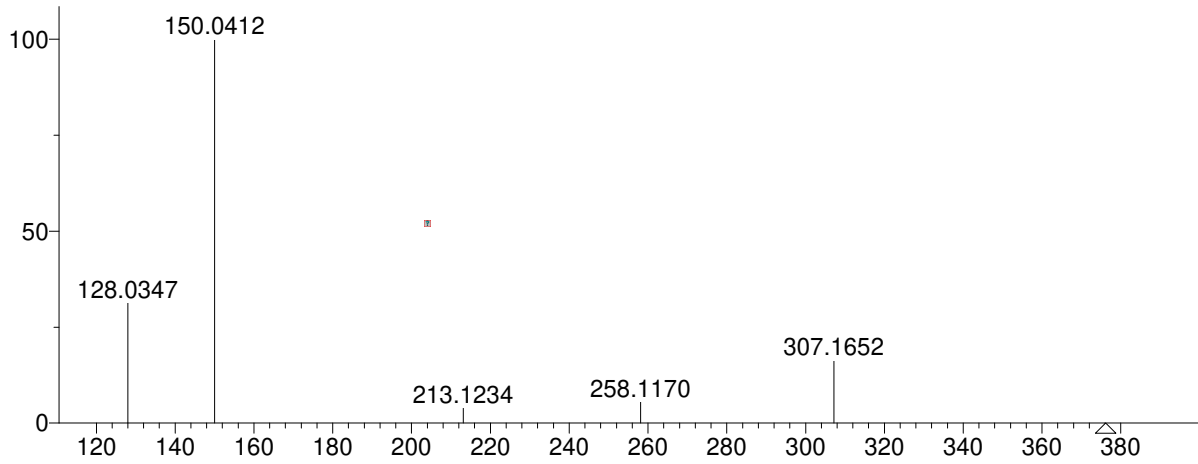

Hit 1 : Ofloxacin N-oxide [M-H]<sup>-</sup> HCD 60V P=376.1  
C<sub>18</sub>H<sub>20</sub>FN<sub>3</sub>O<sub>5</sub>; MF: 0; RMF: 45; Prob 50.0%; CAS: 104721-52-0; Lib: nist\_msms; ID: 464829.

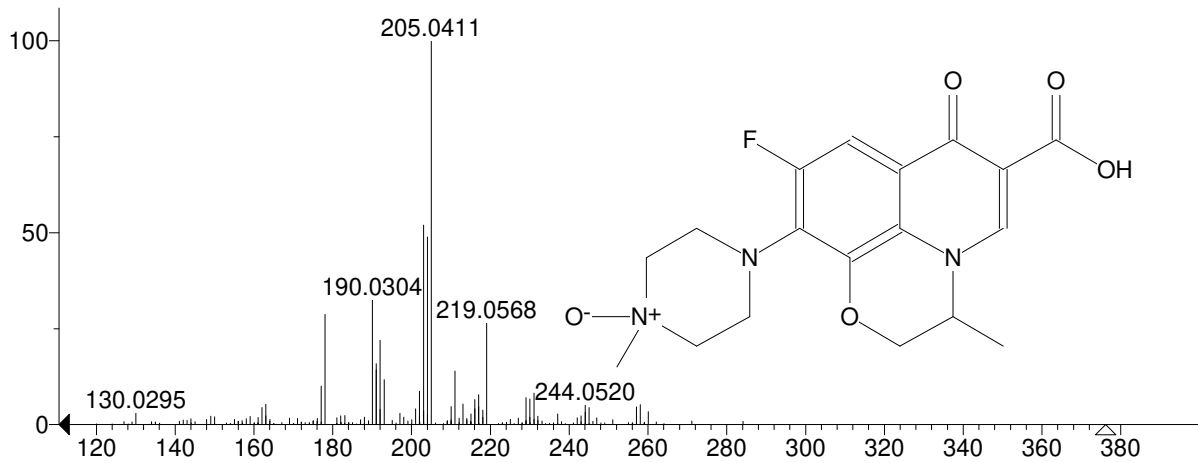

Hit 2 : NCGC00381076-01\_C<sub>17</sub>H<sub>23</sub>NO<sub>7</sub>\_4-[(2-[(2-Ethyl-2,3-dihydroxybutanoyl)oxy]methyl)phenyl]amino]-4-oxo  
C<sub>17</sub>H<sub>23</sub>NO<sub>7</sub>; MF: 0; RMF: 4; Prob 50.0%; Lib: mona-export-gnps; ID: 10257.

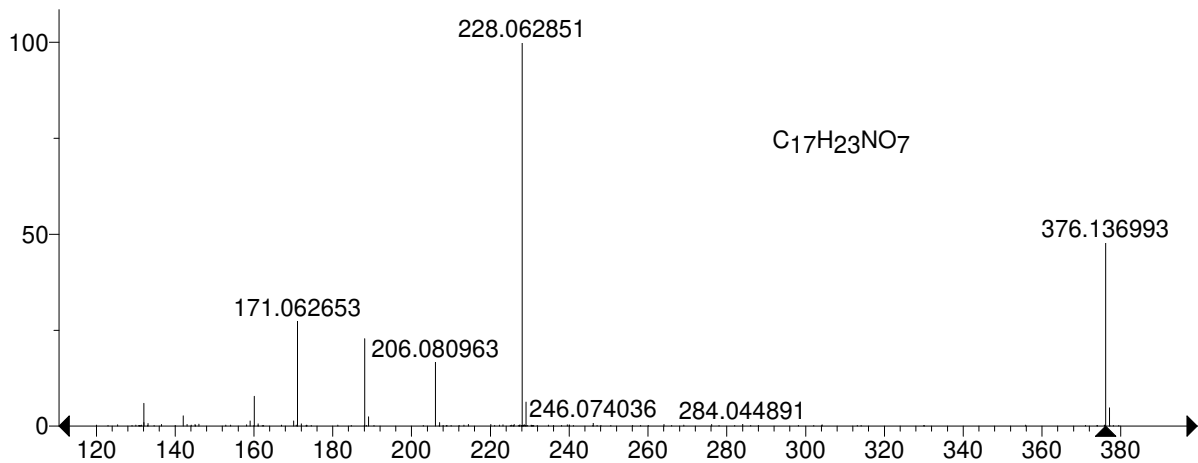

\*\* Search Report Page 1 of 2 \*\*

Unknown: Unknown (2.12\_379.1704m/z)  
Compound in Library Factor = 0

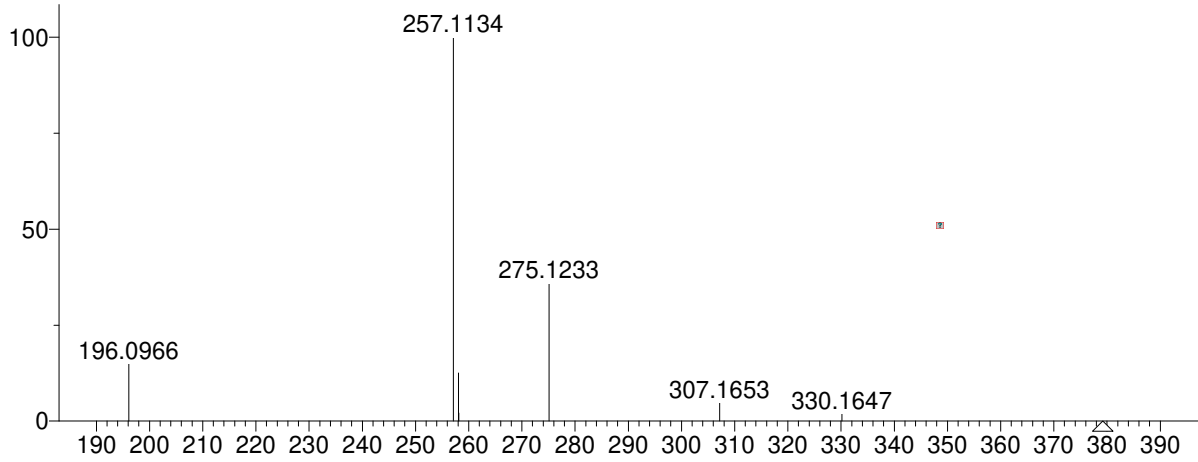

Hit 1 : [Glu1] TRH [M-H]- HCD 28eV P=379.2  
C16H24N6O5; MF: 0; RMF: 19; Prob 33.3%; CAS: 51826-17-6; Lib: nist\_msms; ID: 569033.

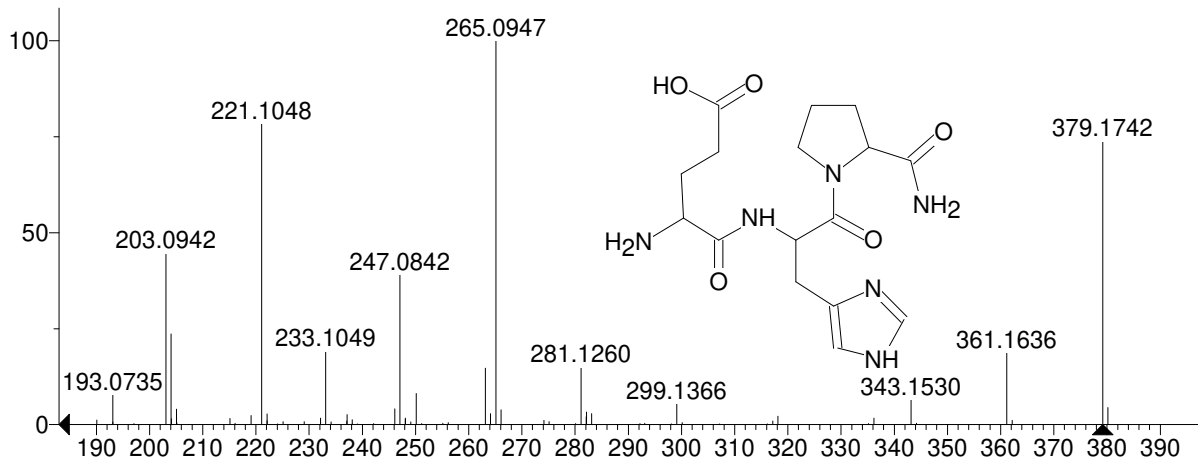

Hit 2 : [Glu1] TRH [M-H]- HCD 28eV P=379.2  
C16H24N6O5; MF: 0; RMF: 19; Prob 33.3%; Lib: nist\_msms2; ID: 74025.

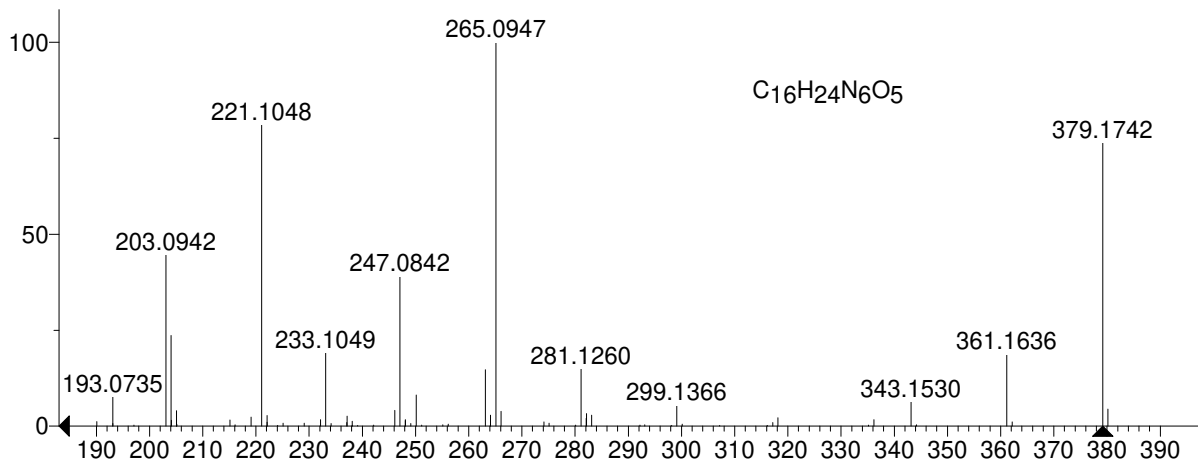



\*\* Search Report Page 2 of 2 \*\*

Hit 3 : Bisphenol PH [M-H]- HCD 49V P=379.2  
C<sub>27</sub>H<sub>24</sub>O<sub>2</sub>; MF: 0; RMF: 17; Prob 33.3%; CAS: 24038-68-4; Lib: nist\_msms; ID: 403295.

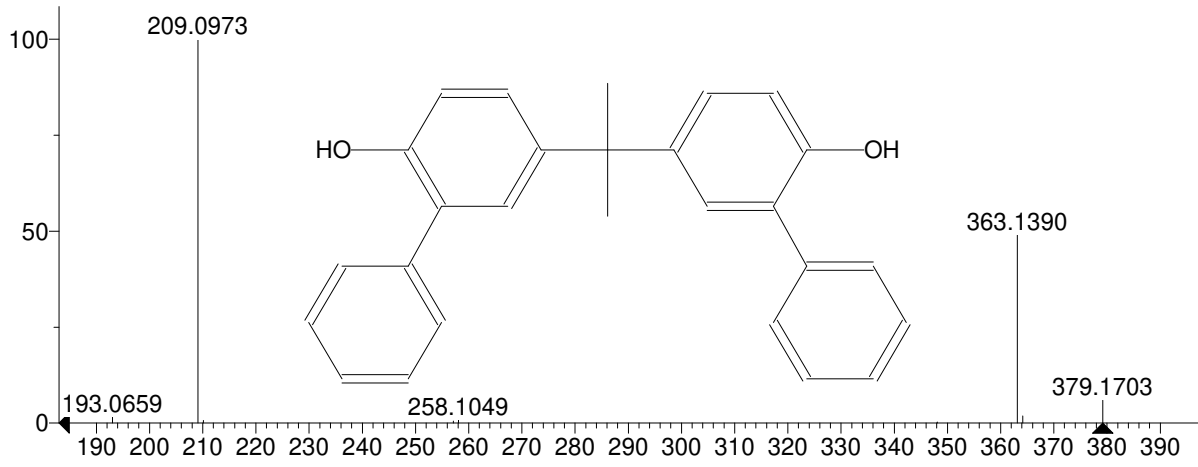

\*\* Search Report Page 1 of 2 \*\*

Unknown: Unknown (2.12\_445.1817m/z)  
Compound in Library Factor = -3273

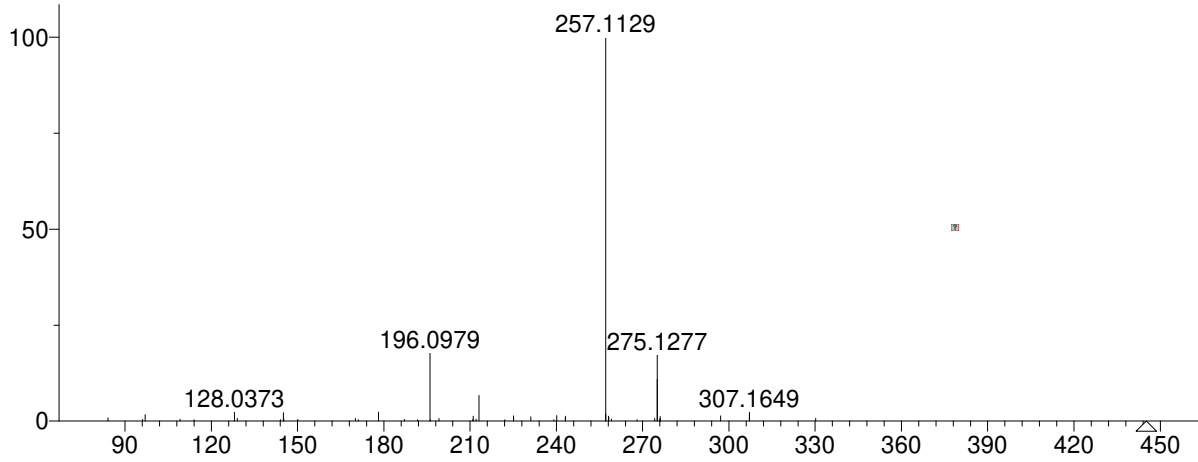

Hit 1 : Difenacoum [M+H]<sup>+</sup> IT 35% P=445.2  
C<sub>31</sub>H<sub>24</sub>O<sub>3</sub>; MF: 8; RMF: 495; Prob 20.8%; CAS: 56073-07-5; Lib: nist\_msms; ID: 399396.



Hit 2 : 11-(hydroxymethyl)-2,6,6,14,19-pentamethyl-7,16,18-trioxapentacyclo[12.6.1.0A<sup>2</sup>,A<sup>1</sup>A<sup>2</sup>.0a<sup>u</sup>,A<sup>1</sup>a<sup>c</sup>  
C<sub>24</sub>H<sub>28</sub>O<sub>8</sub>; MF: 4; RMF: 99; Prob 17.6%; Lib: mona-export-vf-npl\_qexactive; ID: 21174.

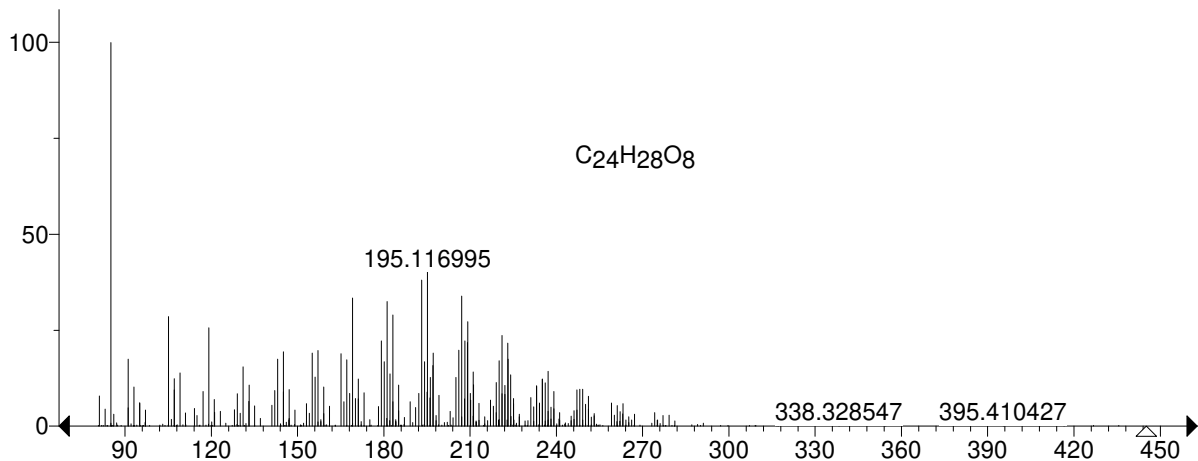

Hit 3 : NCGC00381216-01\_C24H28O8\_Furo[4,3,2-ij]pyrano[4',3':4,5]cyclohepta[1,2-f][2]benzopyran-1,5,9,13(2H, C24H28O8; MF: 3; RMF: 121; Prob 16.9%; Lib: mona-export-gnps; ID: 11597.



Hit 4 : [(6Z,10Z)-6-(acetyloxymethyl)-10-(hydroperoxymethyl)-3-methylidene-2-oxo-3a,4,5,8,9,11a-hexahydrocyclo C22H30O8; MF: 0; RMF: 48; Prob 14.9%; Lib: mona-export-vf-npl\_gexactive; ID: 19873.

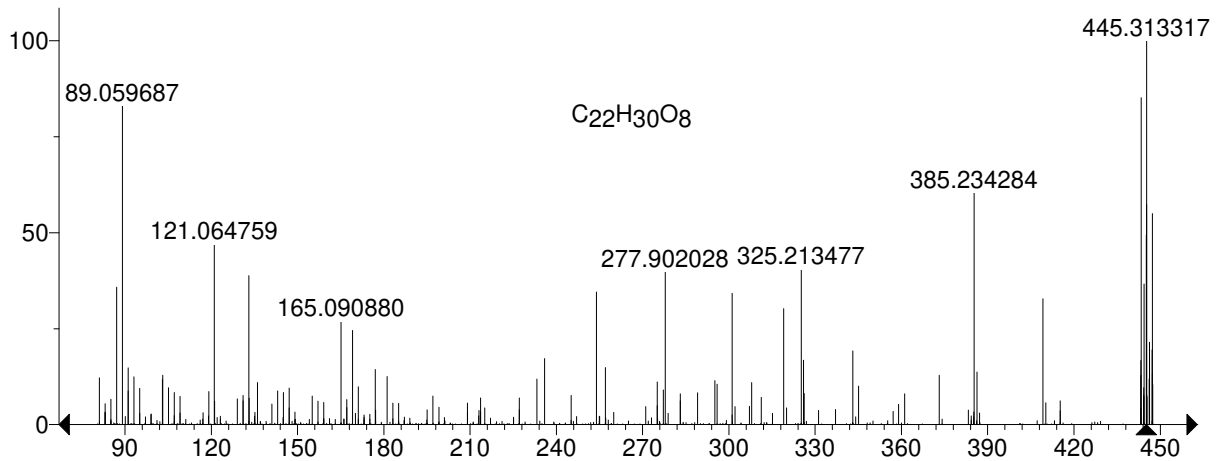

Hit 5 : NCGC00381245-01\_C22H30O8\_2-[6-{{(2Z)-4-Acetoxy-2-methyl-2-butenoyl}oxy}-2-hydroxy-3-(3-hydroxy-1 C22H30O8; MF: 0; RMF: 13; Prob 14.9%; Lib: mona-export-gnps; ID: 10571.



Unknown: Unknown (2.12\_467.1570m/z)  
Compound in Library Factor = 0

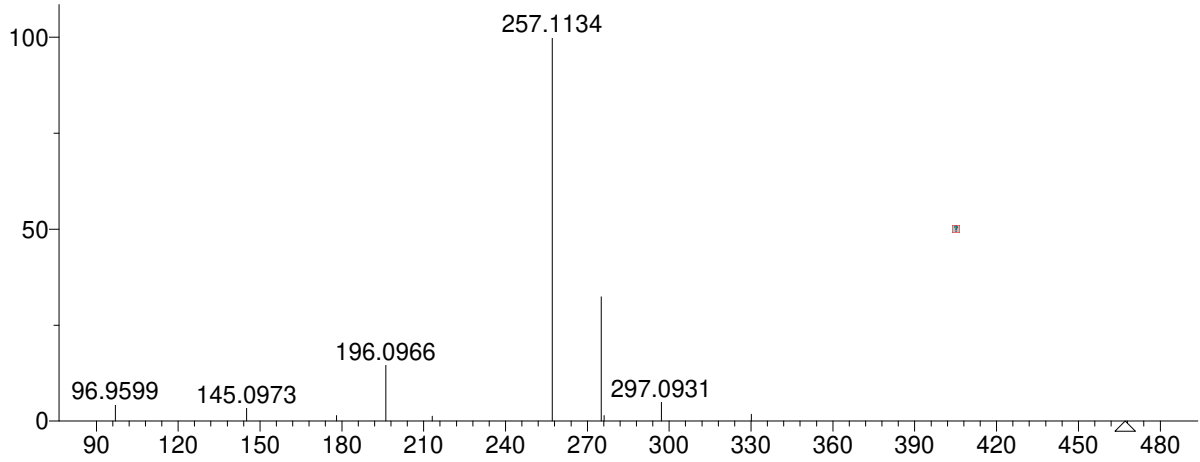

Hit 1 : agnuside [M+H]<sup>+</sup> 45HCD P=467.2  
C<sub>22</sub>H<sub>26</sub>O<sub>11</sub>; MF: 0; RMF: 11; Prob 50.0%; Lib: mona-export-vf-npl\_qexactive; ID: 4715.

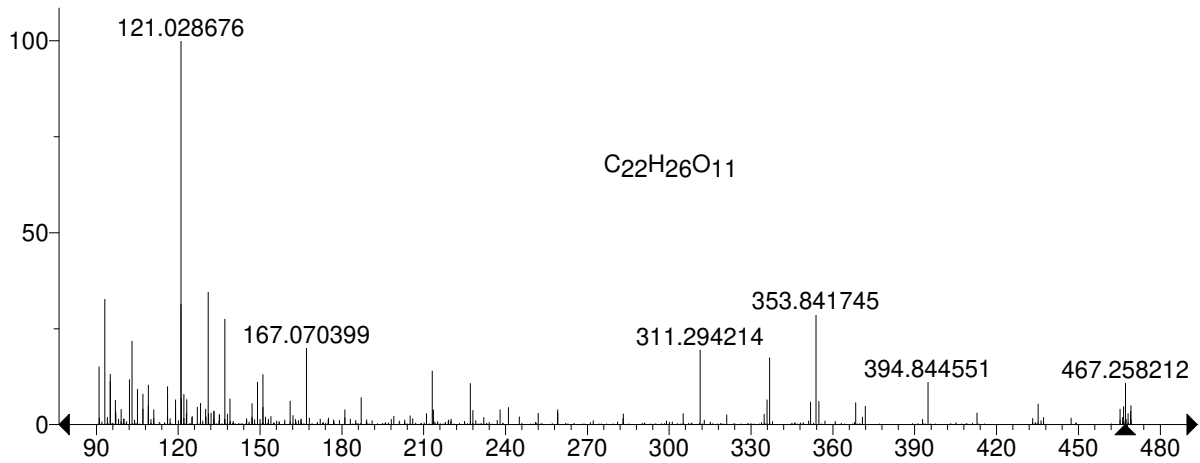

Hit 2 : [(1aS,1bS,2S,5aR,6S,6aS)-1a-(hydroxymethyl)-2-[(2S,3R,4S,5S,6R)-3,4,5-trihydroxy-6-(hydroxymethyl)ox:  
C<sub>22</sub>H<sub>26</sub>O<sub>11</sub>; MF: 0; RMF: 4; Prob 50.0%; Lib: mona-export-vf-npl\_qexactive; ID: 12085.

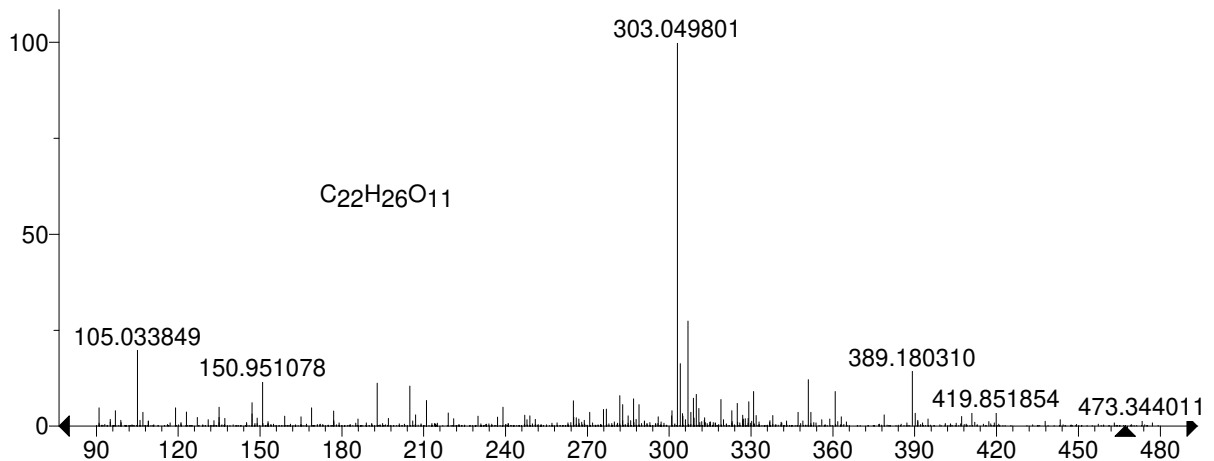

Unknown: Unknown (2.12\_571.1296m/z)  
Compound in Library Factor = -3273

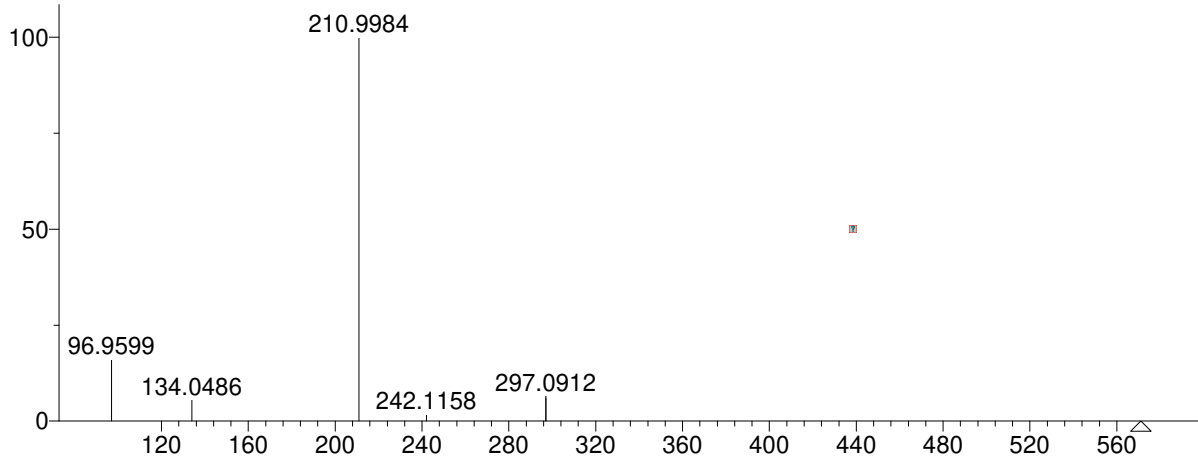

Hit 1 : Adenylyl(3'-5')cytidine [M-H]<sup>-</sup> QTOF 40V P=571.1  
C19H25N8O11P; MF: 3; RMF: 175; Prob 53.1%; CAS: 2382-66-3; Lib: nist\_msms; ID: 28245.

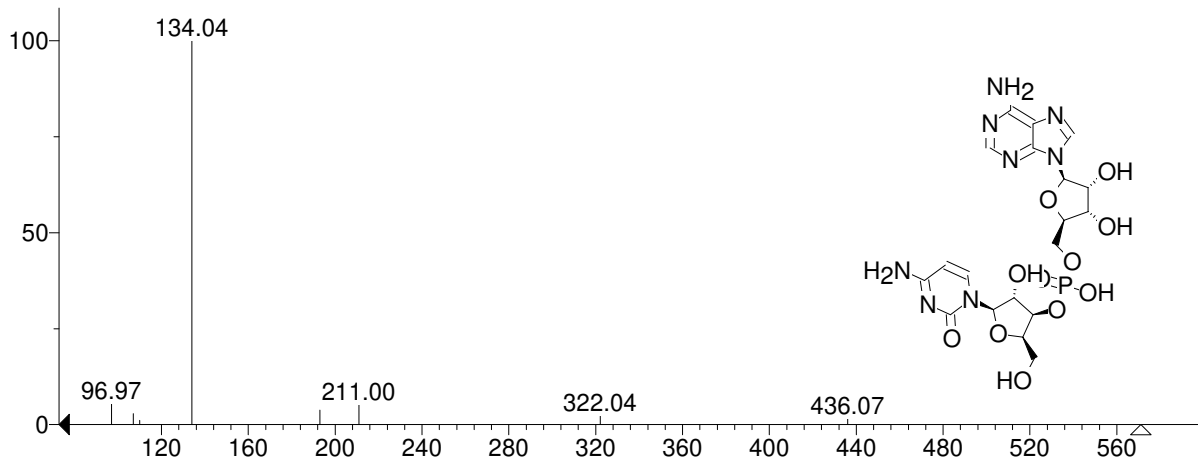

Hit 2 : methyl 8,11,15,20,22-pentahydroxy-24-methyl-13,18,27-trioxo-6-oxaheptacyclo[15.10.2.0A<sup>1</sup>,A<sup>1</sup>a<sup>1</sup>.0A<sup>1</sup>  
C31H24O11; MF: 0; RMF: 32; Prob 46.9%; Lib: mona-export-1c-ms-ms\_negative\_mode; ID: 23338.

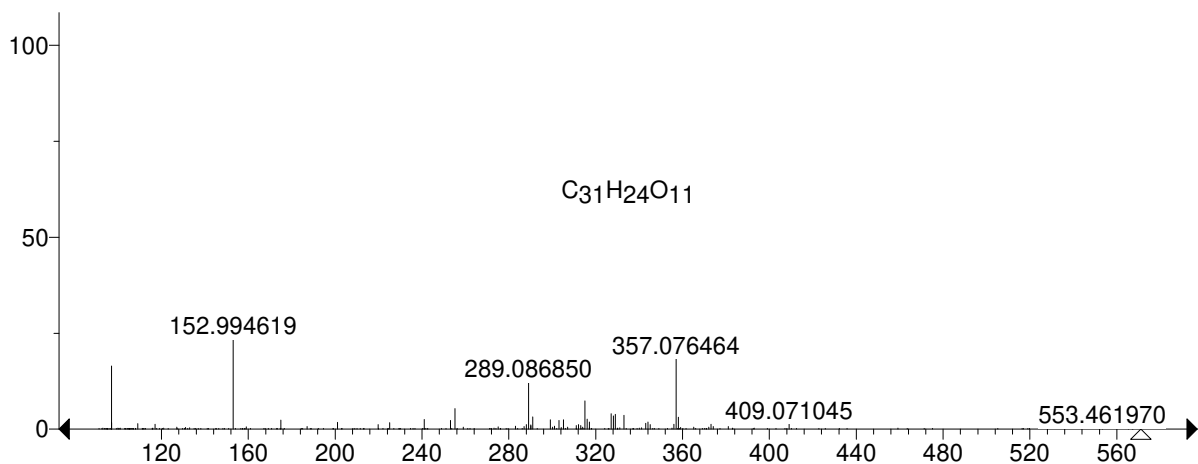

Unknown: Unknown (2.14\_405.1613m/z)  
Compound in Library Factor = 0

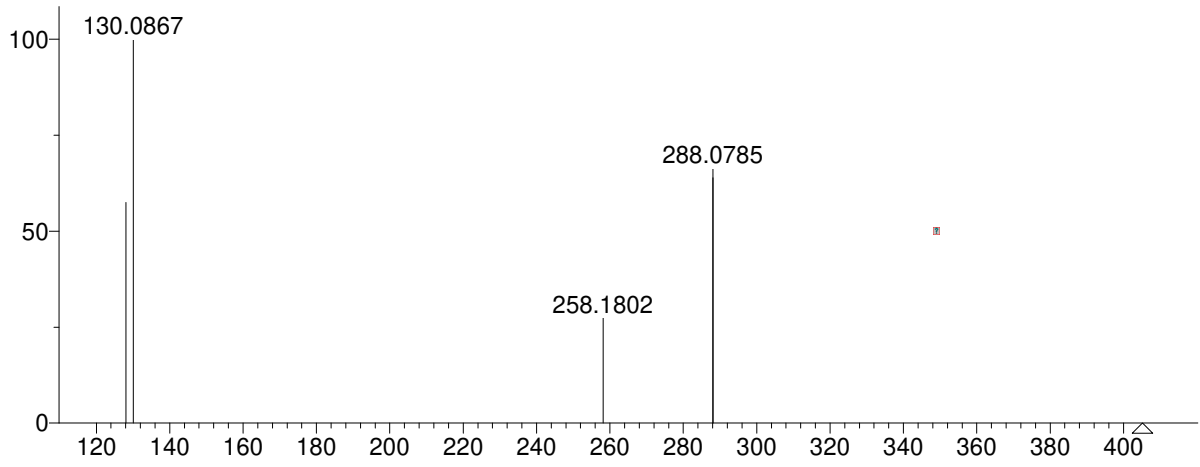

\*\* Search Report Page 1 of 2 \*\*

Unknown: Unknown (2.15\_323.0972m/z)  
Compound in Library Factor = 0

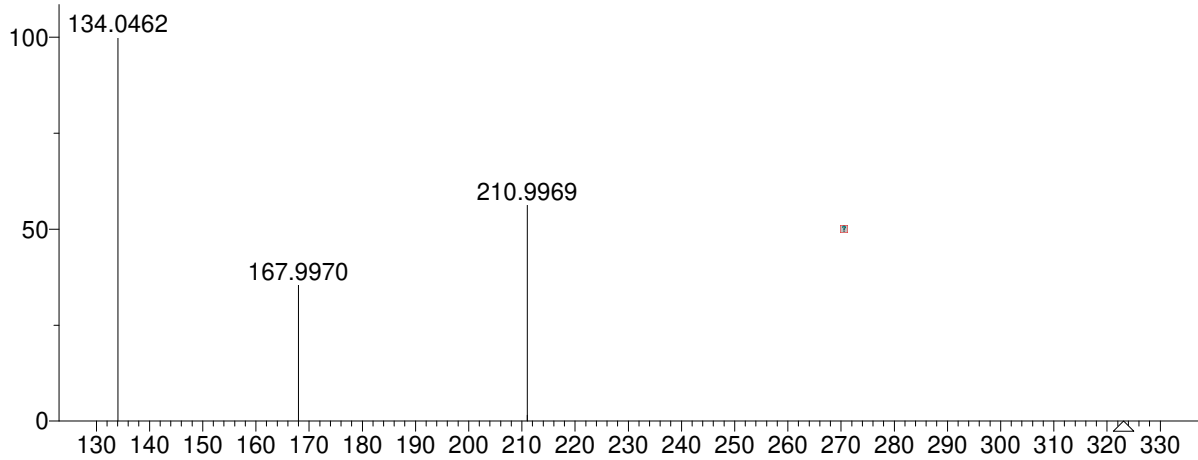

Hit 1 : 1-Piperidinecarboxylic acid, 4-[6-[4-[(methoxycarbonyl)amino]phenyl]-4-(4-morpholinyl)-1H-pyrazolo[3,4-d]]  
C<sub>24</sub>H<sub>29</sub>N<sub>7</sub>O<sub>5</sub>; MF: 0; RMF: 105; Prob 7.69%; CAS: 1062169-56-5; Lib: nist\_msms; ID: 265735.

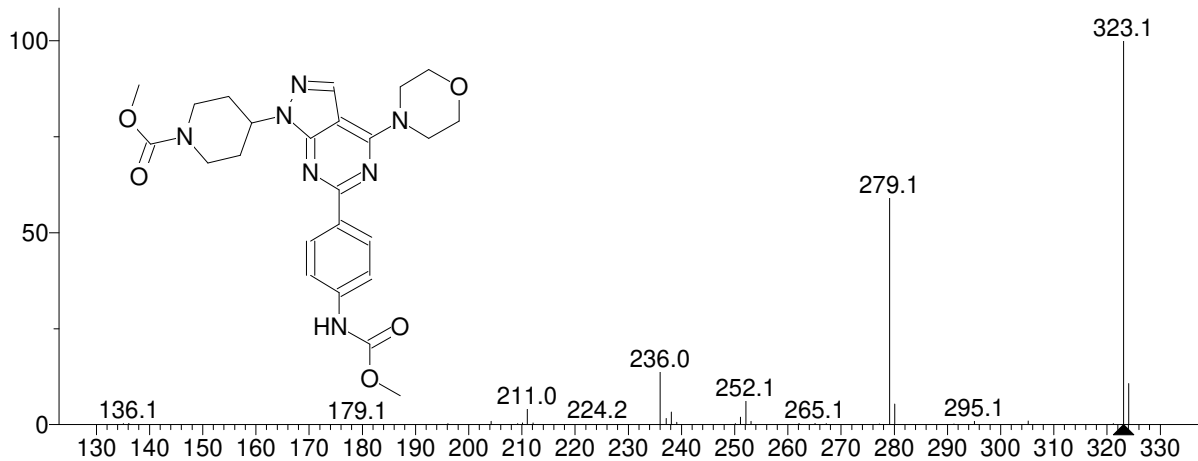

Hit 2 : Indanofan [M+H]<sup>+</sup>=>323.1 IT 35% P=323.1  
C<sub>20</sub>H<sub>17</sub>ClO<sub>3</sub>; MF: 0; RMF: 88; Prob 7.69%; CAS: 133220-30-1; Lib: nist\_msms; ID: 477459.

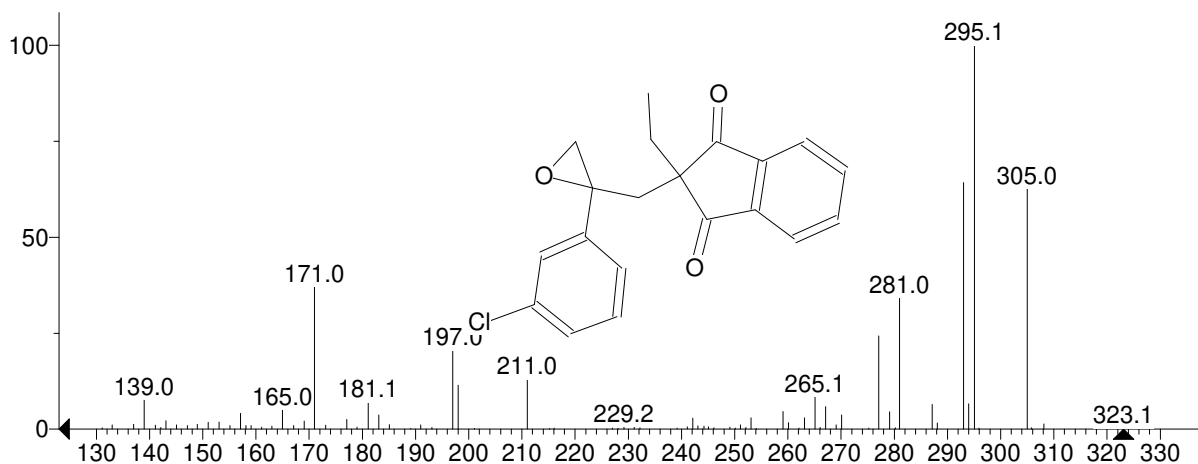

Hit 3 : Prednisone [M+H-H<sub>2</sub>O]<sup>+</sup>=>323.1 IT 35% P=323.1  
C<sub>21</sub>H<sub>26</sub>O<sub>5</sub>; MF: 0; RMF: 83; Prob 7.69%; CAS: 53-03-2; Lib: nist\_msms; ID: 99548.



Hit 4 : Fluorometholone [M+H-H<sub>2</sub>O]<sup>+</sup>=>341.1=>323.1 IT 35% P=323.1  
C<sub>22</sub>H<sub>29</sub>FO<sub>4</sub>; MF: 0; RMF: 66; Prob 7.69%; CAS: 426-13-1; Lib: nist\_msms; ID: 119128.

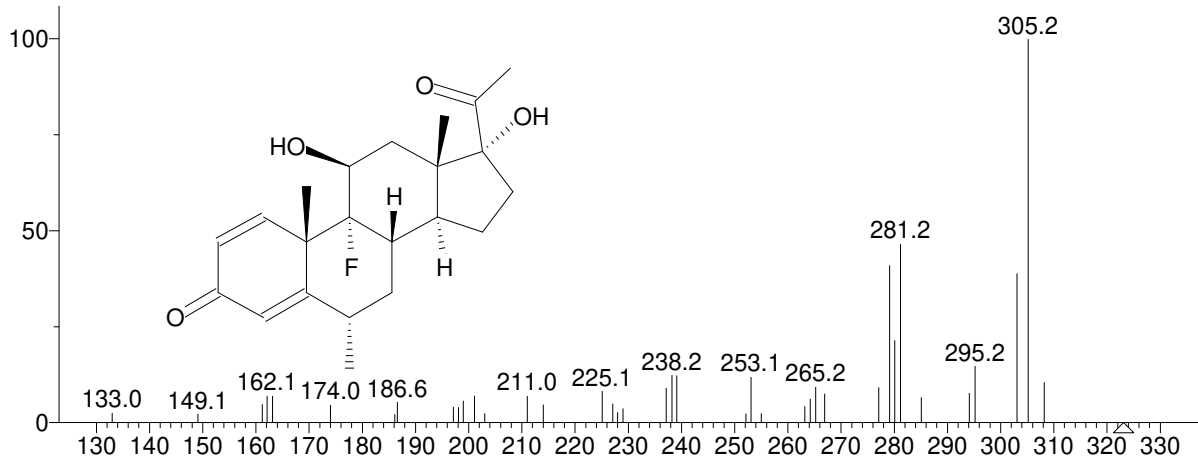

Hit 5 : Budesonide [M+H-H<sub>2</sub>O]<sup>+</sup>=>323.1 IT 35% P=323.1  
C<sub>25</sub>H<sub>34</sub>O<sub>6</sub>; MF: 0; RMF: 49; Prob 7.69%; CAS: 51333-22-3; Lib: nist\_msms; ID: 152692.

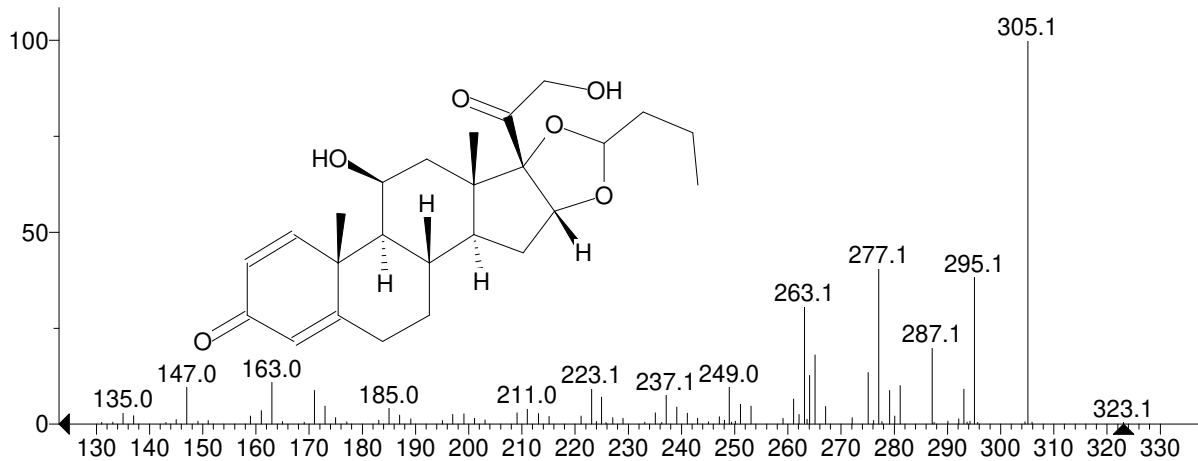



Unknown: Unknown (2.15\_352.0694m/z)  
Compound in Library Factor = 0

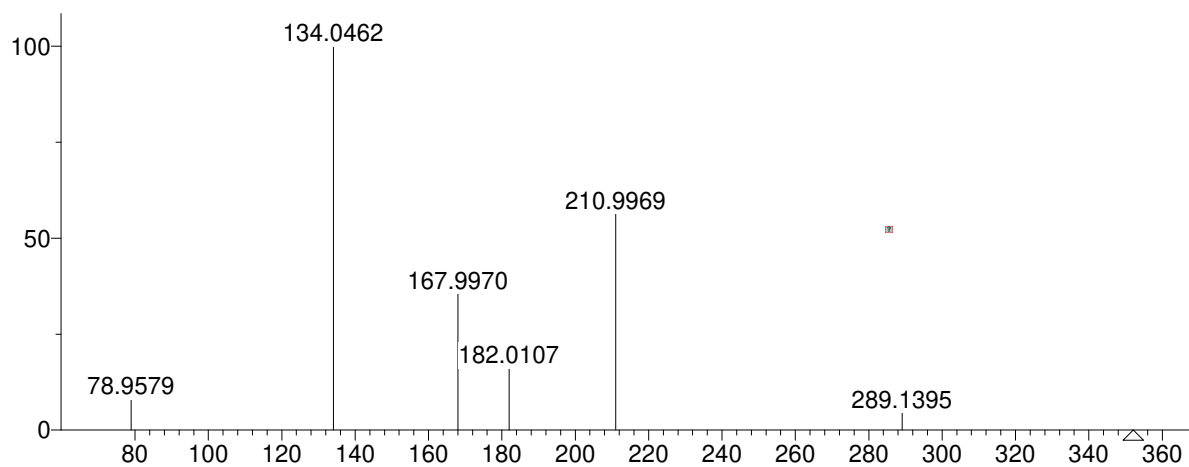

Hit 1 : Lansoprazole [M+H-H<sub>2</sub>O]<sup>+</sup> HCD 47V P=352.1  
C<sub>16</sub>H<sub>14</sub>F<sub>3</sub>N<sub>3</sub>O<sub>2</sub>S; MF: 0; RMF: 14; Prob 100.0%; CAS: 103577-45-3; Lib: nist\_msms; ID: 316346.

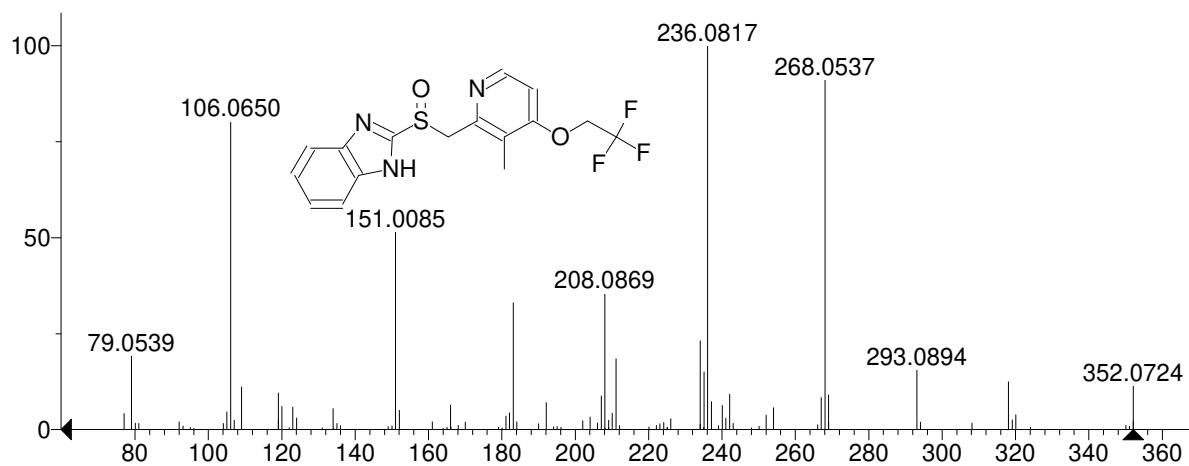

Unknown: Unknown (2.15\_403.1336m/z)  
Compound in Library Factor = 0

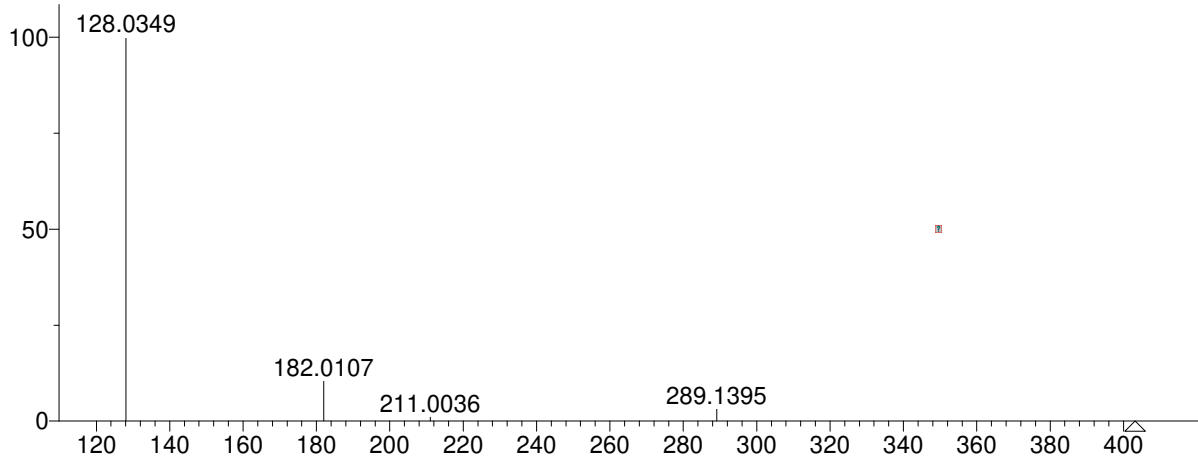

Hit 1 : Egtazic acid [M+Na]<sup>+</sup> HCD 52V P=403.1  
C<sub>14</sub>H<sub>24</sub>N<sub>2</sub>O<sub>10</sub>; MF: 0; RMF: 6; Prob 50.0%; CAS: 67-42-5; Lib: nist\_msms; ID: 81815.

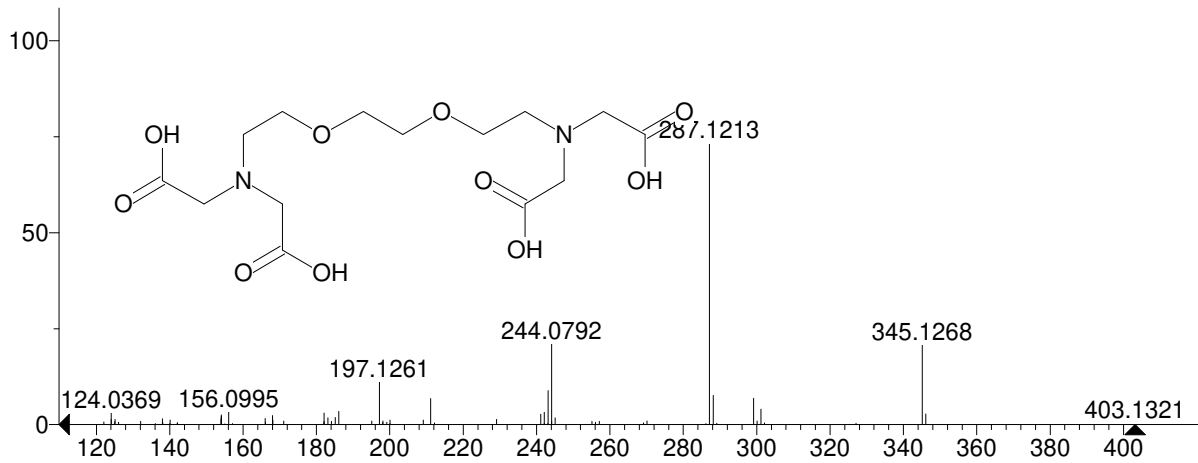

Hit 2 : methyl 2-(4,5-dihydroxy-6-methoxy-3,6-dimethyl-2-oxocyclohex-3-en-1-yl)oxy-4-hydroxy-3,6-dimethylbenzoate  
C<sub>19</sub>H<sub>24</sub>O<sub>8</sub>; MF: 0; RMF: 2; Prob 50.0%; Lib: mona-export-vf-npl\_qexactive; ID: 23487.

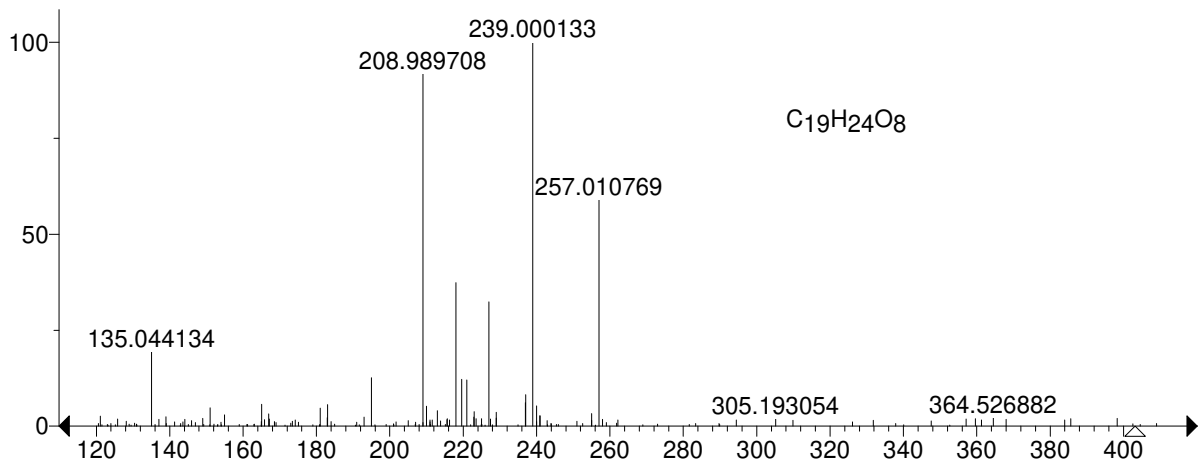

Unknown: Unknown (2.16\_302.0651m/z)  
Compound in Library Factor = -2387

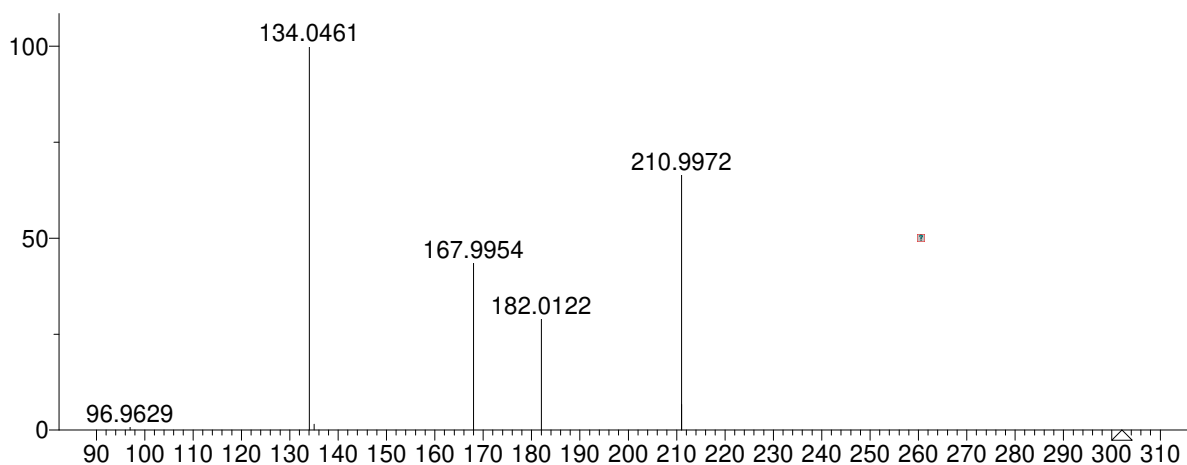

Hit 1 : 2-Chloroadenosine [M+H]<sup>+</sup> HCD 57V P=302.1  
C<sub>10</sub>H<sub>12</sub>ClN<sub>5</sub>O<sub>4</sub>; MF: 21; RMF: 506; Prob 100.0%; CAS: 146-77-0; Lib: nist\_msms; ID: 116075.

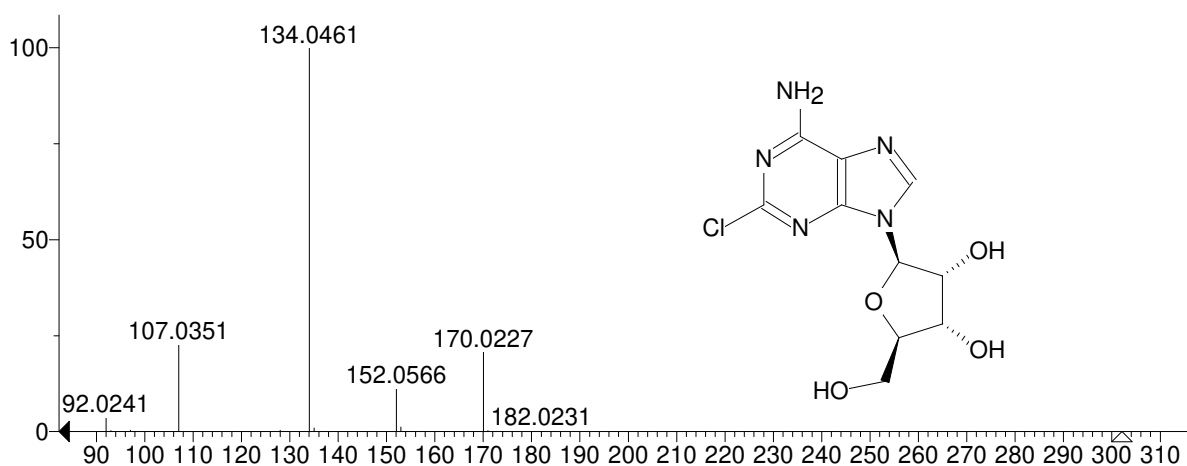

Unknown: Unknown (2.16\_338.0528m/z)  
Compound in Library Factor = 0

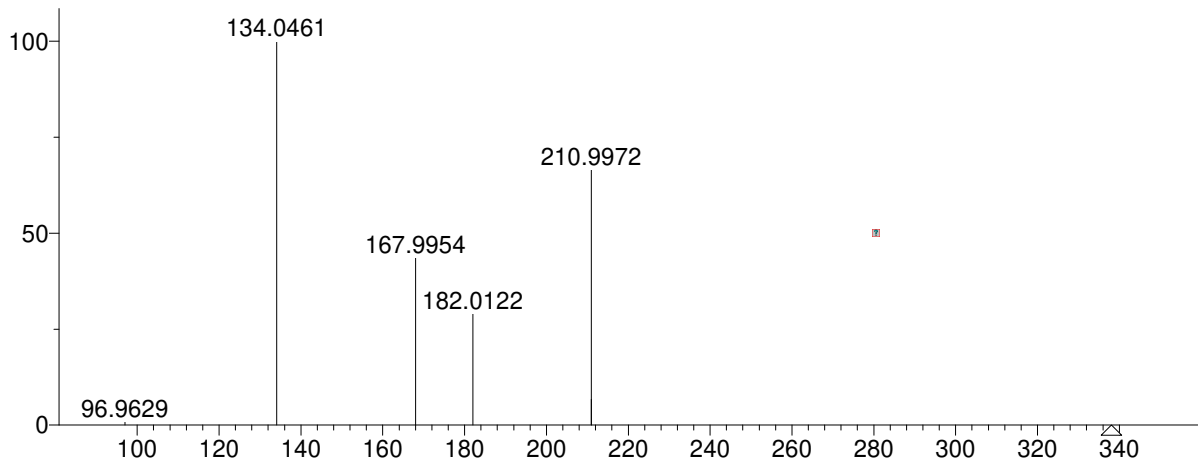

\*\* Search Report Page 1 of 2 \*\*

Unknown: Unknown (2.16\_420.1979m/z)  
Compound in Library Factor = 0

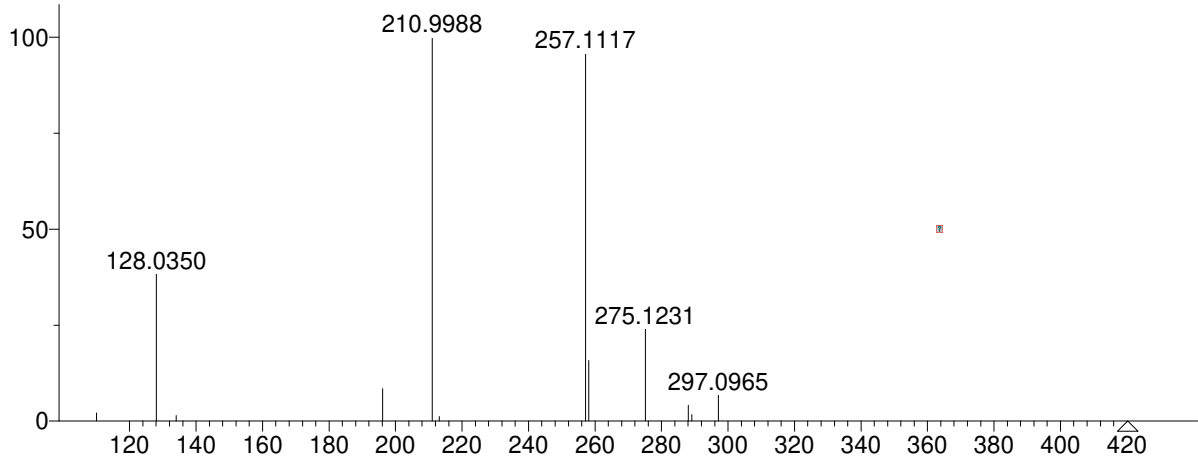

Hit 1 : (2R,3R,3aR,5R)-5,7-dimethoxy-2-(7-methoxy-1,3-benzodioxol-5-yl)-3-methyl-3a-prop-2-enyl-2,3,4,5-tetrahydro-2H-benzofuran; MF: 0; RMF: 54; Prob 14.3%; Lib: mona-export-vf-npl\_gexactive; ID: 23179.

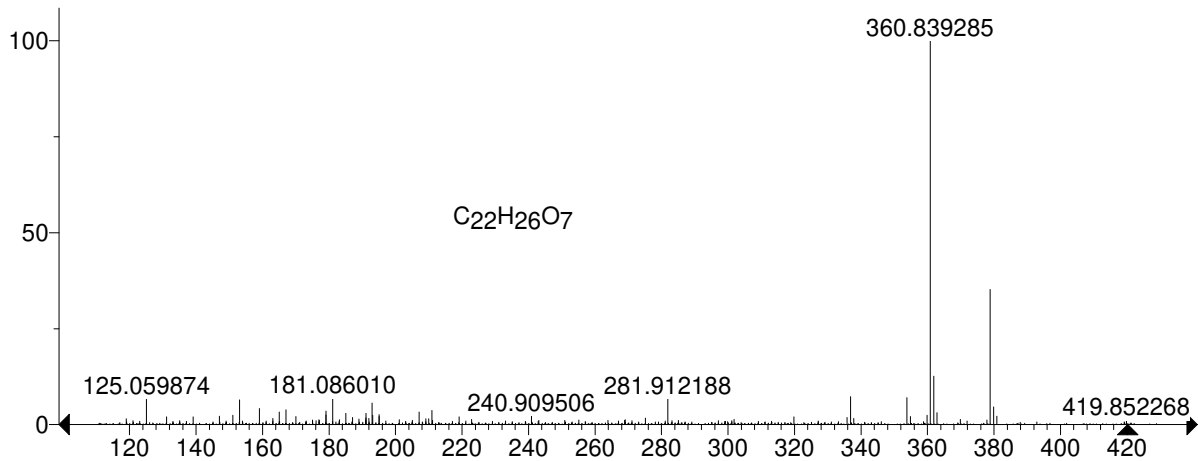

Hit 2 : Montelukast-1,2-diol [M+H-C<sub>6</sub>H<sub>10</sub>O<sub>2</sub>S]<sup>+</sup>=>420.2 IT 35% P=420.2  
C<sub>35</sub>H<sub>36</sub>ClNO<sub>4</sub>S; MF: 0; RMF: 53; Prob 14.3%; CAS: 186352-97-6; Lib: nist\_msms; ID: 463638.

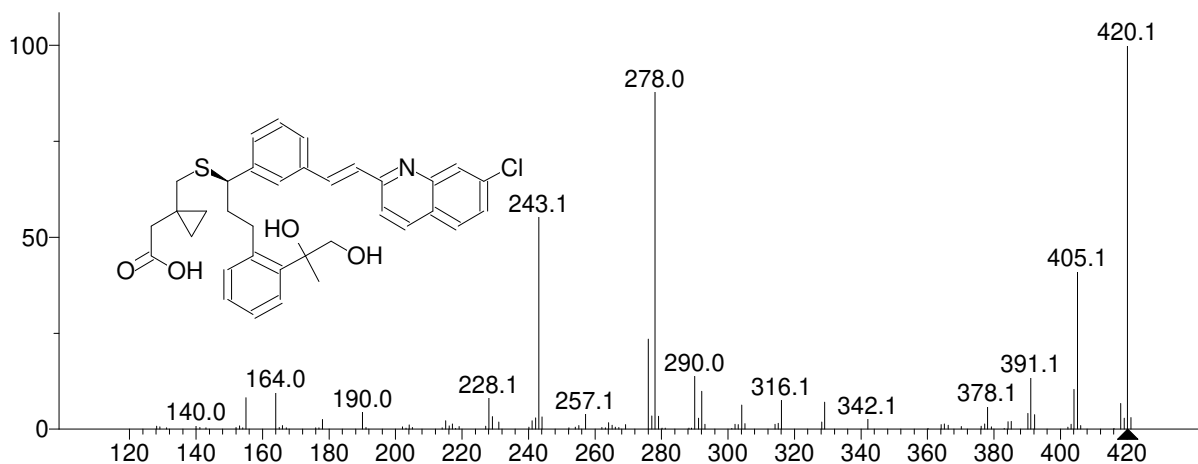

\*\* Search Report Page 2 of 2 \*\*

Hit 3 : NCGC00381253-01\_C22H29NO7\_2H-Isoindole-2-acetic acid, 7-carboxy-1,3-dihydro-6-methoxy-5-methyl-C22H29NO7; MF: 0; RMF: 38; Prob 14.3%; Lib: mona-export-gnps; ID: 13397.

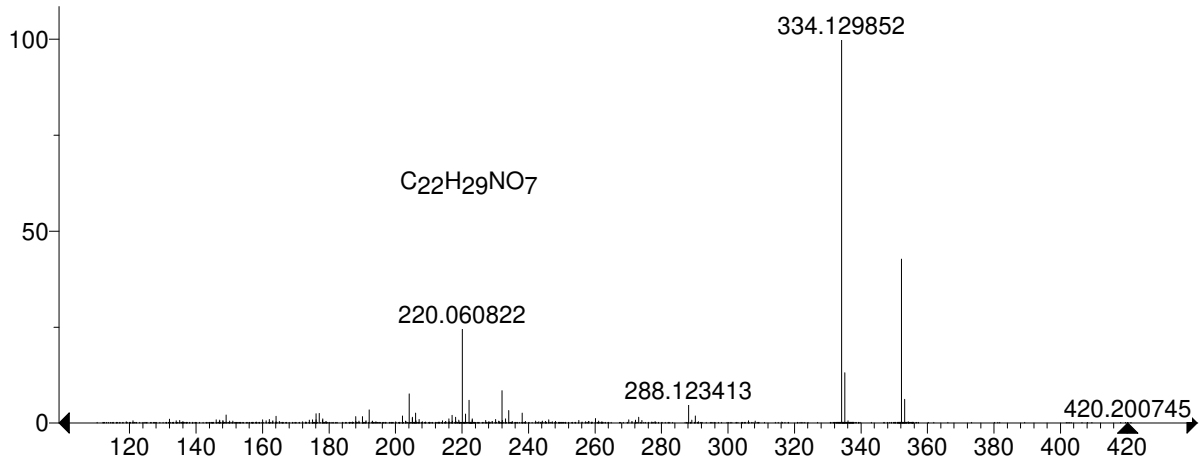

Hit 4 : [2-[2-(2-methylpropanoyloxy)propan-2-yl]-7-oxo-2,3-dihydrofuro[3,2-g]chromen-3-yl] 2-methylpropanoate [C22H26O7; MF: 0; RMF: 29; Prob 14.3%; Lib: mona-export-vf-npl\_gexactive; ID: 9047.

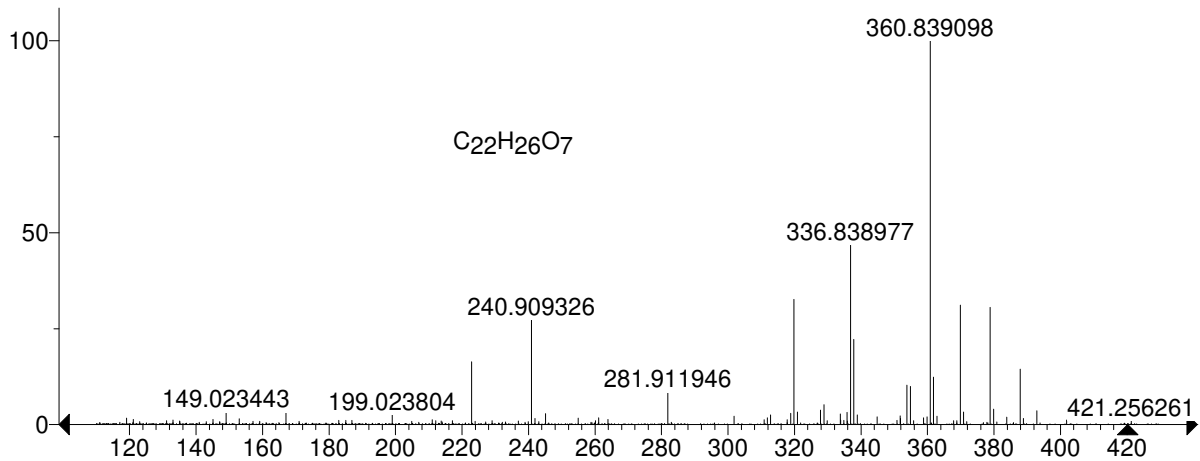

Hit 5 : 5-trans-17-Phenyltrilorprostaglandin F2α ethylamide [M+Na]<sup>+</sup>=>420.2 IT 35% P=420.2 C25H37NO4; MF: 0; RMF: 19; Prob 14.3%; CAS: 1163135-95-2; Lib: nist\_msms; ID: 156516.

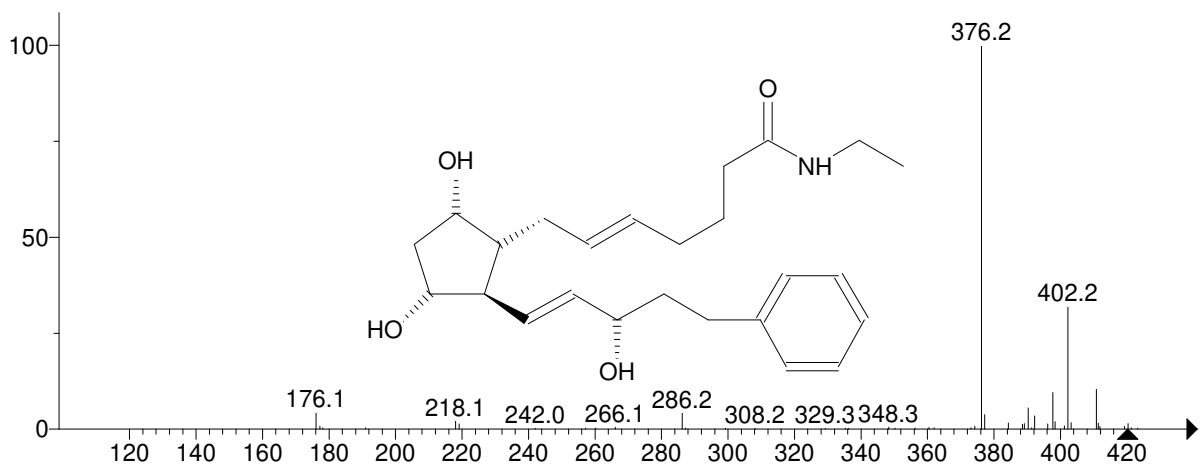

\*\* Search Report Page 1 of 1 \*\*

Unknown: Unknown (2.16\_638.1987m/z)  
Compound in Library Factor = 0

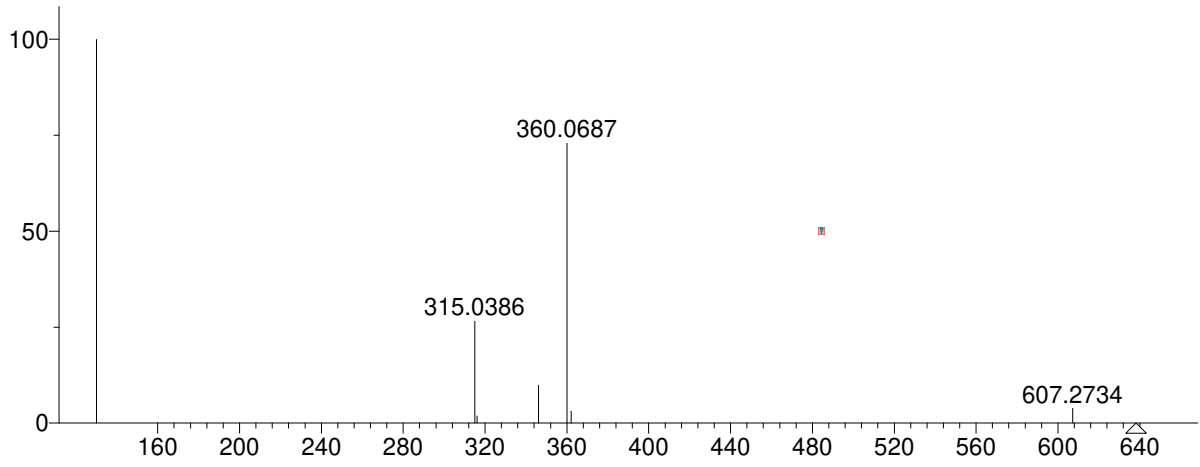

\*\* Search Report Page 1 of 2 \*\*

Unknown: Unknown (2.17\_359.0970m/z)  
Compound in Library Factor = -3273

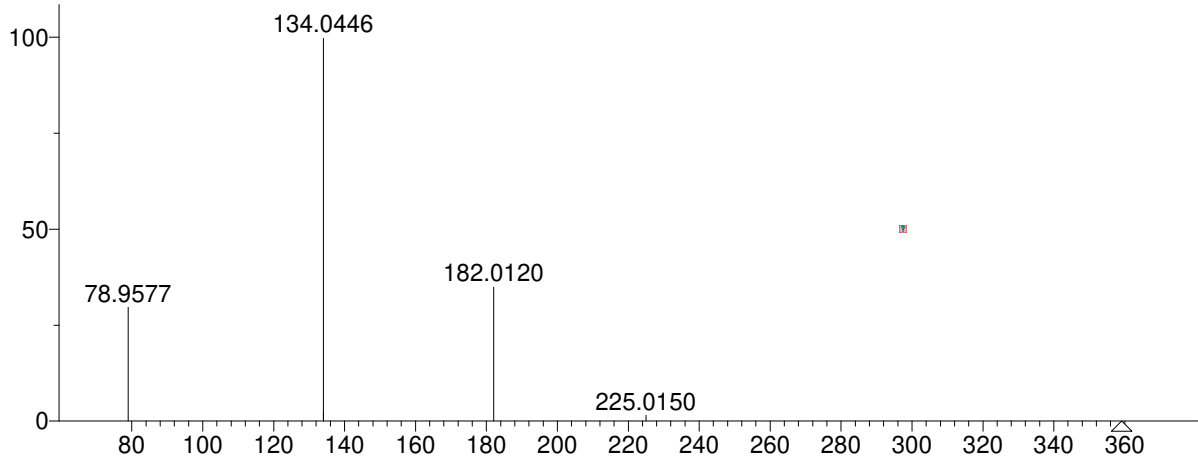

Hit 1 : Benzoic acid + 1O, 2MeO, O-Hex [M-H]<sup>-</sup> 6V P=359.1  
C<sub>15</sub>H<sub>20</sub>O<sub>10</sub>; MF: 2; RMF: 157; Prob 21.0%; Lib: anthocyanins mona; ID: 7465.

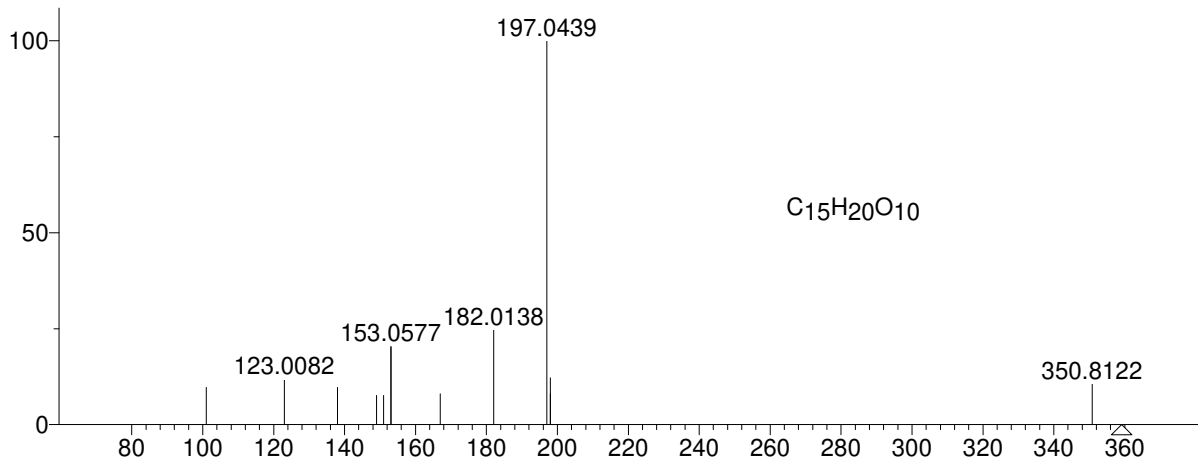

Hit 2 : Benzoic acid + 1O, 2MeO, O-Hex; PlaSMA ID-868 [M-H]<sup>-</sup> P=359.1  
C<sub>15</sub>H<sub>20</sub>O<sub>10</sub>; MF: 2; RMF: 157; Prob 21.0%; Lib: biomsmns-neg-plasma; ID: 397.

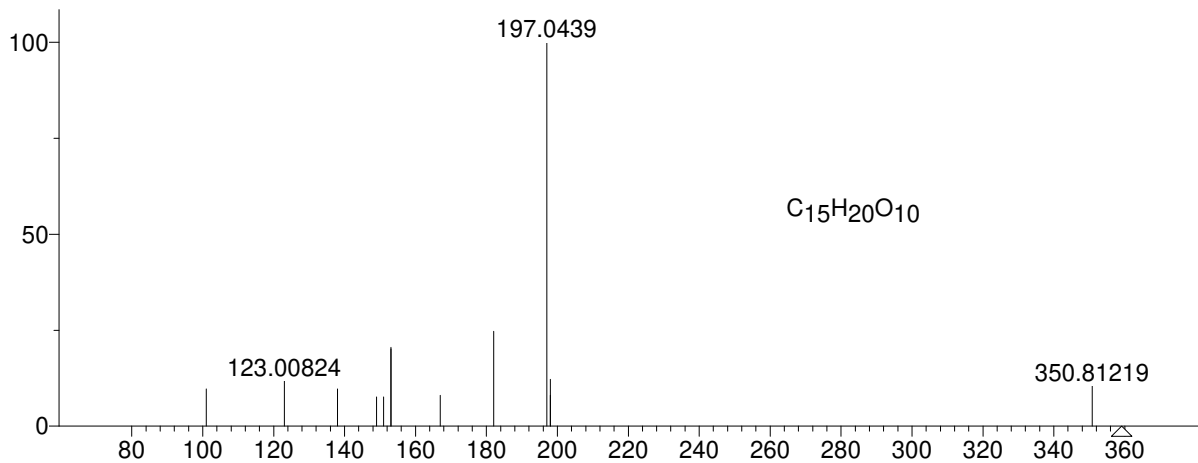



Hit 3 : Rosmarinic acid [M-H]<sup>-</sup> P=359.1  
C<sub>18</sub>H<sub>16</sub>O<sub>8</sub>; MF: 0; RMF: 99; Prob 19.3%; Lib: mona-export-gnps; ID: 1168.

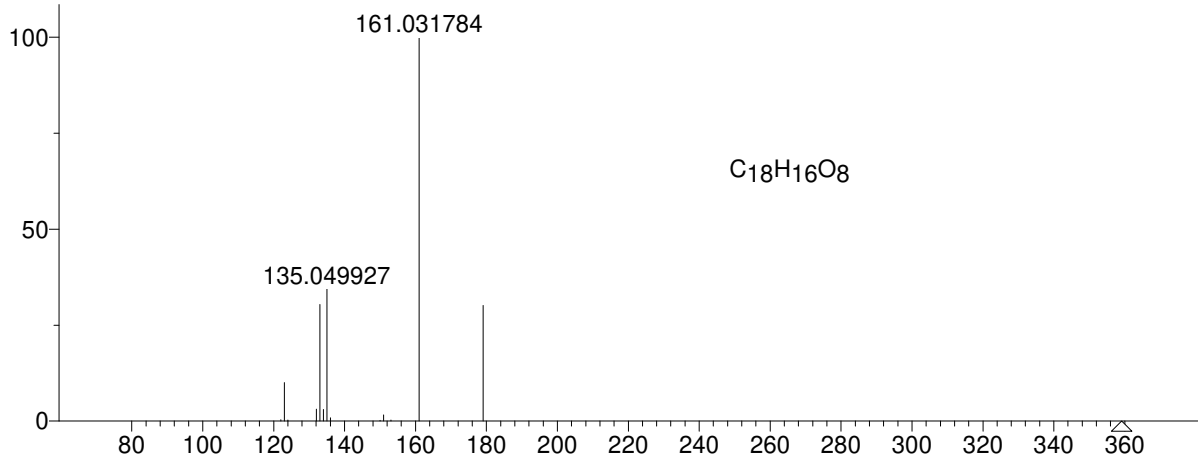

Hit 4 : C<sub>15</sub>H<sub>20</sub>O<sub>10</sub>; PlaSMA ID-869 [M-H]<sup>-</sup> P=359.1  
C<sub>15</sub>H<sub>20</sub>O<sub>10</sub>; MF: 0; RMF: 80; Prob 19.3%; Lib: biomsms-neg-plasma; ID: 816.

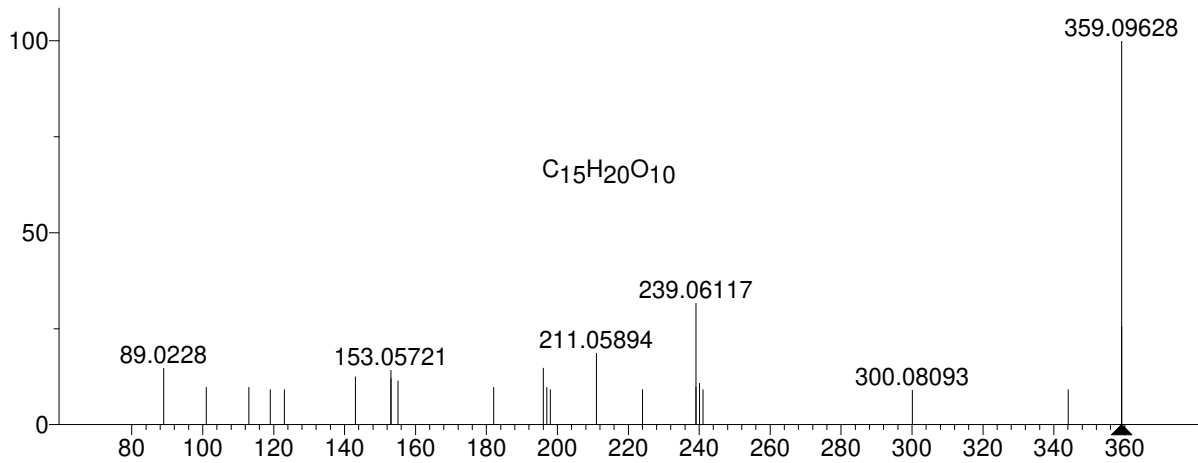

Hit 5 : syringic acid 4-O-hexoside () [M-H]<sup>-</sup> P=359.1  
C<sub>15</sub>H<sub>20</sub>O<sub>10</sub>; MF: 0; RMF: 76; Prob 19.3%; Lib: phytofrag2018\_final\_060219; ID: 860.

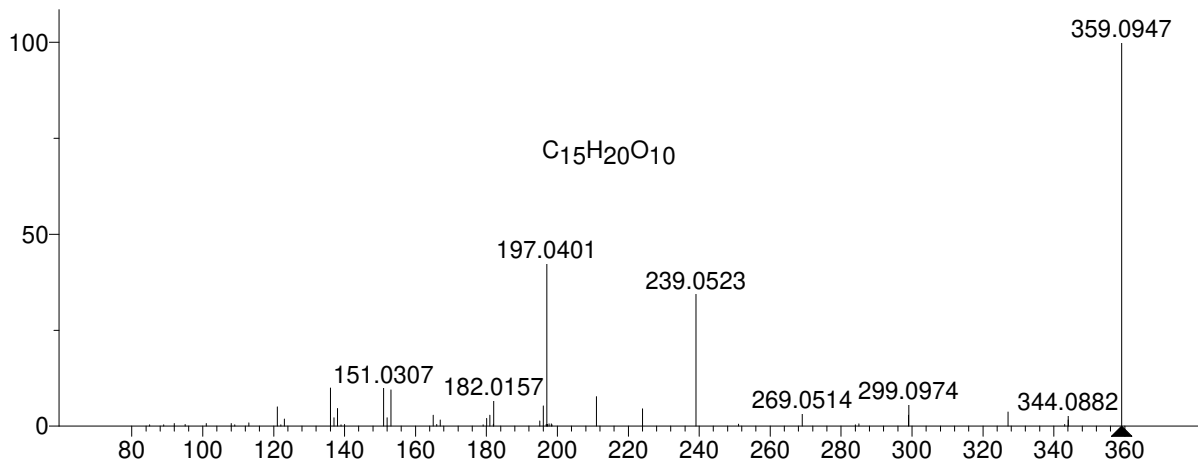

Unknown: Unknown (2.17\_548.1026m/z)  
Compound in Library Factor = 0

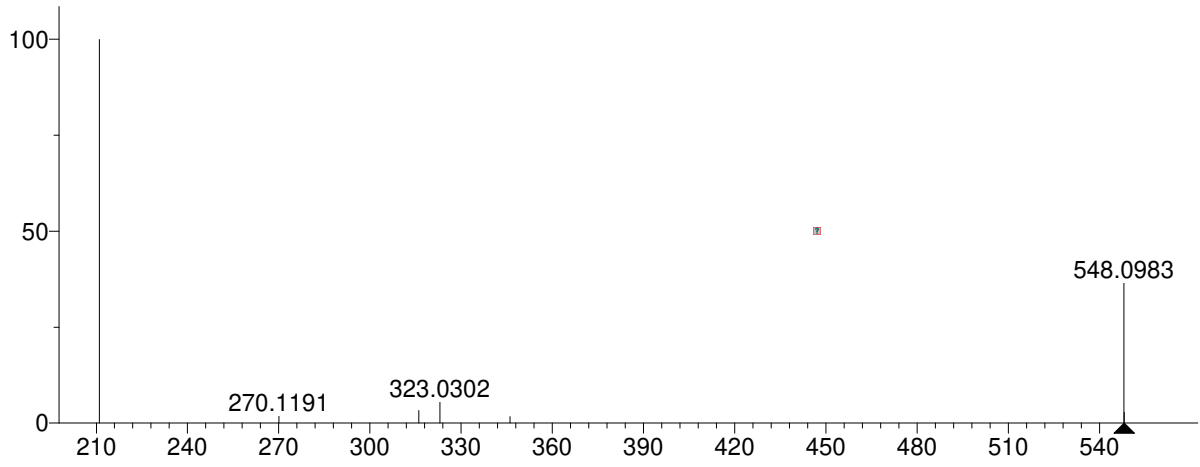

Unknown: Unknown (2.17\_611.0429m/z)  
Compound in Library Factor = 0

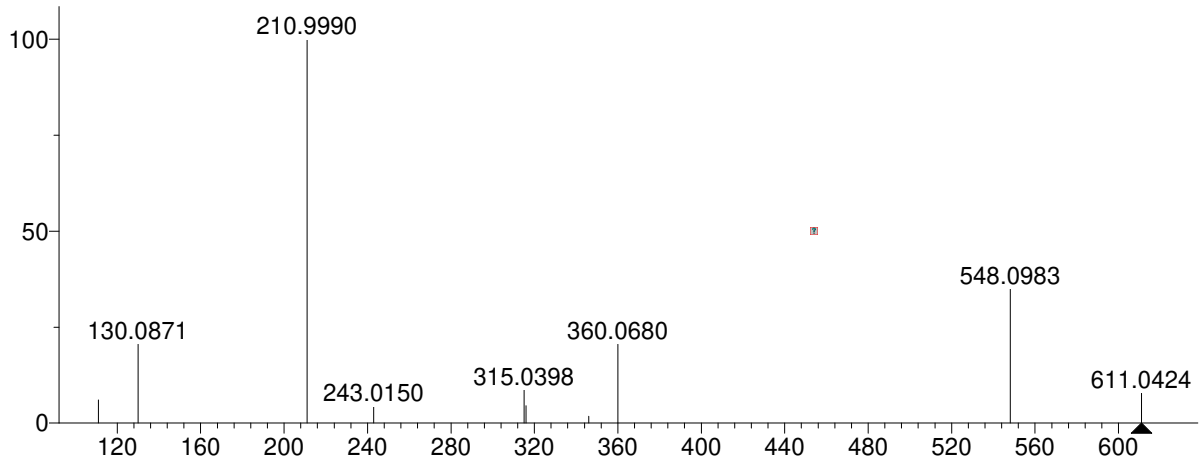

Unknown: Unknown (2.18\_360.0707m/z)  
Compound in Library Factor = 0

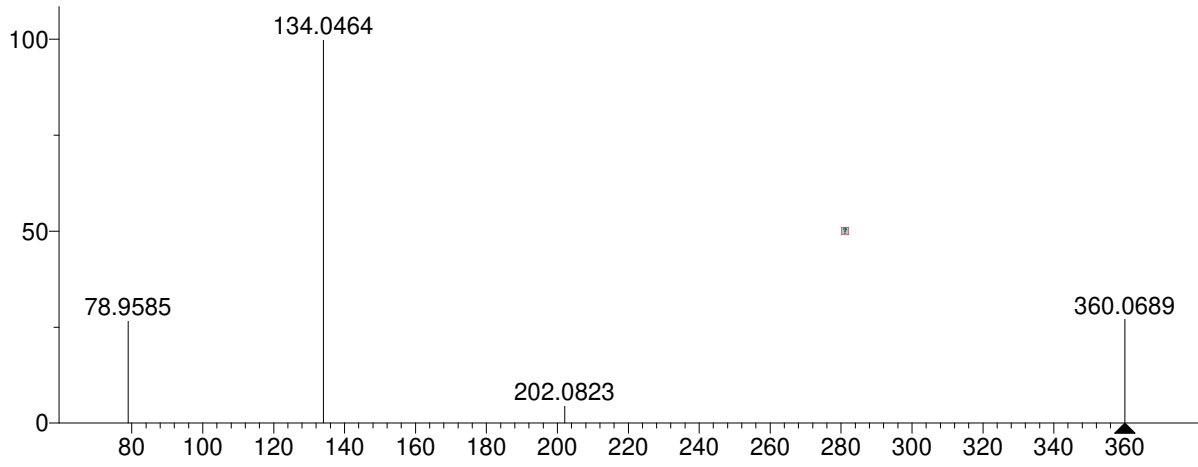

Unknown: Unknown (2.18\_607.2683m/z)  
Compound in Library Factor = 0

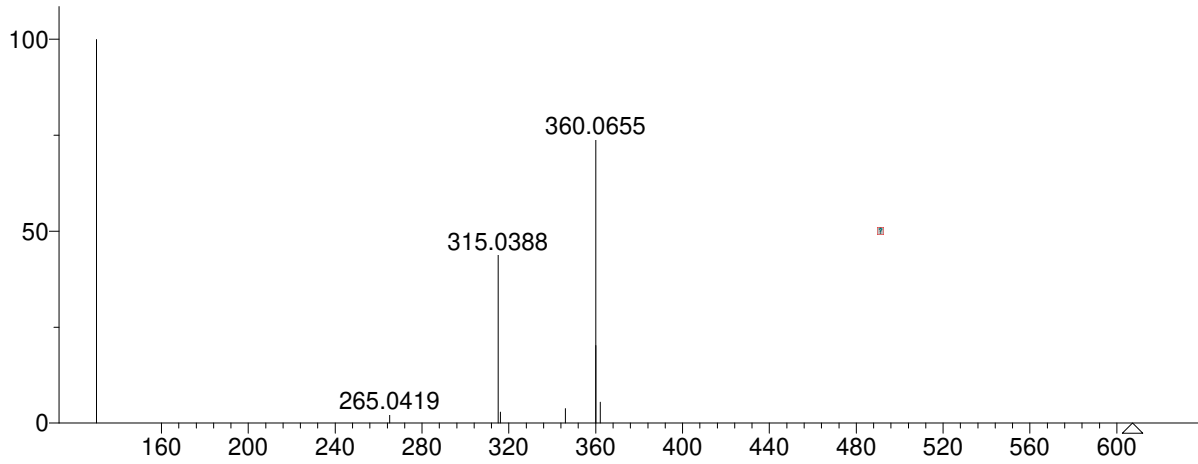

Hit 1 : Reserpine [M-H]<sup>-</sup> 38.22 P=607.3  
C<sub>33</sub>H<sub>40</sub>N<sub>2</sub>O<sub>9</sub>; MF: 0; RMF: 37; Prob 50.0%; Lib: msms neg mona\_ipb\_gnps\_plasma; ID: 1257.

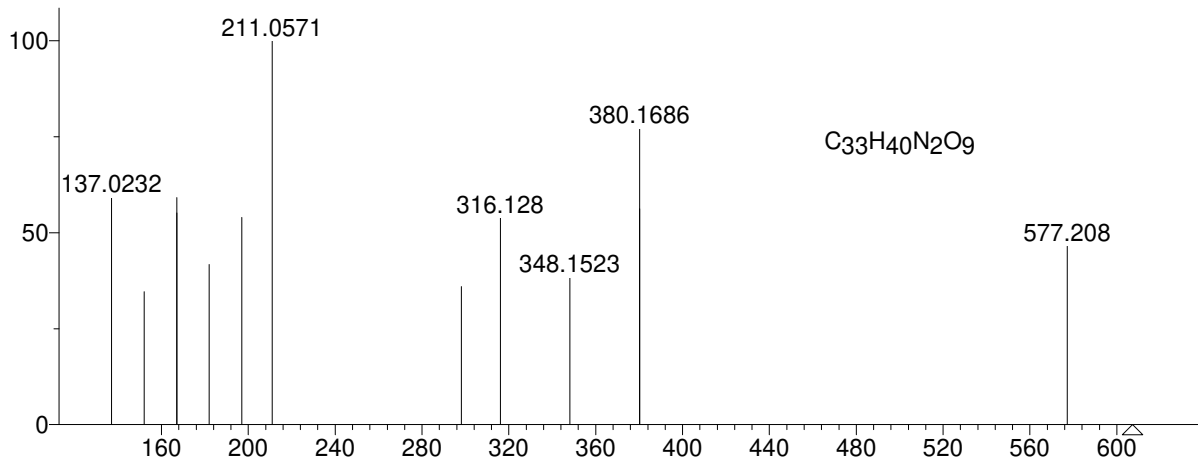

Hit 2 : 3-[(1R,3S,5S,10R,11R,13R,14S,17R)-1,5,11,14-tetrahydroxy-10-(hydroxymethyl)-13-methyl-3-[(2R,3S,4S,5S)-2,3,4,5-tetrahydroxy-10-oxo-9-oxaphosphorin-3-ylidene]butyl]butanoic acid  
C<sub>29</sub>H<sub>44</sub>O<sub>12</sub>; MF: 0; RMF: 3; Prob 50.0%; Lib: mona-export-vf-npl\_qexactive; ID: 14858.

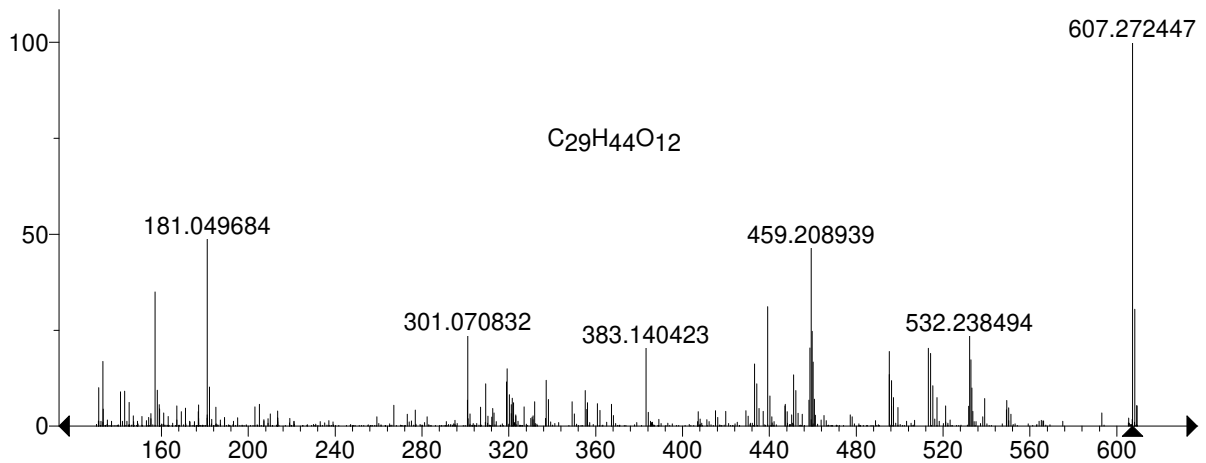

Unknown: Unknown (2.19\_485.1879m/z)  
Compound in Library Factor = 0

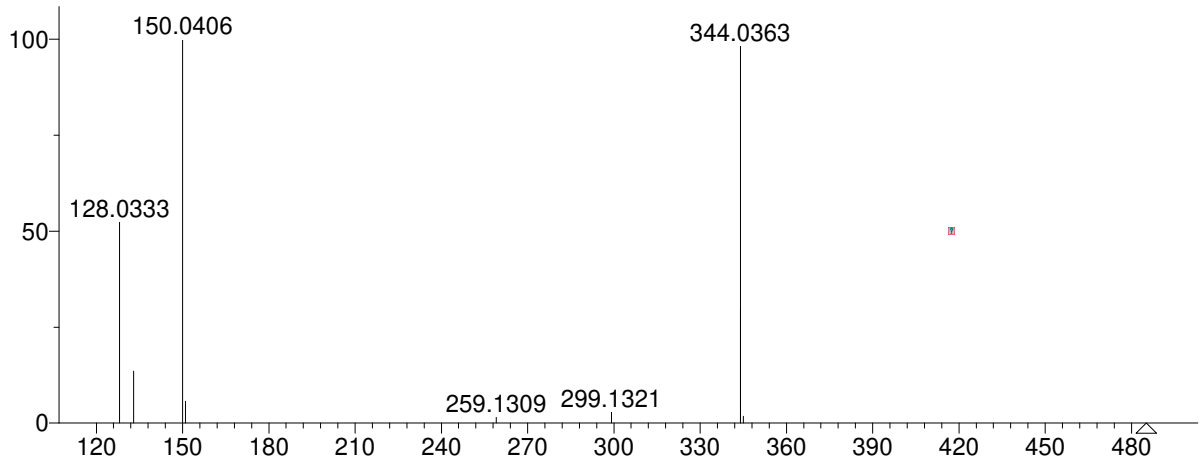

Unknown: Unknown (2.19\_856.3218m/z)  
Compound in Library Factor = 0

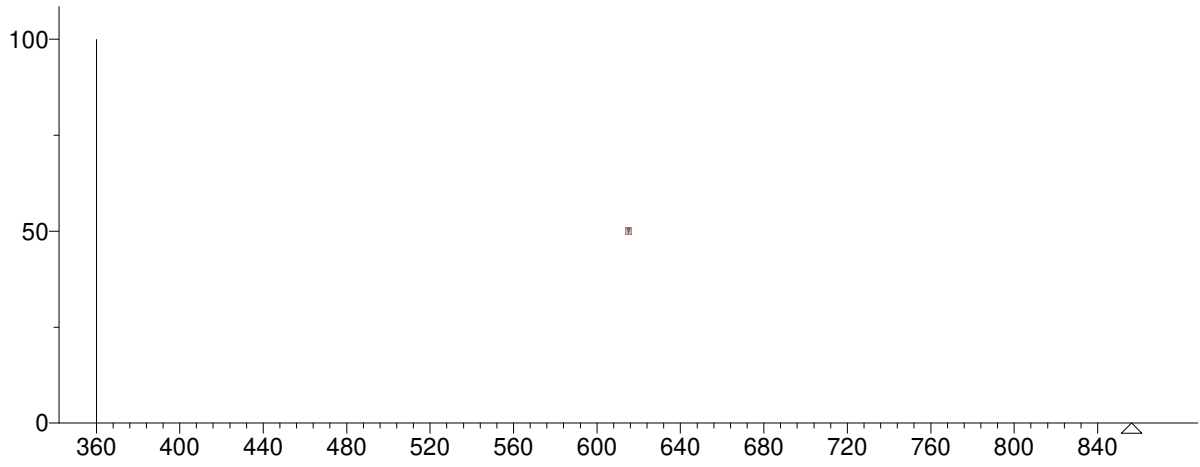

\*\* Search Report Page 1 of 2 \*\*

Unknown: Unknown (2.21\_259.1289m/z)  
Compound in Library Factor = -2176

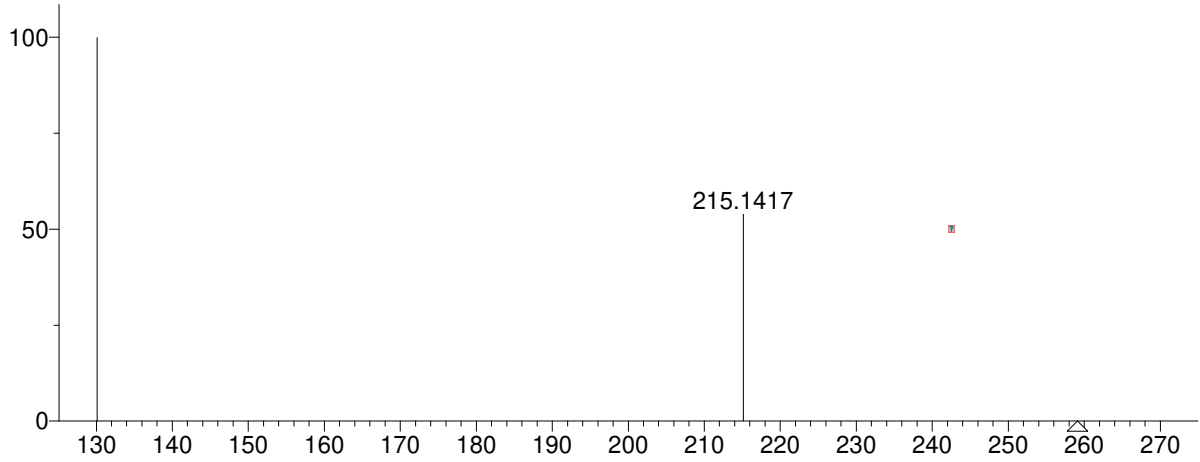

Hit 1 : Leu-Glu [M-H]<sup>-</sup> HCD 23eV P=259.1  
C<sub>11</sub>H<sub>20</sub>N<sub>2</sub>O<sub>5</sub>; MF: 141; RMF: 770; Prob 22.9%; Lib: nist\_msms; ID: 570784.

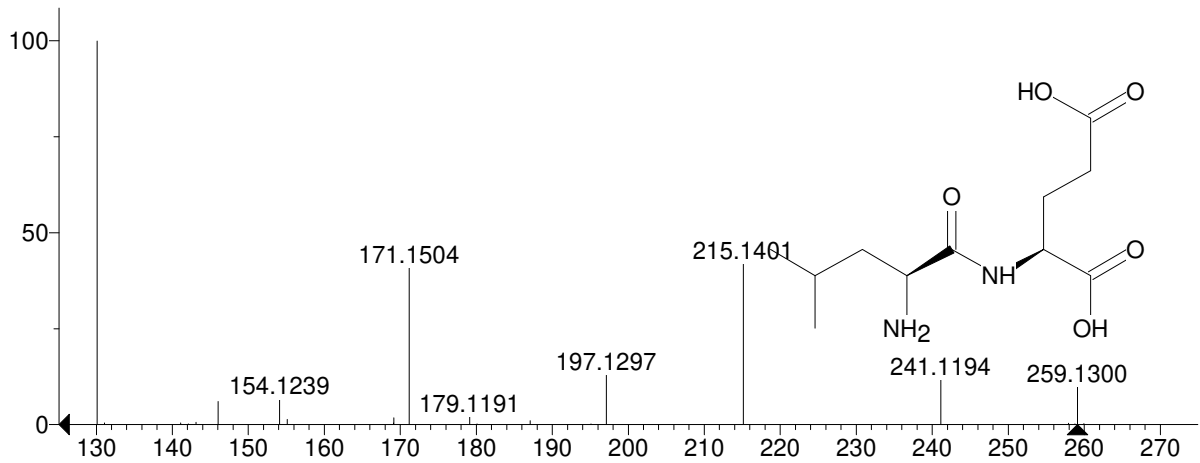

Hit 2 : Leu-Glu [M-H]<sup>-</sup> HCD 23eV P=259.1  
C<sub>11</sub>H<sub>20</sub>N<sub>2</sub>O<sub>5</sub>; MF: 141; RMF: 770; Prob 22.9%; CAS: 16364-31-1; Lib: nist\_msms2; ID: 84517.

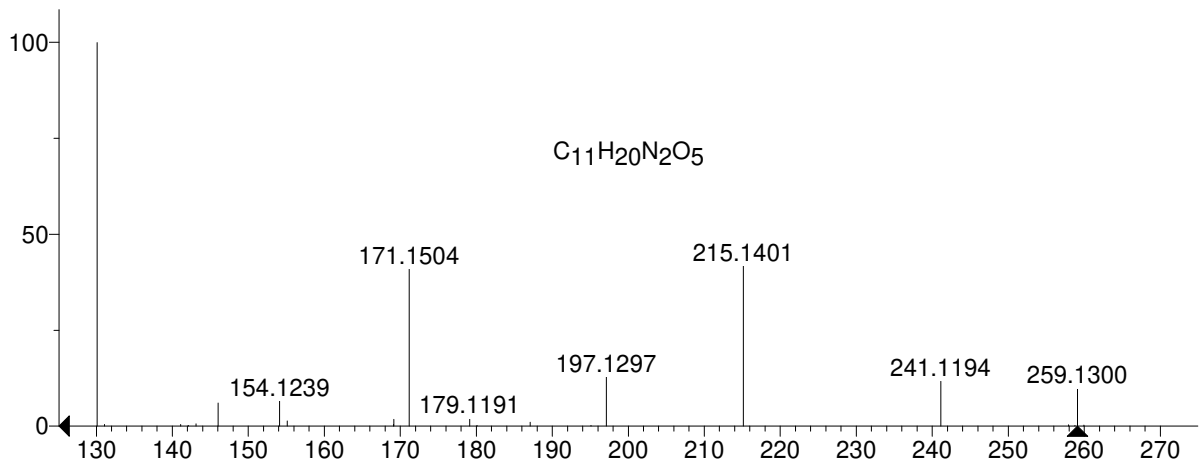



Hit 3 : Ile-Glu [M-H]<sup>-</sup> HCD 23eV P=259.1  
C<sub>11</sub>H<sub>20</sub>N<sub>2</sub>O<sub>5</sub>; MF: 141; RMF: 754; Prob 22.9%; Lib: nist\_msms; ID: 570716.

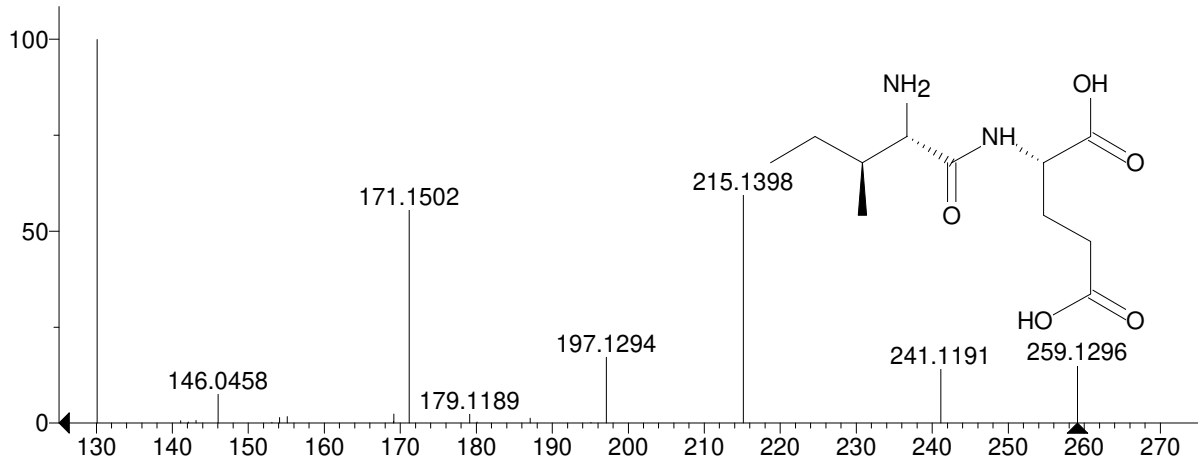

Hit 4 : Ile-Glu [M-H]<sup>-</sup> HCD 23eV P=259.1  
C<sub>11</sub>H<sub>20</sub>N<sub>2</sub>O<sub>5</sub>; MF: 141; RMF: 754; Prob 22.9%; CAS: 42516-53-0; Lib: nist\_msms2; ID: 84449.

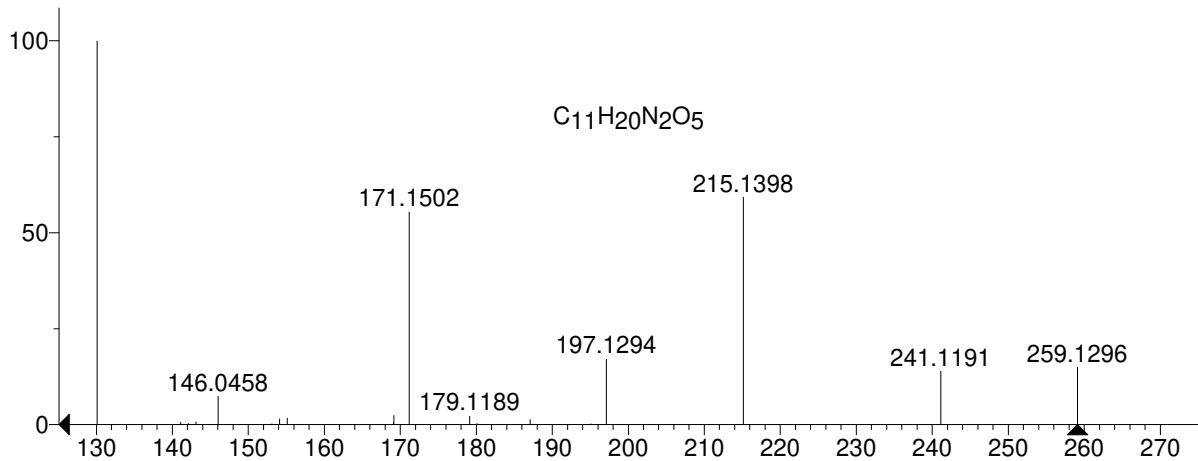

Hit 5 : Glu-Leu [M-H]<sup>-</sup> HCD 41eV P=259.1  
C<sub>11</sub>H<sub>20</sub>N<sub>2</sub>O<sub>5</sub>; MF: 62; RMF: 740; Prob 2.60%; Lib: nist\_msms; ID: 570065.

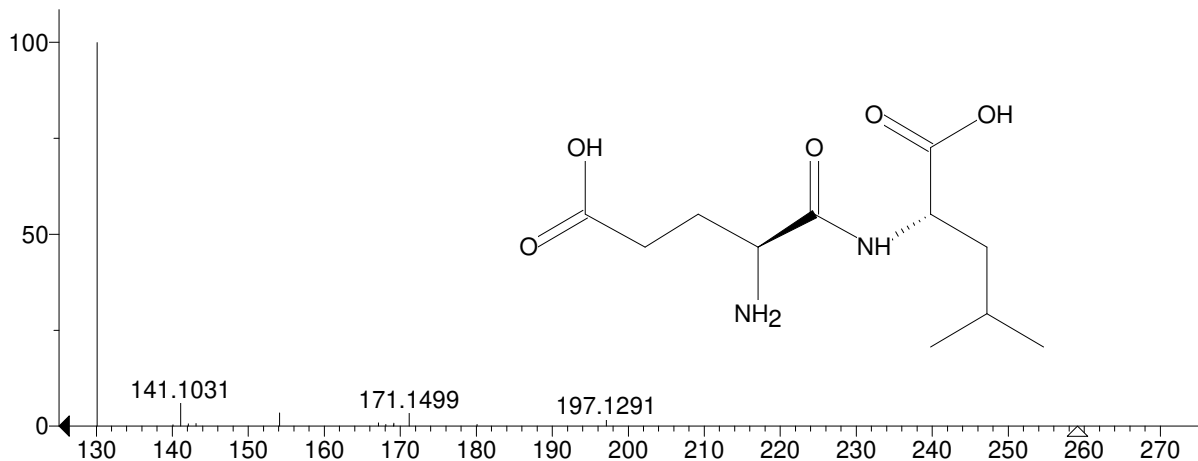

\*\* Search Report Page 1 of 2 \*\*

Unknown: Unknown (2.21\_439.1695m/z)  
Compound in Library Factor = -3273

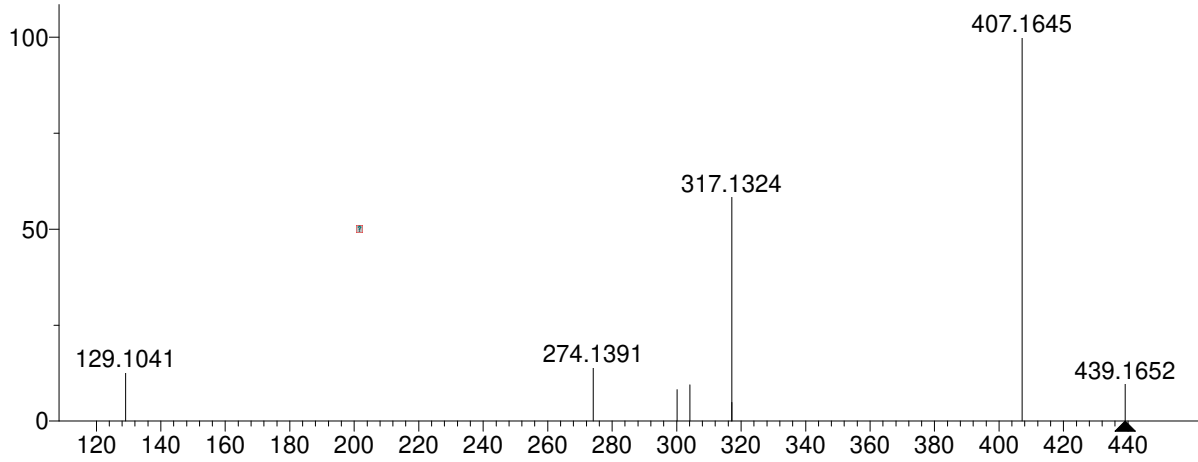

Hit 1 : (+)-Fluprostenol [M-H-H<sub>2</sub>O]- HCD 13V P=439.2  
C<sub>23</sub>H<sub>29</sub>F<sub>3</sub>O<sub>6</sub>; MF: 12; RMF: 207; Prob 22.4%; CAS: 54276-17-4; Lib: nist\_msms; ID: 155447.

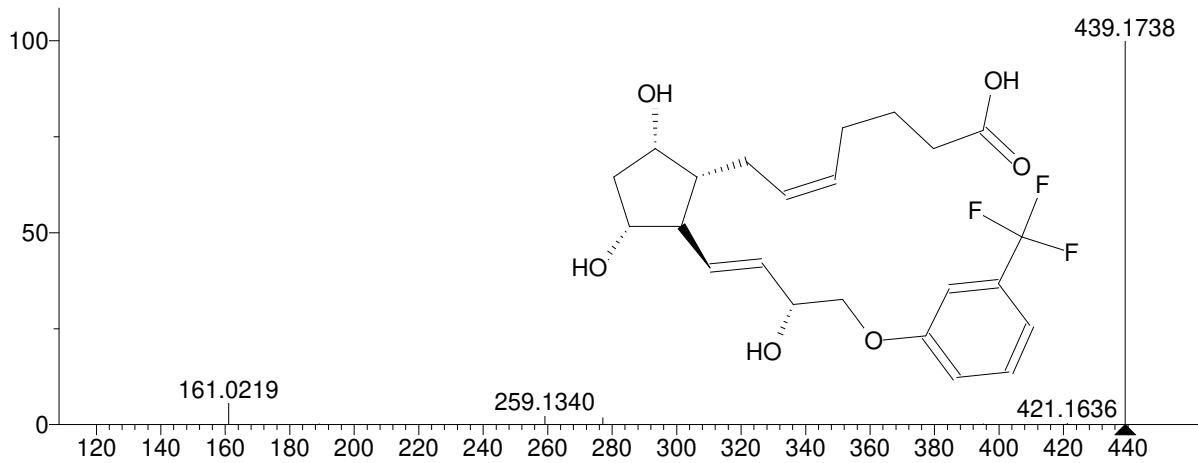

Hit 2 : 15-Ketofluprostenol [M+H-H<sub>2</sub>O]+ HCD 7V P=439.2  
C<sub>23</sub>H<sub>27</sub>F<sub>3</sub>O<sub>6</sub>; MF: 9; RMF: 208; Prob 19.8%; Lib: nist\_msms; ID: 155572.

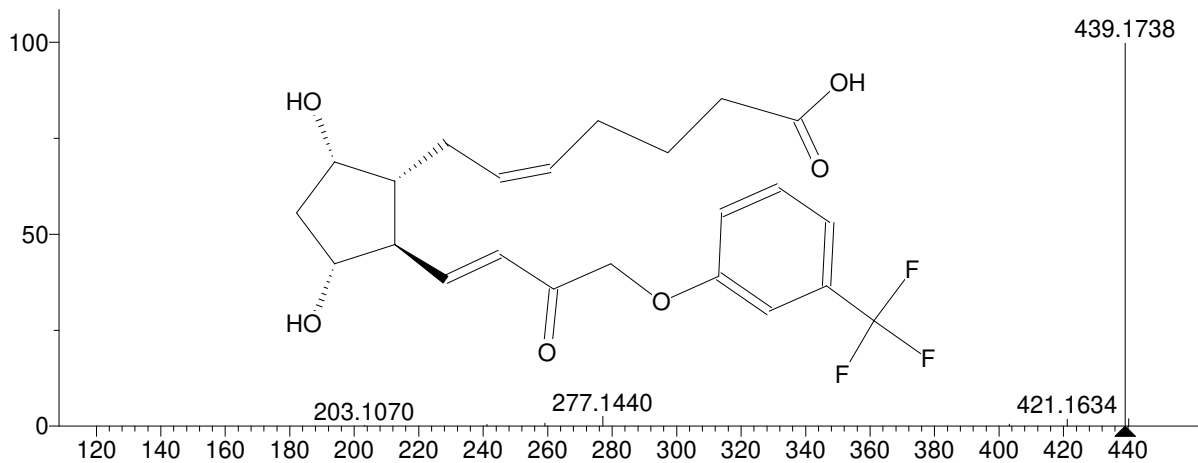

Hit 3 : 13(R),14(R)-Epoxyfluprostenol isopropyl ester [M+H-C<sub>3</sub>H<sub>10</sub>O<sub>2</sub>]<sup>+</sup> HCD 13V P=439.2  
C<sub>26</sub>H<sub>35</sub>F<sub>3</sub>O<sub>7</sub>; MF: 5; RMF: 193; Prob 16.7%; Lib: nist\_msms; ID: 254094.

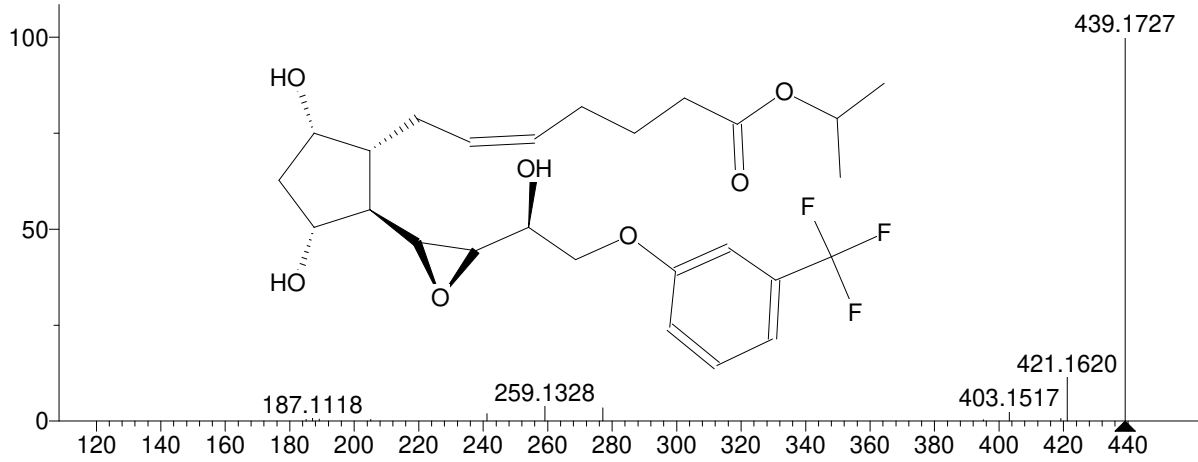

Hit 4 : NCGC00385132-01\_C<sub>23</sub>H<sub>28</sub>O<sub>7</sub>\_1-Phenanthrenecarboxylic acid, 10-(acetyloxy)-1,2,4a,9,10,10a-hexahydri  
C<sub>23</sub>H<sub>28</sub>O<sub>7</sub>; MF: 1; RMF: 167; Prob 14.1%; Lib: mona-export-gnps; ID: 14186.

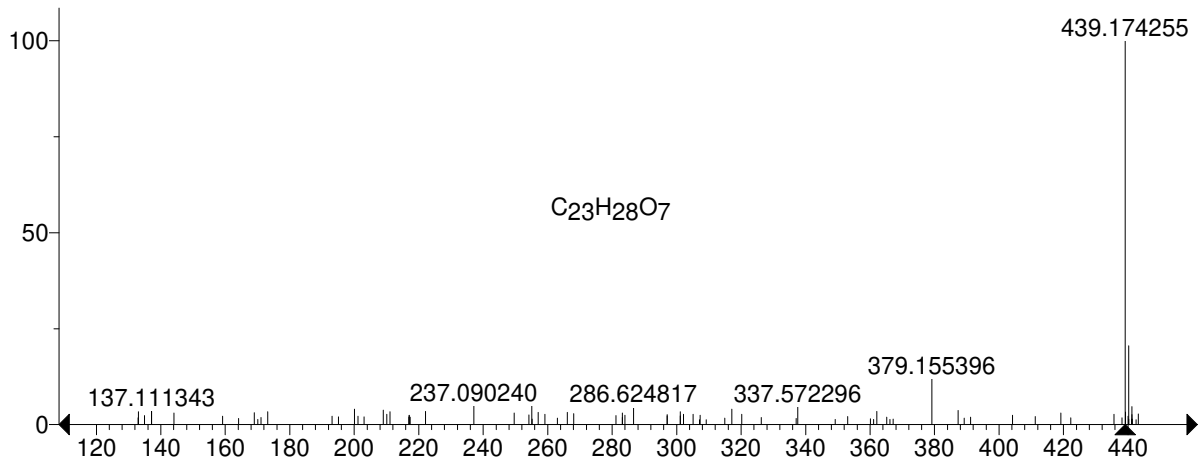

Hit 5 : NCGC00380879-01\_C<sub>23</sub>H<sub>28</sub>O<sub>7</sub>\_1,3-Benzodioxole, 4-methoxy-6-[(2S,3R,4R,5S)-tetrahydro-3,4-dimethyl-!  
C<sub>23</sub>H<sub>28</sub>O<sub>7</sub>; MF: 0; RMF: 155; Prob 13.6%; Lib: mona-export-gnps; ID: 11784.

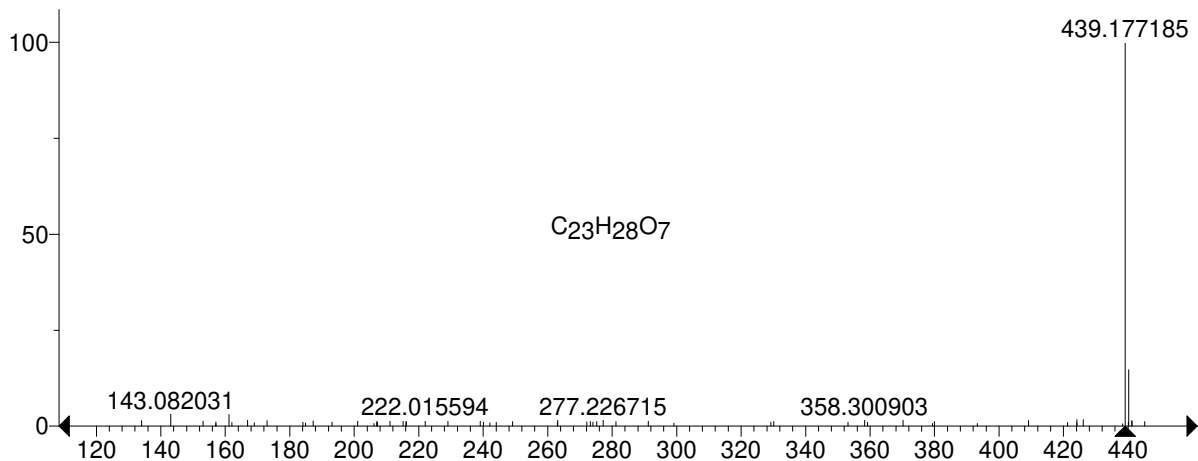

Unknown: Unknown (2.21\_650.0651m/z)  
Compound in Library Factor = 0

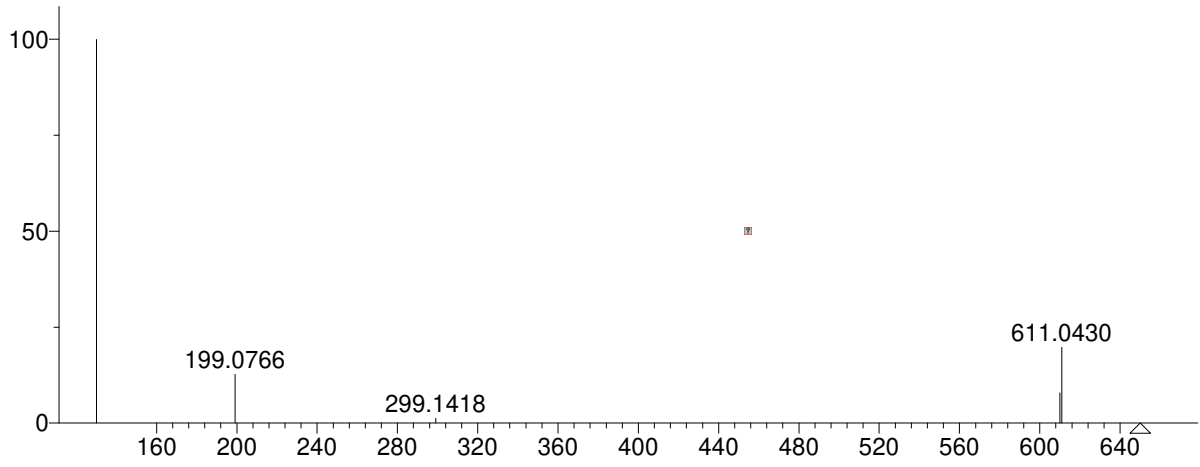

Unknown: Unknown (2.22\_374.1541m/z)  
Compound in Library Factor = 0

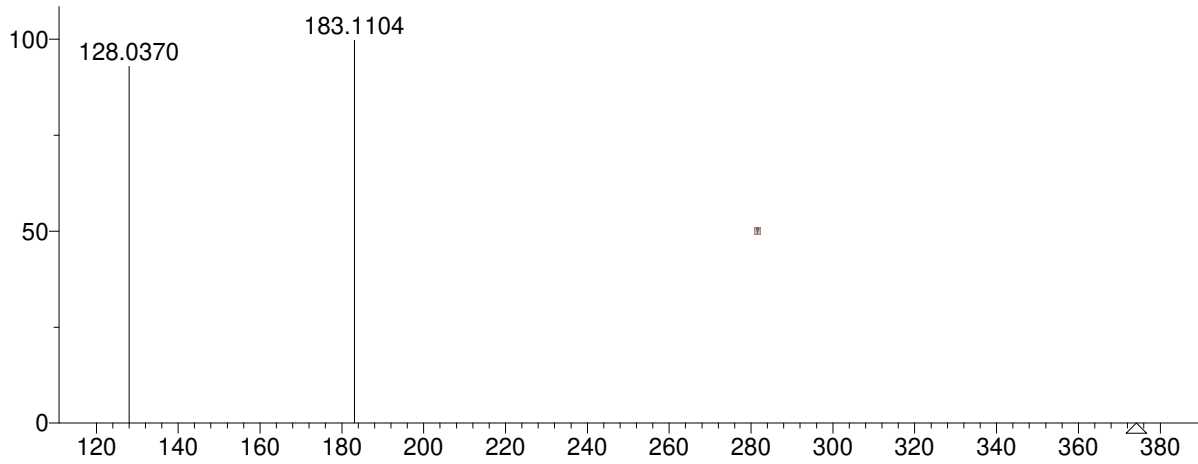

Hit 1 : Gatifloxacin [M-H]<sup>-</sup> HCD 93V P=374.2  
C<sub>19</sub>H<sub>22</sub>FN<sub>3</sub>O<sub>4</sub>; MF: 0; RMF: 21; Prob 100.0%; CAS: 112811-59-3; Lib: nist\_msms; ID: 357666.

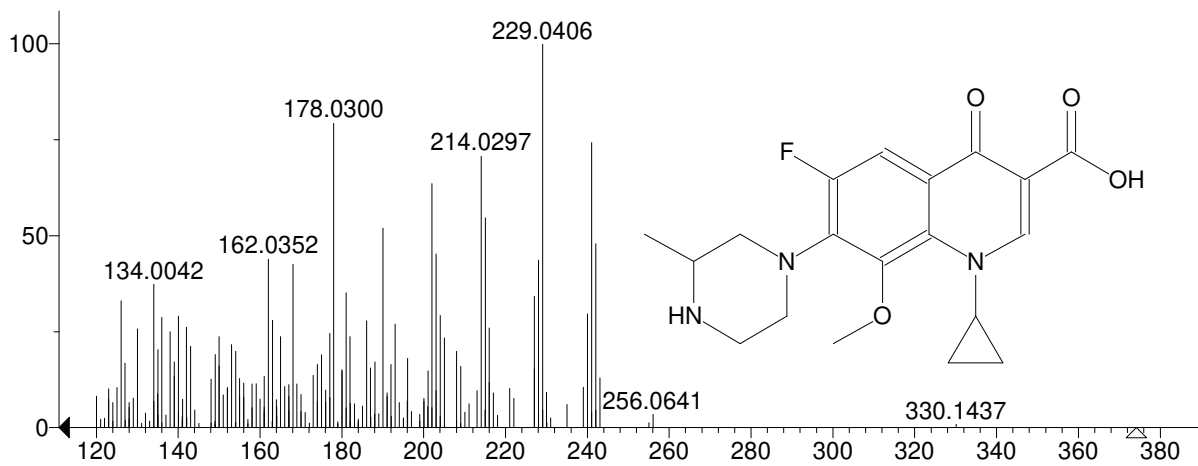

Unknown: Unknown (2.25\_606.2489m/z)  
Compound in Library Factor = 0

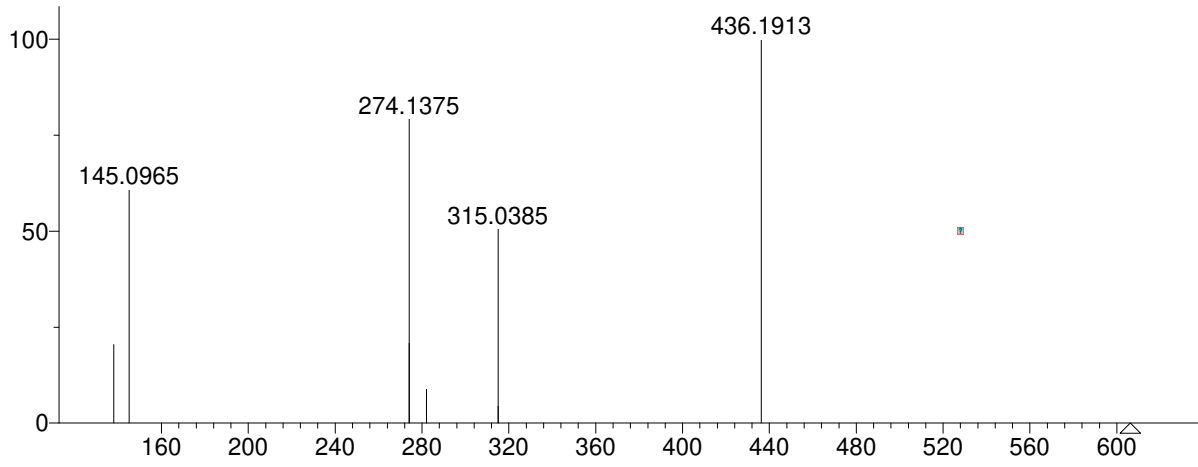

Unknown: Unknown (2.26\_464.1856m/z)  
Compound in Library Factor = 0

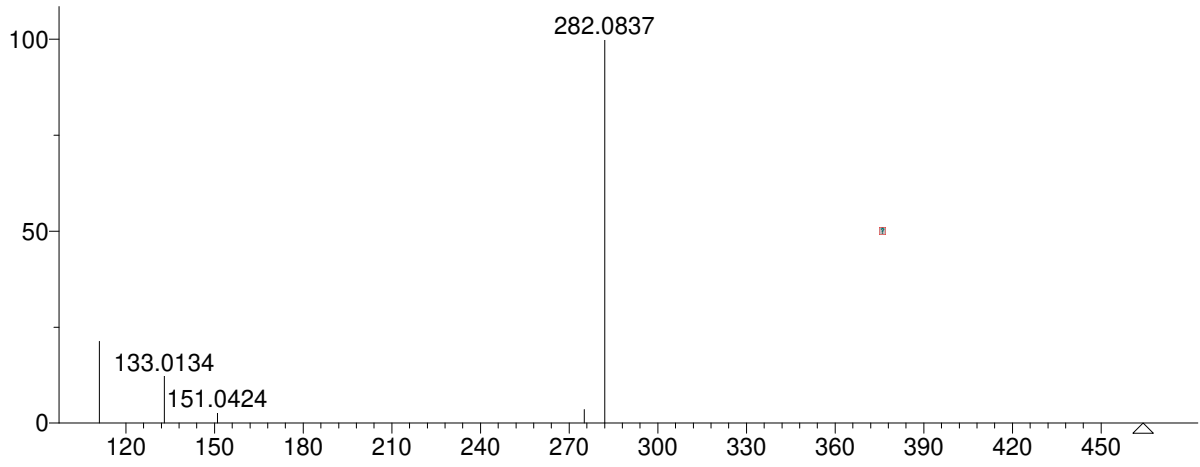

Unknown: Unknown (2.26\_602.1821m/z)  
Compound in Library Factor = 0

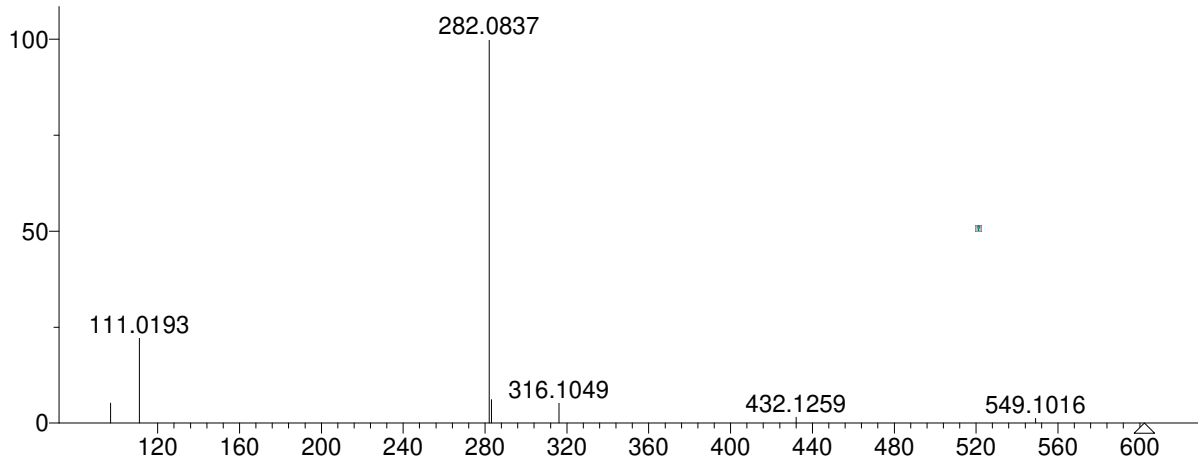



Unknown: Unknown (2.27\_282.0838m/z)  
Compound in Library Factor = 327

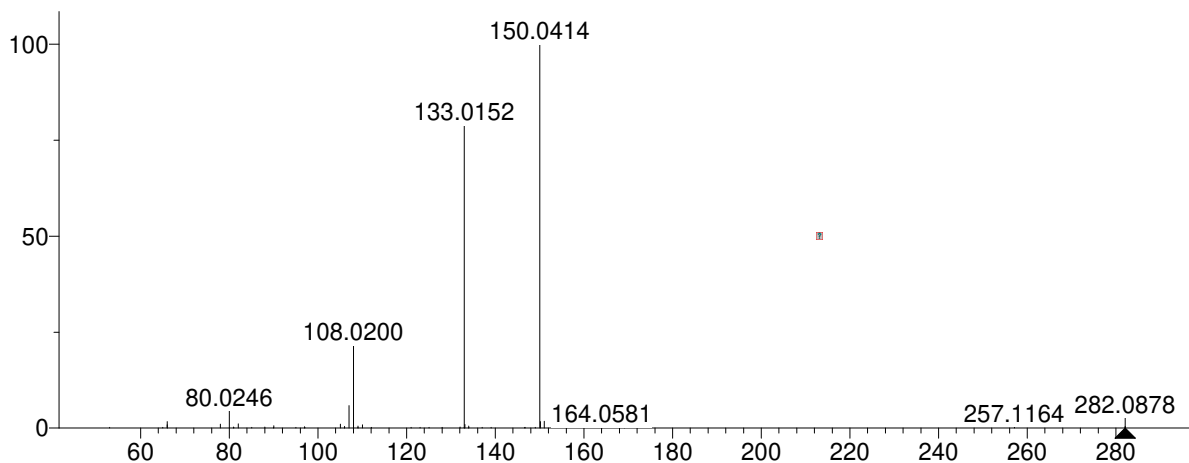

Hit 1 : Guanosine [M-H]<sup>-</sup> HCD 36V P=282.1  
C<sub>10</sub>H<sub>13</sub>N<sub>5</sub>O<sub>5</sub>; MF: 909; RMF: 946; Prob 96.8%; CAS: 118-00-3; Lib: nist\_msms; ID: 228186.

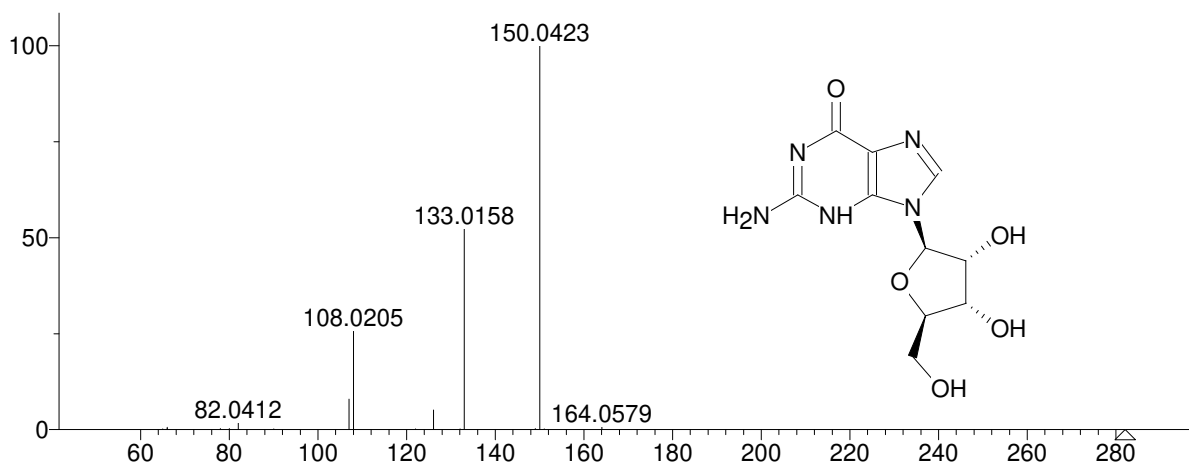

Hit 2 : Guanosine; LC-ESI-QTOF; MS2; CE [M-H]<sup>-</sup> P=282.1  
C<sub>10</sub>H<sub>13</sub>N<sub>5</sub>O<sub>5</sub>; MF: 766; RMF: 919; Prob 3.05%; Lib: msms-neg-massbank; ID: 4336.

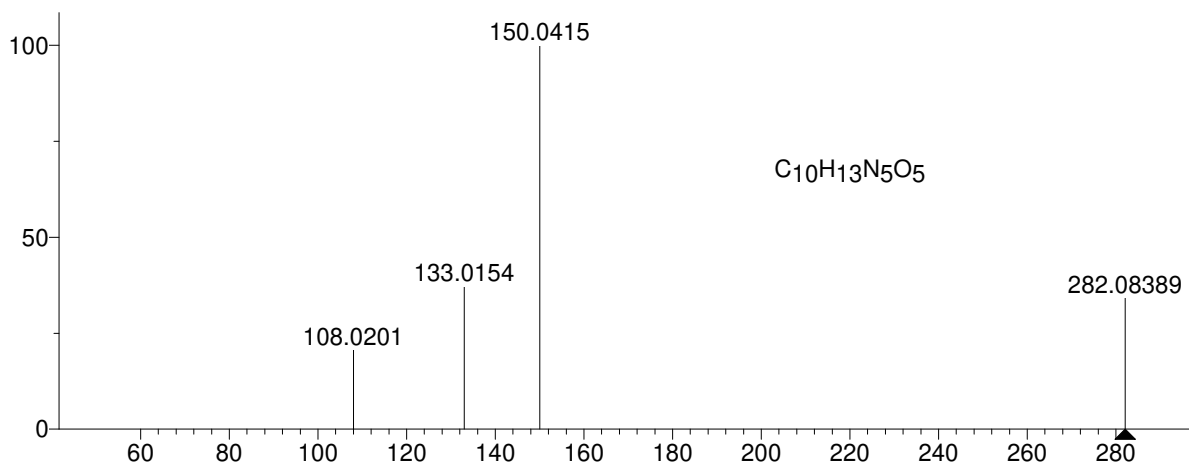

Hit 3 : Guanosine  
C<sub>10</sub>H<sub>13</sub>N<sub>5</sub>O<sub>5</sub>; MF: 617; RMF: 805; Prob 0.08%; Lib: embl neg mcg; ID: 151.

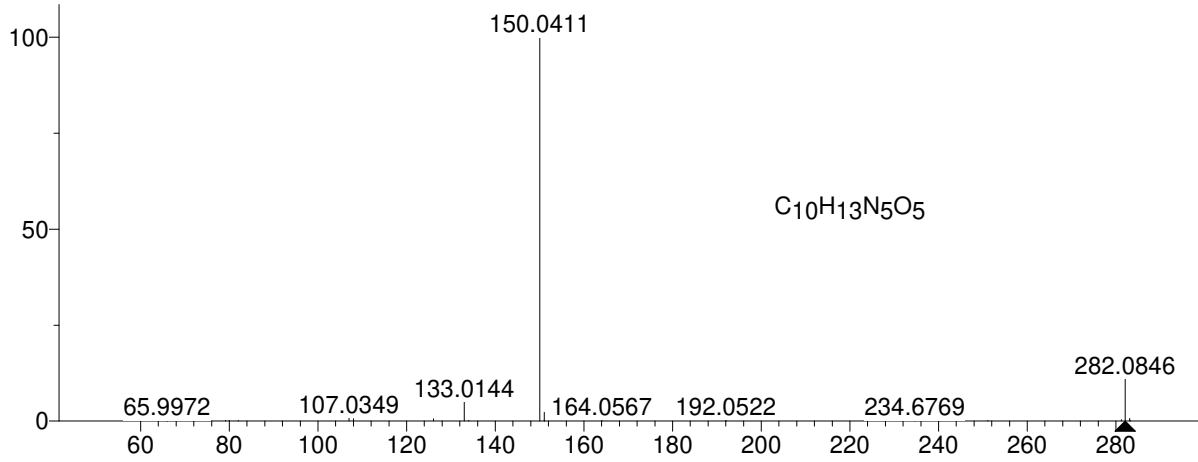

Hit 4 : GUANOSINE [M-H]<sup>-</sup> P=282.1  
C<sub>10</sub>H<sub>13</sub>N<sub>5</sub>O<sub>5</sub>; MF: 617; RMF: 805; Prob 0.08%; Lib: mona-export-gnps; ID: 5564.

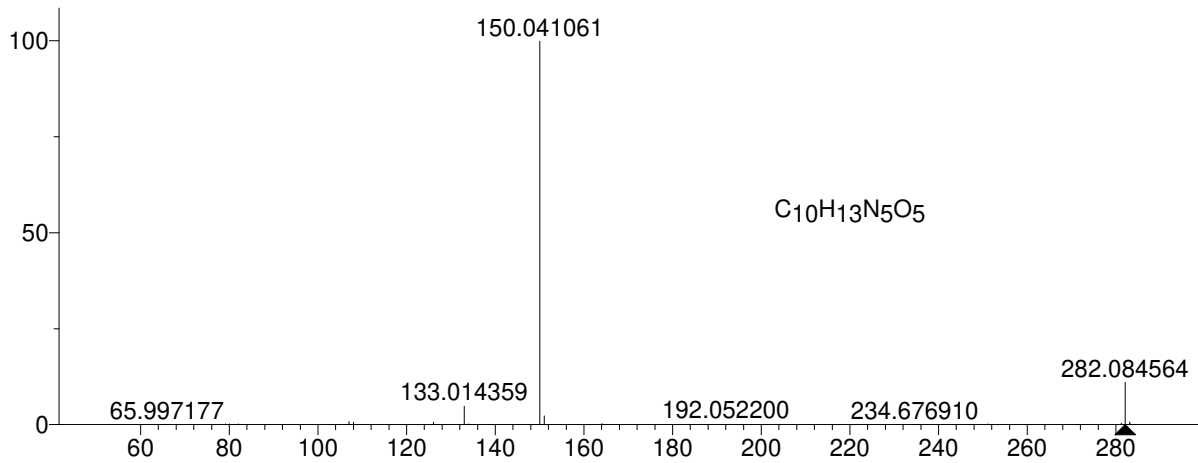

Hit 5 : Guanosine (Not validated); PlaSMA ID-499 [M-H]<sup>-</sup> P=282.1  
C<sub>10</sub>H<sub>13</sub>N<sub>5</sub>O<sub>5</sub>; MF: 557; RMF: 808; Prob 0.01%; Lib: biomsms-neg-plasma; ID: 470.

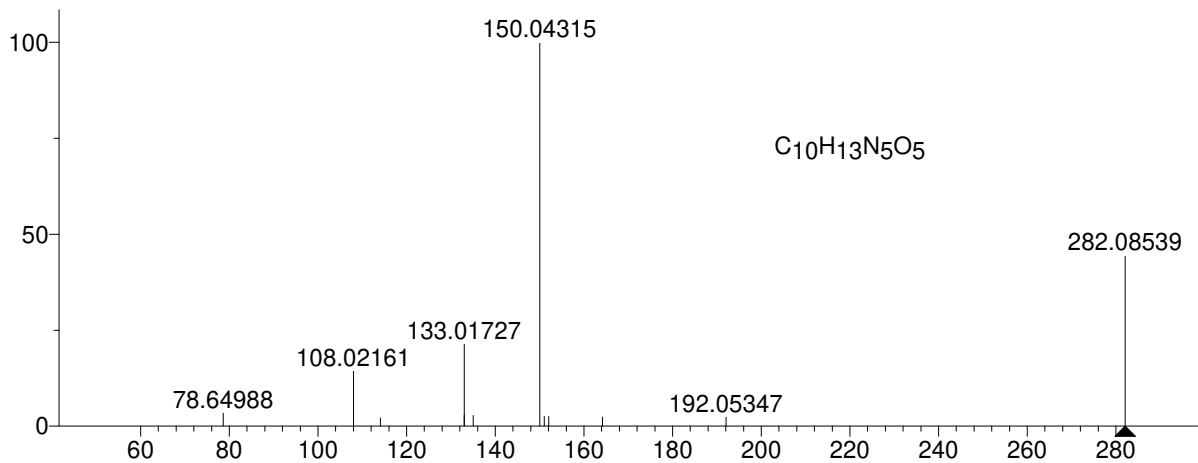

Unknown: Unknown (2.27\_548.1029m/z)  
Compound in Library Factor = 0

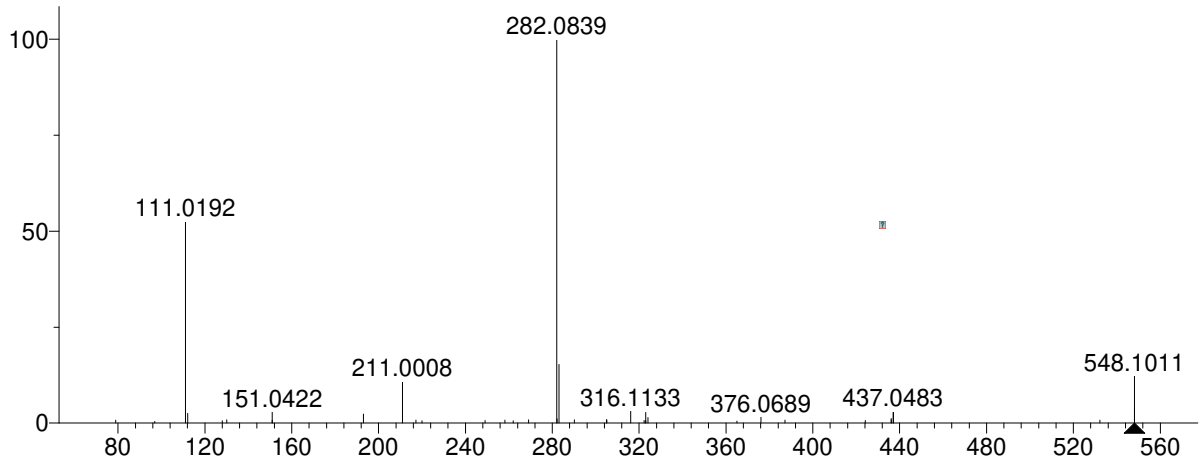

Unknown: Unknown (2.28\_282.2416m/z)  
Compound in Library Factor = 0

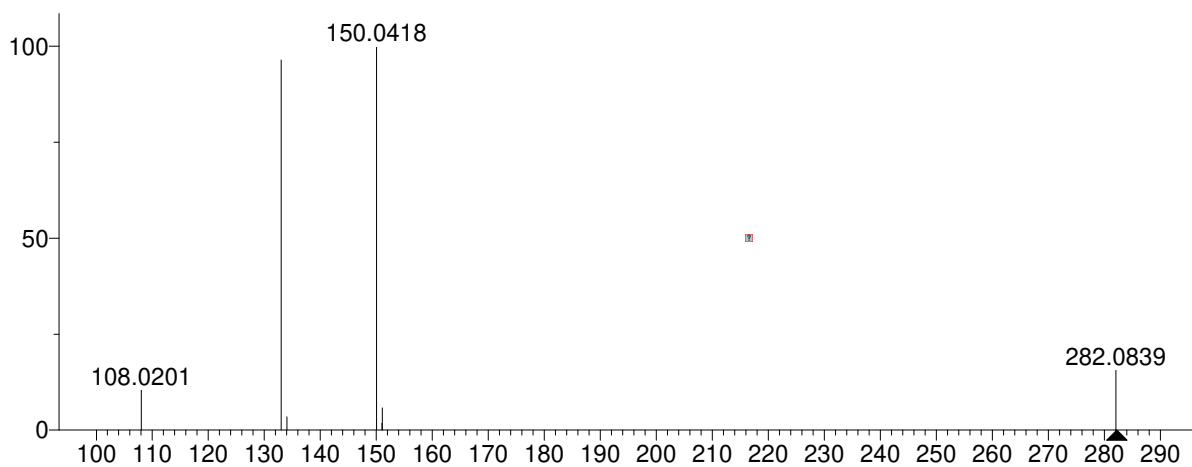

Hit 1 : MLS001146935-01!ANISOTROPINE METHYLBROMIDE [M+H]<sup>+</sup> P=282.2  
C<sub>17</sub>H<sub>32</sub>BrNO<sub>2</sub>; MF: 0; RMF: 6; Prob 100.0%; Lib: mona-export-gnps; ID: 3650.

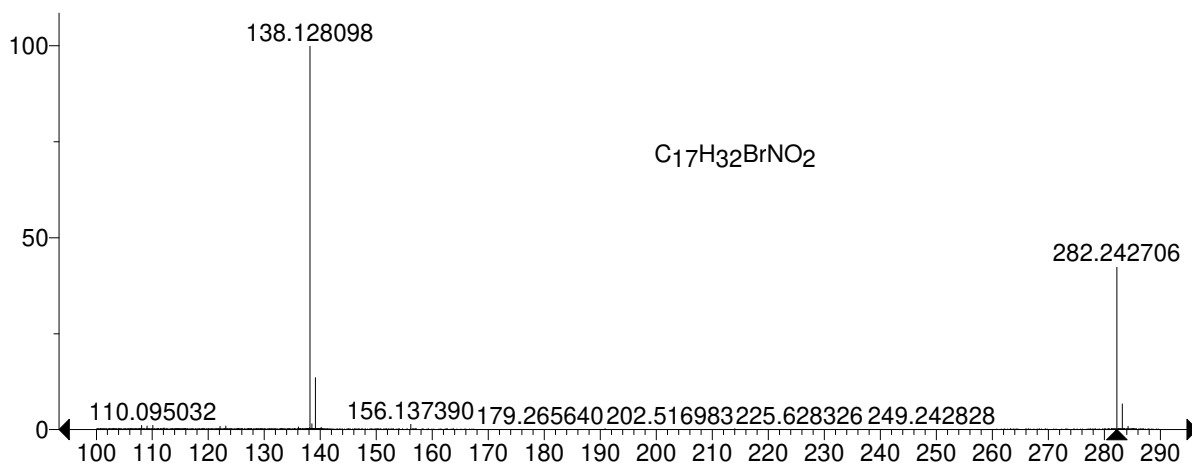

Unknown: Unknown (2.29\_385.1344m/z)  
Compound in Library Factor = 0

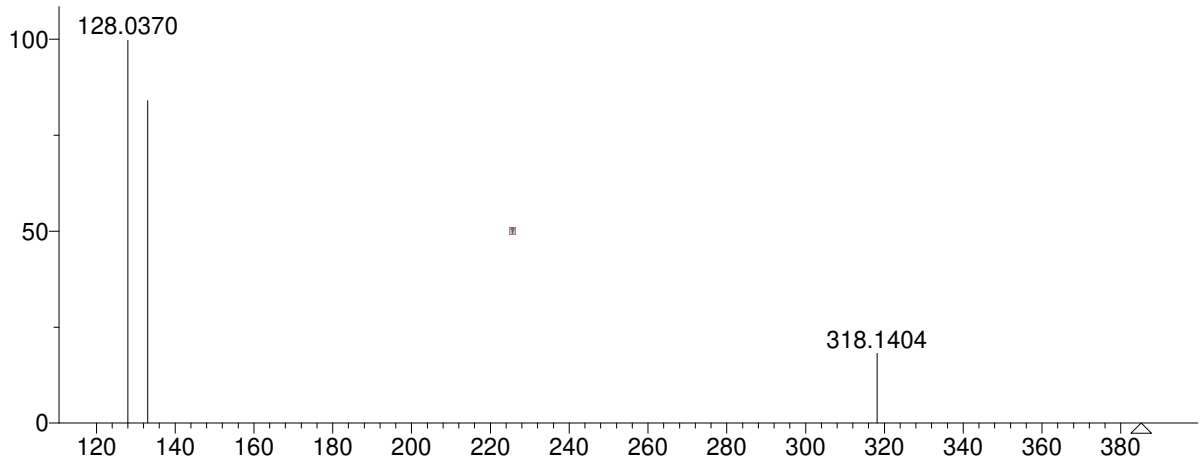

Unknown: Unknown (2.29\_601.1518m/z)  
Compound in Library Factor = -3273

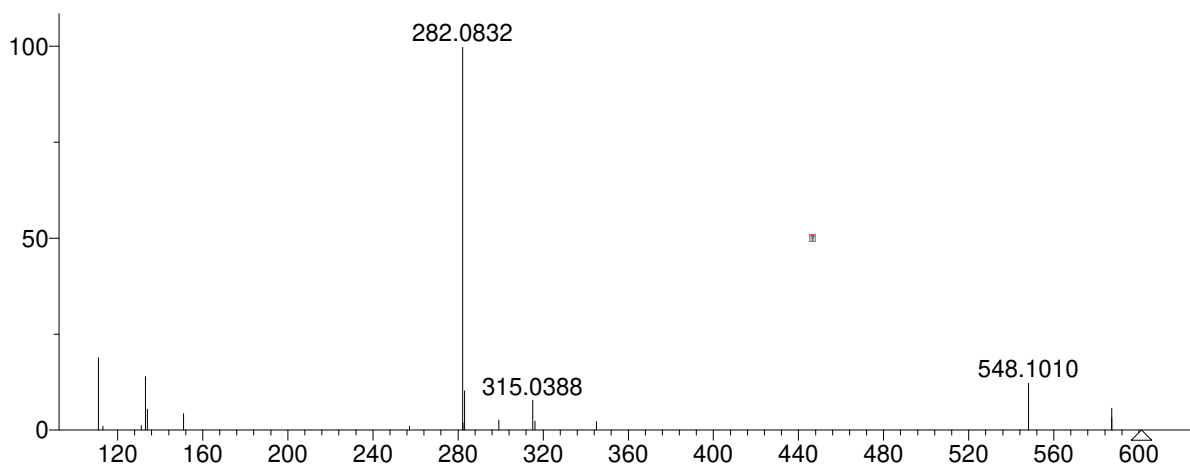

Hit 1 : Kaempferitrin [M+Na]<sup>+</sup> HCD 90V P=601.2  
C<sub>27</sub>H<sub>30</sub>O<sub>14</sub>; MF: 3; RMF: 81; Prob 22.1%; CAS: 482-38-2; Lib: nist\_msms; ID: 389463.

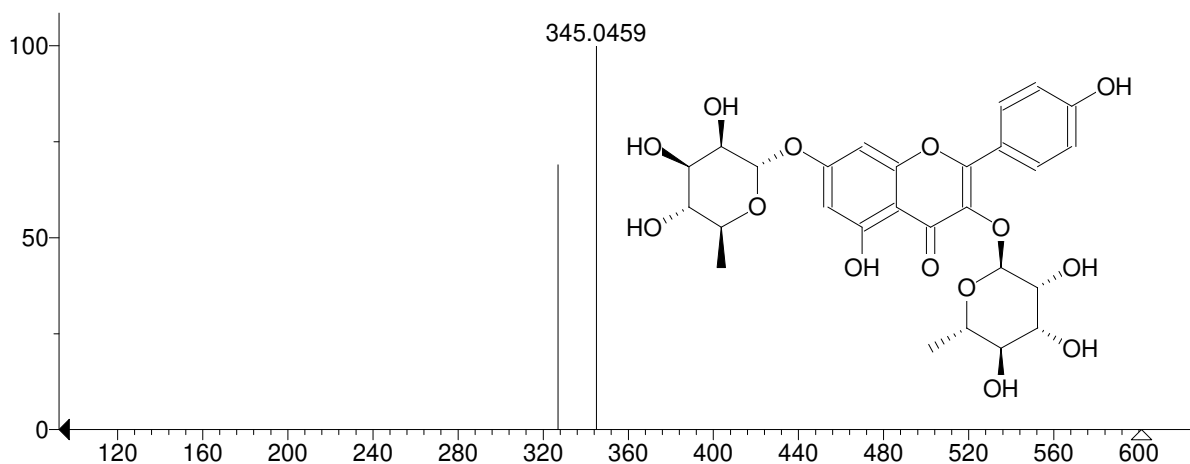

Hit 2 : Iespenefril [M+Na]<sup>+</sup> 45HCD P=601.2  
C<sub>27</sub>H<sub>30</sub>O<sub>14</sub>; MF: 0; RMF: 41; Prob 19.5%; Lib: anthocyanins\_mona; ID: 5801.

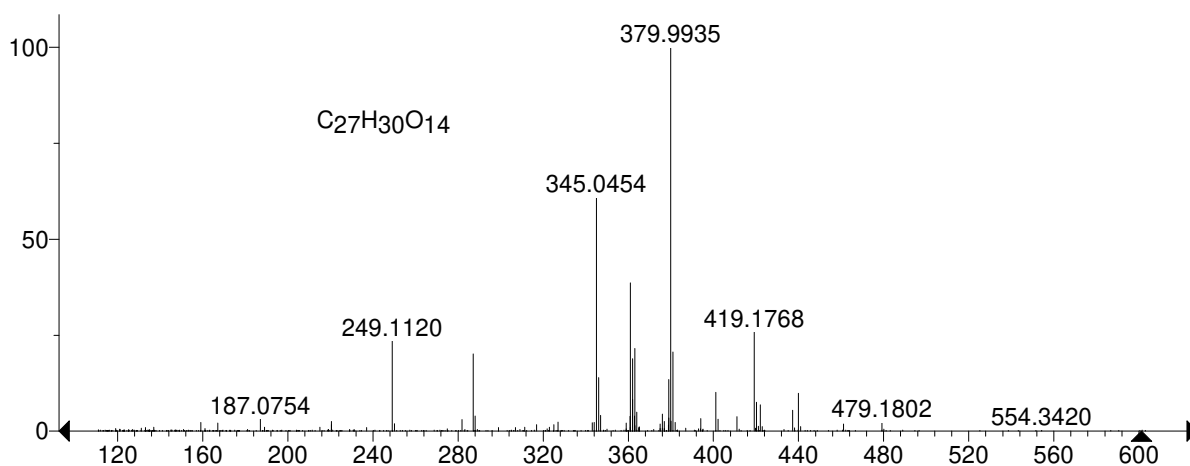



Unknown: Unknown (2.30\_611.0426m/z)  
Compound in Library Factor = 0

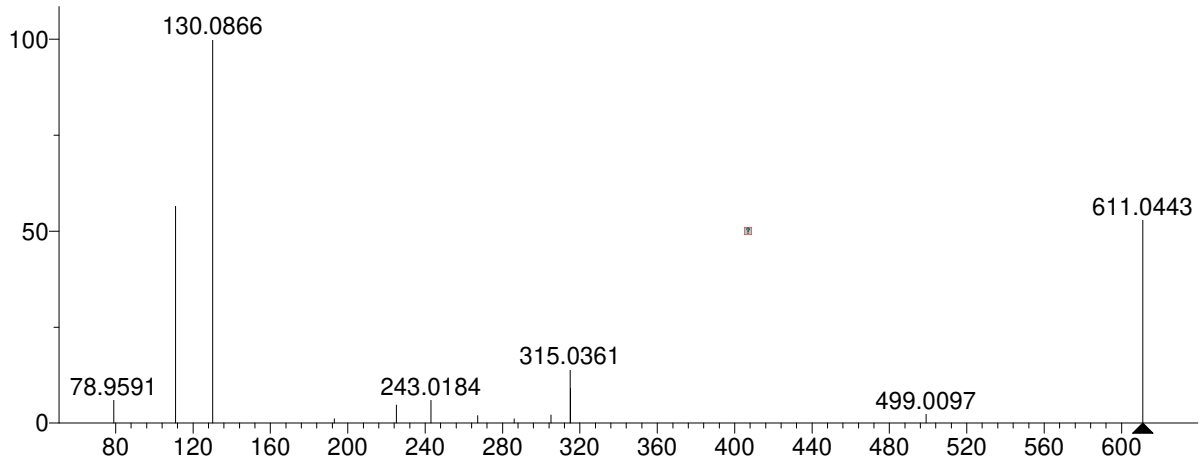



Unknown: Unknown (2.31\_469.1921m/z)  
Compound in Library Factor = 0

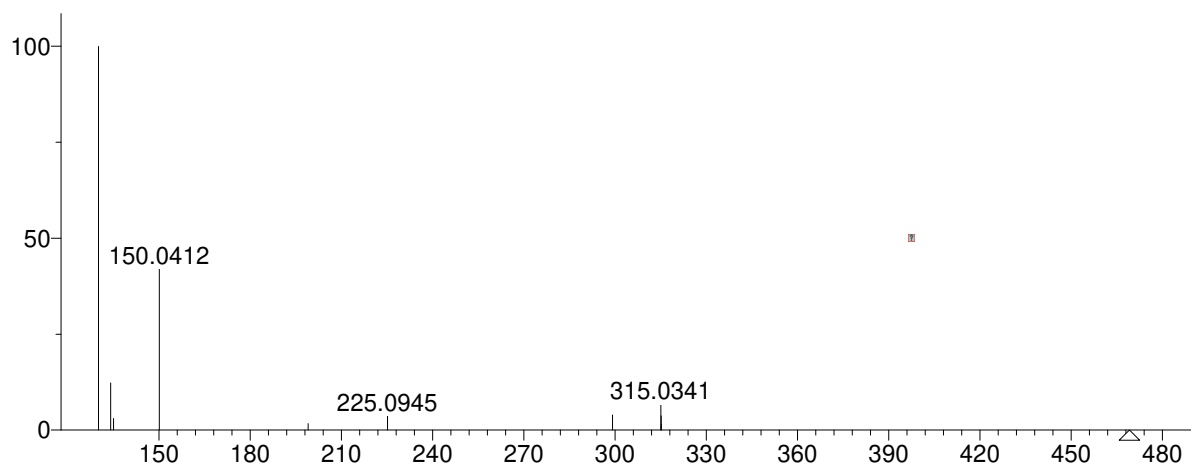

Hit 1 : Flucythrinate [M+NH4]<sup>+</sup> HCD 121V P=469.2  
C<sub>26</sub>H<sub>23</sub>F<sub>2</sub>N<sub>2</sub>O<sub>4</sub>; MF: 0; RMF: 94; Prob 50.0%; CAS: 70124-77-5; Lib: nist\_msms; ID: 388430.

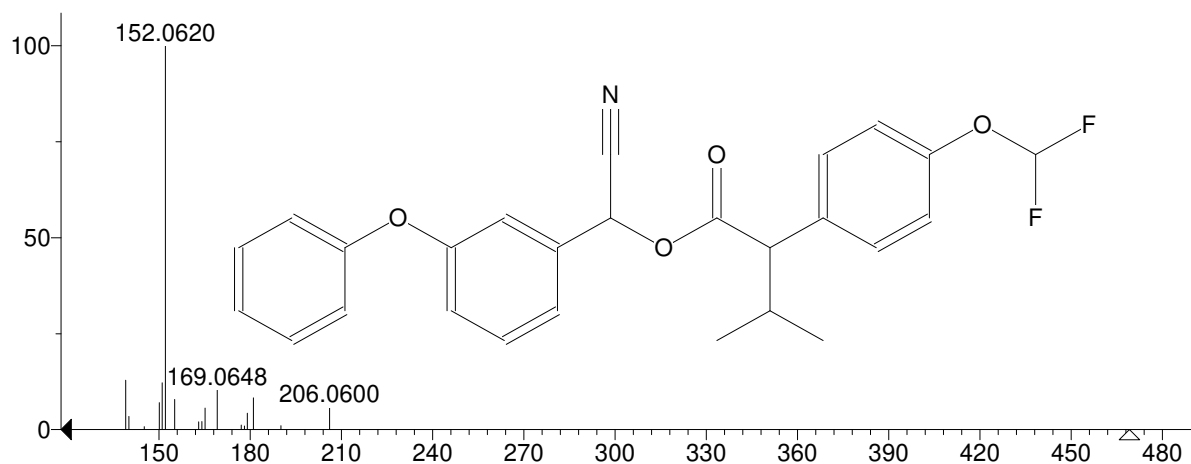

Hit 2 : Mexicanolide [M+H]<sup>+</sup> 35% P=469.2  
C<sub>27</sub>H<sub>32</sub>O<sub>7</sub>; MF: 0; RMF: 18; Prob 50.0%; Lib: mona-export-itree; ID: 713.

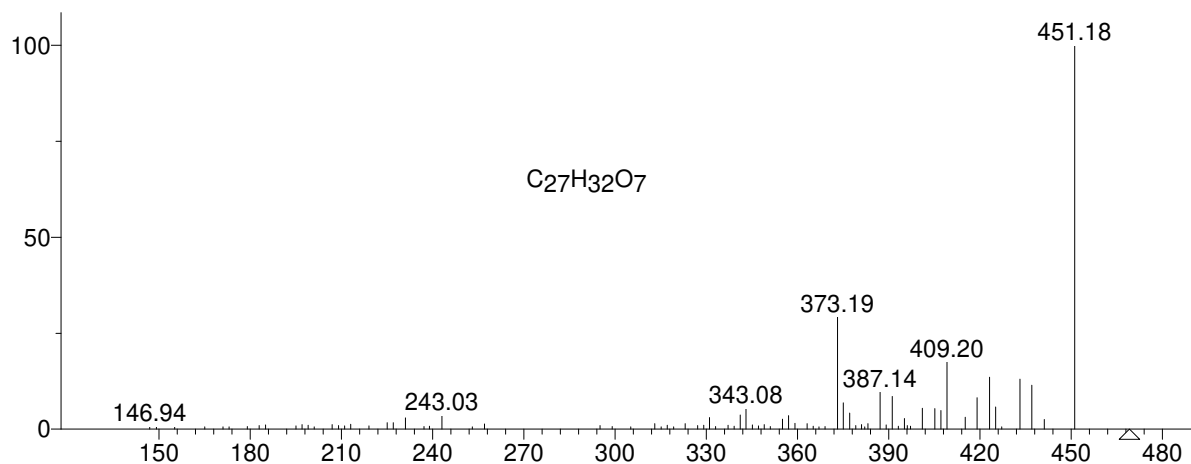

Unknown: Unknown (2.31\_485.1875m/z)  
Compound in Library Factor = 0

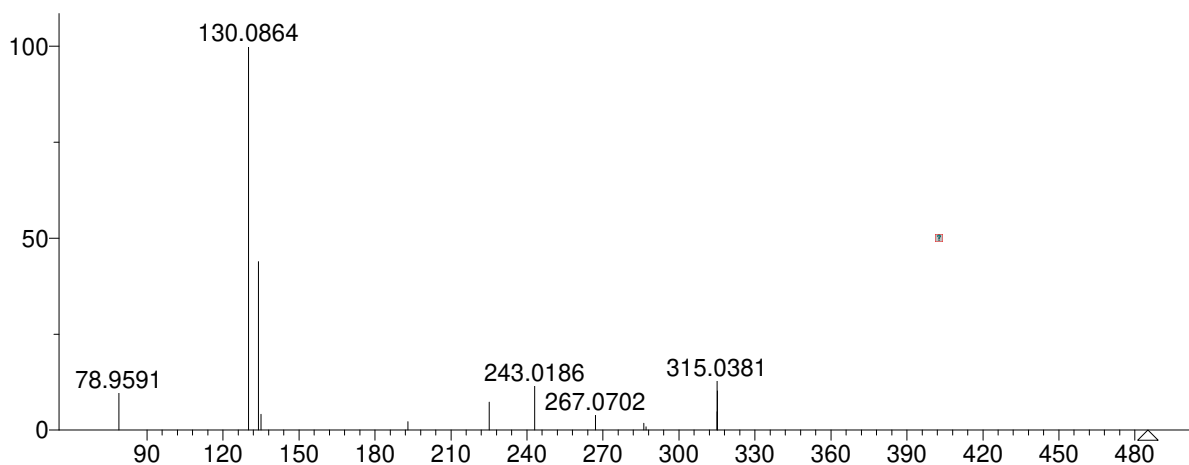

Hit 1 : Alpha-Dihydrogedunol [M-H]<sup>-</sup> 35% P=485.2  
C<sub>28</sub>H<sub>38</sub>O<sub>7</sub>; MF: 0; RMF: 20; Prob 50.0%; Lib: mona-export-itree; ID: 2342.

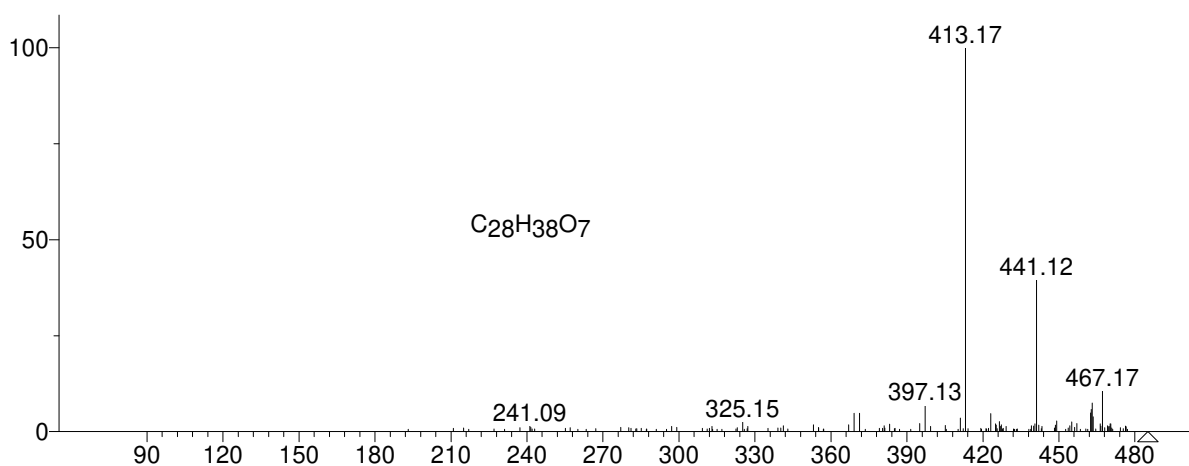

Hit 2 : Thymidine [2M+H]<sup>+</sup> QTOF 4V P=485.2  
C<sub>10</sub>H<sub>14</sub>N<sub>2</sub>O<sub>5</sub>; MF: 0; RMF: 19; Prob 50.0%; CAS: 50-89-5; Lib: nist\_msms; ID: 34484.

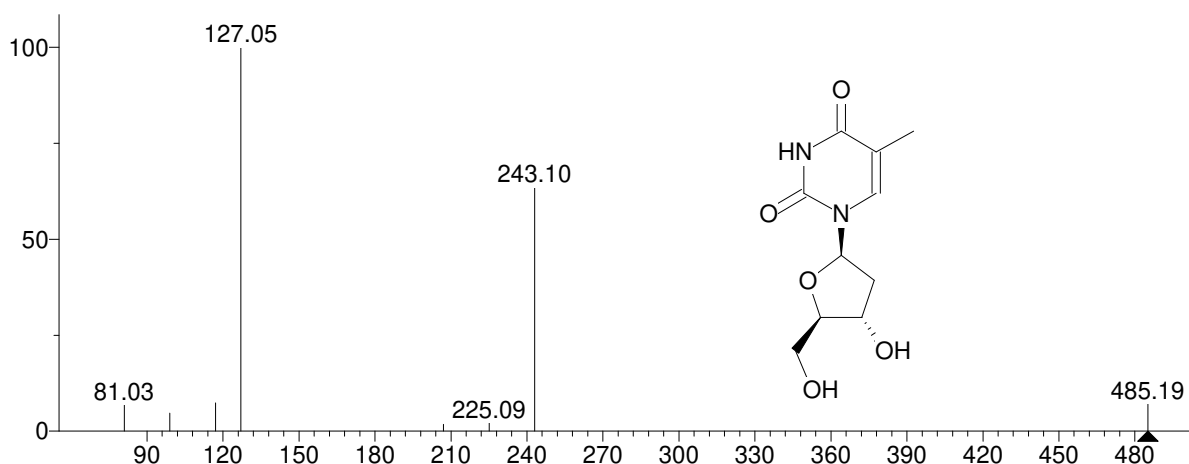

\*\* Search Report Page 1 of 2 \*\*

Unknown: Unknown (2.32\_407.1661m/z)  
Compound in Library Factor = -2387

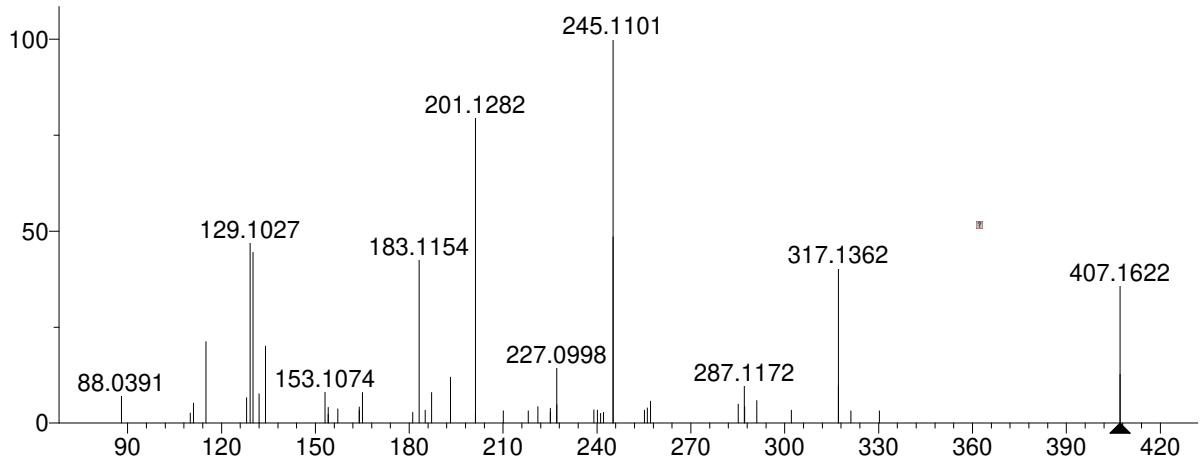

Hit 1 : (2R,3R,4S,6R)-2-((5-hydroxy-2,2-dimethyl-3,4-dihydro-2H-benzo[h]chromen-6-yl)oxy)-6-(hydroxymethyl)tetrahydro-2H-pyran-3-ol  
C<sub>21</sub>H<sub>26</sub>O<sub>8</sub>; MF: 27; RMF: 365; Prob 21.8%; Lib: mona-export-gnps; ID: 2855.

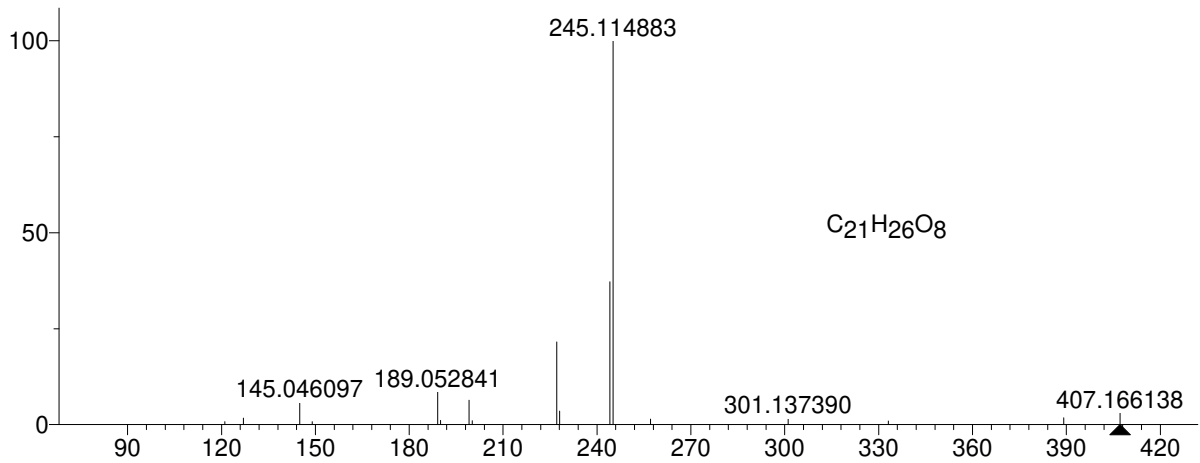

Hit 2 : (2R,3R,4S,6R)-2-((10-hydroxy-2,2-dimethyl-3,4-dihydro-2H-benzo[g]chromen-5-yl)oxy)-6-(hydroxymethyl)tetrahydro-2H-pyran-3-ol  
C<sub>21</sub>H<sub>26</sub>O<sub>8</sub>; MF: 15; RMF: 258; Prob 14.5%; Lib: mona-export-gnps; ID: 2848.

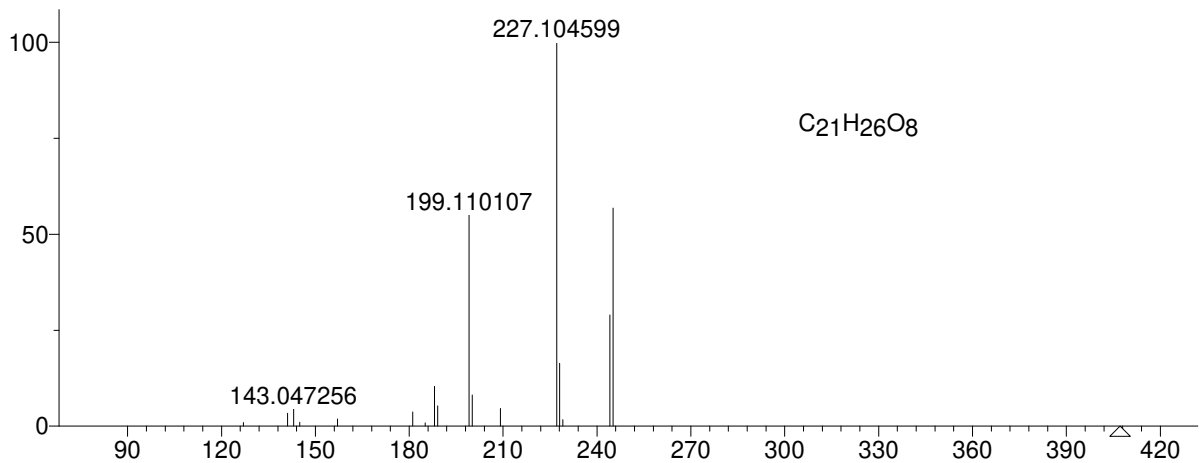

Hit 3 : Artesunate [M+Na]<sup>+</sup> HCD 7V P=407.2  
C19H28O8; MF: 12; RMF: 249; Prob 12.8%; CAS: 88495-63-0; Lib: nist\_msms; ID: 119192.

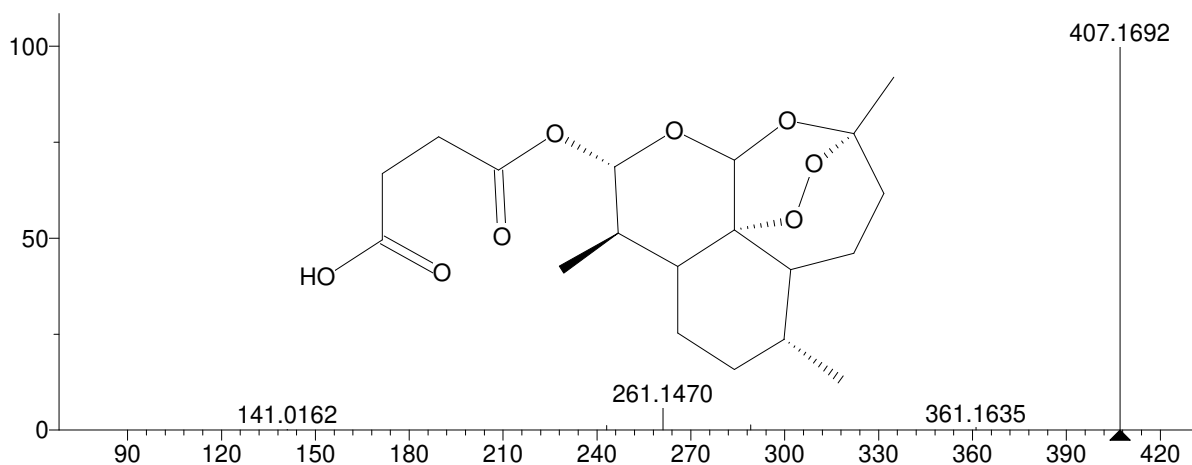

Hit 4 : N,N'-Diacetylchitobiose [M+H-H<sub>2</sub>O]<sup>+</sup> HCD 8V P=407.2  
C16H28N2O11; MF: 4; RMF: 185; Prob 9.55%; CAS: 35061-50-8; Lib: nist\_msms; ID: 486176.

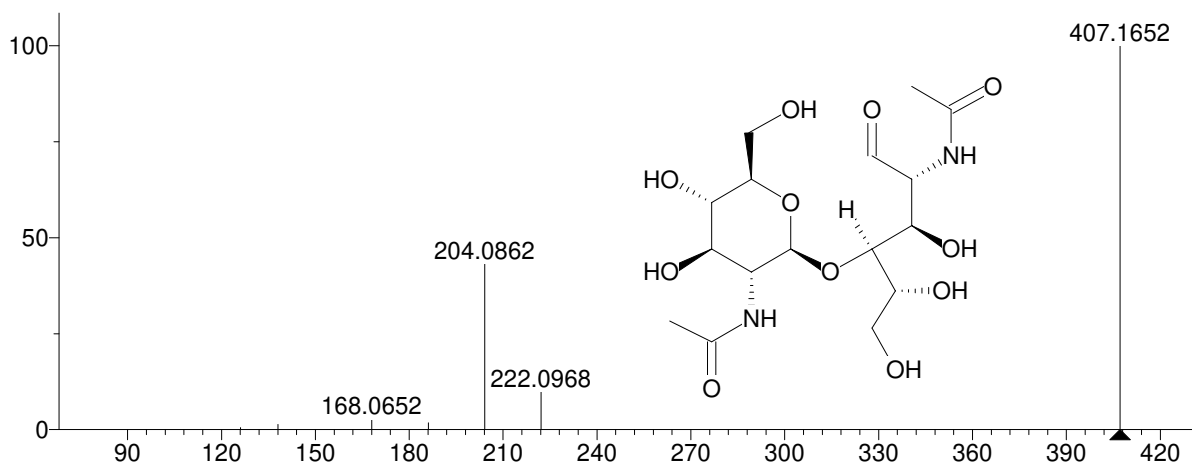

Hit 5 : 16-Phenyltetranorprostaglandin E2 [M+Cl]<sup>-</sup> HCD 36V P=407.2  
C22H28O5; MF: 2; RMF: 58; Prob 8.81%; CAS: 38315-44-5; Lib: nist\_msms; ID: 545300.

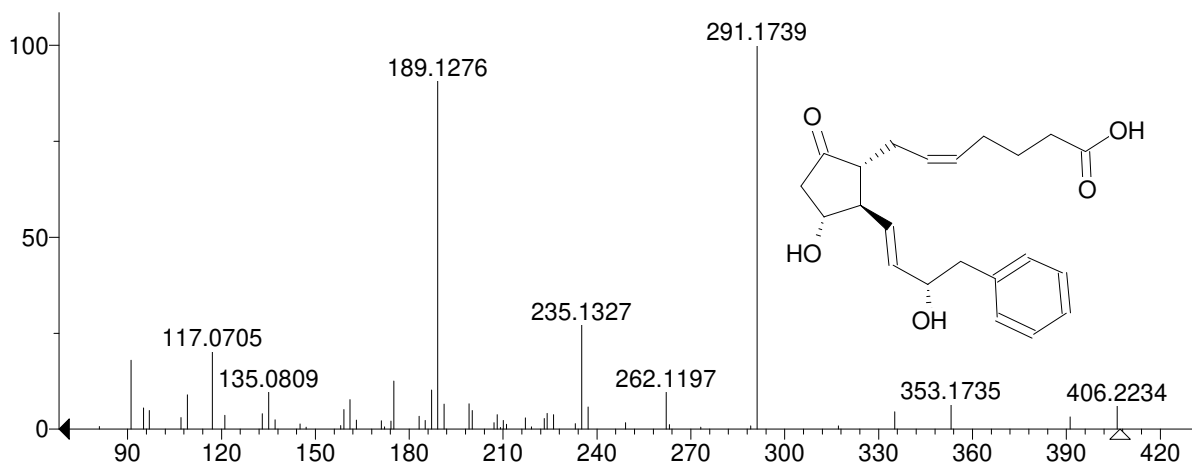

Unknown: Unknown (2.32\_485.1531m/z)  
Compound in Library Factor = 0

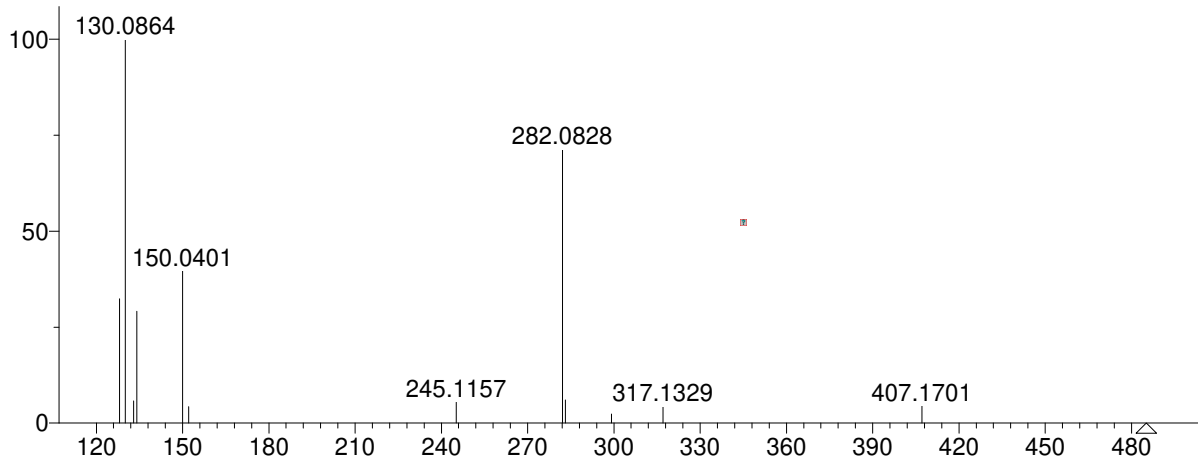

Hit 1 : epiyangambin [M+K]<sup>+</sup> 35HCD P=485.2  
C<sub>24</sub>H<sub>30</sub>O<sub>8</sub>; MF: 0; RMF: 12; Prob 100.0%; Lib: mona-export-vf-npl\_qexactive; ID: 4132.

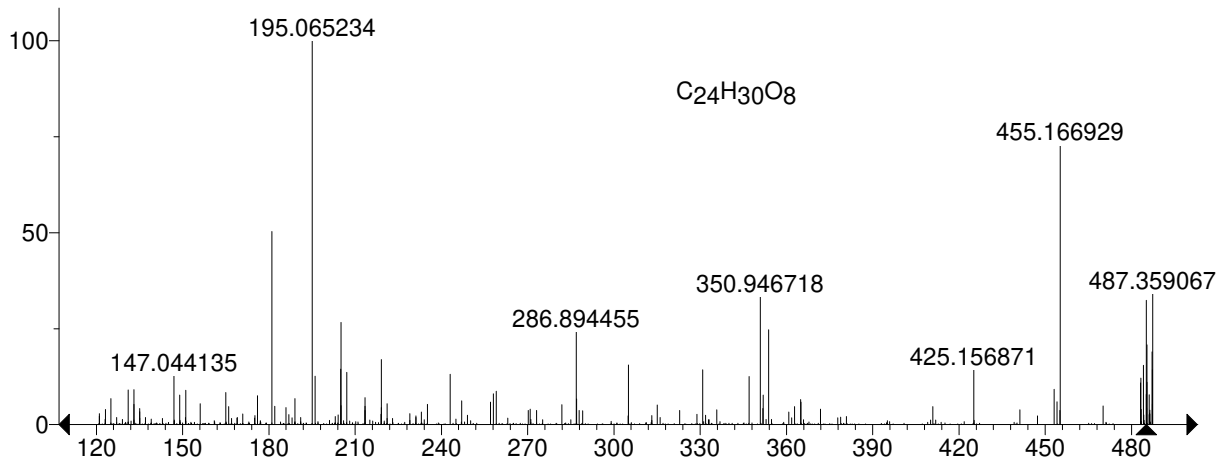

\*\* Search Report Page 1 of 2 \*\*

Unknown: Unknown (2.33\_607.2677m/z)  
Compound in Library Factor = -171

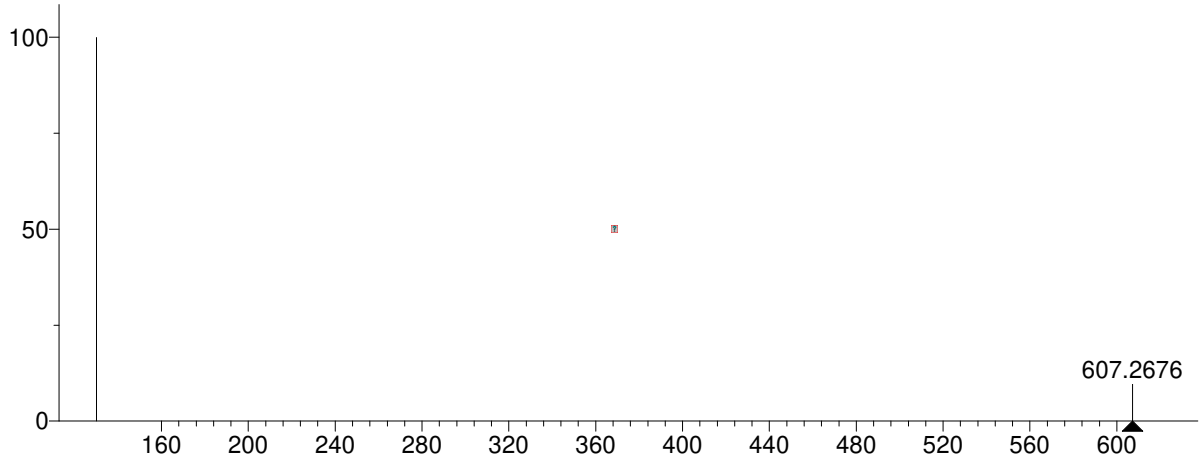

Hit 1 : Isoreserpin [M-H]<sup>-</sup> 10 P=607.3  
C<sub>33</sub>H<sub>40</sub>N<sub>2</sub>O<sub>9</sub>; MF: 362; RMF: 997; Prob 97.1%; Lib: msms neg mona\_ipb\_gnps\_plasma; ID: 18755.

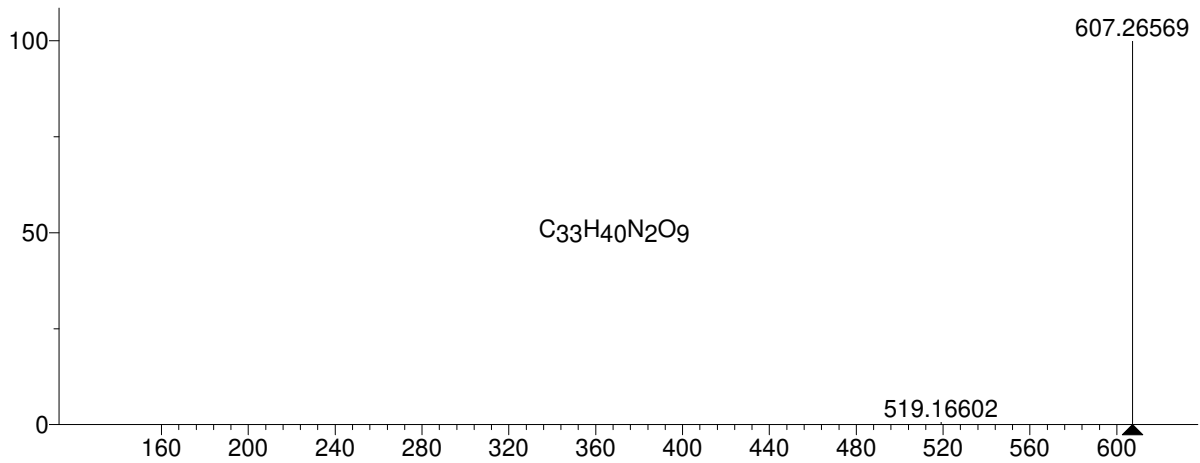

Hit 2 : Reserpine [M-H]<sup>-</sup> 10 P=607.3  
C<sub>33</sub>H<sub>40</sub>N<sub>2</sub>O<sub>9</sub>; MF: 33; RMF: 830; Prob 0.97%; Lib: mona-export-lc-ms-ms\_negative\_mode; ID: 27799.

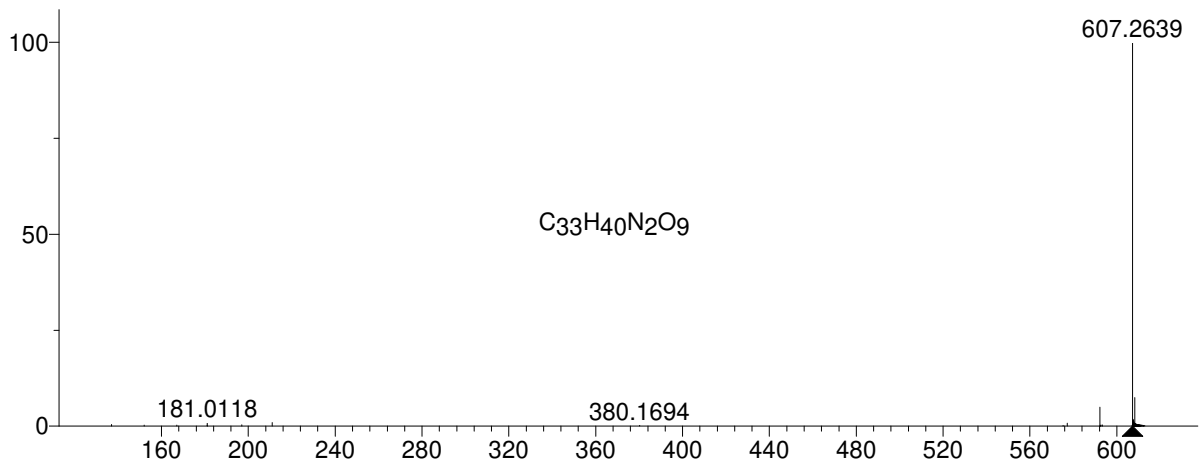

Hit 3 : Ouabain [M+Na]<sup>+</sup> HCD 60V P=607.3  
C<sub>29</sub>H<sub>44</sub>O<sub>12</sub>; MF: 18; RMF: 263; Prob 0.58%; CAS: 630-60-4; Lib: nist\_msms; ID: 384921.

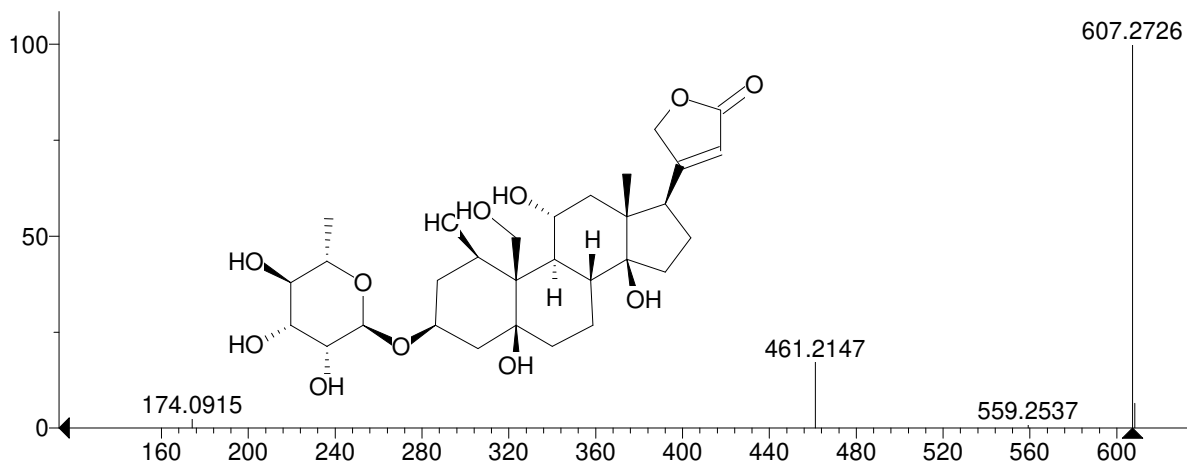

Hit 4 : NCGC00180829-02\_C<sub>29</sub>H<sub>44</sub>O<sub>12</sub>\_Card-20(22)-enolide, 3-[(6-deoxy-beta-D-talopyranosyl)oxy]-1,5,11,14,1  
C<sub>29</sub>H<sub>44</sub>O<sub>12</sub>; MF: 3; RMF: 247; Prob 0.35%; Lib: mona-export-gnps; ID: 14671.

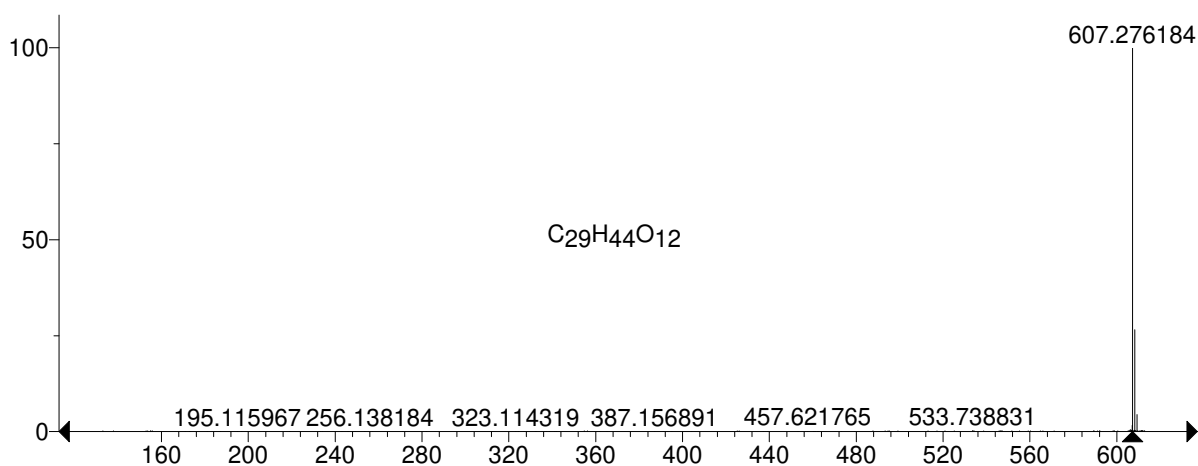

Hit 5 : OUABAIN [M+Na]<sup>+</sup> 25HCD P=607.3  
C<sub>29</sub>H<sub>44</sub>O<sub>12</sub>; MF: 3; RMF: 243; Prob 0.35%; Lib: anthocyanins mona; ID: 7849.

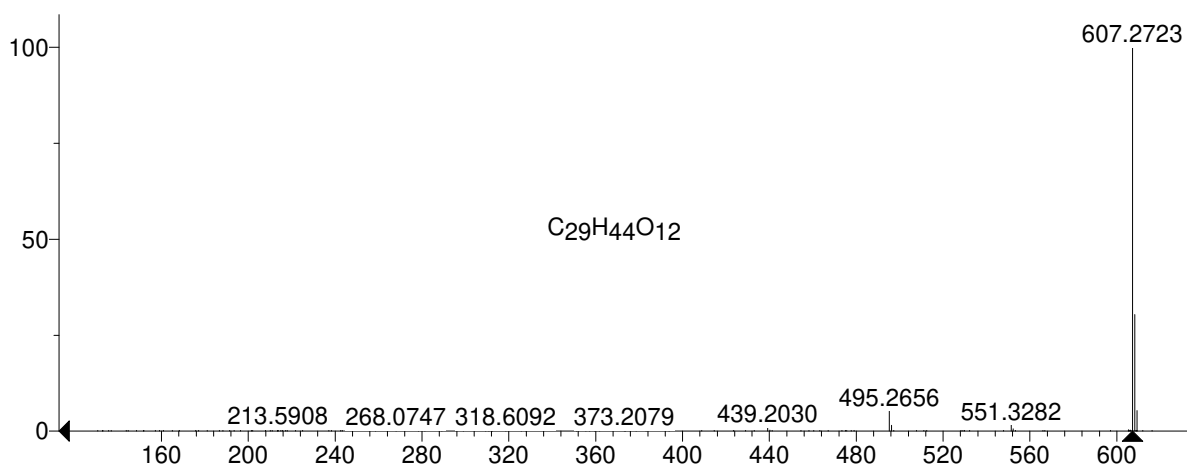

Unknown: Unknown (2.33\_638.1988m/z)  
Compound in Library Factor = 0

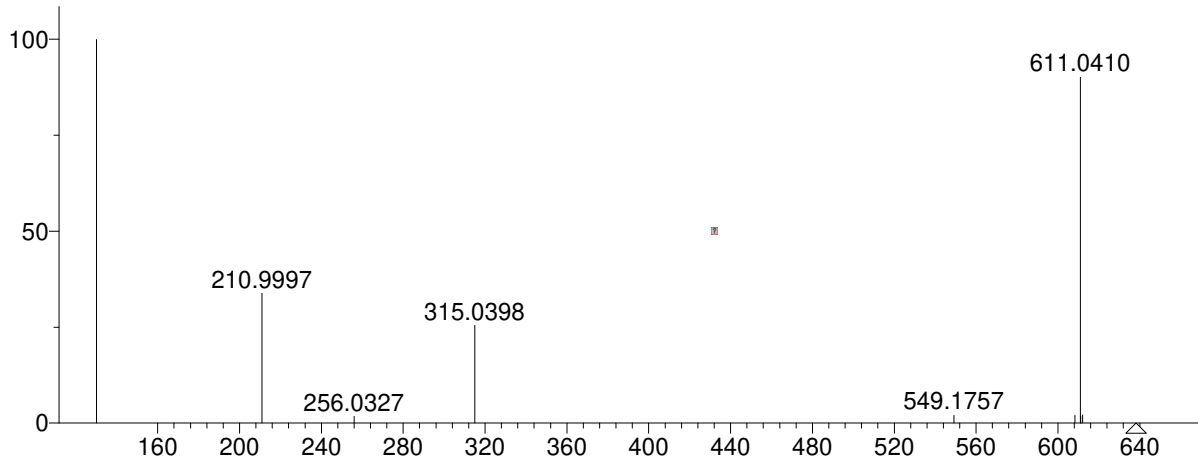



\*\* Search Report Page 1 of 2 \*\*

Unknown: Unknown (2.34\_403.1350m/z)  
Compound in Library Factor = -258

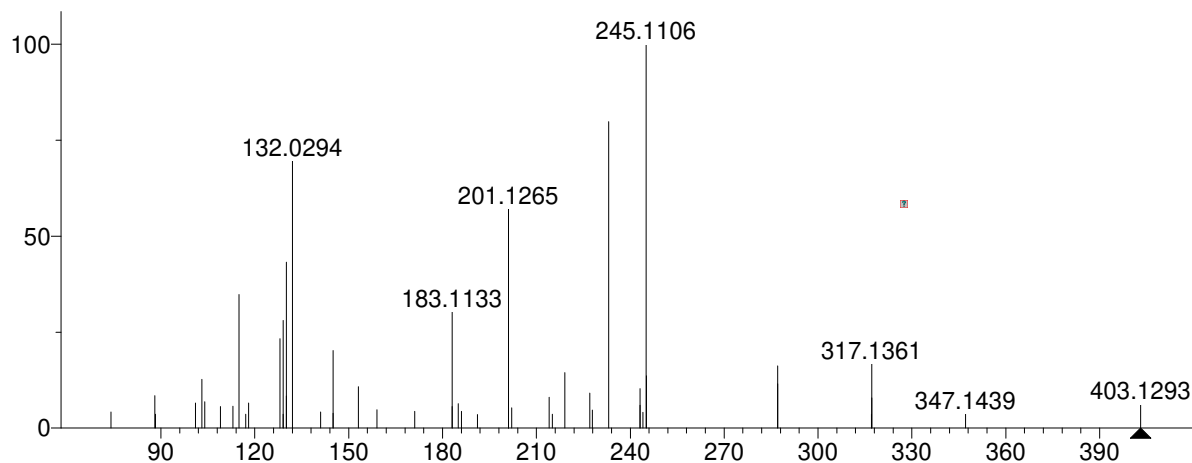

Hit 1 : Nobiletin [M+H]<sup>+</sup> HCD 20V P=403.1  
C<sub>21</sub>H<sub>22</sub>O<sub>8</sub>; MF: 269; RMF: 935; Prob 95.1%; CAS: 478-01-3; Lib: nist\_msms; ID: 178331.

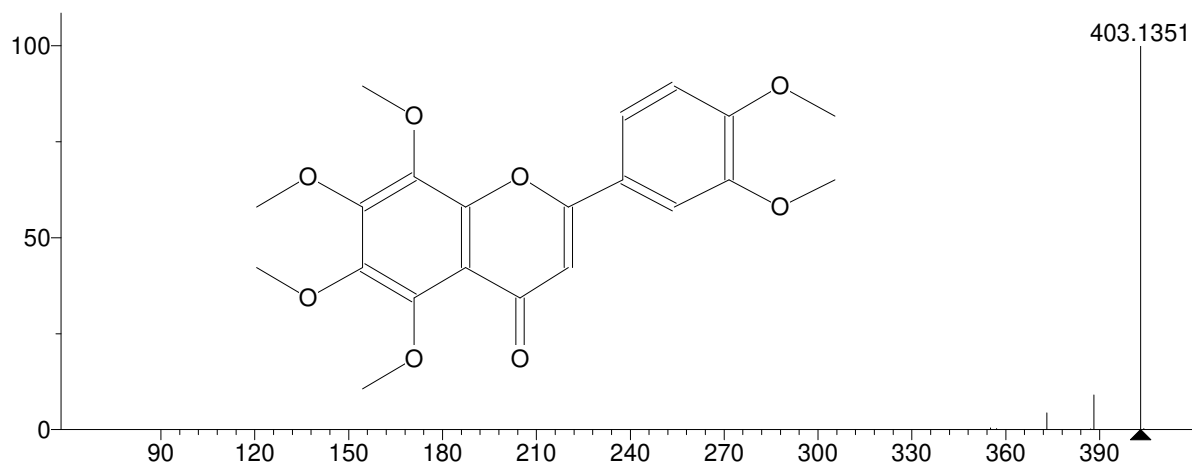

Hit 2 : 3',4',5',5,6,7-Hexamethoxyflavone [M+H]<sup>+</sup> HCD 24V P=403.1  
C<sub>21</sub>H<sub>22</sub>O<sub>8</sub>; MF: 28; RMF: 637; Prob 0.95%; CAS: 29043-07-0; Lib: nist\_msms; ID: 462282.

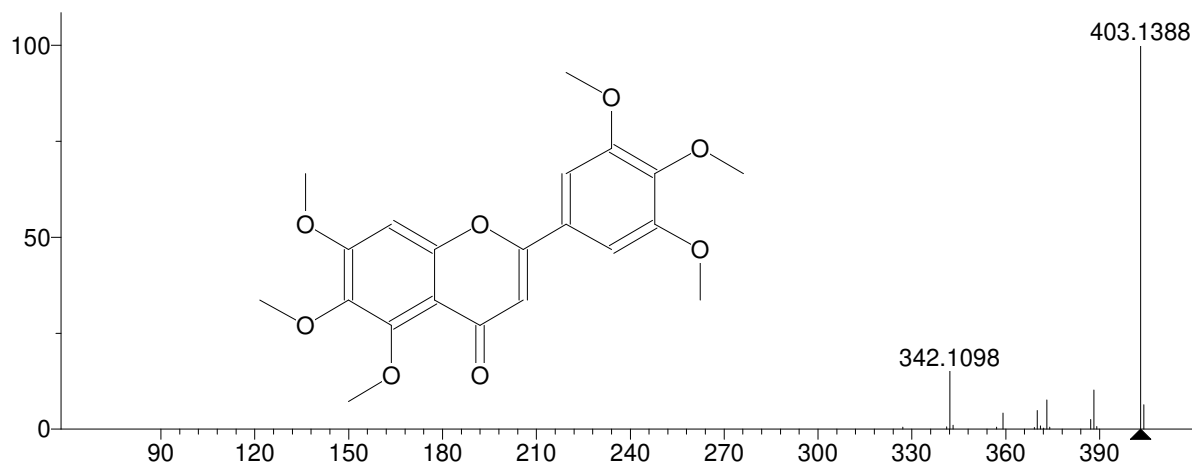

Hit 3 : Egtazic acid [M+Na]<sup>+</sup> QTOF 15V P=403.1  
C<sub>14</sub>H<sub>24</sub>N<sub>2</sub>O<sub>10</sub>; MF: 15; RMF: 101; Prob 0.61%; CAS: 67-42-5; Lib: nist\_msms; ID: 21811.

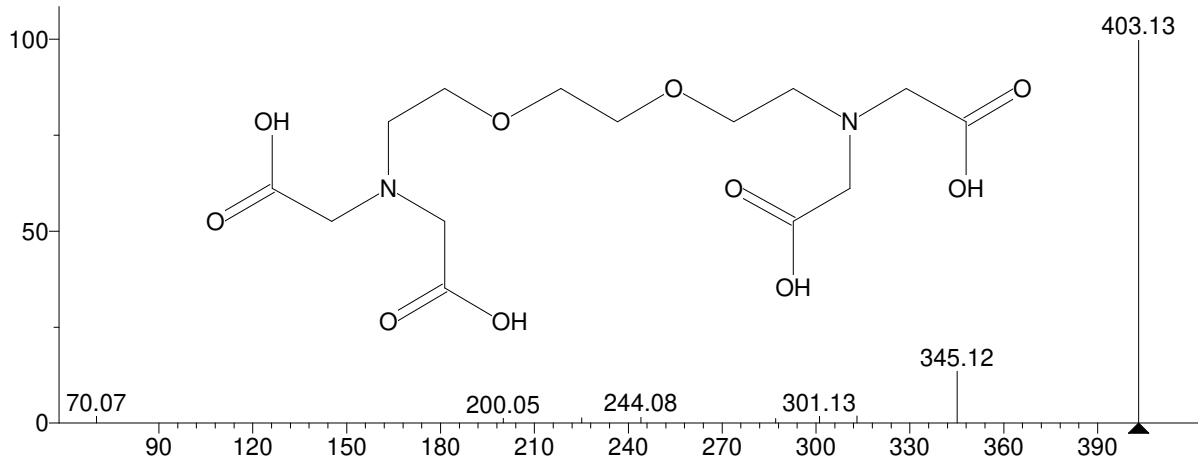

Hit 4 : Naringin dihydrochalcone [M+H-C<sub>6</sub>H<sub>12</sub>O<sub>6</sub>]<sup>+</sup> HCD 36V P=403.1  
C<sub>27</sub>H<sub>34</sub>O<sub>14</sub>; MF: 3; RMF: 56; Prob 0.40%; CAS: 18916-17-1; Lib: nist\_msms; ID: 237395.

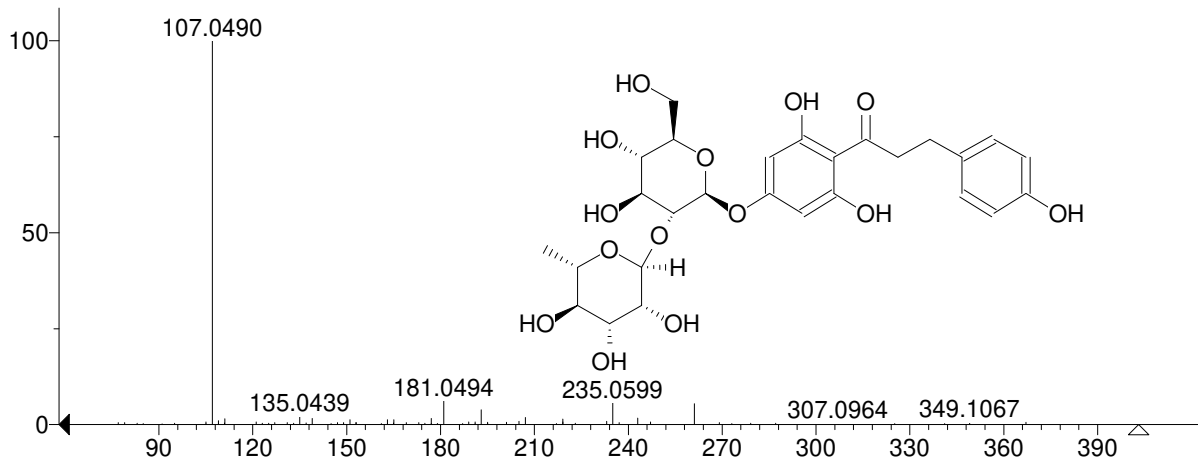

Hit 5 : NCGC00347547-02!methyl 2-(4,5-dihydroxy-6-methoxy-3,6-dimethyl-2-oxocyclohex-3-en-1-yl)oxy-4-hydro: C<sub>19</sub>H<sub>24</sub>O<sub>8</sub>; MF: 1; RMF: 70; Prob 0.37%; Lib: mona-export-gnps; ID: 8950.

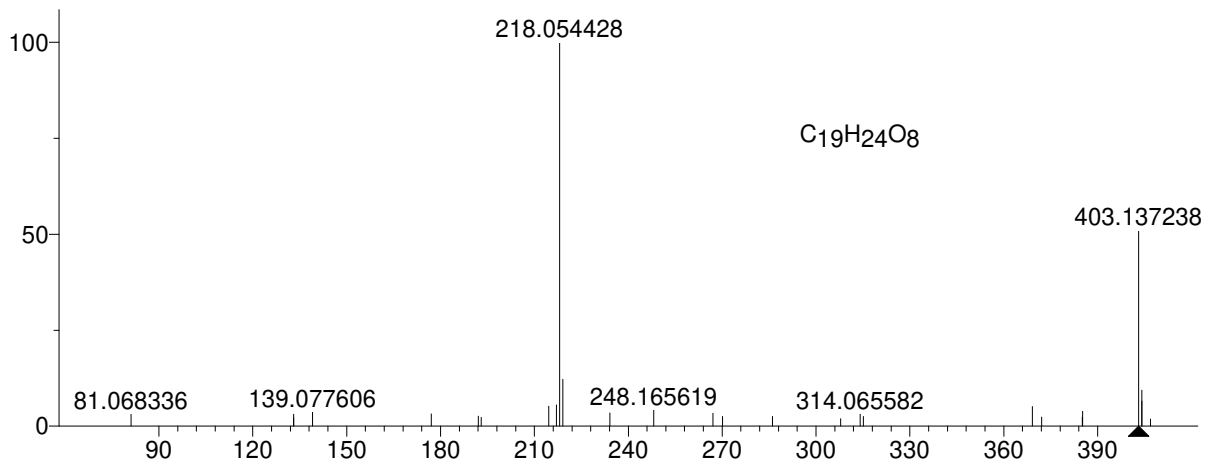

Unknown: Unknown (2.37\_288.1078m/z)  
Compound in Library Factor = 0

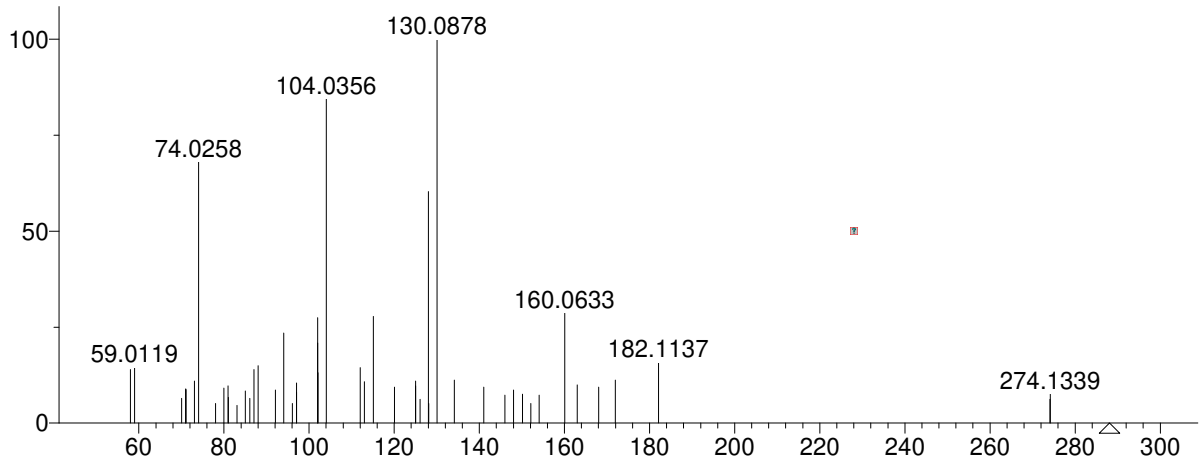

Unknown: Unknown (2.37\_393.1860m/z)  
Compound in Library Factor = -3273

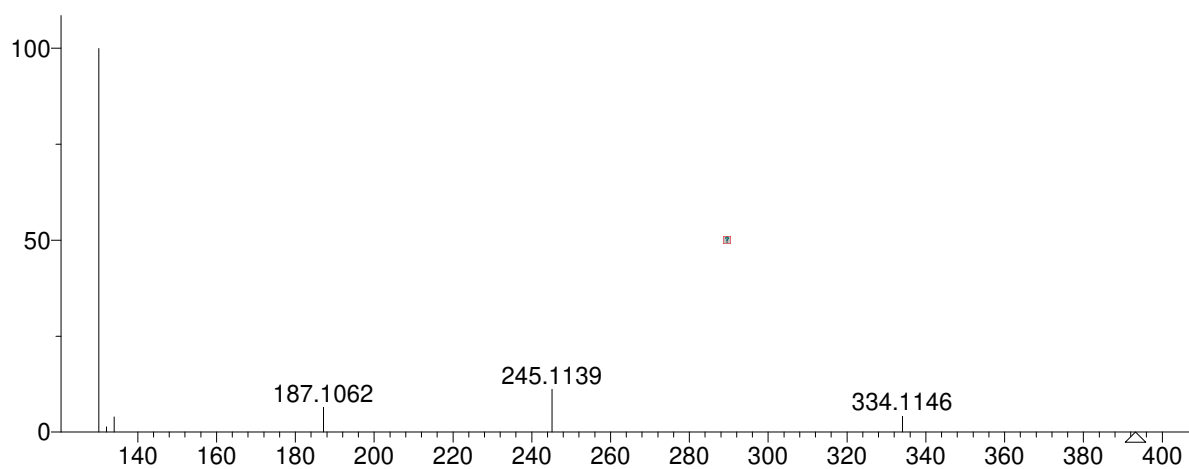

Hit 1 : Dovitinib [M+H]<sup>+</sup> IT-FT 35% P=393.2  
C<sub>21</sub>H<sub>21</sub>FN<sub>6</sub>O; MF: 1; RMF: 159; Prob 100.0%; CAS: 405169-16-6; Lib: nist\_msms; ID: 381645.

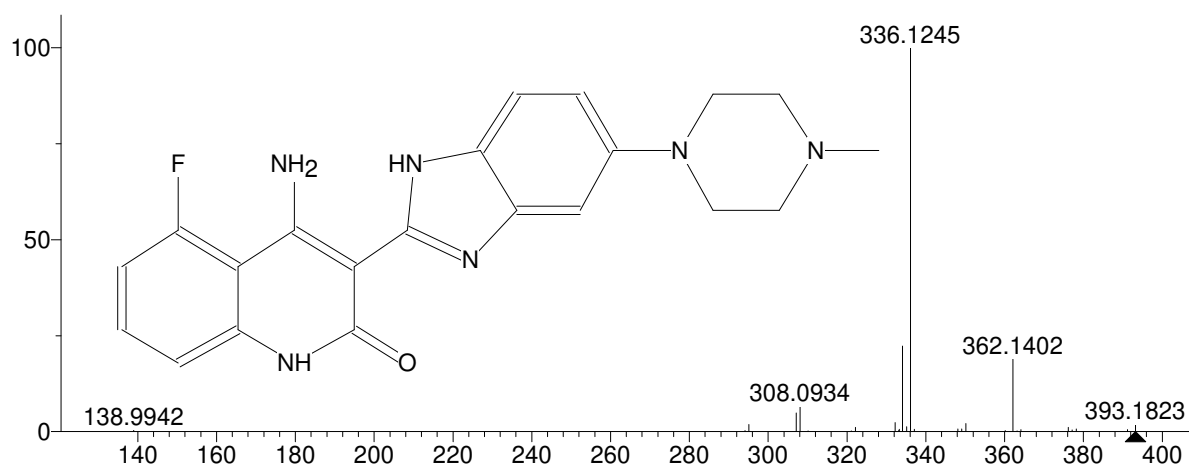

Unknown: Unknown (2.37\_607.2678m/z)  
Compound in Library Factor = 0

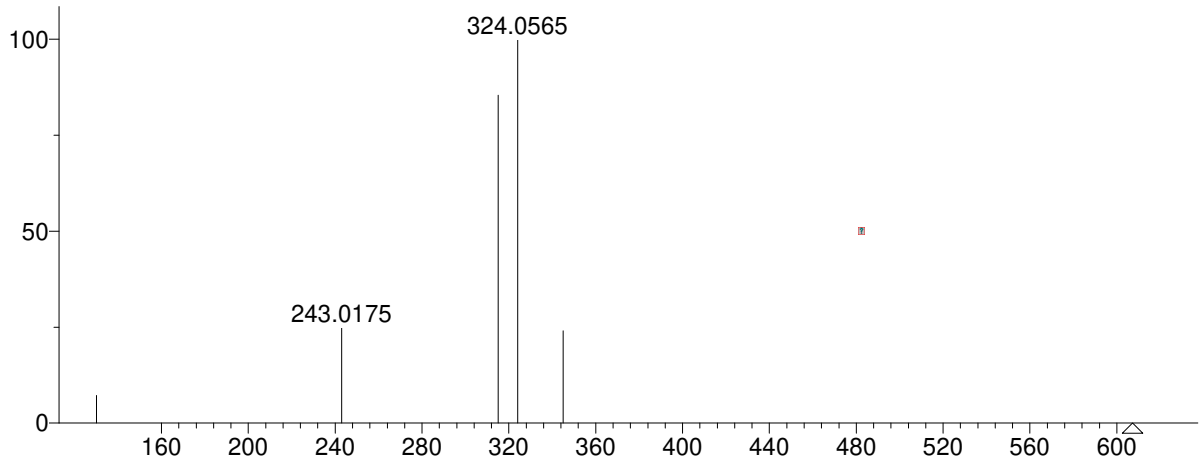

Unknown: Unknown (2.37\_638.2009m/z)  
Compound in Library Factor = 0

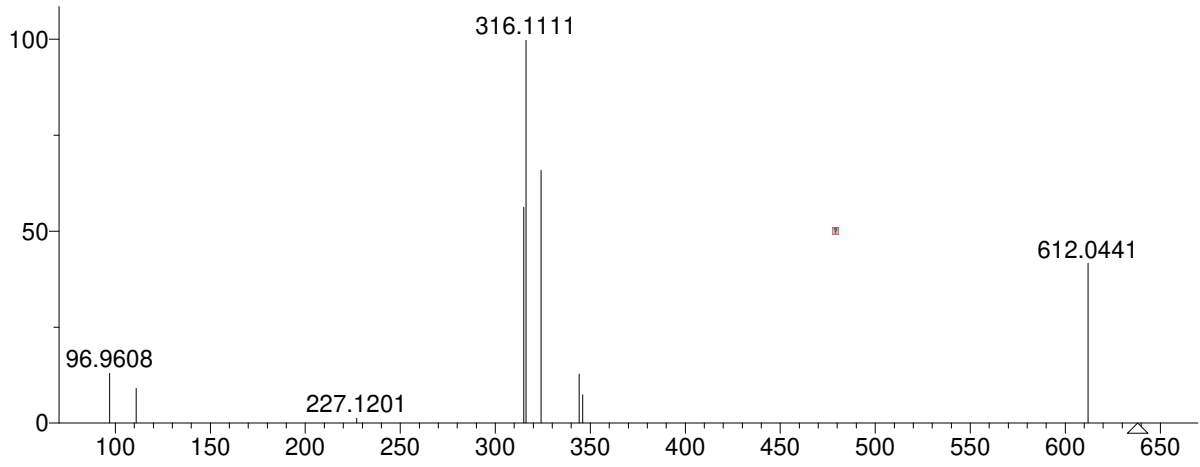

Unknown: Unknown (2.38\_397.1711m/z)  
Compound in Library Factor = 0

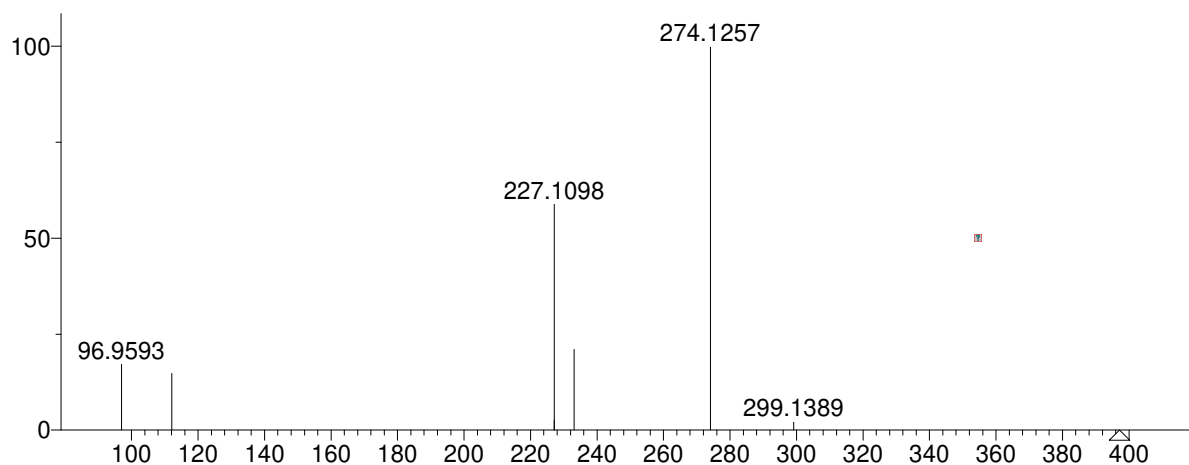

Hit 1 : Benzoic acid, 2-(diphenylphosphino)-4-[21-[(3aS,4S,6aR)-hexahydro-2-oxo-1H-thieno[3,4-d]imidazol-4-yl]-C41H53N4O8PS; MF: 0; RMF: 36; Prob 50.0%; CAS: 608514-42-7; Lib: nist\_msms; ID: 376823.

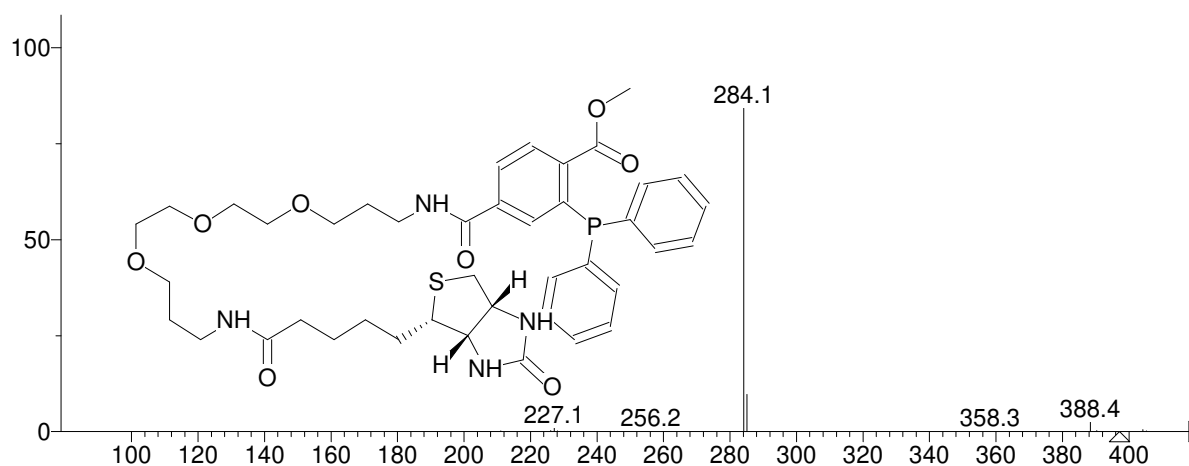

Hit 2 : Atorvastatin [M-H-C7H12O4]- HCD 111V P=397.2  
C33H35FN2O5; MF: 0; RMF: 9; Prob 50.0%; CAS: 134523-00-5; Lib: nist\_msms; ID: 389044.

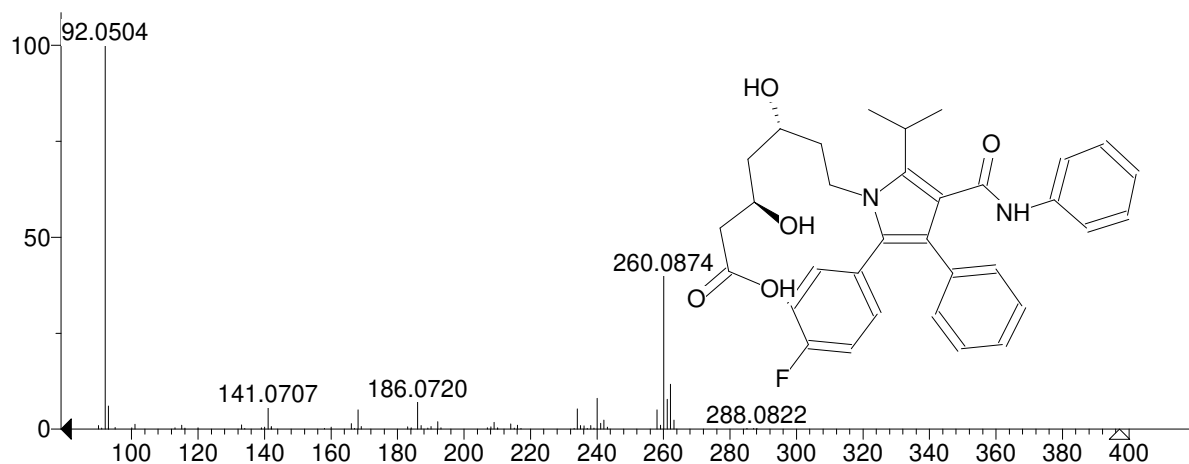

Unknown: Unknown (2.39\_460.1660m/z)  
Compound in Library Factor = 0

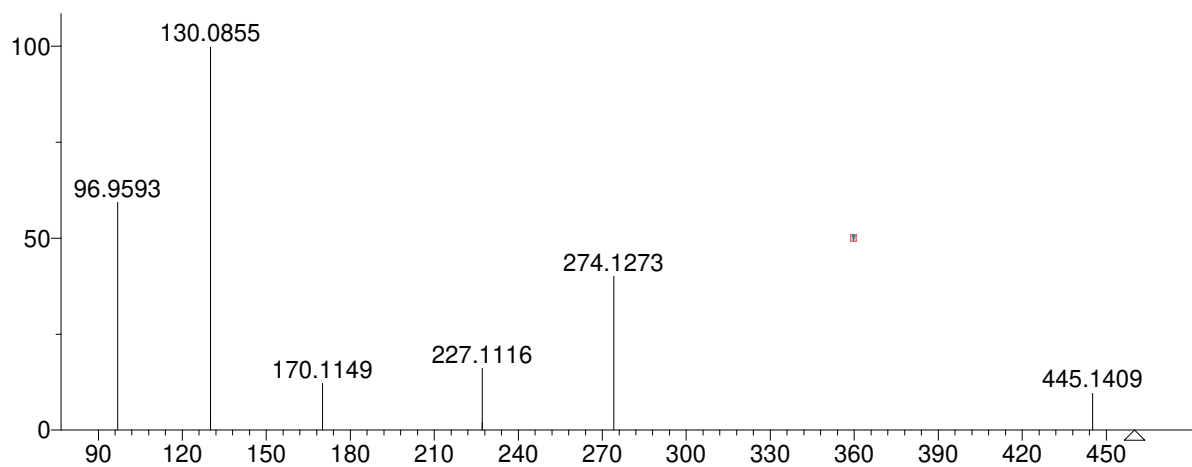

Hit 1 : Benzoic acid, 4-[[[2,4-bis(acetylamino)-6-pteridiny]methyl]methylamino]-, ethyl ester [M+Na]<sup>+</sup> IT-FT 35%  
C<sub>21</sub>H<sub>23</sub>N<sub>7</sub>O<sub>4</sub>; MF: 0; RMF: 20; Prob 100.0%; CAS: 1330265-87-6; Lib: nist\_msms; ID: 436001.

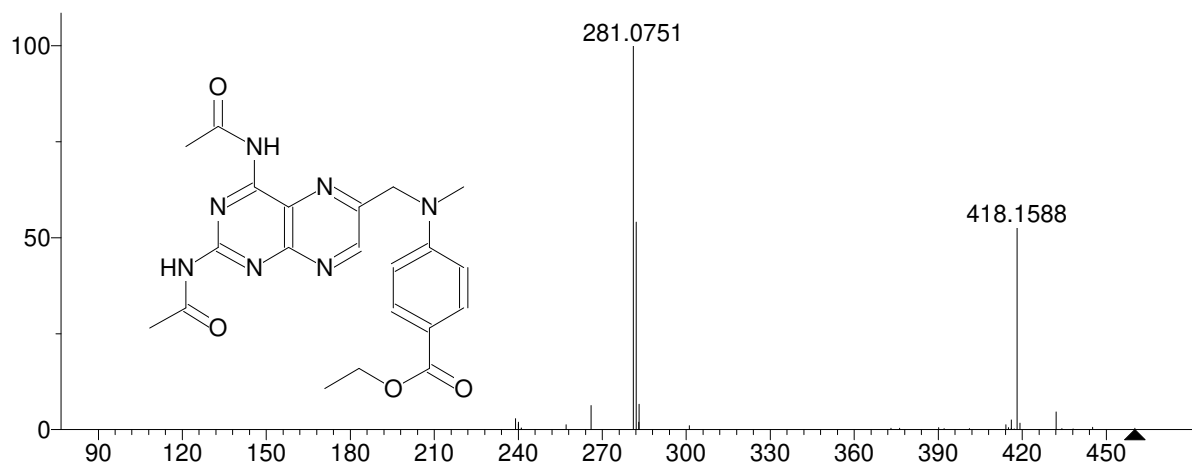



Unknown: Unknown (2.40\_259.1285m/z)  
Compound in Library Factor = 0

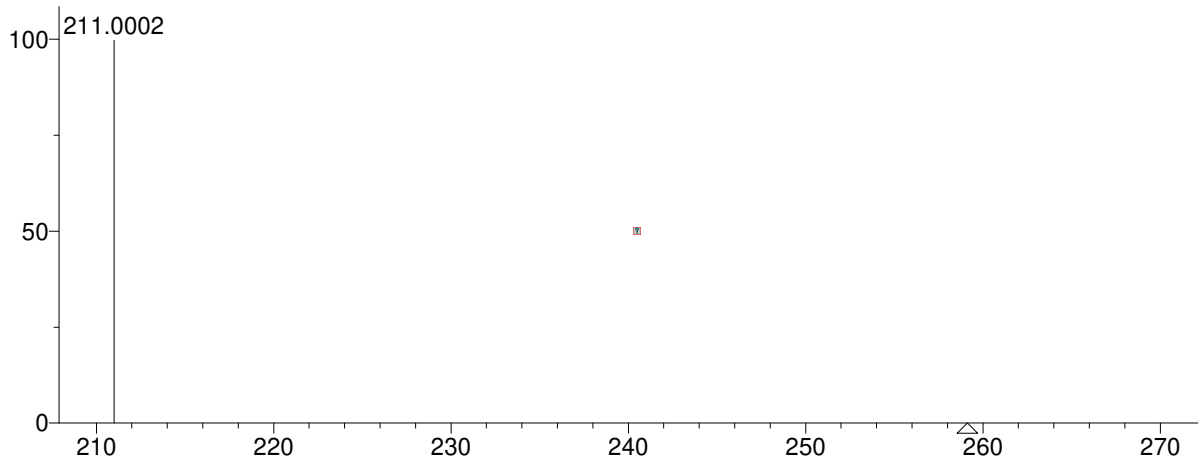

Unknown: Unknown (2.41\_424.1438m/z)  
Compound in Library Factor = 0

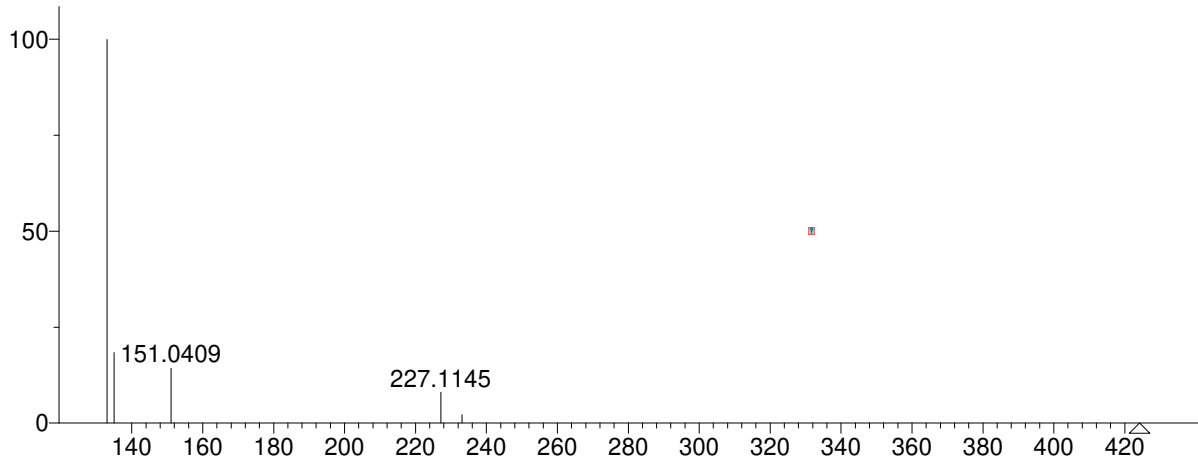

Unknown: Unknown (2.41\_439.1716m/z)  
Compound in Library Factor = 0

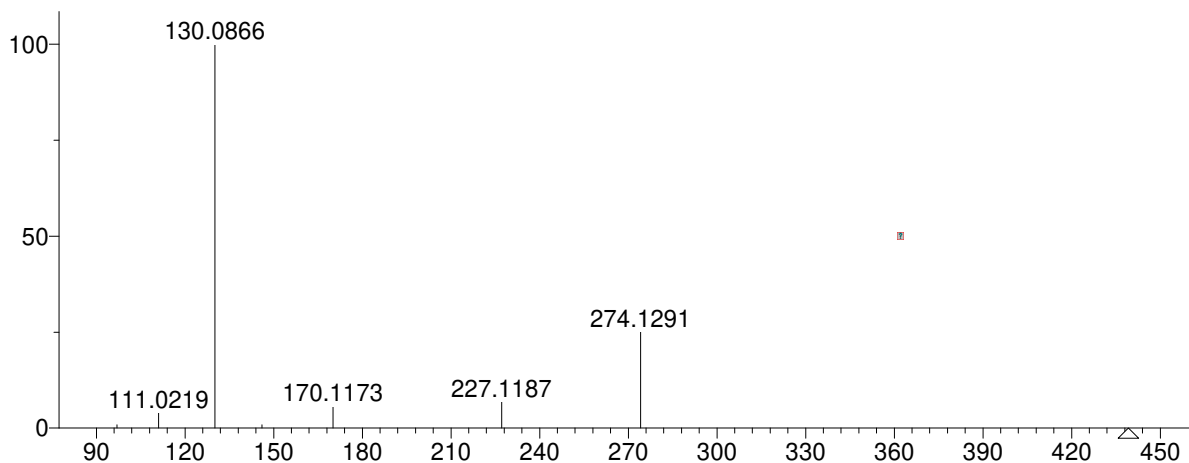

Hit 1 : 15-Ketofluprostenol [M+H-H<sub>2</sub>O]<sup>+</sup> HCD 43V P=439.2  
C<sub>23</sub>H<sub>27</sub>F<sub>3</sub>O<sub>6</sub>; MF: 0; RMF: 15; Prob 16.7%; Lib: nist\_msms; ID: 155577.

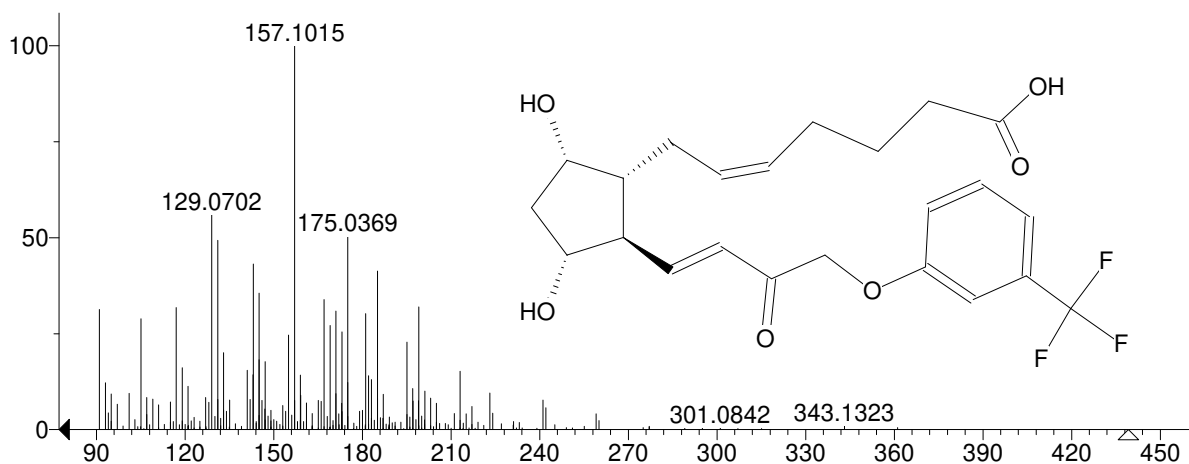

Hit 2 : methyl (1R,4aS,9S,10S)-10-acetyloxy-5,9-dihydroxy-1,4a-dimethyl-2-oxo-7-propan-2-yl-10,10a-dihydro-9H  
C<sub>23</sub>H<sub>28</sub>O<sub>7</sub>; MF: 0; RMF: 13; Prob 16.7%; Lib: mona-export-vf-npl\_qexactive; ID: 18731.

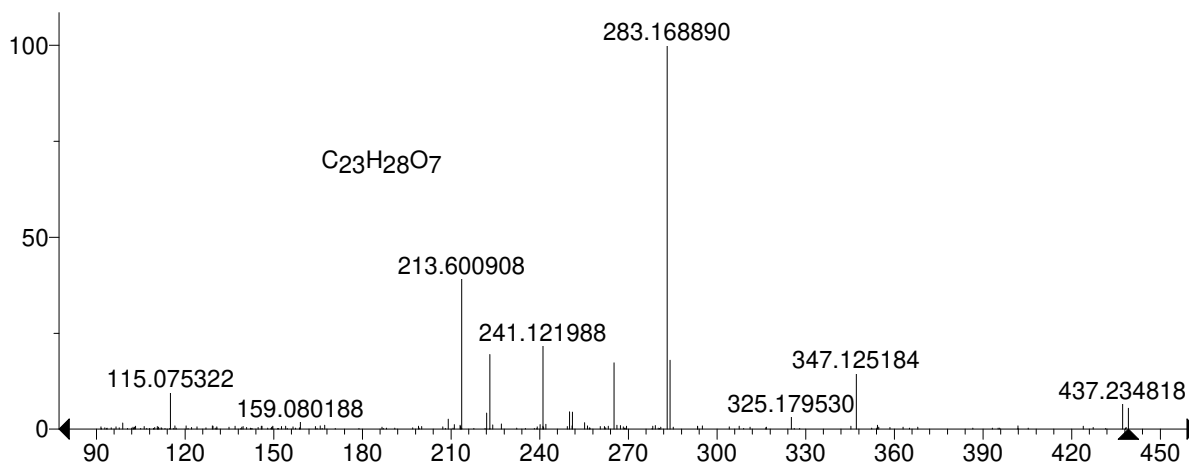

Hit 3 : methyl 2-[[4-hydroxy-3-(3-methylbut-2-enyl)phenyl]methyl]-3-(4-hydroxyphenyl)-4-methoxy-5-oxofuran-2-ylidene  
C<sub>25</sub>H<sub>26</sub>O<sub>7</sub>; MF: 0; RMF: 11; Prob 16.7%; Lib: mona-export-vf-npl\_qexactive; ID: 10071.

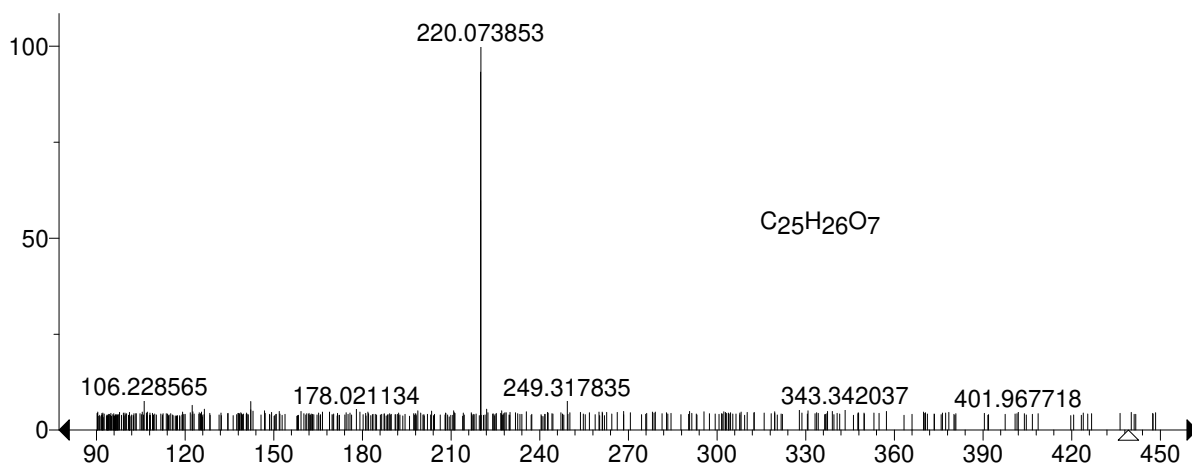

Hit 4 : (+)-Fluprostenol [M-H-H<sub>2</sub>O]- HCD 79V P=439.2  
C<sub>23</sub>H<sub>29</sub>F<sub>3</sub>O<sub>6</sub>; MF: 0; RMF: 9; Prob 16.7%; CAS: 54276-17-4; Lib: nist\_msms; ID: 155456.

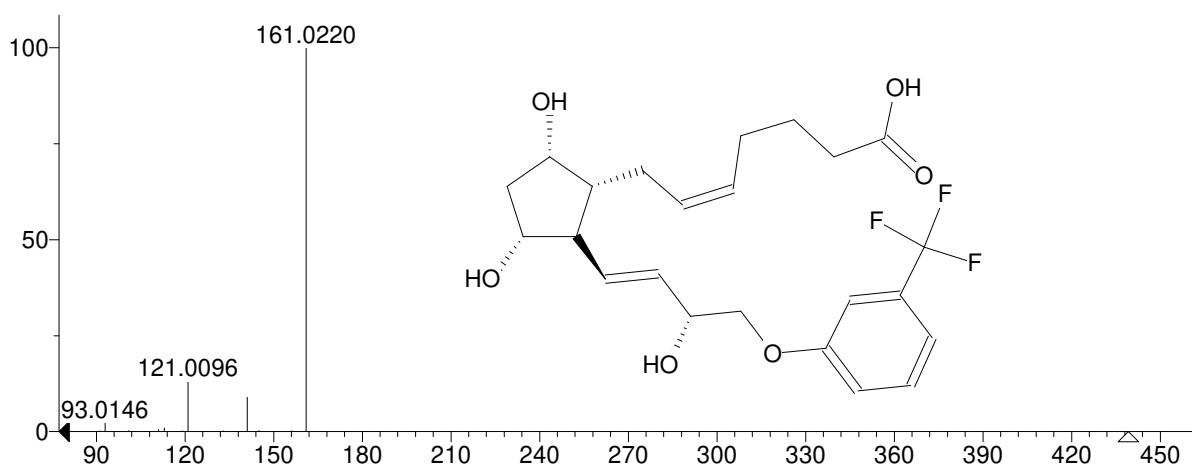

Hit 5 : Lobaric acid [M+H-H<sub>2</sub>O]<sup>+</sup> HCD 43V P=439.2  
C<sub>25</sub>H<sub>28</sub>O<sub>8</sub>; MF: 0; RMF: 5; Prob 16.7%; CAS: 522-53-2; Lib: nist\_msms; ID: 223163.

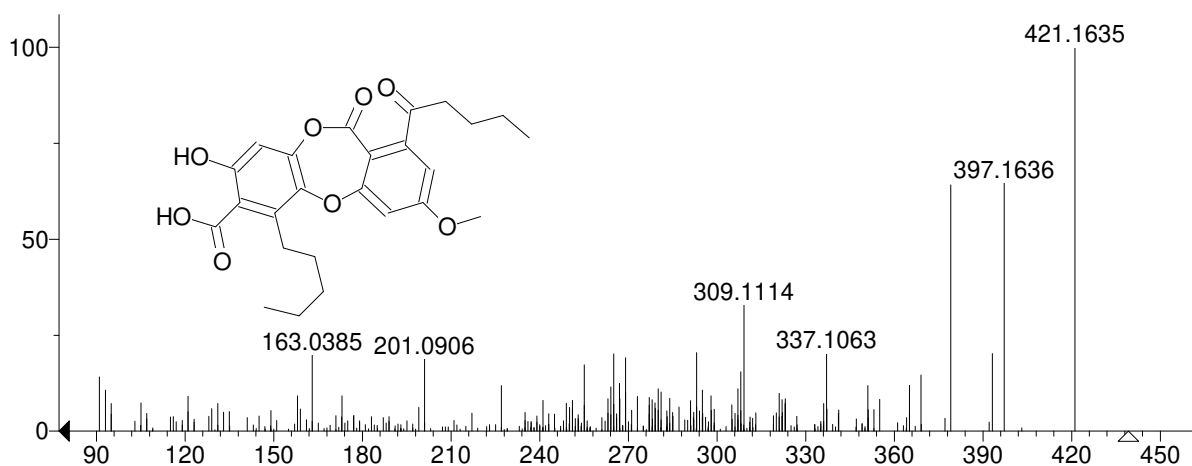

Unknown: Unknown (2.41\_444.1361m/z)  
Compound in Library Factor = -2387

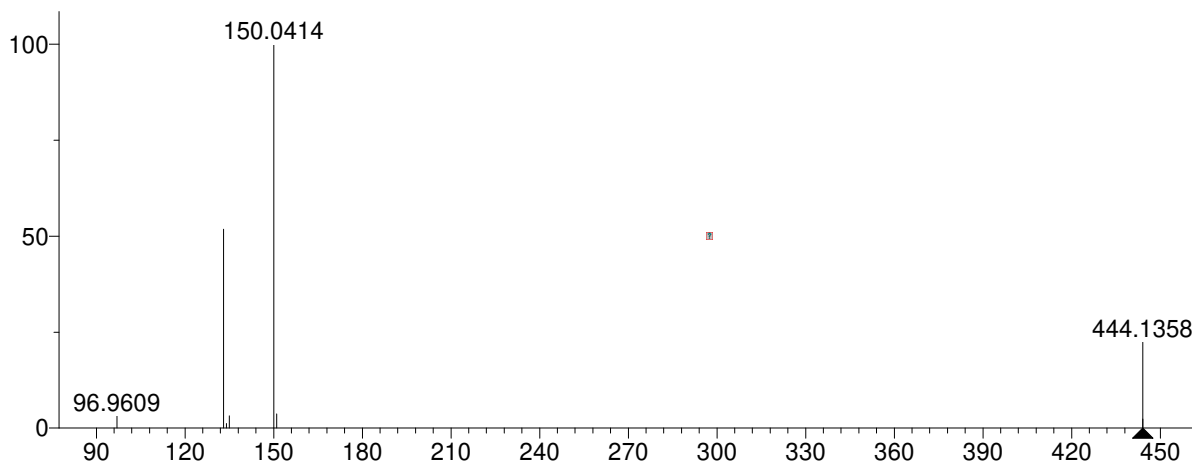

Hit 1 : Propaquizafoxop [M+H]<sup>+</sup> HCD 8V P=444.1  
C<sub>22</sub>H<sub>22</sub>CIN<sub>3</sub>O<sub>5</sub>; MF: 31; RMF: 334; Prob 39.5%; CAS: 111479-05-1; Lib: nist\_msms; ID: 138674.

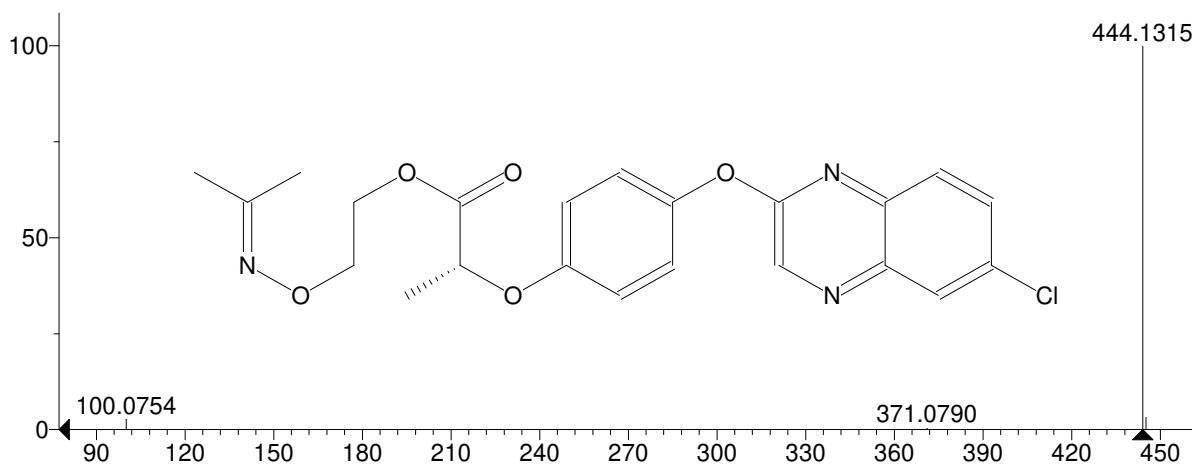

Hit 2 : N-(Deshydroxyethyl)dasatinib [M+H]<sup>+</sup> HCD 26V P=444.1  
C<sub>20</sub>H<sub>22</sub>CIN<sub>7</sub>O<sub>5</sub>; MF: 14; RMF: 320; Prob 21.5%; CAS: 910297-51-7; Lib: nist\_msms; ID: 434471.

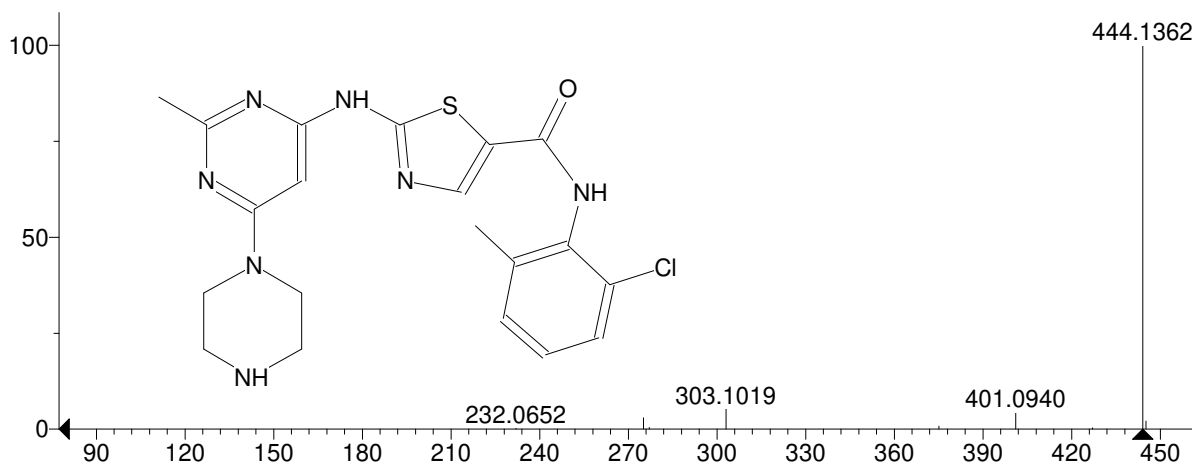

Hit 3 : 7-methyl-octyl-glucosinolate REV 1 () [M-H]- P=444.1  
C<sub>16</sub>H<sub>31</sub>NO<sub>9</sub>S<sub>2</sub>; MF: 12; RMF: 331; Prob 19.9%; Lib: phytofrag2018\_final\_060219; ID: 109.

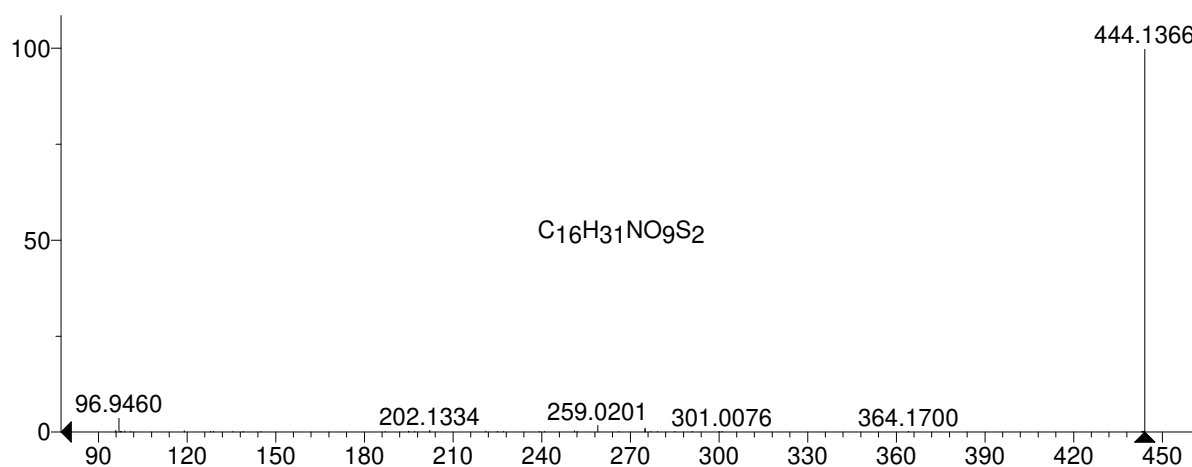

Hit 4 : 7-methyl-octyl-glucosinolate REV 2 () [M-H]- P=444.1  
C<sub>16</sub>H<sub>31</sub>NO<sub>9</sub>S<sub>2</sub>; MF: 11; RMF: 330; Prob 19.1%; Lib: phytofrag2018\_final\_060219; ID: 110.

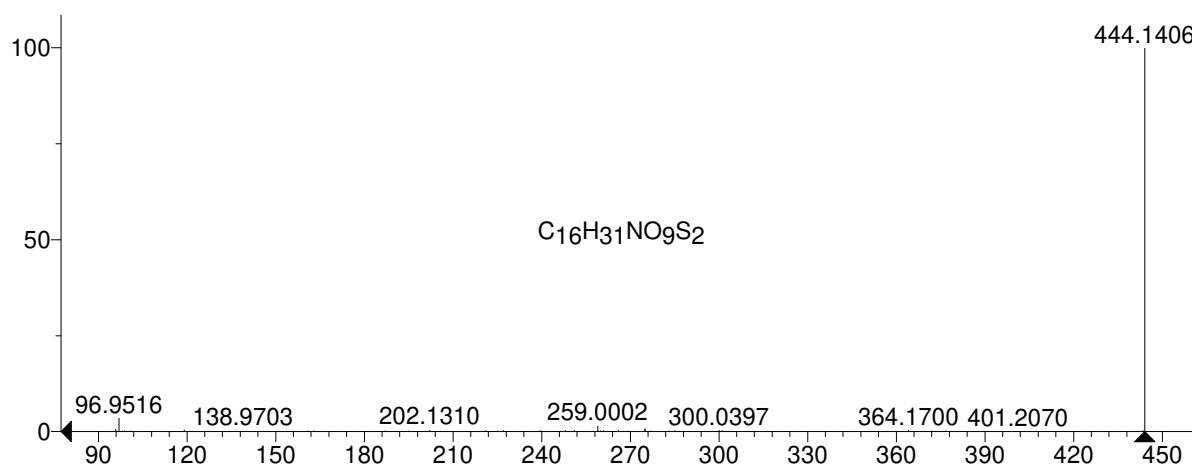

Unknown: Unknown (2.43\_397.1674m/z)  
Compound in Library Factor = 0

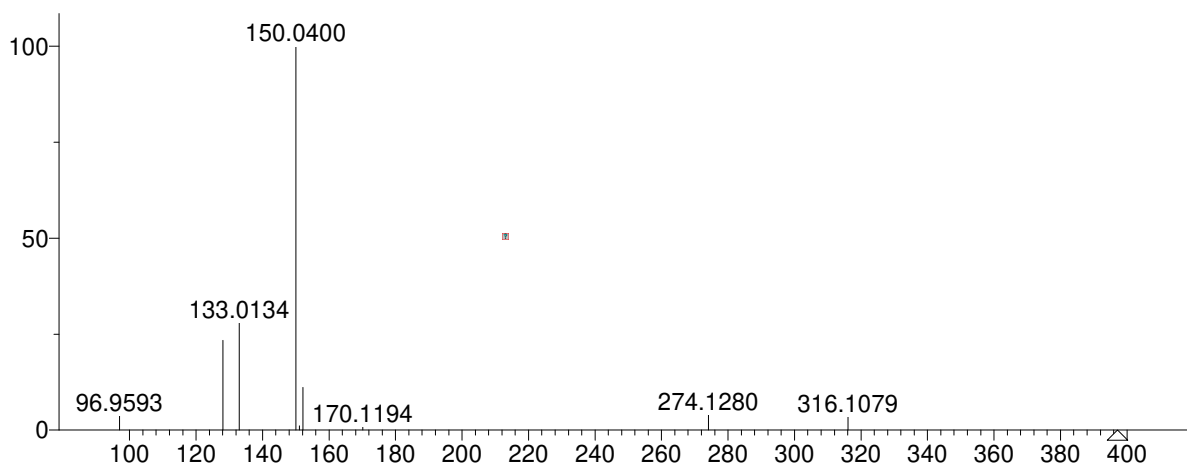

Hit 1 : Dimethoxycurcumin [M+H]<sup>+</sup> HCD 154V P=397.2  
C<sub>23</sub>H<sub>24</sub>O<sub>6</sub>; MF: 0; RMF: 164; Prob 20.0%; CAS: 160096-59-3; Lib: nist\_msms; ID: 167685.

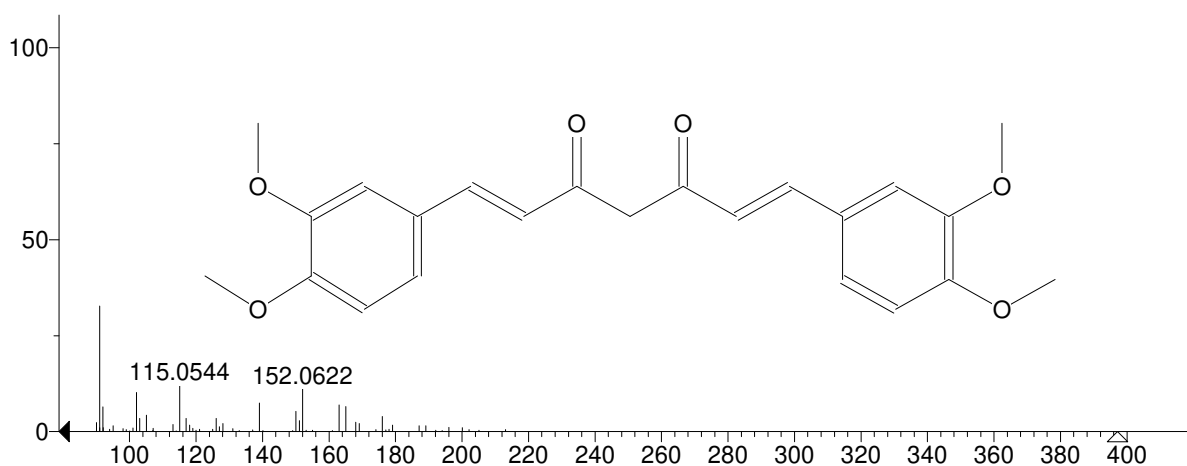

Hit 2 : Gomisin C [M+H-C<sub>7</sub>H<sub>8</sub>O<sub>3</sub>]<sup>+</sup> HCD 127V P=397.2  
C<sub>30</sub>H<sub>32</sub>O<sub>9</sub>; MF: 0; RMF: 128; Prob 20.0%; CAS: 58546-56-8; Lib: nist\_msms; ID: 403958.

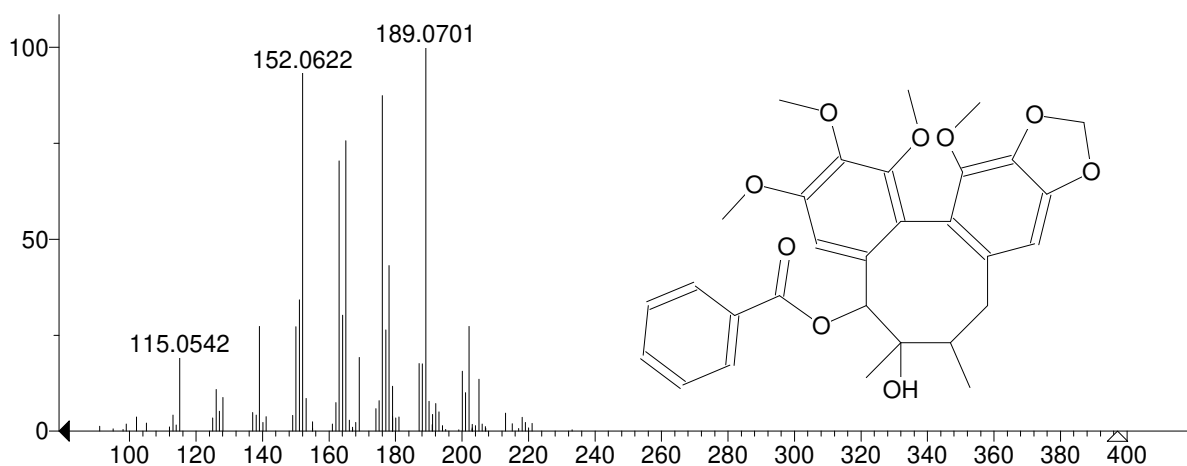

\*\* Search Report Page 2 of 2 \*\*

Hit 3 : 3-[1-(3-Aminopropyl)-1H-indol-3-yl]-4-(1-methyl-1H-indol-3-yl)-1H-pyrrole-2,5-dione [M-H]<sup>-</sup> HCD 51V P=; C<sub>24</sub>H<sub>22</sub>N<sub>4</sub>O<sub>2</sub>; MF: 0; RMF: 32; Prob 20.0%; CAS: 138516-31-1; Lib: nist\_msms; ID: 321333.

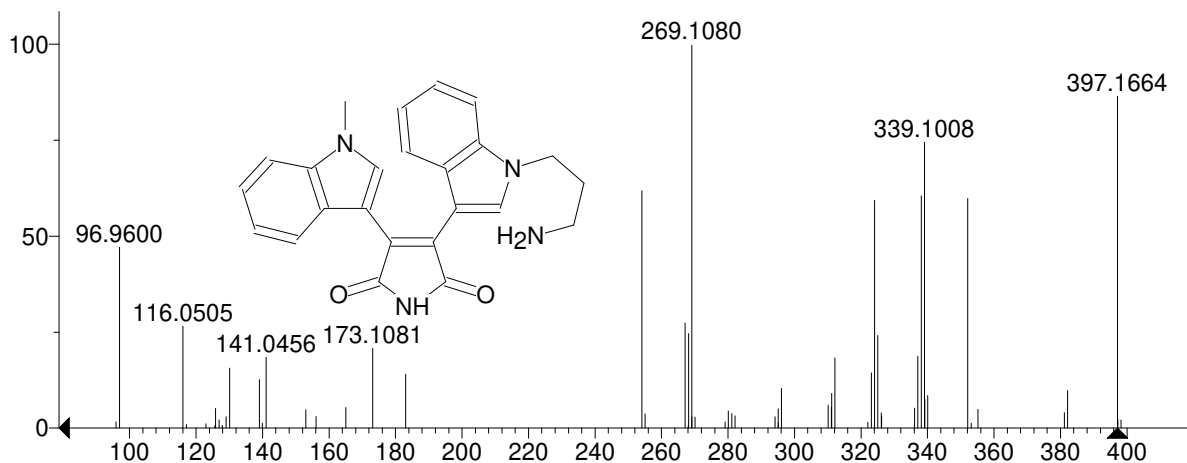

Hit 4 : Garcinone C [M+H-H<sub>2</sub>O]<sup>+</sup> HCD 103V P=397.2 C<sub>23</sub>H<sub>26</sub>O<sub>7</sub>; MF: 0; RMF: 18; Prob 20.0%; CAS: 76996-27-5; Lib: nist\_msms; ID: 389313.

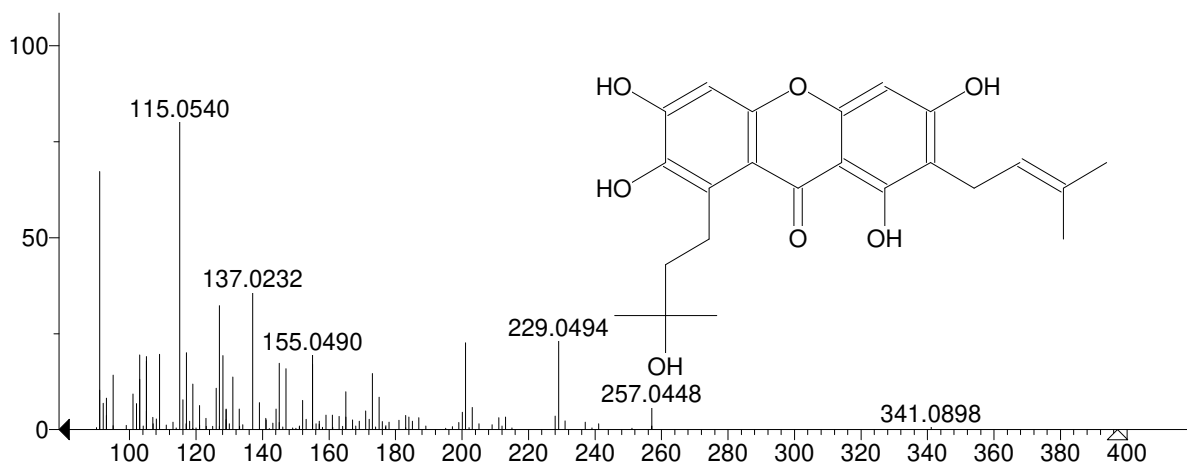

Hit 5 : 1-Naphthalenesulfonamide, N-(10-aminodecyl)-5-chloro- [M+H]<sup>+</sup> IT 35% P=397.2 C<sub>20</sub>H<sub>29</sub>ClN<sub>2</sub>O<sub>2</sub>S; MF: 0; RMF: 9; Prob 20.0%; CAS: 80467-76-1; Lib: nist\_msms; ID: 382044.

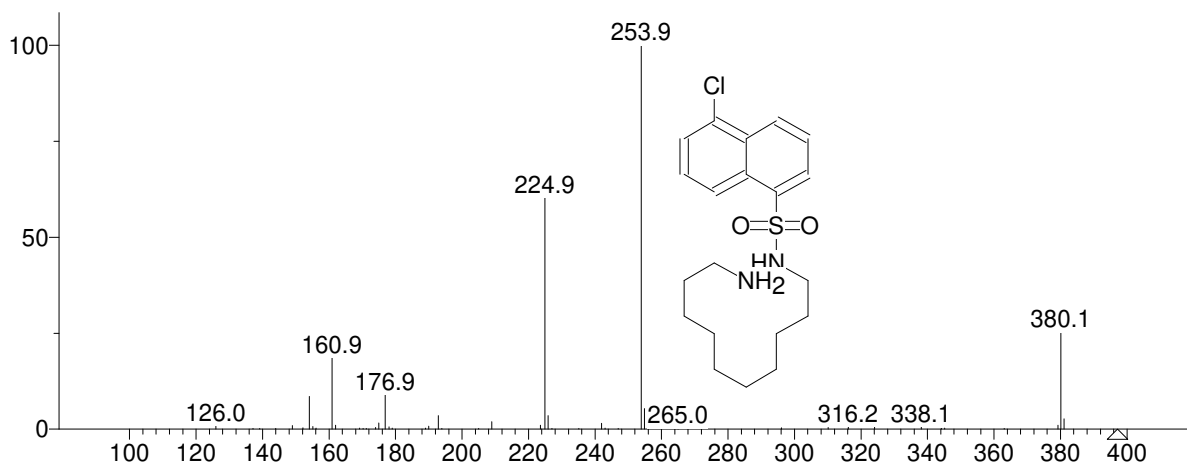



Unknown: Unknown (2.44\_433.1555m/z)  
Compound in Library Factor = 0

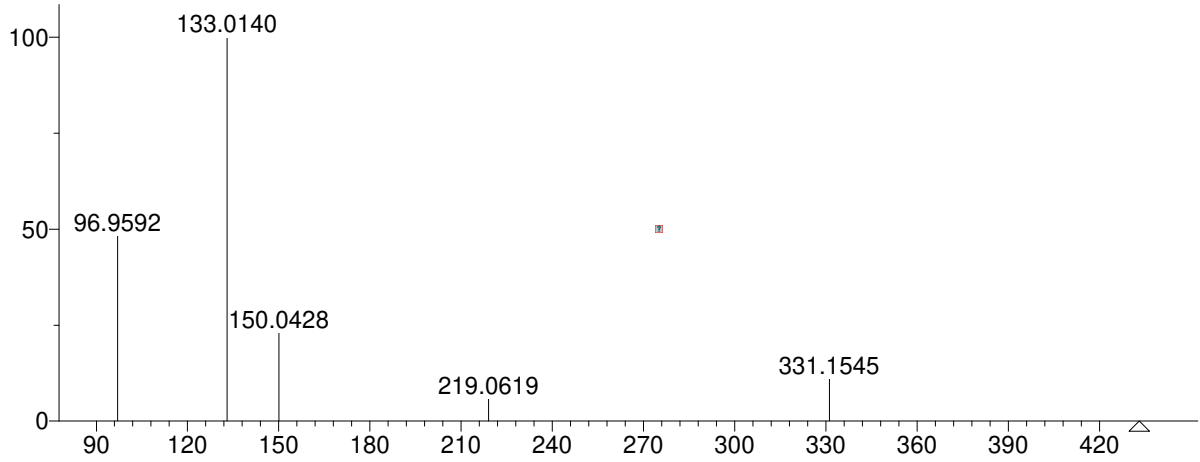

Hit 1 : dihydroferuloyl-beta-keto acid(4-O-8)G 2 (curcumin) [M-H]<sup>-</sup> P=433.2  
C<sub>22</sub>H<sub>26</sub>O<sub>9</sub>; MF: 0; RMF: 56; Prob 50.0%; Lib: phytofrag2018\_final\_060219; ID: 1025.

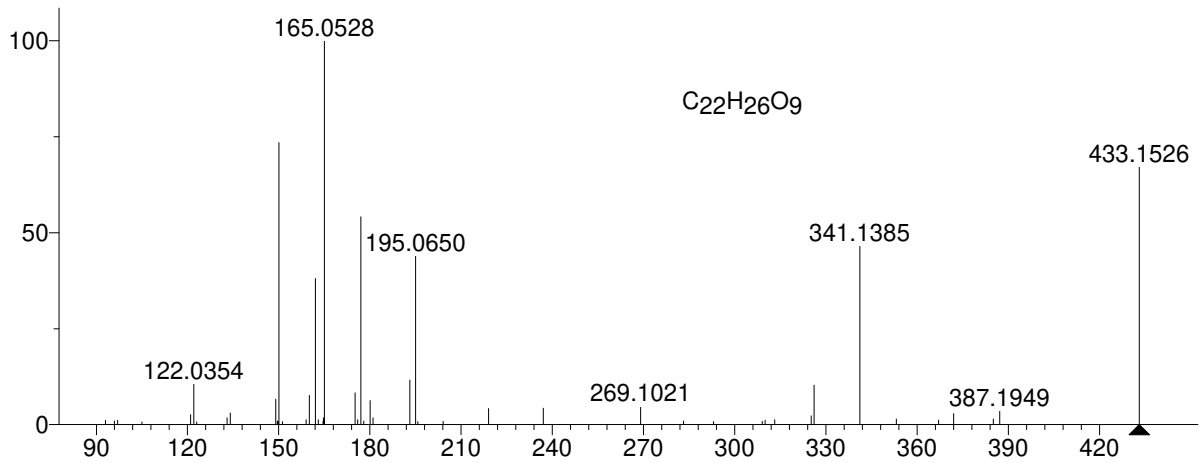

Hit 2 : dihydroferuloyl-beta-keto acid(4-O-8)G 1 (curcumin) [M-H]<sup>-</sup> P=433.2  
C<sub>22</sub>H<sub>26</sub>O<sub>9</sub>; MF: 0; RMF: 10; Prob 50.0%; Lib: phytofrag2018\_final\_060219; ID: 1023.

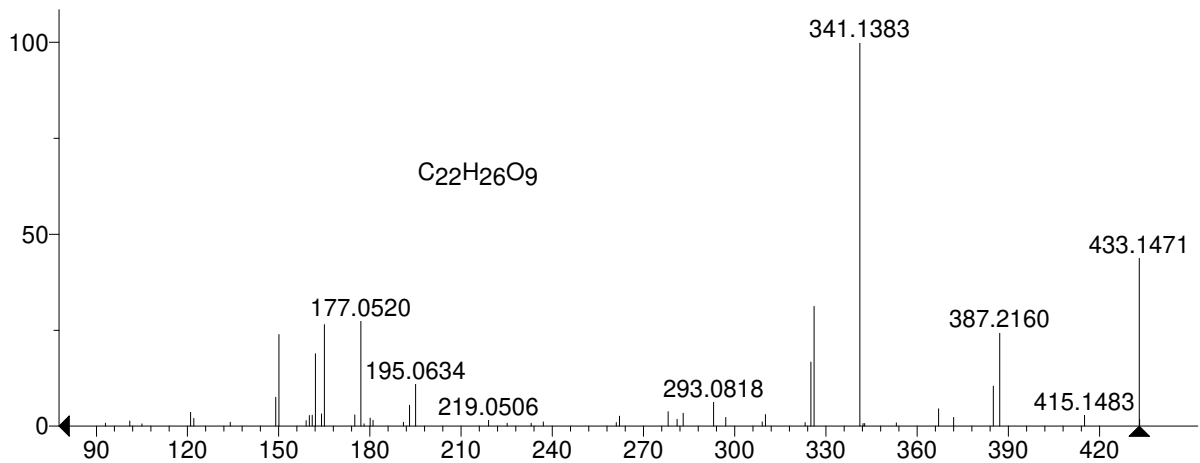

Unknown: Unknown (2.45\_358.1225m/z)  
Compound in Library Factor = 0

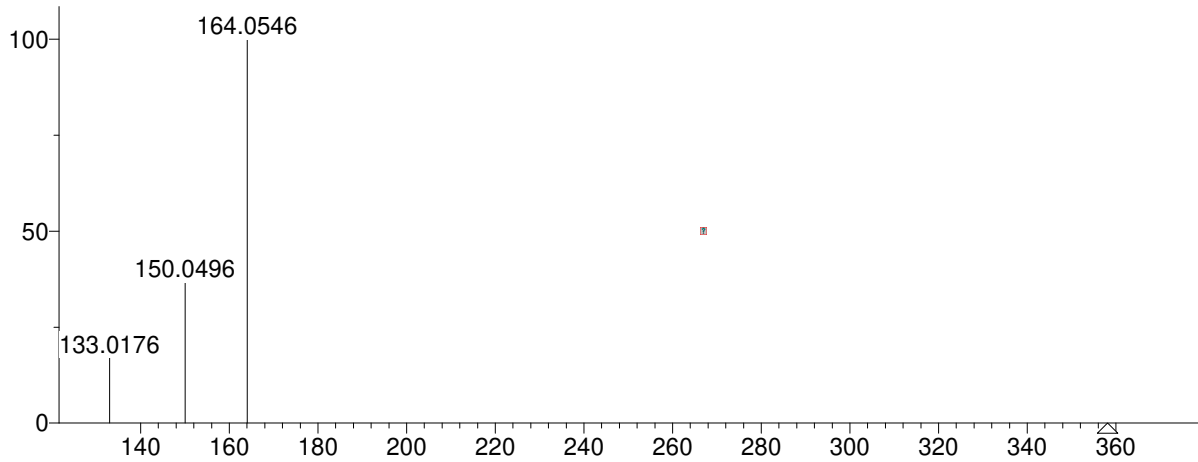

Hit 1 : Formylciprofloxacin [M-H]<sup>-</sup> HCD 57V P=358.1  
C<sub>18</sub>H<sub>18</sub>FN<sub>3</sub>O<sub>4</sub>; MF: 0; RMF: 33; Prob 100.0%; CAS: 93594-39-9; Lib: nist\_msms; ID: 439514.

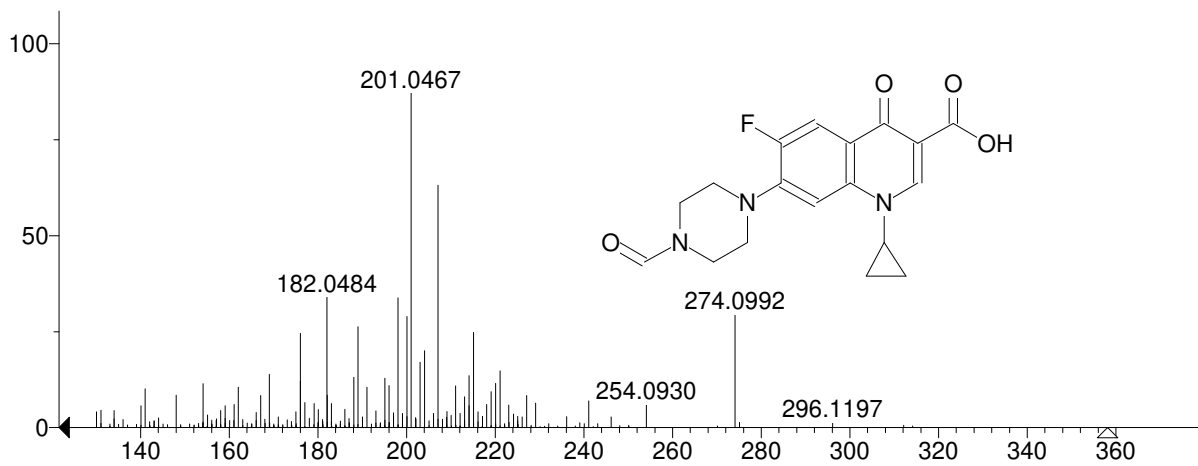

Unknown: Unknown (2.45\_459.0745m/z)  
Compound in Library Factor = 0

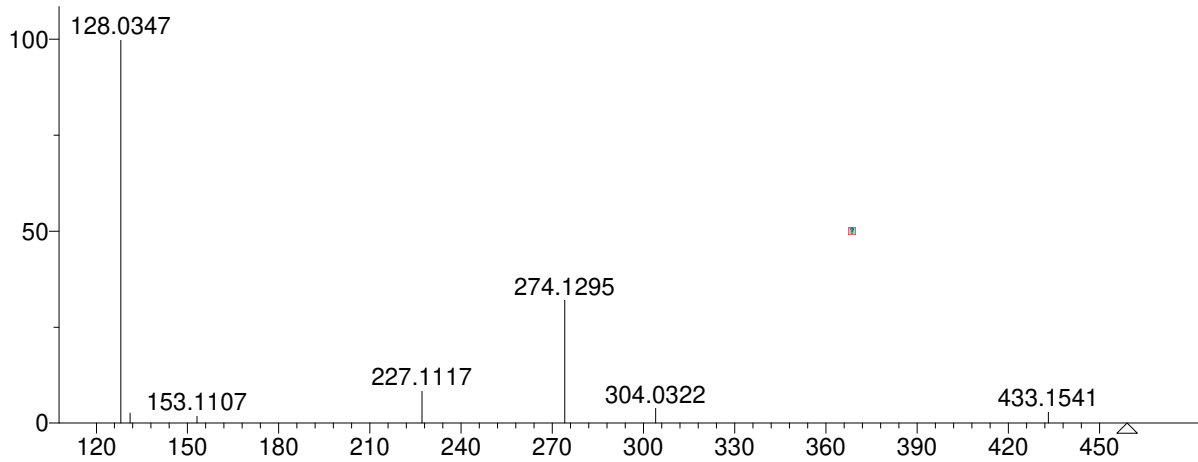

Hit 1 : 3-[(2S,3R,4S,5S,6R)-6-[[[(2R,3R,4R)-3,4-dihydroxy-4-(hydroxymethyl)oxolan-2-yl]oxymethyl]-3,4,5-trihydroxy  
C<sub>17</sub>H<sub>24</sub>O<sub>12</sub>; MF: 0; RMF: 67; Prob 100.0%; Lib: mona-export-vf-npl\_ltq; ID: 4683.

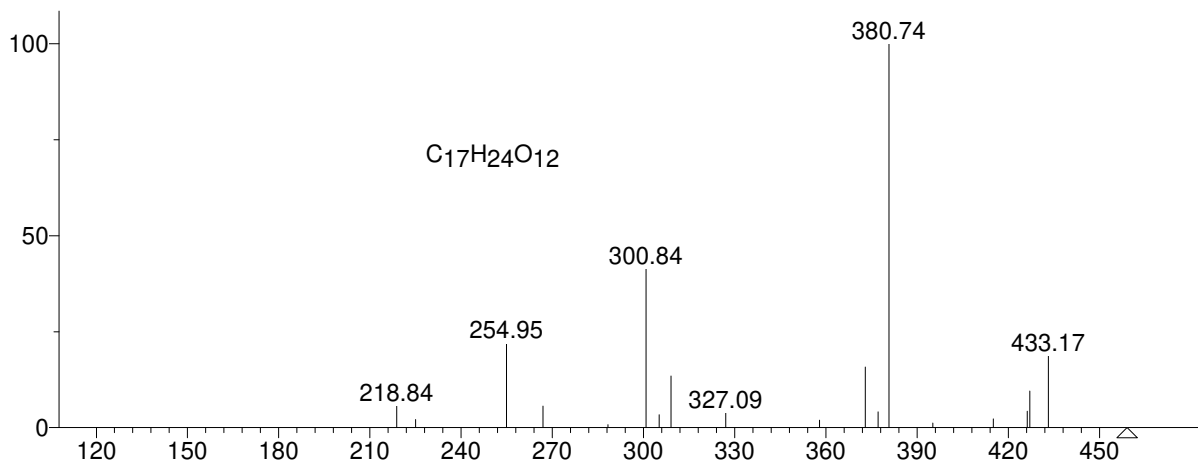

Unknown: Unknown (2.45\_485.1873m/z)  
Compound in Library Factor = 0

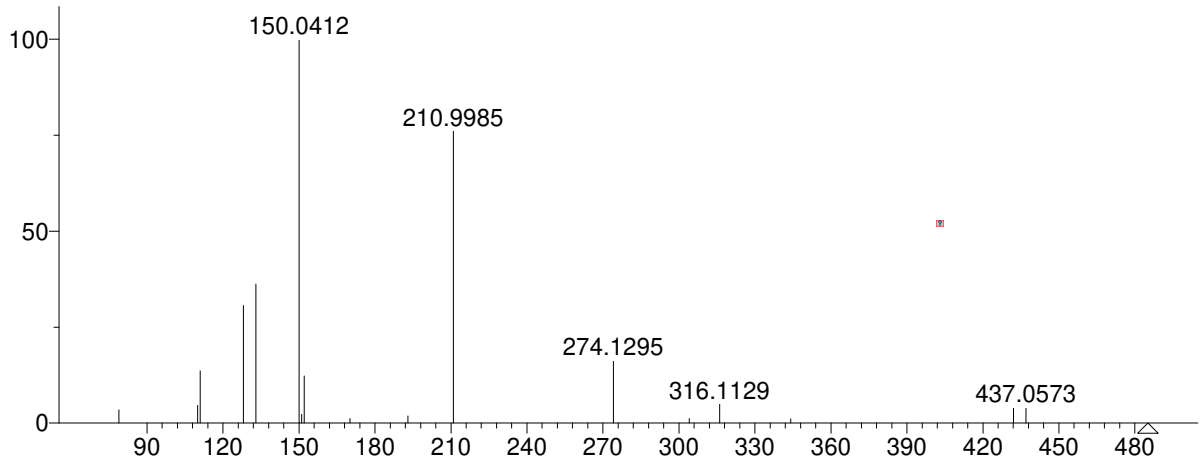

\*\* Search Report Page 1 of 2 \*\*

Unknown: Unknown (2.45\_549.0886m/z)  
Compound in Library Factor = -3273

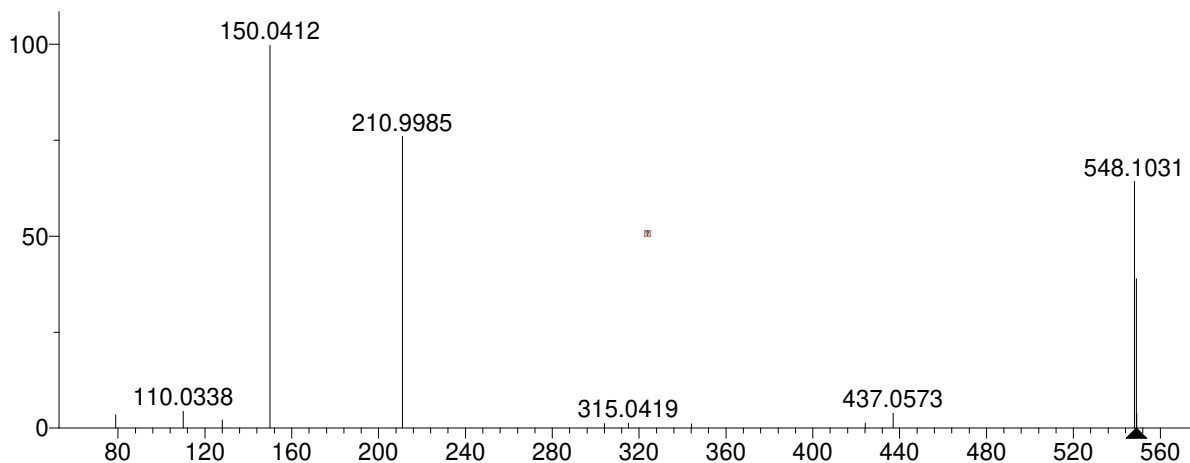

Hit 1 : 5-(3-(2-(7-Chloroquinolin-2-yl)ethenyl)phenyl)-8-dimethylcarbamyl-4,6-dithiaoctanoic acid [M+Cl]<sup>-</sup> HCD 1  
C<sub>26</sub>H<sub>27</sub>CIN<sub>2</sub>O<sub>3</sub>S<sub>2</sub>; MF: 6; RMF: 161; Prob 20.3%; CAS: 115104-28-4; Lib: nist\_msms; ID: 538815.

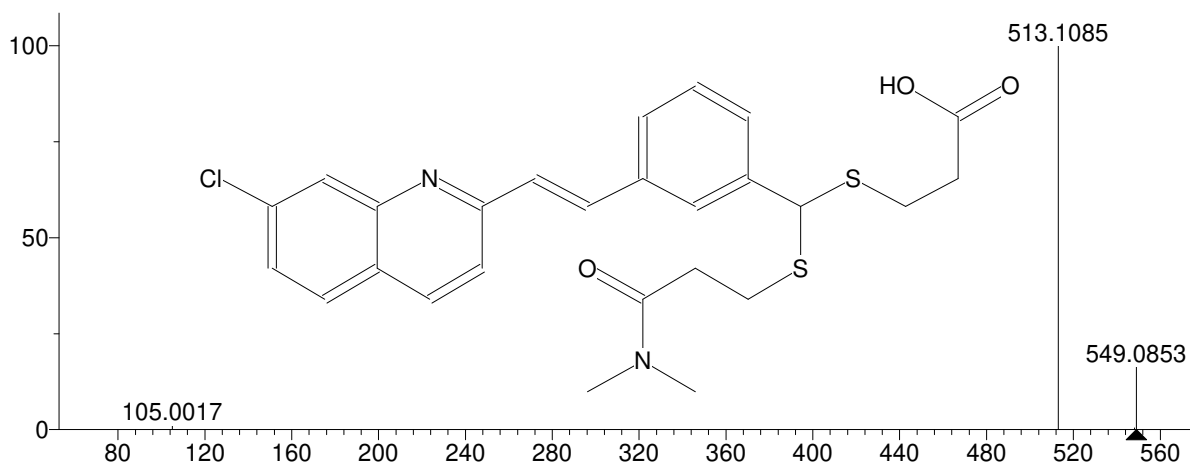

Hit 2 : Quercetin-3-(6"-malonyl)-Glucoside [M-H]<sup>-</sup> 5-60V P=549.1  
C<sub>24</sub>H<sub>22</sub>O<sub>15</sub>; MF: 0; RMF: 80; Prob 15.9%; Lib: mona-export-lc-ms-ms\_negative\_mode; ID: 8837.

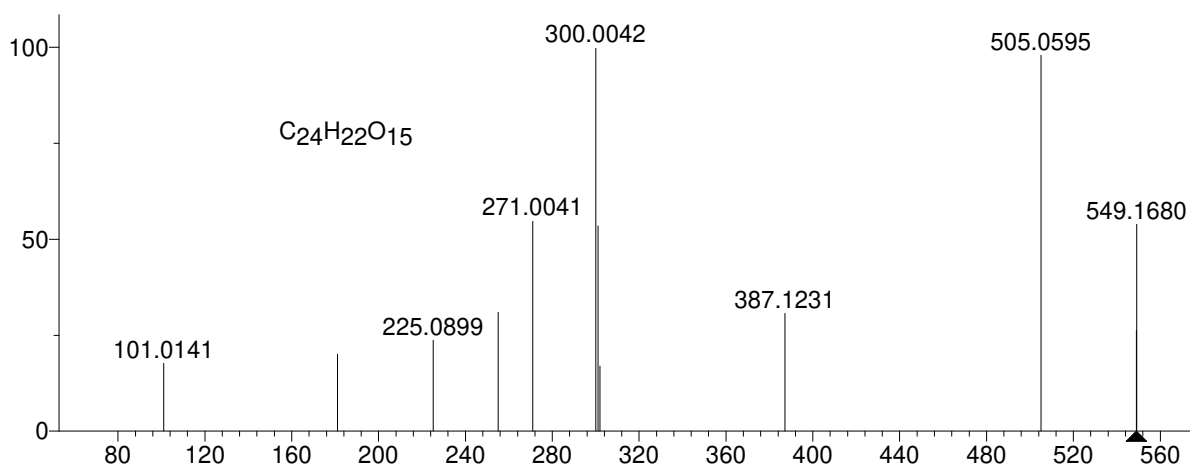

Hit 3 : Quercetin-3-(6"-malonyl)-Glucoside; LC-ESI-QTOF; MS2; CE [M-H]- P=549.1  
C<sub>24</sub>H<sub>22</sub>O<sub>15</sub>; MF: 0; RMF: 75; Prob 15.9%; Lib: msms-neg-massbank; ID: 4722.

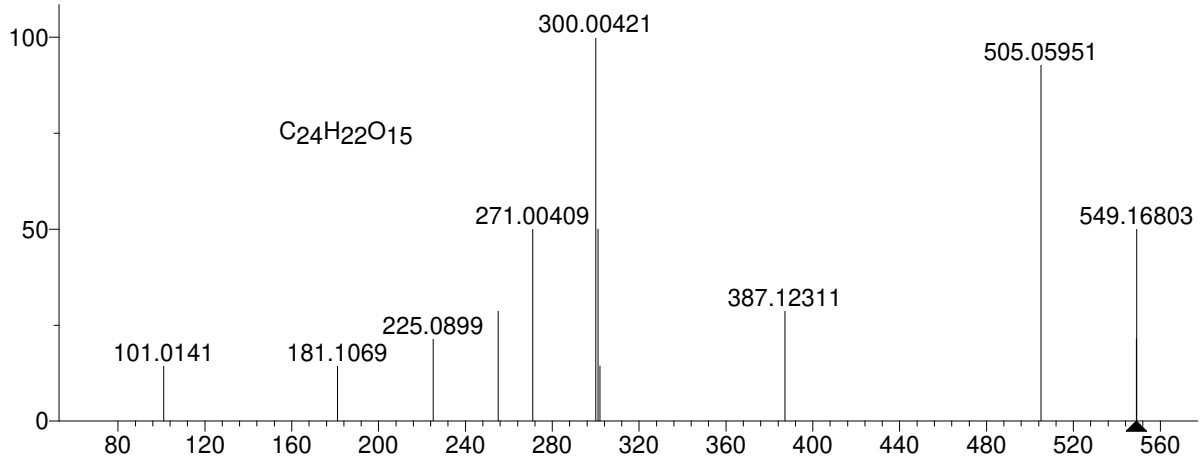

Hit 4 : Quercetin 3-O-malonylglucoside [M-H]- 10 P=549.1  
C<sub>24</sub>H<sub>22</sub>O<sub>15</sub>; MF: 0; RMF: 32; Prob 15.9%; Lib: mona-export-lc-ms-ms\_negative\_mode; ID: 27259.

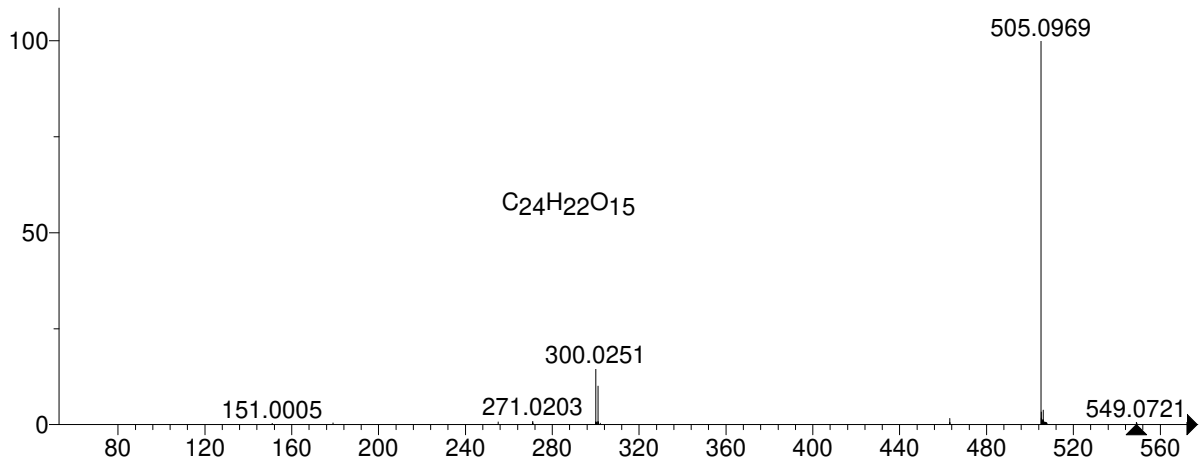

Hit 5 : Flavonol base + 4O, O-MalonylHex [M-H]- 6V P=549.1  
C<sub>24</sub>H<sub>22</sub>O<sub>15</sub>; MF: 0; RMF: 21; Prob 15.9%; Lib: anthocyanins mona; ID: 6952.

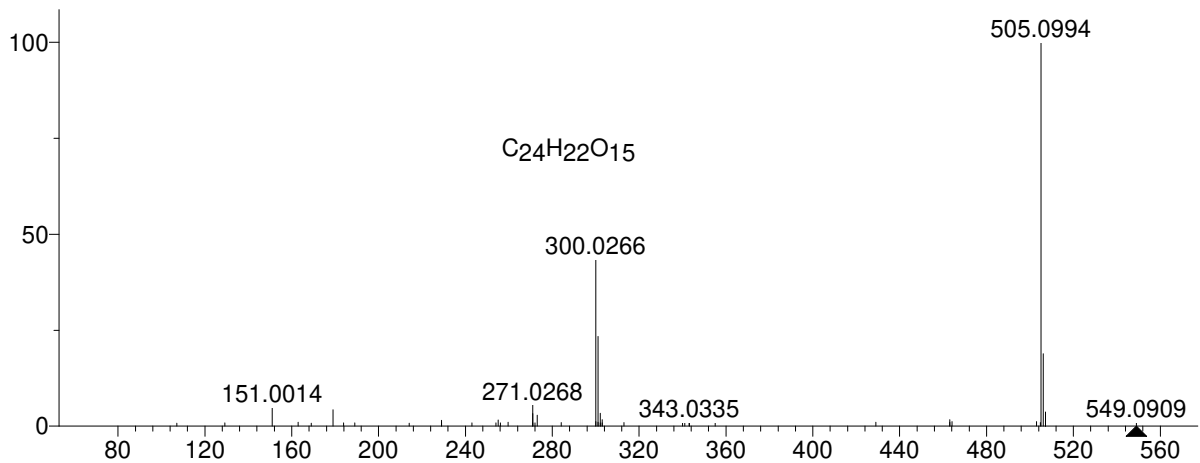

Unknown: Unknown (2.46\_302.1233m/z)  
Compound in Library Factor = -2176

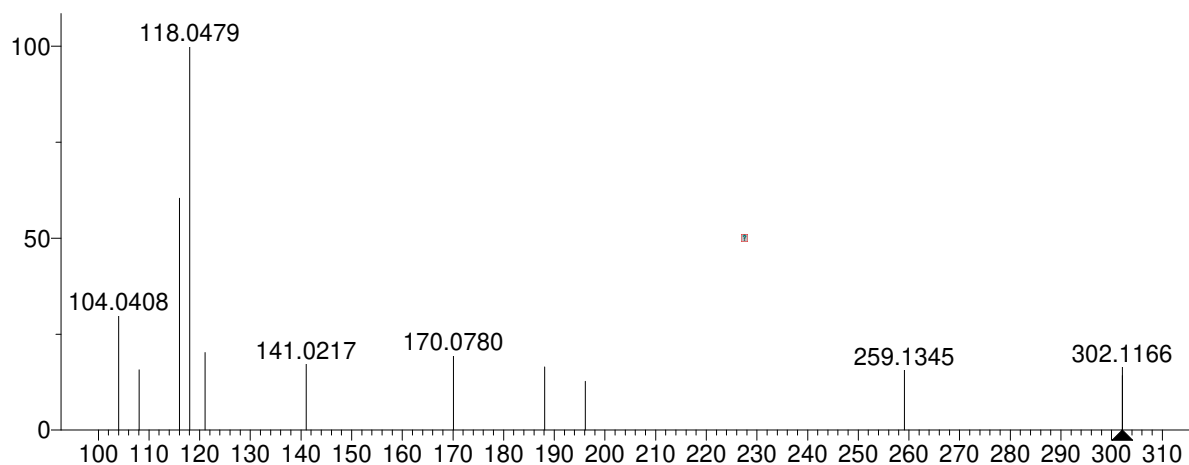

Hit 1 : Pipemidic acid [M-H]<sup>-</sup> HCD 4V P=302.1  
C<sub>14</sub>H<sub>17</sub>N<sub>5</sub>O<sub>3</sub>; MF: 36; RMF: 518; Prob 68.7%; CAS: 51940-44-4; Lib: nist\_msms; ID: 492769.

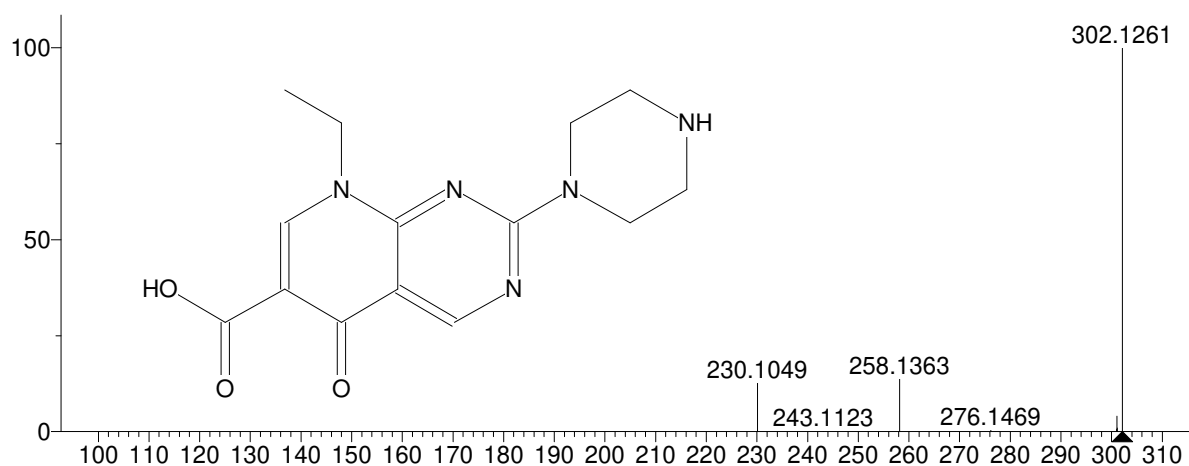

Hit 2 : p-Tolyl-β-D-glucuronide [M+NH<sub>4</sub>]<sup>+</sup> HCD 6V P=302.1  
C<sub>13</sub>H<sub>16</sub>O<sub>7</sub>; MF: 16; RMF: 232; Prob 31.3%; CAS: 17680-99-8; Lib: nist\_msms; ID: 299054.

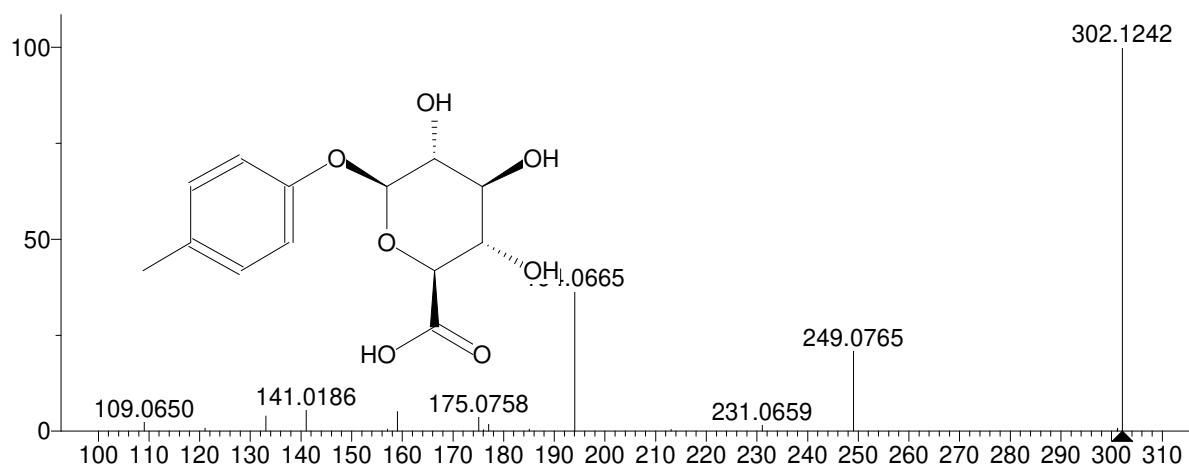

Unknown: Unknown (2.46\_389.1183m/z)  
Compound in Library Factor = 0

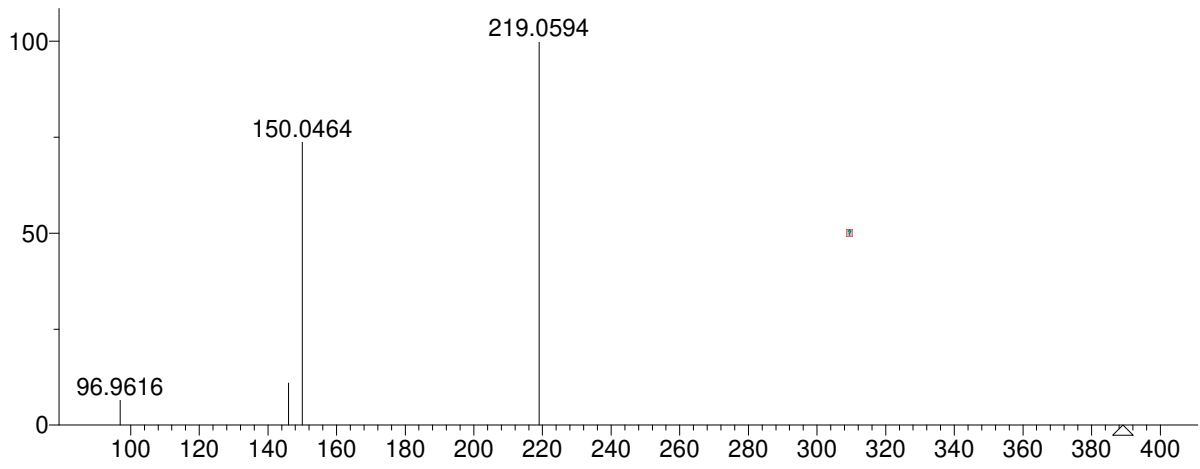



Unknown: Unknown (2.46\_587.1247m/z)  
Compound in Library Factor = 0

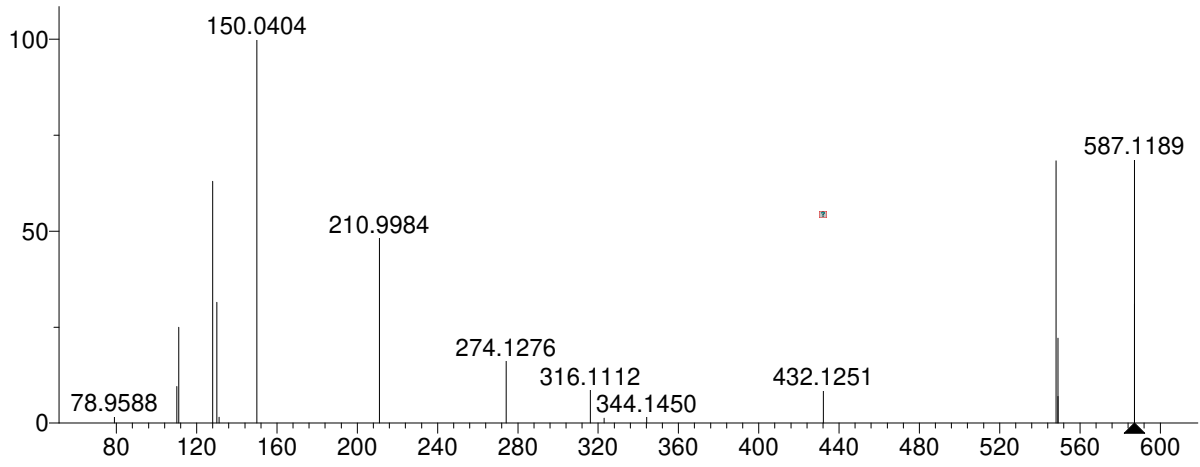

\*\* Search Report Page 1 of 2 \*\*

Unknown: Unknown (2.48\_316.1028m/z)  
Compound in Library Factor = -3273

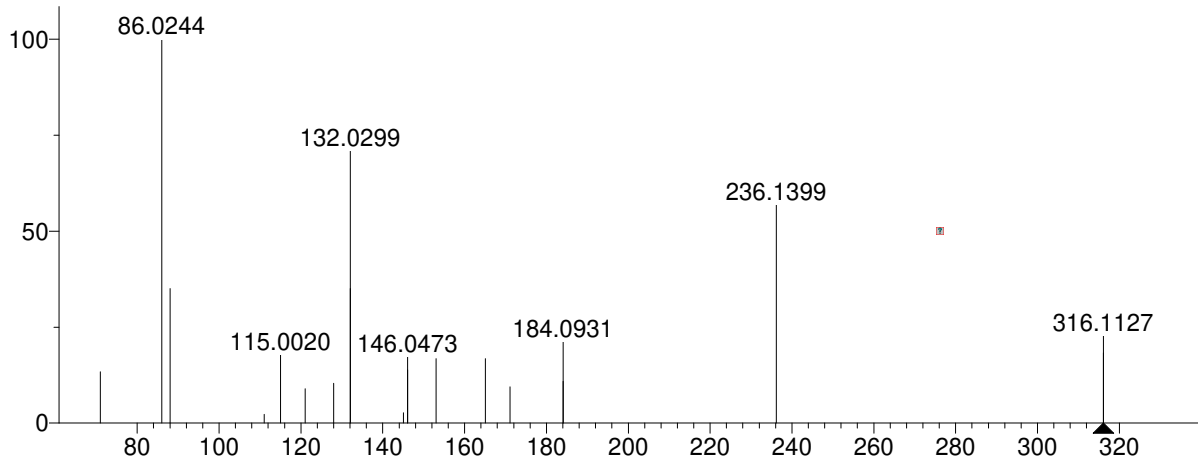

Hit 1 : Topramezone [M+H]<sup>+</sup>=>334.1=>316.1 IT 35% P=316.1  
C16H17N3O5S; MF: 1; RMF: 203; Prob 4.72%; CAS: 210631-68-8; Lib: nist\_msms; ID: 541837.

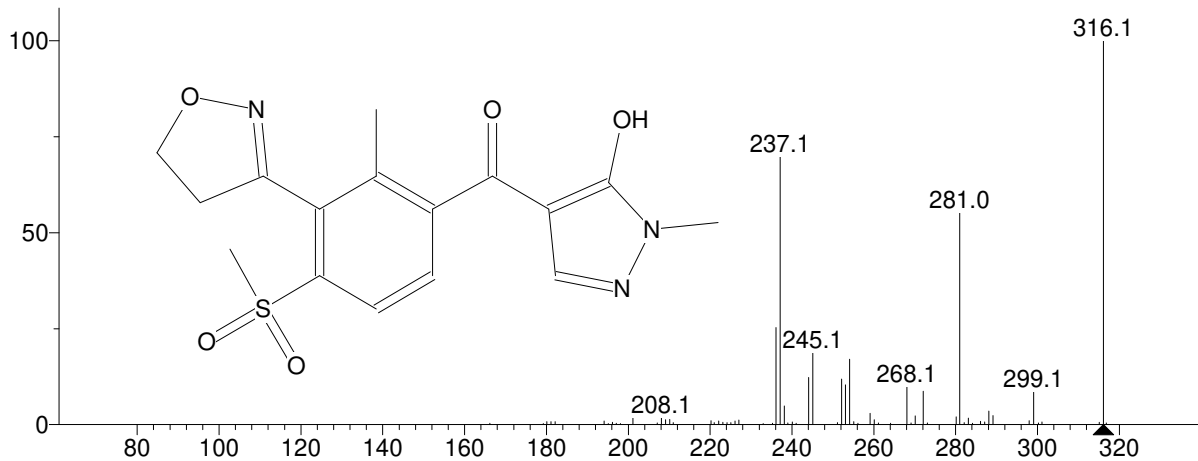

Hit 2 : Dipyradomole [M+H-C3H8O2]<sup>+</sup>=>399.2=>316.1 IT 35% P=316.1  
C24H40N8O4; MF: 0; RMF: 148; Prob 4.53%; CAS: 58-32-2; Lib: nist\_msms; ID: 314354.

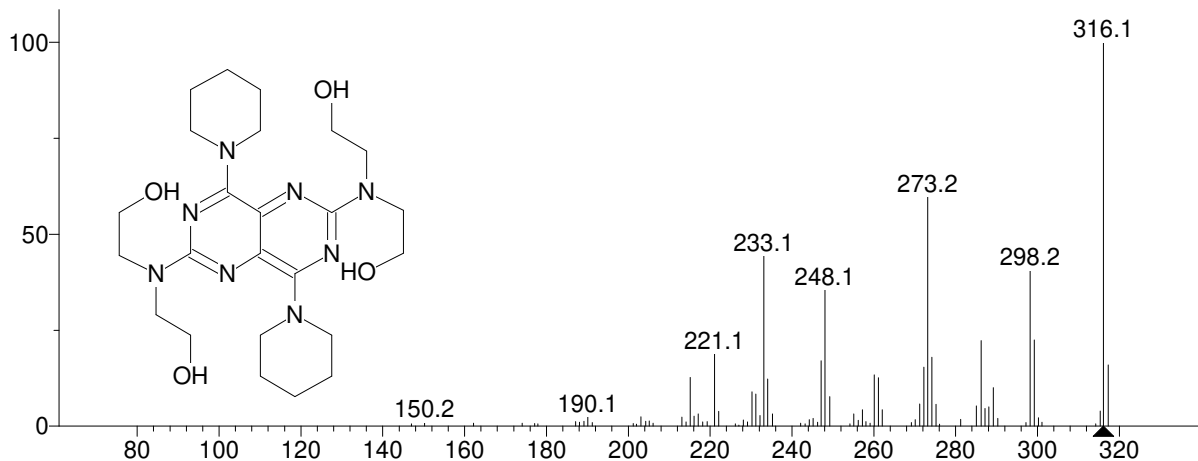

Hit 3 : Caylin-2 [M+H]<sup>+</sup>=>507.1=>316.1 IT 35% P=316.1  
C<sub>32</sub>H<sub>30</sub>F<sub>6</sub>N<sub>4</sub>O<sub>4</sub>; MF: 0; RMF: 132; Prob 4.53%; CAS: 1392830-09-9; Lib: nist\_msms; ID: 417382.

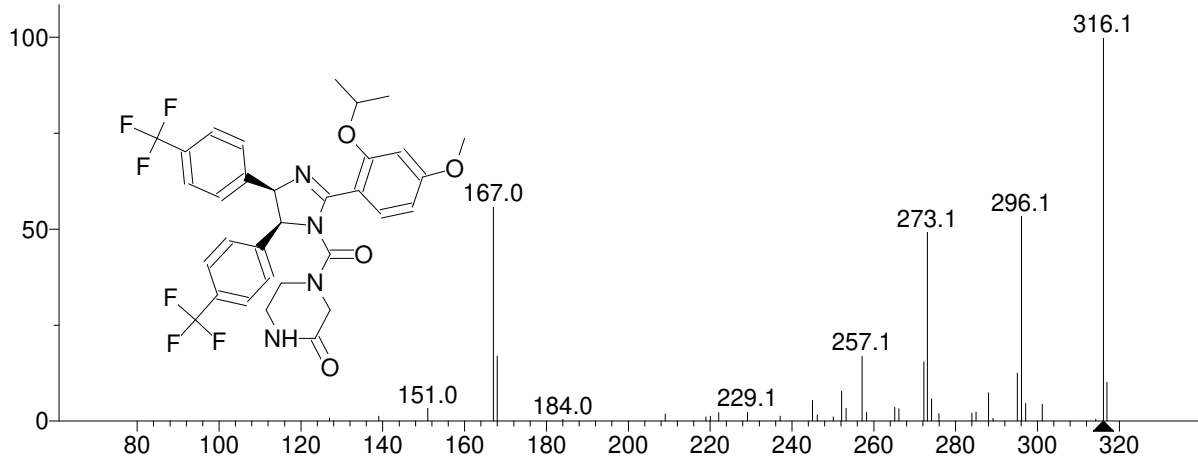

Hit 4 : Celastramycin A [M-H-HCl]<sup>-</sup>=>316.1 IT 35% P=316.1  
C<sub>17</sub>H<sub>18</sub>Cl<sub>3</sub>NO<sub>3</sub>; MF: 0; RMF: 127; Prob 4.53%; CAS: 491600-94-3; Lib: nist\_msms; ID: 376374.

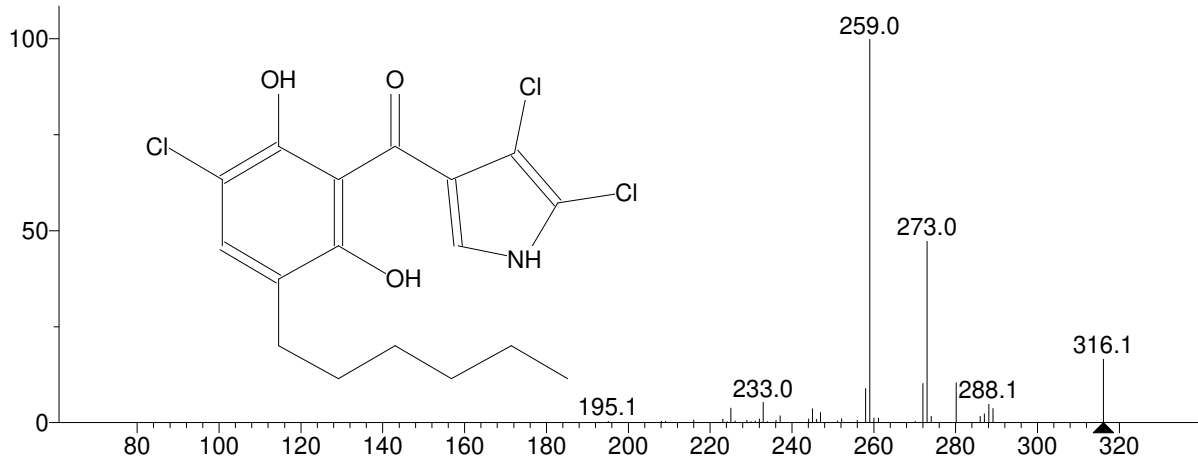

Hit 5 : N-Acetylmuramic Acid [M+Na]<sup>+</sup> 35HCD P=316.1  
C<sub>11</sub>H<sub>19</sub>NO<sub>8</sub>; MF: 0; RMF: 109; Prob 4.53%; Lib: mona-export-vf-npl\_qexactive; ID: 27070.

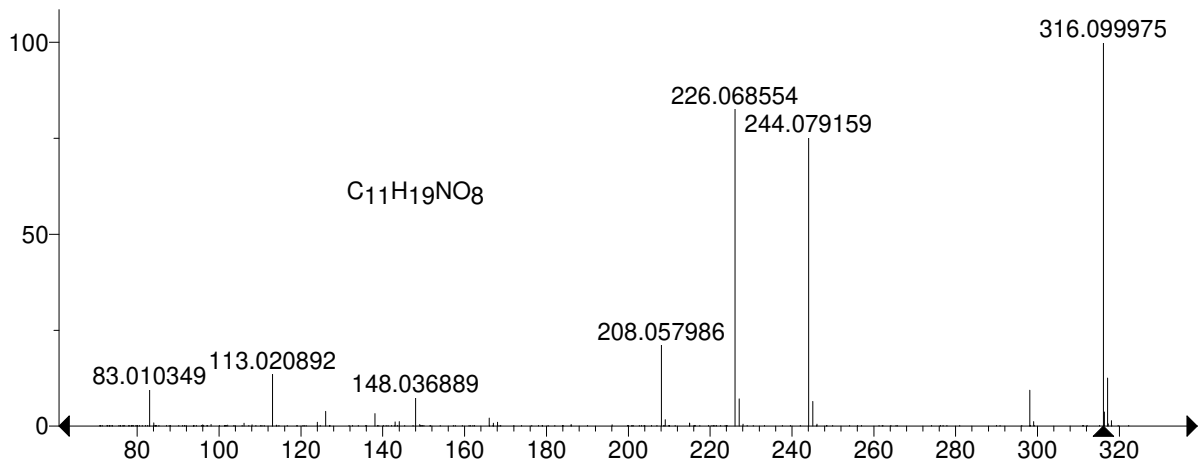

Unknown: Unknown (2.48\_446.1391m/z)  
Compound in Library Factor = 0

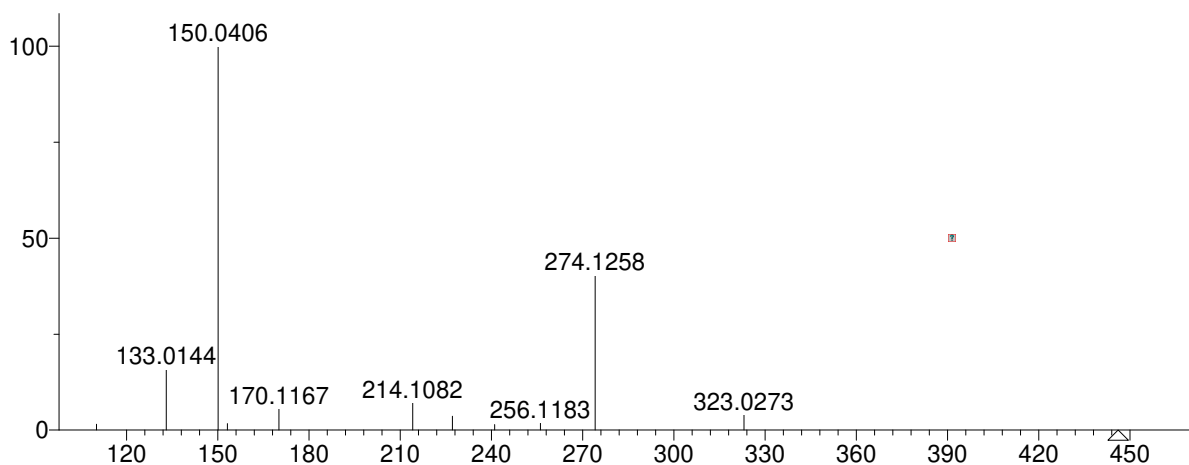

Hit 1 : Benzoic acid, 4-[4-[[5-(4,5-dimethyl-2-nitrophenyl)-2-furanyl]methylene]-4,5-dihydro-3-methyl-5-oxo-1H-pyr  
C24H19N3O6; MF: 0; RMF: 100; Prob 50.0%; CAS: 328968-36-1; Lib: nist\_msms; ID: 247875.

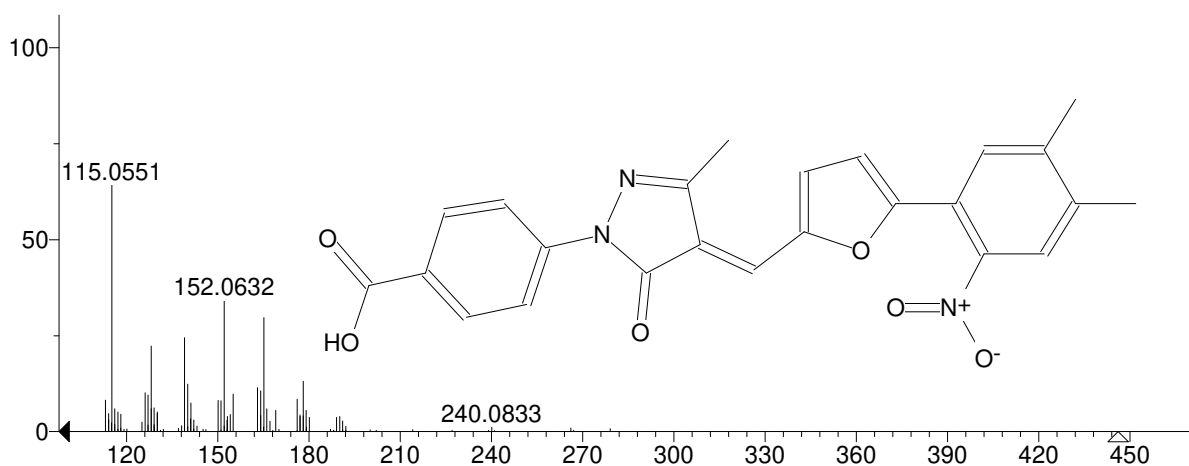

Hit 2 : Dehydroaripiprazole [M+H]<sup>+</sup> HCD 66V P=446.1  
C23H25Cl2N3O2; MF: 0; RMF: 3; Prob 50.0%; CAS: 129722-25-4; Lib: nist\_msms; ID: 323099.

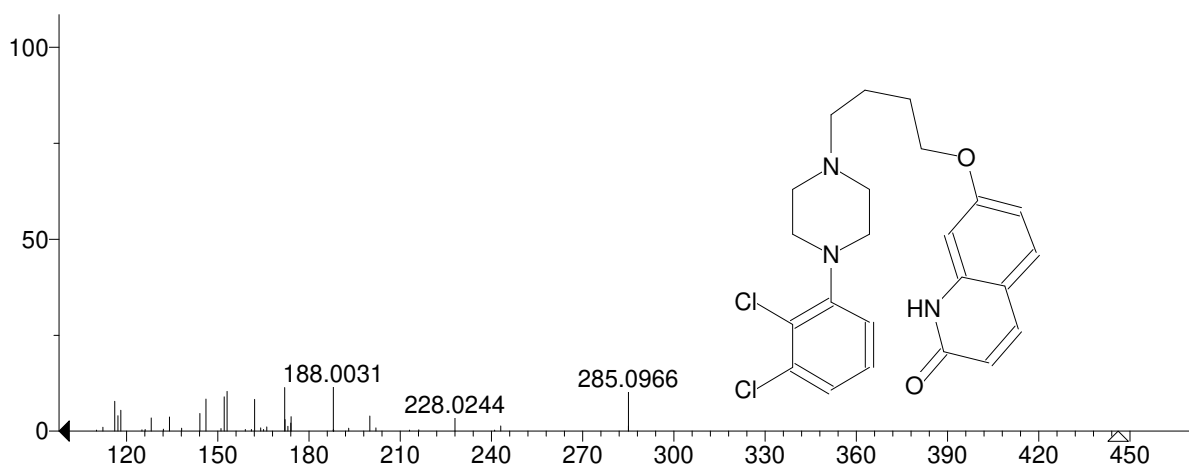

Unknown: Unknown (2.49\_346.1605m/z)  
Compound in Library Factor = 0

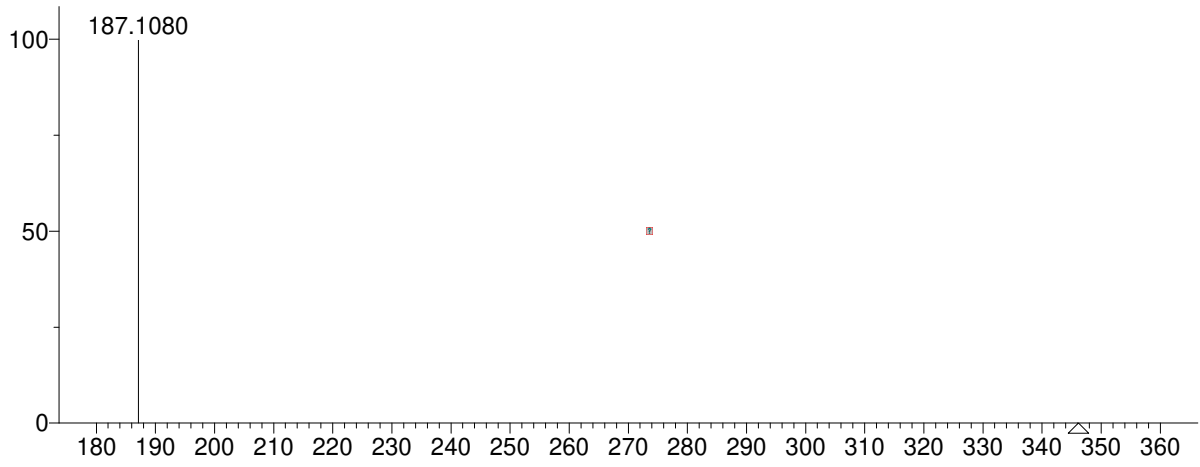

Unknown: Unknown (2.49\_359.1554m/z)  
Compound in Library Factor = 0

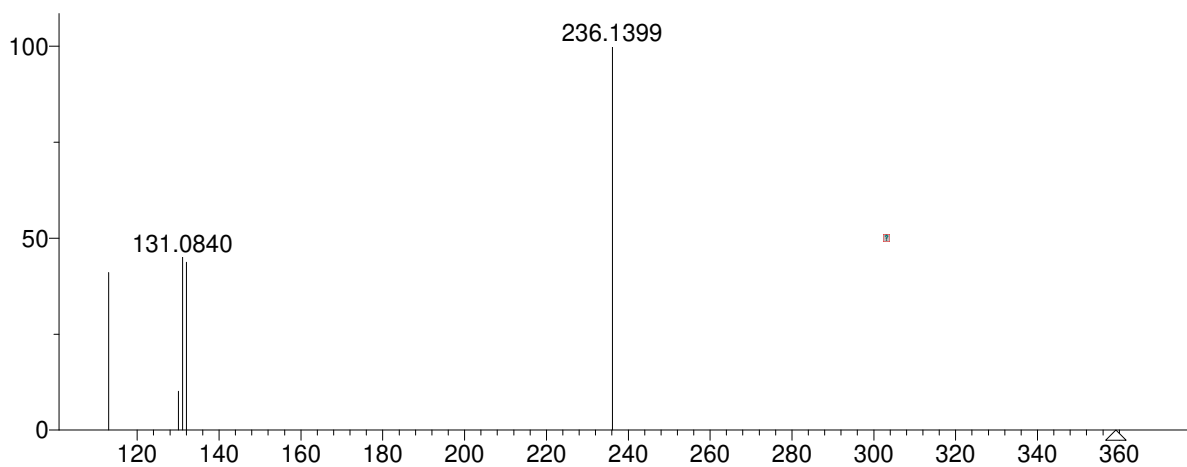

Hit 1 : Ala-Gly-Asp-Val [M-H]<sup>-</sup> HCD 57eV P=359.2  
C<sub>14</sub>H<sub>24</sub>N<sub>4</sub>O<sub>7</sub>; MF: 0; RMF: 59; Prob 100.0%; Lib: nist\_msms2; ID: 72487.

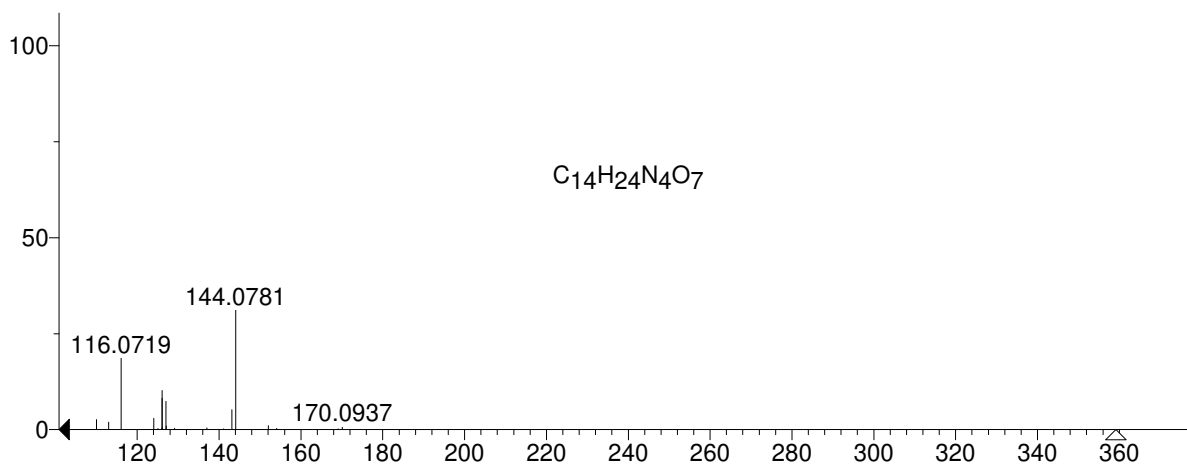

Unknown: Unknown (2.49\_508.1087m/z)  
Compound in Library Factor = 0

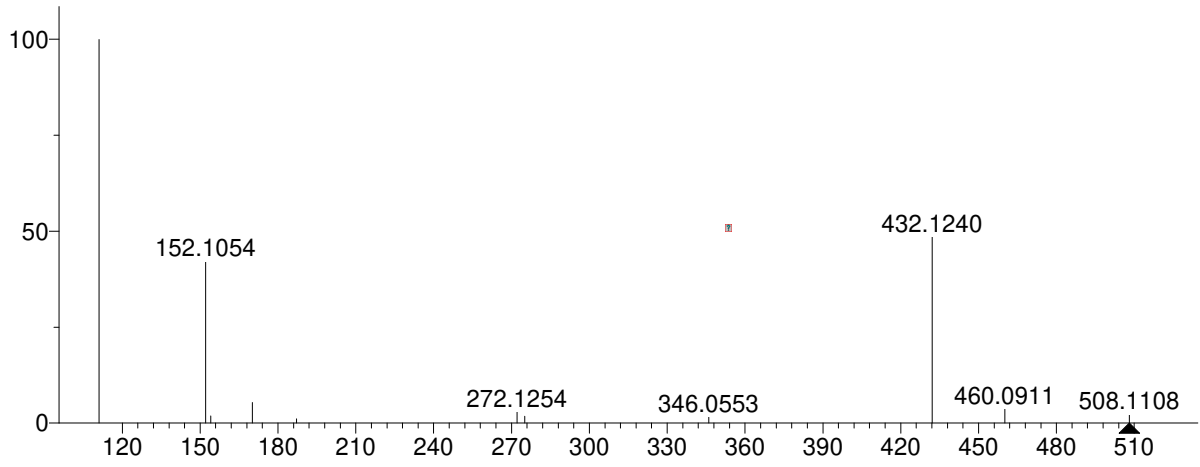

Unknown: Unknown (2.50\_274.1273m/z)  
Compound in Library Factor = 0

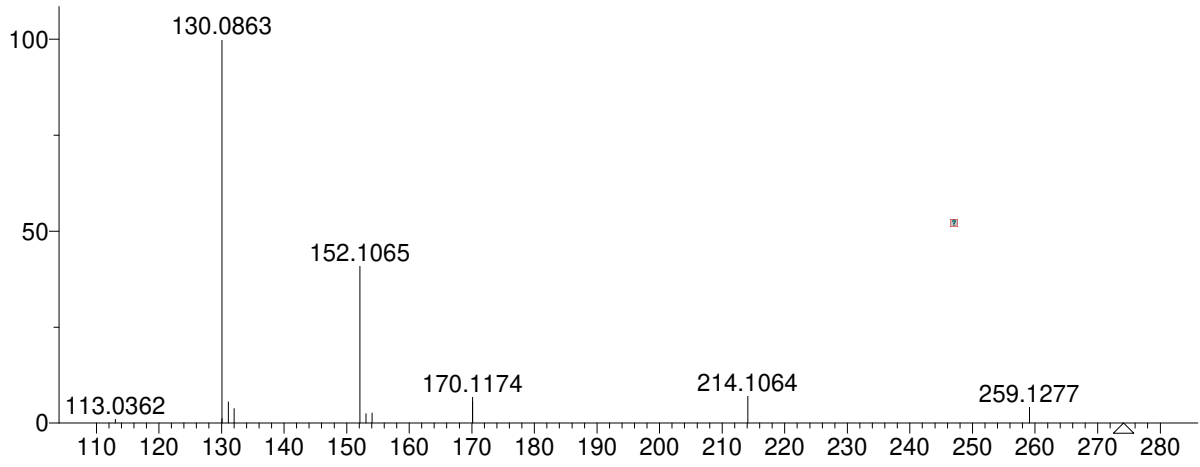



Unknown: Unknown (2.50\_454.1920m/z)  
Compound in Library Factor = 0

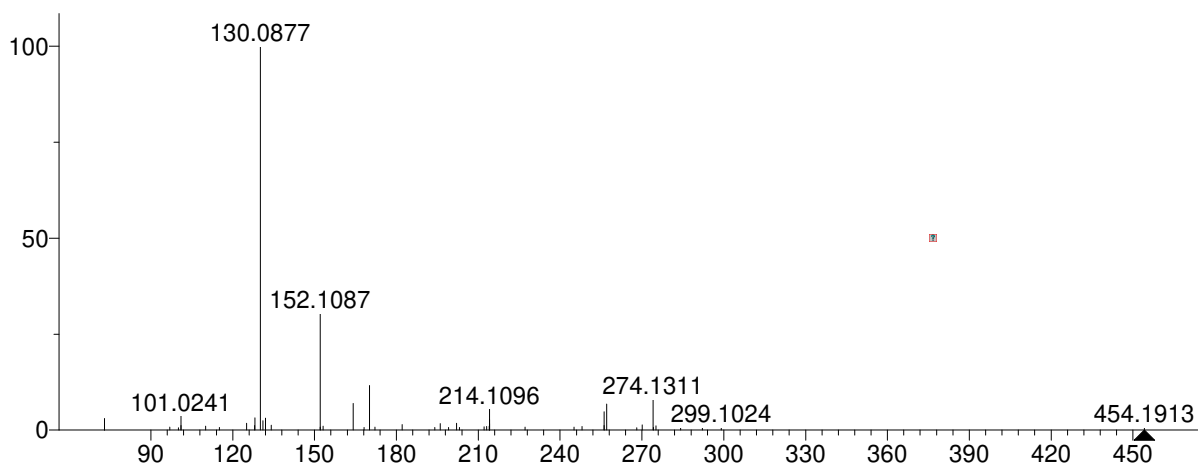

Hit 1 : Acetic acid, 2-[4-[(5,6-diphenyl-2-pyrazinyl)(1-methylethyl)amino]butoxy]- [M+Cl]<sup>-</sup> HCD 18V P=454.2  
C<sub>25</sub>H<sub>29</sub>N<sub>3</sub>O<sub>3</sub>; MF: 0; RMF: 11; Prob 100.0%; CAS: 475085-57-5; Lib: nist\_msms; ID: 551808.

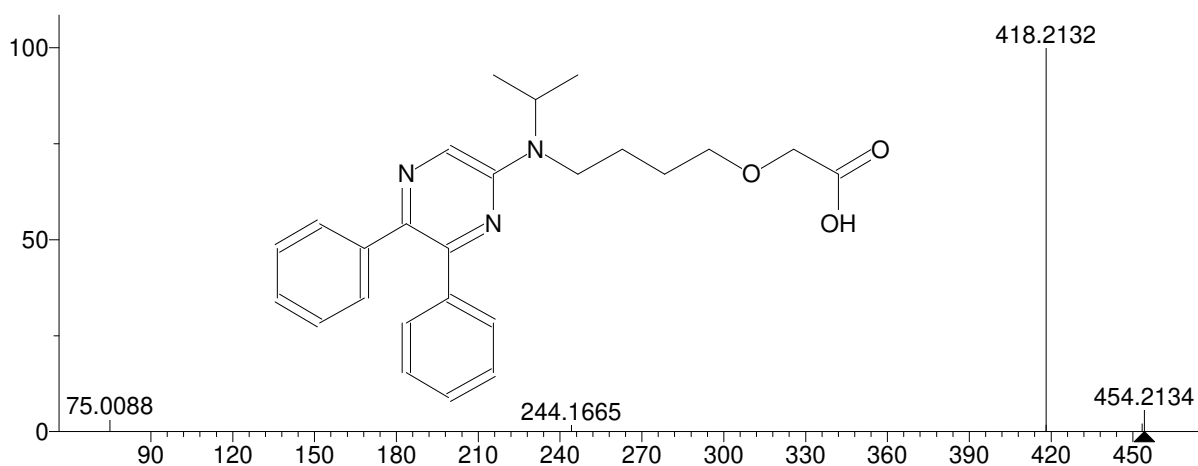

Unknown: Unknown (2.52\_237.0860m/z)  
Compound in Library Factor = 0

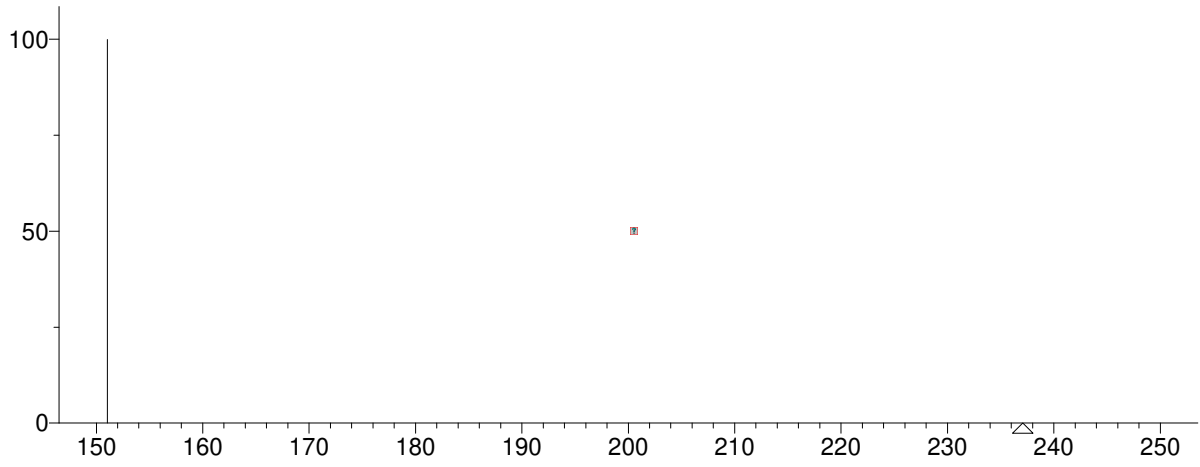

Unknown: Unknown (2.52\_330.1186m/z)  
Compound in Library Factor = -472

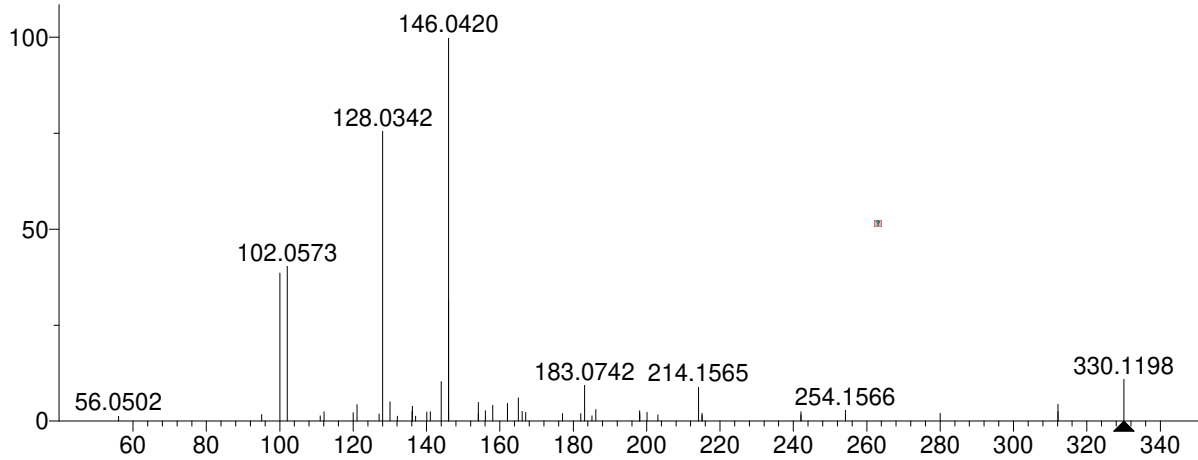

Hit 1 : Dopamine 4-β-D-glucuronide [M+H]<sup>+</sup> HCD 9V P=330.1  
C<sub>14</sub>H<sub>19</sub>NO<sub>8</sub>; MF: 136; RMF: 240; Prob 96.3%; CAS: 38632-24-5; Lib: nist\_msms; ID: 210217.

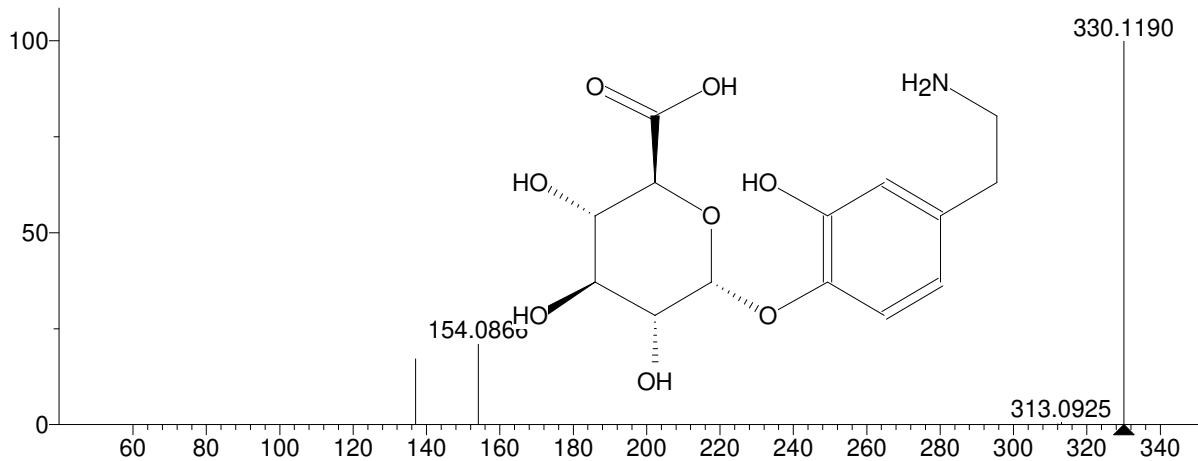

Hit 2 : Nelfinavir [M+H-C<sub>14</sub>H<sub>26</sub>N<sub>2</sub>O]<sup>+</sup> HCD 16V P=330.1  
C<sub>32</sub>H<sub>45</sub>N<sub>3</sub>O<sub>4</sub>S; MF: 2; RMF: 172; Prob 3.72%; CAS: 159989-64-7; Lib: nist\_msms; ID: 367188.

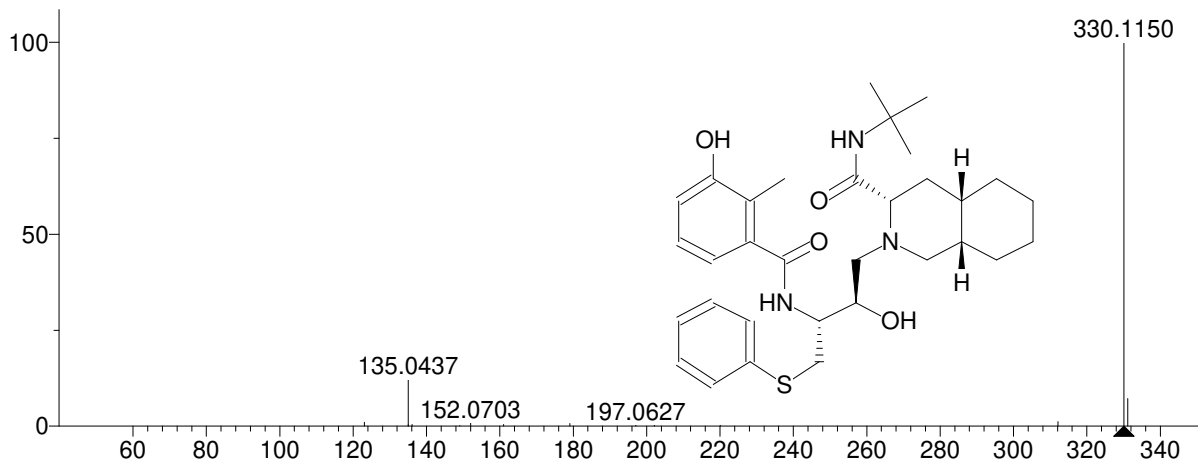

Unknown: Unknown (2.52\_393.1852m/z)  
Compound in Library Factor = -3273

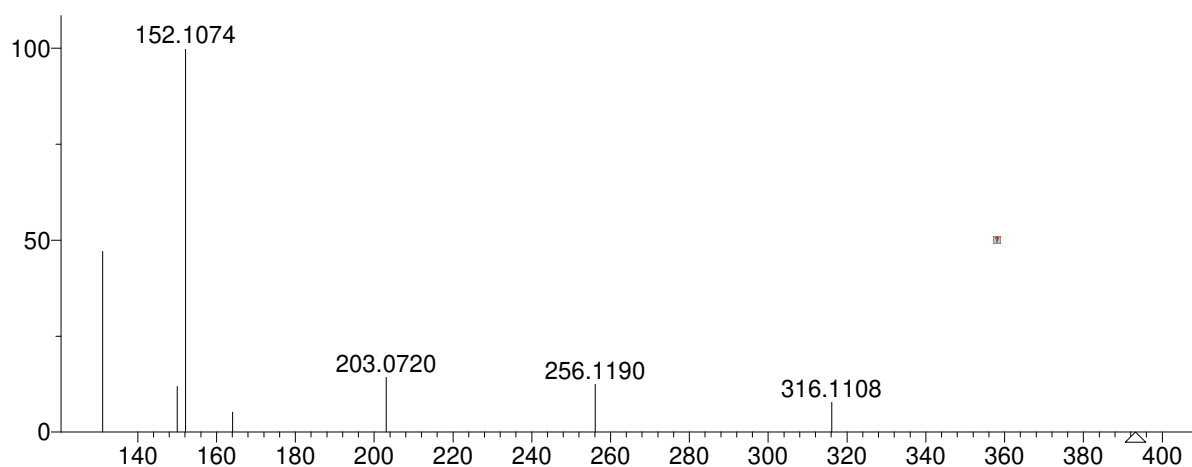

Hit 1 : Simmondsin [M+NH<sub>4</sub>]<sup>+</sup> HCD 27V P=393.2  
C<sub>16</sub>H<sub>25</sub>NO<sub>9</sub>; MF: 1; RMF: 63; Prob 51.0%; CAS: 51771-52-9; Lib: nist\_msms; ID: 460444.

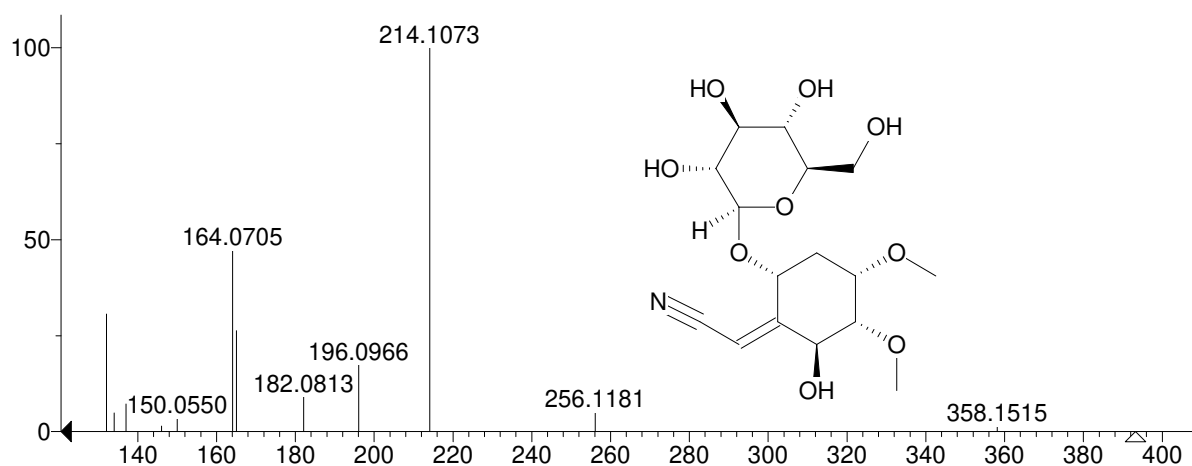

Hit 2 : Dovitinib [M+H]<sup>+</sup> HCD 47V P=393.2  
C<sub>21</sub>H<sub>21</sub>FN<sub>6</sub>O; MF: 0; RMF: 17; Prob 49.0%; CAS: 405169-16-6; Lib: nist\_msms; ID: 381641.

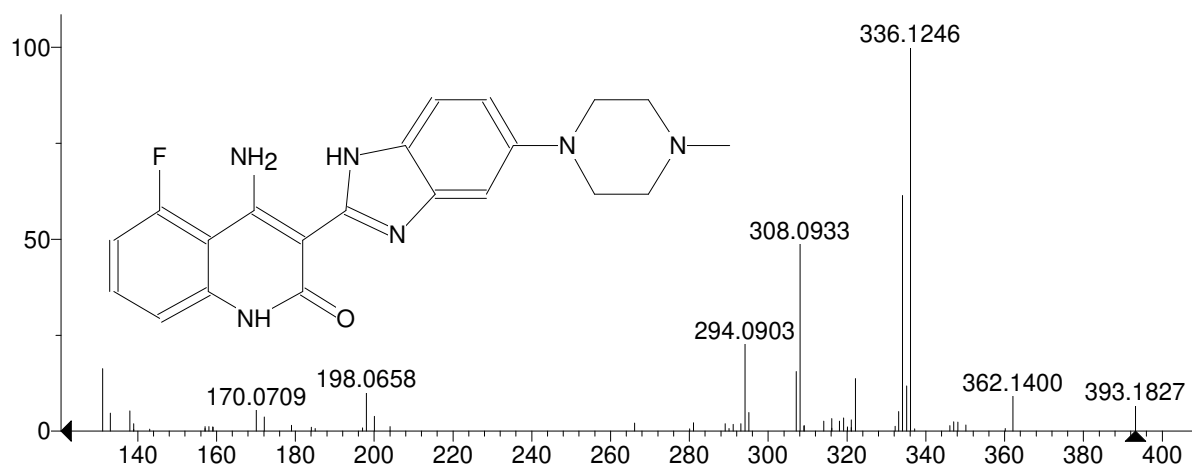

Unknown: Unknown (2.52\_432.1250m/z)  
Compound in Library Factor = 0

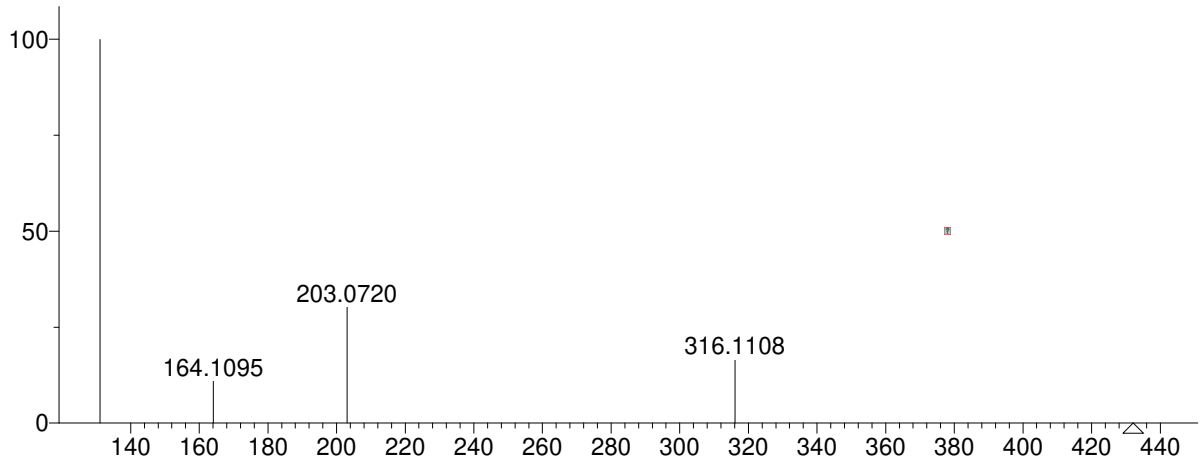

Unknown: Unknown (2.52\_572.1141m/z)  
Compound in Library Factor = -3273

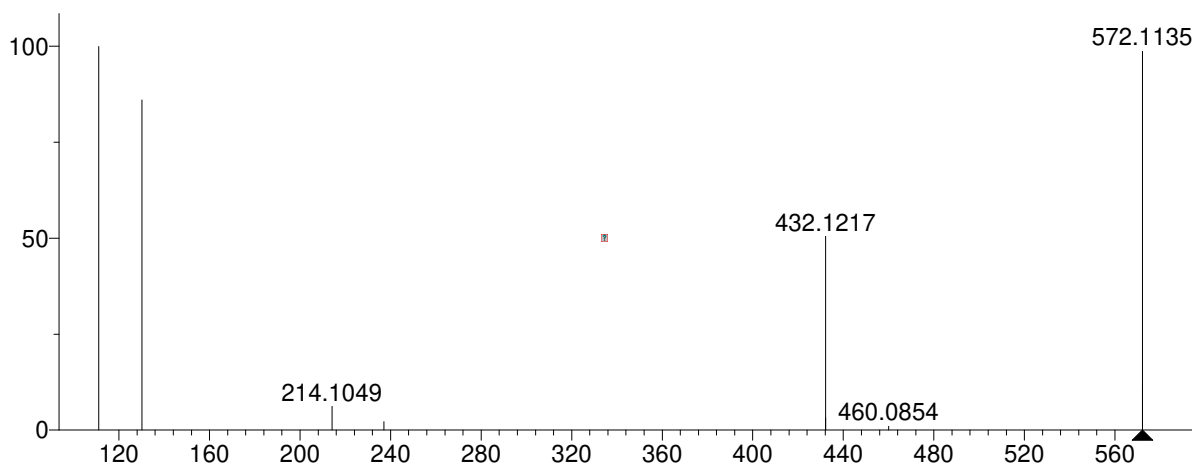

Hit 1 : (Ala11,D-Leu15)-Orexin B, human [M+5H]<sup>5+</sup> HCD 8eV P=572.1  
C<sub>120</sub>H<sub>206</sub>N<sub>44</sub>O<sub>35</sub>S; MF: 1; RMF: 168; Prob 100.0%; CAS: 532932-99-3; Lib: nist\_msms2; ID: 45808.

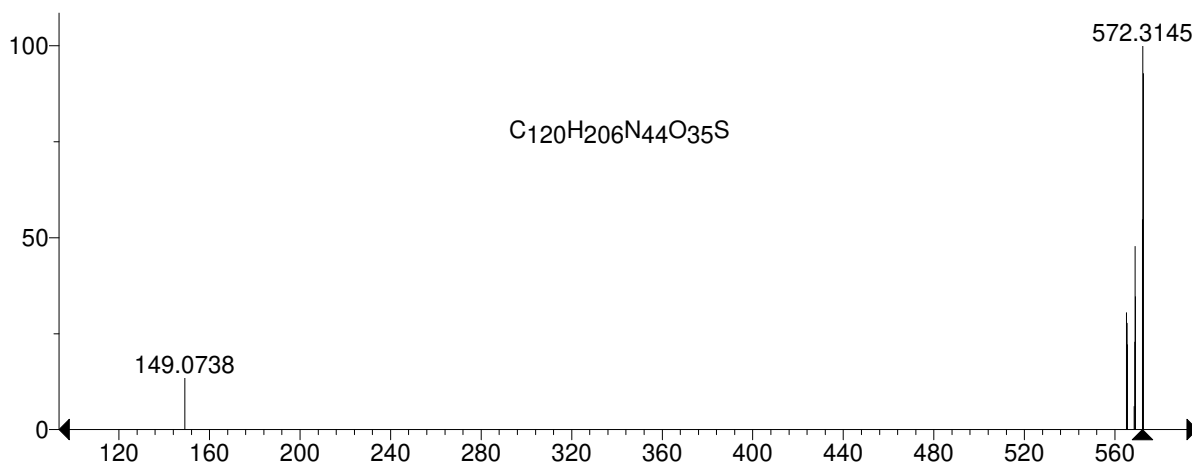

Unknown: Unknown (2.52\_616.2450m/z)  
Compound in Library Factor = 0

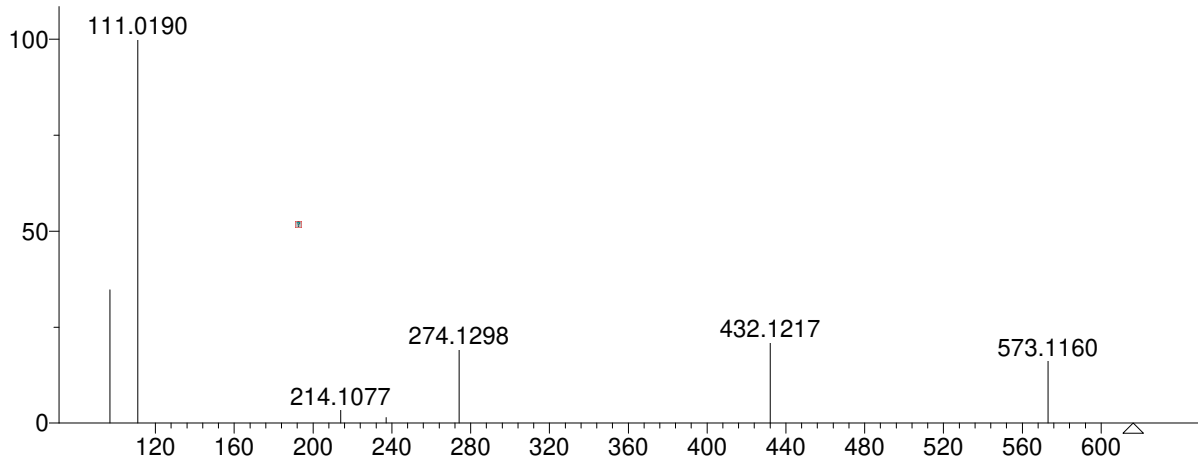

\*\* Search Report Page 1 of 2 \*\*

Unknown: Unknown (2.53\_373.1231m/z)  
Compound in Library Factor = -3273

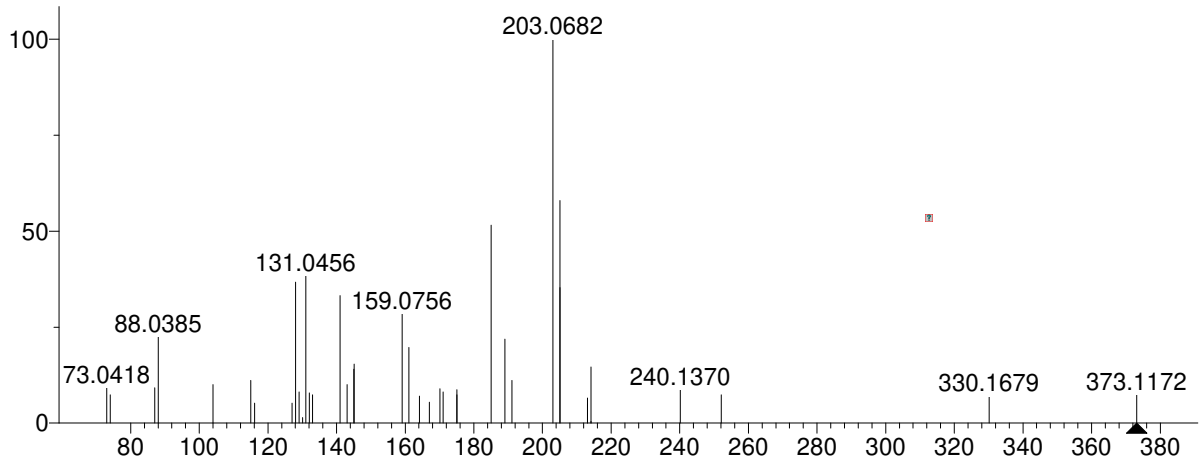

Hit 1 : 2,4-Thiazolidinedione, 5-[[4-[2-(5-ethyl-2-pyridinyl)-2-hydroxyethoxy]phenyl]methyl]- [M+H]<sup>+</sup> HCD 14V P:  
C<sub>19</sub>H<sub>20</sub>N<sub>2</sub>O<sub>4</sub>S; MF: 6; RMF: 119; Prob 29.1%; CAS: 101931-00-4; Lib: nist\_msms; ID: 443088.

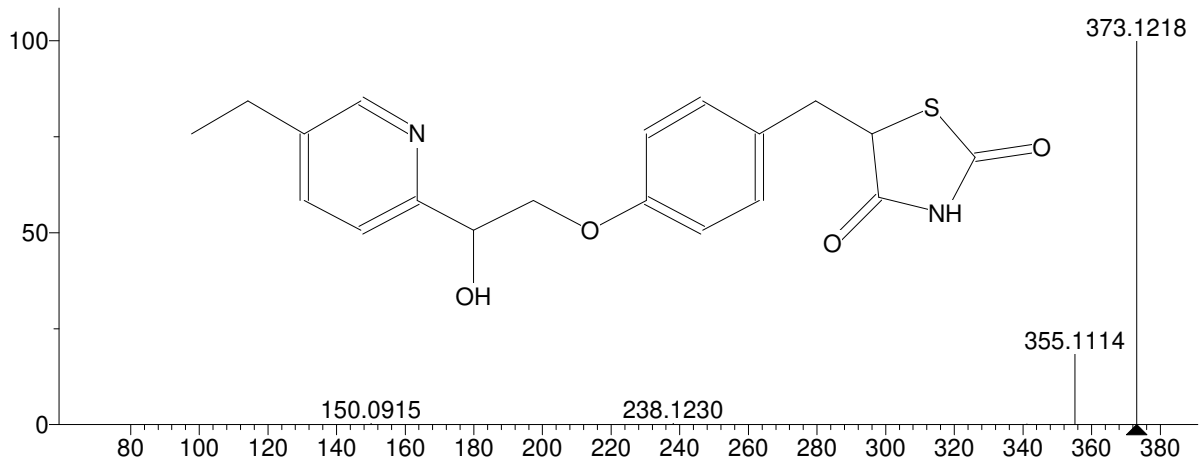

Hit 2 : 2,4-Thiazolidinedione, 5-[[4-[2-[5-(1-hydroxyethyl)-2-pyridinyl]ethoxy]phenyl]methyl]- [M+H]<sup>+</sup> HCD 18V P:  
C<sub>19</sub>H<sub>20</sub>N<sub>2</sub>O<sub>4</sub>S; MF: 2; RMF: 105; Prob 24.6%; CAS: 146062-44-4; Lib: nist\_msms; ID: 443052.

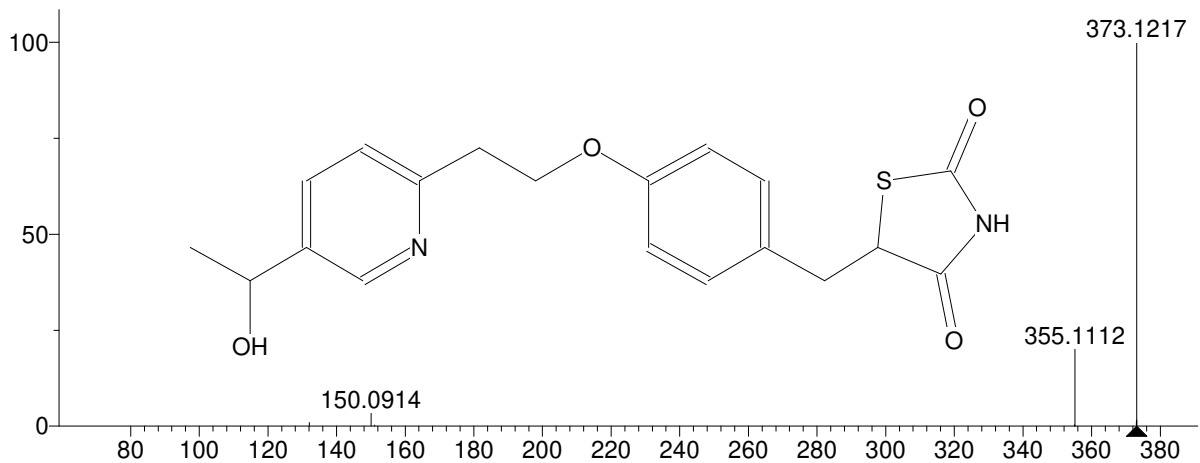



Hit 3 : Dapagliflozin [M+H-2H<sub>2</sub>O]<sup>+</sup> HCD 18V P=373.1  
C<sub>21</sub>H<sub>25</sub>ClO<sub>6</sub>; MF: 1; RMF: 43; Prob 23.6%; CAS: 461432-26-8; Lib: nist\_msms; ID: 548869.

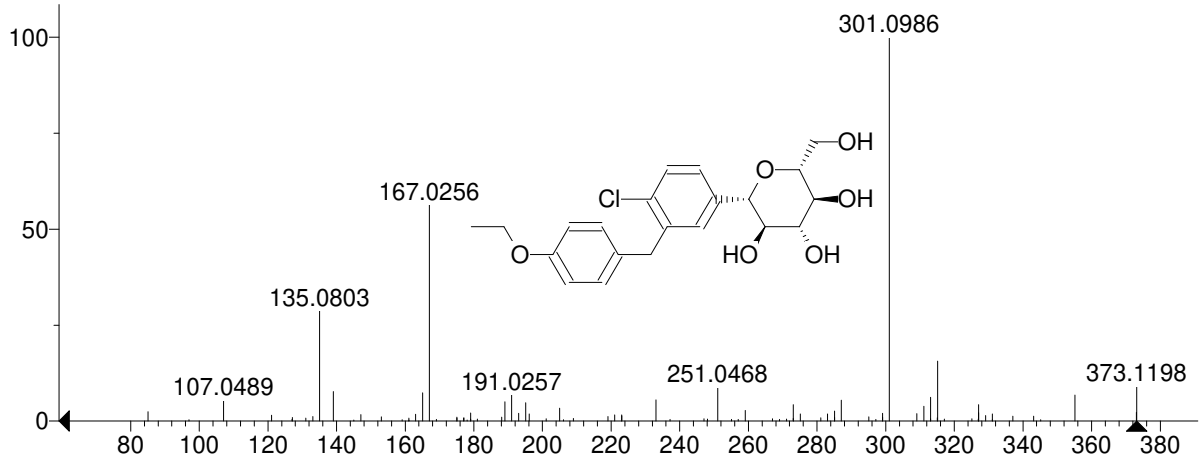

Hit 4 : Gox(8-O-4)G 2 (lignin) [M-H]<sup>-</sup> P=373.1  
C<sub>20</sub>H<sub>22</sub>O<sub>7</sub>; MF: 0; RMF: 38; Prob 22.7%; Lib: phytofrag2018\_final\_060219; ID: 555.

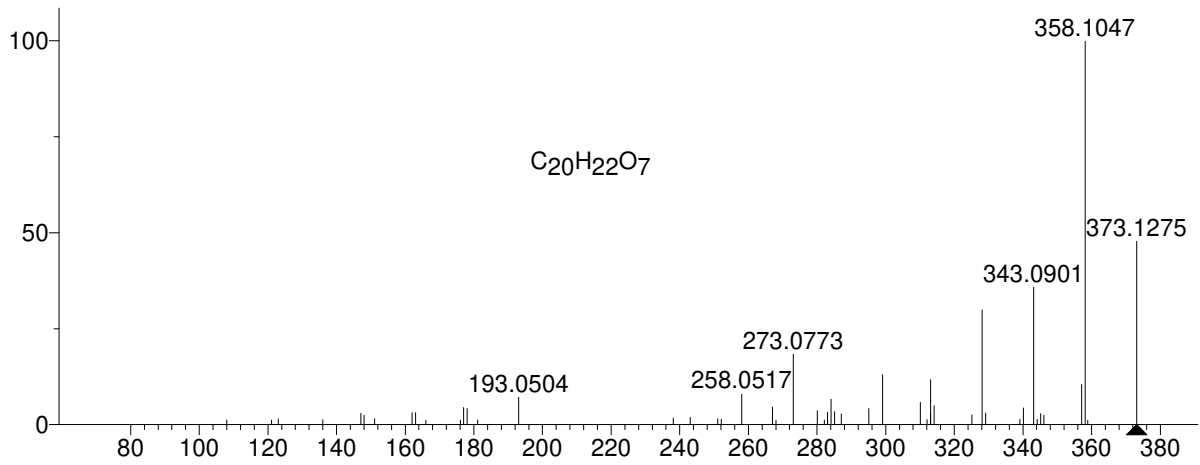

Unknown: Unknown (2.53\_415.1819m/z)  
Compound in Library Factor = 0

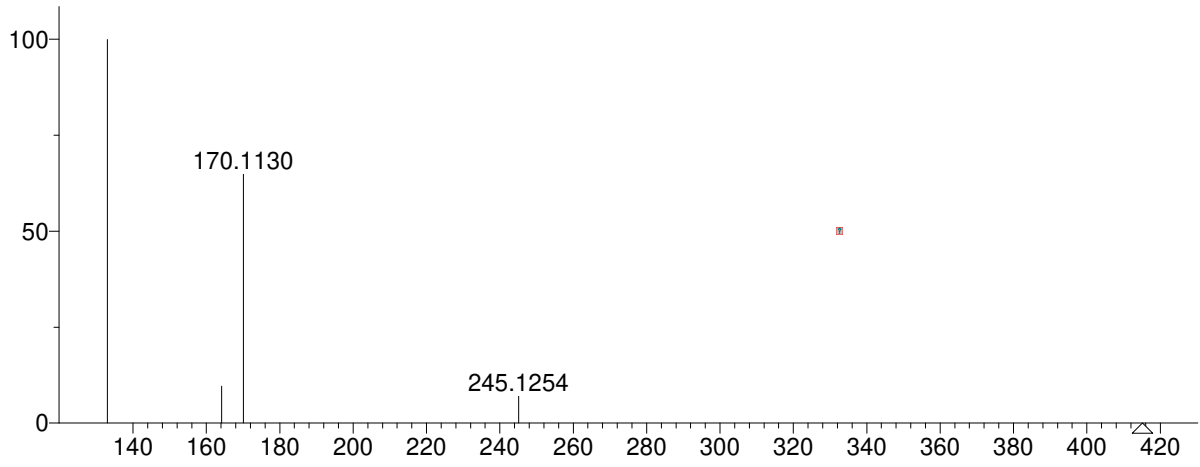

Unknown: Unknown (2.53\_627.1317m/z)  
Compound in Library Factor = 0

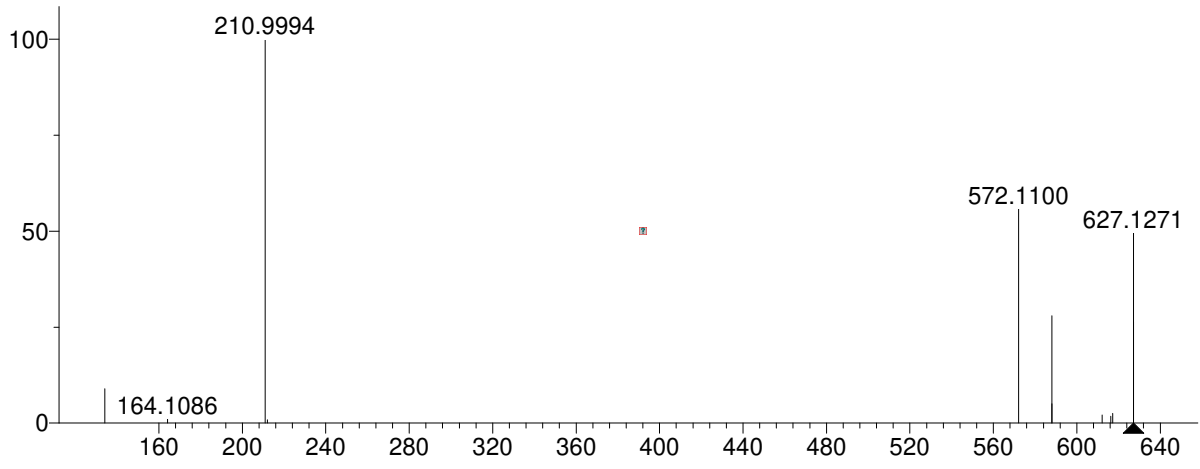

Unknown: Unknown (2.54\_348.1113m/z)  
Compound in Library Factor = 0

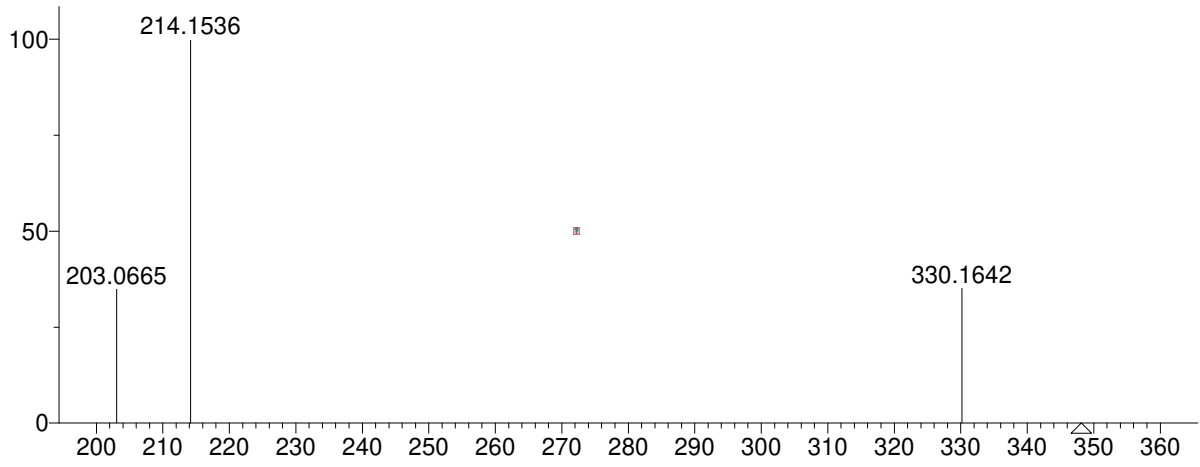

Unknown: Unknown (2.54\_430.1438m/z)  
Compound in Library Factor = 0

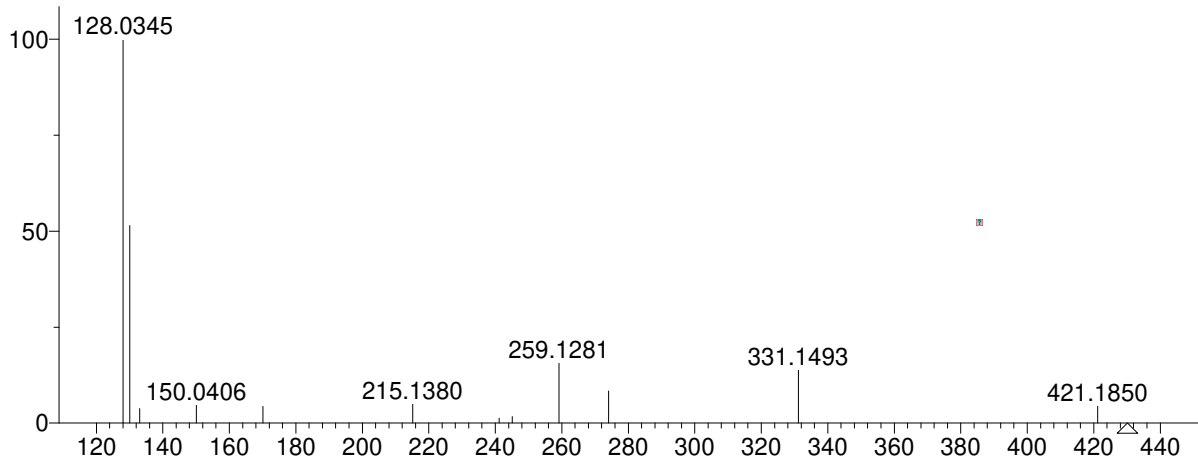

Hit 1 : Tubacin [M+H-C15H20N2O4]+ HCD 137V P=430.1  
C41H43N3O7S; MF: 0; RMF: 16; Prob 100.0%; CAS: 537049-40-4; Lib: nist\_msms; ID: 262955.

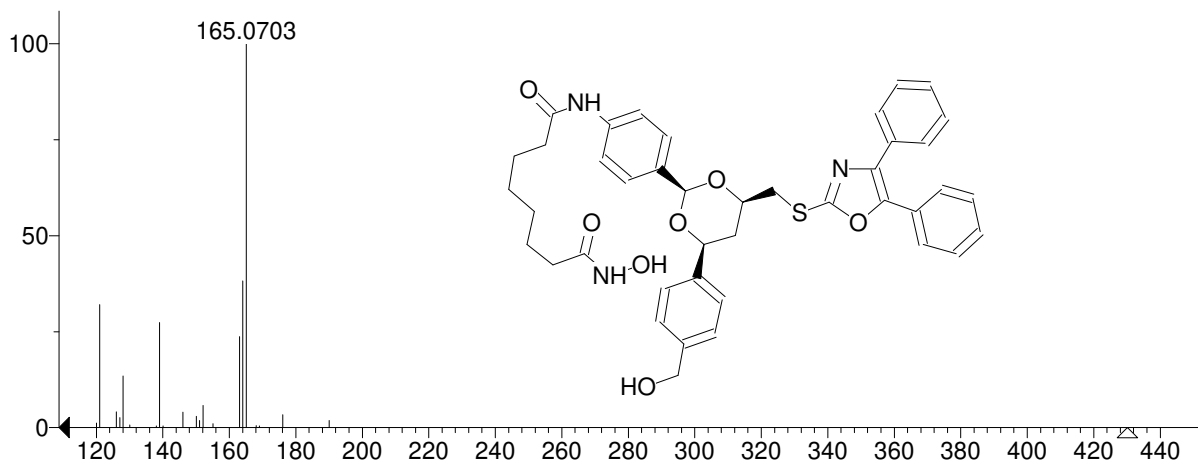

Unknown: Unknown (2.55\_389.1211m/z)  
Compound in Library Factor = 0

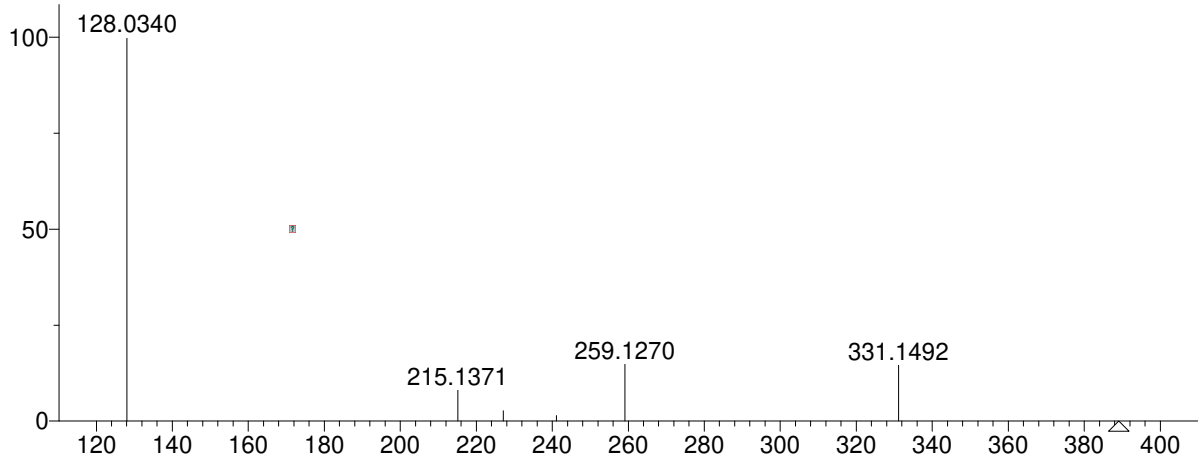

Hit 1 : Ginkgolide B [M+H-2H<sub>2</sub>O]<sup>+</sup> IT-FT 35% P=389.1  
C<sub>20</sub>H<sub>24</sub>O<sub>10</sub>; MF: 0; RMF: 52; Prob 20.0%; CAS: 15291-77-7; Lib: nist\_msms; ID: 352924.

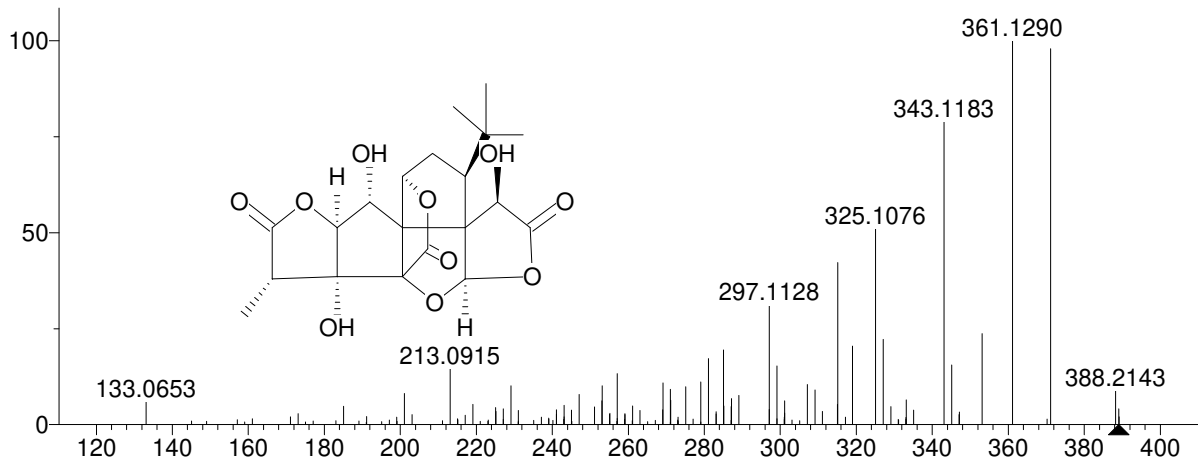

Hit 2 : NCGC00385097-01\_C<sub>20</sub>H<sub>22</sub>O<sub>9</sub>\_beta-D-Glucopyranoside, 4-hydroxy-2-(hydroxymethyl)phenyl, 6-benzoat  
C<sub>20</sub>H<sub>22</sub>O<sub>9</sub>; MF: 0; RMF: 42; Prob 20.0%; Lib: mona-export-gnps; ID: 12625.

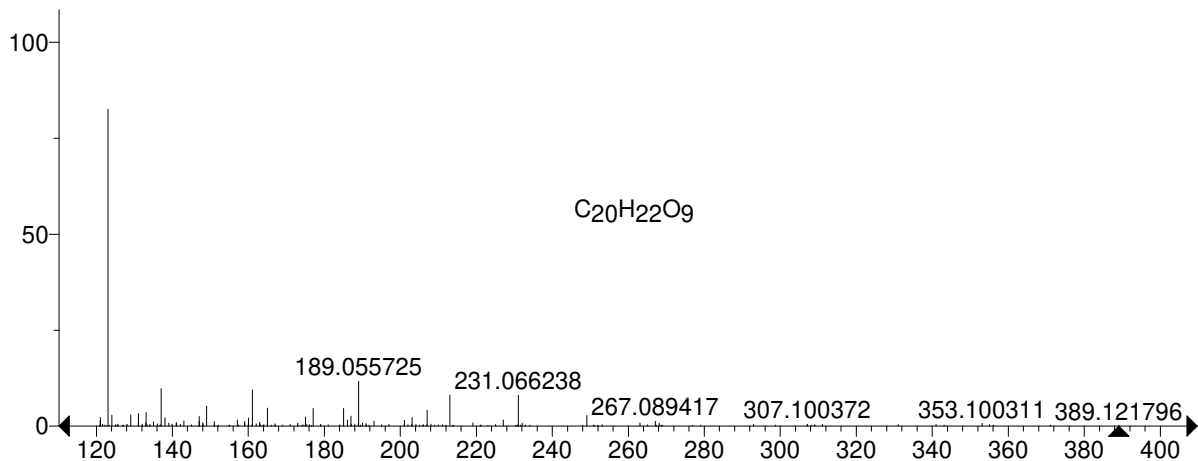

Hit 3 : G(8-O-4)ferulic acid (/Matsuda et al., 2010) [M-H]<sup>-</sup> P=389.1  
C<sub>20</sub>H<sub>22</sub>O<sub>8</sub>; MF: 0; RMF: 11; Prob 20.0%; Lib: phytofrag2018\_final\_060219; ID: 371.

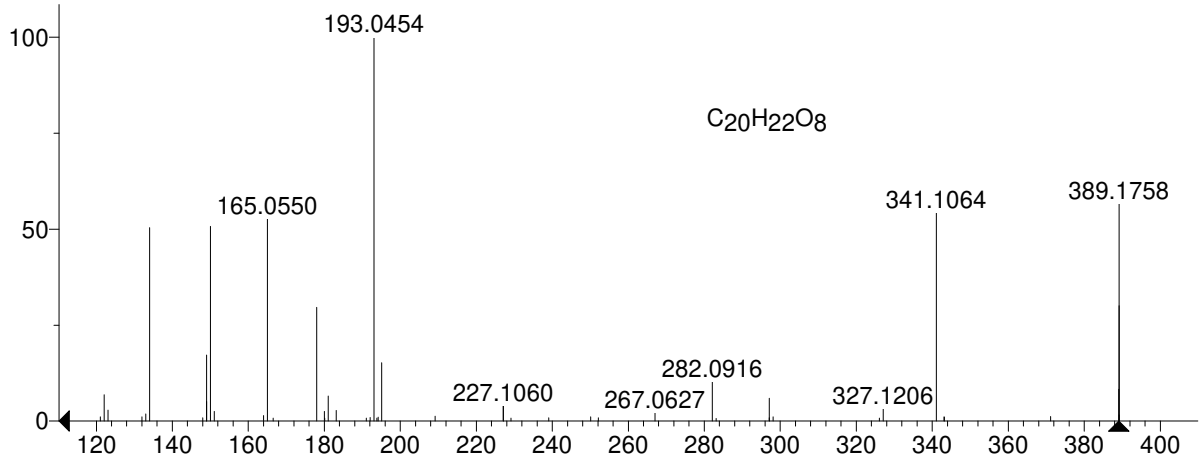

Hit 4 : G(8-O-4)ferulic acid + hexose 4 (fragment) (COc1cc(ccc1O)C(O)C(CO)Oc1ccc(\C=C\C(O)=O)cc1OC) [M-  
C<sub>20</sub>H<sub>22</sub>O<sub>8</sub>; MF: 0; RMF: 5; Prob 20.0%; Lib: phytofrag2018\_final\_060219; ID: 383.

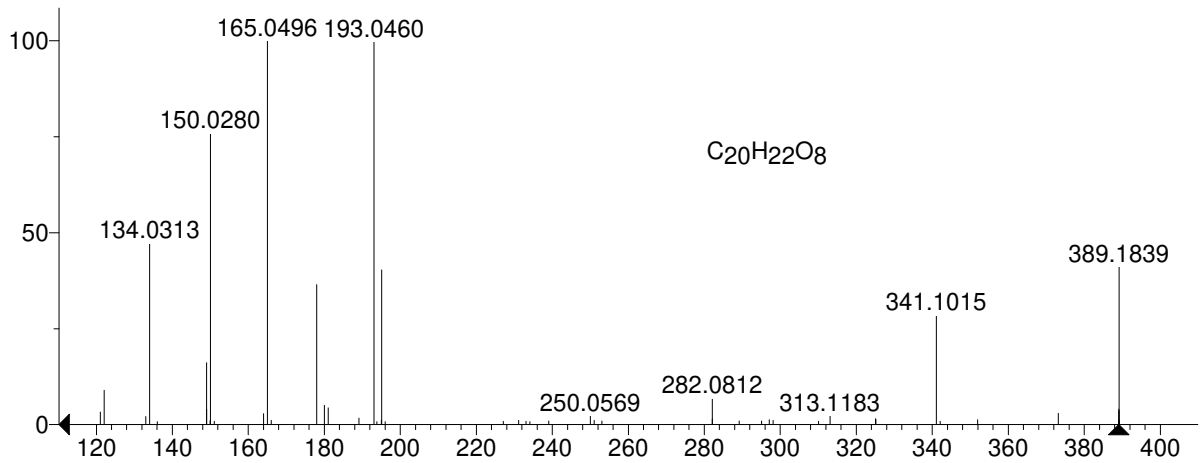

Hit 5 : G(8-O-4)ferulic acid 9 () [M-H]<sup>-</sup> P=389.1  
C<sub>20</sub>H<sub>22</sub>O<sub>8</sub>; MF: 0; RMF: 5; Prob 20.0%; Lib: phytofrag2018\_final\_060219; ID: 403.

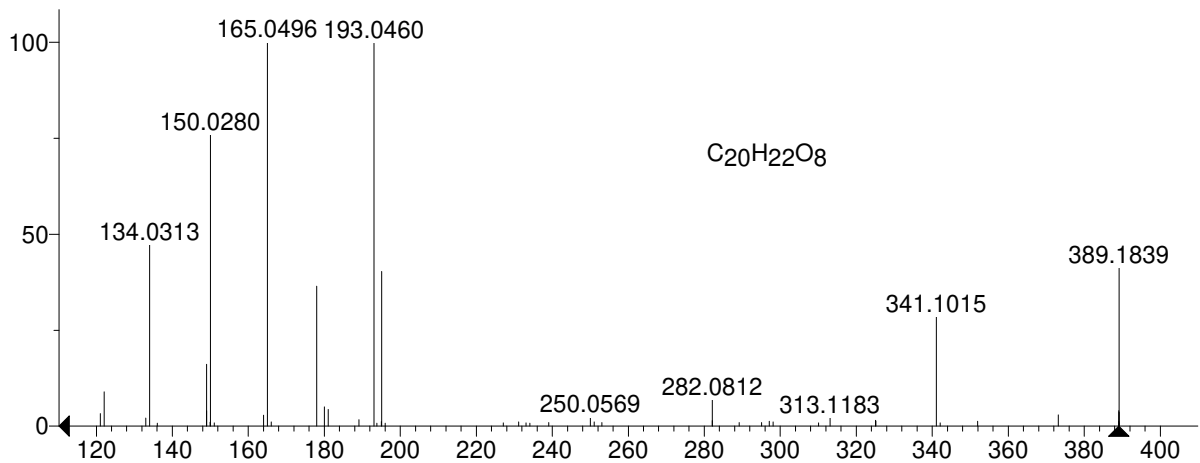

Unknown: Unknown (2.55\_611.1352m/z)  
Compound in Library Factor = -1309

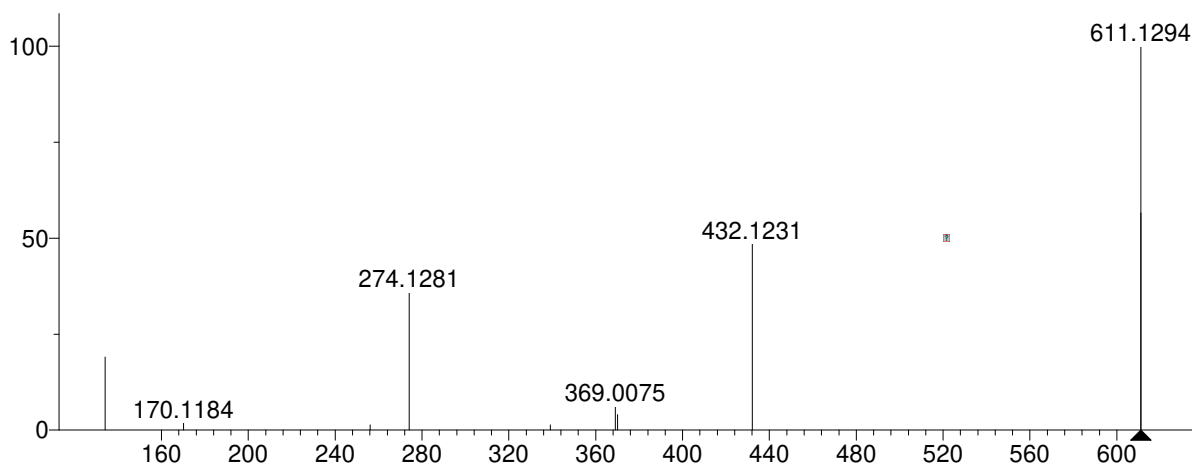

Hit 1 : (-)-Epigallocatechin [2M-H]- HCD 6V P=611.1  
C15H14O7; MF: 108; RMF: 622; Prob 58.5%; CAS: 970-74-1; Lib: nist\_msms; ID: 235135.

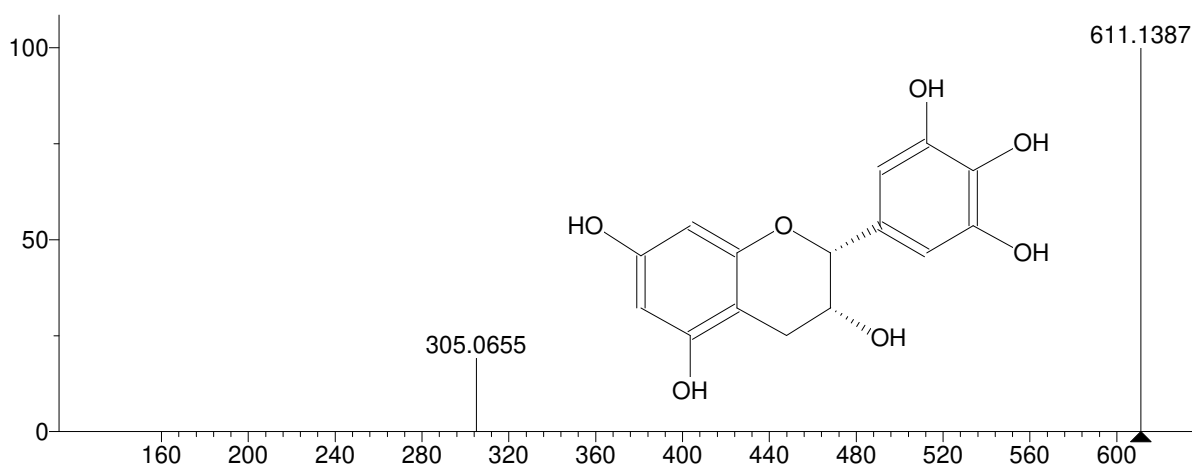

Hit 2 : (-)-Gallocatechin [2M-H]- HCD 6V P=611.1  
C15H14O7; MF: 92; RMF: 621; Prob 33.7%; CAS: 3371-27-5; Lib: nist\_msms; ID: 235923.

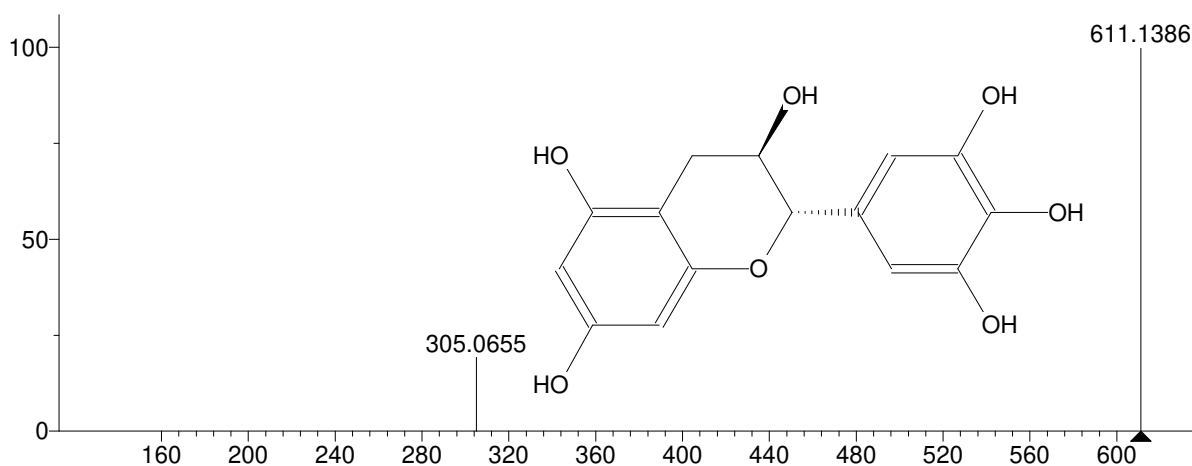



Hit 3 : Melphalan [2M-H+4i]- HCD 5V P=611.1  
C<sub>13</sub>H<sub>18</sub>Cl<sub>2</sub>N<sub>2</sub>O<sub>2</sub>; MF: 52; RMF: 579; Prob 7.81%; CAS: 148-82-3; Lib: nist\_msms; ID: 522785.

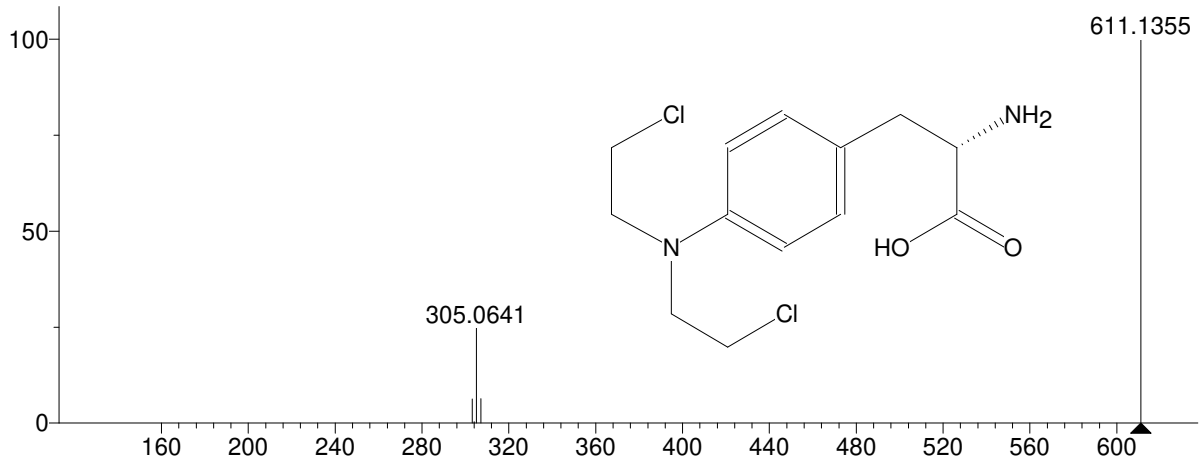

Unknown: Unknown (2.57\_146.0451m/z)  
Compound in Library Factor = -712

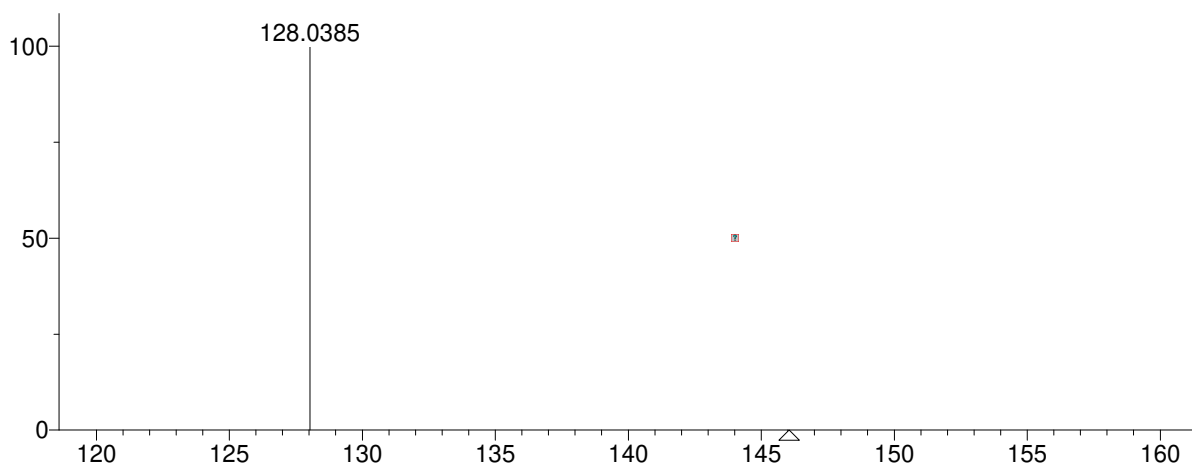

Hit 1 : L-GLUTAMIC ACID  
C<sub>5</sub>H<sub>9</sub>NO<sub>4</sub>; MF: 364; RMF: 999; Prob 15.0%; Lib: embi neg mcg; ID: 601.

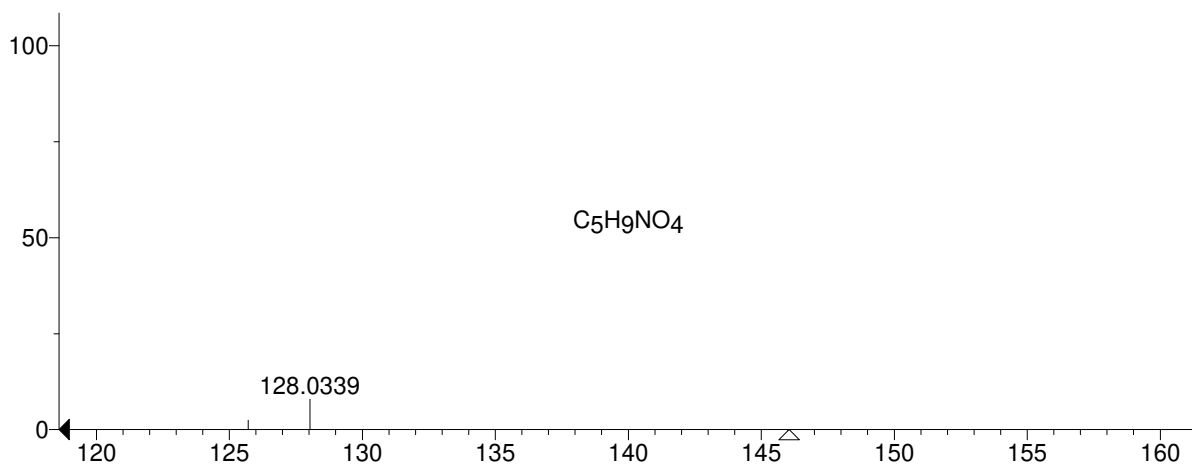

Hit 2 : Glutamic acid [M-H]<sup>-</sup> 35eV P=146  
C<sub>5</sub>H<sub>9</sub>NO<sub>4</sub>; MF: 364; RMF: 999; Prob 15.0%; Lib: mona-export-fiehn\_hilic; ID: 2731.

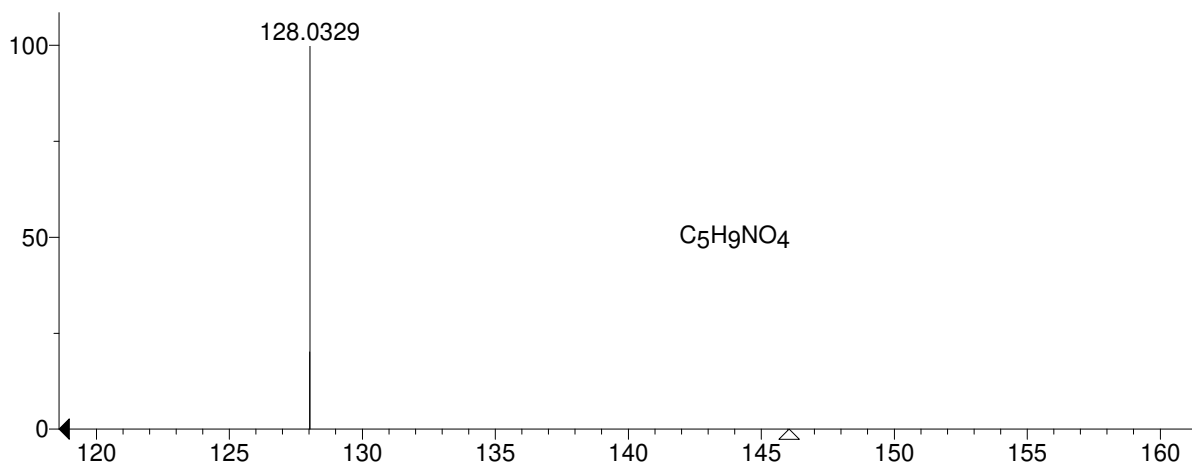

Hit 3 : L-Glutamic acid [M-H]- IT-FT 35% P=146  
C5H9NO4; MF: 364; RMF: 999; Prob 15.0%; CAS: 56-86-0; Lib: nist\_msms; ID: 140307.

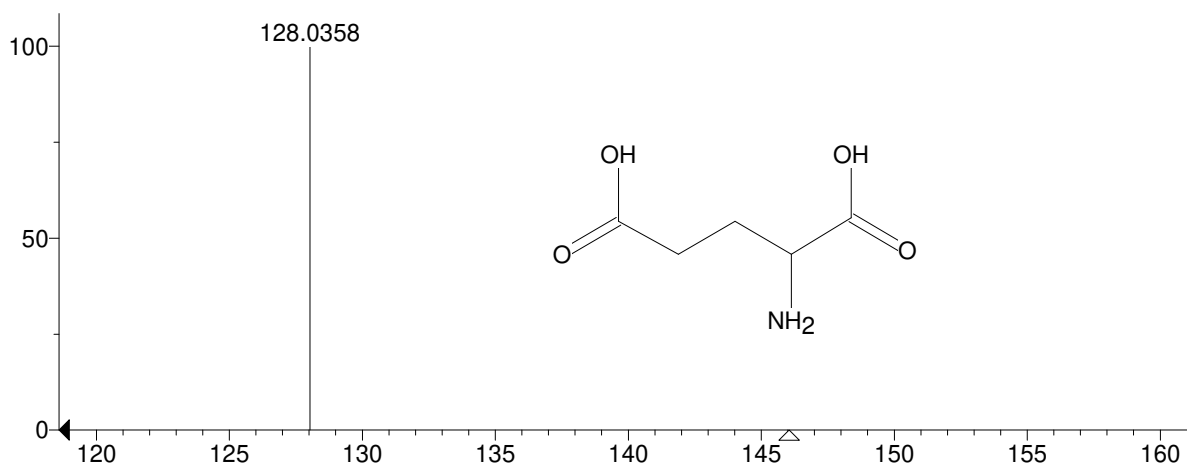

Hit 4 : N-Methyl-D-aspartic acid [M-H]- IT-FT 35% P=146  
C5H9NO4; MF: 364; RMF: 999; Prob 15.0%; CAS: 6384-92-5; Lib: nist\_msms; ID: 203419.

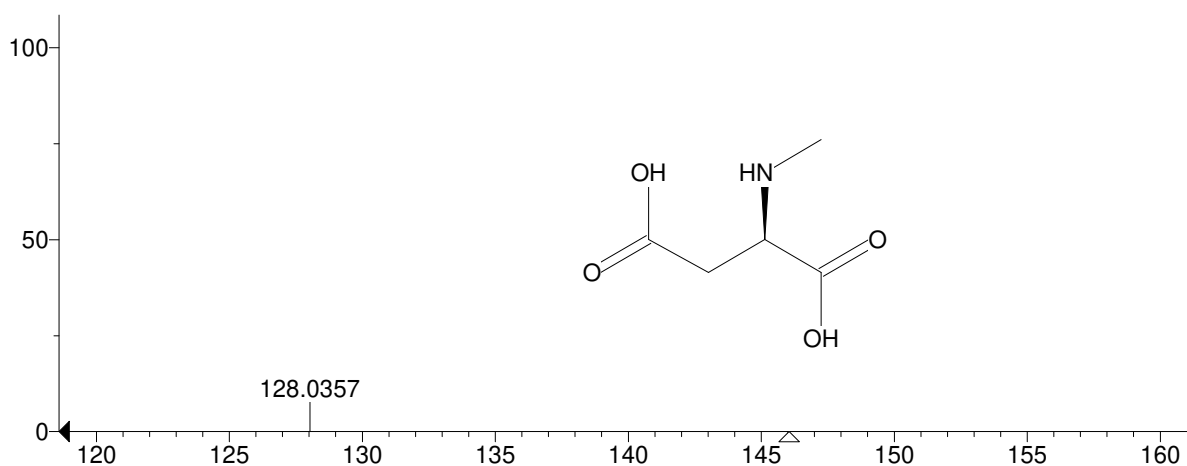

Hit 5 :  $\alpha$ -Guanidinoglutaric acid [M-H-CH2N2]- IT-FT 35% P=146  
C6H11N3O4; MF: 364; RMF: 999; Prob 15.0%; CAS: 73477-53-9; Lib: nist\_msms; ID: 337247.

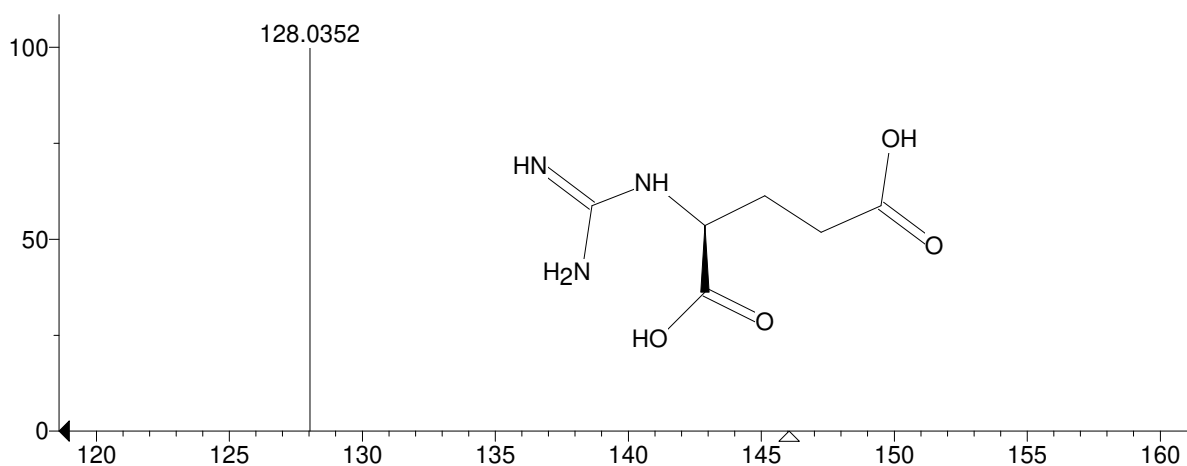

Unknown: Unknown (2.57\_389.1166m/z)  
Compound in Library Factor = 0

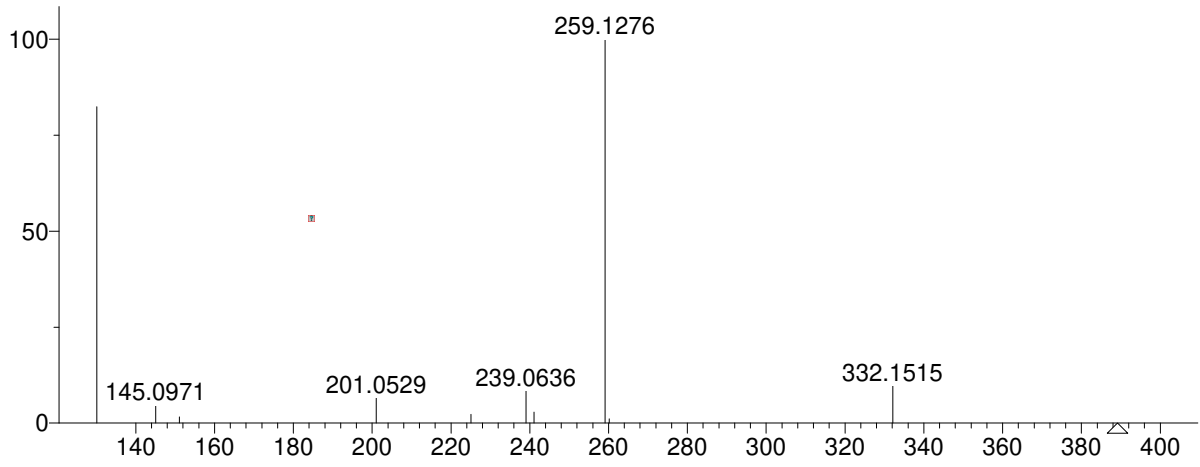

Unknown: Unknown (2.57\_602.1827m/z)  
Compound in Library Factor = 0

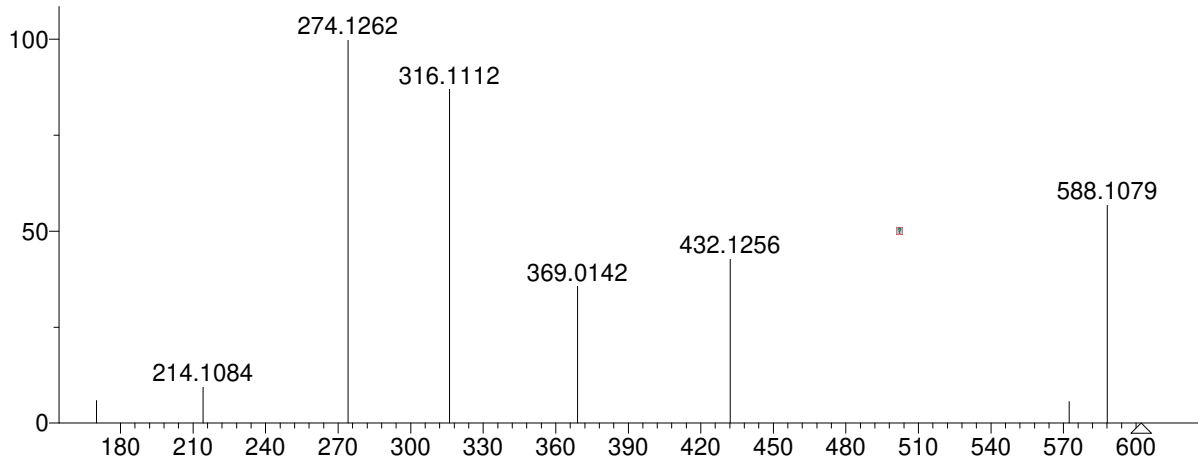

\*\* Search Report Page 1 of 2 \*\*

Unknown: Unknown (2.58\_254.0658m/z)  
Compound in Library Factor = -2176

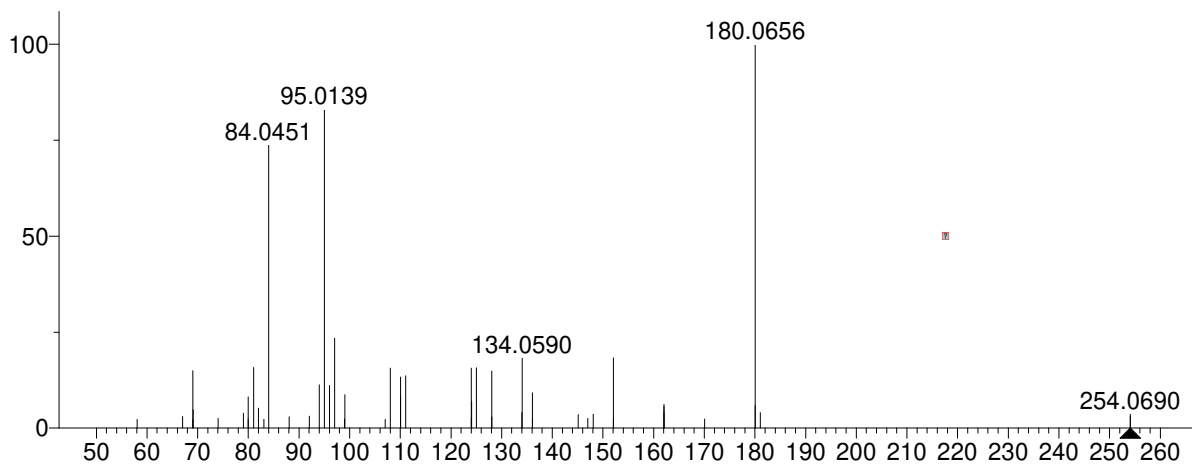

Hit 1 : Nitrothal isopropyl [M+H-C3H6]+ HCD 1V P=254.1  
C14H17NO6; MF: 30; RMF: 464; Prob 53.6%; CAS: 10552-74-6; Lib: nist\_msms; ID: 398573.

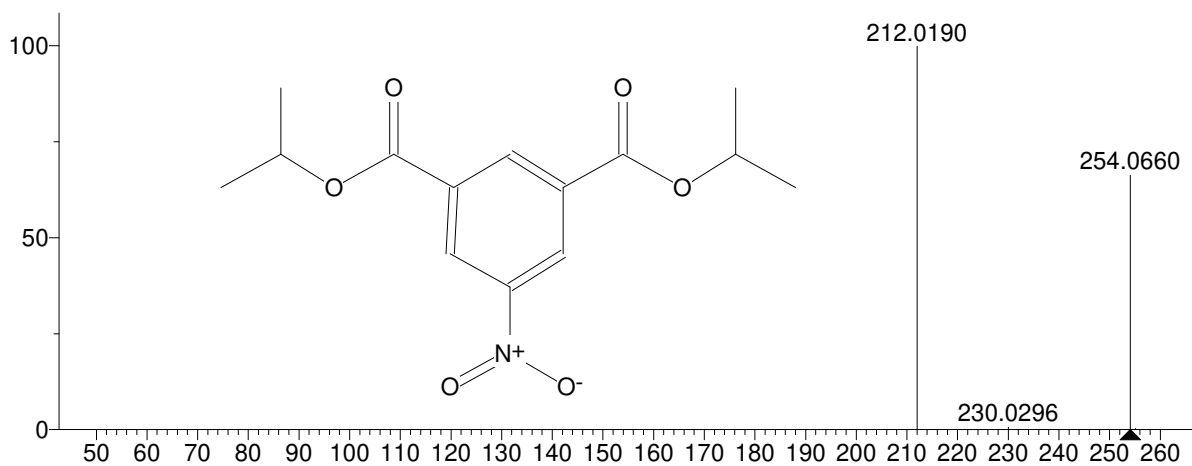

Hit 2 : Unknown (carbon number 11); PlaSMA ID-419 [M-H]- P=254.1  
C11H13NO6; MF: 6; RMF: 92; Prob 18.0%; Lib: biomsms-neg-plasma; ID: 1119.

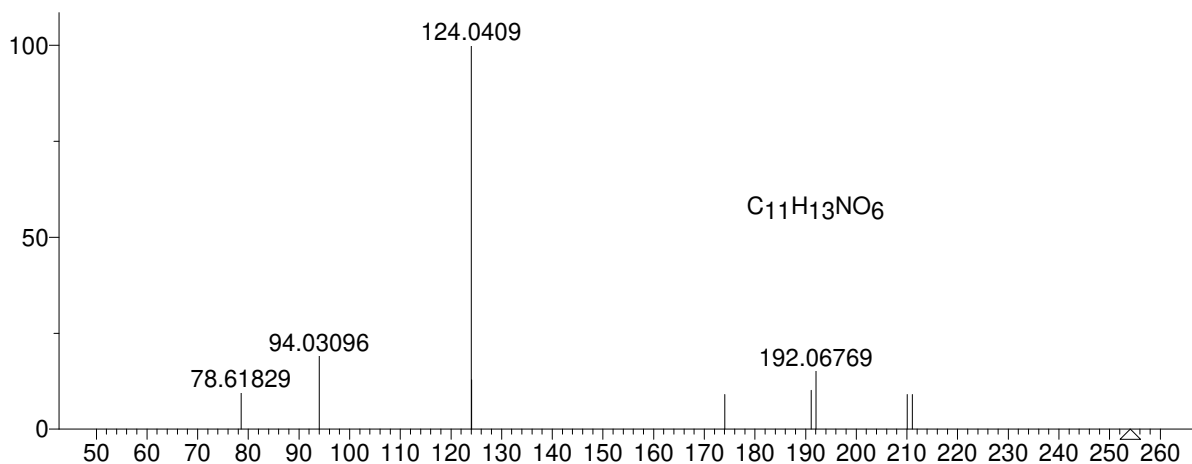

\*\* Search Report Page 2 of 2 \*\*

Hit 3 : methyl 2-[(2,3-dihydroxybenzoyl)amino]-3-hydroxypropanoate [M-H]<sup>-</sup> 65HCD P=254.1  
C<sub>11</sub>H<sub>13</sub>NO<sub>6</sub>; MF: 1; RMF: 43; Prob 14.5%; Lib: mona-export-ic-ms-ms\_negative\_mode; ID: 22579.

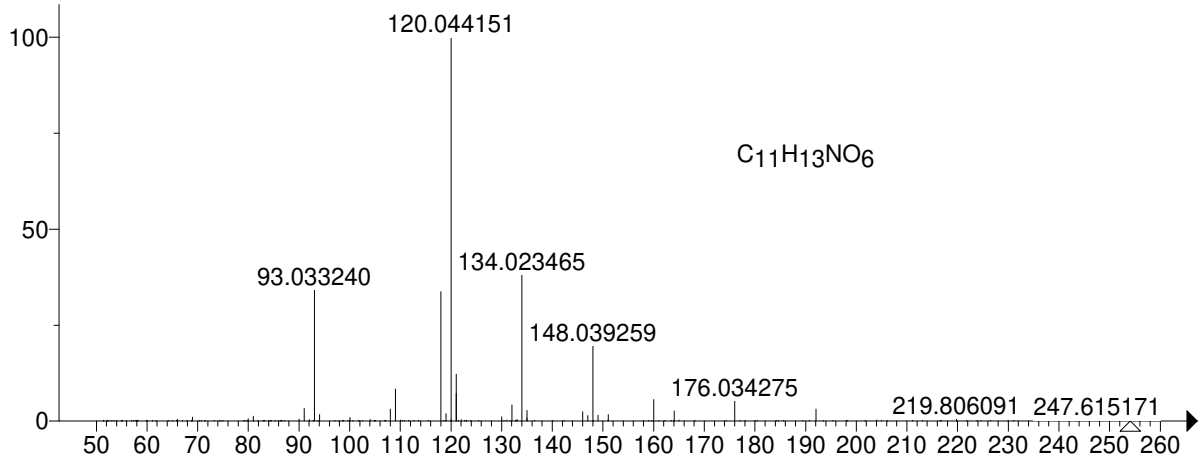

Hit 4 : Caramboxin [M-H]<sup>-</sup> P=254.1  
C<sub>11</sub>H<sub>13</sub>NO<sub>6</sub>; MF: 0; RMF: 9; Prob 13.9%; Lib: msms-neg-gnps; ID: 65.

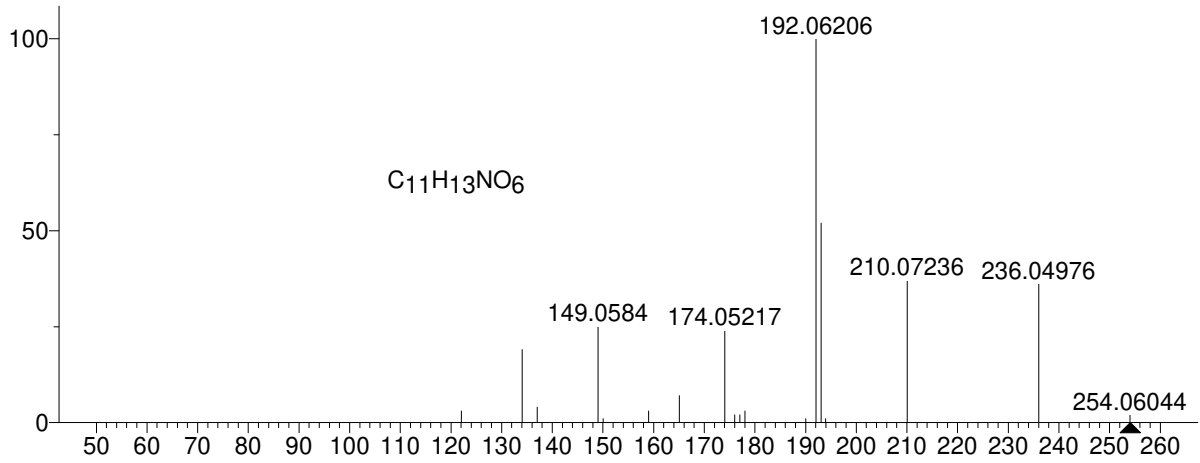

Unknown: Unknown (2.58\_421.1816m/z)  
Compound in Library Factor = -3273

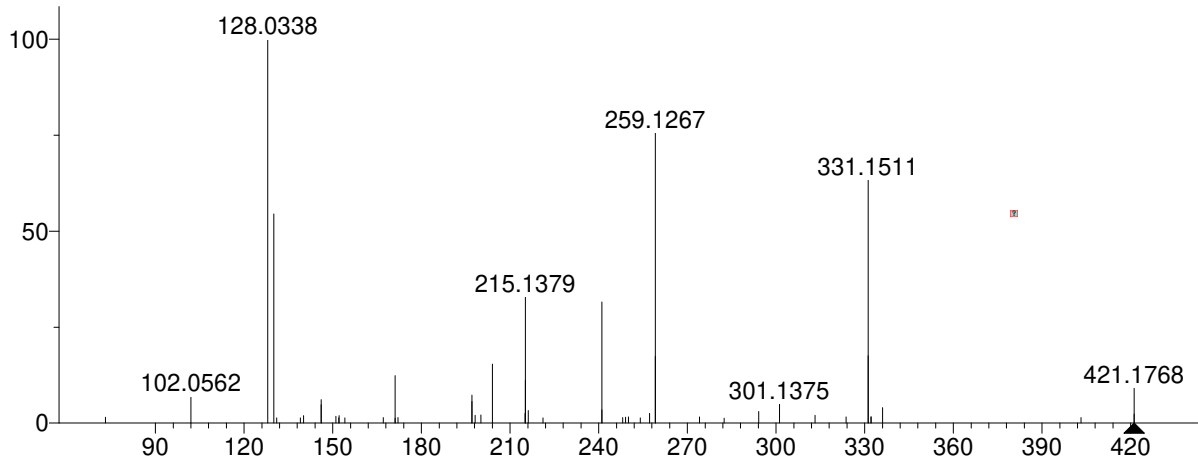

Hit 1 : Glp-His-Pro-Gly [M+H]<sup>+</sup> QTOF 3V P=421.2  
C<sub>18</sub>H<sub>24</sub>N<sub>6</sub>O<sub>6</sub>; MF: 7; RMF: 157; Prob 12.5%; Lib: nist\_msms2; ID: 32614.

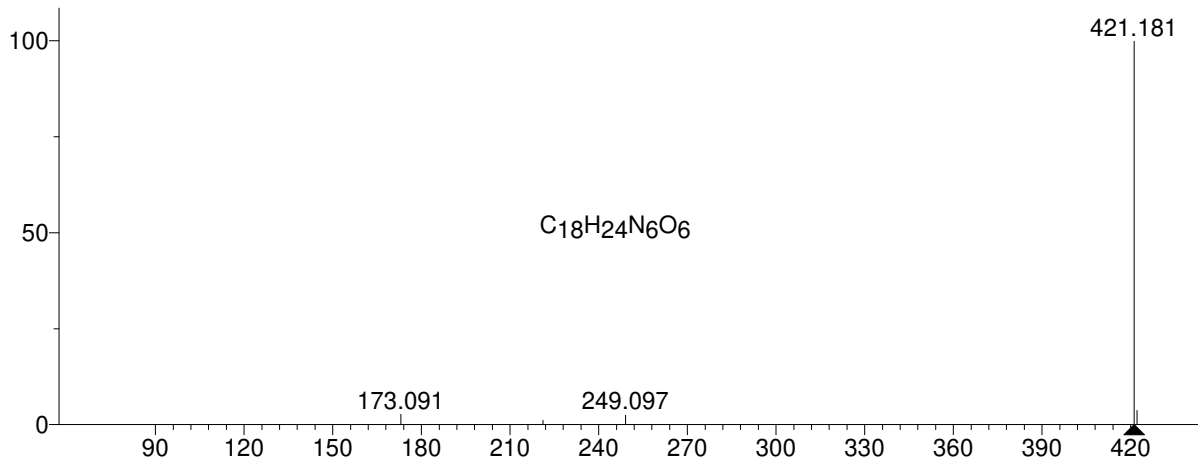

Hit 2 : NCGC00347584-0215-chloro-2,4-dihydroxy-3-[(E)-4-hydroxy-3-methyl-5-(1,2,6-trimethyl-3-oxocyclohexyl)]p  
C<sub>23</sub>H<sub>31</sub>ClO<sub>5</sub>; MF: 3; RMF: 134; Prob 10.6%; Lib: mona-export-gnps; ID: 8243.

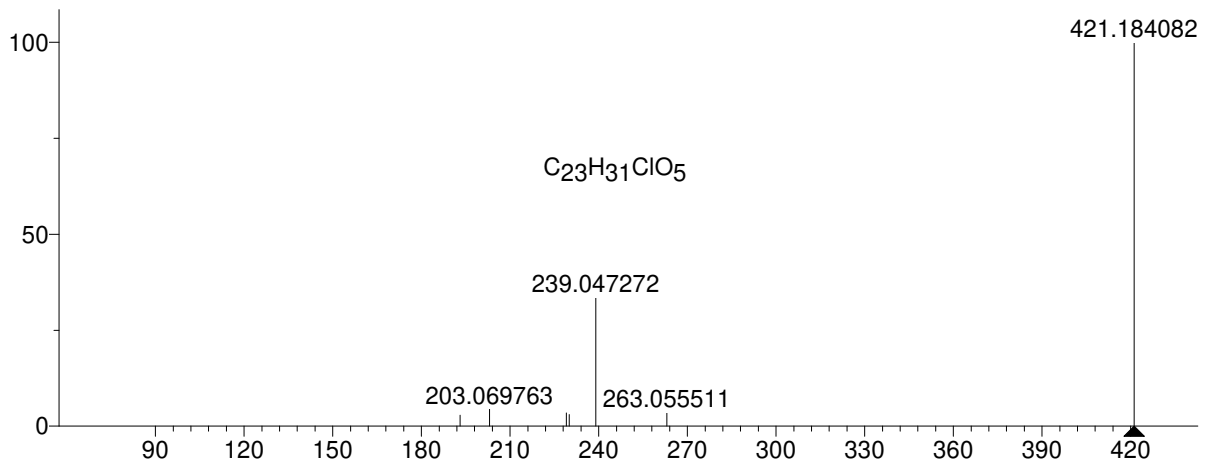



\*\* Search Report Page 2 of 2 \*\*

Hit 3 : 3-Cyclohexyl-6-[4-[3-(trifluoromethyl)phenyl]-1-piperazinyl]-2,4(1H,3H)-pyrimidinedione [M-H]<sup>-</sup> HCD 29V  
C<sub>21</sub>H<sub>25</sub>F<sub>3</sub>N<sub>4</sub>O<sub>2</sub>; MF: 2; RMF: 134; Prob 10.2%; Lib: nist\_msms; ID: 348660.

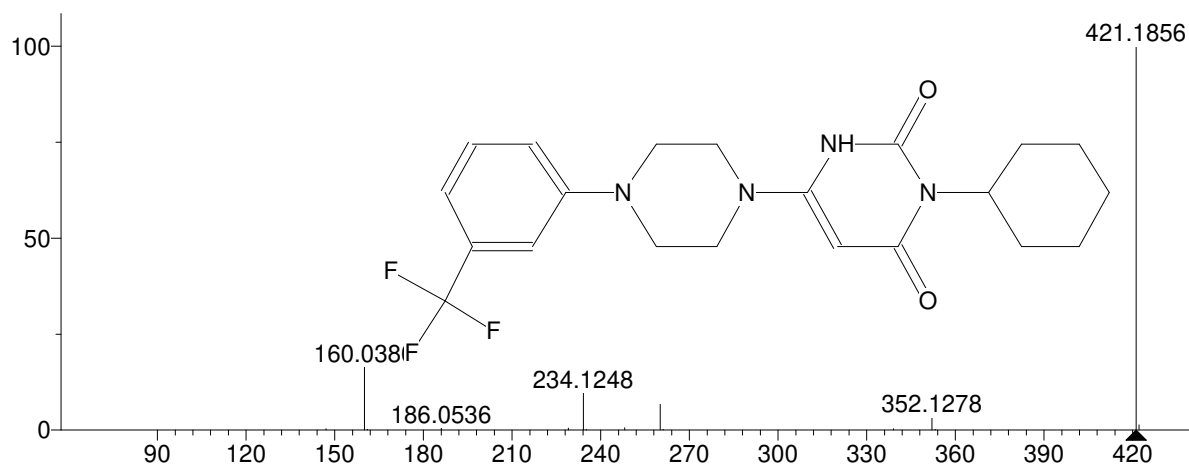

Hit 4 : (2R,3S,4S,9R,12R,13R,14S,15R,16R,17S)-3,4,12,13,15,16-hexahydroxy-2,6,14,17-tetramethyl-10-oxatetr:  
C<sub>20</sub>H<sub>30</sub>O<sub>8</sub>; MF: 1; RMF: 89; Prob 9.79%; Lib: mona-export-vf-npl\_gexactive; ID: 16420.

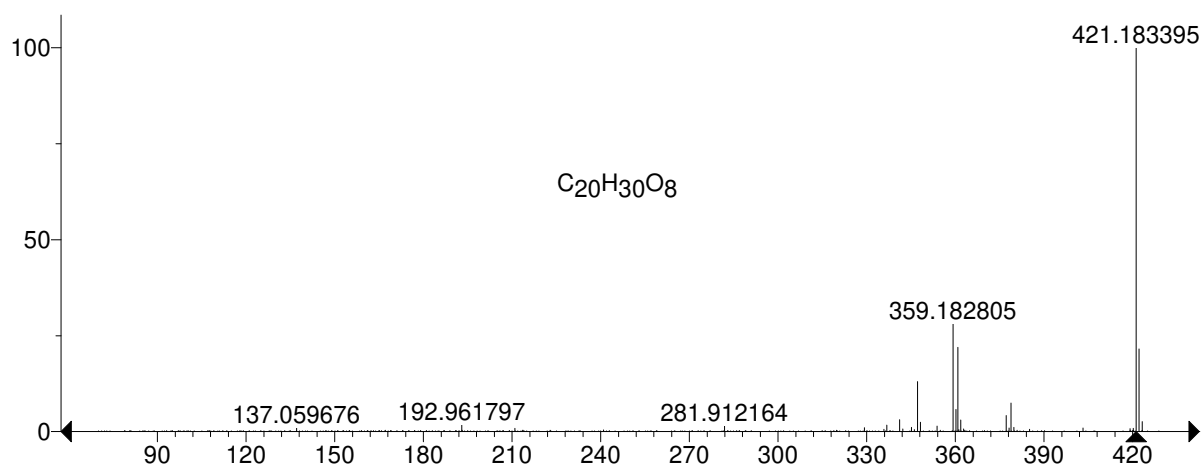

Hit 5 : (+)-Cloprostrenol methyl ester [M+H-H<sub>2</sub>O]<sup>+</sup> IT-FT 35% P=421.2  
C<sub>23</sub>H<sub>31</sub>ClO<sub>6</sub>; MF: 1; RMF: 46; Prob 9.79%; CAS: 56687-85-5; Lib: nist\_msms; ID: 544266.

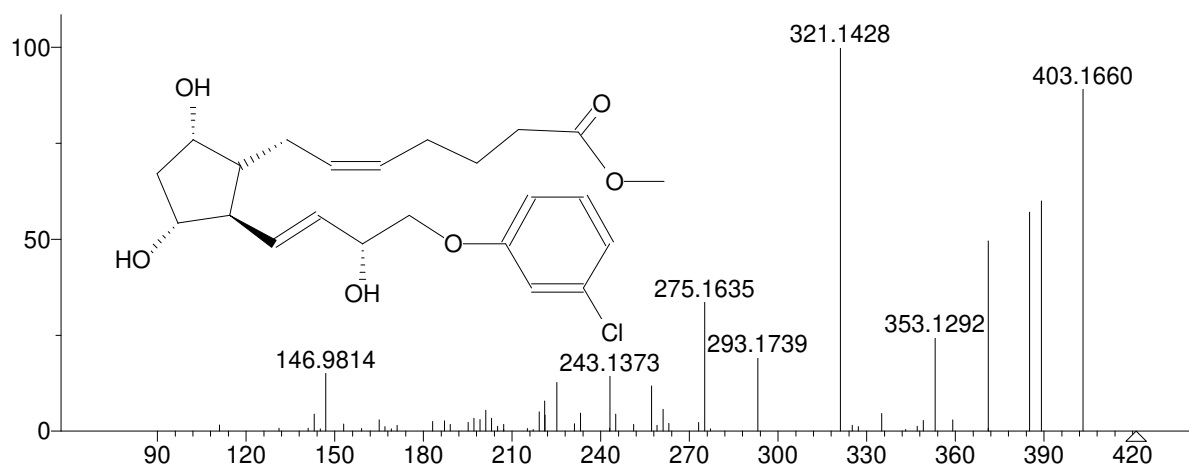

Unknown: Unknown (2.58\_603.1852m/z)  
Compound in Library Factor = 0

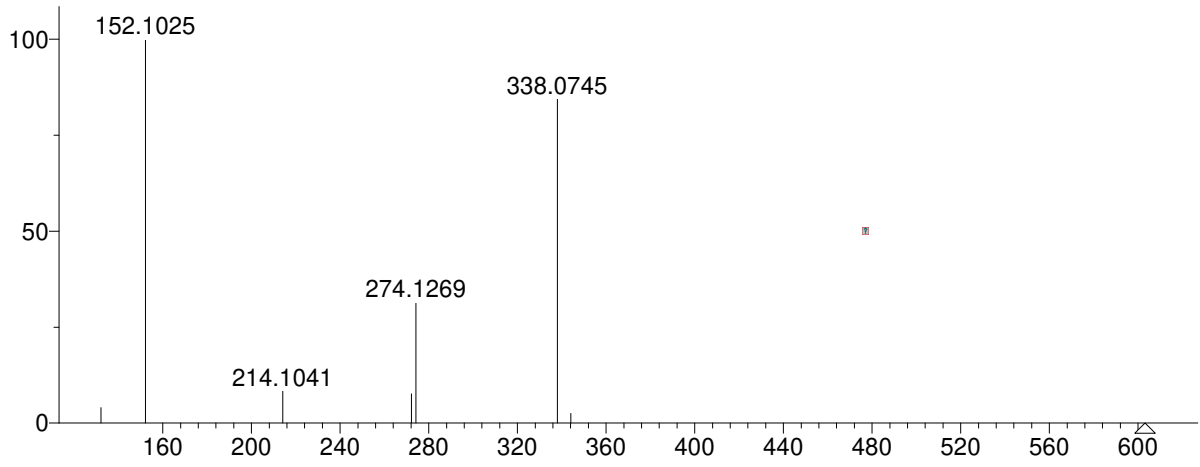

Unknown: Unknown (2.59\_284.0759m/z)  
Compound in Library Factor = 0

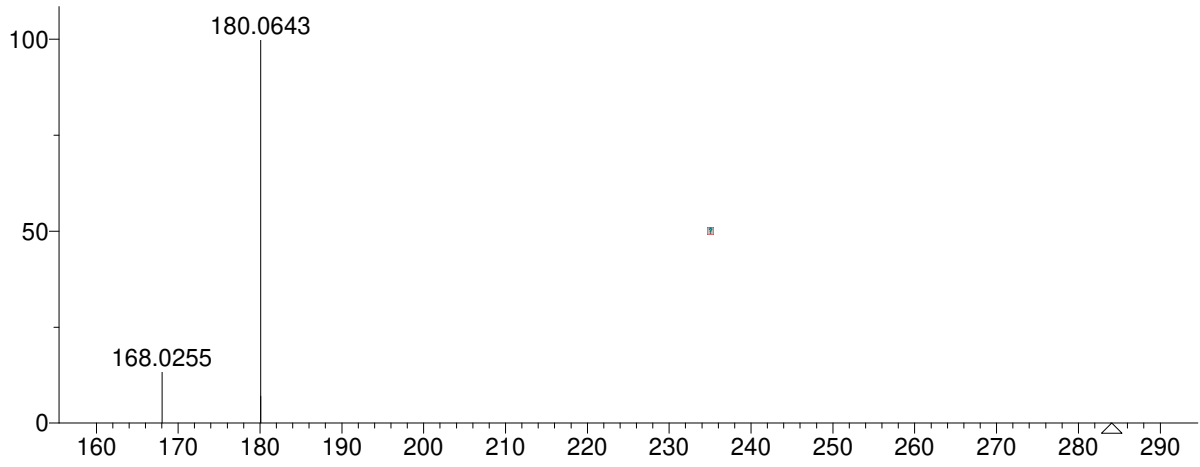

Unknown: Unknown (2.59\_386.1190m/z)  
Compound in Library Factor = 0

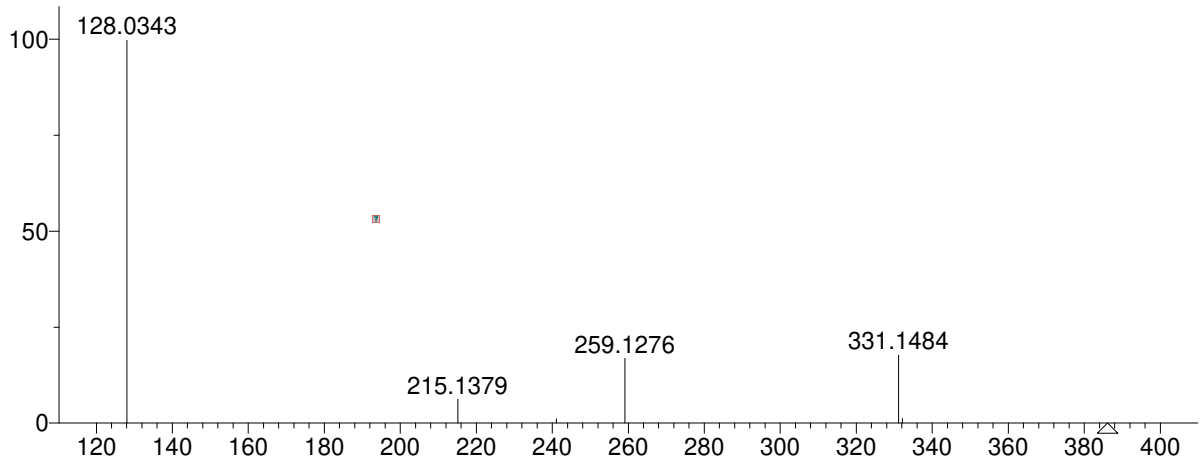

Unknown: Unknown (2.59\_444.1613m/z)  
Compound in Library Factor = -3273

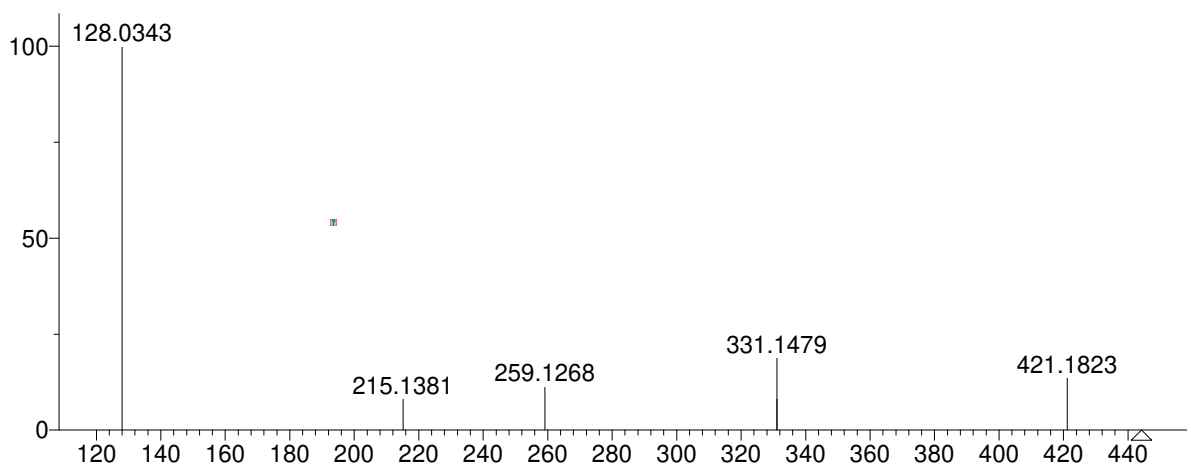

Hit 1 : Tetrahydrofolic acid [M-H]<sup>-</sup> HCD 71V P=444.2  
C19H23N7O6; MF: 3; RMF: 320; Prob 53.1%; CAS: 135-16-0; Lib: nist\_msms; ID: 185413.

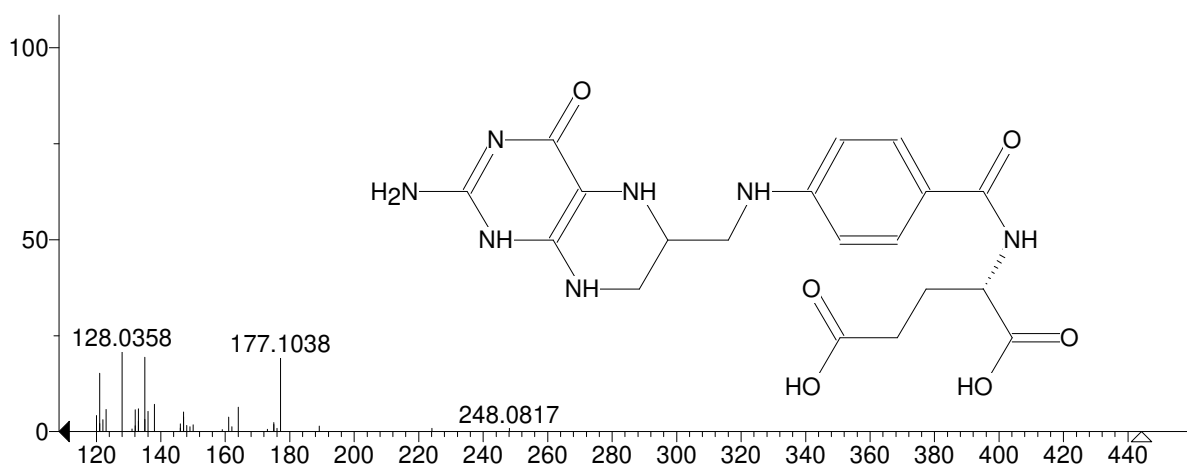

Hit 2 : Pitavastatin [M+Na]<sup>+</sup> IT 35% P=444.2  
C25H24FNO4; MF: 0; RMF: 23; Prob 46.9%; CAS: 147511-69-1; Lib: nist\_msms; ID: 369448.

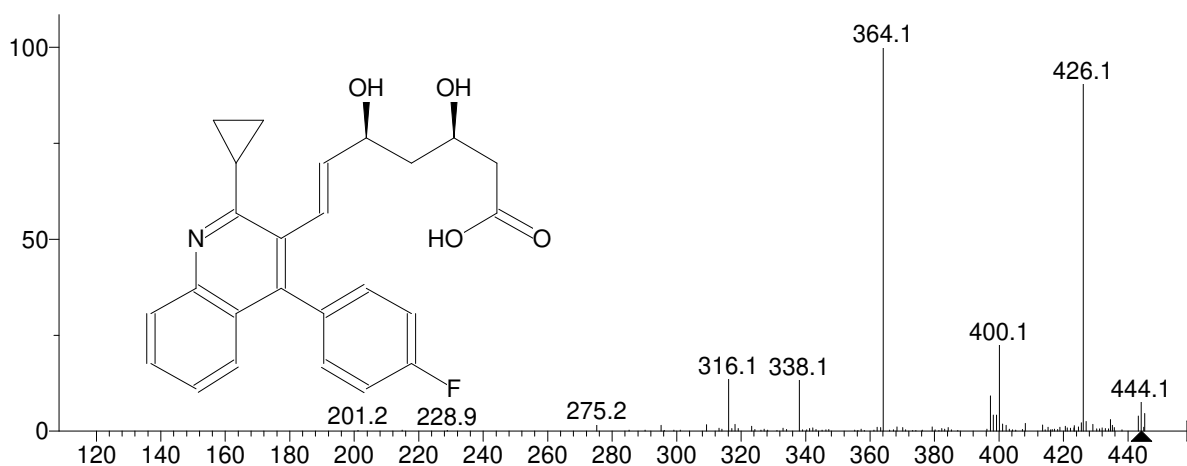

\*\* Search Report Page 1 of 2 \*\*

Unknown: Unknown (2.61\_345.1296m/z)  
Compound in Library Factor = 0

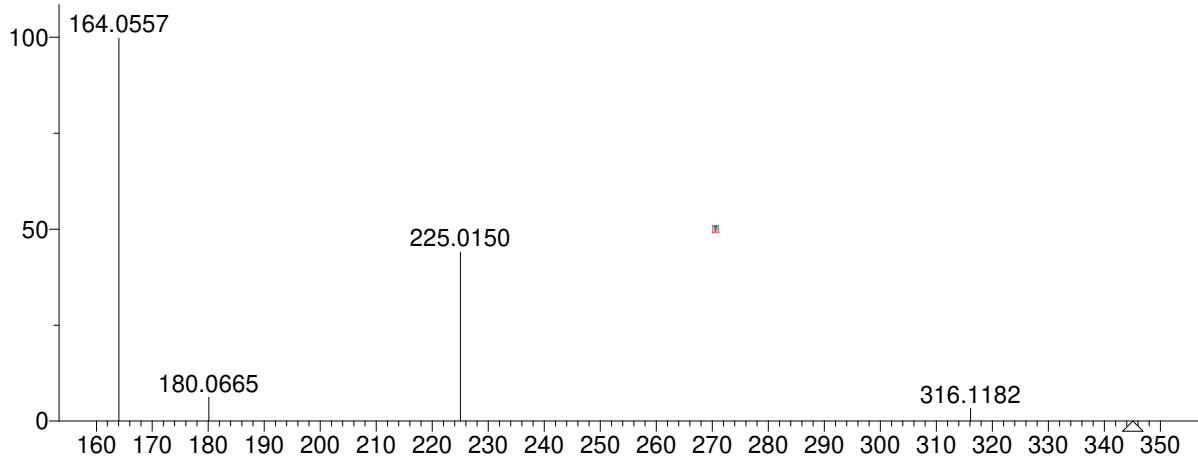

Hit 1 : NCGC00380950-01\_C19H20O6\_6a,7,8,12a-Tetrahydroxy-3-methyl-2,3,4,5,6,6a,7,12a-octahydro-1,12-tetr  
C19H20O6; MF: 0; RMF: 25; Prob 25.0%; Lib: mona-export-gnps; ID: 14170.

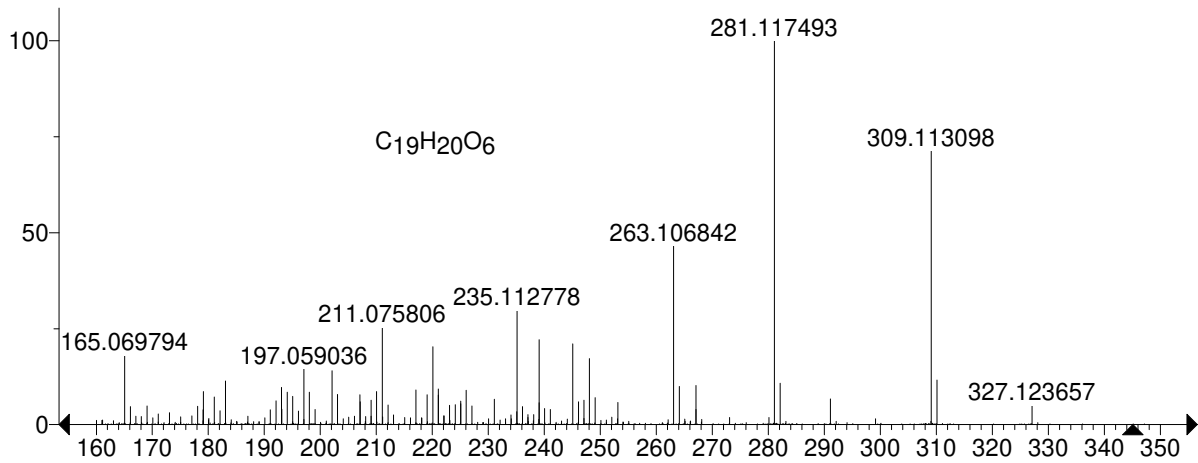

Hit 2 : NCGC00180657-03!(3S,6R,6aS,7S)-6,6a,7,8-tetrahydroxy-3-methyl-3,4,5,6,7,12a-hexahydro-2H-benzo[a]  
C19H20O6; MF: 0; RMF: 7; Prob 25.0%; Lib: mona-export-gnps; ID: 9740.

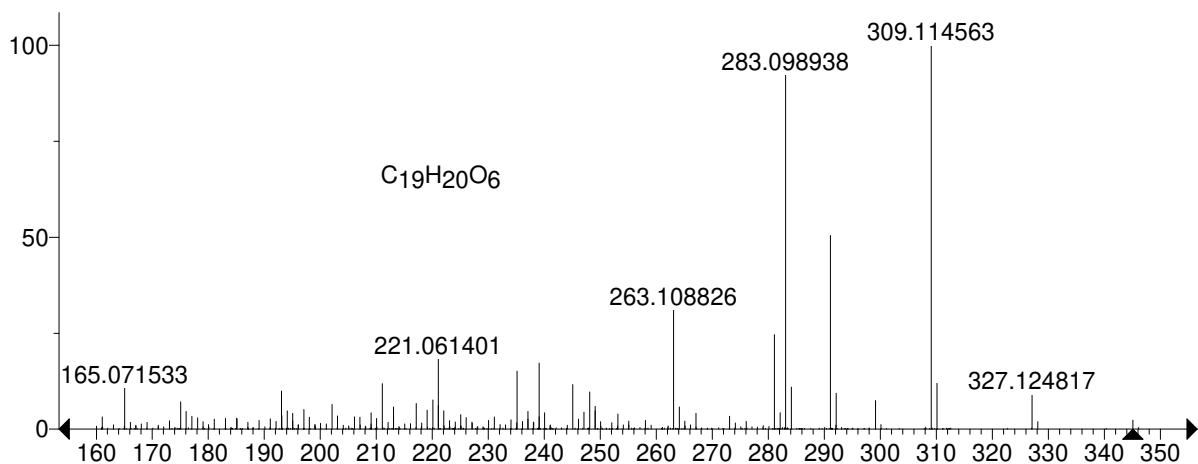

\*\* Search Report Page 2 of 2 \*\*

Hit 3 : NCGC00384644-01!(E)-1-(2-hydroxy-3,4,5,6-tetramethoxyphenyl)-3-phenylprop-2-en-1-one [M+H]<sup>+</sup> P=34  
C<sub>19</sub>H<sub>20</sub>O<sub>6</sub>; MF: 0; RMF: 6; Prob 25.0%; Lib: mona-export-gnps; ID: 9870.

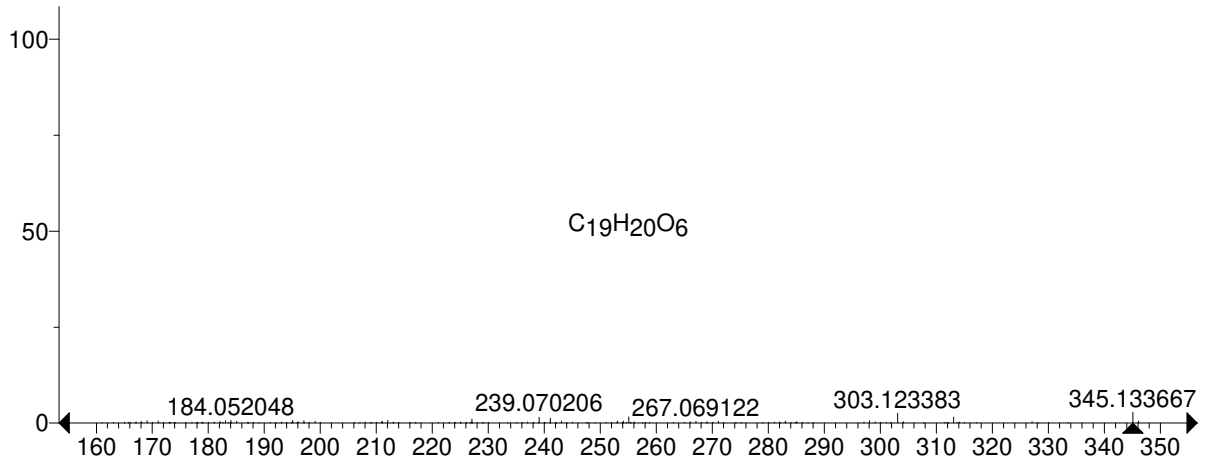

Hit 4 : NCGC00385790-01\_C19H20O6\_(3S,5S,5a'S,7'S,8'S,8a'R)-5-(3-Furyl)-8'-hydroxy-7'-methyl-3',4,5,5',5a',7',  
C<sub>19</sub>H<sub>20</sub>O<sub>6</sub>; MF: 0; RMF: 2; Prob 25.0%; Lib: mona-export-gnps; ID: 13450.

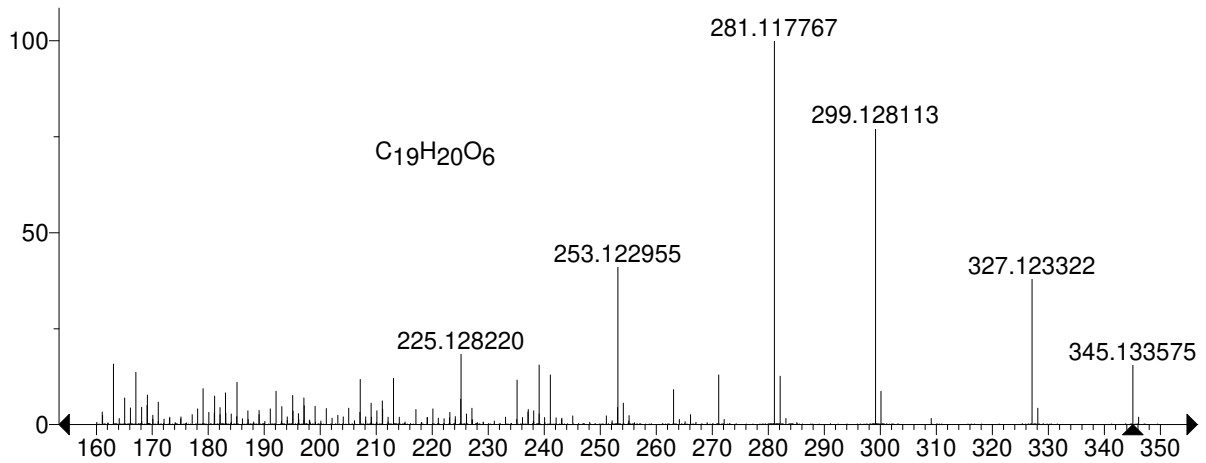

Unknown: Unknown (2.62\_358.0532m/z)  
Compound in Library Factor = 0

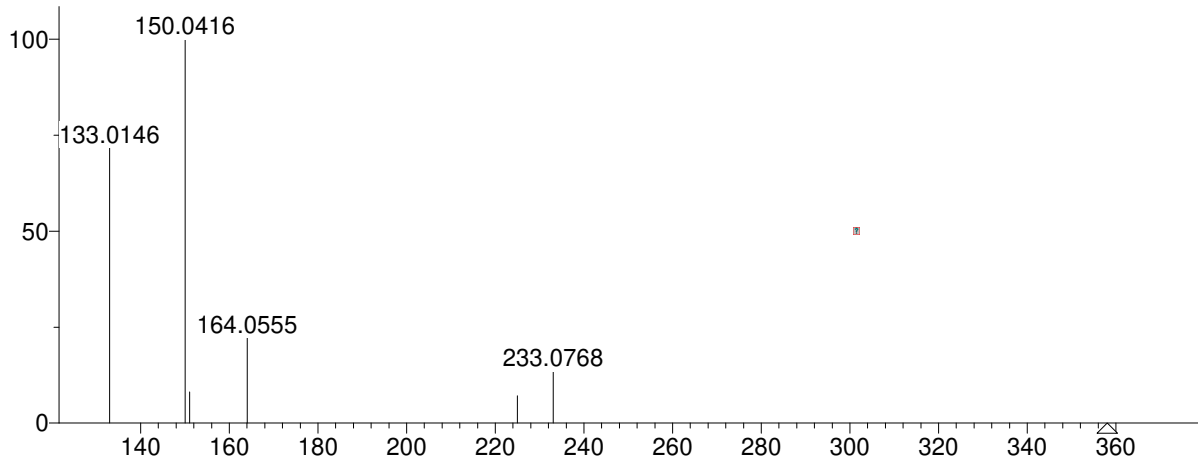



Unknown: Unknown (2.63\_281.0326m/z)  
Compound in Library Factor = -1486

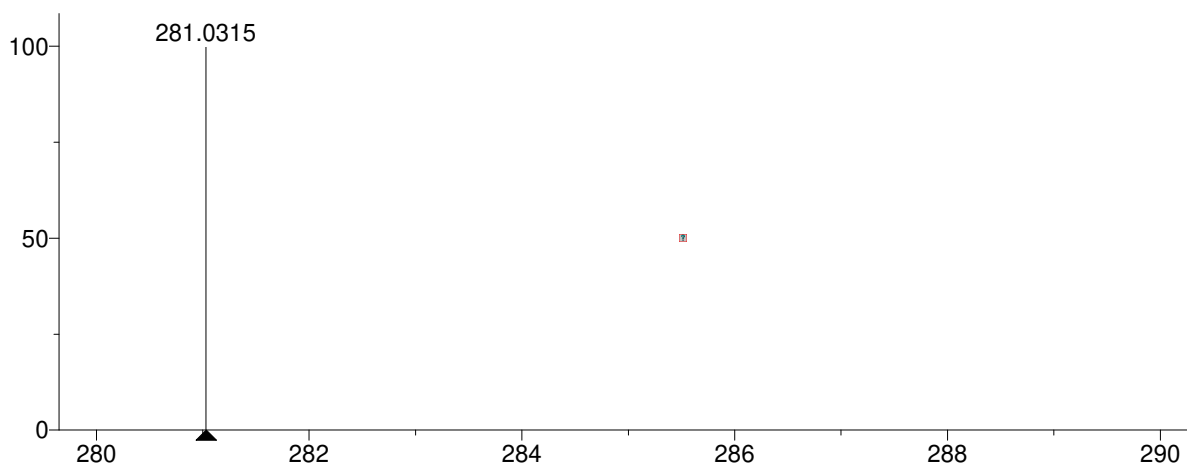

Hit 1 : 2-Aminoethyl dihydrogen phosphate [2M-H]- HCD 7V P=281  
C<sub>2</sub>H<sub>8</sub>NO<sub>4</sub>P; MF: 364; RMF: 999; Prob 44.3%; CAS: 1071-23-4; Lib: nist\_msms; ID: 299770.

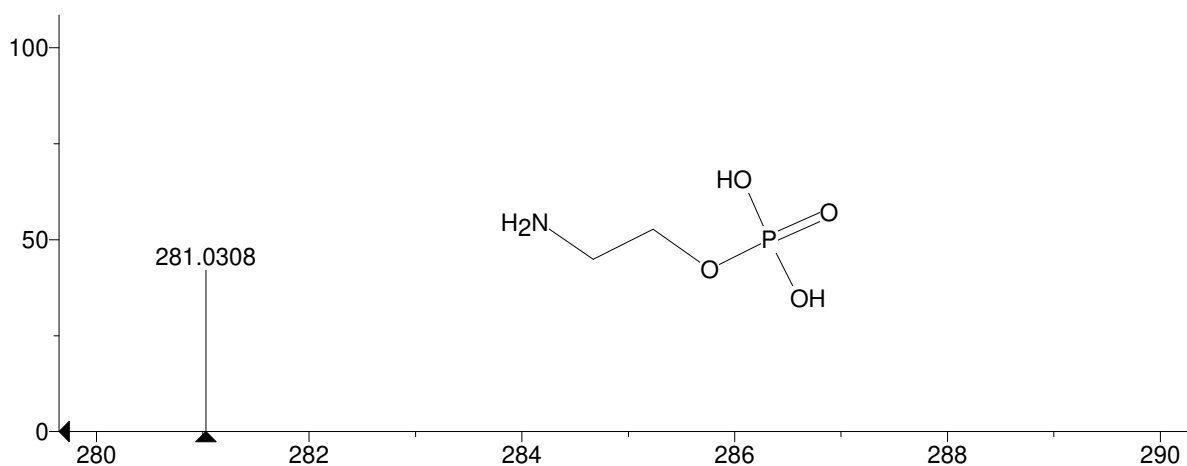

Hit 2 : Diclofensine [M+H-C<sub>2</sub>H<sub>5</sub>N+2i]+ HCD 37V P=281  
C<sub>17</sub>H<sub>17</sub>Cl<sub>2</sub>NO; MF: 364; RMF: 999; Prob 44.3%; CAS: 67165-56-4; Lib: nist\_msms; ID: 510749.

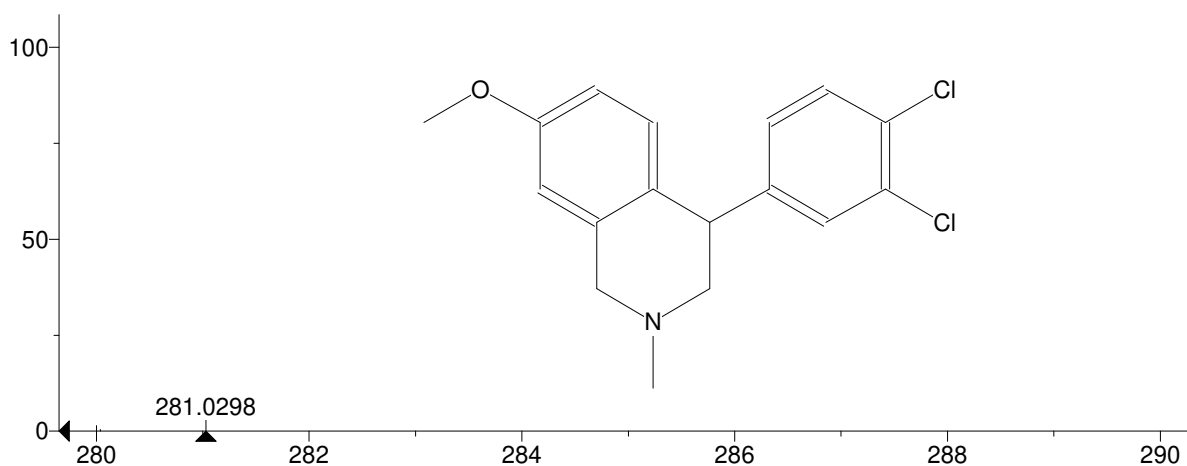

Hit 3 : (E)-1-[4-(4-Methoxyphenyl)]-2-(3,5-dichlorophenyl)ethene [M+H+2i]+ HCD 14V P=281  
C<sub>15</sub>H<sub>12</sub>Cl<sub>2</sub>O; MF: 330; RMF: 954; Prob 11.4%; CAS: 688348-37-0; Lib: nist\_msms; ID: 511264.

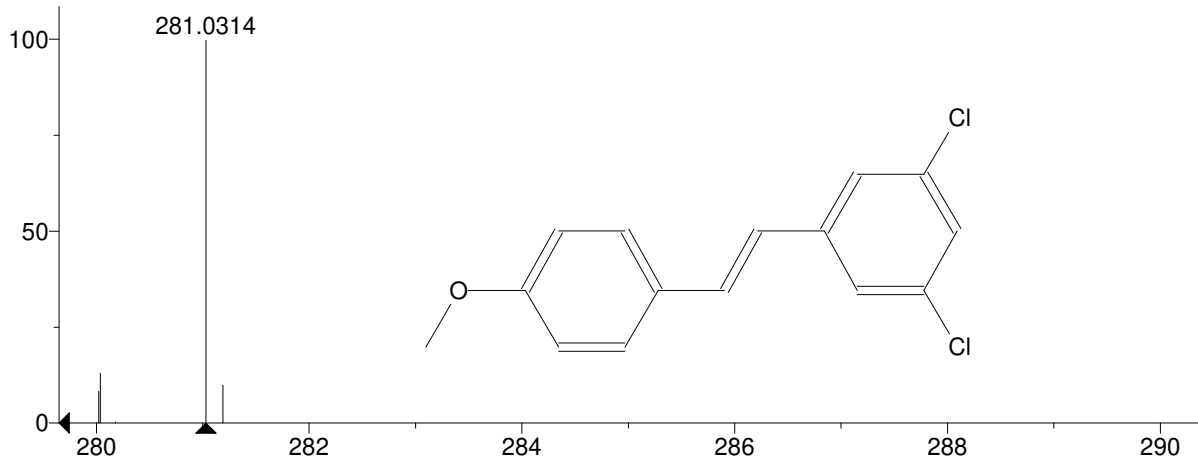

Unknown: Unknown (2.63\_376.0657m/z)  
Compound in Library Factor = 0

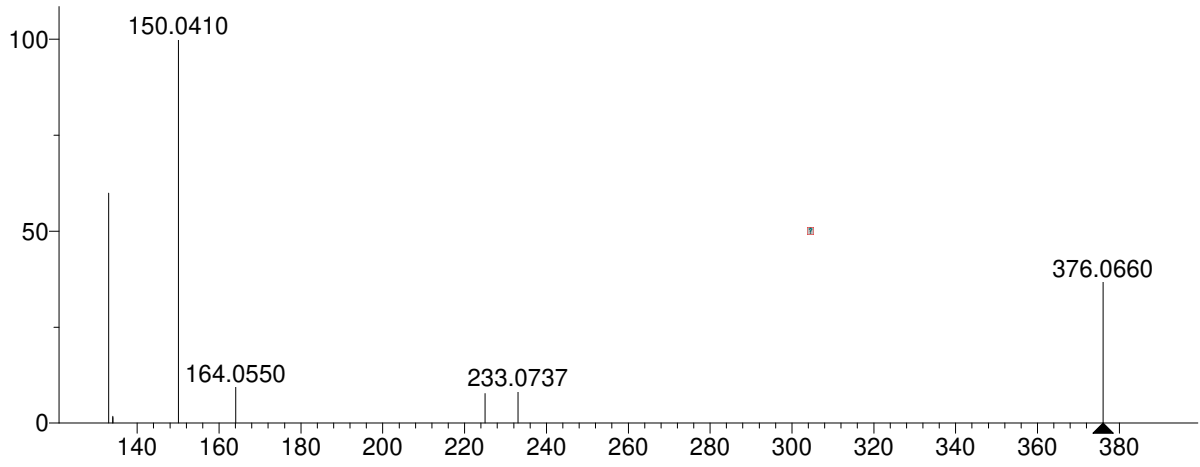

Unknown: Unknown (2.63\_403.1348m/z)  
Compound in Library Factor = -3273

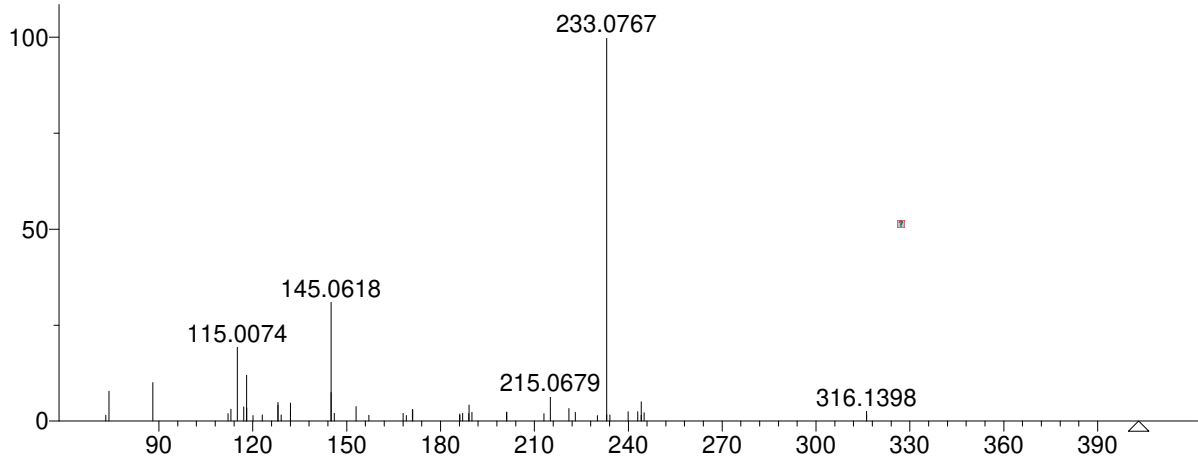

Hit 1 : Naringin dihydrochalcone [M+H-C<sub>6</sub>H<sub>12</sub>O<sub>6</sub>]<sup>+</sup> HCD 40V P=403.1  
C<sub>27</sub>H<sub>34</sub>O<sub>14</sub>; MF: 6; RMF: 72; Prob 10.9%; CAS: 18916-17-1; Lib: nist\_msms; ID: 237396.

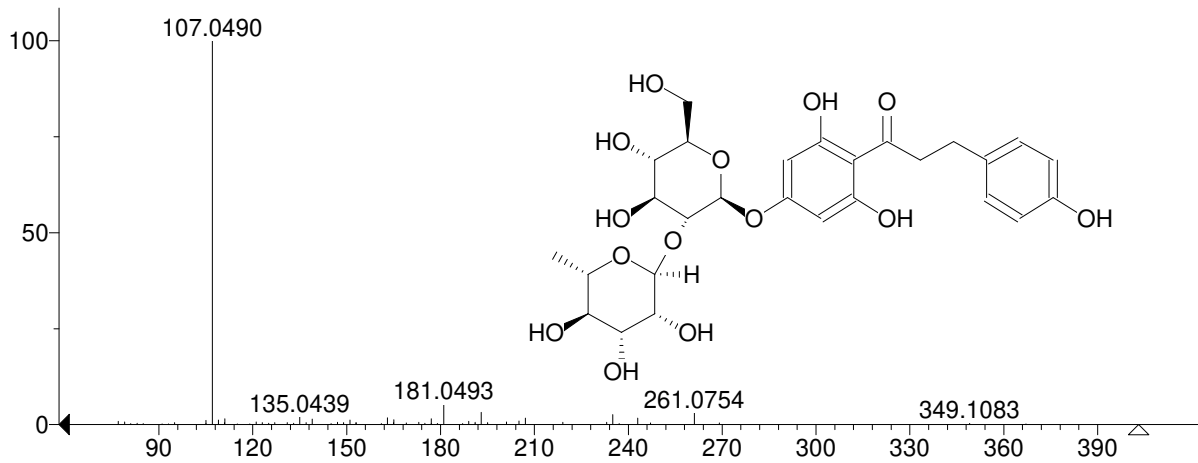

Hit 2 : NCGC00380227-01!(E)-3-[4-[1,3-dihydroxy-1-(4-hydroxy-3-methoxyphenyl)propan-2-yl]oxy-3,5-dimethoxyphenyl]propan-2-yl]oxy-3,5-dimethoxyphenyl  
C<sub>21</sub>H<sub>24</sub>O<sub>9</sub>; MF: 4; RMF: 121; Prob 10.1%; Lib: mona-export-gnps; ID: 8693.

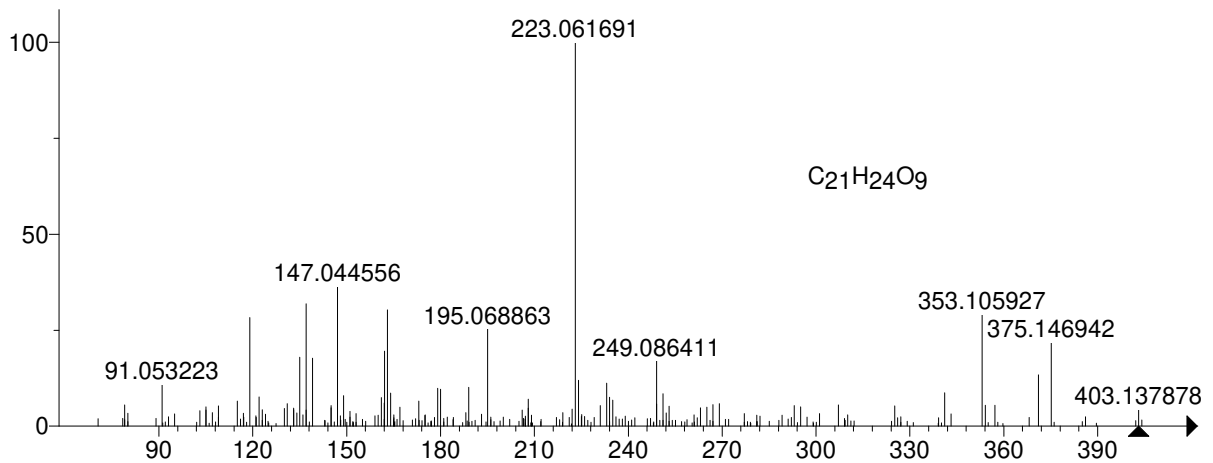

Hit 3 : Nobiletin [M+H]<sup>+</sup> HCD 92V P=403.1  
C<sub>21</sub>H<sub>22</sub>O<sub>8</sub>; MF: 2; RMF: 67; Prob 9.29%; CAS: 478-01-3; Lib: nist\_msms; ID: 178340.

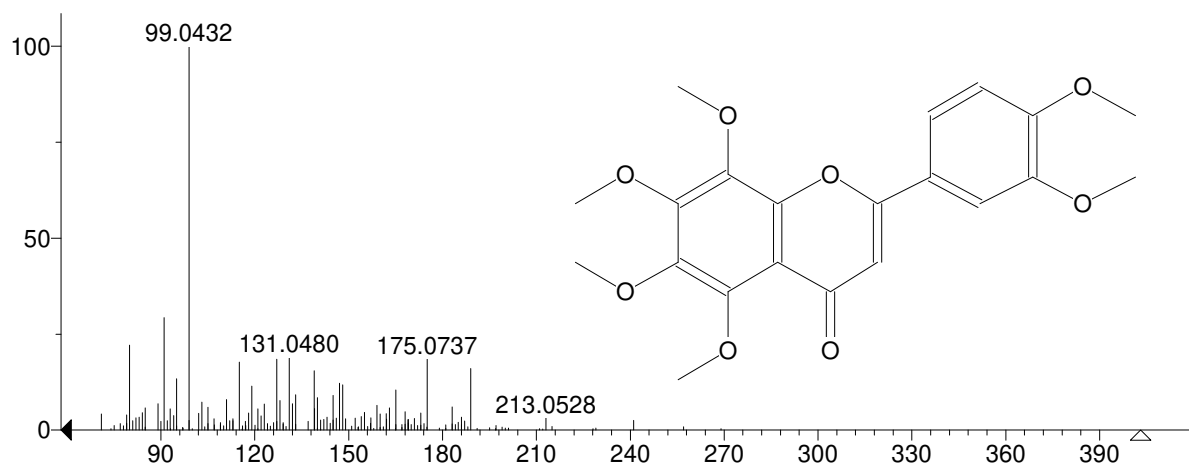

Hit 4 : 4-Deoxyphloridzin [M+H-H<sub>2</sub>O]<sup>+</sup> HCD 24V P=403.1  
C<sub>21</sub>H<sub>24</sub>O<sub>9</sub>; MF: 2; RMF: 37; Prob 9.29%; CAS: 31018-48-1; Lib: nist\_msms; ID: 494859.

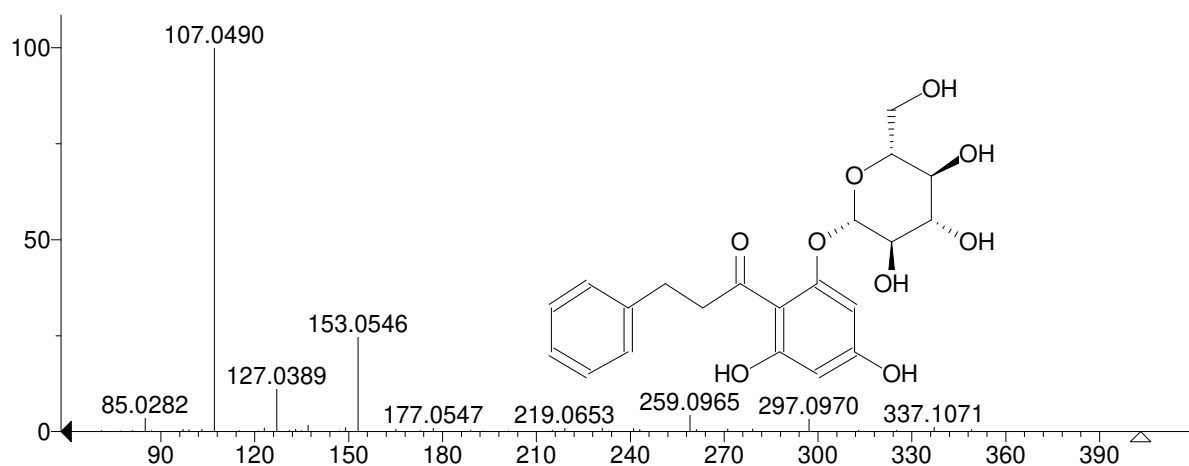

Hit 5 : 3',4',5',5,6,7-Hexamethoxyflavone [M+H]<sup>+</sup> HCD 104V P=403.1  
C<sub>21</sub>H<sub>22</sub>O<sub>8</sub>; MF: 1; RMF: 56; Prob 8.92%; CAS: 29043-07-0; Lib: nist\_msms; ID: 462291.

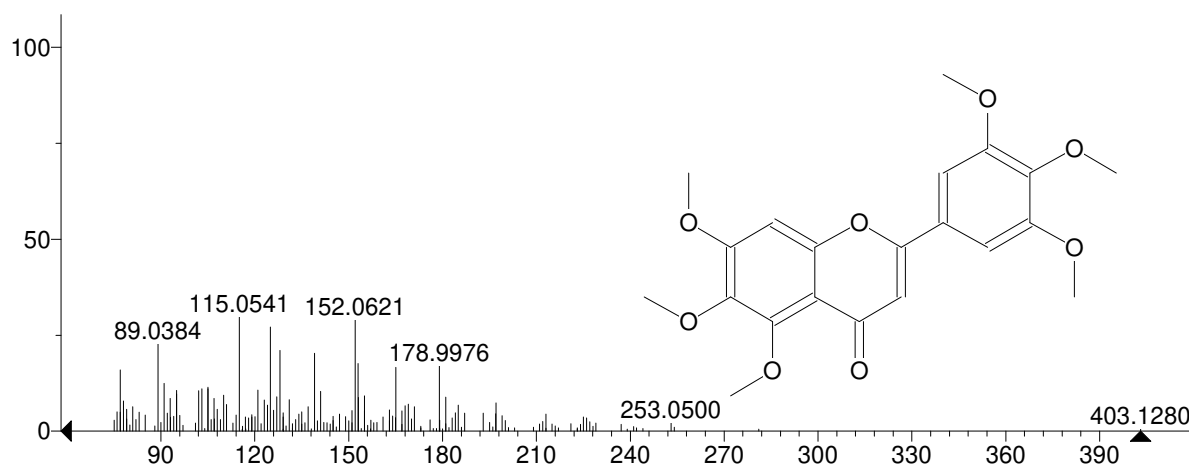

\*\* Search Report Page 1 of 2 \*\*

Unknown: Unknown (2.63\_549.0872m/z)  
Compound in Library Factor = -3273

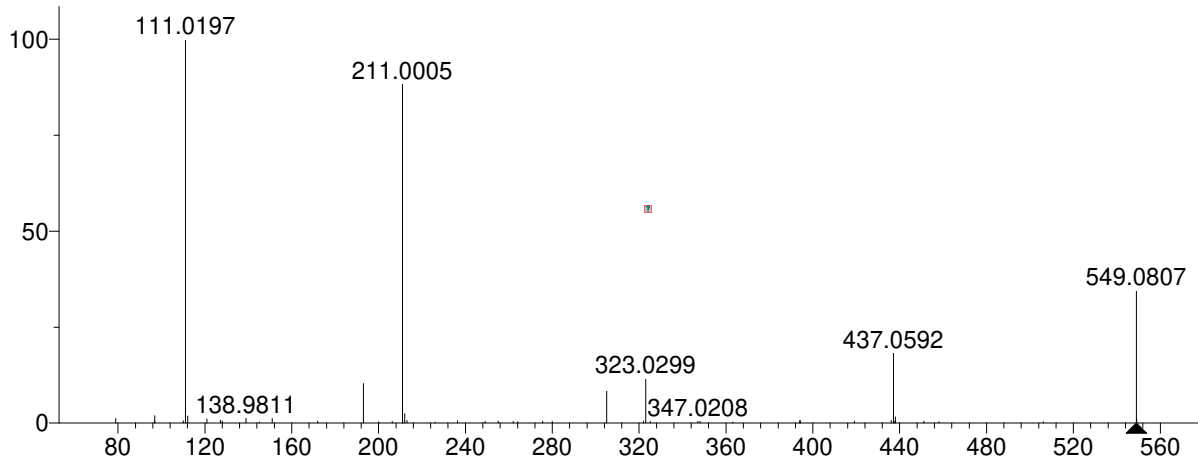

Hit 1 : 5-(3-(2-(7-Chloroquinolin-2-yl)ethenyl)phenyl)-8-dimethylcarbamyl-4,6-dithiaoctanoic acid [M+Cl]<sup>-</sup> HCD 1  
C<sub>26</sub>H<sub>27</sub>CIN<sub>2</sub>O<sub>3</sub>S<sub>2</sub>; MF: 3; RMF: 127; Prob 18.4%; CAS: 115104-28-4; Lib: nist\_msms; ID: 538815.

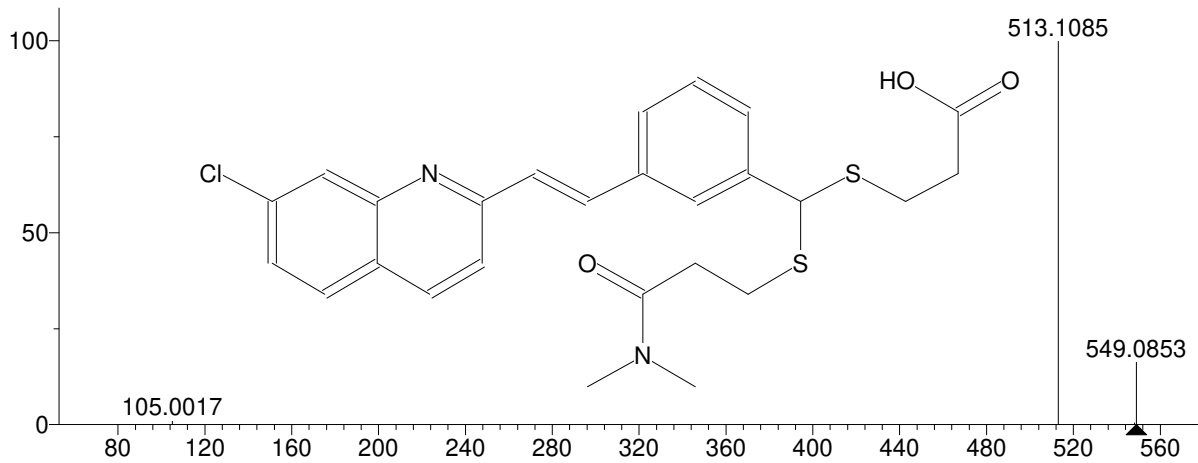

Hit 2 : Quercetin-3-(6"-malonyl)-Glucoside [M-H]<sup>-</sup> 5-60V P=549.1  
C<sub>24</sub>H<sub>22</sub>O<sub>15</sub>; MF: 0; RMF: 76; Prob 16.3%; Lib: mona-export-1c-ms-ms\_negative\_mode; ID: 8837.

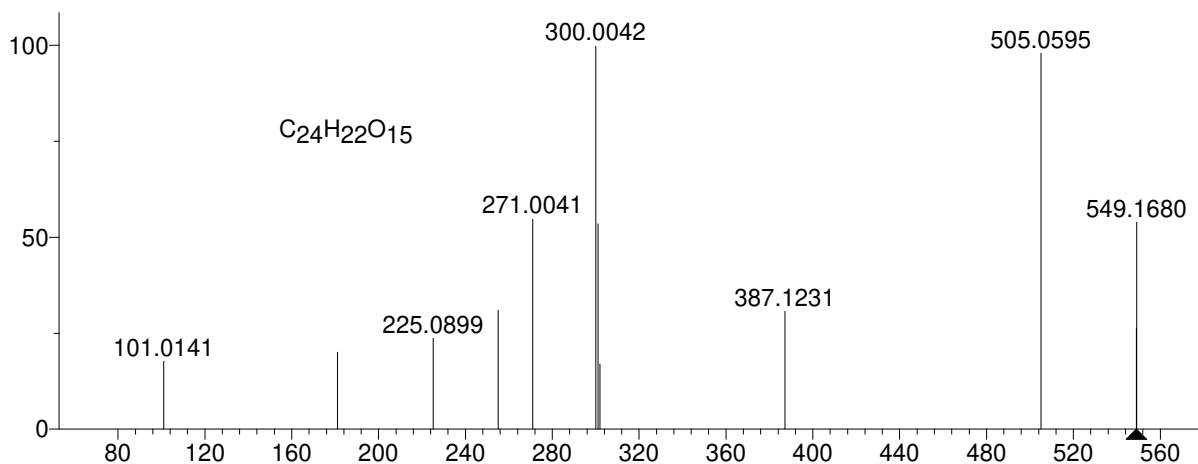

Hit 3 : Quercetin-3-(6"-malonyl)-Glucoside; LC-ESI-QTOF; MS2; CE [M-H]- P=549.1  
C<sub>24</sub>H<sub>22</sub>O<sub>15</sub>; MF: 0; RMF: 71; Prob 16.3%; Lib: msms-neg-massbank; ID: 4722.



Hit 4 : Quercetin 3-O-malonylglucoside [M-H]- 10 P=549.1  
C<sub>24</sub>H<sub>22</sub>O<sub>15</sub>; MF: 0; RMF: 33; Prob 16.3%; Lib: mona-export-lc-ms-ms\_negative\_mode; ID: 27259.



Hit 5 : Flavonol base + 4O, O-MalonylHex [M-H]- 6V P=549.1  
C<sub>24</sub>H<sub>22</sub>O<sub>15</sub>; MF: 0; RMF: 20; Prob 16.3%; Lib: anthocyanins mona; ID: 6952.



\*\* Search Report Page 1 of 1 \*\*

Unknown: Unknown (2.64\_265.0374m/z)  
Compound in Library Factor = -3273

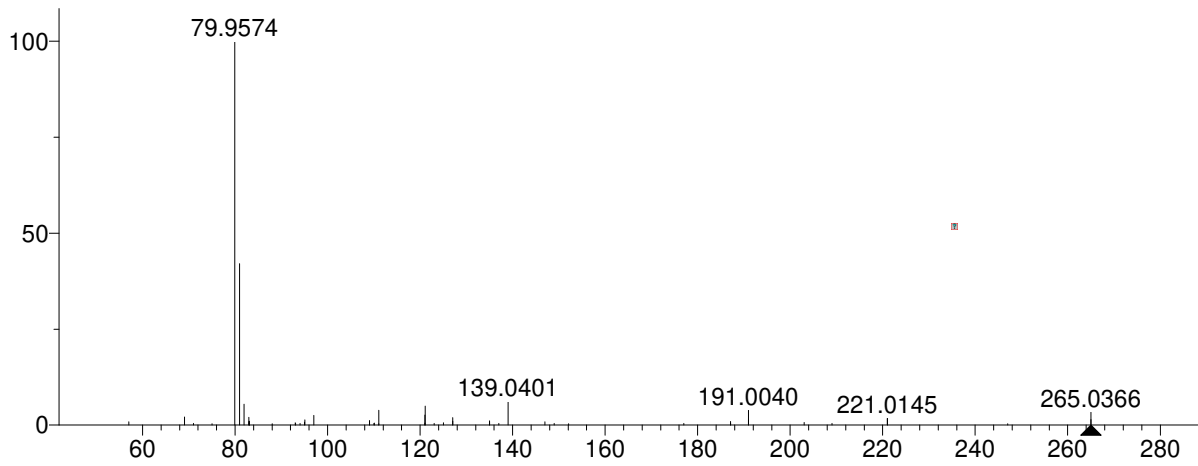

Hit 1 : Aclonifen [M+H]<sup>+</sup> HCD 10V P=265  
C<sub>12</sub>H<sub>9</sub>ClN<sub>2</sub>O<sub>3</sub>; MF: 33; RMF: 576; Prob 100.0%; CAS: 74070-46-5; Lib: nist\_msms; ID: 473154.

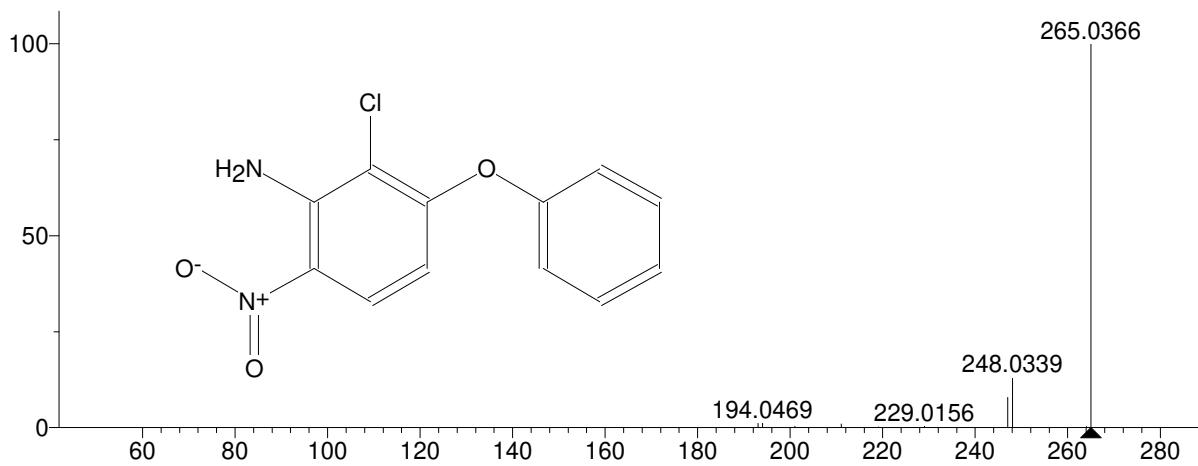



Unknown: Unknown (2.66\_454.2136m/z)  
Compound in Library Factor = 0

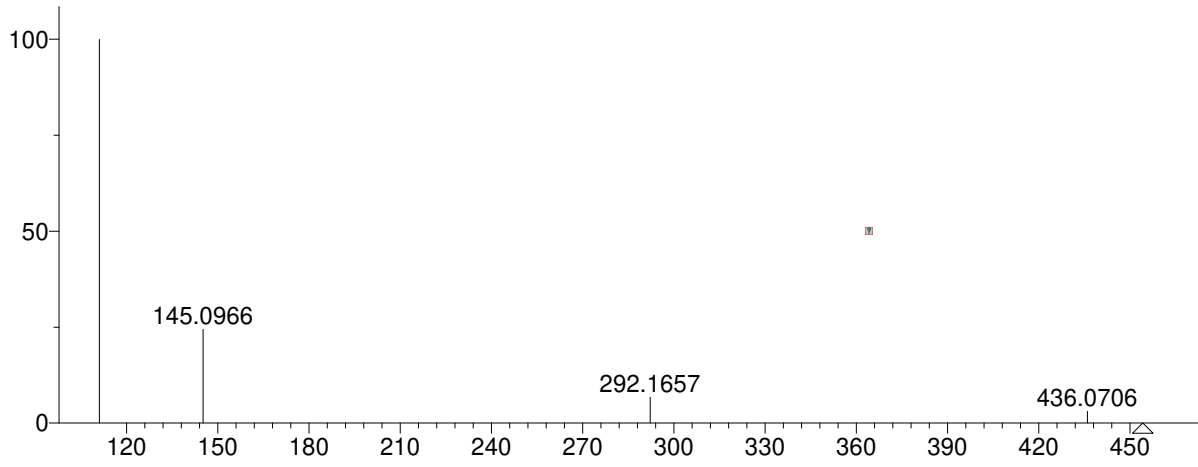

Unknown: Unknown (2.66\_477.2077m/z)  
Compound in Library Factor = -1848

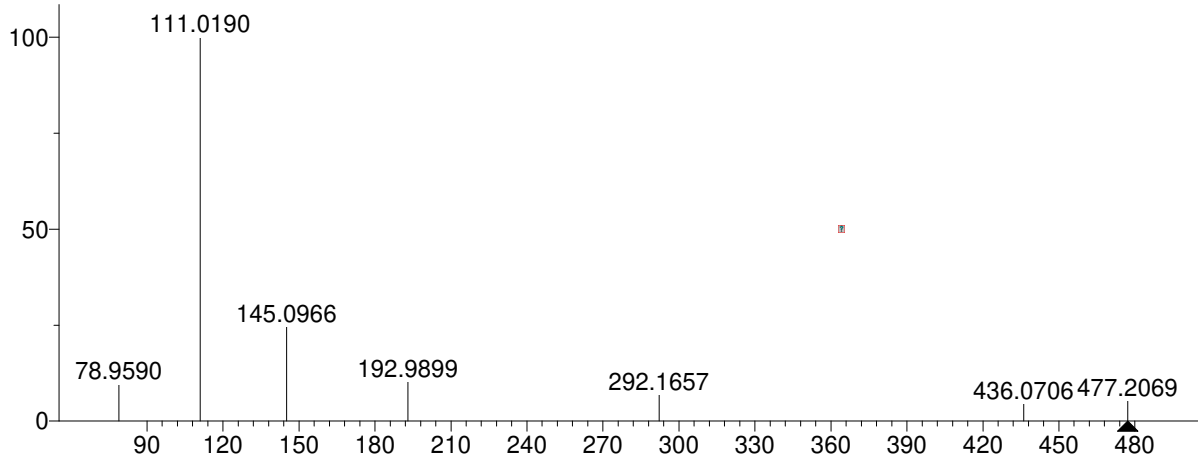

Hit 1 : 4-(2-Hydroxyethyl)piperazine-1-ethanesulfonic acid [2M+H]<sup>+</sup> HCD 4V P=477.2  
C<sub>8</sub>H<sub>18</sub>N<sub>2</sub>O<sub>4</sub>S; MF: 34; RMF: 470; Prob 66.1%; CAS: 7365-45-9; Lib: nist\_msms; ID: 58512.

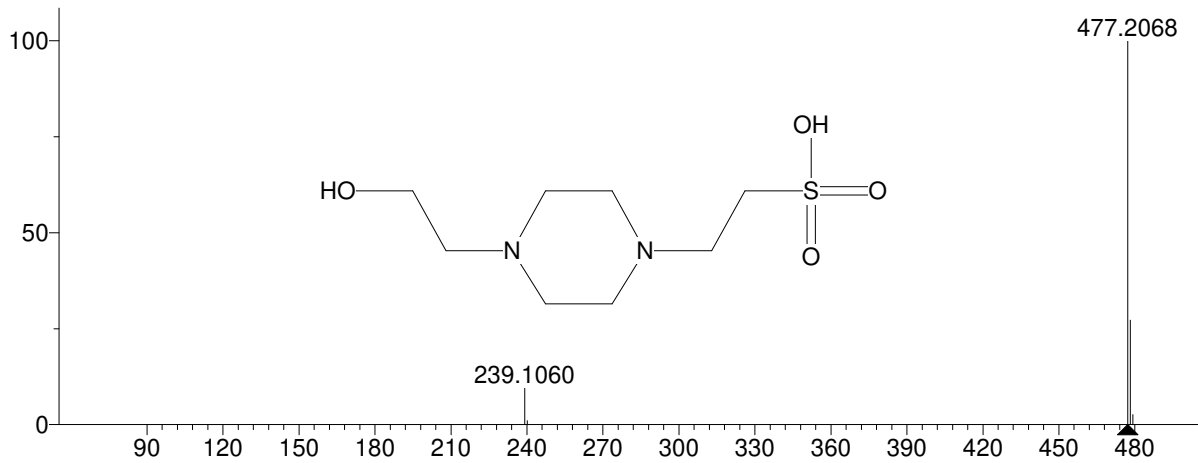

Hit 2 : 5-O-methyllicoricidin [M+K]<sup>+</sup> 35HCD P=477.2  
C<sub>27</sub>H<sub>34</sub>O<sub>5</sub>; MF: 0; RMF: 24; Prob 16.9%; Lib: mona-export-vf-npl\_qexactive; ID: 964.

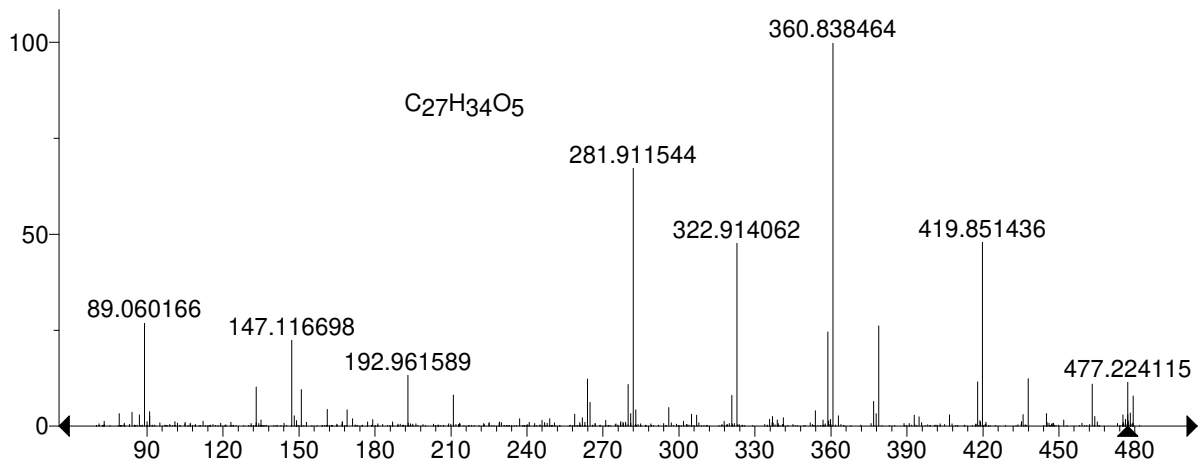

Hit 3 : 1,7-bis(4-hydroxyphenyl)-5-[(2R,3R,4S,5S,6R)-3,4,5-trihydroxy-6-(hydroxymethyl)oxan-2-yl]oxyheptan-3-ol  
C<sub>25</sub>H<sub>32</sub>O<sub>9</sub>; MF: 0; RMF: 2; Prob 16.9%; Lib: mona-export-vf-npl\_qexactive; ID: 7567.

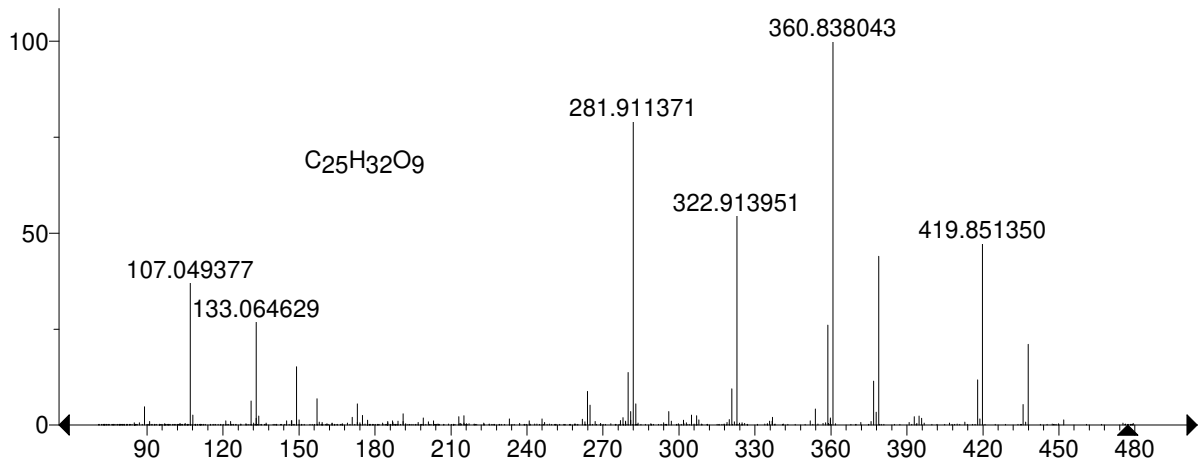

Unknown: Unknown (2.66\_521.2086m/z)  
Compound in Library Factor = 0

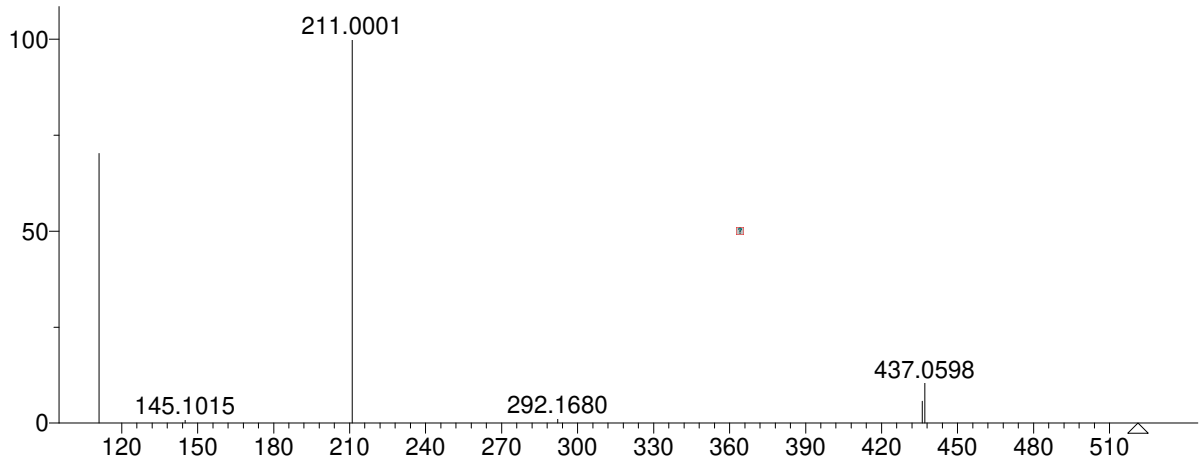

\*\* Search Report Page 1 of 2 \*\*

Unknown: Unknown (2.68\_283.0681m/z)  
Compound in Library Factor = -691

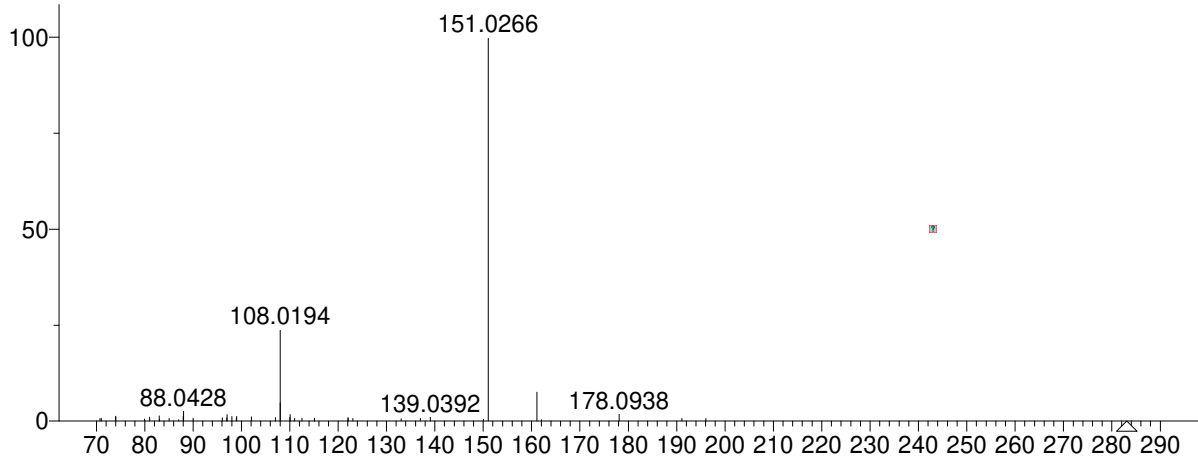

Hit 1 : Xanthosine [M-H]<sup>-</sup> 5-60V P=283.1  
C<sub>10</sub>H<sub>12</sub>N<sub>4</sub>O<sub>6</sub>; MF: 304; RMF: 838; Prob 49.3%; Lib: mona-export-ic-ms-ms\_negative\_mode; ID: 8601.

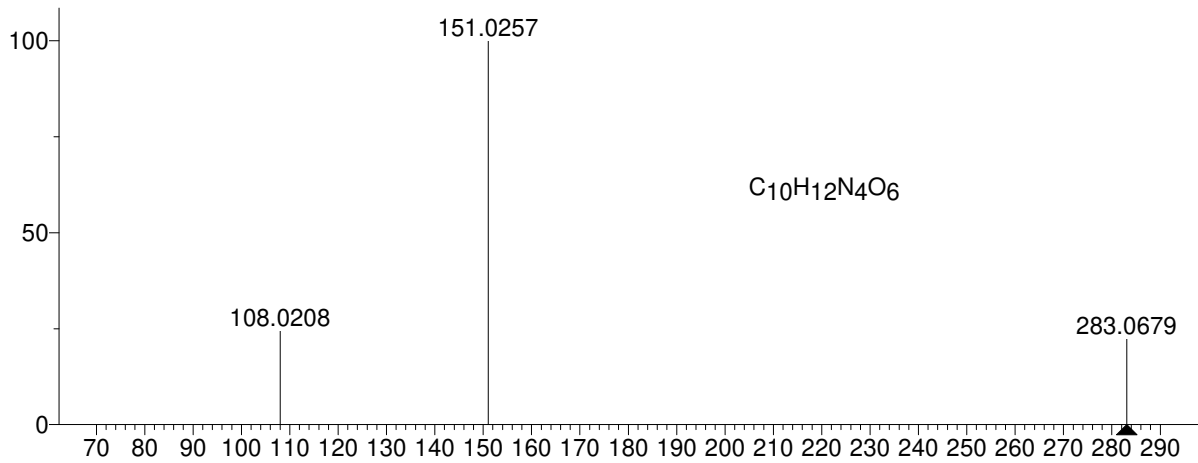

Hit 2 : Xanthosine; LC-ESI-QTOF; MS2; CE [M-H]<sup>-</sup> P=283.1  
C<sub>10</sub>H<sub>12</sub>N<sub>4</sub>O<sub>6</sub>; MF: 304; RMF: 838; Prob 49.3%; Lib: msms-neg-massbank; ID: 4496.

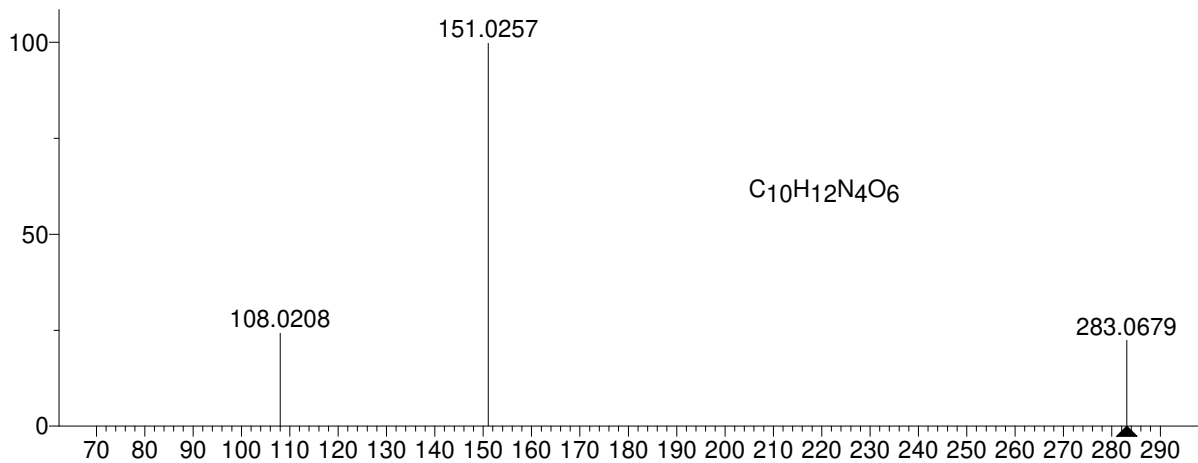

\*\* Search Report Page 2 of 2 \*\*

Hit 3 : Xanthosine (Not validated); PlaSMA ID-511 [M-H]<sup>-</sup> P=283.1  
C<sub>10</sub>H<sub>12</sub>N<sub>4</sub>O<sub>6</sub>; MF: 137; RMF: 796; Prob 1.14%; Lib: biomsms-neg-plasma; ID: 469.

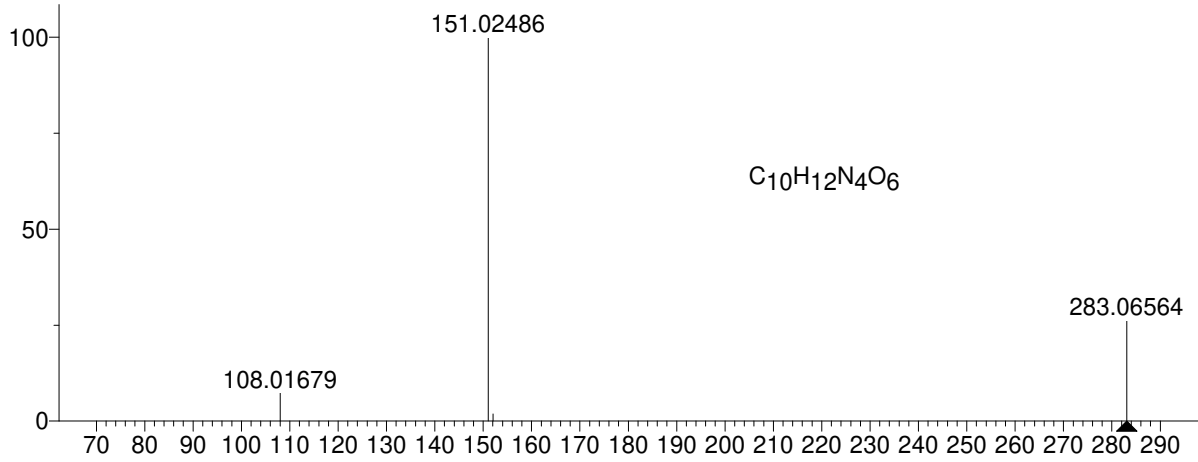

Hit 4 : XANTHOSINE  
C<sub>10</sub>H<sub>12</sub>N<sub>4</sub>O<sub>6</sub>; MF: 46; RMF: 758; Prob 0.09%; Lib: embl neg mcg; ID: 237.

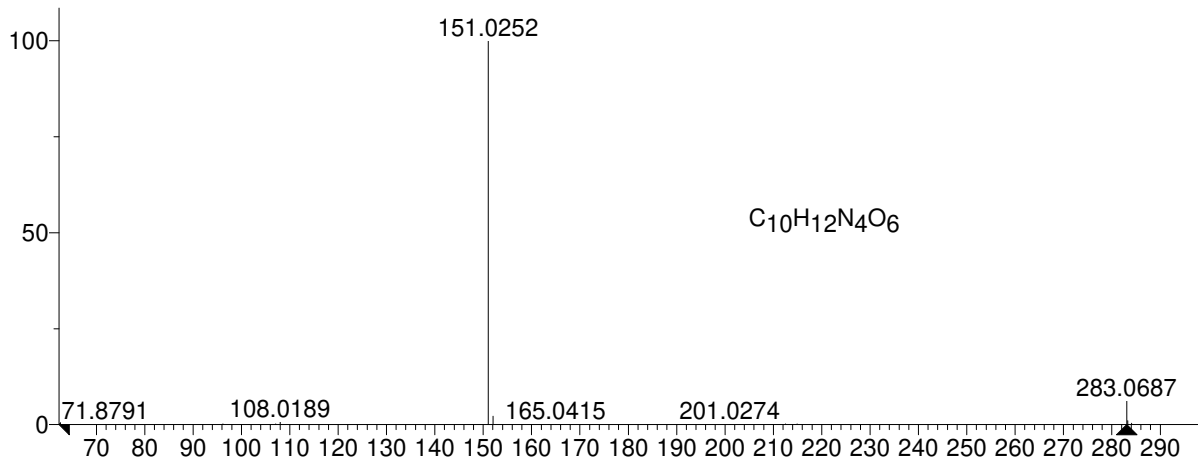

Hit 5 : XANTHOSINE [M-H]<sup>-</sup> P=283.1  
C<sub>10</sub>H<sub>12</sub>N<sub>4</sub>O<sub>6</sub>; MF: 46; RMF: 758; Prob 0.09%; Lib: msms neg mona\_ipb\_gnps\_plasma; ID: 22900.

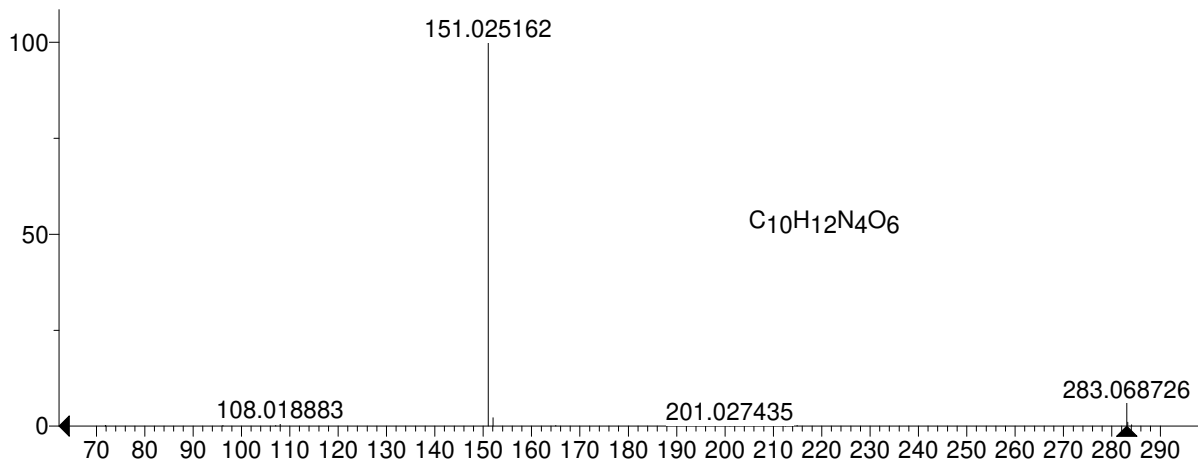

Unknown: Unknown (2.68\_426.1259m/z)  
Compound in Library Factor = 0

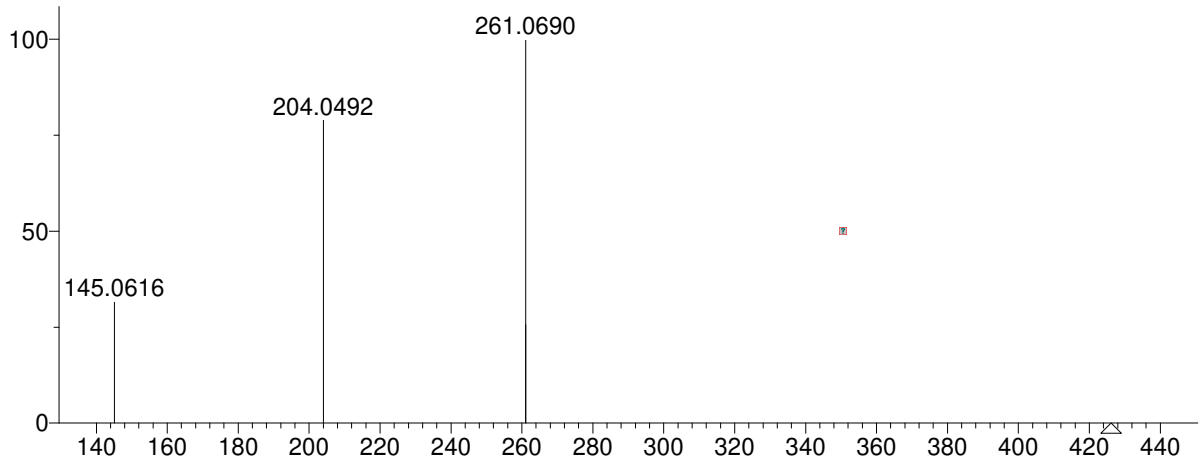

\*\* Search Report Page 1 of 2 \*\*

Unknown: Unknown (2.68\_431.1296m/z)  
Compound in Library Factor = 0

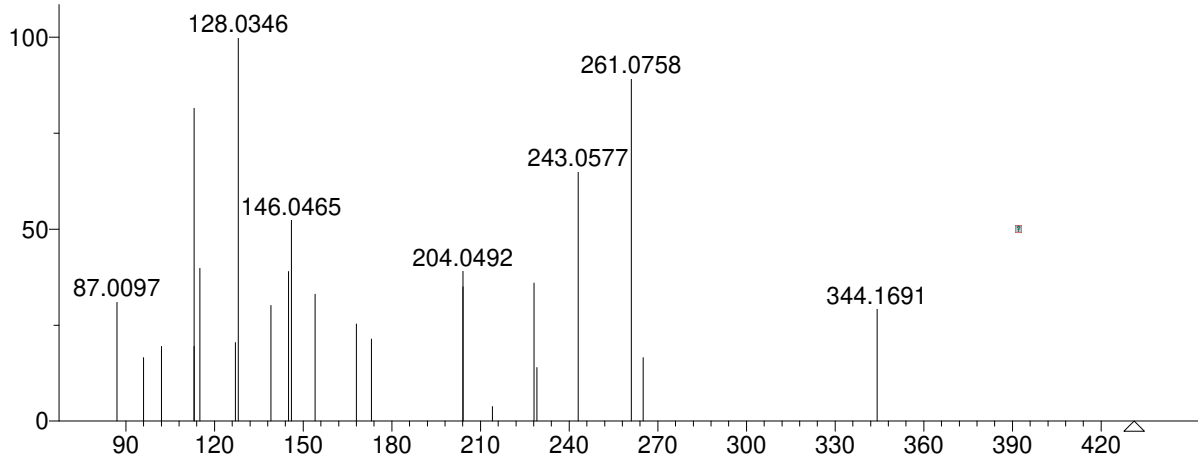

Hit 1 : Agnuside [M+H-2H<sub>2</sub>O]<sup>+</sup> HCD 94V P=431.1  
C<sub>22</sub>H<sub>26</sub>O<sub>11</sub>; MF: 0; RMF: 34; Prob 20.0%; CAS: 11027-63-7; Lib: nist\_msms; ID: 389587.

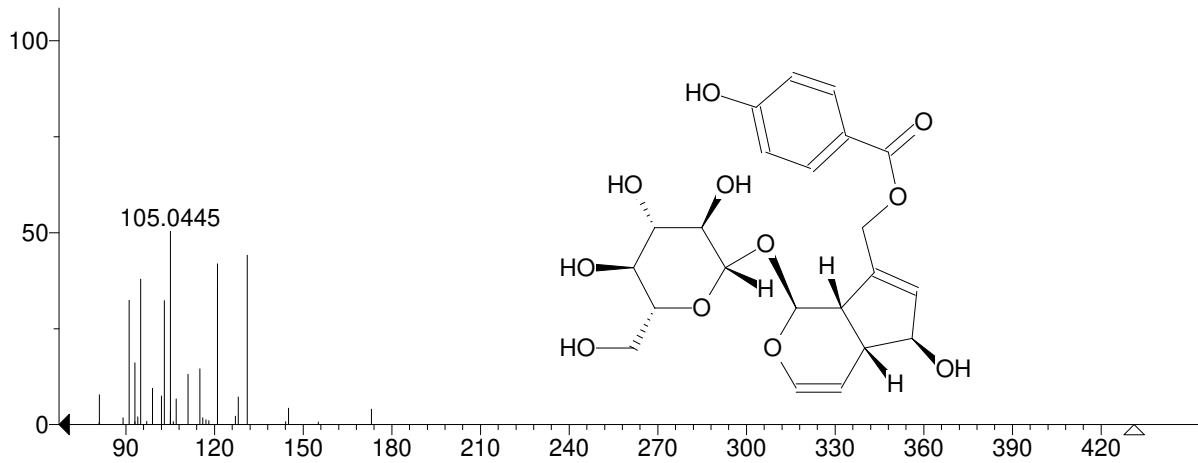

Hit 2 : Formononetin-7-O-glucoside [M+H]<sup>+</sup> 50eV P=431.1  
C<sub>22</sub>H<sub>22</sub>O<sub>9</sub>; MF: 0; RMF: 18; Prob 20.0%; Lib: anthocyanins\_mona; ID: 1127.

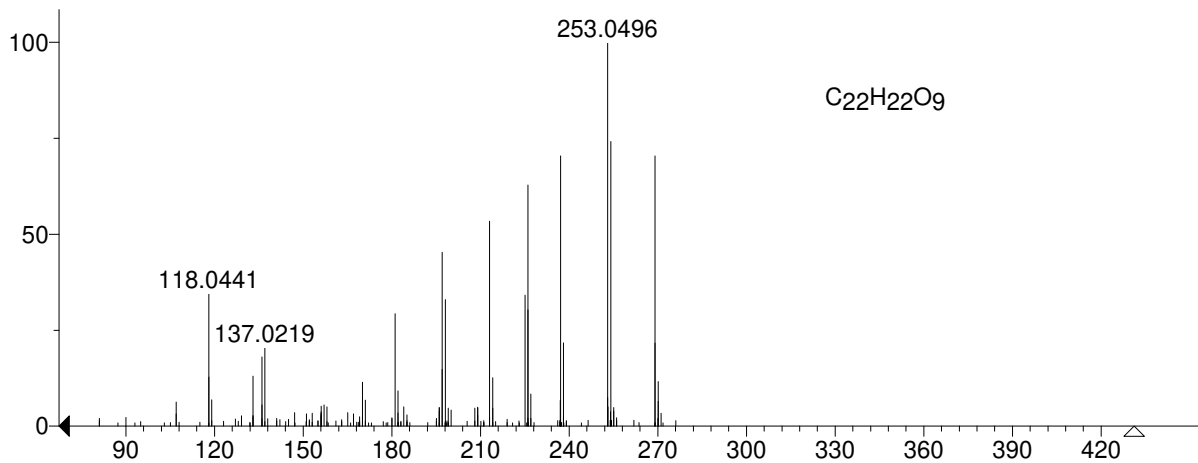



Hit 3 : NCGC00169054-02!3-(4-methoxyphenyl)-7-[(2S,3R,4S,5S,6R)-3,4,5-trihydroxy-6-(hydroxymethyl)oxan-2-yl]  
C<sub>22</sub>H<sub>22</sub>O<sub>9</sub>; MF: 0; RMF: 5; Prob 20.0%; Lib: mona-export-gnps; ID: 9246.

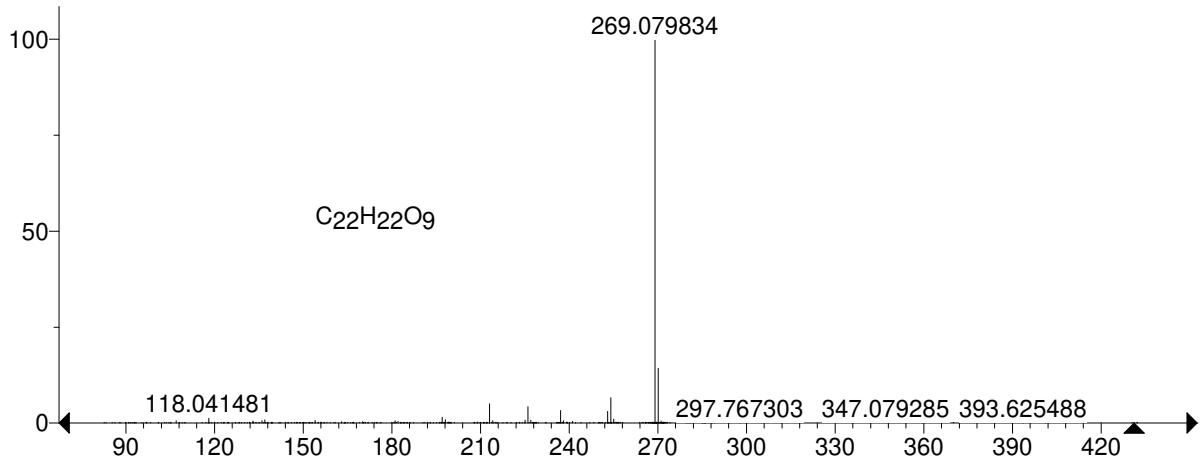

Hit 4 : calycosin-7-O-beta-D-glucoside [M+H]<sup>+</sup> 40 P=431.1  
C<sub>22</sub>H<sub>22</sub>O<sub>9</sub>; MF: 0; RMF: 5; Prob 20.0%; Lib: mona-export-vf-npl\_qtof; ID: 916.

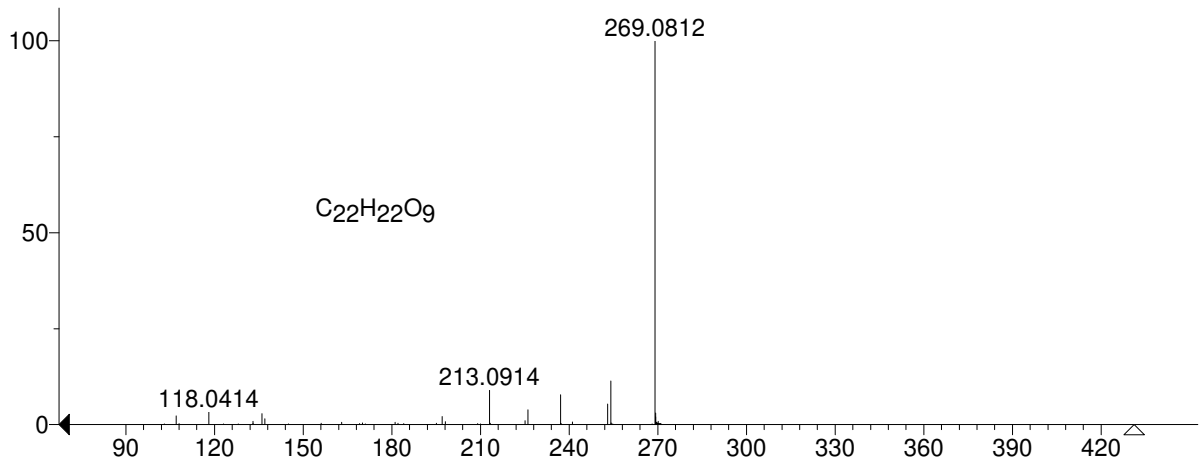

Hit 5 : (1S,3R,6R,7S,8S,10R,13S,16S,17R)-8-tert-butyl-6,17-dihydroxy-16-methyl-2,4,14,19-tetraoxahexacyclo[8.  
C<sub>20</sub>H<sub>24</sub>O<sub>9</sub>; MF: 0; RMF: 2; Prob 20.0%; Lib: mona-export-vf-npl\_qexactive; ID: 10727.

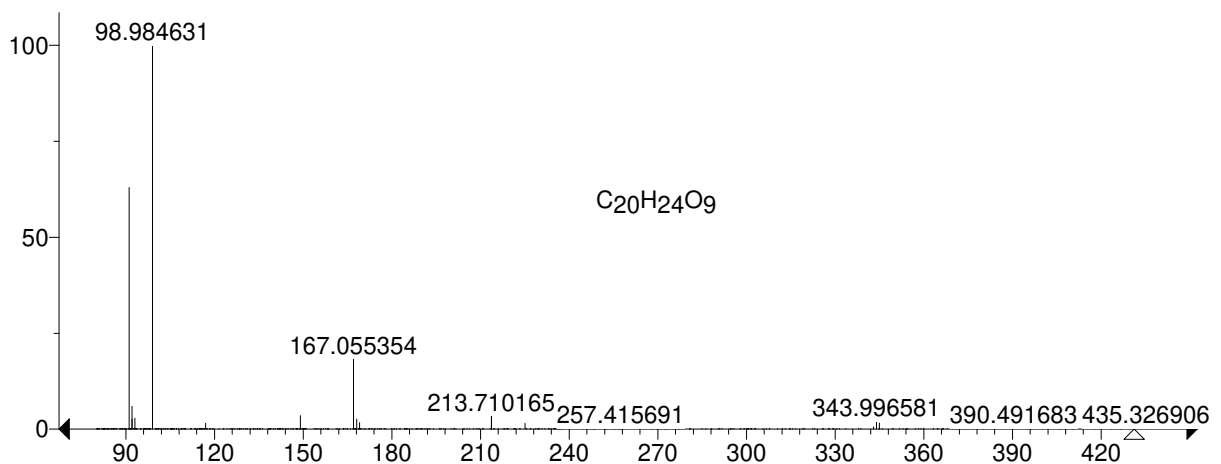

Unknown: Unknown (2.68\_616.2528m/z)  
Compound in Library Factor = 0

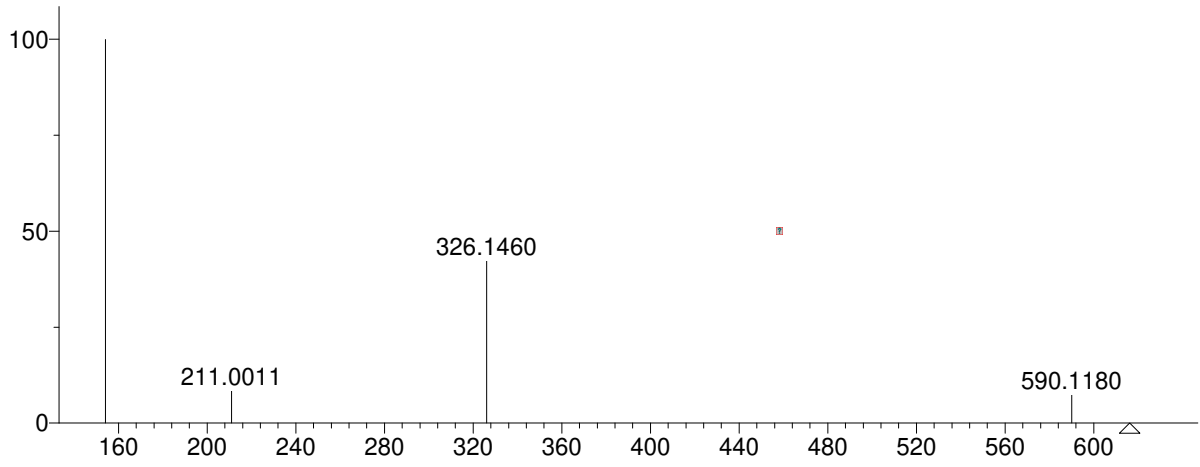

Unknown: Unknown (2.68\_732.2837m/z)  
Compound in Library Factor = 0

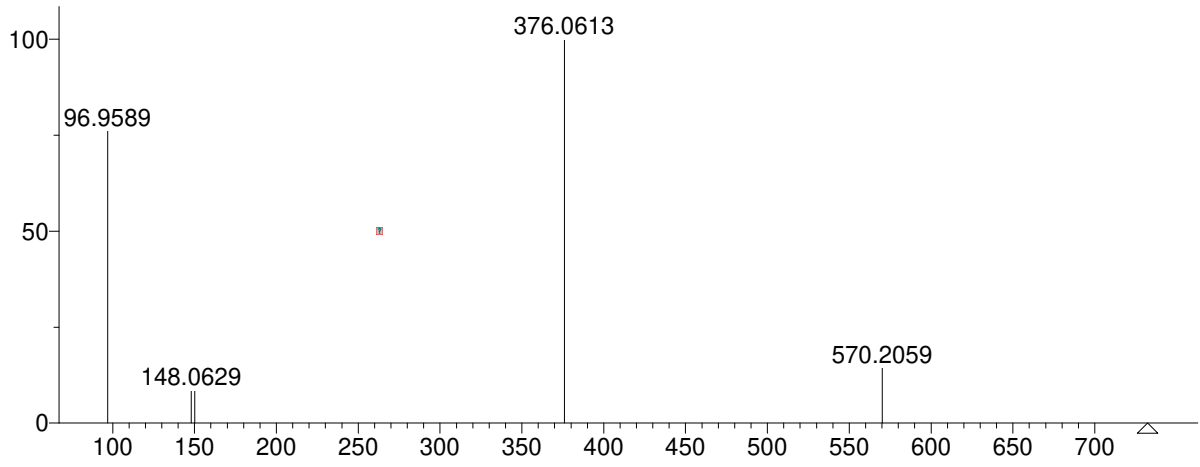

Unknown: Unknown (2.70\_588.1090m/z)  
Compound in Library Factor = 0

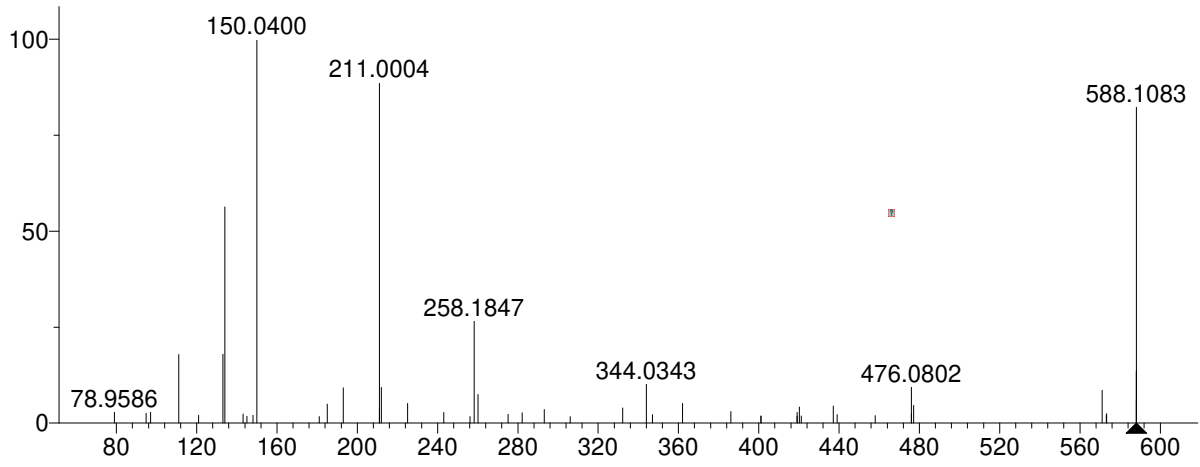

\*\* Search Report Page 1 of 2 \*\*

Unknown: Unknown (2.70\_595.1416m/z)  
Compound in Library Factor = -2176

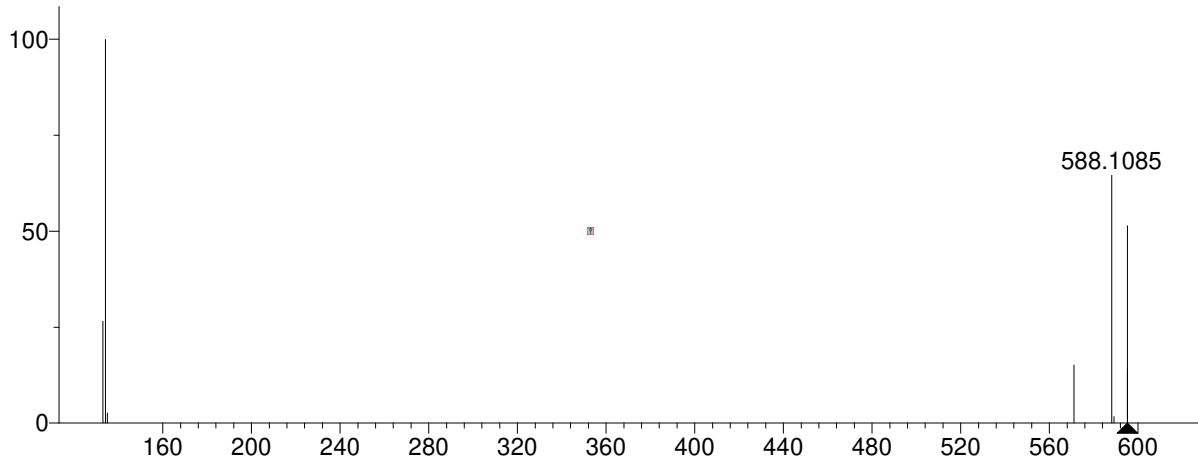

Hit 1 : Tiliroside [M+H]<sup>+</sup> HCD 2V P=595.1  
C<sub>30</sub>H<sub>26</sub>O<sub>13</sub>; MF: 30; RMF: 401; Prob 27.3%; CAS: 20316-62-5; Lib: nist\_msms; ID: 390877.

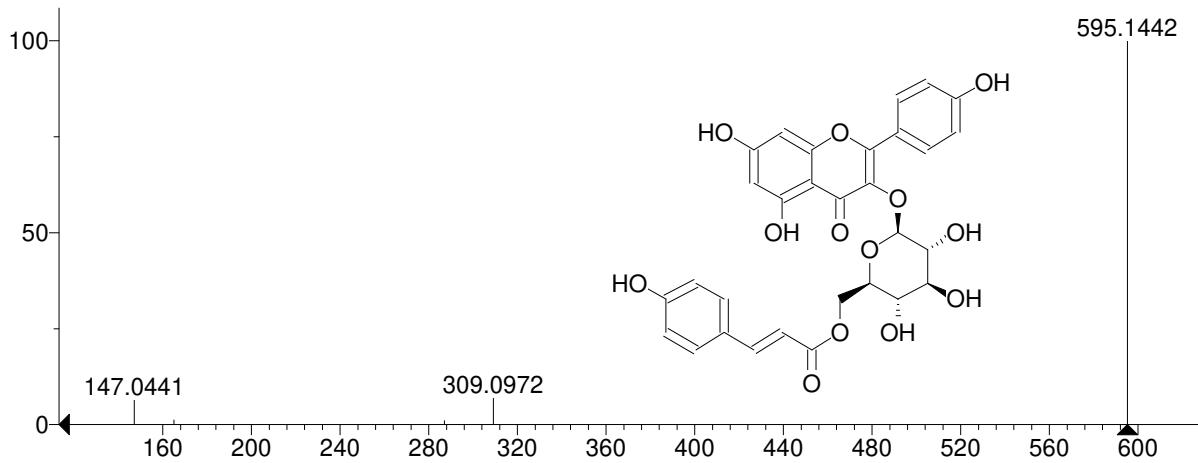

Hit 2 : Flavonol base + 3O, O-Hex, O-coumaroyl [M+H]<sup>+</sup> 6V P=595.1  
C<sub>30</sub>H<sub>26</sub>O<sub>13</sub>; MF: 5; RMF: 289; Prob 8.32%; Lib: anthocyanins mona; ID: 8311.

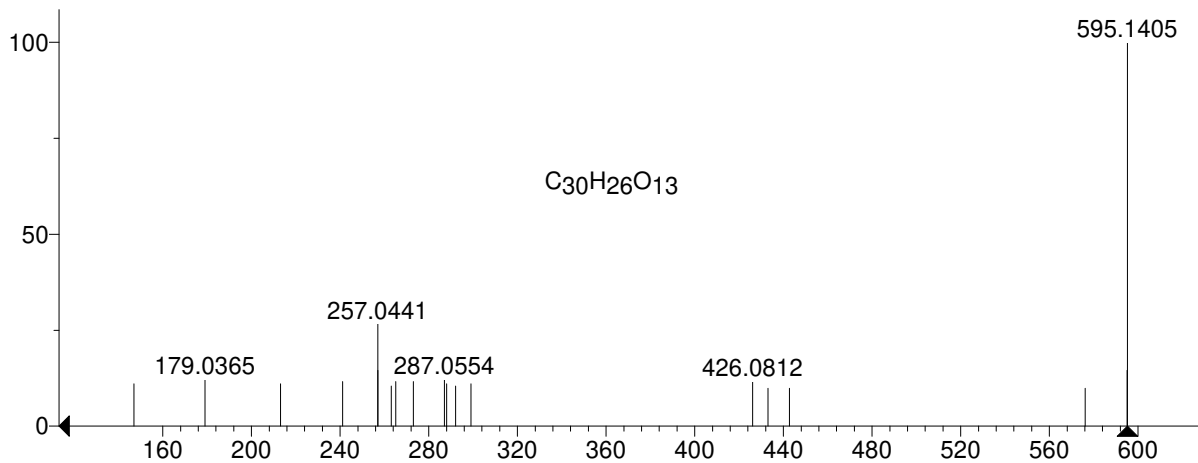

\*\* Search Report Page 2 of 2 \*\*

Hit 3 : 7-O-??-(6???-trans-p-coumaroyl)-glucopyranosyl-8,3????,4???-trihydroxyflavanone [M-H]- P=595.1  
C<sub>30</sub>H<sub>28</sub>O<sub>13</sub>; MF: 4; RMF: 295; Prob 8.00%; Lib: msms-neg-gnps; ID: 78.

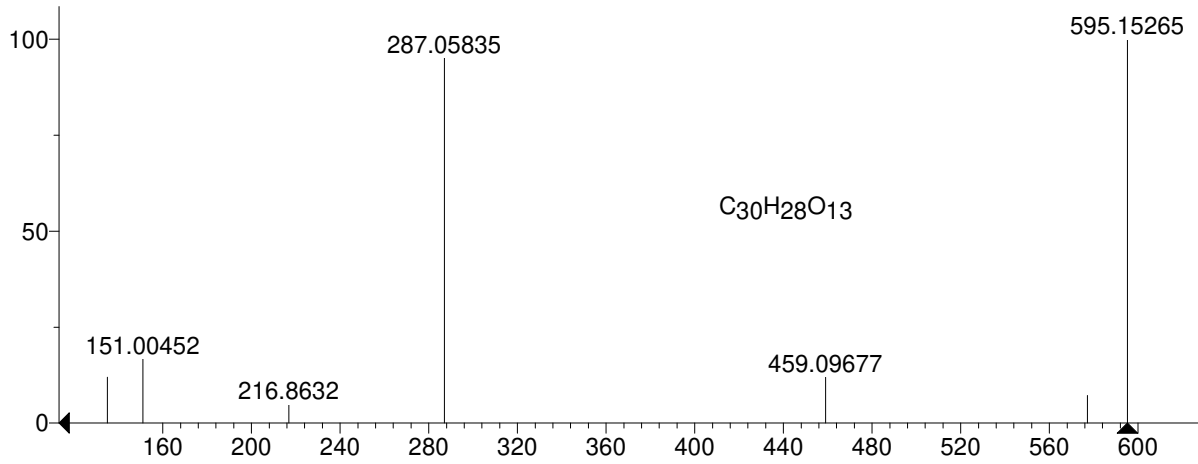

Hit 4 : Kaempferol-3-O-glucoside-6"-p-coumaroyl [M+H]<sup>+</sup> 10eV P=595.1  
C<sub>30</sub>H<sub>26</sub>O<sub>13</sub>; MF: 3; RMF: 332; Prob 7.69%; Lib: anthocyanins mona; ID: 1220.

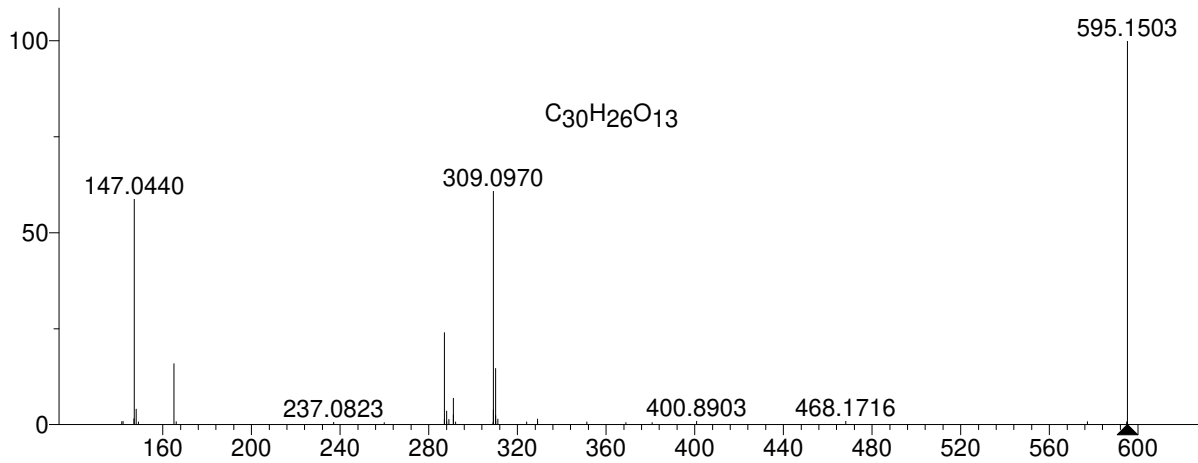

Hit 5 : 4???-O-??-(6???-trans-p-coumaroyl)-glucopyranosyl okanin [M-H]- P=595.1  
C<sub>30</sub>H<sub>28</sub>O<sub>13</sub>; MF: 2; RMF: 129; Prob 7.39%; Lib: msms-neg-gnps; ID: 62.

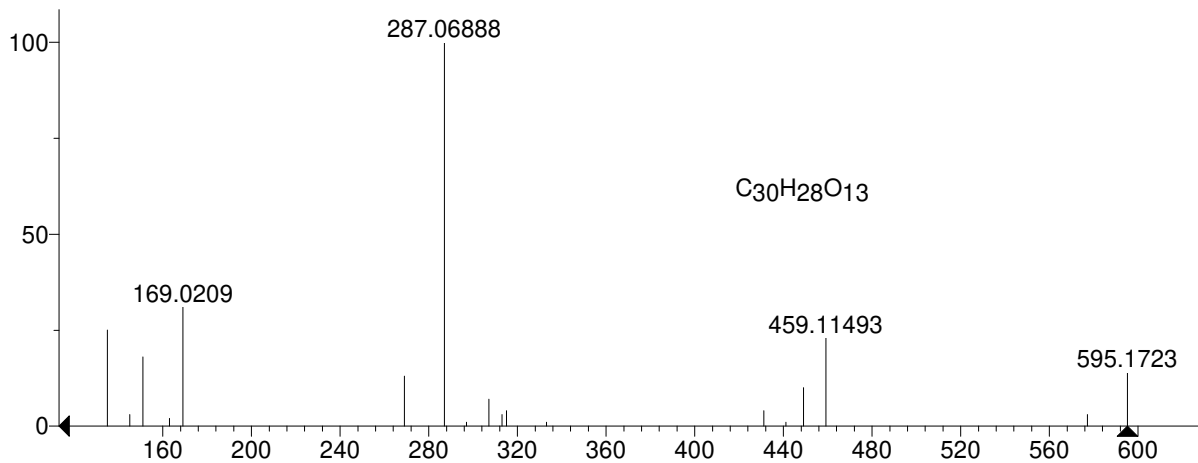

\*\* Search Report Page 1 of 2 \*\*

Unknown: Unknown (2.71\_355.1970m/z)  
Compound in Library Factor = -3273

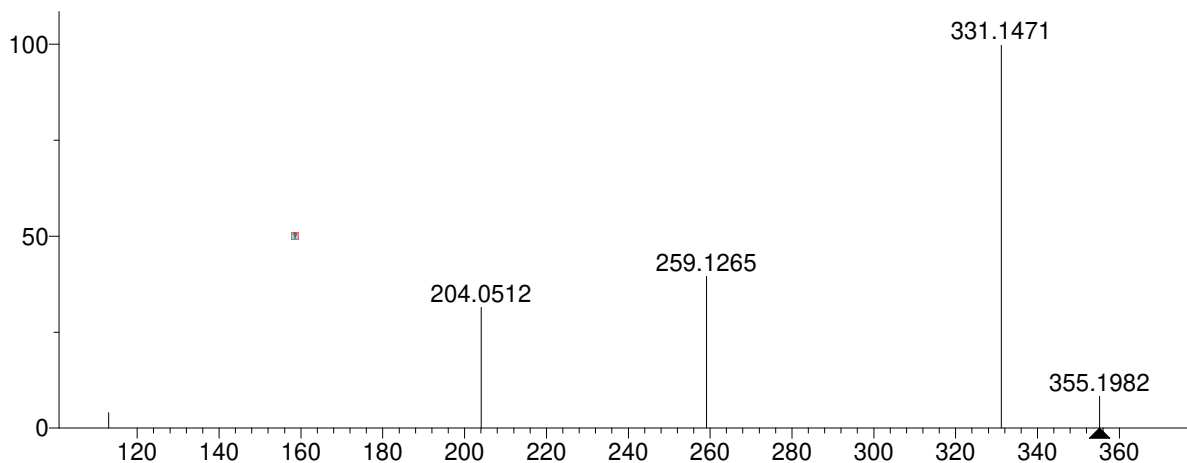

Hit 1 : PyroGlu-Pro-Lys [M+H]<sup>+</sup> QQQ 12V P=355.2  
C16H26N4O5; MF: 13; RMF: 211; Prob 9.78%; Lib: nist\_msms; ID: 44842.

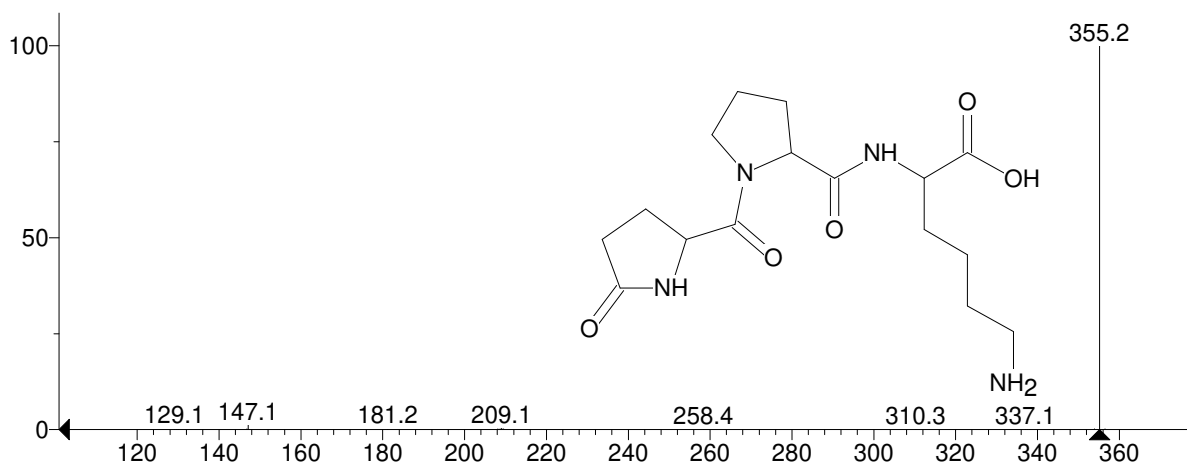

Hit 2 : Quinoline, 4-[5,6-dihydro-2-(2-pyridinyl)-4H-pyrrolo[1,2-b]pyrazol-3-yl]-7-[2-(4-morpholinyl)ethoxy]- [M+H]<sup>+</sup>  
C26H27N5O2; MF: 8; RMF: 188; Prob 7.88%; CAS: 700874-71-1; Lib: nist\_msms; ID: 369275.

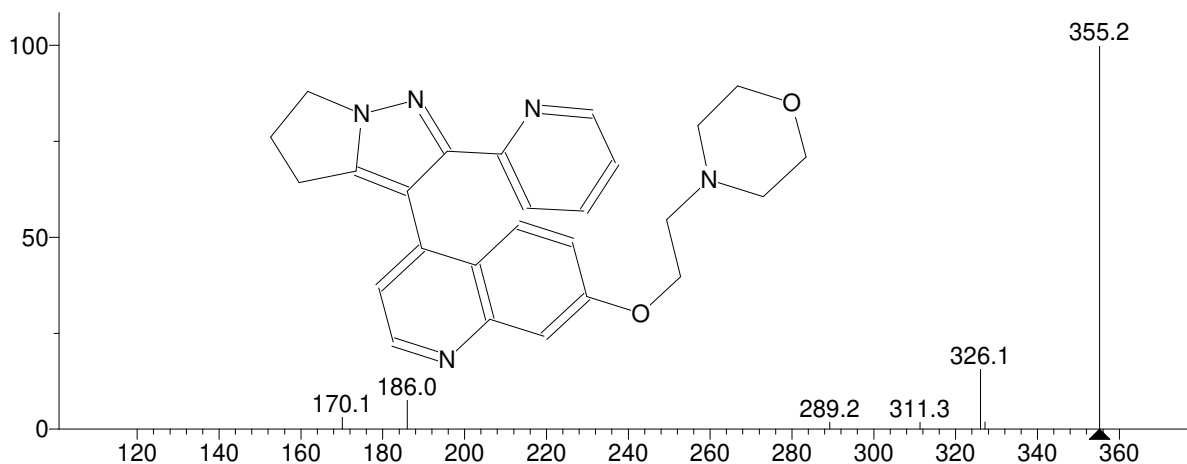

Hit 3 : Carboxolone [M-H] $\Rightarrow$ 469.3 $\Rightarrow$ 355.2 IT 35% P=355.2  
C<sub>34</sub>H<sub>50</sub>O<sub>7</sub>; MF: 0; RMF: 62; Prob 5.88%; CAS: 5697-56-3; Lib: nist\_msms; ID: 153421.

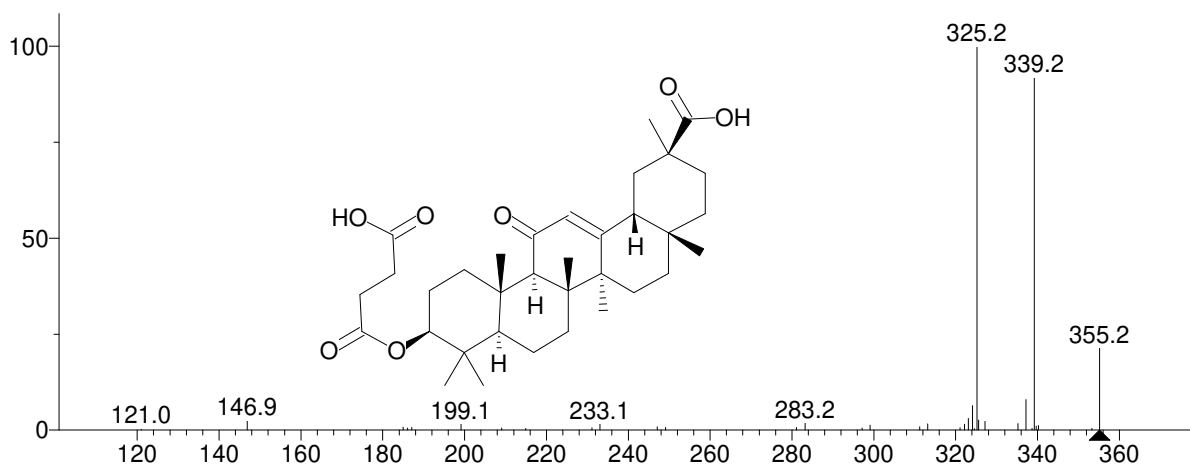

Hit 4 : Nobiletin [M+H] $\Rightarrow$ 388.4 $\Rightarrow$ 355.2 IT 35% P=355.2  
C<sub>21</sub>H<sub>22</sub>O<sub>8</sub>; MF: 0; RMF: 60; Prob 5.88%; CAS: 478-01-3; Lib: nist\_msms; ID: 178356.

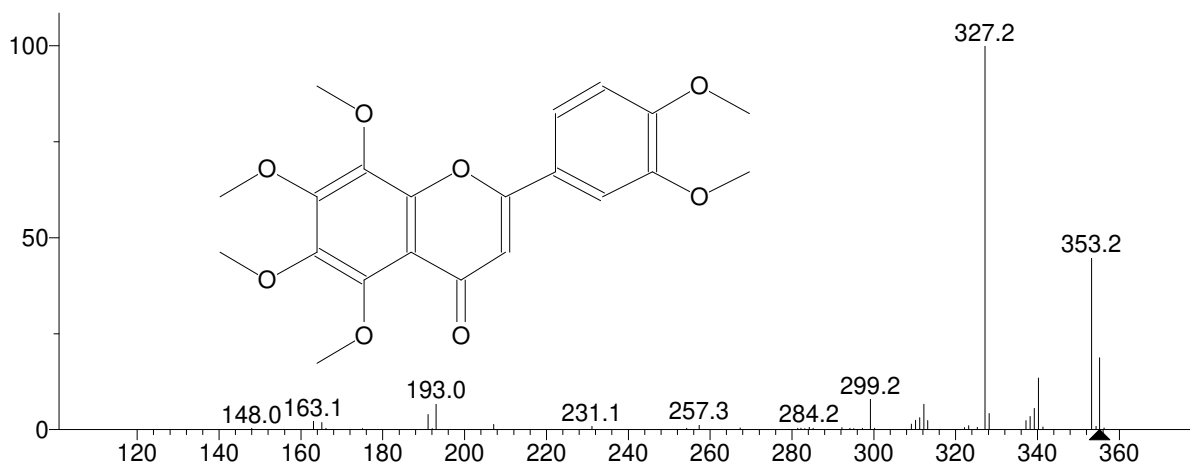

Hit 5 : 15-Ketoprostaglandin E2 [M+Na] $\Rightarrow$ 355.2 IT 35% P=355.2  
C<sub>20</sub>H<sub>30</sub>O<sub>5</sub>; MF: 0; RMF: 48; Prob 5.88%; CAS: 26441-05-4; Lib: nist\_msms; ID: 169440.

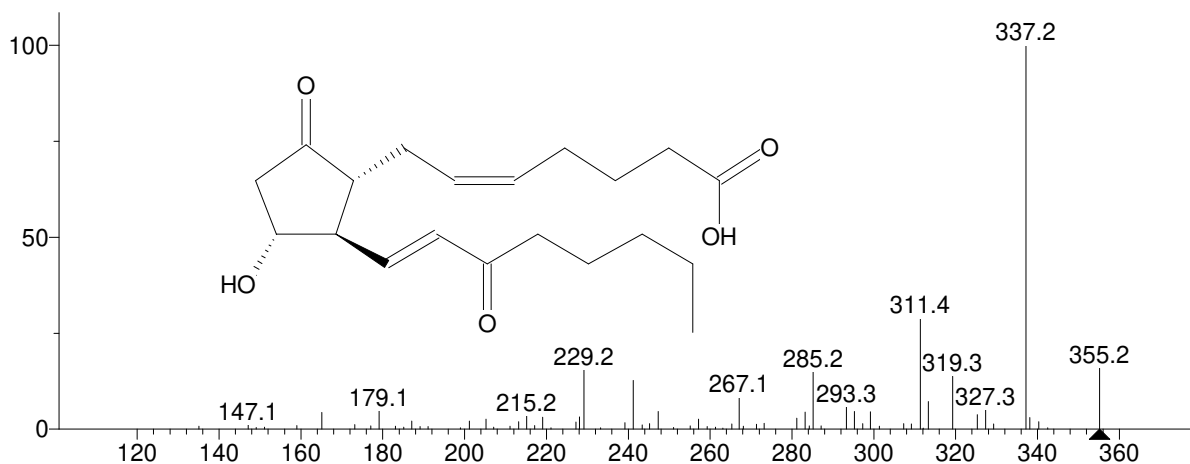



Unknown: Unknown (2.71\_432.1260m/z)  
Compound in Library Factor = 0

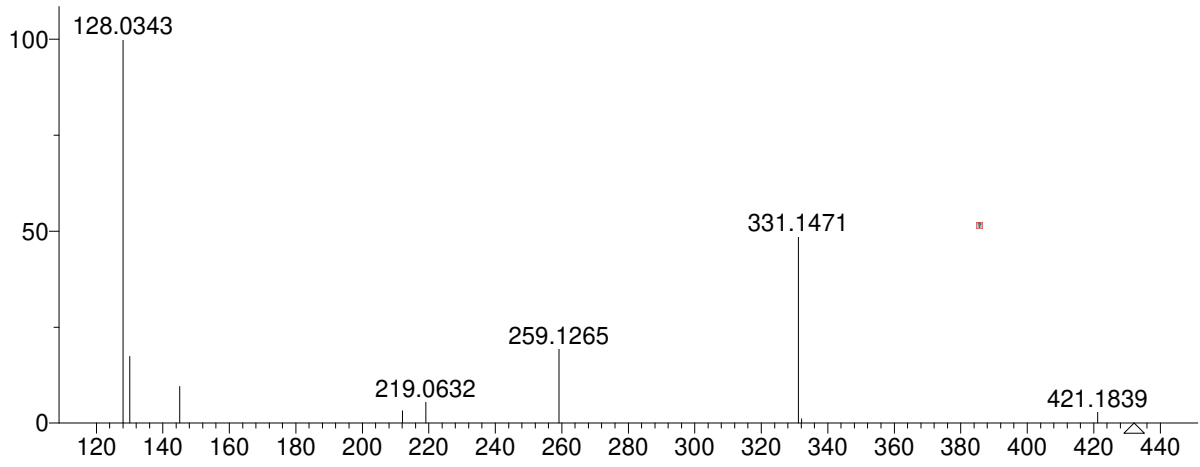

Unknown: Unknown (2.72\_355.0239m/z)  
Compound in Library Factor = 0

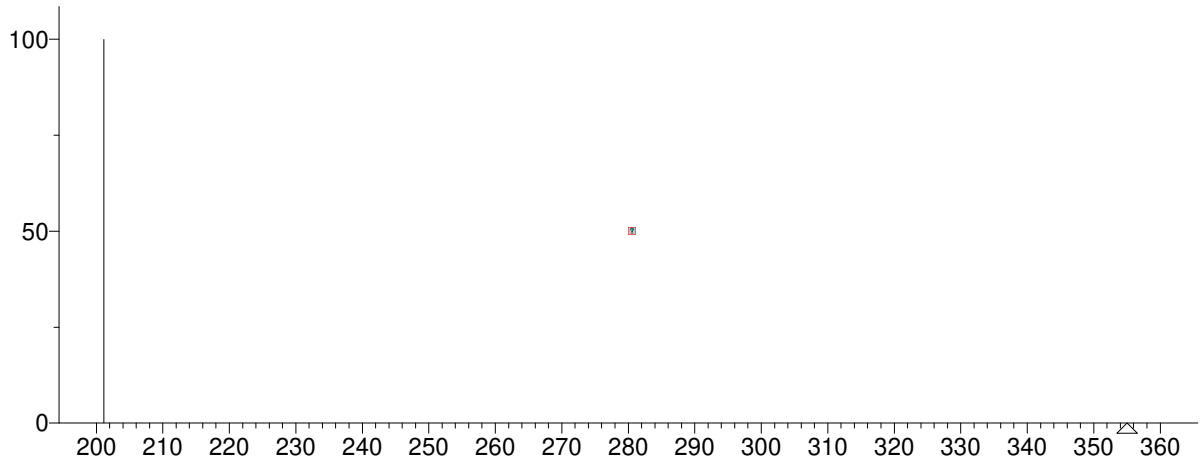

Unknown: Unknown (2.72\_573.0992m/z)  
Compound in Library Factor = 0

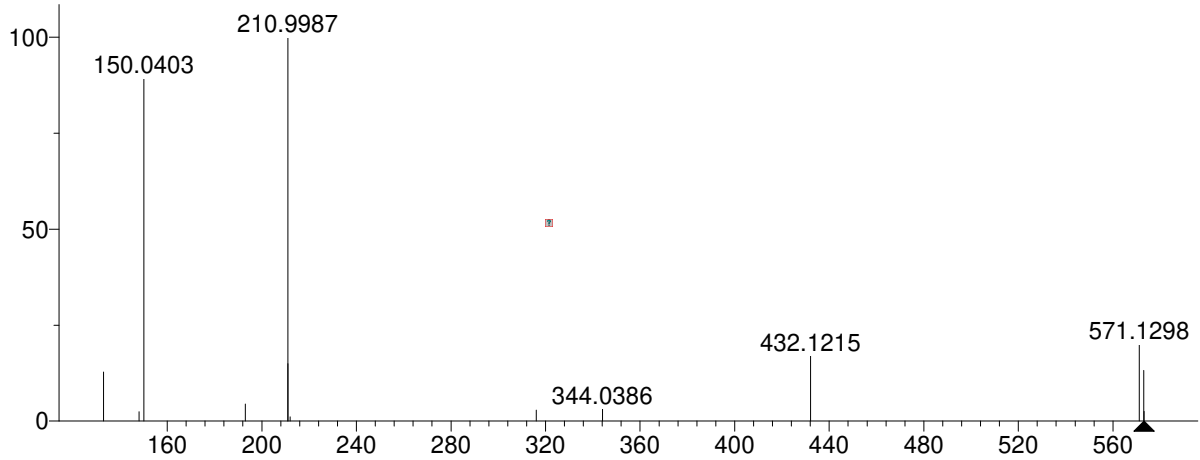

Hit 1 : NCGC00385638-01|2,2'-bis(3,4-dihydroxyphenyl)-3',4,5',6-tetrahydroxySpiro[2H-1-benzofuran-3,9'-3,4-dihydro-2H-benzofuran-3,9'-3,4-dihydroxy] C<sub>30</sub>H<sub>22</sub>O<sub>12</sub>; MF: 0; RMF: 51; Prob 25.0%; Lib: mona-export-gnps; ID: 8139.

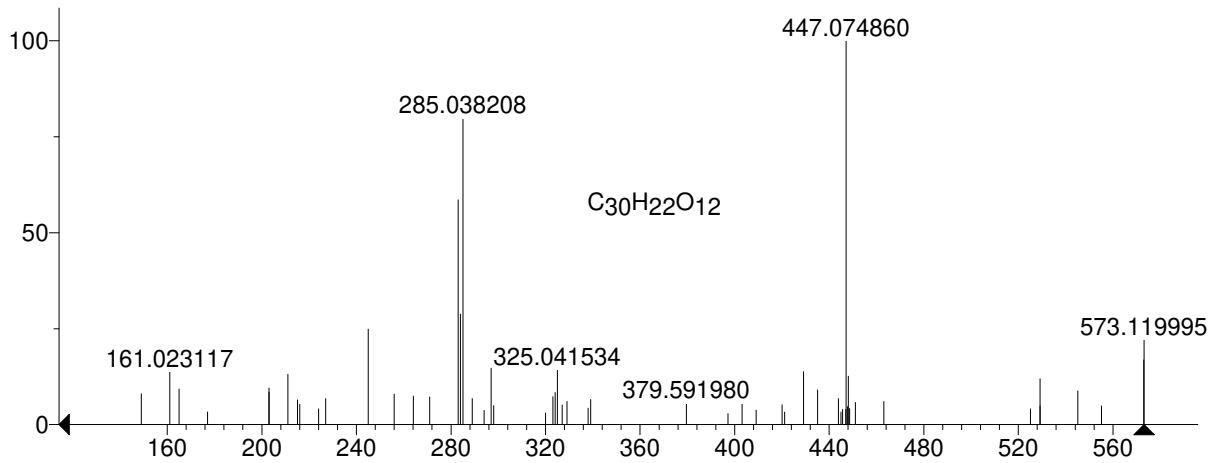

Hit 2 : Theaflavin 3-gallate [M+H-H<sub>2</sub>O]<sup>+</sup>=>573.1 IT 35% P=573.1  
C<sub>36</sub>H<sub>28</sub>O<sub>16</sub>; MF: 0; RMF: 10; Prob 25.0%; CAS: 30462-34-1; Lib: nist\_msms; ID: 394282.

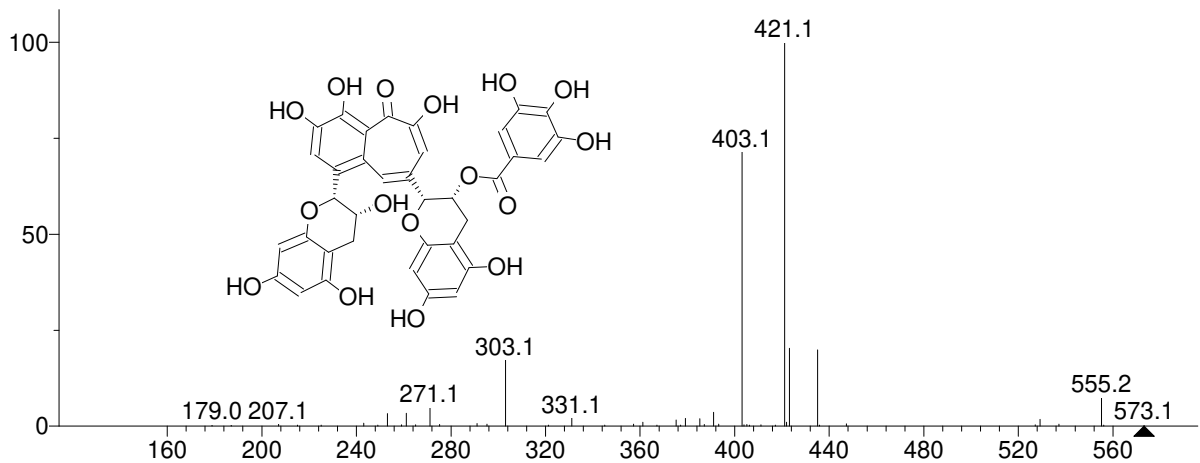

\*\* Search Report Page 2 of 2 \*\*

Hit 3 :  $\beta$ -Nicotinamide adenine dinucleotide, reduced [M+Na]<sup>+</sup>=>671.1=>573.1 IT 35% P=573.1  
C<sub>21</sub>H<sub>29</sub>N<sub>7</sub>O<sub>14</sub>P<sub>2</sub>; MF: 0; RMF: 5; Prob 25.0%; CAS: 58-68-4; Lib: nist\_msms; ID: 114554.

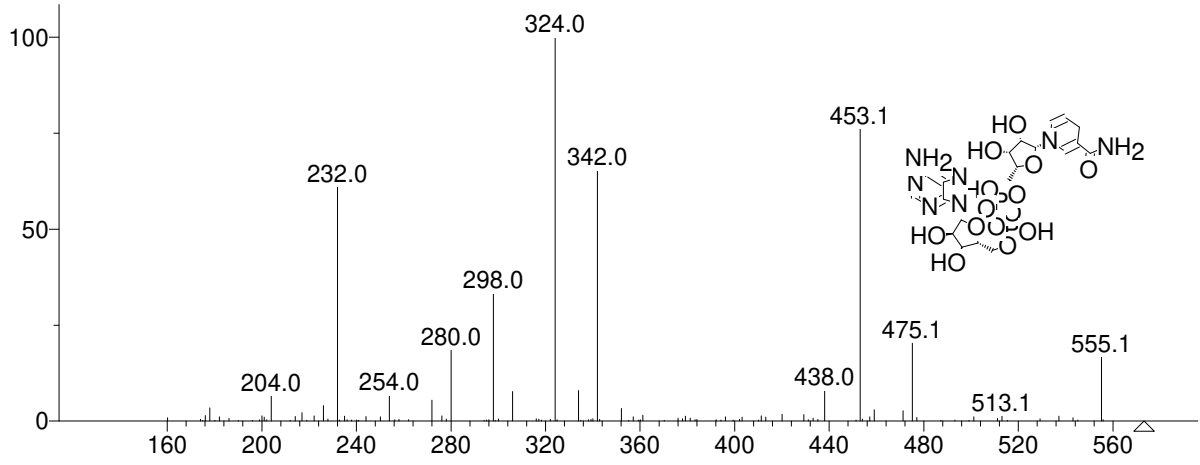

Hit 4 : 3-[5,7-dihydroxy-4-(4-hydroxyphenyl)-2-oxo-3,4-dihydrochromen-3-yl]-5,6,7,8-tetrahydroxy-4-(4-hydroxyphenyl)-2H-chromen-2-one  
C<sub>30</sub>H<sub>22</sub>O<sub>12</sub>; MF: 0; RMF: 4; Prob 25.0%; Lib: mona-export-1c-ms-ms\_negative\_mode; ID: 23407.

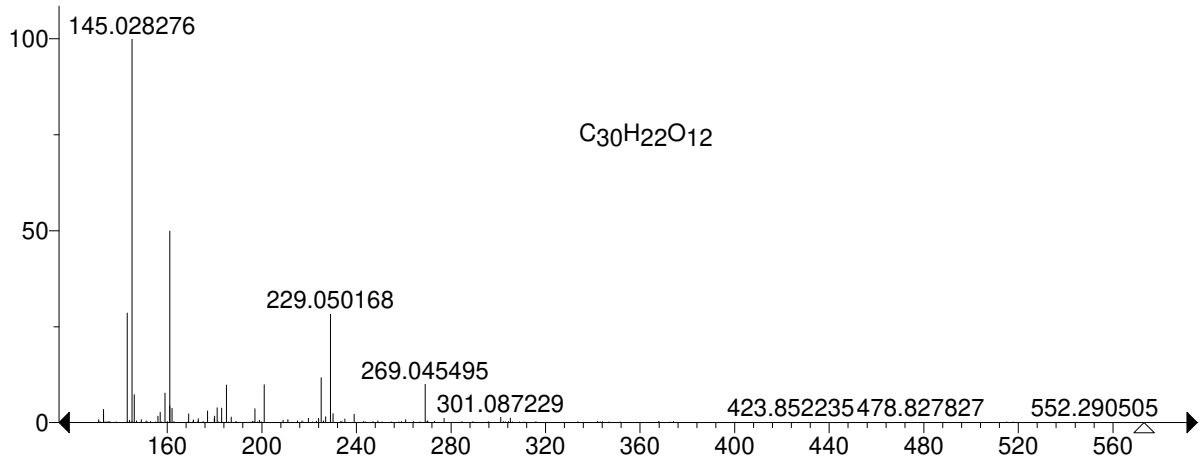

Unknown: Unknown (2.72\_596.1269m/z)  
Compound in Library Factor = 0

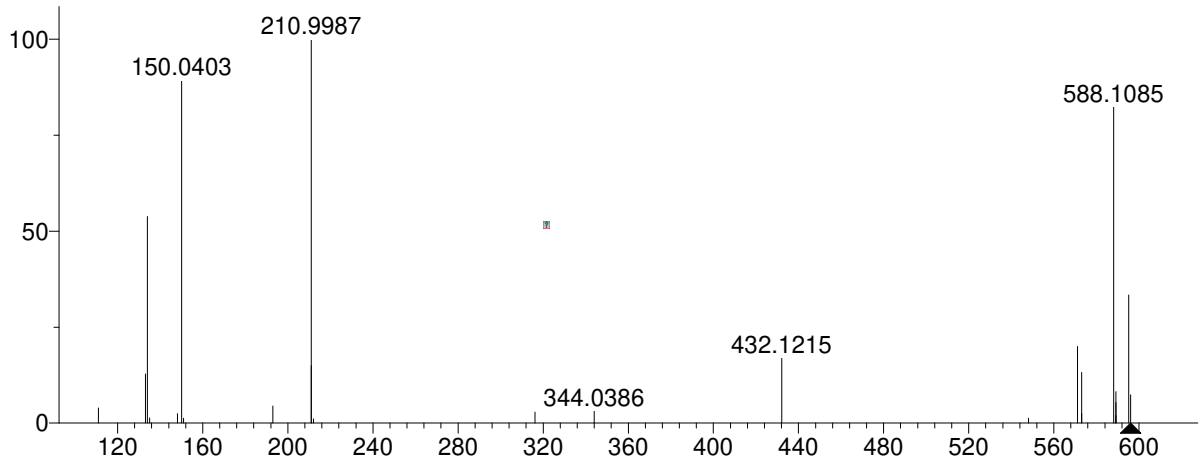

Unknown: Unknown (2.72\_603.1817m/z)  
Compound in Library Factor = 0

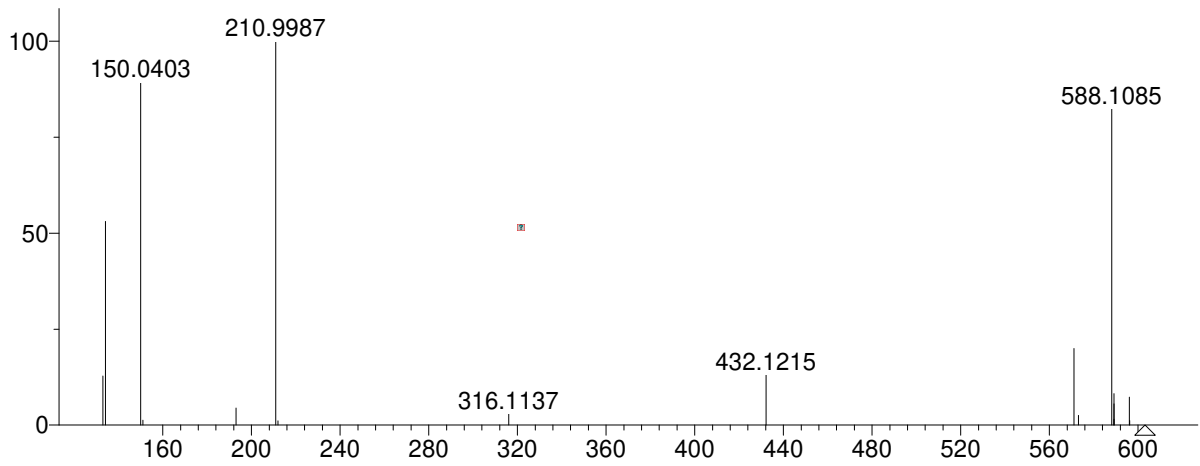

Unknown: Unknown (2.73\_403.1335m/z)  
Compound in Library Factor = 0

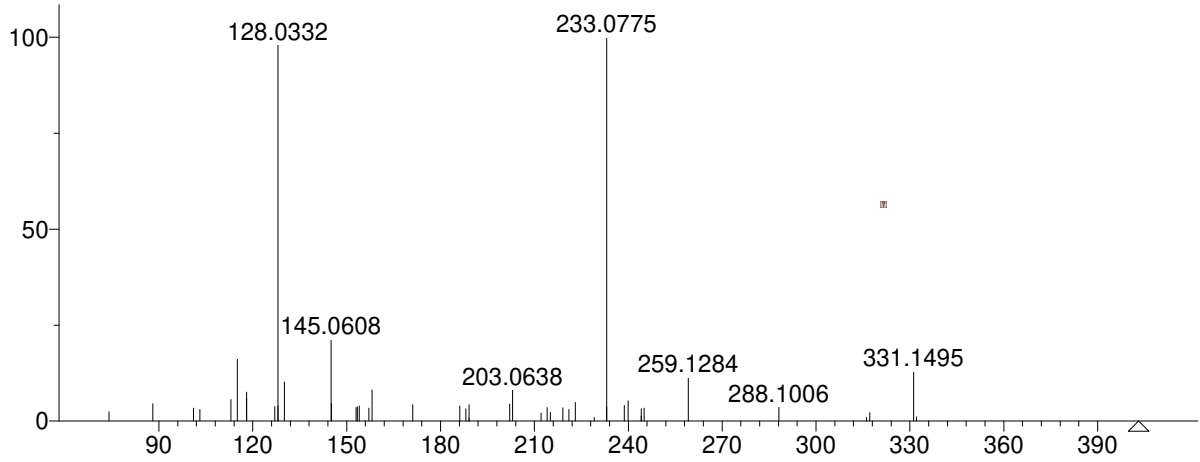

Hit 1 : DEHYDROCHOLIC ACID [M+H]<sup>+</sup> 35% P=403.1  
C<sub>24</sub>H<sub>34</sub>O<sub>5</sub>; MF: 0; RMF: 38; Prob 25.0%; Lib: mona-export-itree; ID: 2247.

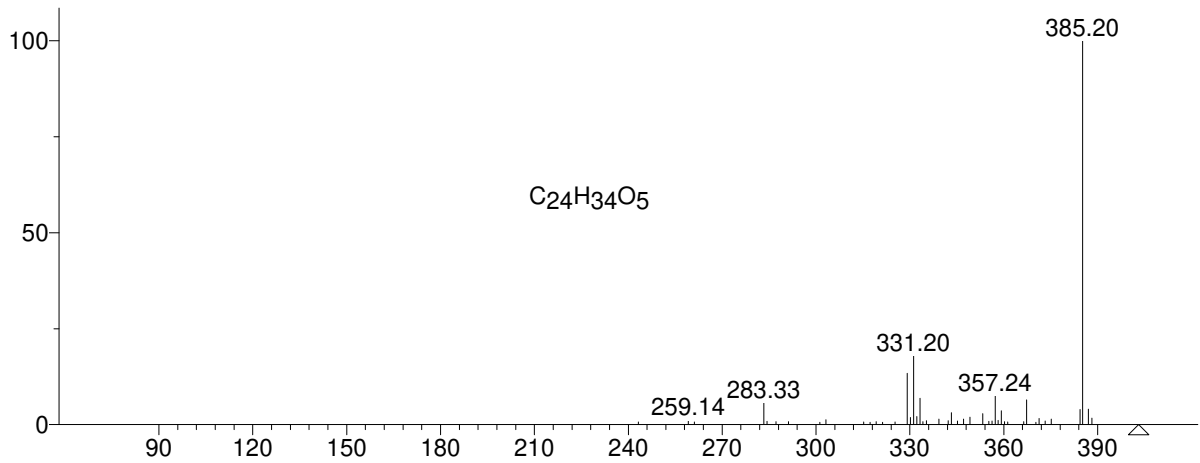

Hit 2 : methyl 2-(4,5-dihydroxy-6-methoxy-3,6-dimethyl-2-oxocyclohex-3-en-1-yl)oxy-4-hydroxy-3,6-dimethylbenzoate  
C<sub>19</sub>H<sub>24</sub>O<sub>8</sub>; MF: 0; RMF: 29; Prob 25.0%; Lib: mona-export-vf-npl\_qexactive; ID: 23486.

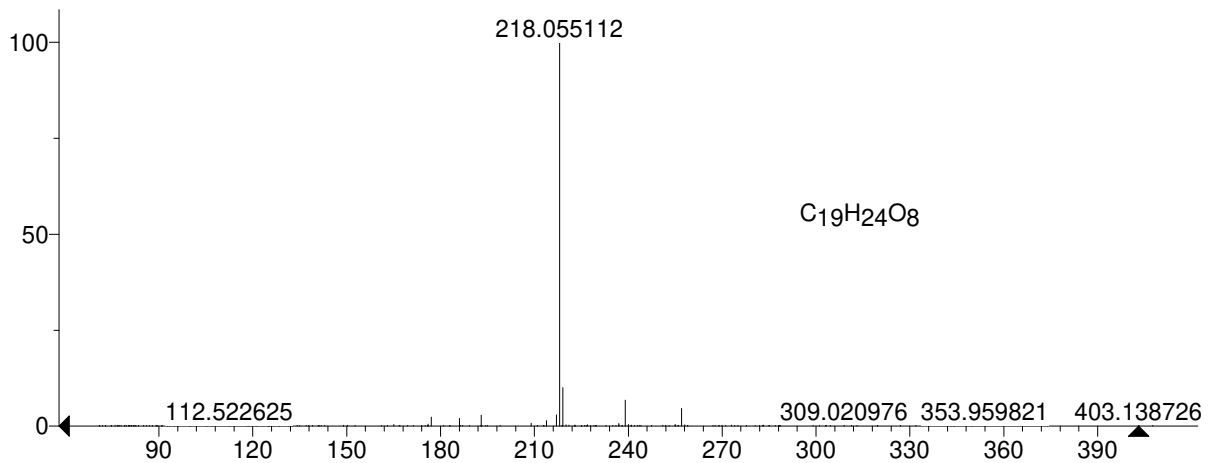

Hit 3 : NCGC00347547-02!methyl 2-(4,5-dihydroxy-6-methoxy-3,6-dimethyl-2-oxocyclohex-3-en-1-yl)oxy-4-hydro: C<sub>19</sub>H<sub>24</sub>O<sub>8</sub>; MF: 0; RMF: 20; Prob 25.0%; Lib: mona-export-gnps; ID: 8950.

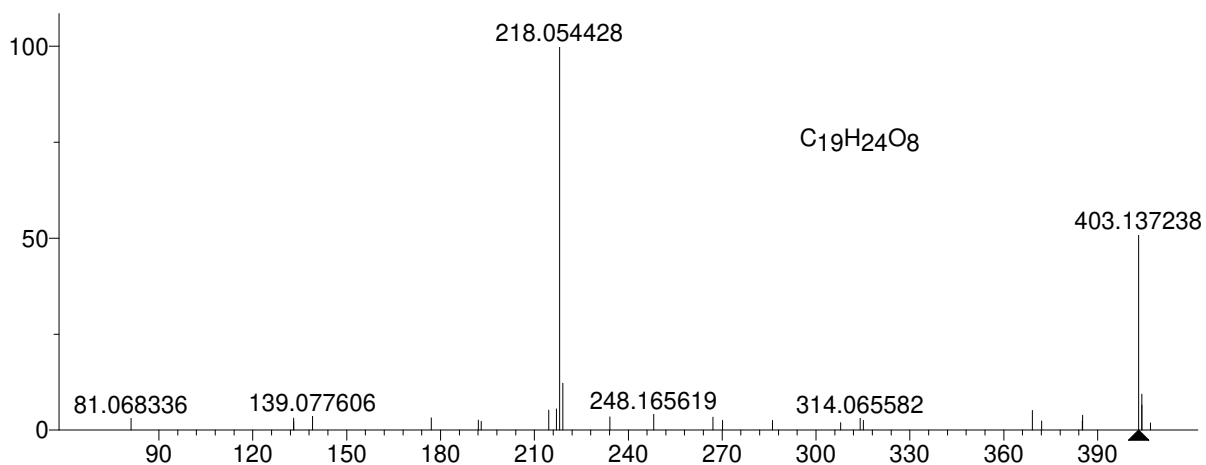

Hit 4 : Egtazic acid [M+Na]<sup>+</sup> HCD 52V P=403.1 C<sub>14</sub>H<sub>24</sub>N<sub>2</sub>O<sub>10</sub>; MF: 0; RMF: 20; Prob 25.0%; CAS: 67-42-5; Lib: nist\_msms; ID: 81815.

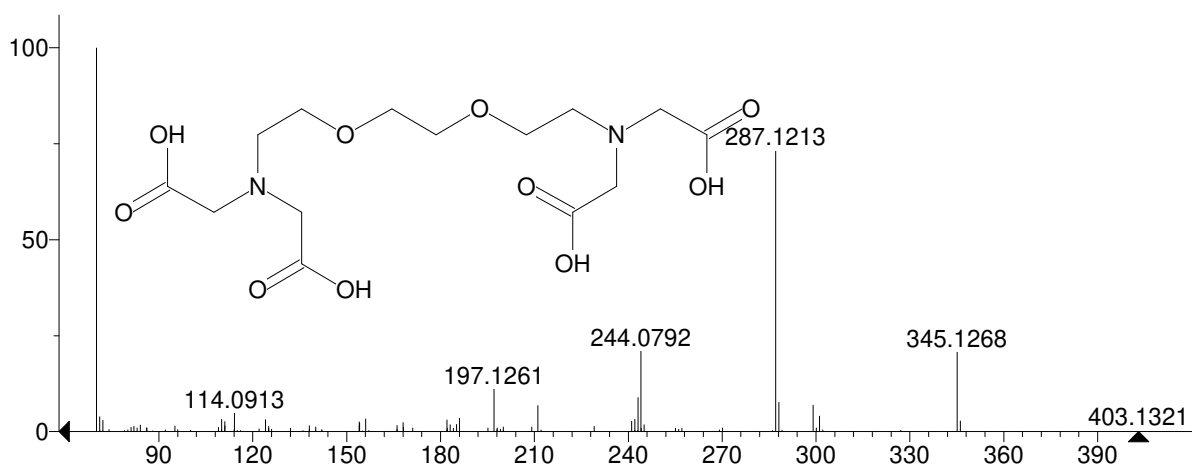



Unknown: Unknown (2.73\_508.2128m/z)  
Compound in Library Factor = 0

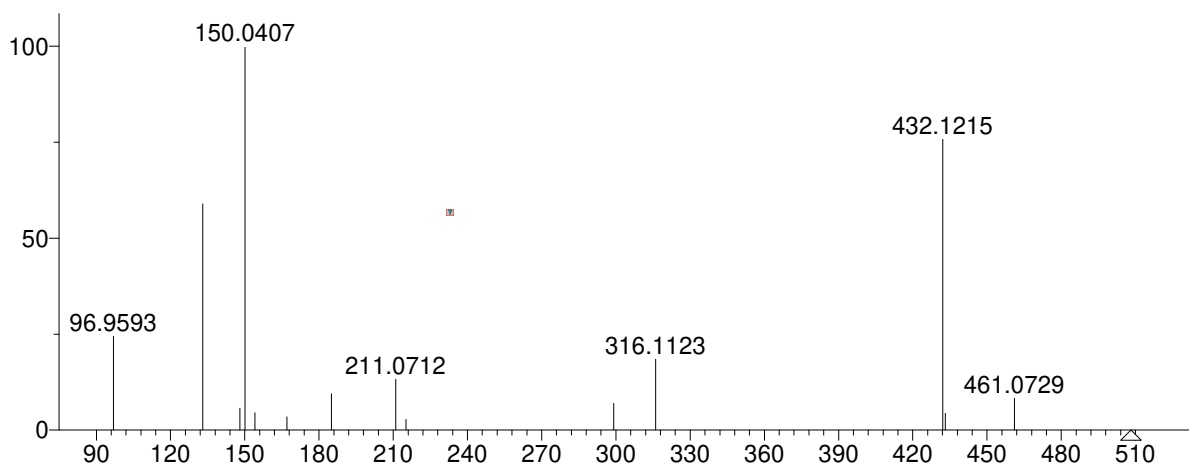

Hit 1 :  $\beta$ -Lipotropin (61-69) [M-2H]<sup>2-</sup> HCD 41eV P=508.2  
C<sub>45</sub>H<sub>66</sub>N<sub>10</sub>O<sub>15</sub>S; MF: 0; RMF: 27; Prob 100.0%; Lib: nist\_msms2; ID: 77123.

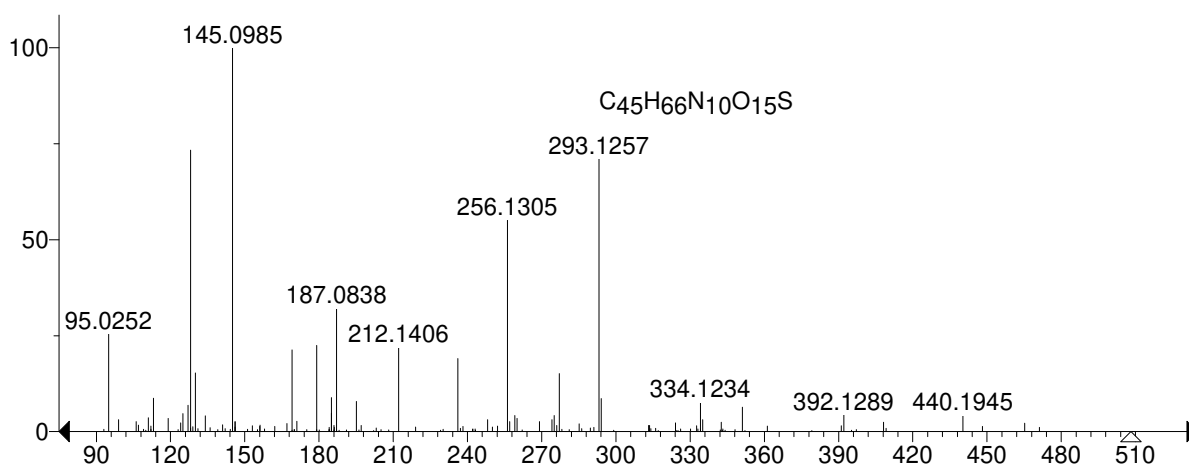

Unknown: Unknown (2.75\_309.1075m/z)  
Compound in Library Factor = -236

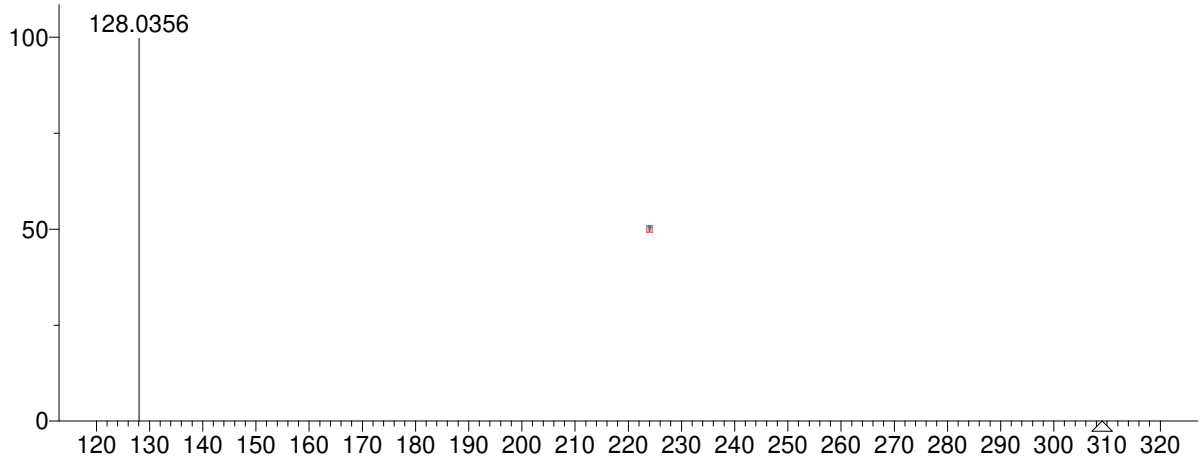

Hit 1 : gamma-Glu-Tyr [M-H]- 35eV P=309.1  
C<sub>14</sub>H<sub>18</sub>N<sub>2</sub>O<sub>6</sub>; MF: 299; RMF: 944; Prob 97.4%; Lib: msms-neg-fiehnhilic; ID: 990.

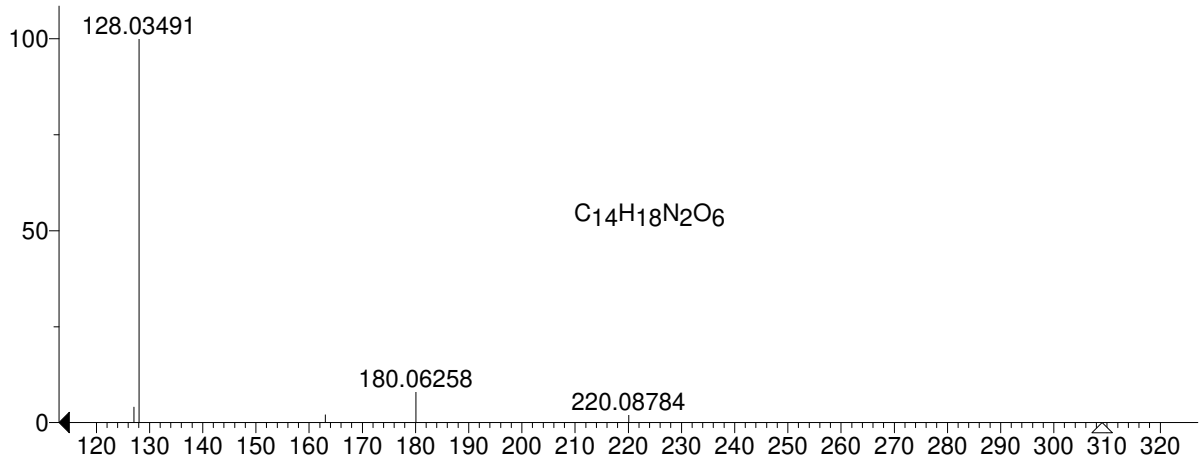

Hit 2 : gamma-Glutamyltyrosine [M-H]- 20-30-40% P=309.1  
C<sub>14</sub>H<sub>18</sub>N<sub>2</sub>O<sub>6</sub>; MF: 44; RMF: 681; Prob 0.97%; Lib: msms-neg-fiehnhilic; ID: 331.

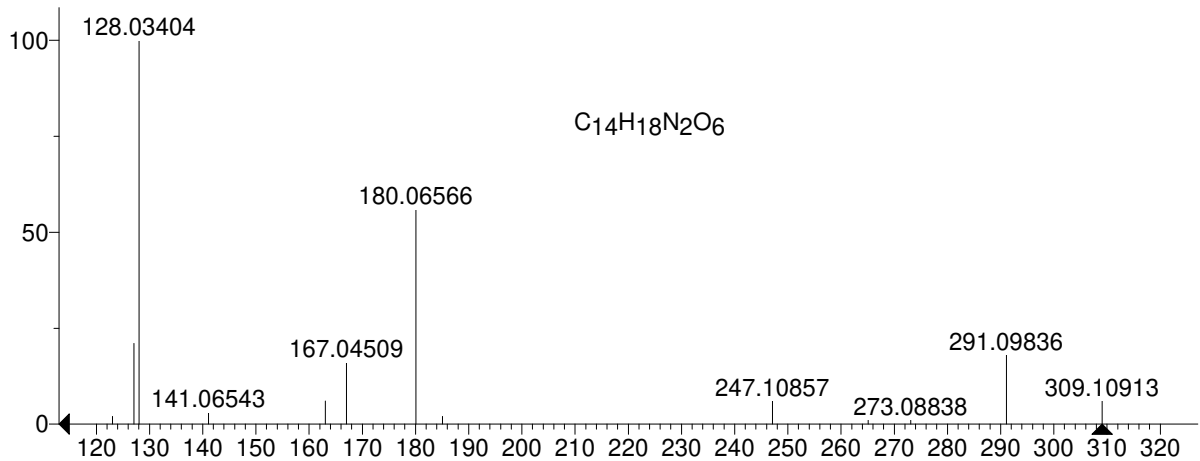

Hit 3 : Glutamyltyrosine; PlaSMA ID-626 [M-H]<sup>-</sup> P=309.1  
C<sub>14</sub>H<sub>18</sub>N<sub>2</sub>O<sub>6</sub>; MF: 32; RMF: 726; Prob 0.64%; Lib: biomsmms-neg-plasma; ID: 743.

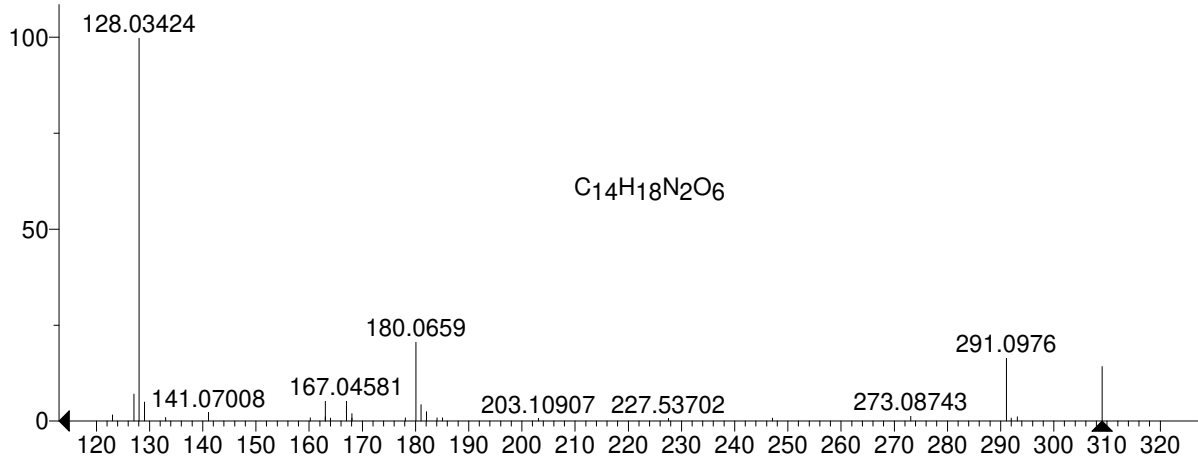

Hit 4 : Tyr-Glu [M-H]<sup>-</sup> HCD 49eV P=309.1  
C<sub>14</sub>H<sub>18</sub>N<sub>2</sub>O<sub>6</sub>; MF: 15; RMF: 569; Prob 0.35%; Lib: nist\_msms; ID: 571144.

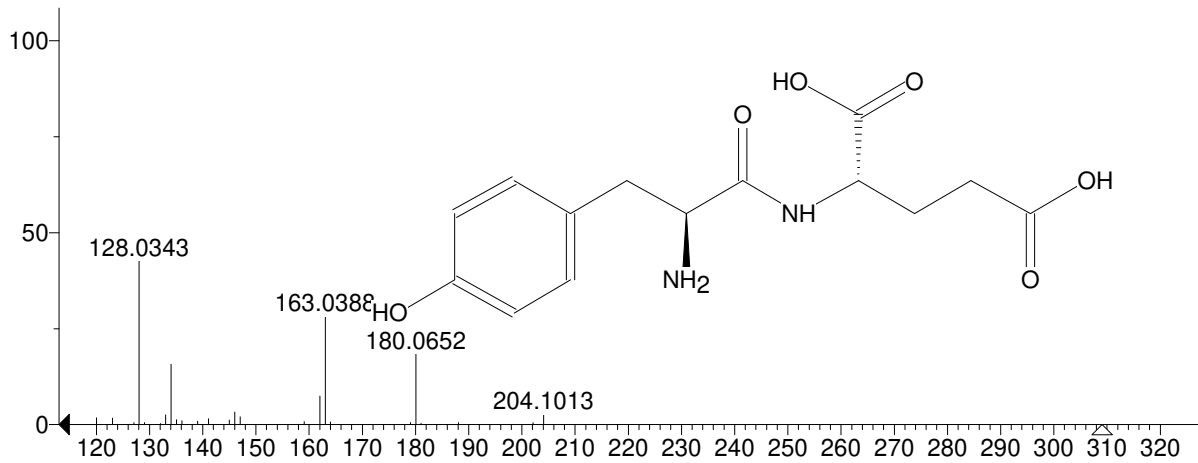

Hit 5 : Tyr-Glu [M-H]<sup>-</sup> HCD 49eV P=309.1  
C<sub>14</sub>H<sub>18</sub>N<sub>2</sub>O<sub>6</sub>; MF: 15; RMF: 569; Prob 0.35%; CAS: 2545-89-3; Lib: nist\_msms2; ID: 84877.

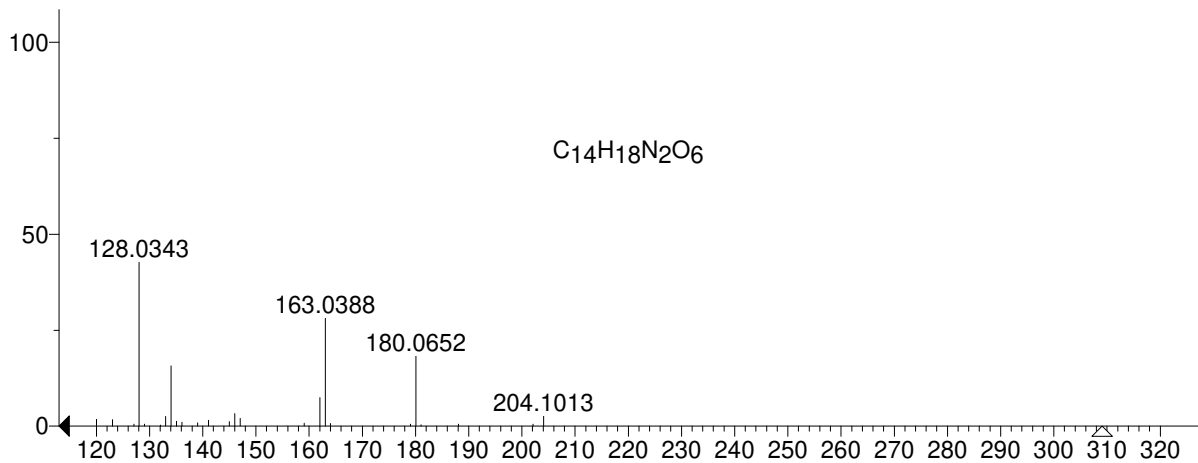

Unknown: Unknown (2.75\_346.1610m/z)  
Compound in Library Factor = 0

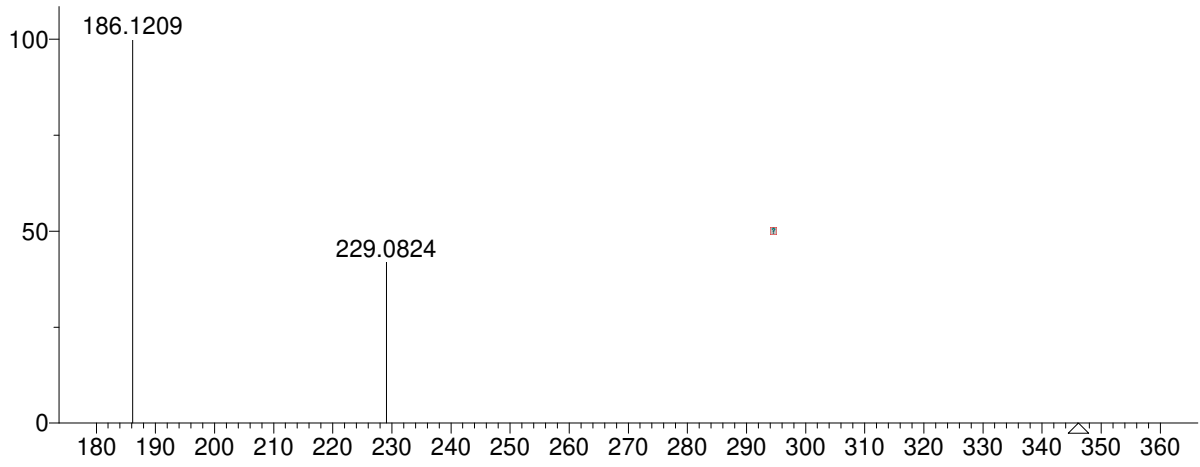

Unknown: Unknown (2.75\_400.1699m/z)  
Compound in Library Factor = 0

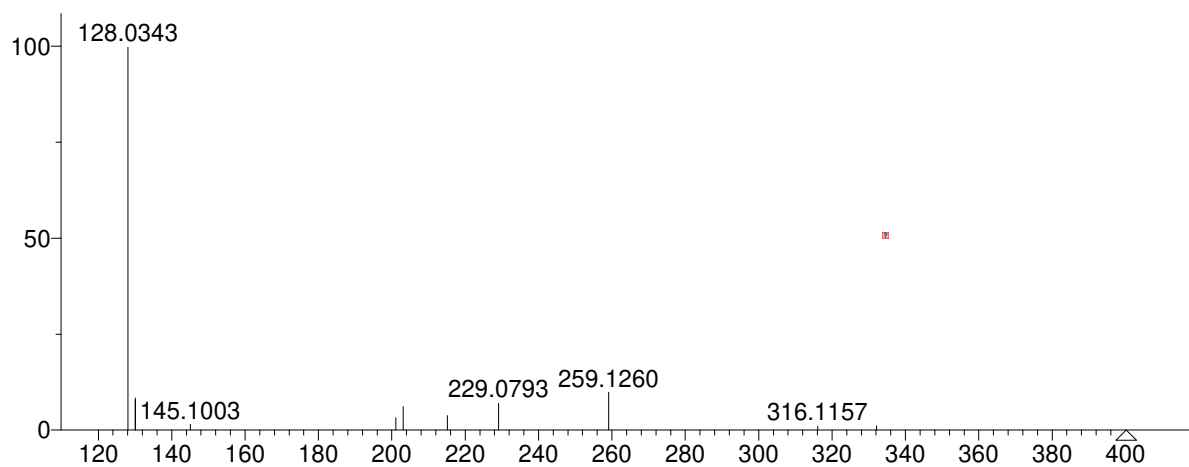

Hit 1 : Quetiapine sulfoxide [M+H]<sup>+</sup> HCD 104V P=400.2  
C<sub>21</sub>H<sub>25</sub>N<sub>3</sub>O<sub>3</sub>S; MF: 0; RMF: 19; Prob 100.0%; CAS: 329216-63-9; Lib: nist\_msms; ID: 452544.

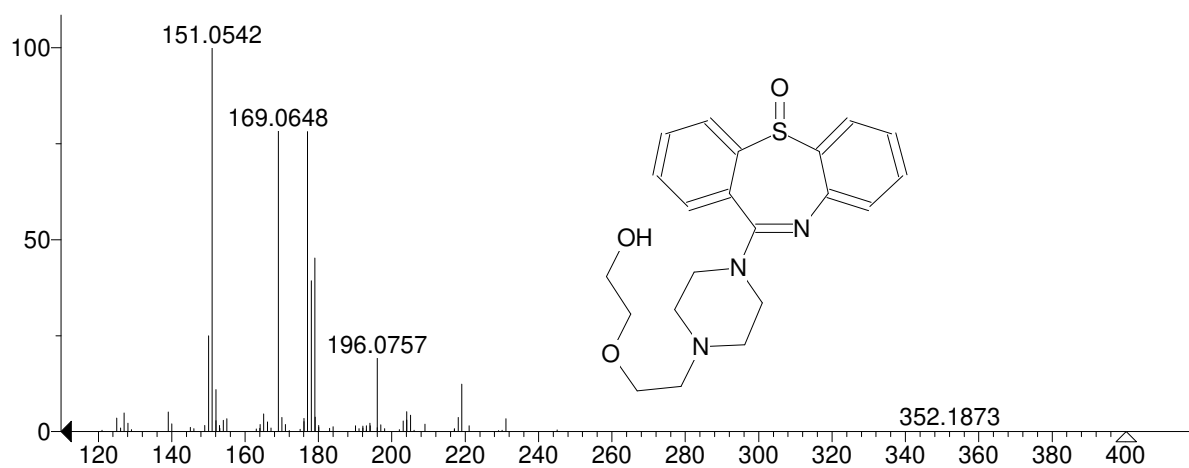

Unknown: Unknown (2.75\_417.1144m/z)  
Compound in Library Factor = 0

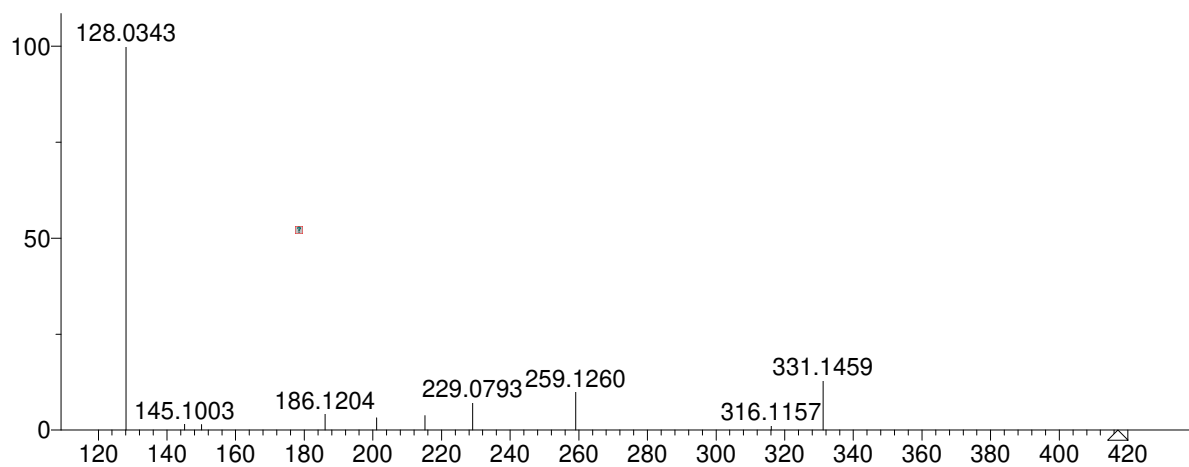

Hit 1 : Daidzin [M+H]<sup>+</sup> HCD 133V P=417.1  
C<sub>21</sub>H<sub>20</sub>O<sub>9</sub>; MF: 0; RMF: 22; Prob 25.0%; CAS: 552-66-9; Lib: nist\_msms; ID: 299121.

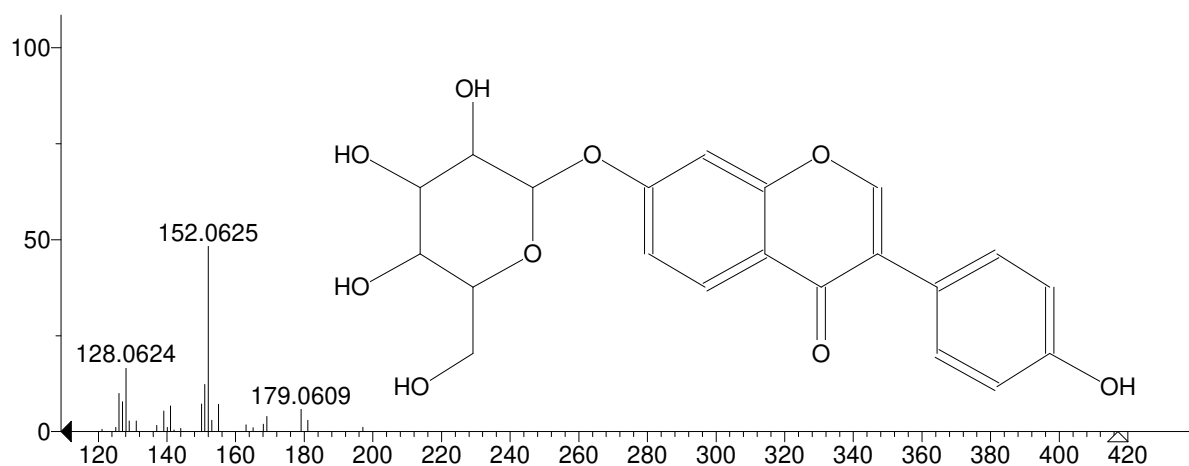

Hit 2 : Engeletin [M+H-H<sub>2</sub>O]<sup>+</sup> HCD 133V P=417.1  
C<sub>21</sub>H<sub>22</sub>O<sub>10</sub>; MF: 0; RMF: 15; Prob 25.0%; CAS: 572-31-6; Lib: nist\_msms; ID: 236880.

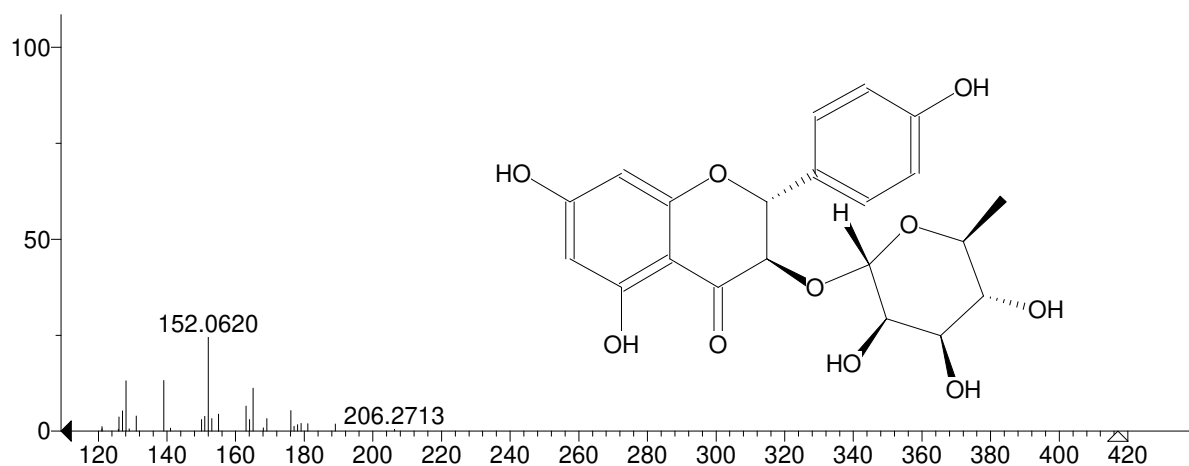

Hit 3 : Frangulin A [M+H]<sup>+</sup> HCD 108V P=417.1  
C<sub>21</sub>H<sub>20</sub>O<sub>9</sub>; MF: 0; RMF: 13; Prob 25.0%; CAS: 521-62-0; Lib: nist\_msms; ID: 258728.

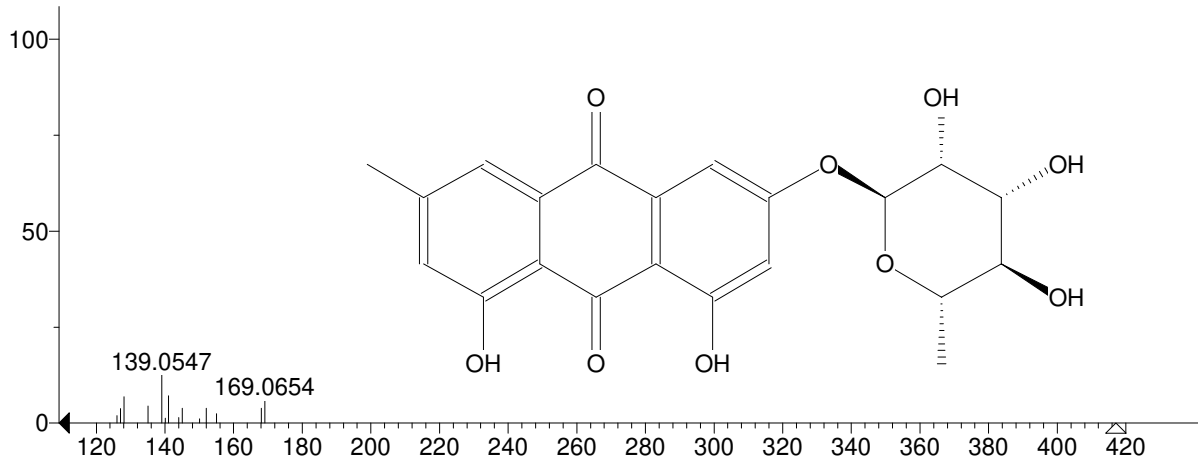

Hit 4 : aloesin [M+Na]<sup>+</sup> 35HCD P=417.1  
C<sub>19</sub>H<sub>22</sub>O<sub>9</sub>; MF: 0; RMF: 2; Prob 25.0%; Lib: mona-export-vf-npl\_qexactive; ID: 4465.

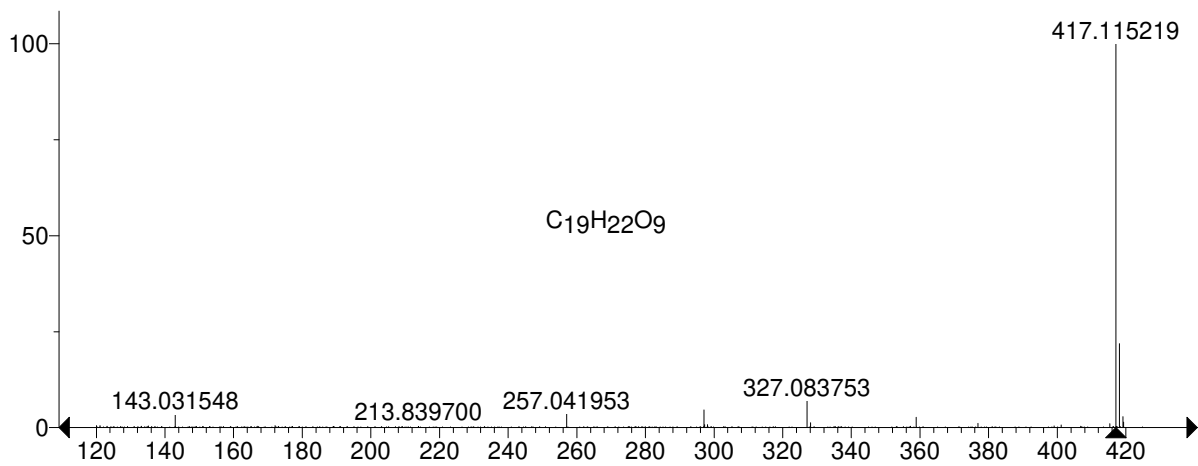

Unknown: Unknown (2.75\_698.2882m/z)  
Compound in Library Factor = 0

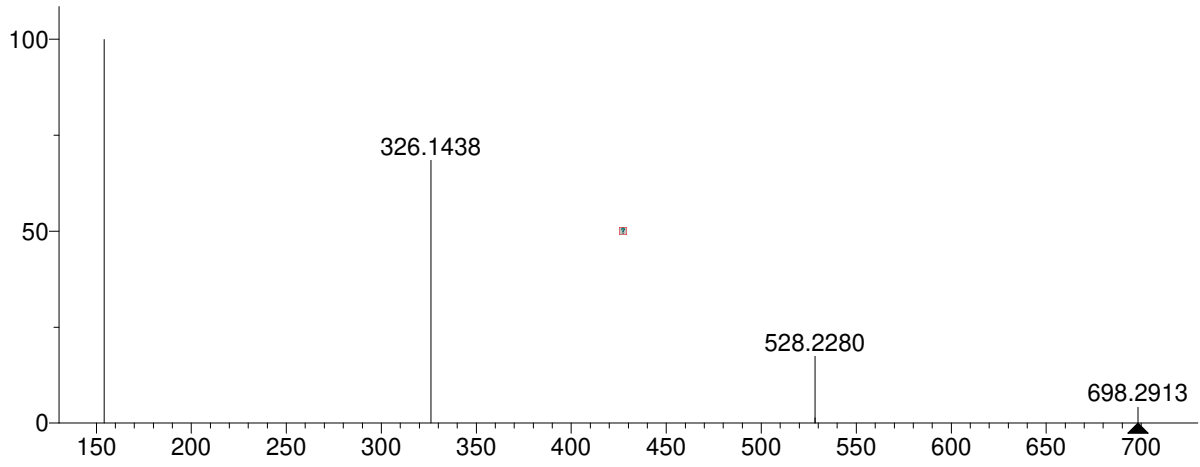



Unknown: Unknown (2.76\_422.1836m/z)  
Compound in Library Factor = 0

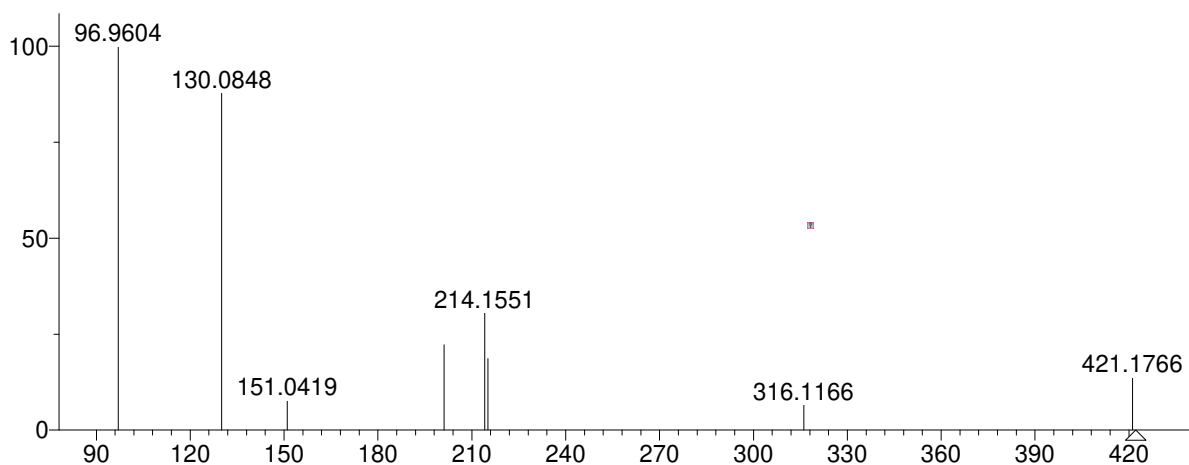

Hit 1 : [Des-Tyr1, DAla] Met-Enkephalins, amid [M-H]<sup>-</sup> IT 35% P=422.2  
C<sub>19</sub>H<sub>29</sub>N<sub>5</sub>O<sub>4</sub>S; MF: 0; RMF: 25; Prob 100.0%; Lib: nist\_msms2; ID: 74806.

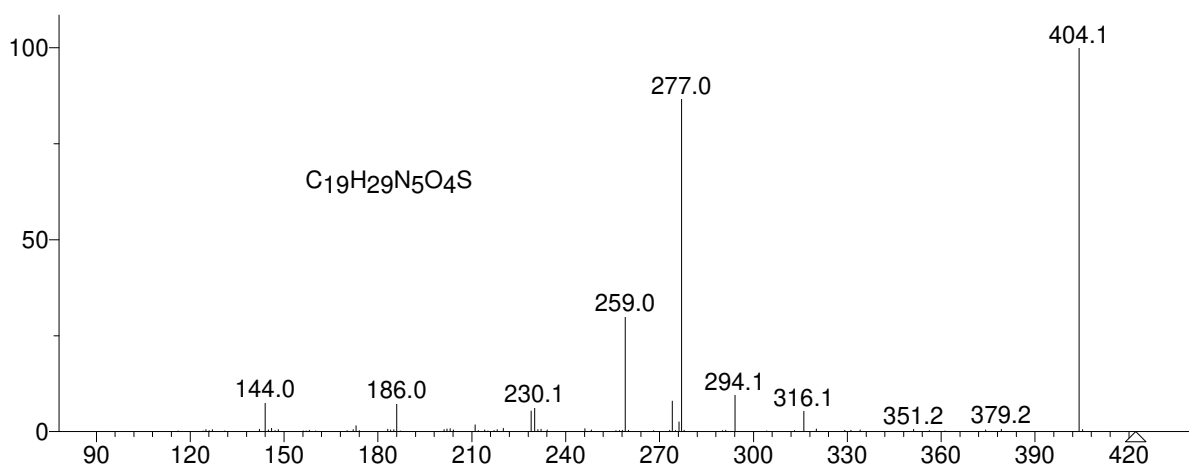

Unknown: Unknown (2.76\_639.2605m/z)  
Compound in Library Factor = 0

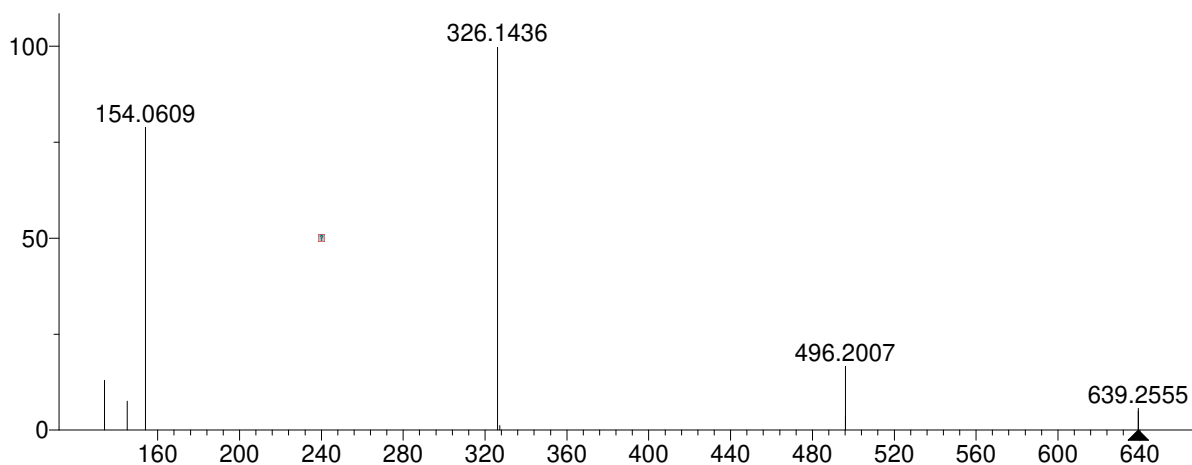

Hit 1 : Caspase 8 Substrate 1, chromogenic [M+H]<sup>+</sup> QTOF 5V P=639.3  
C<sub>27</sub>H<sub>38</sub>N<sub>6</sub>O<sub>12</sub>; MF: 0; RMF: 66; Prob 100.0%; Lib: nist\_msms2; ID: 39457.

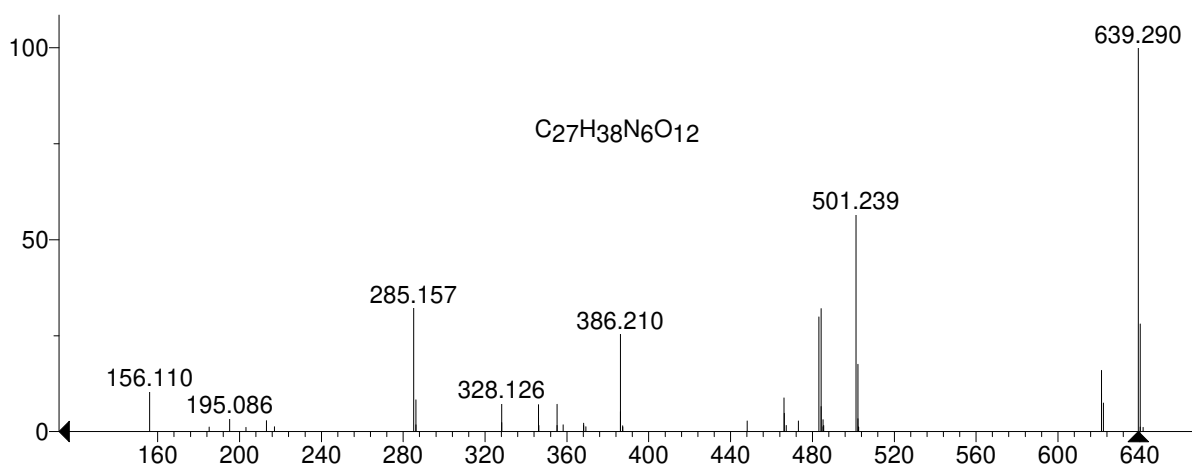

Unknown: Unknown (2.78\_255.1333m/z)  
Compound in Library Factor = -3273

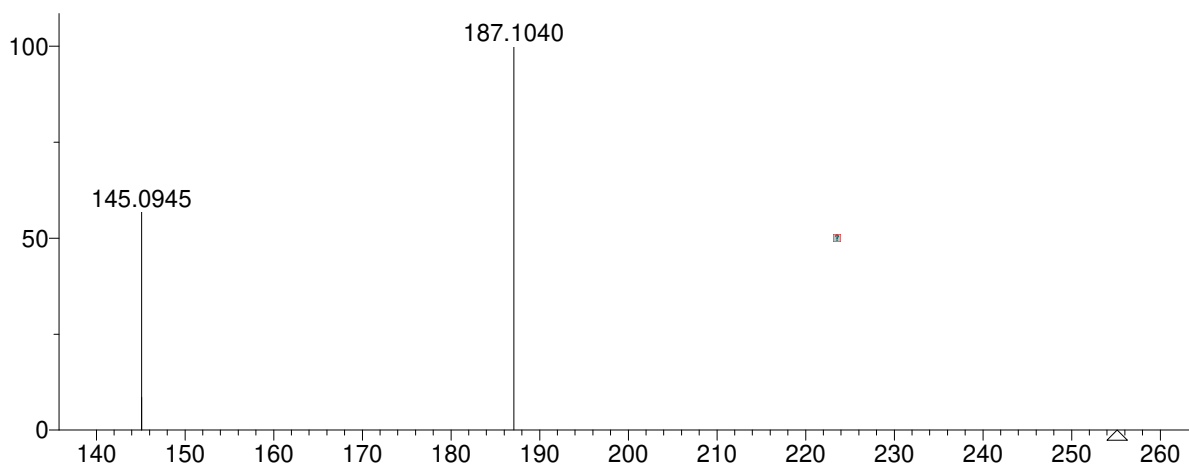

Hit 1 : Secobarbital [M+OH]<sup>-</sup> IT 35% P=255.1  
C<sub>12</sub>H<sub>18</sub>N<sub>2</sub>O<sub>3</sub>; MF: 4; RMF: 294; Prob 54.2%; CAS: 76-73-3; Lib: nist\_msms; ID: 14139.

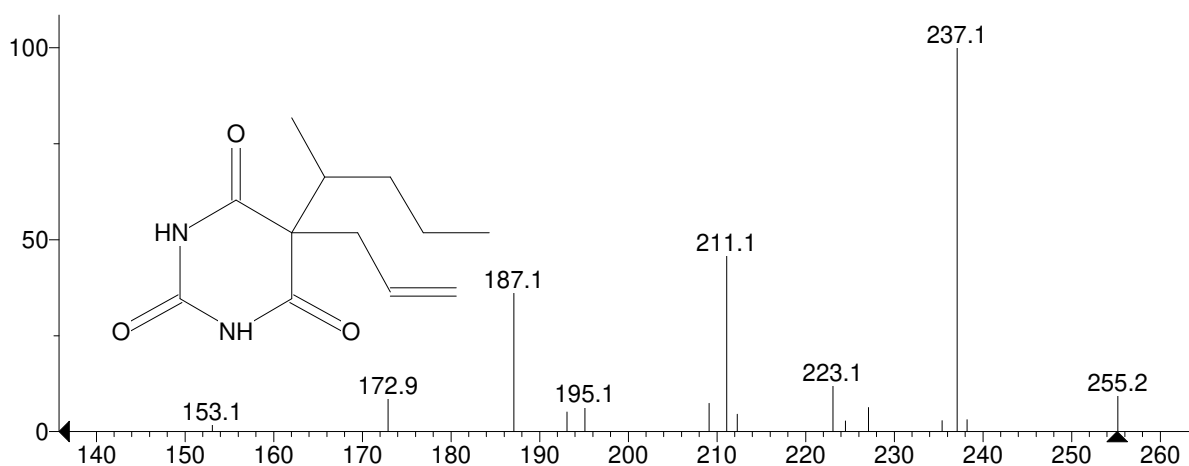

Hit 2 : Helenine [M+Na]<sup>+</sup> 65HCD P=255.1  
C<sub>15</sub>H<sub>20</sub>O<sub>2</sub>; MF: 0; RMF: 28; Prob 45.8%; Lib: mona-export-vf-npl\_qexactive; ID: 2649.

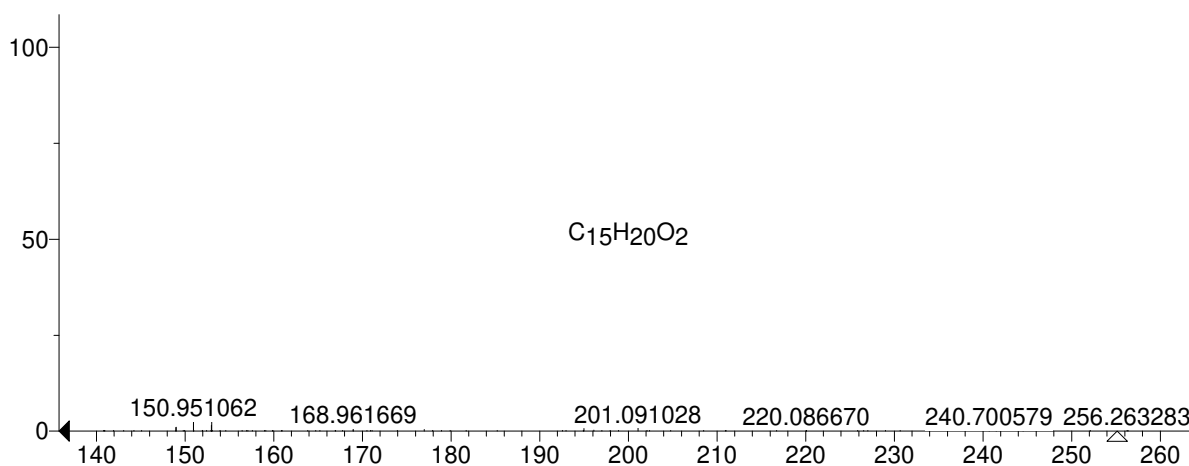

Unknown: Unknown (2.78\_395.0754m/z)  
Compound in Library Factor = 0

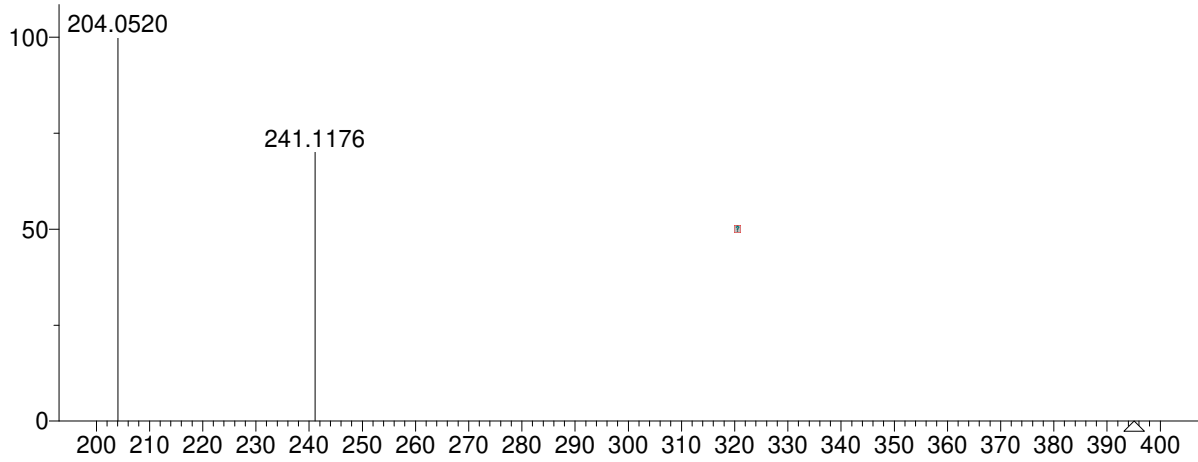

Hit 1 : Doxorubicin [M-H-C6H13NO3]- HCD 126V P=395.1  
C27H29NO11; MF: 0; RMF: 120; Prob 25.0%; CAS: 23214-92-8; Lib: nist\_msms; ID: 345538.

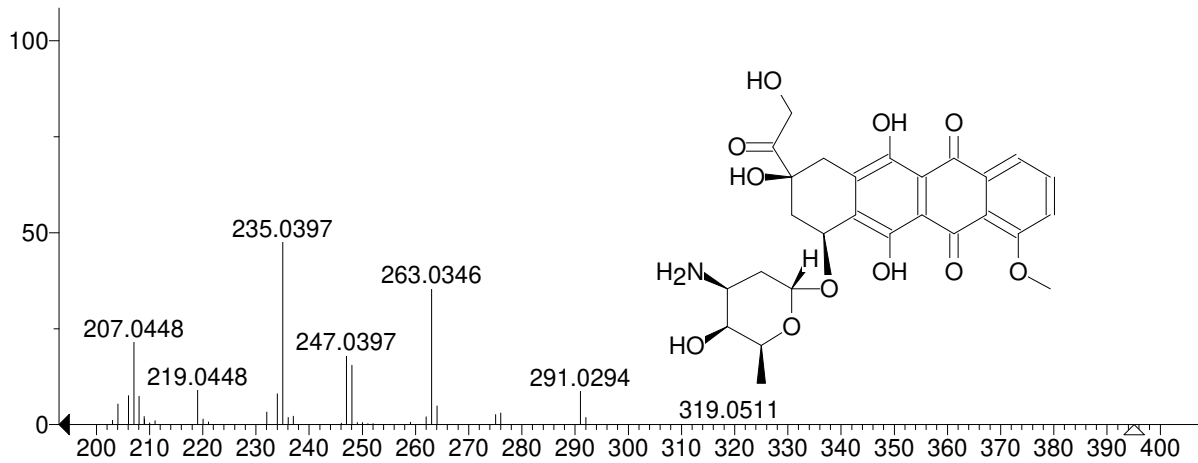

Hit 2 : Doxorubicinone [M-H-H2O]- HCD 63V P=395.1  
C21H18O9; MF: 0; RMF: 43; Prob 25.0%; CAS: 24385-10-2; Lib: nist\_msms; ID: 437424.

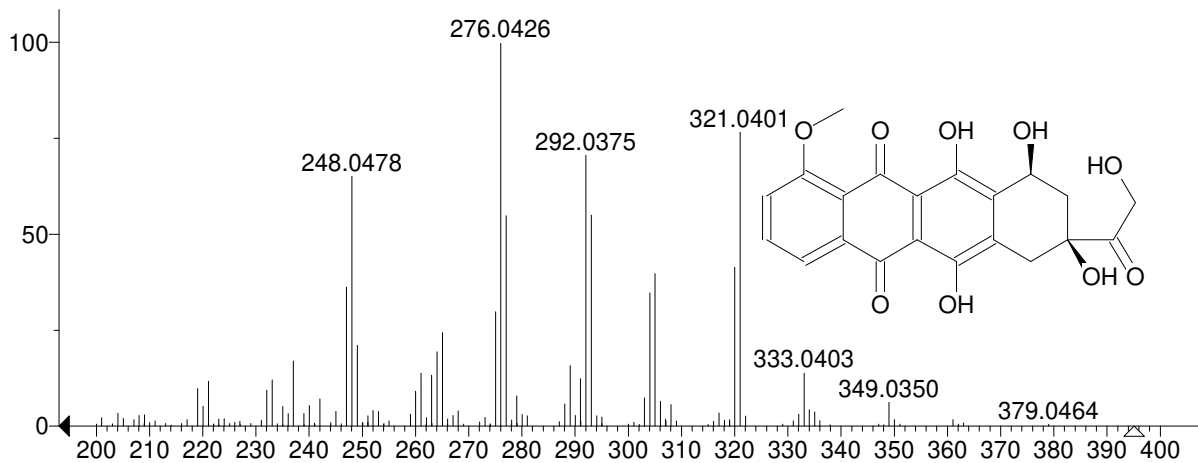

Hit 3 : Isoorientin [M+H-3H<sub>2</sub>O]<sup>+</sup> HCD 71V P=395.1

C<sub>21</sub>H<sub>20</sub>O<sub>11</sub>; MF: 0; RMF: 35; Prob 25.0%; CAS: 4261-42-1; Lib: nist\_msms; ID: 390618.

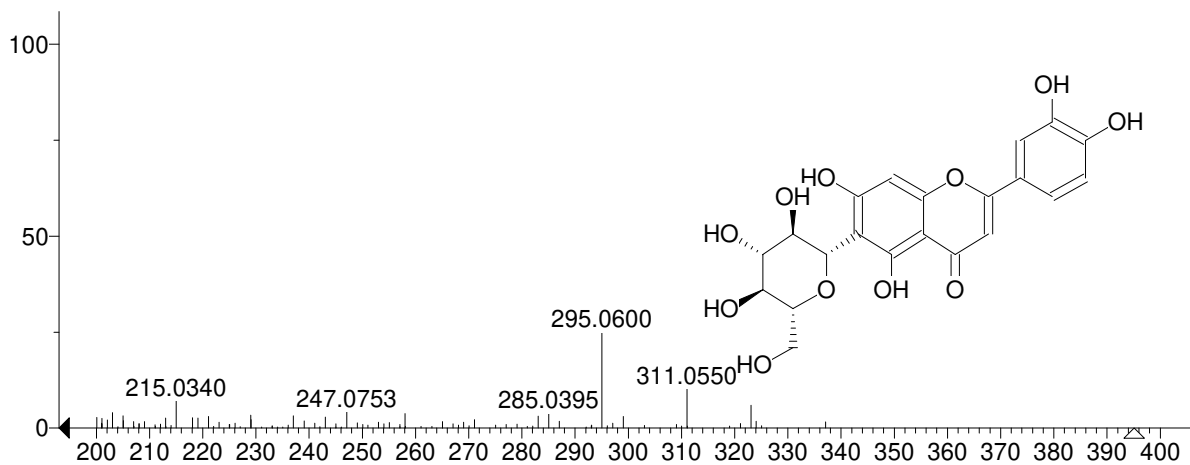

Hit 4 : (Z)-3-[4-methoxy-2-[(2S,3R,4S,5S,6R)-3,4,5-trihydroxy-6-(hydroxymethyl)oxan-2-yl]oxyphenyl]prop-2-enoic  
C<sub>16</sub>H<sub>20</sub>O<sub>9</sub>; MF: 0; RMF: 21; Prob 25.0%; Lib: mona-export-vf-npl\_qexactive; ID: 7762.

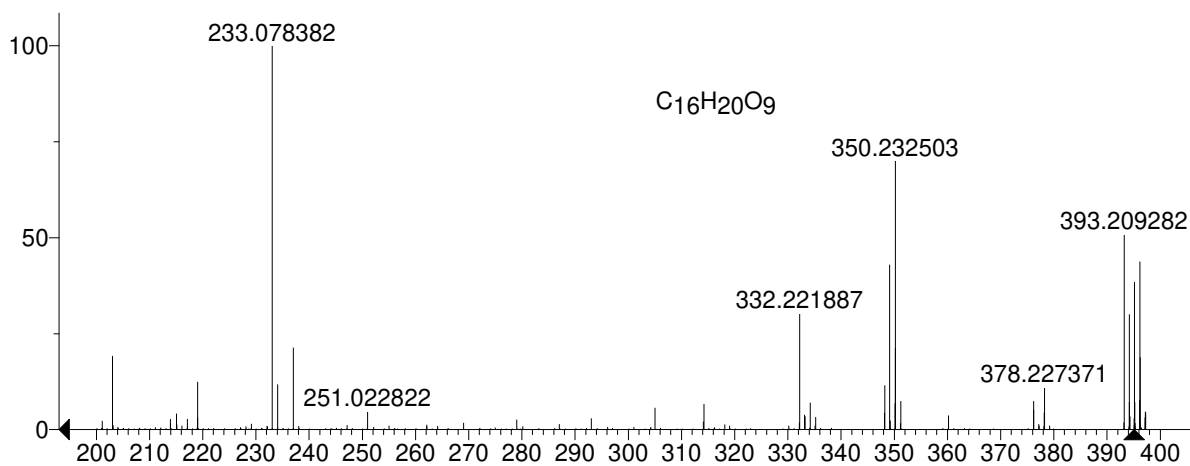

Unknown: Unknown (2.78\_666.2620m/z)  
Compound in Library Factor = 0

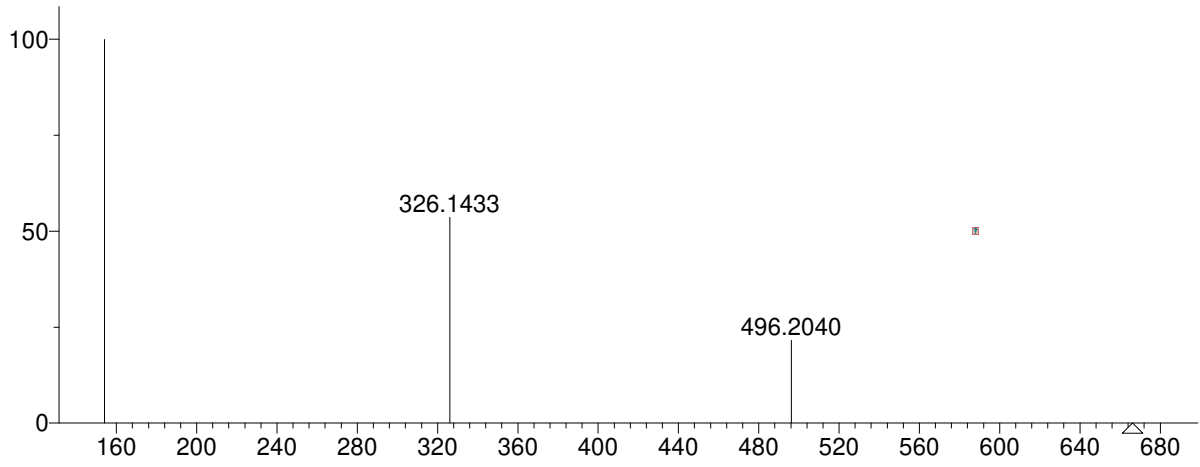

Unknown: Unknown (2.79\_325.0165m/z)  
Compound in Library Factor = 0

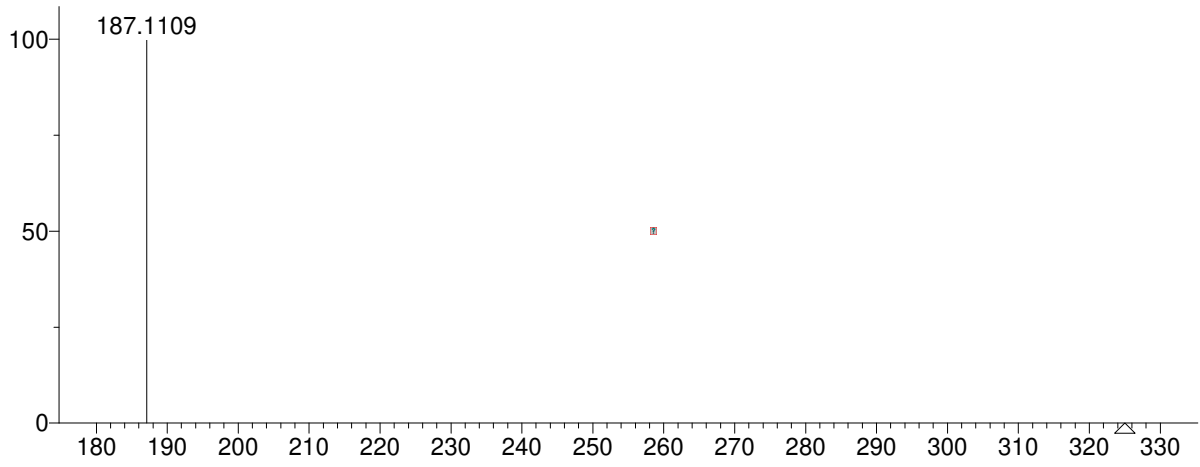

Unknown: Unknown (2.79\_373.1220m/z)  
Compound in Library Factor = 0

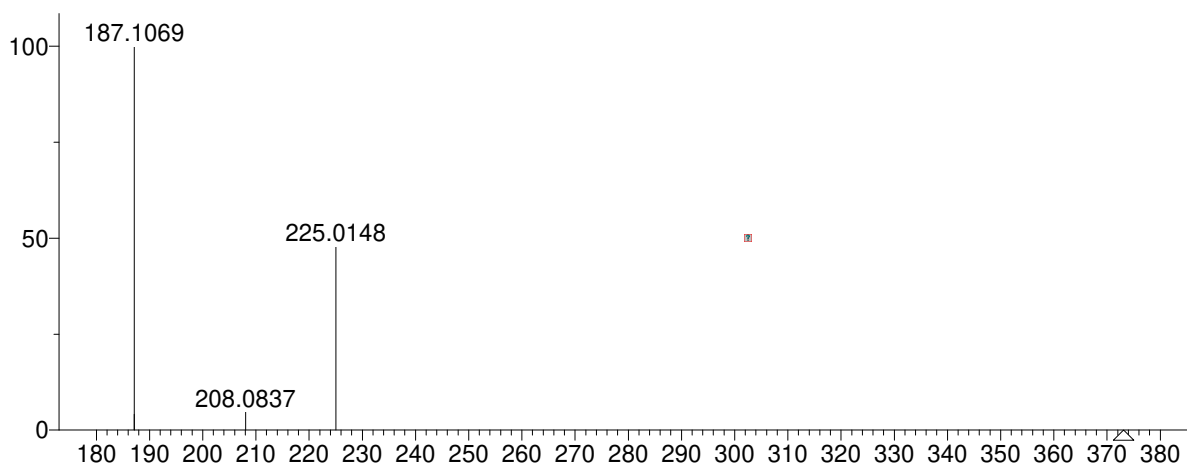

Hit 1 : 2,4-Thiazolidinedione, 5-[[4-[2-(5-ethyl-2-pyridinyl)-2-hydroxyethoxy]phenyl]methyl]- [M+H]<sup>+</sup> HCD 82V P: C19H20N2O4S; MF: 0; RMF: 25; Prob 50.0%; CAS: 101931-00-4; Lib: nist\_msms; ID: 443098.

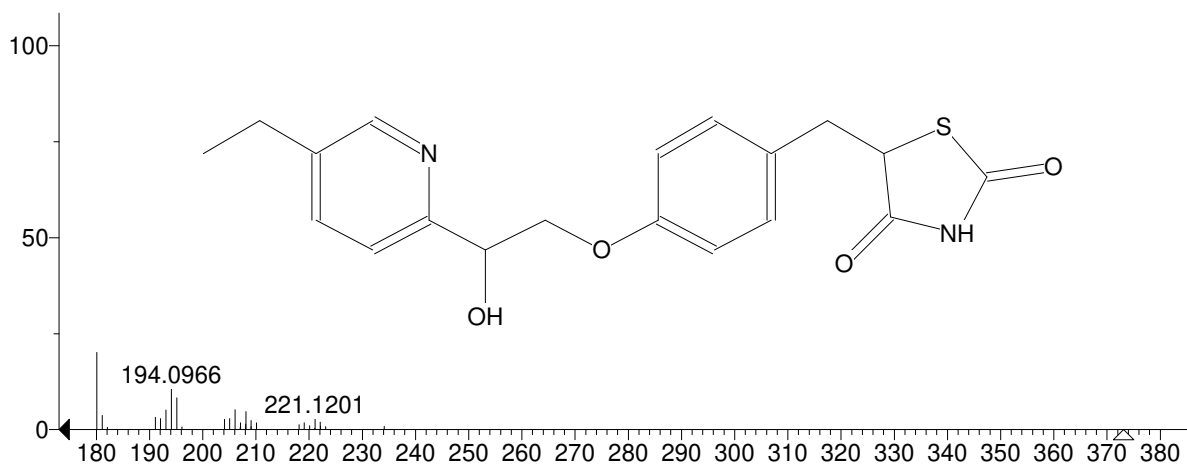

Hit 2 : Dapagliflozin [M+H-2H2O]<sup>+</sup> IT 35% P=373.1  
C21H25ClO6; MF: 0; RMF: 16; Prob 50.0%; CAS: 461432-26-8; Lib: nist\_msms; ID: 548881.

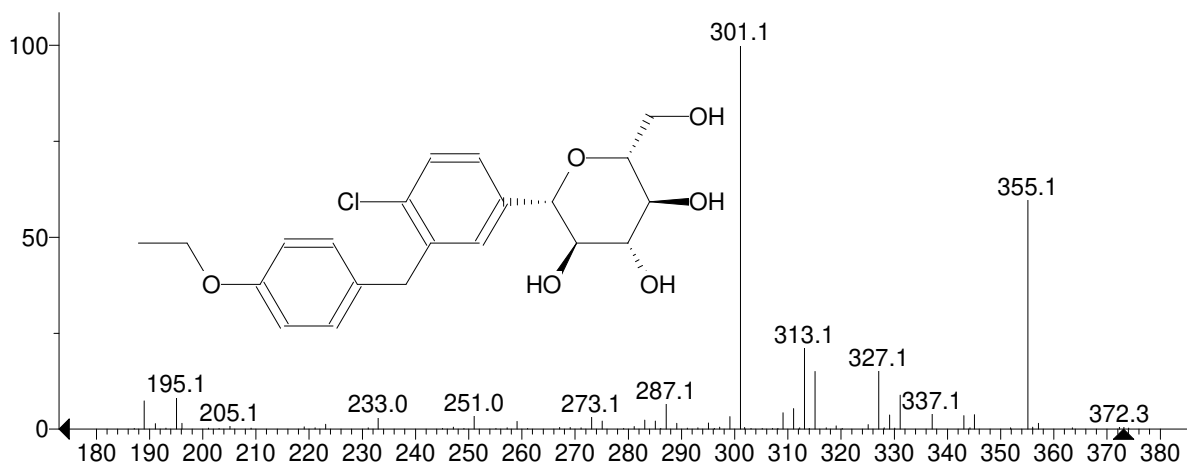



\*\* Search Report Page 1 of 2 \*\*

Unknown: Unknown (2.81\_215.1384m/z)  
Compound in Library Factor = -344

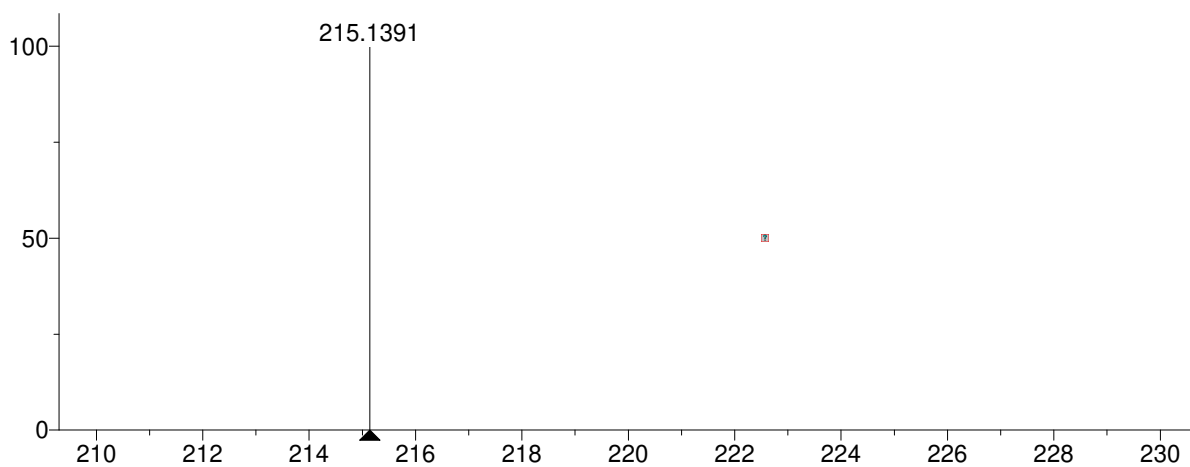

Hit 1 : Val-Pro [M+H]<sup>+</sup> QTOF 30V P=215.1  
C<sub>10</sub>H<sub>18</sub>N<sub>2</sub>O<sub>3</sub>; MF: 364; RMF: 999; Prob 14.4%; Lib: nist\_msms; ID: 49019.

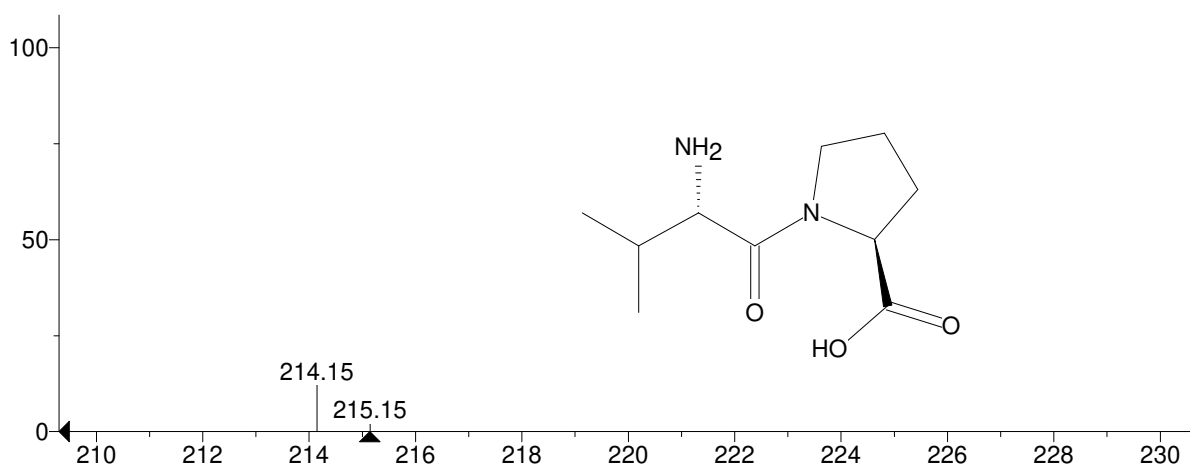

Hit 2 : D-Desthiobiotin [M+H]<sup>+</sup> HCD 19V P=215.1  
C<sub>10</sub>H<sub>18</sub>N<sub>2</sub>O<sub>3</sub>; MF: 364; RMF: 999; Prob 14.4%; CAS: 533-48-2; Lib: nist\_msms; ID: 489068.

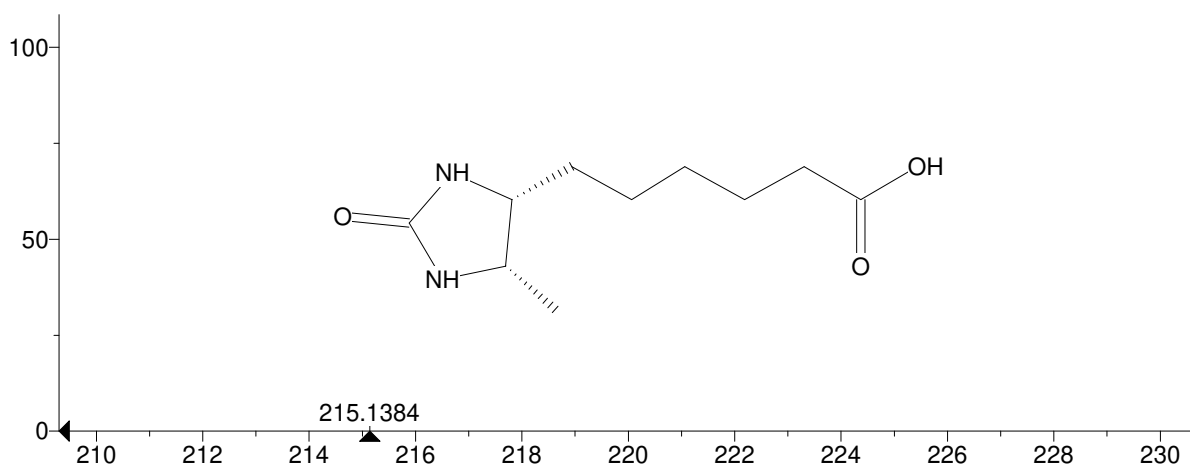

Hit 3 : Pro-Val [M+H]<sup>+</sup> HCD 12eV P=215.1  
C<sub>10</sub>H<sub>18</sub>N<sub>2</sub>O<sub>3</sub>; MF: 364; RMF: 999; Prob 14.4%; Lib: nist\_msms; ID: 563234.

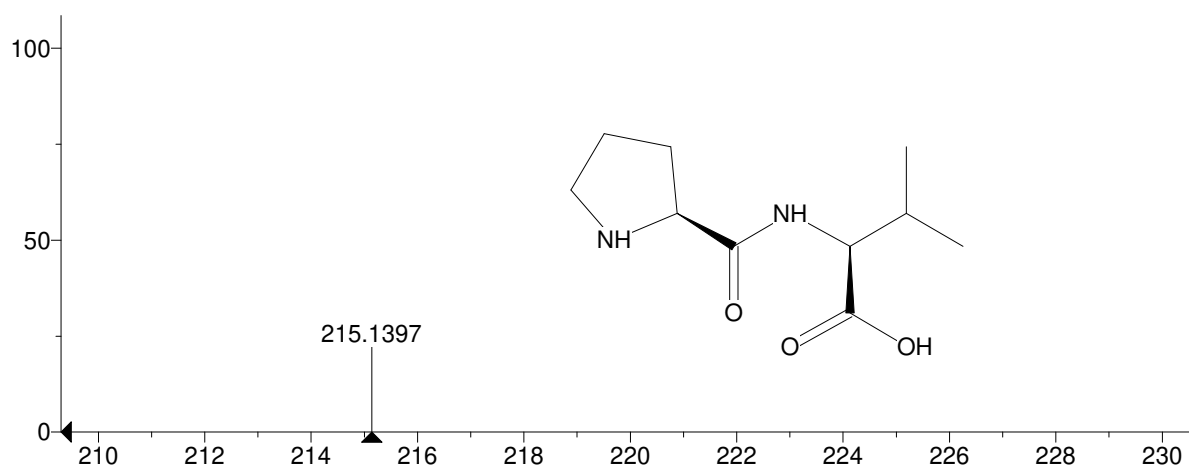

Hit 4 : Val-Val [M-H]<sup>-</sup> HCD 34eV P=215.1  
C<sub>10</sub>H<sub>20</sub>N<sub>2</sub>O<sub>3</sub>; MF: 364; RMF: 999; Prob 14.4%; CAS: 3918-94-3; Lib: nist\_msms; ID: 568163.

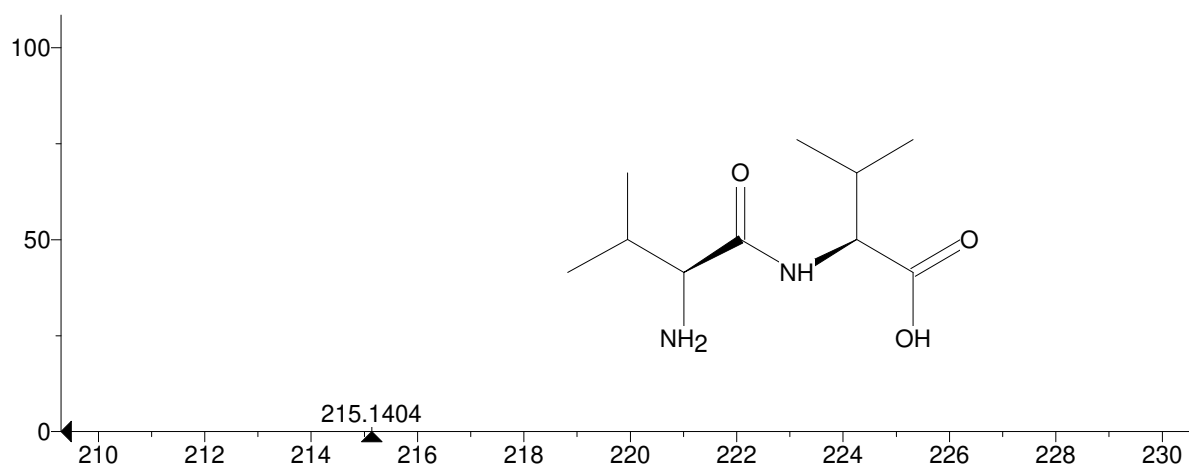

Hit 5 : Pro-Val [M+H]<sup>+</sup> HCD 12eV P=215.1  
C<sub>10</sub>H<sub>18</sub>N<sub>2</sub>O<sub>3</sub>; MF: 364; RMF: 999; Prob 14.4%; CAS: 52899-09-9; Lib: nist\_msms2; ID: 43035.

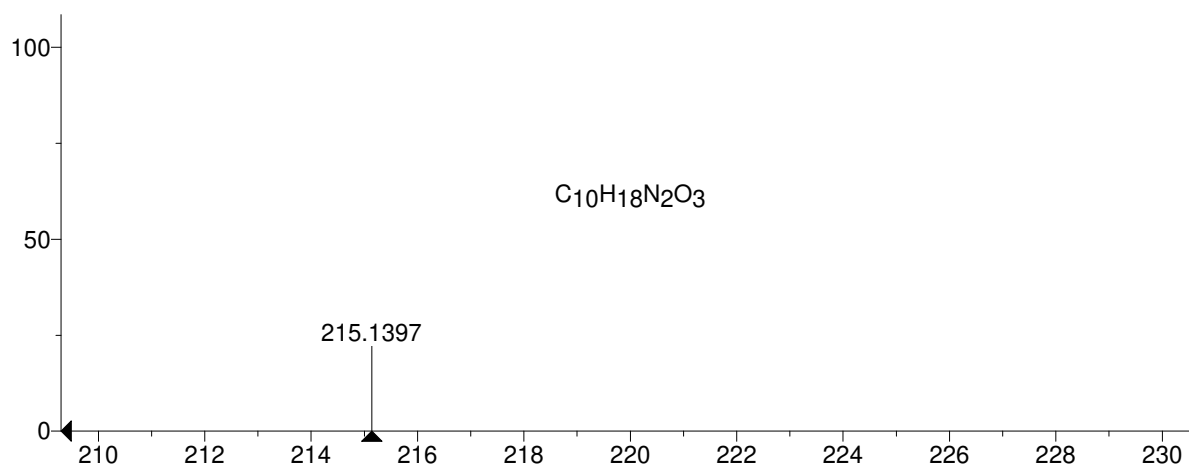

Unknown: Unknown (2.82\_409.0901m/z)  
Compound in Library Factor = -359

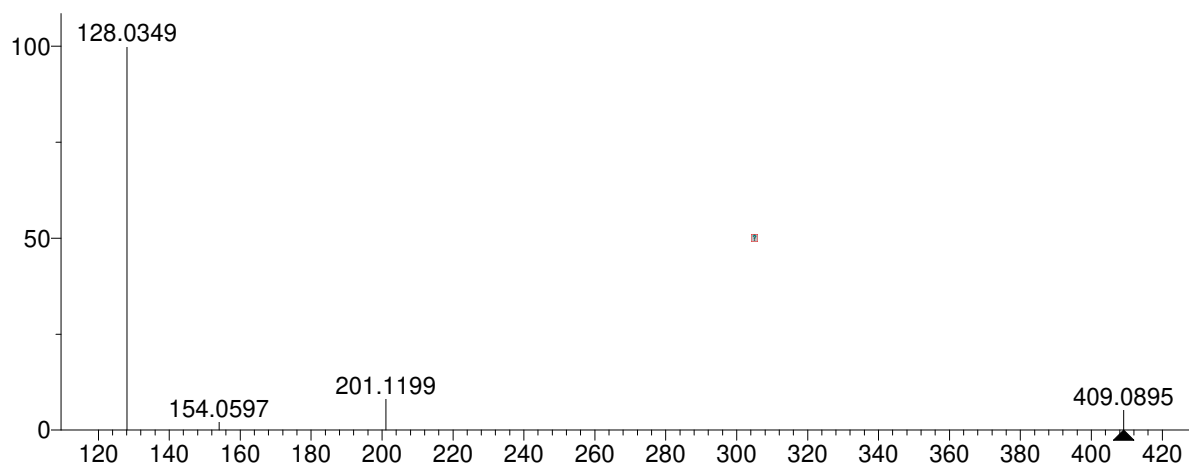

Hit 1 : Irisflorentin [M+Na]<sup>+</sup> HCD 24V P=409.1  
C<sub>20</sub>H<sub>18</sub>O<sub>8</sub>; MF: 328; RMF: 951; Prob 95.3%; CAS: 41743-73-1; Lib: nist\_msms; ID: 240385.

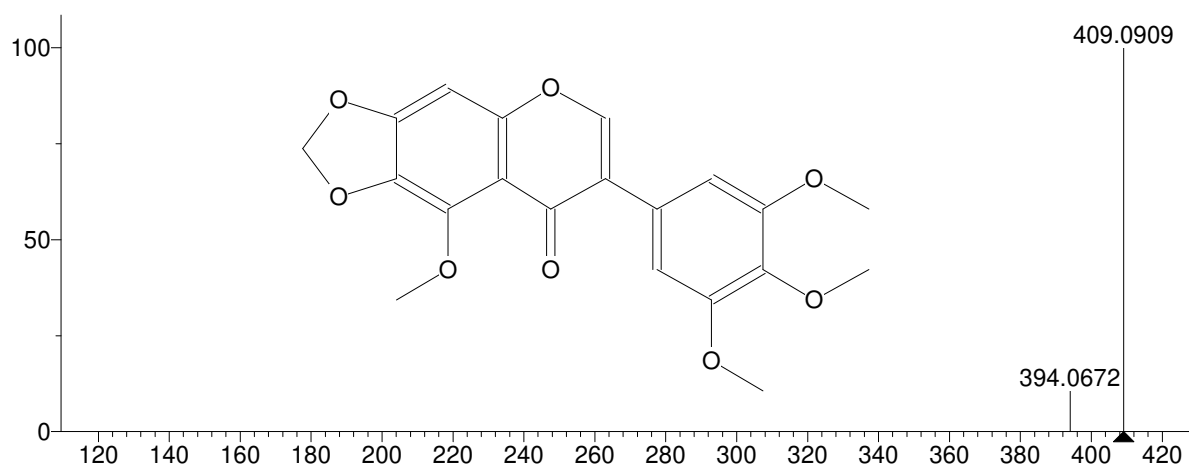

Hit 2 : Nicosulfuron [M-H]<sup>-</sup> 15% ( P=409.1  
C<sub>15</sub>H<sub>18</sub>N<sub>6</sub>O<sub>6</sub>S; MF: 166; RMF: 584; Prob 2.34%; Lib: mona-export-ic-ms-ms\_negative\_mode; ID: 2153.

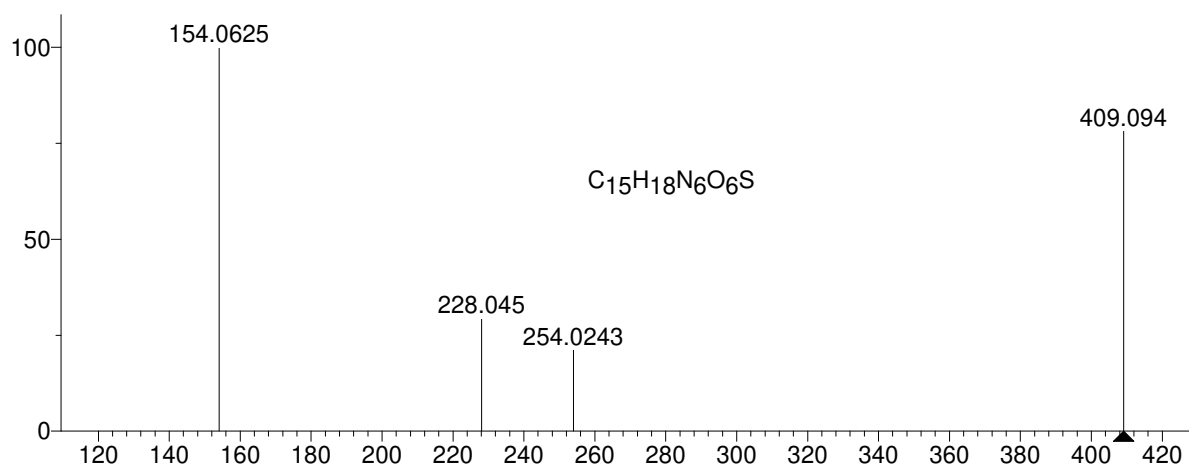

Hit 3 : Nicosulfuron; LC-ESI-ITFT; MS2; CE [M-H]- 15 P=409.1  
C<sub>15</sub>H<sub>18</sub>N<sub>6</sub>O<sub>6</sub>S; MF: 166; RMF: 584; Prob 2.34%; Lib: msms-neg-massbank; ID: 2011.

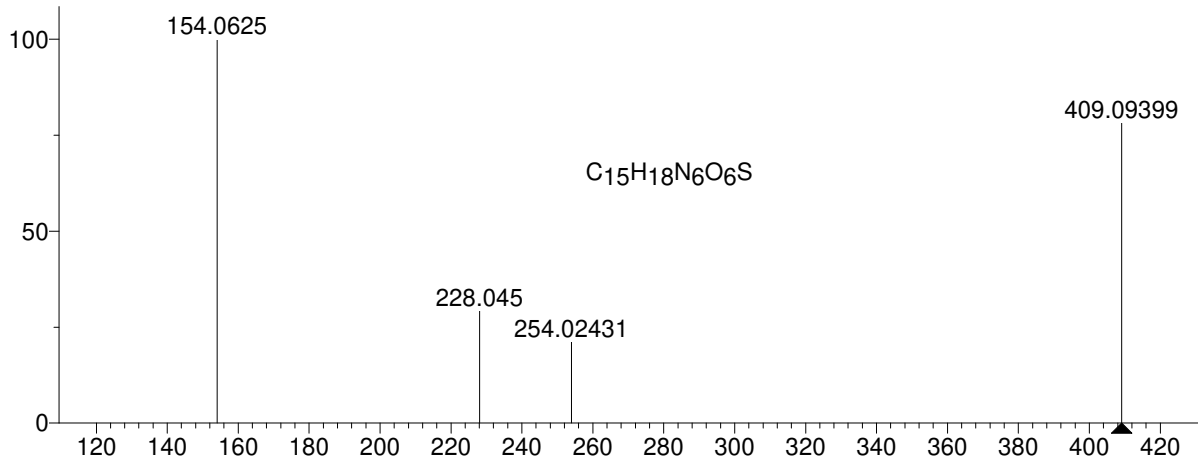

Unknown: Unknown (2.82\_435.1505m/z)  
Compound in Library Factor = 0

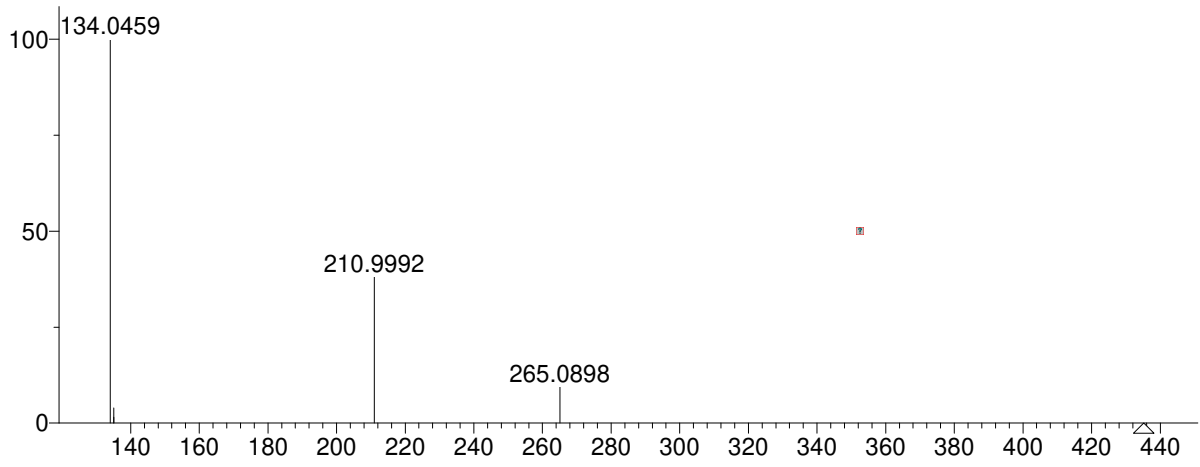

Unknown: Unknown (2.83\_344.1819m/z)  
Compound in Library Factor = 0

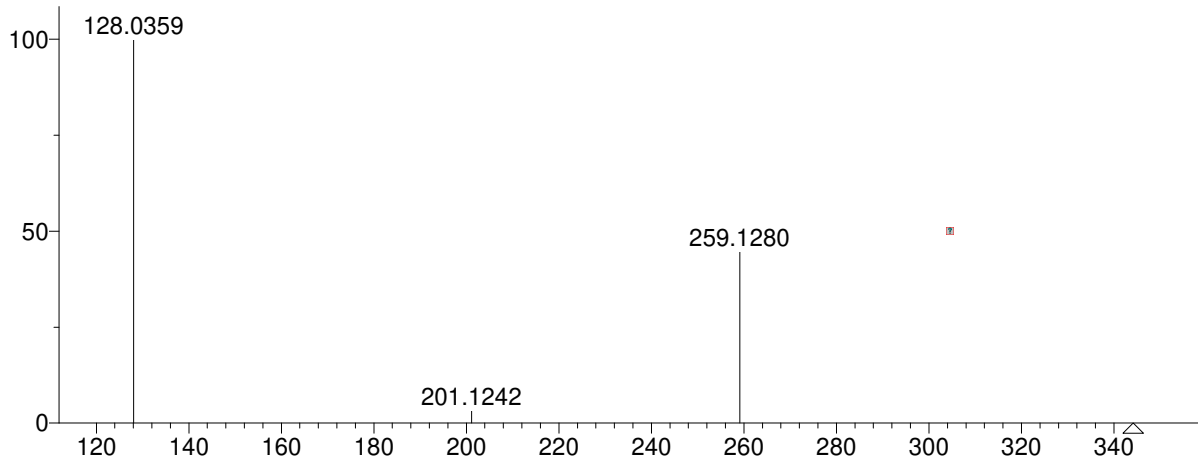

Hit 1 : 4-amino-2-hydroxy-5-[[1-hydroxy-1-(5-oxo-6-bicyclo[4.1.0]hept-3-enyl)propan-2-yl]amino]-5-oxopentanoic acid  
C<sub>15</sub>H<sub>22</sub>N<sub>2</sub>O<sub>6</sub>; MF: 0; RMF: 27; Prob 100.0%; Lib: mona-export-vf-npl\_qexactive; ID: 16561.

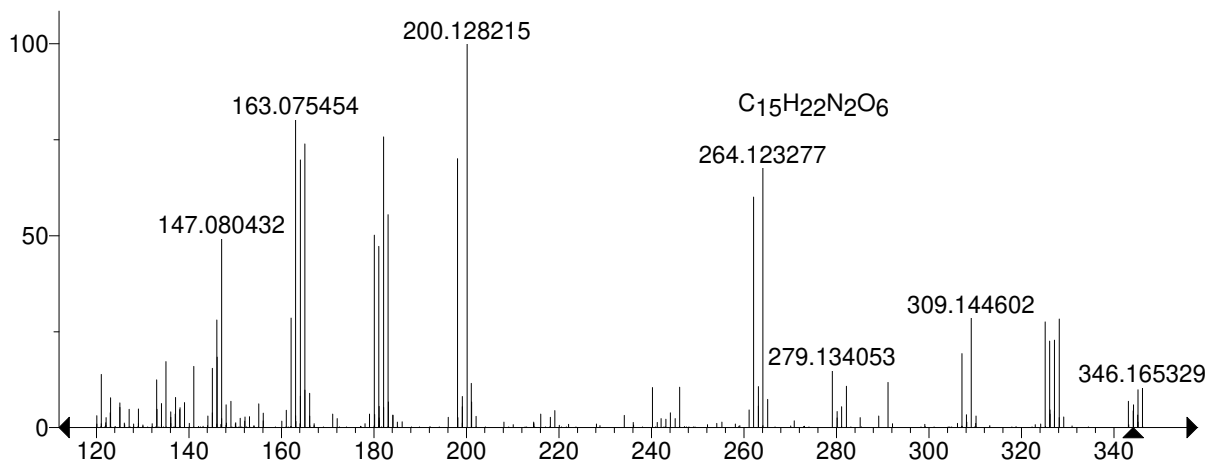

\*\* Search Report Page 1 of 2 \*\*

Unknown: Unknown (2.83\_373.1250m/z)  
Compound in Library Factor = 0

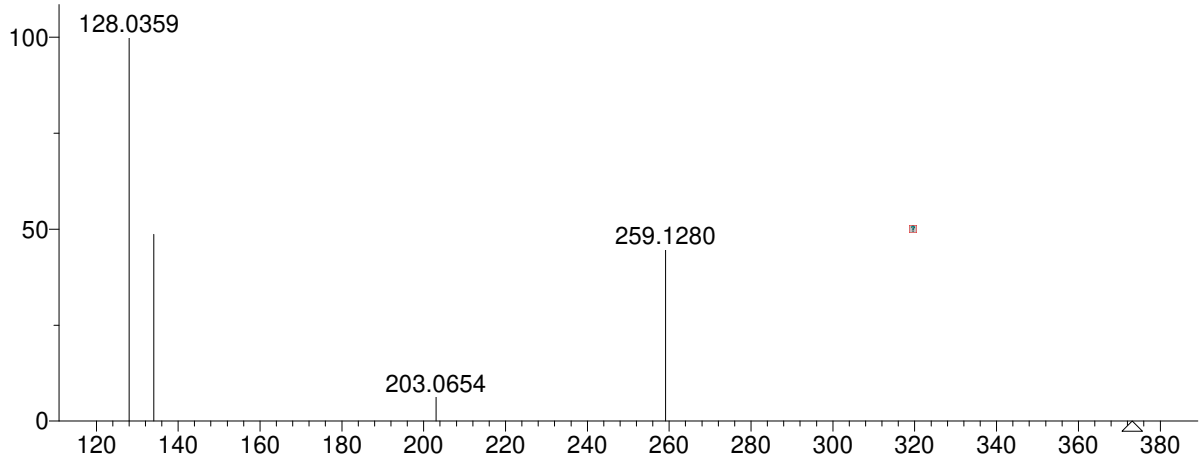

Hit 1 : Gox(8-O-4)G 1 (lignin) [M-H]- P=373.1  
C<sub>20</sub>H<sub>22</sub>O<sub>7</sub>; MF: 0; RMF: 58; Prob 7.14%; Lib: phytofrag2018\_final\_060219; ID: 554.

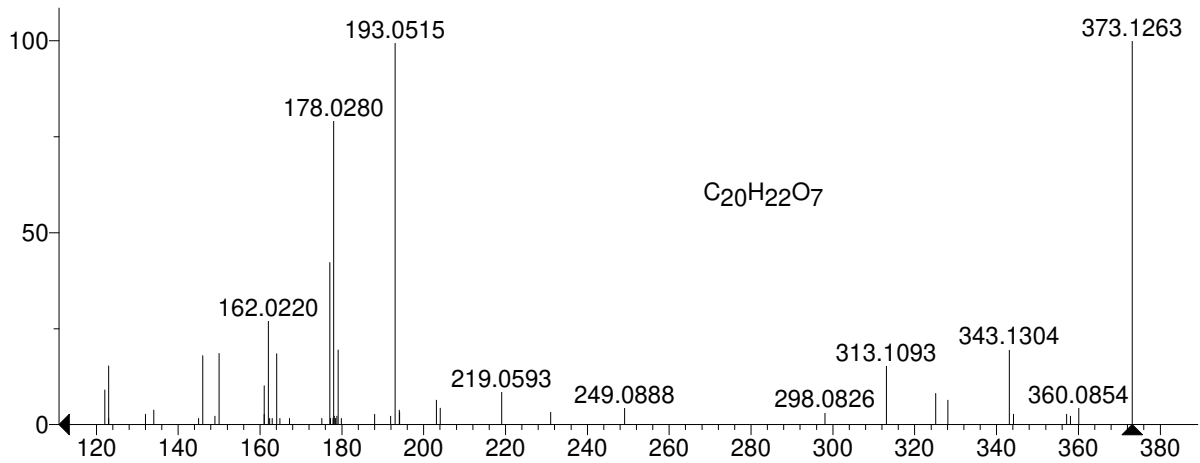

Hit 2 : NCGC00385104-01\_C<sub>20</sub>H<sub>22</sub>O<sub>8</sub>\_beta-D-Glucopyranoside, 2-(hydroxymethyl)phenyl, 6-benzoate [M-H<sub>2</sub>O]  
C<sub>20</sub>H<sub>22</sub>O<sub>8</sub>; MF: 0; RMF: 38; Prob 7.14%; Lib: mona-export-gnps; ID: 14283.

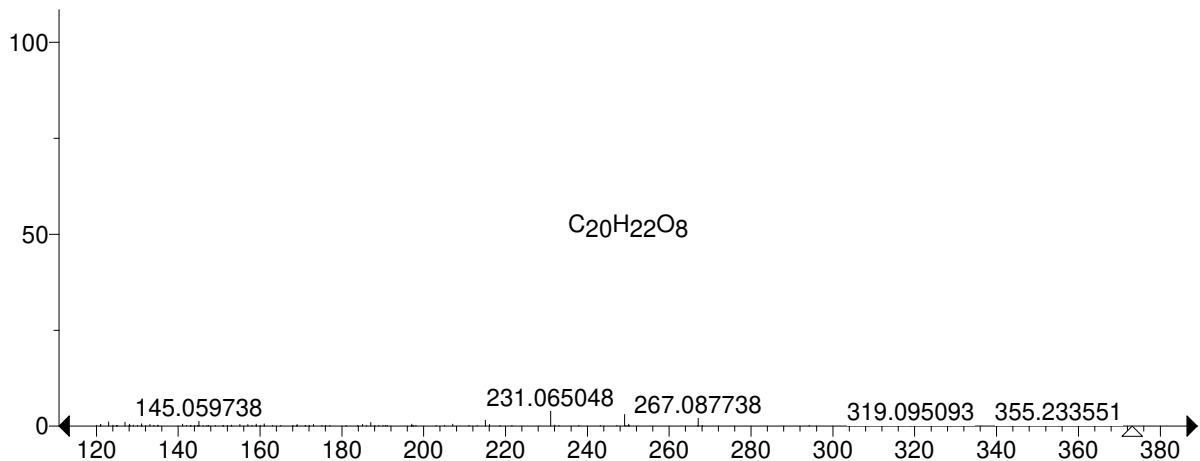

\*\* Search Report Page 2 of 2 \*\*

Hit 3 : NCGC00095850-0415,6,7,8-tetramethoxy-2-(4-methoxyphenyl)chromen-4-one [M+H]<sup>+</sup> P=373.1  
C<sub>20</sub>H<sub>20</sub>O<sub>7</sub>; MF: 0; RMF: 28; Prob 7.14%; Lib: mona-export-gnps; ID: 9185.

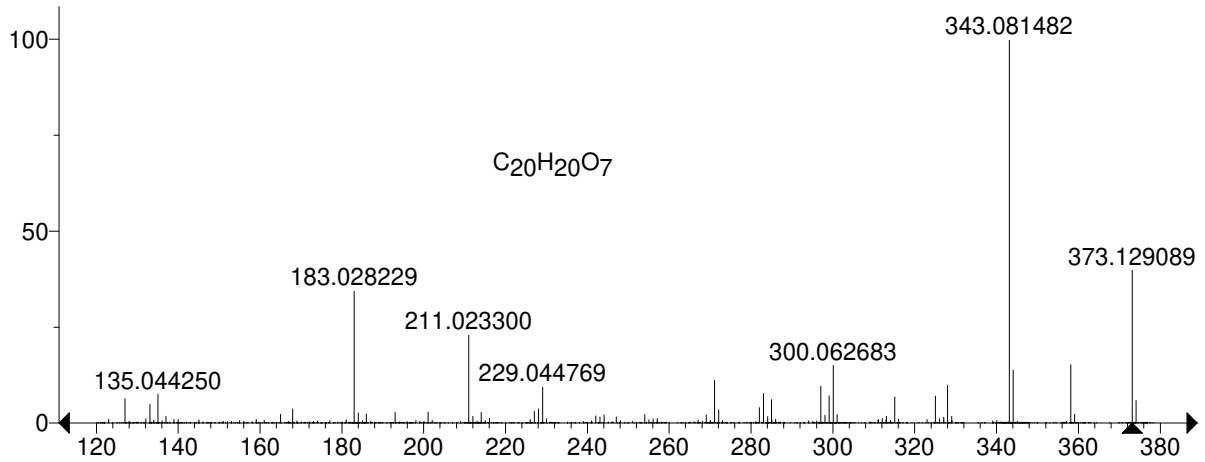

Hit 4 : [3-(4-hydroxy-3-methoxybenzoyl)-2,3-dimethyloxiran-2-yl]-(4-hydroxy-3-methoxyphenyl)methanone [M+H]<sup>+</sup>  
C<sub>20</sub>H<sub>20</sub>O<sub>7</sub>; MF: 0; RMF: 18; Prob 7.14%; Lib: mona-export-vf-npl\_qexactive; ID: 19627.

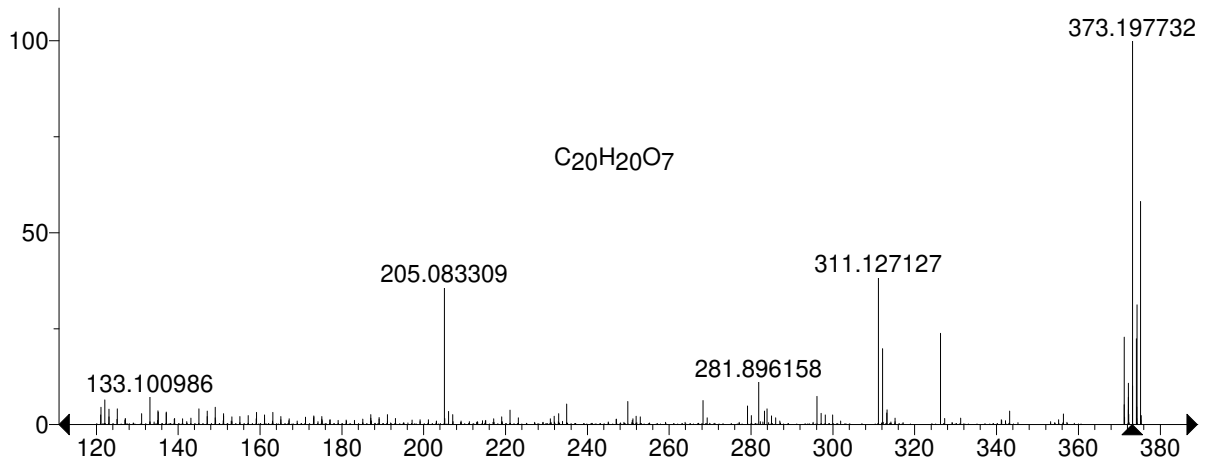

Hit 5 : Sinensetin [M+H]<sup>+</sup> 65HCD P=373.1  
C<sub>20</sub>H<sub>20</sub>O<sub>7</sub>; MF: 0; RMF: 16; Prob 7.14%; Lib: mona-export-vf-npl\_qexactive; ID: 14397.

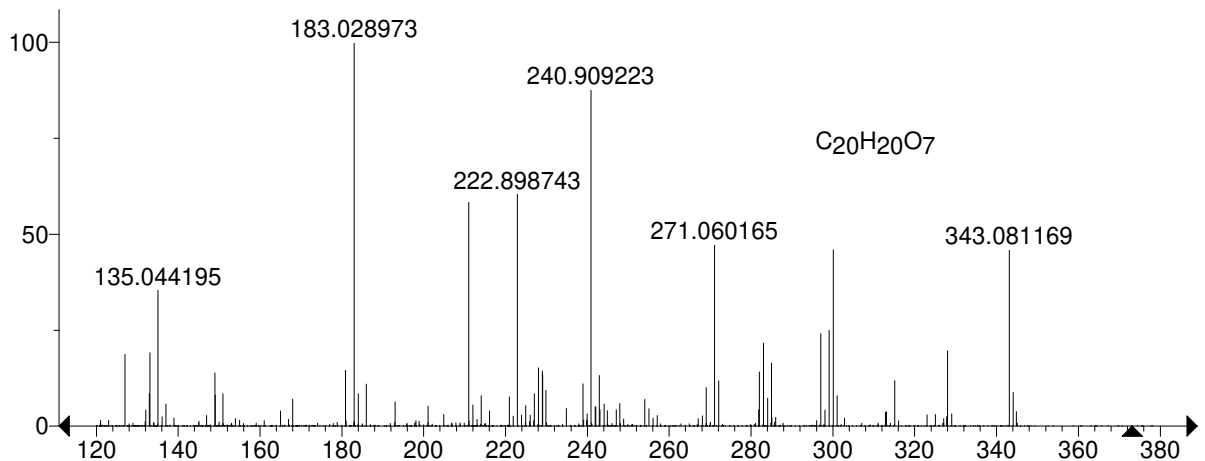



Unknown: Unknown (2.83\_492.2181m/z)  
Compound in Library Factor = 0

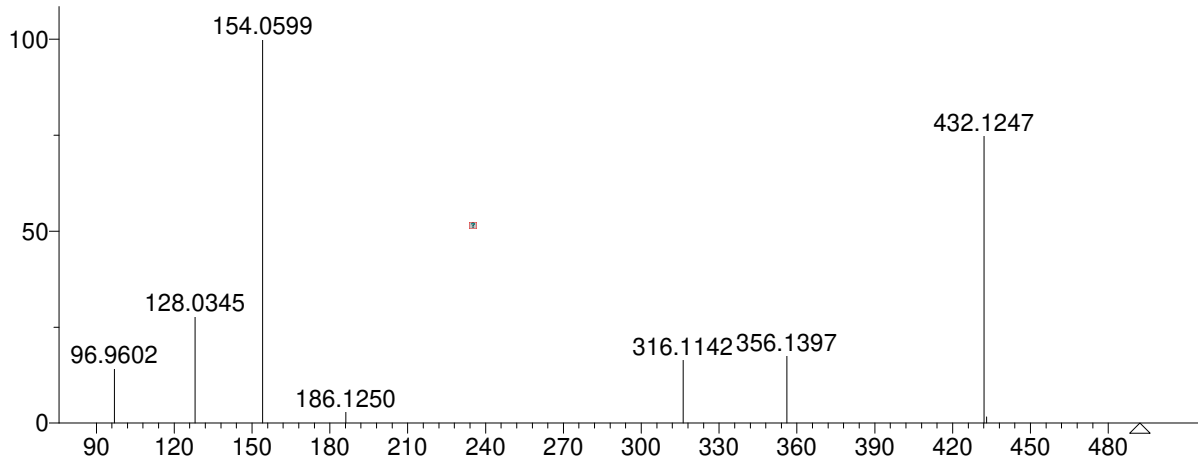

Unknown: Unknown (2.83\_526.2034m/z)  
Compound in Library Factor = 0

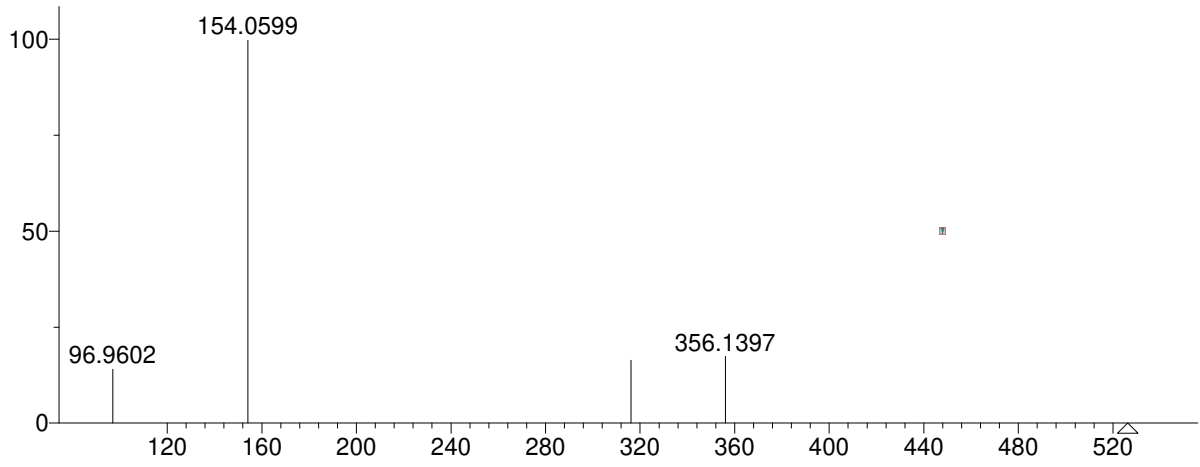

Unknown: Unknown (2.83\_603.1866m/z)  
Compound in Library Factor = 0

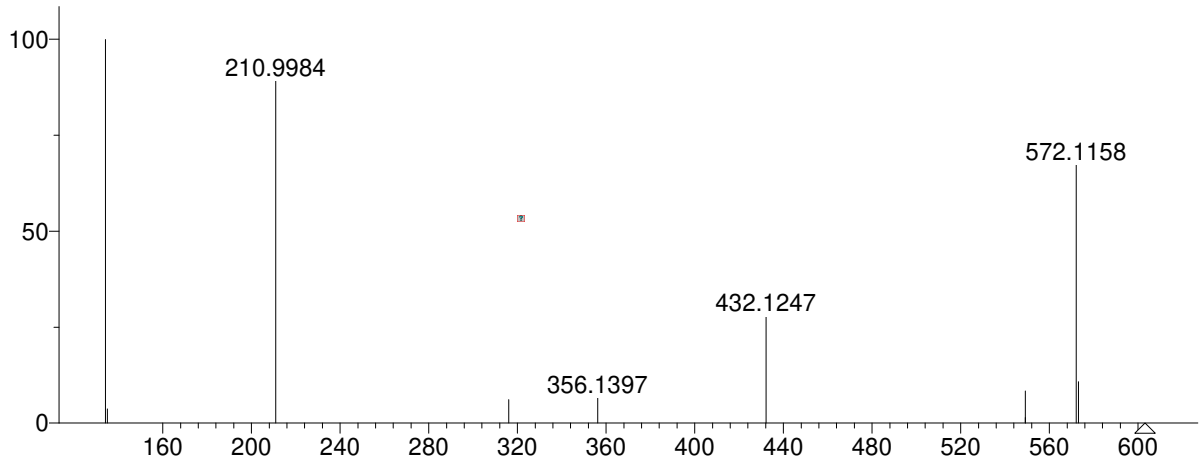

Unknown: Unknown (2.84\_349.1602m/z)  
Compound in Library Factor = 0

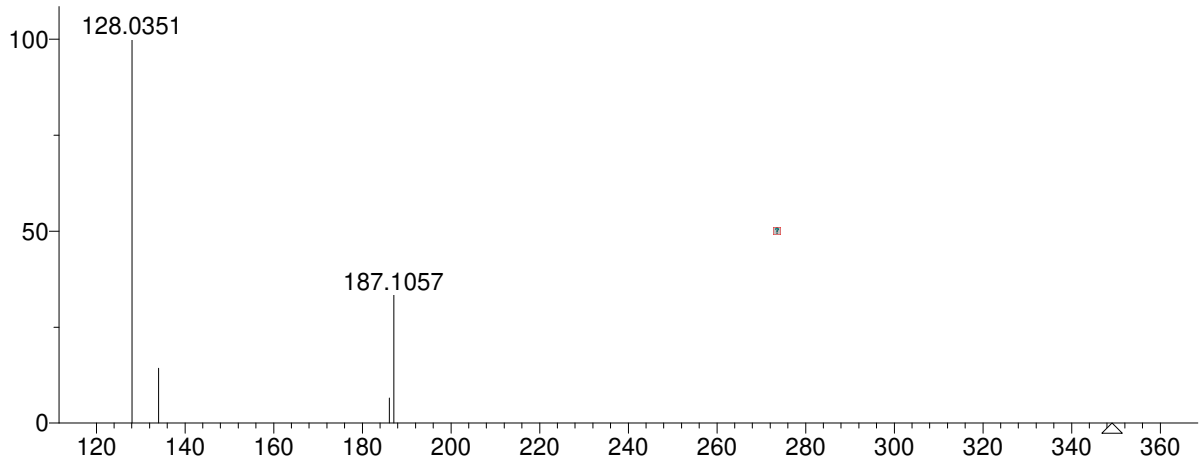

Unknown: Unknown (2.84\_432.1264m/z)  
Compound in Library Factor = 0

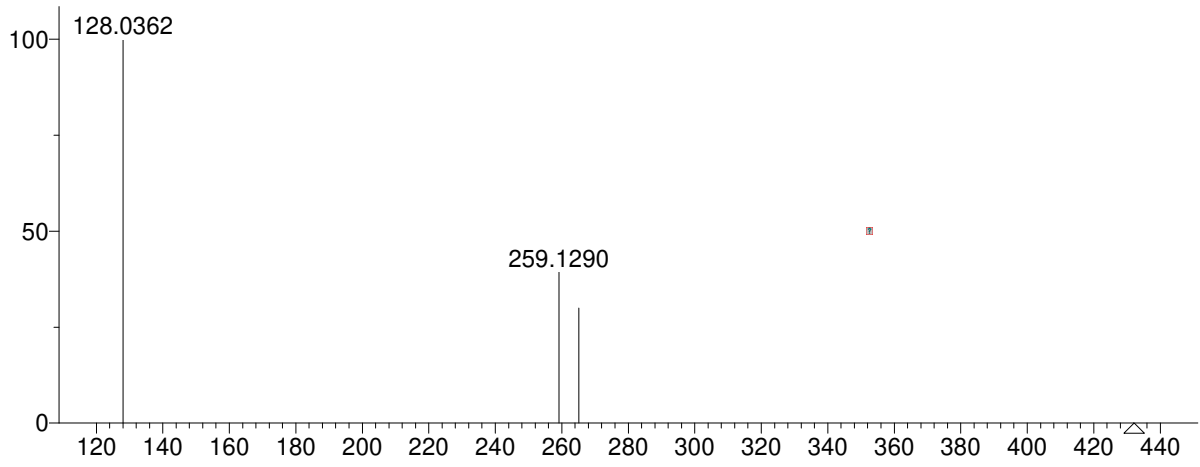

Unknown: Unknown (2.85\_572.1147m/z)  
Compound in Library Factor = -3273

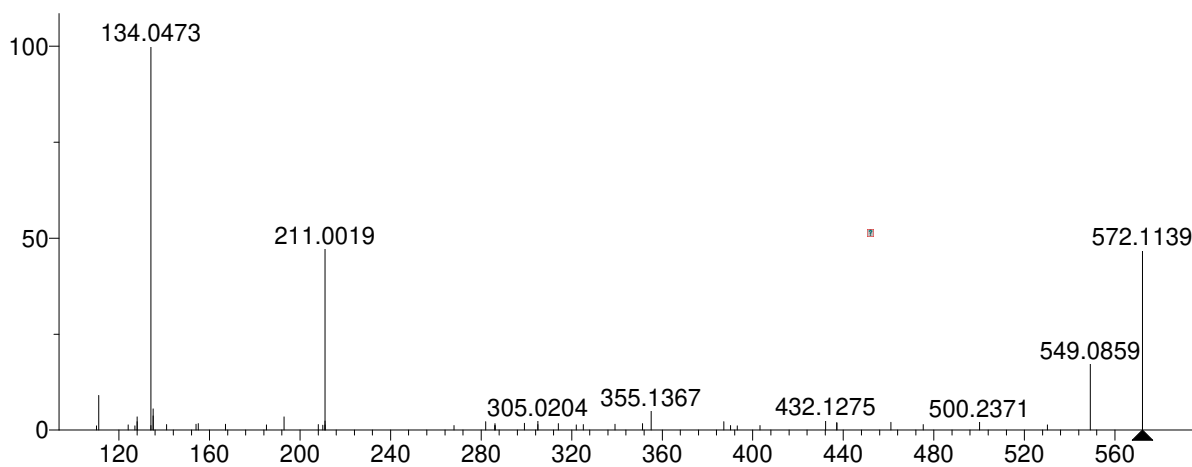

Hit 1 : (Ala11,D-Leu15)-Orexin B, human [M+5H]<sup>5+</sup> HCD 8eV P=572.1  
C<sub>120</sub>H<sub>206</sub>N<sub>44</sub>O<sub>35</sub>S; MF: 1; RMF: 126; Prob 100.0%; CAS: 532932-99-3; Lib: nist\_msms2; ID: 45808.



Unknown: Unknown (2.85\_695.2510m/z)  
Compound in Library Factor = 0

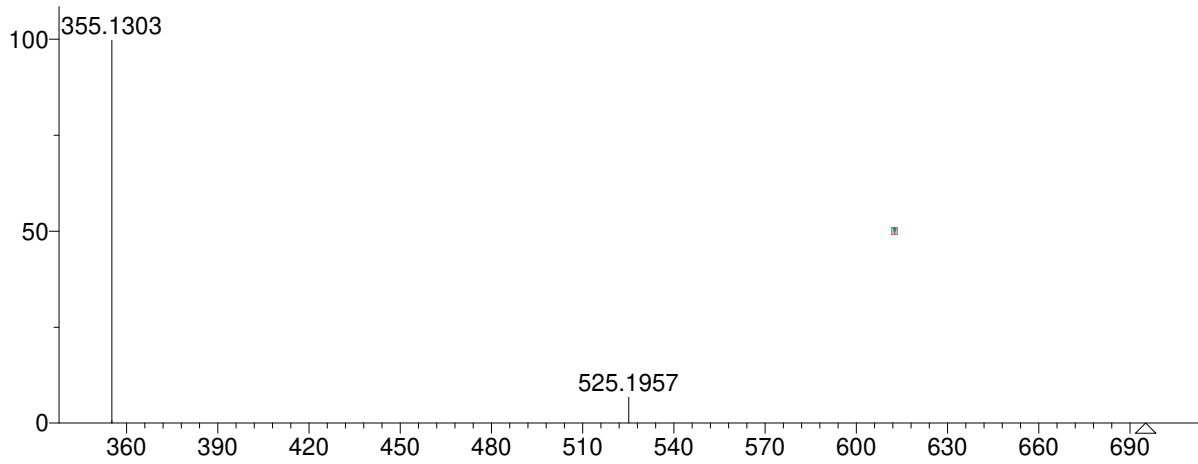

Hit 1 : Calcitonin (1-7), human [M+H]<sup>+</sup> HCD 75eV P=695.2  
C<sub>25</sub>H<sub>42</sub>N<sub>8</sub>O<sub>11</sub>S<sub>2</sub>; MF: 0; RMF: 27; Prob 100.0%; Lib: nist\_msms2; ID: 62820.

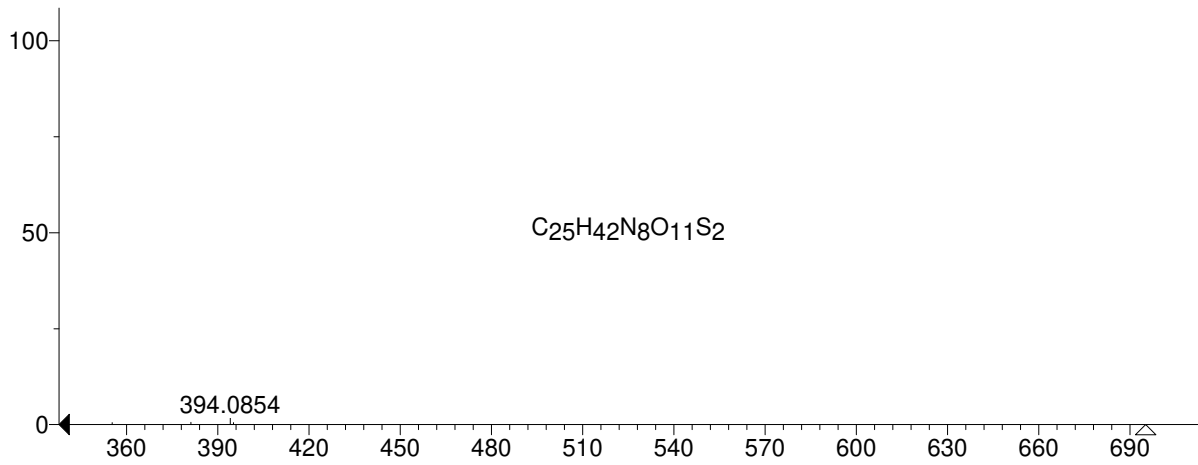

Unknown: Unknown (2.88\_399.1391m/z)  
Compound in Library Factor = -3273

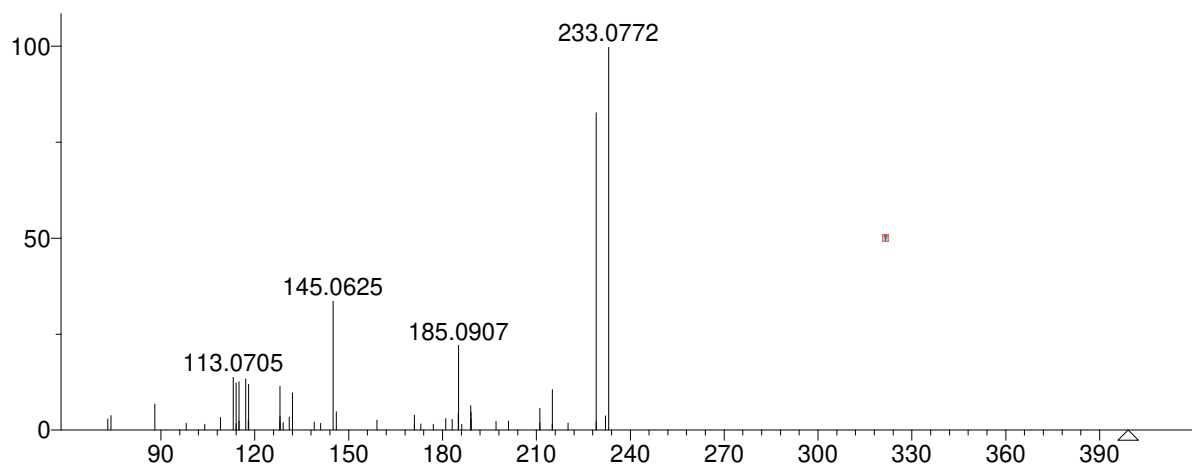

Hit 1 : 4-[4-[hydroxy-(4-hydroxy-3-methoxyphenyl)methyl]-3-(hydroxymethyl)oxolan-2-yl]-2-methoxyphenol [M+Na]  
C<sub>20</sub>H<sub>24</sub>O<sub>7</sub>; MF: 7; RMF: 109; Prob 15.3%; Lib: mona-export-vf-npl\_qexactive; ID: 7275.

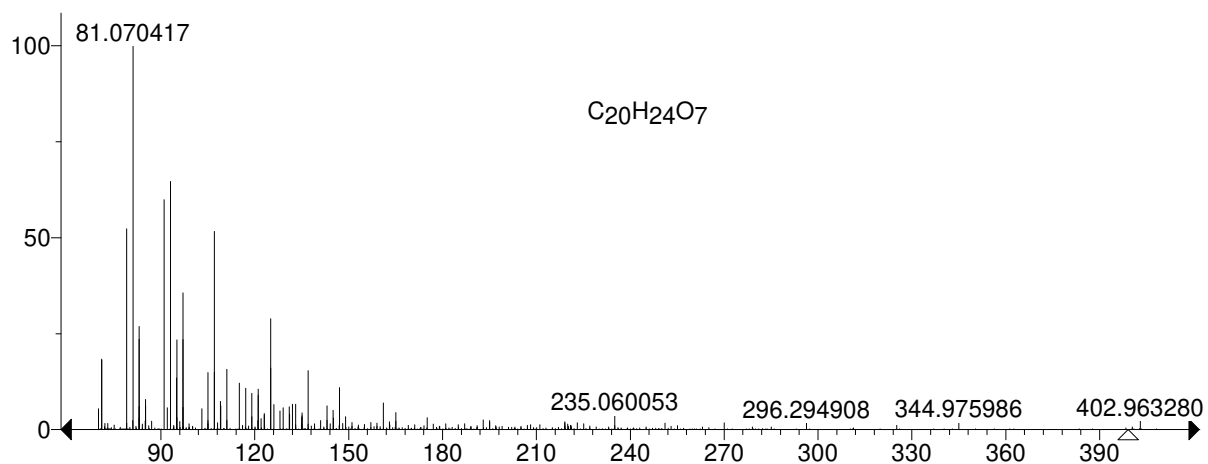

Hit 2 : [1,3-dihydroxy-1-(7-methoxy-2-oxochromen-6-yl)-3-methylbutan-2-yl] (E)-2-methylbut-2-enoate [M+Na]  
C<sub>20</sub>H<sub>24</sub>O<sub>7</sub>; MF: 4; RMF: 129; Prob 13.5%; Lib: mona-export-vf-npl\_qexactive; ID: 5457.

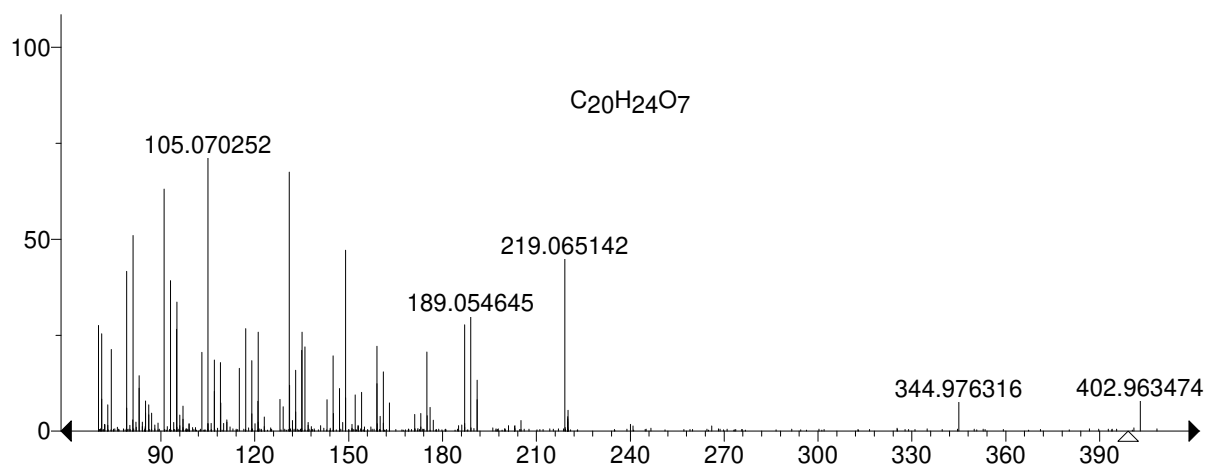



\*\* Search Report Page 2 of 2 \*\*

Hit 3 : [2,3-dihydroxy-1-(7-methoxy-2-oxochromen-6-yl)-3-methylbutyl] (Z)-2-methylbut-2-enoate [M+Na]<sup>+</sup> 65HCl  
C<sub>20</sub>H<sub>24</sub>O<sub>7</sub>; MF: 4; RMF: 110; Prob 13.5%; Lib: mona-export-vf-npl\_qexactive; ID: 5712.

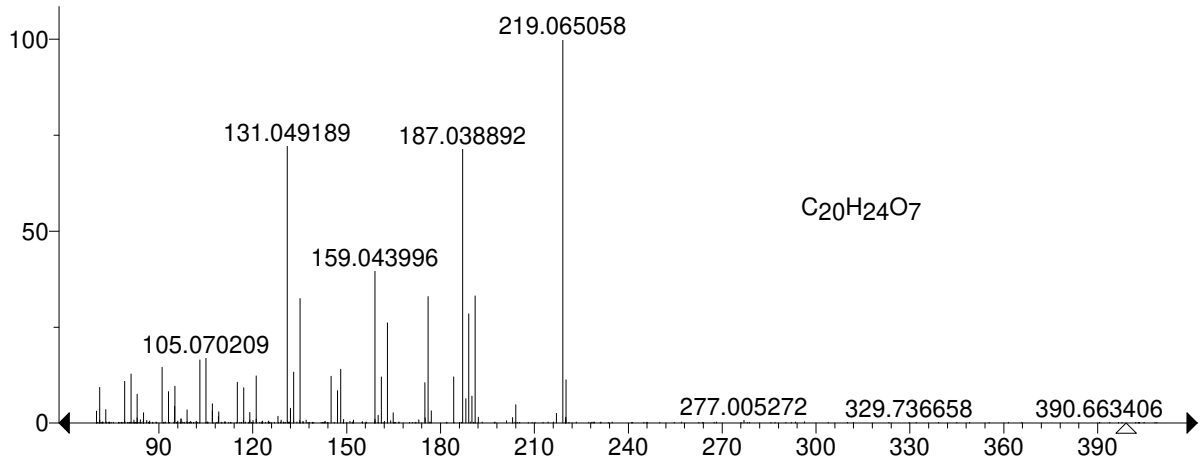

Hit 4 : [1,3-dihydroxy-1-(7-methoxy-2-oxochromen-6-yl)-3-methylbutan-2-yl] 3-methylbut-2-enoate [M+Na]<sup>+</sup> 65HCl  
C<sub>20</sub>H<sub>24</sub>O<sub>7</sub>; MF: 1; RMF: 58; Prob 11.9%; Lib: mona-export-vf-npl\_qexactive; ID: 24777.

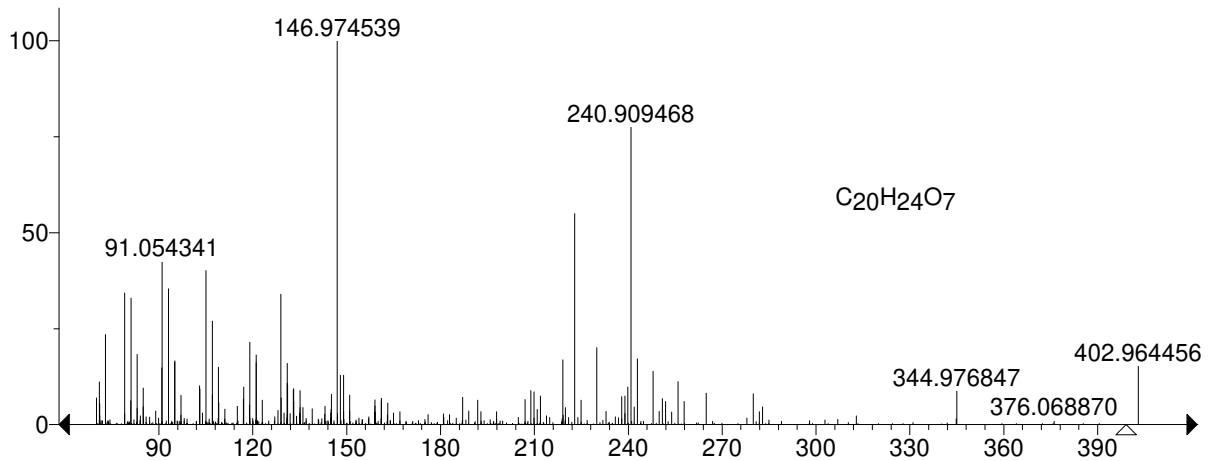

Hit 5 : (1R,2S,4R,6R,7S,9S,11R,12S)-11-hydroxy-4-methyl-10,15-dimethylidene-14-oxo-5,8,13-trioxatetracyclo[1C  
C<sub>20</sub>H<sub>24</sub>O<sub>7</sub>; MF: 0; RMF: 42; Prob 11.4%; Lib: mona-export-vf-npl\_qexactive; ID: 10422.

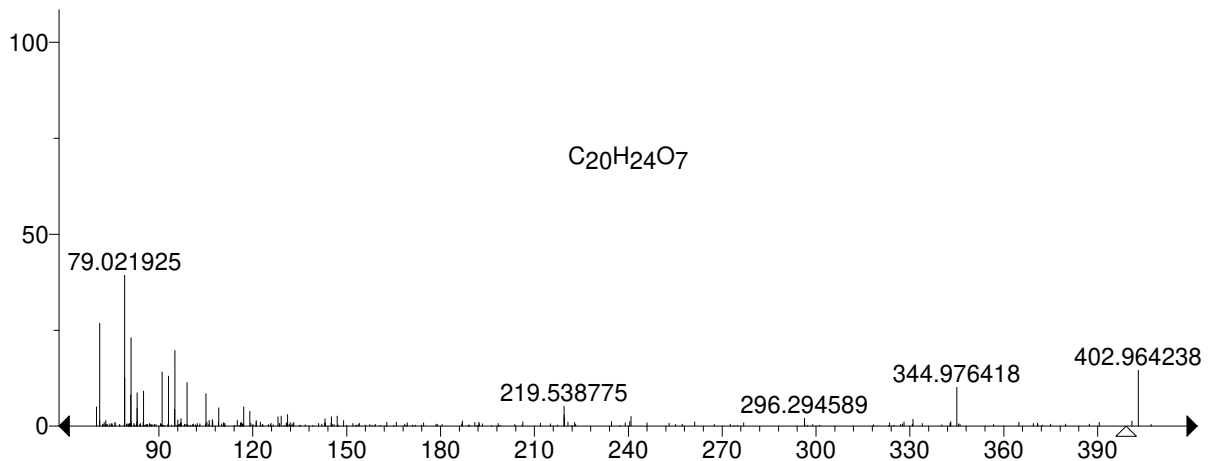

Unknown: Unknown (2.88\_588.1091m/z)  
Compound in Library Factor = 0

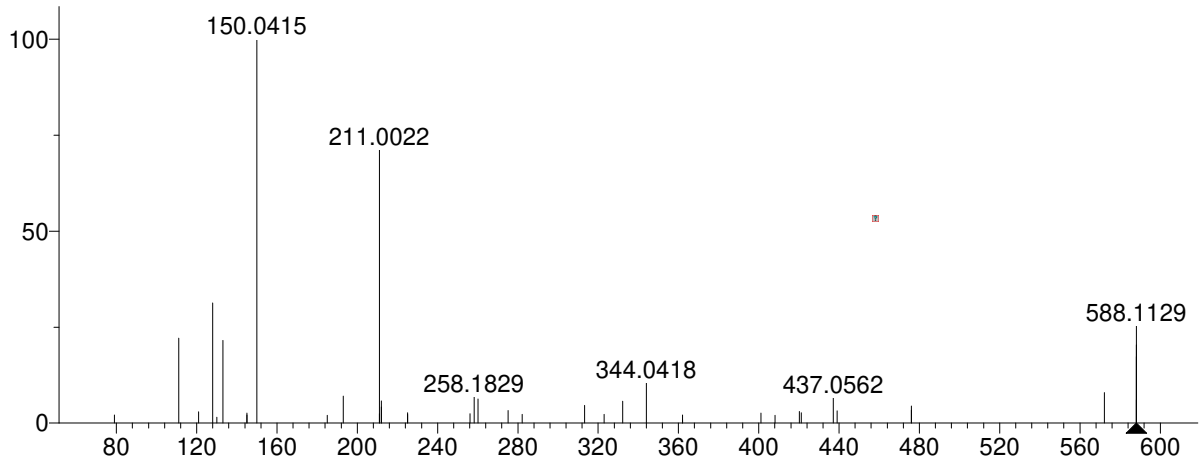

Unknown: Unknown (2.90\_445.1808m/z)  
Compound in Library Factor = 0

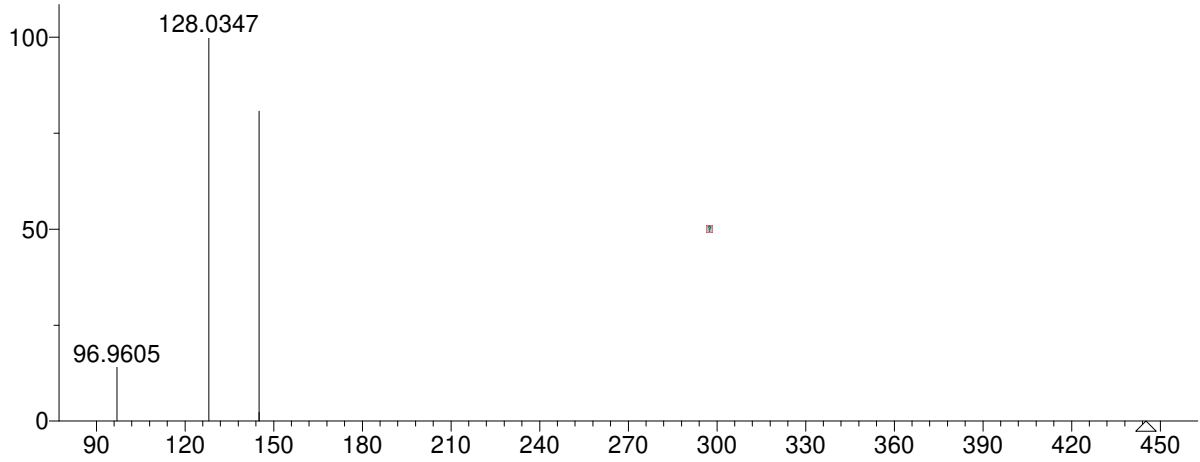

Hit 1 : [(6Z,10Z)-6-(acetyloxymethyl)-10-(hydroperoxymethyl)-3-methylidene-2-oxo-3a,4,5,8,9,11a-hexahydrocyclo  
C22H30O8; MF: 0; RMF: 58; Prob 50.0%; Lib: mona-export-vf-npl\_qexactive; ID: 19874.

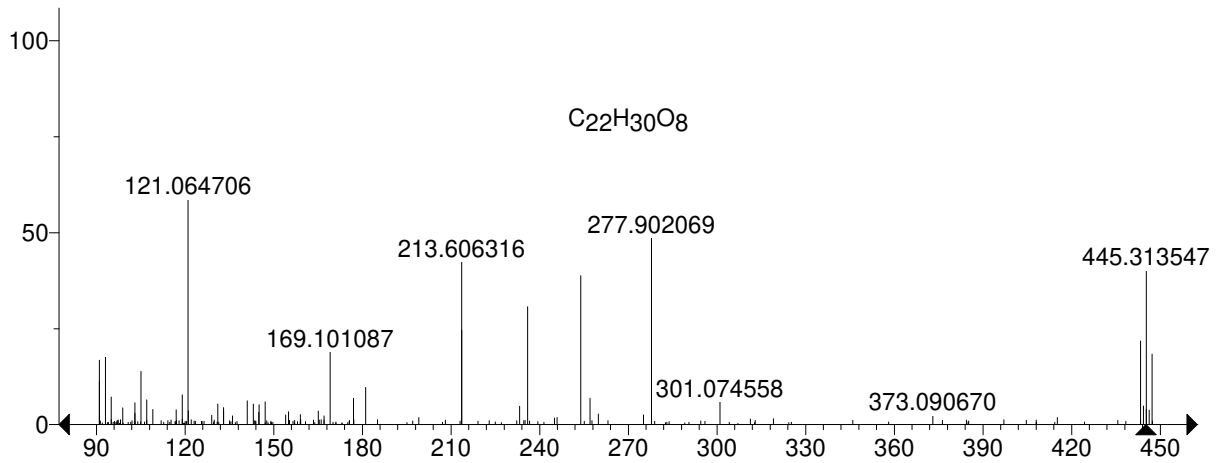

Hit 2 : NCGC00381245-01\_C22H30O8\_2-[6-[[[(2Z)-4-Acetoxy-2-methyl-2-butenoyl]oxy]-2-hydroxy-3-(3-hydroxy-1  
C22H30O8; MF: 0; RMF: 20; Prob 50.0%; Lib: mona-export-gnps; ID: 10571.

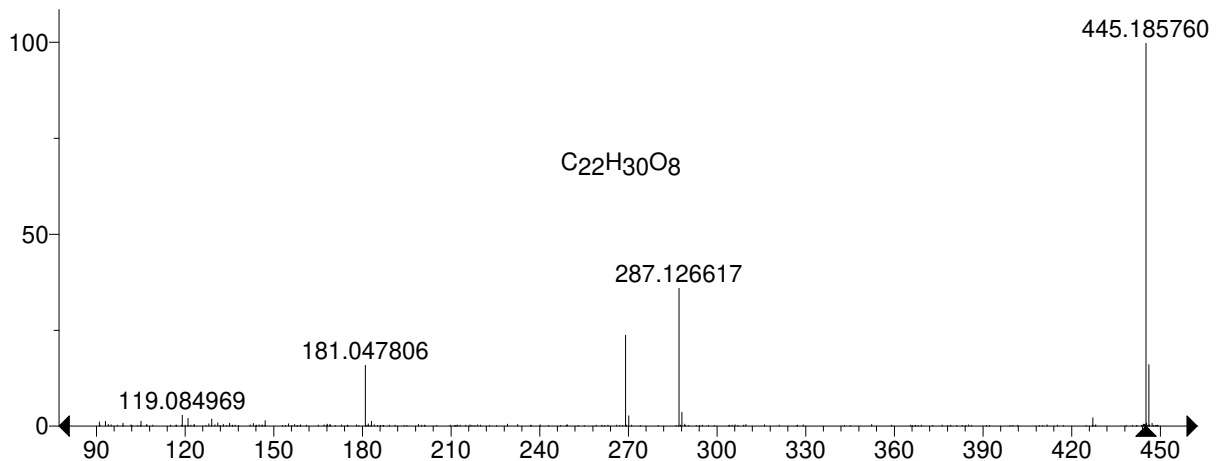

Unknown: Unknown (2.90\_445.1883m/z)  
Compound in Library Factor = 0

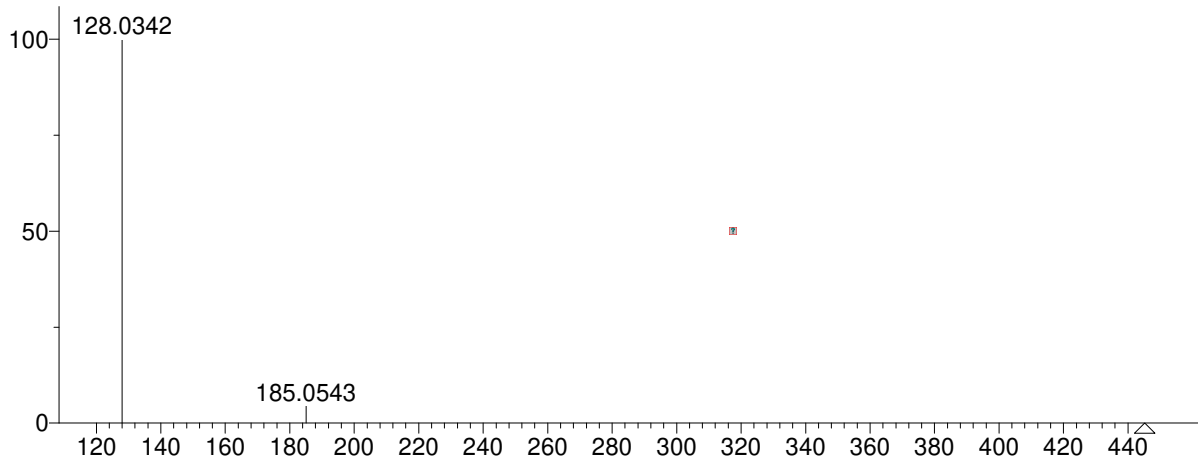

Hit 1 : epiyangambin [M-H]<sup>-</sup> 45HCD P=445.2  
C<sub>24</sub>H<sub>30</sub>O<sub>8</sub>; MF: 0; RMF: 51; Prob 100.0%; Lib: mona-export-ic-ms-ms\_negative\_mode; ID: 18558.

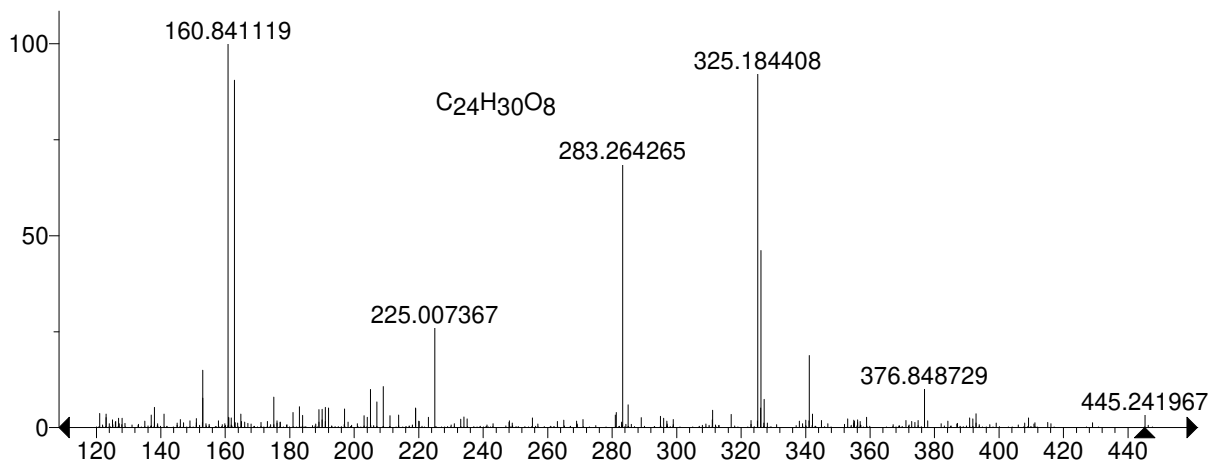

Unknown: Unknown (2.92\_666.2620m/z)  
Compound in Library Factor = 0

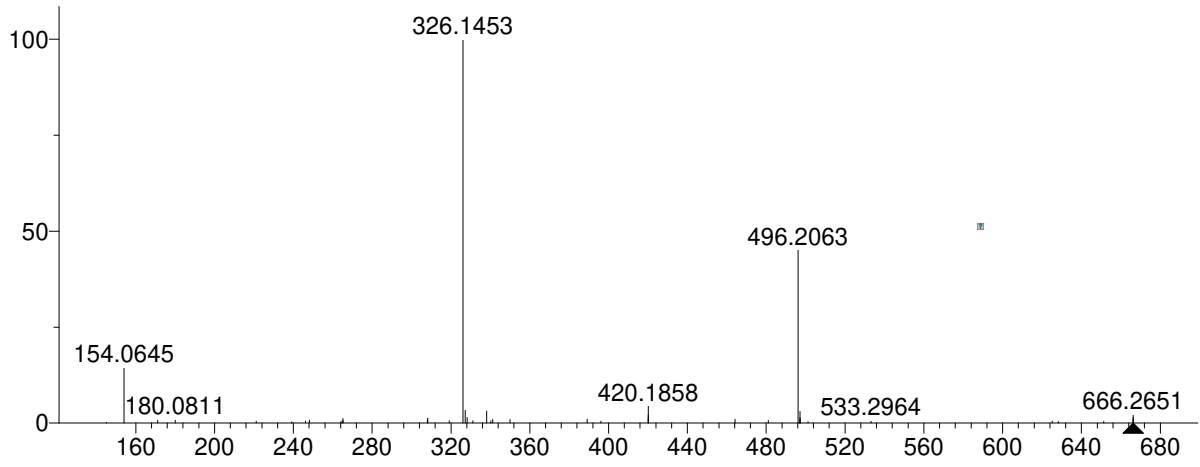

\*\* Search Report Page 1 of 2 \*\*

Unknown: Unknown (2.93\_325.1052m/z)  
Compound in Library Factor = -327

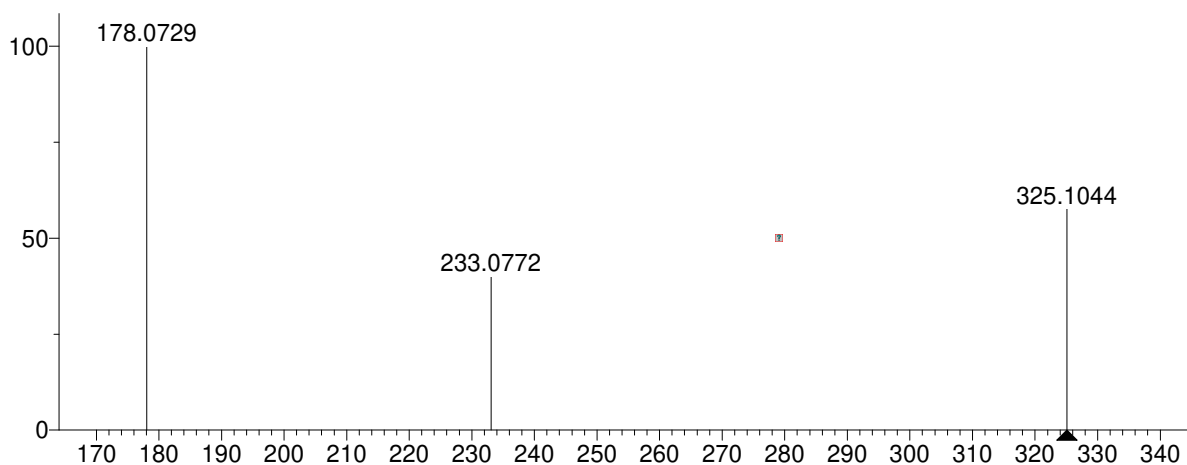

Hit 1 : 8-Desoxygartanin [M+H-C4H8]+ HCD 9V P=325.1  
C23H24O5; MF: 287; RMF: 930; Prob 96.8%; CAS: 33390-41-9; Lib: nist\_msms; ID: 227545.

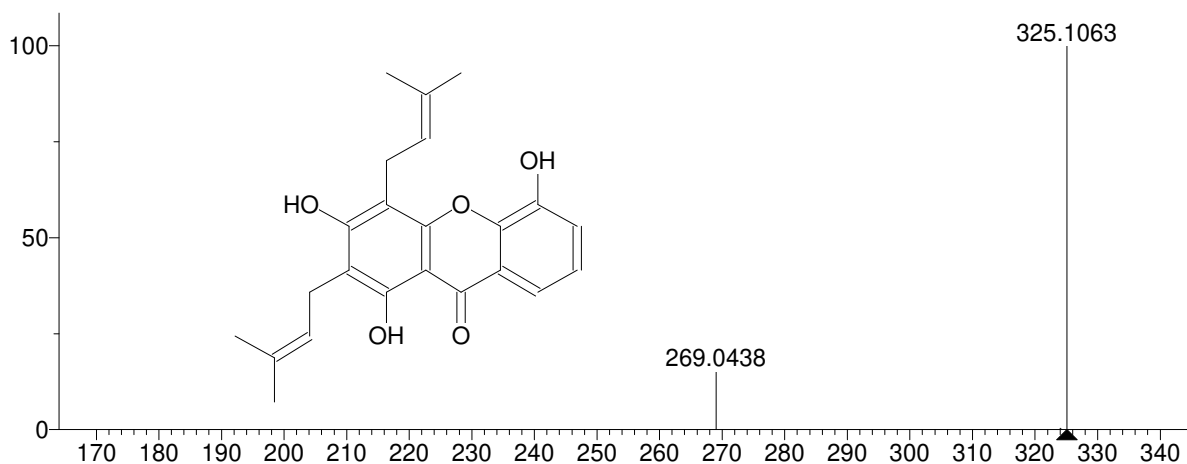

Hit 2 : 6-Hydroxywarfarin [M+H]+ HCD 5V P=325.1  
C19H16O5; MF: 92; RMF: 533; Prob 1.35%; CAS: 17834-02-5; Lib: nist\_msms; ID: 122405.

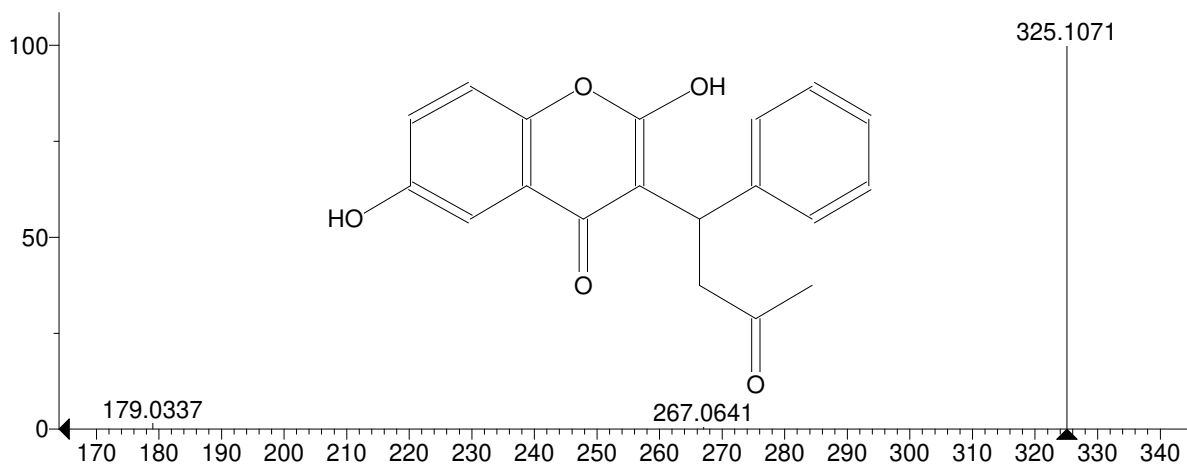

Hit 3 : 7-Hydroxywarfarin [M+H]<sup>+</sup> HCD 5V P=325.1  
C<sub>19</sub>H<sub>16</sub>O<sub>5</sub>; MF: 87; RMF: 527; Prob 1.09%; CAS: 17834-03-6; Lib: nist\_msms; ID: 122448.

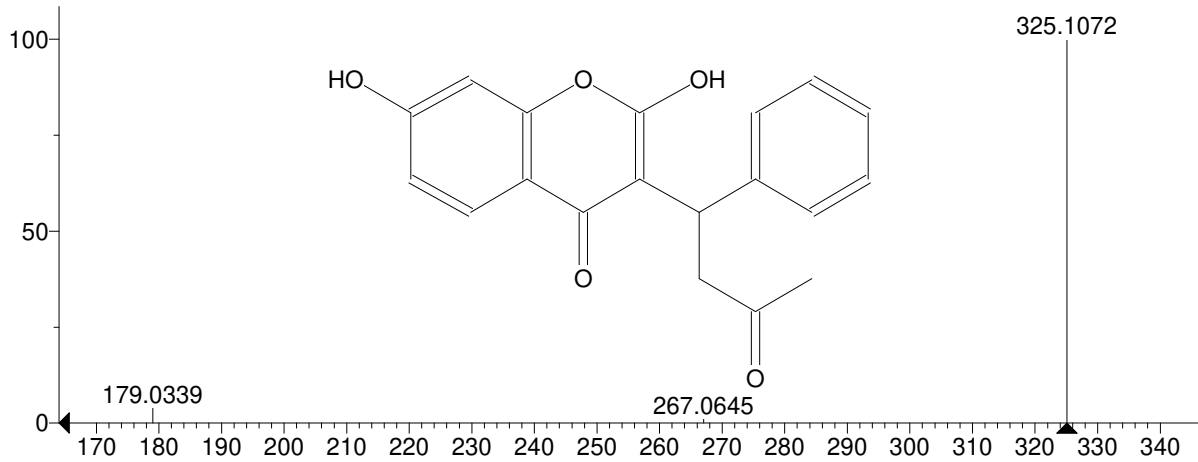

Hit 4 : Methopterin [M-H-C<sub>5</sub>H<sub>7</sub>O<sub>3</sub>N]<sup>-</sup> HCD 16V P=325.1  
C<sub>20</sub>H<sub>21</sub>N<sub>7</sub>O<sub>6</sub>; MF: 64; RMF: 532; Prob 0.39%; CAS: 2410-93-7; Lib: nist\_msms; ID: 206259.

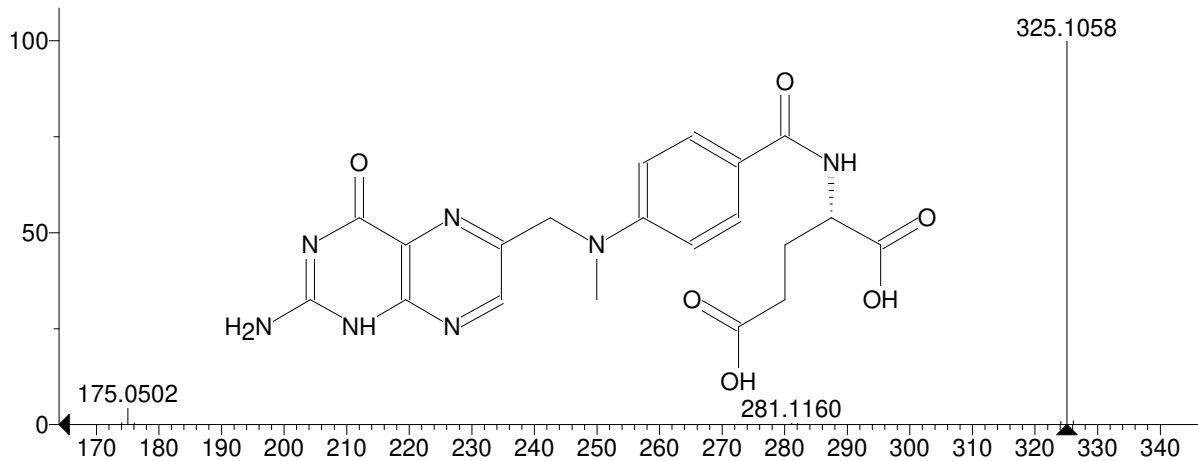

Hit 5 : PA 9:0; PA 2:0-7:0; [M-H]<sup>-</sup> [M-H]<sup>-</sup> P=325.1  
C<sub>12</sub>H<sub>23</sub>O<sub>8</sub>P; MF: 16; RMF: 381; Prob 0.08%; Lib: msdial-insilicomsmms-lipids-neg; ID: 315681.

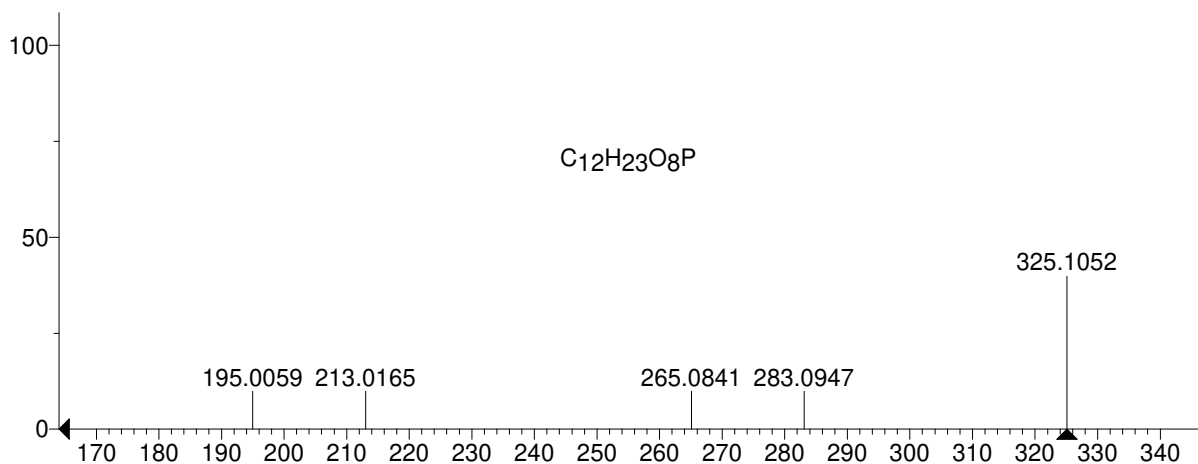

\*\* Search Report Page 1 of 2 \*\*

Unknown: Unknown (2.93\_417.1150m/z)  
Compound in Library Factor = -3273

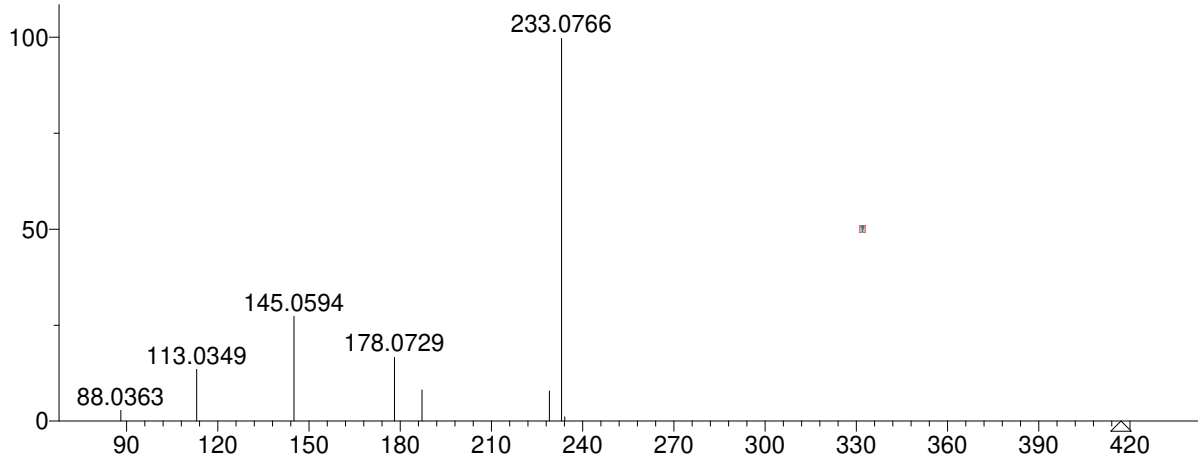

Hit 1 : Frangulin A [M+H]<sup>+</sup> HCD 50V P=417.1  
C<sub>21</sub>H<sub>20</sub>O<sub>9</sub>; MF: 3; RMF: 118; Prob 12.4%; CAS: 521-62-0; Lib: nist\_msms; ID: 258725.

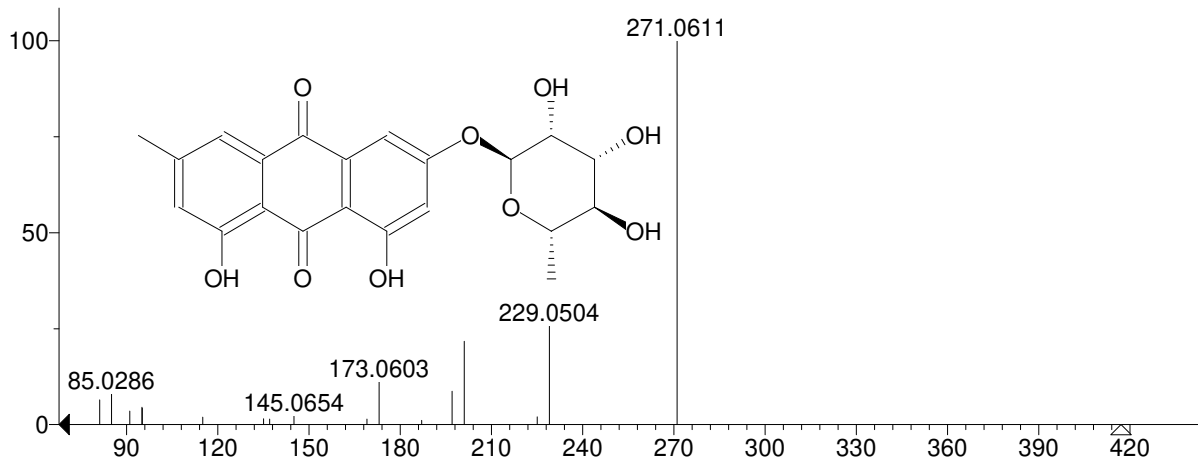

Hit 2 : Aloin [M-H]<sup>-</sup> 35HCD P=417.1  
C<sub>21</sub>H<sub>22</sub>O<sub>9</sub>; MF: 0; RMF: 81; Prob 10.9%; Lib: mona-export-lc-ms-ms\_negative\_mode; ID: 23720.

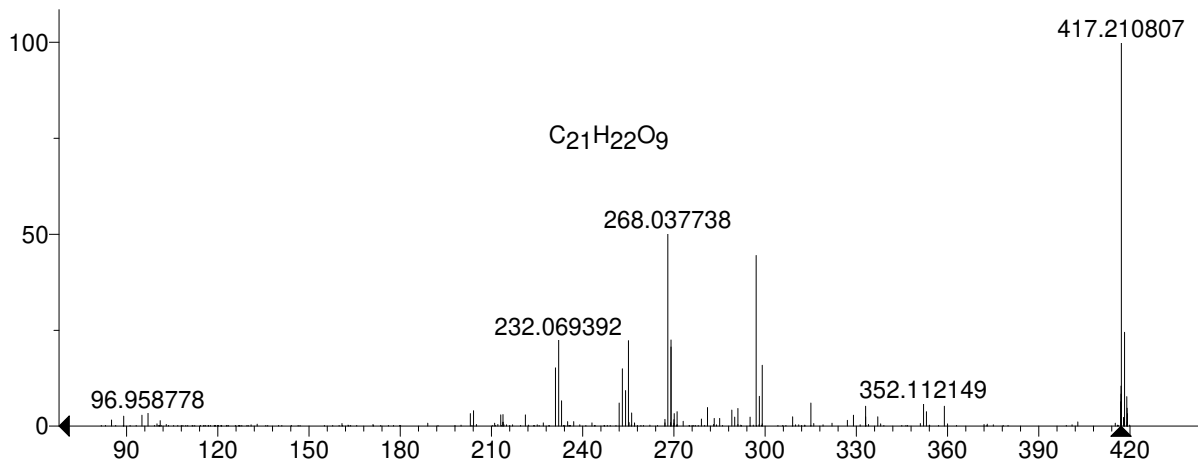



Hit 3 : aloesin [M+Na]<sup>+</sup> 65HCD P=417.1  
C<sub>19</sub>H<sub>22</sub>O<sub>9</sub>; MF: 0; RMF: 63; Prob 10.9%; Lib: mona-export-vf-npl\_qexactive; ID: 4467.

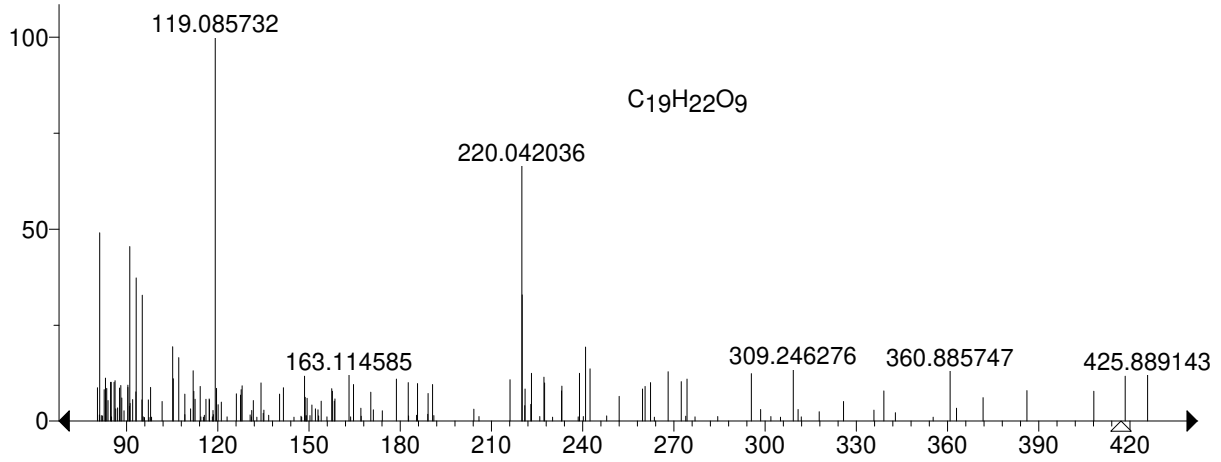

Hit 4 : Daidzein-8-C-glucoside [M+H]<sup>+</sup> 50eV P=417.1  
C<sub>21</sub>H<sub>20</sub>O<sub>9</sub>; MF: 0; RMF: 56; Prob 10.9%; Lib: anthocyanins mona; ID: 3706.

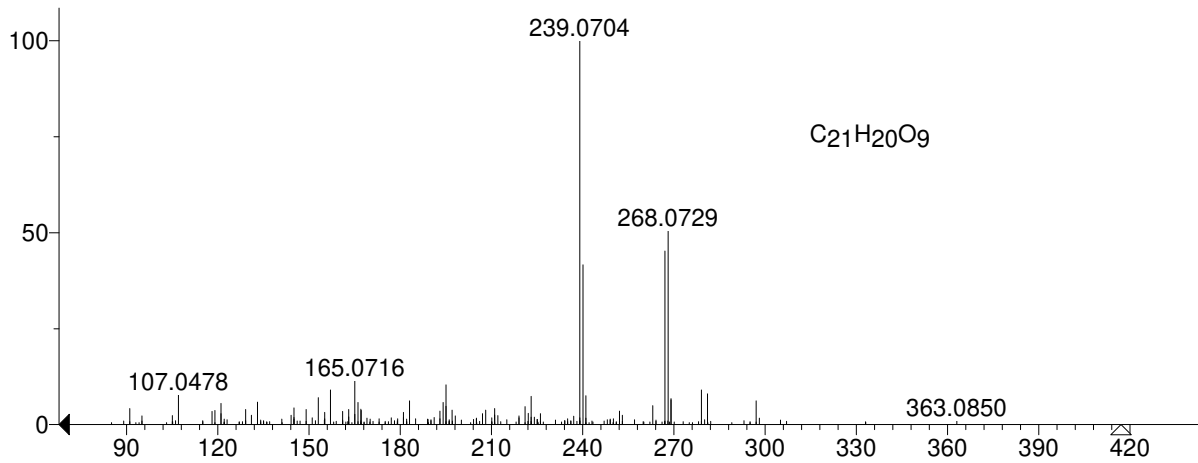

Hit 5 : Engeletin [M+H-H<sub>2</sub>O]<sup>+</sup> HCD 75V P=417.1  
C<sub>21</sub>H<sub>22</sub>O<sub>10</sub>; MF: 0; RMF: 51; Prob 10.9%; CAS: 572-31-6; Lib: nist\_msms; ID: 236877.

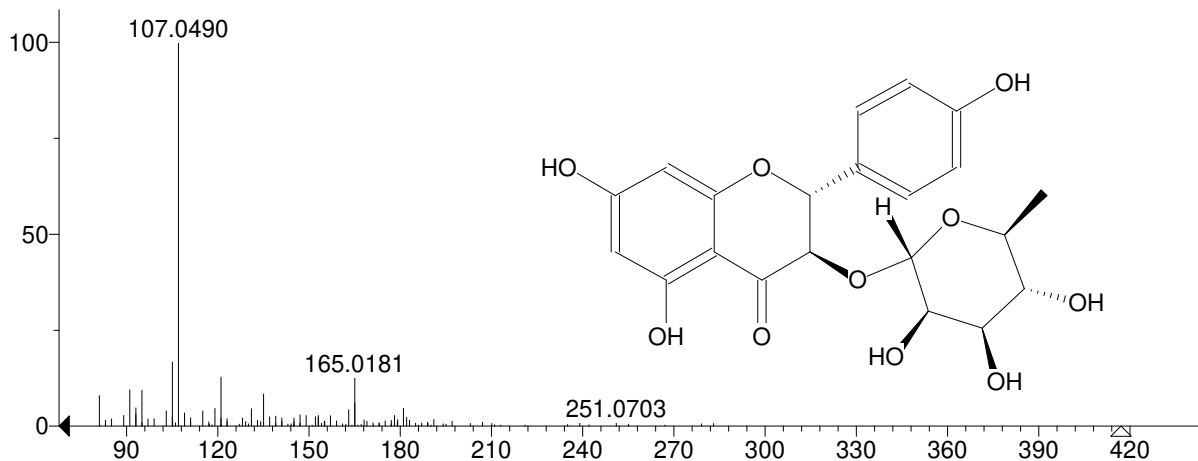

Unknown: Unknown (2.94\_474.1730m/z)  
Compound in Library Factor = 0

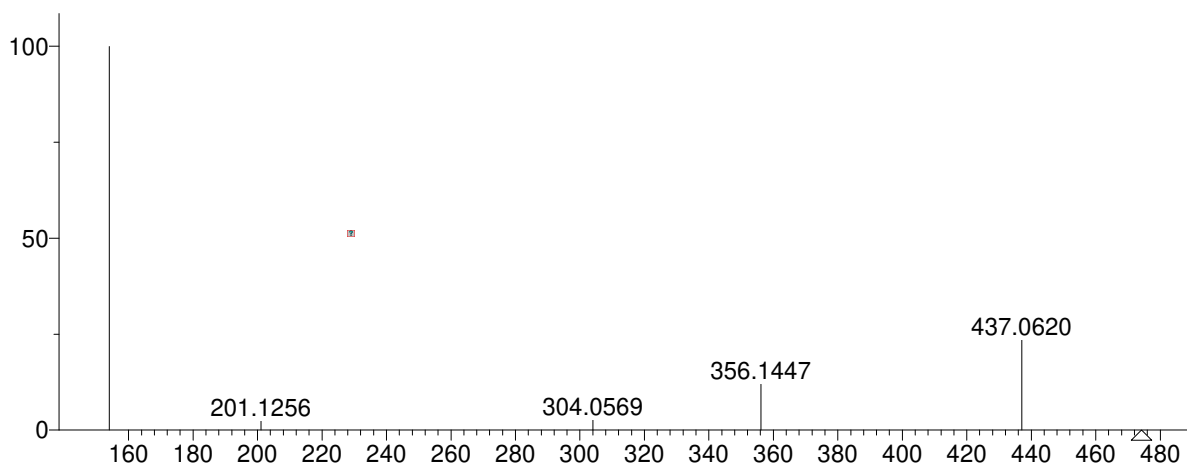

Hit 1 : Podophyllin Acetate [M+NH4]<sup>+</sup> 45HCD P=474.2  
C<sub>24</sub>H<sub>24</sub>O<sub>9</sub>; MF: 0; RMF: 53; Prob 33.3%; Lib: mona-export-vf-npl\_qexactive; ID: 11162.

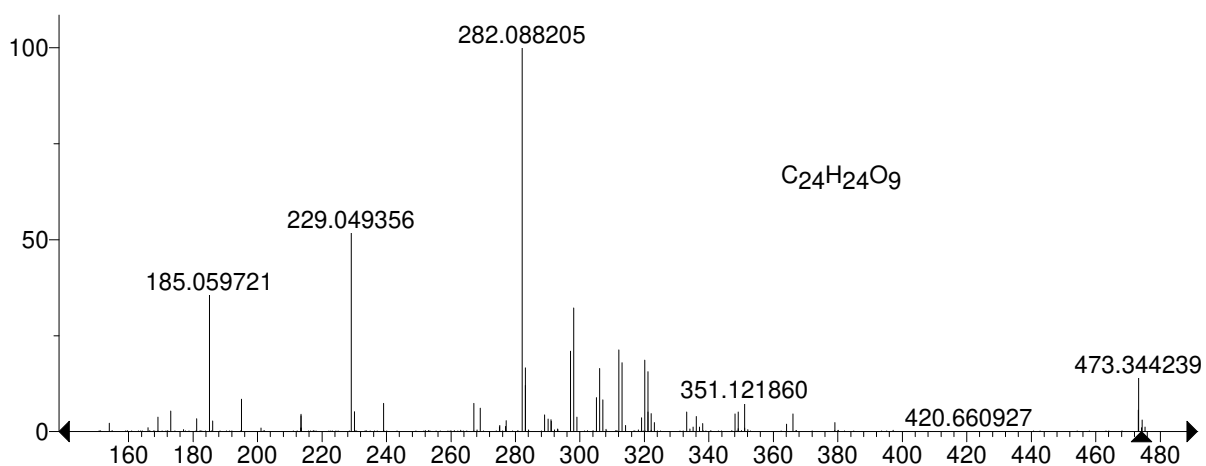

Hit 2 : steganacin [M+NH4]<sup>+</sup> 65HCD P=474.2  
C<sub>24</sub>H<sub>24</sub>O<sub>9</sub>; MF: 0; RMF: 5; Prob 33.3%; Lib: mona-export-vf-npl\_qexactive; ID: 19395.

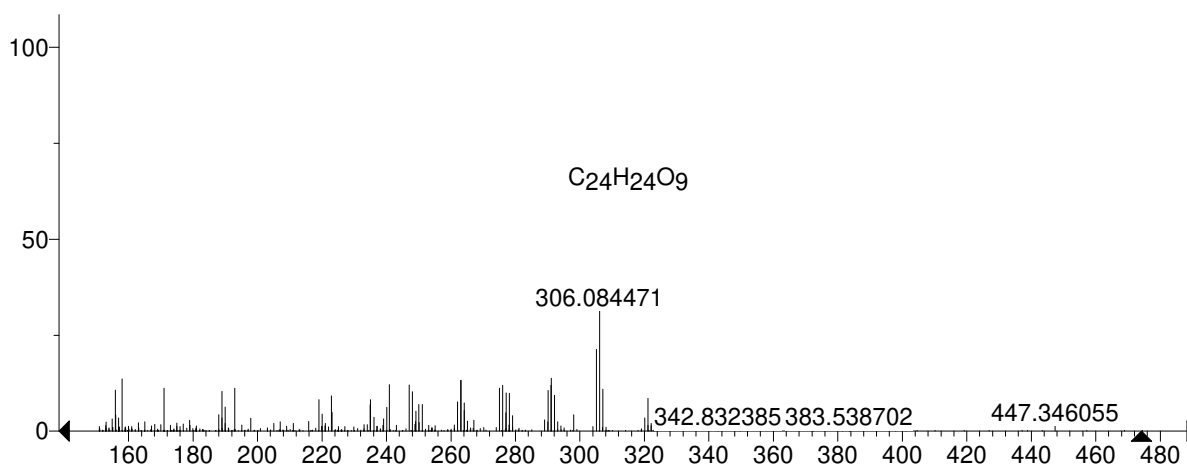

Hit 3 : NCGC00180175-03! [M+NH4]<sup>+</sup> P=474.2  
C<sub>24</sub>H<sub>24</sub>O<sub>9</sub>; MF: 0; RMF: 3; Prob 33.3%; Lib: mona-export-gnps; ID: 7998.

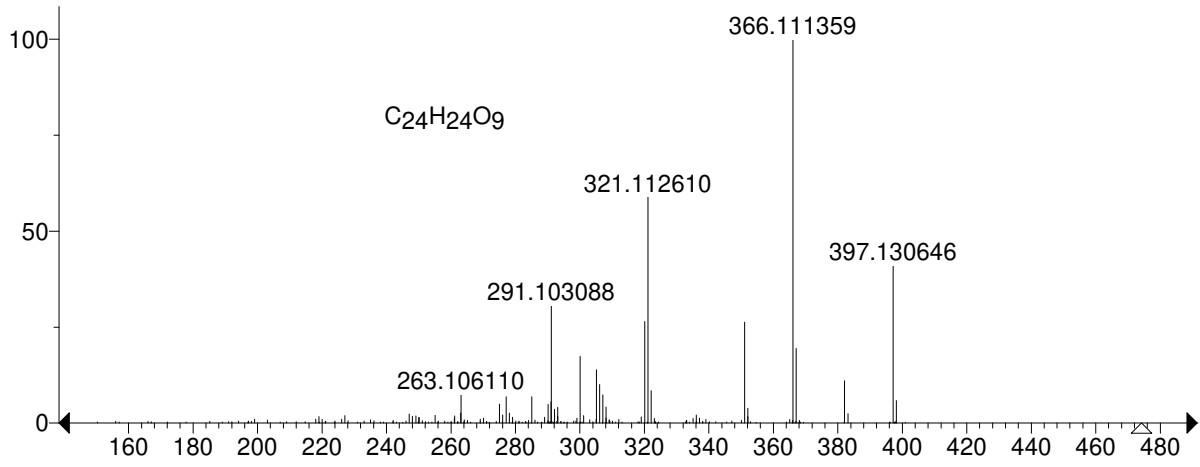

Unknown: Unknown (2.95\_681.2962m/z)  
Compound in Library Factor = -1848

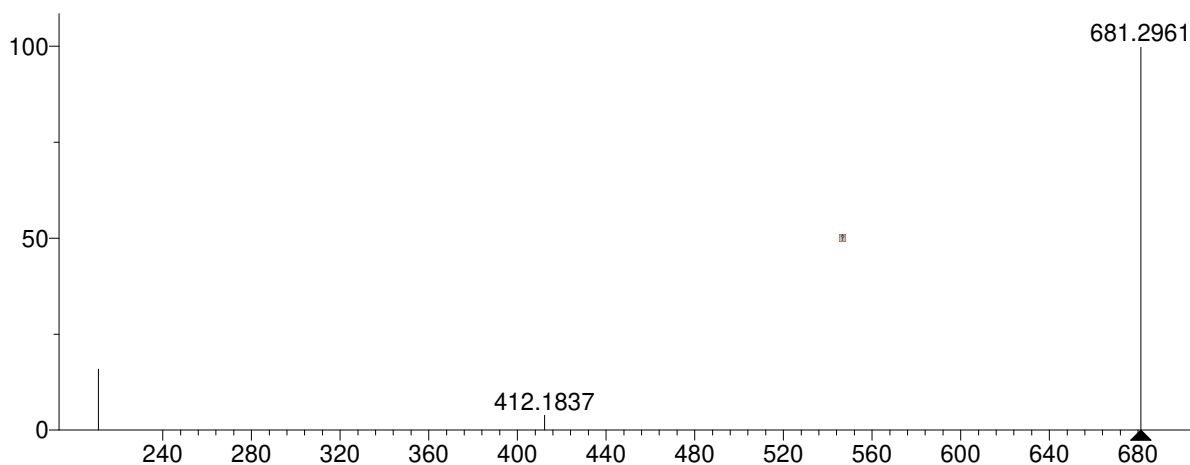

Hit 1 : S4:17(P3:15/F1:2); PlaSMA ID-1857 [M+FA-H]- P=681.3  
C<sub>29</sub>H<sub>48</sub>O<sub>15</sub>; MF: 37; RMF: 710; Prob 100.0%; Lib: biomsmms-neg-plasma; ID: 344.

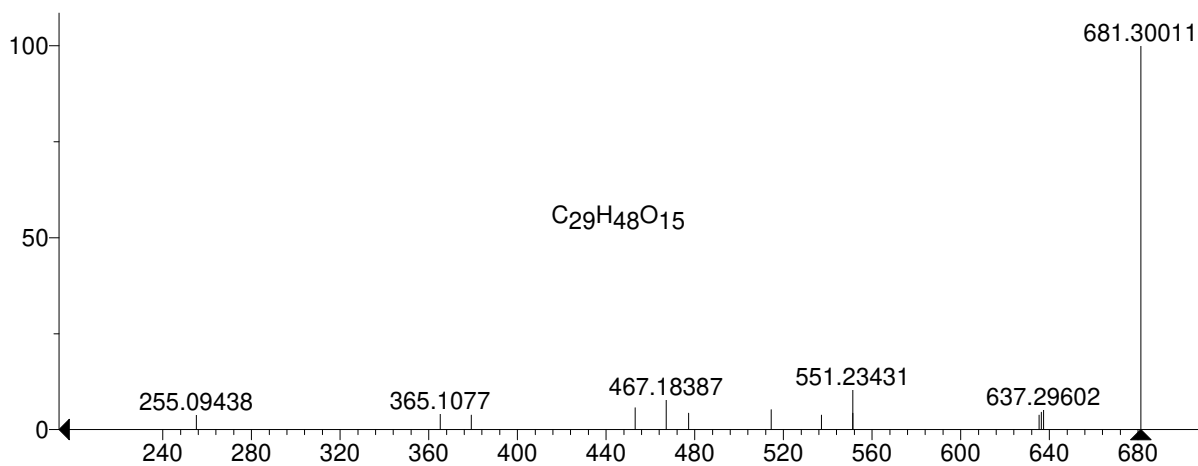

Unknown: Unknown (2.96\_279.0972m/z)  
Compound in Library Factor = -516

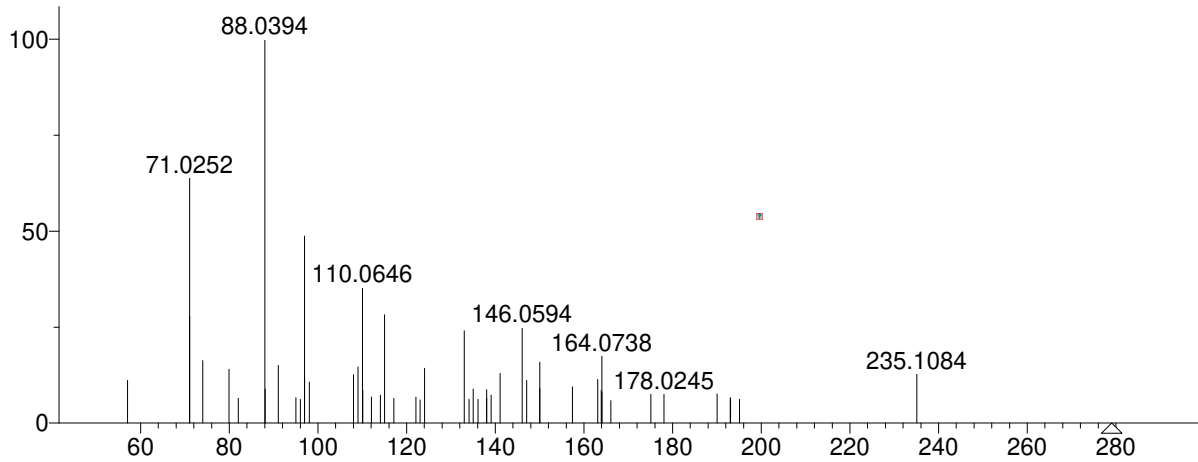

Hit 1 : Phe-Asp [M-H]<sup>-</sup> HCD 25eV P=279.1  
C<sub>13</sub>H<sub>16</sub>N<sub>2</sub>O<sub>5</sub>; MF: 356; RMF: 579; Prob 49.6%; Lib: nist\_msms; ID: 570583.

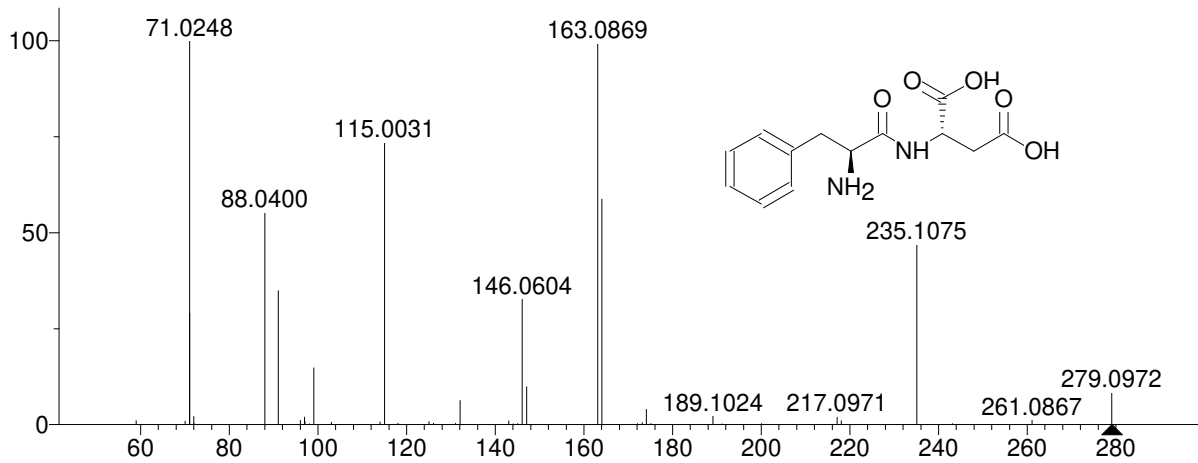

Hit 2 : Phe-Asp [M-H]<sup>-</sup> HCD 25eV P=279.1  
C<sub>13</sub>H<sub>16</sub>N<sub>2</sub>O<sub>5</sub>; MF: 356; RMF: 579; Prob 49.6%; CAS: 22828-05-3; Lib: nist\_msms2; ID: 84316.

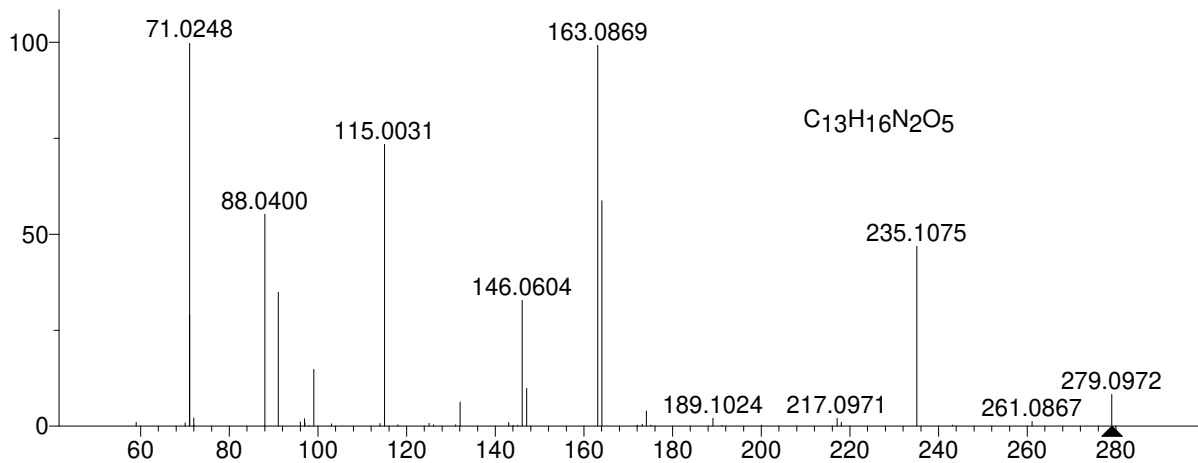

Hit 3 : Asp-Phe [M-H]<sup>-</sup> 20-30-40%) P=279.1  
C<sub>13</sub>H<sub>16</sub>N<sub>2</sub>O<sub>5</sub>; MF: 14; RMF: 145; Prob 0.49%; Lib: msms-neg-fiehnhilic; ID: 208.

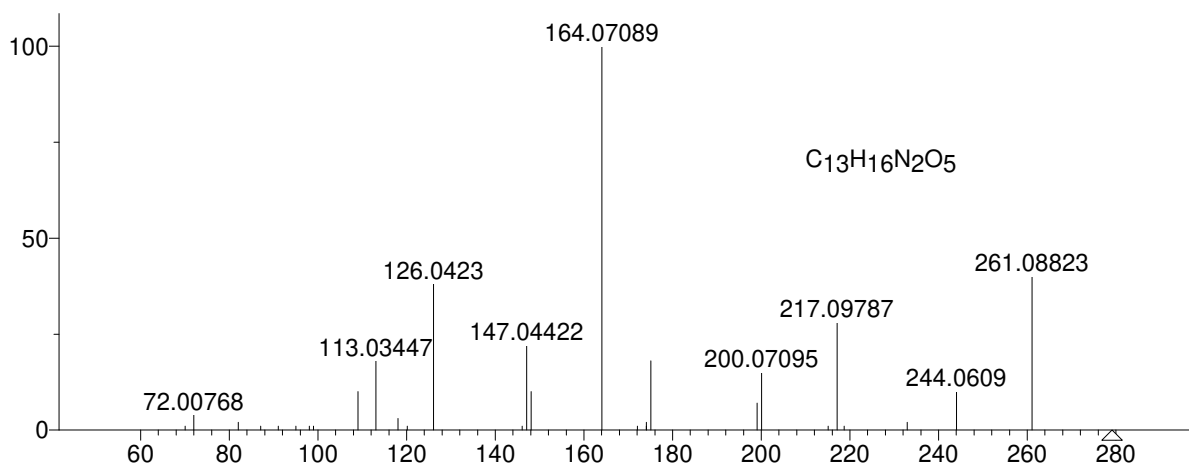

Hit 4 : gamma-Glutamylmethionine [M+H]<sup>+</sup> 35eV P=279.1  
C<sub>10</sub>H<sub>18</sub>N<sub>2</sub>O<sub>5</sub>S; MF: 0; RMF: 27; Prob 0.31%; Lib: mona-export-fiehn\_hilic; ID: 1953.

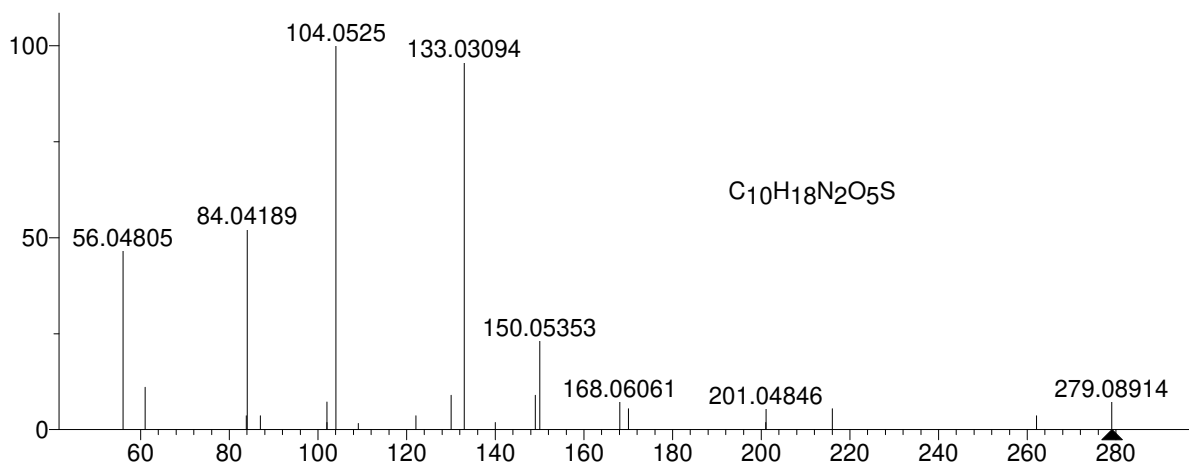

Unknown: Unknown (2.96\_399.1027m/z)  
Compound in Library Factor = 0

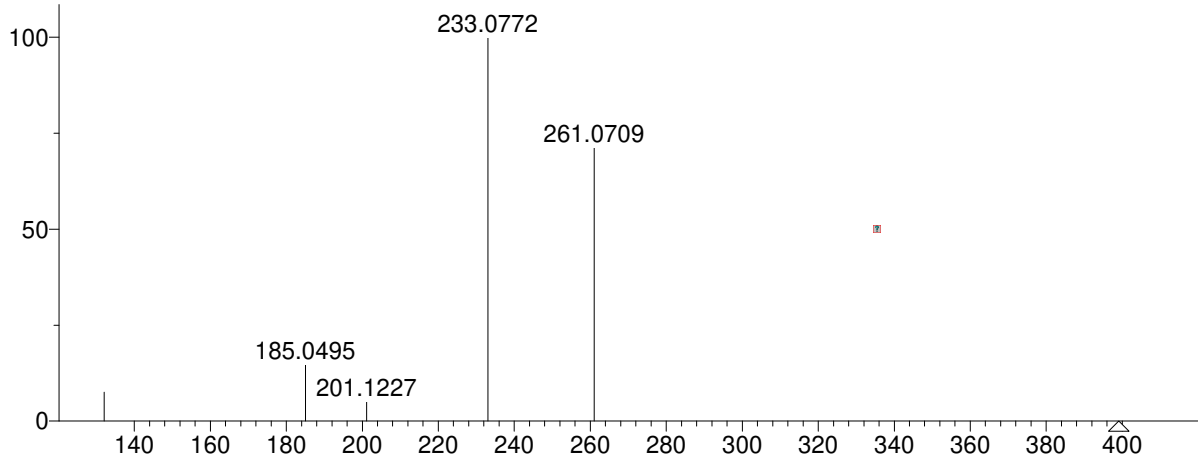

Hit 1 : (2R,3R,4S,5S,6R)-2-[3-hydroxy-2-(4-hydroxy-3-methoxyphenyl)propoxy]-6-(hydroxymethyl)oxane-3,4,5-tric  
C16H24O9; MF: 0; RMF: 16; Prob 50.0%; Lib: mona-export-vf-npl\_qexactive; ID: 10759.

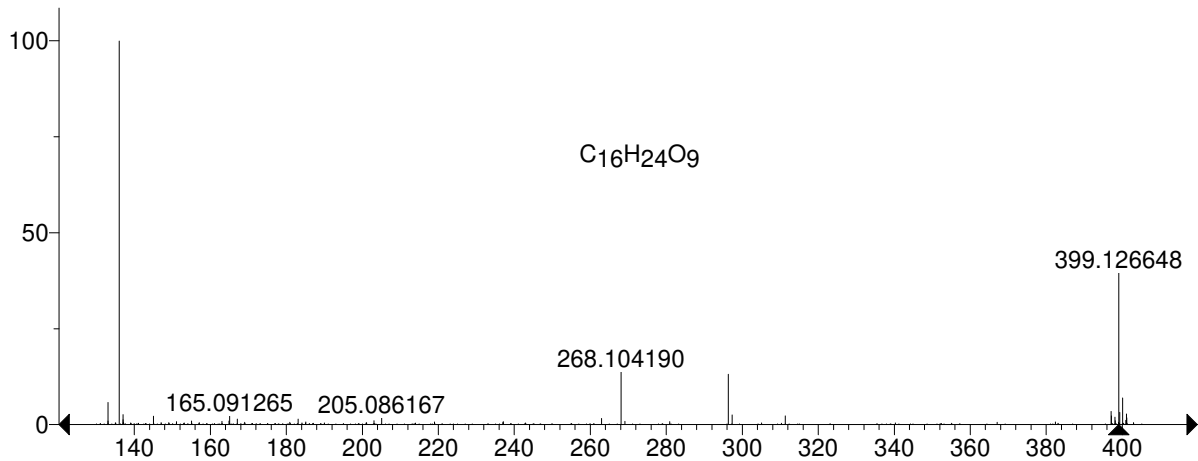

Hit 2 : 2,3,9,10-tetramethoxy-6a,11a-dihydro-6H-[1]benzofuro[3,2-c]chromene-4,8-diol [M+Na]+ 65HCD P=399.  
C19H20O8; MF: 0; RMF: 11; Prob 50.0%; Lib: mona-export-vf-npl\_qexactive; ID: 18612.

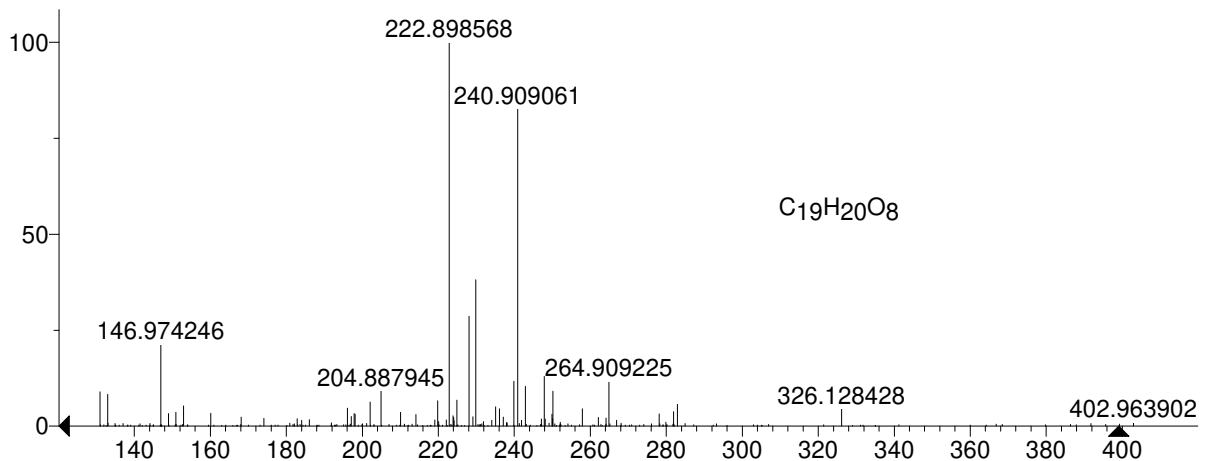

Unknown: Unknown (2.96\_403.1344m/z)  
Compound in Library Factor = 0

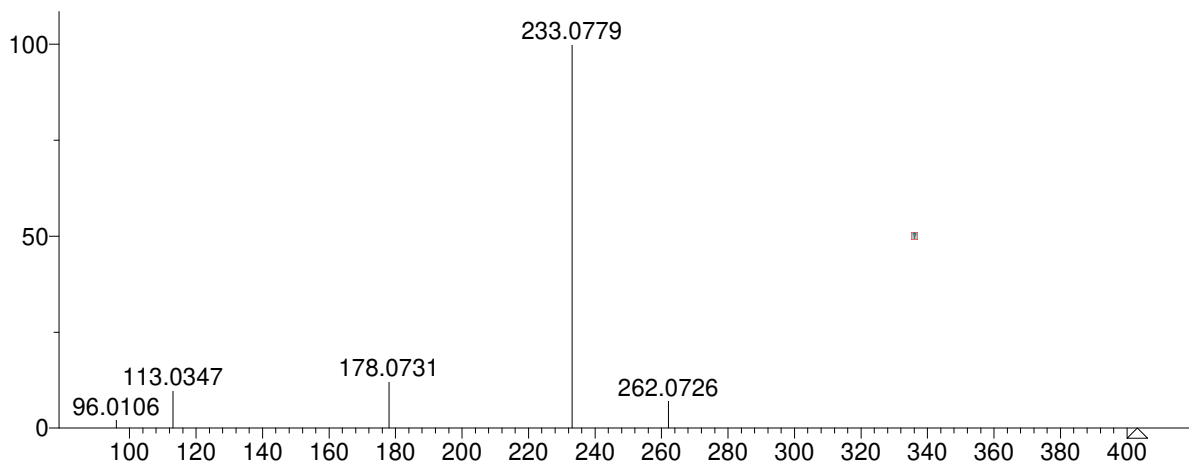

Hit 1 : NCGC00380227-01!(E)-3-[4-[1,3-dihydroxy-1-(4-hydroxy-3-methoxyphenyl)propan-2-yl]oxy-3,5-dimethoxy]phenyl]propan-2-yl]oxy-2-methoxypropane  
C<sub>21</sub>H<sub>24</sub>O<sub>9</sub>; MF: 0; RMF: 118; Prob 50.0%; Lib: mona-export-gnps; ID: 8693.

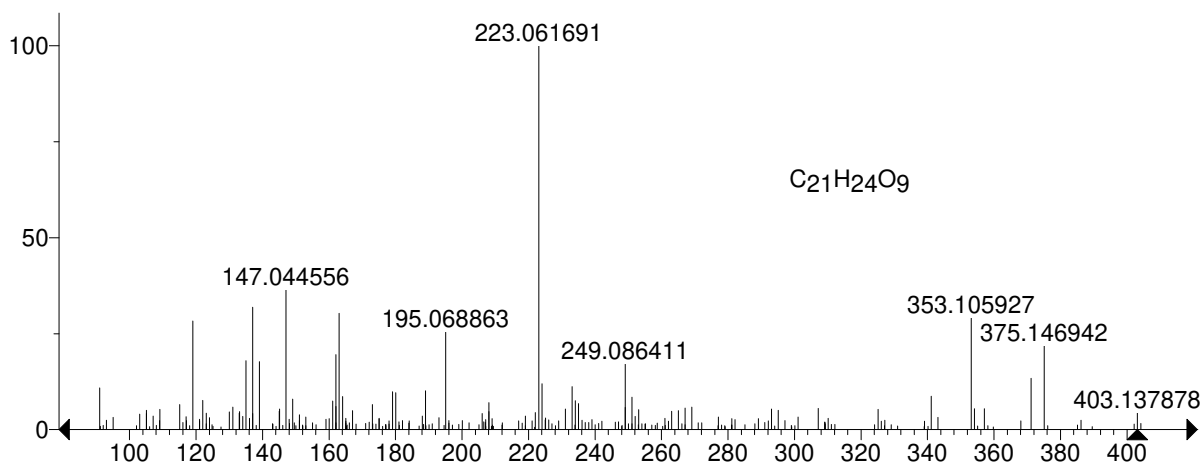

Hit 2 : NCGC00384517-01!(2S)-2-phenyl-7-[(2S,3R,4S,5S,6R)-3,4,5-trihydroxy-6-(hydroxymethyl)oxan-2-yl]oxy-2-methoxypropane  
C<sub>21</sub>H<sub>22</sub>O<sub>8</sub>; MF: 0; RMF: 12; Prob 50.0%; Lib: mona-export-gnps; ID: 7455.

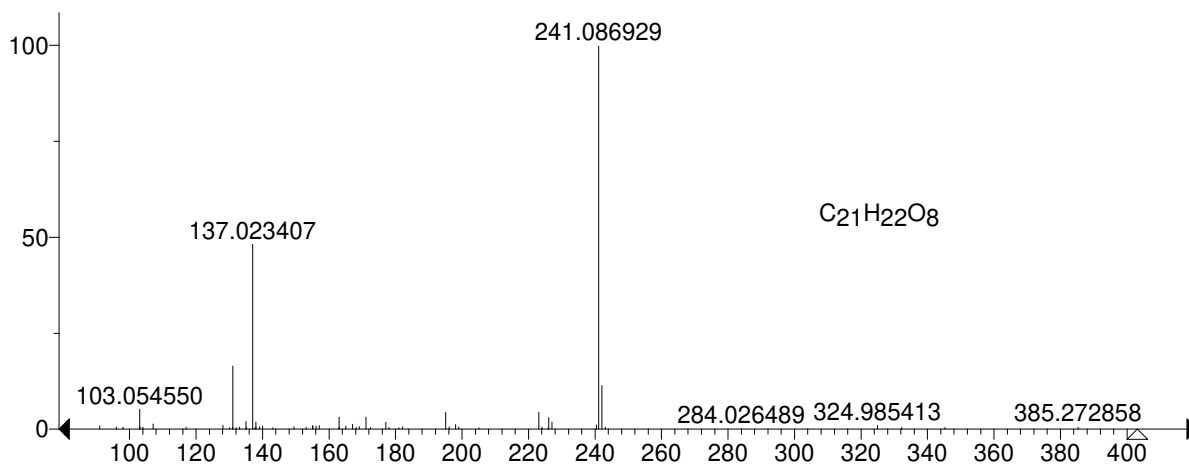



Unknown: Unknown (2.96\_431.1298m/z)  
Compound in Library Factor = 0

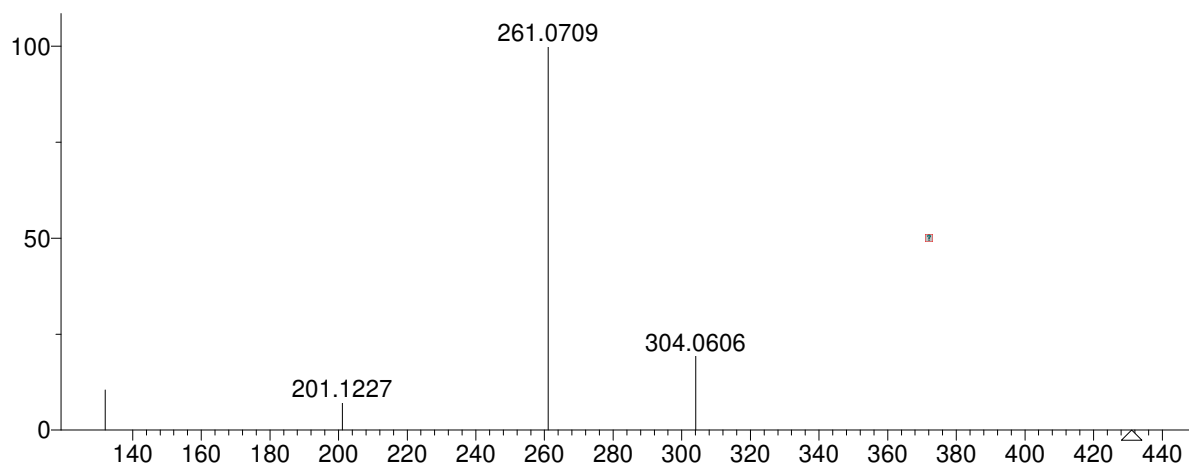

Hit 1 : O-Desmethylgefitinib [M-H]<sup>-</sup> HCD 68V P=431.1  
C<sub>21</sub>H<sub>22</sub>ClFN<sub>4</sub>O<sub>3</sub>; MF: 0; RMF: 13; Prob 33.3%; CAS: 847949-49-9; Lib: nist\_msms; ID: 451781.

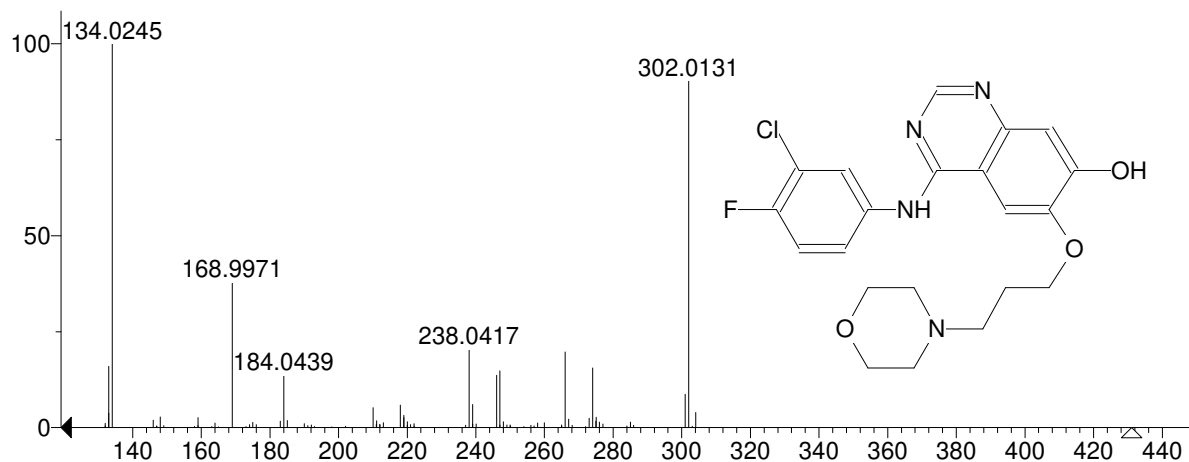

Hit 2 : Formononetin-7-O-glucoside [M+H]<sup>+</sup> 50eV P=431.1  
C<sub>22</sub>H<sub>22</sub>O<sub>9</sub>; MF: 0; RMF: 7; Prob 33.3%; Lib: anthocyanins\_mona; ID: 1127.

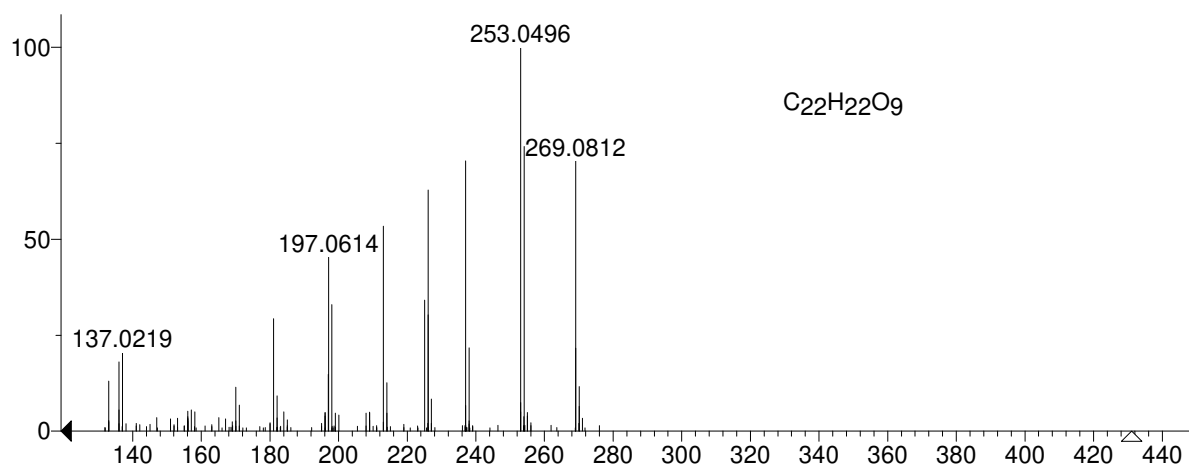

Hit 3 : calycosin-7-O-beta-D-glucoside [M+H]<sup>+</sup> 35HCD P=431.1  
C<sub>22</sub>H<sub>22</sub>O<sub>9</sub>; MF: 0; RMF: 2; Prob 33.3%; Lib: mona-export-vf-npl\_qexactive; ID: 13249.

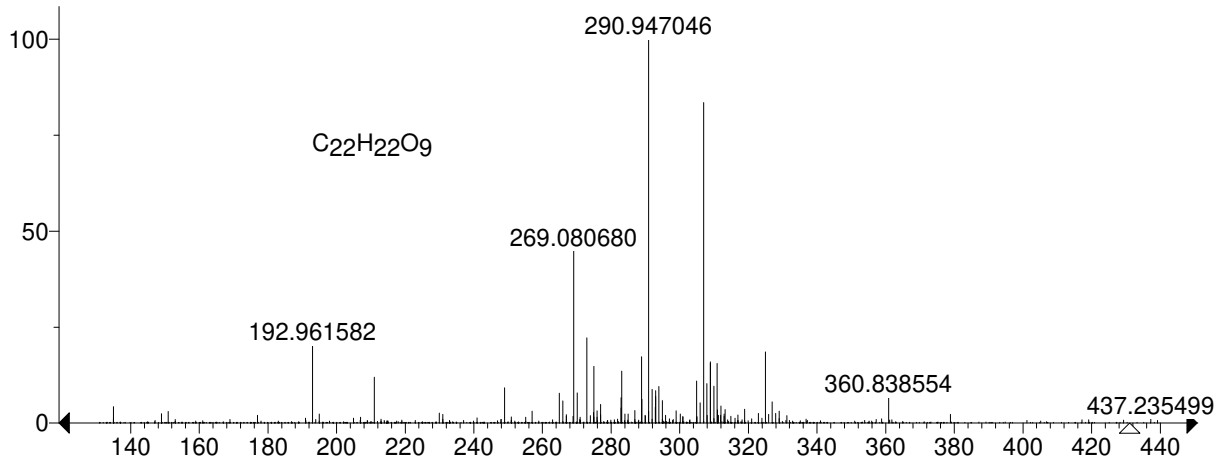

Unknown: Unknown (2.99\_416.1298m/z)  
Compound in Library Factor = 0

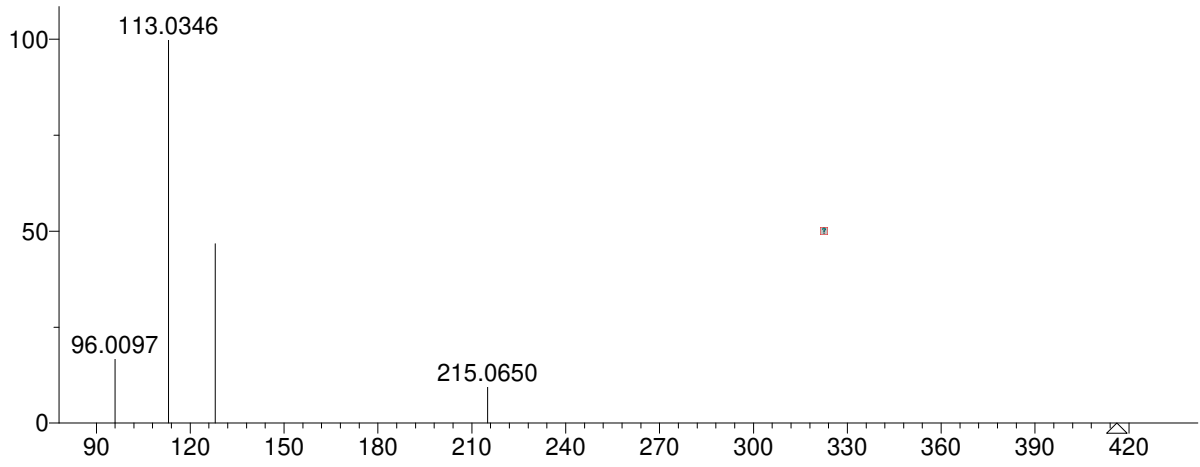

Unknown: Unknown (2.99\_464.1857m/z)  
Compound in Library Factor = 0

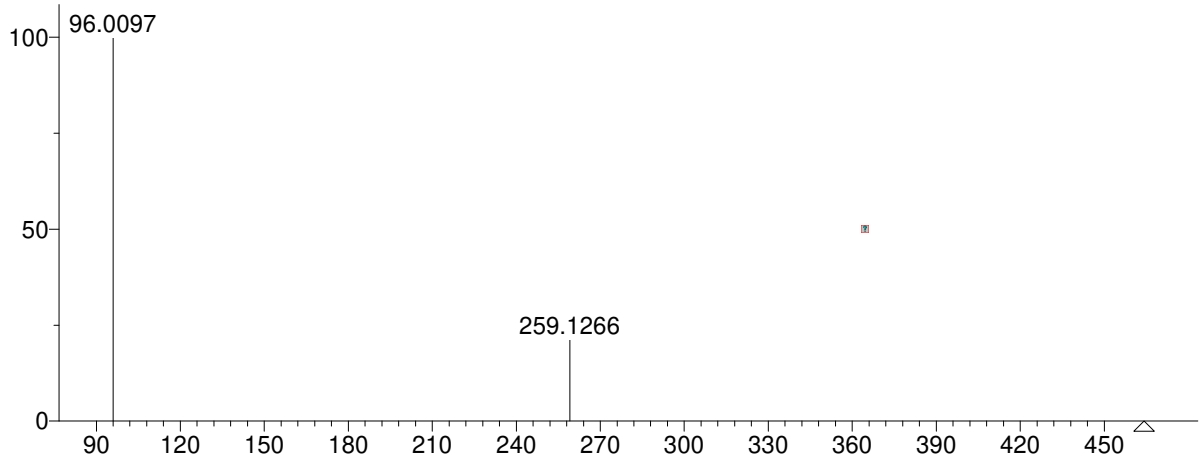

Unknown: Unknown (20.00\_341.9273m/z)  
Compound in Library Factor = 0

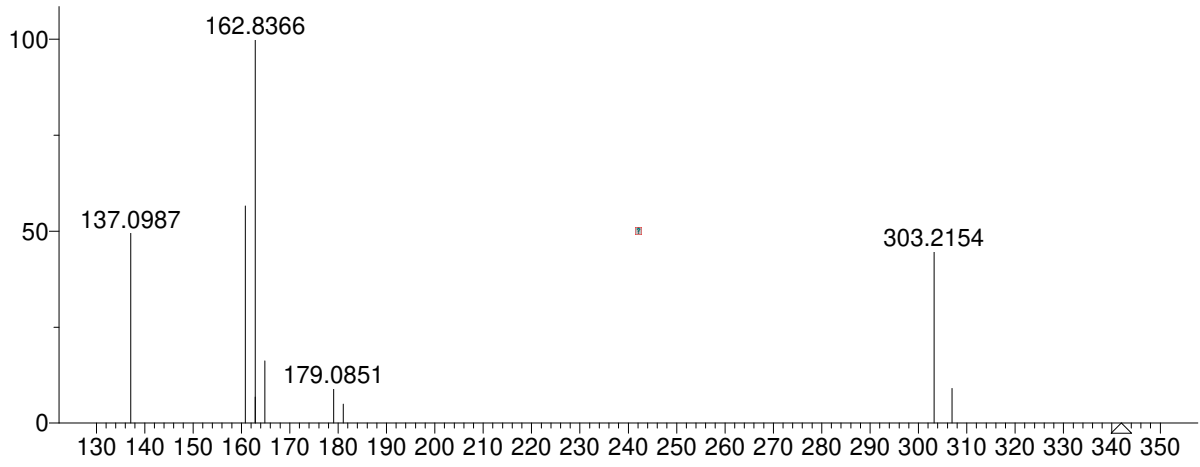

\*\* Search Report Page 1 of 2 \*\*

Unknown: Unknown (20.03\_277.1435m/z)  
Compound in Library Factor = -1072

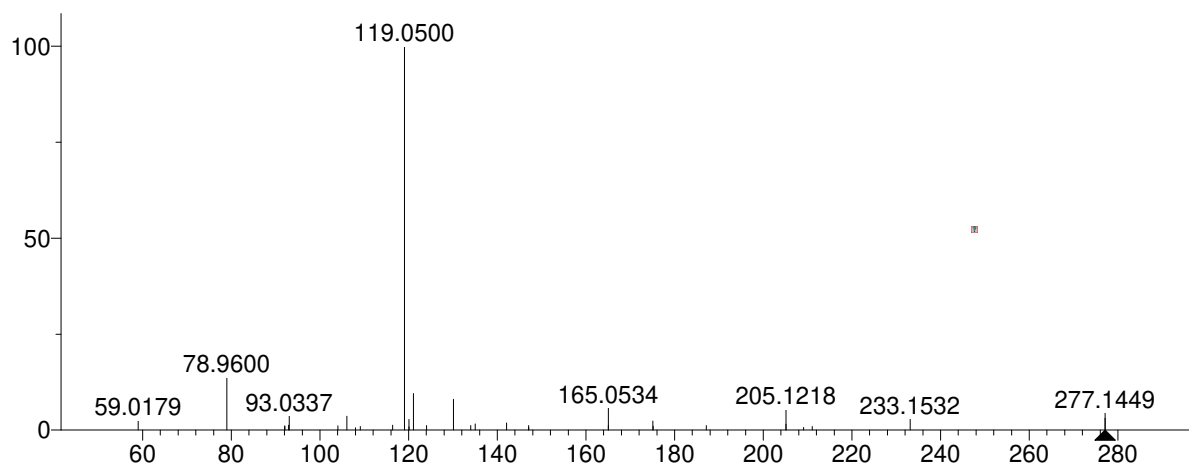

Hit 1 : 2,5,7,8-Tetramethyl-2-( $\beta$ -carboxyethyl)-6-hydroxychroman [M-H]<sup>-</sup> HCD 9V P=277.1  
C<sub>16</sub>H<sub>22</sub>O<sub>4</sub>; MF: 112; RMF: 462; Prob 69.1%; CAS: 4072-32-6; Lib: nist\_msms; ID: 340391.

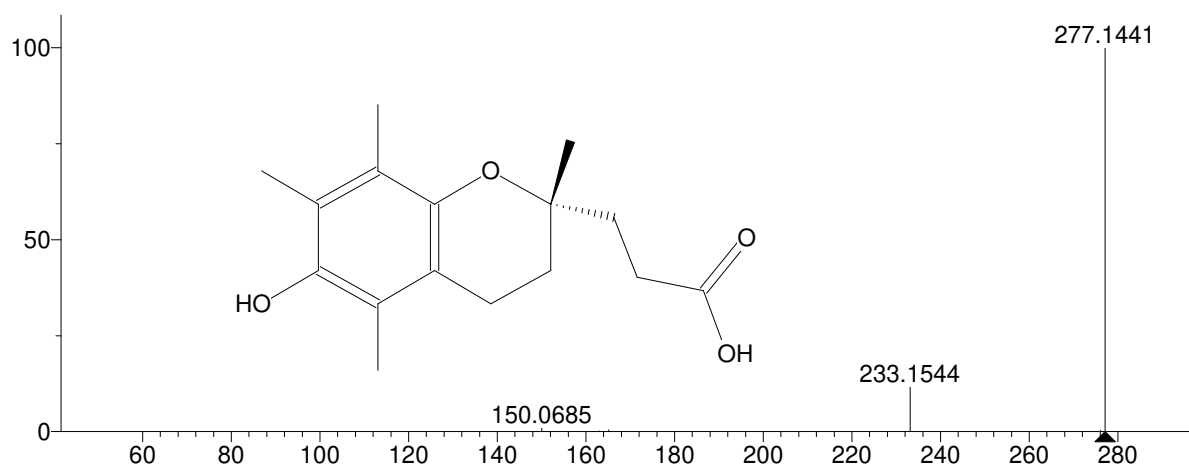

Hit 2 : Ferimzone [M+Na]<sup>+</sup> HCD 13V P=277.1  
C<sub>15</sub>H<sub>18</sub>N<sub>4</sub>; MF: 39; RMF: 361; Prob 9.41%; CAS: 89269-64-7; Lib: nist\_msms; ID: 293640.

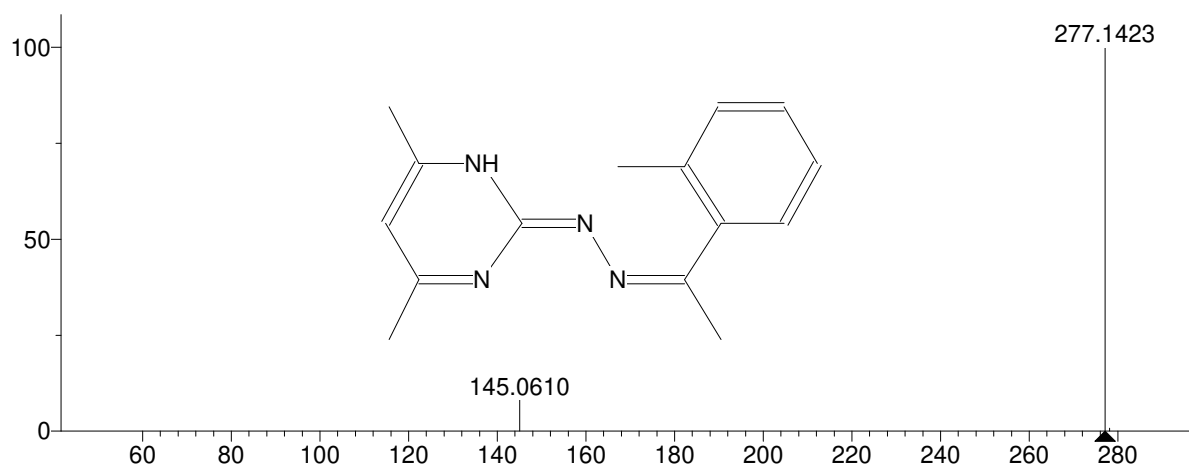

Hit 3 : Mono-2-ethylhexyl phthalate [M-H]<sup>-</sup> HCD 9V P=277.1  
C<sub>16</sub>H<sub>22</sub>O<sub>4</sub>; MF: 26; RMF: 171; Prob 6.07%; CAS: 4376-20-9; Lib: nist\_msms; ID: 206479.

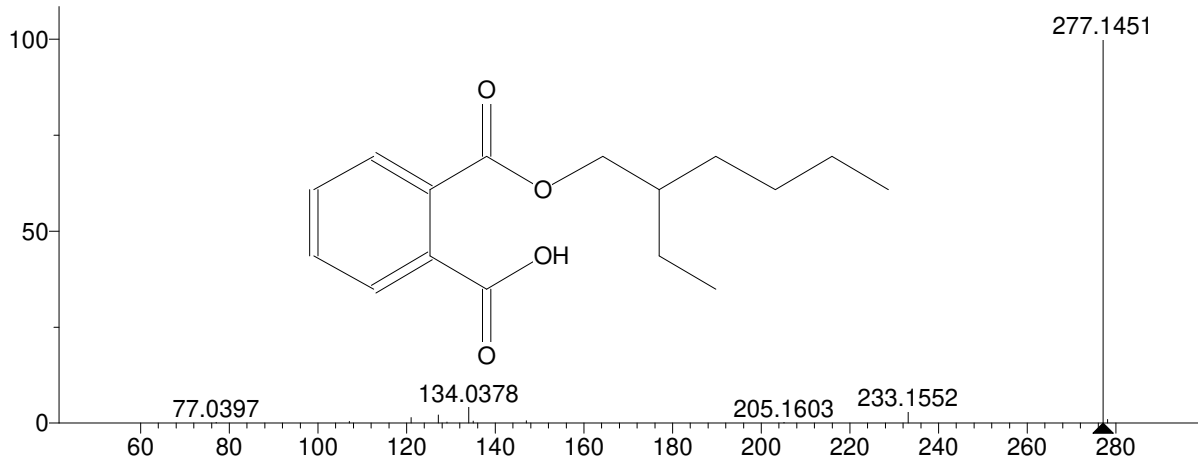

Hit 4 : Di-n-butyl phthalate [M-H]<sup>-</sup> 15(no P=277.1  
C<sub>16</sub>H<sub>22</sub>O<sub>4</sub>; MF: 9; RMF: 151; Prob 3.31%; Lib: mona-export-ic-ms-ms\_negative\_mode; ID: 4903.

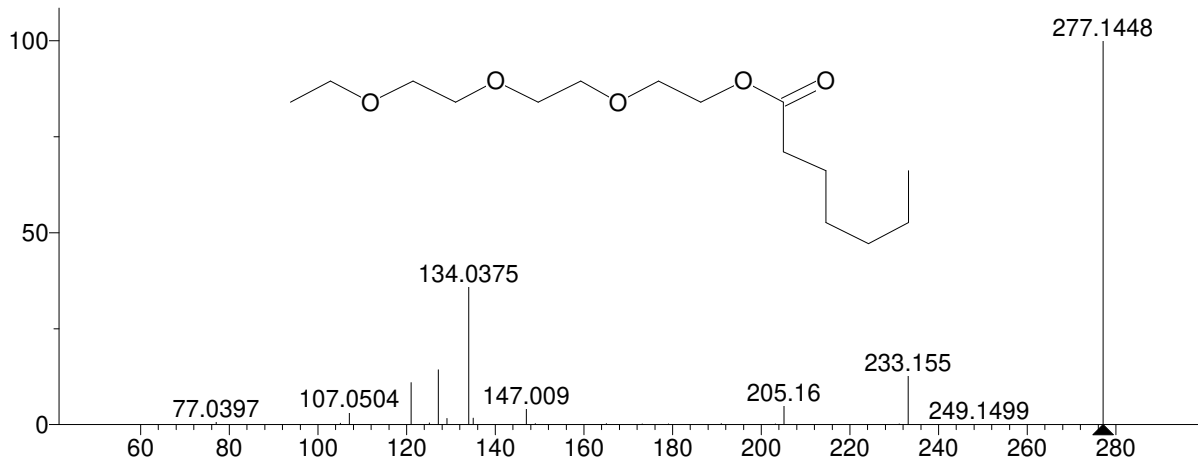

Hit 5 : Gliocladic acid\_130132 [M+Na]<sup>+</sup> P=277.1  
C<sub>14</sub>H<sub>22</sub>O<sub>4</sub>; MF: 1; RMF: 121; Prob 2.47%; Lib: mona-export-gnps; ID: 5077.

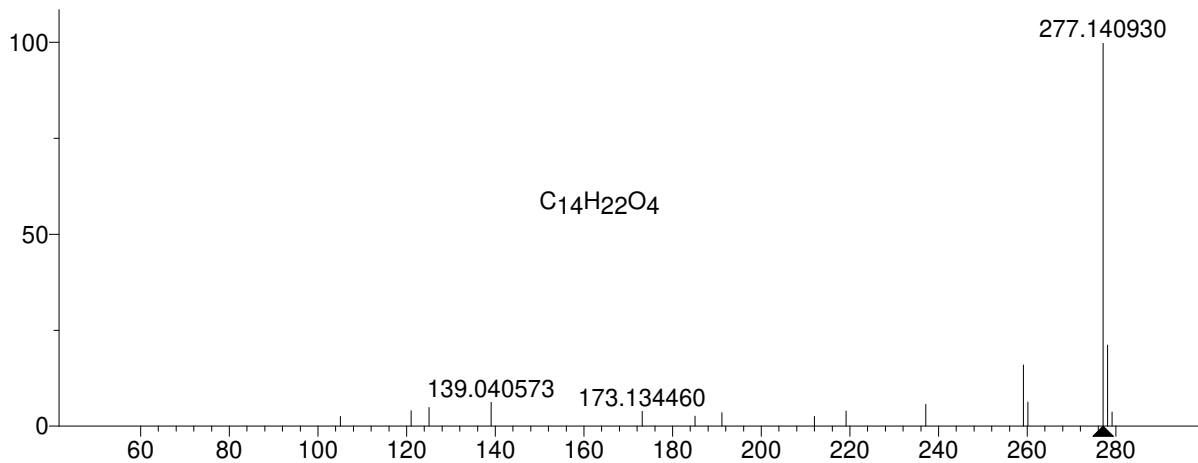

\*\* Search Report Page 1 of 2 \*\*

Unknown: Unknown (20.04\_567.2180m/z)  
Compound in Library Factor = 0

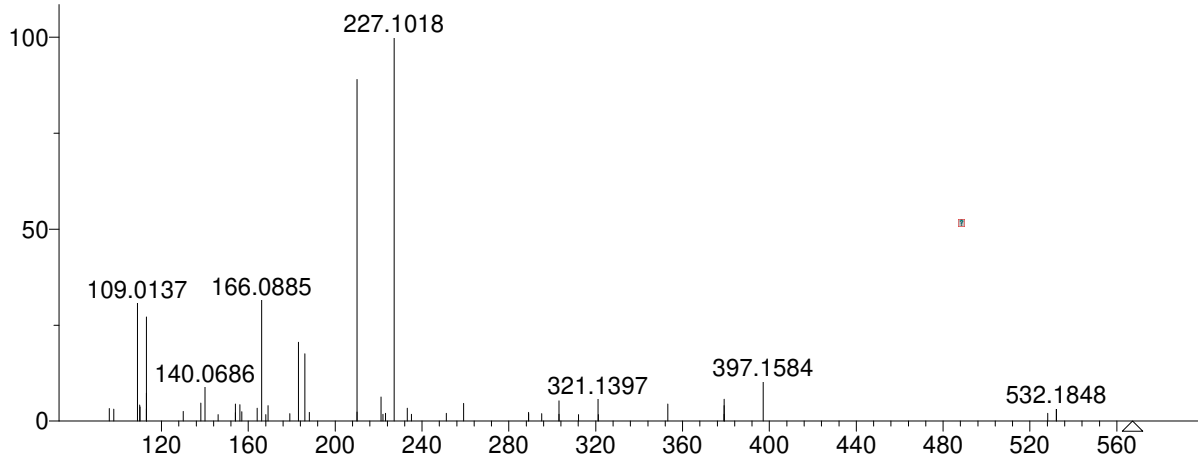

Hit 1 : 10-Deacetylbaaccatin III [M+Na]<sup>+</sup> HCD 51V P=567.2  
C<sub>29</sub>H<sub>36</sub>O<sub>10</sub>; MF: 0; RMF: 48; Prob 20.0%; CAS: 32981-86-5; Lib: nist\_msms; ID: 502979.

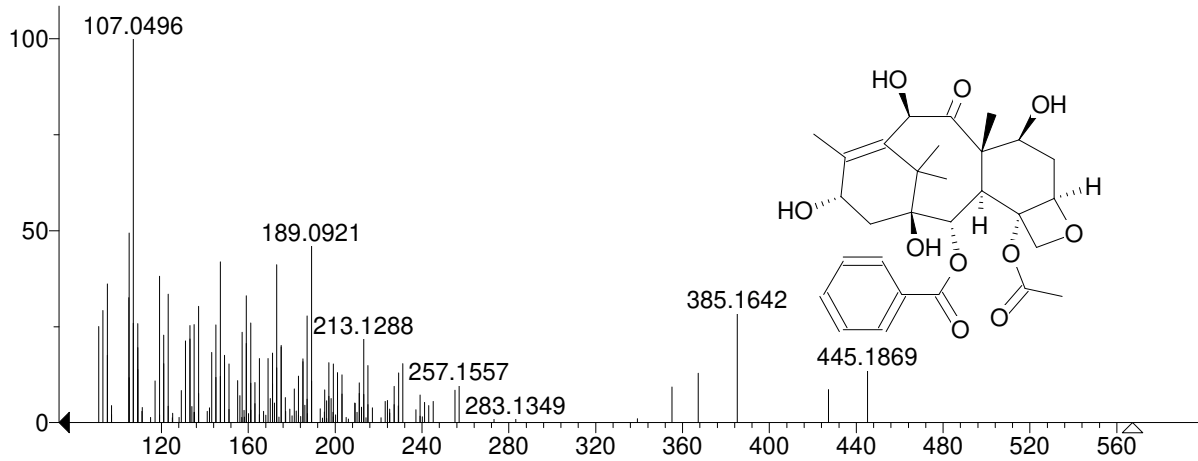

Hit 2 : methyl (2E)-3-[18-(acetyloxy)-7-(furan-3-yl)-17-hydroxy-1,8,15,15-tetramethyl-5-oxo-3,6,14-trioxapentacycl  
C<sub>29</sub>H<sub>36</sub>O<sub>10</sub>; MF: 0; RMF: 35; Prob 20.0%; Lib: mona-export-vf-npl\_qexactive; ID: 22573.

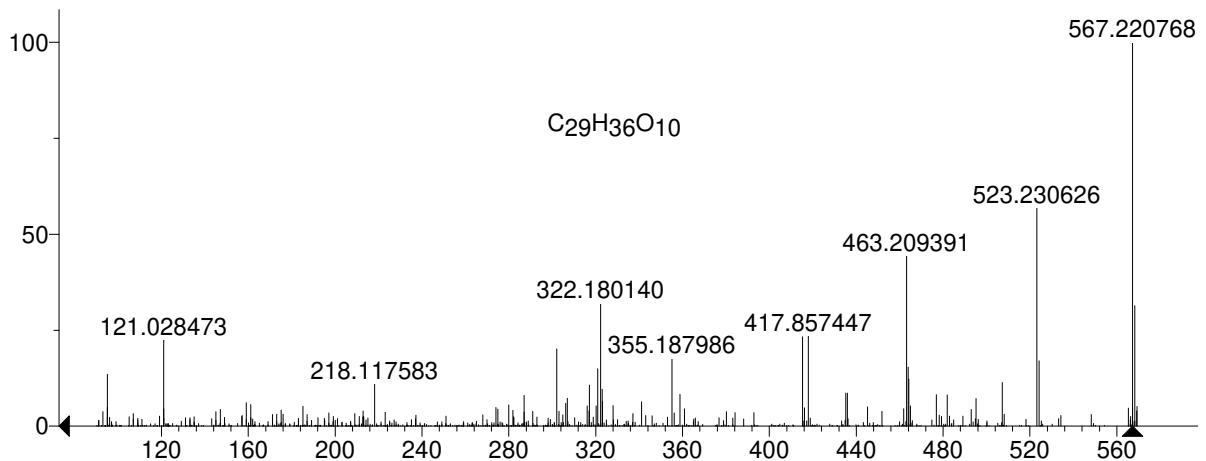



\*\* Search Report Page 2 of 2 \*\*

Hit 3 : NCGC00347452-02!4-[4-(2,4-dihydroxy-3,6-dimethylbenzoyl)oxy-2-methoxy-3,5,6-trimethylbenzoyl]oxy-2-r  
C<sub>31</sub>H<sub>34</sub>O<sub>10</sub>; MF: 0; RMF: 30; Prob 20.0%; Lib: mona-export-gnps; ID: 7149.

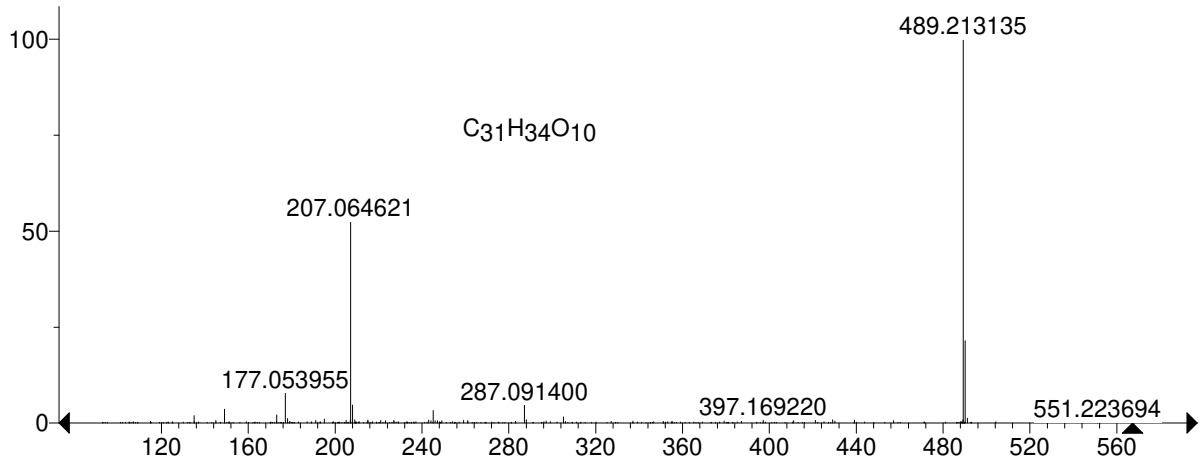

Hit 4 : NCGC00380342-01!methyl 3-[3,4-dihydroxy-2-(3-methylbut-2-enyl)phenyl]-2-[[4-hydroxy-3-(3-methylbut-2-  
C<sub>30</sub>H<sub>34</sub>O<sub>8</sub>; MF: 0; RMF: 14; Prob 20.0%; Lib: mona-export-gnps; ID: 6760.

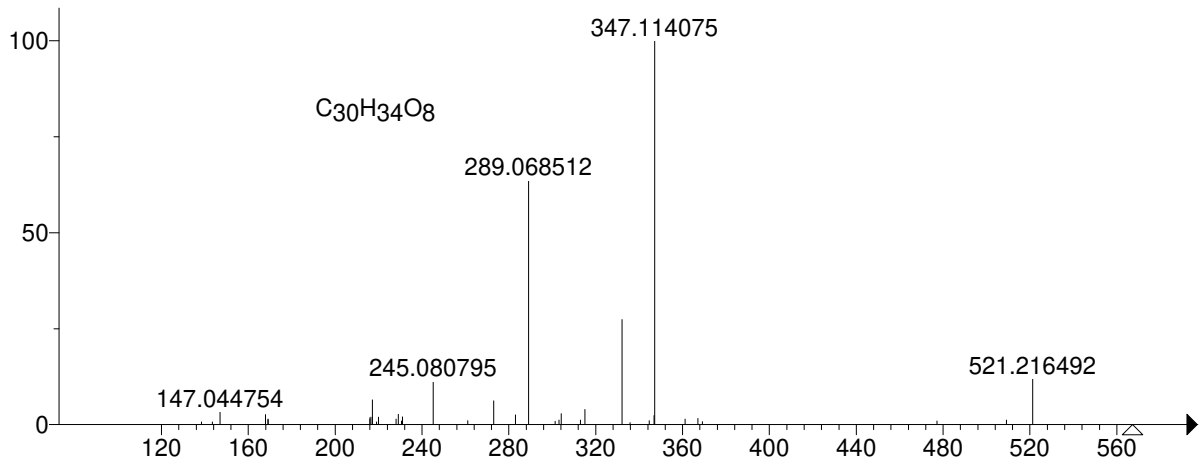

Hit 5 : NCGC00384820-01\_C<sub>29</sub>H<sub>36</sub>O<sub>10</sub>\_2-Propenoic acid, 3-[5-(acetyloxy)-9-(3-furanyl)dodecahydro-4-hydroxy-  
C<sub>29</sub>H<sub>36</sub>O<sub>10</sub>; MF: 0; RMF: 4; Prob 20.0%; Lib: mona-export-gnps; ID: 13032.

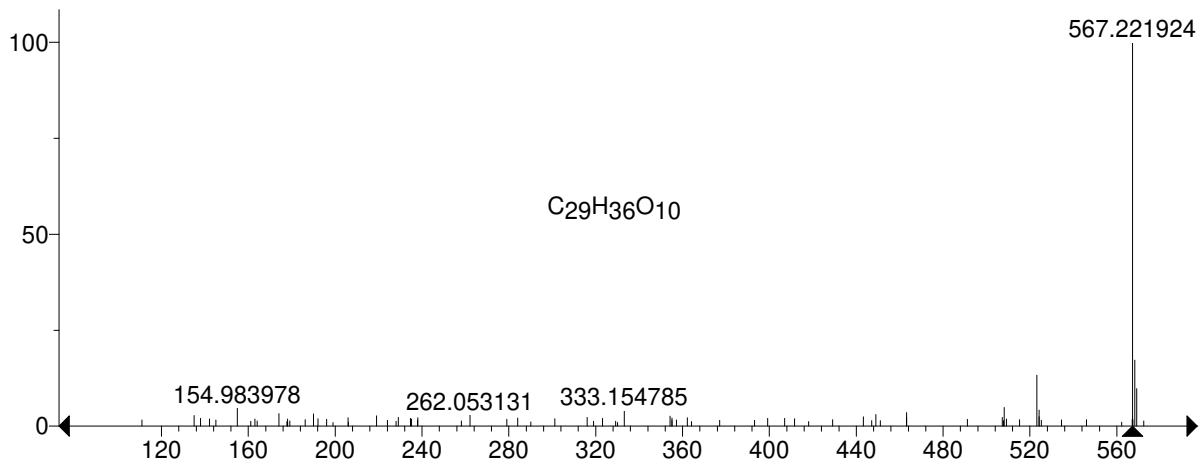

\*\* Search Report Page 1 of 2 \*\*

Unknown: Unknown (20.10\_325.1649m/z)  
Compound in Library Factor = -2387

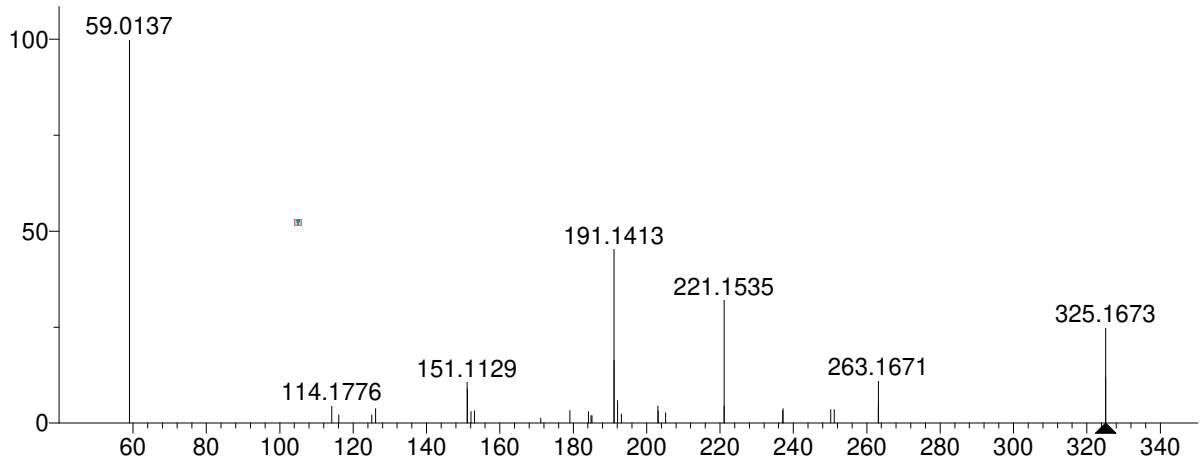

Hit 1 : [5-acetyloxy-3-(hydroxymethyl)-2-oxo-6-propan-2-ylcyclohex-3-en-1-yl] 3-methylbutanoate [M-H]<sup>-</sup> 35HCD  
C<sub>17</sub>H<sub>26</sub>O<sub>6</sub>; MF: 26; RMF: 286; Prob 23.1%; Lib: mona-export-1c-ms-ms\_negative\_mode; ID: 19385.

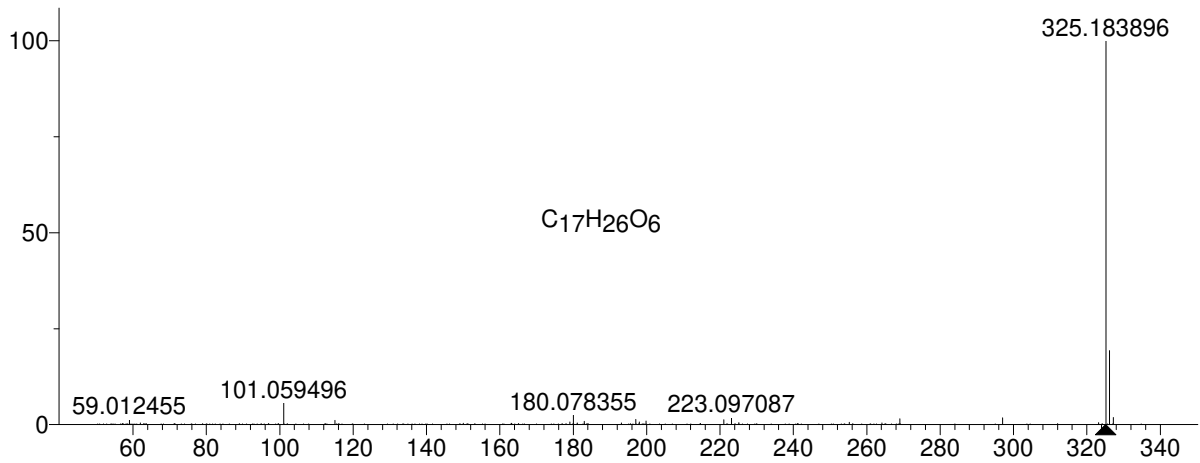

Hit 2 : Tributyrin [M+Na]<sup>+</sup> HCD 13V P=325.2  
C<sub>15</sub>H<sub>26</sub>O<sub>6</sub>; MF: 22; RMF: 306; Prob 19.5%; CAS: 60-01-5; Lib: nist\_msms; ID: 144821.

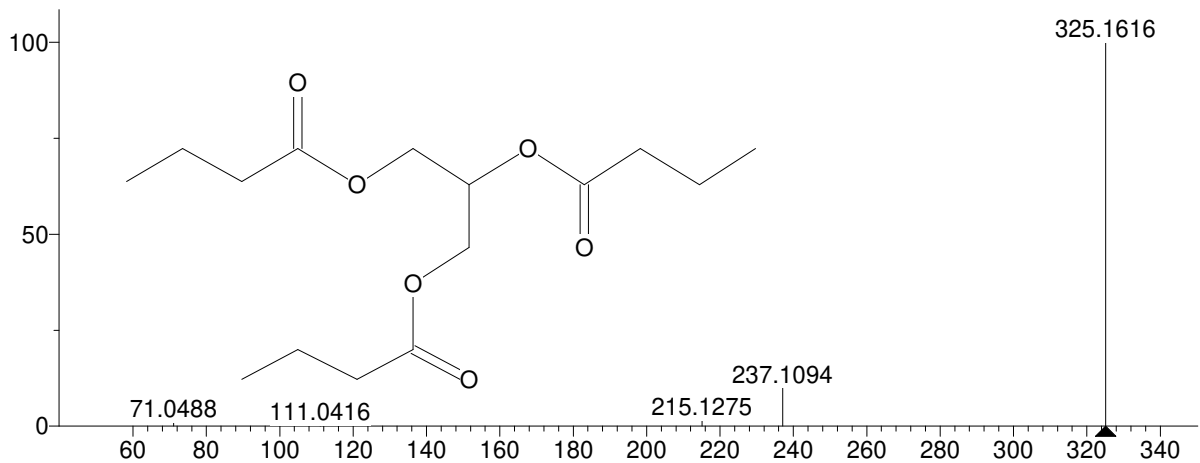

Hit 3 : Chamissonolide [M+H]<sup>+</sup> HCD 1V P=325.2  
C<sub>17</sub>H<sub>24</sub>O<sub>6</sub>; MF: 20; RMF: 315; Prob 18.0%; CAS: 78853-98-2; Lib: nist\_msms; ID: 500759.

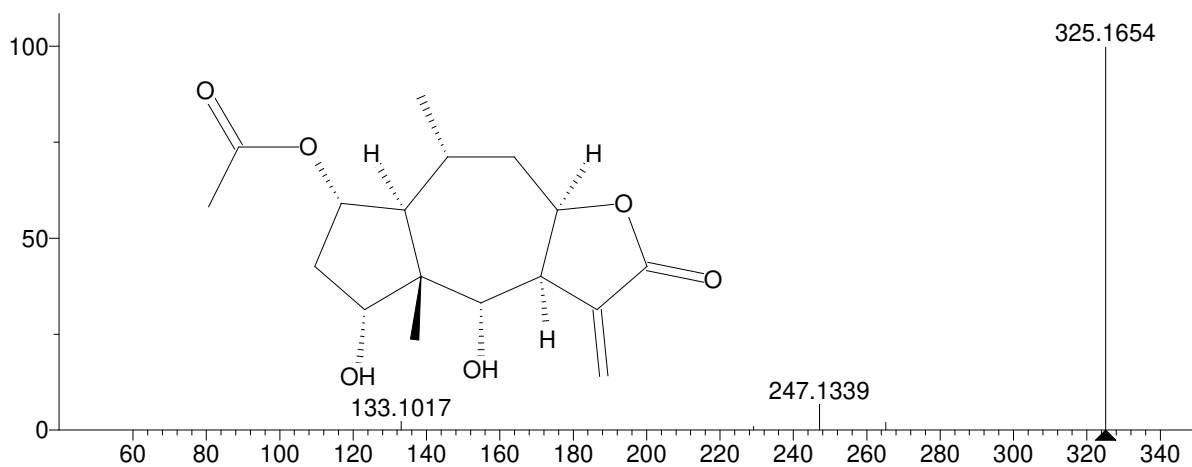

Hit 4 : MMV023985 [M+H]<sup>+</sup> 20-30-40%) P=325.2  
C<sub>18</sub>H<sub>20</sub>N<sub>4</sub>O<sub>2</sub>; MF: 8; RMF: 286; Prob 12.0%; Lib: mona-export-pathogen\_box; ID: 292.

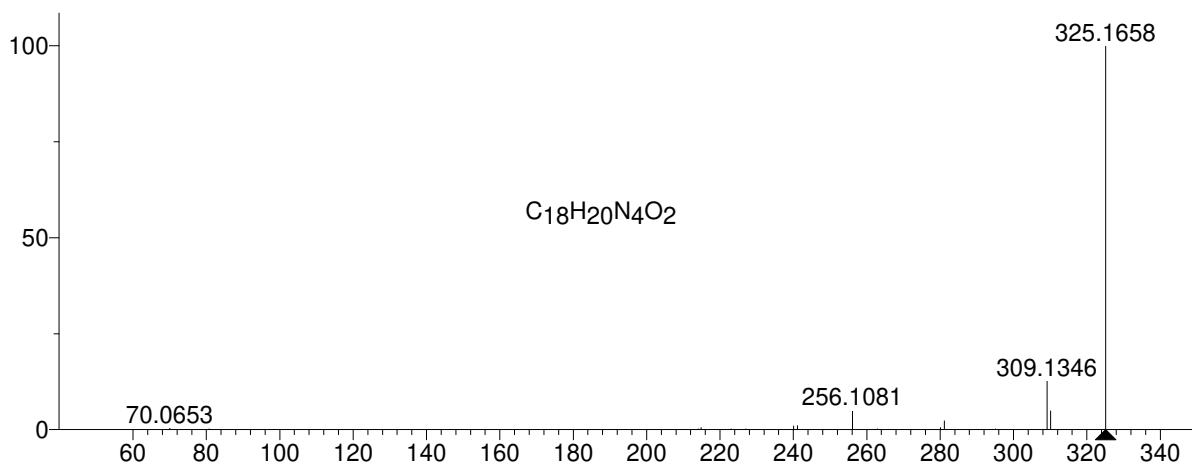

Hit 5 : 2H-Benzimidazol-2-one, 1-ethyl-1,3-dihydro- [2M+H]<sup>+</sup> HCD 3V P=325.2  
C<sub>9</sub>H<sub>10</sub>N<sub>2</sub>O; MF: 4; RMF: 182; Prob 10.1%; CAS: 10045-45-1; Lib: nist\_msms; ID: 364753.

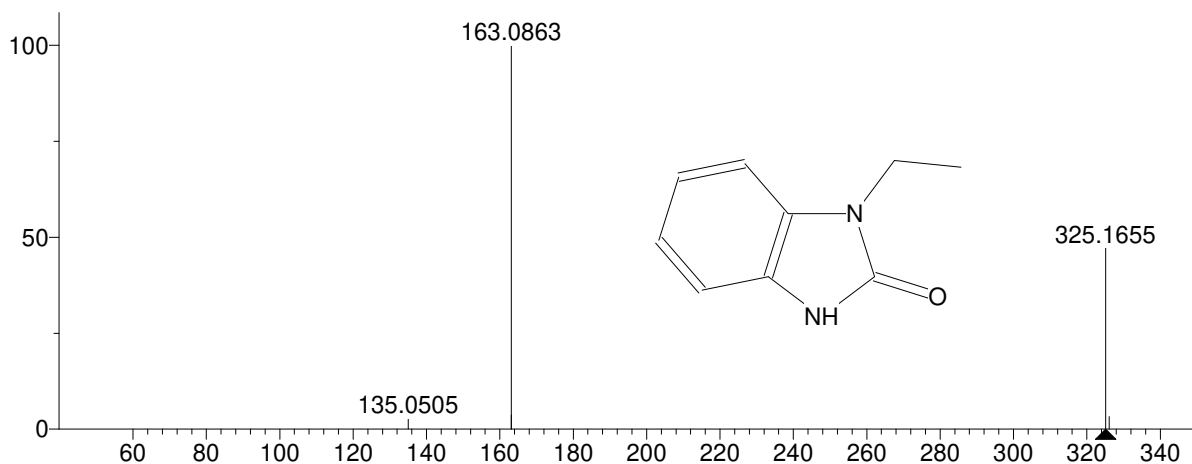

Unknown: Unknown (20.10\_450.0290m/z)  
Compound in Library Factor = 0

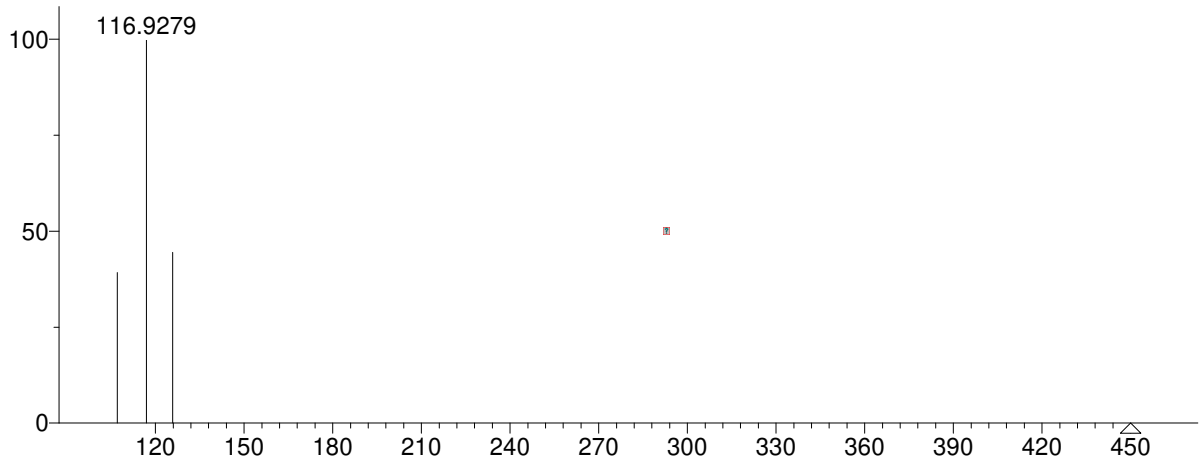

Unknown: Unknown (20.11\_687.3608m/z)  
Compound in Library Factor = 0

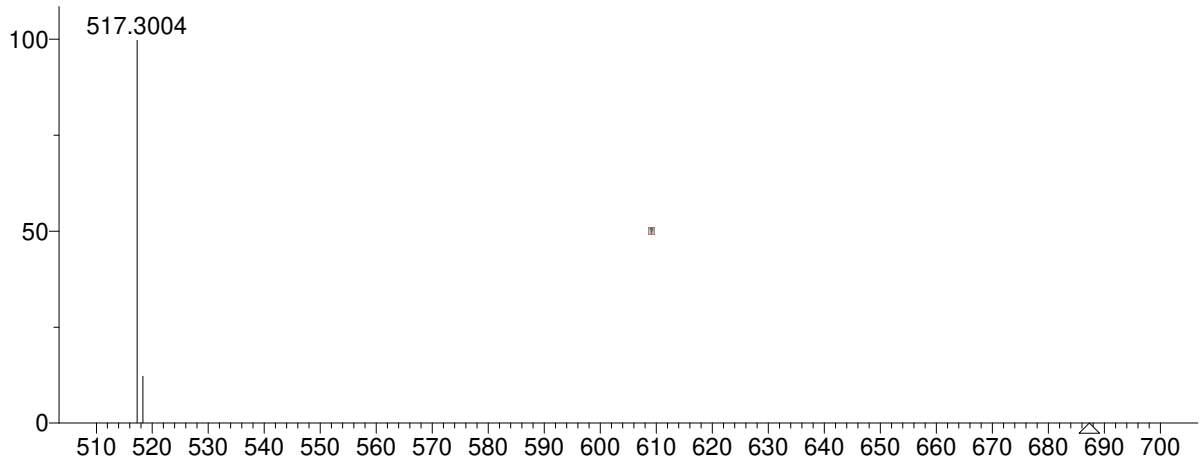

\*\* Search Report Page 1 of 2 \*\*

Unknown: Unknown (20.15\_425.1919m/z)  
Compound in Library Factor = -3273

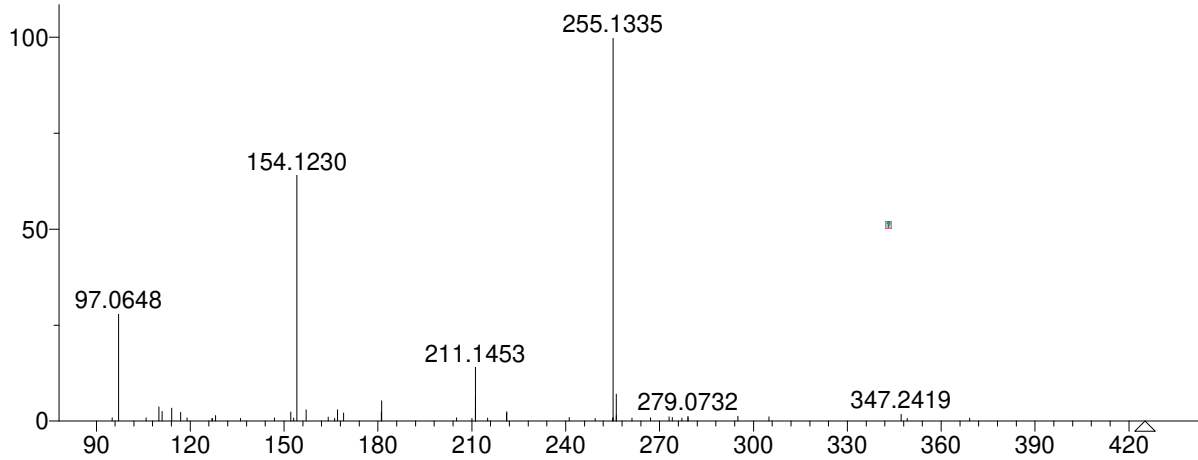

Hit 1 : Evodin [M+H-CH<sub>2</sub>O<sub>2</sub>]<sup>+</sup> IT-FT 35% P=425.2  
C<sub>26</sub>H<sub>30</sub>O<sub>8</sub>; MF: 1; RMF: 53; Prob 9.42%; CAS: 1180-71-8; Lib: nist\_msms; ID: 223331.

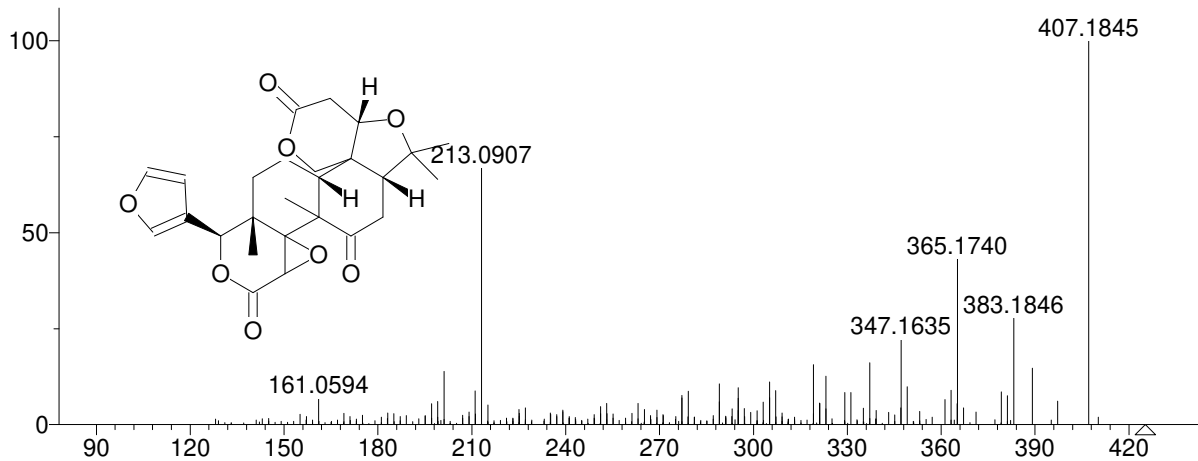

Hit 2 : NCGC00385788-0113-(2,4-dihydroxyphenyl)-5,7-dihydroxy-6,8-bis(3-methylbut-2-enyl)-2,3-dihydrochromen  
C<sub>25</sub>H<sub>28</sub>O<sub>6</sub>; MF: 0; RMF: 39; Prob 9.05%; Lib: mona-export-gnps; ID: 7334.

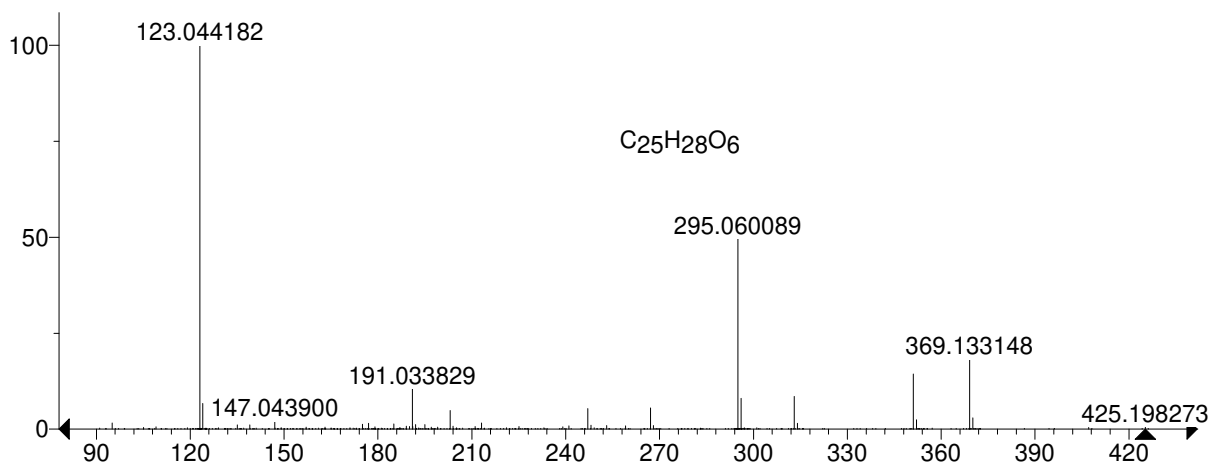

\*\* Search Report Page 2 of 2 \*\*

Hit 3 : 2-[5-[2-[2-[5-(2-hydroxypropyl)oxolan-2-yl]propanoyloxy]propyl]oxolan-2-yl]propanoic acid [M+K]<sup>+</sup> 45HCD  
C<sub>20</sub>H<sub>34</sub>O<sub>7</sub>; MF: 0; RMF: 27; Prob 9.05%; Lib: mona-export-vf-npl\_qexactive; ID: 9131.

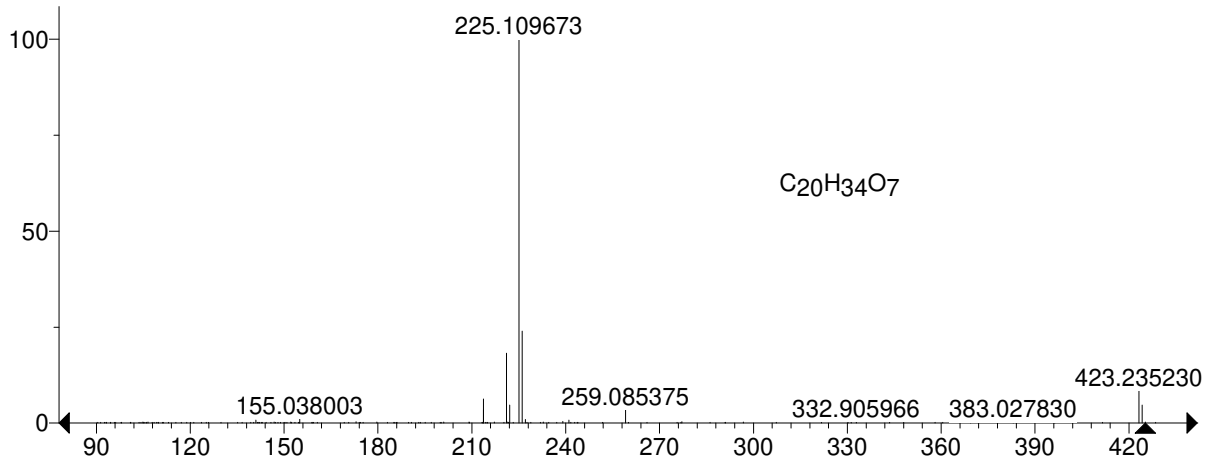

Hit 4 : NCGC00385984-0112-(3,5-dihydroxyphenyl)-5,7-dihydroxy-6,8-bis(3-methylbut-2-enyl)-2,3-dihydrochromen  
C<sub>25</sub>H<sub>28</sub>O<sub>6</sub>; MF: 0; RMF: 12; Prob 9.05%; Lib: mona-export-gnps; ID: 6690.

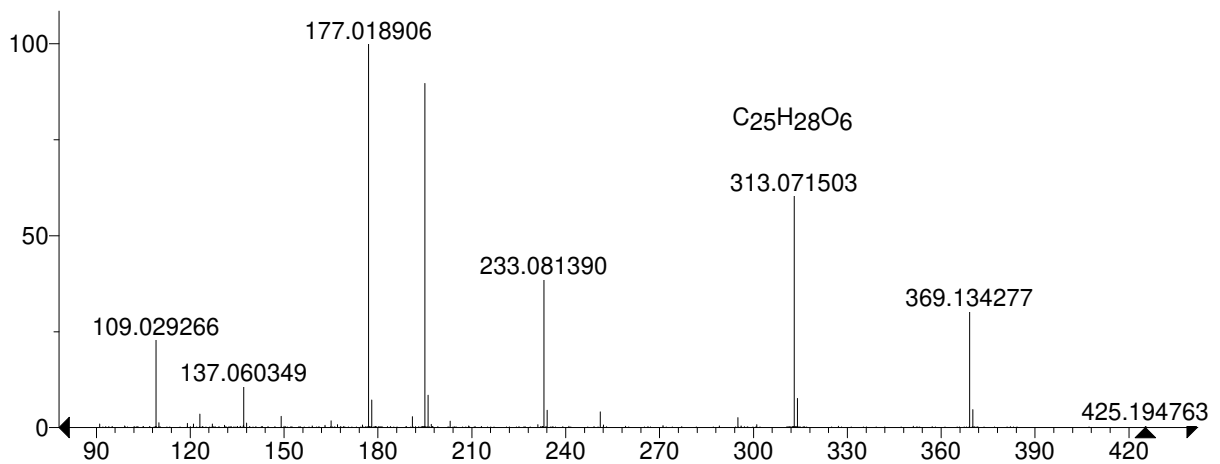

Hit 5 : Pantethine [M+H-C<sub>6</sub>H<sub>10</sub>O<sub>3</sub>]<sup>+</sup> HCD 63V P=425.2  
C<sub>22</sub>H<sub>42</sub>N<sub>4</sub>O<sub>8</sub>S<sub>2</sub>; MF: 0; RMF: 10; Prob 9.05%; CAS: 16816-67-4; Lib: nist\_msms; ID: 218929.

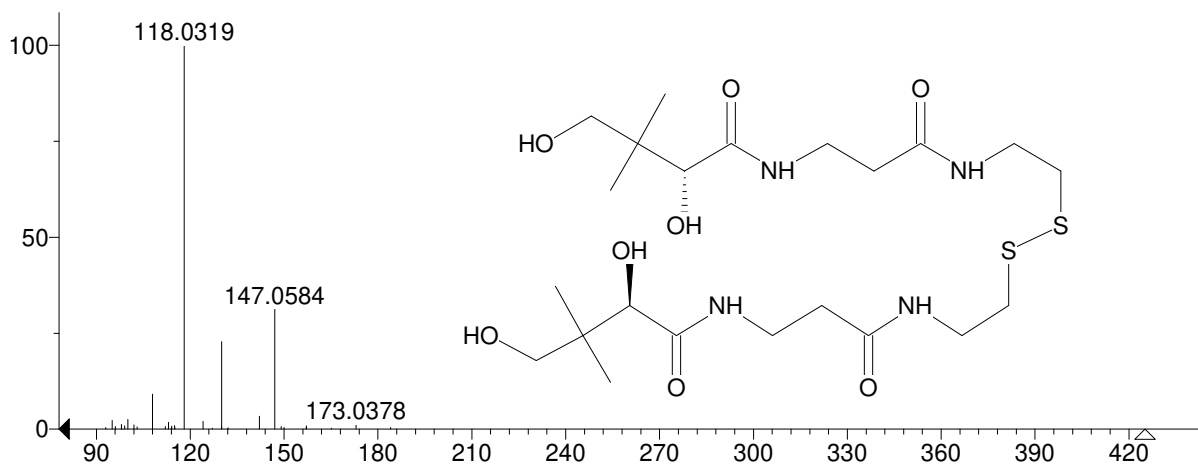

Unknown: Unknown (20.29\_381.0999m/z)  
Compound in Library Factor = -275

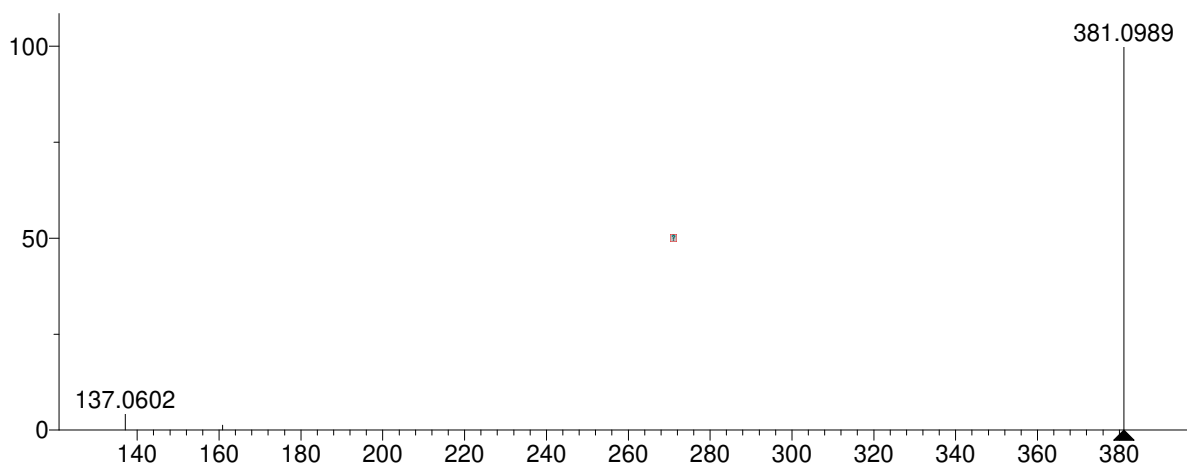

Hit 1 : Lactobionic acid [M+Na]<sup>+</sup> HCD 19V P=381.1  
C<sub>12</sub>H<sub>22</sub>O<sub>12</sub>; MF: 313; RMF: 966; Prob 97.7%; CAS: 96-82-2; Lib: nist\_msms; ID: 407480.

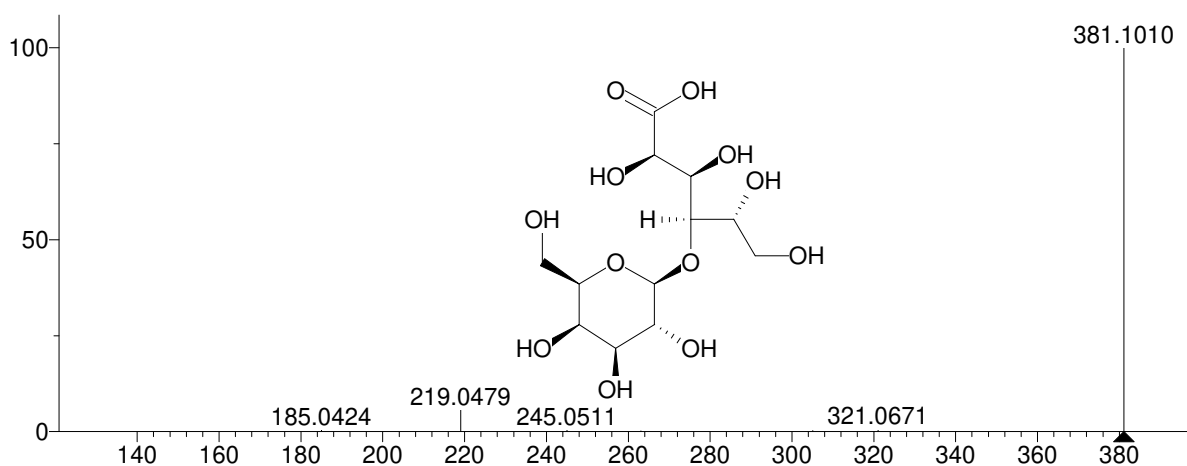

Hit 2 : Swertisin [M+H-CH<sub>6</sub>O<sub>3</sub>]<sup>+</sup> HCD 11V P=381.1  
C<sub>22</sub>H<sub>22</sub>O<sub>10</sub>; MF: 93; RMF: 744; Prob 0.97%; CAS: 6991-10-2; Lib: nist\_msms; ID: 411740.

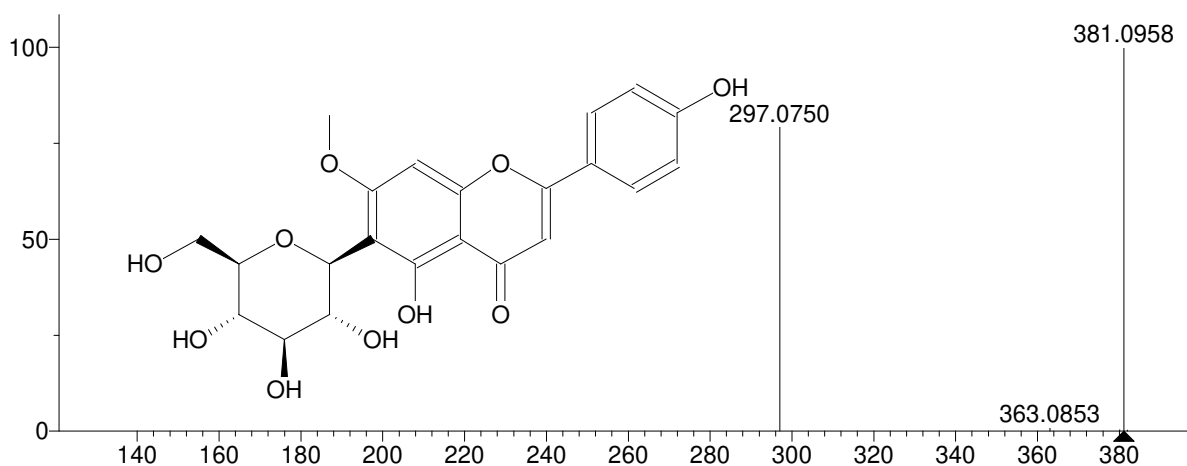



Hit 3 : Teniposide [M-H-C11H14O6S]- HCD 19V P=381.1  
C26H32O13S; MF: 85; RMF: 827; Prob 0.72%; CAS: 29767-20-2; Lib: nist\_msms; ID: 419605.

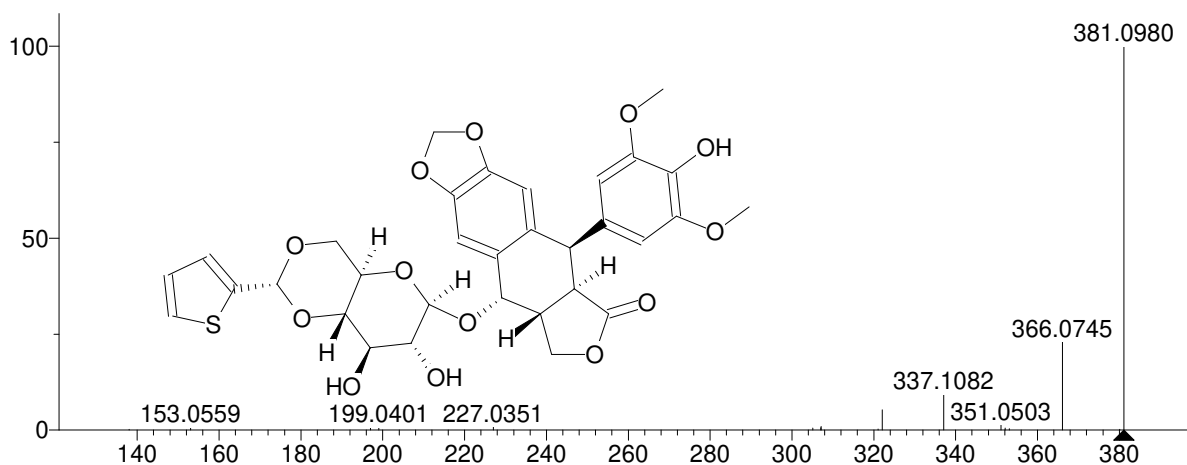

Hit 4 : 3-[1-[3-(Dimethylamino)propyl]-5-methoxy-1H-indol-3-yl]-4-(1H-indol-3-yl)-1H-pyrrole-2,5-dione [M+H]<sup>+</sup>=>  
C26H26N4O3; MF: 20; RMF: 619; Prob 0.11%; CAS: 133053-19-7; Lib: nist\_msms; ID: 321304.

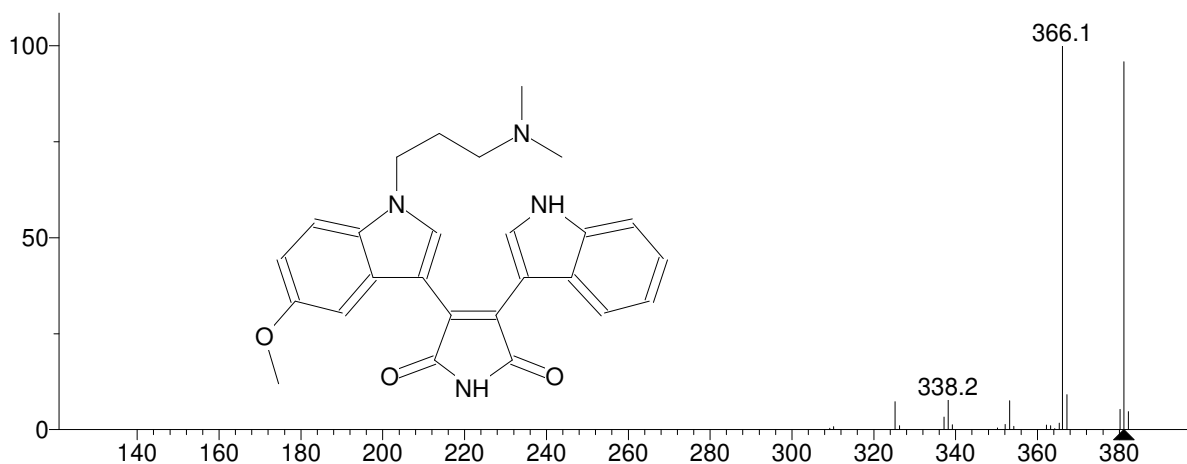

Hit 5 : 1-[[4,5-Bis(4-methoxyphenyl)-2-thiazolyl]carbonyl]-4-methylpiperazine [M+H]<sup>+</sup>=>381.1 IT 35% P=381.1  
C23H25N3O3S; MF: 18; RMF: 646; Prob 0.10%; CAS: 130717-22-5; Lib: nist\_msms; ID: 538941.

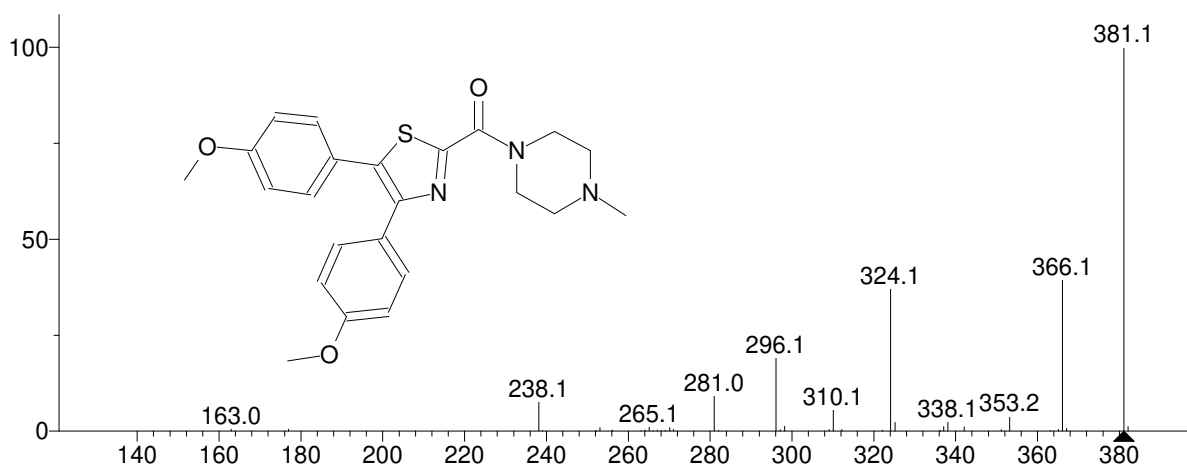

\*\* Search Report Page 1 of 2 \*\*

Unknown: Unknown (20.41\_303.2169m/z)  
Compound in Library Factor = -2176

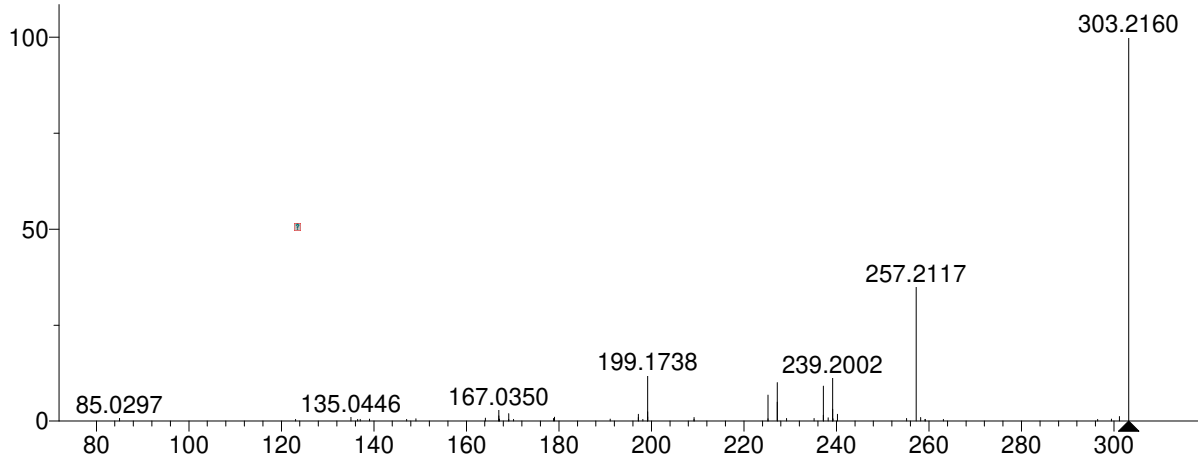

Hit 1 : Lys-Arg [M+H]<sup>+</sup> QTOF 8V P=303.2  
C<sub>12</sub>H<sub>26</sub>N<sub>6</sub>O<sub>3</sub>; MF: 72; RMF: 628; Prob 43.8%; Lib: nist\_msms; ID: 48416.

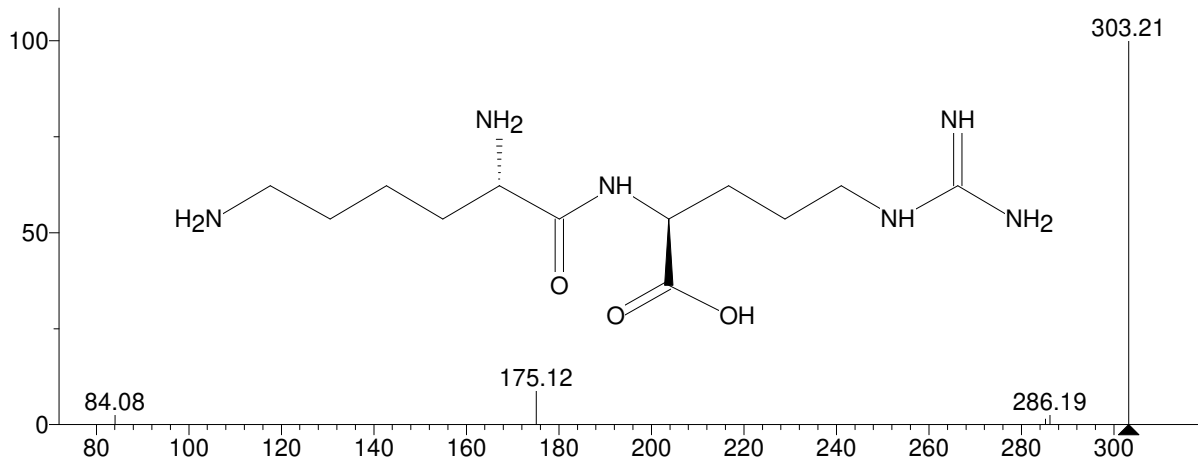

Hit 2 : Arg-Lys [M+H]<sup>+</sup> HCD 13eV P=303.2  
C<sub>12</sub>H<sub>26</sub>N<sub>6</sub>O<sub>3</sub>; MF: 67; RMF: 648; Prob 35.3%; CAS: 40968-46-5; Lib: nist\_msms; ID: 565904.

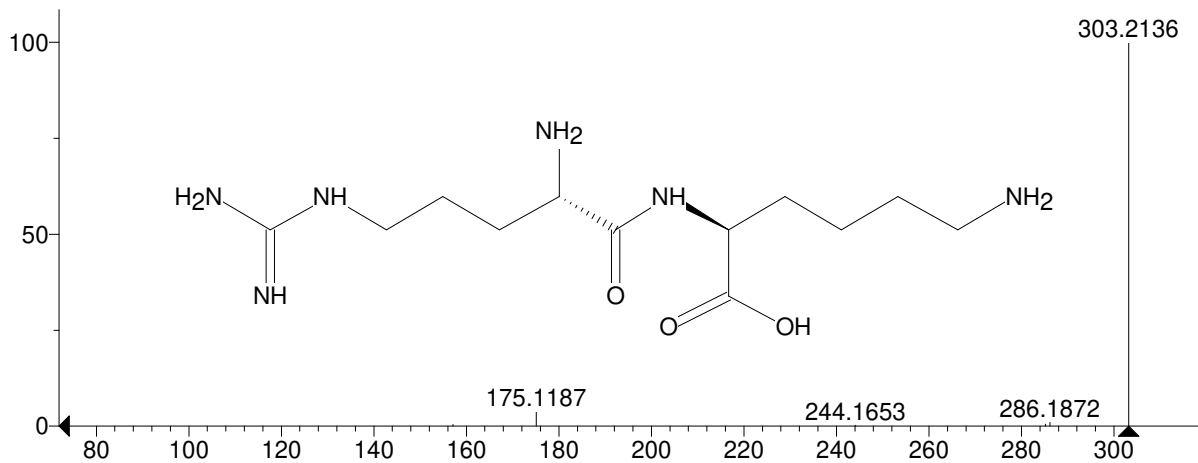

Hit 3 : Aleuritic acid [M-H]<sup>-</sup> IT-FT 35% P=303.2  
C<sub>16</sub>H<sub>32</sub>O<sub>5</sub>; MF: 26; RMF: 190; Prob 8.05%; CAS: 533-87-9; Lib: nist\_msms; ID: 411121.

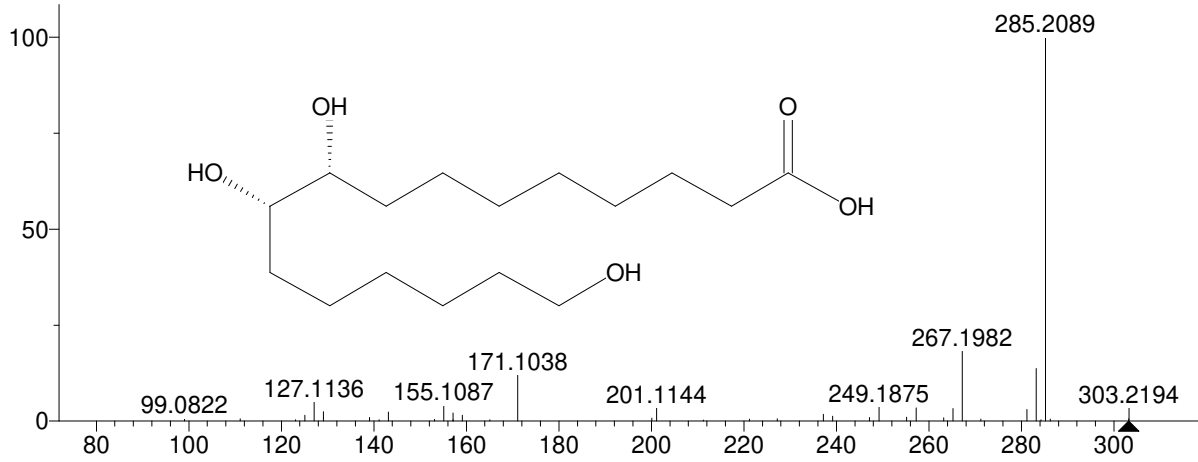

Hit 4 : Lys-Arg [M+H]<sup>+</sup> HCD 15eV P=303.2  
C<sub>12</sub>H<sub>26</sub>N<sub>6</sub>O<sub>3</sub>; MF: 25; RMF: 606; Prob 7.73%; CAS: 29586-66-1; Lib: nist\_msms2; ID: 41398.

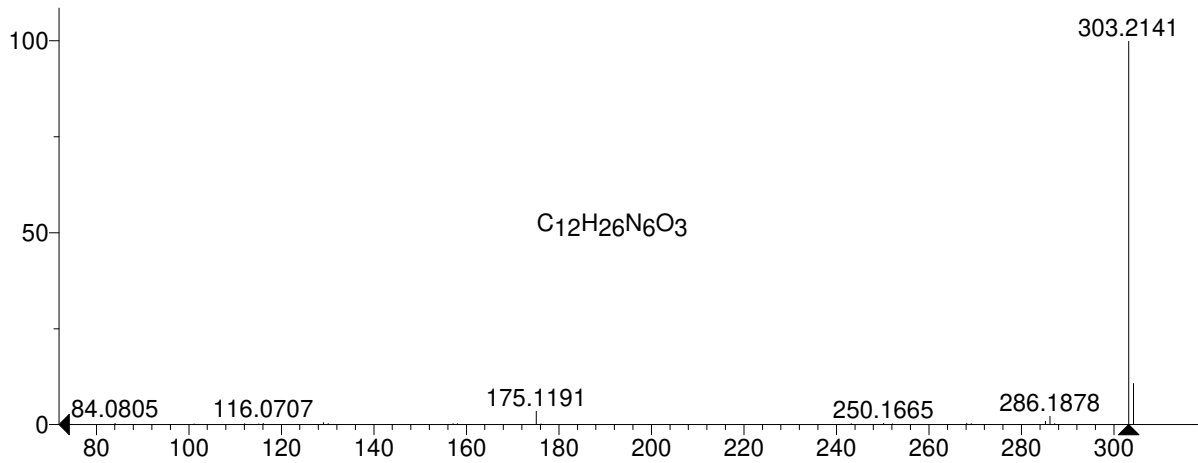

Hit 5 : Aleuritic Acid [M-H]<sup>-</sup> 35HCD P=303.2  
C<sub>16</sub>H<sub>32</sub>O<sub>5</sub>; MF: 13; RMF: 569; Prob 5.15%; Lib: mona-export-1c-ms-ms\_negative\_mode; ID: 20798.

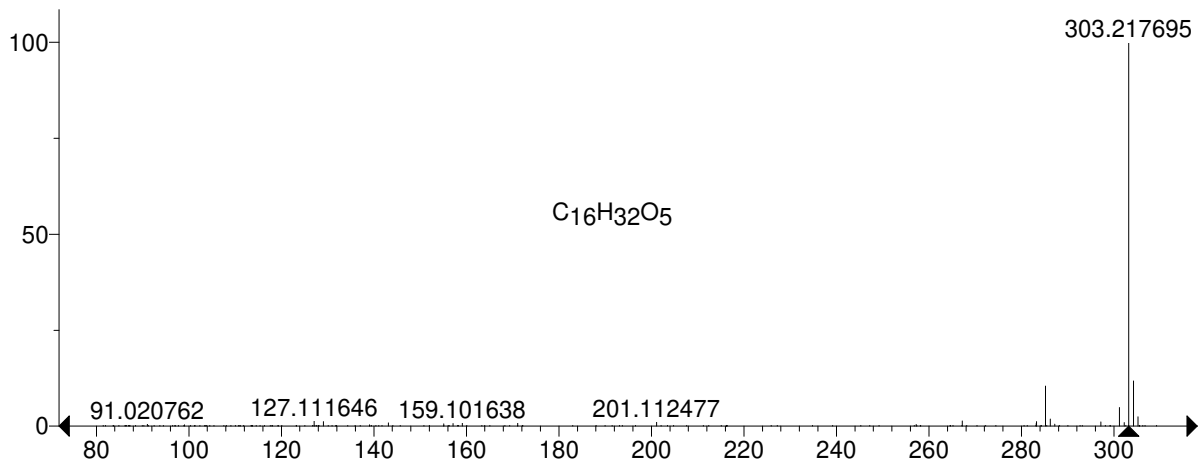

Unknown: Unknown (20.47\_239.1385m/z)  
Compound in Library Factor = 0

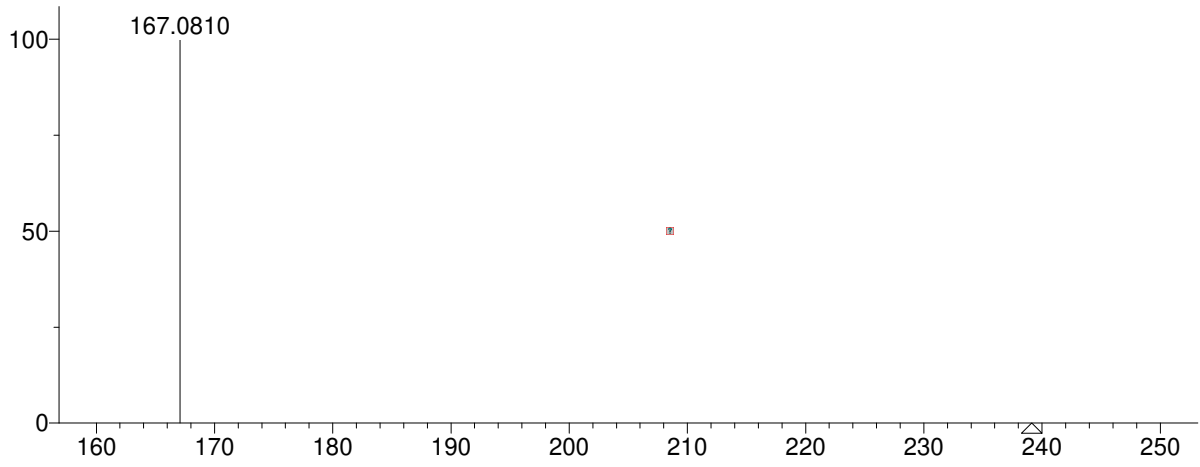

\*\* Search Report Page 1 of 2 \*\*

Unknown: Unknown (20.52\_305.0656m/z)  
Compound in Library Factor = -3273

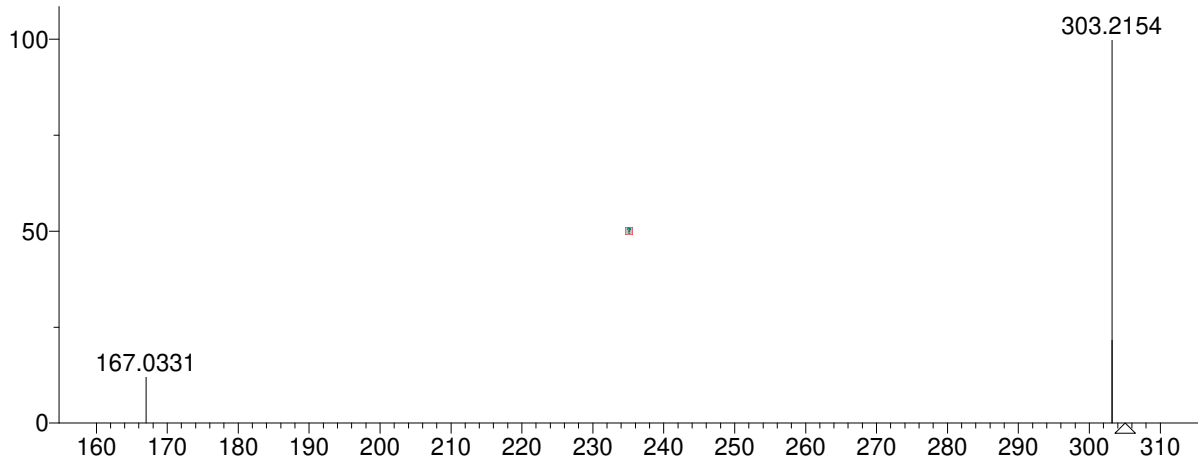

Hit 1 : (2S,3S)-2-(3,4,5-trihydroxyphenyl)-3,4-dihydro-2H-chromene-3,5,7-triol [M-H]<sup>-</sup> 45HCD P=305.1  
C<sub>15</sub>H<sub>14</sub>O<sub>7</sub>; MF: 3; RMF: 173; Prob 6.89%; Lib: mona-export-1c-ms-ms\_negative\_mode; ID: 20160.

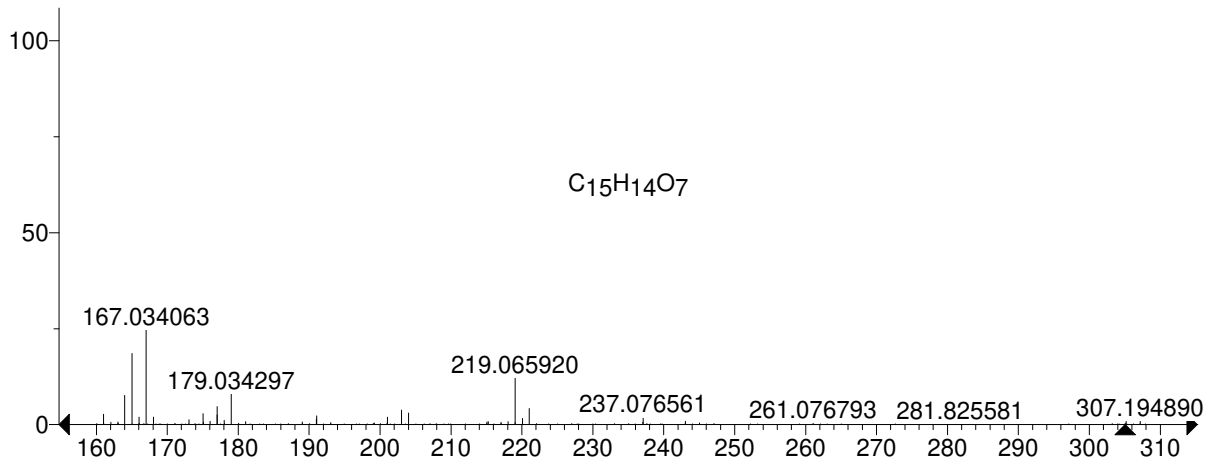

Hit 2 : Epigallocatechin [M-H]<sup>-</sup> P=305.1  
C<sub>15</sub>H<sub>14</sub>O<sub>7</sub>; MF: 2; RMF: 109; Prob 6.62%; Lib: msms-neg-gnps; ID: 39.

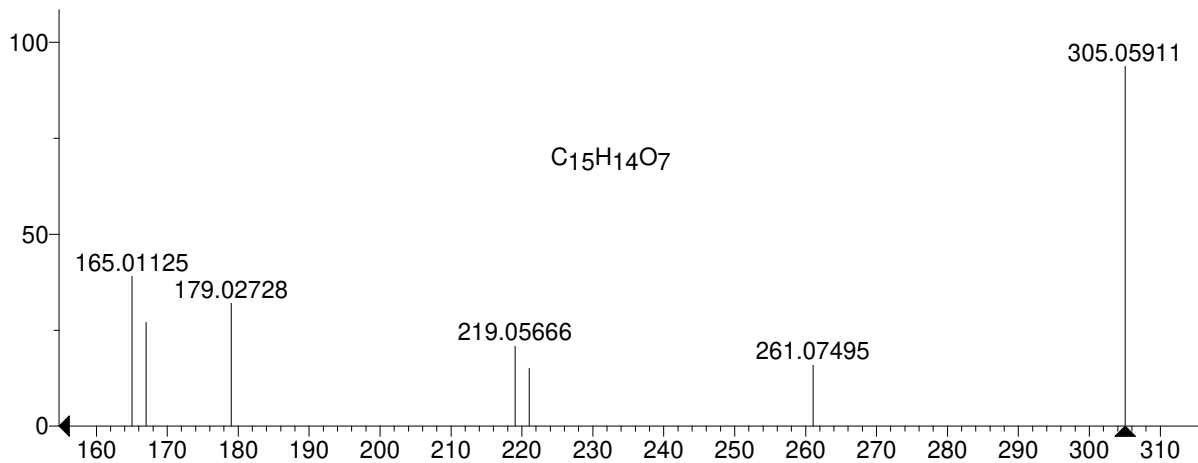

Hit 3 : (-)-Epigallocatechin [M-H]<sup>-</sup> HCD 33V P=305.1  
C<sub>15</sub>H<sub>14</sub>O<sub>7</sub>; MF: 1; RMF: 174; Prob 6.37%; CAS: 970-74-1; Lib: nist\_msms; ID: 235103.

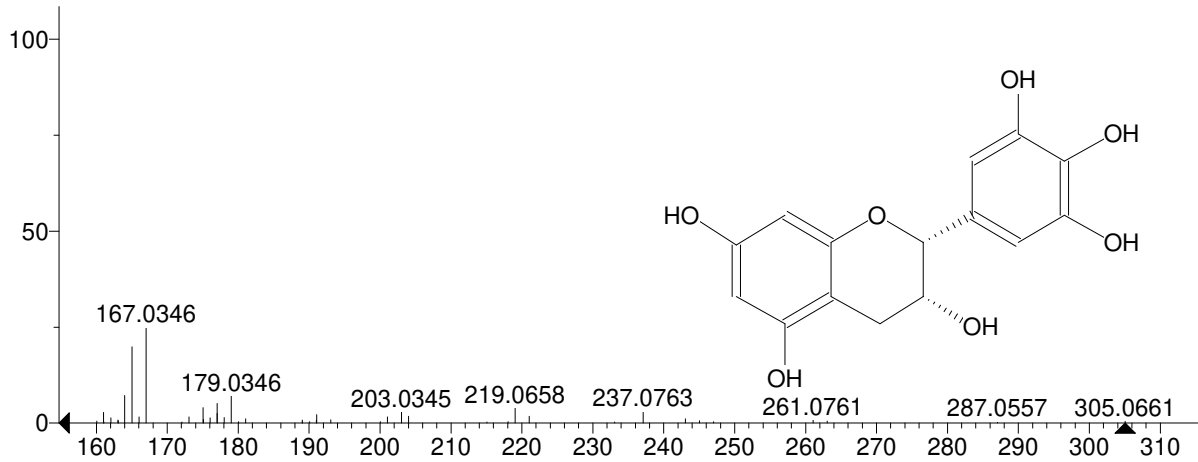

Hit 4 : (-)-Gallocatechin [M-H]<sup>-</sup> HCD 33V P=305.1  
C<sub>15</sub>H<sub>14</sub>O<sub>7</sub>; MF: 1; RMF: 171; Prob 6.37%; CAS: 3371-27-5; Lib: nist\_msms; ID: 235885.

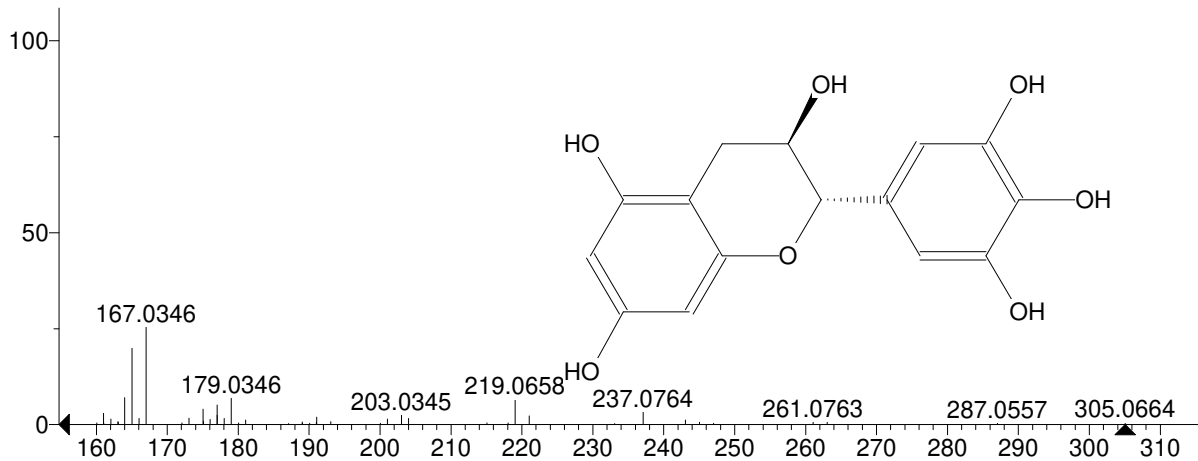

Hit 5 : 3,5,7,3',4'-Pentahydroxyflavanone [M+H]<sup>+</sup> HCD 24V P=305.1  
C<sub>15</sub>H<sub>12</sub>O<sub>7</sub>; MF: 1; RMF: 118; Prob 6.37%; CAS: 480-18-2; Lib: nist\_msms; ID: 136818.

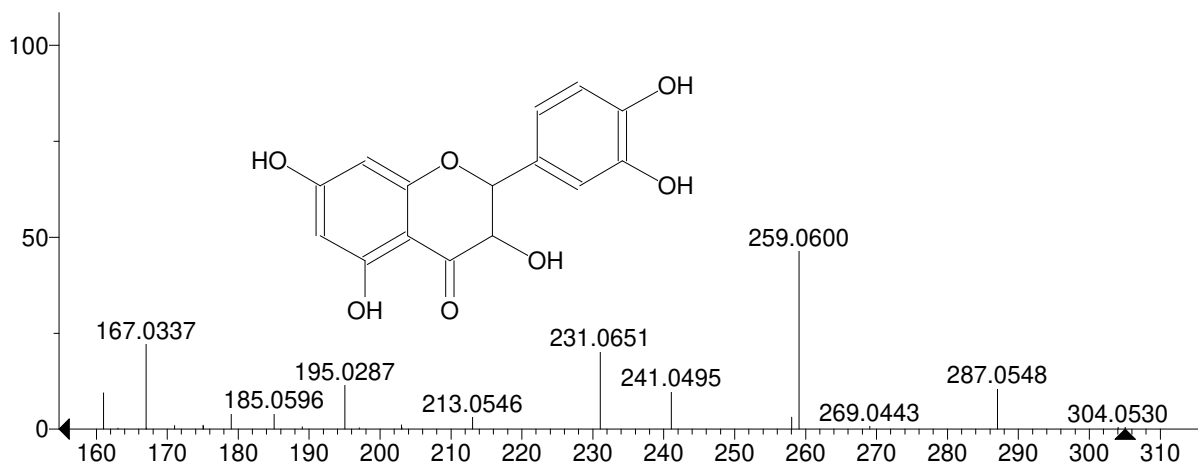

Unknown: Unknown (20.52\_568.2849m/z)  
Compound in Library Factor = -1309

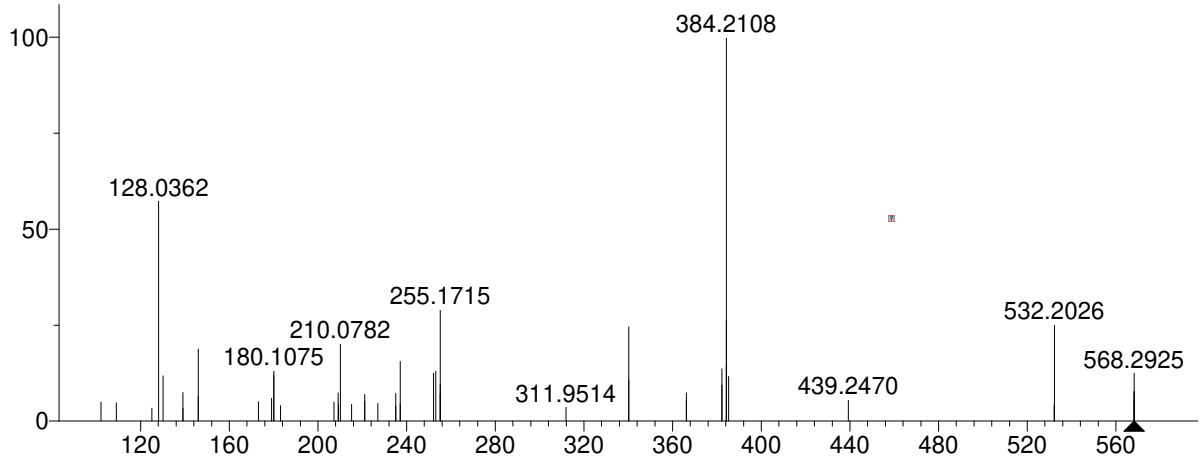

Hit 1 : Amikacin [M+H-H<sub>2</sub>O]<sup>+</sup> HCD 22V P=568.3  
C22H43N5O13; MF: 54; RMF: 417; Prob 83.6%; CAS: 37517-28-5; Lib: nist\_msms; ID: 153483.

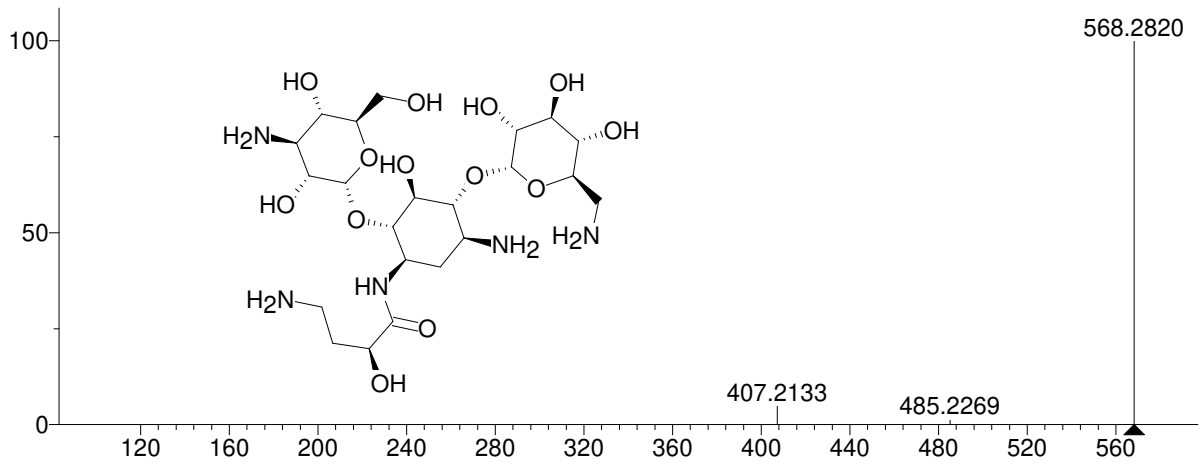

Hit 2 : ACTH (1-39), human [M+8H]<sup>8+</sup> HCD 21eV P=568.3  
C207H308N56O58S; MF: 0; RMF: 42; Prob 16.4%; CAS: 12279-41-3; Lib: nist\_msms2; ID: 51598.

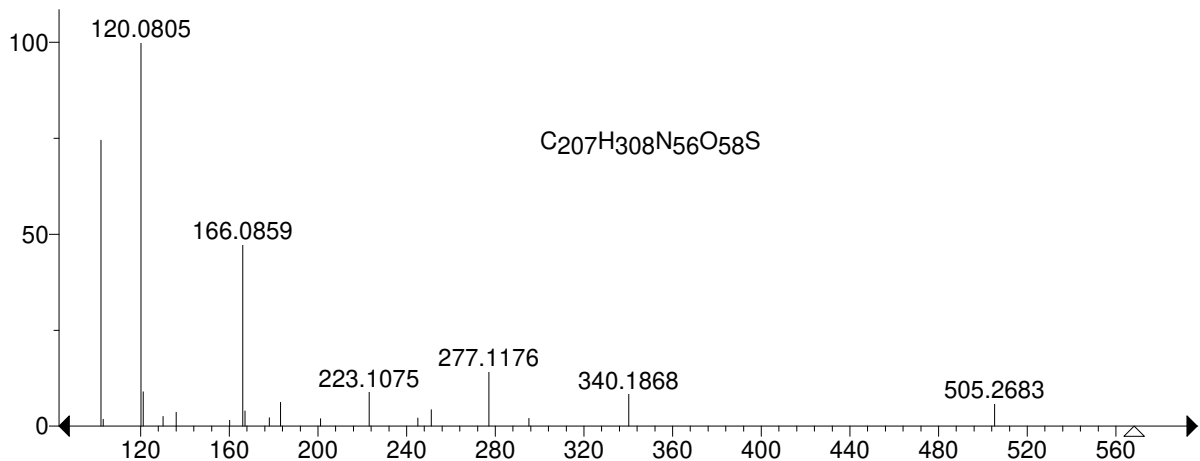

\*\* Search Report Page 1 of 2 \*\*

Unknown: Unknown (20.56\_303.2164m/z)  
Compound in Library Factor = -2387

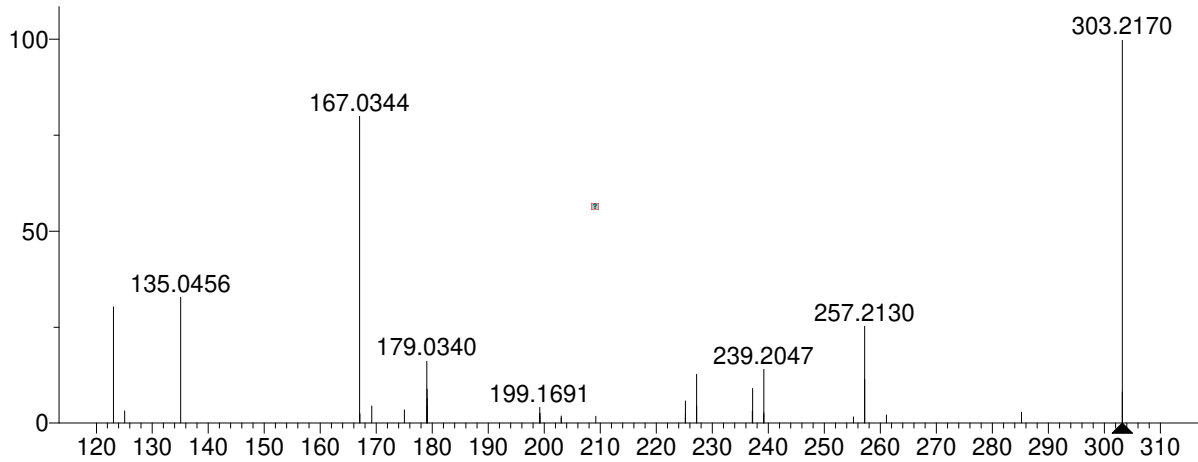

Hit 1 : Aleuritic acid [M-H]<sup>-</sup> IT-FT 35% P=303.2  
C<sub>16</sub>H<sub>32</sub>O<sub>5</sub>; MF: 32; RMF: 204; Prob 35.2%; CAS: 533-87-9; Lib: nist\_msms; ID: 411121.

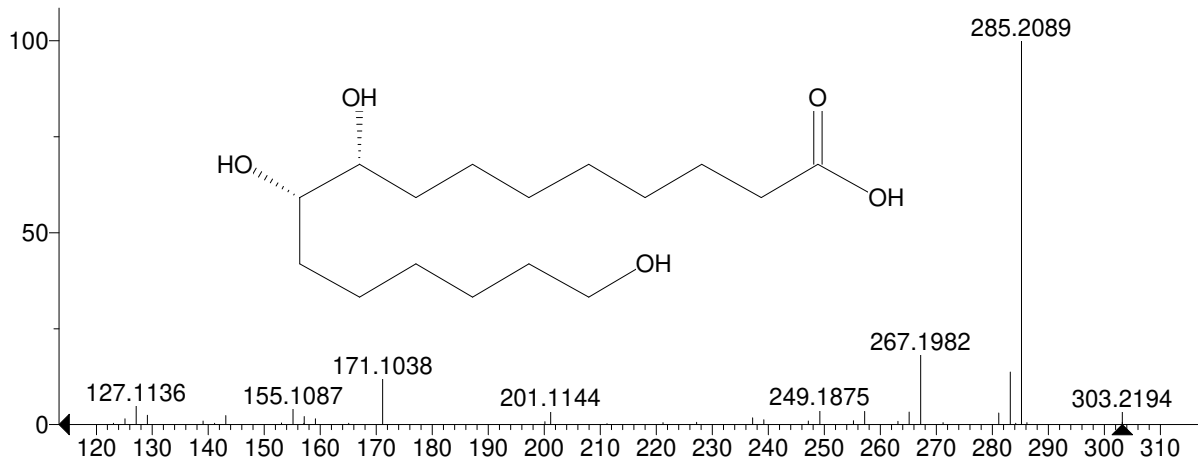

Hit 2 : Arg-Lys [M+H]<sup>+</sup> QTOF 5V P=303.2  
C<sub>12</sub>H<sub>26</sub>N<sub>6</sub>O<sub>3</sub>; MF: 15; RMF: 412; Prob 19.2%; CAS: 40968-46-5; Lib: nist\_msms; ID: 55168.

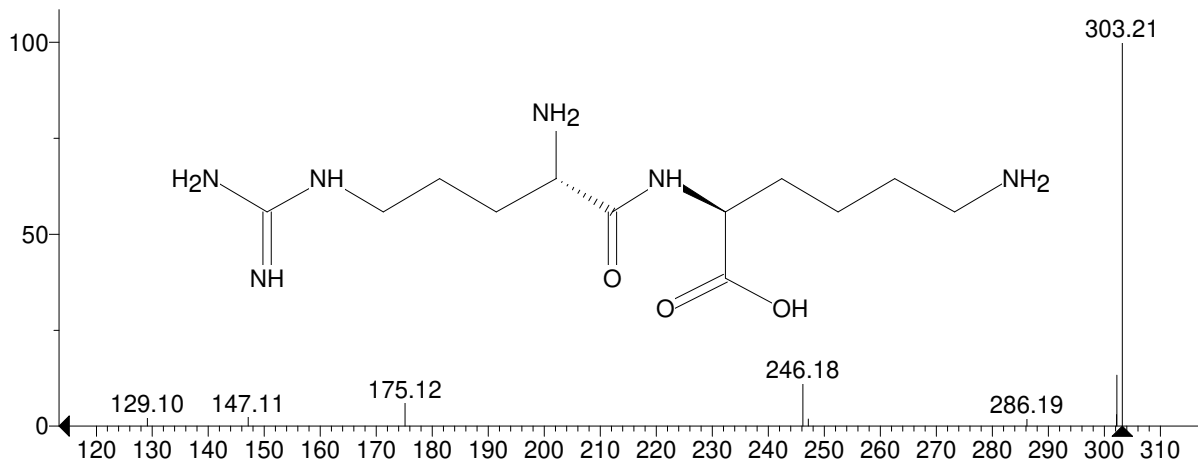



Hit 3 : Lys-Arg [M+H]<sup>+</sup> QTOF 8V P=303.2  
C<sub>12</sub>H<sub>26</sub>N<sub>6</sub>O<sub>3</sub>; MF: 12; RMF: 471; Prob 17.0%; Lib: nist\_msms; ID: 48416.

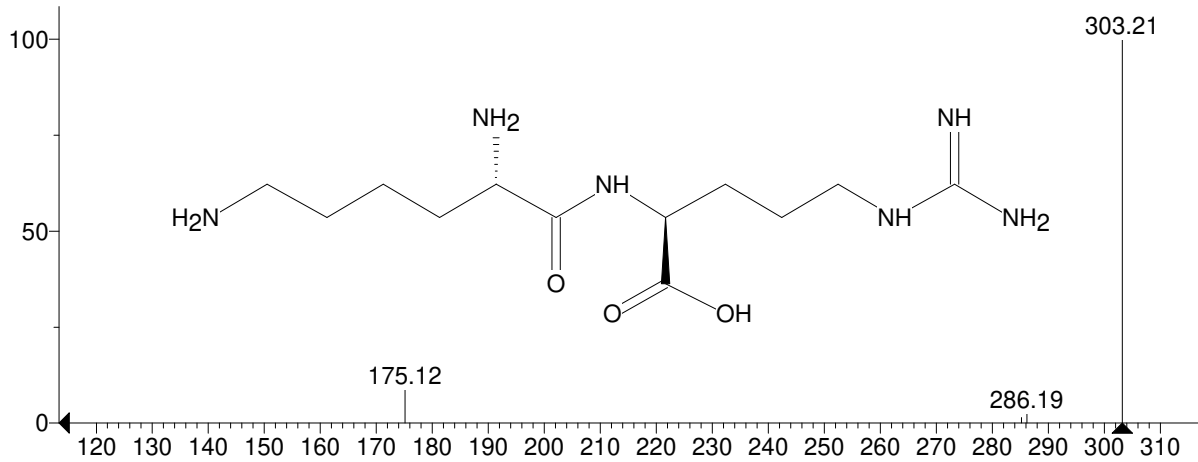

Hit 4 : Aleuretic Acid [M-H]<sup>-</sup> 35HCD P=303.2  
C<sub>16</sub>H<sub>32</sub>O<sub>5</sub>; MF: 11; RMF: 430; Prob 16.3%; Lib: mona-export-ic-ms-ms\_negative\_mode; ID: 20798.

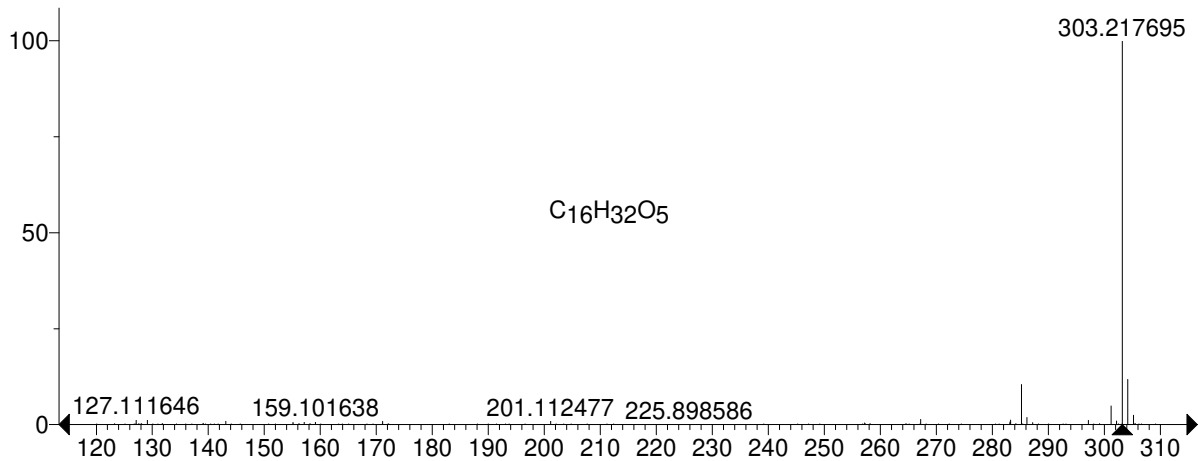

Hit 5 : Lys-Arg [M+H]<sup>+</sup> HCD 15eV P=303.2  
C<sub>12</sub>H<sub>26</sub>N<sub>6</sub>O<sub>3</sub>; MF: 3; RMF: 454; Prob 12.2%; CAS: 29586-66-1; Lib: nist\_msms2; ID: 41398.

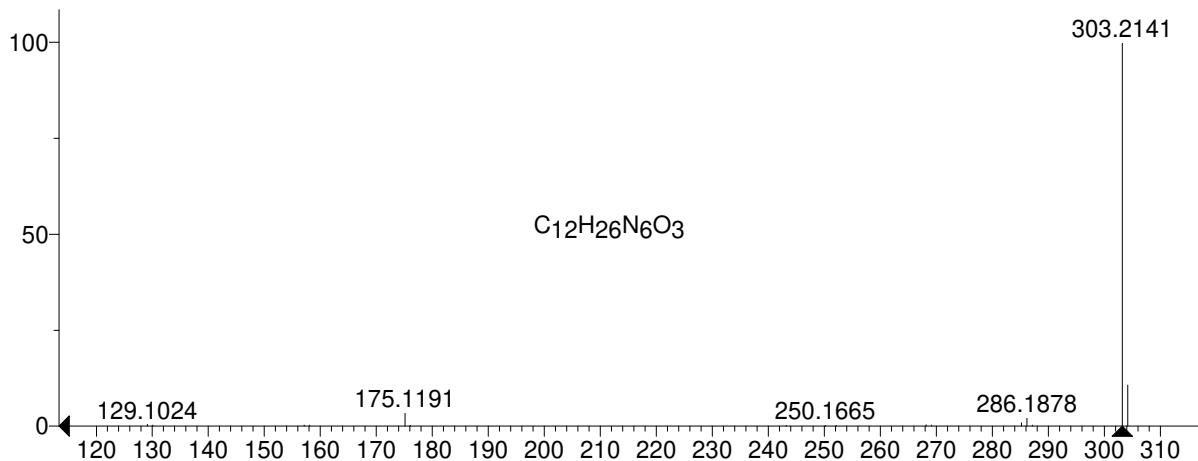

Unknown: Unknown (20.66\_440.1122m/z)  
Compound in Library Factor = 0

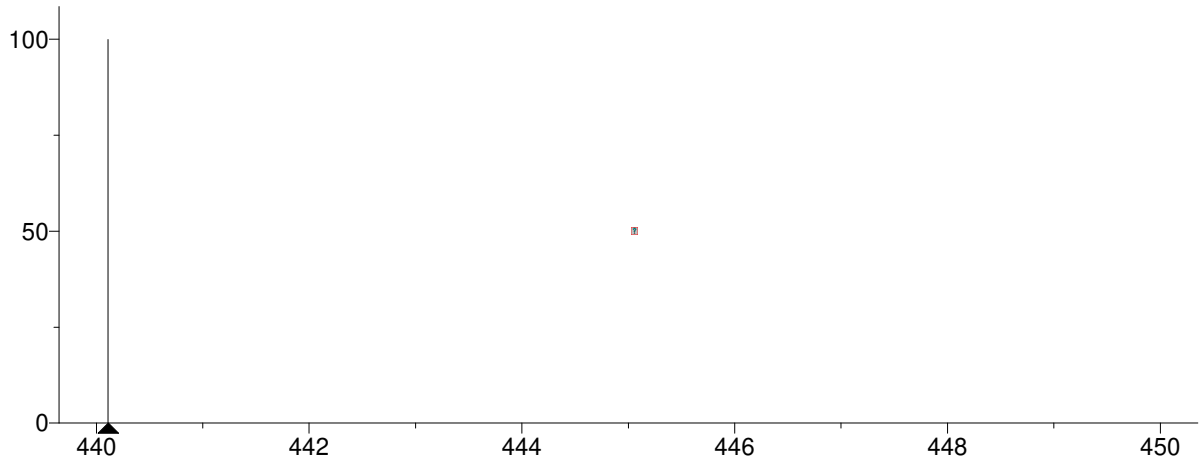

\*\* Search Report Page 1 of 2 \*\*

Unknown: Unknown (20.72\_403.1753m/z)  
Compound in Library Factor = -3273

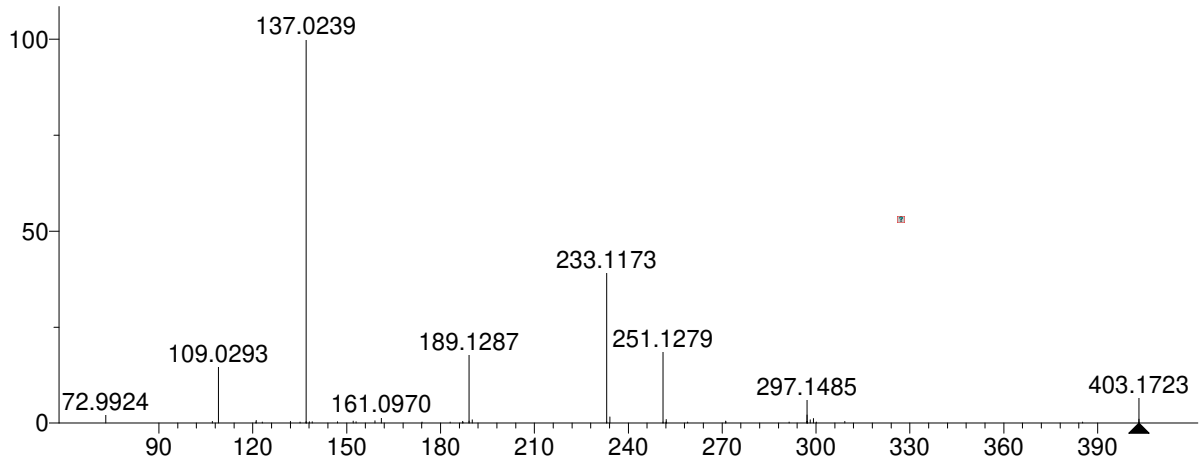

Hit 1 : Acetic acid, 2-[4-[3-(4-acetyl-3-hydroxy-2-propylphenoxy)propoxy]phenoxy]- [M+H]<sup>+</sup> HCD 20V P=403.2  
C<sub>22</sub>H<sub>26</sub>O<sub>7</sub>; MF: 12; RMF: 133; Prob 10.9%; CAS: 79558-09-1; Lib: nist\_msms; ID: 245666.

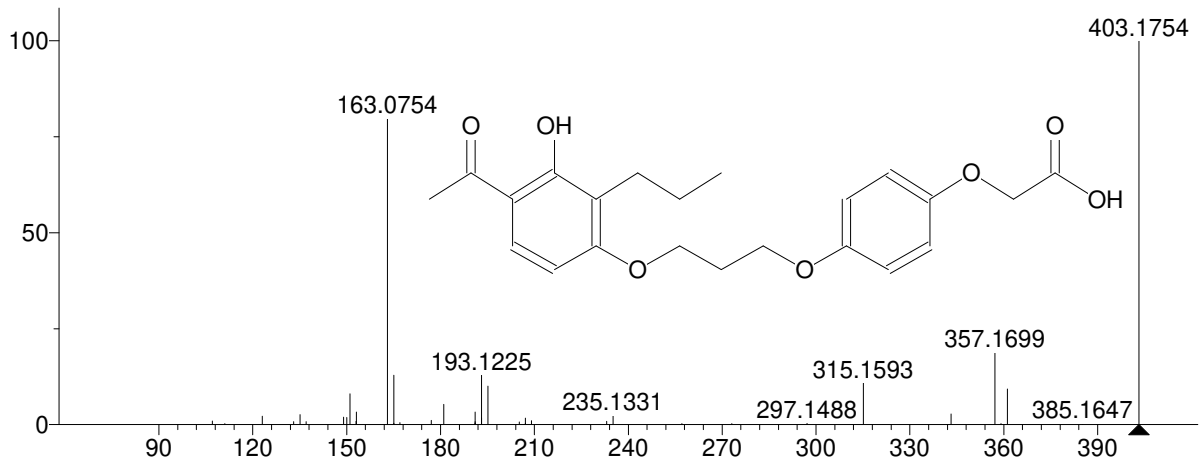

Hit 2 : NCGC00380826-01! [1-(3,4-dihydroxy-5-methoxyphenyl)-7-(3,4-dihydroxyphenyl)heptan-3-yl] acetate [M-H]<sup>-</sup>  
C<sub>22</sub>H<sub>28</sub>O<sub>7</sub>; MF: 11; RMF: 181; Prob 10.5%; Lib: msms-neg-grps; ID: 1036.

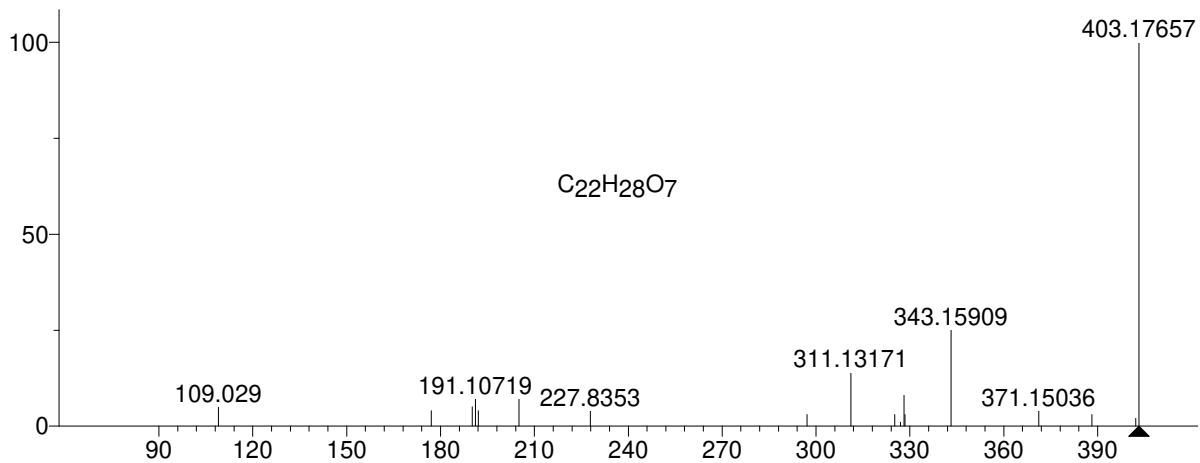

\*\* Search Report Page 2 of 2 \*\*

Hit 3 : NCGC00347636-02! [2-[2-(2-methylpropanoyloxy)propan-2-yl]-7-oxo-2,3-dihydrofuro[3,2-g]chromen-3-yl] 2-C<sub>22</sub>H<sub>26</sub>O<sub>7</sub>; MF: 3; RMF: 88; Prob 7.81%; Lib: mona-export-gnps; ID: 9715.

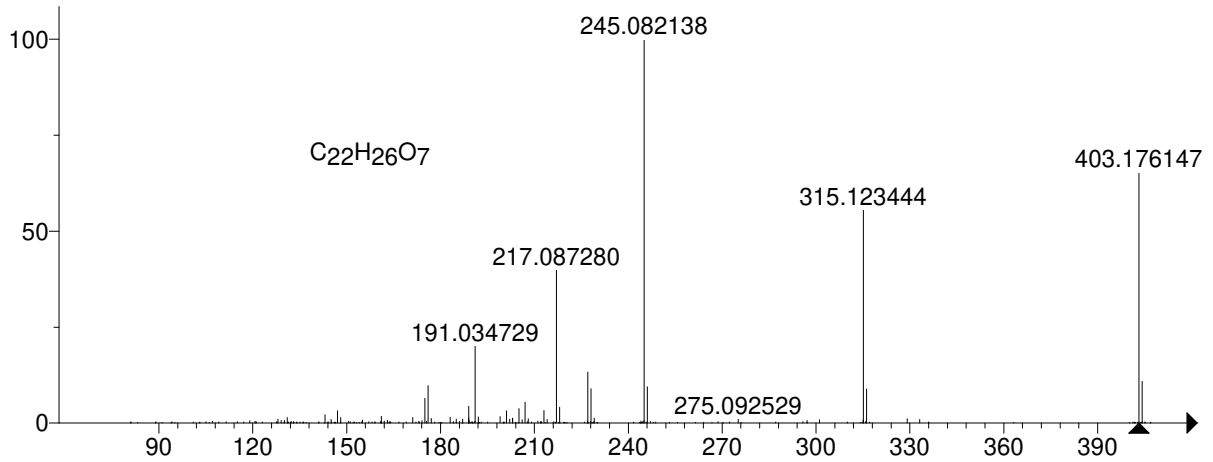

Hit 4 : NCGC00384925-01\_C<sub>22</sub>H<sub>28</sub>O<sub>8</sub> [(2'R,3R,4'R,4a'R,5S,5'R,7'S,8a'S)-5-(3-Furyl)-4',7'-dihydroxy-2'-methyl-2-C<sub>22</sub>H<sub>28</sub>O<sub>8</sub>; MF: 2; RMF: 75; Prob 7.51%; Lib: mona-export-gnps; ID: 11188.

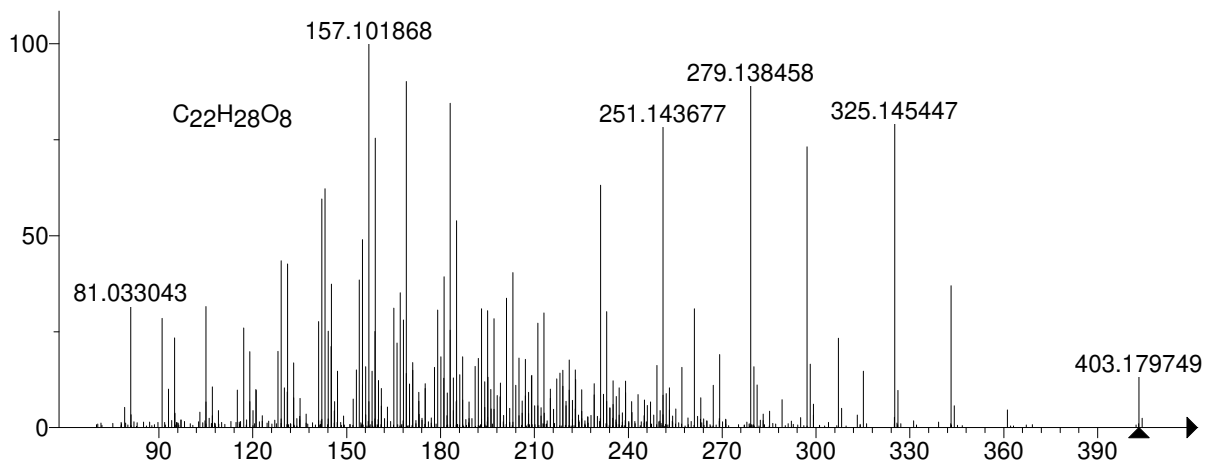

Hit 5 : NCGC00169274-03\_C<sub>22</sub>H<sub>26</sub>O<sub>7</sub>\_6(2H)-Benzofuranone, 3,3a,4,5-tetrahydro-5,7-dimethoxy-2-(7-methoxy-1-C<sub>22</sub>H<sub>26</sub>O<sub>7</sub>; MF: 1; RMF: 71; Prob 7.22%; Lib: mona-export-gnps; ID: 12133.

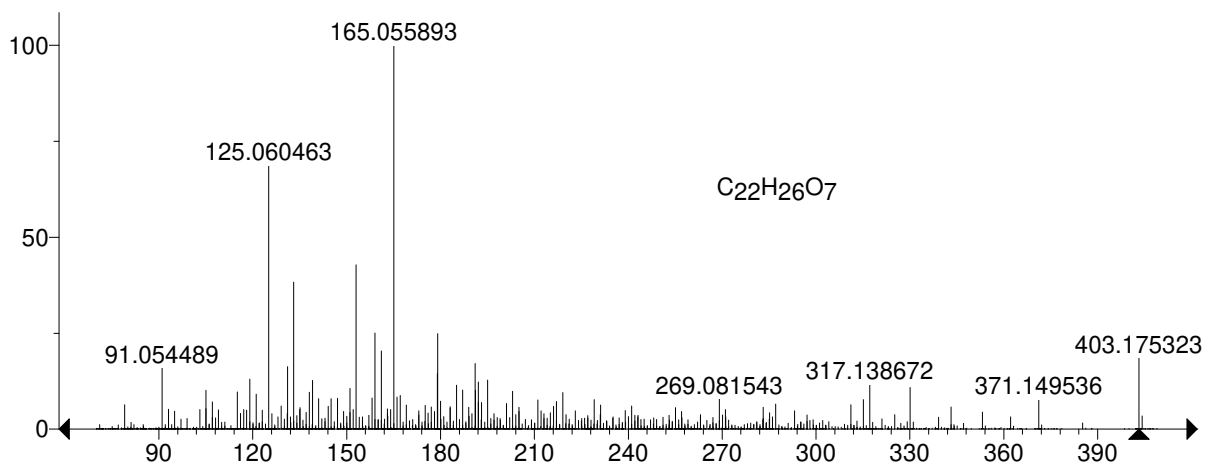

Unknown: Unknown (20.79\_650.2270m/z)  
Compound in Library Factor = 0

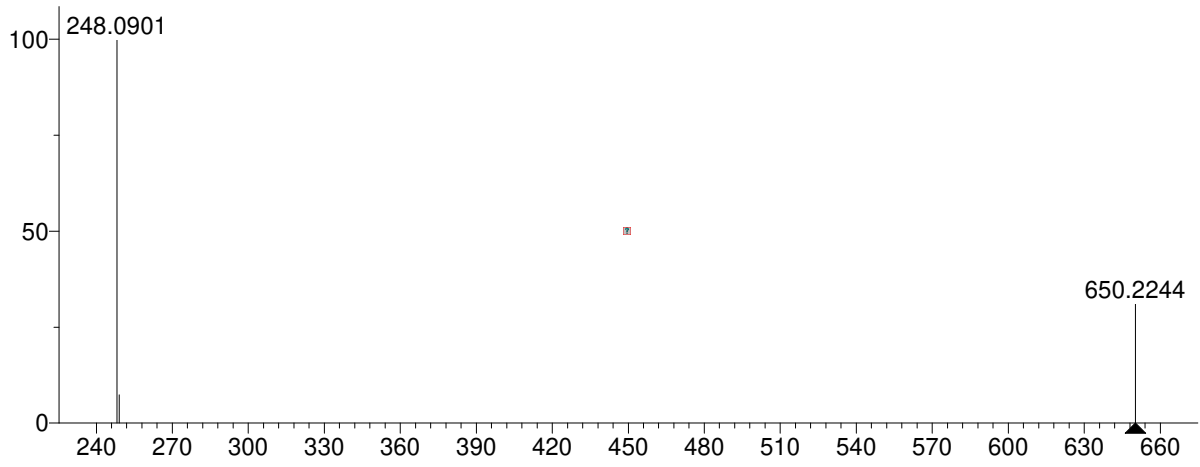

\*\* Search Report Page 1 of 2 \*\*

Unknown: Unknown (20.86\_263.1646m/z)  
Compound in Library Factor = -791

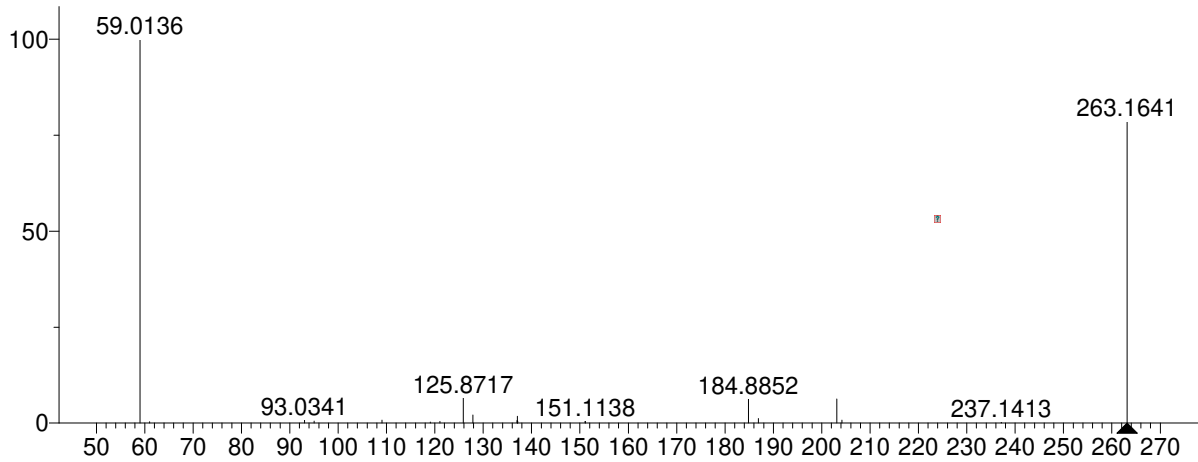

Hit 1 : Dinor-12-oxophytodienoic acid [M-H]<sup>-</sup> HCD 21V P=263.2  
C<sub>16</sub>H<sub>24</sub>O<sub>3</sub>; MF: 113; RMF: 634; Prob 79.1%; CAS: 197247-23-7; Lib: nist\_msms; ID: 87586.

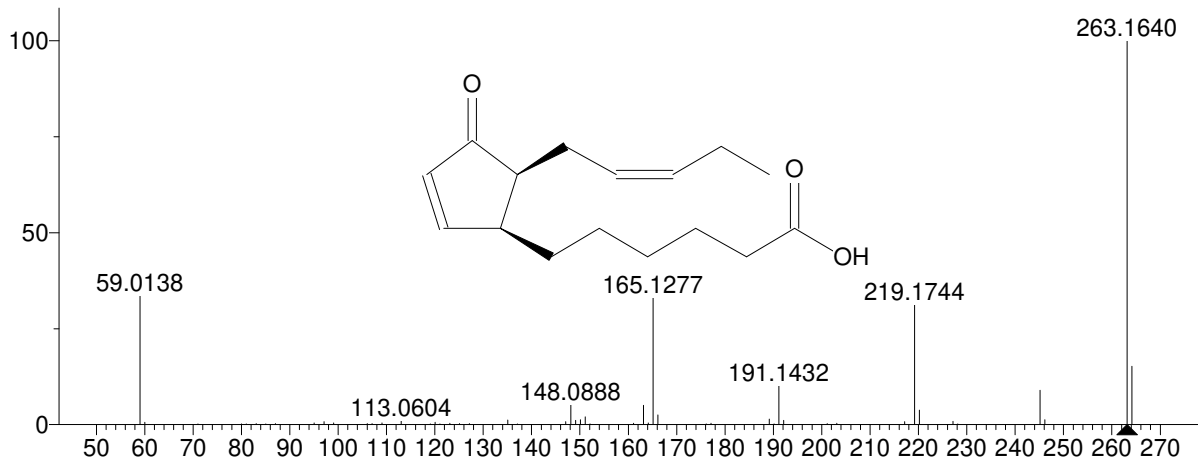

Hit 2 : Brefeldin A [M+H-H<sub>2</sub>O]<sup>+</sup> HCD 13V P=263.2  
C<sub>16</sub>H<sub>24</sub>O<sub>4</sub>; MF: 18; RMF: 403; Prob 6.40%; CAS: 20350-15-6; Lib: nist\_msms; ID: 271402.

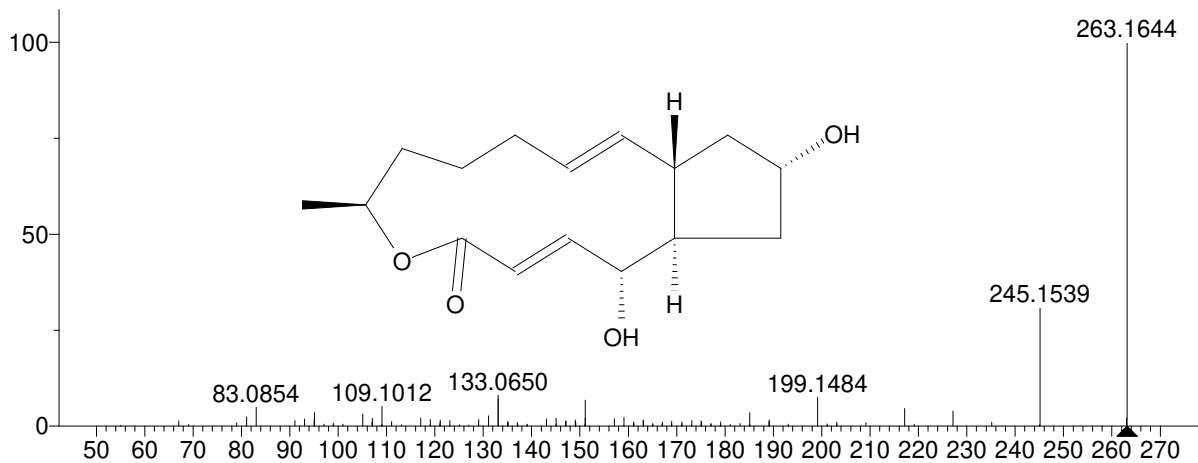

\*\* Search Report Page 2 of 2 \*\*

Hit 3 : NCGC00381408-02\_C16H24O4\_4-Hydroxy-1-methoxy-6,6,9a-trimethyl-4,5,5a,6,7,8,9,9a-octahydronaphth  
C16H24O4; MF: 6; RMF: 430; Prob 4.26%; Lib: mona-export-gnps; ID: 10408.

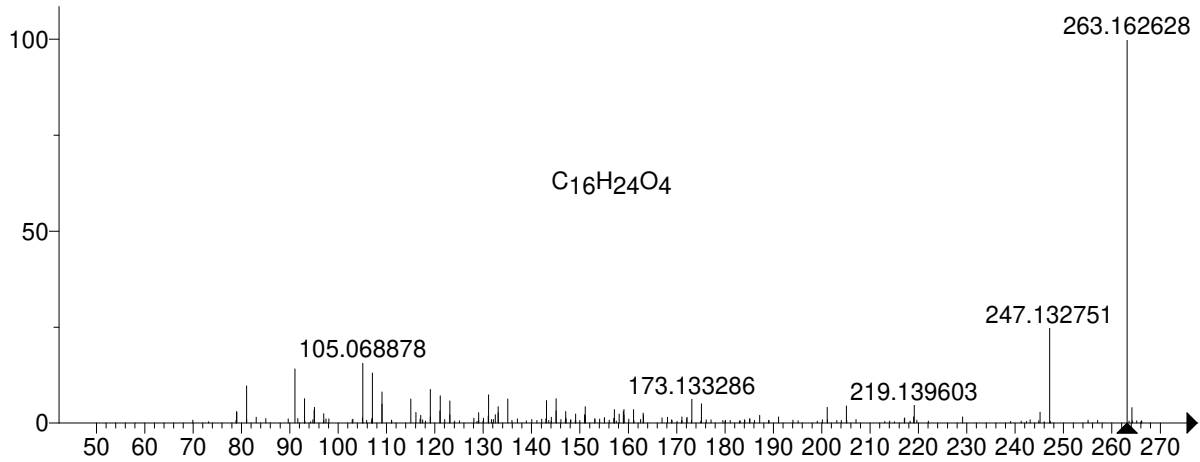

Hit 4 : NCGC00381353-01\_C16H24O4\_[4a-Formyl-5-(hydroxymethyl)-1,2-dimethyl-1,2,3,4,4a,7,8,8a-octahydro-1  
C16H24O4; MF: 2; RMF: 155; Prob 3.60%; Lib: mona-export-gnps; ID: 12572.

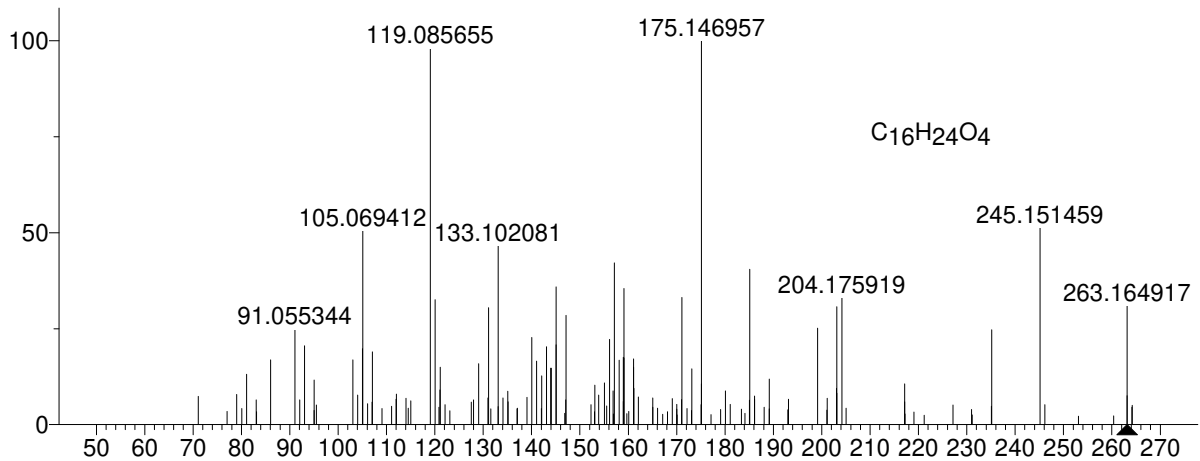

Hit 5 : 13,14-Dihydro-15-ketotetranorprostaglandin D2 [M+H-2H2O]+ IT-FT 35% P=263.2  
C16H26O5; MF: 0; RMF: 50; Prob 3.32%; CAS: 1204116-69-7; Lib: nist\_msms; ID: 546205.

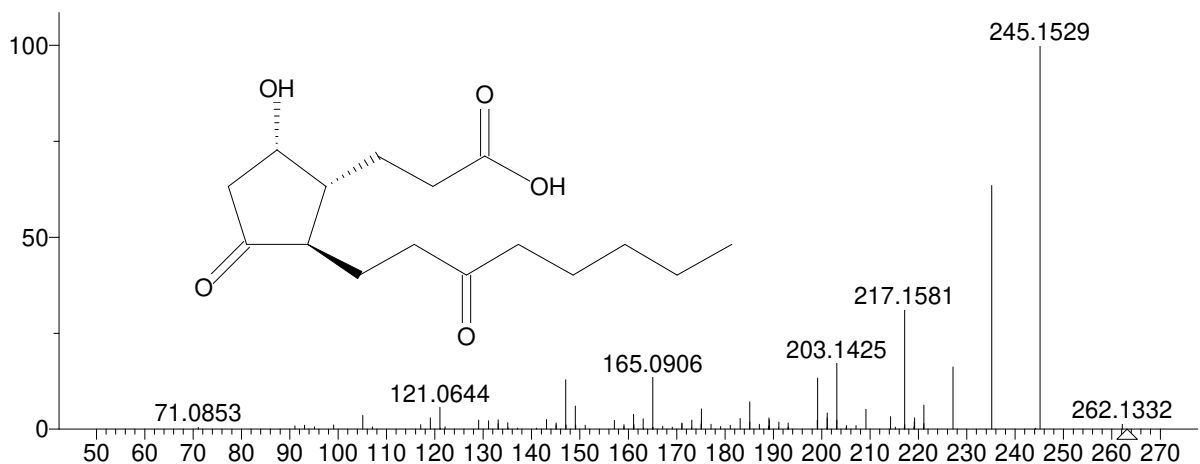

Unknown: Unknown (20.86\_423.2131m/z)  
Compound in Library Factor = 0

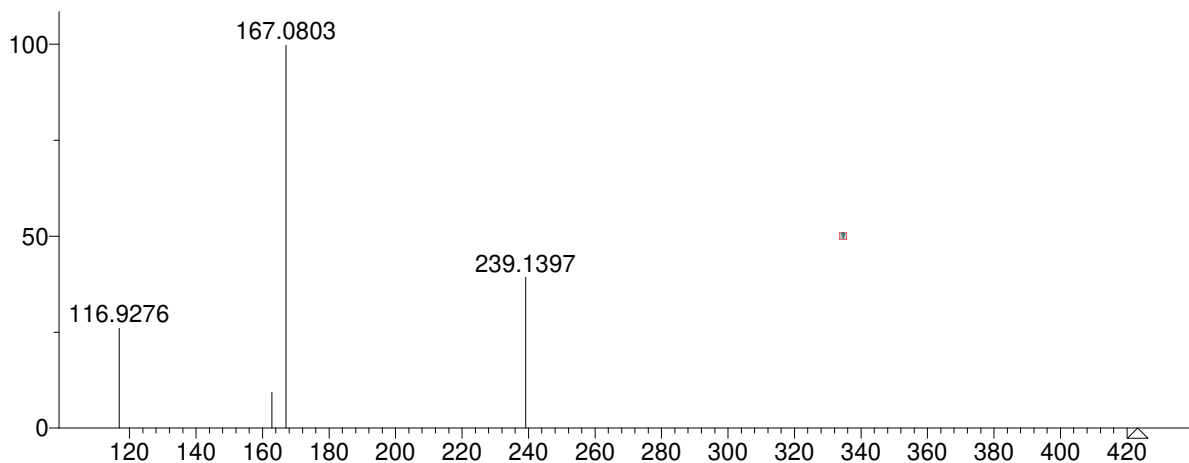

Hit 1 : Cinobufotalin [M+H-2H<sub>2</sub>O]<sup>+</sup> HCD 63V P=423.2  
C<sub>26</sub>H<sub>34</sub>O<sub>7</sub>; MF: 0; RMF: 115; Prob 25.0%; CAS: 1108-68-5; Lib: nist\_msms; ID: 391347.

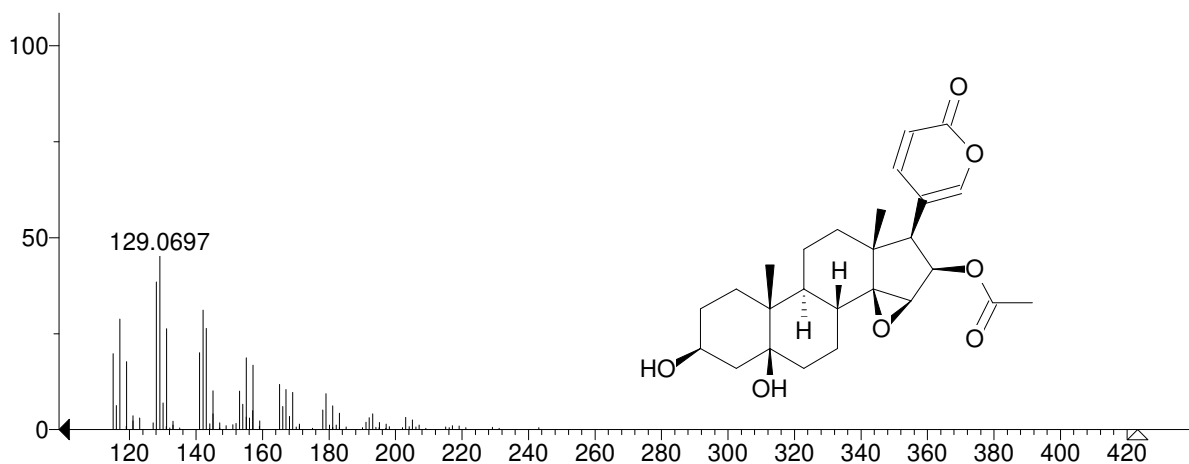

Hit 2 : [4,5-dihydroxy-3,4-bis(hydroxymethyl)-4a,8,8-trimethyl-5,6,7,8a-tetrahydro-1H-naphthalen-1-yl] hexanoate  
C<sub>21</sub>H<sub>36</sub>O<sub>6</sub>; MF: 0; RMF: 39; Prob 25.0%; Lib: mona-export-vf-npl\_qexactive; ID: 8154.

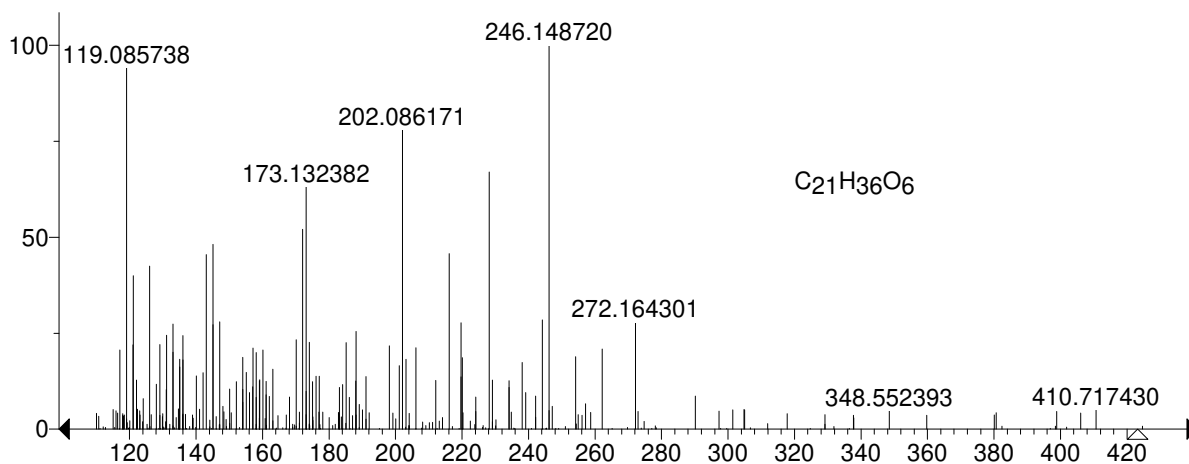



Hit 3 : NCGC00384666-01!(2S)-5,7-dihydroxy-2-[4-methoxy-3,5-bis(3-methylbut-2-enyl)phenyl]-2,3-dihydrochrom  
C<sub>26</sub>H<sub>30</sub>O<sub>5</sub>; MF: 0; RMF: 23; Prob 25.0%; Lib: mona-export-gnps; ID: 7800.

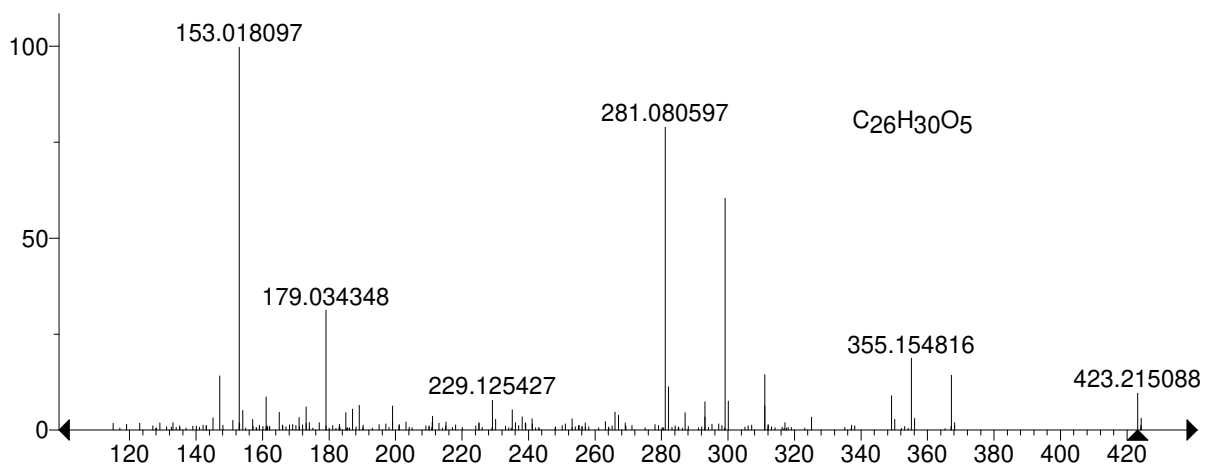

Hit 4 : 4-Methylabysynone V [M+H]<sup>+</sup> 65HCD P=423.2  
C<sub>26</sub>H<sub>30</sub>O<sub>5</sub>; MF: 0; RMF: 17; Prob 25.0%; Lib: mona-export-vf-npl\_gexactive; ID: 6033.

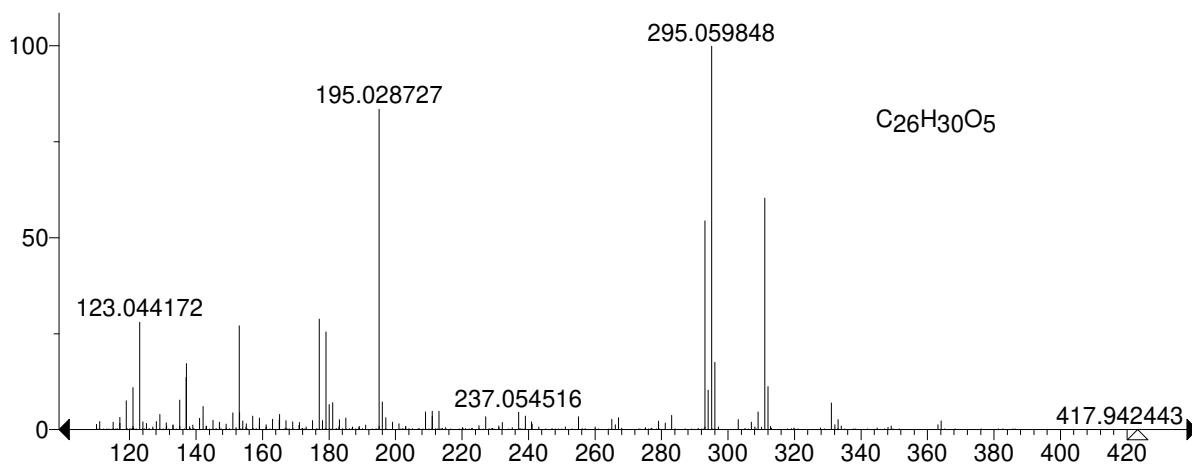

Unknown: Unknown (20.86\_450.0296m/z)  
Compound in Library Factor = 0

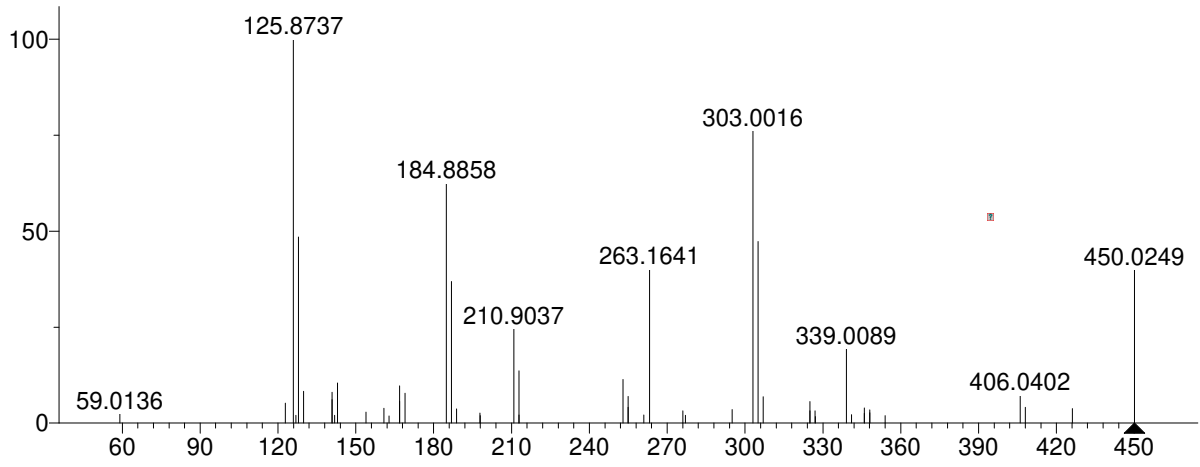

Unknown: Unknown (20.86\_486.0058m/z)  
Compound in Library Factor = 0

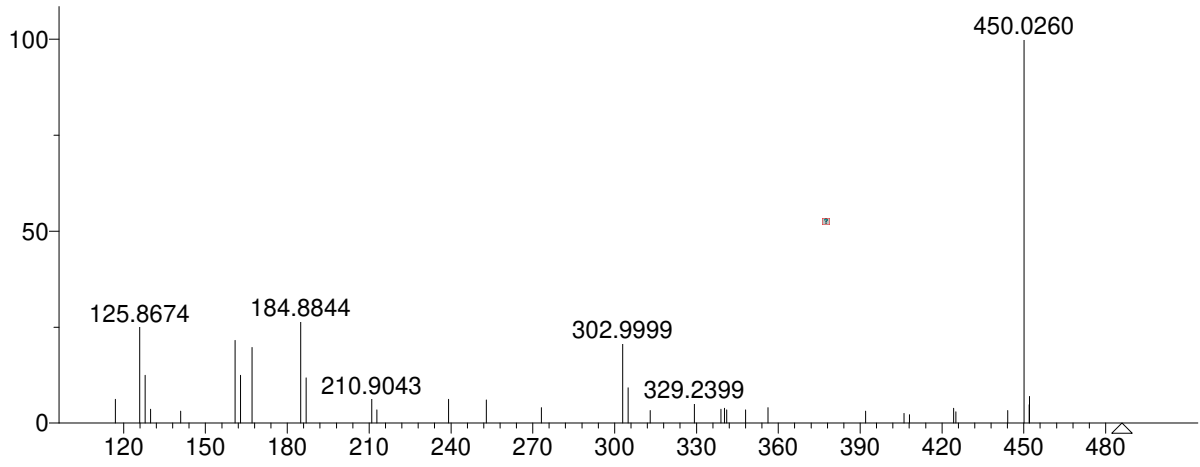

Unknown: Unknown (20.87\_452.0266m/z)  
Compound in Library Factor = -3273

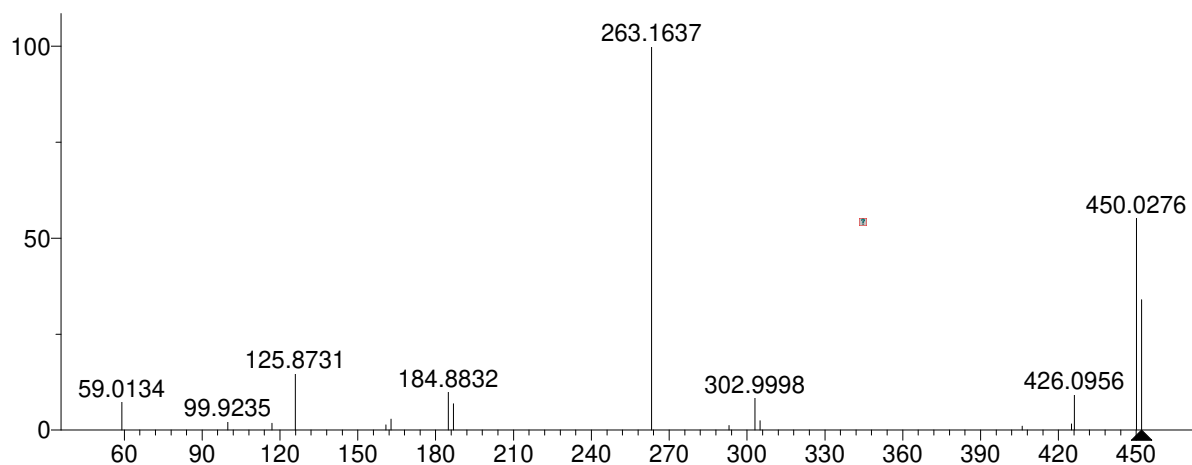

Hit 1 : Copper gluconate [M-H]<sup>-</sup> HCD 6V P=452  
C<sub>12</sub>H<sub>22</sub>CuO<sub>14</sub>; MF: 20; RMF: 365; Prob 100.0%; CAS: 527-09-3; Lib: nist\_msms; ID: 152771.

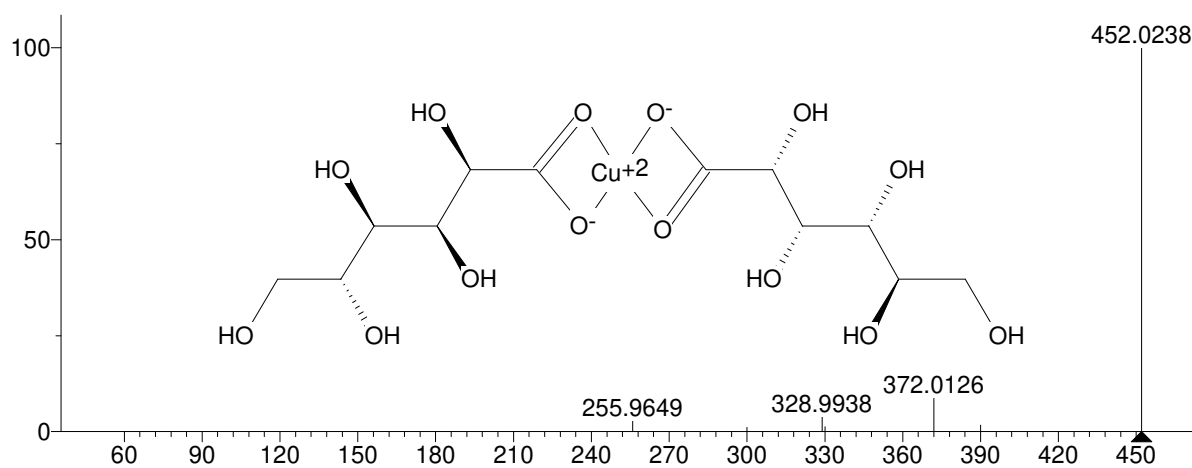

Unknown: Unknown (20.87\_470.0872m/z)  
Compound in Library Factor = 0

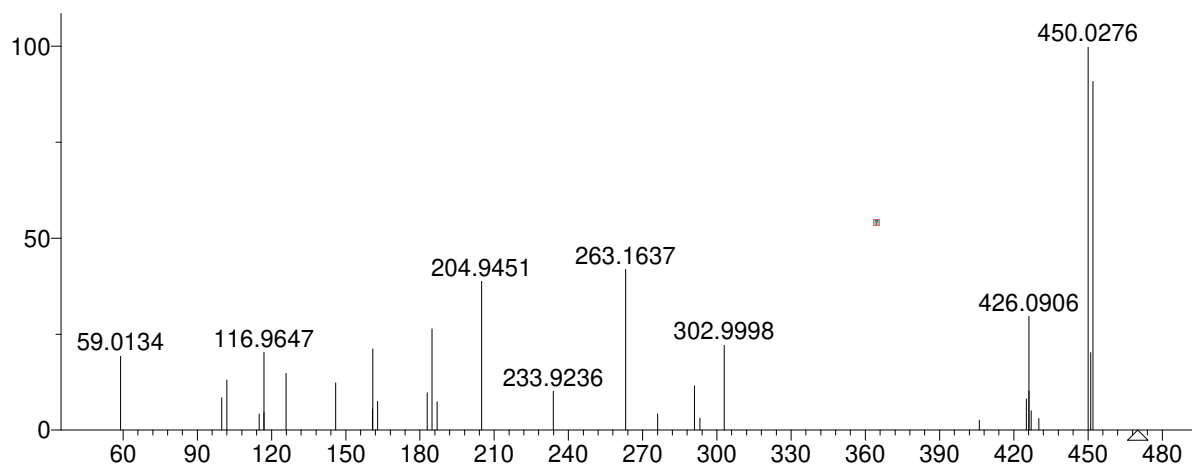

Hit 1 : 2-Thiophenecarbonitrile, 5-(5,6-dimethoxy-1H-benzimidazol-1-yl)-3-[[2-(methylsulfonyl)phenyl]methoxy]- [I  
C22H19N3O5S2; MF: 0; RMF: 36; Prob 100.0%; CAS: 862812-98-4; Lib: nist\_msms; ID: 372407.

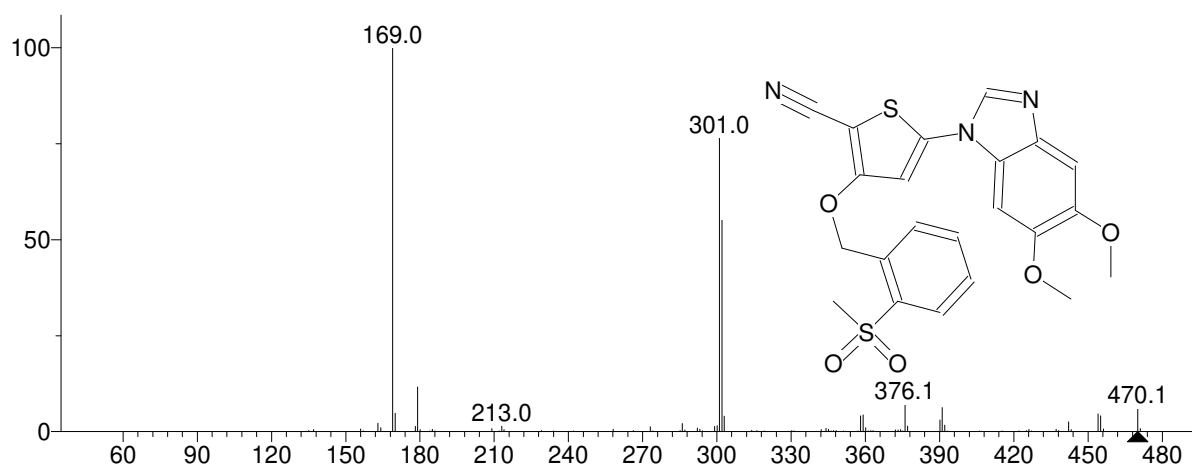

Unknown: Unknown (20.87\_740.2260m/z)  
Compound in Library Factor = 0

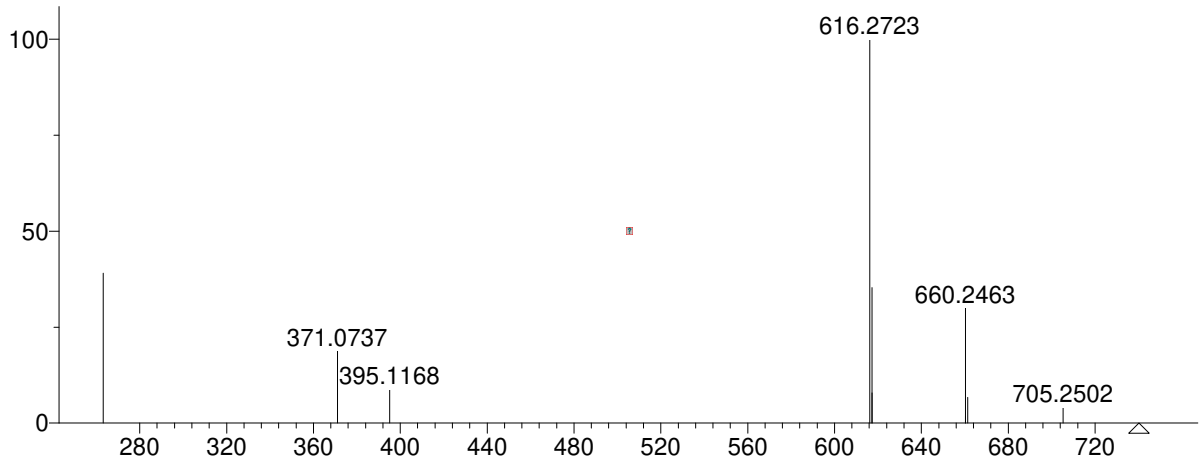

\*\* Search Report Page 1 of 2 \*\*

Unknown: Unknown (20.88\_325.1649m/z)  
Compound in Library Factor = -3273

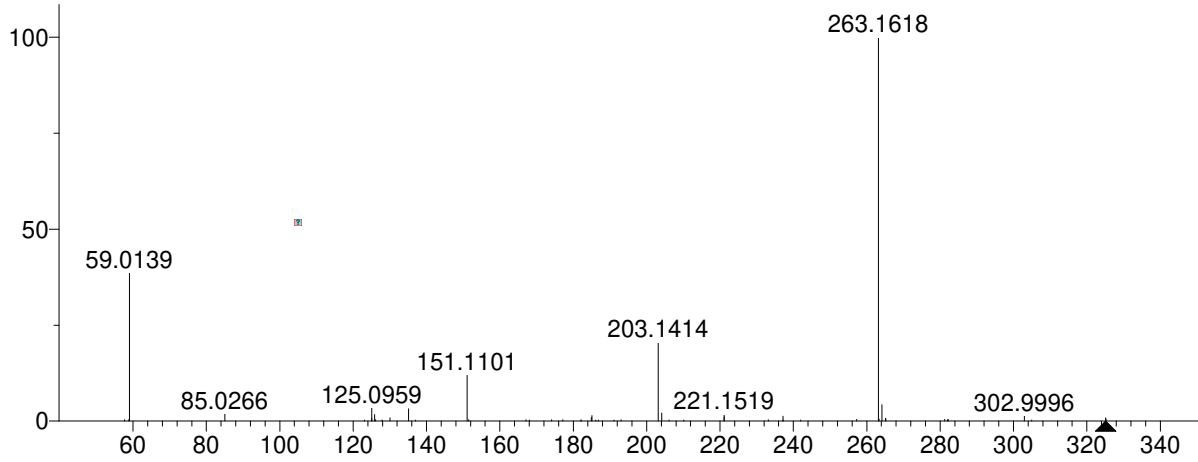

Hit 1 : Chamissonolide [M+H]<sup>+</sup> HCD 1V P=325.2  
C<sub>17</sub>H<sub>24</sub>O<sub>6</sub>; MF: 5; RMF: 75; Prob 16.1%; CAS: 78853-98-2; Lib: nist\_msms; ID: 500759.

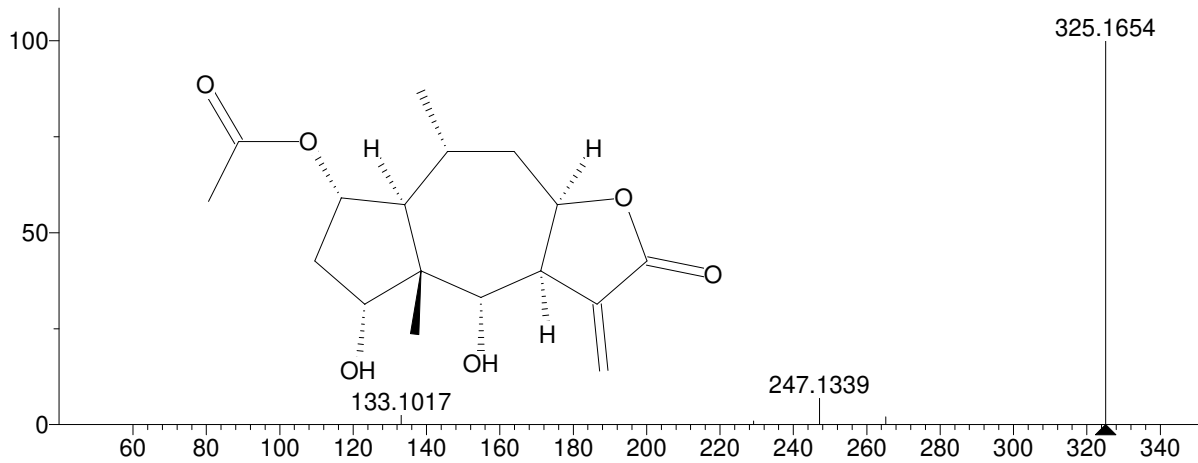

Hit 2 : [5-acetyloxy-3-(hydroxymethyl)-2-oxo-6-propan-2-ylcyclohex-3-en-1-yl] 3-methylbutanoate [M-H]<sup>-</sup> 35HCD  
C<sub>17</sub>H<sub>26</sub>O<sub>6</sub>; MF: 4; RMF: 86; Prob 15.5%; Lib: mona-export-1c-ms-ms\_negative\_mode; ID: 19385.

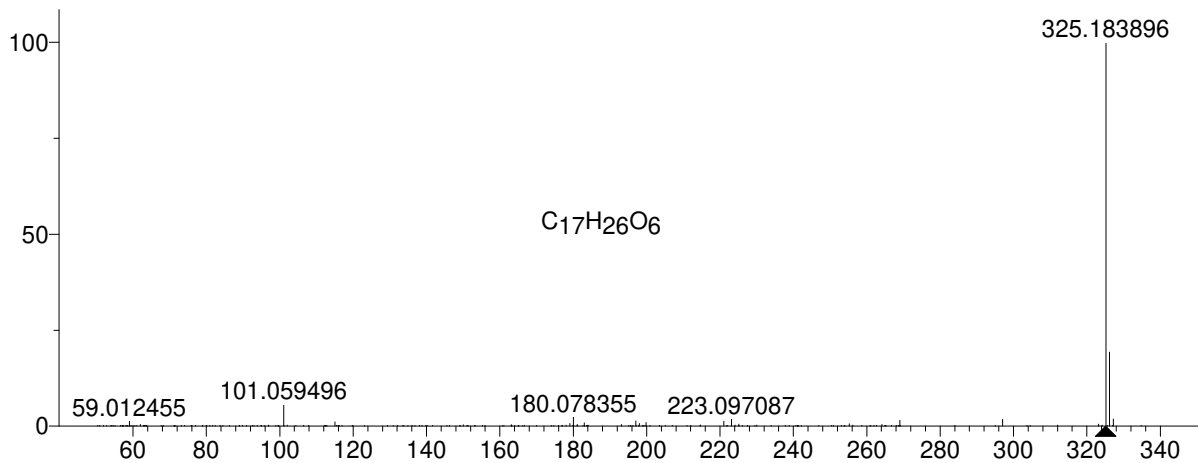

Hit 3 : Tributyrin [M+Na]<sup>+</sup> HCD 13V P=325.2  
C<sub>15</sub>H<sub>26</sub>O<sub>6</sub>; MF: 3; RMF: 66; Prob 14.9%; CAS: 60-01-5; Lib: nist\_msms; ID: 144821.

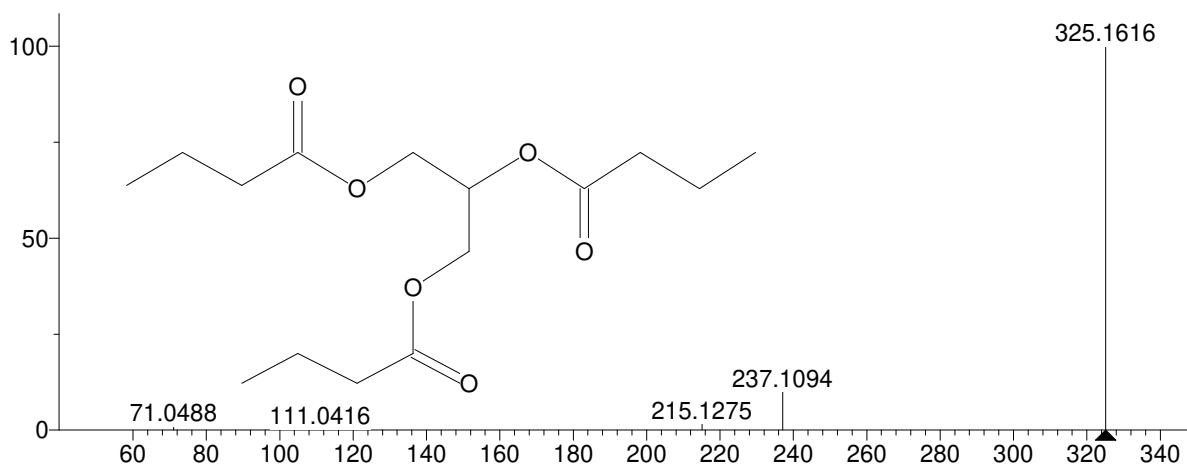

Hit 4 : MMV023985 [M+H]<sup>+</sup> 20-30-40%) P=325.2  
C<sub>18</sub>H<sub>20</sub>N<sub>4</sub>O<sub>2</sub>; MF: 1; RMF: 61; Prob 13.8%; Lib: mona-export-pathogen\_box; ID: 292.

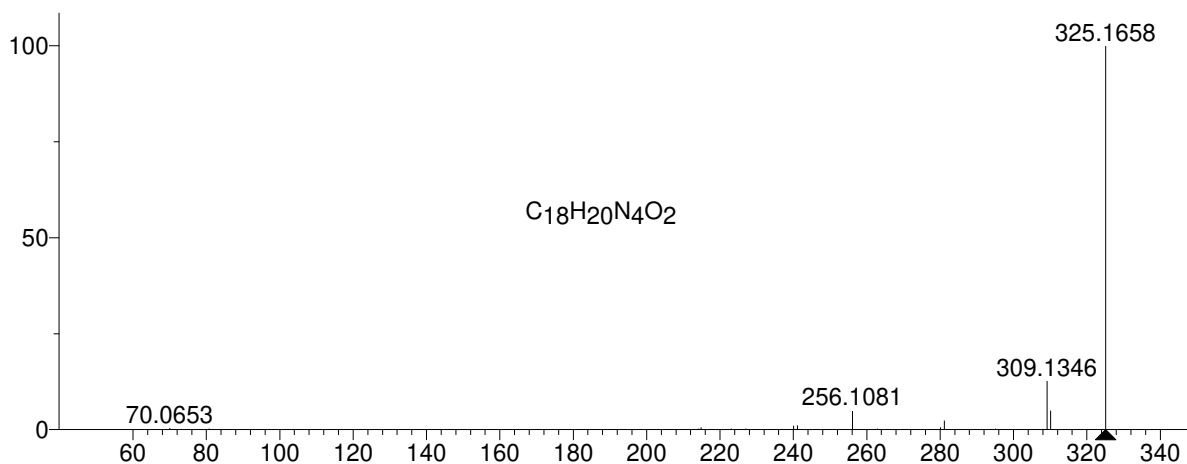

Hit 5 : 2H-Benzimidazol-2-one, 1-ethyl-1,3-dihydro- [2M+H]<sup>+</sup> HCD 3V P=325.2  
C<sub>9</sub>H<sub>10</sub>N<sub>2</sub>O; MF: 0; RMF: 39; Prob 13.2%; CAS: 10045-45-1; Lib: nist\_msms; ID: 364753.

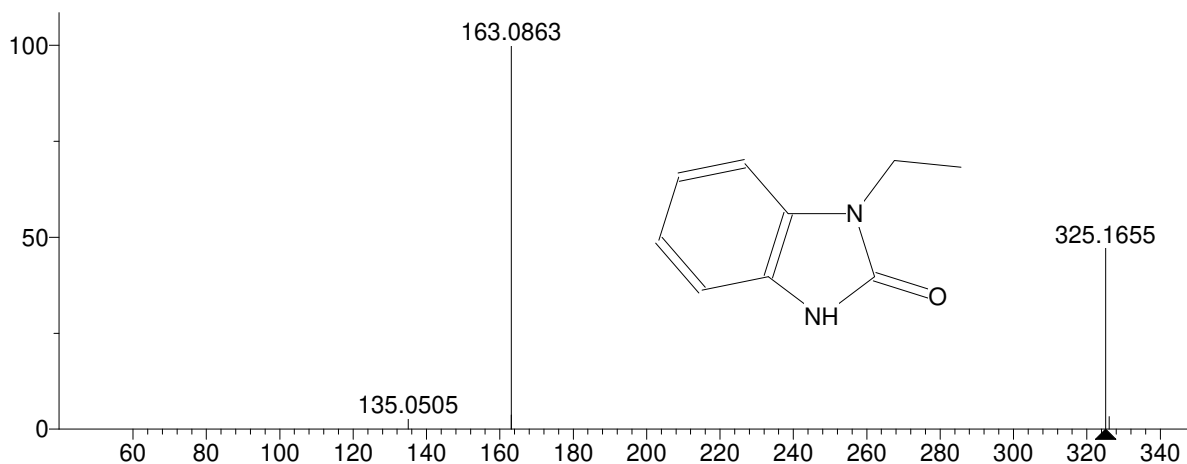



Unknown: Unknown (20.88\_425.0896m/z)  
Compound in Library Factor = 0

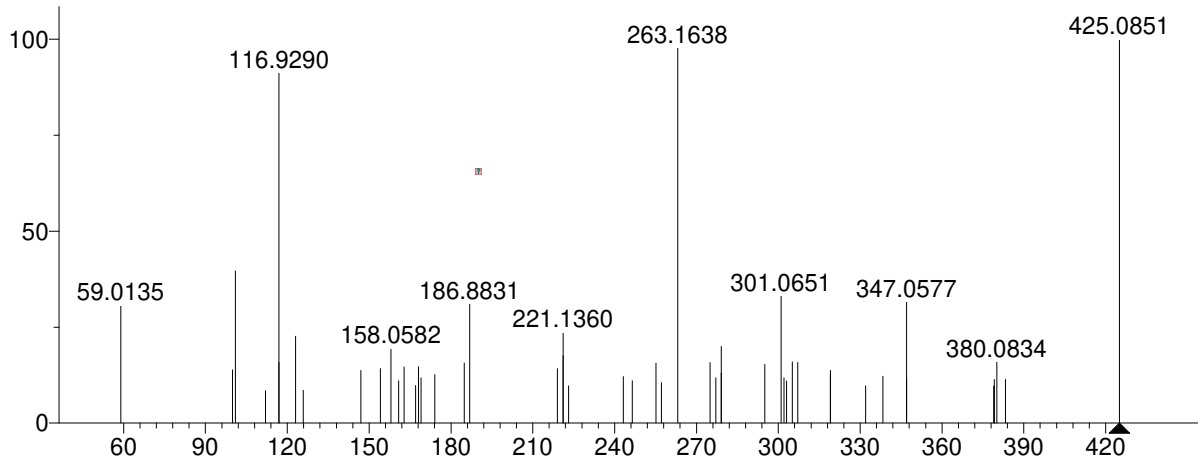

\*\* Search Report Page 1 of 1 \*\*

Unknown: Unknown (20.89\_393.1518m/z)  
Compound in Library Factor = 0

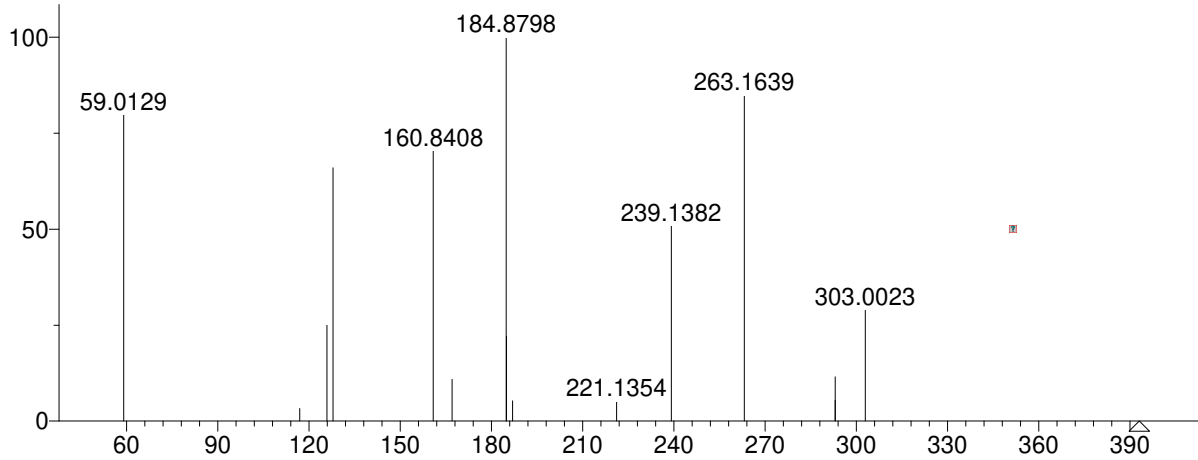

Hit 1 : NCGC00168813-03\_C20H24O8\_1H-2-Benzopyran-6-acetic acid, 8a-ethenyl-octahydro-5-hydroxy-7-[[2-(hy C20H24O8; MF: 0; RMF: 44; Prob 50.0%; Lib: mona-export-gnps; ID: 13917.

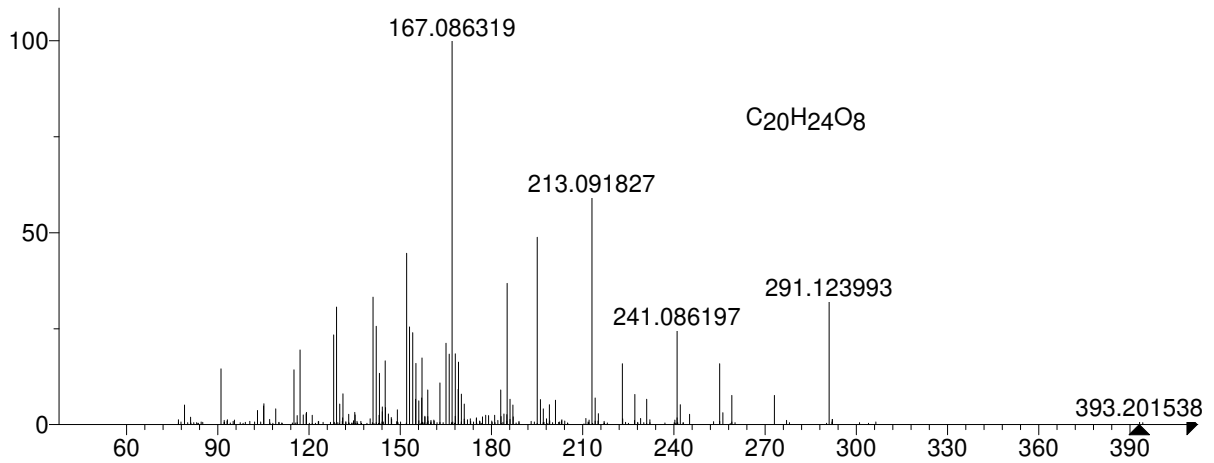

Hit 2 : [(5R,6S,7S,8aR)-8a-ethenyl-5-hydroxy-6-(3-methoxy-3-oxoprop-1-en-2-yl)-4-methylidene-3-oxo-1,4a,5,6,7, C20H24O8; MF: 0; RMF: 17; Prob 50.0%; Lib: mona-export-vf-npl\_qexactive; ID: 9920.

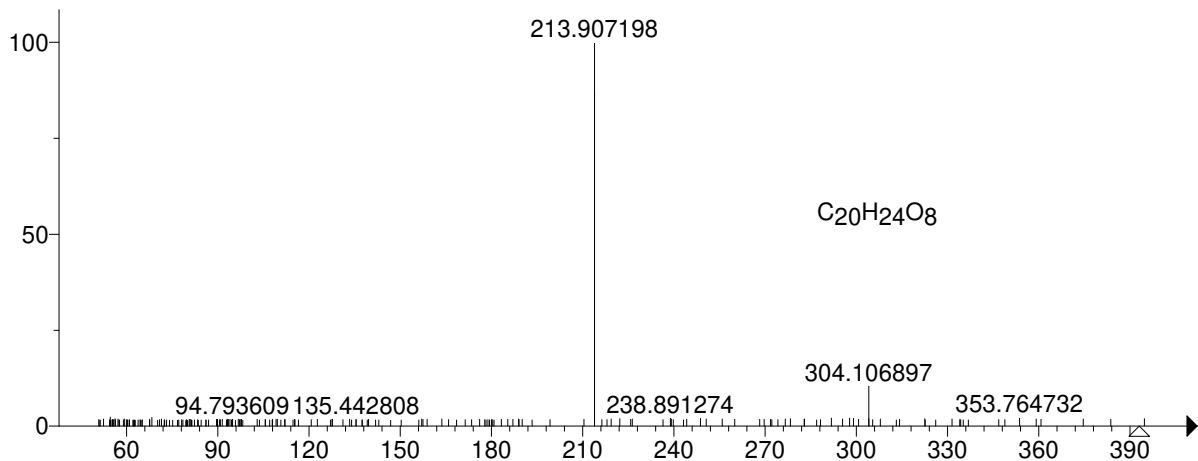

Unknown: Unknown (20.89\_704.2504m/z)  
Compound in Library Factor = 0

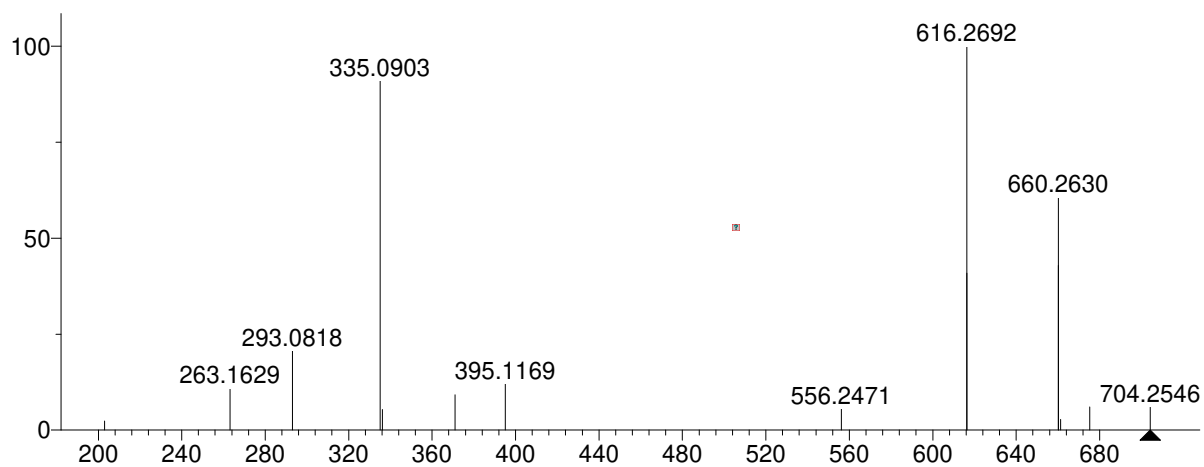

Hit 1 : DFLNHc [M-H+HCO<sub>2</sub>]<sup>2-</sup> IT 35% P=704.2  
C52H88N2O39; MF: 0; RMF: 12; Prob 100.0%; Lib: nist\_msms; ID: 532655.

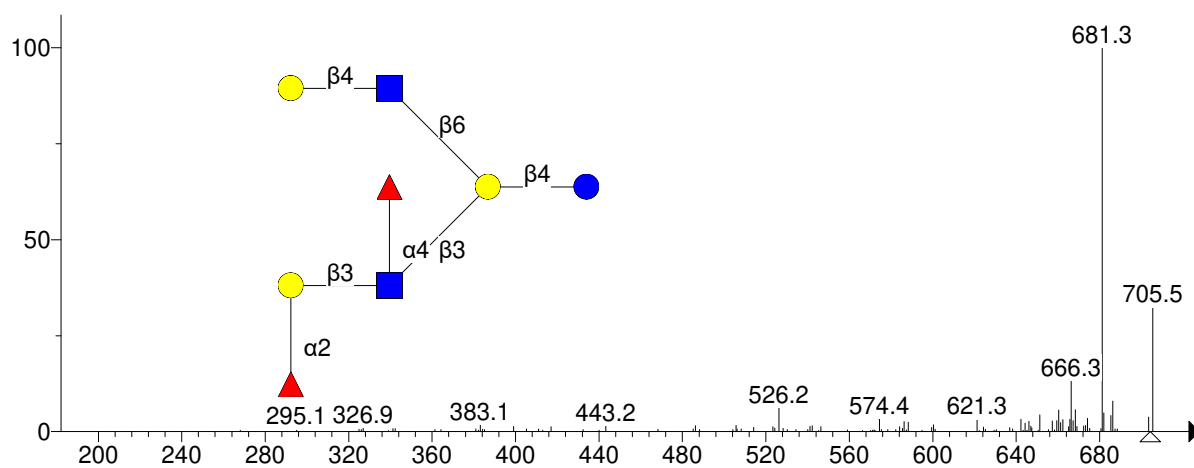

Unknown: Unknown (20.97\_682.2865m/z)  
Compound in Library Factor = 0

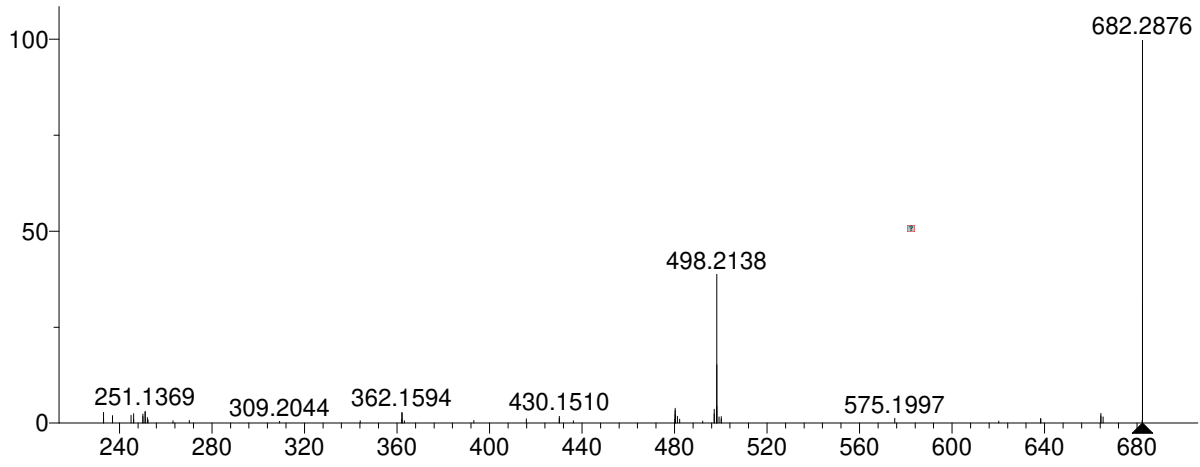

\*\* Search Report Page 1 of 2 \*\*

Unknown: Unknown (21.20\_425.1915m/z)  
Compound in Library Factor = 0

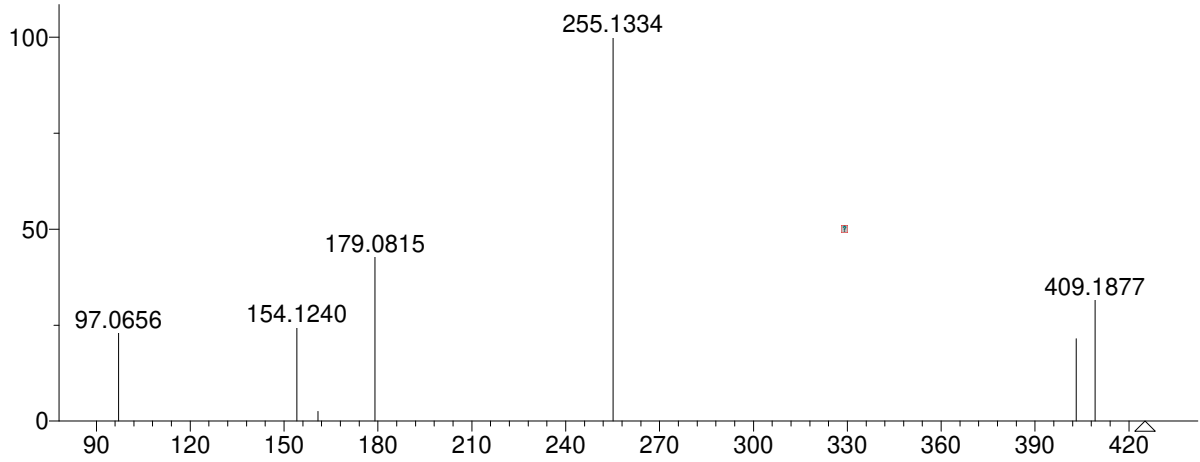

Hit 1 : 2-[5-[2-[2-[5-(2-hydroxypropyl)oxolan-2-yl]propanoyloxy]propyl]oxolan-2-yl]propanoic acid [M+K]<sup>+</sup> 65HCD  
C<sub>20</sub>H<sub>34</sub>O<sub>7</sub>; MF: 0; RMF: 16; Prob 33.3%; Lib: mona-export-vf-npl\_qexactive; ID: 9132.

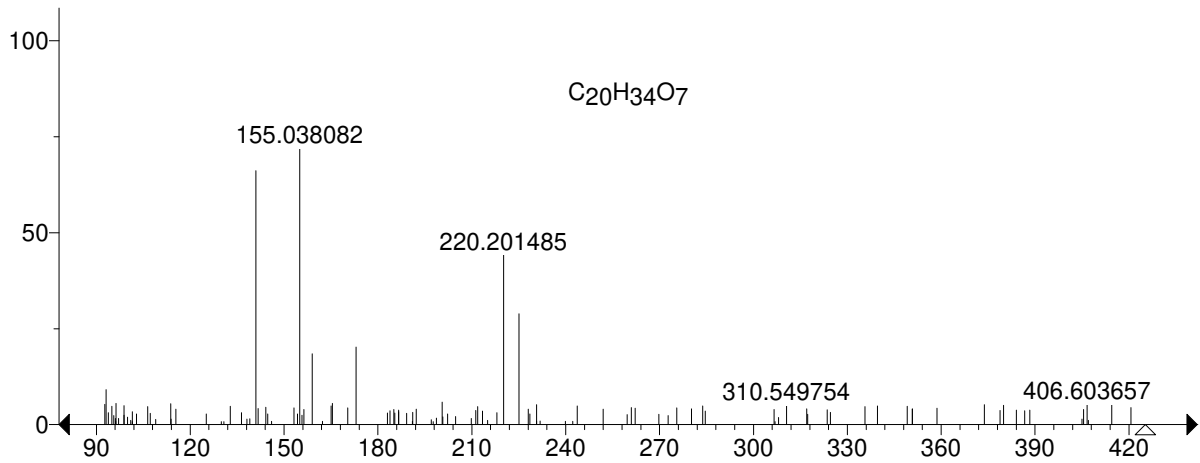

Hit 2 : MLS001183714-01!Clindamycin [M+H]<sup>+</sup> P=425.2  
C<sub>18</sub>H<sub>33</sub>ClN<sub>2</sub>O<sub>5</sub>S; MF: 0; RMF: 7; Prob 33.3%; Lib: mona-export-gnps; ID: 3814.

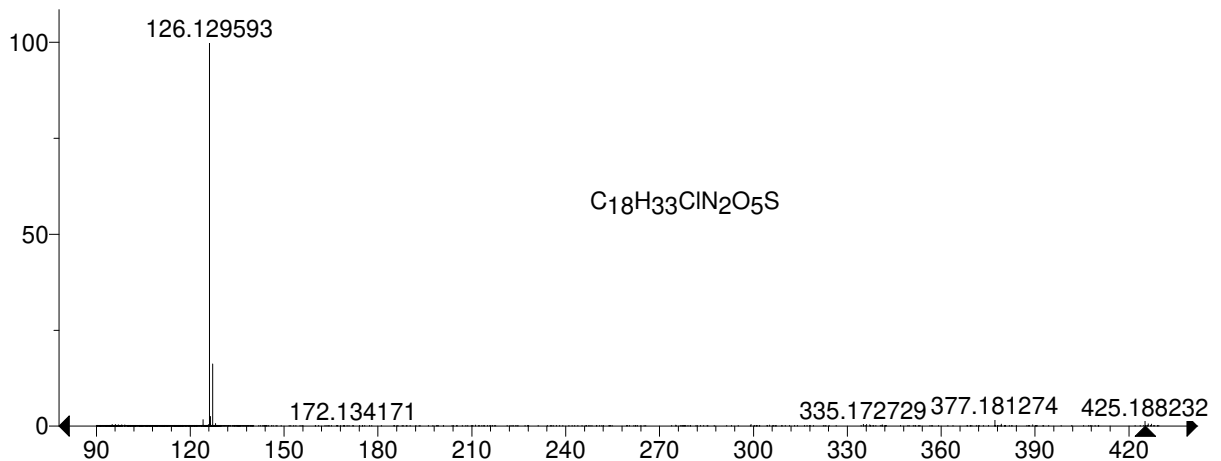

Hit 3 : MLS001304044-01! [M+H]<sup>+</sup> P=425.2  
C<sub>18</sub>H<sub>36</sub>Cl<sub>2</sub>N<sub>2</sub>O<sub>6</sub>S; MF: 0; RMF: 5; Prob 33.3%; Lib: mona-export-gnps; ID: 3214.

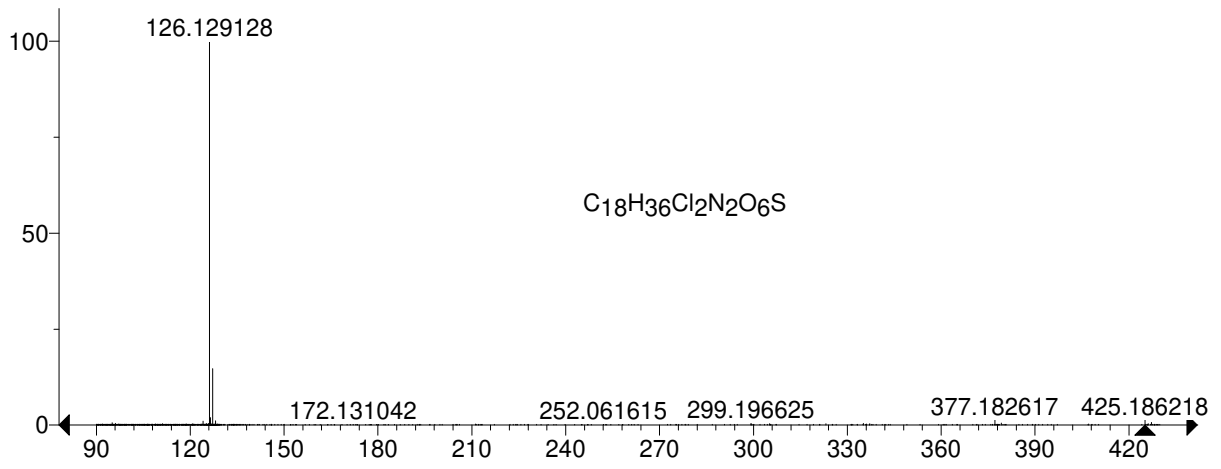

\*\* Search Report Page 1 of 2 \*\*

Unknown: Unknown (21.21\_403.1734m/z)  
Compound in Library Factor = -3273

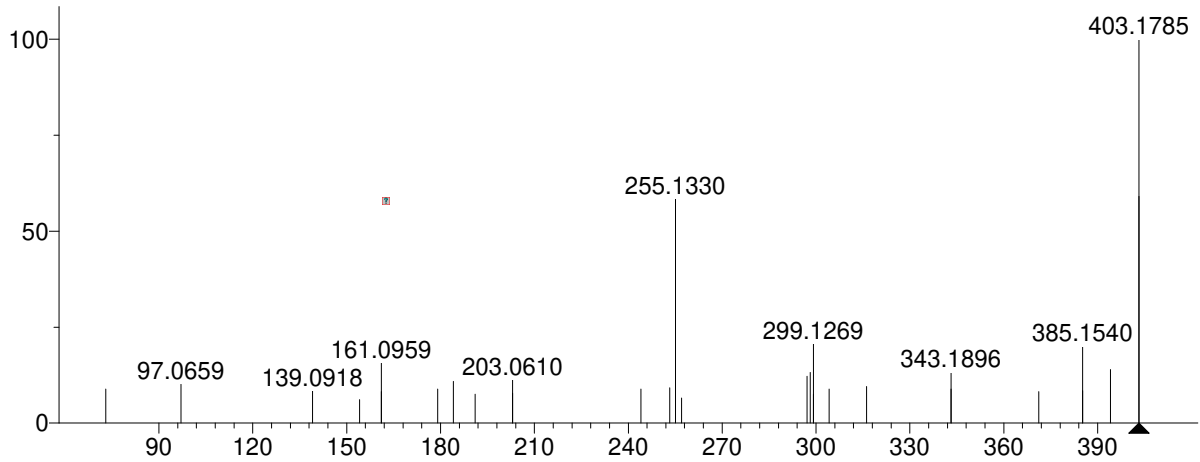

Hit 1 : NCGC00380826-01![1-(3,4-dihydroxy-5-methoxyphenyl)-7-(3,4-dihydroxyphenyl)heptan-3-yl] acetate [M-H]  
C22H28O7; MF: 5; RMF: 362; Prob 8.75%; Lib: msms-neg-gnps; ID: 1036.

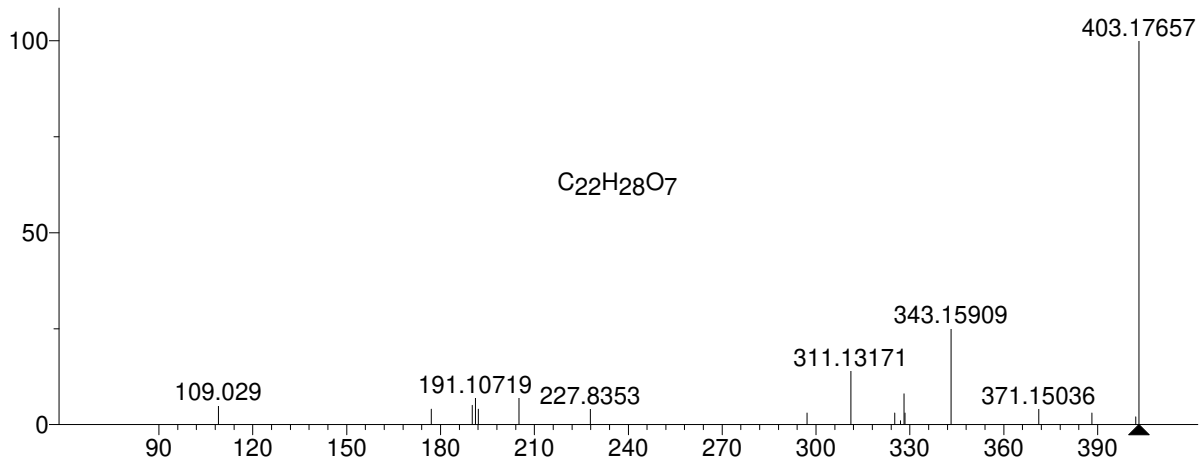

Hit 2 : Acetic acid, 2-[4-[3-(4-acetyl-3-hydroxy-2-propylphenoxy)propoxy]phenoxy]- [M+H]<sup>+</sup> HCD 24V P=403.2  
C22H26O7; MF: 5; RMF: 167; Prob 8.75%; CAS: 79558-09-1; Lib: nist\_msms; ID: 245667.

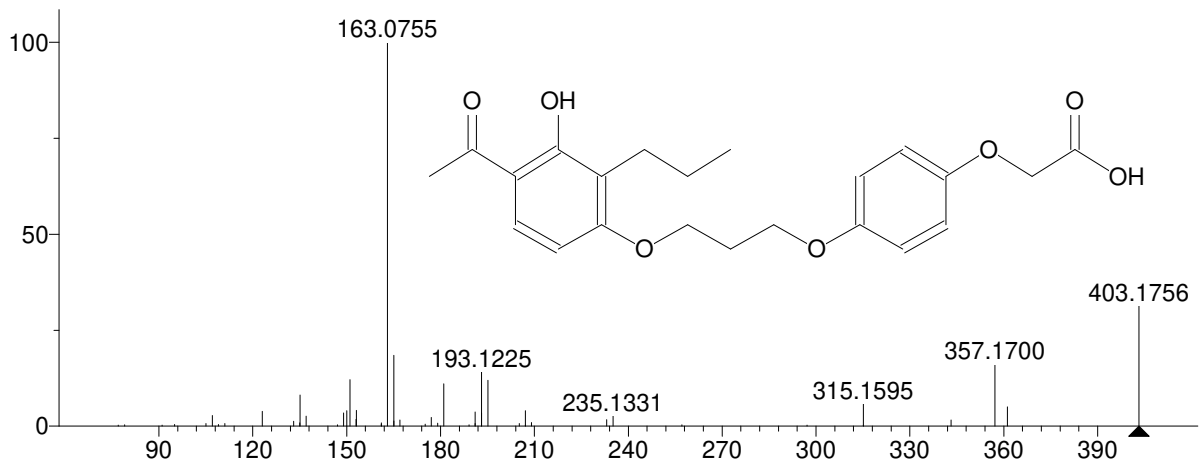

Hit 3 : (2R,3R,3aR,5R)-5,7-dimethoxy-2-(7-methoxy-1,3-benzodioxol-5-yl)-3-methyl-3a-prop-2-enyl-2,3,4,5-tetrahydro-2H-2,6-benzodioxepine; MF: 4; RMF: 150; Prob 8.41%; Lib: mona-export-vf-npl\_qexactive; ID: 23182.

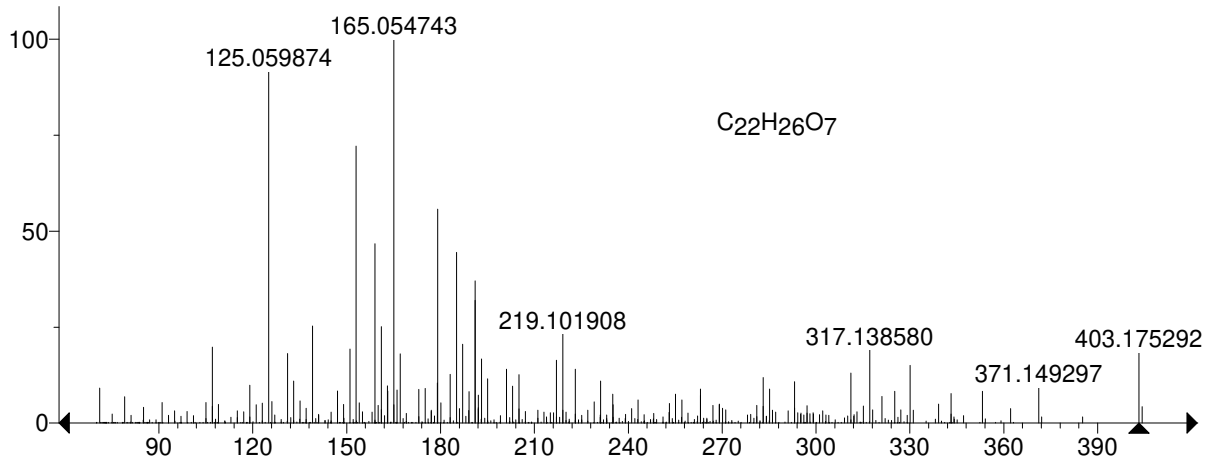

Hit 4 : gmelinol [M+H]<sup>+</sup> 10 P=403.2; MF: 2; RMF: 220; Prob 7.76%; Lib: mona-export-vf-npl\_qtof; ID: 1874.

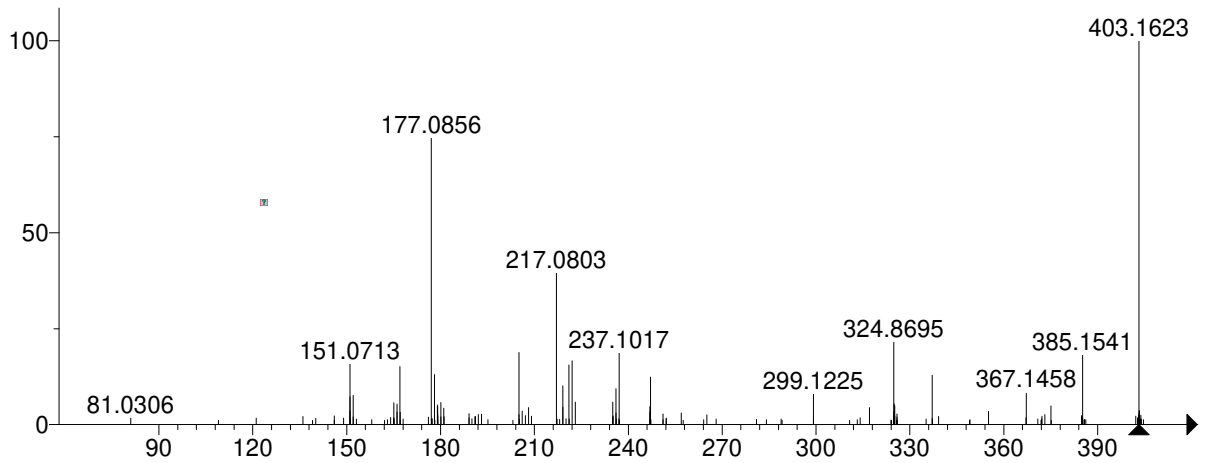

Hit 5 : NCGC00347636-02! [2-[2-(2-methylpropanoyloxy)propan-2-yl]-7-oxo-2,3-dihydrofuro[3,2-g]chromen-3-yl] 2; MF: 2; RMF: 197; Prob 7.76%; Lib: mona-export-gnps; ID: 9715.

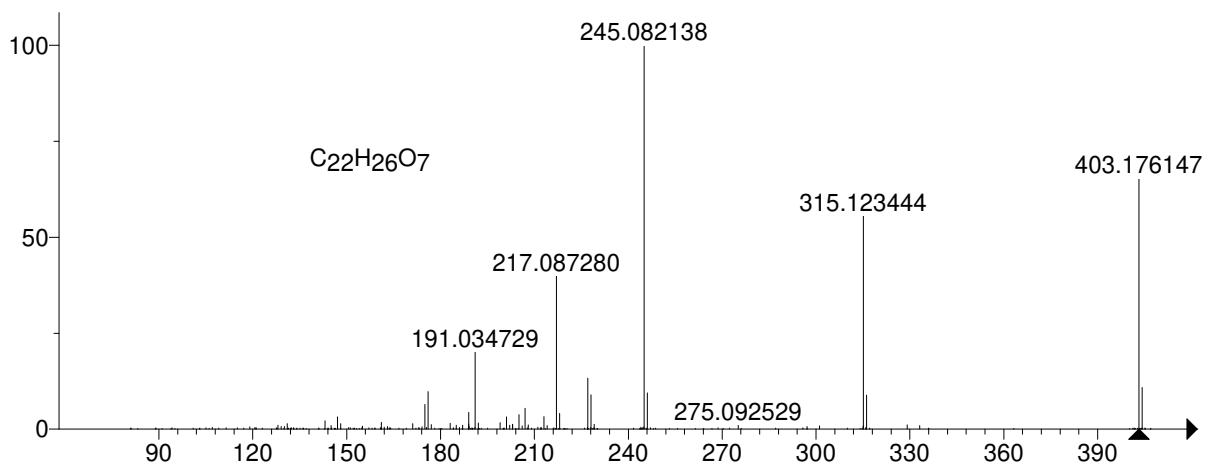



\*\* Search Report Page 1 of 2 \*\*

Unknown: Unknown (21.29\_327.2164m/z)  
Compound in Library Factor = -755

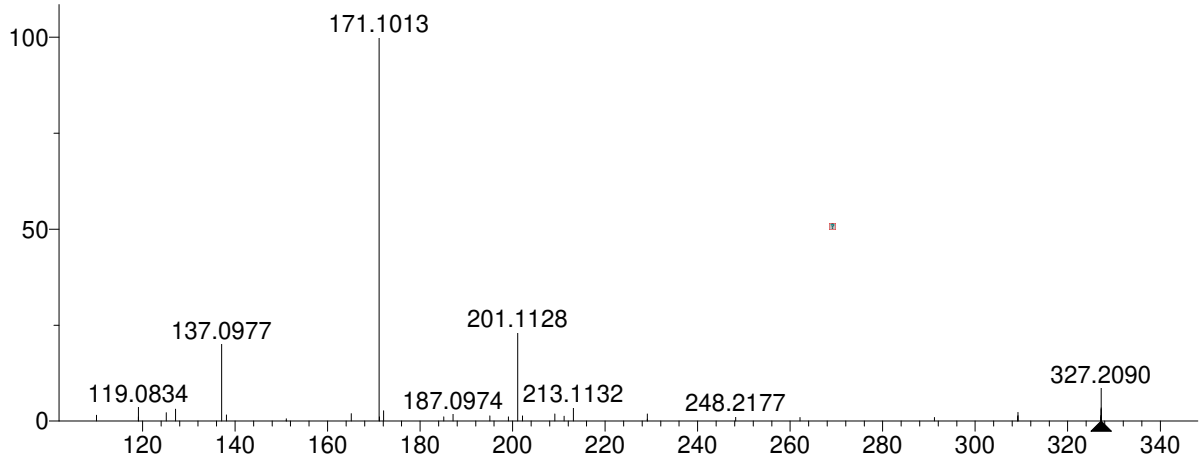

Hit 1 : FA 18:2+3O; PlaSMA ID-711 [M-H]<sup>-</sup> P=327.2  
C<sub>18</sub>H<sub>32</sub>O<sub>5</sub>; MF: 214; RMF: 428; Prob 31.1%; Lib: biomsms-neg-plasma; ID: 437.

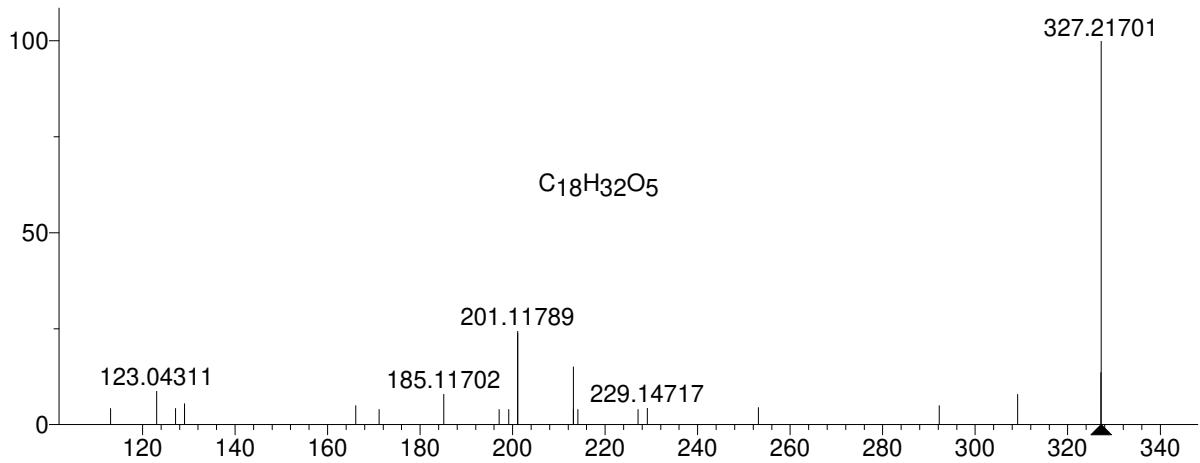

Hit 2 : Unknown (carbon number 18); PlaSMA ID-715 [M-H]<sup>-</sup> P=327.2  
C<sub>18</sub>H<sub>32</sub>O<sub>5</sub>; MF: 214; RMF: 368; Prob 31.1%; Lib: biomsms-neg-plasma; ID: 1234.

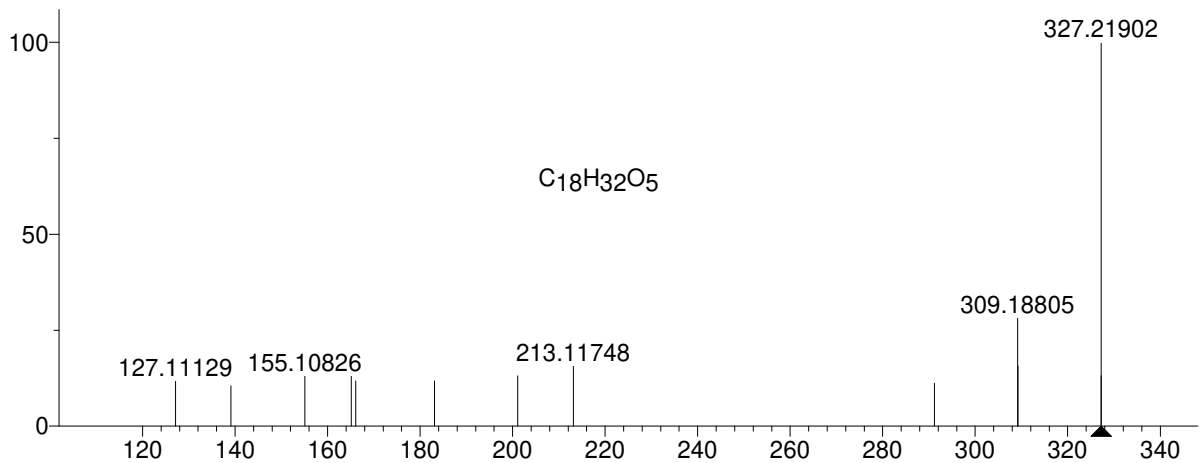

Hit 3 : FA 18:2+3O; PlaSMA ID-717 [M-H]<sup>-</sup> P=327.2  
C<sub>18</sub>H<sub>32</sub>O<sub>5</sub>; MF: 201; RMF: 549; Prob 20.1%; Lib: biomsms-neg-plasma; ID: 436.

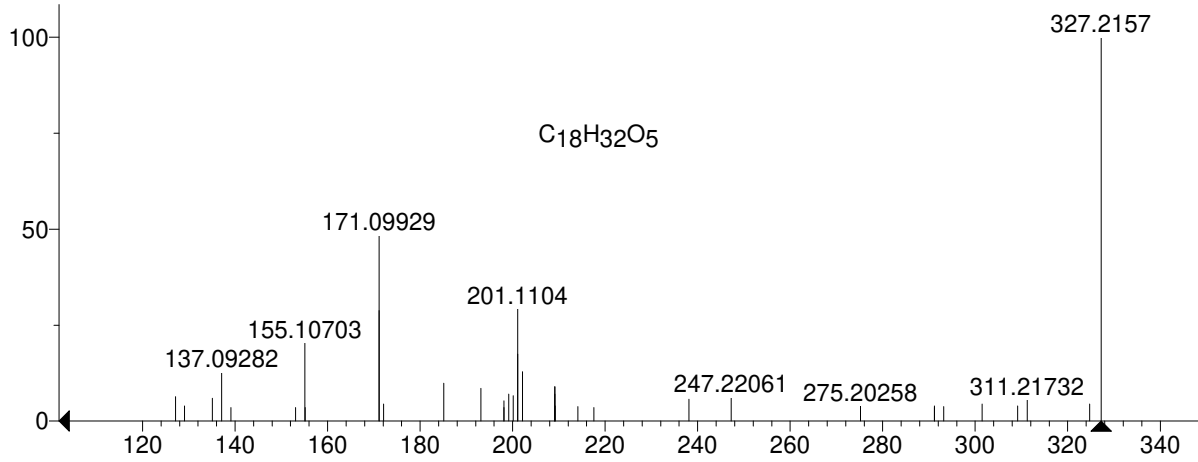

Hit 4 : 9,12,13-Trihydroxy-10(E),15(Z)-octadecadienoic acid ( ) [M-H]<sup>-</sup> P=327.2  
C<sub>18</sub>H<sub>32</sub>O<sub>5</sub>; MF: 188; RMF: 516; Prob 13.0%; Lib: phytofrag2018\_final\_060219; ID: 128.

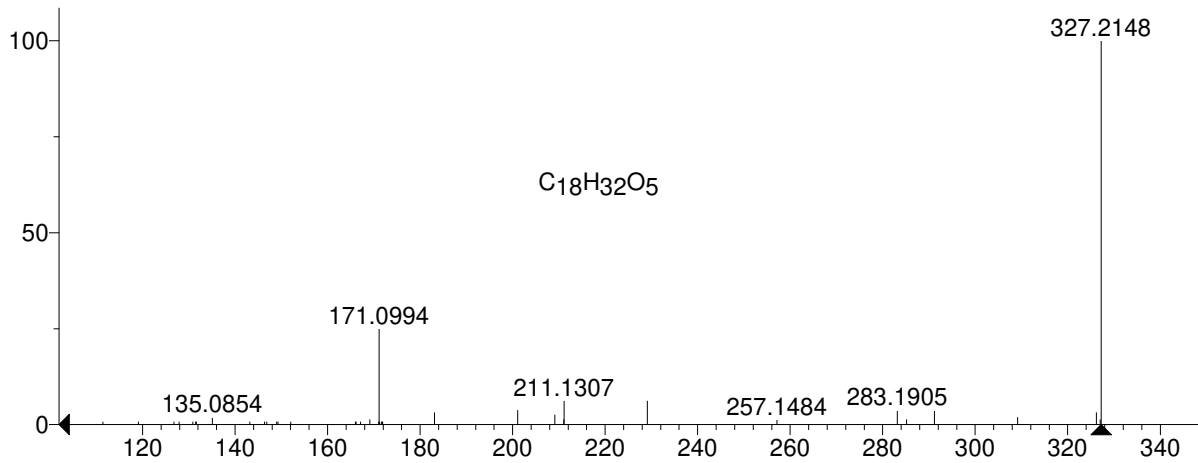

Hit 5 : FA 18:2+3O; PlaSMA ID-720 [M-H]<sup>-</sup> P=327.2  
C<sub>18</sub>H<sub>32</sub>O<sub>5</sub>; MF: 156; RMF: 381; Prob 3.46%; Lib: biomsms-neg-plasma; ID: 434.

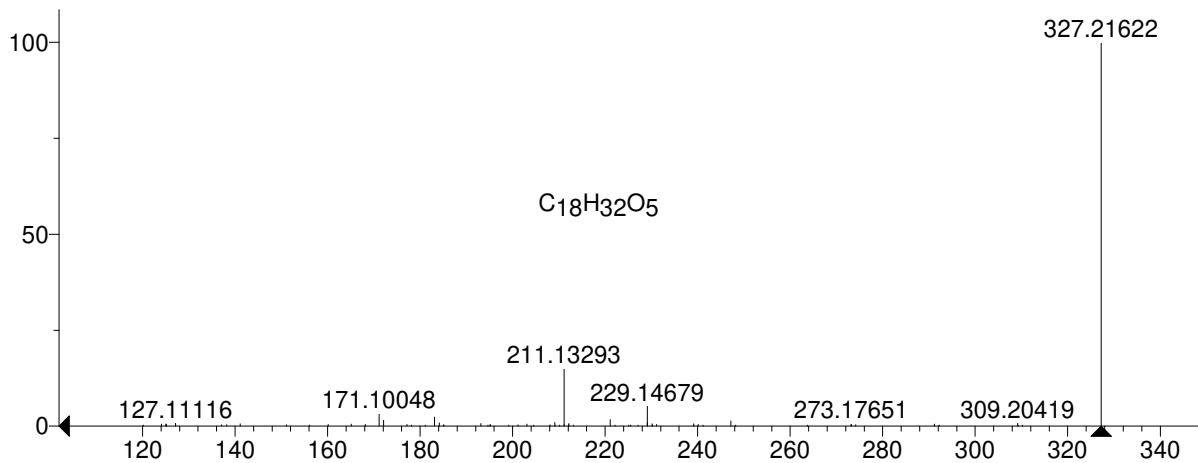

\*\* Search Report Page 1 of 2 \*\*

Unknown: Unknown (21.37\_290.1390m/z)  
Compound in Library Factor = -2387

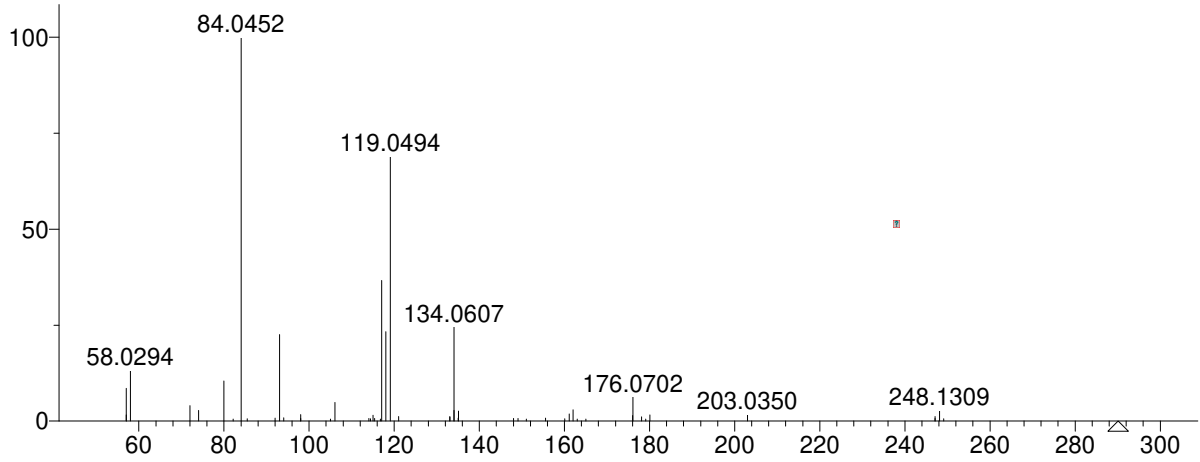

Hit 1 : Benzoylecgonine [M+H]<sup>+</sup> 50eV P=290.1  
C<sub>16</sub>H<sub>19</sub>NO<sub>4</sub>; MF: 31; RMF: 361; Prob 49.1%; Lib: mona-export-massbank; ID: 526.

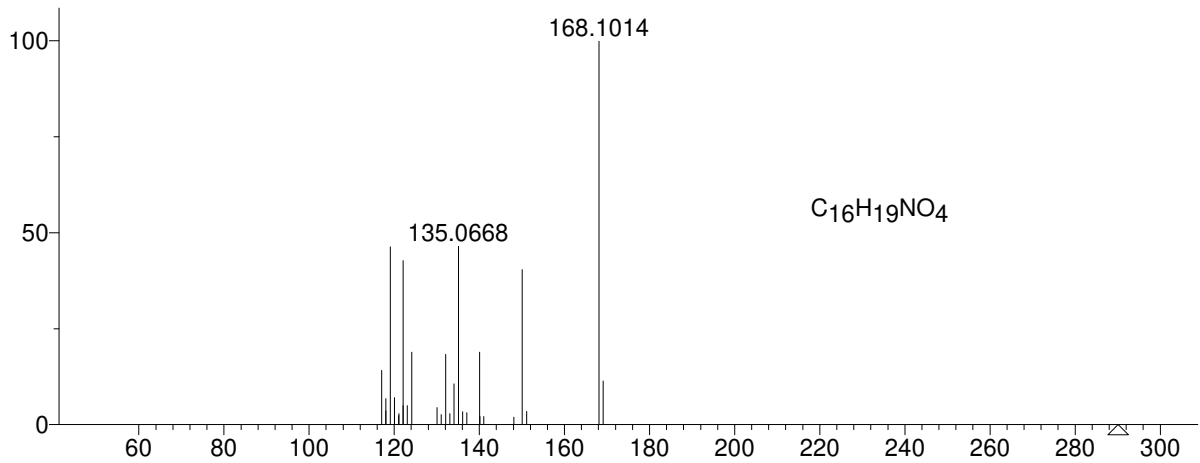

Hit 2 : Norcocaine [M+H]<sup>+</sup> HCD 34V P=290.1  
C<sub>16</sub>H<sub>19</sub>NO<sub>4</sub>; MF: 10; RMF: 137; Prob 20.9%; CAS: 18717-72-1; Lib: nist\_msms; ID: 325503.

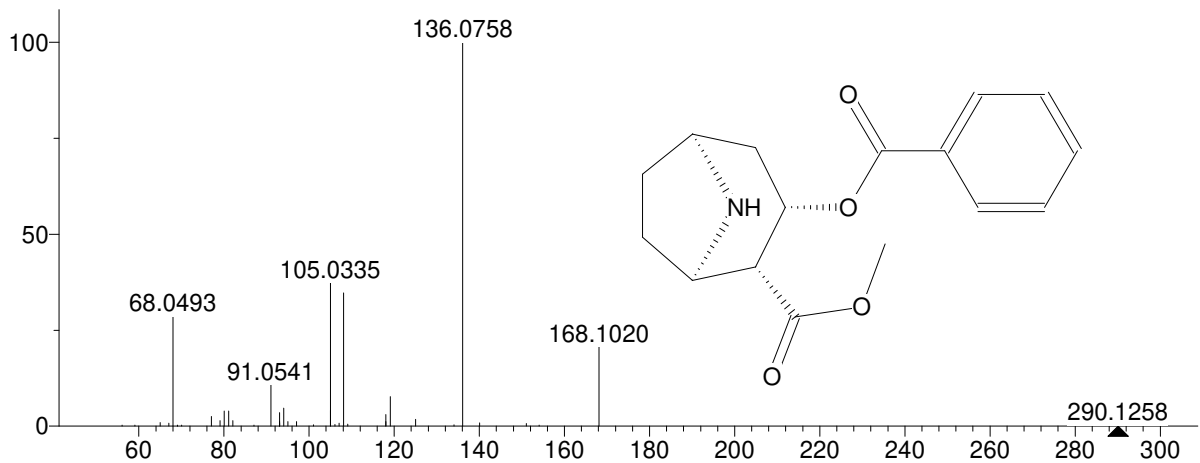

Hit 3 : OPHTHALMIC ACID [M+H]<sup>+</sup> P=290.1  
C<sub>11</sub>H<sub>19</sub>N<sub>3</sub>O<sub>6</sub>; MF: 2; RMF: 123; Prob 15.6%; Lib: mona-export-gnps; ID: 5471.

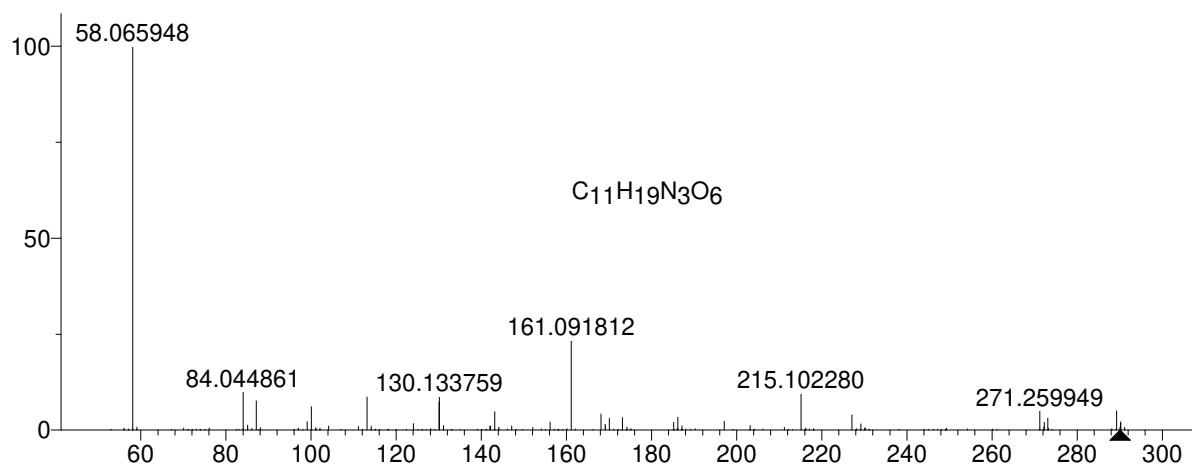

Hit 4 : Anabasamine Hydrochloride [M+H]<sup>+</sup> 65HCD P=290.1  
C<sub>16</sub>H<sub>20</sub>ClN<sub>3</sub>; MF: 0; RMF: 72; Prob 14.4%; Lib: mona-export-vf-npl\_qexactive; ID: 26781.

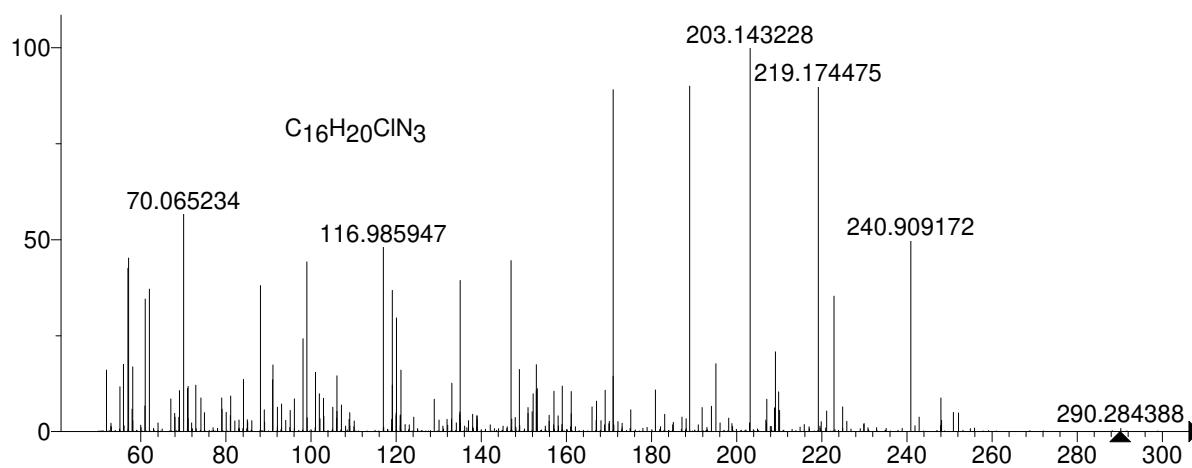

\*\* Search Report Page 1 of 2 \*\*

Unknown: Unknown (21.39\_349.1281m/z)  
Compound in Library Factor = -3273

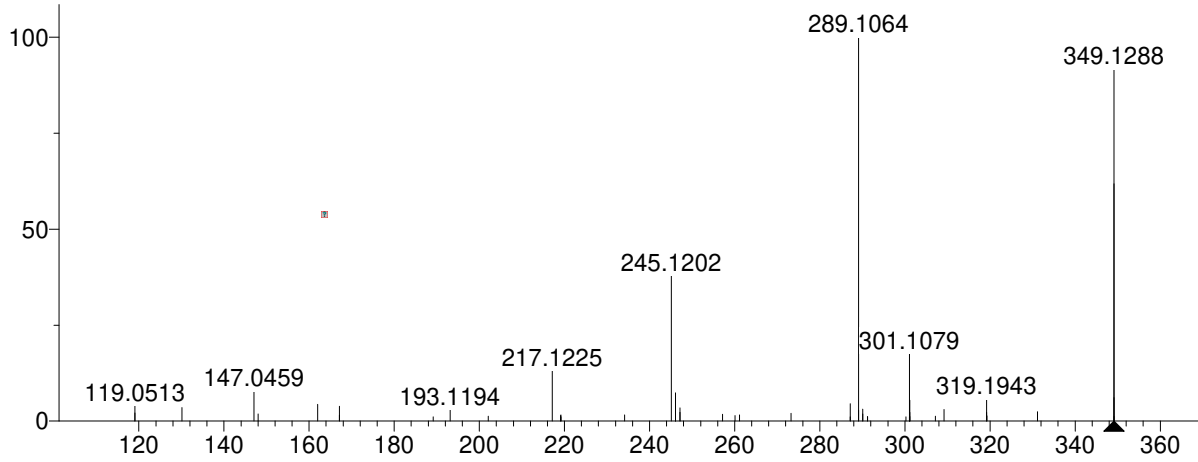

Hit 1 : Phenol, 3-[4-(4-morpholinyl)pyrido[3',2':4,5]furo[3,2-d]pyrimidin-2-yl]- [M+H]<sup>+</sup> HCD 31V P=349.1  
C<sub>19</sub>H<sub>16</sub>N<sub>4</sub>O<sub>3</sub>; MF: 12; RMF: 388; Prob 38.1%; CAS: 371935-74-9; Lib: nist\_msms; ID: 375610.

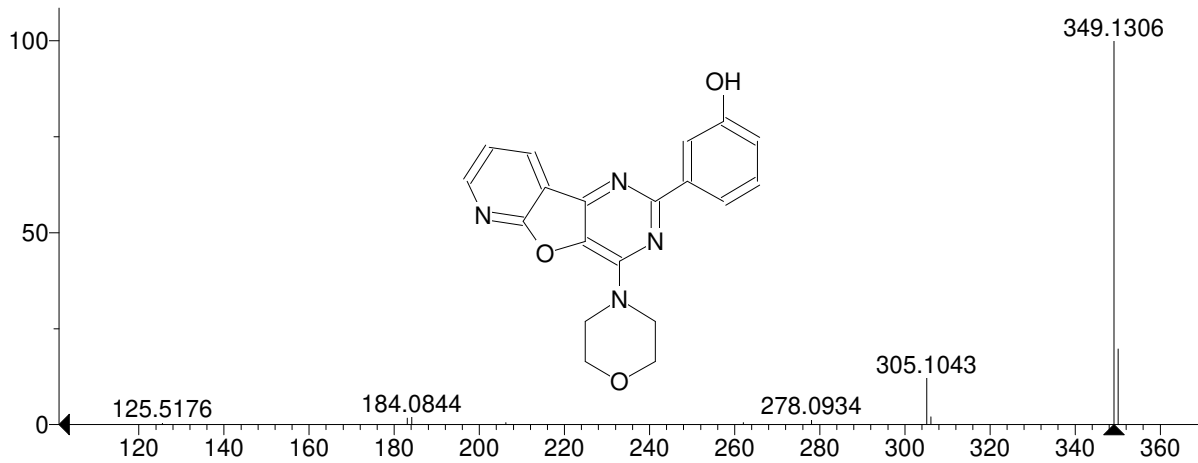

Hit 2 : NCGC00380409-01\_C<sub>16</sub>H<sub>22</sub>O<sub>7</sub>\_(4E)-7-Acetoxy-6-hydroxy-2-methyl-10-oxo-3,6,7,8,9,10-hexahydro-2H-o:  
C<sub>16</sub>H<sub>22</sub>O<sub>7</sub>; MF: 8; RMF: 392; Prob 32.2%; Lib: mona-export-gnps; ID: 12852.

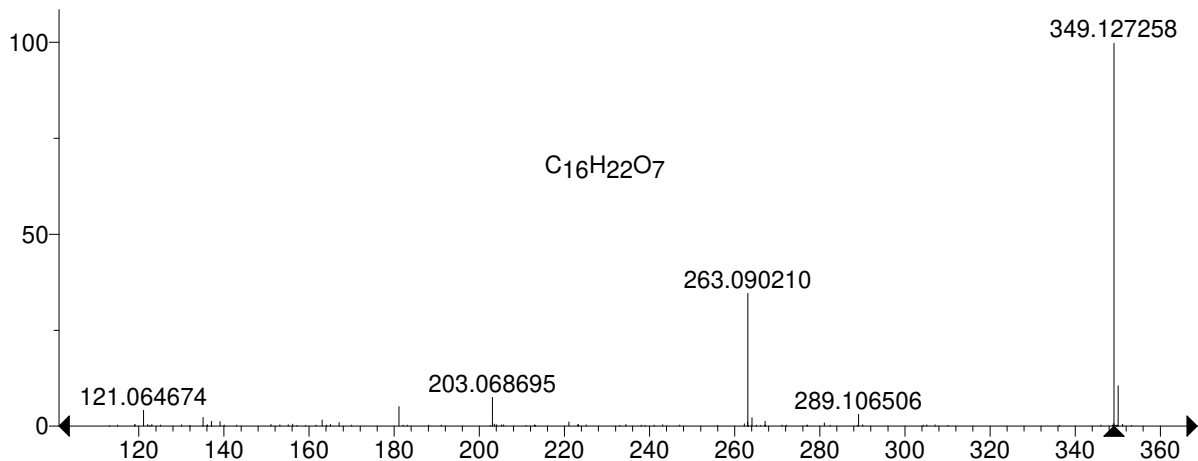

\*\* Search Report Page 2 of 2 \*\*

Hit 3 : [(4E)-7-acetyloxy-6-hydroxy-2-methyl-10-oxo-2,3,6,7,8,9-hexahydrooxecin-3-yl] (E)-but-2-enoate [M+Na]<sup>+</sup>  
C<sub>16</sub>H<sub>22</sub>O<sub>7</sub>; MF: 6; RMF: 172; Prob 29.7%; Lib: mona-export-vf-npl\_qexactive; ID: 1693.

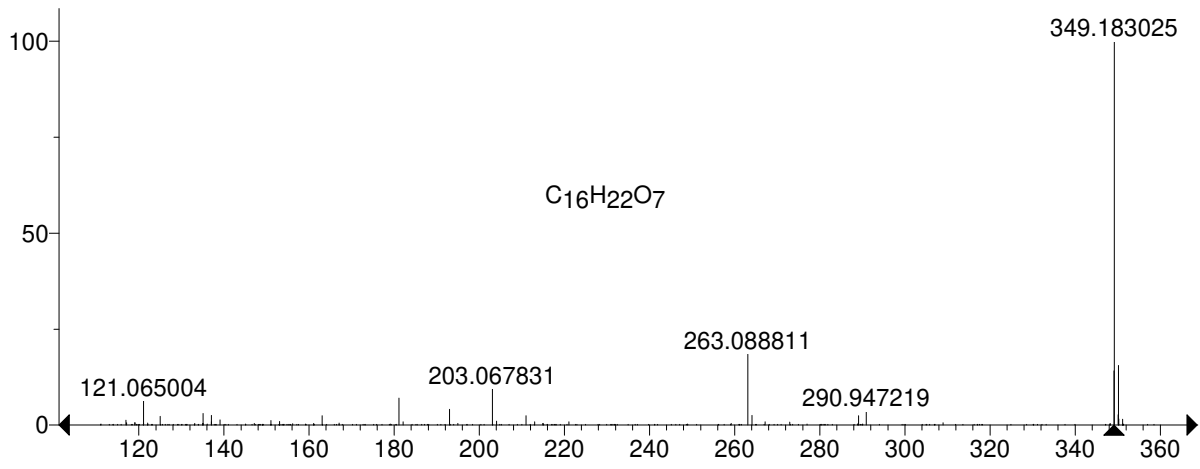

\*\* Search Report Page 1 of 2 \*\*

Unknown: Unknown (21.51\_329.2325m/z)  
Compound in Library Factor = -246

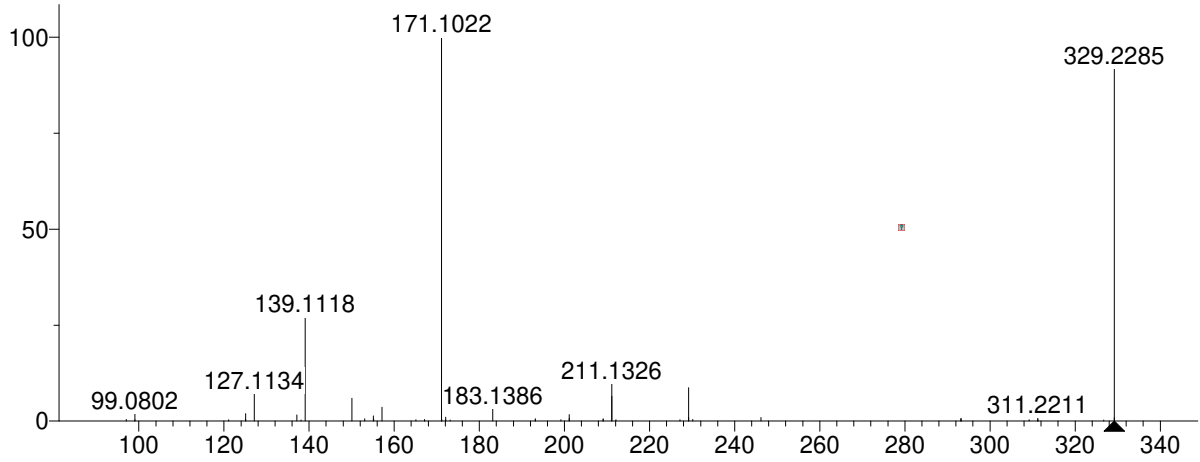

Hit 1 : FA 18:1+3O; PlaSMA ID-738 [M-H]<sup>-</sup> P=329.2  
C<sub>18</sub>H<sub>34</sub>O<sub>5</sub>; MF: 588; RMF: 762; Prob 98.2%; Lib: biomsms-neg-plasma; ID: 444.

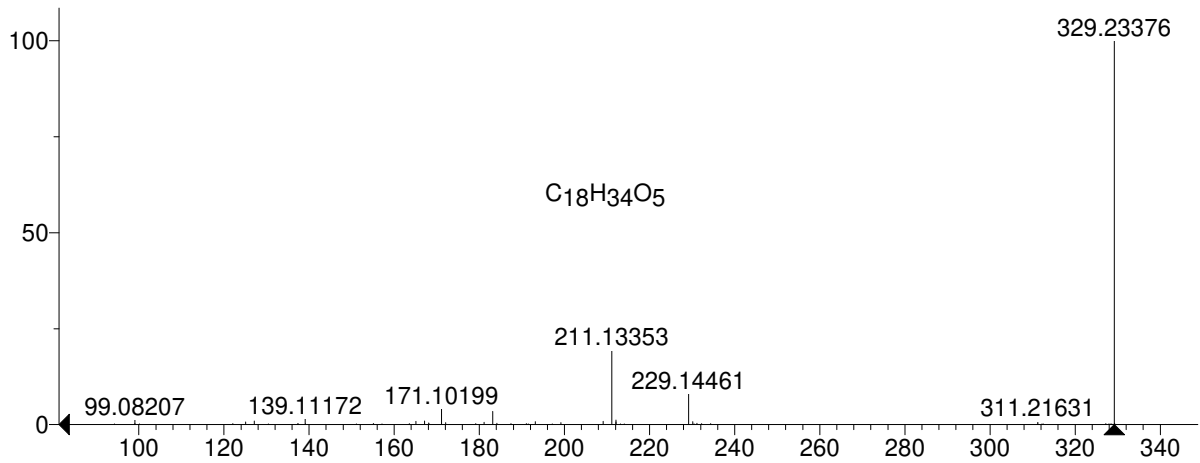

Hit 2 : FA 18:1+3O; PlaSMA ID-737 [M-H]<sup>-</sup> P=329.2  
C<sub>18</sub>H<sub>34</sub>O<sub>5</sub>; MF: 402; RMF: 728; Prob 1.55%; Lib: biomsms-neg-plasma; ID: 448.

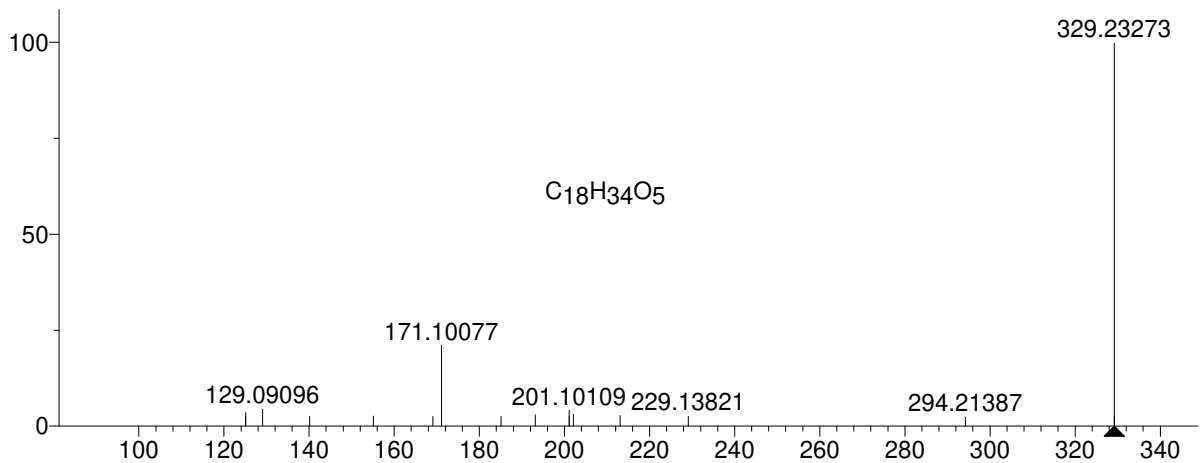

Hit 3 : FA 18:1+3O; PlaSMA ID-735 [M-H]<sup>-</sup> P=329.2  
C<sub>18</sub>H<sub>34</sub>O<sub>5</sub>; MF: 323; RMF: 758; Prob 0.17%; Lib: biomsms-neg-plasma; ID: 443.

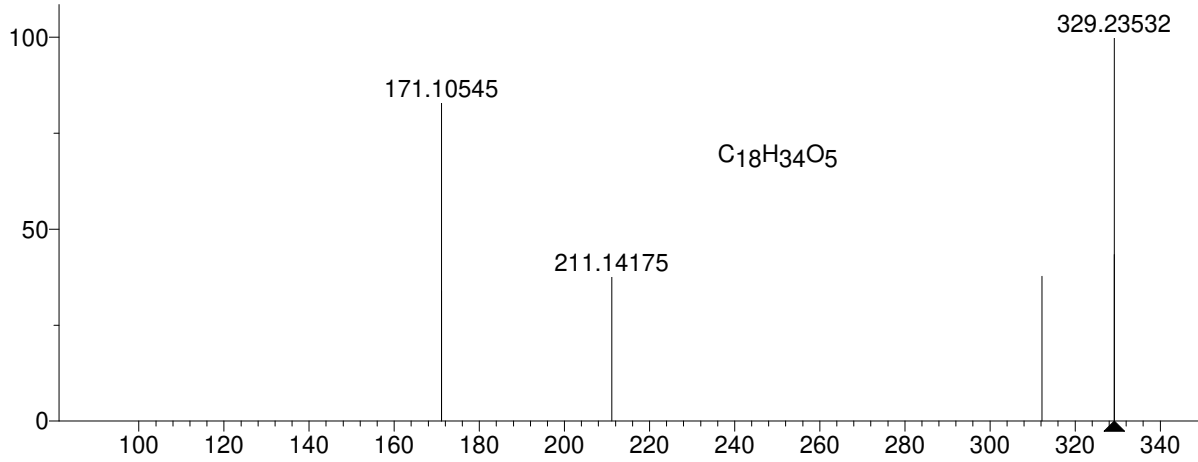

Hit 4 : 9,12,13-Trihydroxy-10(E)-octadecadienoic acid ( ) [M-H]<sup>-</sup> P=329.2  
C<sub>18</sub>H<sub>34</sub>O<sub>5</sub>; MF: 273; RMF: 620; Prob 0.03%; Lib: phytofrag2018\_final\_060219; ID: 129.

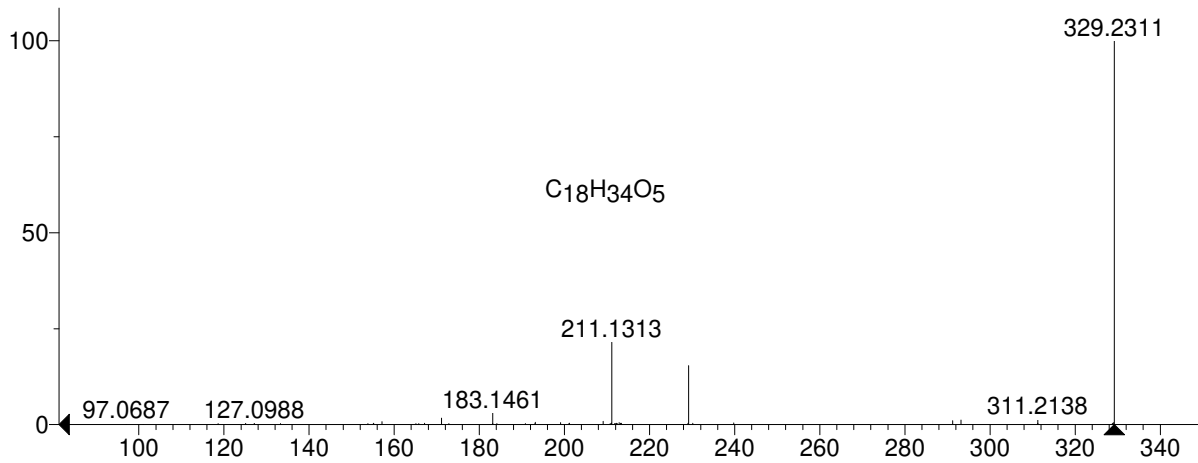

Hit 5 : FA 18:1+3O; PlaSMA ID-739 [M-H]<sup>-</sup> P=329.2  
C<sub>18</sub>H<sub>34</sub>O<sub>5</sub>; MF: 111; RMF: 533; Prob 0.00%; Lib: biomsms-neg-plasma; ID: 446.

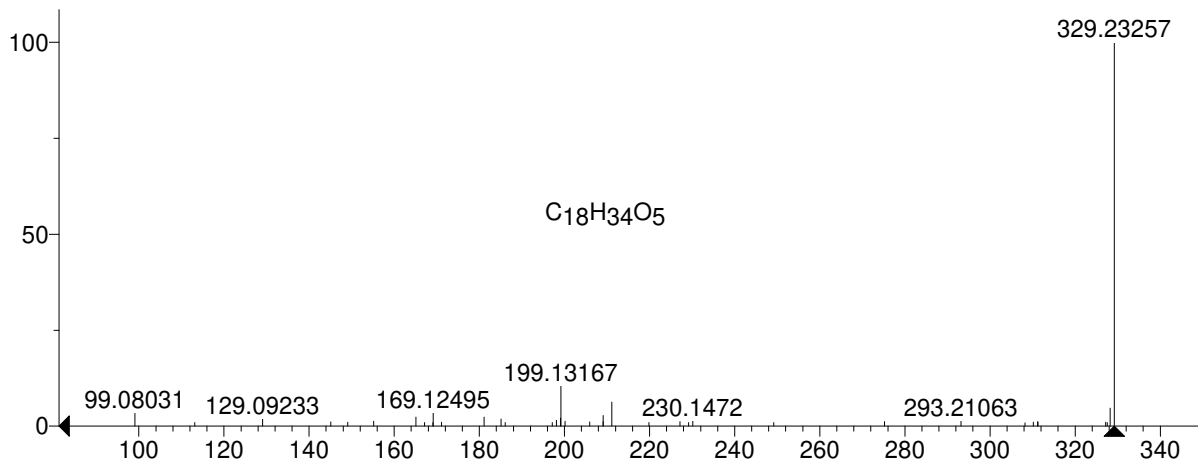



Unknown: Unknown (21.52\_522.2801m/z)  
Compound in Library Factor = 0

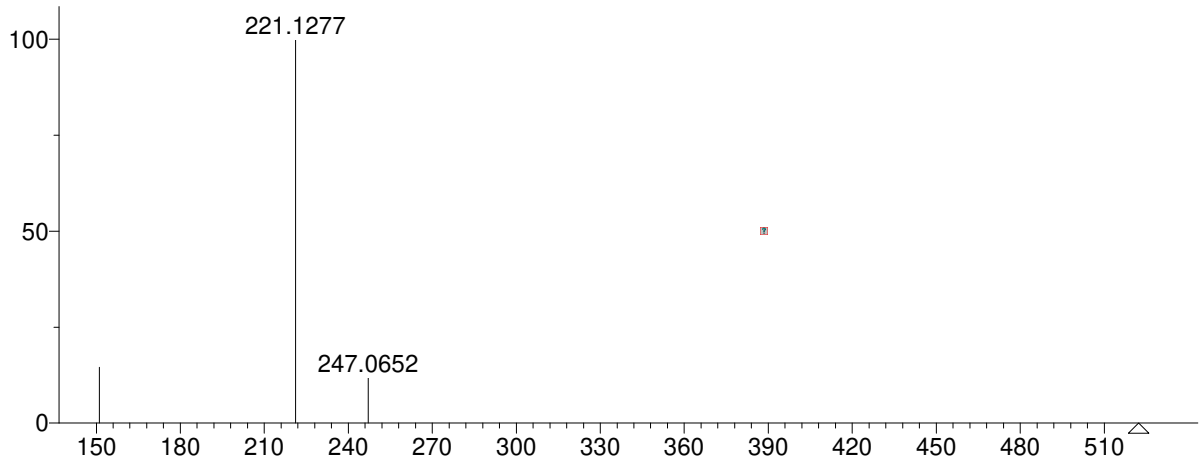

Unknown: Unknown (21.54\_257.1494m/z)  
Compound in Library Factor = 0

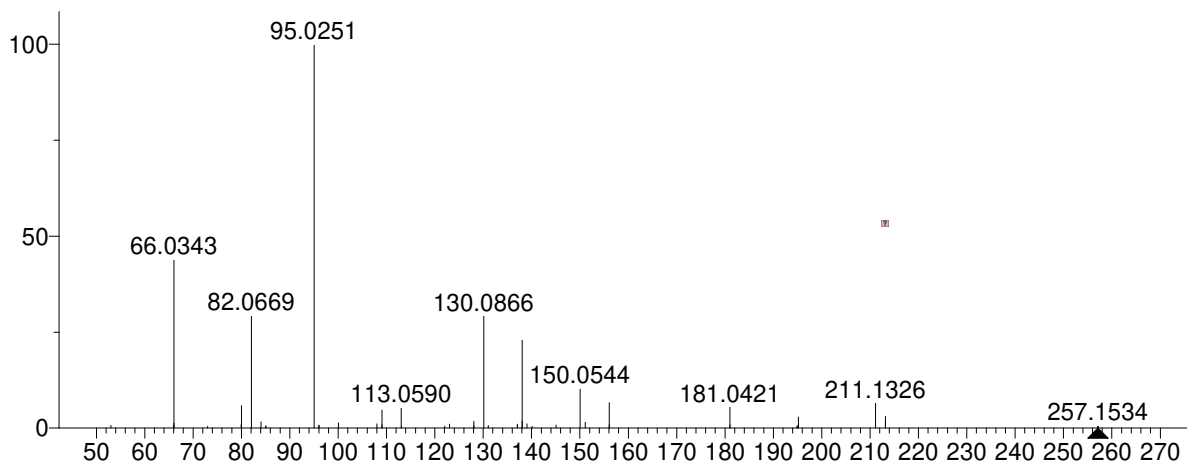

Hit 1 : NCGC00380601-01!N-[1-(4-methoxy-6-oxopyran-2-yl)-2-methylpropyl]acetamide [M+NH<sub>4</sub>]<sup>+</sup> P=257.2  
C<sub>12</sub>H<sub>17</sub>NO<sub>4</sub>; MF: 0; RMF: 44; Prob 20.0%; Lib: mona-export-gnps; ID: 9337.

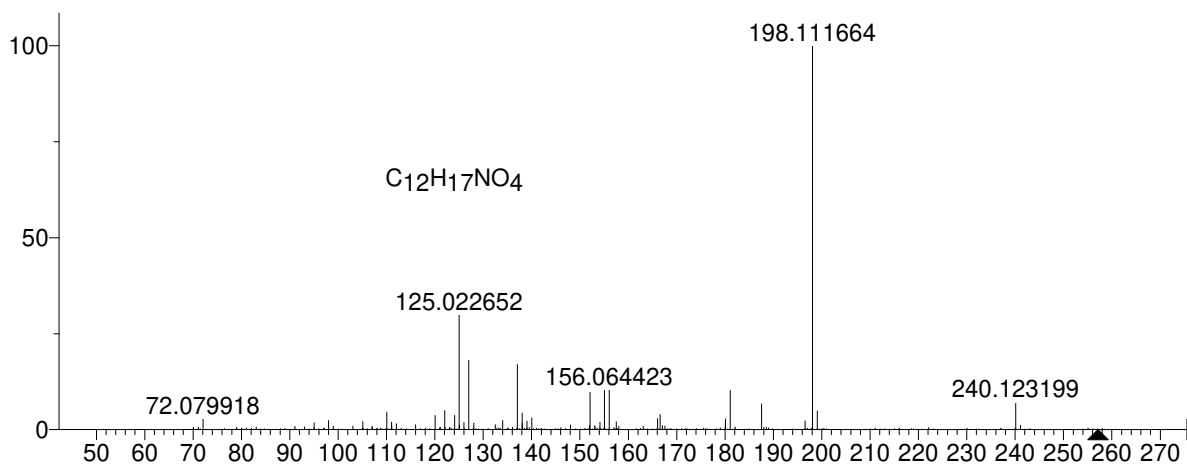

Hit 2 : NCGC00385875-01\_C<sub>15</sub>H<sub>22</sub>O<sub>2</sub>\_(1R,4Z,9S)-4-(Hydroxymethyl)-11,11-dimethyl-8-methylenebicyclo[7.2.0]u  
C<sub>15</sub>H<sub>22</sub>O<sub>2</sub>; MF: 0; RMF: 17; Prob 20.0%; Lib: mona-export-gnps; ID: 10431.

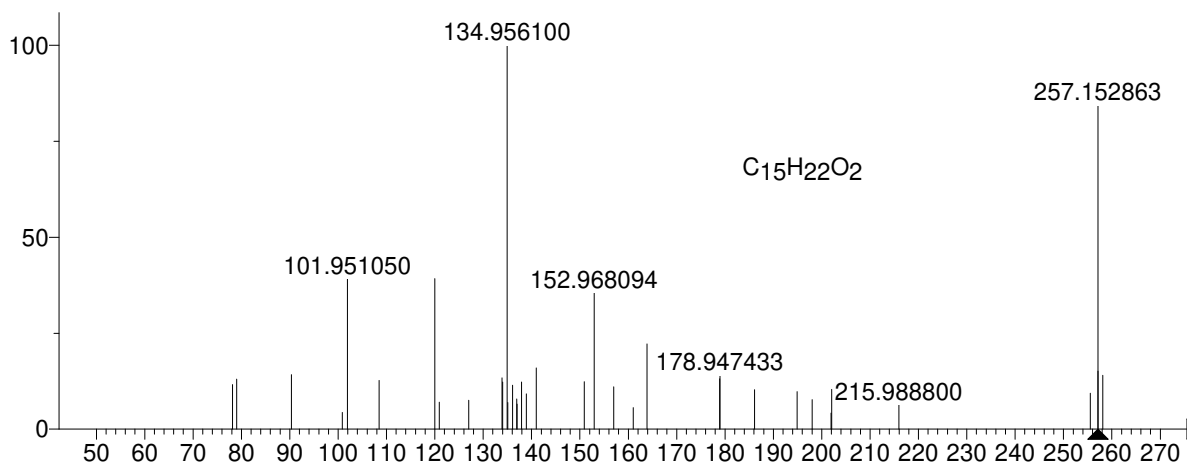

\*\* Search Report Page 2 of 2 \*\*

Hit 3 : (4S,5Z,6S)-4-(2-methoxy-2-oxoethyl)-5-[2-[(E)-3-phenylprop-2-enoyl]oxyethylidene]-6-[(2S,3R,4S,5S,6R)-3-C<sub>15</sub>H<sub>22</sub>O<sub>2</sub>; MF: 0; RMF: 10; Prob 20.0%; Lib: mona-export-vf-npl\_qexactive; ID: 9355.

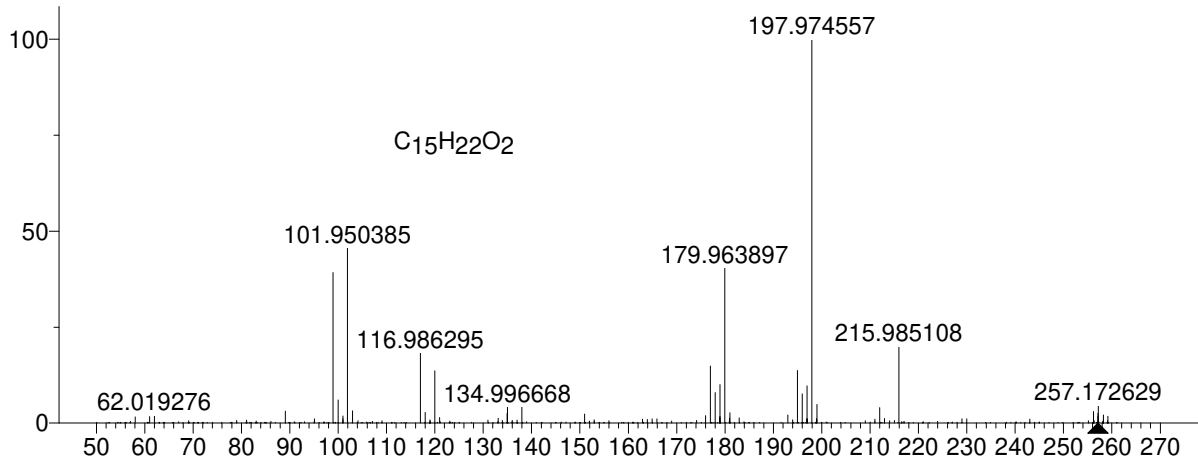

Hit 4 : (1R,4Z,9S)-4-(hydroxymethyl)-11,11-dimethyl-8-methylidenebicyclo[7.2.0]undec-4-en-3-one [M+Na]<sup>+</sup> 35H C<sub>15</sub>H<sub>22</sub>O<sub>2</sub>; MF: 0; RMF: 7; Prob 20.0%; Lib: mona-export-vf-npl\_qexactive; ID: 21136.

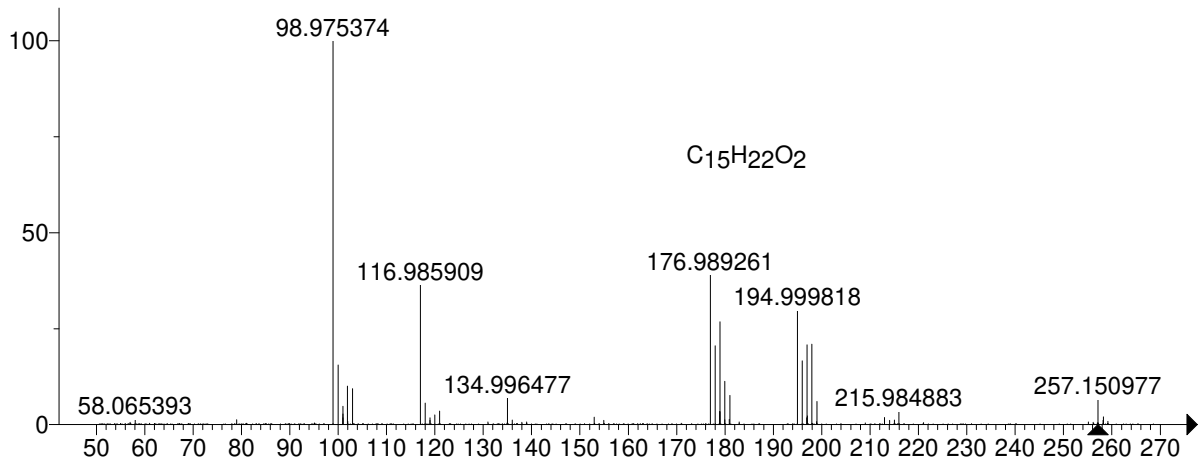

Hit 5 : Curcumenol [M+Na]<sup>+</sup> 35HCD P=257.2 C<sub>15</sub>H<sub>22</sub>O<sub>2</sub>; MF: 0; RMF: 6; Prob 20.0%; Lib: mona-export-vf-npl\_qexactive; ID: 18640.

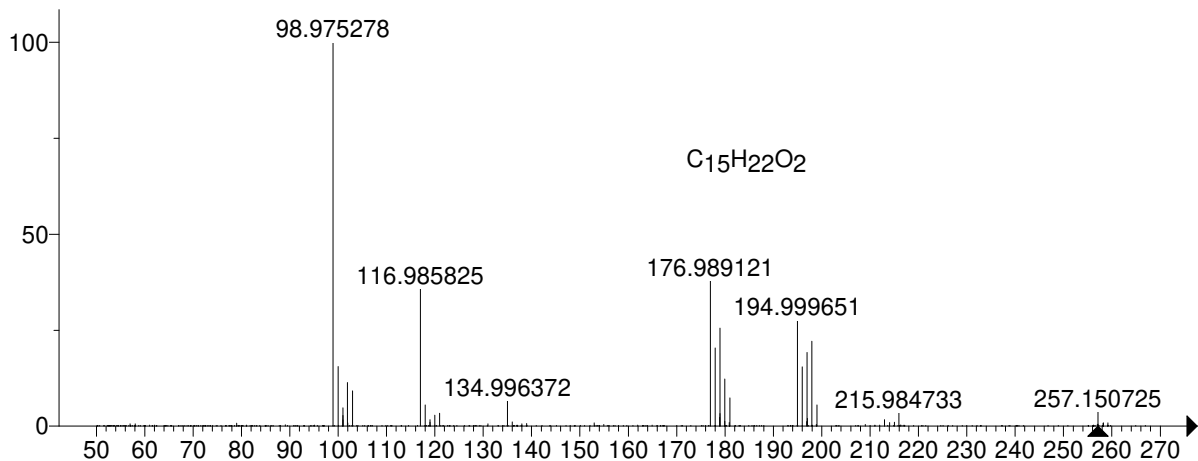

Unknown: Unknown (21.55\_532.2172m/z)  
Compound in Library Factor = 0

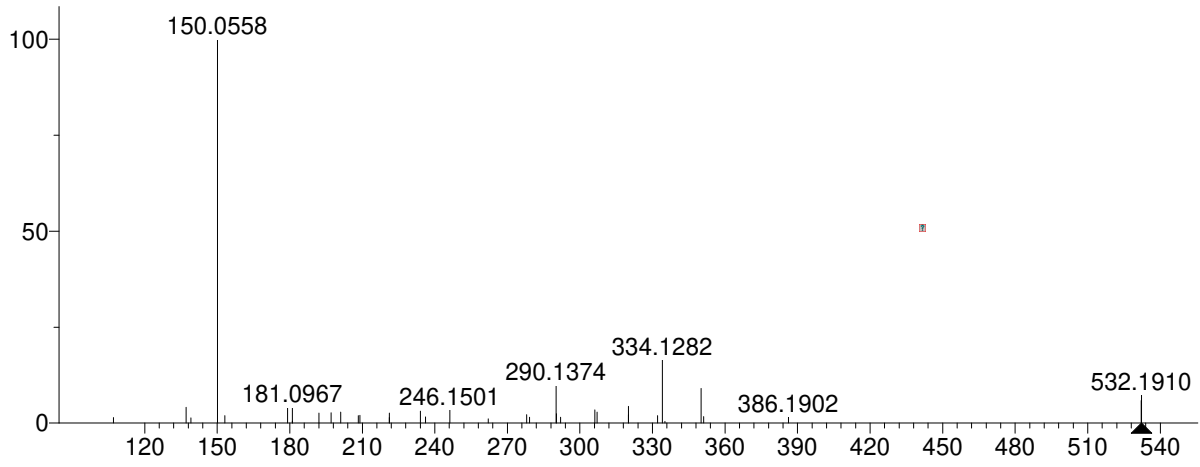

\*\* Search Report Page 1 of 2 \*\*

Unknown: Unknown (21.57\_647.3769m/z)  
Compound in Library Factor = -165

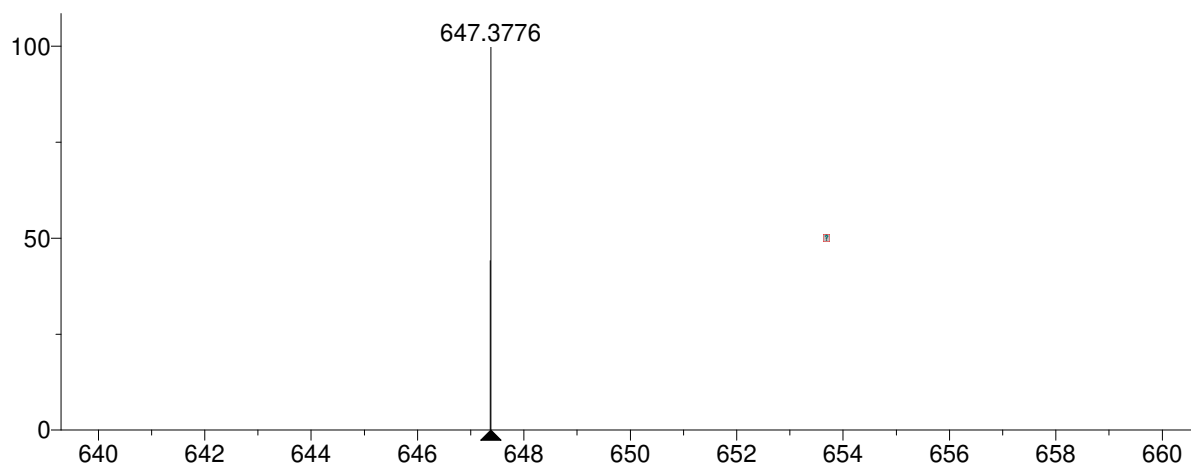

Hit 1 : Hymeglusin [2M-H]- HCD 25V P=647.4  
C18H28O5; MF: 569; RMF: 946; Prob 96.8%; CAS: 29066-42-0; Lib: nist\_msms; ID: 376632.

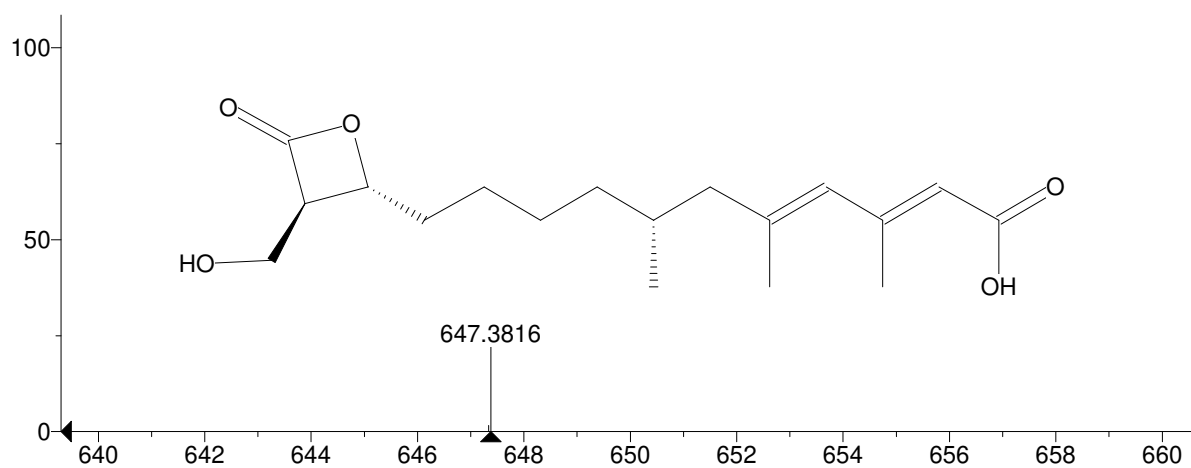

Hit 2 : Unknown (carbon number 36); PlaSMA ID-1785 [M-H]- P=647.4  
C36H56O10; MF: 290; RMF: 833; Prob 0.96%; Lib: biomsms-neg-plasma; ID: 1567.

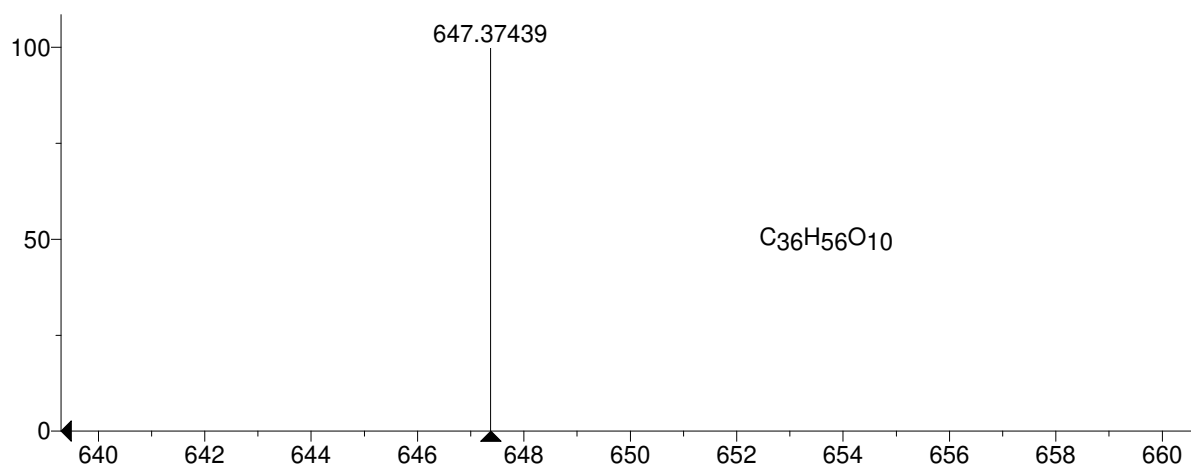

Hit 3 : PA 33:7 [M-H]<sup>-</sup> 40eV P=647.4  
C<sub>36</sub>H<sub>57</sub>O<sub>8</sub>P; MF: 290; RMF: 833; Prob 0.96%; Lib: mona-export-in-silico\_spectra; ID: 59358.

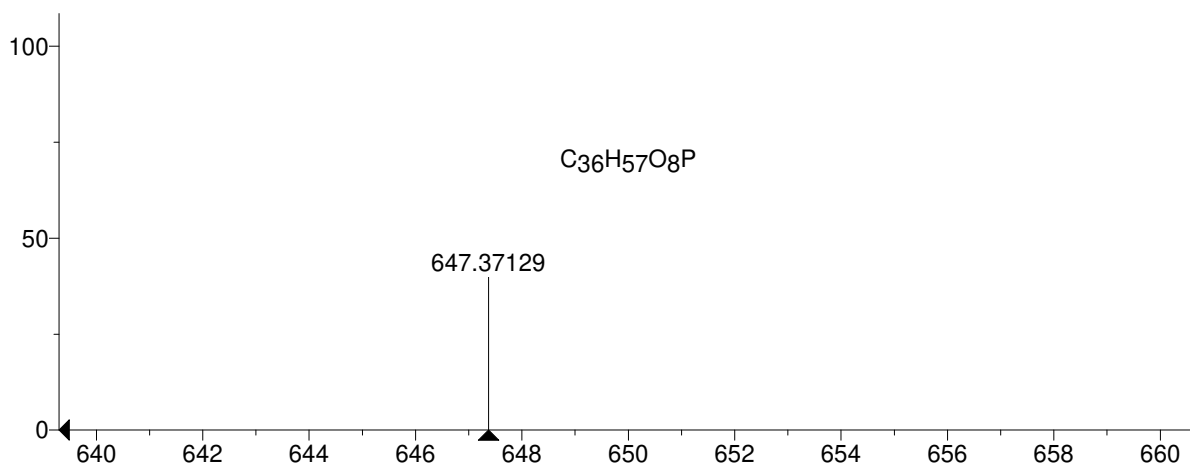

Hit 4 : PMeOH 32:7; PMeOH 16:3-16:4; [M-H]<sup>-</sup> [M-H]<sup>-</sup> P=647.4  
C<sub>36</sub>H<sub>57</sub>O<sub>8</sub>P; MF: 290; RMF: 833; Prob 0.96%; Lib: msdial-insilicomsm-lipids-neg; ID: 328815.

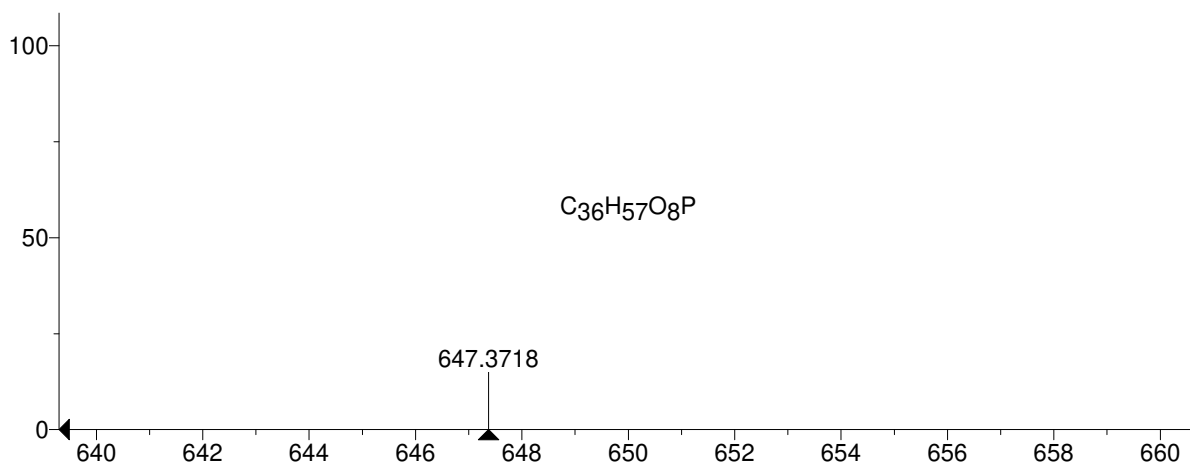

Hit 5 : NCGC00381031-01\_C36H56O10\_Olean-12-en-28-oic acid, 3-(beta-D-glucopyranuronosyloxy)-23-hydroxy  
C<sub>36</sub>H<sub>56</sub>O<sub>10</sub>; MF: 251; RMF: 828; Prob 0.22%; Lib: msms-neg-gnps; ID: 1840.

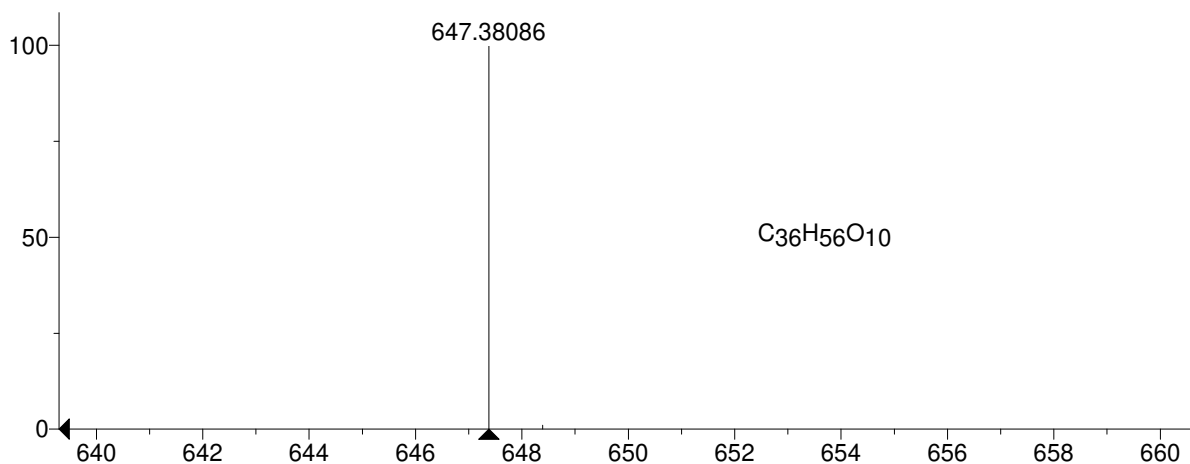

Unknown: Unknown (21.62\_411.9511m/z)  
Compound in Library Factor = 0

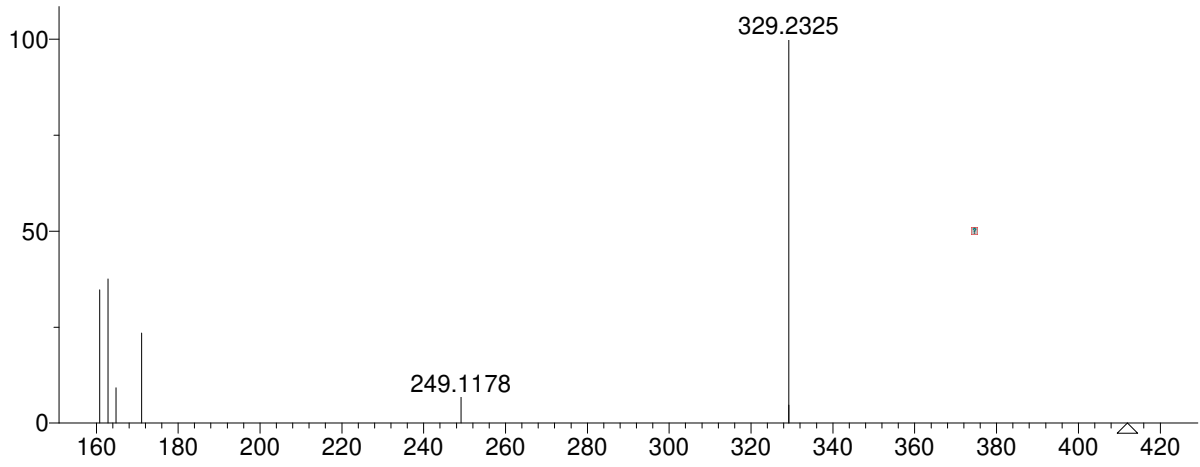

Unknown: Unknown (21.62\_624.0987m/z)  
Compound in Library Factor = 0

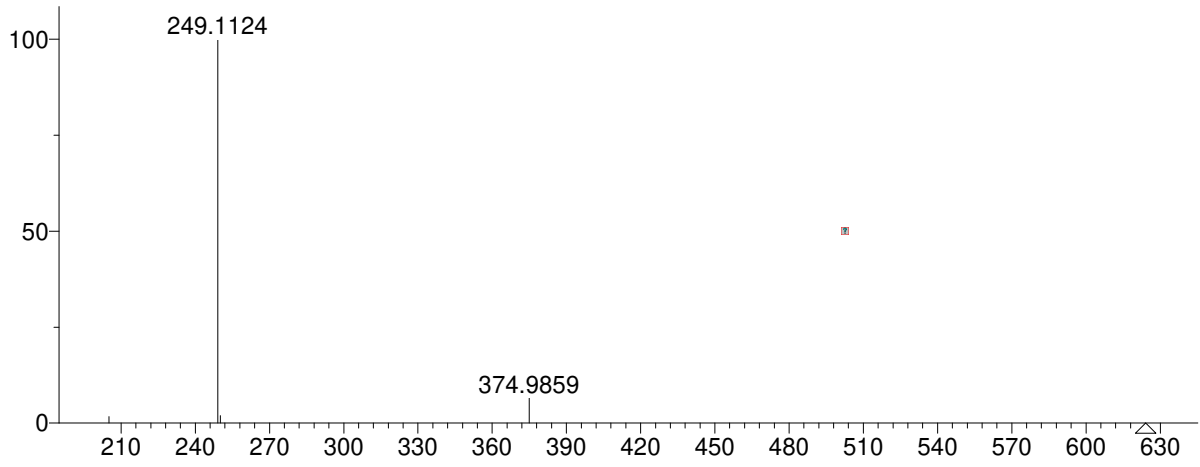



\*\* Search Report Page 1 of 2 \*\*

Unknown: Unknown (21.63\_329.2325m/z)  
Compound in Library Factor = -517

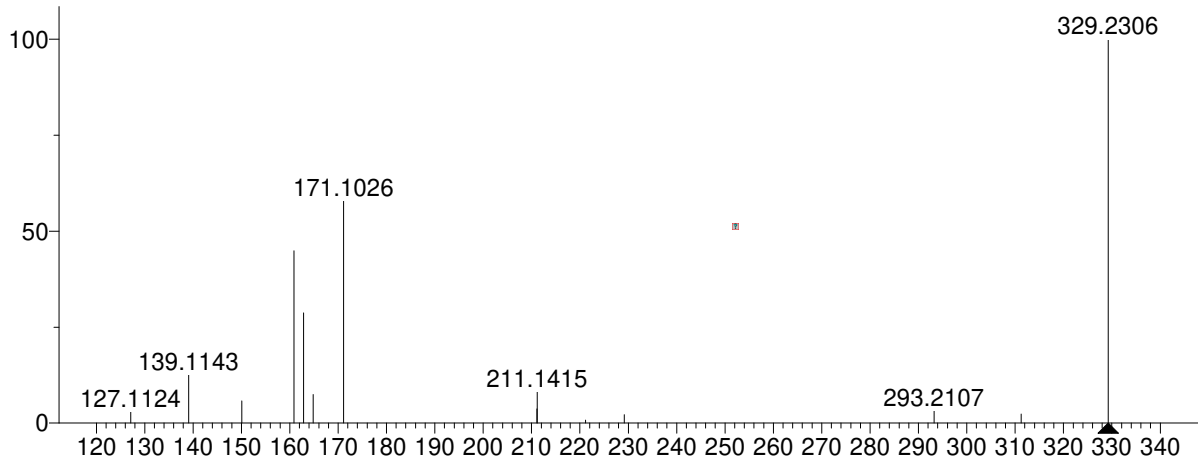

Hit 1 : FA 18:1+3O; PlaSMA ID-735 [M-H]<sup>-</sup> P=329.2  
C<sub>18</sub>H<sub>34</sub>O<sub>5</sub>; MF: 234; RMF: 764; Prob 77.8%; Lib: biomsms-neg-plasma; ID: 443.

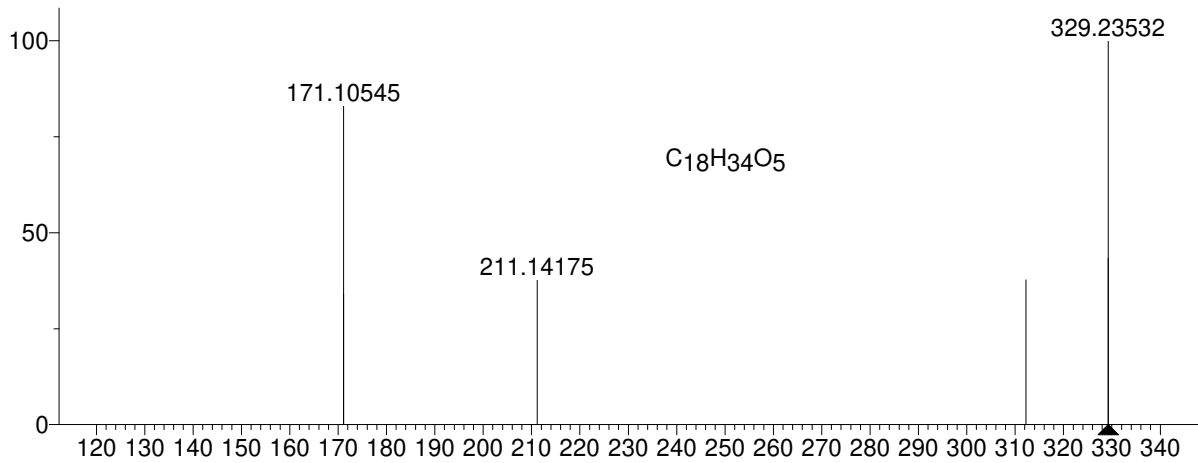

Hit 2 : FA 18:1+3O; PlaSMA ID-738 [M-H]<sup>-</sup> P=329.2  
C<sub>18</sub>H<sub>34</sub>O<sub>5</sub>; MF: 201; RMF: 658; Prob 20.4%; Lib: biomsms-neg-plasma; ID: 444.

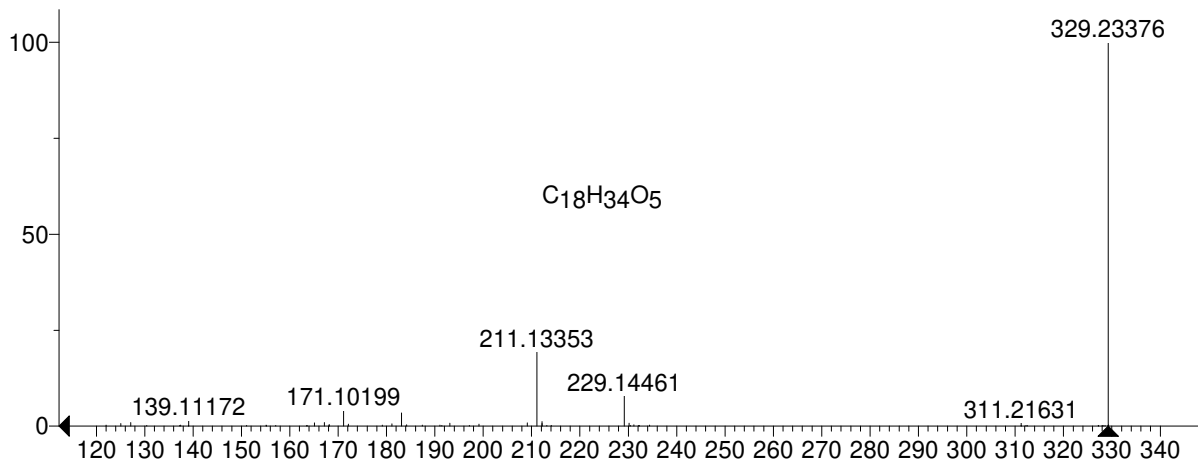

Hit 3 : FA 18:1+3O; PlaSMA ID-737 [M-H]<sup>-</sup> P=329.2  
C<sub>18</sub>H<sub>34</sub>O<sub>5</sub>; MF: 74; RMF: 641; Prob 0.88%; Lib: biomsmns-neg-plasma; ID: 448.

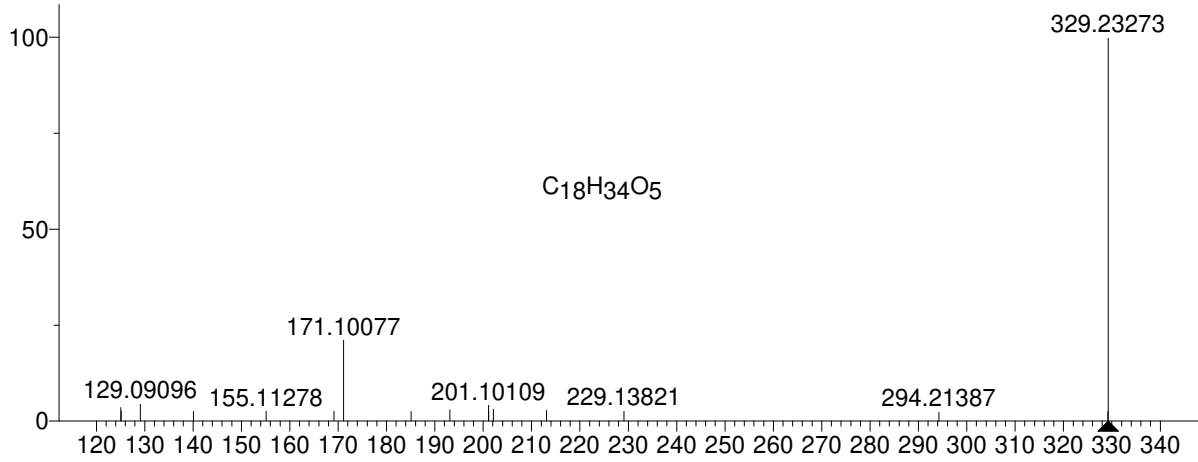

Hit 4 : FA 18:1+3O; PlaSMA ID-741 [M-H]<sup>-</sup> P=329.2  
C<sub>18</sub>H<sub>34</sub>O<sub>5</sub>; MF: 56; RMF: 577; Prob 0.45%; Lib: biomsmns-neg-plasma; ID: 449.

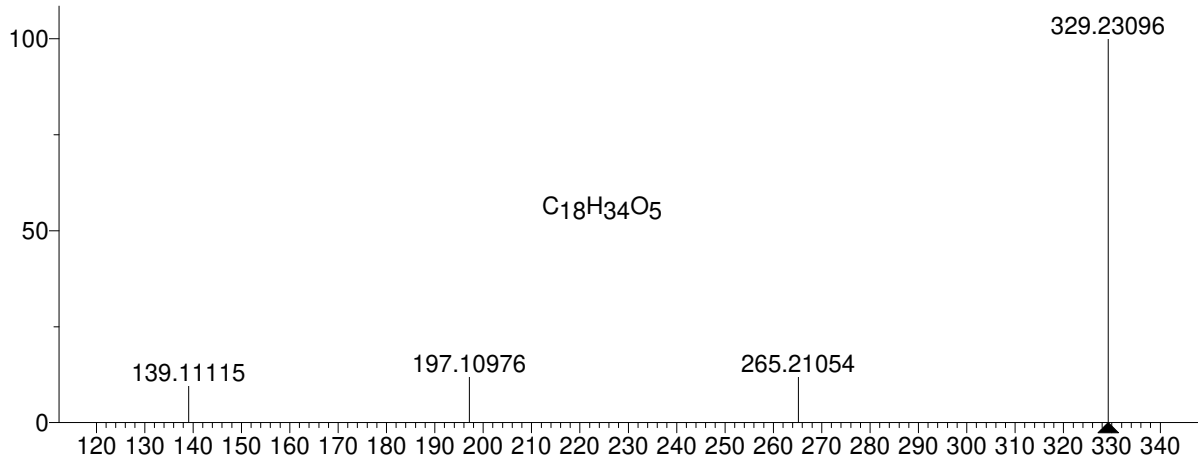

Hit 5 : Unknown (carbon number 18); PlaSMA ID-736 [M-H]<sup>-</sup> P=329.2  
C<sub>18</sub>H<sub>34</sub>O<sub>5</sub>; MF: 30; RMF: 501; Prob 0.13%; Lib: biomsmns-neg-plasma; ID: 1245.

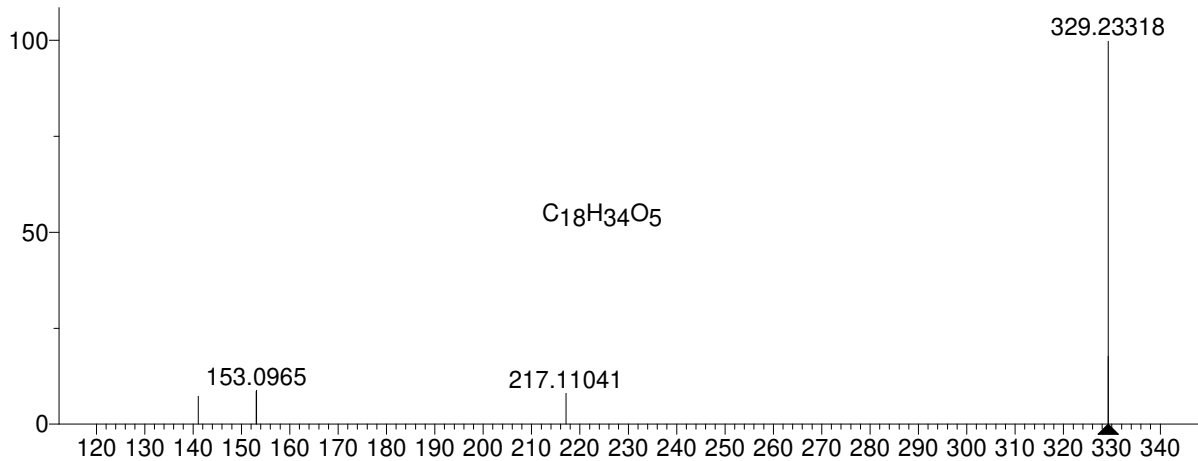

Unknown: Unknown (21.63\_409.9537m/z)  
Compound in Library Factor = 0

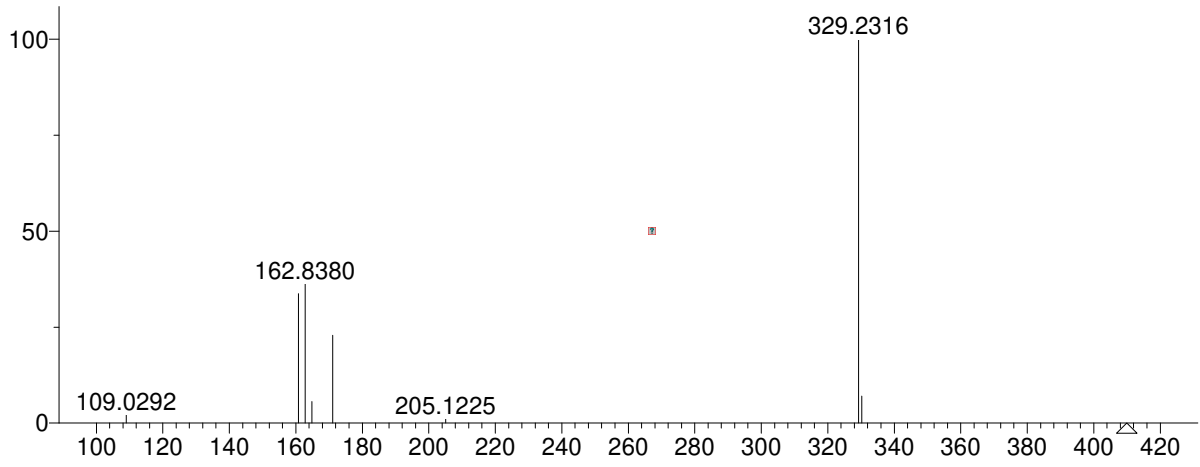

\*\* Search Report Page 1 of 2 \*\*

Unknown: Unknown (21.64\_249.1126m/z)  
Compound in Library Factor = -1072

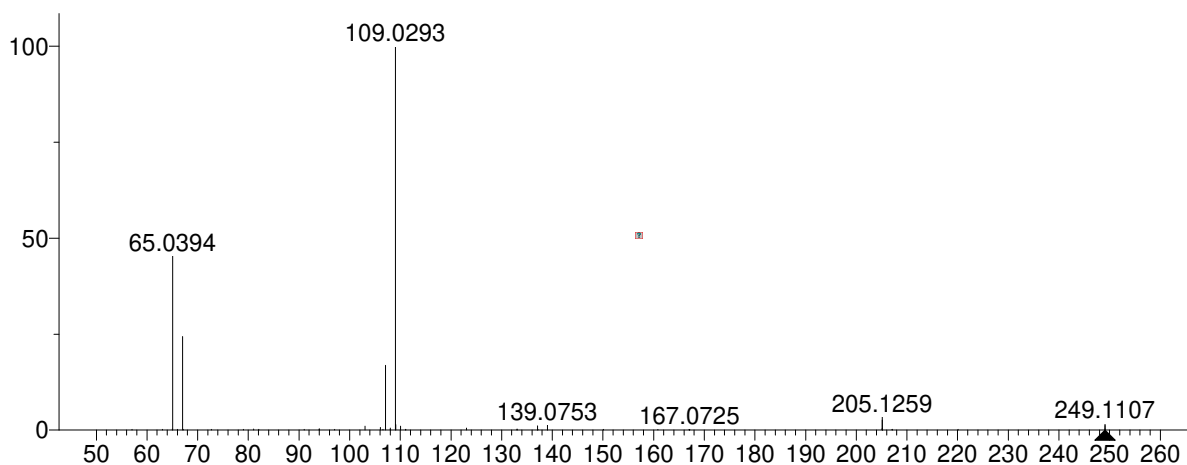

Hit 1 : 2,8-Dimethyl-2-(β-carboxyethyl)-6-hydroxychroman [M-H]<sup>-</sup> QTOF 4V P=249.1  
C<sub>14</sub>H<sub>18</sub>O<sub>4</sub>; MF: 150; RMF: 547; Prob 78.4%; CAS: 1221504-67-1; Lib: nist\_msms; ID: 63168.

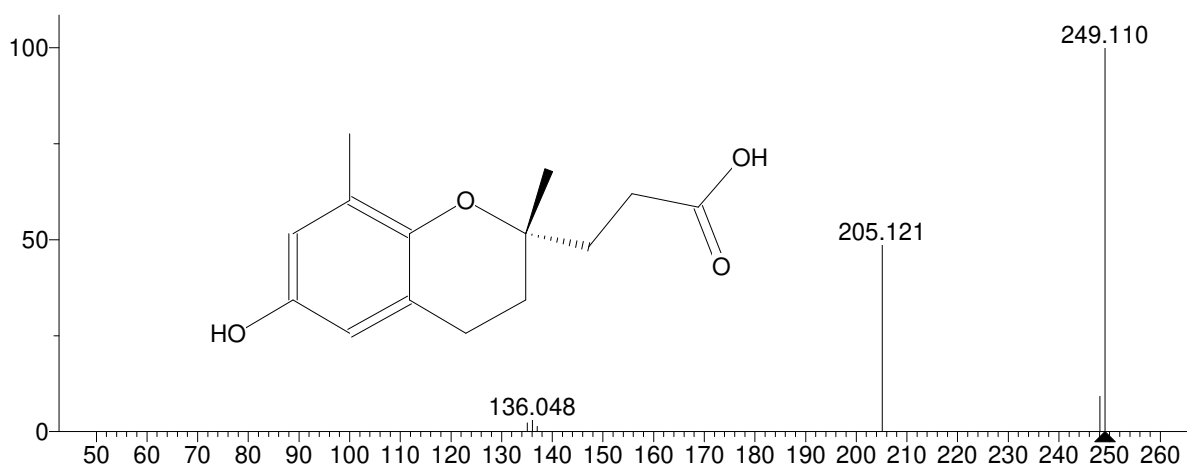

Hit 2 : Trolox [M-H]<sup>-</sup> HCD 9V P=249.1  
C<sub>14</sub>H<sub>18</sub>O<sub>4</sub>; MF: 77; RMF: 454; Prob 10.7%; CAS: 53188-07-1; Lib: nist\_msms; ID: 159177.

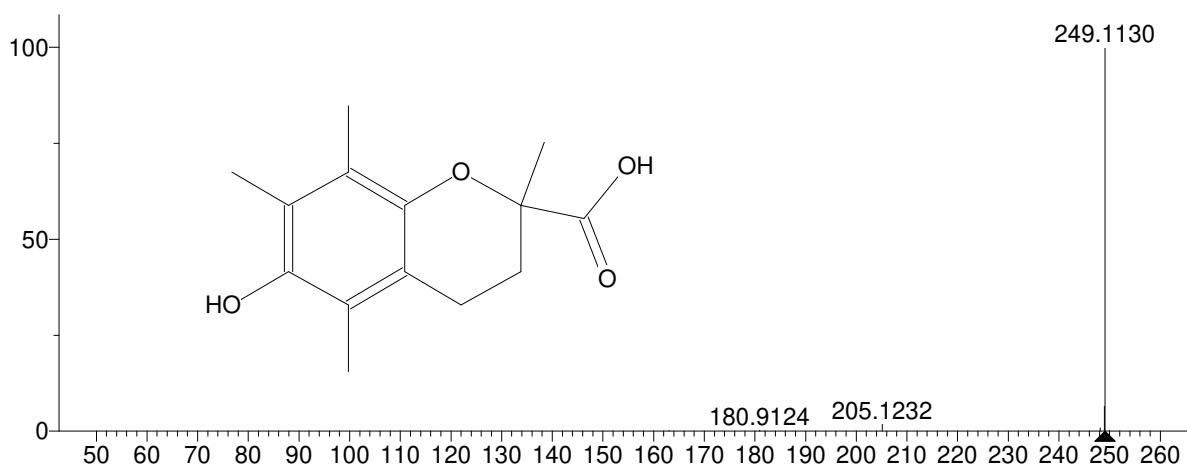

Hit 3 : 6,7-Diethoxy-4-methylcoumarin [M+H]<sup>+</sup> HCD 79V P=249.1  
C<sub>14</sub>H<sub>16</sub>O<sub>4</sub>; MF: 58; RMF: 313; Prob 5.18%; CAS: 314744-06-4; Lib: nist\_msms; ID: 109458.

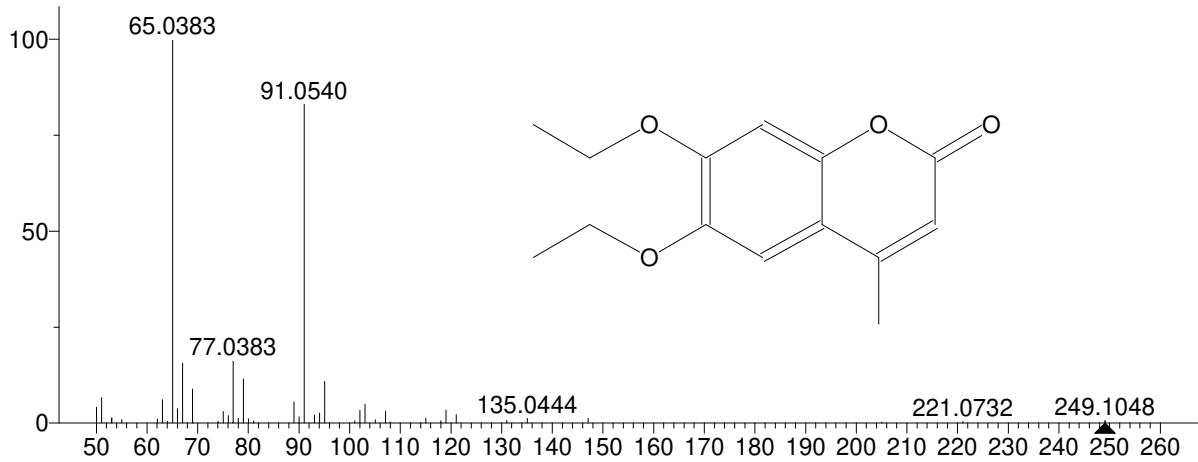

Hit 4 : Nevirapine [M+H-H<sub>2</sub>O]<sup>+</sup> HCD 71V P=249.1  
C<sub>15</sub>H<sub>14</sub>N<sub>4</sub>O; MF: 3; RMF: 68; Prob 1.00%; CAS: 129618-40-2; Lib: nist\_msms; ID: 366892.

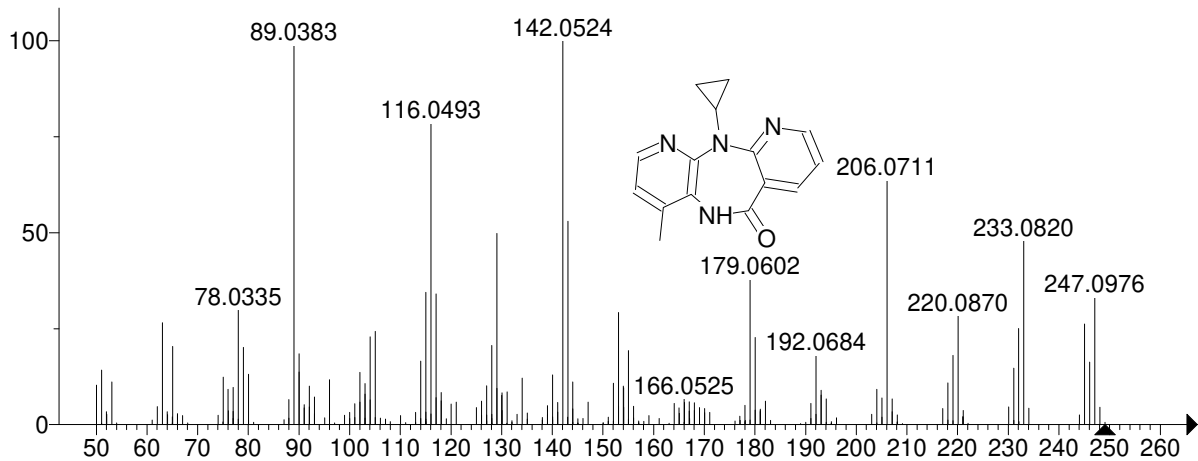

Hit 5 : (+)-2,5-epi-Gonithalesdiol [M+H-H<sub>2</sub>O]<sup>+</sup> HCD 39V P=249.1  
C<sub>14</sub>H<sub>18</sub>O<sub>5</sub>; MF: 2; RMF: 67; Prob 0.96%; Lib: nist\_msms; ID: 94184.

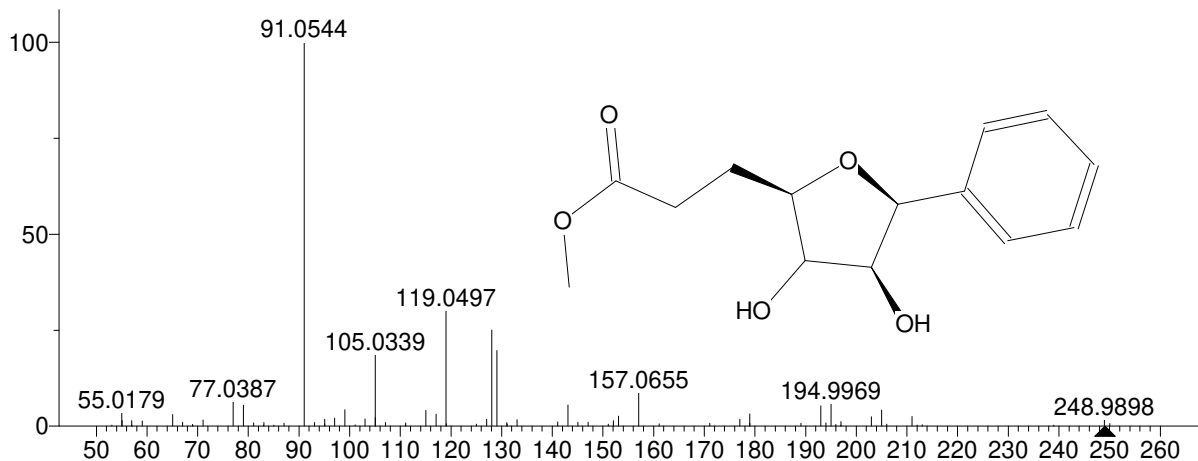

\*\* Search Report Page 1 of 2 \*\*

Unknown: Unknown (21.65\_374.1960m/z)  
Compound in Library Factor = -344

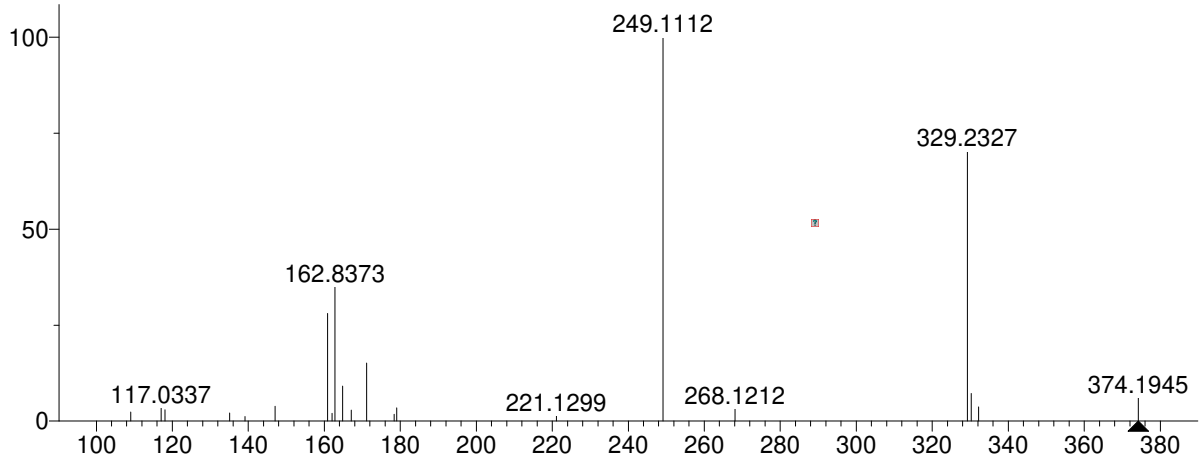

Hit 1 : Hetisine; PlaSMA ID-919 [M+FA-H]- P=374.2  
C<sub>20</sub>H<sub>27</sub>NO<sub>3</sub>; MF: 364; RMF: 999; Prob 97.6%; Lib: biomsmms-neg-plasma; ID: 214.

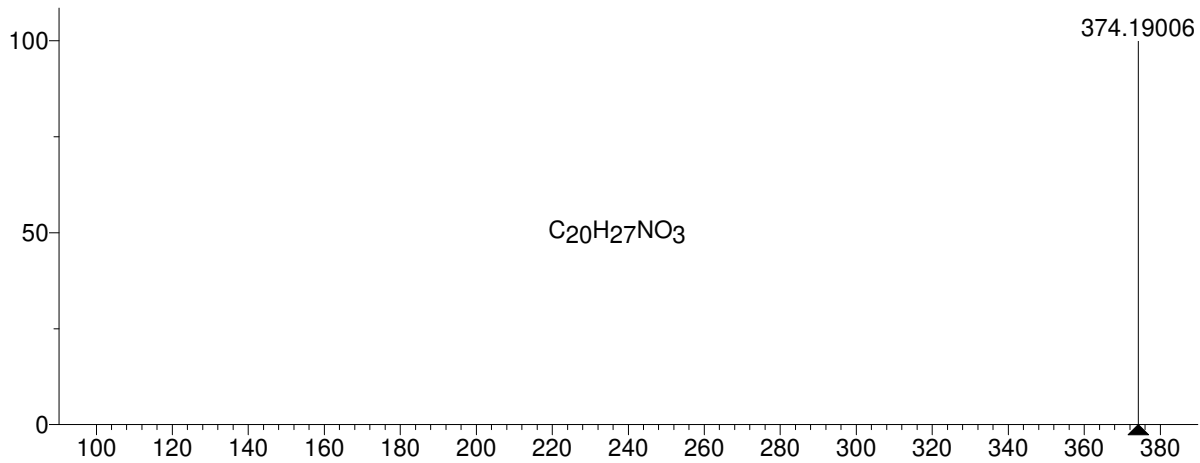

Hit 2 : Hetisine [M+FA-H]- 10 P=374.2  
C<sub>20</sub>H<sub>27</sub>NO<sub>3</sub>; MF: 197; RMF: 840; Prob 2.26%; Lib: msms neg mona\_ipb\_gnps\_plasma; ID: 18798.

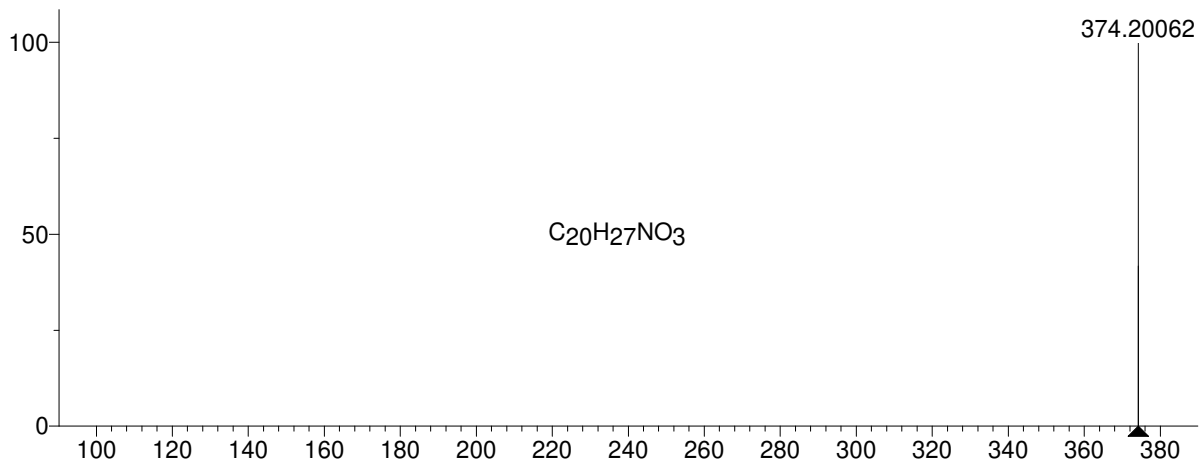

Hit 3 : Spirotetramat [M+H]<sup>+</sup> HCD 3V P=374.2  
C<sub>21</sub>H<sub>27</sub>NO<sub>5</sub>; MF: 54; RMF: 262; Prob 0.07%; CAS: 203313-25-1; Lib: nist\_msms; ID: 161965.

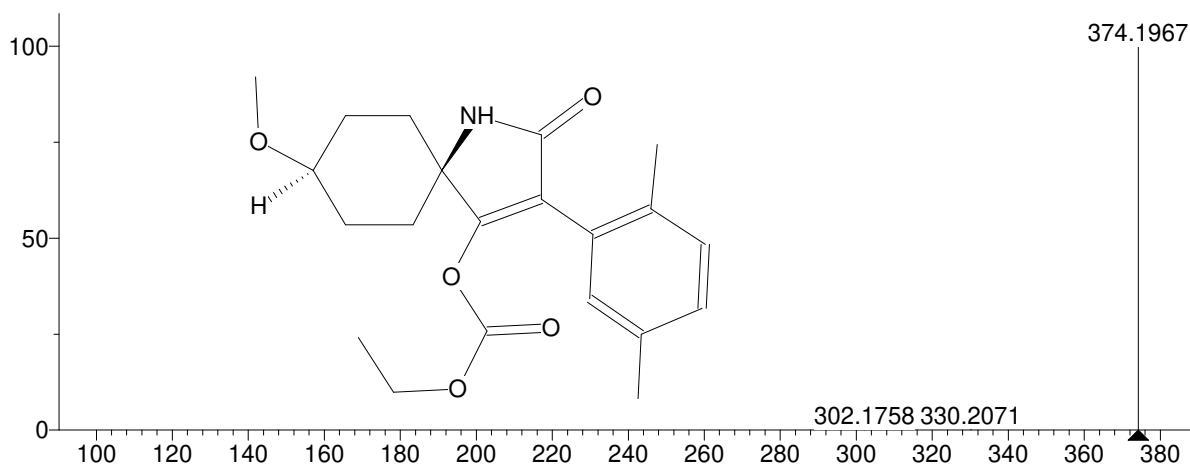

Hit 4 : N-Desmethyltrimebutine [M+H]<sup>+</sup> HCD 1V P=374.2  
C<sub>21</sub>H<sub>27</sub>NO<sub>5</sub>; MF: 19; RMF: 176; Prob 0.01%; CAS: 294882-33-0; Lib: nist\_msms; ID: 168311.

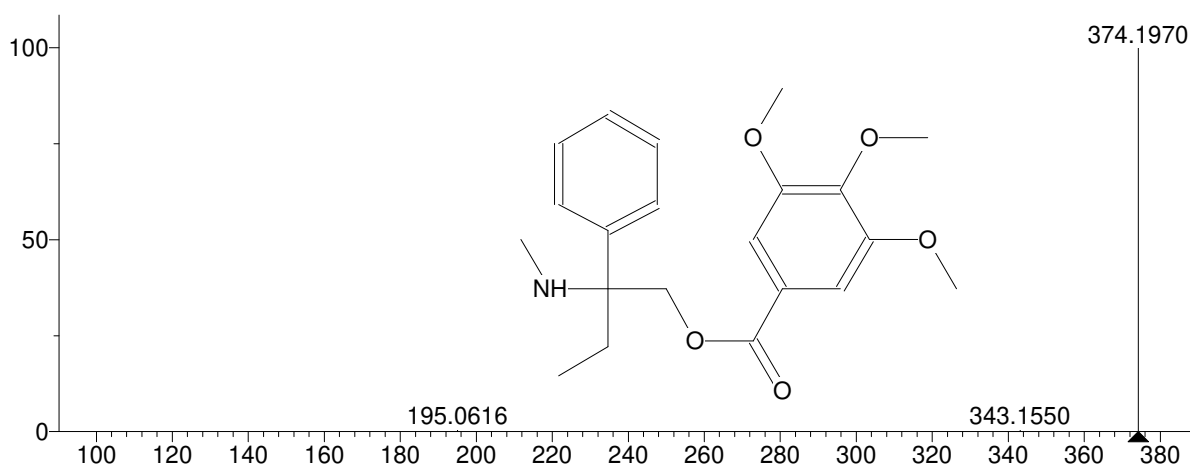

Hit 5 : Dipivefrine [M+Na]<sup>+</sup> HCD 37V P=374.2  
C<sub>19</sub>H<sub>29</sub>NO<sub>5</sub>; MF: 15; RMF: 136; Prob 0.01%; CAS: 52365-63-6; Lib: nist\_msms; ID: 127584.

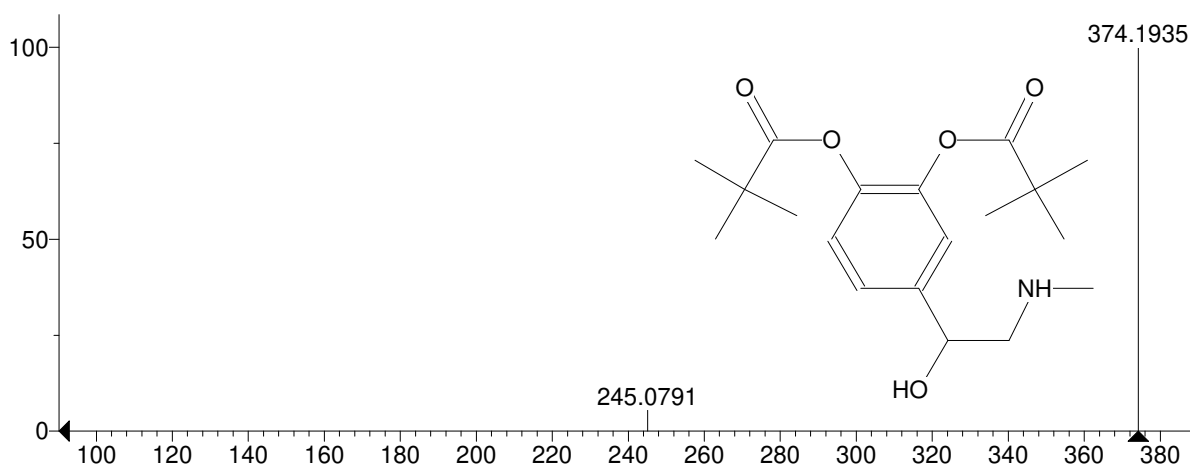

Unknown: Unknown (21.66\_419.9823m/z)  
Compound in Library Factor = 0

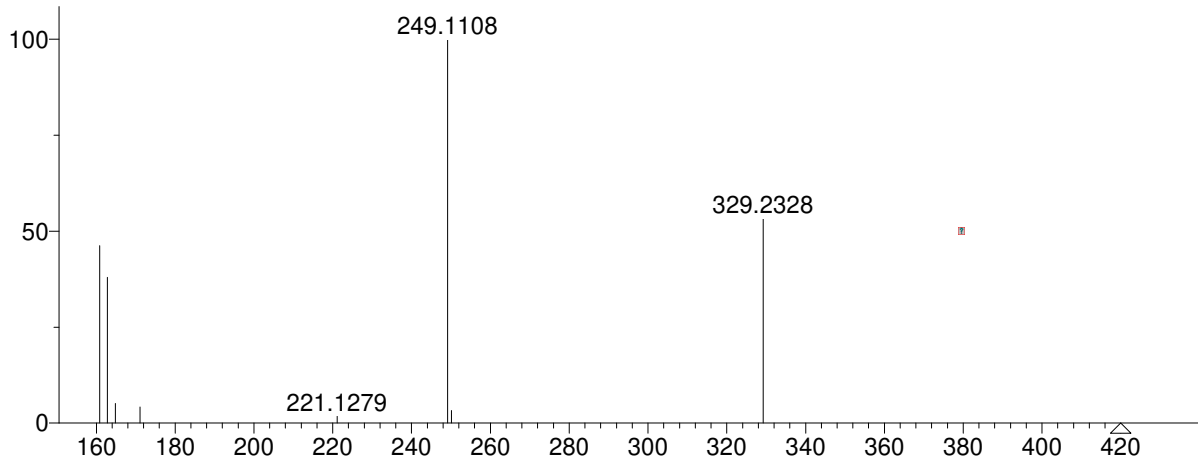



Unknown: Unknown (21.68\_267.1588m/z)  
Compound in Library Factor = -462

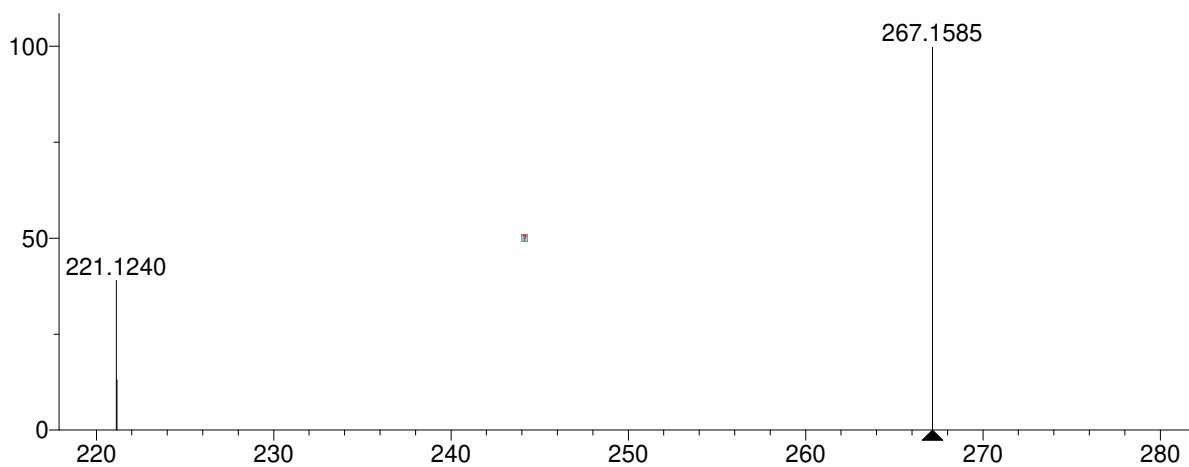

Hit 1 : Dihydroartemisinin [M+H-H<sub>2</sub>O]<sup>+</sup> HCD 7V P=267.2  
C<sub>15</sub>H<sub>24</sub>O<sub>5</sub>; MF: 167; RMF: 787; Prob 77.5%; CAS: 71939-50-9; Lib: nist\_msms; ID: 121293.

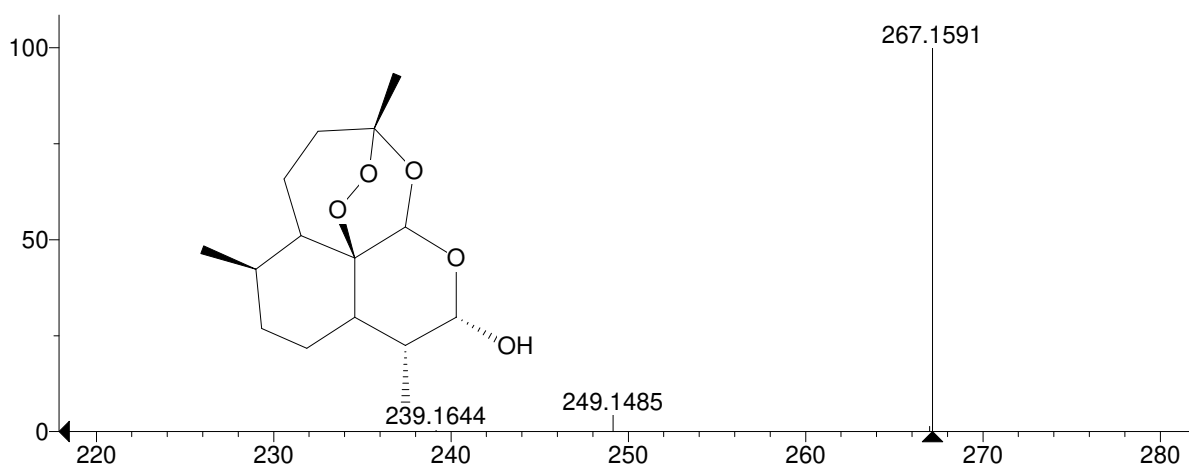

Hit 2 : NCGC00385871-01\_C<sub>15</sub>H<sub>22</sub>O<sub>4</sub>\_2,8-Dihydroxy-5,5,8-trimethyl-11-oxatetracyclo[7.3.1.0~1,9~.0~3,7~]tridecane  
C<sub>15</sub>H<sub>22</sub>O<sub>4</sub>; MF: 22; RMF: 240; Prob 2.32%; Lib: mona-export-gnps; ID: 10011.

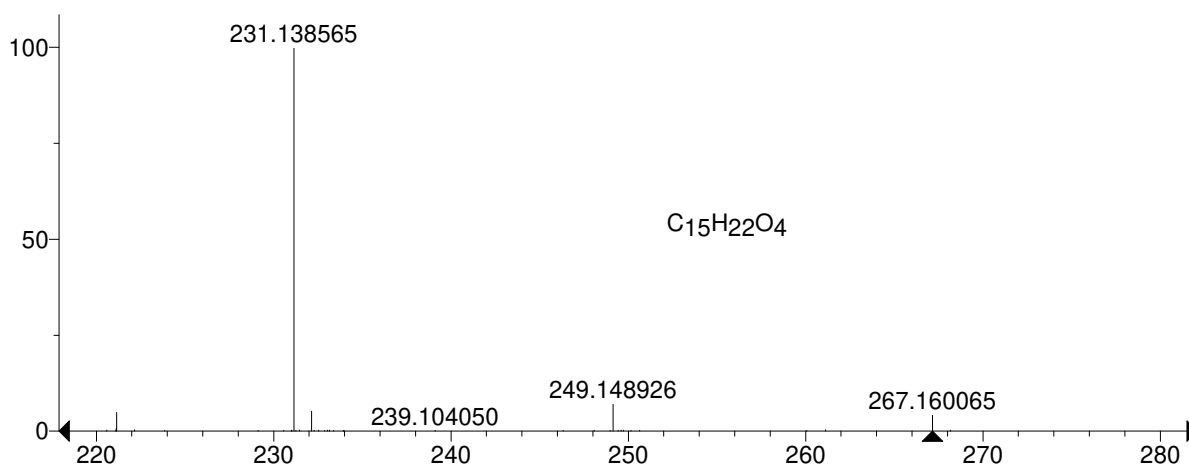

Hit 3 : 3-[4-methyl-1-(2-methylpropanoyl)-3-oxocyclohexyl]butanoic acid [M-H]<sup>-</sup> 35HCD P=267.2  
C<sub>15</sub>H<sub>24</sub>O<sub>4</sub>; MF: 19; RMF: 596; Prob 2.05%; Lib: mona-export-lc-ms-ms\_negative\_mode; ID: 19214.

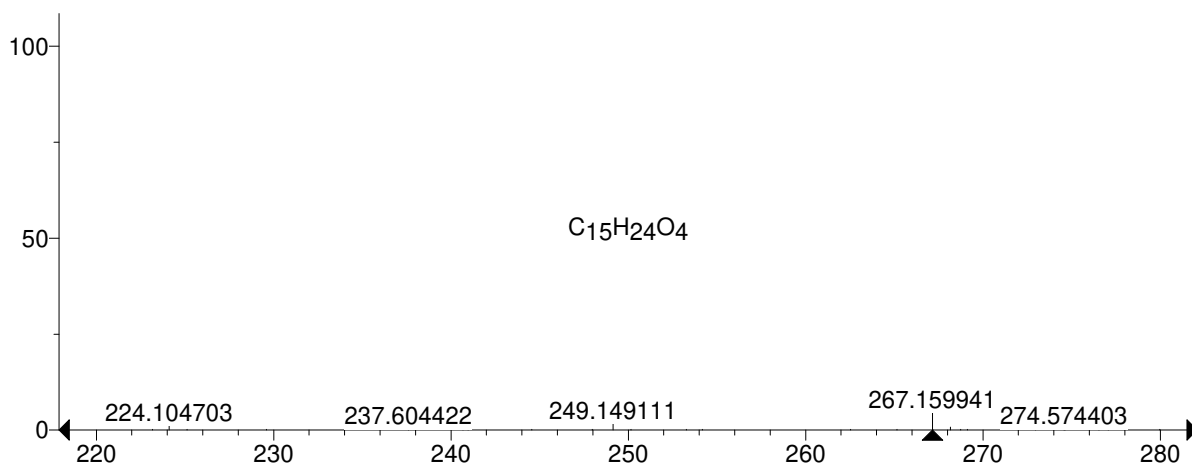

Hit 4 : NCGC00385633-01\_C<sub>15</sub>H<sub>22</sub>O<sub>4</sub>\_Naphtho[1,2-c]furan-3(1H)-one, 5,5a,6,7,8,9,9a,9b-octahydro-5-hydroxy-  
C<sub>15</sub>H<sub>22</sub>O<sub>4</sub>; MF: 18; RMF: 481; Prob 1.97%; Lib: mona-export-gnps; ID: 13883.

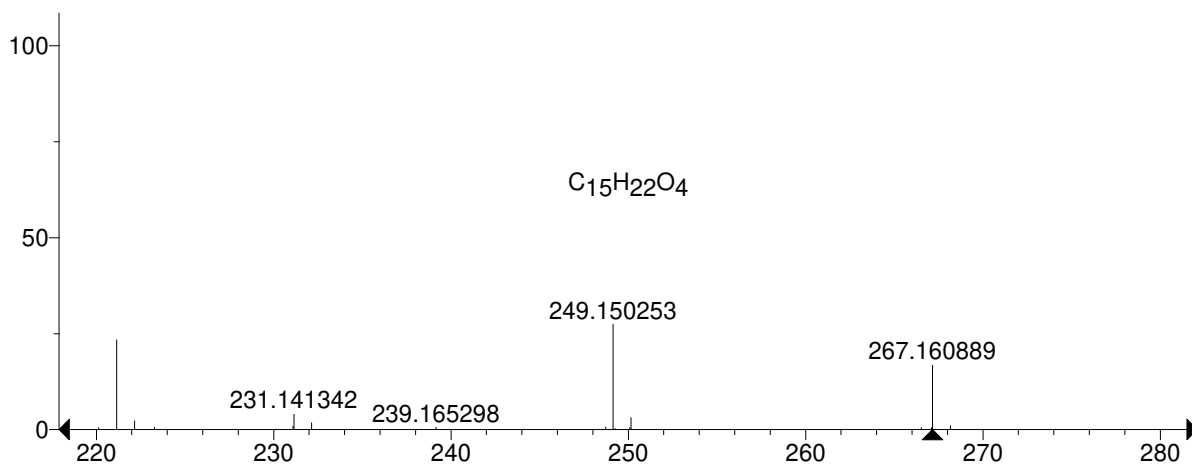

Hit 5 : NCGC00380321-01\_C<sub>15</sub>H<sub>22</sub>O<sub>4</sub>\_11-(Hydroxymethyl)-2,11-dimethyl-3-oxotricyclo[4.3.2.0~1,5~]undecane-9  
C<sub>15</sub>H<sub>22</sub>O<sub>4</sub>; MF: 12; RMF: 313; Prob 1.55%; Lib: mona-export-gnps; ID: 10316.

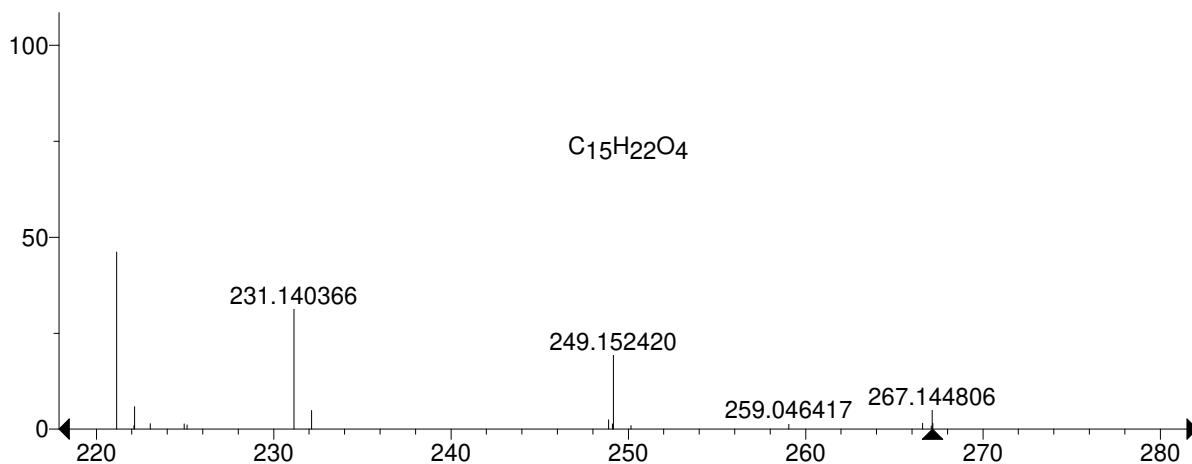

Unknown: Unknown (21.69\_351.2153m/z)  
Compound in Library Factor = -1848

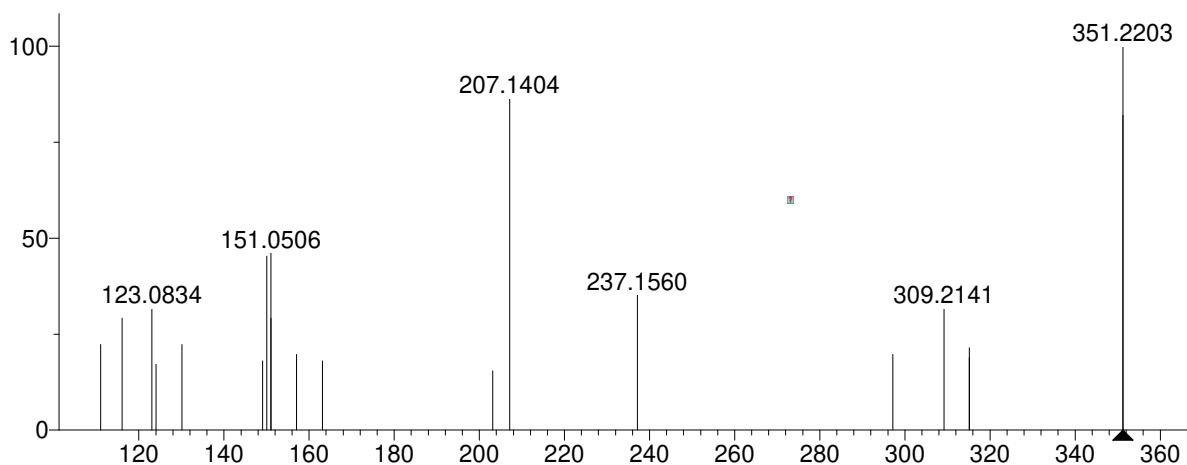

Hit 1 : 15-Ketoprostaglandin E2 [M+H]<sup>+</sup> HCD 1V P=351.2  
C<sub>20</sub>H<sub>30</sub>O<sub>5</sub>; MF: 162; RMF: 725; Prob 36.8%; CAS: 26441-05-4; Lib: nist\_msms; ID: 169378.

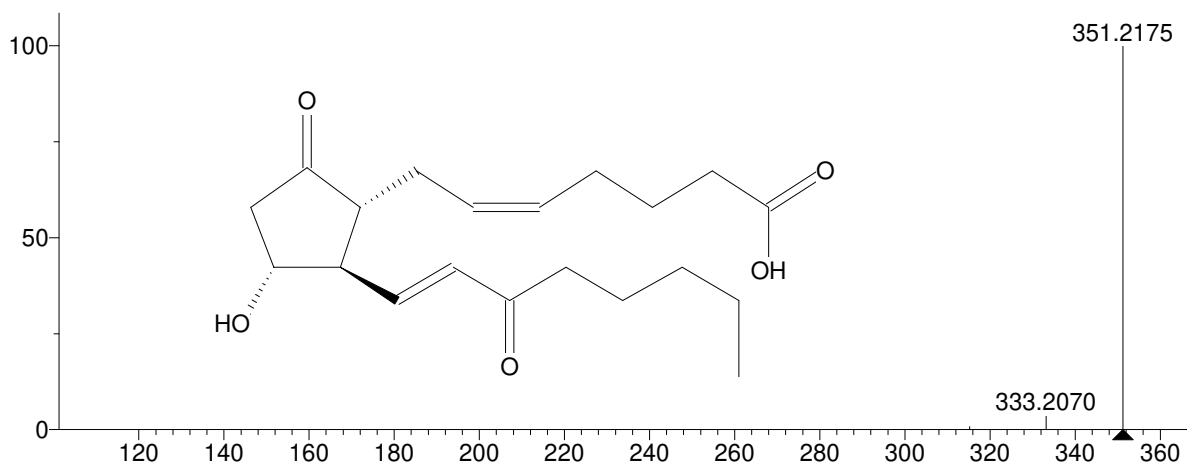

Hit 2 : 15-Ketoprostaglandin F2 $\alpha$  [M-H]<sup>-</sup> HCD 3V P=351.2  
C<sub>20</sub>H<sub>32</sub>O<sub>5</sub>; MF: 145; RMF: 730; Prob 20.1%; CAS: 35850-13-6; Lib: nist\_msms; ID: 155319.

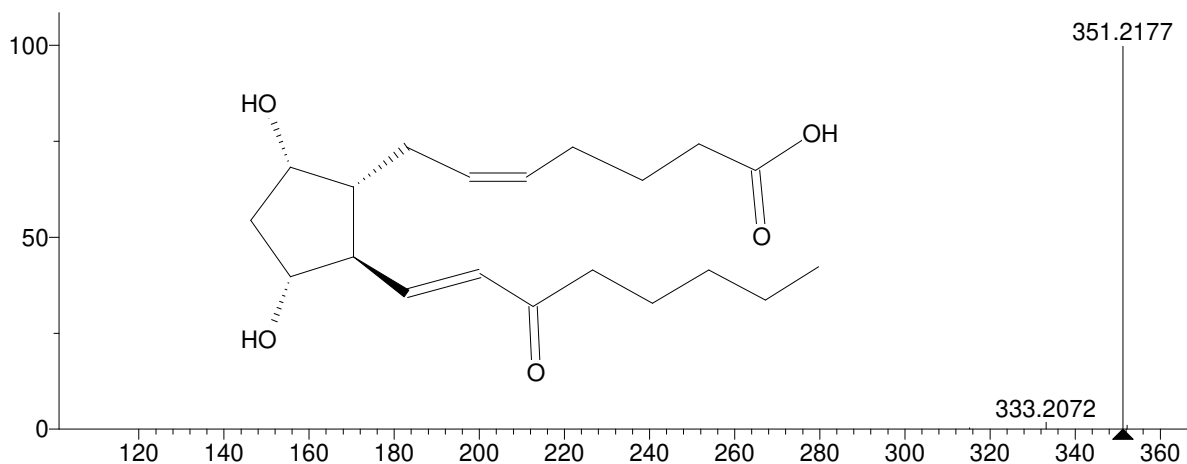

Hit 3 : 11,15-Dioxo-9S-hydroxy-5Z-prostenoic acid [M-H]- HCD 1V P=351.2  
C20H32O5; MF: 133; RMF: 722; Prob 13.4%; CAS: 59894-07-4; Lib: nist\_msms; ID: 87215.

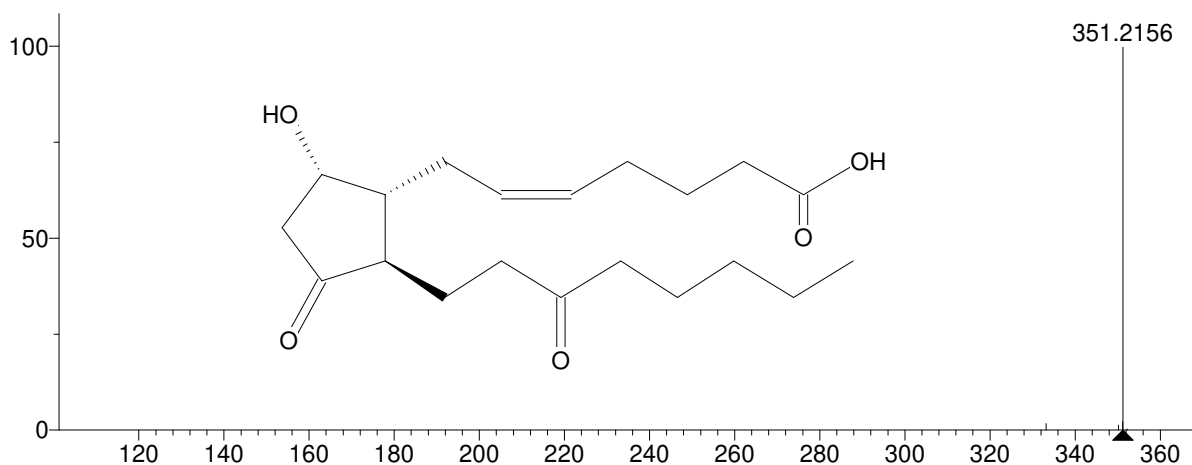

Hit 4 : 19(R)-Hydroxyprostaglandin E2 [M+H-H2O]+ HCD 1V P=351.2  
C20H32O6; MF: 128; RMF: 723; Prob 10.8%; CAS: 64625-54-3; Lib: nist\_msms; ID: 169989.

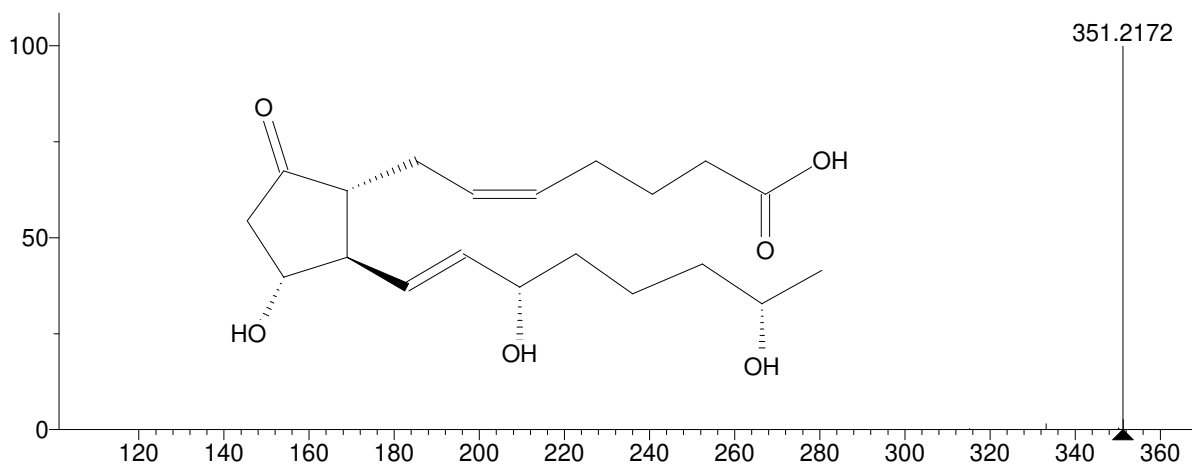

Hit 5 : 6-Ketoprostaglandin E1 [M+H-H2O]+ HCD 1V P=351.2  
C20H32O6; MF: 112; RMF: 620; Prob 6.21%; CAS: 67786-53-2; Lib: nist\_msms; ID: 161827.

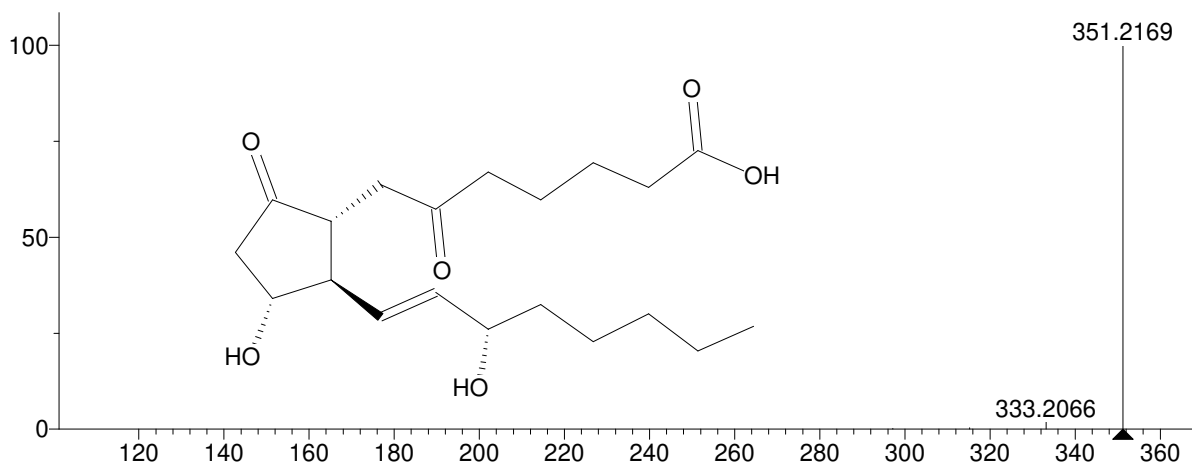

\*\* Search Report Page 1 of 2 \*\*

Unknown: Unknown (21.75\_358.1645m/z)  
Compound in Library Factor = -2176

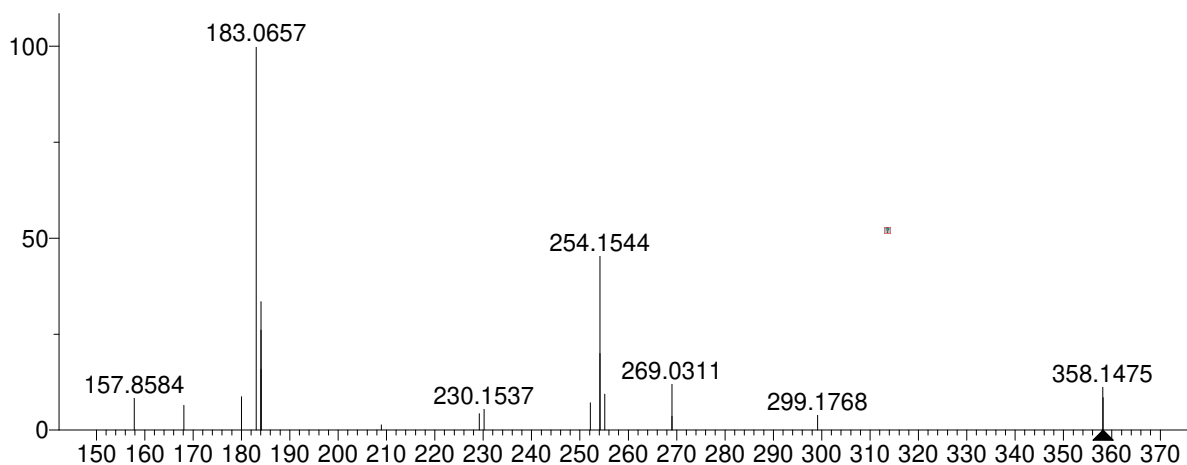

Hit 1 : Pitavastatin [M-H-CH<sub>2</sub>O<sub>3</sub>]- HCD 10V P=358.2  
C<sub>25</sub>H<sub>24</sub>FNO<sub>4</sub>; MF: 51; RMF: 508; Prob 57.1%; CAS: 147511-69-1; Lib: nist\_msms; ID: 369473.

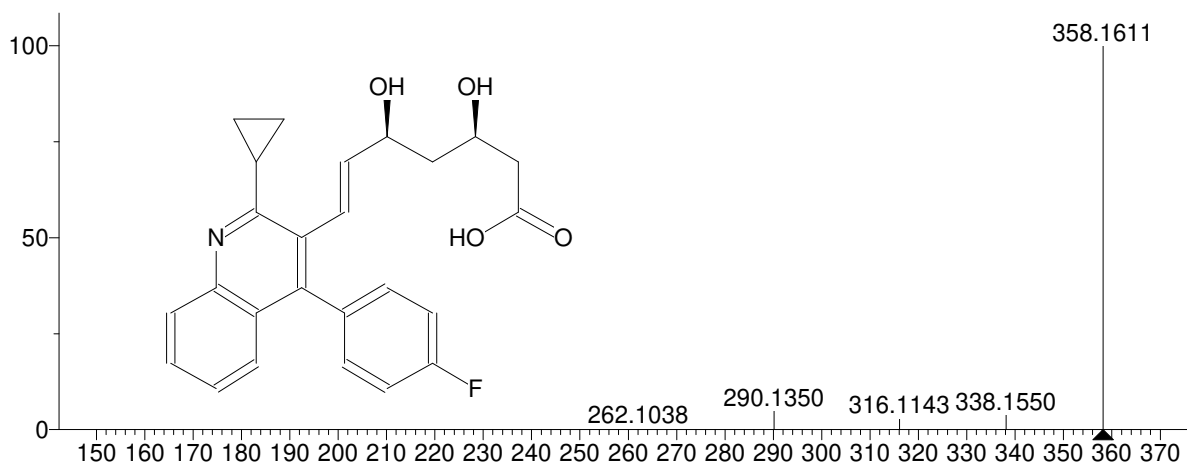

Hit 2 : 3',4',5'-Trimethoxytropacocaine [M+Na]<sup>+</sup> HCD 9V P=358.2  
C<sub>18</sub>H<sub>25</sub>NO<sub>5</sub>; MF: 22; RMF: 182; Prob 16.2%; CAS: 60820-69-1; Lib: nist\_msms; ID: 383514.

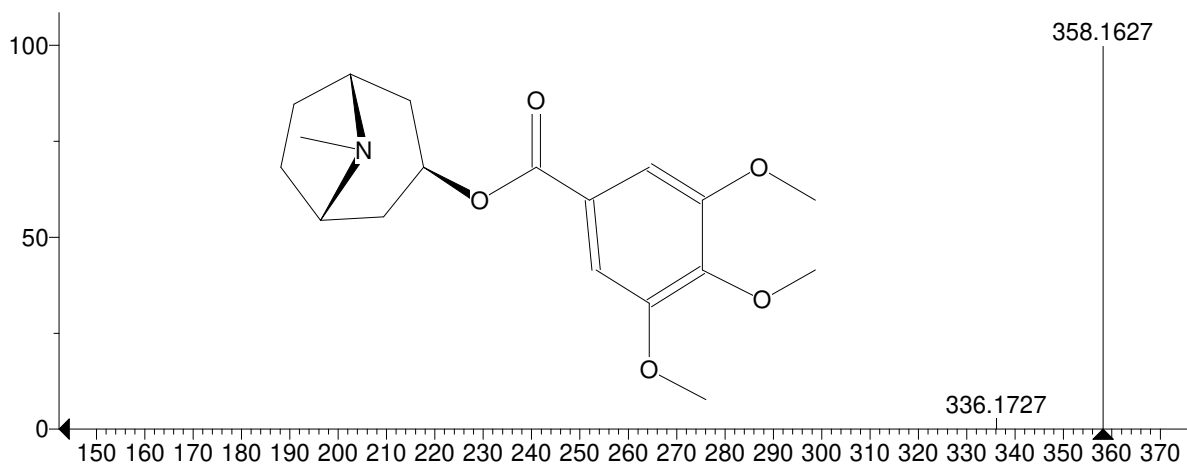

\*\* Search Report Page 2 of 2 \*\*

Hit 3 : MMV688361 [M+H]<sup>+</sup> 20-30-40%) P=358.2  
C<sub>21</sub>H<sub>19</sub>N<sub>5</sub>O; MF: 7; RMF: 153; Prob 9.81%; Lib: mona-export-pathogen\_box; ID: 186.

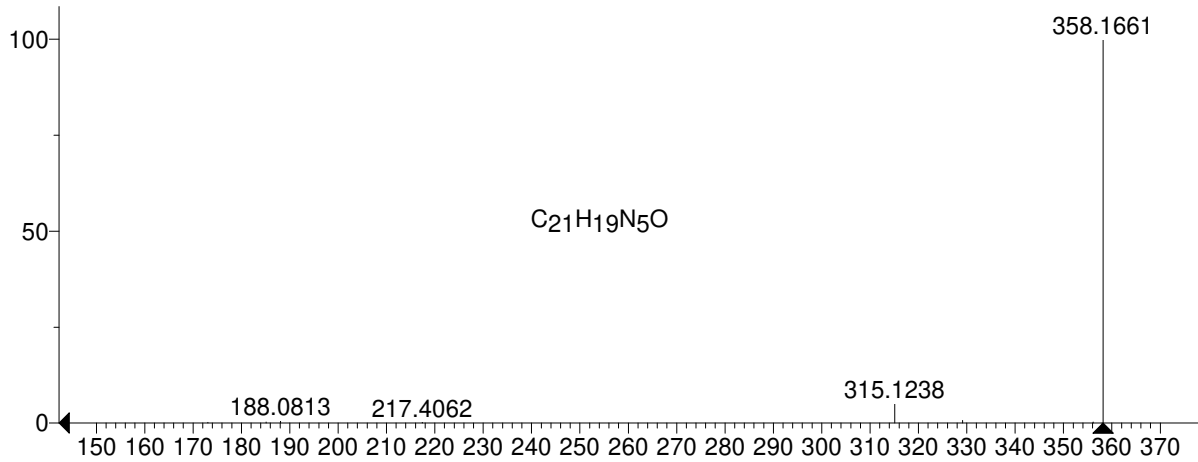

Hit 4 : Senecionine [M+Na]<sup>+</sup> HCD 19V P=358.2  
C<sub>18</sub>H<sub>25</sub>NO<sub>5</sub>; MF: 6; RMF: 173; Prob 9.43%; CAS: 130-01-8; Lib: nist\_msms; ID: 219389.

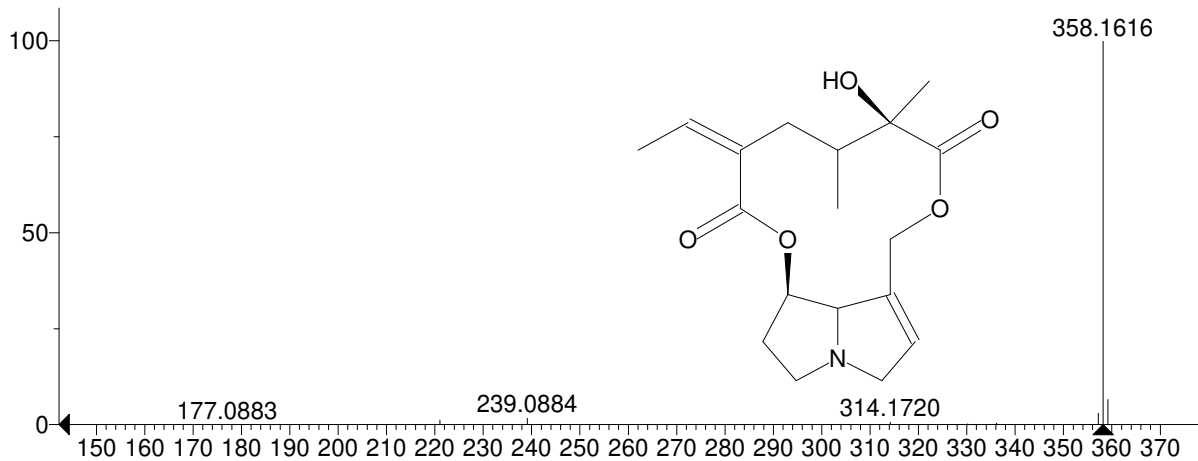

Hit 5 : (6aS)-1,2,10-trimethoxy-6-methyl-6-oxido-5,6,6a,7-tetrahydro-4H-dibenzo[de,g]quinoline-6-ium-9-ol [M+H]<sup>+</sup>  
C<sub>20</sub>H<sub>23</sub>NO<sub>5</sub>; MF: 0; RMF: 10; Prob 7.41%; Lib: mona-export-vf-npl\_qexactive; ID: 1684.

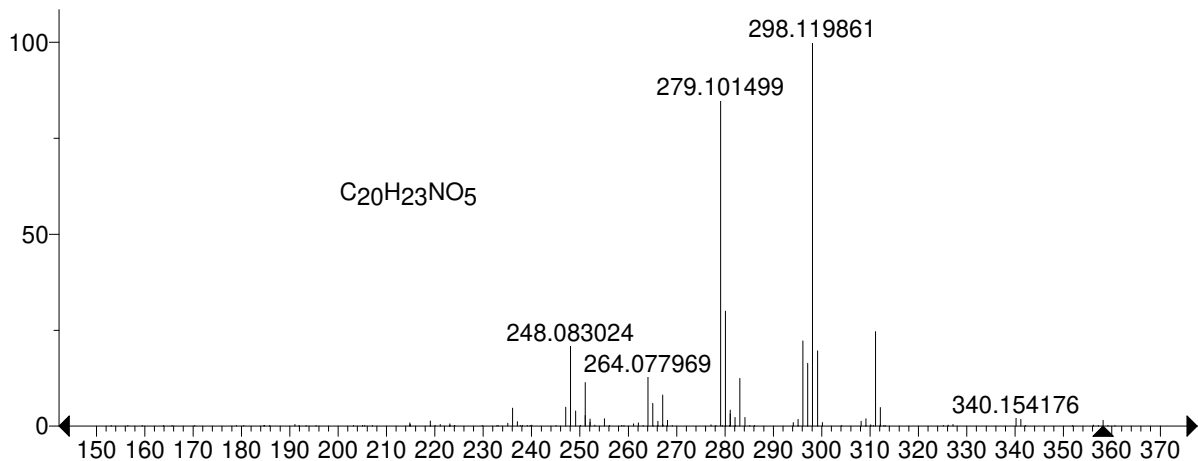

Unknown: Unknown (21.75\_532.2178m/z)  
Compound in Library Factor = 0

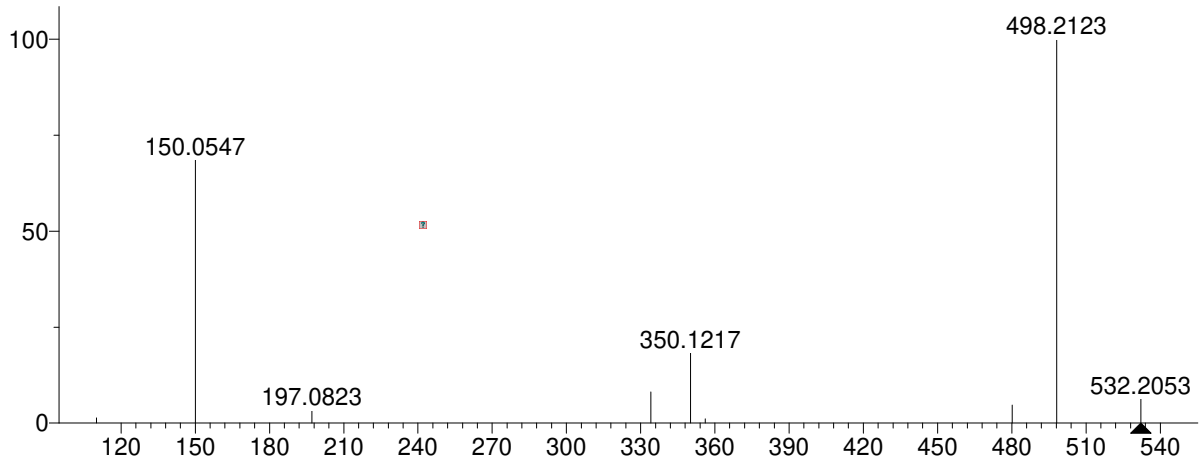

\*\* Search Report Page 1 of 2 \*\*

Unknown: Unknown (21.77\_329.2323m/z)  
Compound in Library Factor = -396

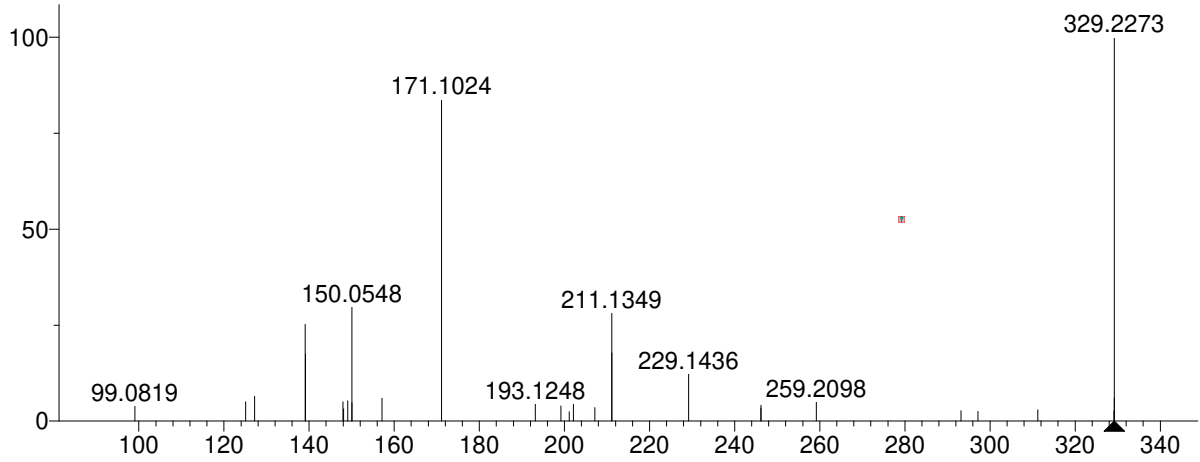

Hit 1 : FA 18:1+3O; PlaSMA ID-738 [M-H]- P=329.2  
C18H34O5; MF: 348; RMF: 669; Prob 95.1%; Lib: biomsms-neg-plasma; ID: 444.



Hit 2 : FA 18:1+3O; PlaSMA ID-737 [M-H]- P=329.2  
C18H34O5; MF: 216; RMF: 632; Prob 3.81%; Lib: biomsms-neg-plasma; ID: 448.





Hit 3 : FA 18:1+3O; PlaSMA ID-735 [M-H]<sup>-</sup> P=329.2  
C<sub>18</sub>H<sub>34</sub>O<sub>5</sub>; MF: 180; RMF: 692; Prob 0.94%; Lib: biomsms-neg-plasma; ID: 443.

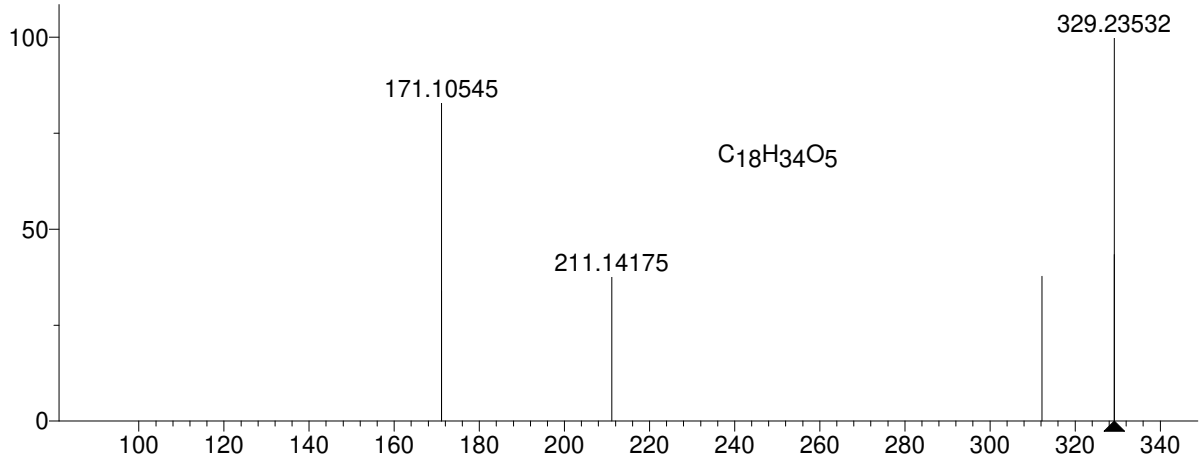

Hit 4 : 9,12,13-Trihydroxy-10(E)-octadecadienoic acid ( ) [M-H]<sup>-</sup> P=329.2  
C<sub>18</sub>H<sub>34</sub>O<sub>5</sub>; MF: 107; RMF: 566; Prob 0.12%; Lib: phytofrag2018\_final\_060219; ID: 129.

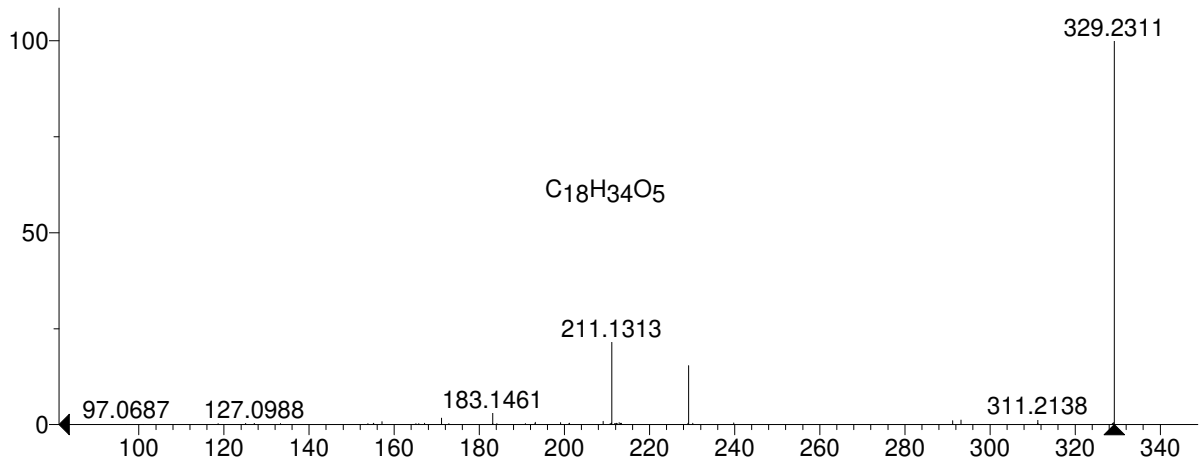

Hit 5 : FA 18:1+3O; PlaSMA ID-741 [M-H]<sup>-</sup> P=329.2  
C<sub>18</sub>H<sub>34</sub>O<sub>5</sub>; MF: 55; RMF: 509; Prob 0.02%; Lib: biomsms-neg-plasma; ID: 449.

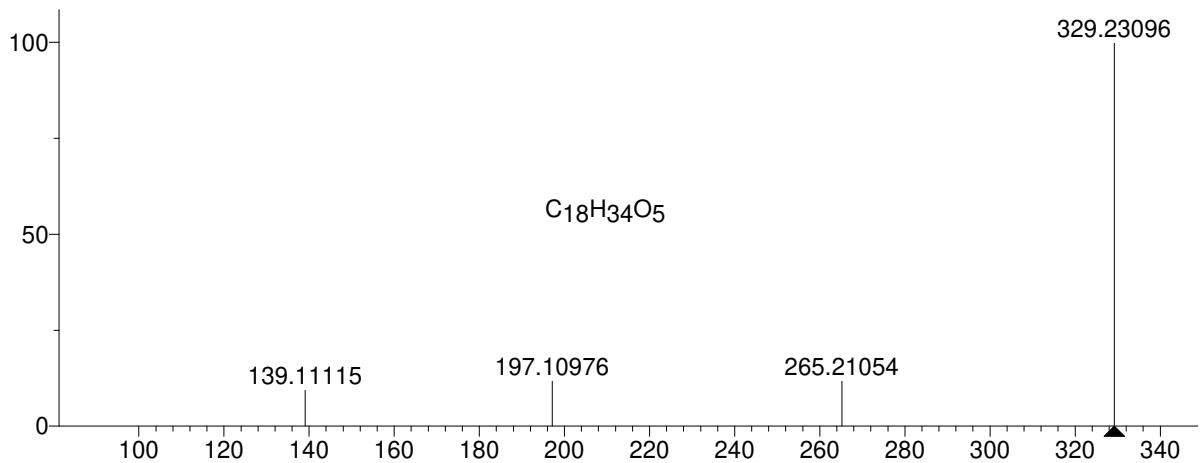

Unknown: Unknown (21.83\_392.0549m/z)  
Compound in Library Factor = 0

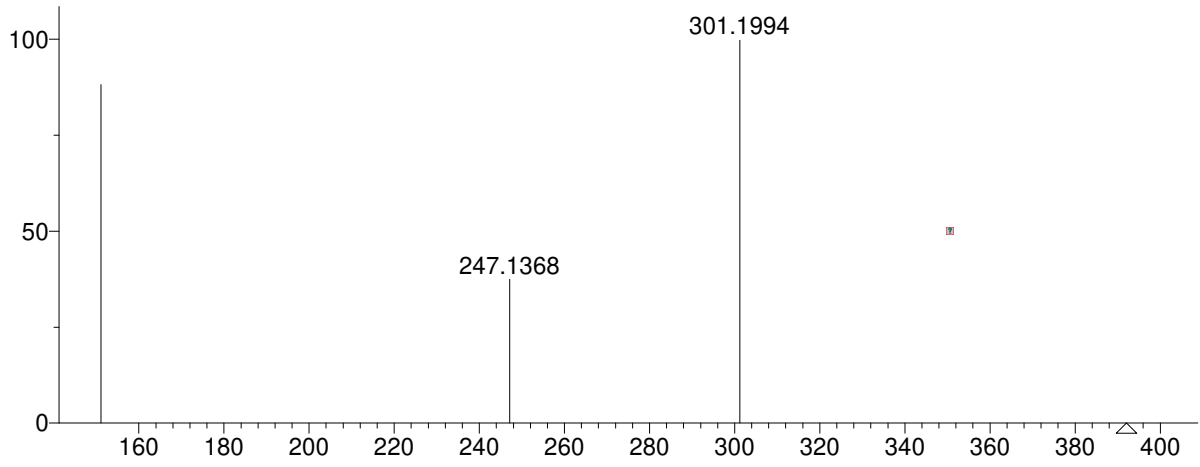

Unknown: Unknown (21.85\_247.1332m/z)  
Compound in Library Factor = -2176

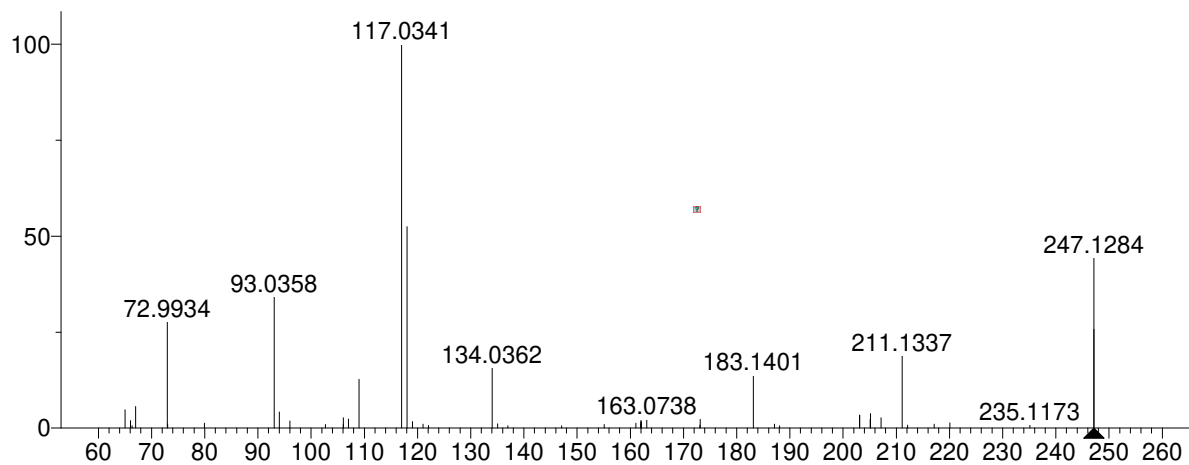

Hit 1 : 2-cis-4-trans-Abscisic acid [M+H-H<sub>2</sub>O]<sup>+</sup> HCD 9V P=247.1  
C<sub>15</sub>H<sub>20</sub>O<sub>4</sub>; MF: 81; RMF: 328; Prob 21.7%; CAS: 14375-45-2; Lib: nist\_msms; ID: 127783.

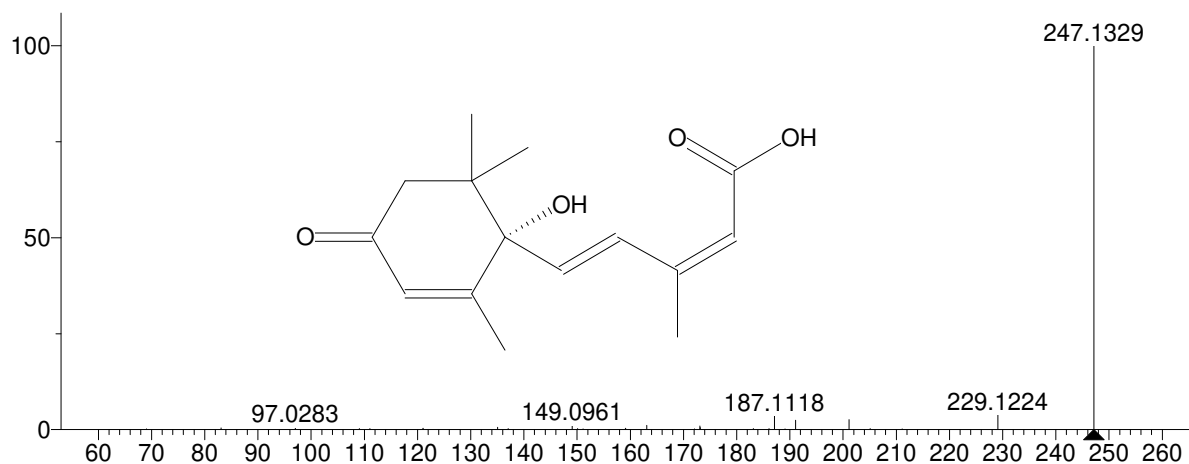

Hit 2 :  $\alpha$ -Santonin [M+H]<sup>+</sup> HCD 4V P=247.1  
C<sub>15</sub>H<sub>18</sub>O<sub>3</sub>; MF: 74; RMF: 566; Prob 16.6%; CAS: 481-06-1; Lib: nist\_msms; ID: 456743.

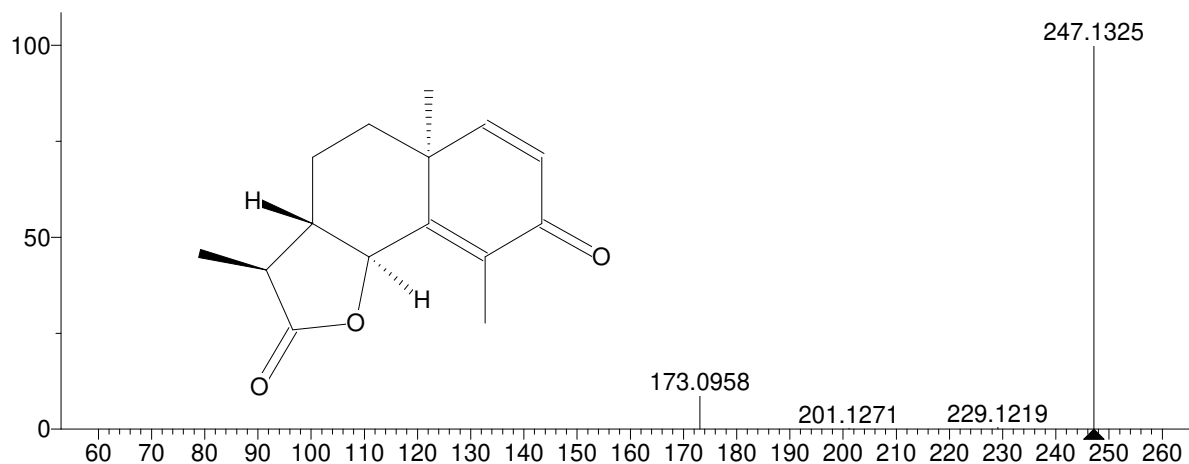

\*\* Search Report Page 2 of 2 \*\*

Hit 3 : (+)-Abscisic acid [M+H-H<sub>2</sub>O]<sup>+</sup> HCD 9V P=247.1  
C<sub>15</sub>H<sub>20</sub>O<sub>4</sub>; MF: 71; RMF: 316; Prob 14.7%; CAS: 21293-29-8; Lib: nist\_msms; ID: 539021.

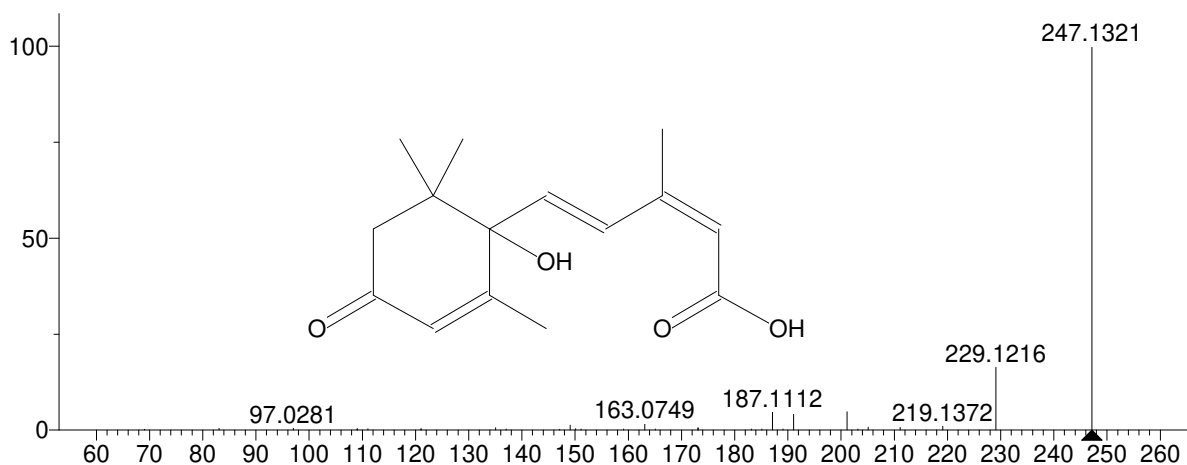

Hit 4 : 2,7,8-Trimethyl-2-(β-carboxyethyl)-6-hydroxychroman [M+H-H<sub>2</sub>O]<sup>+</sup> HCD 12V P=247.1  
C<sub>15</sub>H<sub>20</sub>O<sub>4</sub>; MF: 46; RMF: 311; Prob 4.47%; CAS: 178167-75-4; Lib: nist\_msms; ID: 340433.

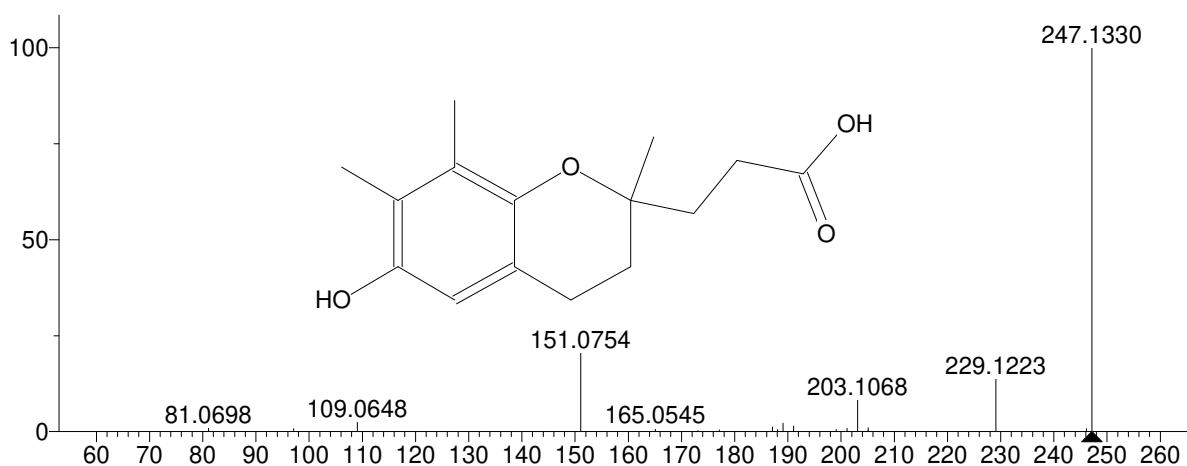

Hit 5 : Chamissonolide [M+H-C<sub>2</sub>H<sub>6</sub>O<sub>3</sub>]<sup>+</sup> HCD 9V P=247.1  
C<sub>17</sub>H<sub>24</sub>O<sub>6</sub>; MF: 40; RMF: 296; Prob 3.51%; CAS: 78853-98-2; Lib: nist\_msms; ID: 500793.

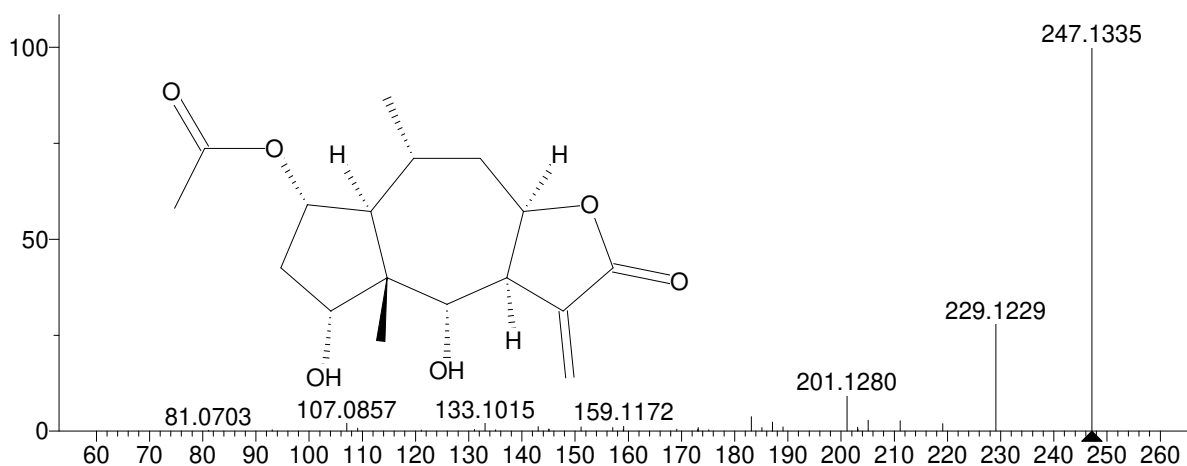

\*\* Search Report Page 1 of 2 \*\*

Unknown: Unknown (21.88\_229.1433m/z)  
Compound in Library Factor = 588

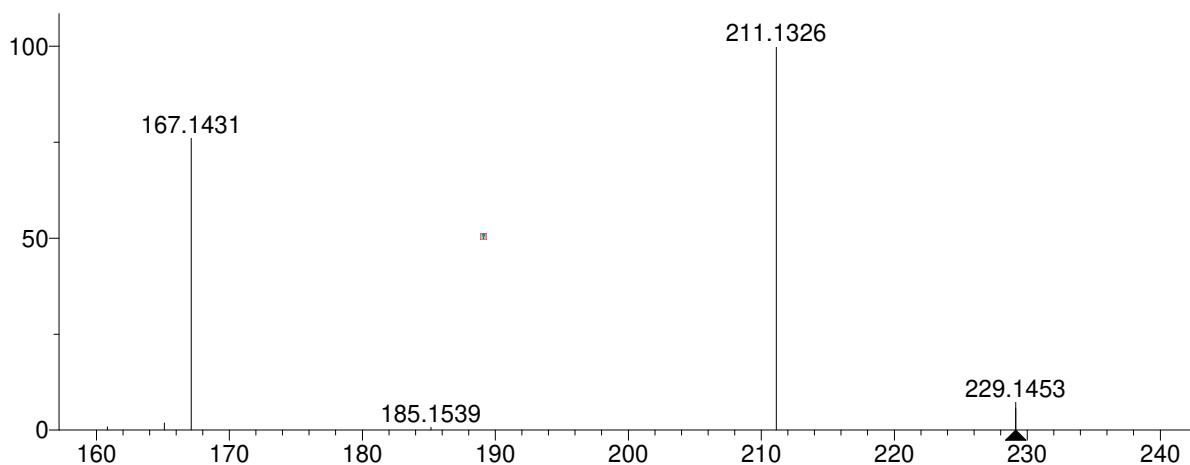

Hit 1 : Dodecanedioic acid [M-H]<sup>-</sup> HCD 29V P=229.1  
C<sub>12</sub>H<sub>22</sub>O<sub>4</sub>; MF: 890; RMF: 970; Prob 99.0%; CAS: 693-23-2; Lib: nist\_msms; ID: 289814.

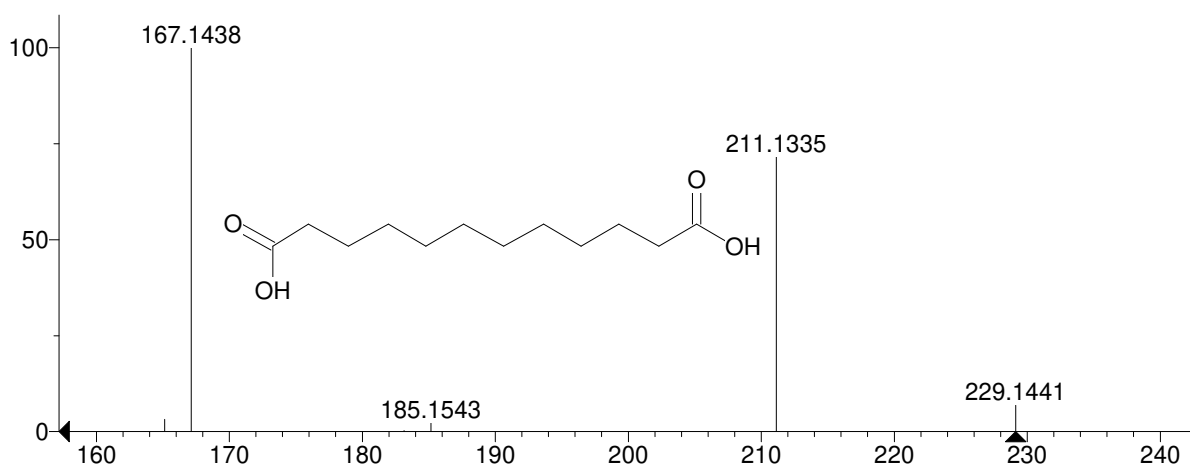

Hit 2 : Unknown (carbon number 12); PlaSMA ID-339 [M-H]<sup>-</sup> P=229.1  
C<sub>12</sub>H<sub>22</sub>O<sub>4</sub>; MF: 574; RMF: 868; Prob 0.98%; Lib: biomsms-neg-plasma; ID: 1074.

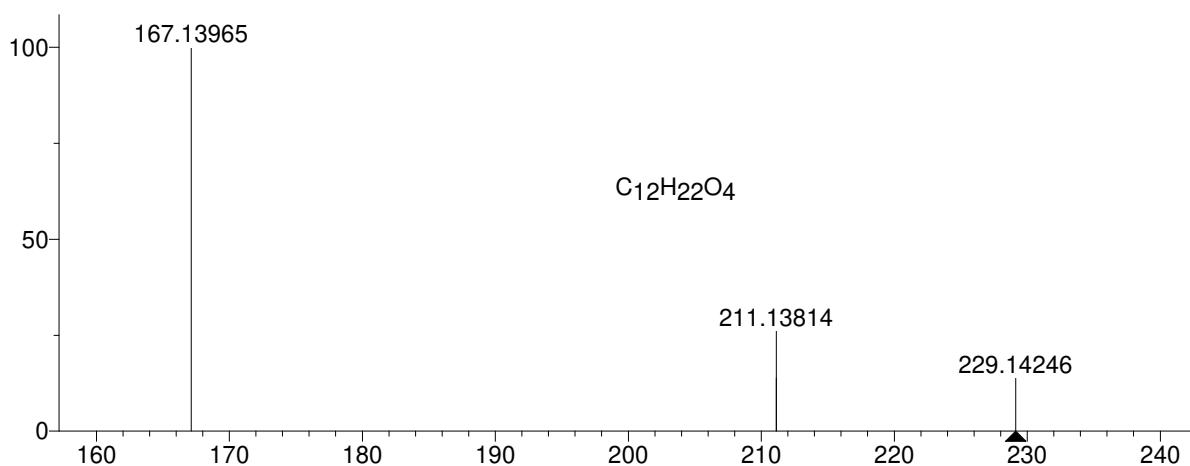

Hit 3 : Unknown (carbon number 12); PlaSMA ID-340 [M-H]<sup>-</sup> P=229.1  
C<sub>12</sub>H<sub>22</sub>O<sub>4</sub>; MF: 255; RMF: 750; Prob 0.00%; Lib: biomsms-neg-plasma; ID: 1075.

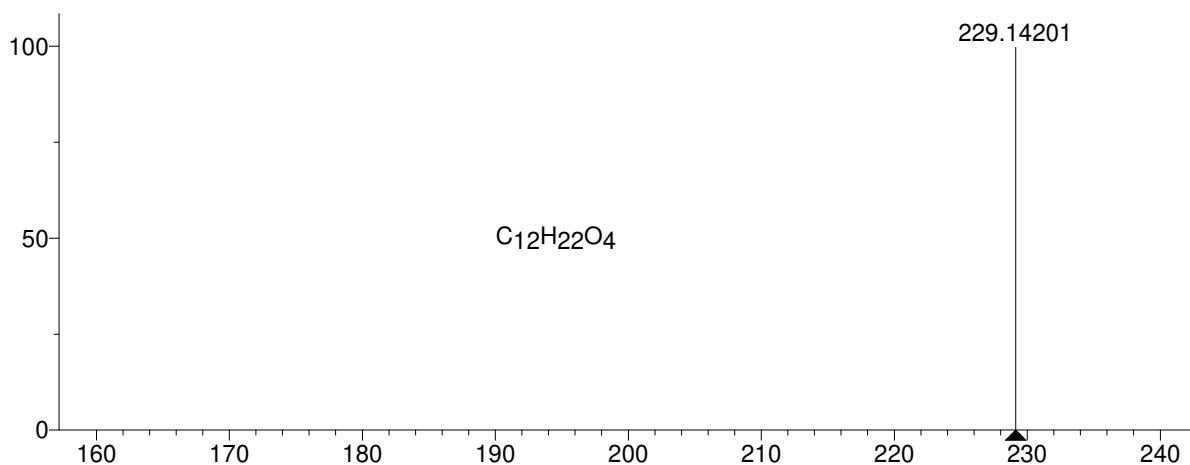

Hit 4 : Unknown (carbon number 12); PlaSMA ID-341 [M-H]<sup>-</sup> P=229.1  
C<sub>12</sub>H<sub>22</sub>O<sub>4</sub>; MF: 255; RMF: 750; Prob 0.00%; Lib: biomsms-neg-plasma; ID: 1076.

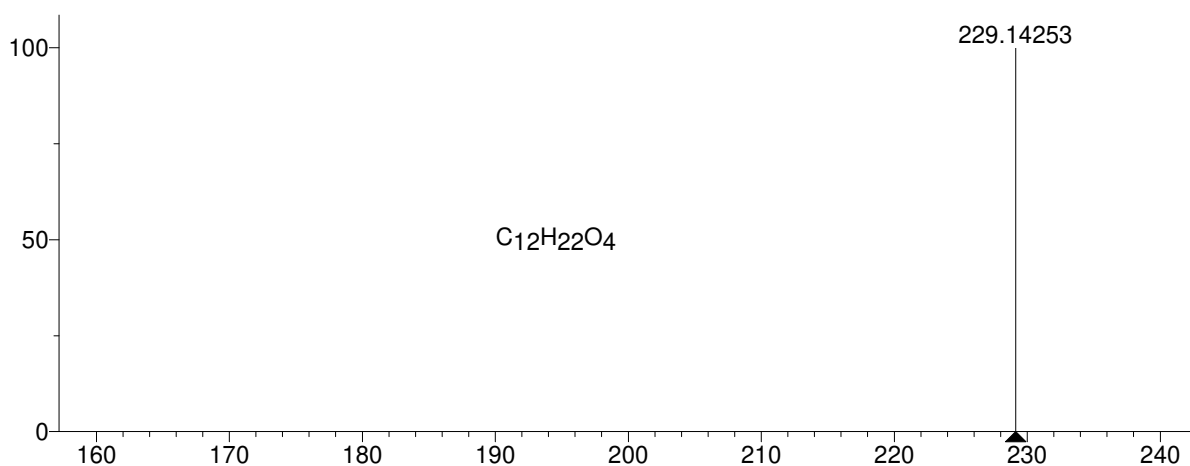

Hit 5 : Unknown (carbon number 12); PlaSMA ID-342 [M-H]<sup>-</sup> P=229.1  
C<sub>12</sub>H<sub>22</sub>O<sub>4</sub>; MF: 132; RMF: 450; Prob 0.00%; Lib: biomsms-neg-plasma; ID: 1077.

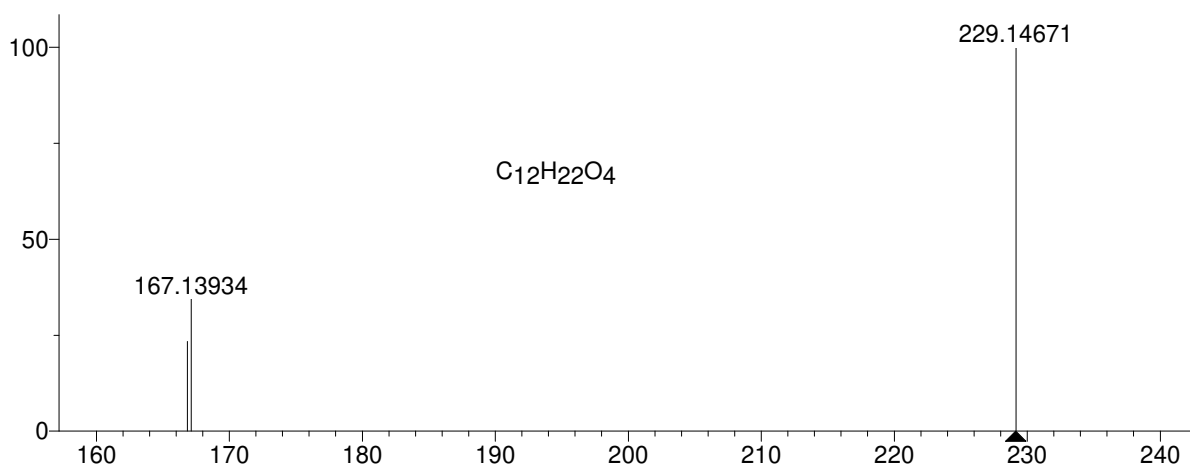

Unknown: Unknown (21.97\_438.0470m/z)  
Compound in Library Factor = 0

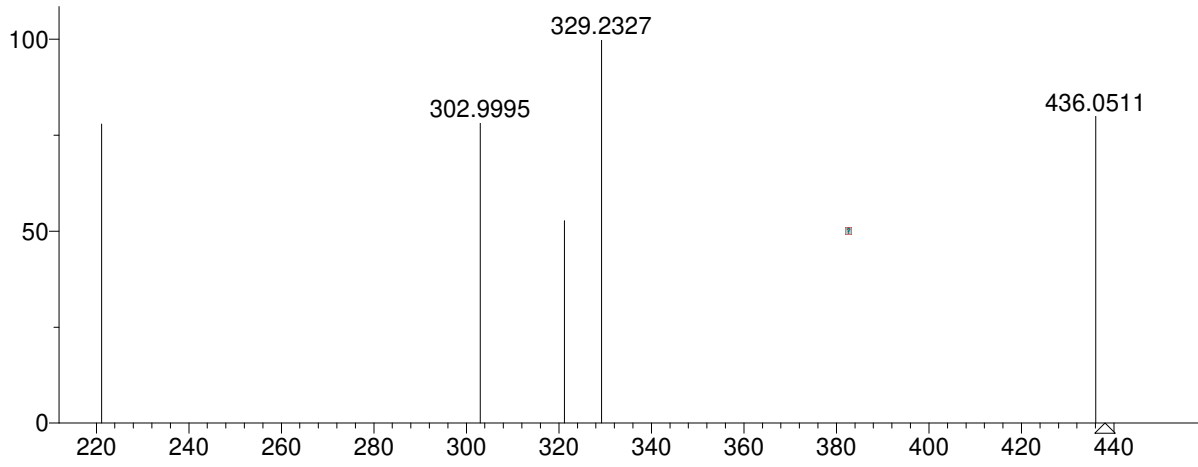

\*\* Search Report Page 1 of 2 \*\*

Unknown: Unknown (21.98\_329.2317m/z)  
Compound in Library Factor = -357

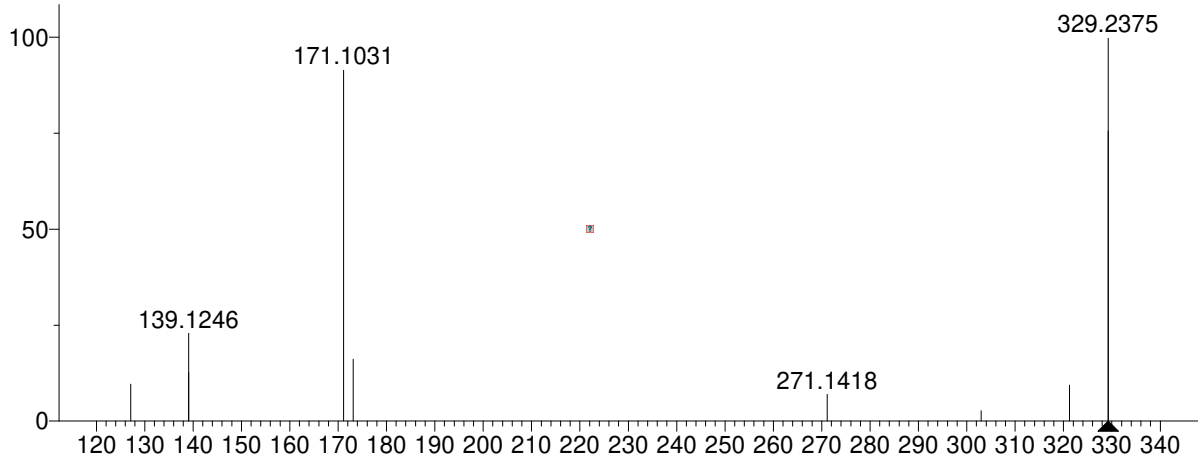

Hit 1 : FA 18:1+3O; PlaSMA ID-735 [M-H]<sup>-</sup> P=329.2  
C<sub>18</sub>H<sub>34</sub>O<sub>5</sub>; MF: 320; RMF: 767; Prob 97.6%; Lib: biomsms-neg-plasma; ID: 443.

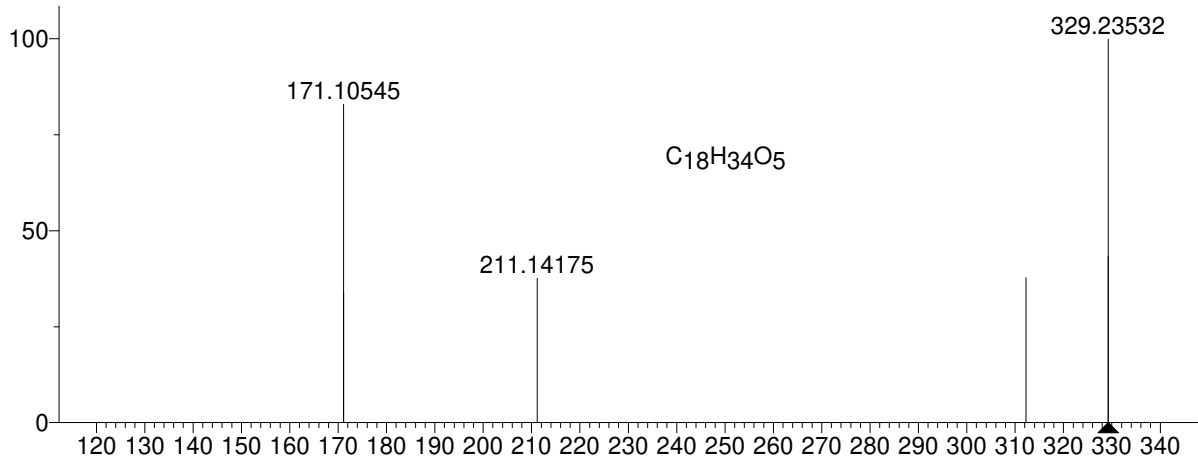

Hit 2 : Unknown (carbon number 18); PlaSMA ID-736 [M-H]<sup>-</sup> P=329.2  
C<sub>18</sub>H<sub>34</sub>O<sub>5</sub>; MF: 143; RMF: 605; Prob 1.87%; Lib: biomsms-neg-plasma; ID: 1245.





Hit 3 : FA 18:1+3O; PlaSMA ID-737 [M-H]- P=329.2  
C<sub>18</sub>H<sub>34</sub>O<sub>5</sub>; MF: 77; RMF: 613; Prob 0.29%; Lib: biomsmns-neg-plasma; ID: 448.

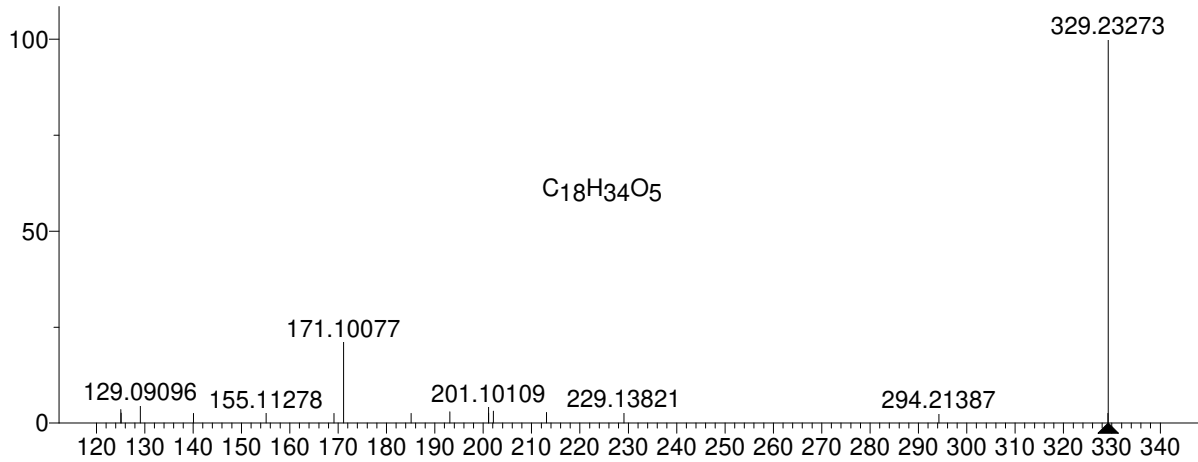

Hit 4 : FA 18:1+3O; PlaSMA ID-741 [M-H]- P=329.2  
C<sub>18</sub>H<sub>34</sub>O<sub>5</sub>; MF: 48; RMF: 523; Prob 0.08%; Lib: biomsmns-neg-plasma; ID: 449.

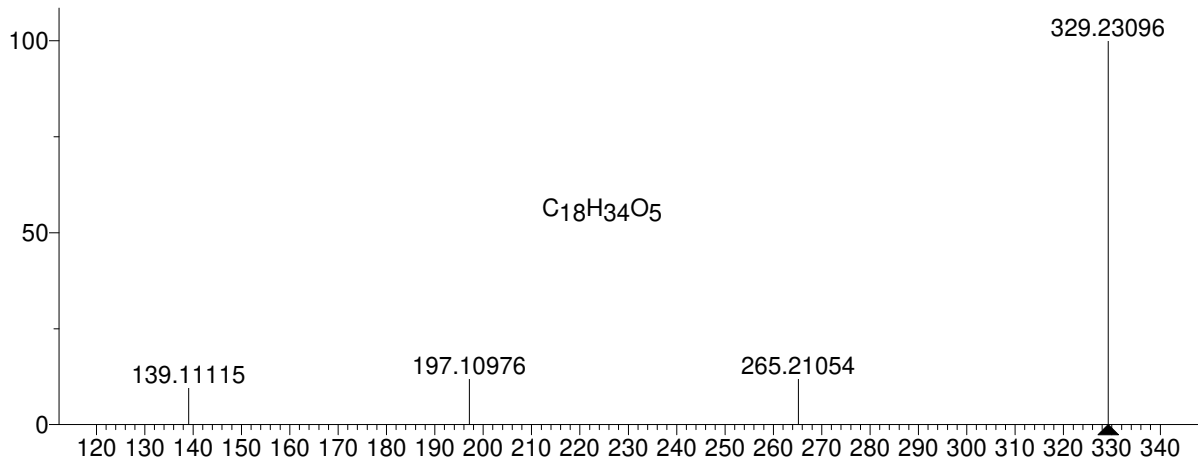

Hit 5 : FA 18:1+3O; PlaSMA ID-738 [M-H]- P=329.2  
C<sub>18</sub>H<sub>34</sub>O<sub>5</sub>; MF: 43; RMF: 561; Prob 0.06%; Lib: biomsmns-neg-plasma; ID: 444.

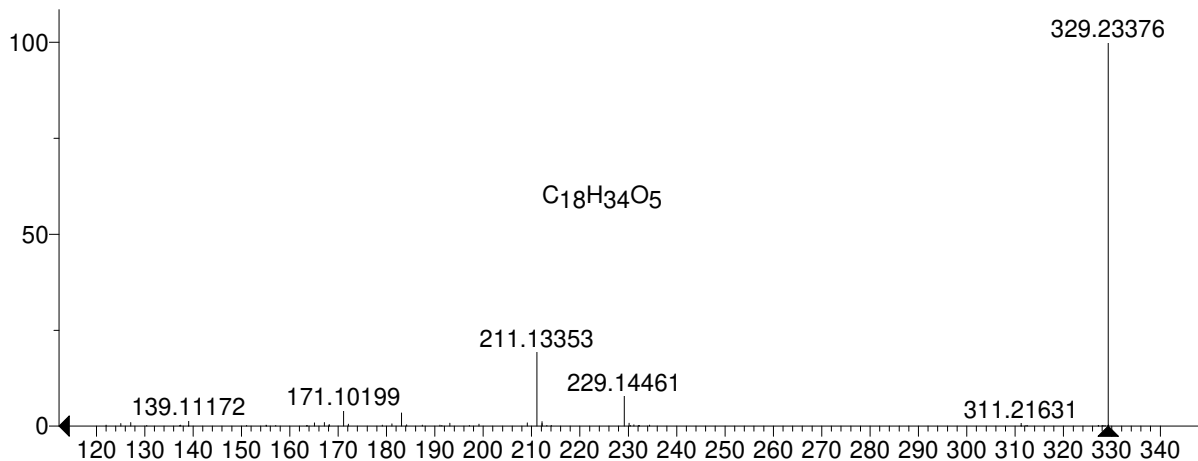

\*\* Search Report Page 1 of 2 \*\*

Unknown: Unknown (21.98\_351.2156m/z)  
Compound in Library Factor = -2176

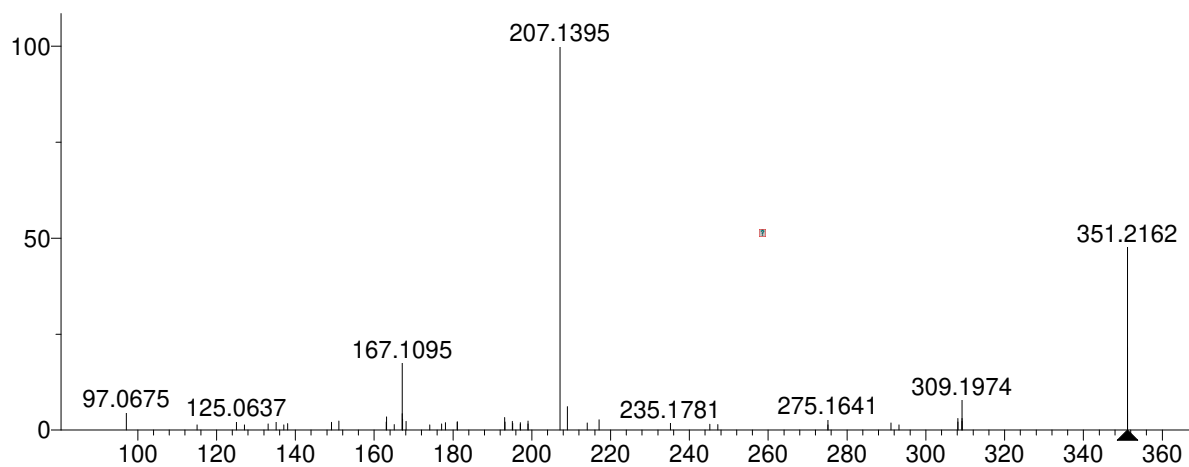

Hit 1 : 15-Ketoprostaglandin E2 [M+H]<sup>+</sup> HCD 1V P=351.2  
C<sub>20</sub>H<sub>30</sub>O<sub>5</sub>; MF: 175; RMF: 762; Prob 36.9%; CAS: 26441-05-4; Lib: nist\_msms; ID: 169378.

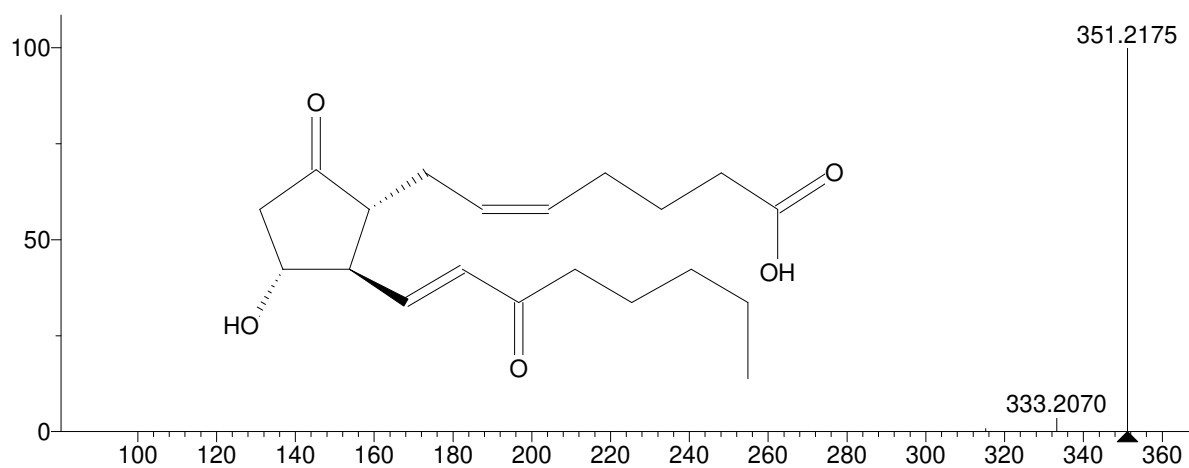

Hit 2 : 15-Ketoprostaglandin F2 $\alpha$  [M-H]<sup>-</sup> HCD 3V P=351.2  
C<sub>20</sub>H<sub>32</sub>O<sub>5</sub>; MF: 158; RMF: 767; Prob 20.1%; CAS: 35850-13-6; Lib: nist\_msms; ID: 155319.

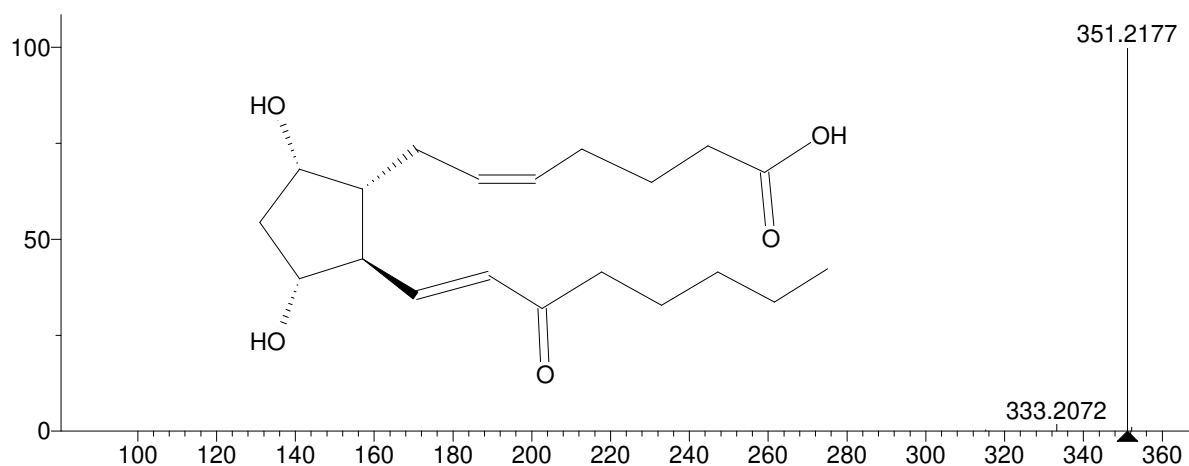

Hit 3 : 11,15-Dioxo-9S-hydroxy-5Z-prostenoic acid [M-H]- HCD 1V P=351.2  
C<sub>20</sub>H<sub>32</sub>O<sub>5</sub>; MF: 145; RMF: 759; Prob 13.0%; CAS: 59894-07-4; Lib: nist\_msms; ID: 87215.

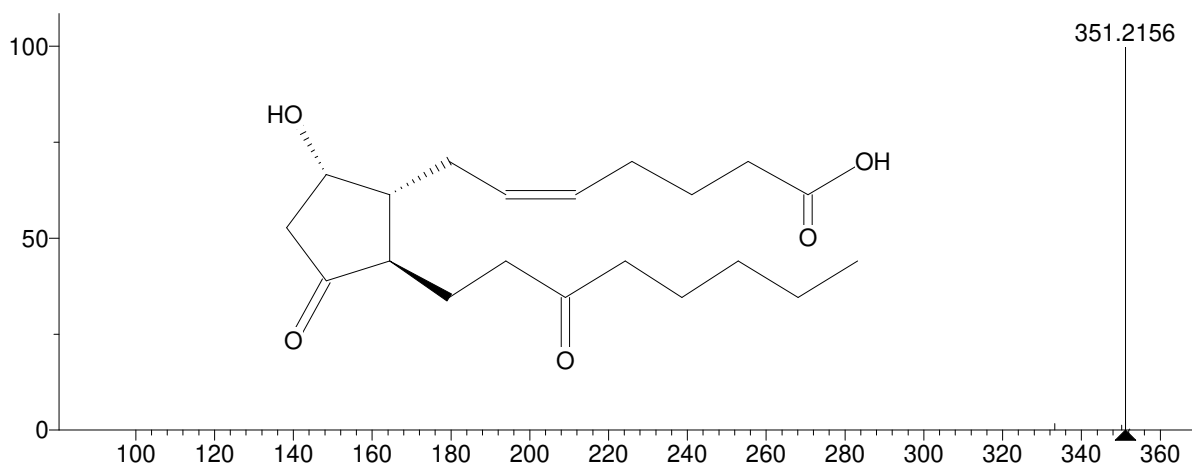

Hit 4 : 19(R)-Hydroxyprostaglandin E2 [M+H-H<sub>2</sub>O]<sup>+</sup> HCD 1V P=351.2  
C<sub>20</sub>H<sub>32</sub>O<sub>6</sub>; MF: 140; RMF: 760; Prob 10.5%; CAS: 64625-54-3; Lib: nist\_msms; ID: 169989.

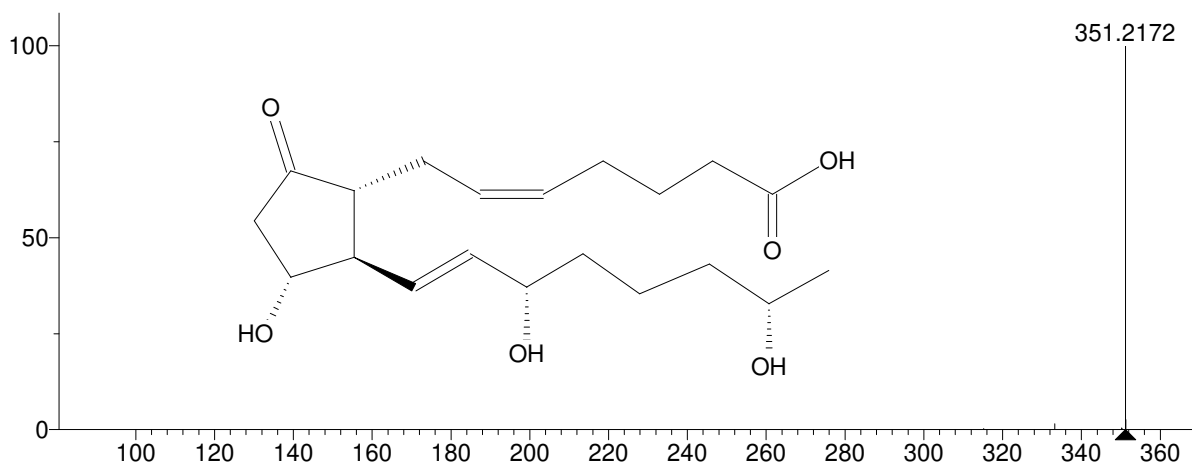

Hit 5 : 6-Ketoprostaglandin E1 [M+H-H<sub>2</sub>O]<sup>+</sup> HCD 1V P=351.2  
C<sub>20</sub>H<sub>32</sub>O<sub>6</sub>; MF: 137; RMF: 694; Prob 9.26%; CAS: 67786-53-2; Lib: nist\_msms; ID: 161827.

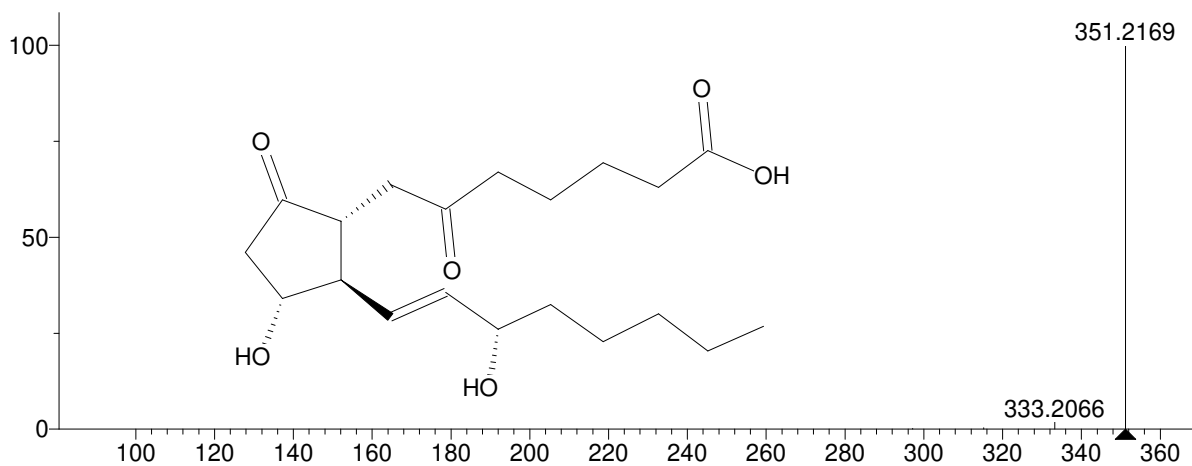

Unknown: Unknown (21.99\_436.0494m/z)  
Compound in Library Factor = 0

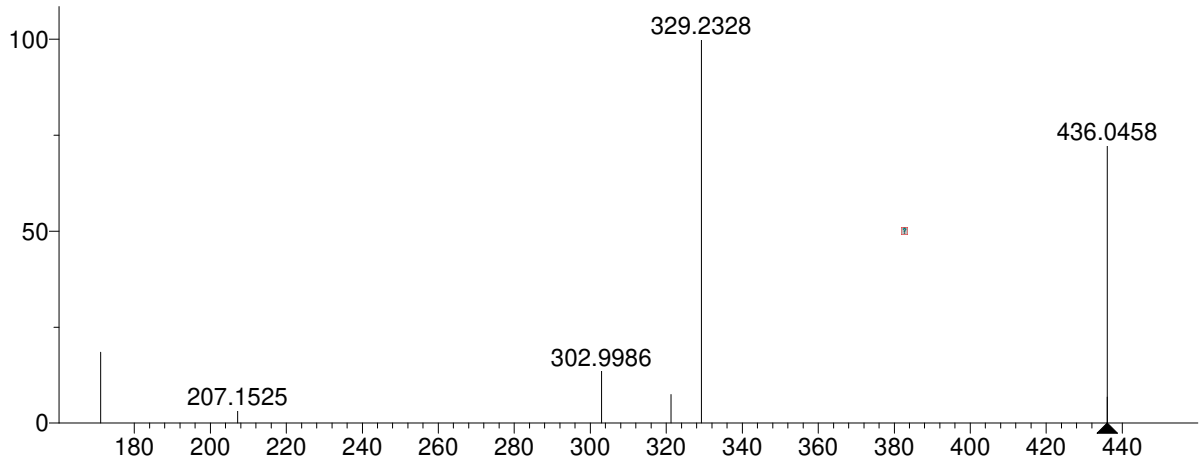

Unknown: Unknown (21.99\_456.1076m/z)  
Compound in Library Factor = 0

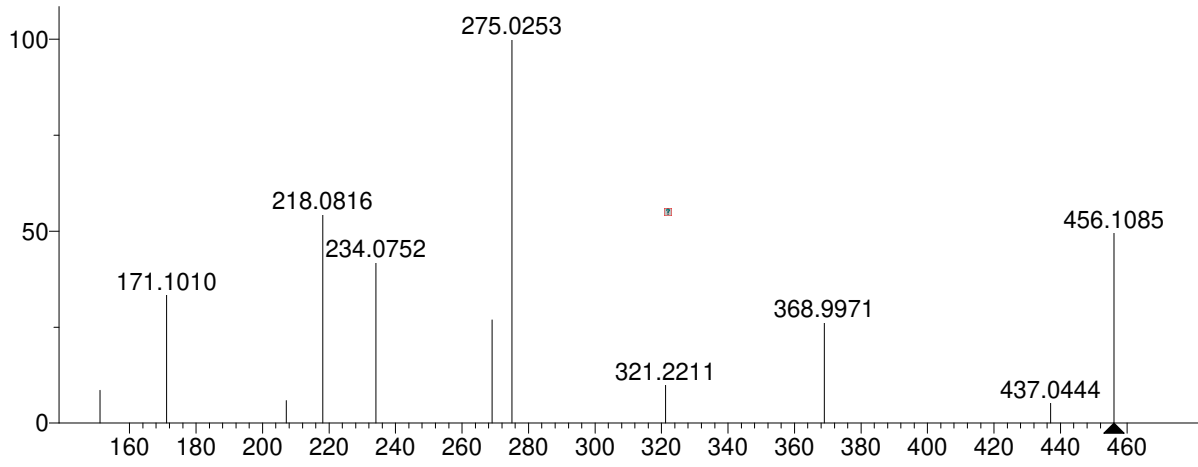

\*\* Search Report Page 1 of 2 \*\*

Unknown: Unknown (22.03\_220.0968m/z)  
Compound in Library Factor = -1523

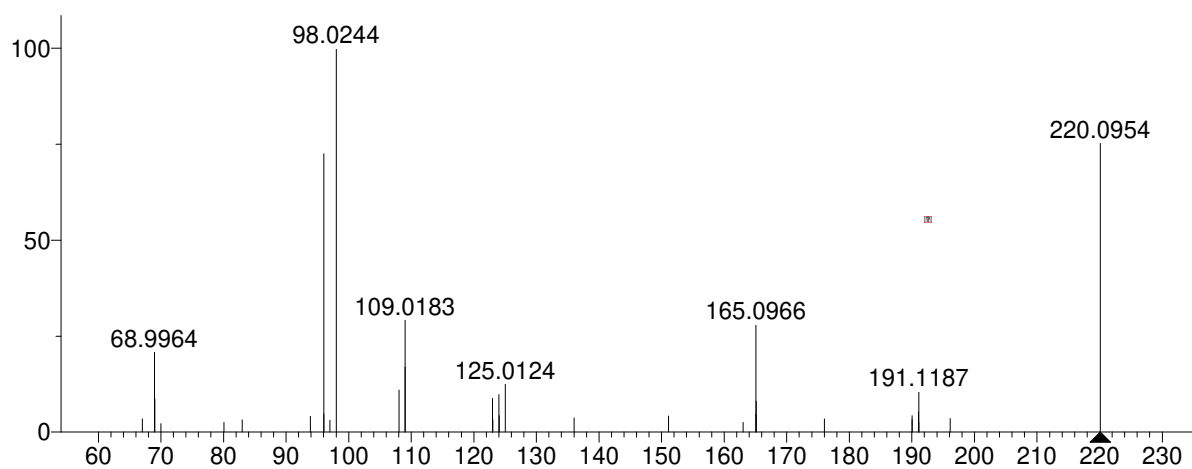

Hit 1 : 6-Methoxymethylone [M+H-H<sub>2</sub>O]<sup>+</sup> HCD 9V P=220.1  
C<sub>12</sub>H<sub>15</sub>NO<sub>4</sub>; MF: 144; RMF: 759; Prob 37.3%; Lib: nist\_msms; ID: 551027.

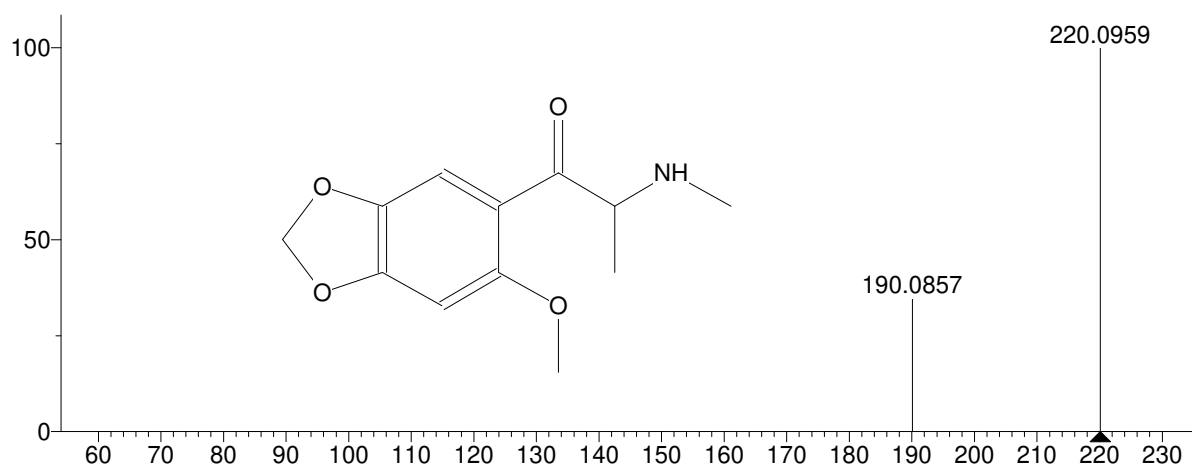

Hit 2 : 5-Methoxymethylone [M+H-H<sub>2</sub>O]<sup>+</sup> HCD 8V P=220.1  
C<sub>12</sub>H<sub>15</sub>NO<sub>4</sub>; MF: 137; RMF: 679; Prob 28.6%; Lib: nist\_msms; ID: 547148.

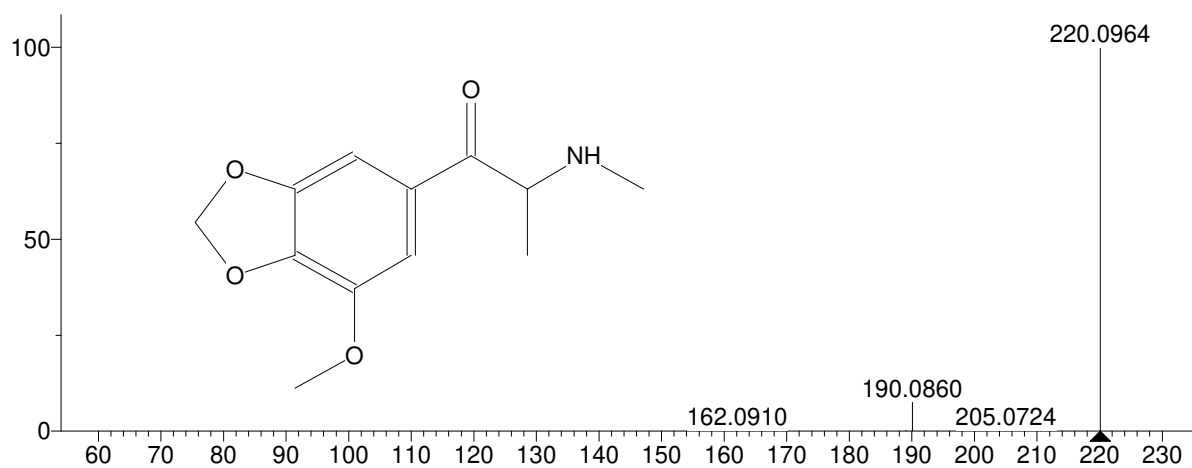

Hit 3 : 3-Hydroxycarbofuran [M+H-H<sub>2</sub>O]<sup>+</sup> HCD 2V P=220.1  
C<sub>12</sub>H<sub>15</sub>NO<sub>4</sub>; MF: 136; RMF: 669; Prob 27.5%; CAS: 16655-82-6; Lib: nist\_msms; ID: 471676.

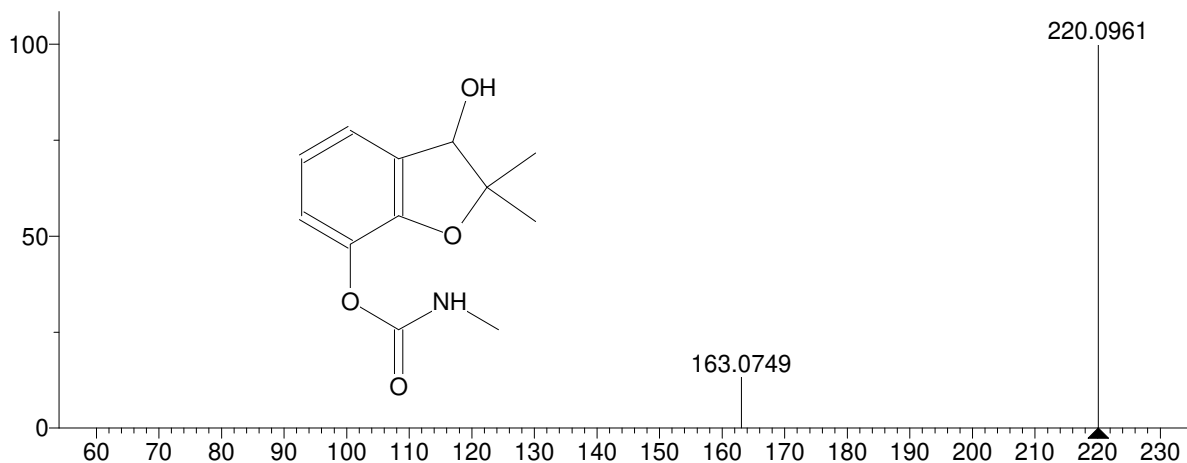

Hit 4 : N-Phenylacetyl-L-homoserine lactone [M+H]<sup>+</sup> HCD 4V P=220.1  
C<sub>12</sub>H<sub>13</sub>NO<sub>3</sub>; MF: 17; RMF: 362; Prob 1.48%; CAS: 55154-48-8; Lib: nist\_msms; ID: 423889.

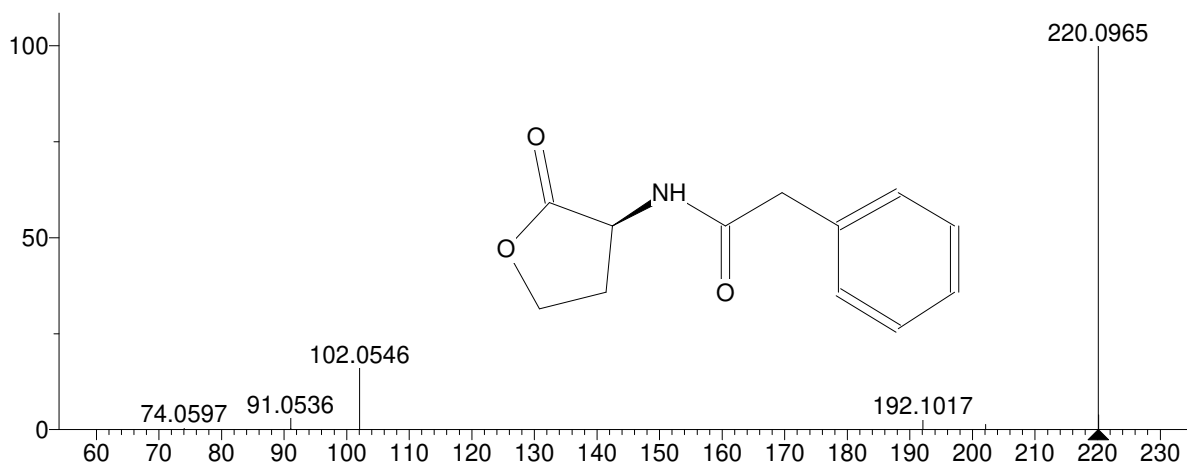

Hit 5 : Mepirizole [M+H-CH<sub>3</sub>]<sup>+</sup> HCD 13V P=220.1  
C<sub>11</sub>H<sub>14</sub>N<sub>4</sub>O<sub>2</sub>; MF: 10; RMF: 296; Prob 1.13%; CAS: 18694-40-1; Lib: nist\_msms; ID: 188207.

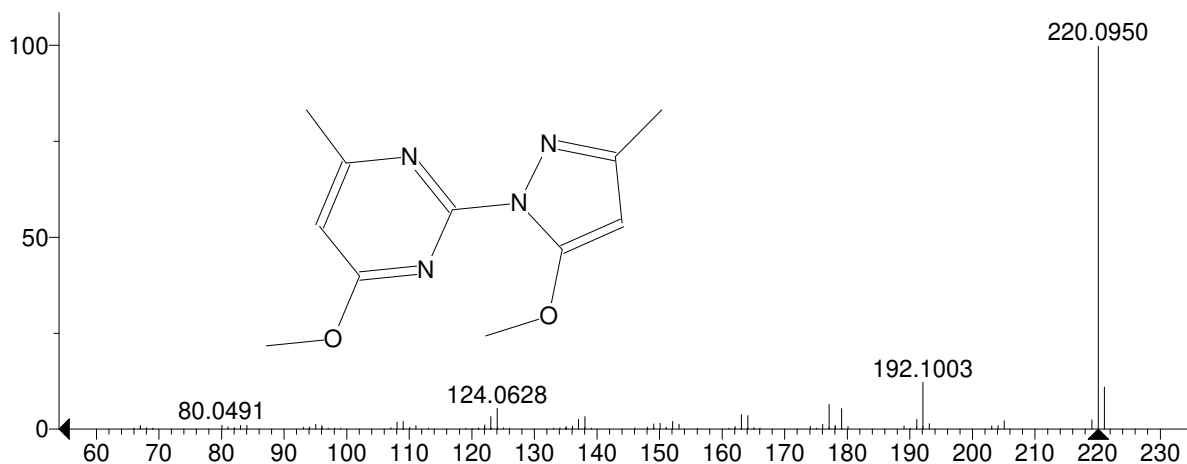

Unknown: Unknown (22.03\_395.0298m/z)  
Compound in Library Factor = 0

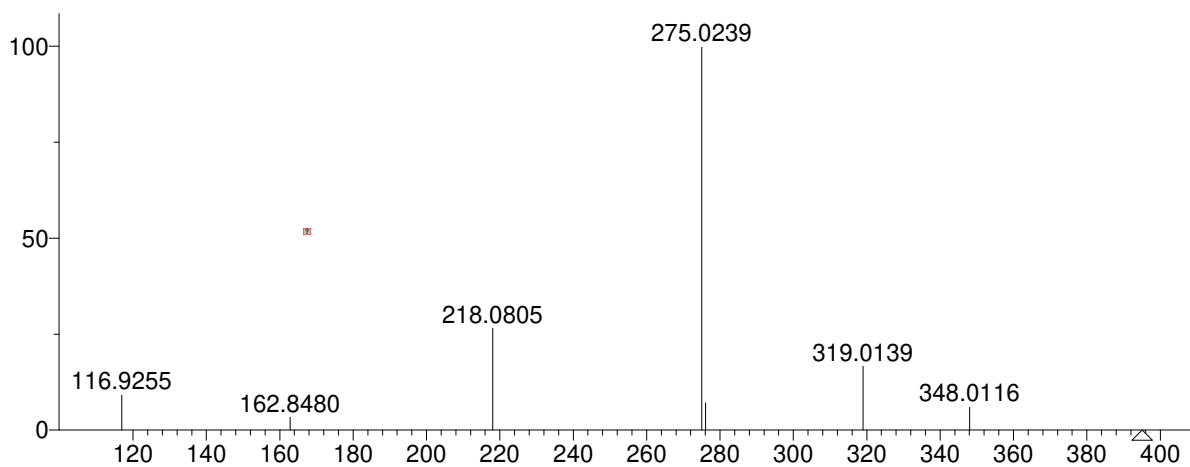

Hit 1 : (4R,8S)-17-chloro-2,18-dimethoxy-7,9,13-trioxapentacyclo[10.8.0.0A^3,A^1a^o.0a^",a^,,0A^1a^",A^1a^'  
C19H13ClO6; MF: 0; RMF: 51; Prob 100.0%; Lib: mona-export-vf-npl\_qexactive; ID: 22920.

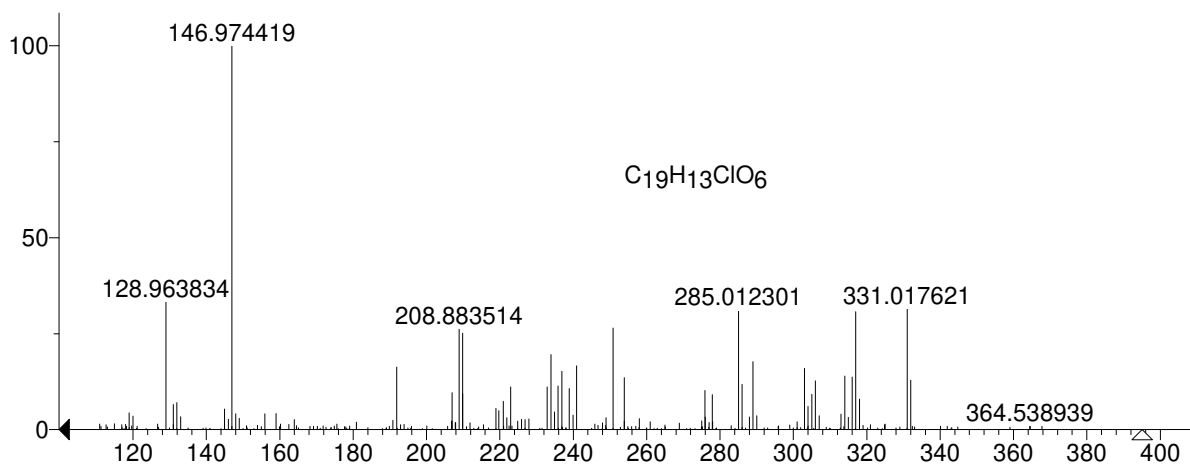



\*\* Search Report Page 1 of 2 \*\*

Unknown: Unknown (22.04\_250.1077m/z)  
Compound in Library Factor = -2387

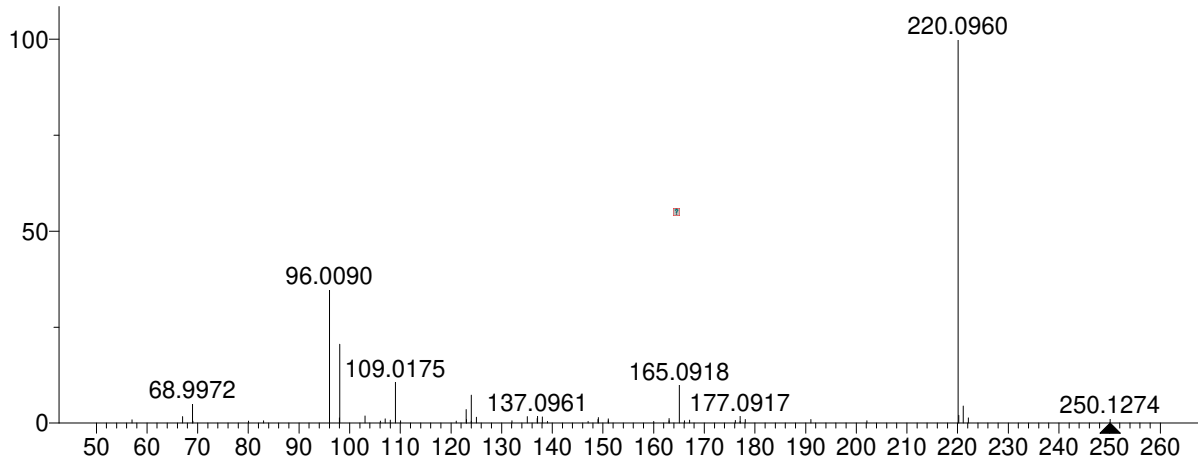

Hit 1 : N-Acetyl-L-tyrosine ethyl ester [M-H]<sup>-</sup> HCD 22V P=250.1  
C<sub>13</sub>H<sub>17</sub>NO<sub>4</sub>; MF: 16; RMF: 283; Prob 46.5%; CAS: 36546-50-6; Lib: nist\_msms; ID: 220864.

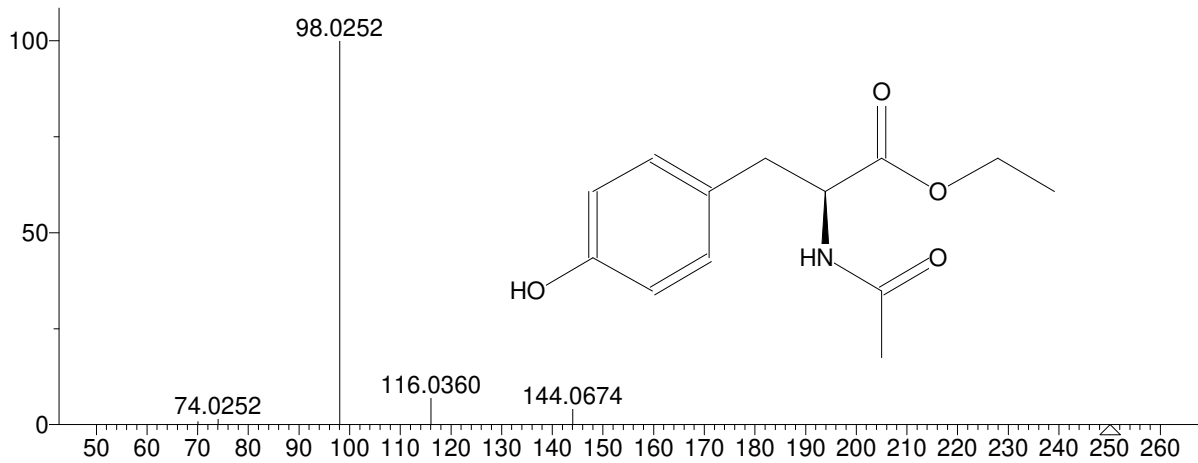

Hit 2 : Goniotalenol [M+NH<sub>4</sub>]<sup>+</sup> 35HCD P=250.1  
C<sub>13</sub>H<sub>12</sub>O<sub>4</sub>; MF: 0; RMF: 9; Prob 26.8%; Lib: mona-export-vf-npl\_qexactive; ID: 18316.

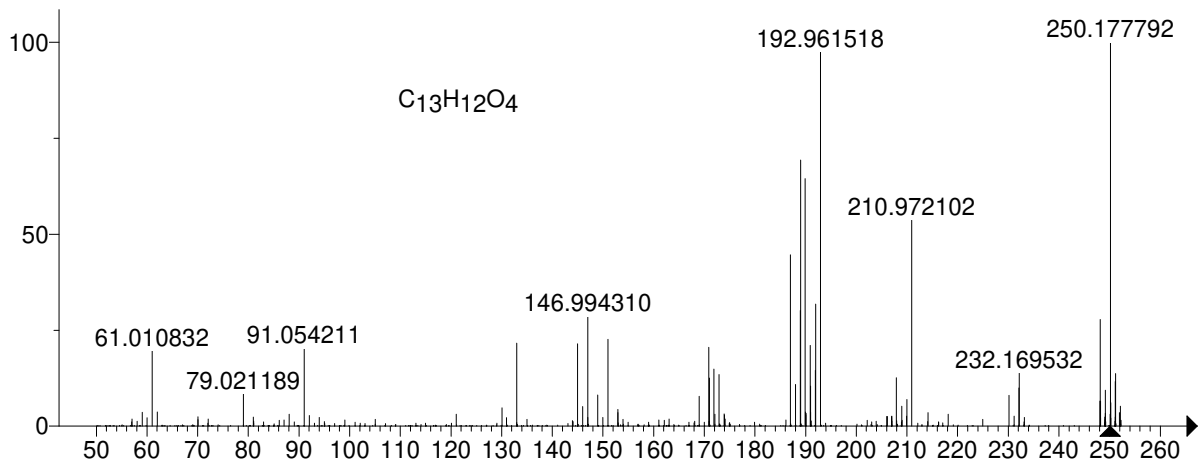

\*\* Search Report Page 2 of 2 \*\*

Hit 3 : N-Acetyl-3,4-methylenedioxyamphetaminone [M+H]<sup>+</sup> HCD 45V P=250.1  
C<sub>13</sub>H<sub>15</sub>NO<sub>4</sub>; MF: 0; RMF: 2; Prob 26.8%; CAS: 1227293-15-3; Lib: nist\_msms; ID: 423651.

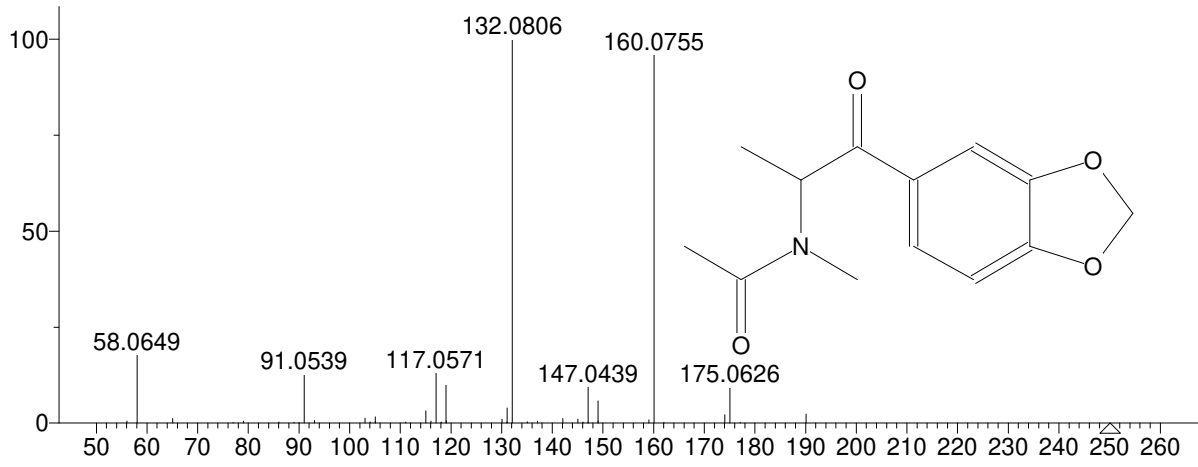

Unknown: Unknown (22.08\_396.2271 m/z)  
Compound in Library Factor = 0

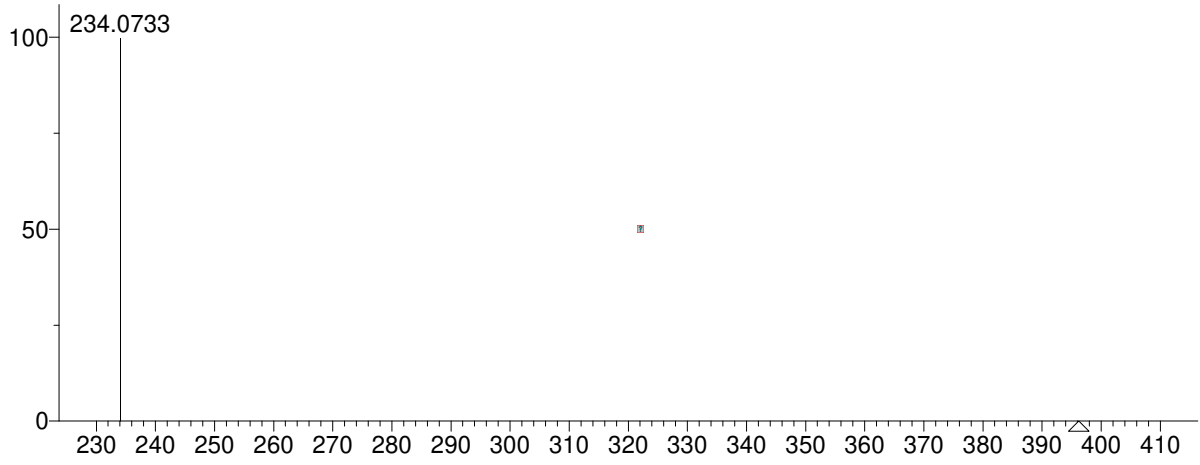

\*\* Search Report Page 1 of 2 \*\*

Unknown: Unknown (22.20\_252.1226m/z)  
Compound in Library Factor = -2176

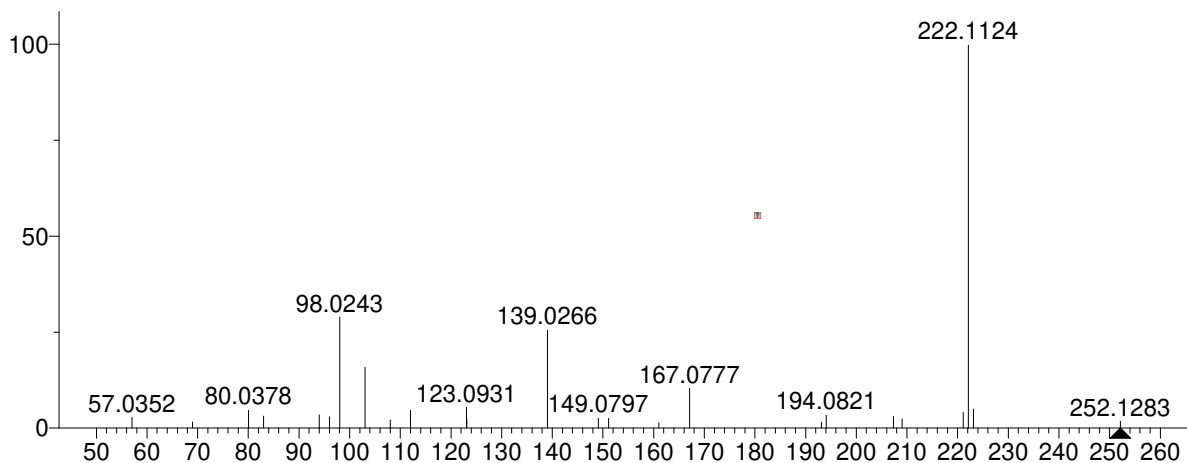

Hit 1 : Dimethachlor-OXA [M+H]<sup>+</sup> 10eV P=252.1  
C<sub>13</sub>H<sub>17</sub>NO<sub>4</sub>; MF: 27; RMF: 197; Prob 37.5%; Lib: mona-export-massbank; ID: 785.

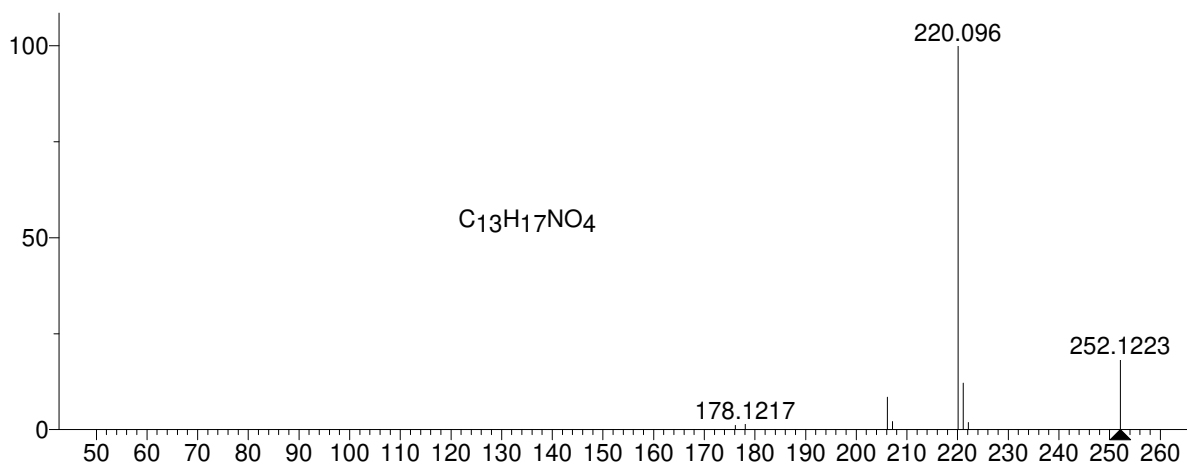

Hit 2 : Dipropyl pyridine-2,5-dicarboxylate [M+H]<sup>+</sup> HCD 7V P=252.1  
C<sub>13</sub>H<sub>17</sub>NO<sub>4</sub>; MF: 4; RMF: 97; Prob 13.7%; CAS: 136-45-8; Lib: nist\_msms; ID: 282969.

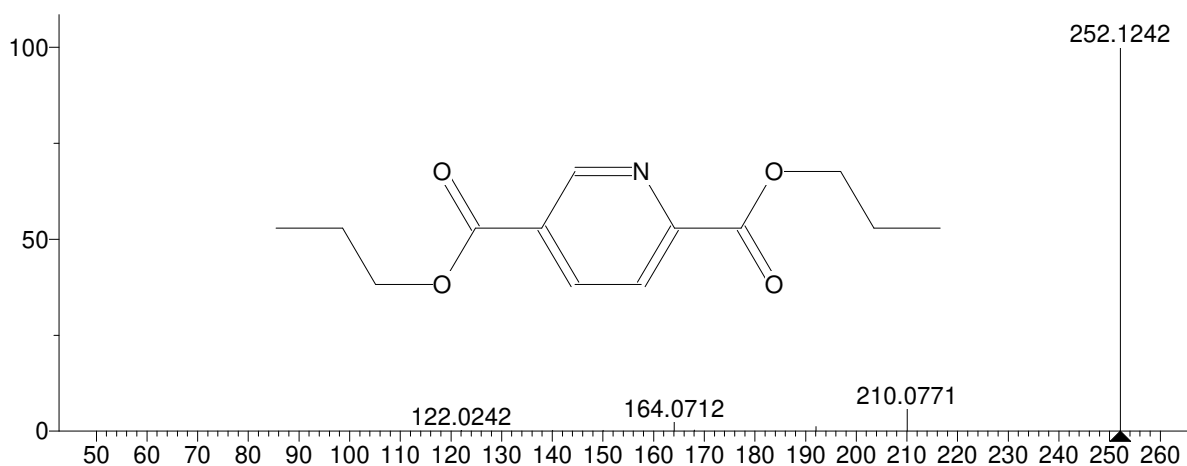

\*\* Search Report Page 2 of 2 \*\*

Hit 3 : N-Acetyl-L-tyrosine ethyl ester [M+H]<sup>+</sup> HCD 1V P=252.1  
C<sub>13</sub>H<sub>17</sub>NO<sub>4</sub>; MF: 3; RMF: 84; Prob 13.2%; CAS: 36546-50-6; Lib: nist\_msms; ID: 220796.

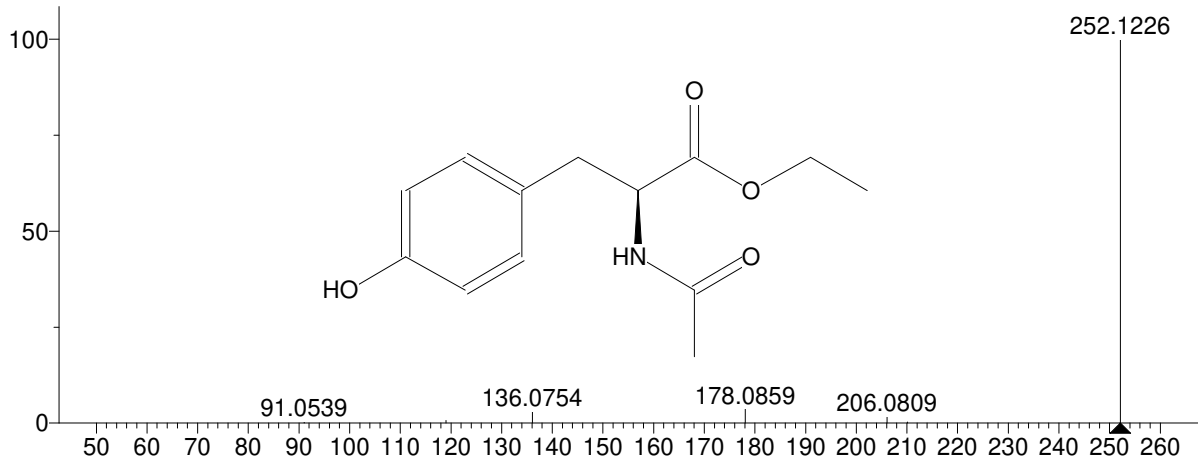

Hit 4 : Dimethachlor OXA [M+H]<sup>+</sup> 15% ( P=252.1  
C<sub>13</sub>H<sub>17</sub>NO<sub>4</sub>; MF: 1; RMF: 66; Prob 12.2%; Lib: mona-export-massbank; ID: 7734.

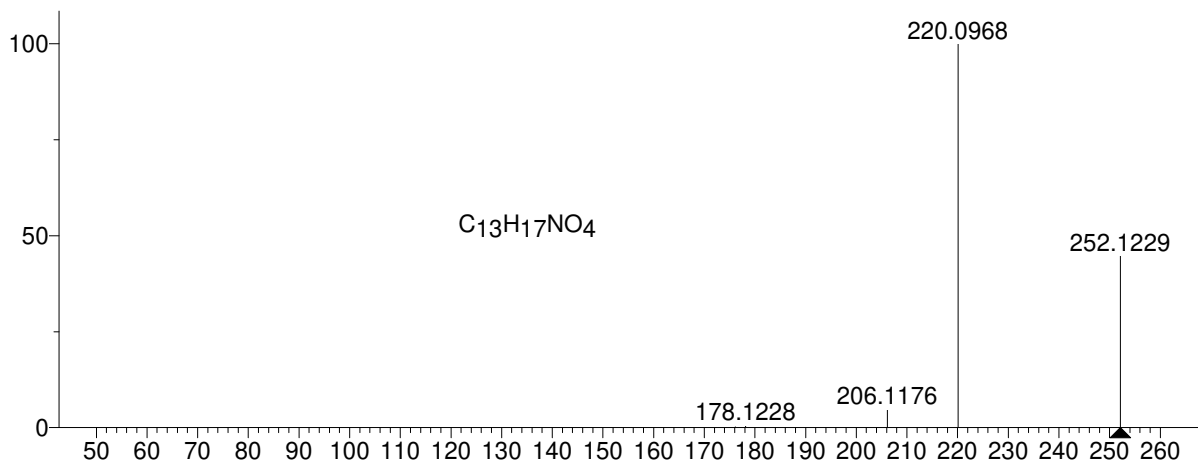

Hit 5 : N-[1-(4-methoxy-6-oxopyran-2-yl)-2-methylbutyl]acetamide [M-H]<sup>-</sup> 65HCD P=252.1  
C<sub>13</sub>H<sub>19</sub>NO<sub>4</sub>; MF: 0; RMF: 29; Prob 11.7%; Lib: mona-export-lc-ms-ms\_negative\_mode; ID: 22408.

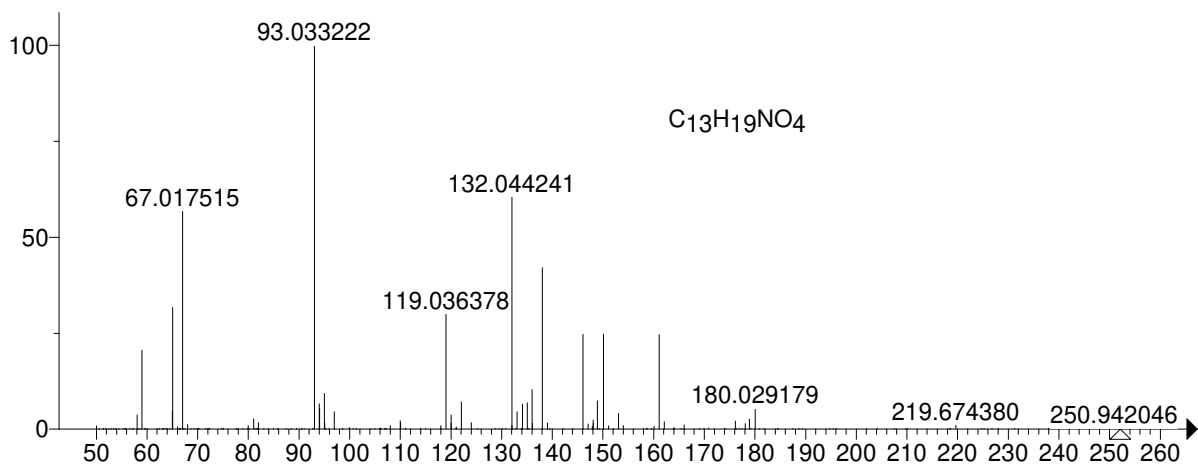

\*\* Search Report Page 1 of 2 \*\*

Unknown: Unknown (22.23\_391.1752m/z)  
Compound in Library Factor = -3273

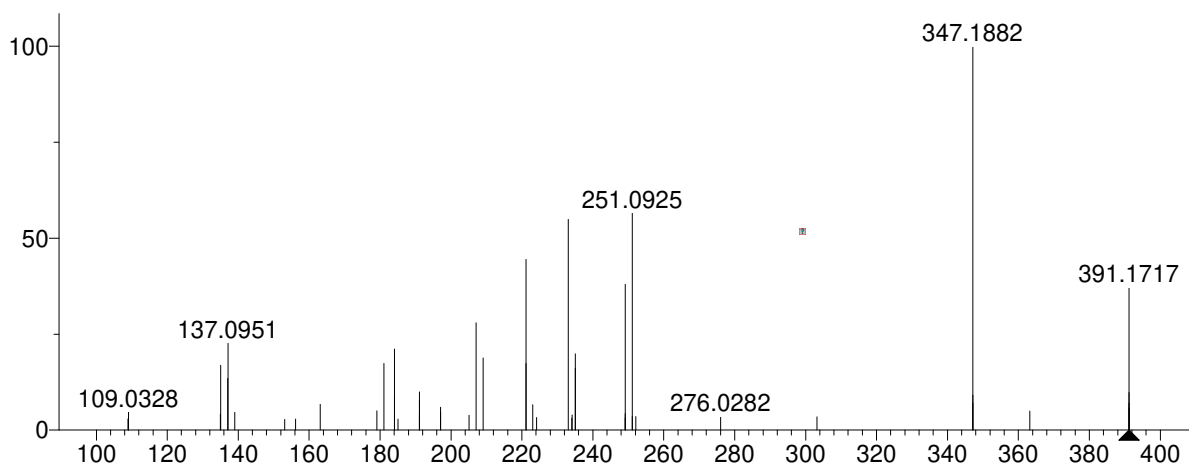

Hit 1 : Tafluprost (free acid) [M-H<sub>2</sub>O]- HCD 15V P=391.2  
C<sub>22</sub>H<sub>28</sub>F<sub>2</sub>O<sub>5</sub>; MF: 17; RMF: 213; Prob 27.1%; CAS: 209860-88-8; Lib: nist\_msms; ID: 156343.

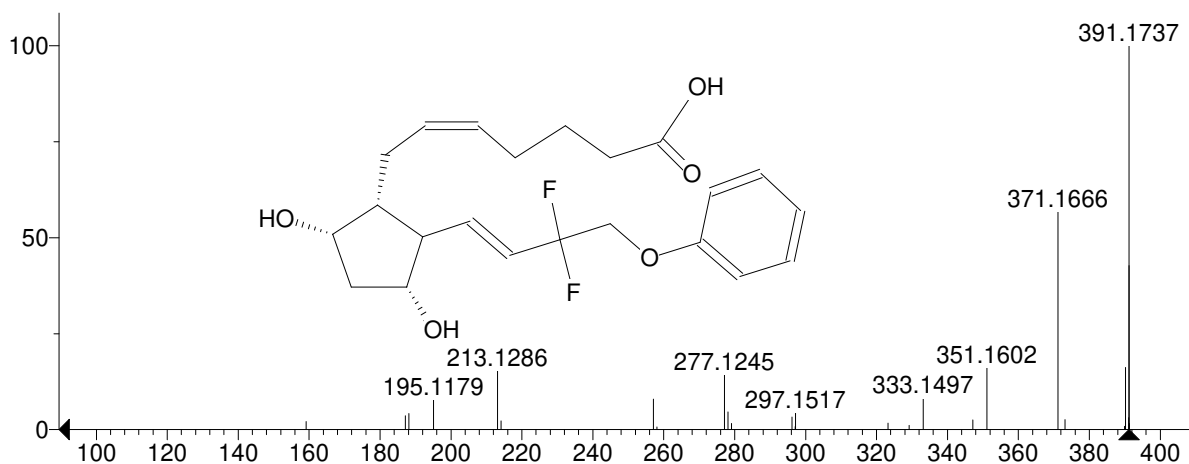

Hit 2 : Salvinorin B [M+H]<sup>+</sup> HCD 15V P=391.2  
C<sub>21</sub>H<sub>26</sub>O<sub>7</sub>; MF: 14; RMF: 187; Prob 24.0%; CAS: 92545-30-7; Lib: nist\_msms; ID: 327112.

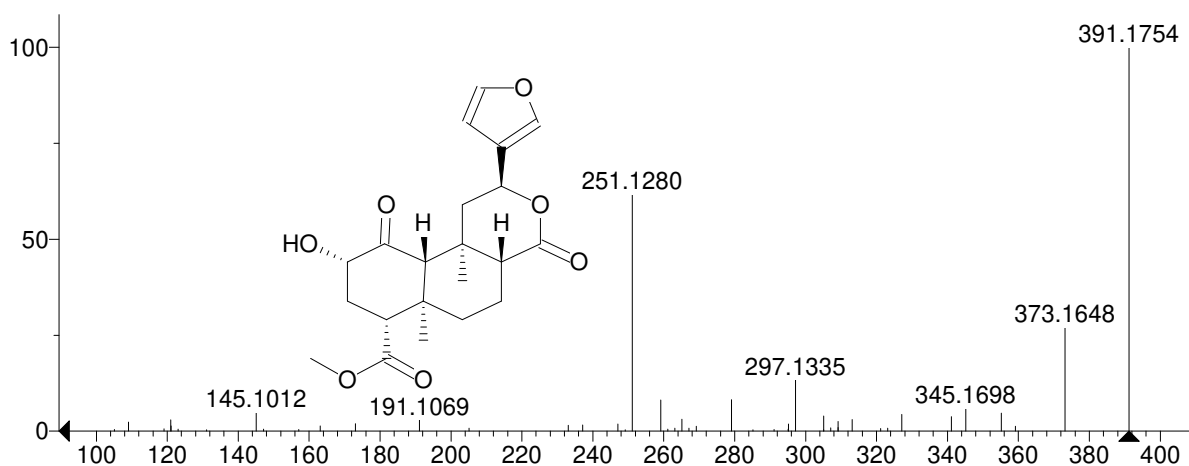

\*\* Search Report Page 2 of 2 \*\*

Hit 3 : (2S,3S,4S,8R,9S,13R,14R,15S,16R)-3,4,8,14,15-pentahydroxy-2,13,16-trimethyl-6-methylidene-10-oxatetracyclodecane; MF: 9; RMF: 201; Prob 19.3%; Lib: mona-export-vf-npl\_qexactive; ID: 21643.

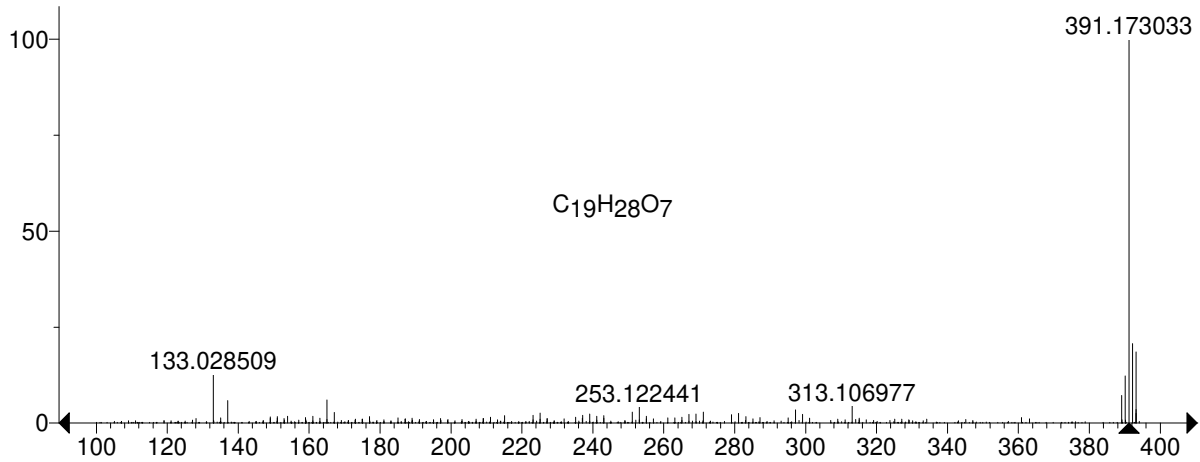

Hit 4 : Trp-Trp [M+H]<sup>+</sup> QTOF 2V P=391.2  
C<sub>22</sub>H<sub>22</sub>N<sub>4</sub>O<sub>3</sub>; MF: 5; RMF: 194; Prob 16.3%; CAS: 20696-60-0; Lib: nist\_msms; ID: 31562.

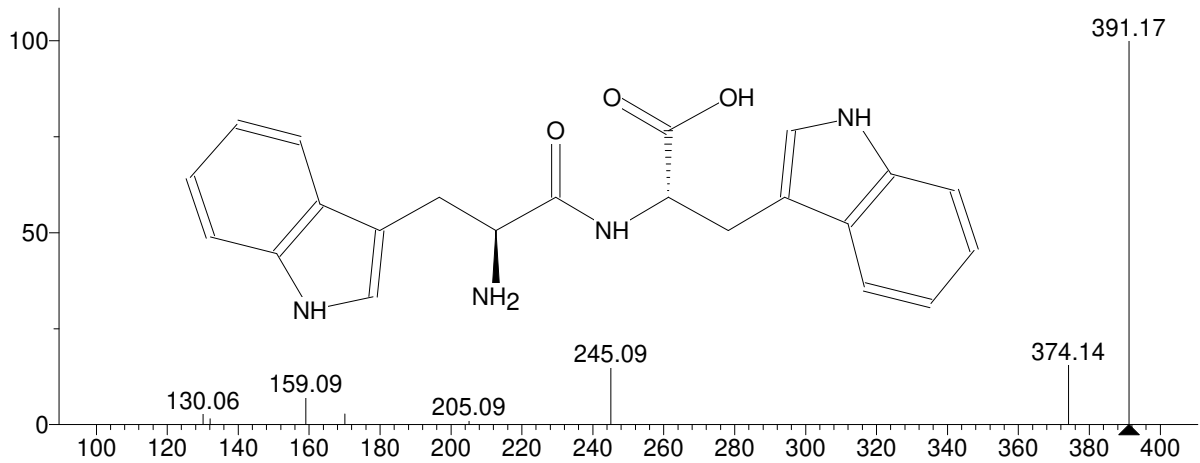

Hit 5 : 6-formyl-10-(hydroxymethyl)-5-methoxy-3-methylidene-2-oxo-2H,3H,3aH,4H,5H,8H,9H,11aH-cyclodeca[b]indole; MF: 0; RMF: 37; Prob 13.2%; Lib: mona-export-lc-ms-ms\_negative\_mode; ID: 21660.

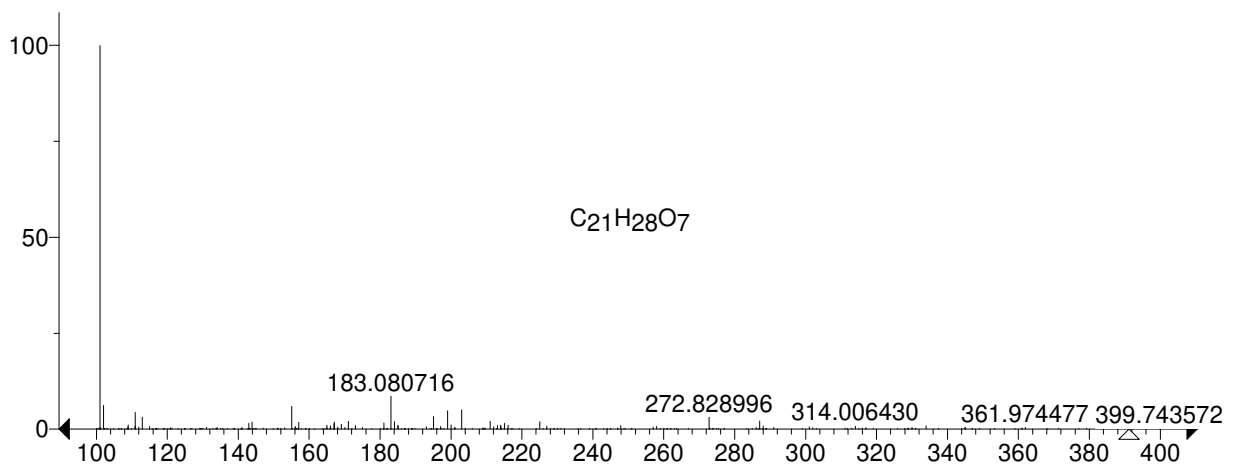

\*\* Search Report Page 1 of 2 \*\*

Unknown: Unknown (22.33\_351.2152m/z)  
Compound in Library Factor = -284

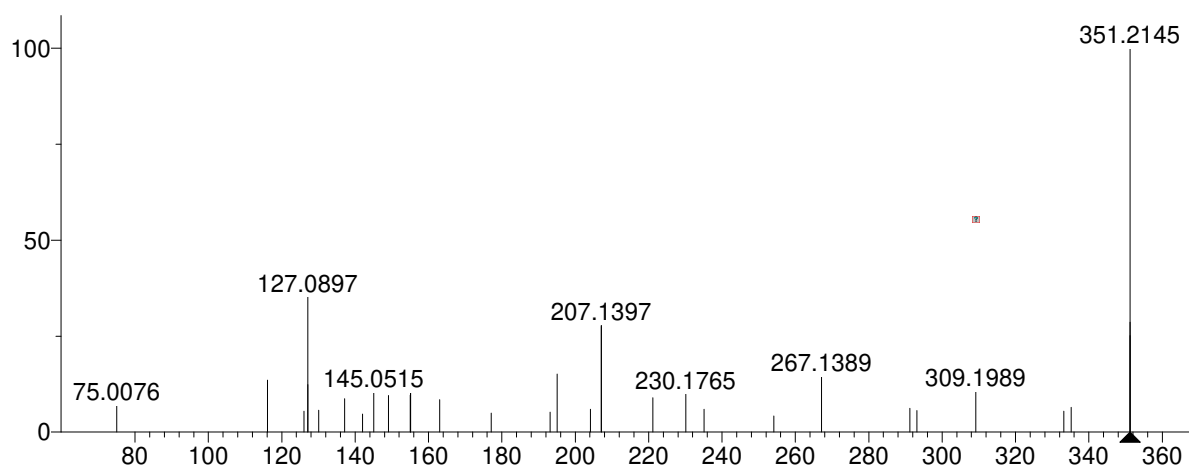

Hit 1 : 11,15-Dioxo-9S-hydroxy-5Z-prostenoic acid [M-H]<sup>-</sup> HCD 4V P=351.2  
C<sub>20</sub>H<sub>32</sub>O<sub>5</sub>; MF: 382; RMF: 839; Prob 98.3%; CAS: 59894-07-4; Lib: nist\_msms; ID: 87217.

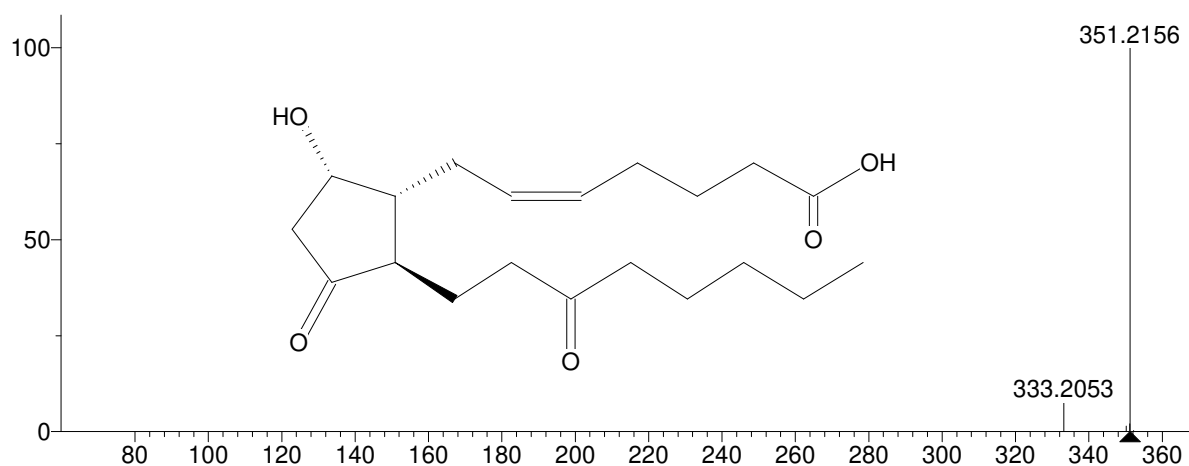

Hit 2 : 15-Ketoprostaglandin E2 [M+H]<sup>+</sup> HCD 1V P=351.2  
C<sub>20</sub>H<sub>30</sub>O<sub>5</sub>; MF: 179; RMF: 794; Prob 0.98%; CAS: 26441-05-4; Lib: nist\_msms; ID: 169378.

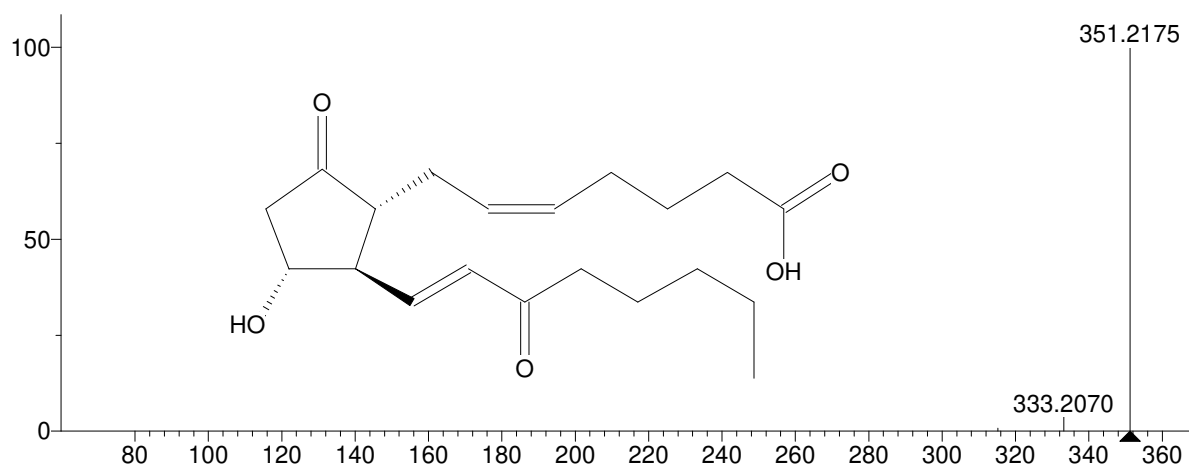



Hit 3 : 6-Ketoprostaglandin E1 [M+H-H<sub>2</sub>O]<sup>+</sup> HCD 1V P=351.2  
C<sub>20</sub>H<sub>32</sub>O<sub>6</sub>; MF: 141; RMF: 768; Prob 0.23%; CAS: 67786-53-2; Lib: nist\_msms; ID: 161827.

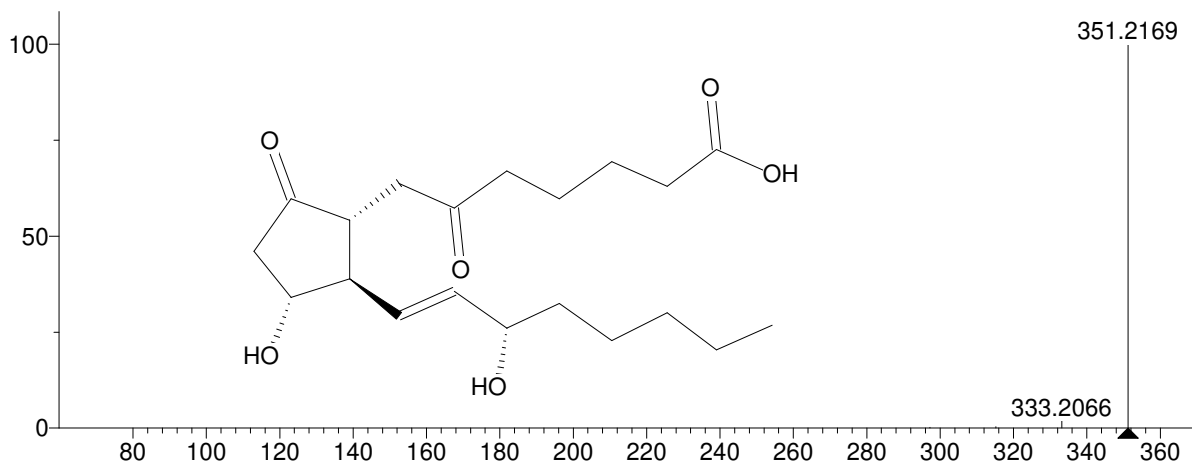

Hit 4 : 15-Ketoprostaglandin F<sub>2</sub>α [M-H]<sup>-</sup> HCD 4V P=351.2  
C<sub>20</sub>H<sub>32</sub>O<sub>5</sub>; MF: 125; RMF: 766; Prob 0.13%; CAS: 35850-13-6; Lib: nist\_msms; ID: 155320.

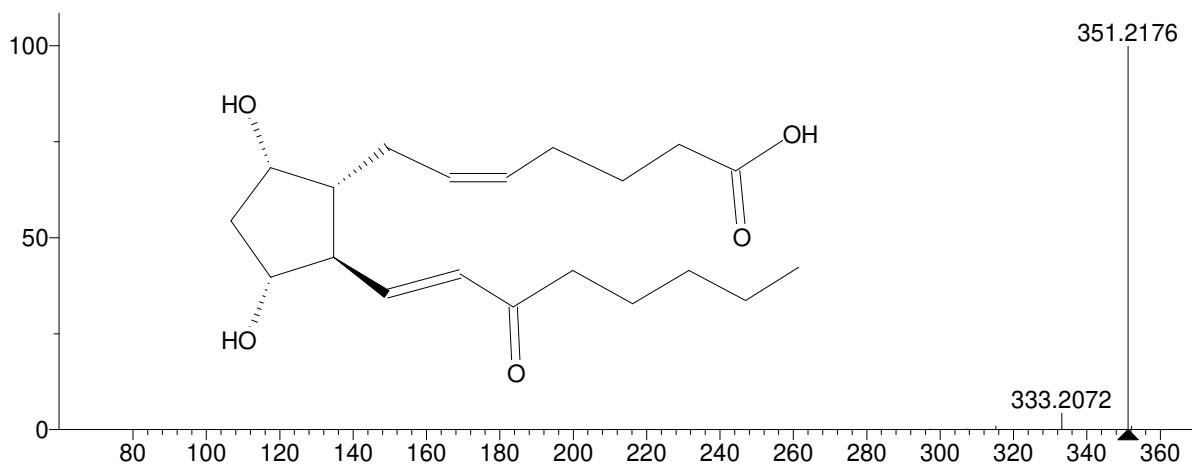

Hit 5 : 8-iso-15-Ketoprostaglandin F<sub>2</sub>α [M-H]<sup>-</sup> HCD 7V P=351.2  
C<sub>20</sub>H<sub>32</sub>O<sub>5</sub>; MF: 118; RMF: 699; Prob 0.10%; CAS: 191919-01-4; Lib: nist\_msms; ID: 158459.

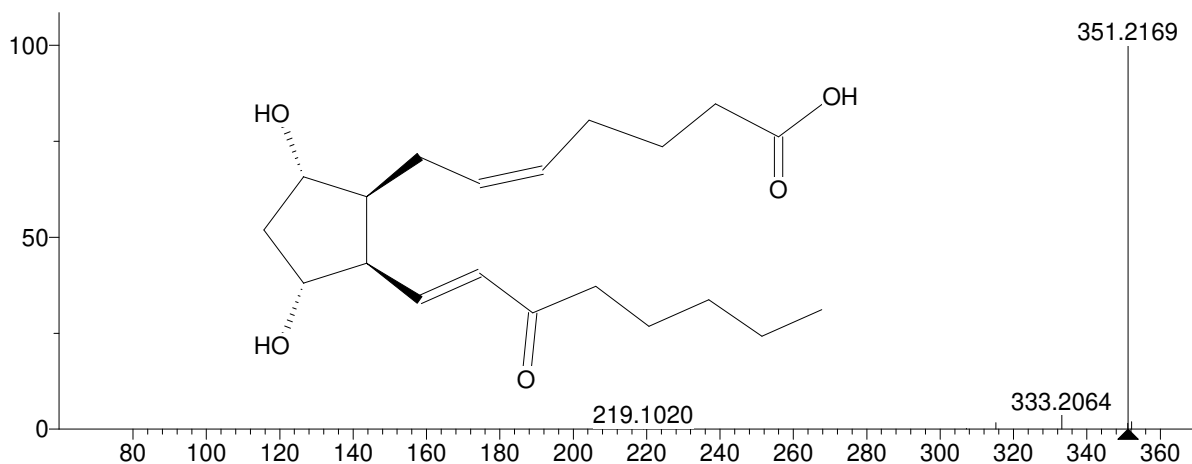

\*\* Search Report Page 1 of 2 \*\*

Unknown: Unknown (22.52\_251.1635m/z)  
Compound in Library Factor = -302

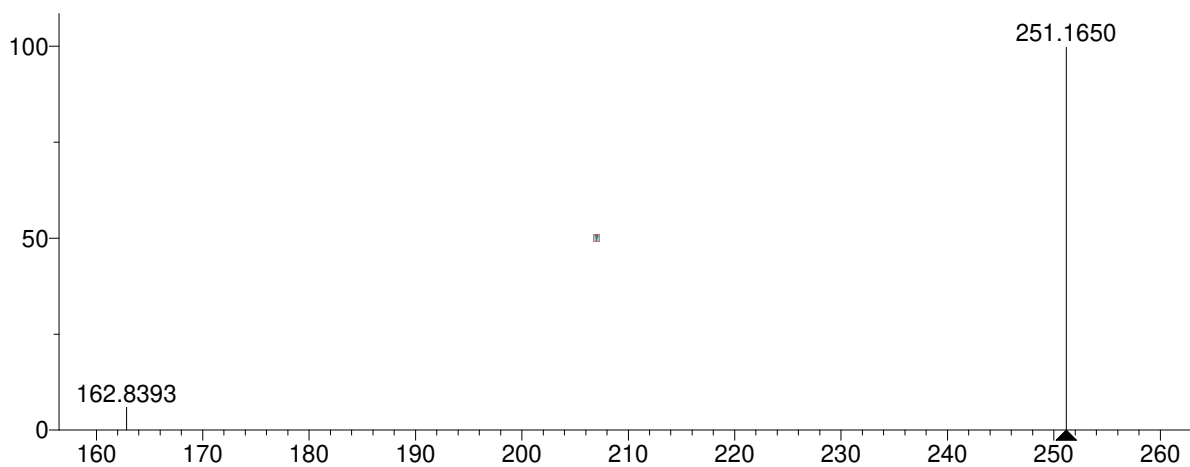

Hit 1 : (6aR)-5S-Hydroxy-4S-((R,E)-3aS-hydroxyoct-1-en-1-yl)hexahydro-2H-cyclopenta[b]furan-2-one [M+H-H<sub>2</sub>O]  
C<sub>15</sub>H<sub>24</sub>O<sub>4</sub>; MF: 352; RMF: 971; Prob 49.4%; CAS: 53110-06-8; Lib: nist\_msms; ID: 158153.

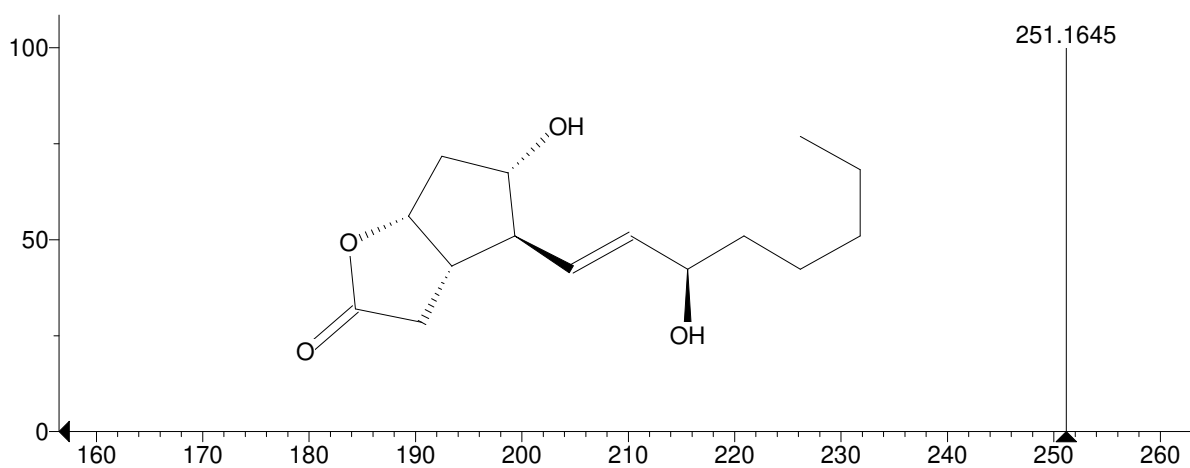

Hit 2 : 3,5-Di-tert-butyl-4-hydroxybenzoic acid [M+H]<sup>+</sup> HCD 80V P=251.2  
C<sub>15</sub>H<sub>22</sub>O<sub>3</sub>; MF: 352; RMF: 971; Prob 49.4%; CAS: 1421-49-4; Lib: nist\_msms; ID: 299242.

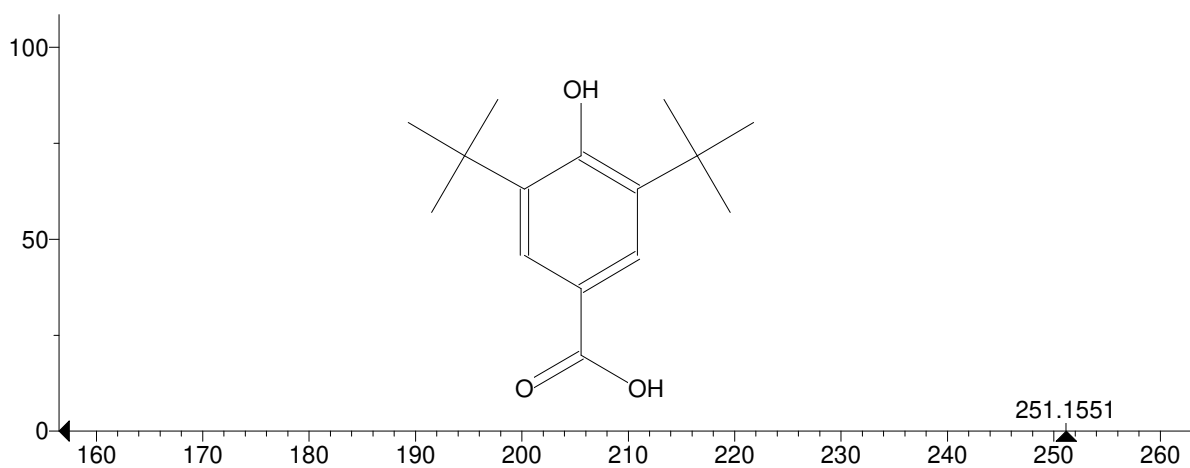

Hit 3 : Corey PG-lactone diol [M+H-H<sub>2</sub>O]<sup>+</sup> HCD 10V P=251.2  
C<sub>15</sub>H<sub>24</sub>O<sub>4</sub>; MF: 171; RMF: 904; Prob 0.86%; CAS: 26054-67-1; Lib: nist\_msms; ID: 374216.

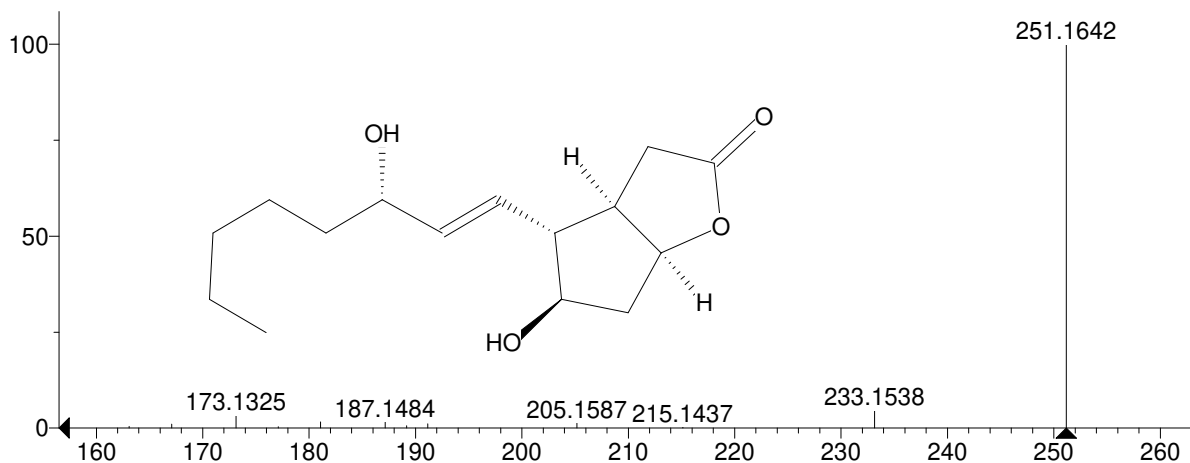

Hit 4 : NCGC00380529-01\_C<sub>15</sub>H<sub>22</sub>O<sub>3</sub>\_4,7-Methanoazulen-6(1H)-one, 2,4,5,7,8,8a-hexahydro-7-hydroxy-9-(hyd  
C<sub>15</sub>H<sub>22</sub>O<sub>3</sub>; MF: 1; RMF: 262; Prob 0.01%; Lib: mona-export-gnps; ID: 10529.

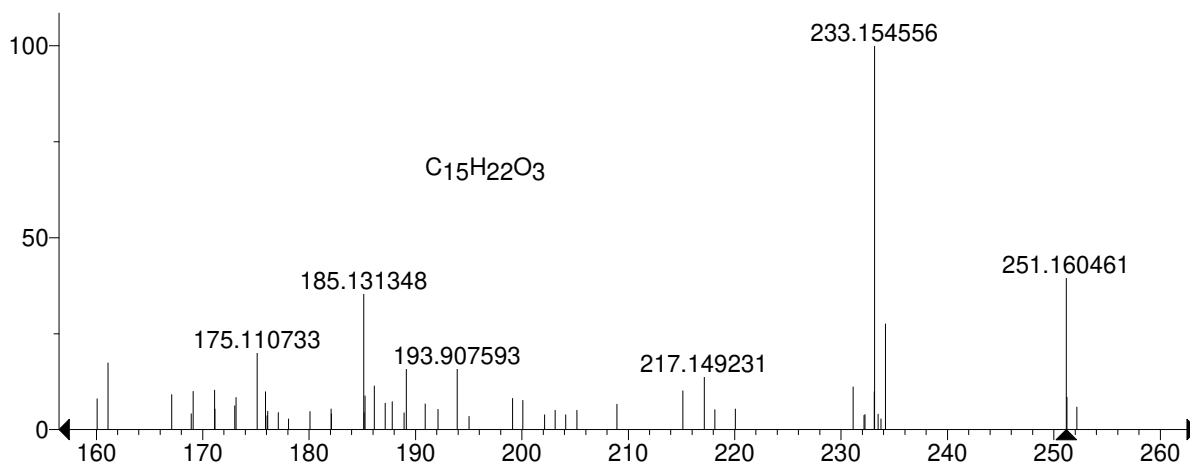

Hit 5 : 8-hydroxy-11-(hydroxymethyl)-1,5,11-trimethyltricyclo[6.2.1.0A<sup>2</sup>,a<sup>1</sup>P]undec-2-en-9-one [M+H]<sup>+</sup> 35HCD  
C<sub>15</sub>H<sub>22</sub>O<sub>3</sub>; MF: 0; RMF: 188; Prob 0.01%; Lib: mona-export-vf-npl\_qexactive; ID: 22627.

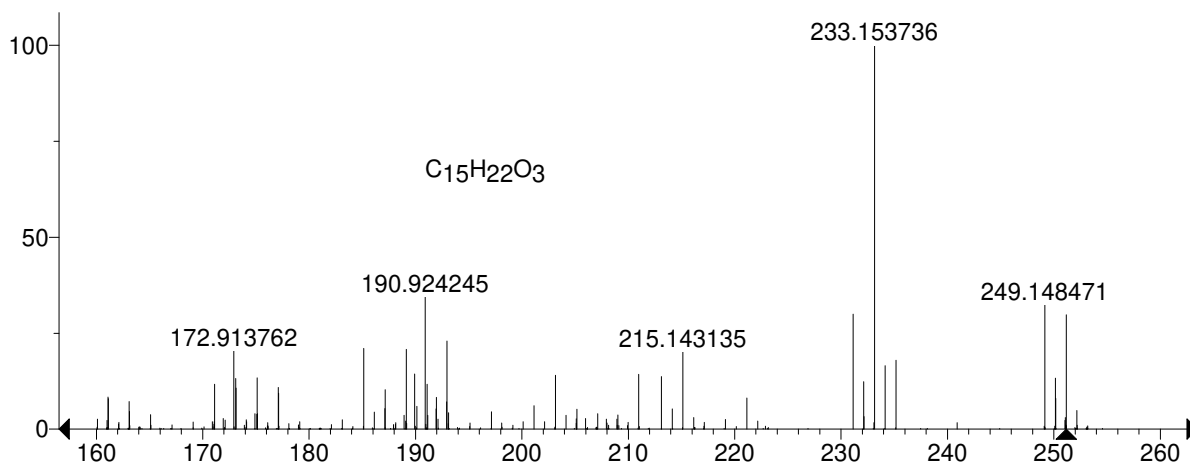

Unknown: Unknown (22.52\_421.1852m/z)  
Compound in Library Factor = -3273

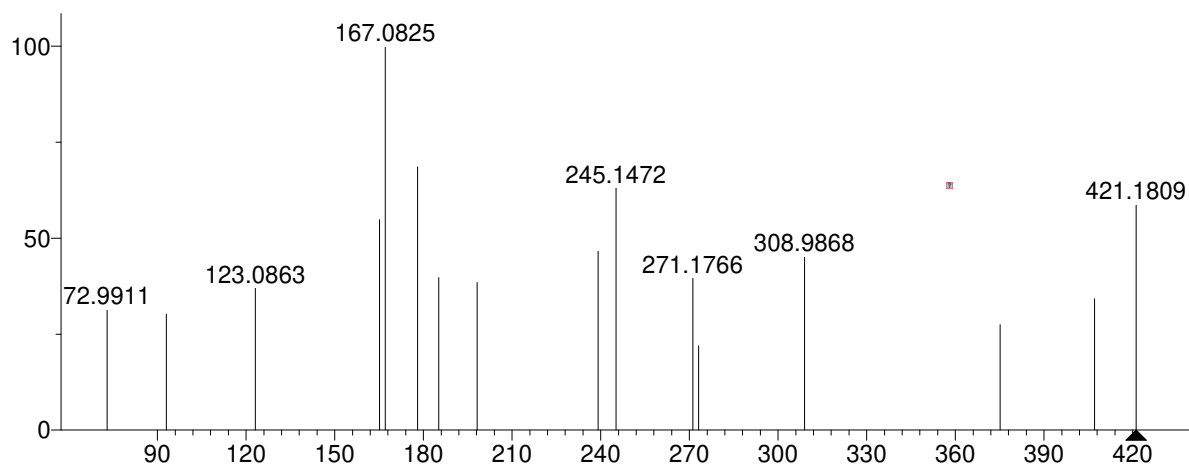

Hit 1 : Met-Asp-Arg [M+H]<sup>+</sup> QTOF 5V P=421.2  
C<sub>15</sub>H<sub>28</sub>N<sub>6</sub>O<sub>6</sub>S; MF: 28; RMF: 332; Prob 21.0%; Lib: nist\_msms; ID: 52198.

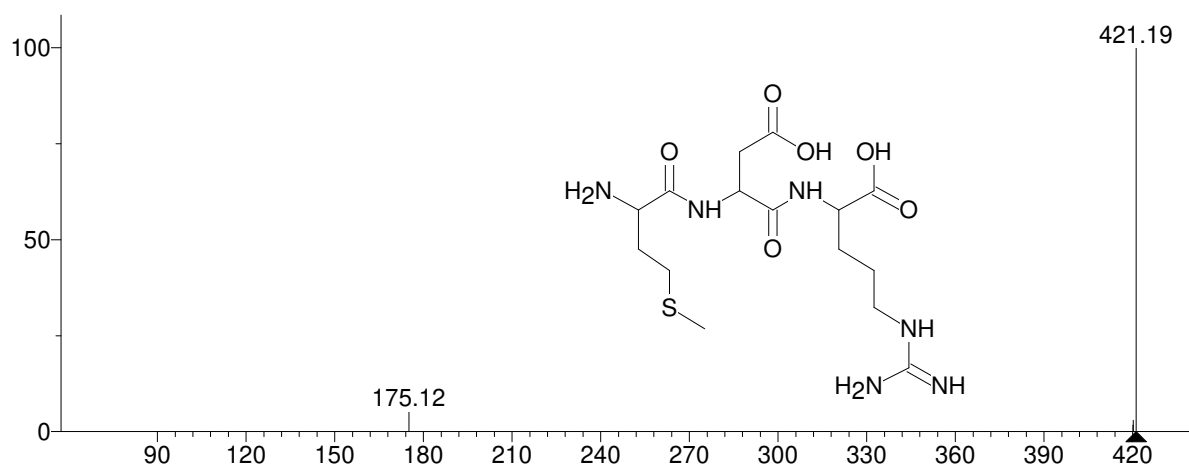

Hit 2 : Glp-His-Pro-Gly [M+H]<sup>+</sup> QTOF 3V P=421.2  
C<sub>18</sub>H<sub>24</sub>N<sub>6</sub>O<sub>6</sub>; MF: 23; RMF: 332; Prob 16.9%; Lib: nist\_msms2; ID: 32614.

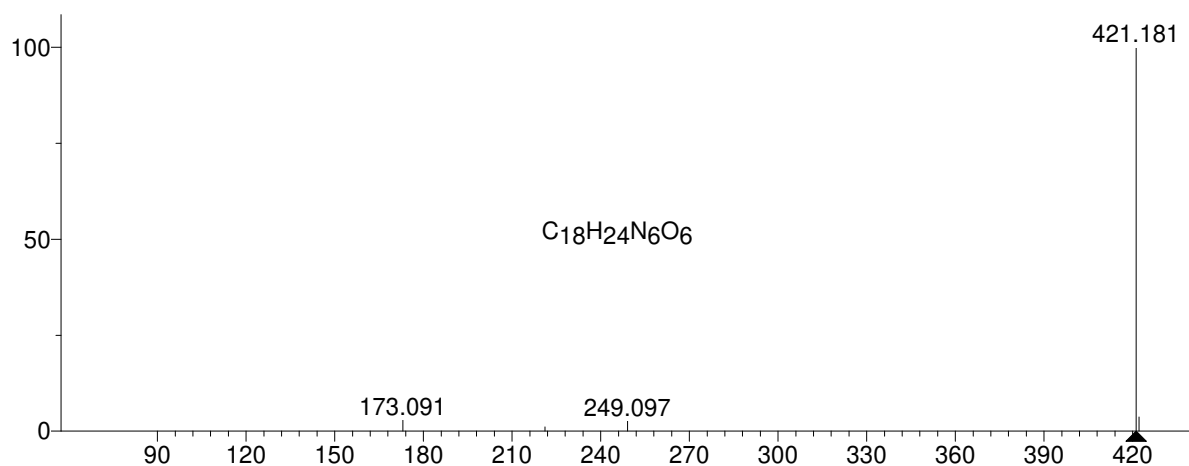

\*\* Search Report Page 2 of 2 \*\*

Hit 3 : Asp-Met-Arg [M+H]<sup>+</sup> QQQ 8V P=421.2  
C<sub>15</sub>H<sub>28</sub>N<sub>6</sub>O<sub>6</sub>S; MF: 21; RMF: 292; Prob 15.6%; Lib: nist\_msms; ID: 41649.

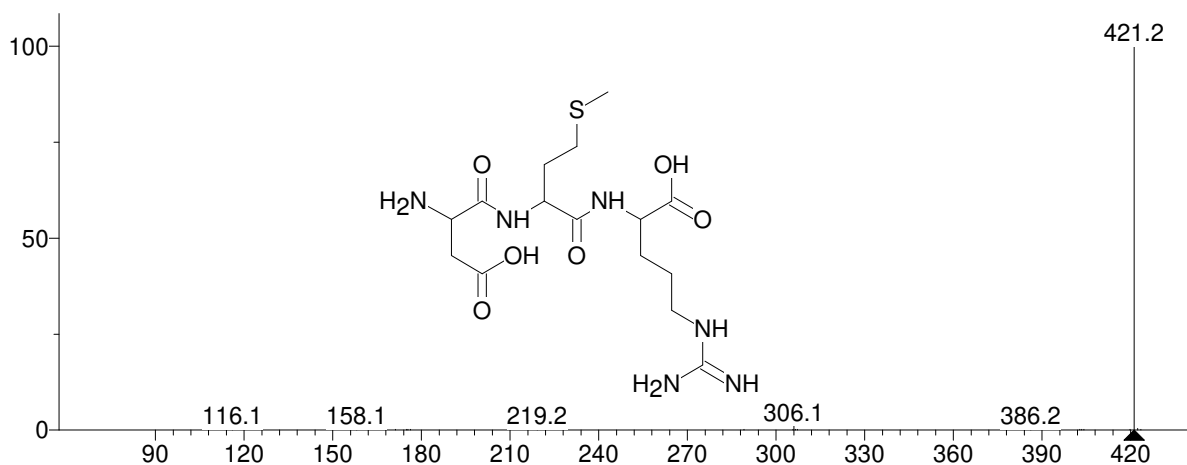

Hit 4 : 3-Cyclohexyl-6-{4-[3-(trifluoromethyl)phenyl]-1-piperazinyl}-2,4(1H,3H)-pyrimidinedione [M-H]<sup>-</sup> HCD 29V  
C<sub>21</sub>H<sub>25</sub>F<sub>3</sub>N<sub>4</sub>O<sub>2</sub>; MF: 6; RMF: 256; Prob 9.46%; Lib: nist\_msms; ID: 348660.

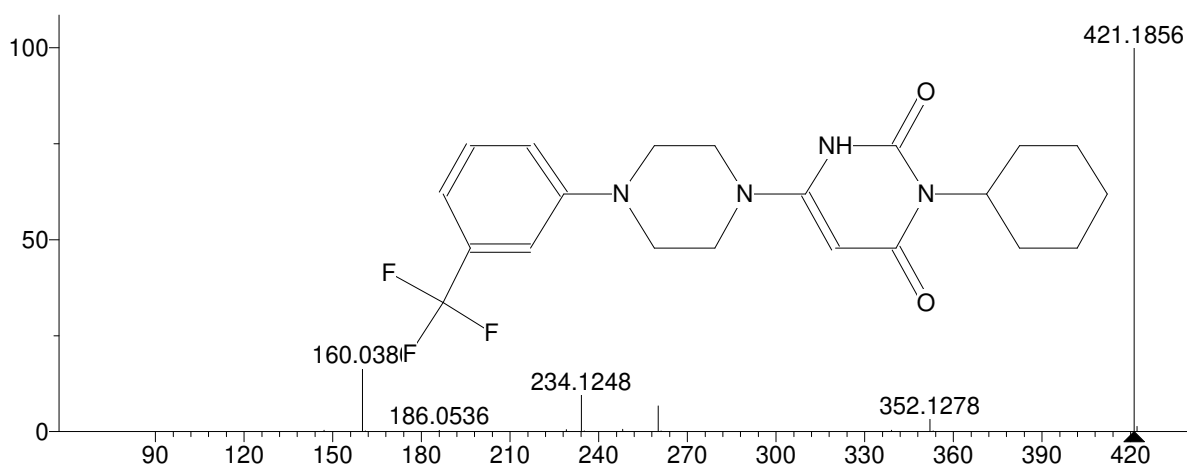

Hit 5 : (2R,3S,4S,9R,12R,13R,14S,15R,16R,17S)-3,4,12,13,15,16-hexahydroxy-2,6,14,17-tetramethyl-10-oxatetr:  
C<sub>20</sub>H<sub>30</sub>O<sub>8</sub>; MF: 1; RMF: 186; Prob 7.62%; Lib: mona-export-vf-npl\_qexactive; ID: 16420.

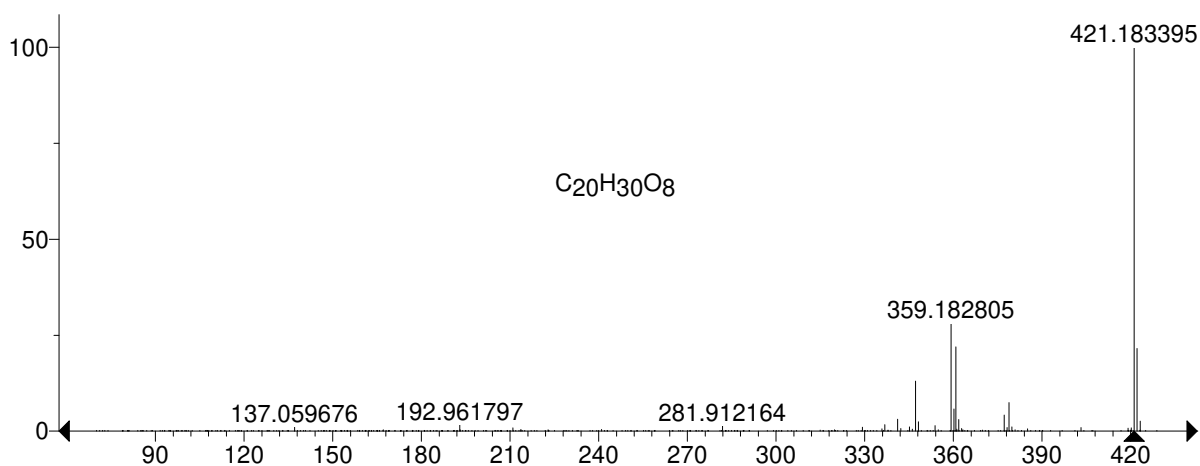

\*\* Search Report Page 1 of 2 \*\*

Unknown: Unknown (22.59\_250.1079m/z)  
Compound in Library Factor = -2176

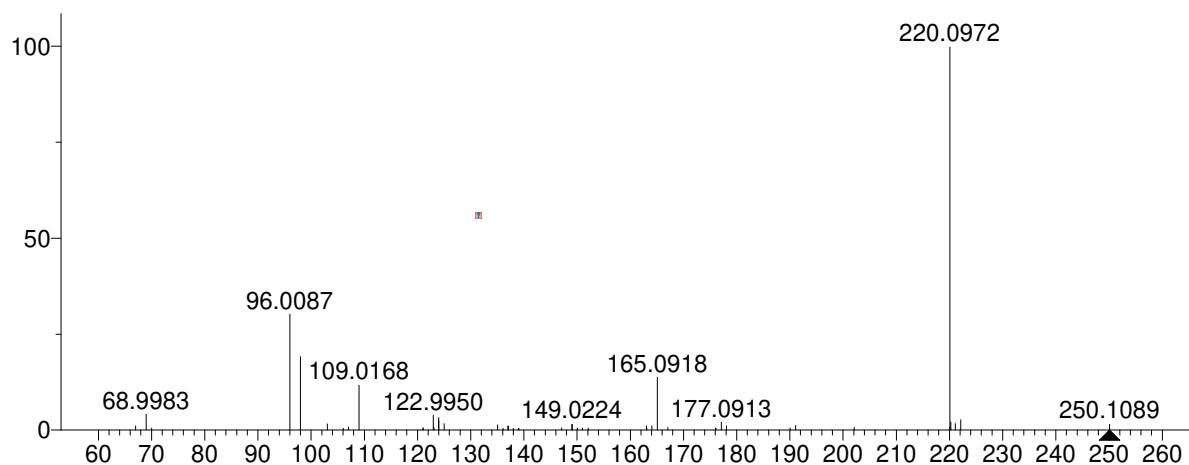

Hit 1 : N-Acetyl-L-tyrosine ethyl ester [M-H]<sup>-</sup> HCD 5V P=250.1  
C<sub>13</sub>H<sub>17</sub>NO<sub>4</sub>; MF: 33; RMF: 165; Prob 50.0%; CAS: 36546-50-6; Lib: nist\_msms; ID: 220855.

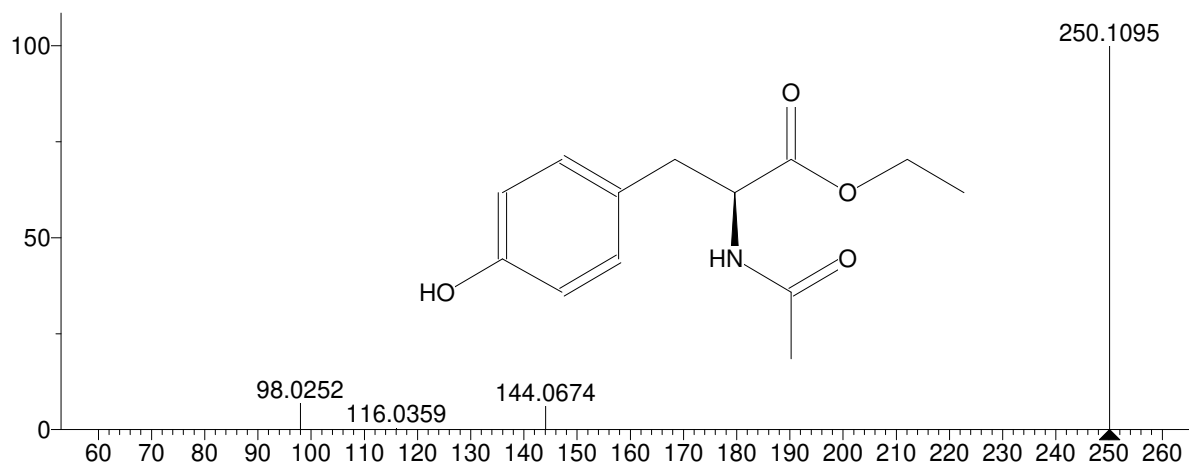

Hit 2 : N-Acetyl-3,4-methylenedioxyamfetamine [M+H]<sup>+</sup> HCD 7V P=250.1  
C<sub>13</sub>H<sub>15</sub>NO<sub>4</sub>; MF: 4; RMF: 80; Prob 14.2%; CAS: 1227293-15-3; Lib: nist\_msms; ID: 423641.

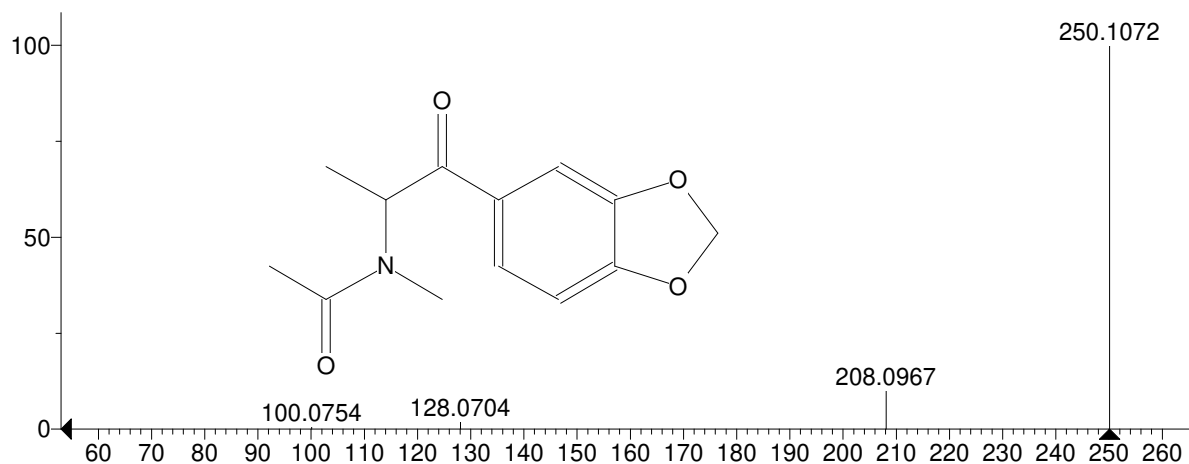

Hit 3 : Dimethachlor OXA; LC-ESI-ITFT; MS2; CE [M-H]- 15 P=250.1  
C<sub>13</sub>H<sub>17</sub>NO<sub>4</sub>; MF: 0; RMF: 28; Prob 12.0%; Lib: msms-neg-massbank; ID: 2796.

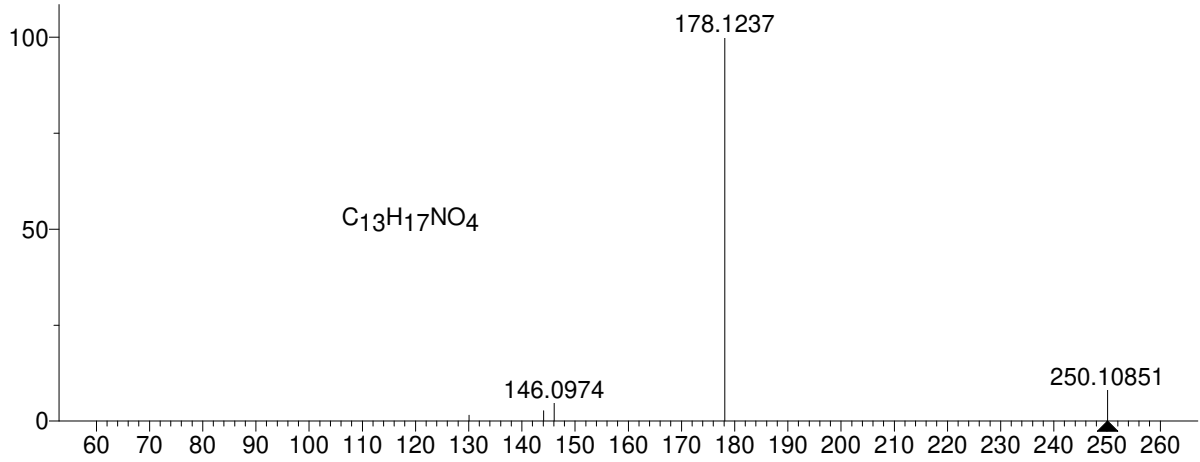

Hit 4 : Dimethachlor OXA [M-H]- 15% ( P=250.1  
C<sub>13</sub>H<sub>17</sub>NO<sub>4</sub>; MF: 0; RMF: 26; Prob 12.0%; Lib: mona-export-lc-ms-ms\_negative\_mode; ID: 3042.

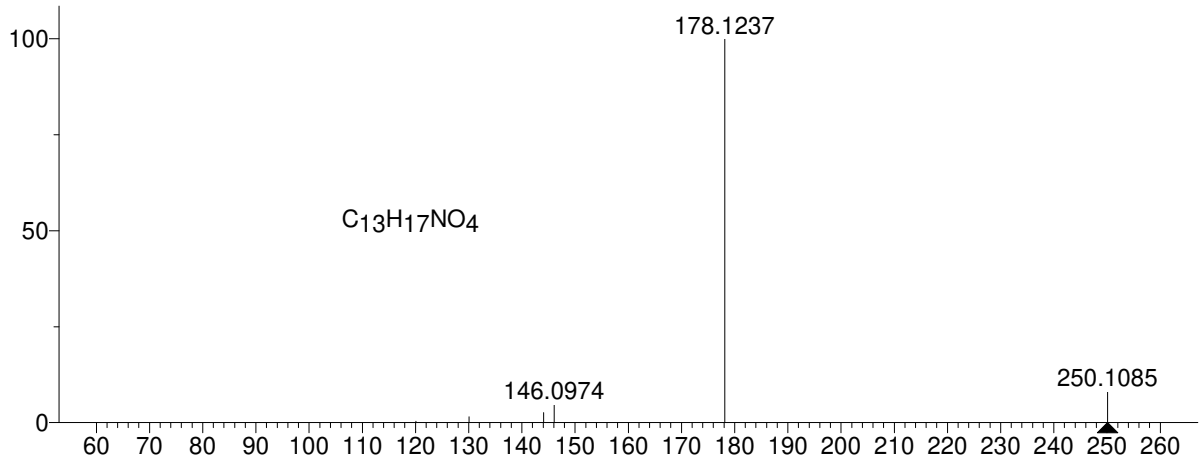

Hit 5 : Goniotalenol [M+NH<sub>4</sub>]+ 35HCD P=250.1  
C<sub>13</sub>H<sub>12</sub>O<sub>4</sub>; MF: 0; RMF: 12; Prob 12.0%; Lib: mona-export-vf-npl\_qexactive; ID: 18316.

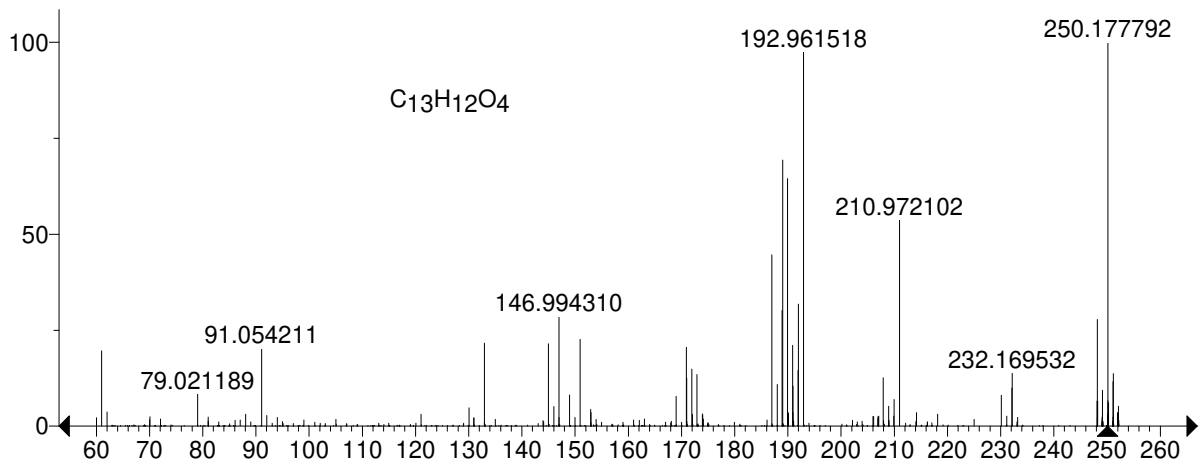

Unknown: Unknown (22.59\_250.2564m/z)  
Compound in Library Factor = 0

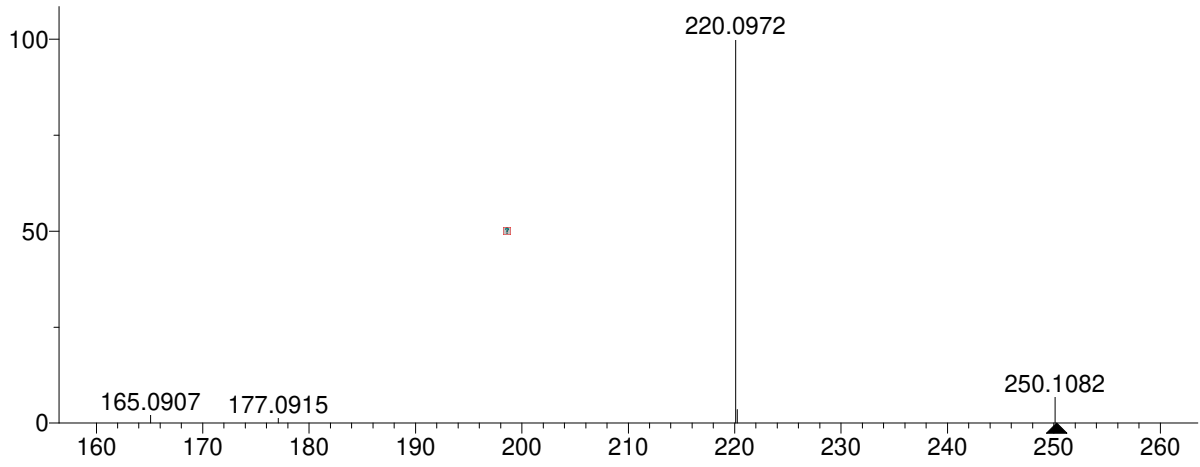



\*\* Search Report Page 1 of 2 \*\*

Unknown: Unknown (22.60\_220.0971 m/z)  
Compound in Library Factor = -1523

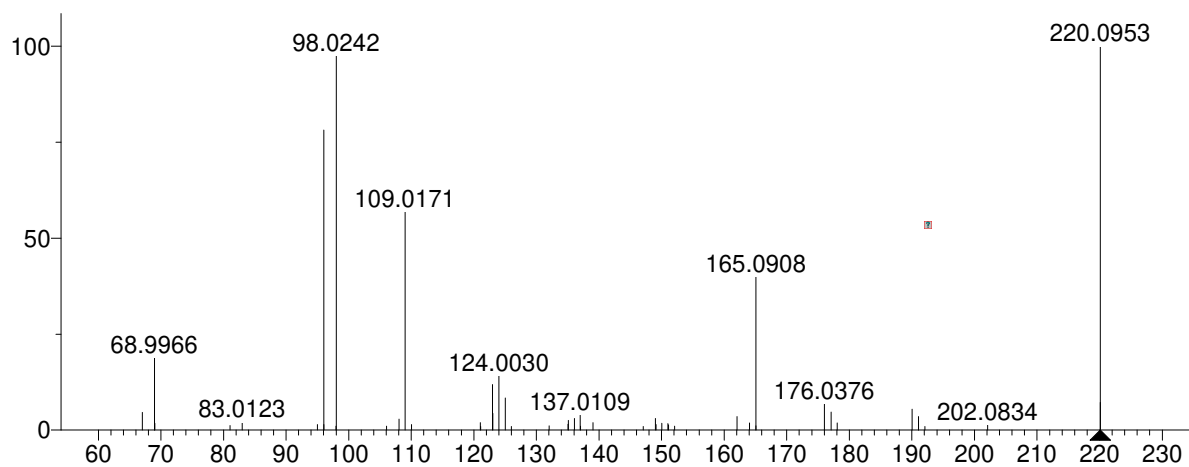

Hit 1 : 6-Methoxymethylone [M+H-H<sub>2</sub>O]<sup>+</sup> HCD 9V P=220.1  
C<sub>12</sub>H<sub>15</sub>NO<sub>4</sub>; MF: 168; RMF: 807; Prob 43.5%; Lib: nist\_msms; ID: 551027.

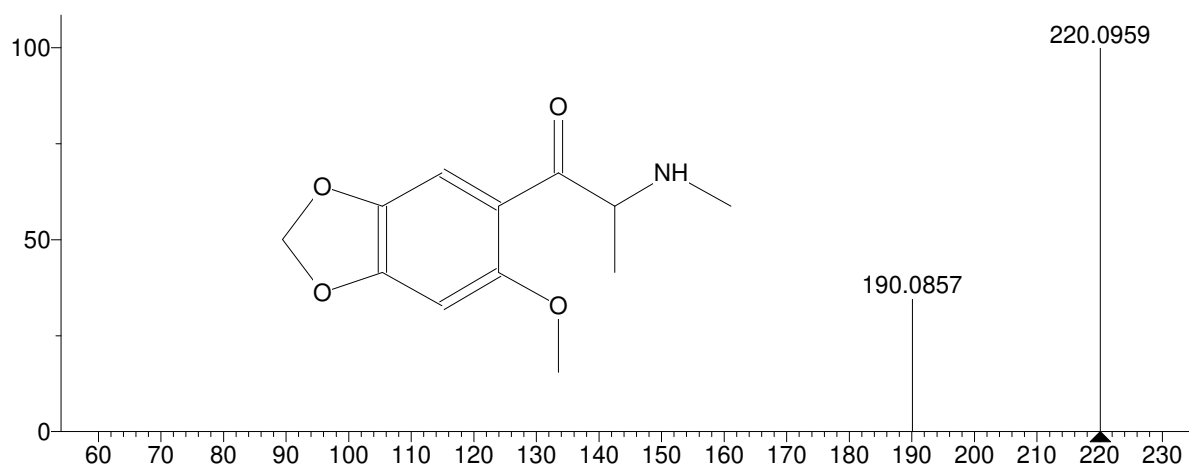

Hit 2 : 5-Methoxymethylone [M+H-H<sub>2</sub>O]<sup>+</sup> HCD 8V P=220.1  
C<sub>12</sub>H<sub>15</sub>NO<sub>4</sub>; MF: 156; RMF: 726; Prob 29.0%; Lib: nist\_msms; ID: 547148.

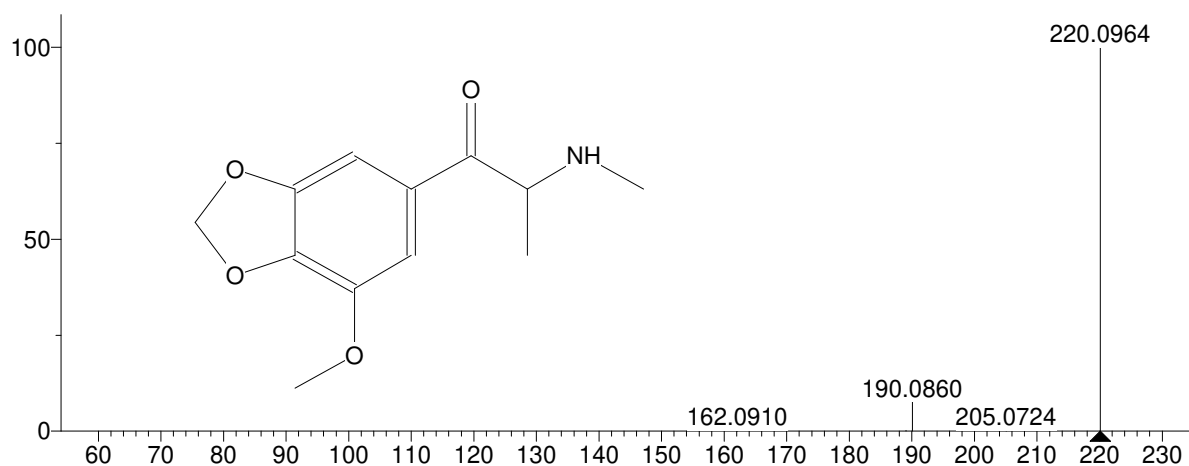

Hit 3 : 3-Hydroxycarbofuran [M+H-H<sub>2</sub>O]<sup>+</sup> HCD 2V P=220.1  
C<sub>12</sub>H<sub>15</sub>NO<sub>4</sub>; MF: 151; RMF: 709; Prob 23.3%; CAS: 16655-82-6; Lib: nist\_msms; ID: 471676.

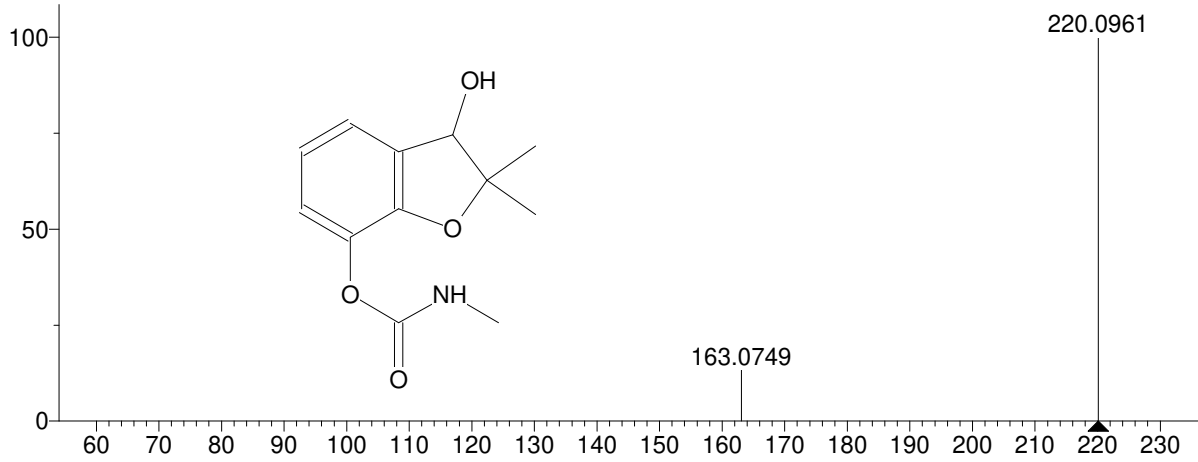

Hit 4 : Mepirizole [M+H-CH<sub>3</sub>]<sup>+</sup> IT-FT 35% P=220.1  
C<sub>11</sub>H<sub>14</sub>N<sub>4</sub>O<sub>2</sub>; MF: 11; RMF: 109; Prob 0.79%; CAS: 18694-40-1; Lib: nist\_msms; ID: 188218.

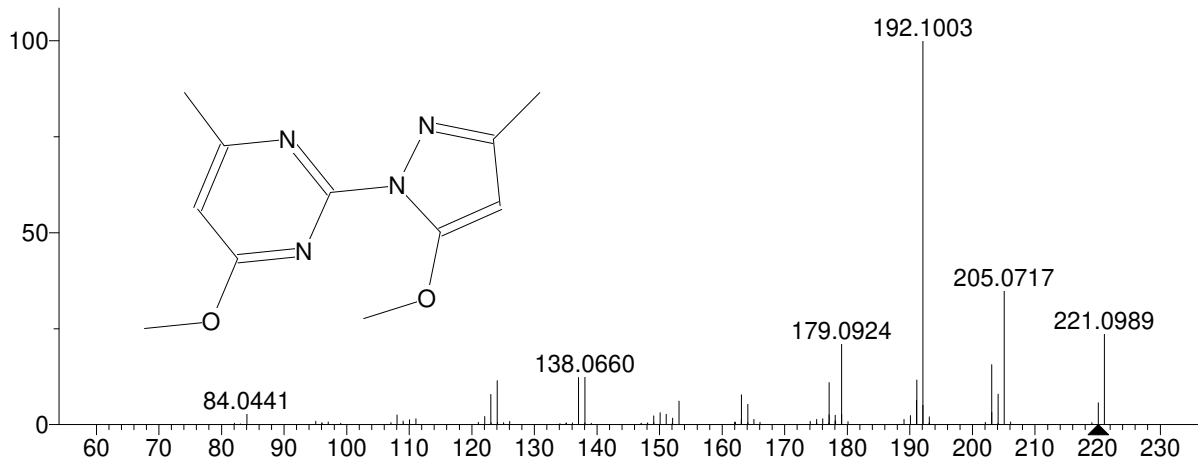

Hit 5 : NCGC00385964-01!3-ethyl-6-hydroxy-3H-2-benzofuran-1-one [M+ACN+H]<sup>+</sup> P=220.1  
C<sub>10</sub>H<sub>10</sub>O<sub>3</sub>; MF: 6; RMF: 187; Prob 0.63%; Lib: mona-export-gnps; ID: 9039.

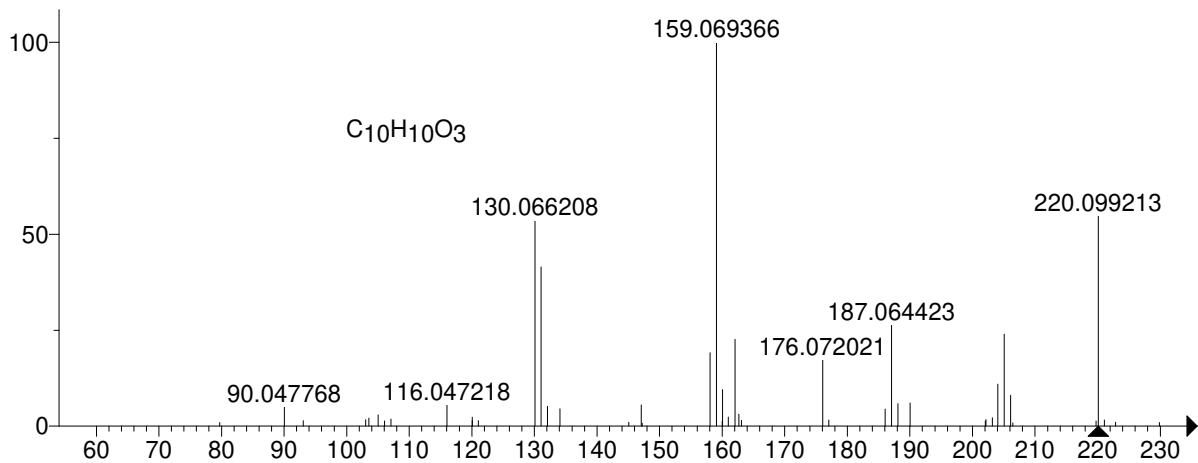

Unknown: Unknown (22.60\_318.0942m/z)  
Compound in Library Factor = 0

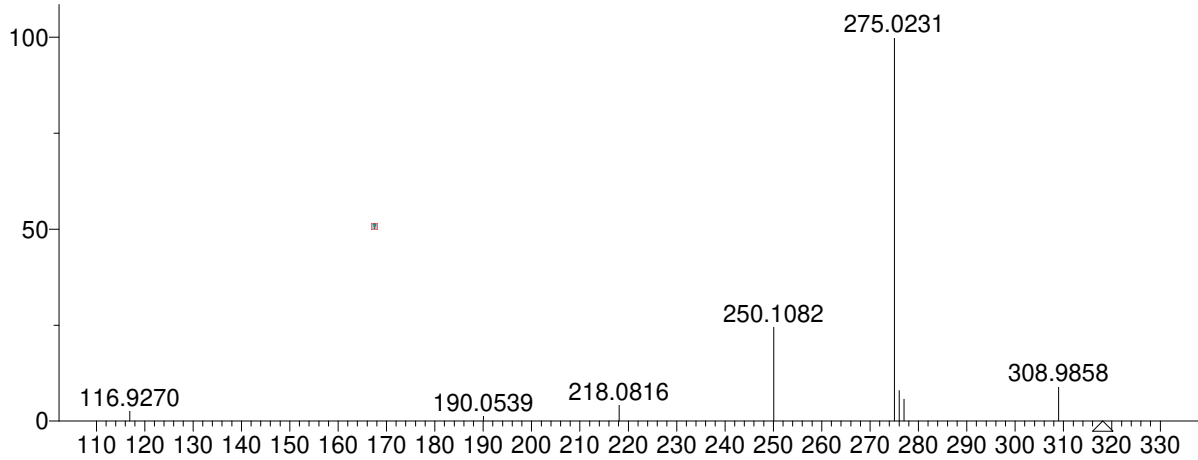

Hit 1 : Hematein [M+NH4]<sup>+</sup> 35HCD P=318.1  
C16H12O6; MF: 0; RMF: 35; Prob 20.0%; Lib: mona-export-vf-npl\_qexactive; ID: 26926.

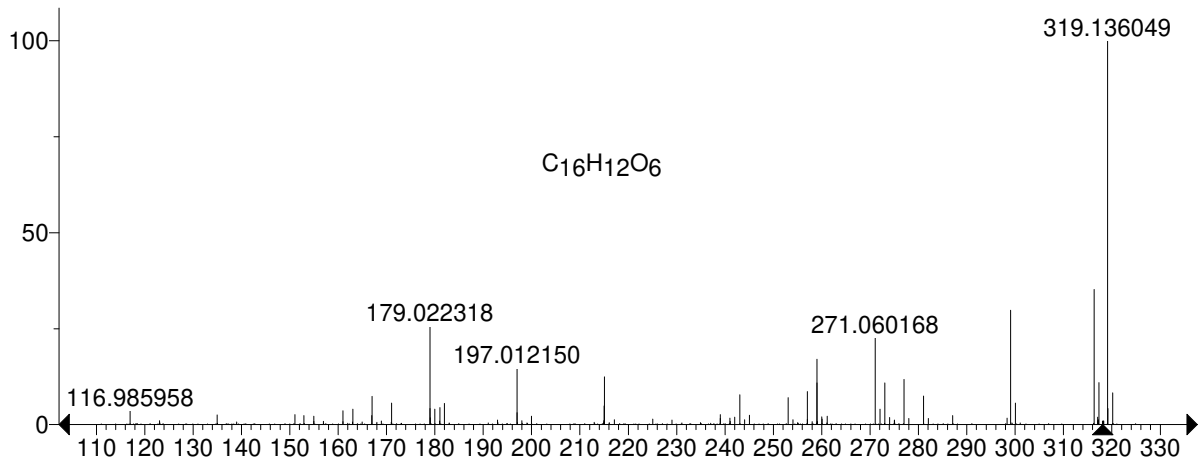

Hit 2 : Prulaurasin [M+Na]<sup>+</sup> 35HCD P=318.1  
C14H17NO6; MF: 0; RMF: 22; Prob 20.0%; Lib: mona-export-vf-npl\_qexactive; ID: 7528.

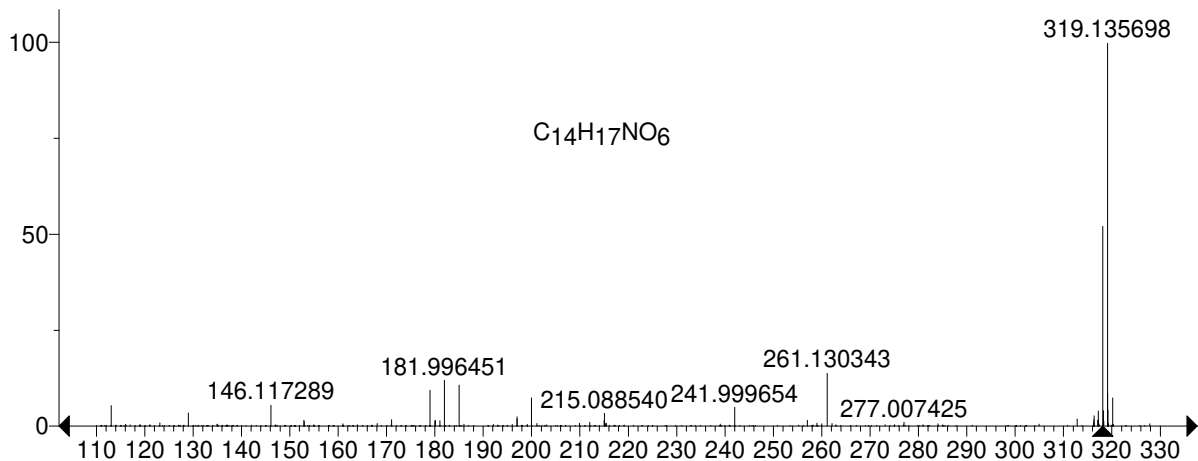

Hit 3 : Fallacinol [M+NH4]<sup>+</sup> 35HCD P=318.1  
C<sub>16</sub>H<sub>12</sub>O<sub>6</sub>; MF: 0; RMF: 8; Prob 20.0%; Lib: mona-export-vf-npl\_qexactive; ID: 4921.

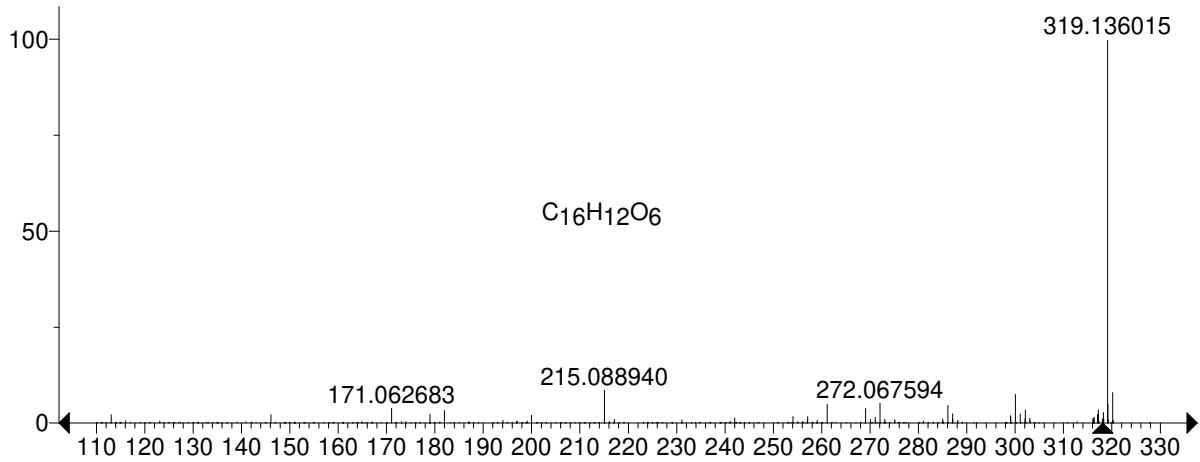

Hit 4 : NCGC00385951-01!1,3,6-trihydroxy-4,5-dimethoxy-10-methylacridin-9-one [M+H]<sup>+</sup> P=318.1  
C<sub>16</sub>H<sub>15</sub>NO<sub>6</sub>; MF: 0; RMF: 5; Prob 20.0%; Lib: mona-export-gnps; ID: 9043.

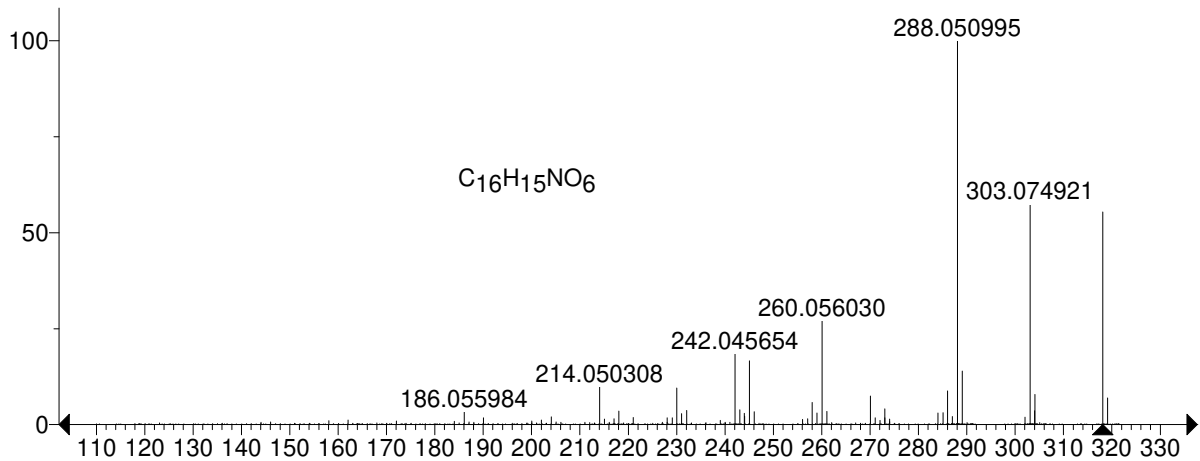

Hit 5 : carviolin [M+NH4]<sup>+</sup> 65HCD P=318.1  
C<sub>16</sub>H<sub>12</sub>O<sub>6</sub>; MF: 0; RMF: 4; Prob 20.0%; Lib: mona-export-vf-npl\_qexactive; ID: 6510.

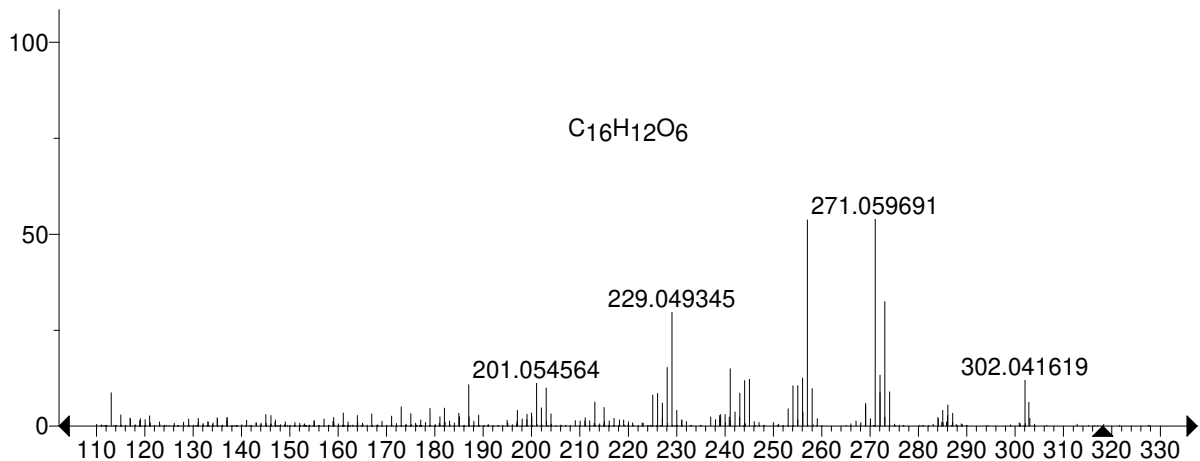

Unknown: Unknown (22.60\_395.0300m/z)  
Compound in Library Factor = -3273

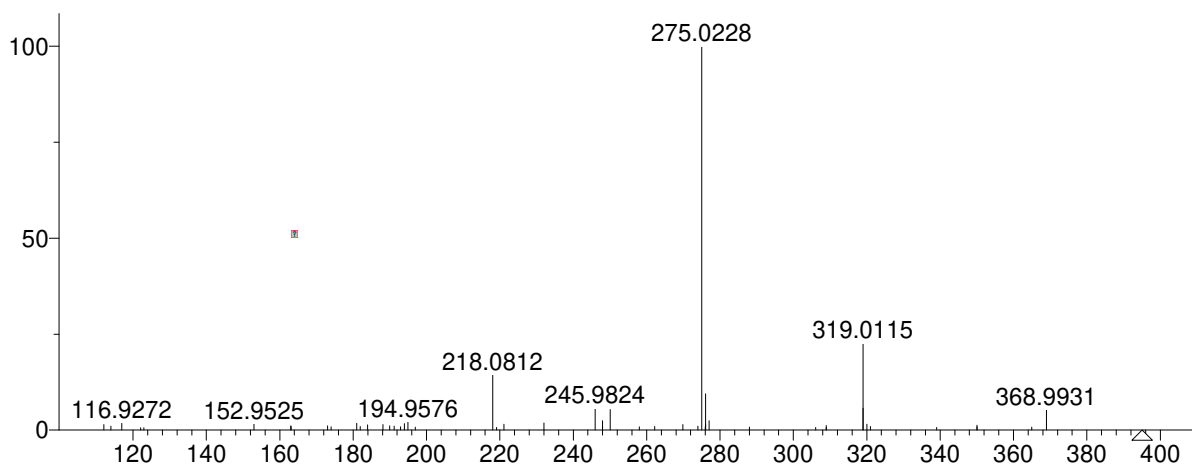

Hit 1 : (4R,8S)-17-chloro-2,18-dimethoxy-7,9,13-trioxapentacyclo[10.8.0.0A^3,A^1a^o.0a^",a^,,.0A^1a^",A^1a^' C<sub>19</sub>H<sub>13</sub>ClO<sub>6</sub>; MF: 1; RMF: 64; Prob 100.0%; Lib: mona-export-vf-npl\_qexactive; ID: 22920.

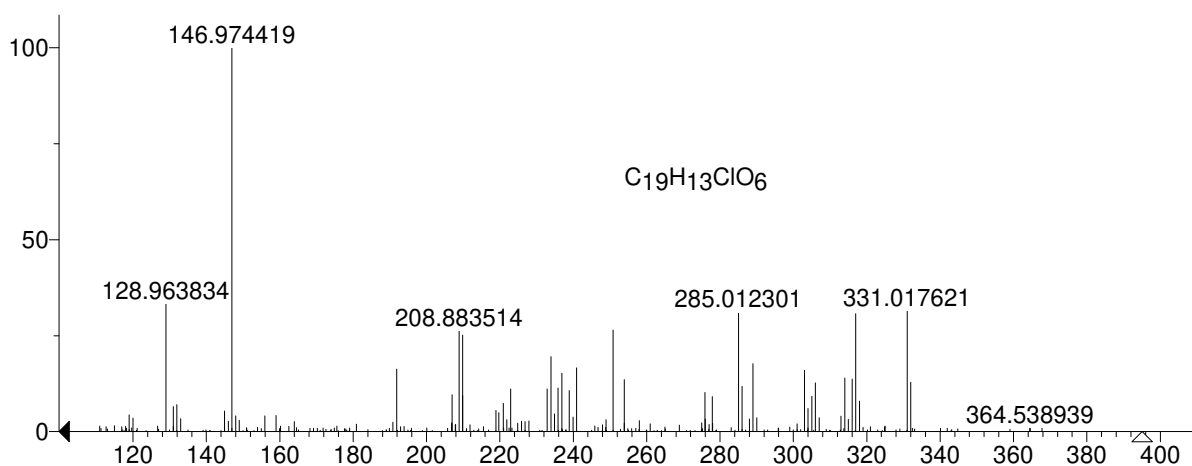

Unknown: Unknown (22.60\_445.0120m/z)  
Compound in Library Factor = 0

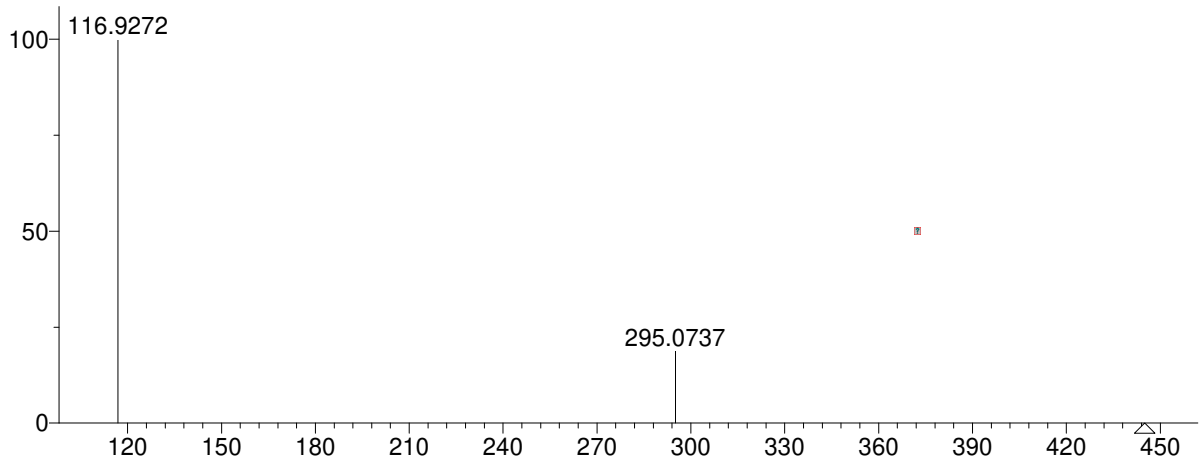

Unknown: Unknown (22.61\_351.2159m/z)  
Compound in Library Factor = -409

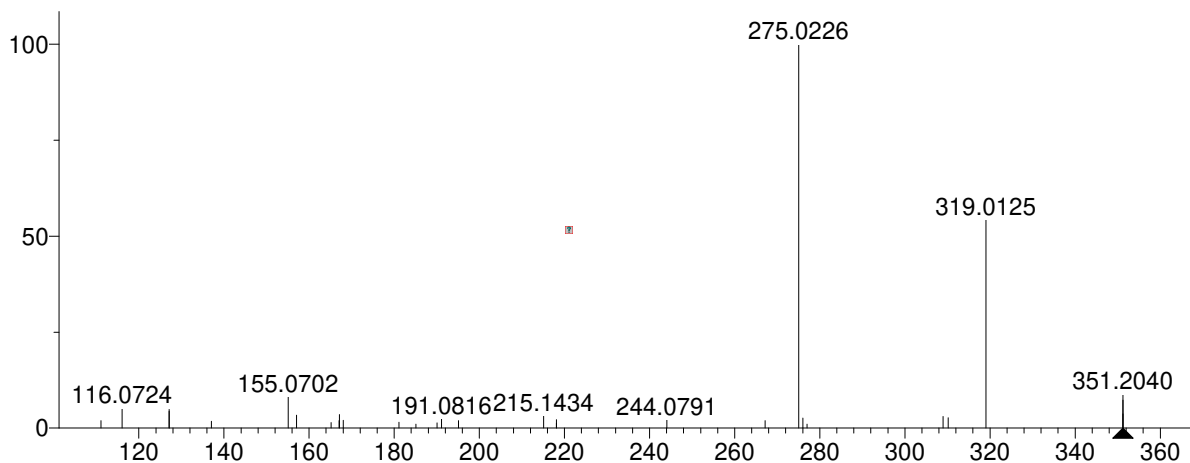

Hit 1 : 11,15-Dioxo-9S-hydroxy-5Z-prostenoic acid [M-H]<sup>-</sup> HCD 1V P=351.2  
C<sub>20</sub>H<sub>32</sub>O<sub>5</sub>; MF: 211; RMF: 687; Prob 77.2%; CAS: 59894-07-4; Lib: nist\_msms; ID: 87215.

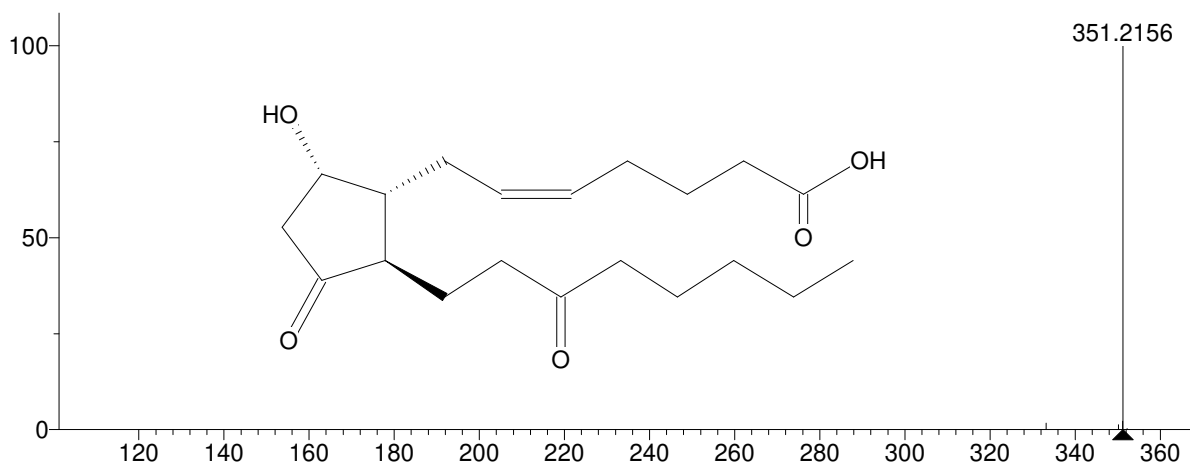

Hit 2 : 15-Ketoprostaglandin E2 [M+H]<sup>+</sup> HCD 1V P=351.2  
C<sub>20</sub>H<sub>30</sub>O<sub>5</sub>; MF: 43; RMF: 336; Prob 1.76%; CAS: 26441-05-4; Lib: nist\_msms; ID: 169378.

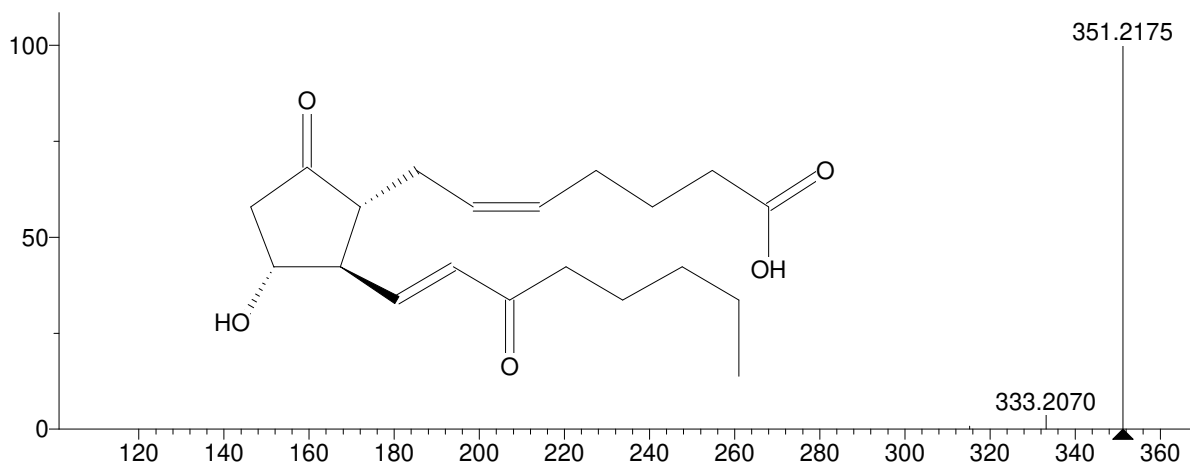

Hit 3 : 6-Ketoprostaglandin E1 [M+H-H<sub>2</sub>O]<sup>+</sup> HCD 1V P=351.2  
C<sub>20</sub>H<sub>32</sub>O<sub>6</sub>; MF: 40; RMF: 327; Prob 1.55%; CAS: 67786-53-2; Lib: nist\_msms; ID: 161827.

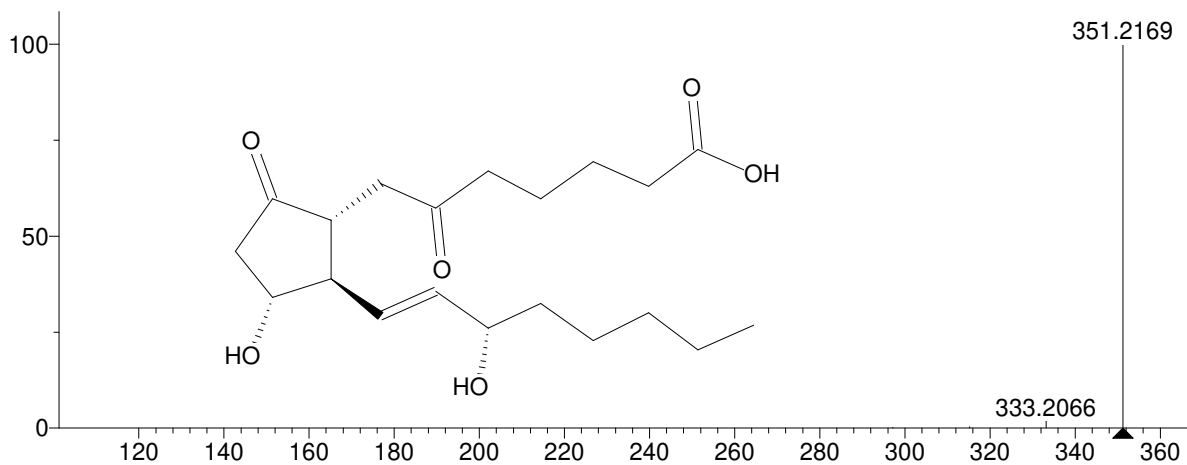

Hit 4 : 15-Ketoprostaglandin F2 $\alpha$  [M-H]<sup>-</sup> HCD 3V P=351.2  
C<sub>20</sub>H<sub>32</sub>O<sub>5</sub>; MF: 36; RMF: 338; Prob 1.31%; CAS: 35850-13-6; Lib: nist\_msms; ID: 155319.

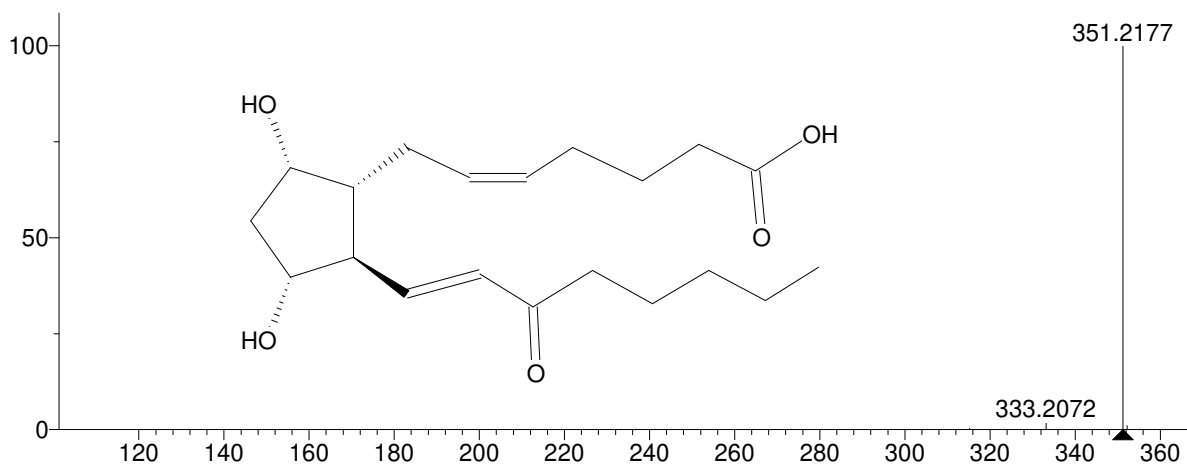

Hit 5 : 19(R)-Hydroxyprostaglandin E2 [M+H-H<sub>2</sub>O]<sup>+</sup> HCD 1V P=351.2  
C<sub>20</sub>H<sub>32</sub>O<sub>6</sub>; MF: 31; RMF: 335; Prob 1.05%; CAS: 64625-54-3; Lib: nist\_msms; ID: 169989.

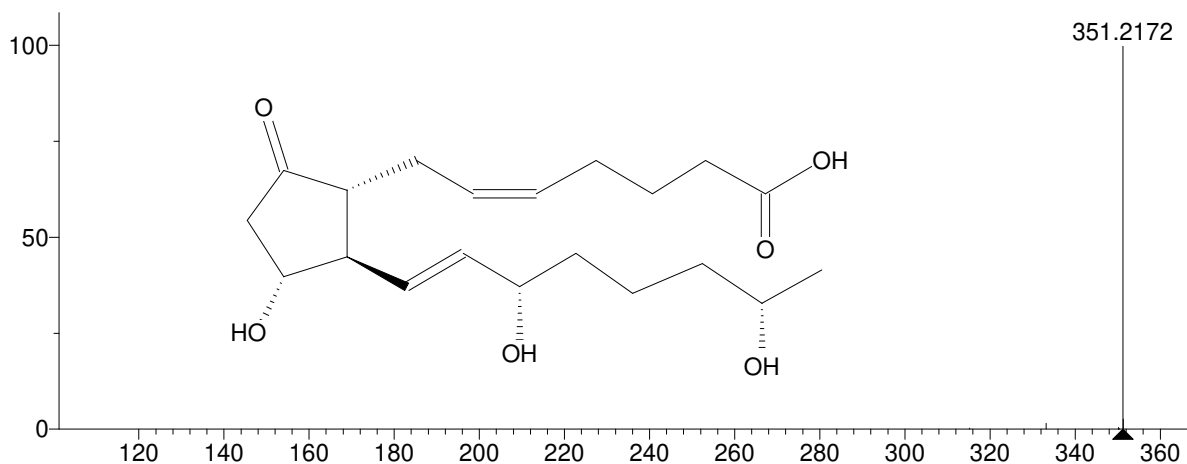



Unknown: Unknown (22.61\_523.2050m/z)  
Compound in Library Factor = 0

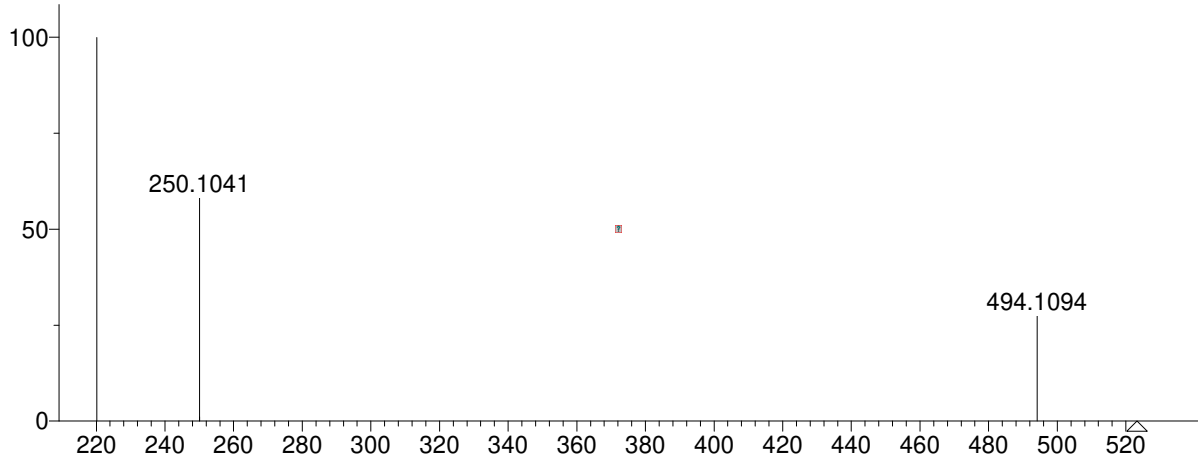

Hit 1 : Oxyacanthine [M+H-C<sub>2</sub>H<sub>5</sub>N]<sub>+</sub>=>523.2 IT 35% P=523.2  
C<sub>37</sub>H<sub>40</sub>N<sub>2</sub>O<sub>6</sub>; MF: 0; RMF: 18; Prob 50.0%; CAS: 548-40-3; Lib: nist\_msms; ID: 455875.

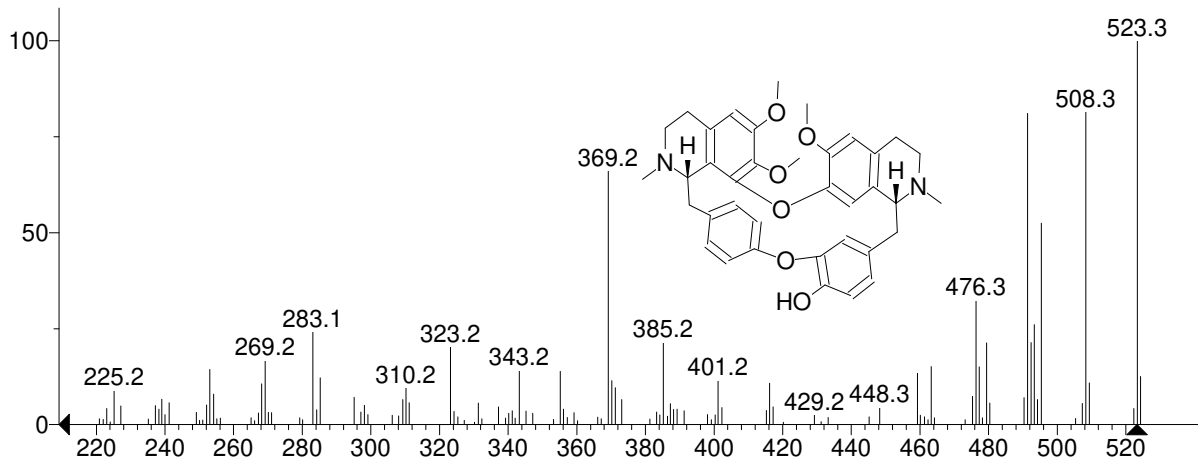

Hit 2 : 3-Deoxy-3Beta-Hydroxymexicanolide 16-Enol Ether [M+K]<sub>+</sub> 35HCD P=523.2  
C<sub>28</sub>H<sub>36</sub>O<sub>7</sub>; MF: 0; RMF: 3; Prob 50.0%; Lib: mona-export-vf-npl\_qexactive; ID: 25726.

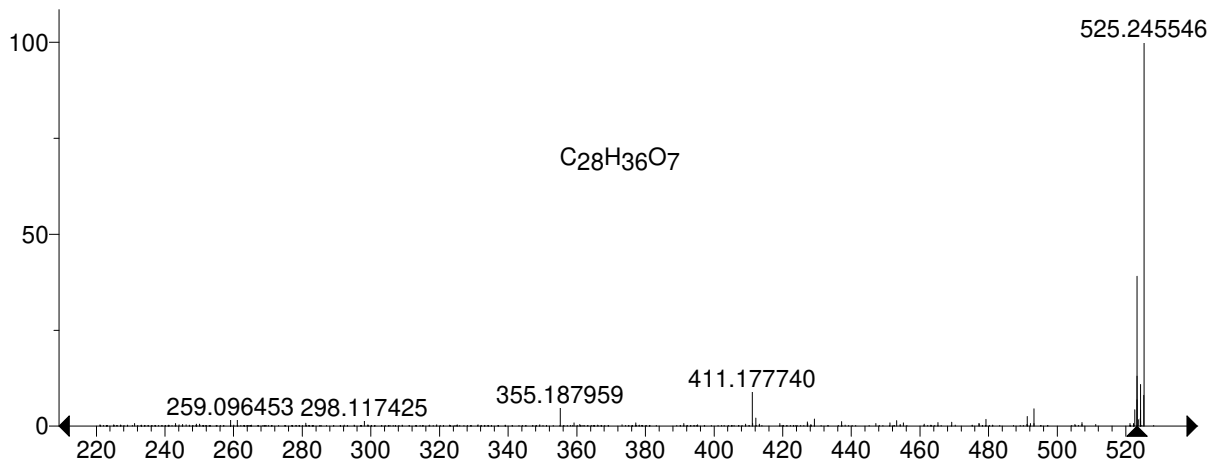

Unknown: Unknown (22.62\_252.1142m/z)  
Compound in Library Factor = 0

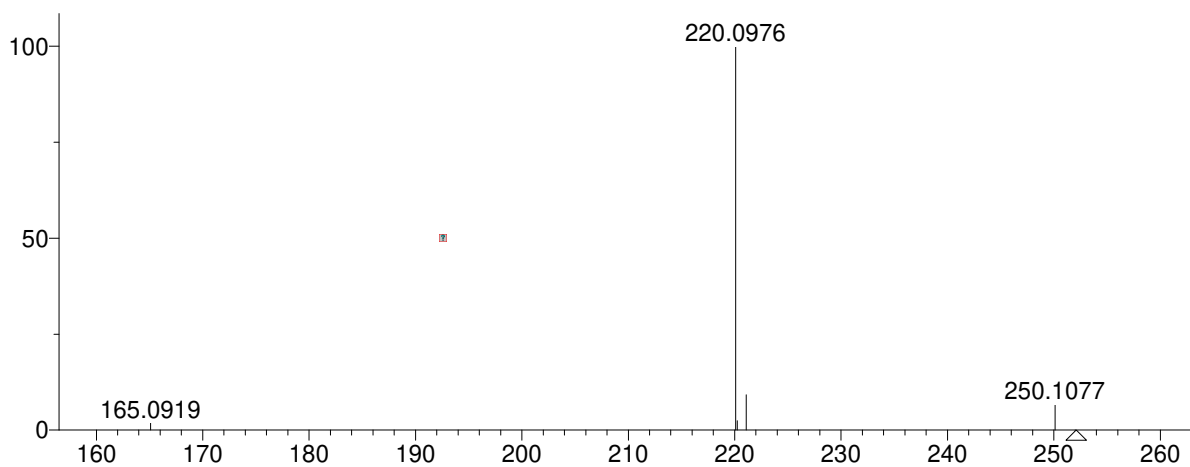

Hit 1 : 7-Aminonitrazepam [M+H]<sup>+</sup> HCD 65V P=252.1  
C<sub>15</sub>H<sub>13</sub>N<sub>3</sub>O; MF: 0; RMF: 13; Prob 100.0%; CAS: 4928-02-3; Lib: nist\_msms; ID: 193640.

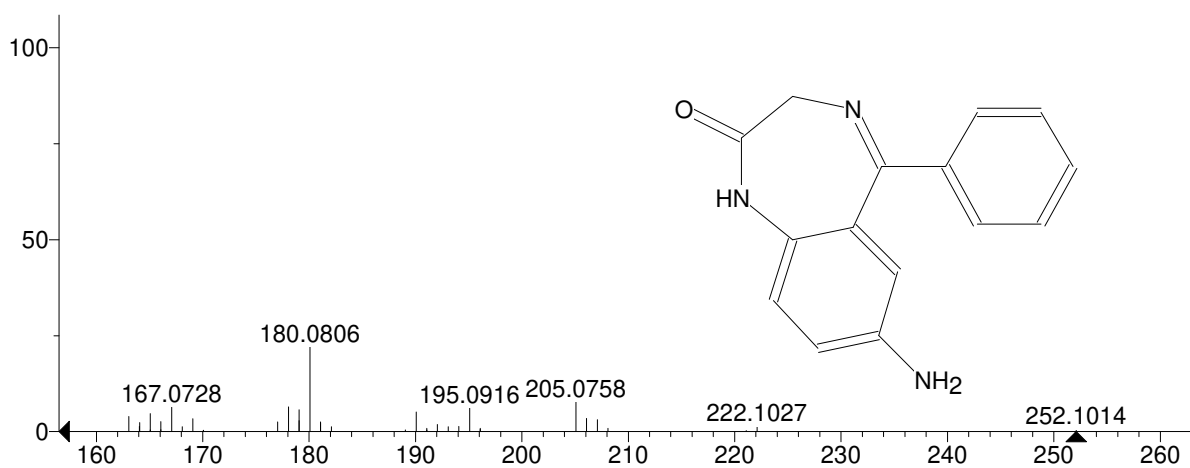

Unknown: Unknown (22.64\_291.1324m/z)  
Compound in Library Factor = 0

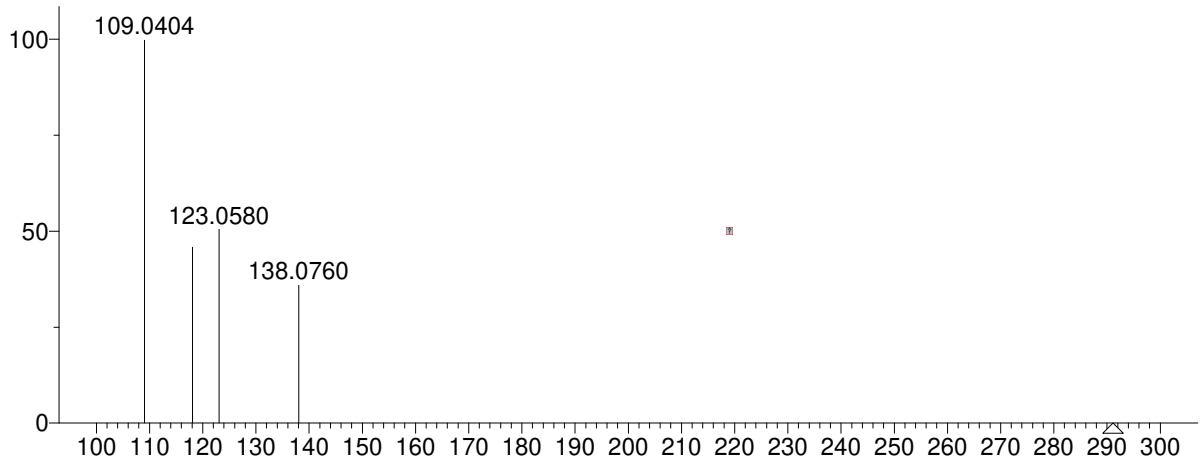

Unknown: Unknown (22.89\_423.0631m/z)  
Compound in Library Factor = -1309

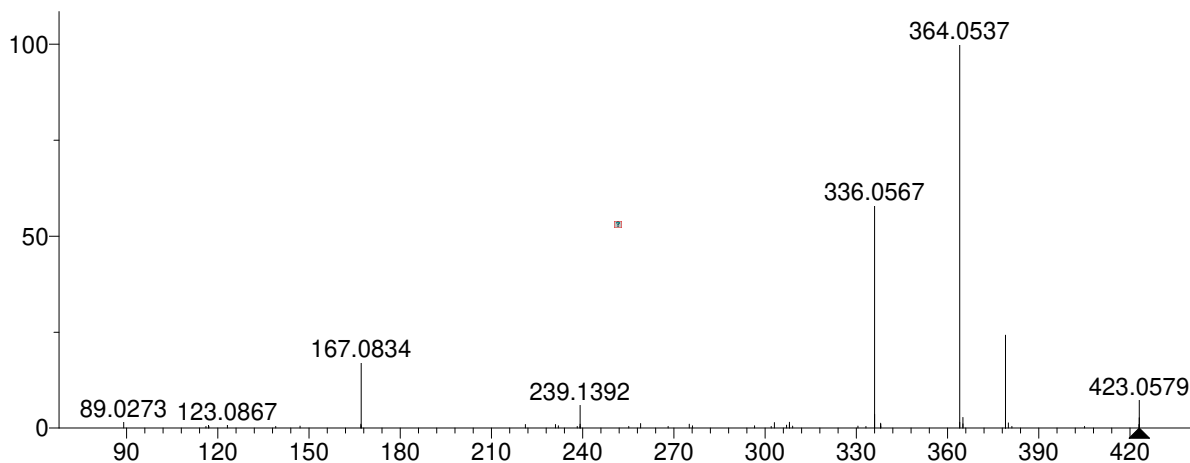

Hit 1 :  $\alpha$ -Carboxybenzylpenicillin [M-H+2Na]<sup>+</sup> HCD 4V P=423.1  
C<sub>17</sub>H<sub>18</sub>N<sub>2</sub>O<sub>6</sub>S; MF: 64; RMF: 254; Prob 83.2%; CAS: 4697-36-3; Lib: nist\_msms; ID: 488820.

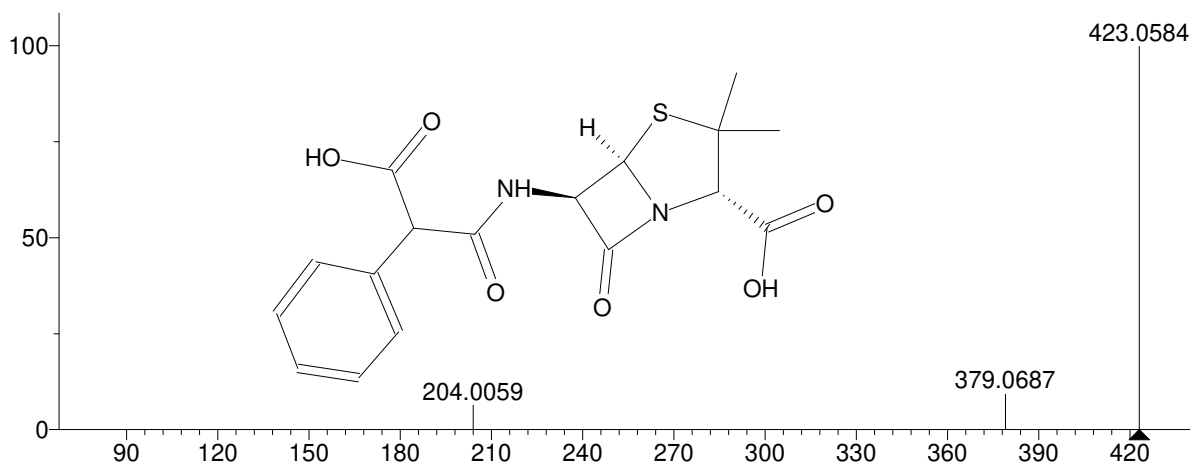

Hit 2 : Cefuroxime [M-H]<sup>-</sup> HCD 4V P=423.1  
C<sub>16</sub>H<sub>16</sub>N<sub>4</sub>O<sub>8</sub>S; MF: 13; RMF: 209; Prob 16.8%; CAS: 55268-75-2; Lib: nist\_msms; ID: 152660.

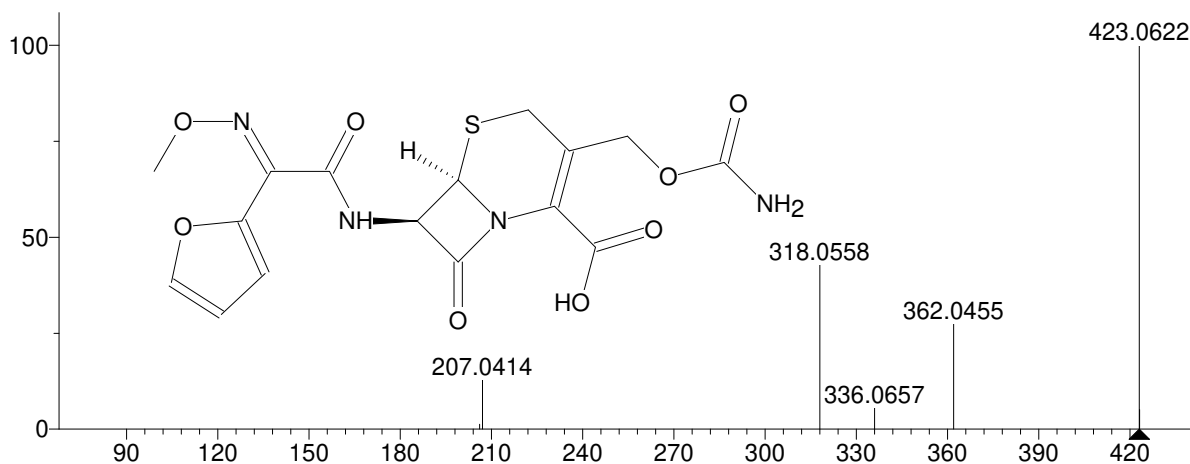

\*\* Search Report Page 1 of 1 \*\*

Unknown: Unknown (23.15\_477.3206m/z)  
Compound in Library Factor = 0

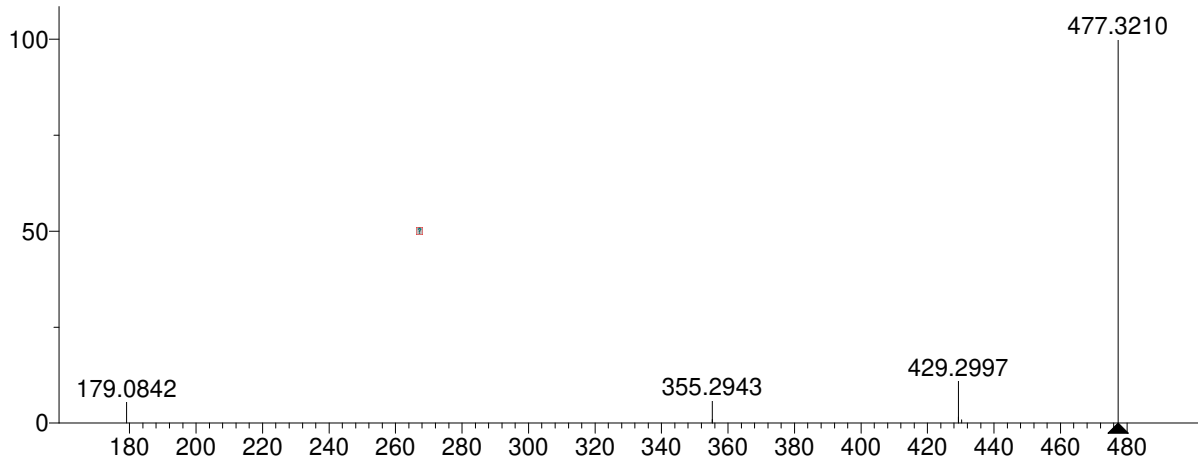

Hit 1 : NCGC00380884-01!(2S,3R,10R,13R,14S)-2,3,14-trihydroxy-10,13-dimethyl-17-[(2R,3R,5R)-2,3,5-trihydroxy-  
C<sub>28</sub>H<sub>46</sub>O<sub>7</sub>; MF: 0; RMF: 172; Prob 100.0%; Lib: mona-export-gnps; ID: 8681.

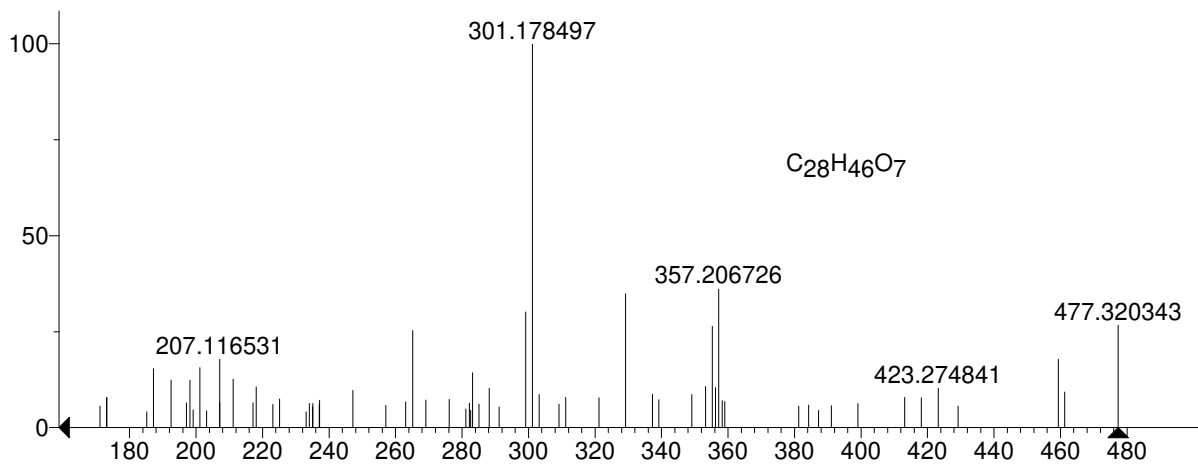

\*\* Search Report Page 1 of 1 \*\*

Unknown: Unknown (23.19\_368.2933m/z)  
Compound in Library Factor = 0

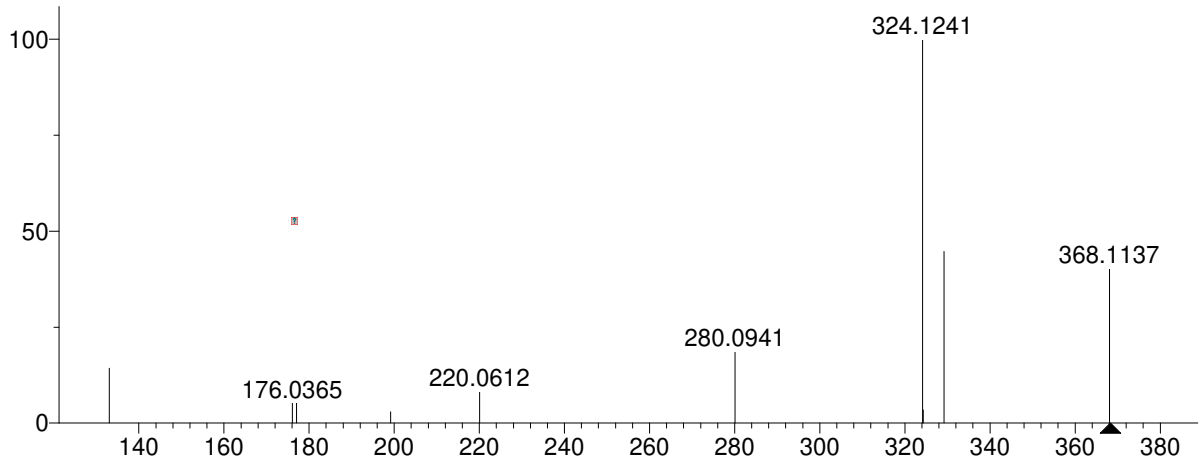

\*\* Search Report Page 1 of 2 \*\*

Unknown: Unknown (23.19\_390.0951m/z)  
Compound in Library Factor = -3273

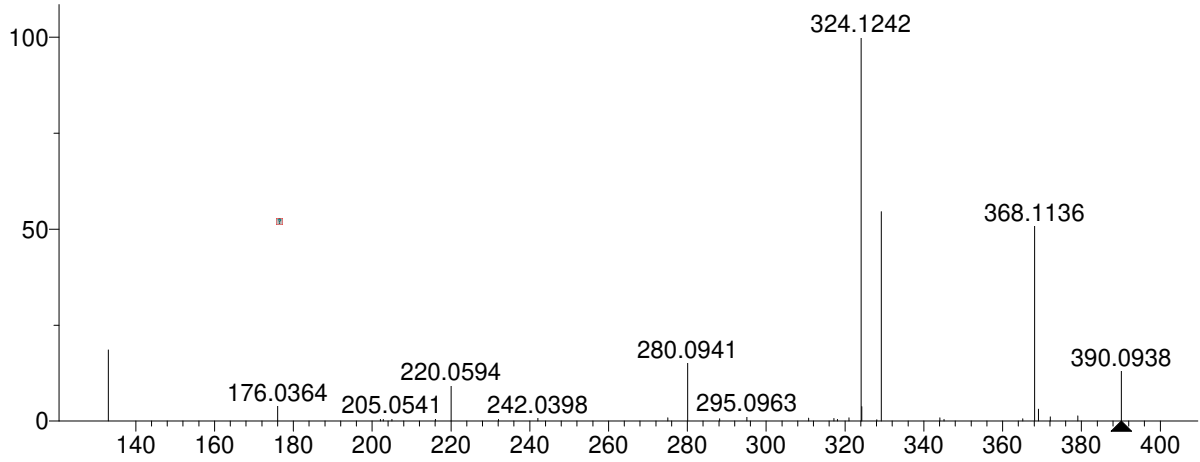

Hit 1 : Picoxystrobin [M+Na]<sup>+</sup> HCD 19V P=390.1  
C<sub>18</sub>H<sub>16</sub>F<sub>3</sub>NO<sub>4</sub>; MF: 8; RMF: 190; Prob 40.1%; CAS: 117428-22-5; Lib: nist\_msms; ID: 476279.

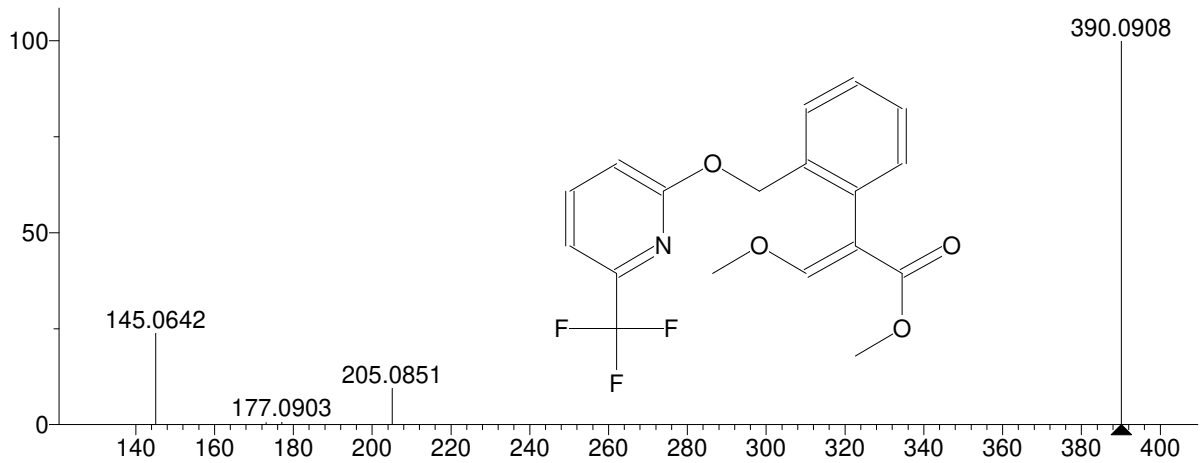

Hit 2 : Pesticide4\_Picoxystrobin\_C<sub>18</sub>H<sub>16</sub>F<sub>3</sub>NO<sub>4</sub>\_Acanto [M+Na]<sup>+</sup> P=390.1  
C<sub>18</sub>H<sub>16</sub>F<sub>3</sub>NO<sub>4</sub>; MF: 0; RMF: 124; Prob 29.9%; Lib: mona-export-gnps; ID: 14037.

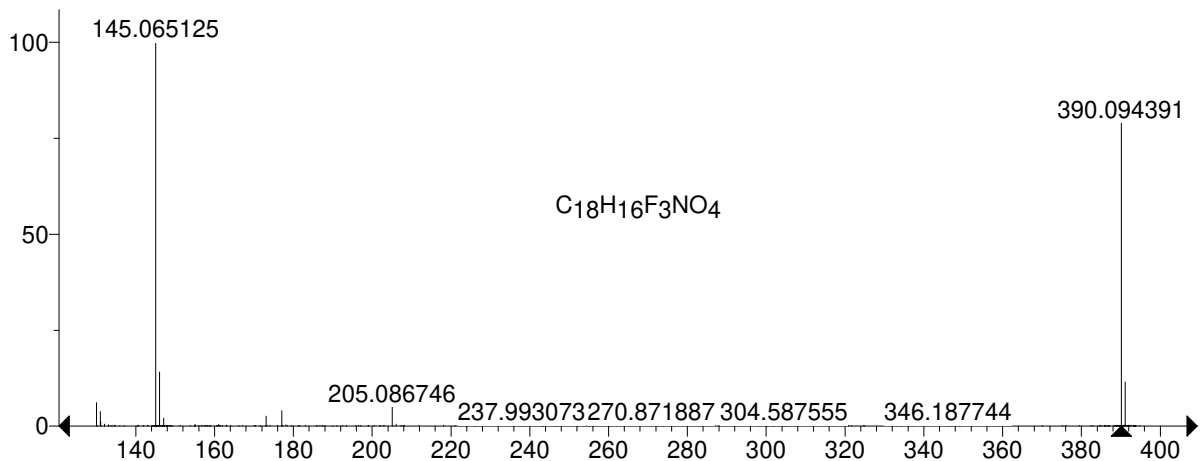

Hit 3 : Bicuculline (+) [M+Na]<sup>+</sup> 35HCD P=390.1  
C<sub>20</sub>H<sub>17</sub>NO<sub>6</sub>; MF: 0; RMF: 13; Prob 29.9%; Lib: mona-export-vf-npl\_qexactive; ID: 3340.

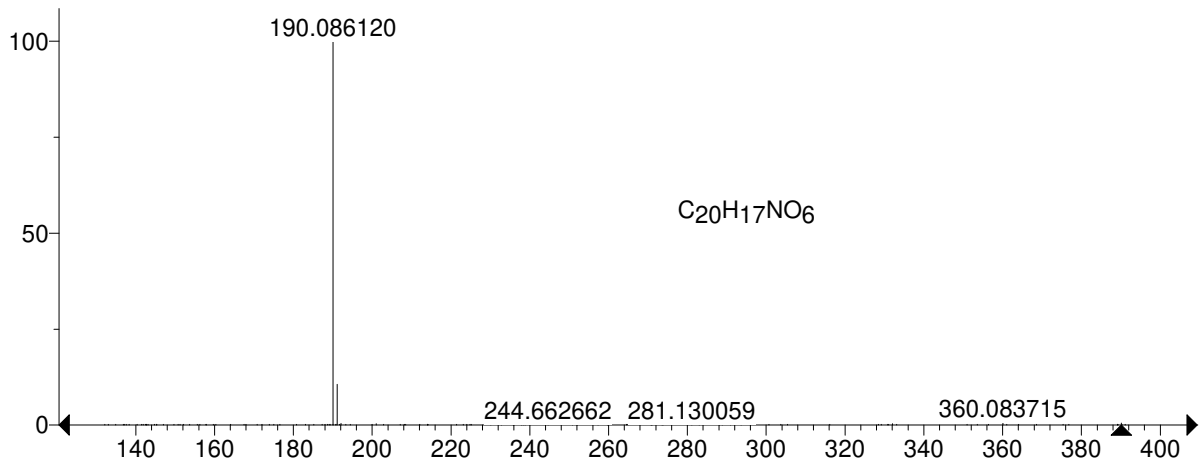



Unknown: Unknown (23.19\_467.0295m/z)  
Compound in Library Factor = 0

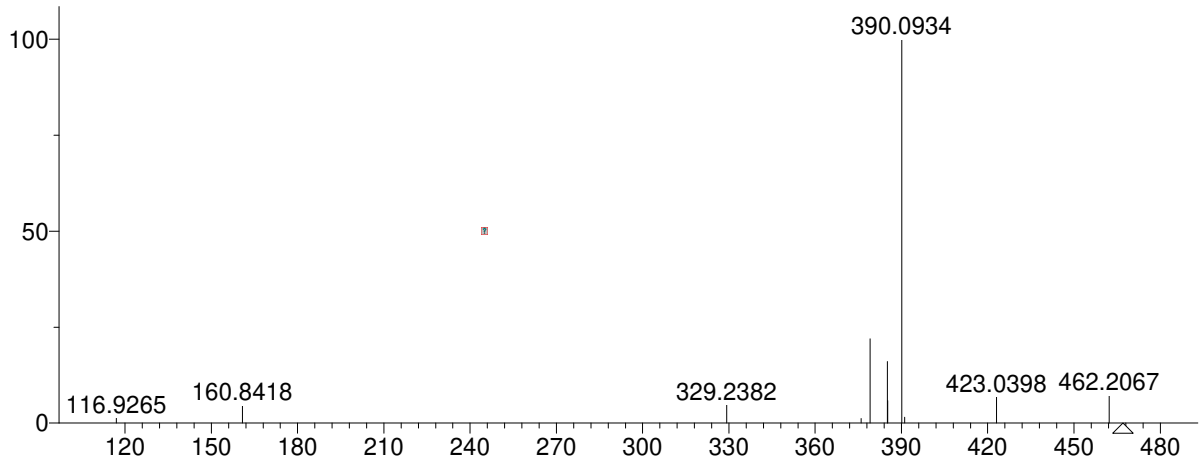

\*\* Search Report Page 1 of 2 \*\*

Unknown: Unknown (23.20\_324.1232m/z)  
Compound in Library Factor = -389

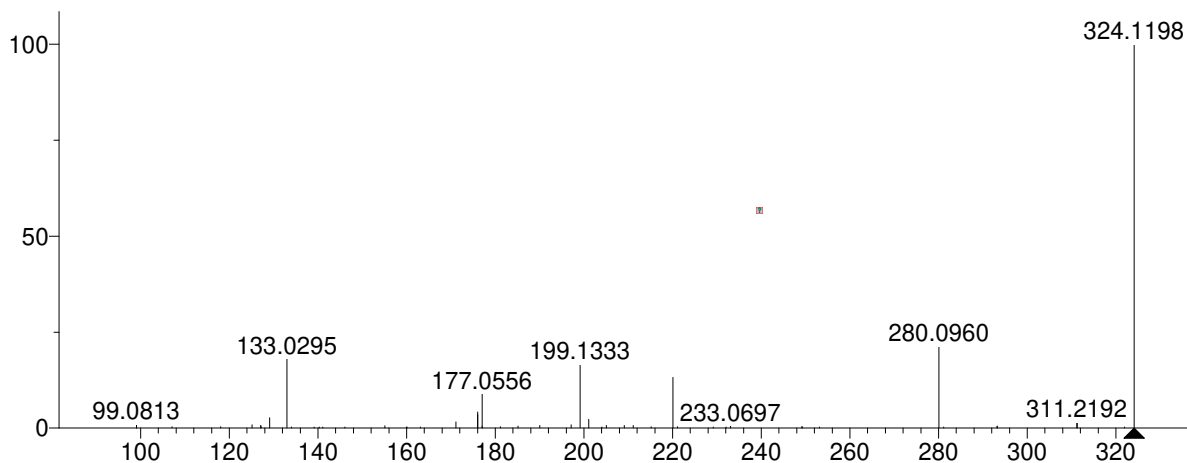

Hit 1 : Tapentadol O-sulfate [M+Na]<sup>+</sup> HCD 12V P=324.1  
C<sub>14</sub>H<sub>23</sub>NO<sub>4</sub>S; MF: 256; RMF: 866; Prob 94.5%; CAS: 1300037-87-9; Lib: nist\_msms; ID: 328508.

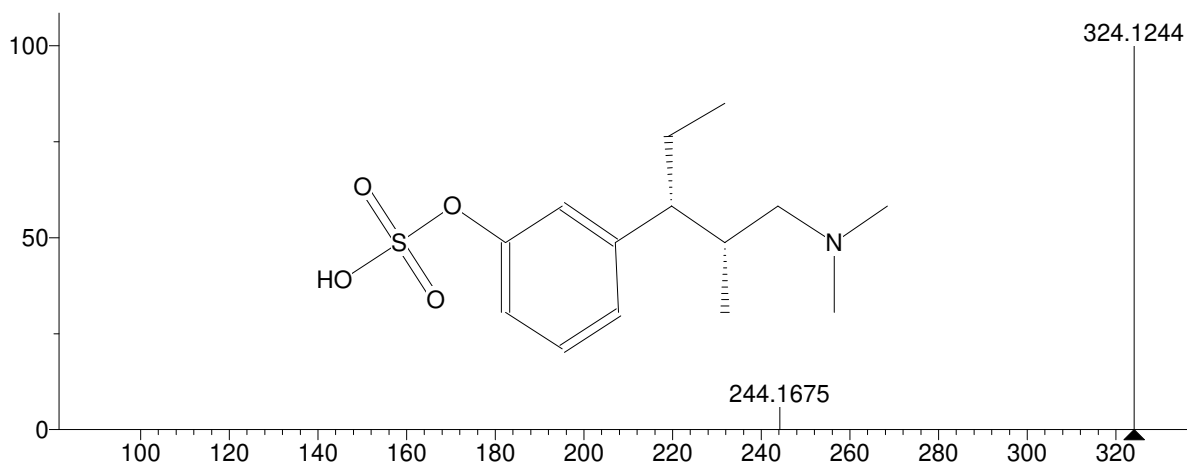

Hit 2 : Stylopine [M+H]<sup>+</sup> HCD 19V P=324.1  
C<sub>19</sub>H<sub>17</sub>NO<sub>4</sub>; MF: 82; RMF: 695; Prob 1.92%; CAS: 84-39-9; Lib: nist\_msms; ID: 219734.

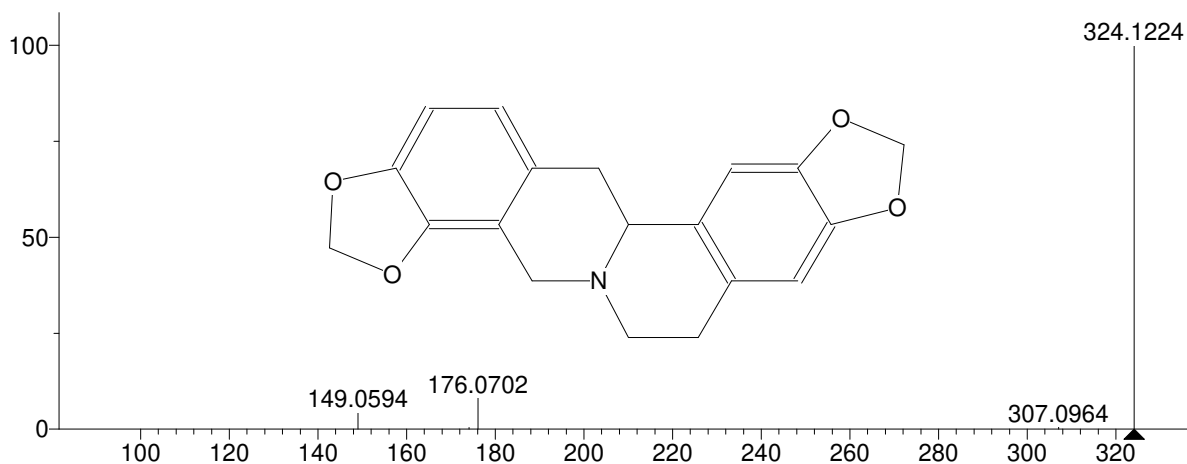

\*\* Search Report Page 2 of 2 \*\*

Hit 3 : Flutolanil [M+H]<sup>+</sup> HCD 9V P=324.1  
C<sub>17</sub>H<sub>16</sub>F<sub>3</sub>NO<sub>2</sub>; MF: 72; RMF: 658; Prob 1.36%; CAS: 66332-96-5; Lib: nist\_msms; ID: 486552.

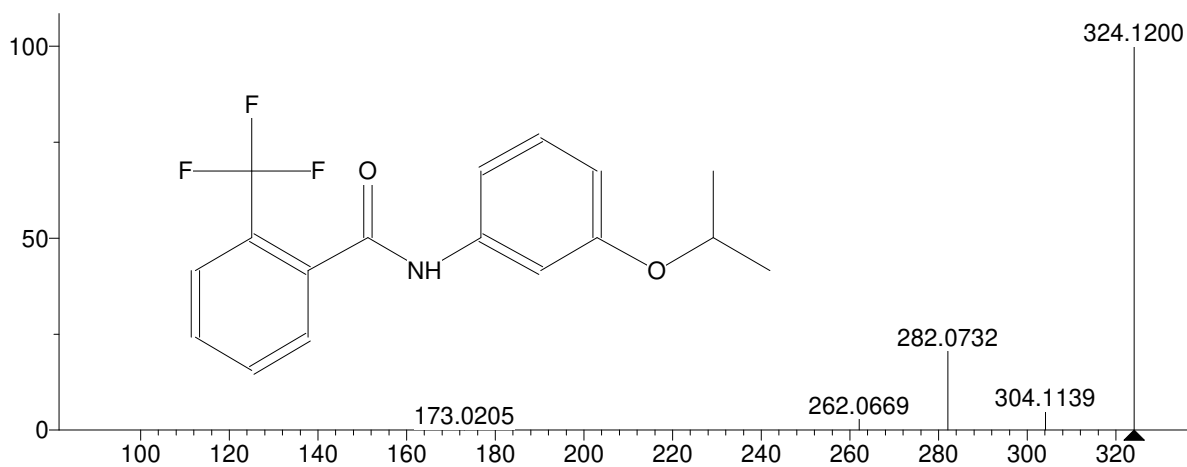

Hit 4 : Brucine [M+H-C<sub>4</sub>H<sub>9</sub>N]<sup>+</sup> HCD 16V P=324.1  
C<sub>23</sub>H<sub>26</sub>N<sub>2</sub>O<sub>4</sub>; MF: 65; RMF: 780; Prob 1.04%; CAS: 357-57-3; Lib: nist\_msms; ID: 216817.

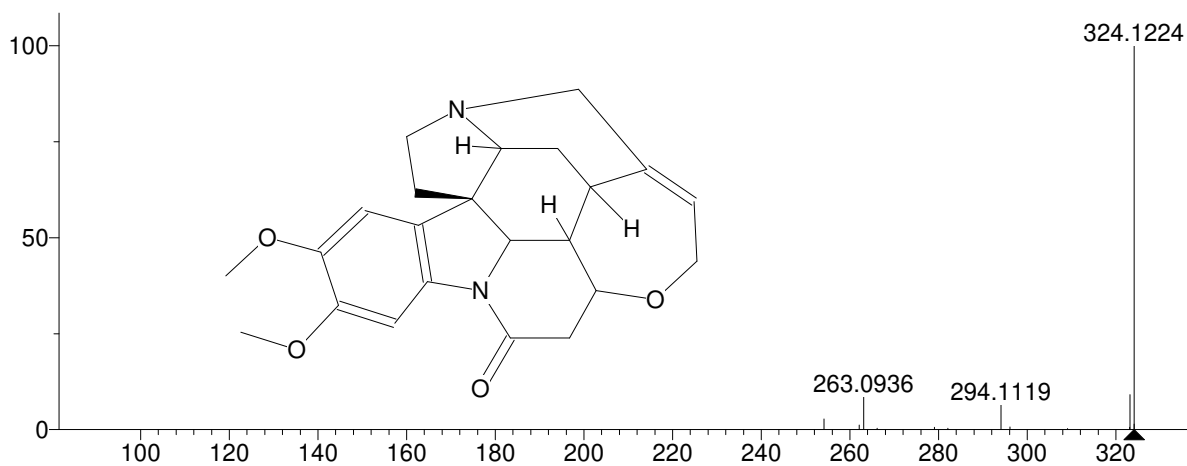

Hit 5 : Furalaxyl [M+Na]<sup>+</sup> HCD 29V P=324.1  
C<sub>17</sub>H<sub>19</sub>NO<sub>4</sub>; MF: 53; RMF: 630; Prob 0.69%; CAS: 57646-30-7; Lib: nist\_msms; ID: 474805.

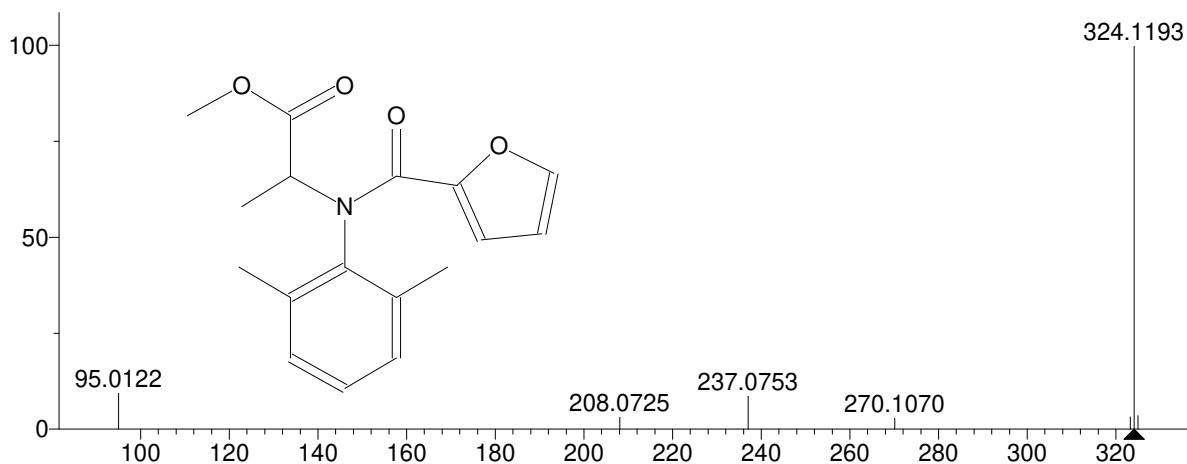

\*\* Search Report Page 1 of 2 \*\*

Unknown: Unknown (23.20\_368.1134m/z)  
Compound in Library Factor = -3273

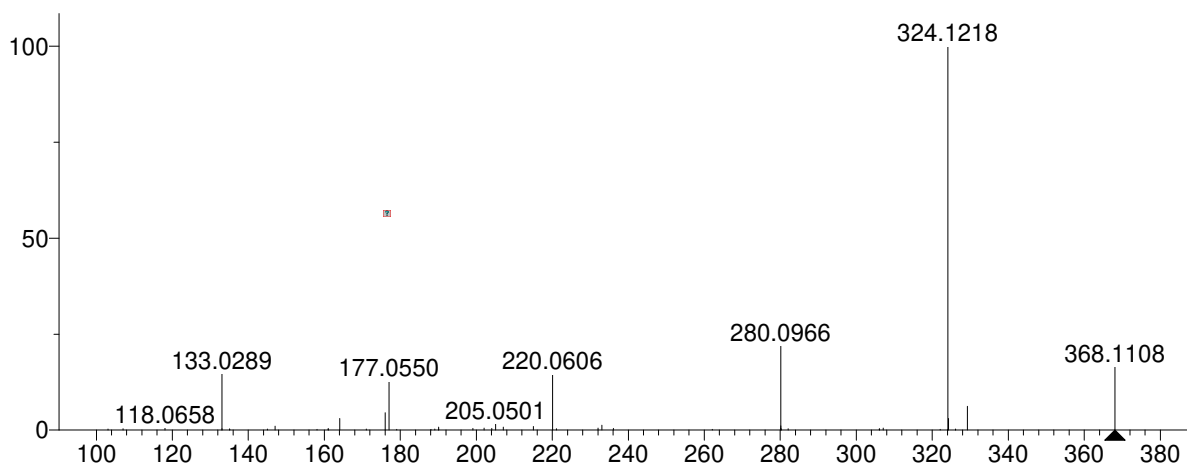

Hit 1 : Bicuculline [M+H]<sup>+</sup> HCD 14V P=368.1  
C<sub>20</sub>H<sub>17</sub>NO<sub>6</sub>; MF: 13; RMF: 280; Prob 16.8%; CAS: 485-49-4; Lib: nist\_msms; ID: 216706.

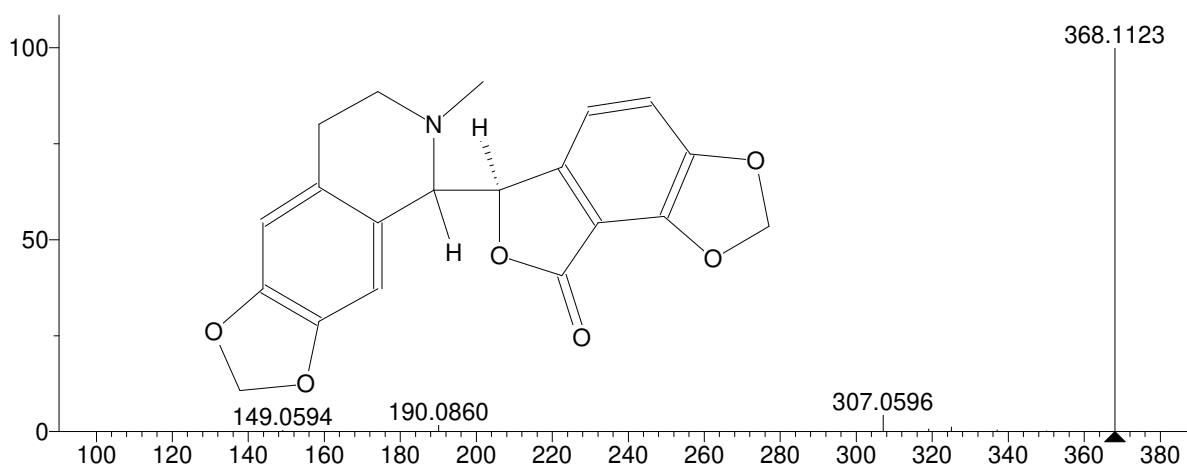

Hit 2 : Picoxystrobin [M+H]<sup>+</sup> HCD 1V P=368.1  
C<sub>18</sub>H<sub>16</sub>F<sub>3</sub>NO<sub>4</sub>; MF: 13; RMF: 238; Prob 16.8%; CAS: 117428-22-5; Lib: nist\_msms; ID: 476221.

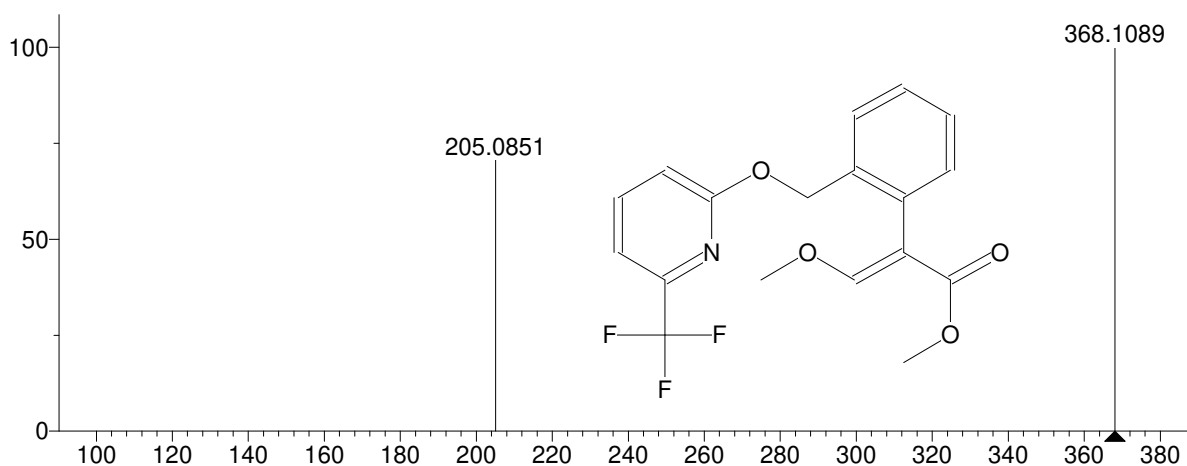

Hit 3 : 2-Chloro-N6-cyclopentyladenosine [M-H]<sup>-</sup> 20-30-40%) P=368.1  
C<sub>15</sub>H<sub>20</sub>ClN<sub>5</sub>O<sub>4</sub>; MF: 4; RMF: 196; Prob 12.2%; Lib: msms-neg-fiehnhilic; ID: 44.

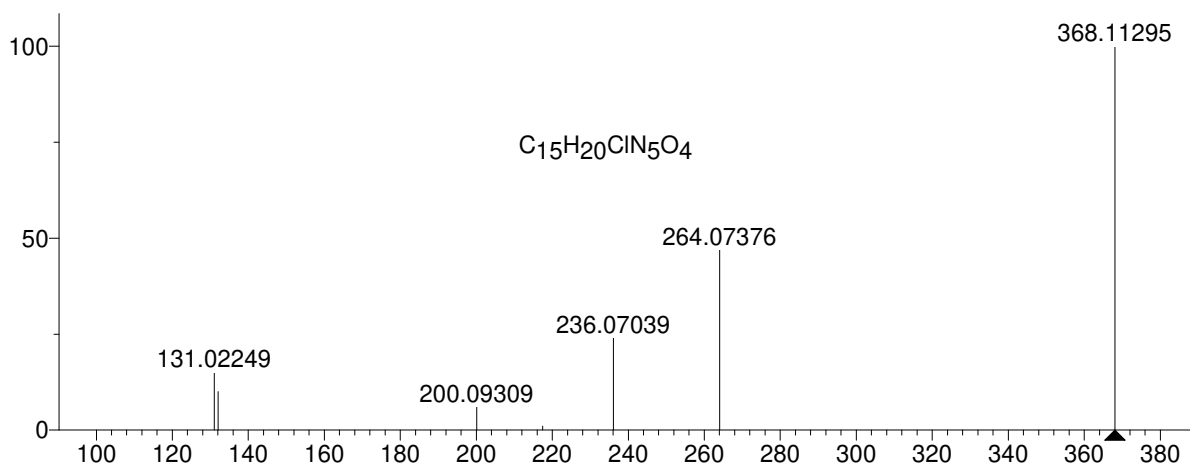

Hit 4 : NCGC00015169-03\_C<sub>20</sub>H<sub>17</sub>NO<sub>6</sub>\_6-(6-Methyl-5,6,7,8-tetrahydro[1,3]dioxolo[4,5-g]isoquinolin-5-yl)furo[3,4-c][1,2,5]oxadiazole; MF: 4; RMF: 126; Prob 12.2%; Lib: mona-export-gnps; ID: 13752.

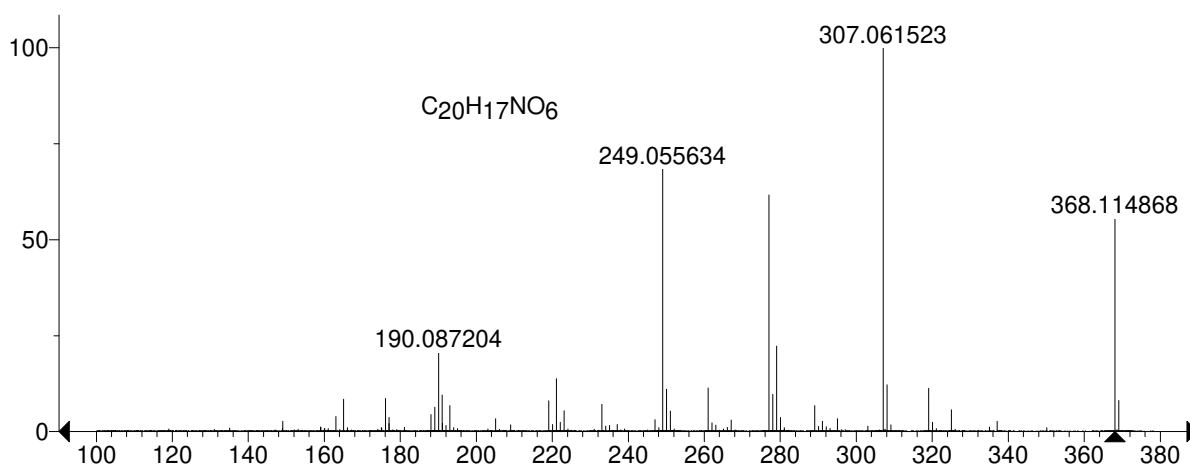

Hit 5 : CCPA [M-H]<sup>-</sup> 35eV P=368.1  
C<sub>15</sub>H<sub>20</sub>ClN<sub>5</sub>O<sub>4</sub>; MF: 1; RMF: 226; Prob 10.7%; Lib: msms-neg-fiehnhilic; ID: 913.

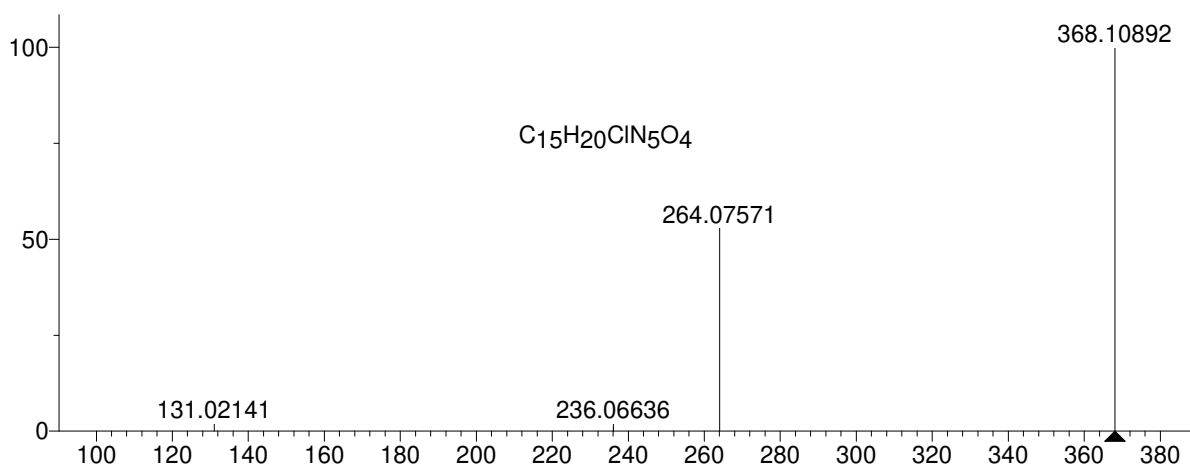

Unknown: Unknown (23.20\_424.0300m/z)  
Compound in Library Factor = 0

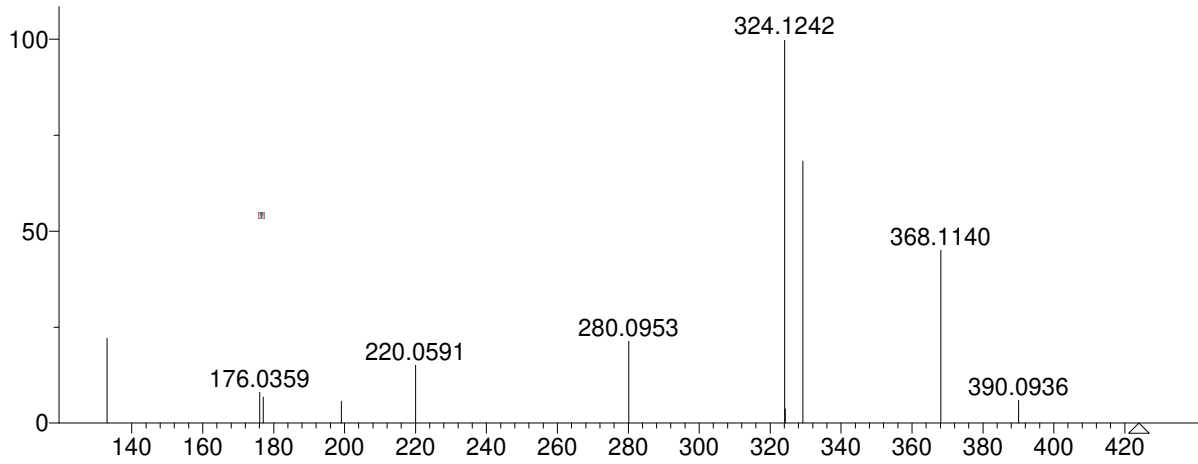

Unknown: Unknown (23.21\_365.1585m/z)  
Compound in Library Factor = 0

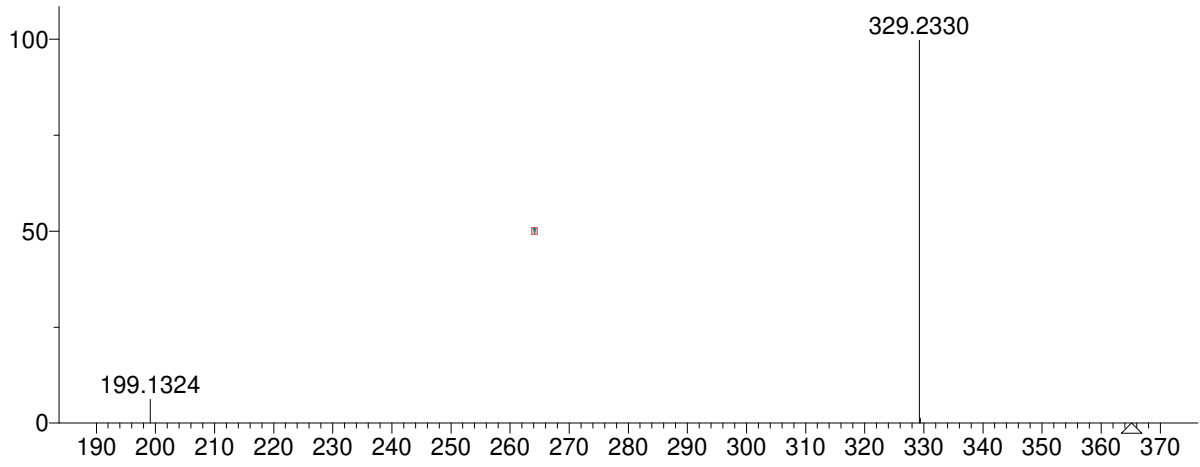

Unknown: Unknown (23.22\_474.1541m/z)  
Compound in Library Factor = 0

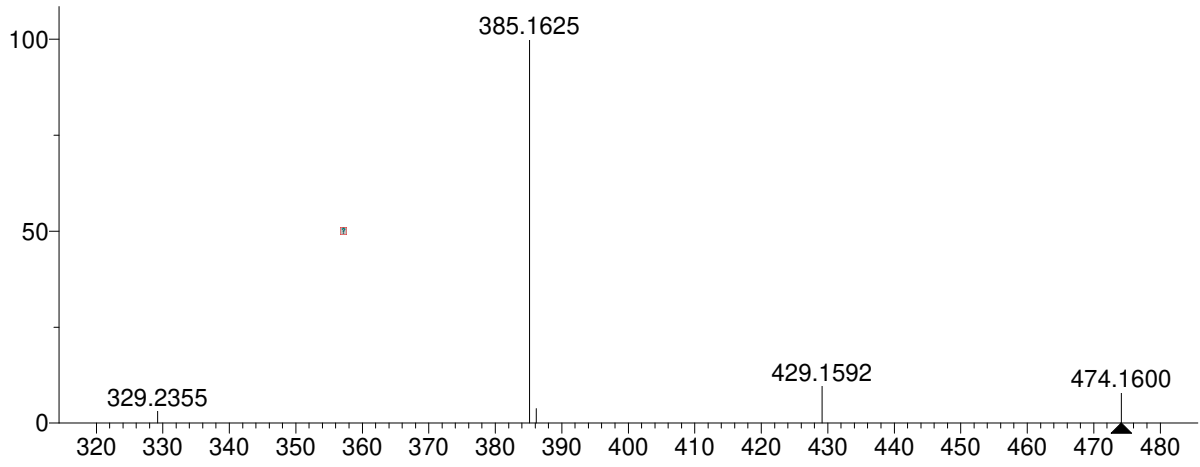



\*\* Search Report Page 1 of 2 \*\*

Unknown: Unknown (23.29\_396.2273m/z)  
Compound in Library Factor = -2176

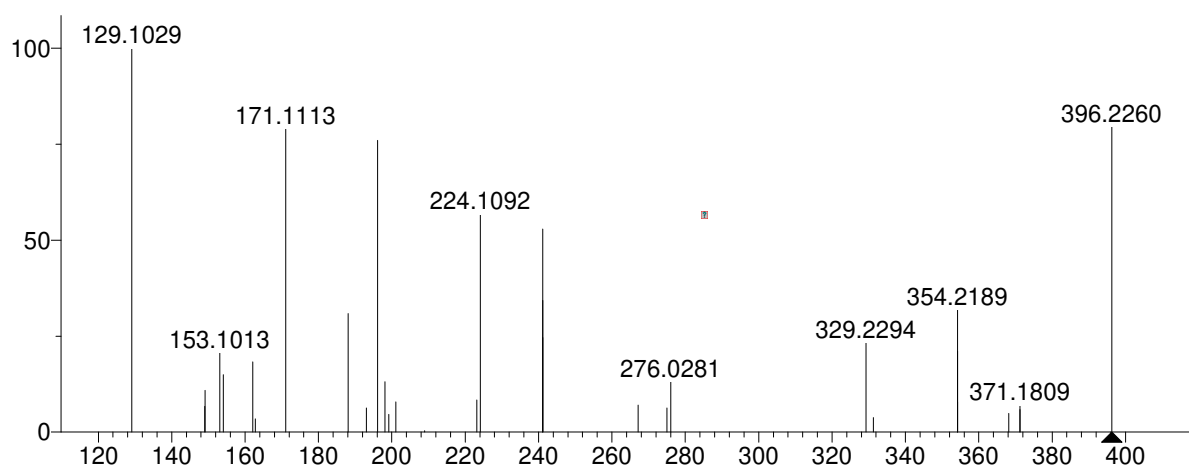

Hit 1 : 1H-Indazole-1-pentanoic acid, 3-[(tricyclo[3.3.1.1(3,7)]dec-1-ylamino)carbonyl]- [M+H]<sup>+</sup> HCD 11V P=396  
C<sub>23</sub>H<sub>29</sub>N<sub>3</sub>O<sub>3</sub>; MF: 30; RMF: 324; Prob 47.1%; CAS: 1630022-94-4; Lib: nist\_msms; ID: 361142.

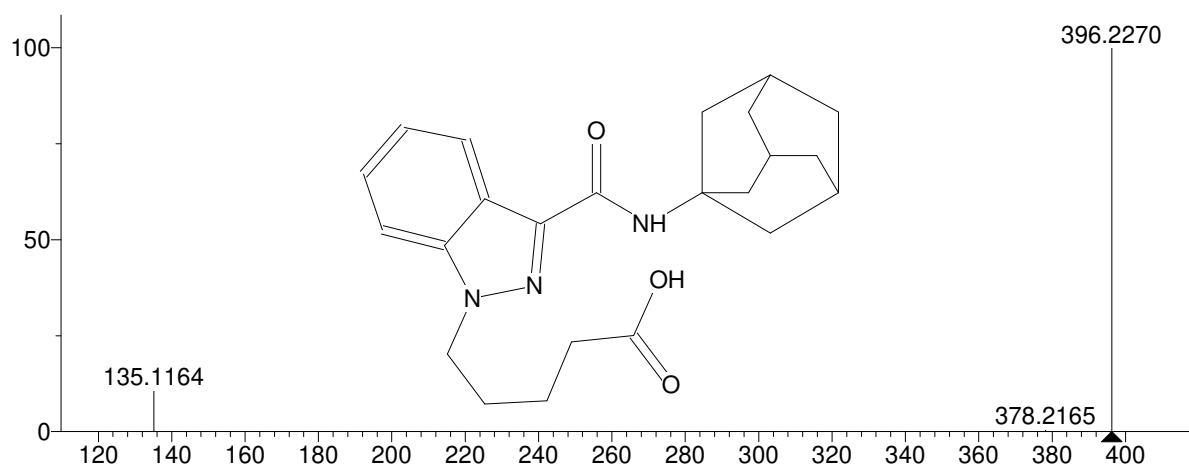

Hit 2 : Phosphonic acid, P-[[4-[(1-oxotetradecyl)amino]phenyl]methyl]- [M-H]<sup>-</sup> HCD 27V P=396.2  
C<sub>21</sub>H<sub>36</sub>NO<sub>4</sub>P; MF: 25; RMF: 313; Prob 37.9%; CAS: 1096770-84-1; Lib: nist\_msms; ID: 262687.

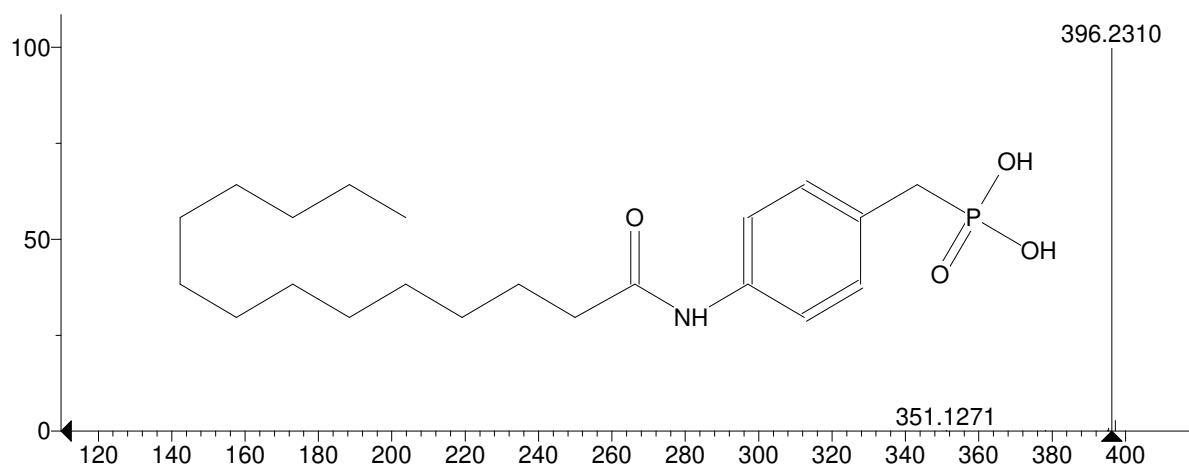

Hit 3 : NCGC00015878-08\_C21H26N2O3\_Methyl (16alpha,17alpha)-17-hydroxyyoohimban-16-carboxylate [M+Al  
C21H26N2O3; MF: 3; RMF: 207; Prob 15.0%; Lib: mona-export-gnps; ID: 13933.

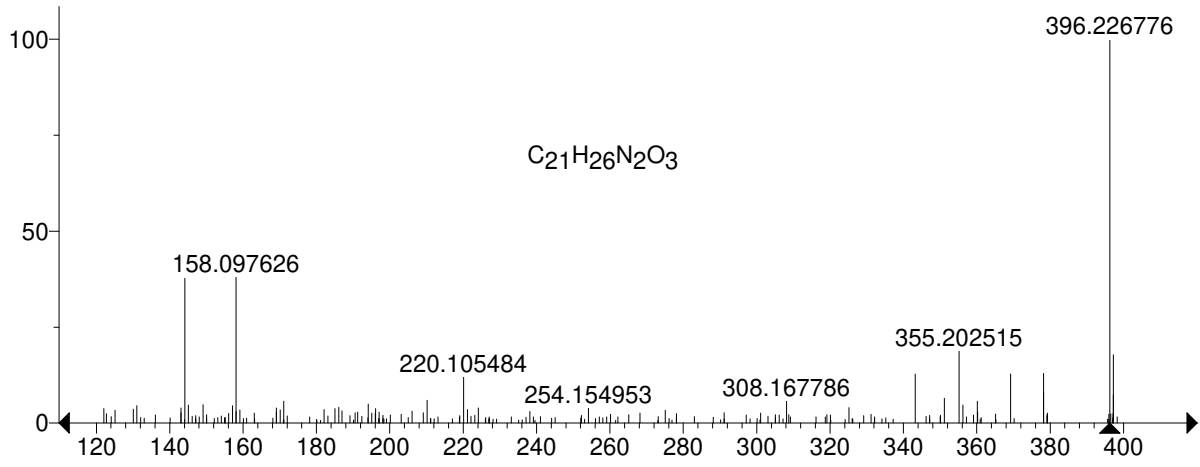

\*\* Search Report Page 1 of 2 \*\*

Unknown: Unknown (23.40\_329.2324m/z)  
Compound in Library Factor = -182

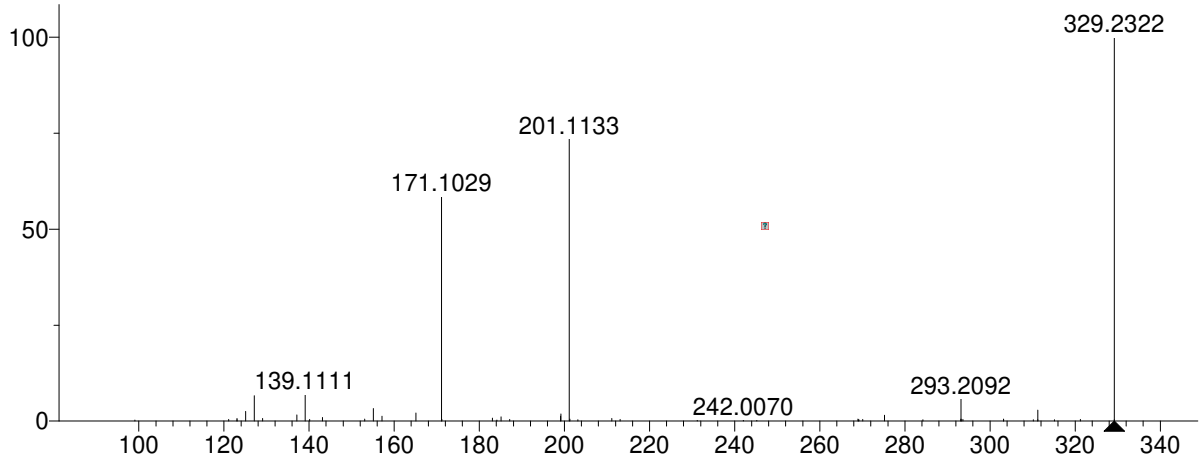

Hit 1 : FA 18:1+3O; PlaSMA ID-737 [M-H]<sup>-</sup> P=329.2  
C<sub>18</sub>H<sub>34</sub>O<sub>5</sub>; MF: 420; RMF: 740; Prob 98.7%; Lib: biomsms-neg-plasma; ID: 448.

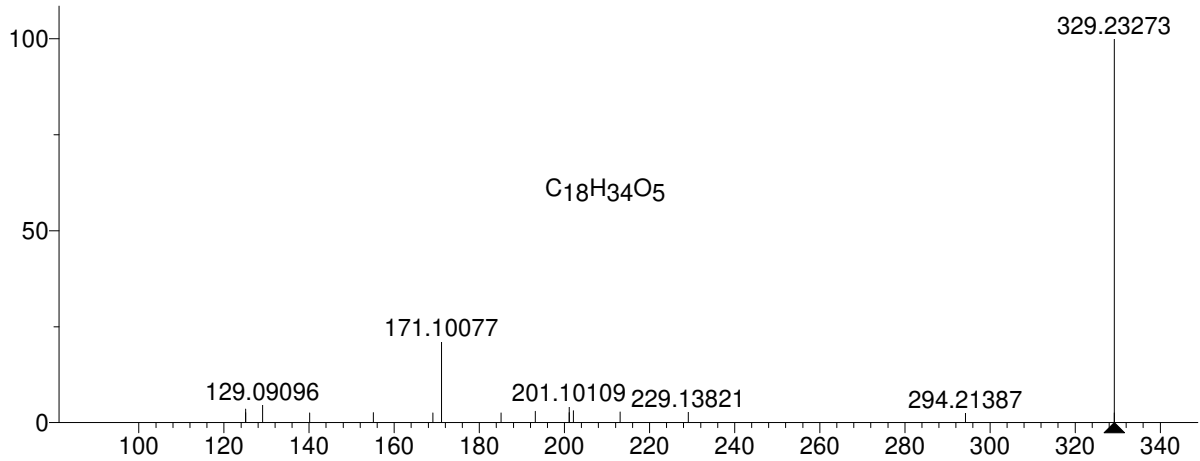

Hit 2 : FA 18:1+3O; PlaSMA ID-738 [M-H]<sup>-</sup> P=329.2  
C<sub>18</sub>H<sub>34</sub>O<sub>5</sub>; MF: 136; RMF: 626; Prob 0.98%; Lib: biomsms-neg-plasma; ID: 444.

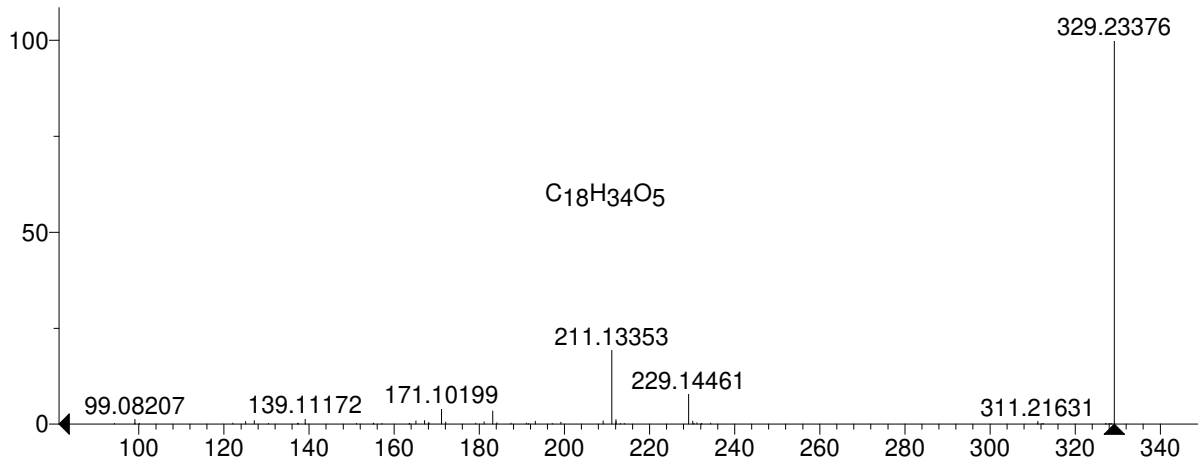

Hit 3 : FA 18:1+3O; PlaSMA ID-735 [M-H]<sup>-</sup> P=329.2  
C<sub>18</sub>H<sub>34</sub>O<sub>5</sub>; MF: 56; RMF: 596; Prob 0.10%; Lib: biomsmns-neg-plasma; ID: 443.

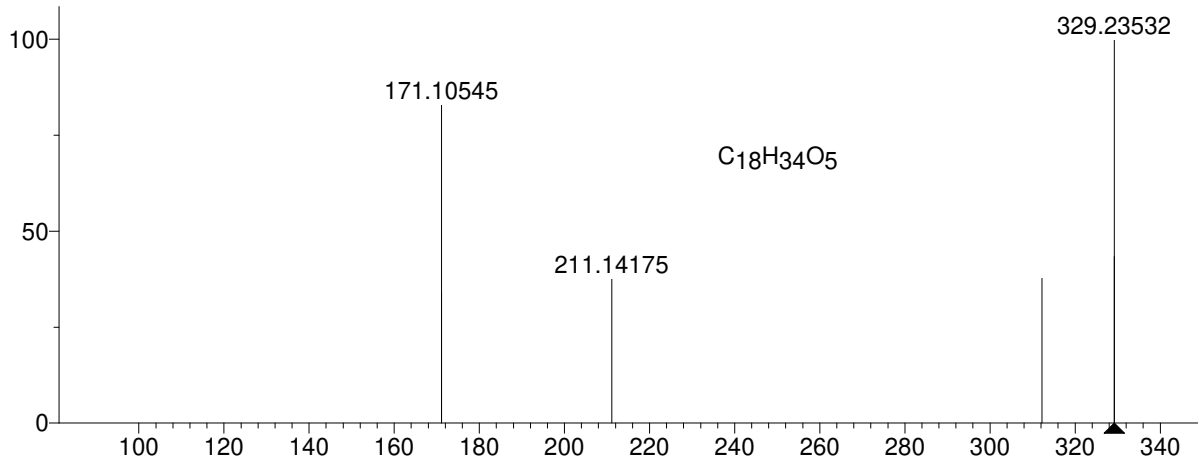

Hit 4 : FA 18:1+3O; PlaSMA ID-739 [M-H]<sup>-</sup> P=329.2  
C<sub>18</sub>H<sub>34</sub>O<sub>5</sub>; MF: 56; RMF: 528; Prob 0.10%; Lib: biomsmns-neg-plasma; ID: 446.

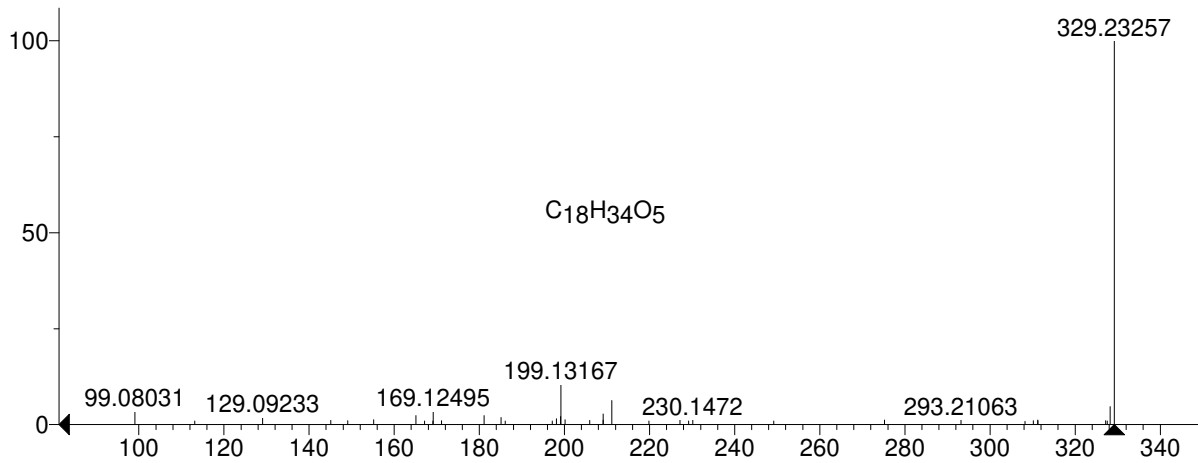

Hit 5 : FA 18:1+3O; PlaSMA ID-741 [M-H]<sup>-</sup> P=329.2  
C<sub>18</sub>H<sub>34</sub>O<sub>5</sub>; MF: 29; RMF: 569; Prob 0.03%; Lib: biomsmns-neg-plasma; ID: 449.

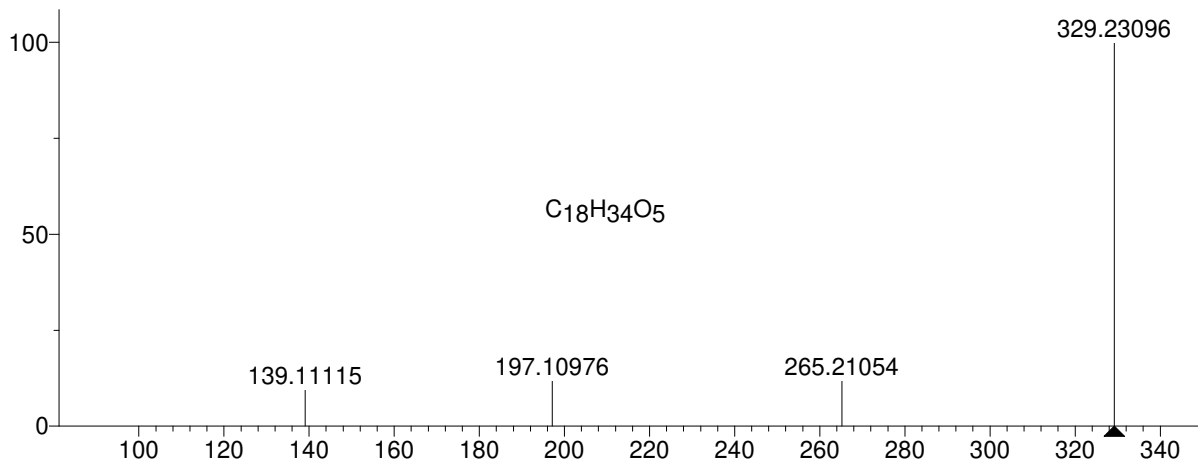

\*\* Search Report Page 1 of 1 \*\*

Unknown: Unknown (23.45\_372.1799m/z)  
Compound in Library Factor = 0

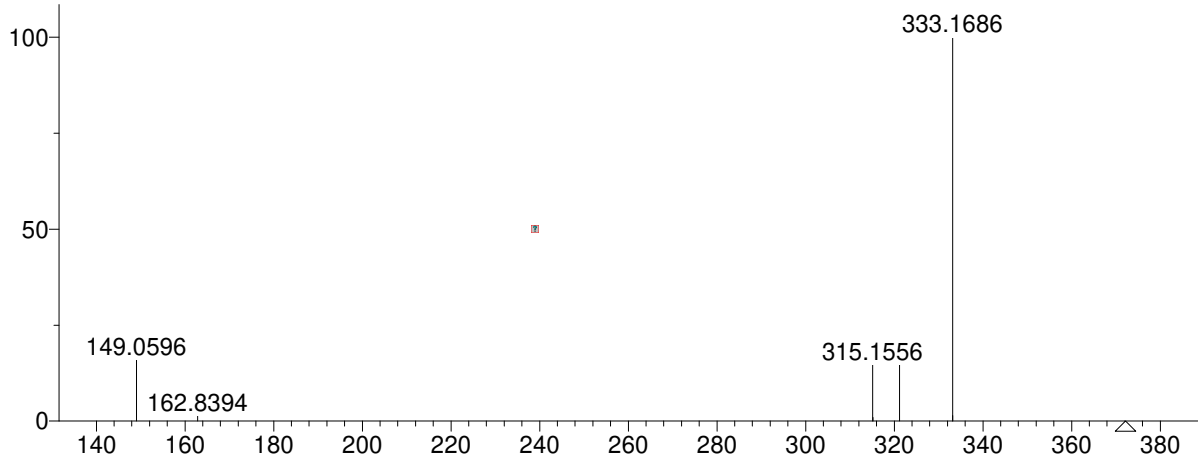

Hit 1 : 5,7-dihydroxy-2-(4-methoxyphenyl)-6-(3-methylbut-2-enyl)-2,3-dihydrochromen-4-one [M+NH4]<sup>+</sup> 65HCD  
C<sub>21</sub>H<sub>22</sub>O<sub>5</sub>; MF: 0; RMF: 29; Prob 50.0%; Lib: mona-export-vf-npl\_qexactive; ID: 9528.

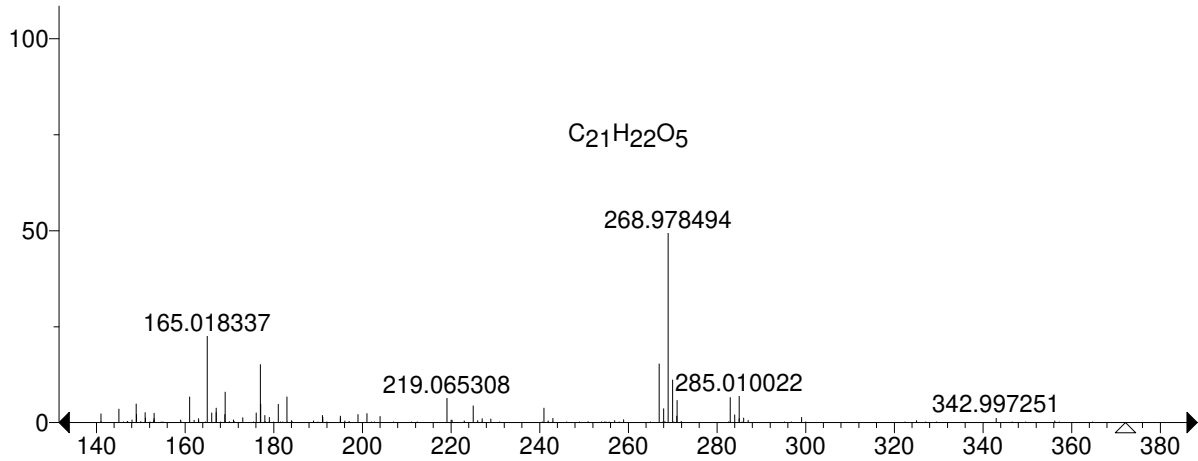

Hit 2 : xanthohumol [M+NH4]<sup>+</sup> 65HCD P=372.2  
C<sub>21</sub>H<sub>22</sub>O<sub>5</sub>; MF: 0; RMF: 7; Prob 50.0%; Lib: mona-export-vf-npl\_qexactive; ID: 10932.

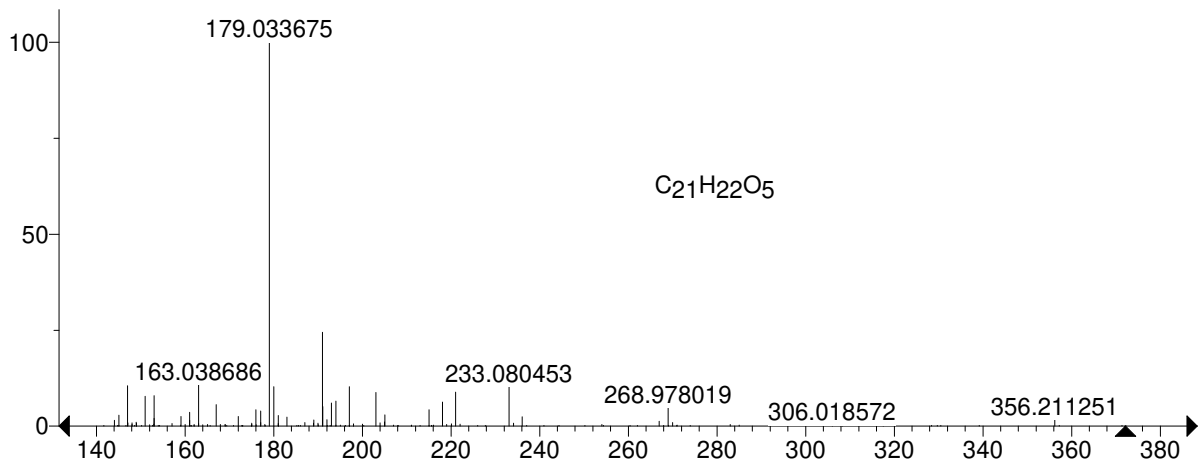

Unknown: Unknown (23.48\_323.1839m/z)  
Compound in Library Factor = 0

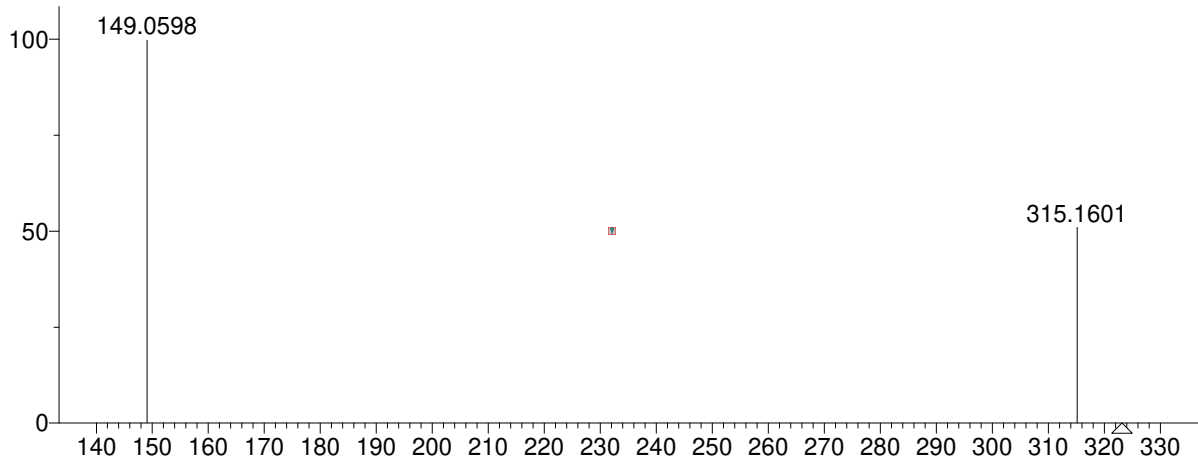

Hit 1 : Zeranol [M+H]<sup>+</sup> 20-30-40%) P=323.2  
C<sub>18</sub>H<sub>26</sub>O<sub>5</sub>; MF: 0; RMF: 164; Prob 50.0%; Lib: mona-export-fiehn\_hilic; ID: 867.

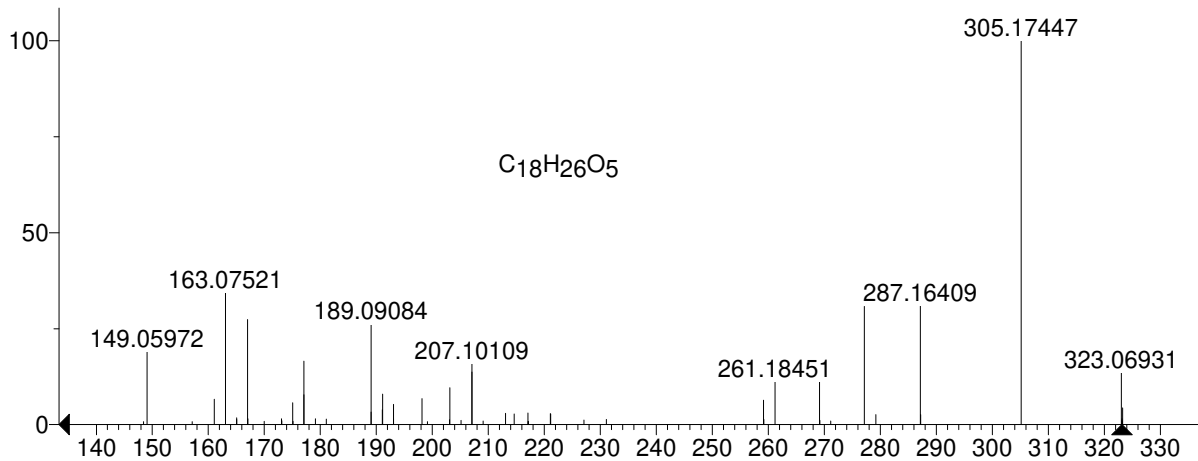

Hit 2 : (5E)-2-heptyl-3,4,7-trihydroxy-2,3,4,7,8,9-hexahydroxecin-10-one [M+Na]<sup>+</sup> 65HCD P=323.2  
C<sub>16</sub>H<sub>28</sub>O<sub>5</sub>; MF: 0; RMF: 35; Prob 50.0%; Lib: mona-export-vf-npl\_qexactive; ID: 2283.

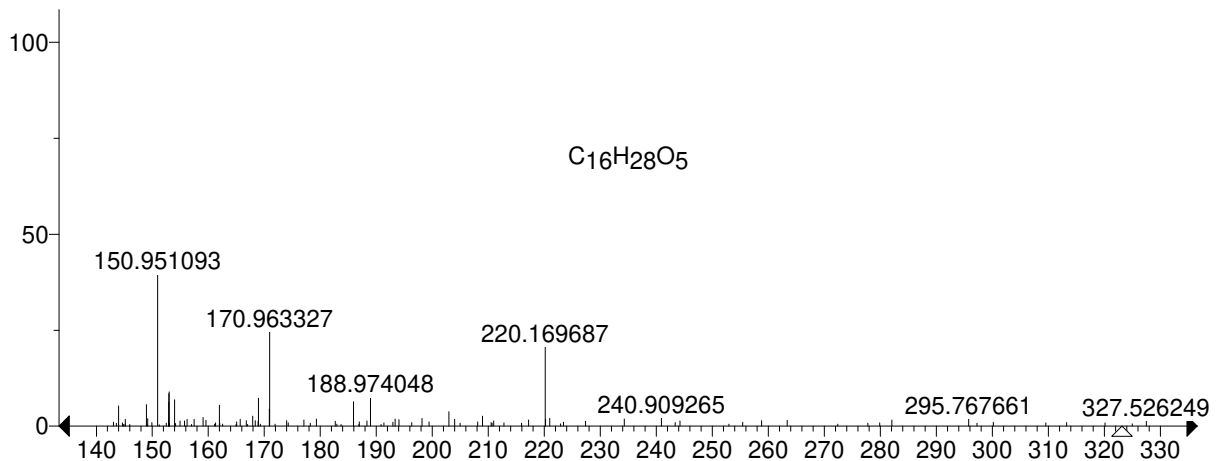

Unknown: Unknown (23.49\_325.2009m/z)  
Compound in Library Factor = -2176

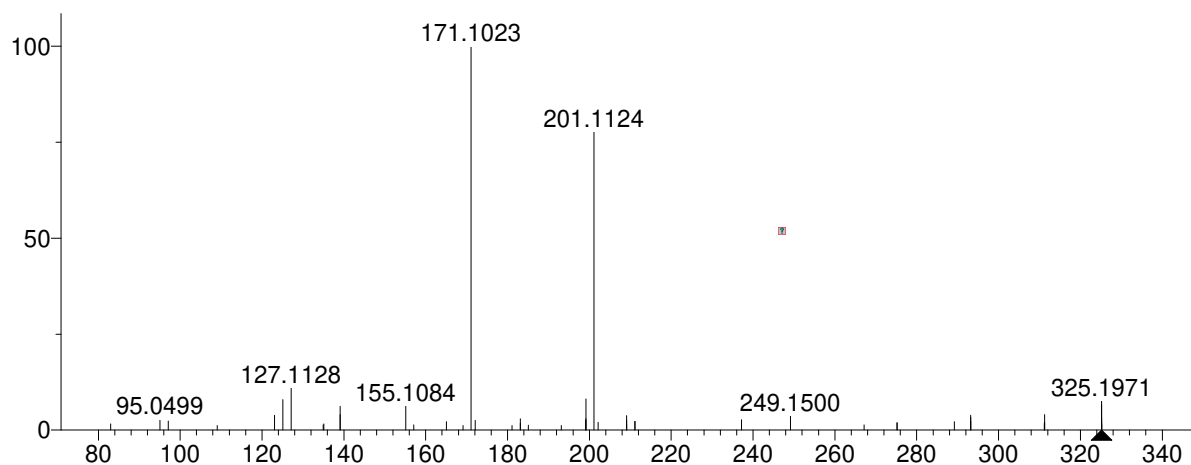

Hit 1 : Hymeglusin [M+H]<sup>+</sup> HCD 3V P=325.2  
C<sub>18</sub>H<sub>28</sub>O<sub>5</sub>; MF: 102; RMF: 530; Prob 38.3%; CAS: 29066-42-0; Lib: nist\_msms; ID: 376516.

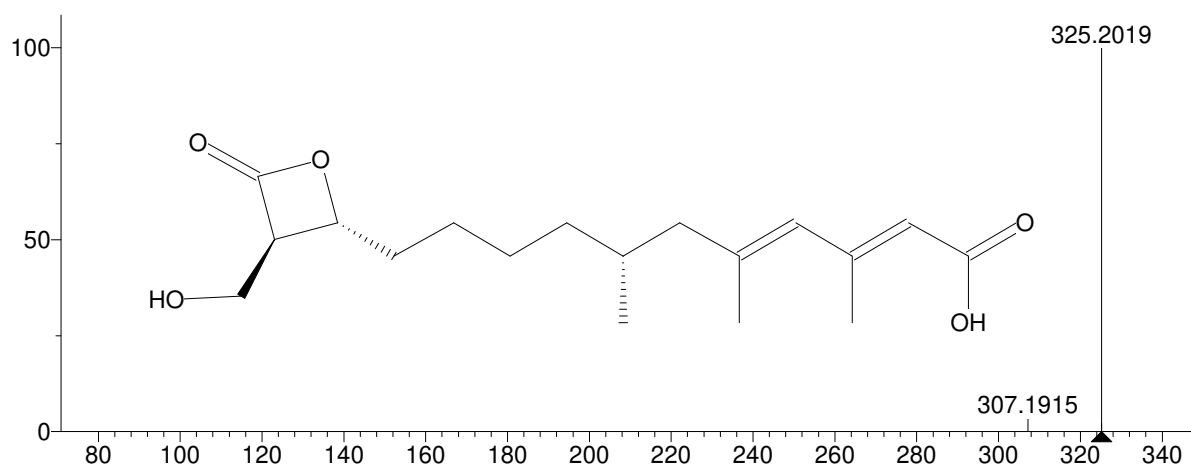

Hit 2 : Unknown (carbon number 18); PlaSMA ID-697 [M-H]<sup>-</sup> P=325.2  
C<sub>18</sub>H<sub>30</sub>O<sub>5</sub>; MF: 80; RMF: 407; Prob 15.2%; Lib: biomsms-neg-plasma; ID: 1224.

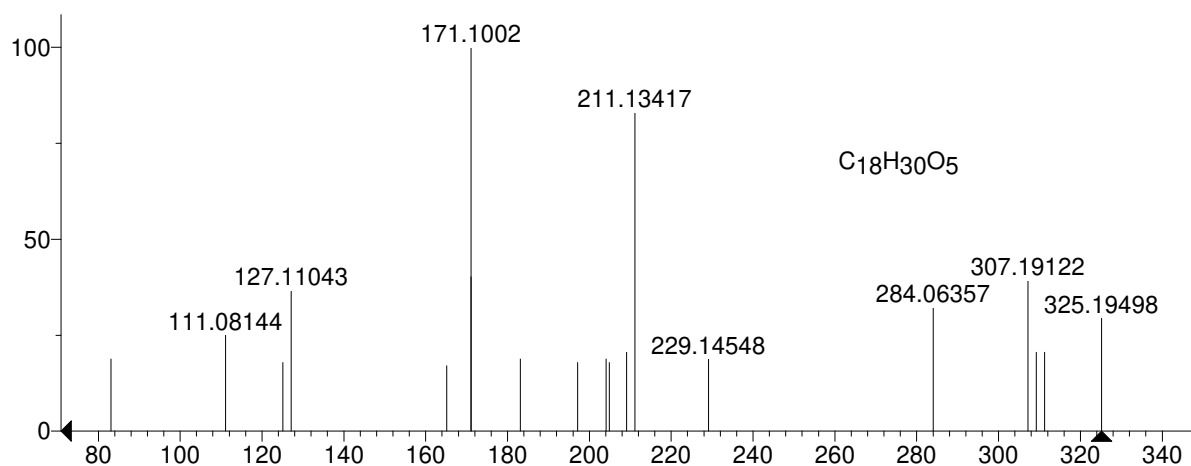

Hit 3 : FA 18:3+3O; PlaSMA ID-694 [M-H]- P=325.2  
C<sub>18</sub>H<sub>30</sub>O<sub>5</sub>; MF: 58; RMF: 289; Prob 5.99%; Lib: biomsmms-neg-plasma; ID: 424.

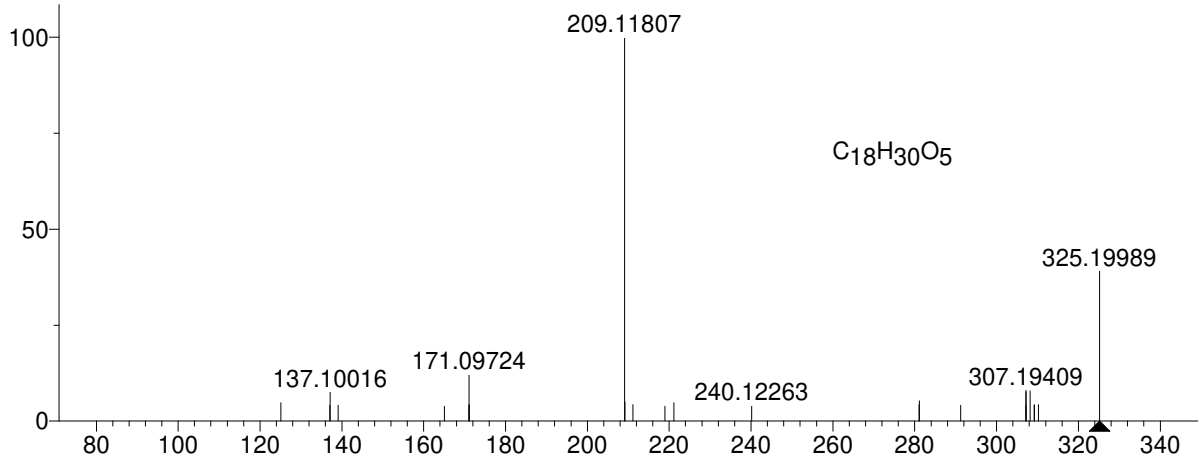

Hit 4 : Dinorprostaglandin E1 [M-H]- HCD 4V P=325.2  
C<sub>18</sub>H<sub>30</sub>O<sub>5</sub>; MF: 48; RMF: 373; Prob 4.22%; CAS: 7046-40-4; Lib: nist\_msms; ID: 88066.

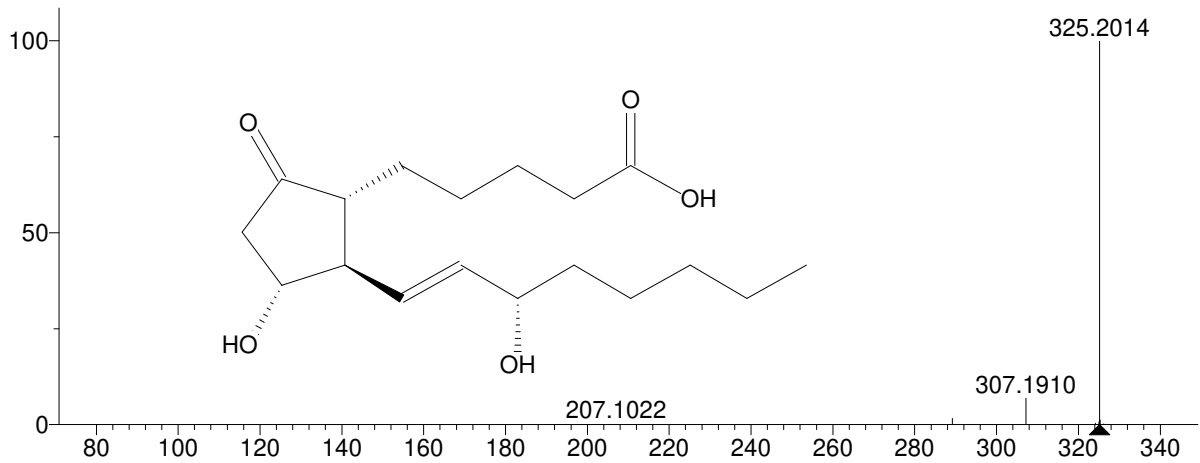

Hit 5 : Unknown (carbon number 19); PlaSMA ID-693 [M-H]- P=325.2  
C<sub>19</sub>H<sub>26</sub>N<sub>4</sub>O; MF: 27; RMF: 252; Prob 1.79%; Lib: biomsmms-neg-plasma; ID: 1223.

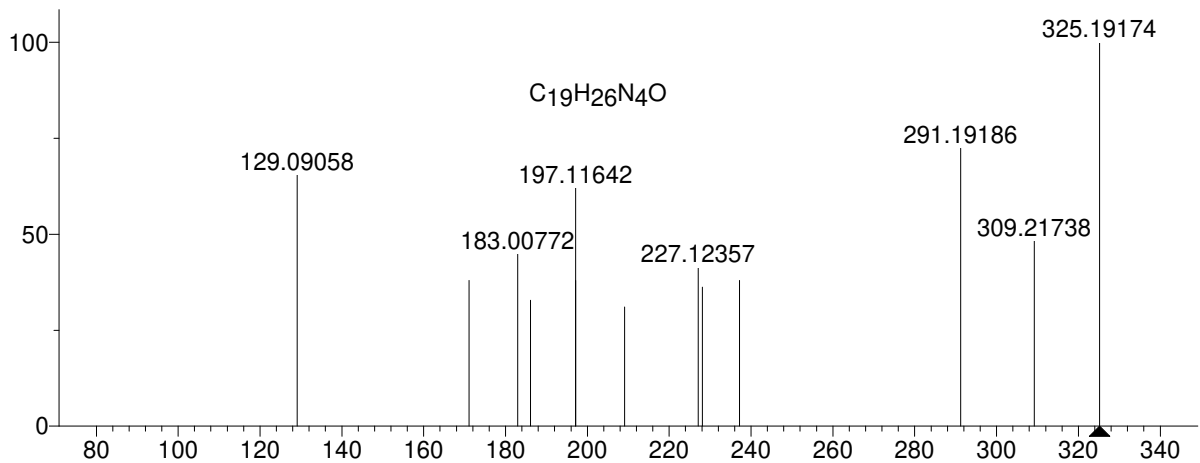



Unknown: Unknown (23.49\_413.1259m/z)  
Compound in Library Factor = -2387

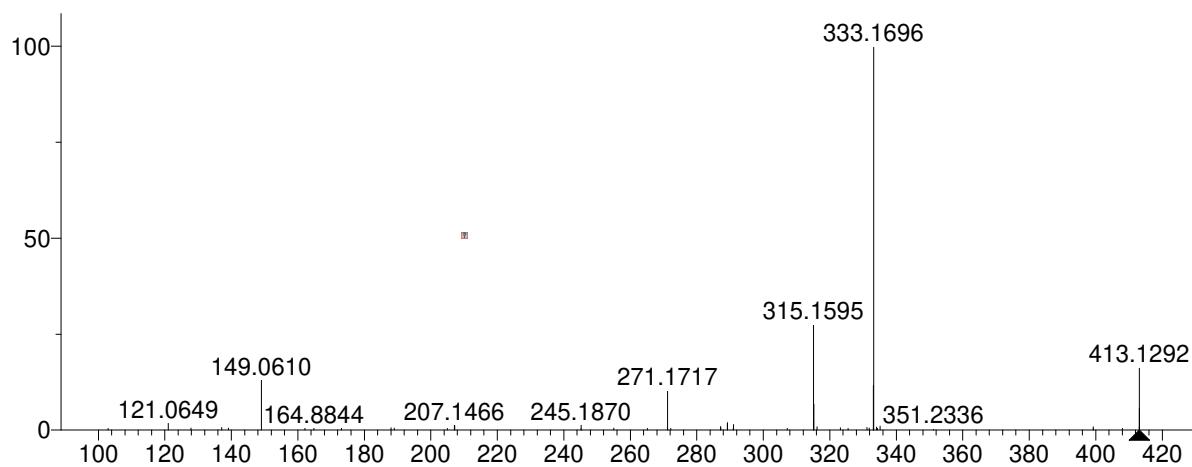

Hit 1 : 7H-1,2,4-Triazolo[3,4-b][1,3,4]thiadiazine, 3-(2,5-dimethoxyphenyl)-6-(3,4-dimethoxyphenyl)- [M+H]<sup>+</sup> HCl  
C<sub>20</sub>H<sub>20</sub>N<sub>4</sub>O<sub>4</sub>S; MF: 13; RMF: 266; Prob 23.7%; CAS: 1013750-77-0; Lib: nist\_msms; ID: 367682.

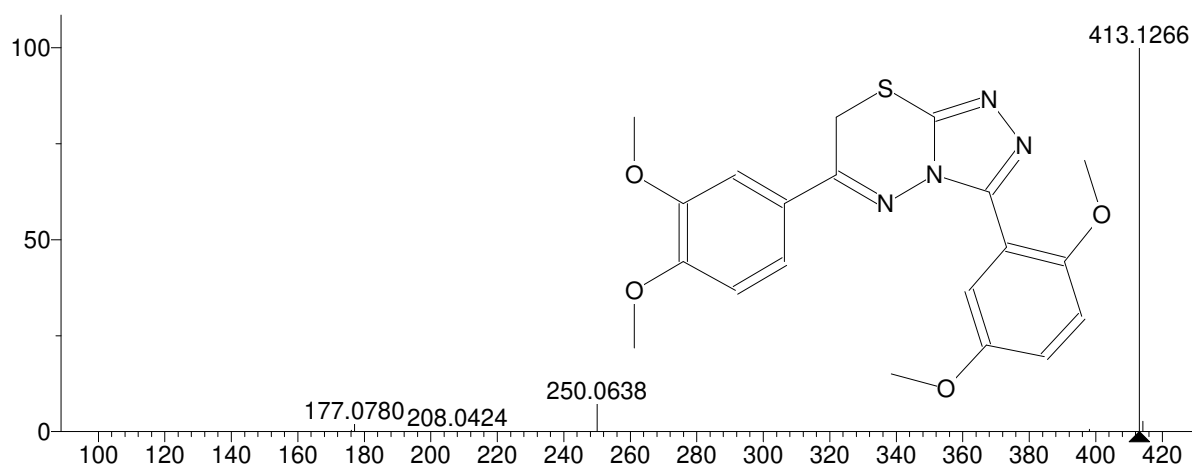

Hit 2 : Cyflufenamide [M+H]<sup>+</sup> HCD 8V P=413.1  
C<sub>20</sub>H<sub>17</sub>F<sub>5</sub>N<sub>2</sub>O<sub>2</sub>; MF: 2; RMF: 250; Prob 16.3%; CAS: 180409-60-3; Lib: nist\_msms; ID: 477205.

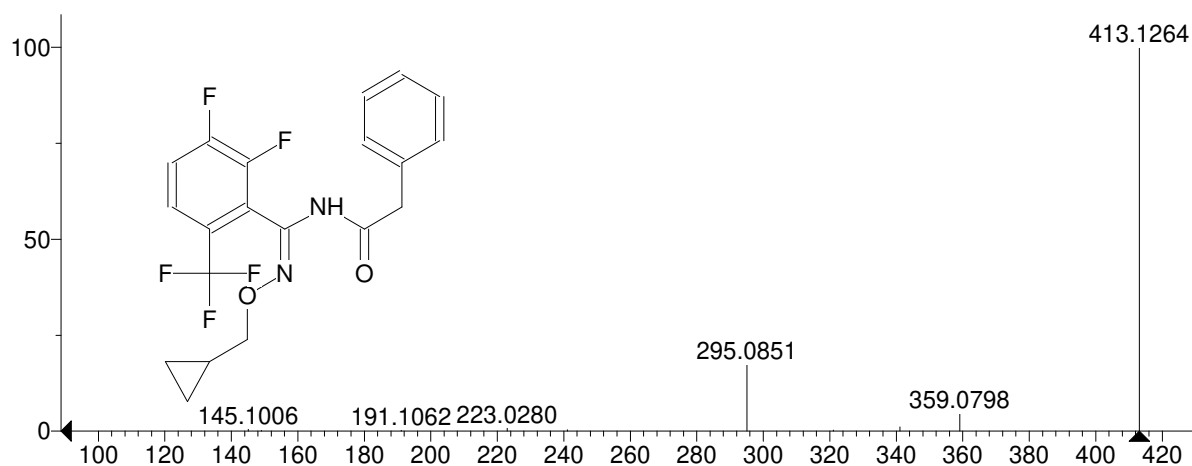

Hit 3 : NCGC00380419-01\_C19H24O8S\_3-[(11,13-Dihydroxy-4-methyl-2,10-dioxo-1,4,5,6,7,8,9,10-octahydro-2H C19H24O8S; MF: 0; RMF: 56; Prob 15.0%; Lib: mona-export-gnps; ID: 14573.

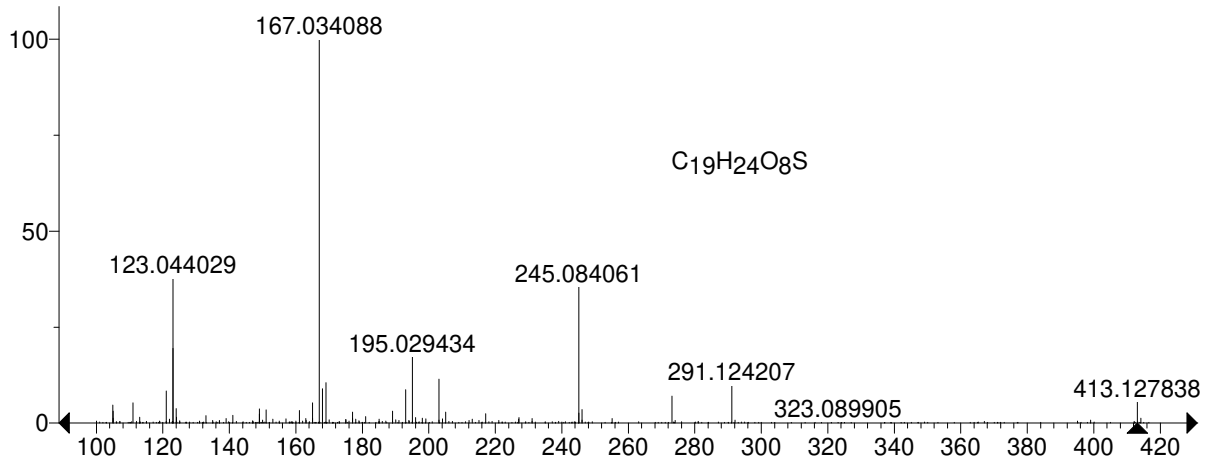

Hit 4 : Beta-Peltatin [M-H]- 35HCD P=413.1  
C<sub>22</sub>H<sub>22</sub>O<sub>8</sub>; MF: 0; RMF: 33; Prob 15.0%; Lib: mona-export-lc-ms-ms\_negative\_mode; ID: 19961.

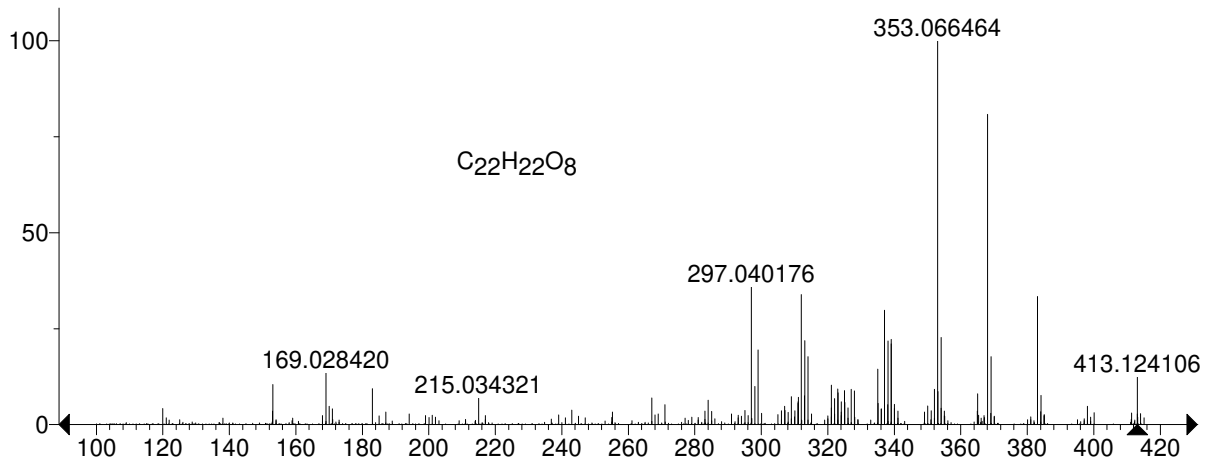

Hit 5 : 2,4,18-trihydroxy-15-(3-hydroxy-3-methylbutyl)-7,9,13-trioxapentacyclo[10.8.0.0A^3,A^1a^o.0a^",a^",,0A^ C<sub>22</sub>H<sub>20</sub>O<sub>8</sub>; MF: 0; RMF: 24; Prob 15.0%; Lib: mona-export-vf-npl\_qexactive; ID: 1267.

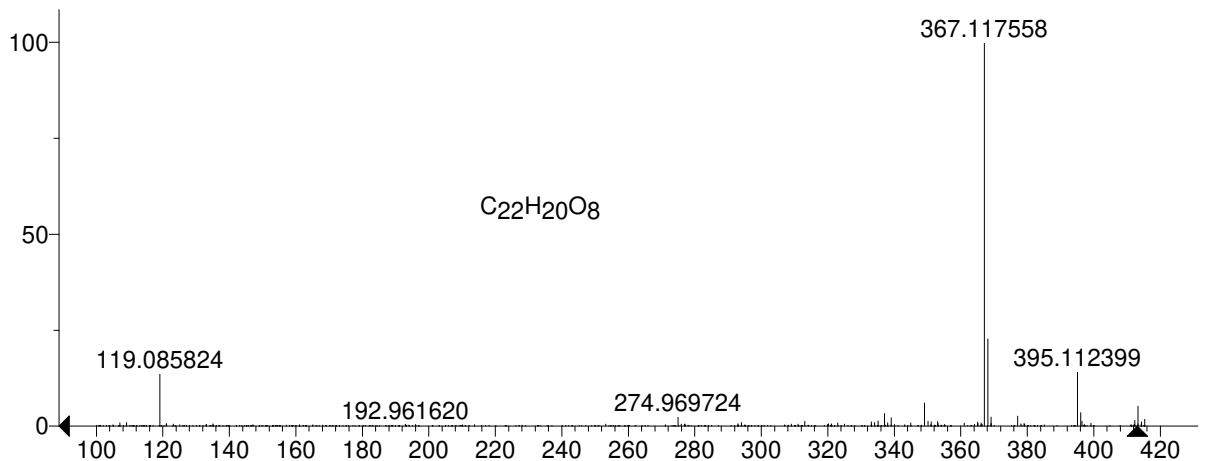

\*\* Search Report Page 1 of 2 \*\*

Unknown: Unknown (23.59\_325.2009m/z)  
Compound in Library Factor = -1848

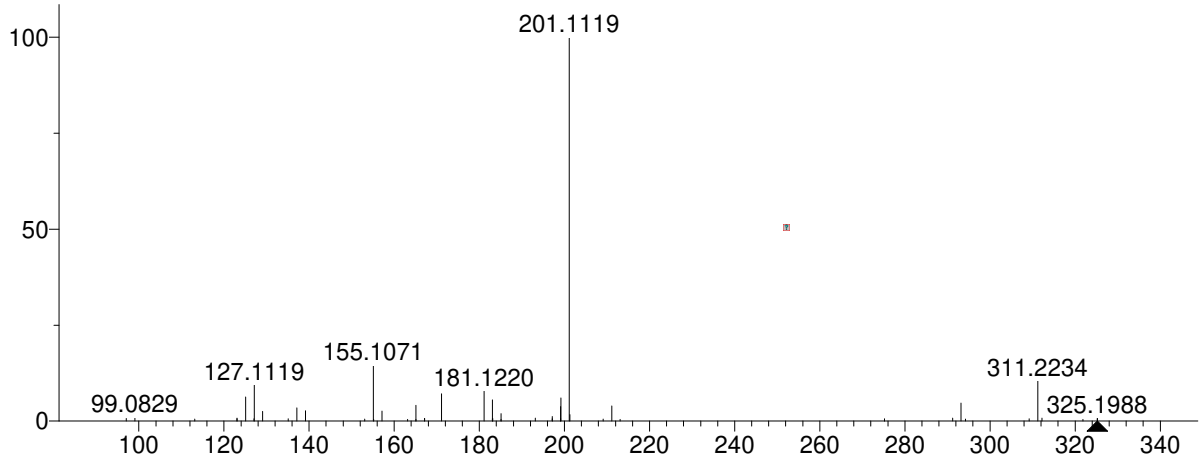

Hit 1 : Unknown (carbon number 18); PlaSMA ID-697 [M-H]<sup>-</sup> P=325.2  
C<sub>18</sub>H<sub>30</sub>O<sub>5</sub>; MF: 111; RMF: 274; Prob 43.5%; Lib: biomsms-neg-plasma; ID: 1224.

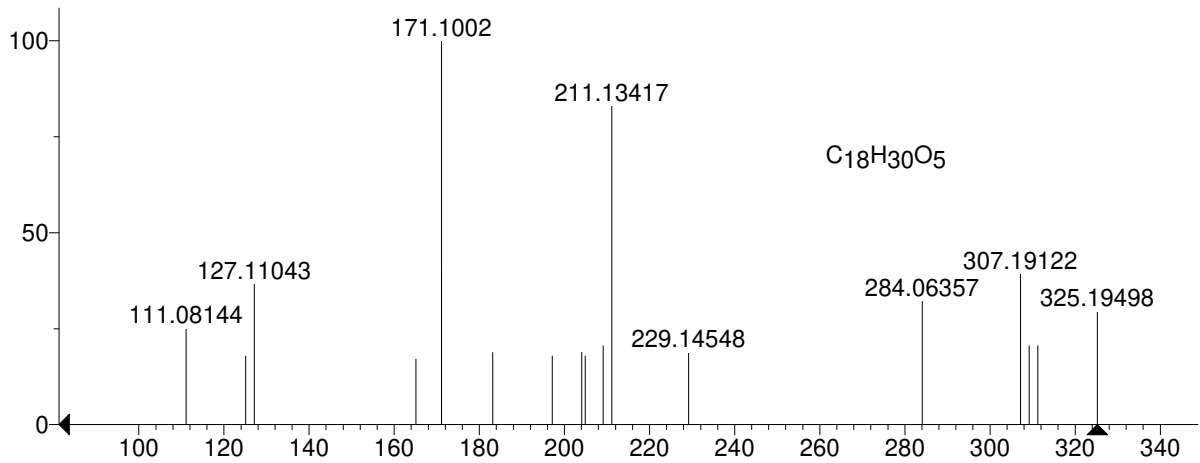

Hit 2 : Unknown (carbon number 19); PlaSMA ID-693 [M-H]<sup>-</sup> P=325.2  
C<sub>19</sub>H<sub>26</sub>N<sub>4</sub>O; MF: 72; RMF: 183; Prob 10.3%; Lib: biomsms-neg-plasma; ID: 1223.

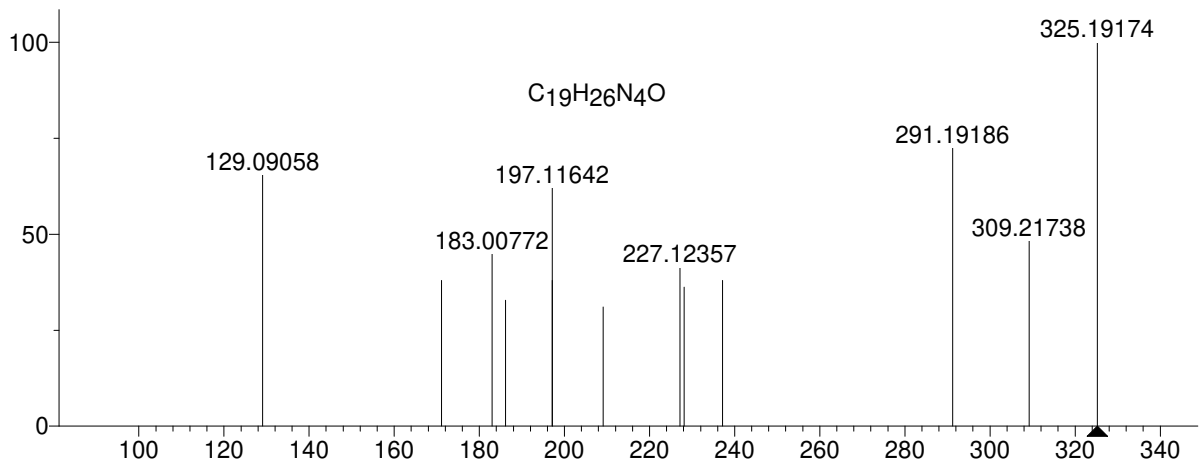

Hit 3 : 2,3-Dinor-8-isoprostaglandin-F2 $\alpha$  [M-H]<sup>-</sup> HCD 26V P=325.2  
C<sub>18</sub>H<sub>30</sub>O<sub>5</sub>; MF: 51; RMF: 182; Prob 4.36%; CAS: 221664-05-7; Lib: nist\_msms; ID: 88183.

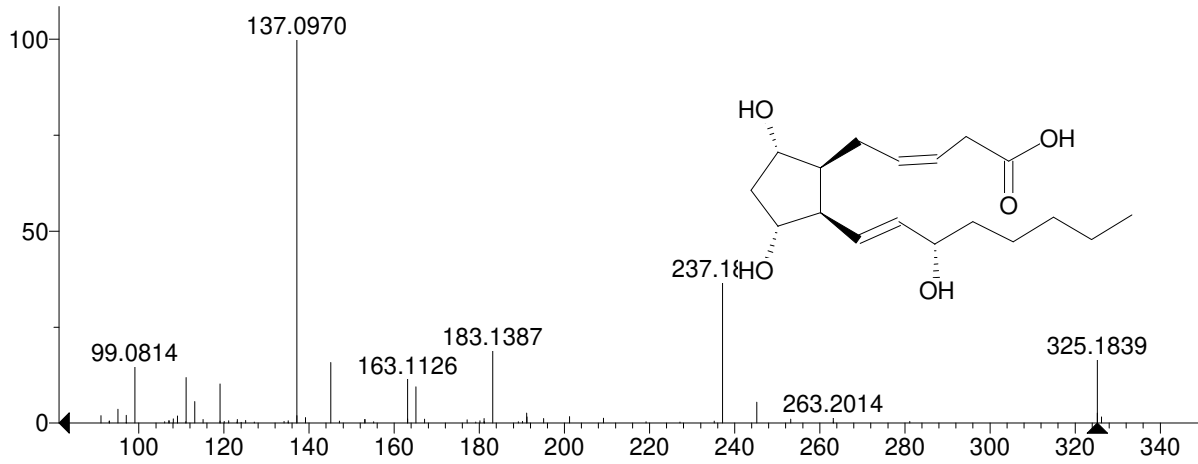

Hit 4 : FA 18:3+3O; PlaSMA ID-694 [M-H]<sup>-</sup> P=325.2  
C<sub>18</sub>H<sub>30</sub>O<sub>5</sub>; MF: 41; RMF: 161; Prob 3.08%; Lib: biomsmns-neg-plasma; ID: 424.

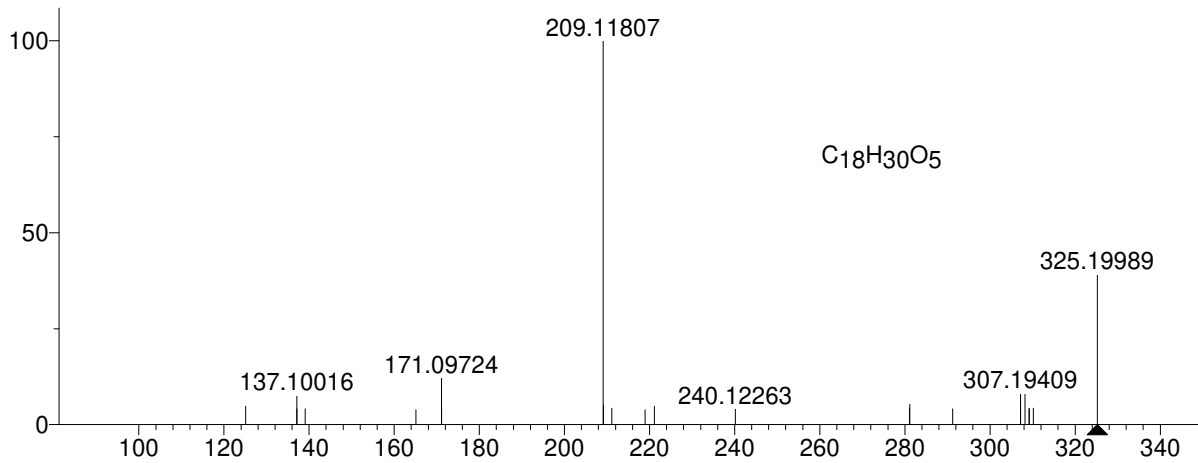

Hit 5 : Unknown (carbon number 18); PlaSMA ID-698 [M-H]<sup>-</sup> P=325.2  
C<sub>18</sub>H<sub>30</sub>O<sub>5</sub>; MF: 27; RMF: 104; Prob 1.93%; Lib: biomsmns-neg-plasma; ID: 1225.

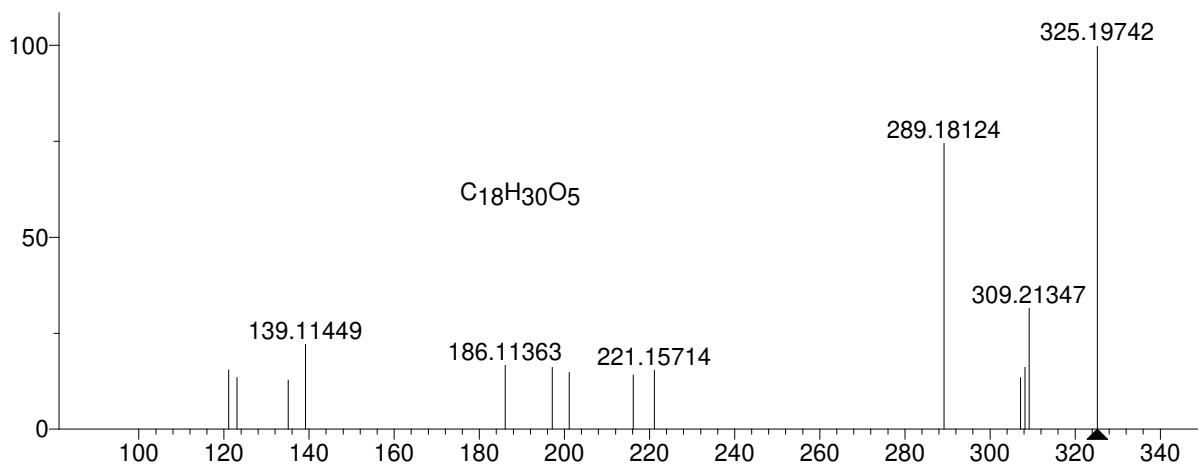

\*\* Search Report Page 1 of 2 \*\*

Unknown: Unknown (23.71\_329.2328m/z)  
Compound in Library Factor = -773

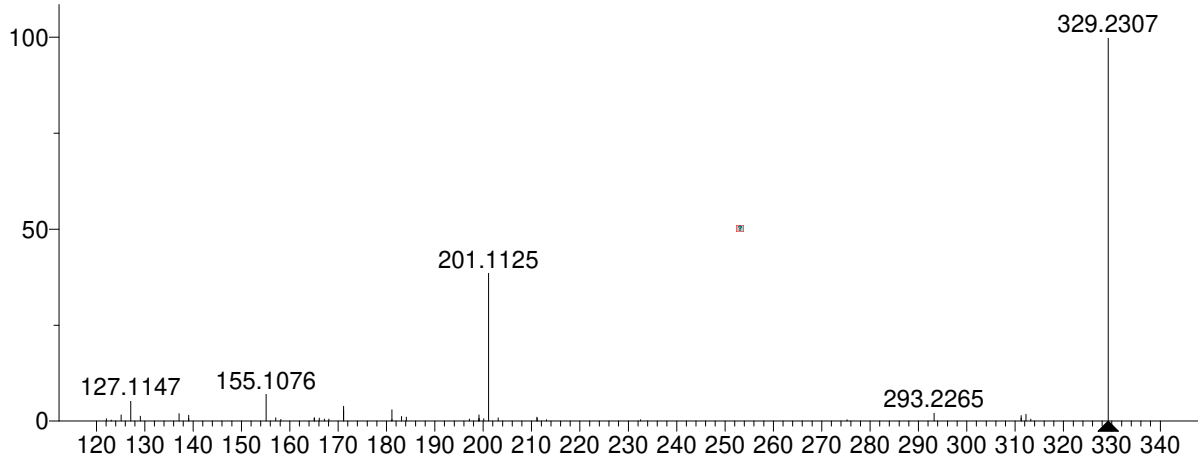

Hit 1 : FA 18:1+3O; PlaSMA ID-735 [M-H]<sup>-</sup> P=329.2  
C<sub>18</sub>H<sub>34</sub>O<sub>5</sub>; MF: 282; RMF: 599; Prob 82.4%; Lib: biomsms-neg-plasma; ID: 443.



Hit 2 : FA 18:1+3O; PlaSMA ID-737 [M-H]<sup>-</sup> P=329.2  
C<sub>18</sub>H<sub>34</sub>O<sub>5</sub>; MF: 219; RMF: 719; Prob 13.8%; Lib: biomsms-neg-plasma; ID: 448.

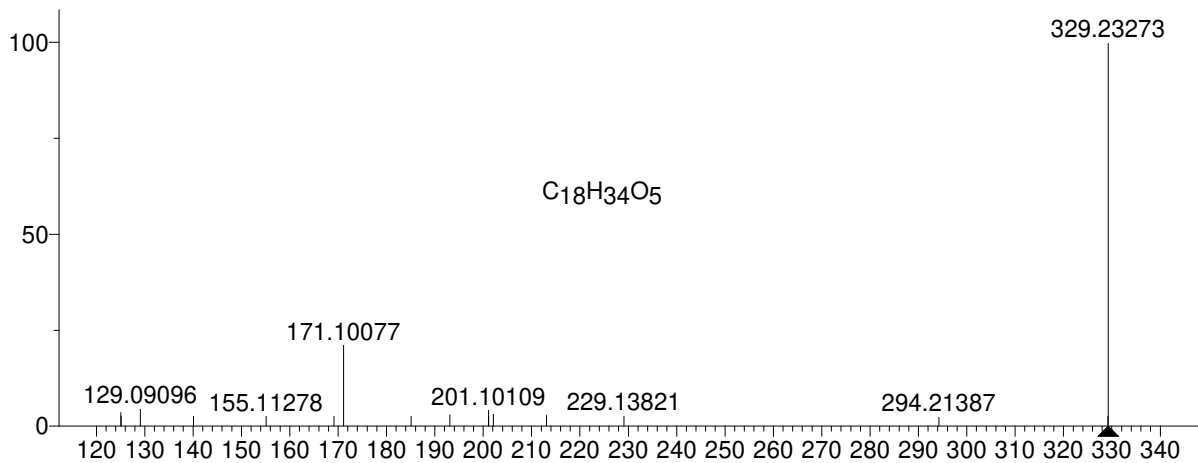

Hit 3 : FA 18:1+3O; PlaSMA ID-738 [M-H]<sup>-</sup> P=329.2  
C<sub>18</sub>H<sub>34</sub>O<sub>5</sub>; MF: 172; RMF: 701; Prob 2.89%; Lib: biomsms-neg-plasma; ID: 444.

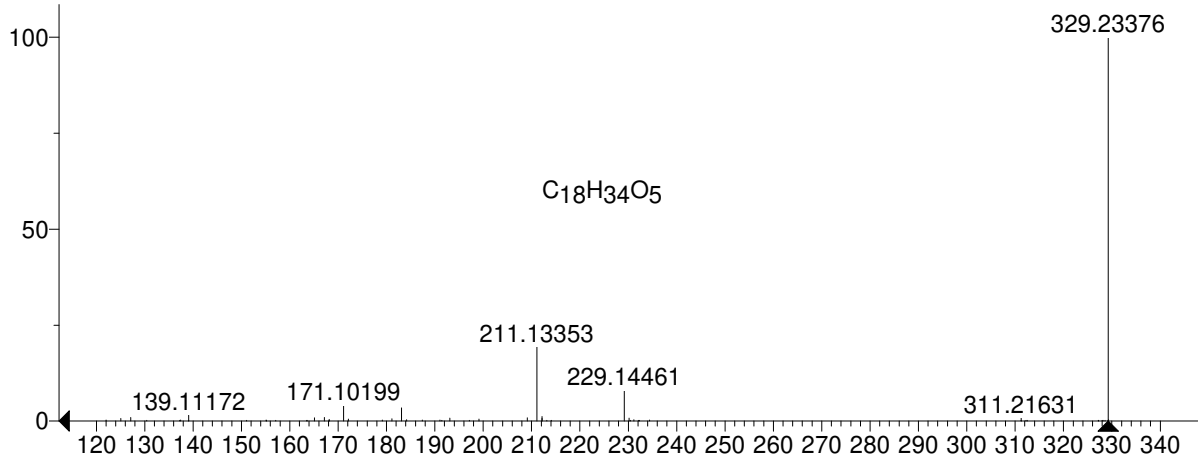

Hit 4 : FA 18:1+3O; PlaSMA ID-742 [M-H]<sup>-</sup> P=329.2  
C<sub>18</sub>H<sub>34</sub>O<sub>5</sub>; MF: 91; RMF: 671; Prob 0.30%; Lib: biomsms-neg-plasma; ID: 445.

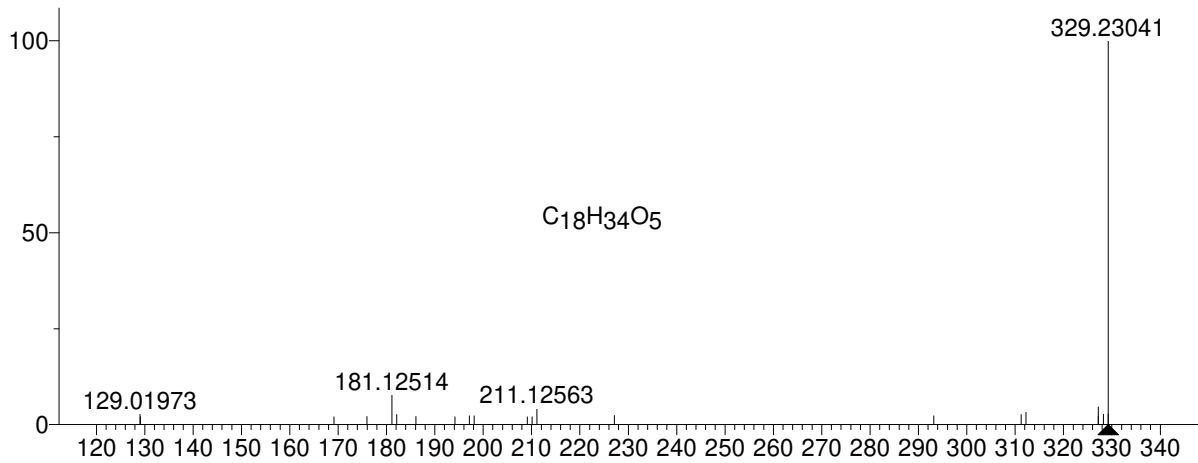

Hit 5 : FA 18:1+3O; PlaSMA ID-739 [M-H]<sup>-</sup> P=329.2  
C<sub>18</sub>H<sub>34</sub>O<sub>5</sub>; MF: 83; RMF: 645; Prob 0.22%; Lib: biomsms-neg-plasma; ID: 446.

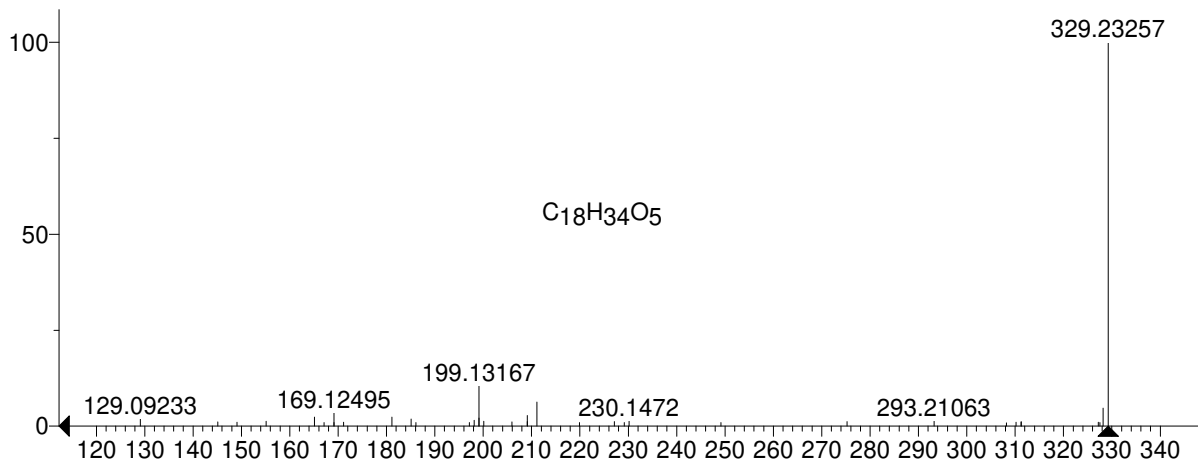

Unknown: Unknown (23.72\_329.4029m/z)  
Compound in Library Factor = 0

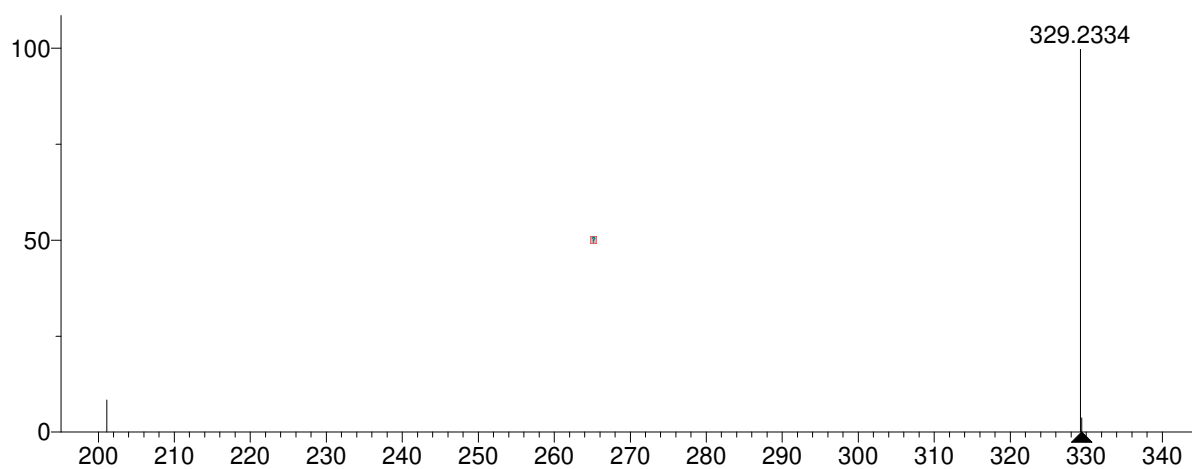

Hit 1 : Unoprostone isopropyl ester [M+H-H<sub>2</sub>O]<sup>+</sup>=>329.4 IT 35% P=329.4  
C<sub>25</sub>H<sub>44</sub>O<sub>5</sub>; MF: 0; RMF: 10; Prob 100.0%; CAS: 120373-24-2; Lib: nist\_msms; ID: 172883.

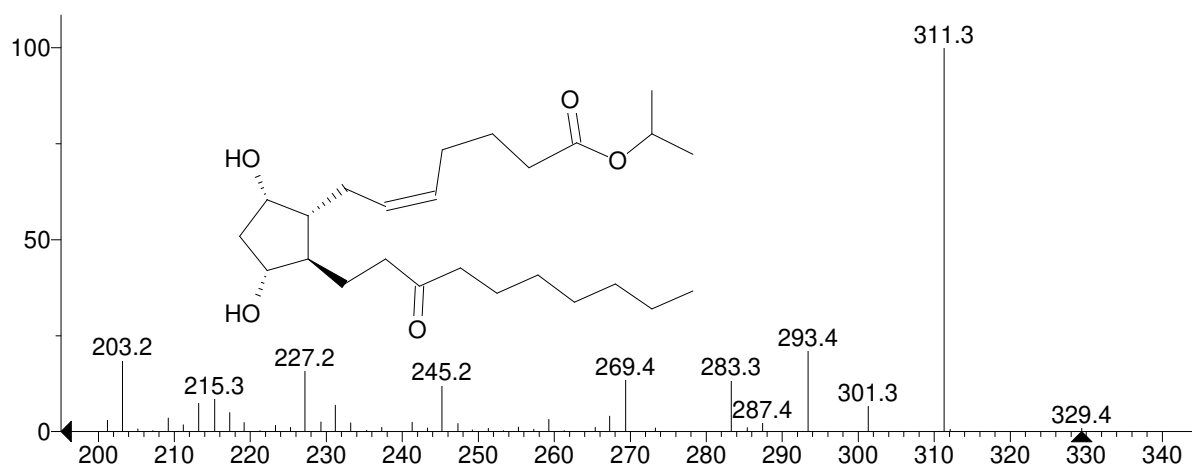

Unknown: Unknown (23.72\_397.2191m/z)  
Compound in Library Factor = 0

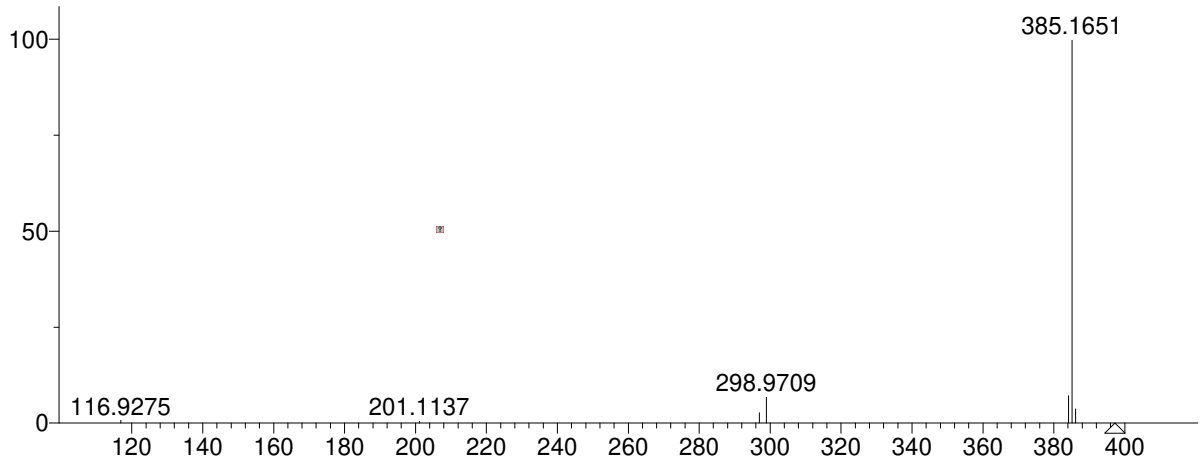



Unknown: Unknown (23.73\_474.1550m/z)  
Compound in Library Factor = 0

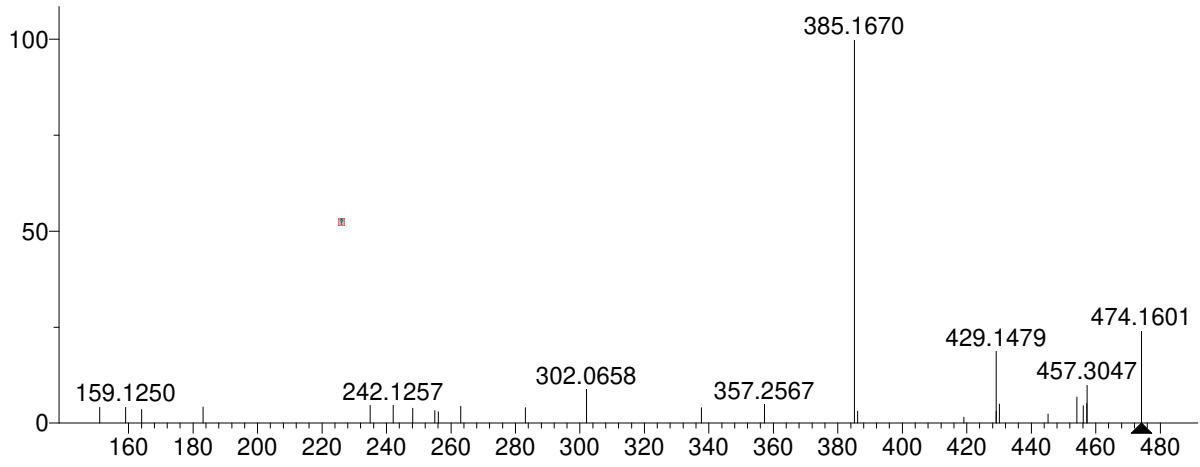

\*\* Search Report Page 1 of 2 \*\*

Unknown: Unknown (23.77\_353.2309m/z)  
Compound in Library Factor = -1523

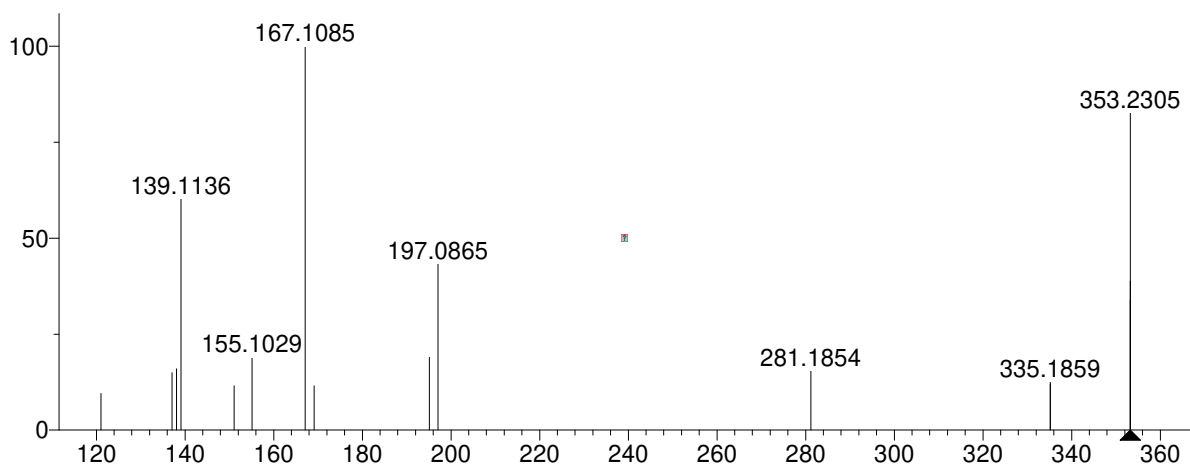

Hit 1 : 15-Ketoprostaglandin E1 [M+H]<sup>+</sup> HCD 3V P=353.2  
C<sub>20</sub>H<sub>32</sub>O<sub>5</sub>; MF: 187; RMF: 675; Prob 47.7%; CAS: 22973-19-9; Lib: nist\_msms; ID: 169227.

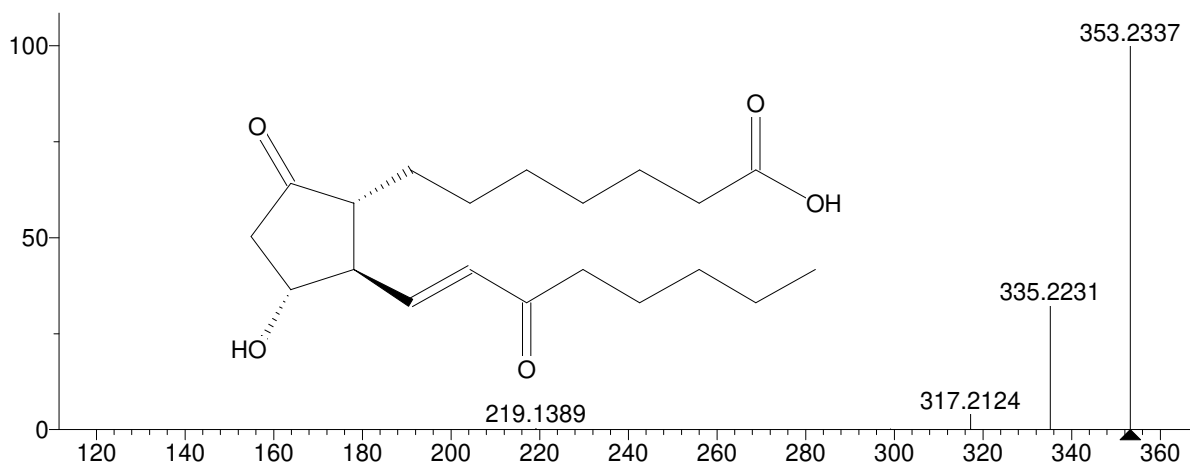

Hit 2 : Prostaglandin D1 [M-H]<sup>-</sup> HCD 5V P=353.2  
C<sub>20</sub>H<sub>34</sub>O<sub>5</sub>; MF: 145; RMF: 680; Prob 10.7%; CAS: 17968-82-0; Lib: nist\_msms; ID: 320117.

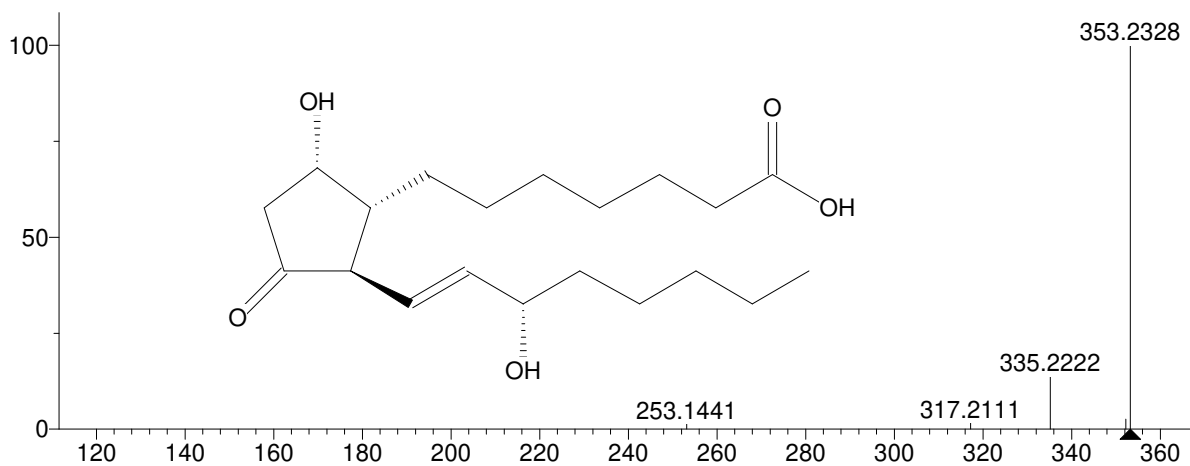

Hit 3 : Prostaglandin E1 [M-H]<sup>-</sup> HCD 7V P=353.2  
C<sub>20</sub>H<sub>34</sub>O<sub>5</sub>; MF: 138; RMF: 674; Prob 8.19%; CAS: 745-65-3; Lib: nist\_msms; ID: 320381.

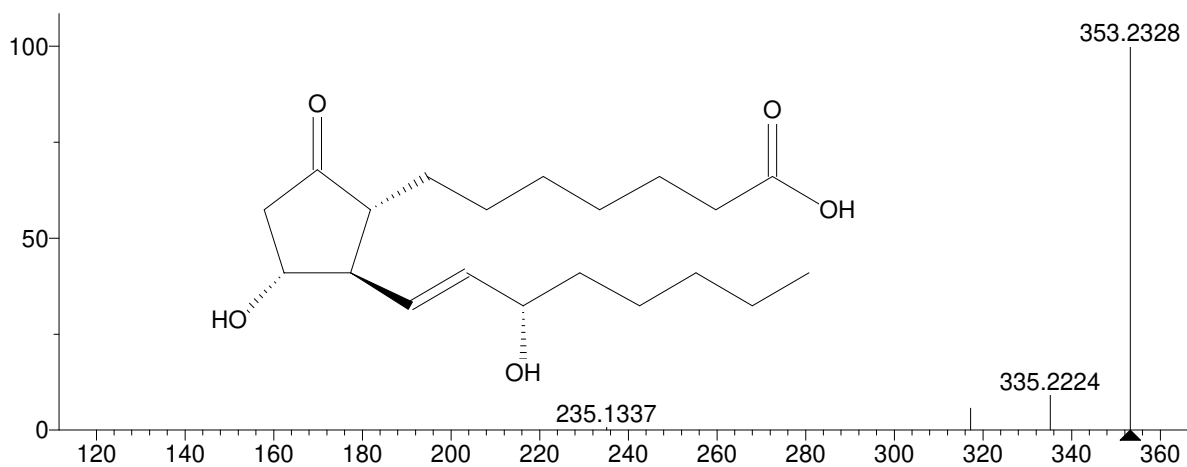

Hit 4 : 9S,11R-Dihydroxy-15-oxo-13E-prostenoic acid [M-H]<sup>-</sup> HCD 7V P=353.2  
C<sub>20</sub>H<sub>34</sub>O<sub>5</sub>; MF: 135; RMF: 706; Prob 7.24%; CAS: 21562-58-3; Lib: nist\_msms; ID: 155079.

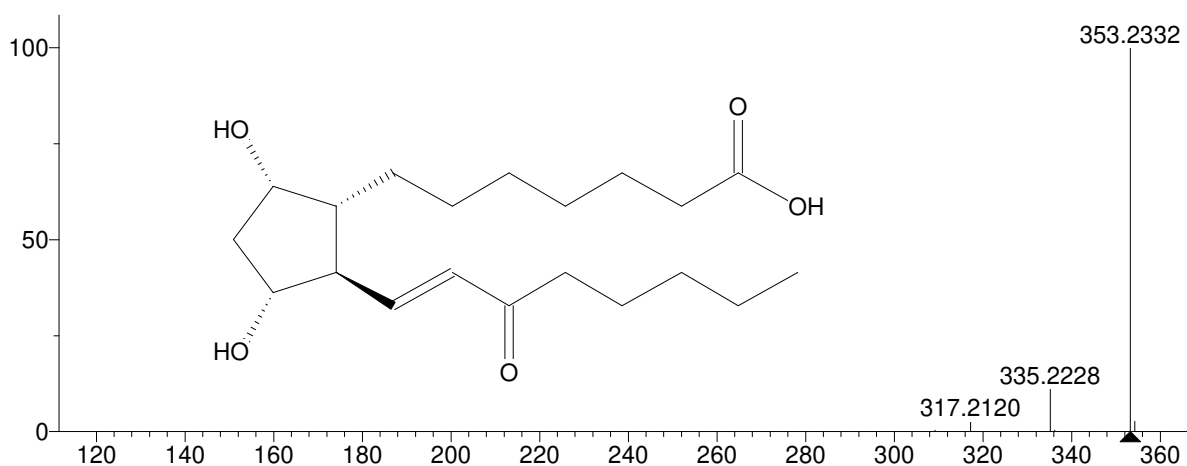

Hit 5 : 6-Ketoprostaglandin F1 $\alpha$  [M+H-H<sub>2</sub>O]<sup>+</sup> HCD 1V P=353.2  
C<sub>20</sub>H<sub>34</sub>O<sub>6</sub>; MF: 133; RMF: 700; Prob 6.68%; CAS: 58962-34-8; Lib: nist\_msms; ID: 166451.

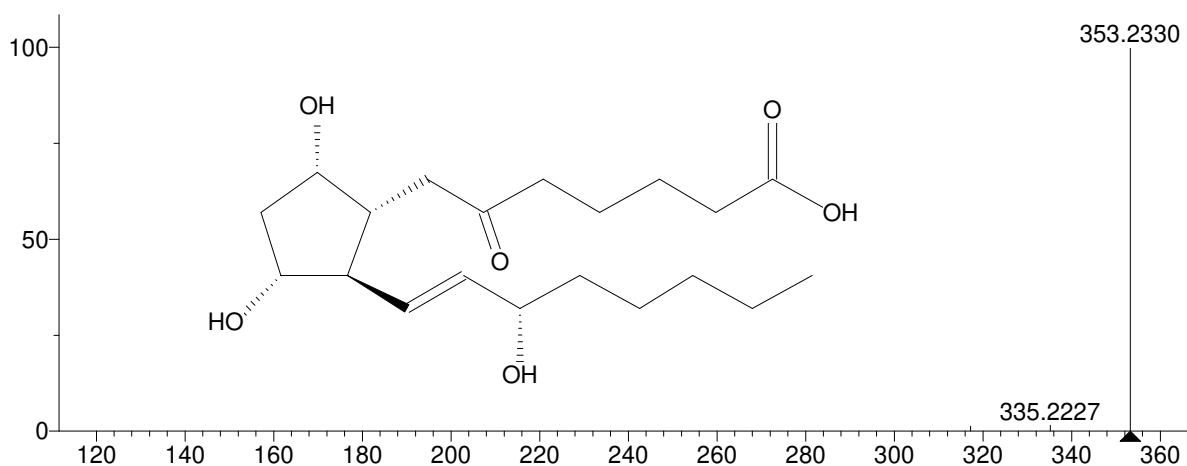

Unknown: Unknown (23.82\_351.1802m/z)  
Compound in Library Factor = -3273

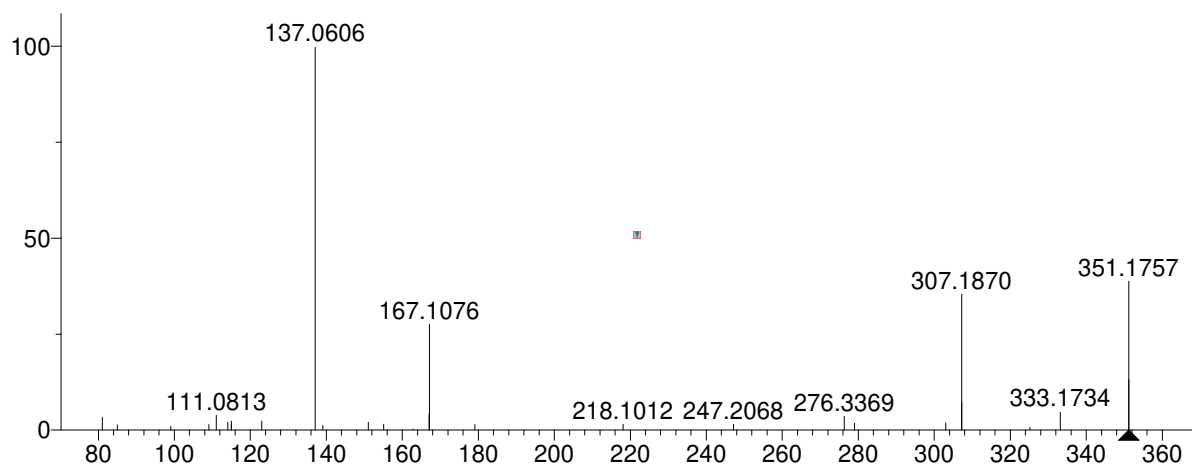

Hit 1 : 3-[(E)-3,4-dihydroxy-3,5-dimethylhept-1-enyl]-7,8-dihydroxy-7-methyl-8,8a-dihydro-1H-isochromen-6-one [ C<sub>19</sub>H<sub>28</sub>O<sub>6</sub>; MF: 5; RMF: 137; Prob 100.0%; Lib: mona-export-1c-ms-ms\_negative\_mode; ID: 22067.

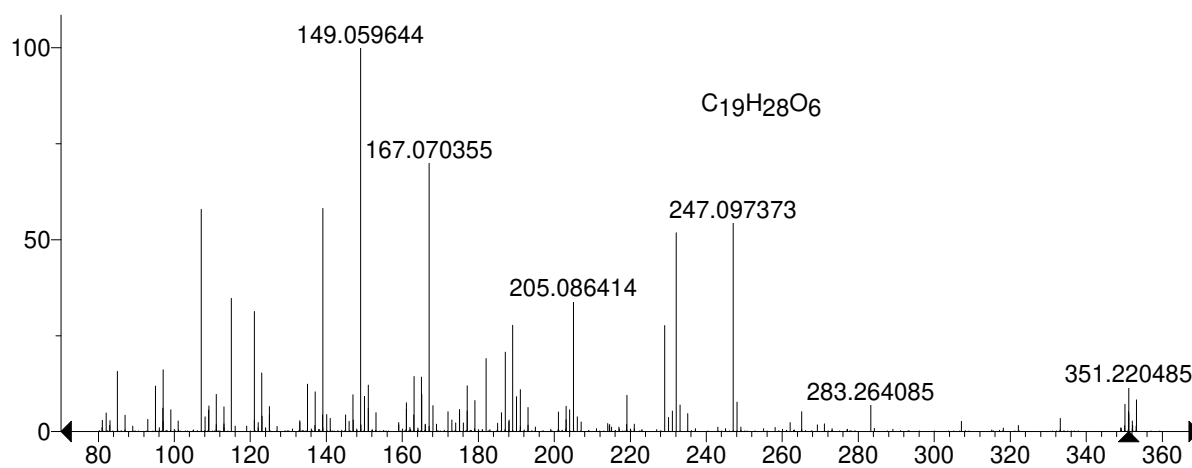

\*\* Search Report Page 1 of 2 \*\*

Unknown: Unknown (23.84\_325.2006m/z)  
Compound in Library Factor = -755

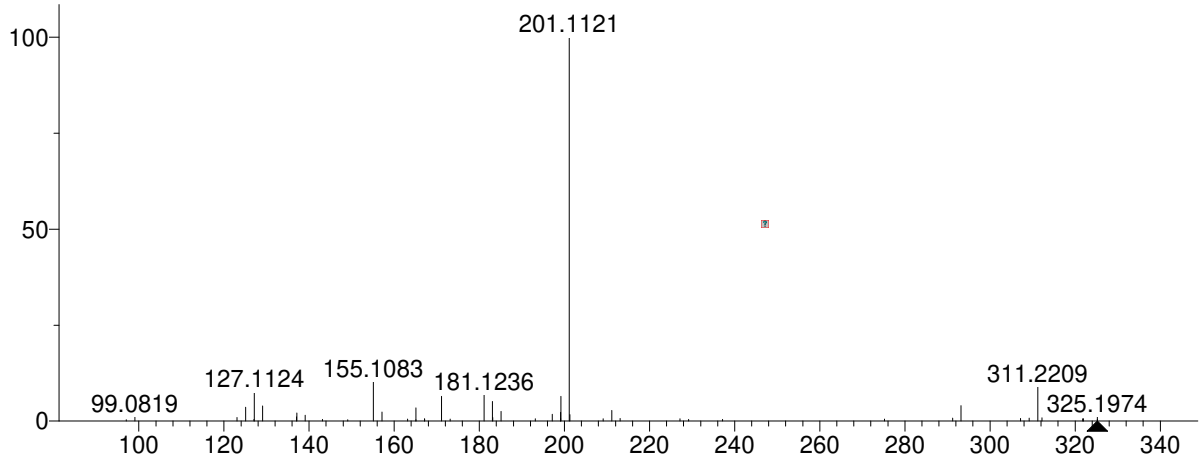

Hit 1 : Unknown (carbon number 18); PlaSMA ID-697 [M-H]- P=325.2  
C18H30O5; MF: 205; RMF: 325; Prob 81.6%; Lib: biomsms-neg-plasma; ID: 1224.



Hit 2 : Unknown (carbon number 19); PlaSMA ID-693 [M-H]- P=325.2  
C19H26N4O; MF: 110; RMF: 221; Prob 6.61%; Lib: biomsms-neg-plasma; ID: 1223.



Hit 3 : Hymeglusin [M+H]<sup>+</sup> HCD 3V P=325.2  
C<sub>18</sub>H<sub>28</sub>O<sub>5</sub>; MF: 63; RMF: 297; Prob 1.38%; CAS: 29066-42-0; Lib: nist\_msms; ID: 376516.

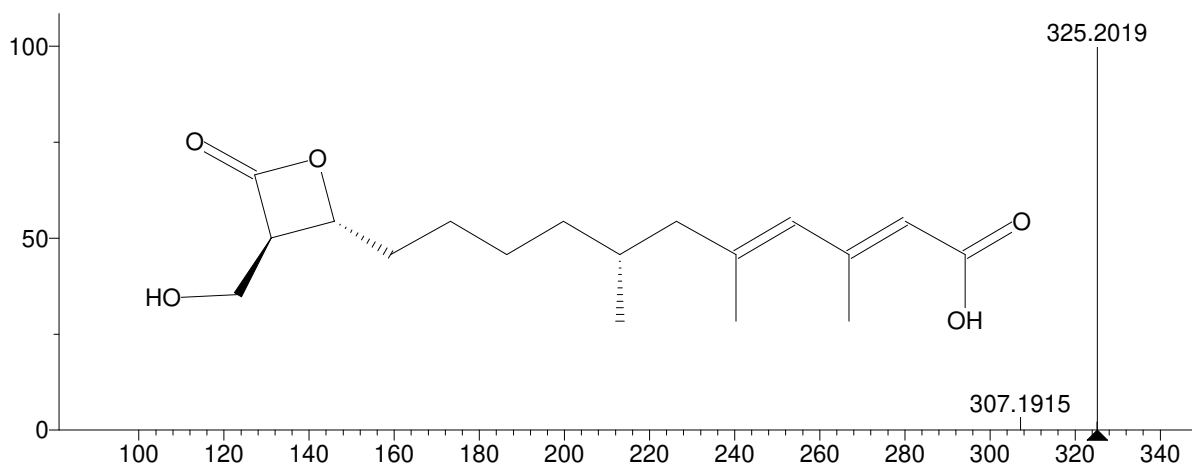

Hit 4 : FA 18:3+3O; PlaSMA ID-694 [M-H]<sup>-</sup> P=325.2  
C<sub>18</sub>H<sub>30</sub>O<sub>5</sub>; MF: 56; RMF: 181; Prob 1.05%; Lib: biomsms-neg-plasma; ID: 424.

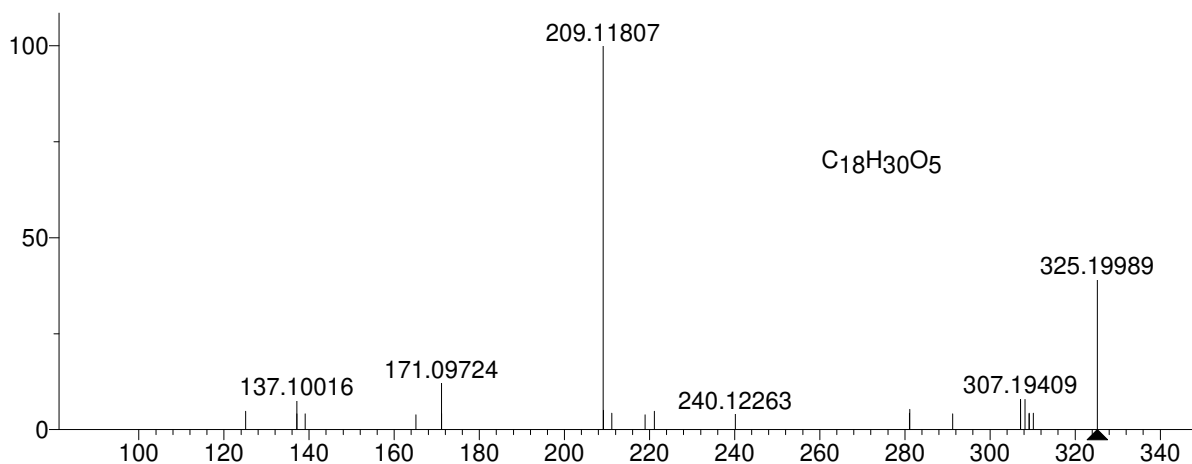

Hit 5 : 3-Oxocholeic acid [M-H]<sup>-</sup> =>361.3=>325.2 IT 35% P=325.2  
C<sub>24</sub>H<sub>38</sub>O<sub>5</sub>; MF: 40; RMF: 258; Prob 0.61%; CAS: 2304-89-4; Lib: nist\_msms; ID: 117921.

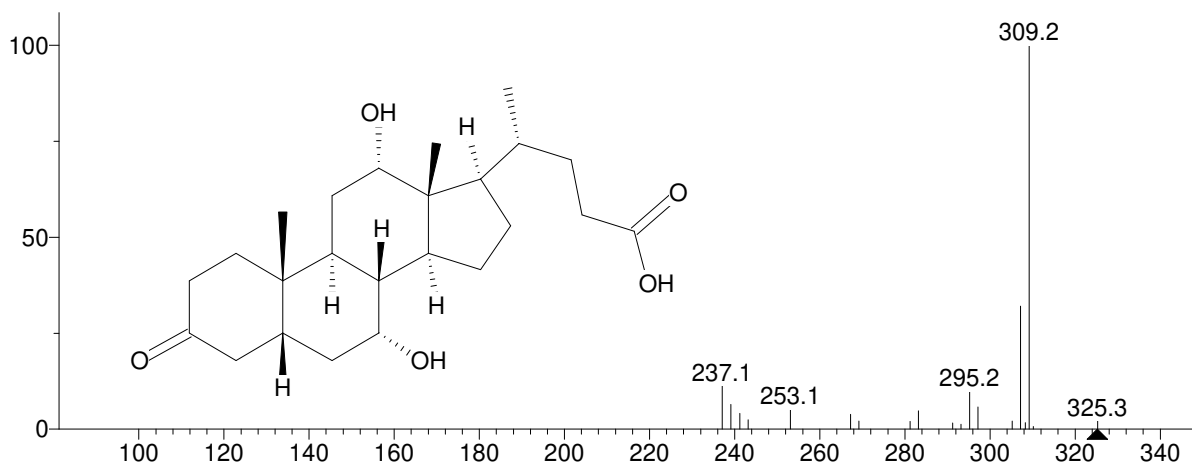

Unknown: Unknown (24.03\_384.0615m/z)  
Compound in Library Factor = 0

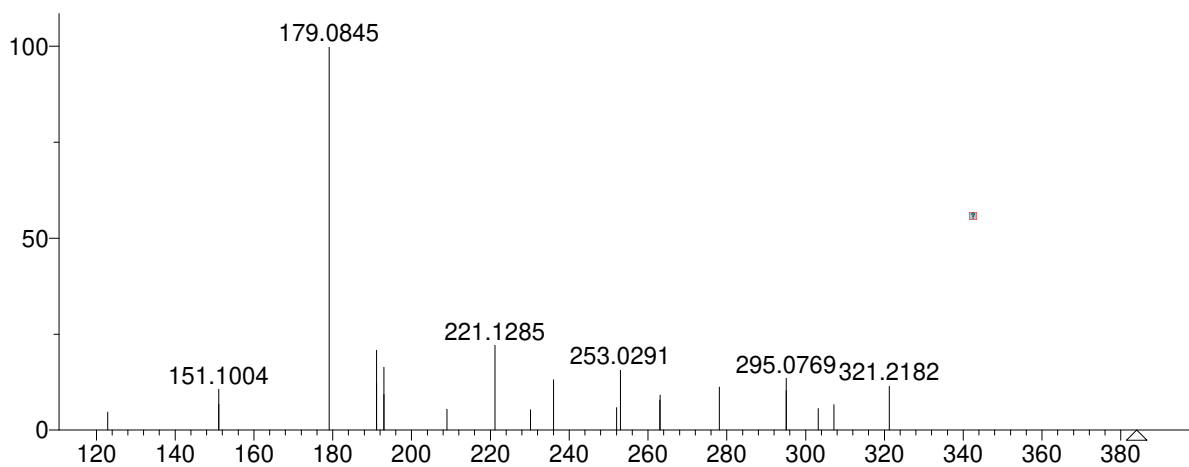

Hit 1 : Dehydrofelodipine [M+H+2i]+ HCD 46V P=384.1  
C<sub>18</sub>H<sub>17</sub>Cl<sub>2</sub>NO<sub>4</sub>; MF: 0; RMF: 3; Prob 100.0%; CAS: 96382-71-7; Lib: nist\_msms; ID: 517307.

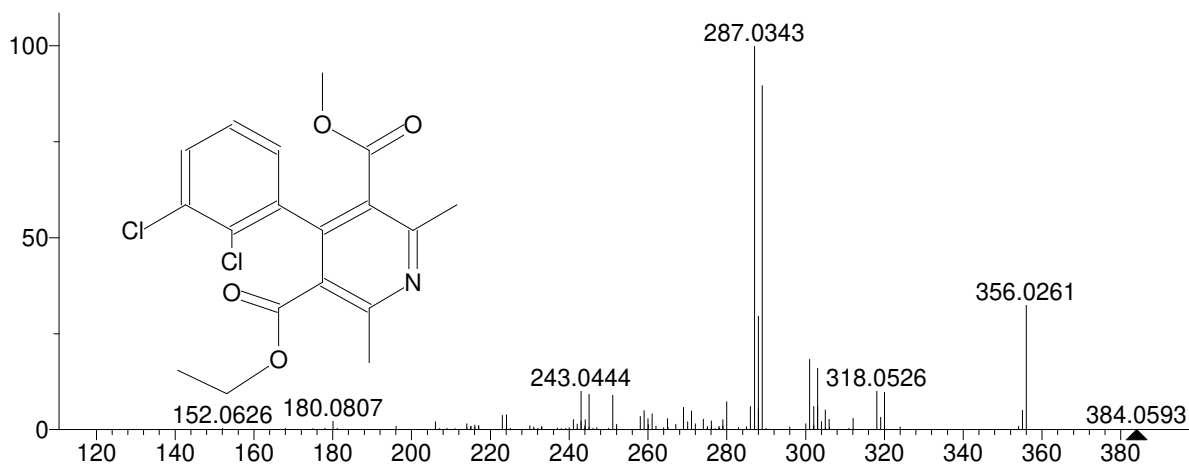

\*\* Search Report Page 1 of 2 \*\*

Unknown: Unknown (24.06\_793.4383m/z)  
Compound in Library Factor = -1072

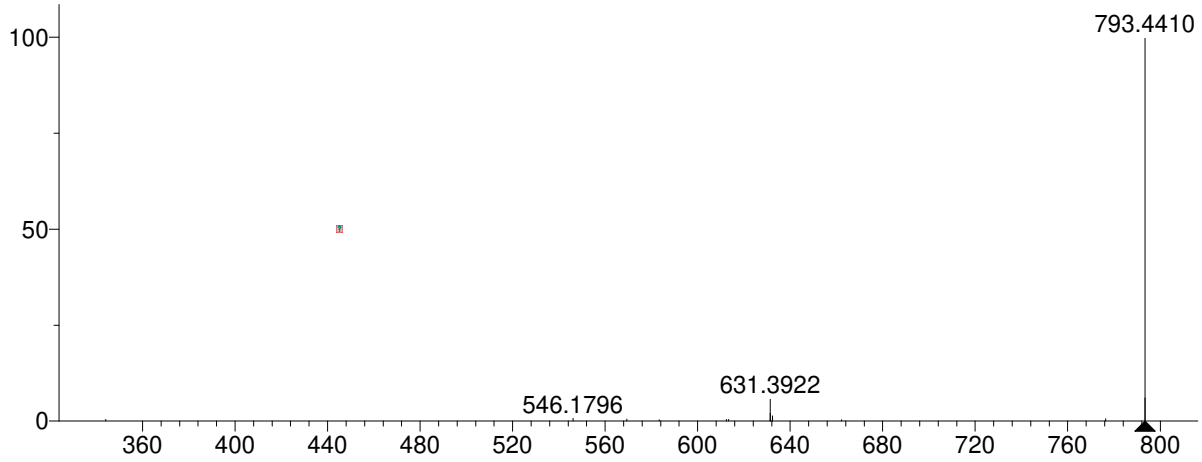

Hit 1 : Unknown (carbon number 42); PlaSMA ID-2040 [M-H]<sup>-</sup> P=793.4  
C<sub>42</sub>H<sub>66</sub>O<sub>14</sub>; MF: 190; RMF: 875; Prob 74.7%; Lib: biomsmms-neg-plasma; ID: 1628.

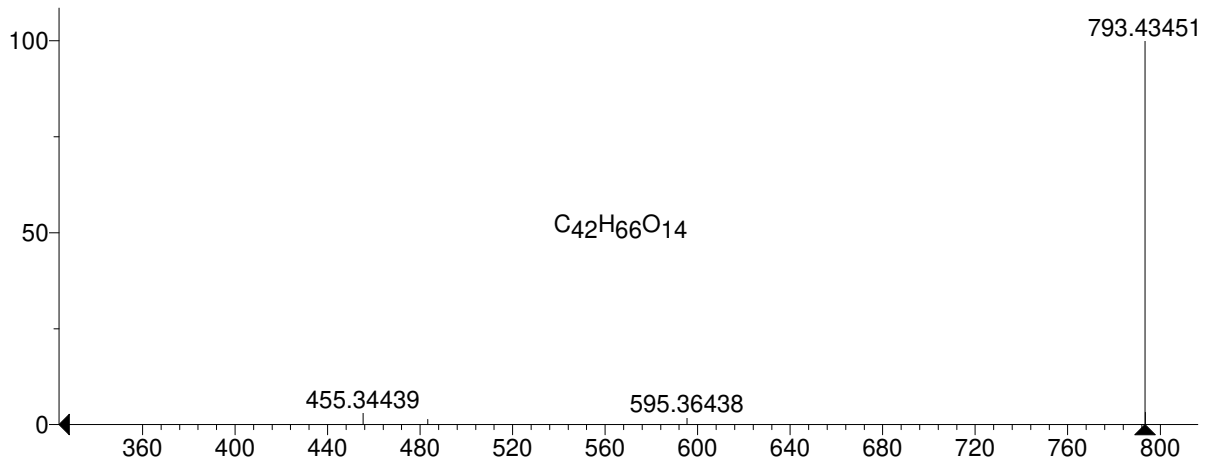

Hit 2 : 3-GlcA-28-Glc oleanolic acid (NMR) [M-H]<sup>-</sup> 45eV P=793.4  
C<sub>42</sub>H<sub>66</sub>O<sub>14</sub>; MF: 118; RMF: 750; Prob 10.4%; Lib: msms-neg-metabobase; ID: 1118.

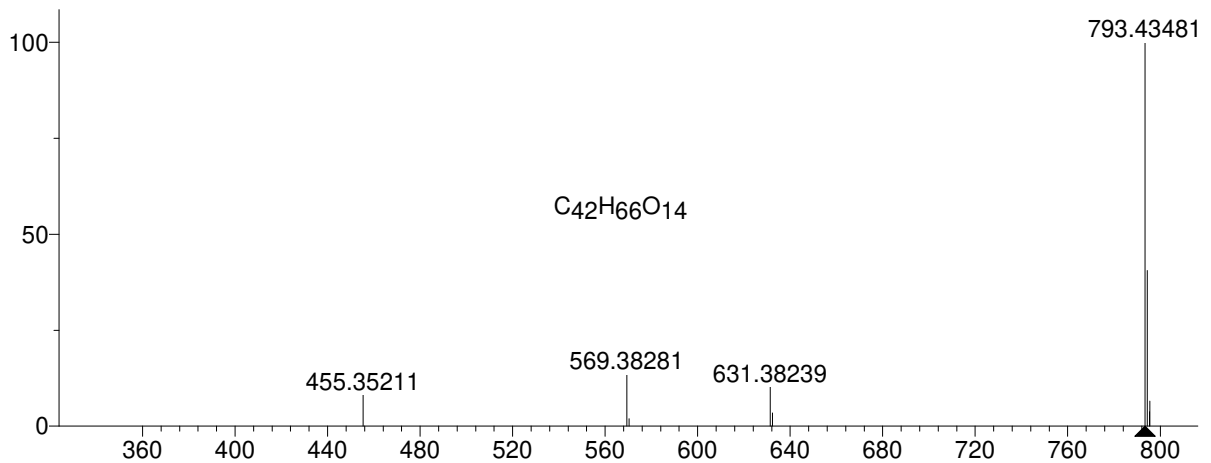



\*\* Search Report Page 2 of 2 \*\*

Hit 3 : (2S,3S,4S,5R,6R)-6-[[[(3S,6aR,6bS,8aS,14bR)-4,4,6a,6b,11,11,14b-heptamethyl-8a-[(2S,3R,4S,5S,6R)-3,4  
C<sub>42</sub>H<sub>66</sub>O<sub>14</sub>; MF: 111; RMF: 768; Prob 7.97%; Lib: mona-export-ic-ms-ms\_negative\_mode; ID: 21494.

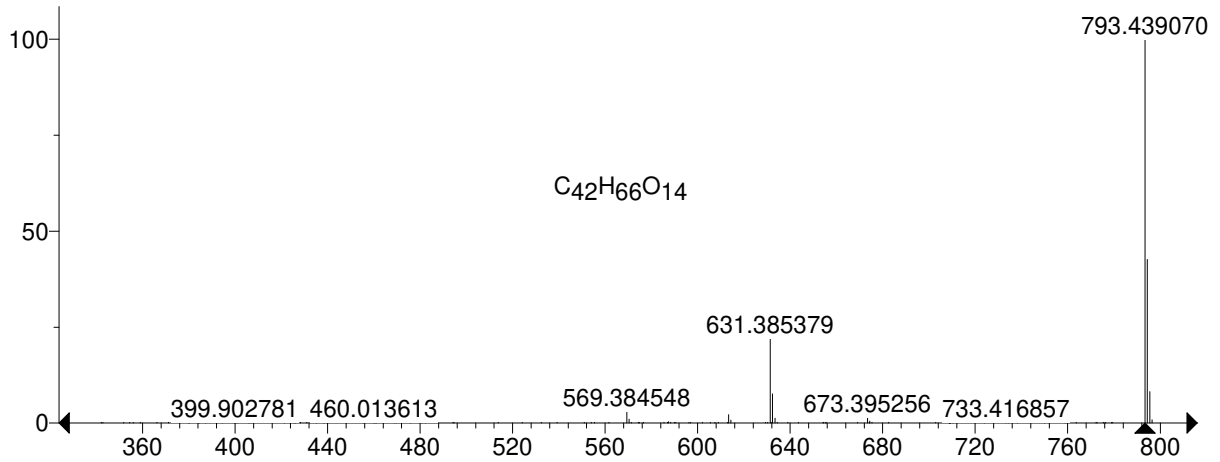

Hit 4 : Unknown (carbon number 42); PlaSMA ID-2041 [M-H]<sup>-</sup> P=793.4  
C<sub>42</sub>H<sub>66</sub>O<sub>14</sub>; MF: 95; RMF: 780; Prob 4.59%; Lib: biomsms-neg-plasma; ID: 1629.

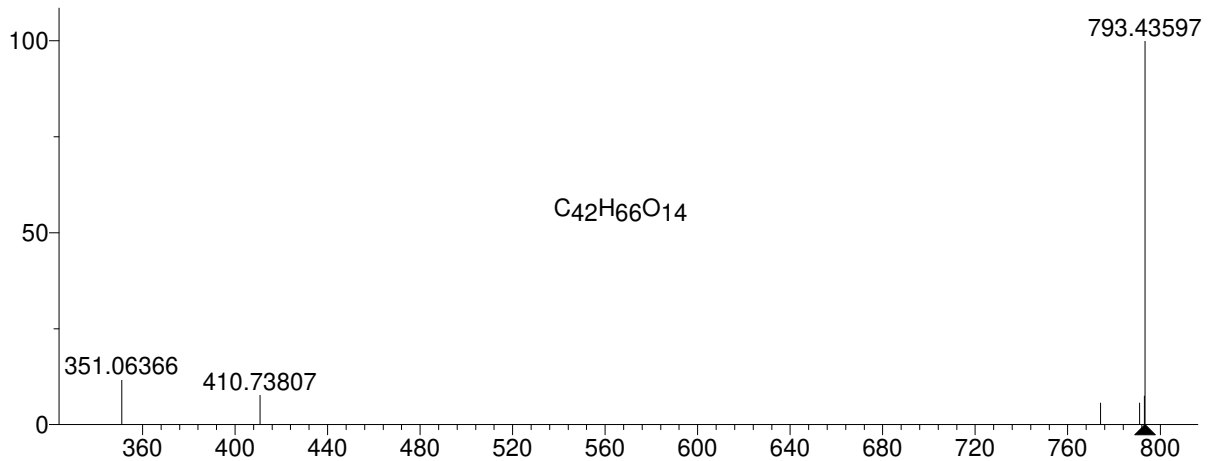

Hit 5 : Oleanolic acid base + O-HexA-Hex; PlaSMA ID-2042 [M-H]<sup>-</sup> P=793.4  
C<sub>42</sub>H<sub>66</sub>O<sub>14</sub>; MF: 25; RMF: 871; Prob 0.66%; Lib: biomsms-neg-plasma; ID: 248.

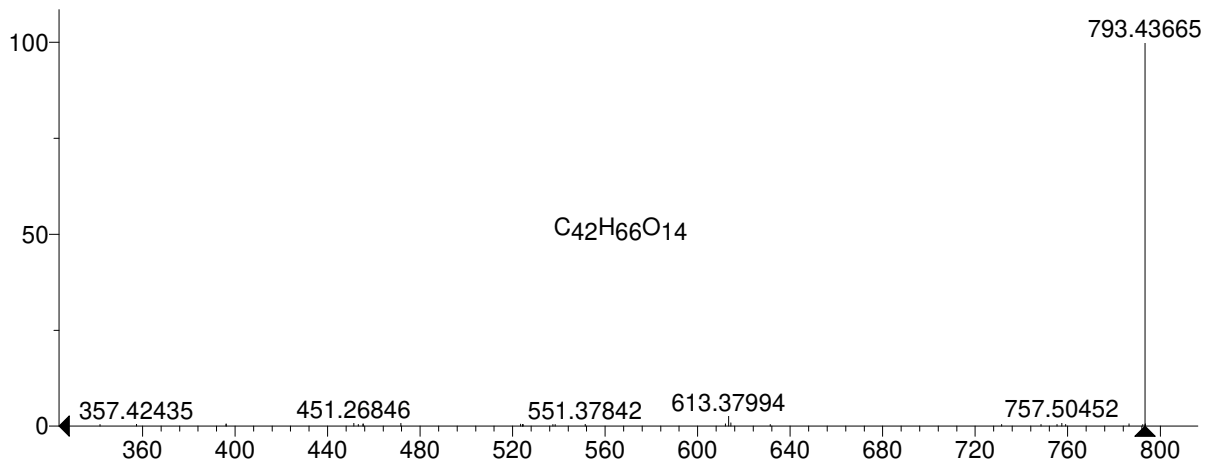

Unknown: Unknown (24.15\_329.2313m/z)  
Compound in Library Factor = 0

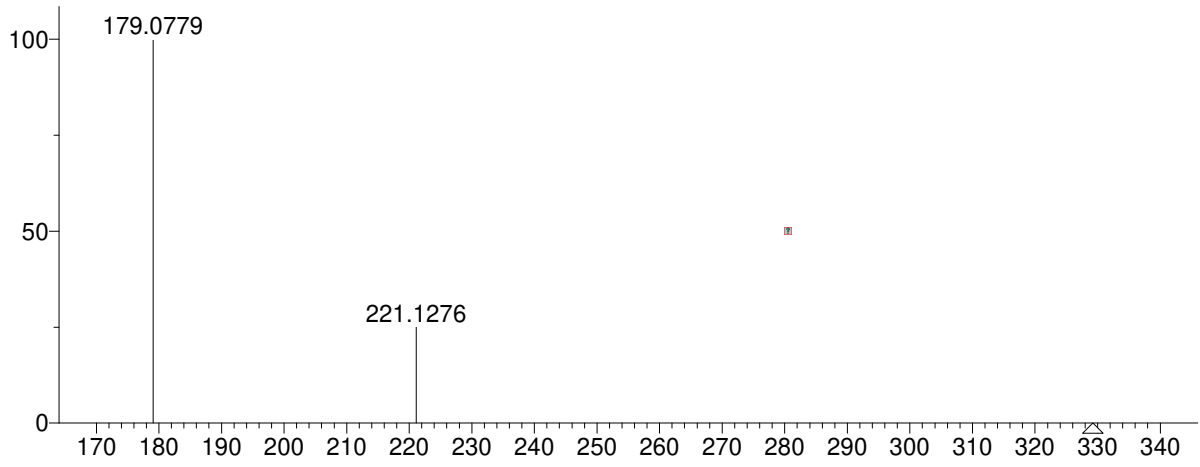

\*\* Search Report Page 1 of 2 \*\*

Unknown: Unknown (24.27\_309.2058m/z)  
Compound in Library Factor = -2387

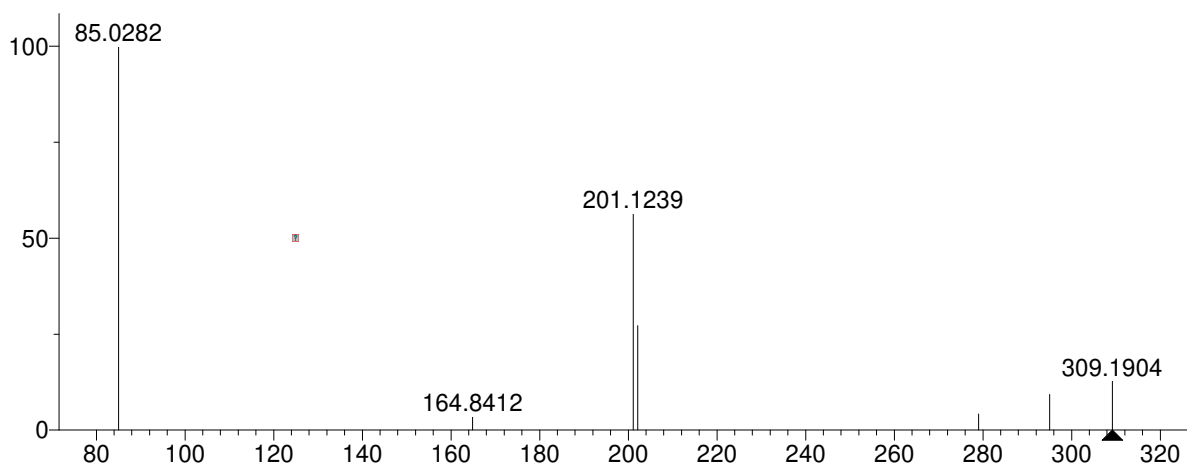

Hit 1 : 3-Cyclopentene-1-octanoic acid, 2-(3-hydroxy-1-penten-1-yl)-5-oxo- [M+H]<sup>+</sup> HCD 6V P=309.2  
C<sub>18</sub>H<sub>28</sub>O<sub>4</sub>; MF: 32; RMF: 615; Prob 12.7%; CAS: 1035557-09-5; Lib: nist\_msms; ID: 245895.

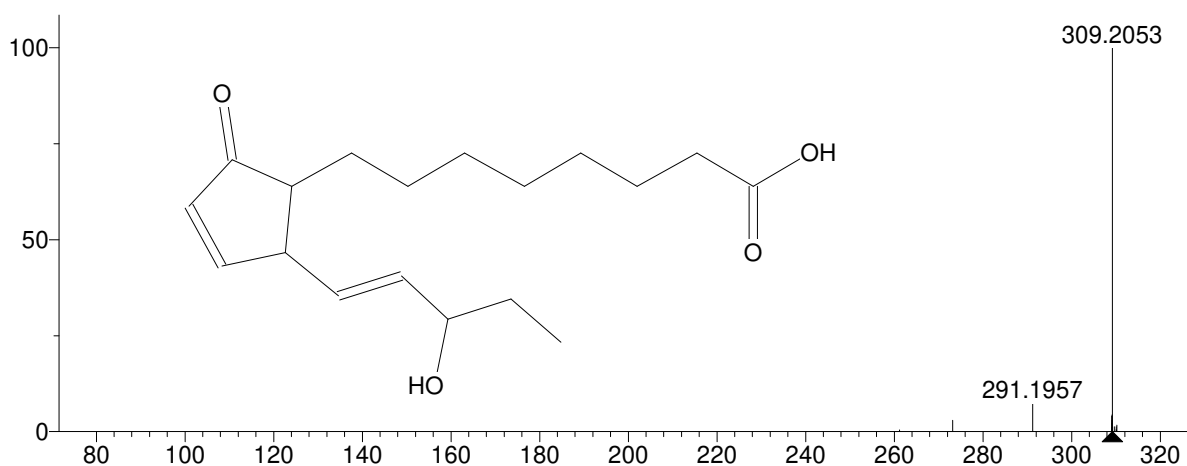

Hit 2 : 2,2,4-Trimethyl-1,3-pentanediol diisobutyrate [M+Na]<sup>+</sup> HCD 21V P=309.2  
C<sub>16</sub>H<sub>30</sub>O<sub>4</sub>; MF: 13; RMF: 232; Prob 6.15%; CAS: 6846-50-0; Lib: nist\_msms; ID: 241979.

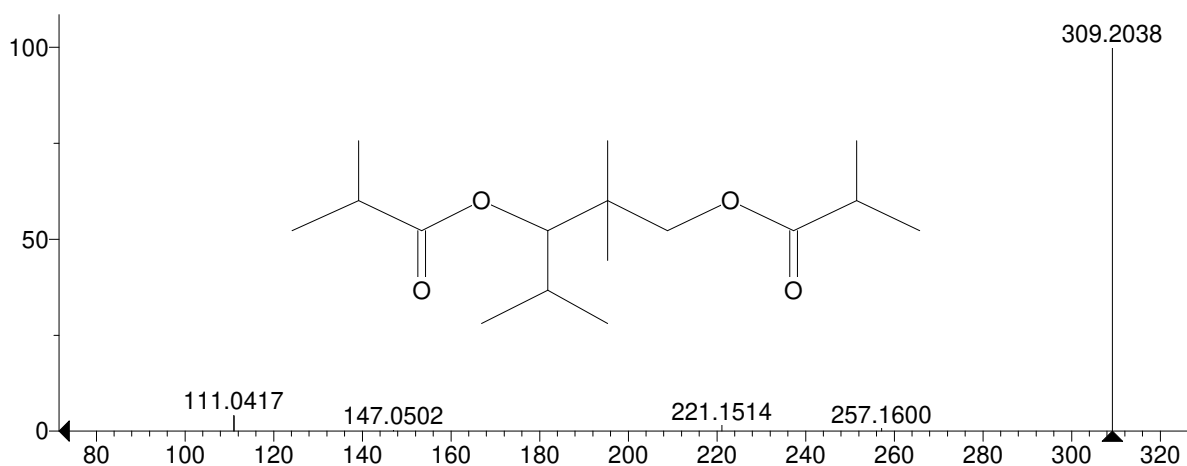

Hit 3 : Unknown (carbon number 18); PlaSMA ID-632 [M-H]<sup>-</sup> P=309.2  
C<sub>18</sub>H<sub>30</sub>O<sub>4</sub>; MF: 7; RMF: 240; Prob 4.83%; Lib: biomsms-neg-plasma; ID: 1197.

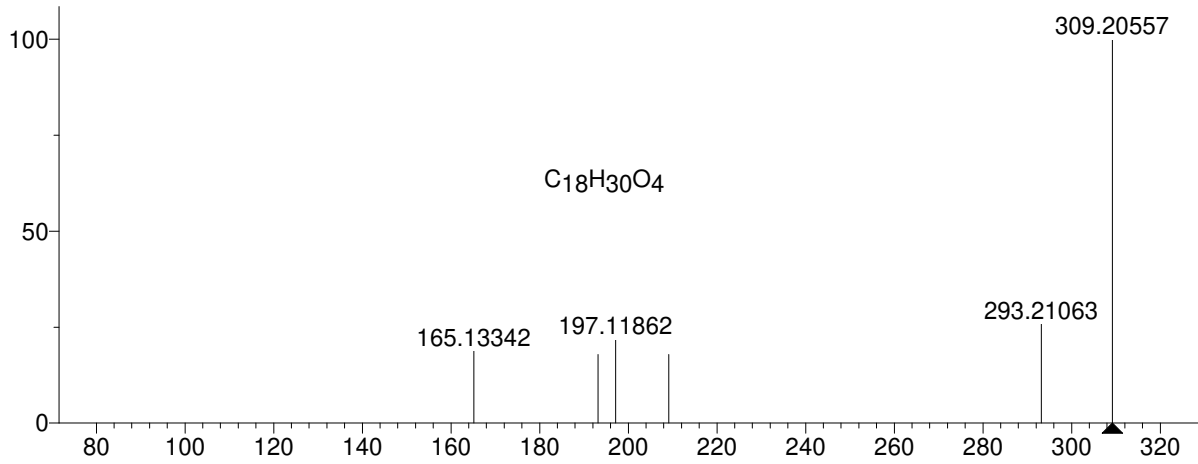

Hit 4 : Unknown (carbon number 17); PlaSMA ID-635 [M-H]<sup>-</sup> P=309.2  
C<sub>17</sub>H<sub>30</sub>N<sub>2</sub>OS; MF: 6; RMF: 208; Prob 4.65%; Lib: biomsms-neg-plasma; ID: 1198.

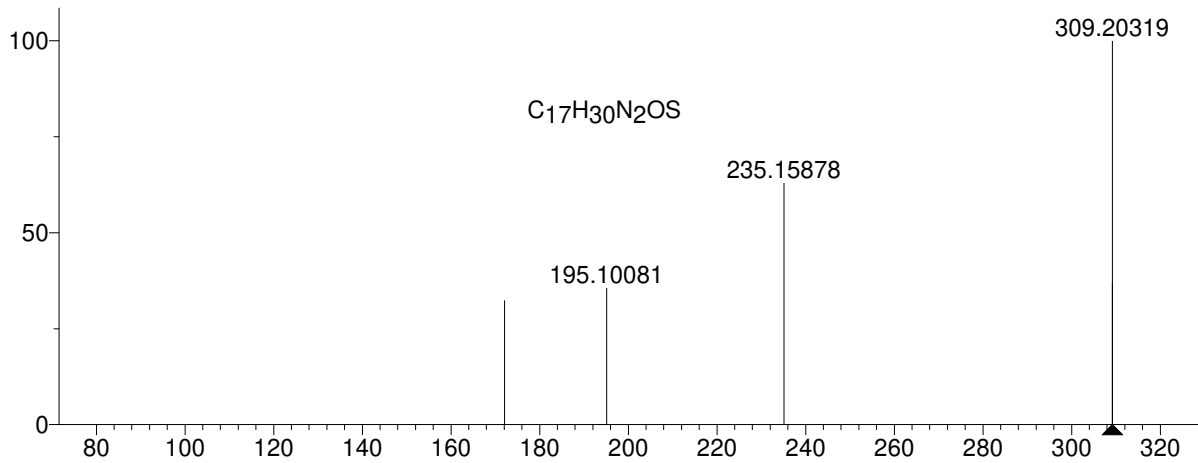

Hit 5 : (E)-4-[(1R,2S,3S,4R,8aS)-2,3,4-trihydroxy-2,5,5,8a-tetramethyl-3,4,4a,6,7,8-hexahydro-1H-naphthalen-1-yl]  
C<sub>18</sub>H<sub>30</sub>O<sub>4</sub>; MF: 5; RMF: 150; Prob 4.47%; Lib: mona-export-lc-ms-ms\_negative\_mode; ID: 23195.

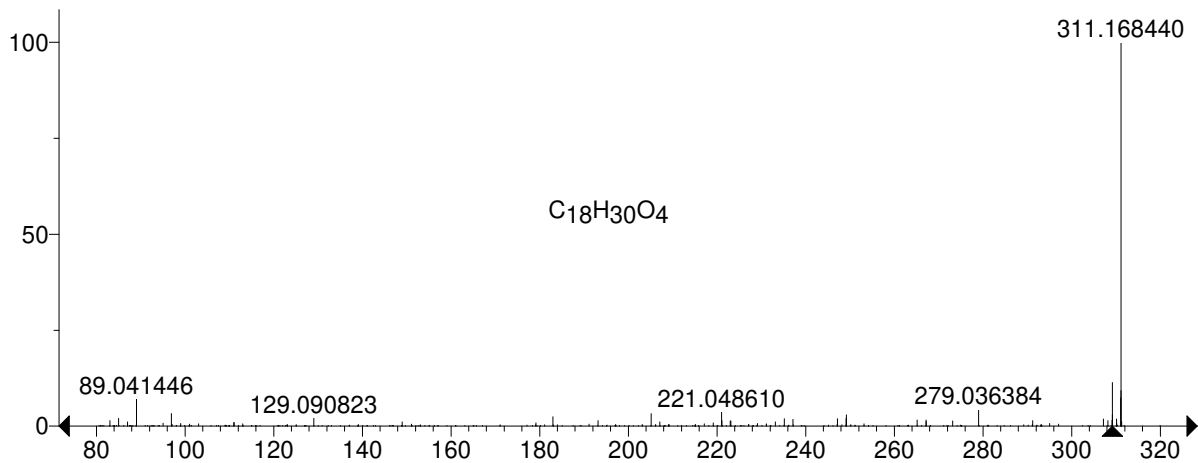

\*\* Search Report Page 1 of 2 \*\*

Unknown: Unknown (24.27\_329.2310m/z)  
Compound in Library Factor = -2176

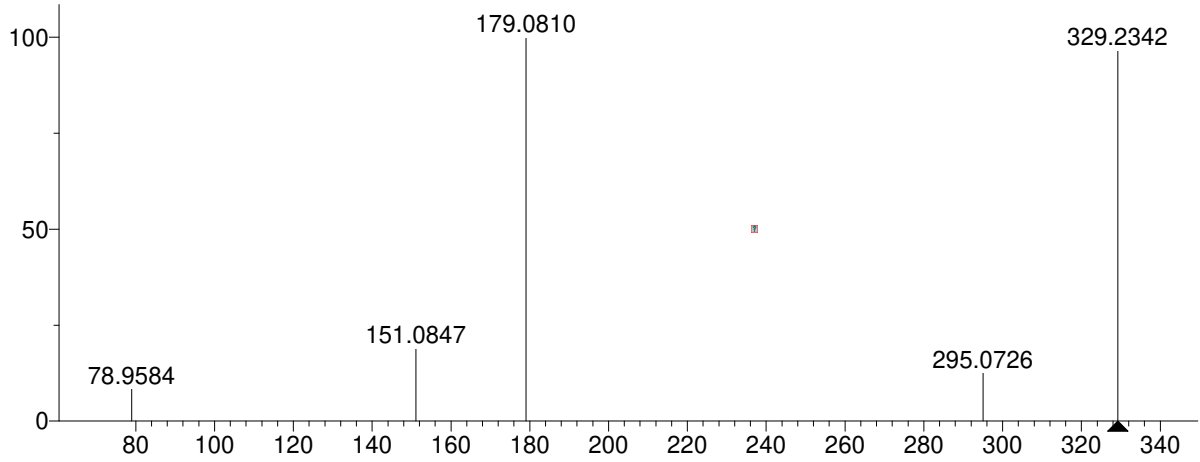

Hit 1 : FA 18:1+3O; PlaSMA ID-741 [M-H]<sup>-</sup> P=329.2  
C<sub>18</sub>H<sub>34</sub>O<sub>5</sub>; MF: 58; RMF: 564; Prob 37.1%; Lib: biomsmms-neg-plasma; ID: 449.

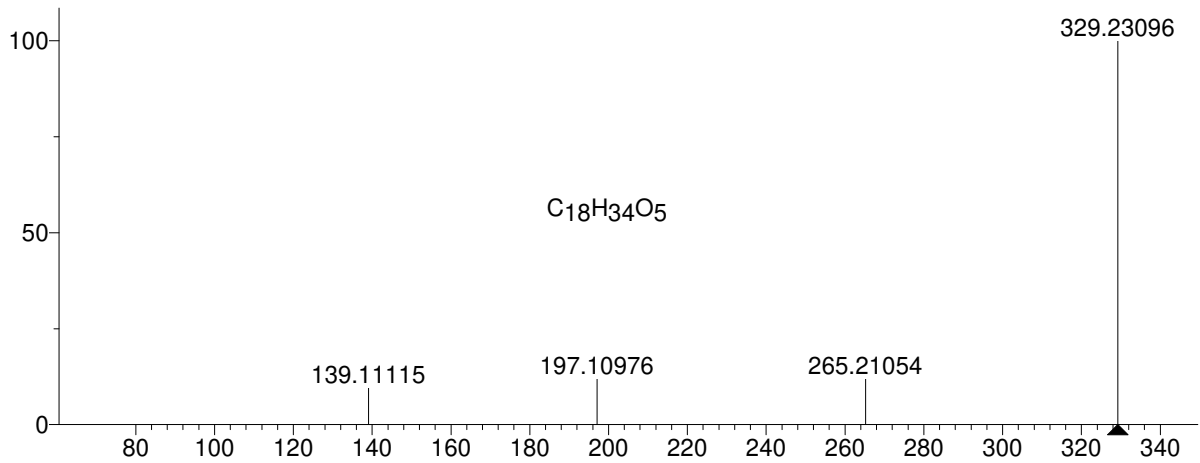

Hit 2 : Unknown (carbon number 18); PlaSMA ID-736 [M-H]<sup>-</sup> P=329.2  
C<sub>18</sub>H<sub>34</sub>O<sub>5</sub>; MF: 37; RMF: 531; Prob 15.8%; Lib: biomsmms-neg-plasma; ID: 1245.

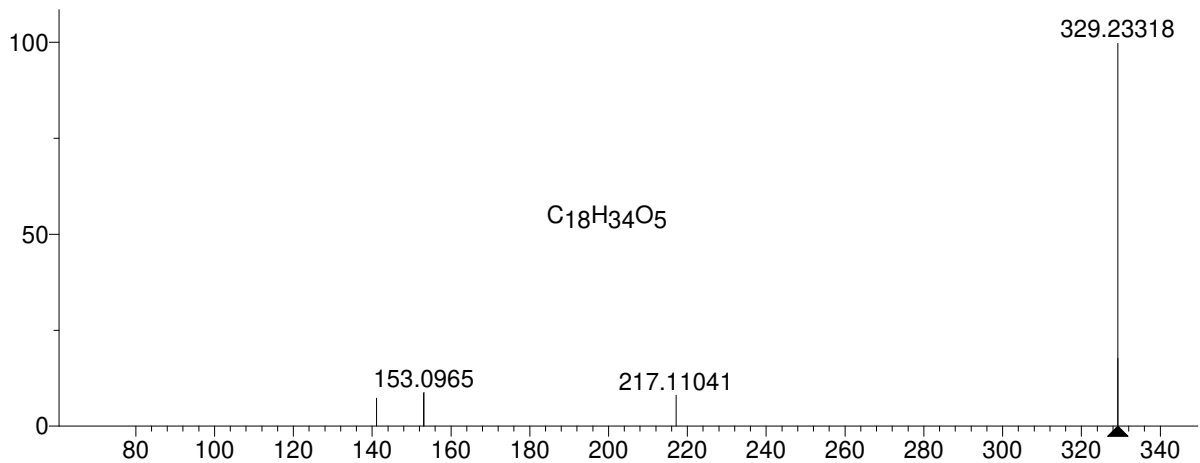

Hit 3 : FA 18:1+3O; PlaSMA ID-740 [M-H]- P=329.2  
C<sub>18</sub>H<sub>34</sub>O<sub>5</sub>; MF: 24; RMF: 522; Prob 10.2%; Lib: biomsms-neg-plasma; ID: 447.

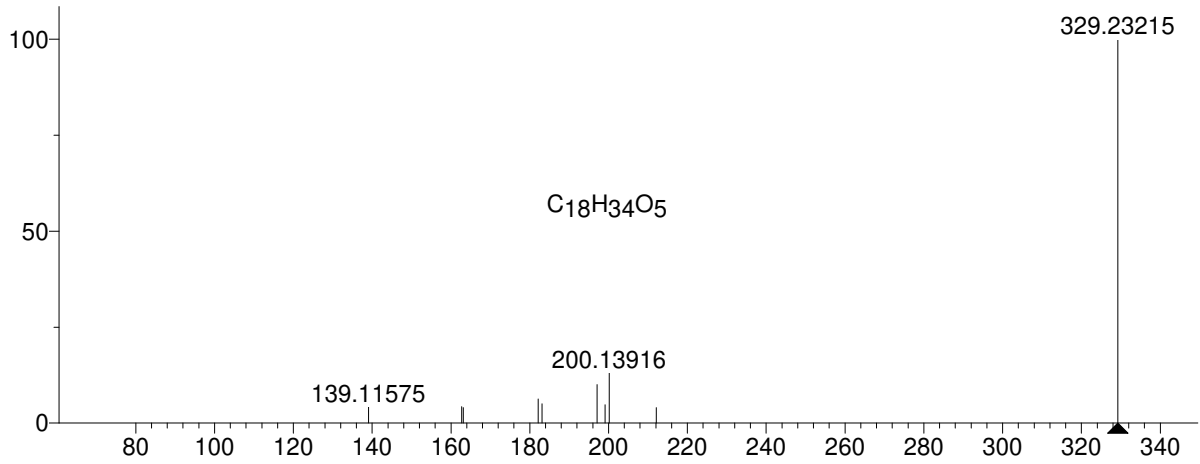

Hit 4 : FA 18:1+3O; PlaSMA ID-737 [M-H]- P=329.2  
C<sub>18</sub>H<sub>34</sub>O<sub>5</sub>; MF: 17; RMF: 507; Prob 7.80%; Lib: biomsms-neg-plasma; ID: 448.

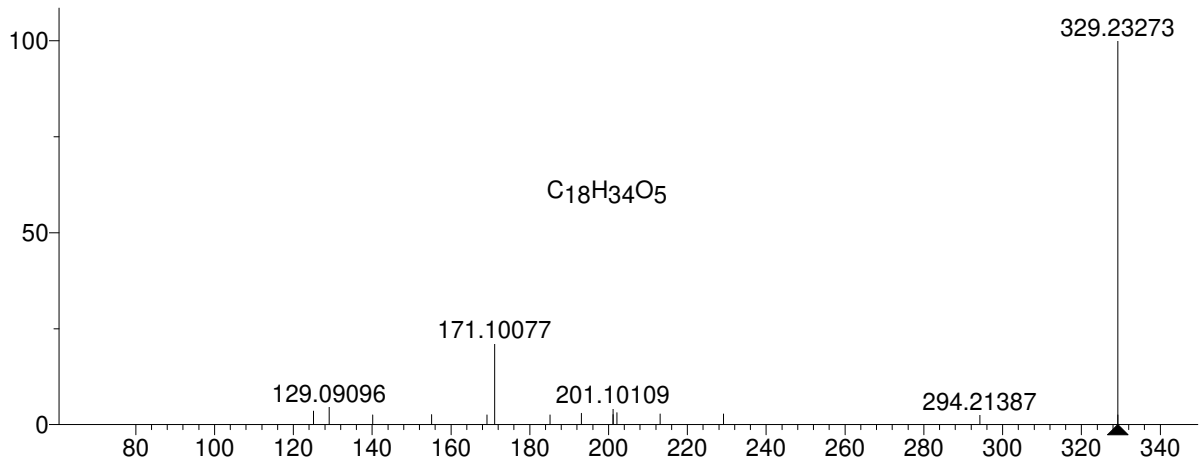

Hit 5 : FA 18:1+3O; PlaSMA ID-742 [M-H]- P=329.2  
C<sub>18</sub>H<sub>34</sub>O<sub>5</sub>; MF: 12; RMF: 518; Prob 6.29%; Lib: biomsms-neg-plasma; ID: 445.

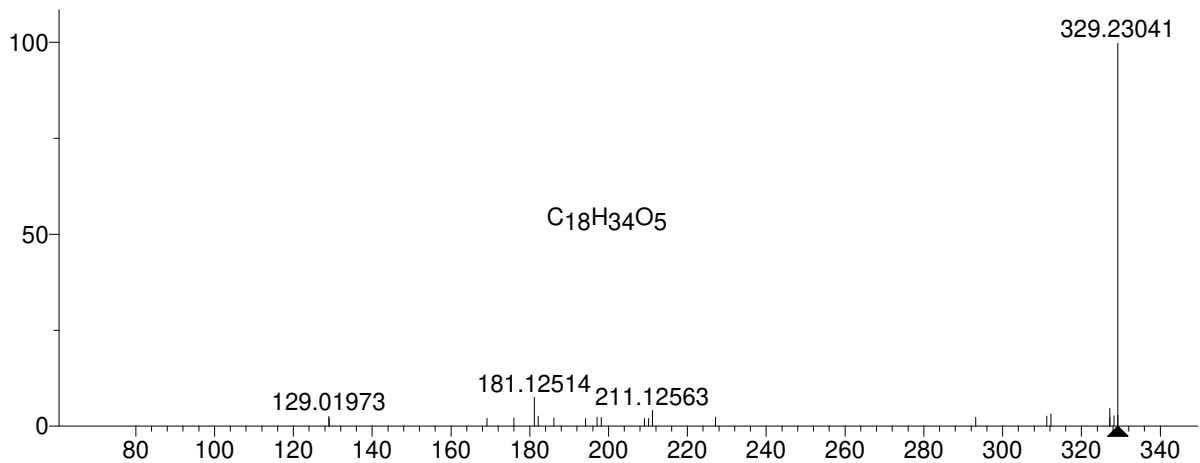

\*\* Search Report Page 1 of 2 \*\*

Unknown: Unknown (24.35\_402.2011 m/z)  
Compound in Library Factor = -3273

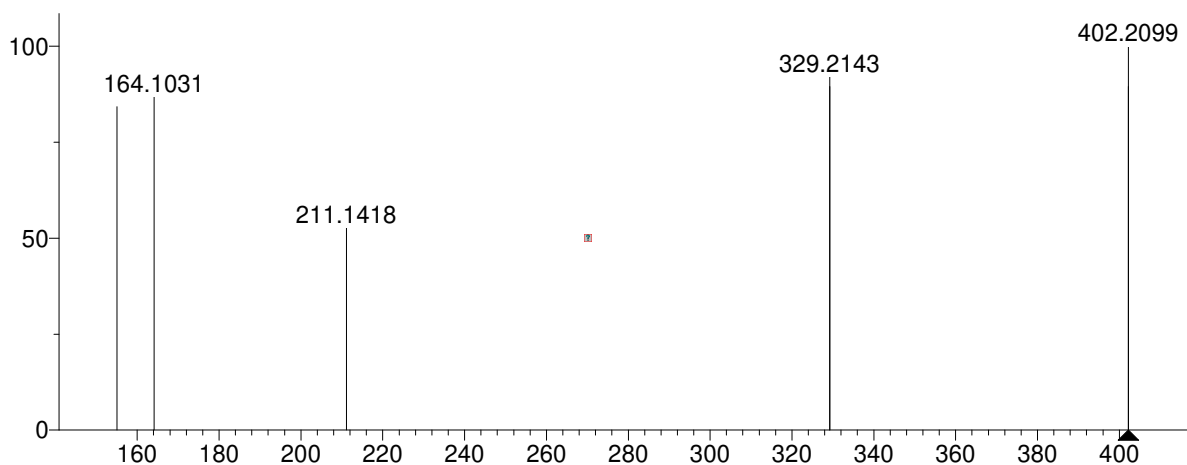

Hit 1 : 3-(1-(Cyclohexylmethyl)-1H-indazole-3-carboxamido)-2,2-dimethylsuccinic acid [M+H]<sup>+</sup> HCD 12V P=40%  
C<sub>21</sub>H<sub>27</sub>N<sub>3</sub>O<sub>5</sub>; MF: 12; RMF: 321; Prob 17.7%; Lib: nist\_msms; ID: 549930.

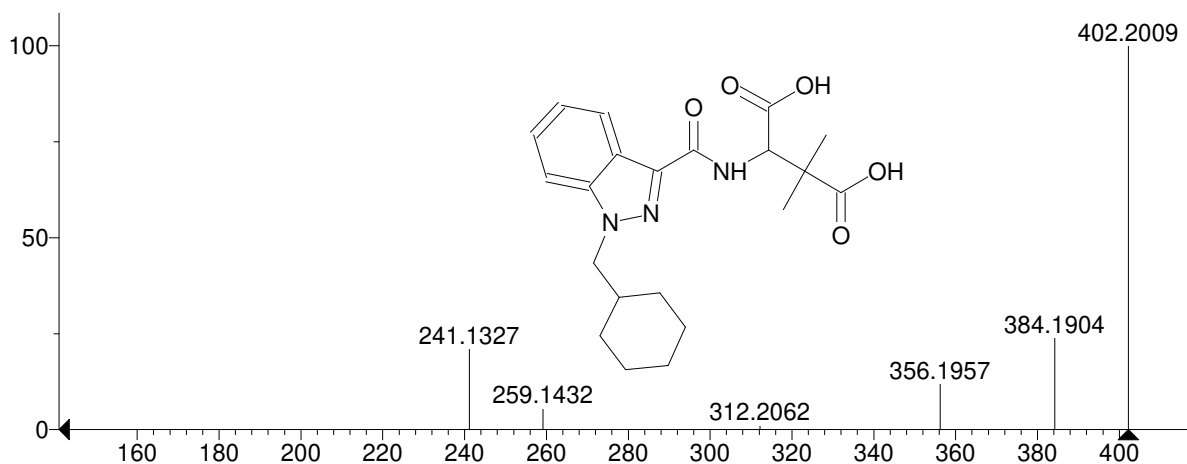

Hit 2 : Schizandrin A [M+H-CH<sub>3</sub>]<sup>+</sup> HCD 20V P=402.2  
C<sub>24</sub>H<sub>32</sub>O<sub>6</sub>; MF: 2; RMF: 308; Prob 12.5%; CAS: 61281-38-7; Lib: nist\_msms; ID: 388069.

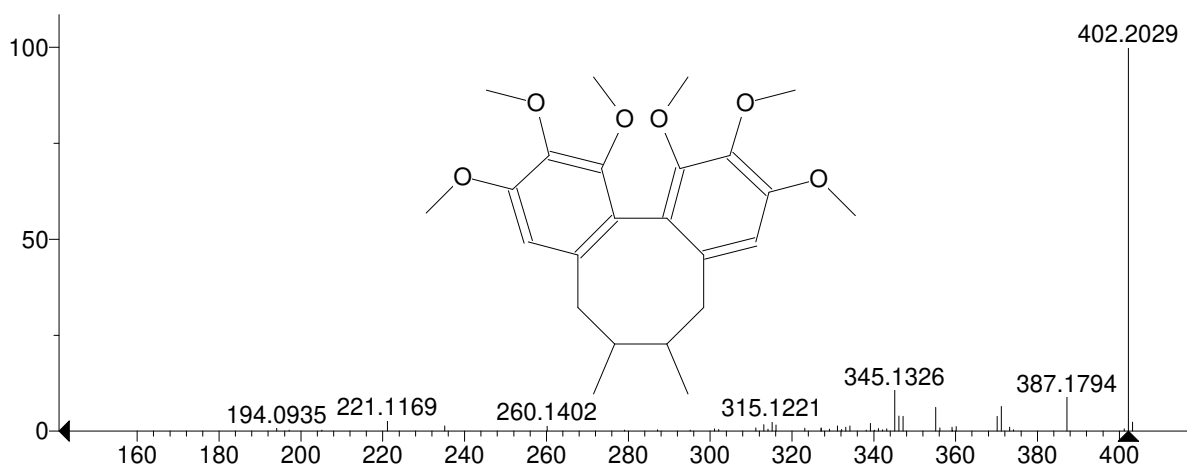

Hit 3 : cis-Moxifloxacin acyl-β-D-glucuronide [M+H]<sup>+</sup>⇒402.2 IT 35% P=402.2  
C<sub>27</sub>H<sub>32</sub>FN<sub>3</sub>O<sub>10</sub>; MF: 1; RMF: 63; Prob 12.0%; CAS: 733002-61-4; Lib: nist\_msms; ID: 463695.

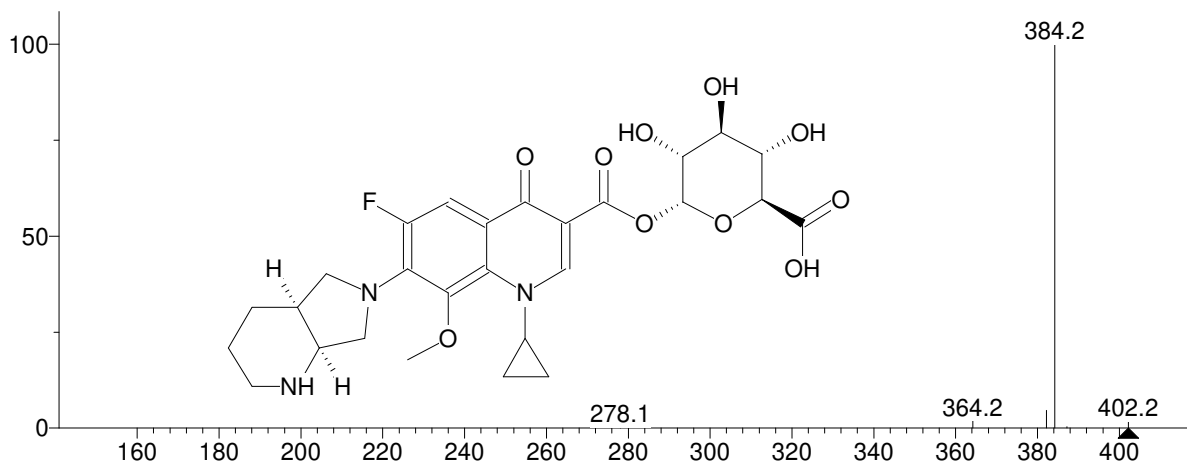

Hit 4 : Epothilone B [M+H]<sup>+</sup>⇒420.2⇒402.2 IT 35% P=402.2  
C<sub>27</sub>H<sub>41</sub>NO<sub>6</sub>S; MF: 0; RMF: 54; Prob 11.6%; CAS: 152044-54-7; Lib: nist\_msms; ID: 252223.

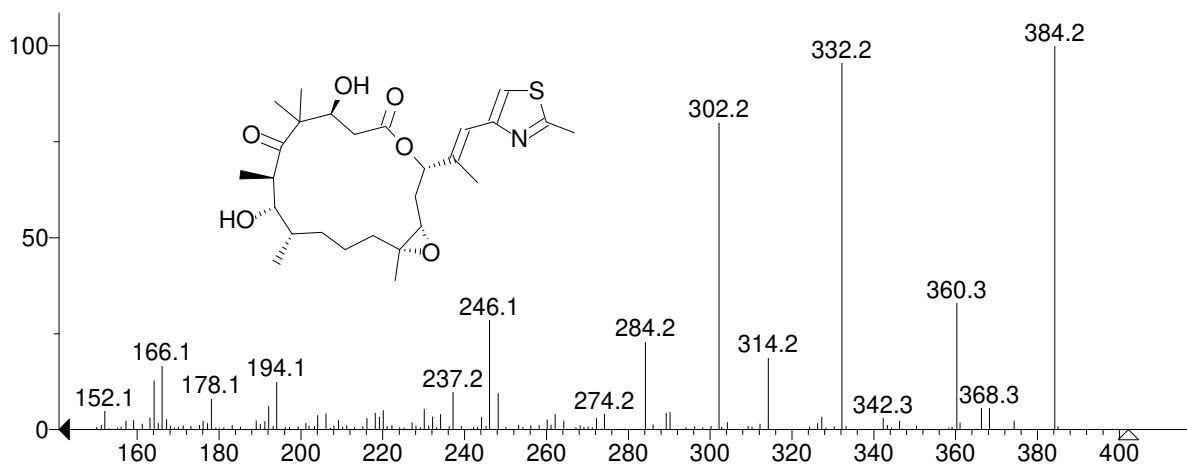

Hit 5 : Cytochalasin C [M+H-2O]<sup>+</sup>⇒430.2⇒402.2 IT 35% P=402.2  
C<sub>30</sub>H<sub>37</sub>NO<sub>6</sub>; MF: 0; RMF: 30; Prob 11.6%; CAS: 22144-76-9; Lib: nist\_msms; ID: 363302.

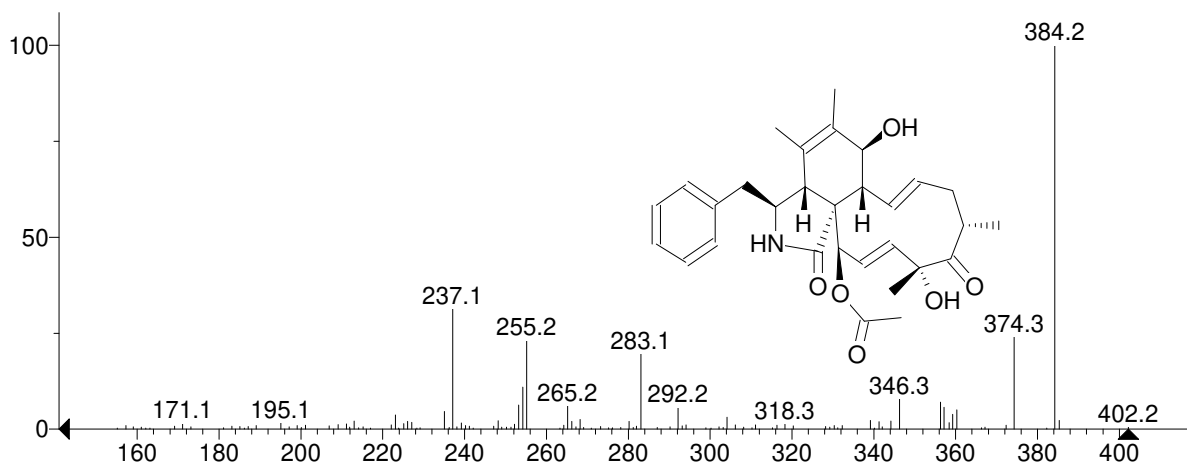



Unknown: Unknown (24.35\_422.1384m/z)  
Compound in Library Factor = 0

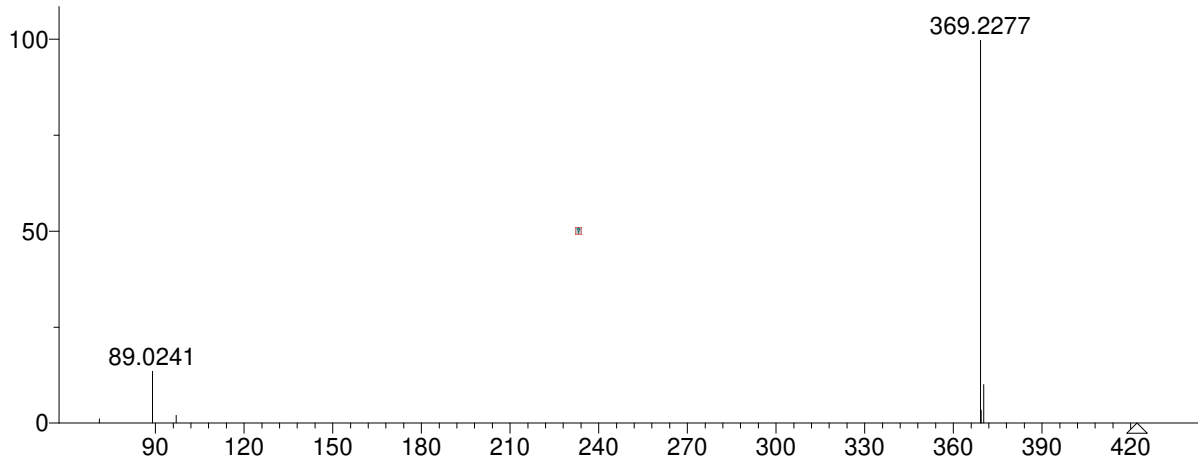

Hit 1 : peniprequinolone [M+K]<sup>+</sup> 35HCD P=422.1  
C<sub>22</sub>H<sub>25</sub>NO<sub>5</sub>; MF: 0; RMF: 1; Prob 100.0%; Lib: mona-export-vf-npl\_qexactive; ID: 22066.

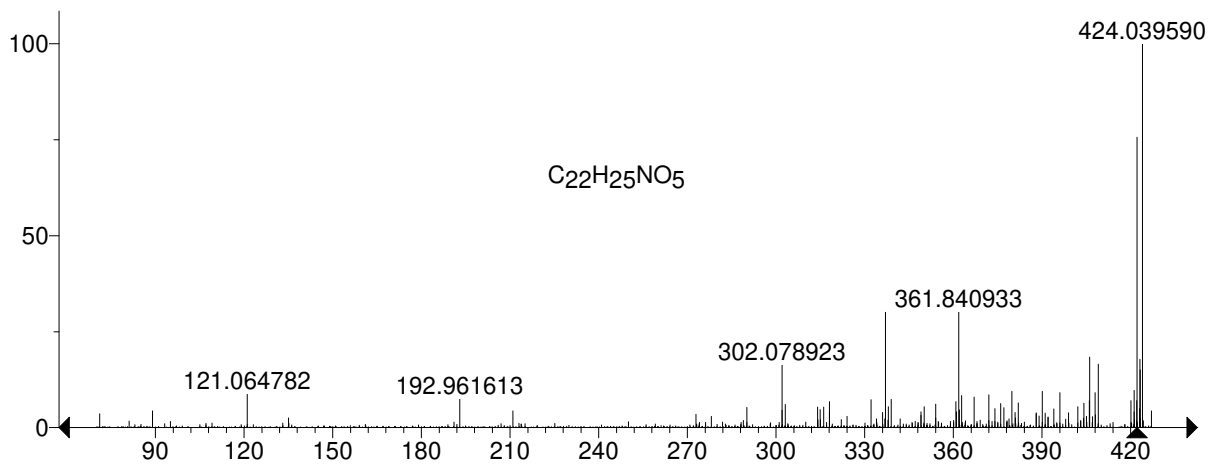

Unknown: Unknown (24.36\_468.1444m/z)  
Compound in Library Factor = 0

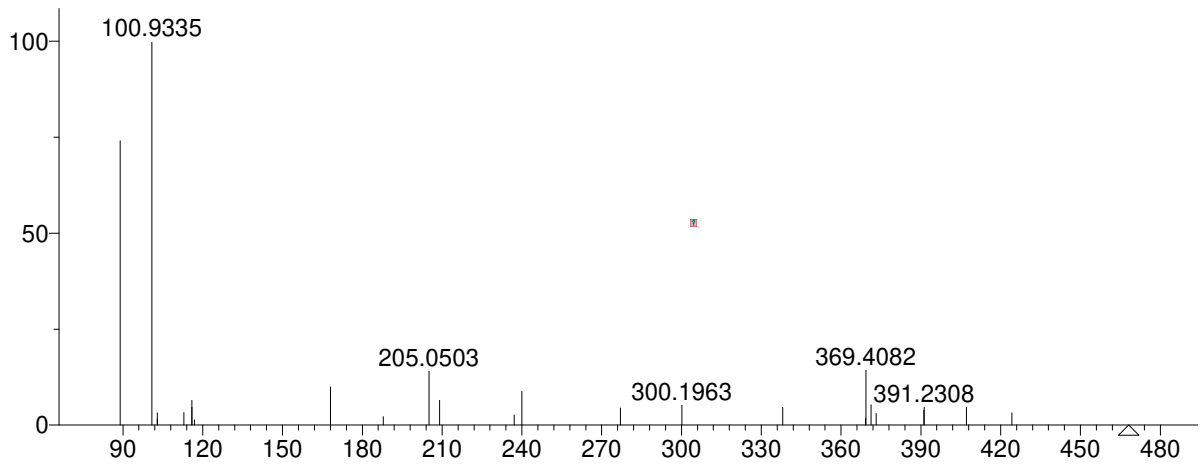

\*\* Search Report Page 1 of 2 \*\*

Unknown: Unknown (24.37\_369.2277m/z)  
Compound in Library Factor = -517

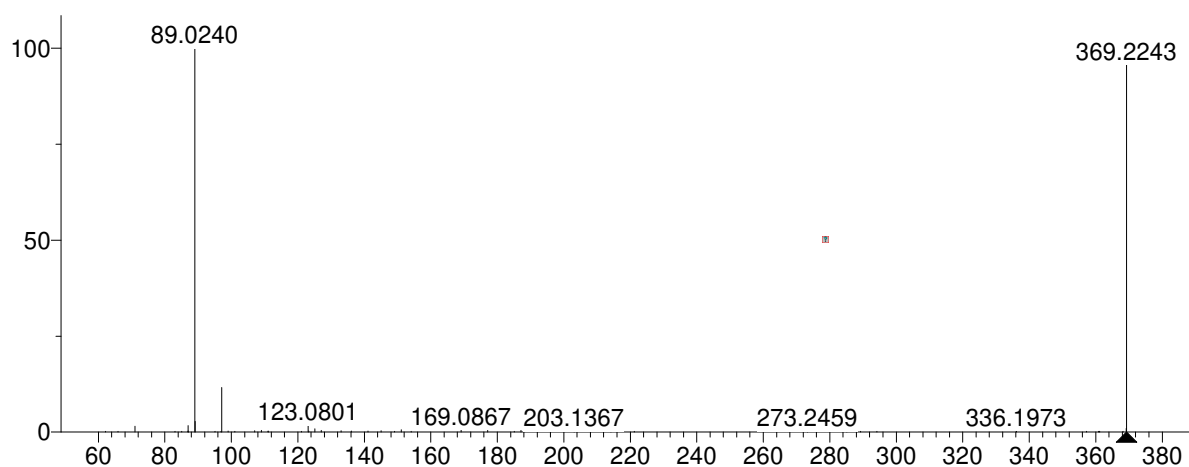

Hit 1 : 15(R),19(R)-Hydroxyprostaglandin E1 [M-H]<sup>-</sup> HCD 7V P=369.2  
C<sub>20</sub>H<sub>34</sub>O<sub>6</sub>; MF: 232; RMF: 911; Prob 93.5%; Lib: nist\_msms; ID: 85452.

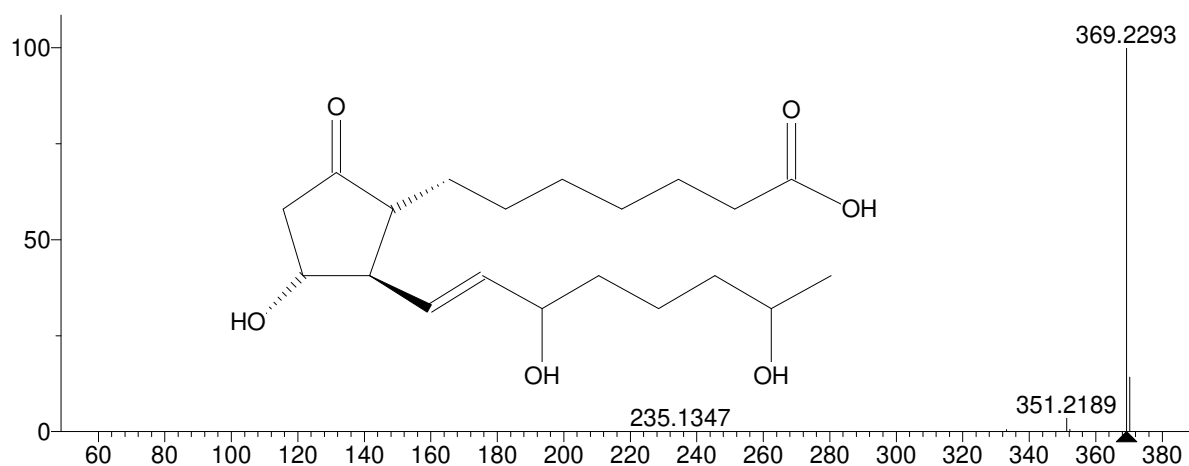

Hit 2 : 6,15-Diketo-13,14-dihydroprostaglandin F1 $\alpha$  [M-H]<sup>-</sup> HCD 23V P=369.2  
C<sub>20</sub>H<sub>34</sub>O<sub>6</sub>; MF: 105; RMF: 598; Prob 4.07%; CAS: 63983-53-9; Lib: nist\_msms; ID: 157291.

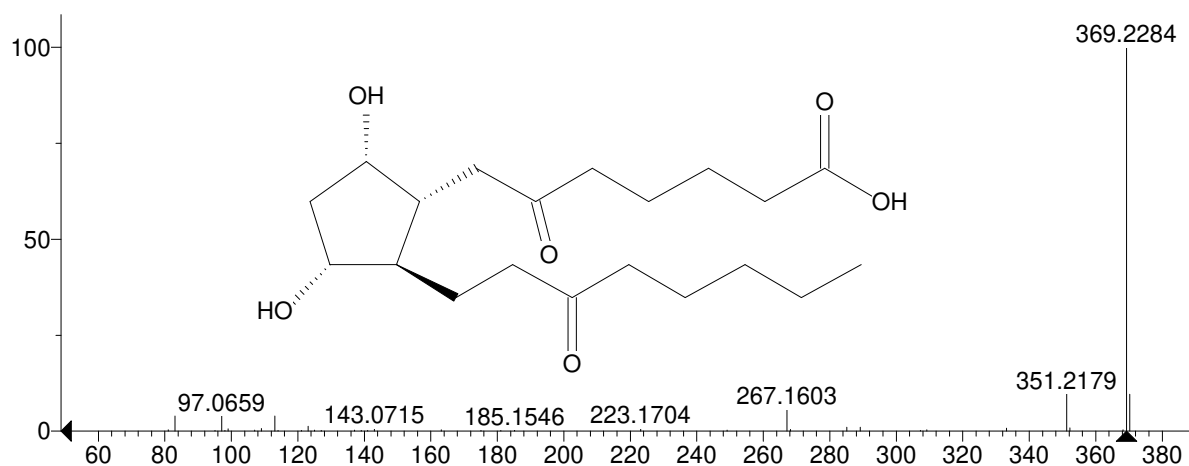

\*\* Search Report Page 2 of 2 \*\*

Hit 3 : Pro-Pro-Arg [M+H]<sup>+</sup> QTOF 5V P=369.2  
C<sub>16</sub>H<sub>28</sub>N<sub>6</sub>O<sub>4</sub>; MF: 78; RMF: 629; Prob 1.19%; Lib: nist\_msms; ID: 52893.

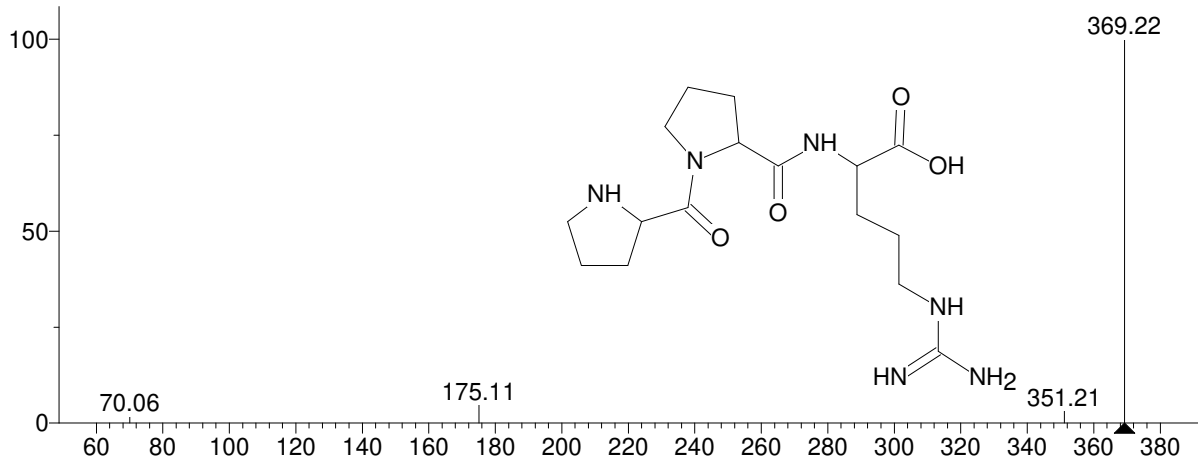

Hit 4 : Thromboxane B2 [M-H]<sup>-</sup> QTOF 2V P=369.2  
C<sub>20</sub>H<sub>34</sub>O<sub>6</sub>; MF: 57; RMF: 799; Prob 0.51%; CAS: 54397-85-2; Lib: nist\_msms; ID: 30001.

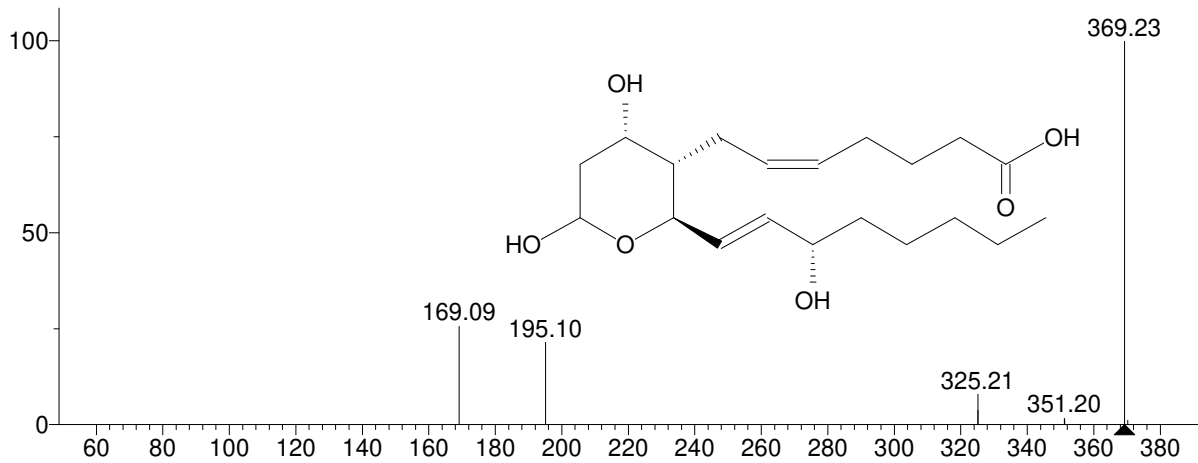

Hit 5 : 19(R)-Hydroxyprostaglandin F2 $\alpha$  [M-H]<sup>-</sup> HCD 29V P=369.2  
C<sub>20</sub>H<sub>34</sub>O<sub>6</sub>; MF: 37; RMF: 303; Prob 0.23%; CAS: 64625-53-2; Lib: nist\_msms; ID: 85679.

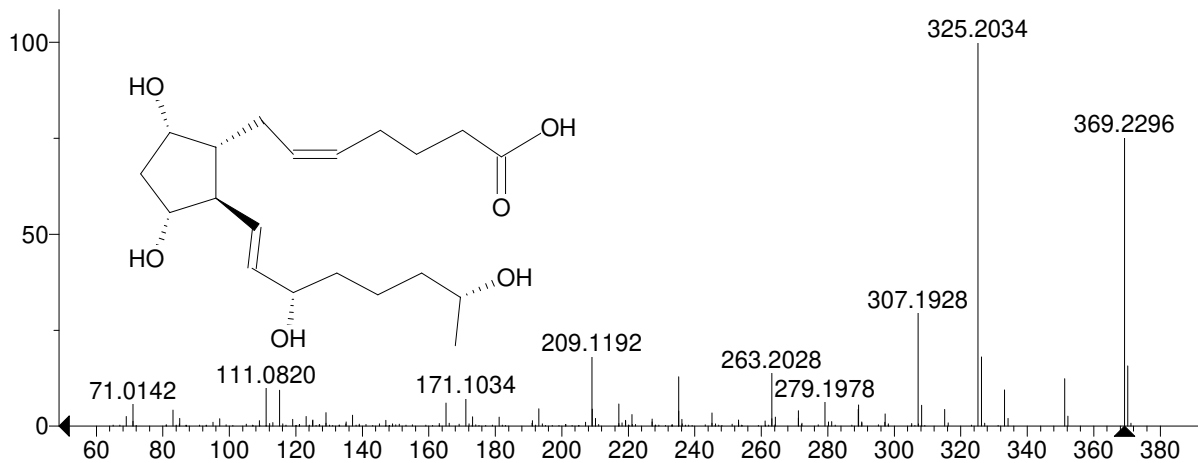

Unknown: Unknown (24.37\_369.4076m/z)  
Compound in Library Factor = 0

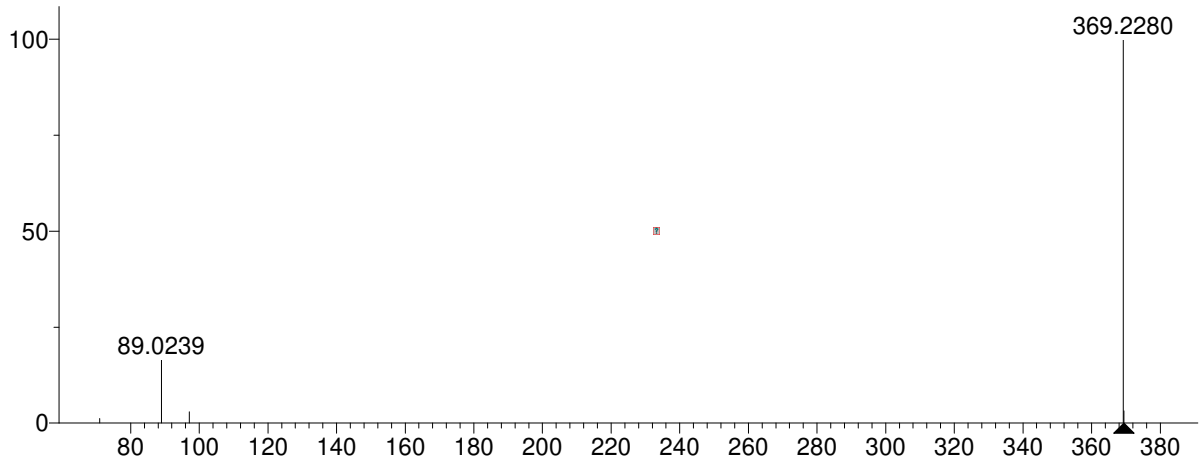

\*\* Search Report Page 1 of 2 \*\*

Unknown: Unknown (24.38\_437.2143m/z)  
Compound in Library Factor = -2176

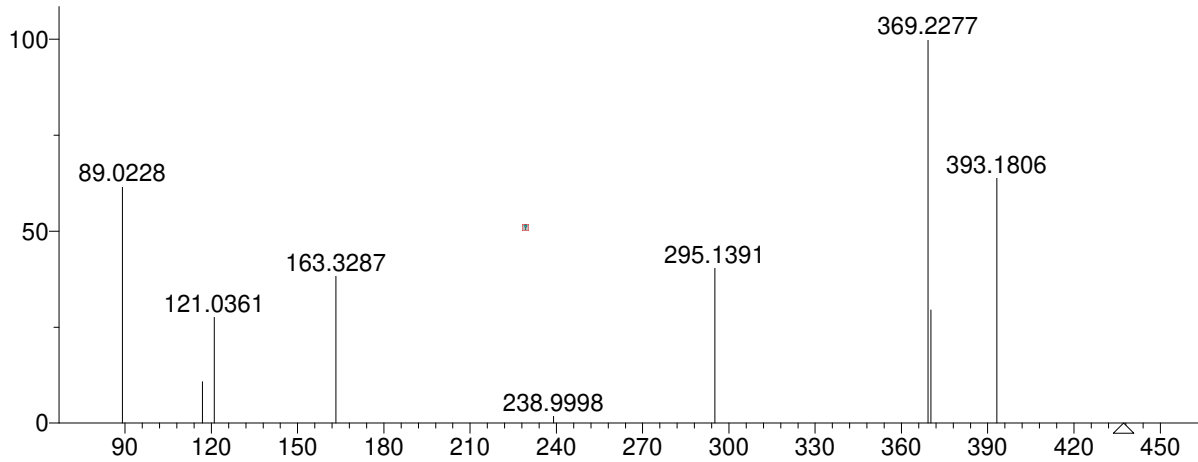

Hit 1 : 1-Hydroxy-3,6,7-Trimethoxy-2,8-Diprenylxanthone M-H 35 P=437.2  
C<sub>26</sub>H<sub>30</sub>O<sub>6</sub>; MF: 20; RMF: 315; Prob 52.3%; Lib: mona-export-lc-ms-ms\_negative\_mode; ID: 26360.

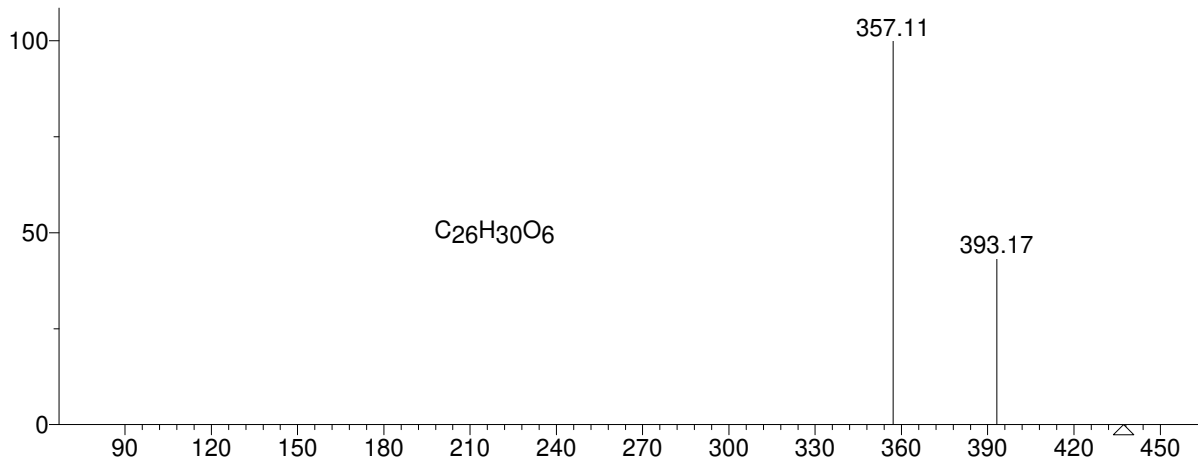

Hit 2 : Ouabagenin [M-H]- IT 35% P=437.2  
C<sub>23</sub>H<sub>34</sub>O<sub>8</sub>; MF: 0; RMF: 168; Prob 23.8%; CAS: 508-52-1; Lib: nist\_msms; ID: 118282.

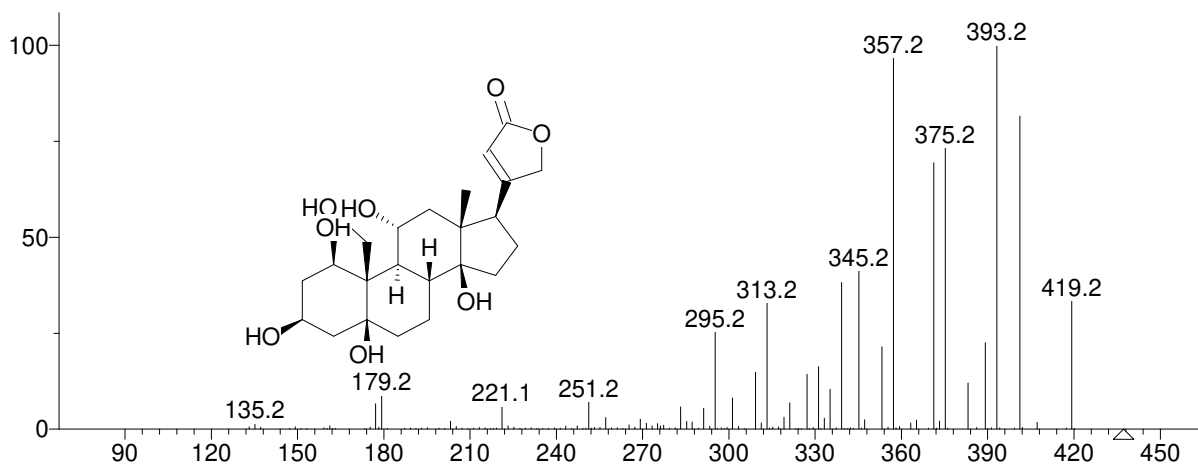

\*\* Search Report Page 2 of 2 \*\*

Hit 3 : NCGC00385056-01\_C23H32O8\_Propanoic acid, 2-methyl-, [(4S)-4-(acetyloxy)-5-[4-(acetyloxy)-1-methylb  
C23H32O8; MF: 0; RMF: 1; Prob 23.8%; Lib: mona-export-gnps; ID: 10830.

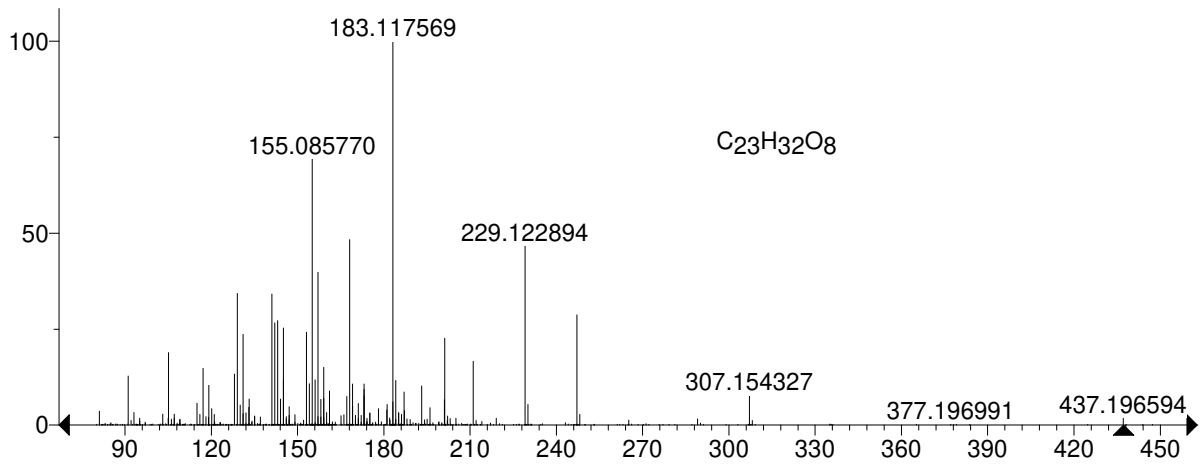

\*\* Search Report Page 1 of 2 \*\*

Unknown: Unknown (24.50\_367.2141m/z)  
Compound in Library Factor = -1309

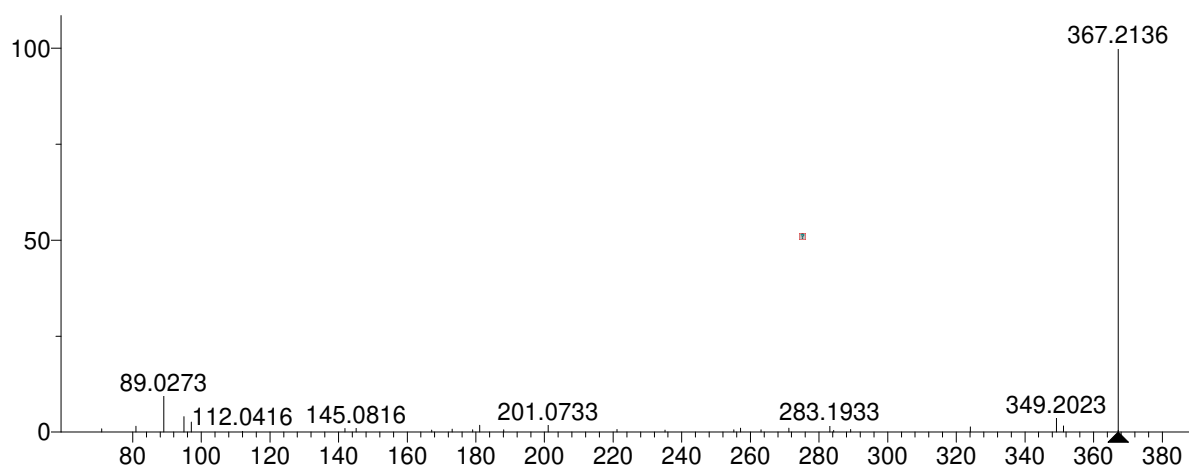

Hit 1 : 15(R),19(R)-Hydroxyprostaglandin E2 [M-H]<sup>-</sup> HCD 7V P=367.2  
C<sub>20</sub>H<sub>32</sub>O<sub>6</sub>; MF: 174; RMF: 914; Prob 75.0%; CAS: 54142-29-9; Lib: nist\_msms; ID: 95386.

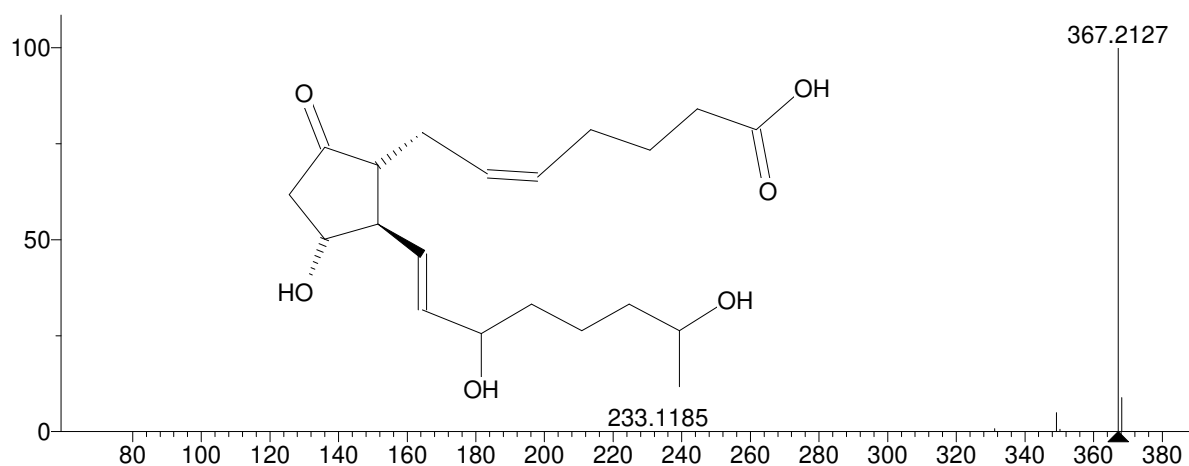

Hit 2 : 20-Hydroxyprostaglandin E2 [M-H]<sup>-</sup> HCD 7V P=367.2  
C<sub>20</sub>H<sub>32</sub>O<sub>6</sub>; MF: 125; RMF: 884; Prob 15.4%; CAS: 57930-95-7; Lib: nist\_msms; ID: 85513.

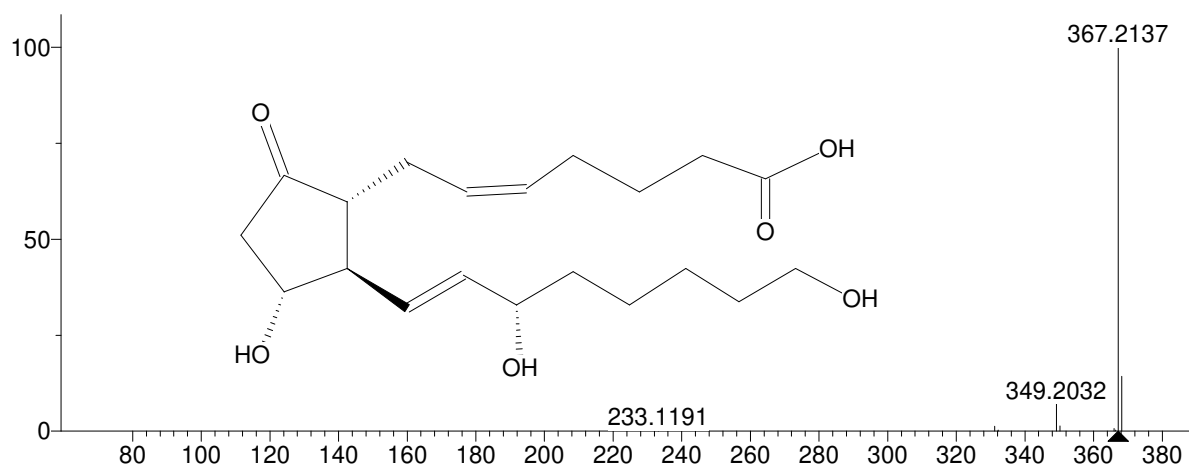



Hit 3 : Prostaglandin G2 [M-H]<sup>-</sup> HCD 14V P=367.2  
C<sub>20</sub>H<sub>32</sub>O<sub>6</sub>; MF: 69; RMF: 825; Prob 2.93%; CAS: 51982-36-6; Lib: nist\_msms; ID: 88334.

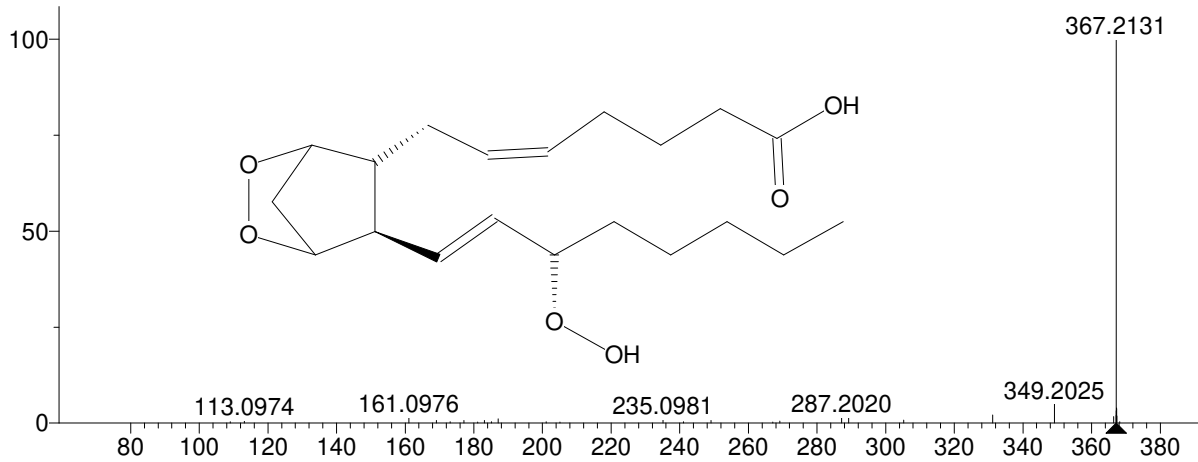

Hit 4 : 6-Ketoprostaglandin E1 [M-H]<sup>-</sup> QTOF 7V P=367.2  
C<sub>20</sub>H<sub>32</sub>O<sub>6</sub>; MF: 66; RMF: 463; Prob 2.59%; CAS: 67786-53-2; Lib: nist\_msms; ID: 22083.

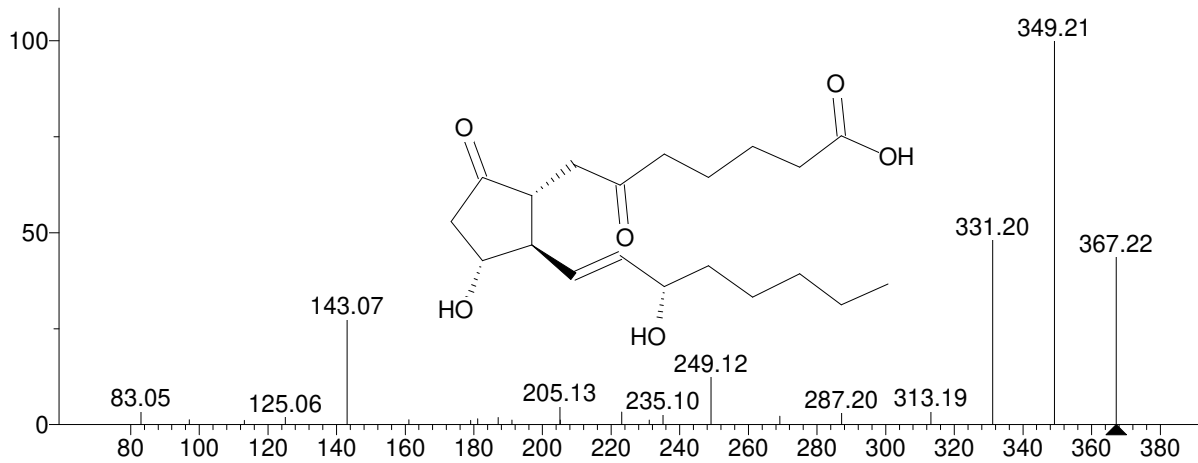

Hit 5 : .DELTA.17-6-Ketoprostaglandin F1 $\alpha$  [M-H]<sup>-</sup> HCD 14V P=367.2  
C<sub>20</sub>H<sub>32</sub>O<sub>6</sub>; MF: 62; RMF: 917; Prob 2.19%; CAS: 68324-95-8; Lib: nist\_msms; ID: 158396.

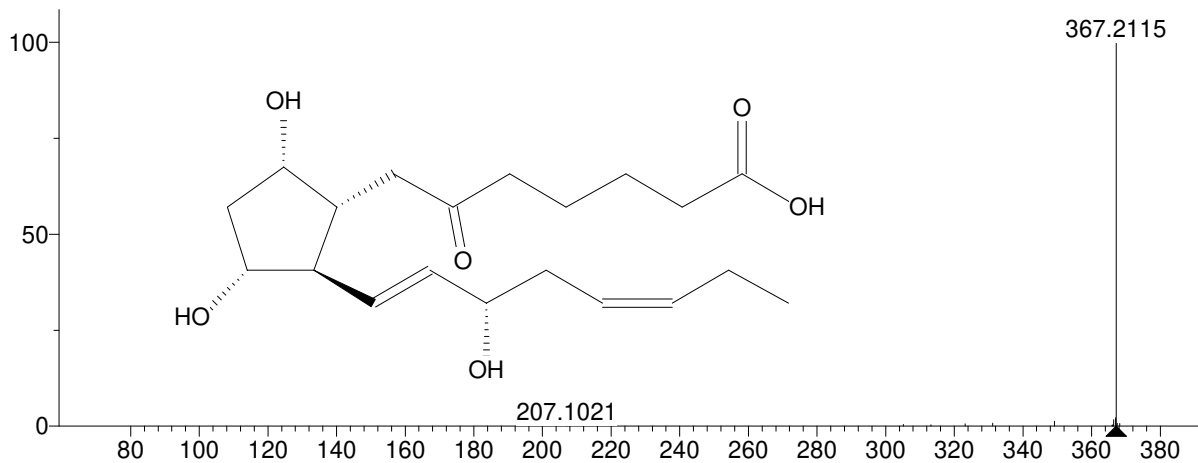

\*\* Search Report Page 1 of 2 \*\*

Unknown: Unknown (24.63\_329.2314m/z)  
Compound in Library Factor = -517

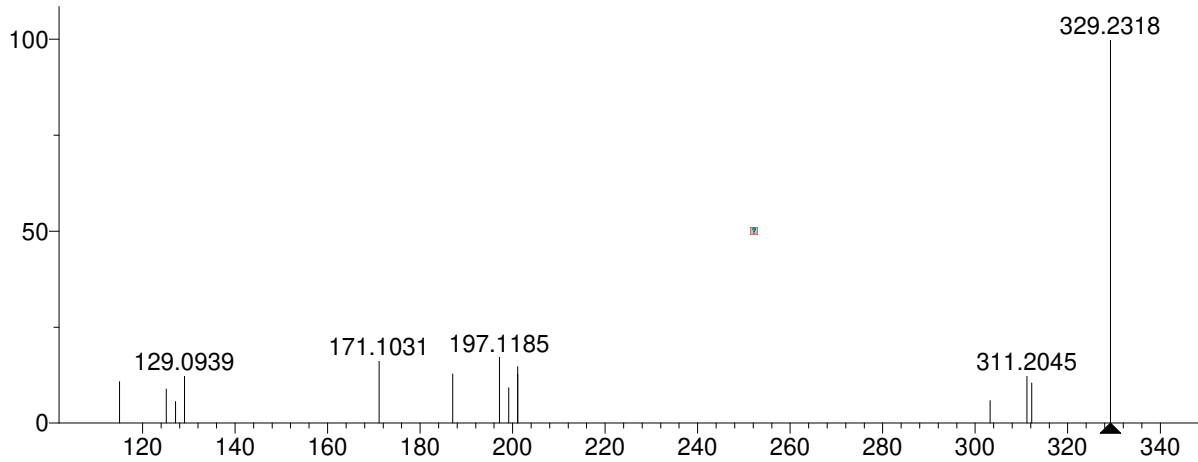

Hit 1 : FA 18:1+3O; PlaSMA ID-737 [M-H]<sup>-</sup> P=329.2  
C<sub>18</sub>H<sub>34</sub>O<sub>5</sub>; MF: 240; RMF: 732; Prob 89.3%; Lib: biomsms-neg-plasma; ID: 448.

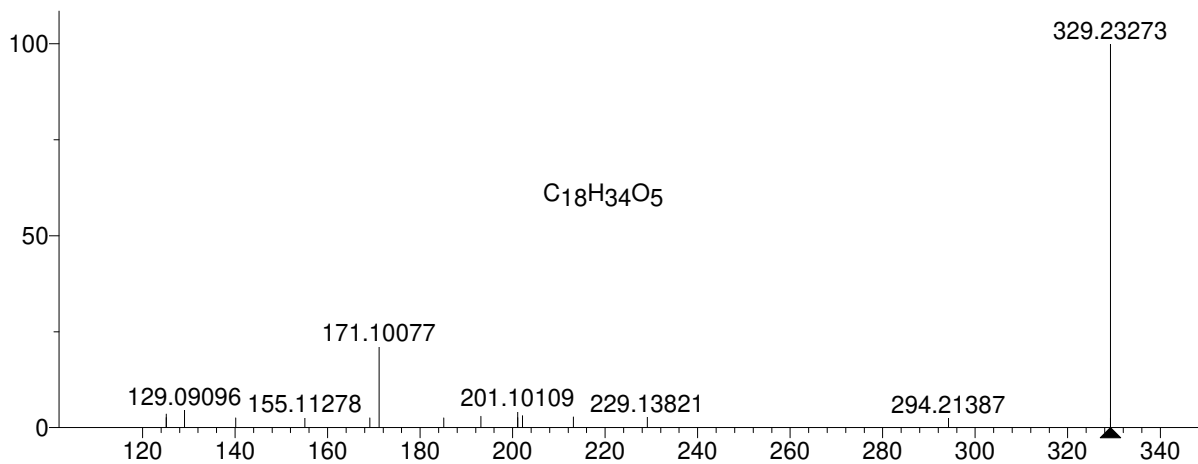

Hit 2 : FA 18:1+3O; PlaSMA ID-735 [M-H]<sup>-</sup> P=329.2  
C<sub>18</sub>H<sub>34</sub>O<sub>5</sub>; MF: 118; RMF: 587; Prob 4.42%; Lib: biomsms-neg-plasma; ID: 443.

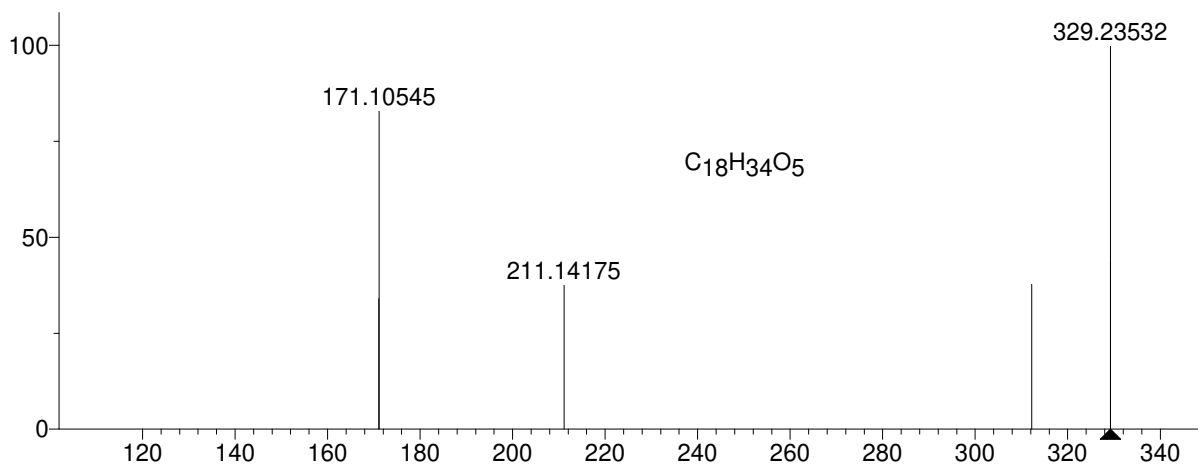

Hit 3 : FA 18:1+3O; PlaSMA ID-741 [M-H]<sup>-</sup> P=329.2  
C<sub>18</sub>H<sub>34</sub>O<sub>5</sub>; MF: 116; RMF: 681; Prob 4.07%; Lib: biomsms-neg-plasma; ID: 449.

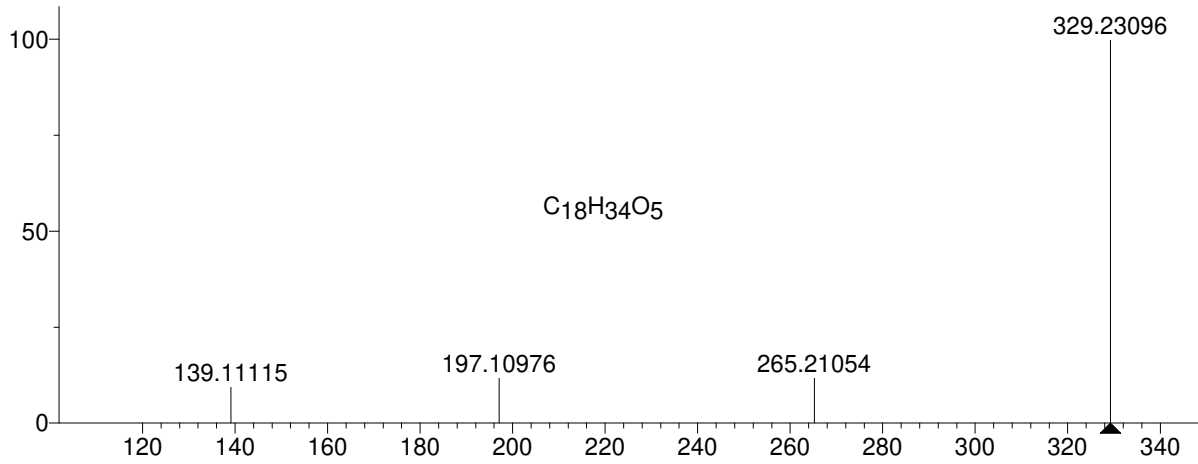

Hit 4 : FA 18:1+3O; PlaSMA ID-738 [M-H]<sup>-</sup> P=329.2  
C<sub>18</sub>H<sub>34</sub>O<sub>5</sub>; MF: 86; RMF: 620; Prob 1.13%; Lib: biomsms-neg-plasma; ID: 444.

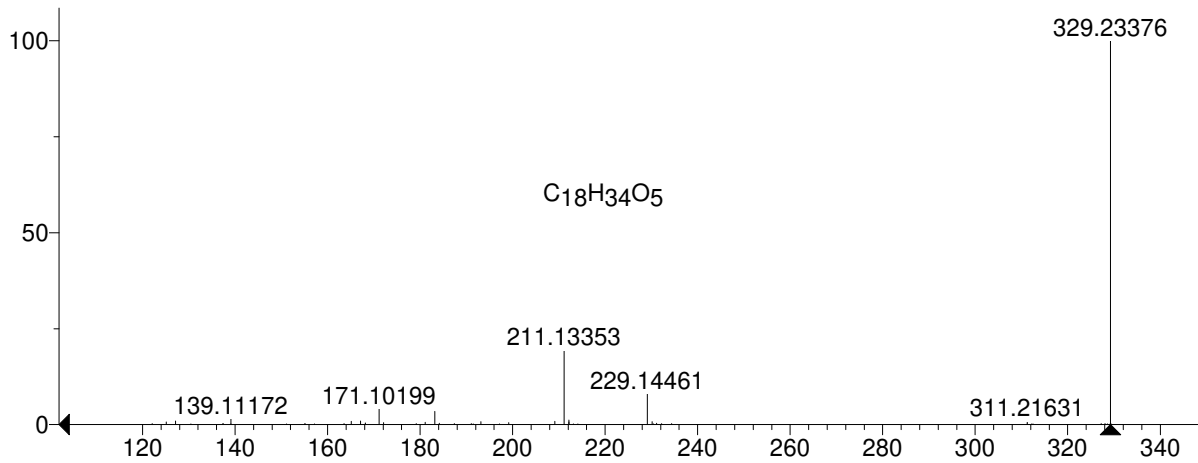

Hit 5 : FA 18:1+3O; PlaSMA ID-742 [M-H]<sup>-</sup> P=329.2  
C<sub>18</sub>H<sub>34</sub>O<sub>5</sub>; MF: 59; RMF: 651; Prob 0.33%; Lib: biomsms-neg-plasma; ID: 445.

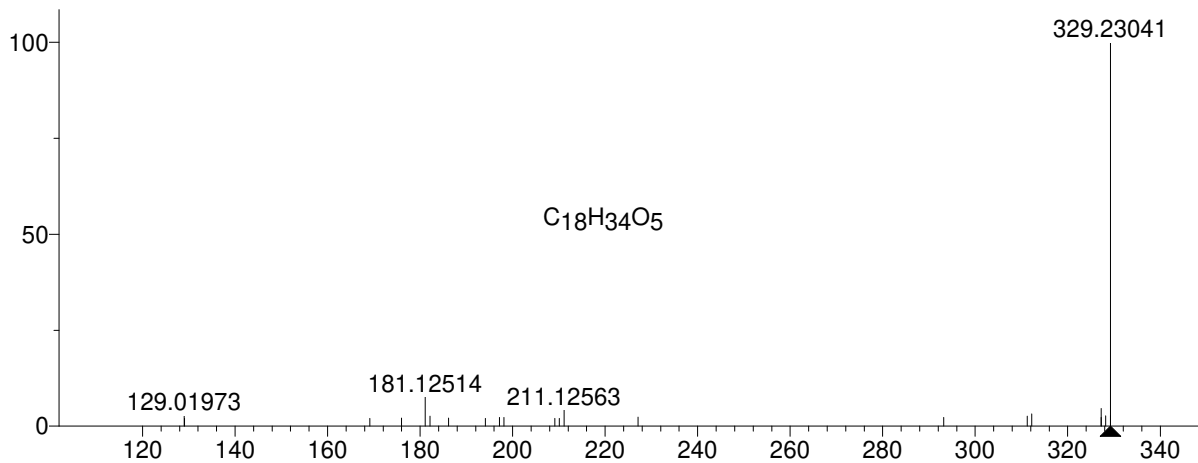

\*\* Search Report Page 1 of 2 \*\*

Unknown: Unknown (24.75\_329.2316m/z)  
Compound in Library Factor = -691

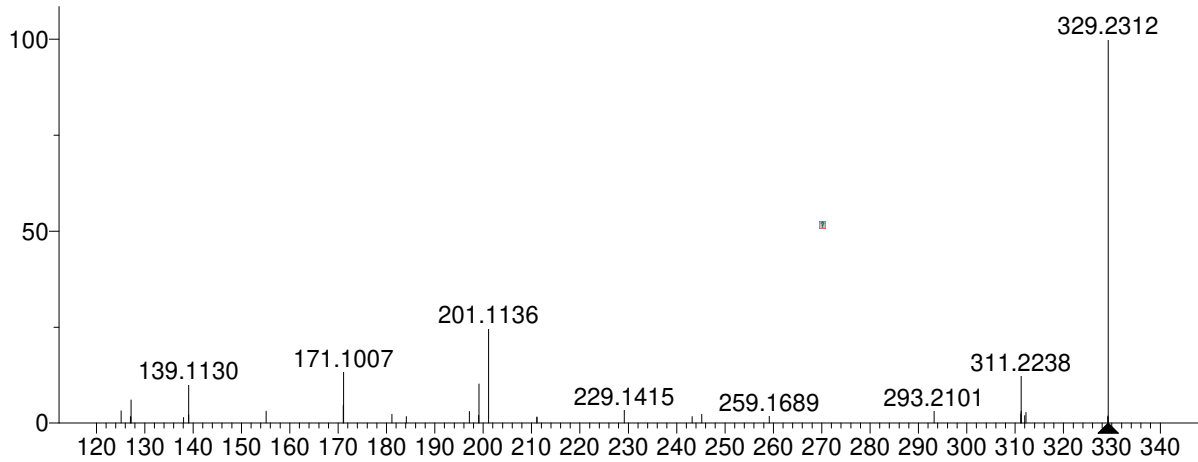

Hit 1 : FA 18:1+3O; PlaSMA ID-738 [M-H]<sup>-</sup> P=329.2  
C<sub>18</sub>H<sub>34</sub>O<sub>5</sub>; MF: 283; RMF: 712; Prob 82.6%; Lib: biomsms-neg-plasma; ID: 444.

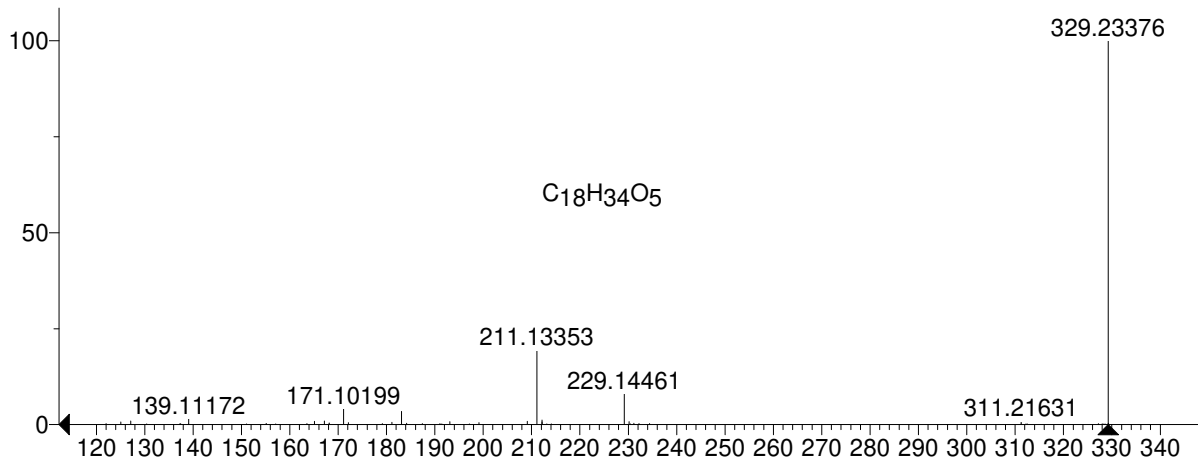

Hit 2 : FA 18:1+3O; PlaSMA ID-737 [M-H]<sup>-</sup> P=329.2  
C<sub>18</sub>H<sub>34</sub>O<sub>5</sub>; MF: 189; RMF: 686; Prob 6.76%; Lib: biomsms-neg-plasma; ID: 448.

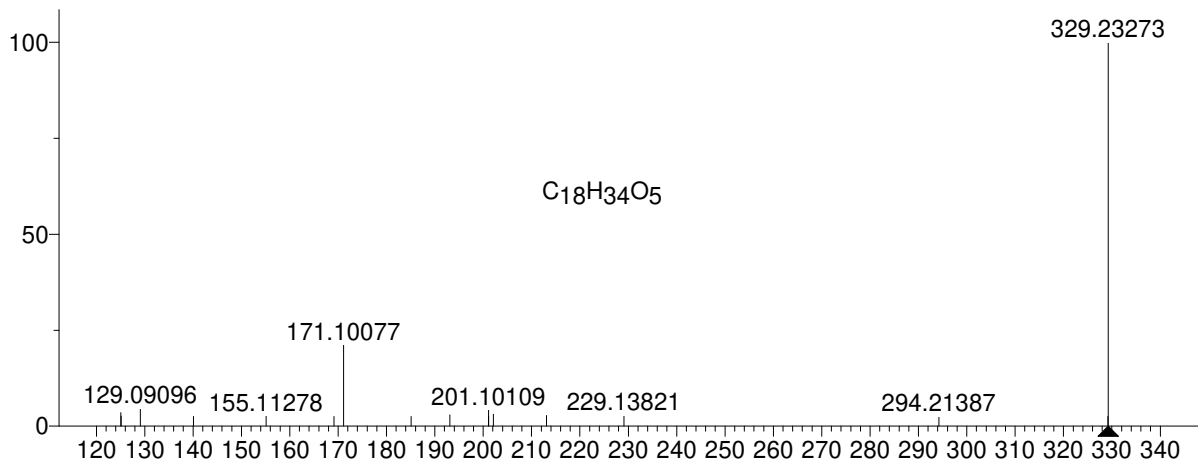

Hit 3 : FA 18:1+3O; PlaSMA ID-735 [M-H]<sup>-</sup> P=329.2  
C<sub>18</sub>H<sub>34</sub>O<sub>5</sub>; MF: 180; RMF: 584; Prob 4.91%; Lib: biomsms-neg-plasma; ID: 443.

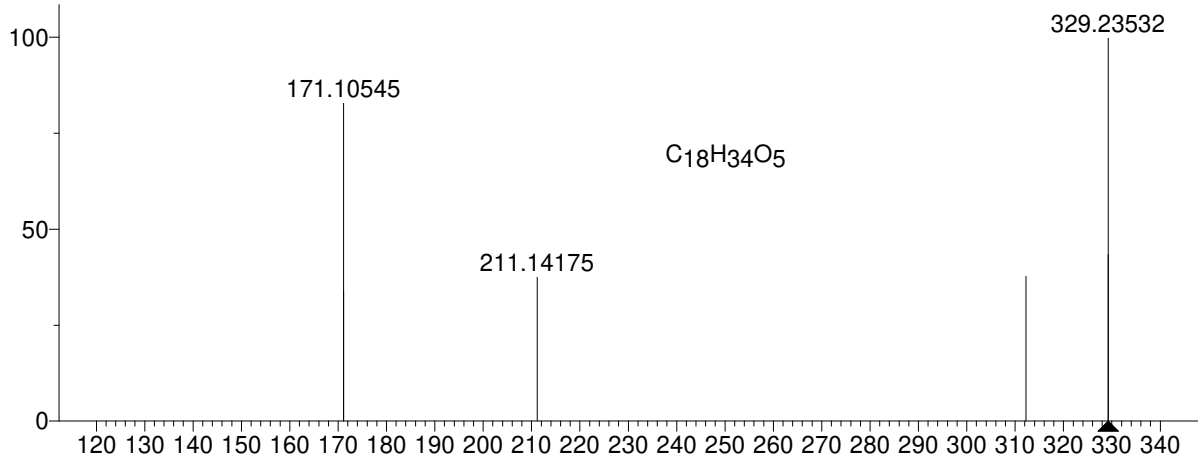

Hit 4 : 9,12,13-Trihydroxy-10(E)-octadecadienoic acid ( ) [M-H]<sup>-</sup> P=329.2  
C<sub>18</sub>H<sub>34</sub>O<sub>5</sub>; MF: 174; RMF: 667; Prob 3.86%; Lib: phytofrag2018\_final\_060219; ID: 129.

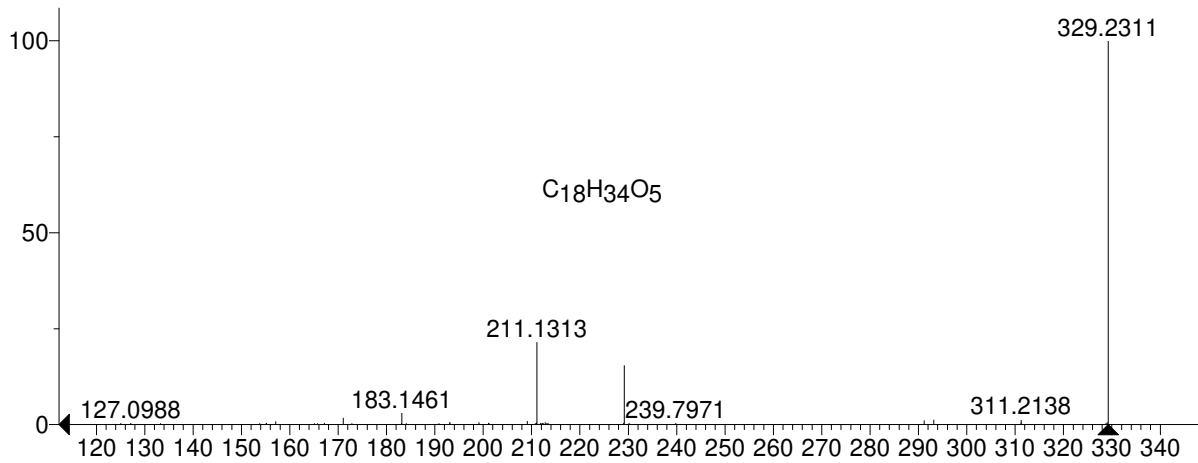

Hit 5 : FA 18:1+3O; PlaSMA ID-741 [M-H]<sup>-</sup> P=329.2  
C<sub>18</sub>H<sub>34</sub>O<sub>5</sub>; MF: 129; RMF: 680; Prob 0.82%; Lib: biomsms-neg-plasma; ID: 449.

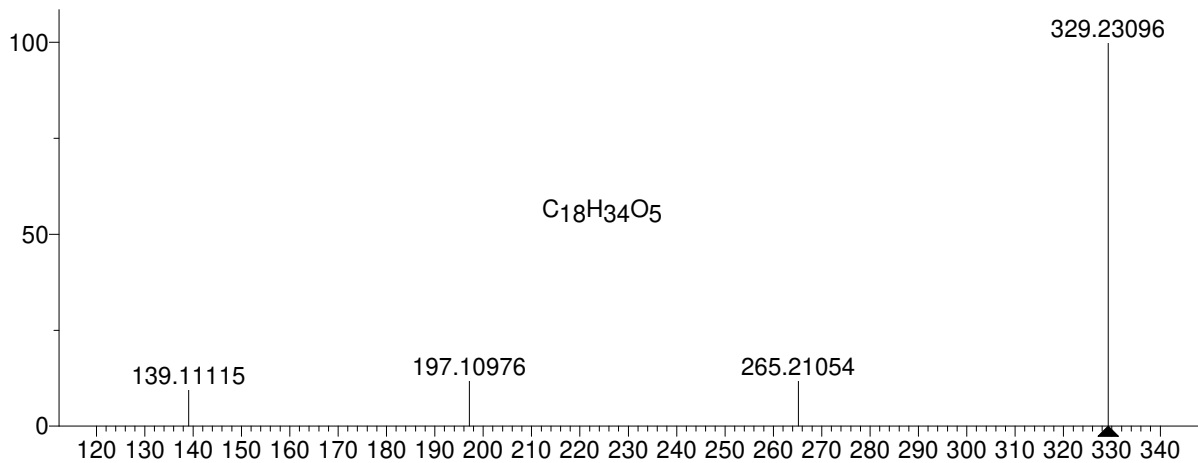

\*\* Search Report Page 1 of 2 \*\*

Unknown: Unknown (24.81\_353.2314m/z)  
Compound in Library Factor = -1453

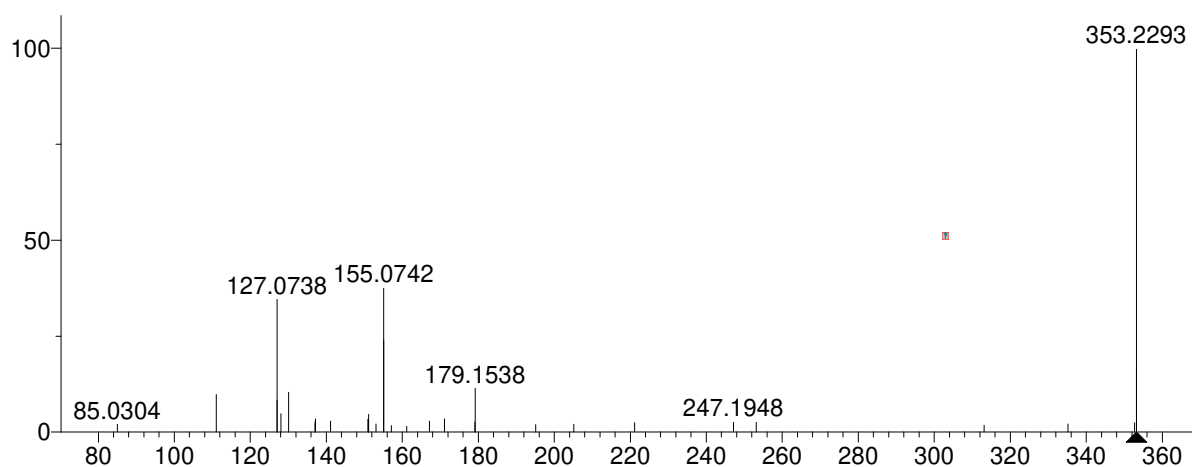

Hit 1 : Isoprostaglandin-F2 $\alpha$ -IV [M-H]<sup>-</sup> HCD 22V P=353.2  
C<sub>20</sub>H<sub>34</sub>O<sub>5</sub>; MF: 239; RMF: 643; Prob 41.9%; CAS: 331962-00-6; Lib: nist\_msms; ID: 88135.

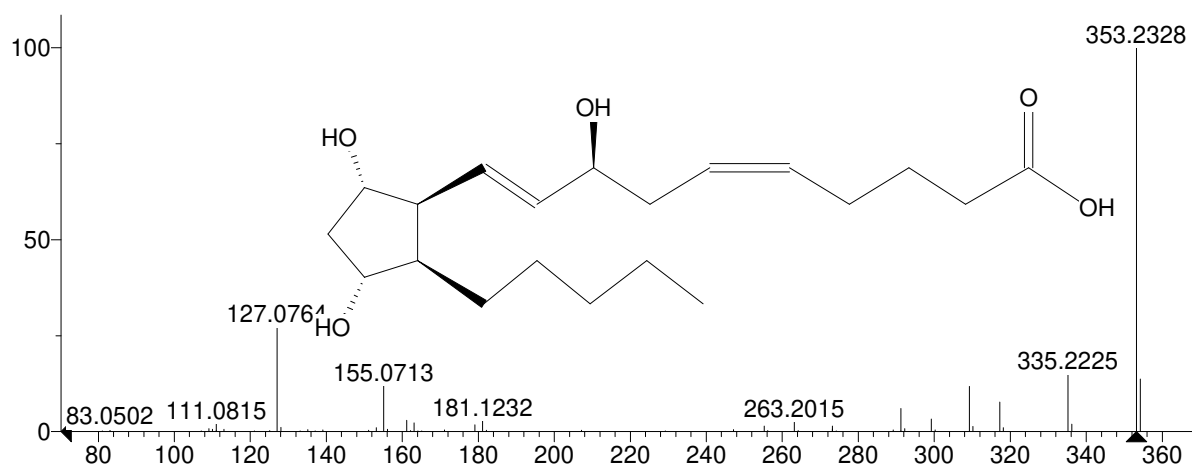

Hit 2 : Prostaglandin D1 [M-H]<sup>-</sup> HCD 5V P=353.2  
C<sub>20</sub>H<sub>34</sub>O<sub>5</sub>; MF: 231; RMF: 875; Prob 31.3%; CAS: 17968-82-0; Lib: nist\_msms; ID: 320117.

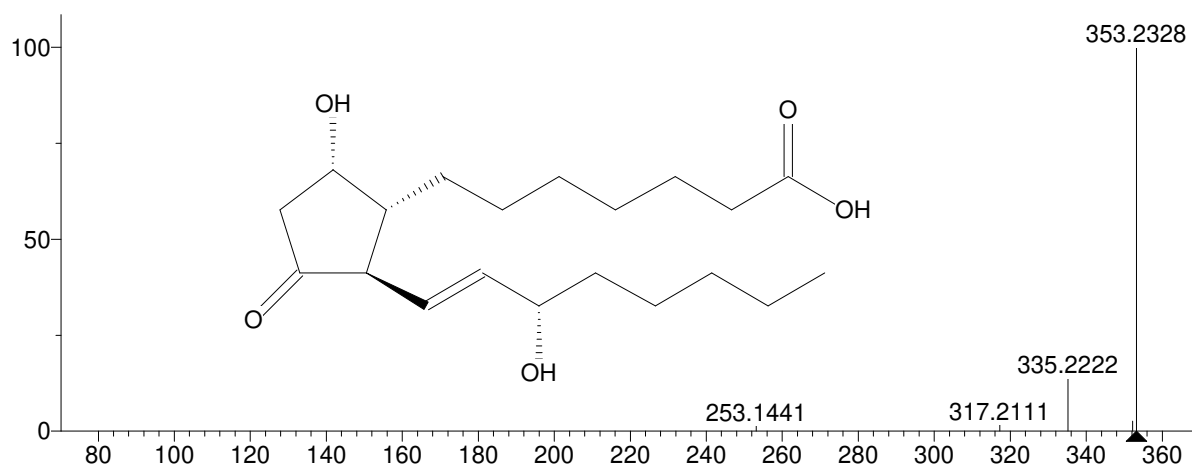

Hit 3 : 15-Ketoprostaglandin E1 [M+H]<sup>+</sup> HCD 3V P=353.2  
C<sub>20</sub>H<sub>32</sub>O<sub>5</sub>; MF: 188; RMF: 807; Prob 6.89%; CAS: 22973-19-9; Lib: nist\_msms; ID: 169227.

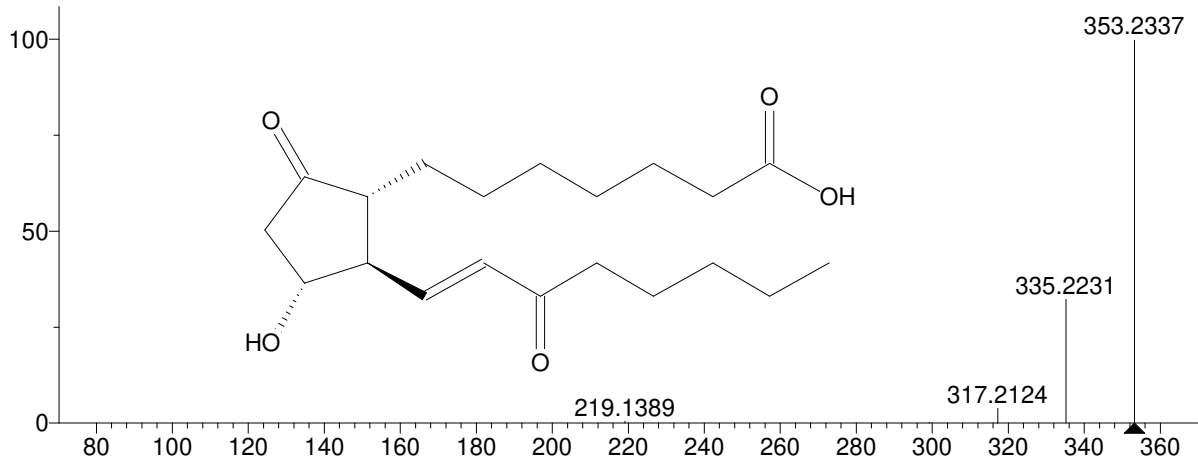

Hit 4 : 6-Ketoprostaglandin F1 $\alpha$  [M+H-H<sub>2</sub>O]<sup>+</sup> HCD 1V P=353.2  
C<sub>20</sub>H<sub>34</sub>O<sub>6</sub>; MF: 187; RMF: 911; Prob 6.63%; CAS: 58962-34-8; Lib: nist\_msms; ID: 166451.

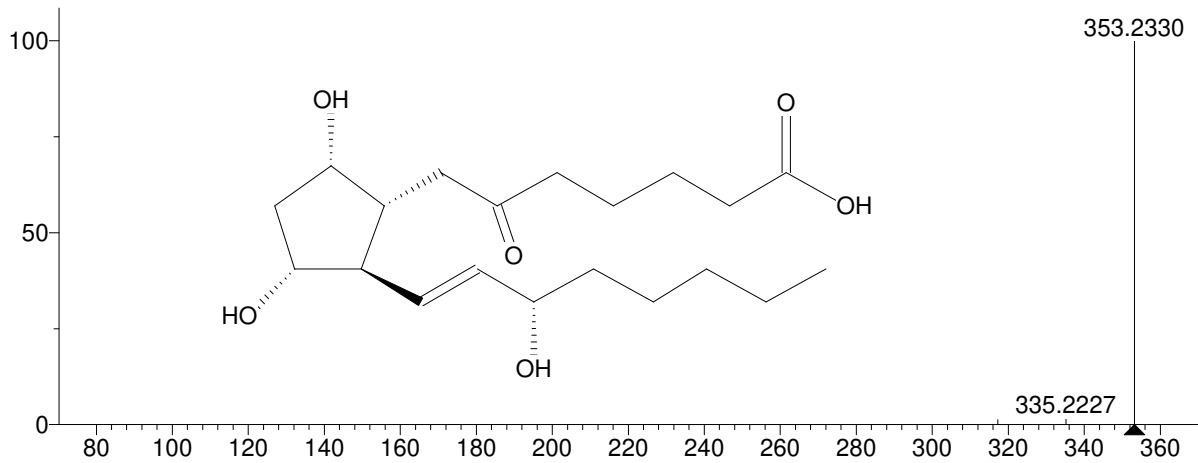

Hit 5 : Prostaglandin I2 [M+H]<sup>+</sup> HCD 1V P=353.2  
C<sub>20</sub>H<sub>32</sub>O<sub>5</sub>; MF: 180; RMF: 911; Prob 5.07%; CAS: 35121-78-9; Lib: nist\_msms; ID: 166889.

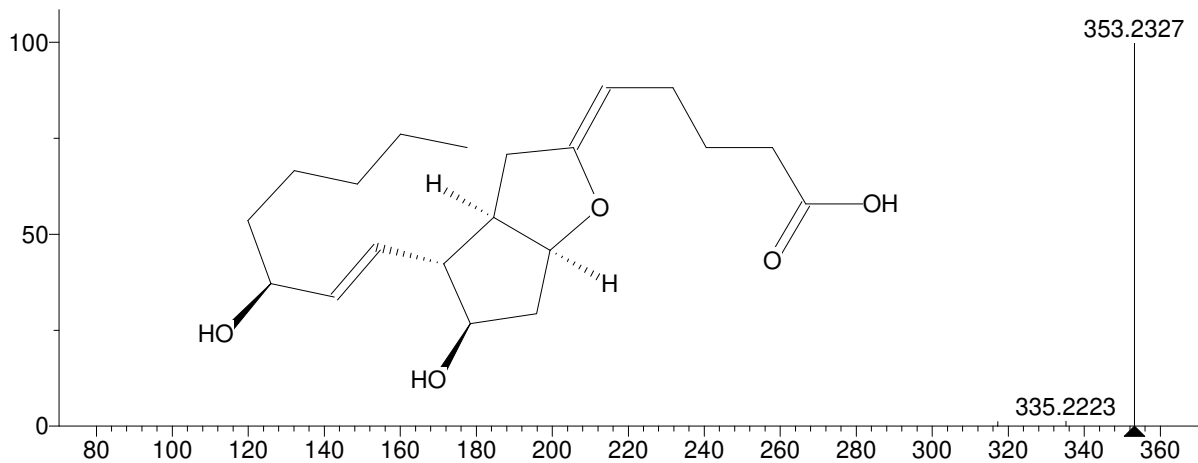

\*\* Search Report Page 1 of 2 \*\*

Unknown: Unknown (24.92\_325.1647m/z)  
Compound in Library Factor = -3273

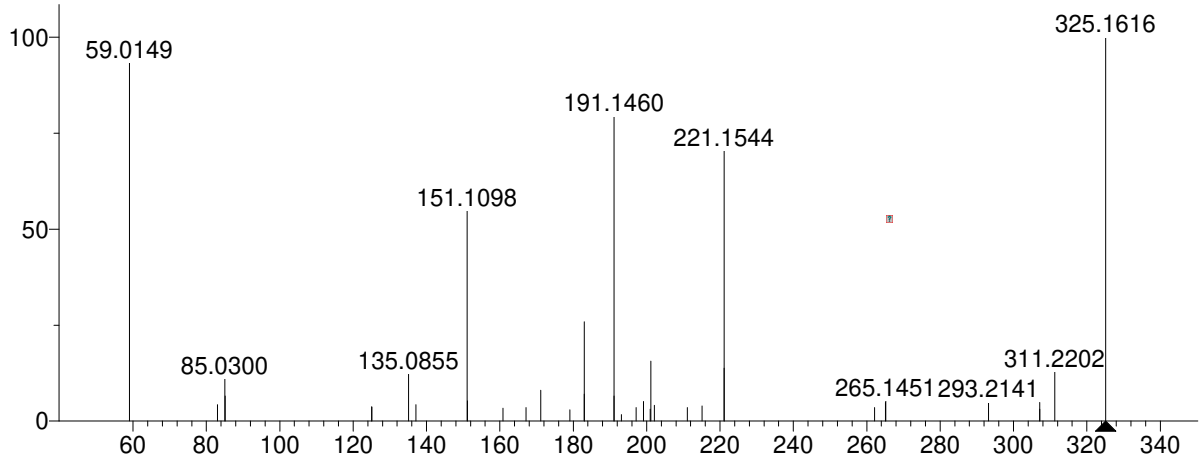

Hit 1 : Chamissonolide [M+H]<sup>+</sup> HCD 1V P=325.2  
C17H24O6; MF: 16; RMF: 447; Prob 17.2%; CAS: 78853-98-2; Lib: nist\_msms; ID: 500759.

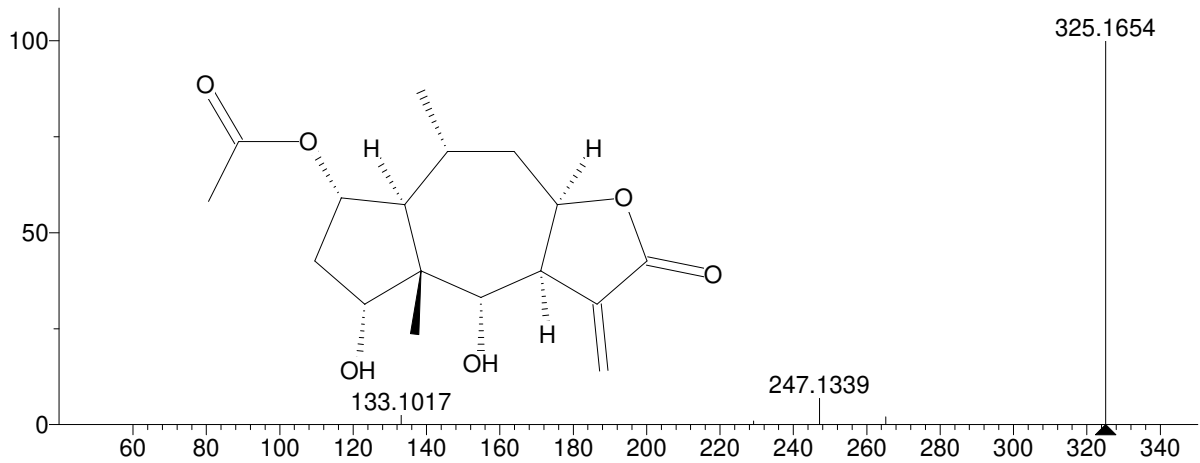

Hit 2 : Tributyrin [M+Na]<sup>+</sup> HCD 16V P=325.2  
C15H26O6; MF: 15; RMF: 416; Prob 16.5%; CAS: 60-01-5; Lib: nist\_msms; ID: 144822.

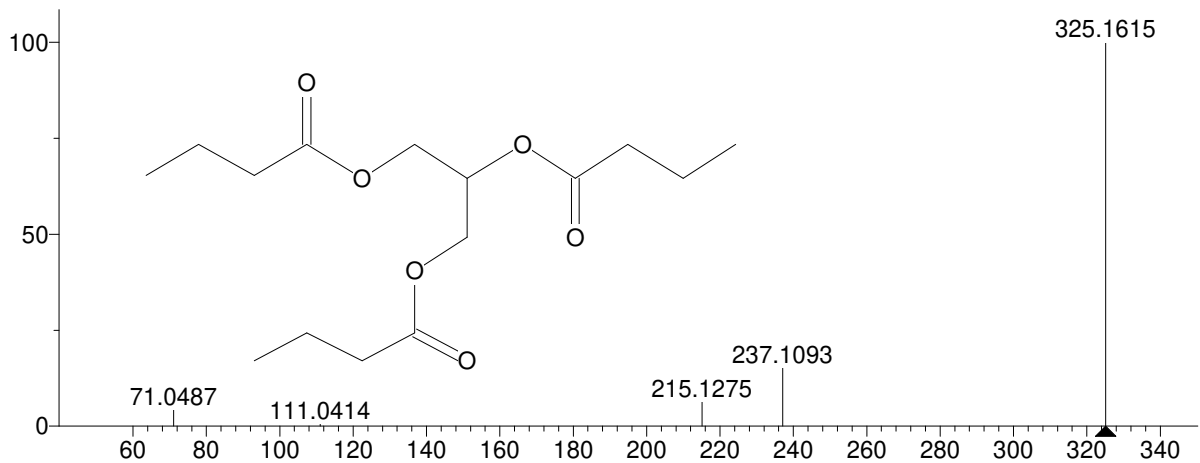



\*\* Search Report Page 2 of 2 \*\*

Hit 3 : MMV023985 [M+H]<sup>+</sup> 20-30-40%) P=325.2  
C<sub>18</sub>H<sub>20</sub>N<sub>4</sub>O<sub>2</sub>; MF: 14; RMF: 393; Prob 15.9%; Lib: mona-export-pathogen\_box; ID: 292.

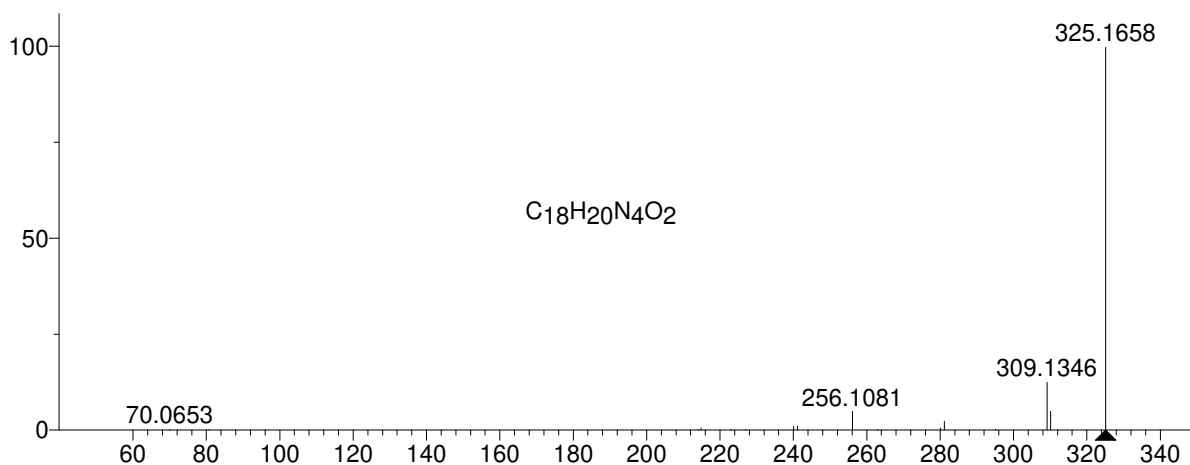

Hit 4 : 2H-Benzimidazol-2-one, 1-ethyl-1,3-dihydro- [2M+H]<sup>+</sup> HCD 3V P=325.2  
C<sub>9</sub>H<sub>10</sub>N<sub>2</sub>O; MF: 7; RMF: 251; Prob 12.2%; CAS: 10045-45-1; Lib: nist\_msms; ID: 364753.

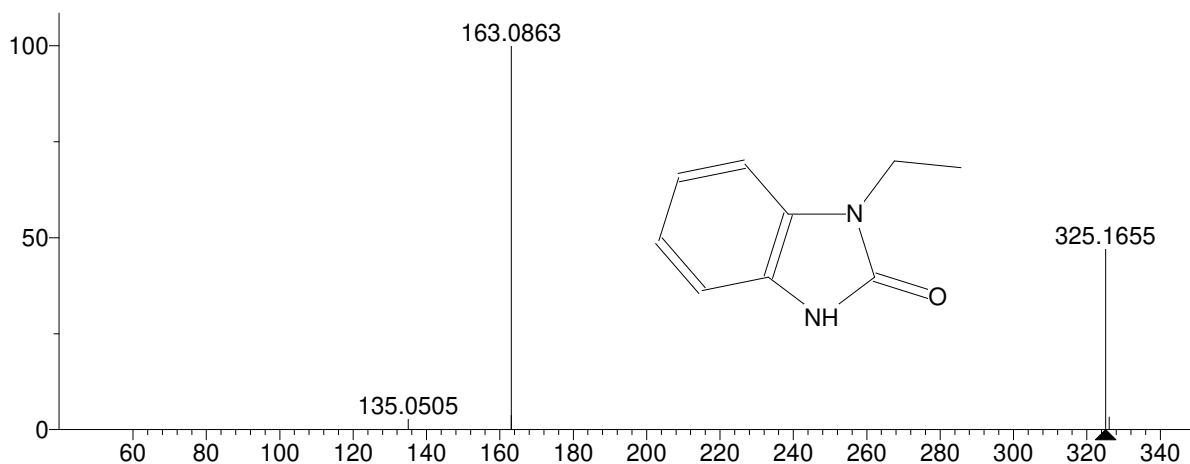

Hit 5 : [5-acetyloxy-3-(hydroxymethyl)-2-oxo-6-propan-2-ylcyclohex-3-en-1-yl] 3-methylbutanoate [M-H]<sup>-</sup> 65HCD  
C<sub>17</sub>H<sub>26</sub>O<sub>6</sub>; MF: 2; RMF: 142; Prob 9.81%; Lib: mona-export-lc-ms-ms\_negative\_mode; ID: 19387.

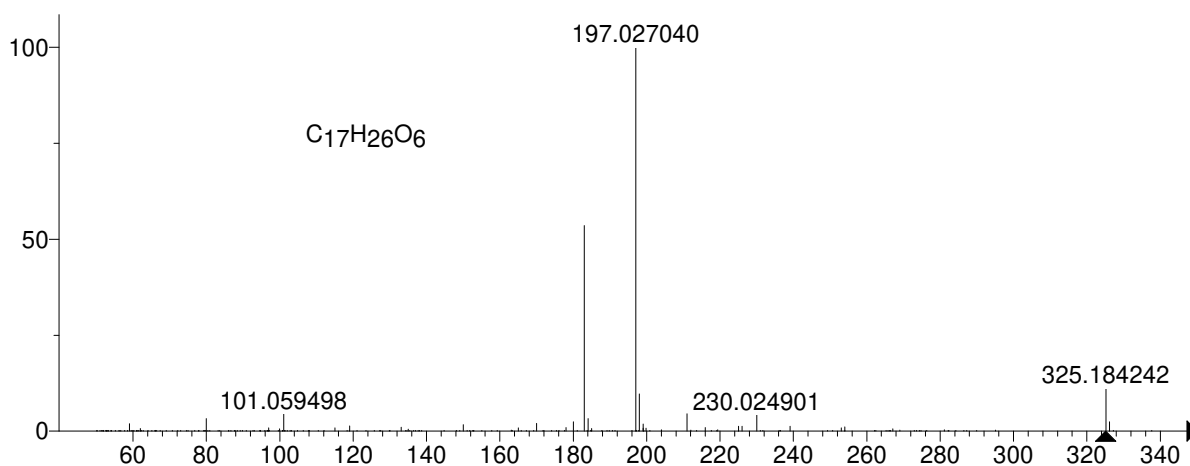

Unknown: Unknown (24.99\_631.3474m/z)  
Compound in Library Factor = 0

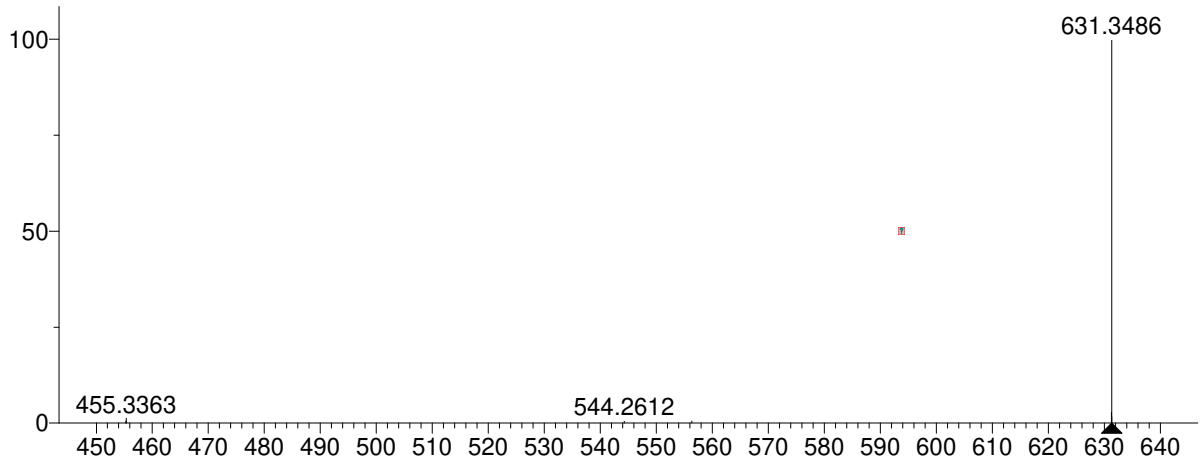

\*\* Search Report Page 1 of 2 \*\*

Unknown: Unknown (25.02\_311.2217m/z)  
Compound in Library Factor = -177

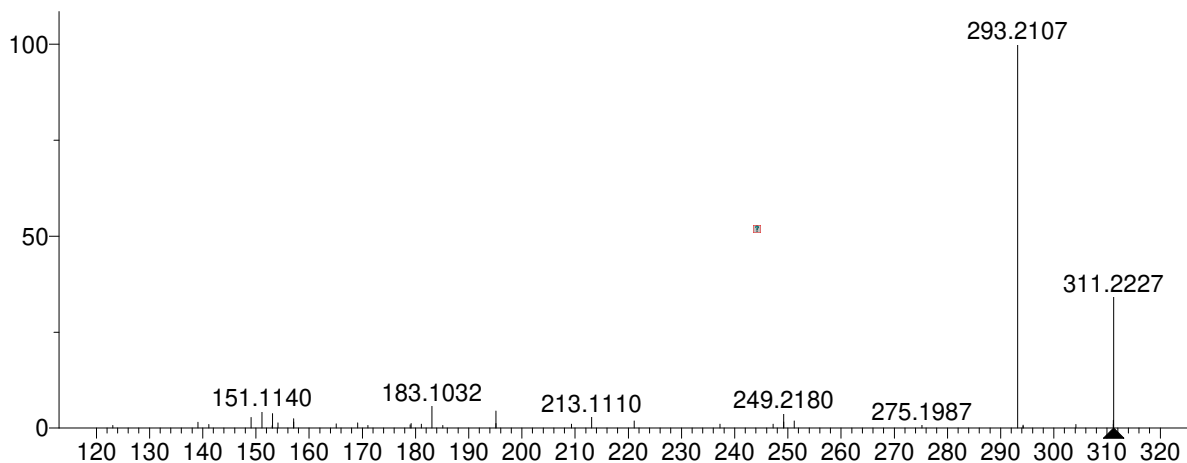

Hit 1 : 9-Oxo-11-(3-pentyl-2-oxiranyl)-10E-undecenoic acid [M+H]<sup>+</sup> HCD 3V P=311.2  
C<sub>18</sub>H<sub>30</sub>O<sub>4</sub>; MF: 581; RMF: 738; Prob 98.0%; CAS: 478931-82-7; Lib: nist\_msms; ID: 91854.

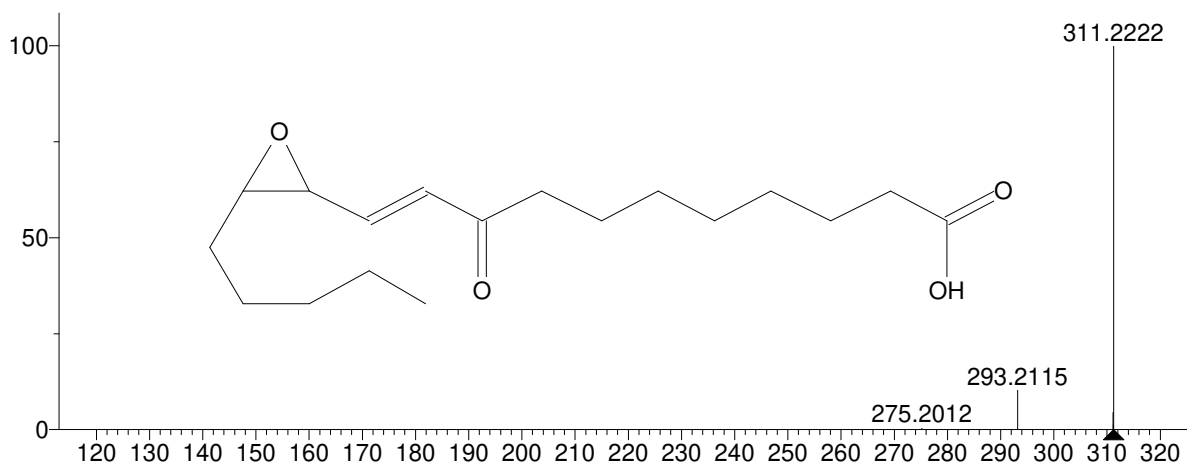

Hit 2 : Unknown (carbon number 18); PlaSMA ID-652 [M-H]<sup>-</sup> P=311.2  
C<sub>18</sub>H<sub>32</sub>O<sub>4</sub>; MF: 329; RMF: 577; Prob 0.98%; Lib: biomsms-neg-plasma; ID: 1205.

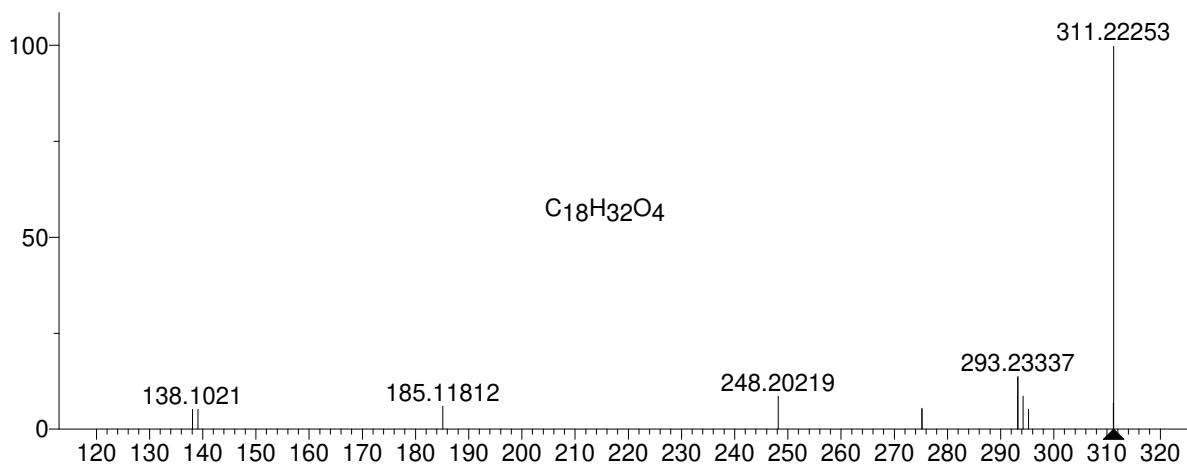

Hit 3 : Unknown (carbon number 17); PlaSMA ID-642 [M-H]<sup>-</sup> P=311.2  
C<sub>17</sub>H<sub>32</sub>N<sub>2</sub>O<sub>5</sub>; MF: 327; RMF: 616; Prob 0.90%; Lib: biomsms-neg-plasma; ID: 1201.

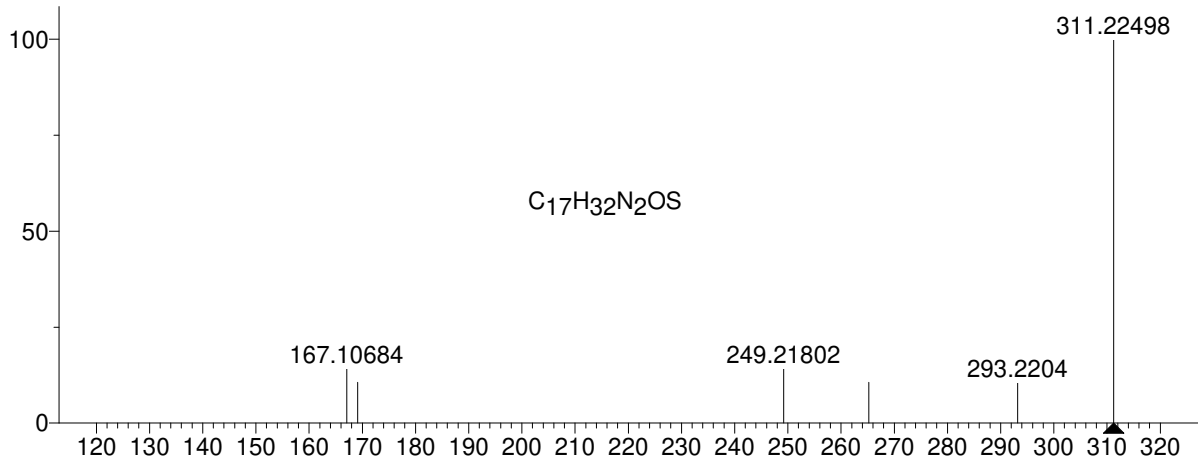

Hit 4 : FA 18:2+2O; PlaSMA ID-643 [M-H]<sup>-</sup> P=311.2  
C<sub>18</sub>H<sub>32</sub>O<sub>4</sub>; MF: 228; RMF: 648; Prob 0.06%; Lib: biomsms-neg-plasma; ID: 431.

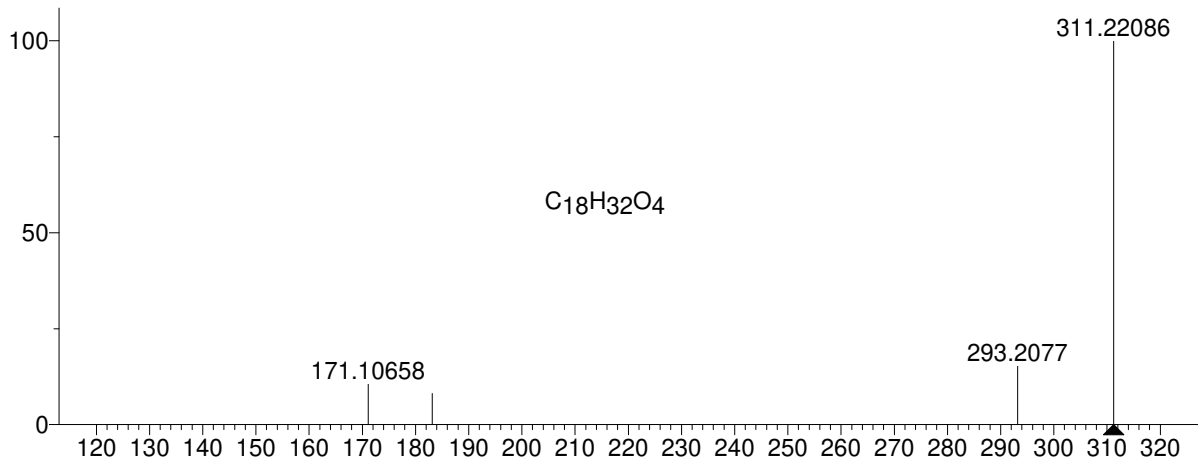

Hit 5 : Unknown (carbon number 19); PlaSMA ID-644 [M-CH<sub>3</sub>]<sup>-</sup> P=311.2  
C<sub>19</sub>H<sub>34</sub>O<sub>4</sub>; MF: 139; RMF: 511; Prob 0.00%; Lib: biomsms-neg-plasma; ID: 1202.

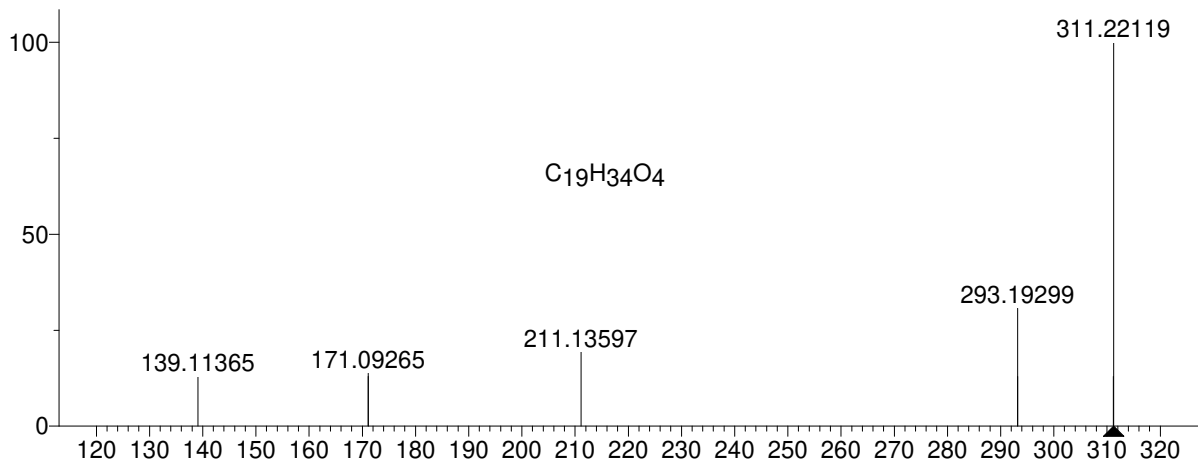

Unknown: Unknown (25.05\_329.2324m/z)  
Compound in Library Factor = -542

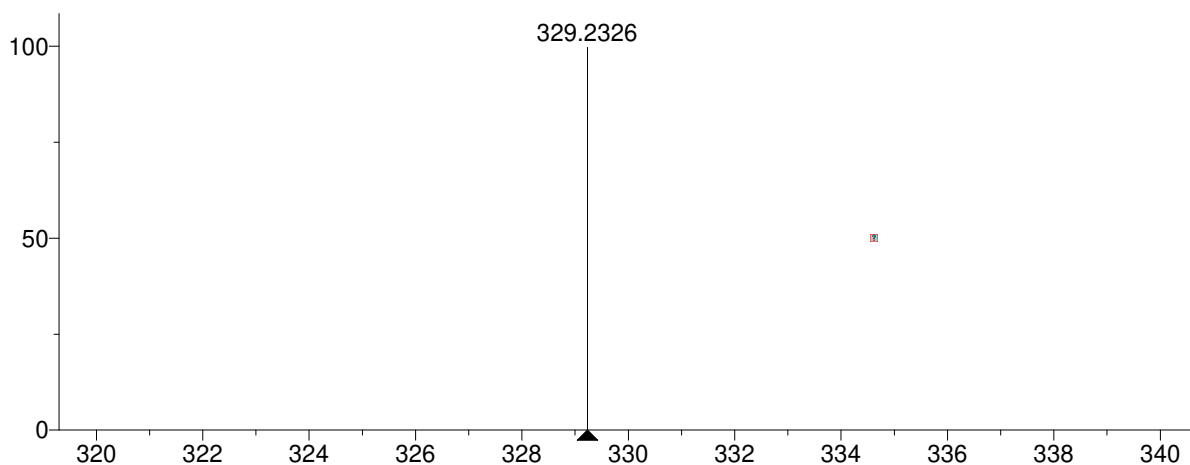

Hit 1 : FA 18:1+3O; PlaSMA ID-739 [M-H]<sup>-</sup> P=329.2  
C<sub>18</sub>H<sub>34</sub>O<sub>5</sub>; MF: 364; RMF: 999; Prob 14.7%; Lib: biomsms-neg-plasma; ID: 446.

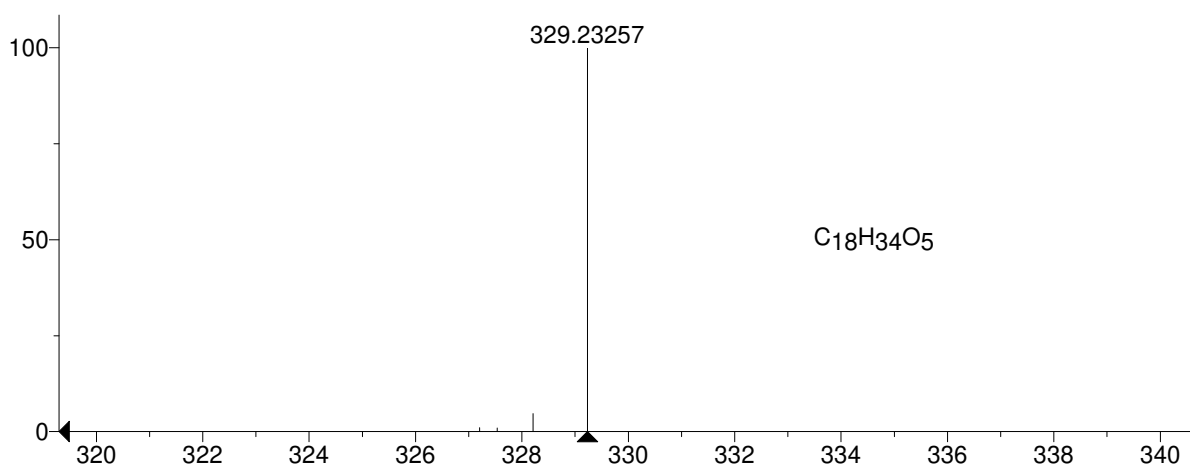

Hit 2 : FA 18:1+3O; PlaSMA ID-740 [M-H]<sup>-</sup> P=329.2  
C<sub>18</sub>H<sub>34</sub>O<sub>5</sub>; MF: 364; RMF: 999; Prob 14.7%; Lib: biomsms-neg-plasma; ID: 447.

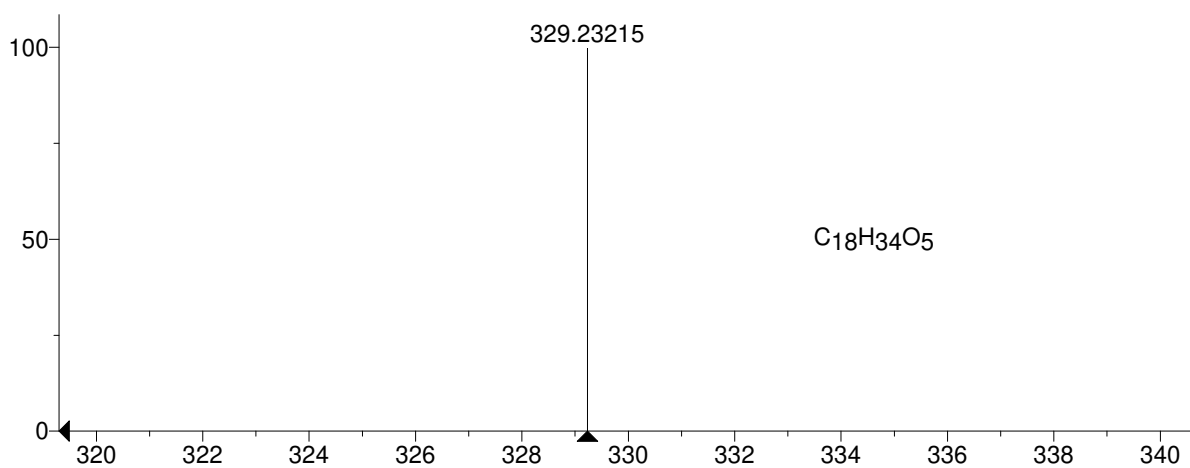

Hit 3 : FA 18:1+3O; PlaSMA ID-737 [M-H]<sup>-</sup> P=329.2  
C<sub>18</sub>H<sub>34</sub>O<sub>5</sub>; MF: 364; RMF: 999; Prob 14.7%; Lib: biomsms-neg-plasma; ID: 448.

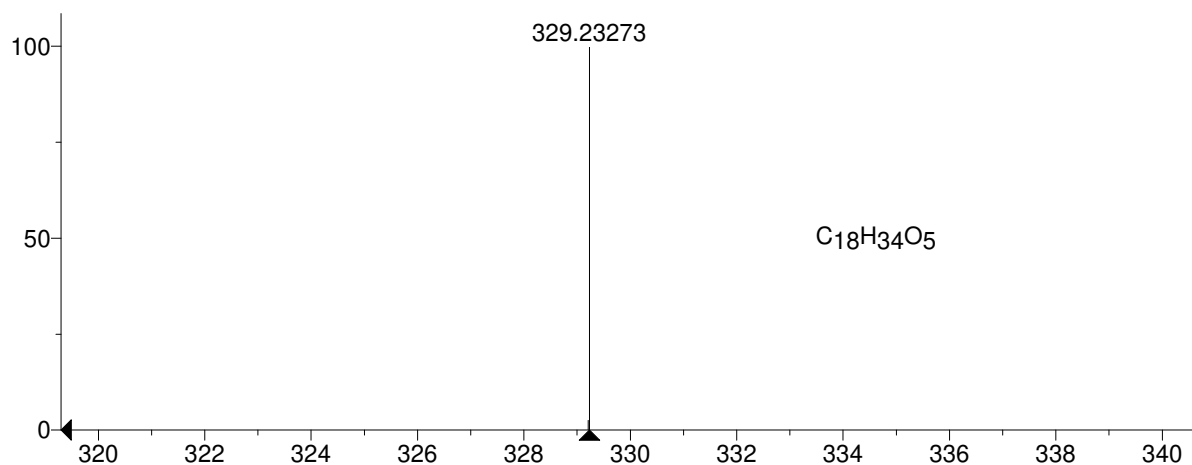

Hit 4 : FA 18:1+3O; PlaSMA ID-741 [M-H]<sup>-</sup> P=329.2  
C<sub>18</sub>H<sub>34</sub>O<sub>5</sub>; MF: 364; RMF: 999; Prob 14.7%; Lib: biomsms-neg-plasma; ID: 449.

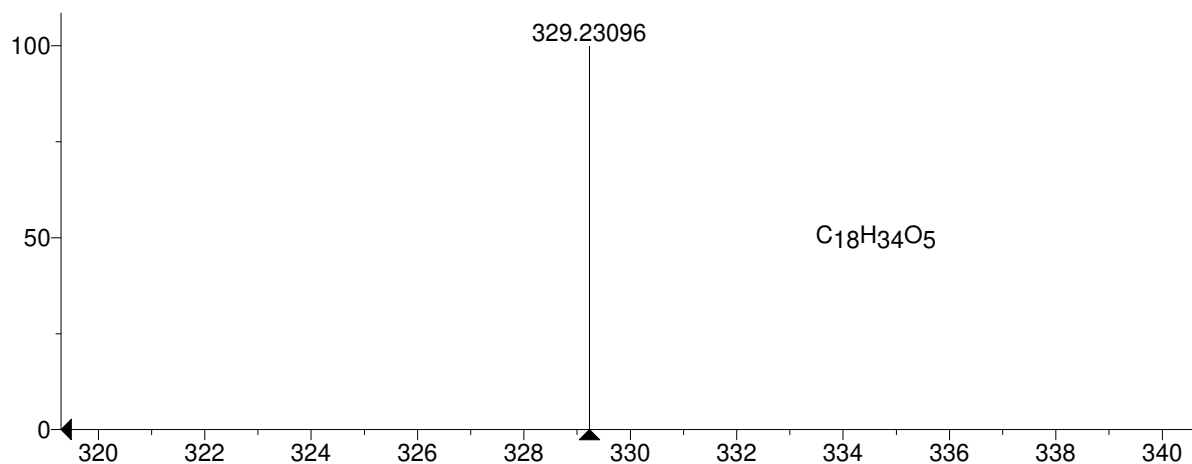

Hit 5 : 9,12,13-Trihydroxy-10(E)-octadecadienoic acid ( ) [M-H]<sup>-</sup> P=329.2  
C<sub>18</sub>H<sub>34</sub>O<sub>5</sub>; MF: 364; RMF: 999; Prob 14.7%; Lib: phytofrag2018\_final\_060219; ID: 129.

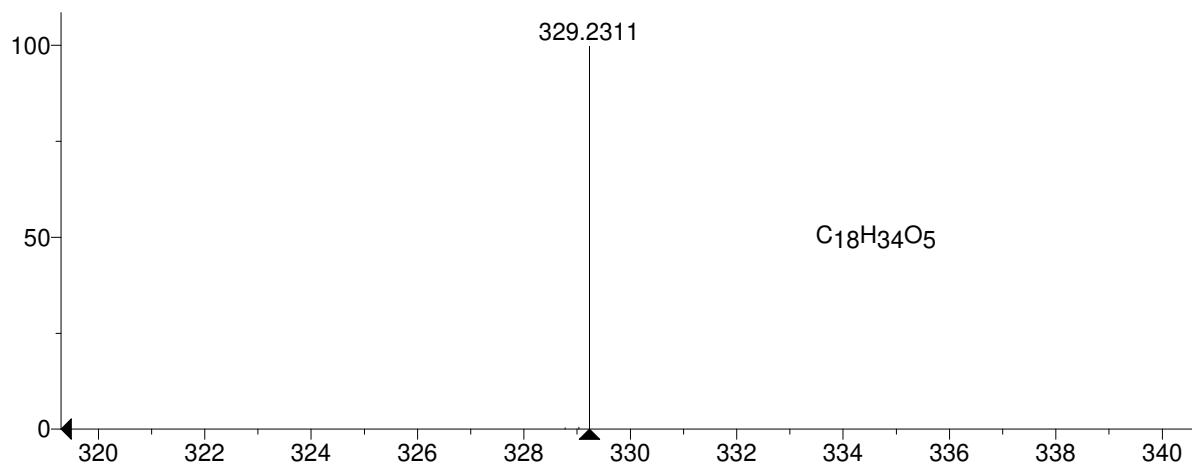

Unknown: Unknown (25.10\_398.0393m/z)  
Compound in Library Factor = 0

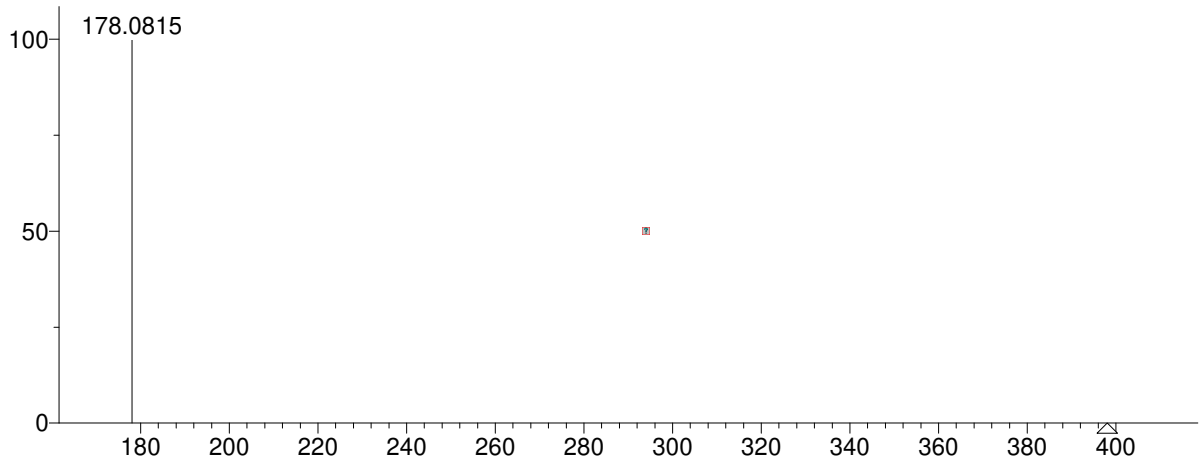

\*\* Search Report Page 1 of 2 \*\*

Unknown: Unknown (25.16\_219.1379m/z)  
Compound in Library Factor = -396

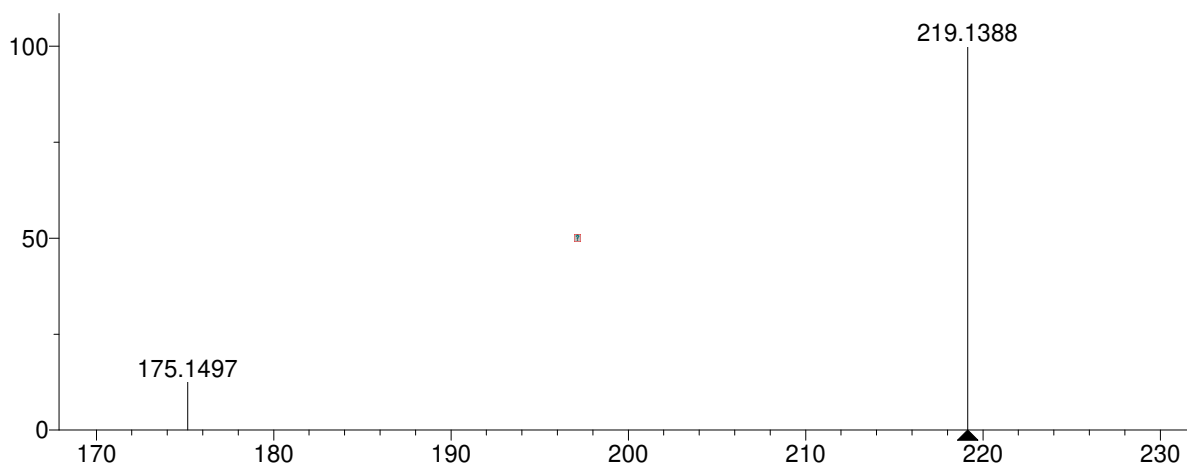

Hit 1 : 1-Heptanone, 1-(4-methoxyphenyl)-2-(1-pyrrolidinyl)- [M+H-C4H9N]+ HCD 6V P=219.1  
C18H27NO2; MF: 321; RMF: 938; Prob 58.1%; CAS: 1801552-04-4; Lib: nist\_msms; ID: 370217.

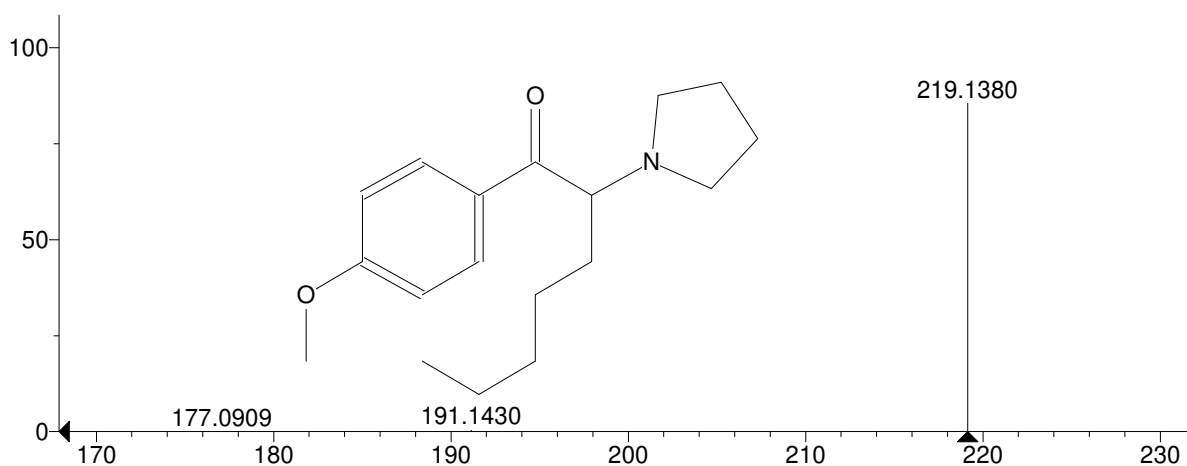

Hit 2 : Empenthrin [M+H-C4H8]+ HCD 10V P=219.1  
C18H26O2; MF: 310; RMF: 944; Prob 39.9%; CAS: 54406-48-3; Lib: nist\_msms; ID: 475486.

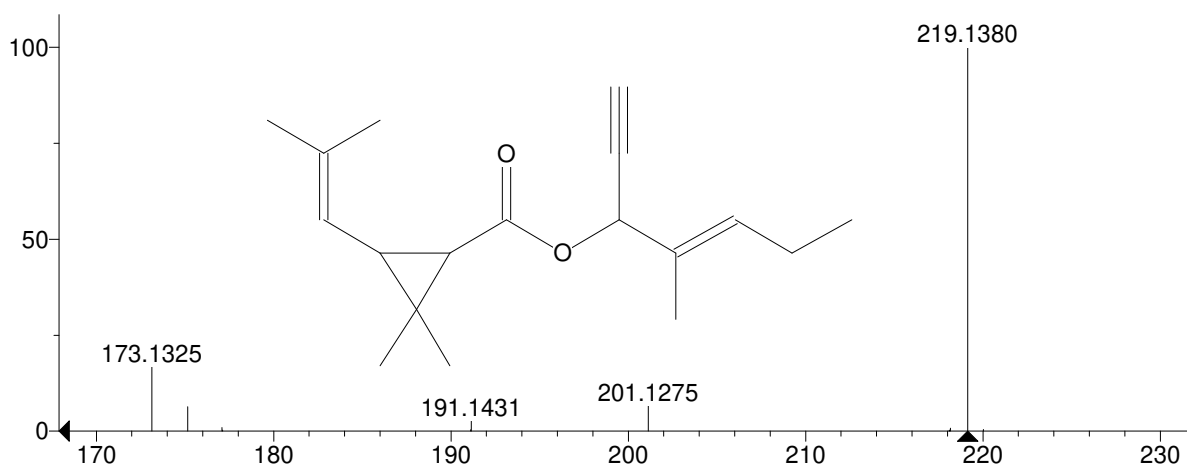



Hit 3 : Hydroxyebastine [M+H-C18H21NO]<sup>+</sup> HCD 17V P=219.1  
C32H39NO3; MF: 179; RMF: 834; Prob 1.62%; CAS: 210686-41-2; Lib: nist\_msms; ID: 441211.

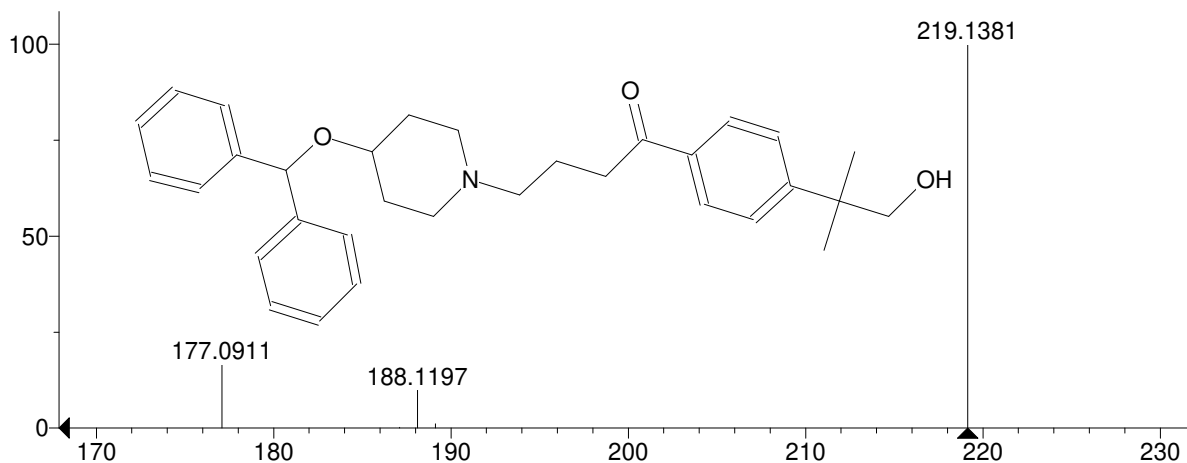

Hit 4 : 3-Furancarboxylic acid, tetrahydro-4-methylene-2-octyl-5-oxo-, (2R,3S)-rel- [M+H-2H2O]<sup>+</sup> HCD 8V P=219.1  
C14H22O4; MF: 125; RMF: 917; Prob 0.31%; CAS: 191282-48-1; Lib: nist\_msms; ID: 427596.

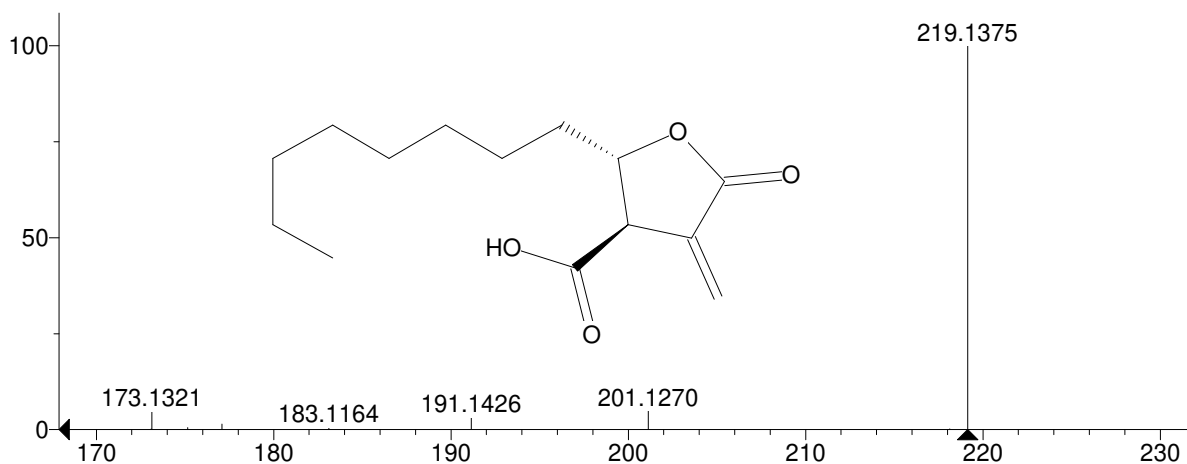

Hit 5 : (+)-Abscisic acid [M-H-CO2]<sup>-</sup> HCD 19V P=219.1  
C15H20O4; MF: 100; RMF: 807; Prob 0.09%; CAS: 21293-29-8; Lib: nist\_msms; ID: 539122.

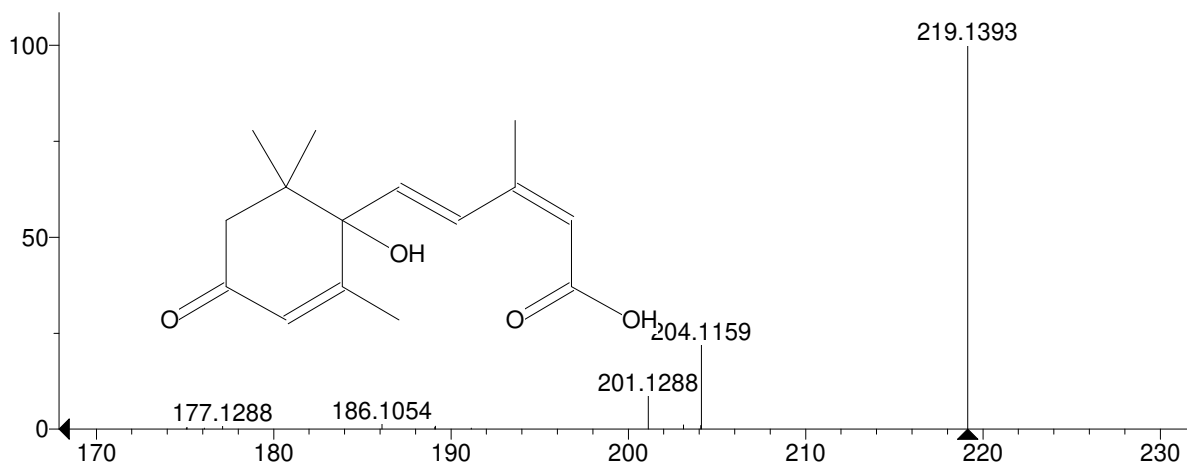

Unknown: Unknown (25.16\_376.0089m/z)  
Compound in Library Factor = 0

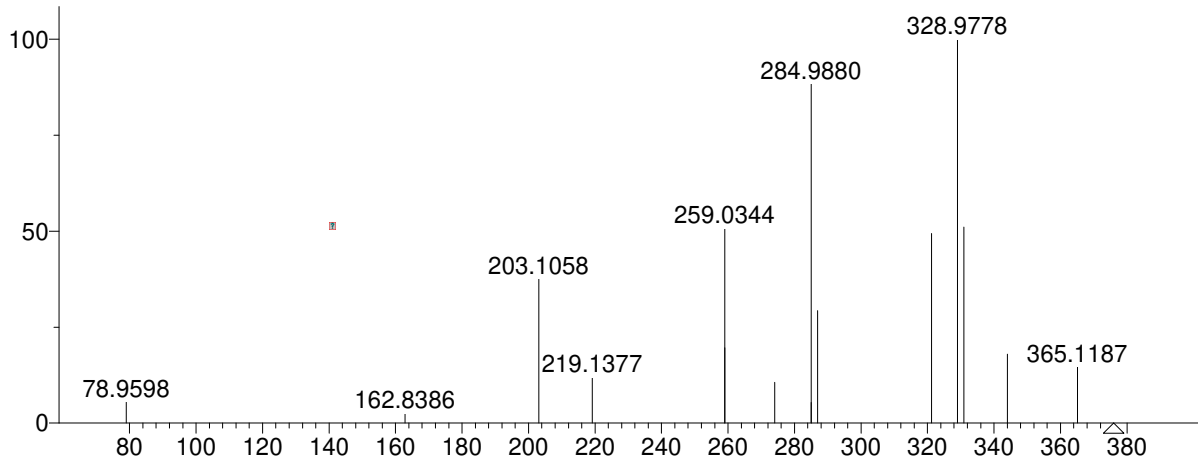

Unknown: Unknown (25.16\_394.0712m/z)  
Compound in Library Factor = -3273

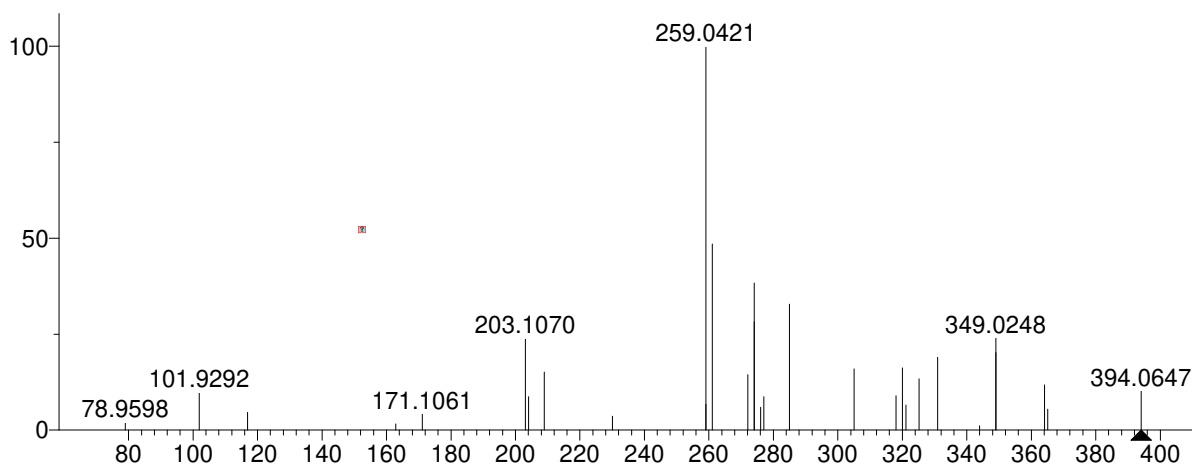

Hit 1 : rac-4-Sulfoxypropranolol [M+K]<sup>+</sup> HCD 11V P=394.1  
C<sub>16</sub>H<sub>21</sub>NO<sub>6</sub>S; MF: 13; RMF: 148; Prob 100.0%; CAS: 87075-33-0; Lib: nist\_msms; ID: 443558.

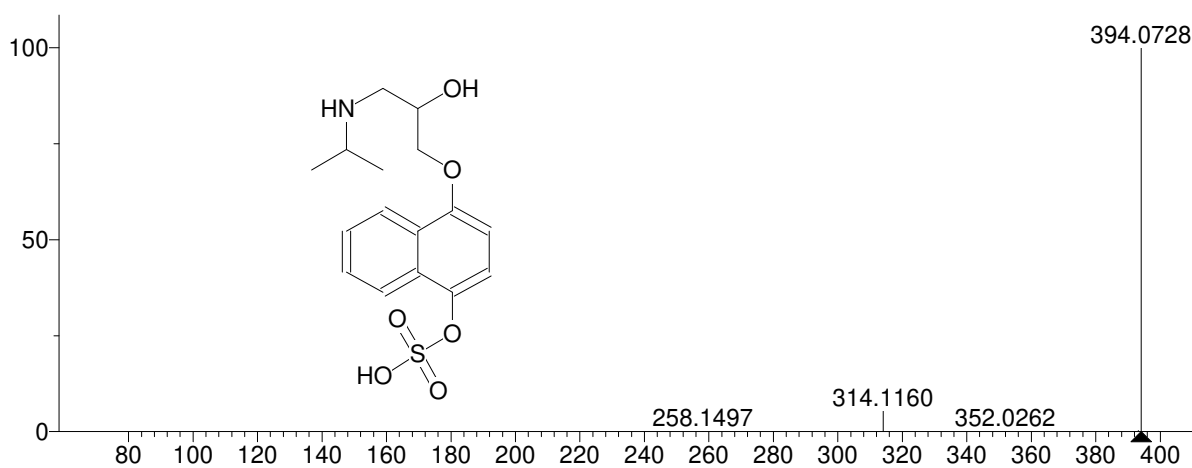

Unknown: Unknown (25.17\_249.1489m/z)  
Compound in Library Factor = -226

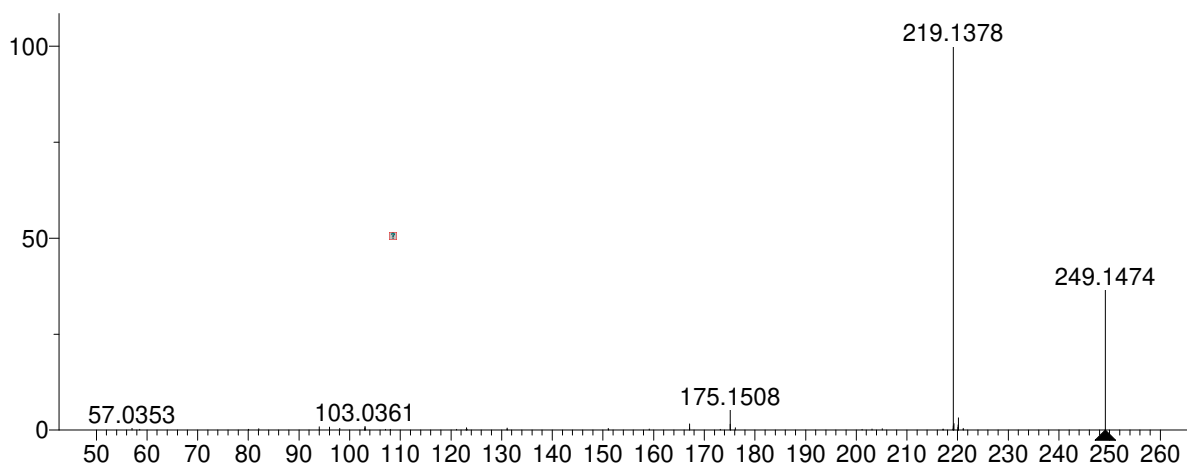

Hit 1 : Atractylenolide III [M+H]<sup>+</sup> HCD 0V P=249.1  
C<sub>15</sub>H<sub>20</sub>O<sub>3</sub>; MF: 328; RMF: 954; Prob 93.2%; CAS: 73030-71-4; Lib: nist\_msms; ID: 459539.

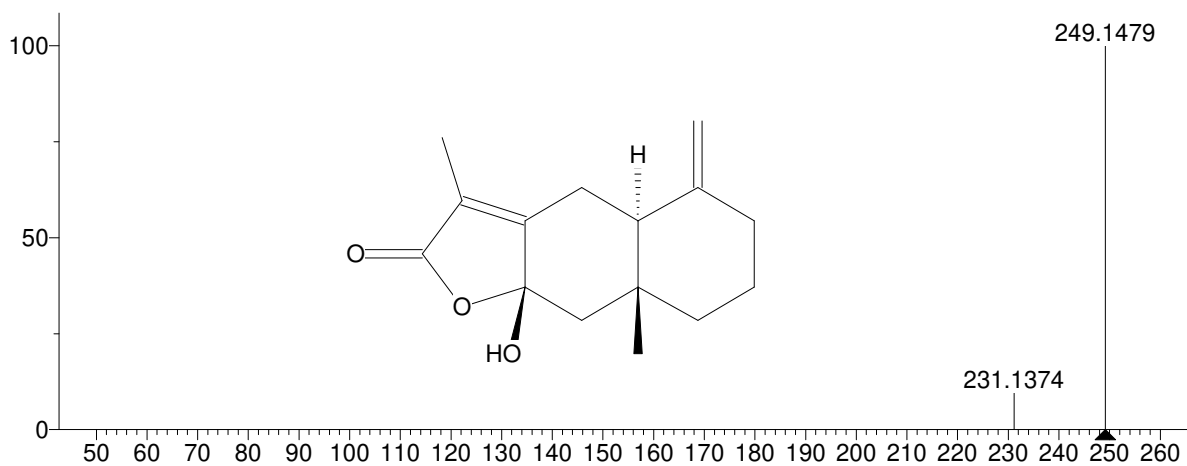

Hit 2 : Parthenolide [M+H]<sup>+</sup> HCD 9V P=249.1  
C<sub>15</sub>H<sub>20</sub>O<sub>3</sub>; MF: 66; RMF: 395; Prob 0.93%; CAS: 20554-84-1; Lib: nist\_msms; ID: 225068.

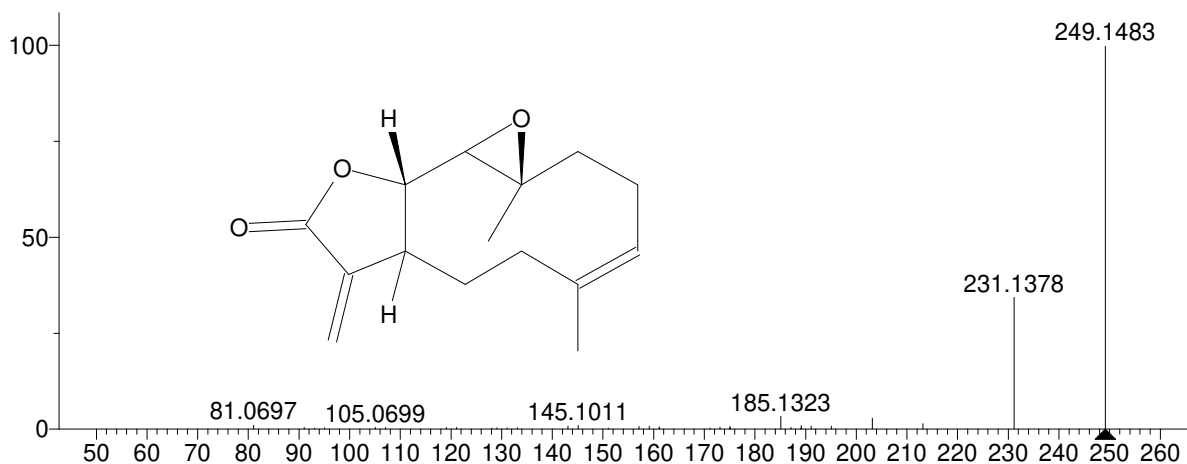

\*\* Search Report Page 2 of 2 \*\*

Hit 3 : 3,5-Di-tert-butyl-4-hydroxybenzoic acid [M-H]- HCD 22V P=249.1  
C<sub>15</sub>H<sub>22</sub>O<sub>3</sub>; MF: 55; RMF: 481; Prob 0.63%; CAS: 1421-49-4; Lib: nist\_msms; ID: 299282.

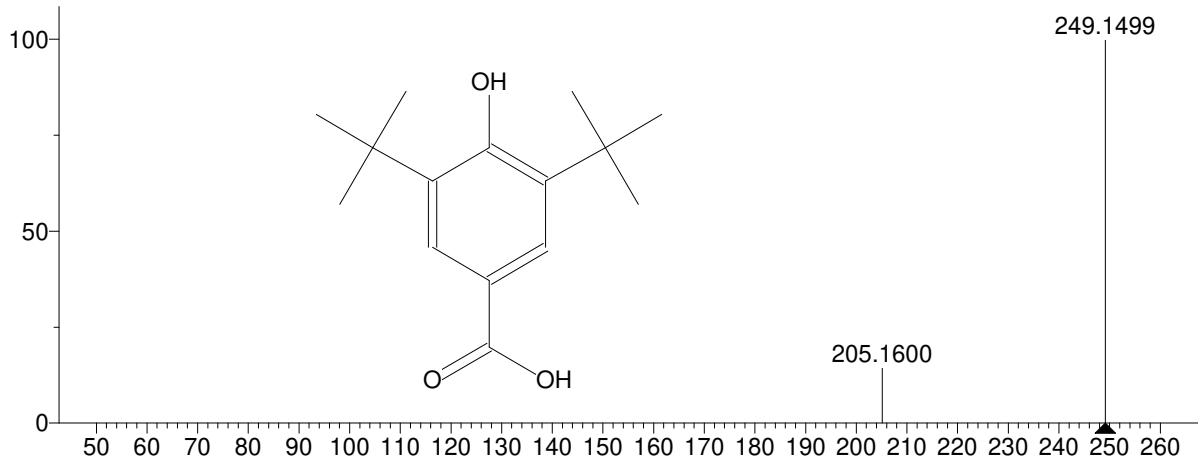

Hit 4 : Gemfibrozil [M-H]- HCD 3V P=249.1  
C<sub>15</sub>H<sub>22</sub>O<sub>3</sub>; MF: 49; RMF: 450; Prob 0.50%; CAS: 25812-30-0; Lib: nist\_msms; ID: 376181.

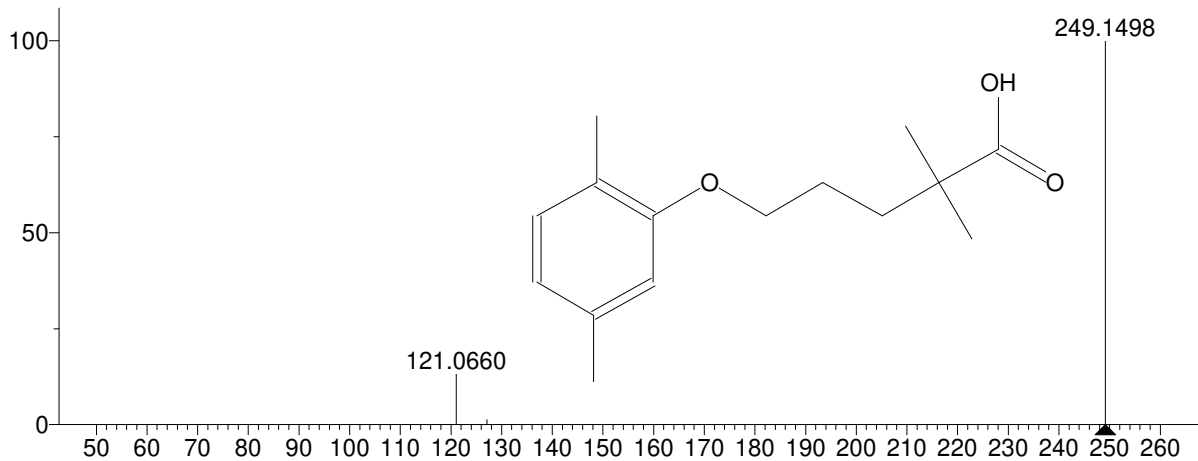

Hit 5 : Hydroxyvaleric Acid [M-H]- 35HCD P=249.1  
C<sub>15</sub>H<sub>22</sub>O<sub>3</sub>; MF: 36; RMF: 361; Prob 0.32%; Lib: mona-export-1c-ms-ms\_negative\_mode; ID: 17834.

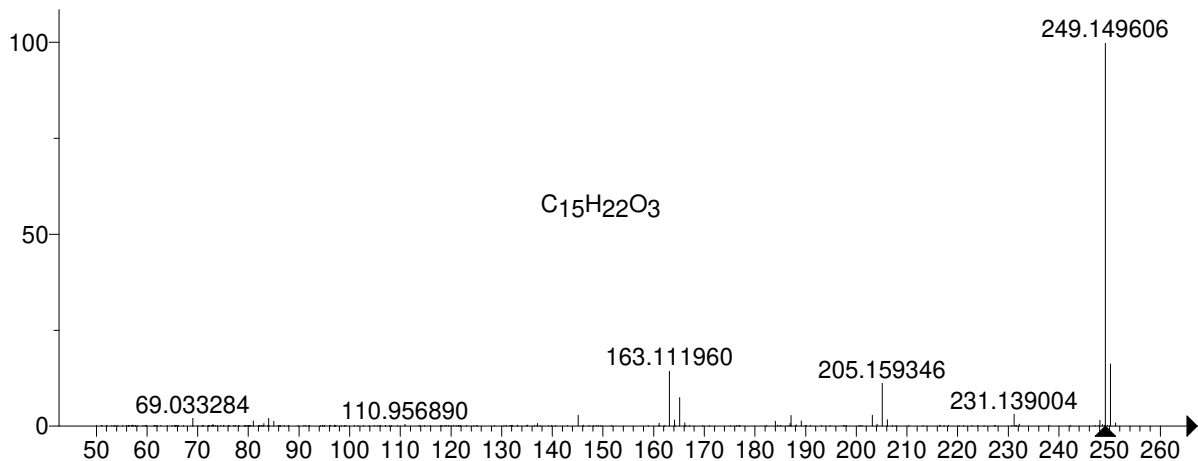

Unknown: Unknown (25.17\_317.1350m/z)  
Compound in Library Factor = 0

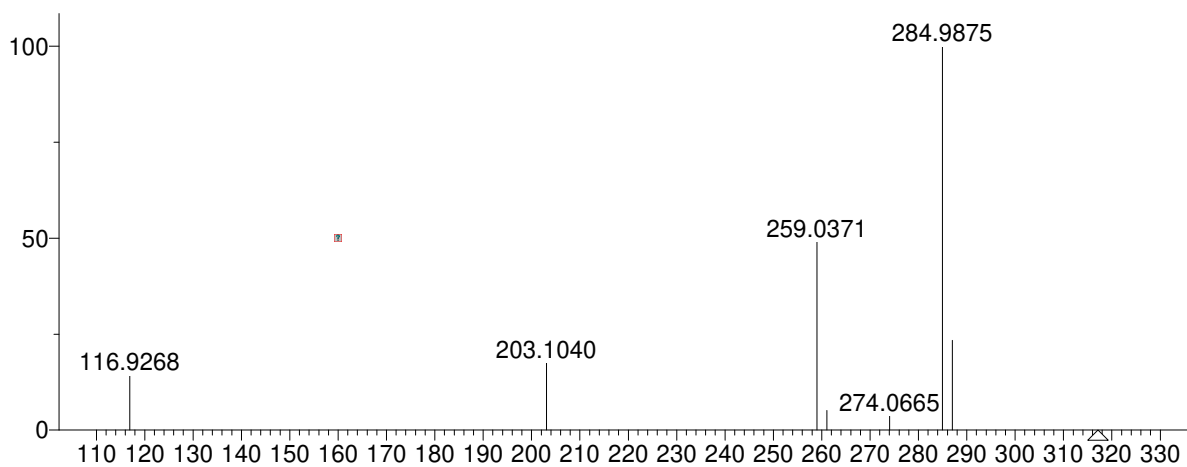

Hit 1 : NCGC00385420-01!(E)-1-(1,3,6,8-tetramethoxynaphthalen-2-yl)but-2-en-1-one [M+H]<sup>+</sup> P=317.1  
C<sub>18</sub>H<sub>20</sub>O<sub>5</sub>; MF: 0; RMF: 7; Prob 100.0%; Lib: mona-export-gnps; ID: 9360.

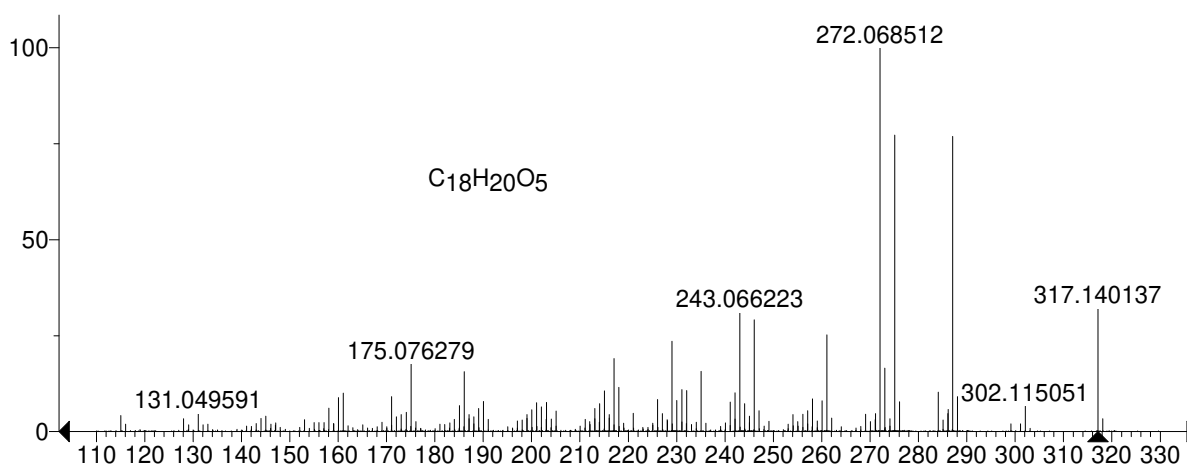

Unknown: Unknown (25.17\_444.0520m/z)  
Compound in Library Factor = 0

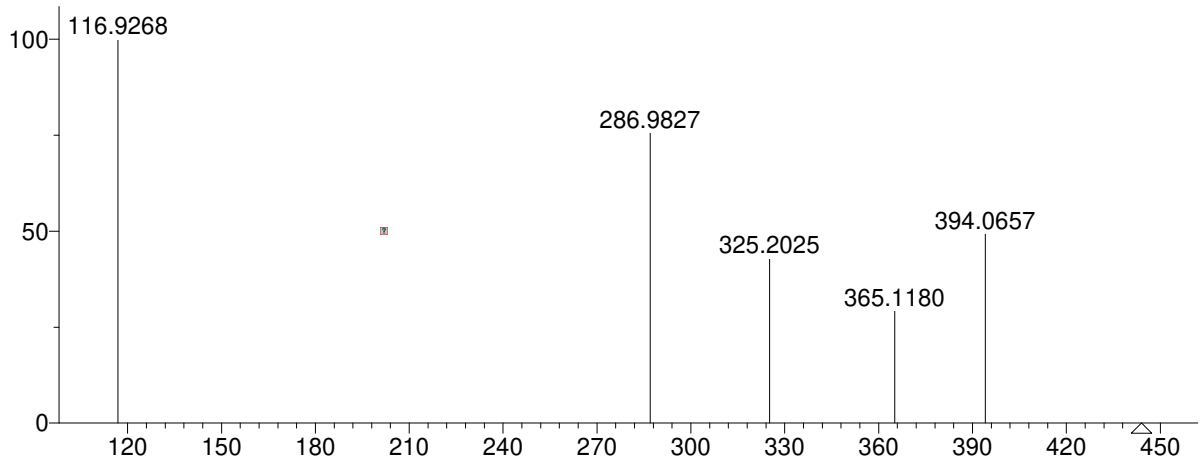

Unknown: Unknown (25.19\_374.0136m/z)  
Compound in Library Factor = 0

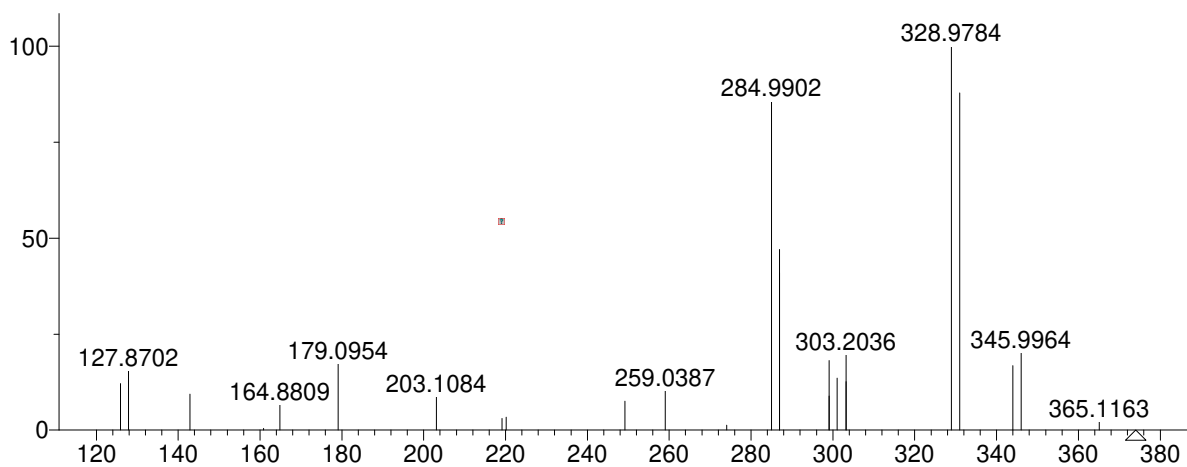

Hit 1 : Mast Cell Degranulating Peptide HR-1 [M+4H]<sup>4+</sup> QQQ 15V P=374  
C<sub>71</sub>H<sub>133</sub>N<sub>19</sub>O<sub>15</sub>; MF: 0; RMF: 14; Prob 100.0%; Lib: nist\_msms2; ID: 10928.

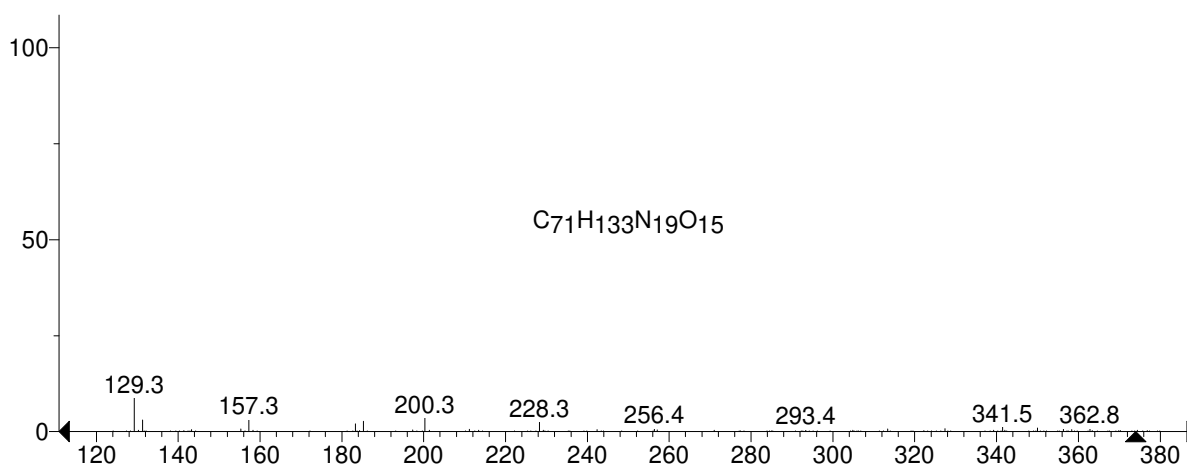



\*\* Search Report Page 1 of 2 \*\*

Unknown: Unknown (25.20\_329.2324m/z)  
Compound in Library Factor = -611

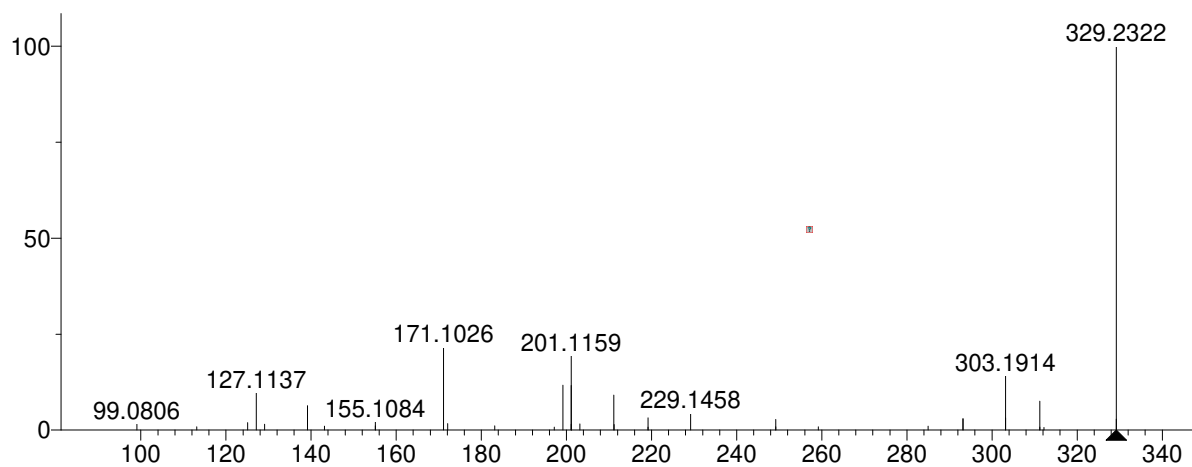

Hit 1 : FA 18:1+3O; PlaSMA ID-738 [M-H]<sup>-</sup> P=329.2  
C<sub>18</sub>H<sub>34</sub>O<sub>5</sub>; MF: 395; RMF: 737; Prob 61.4%; Lib: biomsms-neg-plasma; ID: 444.

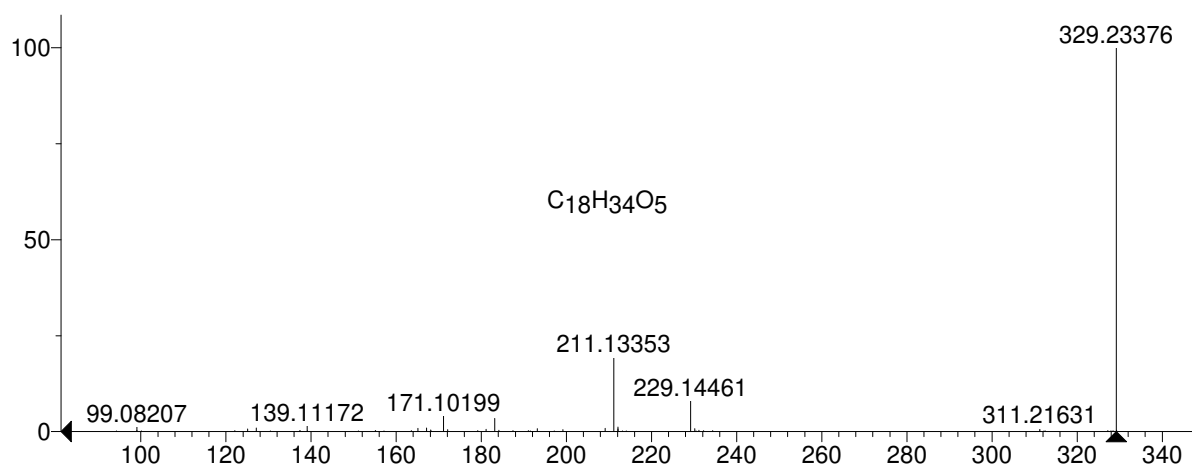

Hit 2 : FA 18:1+3O; PlaSMA ID-735 [M-H]<sup>-</sup> P=329.2  
C<sub>18</sub>H<sub>34</sub>O<sub>5</sub>; MF: 379; RMF: 637; Prob 35.3%; Lib: biomsms-neg-plasma; ID: 443.

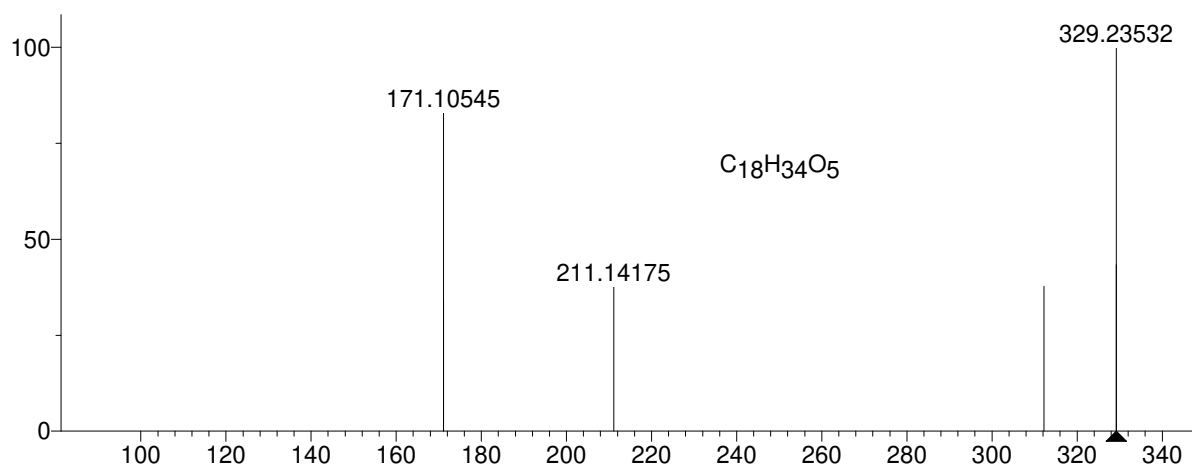

Hit 3 : FA 18:1+3O; PlaSMA ID-737 [M-H]<sup>-</sup> P=329.2  
C<sub>18</sub>H<sub>34</sub>O<sub>5</sub>; MF: 288; RMF: 730; Prob 2.98%; Lib: biomsmns-neg-plasma; ID: 448.

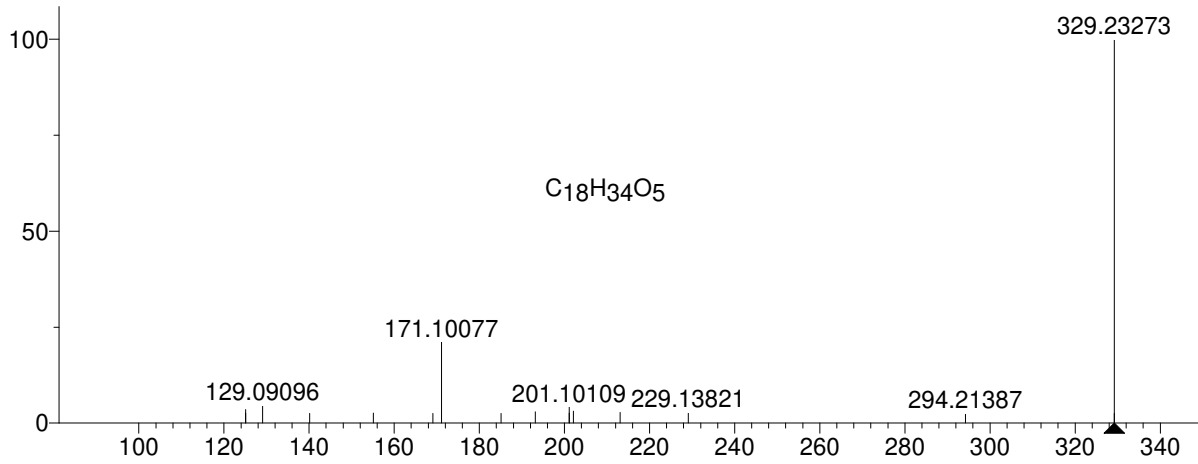

Hit 4 : 9,12,13-Trihydroxy-10(E)-octadecadienoic acid ( ) [M-H]<sup>-</sup> P=329.2  
C<sub>18</sub>H<sub>34</sub>O<sub>5</sub>; MF: 193; RMF: 666; Prob 0.24%; Lib: phytofrag2018\_final\_060219; ID: 129.



Hit 5 : FA 18:1+3O; PlaSMA ID-739 [M-H]<sup>-</sup> P=329.2  
C<sub>18</sub>H<sub>34</sub>O<sub>5</sub>; MF: 128; RMF: 636; Prob 0.03%; Lib: biomsmns-neg-plasma; ID: 446.



Unknown: Unknown (25.44\_397.1540m/z)  
Compound in Library Factor = -3273

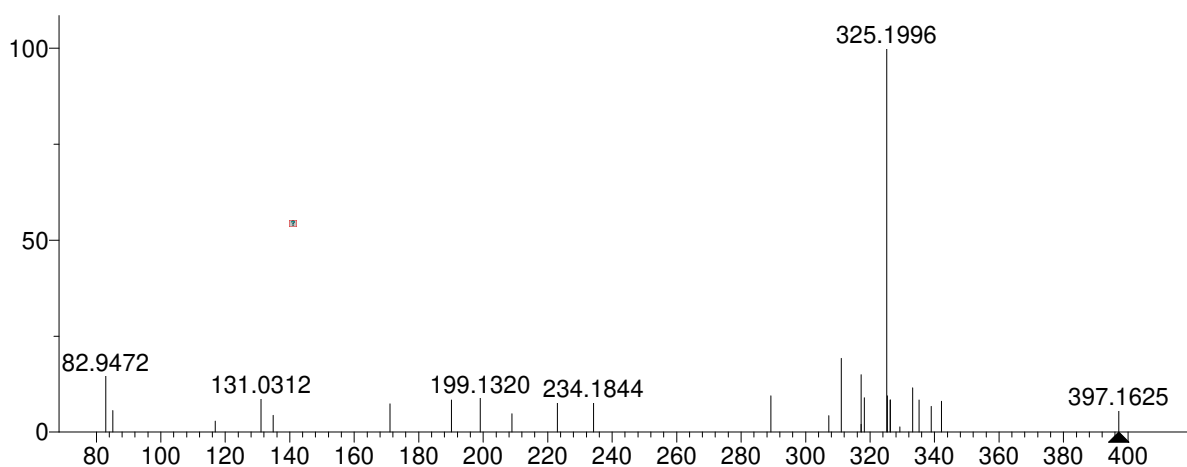

Hit 1 : 1H-Indole-3-carboxylic acid, 1-(5-hydroxypentyl)-, 8-quinolinyl ester [M+Na]<sup>+</sup> HCD 19V P=397.2  
C<sub>23</sub>H<sub>22</sub>N<sub>2</sub>O<sub>3</sub>; MF: 7; RMF: 128; Prob 51.0%; Lib: nist\_msms; ID: 270095.

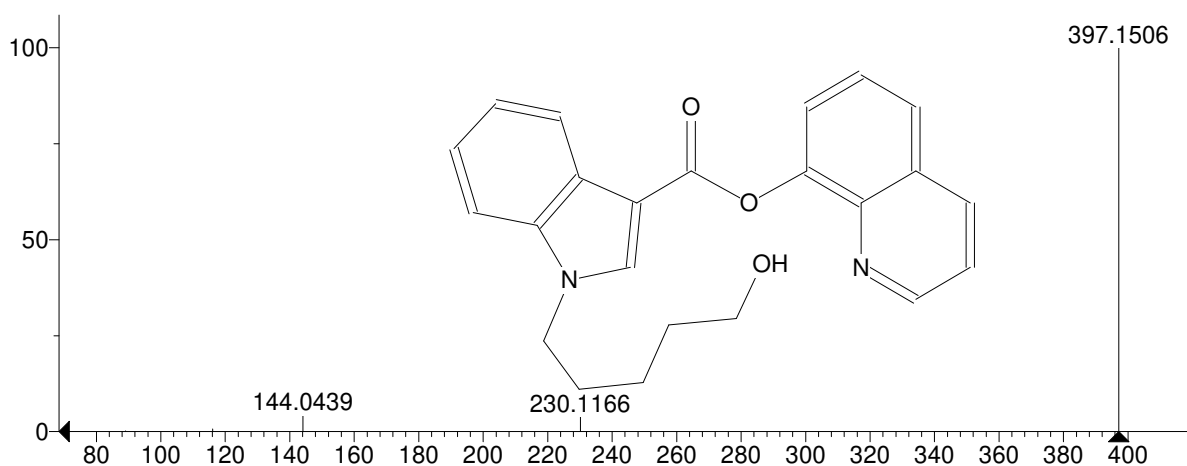

Hit 2 : 1H-Indole-3-carboxylic acid, 1-(4-hydroxypentyl)-, 8-quinolinyl ester [M+Na]<sup>+</sup> HCD 19V P=397.2  
C<sub>23</sub>H<sub>22</sub>N<sub>2</sub>O<sub>3</sub>; MF: 6; RMF: 125; Prob 49.0%; Lib: nist\_msms; ID: 270048.

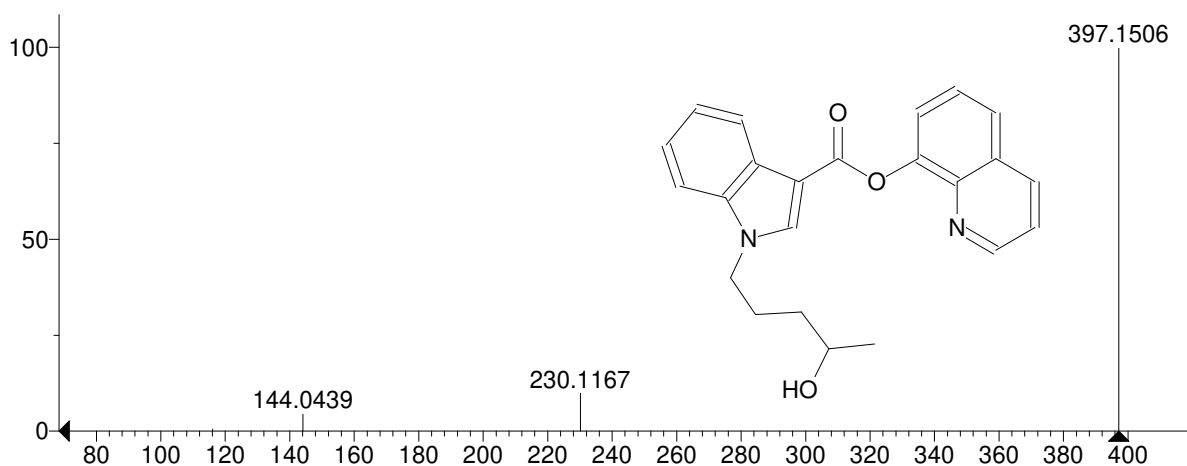

Unknown: Unknown (25.47\_579.1037m/z)  
Compound in Library Factor = 0

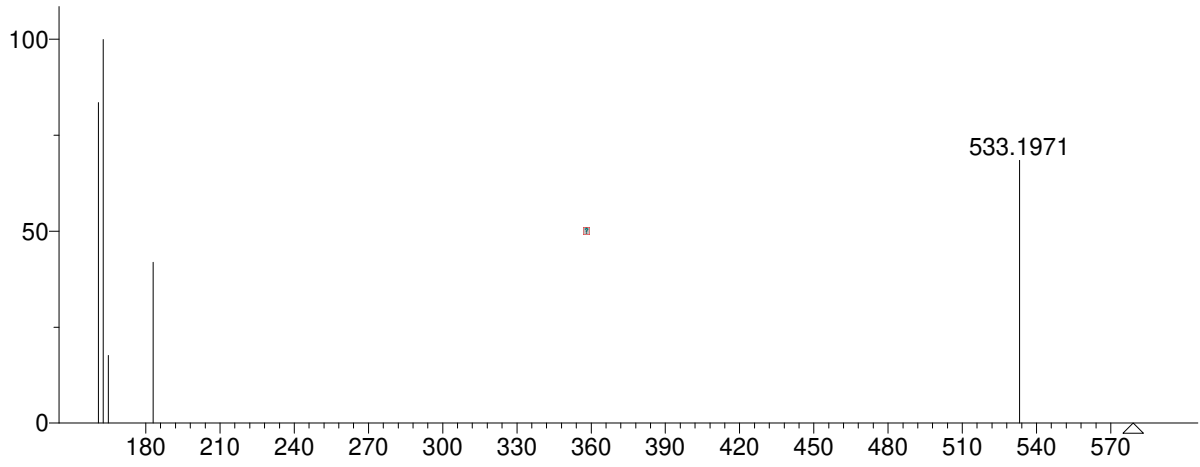

Unknown: Unknown (25.48\_534.1043m/z)  
Compound in Library Factor = 0

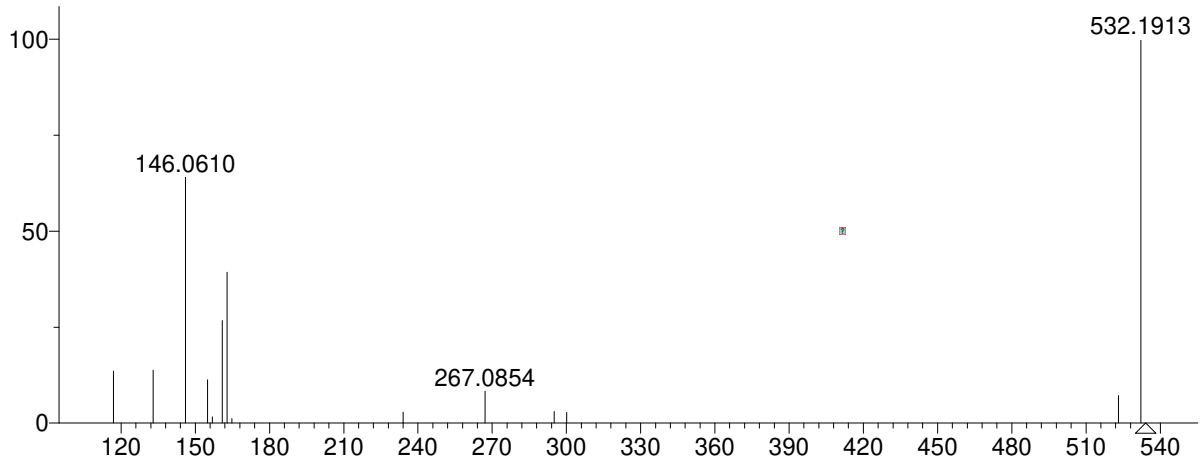

Unknown: Unknown (25.60\_426.1896m/z)  
Compound in Library Factor = 0

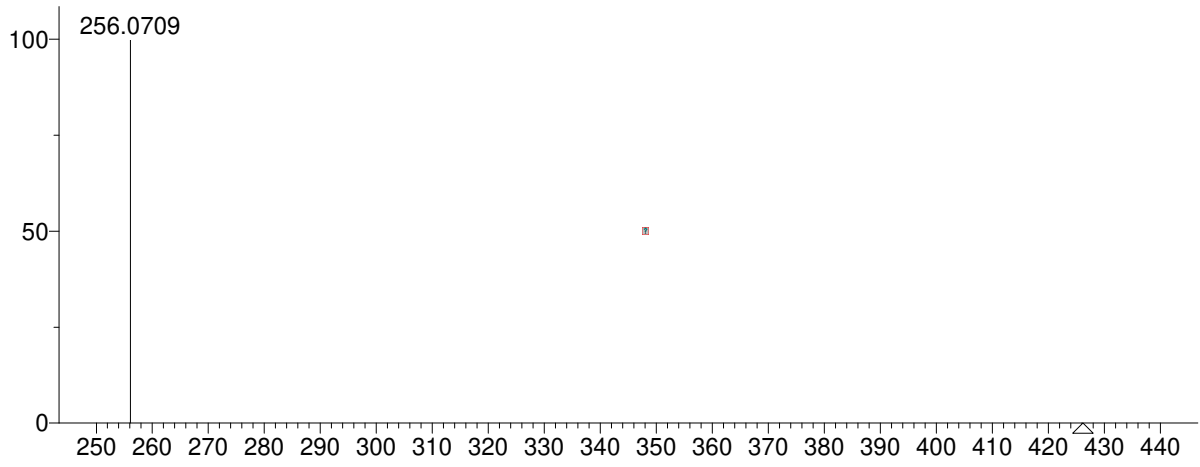

Unknown: Unknown (25.97\_456.1623m/z)  
Compound in Library Factor = 0

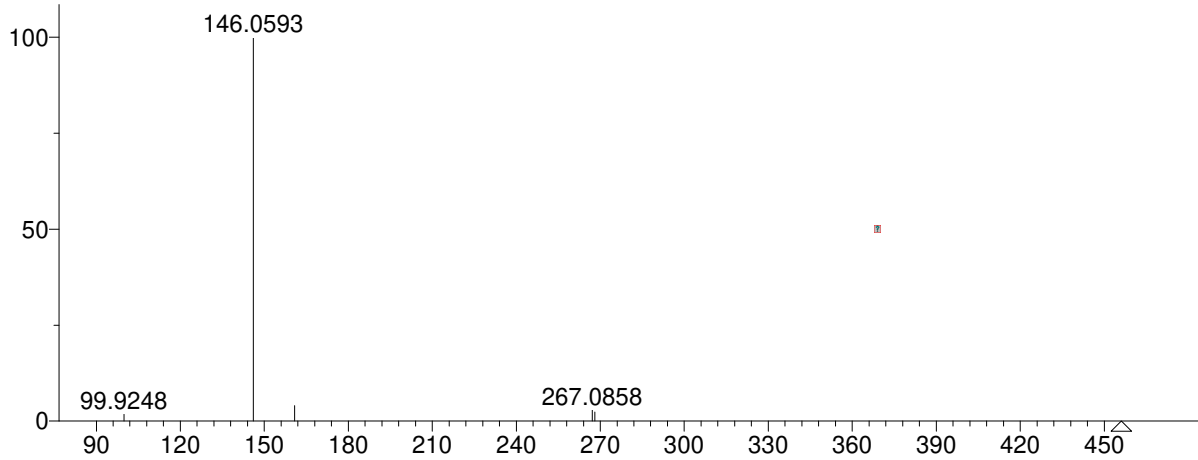

Hit 1 : Folinic acid [M+H-H<sub>2</sub>O]<sup>+</sup> HCD 86V P=456.2  
C<sub>20</sub>H<sub>23</sub>N<sub>7</sub>O<sub>7</sub>; MF: 0; RMF: 67; Prob 50.0%; CAS: 58-05-9; Lib: nist\_msms; ID: 138161.

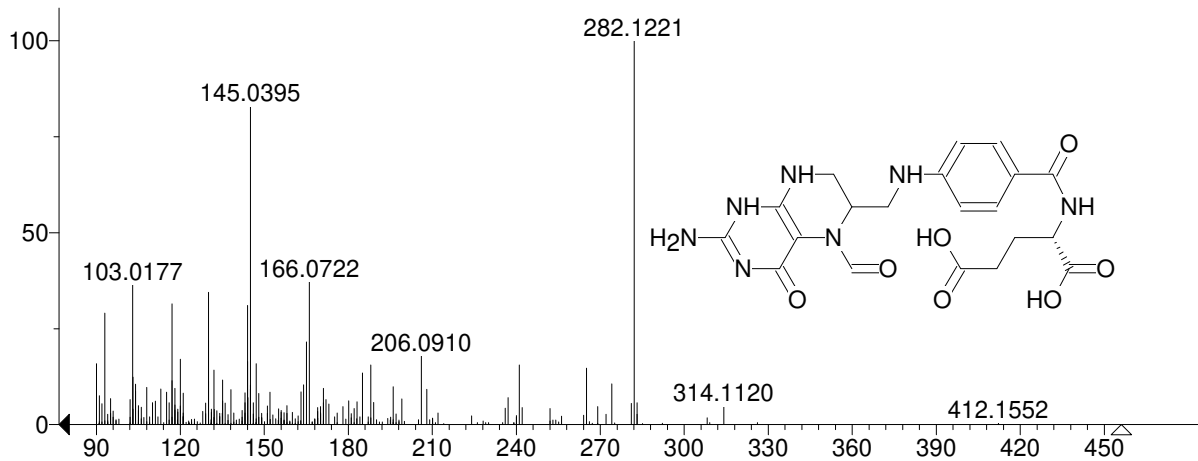

Hit 2 : Codeine-6- $\beta$ -D-glucuronide [M-H-H<sub>2</sub>O]<sup>-</sup> HCD 72V P=456.2  
C<sub>24</sub>H<sub>29</sub>N<sub>1</sub>O<sub>9</sub>; MF: 0; RMF: 52; Prob 50.0%; CAS: 20736-11-2; Lib: nist\_msms; ID: 322871.

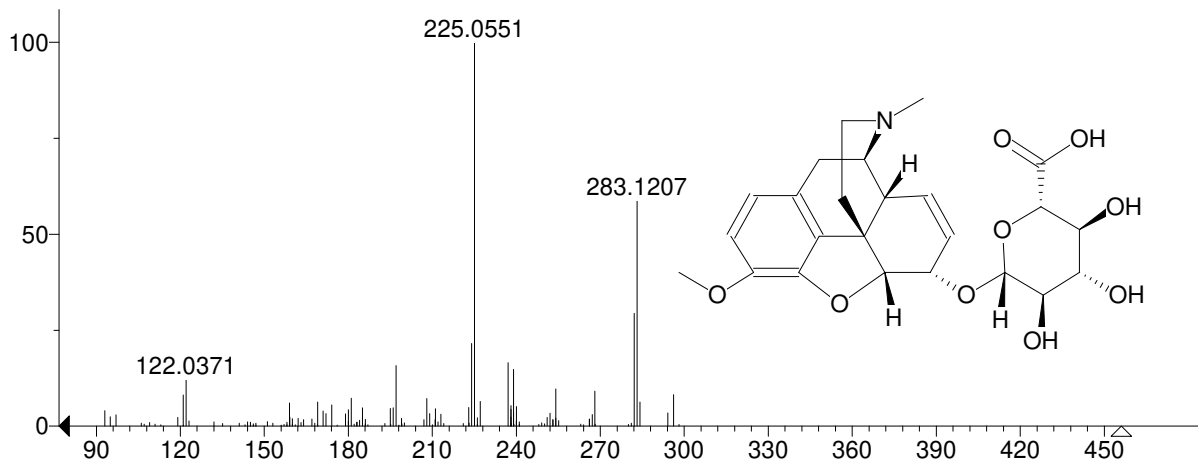

Unknown: Unknown (26.20\_456.1626m/z)  
Compound in Library Factor = -3273

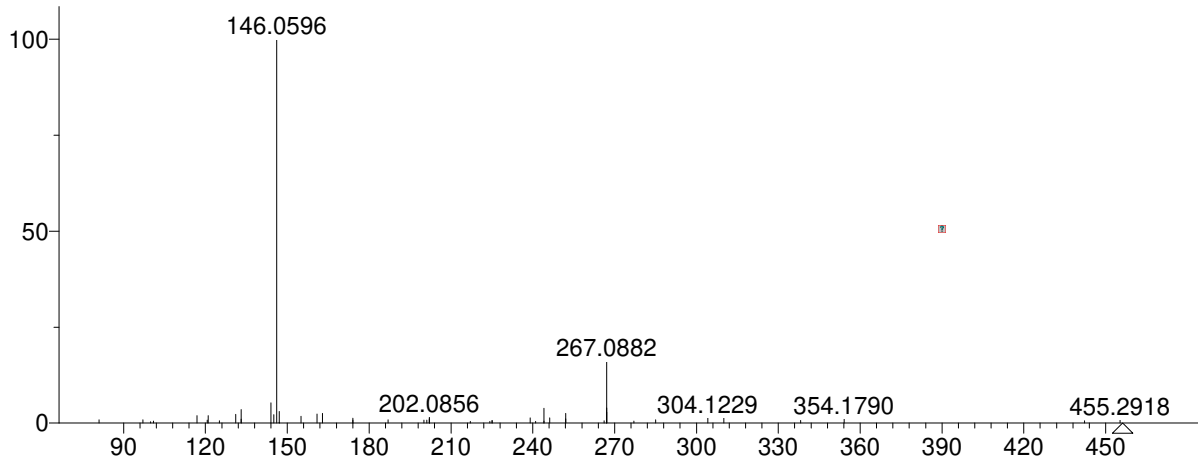

Hit 1 : Codeine-6-β-D-glucuronide [M-H-H<sub>2</sub>O]- HCD 72V P=456.2  
C<sub>24</sub>H<sub>29</sub>NO<sub>9</sub>; MF: 6; RMF: 88; Prob 37.0%; CAS: 20736-11-2; Lib: nist\_msms; ID: 322871.

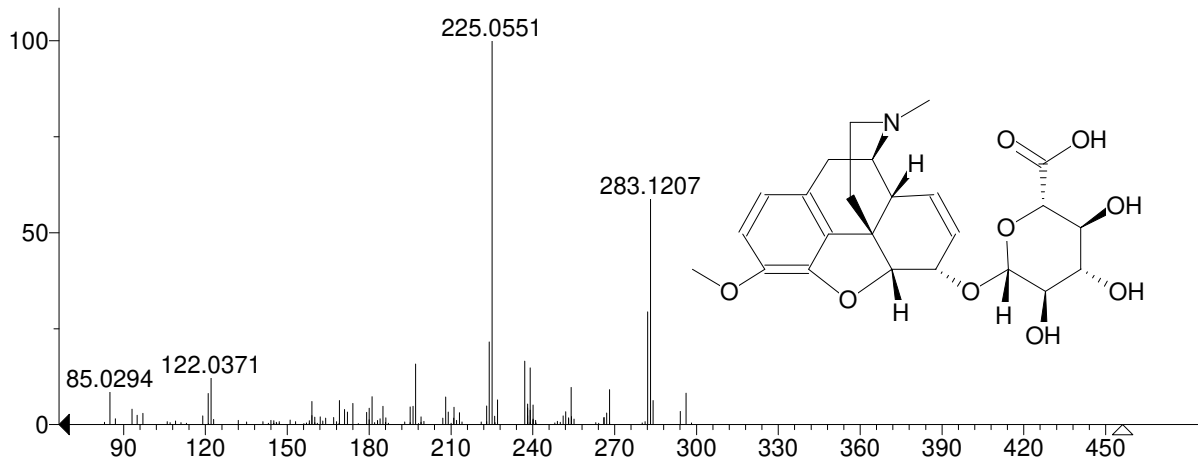

Hit 2 : Folinic acid [M+H-H<sub>2</sub>O]+ HCD 72V P=456.2  
C<sub>20</sub>H<sub>23</sub>N<sub>7</sub>O<sub>7</sub>; MF: 4; RMF: 89; Prob 34.1%; CAS: 58-05-9; Lib: nist\_msms; ID: 138160.

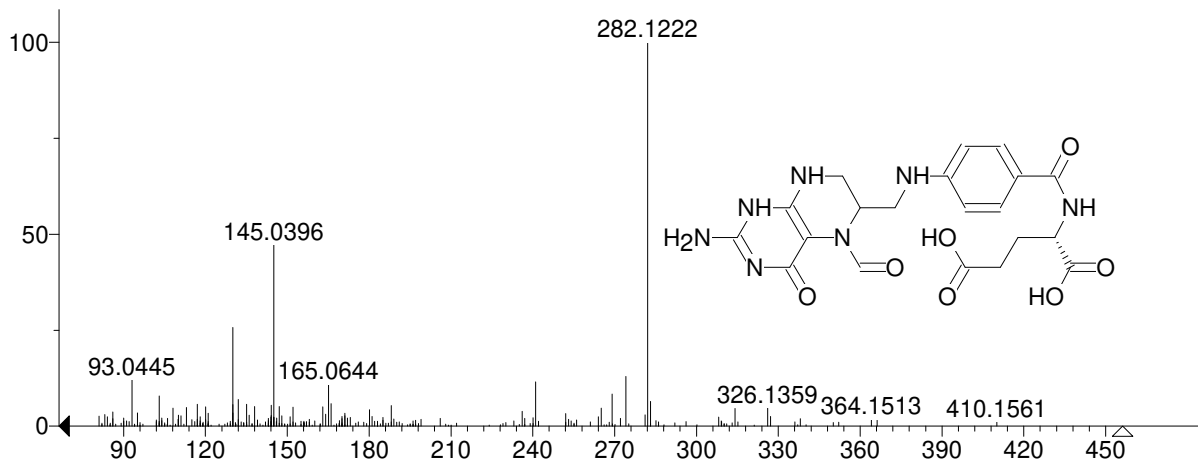



Hit 3 : Methopterine [M+H]<sup>+</sup> HCD 82V P=456.2  
C<sub>20</sub>H<sub>21</sub>N<sub>7</sub>O<sub>6</sub>; MF: 0; RMF: 16; Prob 28.8%; CAS: 2410-93-7; Lib: nist\_msms; ID: 206196.

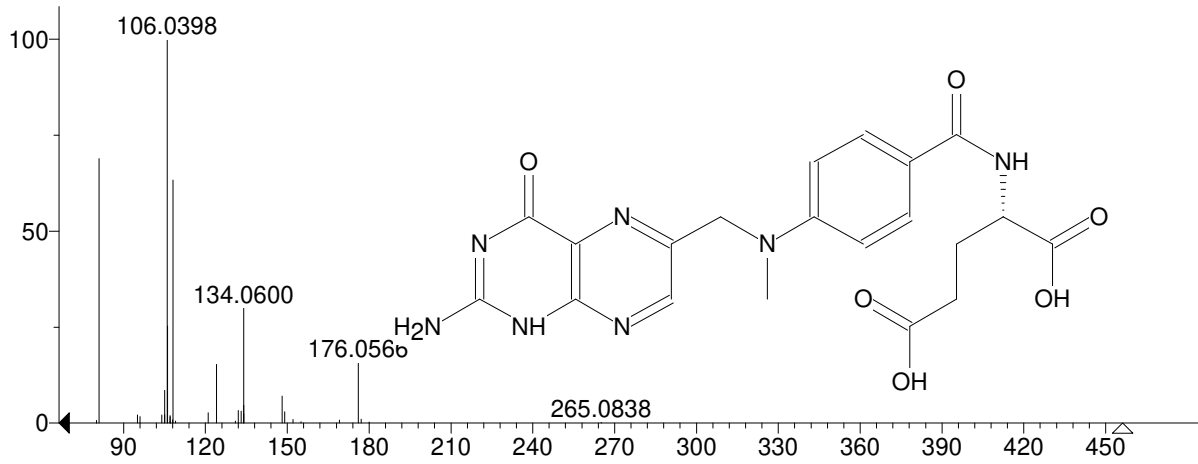

Unknown: Unknown (26.20\_579.1033m/z)  
Compound in Library Factor = 0

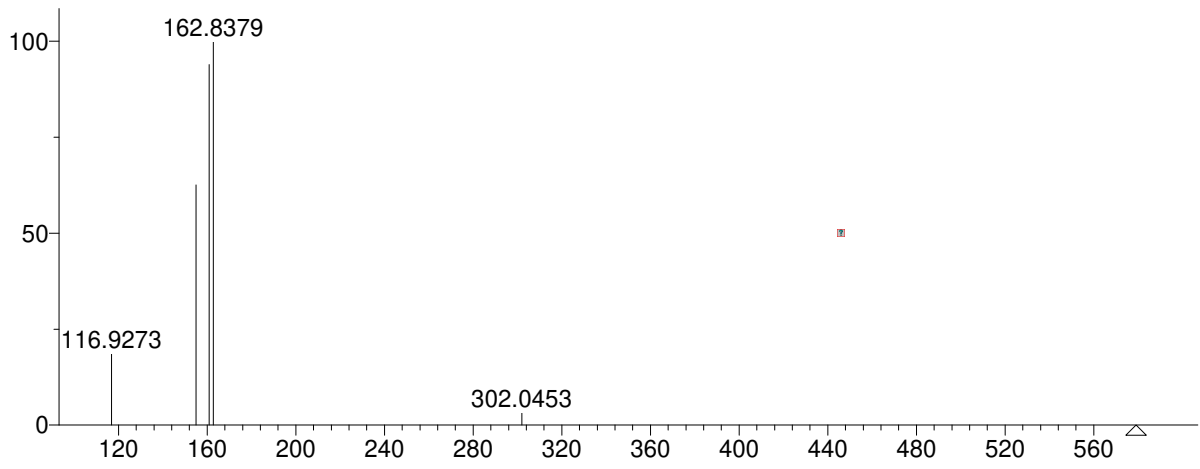

Unknown: Unknown (26.21\_534.1052m/z)  
Compound in Library Factor = 0

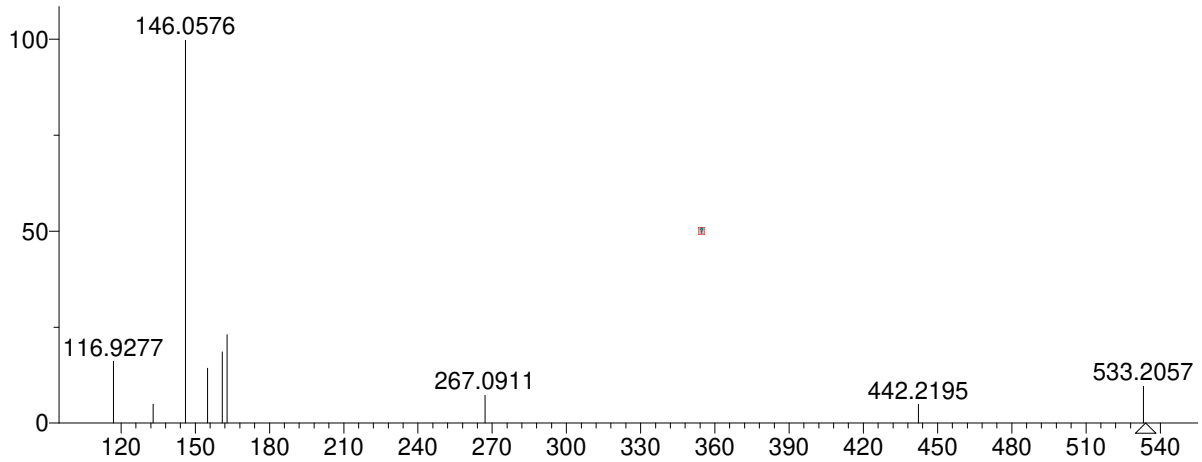

Hit 1 : 3'- $\alpha$ -Sialyl-N-acetylglucosamine [M+K]<sup>+</sup>=>552.1=>534.1 IT 35% P=534.1  
C25H42N2O19; MF: 0; RMF: 21; Prob 50.0%; CAS: 81693-22-3; Lib: nist\_msms; ID: 533666.

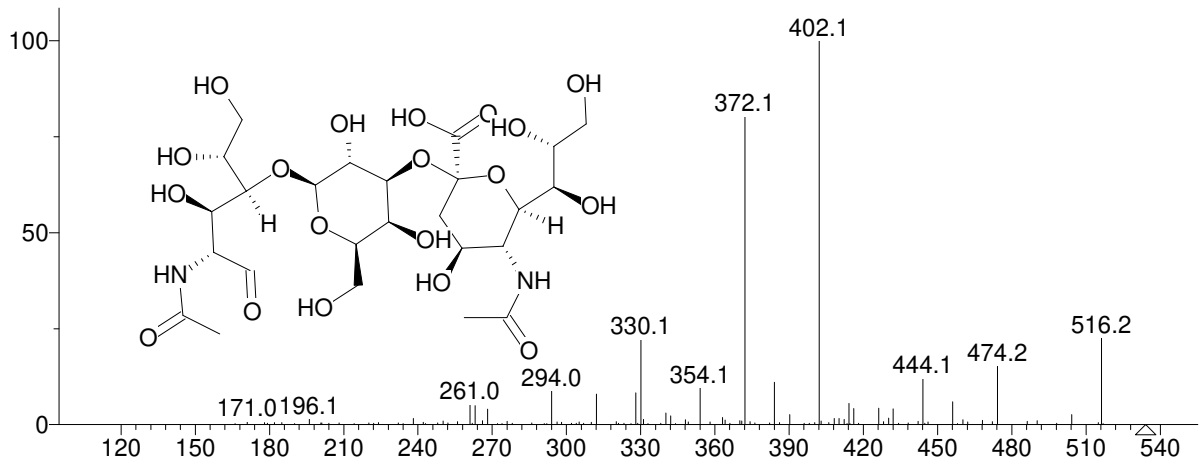

Hit 2 : 3'-Sialyllactose [M+K]<sup>+</sup>=>552.1=>534.1 IT 35% P=534.1  
C23H39NO19; MF: 0; RMF: 10; Prob 50.0%; CAS: 35890-38-1; Lib: nist\_msms; ID: 530573.

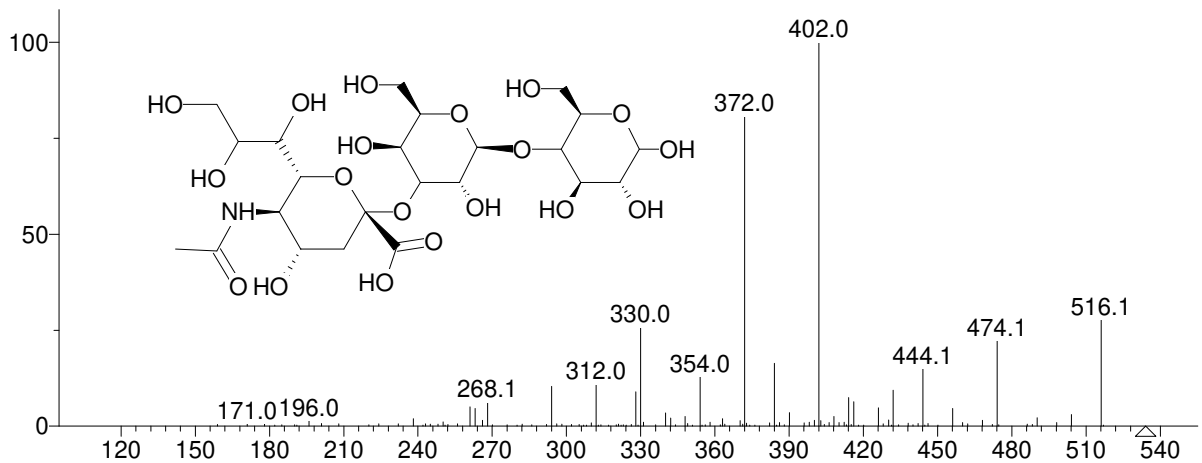

Unknown: Unknown (26.22\_534.1060m/z)  
Compound in Library Factor = 0

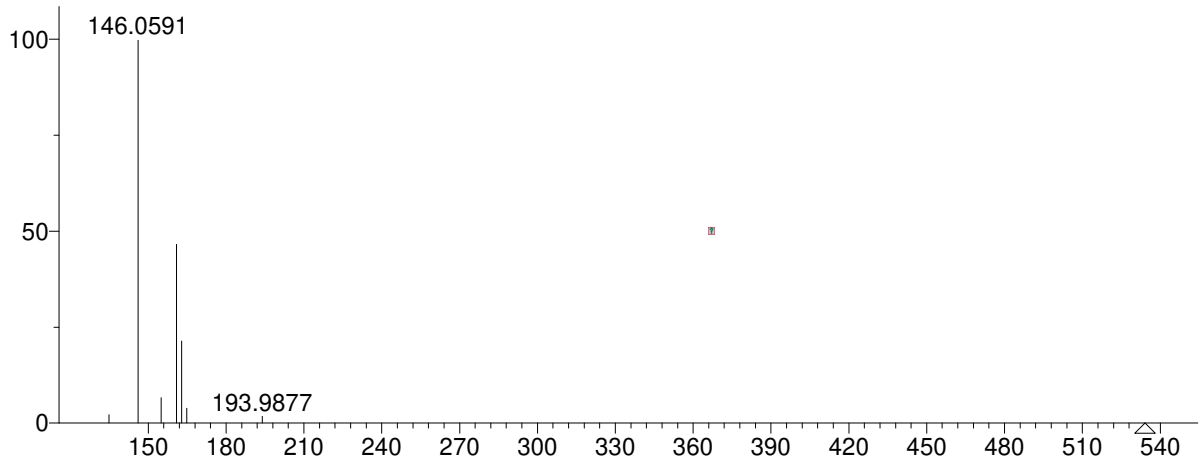

\*\* Search Report Page 1 of 2 \*\*

Unknown: Unknown (26.29\_329.2326m/z)  
Compound in Library Factor = -898

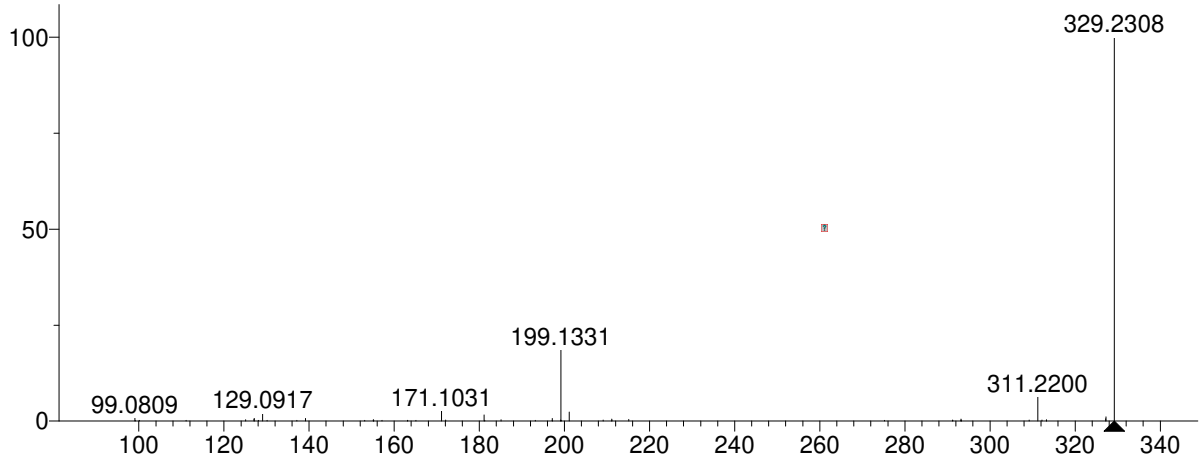

Hit 1 : FA 18:1+3O; PlaSMA ID-738 [M-H]<sup>-</sup> P=329.2  
C<sub>18</sub>H<sub>34</sub>O<sub>5</sub>; MF: 342; RMF: 799; Prob 47.0%; Lib: biomsms-neg-plasma; ID: 444.

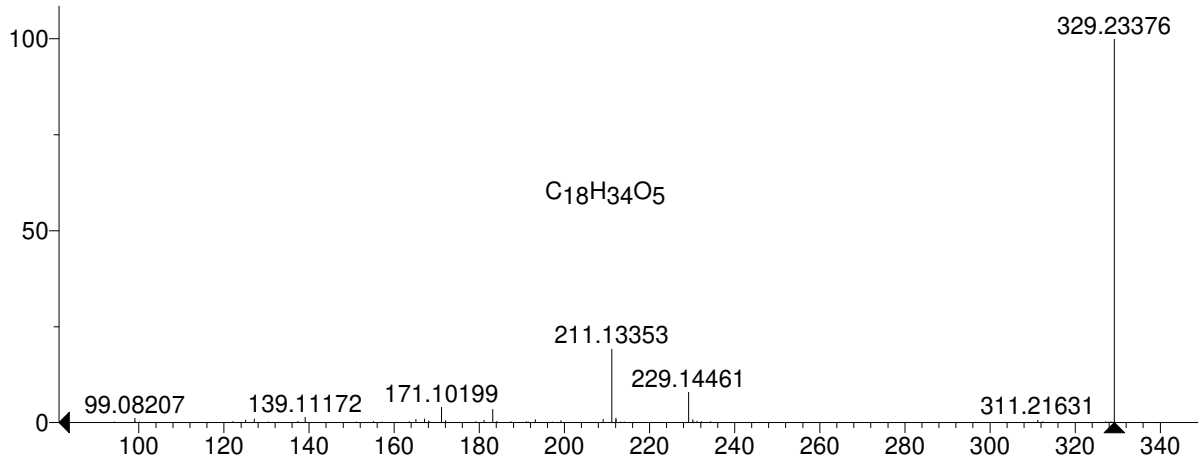

Hit 2 : FA 18:1+3O; PlaSMA ID-739 [M-H]<sup>-</sup> P=329.2  
C<sub>18</sub>H<sub>34</sub>O<sub>5</sub>; MF: 338; RMF: 832; Prob 39.7%; Lib: biomsms-neg-plasma; ID: 446.

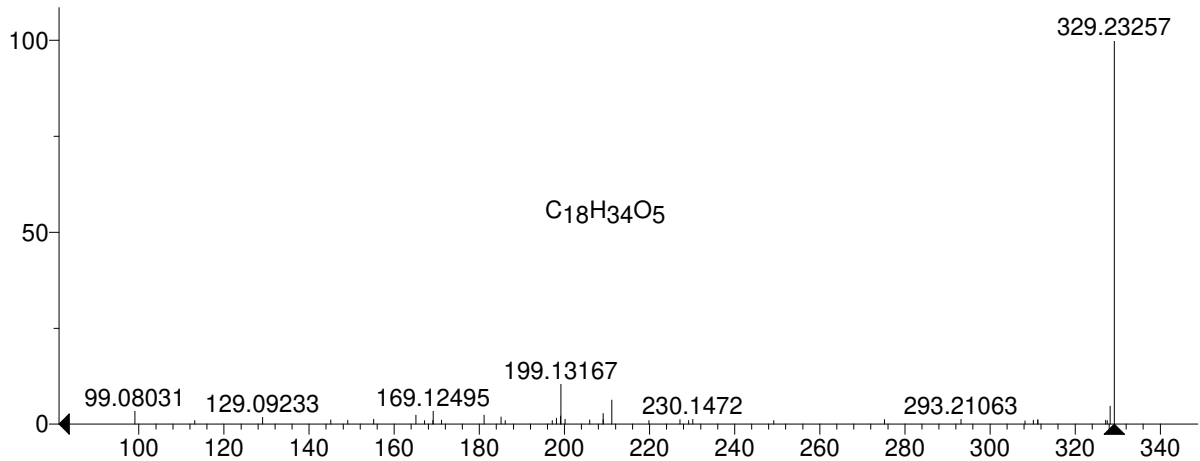

Hit 3 : FA 18:1+3O; PlaSMA ID-742 [M-H]<sup>-</sup> P=329.2  
C<sub>18</sub>H<sub>34</sub>O<sub>5</sub>; MF: 309; RMF: 790; Prob 11.3%; Lib: biomsms-neg-plasma; ID: 445.

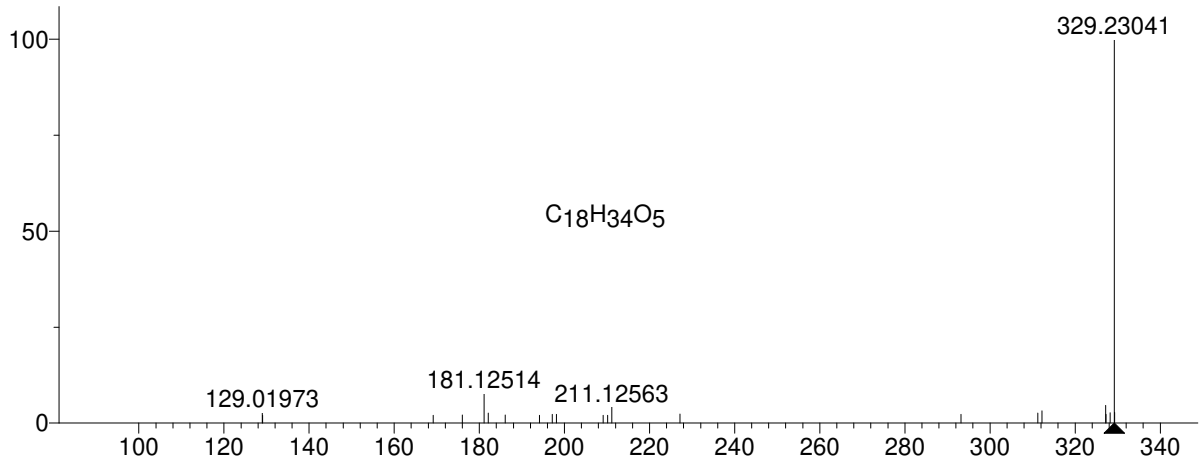

Hit 4 : FA 18:1+3O; PlaSMA ID-737 [M-H]<sup>-</sup> P=329.2  
C<sub>18</sub>H<sub>34</sub>O<sub>5</sub>; MF: 236; RMF: 761; Prob 1.53%; Lib: biomsms-neg-plasma; ID: 448.

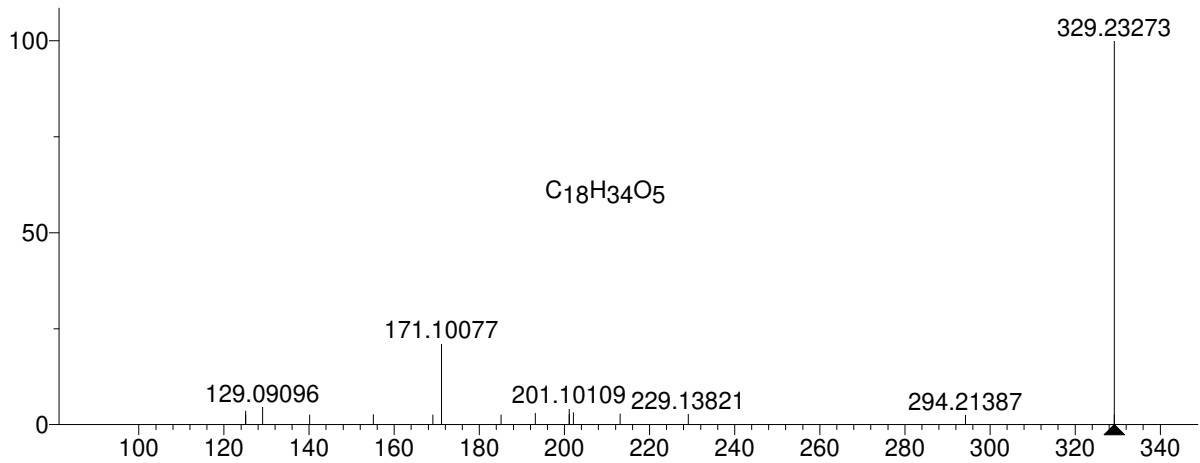

Hit 5 : FA 18:1+3O; PlaSMA ID-740 [M-H]<sup>-</sup> P=329.2  
C<sub>18</sub>H<sub>34</sub>O<sub>5</sub>; MF: 187; RMF: 779; Prob 0.31%; Lib: biomsms-neg-plasma; ID: 447.

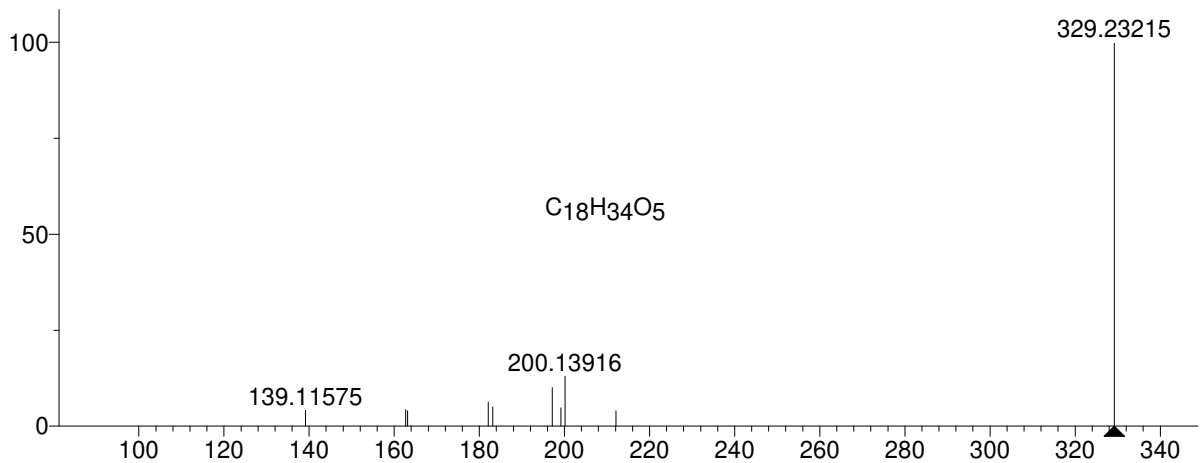

Unknown: Unknown (26.29\_428.1493m/z)  
Compound in Library Factor = 0

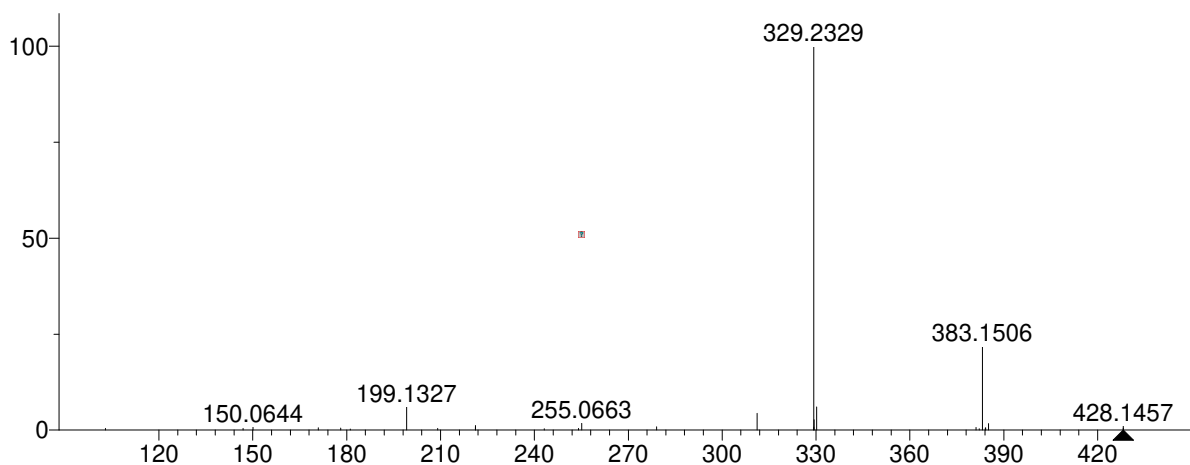

Hit 1 : Roquefortine C [M+K]<sup>+</sup> 35HCD P=428.1  
C<sub>22</sub>H<sub>23</sub>N<sub>5</sub>O<sub>2</sub>; MF: 0; RMF: 23; Prob 100.0%; Lib: mona-export-vf-npl\_qexactive; ID: 16408.

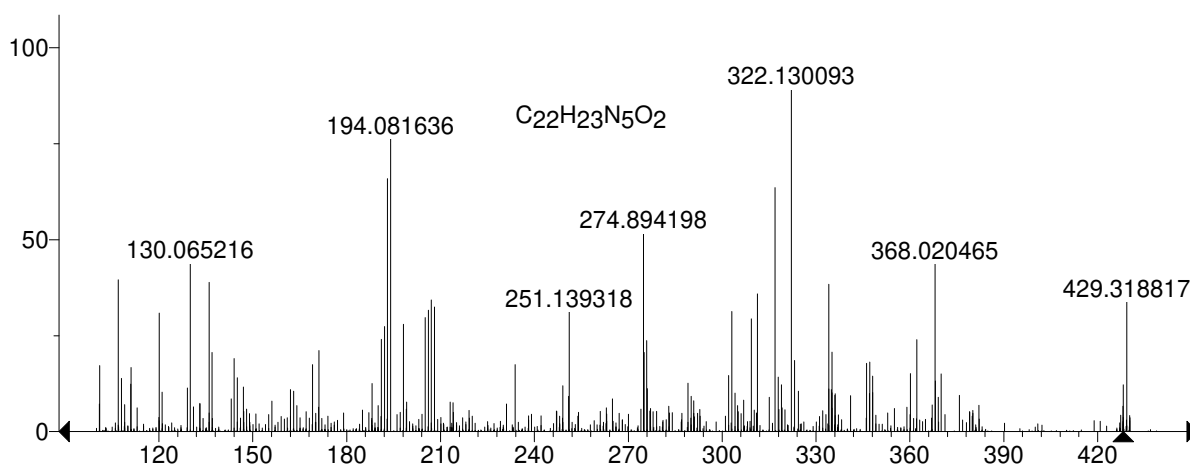

\*\* Search Report Page 1 of 2 \*\*

Unknown: Unknown (26.38\_353.2312m/z)  
Compound in Library Factor = -1249

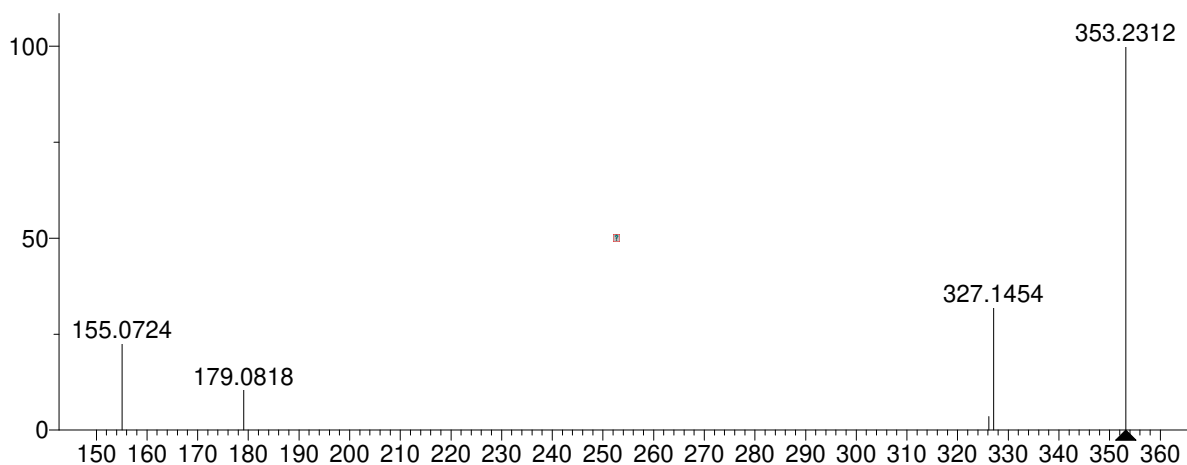

Hit 1 : 6-Ketoprostaglandin F1 $\alpha$  [M+H-H<sub>2</sub>O]<sup>+</sup> HCD 1V P=353.2  
C<sub>20</sub>H<sub>34</sub>O<sub>6</sub>; MF: 232; RMF: 848; Prob 37.8%; CAS: 58962-34-8; Lib: nist\_msms; ID: 166451.

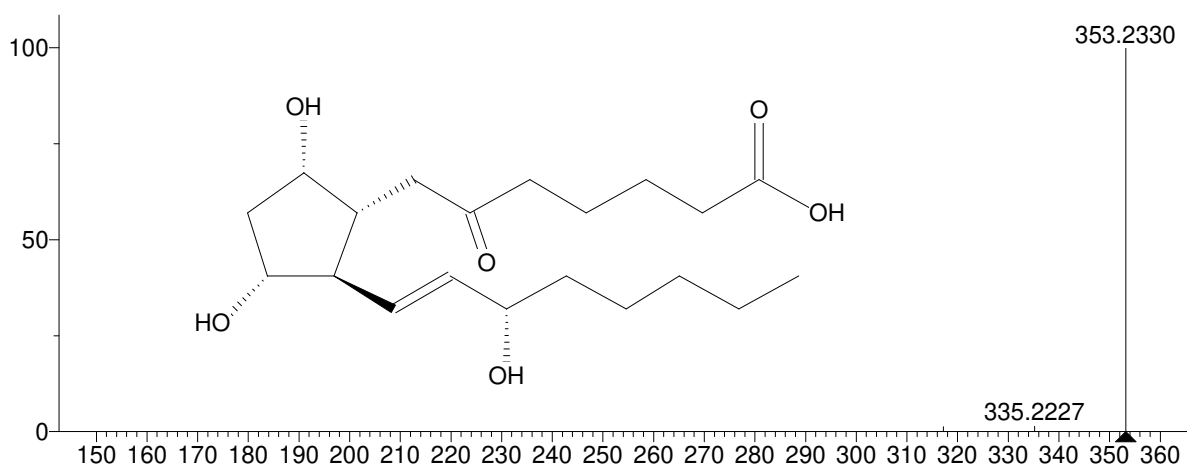

Hit 2 : Prostaglandin I<sub>2</sub> [M+H]<sup>+</sup> HCD 1V P=353.2  
C<sub>20</sub>H<sub>32</sub>O<sub>5</sub>; MF: 230; RMF: 848; Prob 34.9%; CAS: 35121-78-9; Lib: nist\_msms; ID: 166889.

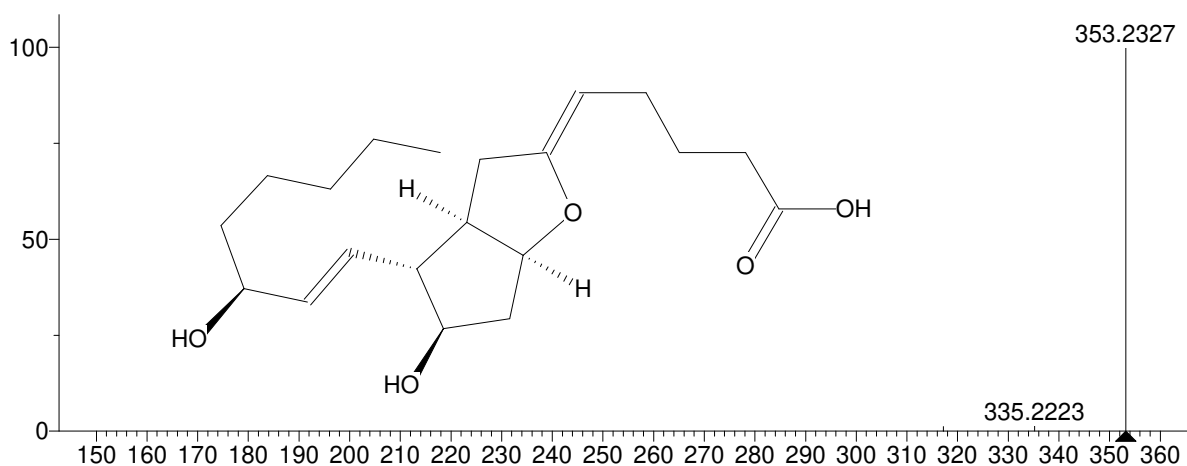



\*\* Search Report Page 2 of 2 \*\*

Hit 3 : 9S,11R-Dihydroxy-15-oxo-13E-prostenoic acid [M-H]<sup>-</sup> HCD 3V P=353.2  
C<sub>20</sub>H<sub>34</sub>O<sub>5</sub>; MF: 208; RMF: 841; Prob 13.8%; CAS: 21562-58-3; Lib: nist\_msms; ID: 155077.

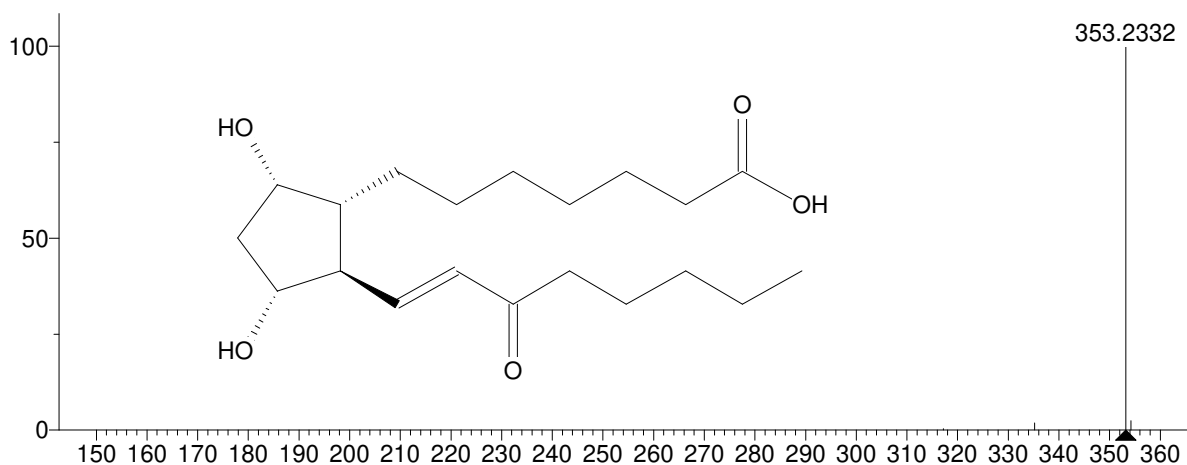

Hit 4 : 15-Ketoprostaglandin E1 [M+H]<sup>+</sup> HCD 1V P=353.2  
C<sub>20</sub>H<sub>32</sub>O<sub>5</sub>; MF: 175; RMF: 814; Prob 3.61%; CAS: 22973-19-9; Lib: nist\_msms; ID: 169226.

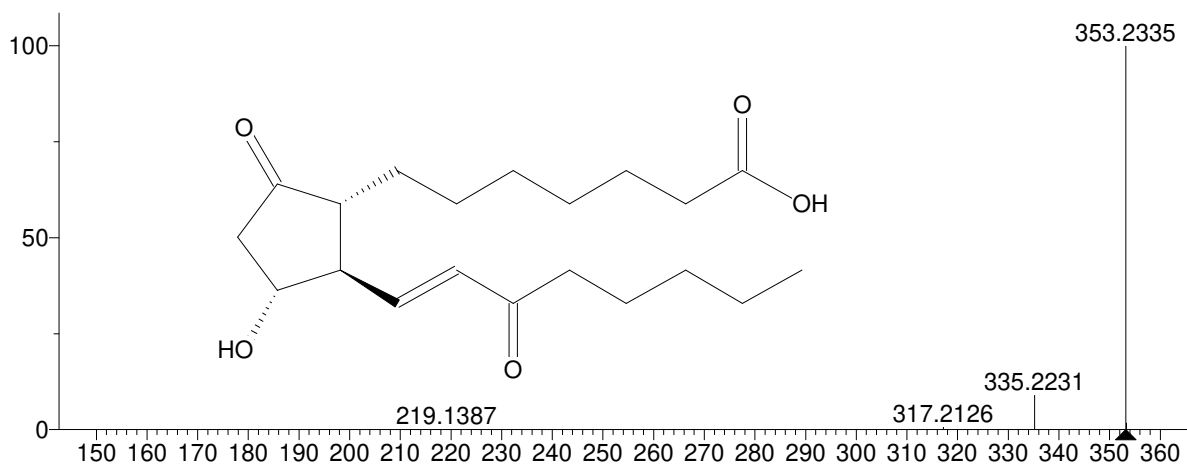

Hit 5 : Prostaglandin E1 [M-H]<sup>-</sup> HCD 7V P=353.2  
C<sub>20</sub>H<sub>34</sub>O<sub>5</sub>; MF: 162; RMF: 799; Prob 2.33%; CAS: 745-65-3; Lib: nist\_msms; ID: 320381.

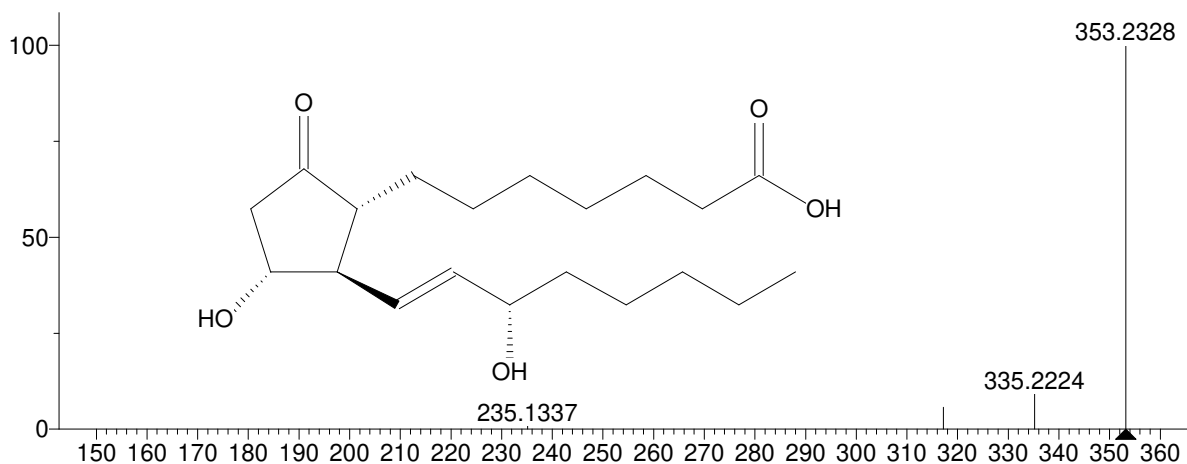

\*\* Search Report Page 1 of 2 \*\*

Unknown: Unknown (26.44\_417.2629m/z)  
Compound in Library Factor = -374

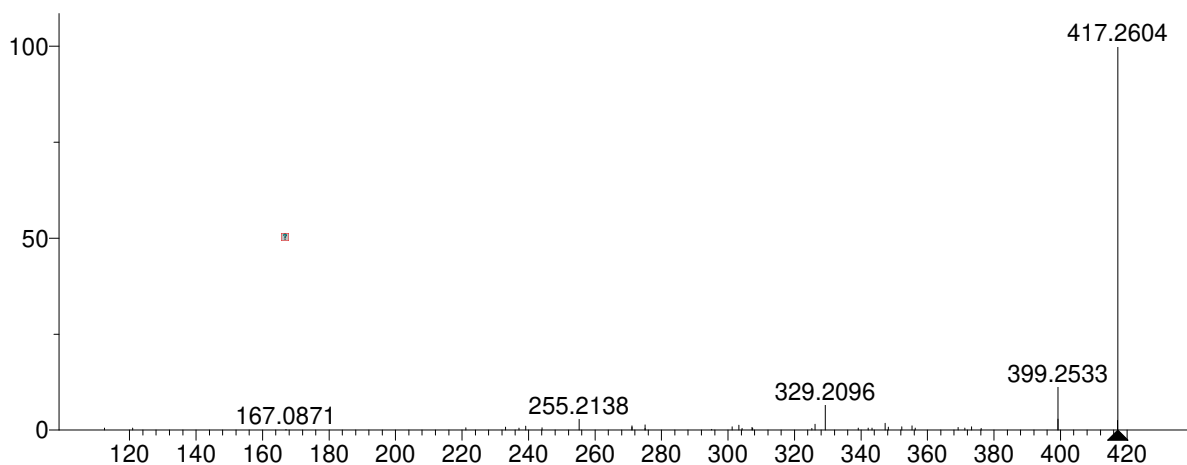

Hit 1 : Prostaglandin E2 isopropyl ester [M+Na]<sup>+</sup> QTOF 17V P=417.3  
C23H38O5; MF: 286; RMF: 899; Prob 90.2%; CAS: 71845-66-4; Lib: nist\_msms; ID: 62065.

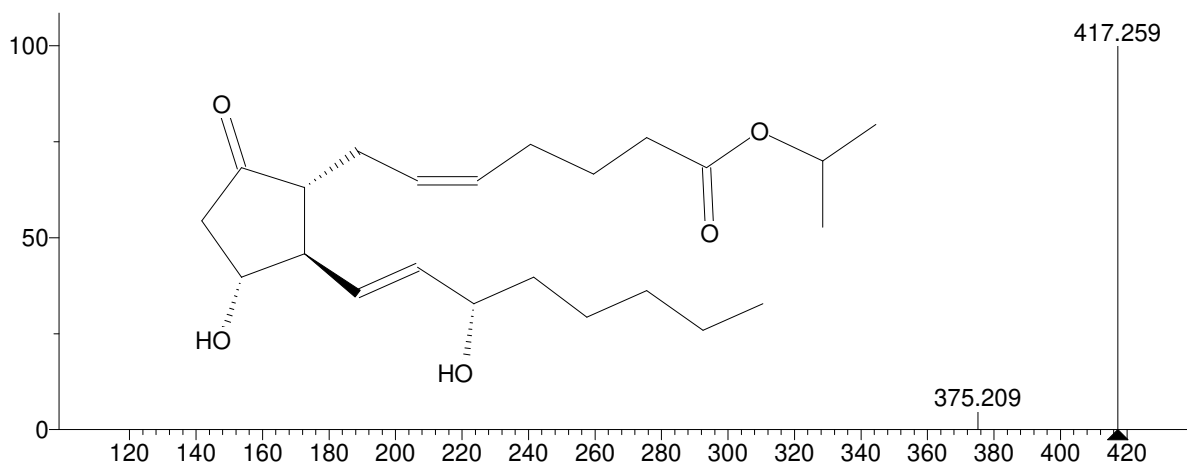

Hit 2 : Manoalide [M+H]<sup>+</sup> HCD 12V P=417.3  
C25H36O5; MF: 176; RMF: 852; Prob 5.77%; CAS: 75088-80-1; Lib: nist\_msms; ID: 362740.

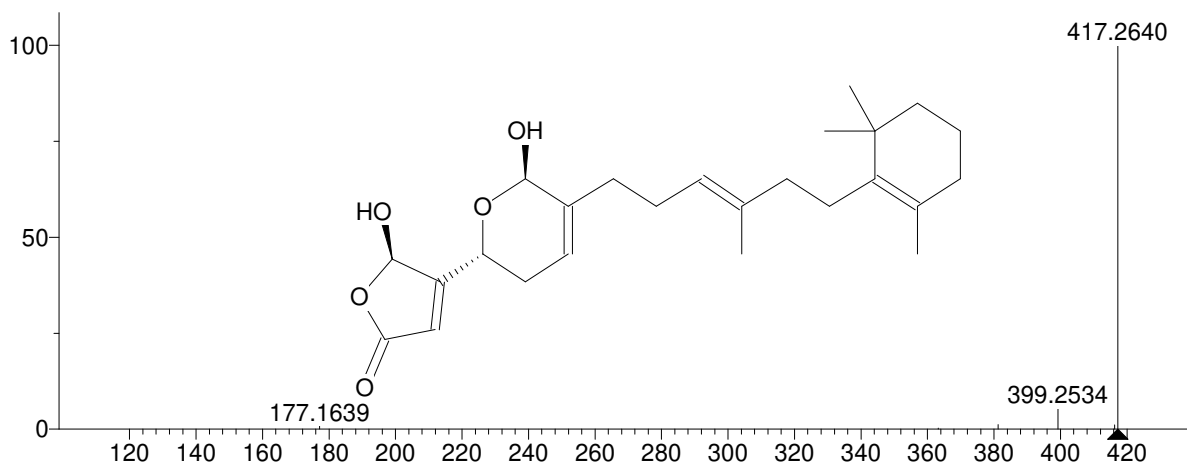

\*\* Search Report Page 2 of 2 \*\*

Hit 3 : Alfentanyl [M+H]<sup>+</sup> HCD 12V P=417.3  
C<sub>21</sub>H<sub>32</sub>N<sub>6</sub>O<sub>3</sub>; MF: 165; RMF: 798; Prob 3.95%; CAS: 71195-58-9; Lib: nist\_msms; ID: 322110.

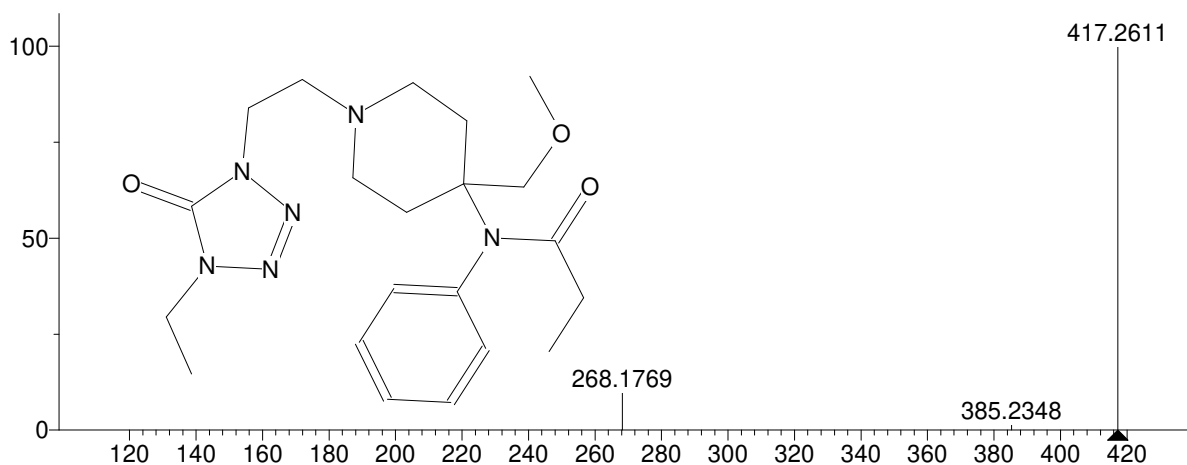

Hit 4 : NCGC00384505-01\_C<sub>25</sub>H<sub>36</sub>O<sub>5</sub>\_2-Butenoic acid, 2-methyl-, (4R,6R)-3,3,7,9-tetramethyl-6-(3-methyl-1-oxo-2-butenoic acid); MF: 0; RMF: 3; Prob 0.09%; Lib: mona-export-gnps; ID: 11433.

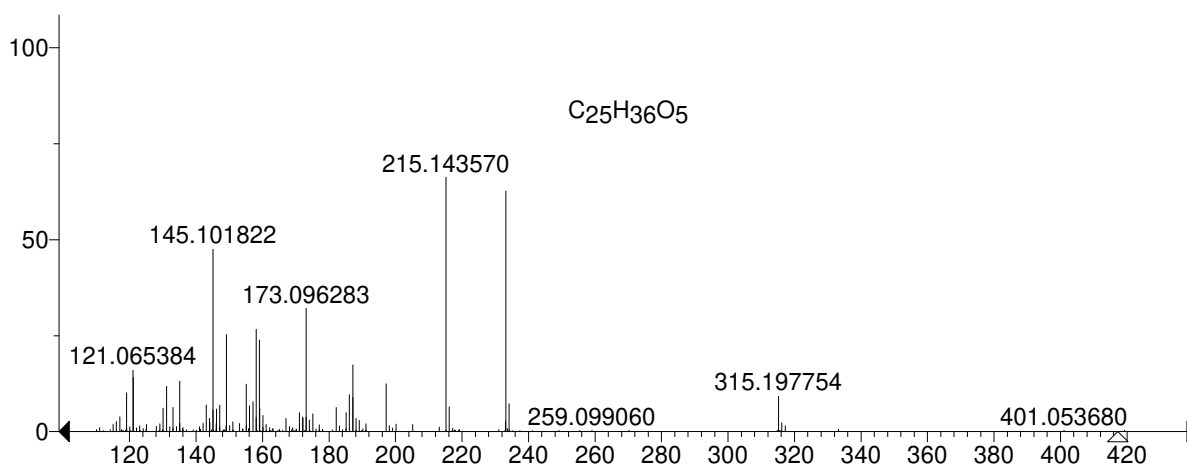

\*\* Search Report Page 1 of 2 \*\*

Unknown: Unknown (26.47\_329.2326m/z)  
Compound in Library Factor = -1249

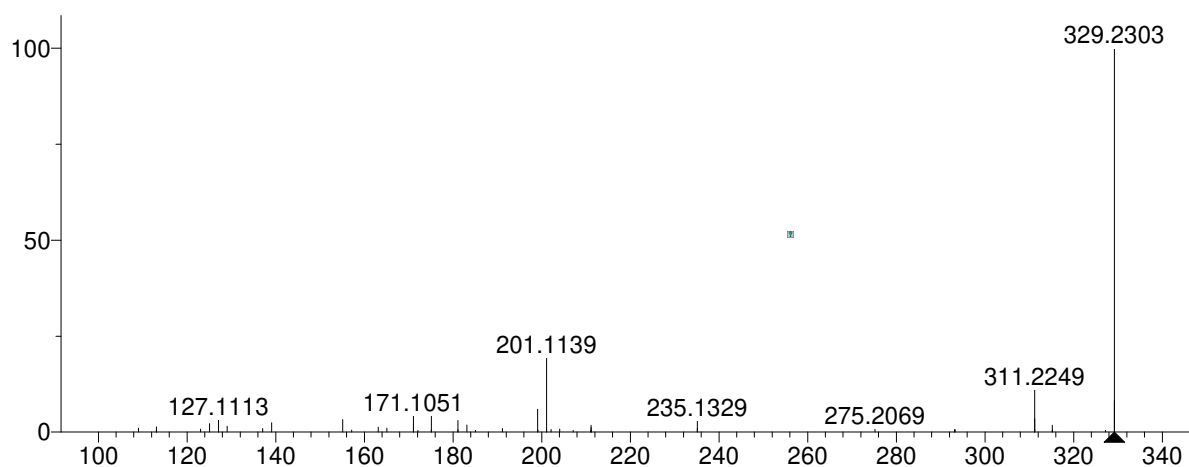

Hit 1 : FA 18:1+3O; PlaSMA ID-737 [M-H]<sup>-</sup> P=329.2  
C<sub>18</sub>H<sub>34</sub>O<sub>5</sub>; MF: 233; RMF: 706; Prob 73.8%; Lib: biomsms-neg-plasma; ID: 448.

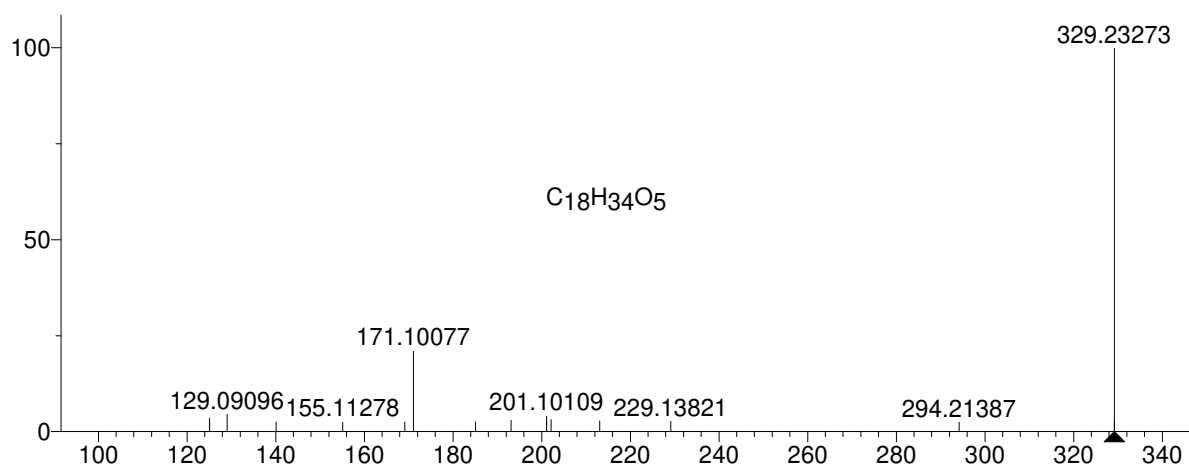

Hit 2 : FA 18:1+3O; PlaSMA ID-738 [M-H]<sup>-</sup> P=329.2  
C<sub>18</sub>H<sub>34</sub>O<sub>5</sub>; MF: 183; RMF: 703; Prob 15.0%; Lib: biomsms-neg-plasma; ID: 444.

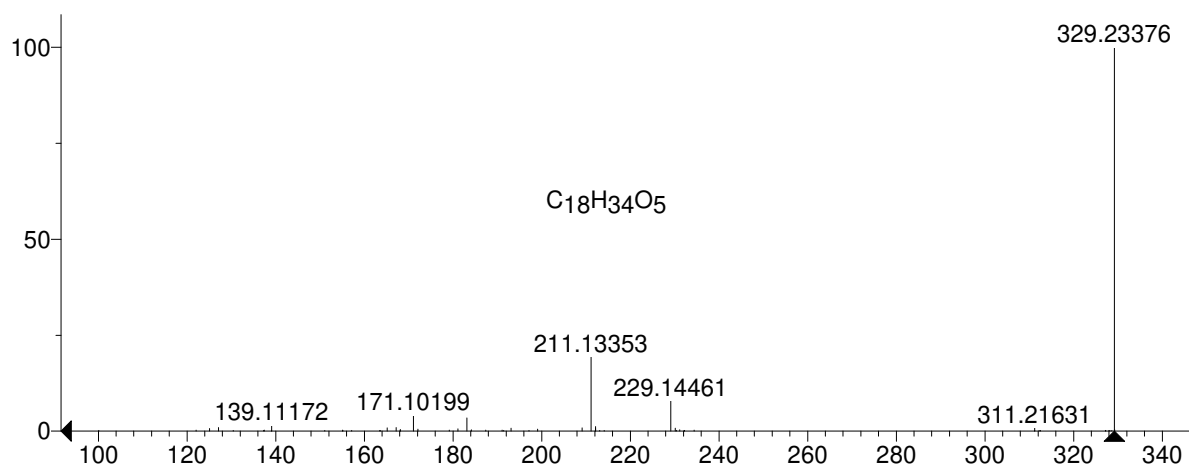

Hit 3 : FA 18:1+3O; PlaSMA ID-739 [M-H]<sup>-</sup> P=329.2  
C<sub>18</sub>H<sub>34</sub>O<sub>5</sub>; MF: 164; RMF: 689; Prob 7.29%; Lib: biomsms-neg-plasma; ID: 446.

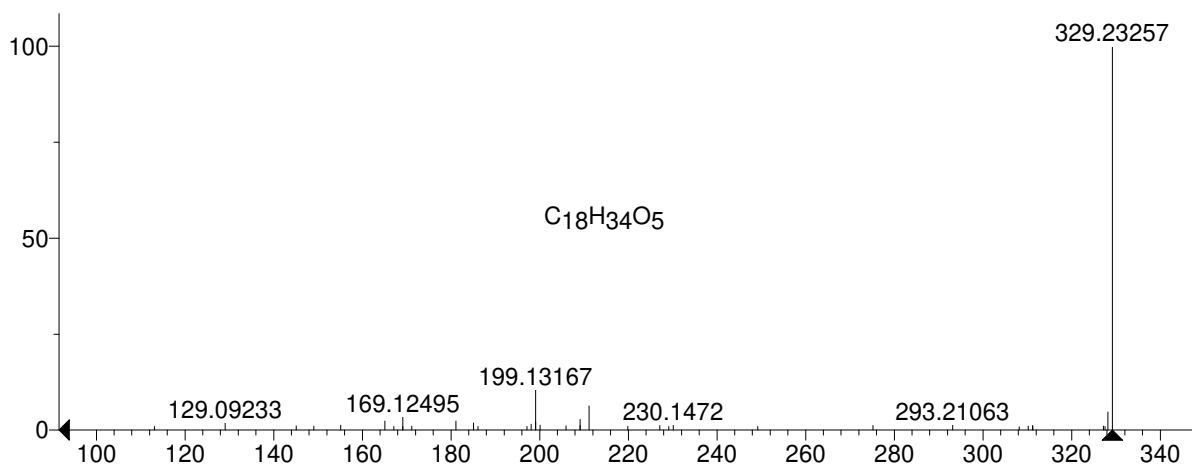

Hit 4 : FA 18:1+3O; PlaSMA ID-735 [M-H]<sup>-</sup> P=329.2  
C<sub>18</sub>H<sub>34</sub>O<sub>5</sub>; MF: 123; RMF: 540; Prob 1.66%; Lib: biomsms-neg-plasma; ID: 443.

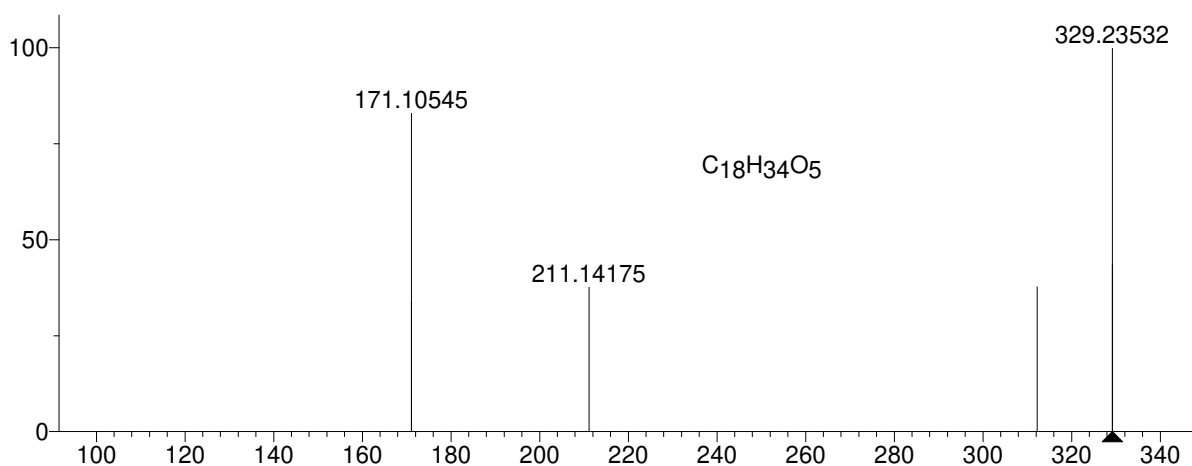

Hit 5 : FA 18:1+3O; PlaSMA ID-742 [M-H]<sup>-</sup> P=329.2  
C<sub>18</sub>H<sub>34</sub>O<sub>5</sub>; MF: 120; RMF: 673; Prob 1.47%; Lib: biomsms-neg-plasma; ID: 445.

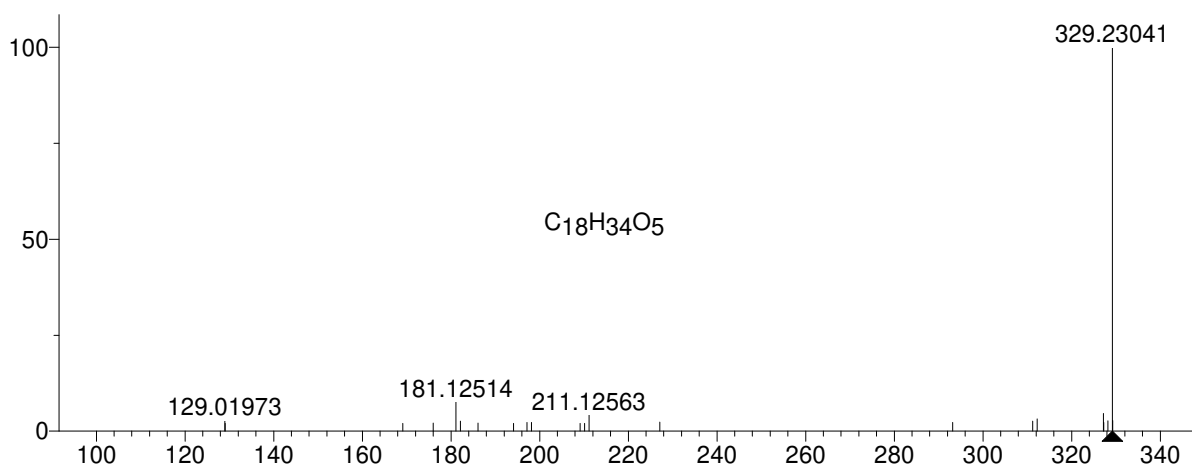

Unknown: Unknown (26.47\_428.1491m/z)  
Compound in Library Factor = 0

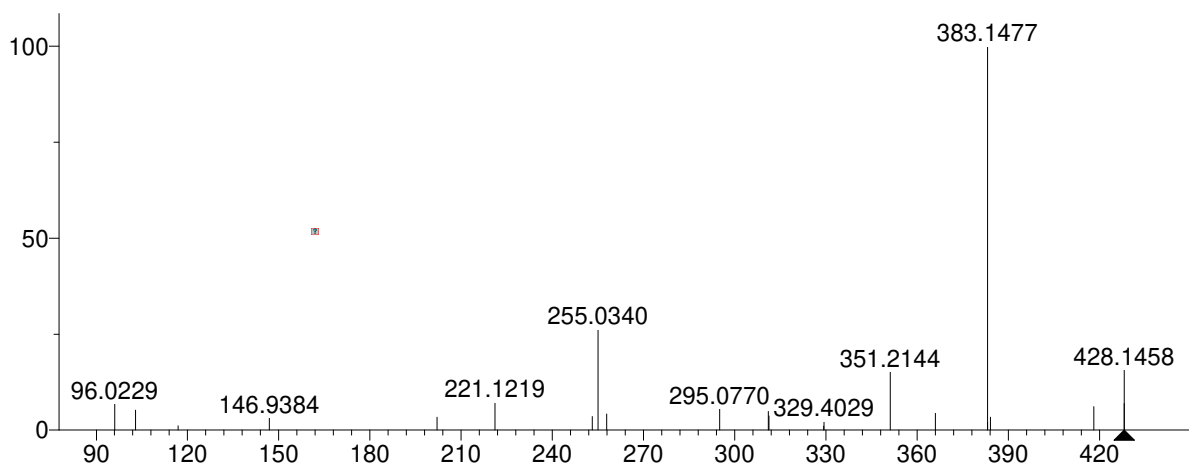

Hit 1 : Roquefortine C [M+K]<sup>+</sup> 35HCD P=428.1  
C<sub>22</sub>H<sub>23</sub>N<sub>5</sub>O<sub>2</sub>; MF: 0; RMF: 21; Prob 100.0%; Lib: mona-export-vf-npl\_qexactive; ID: 16408.

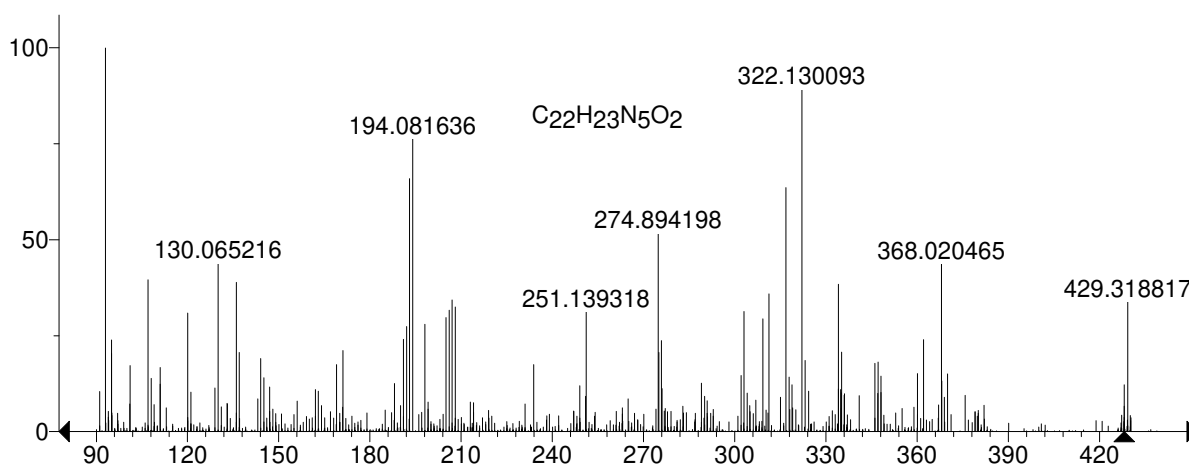

\*\* Search Report Page 1 of 2 \*\*

Unknown: Unknown (26.68\_353.2316m/z)  
Compound in Library Factor = -516

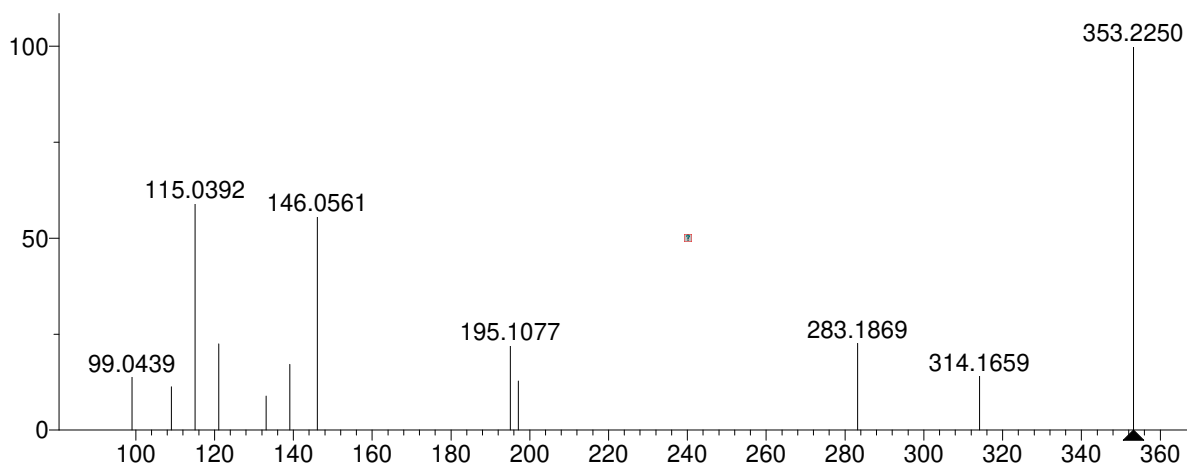

Hit 1 : 6-Ketoprostaglandin F1 $\alpha$  [M+H-H<sub>2</sub>O]<sup>+</sup> HCD 1V P=353.2  
C<sub>20</sub>H<sub>34</sub>O<sub>6</sub>; MF: 352; RMF: 986; Prob 36.0%; CAS: 58962-34-8; Lib: nist\_msms; ID: 166451.

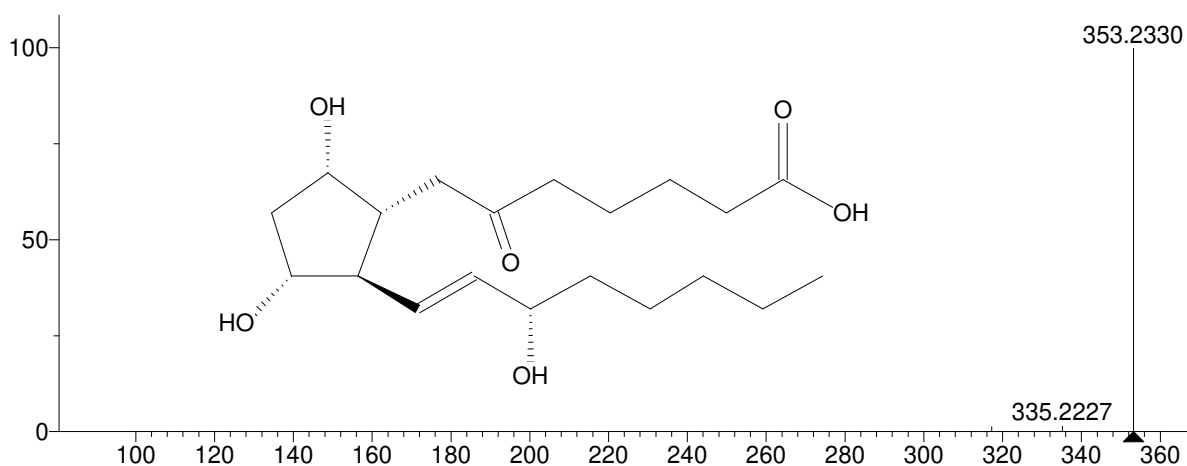

Hit 2 : Prostaglandin I<sub>2</sub> [M+H]<sup>+</sup> HCD 1V P=353.2  
C<sub>20</sub>H<sub>32</sub>O<sub>5</sub>; MF: 351; RMF: 986; Prob 34.6%; CAS: 35121-78-9; Lib: nist\_msms; ID: 166889.

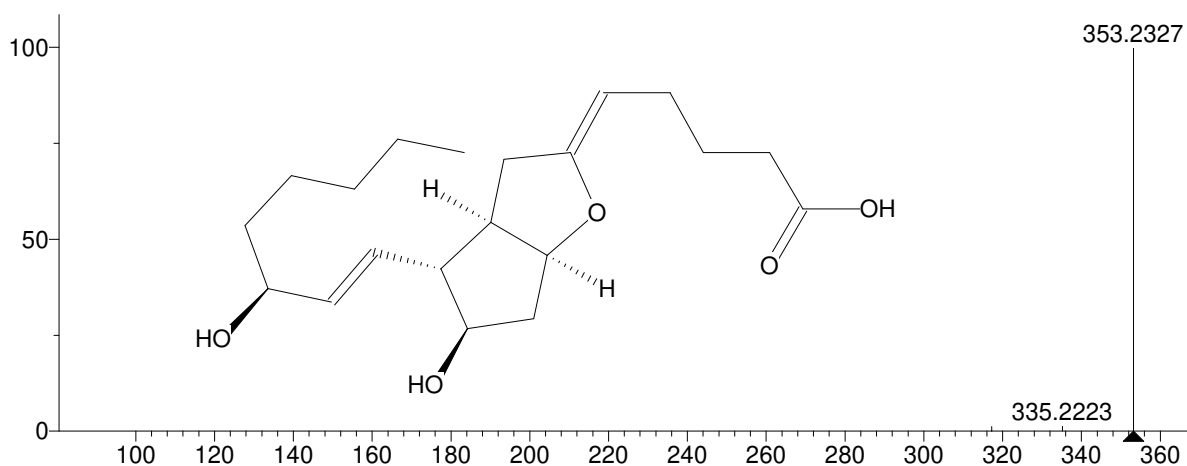

Hit 3 : 9S,11R-Dihydroxy-15-oxo-13E-prostenoic acid [M-H]<sup>-</sup> HCD 3V P=353.2  
C<sub>20</sub>H<sub>34</sub>O<sub>5</sub>; MF: 340; RMF: 978; Prob 23.7%; CAS: 21562-58-3; Lib: nist\_msms; ID: 155077.

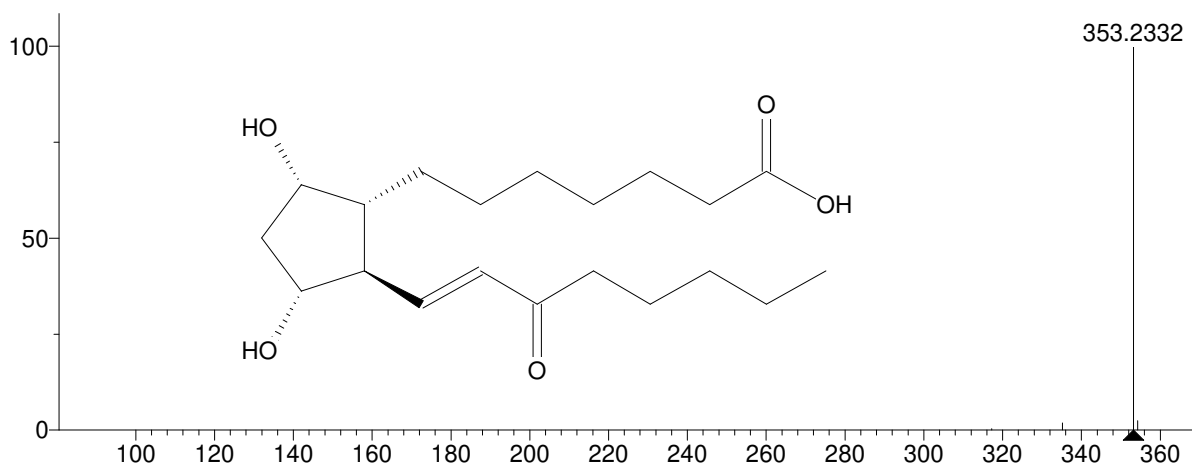

Hit 4 : 11,15-Dioxo-9S-hydroxy-5Z-prostenoic acid [M+H]<sup>+</sup> HCD 1V P=353.2  
C<sub>20</sub>H<sub>32</sub>O<sub>5</sub>; MF: 289; RMF: 952; Prob 4.78%; CAS: 59894-07-4; Lib: nist\_msms; ID: 87155.

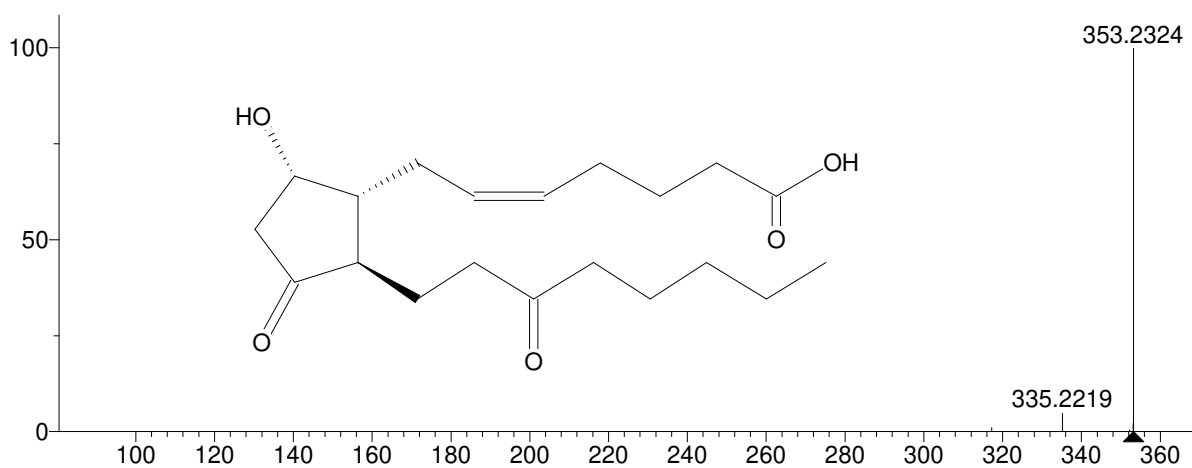

Hit 5 : 15-Ketoprostaglandin E1 [M+H]<sup>+</sup> HCD 1V P=353.2  
C<sub>20</sub>H<sub>32</sub>O<sub>5</sub>; MF: 172; RMF: 810; Prob 0.27%; CAS: 22973-19-9; Lib: nist\_msms; ID: 169226.

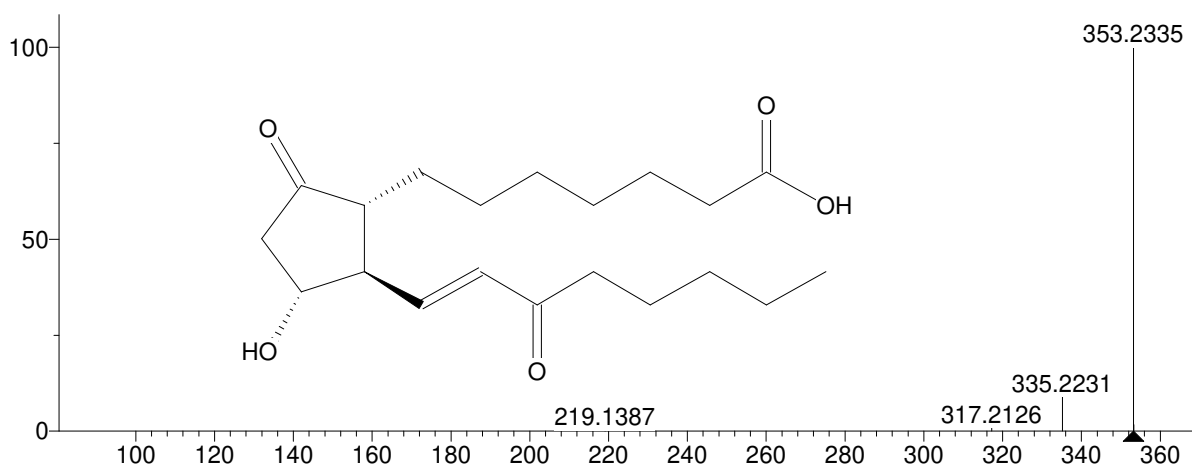



\*\* Search Report Page 1 of 2 \*\*

Unknown: Unknown (26.84\_413.3049m/z)  
Compound in Library Factor = -1750

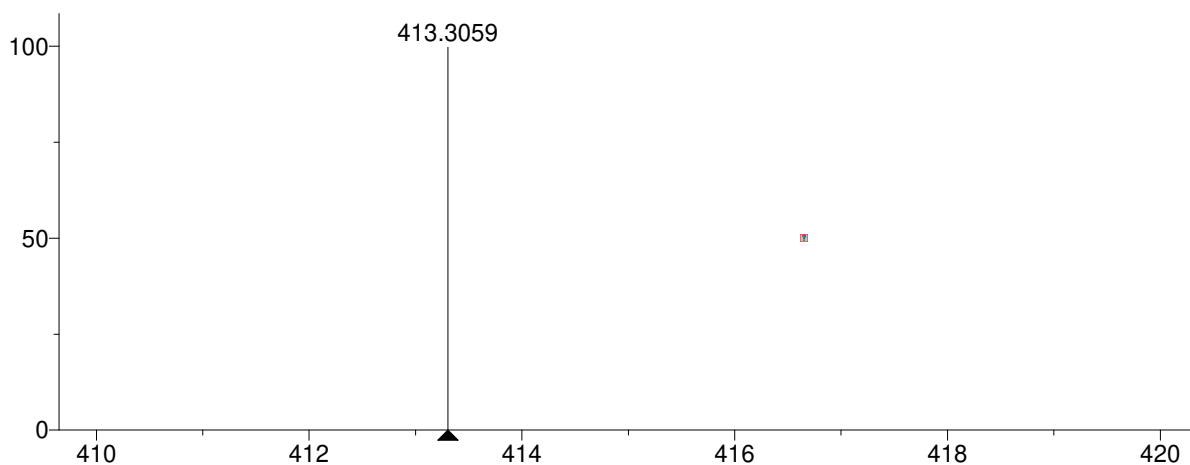

Hit 1 : 7 $\alpha$ -Hydroxy-3-oxo-4-cholestenoic acid [M+H-H<sub>2</sub>O]<sup>+</sup> HCD 41V P=413.3  
C<sub>27</sub>H<sub>42</sub>O<sub>4</sub>; MF: 364; RMF: 999; Prob 22.5%; CAS: 1246298-65-6; Lib: nist\_msms; ID: 101916.

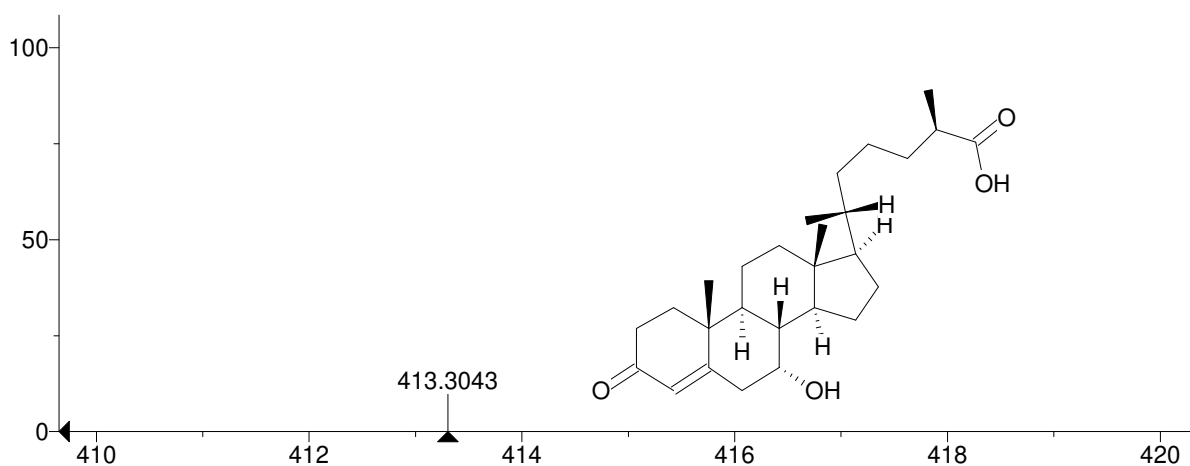

Hit 2 : Hecogenin [M+H-H<sub>2</sub>O]<sup>+</sup> HCD 55V P=413.3  
C<sub>27</sub>H<sub>42</sub>O<sub>4</sub>; MF: 364; RMF: 999; Prob 22.5%; CAS: 467-55-0; Lib: nist\_msms; ID: 404024.

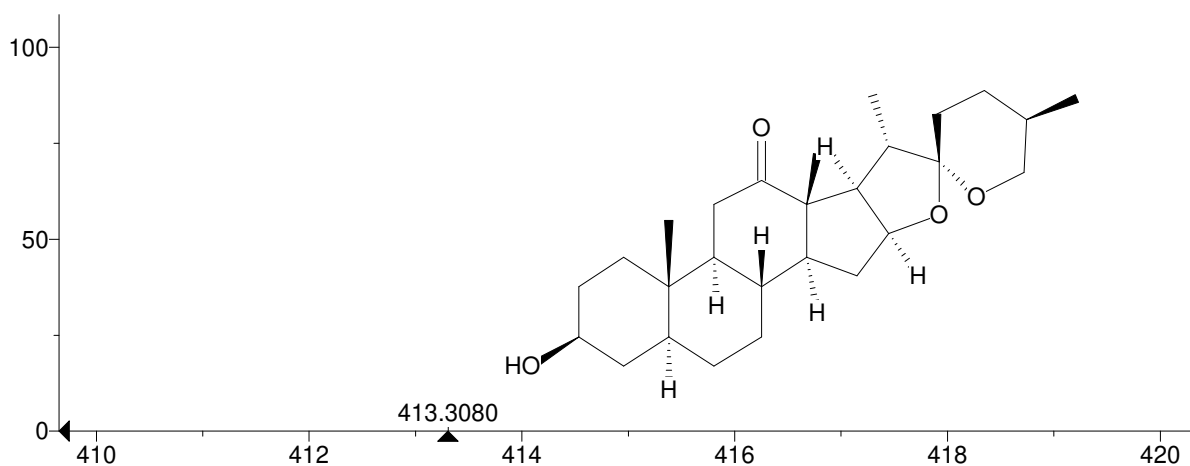

Hit 3 : Testosterone cypionate [M+H]<sup>+</sup> HCD 16V P=413.3  
C<sub>27</sub>H<sub>40</sub>O<sub>3</sub>; MF: 364; RMF: 999; Prob 22.5%; CAS: 58-20-8; Lib: nist\_msms; ID: 383858.

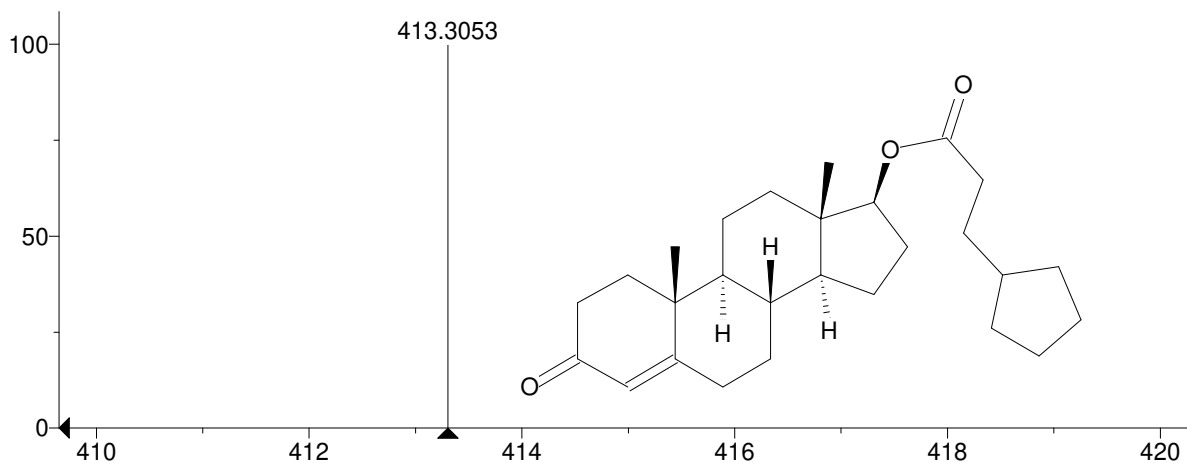

Hit 4 : 3-Oxo-4-cholestenoic acid [M-H]<sup>-</sup> HCD 61V P=413.3  
C<sub>27</sub>H<sub>42</sub>O<sub>3</sub>; MF: 362; RMF: 996; Prob 20.8%; CAS: 309762-85-4; Lib: nist\_msms; ID: 265773.

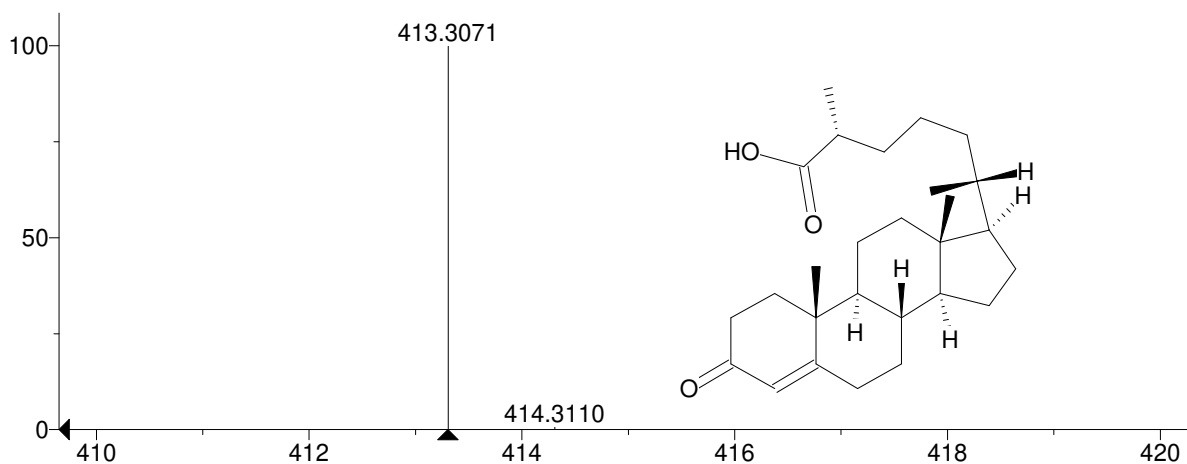

Hit 5 : 2-methyl-2-(3-pentadecylphenoxy)propanoic acid [M+Na]<sup>+</sup> P=413.3  
C<sub>25</sub>H<sub>42</sub>O<sub>3</sub>; MF: 335; RMF: 959; Prob 6.10%; Lib: mona-export-gnps; ID: 4860.

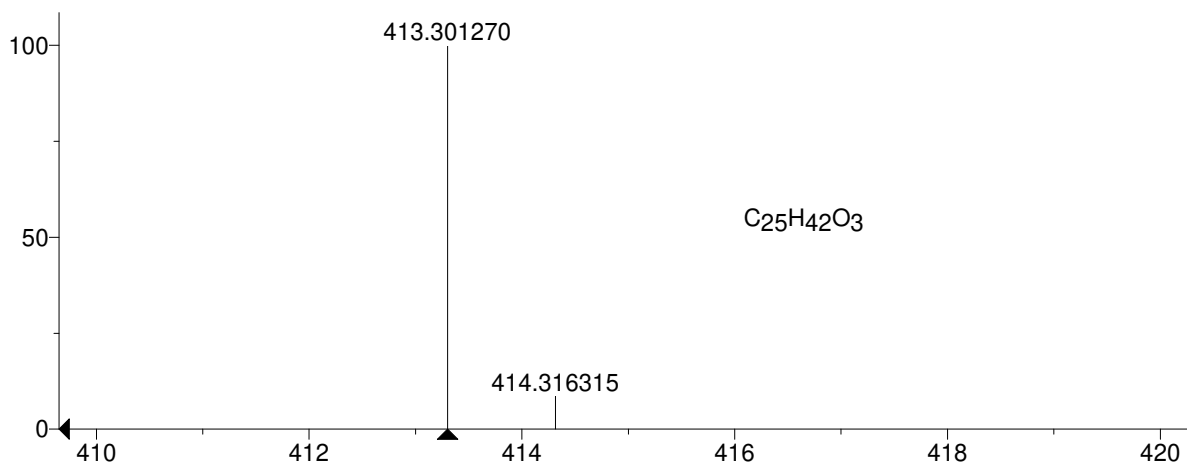

Unknown: Unknown (26.86\_475.3054m/z)  
Compound in Library Factor = 0

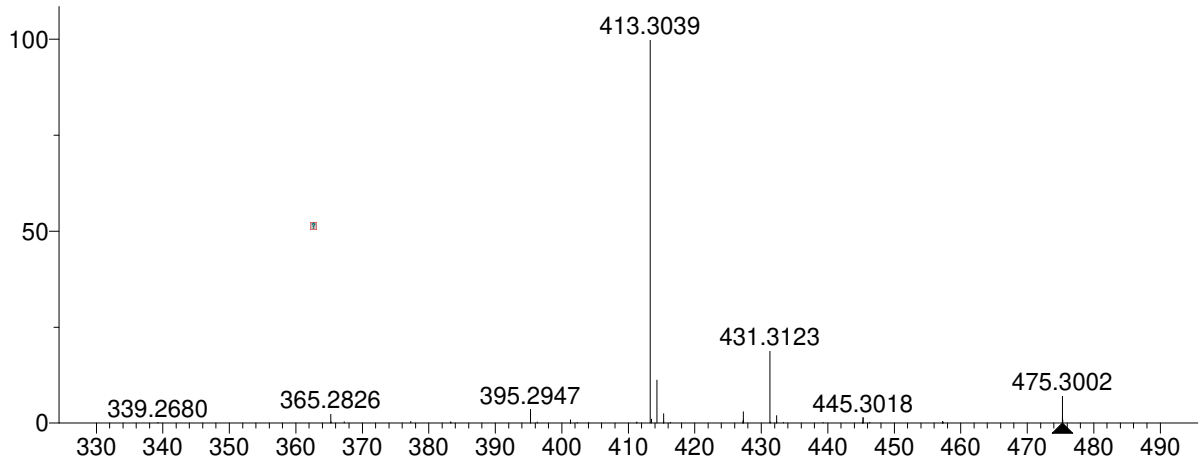

Unknown: Unknown (26.98\_426.0525m/z)  
Compound in Library Factor = 0

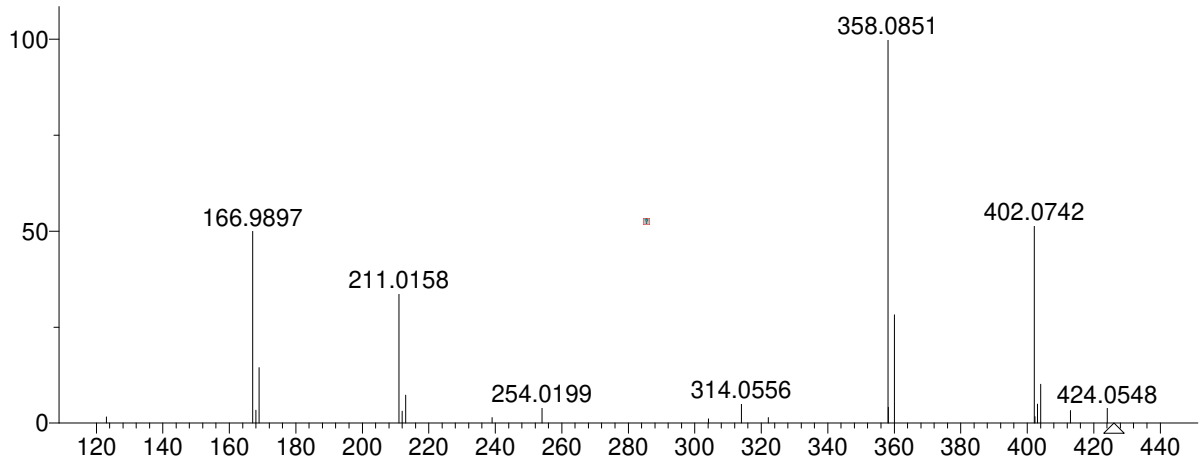

Unknown: Unknown (26.99\_500.9910m/z)  
Compound in Library Factor = 0

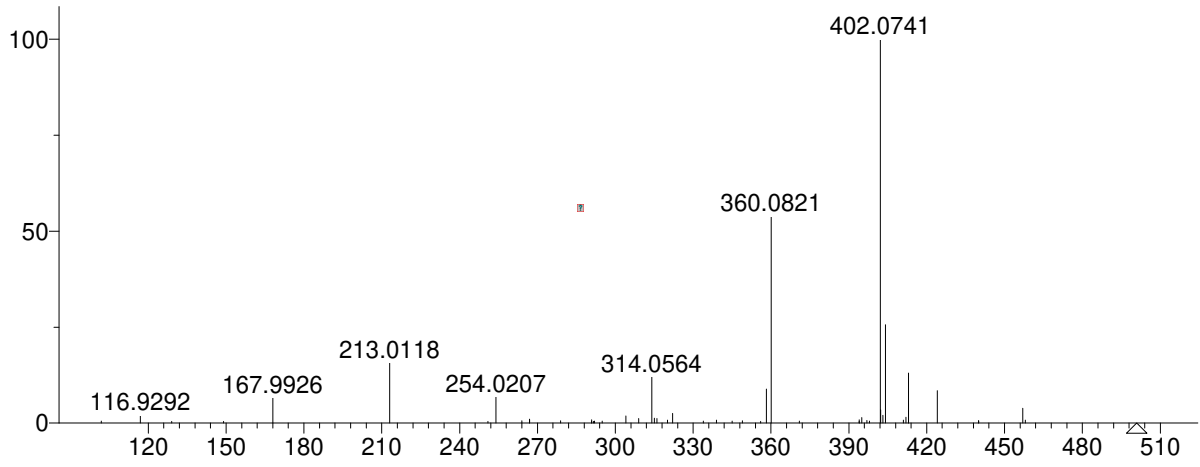

\*\* Search Report Page 1 of 2 \*\*

Unknown: Unknown (27.00\_402.2621m/z)  
Compound in Library Factor = -3273

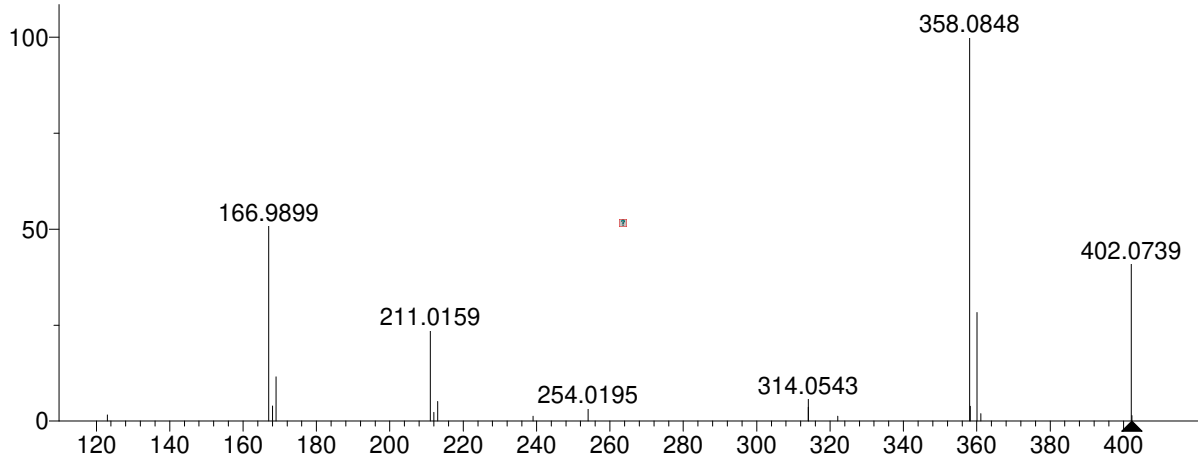

Hit 1 :  $\beta$ -Estradiol 3,17-dipropionate  $[M+NH_4]^+$  HCD 4V P=402.3  
C24H32O4; MF: 3; RMF: 75; Prob 11.1%; CAS: 113-38-2; Lib: nist\_msms; ID: 302458.

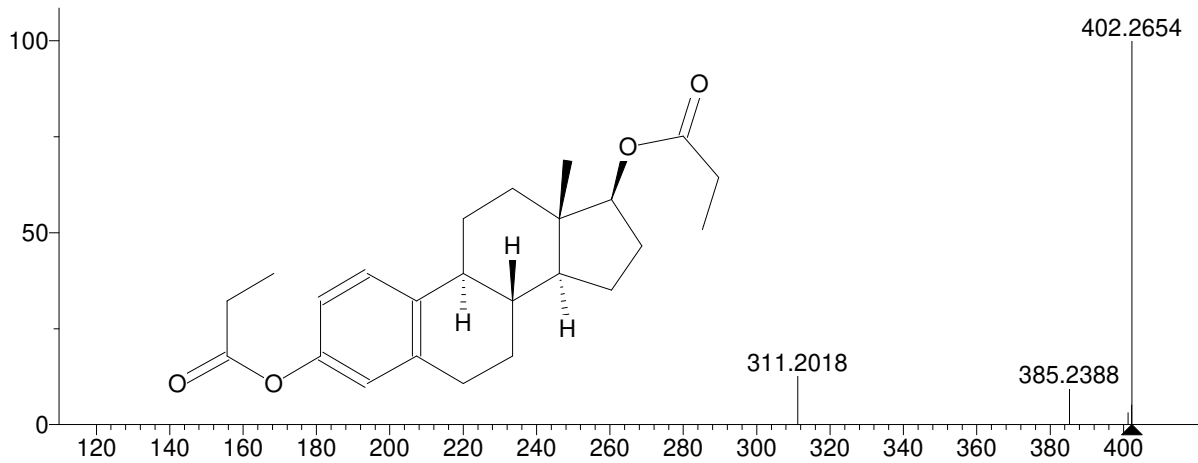

Hit 2 : Leukotriene B4 ethanolamide  $[M+Na]^+$  HCD 24V P=402.3  
C22H37NO4; MF: 1; RMF: 65; Prob 10.2%; CAS: 877459-63-7; Lib: nist\_msms; ID: 88441.

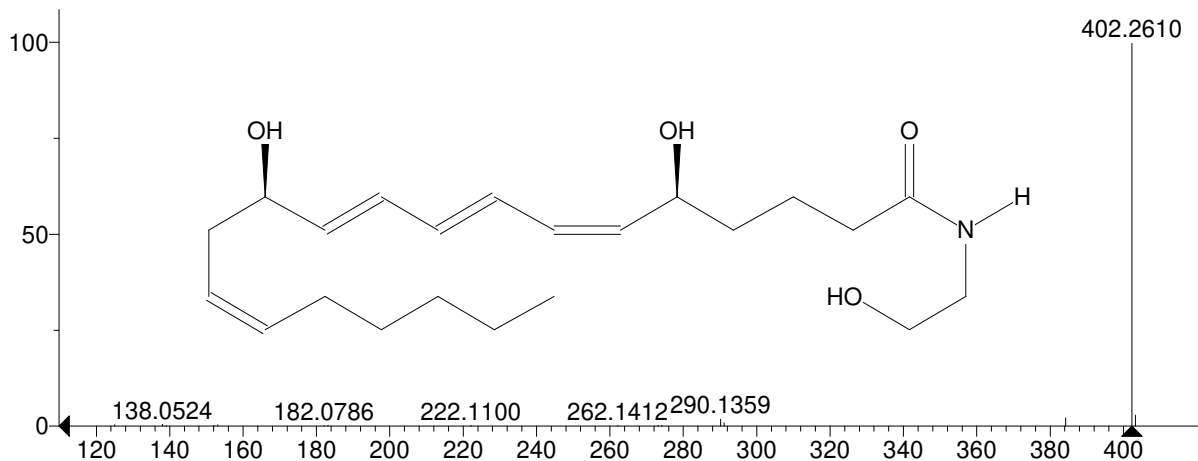

Hit 3 : NCGC00386058-01\_C24H35NO4\_(1S,2R,3R,6S,7R,8S,11S,14S,15S,18R)-18-Hydroxy-8-isobutyl-5,6,15-l  
C24H35NO4; MF: 0; RMF: 23; Prob 9.83%; Lib: mona-export-gnps; ID: 12370.

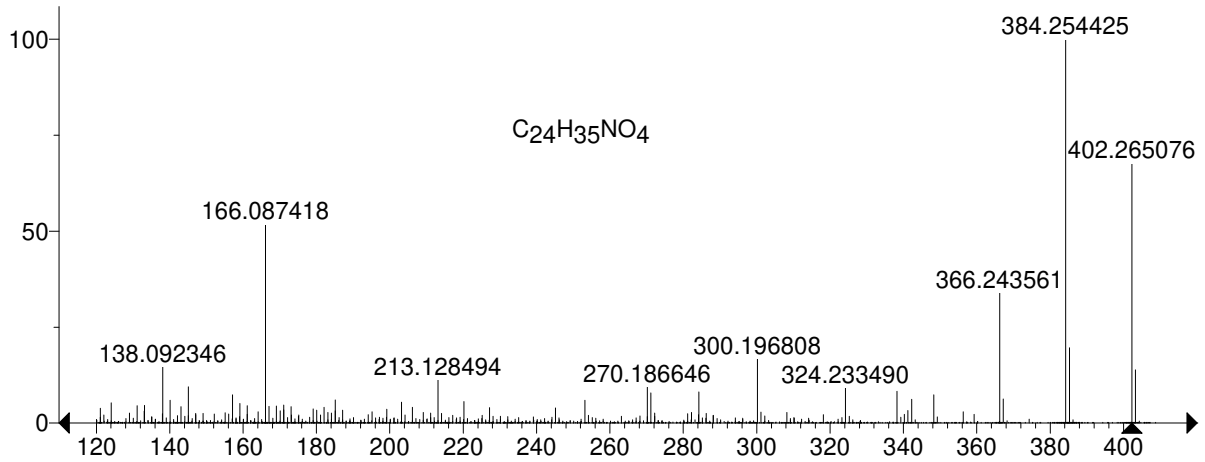

Hit 4 : NCGC00380732-01\_C24H35NO4\_1H-Cycloundec[d]isoindole-1,15(2H)-dione, 3,3a,4,6a,9,10,11,12-octah  
C24H35NO4; MF: 0; RMF: 16; Prob 9.83%; Lib: mona-export-gnps; ID: 11653.

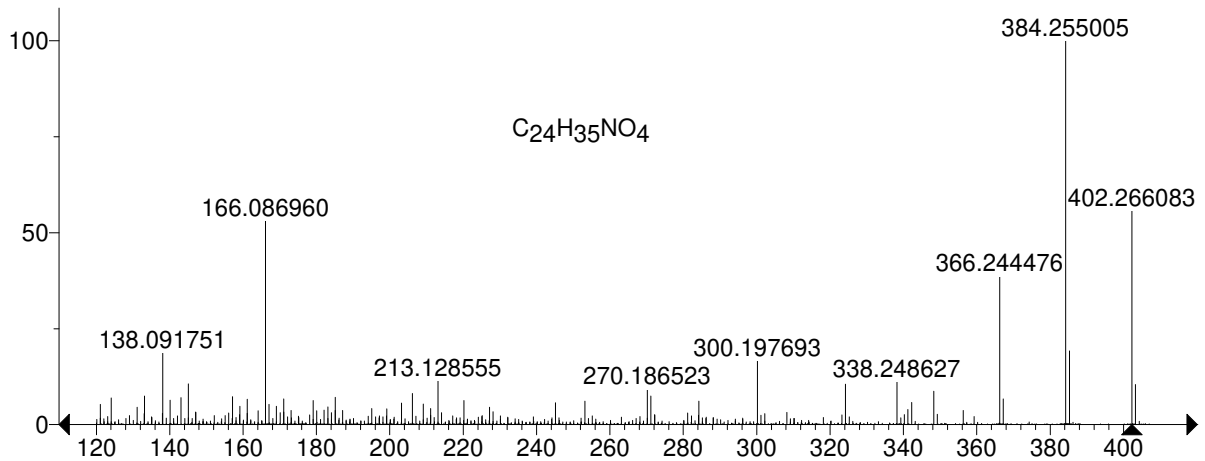

Hit 5 : NCGC00380312-01\_C24H35NO4\_[M+H]<sup>+</sup> P=402.3  
C24H35NO4; MF: 0; RMF: 13; Prob 9.83%; Lib: mona-export-gnps; ID: 10374.

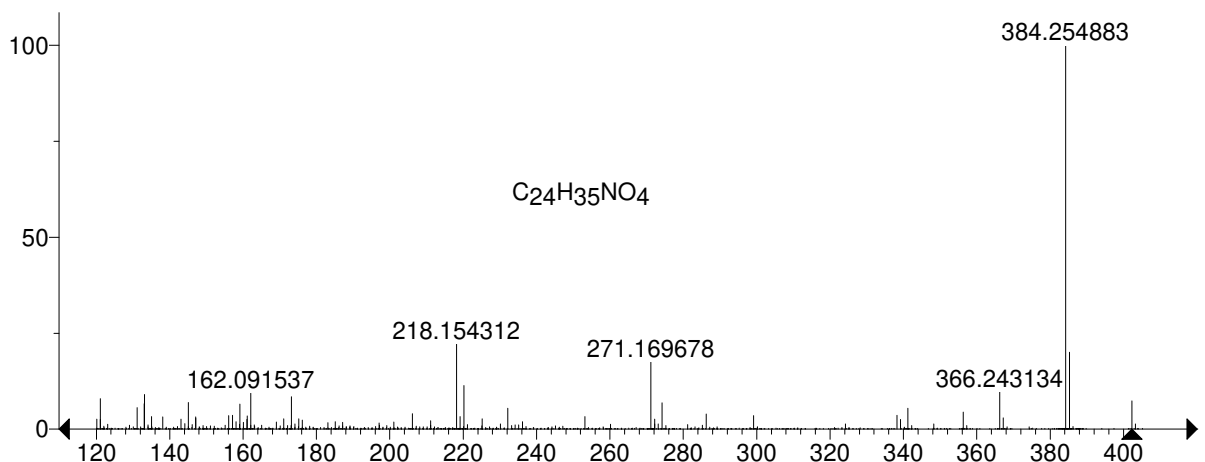

Unknown: Unknown (27.00\_404.0719m/z)  
Compound in Library Factor = -3273

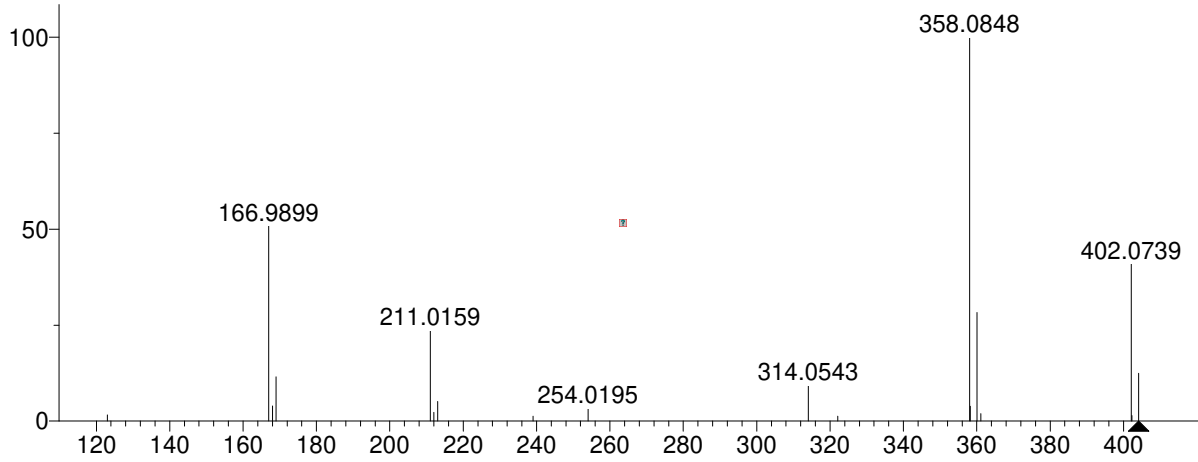

Hit 1 : 2-hydroxypentyl glucosinolate (CCR vessel) [M-H]<sup>-</sup> P=404.1  
C<sub>12</sub>H<sub>23</sub>NO<sub>10</sub>S<sub>2</sub>; MF: 9; RMF: 202; Prob 56.6%; Lib: phytofrag2018\_final\_060219; ID: 921.

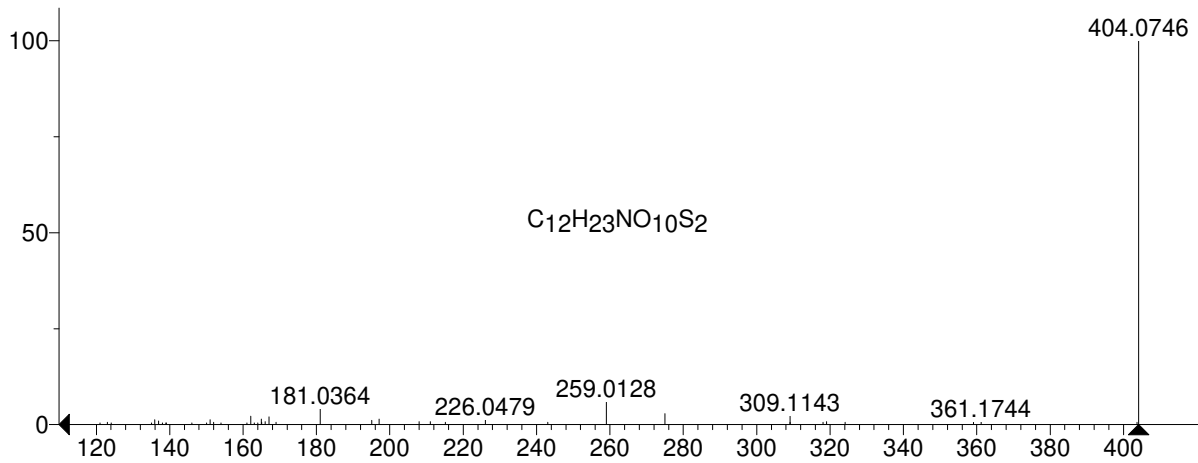

Hit 2 : 5-hydroxyalkyl glucosinolate ( ) [M-H]<sup>-</sup> P=404.1  
C<sub>12</sub>H<sub>23</sub>NO<sub>10</sub>S<sub>2</sub>; MF: 2; RMF: 196; Prob 43.4%; Lib: phytofrag2018\_final\_060219; ID: 87.

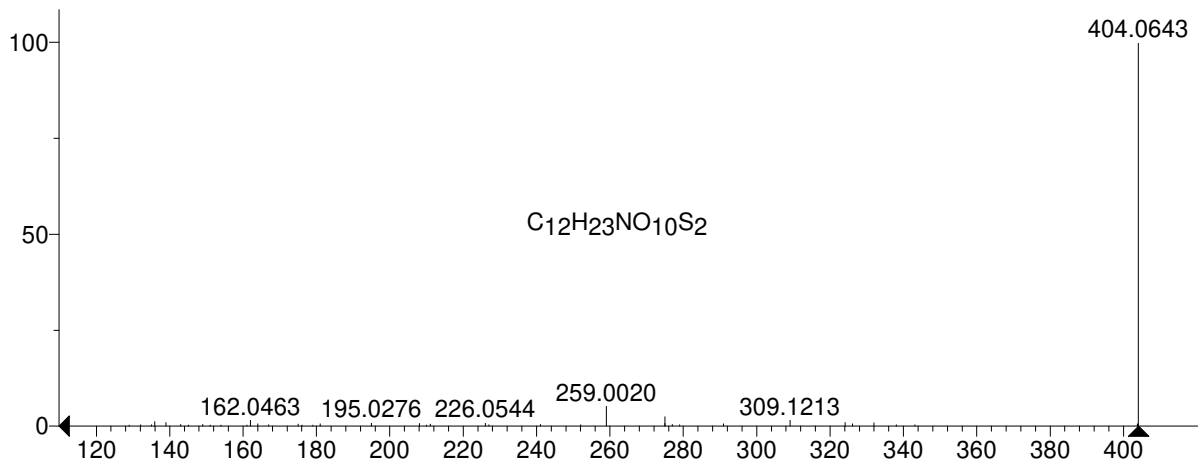



Unknown: Unknown (27.00\_404.2600m/z)  
Compound in Library Factor = 0

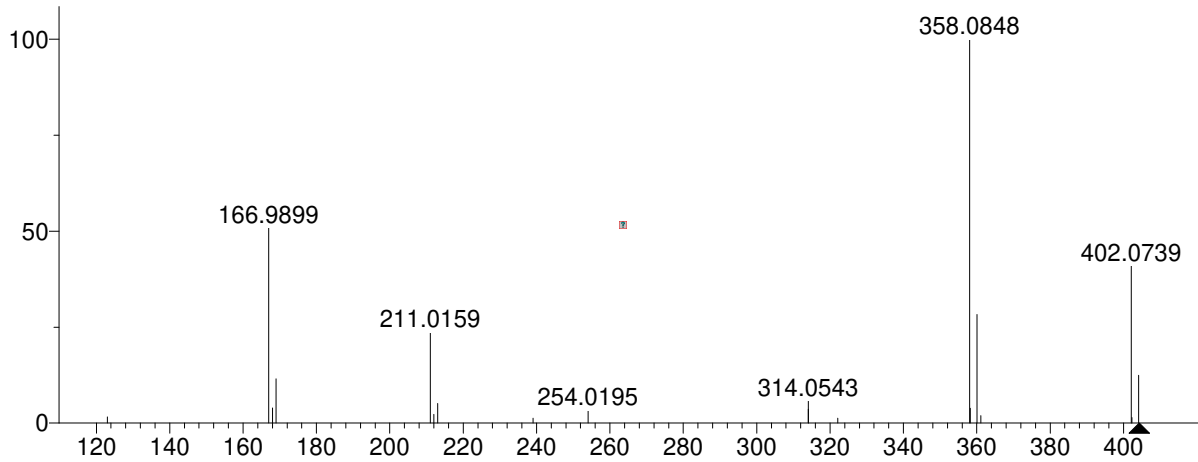

Hit 1 : Lys-Thr-Arg [M+H]<sup>+</sup> IT 35% P=404.3  
C16H33N7O5; MF: 0; RMF: 27; Prob 50.0%; Lib: nist\_msms; ID: 47215.

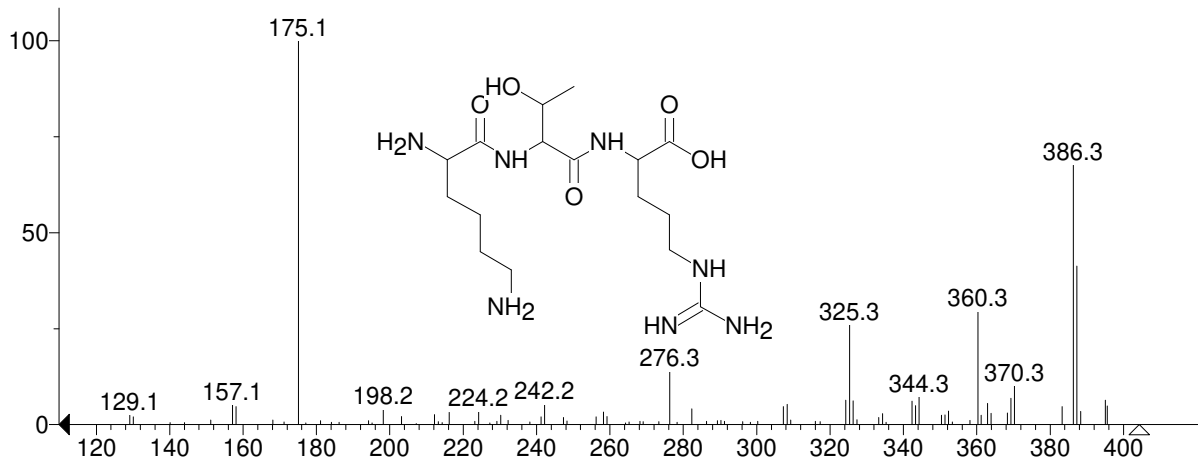

Hit 2 : Arg-Thr-Lys [M+H]<sup>+</sup> QQQ 14V P=404.3  
C16H33N7O5; MF: 0; RMF: 9; Prob 50.0%; Lib: nist\_msms; ID: 41554.

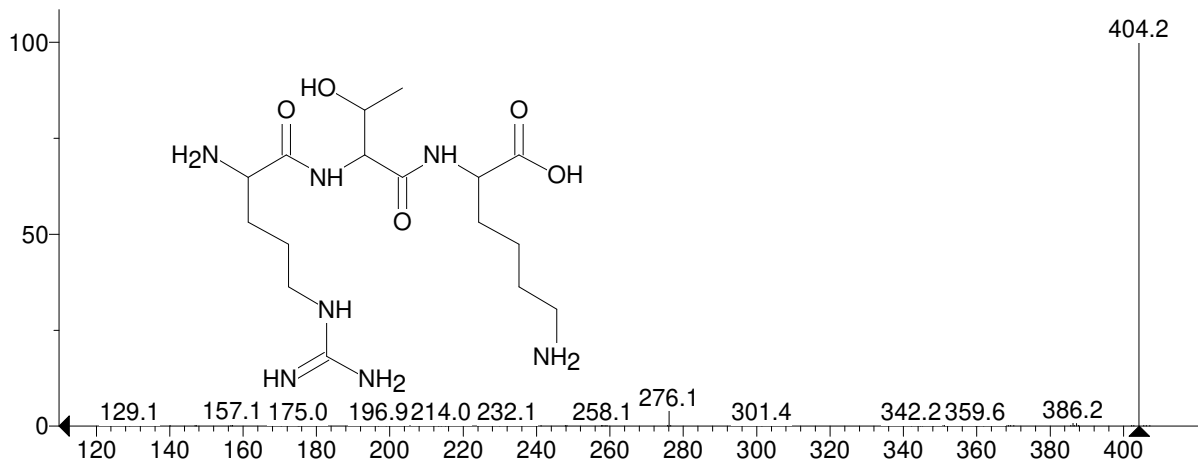

Unknown: Unknown (27.00\_490.9614m/z)  
Compound in Library Factor = 0

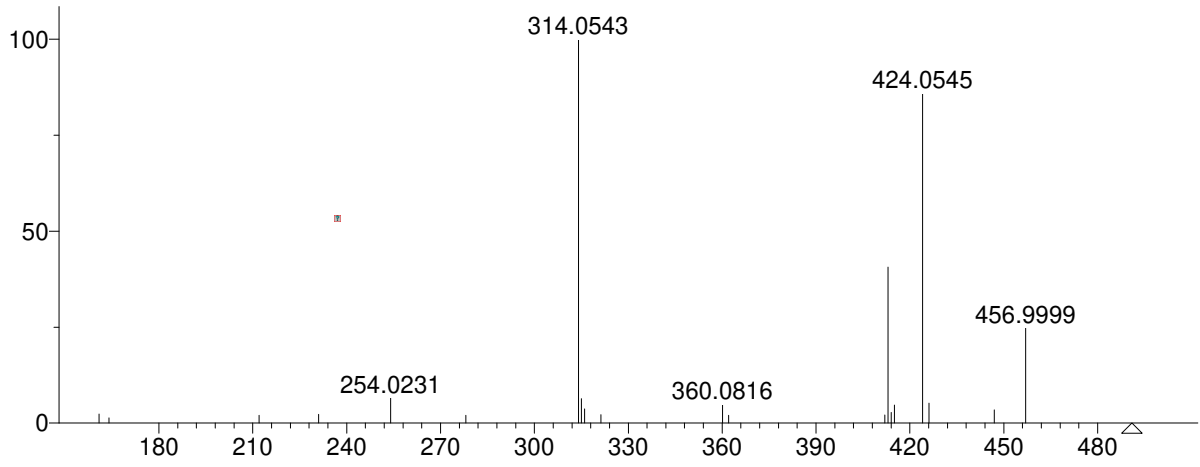

\*\* Search Report Page 1 of 2 \*\*

Unknown: Unknown (27.01\_358.0842m/z)  
Compound in Library Factor = -1848

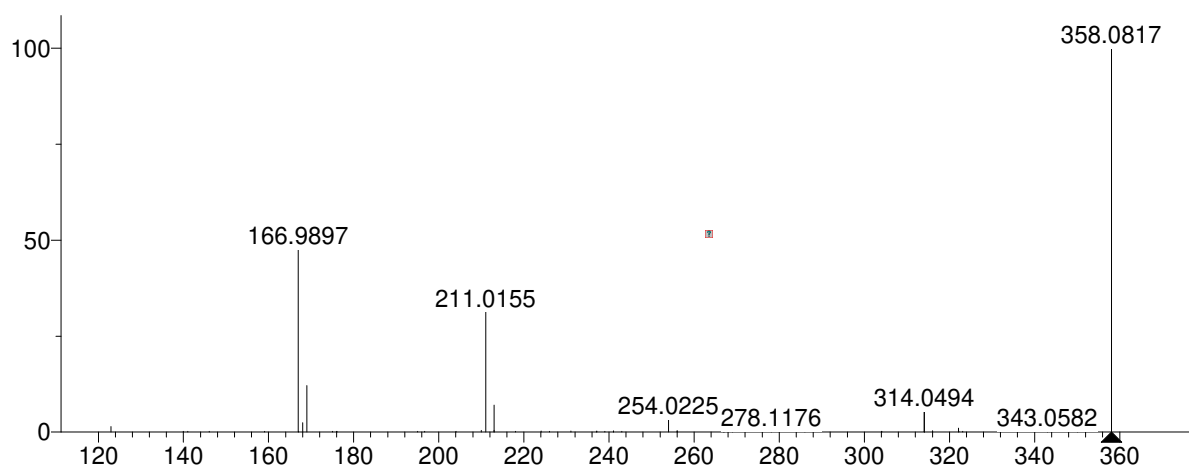

Hit 1 : Indomethacin [M+H]<sup>+</sup> HCD 7V P=358.1  
C<sub>19</sub>H<sub>16</sub>ClNO<sub>4</sub>; MF: 82; RMF: 651; Prob 73.0%; CAS: 53-86-1; Lib: nist\_msms; ID: 332462.

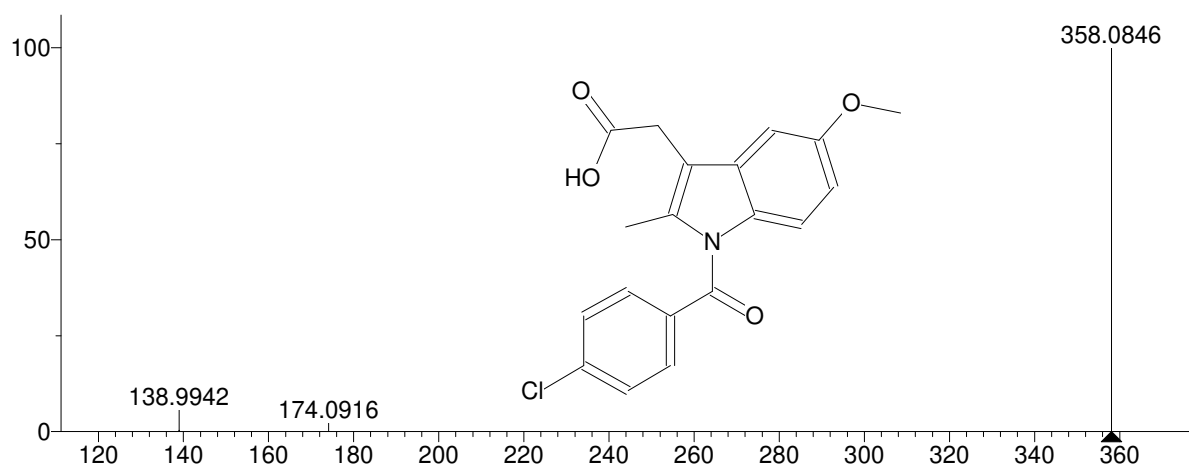

Hit 2 : 2-Furancarboxamide, 5-(4-chlorophenyl)-N-(3,5-dimethoxyphenyl)- [M+H]<sup>+</sup> HCD 14V P=358.1  
C<sub>19</sub>H<sub>16</sub>ClNO<sub>4</sub>; MF: 49; RMF: 610; Prob 19.1%; CAS: 944261-79-4; Lib: nist\_msms; ID: 373202.

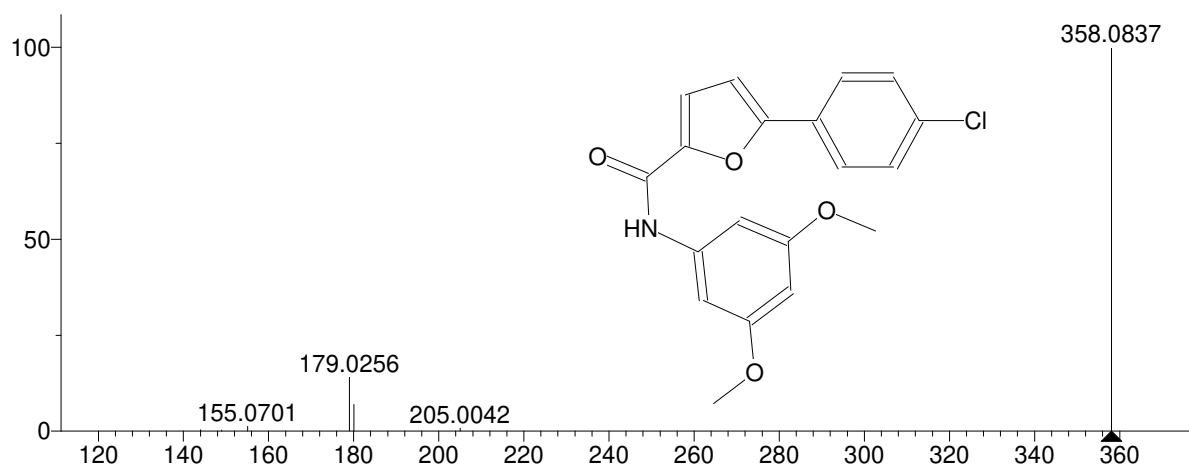

\*\* Search Report Page 2 of 2 \*\*

Hit 3 : Indomethacin heptyl ester [M+H-C7H14]+ HCD 21V P=358.1  
C26H30ClNO4; MF: 4; RMF: 47; Prob 4.07%; CAS: 282728-47-6; Lib: nist\_msms; ID: 359332.

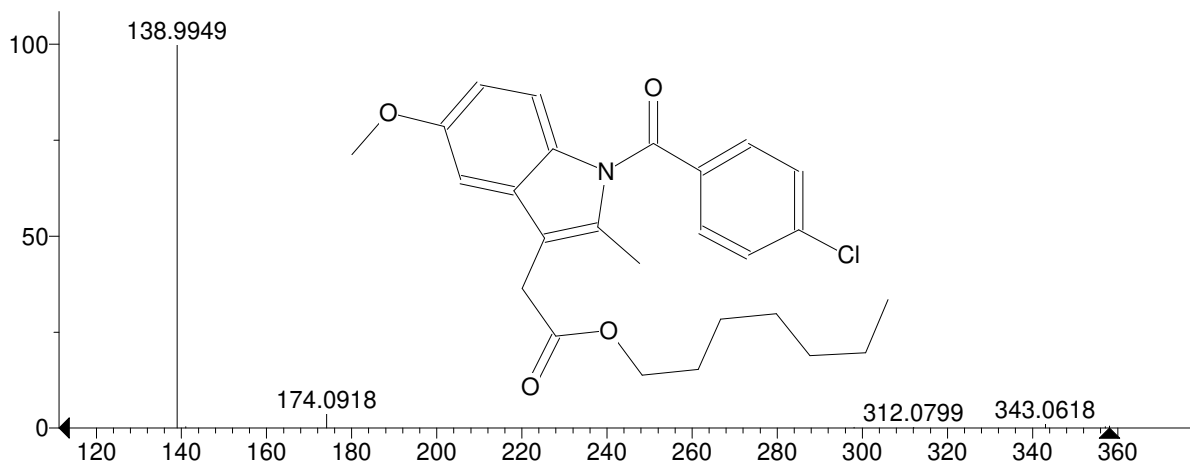

Hit 4 : "Indomethacin (Indocid, Indocin)" [M+H]+ P=358.1  
C19H16ClNO4; MF: 2; RMF: 193; Prob 3.75%; Lib: mona-export-gnps; ID: 583.

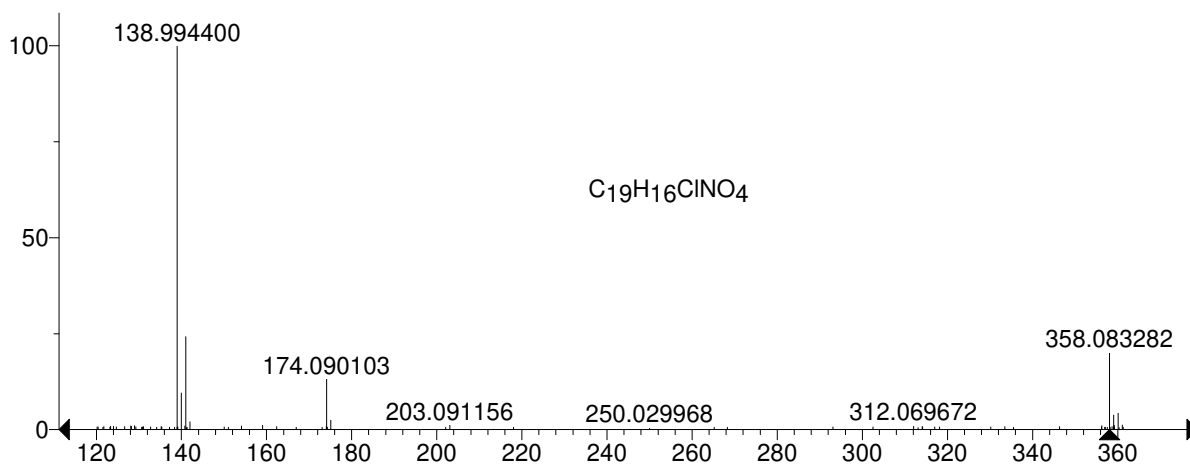

Unknown: Unknown (27.01\_360.0815m/z)  
Compound in Library Factor = -3273

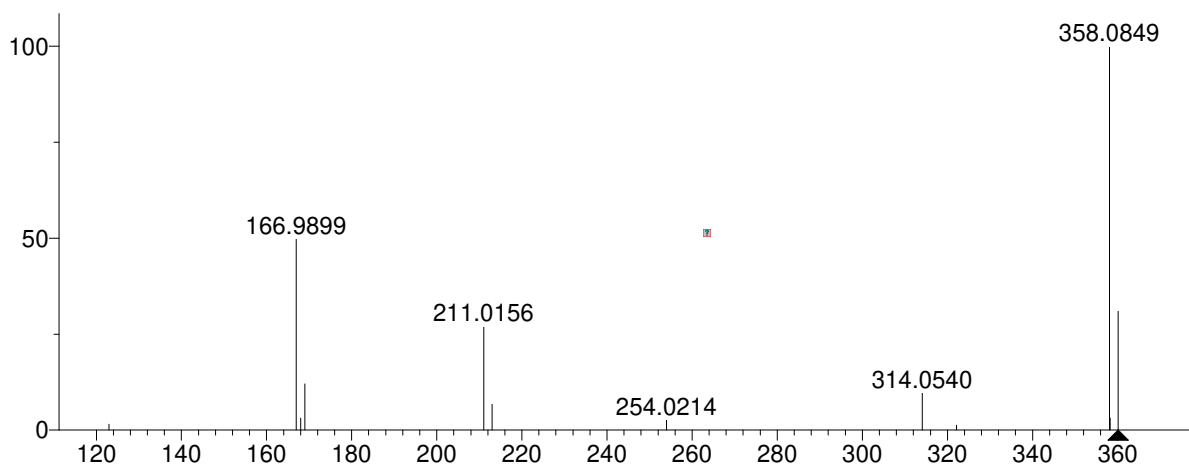

Hit 1 : MMV688755 [M+H]<sup>+</sup> (20-30-40%) P=360.1  
C<sub>14</sub>H<sub>12</sub>F<sub>3</sub>N<sub>3</sub>O<sub>5</sub>; MF: 1; RMF: 151; Prob 51.0%; Lib: mona-export-pathogen\_box; ID: 371.

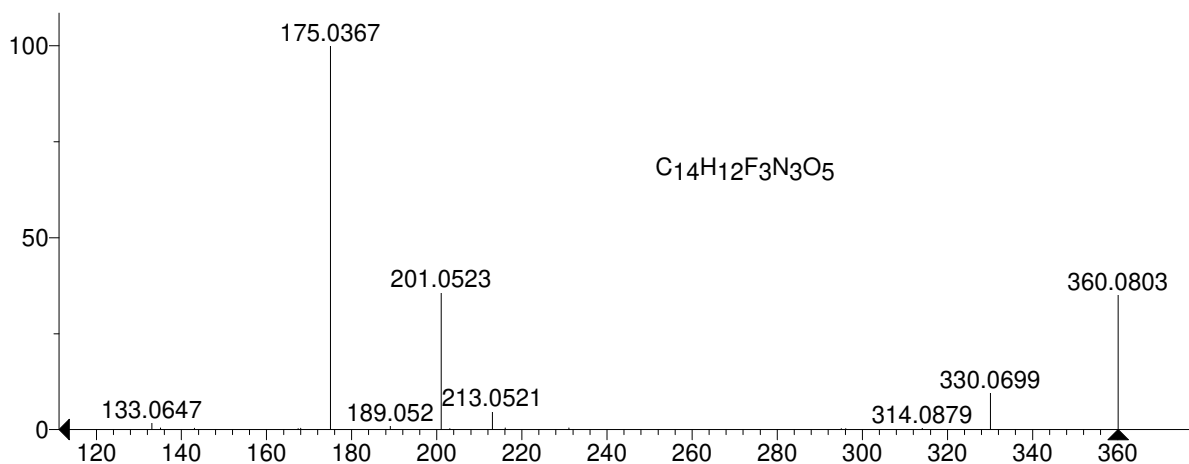

Hit 2 : Casticin [M+H-CH<sub>3</sub>]<sup>+</sup> HCD 25V P=360.1  
C<sub>19</sub>H<sub>18</sub>O<sub>8</sub>; MF: 0; RMF: 166; Prob 49.0%; CAS: 479-91-4; Lib: nist\_msms; ID: 391649.

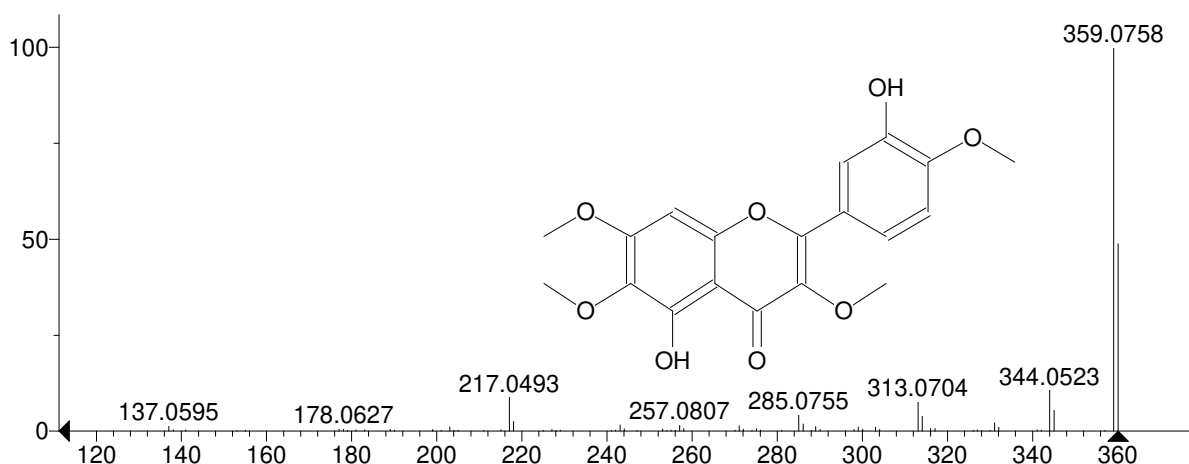

Unknown: Unknown (27.01\_402.0746m/z)  
Compound in Library Factor = -3273

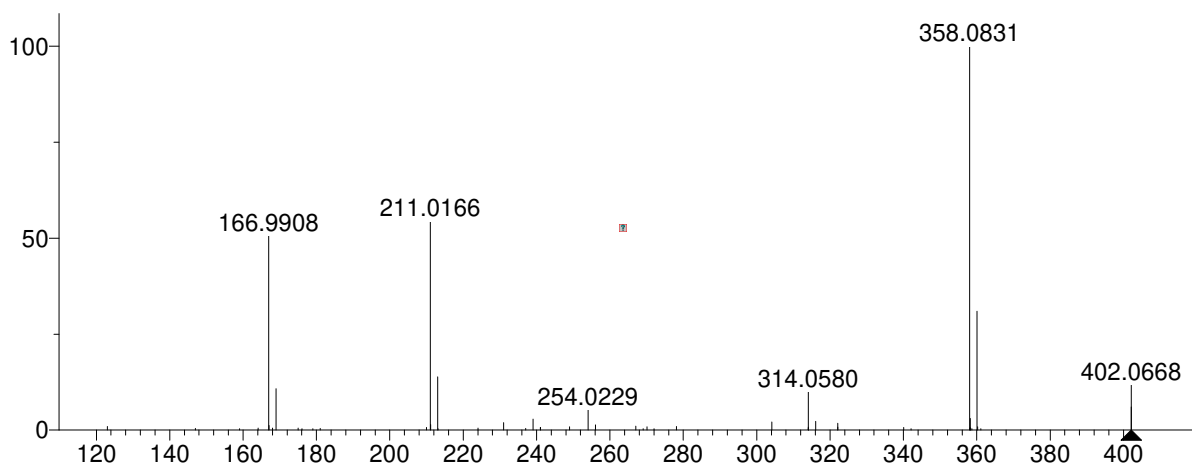

Hit 1 : NCGC00162403-05\_C20H18ClNO6\_L-Phenylalanine, N-[[[(3R)-5-chloro-3,4-dihydro-8-hydroxy-3-methyl-1-C20H18ClNO6]; MF: 74; RMF: 401; Prob 100.0%; Lib: mona-export-gnps; ID: 13740.

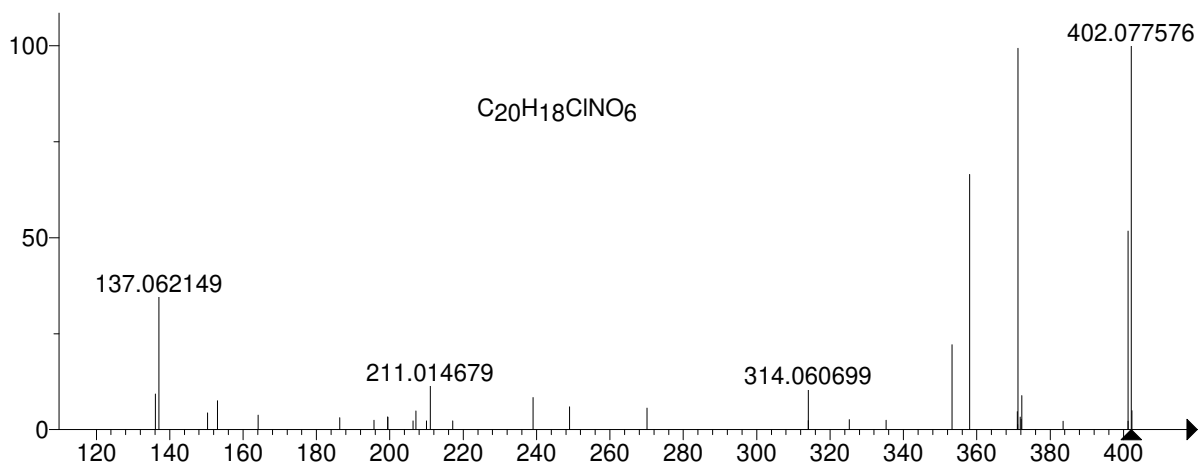

\*\* Search Report Page 1 of 1 \*\*

Unknown: Unknown (27.02\_424.0560m/z)  
Compound in Library Factor = 0

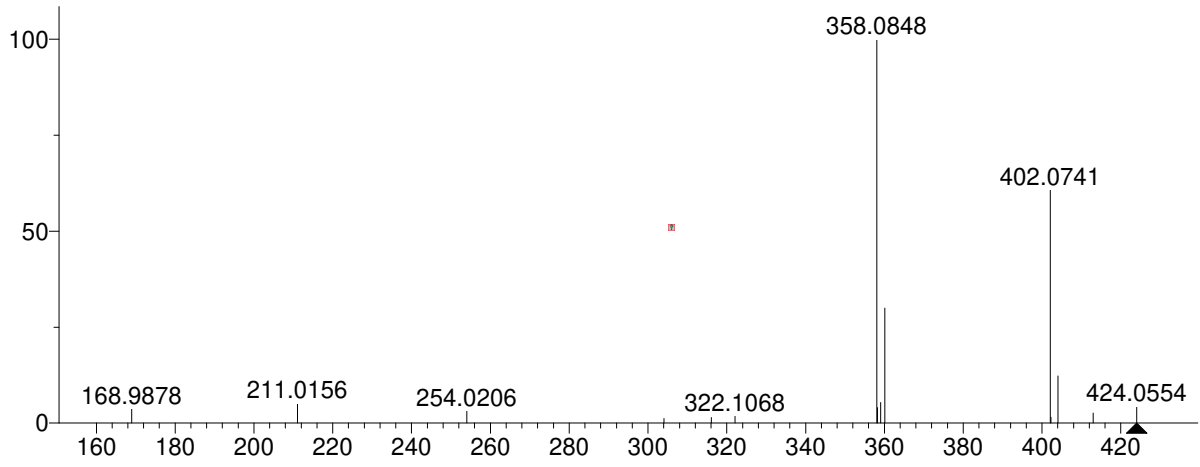

Unknown: Unknown (27.02\_457.9918m/z)  
Compound in Library Factor = 0

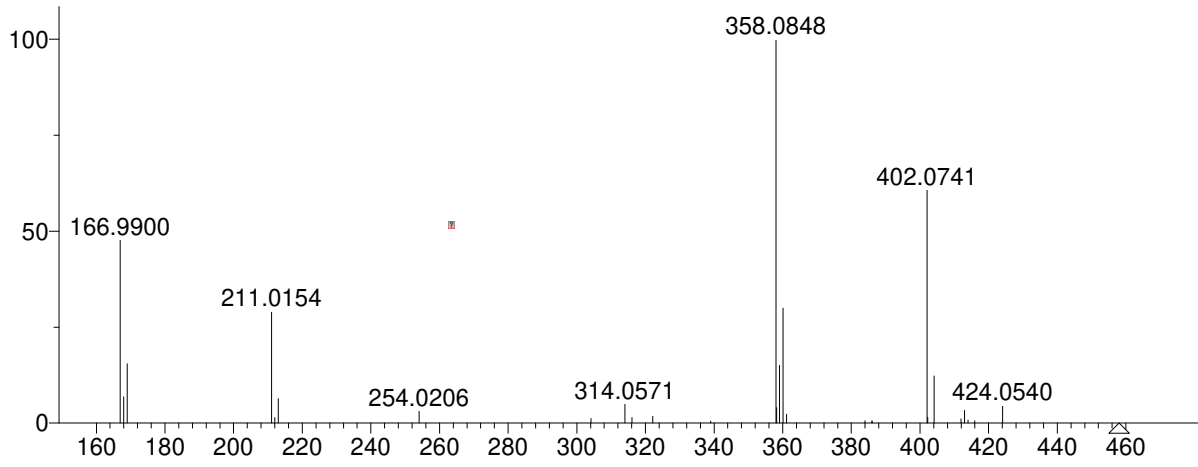



Unknown: Unknown (27.48\_353.2326m/z)  
Compound in Library Factor = -997

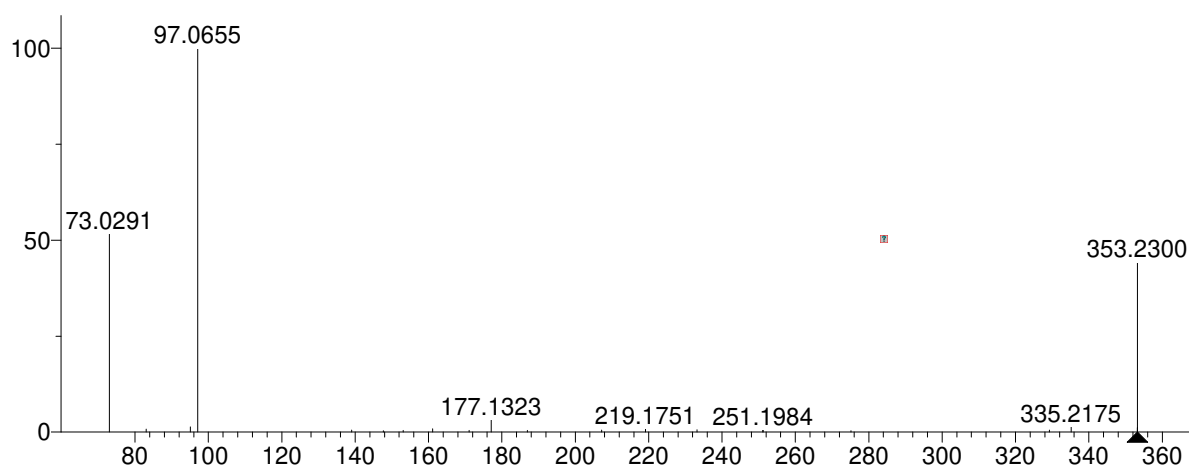

Hit 1 : 6-Ketoprostaglandin F1 $\alpha$  [M+H-H<sub>2</sub>O]<sup>+</sup> HCD 1V P=353.2  
C<sub>20</sub>H<sub>34</sub>O<sub>6</sub>; MF: 310; RMF: 961; Prob 34.2%; CAS: 58962-34-8; Lib: nist\_msms; ID: 166451.

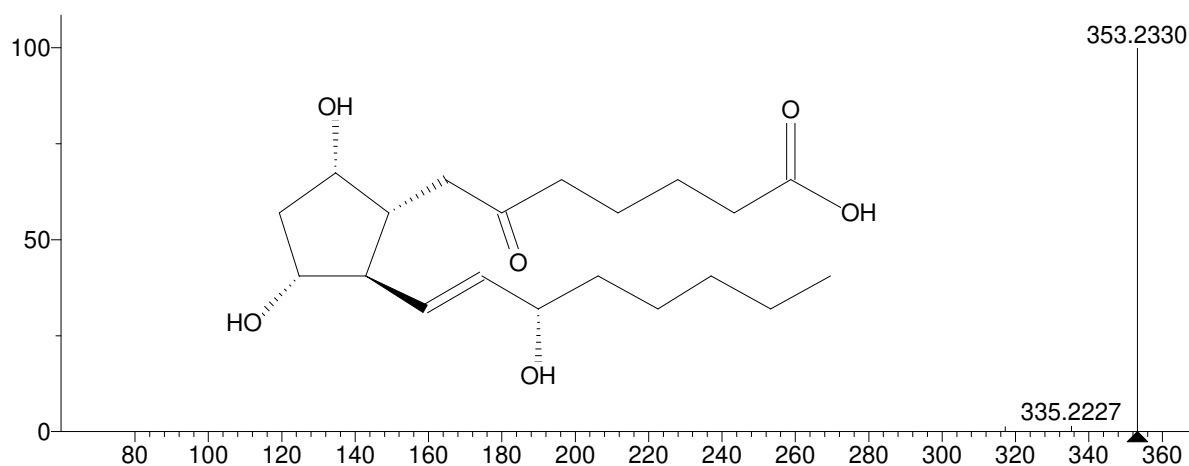

Hit 2 : Prostaglandin I<sub>2</sub> [M+H]<sup>+</sup> HCD 1V P=353.2  
C<sub>20</sub>H<sub>32</sub>O<sub>5</sub>; MF: 301; RMF: 961; Prob 24.9%; CAS: 35121-78-9; Lib: nist\_msms; ID: 166889.

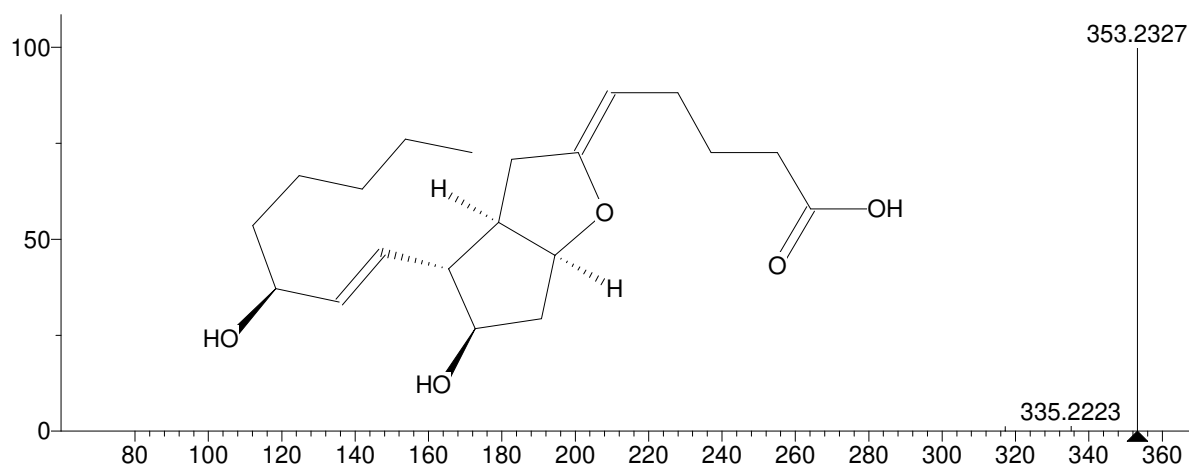

Hit 3 : 9S,11R-Dihydroxy-15-oxo-13E-prostenoic acid [M-H]<sup>-</sup> HCD 4V P=353.2  
C<sub>20</sub>H<sub>34</sub>O<sub>5</sub>; MF: 287; RMF: 953; Prob 15.6%; CAS: 21562-58-3; Lib: nist\_msms; ID: 155078.

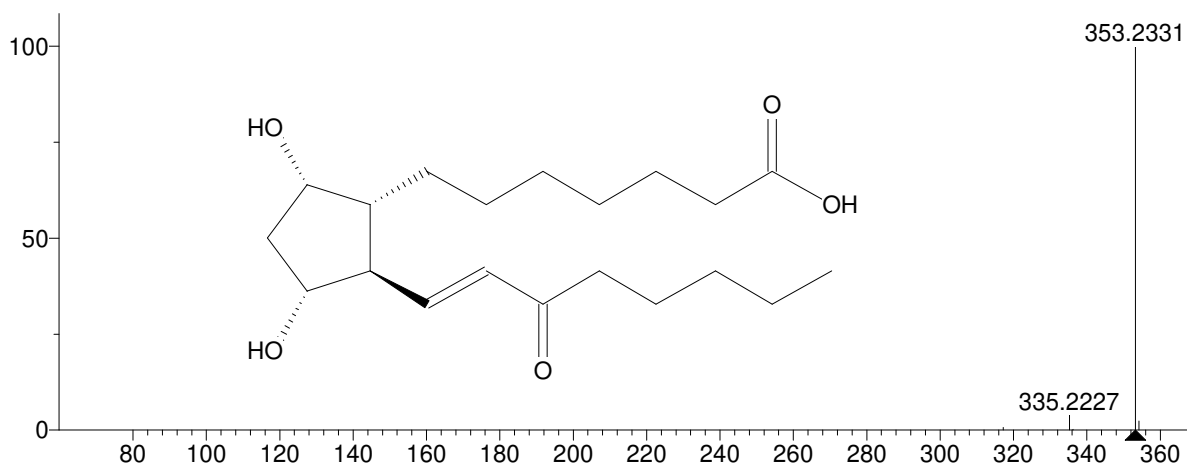

Hit 4 : 15-Ketoprostaglandin E1 [M+H]<sup>+</sup> HCD 3V P=353.2  
C<sub>20</sub>H<sub>32</sub>O<sub>5</sub>; MF: 287; RMF: 869; Prob 15.6%; CAS: 22973-19-9; Lib: nist\_msms; ID: 169227.

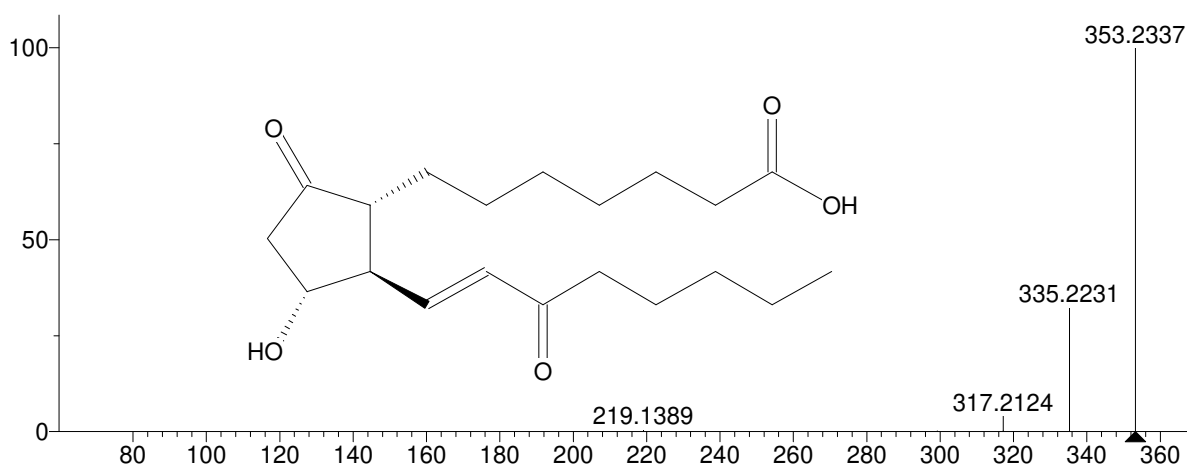

Hit 5 : Prostaglandin D1 [M-H]<sup>-</sup> HCD 5V P=353.2  
C<sub>20</sub>H<sub>34</sub>O<sub>5</sub>; MF: 260; RMF: 925; Prob 4.57%; CAS: 17968-82-0; Lib: nist\_msms; ID: 320117.

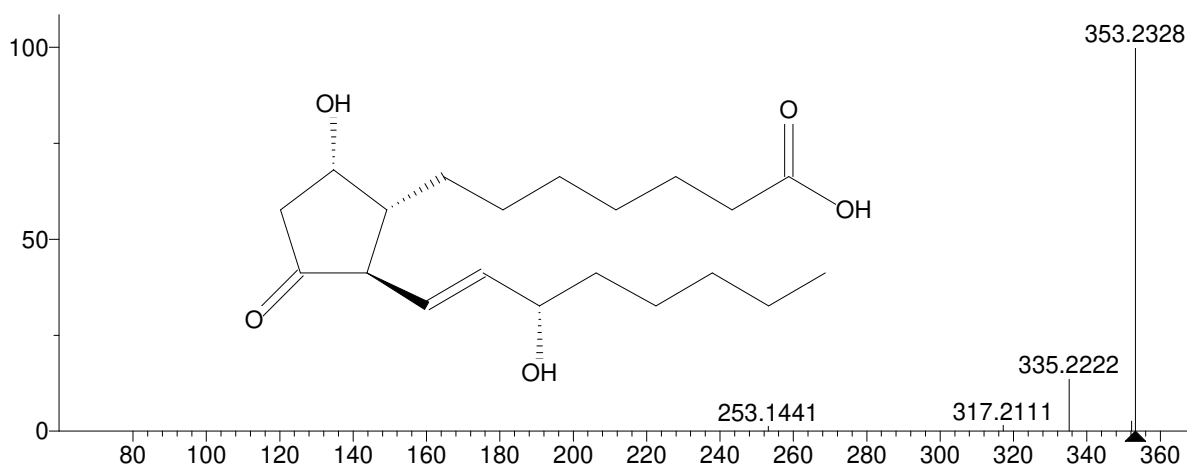

Unknown: Unknown (27.48\_452.1495m/z)  
Compound in Library Factor = 0

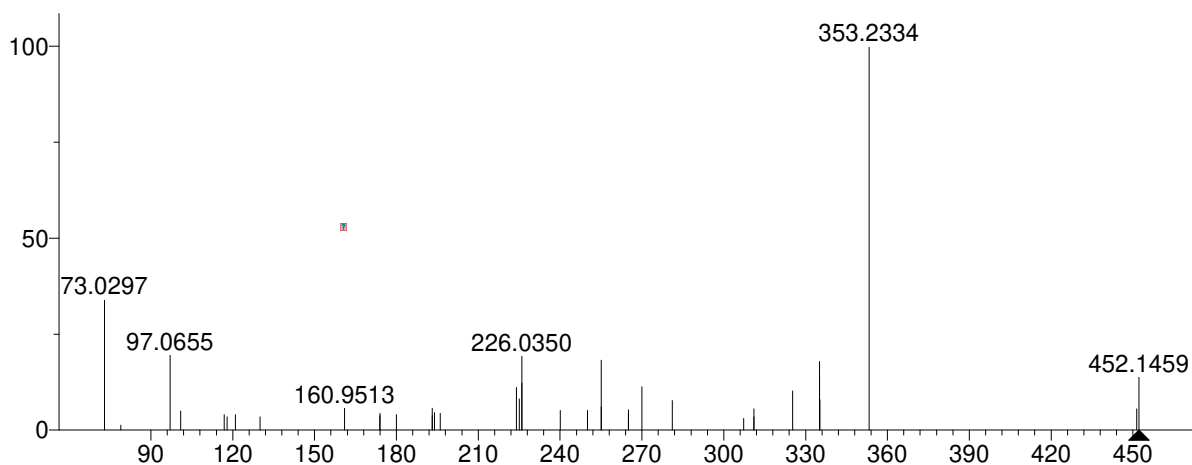

Hit 1 : NOSCAPINE [M+K]<sup>+</sup> 35% P=452.2  
C<sub>22</sub>H<sub>23</sub>NO<sub>7</sub>; MF: 0; RMF: 57; Prob 100.0%; Lib: mona-export-itree; ID: 697.

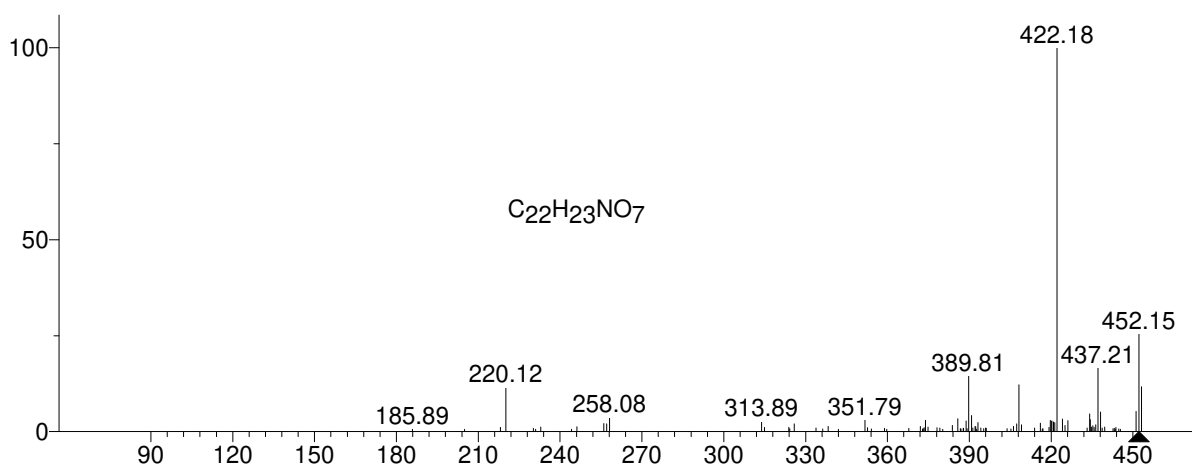

\*\* Search Report Page 1 of 2 \*\*

Unknown: Unknown (27.72\_417.2637m/z)  
Compound in Library Factor = -289

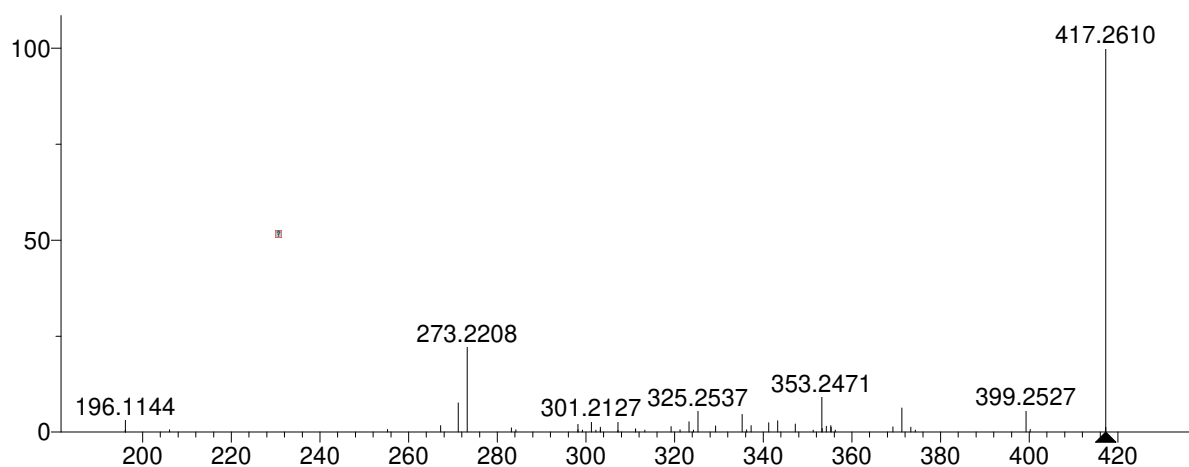

Hit 1 : Prostaglandin E2 isopropyl ester [M+Na]<sup>+</sup> QTOF 17V P=417.3  
C23H38O5; MF: 317; RMF: 941; Prob 98.8%; CAS: 71845-66-4; Lib: nist\_msms; ID: 62065.

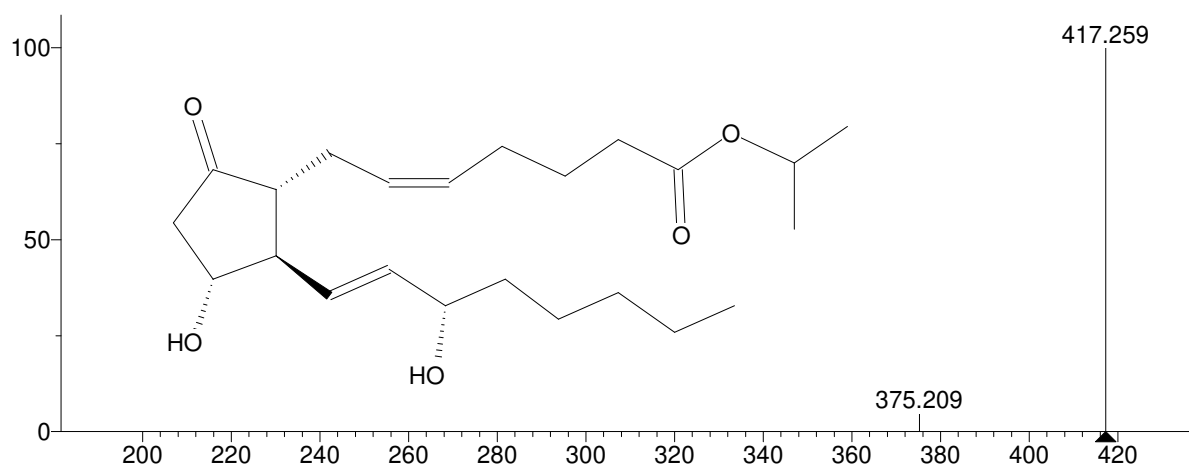

Hit 2 : Alfentanyl [M+H]<sup>+</sup> HCD 12V P=417.3  
C21H32N6O3; MF: 102; RMF: 667; Prob 0.98%; CAS: 71195-58-9; Lib: nist\_msms; ID: 322110.

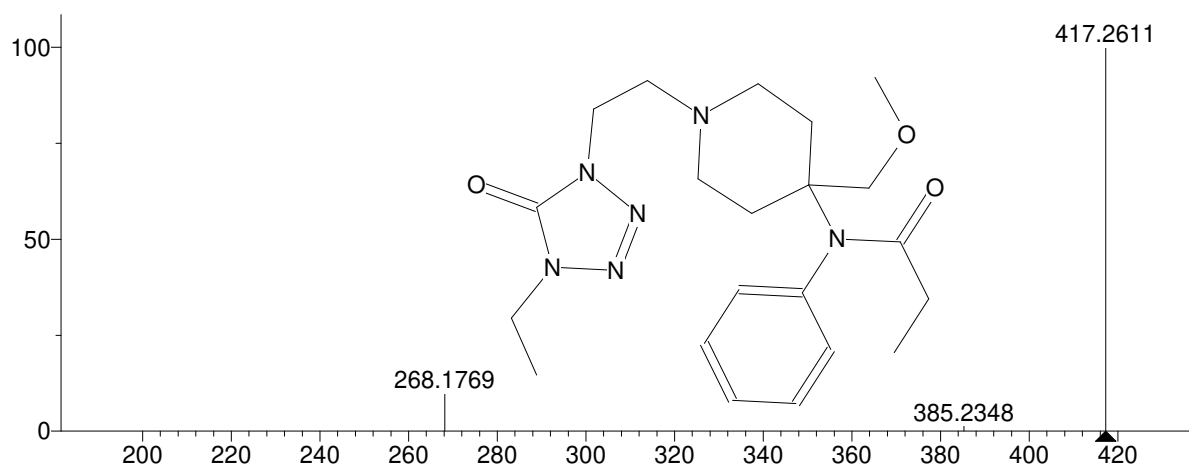

\*\* Search Report Page 2 of 2 \*\*

Hit 3 : Manoalide [M+H]<sup>+</sup> HCD 12V P=417.3  
C<sub>25</sub>H<sub>36</sub>O<sub>5</sub>; MF: 63; RMF: 703; Prob 0.23%; CAS: 75088-80-1; Lib: nist\_msms; ID: 362740.

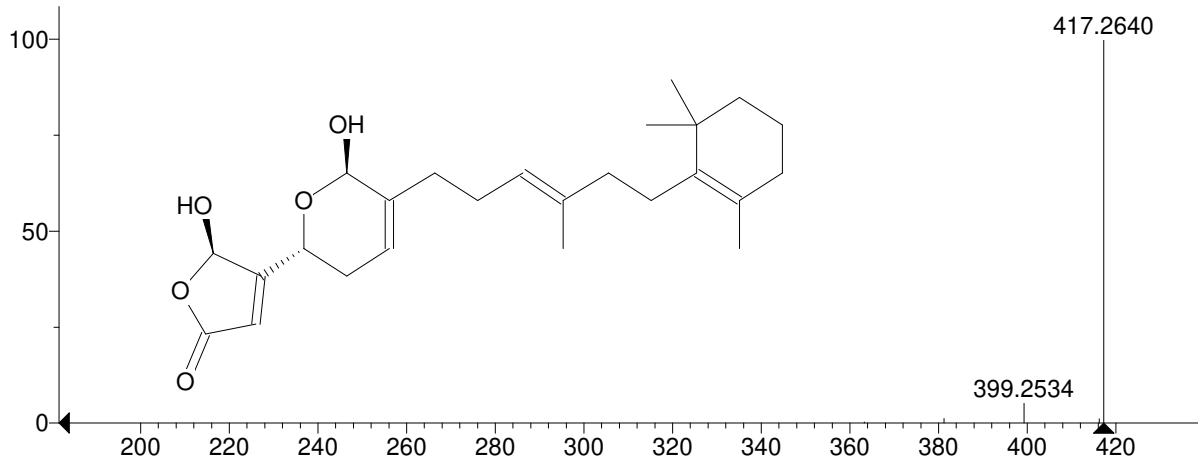

Unknown: Unknown (27.73\_562.1866m/z)  
Compound in Library Factor = 0

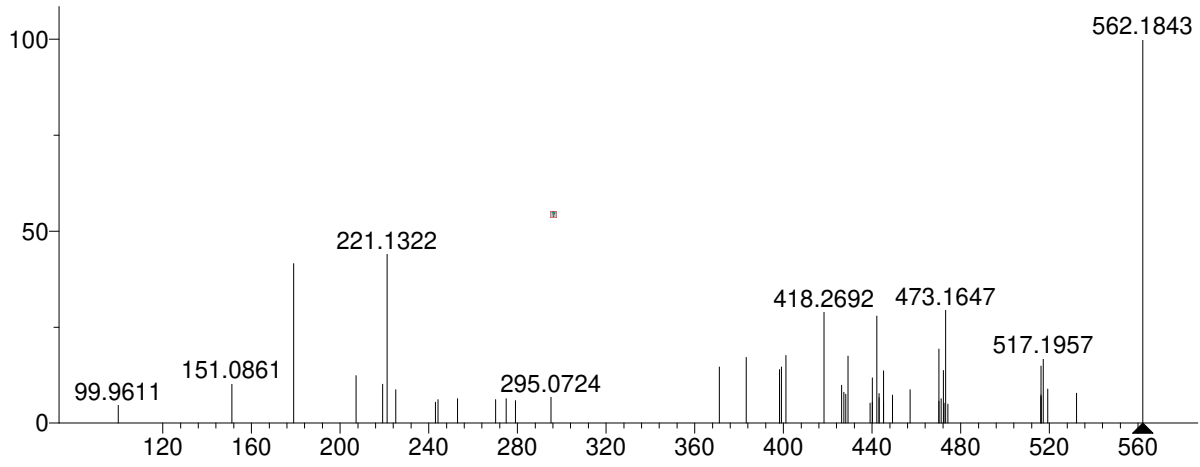

\*\* Search Report Page 1 of 2 \*\*

Unknown: Unknown (28.04\_299.1632m/z)  
Compound in Library Factor = -1090

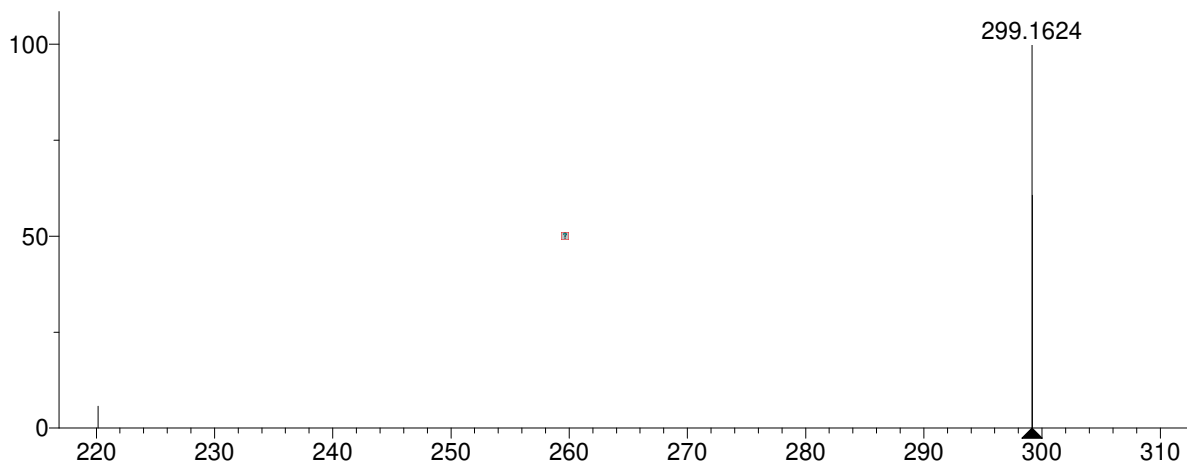

Hit 1 : Olomoucine [M+H]<sup>+</sup> HCD 14V P=299.2  
C<sub>15</sub>H<sub>18</sub>N<sub>6</sub>O; MF: 220; RMF: 773; Prob 50.6%; CAS: 101622-51-9; Lib: nist\_msms; ID: 167756.

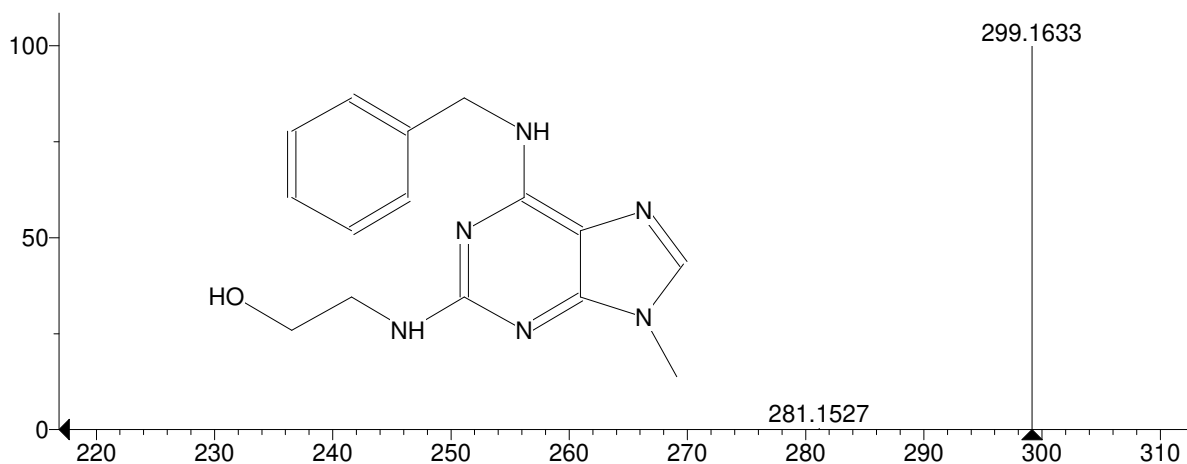

Hit 2 : Urea, N-cyclopropyl-N'-[3-[6-(4-morpholinylmethyl)-1H-benzimidazol-2-yl]-1H-pyrazol-4-yl]- [M+H-C<sub>4</sub>H<sub>5</sub>NC  
C<sub>19</sub>H<sub>23</sub>N<sub>7</sub>O<sub>2</sub>; MF: 214; RMF: 772; Prob 39.8%; CAS: 896466-04-9; Lib: nist\_msms; ID: 362571.

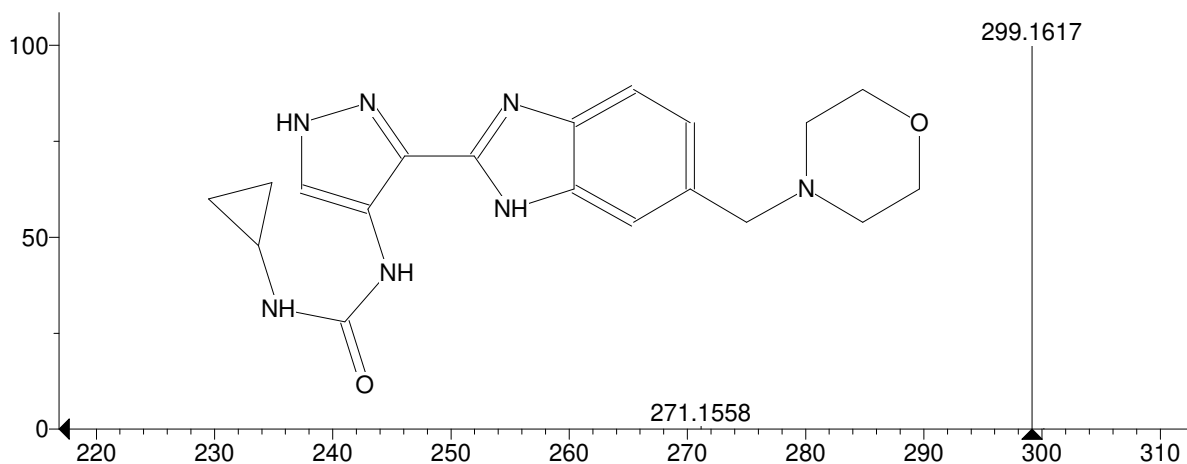

Hit 3 : Aurapten [M+H]<sup>+</sup> HCD 8V P=299.2  
C<sub>19</sub>H<sub>22</sub>O<sub>3</sub>; MF: 148; RMF: 760; Prob 6.28%; CAS: 495-02-3; Lib: nist\_msms; ID: 425033.

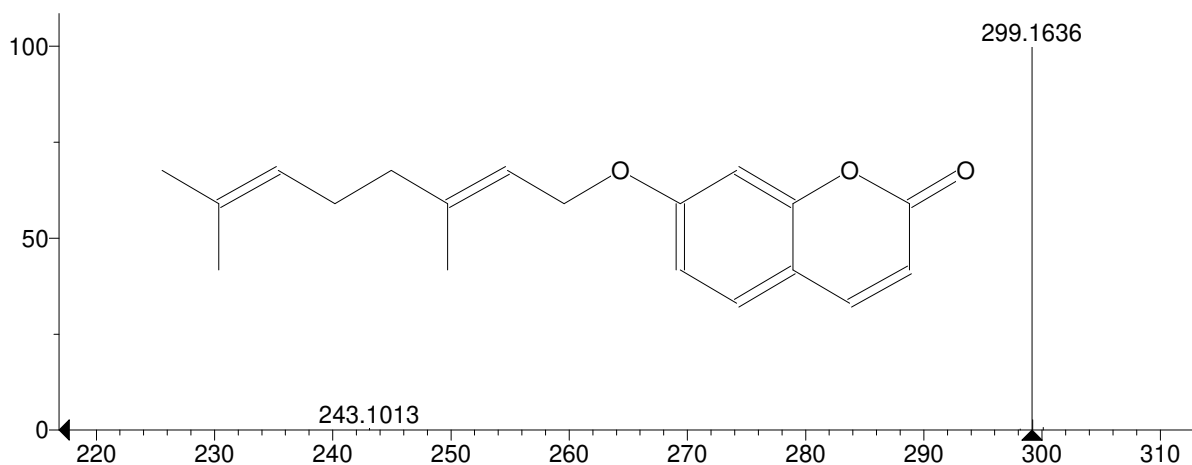

Hit 4 : Iso-olomoucine [M+H]<sup>+</sup> HCD 23V P=299.2  
C<sub>15</sub>H<sub>18</sub>N<sub>6</sub>O; MF: 105; RMF: 746; Prob 1.38%; CAS: 101622-50-8; Lib: nist\_msms; ID: 415534.

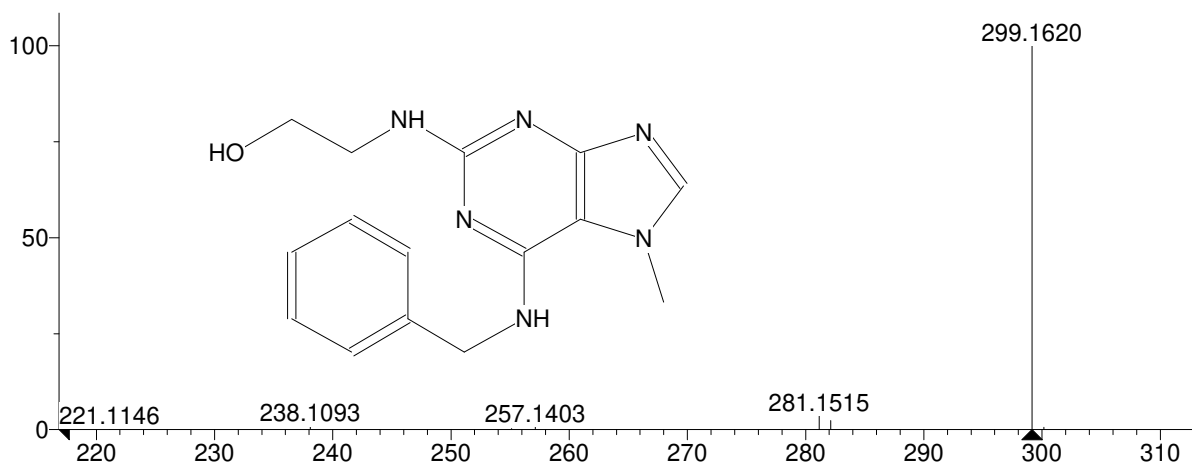

Hit 5 : Oridonin [M+H-CH<sub>6</sub>O<sub>3</sub>]<sup>+</sup> HCD 13V P=299.2  
C<sub>20</sub>H<sub>28</sub>O<sub>6</sub>; MF: 100; RMF: 721; Prob 1.11%; CAS: 28957-04-2; Lib: nist\_msms; ID: 238338.

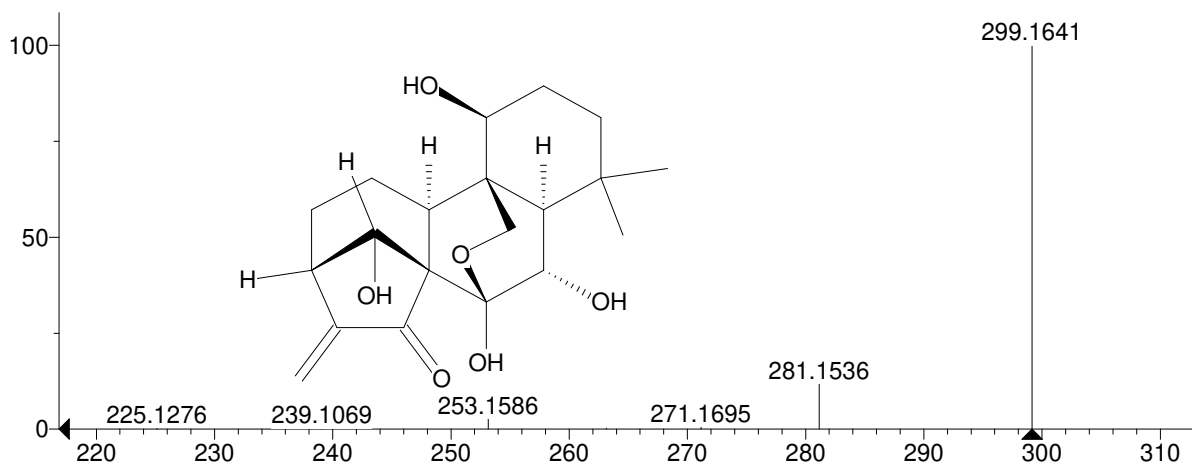



\*\* Search Report Page 1 of 2 \*\*

Unknown: Unknown (28.15\_417.2630m/z)  
Compound in Library Factor = -1142

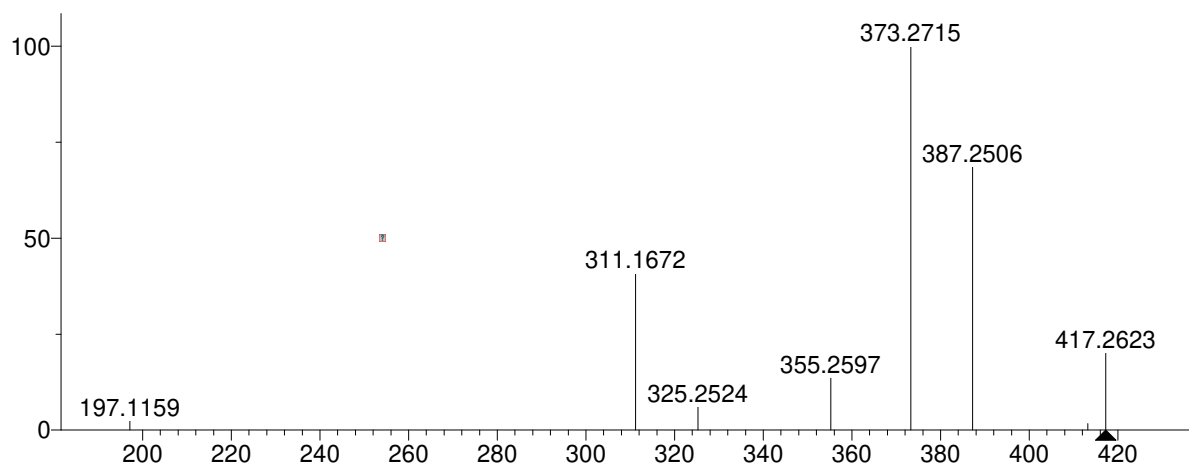

Hit 1 : Prostaglandin E2 isopropyl ester [M+Na]<sup>+</sup> QTOF 17V P=417.3  
C23H38O5; MF: 91; RMF: 460; Prob 77.5%; CAS: 71845-66-4; Lib: nist\_msms; ID: 62065.



Hit 2 : Alfentanyl [M+H]<sup>+</sup> HCD 12V P=417.3  
C21H32N6O3; MF: 27; RMF: 268; Prob 12.7%; CAS: 71195-58-9; Lib: nist\_msms; ID: 322110.



\*\* Search Report Page 2 of 2 \*\*

Hit 3 : Manoalide [M+H]<sup>+</sup> HCD 12V P=417.3  
C<sub>25</sub>H<sub>36</sub>O<sub>5</sub>; MF: 20; RMF: 271; Prob 9.75%; CAS: 75088-80-1; Lib: nist\_msms; ID: 362740.



\*\* Search Report Page 1 of 2 \*\*

Unknown: Unknown (28.17\_431.2428m/z)  
Compound in Library Factor = -218

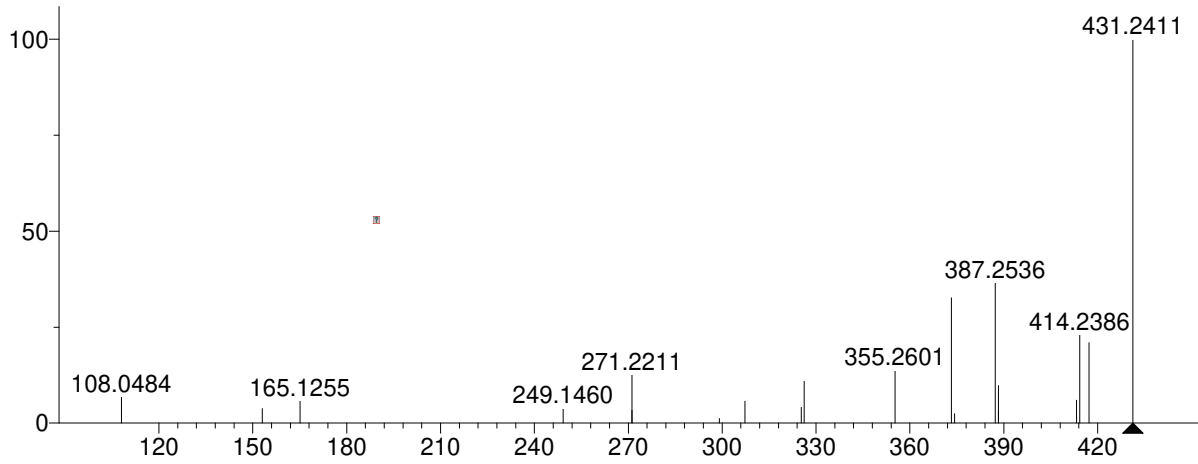

Hit 1 : Bufalin; PlaSMA ID-1130 [M+FA-H]- P=431.2  
C<sub>24</sub>H<sub>34</sub>O<sub>4</sub>; MF: 364; RMF: 999; Prob 79.0%; Lib: biomsmms-neg-plasma; ID: 160.

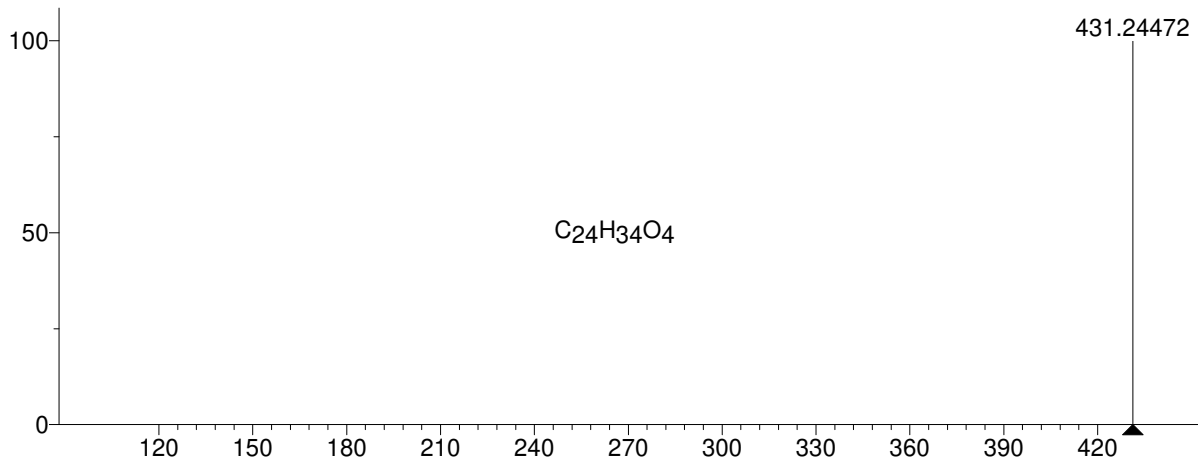

Hit 2 : Budesonide [M+H]<sup>+</sup> HCD 4V P=431.2  
C<sub>25</sub>H<sub>34</sub>O<sub>6</sub>; MF: 316; RMF: 830; Prob 16.4%; CAS: 51333-22-3; Lib: nist\_msms; ID: 152670.

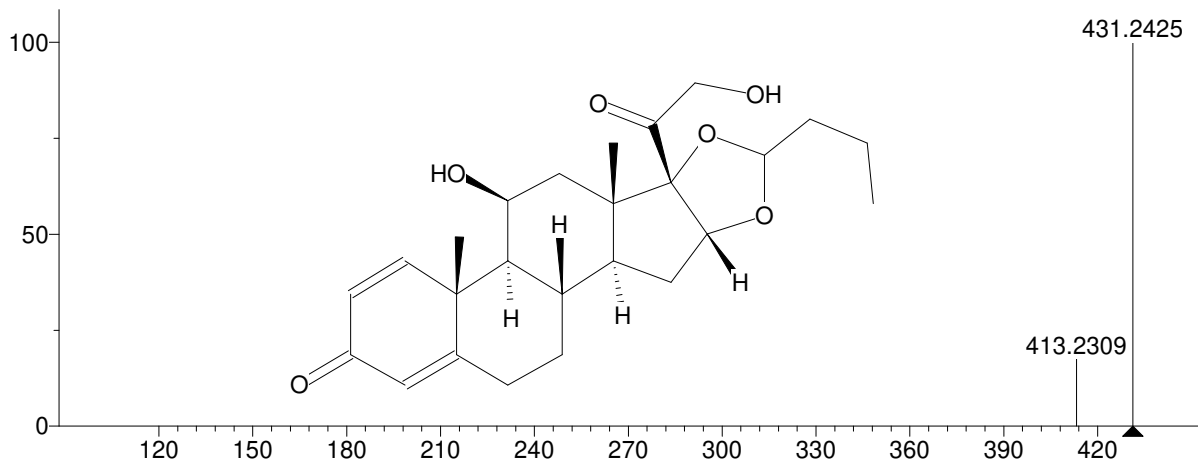

Hit 3 : Bufalin [M+FA-H]- 10 P=431.2

C<sub>24</sub>H<sub>34</sub>O<sub>4</sub>; MF: 286; RMF: 913; Prob 4.54%; Lib: msms neg mona\_ipb\_gnps\_plasma; ID: 21271.

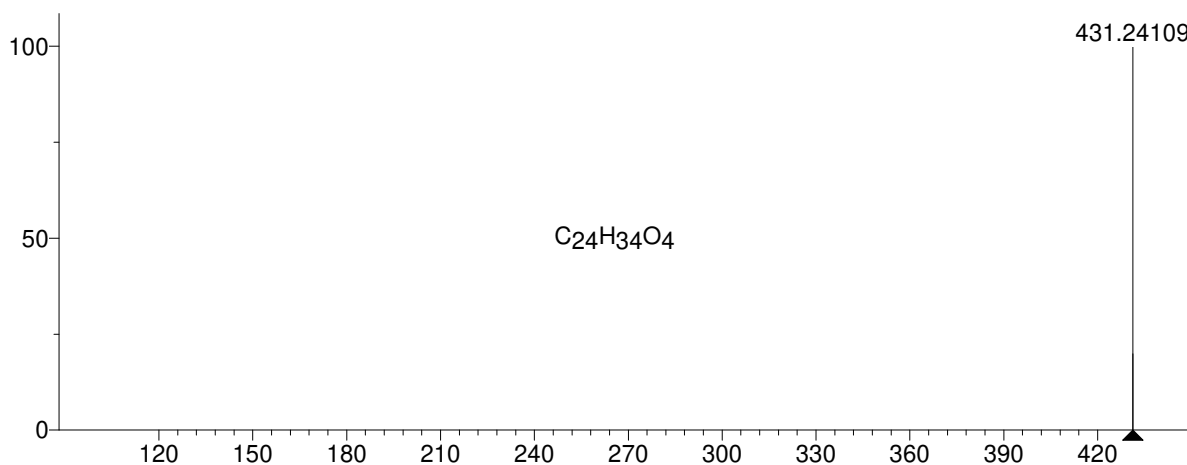

Hit 4 : 3 $\beta$ ,5 $\beta$ -Tetrahydrocortisone 3,21-diacetate [M+H-H<sub>2</sub>O]+ HCD 8V P=431.2

C<sub>25</sub>H<sub>36</sub>O<sub>7</sub>; MF: 35; RMF: 539; Prob 0.04%; CAS: 4003-93-4; Lib: nist\_msms; ID: 551376.

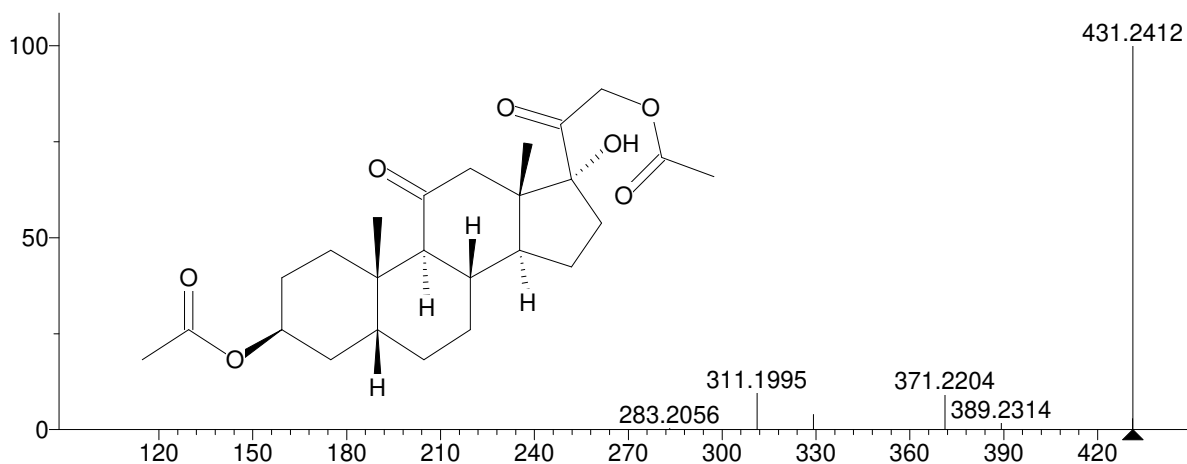

Hit 5 : Phe-His-Lys [M+H]<sup>+</sup> QTOF 5V P=431.2

C<sub>21</sub>H<sub>30</sub>N<sub>6</sub>O<sub>4</sub>; MF: 8; RMF: 537; Prob 0.01%; Lib: nist\_msms; ID: 50393.

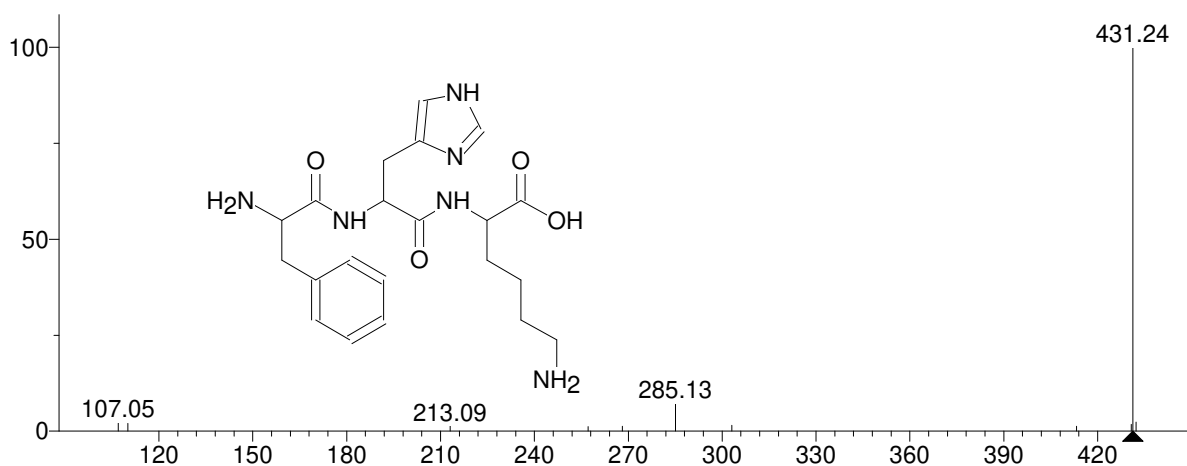

\*\* Search Report Page 1 of 2 \*\*

Unknown: Unknown (28.41\_417.2631m/z)  
Compound in Library Factor = -2176

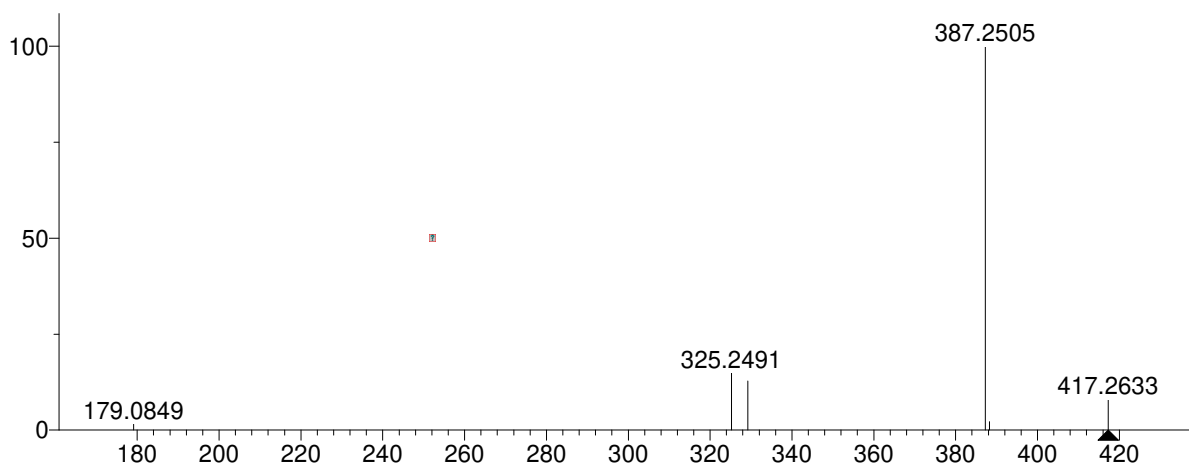

Hit 1 : Prostaglandin E2 isopropyl ester [M+Na]<sup>+</sup> QTOF 17V P=417.3  
C23H38O5; MF: 43; RMF: 262; Prob 56.5%; CAS: 71845-66-4; Lib: nist\_msms; ID: 62065.

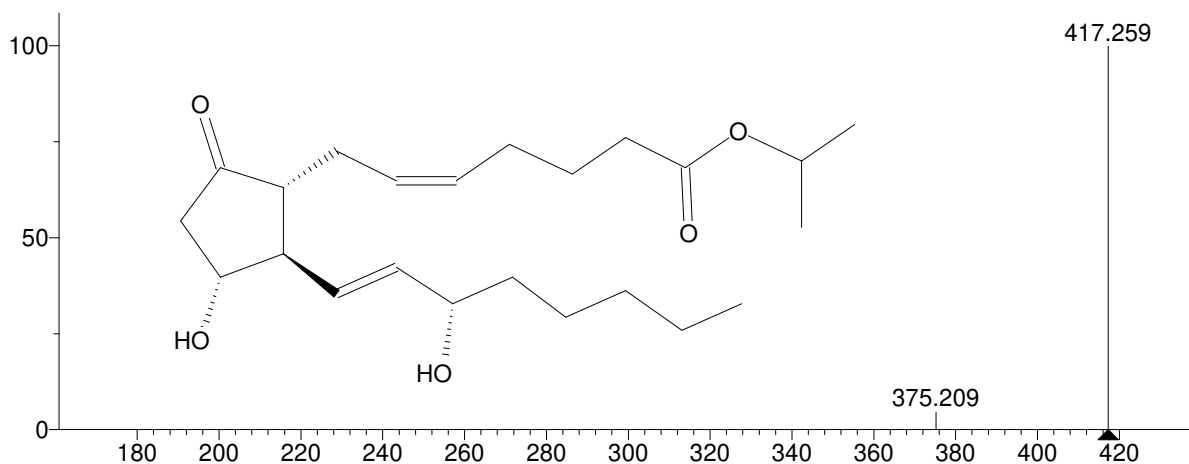

Hit 2 : Alfentanyl [M+H]<sup>+</sup> HCD 12V P=417.3  
C21H32N6O3; MF: 22; RMF: 227; Prob 24.1%; CAS: 71195-58-9; Lib: nist\_msms; ID: 322110.

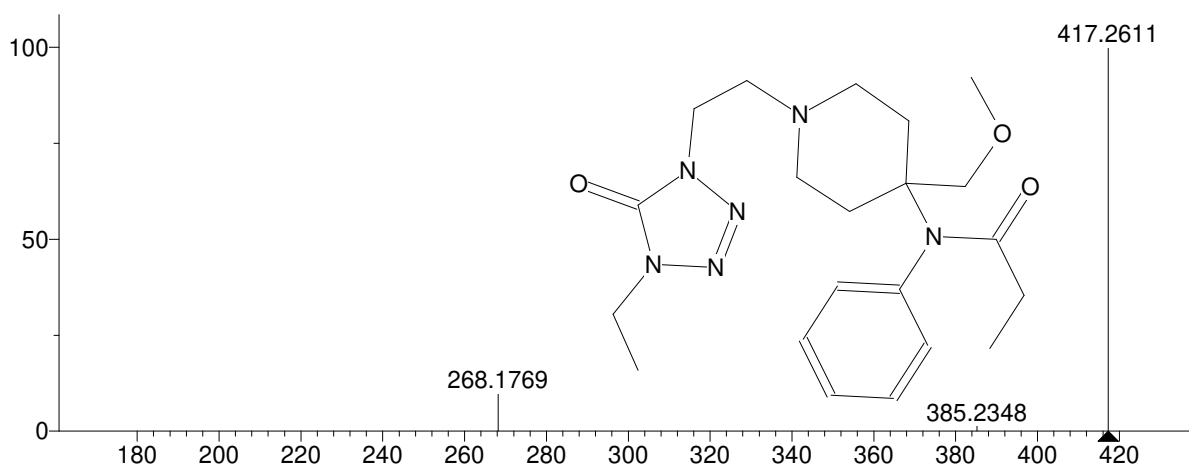

\*\* Search Report Page 2 of 2 \*\*

Hit 3 : Manoalide [M+H]<sup>+</sup> HCD 12V P=417.3  
C<sub>25</sub>H<sub>36</sub>O<sub>5</sub>; MF: 17; RMF: 229; Prob 19.4%; CAS: 75088-80-1; Lib: nist\_msms; ID: 362740.

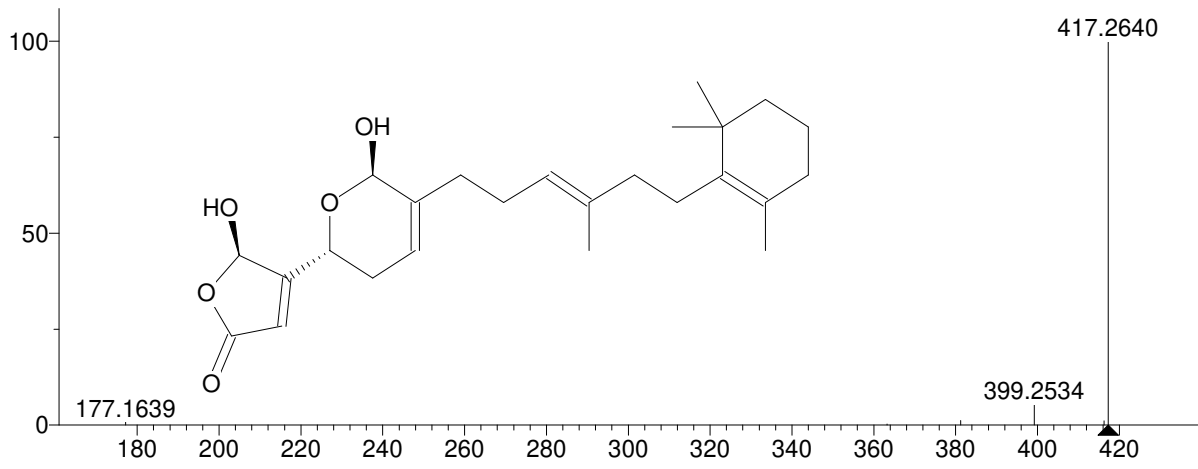

\*\* Search Report Page 1 of 2 \*\*

Unknown: Unknown (28.87\_433.2581m/z)  
Compound in Library Factor = -2387

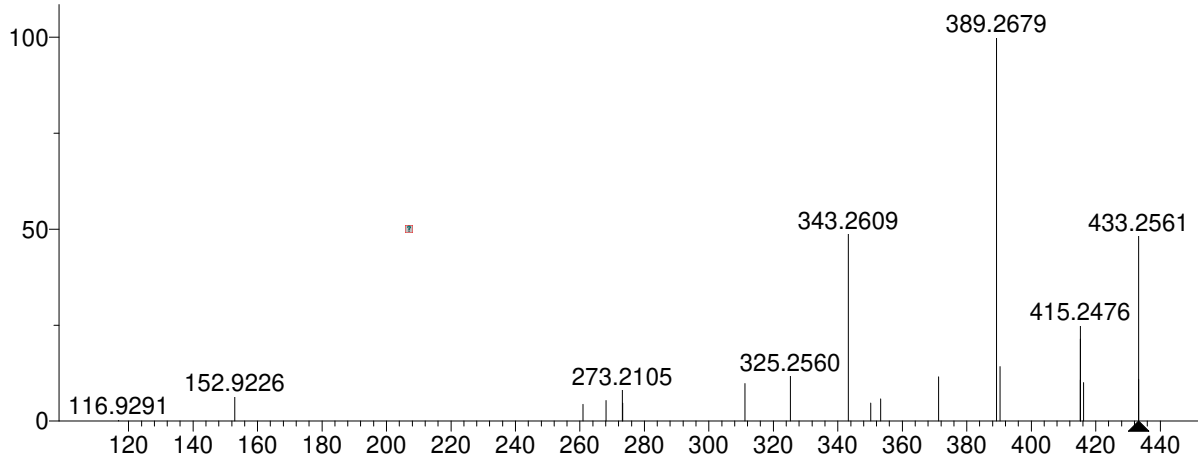

Hit 1 : 3 $\beta$ -Tetrahydrocortisol, 3,21-diacetate [M+H-H<sub>2</sub>O]<sup>+</sup> HCD 8V P=433.3  
C25H38O7; MF: 25; RMF: 357; Prob 39.6%; CAS: 6820-57-1; Lib: nist\_msms; ID: 454119.

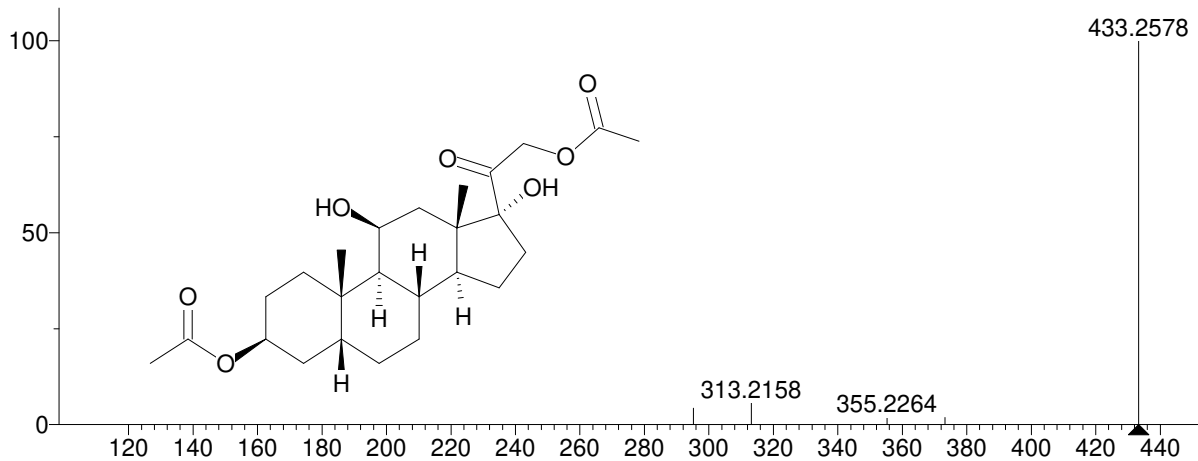

Hit 2 : Arg-Phe-Lys [M+H-NH<sub>3</sub>]<sup>+</sup> QTOF 15V P=433.3  
C21H35N7O4; MF: 11; RMF: 285; Prob 24.8%; Lib: nist\_msms; ID: 53463.

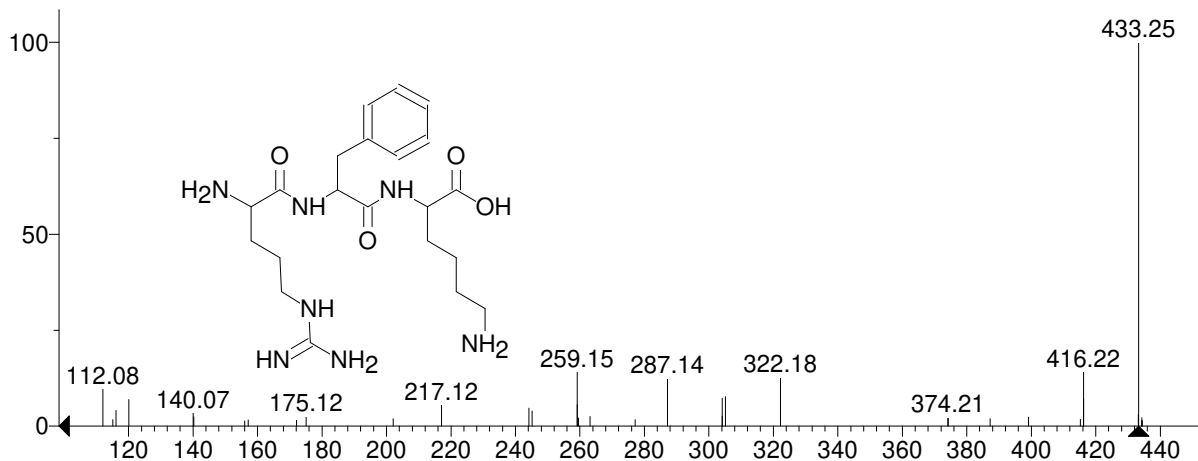

Hit 3 : [(2R)-2-[(E,2S,4R)-4,6-dimethyloct-6-en-2-yl]-6-oxo-2,3-dihydropyran-3-yl] (2E,4E,6S)-8-hydroxy-6-(hydrox  
C<sub>25</sub>H<sub>38</sub>O<sub>6</sub>; MF: 6; RMF: 164; Prob 20.0%; Lib: mona-export-lc-ms-ms\_negative\_mode; ID: 22226.

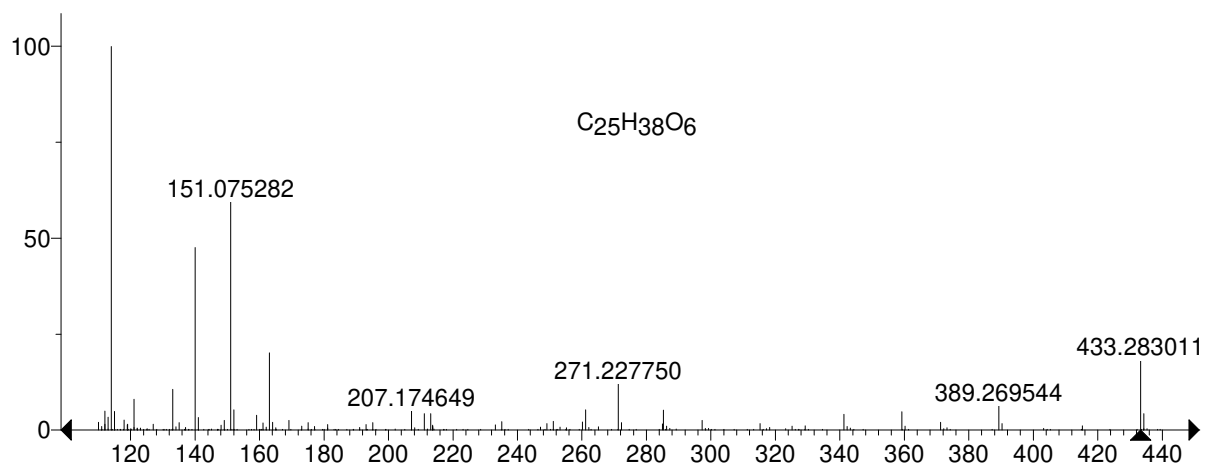

Hit 4 : "MLS001076086-01!11BETA,17,21-TRIHIDROXYPREGN-4-ENE-3,20-DIONE 17-BUTYRATE" [M+H]<sup>+</sup> F  
C<sub>25</sub>H<sub>36</sub>O<sub>6</sub>; MF: 0; RMF: 7; Prob 15.7%; Lib: mona-export-gnps; ID: 3390.

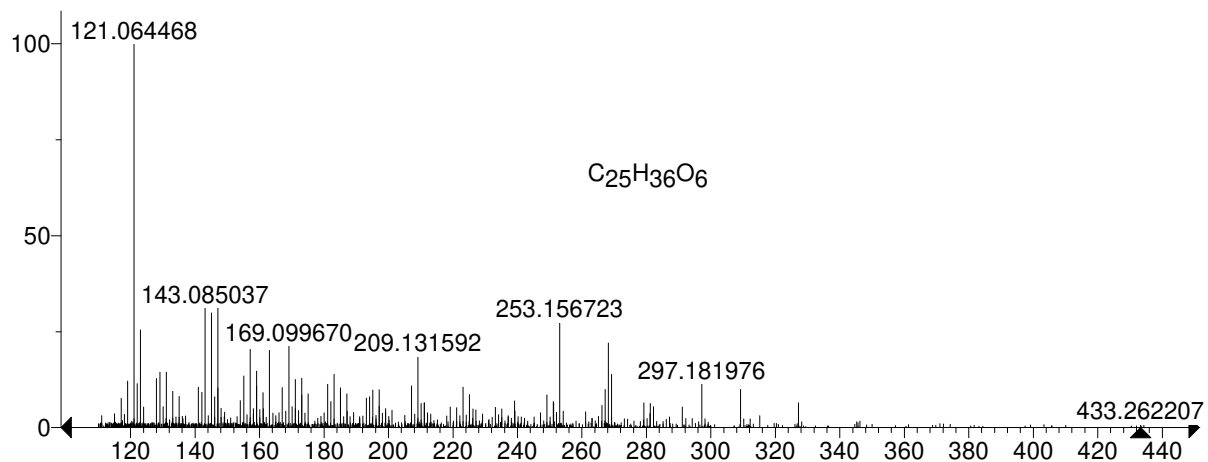



\*\* Search Report Page 1 of 2 \*\*

Unknown: Unknown (29.19\_309.1732m/z)  
Compound in Library Factor = -1309

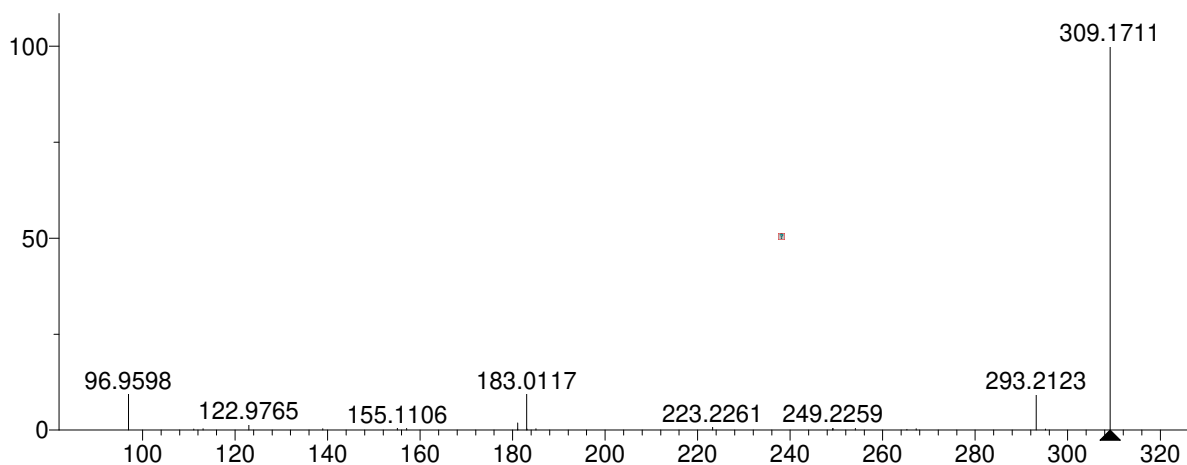

Hit 1 : MMV676401 [M+H]<sup>+</sup> (20-30-40%) P=309.2  
C<sub>18</sub>H<sub>20</sub>N<sub>4</sub>O; MF: 105; RMF: 808; Prob 72.3%; Lib: mona-export-pathogen\_box; ID: 17.

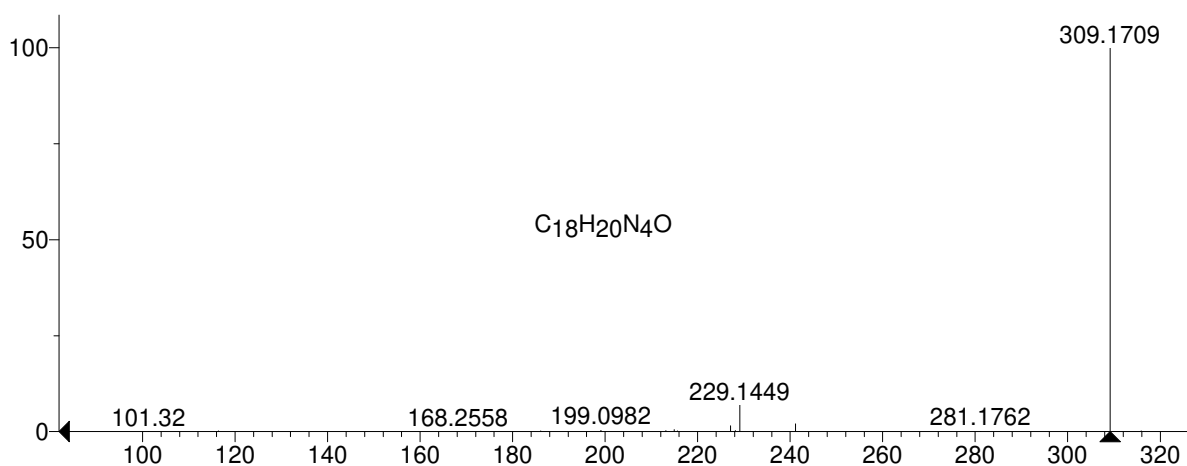

Hit 2 : Mestranol [M-H]<sup>-</sup> (20-30-40%) P=309.2  
C<sub>21</sub>H<sub>26</sub>O<sub>2</sub>; MF: 80; RMF: 796; Prob 22.1%; Lib: mona-export-fiehn\_hilic; ID: 1322.

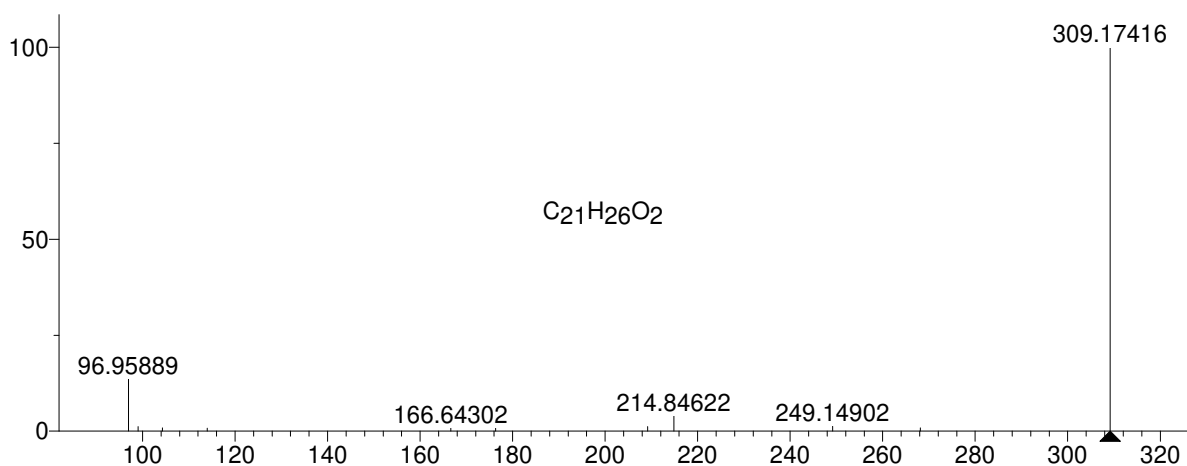

Hit 3 : C12-AE1S (TENTATIVE) [M-H]- 60NCE P=309.2  
C14H30O5S; MF: 27; RMF: 835; Prob 4.36%; Lib: mona-export-1c-ms-ms\_negative\_mode; ID: 14009.

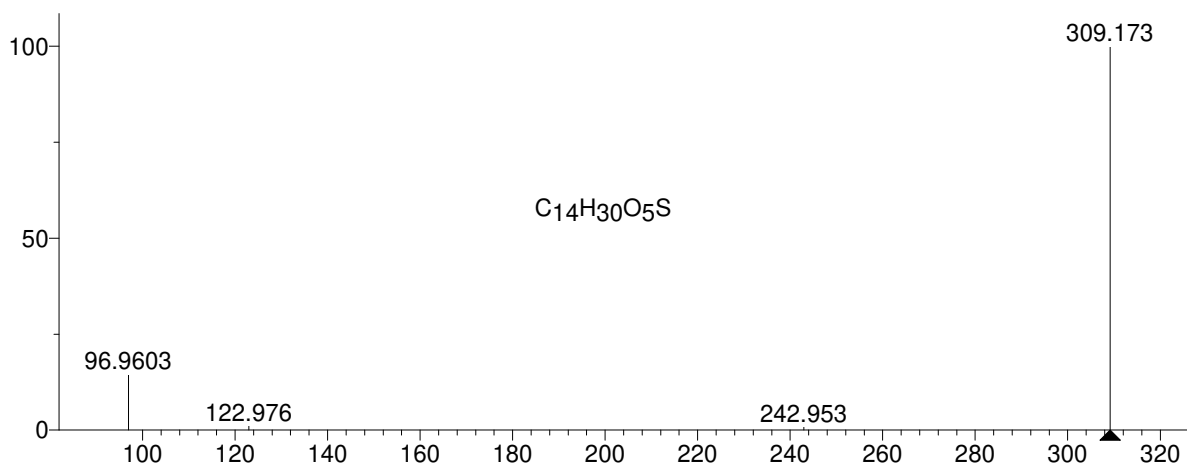

Hit 4 : Ethylene glycol dodecyl ether sulfate [M-H]- QQQ 28V P=309.2  
C14H30O5S; MF: 0; RMF: 7; Prob 1.28%; CAS: 48073-44-5; Lib: nist\_msms; ID: 6887.

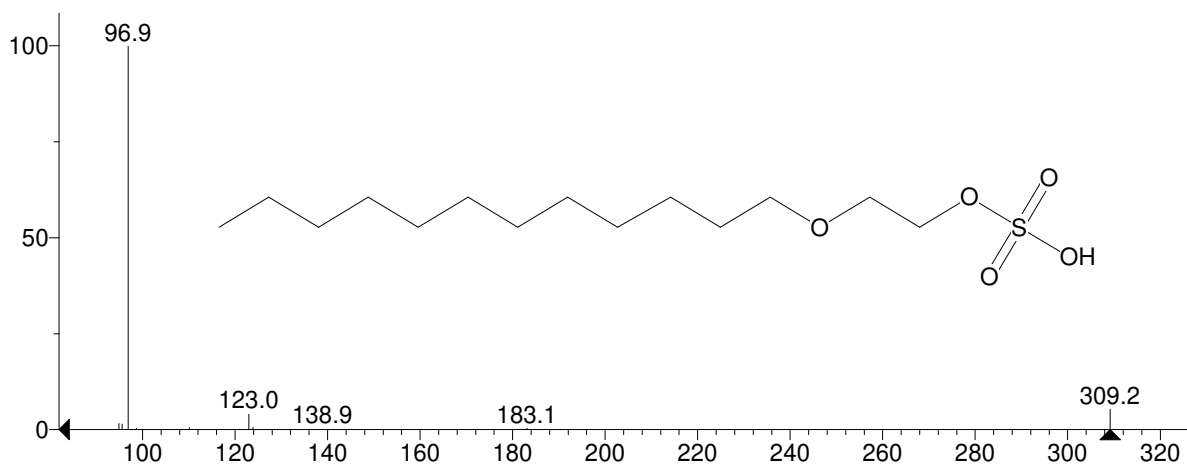

Unknown: Unknown (29.81\_437.2899m/z)  
Compound in Library Factor = 0

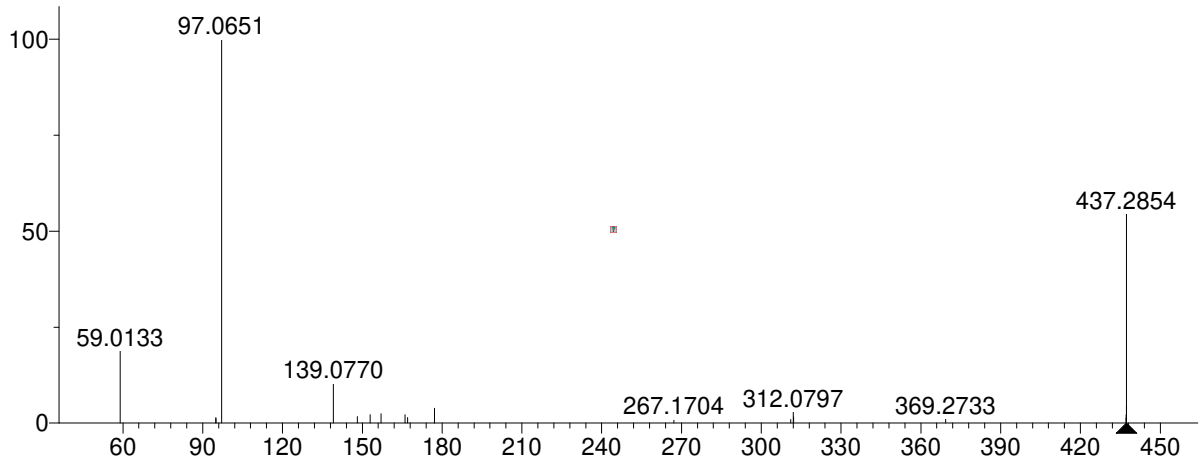

Unknown: Unknown (3.00\_695.2537m/z)  
Compound in Library Factor = 0

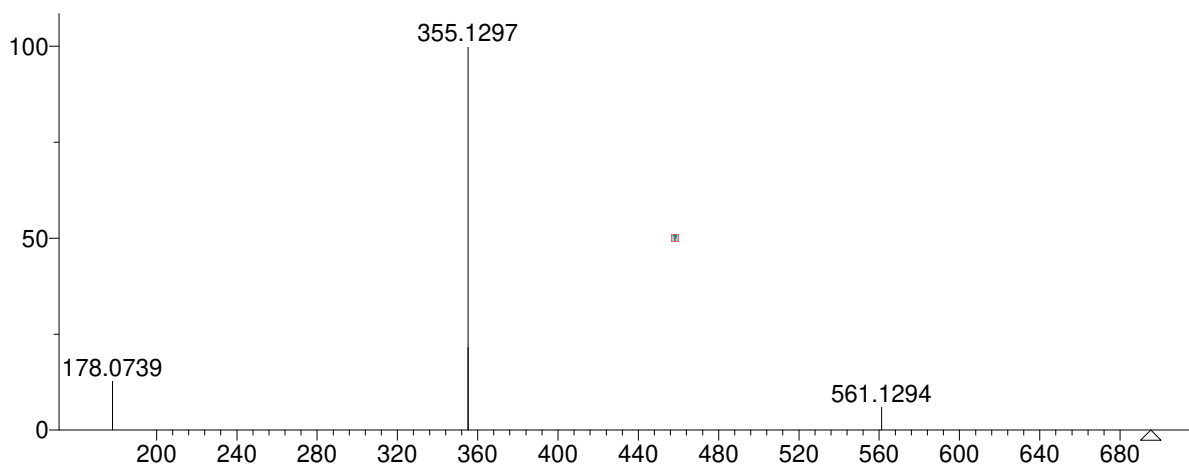

Hit 1 : Calcitonin (1-7), human [M+H]<sup>+</sup> HCD 43eV P=695.2  
C<sub>25</sub>H<sub>42</sub>N<sub>8</sub>O<sub>11</sub>S<sub>2</sub>; MF: 0; RMF: 4; Prob 100.0%; Lib: nist\_msms2; ID: 62813.

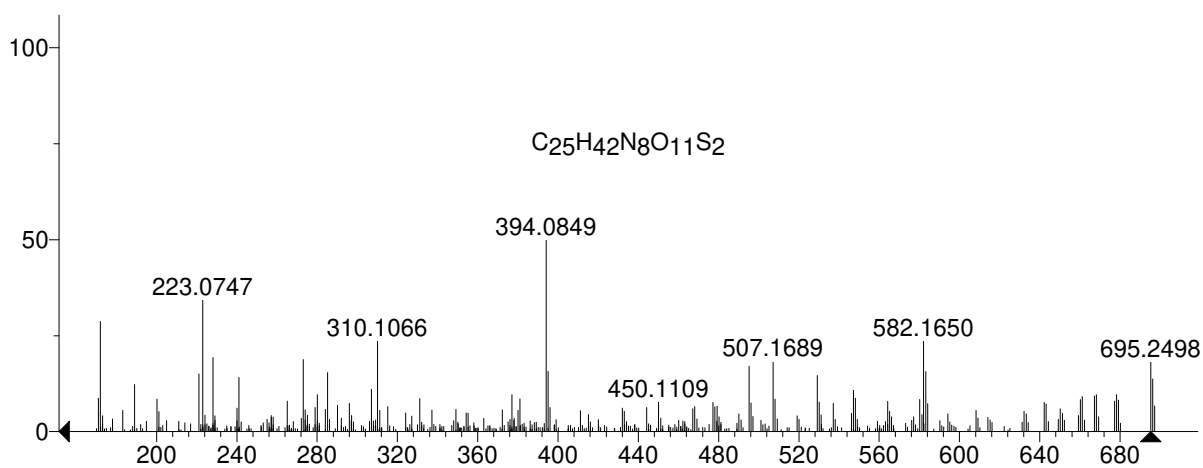

\*\* Search Report Page 1 of 2 \*\*

Unknown: Unknown (3.01\_387.1394m/z)  
Compound in Library Factor = 0

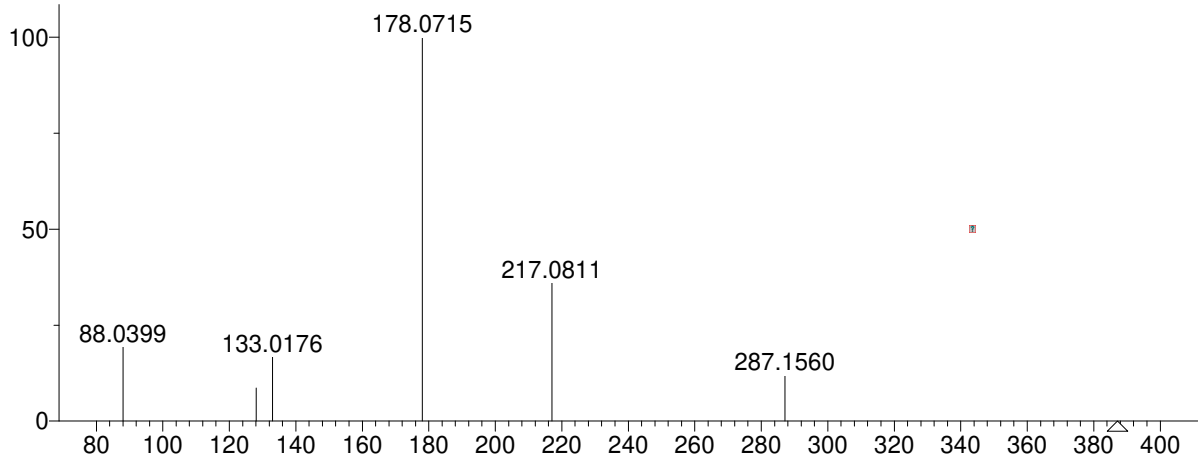

Hit 1 : (5R,6S,8Z,11S)-5,6,15-trihydroxy-17-methoxy-11-methyl-12-oxabicyclo[12.4.0]octadeca-1(14),8,15,17-tetraene  
C<sub>19</sub>H<sub>24</sub>O<sub>7</sub>; MF: 0; RMF: 36; Prob 33.3%; Lib: mona-export-vf-npl\_qexactive; ID: 18340.

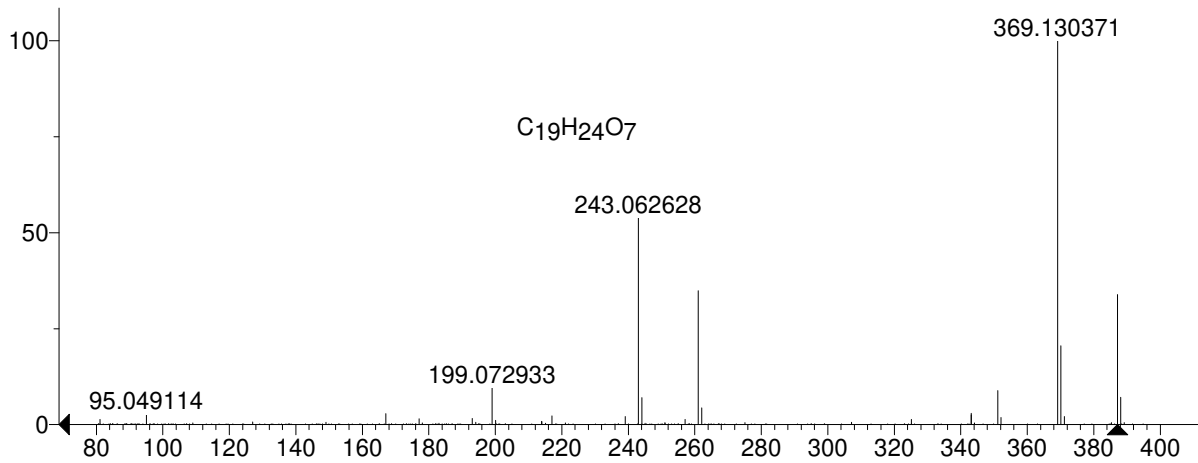

Hit 2 : [(3aR,4S,6R,11aR)-6,9-dihydroxy-6,10-dimethyl-3-methylidene-2,7-dioxo-3a,4,5,8,9,11a-hexahydrocyclohepta[1,2-b]pyridine-2,7-dione  
C<sub>19</sub>H<sub>24</sub>O<sub>7</sub>; MF: 0; RMF: 25; Prob 33.3%; Lib: mona-export-vf-npl\_qexactive; ID: 10212.

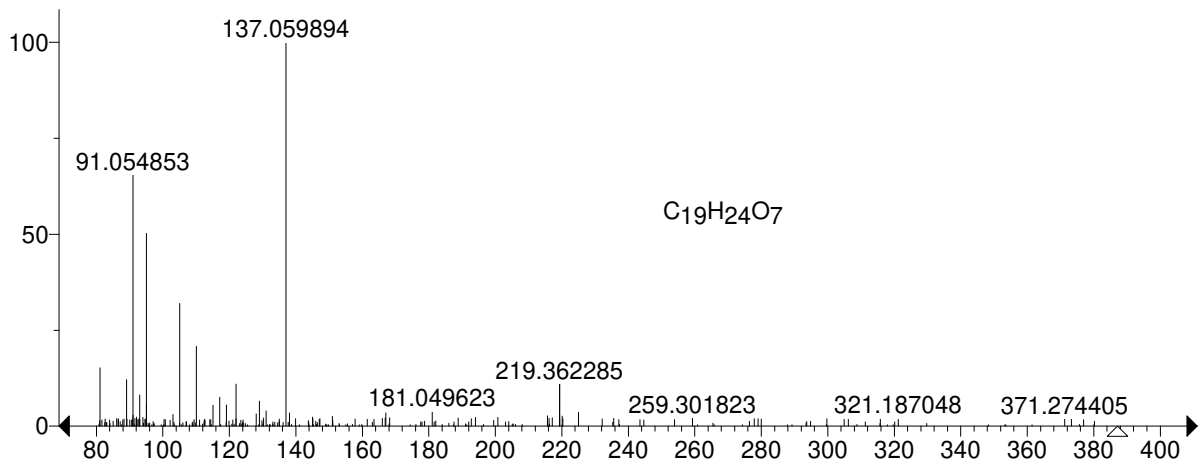

Hit 3 : NCGC00347789-02\_C19H24O7\_(3S,5Z,8S,9R)-8,9,16-Trihydroxy-14-methoxy-3-methyl-3,4,9,10,11,12-he  
C19H24O7; MF: 0; RMF: 21; Prob 33.3%; Lib: mona-export-gnps; ID: 11355.

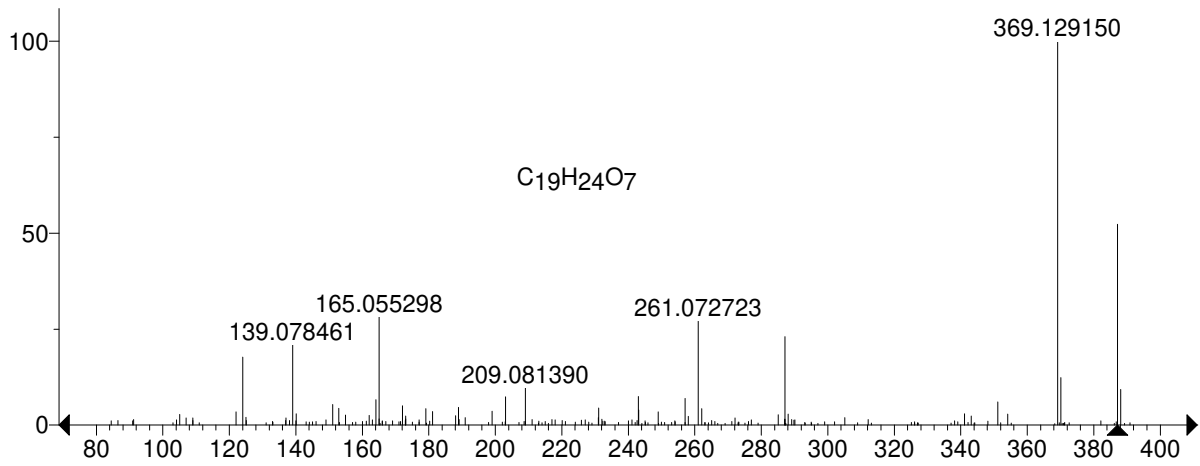

Unknown: Unknown (3.01\_508.2138m/z)  
Compound in Library Factor = -3273

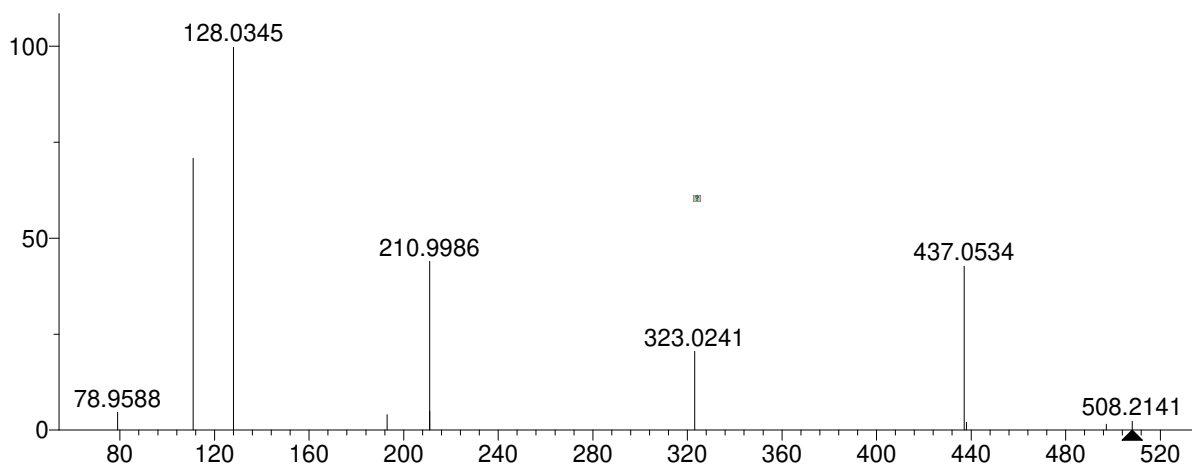

Hit 1 :  $\beta$ -Lipotropin (61-69) [M-2H]<sup>2-</sup> HCD 59eV P=508.2  
C<sub>45</sub>H<sub>66</sub>N<sub>10</sub>O<sub>15</sub>S; MF: 1; RMF: 232; Prob 100.0%; Lib: nist\_msms2; ID: 77125.

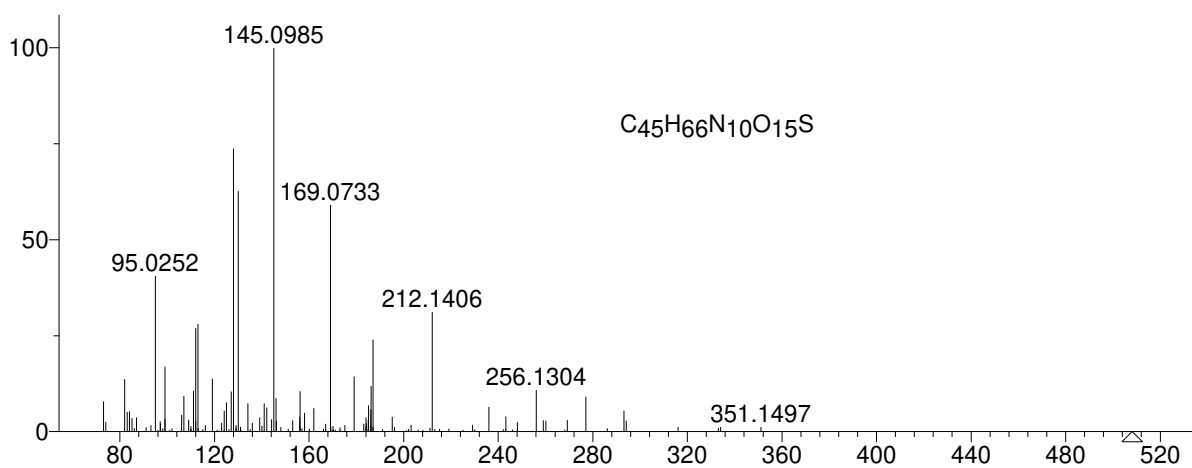

\*\* Search Report Page 1 of 2 \*\*

Unknown: Unknown (3.02\_549.0867m/z)  
Compound in Library Factor = -3273

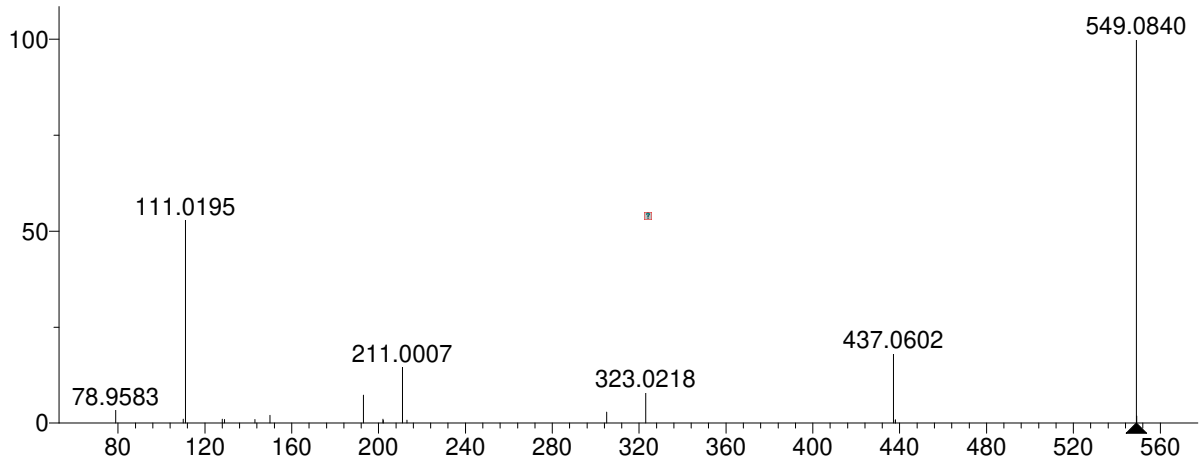

Hit 1 : 5-(3-(2-(7-Chloroquinolin-2-yl)ethenyl)phenyl)-8-dimethylcarbamyl-4,6-dithiaoctanoic acid [M+Cl]<sup>-</sup> HCD 1  
C<sub>26</sub>H<sub>27</sub>CIN<sub>2</sub>O<sub>3</sub>S<sub>2</sub>; MF: 8; RMF: 254; Prob 21.1%; CAS: 115104-28-4; Lib: nist\_msms; ID: 538815.

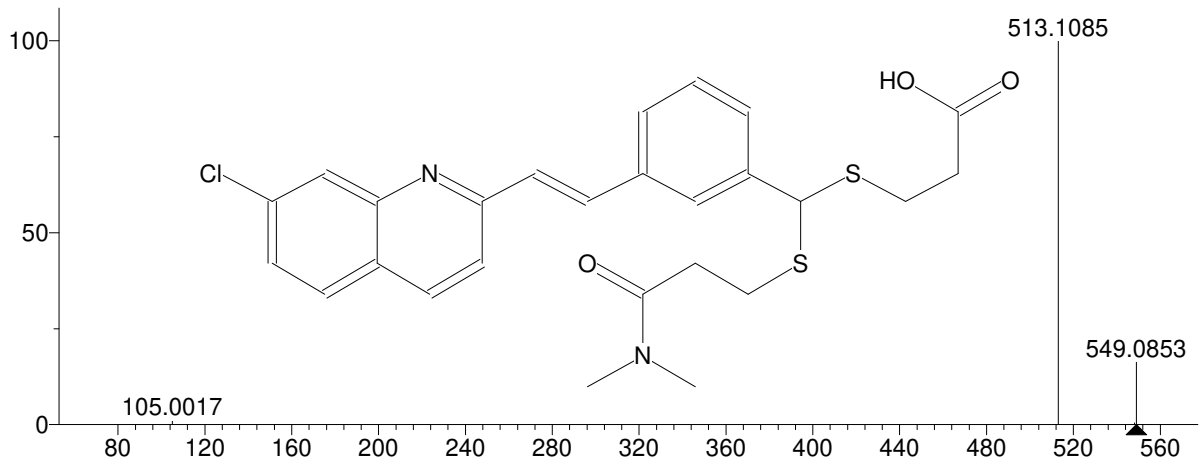

Hit 2 : Quercetin-3-(6"-malonyl)-Glucoside [M-H]<sup>-</sup> 5-60V P=549.1  
C<sub>24</sub>H<sub>22</sub>O<sub>15</sub>; MF: 1; RMF: 152; Prob 16.1%; Lib: mona-export-lc-ms-ms\_negative\_mode; ID: 8837.

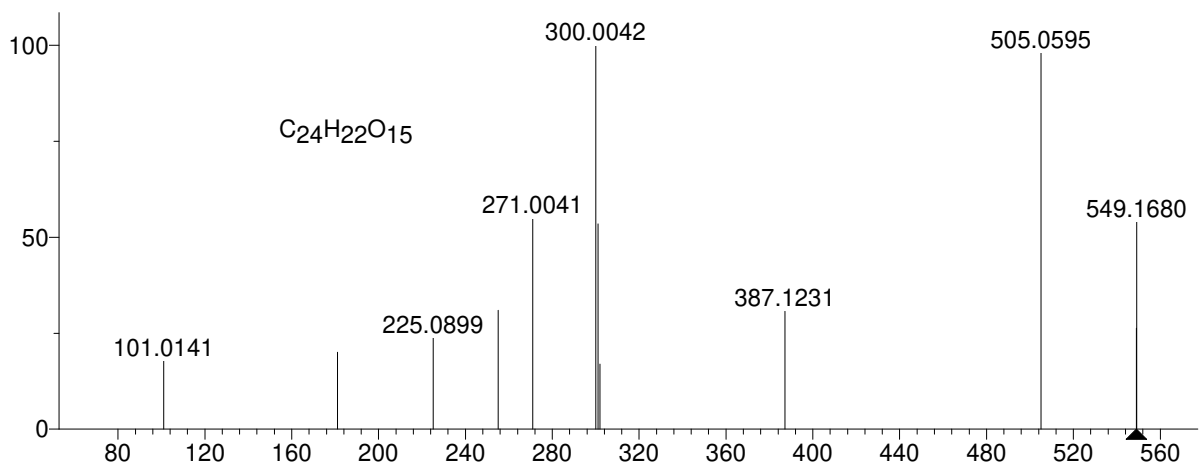



Hit 3 : Quercetin-3-(6"-malonyl)-Glucoside; LC-ESI-QTOF; MS2; CE [M-H]- P=549.1  
C<sub>24</sub>H<sub>22</sub>O<sub>15</sub>; MF: 1; RMF: 143; Prob 16.1%; Lib: msms-neg-massbank; ID: 4722.



Hit 4 : Quercetin 3-O-malonylglucoside [M-H]- 10 P=549.1  
C<sub>24</sub>H<sub>22</sub>O<sub>15</sub>; MF: 0; RMF: 51; Prob 15.5%; Lib: mona-export-lc-ms-ms\_negative\_mode; ID: 27259.



Hit 5 : Flavonol base + 4O, O-MalonylHex [M-H]- 6V P=549.1  
C<sub>24</sub>H<sub>22</sub>O<sub>15</sub>; MF: 0; RMF: 40; Prob 15.5%; Lib: anthocyanins mona; ID: 6952.



Unknown: Unknown (3.03\_515.1643m/z)  
Compound in Library Factor = 0

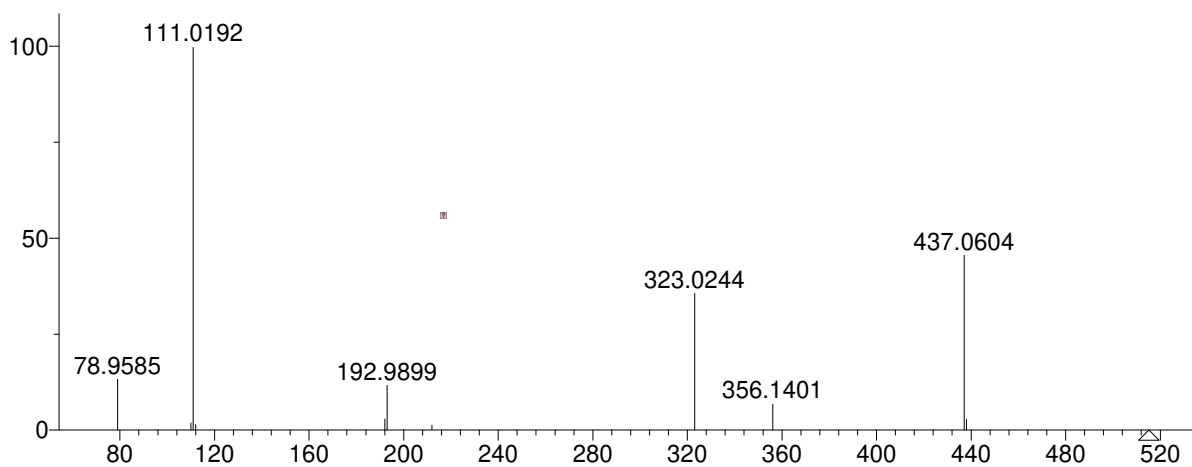

Hit 1 : 1,7-bis(4-hydroxyphenyl)-5-[(2R,3R,4S,5S,6R)-3,4,5-trihydroxy-6-(hydroxymethyl)oxan-2-yl]oxyheptan-3-ol  
C<sub>25</sub>H<sub>32</sub>O<sub>9</sub>; MF: 0; RMF: 6; Prob 100.0%; Lib: mona-export-vf-npl\_qexactive; ID: 7561.

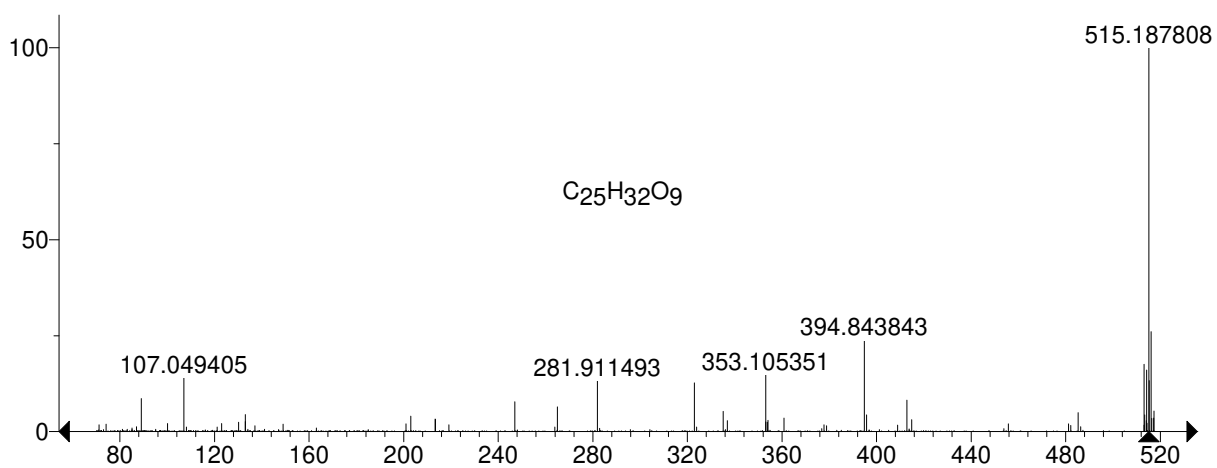

Unknown: Unknown (3.03\_561.1346m/z)  
Compound in Library Factor = 0

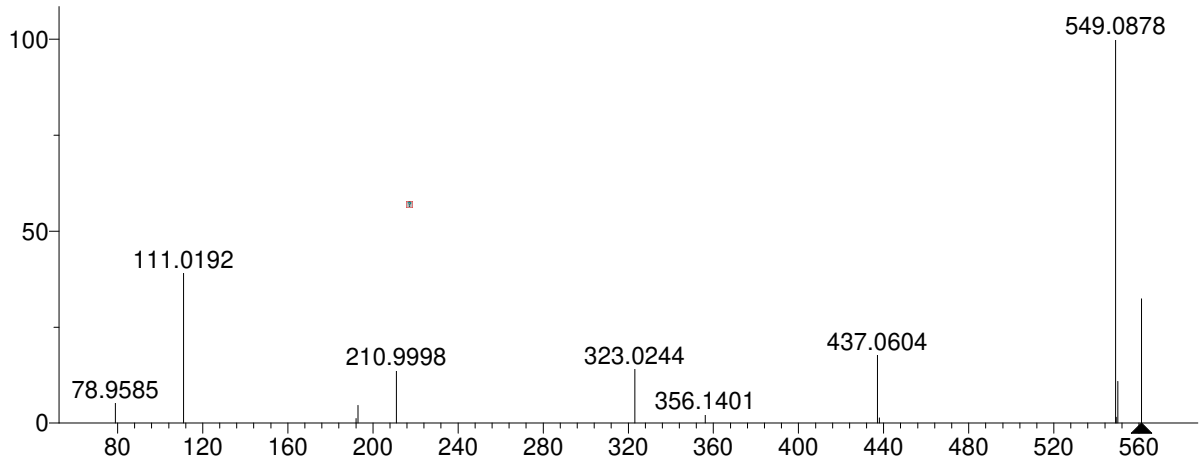

\*\* Search Report Page 1 of 1 \*\*

Unknown: Unknown (3.03\_719.3480m/z)  
Compound in Library Factor = -3273

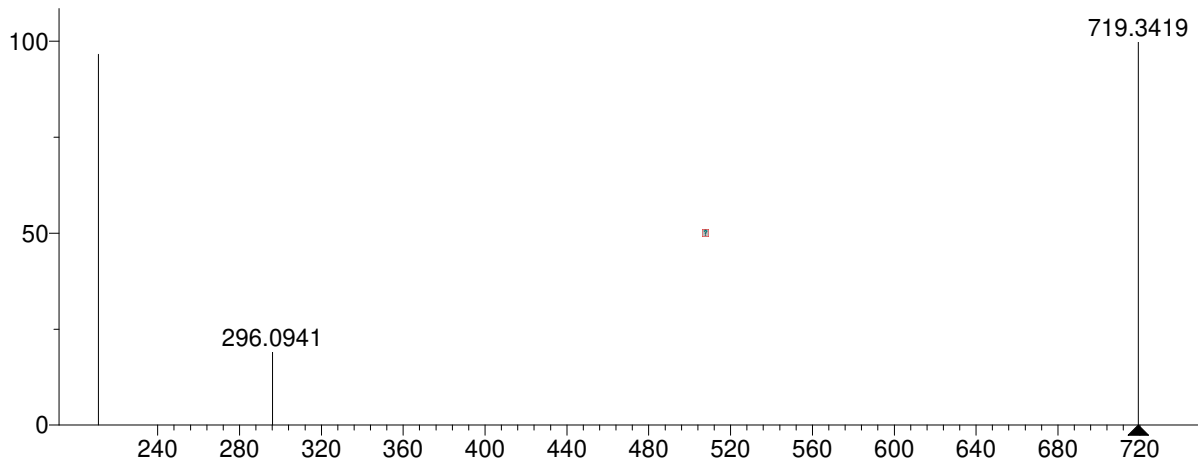

Hit 1 : Etiozazole [2M+H]<sup>+</sup> HCD 14V P=719.3  
C<sub>21</sub>H<sub>23</sub>F<sub>2</sub>NO<sub>2</sub>; MF: 31; RMF: 396; Prob 100.0%; CAS: 153233-91-1; Lib: nist\_msms; ID: 482644.

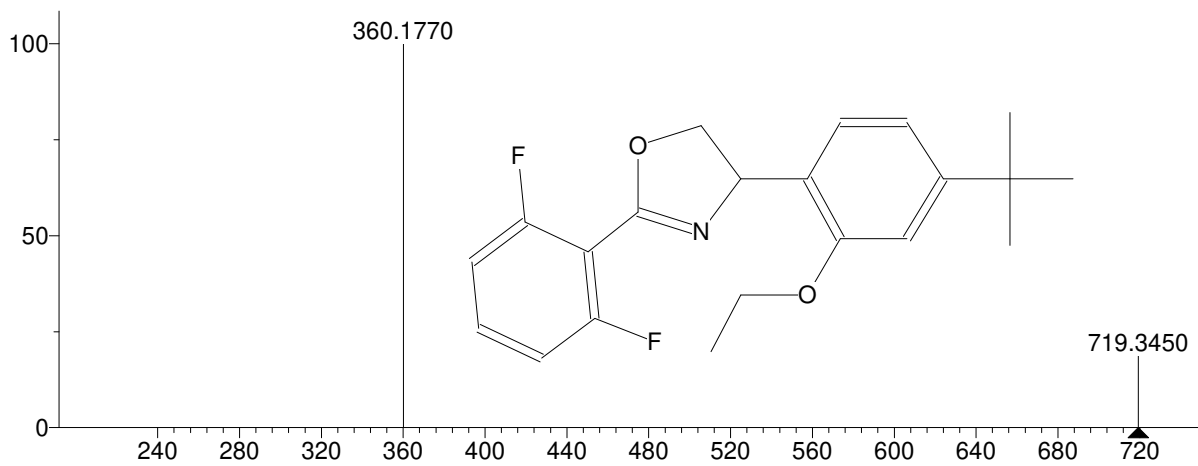

\*\* Search Report Page 1 of 2 \*\*

Unknown: Unknown (3.04\_296.0986m/z)  
Compound in Library Factor = -662

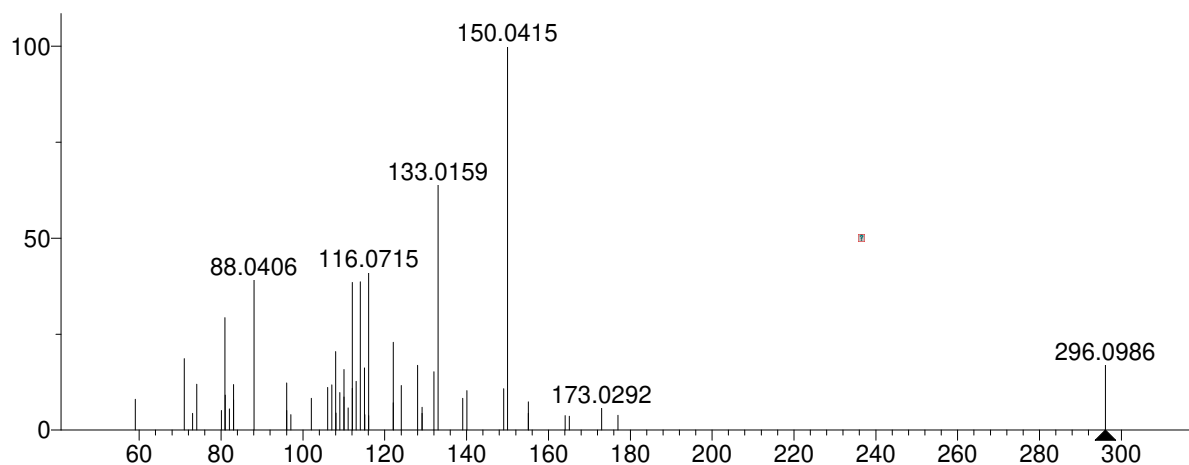

Hit 1 : 3'-O-Methylguanosine [M-H]<sup>-</sup> 20-30-40%) P=296.1  
C<sub>11</sub>H<sub>15</sub>N<sub>5</sub>O<sub>5</sub>; MF: 336; RMF: 535; Prob 92.3%; Lib: mona-export-fiehn\_hilic; ID: 937.

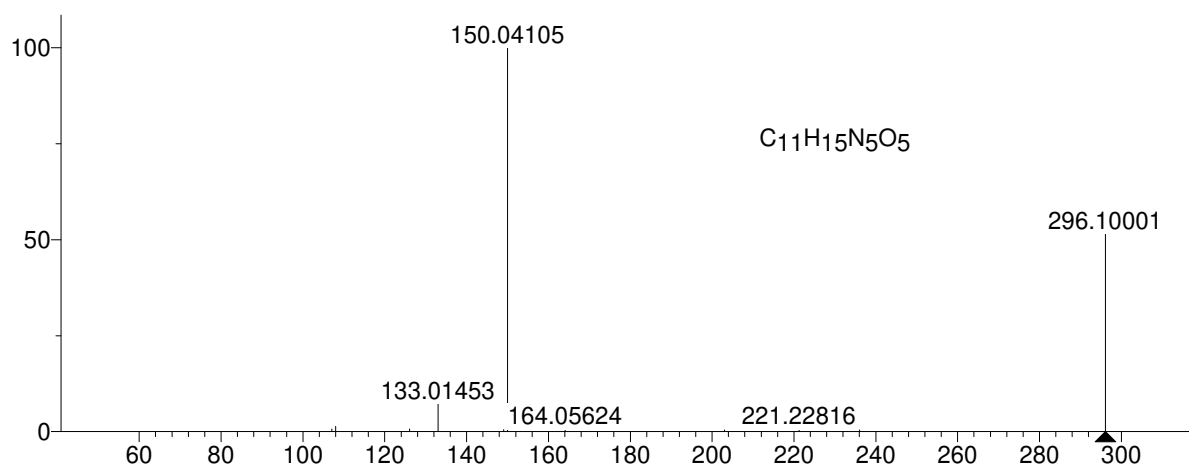

Hit 2 : Fluotrimazole [M+H-C<sub>2</sub>H<sub>3</sub>N<sub>3</sub>]<sup>+</sup>=>296.1 IT 35% P=296.1  
C<sub>22</sub>H<sub>16</sub>F<sub>3</sub>N<sub>3</sub>; MF: 228; RMF: 917; Prob 6.05%; CAS: 31251-03-3; Lib: nist\_msms; ID: 284480.

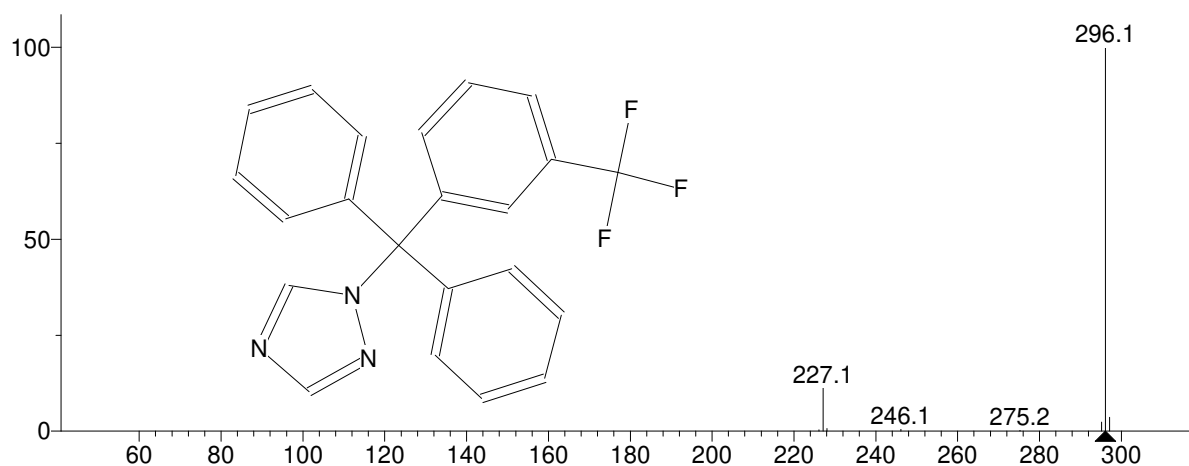

\*\* Search Report Page 2 of 2 \*\*

Hit 3 : 2'-O-Methylguanosine [M-H]- 20-30-40%) P=296.1  
C<sub>11</sub>H<sub>15</sub>N<sub>5</sub>O<sub>5</sub>; MF: 181; RMF: 427; Prob 1.26%; Lib: msms-neg-fiehnhilic; ID: 30.

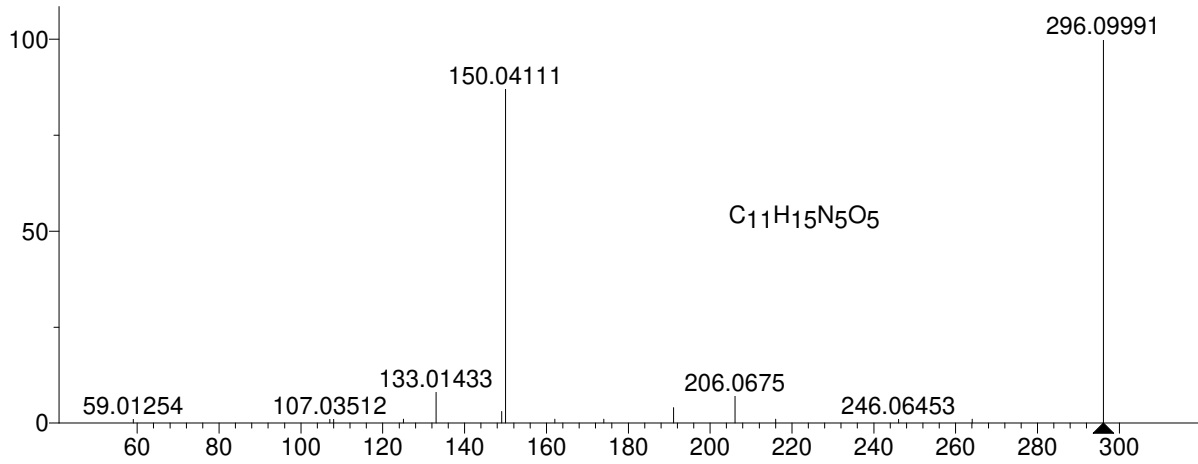

Hit 4 : N2-Methylguanosine [M-H]- 20-30-40%) P=296.1  
C<sub>11</sub>H<sub>15</sub>N<sub>5</sub>O<sub>5</sub>; MF: 125; RMF: 210; Prob 0.24%; Lib: msms-neg-fiehnhilic; ID: 512.

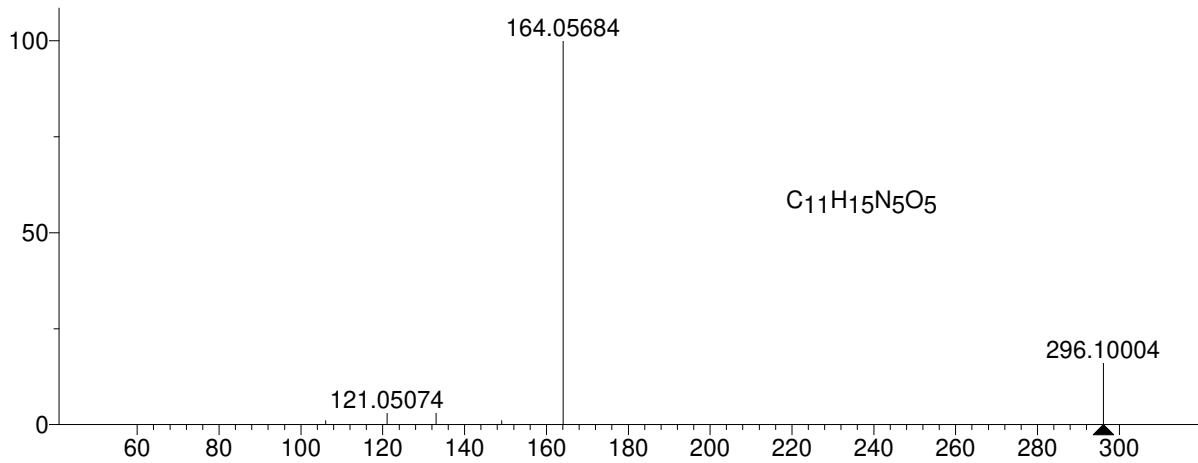

Hit 5 : 1-Methylguanosine [M-H]- 20-30-40%) P=296.1  
C<sub>11</sub>H<sub>15</sub>N<sub>5</sub>O<sub>5</sub>; MF: 100; RMF: 217; Prob 0.07%; Lib: msms-neg-fiehnhilic; ID: 16.

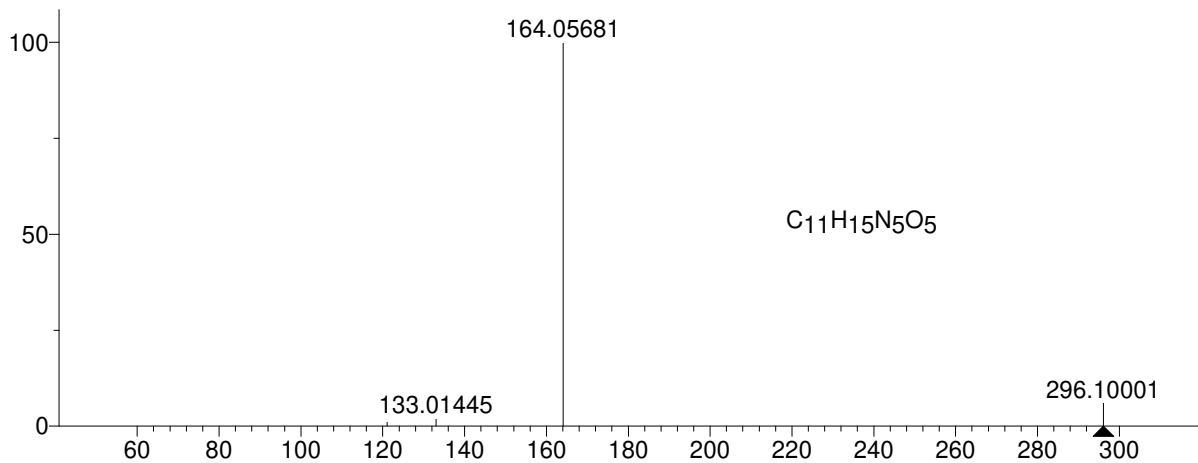

Unknown: Unknown (3.05\_372.0697m/z)  
Compound in Library Factor = 0

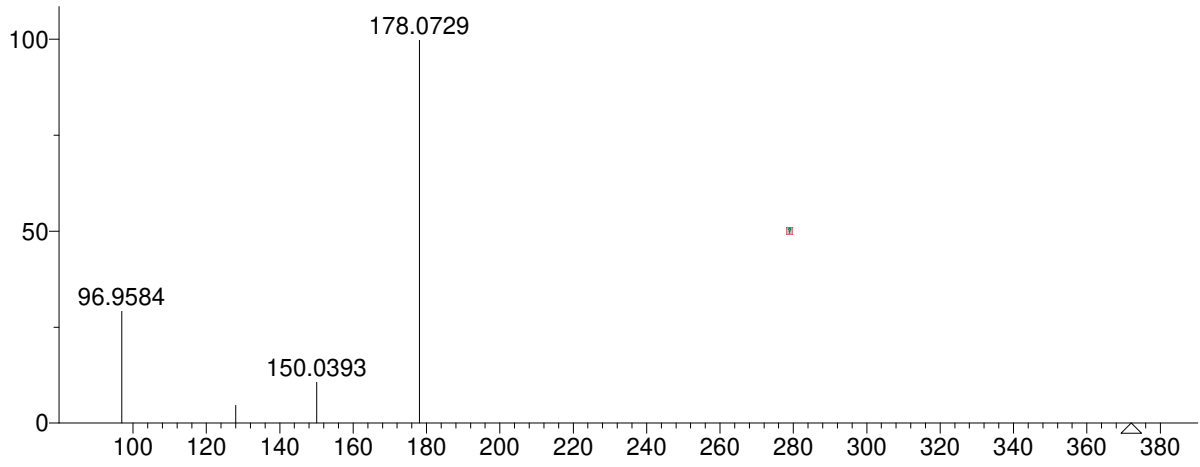

Unknown: Unknown (3.05\_526.2030m/z)  
Compound in Library Factor = 0

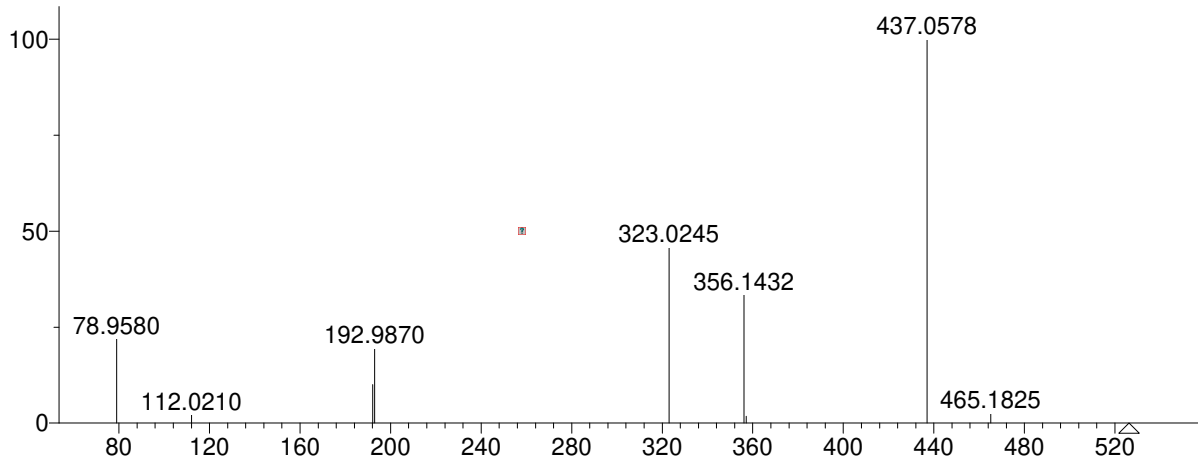



Unknown: Unknown (3.05\_680.2788m/z)  
Compound in Library Factor = 0

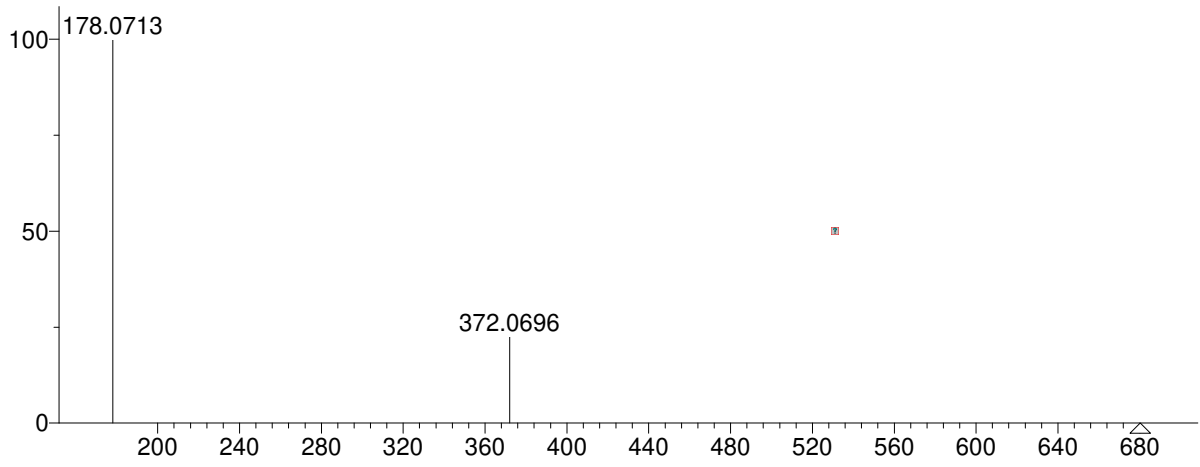

Unknown: Unknown (3.06\_316.1510m/z)  
Compound in Library Factor = 0

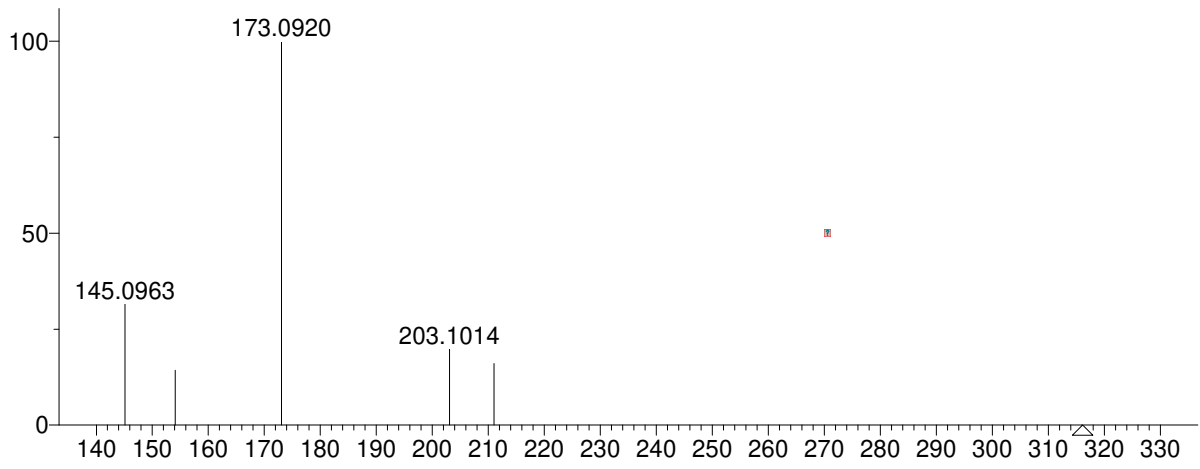

Unknown: Unknown (3.07\_377.1911m/z)  
Compound in Library Factor = -3273

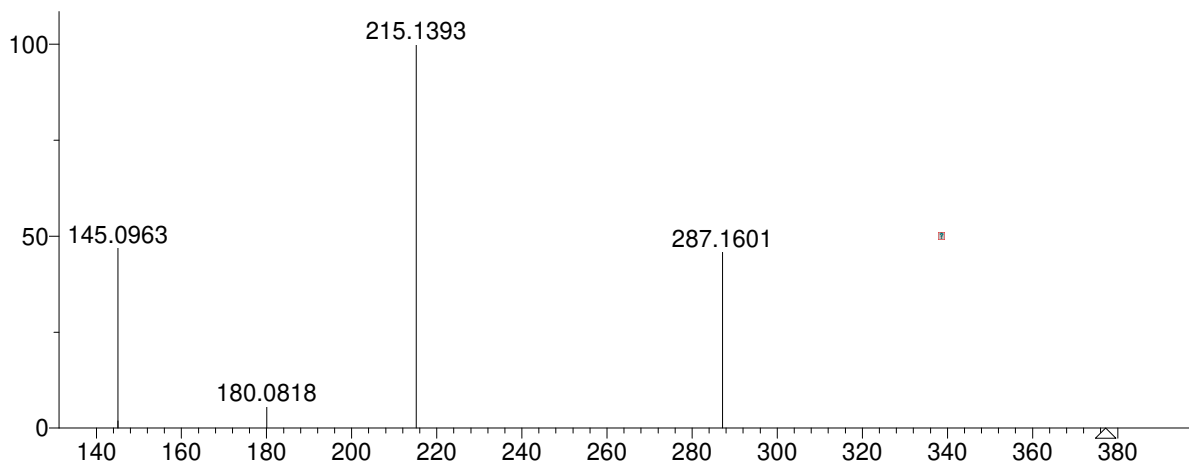

Hit 1 : (E)-3-(4-acetyloxy-2,3-dihydroxy-2,5,5,8a-tetramethyl-3,4,4a,6,7,8-hexahydro-1H-naphthalen-1-yl)prop-2-ene  
C<sub>19</sub>H<sub>30</sub>O<sub>6</sub>; MF: 1; RMF: 90; Prob 20.6%; Lib: mona-export-vf-npl\_qexactive; ID: 20128.

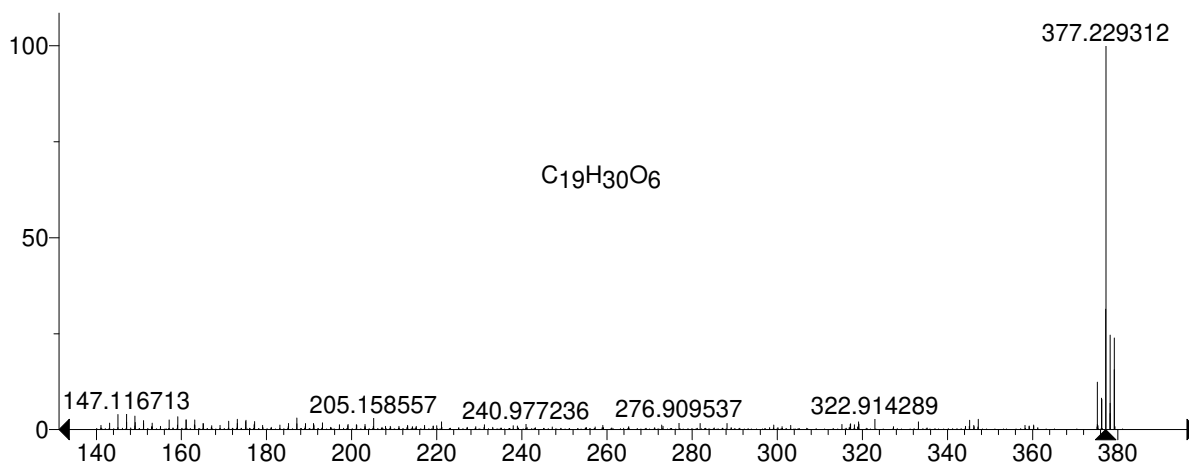

Hit 2 : Pentanoic acid, 5-[(3aR,4R,5R,6aS)-3,3-difluorohexahydro-5-hydroxy-4-[(1E,3S,4S)-3-hydroxy-4-methyl-1-oxo-2-oxo-1,2-dihydro-3H-indolizino[1,2-b]pyridin-5-yl)prop-2-en-1-yl]pentanoic acid  
C<sub>22</sub>H<sub>30</sub>F<sub>2</sub>O<sub>5</sub>; MF: 0; RMF: 55; Prob 19.8%; CAS: 788799-13-3; Lib: nist\_msms; ID: 347296.

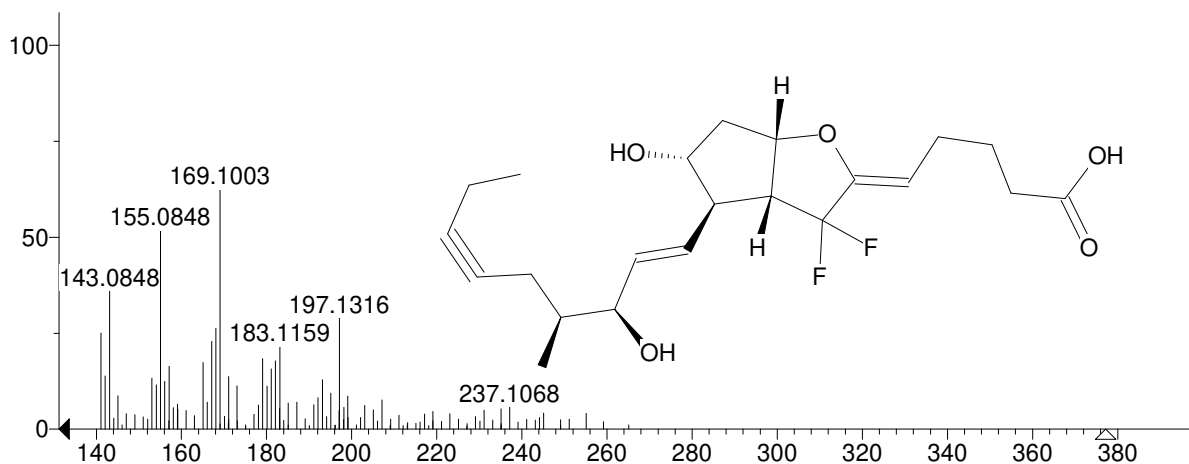

\*\* Search Report Page 2 of 2 \*\*

Hit 3 : Pentanoic acid, 5-[(3aR,4R,5R,6aS)-3,3-difluorohexahydro-5-hydroxy-4-[(1E,3R,4S)-3-hydroxy-4-methyl-1-C22H30F2O5; MF: 0; RMF: 46; Prob 19.8%; CAS: 773825-80-2; Lib: nist\_msms; ID: 357840.

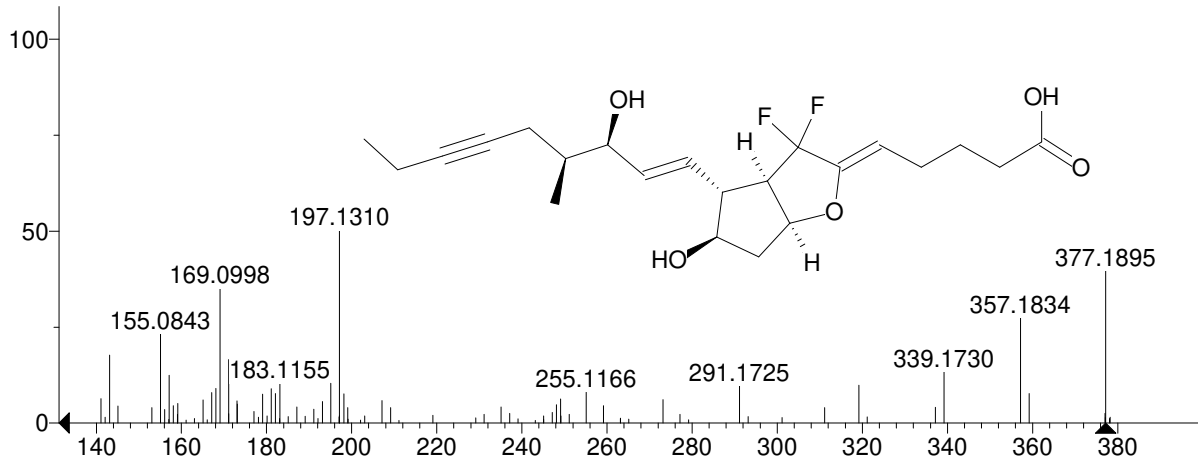

Hit 4 : [3-Me-His2] TRH [M+H]<sup>+</sup> HCD 45eV P=377.2  
C17H24N6O4; MF: 0; RMF: 14; Prob 19.8%; CAS: 34367-54-9; Lib: nist\_msms; ID: 564165.

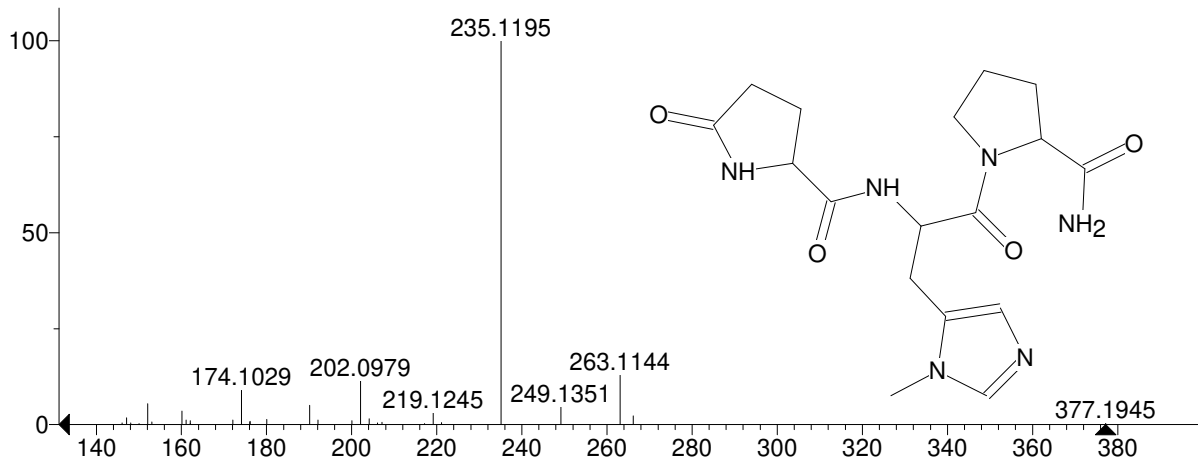

Hit 5 : [3-Me-His2] TRH [M+H]<sup>+</sup> HCD 45eV P=377.2  
C17H24N6O4; MF: 0; RMF: 14; Prob 19.8%; Lib: nist\_msms2; ID: 46584.

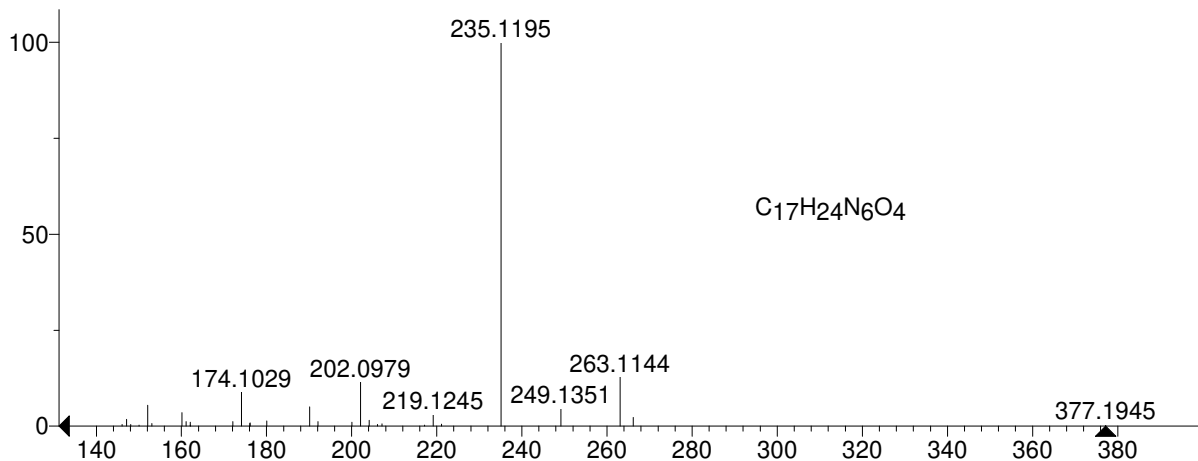

Unknown: Unknown (3.08\_282.1075m/z)  
Compound in Library Factor = 0

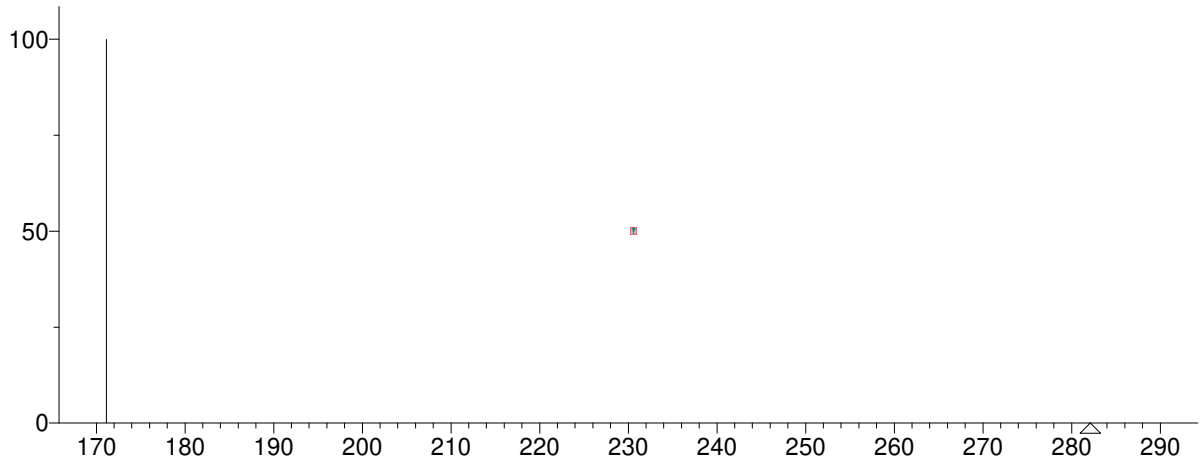

Unknown: Unknown (3.09\_477.2075m/z)  
Compound in Library Factor = -1072

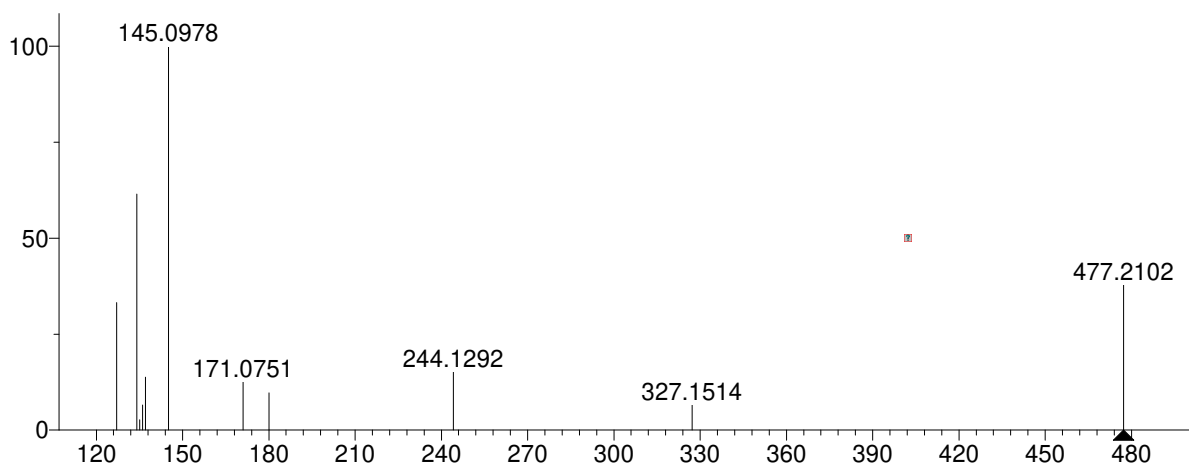

Hit 1 : 4-(2-Hydroxyethyl)piperazine-1-ethanesulfonic acid [2M+H]<sup>+</sup> HCD 4V P=477.2  
C<sub>8</sub>H<sub>18</sub>N<sub>2</sub>O<sub>4</sub>S; MF: 74; RMF: 673; Prob 79.0%; CAS: 7365-45-9; Lib: nist\_msms; ID: 58512.

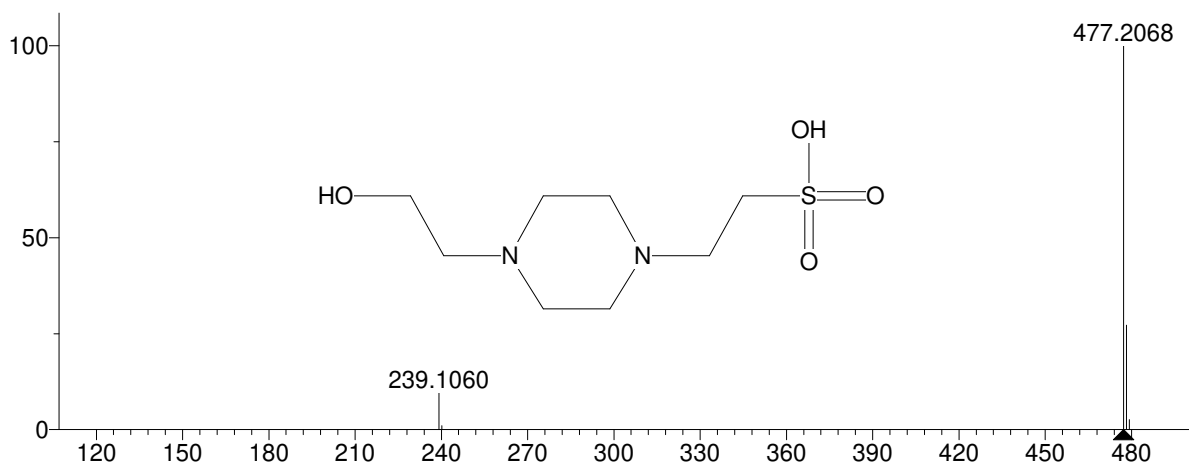

Hit 2 : 5-O-methyllicoricidin [M+K]<sup>+</sup> 35HCD P=477.2  
C<sub>27</sub>H<sub>34</sub>O<sub>5</sub>; MF: 0; RMF: 54; Prob 10.5%; Lib: mona-export-vf-npl\_qexactive; ID: 964.

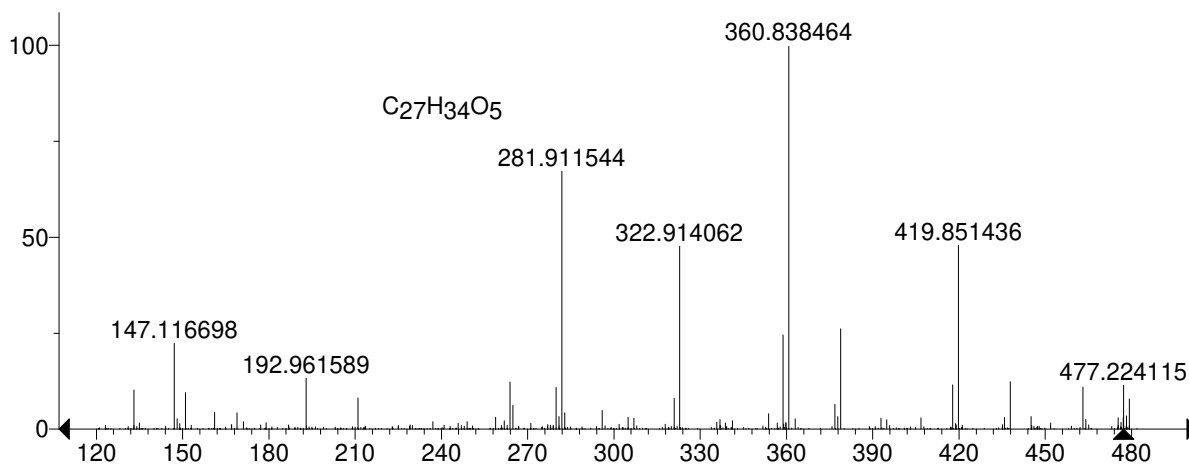

\*\* Search Report Page 2 of 2 \*\*

Hit 3 : 1,7-bis(4-hydroxyphenyl)-5-[(2R,3R,4S,5S,6R)-3,4,5-trihydroxy-6-(hydroxymethyl)oxan-2-yl]oxyheptan-3-ol  
C<sub>25</sub>H<sub>32</sub>O<sub>9</sub>; MF: 0; RMF: 17; Prob 10.5%; Lib: mona-export-vf-npl\_qexactive; ID: 7567.

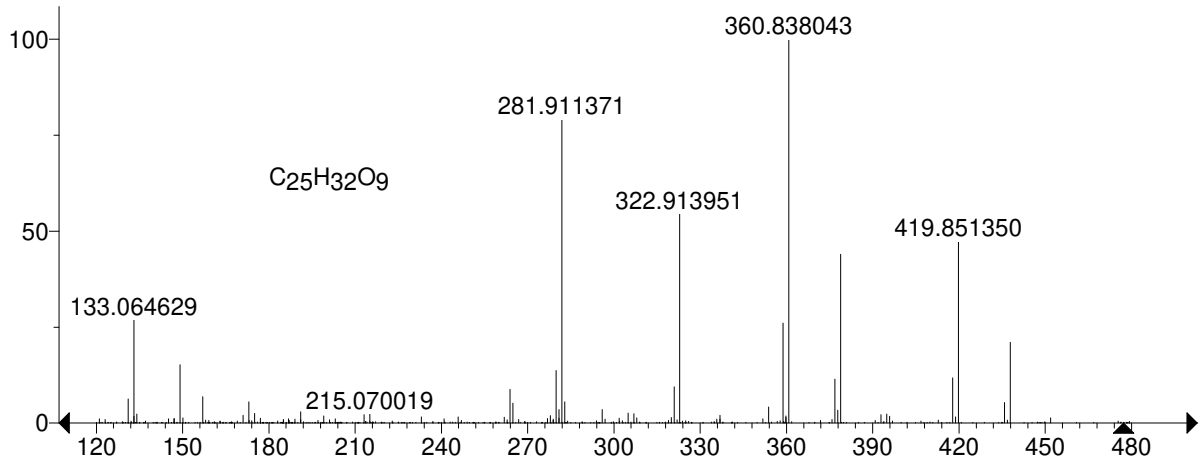

\*\* Search Report Page 1 of 2 \*\*

Unknown: Unknown (3.09\_496.2027m/z)  
Compound in Library Factor = -3273

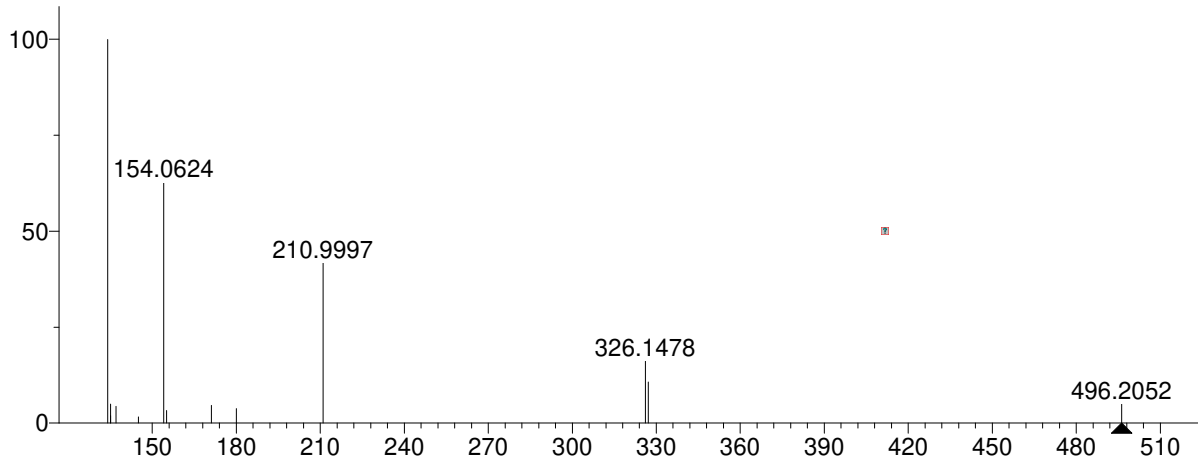

Hit 1 : (2R,3S,4S,5R,6S)-2-[(3,4,5-trihydroxyoxan-2-yl)oxymethyl]-6-(3,4,5-trimethoxyphenoxy)oxane-3,4,5-triol [†]  
C<sub>20</sub>H<sub>30</sub>O<sub>13</sub>; MF: 6; RMF: 238; Prob 22.8%; Lib: mona-export-vf-npl\_qexactive; ID: 9258.

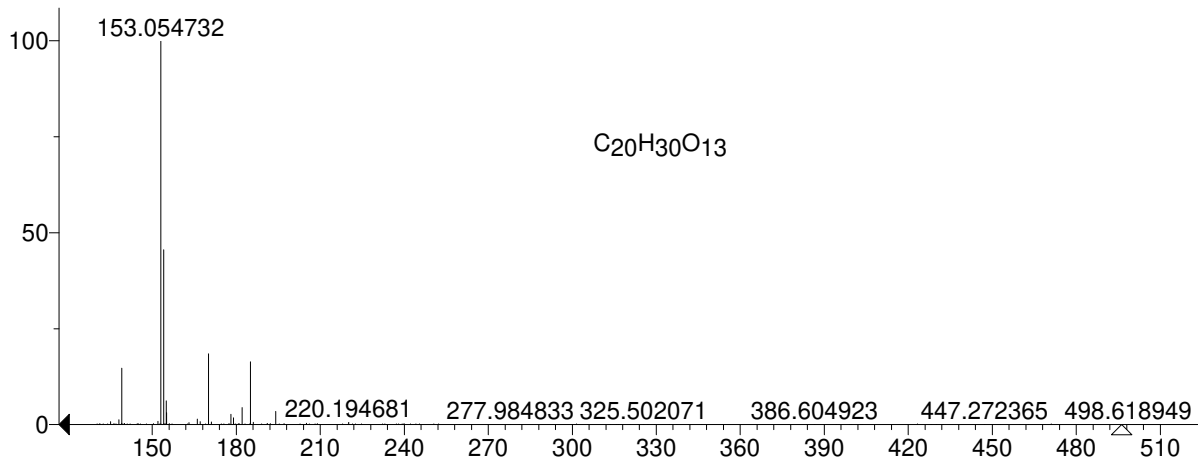

Hit 2 : (2R,3S,4S,5R,6S)-2-[[[(2S,3R,4R)-3,4-dihydroxy-4-(hydroxymethyl)oxolan-2-yl]oxymethyl]-6-(3,4,5-trimethoxyphenoxy)oxane-3,4,5-triol [†]  
C<sub>20</sub>H<sub>30</sub>O<sub>13</sub>; MF: 4; RMF: 217; Prob 21.1%; Lib: mona-export-vf-npl\_qexactive; ID: 9783.

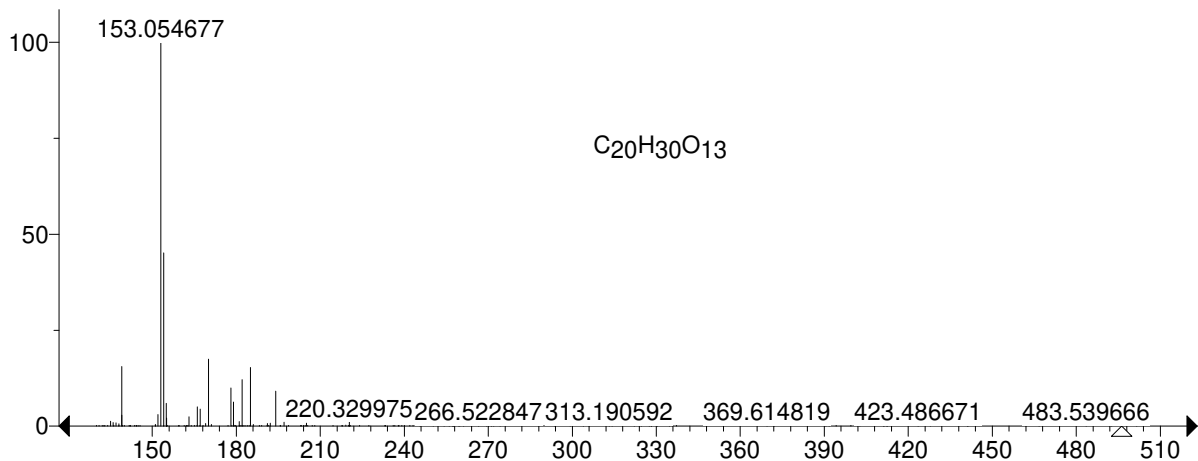



\*\* Search Report Page 2 of 2 \*\*

Hit 3 : NCGC00180666-02!(2R,3S,4S,5R,6S)-2-[(3,4,5-trihydroxyoxan-2-yl)oxymethyl]-6-(3,4,5-trimethoxyphenox  
C<sub>20</sub>H<sub>30</sub>O<sub>13</sub>; MF: 2; RMF: 146; Prob 19.4%; Lib: mona-export-gnps; ID: 8997.

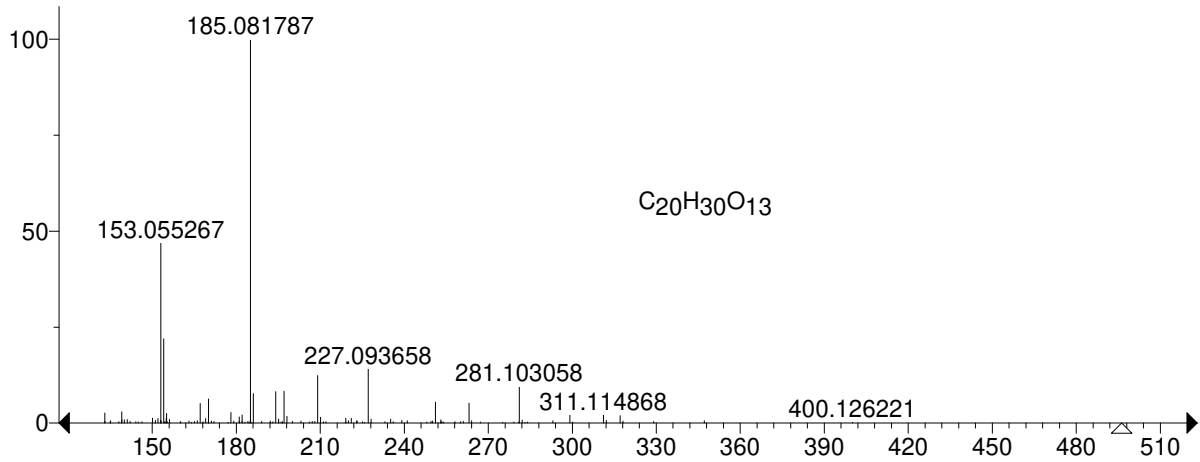

Hit 4 : NCGC00180025-03!(2R,3S,4S,5R,6S)-2-[[[(2S,3R,4R)-3,4-dihydroxy-4-(hydroxymethyl)oxolan-2-yl]oxymetl  
C<sub>20</sub>H<sub>30</sub>O<sub>13</sub>; MF: 1; RMF: 146; Prob 18.7%; Lib: mona-export-gnps; ID: 8565.

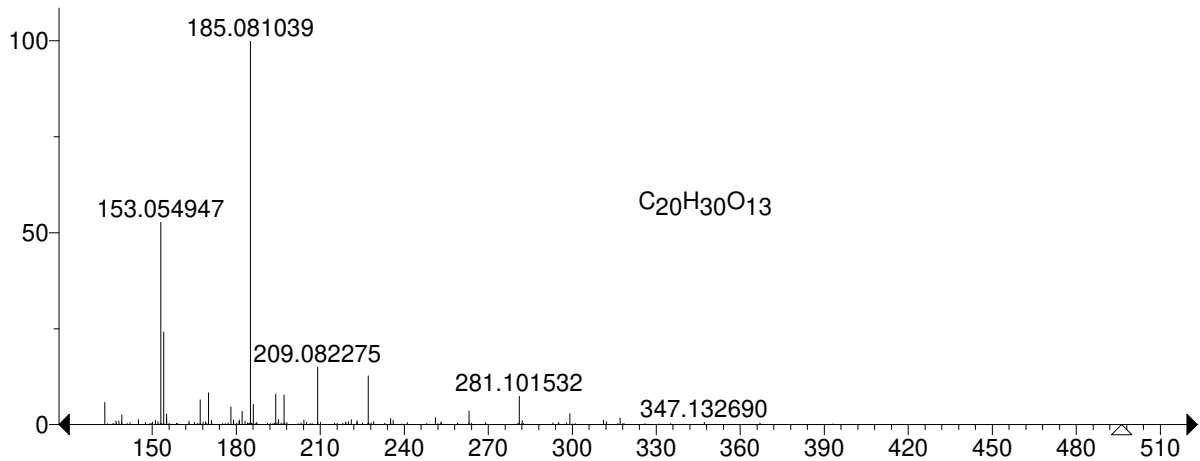

Hit 5 : Benzoic acid, 3-[[[(3-carboxycyclohexyl)amino]carbonyl]-4-[3-[4-[4-(cyclohexyloxy)butoxy]phenyl]propoxy]-  
C<sub>34</sub>H<sub>45</sub>NO<sub>8</sub>; MF: 0; RMF: 4; Prob 17.9%; CAS: 712313-35-4; Lib: nist\_msms; ID: 190533.

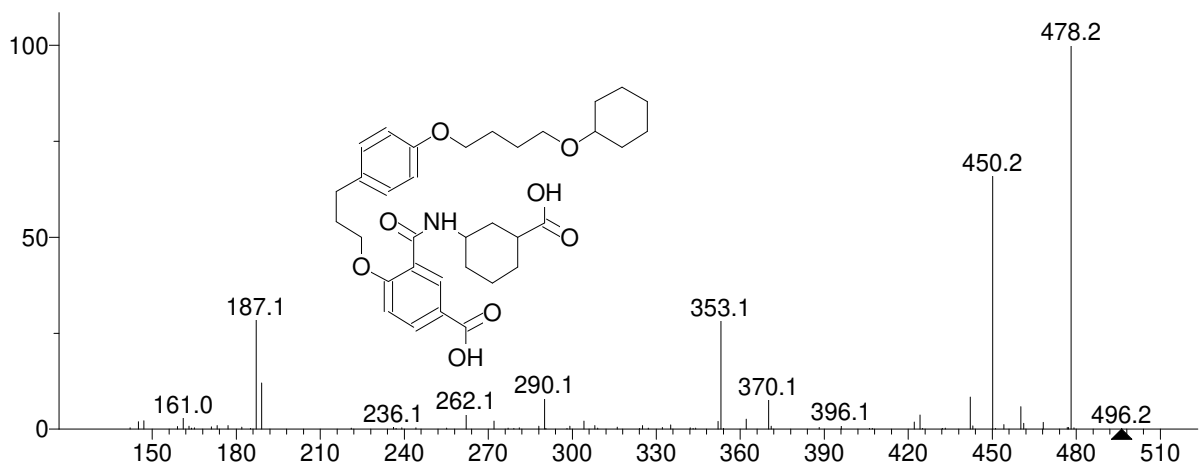

Unknown: Unknown (3.10\_244.1292m/z)  
Compound in Library Factor = -674

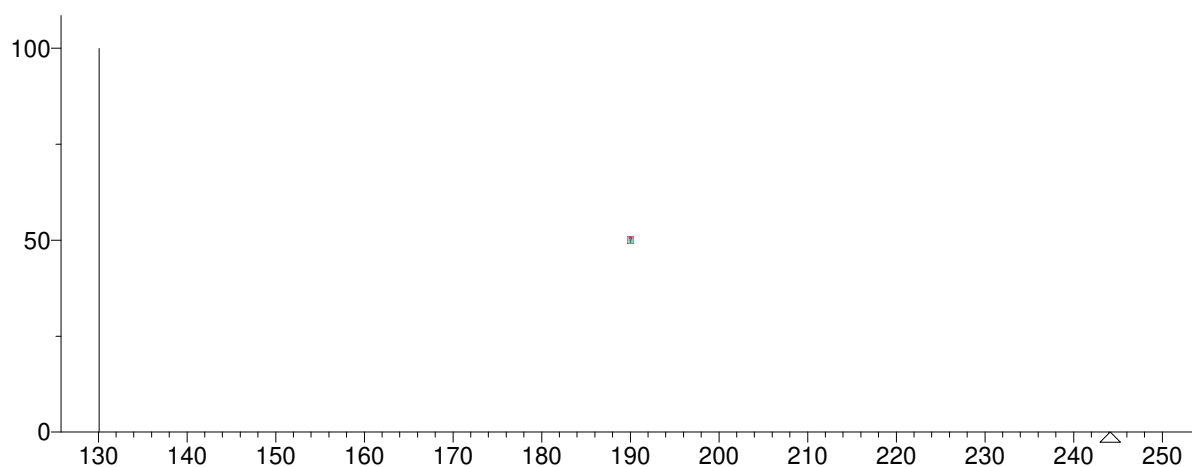

Hit 1 : Asn-Leu [M-H]<sup>-</sup> HCD 39eV P=244.1  
C<sub>10</sub>H<sub>19</sub>N<sub>3</sub>O<sub>4</sub>; MF: 187; RMF: 909; Prob 26.1%; Lib: nist\_msms; ID: 570276.

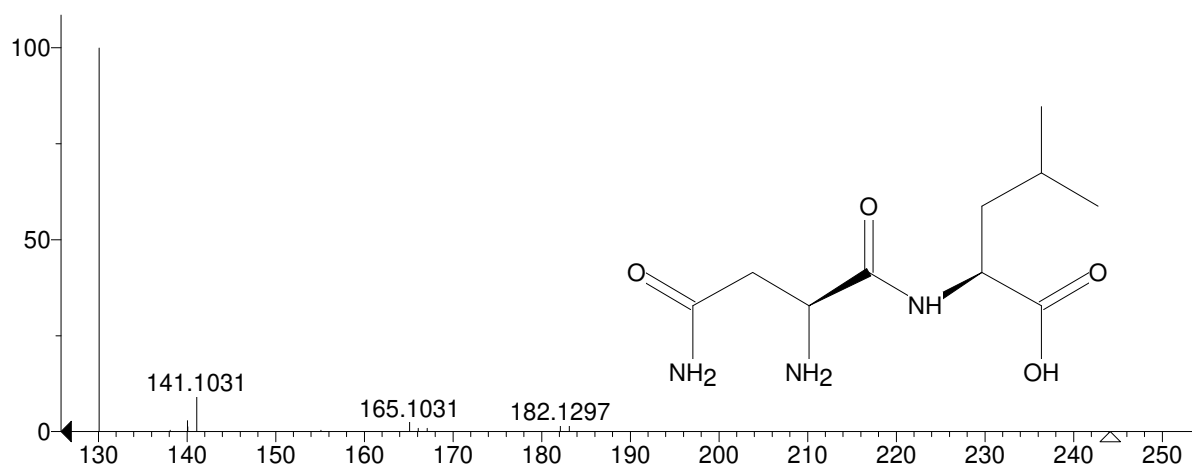

Hit 2 : Asn-Leu [M-H]<sup>-</sup> HCD 39eV P=244.1  
C<sub>10</sub>H<sub>19</sub>N<sub>3</sub>O<sub>4</sub>; MF: 187; RMF: 909; Prob 26.1%; CAS: 22601-71-4; Lib: nist\_msms2; ID: 84002.

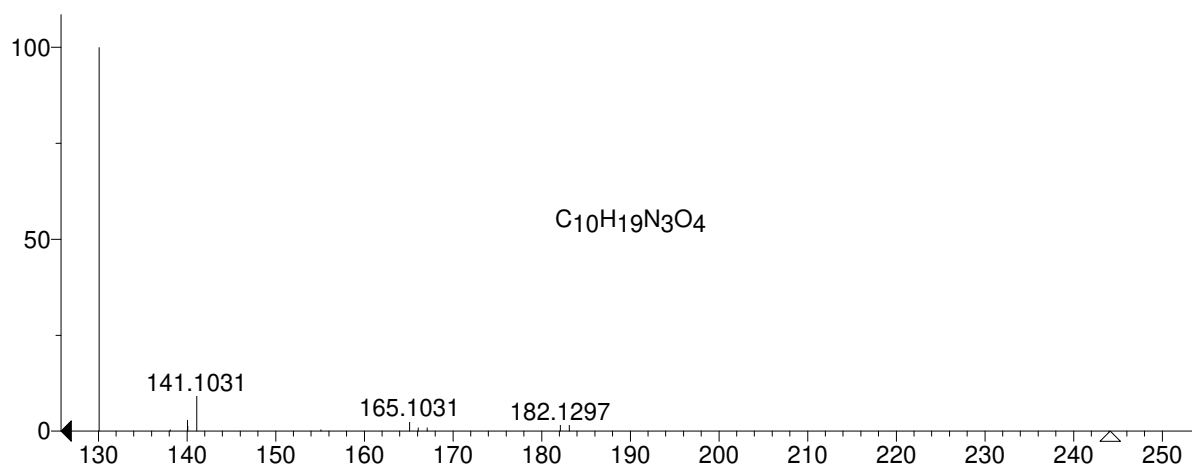

Hit 3 : Asn-Ile [M-H]<sup>-</sup> HCD 39eV P=244.1  
C<sub>10</sub>H<sub>19</sub>N<sub>3</sub>O<sub>4</sub>; MF: 184; RMF: 914; Prob 23.1%; Lib: nist\_msms; ID: 570863.

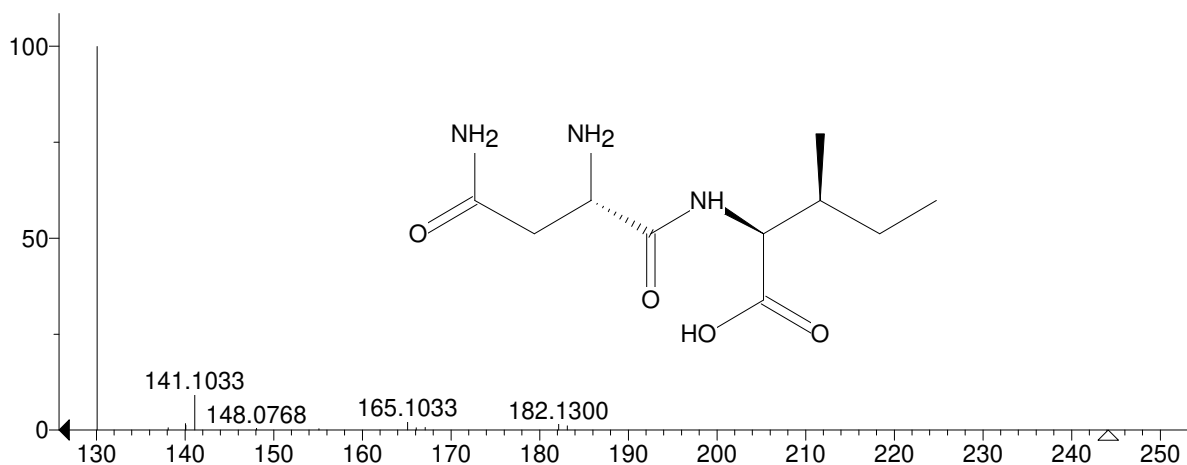

Hit 4 : Asn-Ile [M-H]<sup>-</sup> HCD 39eV P=244.1  
C<sub>10</sub>H<sub>19</sub>N<sub>3</sub>O<sub>4</sub>; MF: 184; RMF: 914; Prob 23.1%; CAS: 438533-59-6; Lib: nist\_msms2; ID: 84596.

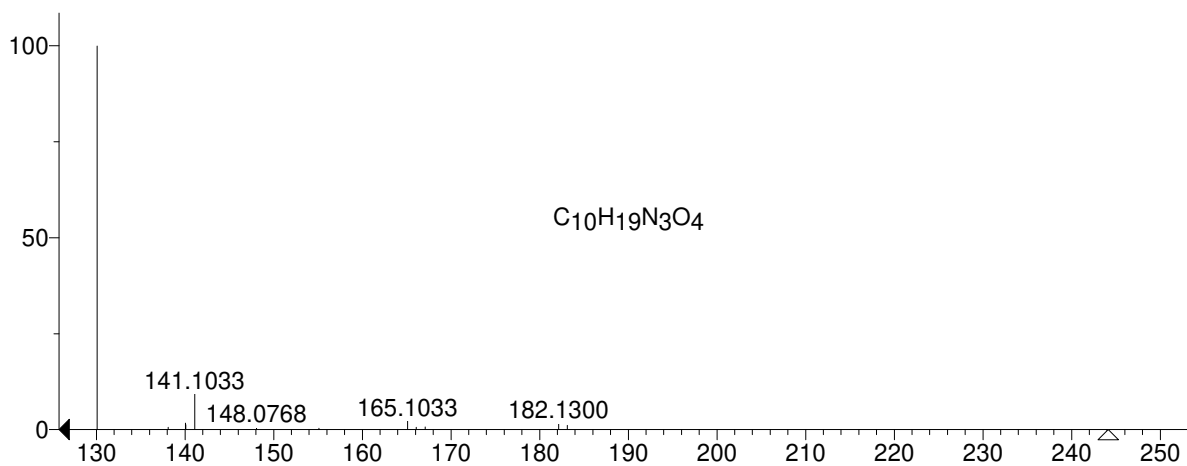

Hit 5 : Unknown (carbon number 10); PlaSMA ID-380 [M-H]<sup>-</sup> P=244.1  
C<sub>10</sub>H<sub>19</sub>N<sub>3</sub>O<sub>4</sub>; MF: 24; RMF: 440; Prob 0.57%; Lib: biomsms-neg-plasma; ID: 1104.

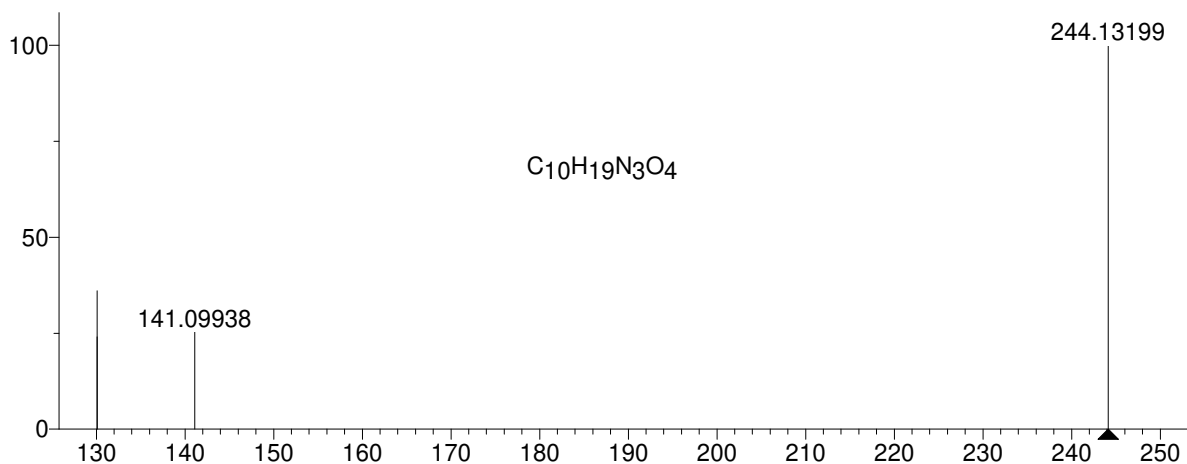

Unknown: Unknown (3.10\_481.2037m/z)  
Compound in Library Factor = 0

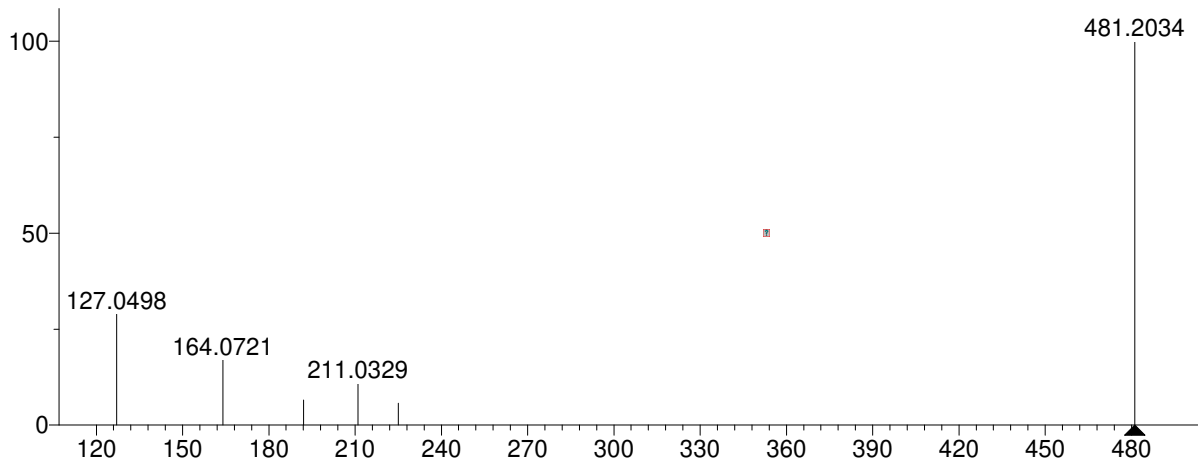

Unknown: Unknown (3.10\_488.1861m/z)  
Compound in Library Factor = 0

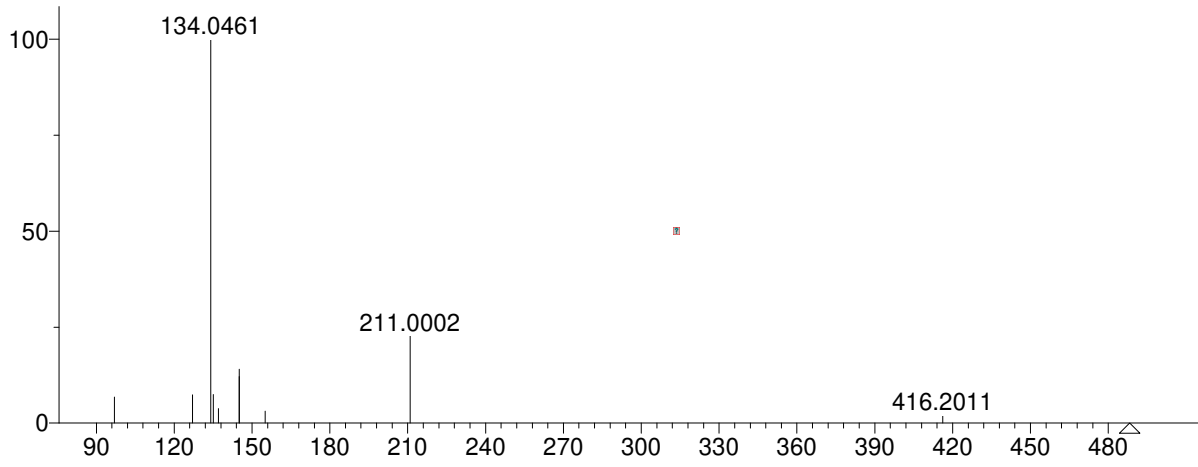

Unknown: Unknown (3.10\_536.2114m/z)  
Compound in Library Factor = 0

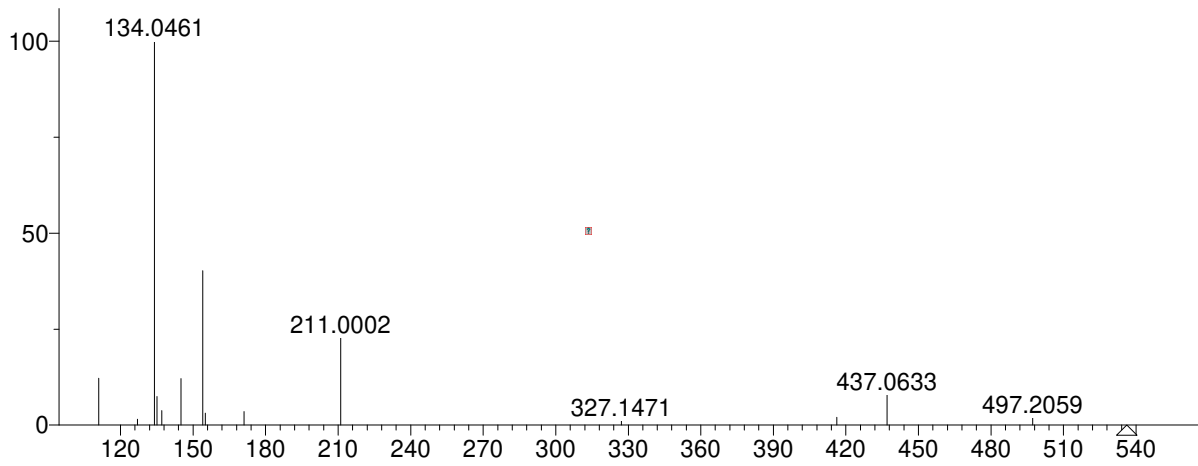

Hit 1 : Lewis A trisaccharide [M+Li]<sup>+</sup> HCD 96V P=536.2  
C<sub>20</sub>H<sub>35</sub>NO<sub>15</sub>; MF: 0; RMF: 41; Prob 100.0%; CAS: 56570-03-7; Lib: nist\_msms; ID: 211089.

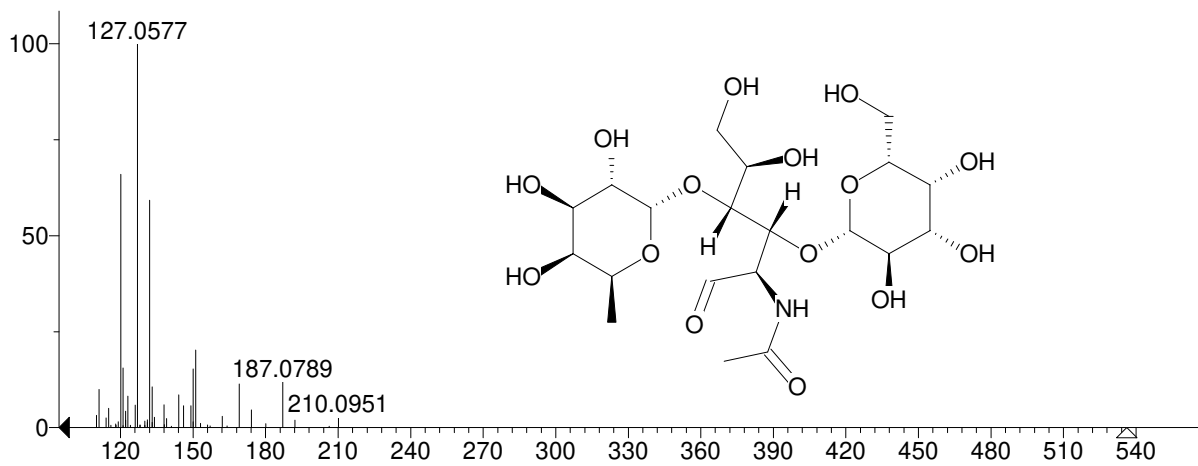

Unknown: Unknown (3.10\_572.1142m/z)  
Compound in Library Factor = 0

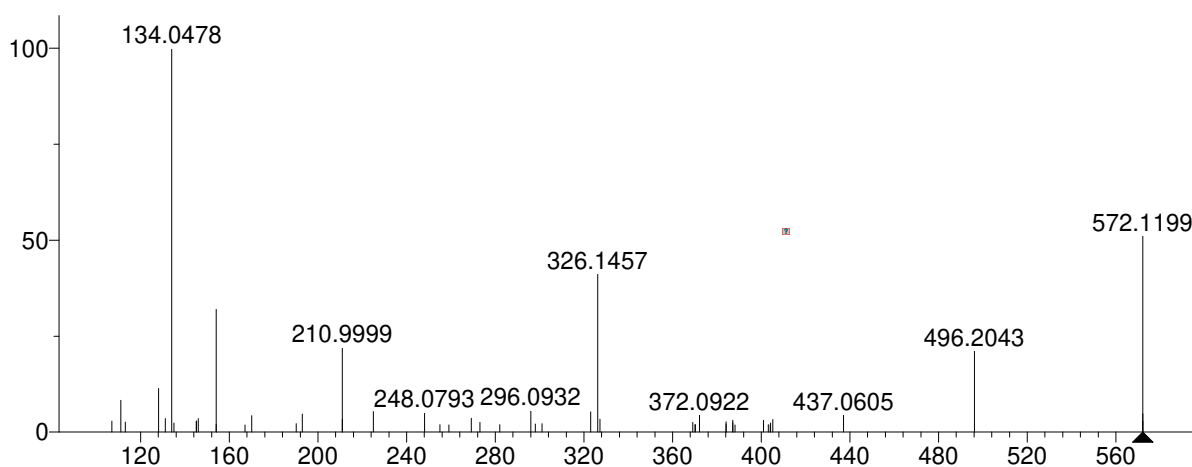

Hit 1 : (Ala11,D-Leu15)-Orexin B, human [M+5H]<sup>5+</sup> HCD 8eV P=572.1  
C<sub>120</sub>H<sub>206</sub>N<sub>44</sub>O<sub>35</sub>S; MF: 0; RMF: 113; Prob 100.0%; CAS: 532932-99-3; Lib: nist\_msms2; ID: 45808.

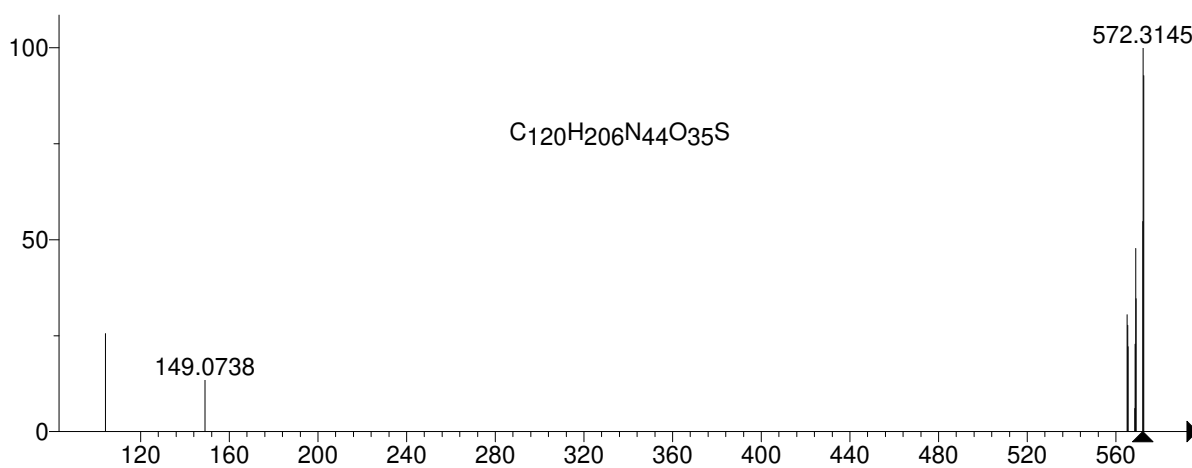

Unknown: Unknown (3.11\_444.1596m/z)  
Compound in Library Factor = 0

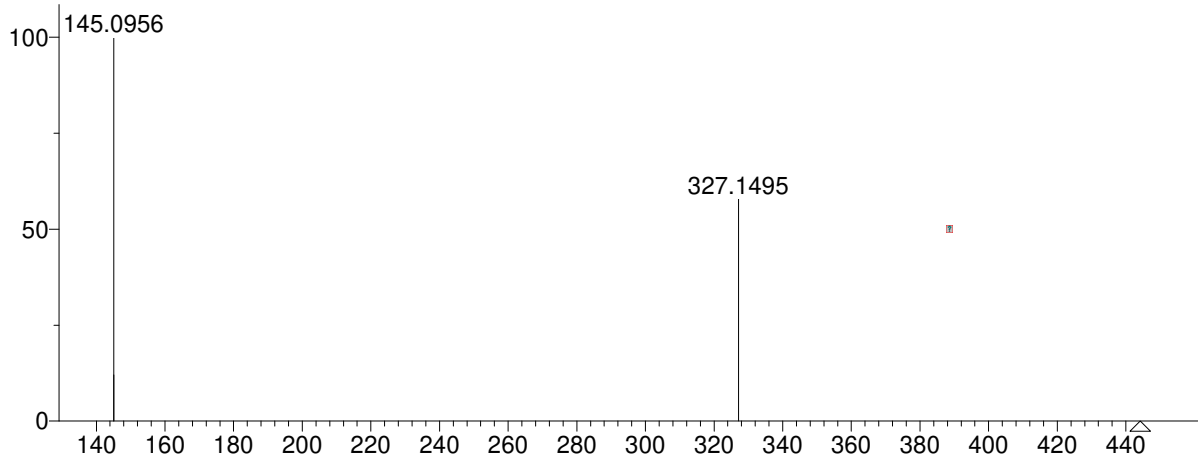



Unknown: Unknown (3.11\_666.2614m/z)  
Compound in Library Factor = 0

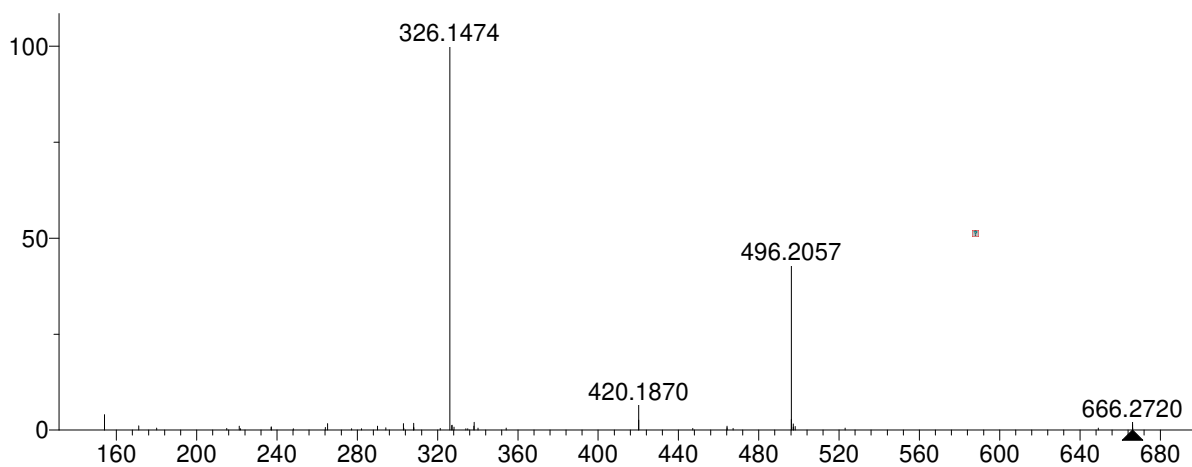

Hit 1 : NCGC00385630-01![[6-[(5,7-dihydroxy-4-methyl-1,2,3,4-tetrahydronaphthalen-2-yl)oxy]-4,5-dihydroxy-3-[(E

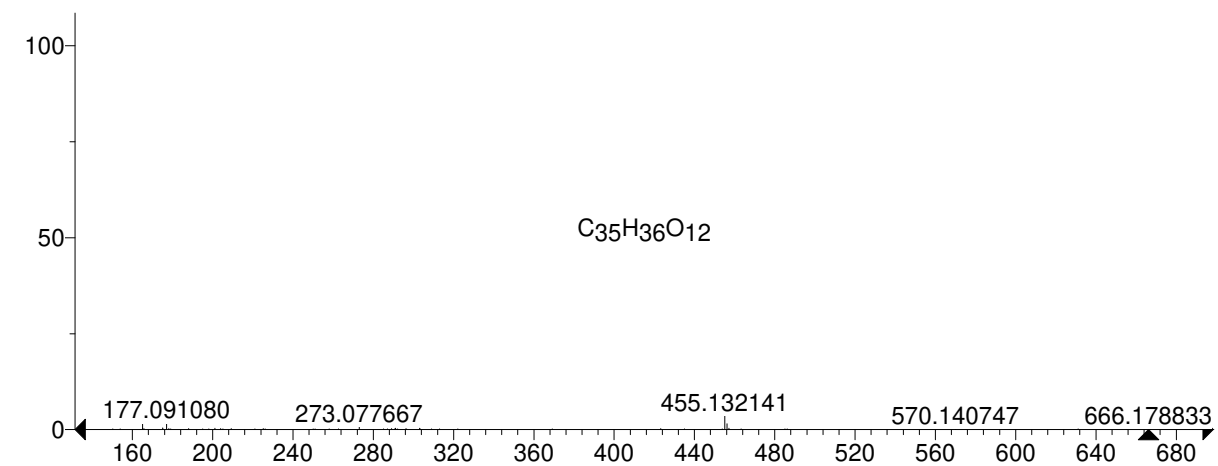

Unknown: Unknown (3.12\_297.0096m/z)  
Compound in Library Factor = 0

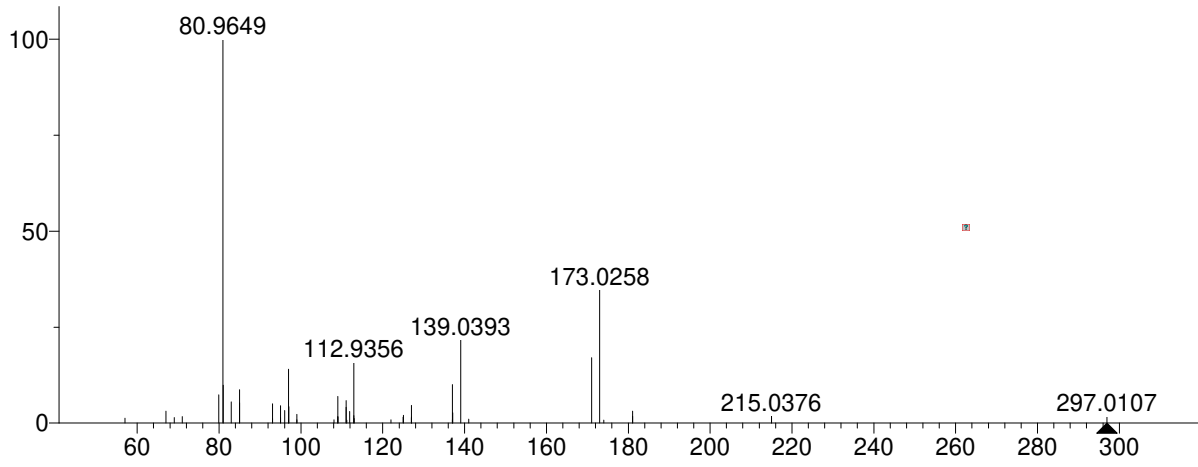

\*\* Search Report Page 1 of 2 \*\*

Unknown: Unknown (3.12\_354.1044m/z)  
Compound in Library Factor = -674

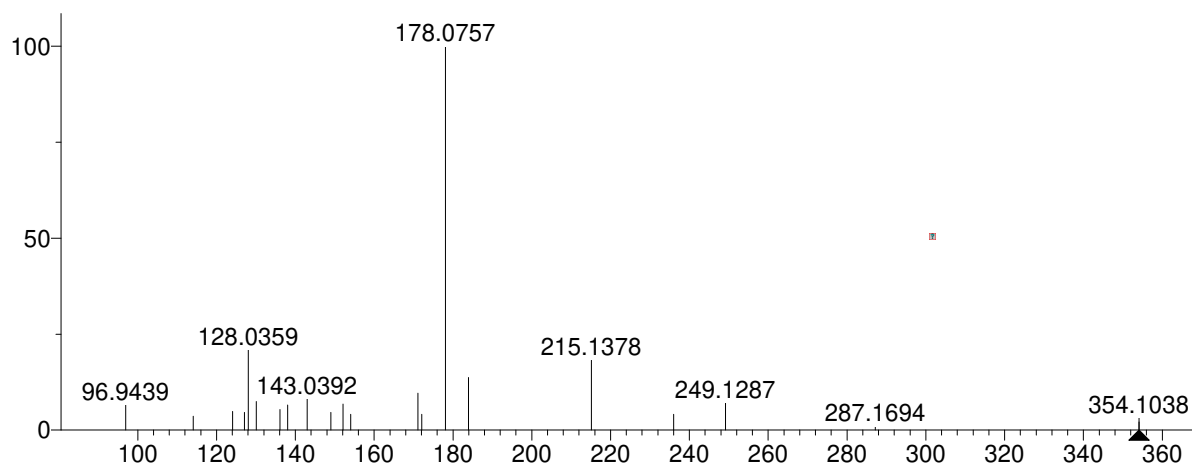

Hit 1 : Nizatidine [M+Na]<sup>+</sup> HCD 10V P=354.1  
C<sub>12</sub>H<sub>21</sub>N<sub>5</sub>O<sub>2</sub>S<sub>2</sub>; MF: 109; RMF: 695; Prob 83.7%; CAS: 76963-41-2; Lib: nist\_msms; ID: 152083.

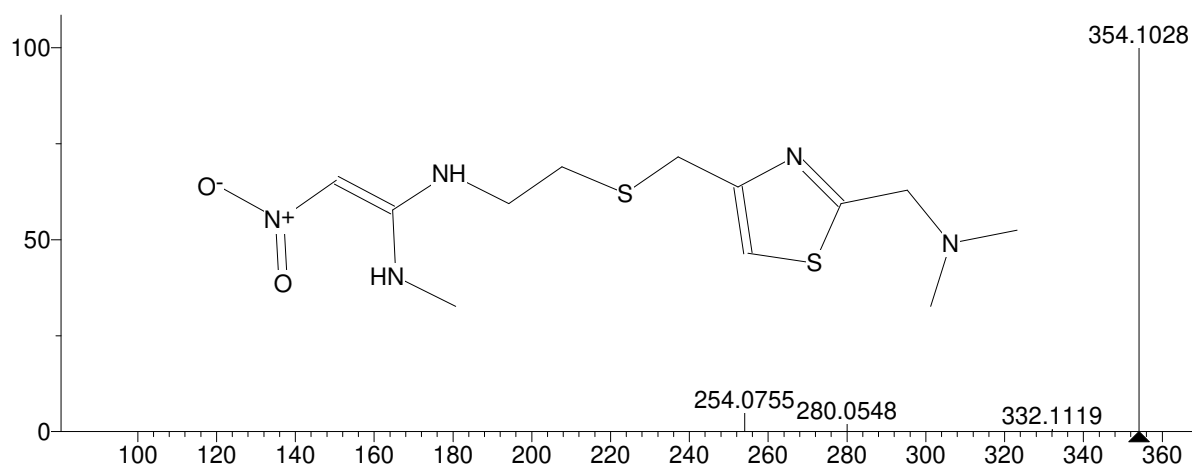

Hit 2 : 5'-O-Acetyladenosine [M+HCO<sub>2</sub>]<sup>-</sup> HCD 5V P=354.1  
C<sub>12</sub>H<sub>15</sub>N<sub>5</sub>O<sub>5</sub>; MF: 7; RMF: 113; Prob 6.02%; CAS: 2140-25-2; Lib: nist\_msms; ID: 228060.

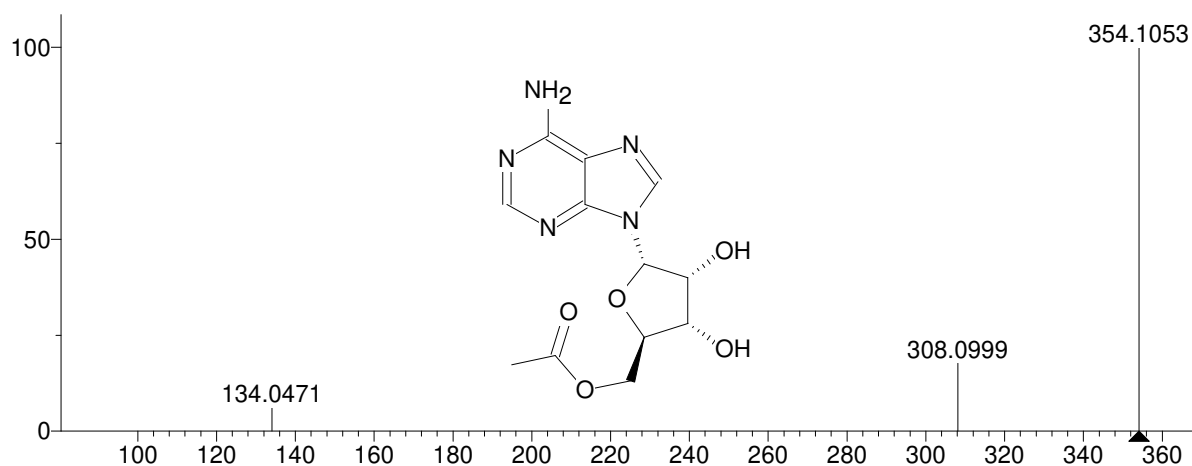

Hit 3 : rac-4-Sulfoxypropranolol [M-H]<sup>-</sup> HCD 17V P=354.1  
C<sub>16</sub>H<sub>21</sub>NO<sub>6</sub>S; MF: 4; RMF: 106; Prob 5.32%; CAS: 87075-33-0; Lib: nist\_msms; ID: 443588.

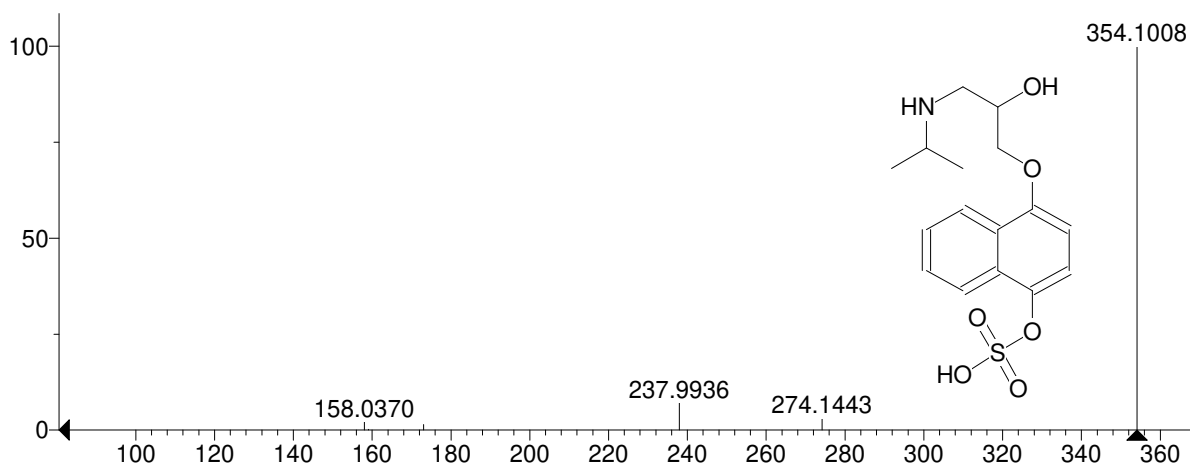

Hit 4 : 1H-Indole-2-propanoic acid, 1-[(4-chlorophenyl)methyl]-5-fluoro- $\alpha,\alpha$ ,3-trimethyl- [M-H-H<sub>2</sub>O]<sup>-</sup> HCD 24V P  
C<sub>21</sub>H<sub>21</sub>ClFNO<sub>2</sub>; MF: 2; RMF: 105; Prob 4.90%; CAS: 103253-15-2; Lib: nist\_msms; ID: 430035.

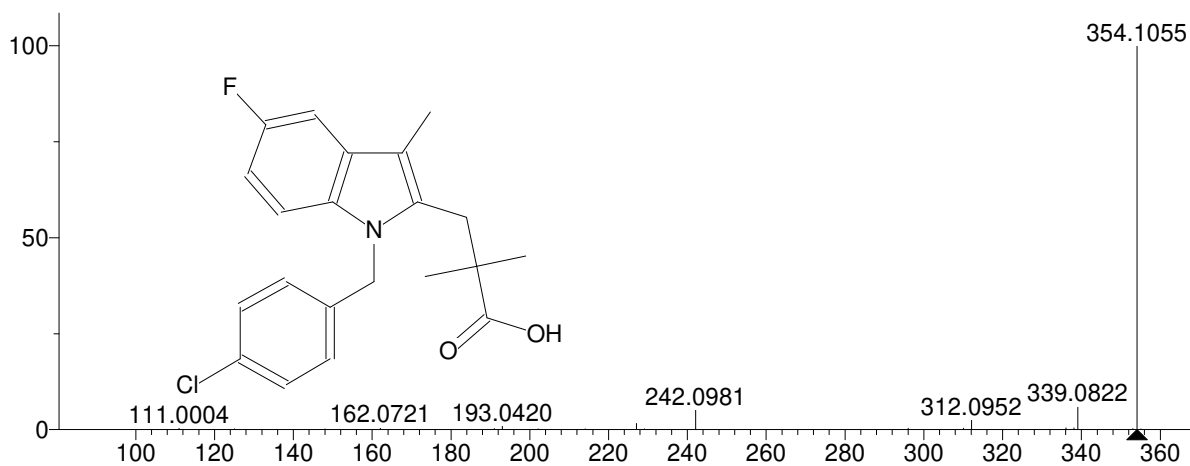

Unknown: Unknown (3.14\_330.1175m/z)  
Compound in Library Factor = 0

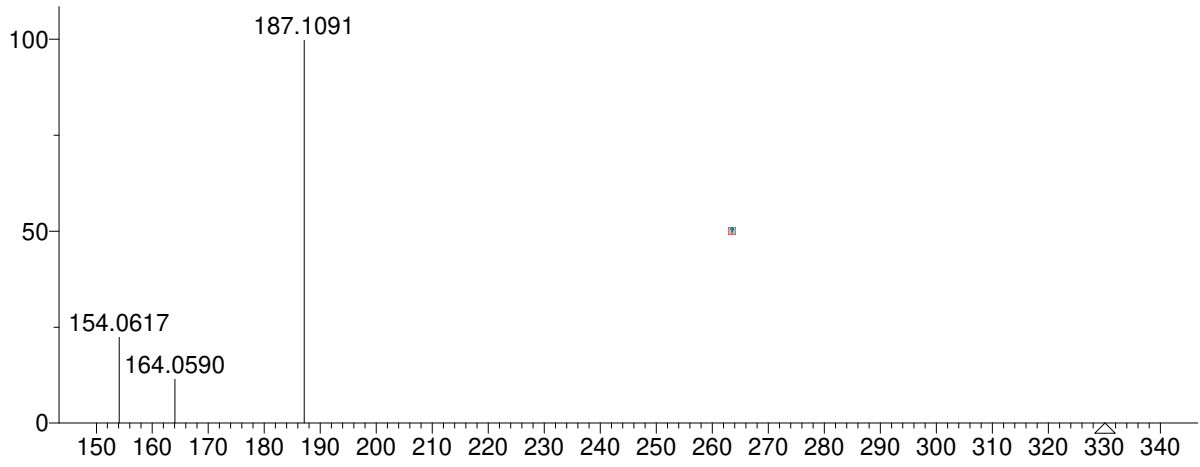

Unknown: Unknown (3.14\_360.1762m/z)  
Compound in Library Factor = 0

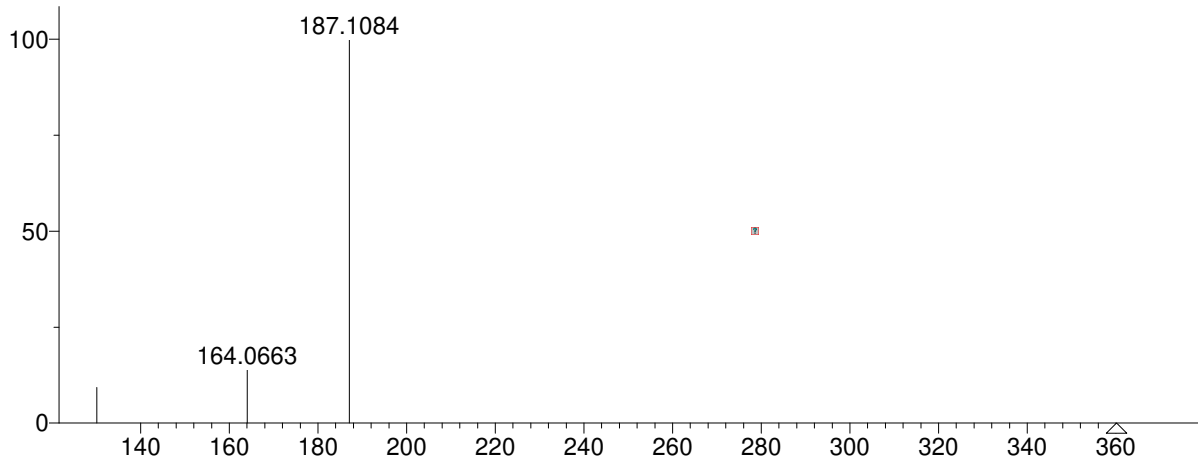

Hit 1 : Pesticide6\_Etoxazole\_C21H23F2NO2\_4-(4-tert-Butyl-2-ethoxyphenyl)-2-(2,6-difluorophenyl)-4,5-dihydro-1  
C21H23F2NO2; MF: 0; RMF: 28; Prob 100.0%; Lib: mona-export-gnps; ID: 12999.

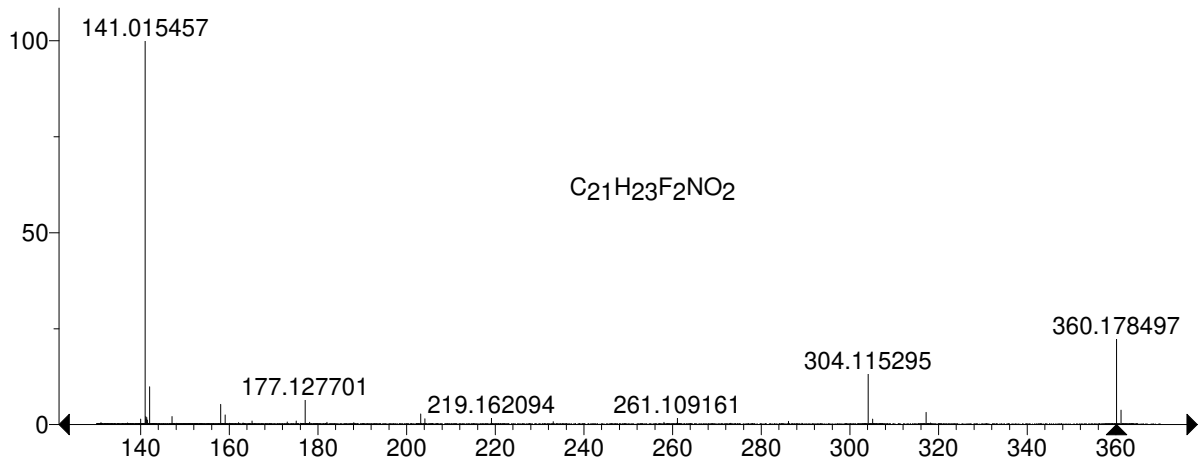

Unknown: Unknown (3.14\_574.2016m/z)  
Compound in Library Factor = 0

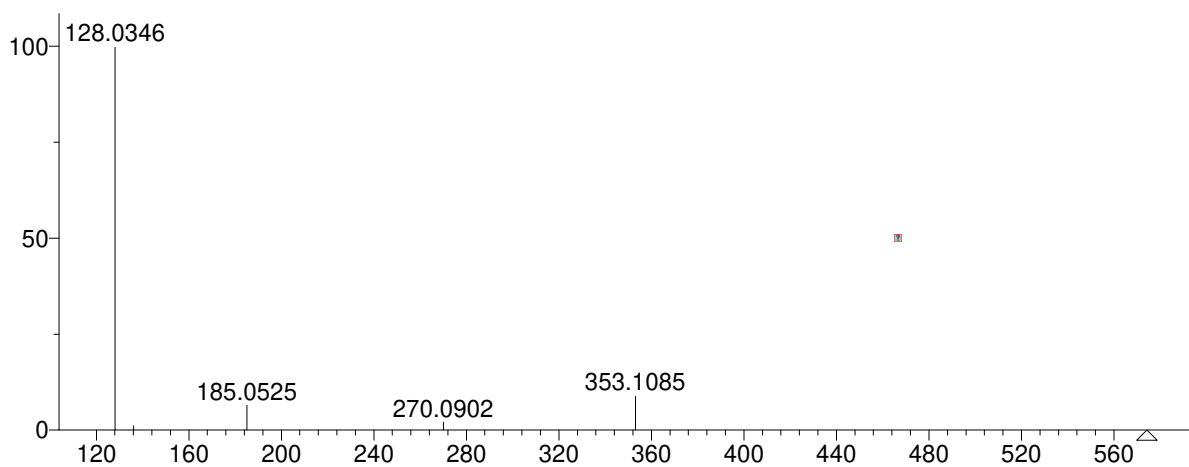

Hit 1 : Lewis A trisaccharide [M+HCO<sub>2</sub>]<sup>-</sup> IT-FT 35% P=574.2  
C<sub>20</sub>H<sub>35</sub>NO<sub>15</sub>; MF: 0; RMF: 21; Prob 100.0%; CAS: 56570-03-7; Lib: nist\_msms; ID: 532836.

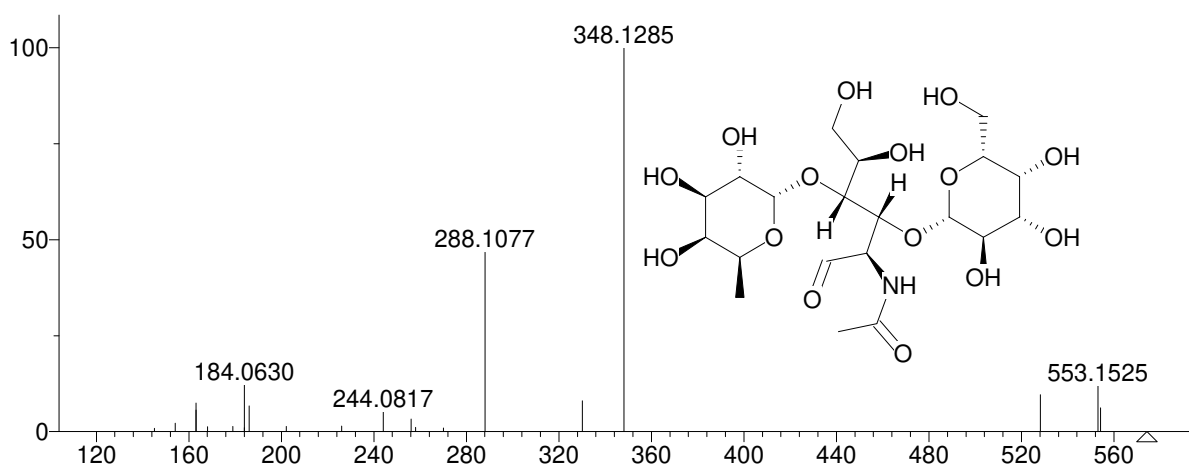

Unknown: Unknown (3.14\_966.3584m/z)  
Compound in Library Factor = 0

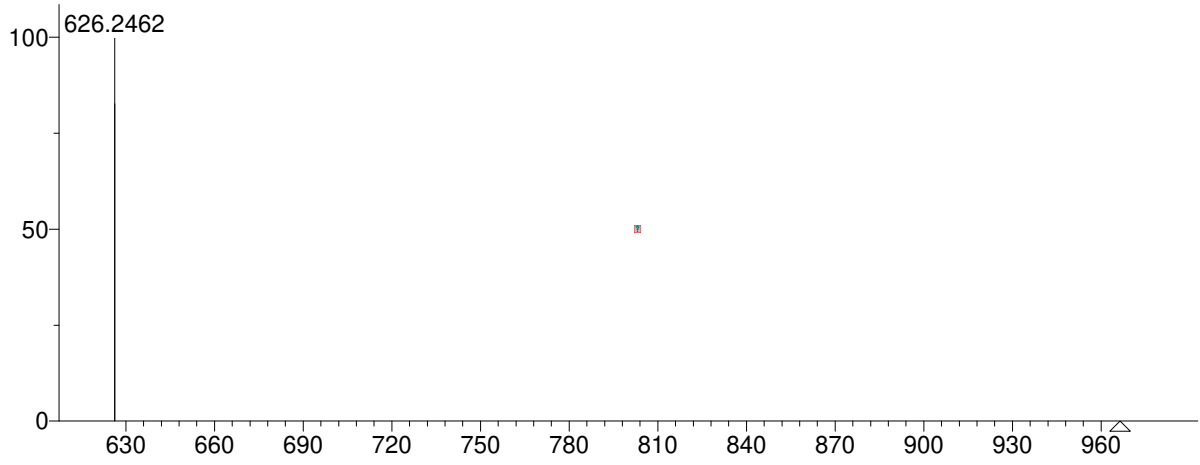



Unknown: Unknown (3.15\_164.0708m/z)  
Compound in Library Factor = -349

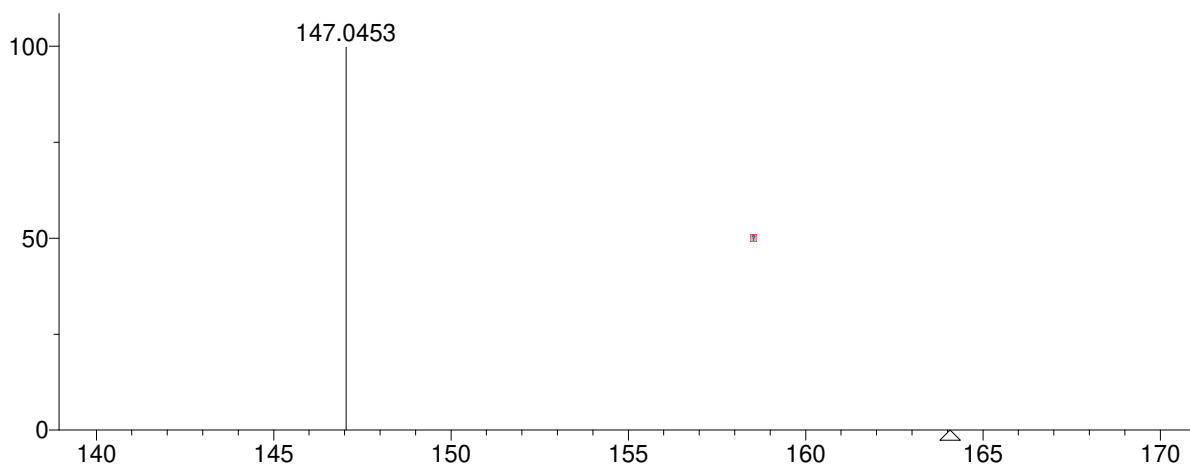

Hit 1 : L-Phenylalanine [M-H]<sup>-</sup> 20 P=164.1  
C<sub>9</sub>H<sub>11</sub>NO<sub>2</sub>; MF: 364; RMF: 999; Prob 17.0%; Lib: msms neg mona\_ipb\_gnps\_plasma; ID: 569.

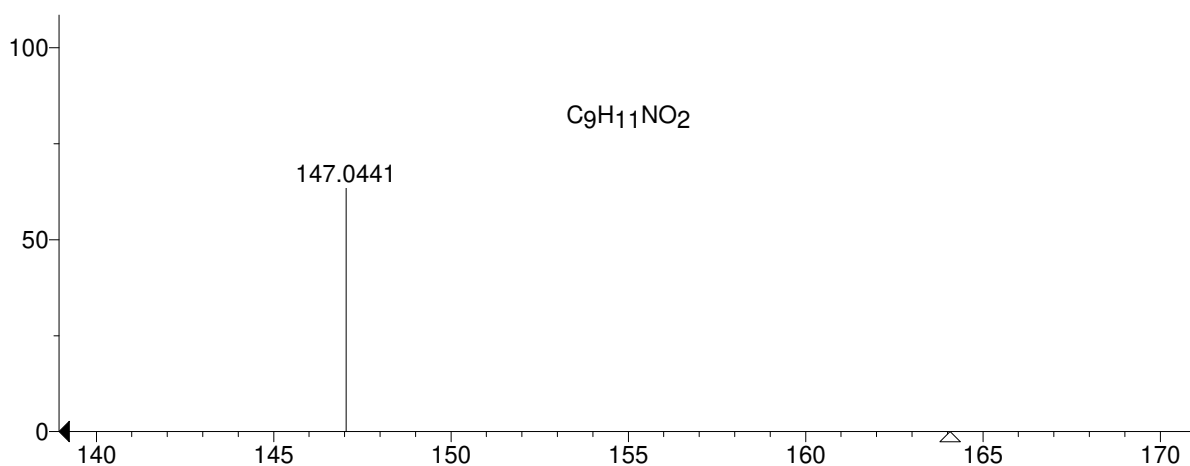

Hit 2 : Phenylalanine [M-H]<sup>-</sup> 35eV P=164.1  
C<sub>9</sub>H<sub>11</sub>NO<sub>2</sub>; MF: 364; RMF: 999; Prob 17.0%; Lib: mona-export-fiehn\_hilic; ID: 2924.

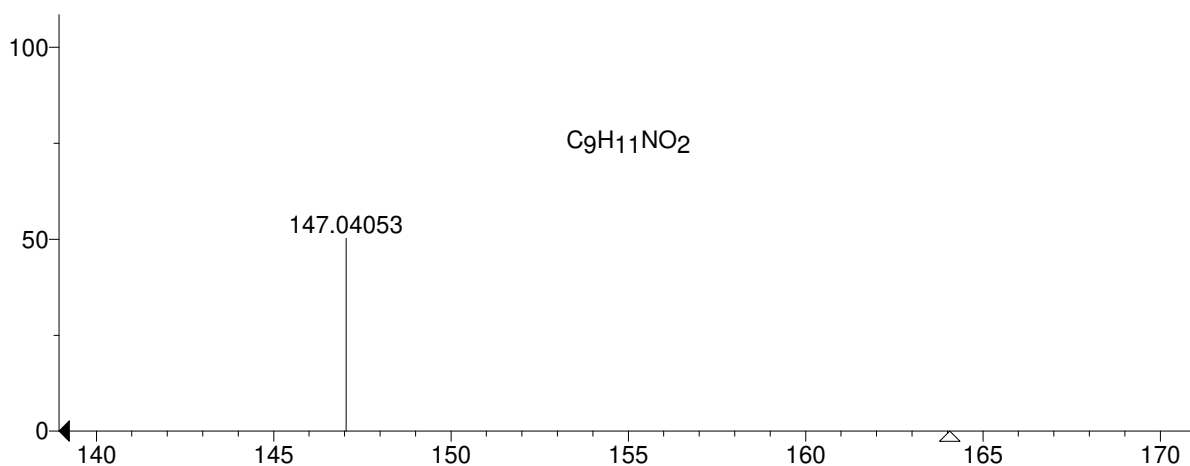

Hit 3 : DL-Phenylalanine [M-H]- IT-FT 35% P=164.1  
C<sub>9</sub>H<sub>11</sub>NO<sub>2</sub>; MF: 364; RMF: 999; Prob 17.0%; CAS: 150-30-1; Lib: nist\_msms; ID: 141494.

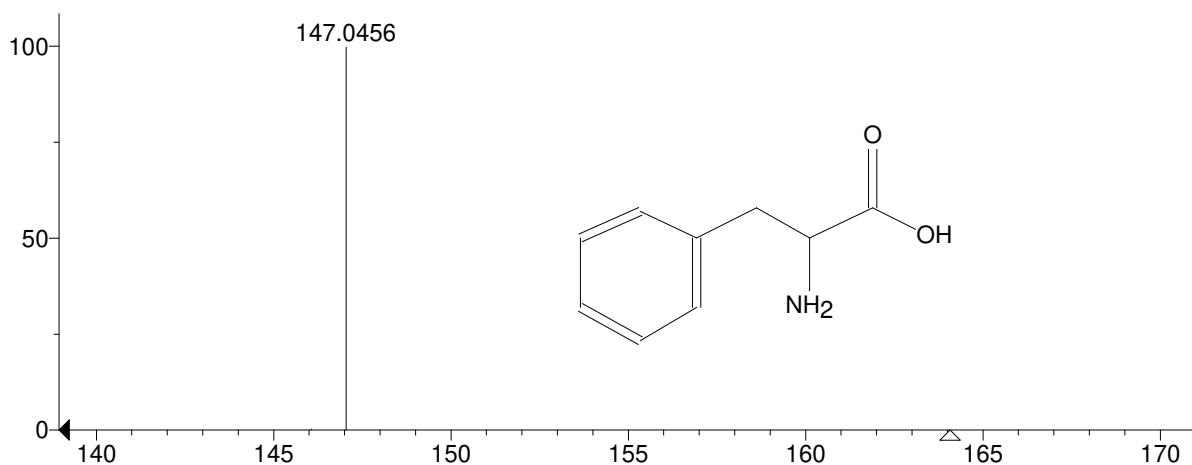

Hit 4 : N-Acetyl-L-phenylalanine [M-H-C<sub>2</sub>H<sub>2</sub>O]- IT-FT 35% P=164.1  
C<sub>11</sub>H<sub>13</sub>NO<sub>3</sub>; MF: 364; RMF: 999; Prob 17.0%; CAS: 2018-61-3; Lib: nist\_msms; ID: 290399.

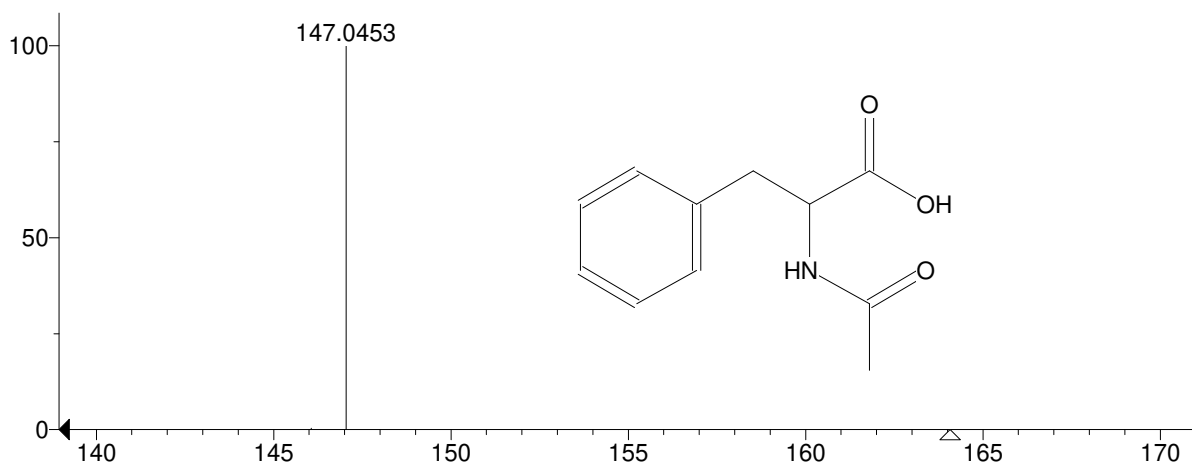

Hit 5 : N-(Phenylacetyl)-L-phenylalanine [M-H-C<sub>8</sub>H<sub>6</sub>O]- HCD 52V P=164.1  
C<sub>17</sub>H<sub>17</sub>NO<sub>3</sub>; MF: 364; RMF: 999; Prob 17.0%; CAS: 738-75-0; Lib: nist\_msms; ID: 485931.

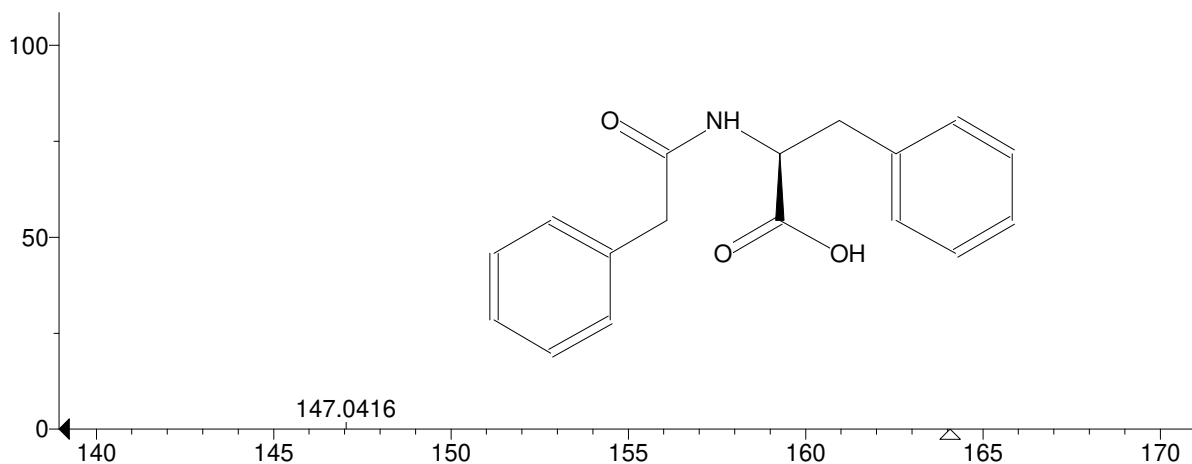

Unknown: Unknown (3.15\_413.1547m/z)  
Compound in Library Factor = -3273

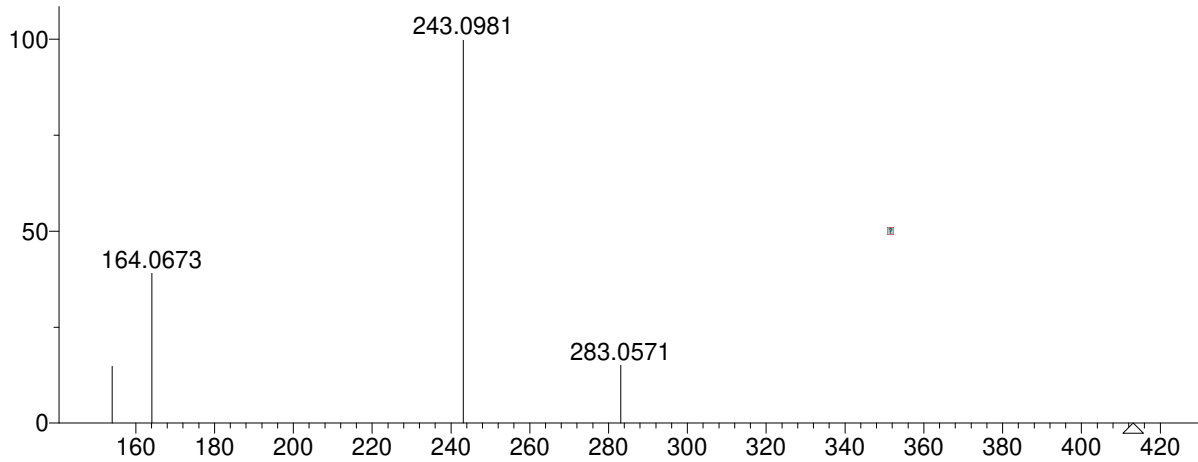

Hit 1 : 2-amino-5-[2-[[2,3-dihydroxy-2-(1-hydroxyethyl)butanoyl]oxymethyl]-4-hydroxyanilino]-5-oxopentanoic acid  
C<sub>18</sub>H<sub>26</sub>N<sub>2</sub>O<sub>9</sub>; MF: 1; RMF: 112; Prob 33.8%; Lib: mona-export-1c-ms-ms\_negative\_mode; ID: 22977.

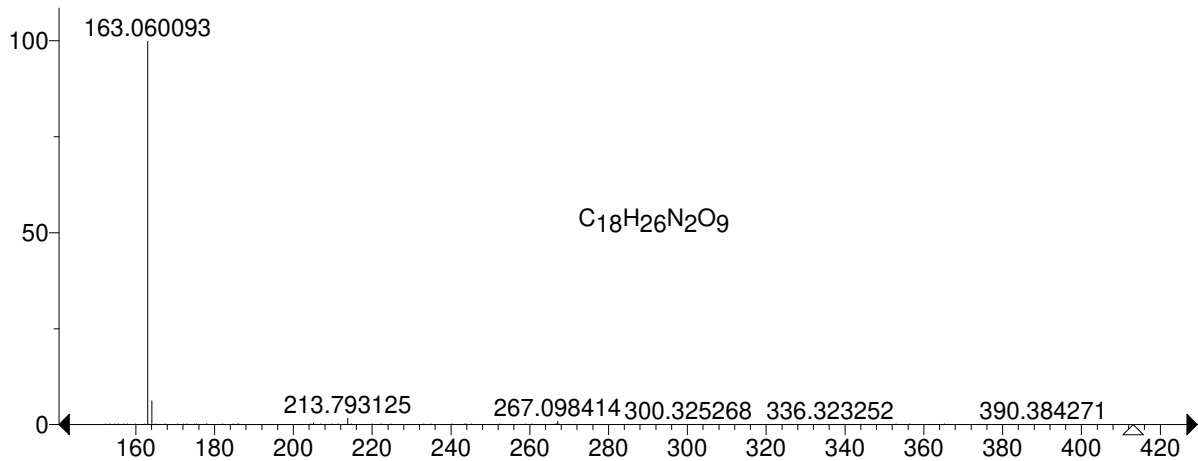

Hit 2 : PG 10:0; PG 3:0-7:0; [M-H]<sup>-</sup> [M-H]<sup>-</sup> P=413.2  
C<sub>16</sub>H<sub>31</sub>O<sub>10</sub>P; MF: 1; RMF: 99; Prob 33.8%; Lib: msdial-insilicomsm-lipids-neg; ID: 324631.

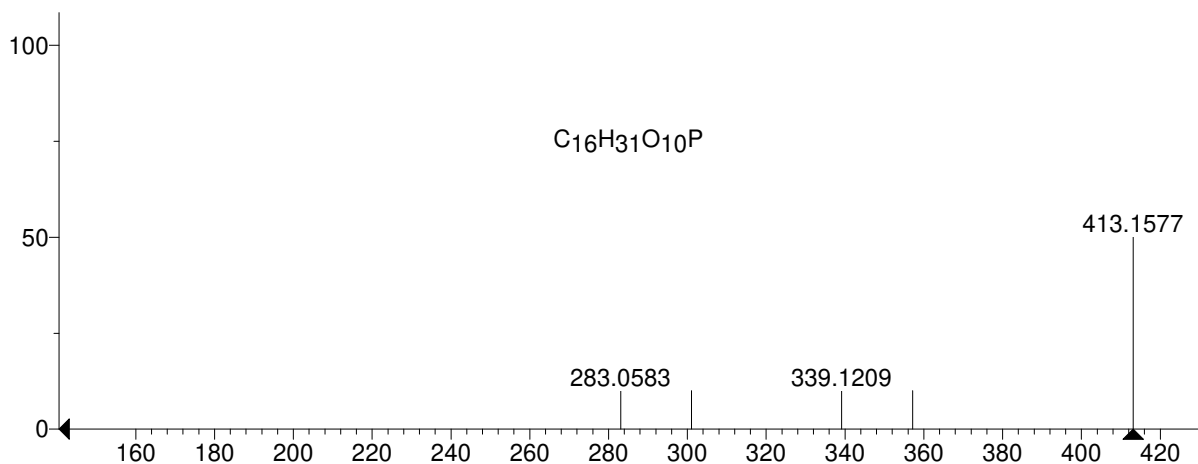

\*\* Search Report Page 2 of 2 \*\*

Hit 3 : 2-[2-[(Z)-pent-2-enyl]-3-[3,4,5-trihydroxy-6-(hydroxymethyl)oxan-2-yl]oxycyclopentyl]acetic acid [M+K]<sup>+</sup> 65  
C<sub>18</sub>H<sub>30</sub>O<sub>8</sub>; MF: 0; RMF: 32; Prob 32.5%; Lib: anthocyanins mona; ID: 9976.

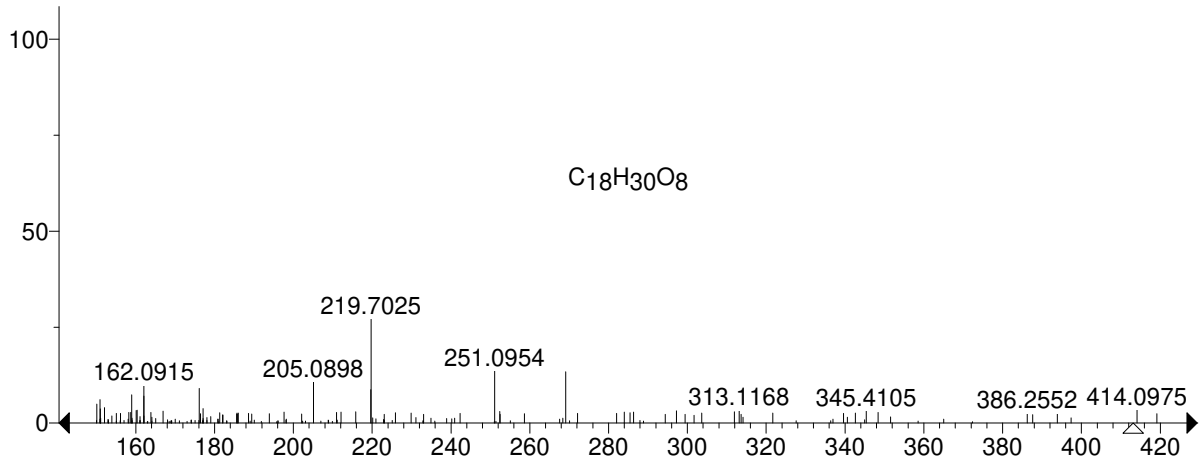

Unknown: Unknown (3.15\_488.1526m/z)  
Compound in Library Factor = 0

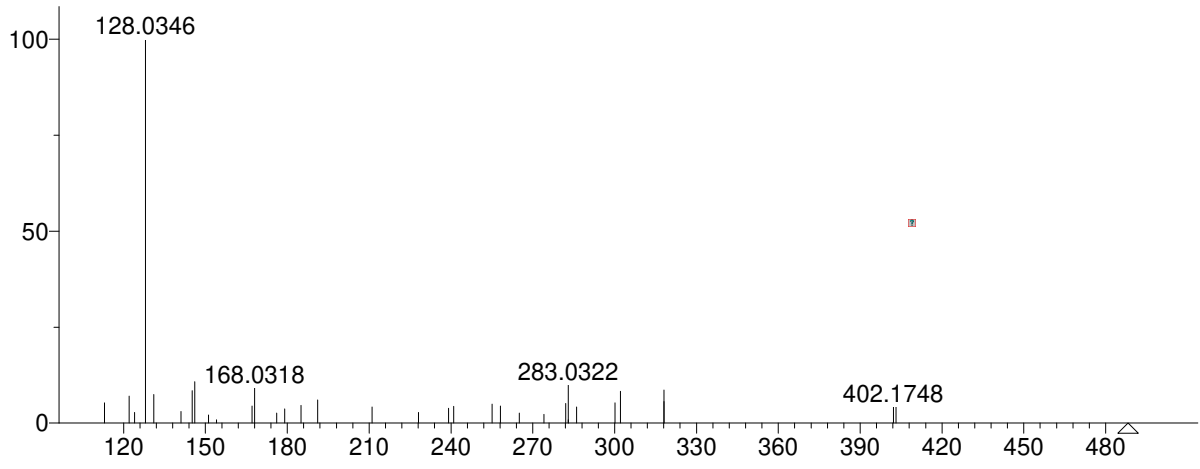

Unknown: Unknown (3.16\_281.0867m/z)  
Compound in Library Factor = 0

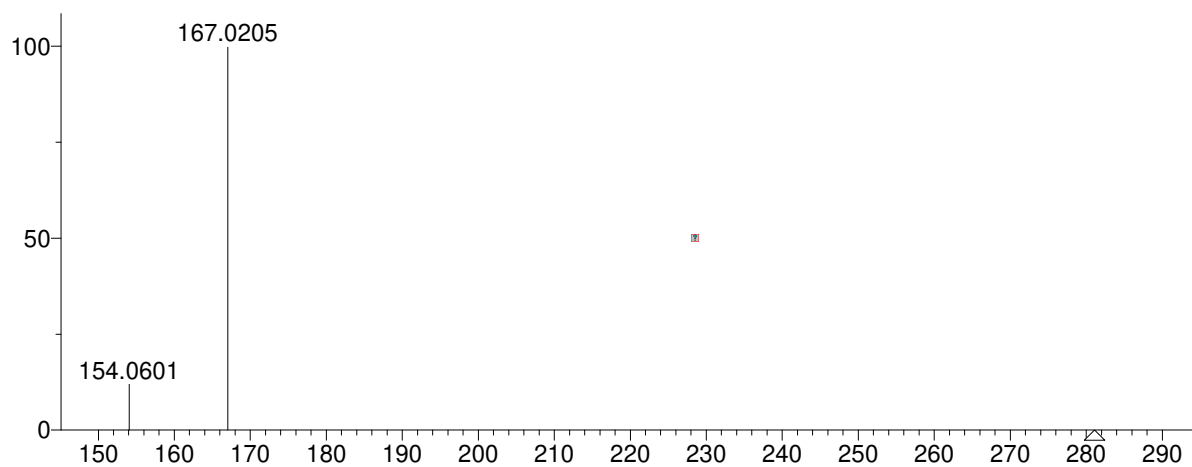

Hit 1 : 1H- Pyrazole-4-carboxylic acid, 1-(2,4-difluorophenyl)-5-[[2-[[[(1,1-dimethylethyl)amino] thioxomethyl]hydraz

C17H19F2N5O2S; MF: 0; RMF: 61; Prob 100.0%; CAS: 264233-05-8; Lib: nist\_msms; ID: 273556.

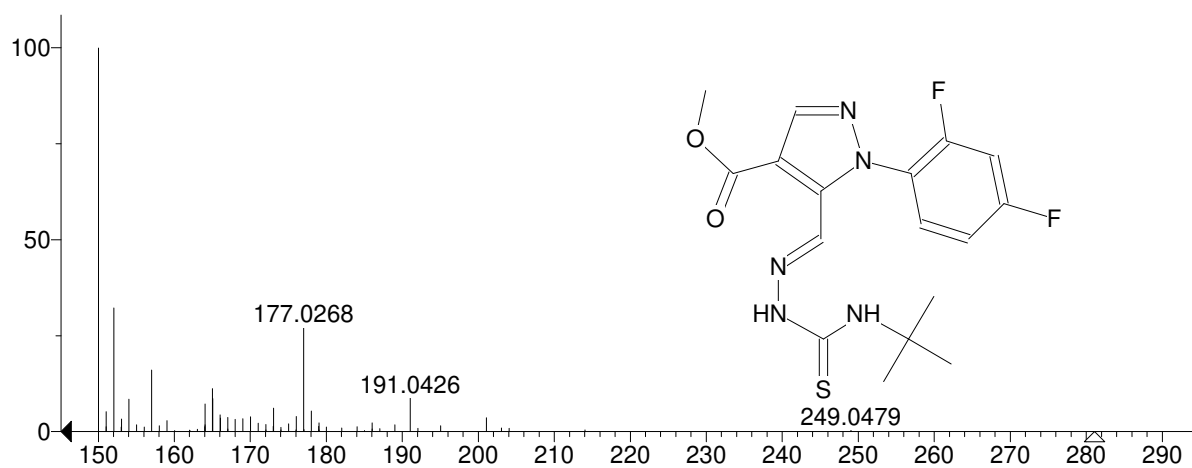

Unknown: Unknown (3.16\_303.0530m/z)  
Compound in Library Factor = -3273

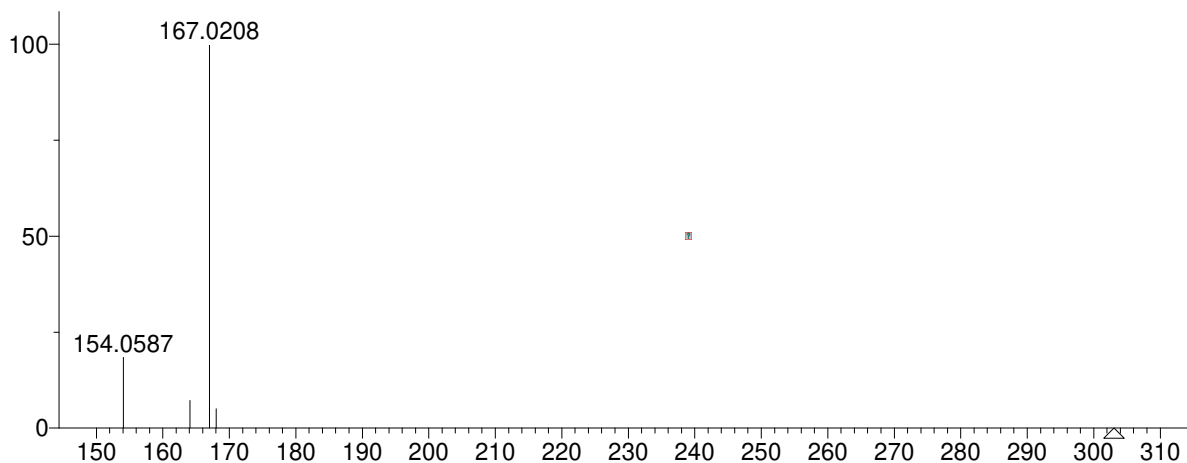

Hit 1 : Sulfamer  $[M+Na]^+$  HCD 27V P=303.1  
 $C_{11}H_{12}N_4O_3S$ ; MF: 1; RMF: 63; Prob 17.2%; CAS: 651-06-9; Lib: nist\_msms; ID: 310116.

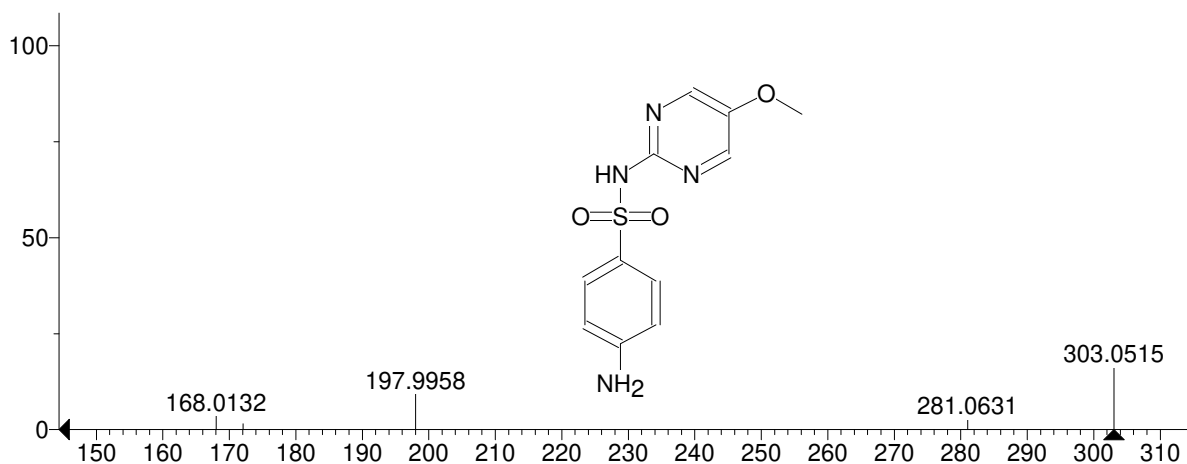

Hit 2 : Dihydroquercetin  $[M-H]^-$  40ev P=303.1  
 $C_{15}H_{12}O_7$ ; MF: 0; RMF: 50; Prob 16.6%; Lib: mona-export-1c-ms-ms\_negative\_mode; ID: 9365.

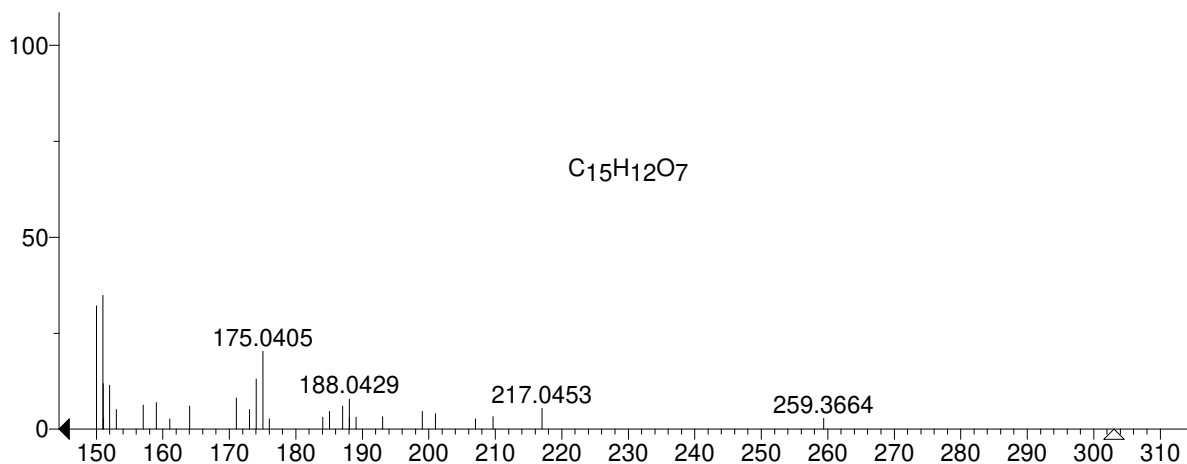

Hit 3 : 3,5,7,3',4'-Pentahydroxyflavanone [M-H]<sup>-</sup> HCD 48V P=303.1  
C<sub>15</sub>H<sub>12</sub>O<sub>7</sub>; MF: 0; RMF: 48; Prob 16.6%; CAS: 480-18-2; Lib: nist\_msms; ID: 148075.

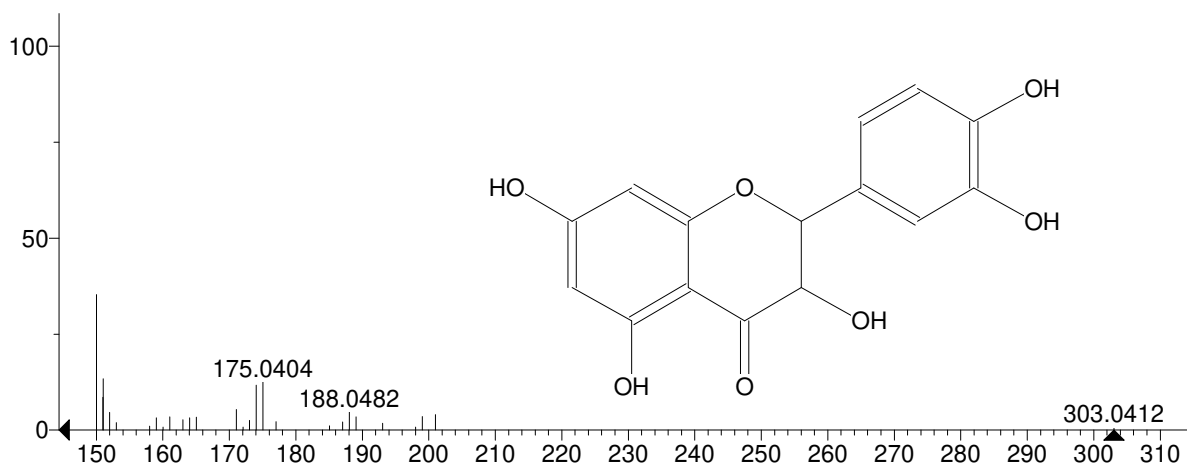

Hit 4 : taxifolin [M-H]<sup>-</sup> 40 P=303.1  
C<sub>15</sub>H<sub>12</sub>O<sub>7</sub>; MF: 0; RMF: 36; Prob 16.6%; Lib: mona-export-lc-ms-ms\_negative\_mode; ID: 27780.

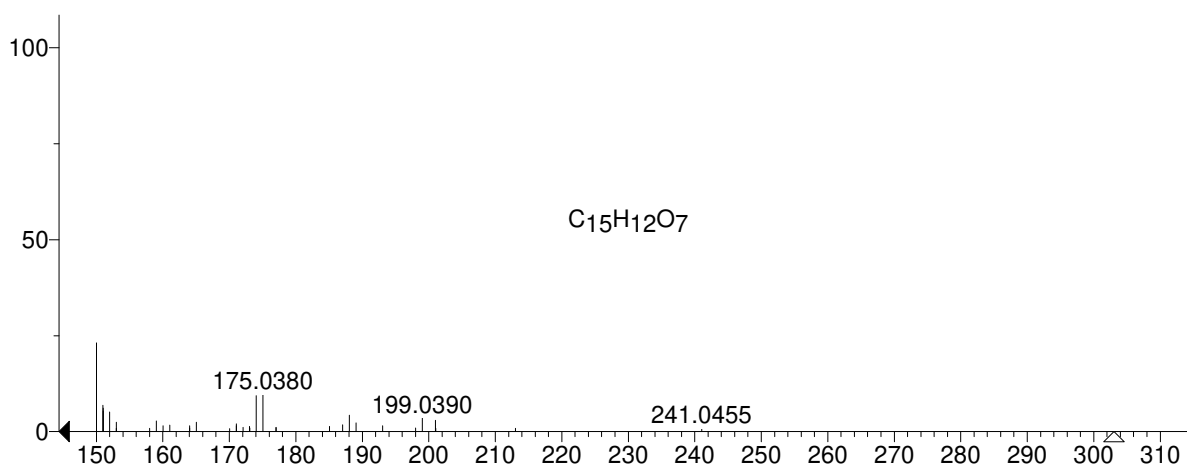

Hit 5 : NCGC00381232-0115,7-dihydroxy-2-(2,3,4-trihydroxyphenyl)chromen-4-one [M+H]<sup>+</sup> P=303.1  
C<sub>15</sub>H<sub>10</sub>O<sub>7</sub>; MF: 0; RMF: 25; Prob 16.6%; Lib: mona-export-gnps; ID: 9293.

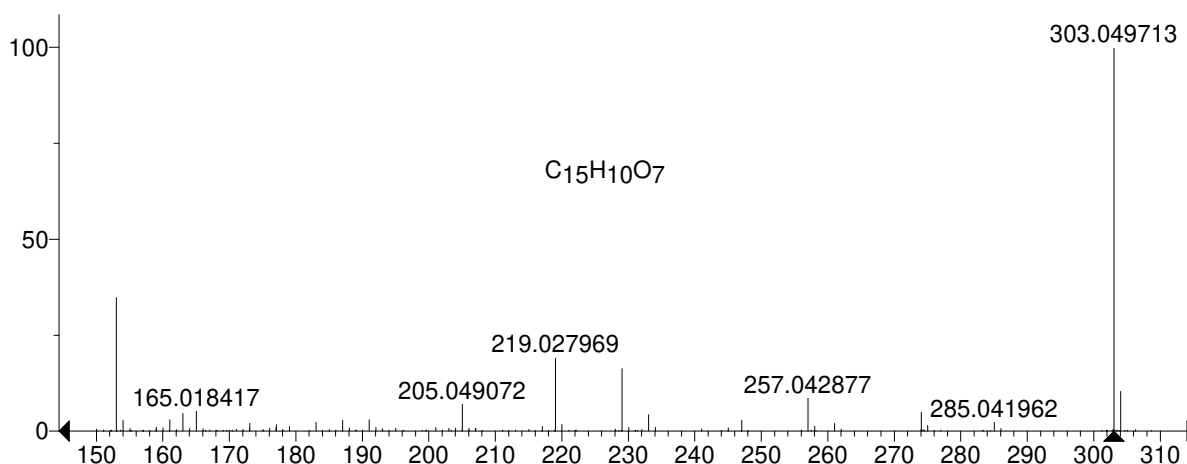



Unknown: Unknown (3.17\_351.0928m/z)  
Compound in Library Factor = 0

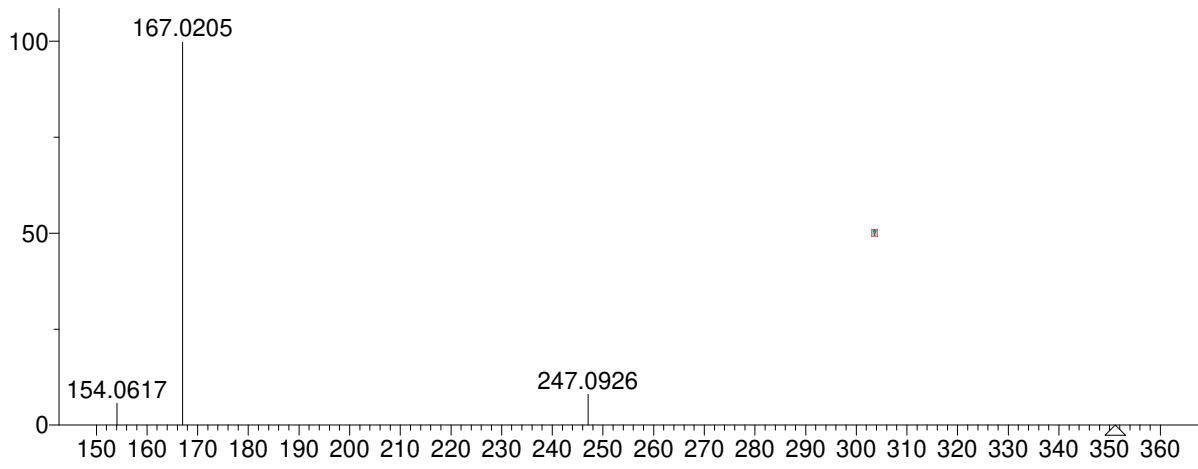

Unknown: Unknown (3.17\_417.1498m/z)  
Compound in Library Factor = 0

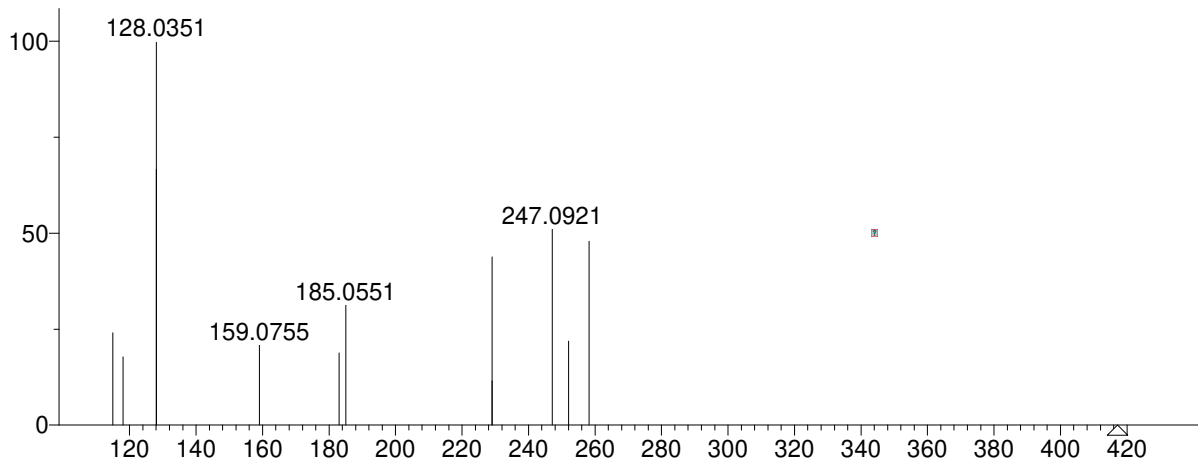

\*\* Search Report Page 1 of 1 \*\*

Unknown: Unknown (3.18\_719.3497m/z)  
Compound in Library Factor = -3273

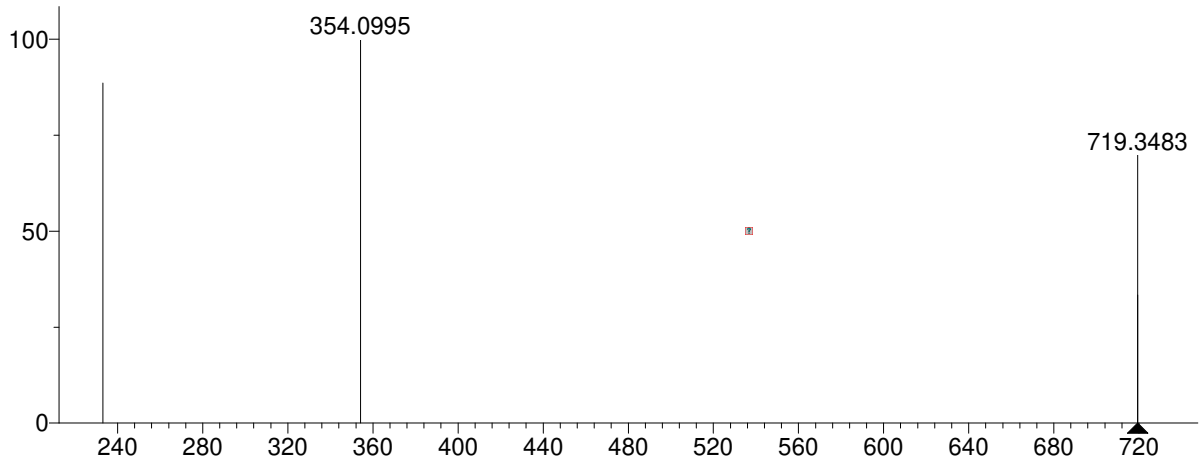

Hit 1 : Etoxazole [2M+H]<sup>+</sup> HCD 14V P=719.3  
C<sub>21</sub>H<sub>23</sub>F<sub>2</sub>NO<sub>2</sub>; MF: 20; RMF: 326; Prob 100.0%; CAS: 153233-91-1; Lib: nist\_msms; ID: 482644.

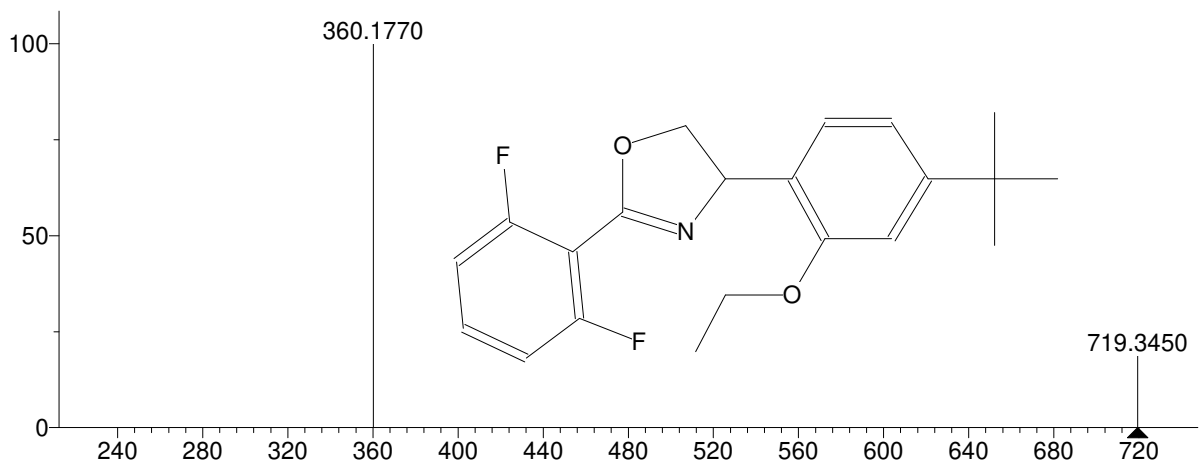

Unknown: Unknown (3.19\_445.1446m/z)  
Compound in Library Factor = -3273

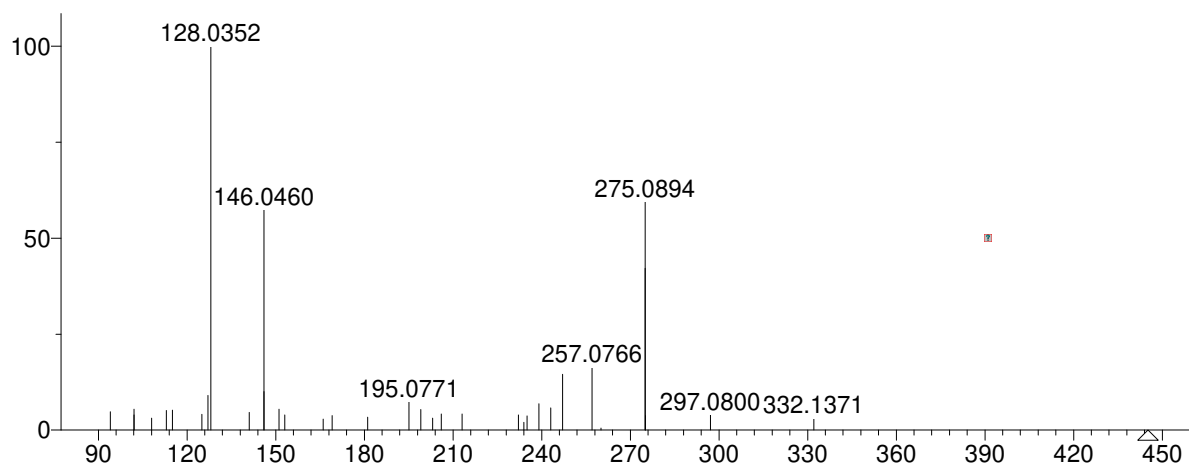

Hit 1 : (1R,3R,4S,6S,8R,9R,10S,11S)-9-(acetyloxy)-8-hydroxy-3,8-dimethyl-12-methylidene-7,13-dioxo-5,14-dioxo-  
C<sub>21</sub>H<sub>26</sub>O<sub>9</sub>; MF: 1; RMF: 49; Prob 34.2%; Lib: mona-export-vf-npl\_gexactive; ID: 6949.

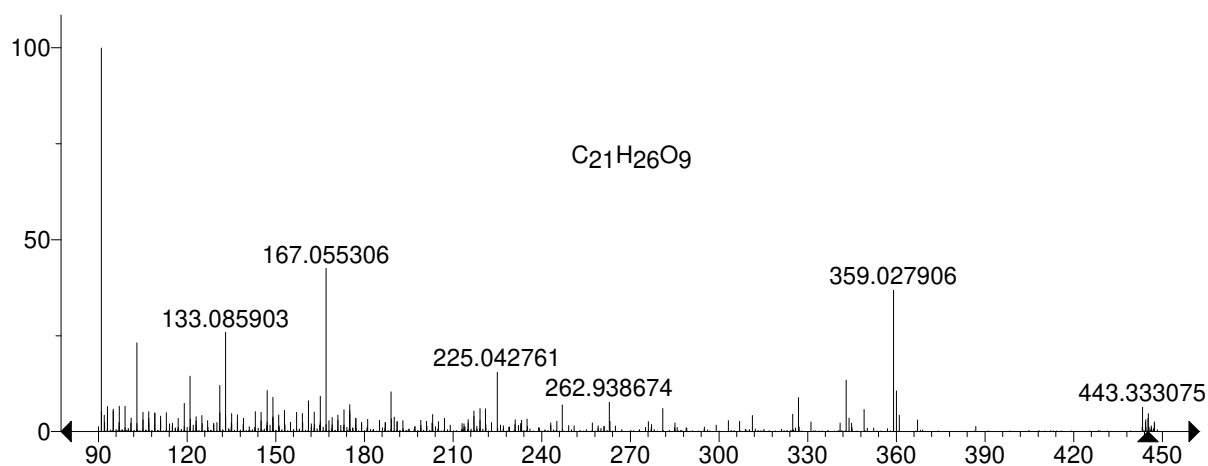

Hit 2 : 1,3-Cyclobutanedicarboxylic acid, 2,4-diphenyl-, 1-(1-naphthalenyl) ester, (1β,2R,3α,4R)- [M+Na]<sup>+</sup> HCD :  
C<sub>28</sub>H<sub>22</sub>O<sub>4</sub>; MF: 0; RMF: 6; Prob 32.9%; CAS: 1541209-75-9; Lib: nist\_msms; ID: 349631.

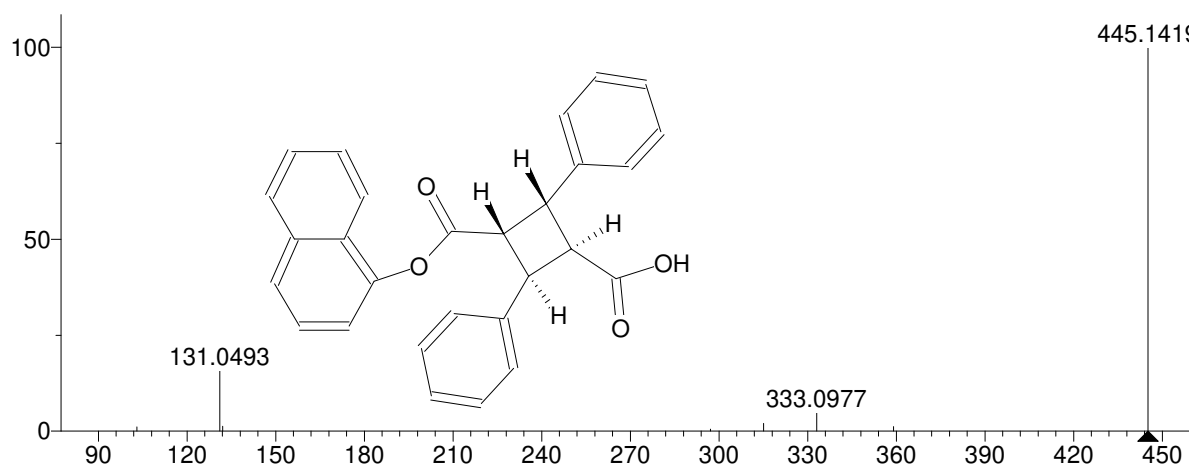

\*\* Search Report Page 2 of 2 \*\*

Hit 3 : Acetamiprid [2M+H]<sup>+</sup> IT 35% P=445.1  
C<sub>10</sub>H<sub>11</sub>ClN<sub>4</sub>; MF: 0; RMF: 5; Prob 32.9%; CAS: 135410-20-7; Lib: nist\_msms; ID: 306864.

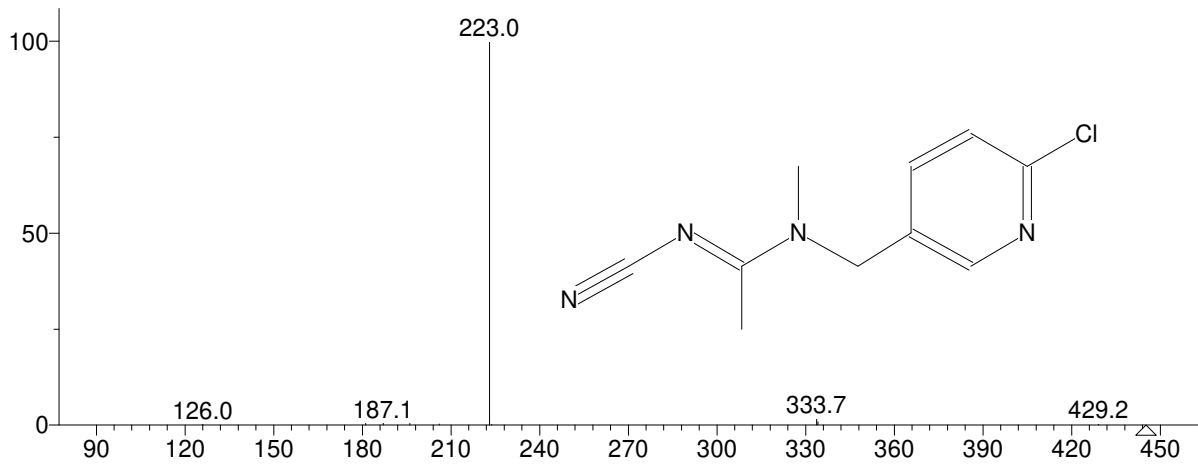

\*\* Search Report Page 1 of 2 \*\*

Unknown: Unknown (3.20\_387.1382m/z)  
Compound in Library Factor = -3273

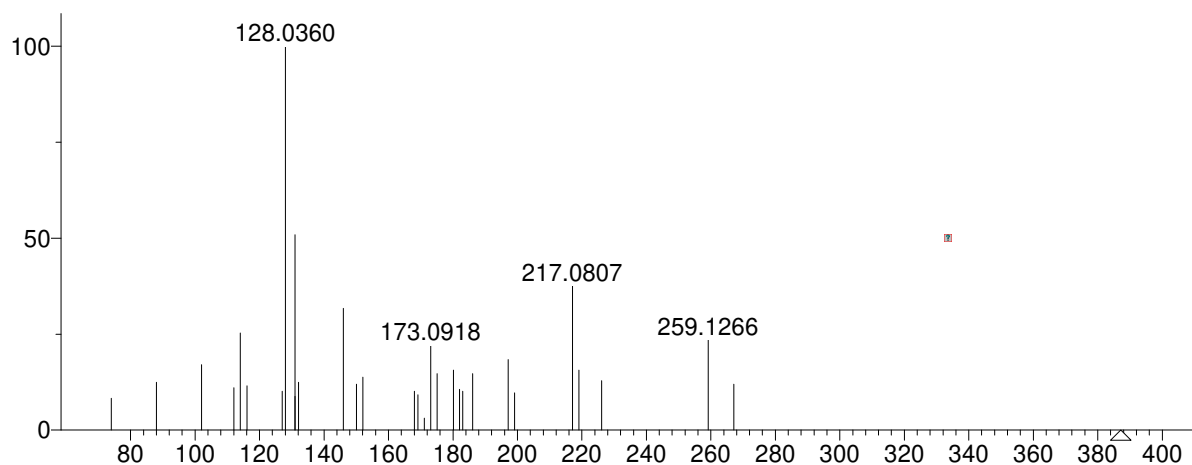

Hit 1 : [(3aR,4S,6R,11aR)-6,9-dihydroxy-6,10-dimethyl-3-methylidene-2,7-dioxo-3a,4,5,8,9,11a-hexahydrocycloheptadec-1(14),8,15,17-tetraene] C<sub>19</sub>H<sub>24</sub>O<sub>7</sub>; MF: 1; RMF: 51; Prob 34.2%; Lib: mona-export-vf-npl\_qexactive; ID: 10210.

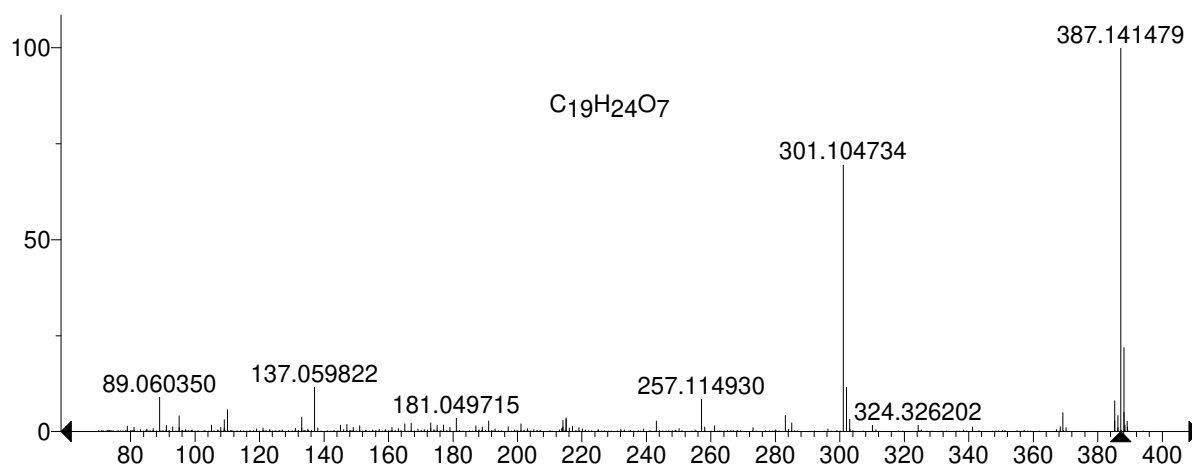

Hit 2 : (5R,6S,8Z,11S)-5,6,15-trihydroxy-17-methoxy-11-methyl-12-oxabicyclo[12.4.0]octadeca-1(14),8,15,17-tetraene C<sub>19</sub>H<sub>24</sub>O<sub>7</sub>; MF: 0; RMF: 46; Prob 32.9%; Lib: mona-export-vf-npl\_qexactive; ID: 18340.

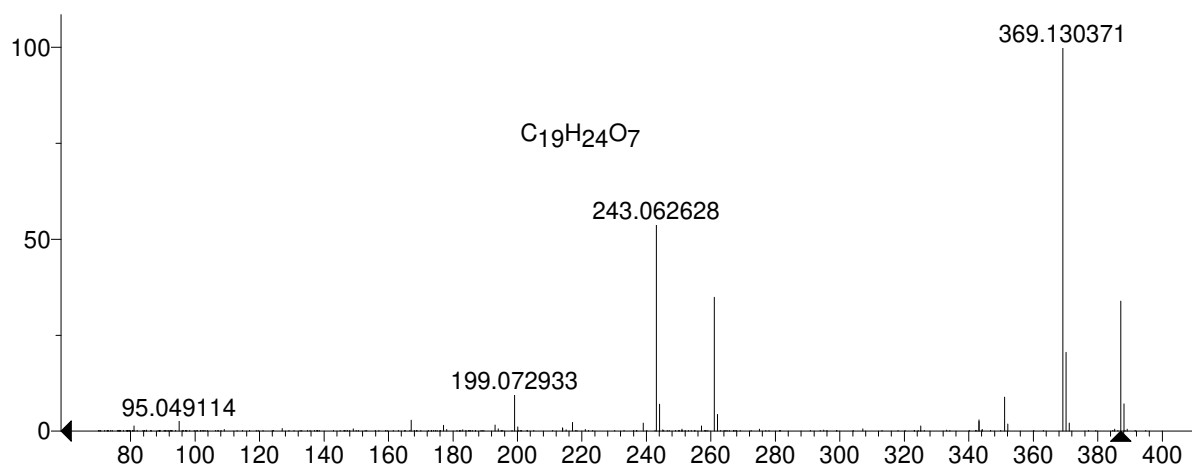

Hit 3 : NCGC00347789-02\_C19H24O7\_(3S,5Z,8S,9R)-8,9,16-Trihydroxy-14-methoxy-3-methyl-3,4,9,10,11,12-he  
C19H24O7; MF: 0; RMF: 23; Prob 32.9%; Lib: mona-export-gnps; ID: 11355.

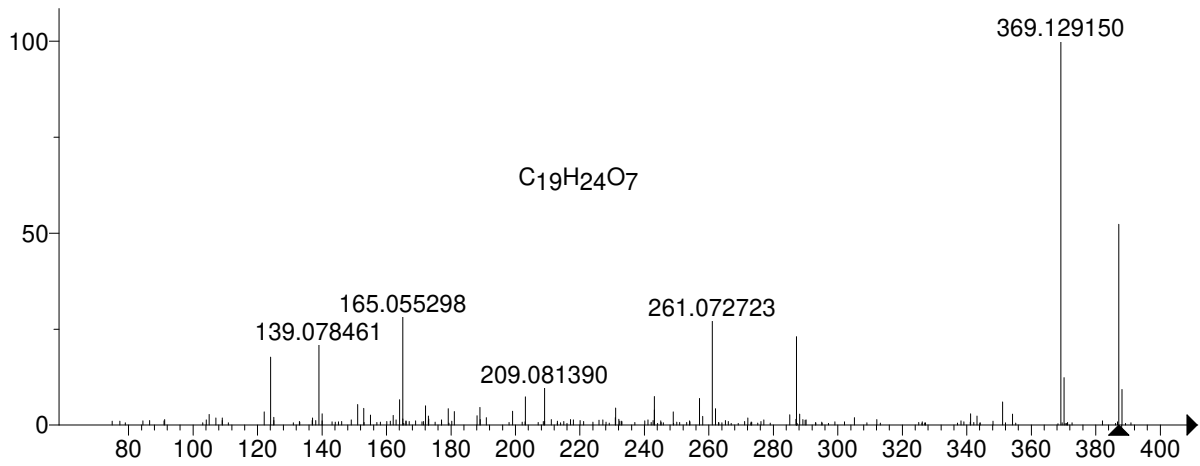

Unknown: Unknown (3.20\_545.2095m/z)  
Compound in Library Factor = 0

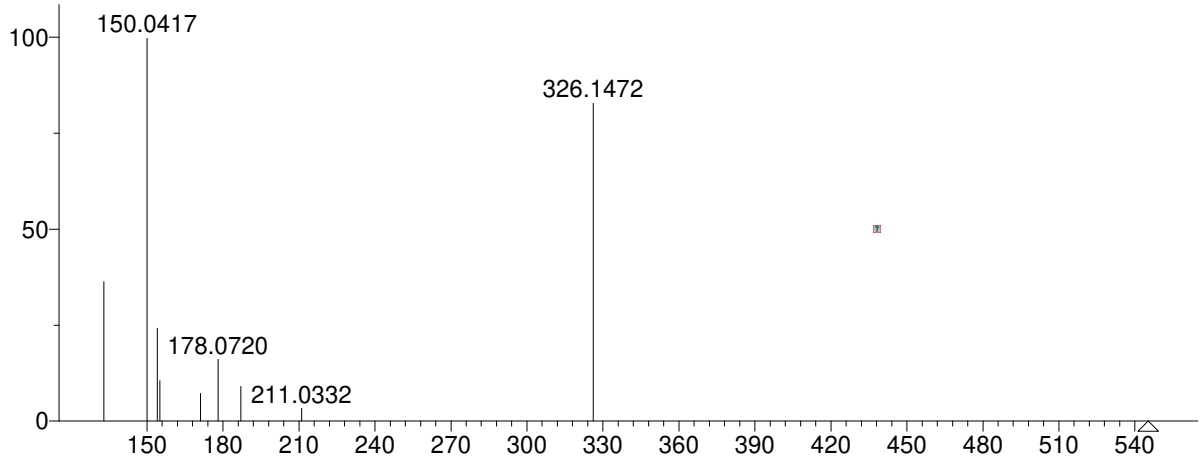

Hit 1 : methyl 3-[3,4-dihydroxy-5-(3-methylbut-2-enyl)phenyl]-2-[[4-hydroxy-3-(3-methylbut-2-enyl)phenyl]methyl]-  
C<sub>30</sub>H<sub>34</sub>O<sub>8</sub>; MF: 0; RMF: 34; Prob 50.0%; Lib: mona-export-vf-npl\_qexactive; ID: 8106.

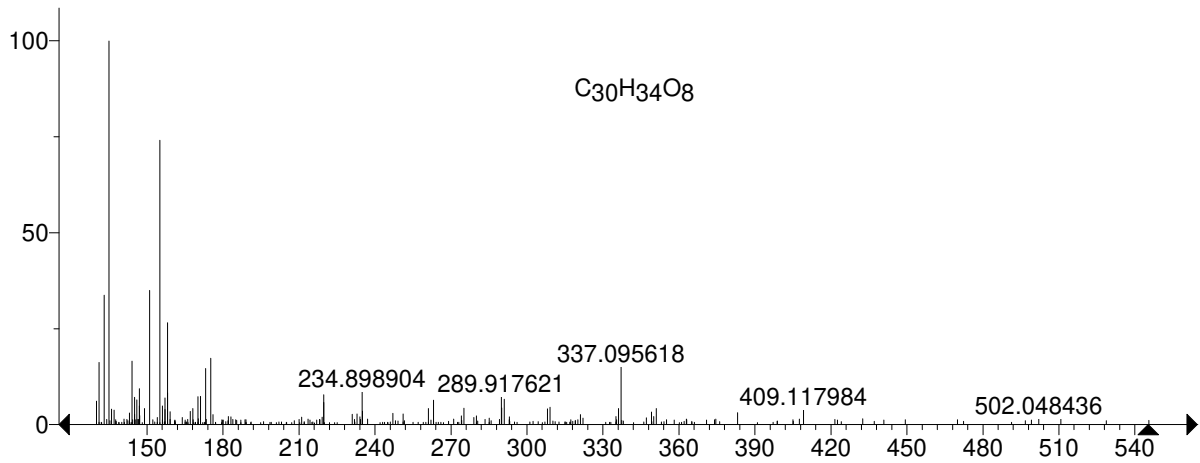

Hit 2 : cadambine [M+H]<sup>+</sup> P=545.2  
C<sub>27</sub>H<sub>32</sub>N<sub>2</sub>O<sub>10</sub>; MF: 0; RMF: 30; Prob 50.0%; Lib: mona-export-gnps; ID: 14914.

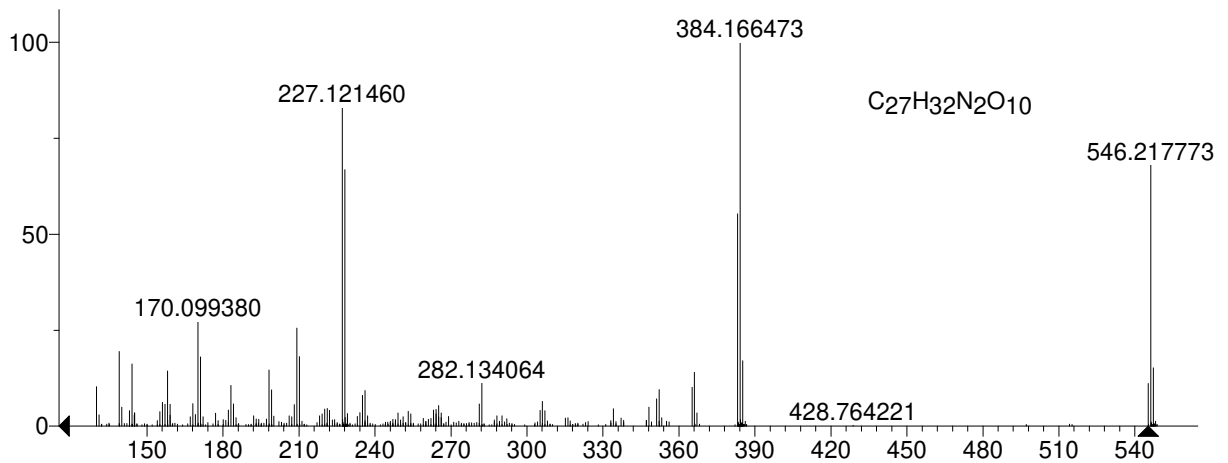



Unknown: Unknown (3.20\_680.2779m/z)  
Compound in Library Factor = 0

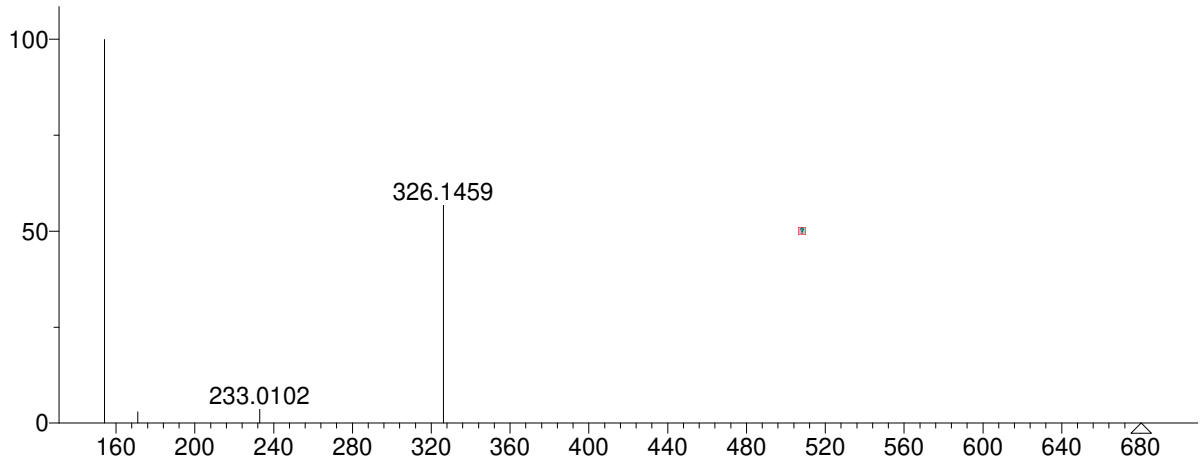

Unknown: Unknown (3.21\_494.1776m/z)  
Compound in Library Factor = 0

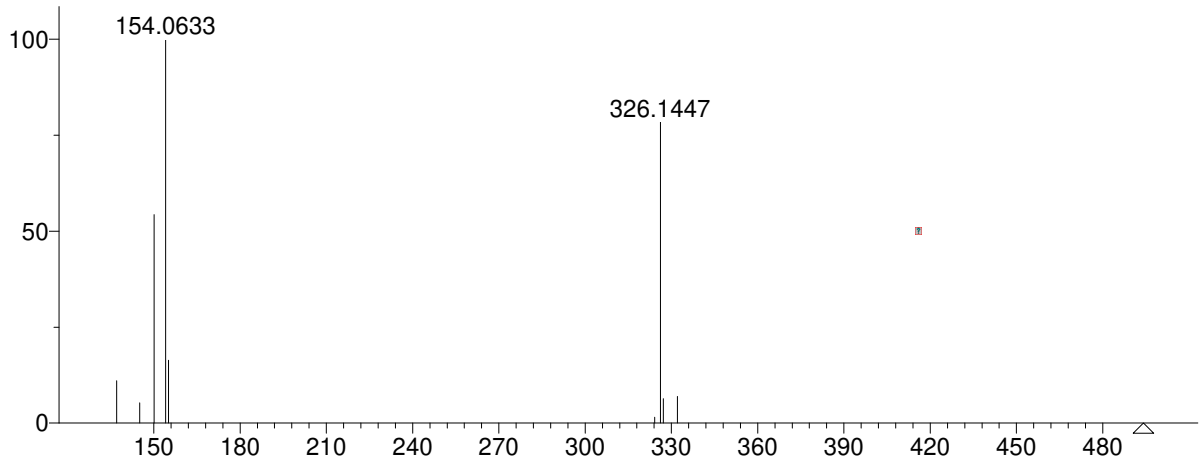

Unknown: Unknown (3.21\_555.1331m/z)  
Compound in Library Factor = 0

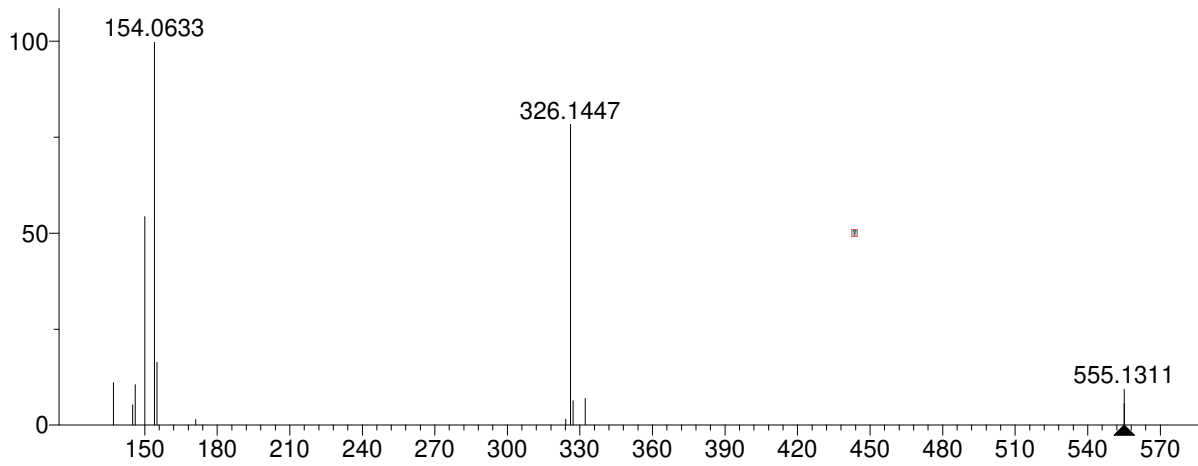

Hit 1 : NCGC00385087-01!3-[5,7-dihydroxy-2-(4-methoxyphenyl)-4-oxo-2,3-dihydrochromen-3-yl]-5,7-dihydroxy-2-C<sub>31</sub>H<sub>24</sub>O<sub>10</sub>; MF: 0; RMF: 51; Prob 100.0%; Lib: mona-export-gnps; ID: 7535.

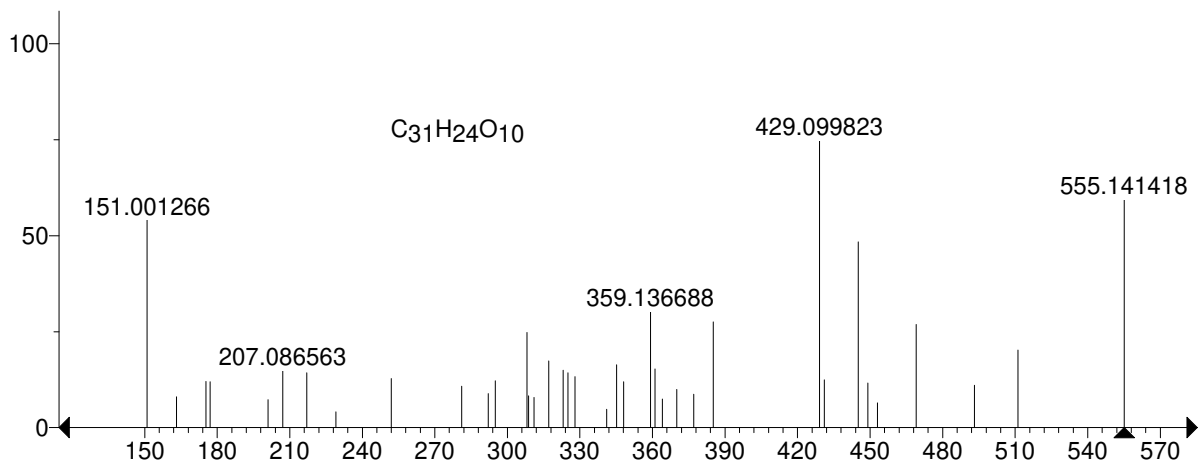

\*\* Search Report Page 1 of 2 \*\*

Unknown: Unknown (3.22\_496.2038m/z)  
Compound in Library Factor = -3273

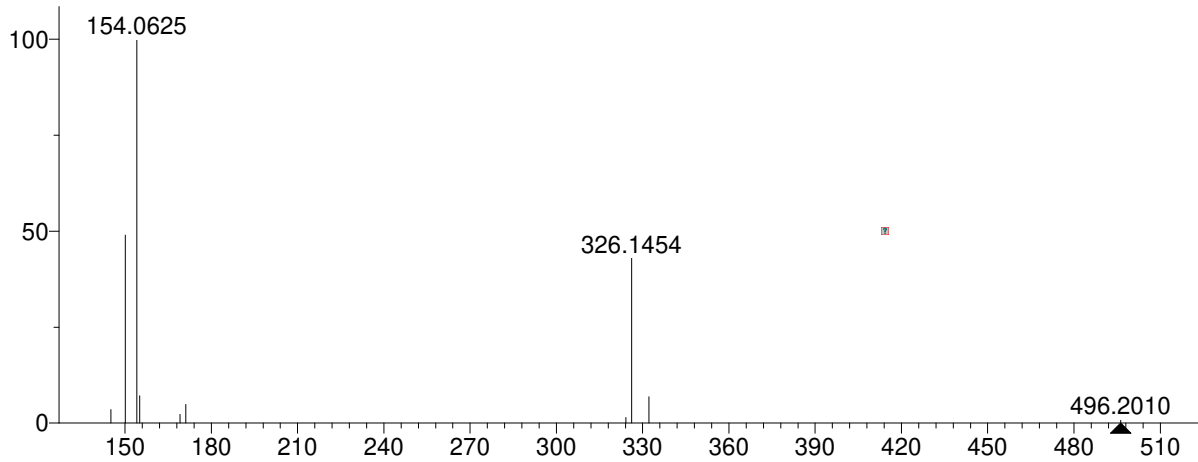

Hit 1 : NCGC00180666-02!(2R,3S,4S,5R,6S)-2-[(3,4,5-trihydroxyoxan-2-yl)oxymethyl]-6-(3,4,5-trimethoxyphenoxy)oxane-3,4,5-triol [M]  
C<sub>20</sub>H<sub>30</sub>O<sub>13</sub>; MF: 2; RMF: 199; Prob 21.1%; Lib: mona-export-gnps; ID: 8997.

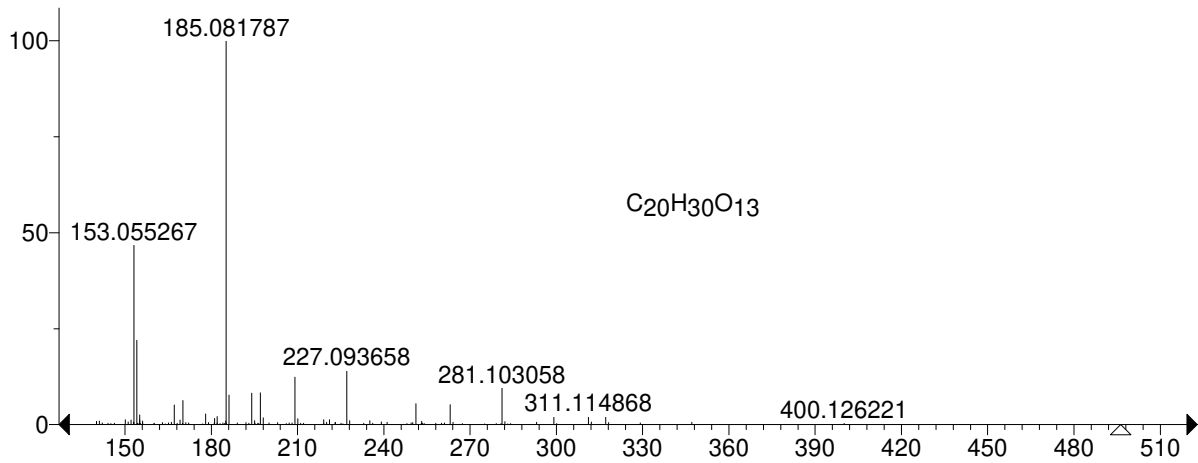

Hit 2 : (2R,3S,4S,5R,6S)-2-[(3,4,5-trihydroxyoxan-2-yl)oxymethyl]-6-(3,4,5-trimethoxyphenoxy)oxane-3,4,5-triol [M]  
C<sub>20</sub>H<sub>30</sub>O<sub>13</sub>; MF: 1; RMF: 334; Prob 20.3%; Lib: mona-export-vf-npl\_qexactive; ID: 9258.

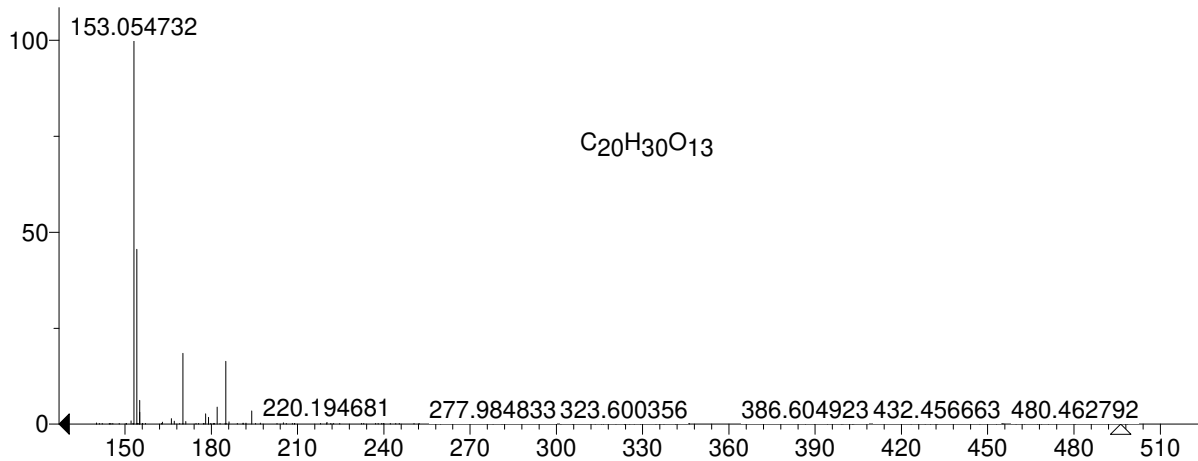

\*\* Search Report Page 2 of 2 \*\*

Hit 3 : (2R,3S,4S,5R,6S)-2-[[[(2S,3R,4R)-3,4-dihydroxy-4-(hydroxymethyl)oxolan-2-yl]oxymethyl]-6-(3,4,5-trimethoxy)phenyl]propanoic acid  
C<sub>20</sub>H<sub>30</sub>O<sub>13</sub>; MF: 0; RMF: 302; Prob 19.5%; Lib: mona-export-vf-npl\_qexactive; ID: 9783.

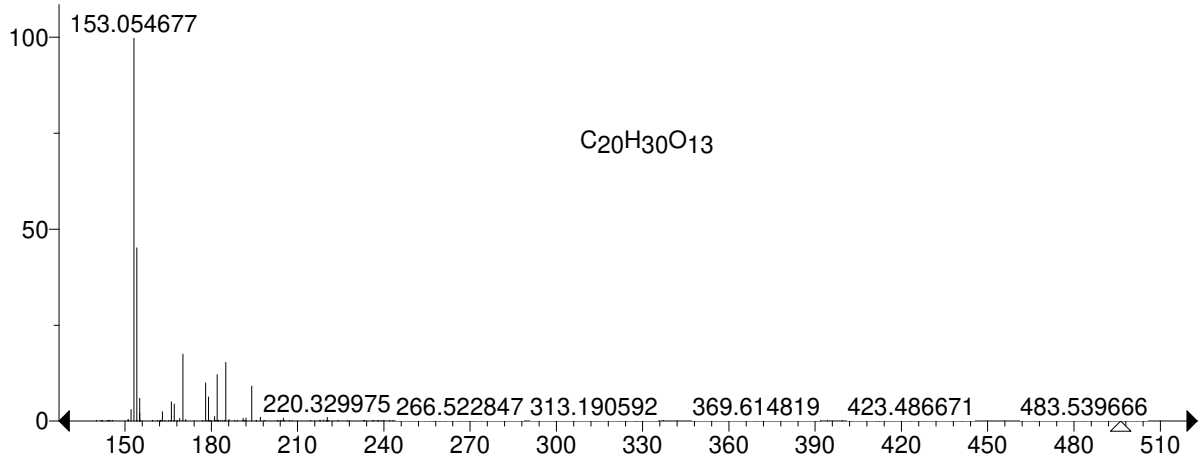

Hit 4 : NCGC00180025-03!(2R,3S,4S,5R,6S)-2-[[[(2S,3R,4R)-3,4-dihydroxy-4-(hydroxymethyl)oxolan-2-yl]oxymethyl]-6-(3,4,5-trimethoxy)phenyl]propanoic acid  
C<sub>20</sub>H<sub>30</sub>O<sub>13</sub>; MF: 0; RMF: 201; Prob 19.5%; Lib: mona-export-gnps; ID: 8565.

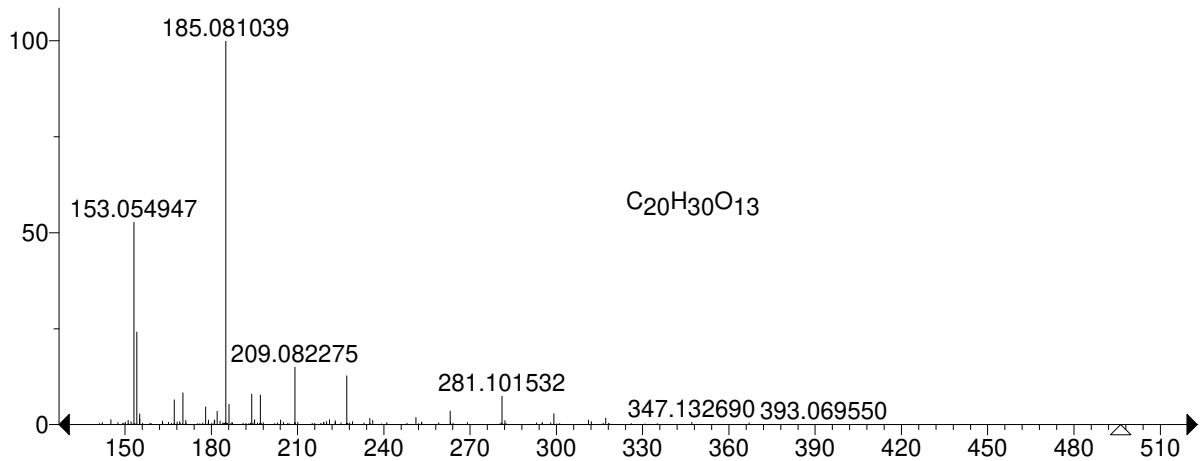

Hit 5 : Benzoic acid, 3-[[[(3-carboxycyclohexyl)amino]carbonyl]-4-[3-[4-[4-(cyclohexyloxy)butoxy]phenyl]propoxy]phenyl]propoxy]-  
C<sub>34</sub>H<sub>45</sub>NO<sub>8</sub>; MF: 0; RMF: 1; Prob 19.5%; CAS: 712313-35-4; Lib: nist\_msms; ID: 190533.

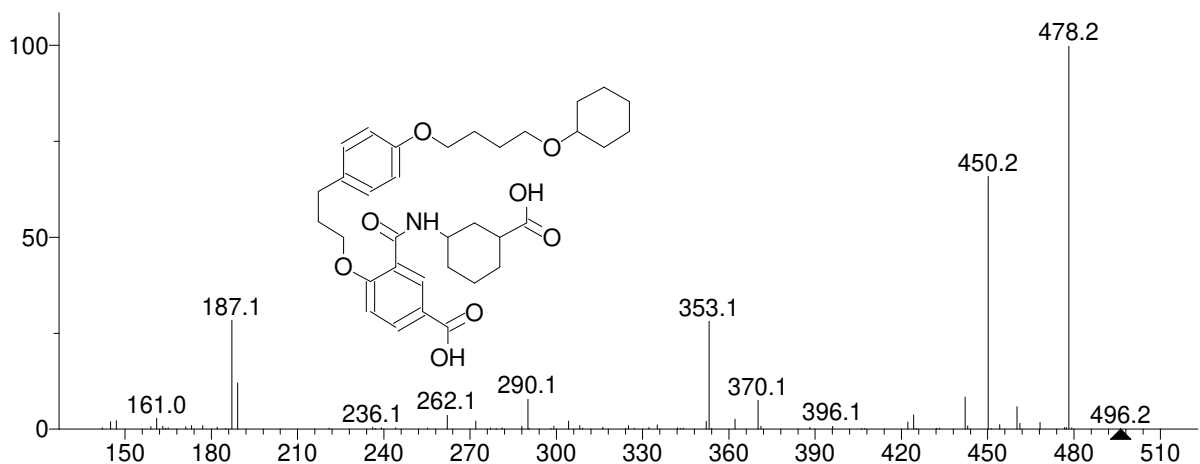

Unknown: Unknown (3.22\_666.2619m/z)  
Compound in Library Factor = 0

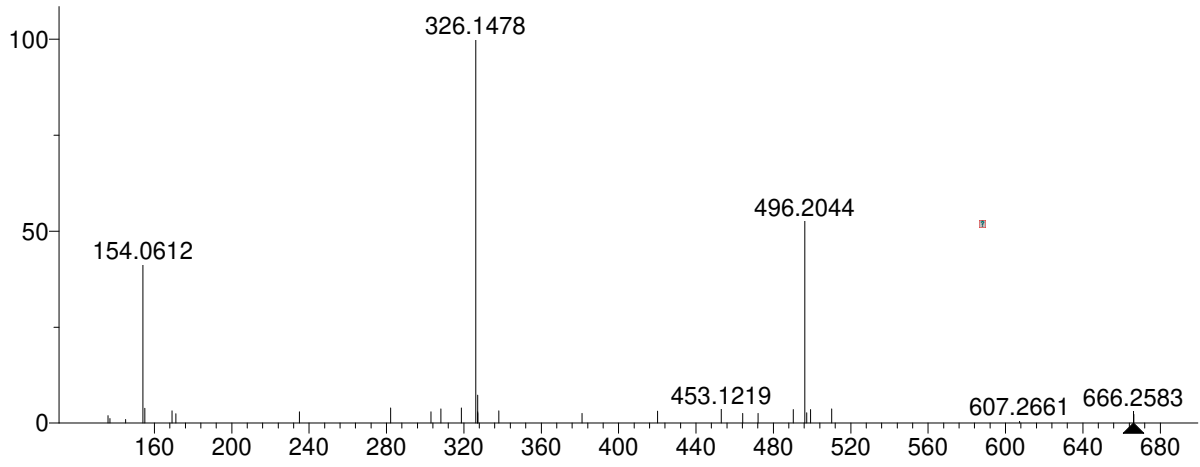

\*\* Search Report Page 1 of 2 \*\*

Unknown: Unknown (3.23\_413.1558m/z)  
Compound in Library Factor = -3273

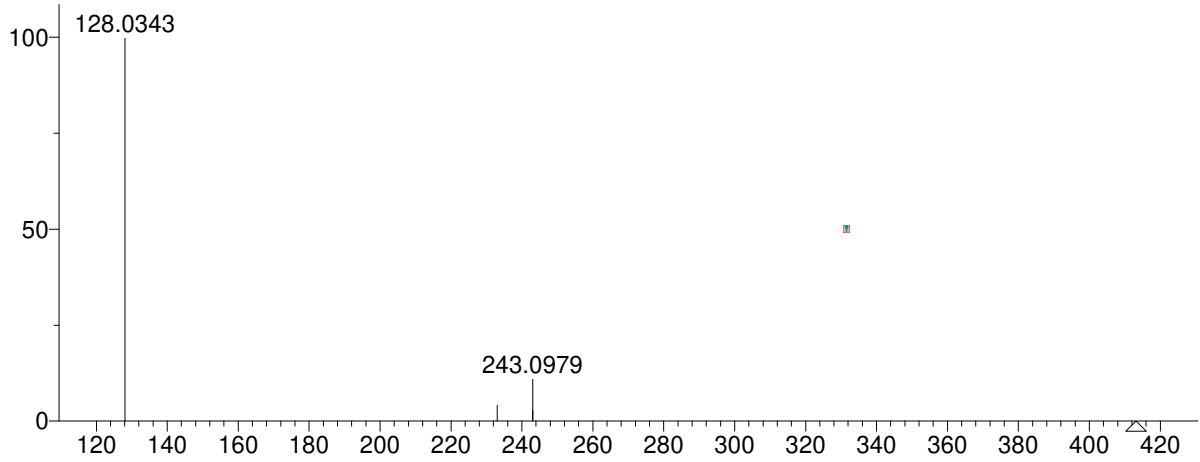

Hit 1 : 2-amino-5-[2-[[2,3-dihydroxy-2-(1-hydroxyethyl)butanoyl]oxymethyl]-4-hydroxyanilino]-5-oxopentanoic acid  
C<sub>18</sub>H<sub>26</sub>N<sub>2</sub>O<sub>9</sub>; MF: 2; RMF: 198; Prob 26.5%; Lib: mona-export-1c-ms-ms\_negative\_mode; ID: 22977.

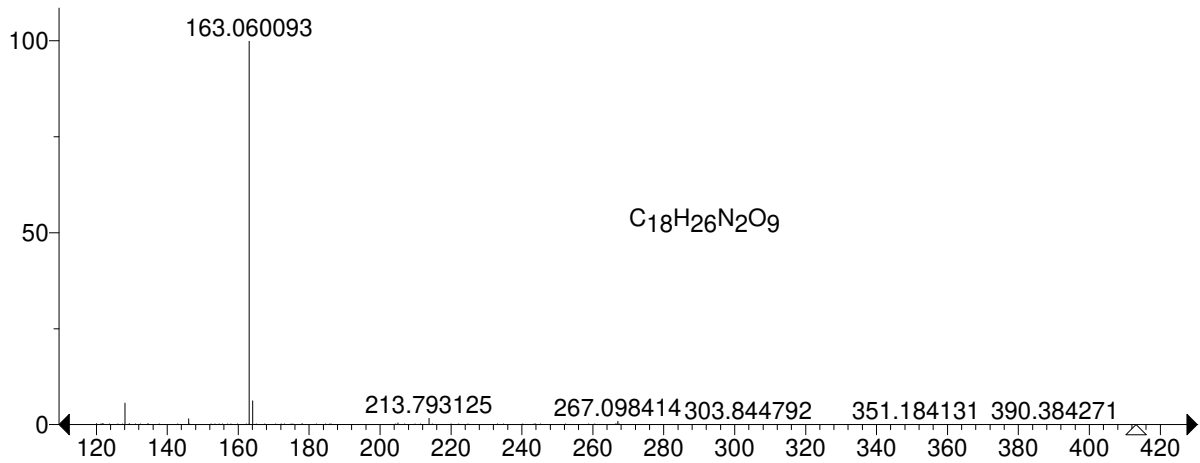

Hit 2 : NCGC00385396-01\_C<sub>23</sub>H<sub>24</sub>O<sub>7</sub>\_Benzeneacetic acid, 4-hydroxy-, (3S,3aR,4S,9aS,9bR)-2,3,3a,4,5,7,9a,9  
C<sub>23</sub>H<sub>24</sub>O<sub>7</sub>; MF: 0; RMF: 40; Prob 24.5%; Lib: mona-export-gnps; ID: 14019.

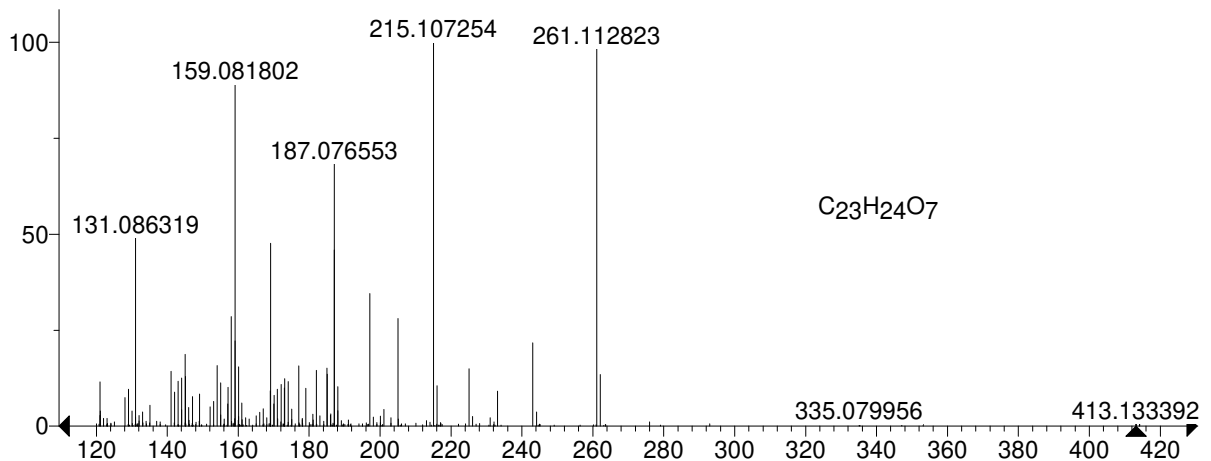

Hit 3 : NCGC00380168-0113-[2-(2-hydroxy-4-methoxy-6-methylphenoxy)-4-methoxy-6-methylphenoxy]-5-methylb  
C<sub>23</sub>H<sub>24</sub>O<sub>7</sub>; MF: 0; RMF: 19; Prob 24.5%; Lib: mona-export-gnps; ID: 6039.

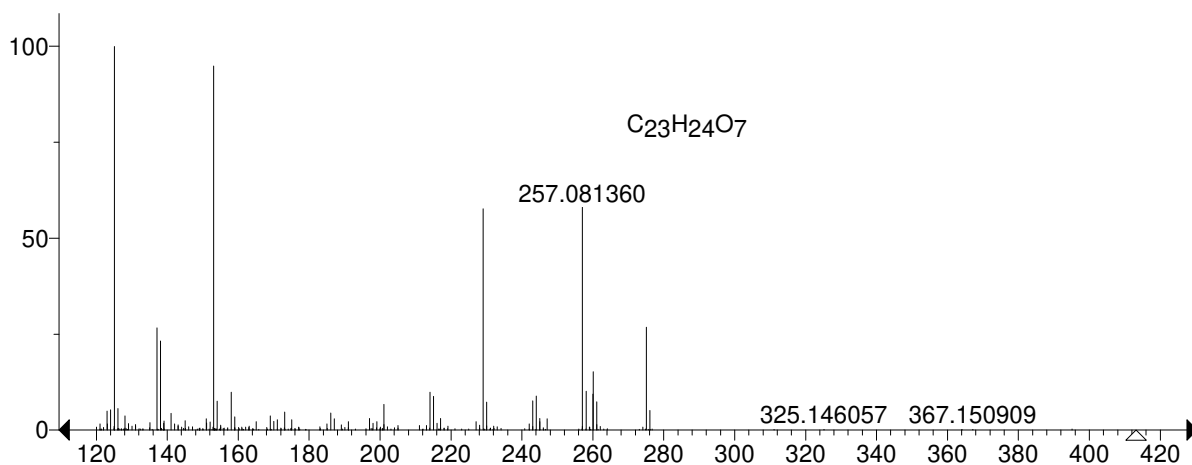

Hit 4 : 2-[2-[(Z)-pent-2-enyl]-3-[3,4,5-trihydroxy-6-(hydroxymethyl)oxan-2-yl]oxycyclopentyl]acetic acid [M+K]<sup>+</sup> 45  
C<sub>18</sub>H<sub>30</sub>O<sub>8</sub>; MF: 0; RMF: 5; Prob 24.5%; Lib: anthocyanins mona; ID: 9972.

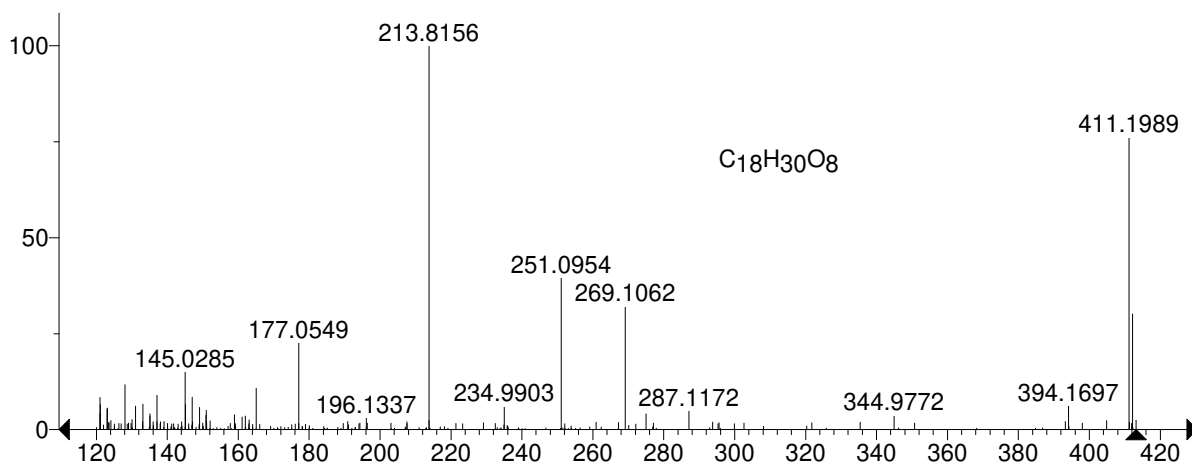



\*\* Search Report Page 1 of 2 \*\*

Unknown: Unknown (3.24\_403.1341m/z)  
Compound in Library Factor = 0

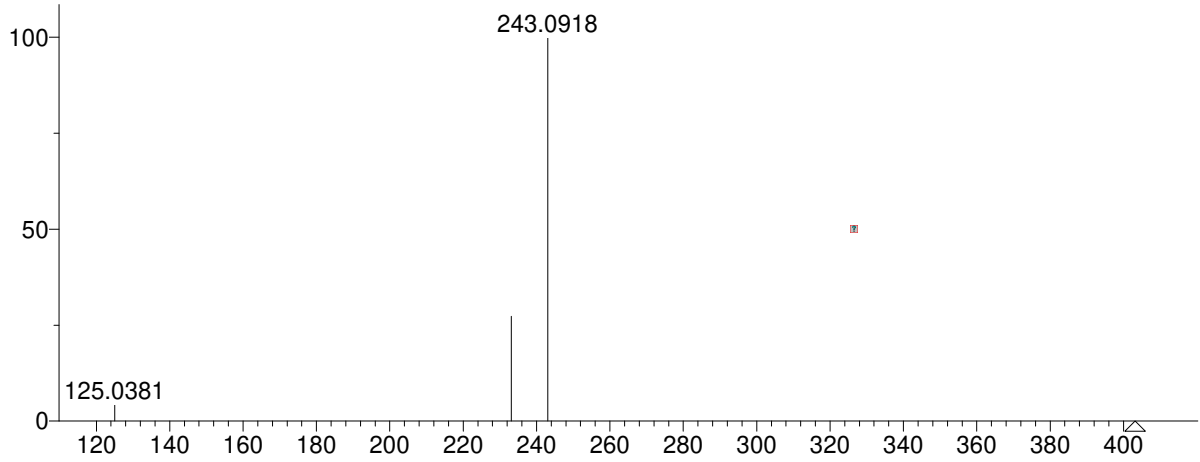

Hit 1 : NCGC00380227-01!(E)-3-[4-[1,3-dihydroxy-1-(4-hydroxy-3-methoxyphenyl)propan-2-yl]oxy-3,5-dimethoxy]benzylamine  
C<sub>21</sub>H<sub>24</sub>O<sub>9</sub>; MF: 0; RMF: 51; Prob 33.3%; Lib: mona-export-gnps; ID: 8693.

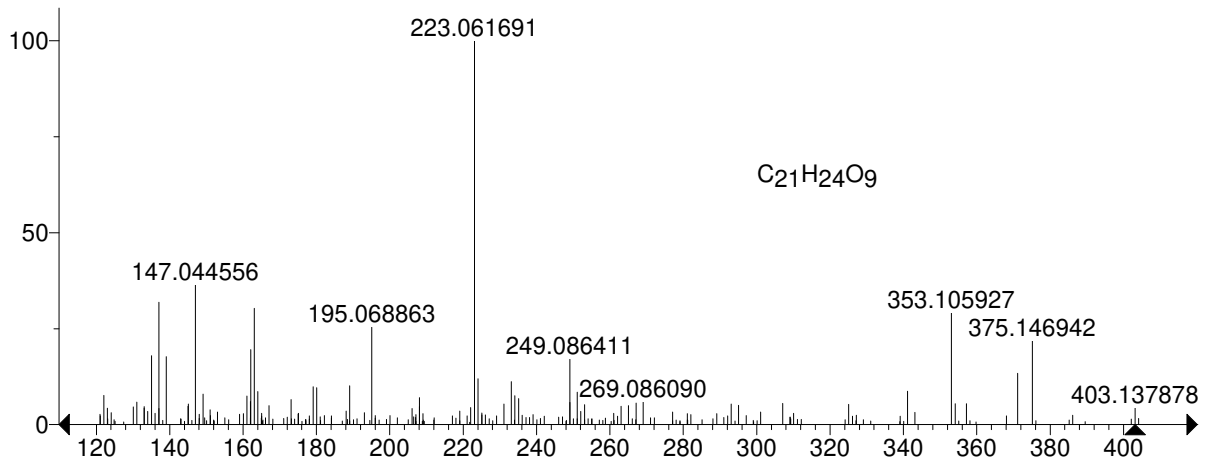

Hit 2 : Egtazic acid [M+Na]<sup>+</sup> HCD 52V P=403.1  
C<sub>14</sub>H<sub>24</sub>N<sub>2</sub>O<sub>10</sub>; MF: 0; RMF: 10; Prob 33.3%; CAS: 67-42-5; Lib: nist\_msms; ID: 81815.

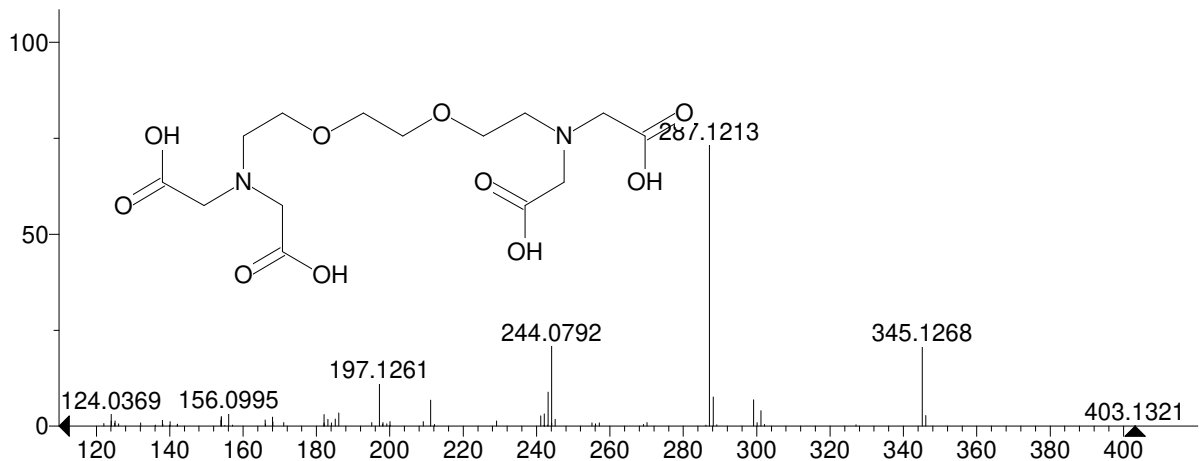

\*\* Search Report Page 2 of 2 \*\*

Hit 3 : methyl 2-(4,5-dihydroxy-6-methoxy-3,6-dimethyl-2-oxocyclohex-3-en-1-yl)oxy-4-hydroxy-3,6-dimethylbenzoate  
C<sub>19</sub>H<sub>24</sub>O<sub>8</sub>; MF: 0; RMF: 3; Prob 33.3%; Lib: mona-export-vf-npl\_qexactive; ID: 23485.

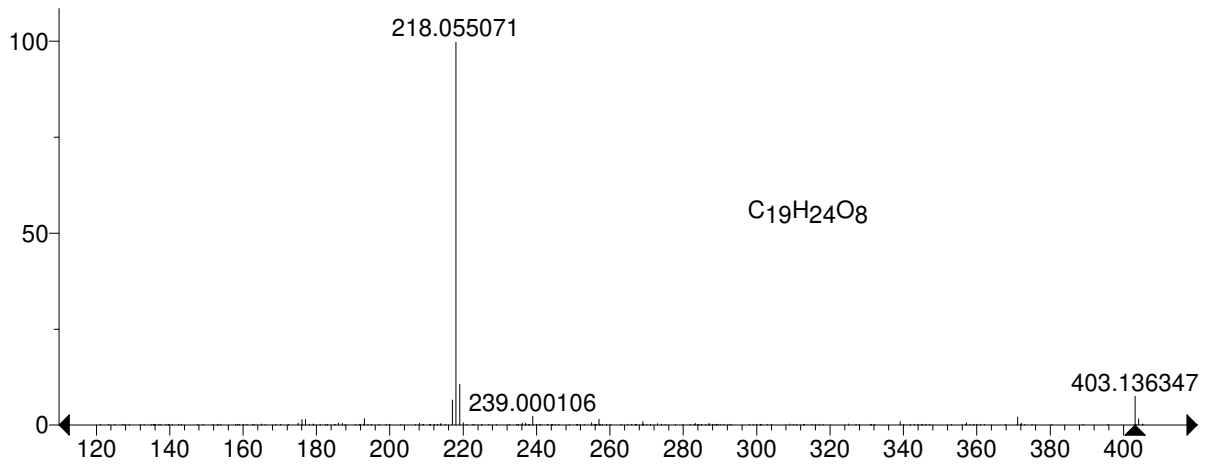

Unknown: Unknown (3.24\_659.1476m/z)  
Compound in Library Factor = 0

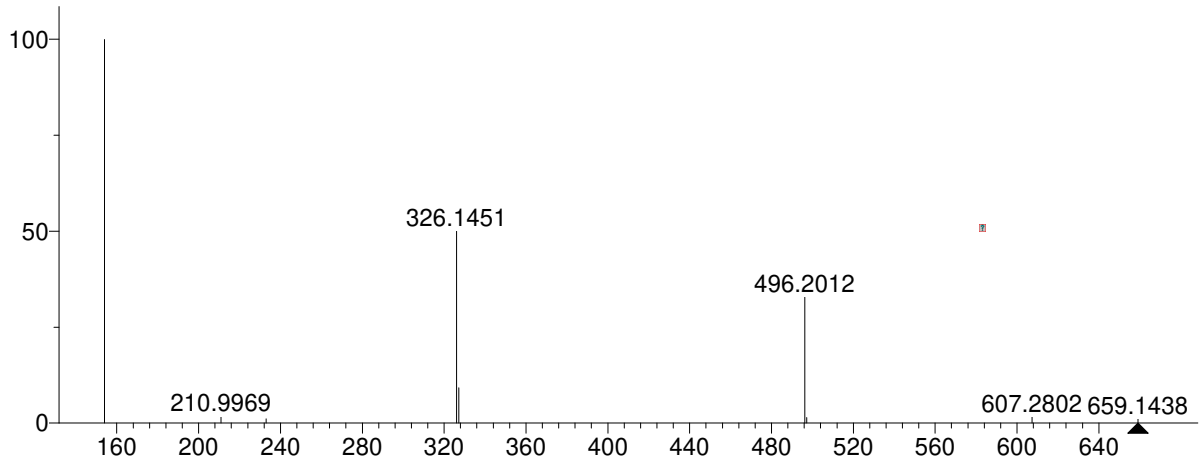

Unknown: Unknown (3.25\_406.1342m/z)  
Compound in Library Factor = 0

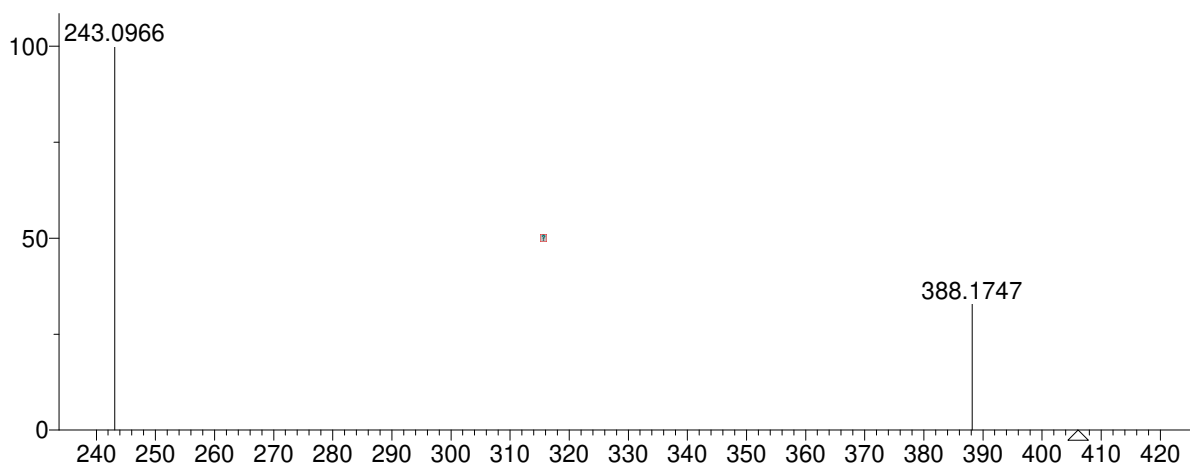

Hit 1 : N-Acetyl-D-lactosamine [M+Na]<sup>+</sup> QTOF 15V P=406.1  
C<sub>14</sub>H<sub>25</sub>NO<sub>11</sub>; MF: 0; RMF: 48; Prob 100.0%; CAS: 32181-59-2; Lib: nist\_msms; ID: 27969.

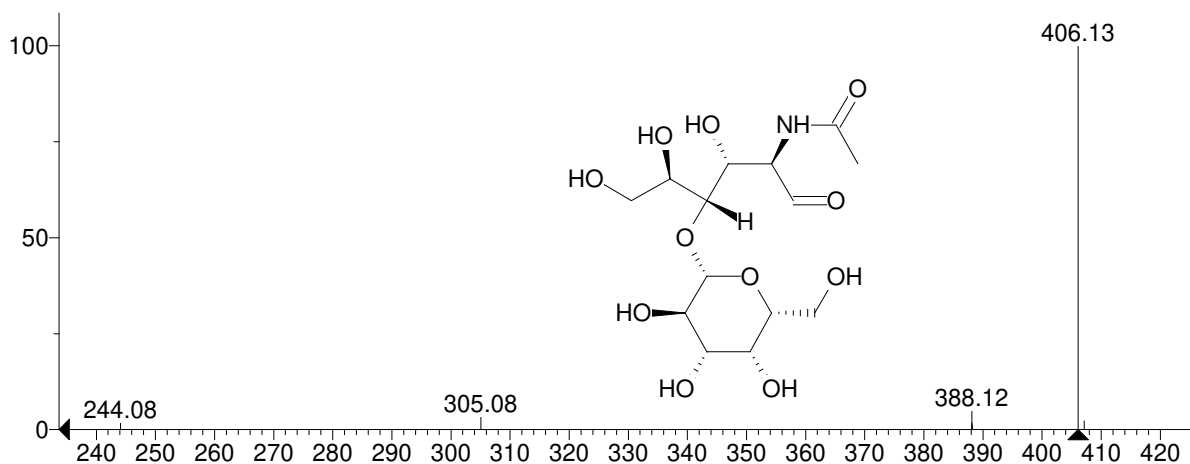

Unknown: Unknown (3.27\_571.1256m/z)  
Compound in Library Factor = -2387

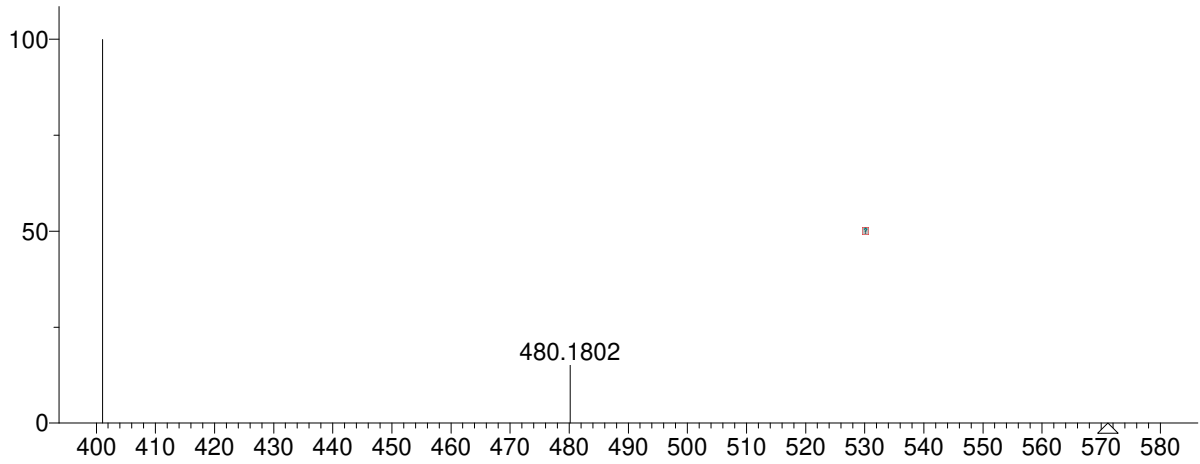

Hit 1 : NCGC00380623-01! [M-H]<sup>-</sup> P=571.1  
C<sub>31</sub>H<sub>24</sub>O<sub>11</sub>; MF: 14; RMF: 490; Prob 59.3%; Lib: msms-neg-gnps; ID: 661.

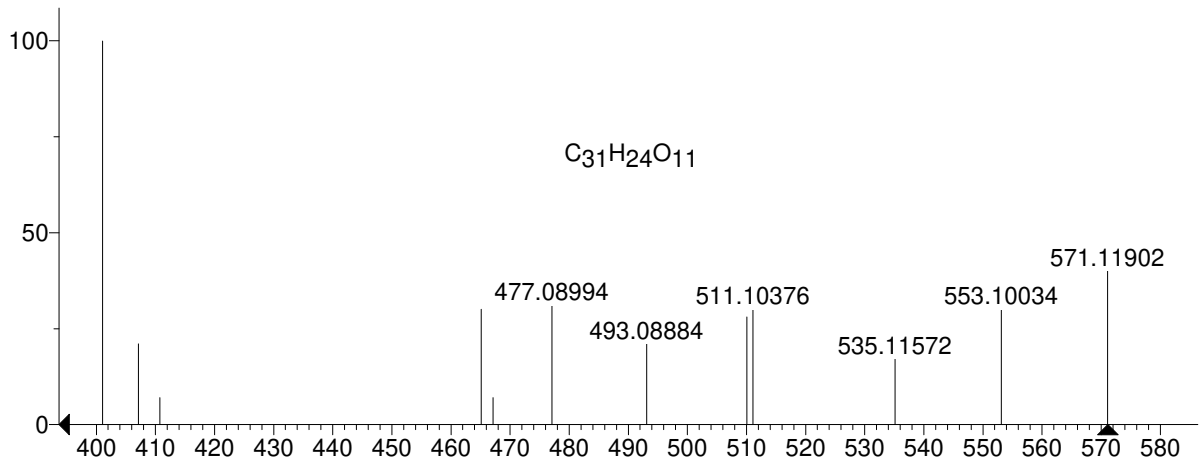

Hit 2 : methyl 8,11,15,20,22-pentahydroxy-24-methyl-13,18,27-trioxo-6-oxaheptacyclo[15.10.2.0A<sup>1</sup>,A<sup>1</sup>a<sup>1</sup>a<sup>1</sup>.0A<sup>1</sup>  
C<sub>31</sub>H<sub>24</sub>O<sub>11</sub>; MF: 3; RMF: 401; Prob 40.7%; Lib: mona-export-1c-ms-ms\_negative\_mode; ID: 23337.

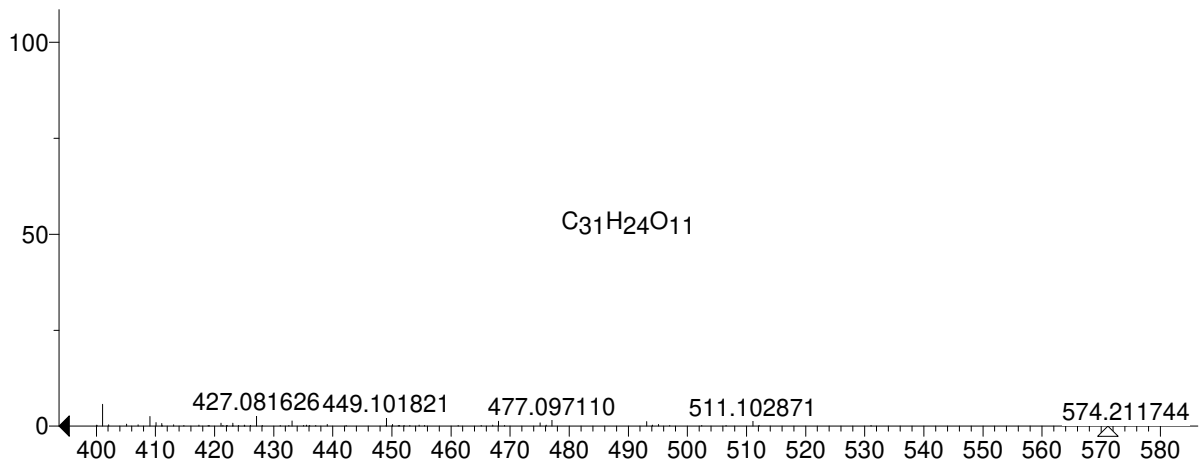

\*\* Search Report Page 1 of 2 \*\*

Unknown: Unknown (3.28\_395.0753m/z)  
Compound in Library Factor = 0

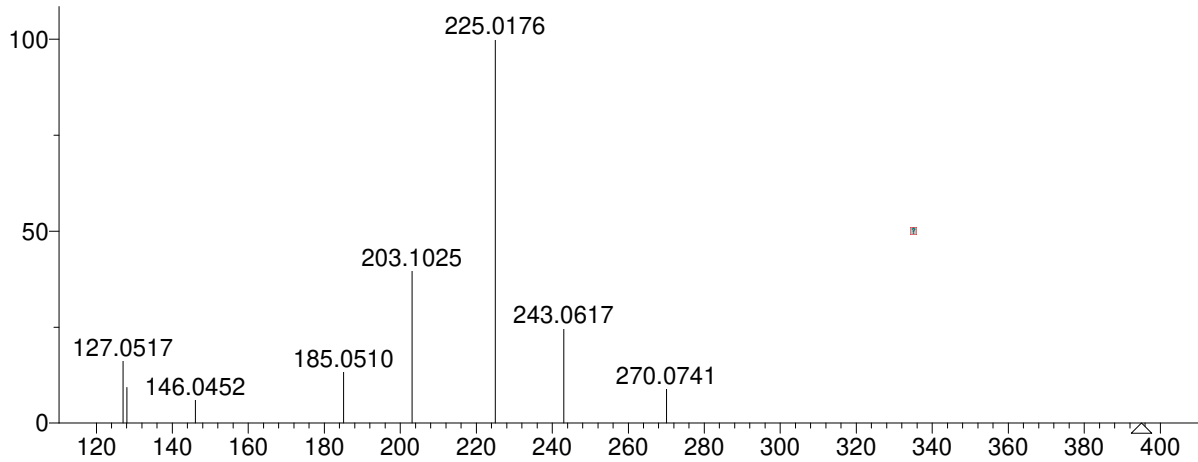

Hit 1 : (Z)-3-[4-methoxy-2-[(2S,3R,4S,5S,6R)-3,4,5-trihydroxy-6-(hydroxymethyl)oxan-2-yl]oxyphenyl]prop-2-enoic  
C16H20O9; MF: 0; RMF: 55; Prob 33.3%; Lib: mona-export-vf-npl\_gexactive; ID: 7762.

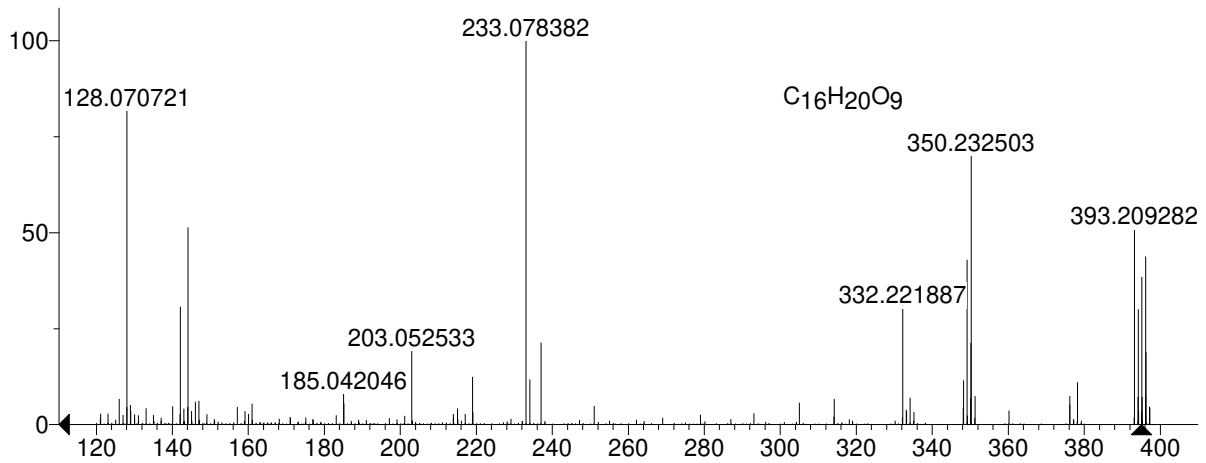

Hit 2 : Isoorientin [M+H-3H2O]<sup>+</sup> HCD 59V P=395.1  
C21H20O11; MF: 0; RMF: 52; Prob 33.3%; CAS: 4261-42-1; Lib: nist\_msms; ID: 390617.

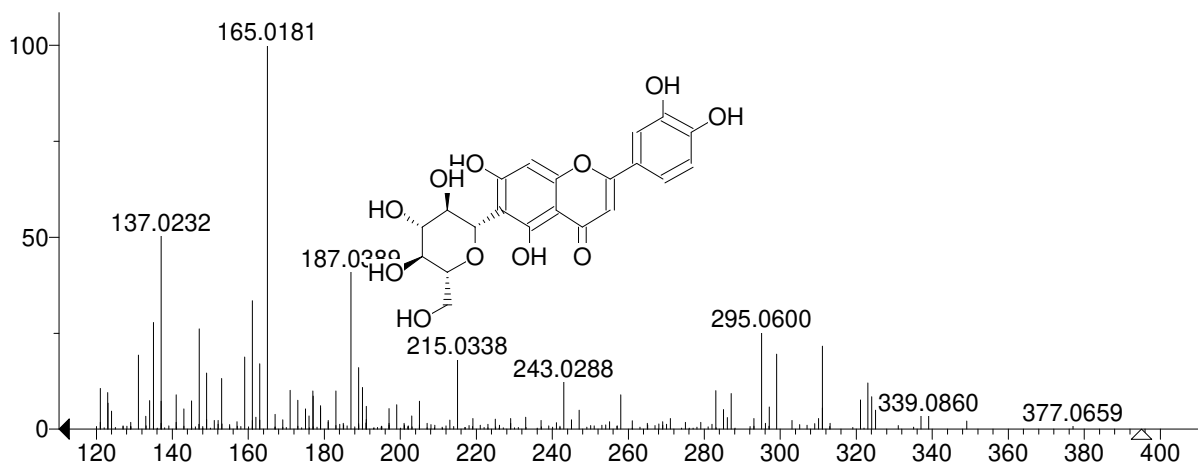

\*\* Search Report Page 2 of 2 \*\*

Hit 3 : (E)-3-[4-methoxy-2-[(2S,3R,4S,5S,6R)-3,4,5-trihydroxy-6-(hydroxymethyl)oxan-2-yl]oxyphenyl]prop-2-enoic  
C<sub>16</sub>H<sub>20</sub>O<sub>9</sub>; MF: 0; RMF: 15; Prob 33.3%; Lib: mona-export-vf-npl\_qexactive; ID: 10003.

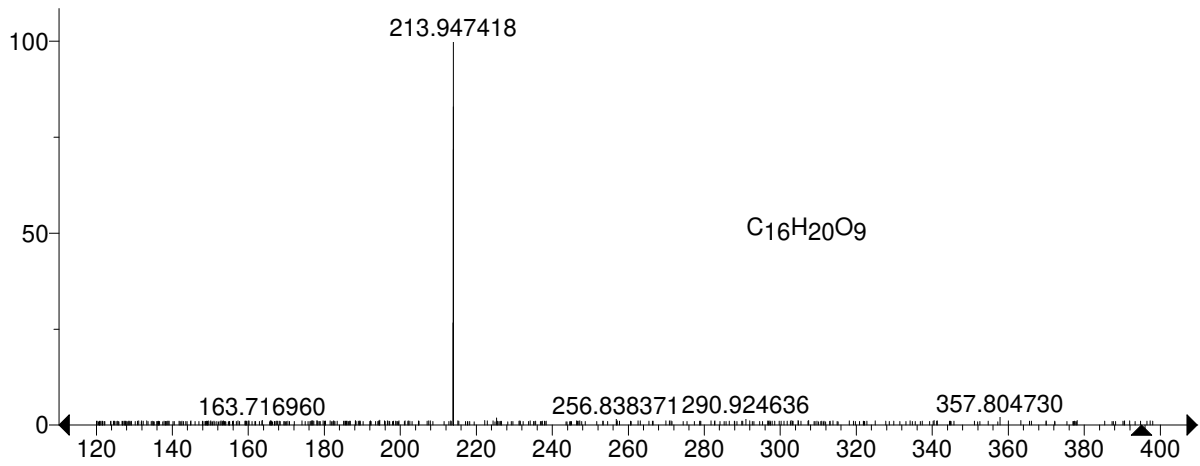

Unknown: Unknown (3.28\_431.1301m/z)  
Compound in Library Factor = 0

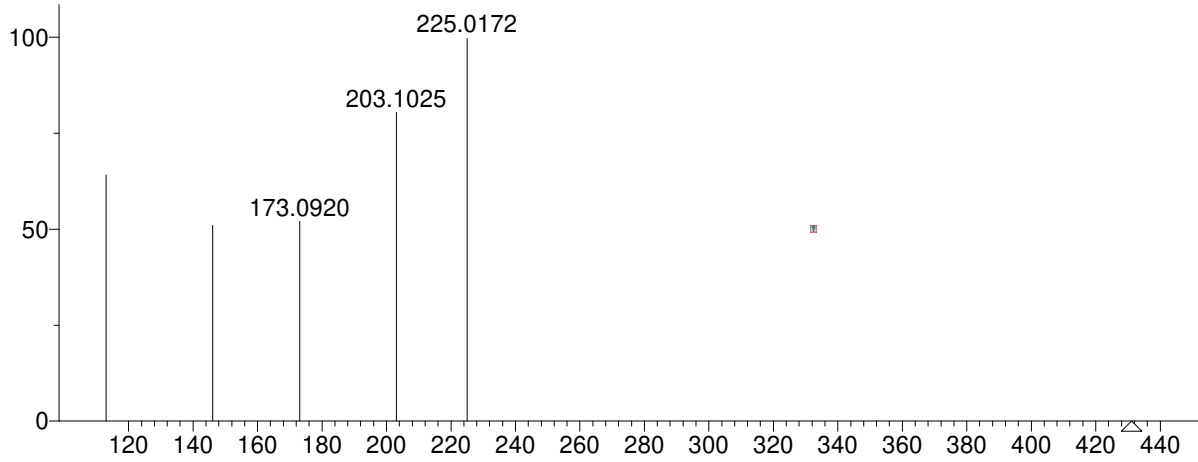

Hit 1 : O-Desmethylgefitinib [M-H]<sup>-</sup> HCD 68V P=431.1  
C21H22ClFN4O3; MF: 0; RMF: 24; Prob 25.0%; CAS: 847949-49-9; Lib: nist\_msms; ID: 451781.

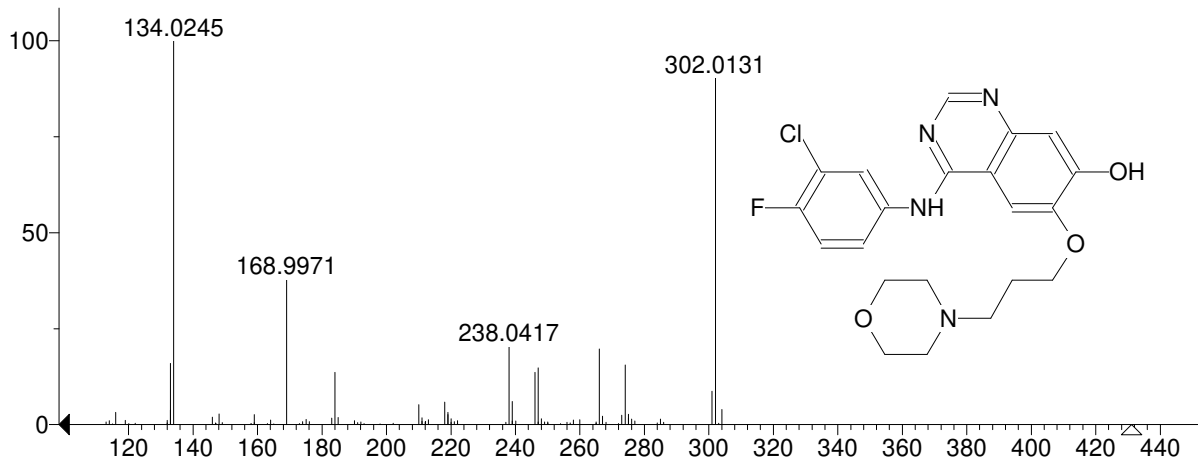

Hit 2 : Agnuside [M+H-2H2O]<sup>+</sup> IT 35% P=431.1  
C22H26O11; MF: 0; RMF: 22; Prob 25.0%; CAS: 11027-63-7; Lib: nist\_msms; ID: 389591.

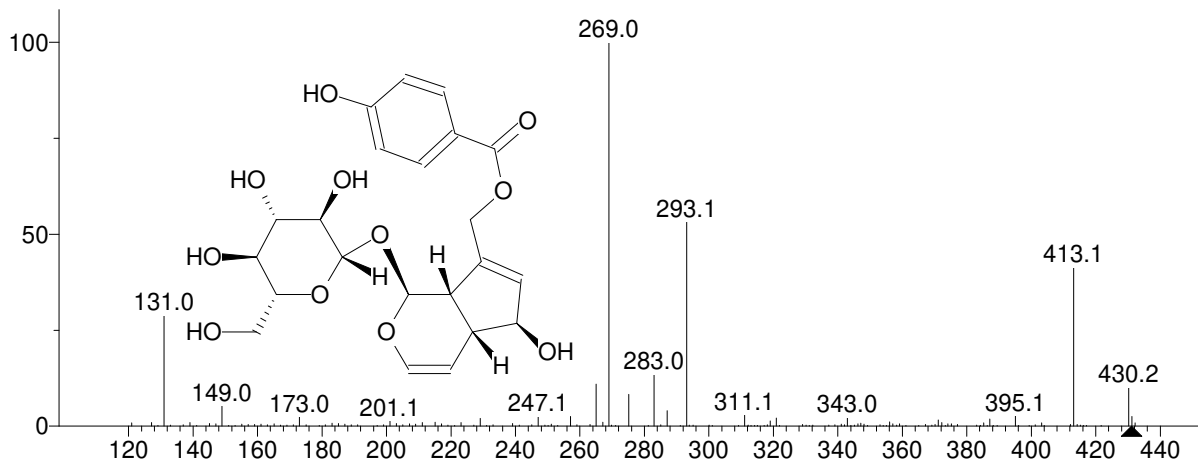



Hit 3 : Formononetin-7-O-glucoside [M+H]<sup>+</sup> 50eV P=431.1  
C<sub>22</sub>H<sub>22</sub>O<sub>9</sub>; MF: 0; RMF: 10; Prob 25.0%; Lib: anthocyanins mona; ID: 1127.

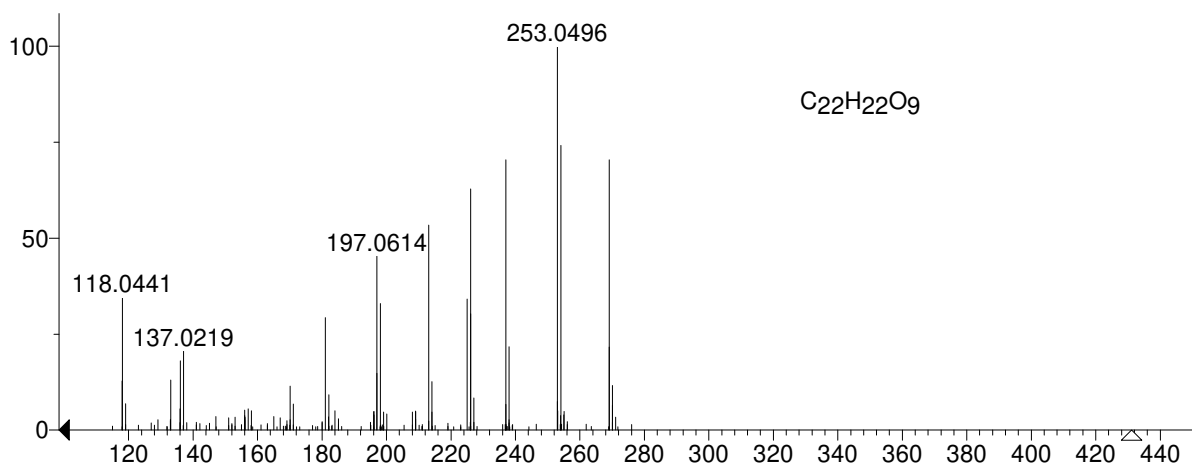

Hit 4 : calycosin-7-O-beta-D-glucoside [M+H]<sup>+</sup> 35HCD P=431.1  
C<sub>22</sub>H<sub>22</sub>O<sub>9</sub>; MF: 0; RMF: 5; Prob 25.0%; Lib: mona-export-vf-npl\_qexactive; ID: 13249.

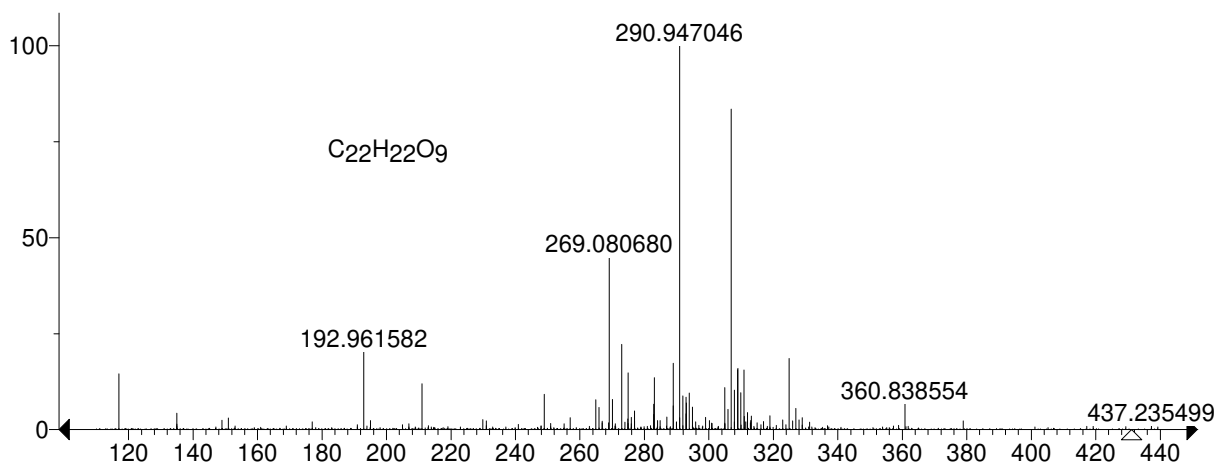

Unknown: Unknown (3.30\_498.1345m/z)  
Compound in Library Factor = 0

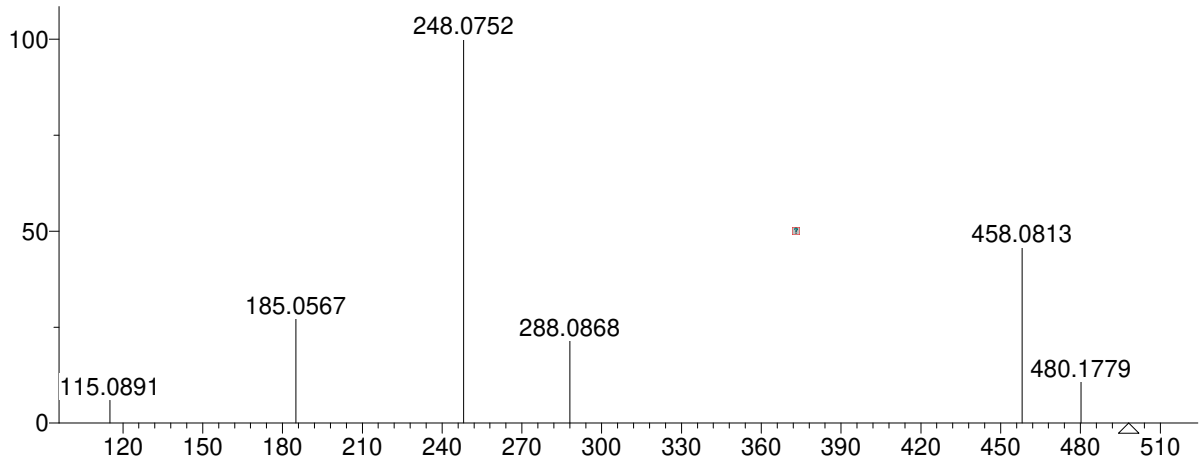

\*\* Search Report Page 1 of 2 \*\*

Unknown: Unknown (3.31\_401.1551m/z)  
Compound in Library Factor = -3273

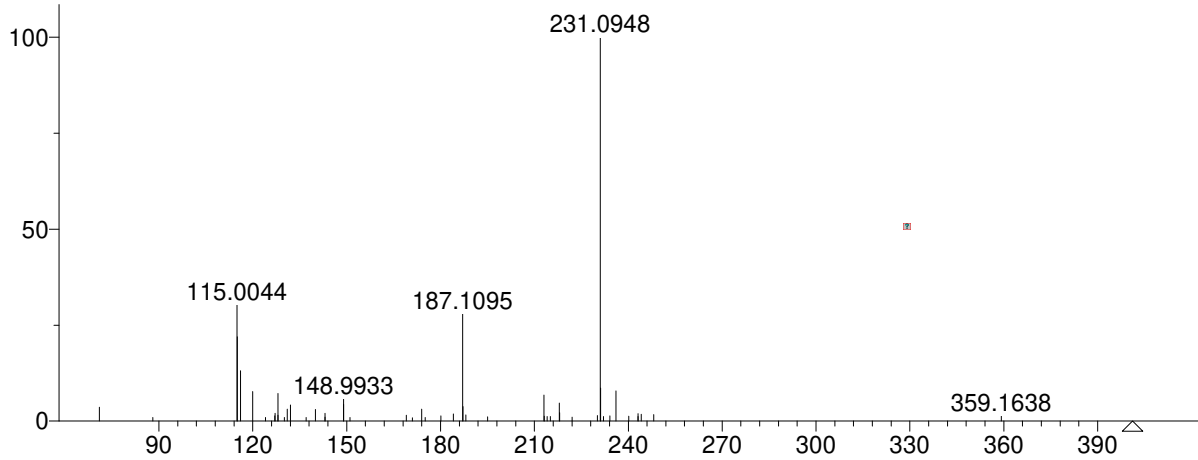

Hit 1 : NCGC00168917-0215-[(3S,3aR,6S,6aR)-6-(3,4,5-trimethoxyphenyl)-1,3,3a,4,6,6a-hexahydrofuro[3,4-c]furan]  
C<sub>22</sub>H<sub>24</sub>O<sub>7</sub>; MF: 2; RMF: 117; Prob 9.69%; Lib: mona-export-gnps; ID: 8887.

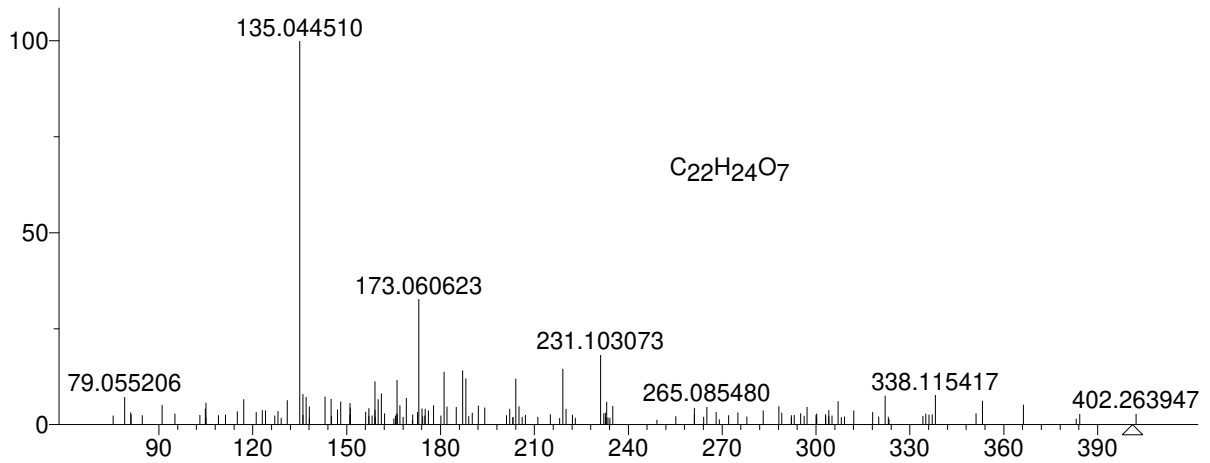

Hit 2 : 6-formyl-5-hydroxy-10-(hydroxymethyl)-3-methylidene-2-oxo-2H,3H,3aH,4H,5H,8H,9H,11aH-cyclodeca[b]furan  
C<sub>20</sub>H<sub>26</sub>O<sub>7</sub>; MF: 1; RMF: 60; Prob 9.31%; Lib: mona-export-vf-npl\_qexactive; ID: 22438.

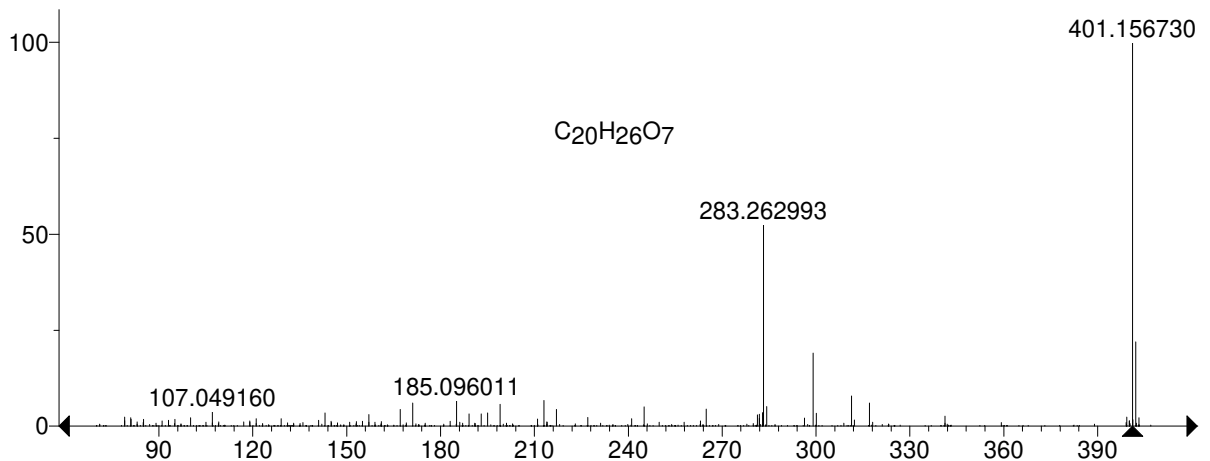

\*\* Search Report Page 2 of 2 \*\*

Hit 3 : (2aR,4S,6R,7R,9R,9aR)-5'-(furan-3-yl)-4,9-dihydroxy-2a-(hydroxymethyl)-7-methylspiro[1,3,4,5,5a,7,8,9-oc  
C<sub>20</sub>H<sub>26</sub>O<sub>7</sub>; MF: 1; RMF: 56; Prob 9.31%; Lib: mona-export-vf-npl\_qexactive; ID: 23516.

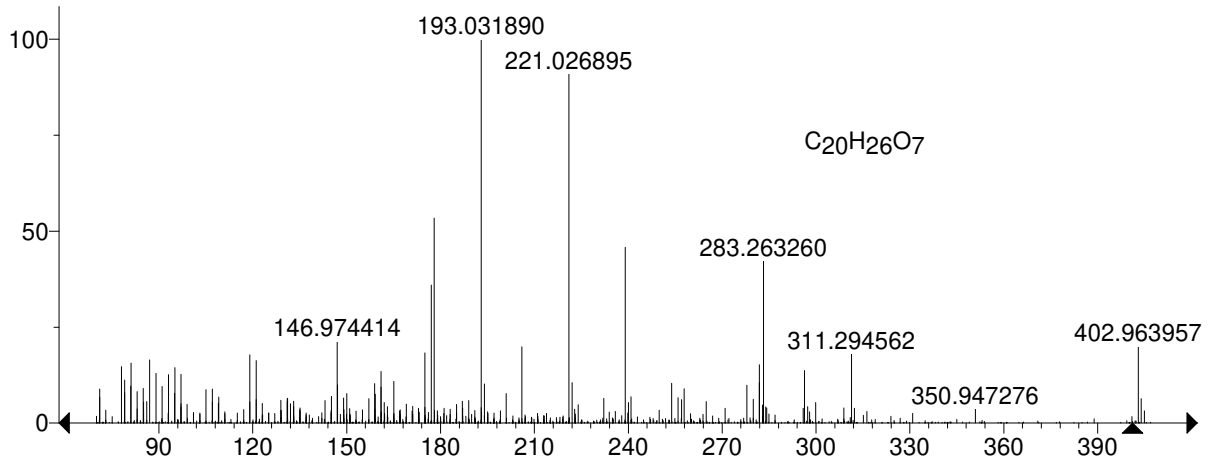

Hit 4 : rel-Dimethylenedioxy-dimethoxy-epoxyignan [M+H]<sup>+</sup> P=401.2  
C<sub>22</sub>H<sub>24</sub>O<sub>7</sub>; MF: 0; RMF: 315; Prob 8.95%; Lib: mona-export-gnps; ID: 2894.

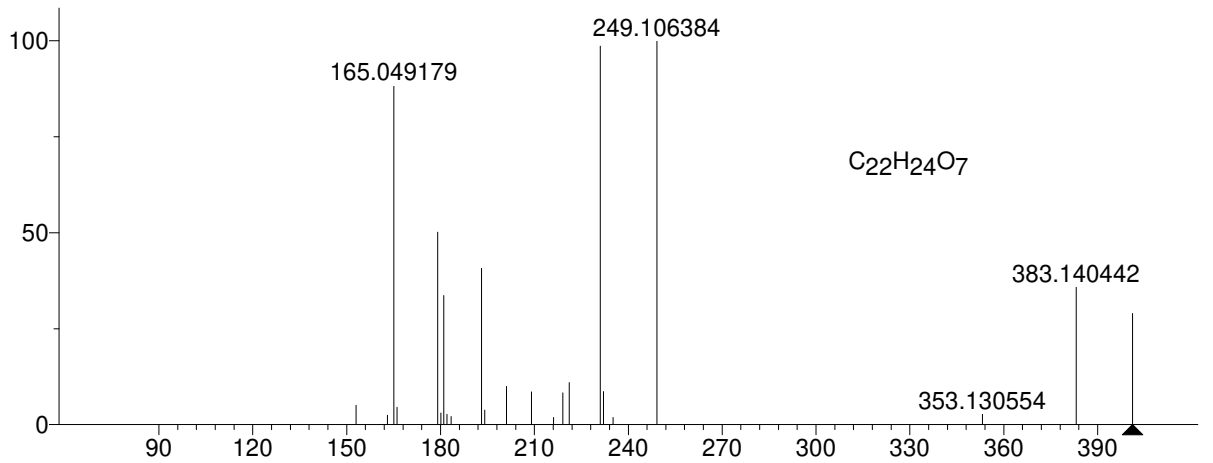

Hit 5 : NCGC00347752-02! [2-(3'-ethenyl-3',5'-dimethyl-2,4,5'-trioxospiro[chromene-3,2'-cyclopentane]-1'-yl)-3-hyd  
C<sub>22</sub>H<sub>24</sub>O<sub>7</sub>; MF: 0; RMF: 41; Prob 8.95%; Lib: mona-export-gnps; ID: 7415.

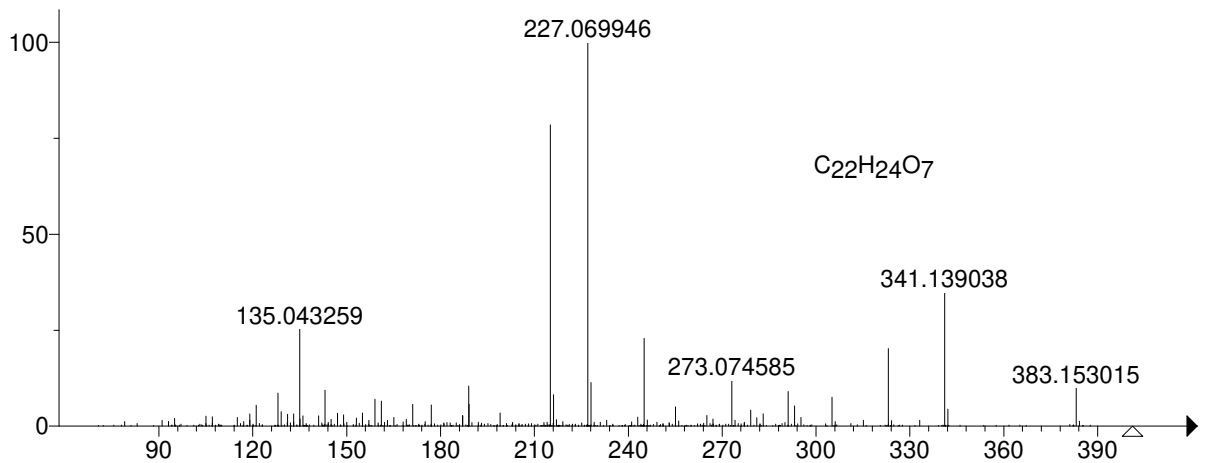

Unknown: Unknown (3.31\_441.1486m/z)  
Compound in Library Factor = 0

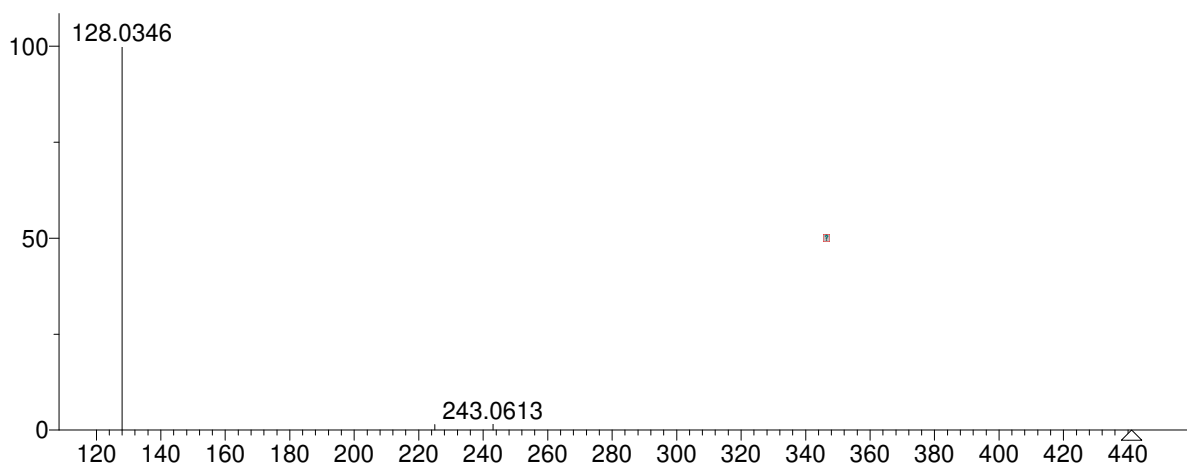

Hit 1 : MLS002695932-01! [M+H]<sup>+</sup> P=441.1  
C<sub>20</sub>H<sub>24</sub>O<sub>11</sub>; MF: 0; RMF: 5; Prob 50.0%; Lib: mona-export-gnps; ID: 3878.

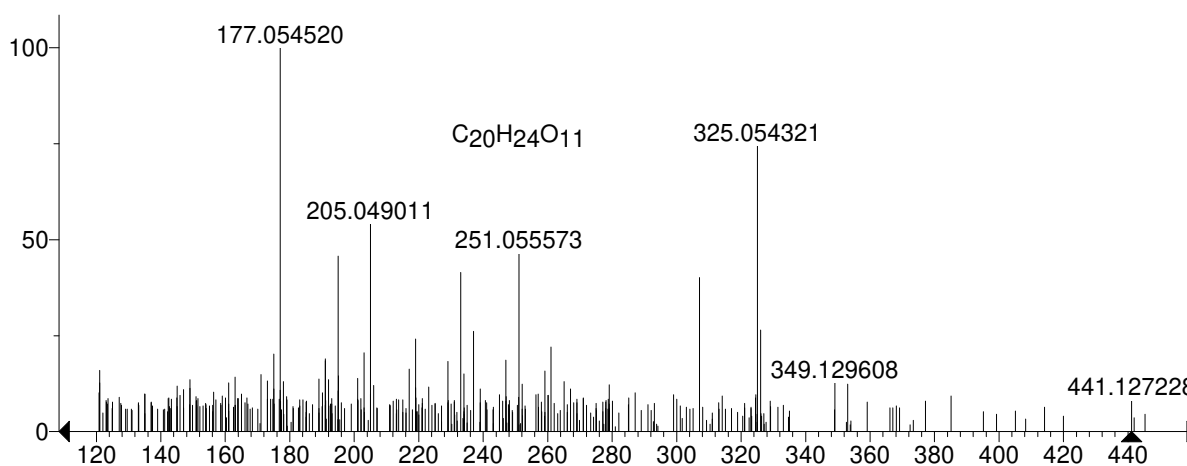

Hit 2 : syringaresinol [M+Na]<sup>+</sup> 45HCD P=441.2  
C<sub>22</sub>H<sub>26</sub>O<sub>8</sub>; MF: 0; RMF: 1; Prob 50.0%; Lib: mona-export-vf-npl\_qexactive; ID: 4436.

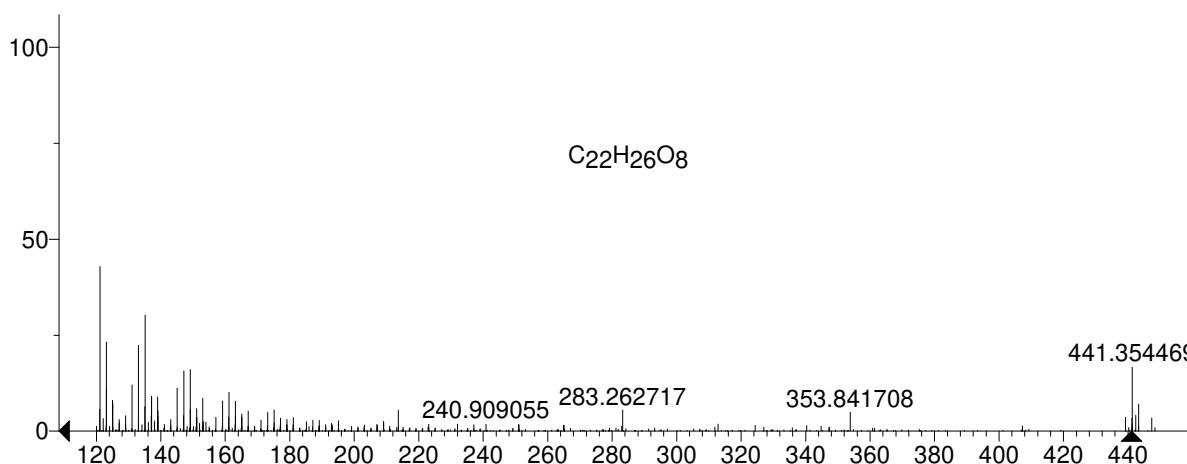

Unknown: Unknown (3.31\_458.1417m/z)  
Compound in Library Factor = 0

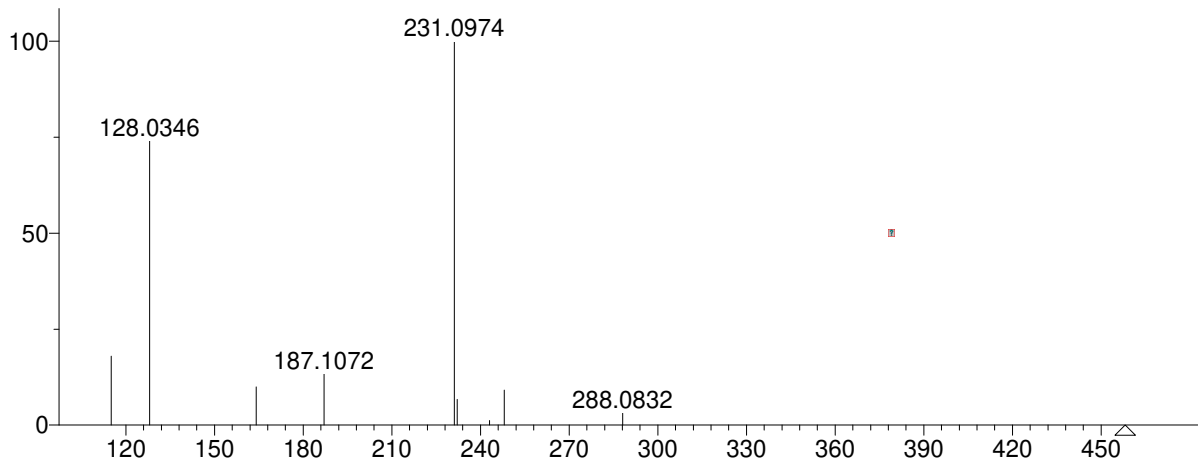

Unknown: Unknown (3.31\_473.0879m/z)  
Compound in Library Factor = 0

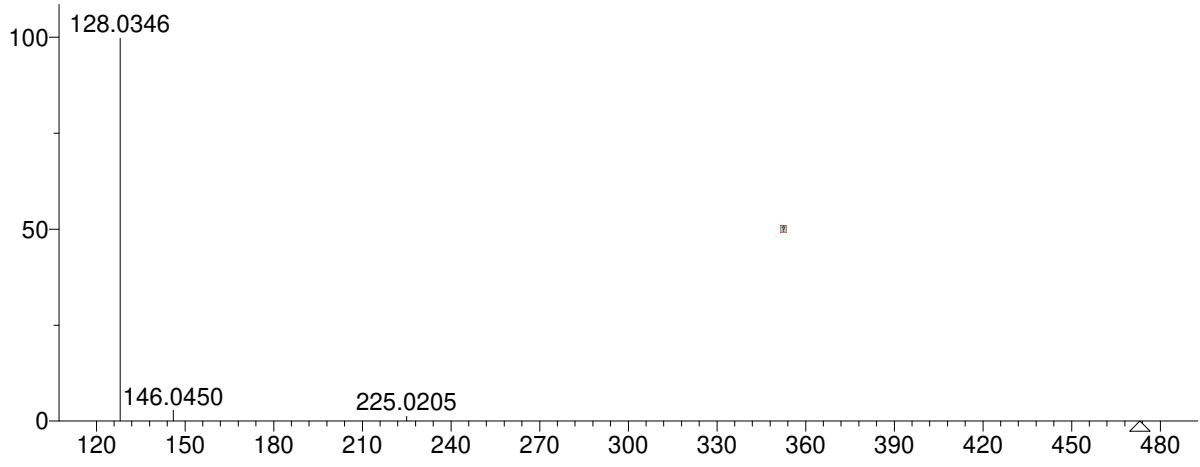

Unknown: Unknown (3.31\_478.2042m/z)  
Compound in Library Factor = 0

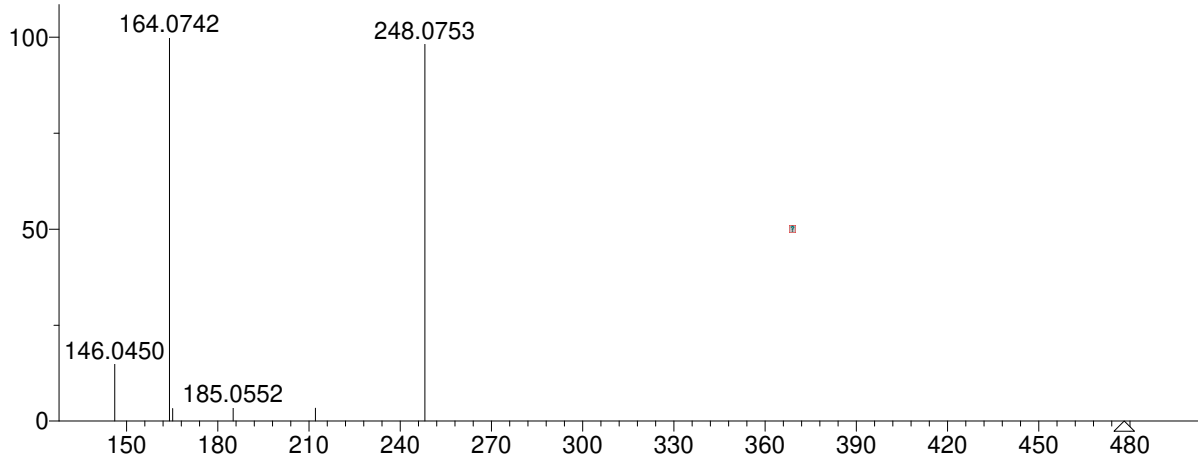

Hit 1 : NCGC00169156-03\_C24H28O9\_[(2'R,3R,4a'S,5S,5'R,6'S,8a'S)-6'-Acetoxy-5-(3-furyl)-2'-methyl-2,4'-dioxo-C24H28O9; MF: 0; RMF: 37; Prob 50.0%; Lib: mona-export-gnps; ID: 13458.

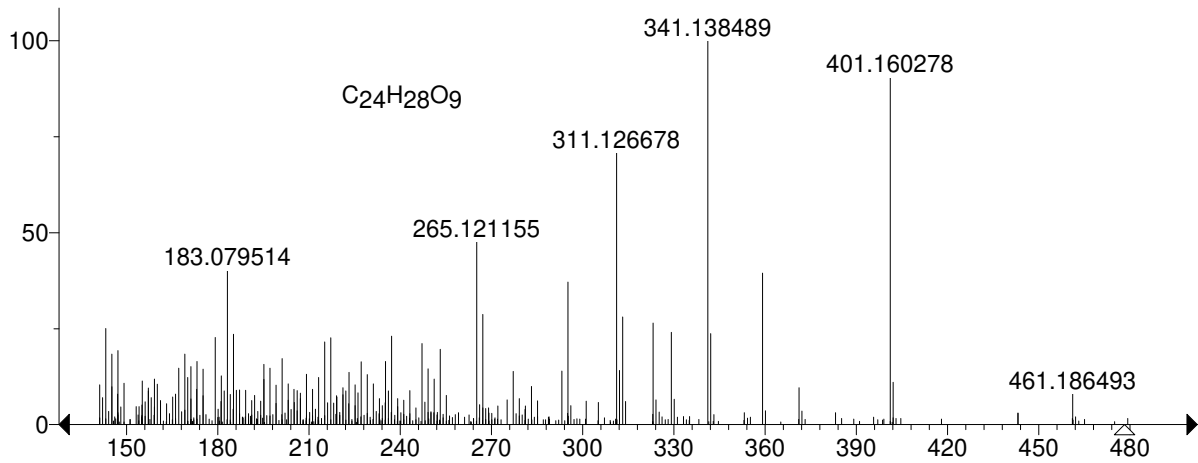

Hit 2 : (2R,2'S,4'aS,5'R,5''S,6'R,8'aS)-2'-(acetyloxy)-5''-(furan-3-yl)-6'-methyl-2'',8'-dioxo-octahydrodispiro[oxirane-C24H28O9; MF: 0; RMF: 23; Prob 50.0%; Lib: mona-export-vf-npl\_qexactive; ID: 9886.

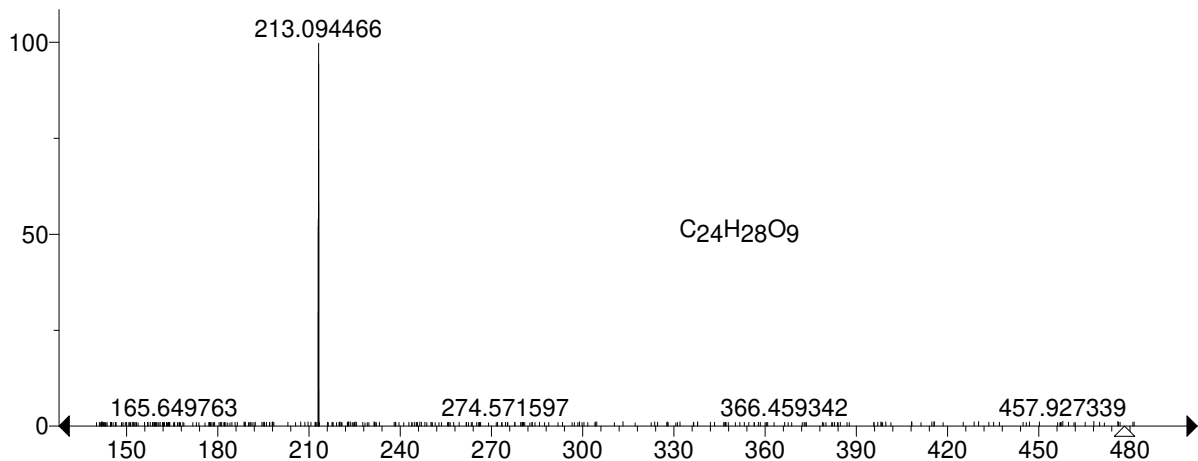



Unknown: Unknown (3.32\_360.1396m/z)  
Compound in Library Factor = 0

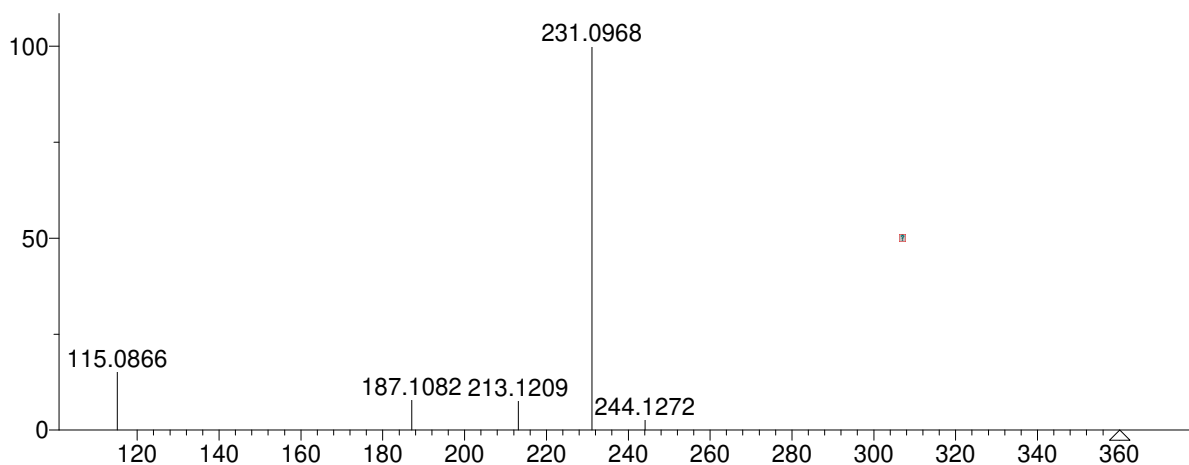

Hit 1 : Clethodim [M+H]<sup>+</sup> IT-FT 35% P=360.1  
C<sub>17</sub>H<sub>26</sub>ClNO<sub>3</sub>S; MF: 0; RMF: 14; Prob 100.0%; CAS: 99129-21-2; Lib: nist\_msms; ID: 491497.

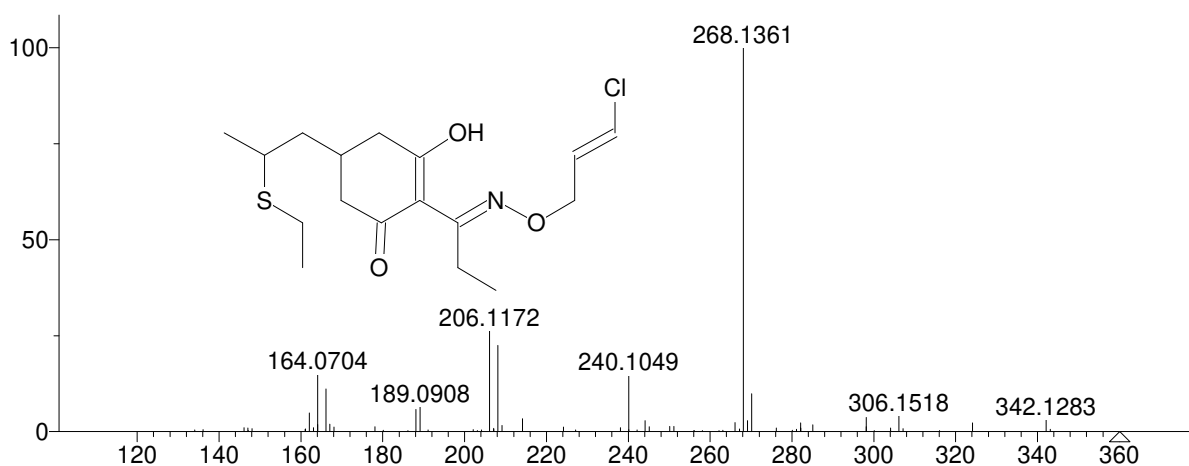

Unknown: Unknown (3.32\_381.1868m/z)  
Compound in Library Factor = -3273

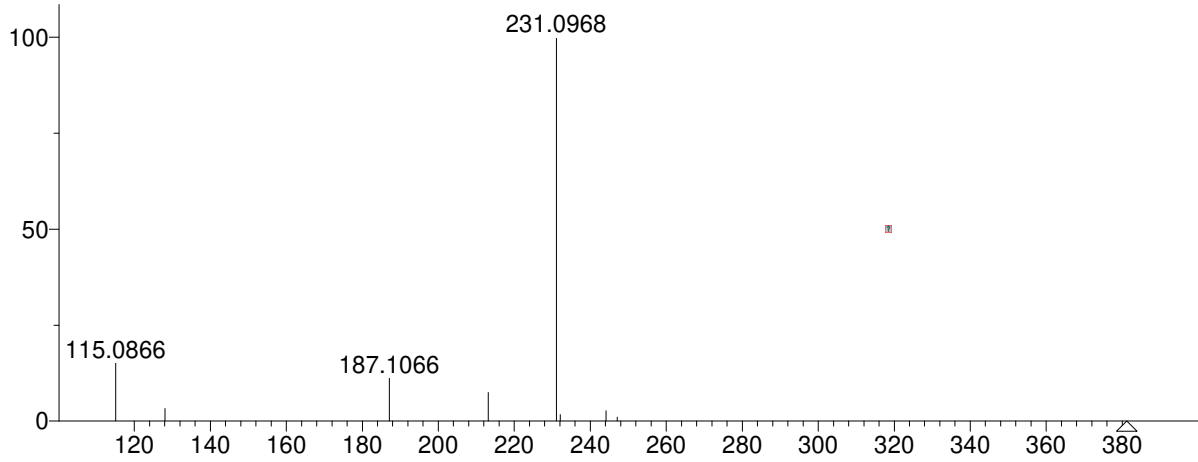

Hit 1 : [Glu1] TRH [M+H]<sup>+</sup> QTOF 33V P=381.2  
C<sub>16</sub>H<sub>24</sub>N<sub>6</sub>O<sub>5</sub>; MF: 3; RMF: 170; Prob 51.0%; Lib: nist\_msms2; ID: 32559.

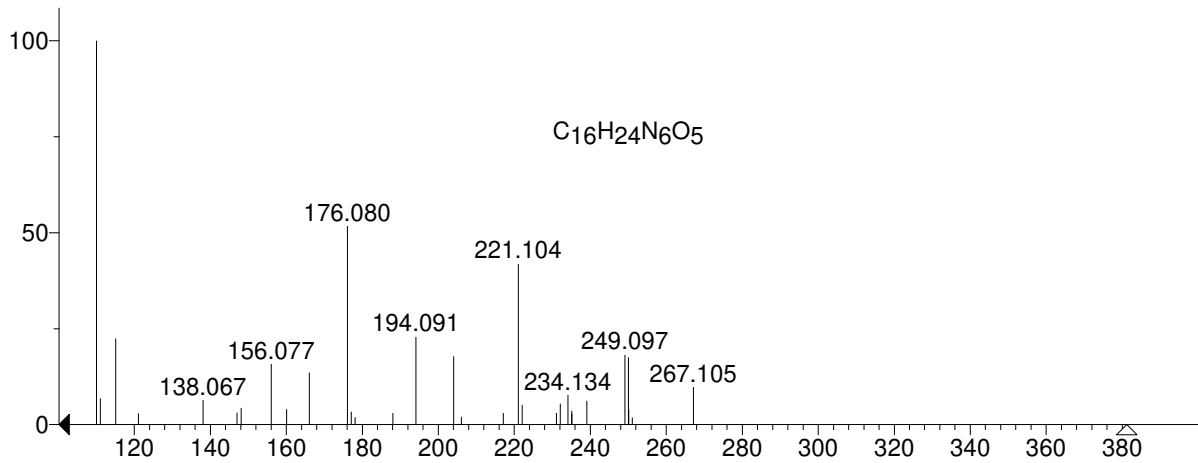

Hit 2 : [Glu1] TRH [M+H]<sup>+</sup> HCD 34eV P=381.2  
C<sub>16</sub>H<sub>24</sub>N<sub>6</sub>O<sub>5</sub>; MF: 2; RMF: 173; Prob 49.0%; CAS: 51826-17-6; Lib: nist\_msms; ID: 564476.

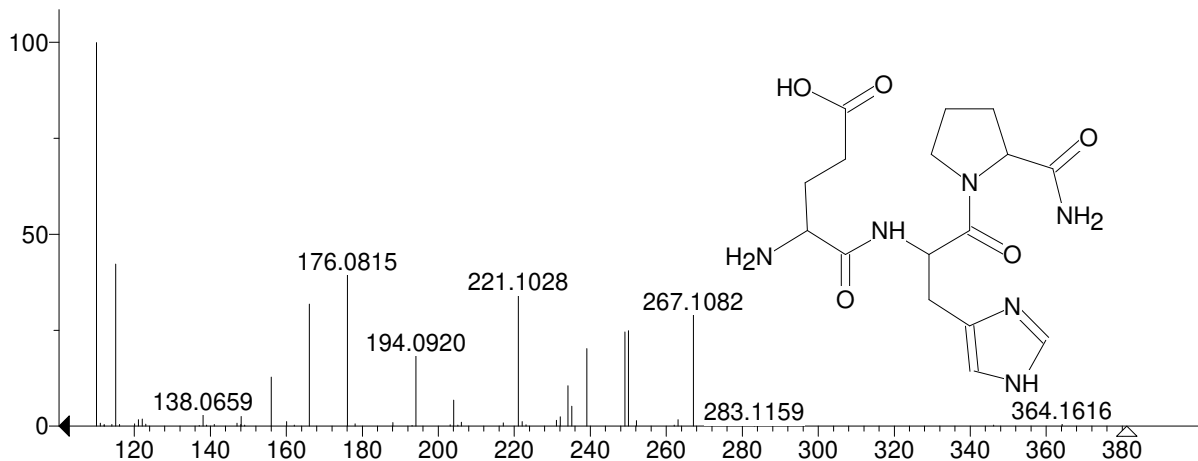

Unknown: Unknown (3.32\_427.0456m/z)  
Compound in Library Factor = 0

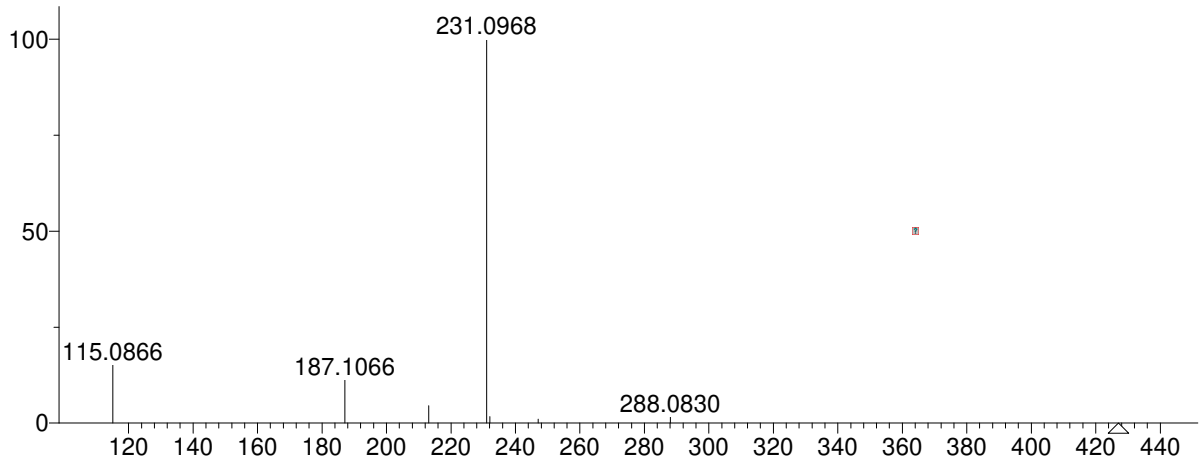

Unknown: Unknown (3.32\_568.1889m/z)  
Compound in Library Factor = -2176

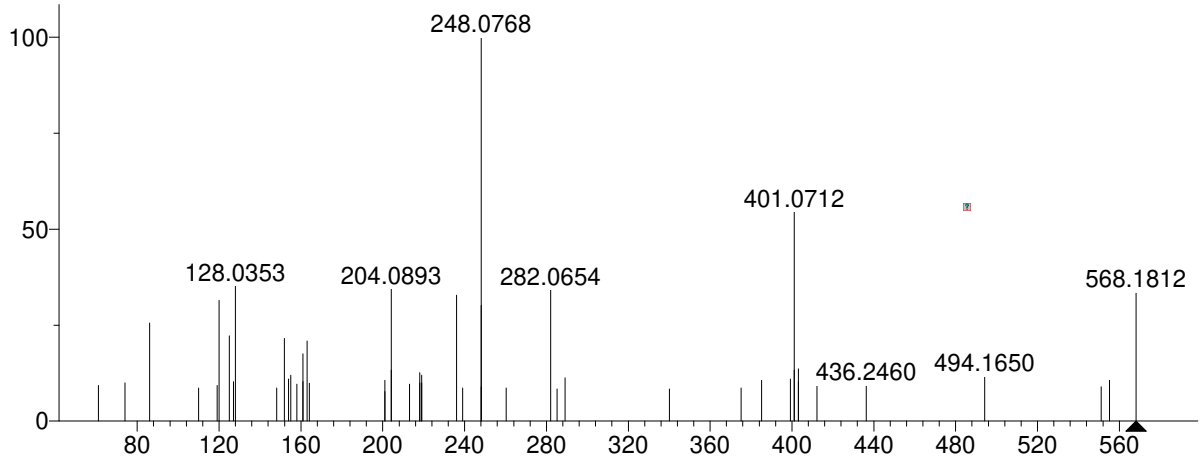

Hit 1 : Lacto-N-triaose [M+Na]<sup>+</sup> HCD 28V P=568.2  
C<sub>20</sub>H<sub>35</sub>N<sub>2</sub>O<sub>16</sub>; MF: 20; RMF: 374; Prob 68.7%; CAS: 75645-27-1; Lib: nist\_msms; ID: 533058.

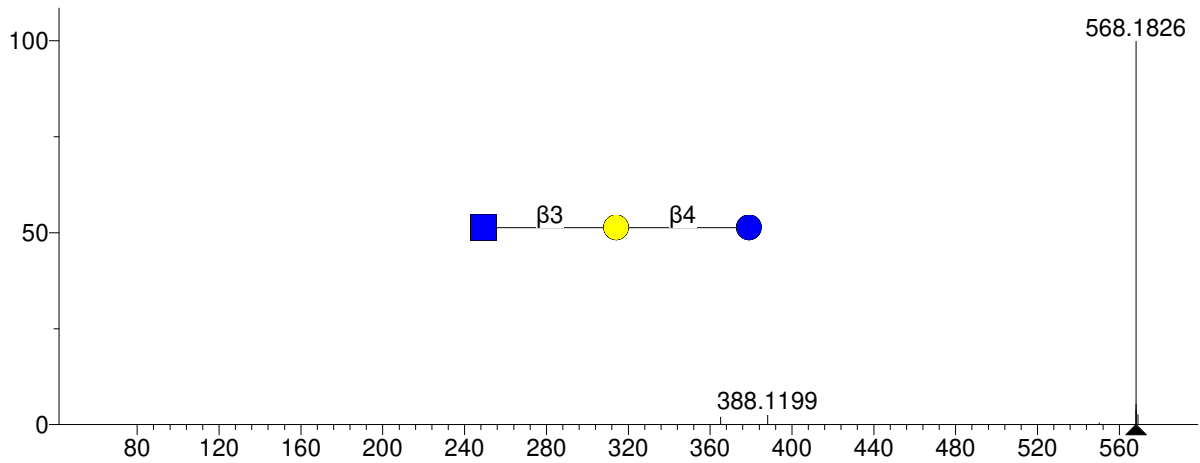

Hit 2 : ophiocordin [M+NH<sub>4</sub>]<sup>+</sup> 35HCD P=568.2  
C<sub>28</sub>H<sub>26</sub>N<sub>2</sub>O<sub>10</sub>; MF: 0; RMF: 2; Prob 31.3%; Lib: mona-export-vf-npl\_qexactive; ID: 22744.

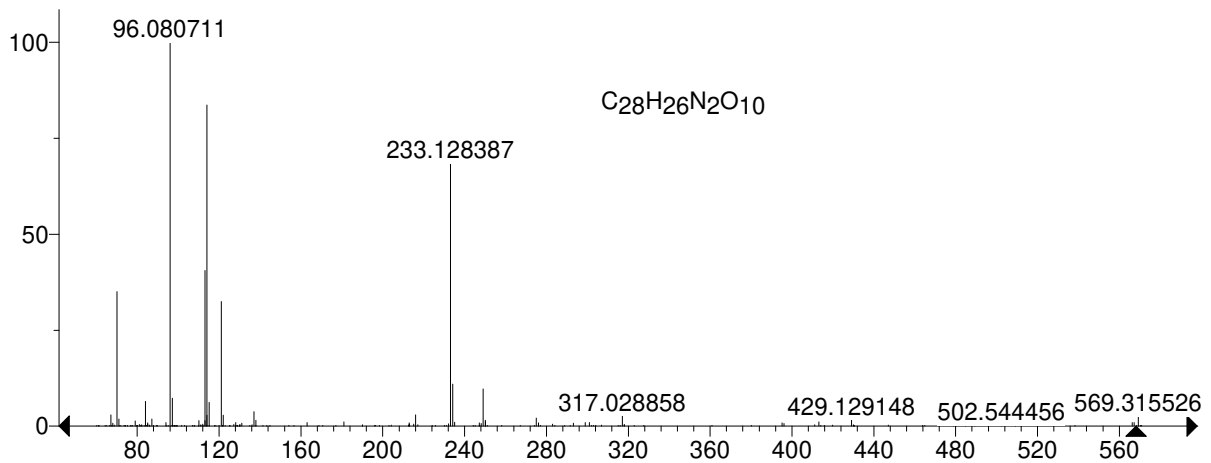

Unknown: Unknown (3.32\_628.1471m/z)  
Compound in Library Factor = 0

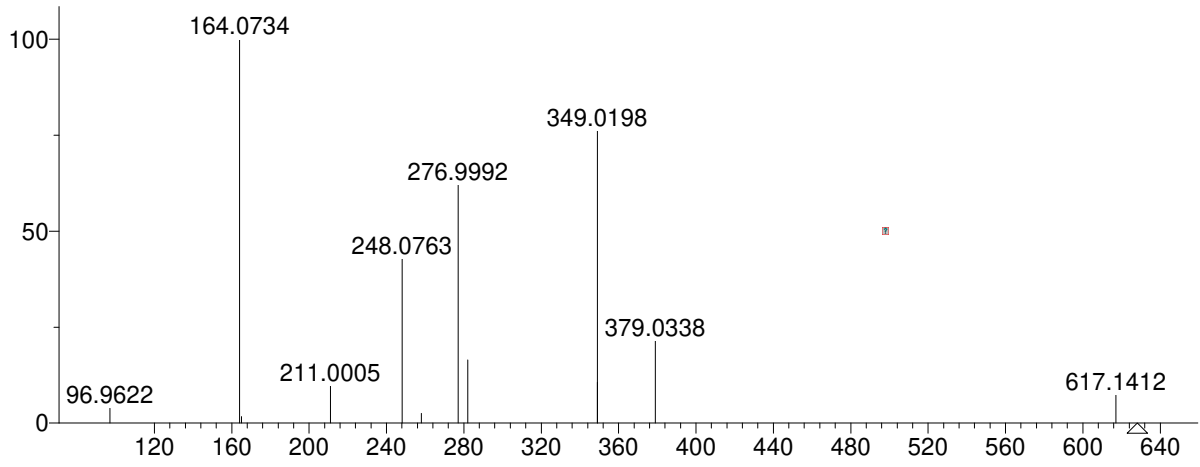

Unknown: Unknown (3.33\_706.1670m/z)  
Compound in Library Factor = 0

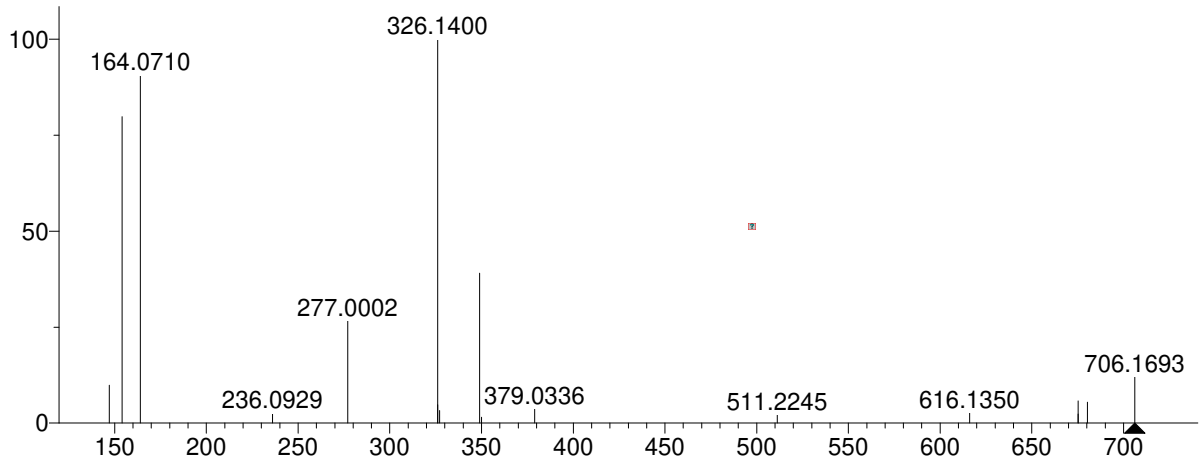

Unknown: Unknown (3.34\_326.1231m/z)  
Compound in Library Factor = 0

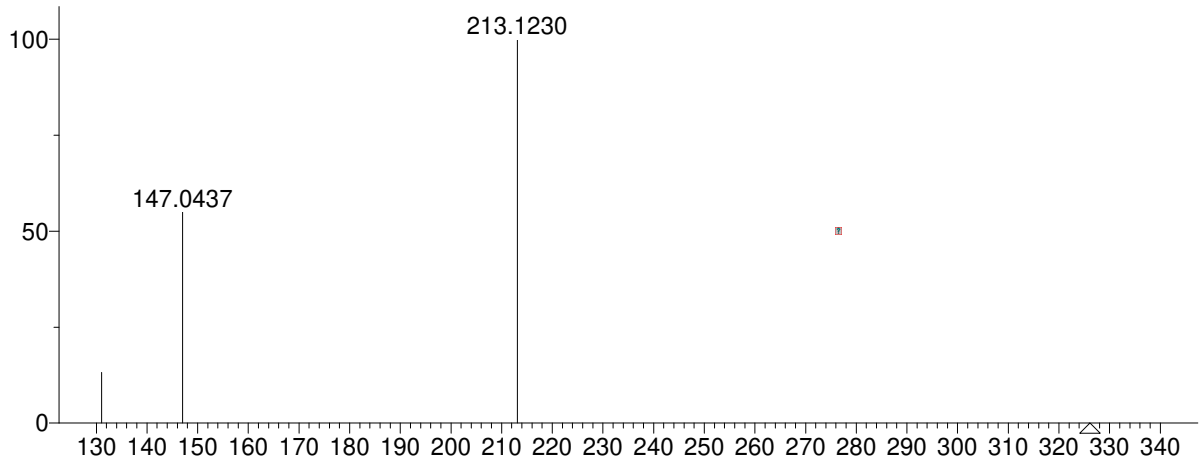

Unknown: Unknown (3.34\_406.0795m/z)  
Compound in Library Factor = 0

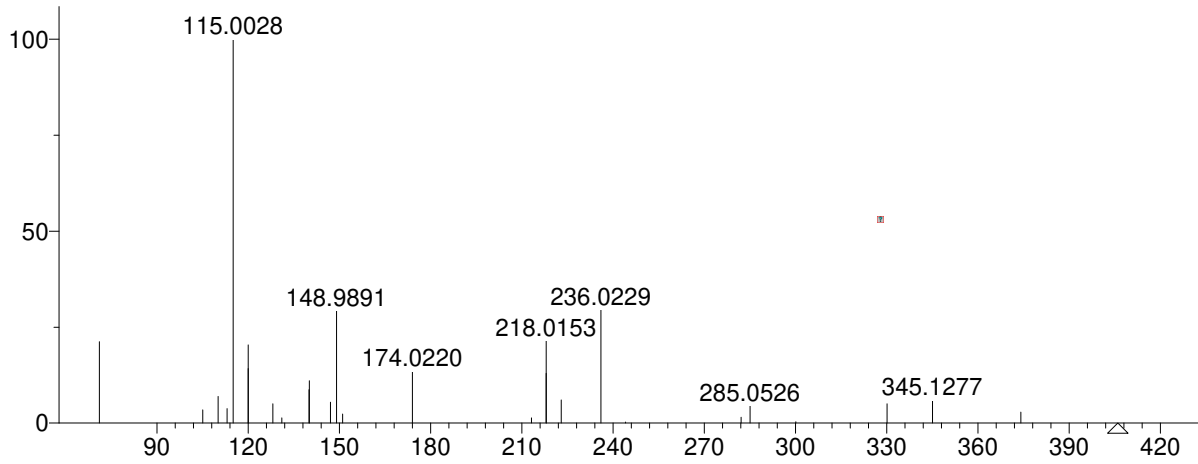

Hit 1 : Bicculline (+) [M+K]<sup>+</sup> 35% P=406.1  
C<sub>20</sub>H<sub>17</sub>NO<sub>6</sub>; MF: 0; RMF: 12; Prob 100.0%; Lib: mona-export-itree; ID: 1031.

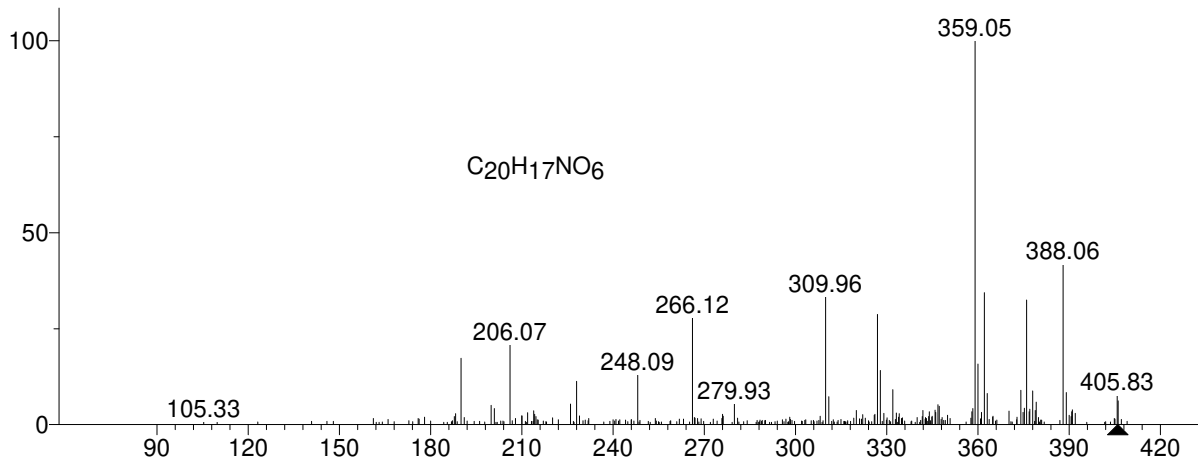



\*\* Search Report Page 1 of 1 \*\*

Unknown: Unknown (3.34\_675.2356m/z)  
Compound in Library Factor = -1072

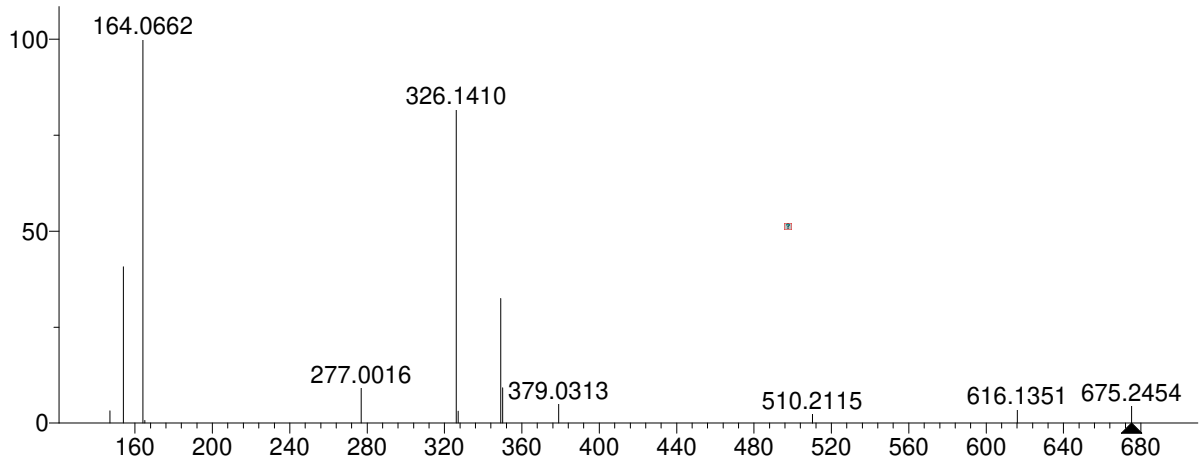

Hit 1 : Blood Group H Disaccharide [2M+Na]<sup>+</sup> HCD 2V P=675.2  
C<sub>12</sub>H<sub>22</sub>O<sub>10</sub>; MF: 70; RMF: 404; Prob 87.3%; CAS: 24656-24-4; Lib: nist\_msms; ID: 530868.

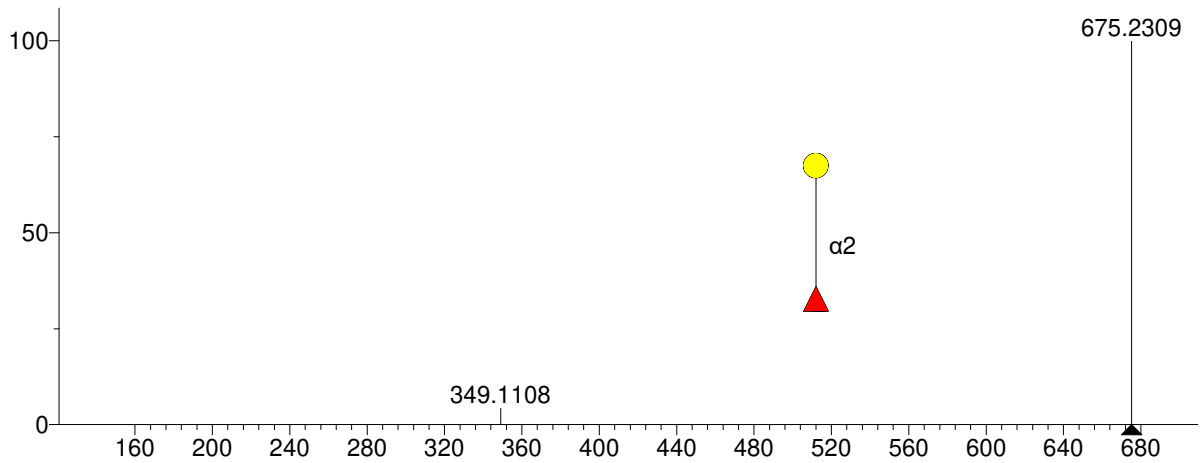

Hit 2 : Icaritin [M-H]<sup>-</sup> 45eV P=675.2  
C<sub>33</sub>H<sub>40</sub>O<sub>15</sub>; MF: 0; RMF: 56; Prob 12.7%; Lib: msms-neg-metabobase; ID: 693.

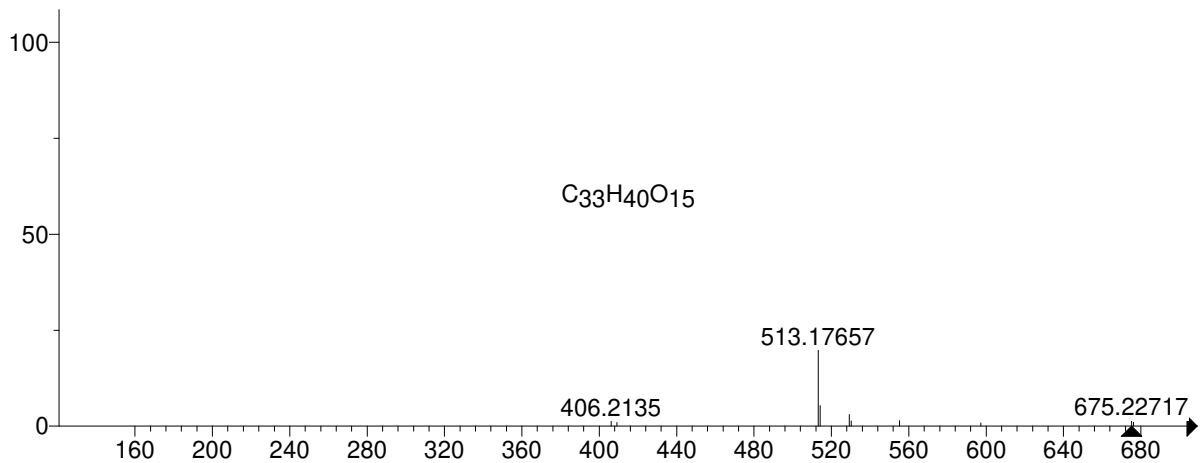

Unknown: Unknown (3.35\_563.1505m/z)  
Compound in Library Factor = 0

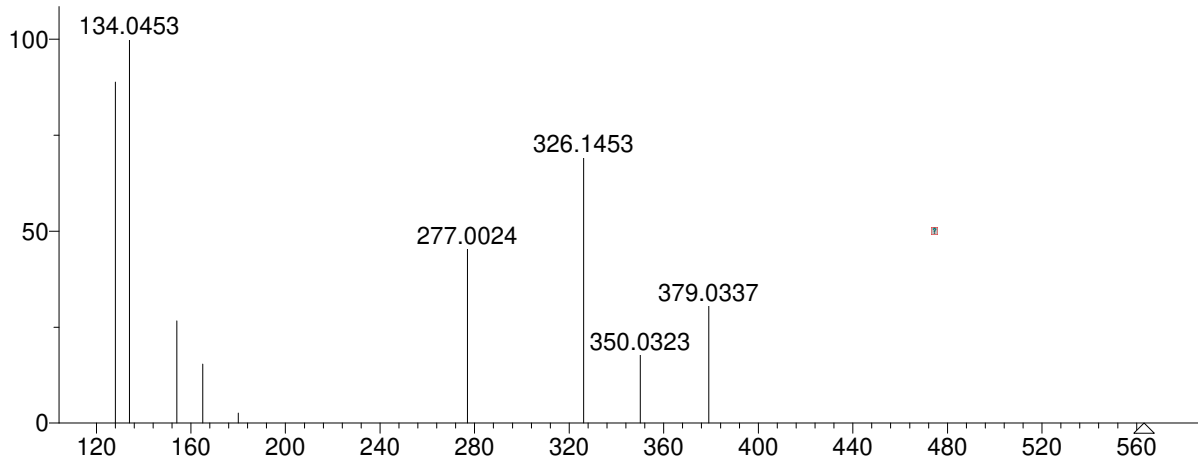

Unknown: Unknown (3.36\_573.2029m/z)  
Compound in Library Factor = 0

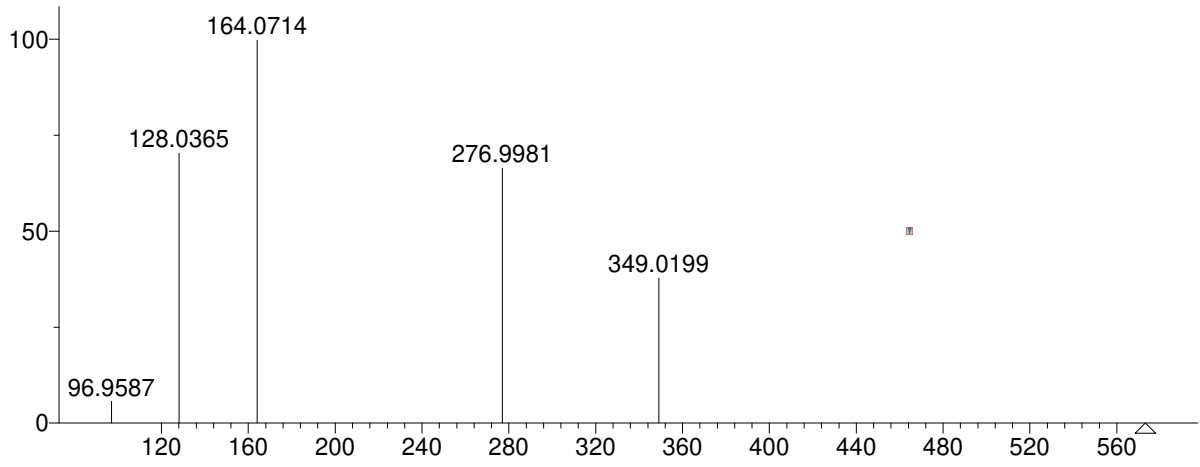

Unknown: Unknown (3.36\_680.2761m/z)  
Compound in Library Factor = 0

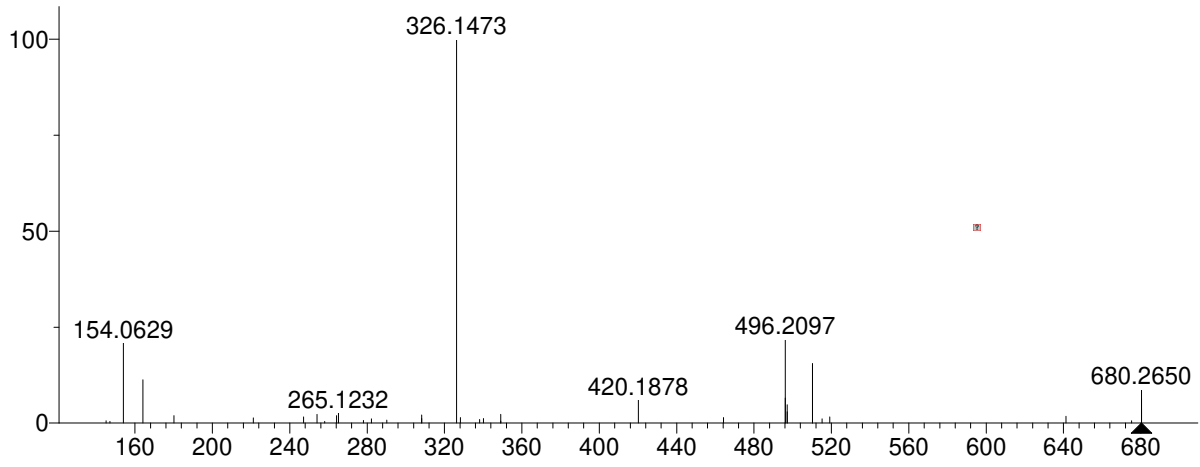

Unknown: Unknown (3.37\_164.0707m/z)  
Compound in Library Factor = -349

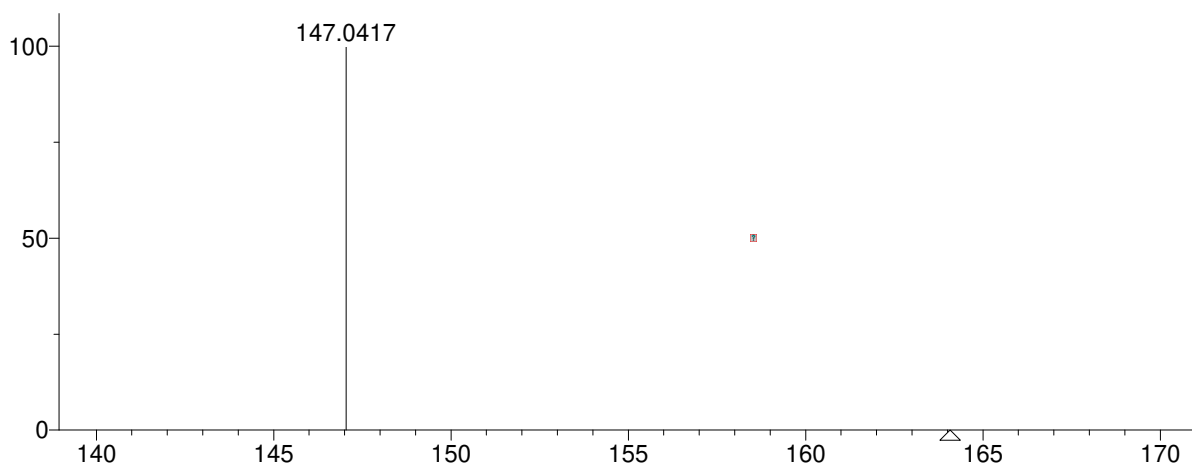

Hit 1 : L-Phenylalanine [M-H]<sup>-</sup> 20 P=164.1  
C<sub>9</sub>H<sub>11</sub>NO<sub>2</sub>; MF: 364; RMF: 999; Prob 17.0%; Lib: msms neg mona\_ipb\_gnps\_plasma; ID: 569.

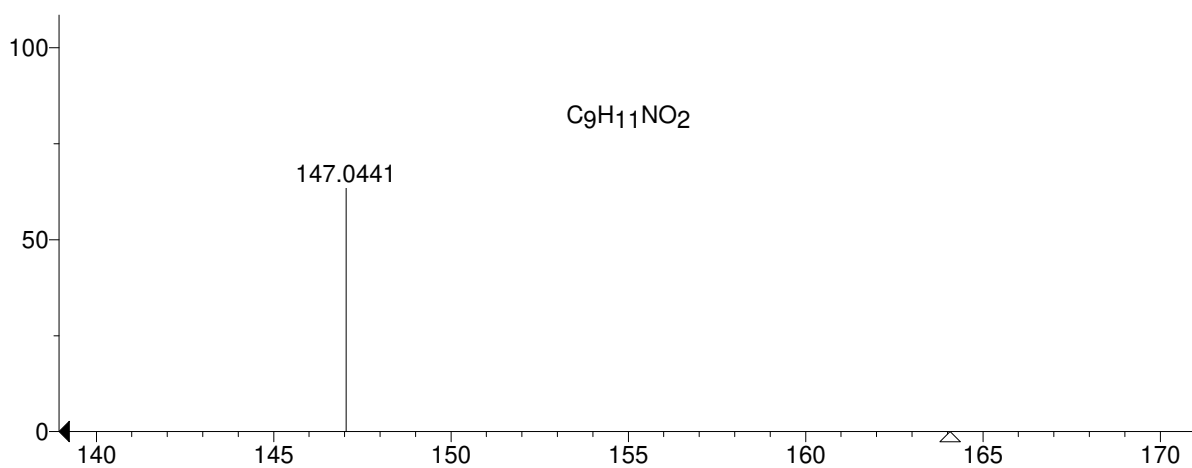

Hit 2 : Phenylalanine [M-H]<sup>-</sup> 35eV P=164.1  
C<sub>9</sub>H<sub>11</sub>NO<sub>2</sub>; MF: 364; RMF: 999; Prob 17.0%; Lib: mona-export-fiehn\_hilic; ID: 2924.

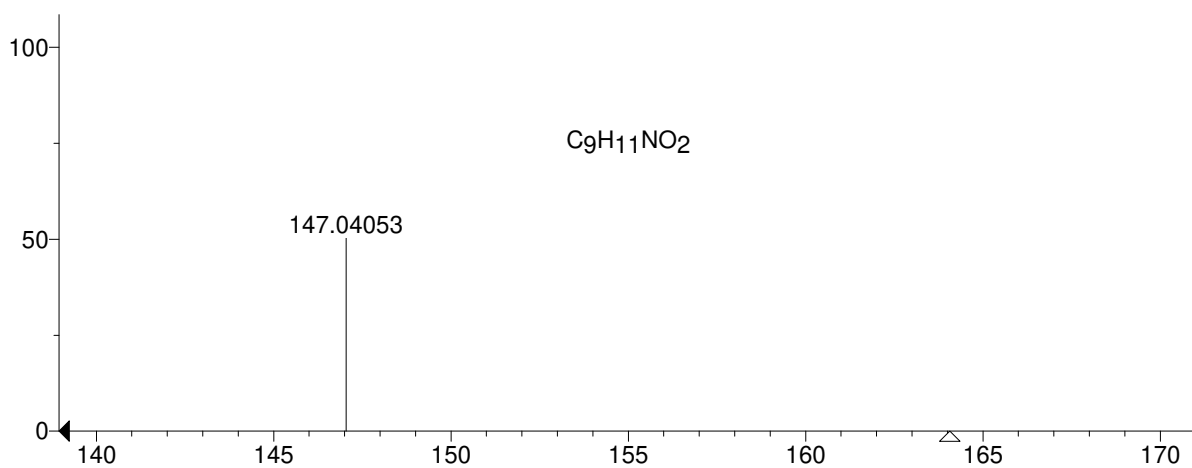

Hit 3 : DL-Phenylalanine [M-H]- IT-FT 35% P=164.1  
C<sub>9</sub>H<sub>11</sub>NO<sub>2</sub>; MF: 364; RMF: 999; Prob 17.0%; CAS: 150-30-1; Lib: nist\_msms; ID: 141494.



Hit 4 : N-Acetyl-L-phenylalanine [M-H-C<sub>2</sub>H<sub>2</sub>O]- IT-FT 35% P=164.1  
C<sub>11</sub>H<sub>13</sub>NO<sub>3</sub>; MF: 364; RMF: 999; Prob 17.0%; CAS: 2018-61-3; Lib: nist\_msms; ID: 290399.



Hit 5 : N-(Phenylacetyl)-L-phenylalanine [M-H-C<sub>8</sub>H<sub>6</sub>O]- HCD 52V P=164.1  
C<sub>17</sub>H<sub>17</sub>NO<sub>3</sub>; MF: 364; RMF: 999; Prob 17.0%; CAS: 738-75-0; Lib: nist\_msms; ID: 485931.



Unknown: Unknown (3.37\_413.1530m/z)  
Compound in Library Factor = -3273

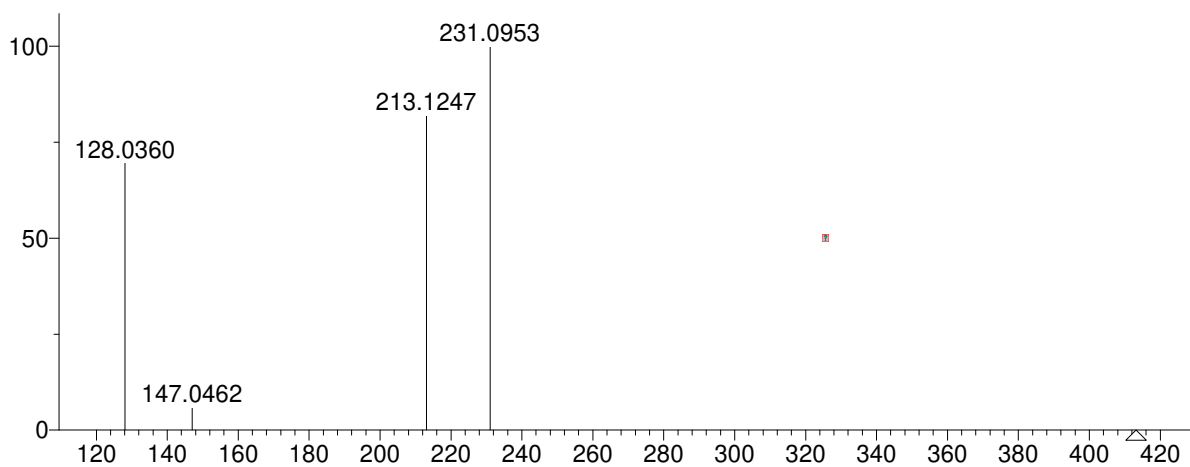

Hit 1 : 2-amino-5-[2-[[2,3-dihydroxy-2-(1-hydroxyethyl)butanoyl]oxymethyl]-4-hydroxyanilino]-5-oxopentanoic acid  
C<sub>18</sub>H<sub>26</sub>N<sub>2</sub>O<sub>9</sub>; MF: 1; RMF: 112; Prob 100.0%; Lib: mona-export-1c-ms-ms\_negative\_mode; ID: 22977.

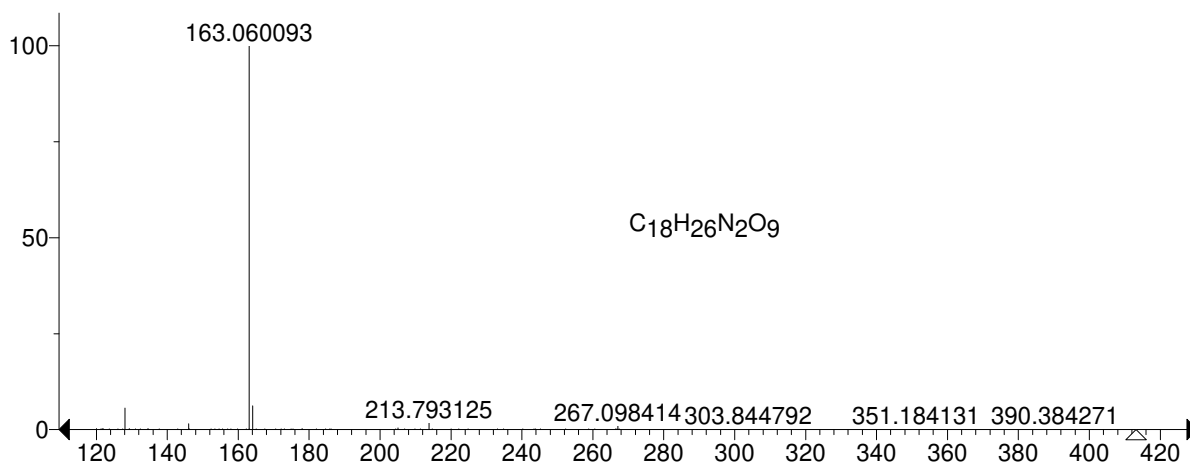

Unknown: Unknown (3.38\_293.1133m/z)  
Compound in Library Factor = -589

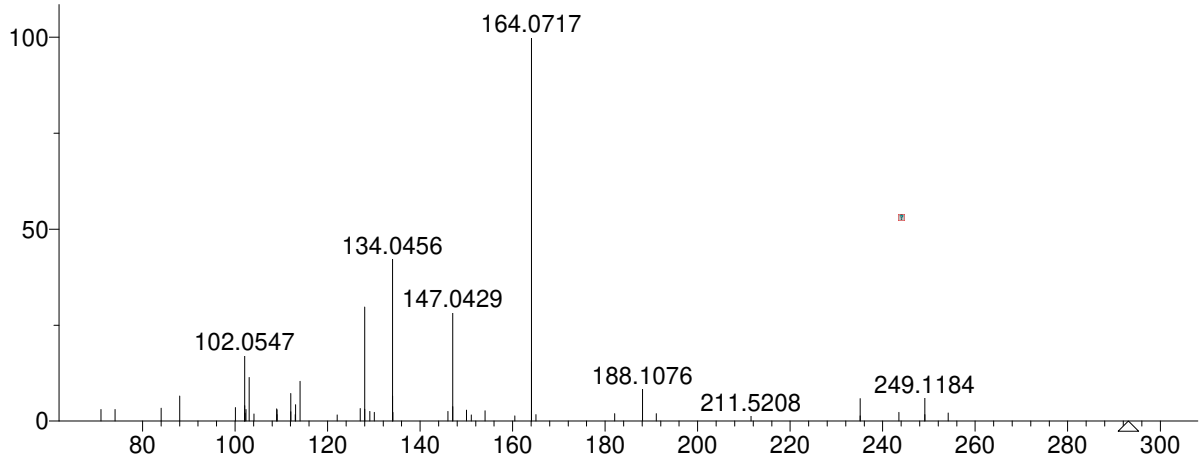

Hit 1 : Phe-Glu [M-H]<sup>-</sup> HCD 26eV P=293.1  
C<sub>14</sub>H<sub>18</sub>N<sub>2</sub>O<sub>5</sub>; MF: 305; RMF: 628; Prob 49.0%; Lib: nist\_msms; ID: 570595.

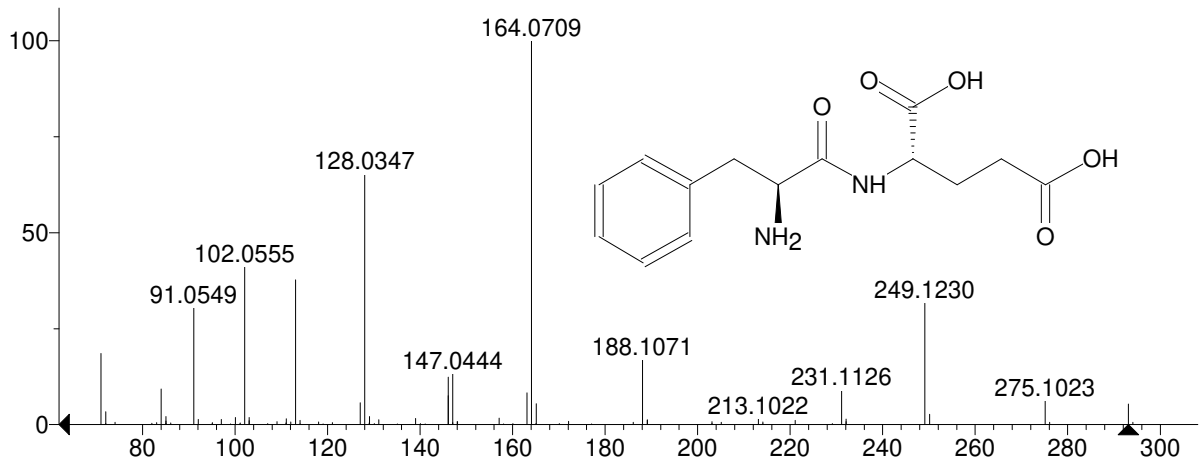

Hit 2 : Phe-Glu [M-H]<sup>-</sup> HCD 26eV P=293.1  
C<sub>14</sub>H<sub>18</sub>N<sub>2</sub>O<sub>5</sub>; MF: 305; RMF: 628; Prob 49.0%; CAS: 3617-45-6; Lib: nist\_msms2; ID: 84328.

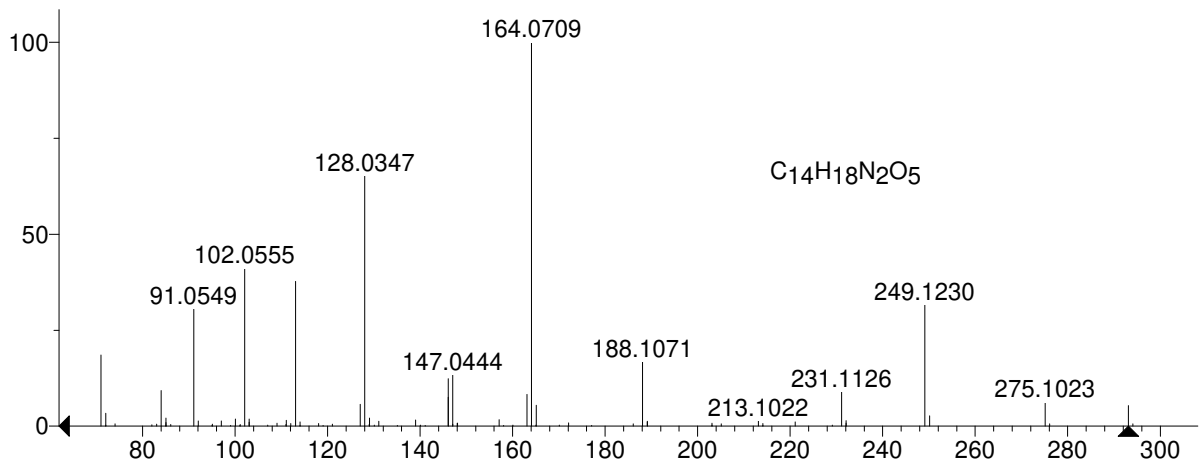



Hit 3 : Glu-Phe [M-H]- HCD 26eV P=293.1  
C<sub>14</sub>H<sub>18</sub>N<sub>2</sub>O<sub>5</sub>; MF: 127; RMF: 491; Prob 0.92%; Lib: nist\_msms; ID: 570031.

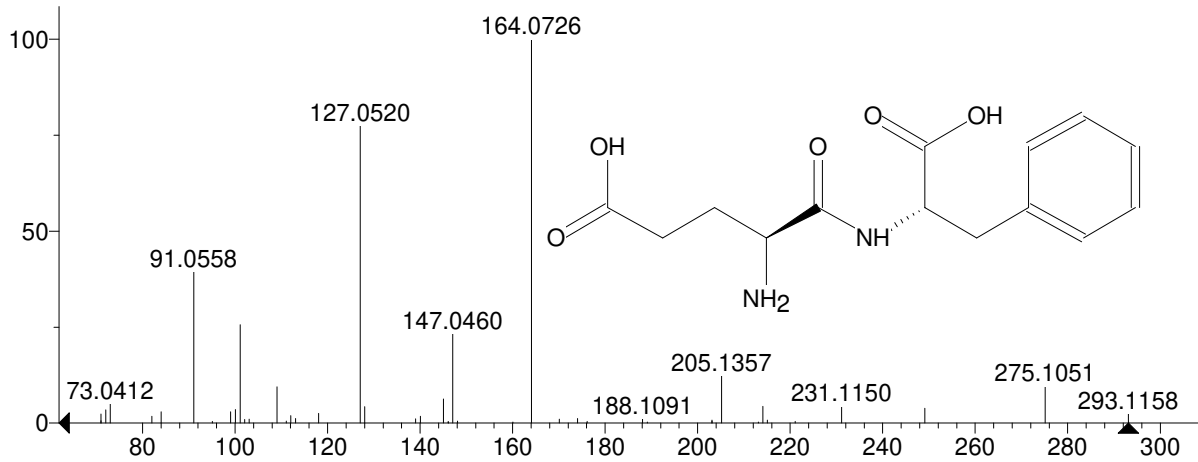

Hit 4 : Glu-Phe [M-H]- HCD 26eV P=293.1  
C<sub>14</sub>H<sub>18</sub>N<sub>2</sub>O<sub>5</sub>; MF: 127; RMF: 491; Prob 0.92%; CAS: 20556-22-3; Lib: nist\_msms2; ID: 83757.

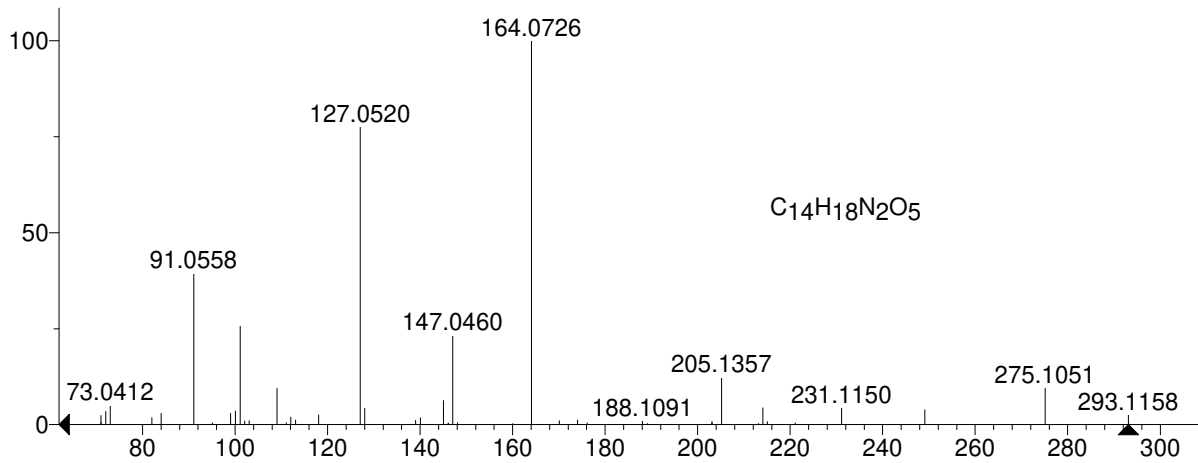

Hit 5 : Unknown (carbon number 14); PlaSMA ID-549 [M-H]- P=293.1  
C<sub>14</sub>H<sub>18</sub>N<sub>2</sub>O<sub>5</sub>; MF: 29; RMF: 210; Prob 0.07%; Lib: biomsmms-neg-plasma; ID: 1167.

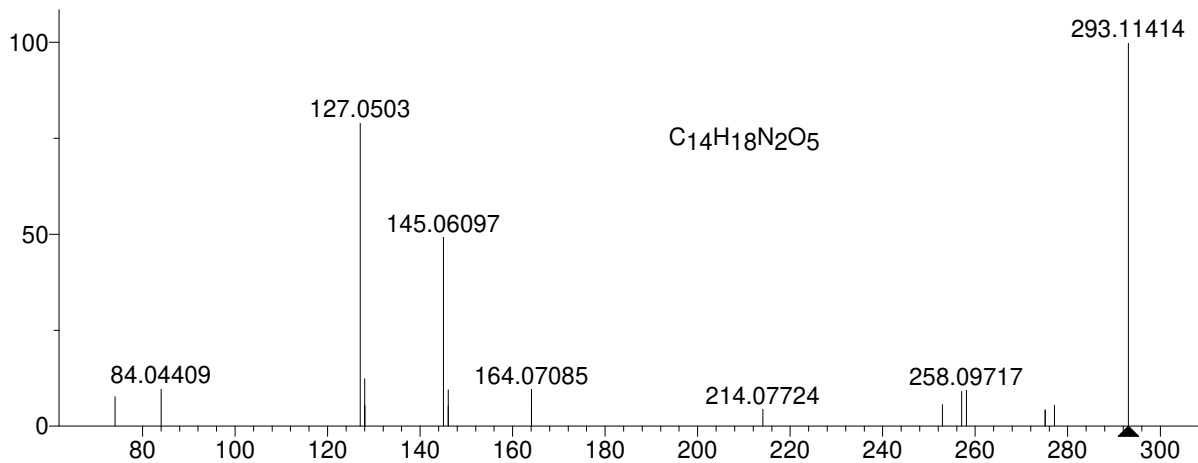

Unknown: Unknown (3.38\_426.1871m/z)  
Compound in Library Factor = 0

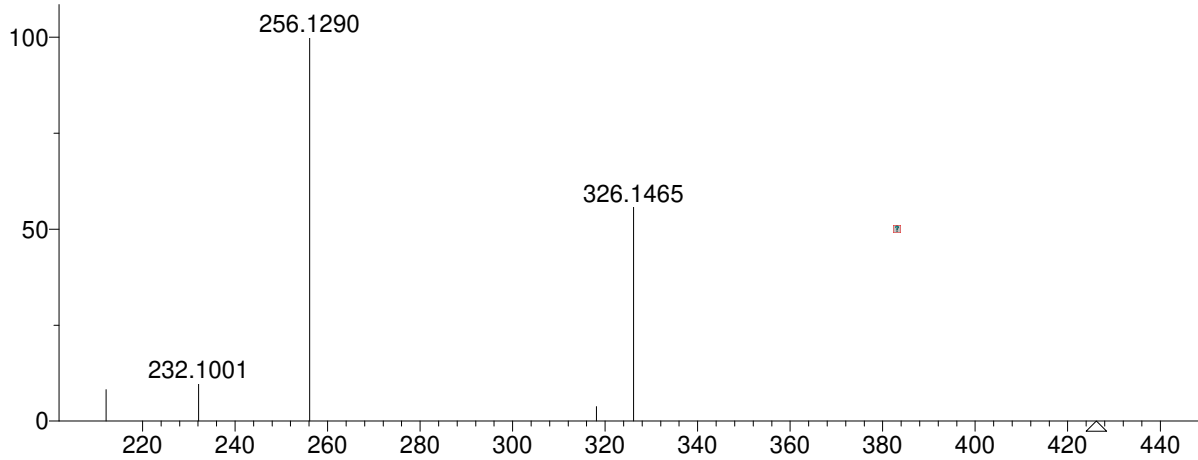

Hit 1 : Leucokinin II [M+2H]<sup>2+</sup> HCD 30eV P=426.2  
C<sub>39</sub>H<sub>50</sub>N<sub>10</sub>O<sub>12</sub>; MF: 0; RMF: 60; Prob 50.0%; Lib: nist\_msms2; ID: 59914.

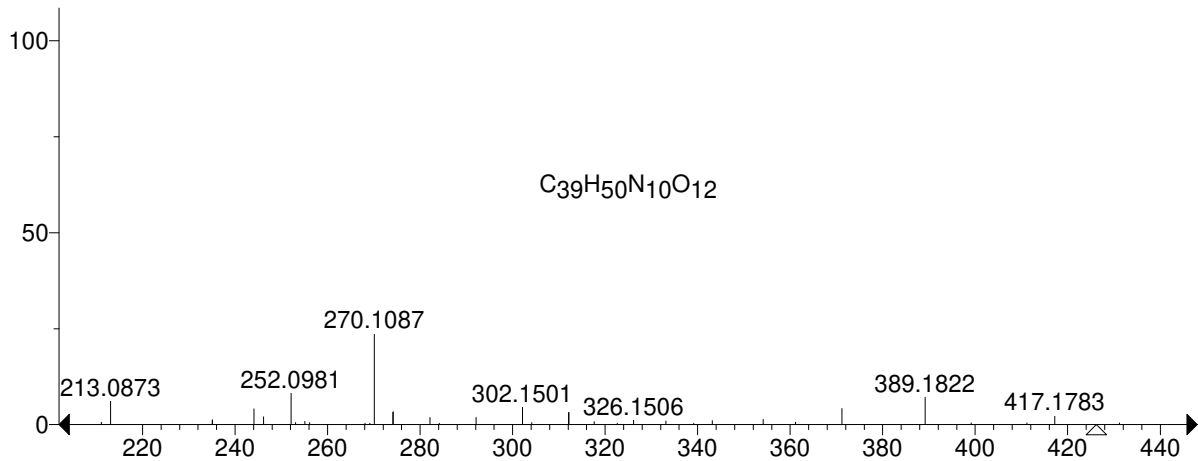

Hit 2 : Ritonavir [M+H-C<sub>14</sub>H<sub>21</sub>N<sub>3</sub>O<sub>2</sub>S]<sup>+</sup> IT 35% P=426.2  
C<sub>37</sub>H<sub>48</sub>N<sub>6</sub>O<sub>5</sub>S<sub>2</sub>; MF: 0; RMF: 7; Prob 50.0%; CAS: 155213-67-5; Lib: nist\_msms; ID: 366790.

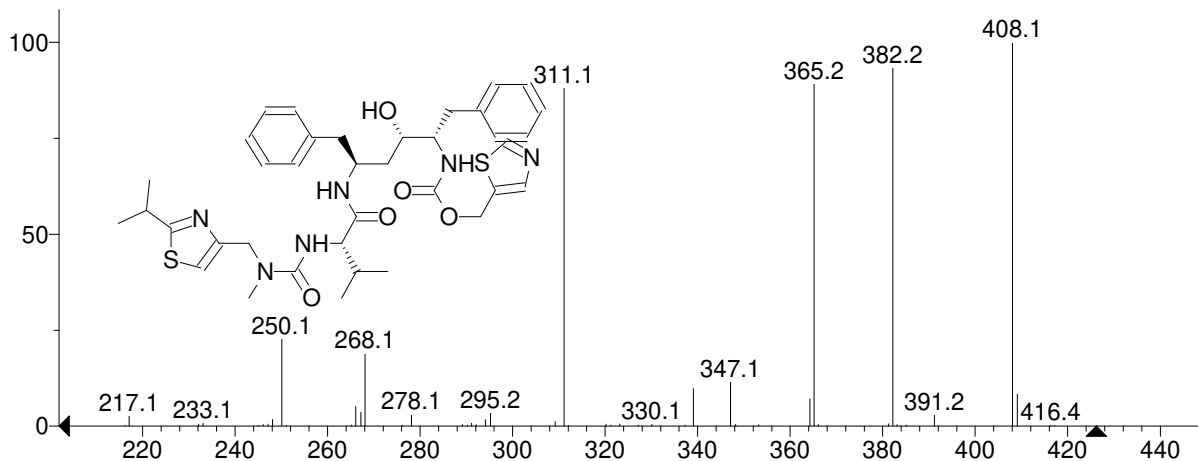

Unknown: Unknown (3.39\_369.0410m/z)  
Compound in Library Factor = 0

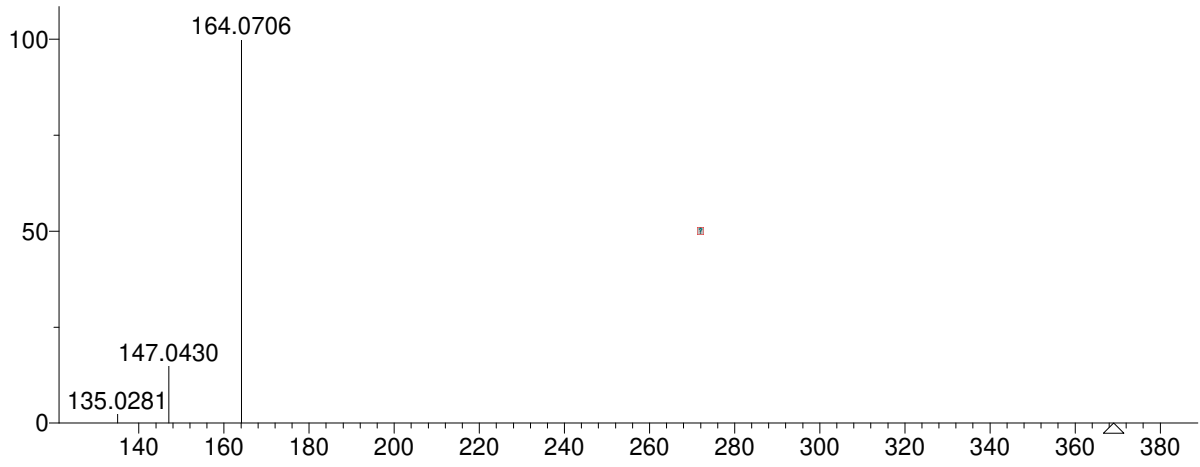

\*\* Search Report Page 1 of 2 \*\*

Unknown: Unknown (3.39\_417.1159m/z)  
Compound in Library Factor = 0

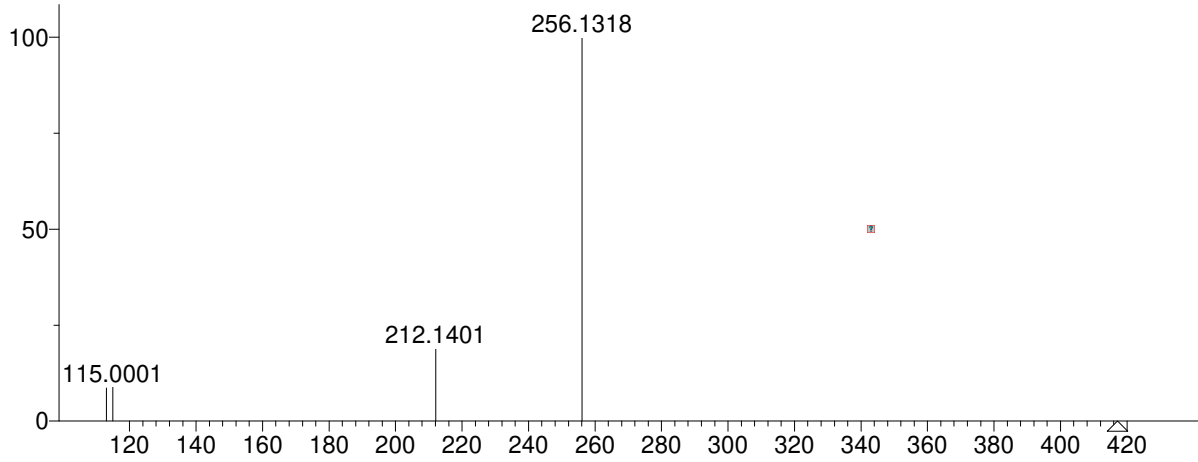

Hit 1 : 7-hydroxy-2-[4-[(2S,3R,4S,5S,6R)-3,4,5-trihydroxy-6-(hydroxymethyl)oxan-2-yl]oxyphenyl]-2,3-dihydrochromen-6-one; MF: 0; RMF: 33; Prob 16.7%; Lib: mona-export-1c-ms-ms\_negative\_mode; ID: 28010.

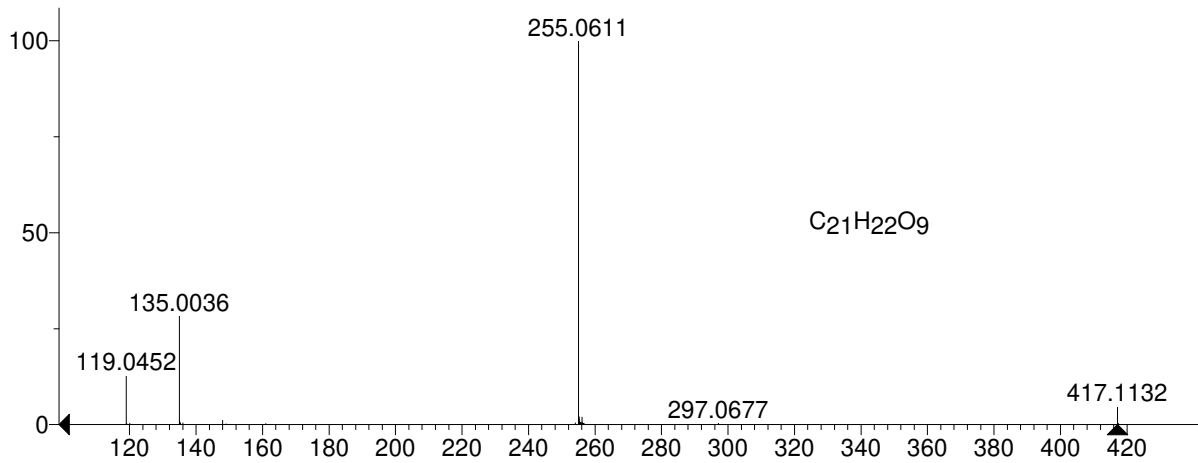

Hit 2 : Engeletin [M+H-H<sub>2</sub>O]<sup>+</sup> HCD 133V P=417.1  
C<sub>21</sub>H<sub>22</sub>O<sub>10</sub>; MF: 0; RMF: 21; Prob 16.7%; CAS: 572-31-6; Lib: nist\_msms; ID: 236880.

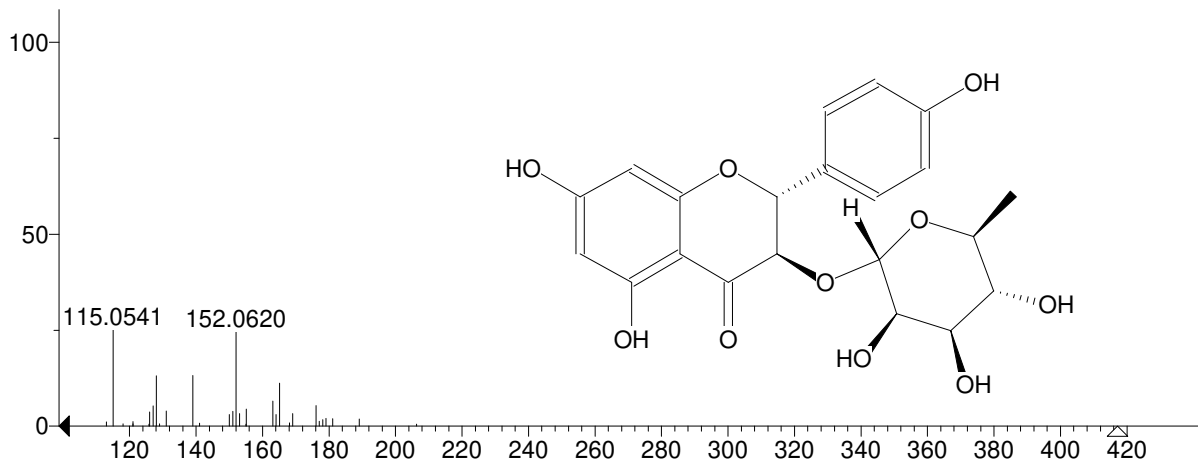

Hit 3 : Daidzin [M+H]<sup>+</sup> HCD 133V P=417.1

C<sub>21</sub>H<sub>20</sub>O<sub>9</sub>; MF: 0; RMF: 20; Prob 16.7%; CAS: 552-66-9; Lib: nist\_msms; ID: 299121.

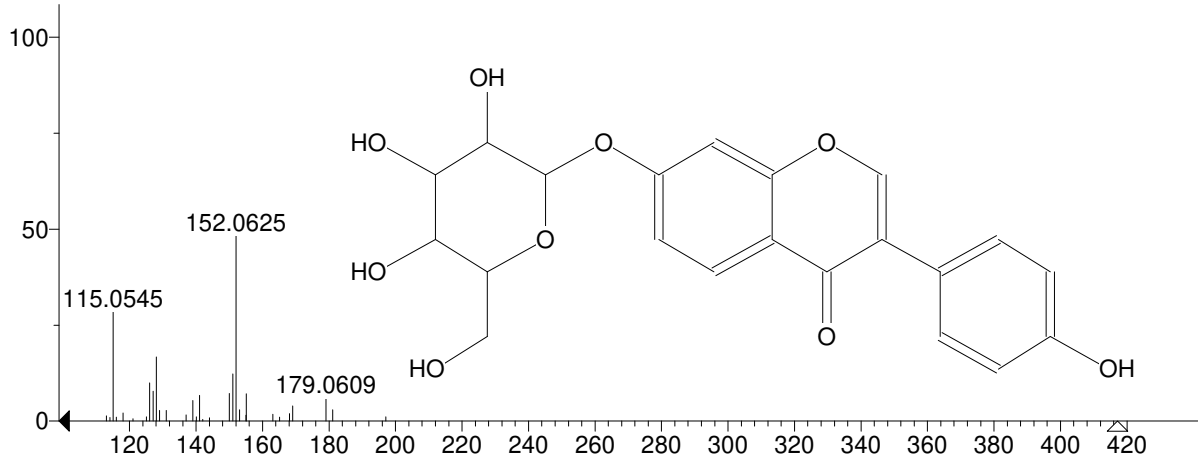

Hit 4 : Isoflavone base + 2O, O-Hex [M+H]<sup>+</sup> 6V P=417.1

C<sub>21</sub>H<sub>20</sub>O<sub>9</sub>; MF: 0; RMF: 16; Prob 16.7%; Lib: mona anthocyanidin-o-glycosides; ID: 6910.

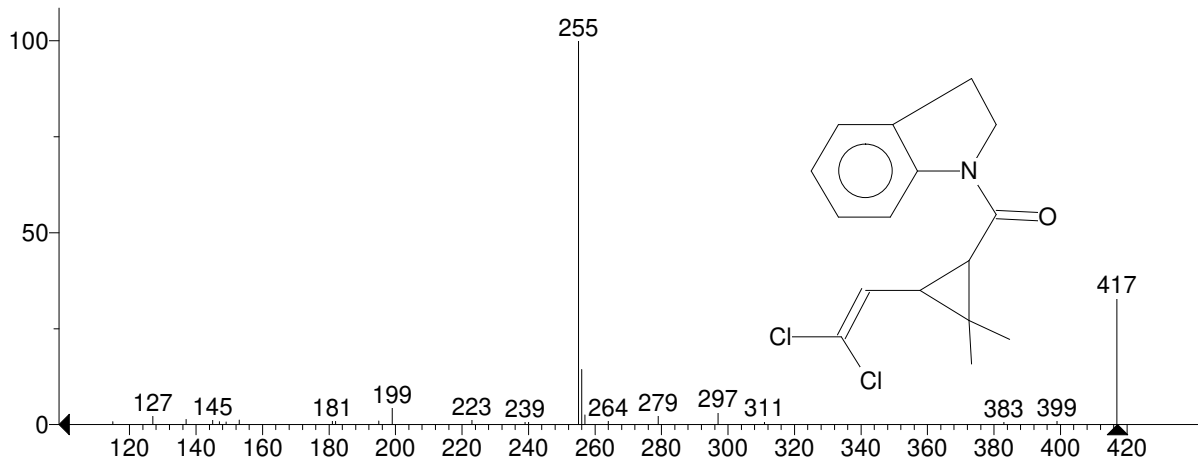

Hit 5 : Daidzein-8-C-glucoside [M+H]<sup>+</sup> 50eV P=417.1

C<sub>21</sub>H<sub>20</sub>O<sub>9</sub>; MF: 0; RMF: 14; Prob 16.7%; Lib: mona anthocyanidin-o-glycosides; ID: 3705.

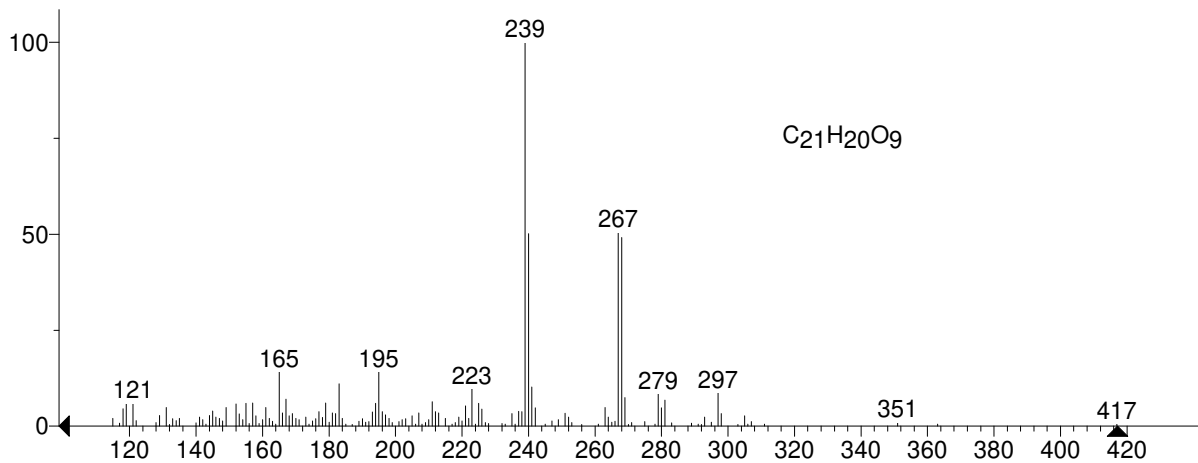

Unknown: Unknown (3.39\_460.1571m/z)  
Compound in Library Factor = -3273

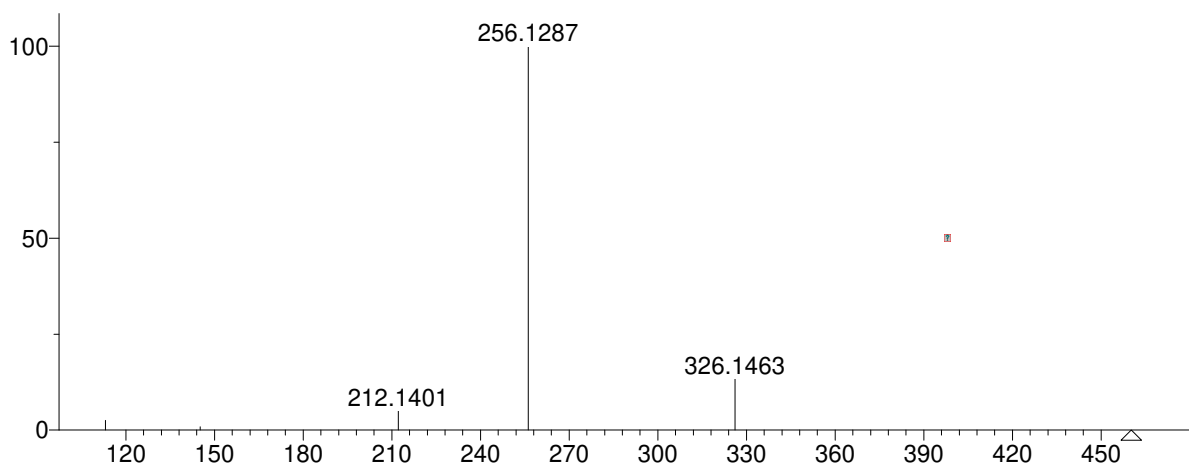

Hit 1 : Hydromorphone-3- $\beta$ -D-glucuronide [M-H]<sup>-</sup> HCD 59V P=460.2  
C<sub>23</sub>H<sub>27</sub>NO<sub>9</sub>; MF: 3; RMF: 345; Prob 22.1%; CAS: 40505-76-8; Lib: nist\_msms; ID: 332372.

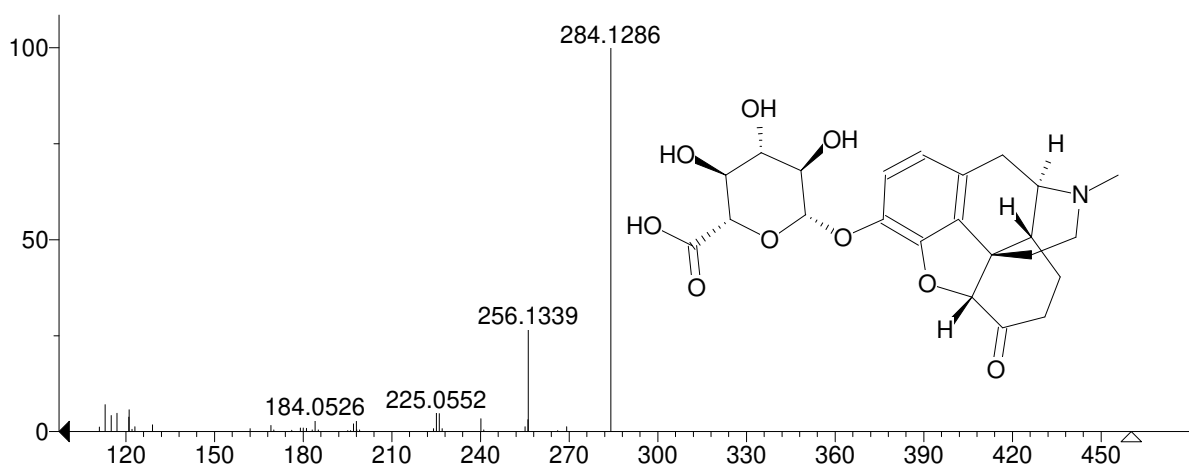

Hit 2 : Oxycodone 3- $\beta$ -D-glucuronide [M+H-H<sub>2</sub>O]<sup>+</sup> HCD 46V P=460.2  
C<sub>23</sub>H<sub>27</sub>NO<sub>10</sub>; MF: 0; RMF: 69; Prob 19.5%; CAS: 770735-01-8; Lib: nist\_msms; ID: 326438.

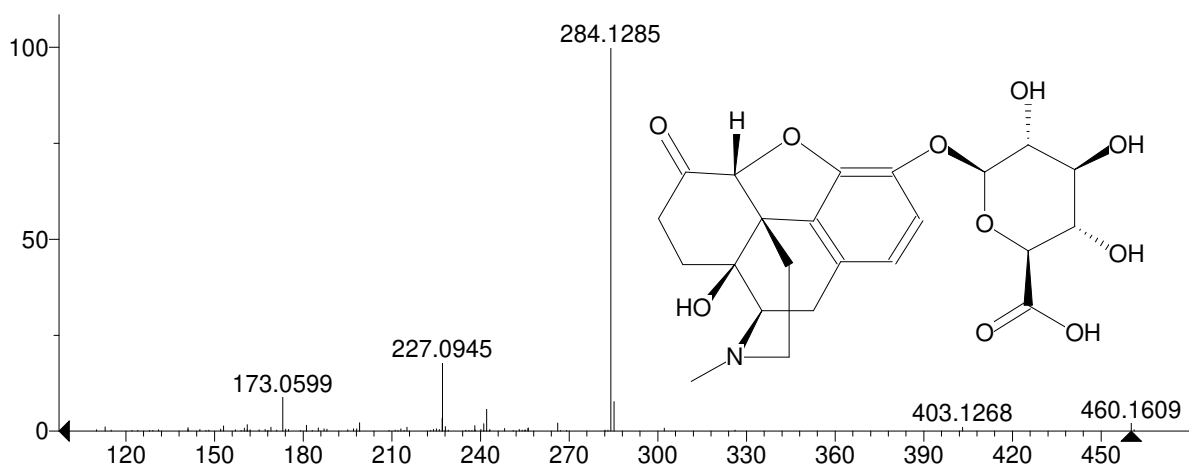

Hit 3 : Morphine-3-glucuronide [M-H]- HCD 73V P=460.2  
C23H27NO9; MF: 0; RMF: 47; Prob 19.5%; CAS: 20290-09-9; Lib: nist\_msms; ID: 324944.

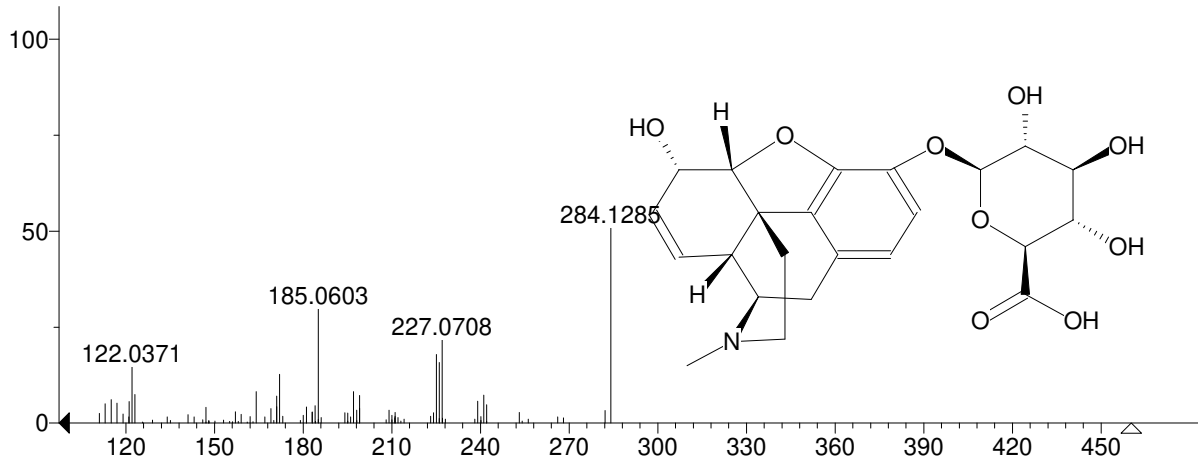

Hit 4 : Morphine-6-glucuronide [M-H]- HCD 73V P=460.2  
C23H27NO9; MF: 0; RMF: 32; Prob 19.5%; CAS: 20290-10-2; Lib: nist\_msms; ID: 325026.

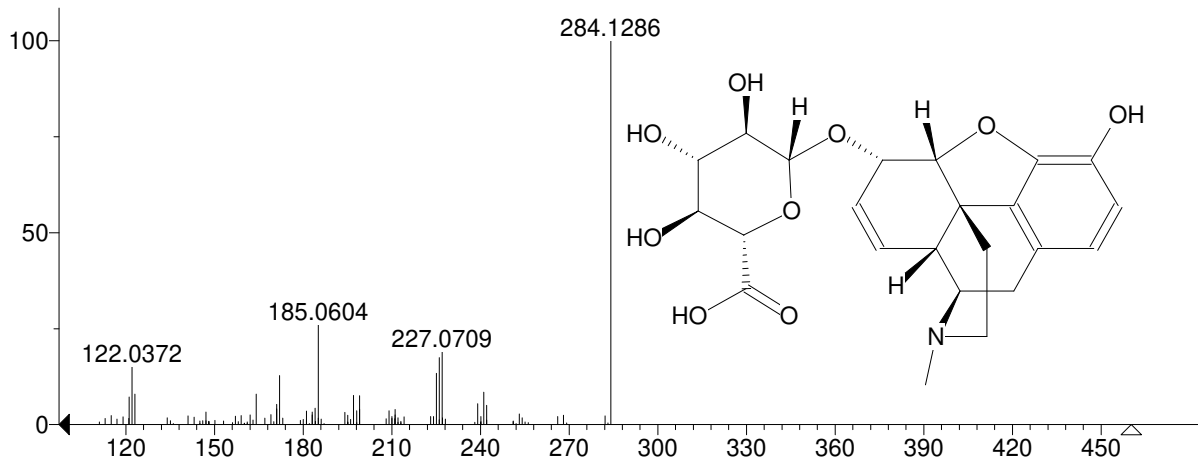

Hit 5 : Villol [M+NH4]+ 45HCD P=460.2  
C23H22O9; MF: 0; RMF: 3; Prob 19.5%; Lib: mona-export-vf-npl\_qexactive; ID: 8051.

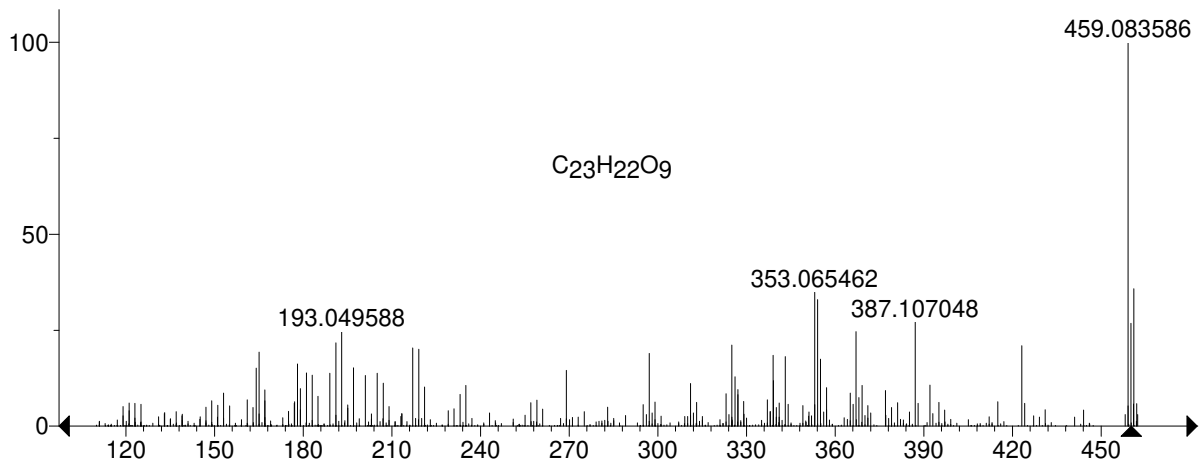

Unknown: Unknown (3.40\_297.0095m/z)  
Compound in Library Factor = 0

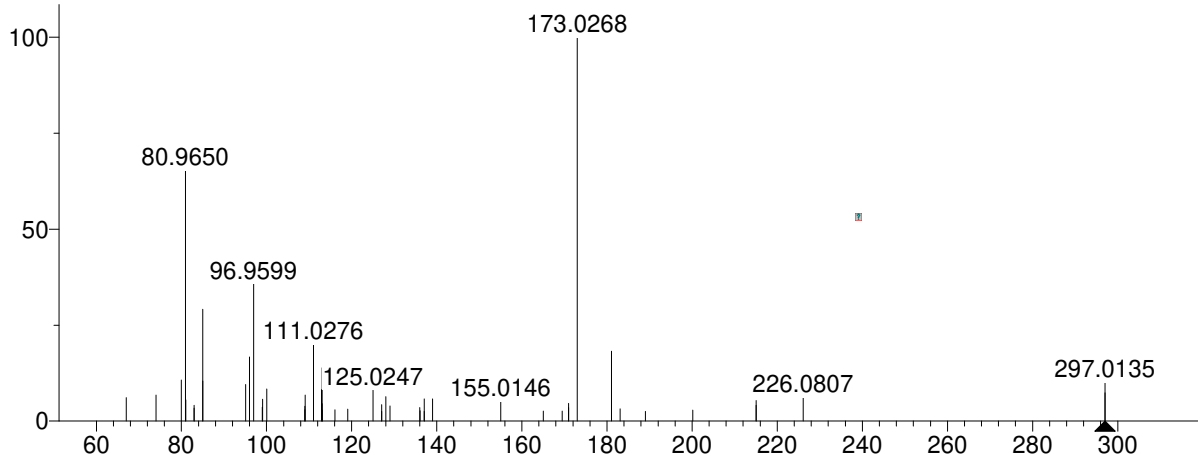



Unknown: Unknown (3.40\_343.1484m/z)  
Compound in Library Factor = 0

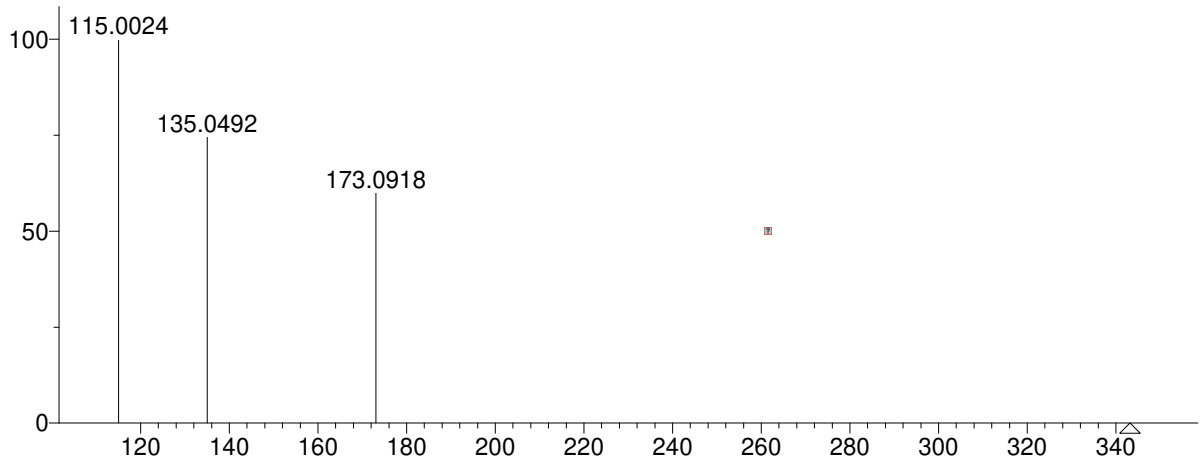

\*\* Search Report Page 1 of 1 \*\*

Unknown: Unknown (3.40\_375.1737m/z)  
Compound in Library Factor = 0

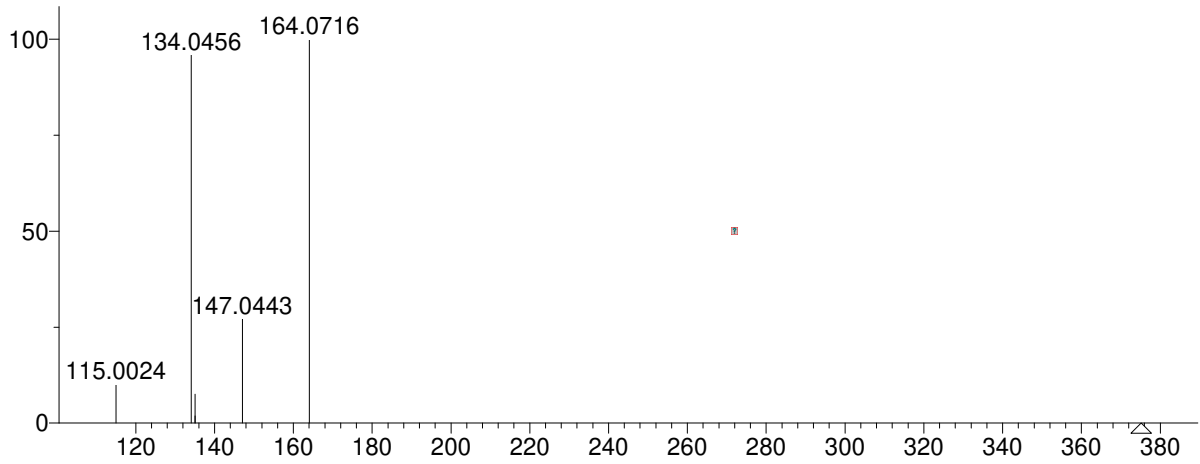

Hit 1 : Cyhalofop-butyl [M+NH4]<sup>+</sup> HCD 82V P=375.2  
C<sub>20</sub>H<sub>20</sub>FNO<sub>4</sub>; MF: 0; RMF: 96; Prob 100.0%; CAS: 122008-85-9; Lib: nist\_msms; ID: 399034.

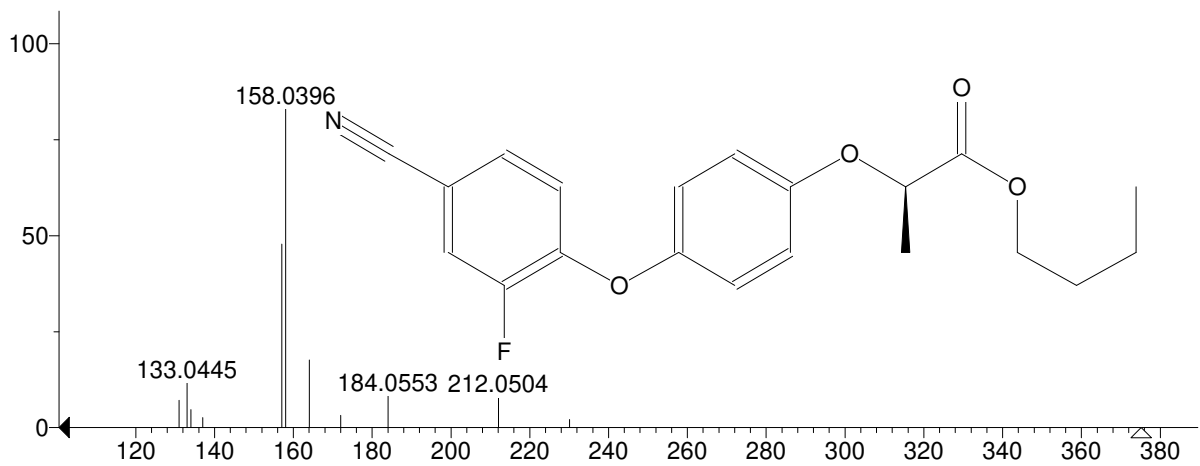

Unknown: Unknown (3.40\_406.0800m/z)  
Compound in Library Factor = 0

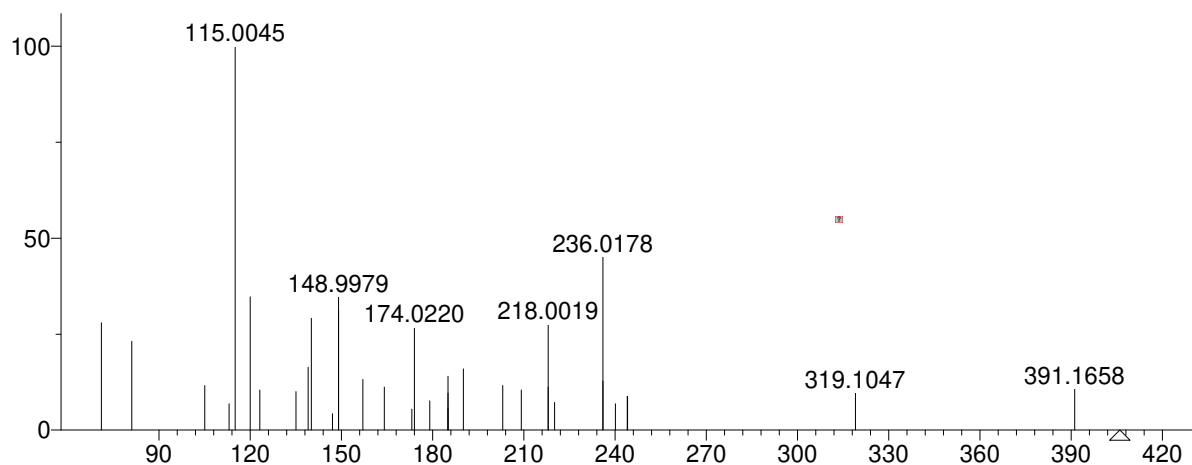

Hit 1 : Bicuculline (+) [M+K]<sup>+</sup> 35% P=406.1  
C<sub>20</sub>H<sub>17</sub>NO<sub>6</sub>; MF: 0; RMF: 8; Prob 100.0%; Lib: mona-export-itree; ID: 1031.

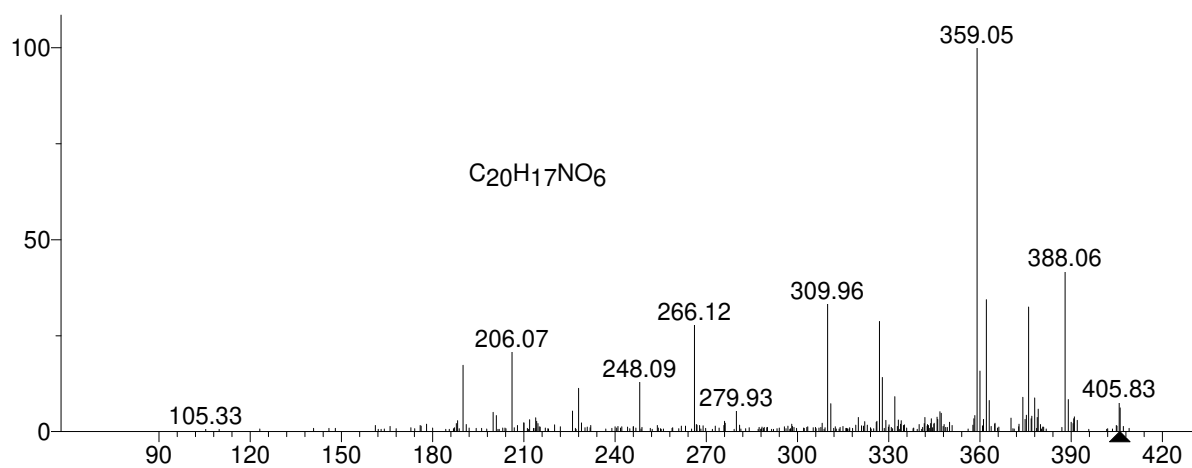

Unknown: Unknown (3.41\_516.1806m/z)  
Compound in Library Factor = 0

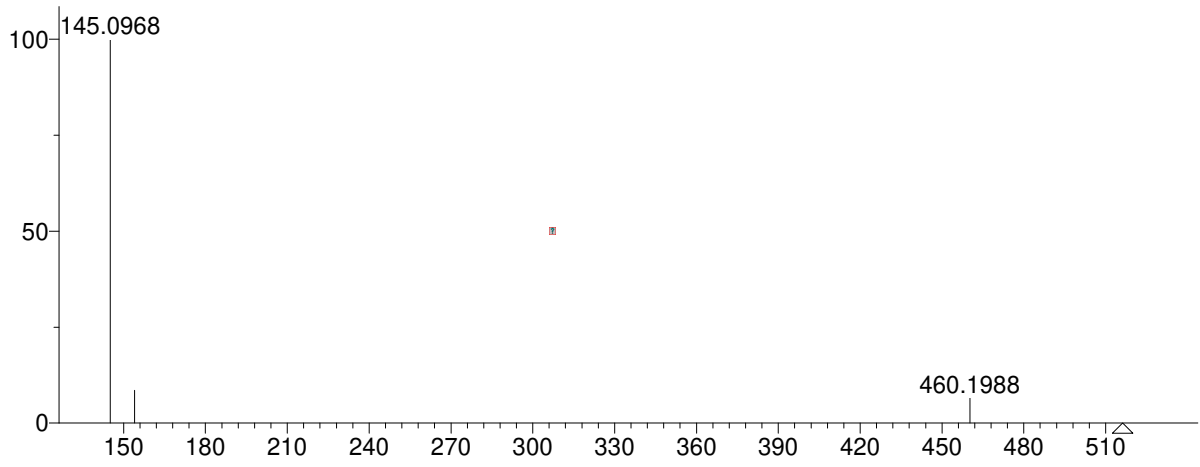

Unknown: Unknown (3.42\_364.1145m/z)  
Compound in Library Factor = 0

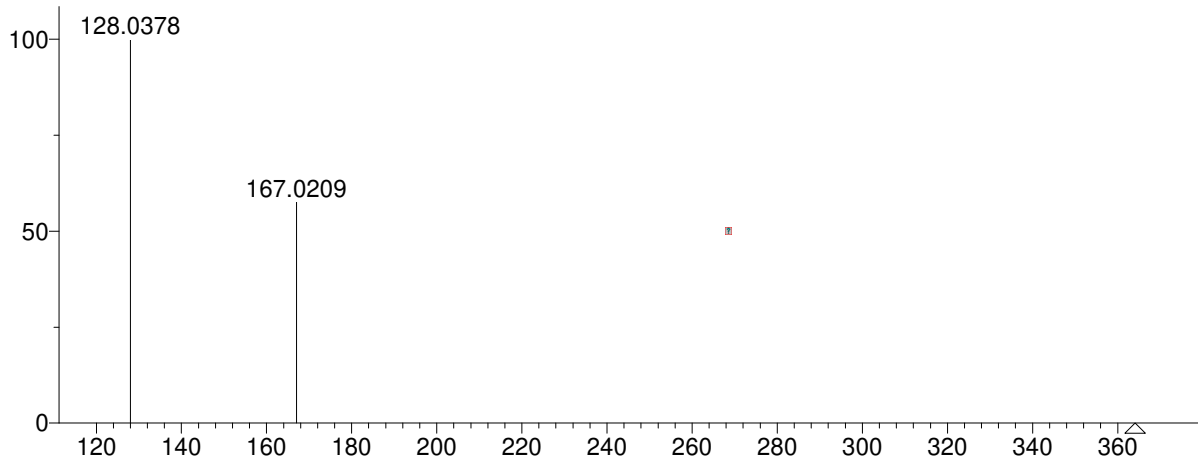

Unknown: Unknown (3.43\_625.2575m/z)  
Compound in Library Factor = 0

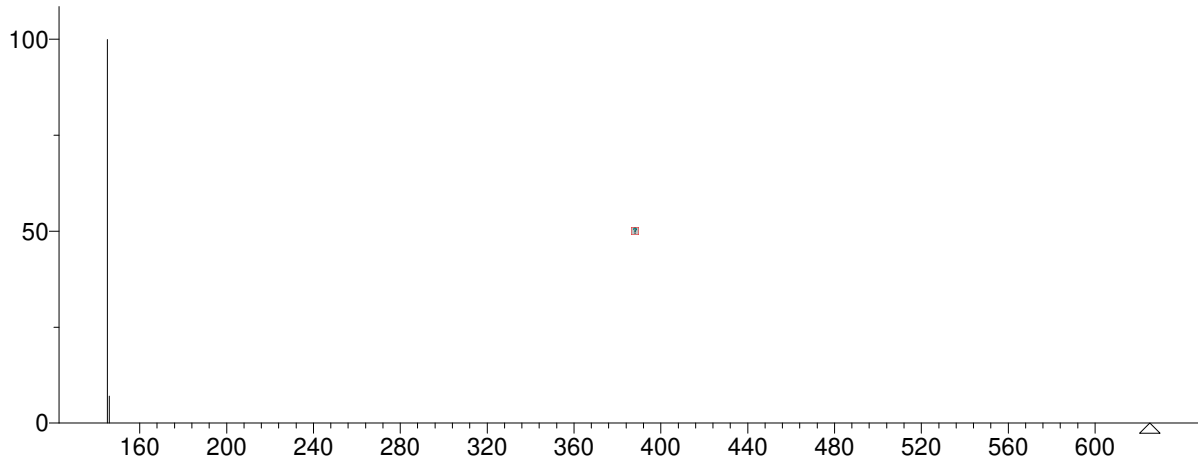

Hit 1 : N-Caffeoyl-O-methyltyramine [2M-H]- HCD 100V P=625.3  
C18H19NO4; MF: 0; RMF: 14; Prob 100.0%; CAS: 189307-47-9; Lib: nist\_msms; ID: 221342.

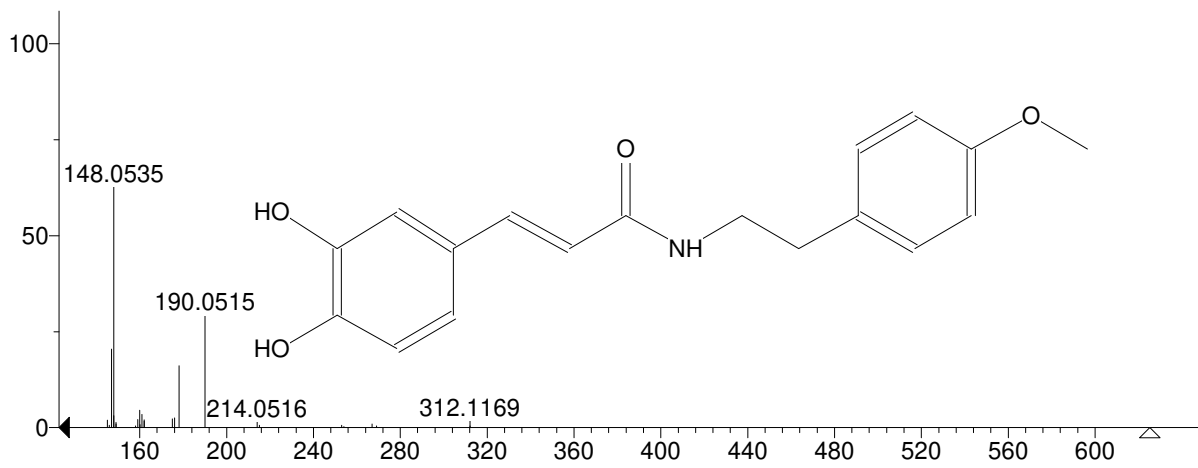

Unknown: Unknown (3.44\_339.0301m/z)  
Compound in Library Factor = 0

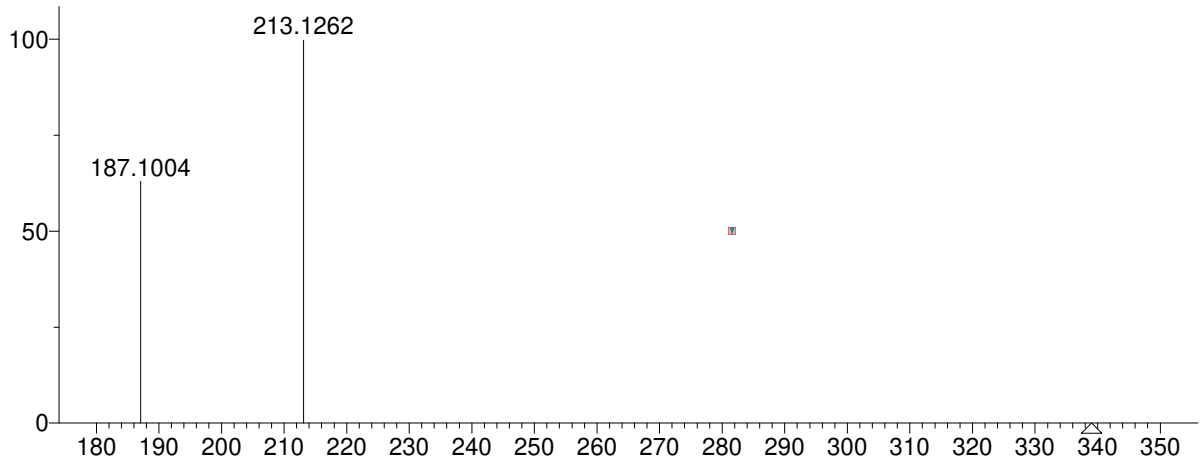

Unknown: Unknown (3.44\_341.1440m/z)  
Compound in Library Factor = 0

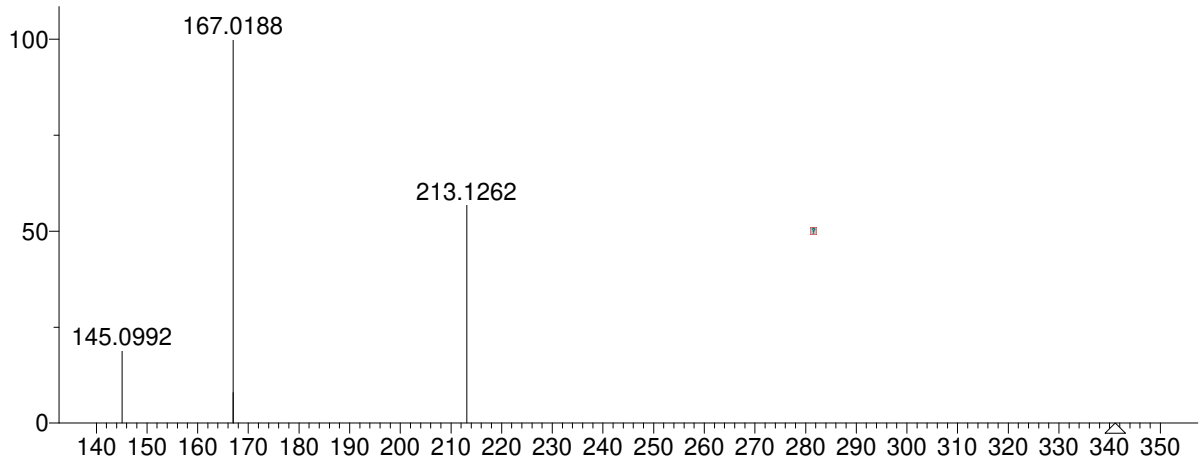



Unknown: Unknown (3.44\_388.1752m/z)  
Compound in Library Factor = 0

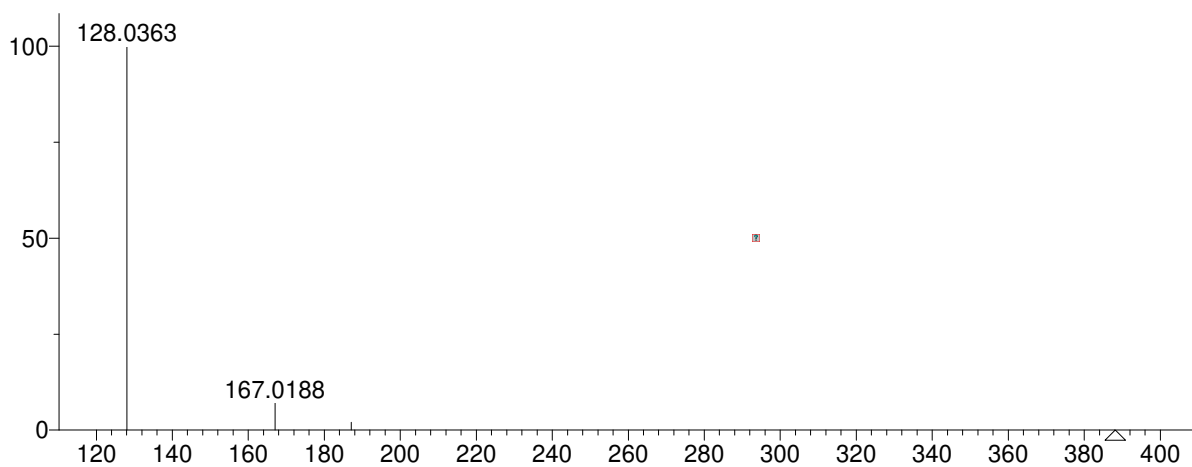

Hit 1 : 5,7-dihydroxy-2-(4-hydroxy-3-methoxyphenyl)-6-(3-methylbut-2-enyl)-2,3-dihydrochromen-4-one [M+NH4]  
C<sub>21</sub>H<sub>22</sub>O<sub>6</sub>; MF: 0; RMF: 17; Prob 100.0%; Lib: mona-export-vf-npl\_qexactive; ID: 9003.

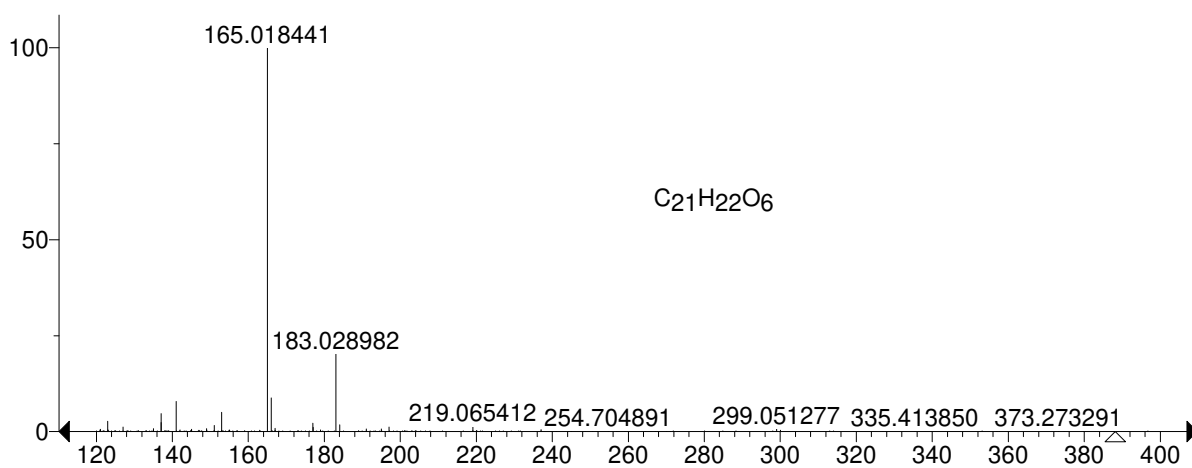

Unknown: Unknown (3.44\_445.1454m/z)  
Compound in Library Factor = -3273

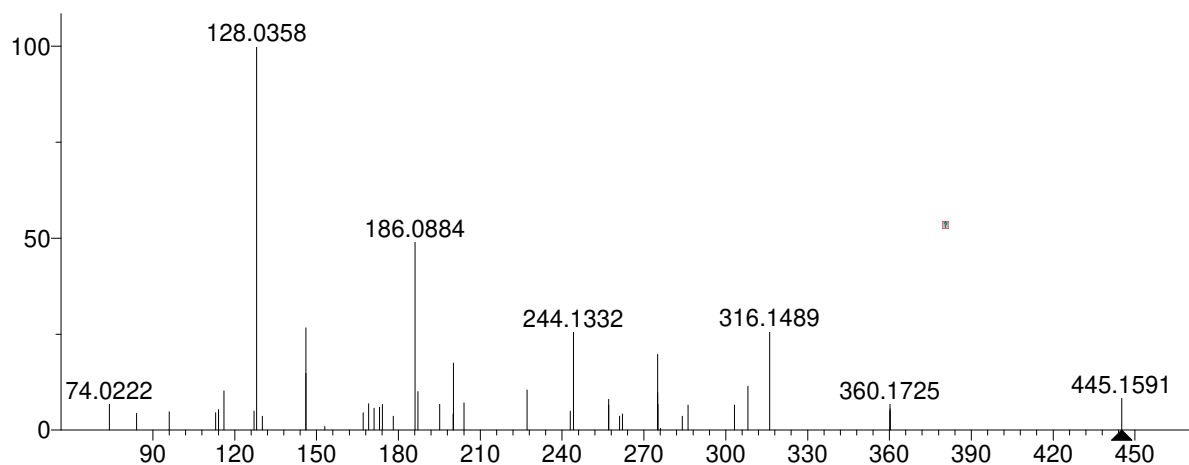

Hit 1 : Acetamiprid [2M+H]<sup>+</sup> HCD 1V P=445.1  
C<sub>10</sub>H<sub>11</sub>CIN<sub>4</sub>; MF: 9; RMF: 179; Prob 30.6%; CAS: 135410-20-7; Lib: nist\_msms; ID: 306855.

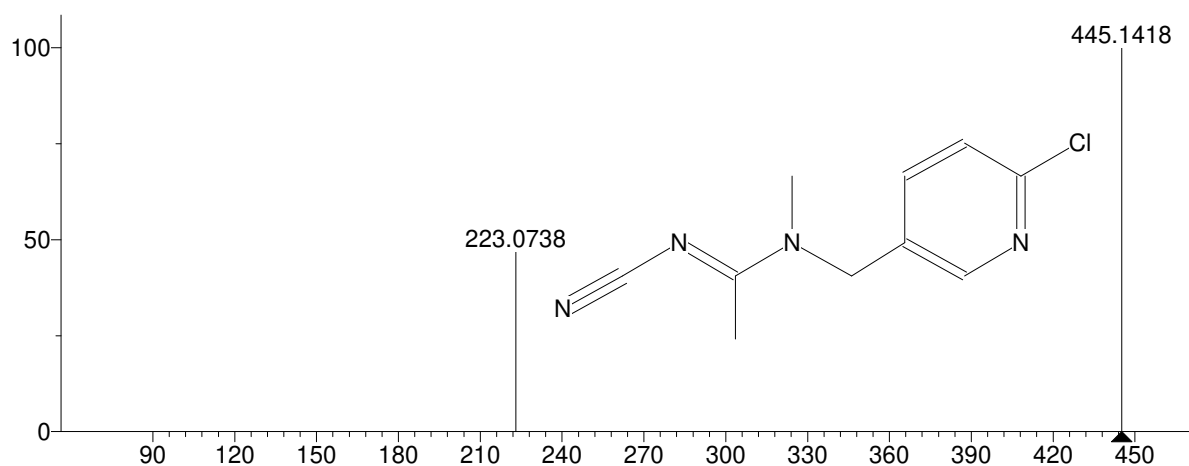

Hit 2 : 1,3-Cyclobutanedicarboxylic acid, 2,4-diphenyl-, 1-(1-naphthalenyl) ester, (1 $\beta$ ,2R,3 $\alpha$ ,4R)- [M+Na]<sup>+</sup> HCD :  
C<sub>28</sub>H<sub>22</sub>O<sub>4</sub>; MF: 3; RMF: 117; Prob 24.1%; CAS: 1541209-75-9; Lib: nist\_msms; ID: 349631.

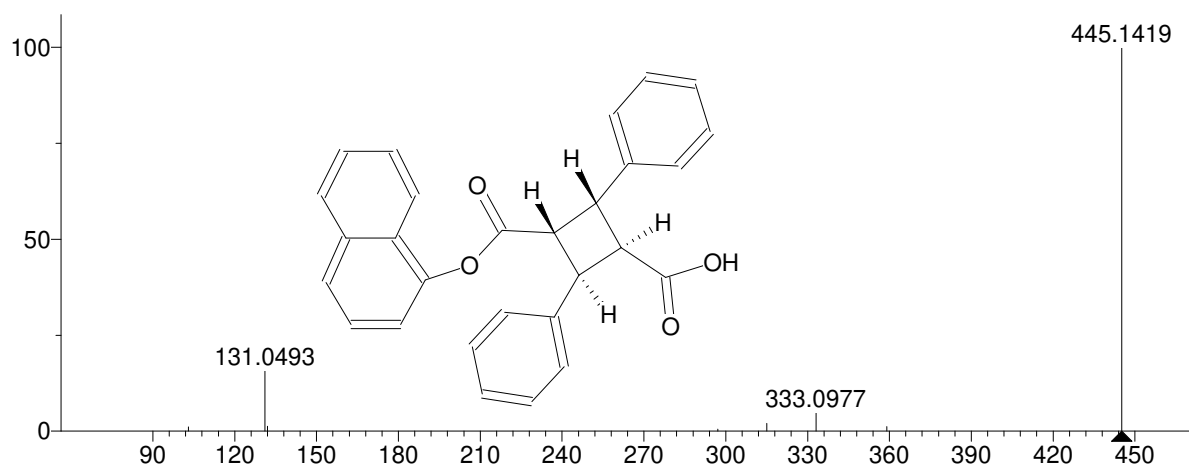

Hit 3 : LPI 7:0; [M-H]<sup>-</sup> [M-H]<sup>-</sup> P=445.1  
C<sub>16</sub>H<sub>31</sub>O<sub>12</sub>P; MF: 2; RMF: 93; Prob 23.1%; Lib: msdial-insilicomsms-lipids-neg; ID: 311147.

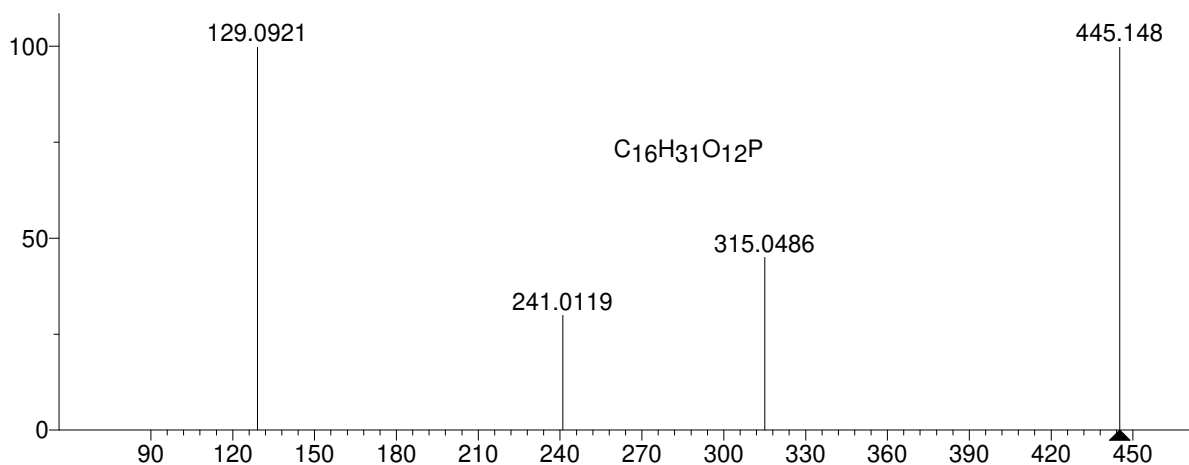

Hit 4 : (1R,3R,4S,6S,8R,9R,10S,11S)-9-(acetyloxy)-8-hydroxy-3,8-dimethyl-12-methylidene-7,13-dioxo-5,14-dioxo-  
C<sub>21</sub>H<sub>26</sub>O<sub>9</sub>; MF: 1; RMF: 57; Prob 22.2%; Lib: mona-export-vf-npl\_qexactive; ID: 6949.

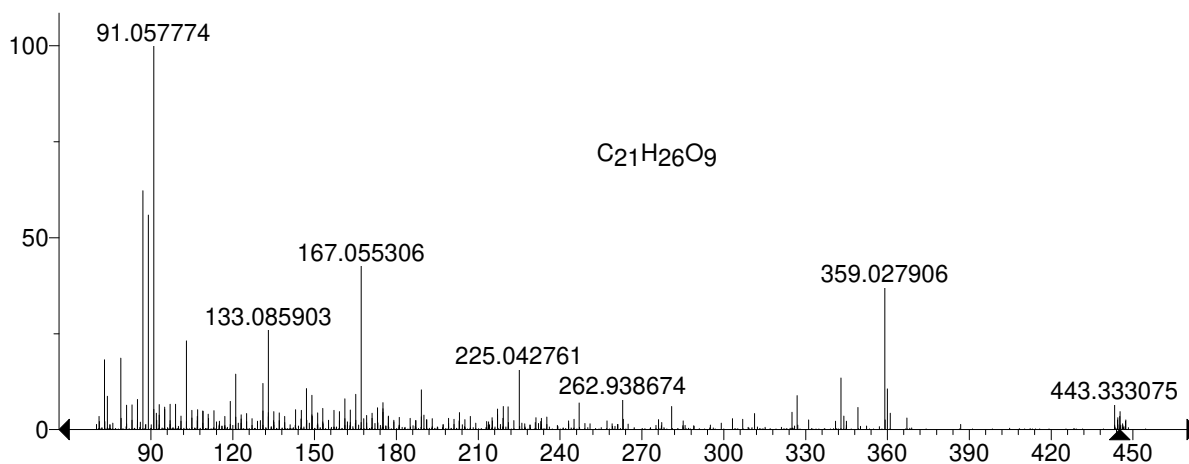

Unknown: Unknown (3.45\_300.1440m/z)  
Compound in Library Factor = -1523

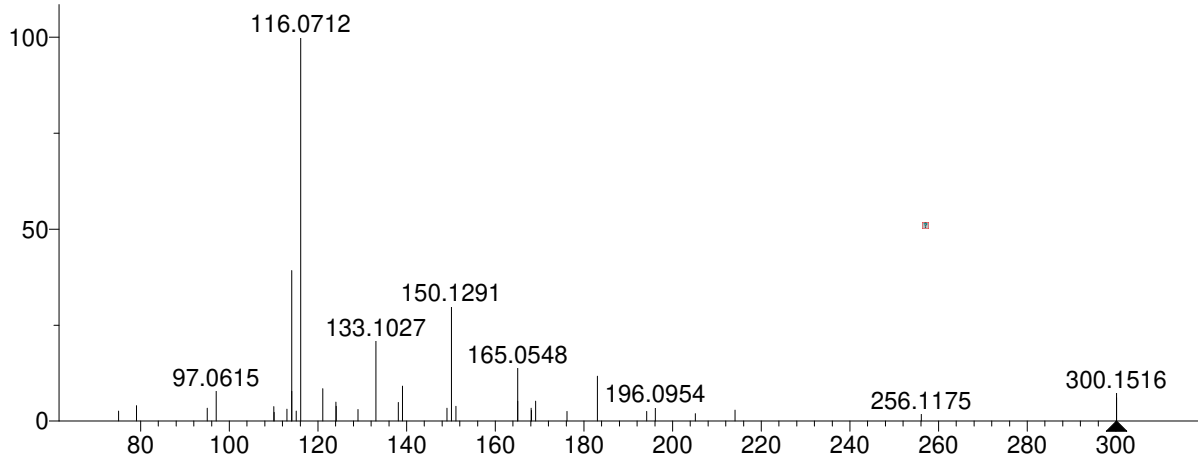

Hit 1 : Hematoporphyrin [M+2H]<sup>2+</sup> HCD 8V P=300.1  
C<sub>34</sub>H<sub>38</sub>N<sub>4</sub>O<sub>6</sub>; MF: 42; RMF: 622; Prob 81.4%; CAS: 14459-29-1; Lib: nist\_msms; ID: 288998.

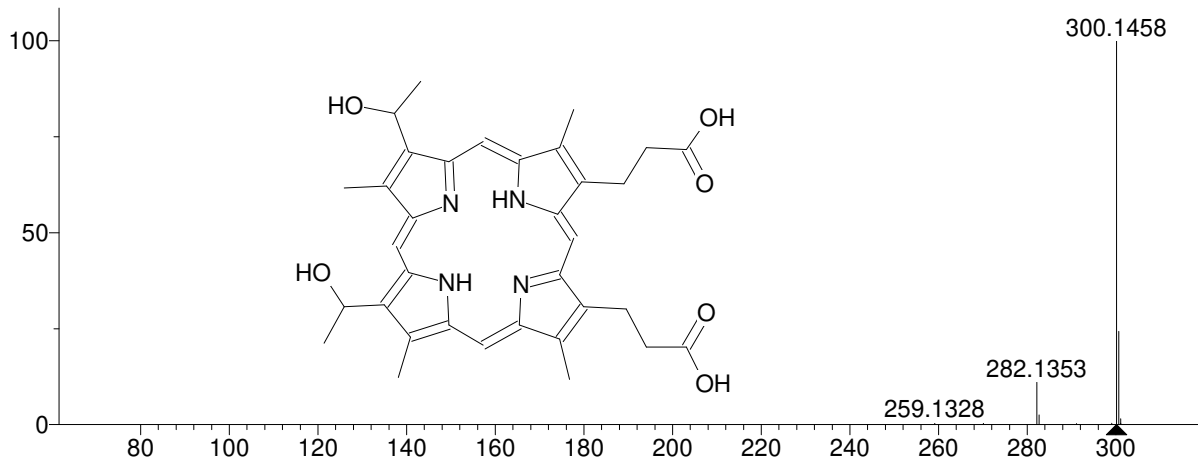

Hit 2 : methyl 3-(3,4-dihydroxy-5-phenyloxolan-2-yl)-3-hydroxypropanoate [M+NH<sub>4</sub>]<sup>+</sup> 65HCD P=300.1  
C<sub>14</sub>H<sub>18</sub>O<sub>6</sub>; MF: 1; RMF: 66; Prob 18.6%; Lib: mona-export-vf-npl\_qexactive; ID: 24723.

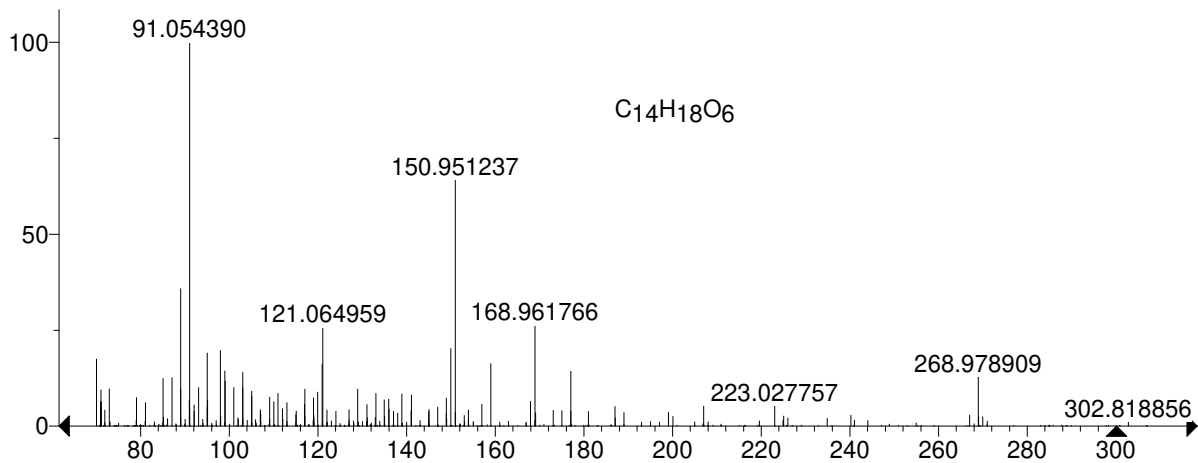

Unknown: Unknown (3.45\_308.1107m/z)  
Compound in Library Factor = 0

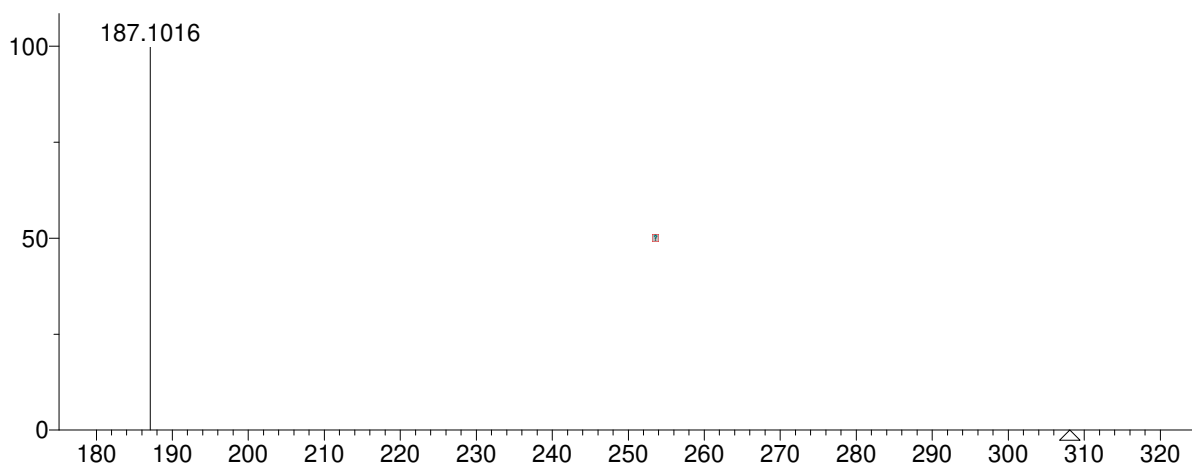

Hit 1 : altenusin [M+NH4]<sup>+</sup> 35HCD P=308.1  
C<sub>15</sub>H<sub>14</sub>O<sub>6</sub>; MF: 0; RMF: 30; Prob 100.0%; Lib: mona-export-vf-npl\_qexactive; ID: 24511.

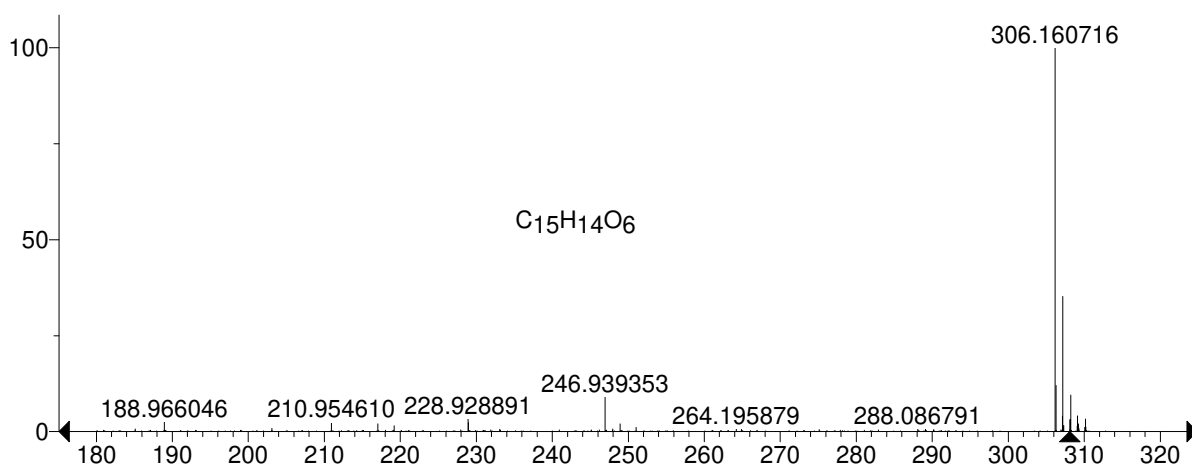

Unknown: Unknown (3.45\_450.2091m/z)  
Compound in Library Factor = 0

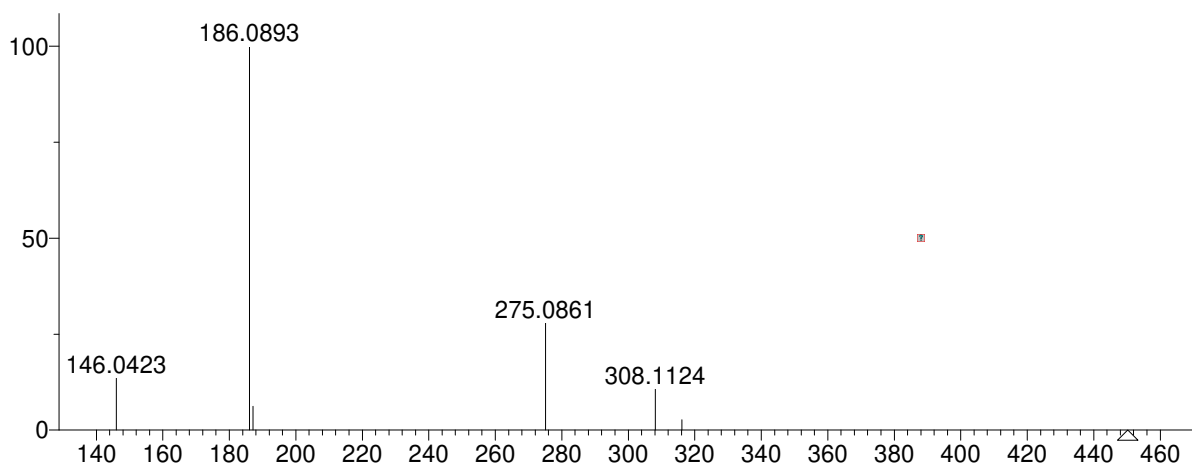

Hit 1 : NCGC00385574-01![5-acetyloxy-1,7-bis(3,4-dihydroxyphenyl)heptan-3-yl] acetate [M+NH4]<sup>+</sup> P=450.2  
C<sub>23</sub>H<sub>28</sub>O<sub>8</sub>; MF: 0; RMF: 38; Prob 100.0%; Lib: mona-export-gnps; ID: 9703.

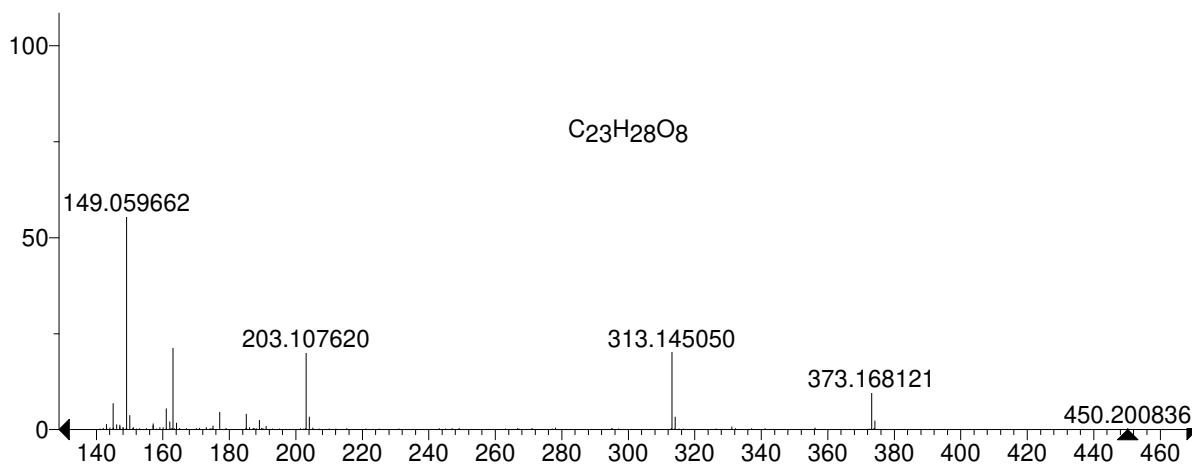

Unknown: Unknown (3.47\_434.1644m/z)  
Compound in Library Factor = 0

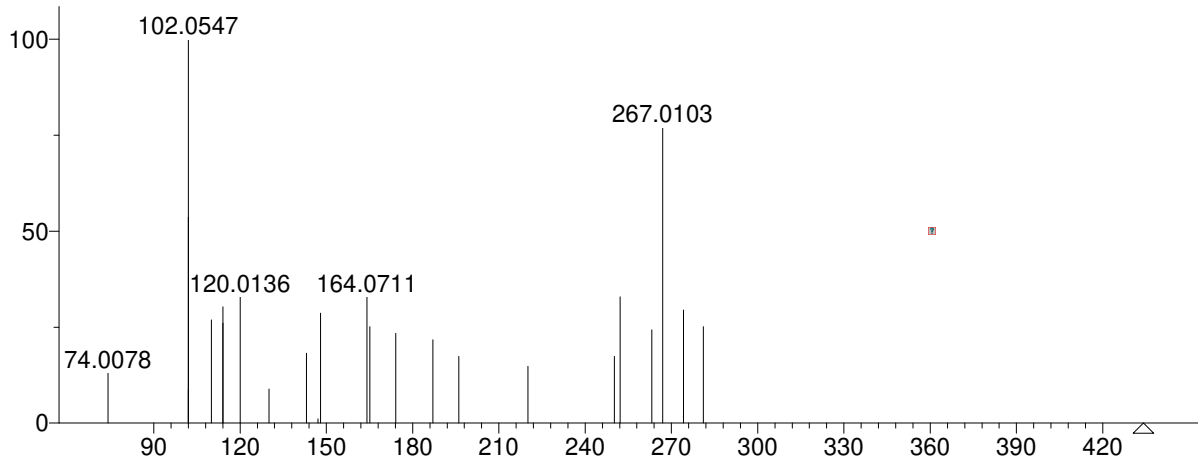

Unknown: Unknown (3.47\_450.2062m/z)  
Compound in Library Factor = 0

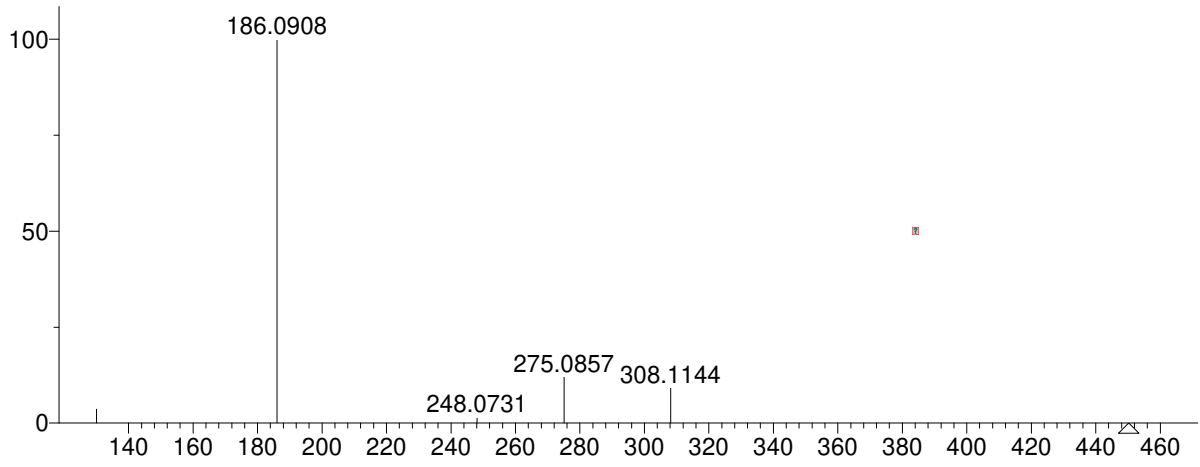



Unknown: Unknown (3.48\_279.1333m/z)  
Compound in Library Factor = -3273

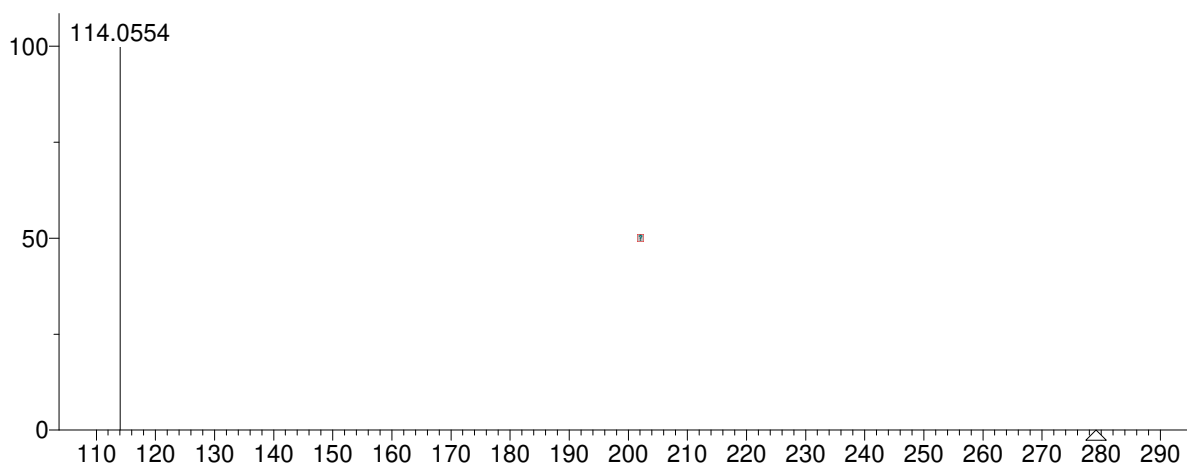

Hit 1 : Tyr-Pro [M+H]<sup>+</sup> HCD 22eV P=279.1  
C<sub>14</sub>H<sub>18</sub>N<sub>2</sub>O<sub>4</sub>; MF: 3; RMF: 154; Prob 50.0%; Lib: nist\_msms; ID: 561803.

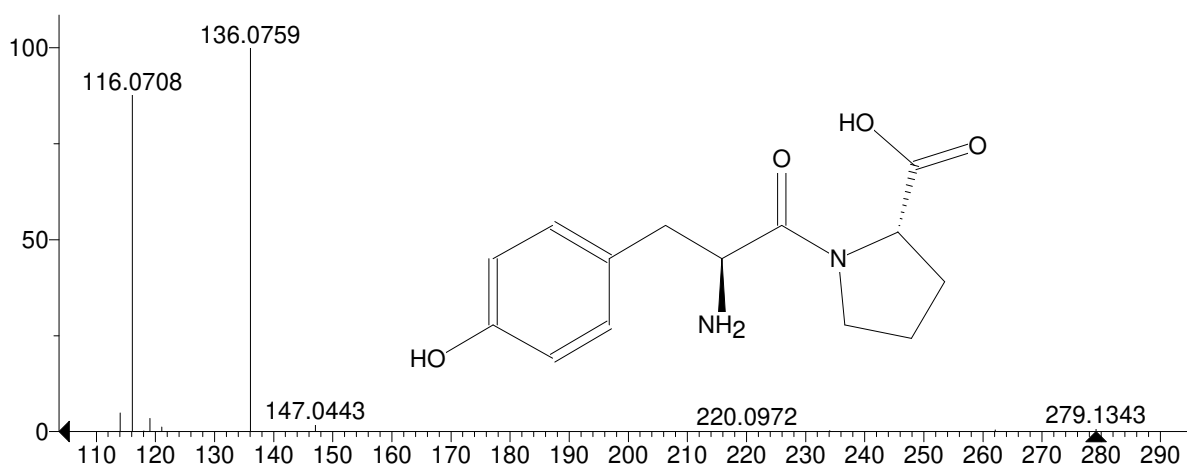

Hit 2 : Tyr-Pro [M+H]<sup>+</sup> HCD 22eV P=279.1  
C<sub>14</sub>H<sub>18</sub>N<sub>2</sub>O<sub>4</sub>; MF: 3; RMF: 154; Prob 50.0%; CAS: 51871-47-7; Lib: nist\_msms2; ID: 41603.

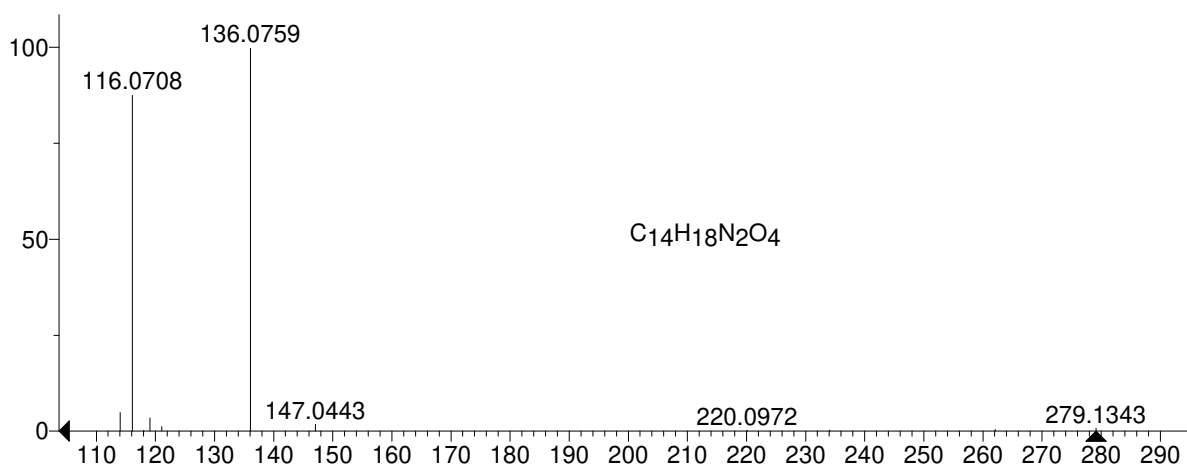

Unknown: Unknown (3.48\_375.1382m/z)  
Compound in Library Factor = 0

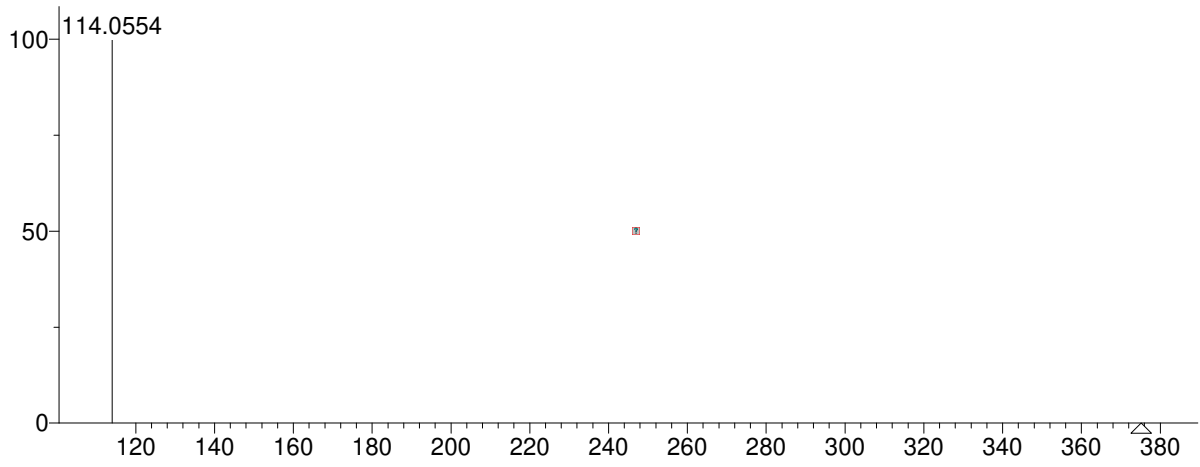

Unknown: Unknown (3.48\_488.1762m/z)  
Compound in Library Factor = -3273

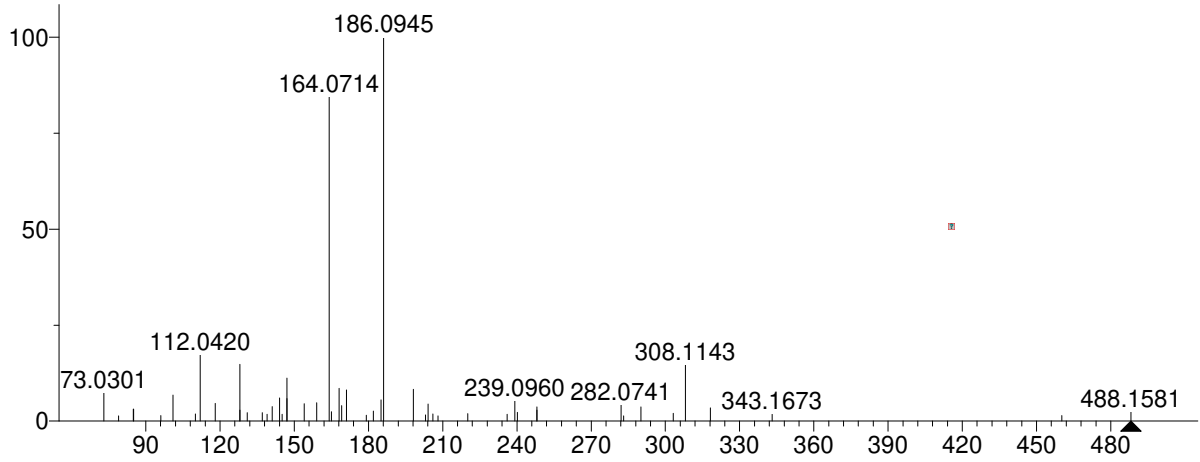

Hit 1 : plumieride [M+NH4]<sup>+</sup> 65HCD P=488.2  
C<sub>21</sub>H<sub>26</sub>O<sub>12</sub>; MF: 2; RMF: 88; Prob 52.0%; Lib: anthocyanins mona; ID: 8440.

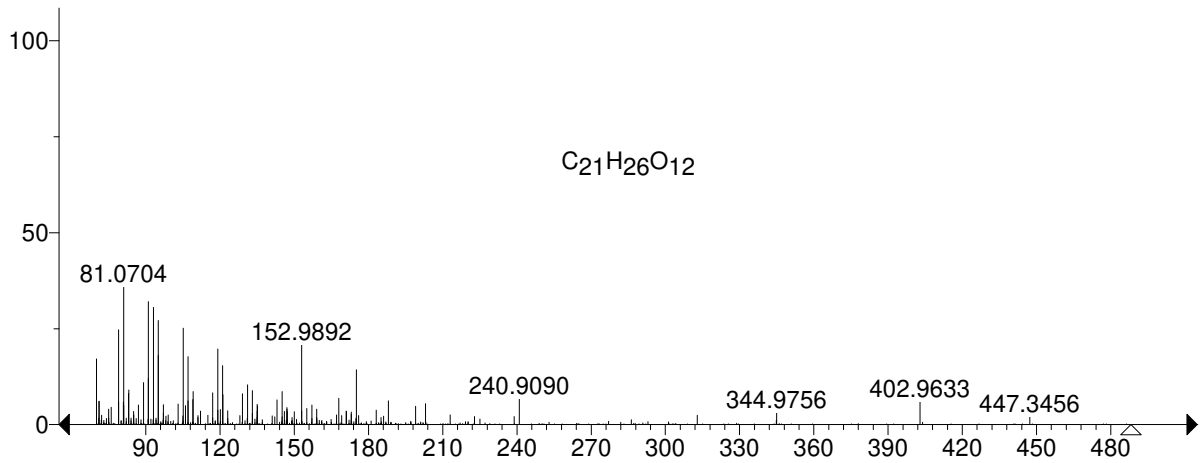

Hit 2 : NCGC00380091-01! [2,6-dihydroxy-5-[3,4,5-trihydroxy-6-(hydroxymethyl)oxan-2-yl]oxycyclohex-3-en-1-yl] (C<sub>21</sub>H<sub>26</sub>O<sub>12</sub>; MF: 0; RMF: 19; Prob 48.0%; Lib: mona-export-gnps; ID: 8124.

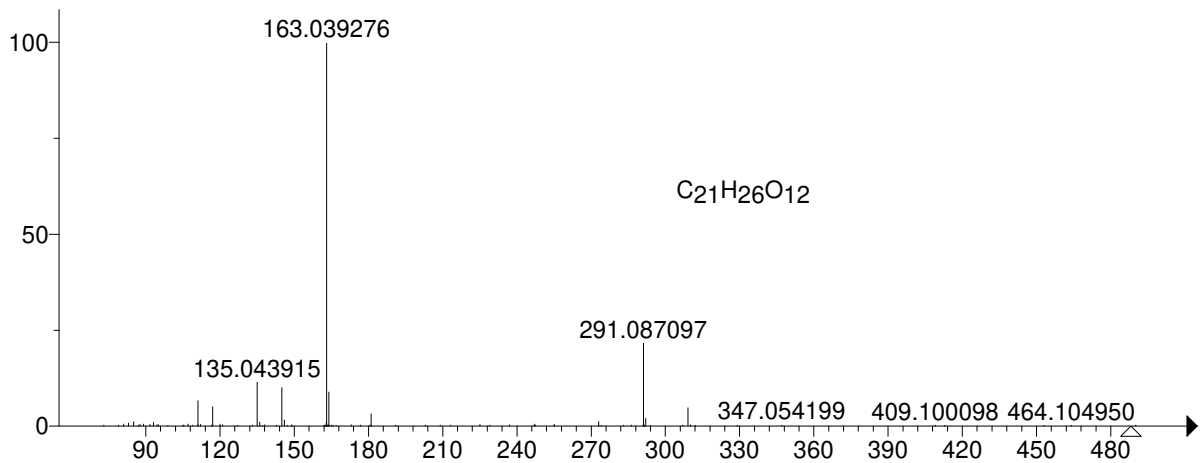

Unknown: Unknown (3.49\_571.1260m/z)  
Compound in Library Factor = 0

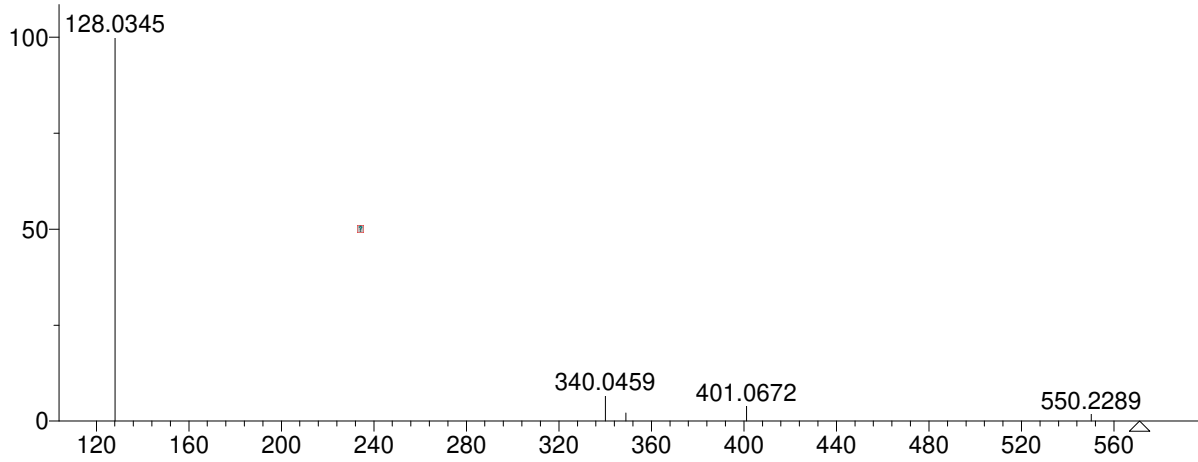

Hit 1 : NCGC00380623-01! [M-H]<sup>-</sup> P=571.1  
C<sub>31</sub>H<sub>24</sub>O<sub>11</sub>; MF: 0; RMF: 79; Prob 50.0%; Lib: mona-export-gnps; ID: 6637.

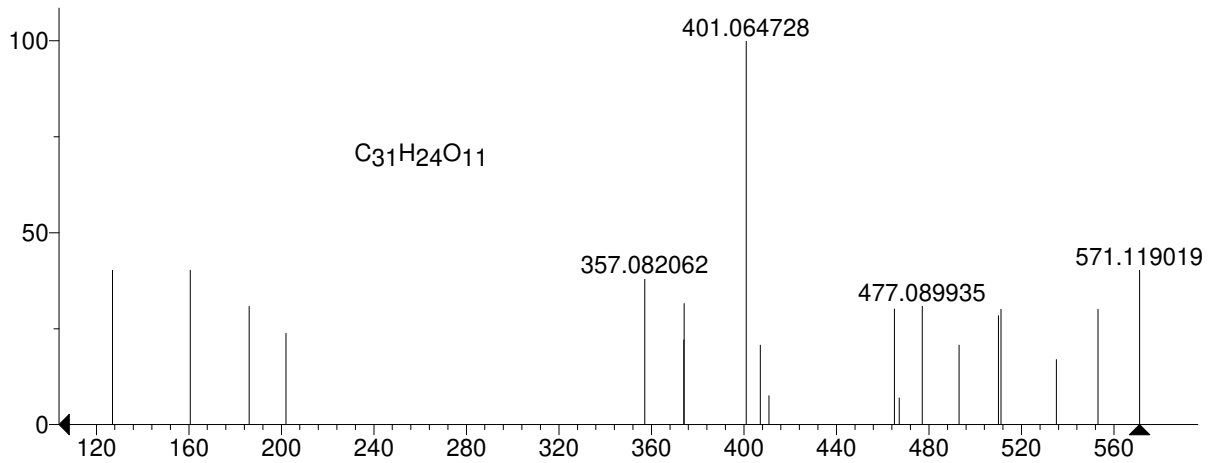

Hit 2 : methyl 8,11,15,20,22-pentahydroxy-24-methyl-13,18,27-trioxo-6-oxaheptacyclo[15.10.2.0A<sup>1</sup>,A<sup>1</sup>a<sup>1</sup>a<sup>1</sup>.0A<sup>1</sup>  
C<sub>31</sub>H<sub>24</sub>O<sub>11</sub>; MF: 0; RMF: 32; Prob 50.0%; Lib: mona-export-ic-ms-ms\_negative\_mode; ID: 23336.

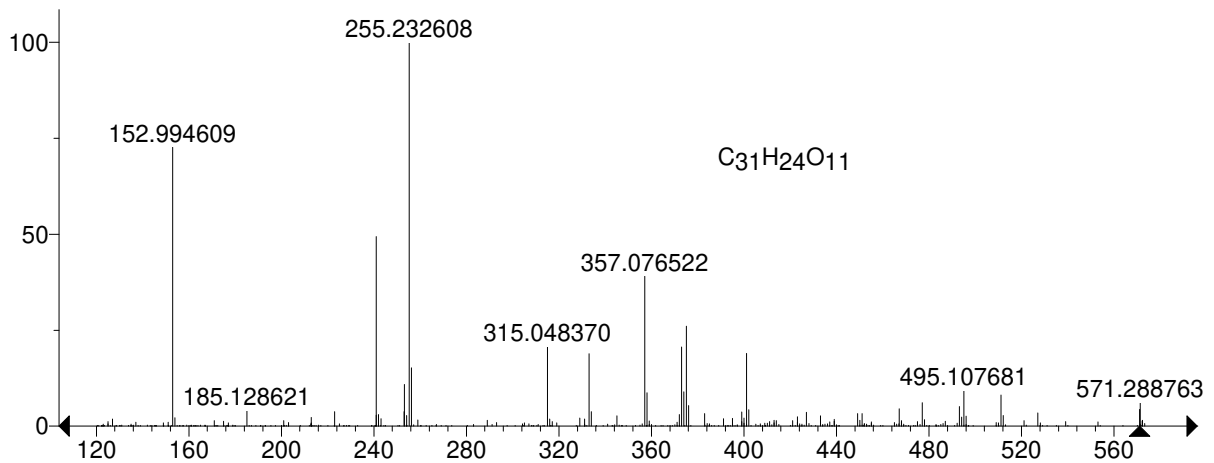

Unknown: Unknown (3.49\_626.1751m/z)  
Compound in Library Factor = 0

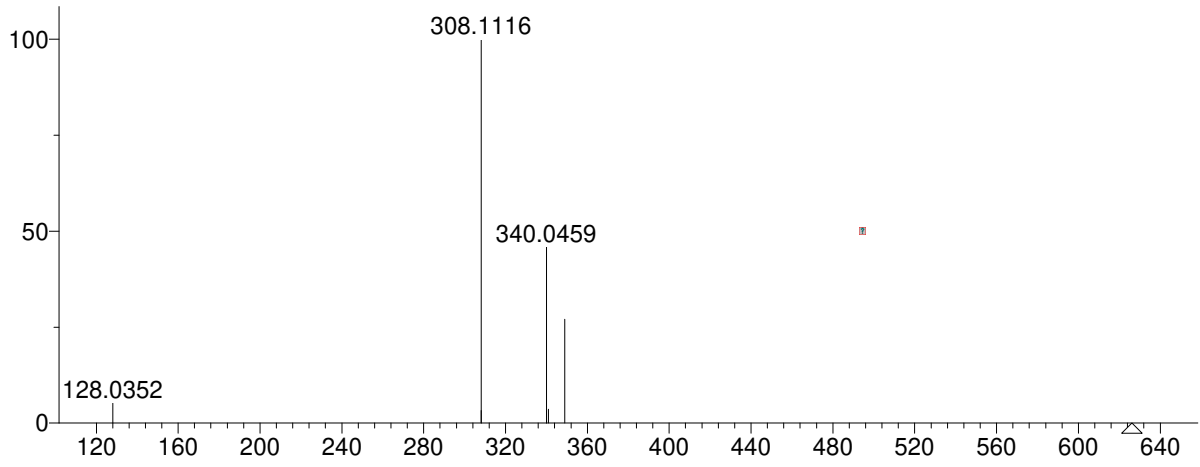

Unknown: Unknown (3.49\_650.2290m/z)  
Compound in Library Factor = 0

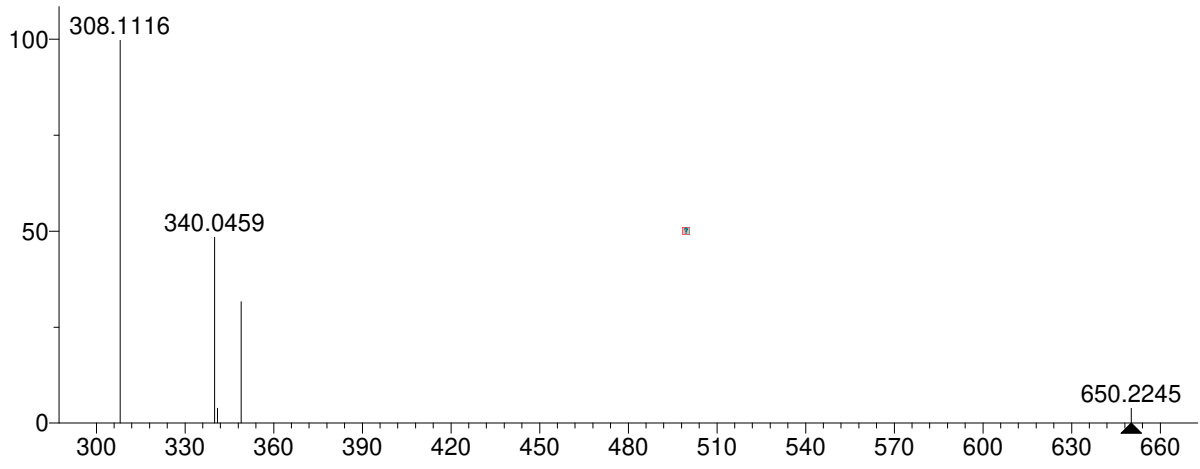

Unknown: Unknown (3.50\_333.0811m/z)  
Compound in Library Factor = 0

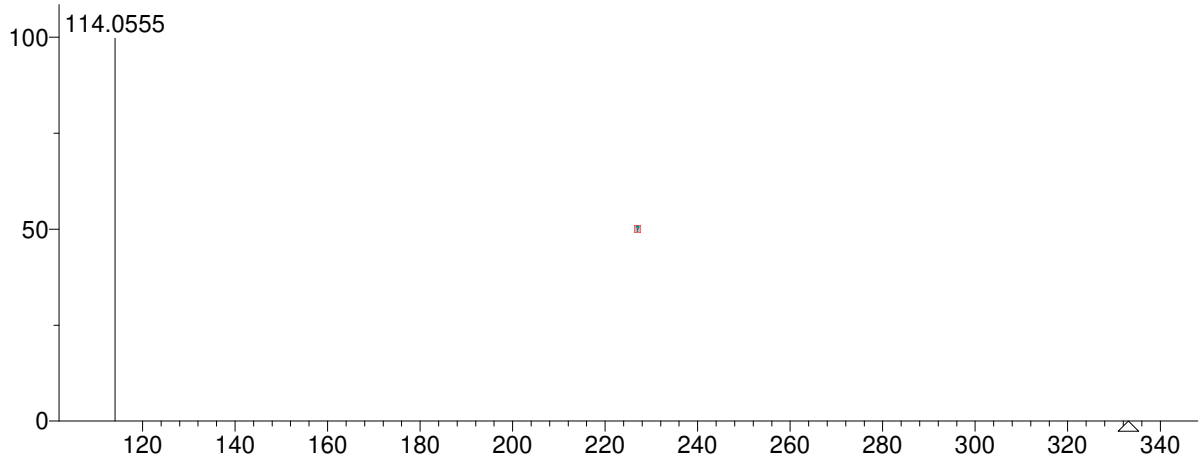

Unknown: Unknown (3.50\_550.2247m/z)  
Compound in Library Factor = -3273

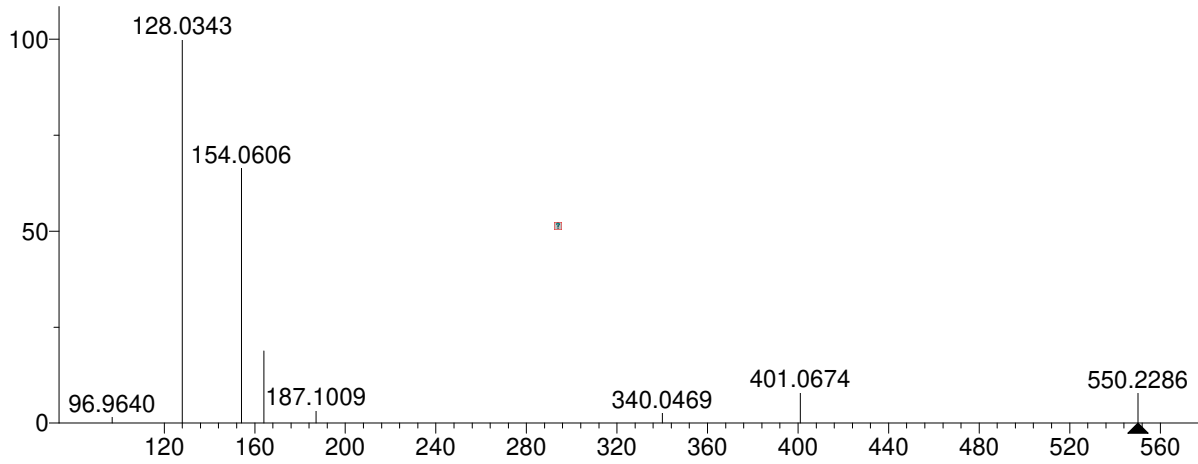

Hit 1 : 1,2-Dioleoyl-sn-glycero-3-phospho-(1'-myo-inositol-3',4',5'-trisphosphate) [M-2H]<sup>2-</sup> HCD 12V P=550.2  
C<sub>45</sub>H<sub>86</sub>O<sub>22</sub>P<sub>4</sub>; MF: 4; RMF: 152; Prob 51.0%; CAS: 207603-22-3; Lib: nist\_msms; ID: 102908.

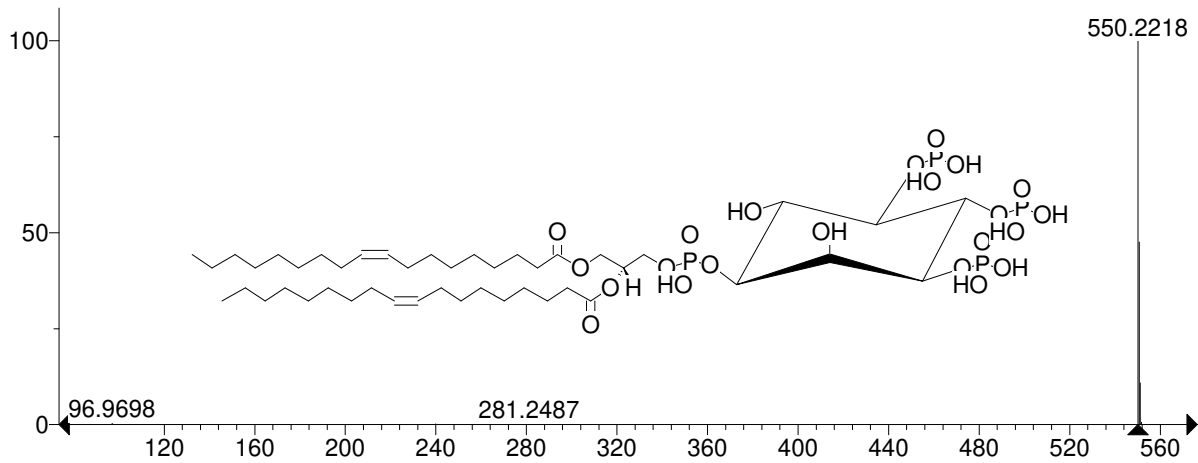

Hit 2 : Hygromycin B [M+Na]<sup>+</sup> HCD 44V P=550.2  
C<sub>20</sub>H<sub>37</sub>N<sub>3</sub>O<sub>13</sub>; MF: 3; RMF: 226; Prob 49.0%; CAS: 31282-04-9; Lib: nist\_msms; ID: 373748.

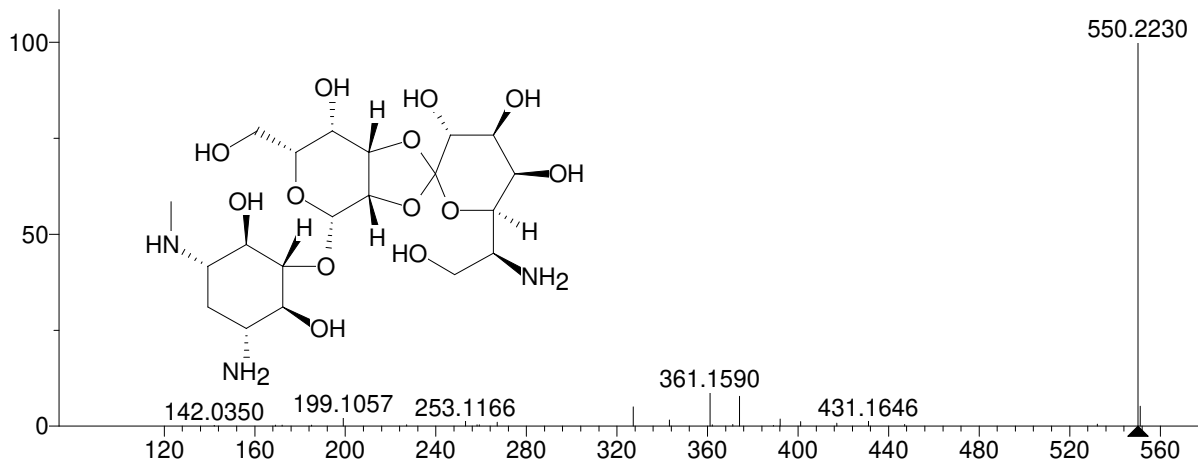



Unknown: Unknown (3.51\_427.0490m/z)  
Compound in Library Factor = 0

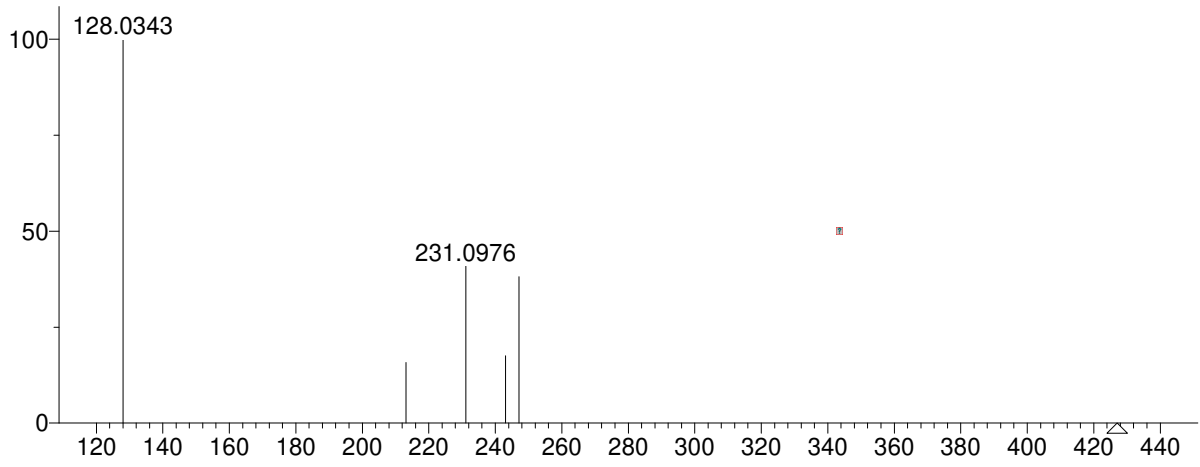

\*\* Search Report Page 1 of 2 \*\*

Unknown: Unknown (3.52\_463.1011m/z)  
Compound in Library Factor = -3273

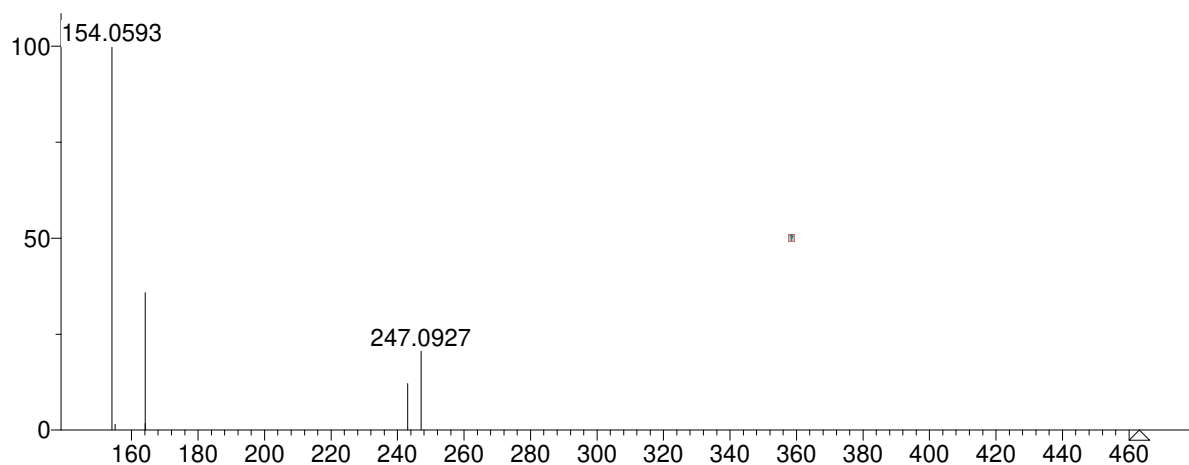

Hit 1 : 2,3-Dehydrosilybin A [M+H-H<sub>2</sub>O]<sup>+</sup> HCD 148V P=463.1  
C<sub>25</sub>H<sub>20</sub>O<sub>10</sub>; MF: 1; RMF: 126; Prob 6.91%; CAS: 25166-14-7; Lib: nist\_msms; ID: 386721.

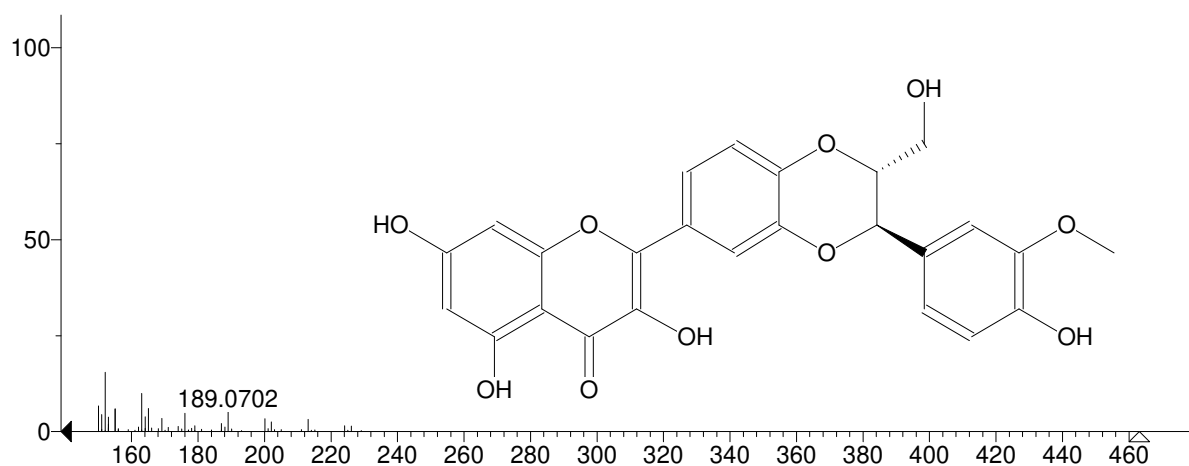

Hit 2 : Rutarin [M+K]<sup>+</sup> 65HCD P=463.1  
C<sub>20</sub>H<sub>24</sub>O<sub>10</sub>; MF: 0; RMF: 27; Prob 6.64%; Lib: anthocyanins mona; ID: 6621.

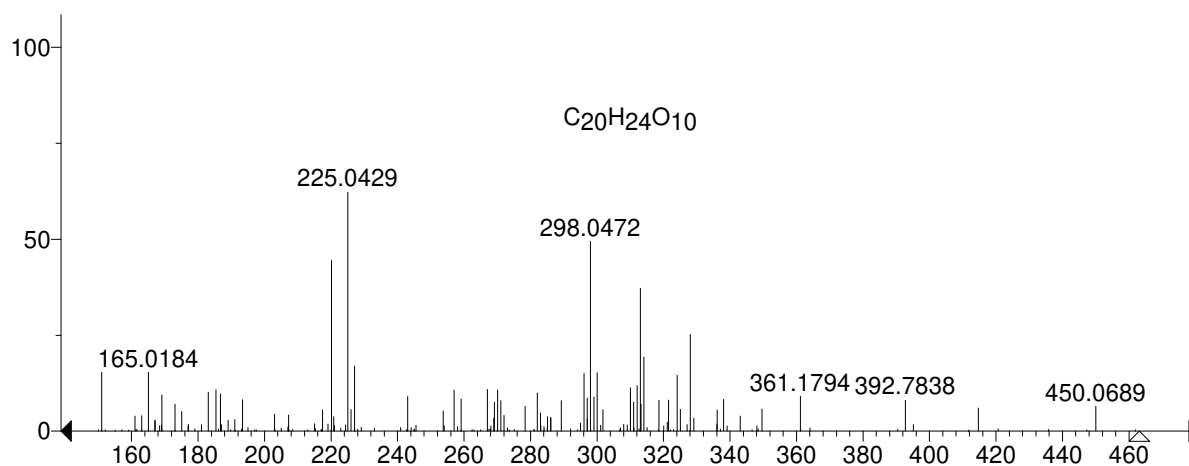

Hit 3 : Delphinidin-3,5-diglucoside cation [Cat-2H]-=>463.1 IT 35% P=463.1  
C27H31O17; MF: 0; RMF: 18; Prob 6.64%; CAS: 47851-70-7; Lib: nist\_msms; ID: 501126.

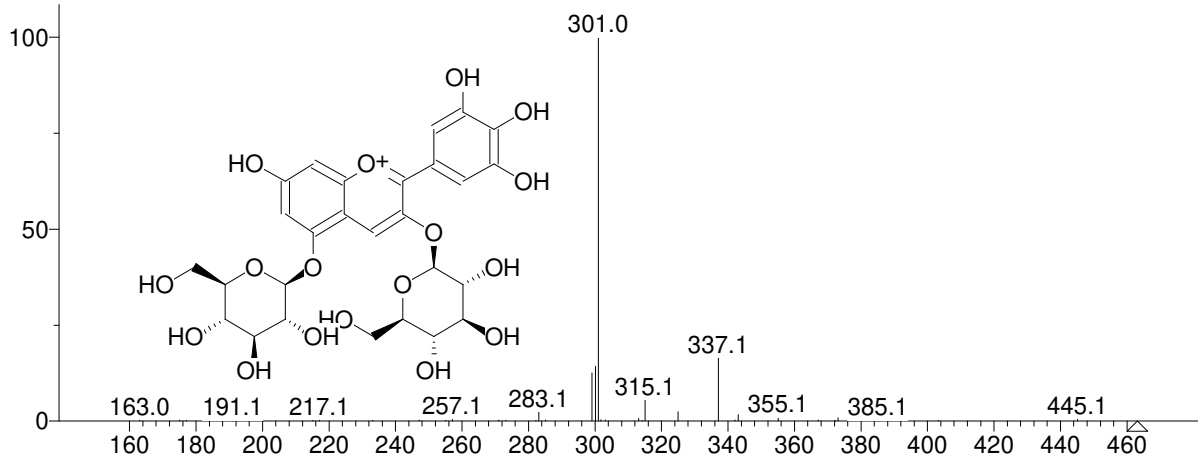

Hit 4 : Silydianin [M-H-H2O]- IT-FT 35% P=463.1  
C25H22O10; MF: 0; RMF: 13; Prob 6.64%; CAS: 29782-68-1; Lib: nist\_msms; ID: 233871.

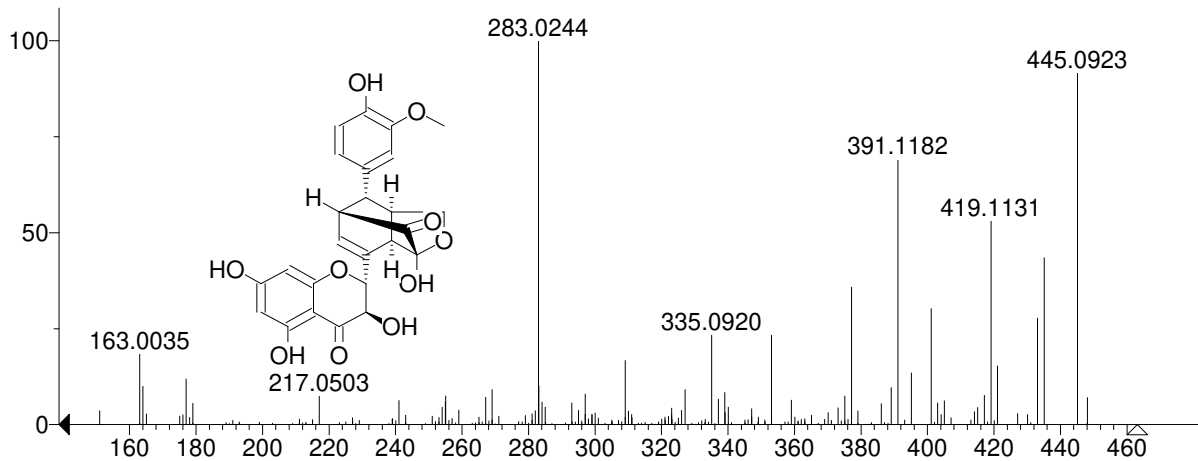

Hit 5 : 2-(2-hydroxypropan-2-yl)-3-[(2R,3R,4S,5S,6R)-3,4,5-trihydroxy-6-(hydroxymethyl)oxan-2-yl]oxy-2,3-dihydroc  
C20H24O10; MF: 0; RMF: 11; Prob 6.64%; Lib: mona-export-vf-npl\_qexactive; ID: 1788.

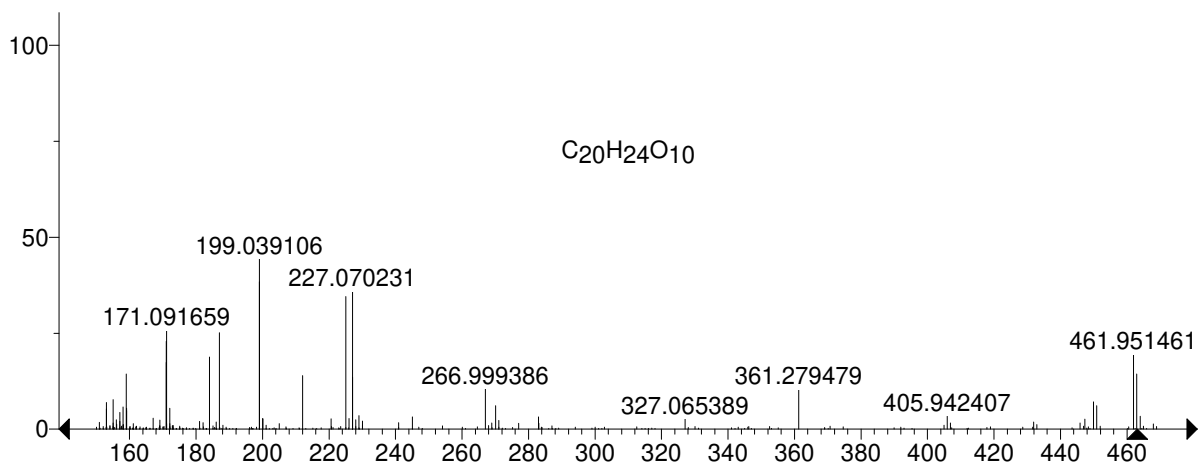

\*\* Search Report Page 1 of 1 \*\*

Unknown: Unknown (3.53\_417.1497m/z)  
Compound in Library Factor = 0

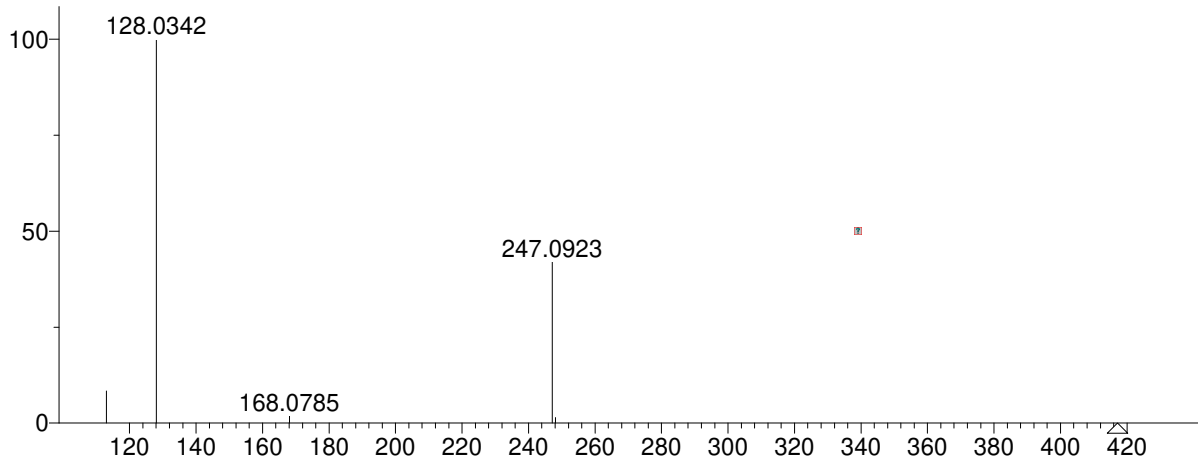

Hit 1 : Halopemide [M+H]<sup>+</sup> HCD 133V P=417.1  
C<sub>21</sub>H<sub>22</sub>ClFN<sub>4</sub>O<sub>2</sub>; MF: 0; RMF: 58; Prob 100.0%; CAS: 59831-65-1; Lib: nist\_msms; ID: 321102.

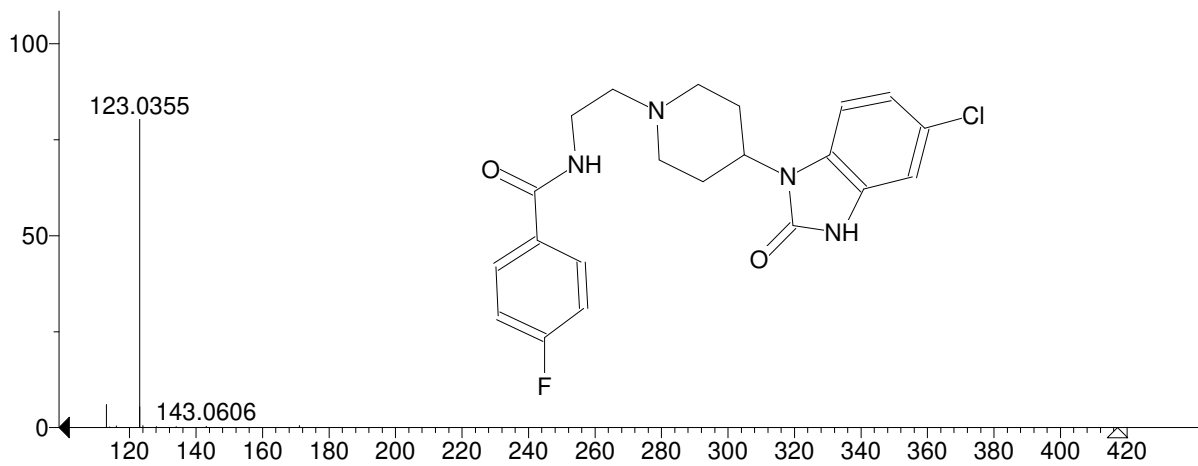

Unknown: Unknown (3.54\_222.0757m/z)  
Compound in Library Factor = 0

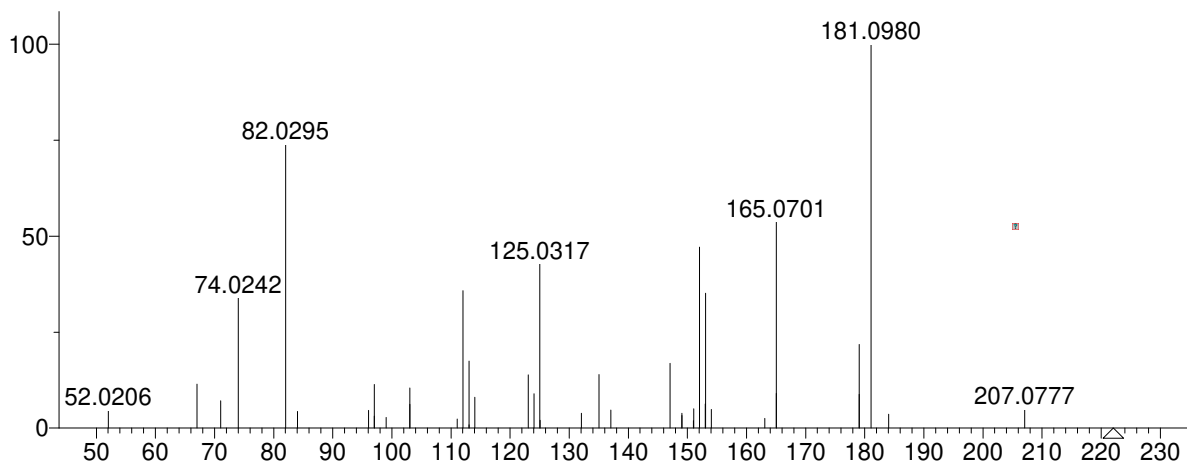

Hit 1 : N-Acetyl-L-tyrosine [M-H]<sup>-</sup> HCD 35V P=222.1  
C<sub>11</sub>H<sub>13</sub>NO<sub>4</sub>; MF: 0; RMF: 32; Prob 33.3%; CAS: 537-55-3; Lib: nist\_msms; ID: 280196.

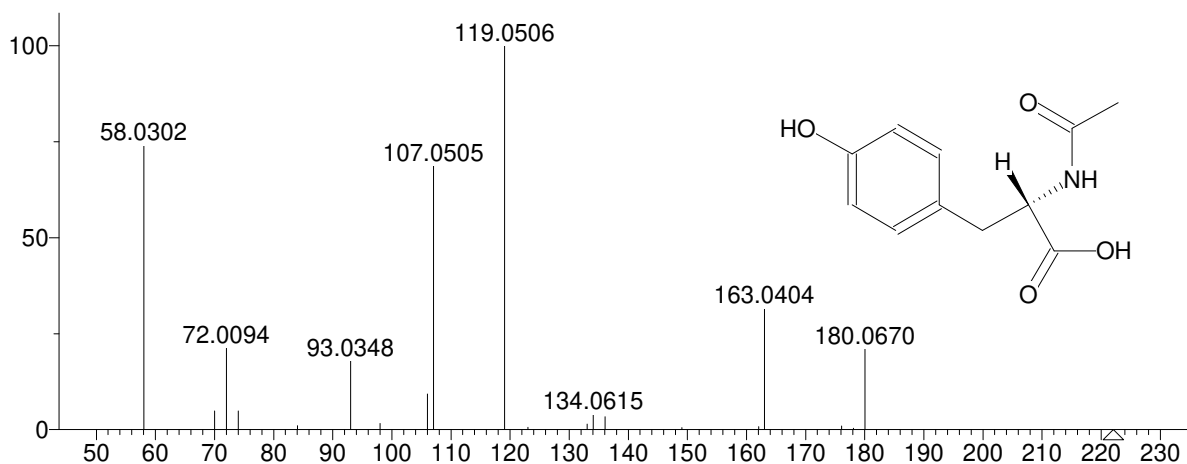

Hit 2 : NCGC00381349-01\_C<sub>11</sub>H<sub>13</sub>NO<sub>5</sub>\_1H-Pyrrole-3-propanoic acid, 5-acetyl-4-(carboxymethyl)- [M-H<sub>2</sub>O+H]<sup>+</sup>  
C<sub>11</sub>H<sub>13</sub>NO<sub>5</sub>; MF: 0; RMF: 26; Prob 33.3%; Lib: mona-export-gnps; ID: 11085.

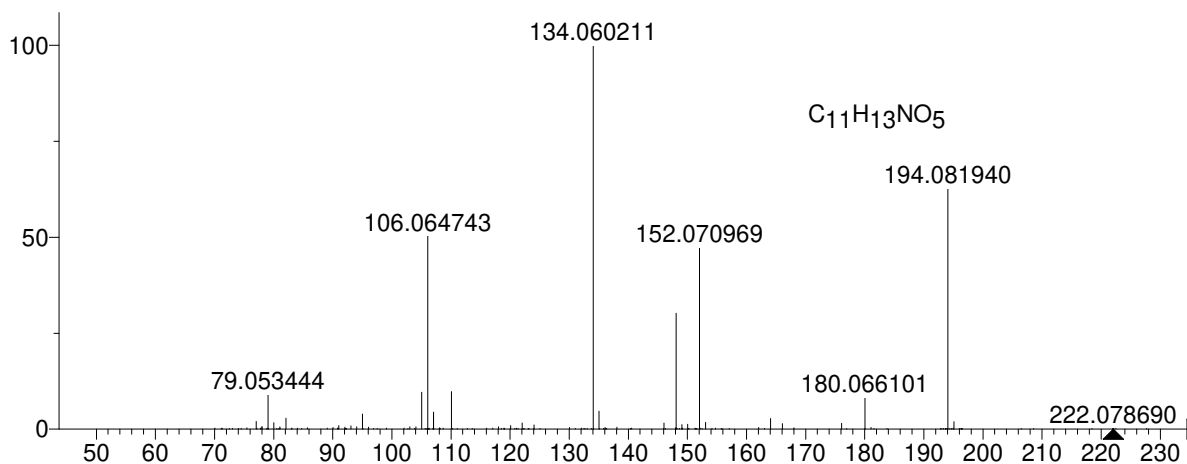

Hit 3 : N-Benzoylaminopurine [M+H-H<sub>2</sub>O]<sup>+</sup> HCD 15V P=222.1  
C<sub>12</sub>H<sub>9</sub>N<sub>5</sub>O; MF: 0; RMF: 23; Prob 33.3%; CAS: 4005-49-6; Lib: nist\_msms; ID: 144559.

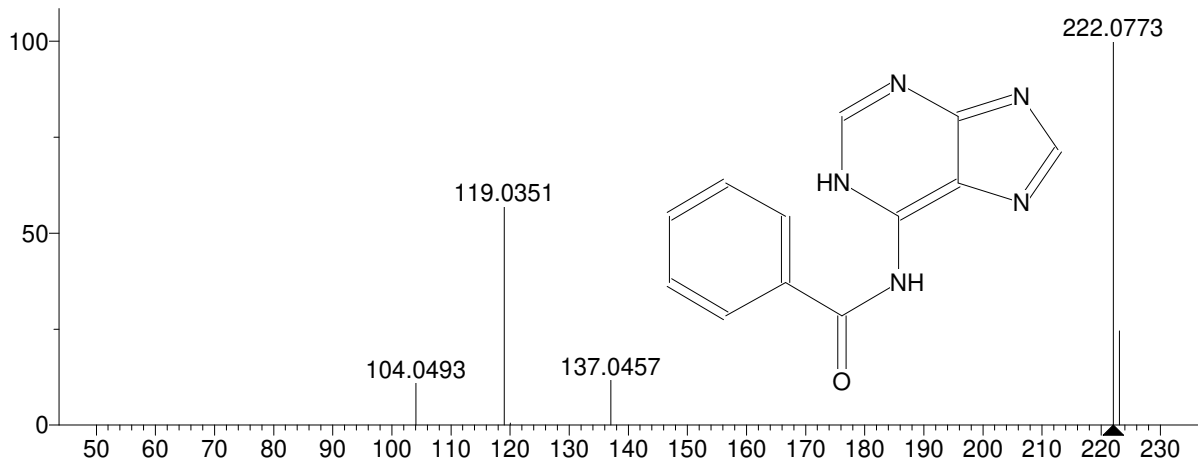

Unknown: Unknown (3.54\_232.9748m/z)  
Compound in Library Factor = 0

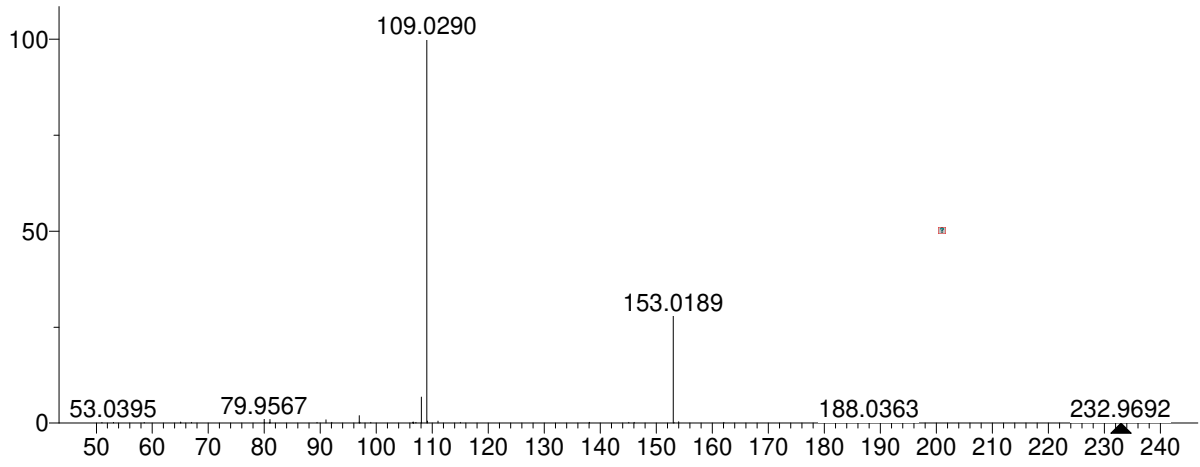

Unknown: Unknown (3.54\_346.1590m/z)  
Compound in Library Factor = 0

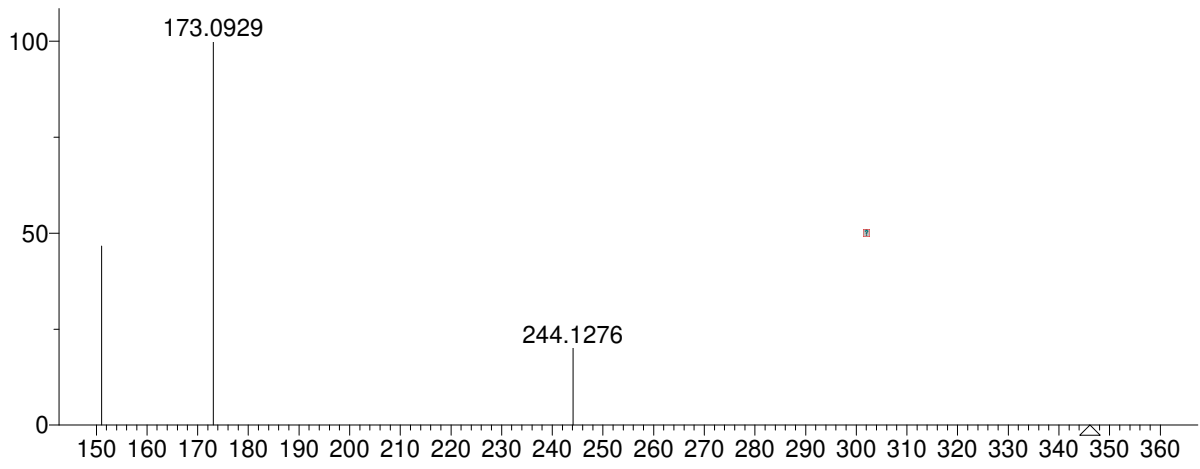



Unknown: Unknown (3.54\_478.2388m/z)  
Compound in Library Factor = 0

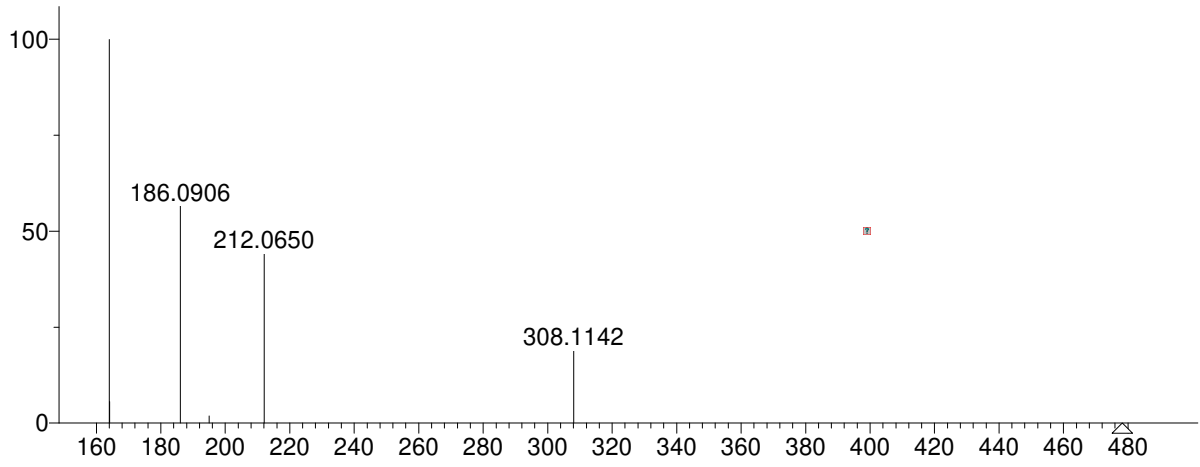

Unknown: Unknown (3.54\_502.1686m/z)  
Compound in Library Factor = 0

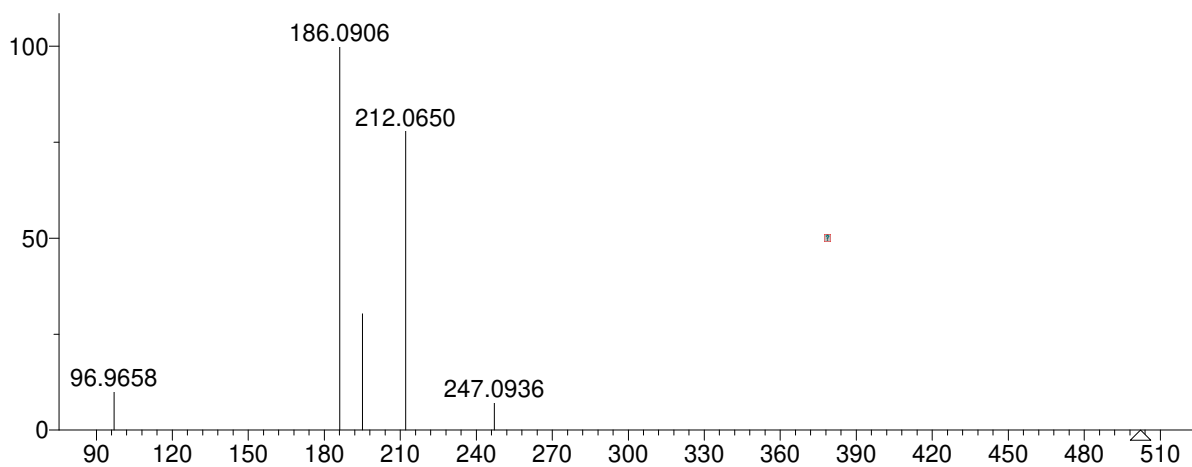

Hit 1 : NCGC00380440-01!2-[[E]-3-[2-(4-hydroxy-3-methoxyphenyl)-3-(hydroxymethyl)-7-methoxy-2,3-dihydro-1-C<sub>25</sub>H<sub>27</sub>NO<sub>10</sub>; MF: 0; RMF: 14; Prob 100.0%; Lib: mona-export-gnps; ID: 8737.

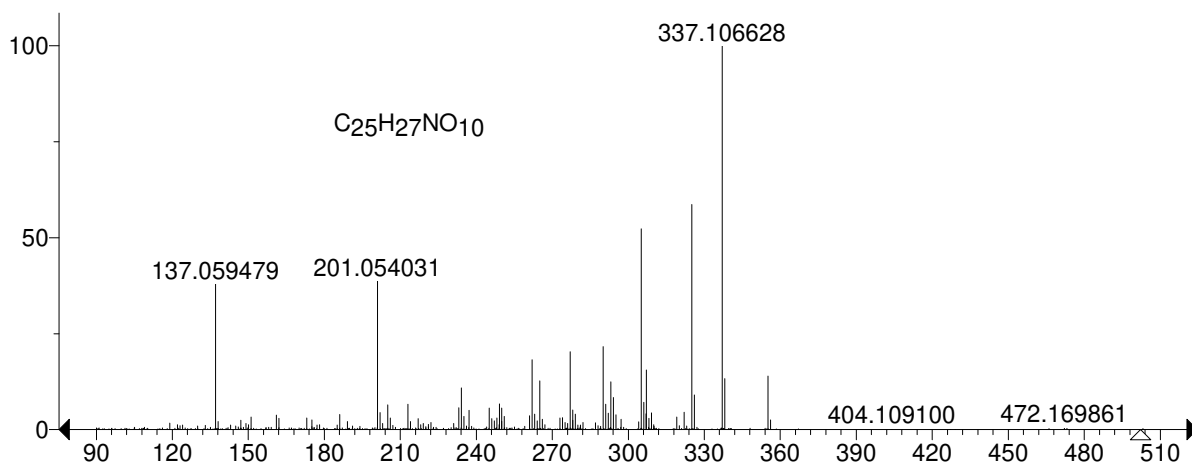

Unknown: Unknown (3.55\_647.2653m/z)  
Compound in Library Factor = 0

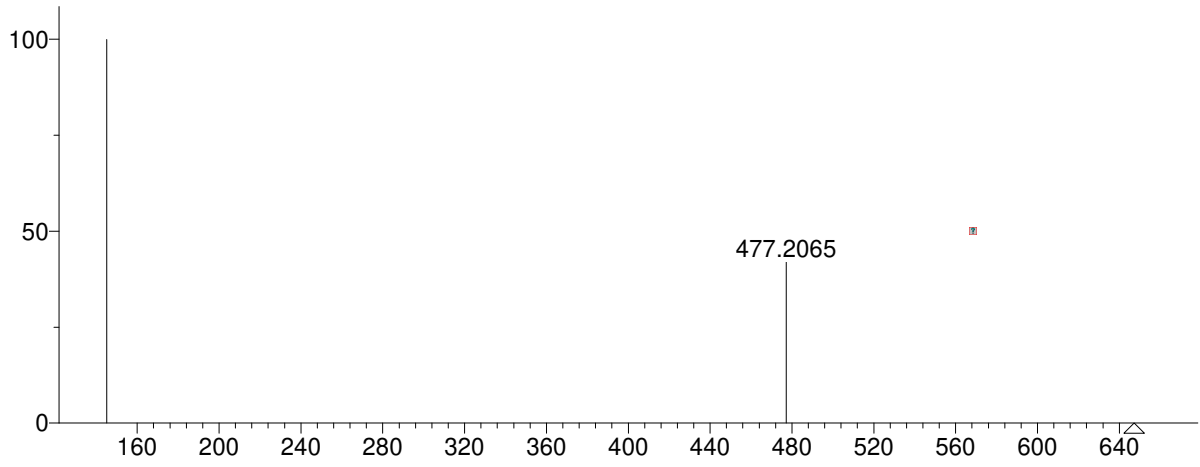

Unknown: Unknown (3.58\_508.1924m/z)  
Compound in Library Factor = 0

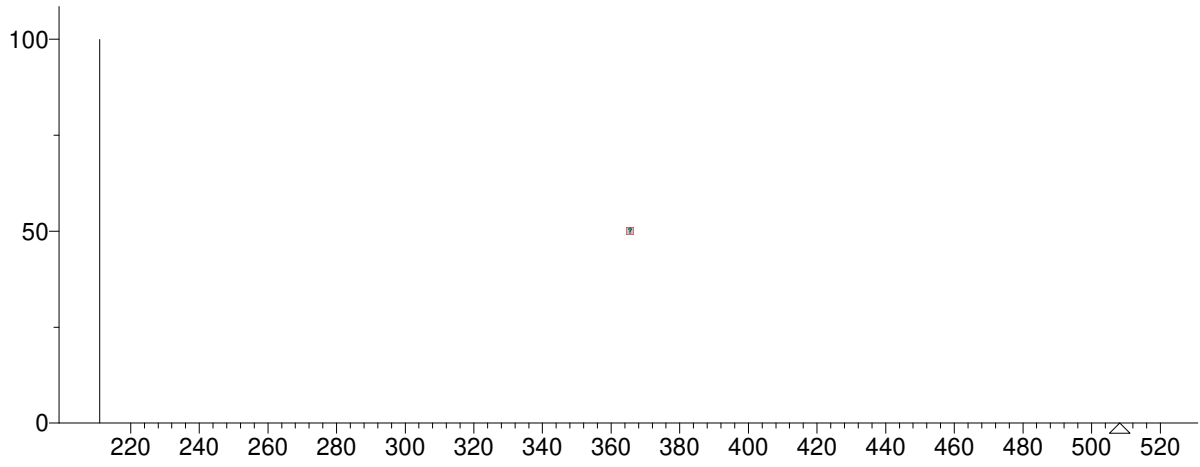

Unknown: Unknown (3.59\_401.1552m/z)  
Compound in Library Factor = -3273

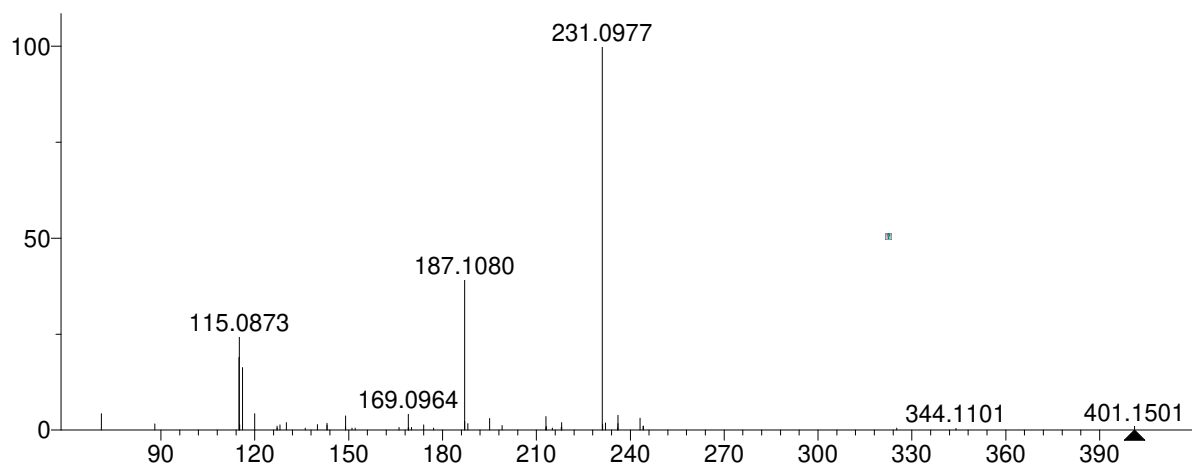

Hit 1 : NCGC00384788-01\_C20H26O7\_Butanoic acid, 2-methyl-, (10Z)-6-formyl-2,3,3a,4,5,8,9,11a-octahydro-5-l  
C20H26O7; MF: 6; RMF: 101; Prob 9.98%; Lib: mona-export-gnps; ID: 12632.

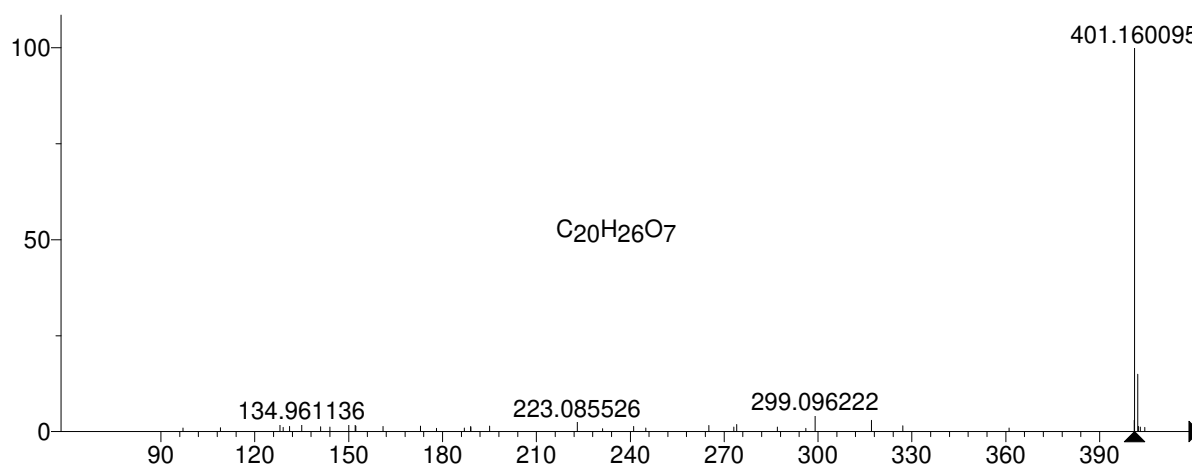

Hit 2 : rel-Dimethylenedioxy-dimethoxy-epoxylignan [M+H]<sup>+</sup> P=401.2  
C<sub>22</sub>H<sub>24</sub>O<sub>7</sub>; MF: 3; RMF: 343; Prob 8.82%; Lib: mona-export-gnps; ID: 2894.

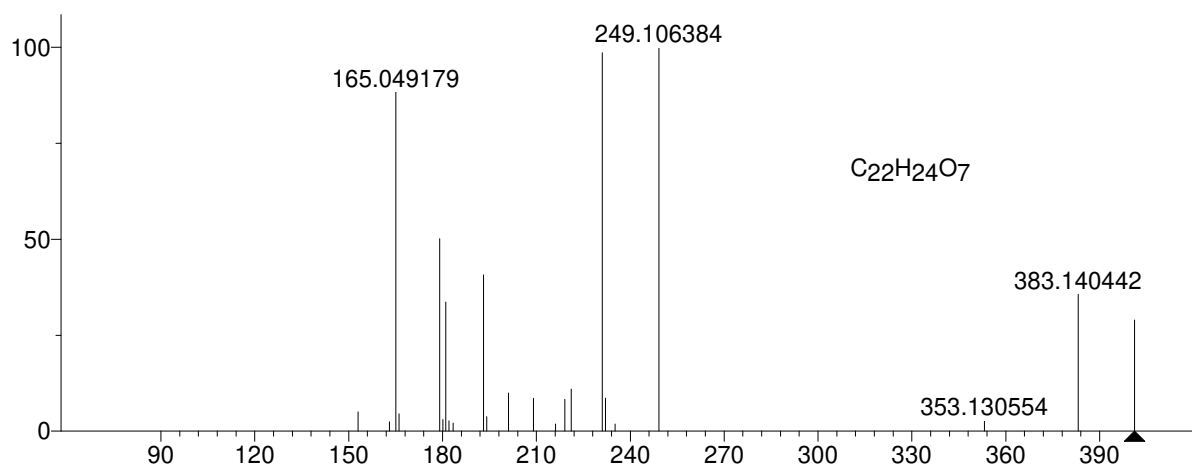

\*\* Search Report Page 2 of 2 \*\*

Hit 3 : 6-formyl-5-hydroxy-10-(hydroxymethyl)-3-methylidene-2-oxo-2H,3H,3aH,4H,5H,8H,9H,11aH-cyclodeca[b]furan  
C<sub>20</sub>H<sub>26</sub>O<sub>7</sub>; MF: 3; RMF: 95; Prob 8.82%; Lib: mona-export-vf-npl\_qexactive; ID: 22438.

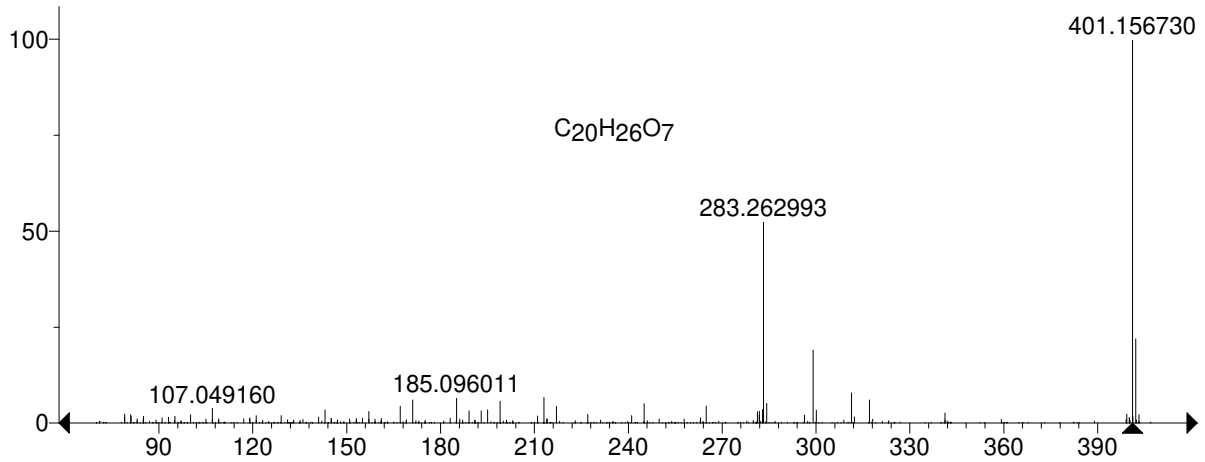

Hit 4 : Cnicin [M+Na]<sup>+</sup> HCD 20V P=401.2  
C<sub>20</sub>H<sub>26</sub>O<sub>7</sub>; MF: 3; RMF: 67; Prob 8.82%; CAS: 24394-09-0; Lib: nist\_msms; ID: 236002.

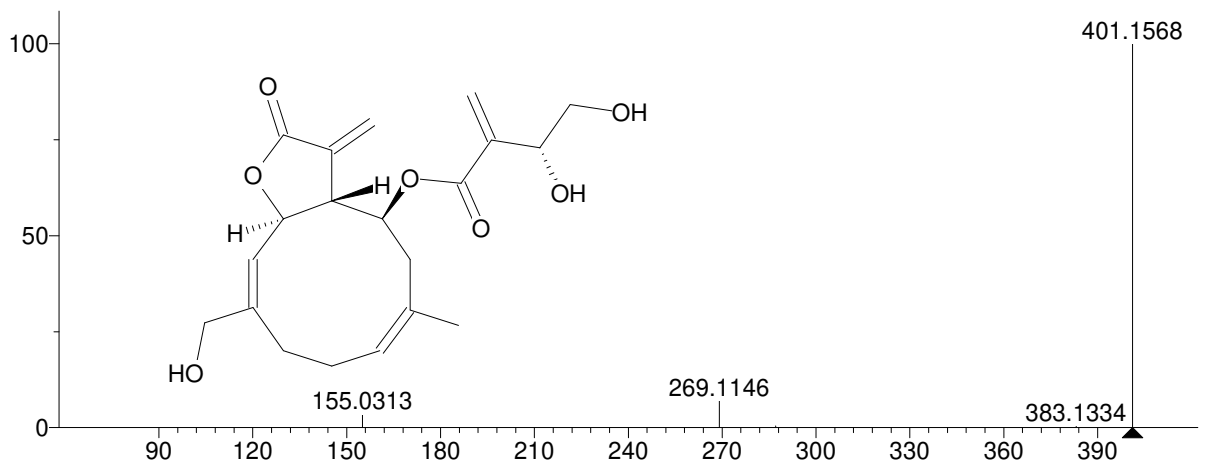

Hit 5 : NCGC00168917-0215-[(3S,3aR,6S,6aR)-6-(3,4,5-trimethoxyphenyl)-1,3,3a,4,6,6a-hexahydrofuro[3,4-c]furan]  
C<sub>22</sub>H<sub>24</sub>O<sub>7</sub>; MF: 1; RMF: 109; Prob 8.13%; Lib: mona-export-gnps; ID: 8887.

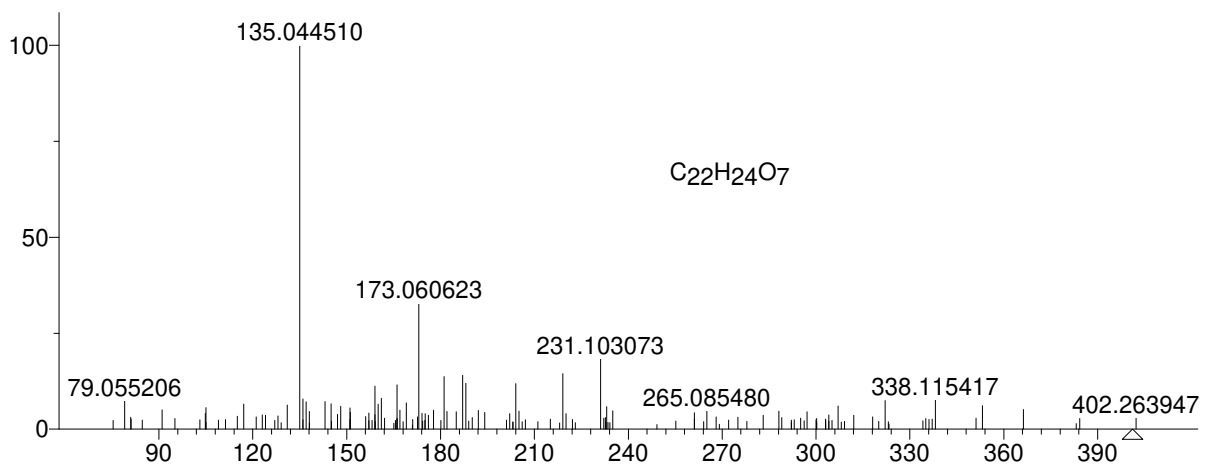

Unknown: Unknown (3.59\_416.0597m/z)  
Compound in Library Factor = 0

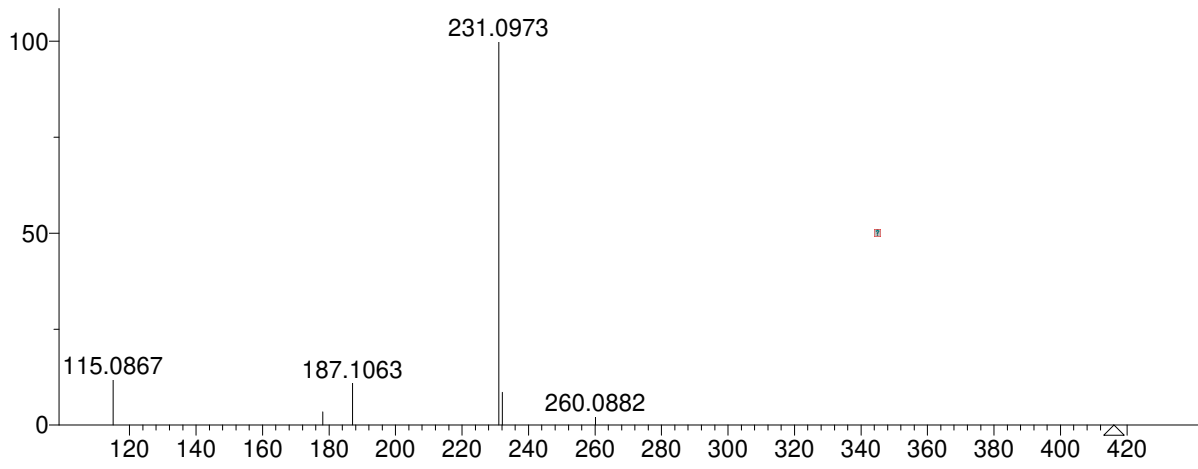

Unknown: Unknown (3.59\_430.1452m/z)  
Compound in Library Factor = 0

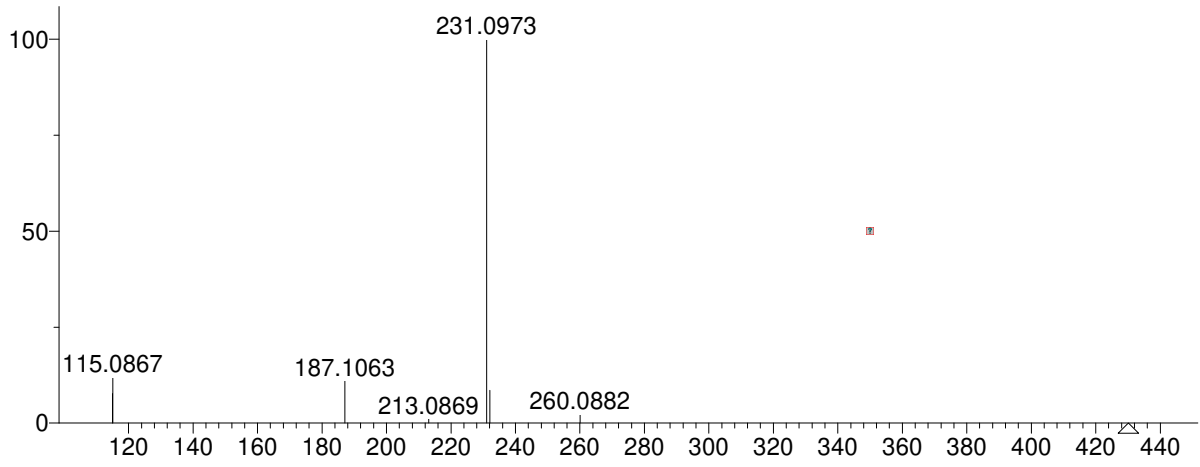



Unknown: Unknown (3.61\_365.1336m/z)  
Compound in Library Factor = 0

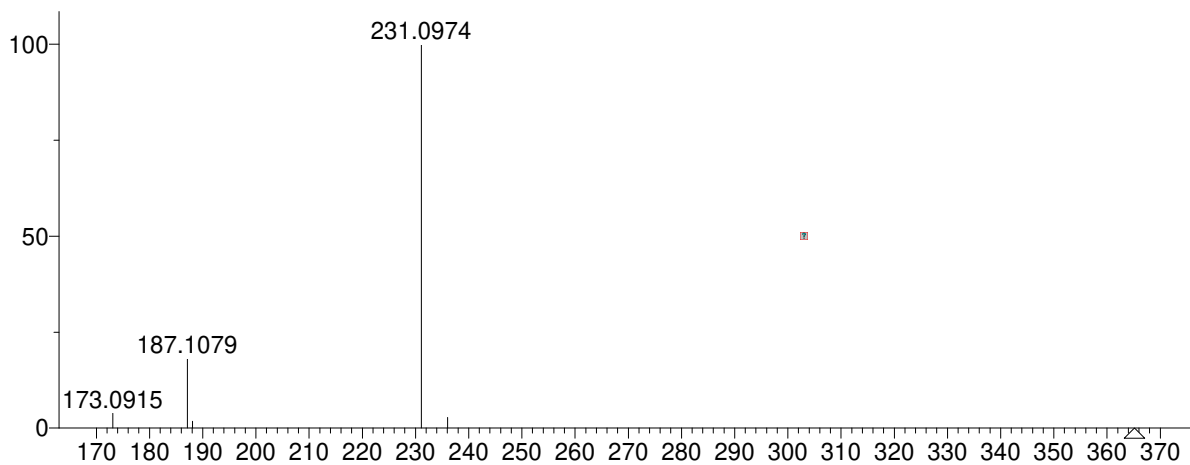

Hit 1 : [5-acetyloxy-3-(hydroxymethyl)-2-oxo-6-propan-2-ylcyclohex-3-en-1-yl] 3-methylbutanoate [M+K]<sup>+</sup> 35HCl  
C<sub>17</sub>H<sub>26</sub>O<sub>6</sub>; MF: 0; RMF: 15; Prob 100.0%; Lib: mona-export-vf-npl\_qexactive; ID: 8245.

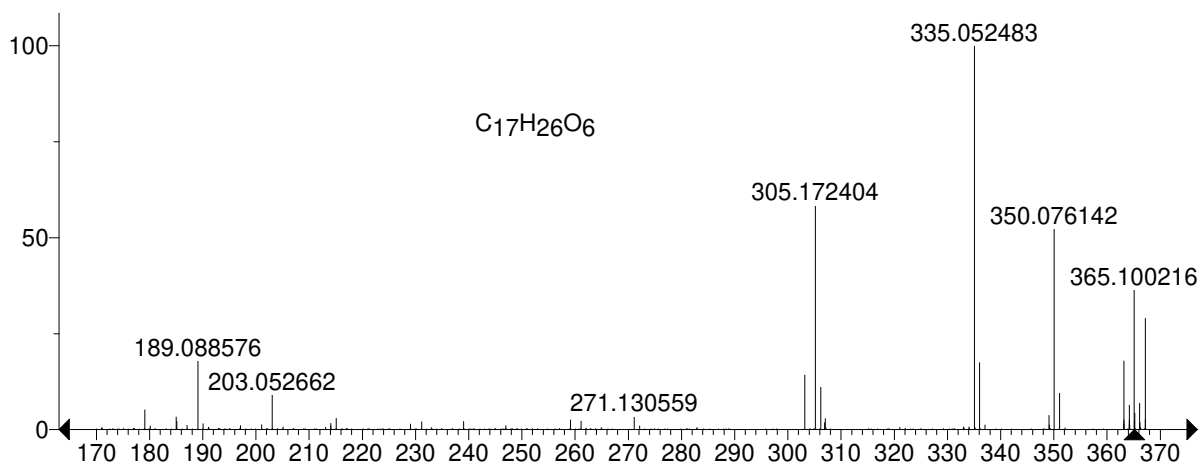

Unknown: Unknown (3.61\_406.0798m/z)  
Compound in Library Factor = 0

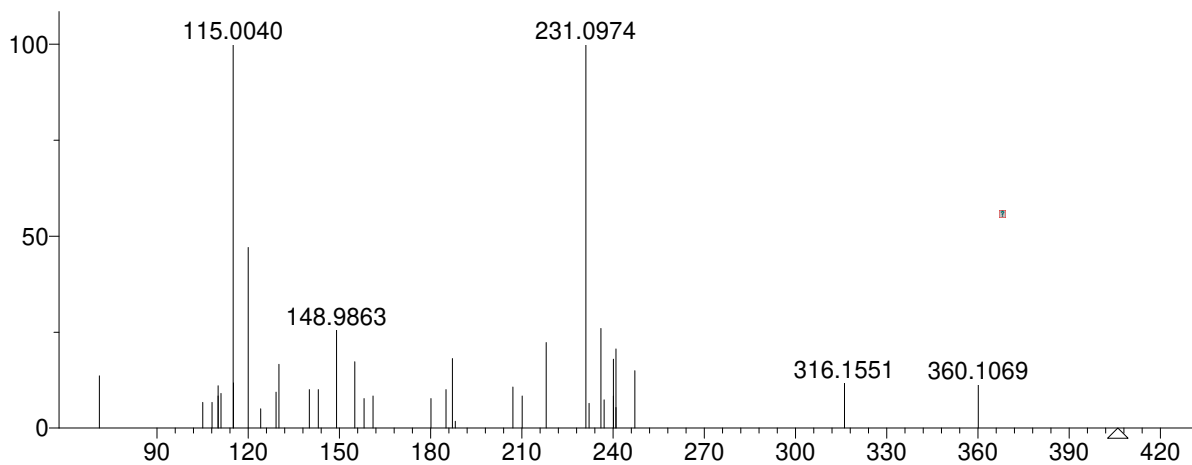

Hit 1 : Bicuculline (+) [M+K]<sup>+</sup> 35% P=406.1  
C<sub>20</sub>H<sub>17</sub>NO<sub>6</sub>; MF: 0; RMF: 7; Prob 100.0%; Lib: mona-export-itree; ID: 1031.

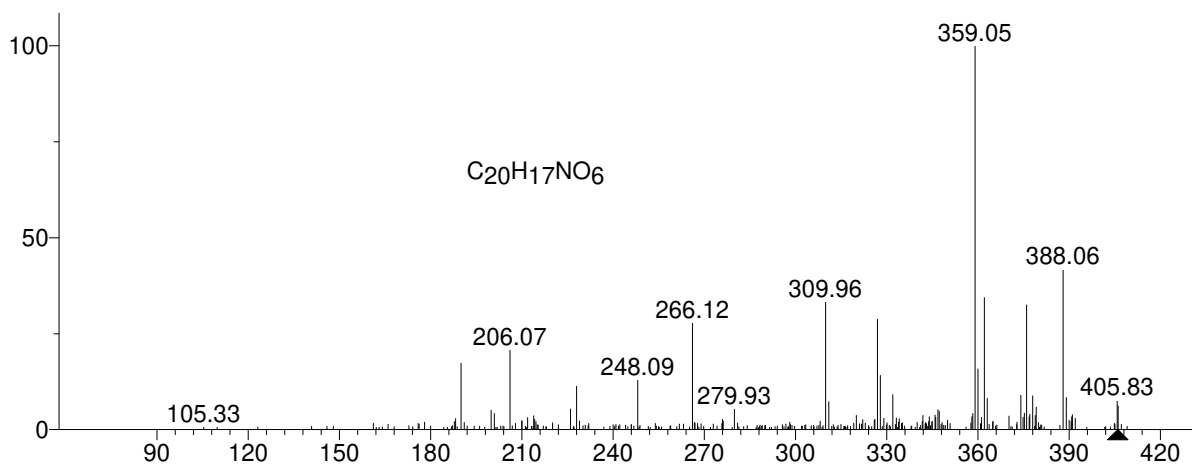

Unknown: Unknown (3.62\_441.1861m/z)  
Compound in Library Factor = 0

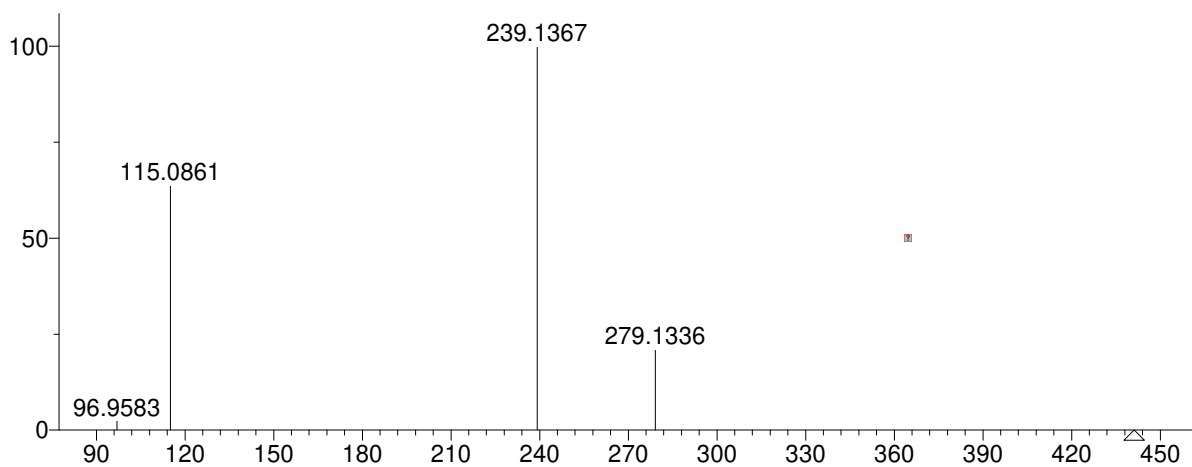

Hit 1 : NCGC00380134-01\_C25H30O8\_3-Furancarboxylic acid, (3R,5S,5aS,6S,9aR)-octahydro-9-hydroxy-2,2,5ε  
C25H30O8; MF: 0; RMF: 12; Prob 100.0%; Lib: mona-export-gnps; ID: 11250.

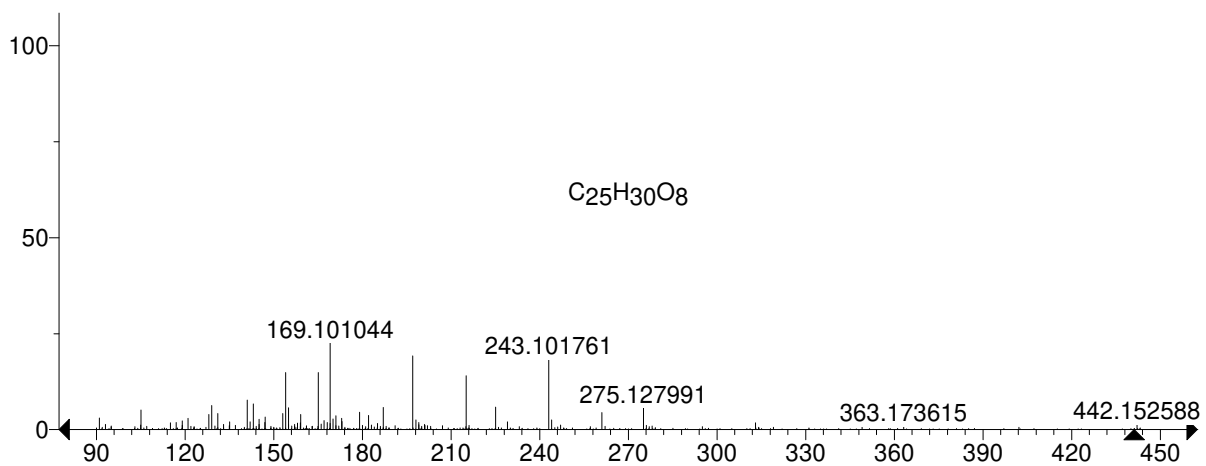

Unknown: Unknown (3.62\_609.2047m/z)  
Compound in Library Factor = 0

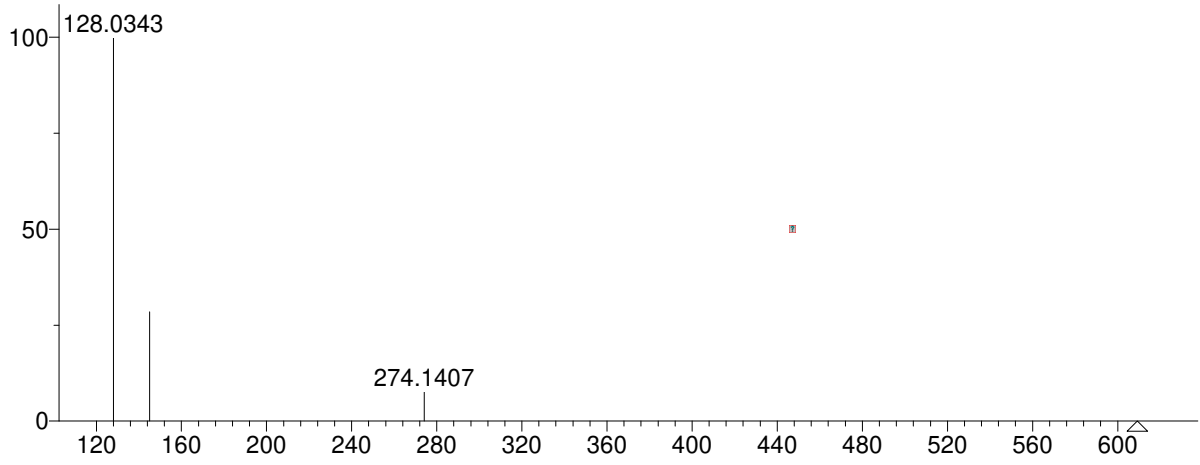

Unknown: Unknown (3.63\_515.1976m/z)  
Compound in Library Factor = 0

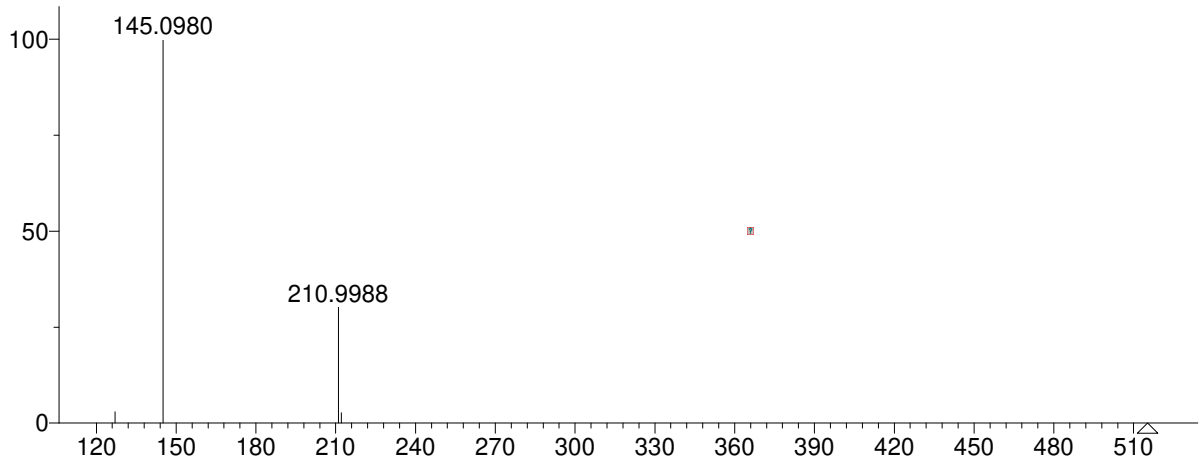

Unknown: Unknown (3.64\_344.1815m/z)  
Compound in Library Factor = -3273

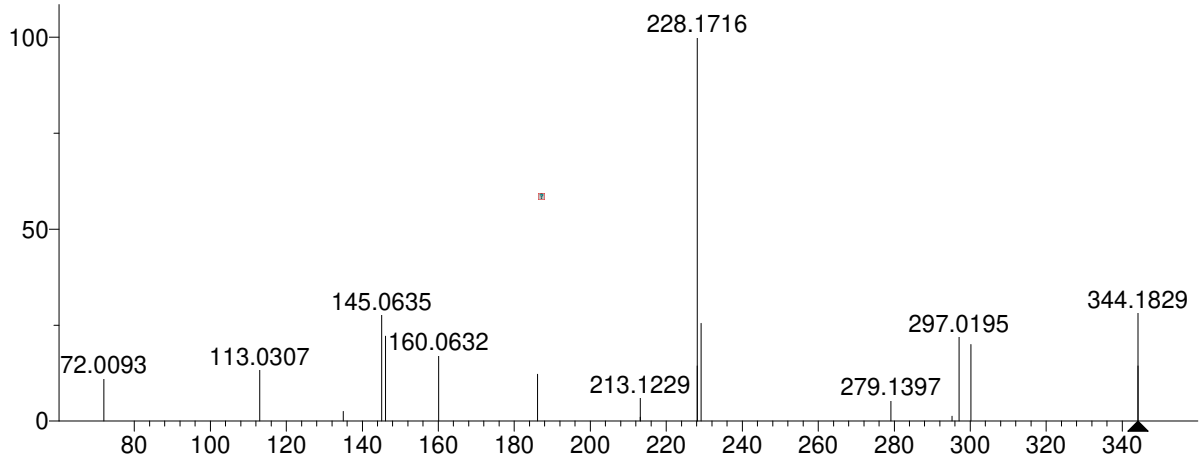

Hit 1 : NCGC00347618-0213-hydroxy-N-(1-hydroxy-4-methylpentan-2-yl)-5-oxo-6-phenylhexanamide [M+Na]<sup>+</sup> P  
C<sub>18</sub>H<sub>27</sub>NO<sub>4</sub>; MF: 4; RMF: 232; Prob 54.2%; Lib: mona-export-gnps; ID: 9879.

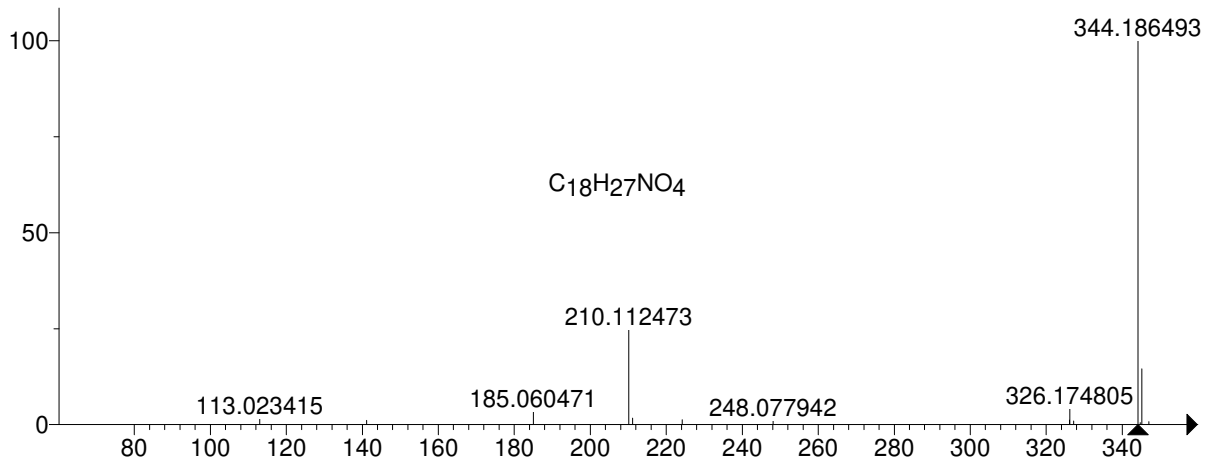

Hit 2 : 4-amino-2-hydroxy-5-[[1-hydroxy-1-(5-oxo-6-bicyclo[4.1.0]hept-3-enyl)propan-2-yl]amino]-5-oxopentanoic acid  
C<sub>15</sub>H<sub>22</sub>N<sub>2</sub>O<sub>6</sub>; MF: 0; RMF: 52; Prob 45.8%; Lib: mona-export-vf-npl\_qexactive; ID: 16561.

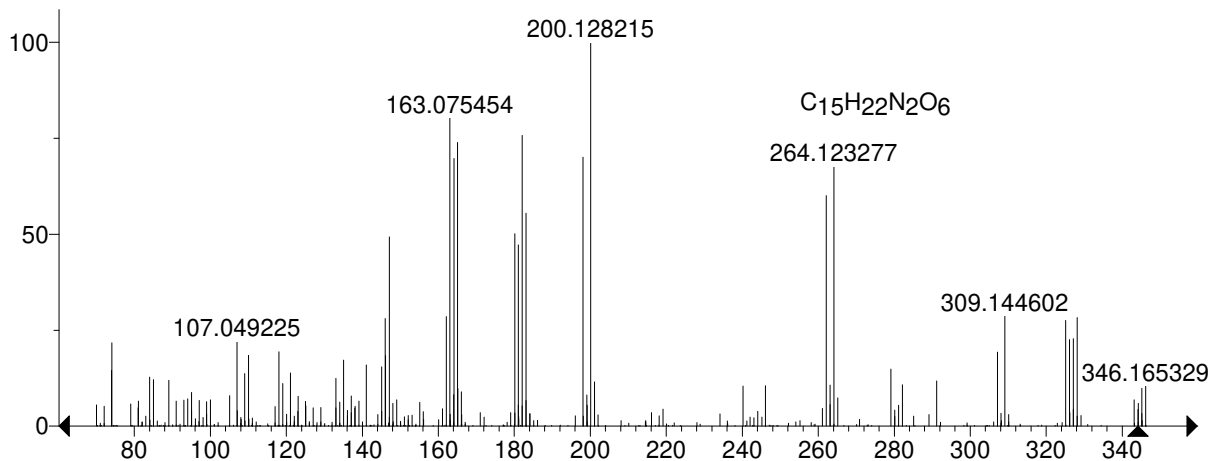

\*\* Search Report Page 1 of 2 \*\*

Unknown: Unknown (3.64\_467.0791m/z)  
Compound in Library Factor = -3273

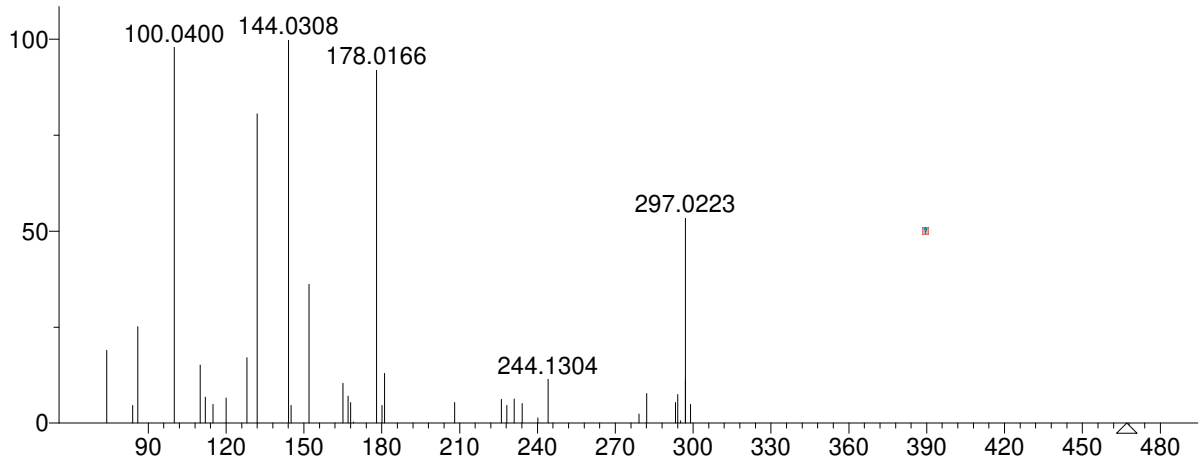

Hit 1 : Hamamelitannin [M+H-H<sub>2</sub>O]<sup>+</sup> IT-FT 35% P=467.1  
C<sub>20</sub>H<sub>20</sub>O<sub>14</sub>; MF: 2; RMF: 115; Prob 35.1%; CAS: 469-32-9; Lib: nist\_msms; ID: 466278.

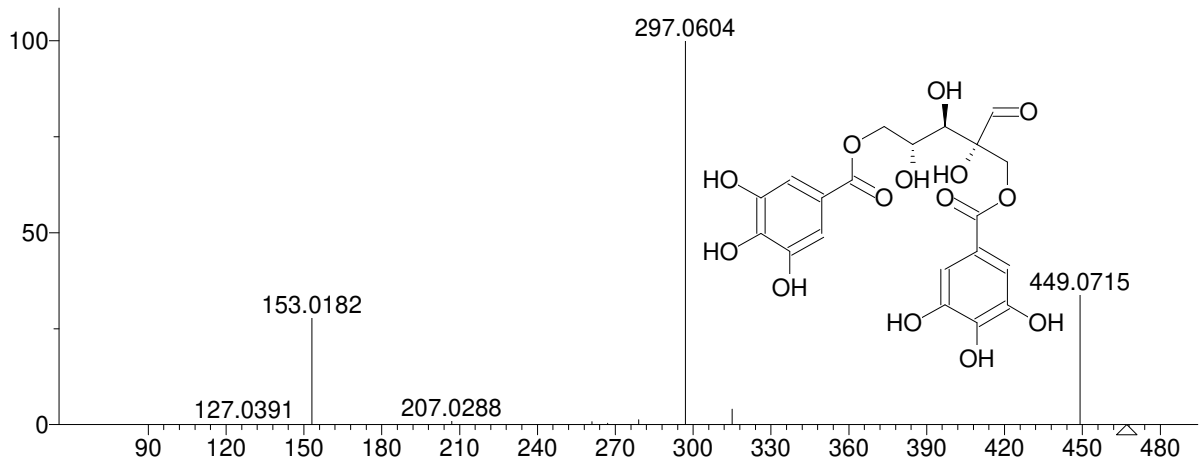

Hit 2 : ginnalin A [M-H]<sup>-</sup> 35HCD P=467.1  
C<sub>20</sub>H<sub>20</sub>O<sub>13</sub>; MF: 0; RMF: 43; Prob 32.4%; Lib: mona-export-lc-ms-ms\_negative\_mode; ID: 18866.

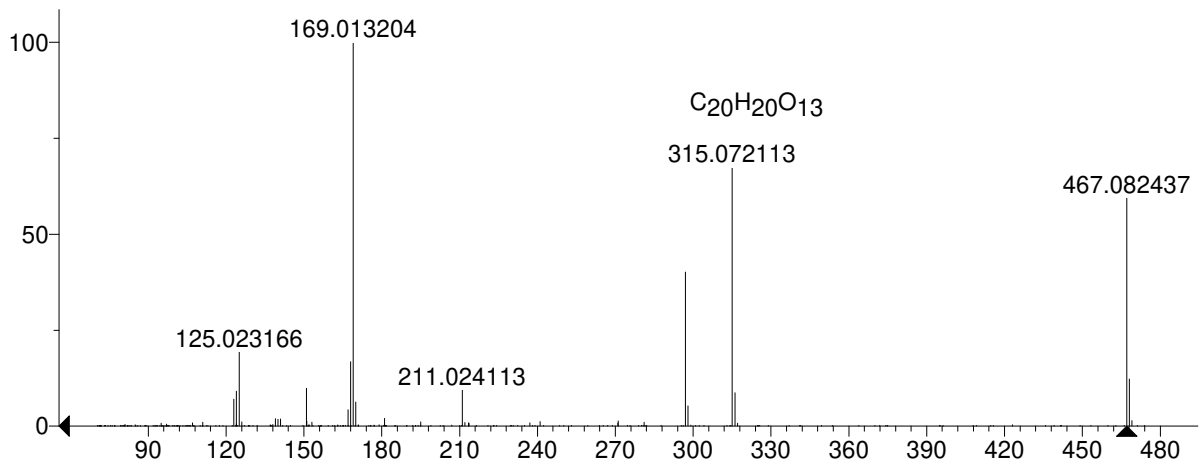

\*\* Search Report Page 2 of 2 \*\*

Hit 3 : NCGC00347845-02![(2R,3S,4S,5S)-3,4-dihydroxy-5-(3,4,5-trihydroxybenzoyl)oxyoxan-2-yl]methyl 3,4,5-tril  
C<sub>20</sub>H<sub>20</sub>O<sub>13</sub>; MF: 0; RMF: 20; Prob 32.4%; Lib: msms-neg-gnps; ID: 742.

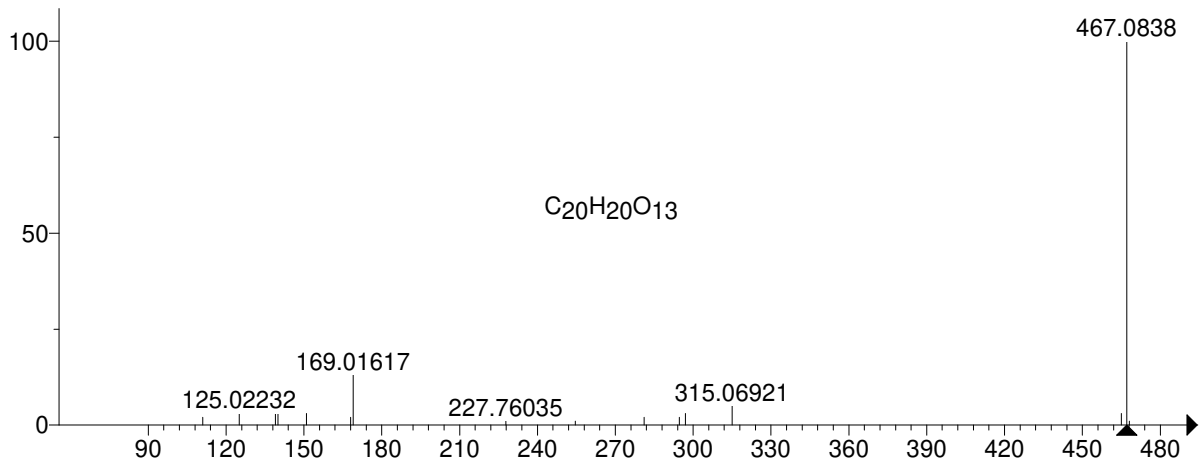



Unknown: Unknown (3.64\_474.1938m/z)  
Compound in Library Factor = 0

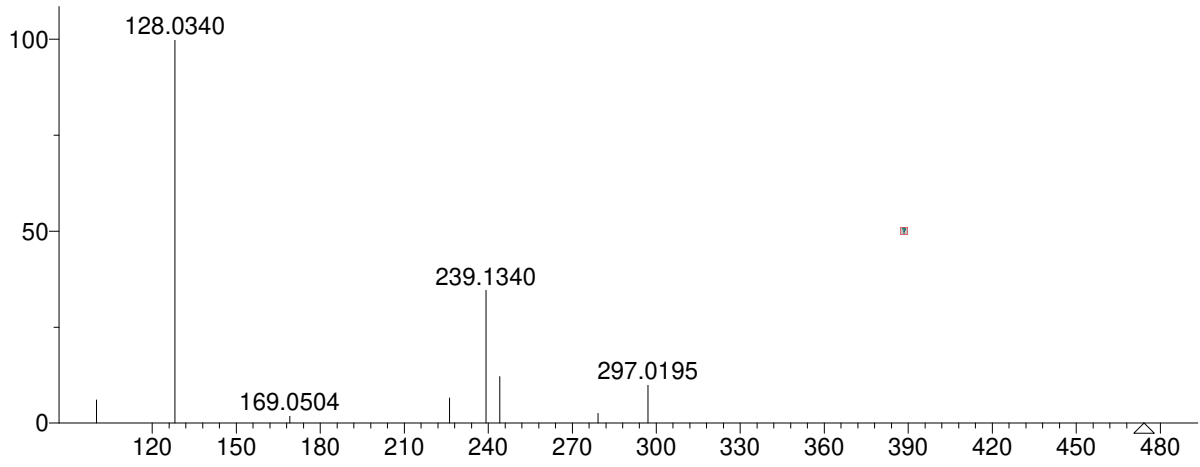

Unknown: Unknown (3.64\_524.1018m/z)  
Compound in Library Factor = 0

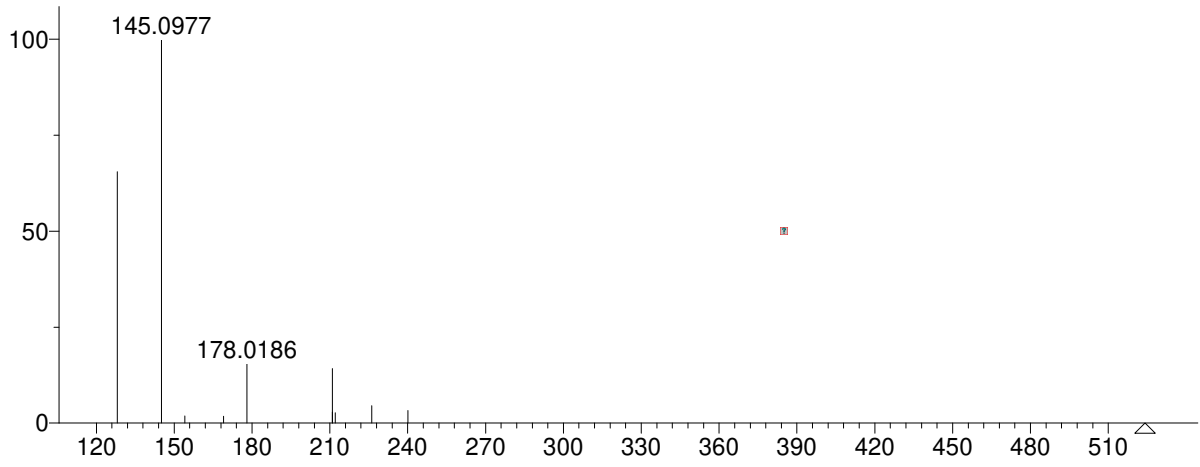

Unknown: Unknown (3.66\_210.1117m/z)  
Compound in Library Factor = 0

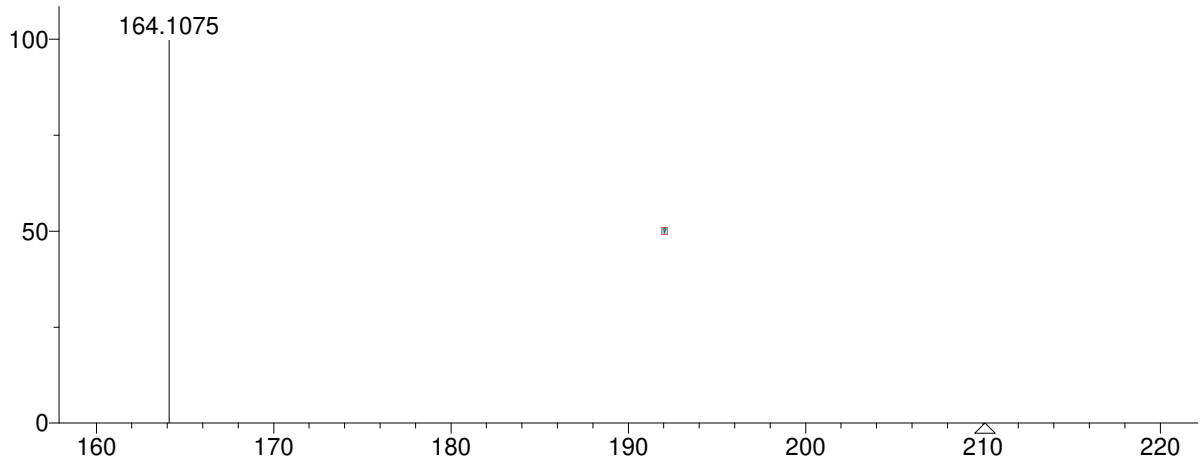

Hit 1 : 4-oxo-5-phenylpentanoic acid [M+NH4]<sup>+</sup> 65HCD P=210.1  
C<sub>11</sub>H<sub>12</sub>O<sub>3</sub>; MF: 0; RMF: 68; Prob 100.0%; Lib: mona-export-vf-npl\_qexactive; ID: 21114.

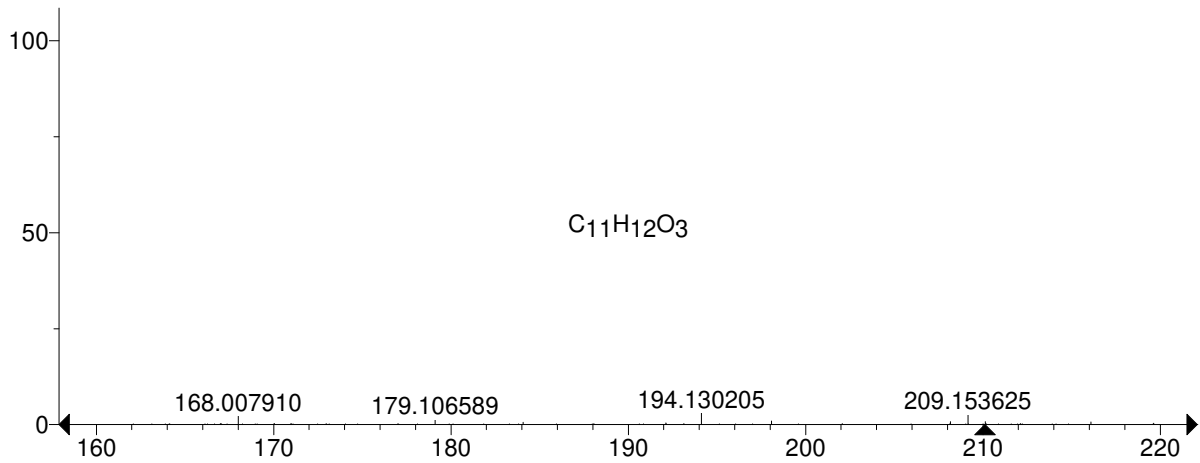

\*\* Search Report Page 1 of 2 \*\*

Unknown: Unknown (3.66\_485.2124m/z)  
Compound in Library Factor = 0

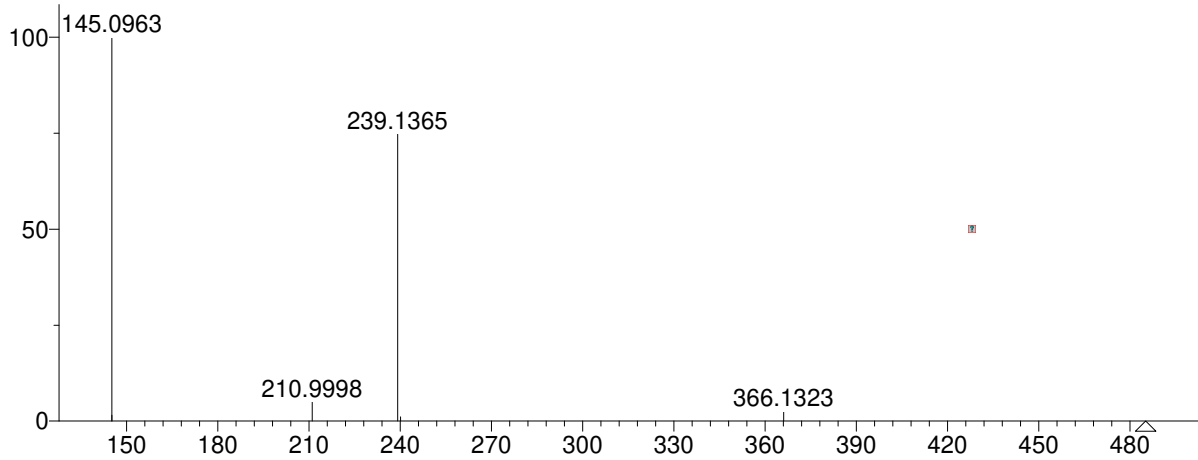

Hit 1 : NCGC00380618-01\_C27H32O8\_(1'R,3'R,8'R,12'E,18'E,20'Z,24'R,25'S)-5',13',25'-Trimethyl-11'H,17'H,22'H-C27H32O8; MF: 0; RMF: 119; Prob 25.0%; Lib: mona-export-gnps; ID: 10939.

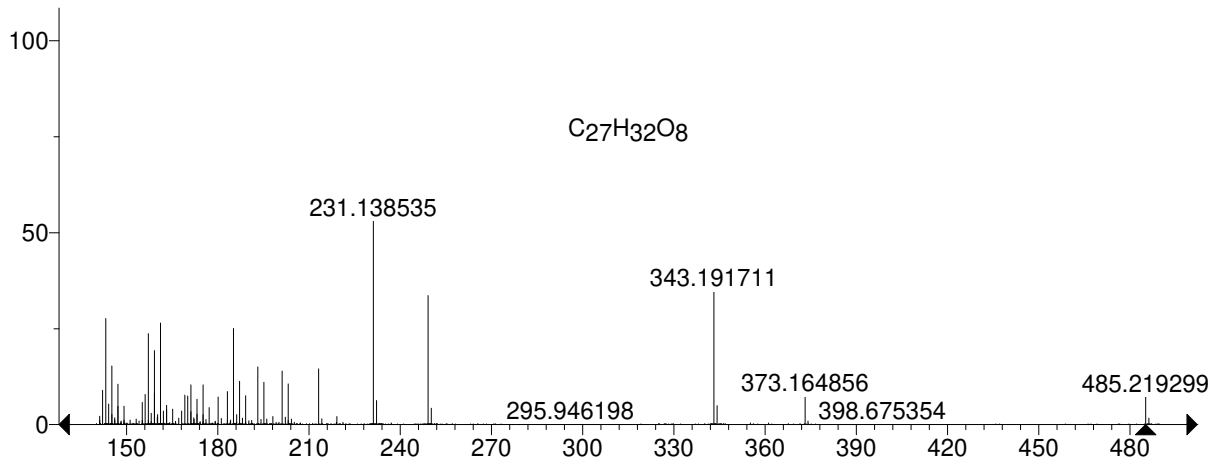

Hit 2 : 3-[7-hydroxy-8-(2-hydroxypropan-2-yl)-11-methoxy-4,5a,9-trimethyl-1-oxo-3,6,7,8,9a,10-hexahydro-[2]benz C25H34O8; MF: 0; RMF: 87; Prob 25.0%; Lib: mona-export-vf-npl\_qexactive; ID: 2220.

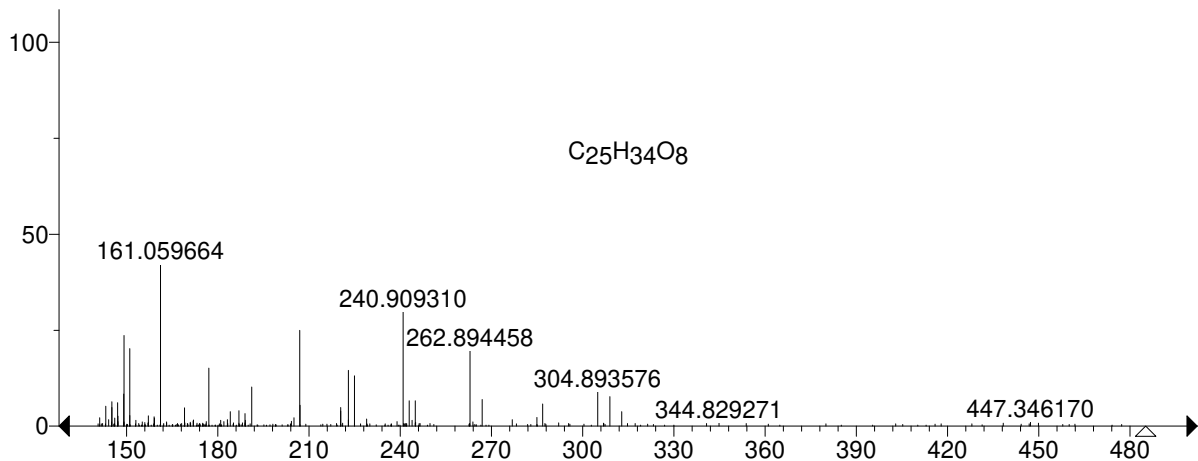

Hit 3 : (2R,3R,4S,5S,6R)-2-[1,7-bis(4-hydroxyphenyl)heptan-3-yloxy]-6-(hydroxymethyl)oxane-3,4,5-triol [M+Na]<sup>+</sup>  
C<sub>25</sub>H<sub>34</sub>O<sub>8</sub>; MF: 0; RMF: 30; Prob 25.0%; Lib: mona-export-vf-npl\_qexactive; ID: 7730.

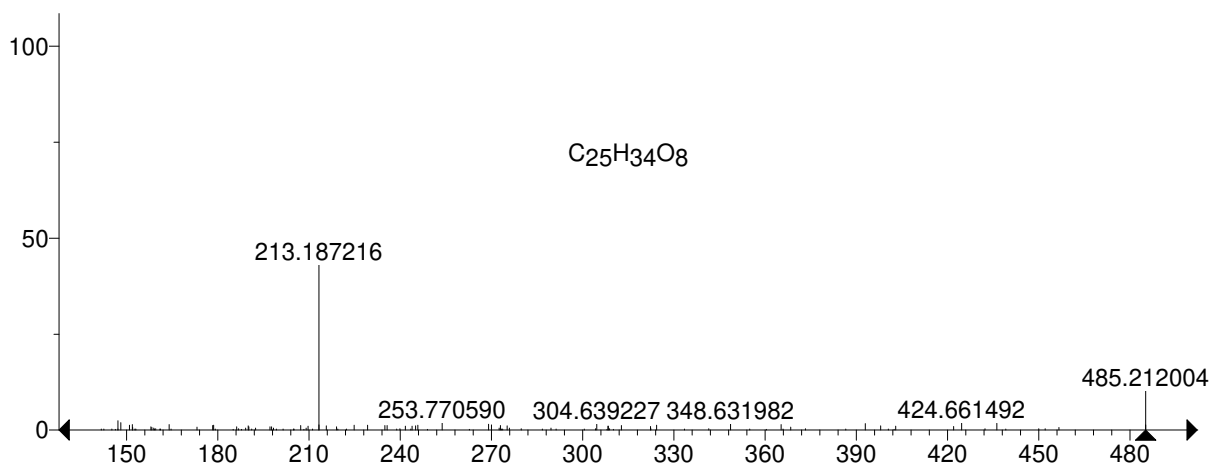

Hit 4 : methyl 4,10-diacetyloxy-5,9-dihydroxy-1,4a-dimethyl-7-propan-2-yl-2,3,4,9,10,10a-hexahydrophenanthrene  
C<sub>25</sub>H<sub>34</sub>O<sub>8</sub>; MF: 0; RMF: 15; Prob 25.0%; Lib: mona-export-vf-npl\_qexactive; ID: 22514.

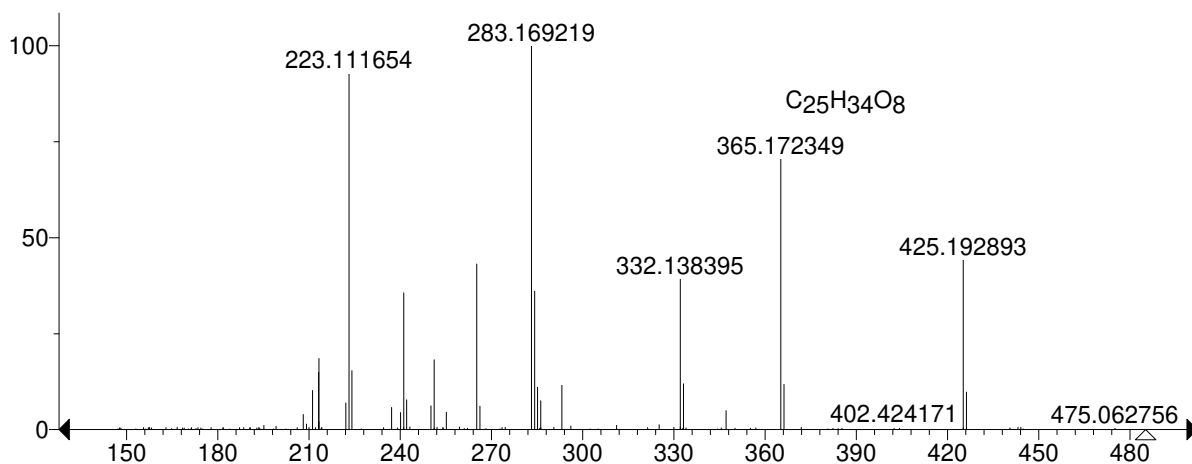

Unknown: Unknown (3.67\_227.0677m/z)  
Compound in Library Factor = 0

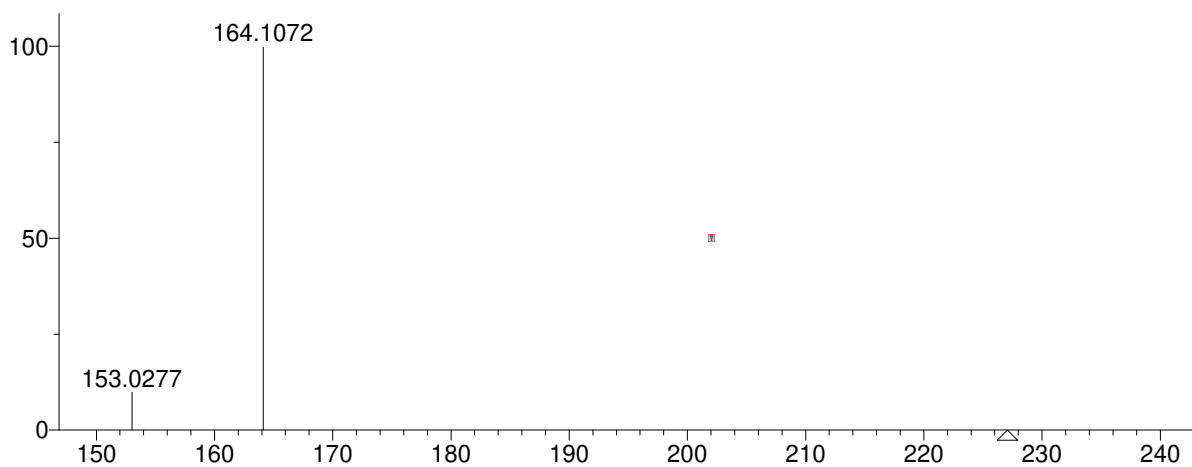

Hit 1 : AZELAIC ACID [M+K]+ 65HCD P=227.1  
C<sub>9</sub>H<sub>16</sub>O<sub>4</sub>; MF: 0; RMF: 13; Prob 100.0%; Lib: mona-export-vf-npl\_gexactive; ID: 11751.

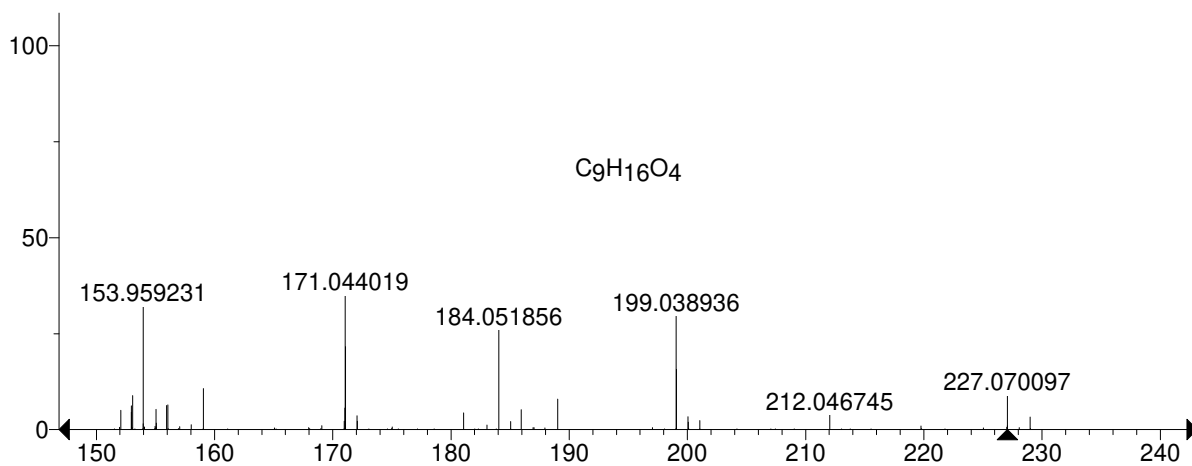

Unknown: Unknown (3.67\_414.1854m/z)  
Compound in Library Factor = 0

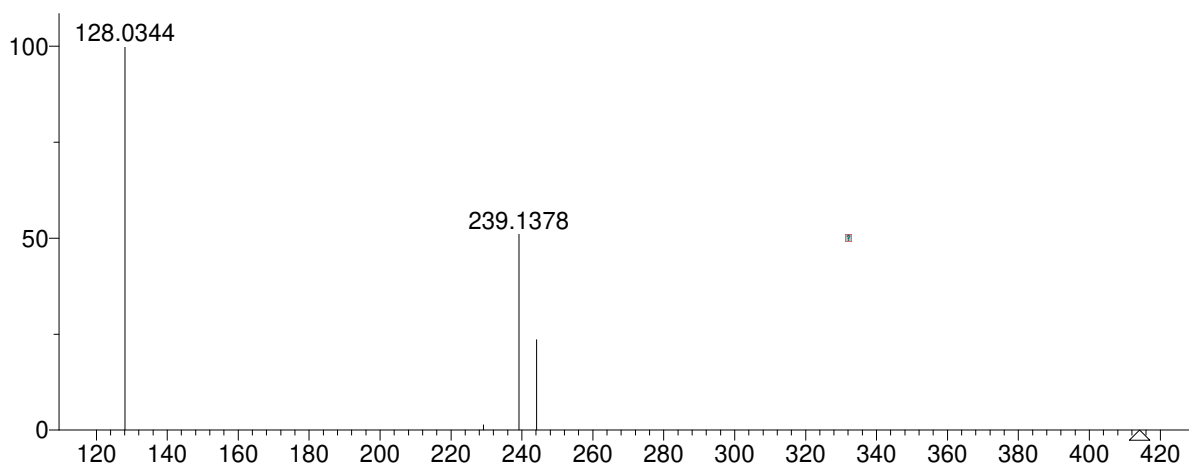

Hit 1 : ACTH (5-10) [M-2H]<sup>2-</sup> HCD 41eV P=414.2  
C<sub>39</sub>H<sub>50</sub>N<sub>12</sub>O<sub>9</sub>; MF: 0; RMF: 63; Prob 100.0%; Lib: nist\_msms2; ID: 71787.

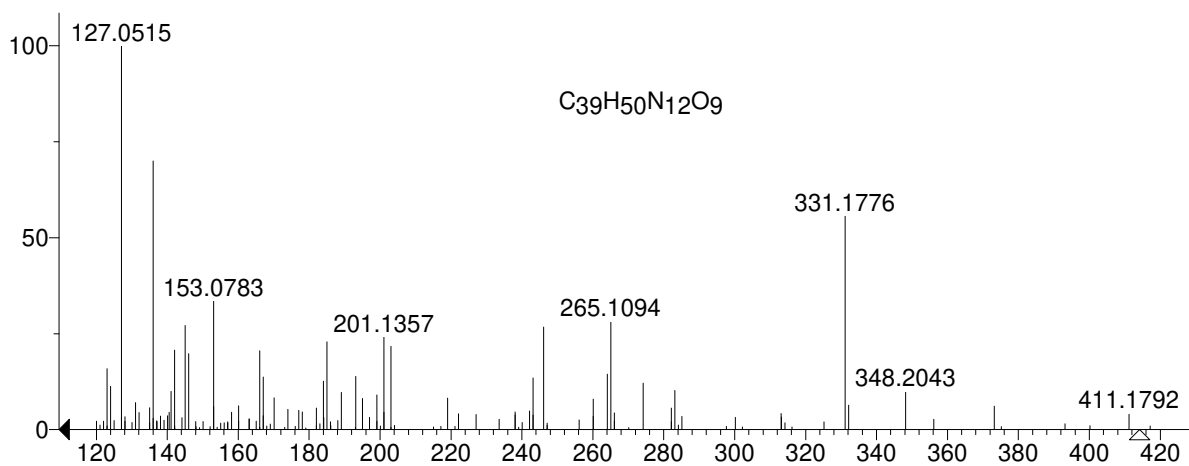

Unknown: Unknown (3.67\_453.1852m/z)  
Compound in Library Factor = 0

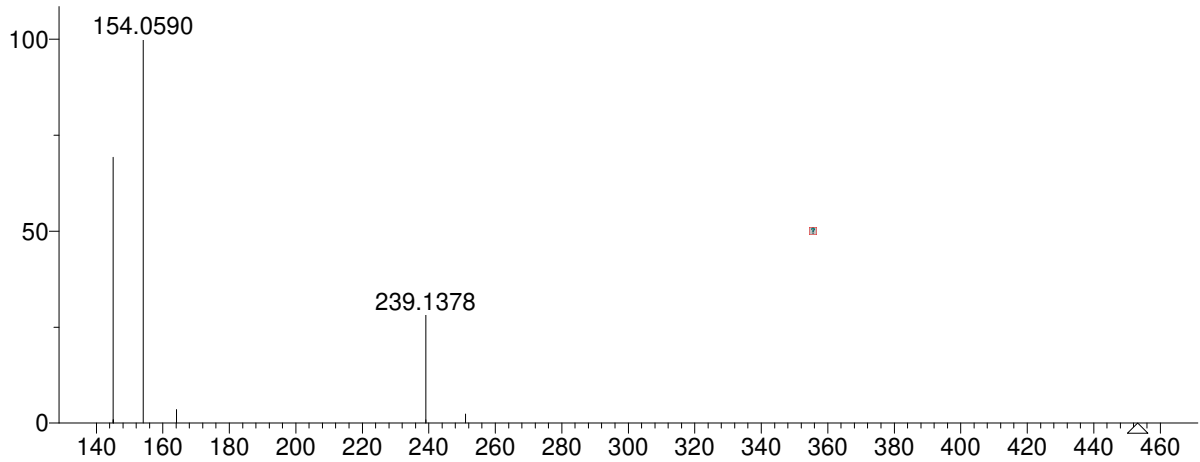

Hit 1 : (1-acetyloxy-3-hydroxy-6,8a-dimethyl-7-oxo-3-propan-2-yl-2,3a,4,8-tetrahydro-1H-azulen-4-yl) 4-hydroxybenzoate  
C<sub>24</sub>H<sub>30</sub>O<sub>7</sub>; MF: 0; RMF: 83; Prob 50.0%; Lib: mona-export-vf-npl\_qexactive; ID: 17757.

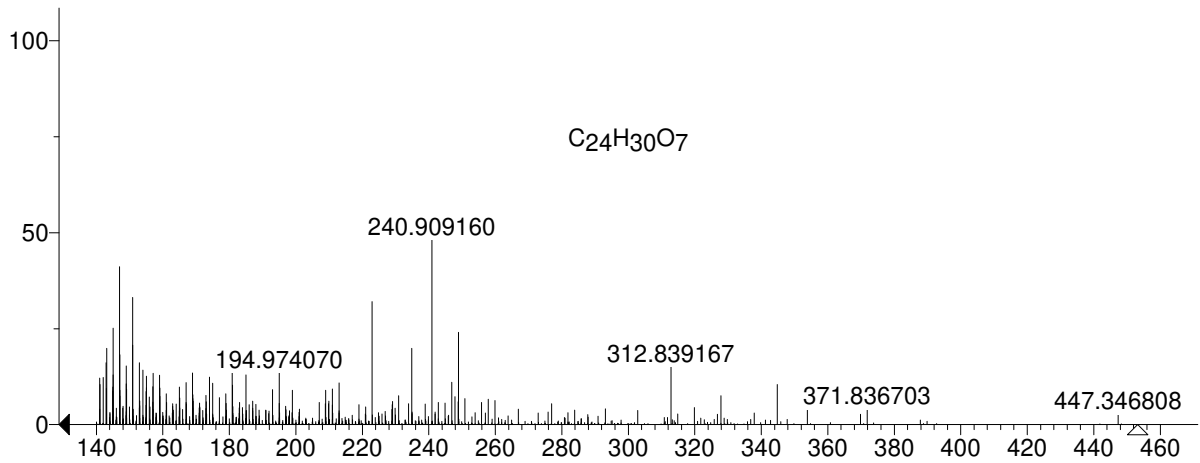

Hit 2 : [8-[2-(3-methylbutanoyloxy)propan-2-yl]-2-oxo-8,9-dihydrofuro[2,3-h]chromen-9-yl] 3-methylbutanoate [M+]  
C<sub>24</sub>H<sub>30</sub>O<sub>7</sub>; MF: 0; RMF: 9; Prob 50.0%; Lib: mona-export-vf-npl\_qexactive; ID: 5397.

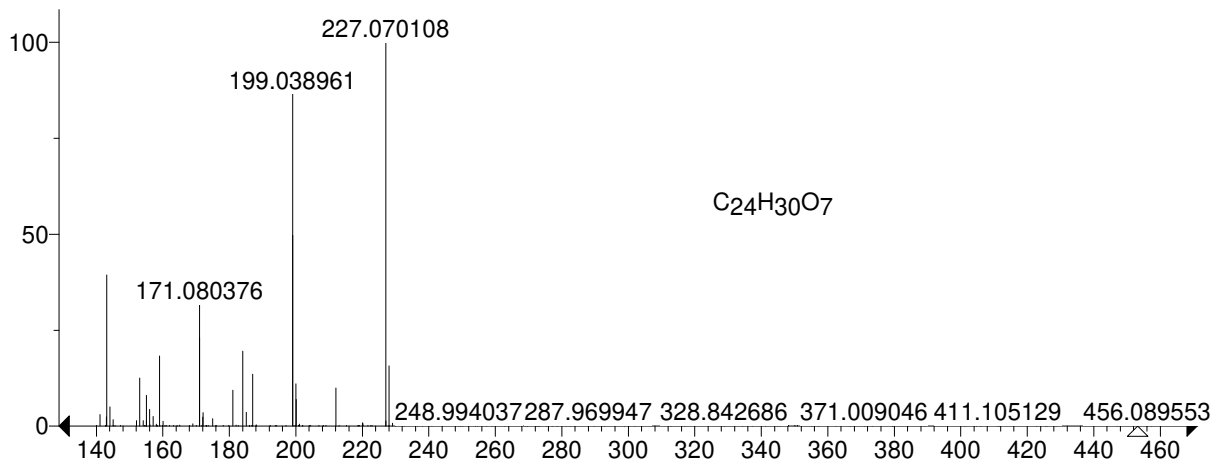



Unknown: Unknown (3.67\_626.1783m/z)  
Compound in Library Factor = 0

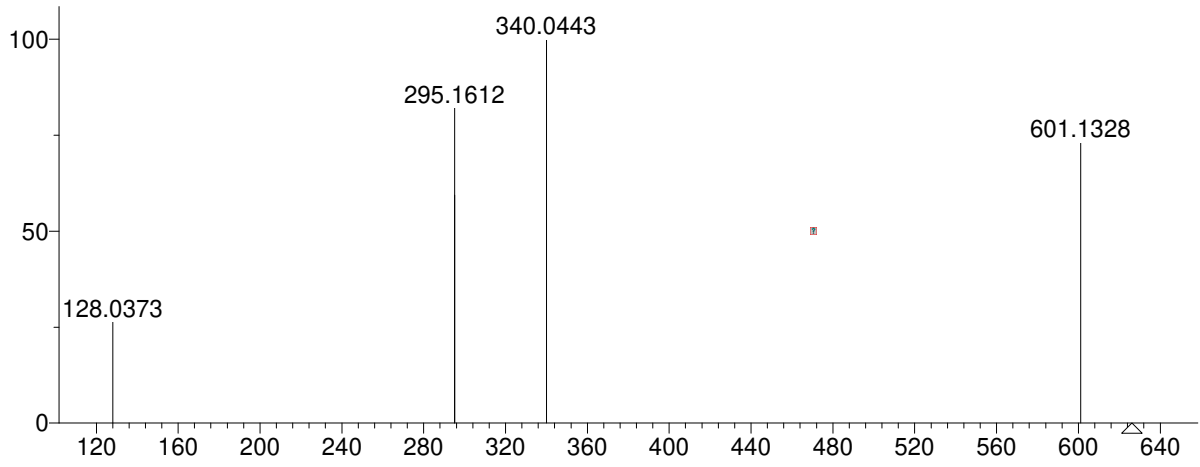

Unknown: Unknown (3.69\_389.2056m/z)  
Compound in Library Factor = 0

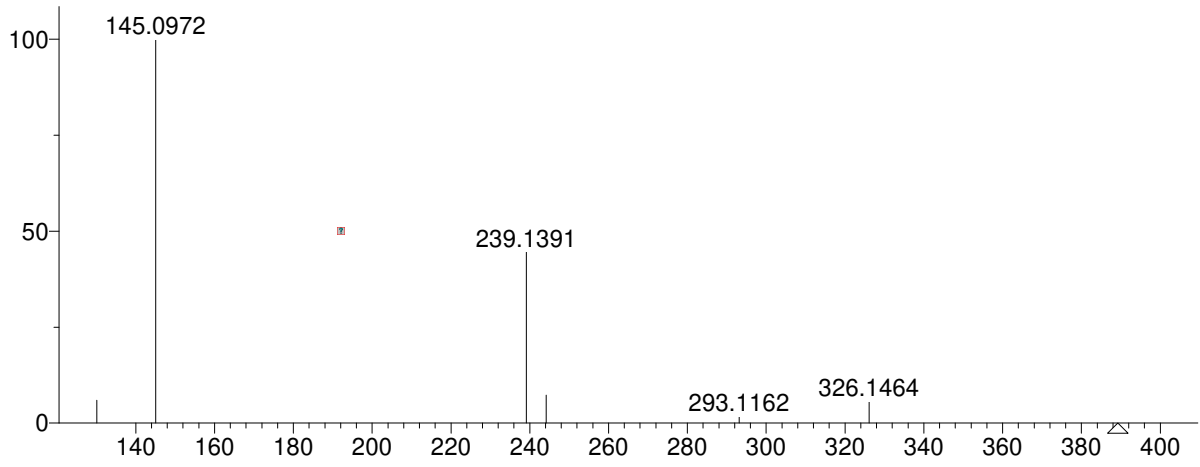

Unknown: Unknown (3.69\_626.2405m/z)  
Compound in Library Factor = 0

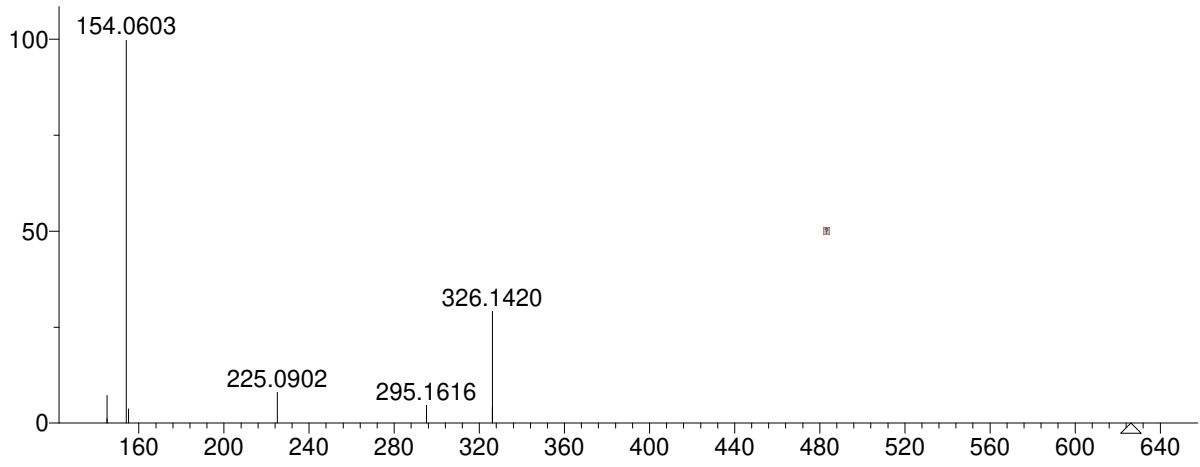

Unknown: Unknown (3.70\_313.1013m/z)  
Compound in Library Factor = 0

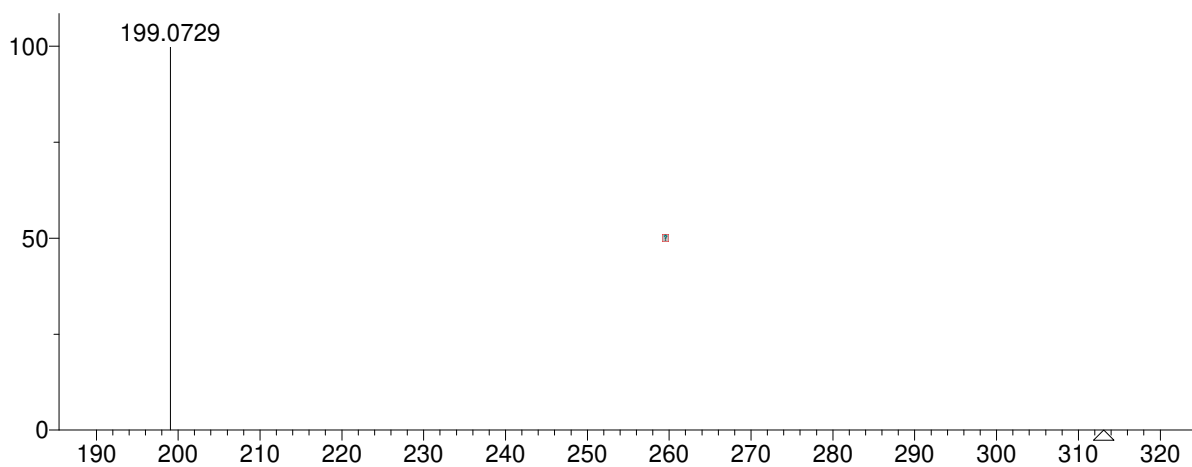

Hit 1 : Flumioxazin [M+H-C2H2O]+ HCD 81V P=313.1  
C19H15FN2O4; MF: 0; RMF: 154; Prob 100.0%; CAS: 103361-09-7; Lib: nist\_msms; ID: 486496.

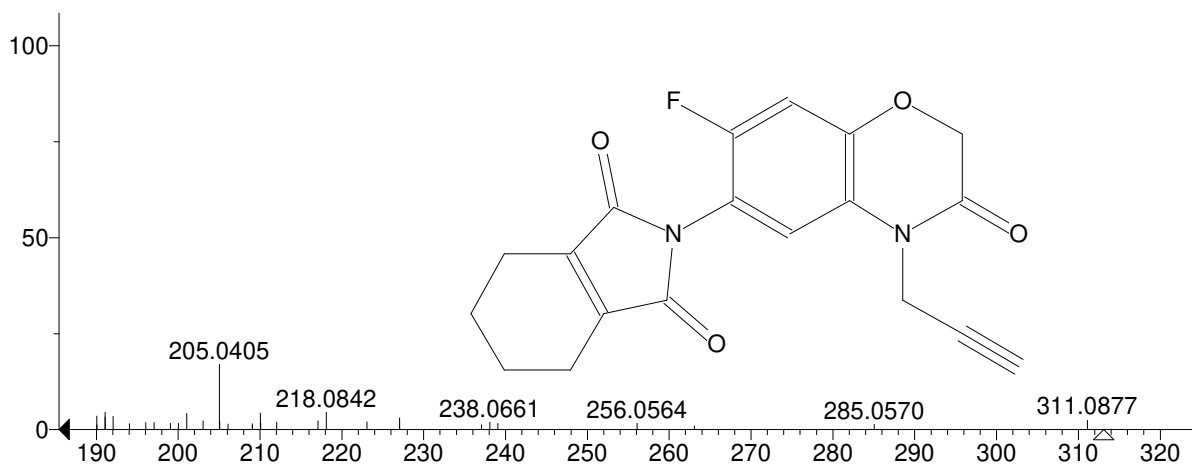

Unknown: Unknown (3.70\_344.1329m/z)  
Compound in Library Factor = -3273

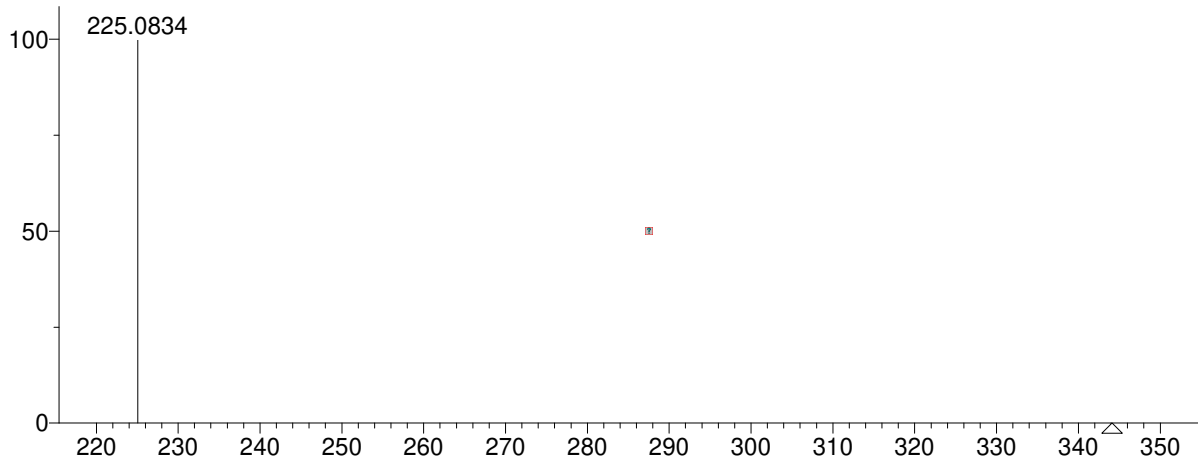

Hit 1 : (1S,4R,7S,8S,11S)-9-tert-butyl-7,9-dihydroxy-3,5,12-trioxatetracyclo[6.6.0.0A<sup>1</sup>,A<sup>1</sup>1A<sup>1</sup>.0a<sup>1</sup>,a<sup>1</sup>,,]tetradec  
C<sub>15</sub>H<sub>18</sub>O<sub>8</sub>; MF: 1; RMF: 236; Prob 100.0%; Lib: mona-export-vf-npl\_qexactive; ID: 8442.

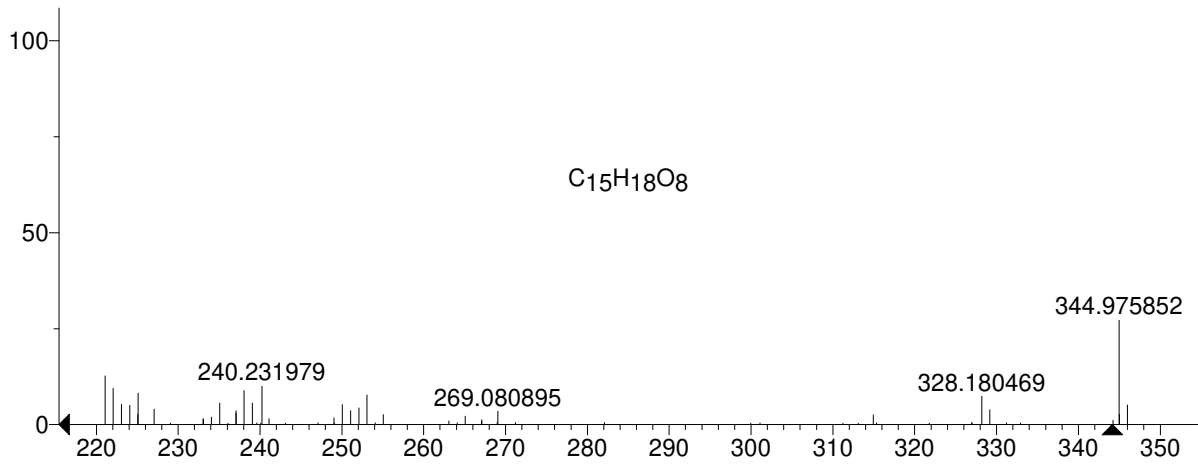

Unknown: Unknown (3.70\_360.1763m/z)  
Compound in Library Factor = 0

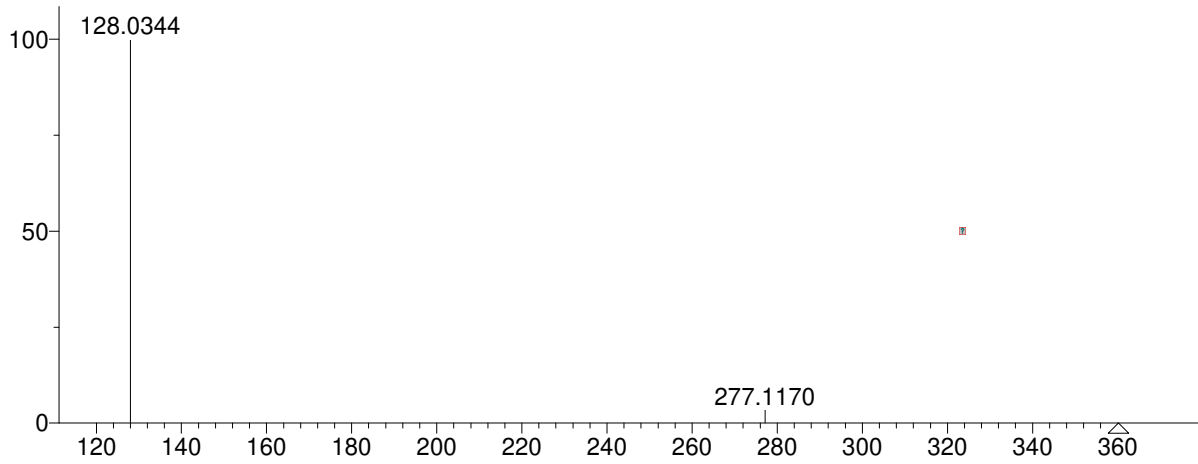

Hit 1 : Pesticide6\_Etoxazole\_C21H23F2NO2\_4-(4-tert-Butyl-2-ethoxyphenyl)-2-(2,6-difluorophenyl)-4,5-dihydro-1  
C21H23F2NO2; MF: 0; RMF: 7; Prob 100.0%; Lib: mona-export-gnps; ID: 12999.

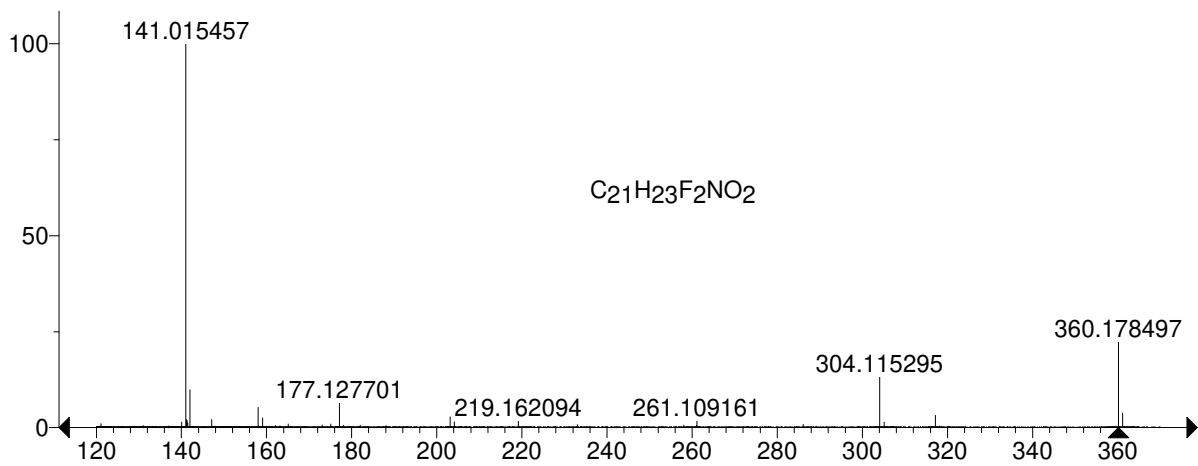

Unknown: Unknown (3.70\_455.1661m/z)  
Compound in Library Factor = -1848

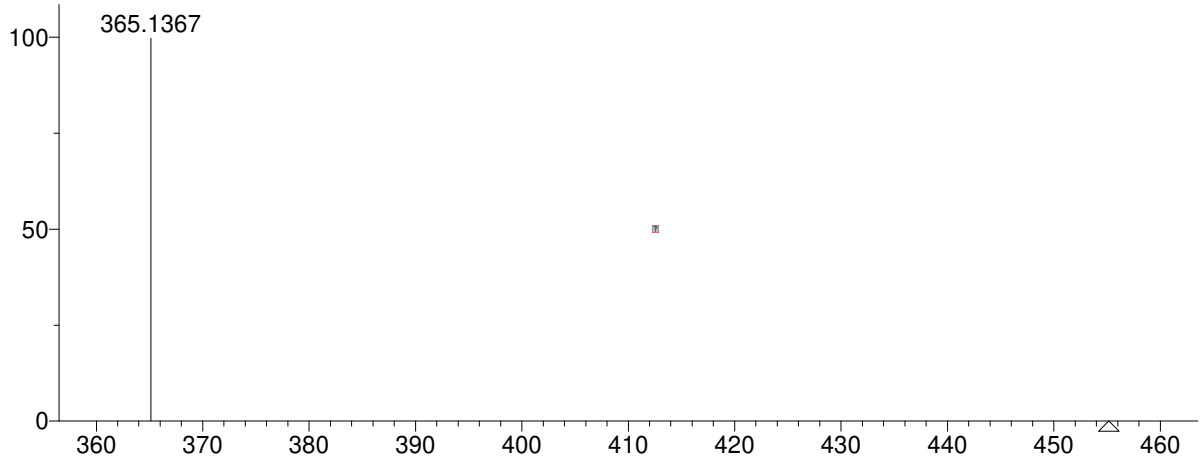

Hit 1 : C<sub>20</sub>H<sub>28</sub>N<sub>2</sub>O<sub>10</sub>; PlaSMA ID-1228 [M-H]<sup>-</sup> P=455.2  
C<sub>20</sub>H<sub>28</sub>N<sub>2</sub>O<sub>10</sub>; MF: 39; RMF: 507; Prob 80.9%; Lib: biomsms-neg-plasma; ID: 855.

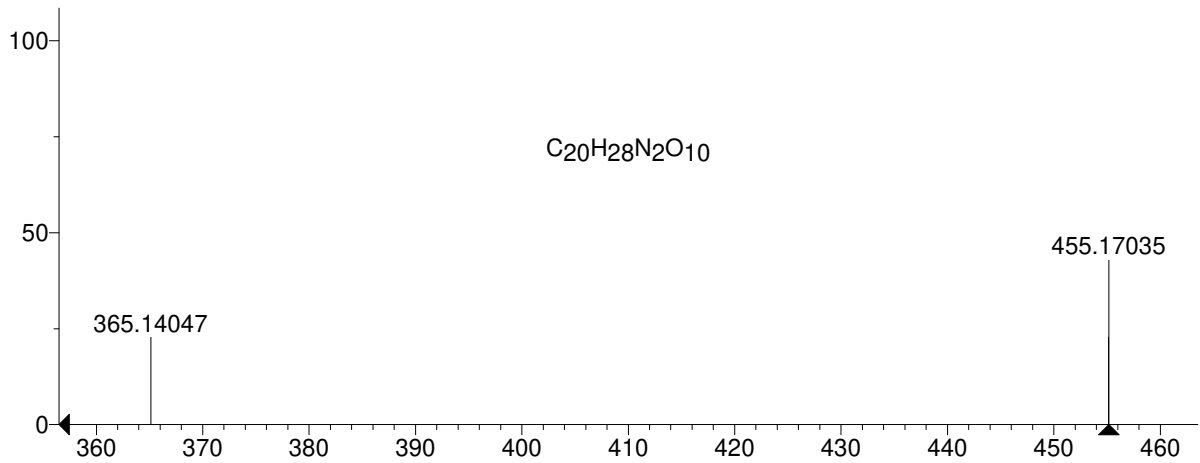

Hit 2 : methyl 3-(3,4-dihydroxyphenyl)-2-[[4-hydroxy-3-(3-methylbut-2-enyl)phenyl][methyl]-4-methoxy-5-oxofuran-:  
C<sub>25</sub>H<sub>26</sub>O<sub>8</sub>; MF: 0; RMF: 134; Prob 19.1%; Lib: mona-export-vf-npl\_qexactive; ID: 9394.

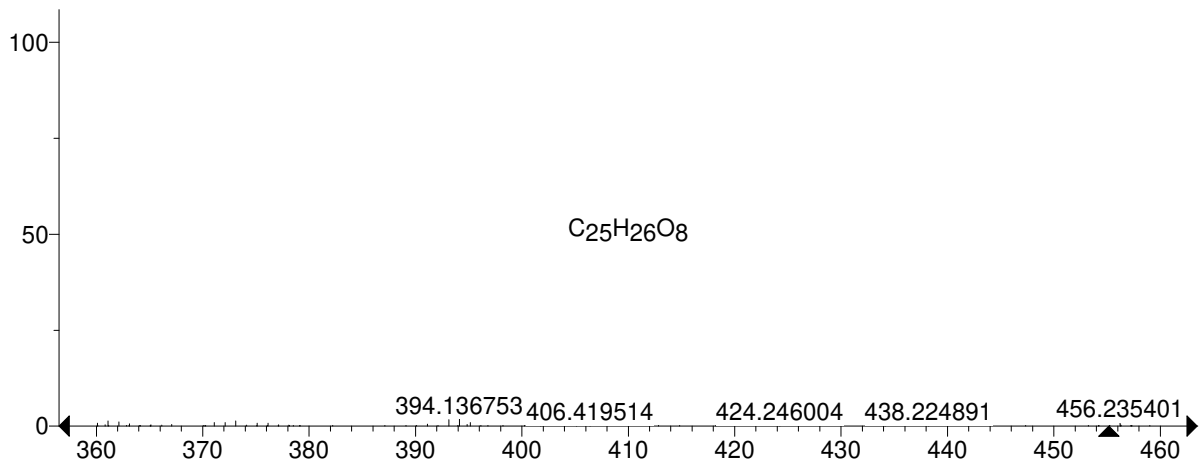

Unknown: Unknown (3.70\_587.2200m/z)  
Compound in Library Factor = 0

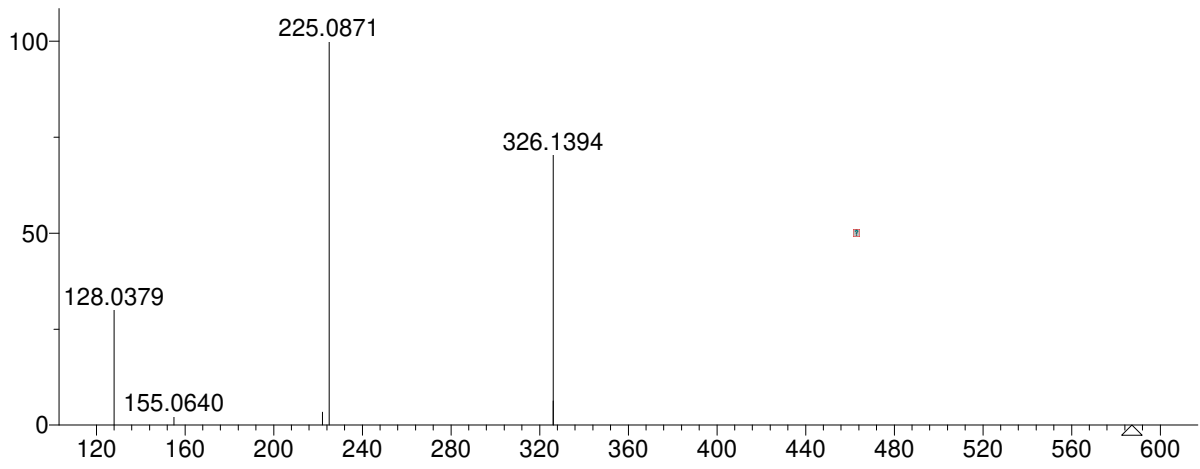



Unknown: Unknown (3.70\_966.3585m/z)  
Compound in Library Factor = 0

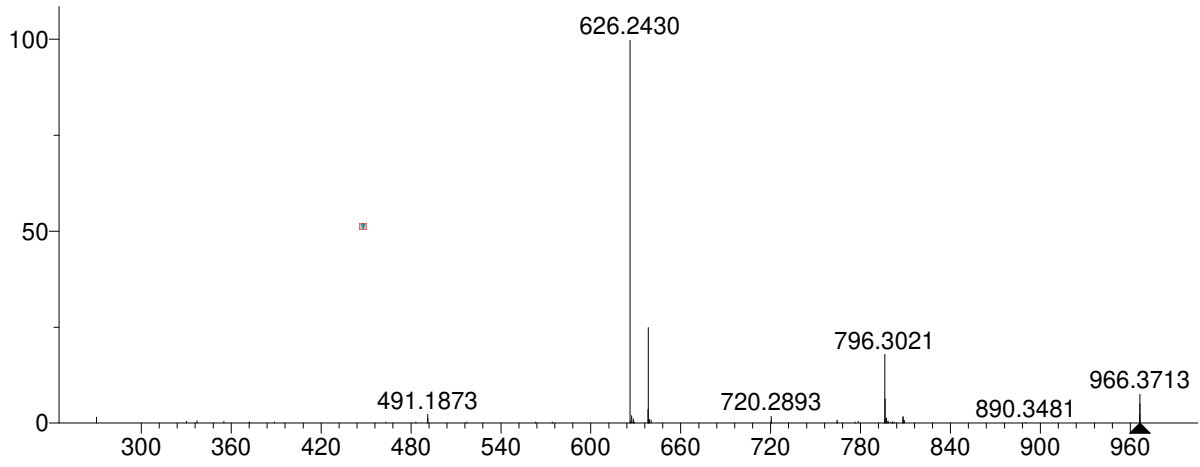

Unknown: Unknown (3.71\_314.1338m/z)  
Compound in Library Factor = 0

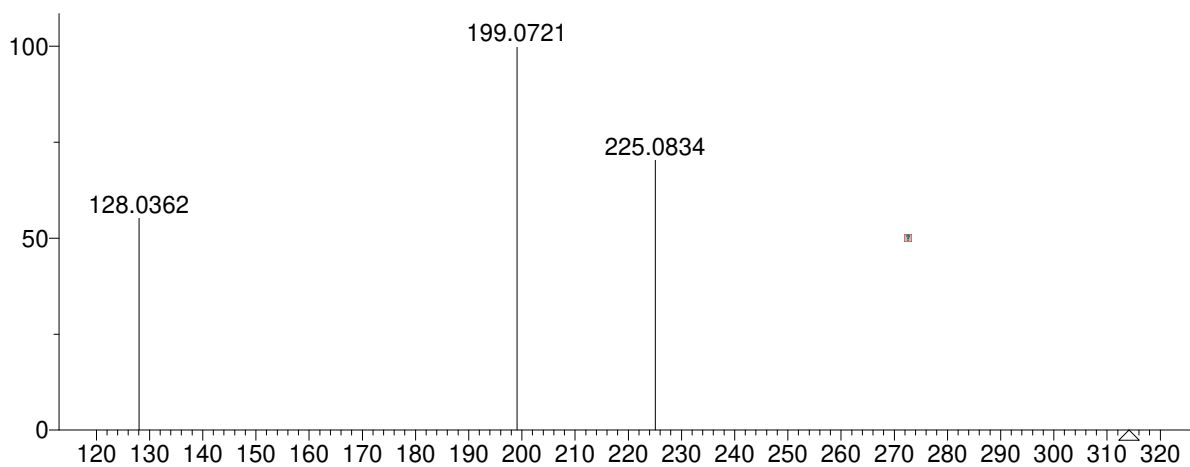

Hit 1 : Formylciprofloxacin [M-H-CO<sub>2</sub>]- HCD 40V P=314.1  
C<sub>18</sub>H<sub>18</sub>FN<sub>3</sub>O<sub>4</sub>; MF: 0; RMF: 78; Prob 100.0%; CAS: 93594-39-9; Lib: nist\_msms; ID: 439525.

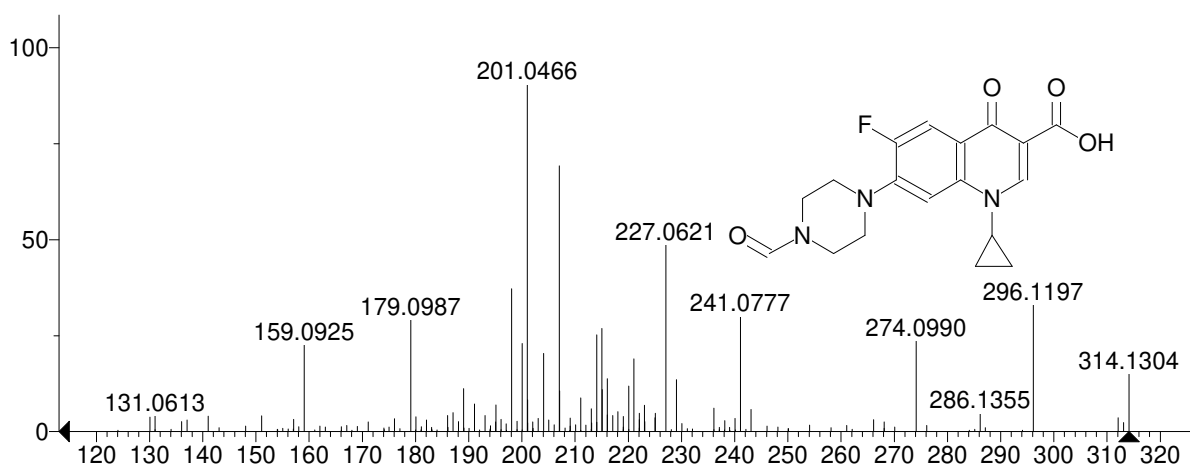

\*\* Search Report Page 1 of 1 \*\*

Unknown: Unknown (3.71\_524.1011m/z)  
Compound in Library Factor = 0

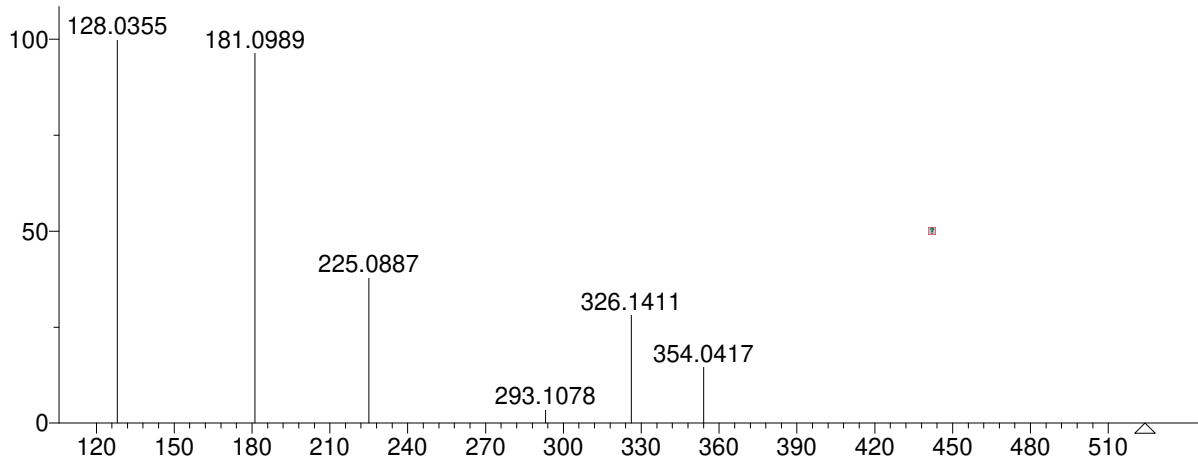

Hit 1 : Acrinathrin [M+H]<sup>+</sup>=>524.1 IT 35% P=524.1  
C<sub>26</sub>H<sub>21</sub>F<sub>6</sub>NO<sub>5</sub>; MF: 0; RMF: 36; Prob 100.0%; CAS: 101007-06-1; Lib: nist\_msms; ID: 476079.

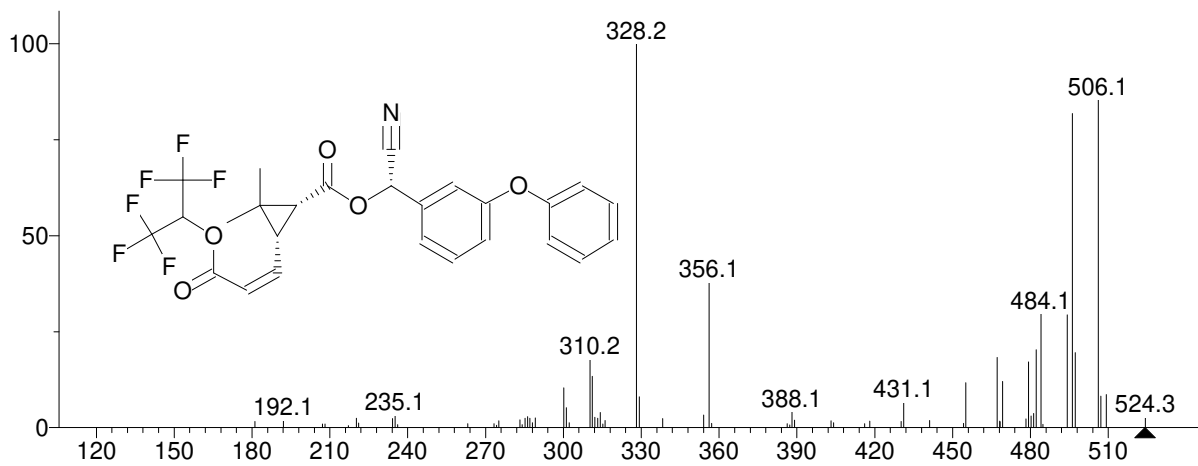

Unknown: Unknown (3.71\_680.2771m/z)  
Compound in Library Factor = 0

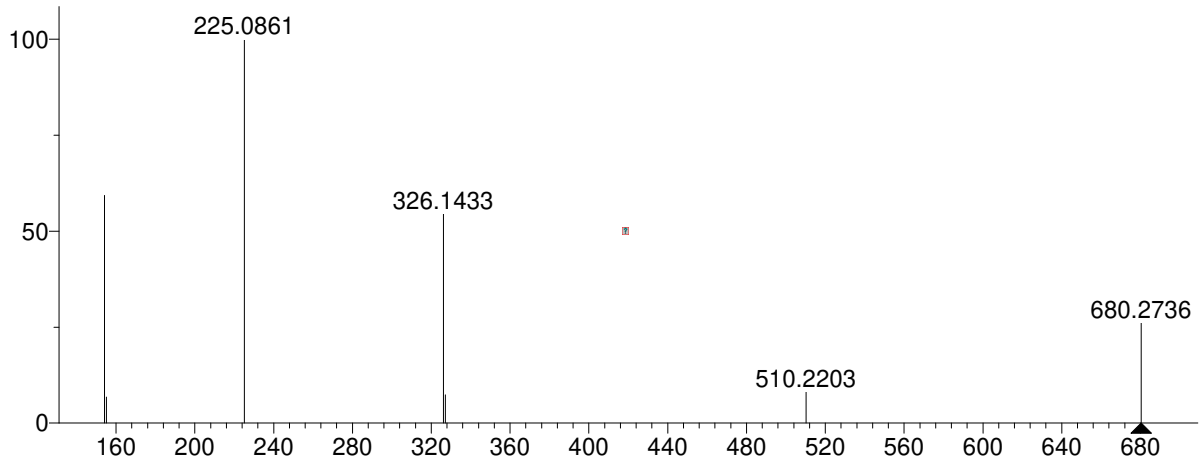

Unknown: Unknown (3.72\_225.0870m/z)  
Compound in Library Factor = -219

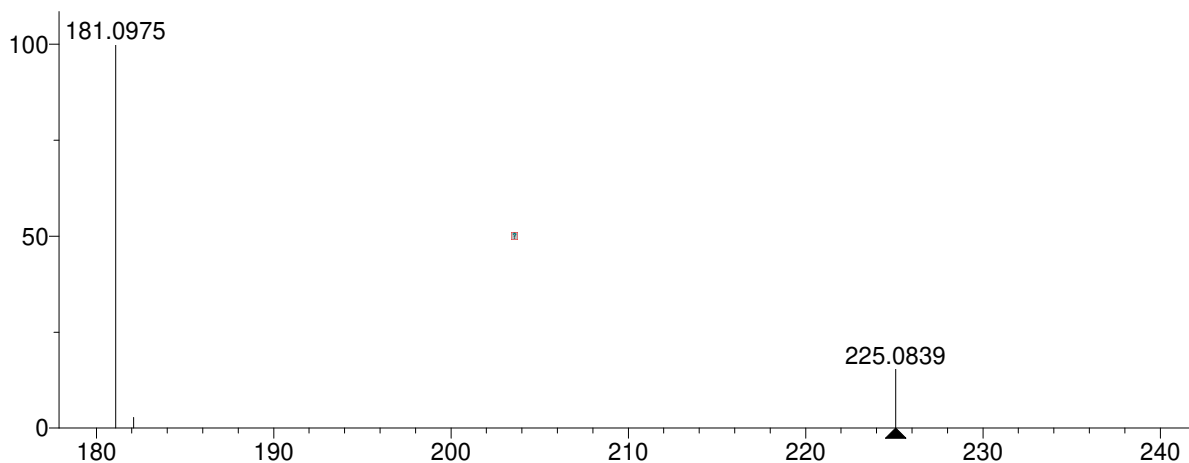

Hit 1 : Porphobilinogen [M-H]<sup>-</sup> HCD 24V P=225.1  
C<sub>10</sub>H<sub>14</sub>N<sub>2</sub>O<sub>4</sub>; MF: 560; RMF: 961; Prob 99.0%; CAS: 487-90-1; Lib: nist\_msms; ID: 125588.

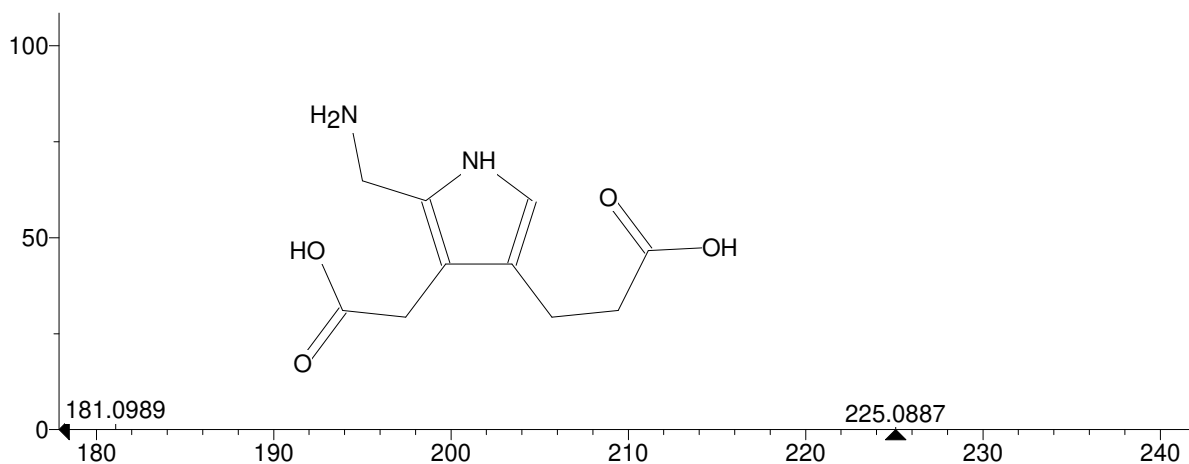

Hit 2 : 3-Hydroxy-DL-kynurenine [M+H]<sup>+</sup> QTOF 5-45V P=225.1  
C<sub>10</sub>H<sub>12</sub>N<sub>2</sub>O<sub>4</sub>; MF: 254; RMF: 894; Prob 0.98%; Lib: mona-export-respect; ID: 3984.

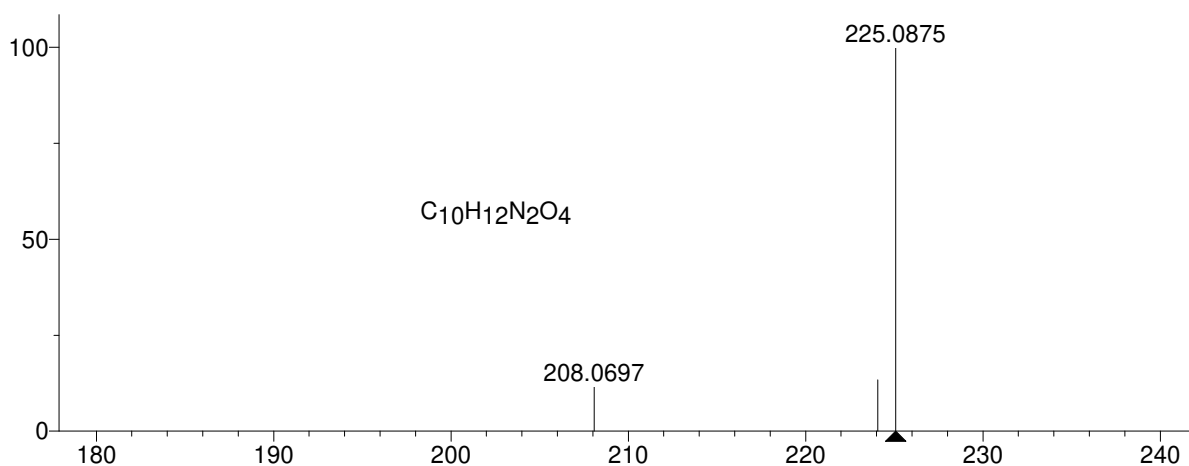

Hit 3 : Thymidine [M+H-H<sub>2</sub>O]<sup>+</sup> HCD 4V P=225.1

C<sub>10</sub>H<sub>14</sub>N<sub>2</sub>O<sub>5</sub>; MF: 103; RMF: 360; Prob 0.02%; CAS: 50-89-5; Lib: nist\_msms; ID: 296349.

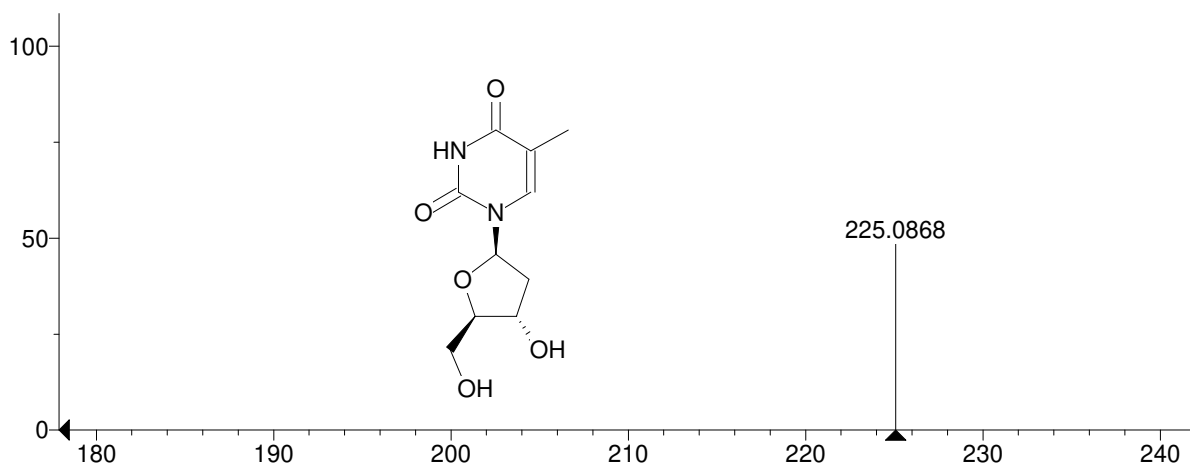

Hit 4 : Carbidopa [M-H]<sup>-</sup> HCD 9V P=225.1

C<sub>10</sub>H<sub>14</sub>N<sub>2</sub>O<sub>4</sub>; MF: 85; RMF: 388; Prob 0.01%; CAS: 28860-95-9; Lib: nist\_msms; ID: 313764.

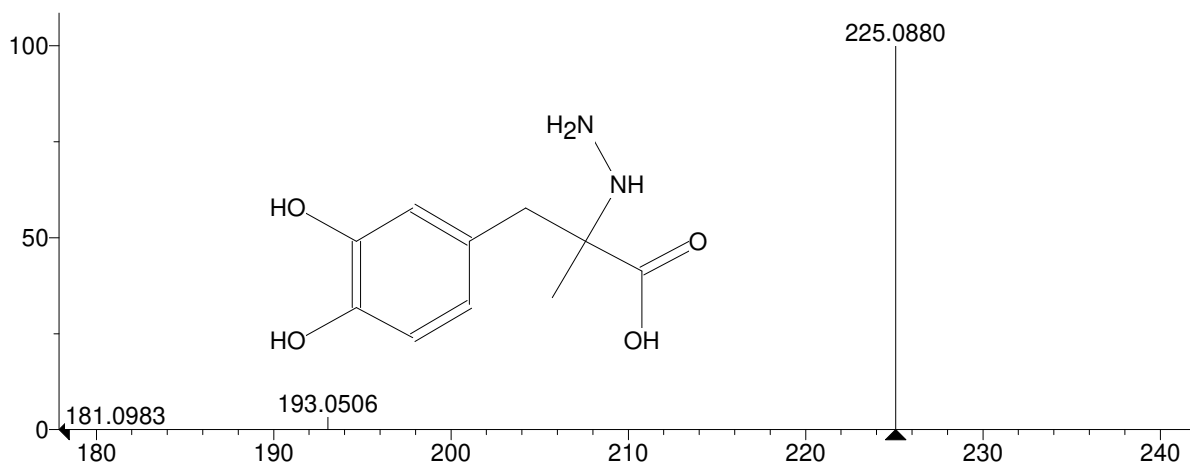

Hit 5 : 3-Hydroxykynurenine [M+H]<sup>+</sup> HCD 0V P=225.1

C<sub>10</sub>H<sub>12</sub>N<sub>2</sub>O<sub>4</sub>; MF: 48; RMF: 337; Prob 0.00%; CAS: 2147-61-7; Lib: nist\_msms; ID: 162769.

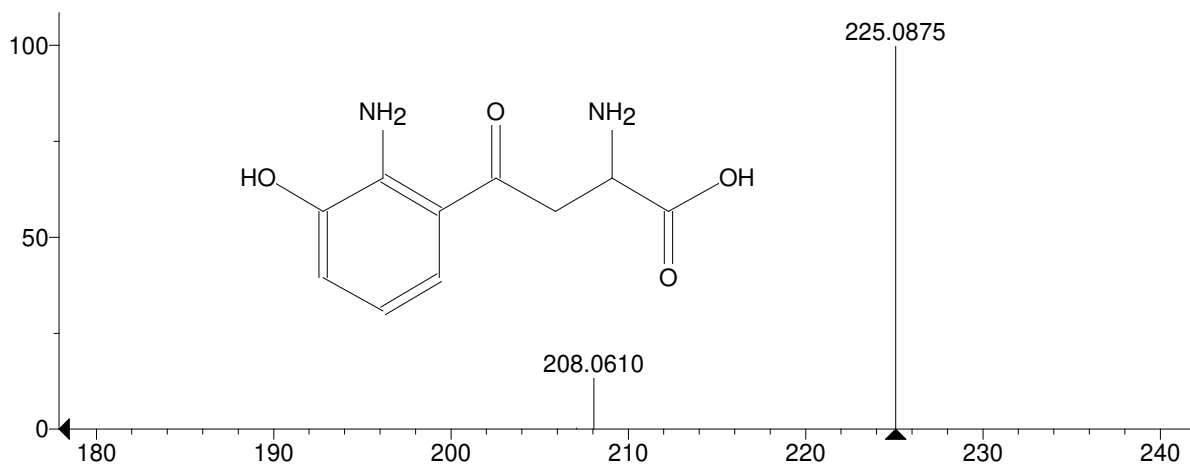

Unknown: Unknown (3.74\_562.1180m/z)  
Compound in Library Factor = 0

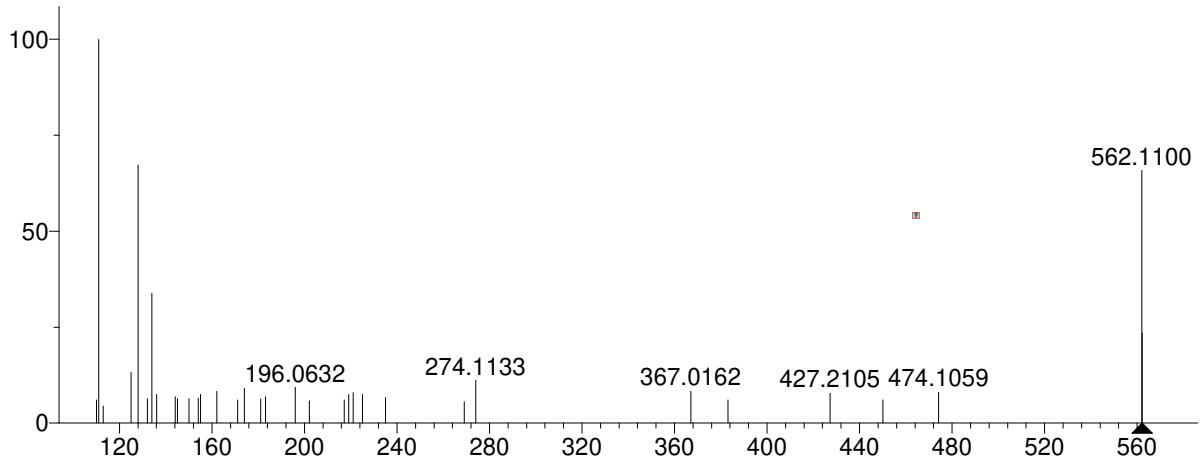

\*\* Search Report Page 1 of 1 \*\*

Unknown: Unknown (3.76\_582.2041m/z)  
Compound in Library Factor = -3273

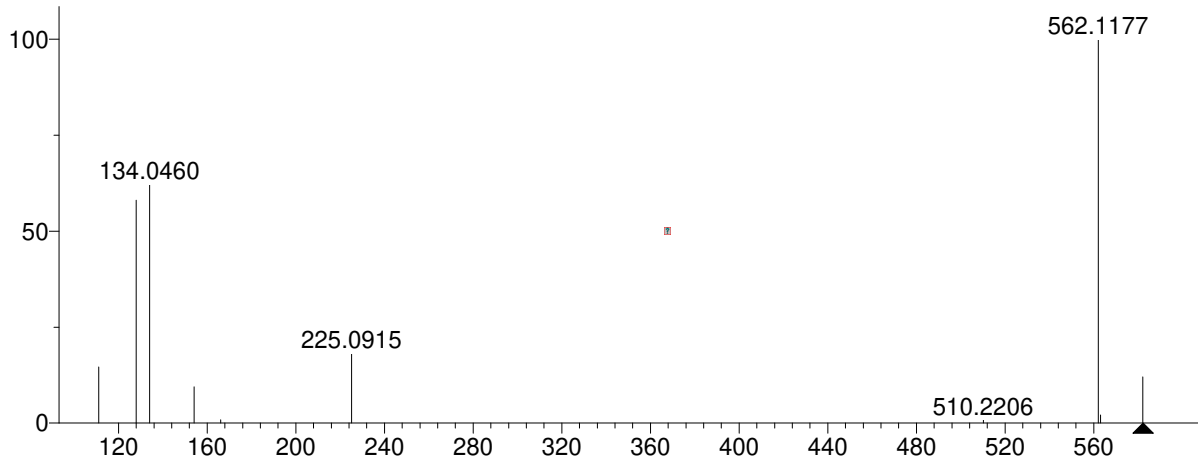

Hit 1 : Benzeneacetic acid, 3-[3-[[[2-chloro-3-(trifluoromethyl)phenyl]methyl](2,2-diphenylethyl)amino]propoxy]- [M]  
C33H31ClF3NO3; MF: 19; RMF: 277; Prob 57.3%; CAS: 405911-09-3; Lib: nist\_msms; ID: 247416.

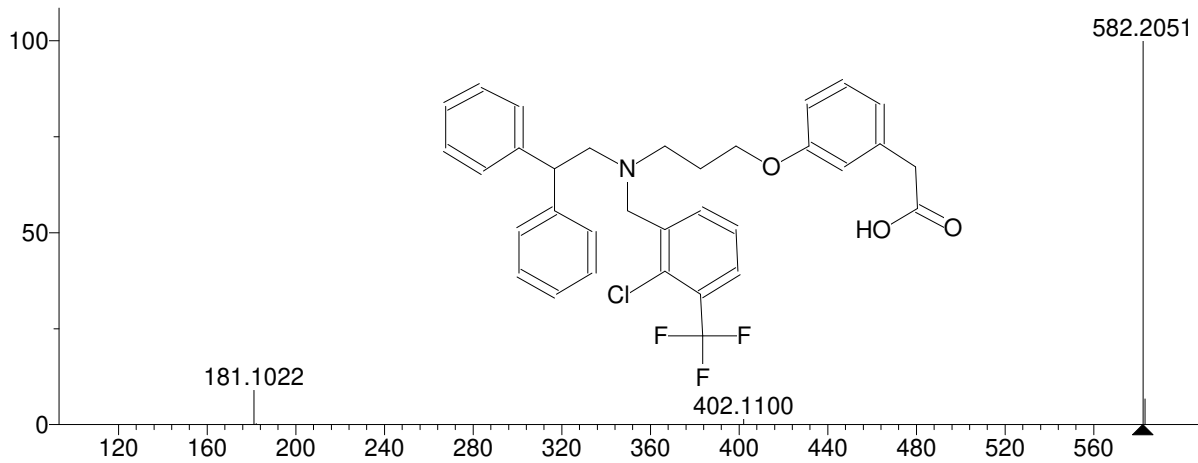

Hit 2 : Isoglobotriose- $\beta$ -N(Acetyl)-Propargyl [M-H]- HCD 17V P=582.2  
C23H37NO16; MF: 11; RMF: 210; Prob 42.7%; Lib: nist\_msms; ID: 185069.

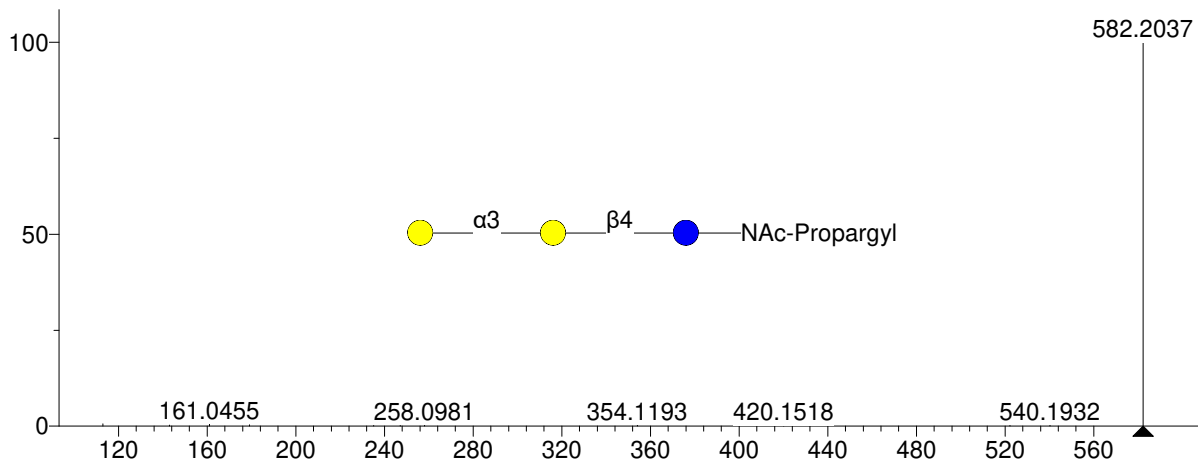



Unknown: Unknown (3.76\_585.1452m/z)  
Compound in Library Factor = -3273

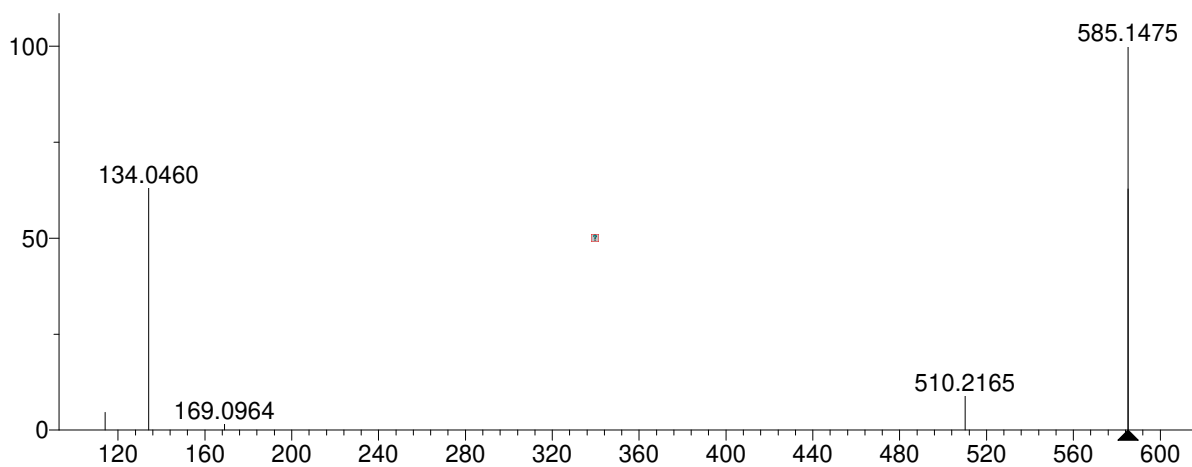

Hit 1 : Neomangiferin [M+H]<sup>+</sup> HCD 11V P=585.1  
C<sub>25</sub>H<sub>28</sub>O<sub>16</sub>; MF: 126; RMF: 733; Prob 100.0%; CAS: 64809-67-2; Lib: nist\_msms; ID: 239539.

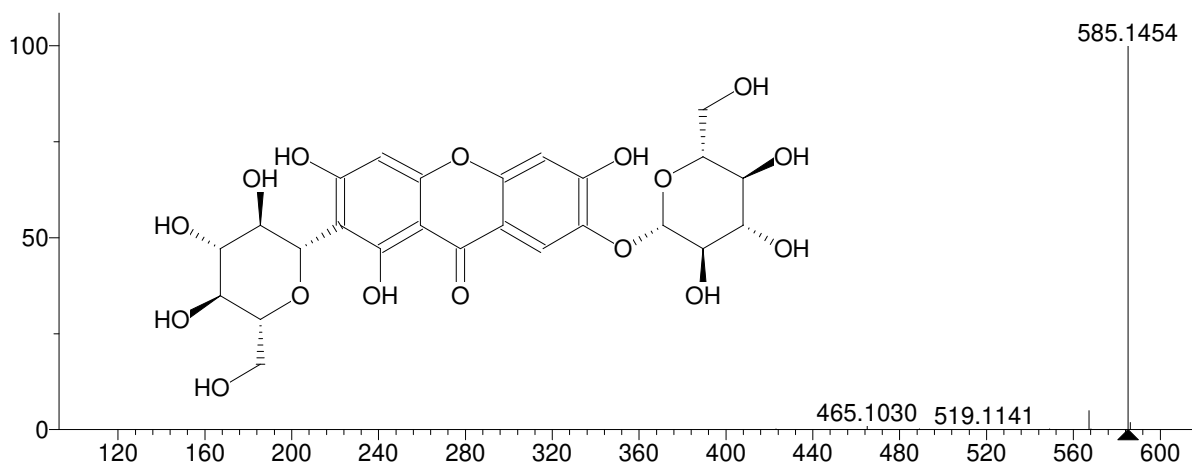

Unknown: Unknown (3.77\_213.0868m/z)  
Compound in Library Factor = 0

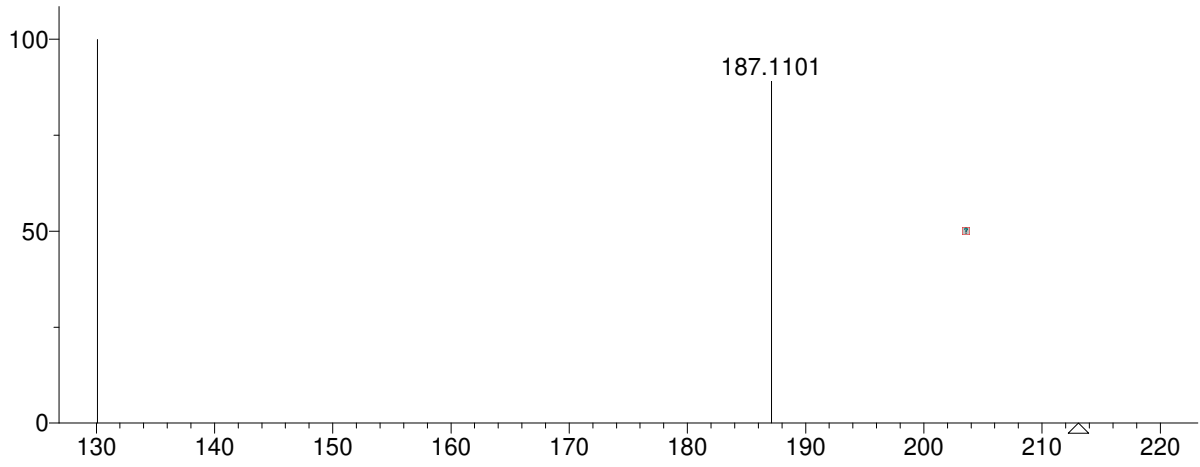

\*\* Search Report Page 1 of 2 \*\*

Unknown: Unknown (3.77\_417.1521m/z)  
Compound in Library Factor = -3273

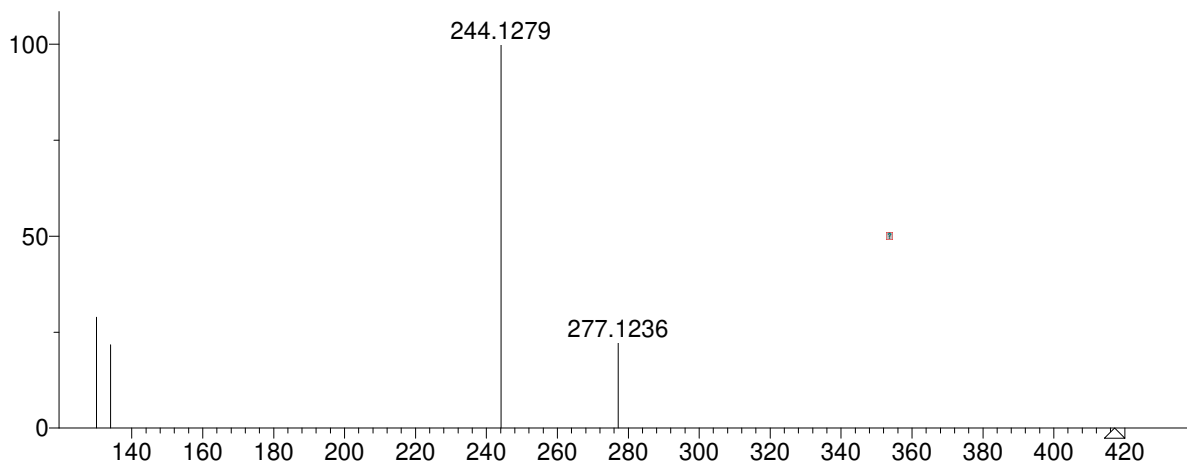

Hit 1 : Halopemide [M+H]<sup>+</sup> HCD 108V P=417.1  
C<sub>21</sub>H<sub>22</sub>ClFN<sub>4</sub>O<sub>2</sub>; MF: 1; RMF: 88; Prob 25.7%; CAS: 59831-65-1; Lib: nist\_msms; ID: 321101.

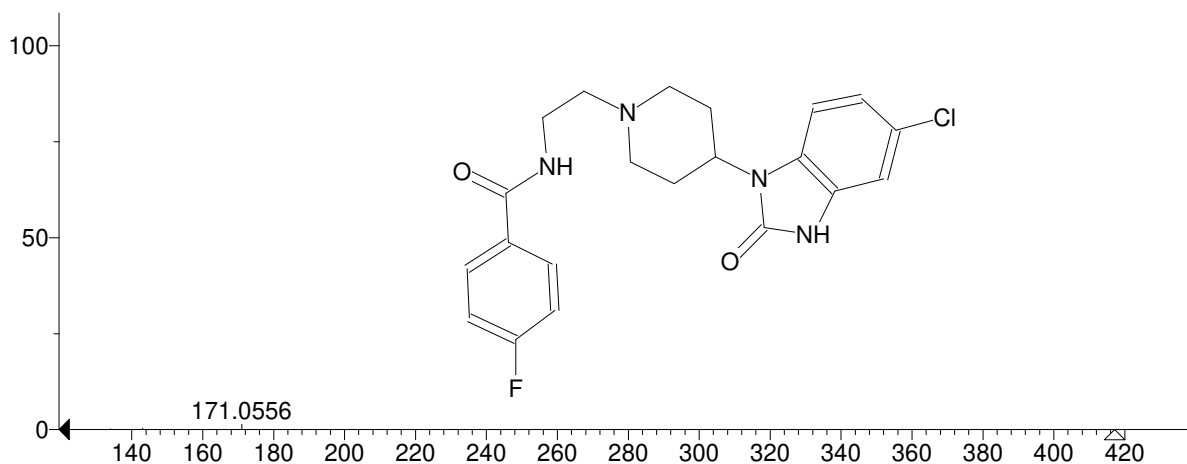

Hit 2 : NCGC00380812-02\_C<sub>23</sub>H<sub>22</sub>N<sub>4</sub>O<sub>5</sub>\_1H-Imidazo[1,2-a]indole-9-propanoic acid, 2,3,9,9a-tetrahydro-9-hydr  
C<sub>23</sub>H<sub>22</sub>N<sub>4</sub>O<sub>5</sub>; MF: 0; RMF: 113; Prob 24.8%; Lib: mona-export-gnps; ID: 13176.

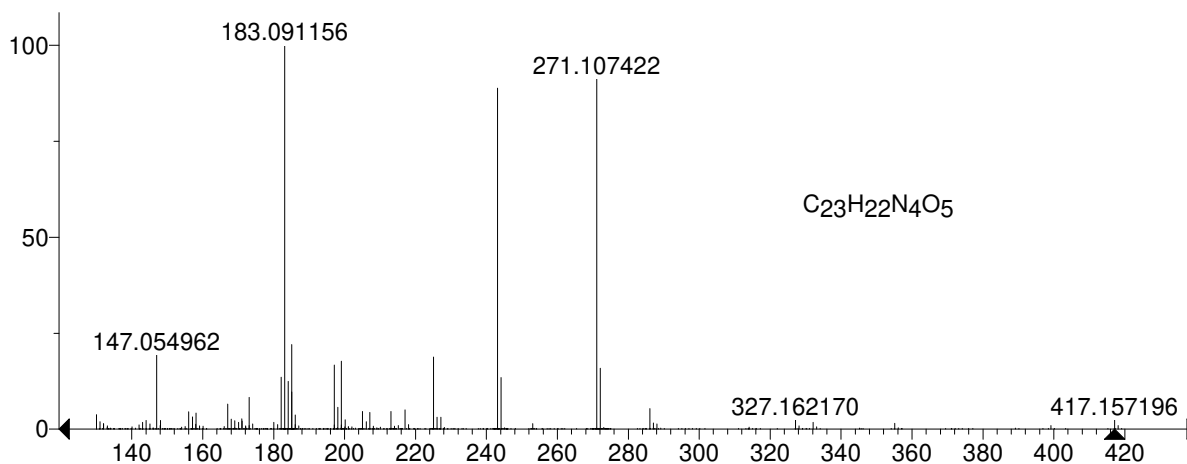

\*\* Search Report Page 2 of 2 \*\*

Hit 3 : NCGC00380812-01!3-(4-hydroxy-2,2-dimethyl-1-oxo-3,3a-dihydroimidazo[1,2-a]indol-4-yl)-2-(4-oxoquinazolin-2-yl)ethane; C<sub>23</sub>H<sub>22</sub>N<sub>4</sub>O<sub>5</sub>; MF: 0; RMF: 99; Prob 24.8%; Lib: mona-export-gnps; ID: 7434.

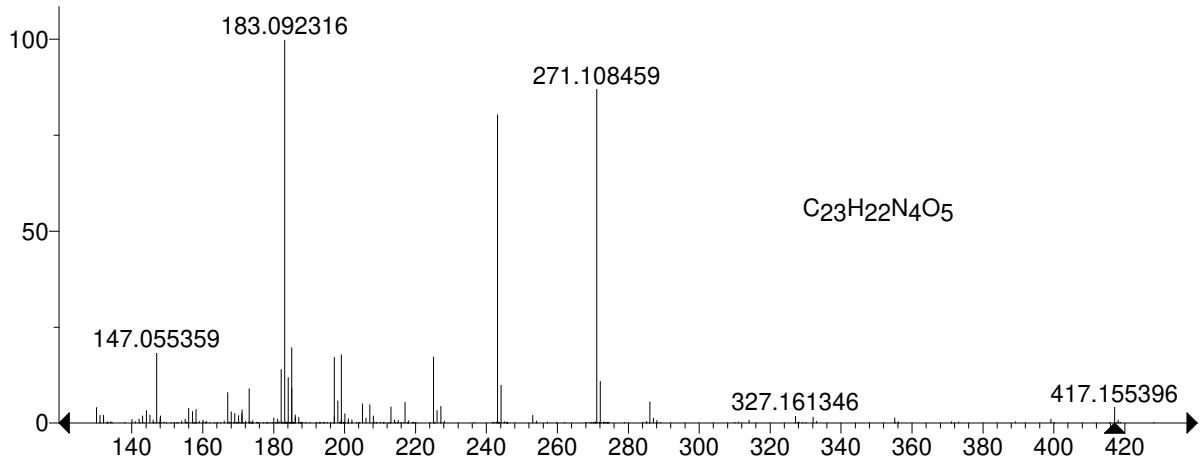

Hit 4 : NCGC00384503-01\_C<sub>22</sub>H<sub>24</sub>O<sub>8</sub>\_(2E)-2,11-Dimethyl-7-methylene-6,12-dioxo-5,14-dioxatricyclo[9.2.1.0~4, C<sub>22</sub>H<sub>24</sub>O<sub>8</sub>; MF: 0; RMF: 8; Prob 24.8%; Lib: mona-export-gnps; ID: 10322.

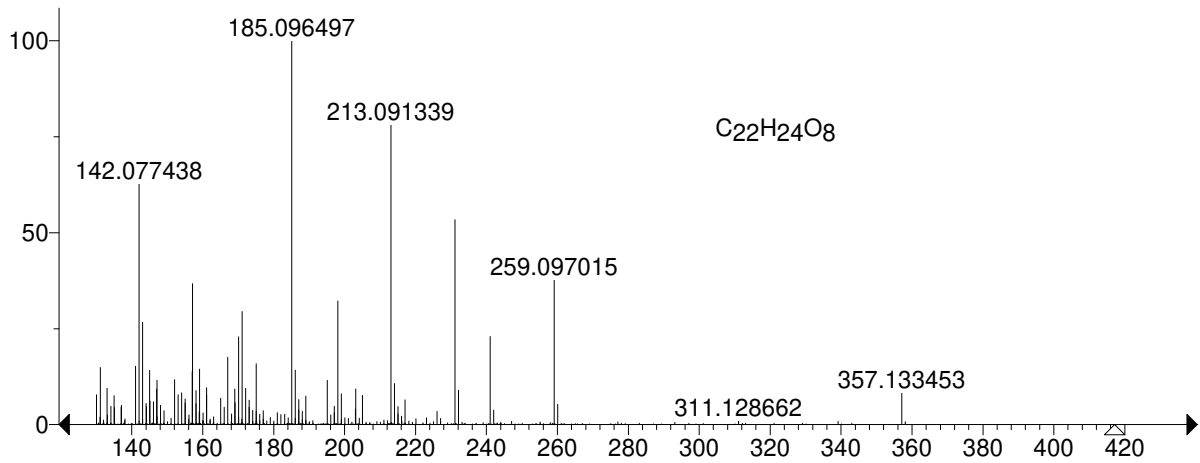

Unknown: Unknown (3.77\_437.0672m/z)  
Compound in Library Factor = 0

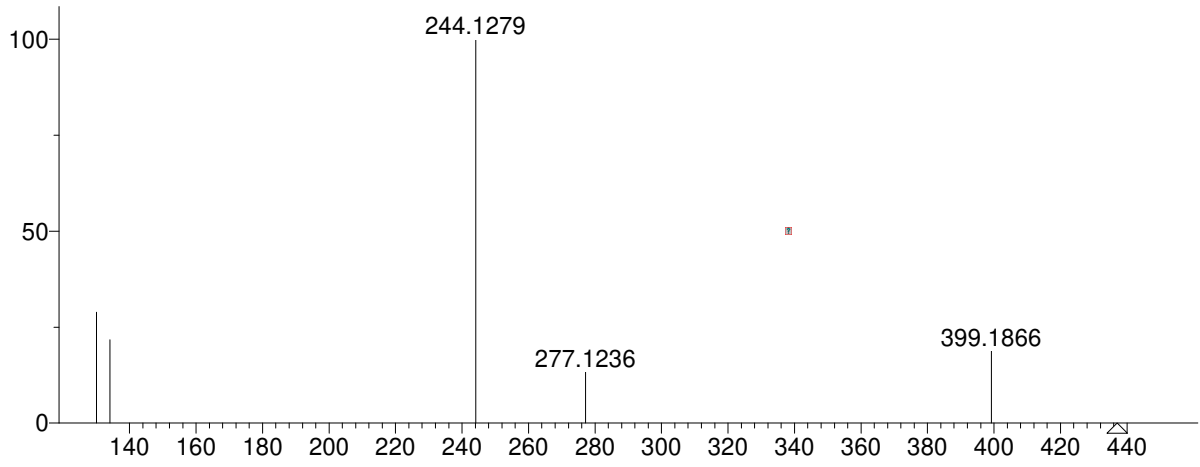

Unknown: Unknown (3.77\_626.2391m/z)  
Compound in Library Factor = 0

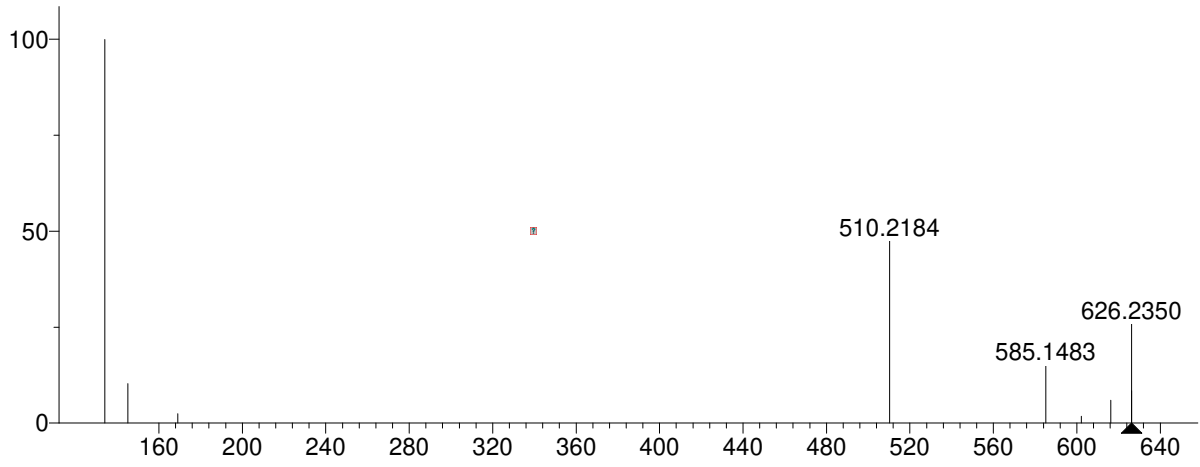

Unknown: Unknown (3.77\_966.3249m/z)  
Compound in Library Factor = 0

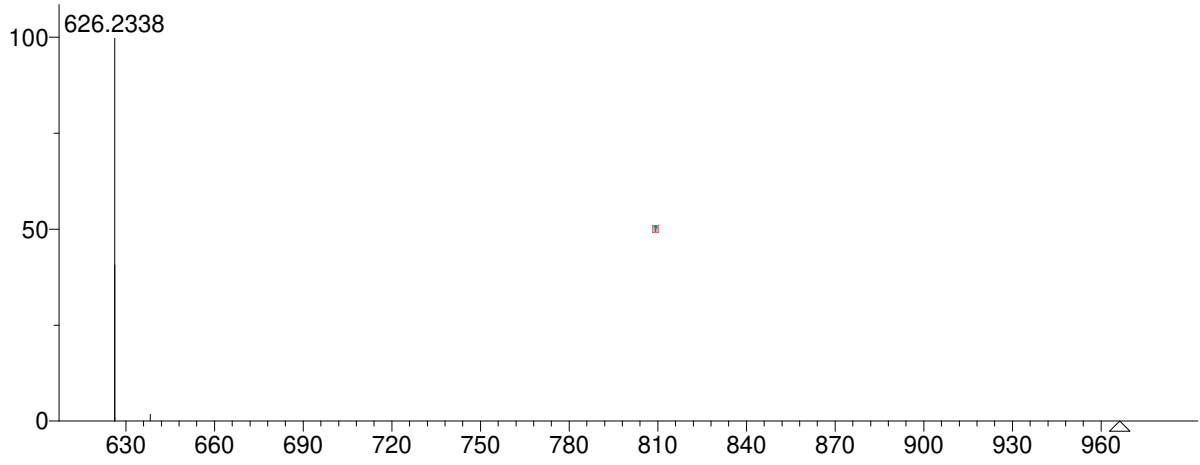

\*\* Search Report Page 1 of 2 \*\*

Unknown: Unknown (3.78\_417.1968m/z)  
Compound in Library Factor = -3273

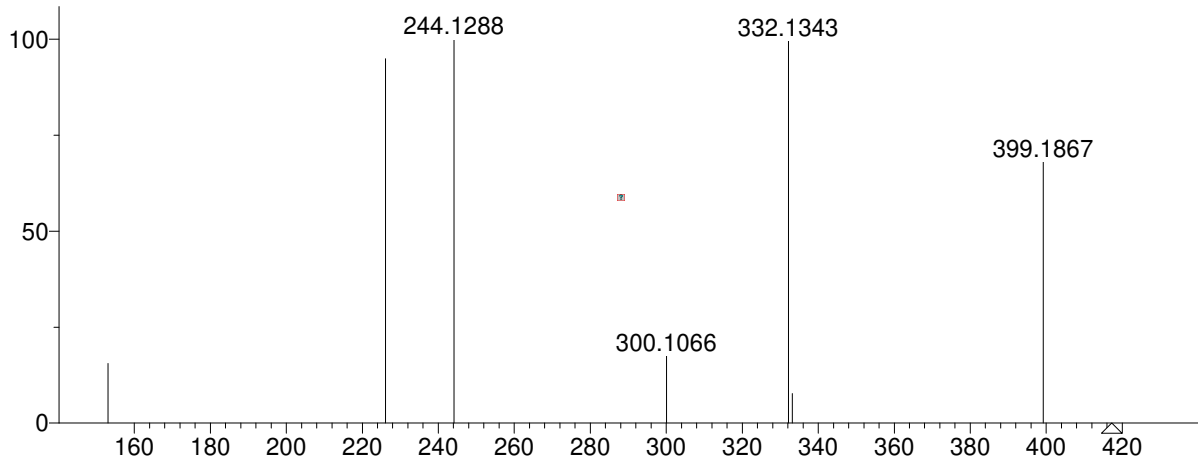

Hit 1 : Glycine, N,N'-[1,2-ethanediylbis(oxy-2,1-phenylene)]bis[N-(carboxymethyl)- [M-H]-=>417.2 IT 35% P=41  
C22H24N2O10; MF: 1; RMF: 203; Prob 9.38%; CAS: 85233-19-8; Lib: nist\_msms; ID: 414018.

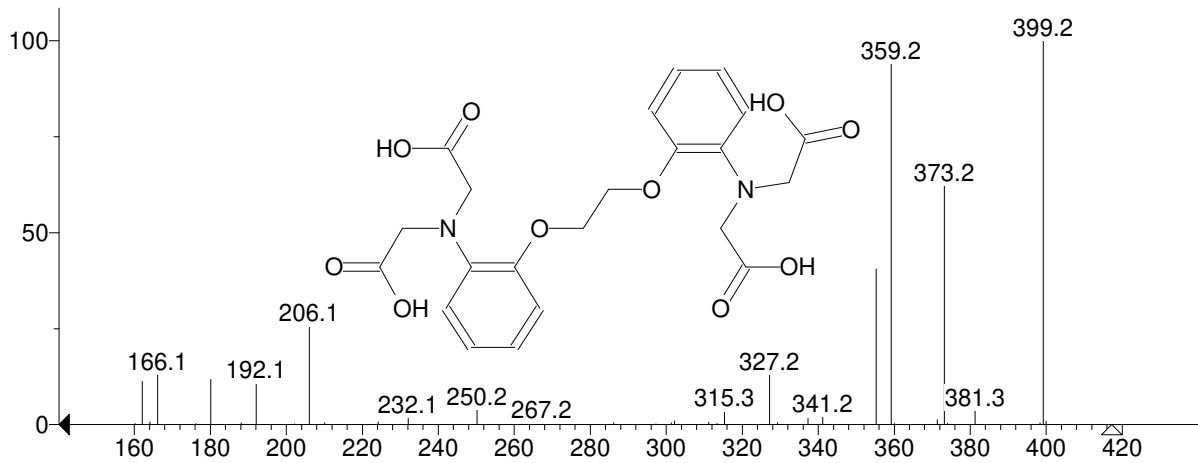

Hit 2 : 19-Norandrosterone glucuronide [M+H-H2O]+=>417.2 IT 35% P=417.2  
C24H36O8; MF: 1; RMF: 96; Prob 9.38%; CAS: 294213-86-8; Lib: nist\_msms; ID: 330392.

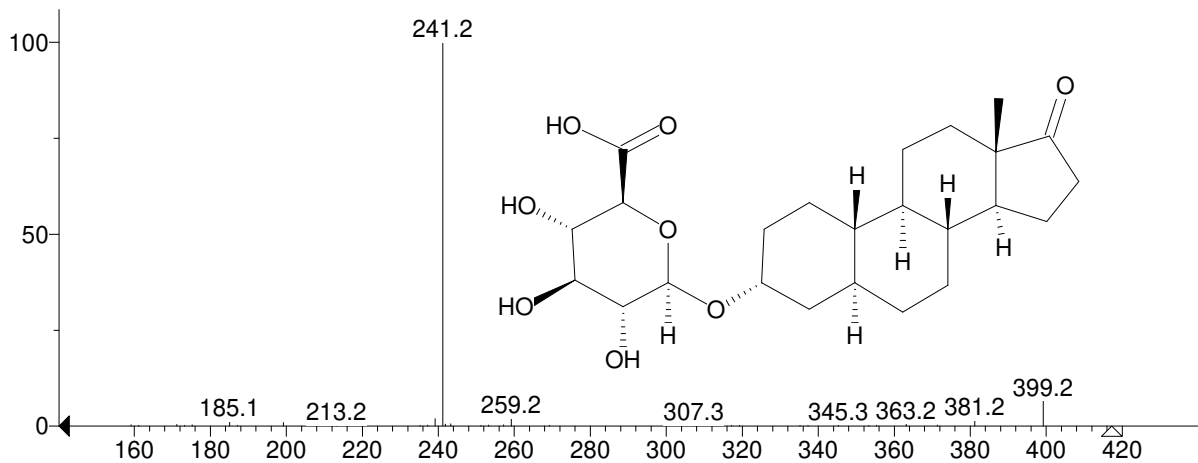



Hit 3 : Withanolide A [M+H]<sup>+</sup>=>417.2 IT 35% P=417.2  
C<sub>28</sub>H<sub>38</sub>O<sub>6</sub>; MF: 0; RMF: 183; Prob 9.02%; CAS: 32911-62-9; Lib: nist\_msms; ID: 227142.

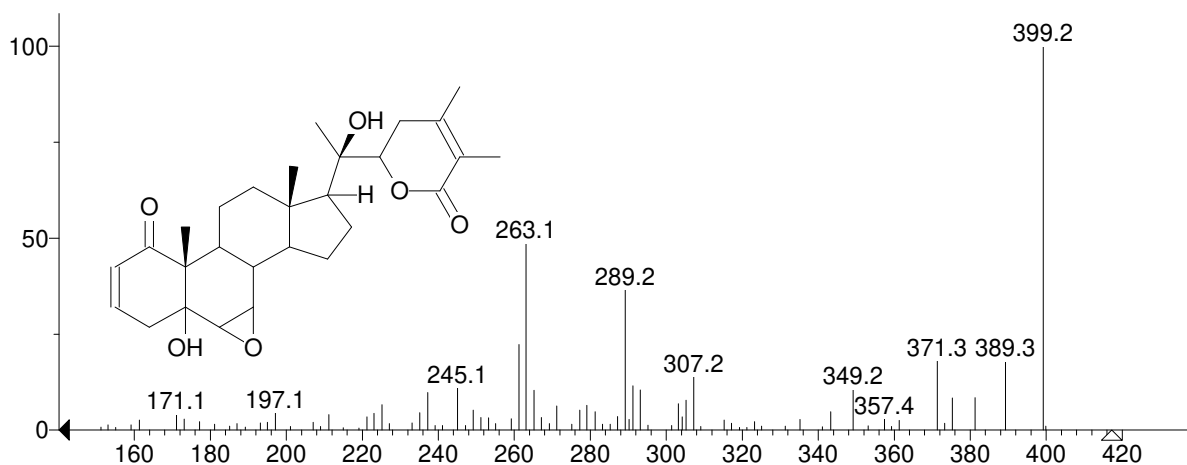

Hit 4 : 12-Deoxywithastramonolide [M+H-H<sub>2</sub>O]<sup>+</sup>=>417.2 IT 35% P=417.2  
C<sub>28</sub>H<sub>38</sub>O<sub>6</sub>; MF: 0; RMF: 183; Prob 9.02%; CAS: 60124-17-6; Lib: nist\_msms; ID: 502681.

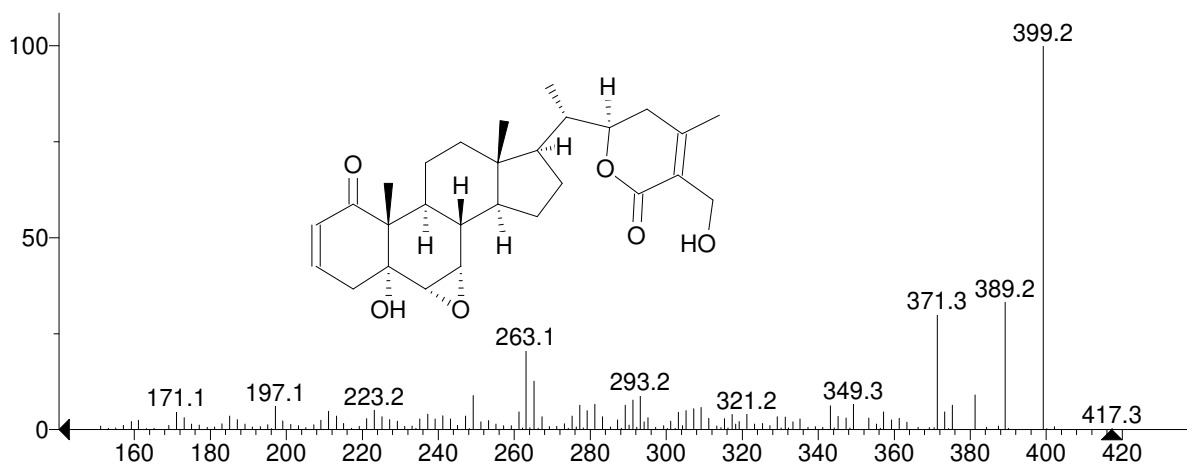

Hit 5 : Dipyridamole [M+H]<sup>+</sup>=>460.3=>417.2 IT 35% P=417.2  
C<sub>24</sub>H<sub>40</sub>N<sub>8</sub>O<sub>4</sub>; MF: 0; RMF: 166; Prob 9.02%; CAS: 58-32-2; Lib: nist\_msms; ID: 314333.

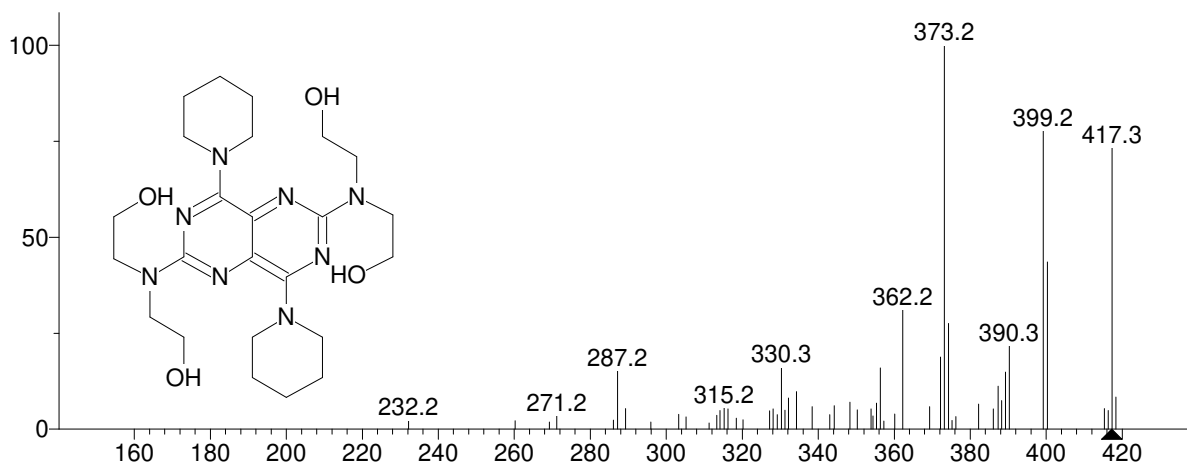

Unknown: Unknown (3.78\_502.1928m/z)  
Compound in Library Factor = 0

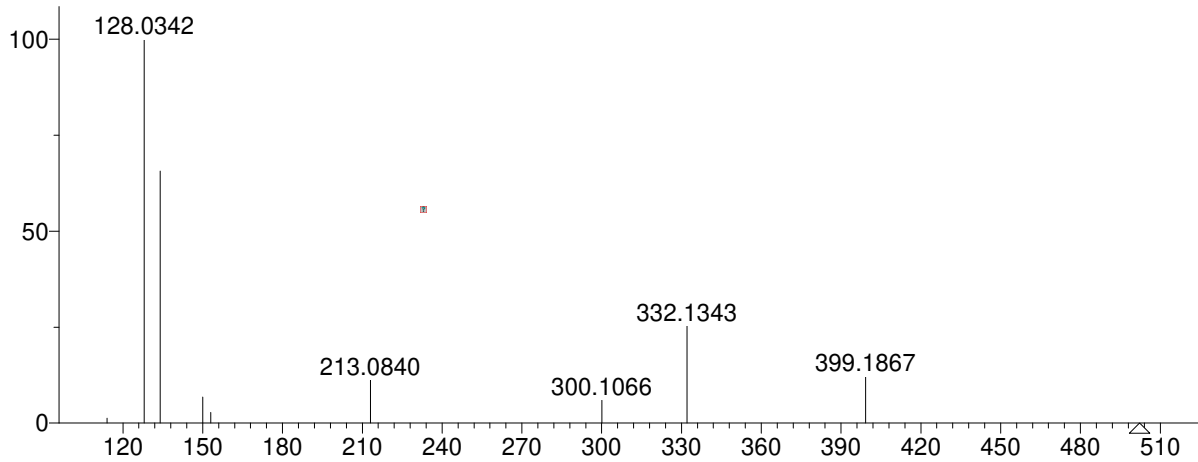

Hit 1 : Irinotecan [M+H-C5H11N]+ IT 35% P=502.2  
C33H38N4O6; MF: 0; RMF: 35; Prob 50.0%; CAS: 97682-44-5; Lib: nist\_msms; ID: 218340.

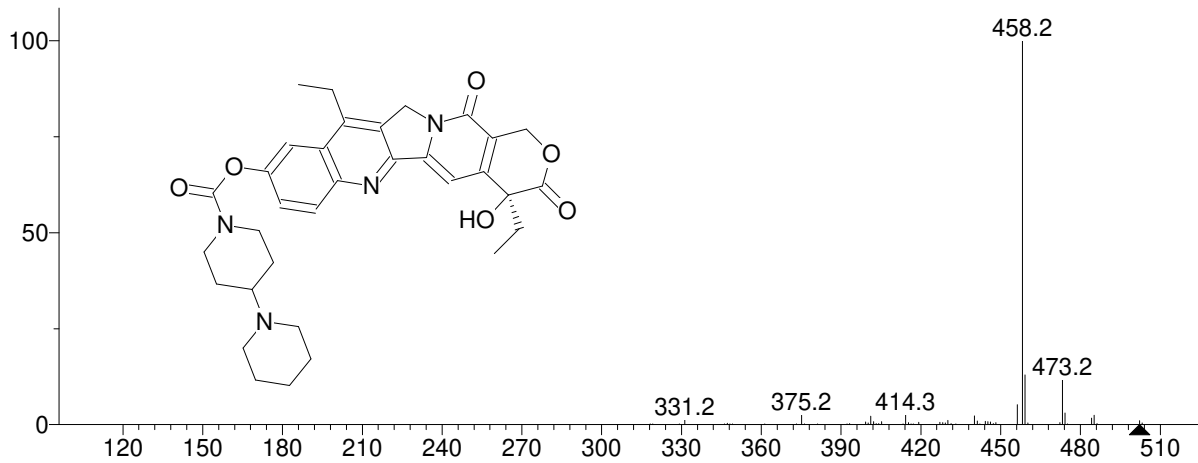

Hit 2 : [(2R,3S,4S,5R,6R)-3,4,5-trihydroxy-6-[2-(3-hydroxy-5-oxoxolan-3-yl)propoxy]oxan-2-yl]methyl (E)-3-(3,4-c  
C22H28O12; MF: 0; RMF: 2; Prob 50.0%; Lib: mona-export-vf-npl\_qexactive; ID: 12996.

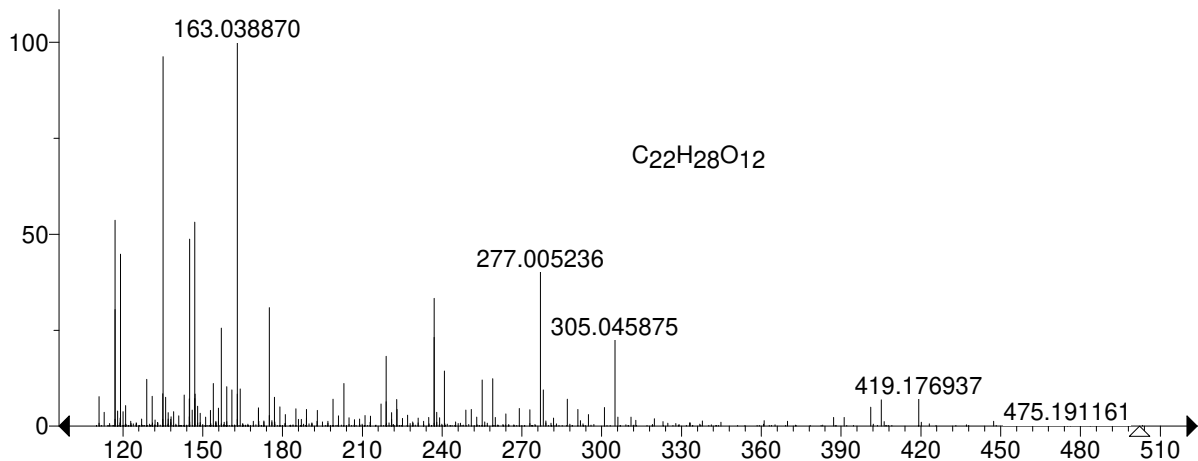

Unknown: Unknown (3.78\_796.2983m/z)  
Compound in Library Factor = 0

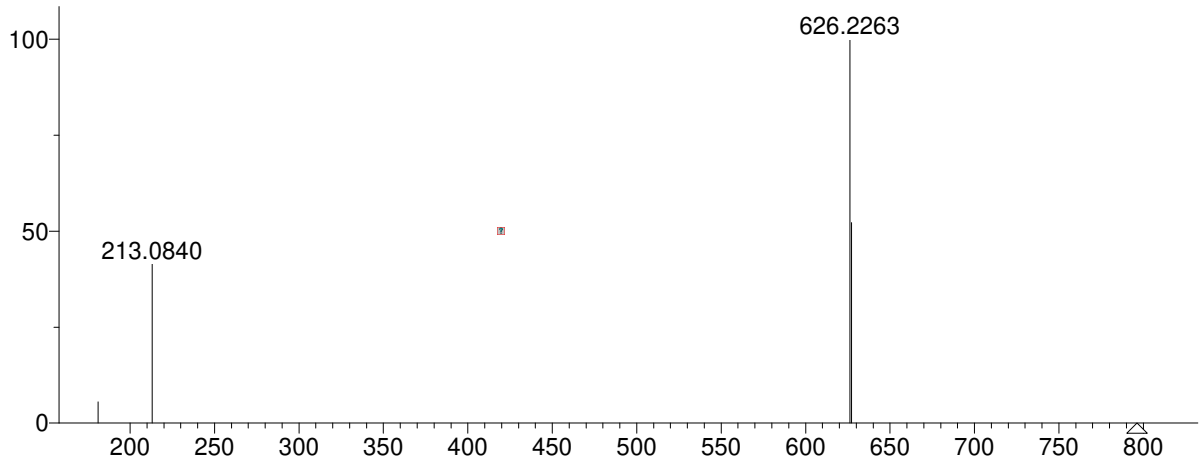

Unknown: Unknown (3.79\_187.1070m/z)  
Compound in Library Factor = -218

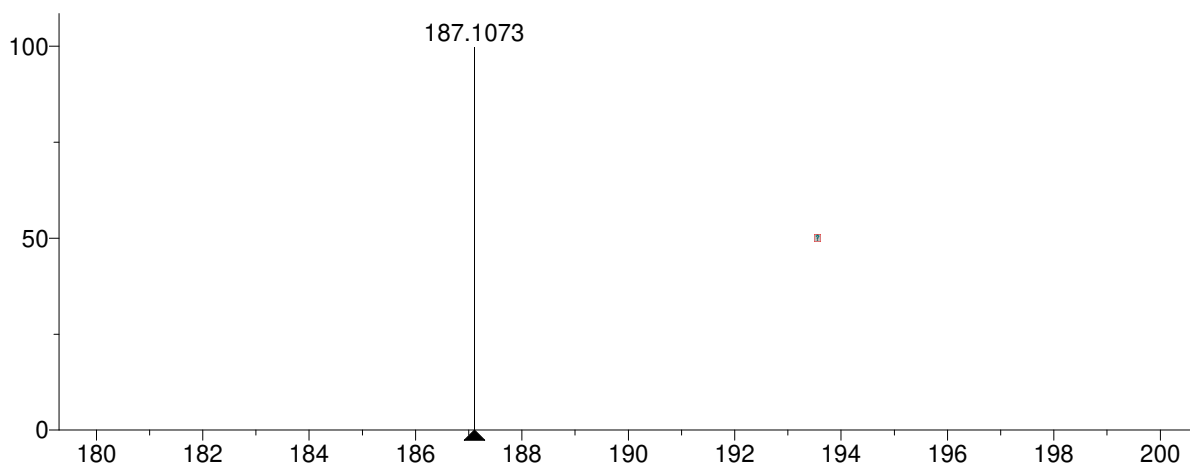

Hit 1 : Unknown (carbon number 8); PlaSMA ID-222 [M-H]<sup>-</sup> P=187.1  
C<sub>8</sub>H<sub>16</sub>N<sub>2</sub>O<sub>3</sub>; MF: 364; RMF: 999; Prob 5.19%; Lib: biomsms-neg-plasma; ID: 1025.

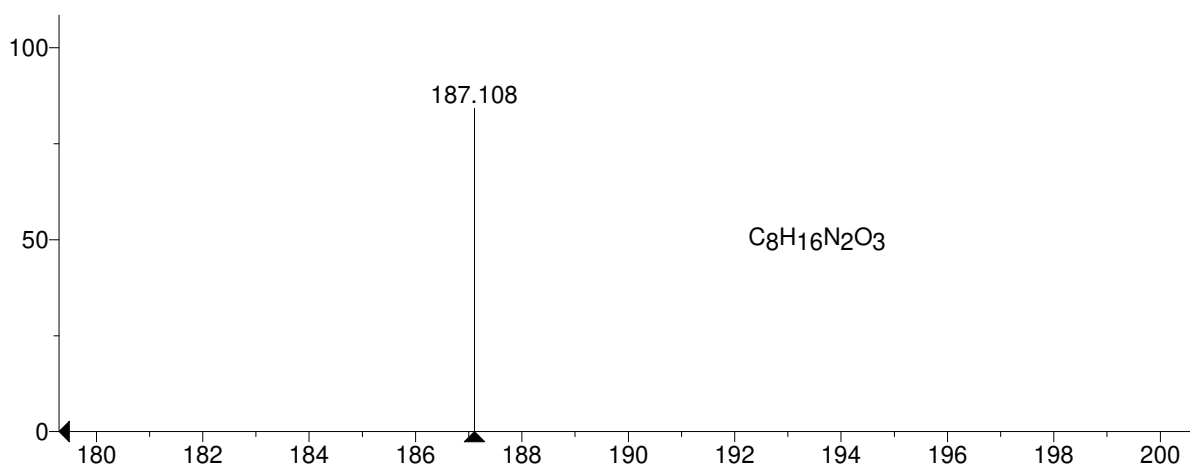

Hit 2 : Gly-Leu [M-H]<sup>-</sup> (20-30-40%) P=187.1  
C<sub>8</sub>H<sub>16</sub>N<sub>2</sub>O<sub>3</sub>; MF: 364; RMF: 999; Prob 5.19%; Lib: mona-export-fiehn\_hilic; ID: 1235.

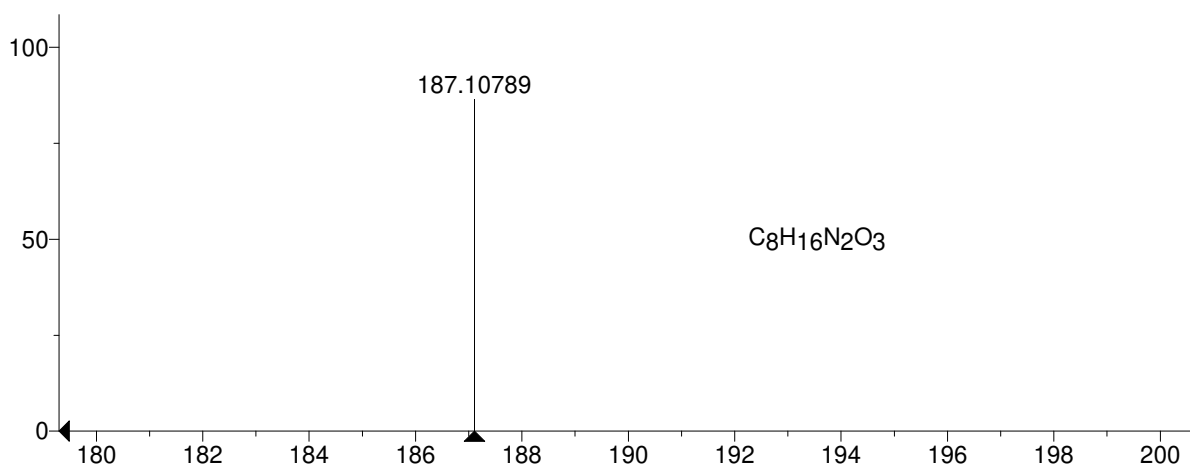

Hit 3 : Ala-Pro [M+H]<sup>+</sup> QTOF 7V P=187.1  
C<sub>8</sub>H<sub>14</sub>N<sub>2</sub>O<sub>3</sub>; MF: 364; RMF: 999; Prob 5.19%; CAS: 13485-59-1; Lib: nist\_msms; ID: 17958.

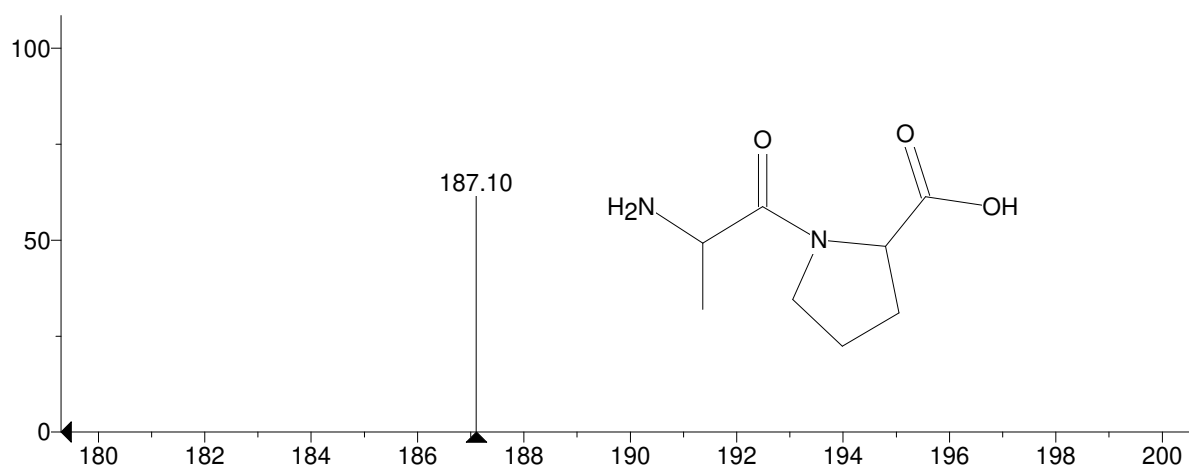

Hit 4 : Glycyl-L-norleucine [M-H]<sup>-</sup> HCD 46V P=187.1  
C<sub>8</sub>H<sub>16</sub>N<sub>2</sub>O<sub>3</sub>; MF: 364; RMF: 999; Prob 5.19%; CAS: 19257-04-6; Lib: nist\_msms; ID: 558394.

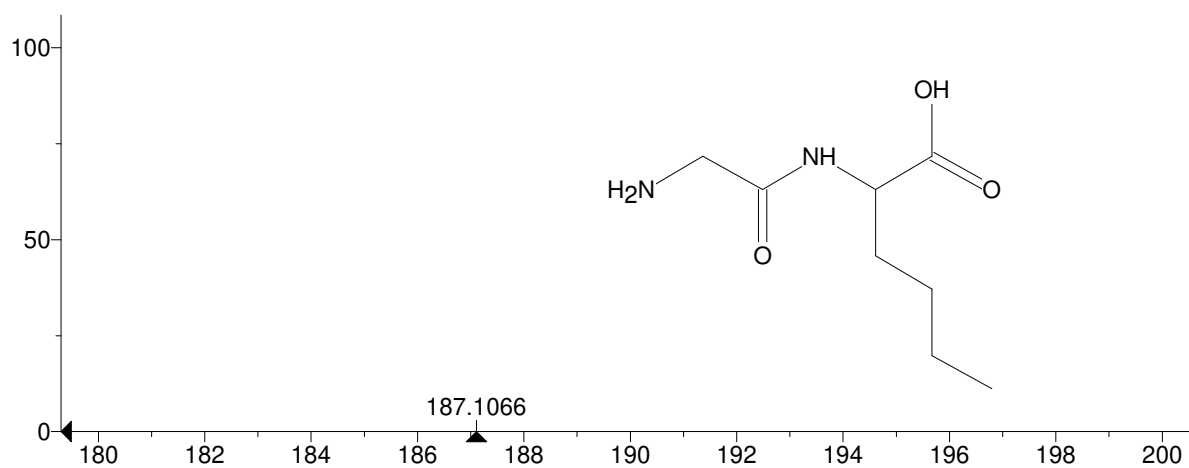

Hit 5 : Ala-Val [M-H]<sup>-</sup> HCD 29eV P=187.1  
C<sub>8</sub>H<sub>16</sub>N<sub>2</sub>O<sub>3</sub>; MF: 364; RMF: 999; Prob 5.19%; Lib: nist\_msms; ID: 567290.

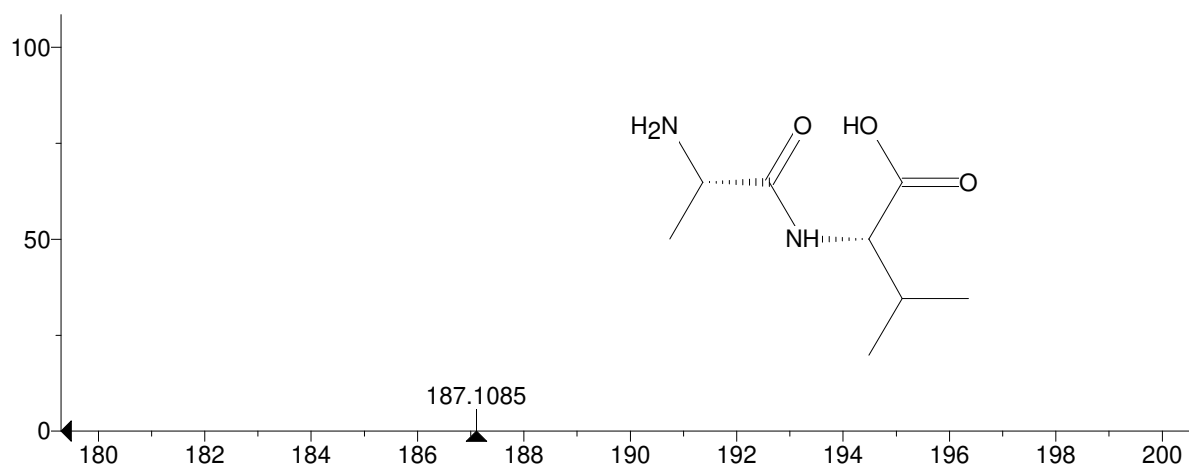

Unknown: Unknown (3.79\_353.1447m/z)  
Compound in Library Factor = 0

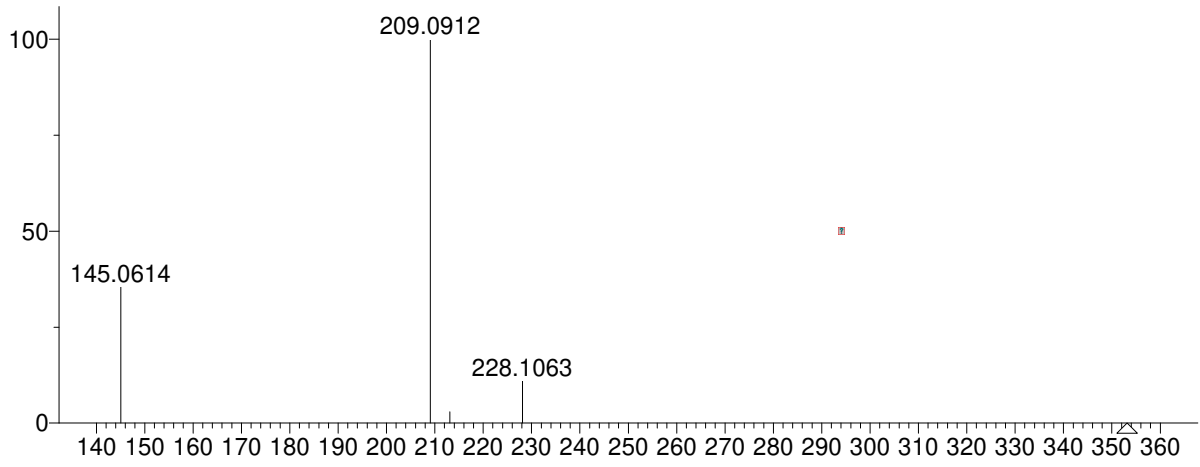

\*\* Search Report Page 1 of 2 \*\*

Unknown: Unknown (3.79\_427.1698m/z)  
Compound in Library Factor = -3273

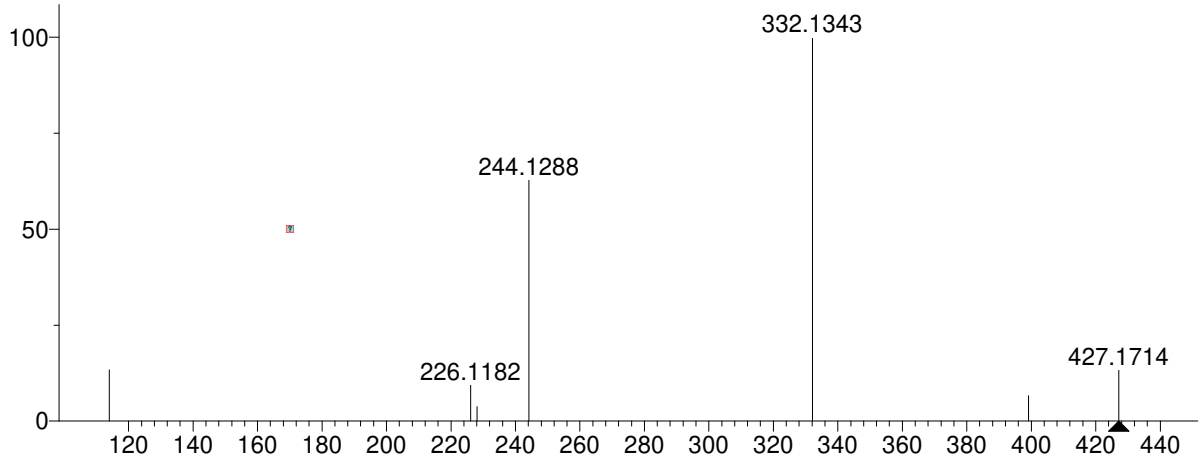

Hit 1 : PG 11:0; PG 2:0-9:0; [M-H]<sup>-</sup> [M-H]<sup>-</sup> P=427.2  
C<sub>17</sub>H<sub>33</sub>O<sub>10</sub>P; MF: 3; RMF: 129; Prob 20.5%; Lib: msdial-insilicomsm-lipids-neg; ID: 324573.

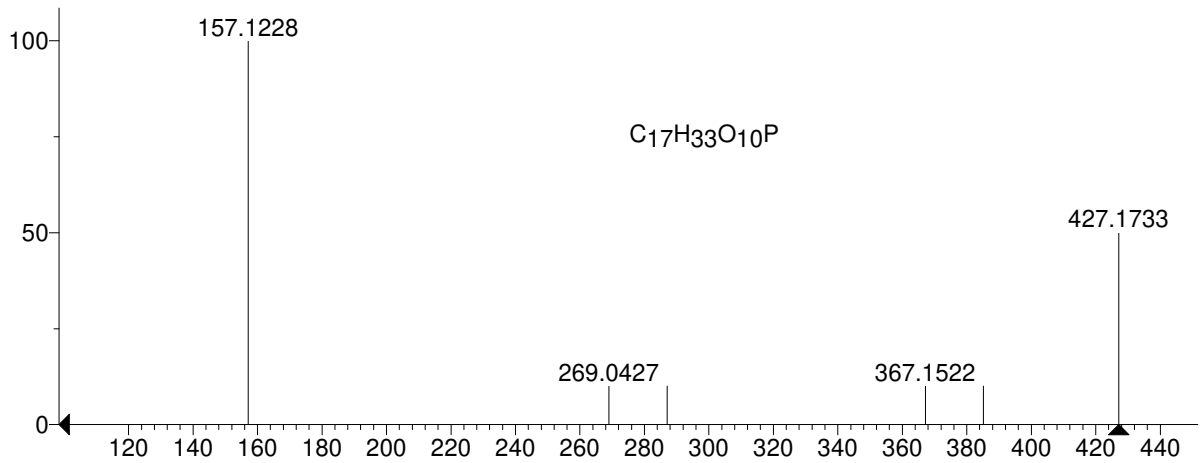

Hit 2 : PG 11:0; PG 3:0-8:0; [M-H]<sup>-</sup> [M-H]<sup>-</sup> P=427.2  
C<sub>17</sub>H<sub>33</sub>O<sub>10</sub>P; MF: 3; RMF: 129; Prob 20.5%; Lib: msdial-insilicomsm-lipids-neg; ID: 324632.

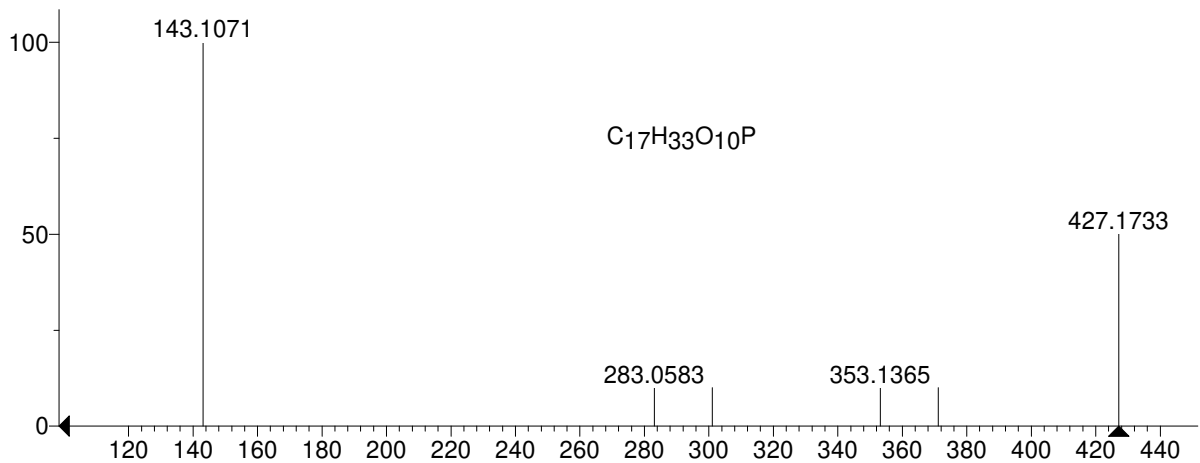

\*\* Search Report Page 2 of 2 \*\*

Hit 3 : PG 11:0; PG 4:0-7:0; [M-H]<sup>-</sup> [M-H]<sup>-</sup> P=427.2  
C<sub>17</sub>H<sub>33</sub>O<sub>10</sub>P; MF: 3; RMF: 129; Prob 20.5%; Lib: msdial-insilicomsm-lipids-neg; ID: 324690.

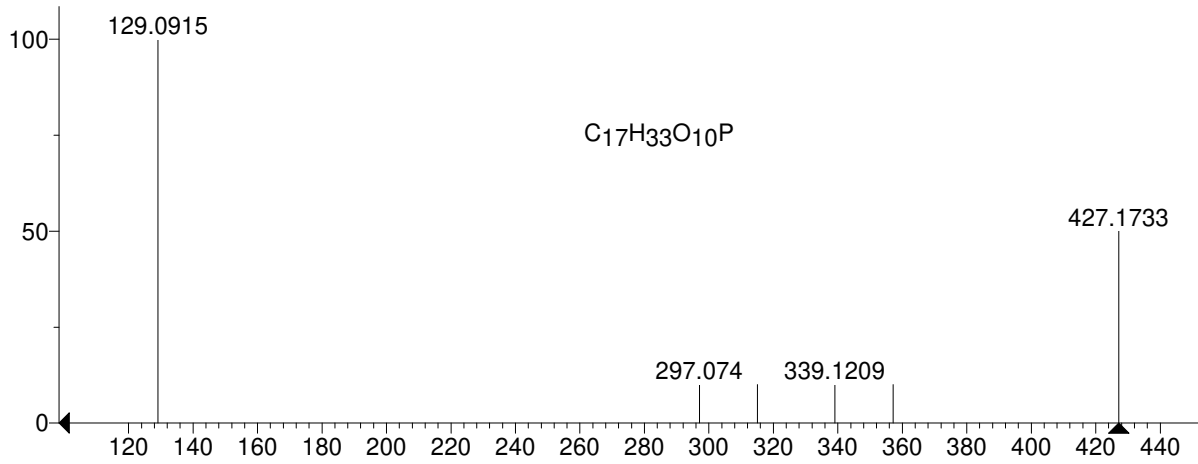

Hit 4 : PG 11:0; PG 5:0-6:0; [M-H]<sup>-</sup> [M-H]<sup>-</sup> P=427.2  
C<sub>17</sub>H<sub>33</sub>O<sub>10</sub>P; MF: 3; RMF: 129; Prob 20.5%; Lib: msdial-insilicomsm-lipids-neg; ID: 324747.

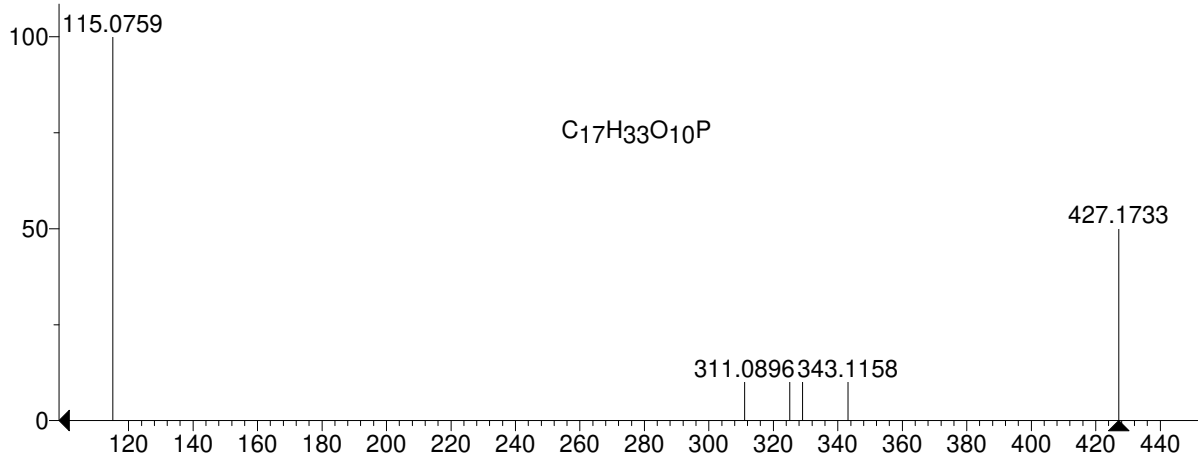

Hit 5 : [(6E,10Z)-10-(acetyloxymethyl)-6-formyl-3-methylidene-2-oxo-3a,4,5,8,9,11a-hexahydrocycloodeca[b]furan-  
C<sub>22</sub>H<sub>28</sub>O<sub>7</sub>; MF: 0; RMF: 29; Prob 18.1%; Lib: mona-export-vf-npl\_qexactive; ID: 23323.

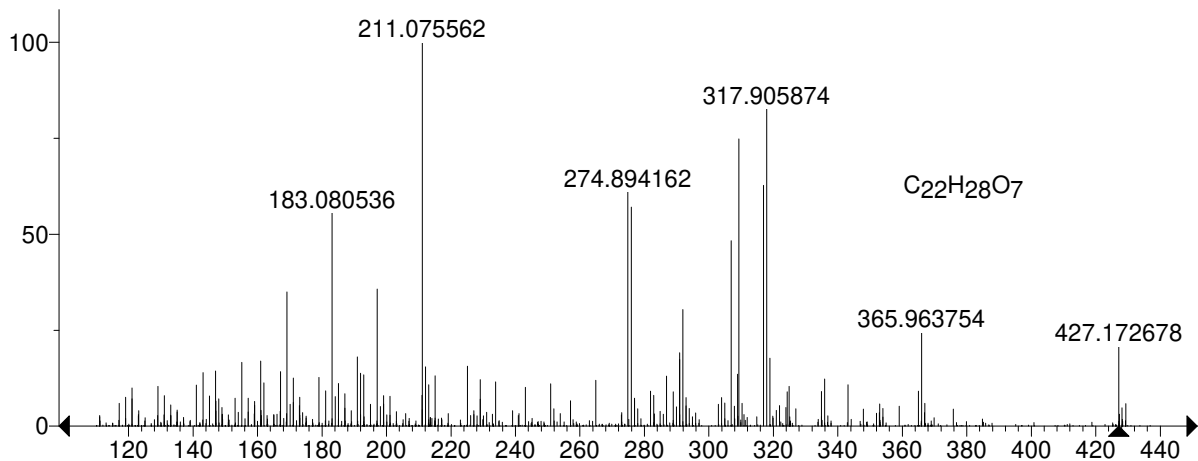



Unknown: Unknown (3.80\_499.2274m/z)  
Compound in Library Factor = 0

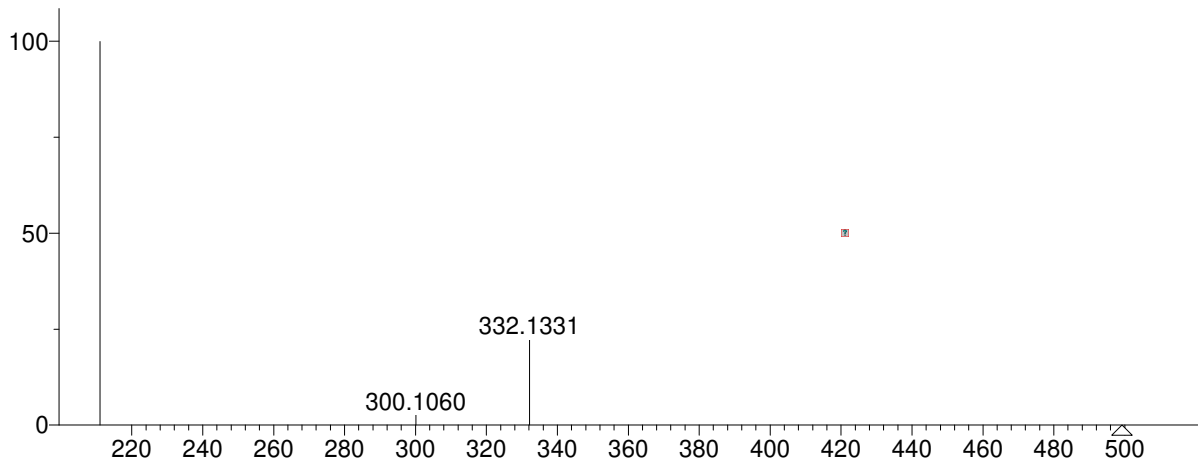

Unknown: Unknown (3.81\_231.1334m/z)  
Compound in Library Factor = -636

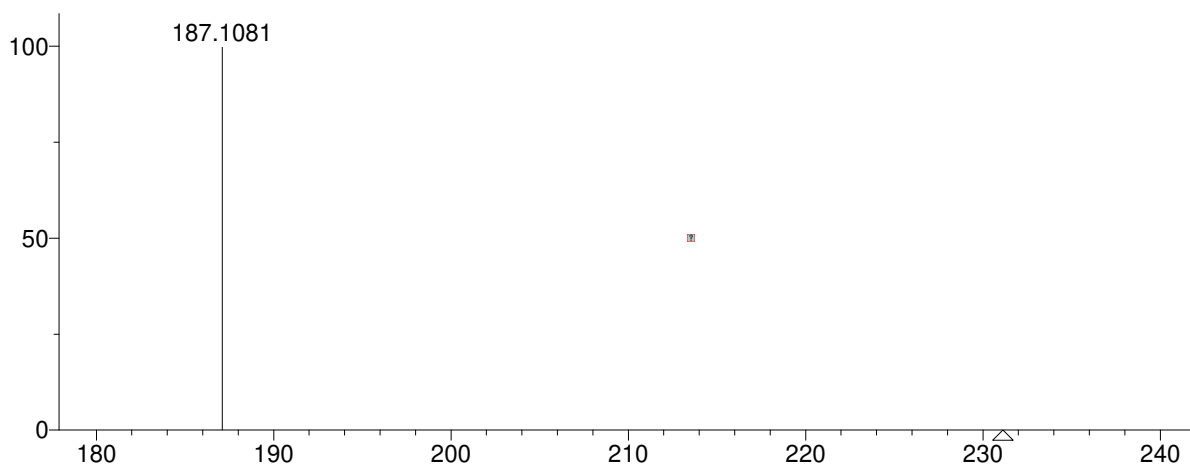

Hit 1 : Leu-Thr [M-H]- HCD 30eV P=231.1  
C<sub>10</sub>H<sub>20</sub>N<sub>2</sub>O<sub>4</sub>; MF: 364; RMF: 999; Prob 19.9%; Lib: nist\_msms; ID: 566949.

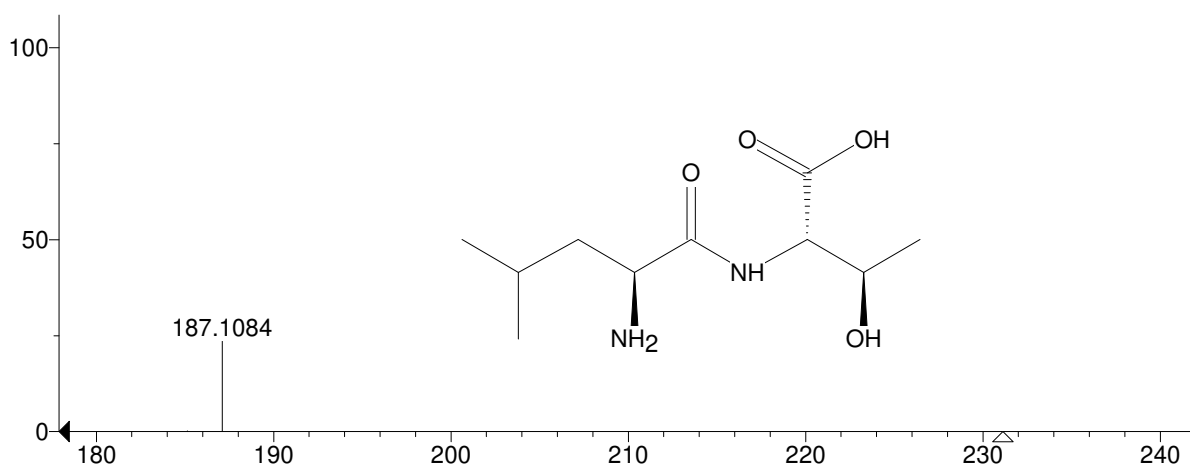

Hit 2 : Thr-Leu [M-H]- HCD 30eV P=231.1  
C<sub>10</sub>H<sub>20</sub>N<sub>2</sub>O<sub>4</sub>; MF: 364; RMF: 999; Prob 19.9%; CAS: 50299-12-2; Lib: nist\_msms; ID: 568153.

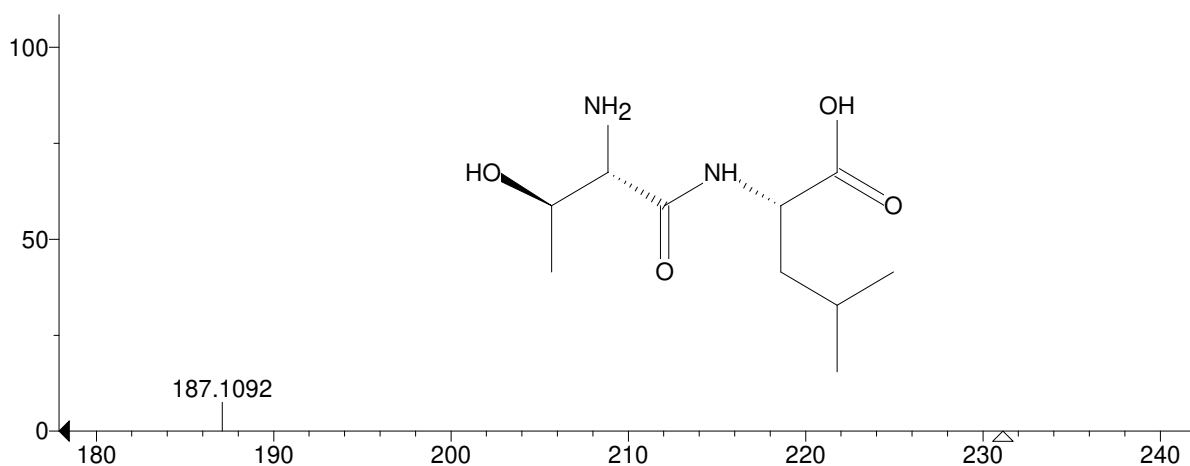

Hit 3 : Leu-Thr [M-H]<sup>-</sup> HCD 30eV P=231.1  
C<sub>10</sub>H<sub>20</sub>N<sub>2</sub>O<sub>4</sub>; MF: 364; RMF: 999; Prob 19.9%; CAS: 38062-82-7; Lib: nist\_msms2; ID: 69806.

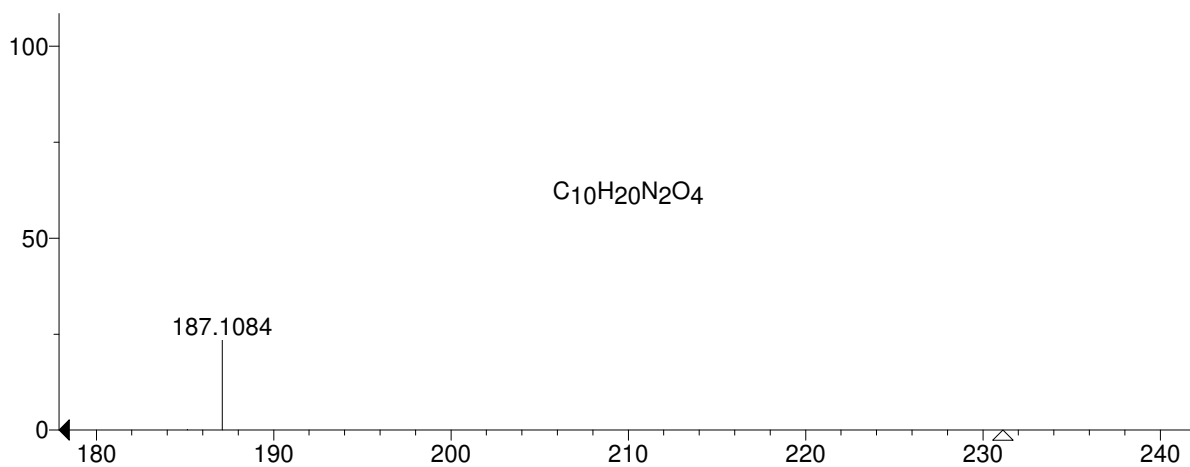

Hit 4 : Ile-Thr [M-H]<sup>-</sup> HCD 30eV P=231.1  
C<sub>10</sub>H<sub>20</sub>N<sub>2</sub>O<sub>4</sub>; MF: 364; RMF: 999; Prob 19.9%; Lib: nist\_msms2; ID: 566888.

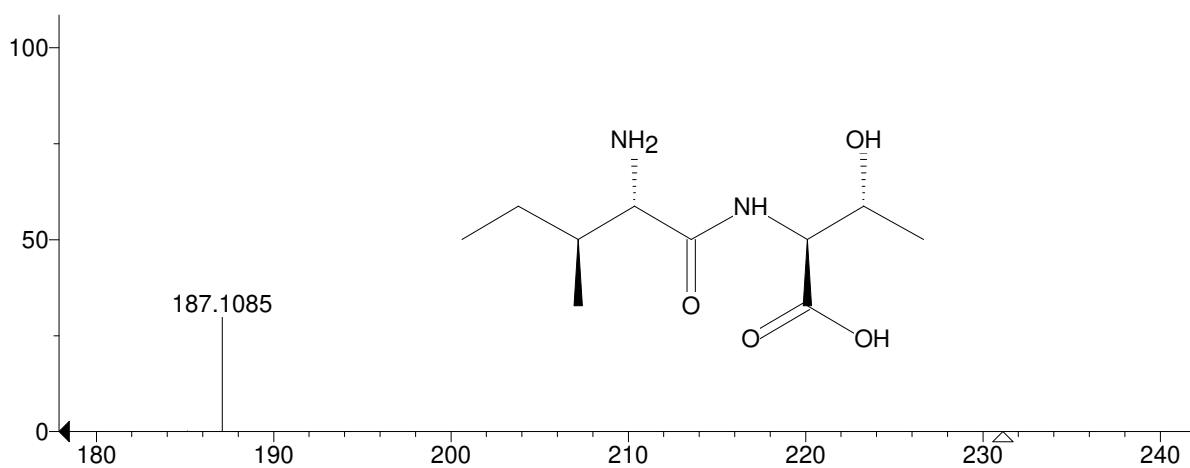

Hit 5 : Ile-Thr [M-H]<sup>-</sup> HCD 30eV P=231.1  
C<sub>10</sub>H<sub>20</sub>N<sub>2</sub>O<sub>4</sub>; MF: 364; RMF: 999; Prob 19.9%; CAS: 59652-61-8; Lib: nist\_msms2; ID: 69745.

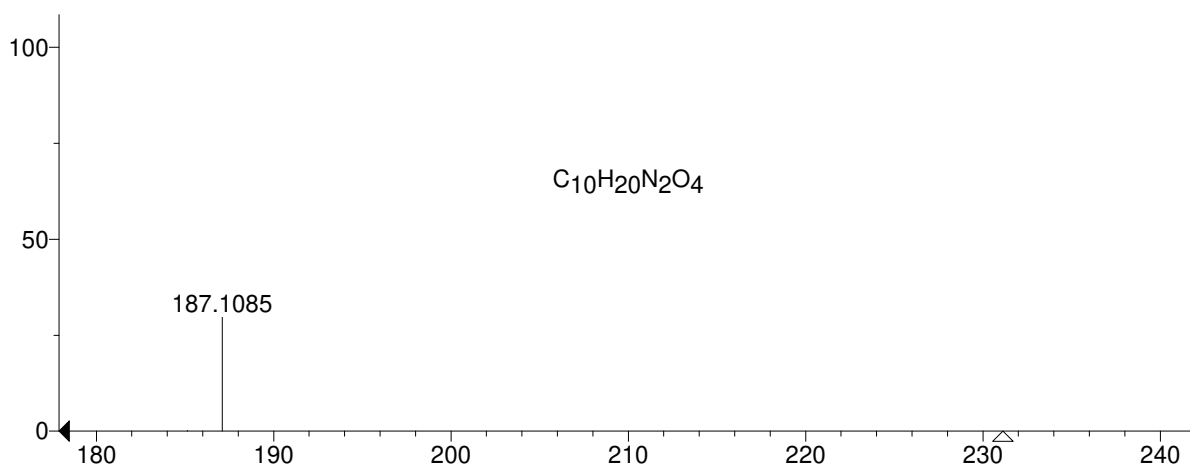

Unknown: Unknown (3.81\_355.1607m/z)  
Compound in Library Factor = -2176

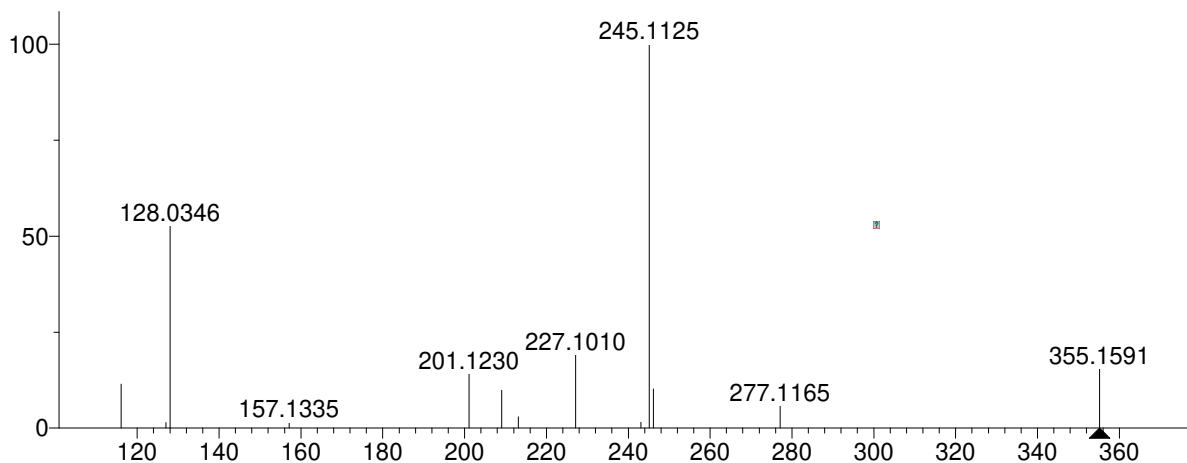

Hit 1 : pGlu-Glu-Pro-amide [M+H]<sup>+</sup> HCD 3eV P=355.2  
C15H22N4O6; MF: 37; RMF: 249; Prob 77.9%; CAS: 85541-78-2; Lib: nist\_msms; ID: 564354.

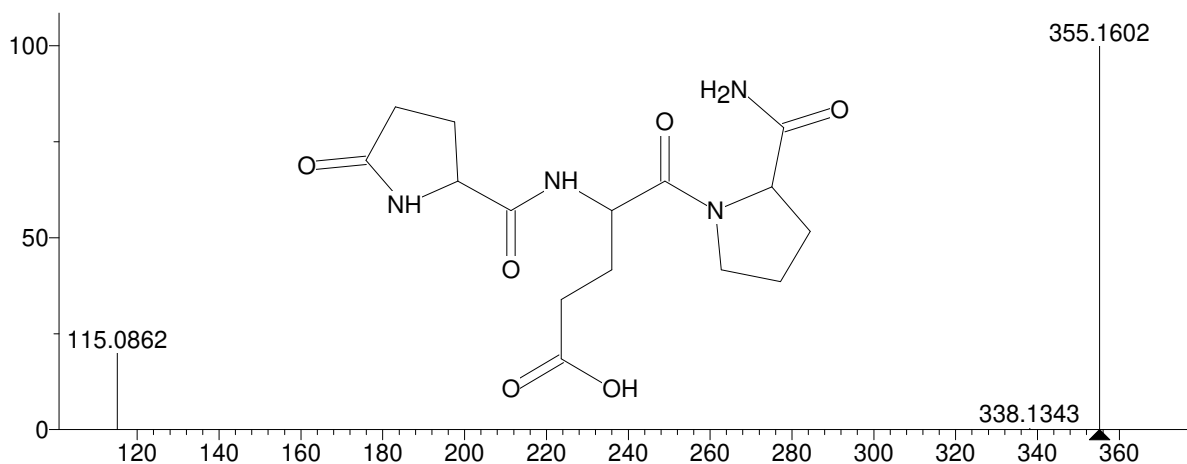

Hit 2 : Isoxaben [M+Na]<sup>+</sup> HCD 10V P=355.2  
C18H24N2O4; MF: 8; RMF: 238; Prob 22.1%; CAS: 82558-50-7; Lib: nist\_msms; ID: 397188.

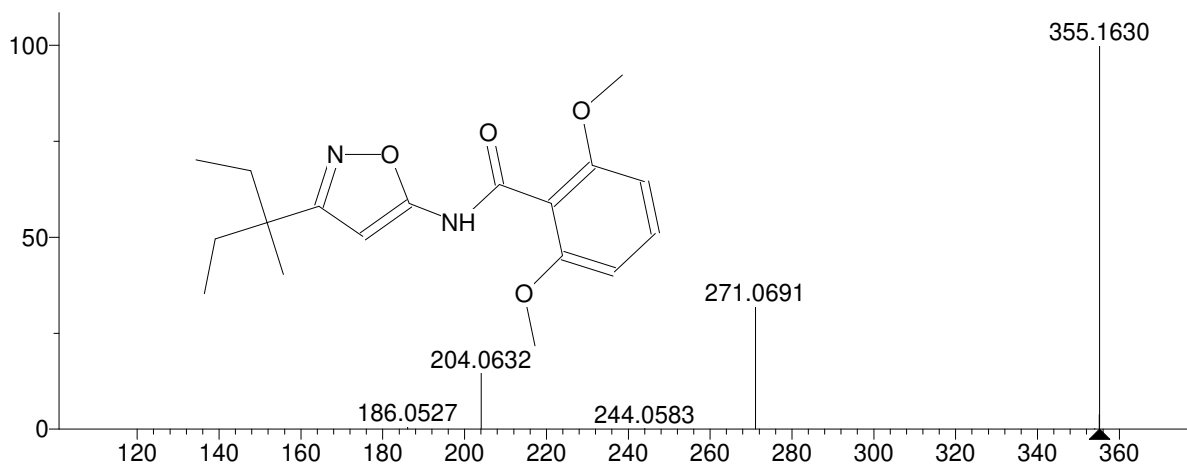

Unknown: Unknown (3.81\_389.1545m/z)  
Compound in Library Factor = 0

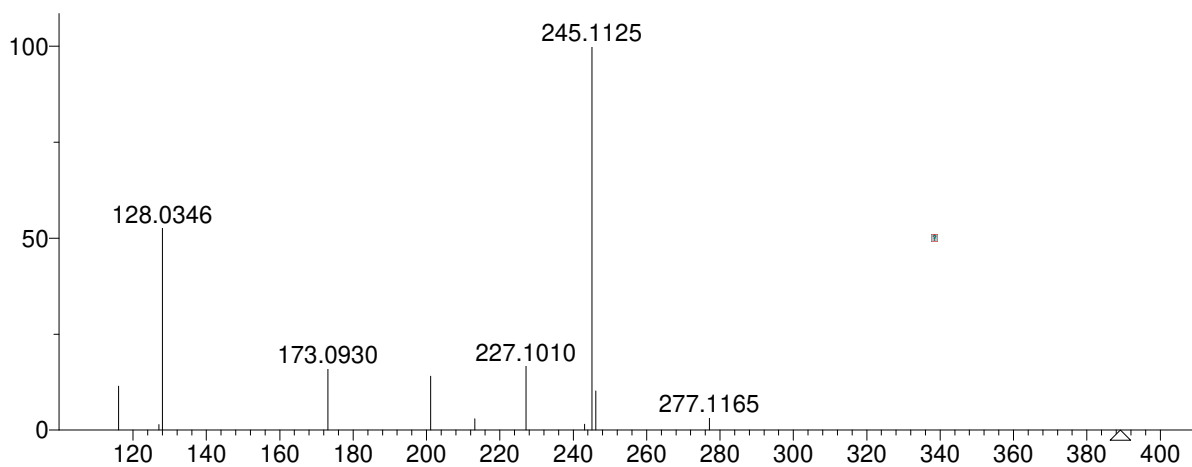

Hit 1 : Diacetoxyscirpenol [M+Na]<sup>+</sup> IT 35% P=389.2  
C19H26O7; MF: 0; RMF: 49; Prob 100.0%; CAS: 2270-40-8; Lib: nist\_msms; ID: 379600.

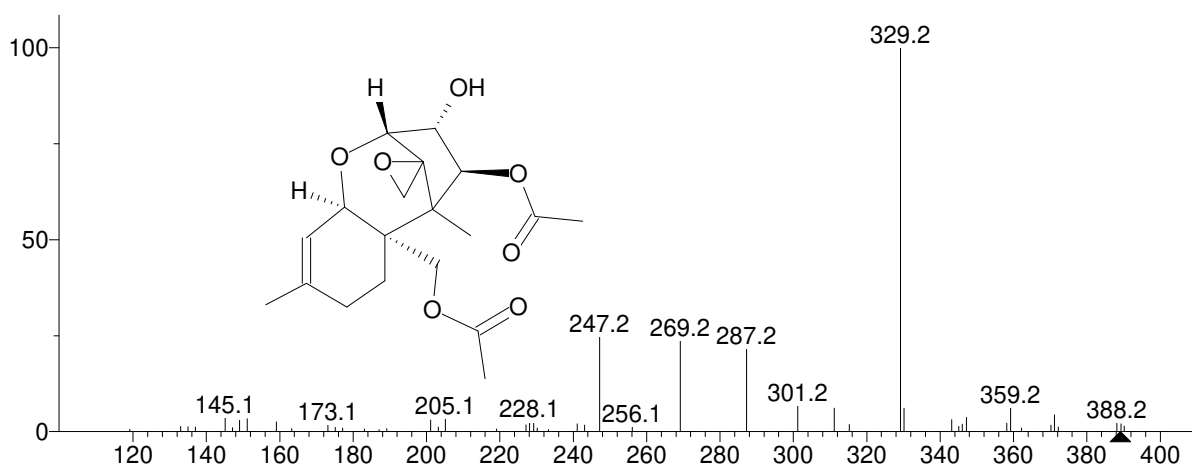

Unknown: Unknown (3.81\_530.1991m/z)  
Compound in Library Factor = 0

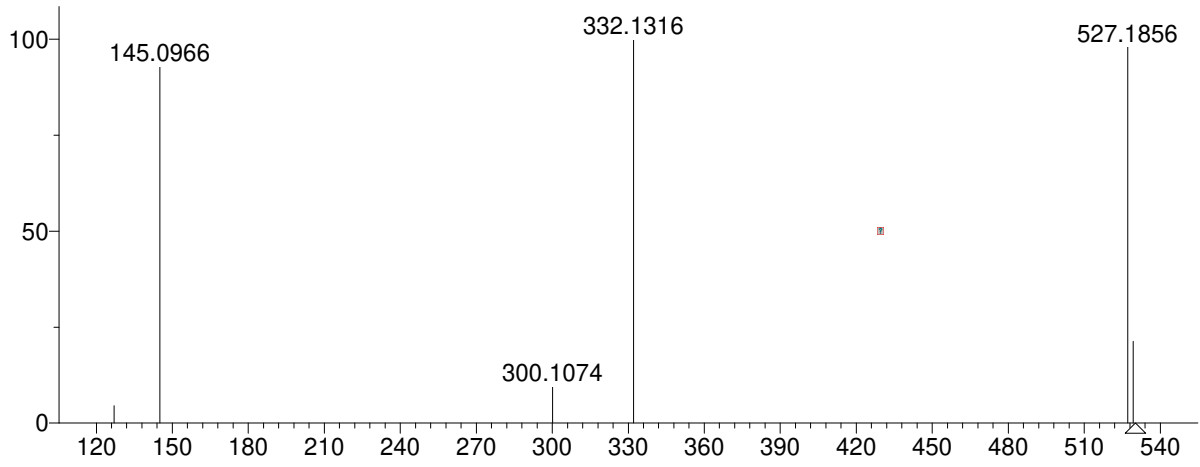

\*\* Search Report Page 1 of 2 \*\*

Unknown: Unknown (3.82\_387.1751m/z)  
Compound in Library Factor = -3273

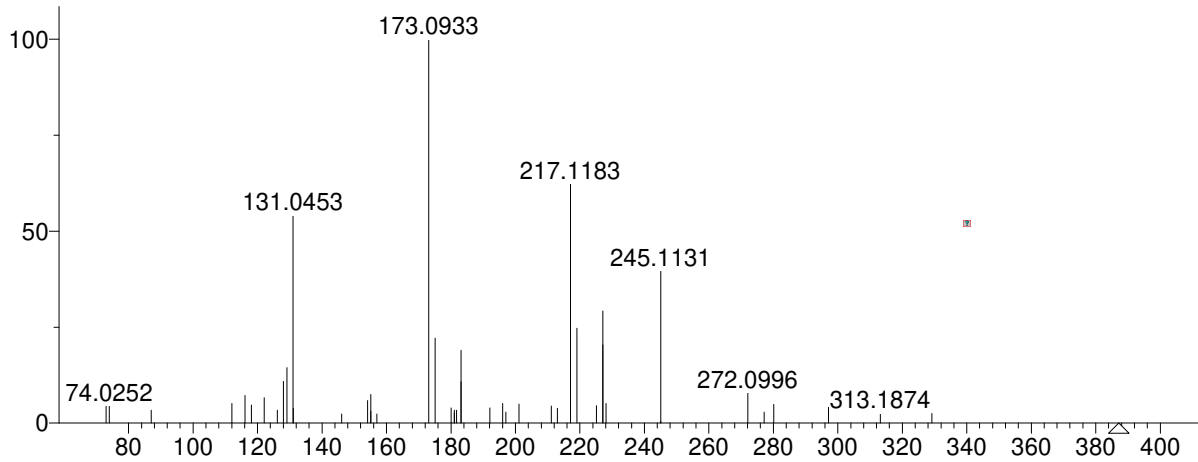

Hit 1 : Neurotensin (1-6) [M-2H]<sup>2-</sup> HCD 31eV P=387.2  
C<sub>35</sub>H<sub>52</sub>N<sub>8</sub>O<sub>12</sub>; MF: 2; RMF: 49; Prob 21.3%; Lib: nist\_msms2; ID: 74177.

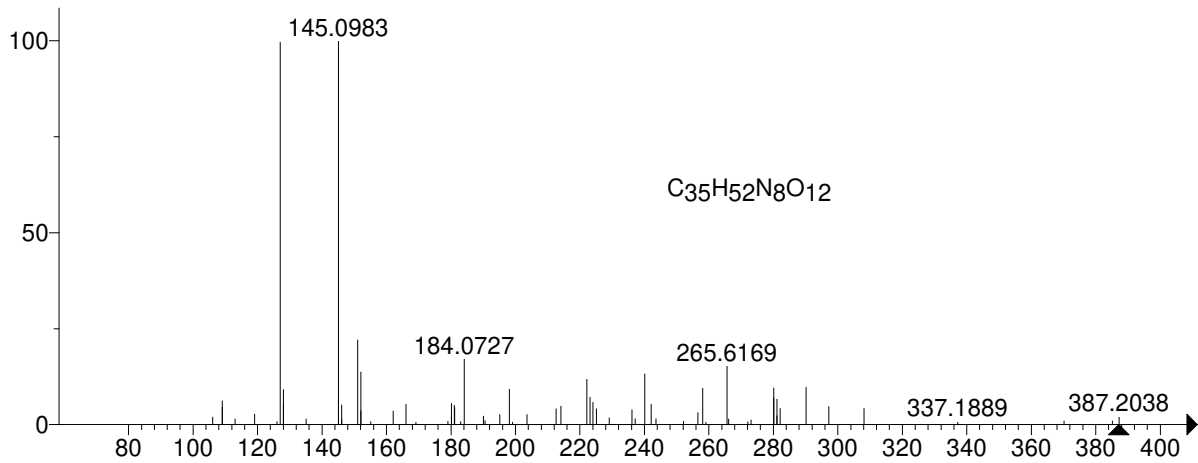

Hit 2 : NCGC00347508-0214-[2-[[[2,3-dihydroxy-2-(1-hydroxyethyl)butanoyl]oxymethyl]anilino]-4-oxobutanoic acid  
C<sub>17</sub>H<sub>23</sub>NO<sub>8</sub>; MF: 0; RMF: 49; Prob 19.7%; Lib: mona-export-gnps; ID: 6723.

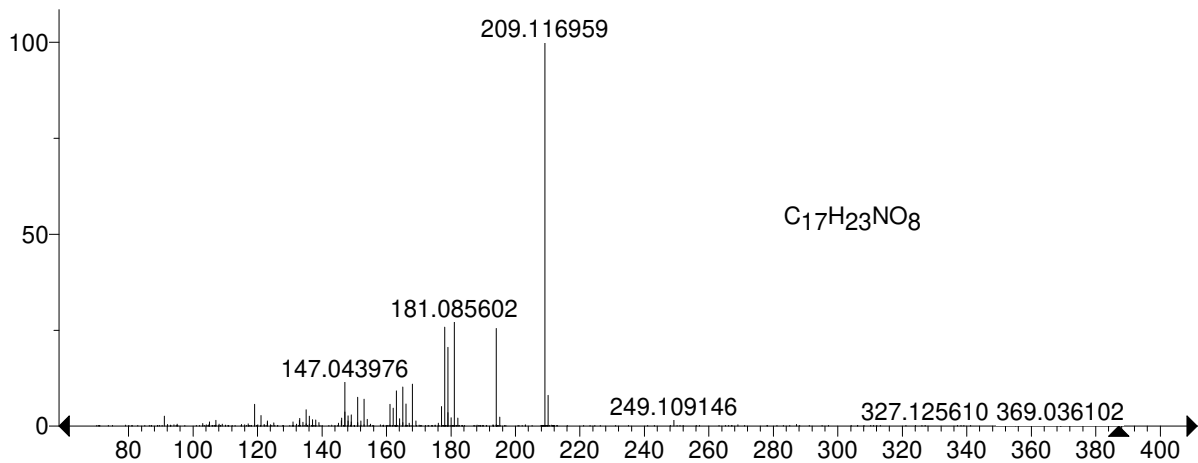

Hit 3 : rac-N'-Nitrosonornicotine 1-N-oxide [2M+H]<sup>+</sup> HCD 100V P=387.2  
C<sub>9</sub>H<sub>11</sub>N<sub>3</sub>O<sub>2</sub>; MF: 0; RMF: 21; Prob 19.7%; CAS: 1314916-69-2; Lib: nist\_msms; ID: 464580.

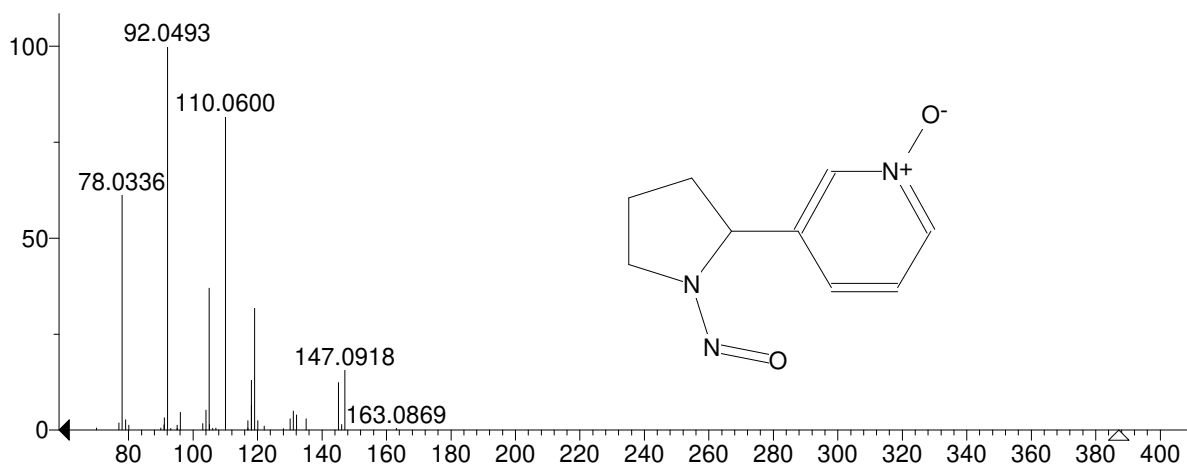

Hit 4 : N6-(4-Aminophenyl)ethyladenosine [M+H]<sup>+</sup> QTOF 60V P=387.2  
C<sub>18</sub>H<sub>22</sub>N<sub>6</sub>O<sub>4</sub>; MF: 0; RMF: 17; Prob 19.7%; CAS: 89705-21-5; Lib: nist\_msms; ID: 17232.

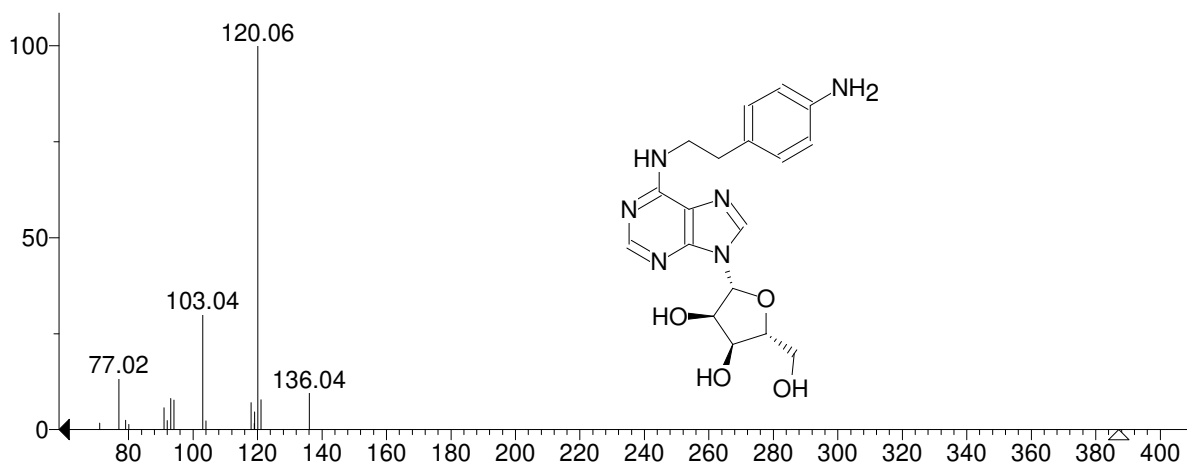

Hit 5 : Rubescensin A [M+Na]<sup>+</sup> IT 35% P=387.2  
C<sub>20</sub>H<sub>28</sub>O<sub>6</sub>; MF: 0; RMF: 9; Prob 19.7%; CAS: 28957-10-0; Lib: nist\_msms; ID: 401361.

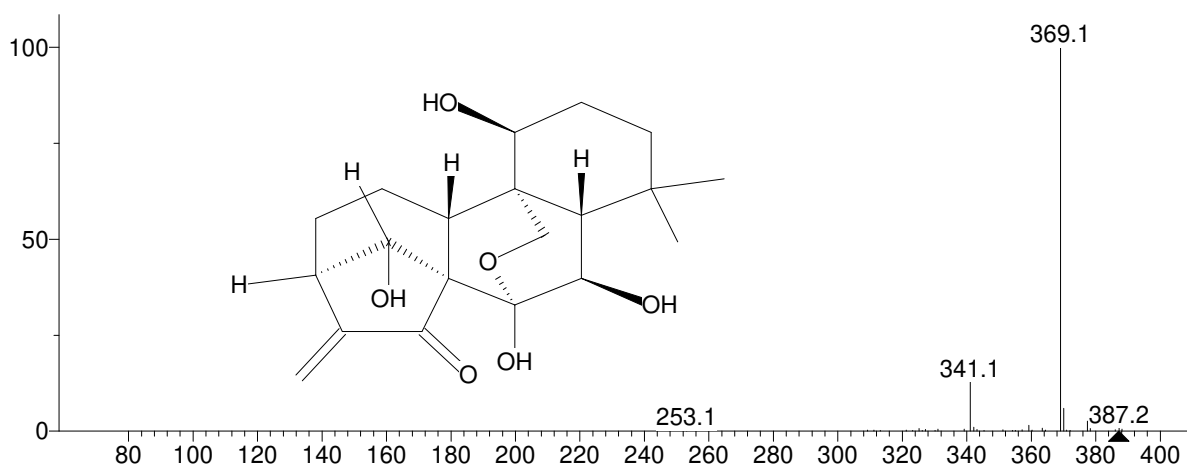



\*\* Search Report Page 1 of 2 \*\*

Unknown: Unknown (3.82\_415.1715m/z)  
Compound in Library Factor = -3273

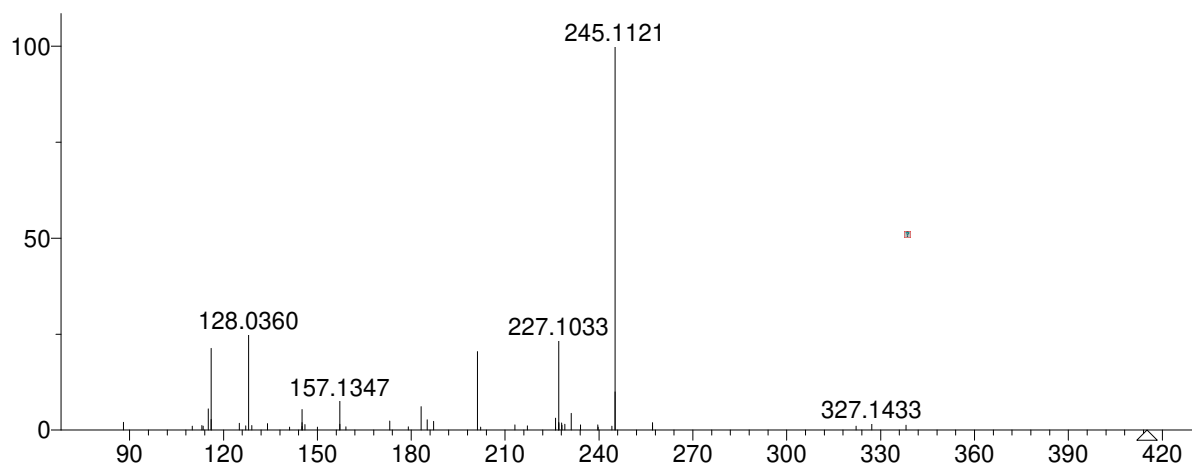

Hit 1 : 6-formyl-10-(hydroxymethyl)-5-methoxy-3-methylidene-2-oxo-2H,3H,3aH,4H,5H,8H,9H,11aH-cyclodeca[b]furan  
C<sub>21</sub>H<sub>28</sub>O<sub>7</sub>; MF: 4; RMF: 76; Prob 18.9%; Lib: mona-export-vf-npl\_gexactive; ID: 16435.

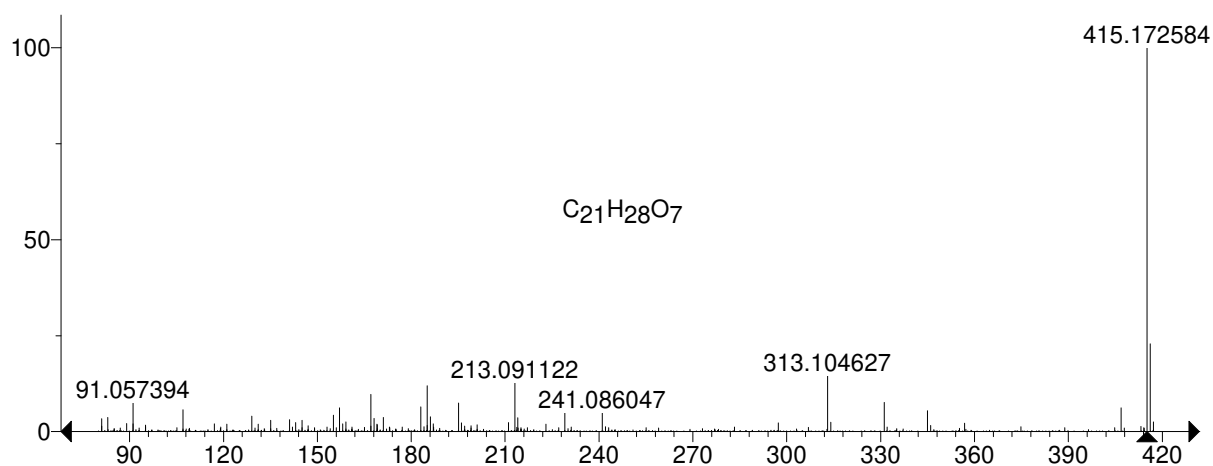

Hit 2 : Garcinone C [M+H]<sup>+</sup> HCD 132V P=415.2  
C<sub>23</sub>H<sub>26</sub>O<sub>7</sub>; MF: 1; RMF: 38; Prob 16.7%; CAS: 76996-27-5; Lib: nist\_msms; ID: 389293.

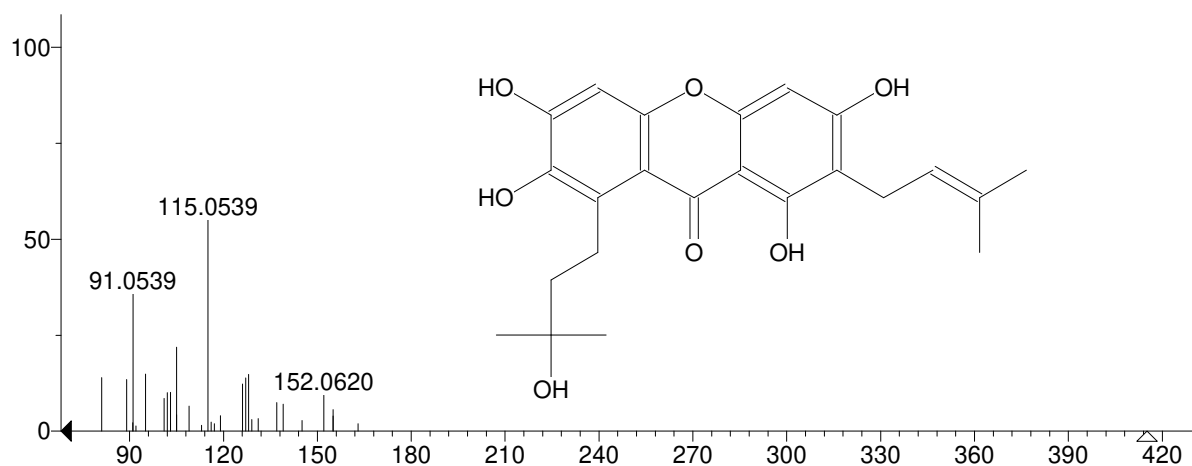

\*\* Search Report Page 2 of 2 \*\*

Hit 3 : NCGC00347525-03!2-amino-5-[2-[[2,3-dihydroxy-2-(1-hydroxyethyl)butanoyl]oxymethyl]-4-hydroxyanilino]-C<sub>18</sub>H<sub>26</sub>N<sub>2</sub>O<sub>9</sub>; MF: 0; RMF: 9; Prob 16.1%; Lib: mona-export-gnps; ID: 9213.

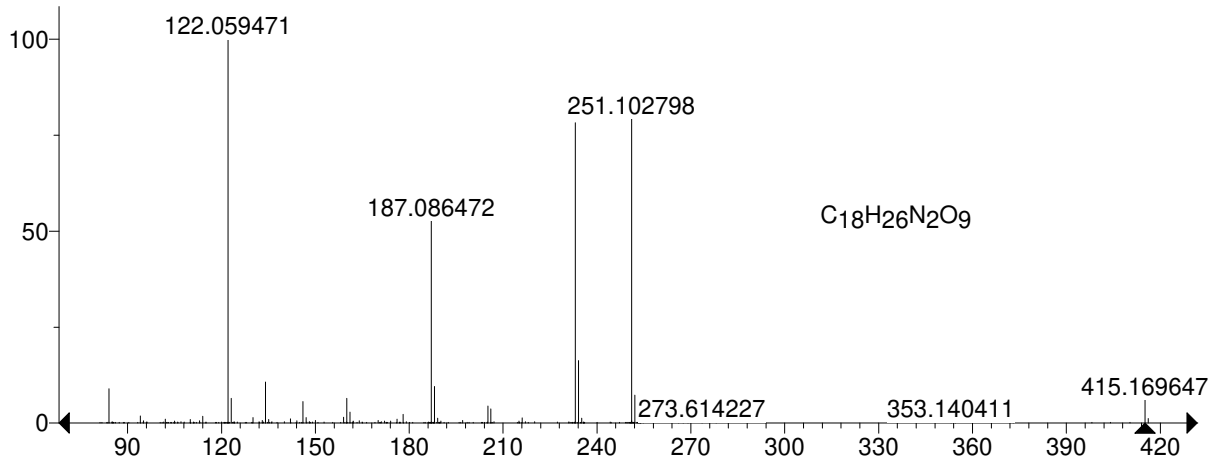

Hit 4 : NCGC00347525-02!2-amino-5-[2-[[2,3-dihydroxy-2-(1-hydroxyethyl)butanoyl]oxymethyl]-4-hydroxyanilino]-C<sub>18</sub>H<sub>26</sub>N<sub>2</sub>O<sub>9</sub>; MF: 0; RMF: 5; Prob 16.1%; Lib: mona-export-gnps; ID: 6270.

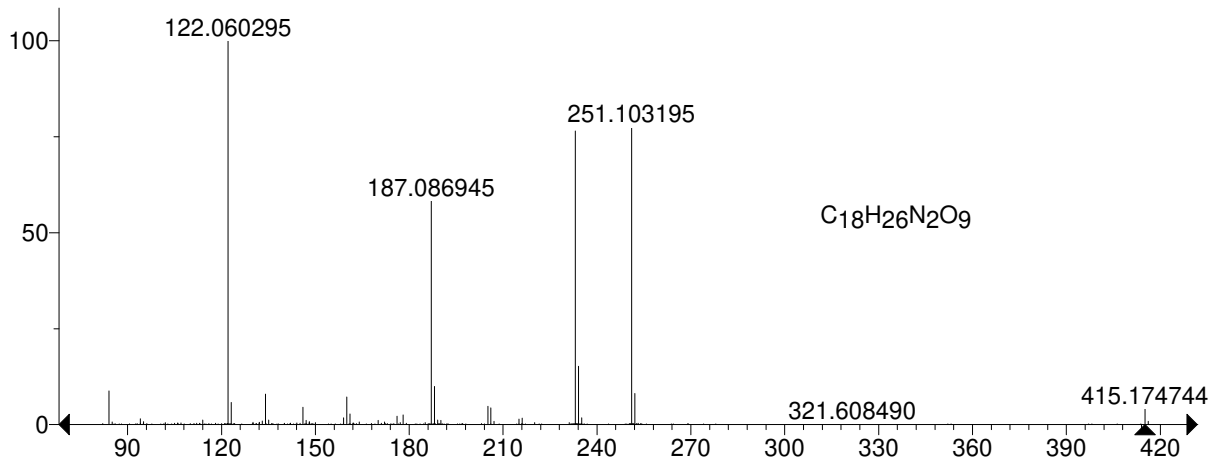

Hit 5 : 2-amino-5-[2-[[2,3-dihydroxy-2-(1-hydroxyethyl)butanoyl]oxymethyl]-4-hydroxyanilino]-5-oxopentanoic acid C<sub>18</sub>H<sub>26</sub>N<sub>2</sub>O<sub>9</sub>; MF: 0; RMF: 4; Prob 16.1%; Lib: mona-export-vf-npl\_qexactive; ID: 23034.

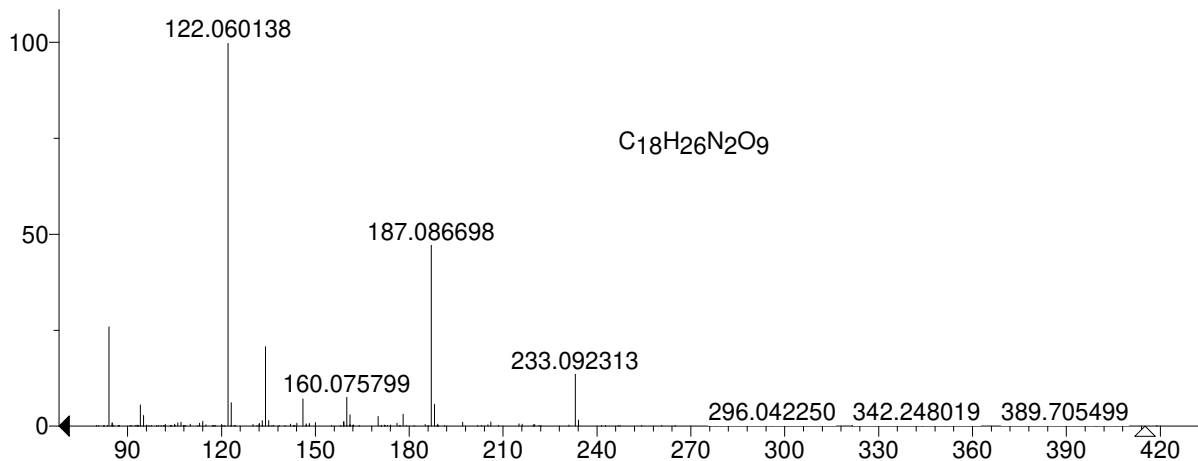

\*\* Search Report Page 1 of 2 \*\*

Unknown: Unknown (3.83\_529.2611m/z)  
Compound in Library Factor = -3273

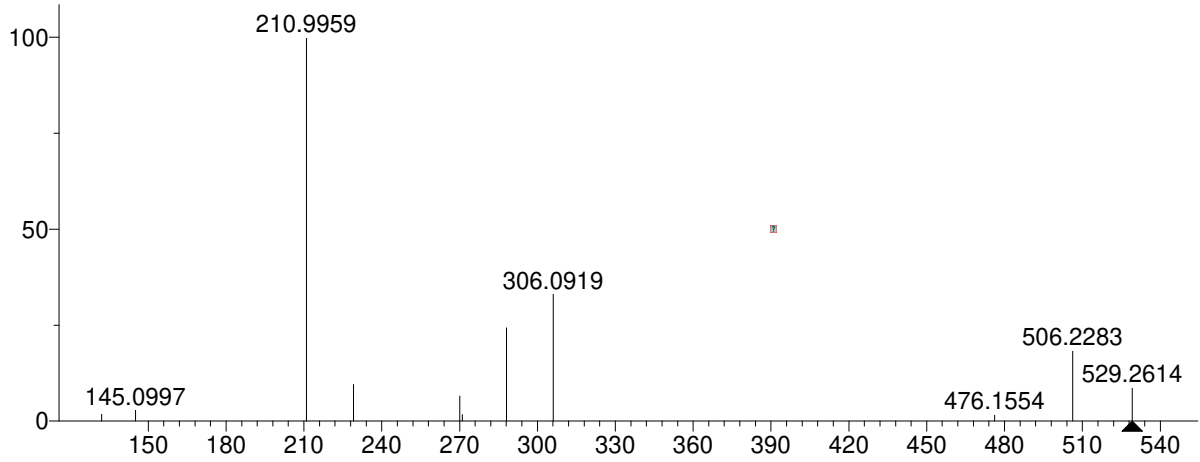

Hit 1 : NCGC00380707-01\_C26H42O11\_(5xi,6alpha,7alpha,9xi,16xi)-16-(beta-D-Glucopyranosyloxy)-6,7,17-trihydroxy-C26H42O11; MF: 5; RMF: 244; Prob 22.9%; Lib: msms-neg-gnps; ID: 1893.

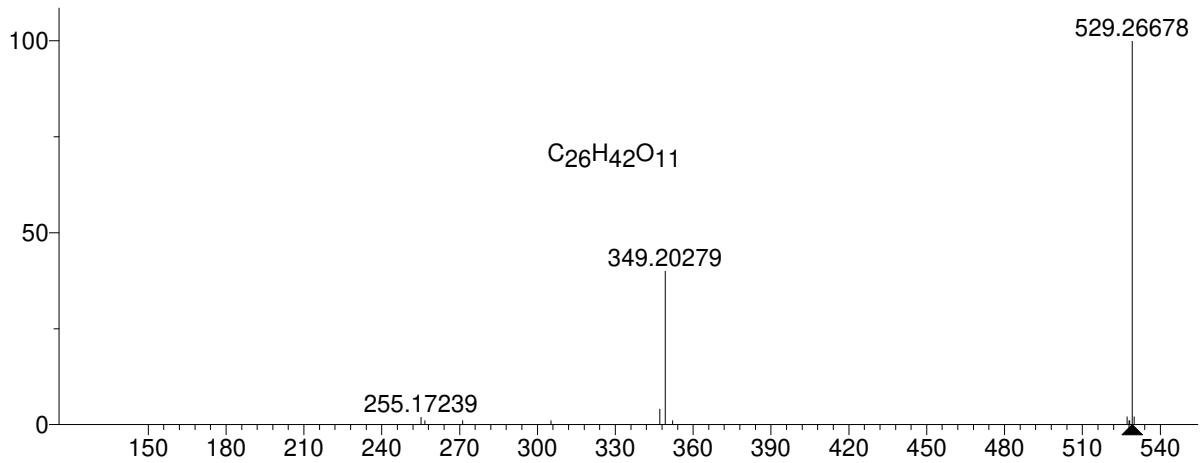

Hit 2 : LPG 20:5; [M-H]<sup>-</sup> [M-H]<sup>-</sup> P=529.3  
C26H43O9P; MF: 2; RMF: 87; Prob 20.2%; Lib: msdial-insilicomsm-lipids-neg; ID: 311120.

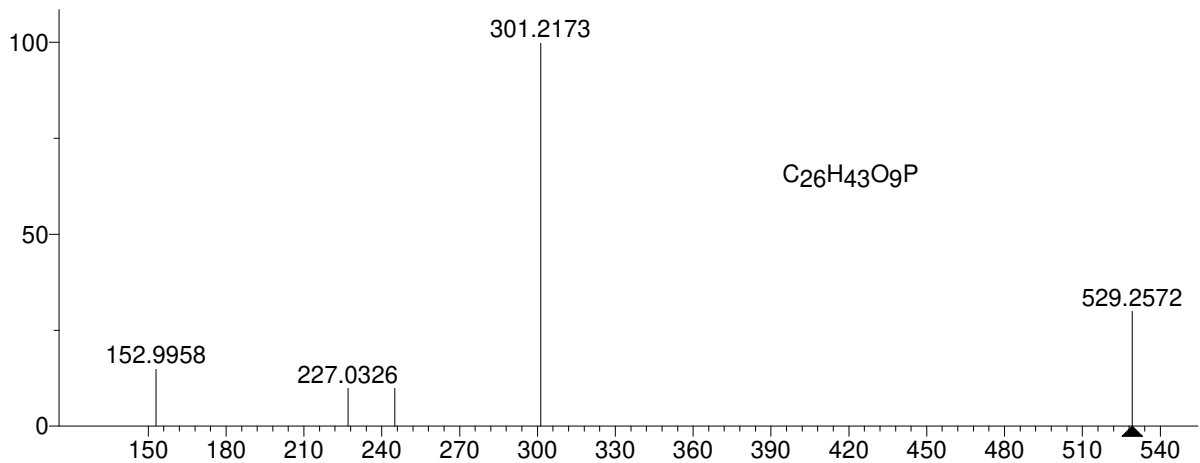

\*\* Search Report Page 2 of 2 \*\*

Hit 3 : NCGC00386012-01\_C24H42O11\_beta-D-Glucopyranoside, (1S,4R,5R)-4-[(1E,3R)-3-hydroxy-1-buten-1-yl]C24H42O11; MF: 1; RMF: 171; Prob 19.4%; Lib: mona-export-gnps; ID: 13699.

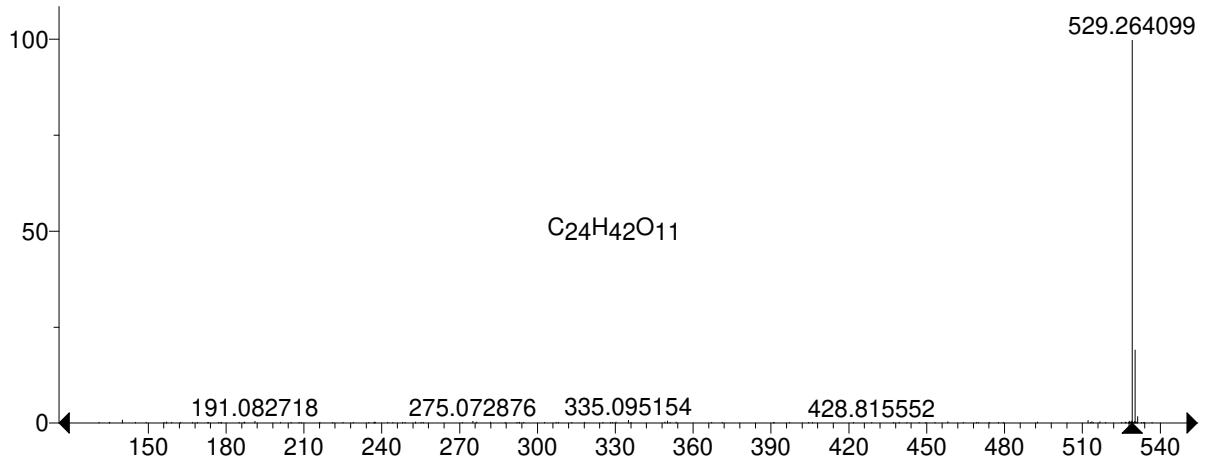

Hit 4 : (2S,3R,5S,9R)-2,3-dihydroxy-14-(hydroxymethyl)-5,9-dimethyl-14-[[[(2S,3R,4S,5S,6R)-3,4,5-trihydroxy-6-(h C26H42O11; MF: 0; RMF: 94; Prob 18.7%; Lib: anthocyanins mona; ID: 5864.

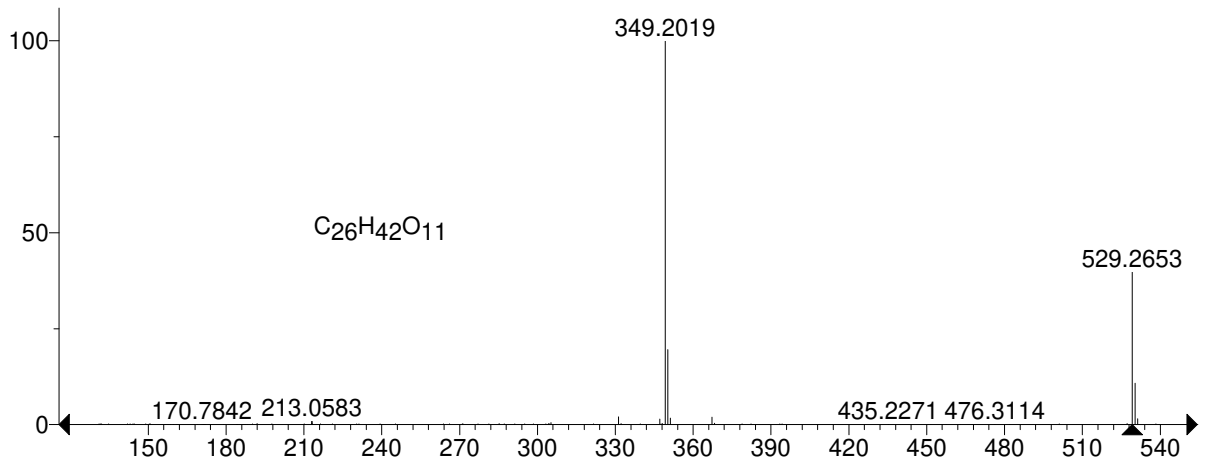

Hit 5 : (2S,3R,5S,9R)-2,3-dihydroxy-14-(hydroxymethyl)-5,9-dimethyl-14-[[[(2S,3R,4S,5S,6R)-3,4,5-trihydroxy-6-(h C26H42O11; MF: 0; RMF: 94; Prob 18.7%; Lib: mona-export-1c-ms-ms\_negative\_mode; ID: 21950.

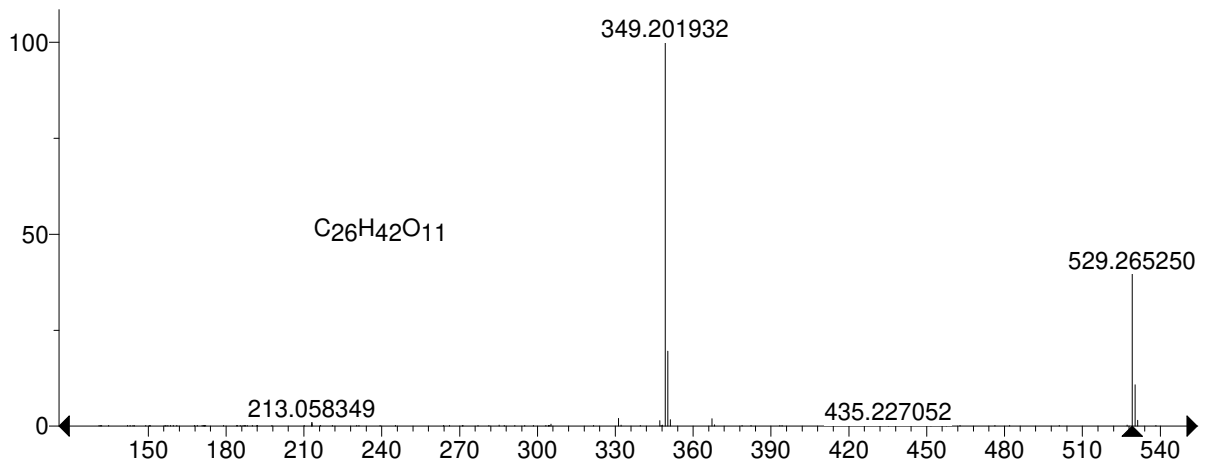

Unknown: Unknown (3.83\_646.2091m/z)  
Compound in Library Factor = 0

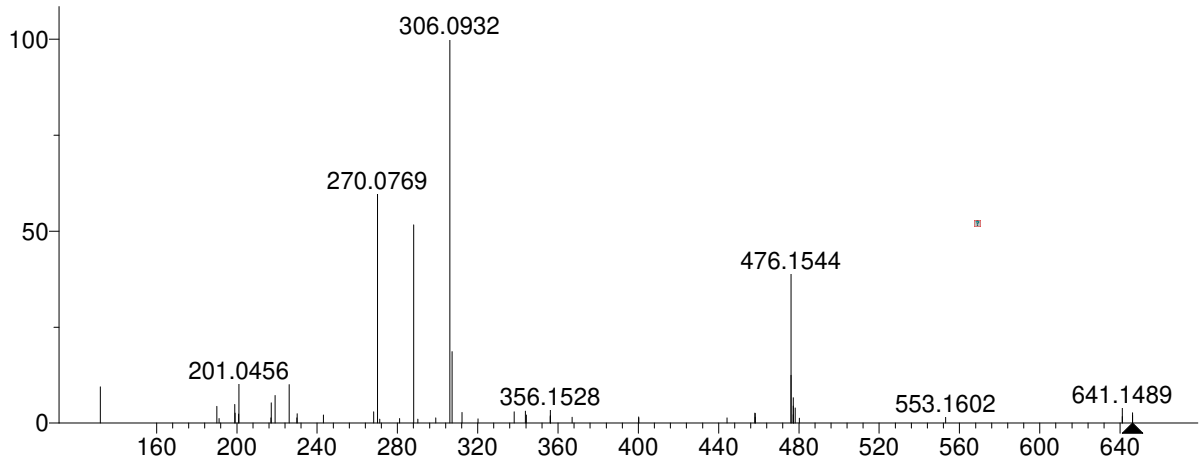

Unknown: Unknown (3.83\_647.2658m/z)  
Compound in Library Factor = 0

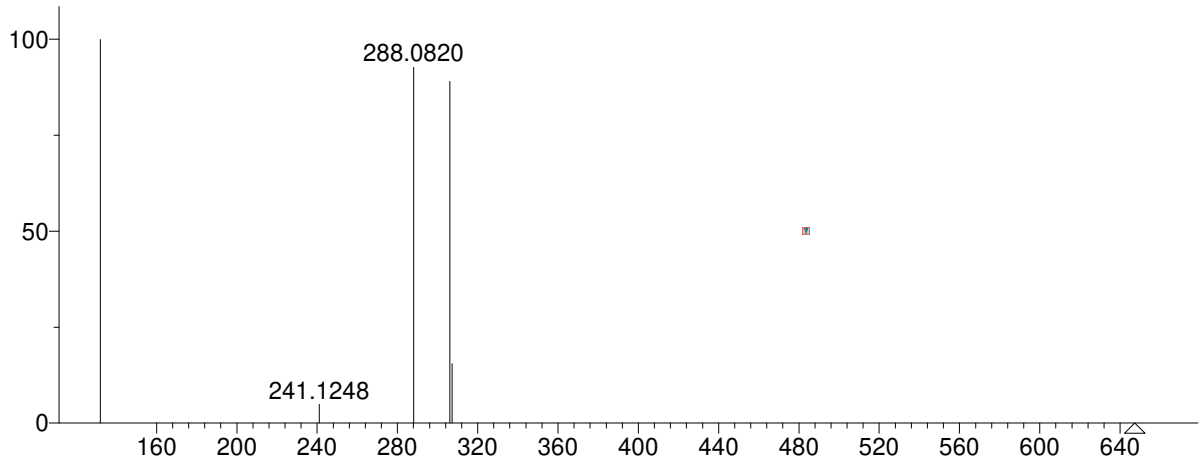

\*\* Search Report Page 1 of 2 \*\*

Unknown: Unknown (3.84\_218.1024m/z)  
Compound in Library Factor = 1080

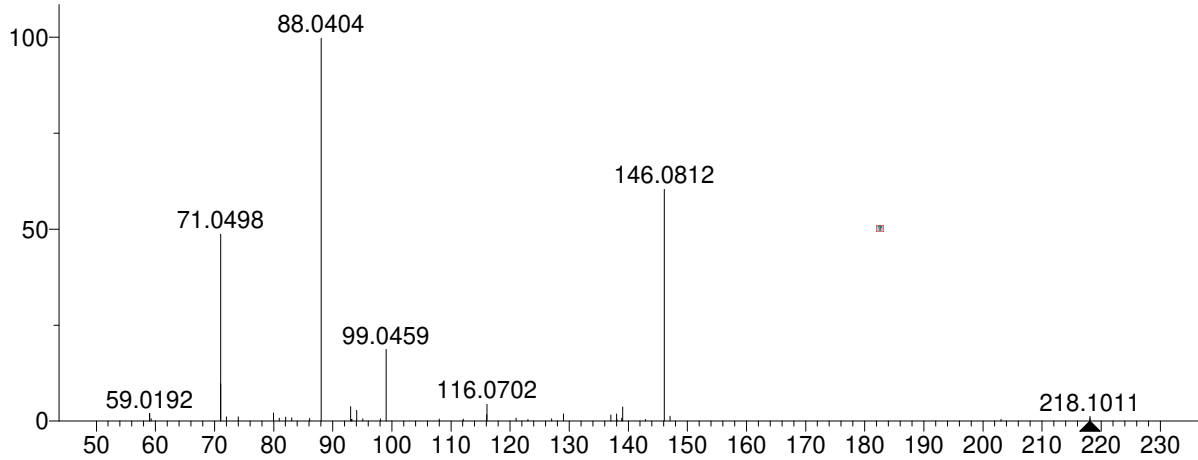

Hit 1 : Pantothenic acid [M-H]<sup>-</sup> HCD 28V P=218.1  
C<sub>9</sub>H<sub>17</sub>NO<sub>5</sub>; MF: 912; RMF: 933; Prob 47.3%; CAS: 599-54-2; Lib: nist\_msms; ID: 295331.

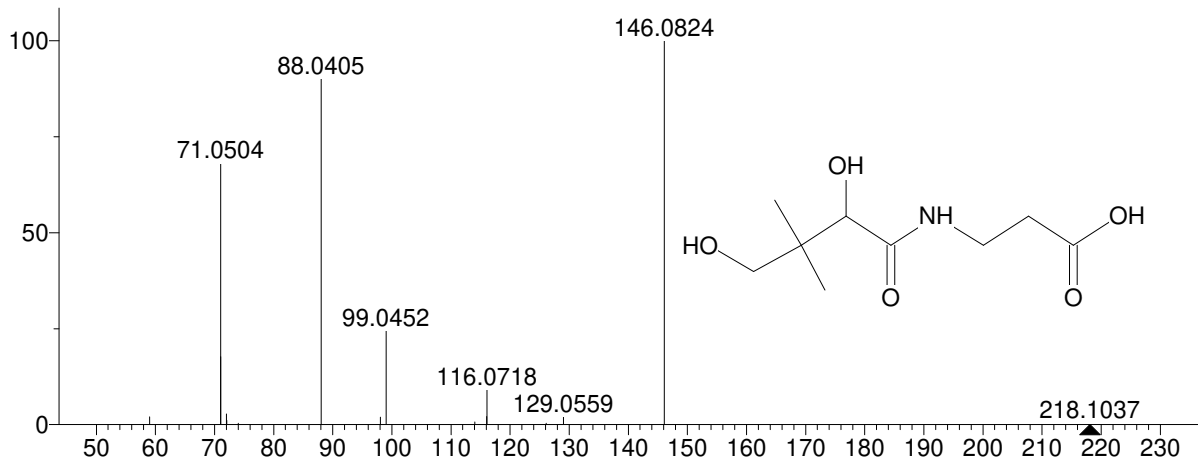

Hit 2 : (+)-Pantothenic acid [M-H]<sup>-</sup> 20 P=218.1  
C<sub>9</sub>H<sub>17</sub>NO<sub>5</sub>; MF: 906; RMF: 931; Prob 37.2%; Lib: msms neg mona\_ipb\_gnps\_plasma; ID: 844.

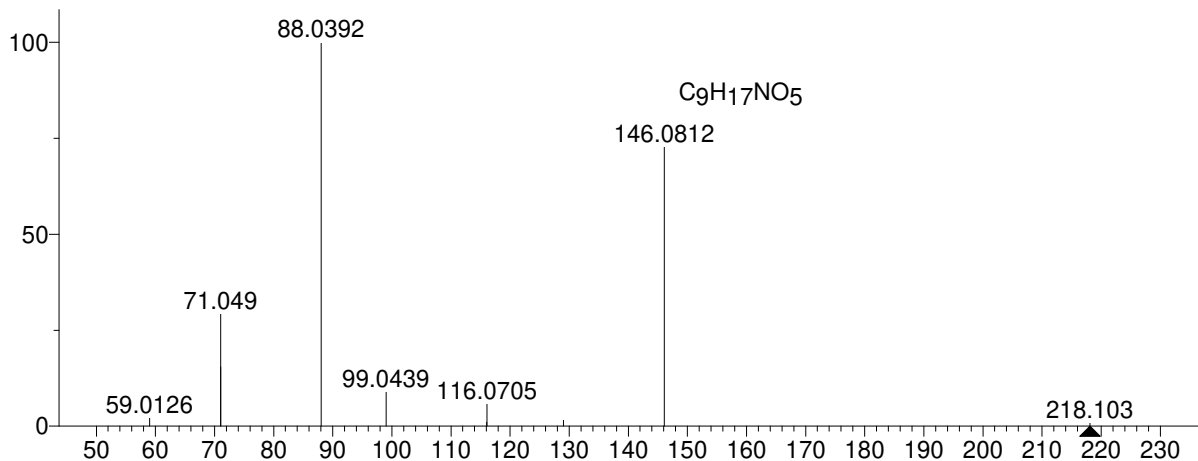

Hit 3 : D-Pantothenic Acid [M-H]<sup>-</sup> 5-60V P=218.1  
C<sub>9</sub>H<sub>17</sub>NO<sub>5</sub>; MF: 799; RMF: 853; Prob 2.46%; Lib: mona-export-lc-ms-ms\_negative\_mode; ID: 8598.

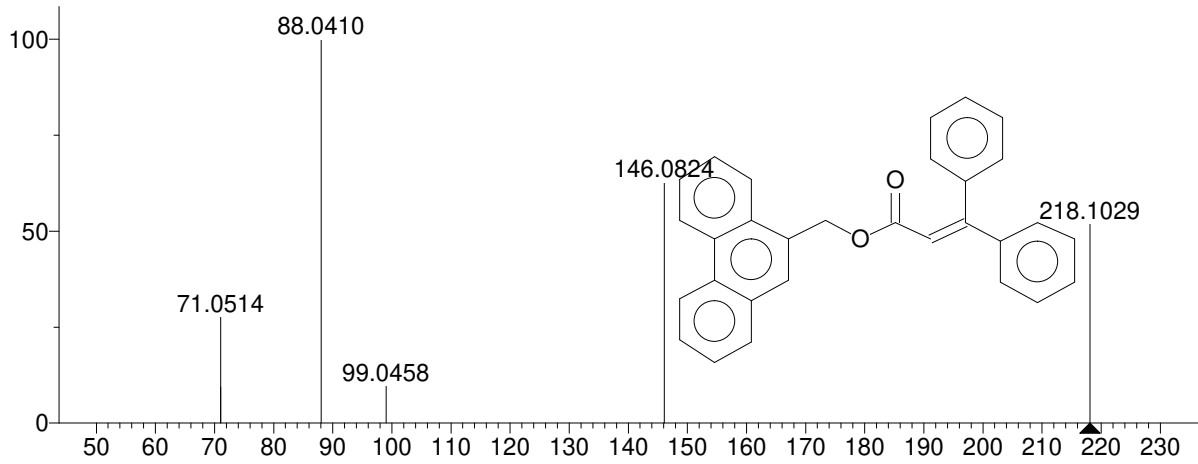

Hit 4 : Sodium pantothenate [M-H]<sup>-</sup> QTOF 5-45V P=218.1  
C<sub>9</sub>H<sub>17</sub>NO<sub>5</sub>; MF: 799; RMF: 853; Prob 2.46%; Lib: mona-export-lc-ms-ms\_negative\_mode; ID: 11485.

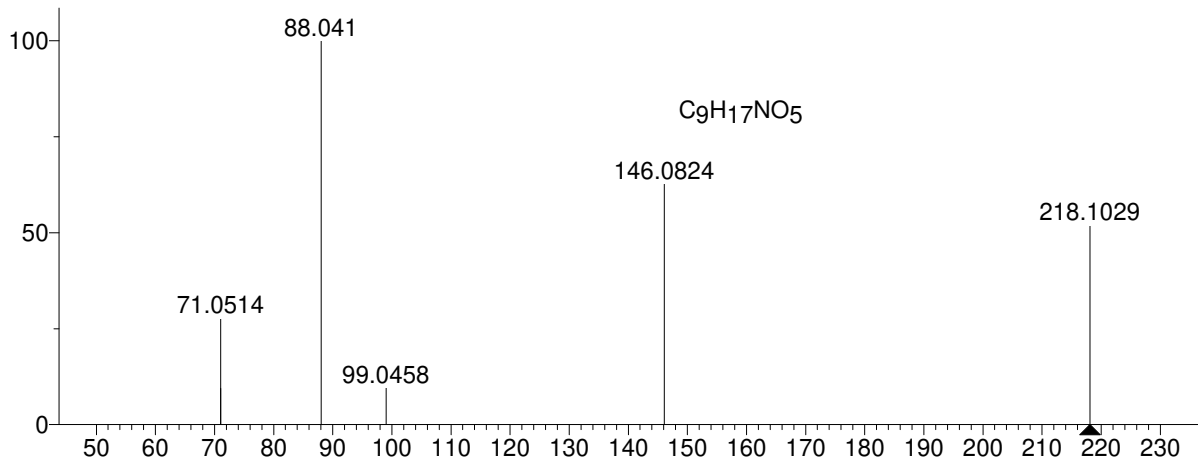

Hit 5 : D-(+)-Pantothenic acid; LC-ESI-QTOF; MS2; CE [M-H]<sup>-</sup> P=218.1  
C<sub>9</sub>H<sub>17</sub>NO<sub>5</sub>; MF: 799; RMF: 853; Prob 2.46%; Lib: msms-neg-massbank; ID: 4493.

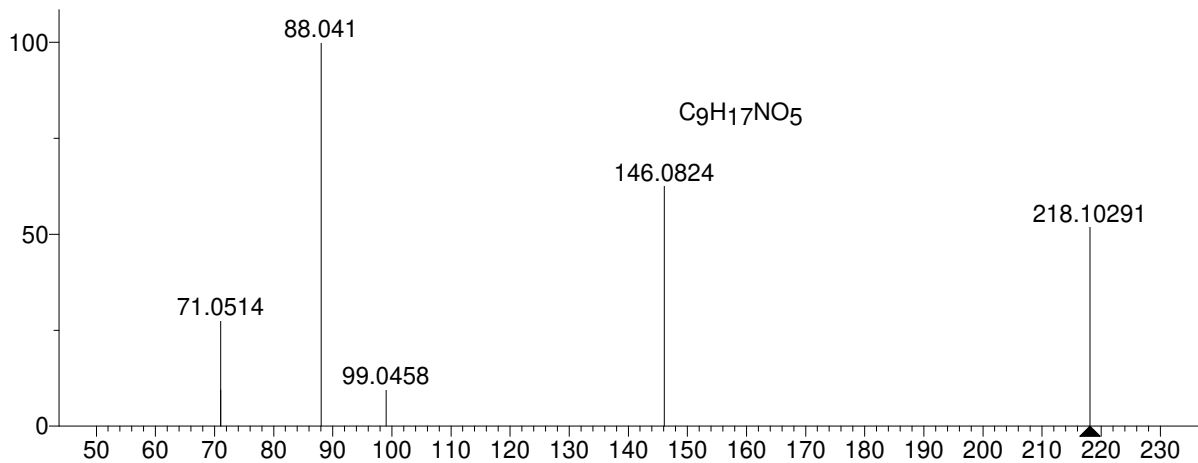



Unknown: Unknown (3.84\_476.1503m/z)  
Compound in Library Factor = 0

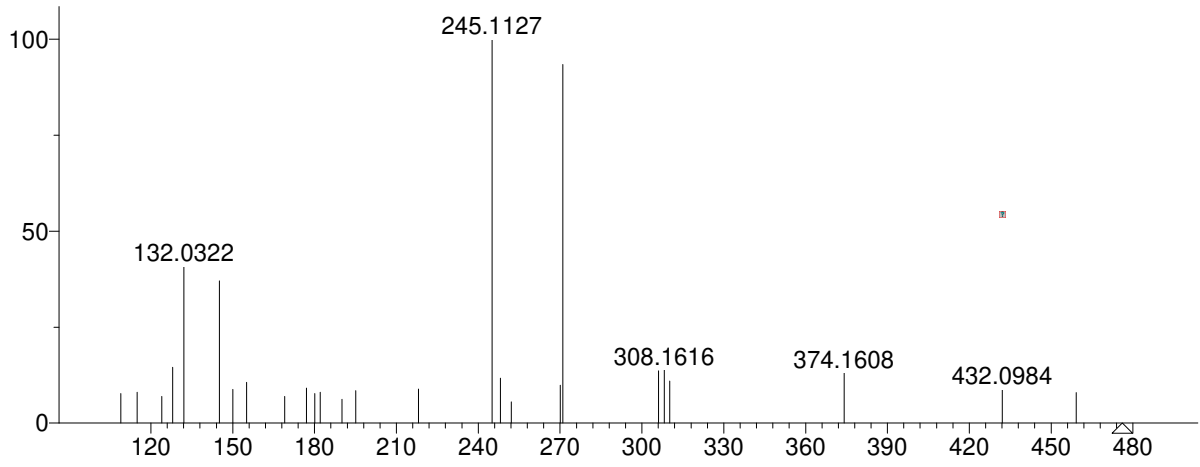

Unknown: Unknown (3.85\_587.2206m/z)  
Compound in Library Factor = 0

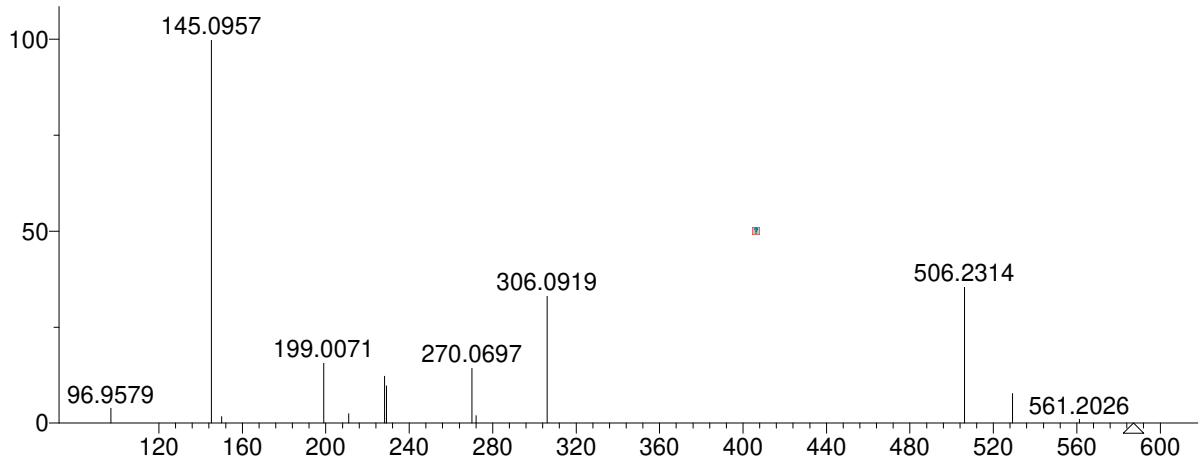

Unknown: Unknown (3.85\_641.1467m/z)  
Compound in Library Factor = 0

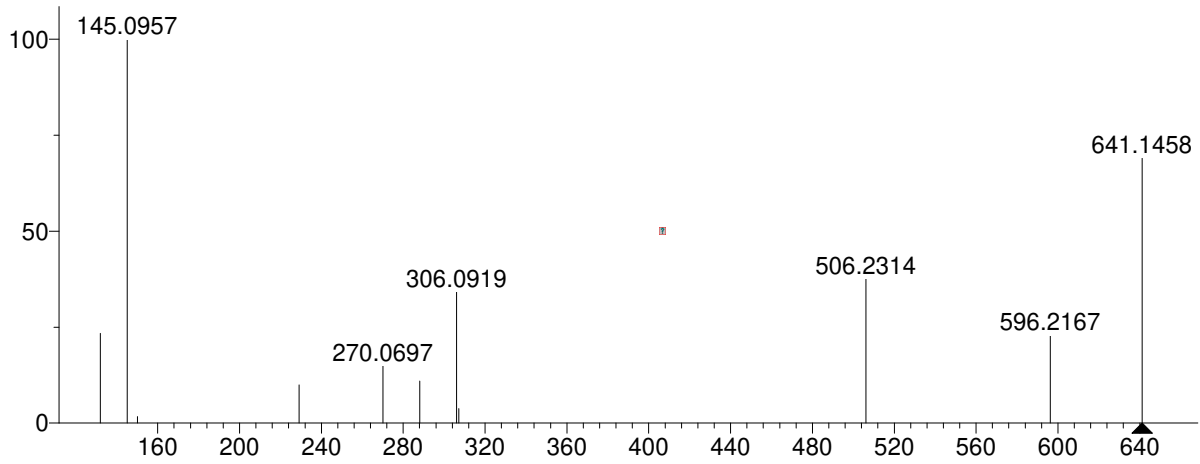

\*\* Search Report Page 1 of 2 \*\*

Unknown: Unknown (3.86\_384.0969m/z)  
Compound in Library Factor = -300

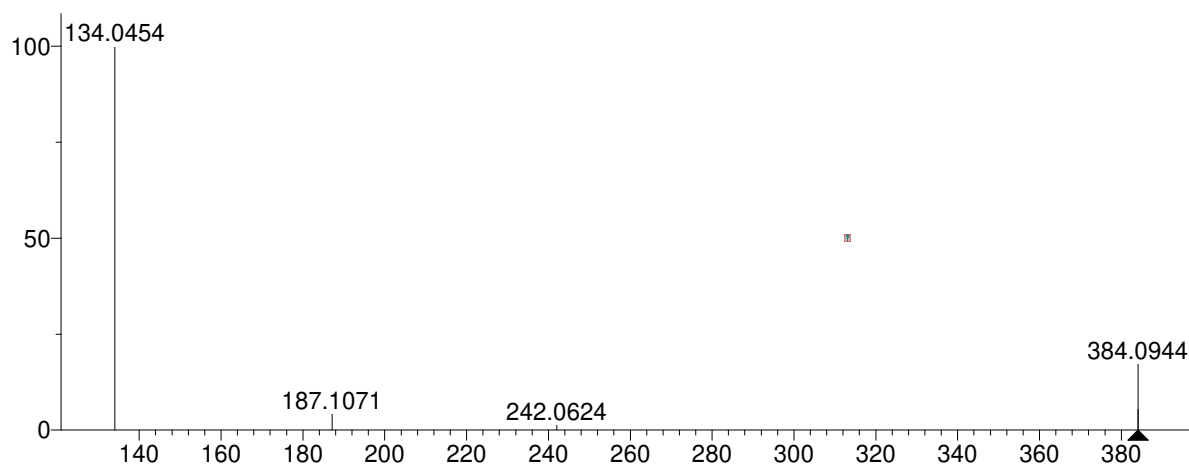

Hit 1 : Bezafibrate [M+Na]<sup>+</sup> HCD 11V P=384.1  
C<sub>19</sub>H<sub>20</sub>ClNO<sub>4</sub>; MF: 247; RMF: 838; Prob 96.4%; CAS: 41859-67-0; Lib: nist\_msms; ID: 163281.

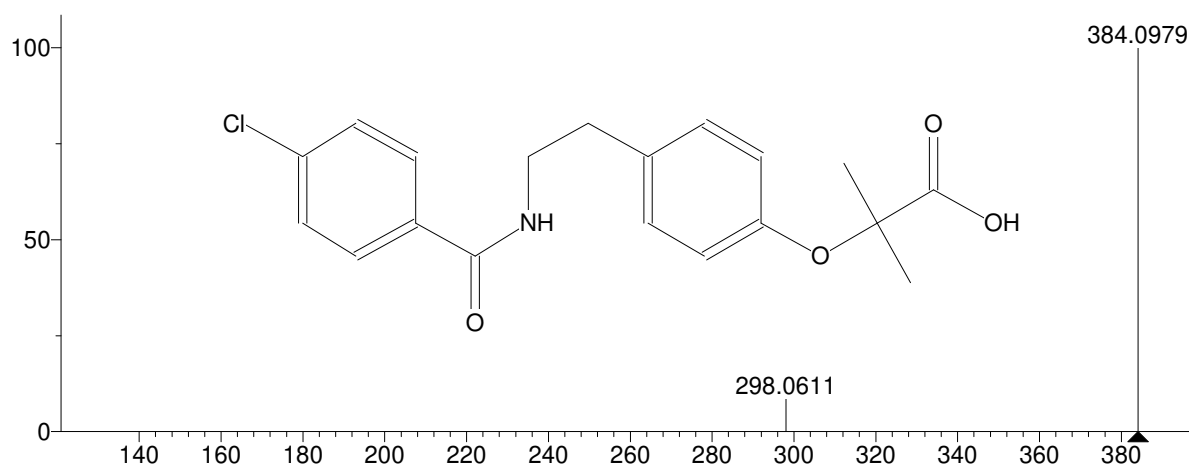

Hit 2 : Ethanone, 2-(2-bromophenyl)-1-(1-pentyl-1H-indol-3-yl)- [M+H]<sup>+</sup> HCD 19V P=384.1  
C<sub>21</sub>H<sub>22</sub>BrNO; MF: 23; RMF: 343; Prob 0.96%; CAS: 864445-60-3; Lib: nist\_msms; ID: 253885.

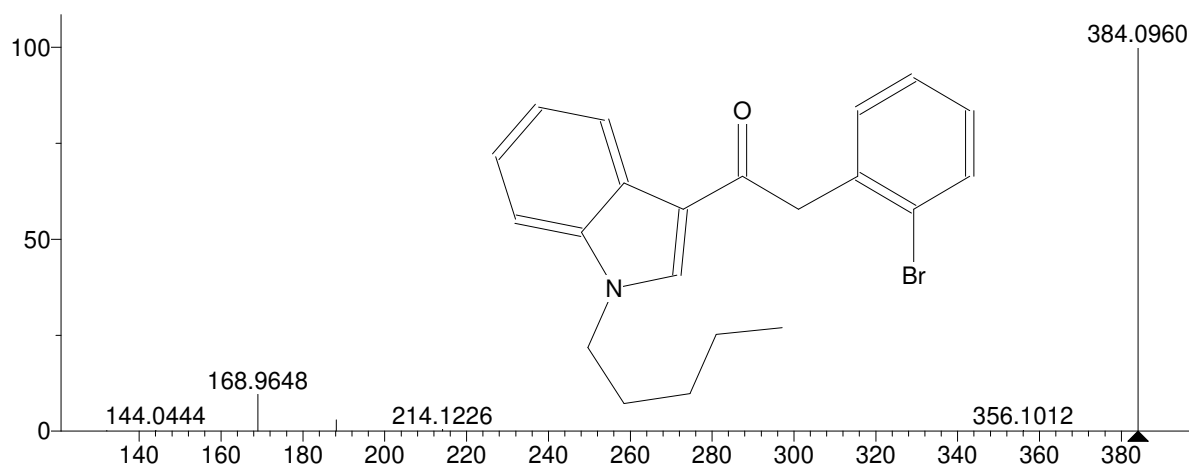

Hit 3 : Flavopiridol [M+H-H<sub>2</sub>O]<sup>+</sup> HCD 19V P=384.1  
C<sub>28</sub>H<sub>20</sub>ClNO<sub>5</sub>; MF: 23; RMF: 343; Prob 0.96%; CAS: 146426-40-6; Lib: nist\_msms; ID: 375544.

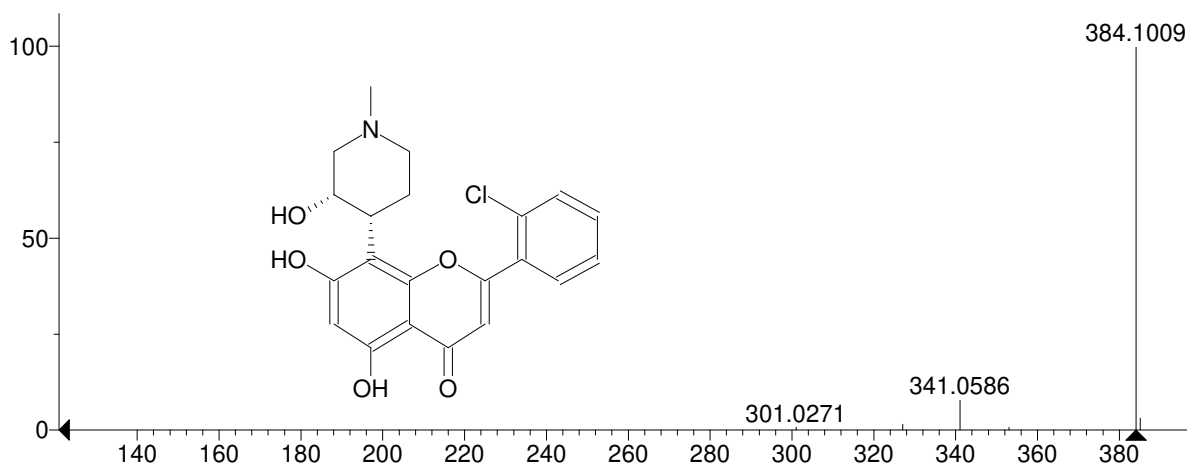

Hit 4 : Rhodamine B cation [Cat-CH<sub>3</sub>]<sup>+</sup>=>384.1 IT 35% P=384.1  
C<sub>28</sub>H<sub>31</sub>N<sub>2</sub>O<sub>3</sub>; MF: 17; RMF: 518; Prob 0.75%; CAS: 64381-98-2; Lib: nist\_msms; ID: 493948.

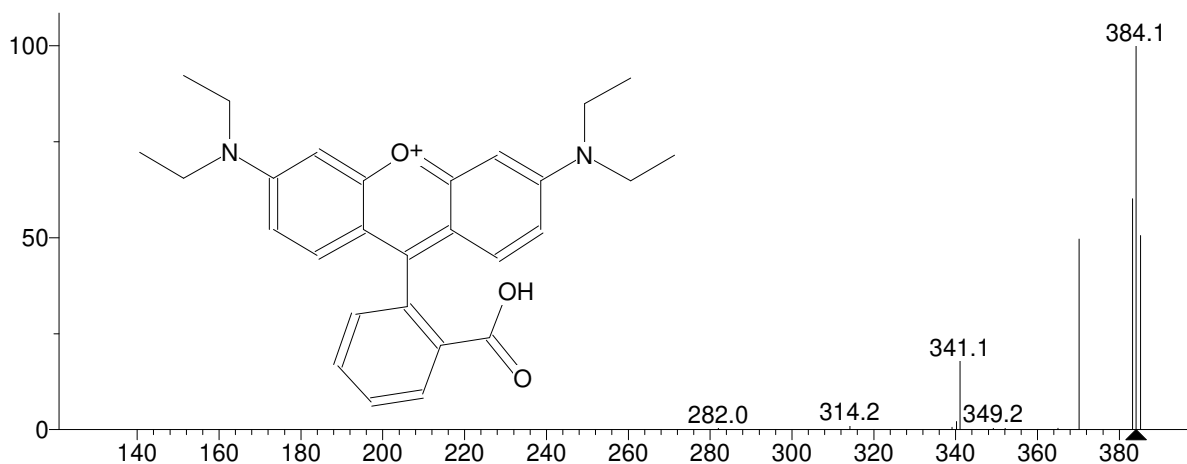

Hit 5 : Torin 2 [M+H-HF]<sup>+</sup>=>412.2=>384.1 IT 35% P=384.1  
C<sub>24</sub>H<sub>15</sub>F<sub>3</sub>N<sub>4</sub>O; MF: 2; RMF: 237; Prob 0.45%; CAS: 1223001-51-1; Lib: nist\_msms; ID: 269358.

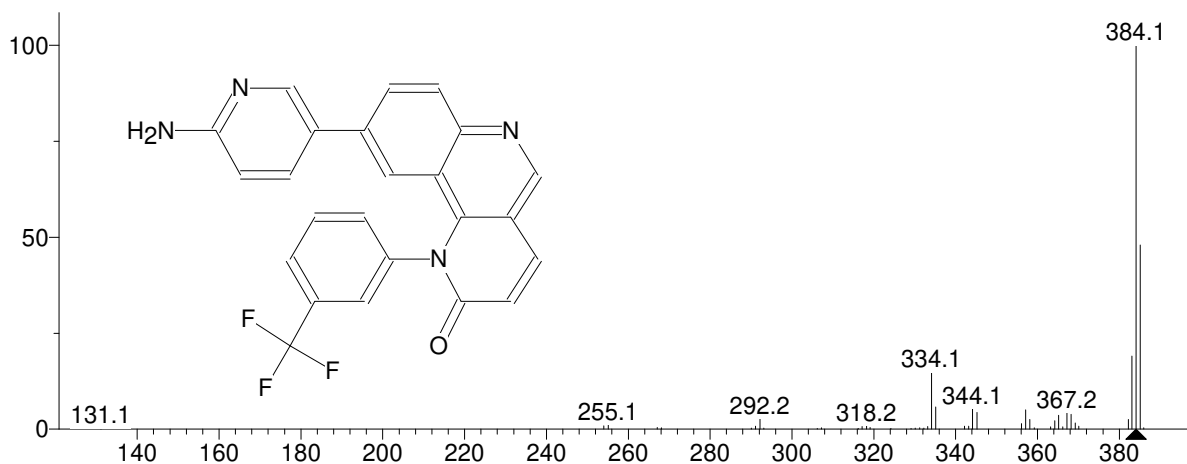

Unknown: Unknown (3.86\_506.2338m/z)  
Compound in Library Factor = -2176

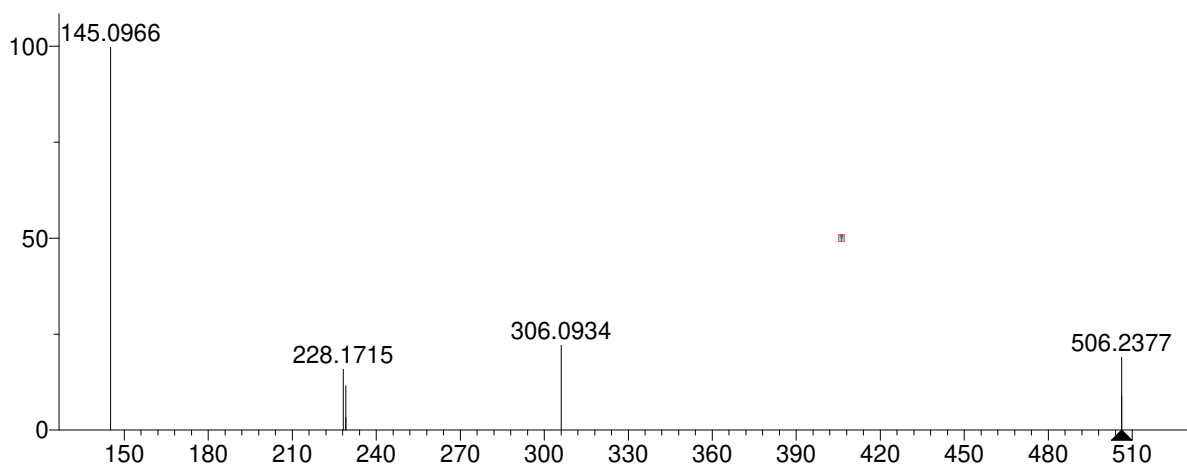

Hit 1 : Amprenavir [M+H]<sup>+</sup> HCD 10V P=506.2  
C<sub>25</sub>H<sub>35</sub>N<sub>3</sub>O<sub>6</sub>S; MF: 21; RMF: 415; Prob 42.9%; CAS: 161814-49-9; Lib: nist\_msms; ID: 368619.

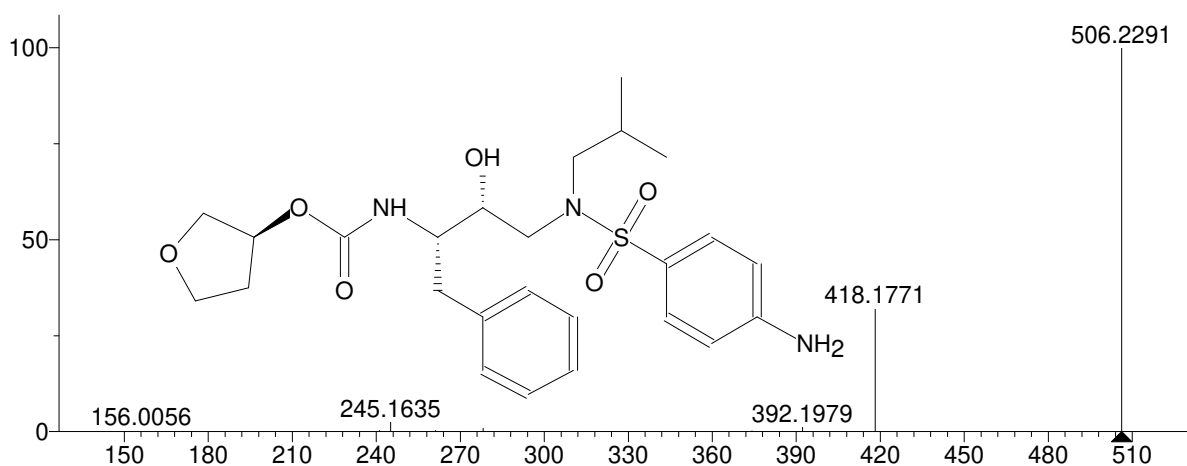

Hit 2 : Virginiamycin component b [M-H-H<sub>2</sub>O]<sup>-</sup> HCD 25V P=506.2  
C<sub>28</sub>H<sub>35</sub>N<sub>3</sub>O<sub>7</sub>; MF: 1; RMF: 235; Prob 19.5%; Lib: nist\_msms; ID: 353199.

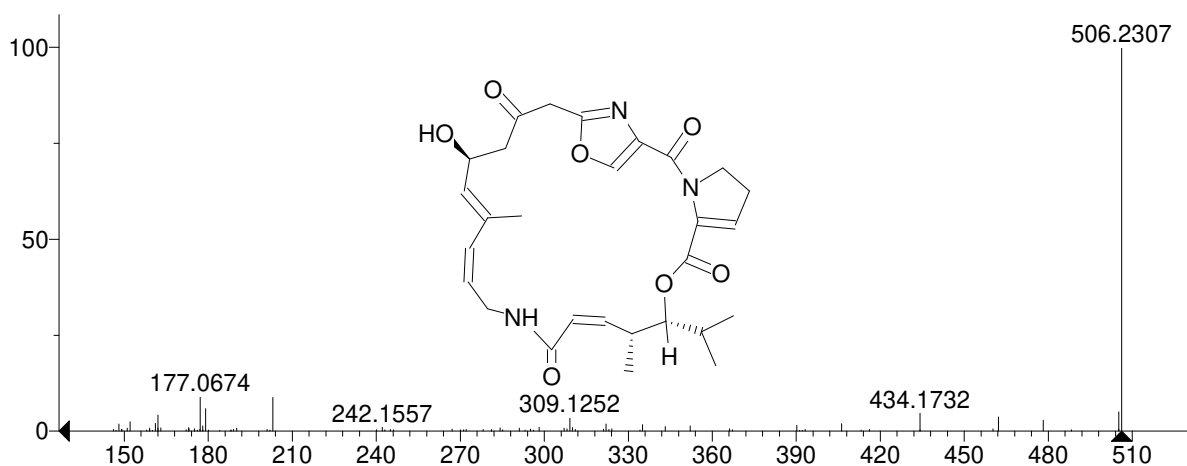

Hit 3 : Benidipine [M+H]<sup>+</sup> 35eV P=506.2  
C<sub>28</sub>H<sub>31</sub>N<sub>3</sub>O<sub>6</sub>; MF: 0; RMF: 151; Prob 18.8%; Lib: mona-export-fiehn\_hilic; ID: 1784.

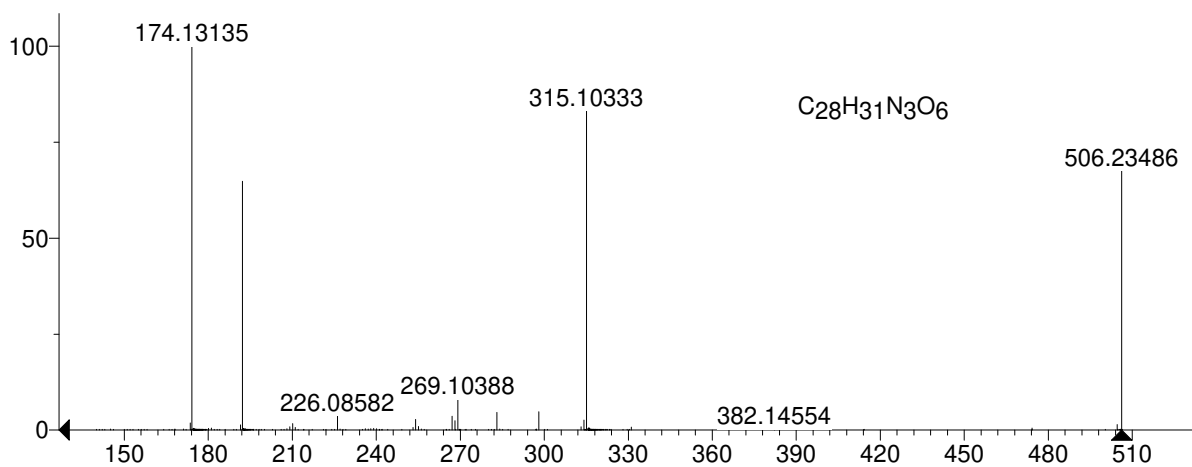

Hit 4 : Amprenavir (Agenerase) [M+H]<sup>+</sup> P=506.2  
C<sub>25</sub>H<sub>35</sub>N<sub>3</sub>O<sub>6</sub>S; MF: 0; RMF: 65; Prob 18.8%; Lib: mona-export-gnps; ID: 547.

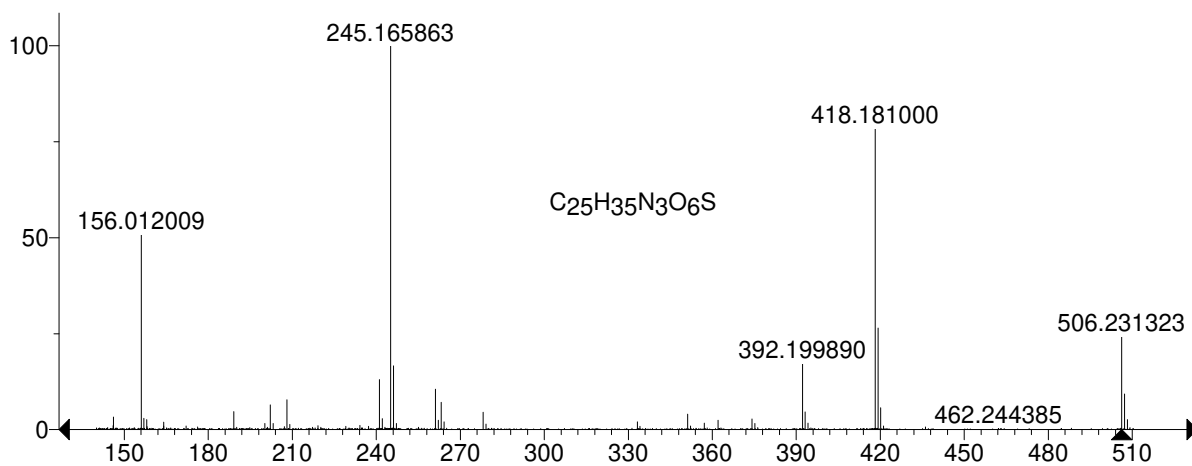

Unknown: Unknown (3.87\_596.2166m/z)  
Compound in Library Factor = 0

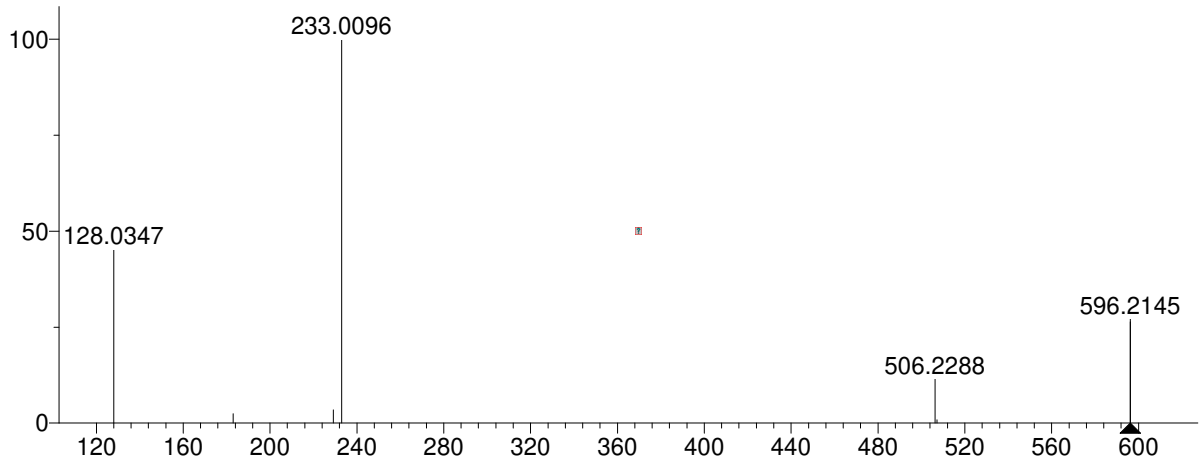



Unknown: Unknown (3.88\_609.2043m/z)  
Compound in Library Factor = -3273

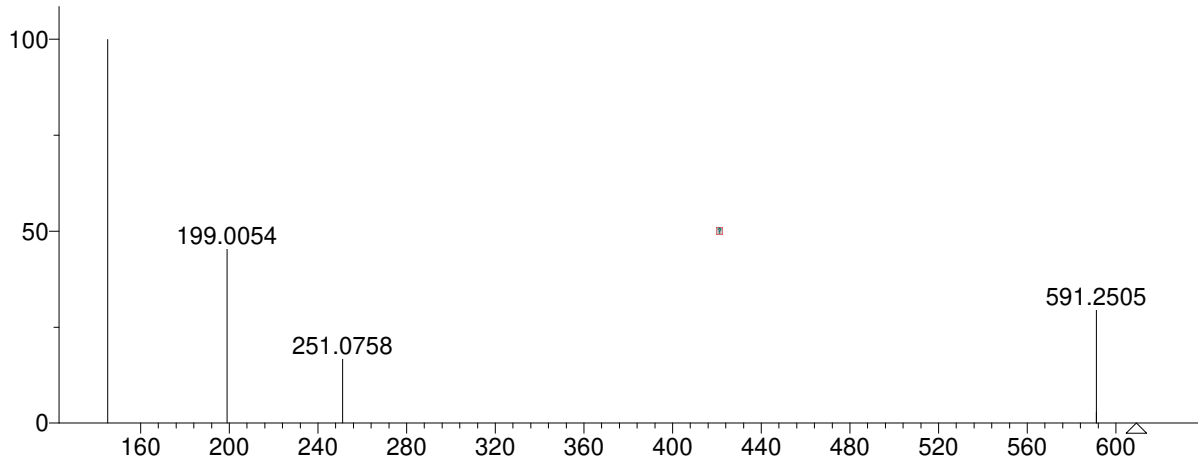

Hit 1 : Hesperidin M-H 35 P=609.2  
C<sub>28</sub>H<sub>34</sub>O<sub>15</sub>; MF: 4; RMF: 199; Prob 100.0%; Lib: mona anthocyanidin-o-glycosides; ID: 2976.

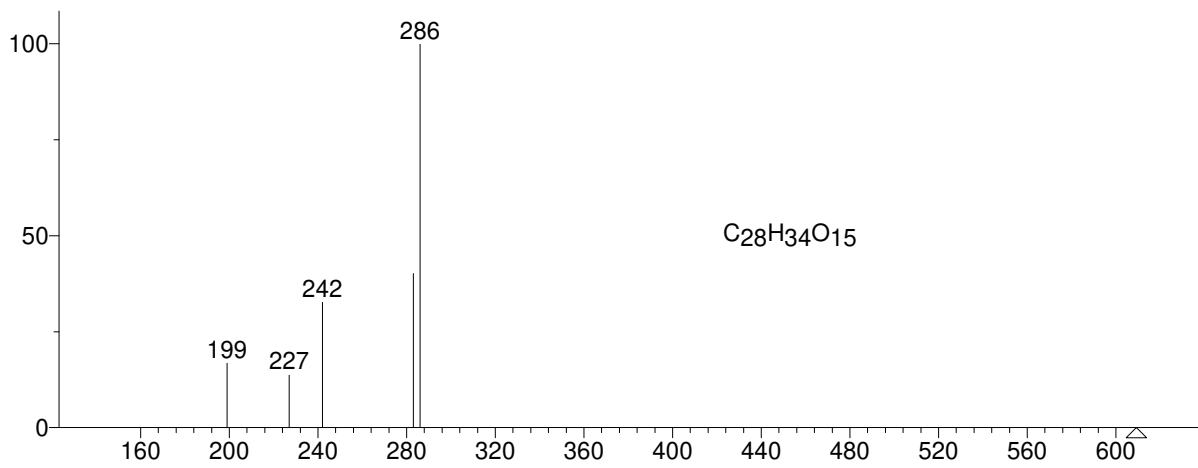

Unknown: Unknown (3.91\_530.1959m/z)  
Compound in Library Factor = 0

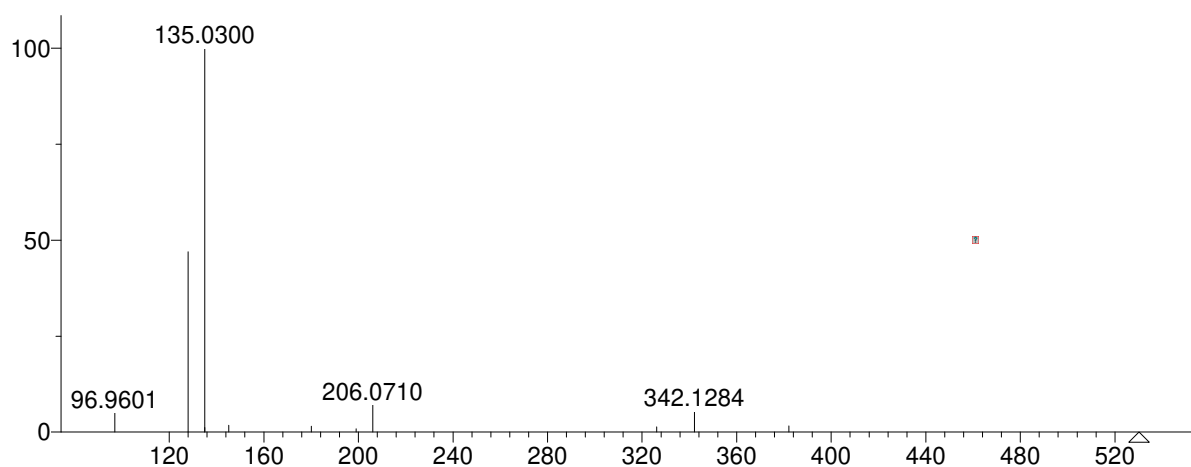

Hit 1 : Nilotinib [M+H]<sup>+</sup> HCD 174V P=530.2  
C<sub>28</sub>H<sub>22</sub>F<sub>3</sub>N<sub>7</sub>O; MF: 0; RMF: 50; Prob 50.0%; CAS: 641571-10-0; Lib: nist\_msms; ID: 165145.

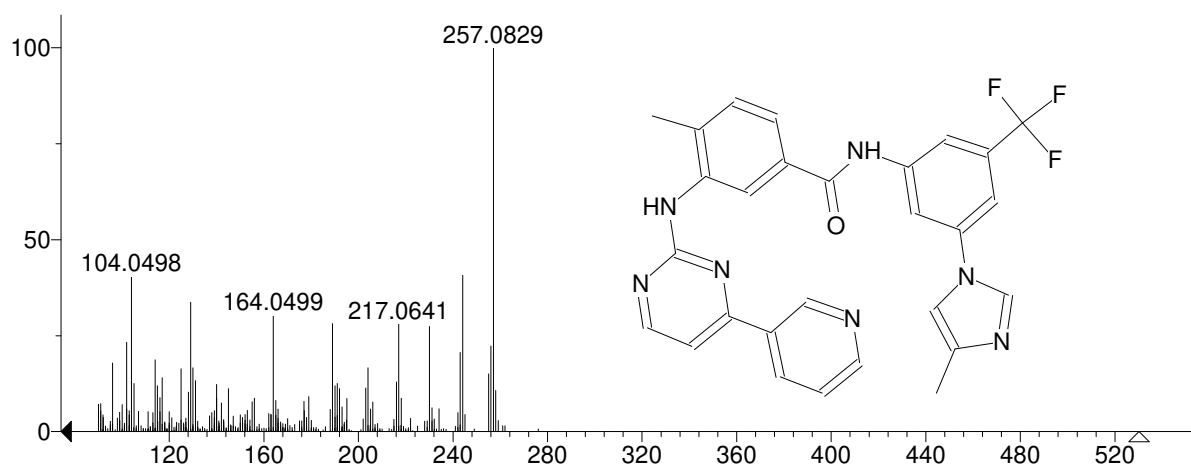

Hit 2 : Cepharanthine [M+H]<sup>+</sup>=>545.2=>530.2 IT 35% P=530.2  
C<sub>37</sub>H<sub>38</sub>N<sub>2</sub>O<sub>6</sub>; MF: 0; RMF: 19; Prob 50.0%; CAS: 481-49-2; Lib: nist\_msms; ID: 217075.

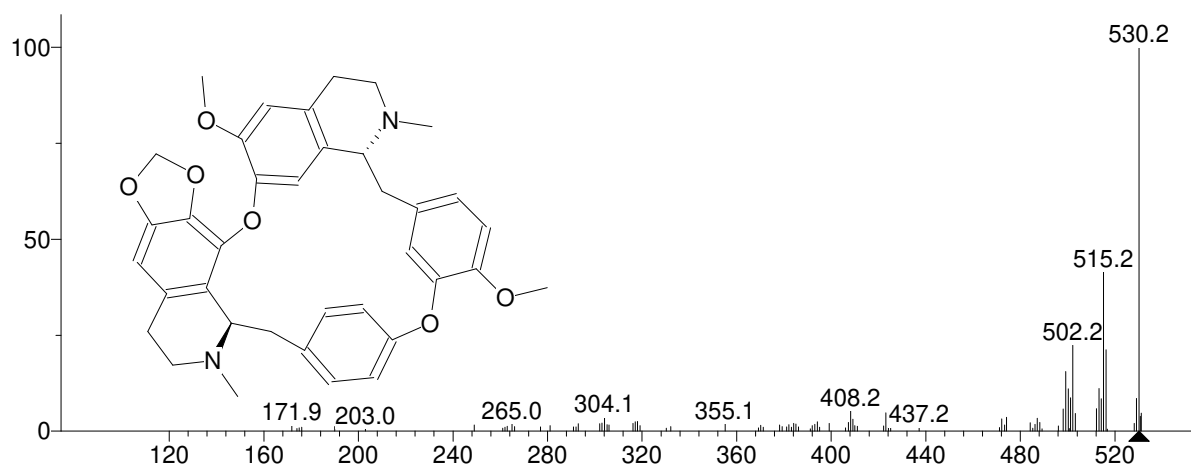

Unknown: Unknown (3.91\_591.2530m/z)  
Compound in Library Factor = -3273

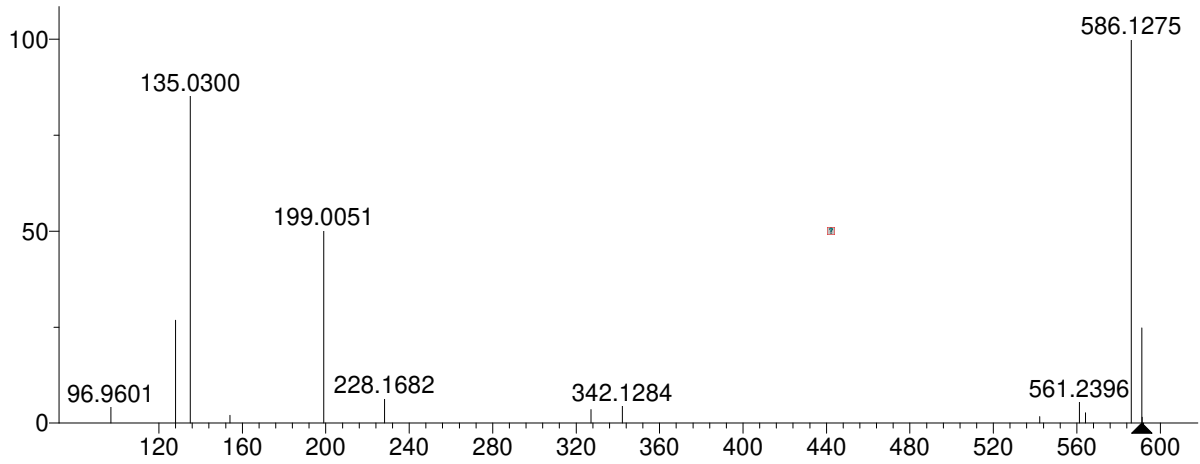

Hit 1 : LPI 18:4; [M-H]<sup>-</sup> [M-H]<sup>-</sup> P=591.3  
C<sub>27</sub>H<sub>45</sub>O<sub>12</sub>P; MF: 8; RMF: 250; Prob 57.3%; Lib: msdial-insilicomsm-lipids-neg; ID: 311171.

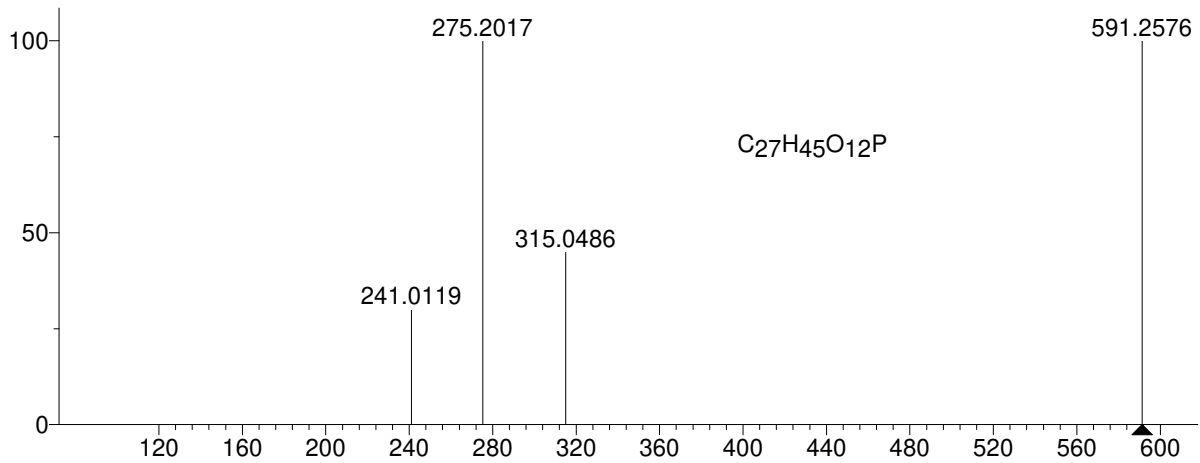

Hit 2 : 3-[(3R,5S,10R,13R,14S,17R)-5,14-dihydroxy-10,13-dimethyl-3-[(2R,3R,4S,5S,6R)-3,4,5-trihydroxy-6-(hydr C<sub>29</sub>H<sub>44</sub>O<sub>10</sub>]; MF: 0; RMF: 33; Prob 42.7%; Lib: mona-export-vf-npl\_qexactive; ID: 14698.

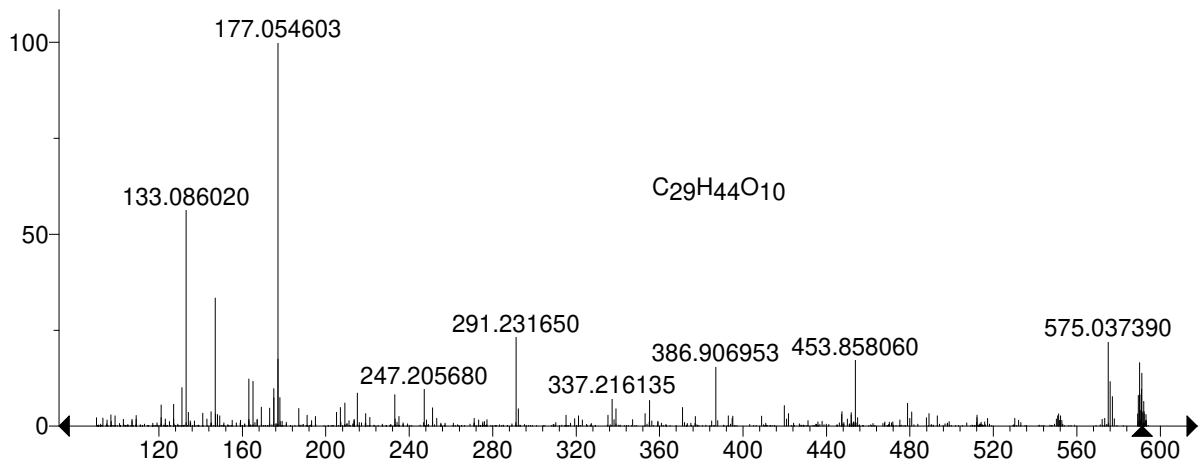

Unknown: Unknown (3.91\_680.2762m/z)  
Compound in Library Factor = 0

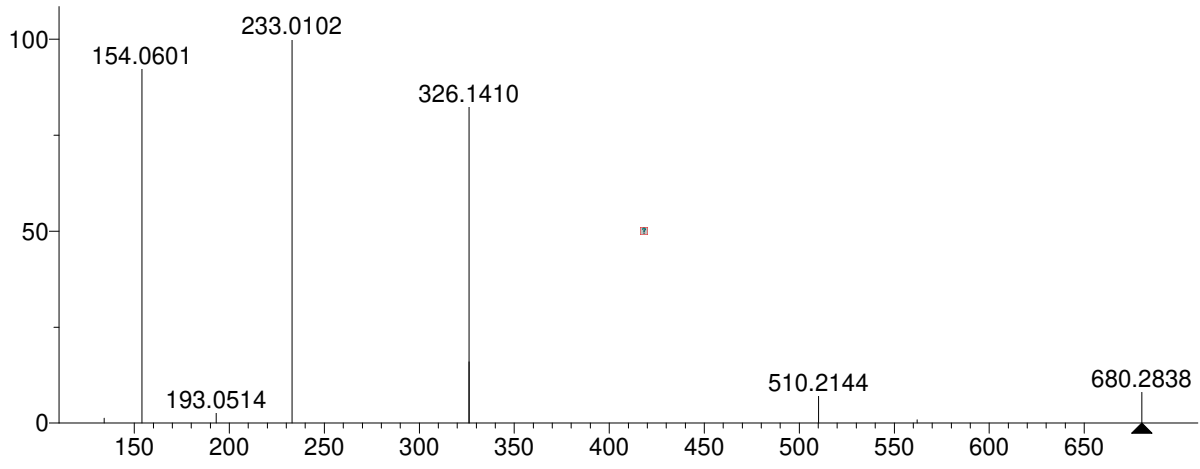

Unknown: Unknown (3.92\_277.1179m/z)  
Compound in Library Factor = 0

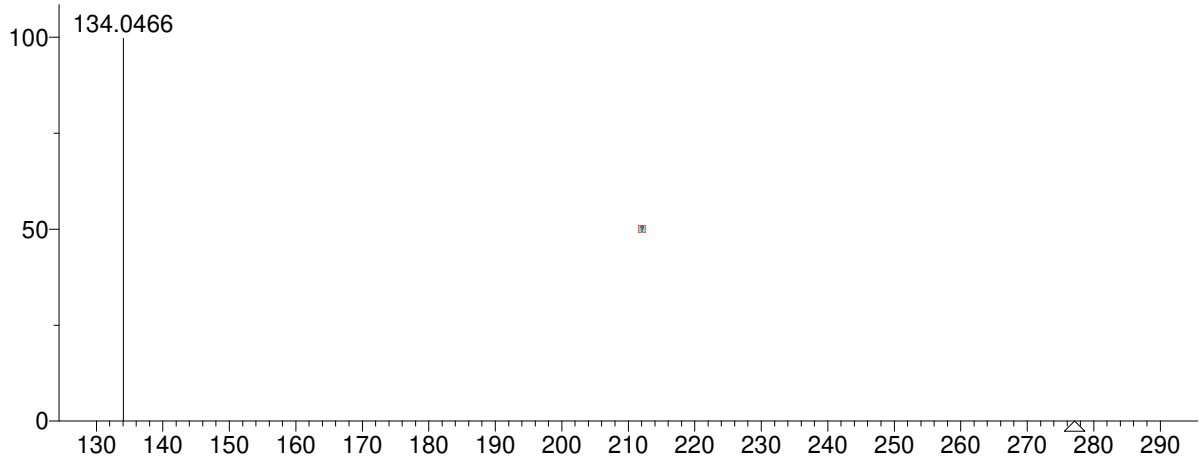

\*\* Search Report Page 1 of 2 \*\*

Unknown: Unknown (3.92\_382.0995m/z)  
Compound in Library Factor = -462

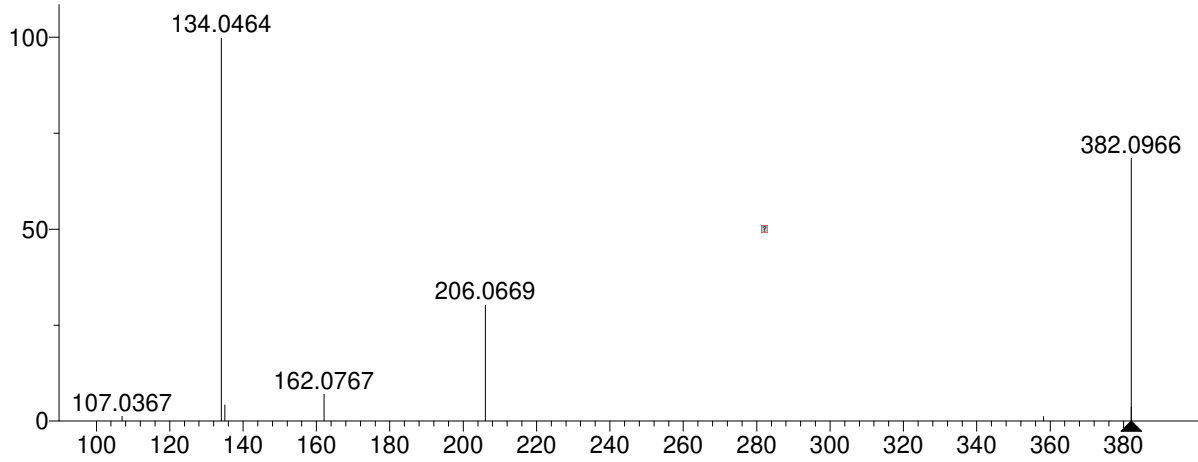

Hit 1 : Fluxapyroxad [M+H]<sup>+</sup> HCD 7V P=382.1  
C<sub>18</sub>H<sub>12</sub>F<sub>5</sub>N<sub>3</sub>O; MF: 149; RMF: 738; Prob 94.6%; CAS: 907204-31-3; Lib: nist\_msms; ID: 469925.

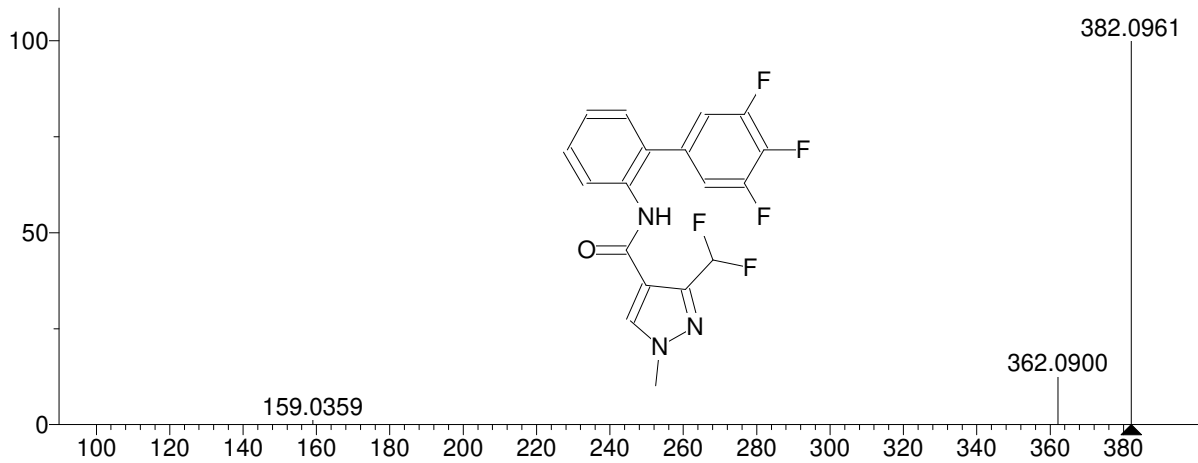

Hit 2 : 5-(3-(2-(7-Chloroquinolin-2-yl)ethenyl)phenyl)-8-dimethylcarbamyl-4,6-dithiooctanoic acid [M+H]<sup>+</sup>=>382.1  
C<sub>26</sub>H<sub>27</sub>ClN<sub>2</sub>O<sub>3</sub>S<sub>2</sub>; MF: 0; RMF: 53; Prob 2.68%; CAS: 115104-28-4; Lib: nist\_msms; ID: 538755.

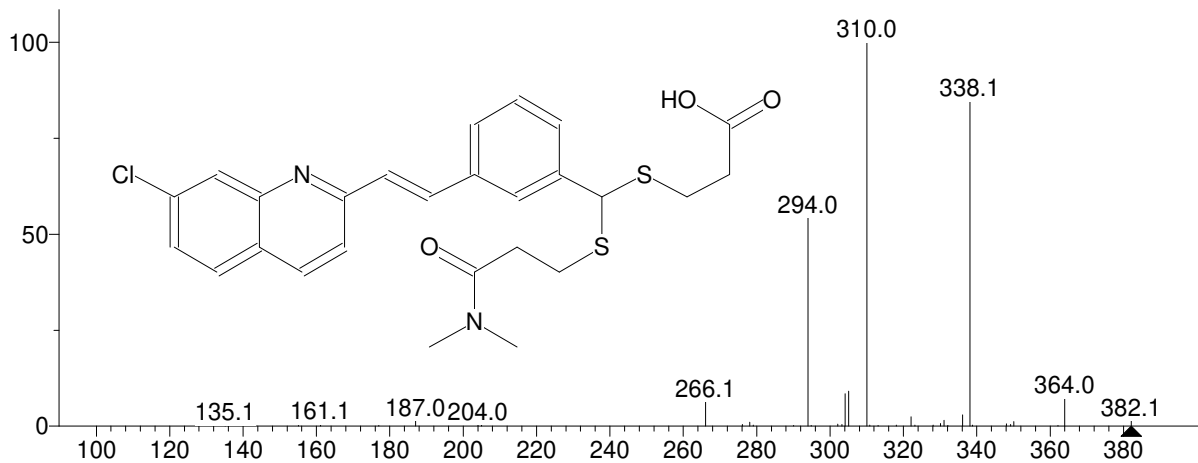

\*\* Search Report Page 2 of 2 \*\*

Hit 3 : Flavopiridol [M-H]<sup>-</sup> => 382.1 IT 35% P=382.1  
C<sub>21</sub>H<sub>20</sub>ClNO<sub>5</sub>; MF: 0; RMF: 52; Prob 2.68%; CAS: 146426-40-6; Lib: nist\_msms; ID: 375595.

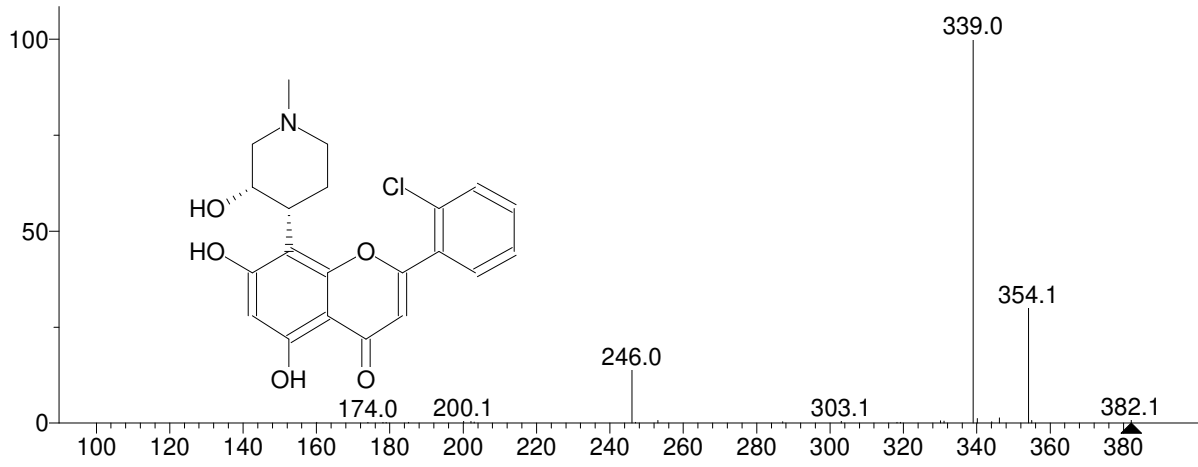

Unknown: Unknown (3.93\_332.1695m/z)  
Compound in Library Factor = 0

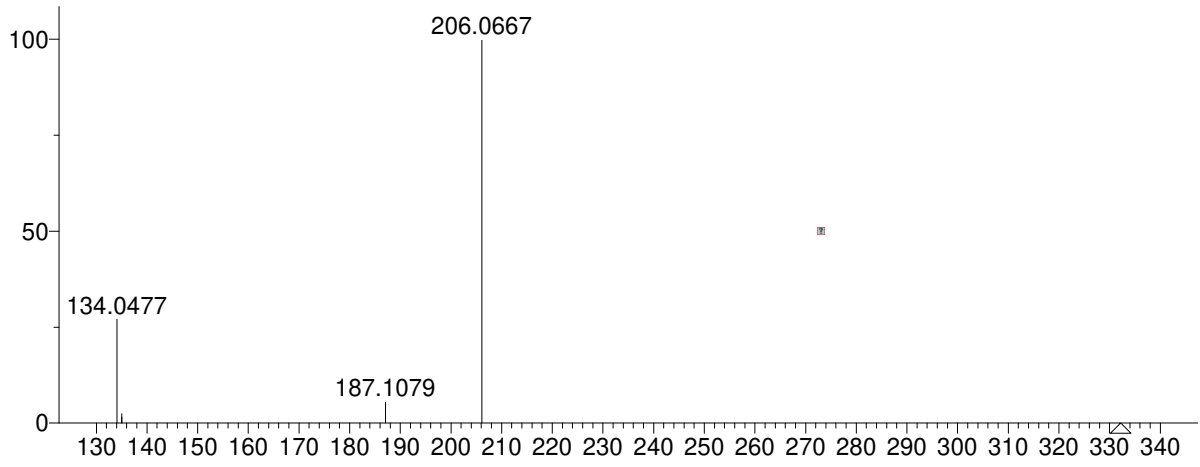



Unknown: Unknown (3.93\_458.1416m/z)  
Compound in Library Factor = 0

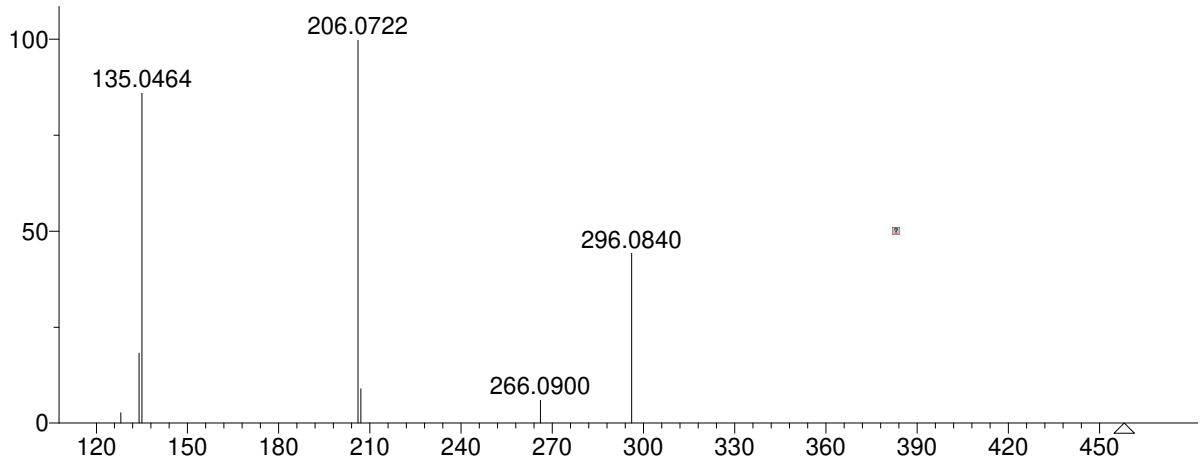

Unknown: Unknown (3.93\_562.1182m/z)  
Compound in Library Factor = 0

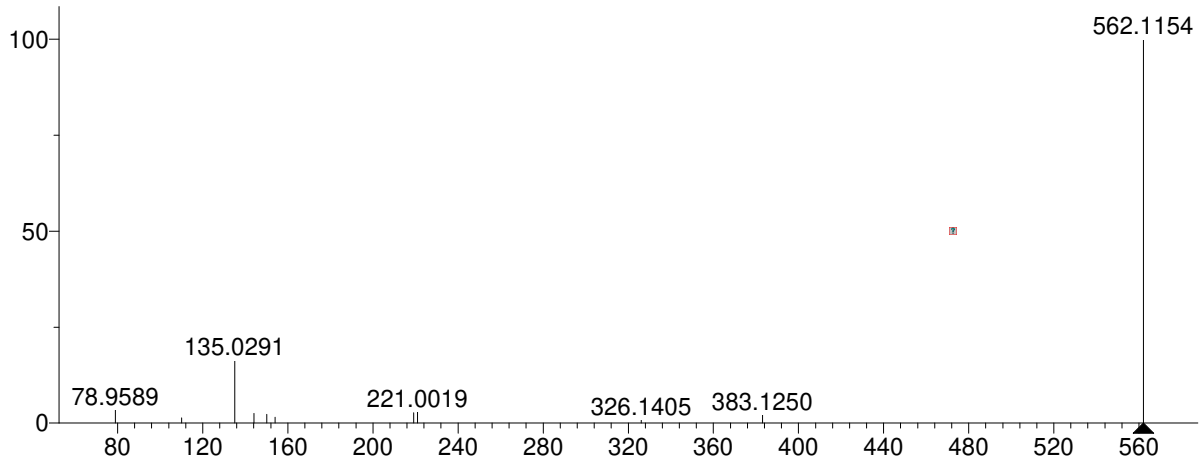

Unknown: Unknown (3.94\_586.1290m/z)  
Compound in Library Factor = 0

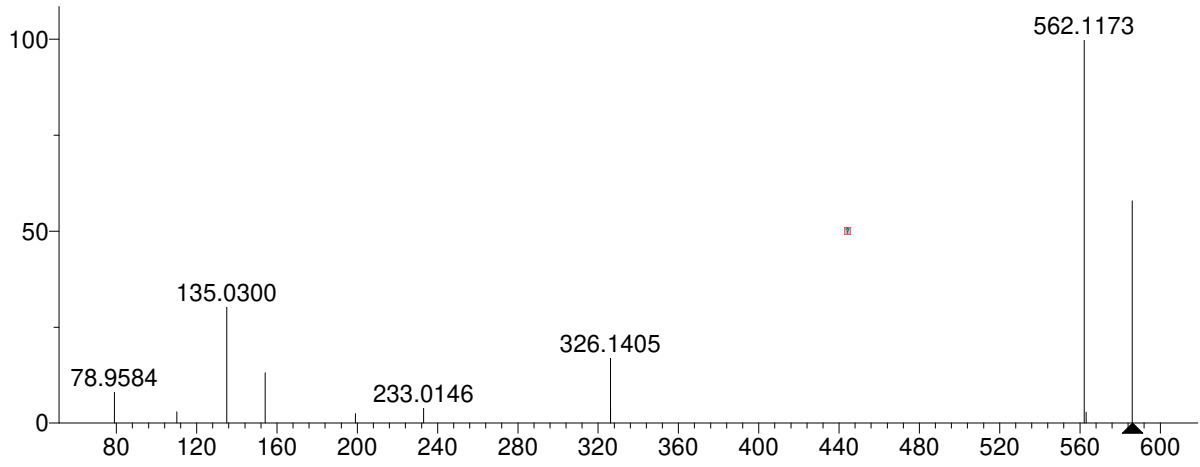

Unknown: Unknown (3.95\_358.1973m/z)  
Compound in Library Factor = -2176

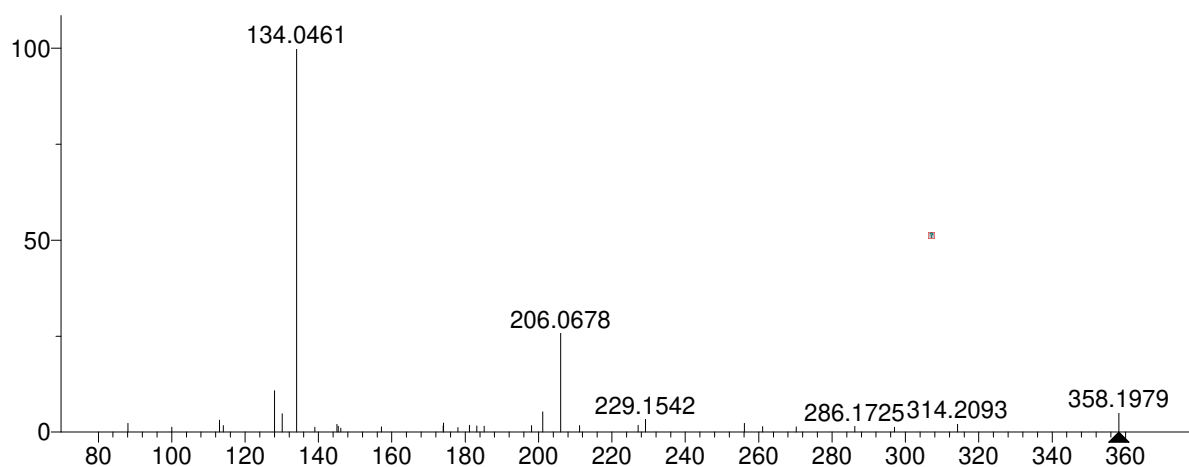

Hit 1 : 4-Hydroxyatorvastatin lactone [M-H-H<sub>2</sub>O] $\Rightarrow$ 493.2 $\Rightarrow$ 358.2 IT 35% P=358.2  
C<sub>33</sub>H<sub>33</sub>FN<sub>2</sub>O<sub>5</sub>; MF: 29; RMF: 447; Prob 17.4%; CAS: 163217-70-7; Lib: nist\_msms; ID: 440854.

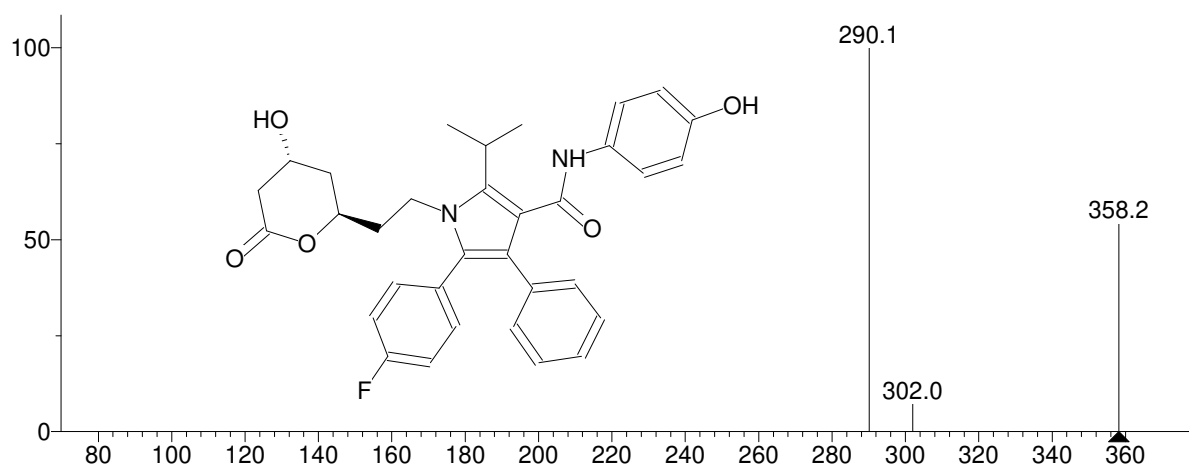

Hit 2 : 1H-Indole-3-carboxamide, 1-(5-fluoropentyl)-N-8-quinolinyl- [M+H] $\Rightarrow$ 358.2 IT 35% P=358.2  
C<sub>23</sub>H<sub>22</sub>FN<sub>3</sub>O; MF: 1; RMF: 141; Prob 5.03%; Lib: nist\_msms; ID: 344362.

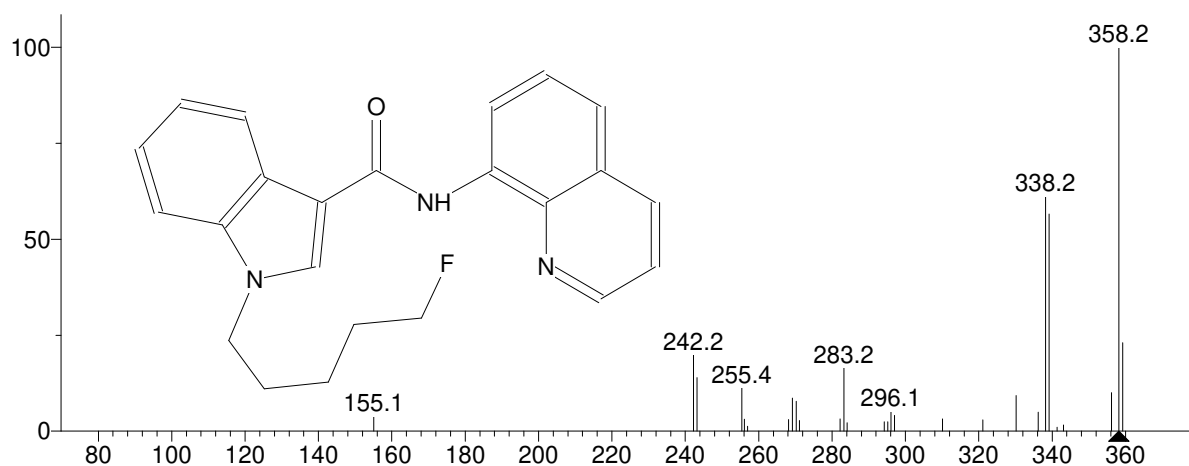

\*\* Search Report Page 2 of 2 \*\*

Hit 3 : 1H-Indole-3,5-dicarboxylic acid, 1-[3-[4-(decyloxy)phenoxy]-2-oxopropyl]-, 3-methyl ester [M-H]<sup>-</sup>=>358.2 | C<sub>30</sub>H<sub>37</sub>NO<sub>7</sub>; MF: 1; RMF: 111; Prob 5.03%; CAS: 888320-29-4; Lib: nist\_msms; ID: 374612.

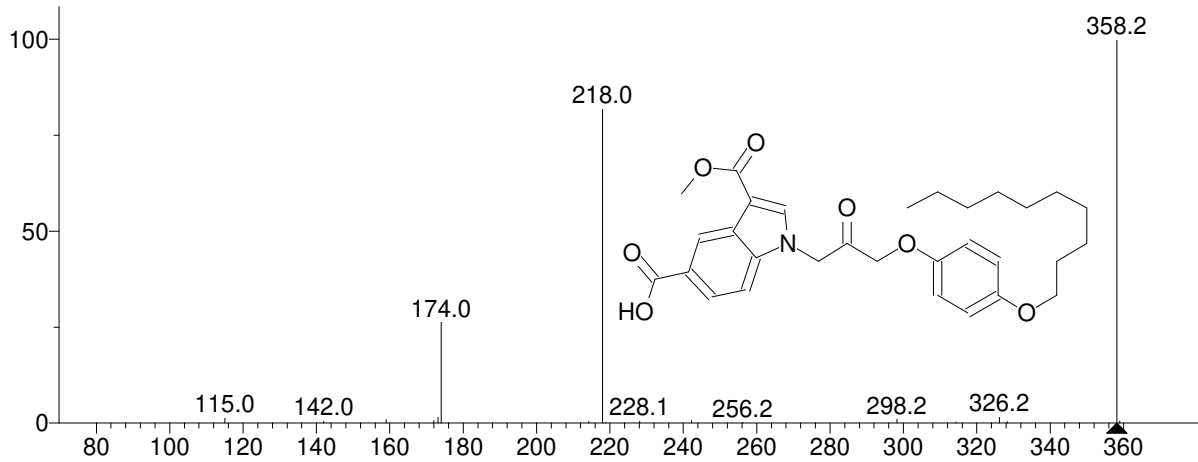

Hit 4 : Nalbuphine [M+H]<sup>+</sup> 20-30-40%) P=358.2 C<sub>21</sub>H<sub>27</sub>NO<sub>4</sub>; MF: 0; RMF: 104; Prob 4.83%; Lib: mona-export-fiehn\_hilic; ID: 599.

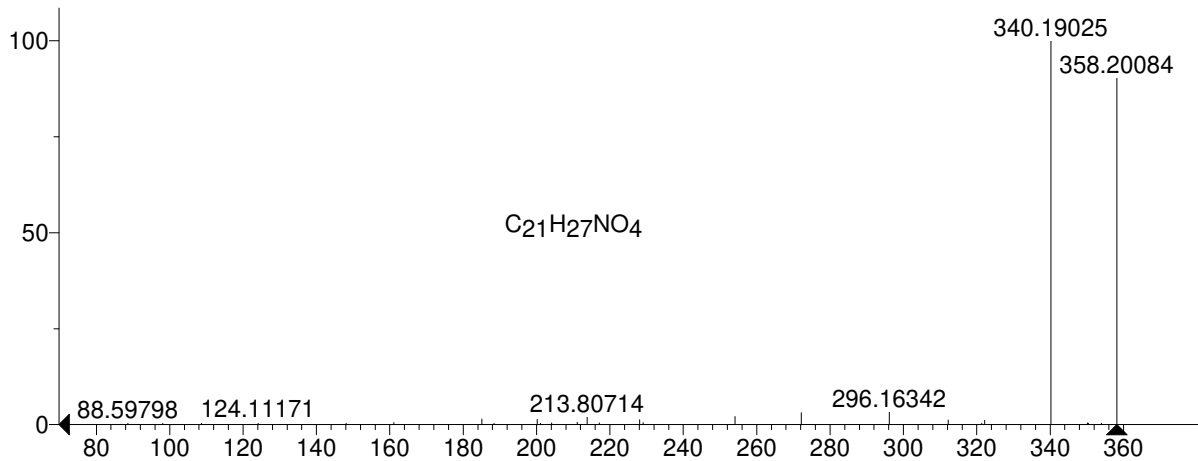

Hit 5 : Leukotriene D4 methyl ester [M+H-H<sub>2</sub>O]<sup>+</sup>=>390.2=>358.2 IT 35% P=358.2 C<sub>26</sub>H<sub>42</sub>N<sub>2</sub>O<sub>6</sub>S; MF: 0; RMF: 83; Prob 4.83%; Lib: nist\_msms; ID: 92133.

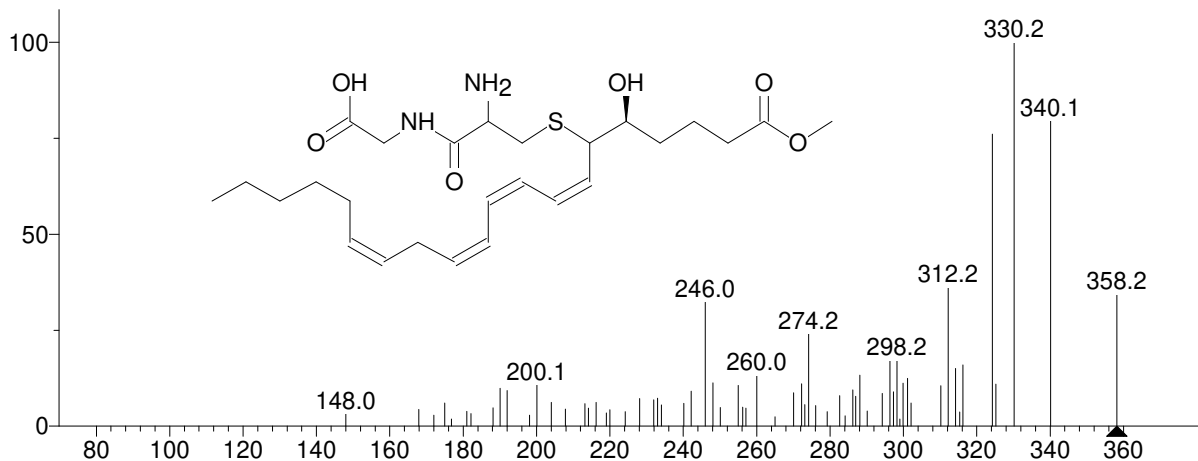

Unknown: Unknown (3.96\_259.1287m/z)  
Compound in Library Factor = -1142

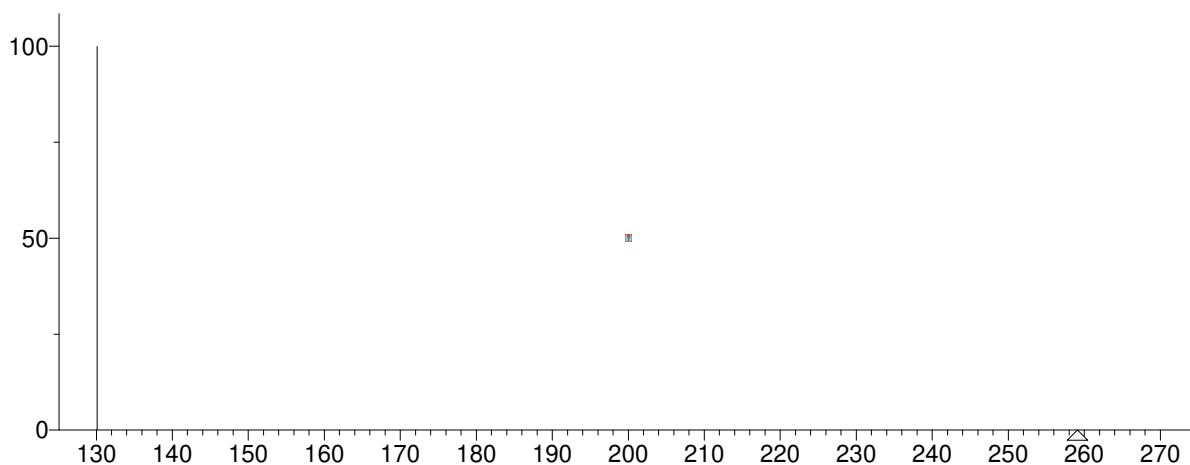

Hit 1 : Glu-Leu [M-H]<sup>-</sup> HCD 41eV P=259.1  
C<sub>11</sub>H<sub>20</sub>N<sub>2</sub>O<sub>5</sub>; MF: 181; RMF: 918; Prob 40.6%; Lib: nist\_msms; ID: 570065.

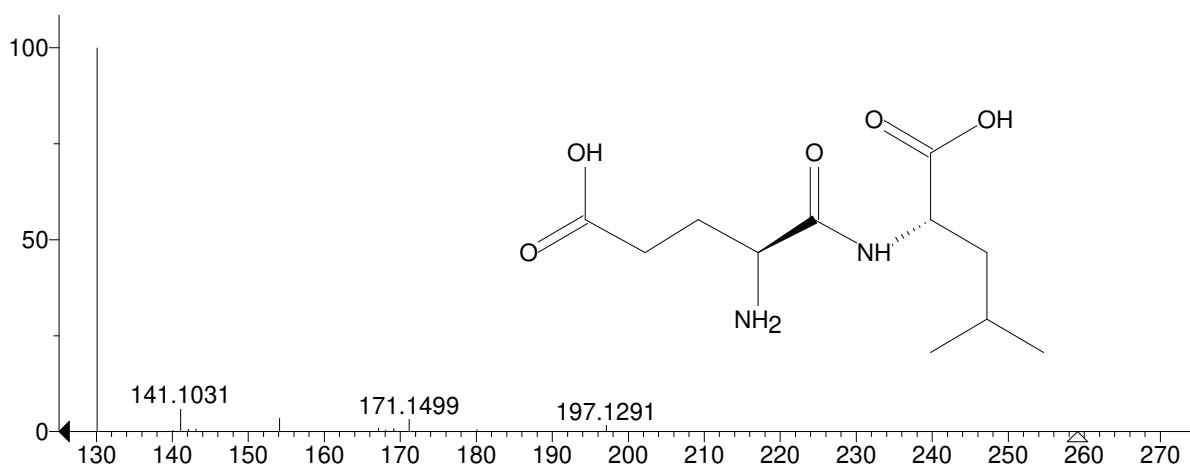

Hit 2 : Glu-Leu [M-H]<sup>-</sup> HCD 41eV P=259.1  
C<sub>11</sub>H<sub>20</sub>N<sub>2</sub>O<sub>5</sub>; MF: 181; RMF: 918; Prob 40.6%; CAS: 5969-52-8; Lib: nist\_msms2; ID: 83791.

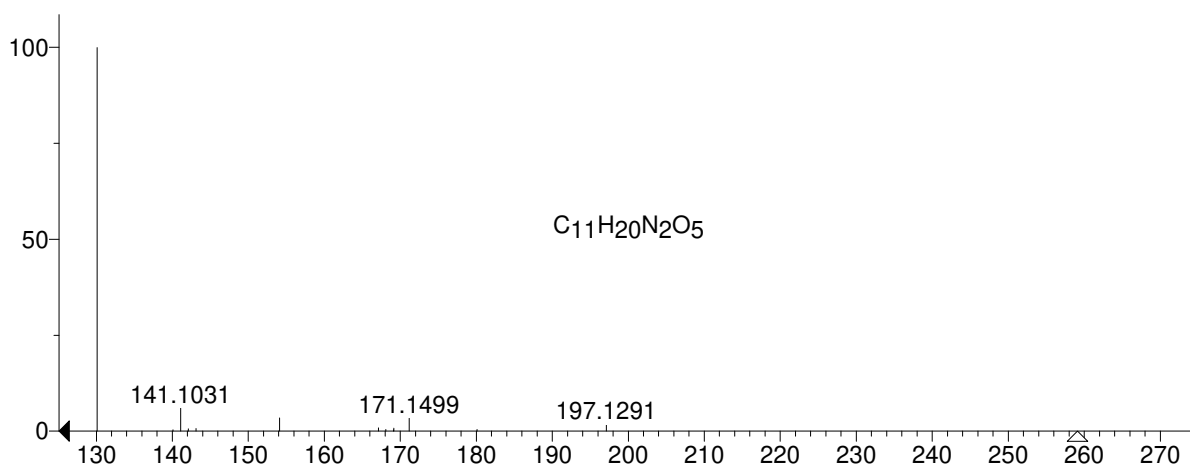

Hit 3 : Ile-Glu [M-H]<sup>-</sup> HCD 41eV P=259.1  
C<sub>11</sub>H<sub>20</sub>N<sub>2</sub>O<sub>5</sub>; MF: 118; RMF: 874; Prob 6.80%; Lib: nist\_msms; ID: 570719.

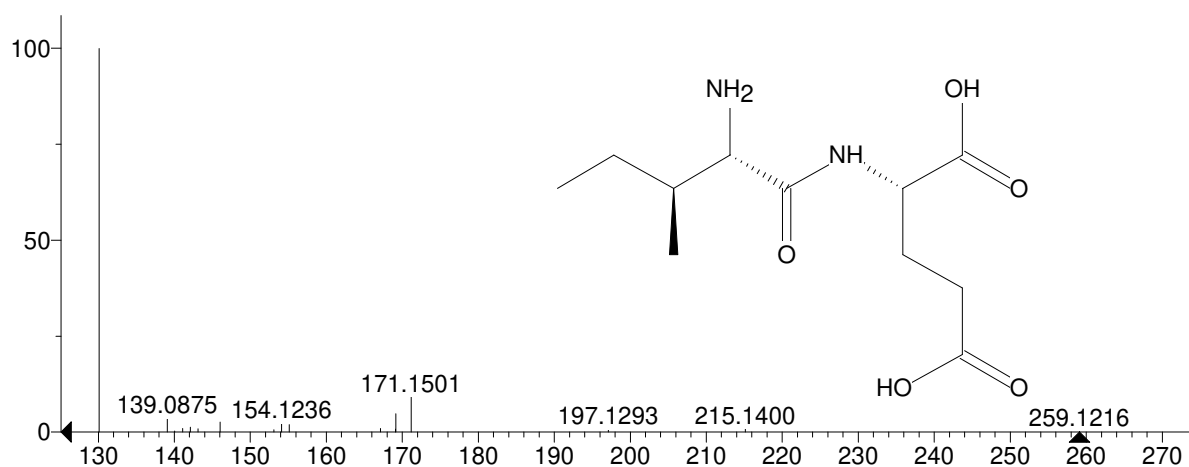

Hit 4 : Ile-Glu [M-H]<sup>-</sup> HCD 41eV P=259.1  
C<sub>11</sub>H<sub>20</sub>N<sub>2</sub>O<sub>5</sub>; MF: 118; RMF: 874; Prob 6.80%; CAS: 42516-53-0; Lib: nist\_msms2; ID: 84452.

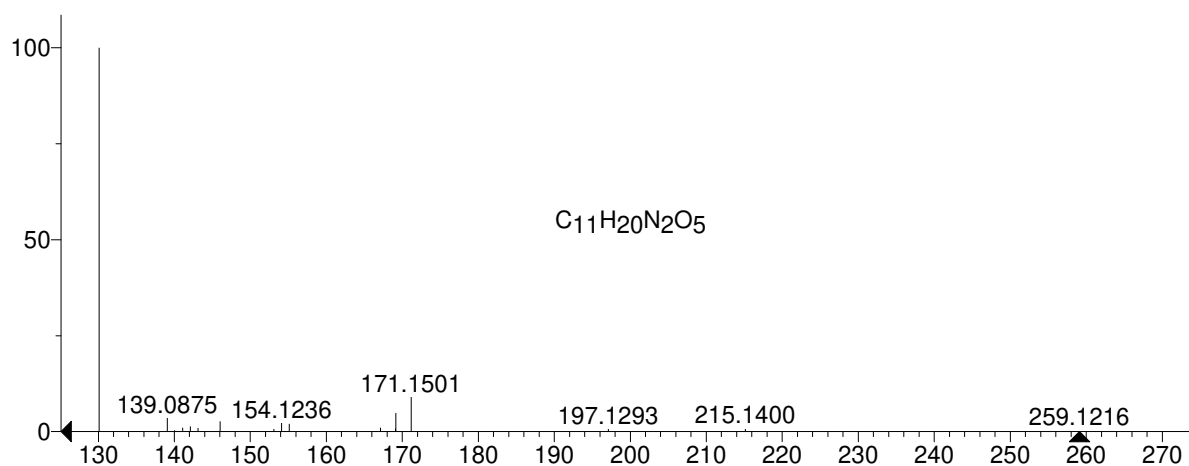

Hit 5 : Leu-Glu [M-H]<sup>-</sup> HCD 41eV P=259.1  
C<sub>11</sub>H<sub>20</sub>N<sub>2</sub>O<sub>5</sub>; MF: 86; RMF: 842; Prob 1.81%; Lib: nist\_msms; ID: 570787.

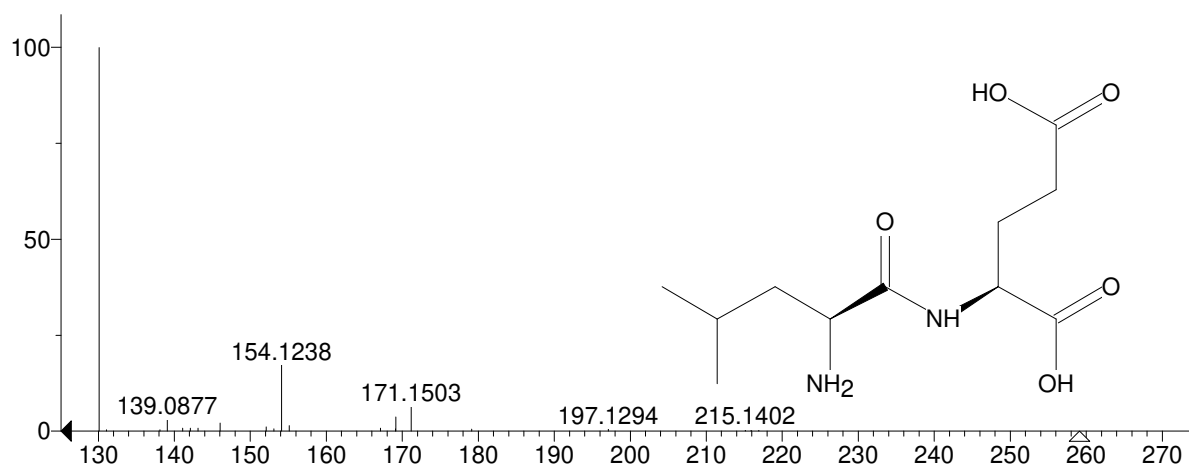

\*\* Search Report Page 1 of 2 \*\*

Unknown: Unknown (3.96\_415.1709m/z)  
Compound in Library Factor = -3273

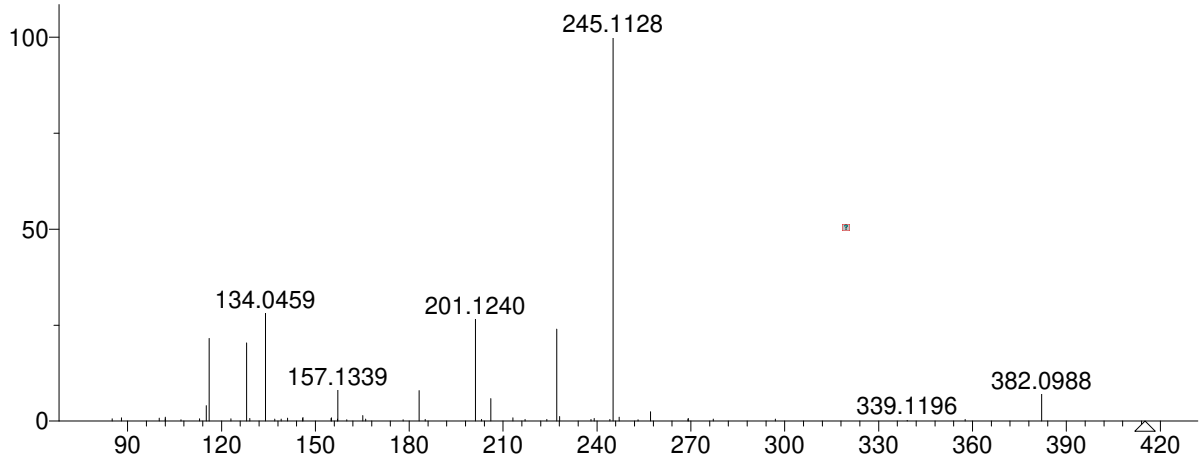

Hit 1 : 6-formyl-10-(hydroxymethyl)-5-methoxy-3-methylidene-2-oxo-2H,3H,3aH,4H,5H,8H,9H,11aH-cyclodeca[b]l  
C<sub>21</sub>H<sub>28</sub>O<sub>7</sub>; MF: 1; RMF: 54; Prob 20.6%; Lib: mona-export-vf-npl\_gexactive; ID: 16435.

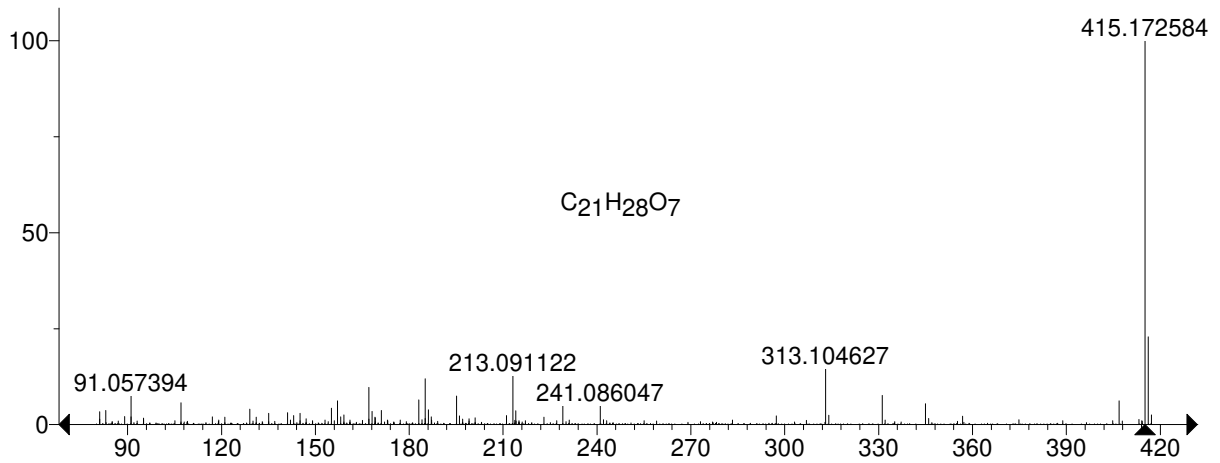

Hit 2 : NCGC00347525-03!2-amino-5-[2-[[[2,3-dihydroxy-2-(1-hydroxyethyl)butanoyl]oxymethyl]-4-hydroxyanilino]-  
C<sub>18</sub>H<sub>26</sub>N<sub>2</sub>O<sub>9</sub>; MF: 0; RMF: 8; Prob 19.8%; Lib: mona-export-gnps; ID: 9213.

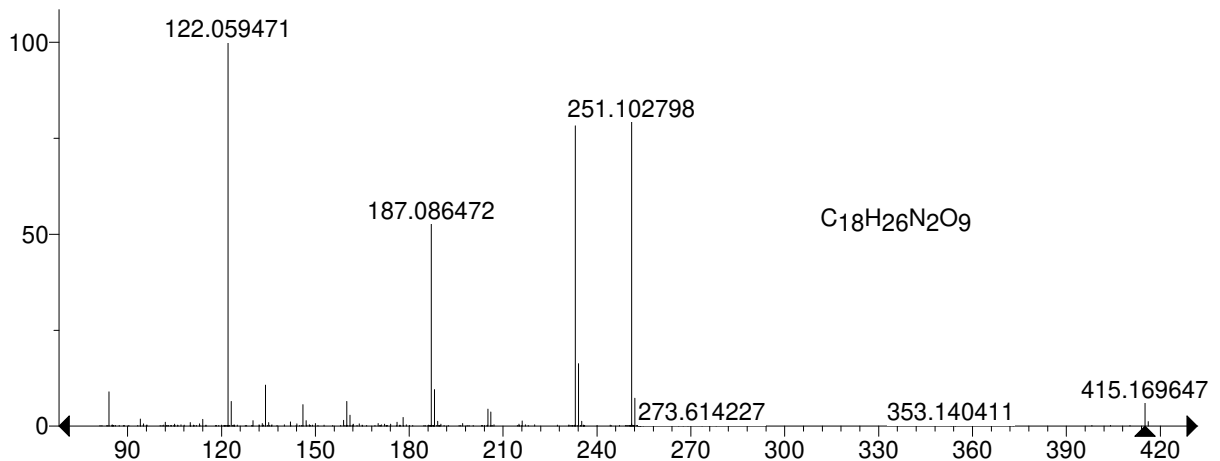



\*\* Search Report Page 2 of 2 \*\*

Hit 3 : 2-amino-5-[2-[[2,3-dihydroxy-2-(1-hydroxyethyl)butanoyl]oxymethyl]-4-hydroxyanilino]-5-oxopentanoic acid  
C<sub>18</sub>H<sub>26</sub>N<sub>2</sub>O<sub>9</sub>; MF: 0; RMF: 6; Prob 19.8%; Lib: mona-export-vf-npl\_qexactive; ID: 23034.

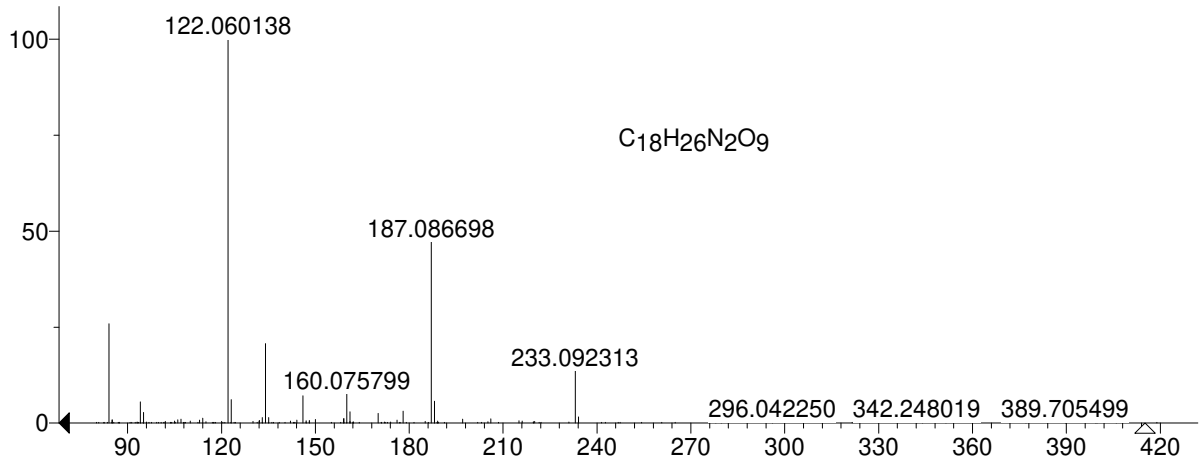

Hit 4 : NCGC00347525-02!2-amino-5-[2-[[2,3-dihydroxy-2-(1-hydroxyethyl)butanoyl]oxymethyl]-4-hydroxyanilino]-  
C<sub>18</sub>H<sub>26</sub>N<sub>2</sub>O<sub>9</sub>; MF: 0; RMF: 5; Prob 19.8%; Lib: mona-export-gnps; ID: 6270.

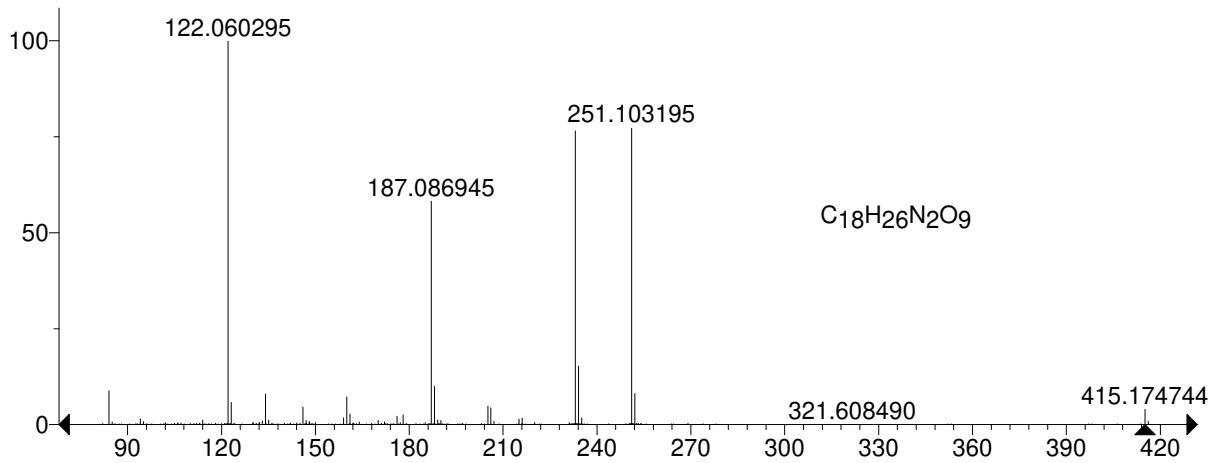

Hit 5 : Diltiazem HCl (Tiazac) [M+H]<sup>+</sup> P=415.2  
C<sub>22</sub>H<sub>27</sub>ClN<sub>2</sub>O<sub>4</sub>S; MF: 0; RMF: 4; Prob 19.8%; Lib: mona-export-gnps; ID: 648.

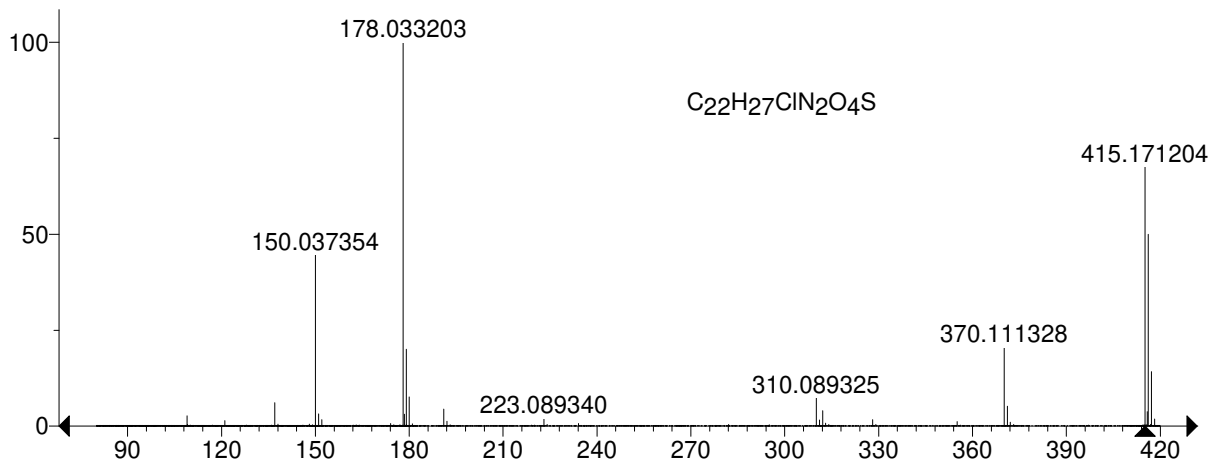

Unknown: Unknown (3.96\_467.0790m/z)  
Compound in Library Factor = 0

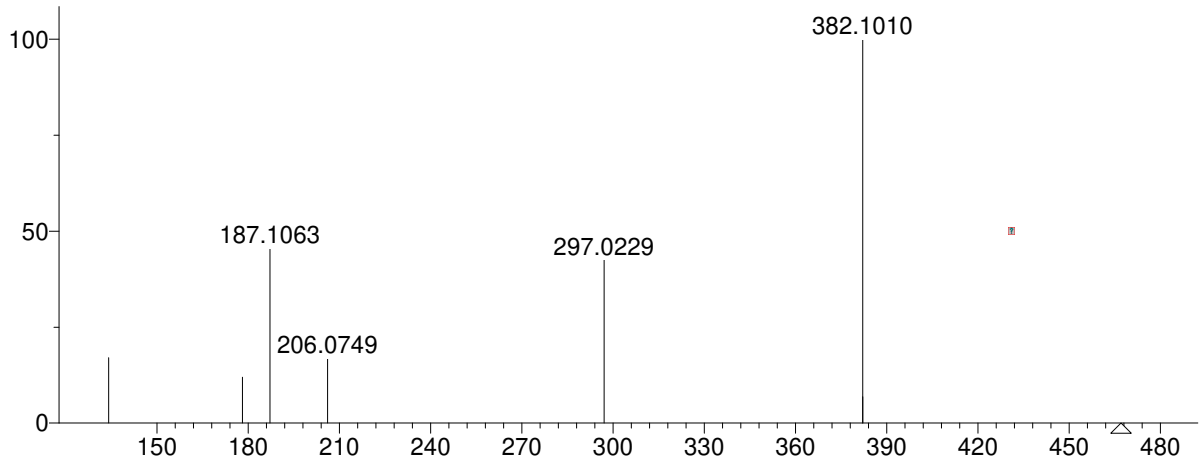

Unknown: Unknown (3.96\_522.2280m/z)  
Compound in Library Factor = 0

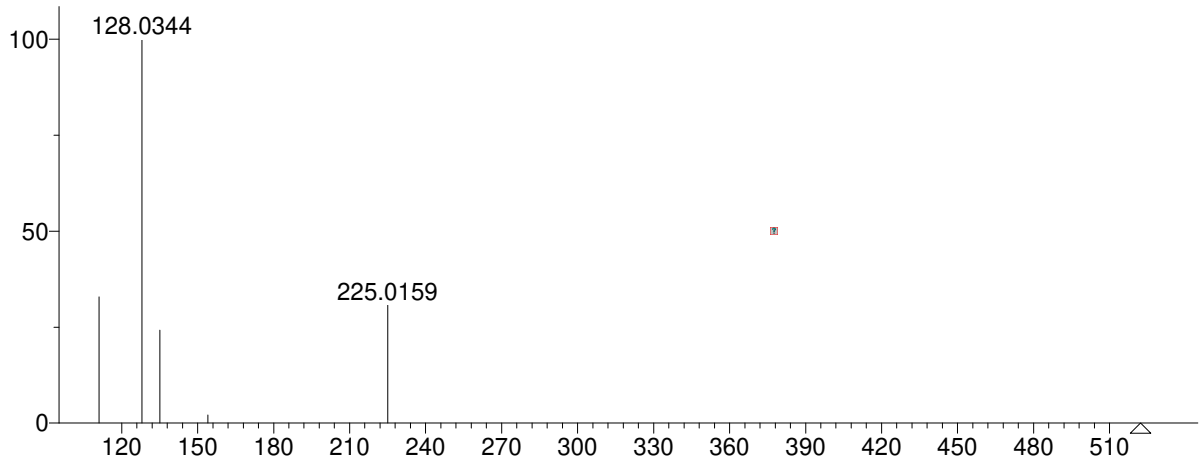

Unknown: Unknown (3.96\_532.2012m/z)  
Compound in Library Factor = 0

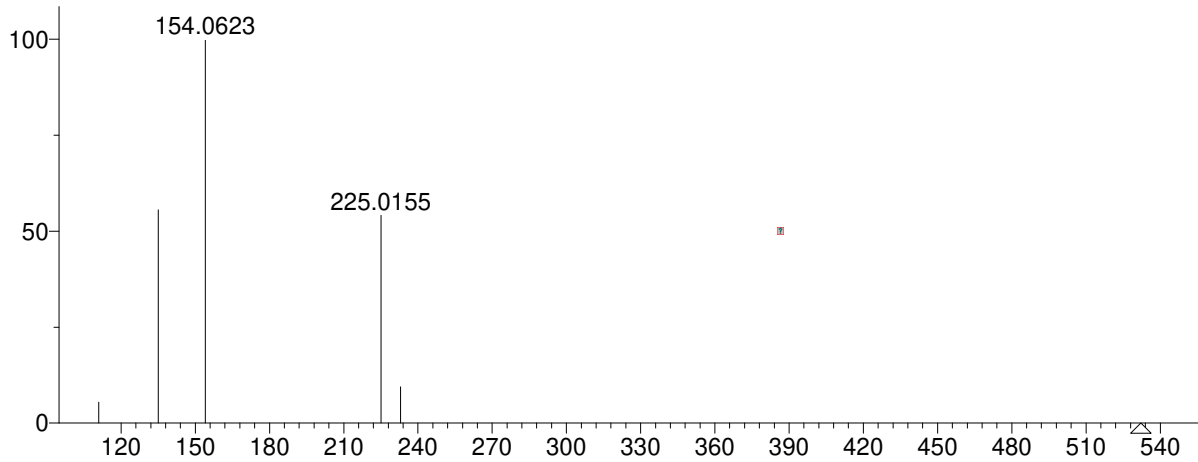

Hit 1 : Cholecystinin, CCK Octapeptide (26-33), Non-Sulfated [M+2H]<sup>2+</sup> HCD 71eV P=532.2  
C49H62N10O13S2; MF: 0; RMF: 30; Prob 50.0%; CAS: 25679-24-7; Lib: nist\_msms2; ID: 63545.

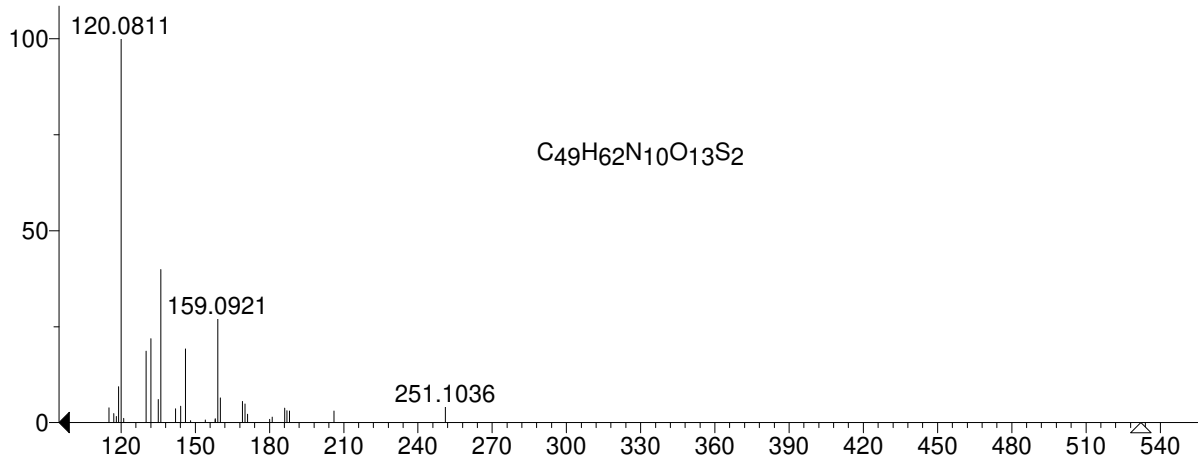

Hit 2 : [(2R,3S,4S,5R,6R)-6-[(2S,3S,4S,5R)-4-acetyloxy-3-hydroxy-2,5-bis(hydroxymethyl)oxolan-2-yl]oxy-3,4,5-tri  
C23H30O13; MF: 0; RMF: 12; Prob 50.0%; Lib: mona-export-vf-npl\_qexactive; ID: 12469.

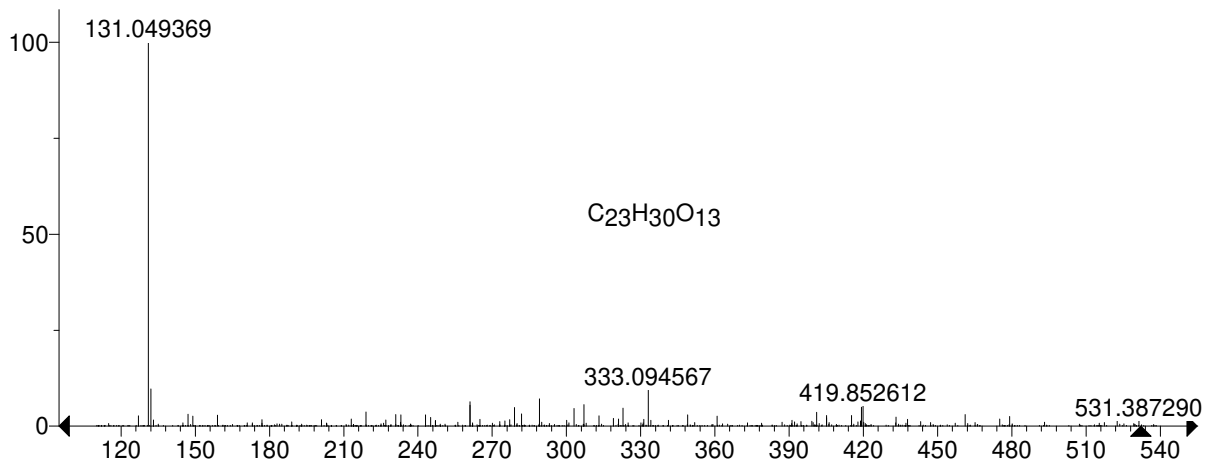

Unknown: Unknown (3.96\_602.1248m/z)  
Compound in Library Factor = 0

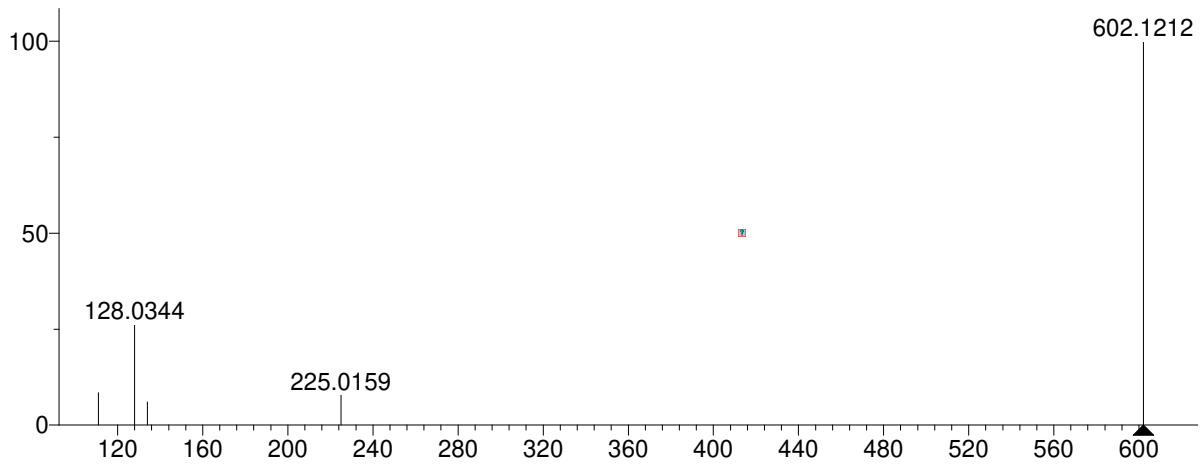

Unknown: Unknown (3.97\_352.0629m/z)  
Compound in Library Factor = 0

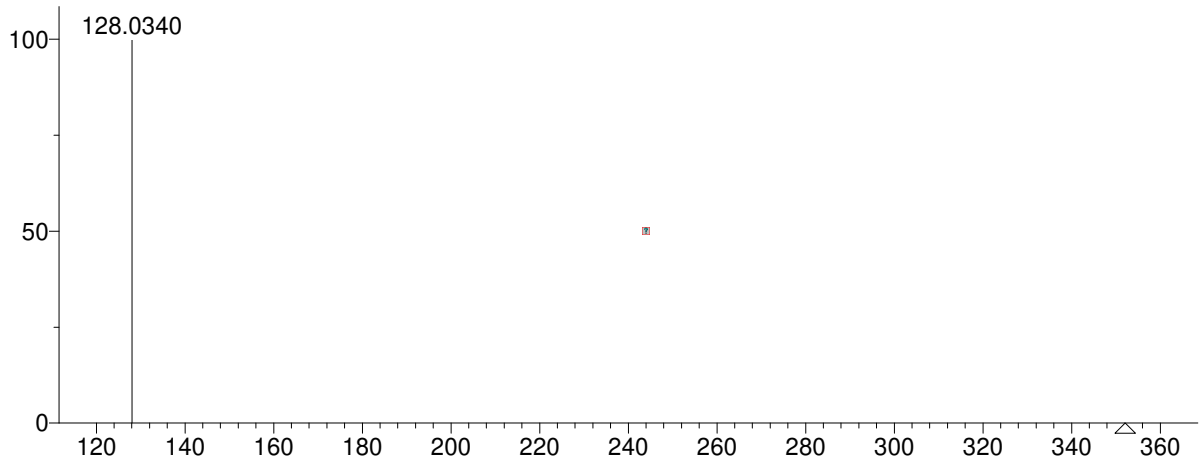

Unknown: Unknown (3.97\_458.1999m/z)  
Compound in Library Factor = 0

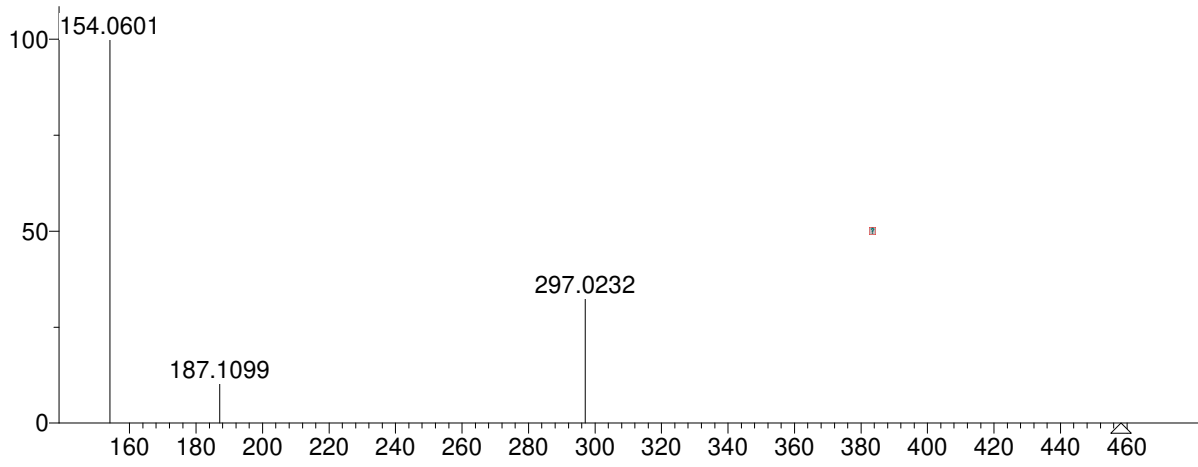

Unknown: Unknown (3.98\_298.0917m/z)  
Compound in Library Factor = 0

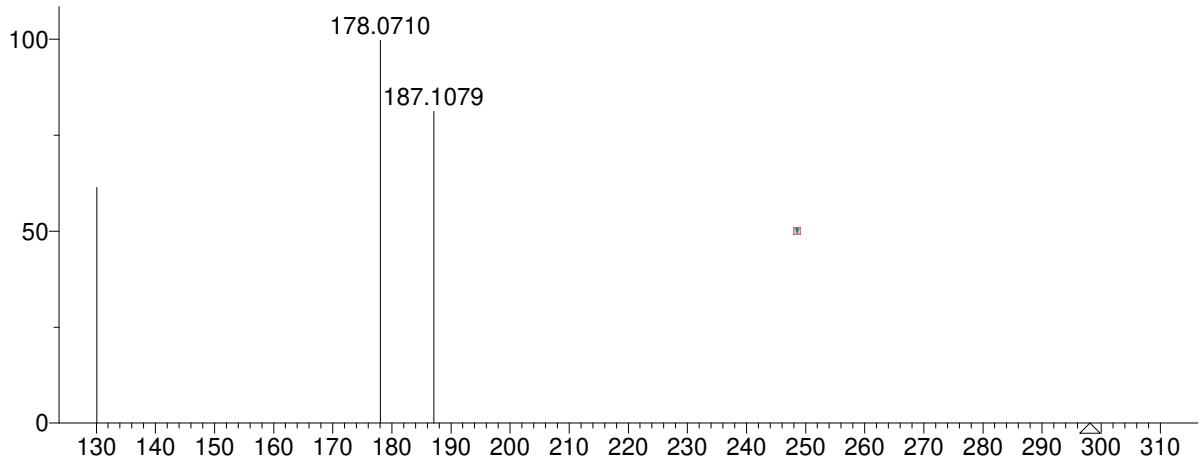



Unknown: Unknown (3.98\_330.1636m/z)  
Compound in Library Factor = 0

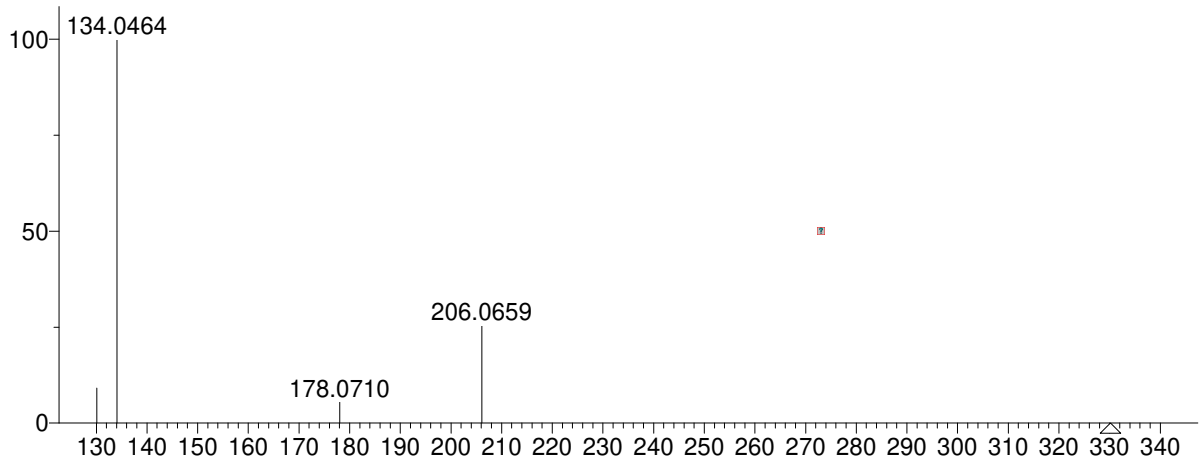

Unknown: Unknown (3.99\_719.4187m/z)  
Compound in Library Factor = 0

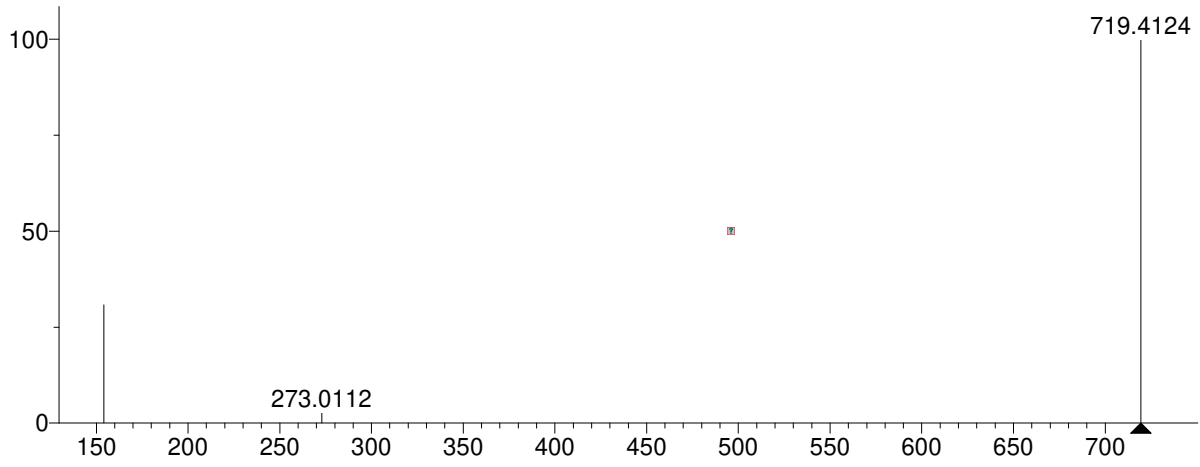

\*\* Search Report Page 1 of 2 \*\*

Unknown: Unknown (30.02\_467.3007m/z)  
Compound in Library Factor = -3273

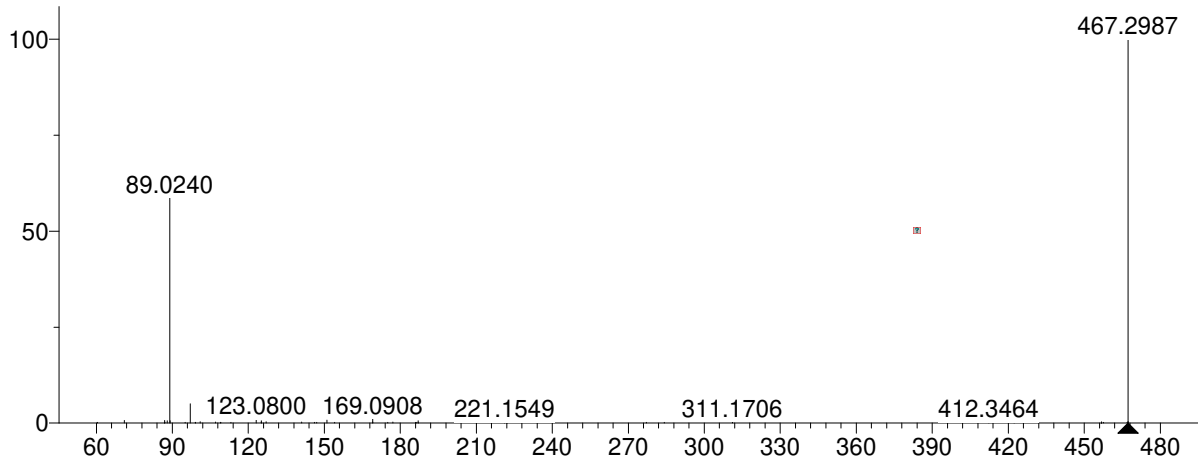

Hit 1 : NCGC00385231-01\_C26H44O8\_{(1S,2R,4aS,5R,8aS)-2-Hydroxy-5-[(3E)-5-hydroxy-3-methyl-3-penten-1-yl]}C26H44O8; MF: 2; RMF: 46; Prob 26.5%; Lib: mona-export-gnps; ID: 11850.

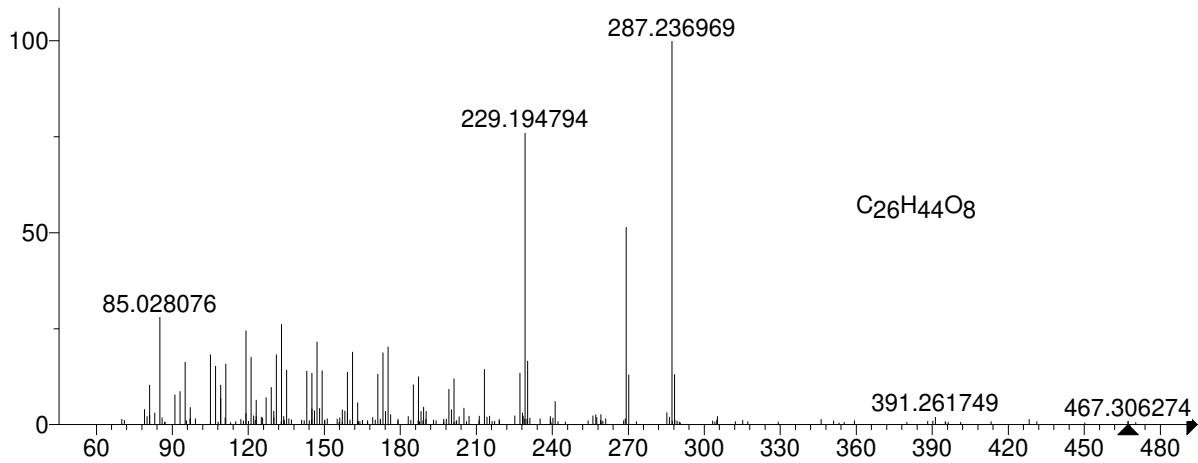

Hit 2 : Kendomycin [M-H]<sup>-</sup>=>467.3 IT 35% P=467.3  
C<sub>29</sub>H<sub>42</sub>O<sub>6</sub>; MF: 0; RMF: 63; Prob 24.5%; CAS: 183202-73-5; Lib: nist\_msms; ID: 254473.

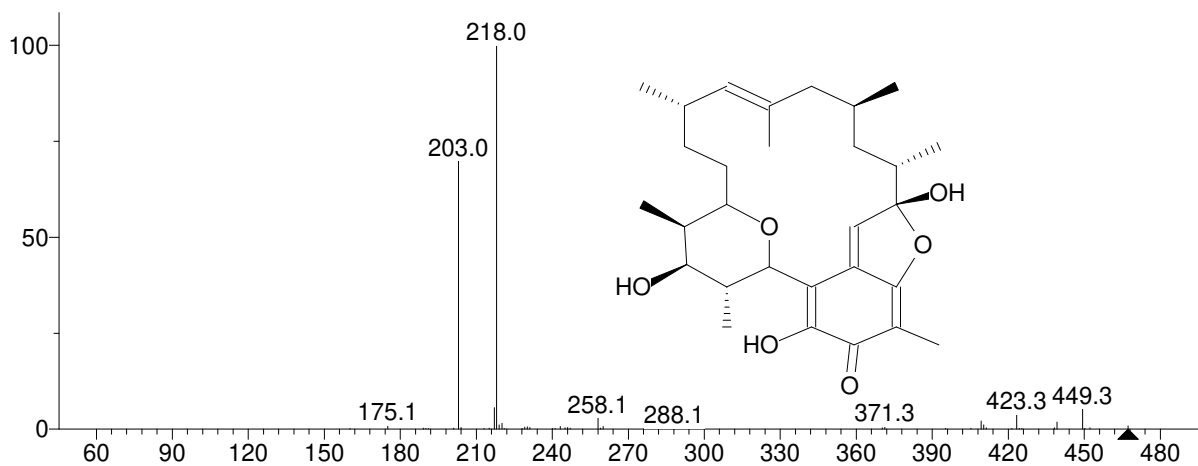

\*\* Search Report Page 2 of 2 \*\*

Hit 3 : Ganoderic acid H [M-H-H<sub>2</sub>O]-=>467.3 IT 35% P=467.3  
C<sub>32</sub>H<sub>44</sub>O<sub>9</sub>; MF: 0; RMF: 21; Prob 24.5%; CAS: 98665-19-1; Lib: nist\_msms; ID: 226715.

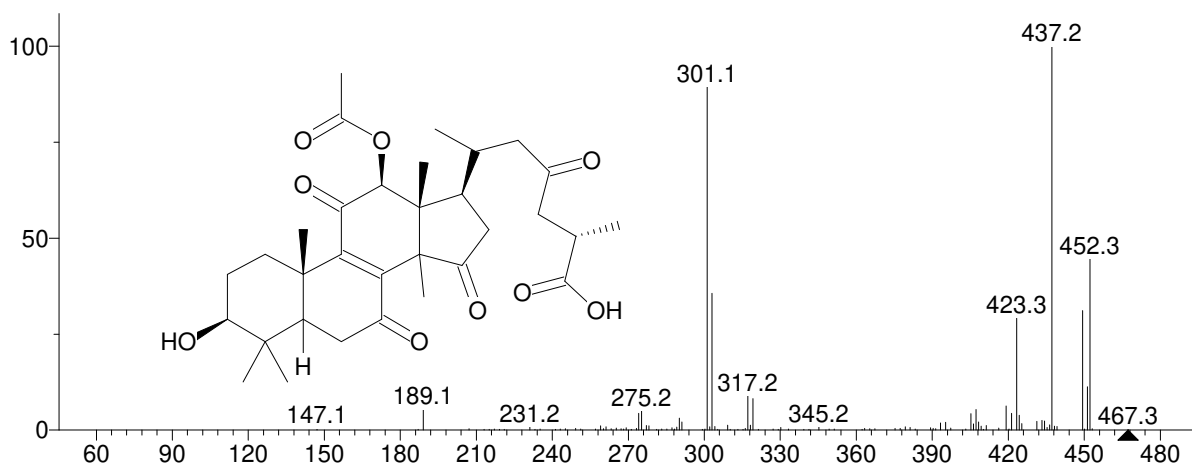

Hit 4 : Cimicifugoside H 2 [M+H-H<sub>2</sub>O]+=>467.3 IT 35% P=467.3  
C<sub>35</sub>H<sub>54</sub>O<sub>10</sub>; MF: 0; RMF: 5; Prob 24.5%; CAS: 161097-77-4; Lib: nist\_msms; ID: 226002.

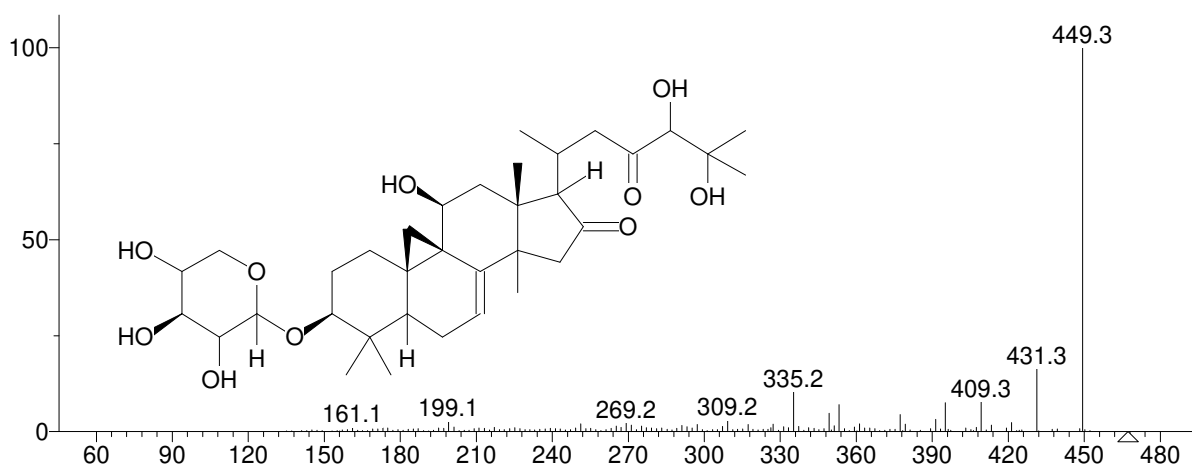

Unknown: Unknown (31.13\_471.3106m/z)  
Compound in Library Factor = -2387

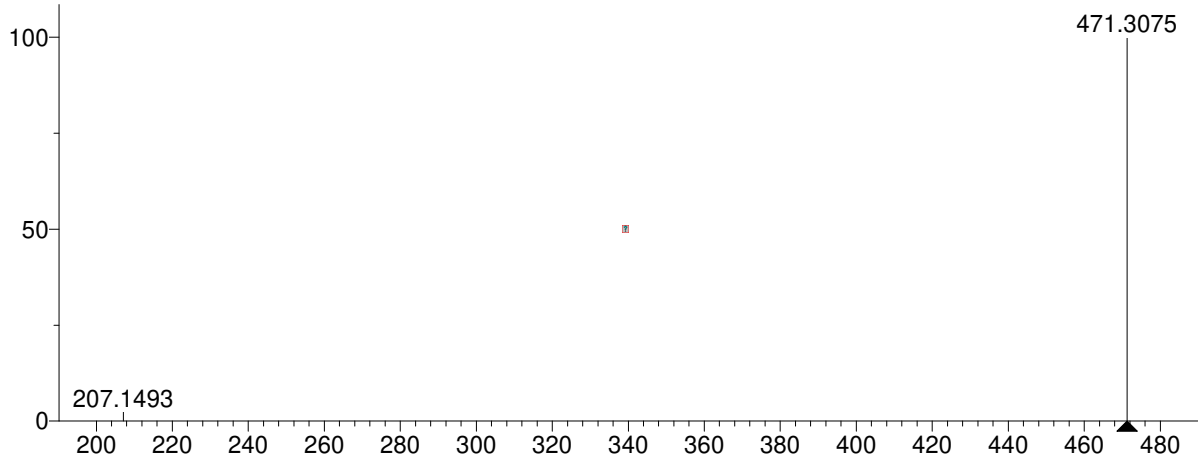

Hit 1 : 3-Ketofusidic acid [M-H-C2H2O]- HCD 28V P=471.3  
C31H46O6; MF: 49; RMF: 790; Prob 63.5%; CAS: 4680-37-9; Lib: nist\_msms; ID: 445022.

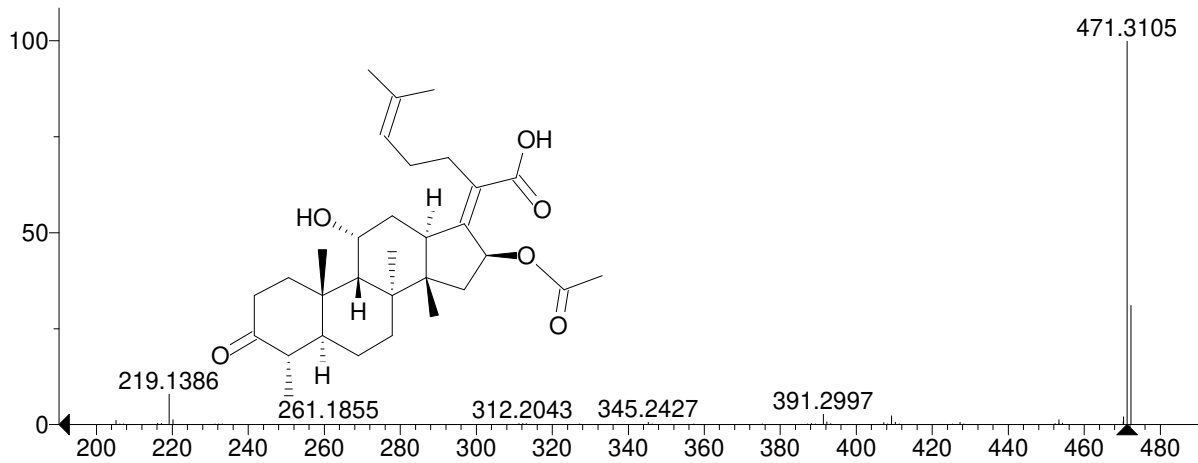

Hit 2 : 11-Ketofusidic acid [M-H-C2H2O]- HCD 28V P=471.3  
C31H46O6; MF: 33; RMF: 756; Prob 36.5%; CAS: 16711-91-4; Lib: nist\_msms; ID: 445168.

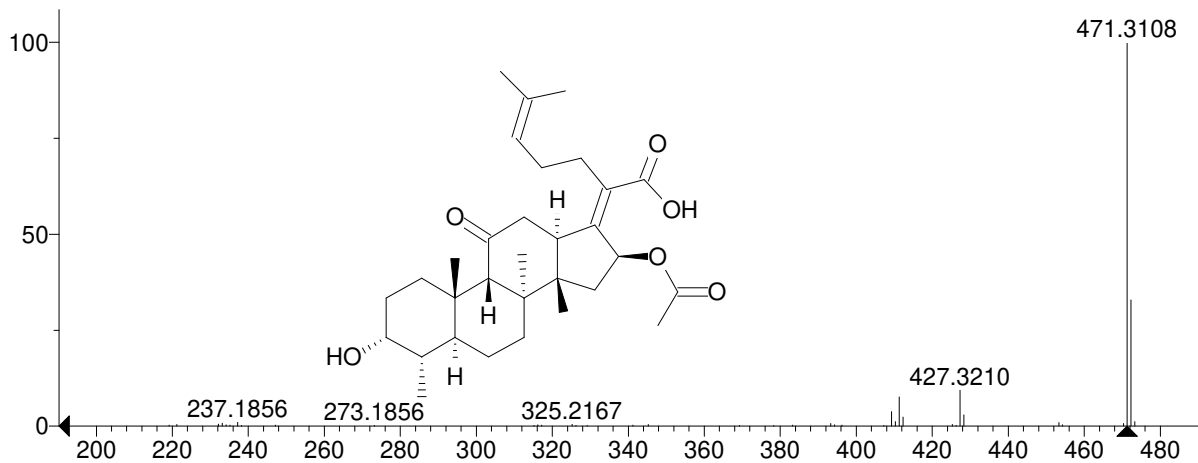

\*\* Search Report Page 1 of 2 \*\*

Unknown: Unknown (31.57\_401.2691m/z)  
Compound in Library Factor = -494

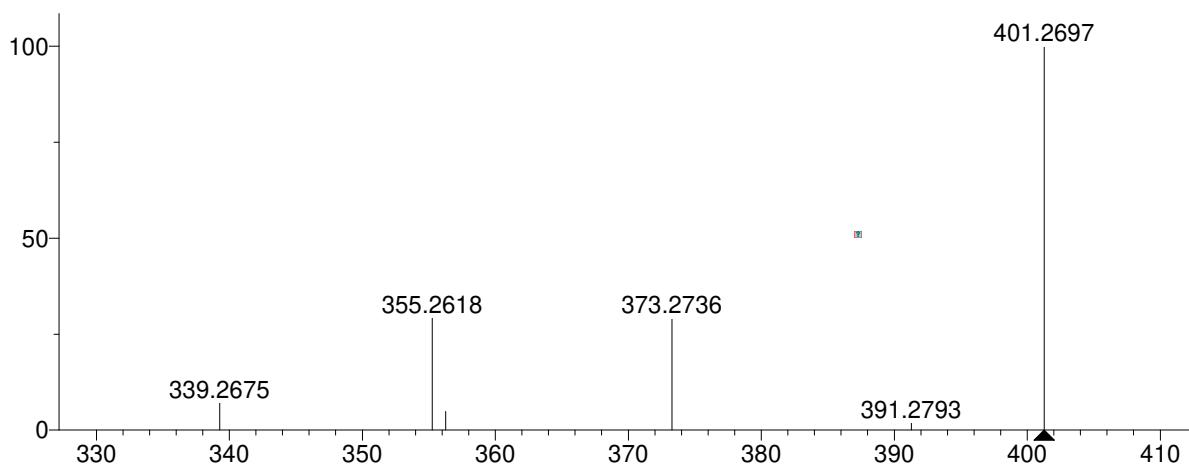

Hit 1 : FAHFA 25:5; FAHFA 18:5/7:0; [M-H]<sup>-</sup> [M-H]<sup>-</sup> P=401.3  
C<sub>25</sub>H<sub>38</sub>O<sub>4</sub>; MF: 251; RMF: 763; Prob 32.6%; Lib: msdial-insilicomsm-lipids-neg; ID: 272714.

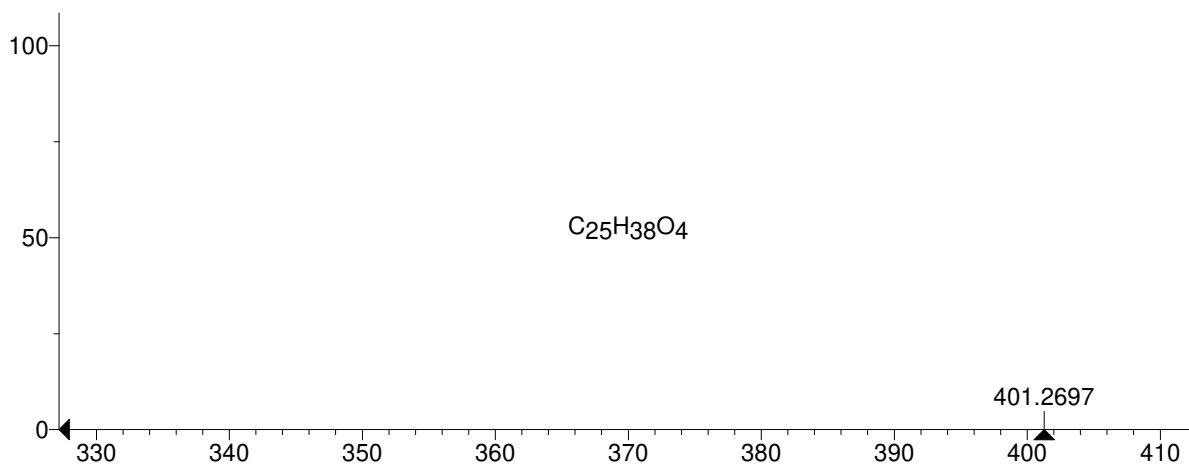

Hit 2 : FAHFA 25:5; FAHFA 20:5/5:0; [M-H]<sup>-</sup> [M-H]<sup>-</sup> P=401.3  
C<sub>25</sub>H<sub>38</sub>O<sub>4</sub>; MF: 251; RMF: 763; Prob 32.6%; Lib: msdial-insilicomsm-lipids-neg; ID: 273216.

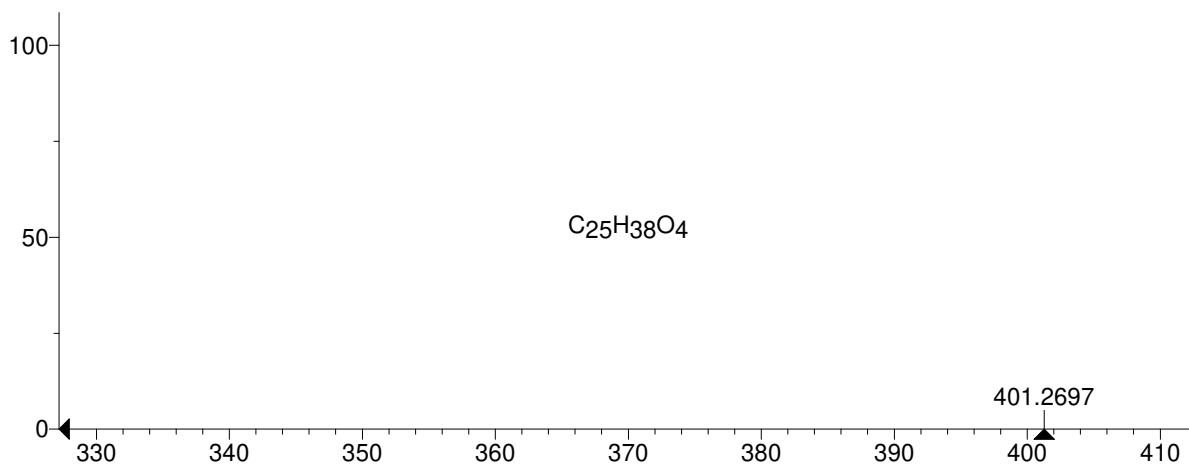

Hit 3 : FAHFA 25:5; FAHFA 22:5/3:0; [M-H]<sup>-</sup> [M-H]<sup>-</sup> P=401.3  
C<sub>25</sub>H<sub>38</sub>O<sub>4</sub>; MF: 251; RMF: 763; Prob 32.6%; Lib: msdial-insilicomsm-lipids-neg; ID: 273718.

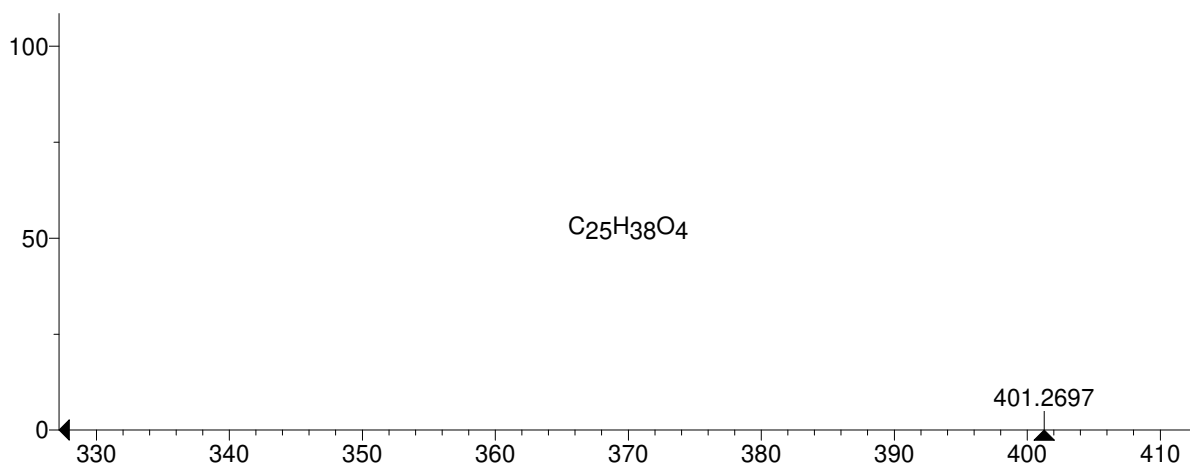

Hit 4 : 1-Arachidonoylglycerol [M+Na]<sup>+</sup> QTOF 20V P=401.3  
C<sub>23</sub>H<sub>38</sub>O<sub>4</sub>; MF: 127; RMF: 728; Prob 1.51%; CAS: 35474-99-8; Lib: nist\_msms; ID: 67120.

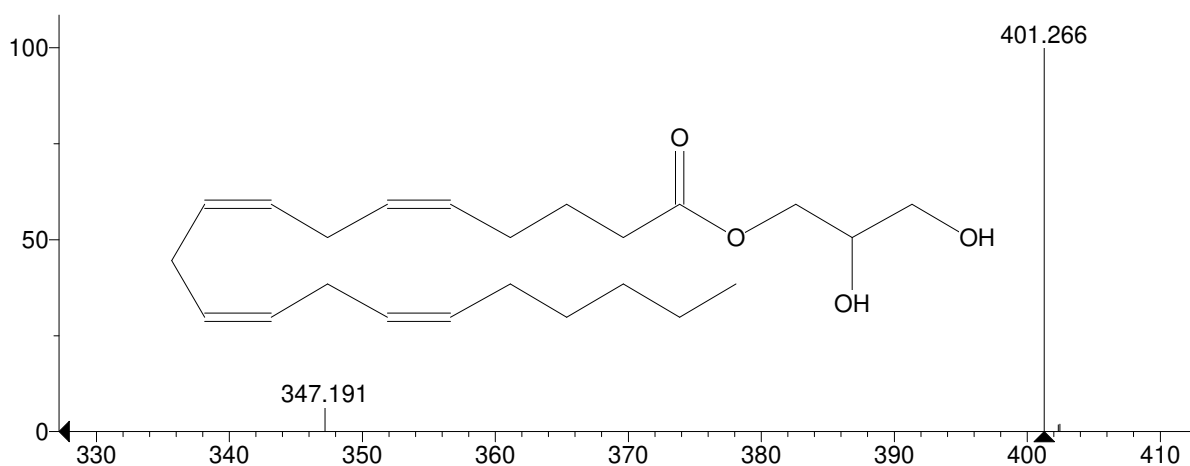

Hit 5 : 9-Deoxy-9-methylene-16,16-dimethylprostaglandin E2 [M+Na]<sup>+</sup> HCD 24V P=401.3  
C<sub>23</sub>H<sub>38</sub>O<sub>4</sub>; MF: 86; RMF: 722; Prob 0.34%; CAS: 61263-35-2; Lib: nist\_msms; ID: 157091.

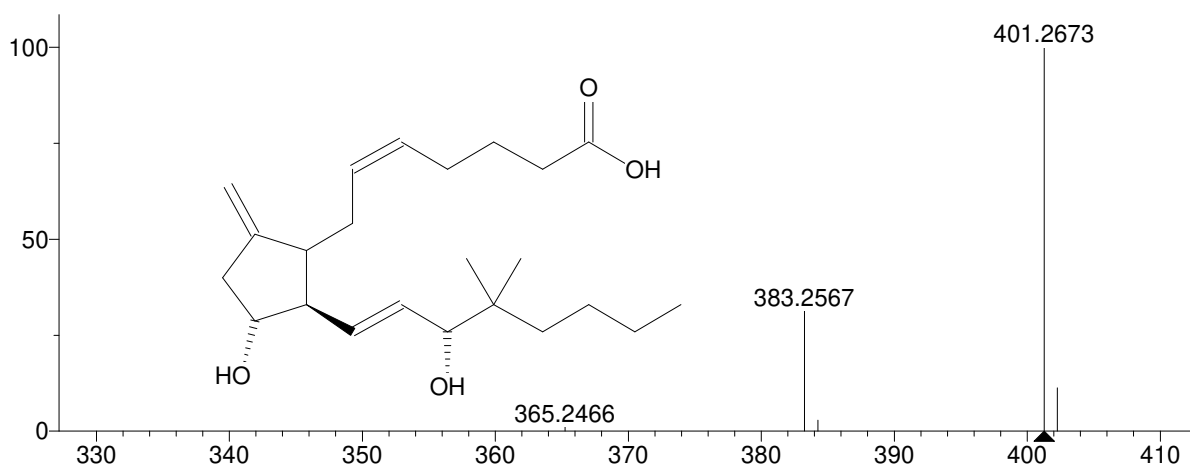

\*\* Search Report Page 1 of 2 \*\*

Unknown: Unknown (31.59\_417.2638m/z)  
Compound in Library Factor = -1848

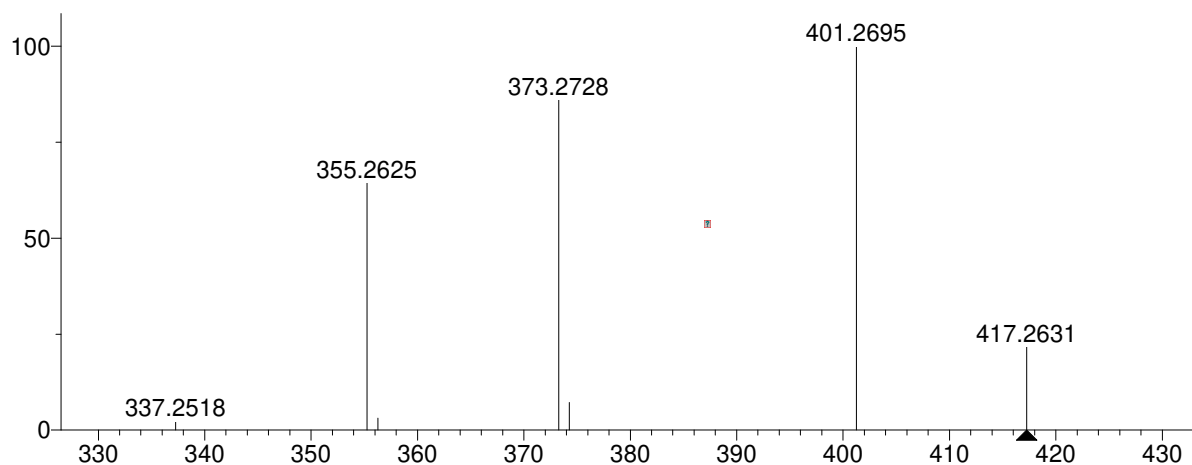

Hit 1 : Prostaglandin E2 isopropyl ester [M+Na]<sup>+</sup> QTOF 17V P=417.3  
C<sub>23</sub>H<sub>38</sub>O<sub>5</sub>; MF: 80; RMF: 412; Prob 75.2%; CAS: 71845-66-4; Lib: nist\_msms; ID: 62065.

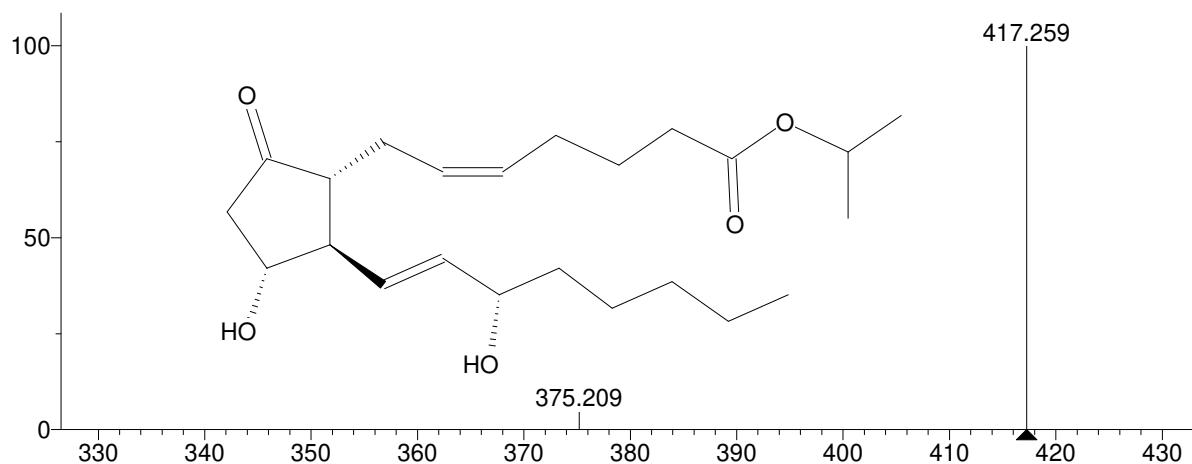

Hit 2 : Alfentanyl [M+H]<sup>+</sup> HCD 12V P=417.3  
C<sub>21</sub>H<sub>32</sub>N<sub>6</sub>O<sub>3</sub>; MF: 44; RMF: 274; Prob 18.6%; CAS: 71195-58-9; Lib: nist\_msms; ID: 322110.

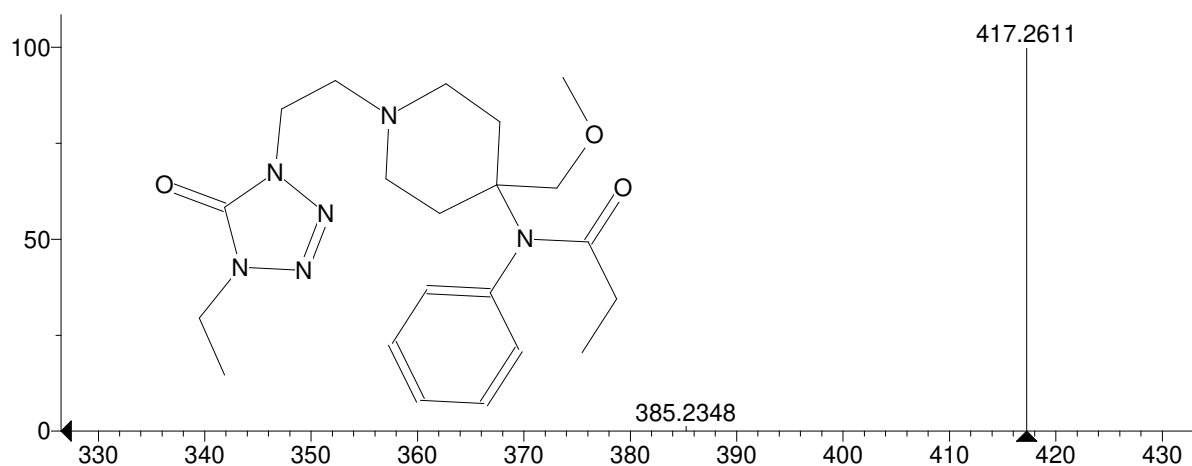



\*\* Search Report Page 2 of 2 \*\*

Hit 3 : Manoalide [M+H]<sup>+</sup> HCD 12V P=417.3  
C<sub>25</sub>H<sub>36</sub>O<sub>5</sub>; MF: 20; RMF: 266; Prob 6.22%; CAS: 75088-80-1; Lib: nist\_msms; ID: 362740.

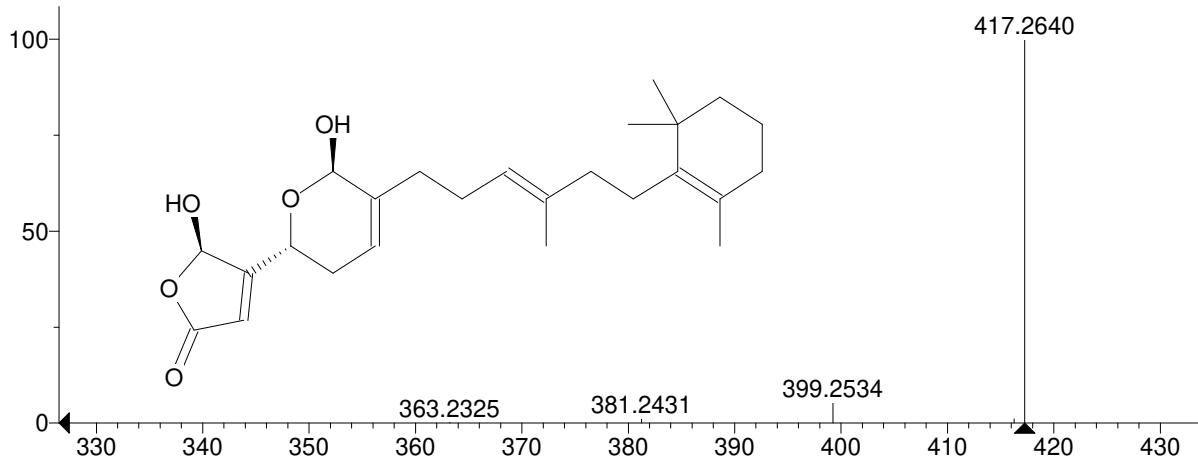

Unknown: Unknown (31.61\_472.0636m/z)  
Compound in Library Factor = -3273

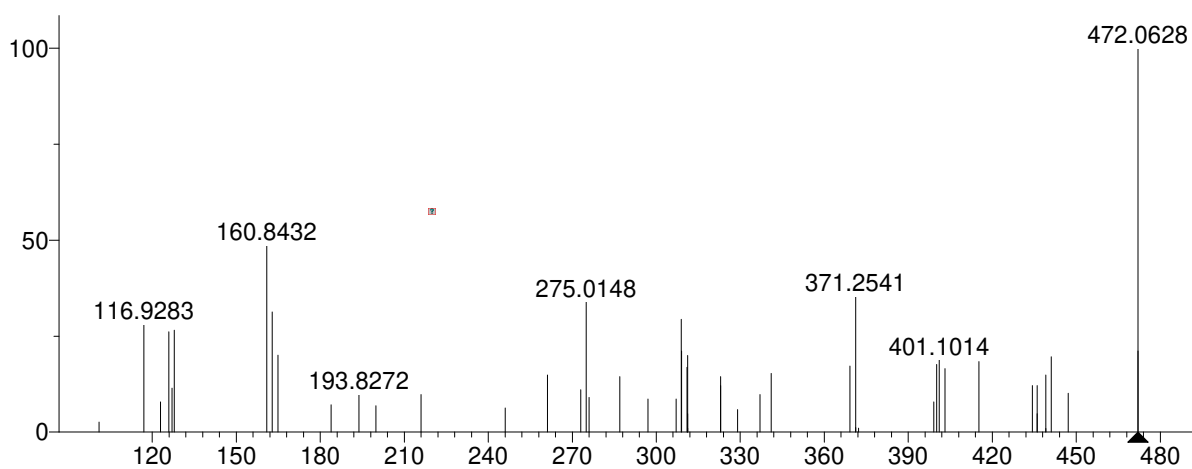

Hit 1 : Acetic acid, 2-[4-[[[2-[3-fluoro-4-(trifluoromethyl)phenyl]-4-methyl-5-thiazolyl]methyl]thio]-2-methylphenoxy]  
C21H17F4NO3S2; MF: 17; RMF: 330; Prob 100.0%; CAS: 317318-84-6; Lib: nist\_msms; ID: 427976.

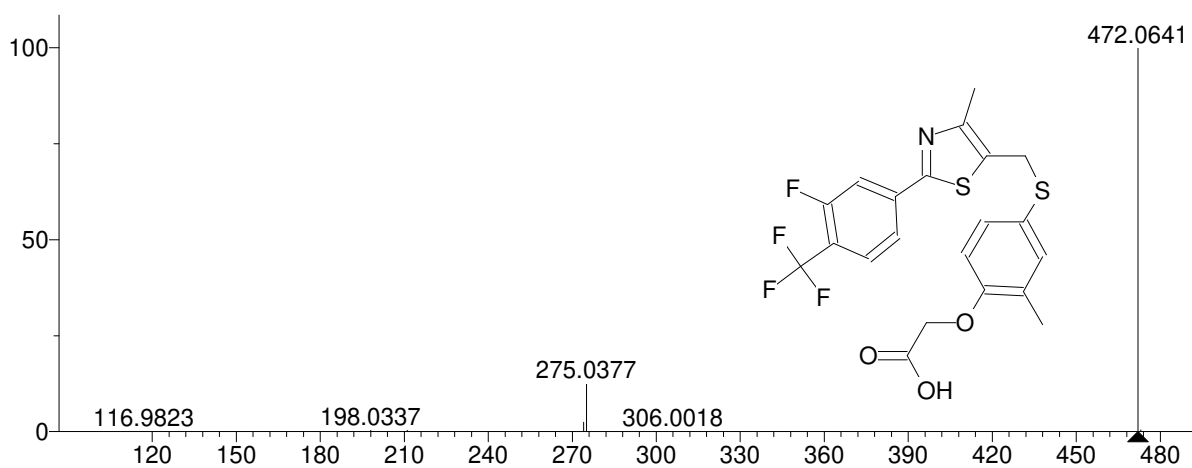

Unknown: Unknown (31.63\_492.1212m/z)  
Compound in Library Factor = -1309

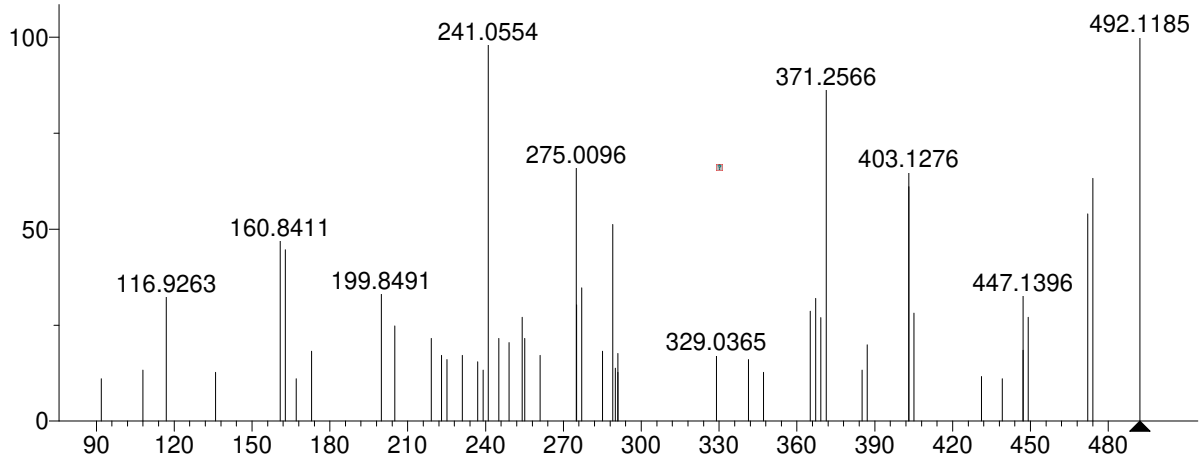

Hit 1 : 6H-Thieno[3,2-f][1,2,4]triazolo[4,3-a][1,4]diazepine-6-acetamide, 4-(4-chlorophenyl)-N-(4-hydroxyphenyl)-2  
C<sub>25</sub>H<sub>22</sub>ClN<sub>5</sub>O<sub>2</sub>S; MF: 60; RMF: 429; Prob 83.5%; CAS: 202590-98-5; Lib: nist\_msms; ID: 356211.

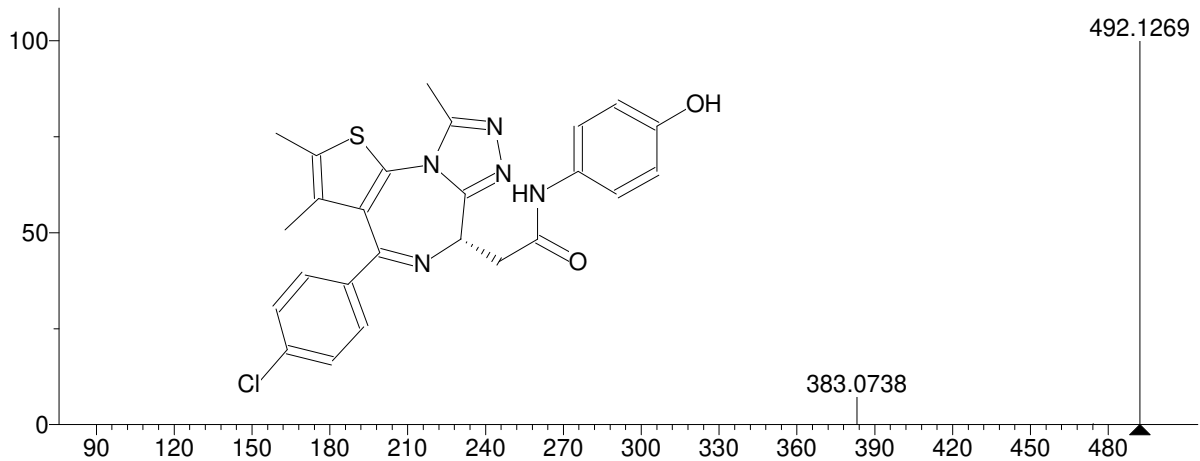

Hit 2 : Bucladesine [M+Na]<sup>+</sup> HCD 19V P=492.1  
C<sub>18</sub>H<sub>24</sub>N<sub>5</sub>O<sub>8</sub>P; MF: 7; RMF: 228; Prob 16.5%; CAS: 362-74-3; Lib: nist\_msms; ID: 350906.

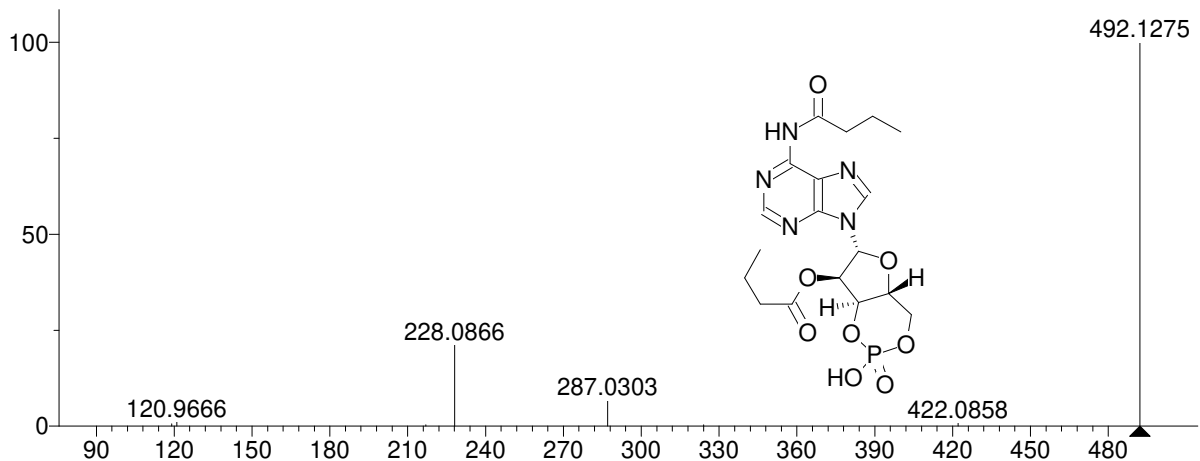

\*\* Search Report Page 1 of 1 \*\*

Unknown: Unknown (31.63\_494.1178m/z)  
Compound in Library Factor = 0

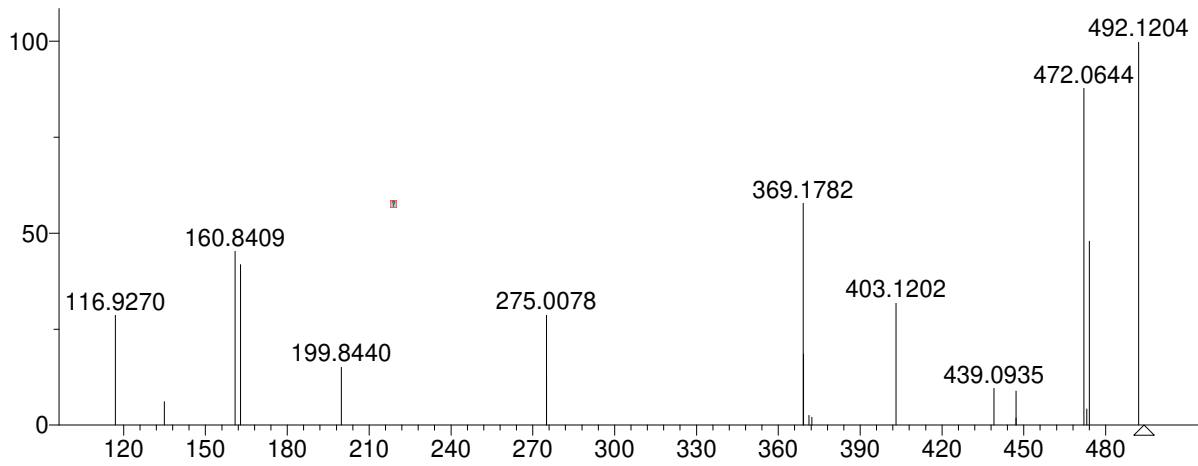

Hit 1 : Halfenprox [M+NH4]<sup>+</sup> IT 35% P=494.1  
C<sub>24</sub>H<sub>23</sub>BrF<sub>2</sub>O<sub>3</sub>; MF: 0; RMF: 13; Prob 100.0%; CAS: 111872-58-3; Lib: nist\_msms; ID: 306726.

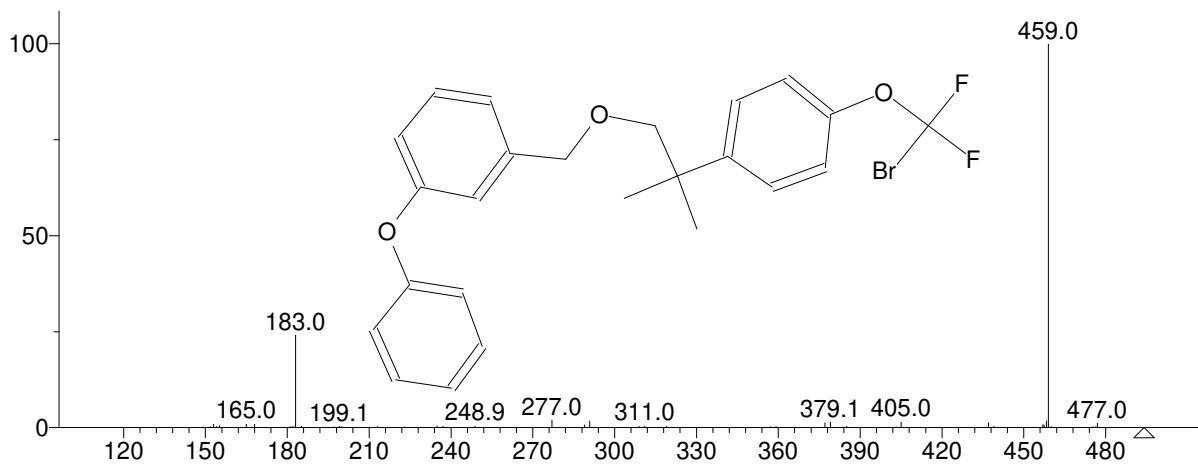

\*\* Search Report Page 1 of 2 \*\*

Unknown: Unknown (31.64\_415.2490m/z)  
Compound in Library Factor = -3273

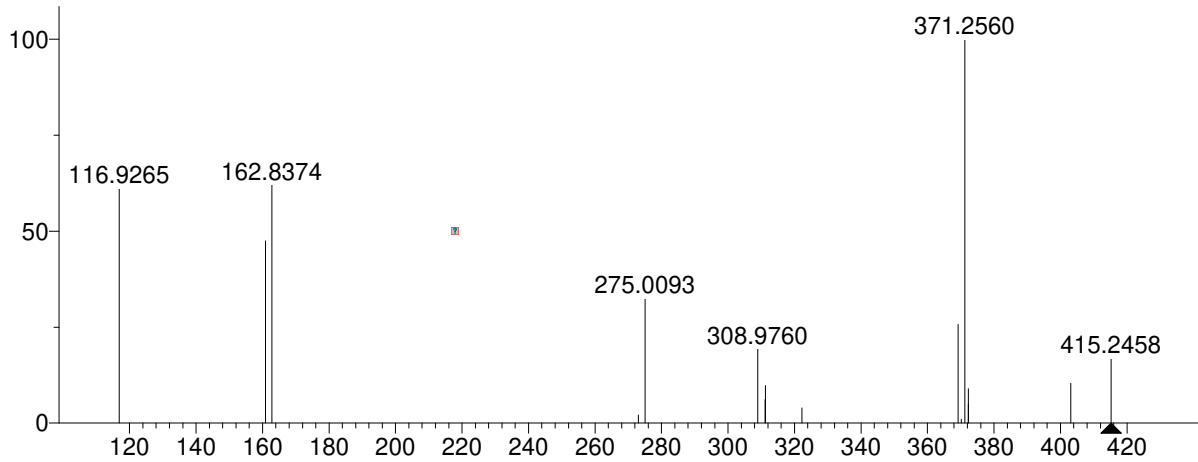

Hit 1 : 9-Oxo-11 $\alpha$ ,16R-dihydroxy-17-cyclobutyl-5Z,13E-dien-1-oic acid [M+Na]<sup>+</sup> HCD 33V P=415.2  
C<sub>23</sub>H<sub>36</sub>O<sub>5</sub>; MF: 17; RMF: 278; Prob 35.3%; CAS: 212310-16-2; Lib: nist\_msms; ID: 172347.

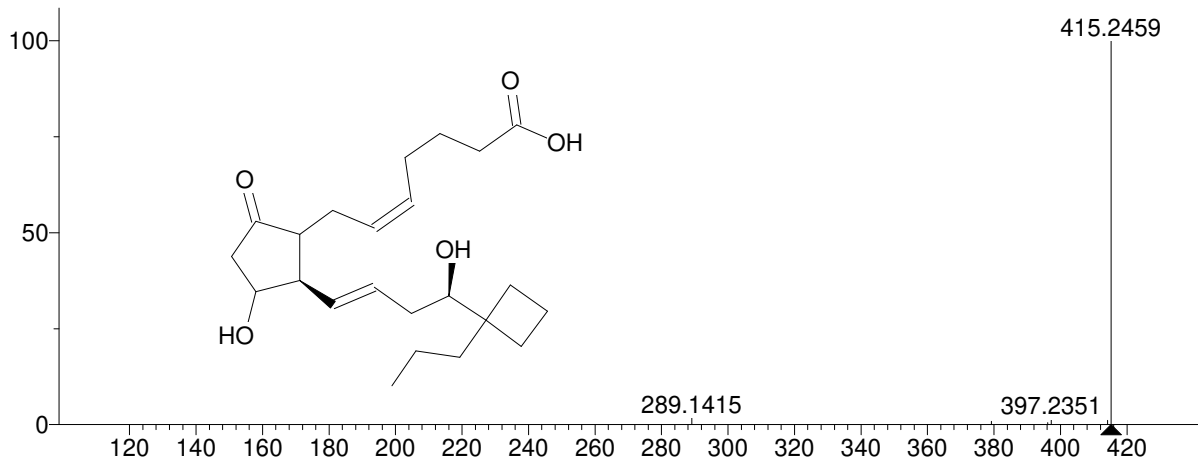

Hit 2 : 3 $\beta$ -Tetrahydrocortisol, 3,21-diacetate [M+H-2H<sub>2</sub>O]<sup>+</sup> HCD 8V P=415.2  
C<sub>25</sub>H<sub>38</sub>O<sub>7</sub>; MF: 9; RMF: 206; Prob 26.4%; CAS: 6820-57-1; Lib: nist\_msms; ID: 454143.

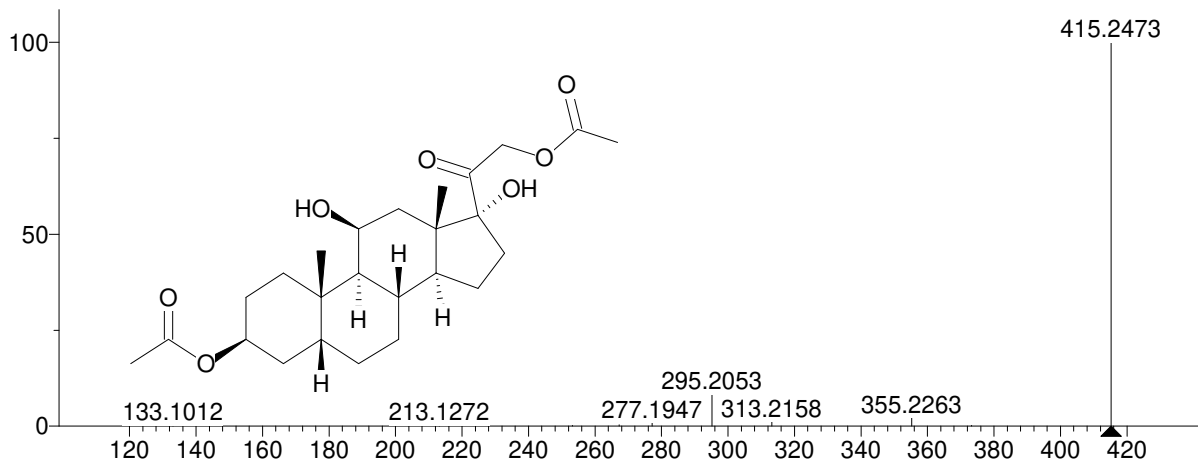

Hit 3 : Alpha-Hydroxydeoxycholic Acid [M+Na]<sup>+</sup> 35% P=415.3  
C<sub>24</sub>H<sub>40</sub>O<sub>4</sub>; MF: 0; RMF: 71; Prob 19.1%; Lib: mona-export-itree; ID: 2369.

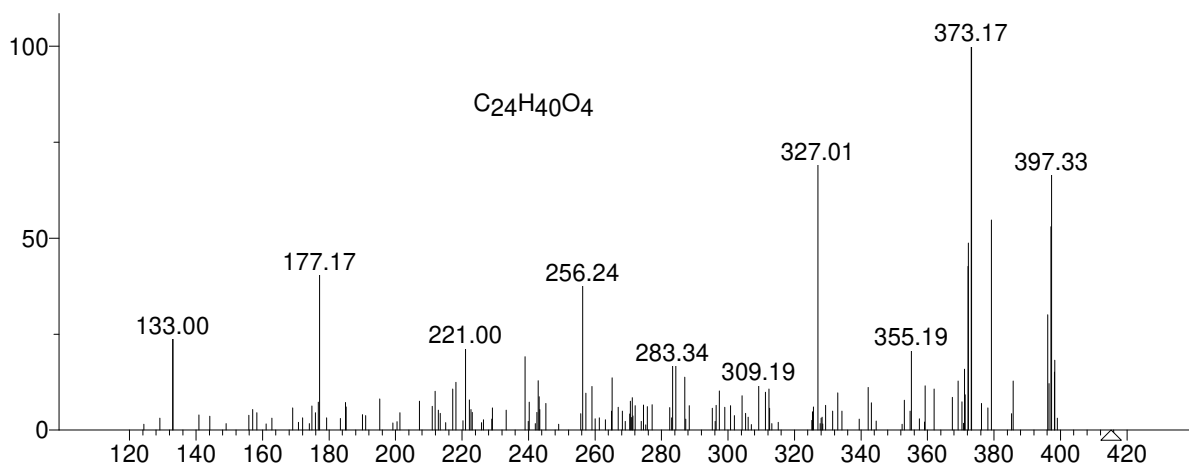

Hit 4 : 16-Phenoxytetranorprostaglandin F<sub>2</sub>α isopropyl ester [M+H-H<sub>2</sub>O]<sup>+</sup> IT-FT 35% P=415.2  
C<sub>25</sub>H<sub>36</sub>O<sub>6</sub>; MF: 0; RMF: 6; Prob 19.1%; CAS: 130209-78-8; Lib: nist\_msms; ID: 545962.

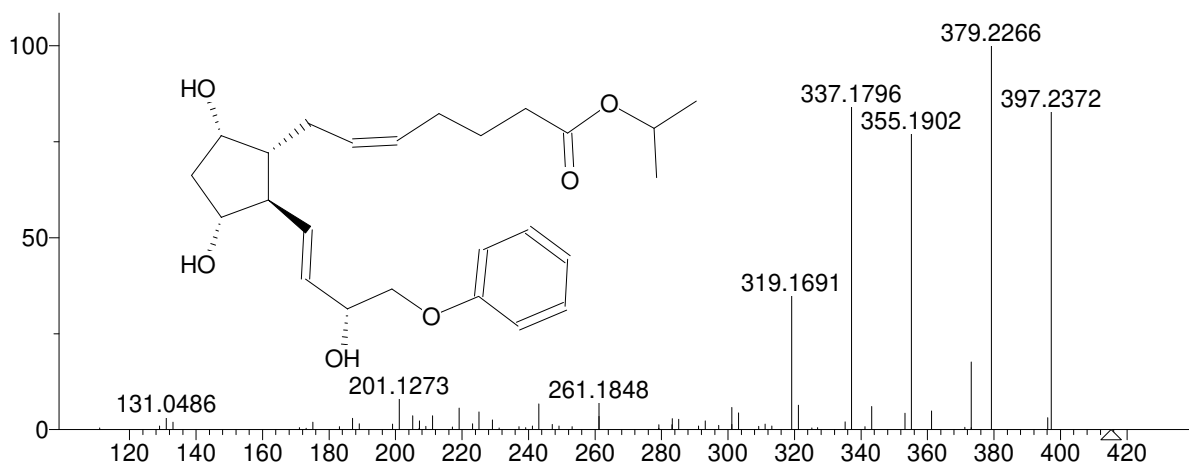

Unknown: Unknown (31.64\_449.1237m/z)  
Compound in Library Factor = 0

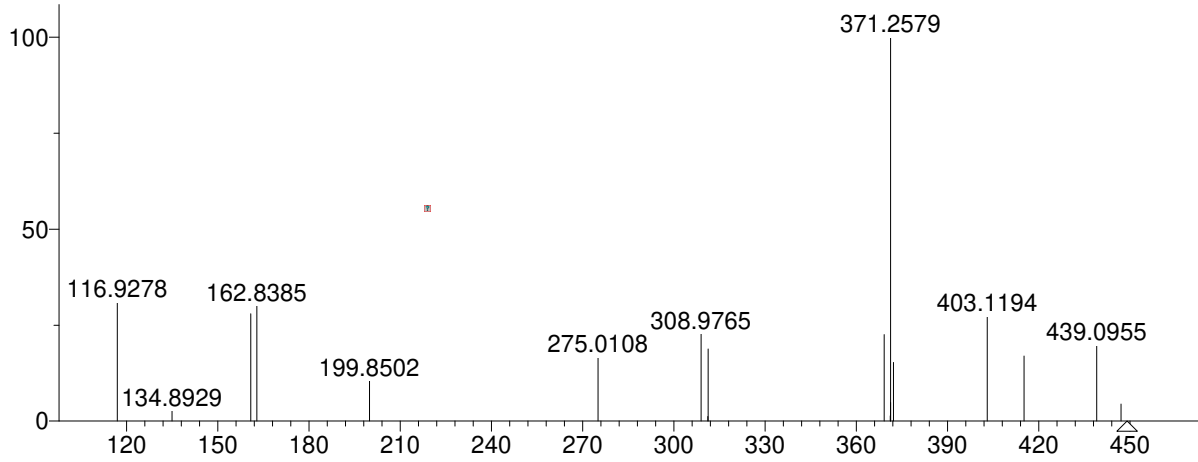

Hit 1 : 6-Hydroxysumatrol [M+Na]<sup>+</sup> 35HCD P=449.1  
C<sub>23</sub>H<sub>22</sub>O<sub>8</sub>; MF: 0; RMF: 9; Prob 50.0%; Lib: mona-export-vf-npl\_qexactive; ID: 7093.

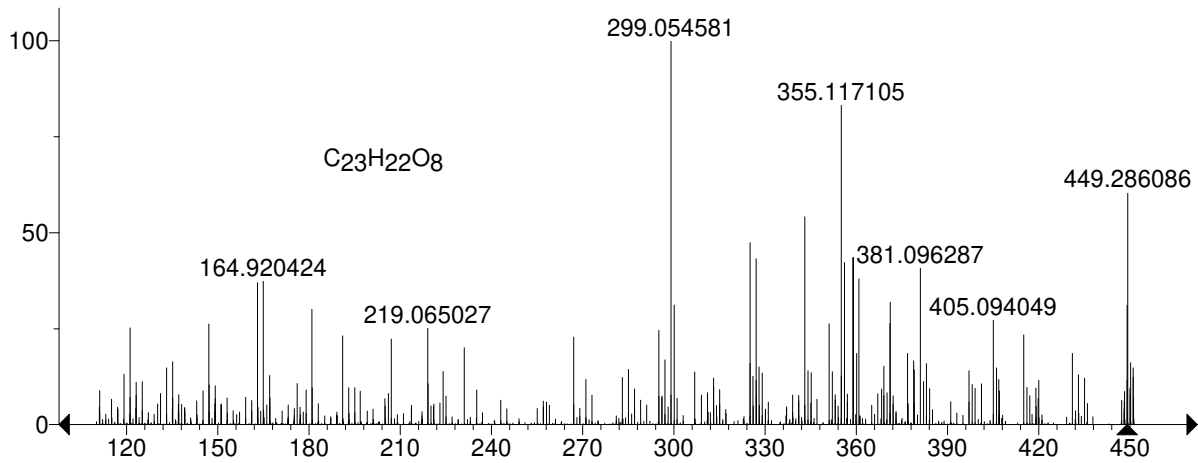

Hit 2 : dabinol [M+Na]<sup>+</sup> 35HCD P=449.1  
C<sub>23</sub>H<sub>22</sub>O<sub>8</sub>; MF: 0; RMF: 3; Prob 50.0%; Lib: mona-export-vf-npl\_qexactive; ID: 10561.

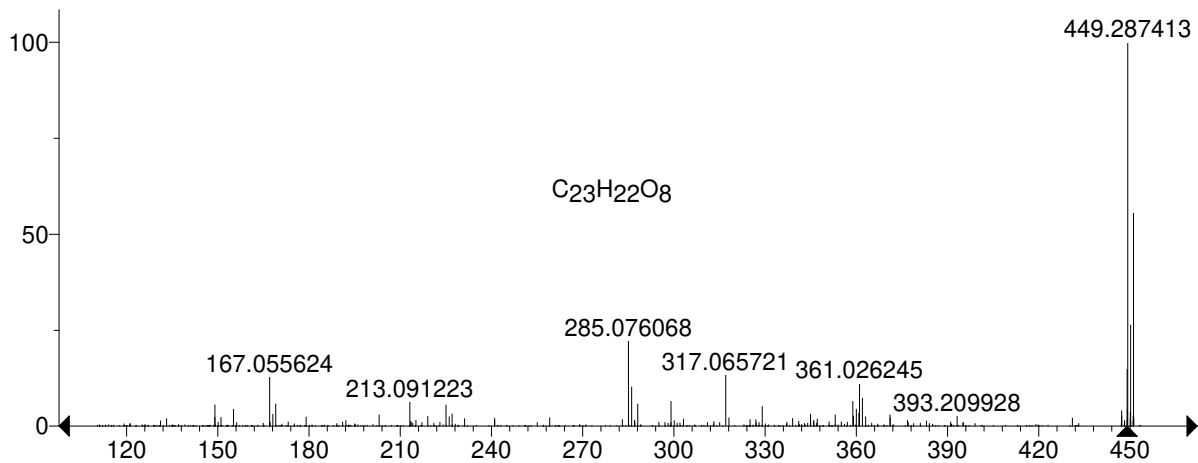

Unknown: Unknown (31.64\_474.0606m/z)  
Compound in Library Factor = 0

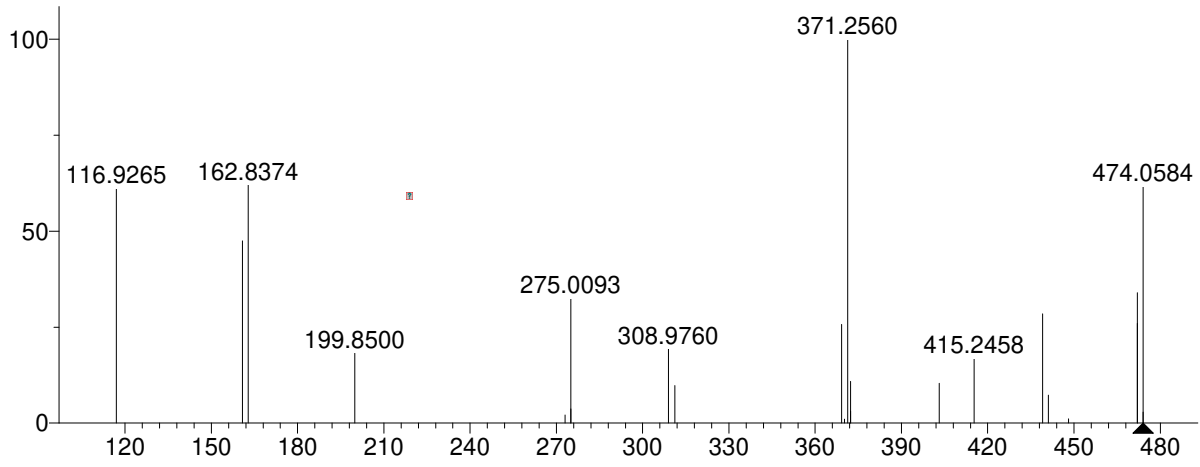







\*\* Search Report Page 1 of 2 \*\*

Unknown: Unknown (31.65\_415.1858m/z)  
Compound in Library Factor = -2176

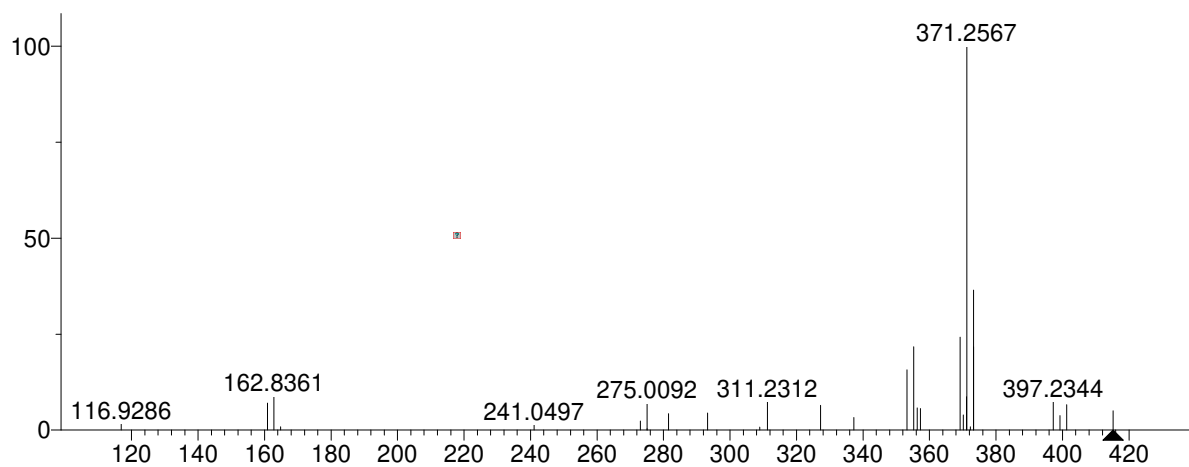

Hit 1 : Dexamethasone [M+Na]<sup>+</sup> HCD 24V P=415.2  
C<sub>22</sub>H<sub>29</sub>FO<sub>5</sub>; MF: 33; RMF: 434; Prob 38.3%; CAS: 50-02-2; Lib: nist\_msms; ID: 310170.

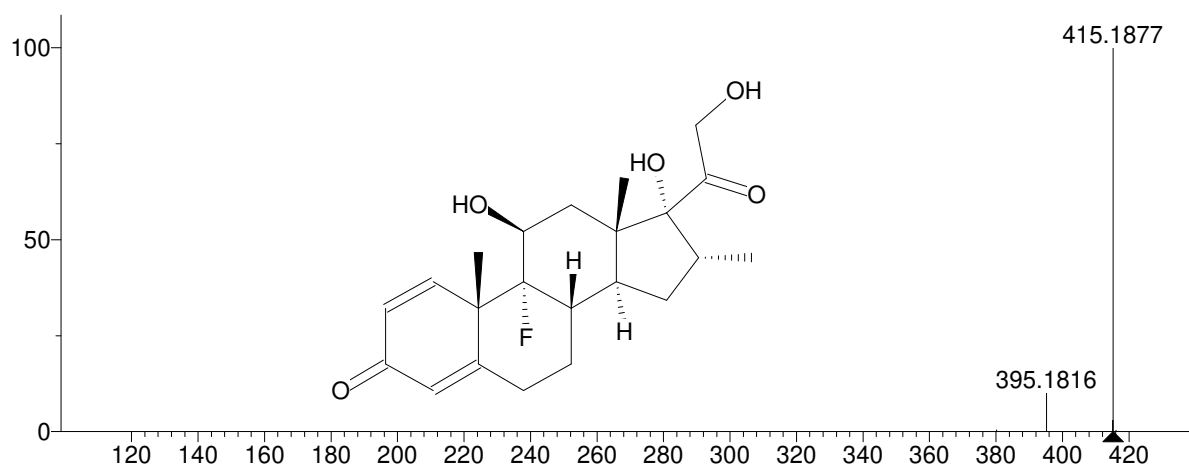

Hit 2 : (±)-N-Formyl-3,4-methylenedioxyamphetamine [2M+H]<sup>+</sup> HCD 1V P=415.2  
C<sub>11</sub>H<sub>13</sub>NO<sub>3</sub>; MF: 5; RMF: 114; Prob 11.1%; CAS: 67669-00-5; Lib: nist\_msms; ID: 243531.

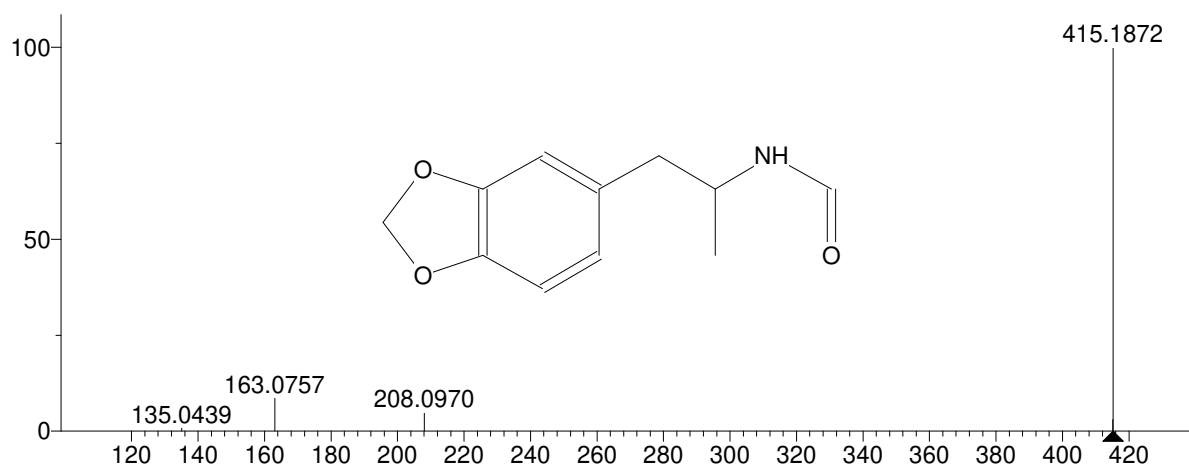

Hit 3 : His-Cys-Arg [M+H]<sup>+</sup> QTOF 2V P=415.2  
C<sub>15</sub>H<sub>26</sub>N<sub>8</sub>O<sub>4</sub>S; MF: 5; RMF: 113; Prob 11.1%; Lib: nist\_msms; ID: 55680.

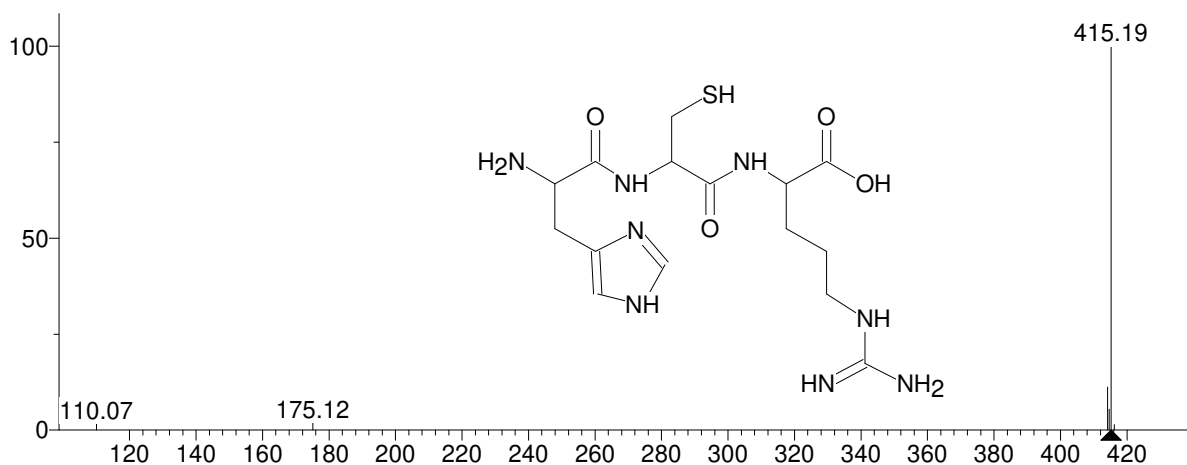

Hit 4 : Betamethasone [M+Na]<sup>+</sup> HCD 24V P=415.2  
C<sub>22</sub>H<sub>29</sub>FO<sub>5</sub>; MF: 3; RMF: 113; Prob 10.2%; CAS: 378-44-9; Lib: nist\_msms; ID: 409063.

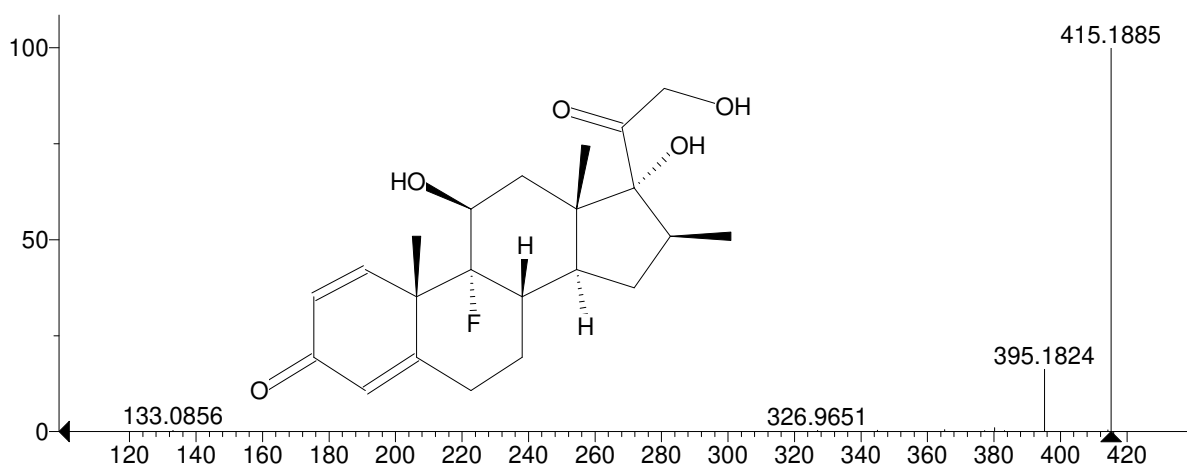

Hit 5 : Cys-His-Arg [M+H]<sup>+</sup> QTOF 10V P=415.2  
C<sub>15</sub>H<sub>26</sub>N<sub>8</sub>O<sub>4</sub>S; MF: 3; RMF: 110; Prob 10.2%; Lib: nist\_msms; ID: 49594.

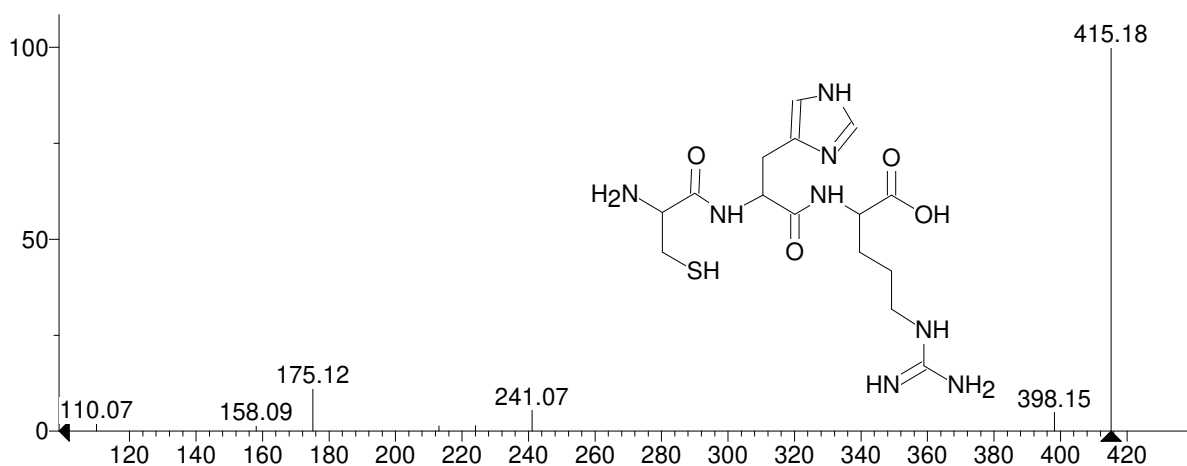

Unknown: Unknown (31.70\_315.2532m/z)  
Compound in Library Factor = 118

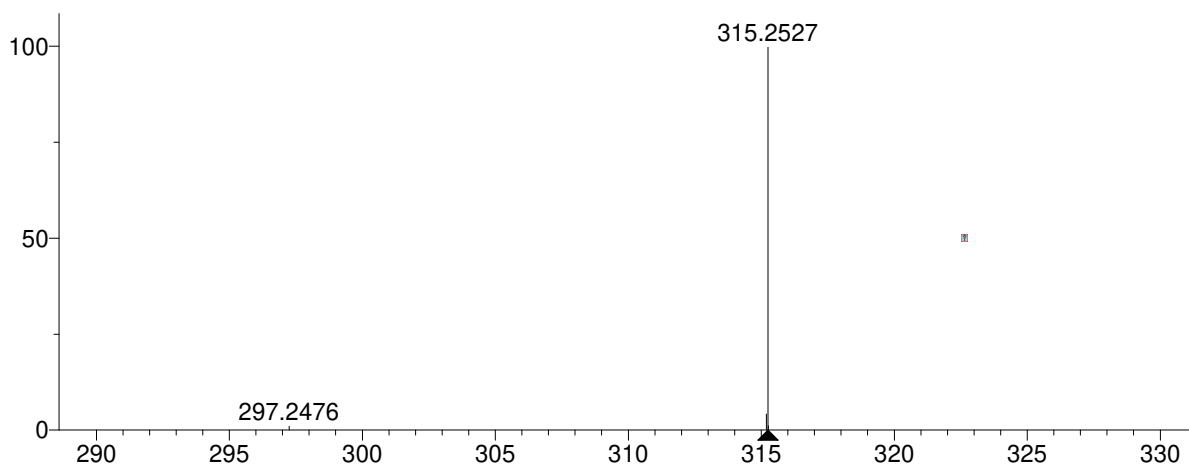

Hit 1 : 12,13-Dihydroxy-9Z-octadecenoic acid [M+H]<sup>+</sup> HCD 3V P=315.3  
C<sub>18</sub>H<sub>34</sub>O<sub>4</sub>; MF: 687; RMF: 987; Prob 98.3%; CAS: 263399-35-5; Lib: nist\_msms; ID: 92801.

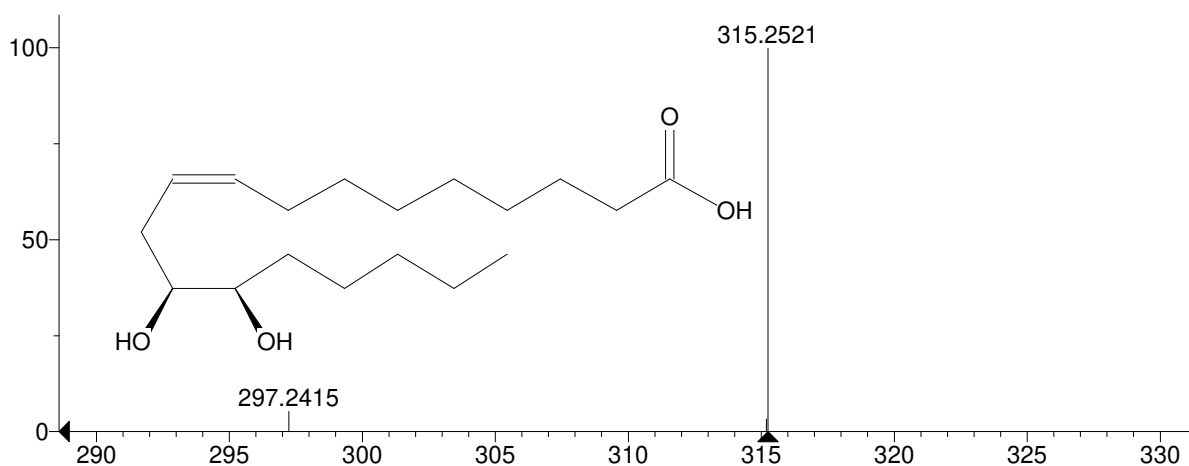

Hit 2 : 9,10-Dihydroxy-12Z-octadecenoic acid [M+H]<sup>+</sup> HCD 5V P=315.3  
C<sub>18</sub>H<sub>34</sub>O<sub>4</sub>; MF: 360; RMF: 831; Prob 0.98%; CAS: 263399-34-4; Lib: nist\_msms; ID: 95803.

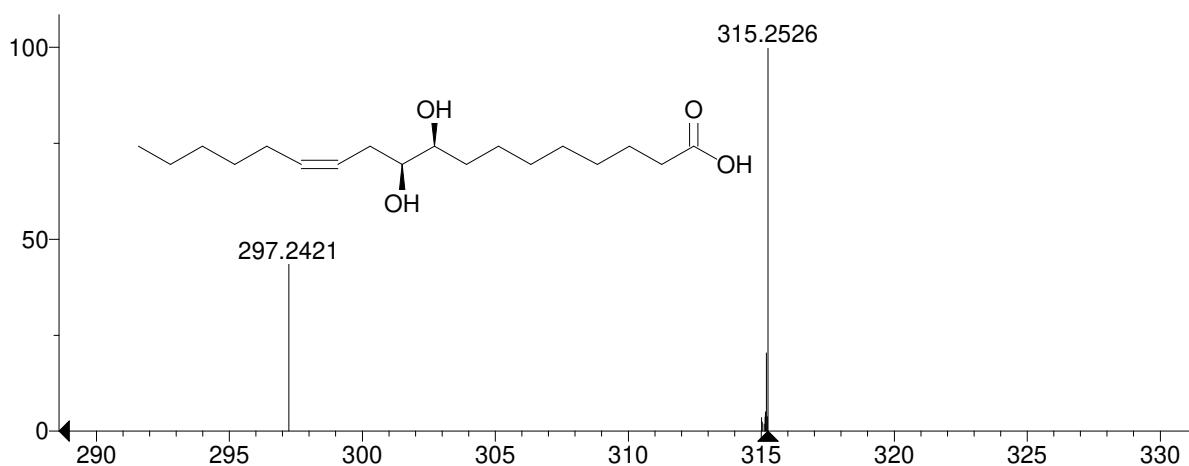

Hit 3 : Dibutyl sebacate [M+H]<sup>+</sup> QTOF 5V P=315.3  
C<sub>18</sub>H<sub>34</sub>O<sub>4</sub>; MF: 350; RMF: 969; Prob 0.69%; CAS: 109-43-3; Lib: nist\_msms; ID: 26918.

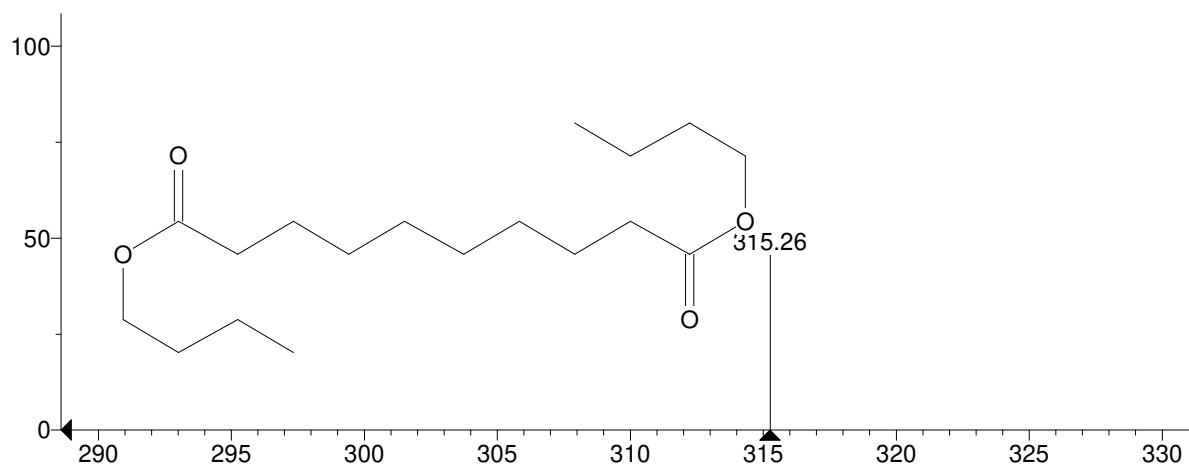

Hit 4 : NCGC00381425-0118-hydroxy-8-(3-octyloxiran-2-yl)octanoic acid [M+H]<sup>+</sup> P=315.3  
C<sub>18</sub>H<sub>34</sub>O<sub>4</sub>; MF: 0; RMF: 39; Prob 0.00%; Lib: mona-export-gnps; ID: 7520.

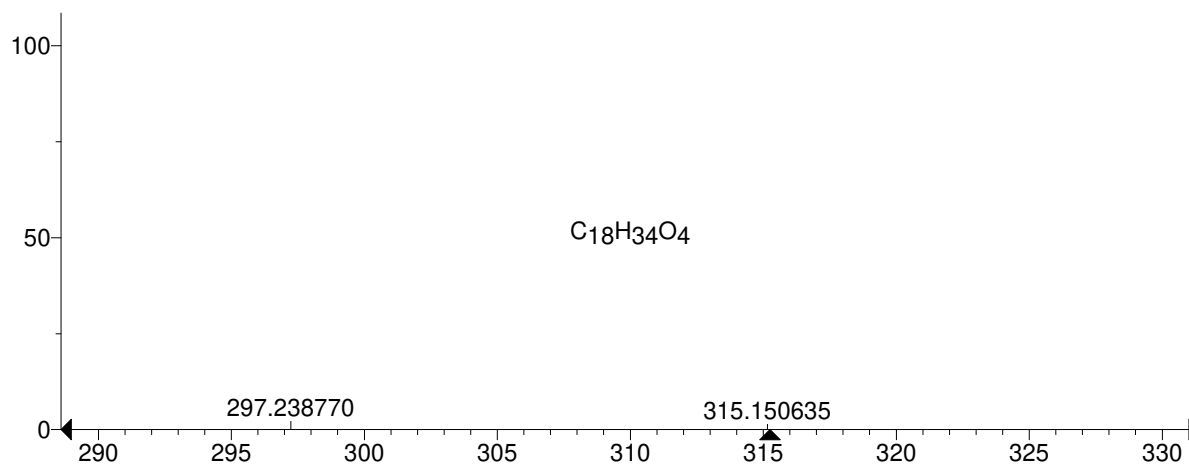

Unknown: Unknown (31.73\_492.1208m/z)  
Compound in Library Factor = -1848

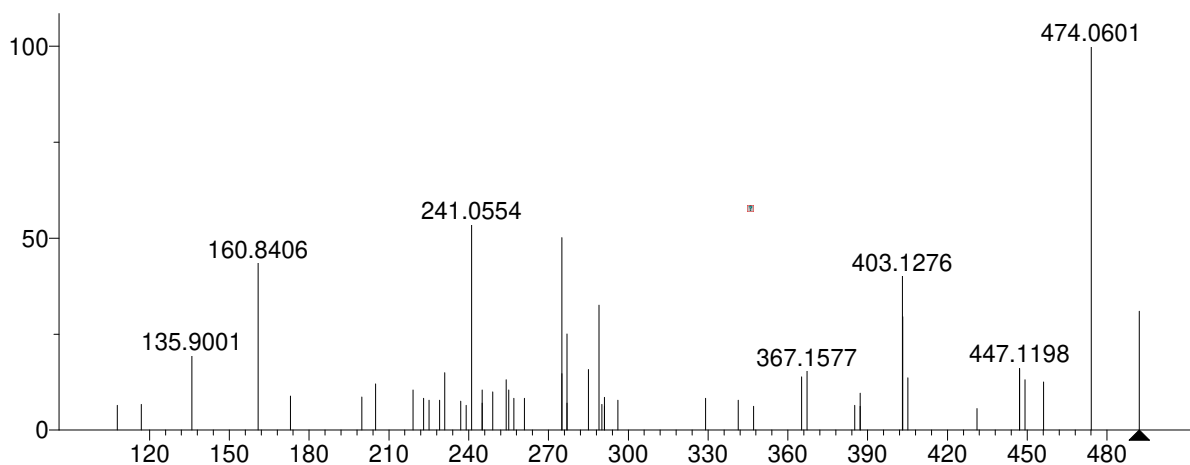

Hit 1 : 6H-Thieno[3,2-f][1,2,4]triazolo[4,3-a][1,4]diazepine-6-acetamide, 4-(4-chlorophenyl)-N-(4-hydroxyphenyl)-2  
C<sub>25</sub>H<sub>22</sub>ClN<sub>5</sub>O<sub>2</sub>S; MF: 38; RMF: 310; Prob 79.3%; CAS: 202590-98-5; Lib: nist\_msms; ID: 356211.

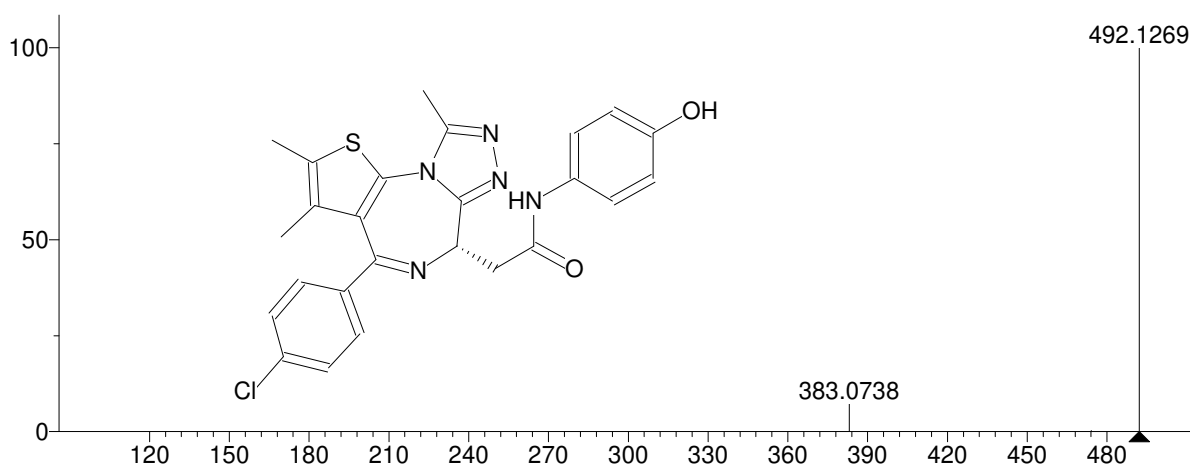

Hit 2 : Bucladesine [M+Na]<sup>+</sup> HCD 19V P=492.1  
C<sub>18</sub>H<sub>24</sub>N<sub>5</sub>O<sub>8</sub>P; MF: 5; RMF: 171; Prob 20.7%; CAS: 362-74-3; Lib: nist\_msms; ID: 350906.

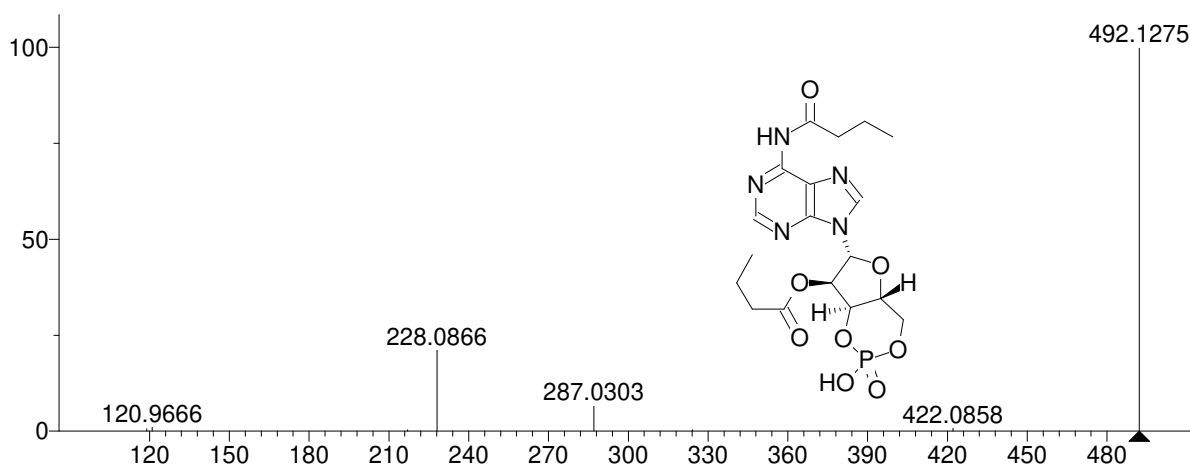

Unknown: Unknown (31.77\_311.3876m/z)  
Compound in Library Factor = 0

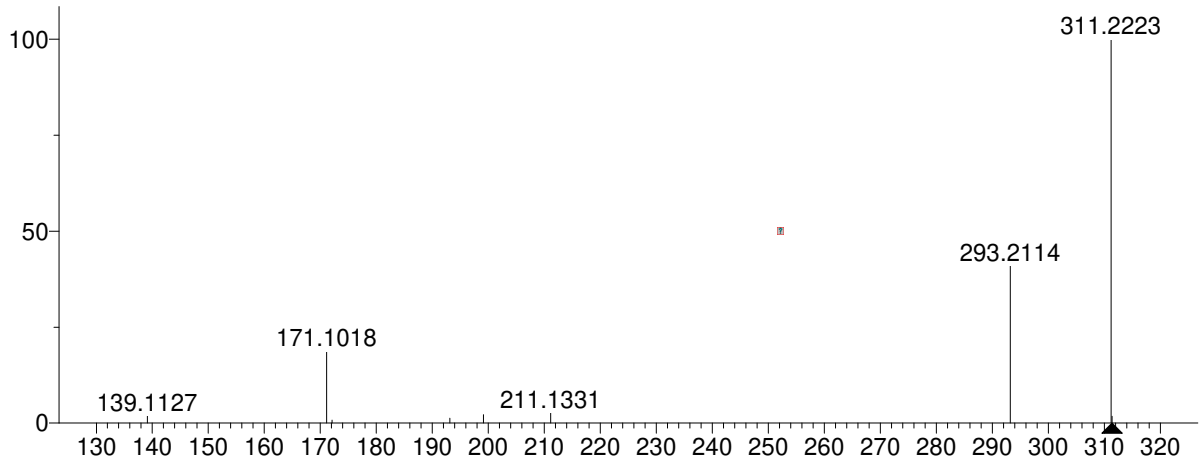



Unknown: Unknown (31.77\_502.1501m/z)  
Compound in Library Factor = 0

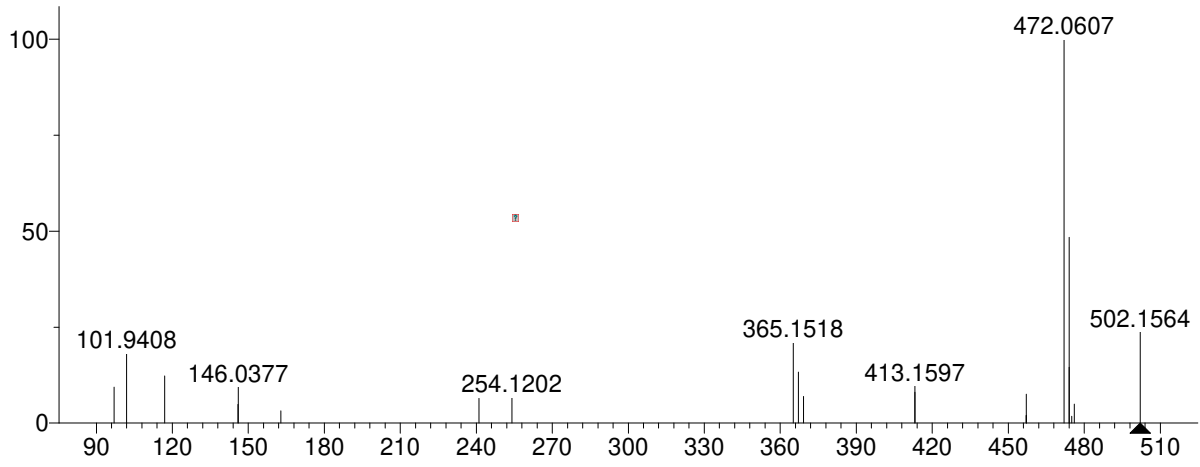

\*\* Search Report Page 1 of 2 \*\*

Unknown: Unknown (31.78\_293.2108m/z)  
Compound in Library Factor = -658

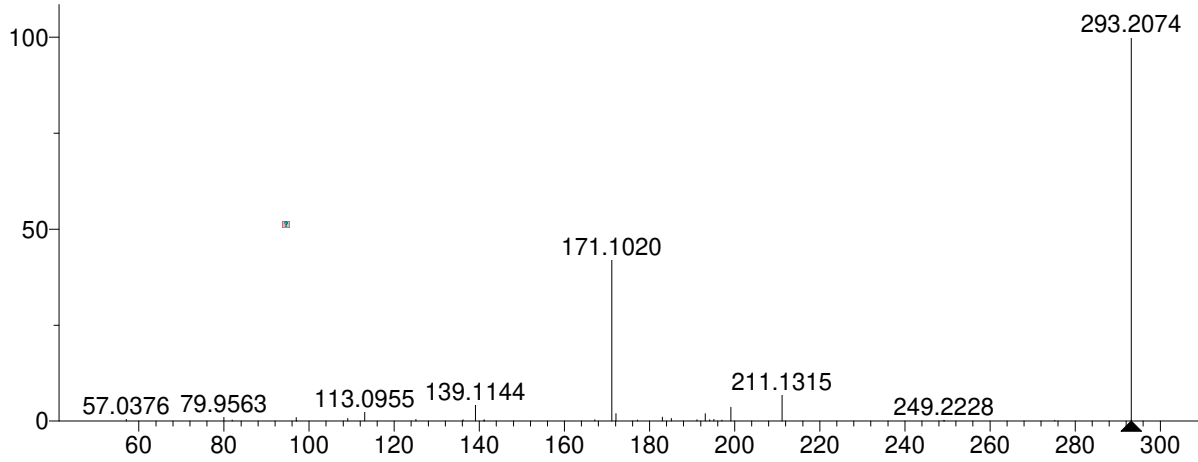

Hit 1 : 9S-Hydroxy-10E,12Z,15Z-octadecatrienoic acid [M-H]- IT-FT 35% P=293.2  
C18H30O3; MF: 450; RMF: 650; Prob 88.8%; CAS: 89886-42-0; Lib: nist\_msms; ID: 82804.

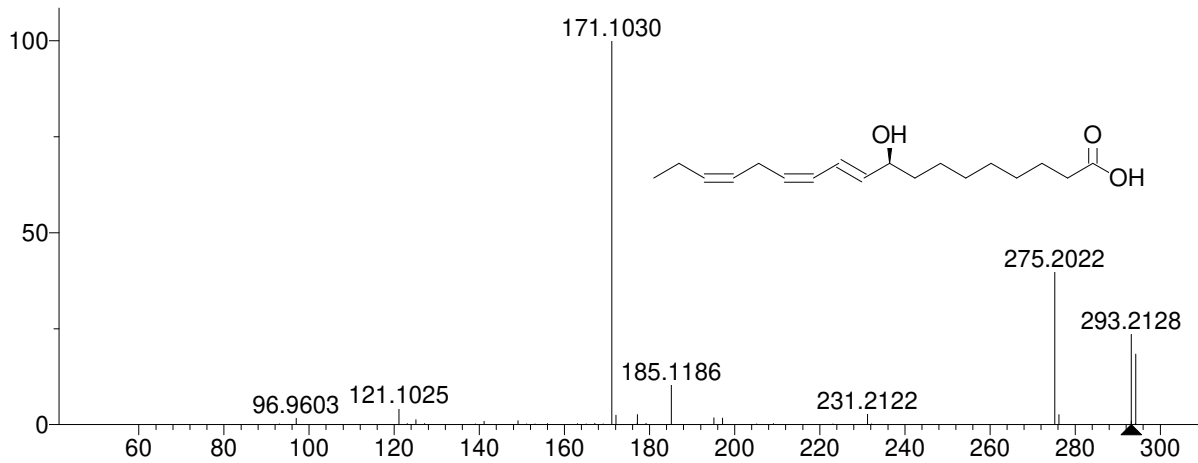

Hit 2 : Unknown (carbon number 18); PlaSMA ID-561 [M-H]- P=293.2  
C18H30O3; MF: 364; RMF: 999; Prob 7.91%; Lib: biomsmms-neg-plasma; ID: 1171.

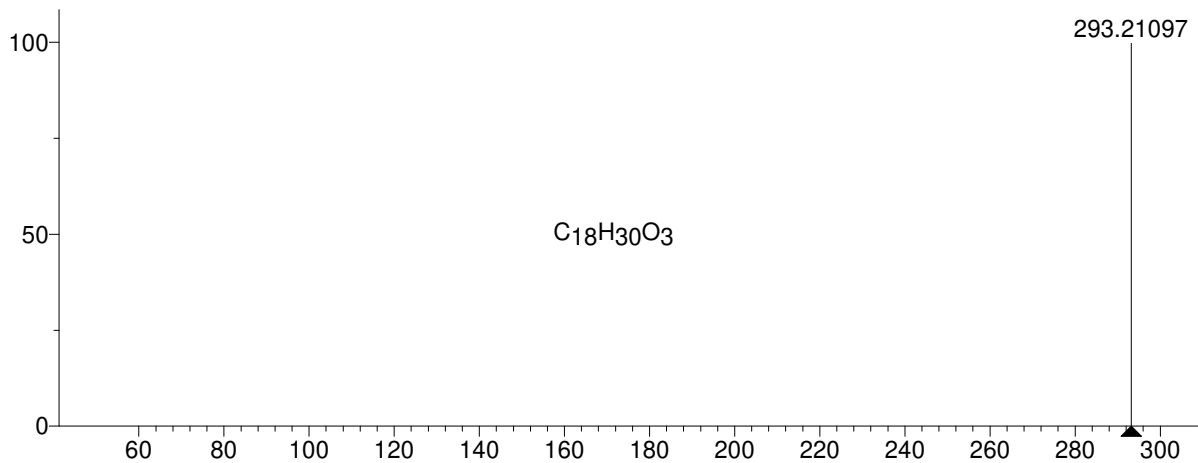

Hit 3 : 9-Hydroperoxy-10E,12Z-octadecadienoic acid [M-H-H<sub>2</sub>O]- HCD 38V P=293.2  
C<sub>18</sub>H<sub>32</sub>O<sub>4</sub>; MF: 316; RMF: 379; Prob 1.64%; CAS: 5502-91-0; Lib: nist\_msms; ID: 87782.

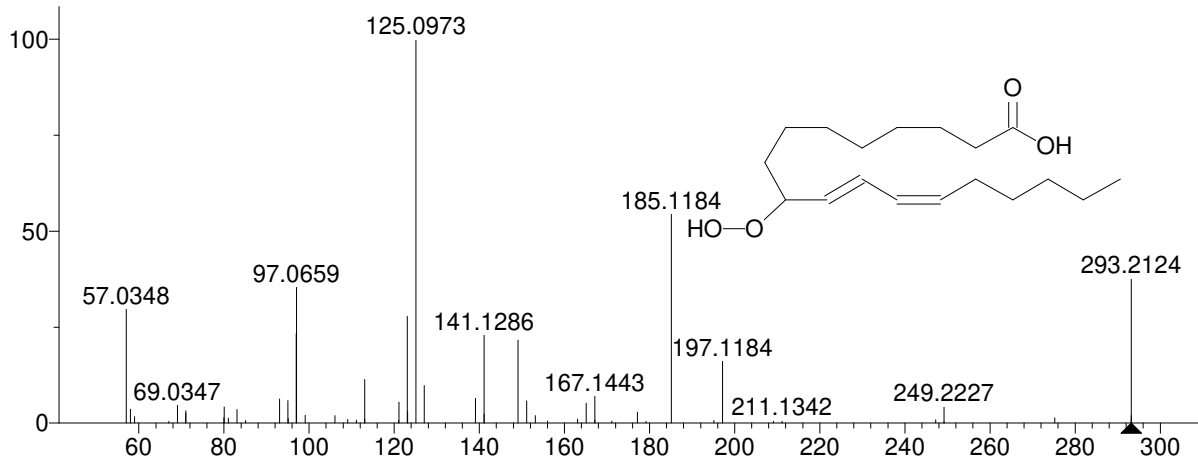

Hit 4 : FA 18:2+O; PlaSMA ID-565 [M-H]- P=293.2  
C<sub>18</sub>H<sub>30</sub>O<sub>3</sub>; MF: 274; RMF: 894; Prob 0.36%; Lib: biomsms-neg-plasma; ID: 418.

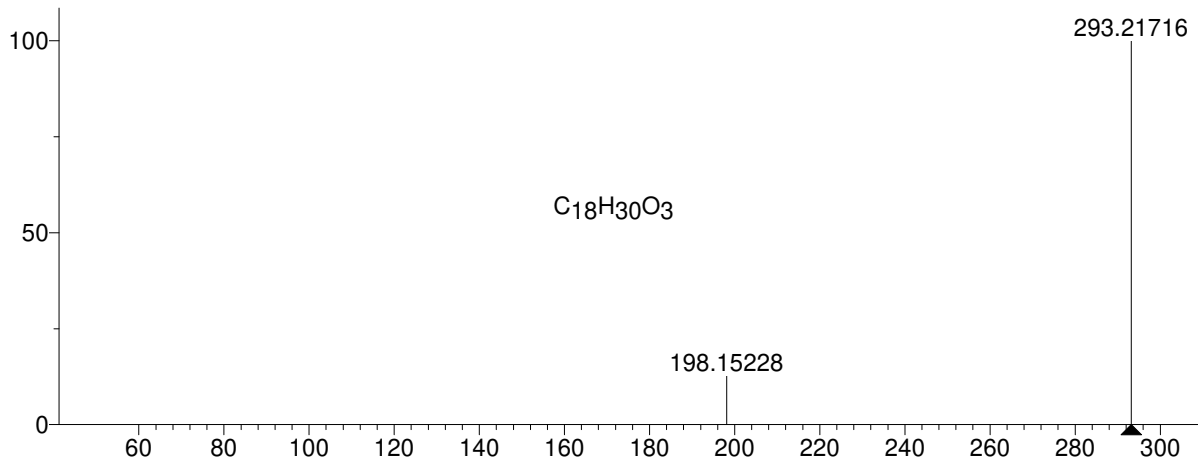

Hit 5 : FA 18:3+1O; PlaSMA ID-558 [M-H]- P=293.2  
C<sub>18</sub>H<sub>30</sub>O<sub>3</sub>; MF: 267; RMF: 779; Prob 0.28%; Lib: biomsms-neg-plasma; ID: 414.

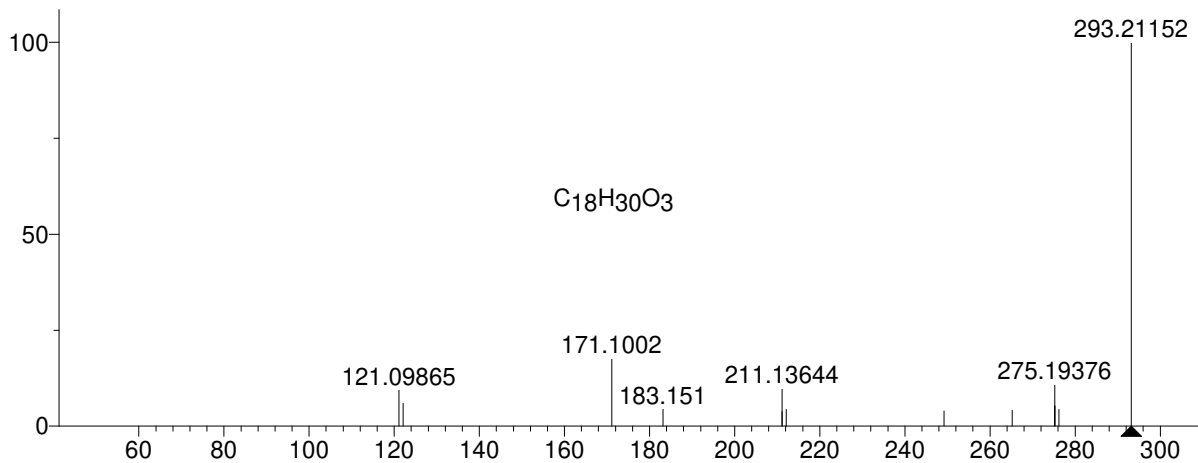

\*\* Search Report Page 1 of 2 \*\*

Unknown: Unknown (31.78\_311.2225m/z)  
Compound in Library Factor = -126

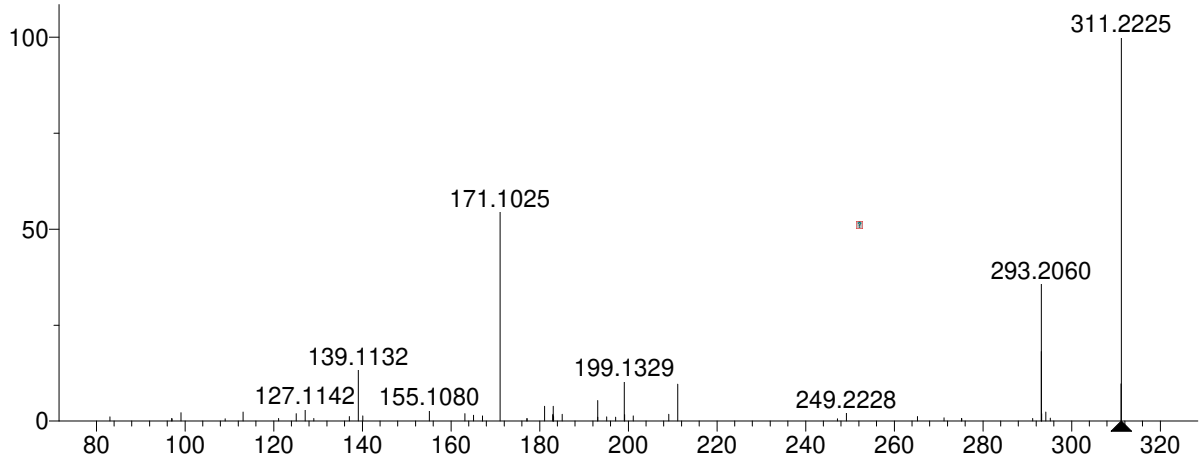

Hit 1 : Unknown (carbon number 19); PlaSMA ID-644 [M-CH3]- P=311.2  
C19H34O4; MF: 742; RMF: 837; Prob 97.8%; Lib: biomsms-neg-plasma; ID: 1202.

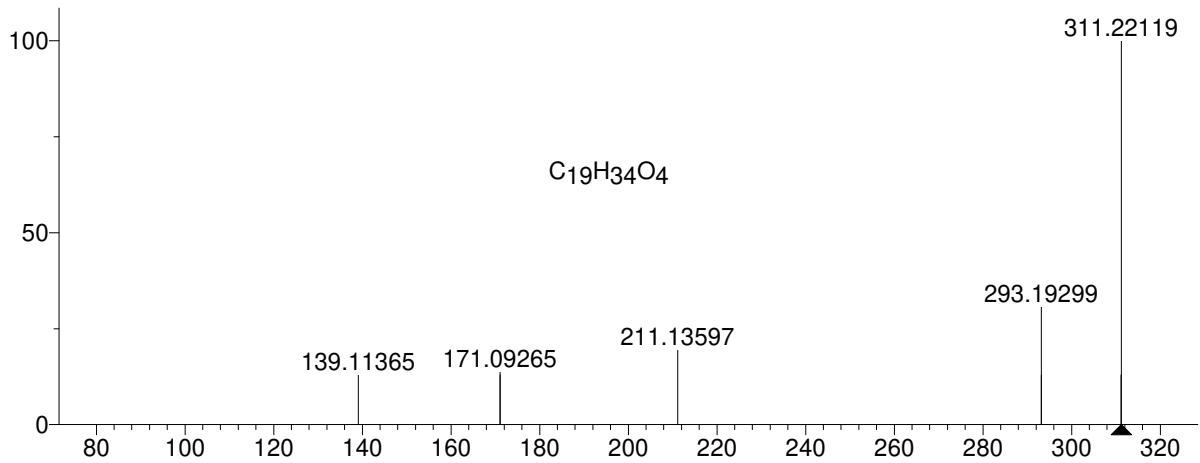

Hit 2 : FA 18:2+2O; PlaSMA ID-643 [M-H]- P=311.2  
C18H32O4; MF: 562; RMF: 780; Prob 1.76%; Lib: biomsms-neg-plasma; ID: 431.

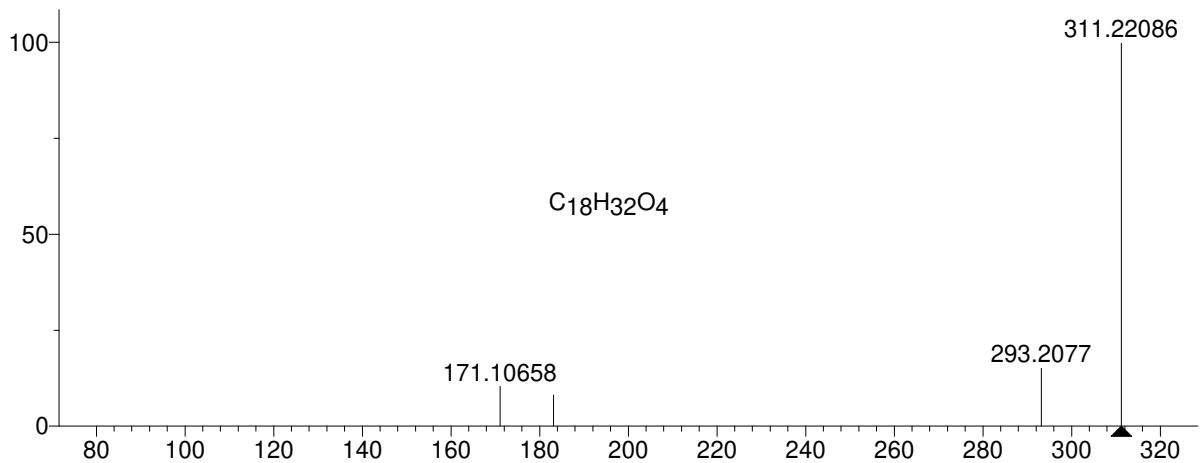

Hit 3 : FA 18:2+2O; PlaSMA ID-641 [M-H]<sup>-</sup> P=311.2  
C<sub>18</sub>H<sub>32</sub>O<sub>4</sub>; MF: 509; RMF: 750; Prob 0.34%; Lib: biomsmms-neg-plasma; ID: 432.

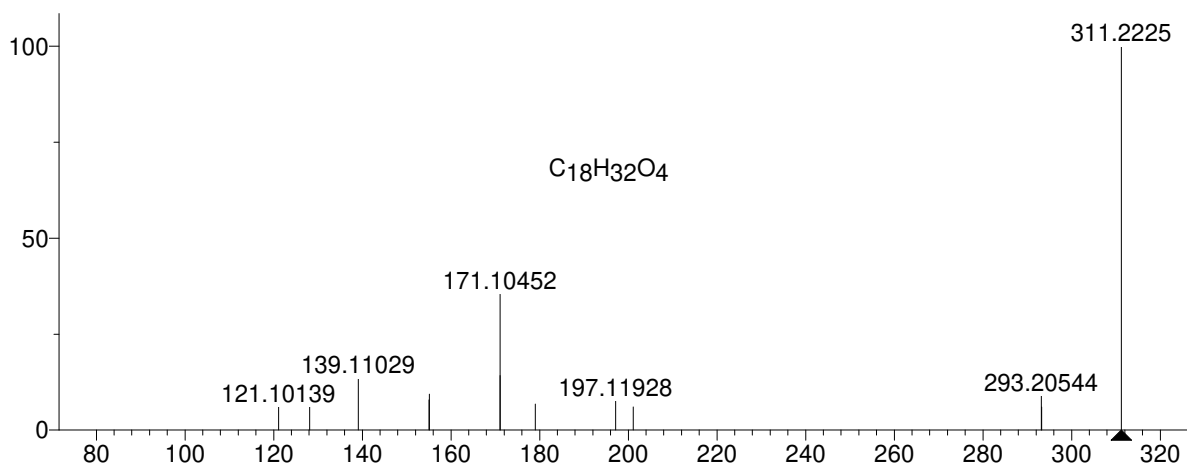

Hit 4 : FA 18:2+2O; PlaSMA ID-645 [M-H]<sup>-</sup> P=311.2  
C<sub>18</sub>H<sub>32</sub>O<sub>4</sub>; MF: 474; RMF: 738; Prob 0.08%; Lib: biomsmms-neg-plasma; ID: 429.

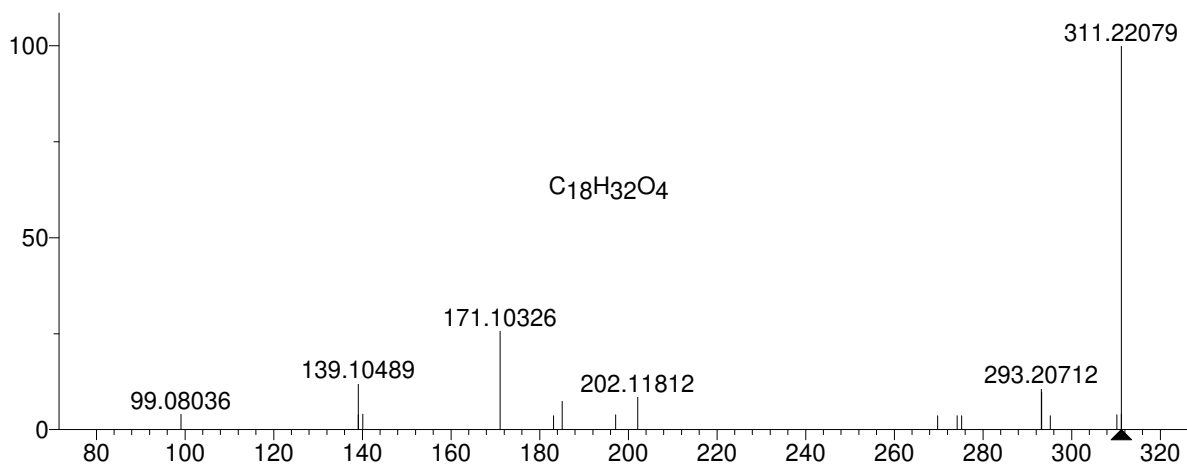

Hit 5 : 9-Oxo-11-(3-pentyl-2-oxiranyl)-10E-undecenoic acid [M+H]<sup>+</sup> HCD 12V P=311.2  
C<sub>18</sub>H<sub>30</sub>O<sub>4</sub>; MF: 401; RMF: 621; Prob 0.01%; CAS: 478931-82-7; Lib: nist\_msms; ID: 91857.

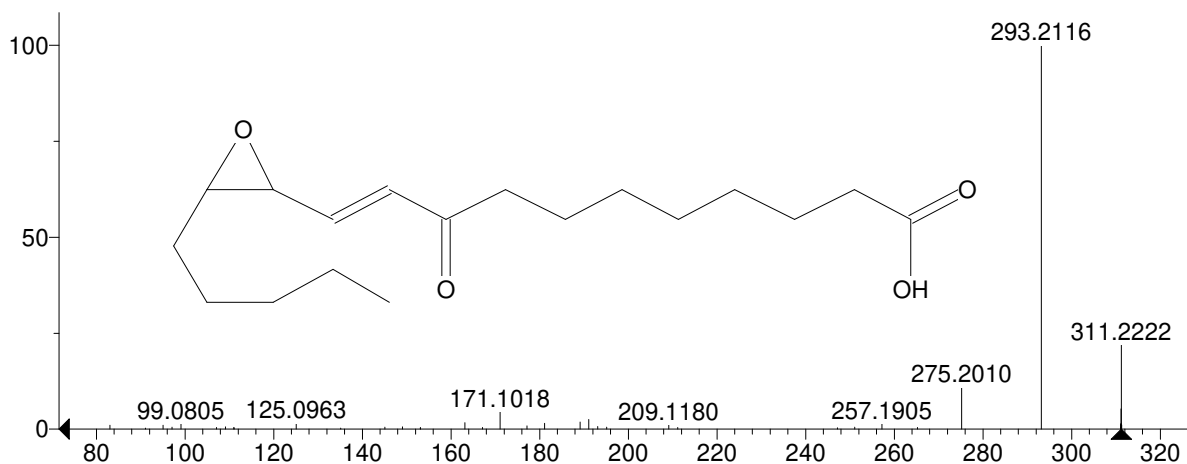

Unknown: Unknown (31.78\_472.0633m/z)  
Compound in Library Factor = -3273

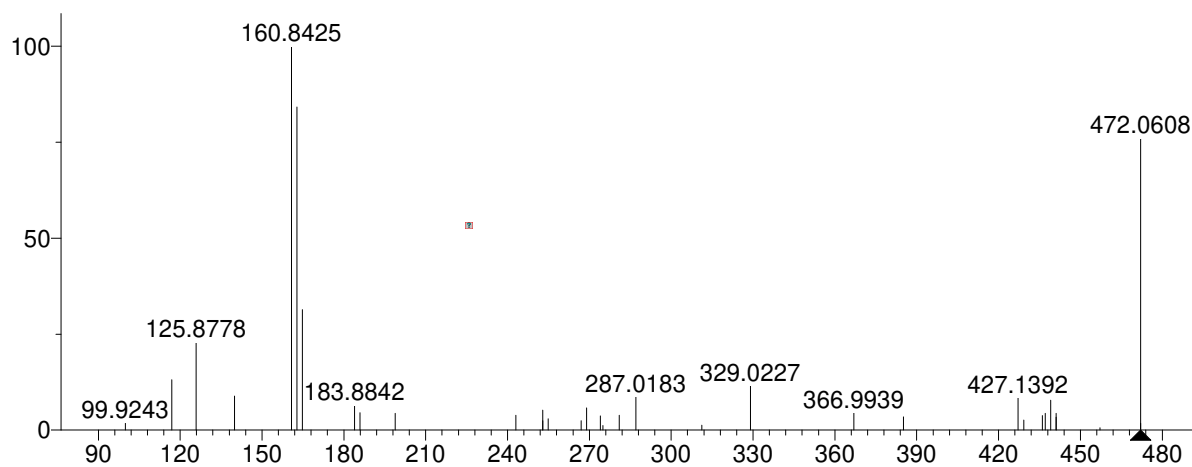

Hit 1 : Acetic acid, 2-[4-[[[2-[3-fluoro-4-(trifluoromethyl)phenyl]-4-methyl-5-thiazolyl]methyl]thio]-2-methylphenoxy]  
C21H17F4NO3S2; MF: 11; RMF: 401; Prob 100.0%; CAS: 317318-84-6; Lib: nist\_msms; ID: 427976.

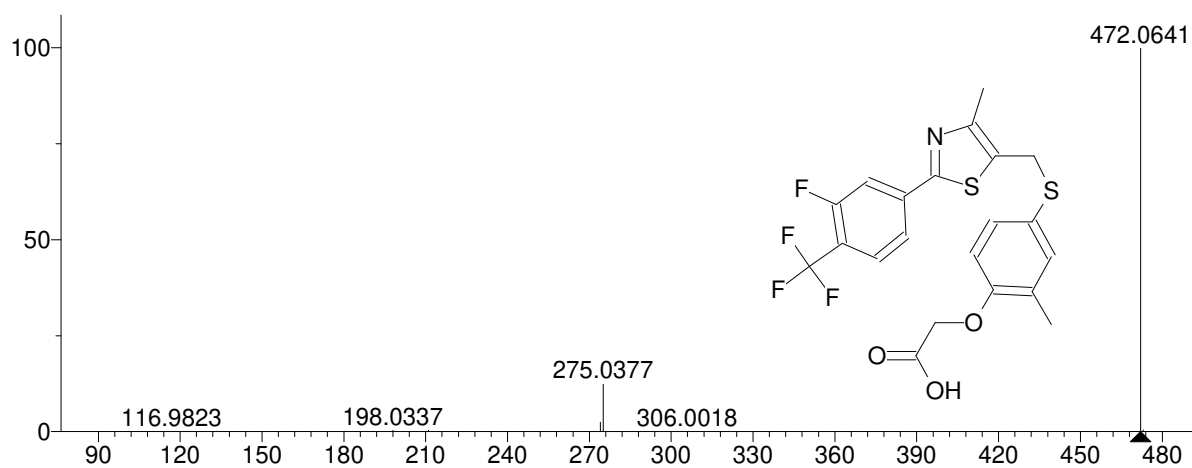

Unknown: Unknown (31.79\_459.1517m/z)  
Compound in Library Factor = 0

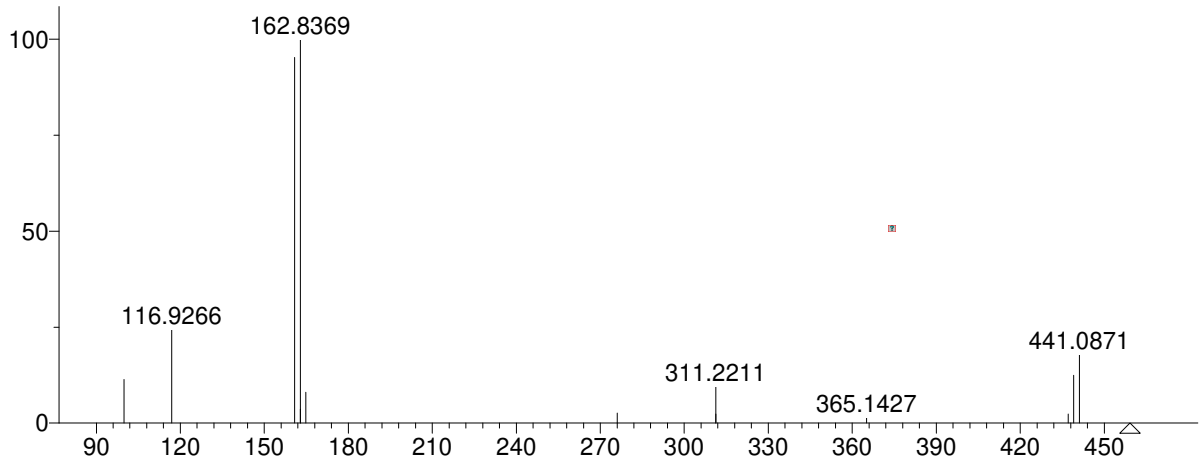

Unknown: Unknown (31.79\_474.0611 m/z)  
Compound in Library Factor = 0

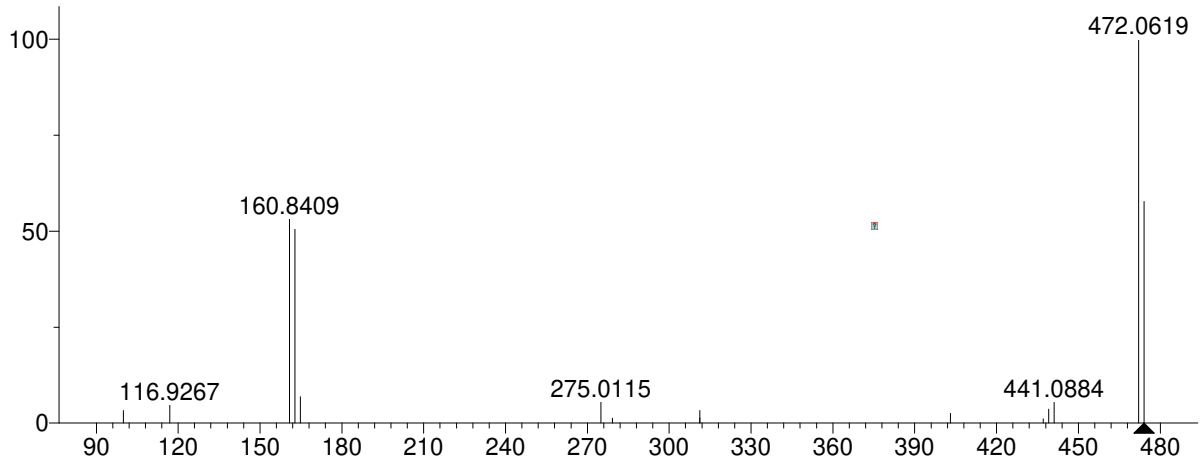



Unknown: Unknown (31.81\_379.2088m/z)  
Compound in Library Factor = 0

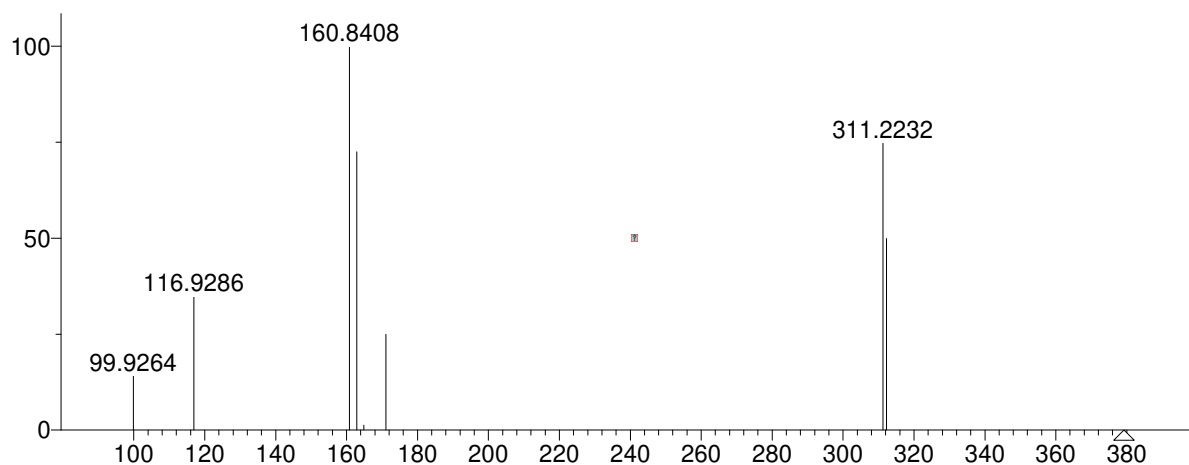

Hit 1 : Gly-Phe-Arg [M+H]<sup>+</sup> QQQ 28V P=379.2  
C17H26N6O4; MF: 0; RMF: 4; Prob 100.0%; Lib: nist\_msms; ID: 38881.

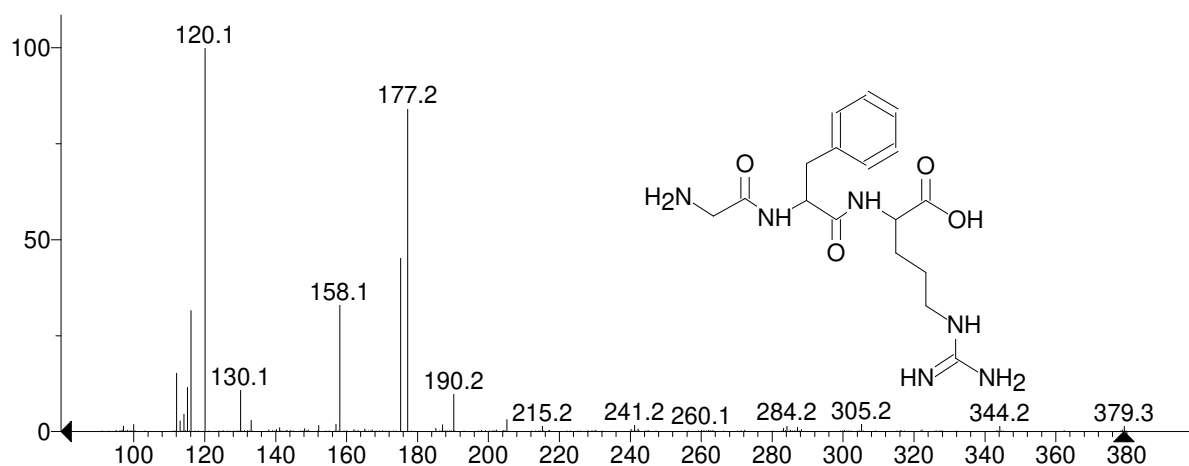

\*\* Search Report Page 1 of 2 \*\*

Unknown: Unknown (31.81\_415.1855m/z)  
Compound in Library Factor = 0

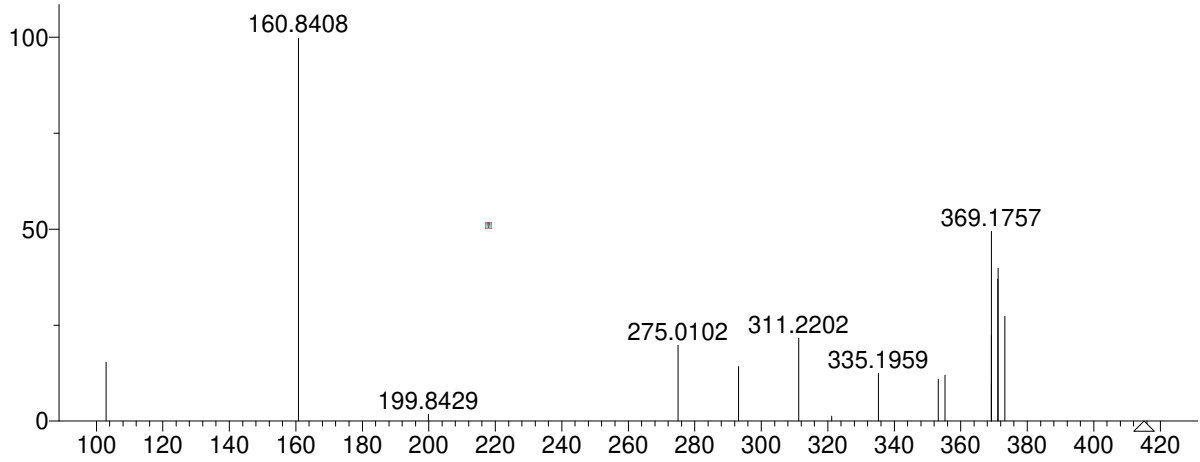

Hit 1 : Dexamethasone [M+Na]<sup>+</sup> IT 35% P=415.2  
C22H29FO5; MF: 0; RMF: 32; Prob 20.0%; CAS: 50-02-2; Lib: nist\_msms; ID: 310175.

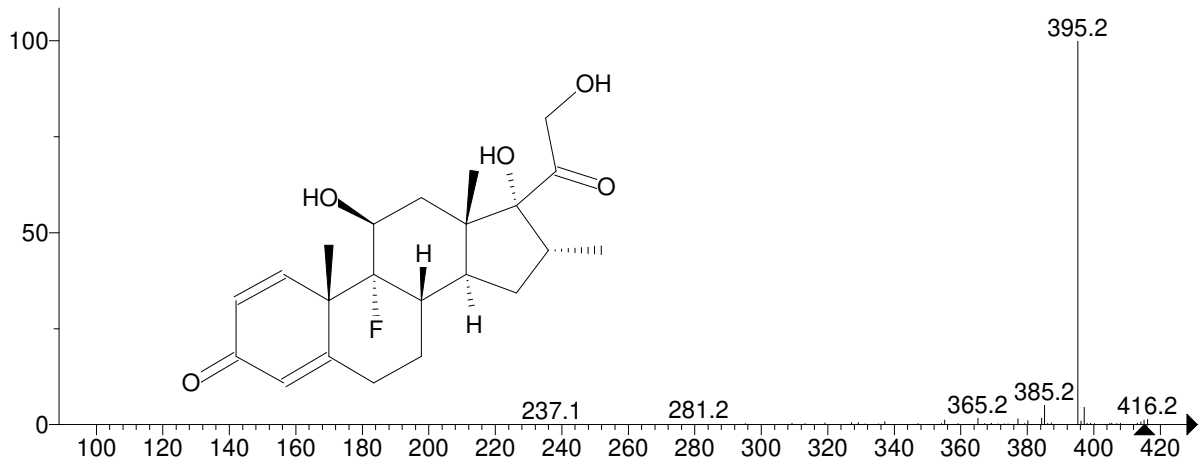

Hit 2 : Betamethasone [M+Na]<sup>+</sup> IT 35% P=415.2  
C22H29FO5; MF: 0; RMF: 31; Prob 20.0%; CAS: 378-44-9; Lib: nist\_msms; ID: 409066.

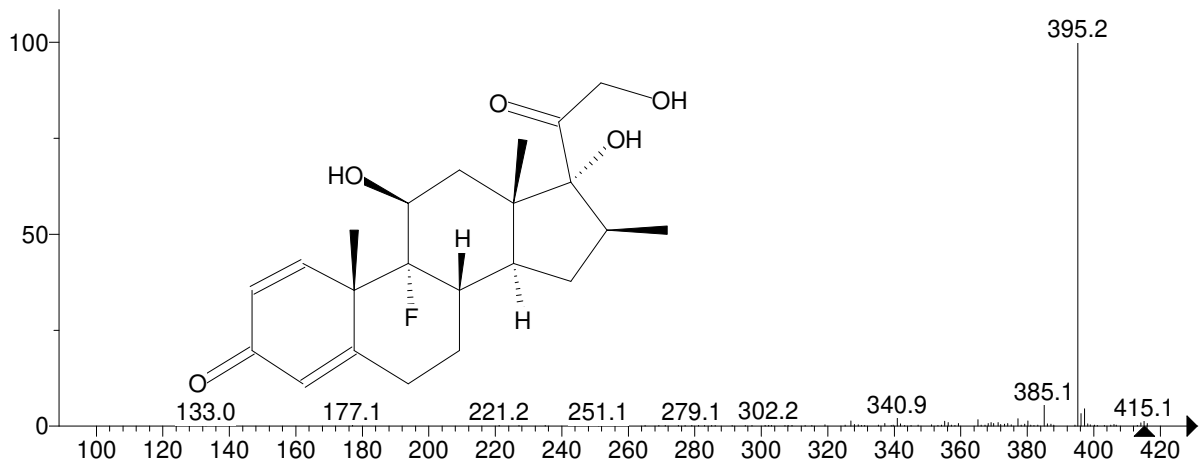

\*\* Search Report Page 2 of 2 \*\*

Hit 3 : Acetic acid, 2-[[2'-(5-ethyl-3,4-diphenyl-1H-pyrazol-1-yl)[1,1'-biphenyl]-3-yl]oxy]- [M-H-C2H2O2]- IT 35%  
C31H26N2O3; MF: 0; RMF: 28; Prob 20.0%; CAS: 300657-03-8; Lib: nist\_msms; ID: 365533.

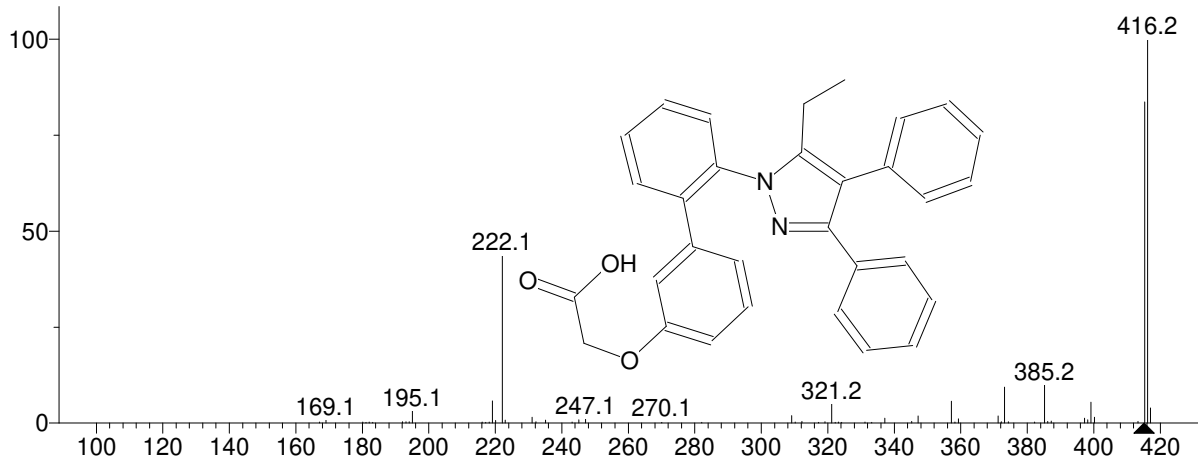

Hit 4 : Cys-His-Arg [M+H]+ IT 35% P=415.2  
C15H26N8O4S; MF: 0; RMF: 23; Prob 20.0%; Lib: nist\_msms; ID: 47287.

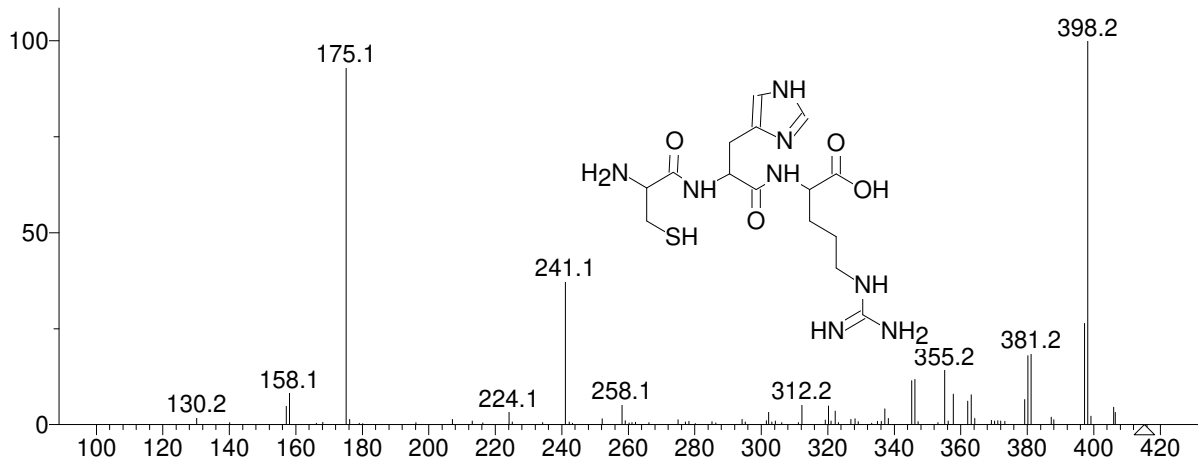

Hit 5 : (±)-N-Formyl-3,4-methylenedioxyamphetamine [2M+H]+ IT 35% P=415.2  
C11H13NO3; MF: 0; RMF: 7; Prob 20.0%; CAS: 67669-00-5; Lib: nist\_msms; ID: 243548.

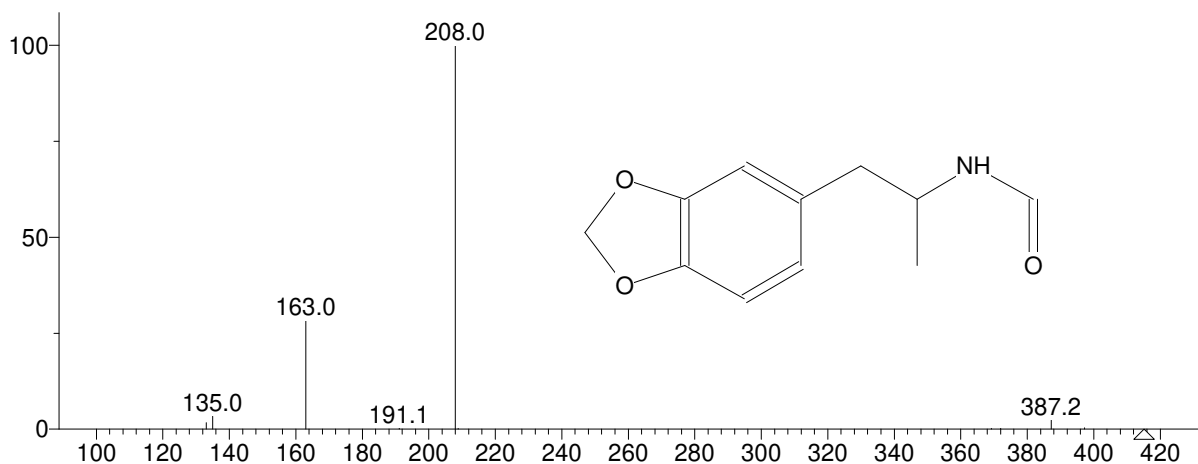

Unknown: Unknown (31.89\_315.1943m/z)  
Compound in Library Factor = -1096

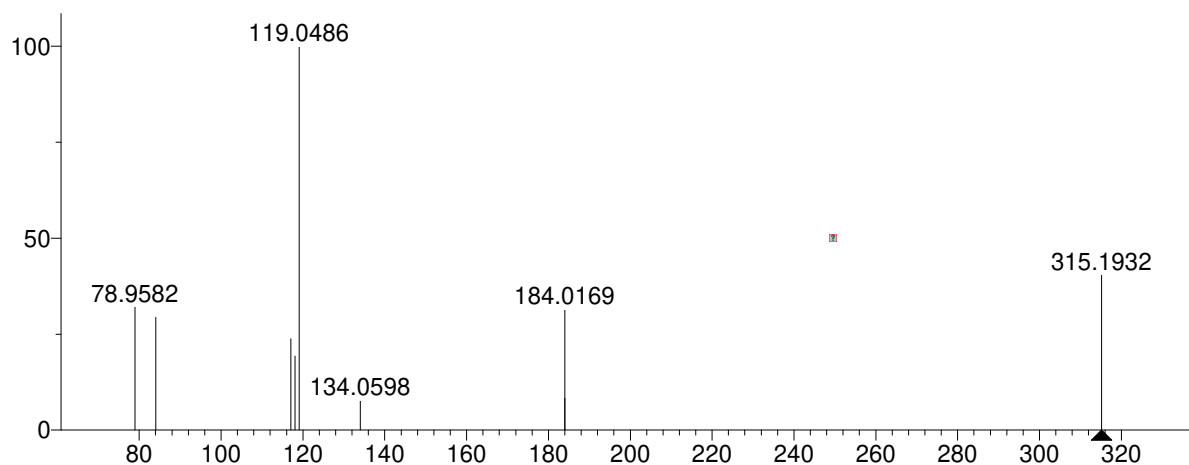

Hit 1 : 20-Carboxyarachidonic acid [M-H-H<sub>2</sub>O]- HCD 9V P=315.2  
C<sub>20</sub>H<sub>30</sub>O<sub>4</sub>; MF: 342; RMF: 983; Prob 70.3%; CAS: 79551-84-1; Lib: nist\_msms; ID: 92299.

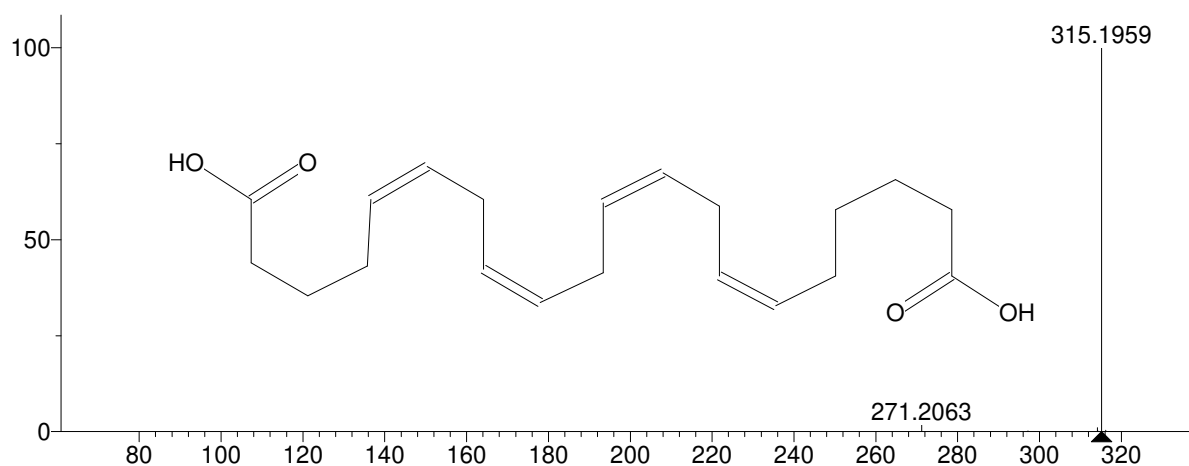

Hit 2 : 5-trans-Prostaglandin D<sub>2</sub> [M-H-2H<sub>2</sub>O]- HCD 12V P=315.2  
C<sub>20</sub>H<sub>32</sub>O<sub>5</sub>; MF: 312; RMF: 935; Prob 19.5%; Lib: nist\_msms; ID: 341167.

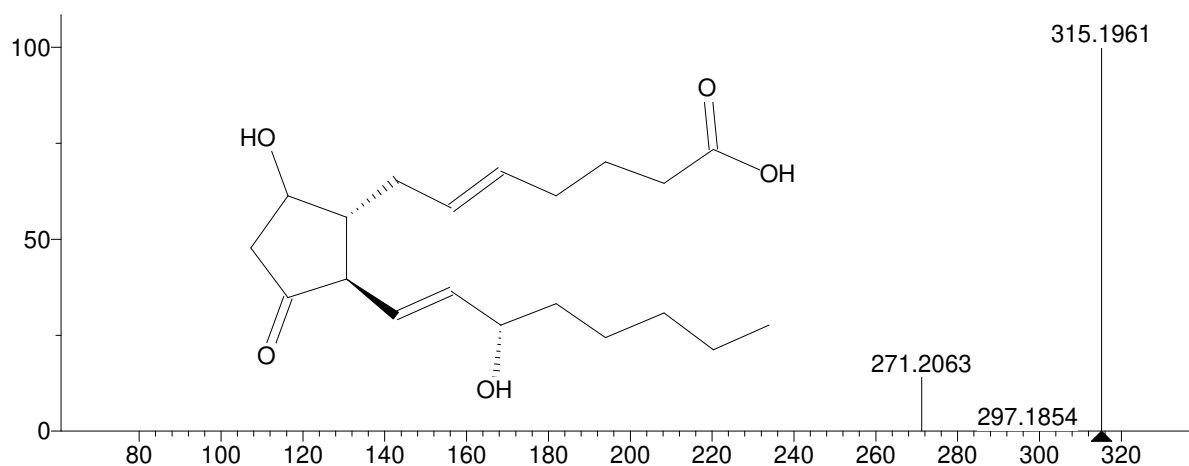

Hit 3 : Prostaglandin B3 [M+H-H2O]<sup>+</sup> HCD 8V P=315.2  
C<sub>20</sub>H<sub>28</sub>O<sub>4</sub>; MF: 244; RMF: 916; Prob 2.96%; CAS: 36614-32-1; Lib: nist\_msms; ID: 85309.

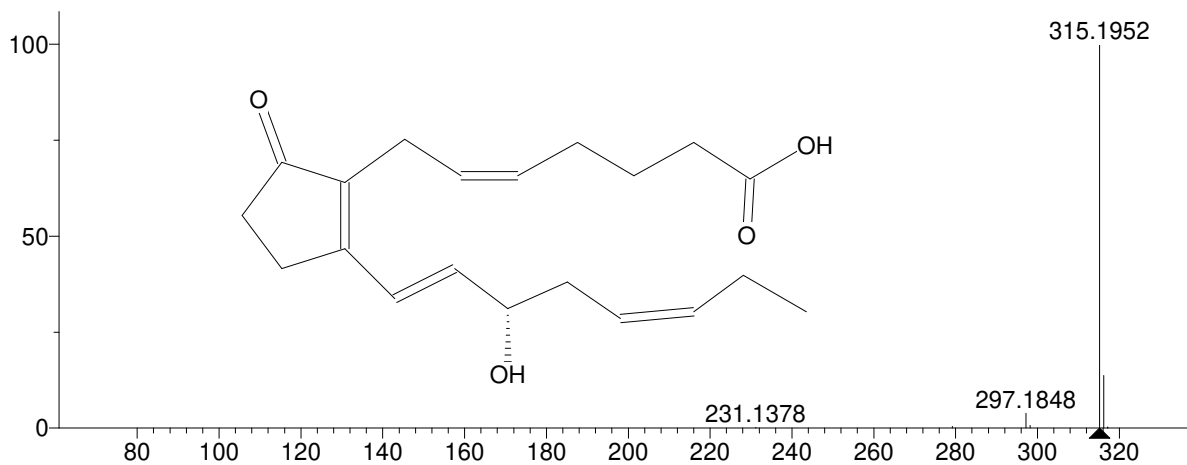

Hit 4 : Prostaglandin A3 [M+H-H2O]<sup>+</sup> HCD 5V P=315.2  
C<sub>20</sub>H<sub>28</sub>O<sub>4</sub>; MF: 243; RMF: 909; Prob 2.85%; CAS: 36614-31-0; Lib: nist\_msms; ID: 85137.

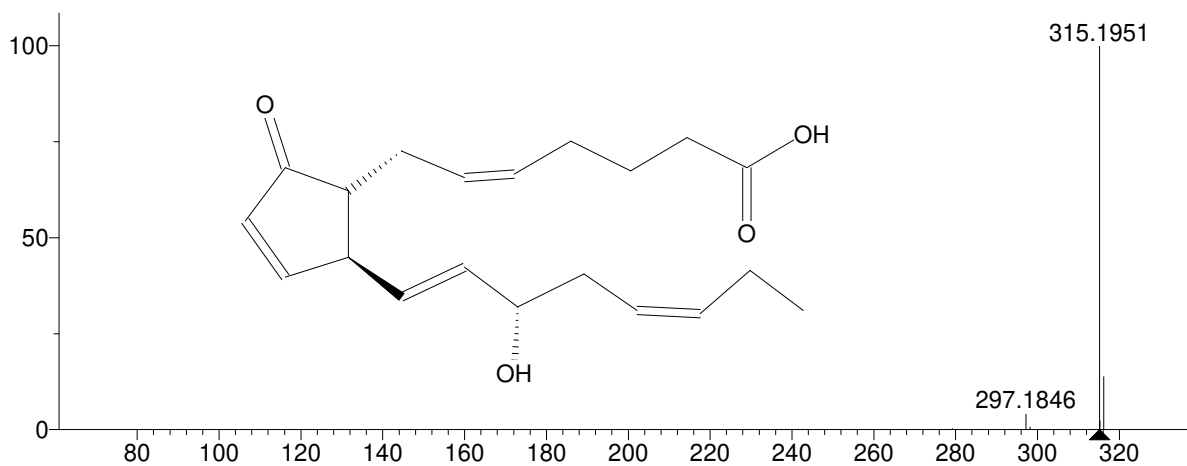

Hit 5 : 9-Oxoprostanoic acid [M-H]<sup>-</sup> HCD 9V P=315.2  
C<sub>20</sub>H<sub>28</sub>O<sub>3</sub>; MF: 240; RMF: 905; Prob 2.51%; CAS: 112839-31-3; Lib: nist\_msms; ID: 156892.

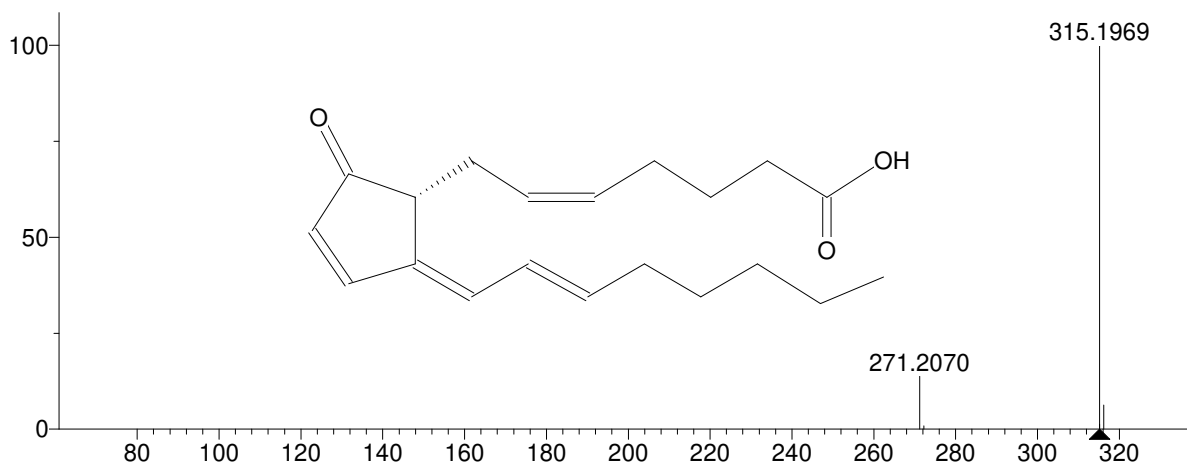

Unknown: Unknown (31.92\_383.1756m/z)  
Compound in Library Factor = 0

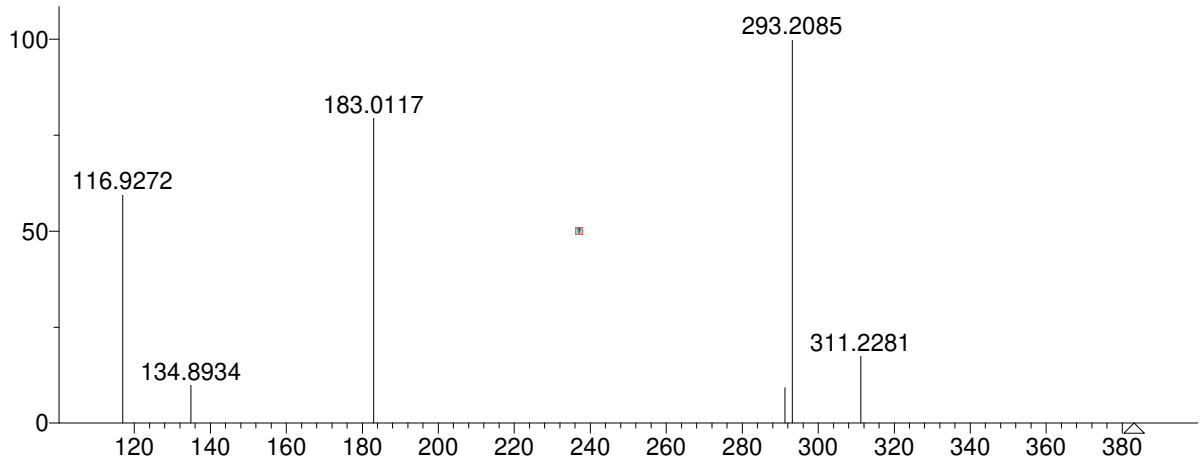

Unknown: Unknown (32.13\_315.2537m/z)  
Compound in Library Factor = -351

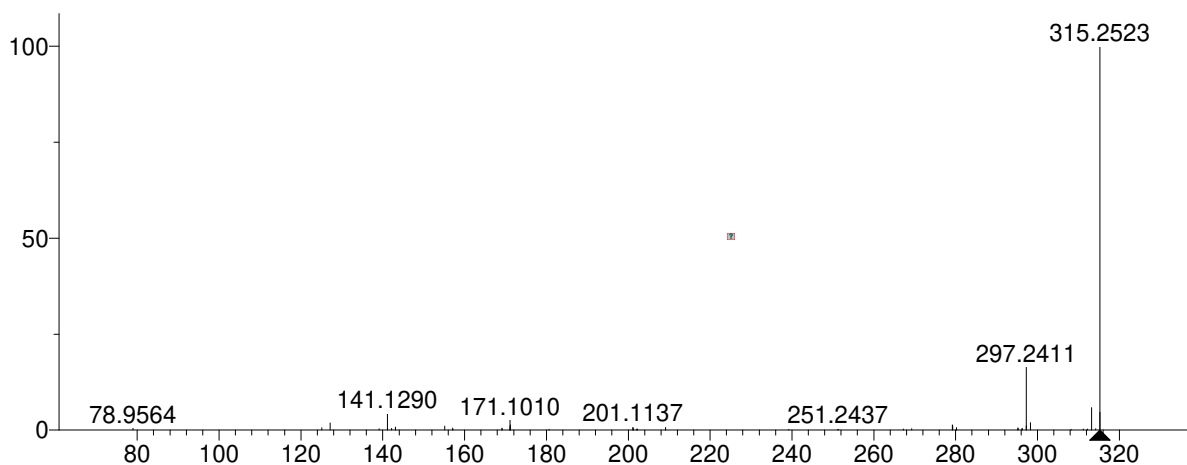

Hit 1 : 12,13-Dihydroxy-9Z-octadecenoic acid [M+H]<sup>+</sup> HCD 8V P=315.3  
C<sub>18</sub>H<sub>34</sub>O<sub>4</sub>; MF: 232; RMF: 655; Prob 56.3%; CAS: 263399-35-5; Lib: nist\_msms; ID: 92803.

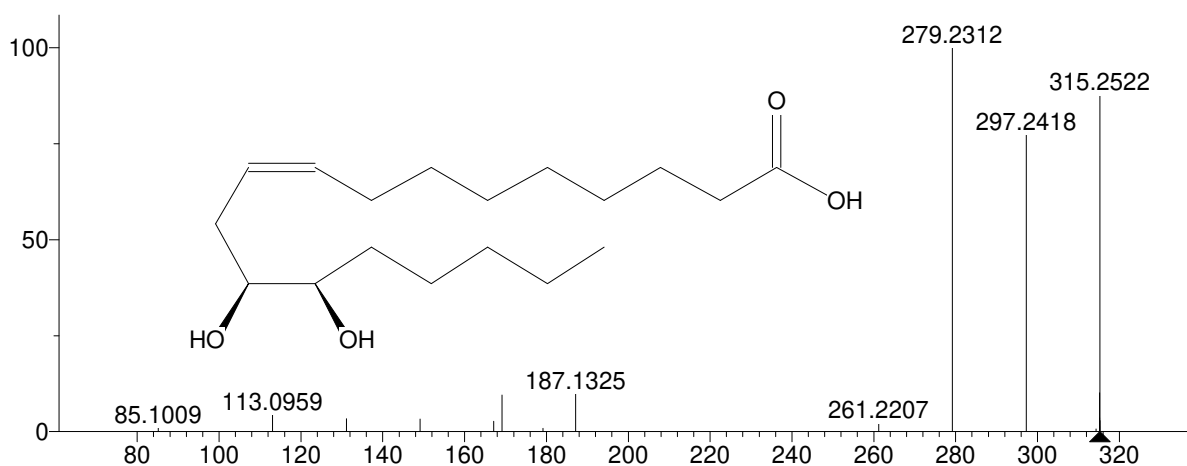

Hit 2 : 9,10-Dihydroxy-12Z-octadecenoic acid [M+H]<sup>+</sup> HCD 8V P=315.3  
C<sub>18</sub>H<sub>34</sub>O<sub>4</sub>; MF: 225; RMF: 603; Prob 43.1%; CAS: 263399-34-4; Lib: nist\_msms; ID: 95804.

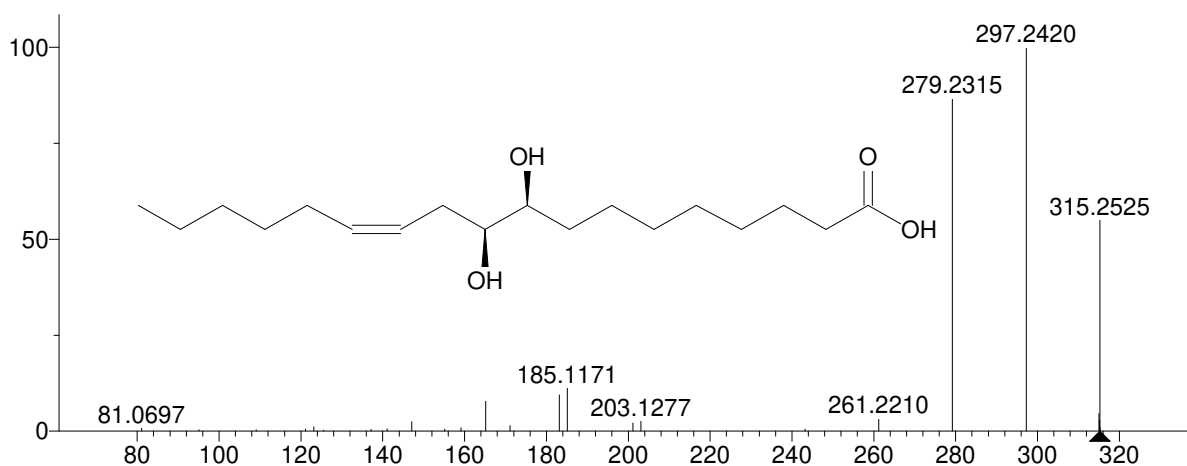

Hit 3 : Dibutyl sebacate [M+H]<sup>+</sup> HCD 9V P=315.3  
C<sub>18</sub>H<sub>34</sub>O<sub>4</sub>; MF: 24; RMF: 420; Prob 0.43%; CAS: 109-43-3; Lib: nist\_msms; ID: 314968.

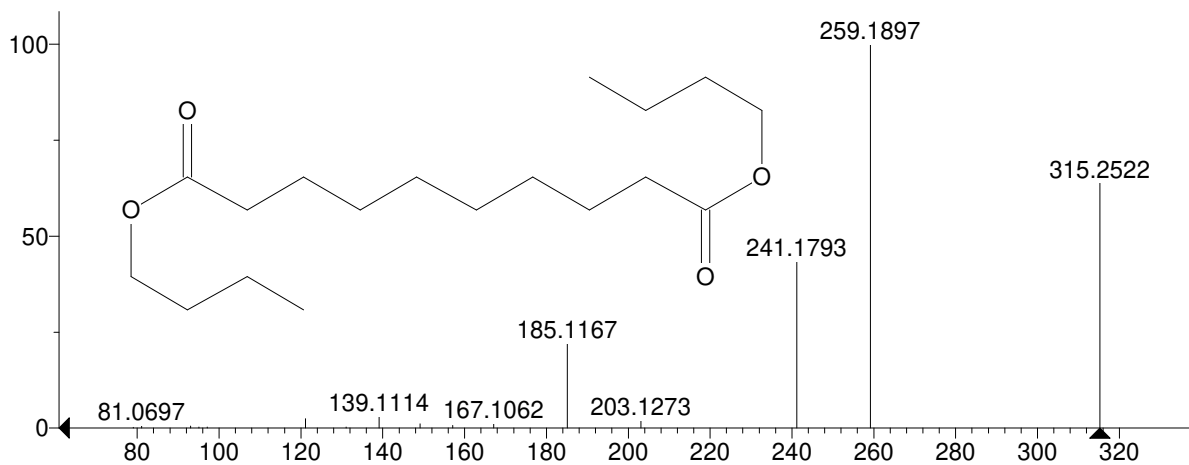

Hit 4 : NCGC00381425-01!8-hydroxy-8-(3-octyloxiran-2-yl)octanoic acid [M+H]<sup>+</sup> P=315.3  
C<sub>18</sub>H<sub>34</sub>O<sub>4</sub>; MF: 4; RMF: 94; Prob 0.19%; Lib: mona-export-gnps; ID: 7520.

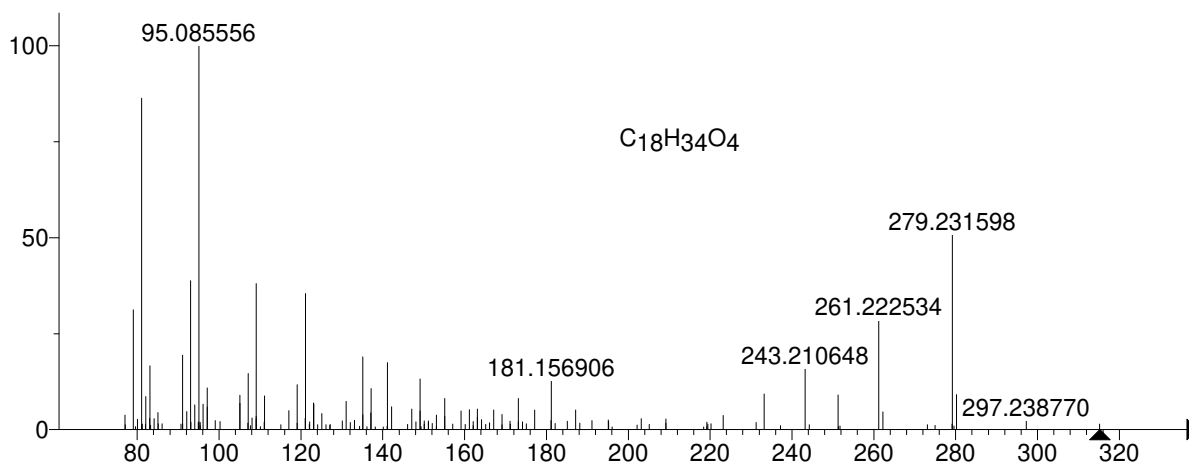



Unknown: Unknown (32.16\_347.1989m/z)  
Compound in Library Factor = 0

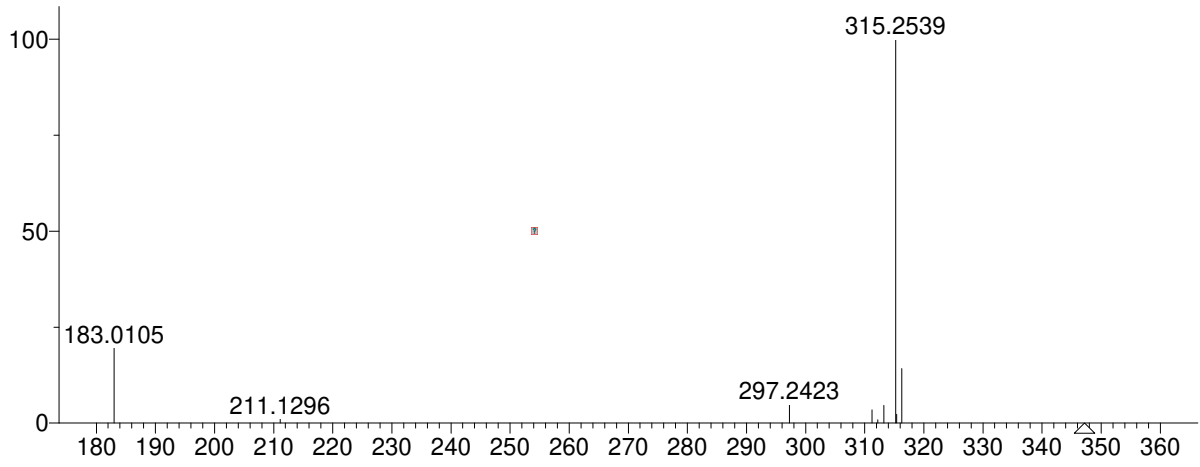

\*\* Search Report Page 1 of 2 \*\*

Unknown: Unknown (32.22\_313.1798m/z)  
Compound in Library Factor = -1249

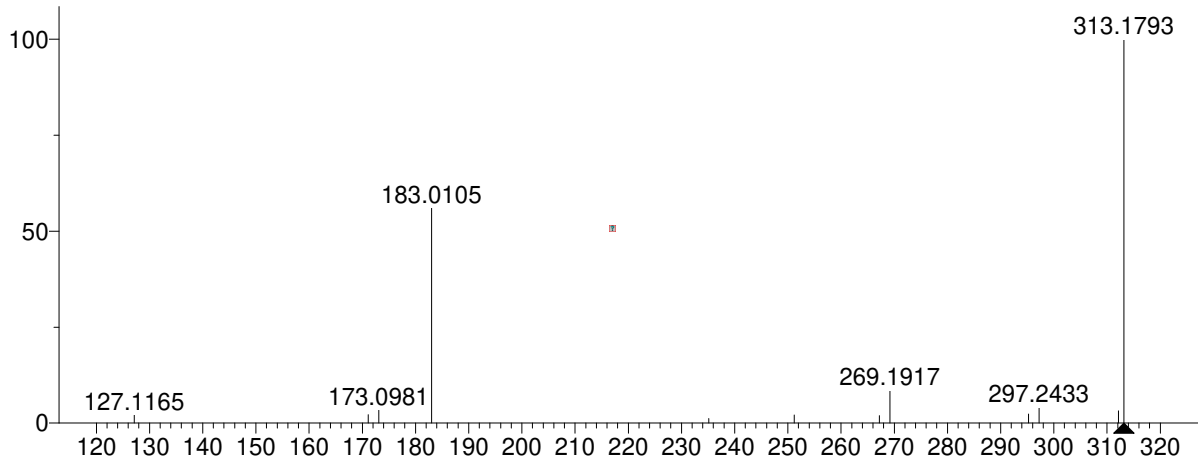

Hit 1 : 1,4a-dimethyl-9-oxo-7-propan-2-yl-3,4,10,10a-tetrahydro-2H-phenanthrene-1-carboxylic acid [M-H]<sup>-</sup> 45HC  
C<sub>20</sub>H<sub>26</sub>O<sub>3</sub>; MF: 234; RMF: 682; Prob 40.3%; Lib: mona-export-1c-ms-ms\_negative\_mode; ID: 19329.

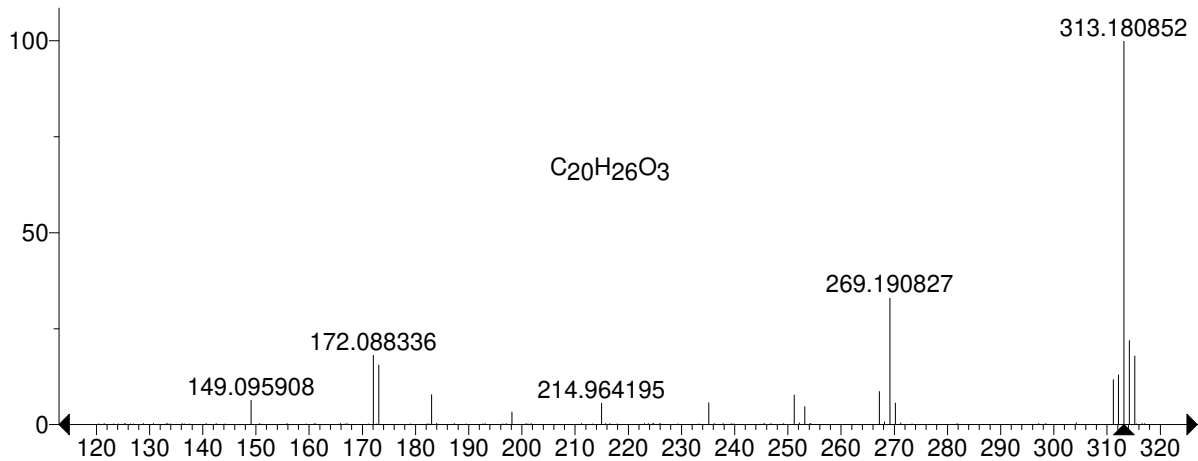

Hit 2 : Trenbolone acetate [M+H]<sup>+</sup> HCD 15V P=313.2  
C<sub>20</sub>H<sub>24</sub>O<sub>3</sub>; MF: 224; RMF: 859; Prob 28.4%; CAS: 10161-34-9; Lib: nist\_msms; ID: 383931.

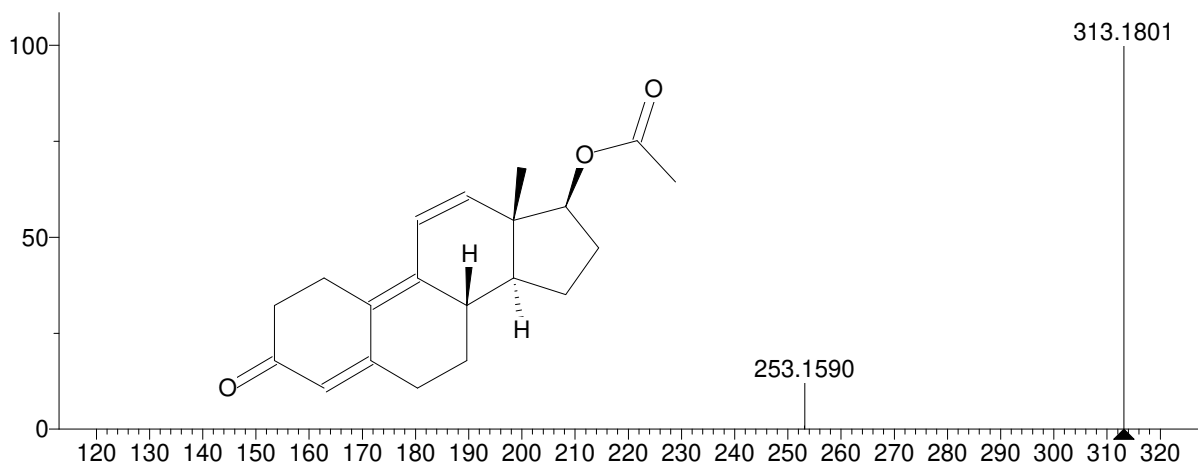

Hit 3 : Prostaglandin A3 [M-H-H<sub>2</sub>O]- HCD 9V P=313.2  
C<sub>20</sub>H<sub>28</sub>O<sub>4</sub>; MF: 219; RMF: 912; Prob 22.9%; CAS: 36614-31-0; Lib: nist\_msms; ID: 85161.

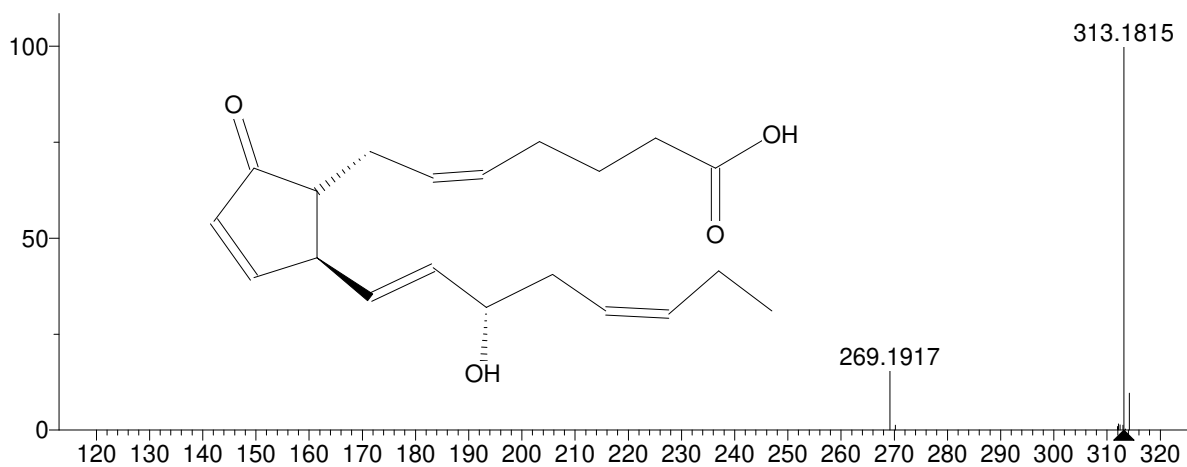

Hit 4 : all-trans-4-Ketoretinoic acid [M-H]- HCD 10V P=313.2  
C<sub>20</sub>H<sub>26</sub>O<sub>3</sub>; MF: 191; RMF: 784; Prob 6.61%; CAS: 38030-57-8; Lib: nist\_msms; ID: 209978.

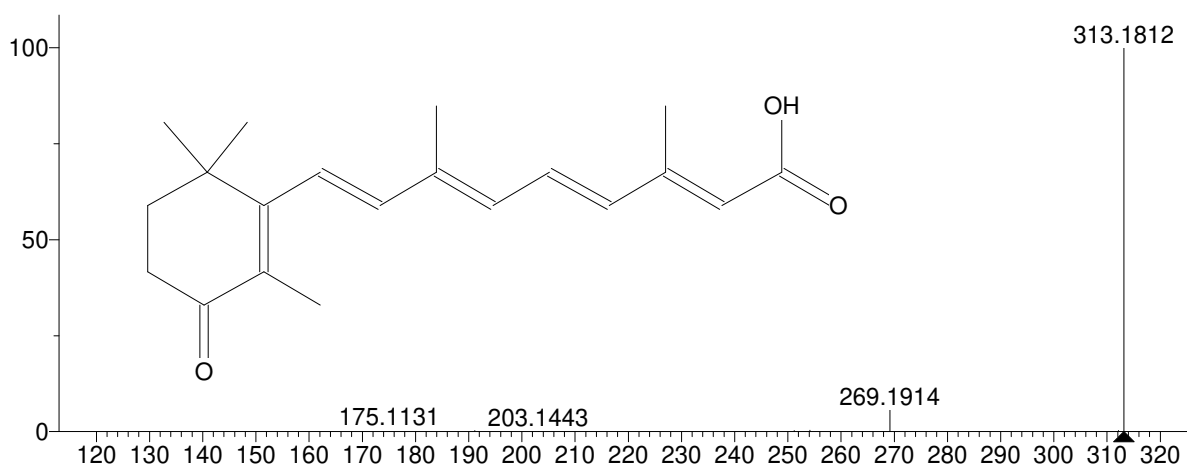

Hit 5 : Prostaglandin B3 [M-H-H<sub>2</sub>O]- HCD 6V P=313.2  
C<sub>20</sub>H<sub>28</sub>O<sub>4</sub>; MF: 127; RMF: 878; Prob 1.08%; CAS: 36614-32-1; Lib: nist\_msms; ID: 85344.

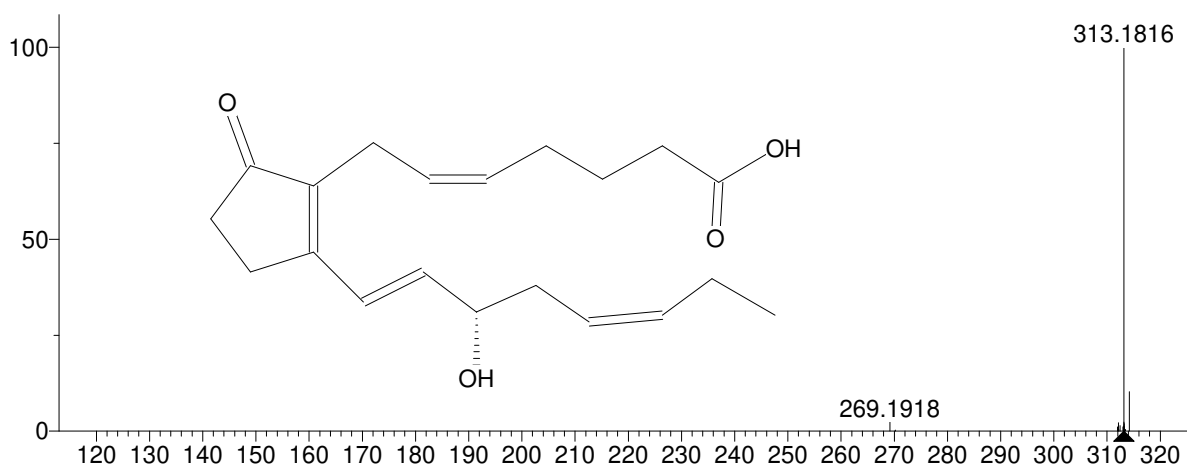

\*\* Search Report Page 1 of 2 \*\*

Unknown: Unknown (32.25\_347.1991m/z)  
Compound in Library Factor = 0

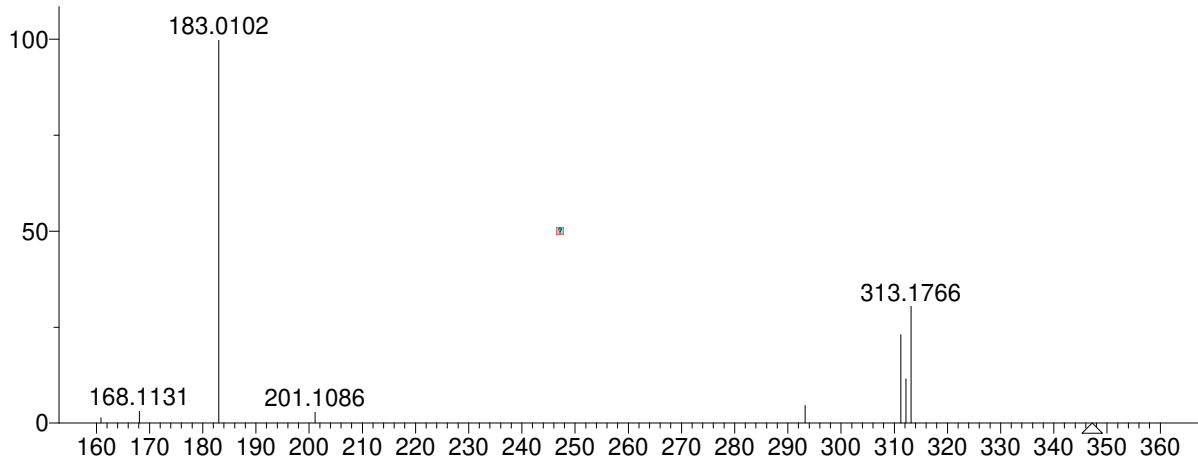

Hit 1 : Ganoderic acid H [M+H-C8H16O6] $\Rightarrow$ 347.2 IT 35% P=347.2  
C32H44O9; MF: 0; RMF: 20; Prob 5.88%; CAS: 98665-19-1; Lib: nist\_msms; ID: 226680.

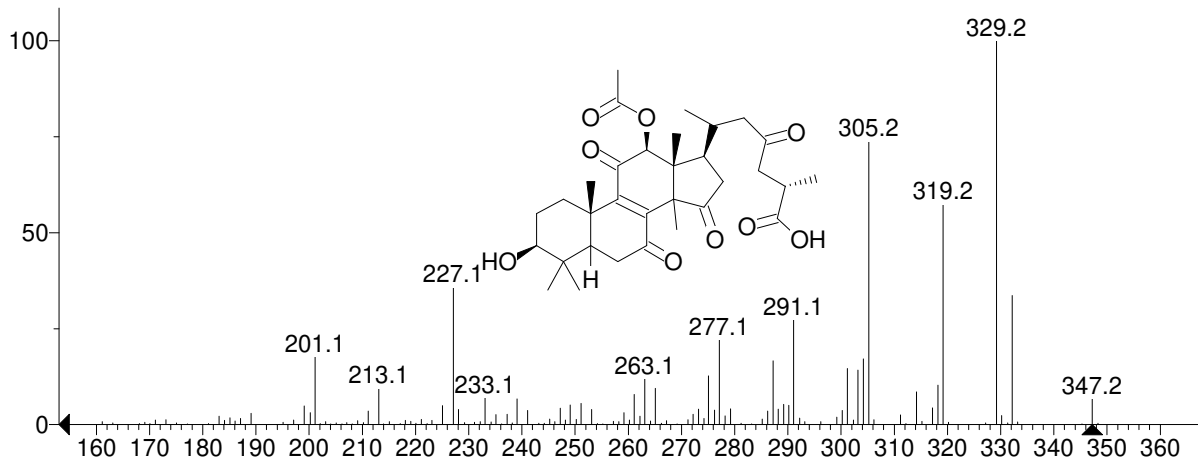

Hit 2 : D-Amygdalin [M+Na] $\Rightarrow$ 347.2 IT 35% P=347.2  
C20H27NO11; MF: 0; RMF: 16; Prob 5.88%; CAS: 29883-15-6; Lib: nist\_msms; ID: 162980.

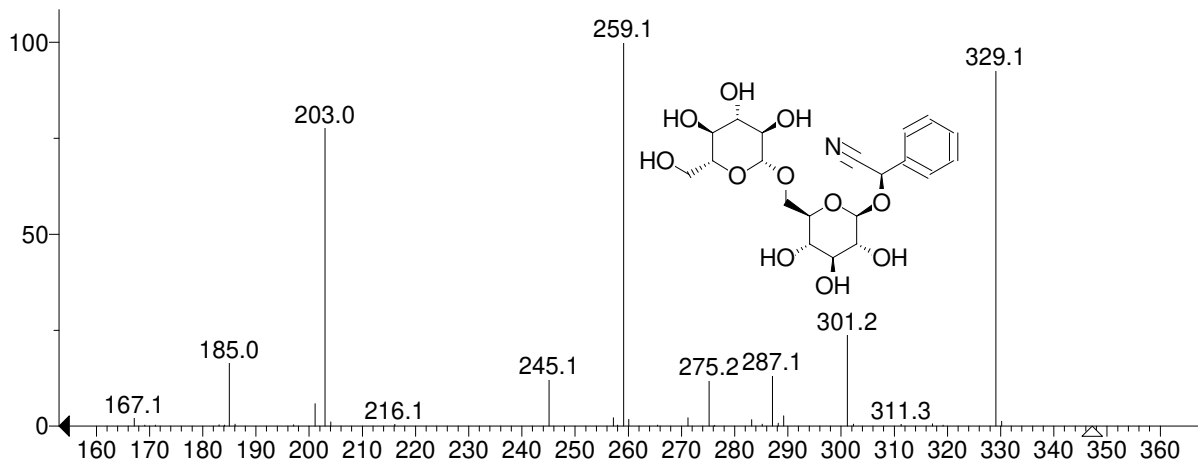

Hit 3 : Cinobufagin [M+H-H<sub>2</sub>O]<sup>+</sup>=>347.2 IT 35% P=347.2  
C<sub>26</sub>H<sub>34</sub>O<sub>6</sub>; MF: 0; RMF: 13; Prob 5.88%; CAS: 470-37-1; Lib: nist\_msms; ID: 234774.

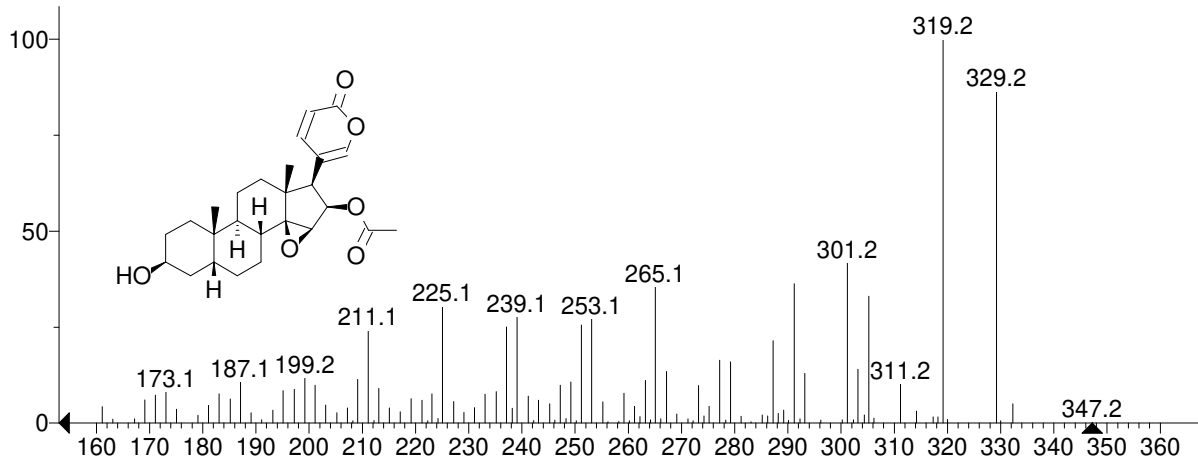

Hit 4 : Dinaciclib [M+H-H<sub>2</sub>O]<sup>+</sup>=>362.2=>347.2 IT 35% P=347.2  
C<sub>21</sub>H<sub>28</sub>N<sub>6</sub>O<sub>2</sub>; MF: 0; RMF: 13; Prob 5.88%; CAS: 779353-01-4; Lib: nist\_msms; ID: 342309.

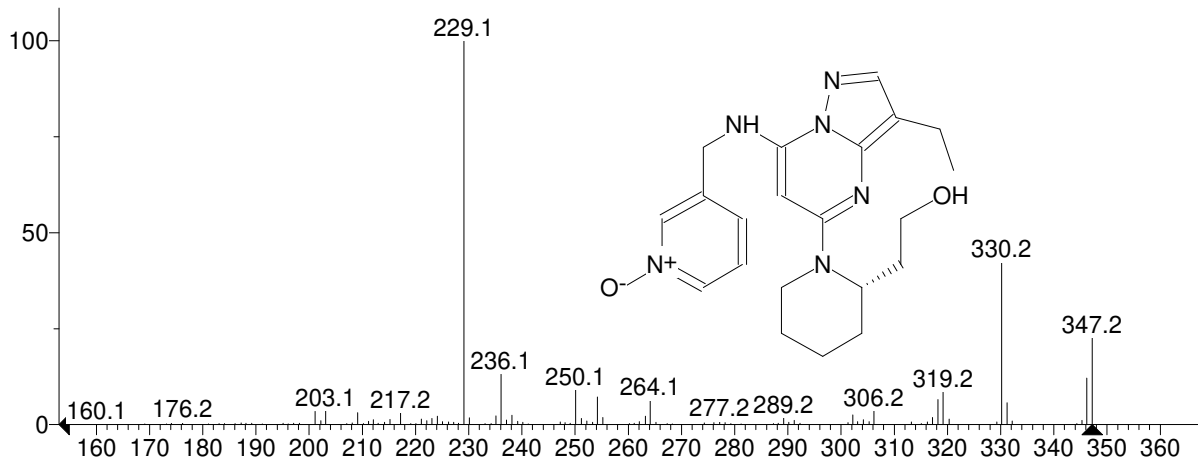

Hit 5 : Alisol B acetate [M+H-C<sub>6</sub>H<sub>14</sub>O<sub>4</sub>]<sup>+</sup>=>347.2 IT 35% P=347.2  
C<sub>32</sub>H<sub>50</sub>O<sub>5</sub>; MF: 0; RMF: 11; Prob 5.88%; CAS: 26575-95-1; Lib: nist\_msms; ID: 400486.

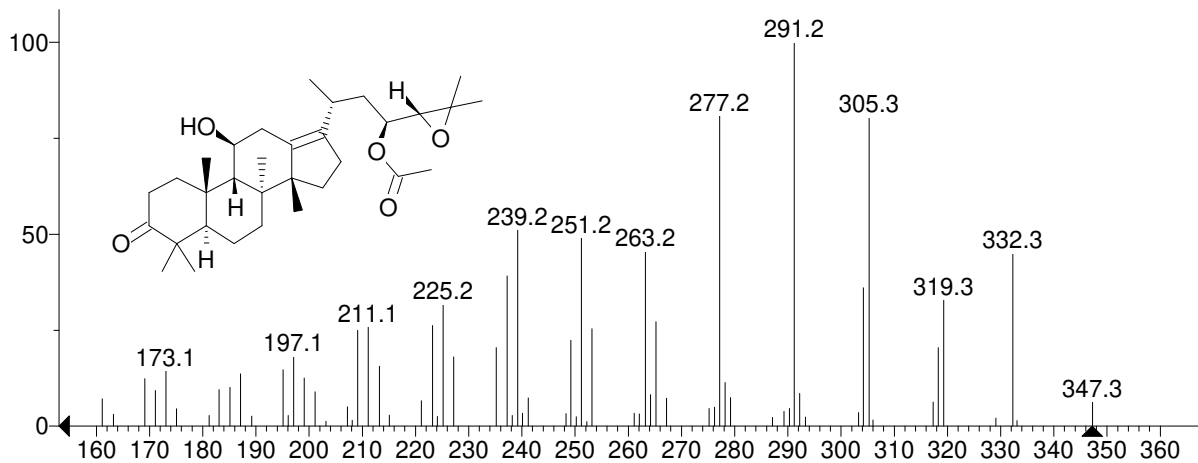

\*\* Search Report Page 1 of 2 \*\*

Unknown: Unknown (32.52\_415.2478m/z)  
Compound in Library Factor = -2387

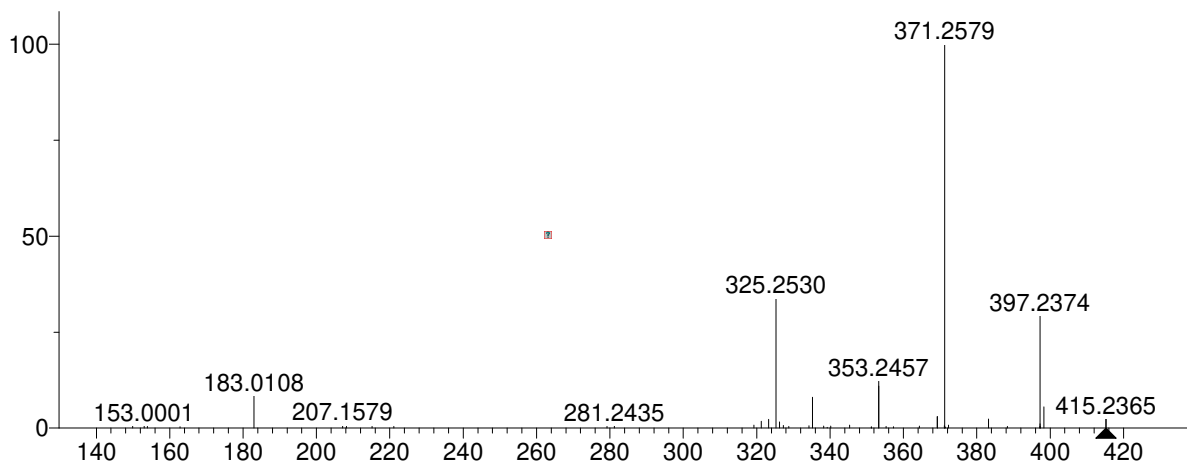

Hit 1 : 9-Oxo-11 $\alpha$ ,16R-dihydroxy-17-cyclobutyl-5Z,13E-dien-1-oic acid [M+Na]<sup>+</sup> HCD 33V P=415.2  
C23H36O5; MF: 19; RMF: 139; Prob 32.2%; CAS: 212310-16-2; Lib: nist\_msms; ID: 172347.

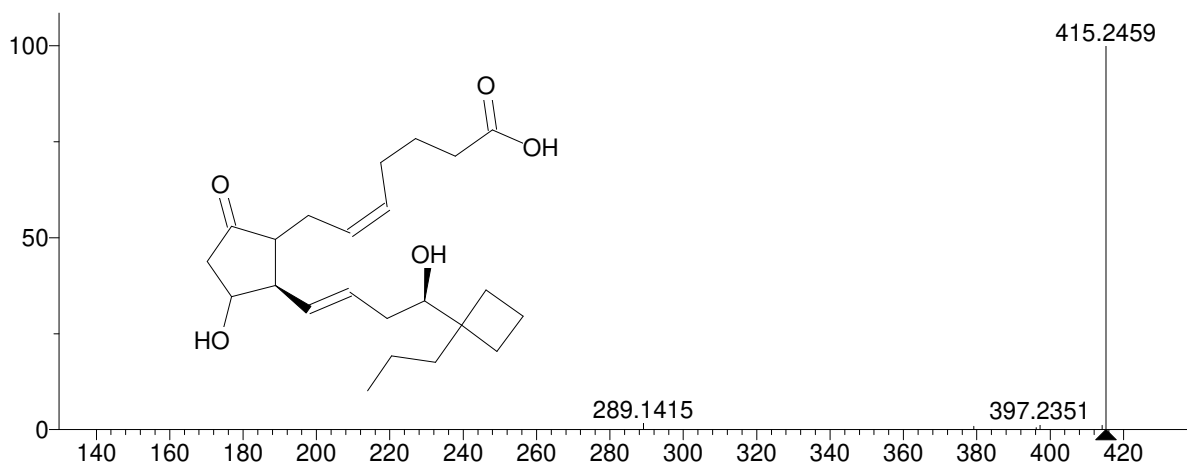

Hit 2 : 3 $\beta$ -Tetrahydrocortisol, 3,21-diacetate [M+H-2H2O]<sup>+</sup> HCD 8V P=415.2  
C25H38O7; MF: 3; RMF: 94; Prob 18.6%; CAS: 6820-57-1; Lib: nist\_msms; ID: 454143.

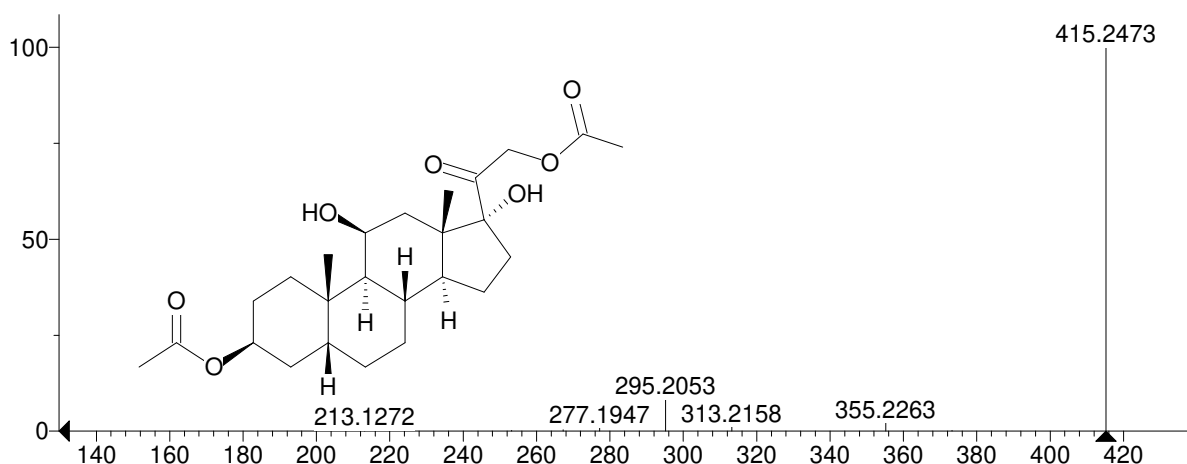

Hit 3 : 16-Phenoxytetranorprostaglandin F2 $\alpha$  isopropyl ester [M+H-H<sub>2</sub>O]<sup>+</sup> IT-FT 35% P=415.2  
C<sub>24</sub>H<sub>36</sub>O<sub>6</sub>; MF: 0; RMF: 149; Prob 16.4%; CAS: 130209-78-8; Lib: nist\_msms; ID: 545962.

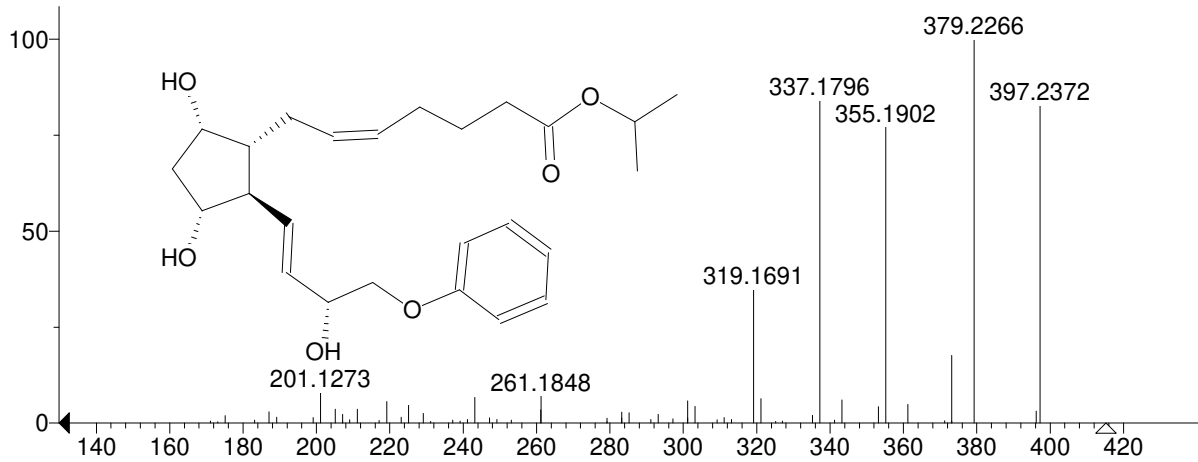

Hit 4 : Alpha-Hydroxydeoxycholic Acid [M+Na]<sup>+</sup> 35% P=415.3  
C<sub>24</sub>H<sub>40</sub>O<sub>4</sub>; MF: 0; RMF: 26; Prob 16.4%; Lib: mona-export-itree; ID: 2369.

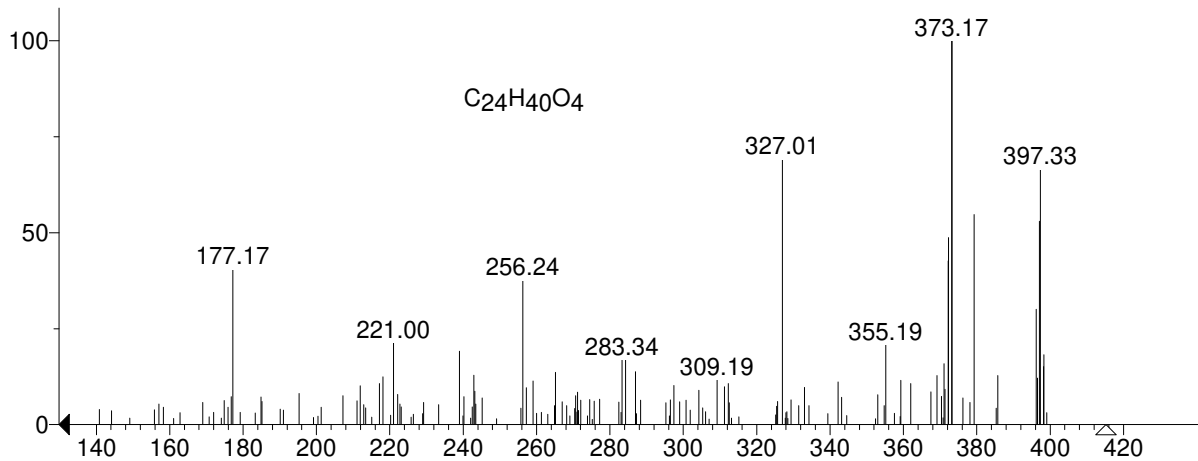

Hit 5 : NCGC00385486-01\_C<sub>25</sub>H<sub>34</sub>O<sub>5</sub>\_2-Butenoic acid, 2-methyl-, (2R,3R,5R)-2,6,6,9-tetramethyl-11-oxotricycl  
C<sub>25</sub>H<sub>34</sub>O<sub>5</sub>; MF: 0; RMF: 12; Prob 16.4%; Lib: mona-export-gnps; ID: 11887.

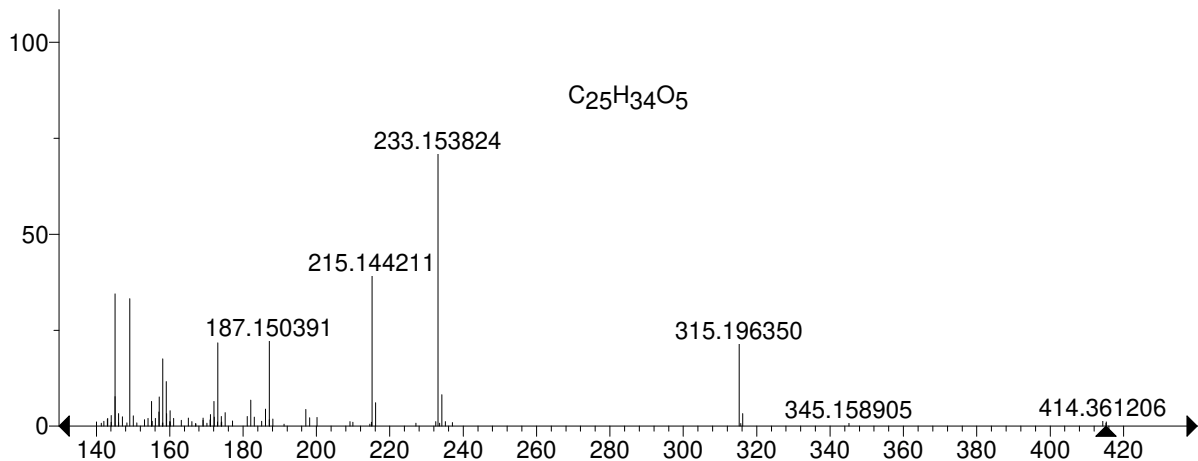

\*\* Search Report Page 1 of 2 \*\*

Unknown: Unknown (32.59\_399.2534m/z)  
Compound in Library Factor = -374

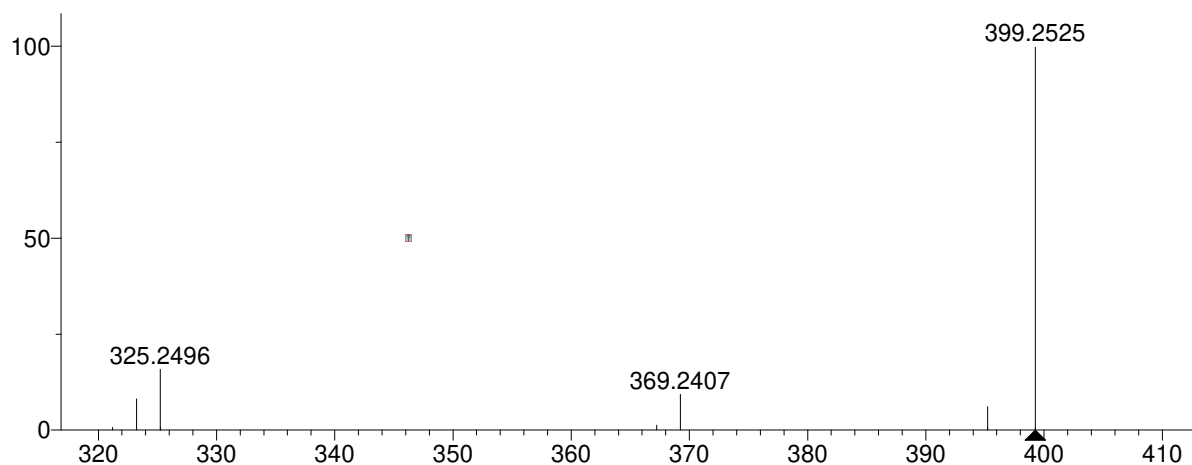

Hit 1 : Tris(2-butoxyethyl) phosphate [M+H]<sup>+</sup> HCD 7V P=399.3  
C18H39O7P; MF: 283; RMF: 837; Prob 97.2%; CAS: 78-51-3; Lib: nist\_msms; ID: 100520.

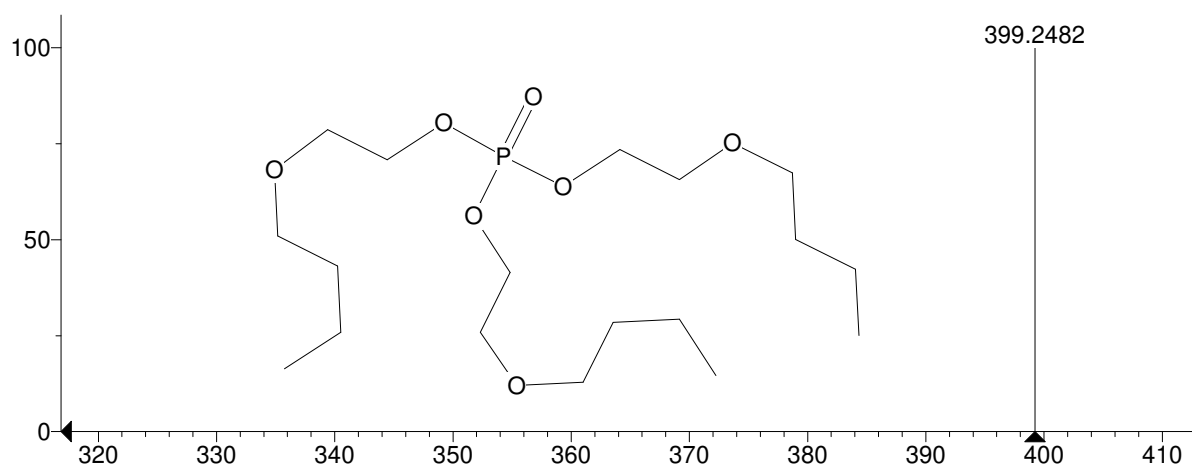

Hit 2 : Manoalide [M+H-H<sub>2</sub>O]<sup>+</sup> HCD 15V P=399.3  
C25H36O5; MF: 120; RMF: 778; Prob 2.37%; CAS: 75088-80-1; Lib: nist\_msms; ID: 362758.

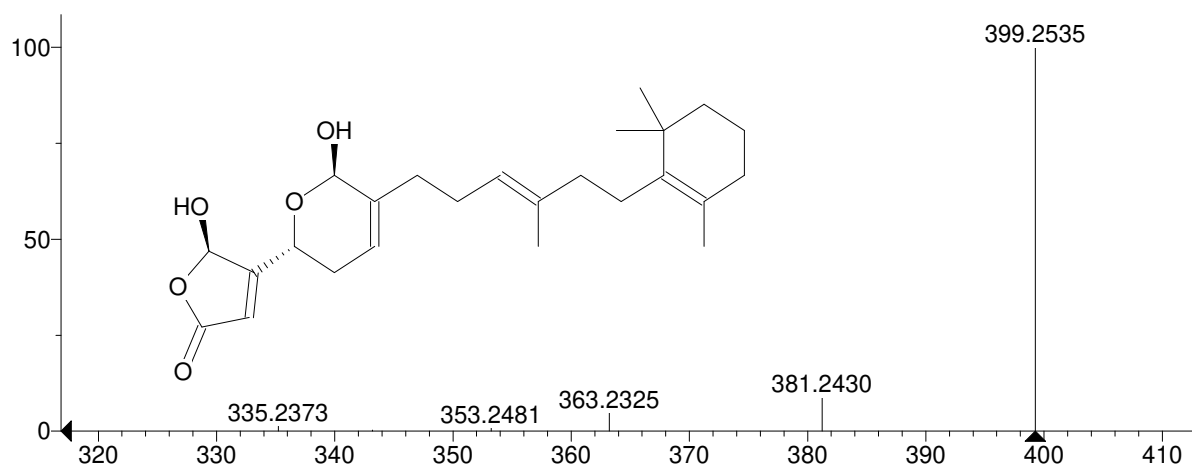



\*\* Search Report Page 2 of 2 \*\*

Hit 3 : NCGC00180855-02\_C23H36O4\_2-Pentenoic acid, 3-[(acetyloxy)methyl]-5-[(1R,4aR,8aR)-decahydro-5,5,1  
C23H36O4; MF: 47; RMF: 748; Prob 0.32%; Lib: mona-export-gnps; ID: 10515.

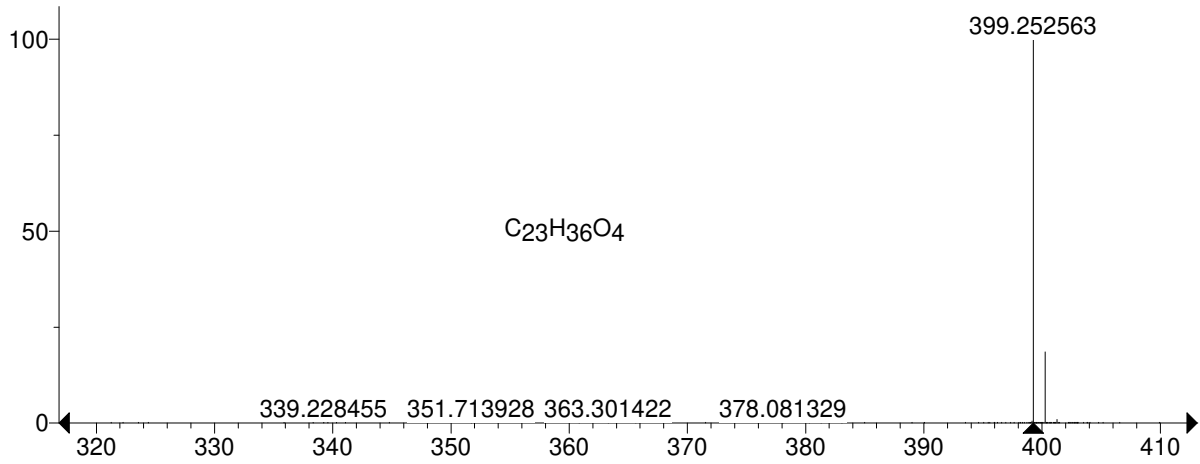

Hit 4 : FAHFA 25:6; FAHFA 22:6/3:0; [M-H]<sup>-</sup> [M-H]<sup>-</sup> P=399.3  
C<sub>25</sub>H<sub>36</sub>O<sub>4</sub>; MF: 7; RMF: 182; Prob 0.07%; Lib: msdial-insilicomsms-lipids-neg; ID: 273774.

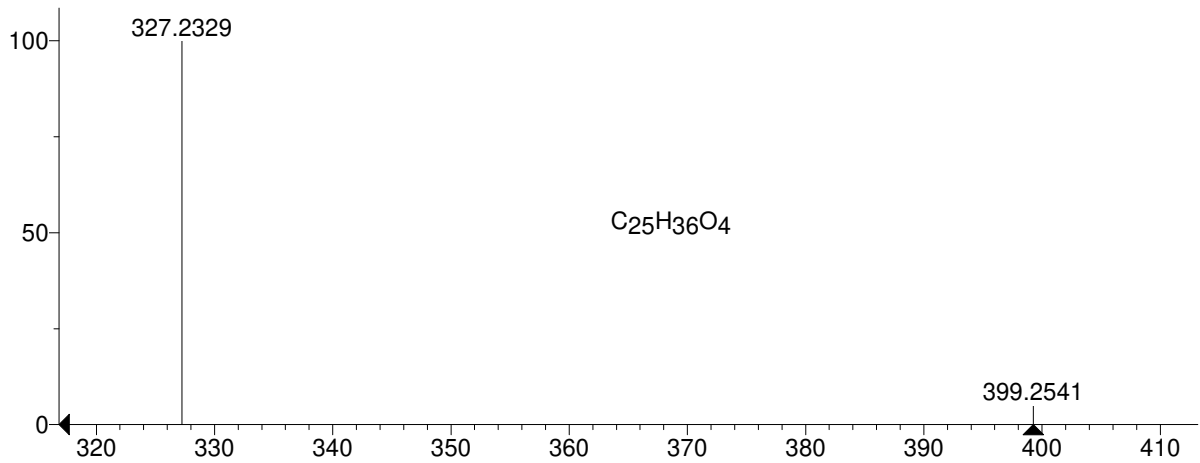

\*\* Search Report Page 1 of 2 \*\*

Unknown: Unknown (32.59\_413.2327m/z)  
Compound in Library Factor = -1072

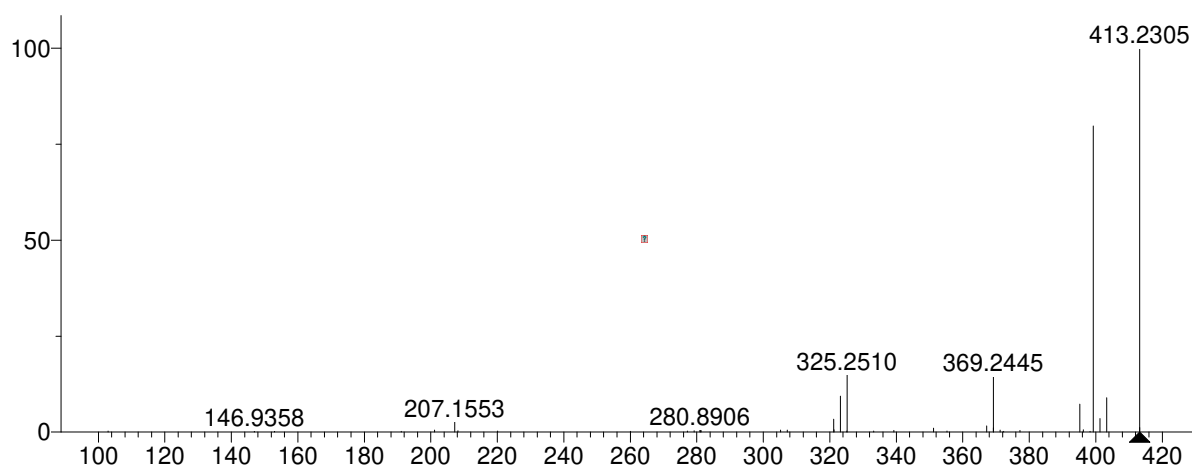

Hit 1 : Mevastatin [M+Na]<sup>+</sup> HCD 20V P=413.2  
C<sub>23</sub>H<sub>34</sub>O<sub>5</sub>; MF: 93; RMF: 610; Prob 54.8%; CAS: 73573-88-3; Lib: nist\_msms; ID: 165105.

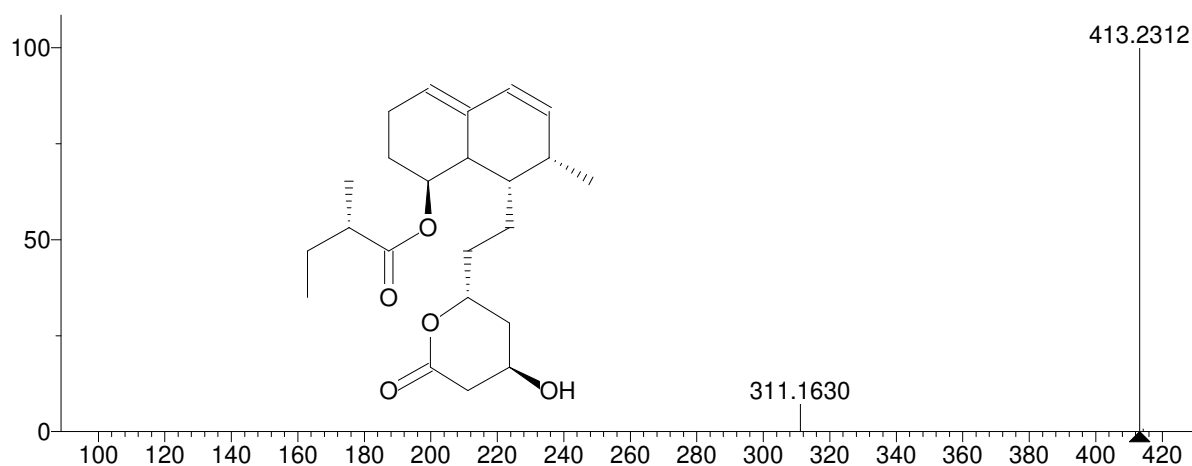

Hit 2 : 17(R)-Resolvin D1 methyl ester [M+Na]<sup>+</sup> HCD 37V P=413.2  
C<sub>23</sub>H<sub>34</sub>O<sub>5</sub>; MF: 23; RMF: 502; Prob 7.97%; CAS: 937738-64-2; Lib: nist\_msms; ID: 378599.

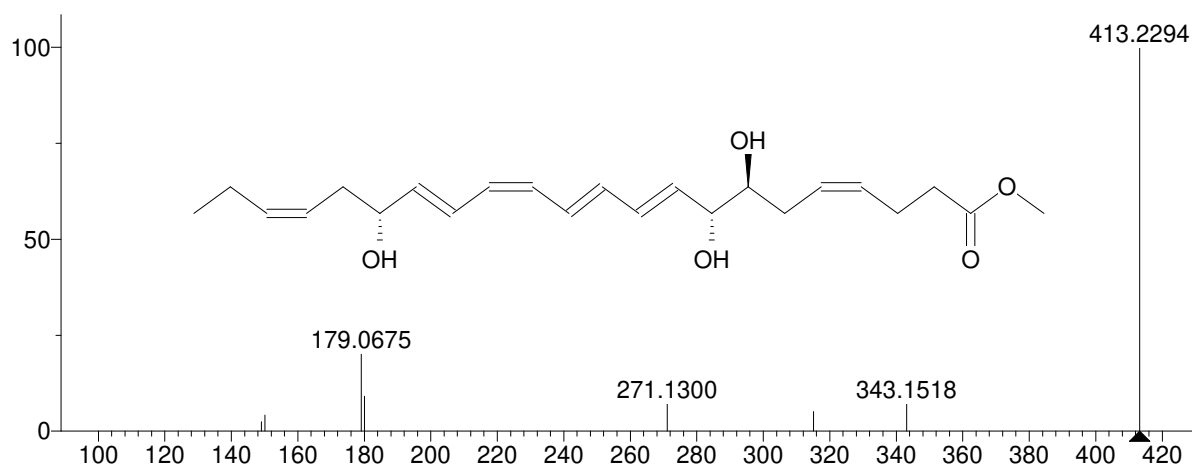

Hit 3 : Digoxigenin [M+Na]<sup>+</sup> IT-FT 35% P=413.2  
C<sub>23</sub>H<sub>34</sub>O<sub>5</sub>; MF: 19; RMF: 177; Prob 6.73%; CAS: 1672-46-4; Lib: nist\_msms; ID: 308679.

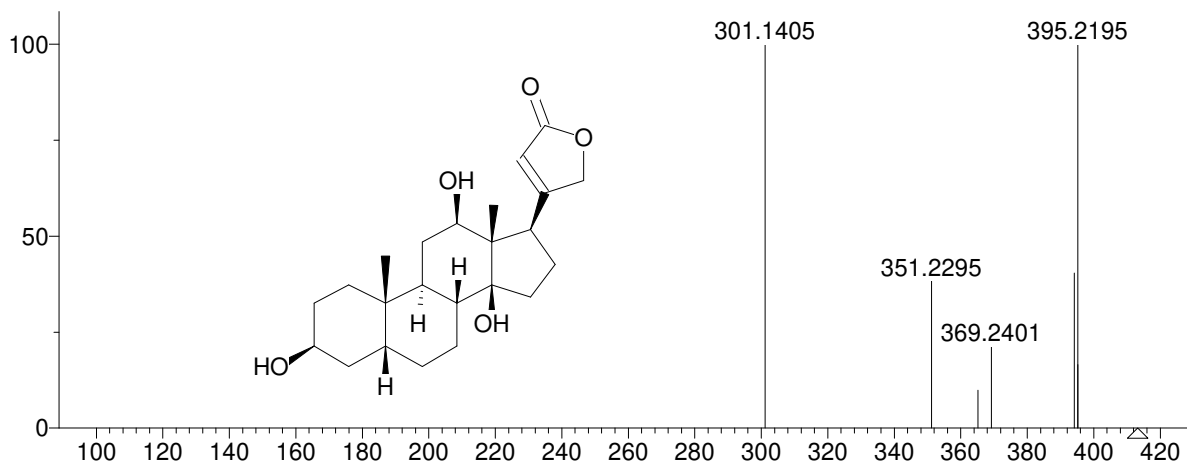

Hit 4 : Resolvin D2 methyl ester [M+Na]<sup>+</sup> HCD 28V P=413.2  
C<sub>23</sub>H<sub>34</sub>O<sub>5</sub>; MF: 18; RMF: 599; Prob 6.47%; CAS: 810668-53-2; Lib: nist\_msms; ID: 378653.

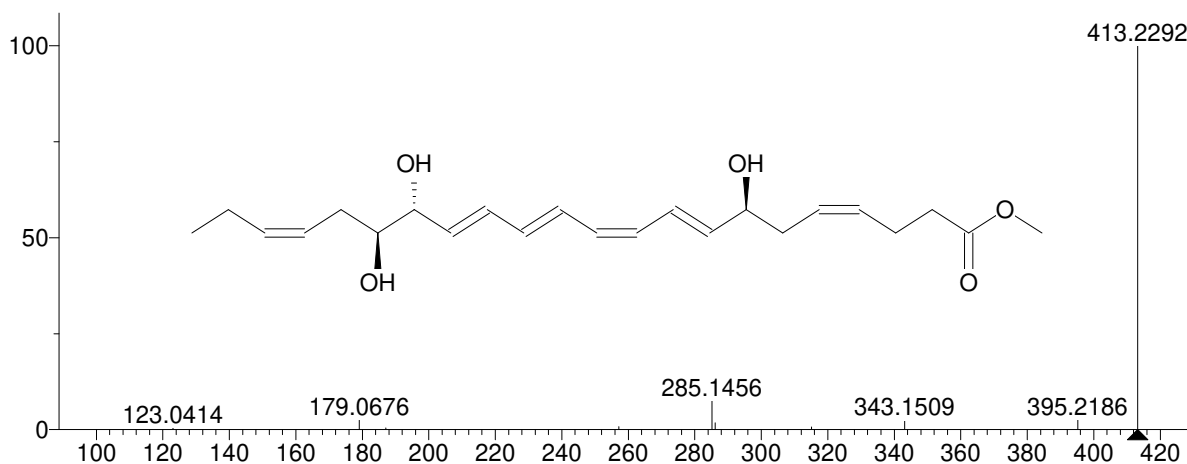

Hit 5 : Treprostinil [M+Na]<sup>+</sup> IT-FT 35% P=413.2  
C<sub>23</sub>H<sub>34</sub>O<sub>5</sub>; MF: 7; RMF: 151; Prob 4.44%; CAS: 81846-19-7; Lib: nist\_msms; ID: 540012.

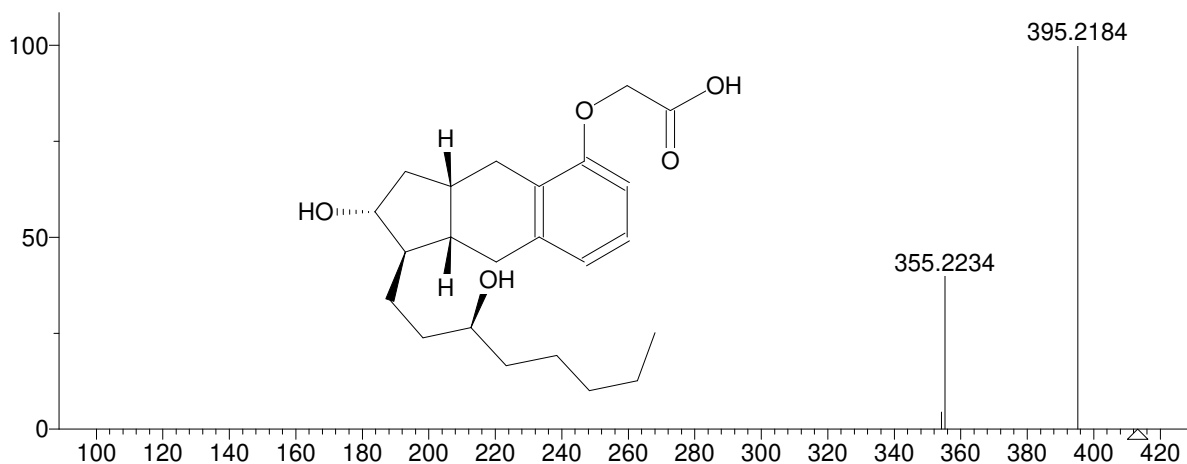

\*\* Search Report Page 1 of 2 \*\*

Unknown: Unknown (32.70\_399.2531m/z)  
Compound in Library Factor = -472

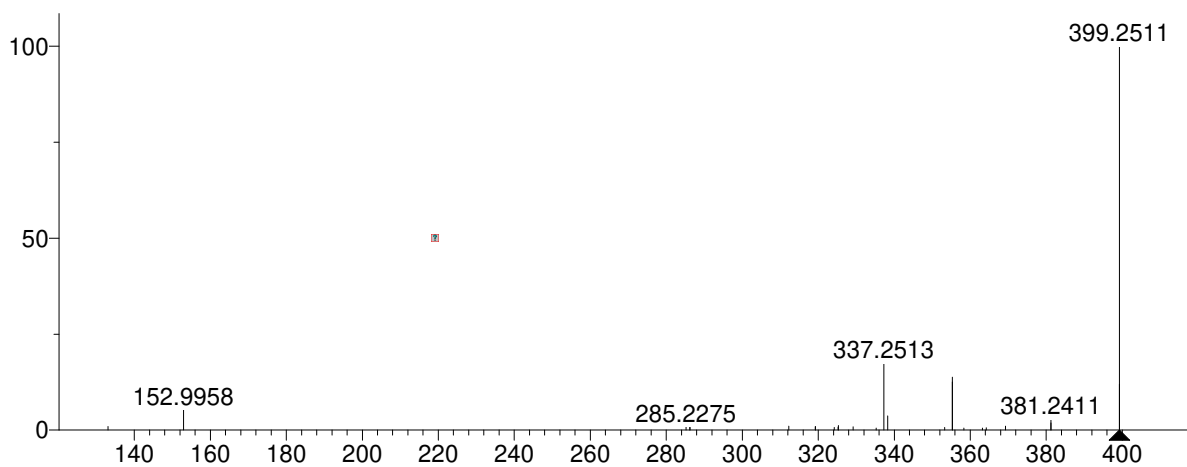

Hit 1 : Tris(2-butoxyethyl) phosphate [M+H]<sup>+</sup> HCD 7V P=399.3  
C18H39O7P; MF: 160; RMF: 738; Prob 93.7%; CAS: 78-51-3; Lib: nist\_msms; ID: 100520.

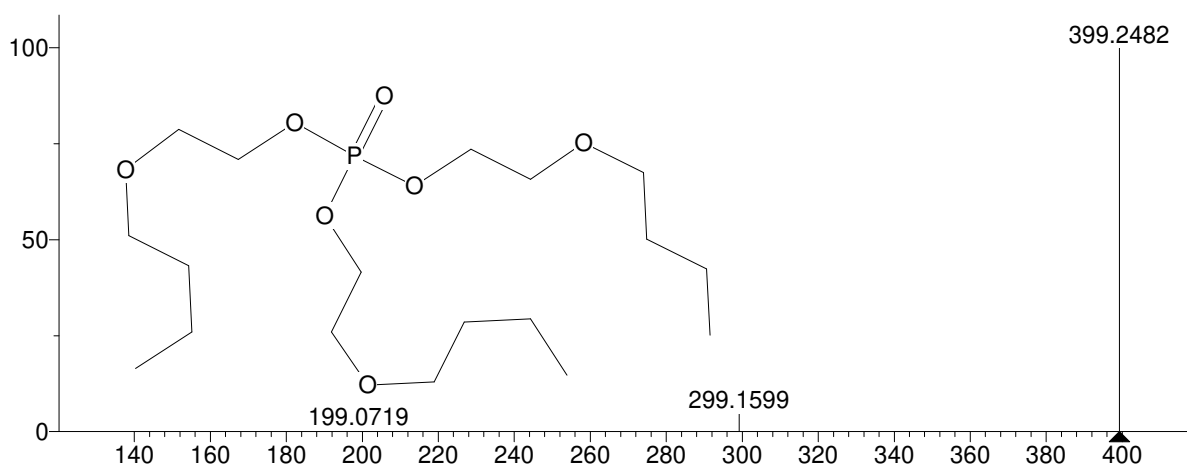

Hit 2 : Manoalide [M+H-H2O]<sup>+</sup> HCD 15V P=399.3  
C25H36O5; MF: 27; RMF: 670; Prob 3.69%; CAS: 75088-80-1; Lib: nist\_msms; ID: 362758.

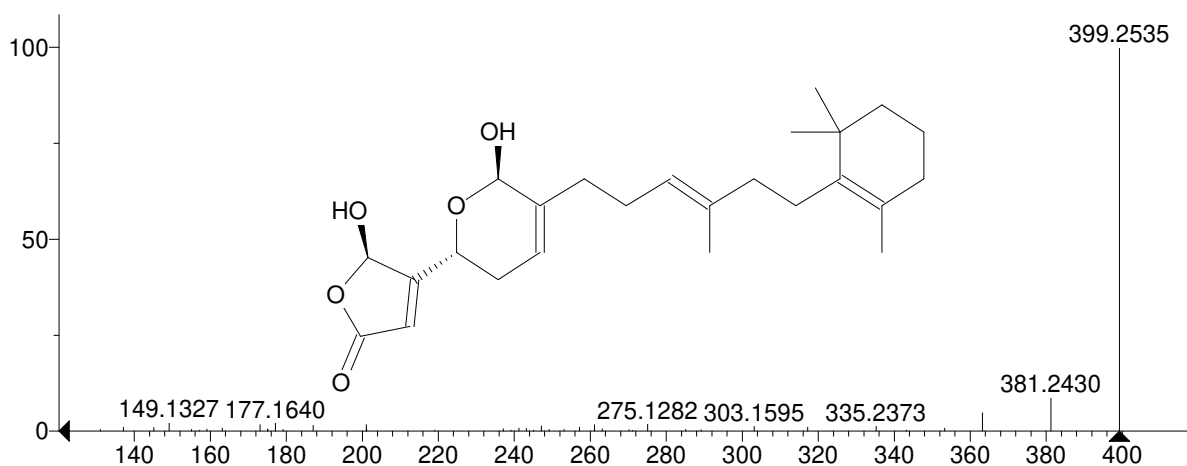

Hit 3 : FAHFA 25:6; FAHFA 22:6/3:0; [M-H]<sup>-</sup> [M-H]<sup>-</sup> P=399.3  
C<sub>25</sub>H<sub>36</sub>O<sub>4</sub>; MF: 5; RMF: 162; Prob 1.45%; Lib: msdial-insilicomsms-lipids-neg; ID: 273774.

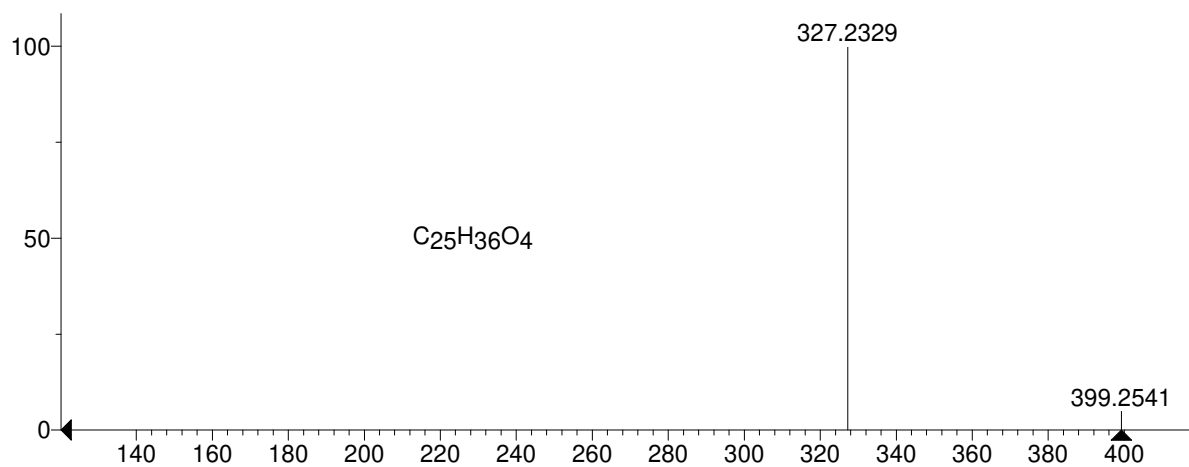

Hit 4 : NCGC00180855-02\_C<sub>23</sub>H<sub>36</sub>O<sub>4</sub>\_2-Pentenoic acid, 3-[(acetyloxy)methyl]-5-[(1R,4aR,8aR)-decahydro-5,5,1  
C<sub>23</sub>H<sub>36</sub>O<sub>4</sub>; MF: 0; RMF: 647; Prob 1.17%; Lib: mona-export-gnps; ID: 10515.

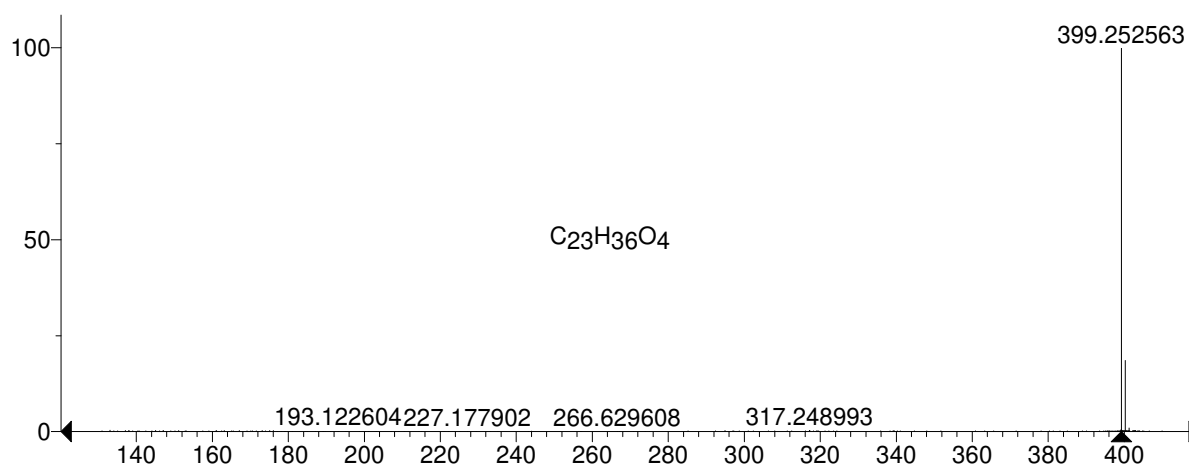

\*\* Search Report Page 1 of 2 \*\*

Unknown: Unknown (4.00\_609.1559m/z)  
Compound in Library Factor = -2176

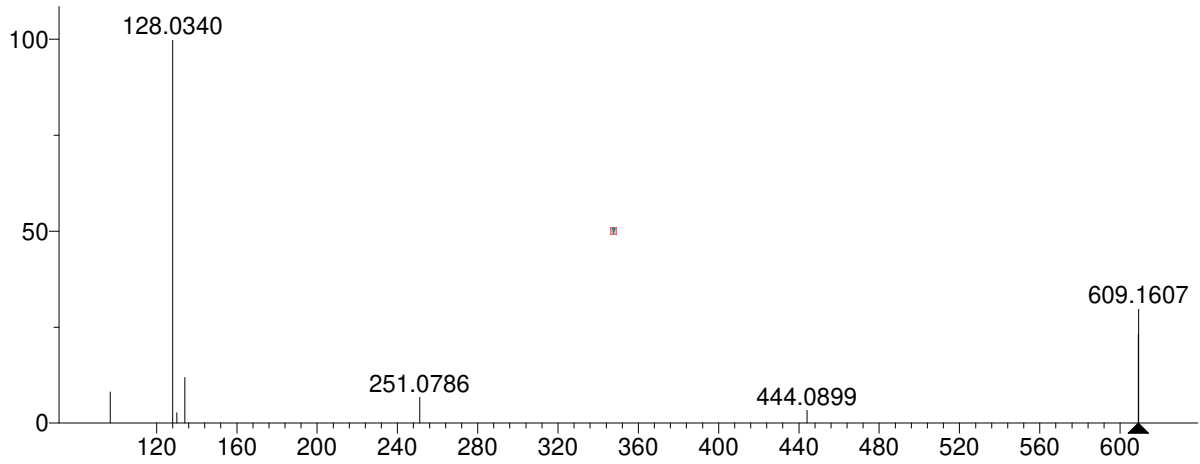

Hit 1 : Amarogentin [M+Na]<sup>+</sup> HCD 15V P=609.2  
C29H30O13; MF: 47; RMF: 601; Prob 64.7%; CAS: 21018-84-8; Lib: nist\_msms; ID: 176811.

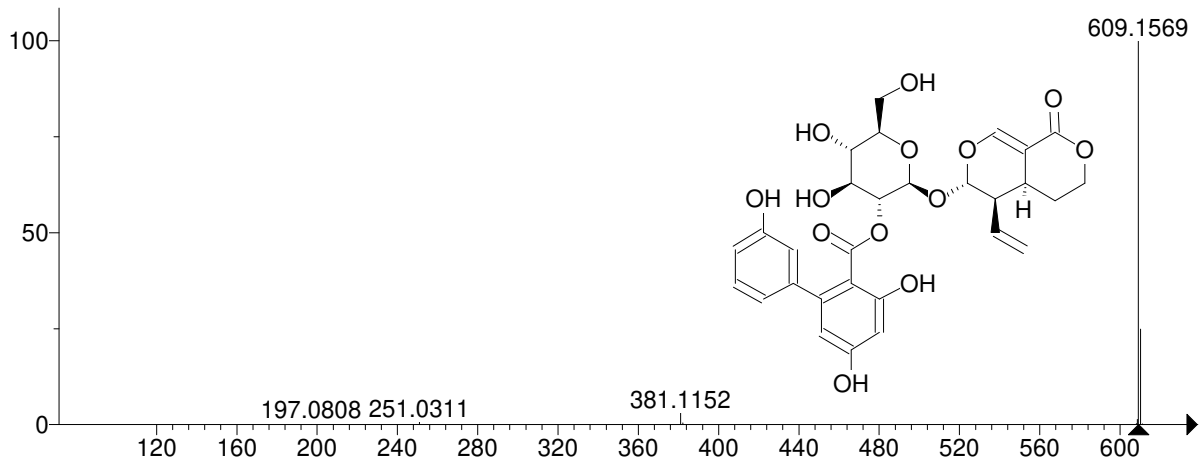

Hit 2 : Luteolin-7,3'-di-O-glucoside [M-H]<sup>-</sup> 20 P=609.2  
C27H30O16; MF: 22; RMF: 485; Prob 19.7%; Lib: mona-export-ic-ms-ms\_negative\_mode; ID: 11885.

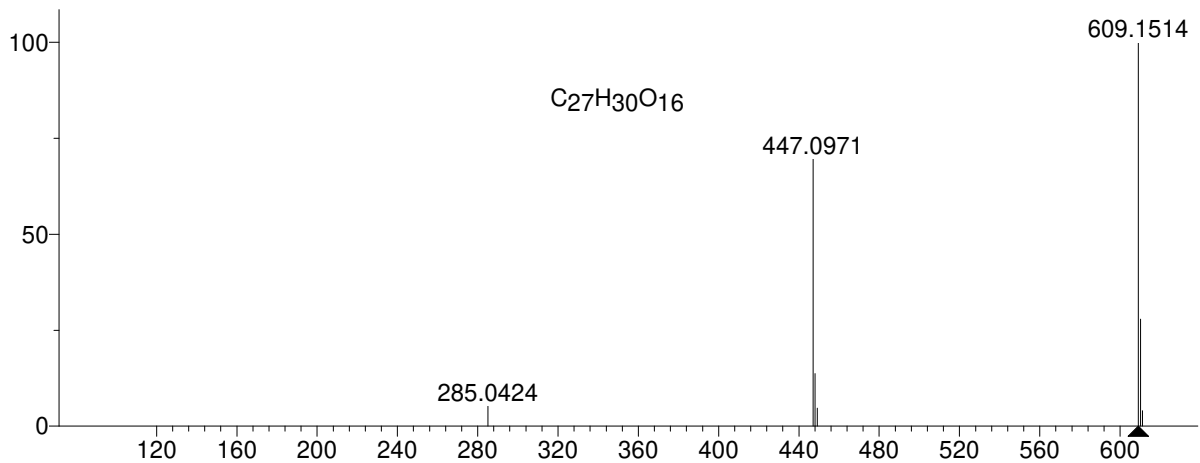

\*\* Search Report Page 2 of 2 \*\*

Hit 3 : Quercetin 3-O-neohesperidoside [M-H]<sup>-</sup> P=609.2  
C<sub>27</sub>H<sub>30</sub>O<sub>16</sub>; MF: 0; RMF: 26; Prob 7.79%; Lib: mona-export-gnps; ID: 14858.

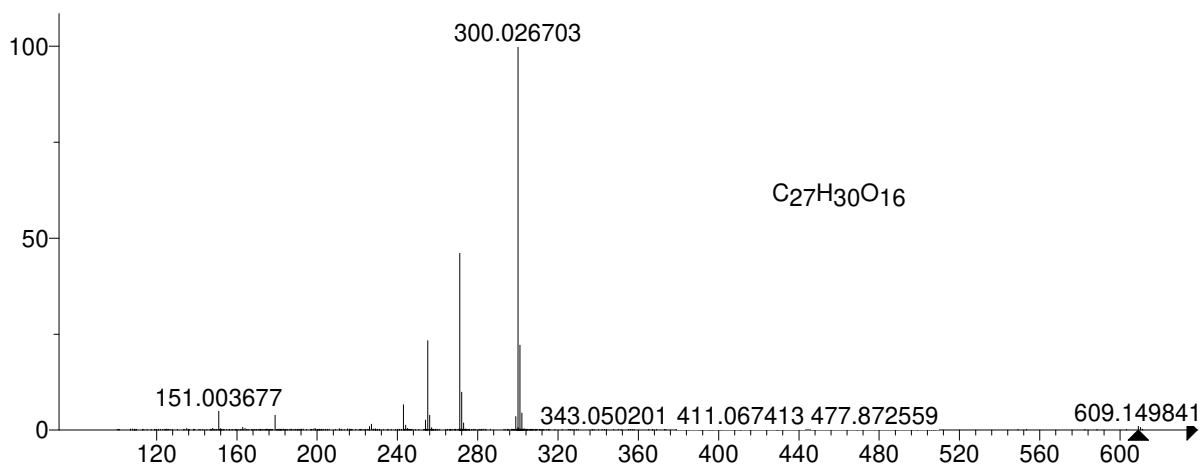

Hit 4 : Kaempferol 3-gentiobioside [M-H]<sup>-</sup> P=609.2  
C<sub>27</sub>H<sub>30</sub>O<sub>16</sub>; MF: 0; RMF: 22; Prob 7.79%; Lib: mona-export-gnps; ID: 15033.

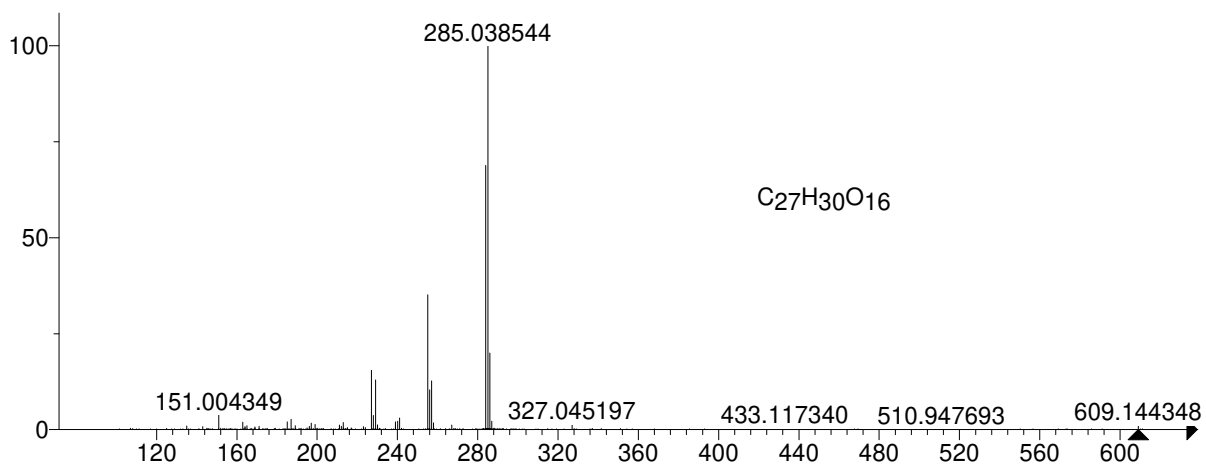

Unknown: Unknown (4.01\_488.1964m/z)  
Compound in Library Factor = 0

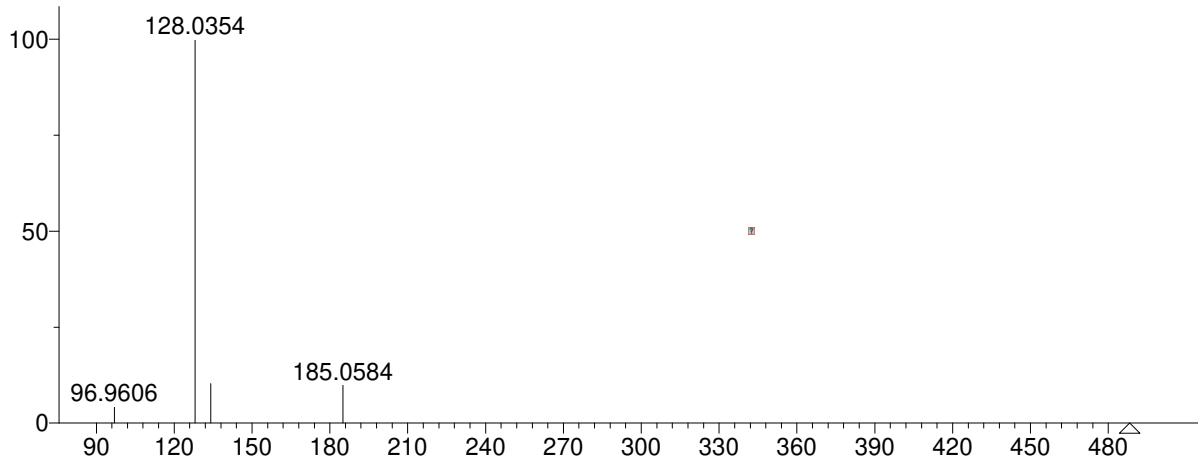



Unknown: Unknown (4.02\_570.1346m/z)  
Compound in Library Factor = 0

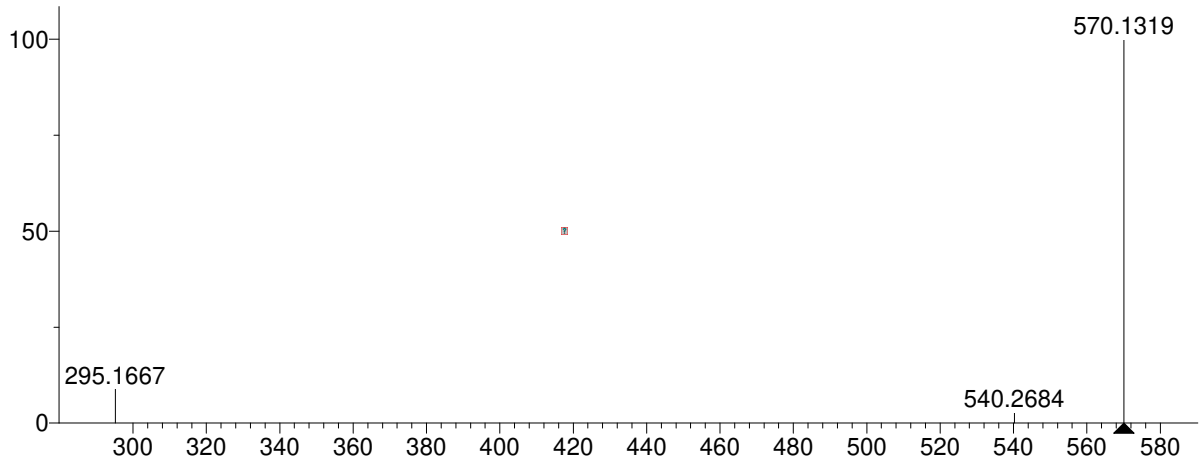

Unknown: Unknown (4.03\_359.1544m/z)  
Compound in Library Factor = 0

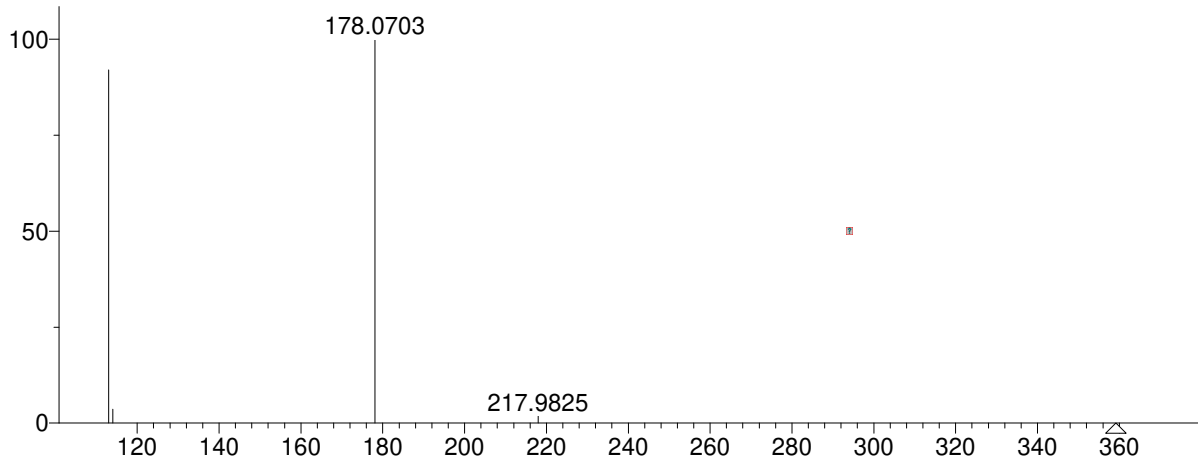

Hit 1 : Ala-Gly-Asp-Val [M-H]<sup>-</sup> HCD 57eV P=359.2  
C<sub>14</sub>H<sub>24</sub>N<sub>4</sub>O<sub>7</sub>; MF: 0; RMF: 97; Prob 100.0%; Lib: nist\_msms2; ID: 72487.

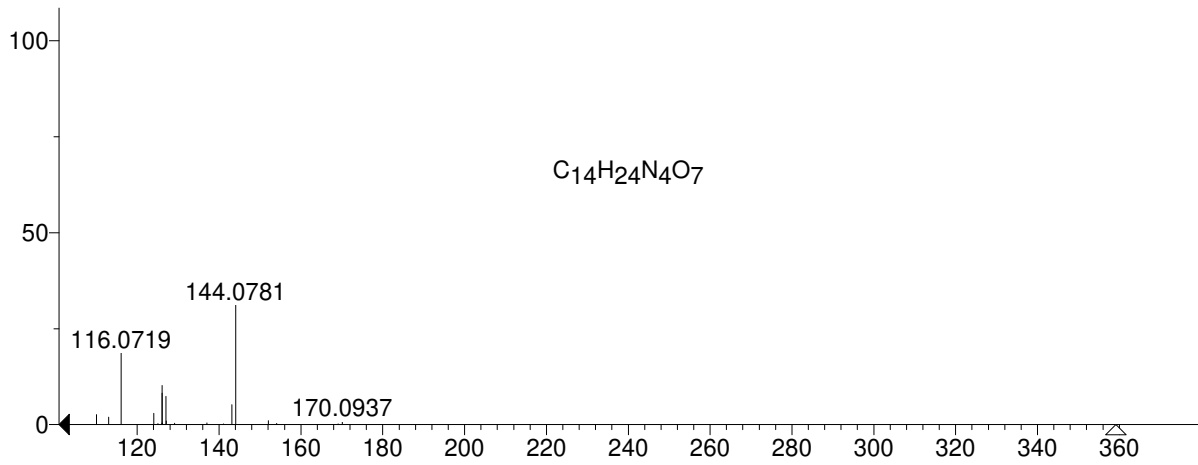

Unknown: Unknown (4.03\_674.2536m/z)  
Compound in Library Factor = 0

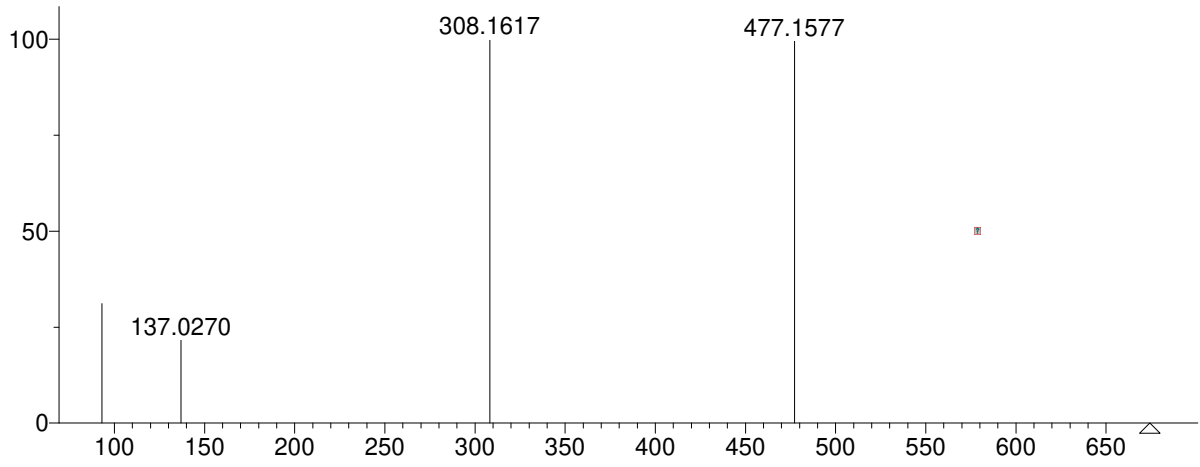

Unknown: Unknown (4.03\_693.2946m/z)  
Compound in Library Factor = -3273

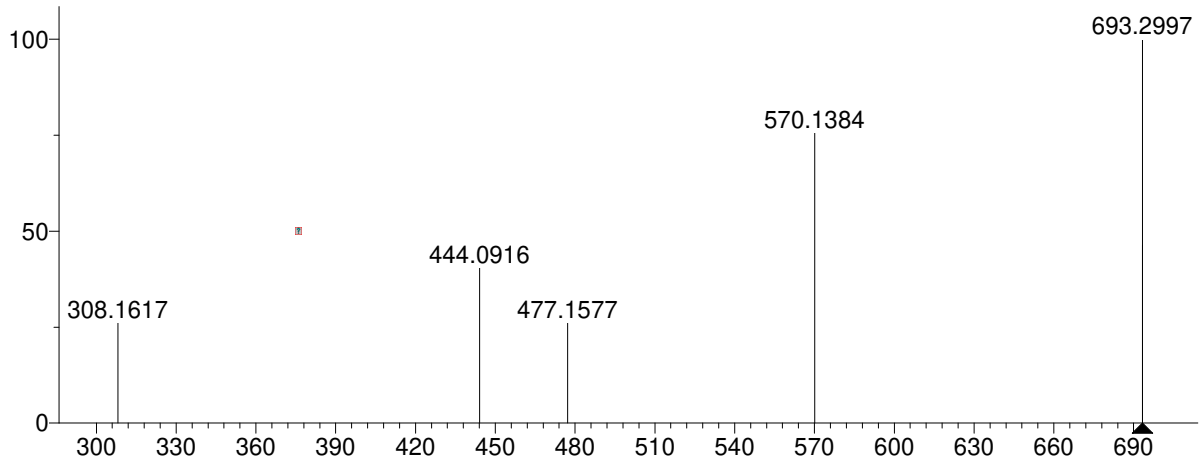

Hit 1 : Strictosidine hexoside ([H][C@@]1(C[C@]2([H])C(=CO[C@@]([H])O[C@]3([H])O[C@]([H])(CO[C@]4([H])C33H44N2O14; MF: 8; RMF: 433; Prob 57.3%; Lib: alkaloids; ID: 27.

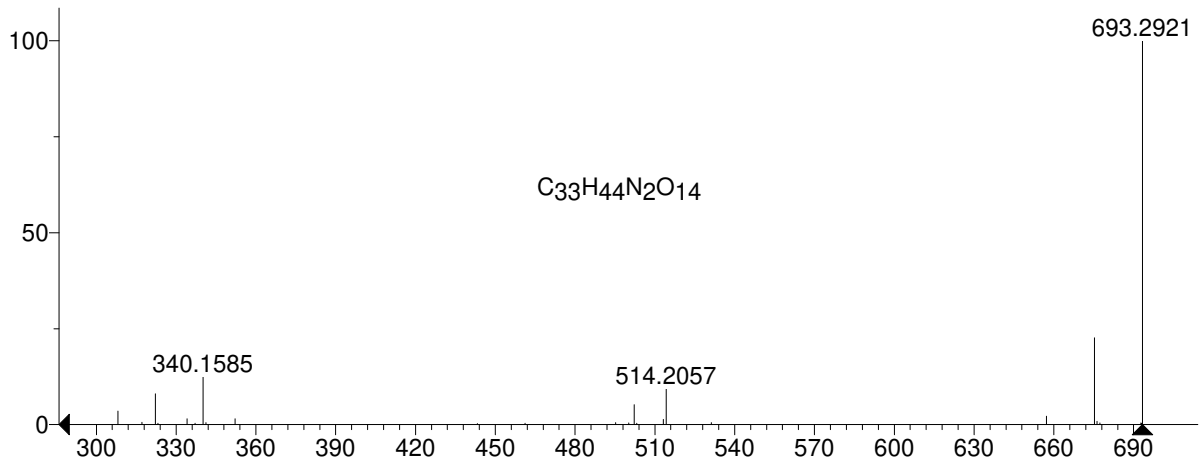

Hit 2 : "7,13,17-O-triacetoxy-5-O-benzoyloxy-7,13,17-O-triacetyl-5-O-benzoyl-3-O-propanoyl-14-oxopremyrsir C36H46O12; MF: 0; RMF: 183; Prob 42.7%; Lib: mona-export-gnps; ID: 5962.

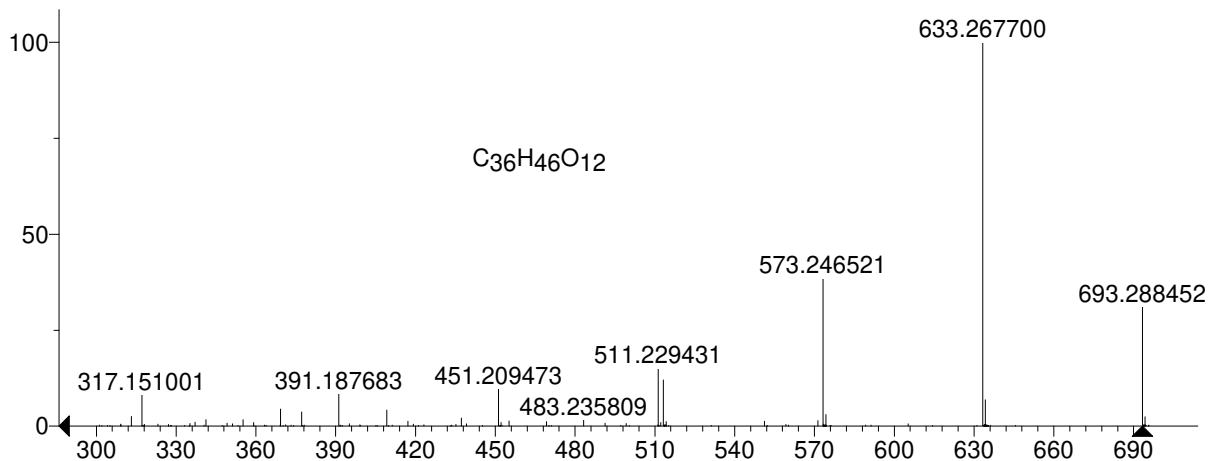

Unknown: Unknown (4.05\_482.1502m/z)  
Compound in Library Factor = 0

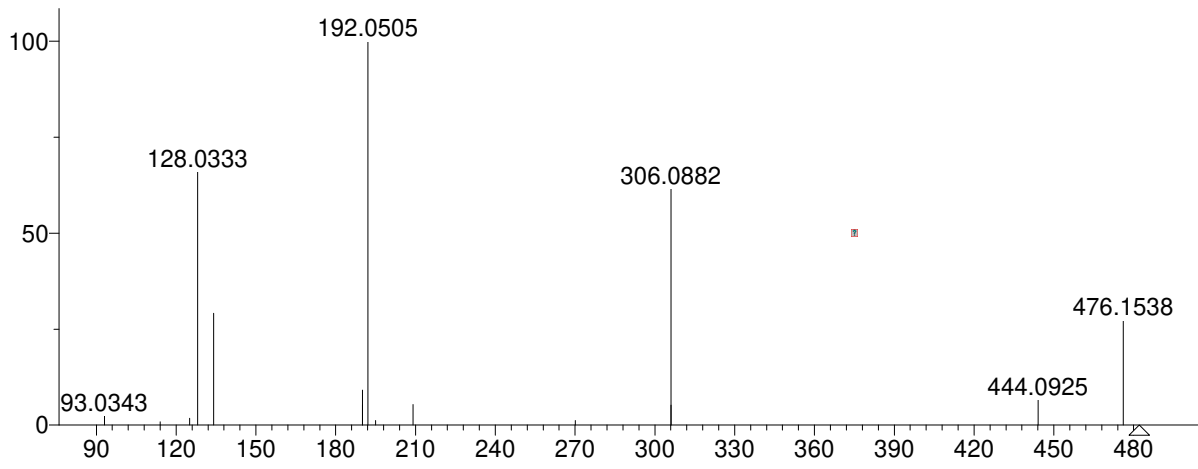

Unknown: Unknown (4.05\_502.1993m/z)  
Compound in Library Factor = 0

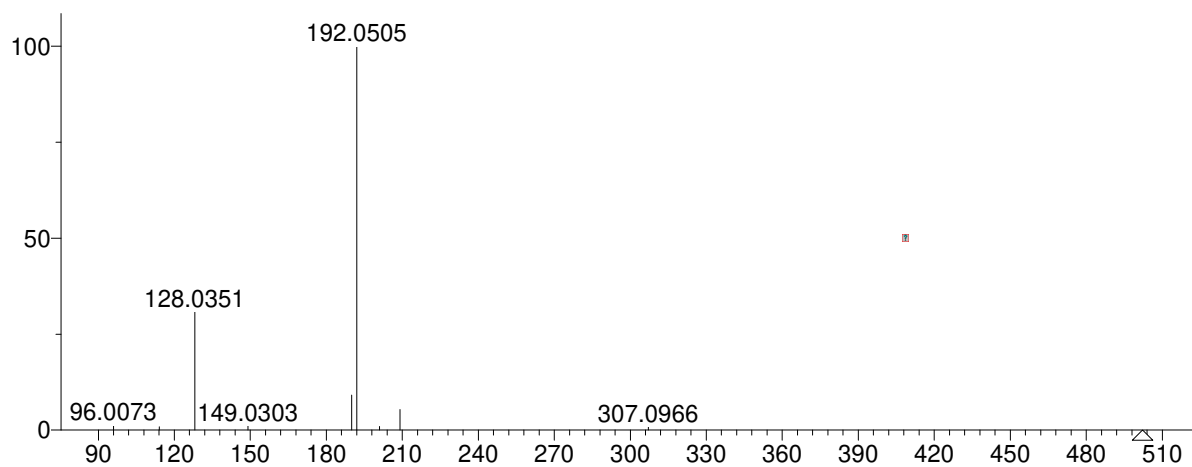

Hit 1 : Irinotecan [M+H-C5H11N]+ HCD 160V P=502.2  
C33H38N4O6; MF: 0; RMF: 54; Prob 100.0%; CAS: 97682-44-5; Lib: nist\_msms; ID: 218338.

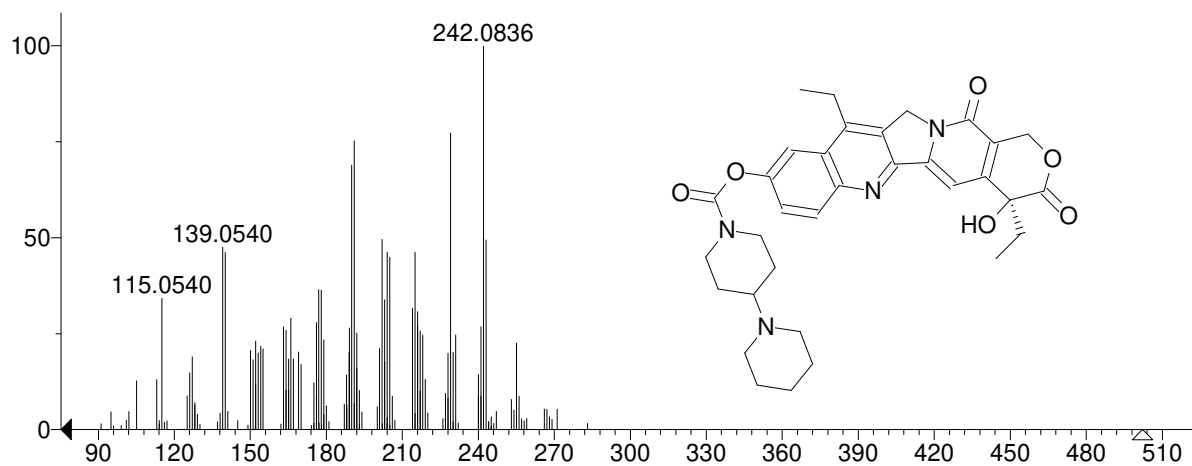

Unknown: Unknown (4.05\_625.1502m/z)  
Compound in Library Factor = 0

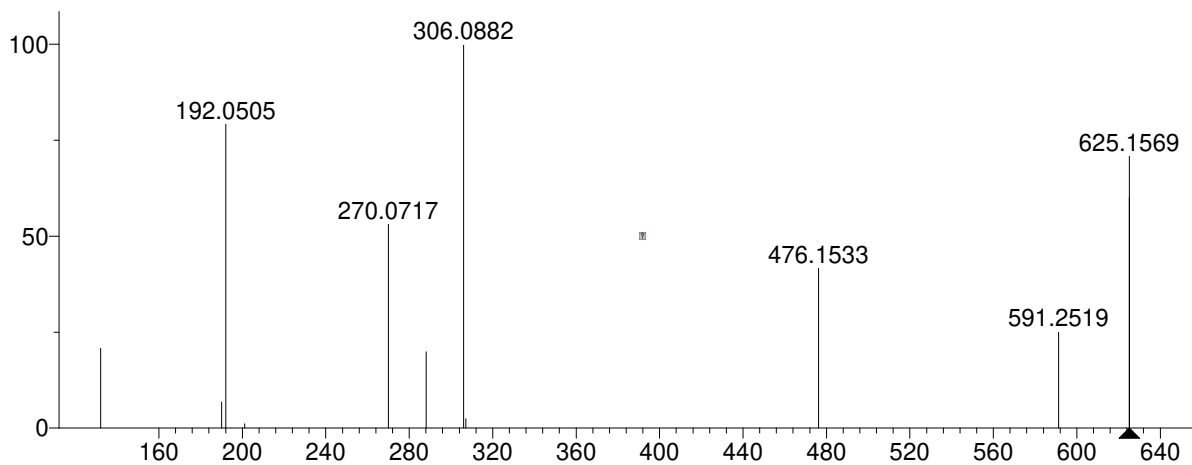

Hit 1 : 3-O-beta-(6"-trans-caffeoyl)-galactopyranosyl quercetin [M-H]- P=625.1  
C<sub>30</sub>H<sub>26</sub>O<sub>15</sub>; MF: 0; RMF: 40; Prob 100.0%; Lib: mona-export-gnps; ID: 3005.

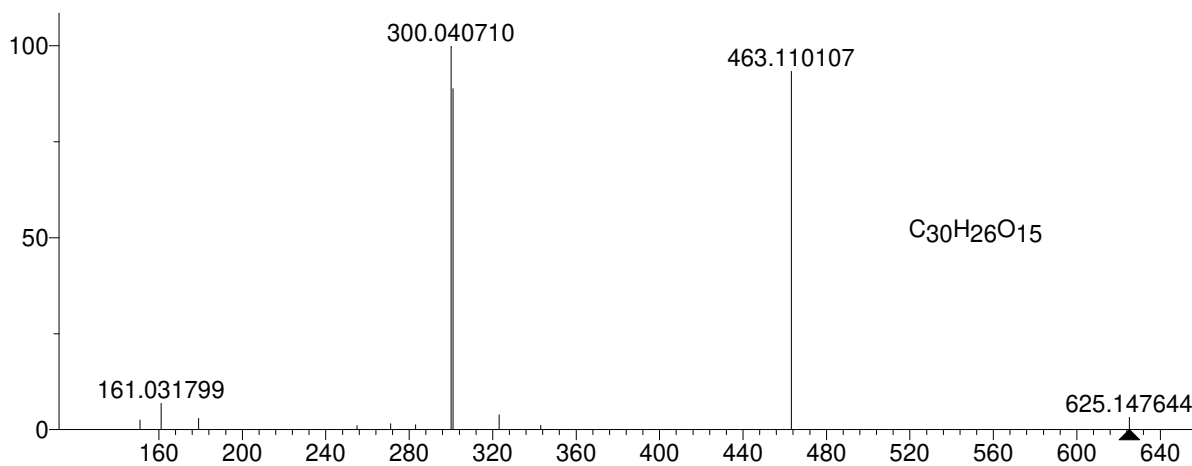

\*\* Search Report Page 1 of 2 \*\*

Unknown: Unknown (4.06\_431.1293m/z)  
Compound in Library Factor = 0

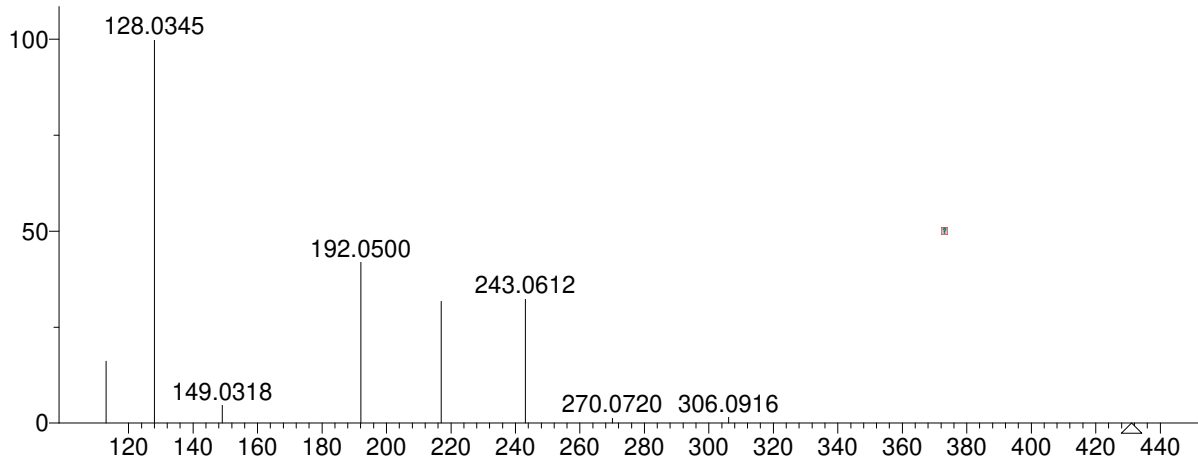

Hit 1 : NCGC00169054-0213-(4-methoxyphenyl)-7-[(2S,3R,4S,5S,6R)-3,4,5-trihydroxy-6-(hydroxymethyl)oxan-2-yl]oxy  
C22H22O9; MF: 0; RMF: 29; Prob 33.3%; Lib: mona-export-gnps; ID: 9246.

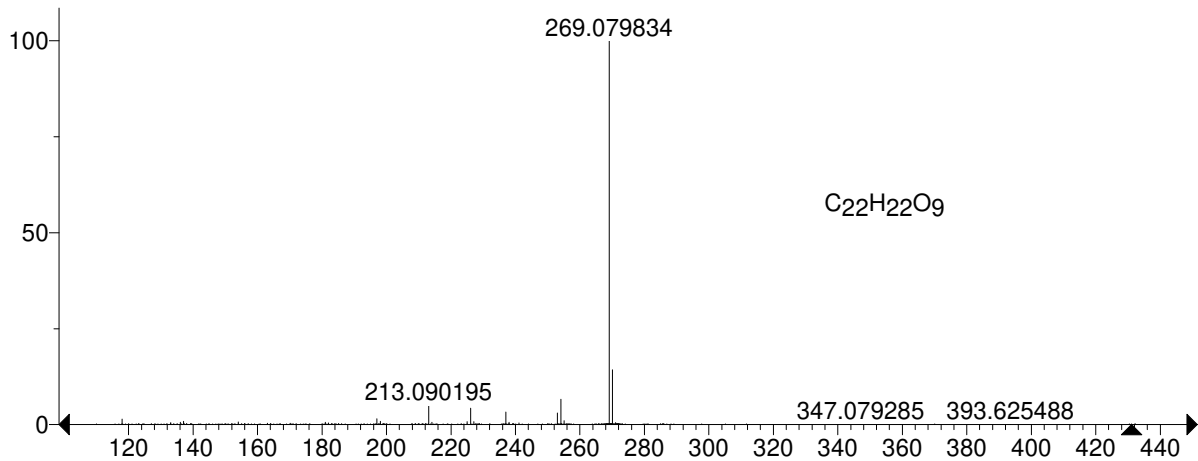

Hit 2 : O-Desmethylgefitinib [M-H]<sup>-</sup> HCD 68V P=431.1  
C21H22ClFN4O3; MF: 0; RMF: 20; Prob 33.3%; CAS: 847949-49-9; Lib: nist\_msms; ID: 451781.

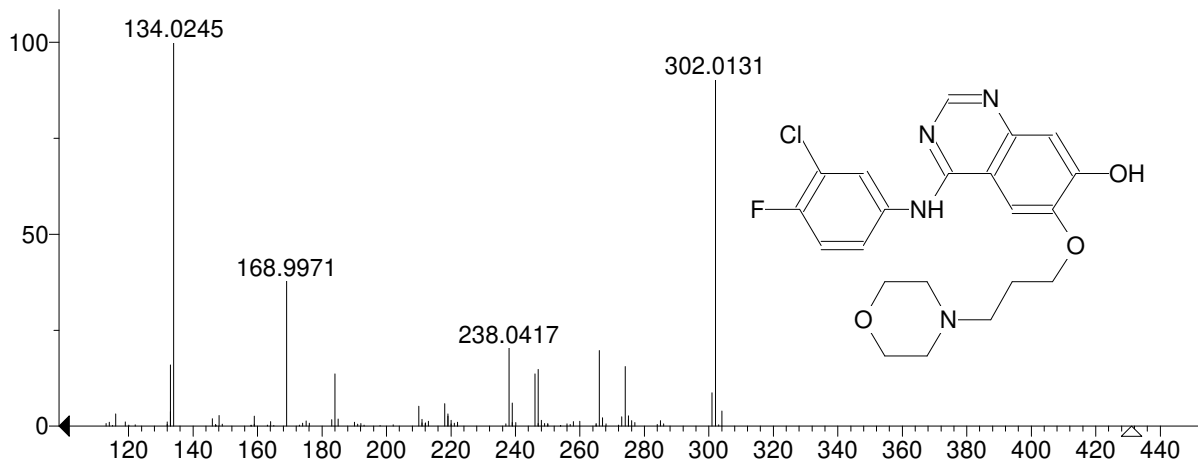



\*\* Search Report Page 2 of 2 \*\*

Hit 3 : (1R,3R,6R,8S,10R,13S,16S,17R)-8-tert-butyl-6,17-dihydroxy-16-methyl-2,4,14,19-tetraoxahexacyclo[8.7.2  
C<sub>20</sub>H<sub>24</sub>O<sub>9</sub>; MF: 0; RMF: 6; Prob 33.3%; Lib: mona-export-vf-npl\_qexactive; ID: 6278.

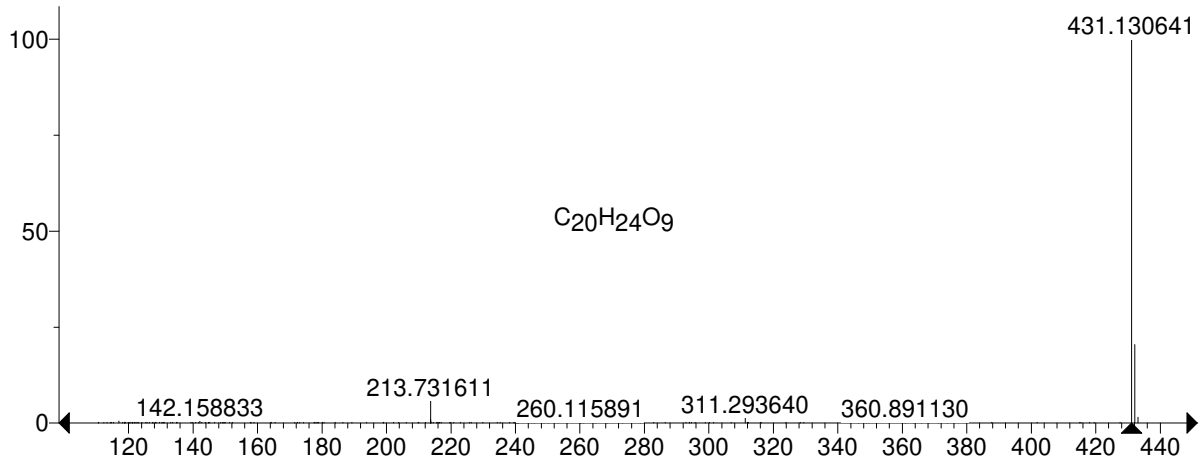

Unknown: Unknown (4.06\_476.1504m/z)  
Compound in Library Factor = 0

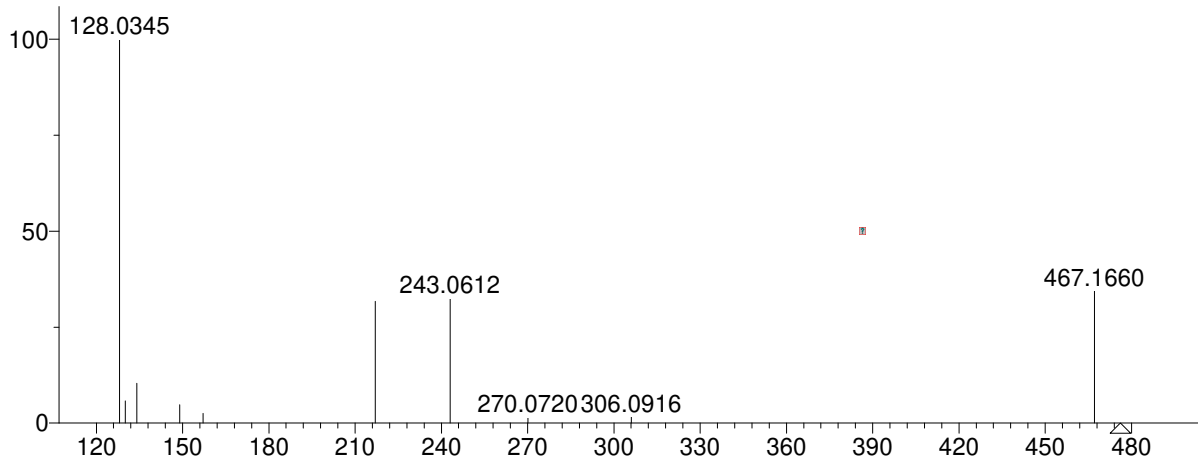

Unknown: Unknown (4.07\_646.2092m/z)  
Compound in Library Factor = 0

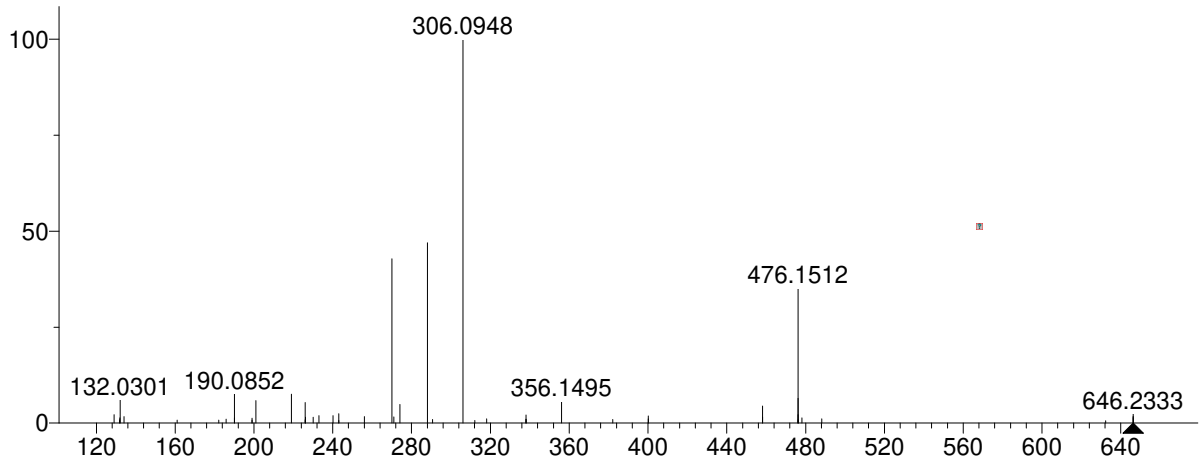

\*\* Search Report Page 1 of 2 \*\*

Unknown: Unknown (4.08\_342.1293m/z)  
Compound in Library Factor = -3273

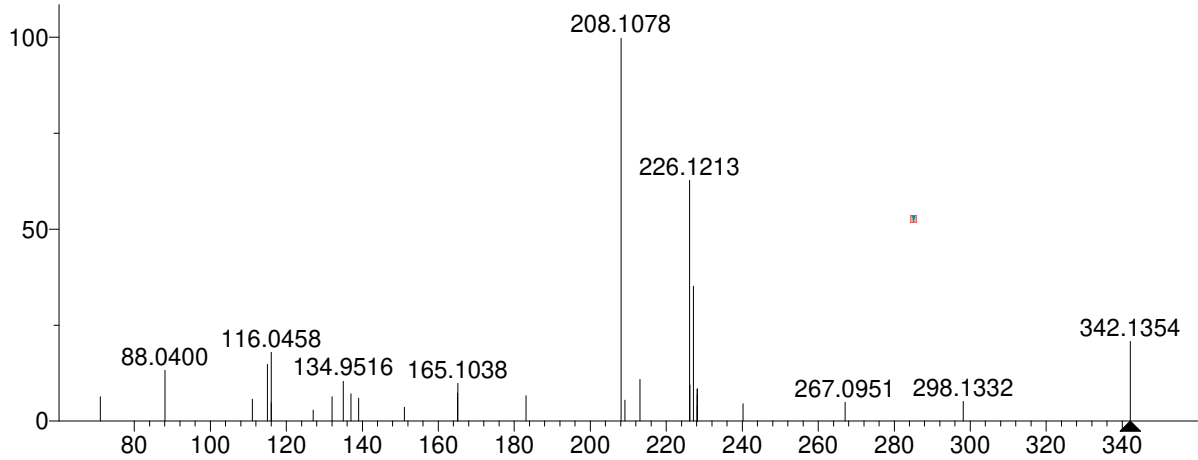

Hit 1 : Rabeprazole [M+H-H<sub>2</sub>O]<sup>+</sup> HCD 18V P=342.1  
C<sub>18</sub>H<sub>21</sub>N<sub>3</sub>O<sub>3</sub>S; MF: 4; RMF: 189; Prob 26.8%; CAS: 117976-89-3; Lib: nist\_msms; ID: 208758.

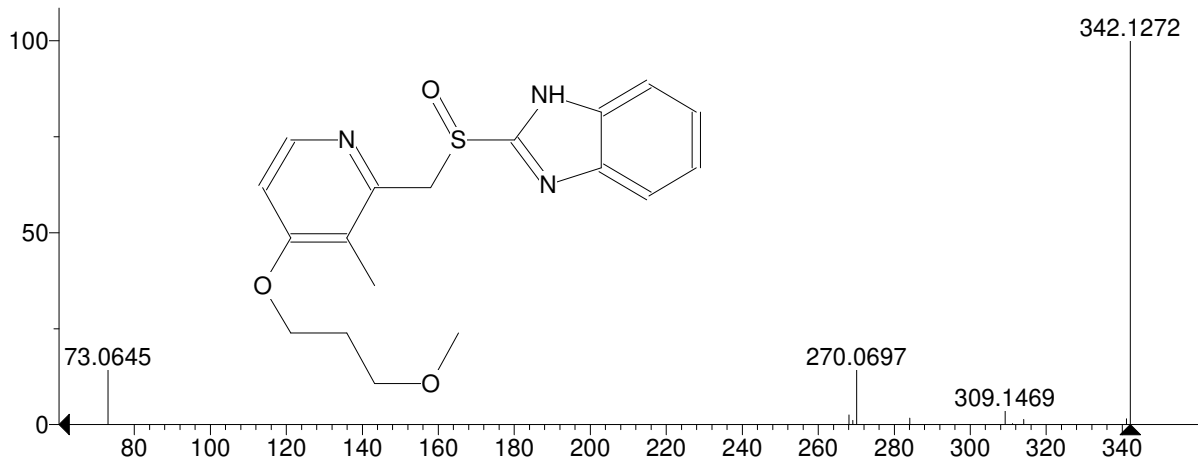

Hit 2 : Clethodim [M+H-H<sub>2</sub>O]<sup>+</sup> HCD 17V P=342.1  
C<sub>17</sub>H<sub>26</sub>ClNO<sub>3</sub>S; MF: 3; RMF: 159; Prob 25.7%; CAS: 99129-21-2; Lib: nist\_msms; ID: 491505.

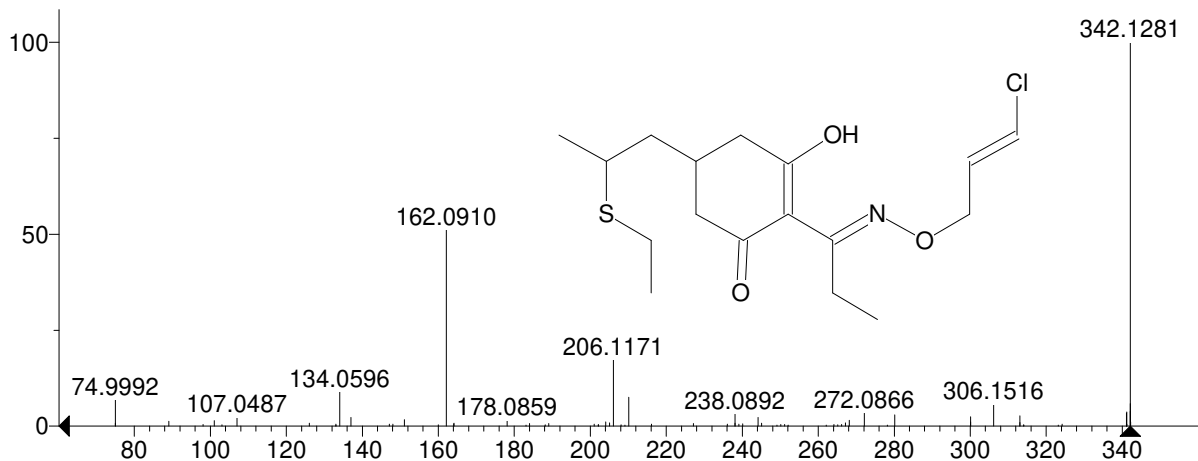

Hit 3 : Unknown (carbon number 19); PlaSMA ID-794 [M-H]<sup>-</sup> P=342.1  
C<sub>19</sub>H<sub>21</sub>NO<sub>5</sub>; MF: 2; RMF: 161; Prob 24.7%; Lib: biomsms-neg-plasma; ID: 1262.

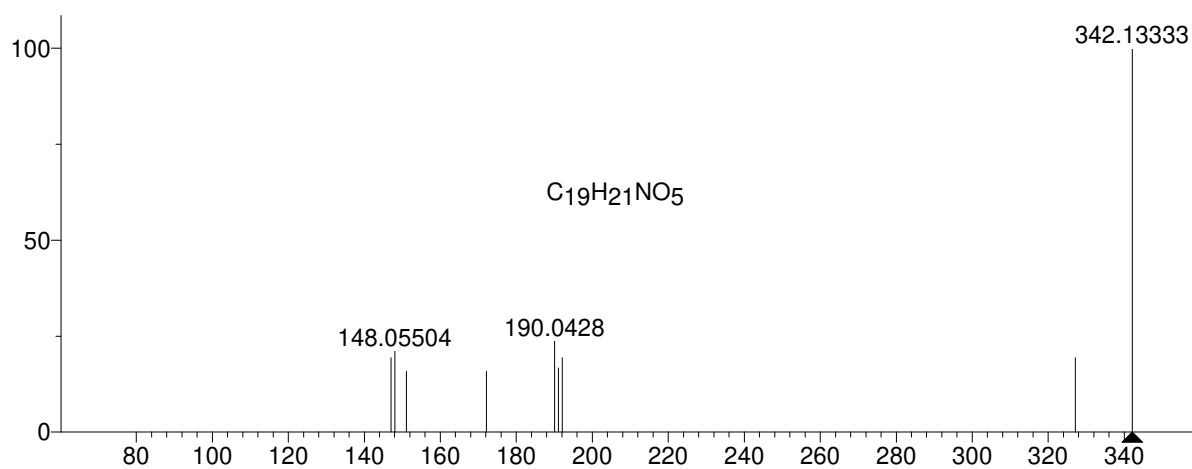

Hit 4 : 8,9-Dihydropiplartine [M+Na]<sup>+</sup> P=342.1  
C<sub>17</sub>H<sub>21</sub>NO<sub>5</sub>; MF: 0; RMF: 98; Prob 22.8%; Lib: mona-export-gnps; ID: 2931.

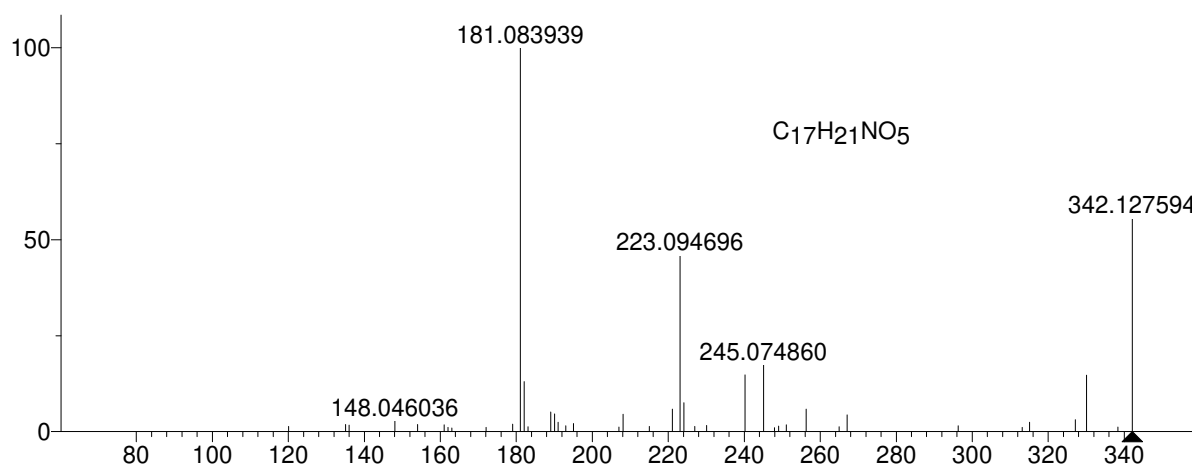

Unknown: Unknown (4.08\_399.1507m/z)  
Compound in Library Factor = 0

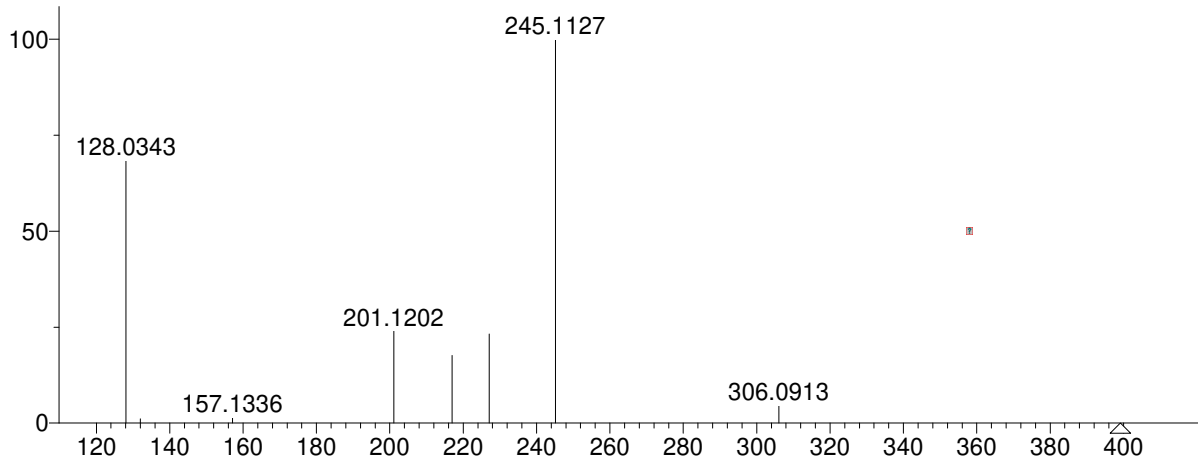

Unknown: Unknown (4.08\_699.1225m/z)  
Compound in Library Factor = 0

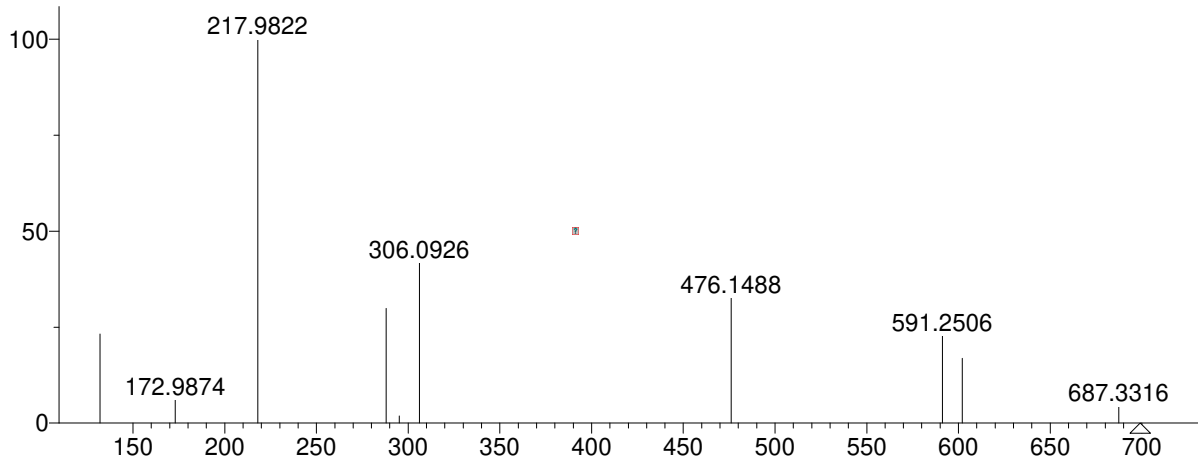

\*\* Search Report Page 1 of 2 \*\*

Unknown: Unknown (4.09\_415.1708m/z)  
Compound in Library Factor = -3273

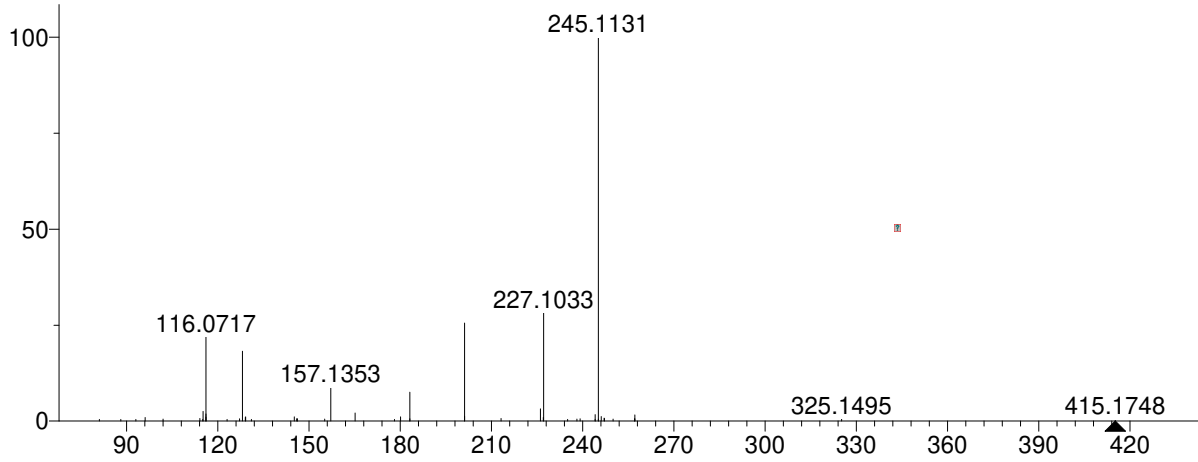

Hit 1 : Diltiazem [M+H]<sup>+</sup> QTOF 3V P=415.2  
C<sub>22</sub>H<sub>26</sub>N<sub>2</sub>O<sub>4</sub>S; MF: 4; RMF: 45; Prob 16.3%; CAS: 42399-41-7; Lib: nist\_msms; ID: 20519.

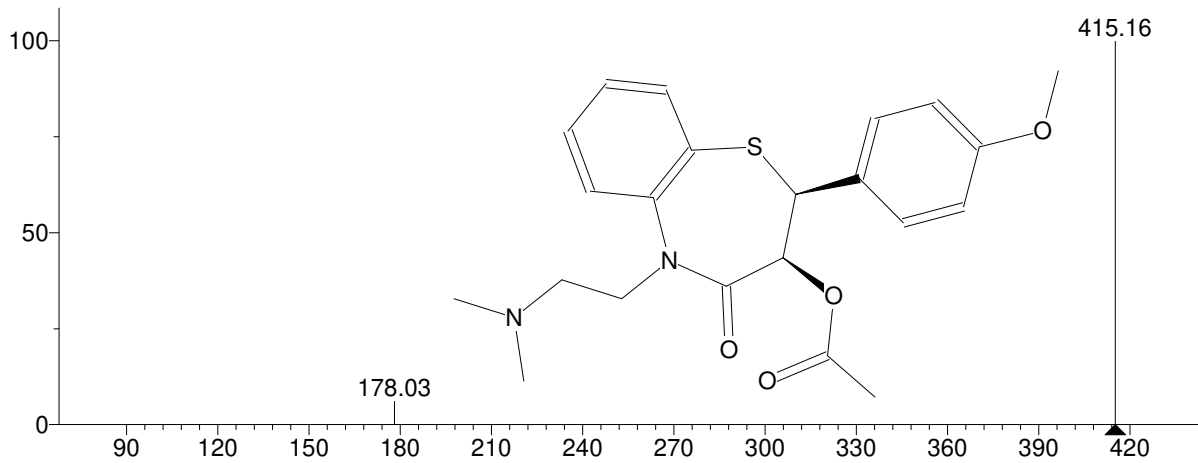

Hit 2 : 6-formyl-10-(hydroxymethyl)-5-methoxy-3-methylidene-2-oxo-2H,3H,3aH,4H,5H,8H,9H,11aH-cyclodeca[b]  
C<sub>21</sub>H<sub>28</sub>O<sub>7</sub>; MF: 1; RMF: 65; Prob 14.4%; Lib: mona-export-vf-npl\_qexactive; ID: 16435.

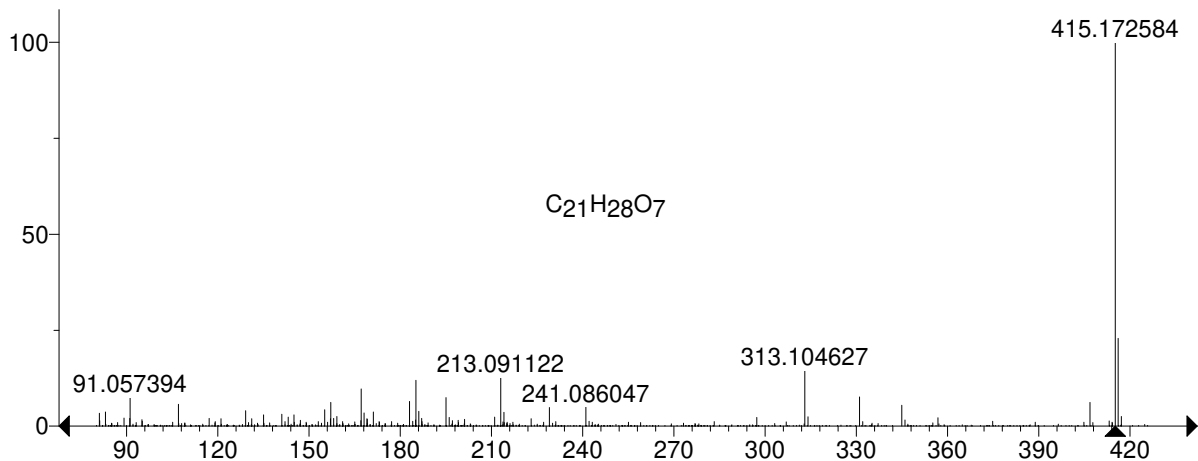



\*\* Search Report Page 2 of 2 \*\*

Hit 3 : Diltiazem HCl (Tiazac) [M+H]<sup>+</sup> P=415.2  
C<sub>22</sub>H<sub>27</sub>CIN<sub>2</sub>O<sub>4</sub>S; MF: 0; RMF: 16; Prob 13.9%; Lib: mona-export-gnps; ID: 648.

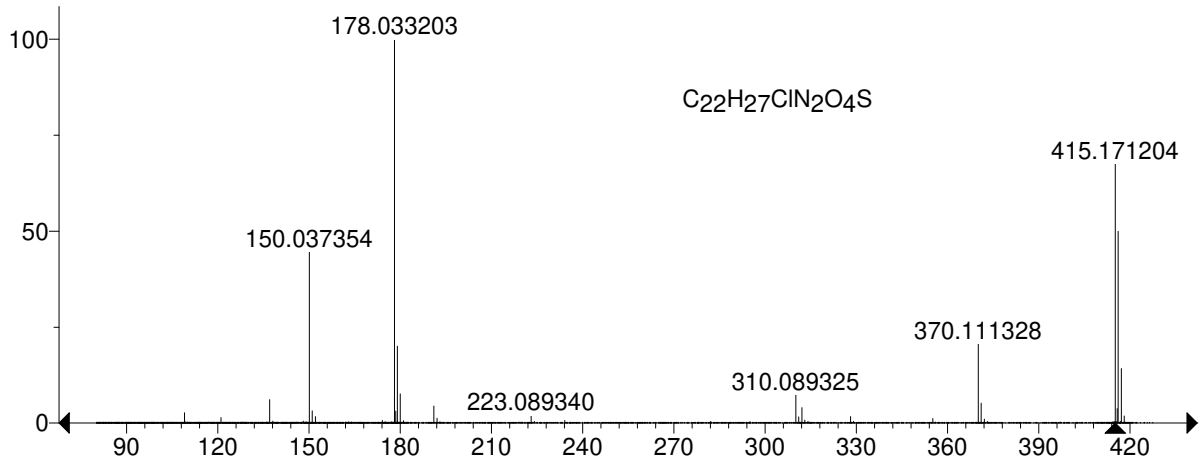

Hit 4 : NCGC00347525-03!2-amino-5-[2-[[2,3-dihydroxy-2-(1-hydroxyethyl)butanoyl]oxymethyl]-4-hydroxyanilino]-C<sub>18</sub>H<sub>26</sub>N<sub>2</sub>O<sub>9</sub>; MF: 0; RMF: 9; Prob 13.9%; Lib: mona-export-gnps; ID: 9213.

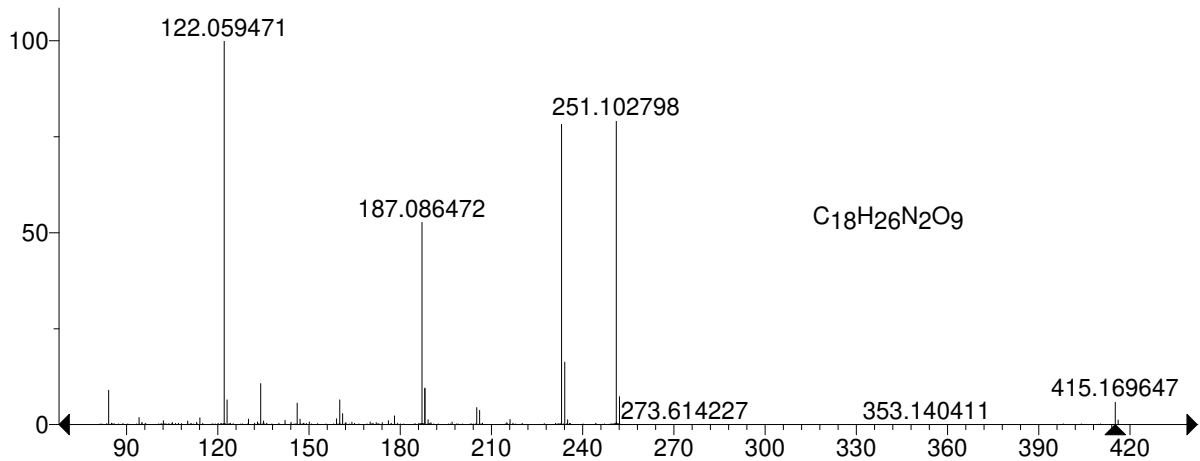

Hit 5 : NCGC00347525-02!2-amino-5-[2-[[2,3-dihydroxy-2-(1-hydroxyethyl)butanoyl]oxymethyl]-4-hydroxyanilino]-C<sub>18</sub>H<sub>26</sub>N<sub>2</sub>O<sub>9</sub>; MF: 0; RMF: 5; Prob 13.9%; Lib: mona-export-gnps; ID: 6270.

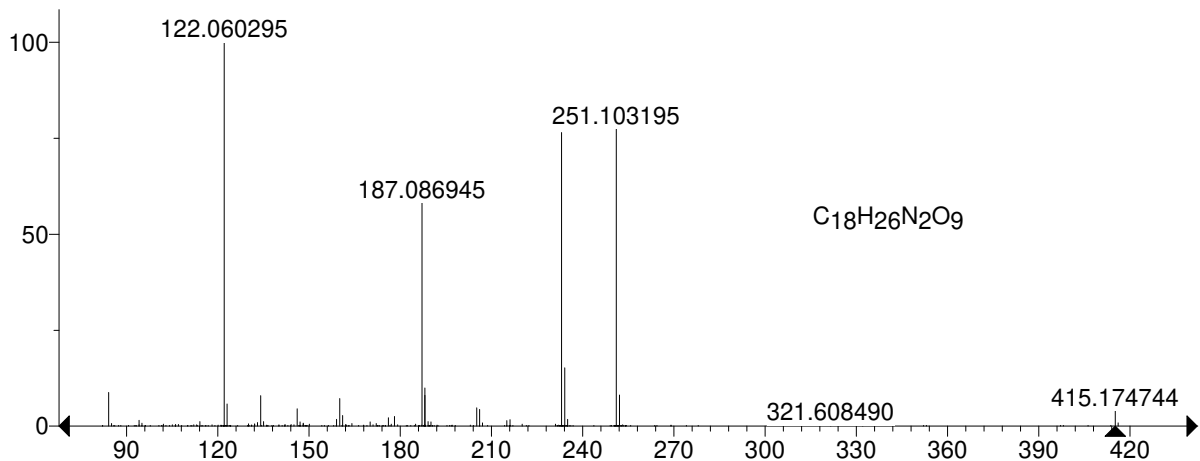

Unknown: Unknown (4.10\_298.0913m/z)  
Compound in Library Factor = 0

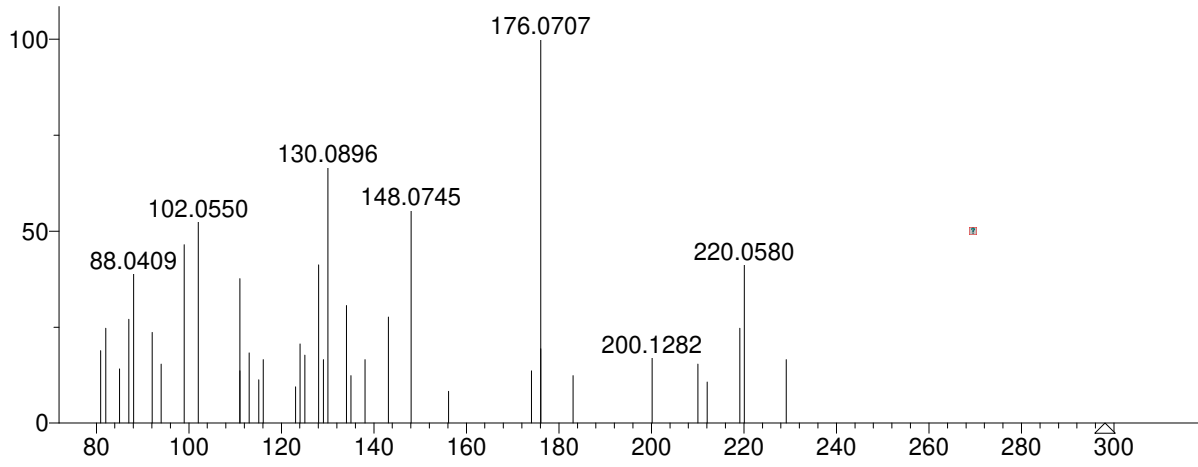

Unknown: Unknown (4.10\_554.1397m/z)  
Compound in Library Factor = 0

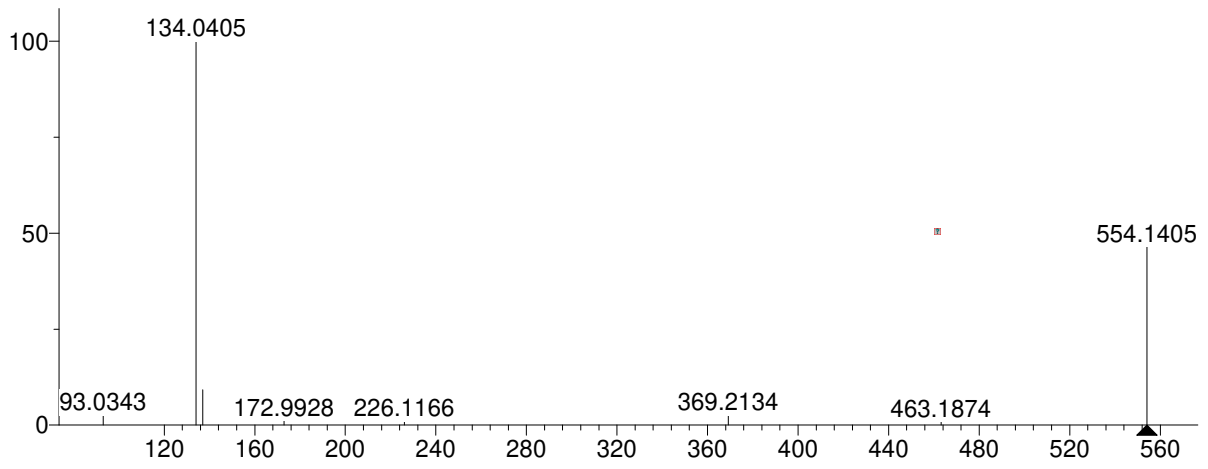

Unknown: Unknown (4.11\_602.1241m/z)  
Compound in Library Factor = 0

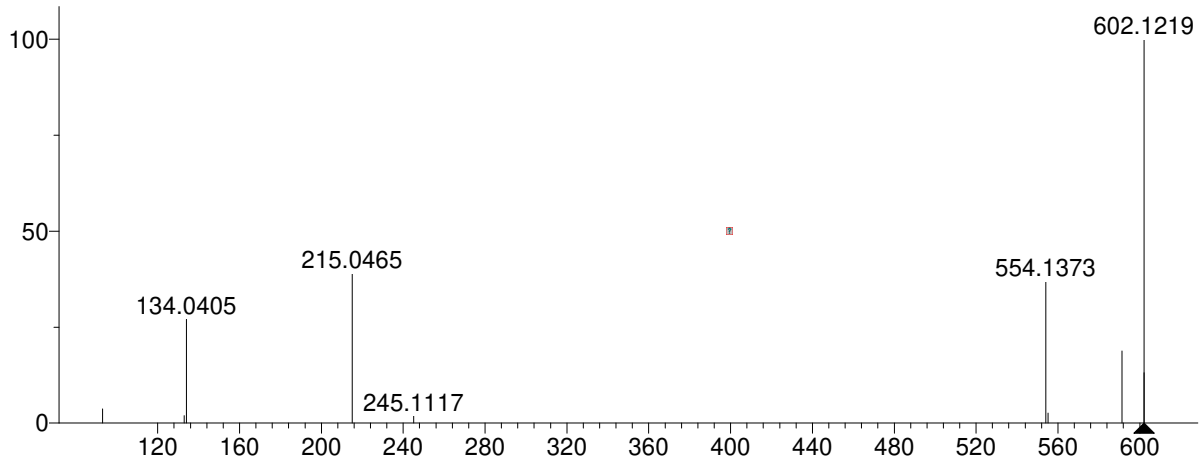

Unknown: Unknown (4.12\_137.0237m/z)  
Compound in Library Factor = -385

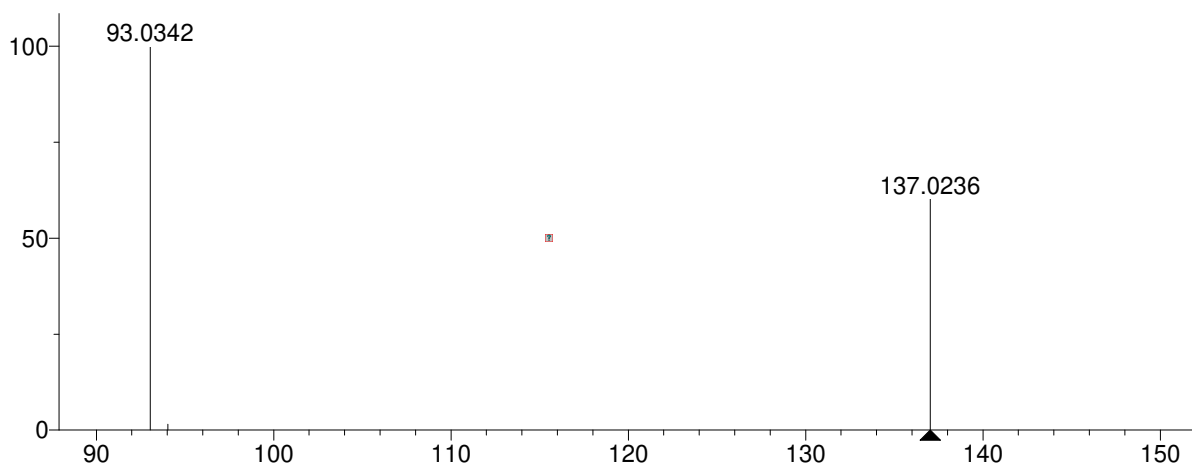

Hit 1 : Salicylic acid [M-H]<sup>-</sup> HCD 12V P=137  
C<sub>7</sub>H<sub>6</sub>O<sub>3</sub>; MF: 747; RMF: 997; Prob 45.6%; CAS: 69-72-7; Lib: nist\_msms; ID: 101033.

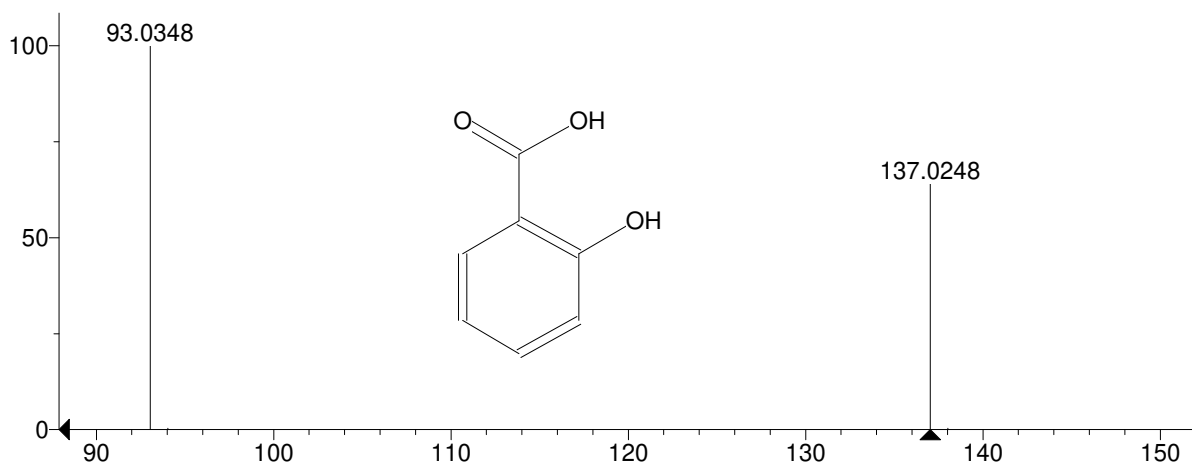

Hit 2 : 3-HYDROXYBENZOATE [M-H]<sup>-</sup> P=137  
C<sub>7</sub>H<sub>6</sub>O<sub>3</sub>; MF: 731; RMF: 990; Prob 26.3%; Lib: mona-export-gnps; ID: 5777.

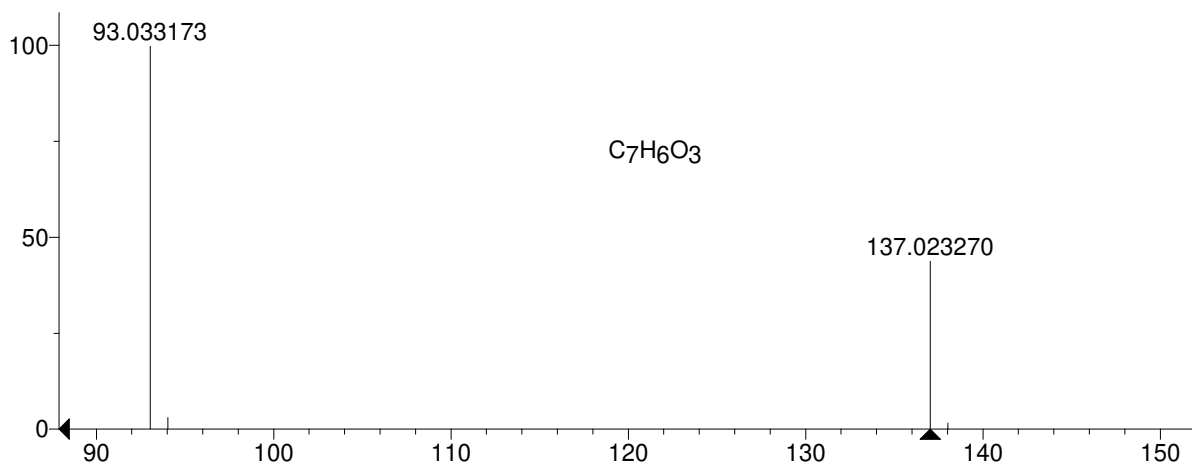

Hit 3 : 4-HYDROXYBENZOATE [M-H]<sup>-</sup> P=137  
C<sub>7</sub>H<sub>6</sub>O<sub>3</sub>; MF: 723; RMF: 965; Prob 19.6%; Lib: msms-neg-gnps; ID: 338.

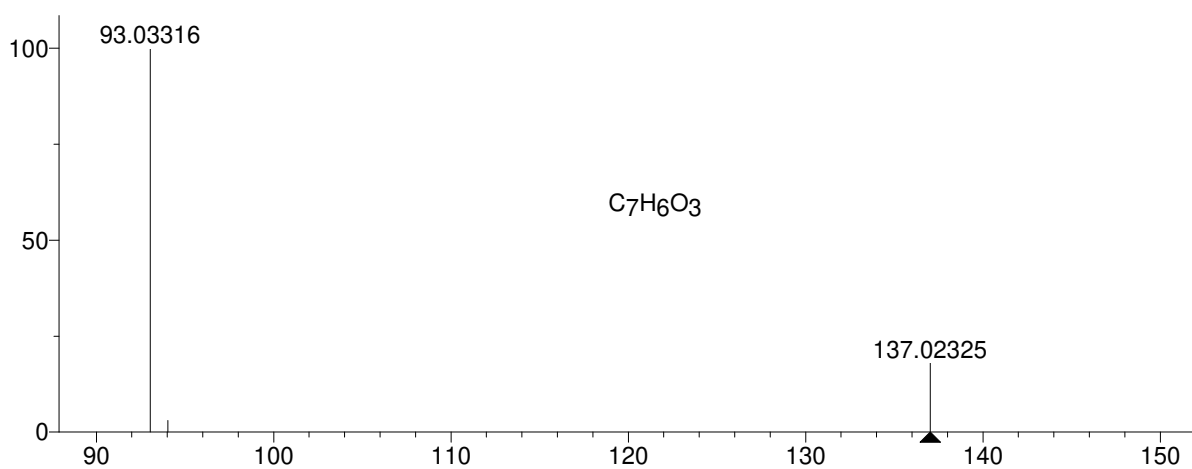

Hit 4 : 4-HYDROXYBENZOATE  
C<sub>7</sub>H<sub>6</sub>O<sub>3</sub>; MF: 669; RMF: 958; Prob 3.83%; Lib: embl neg mcg; ID: 406.

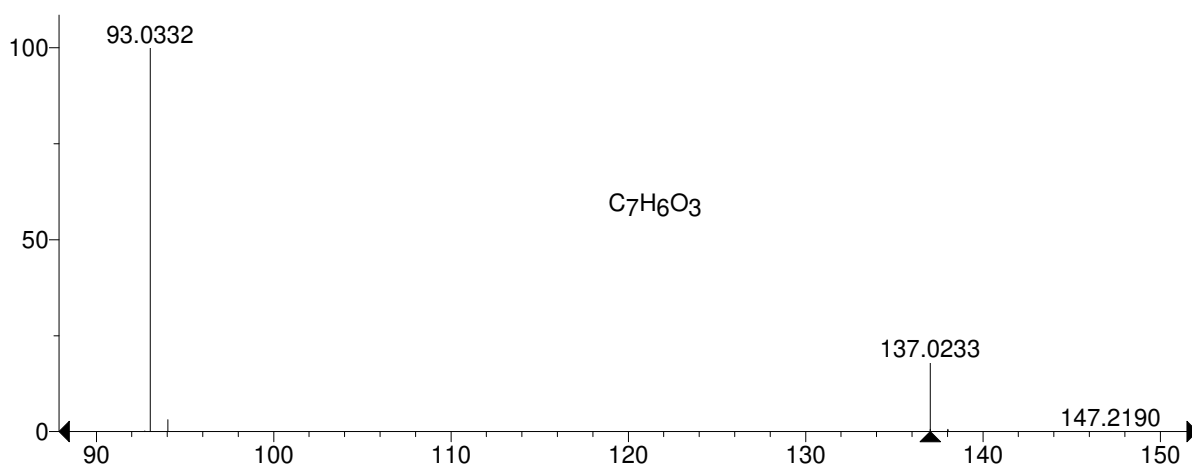

Hit 5 : Unknown (carbon number 7); PlaSMA ID-70 [M-H]<sup>-</sup> P=137  
C<sub>7</sub>H<sub>6</sub>O<sub>3</sub>; MF: 633; RMF: 952; Prob 0.94%; Lib: biomsms-neg-plasma; ID: 973.

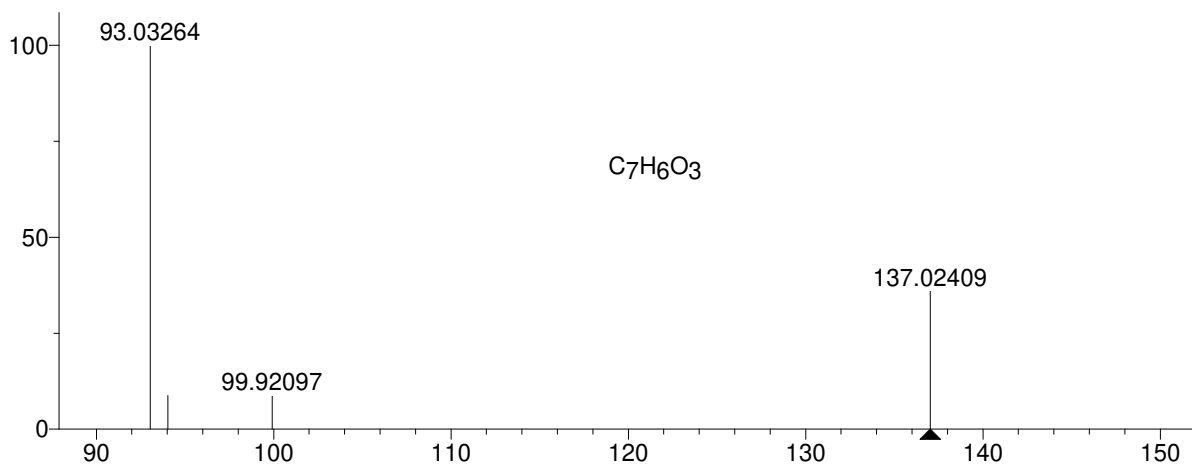

Unknown: Unknown (4.12\_216.9805m/z)  
Compound in Library Factor = -314

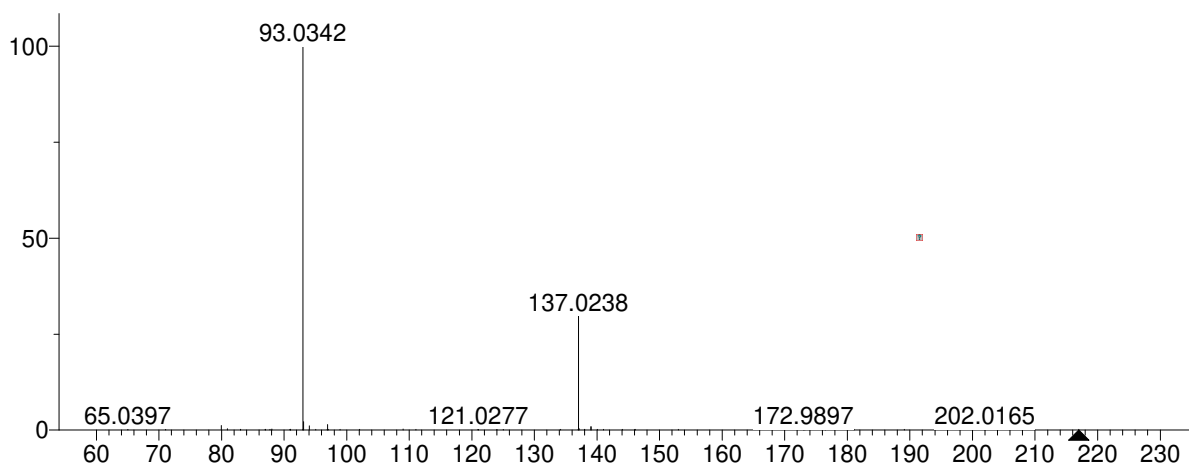

Hit 1 : 5-Sulfosalicylic acid [M-H]<sup>-</sup> HCD 16V P=217  
C<sub>7</sub>H<sub>6</sub>O<sub>6</sub>S; MF: 227; RMF: 393; Prob 100.0%; CAS: 97-05-2; Lib: nist\_msms; ID: 143731.

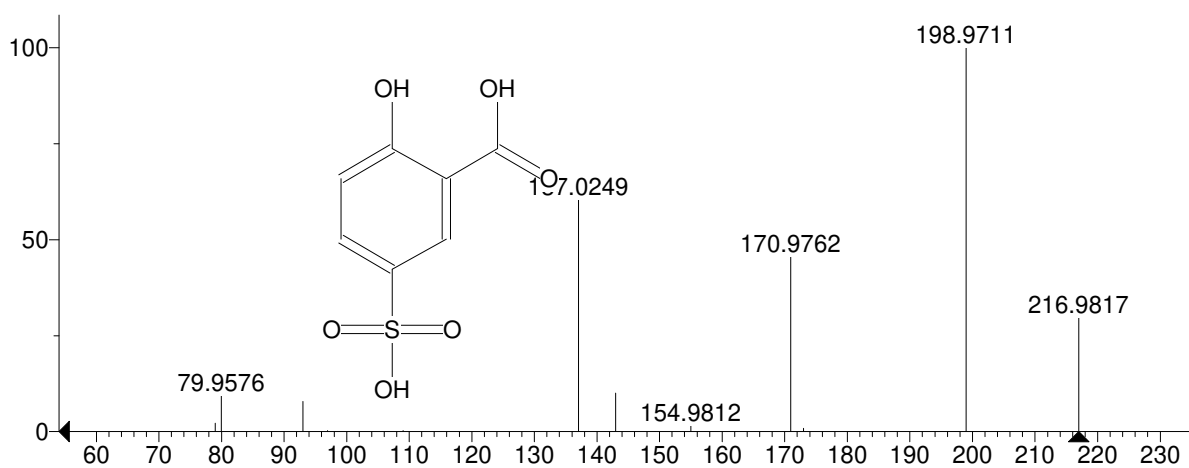

Unknown: Unknown (4.12\_369.2131m/z)  
Compound in Library Factor = -3273

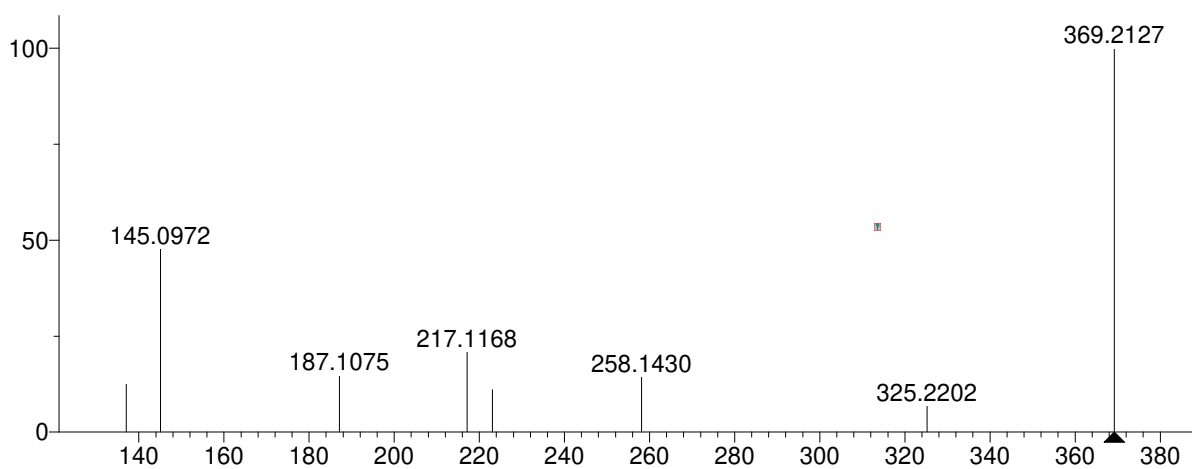

Hit 1 : Neuropeptide S, rat [M+6H]<sup>6+</sup> QTOF 2V P=369.2  
C<sub>95</sub>H<sub>160</sub>N<sub>34</sub>O<sub>27</sub>; MF: 4; RMF: 333; Prob 100.0%; Lib: nist\_msms2; ID: 35976.

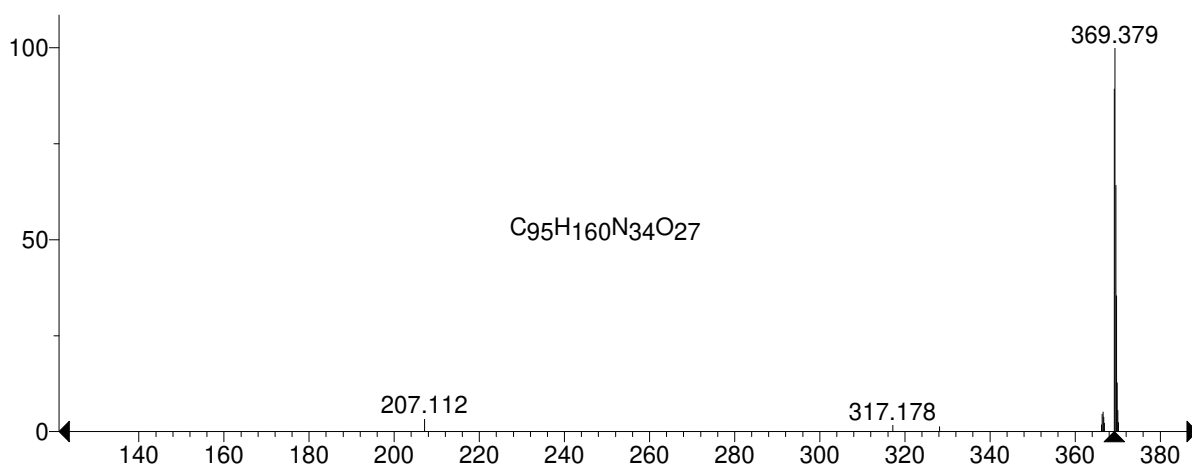



\*\* Search Report Page 1 of 2 \*\*

Unknown: Unknown (4.12\_428.2033m/z)  
Compound in Library Factor = 0

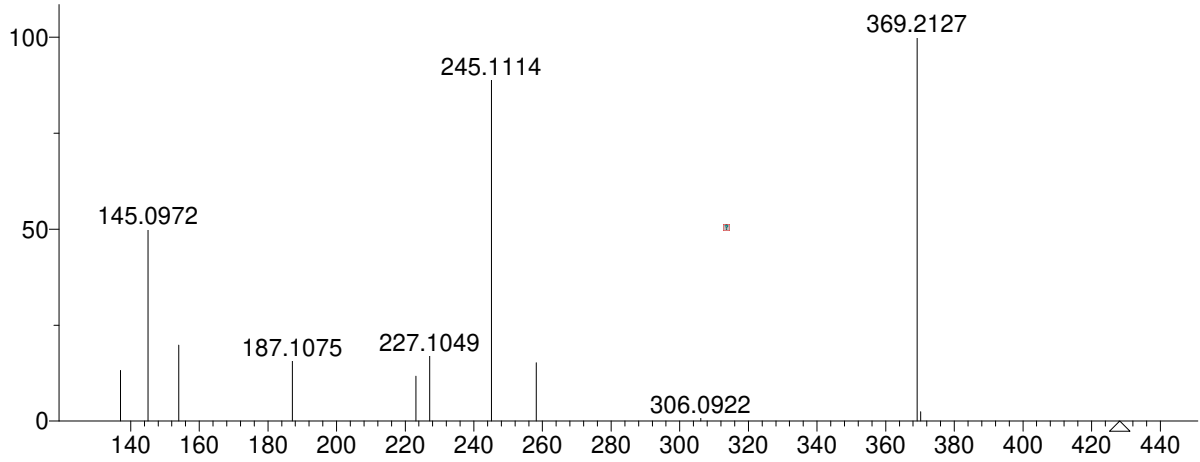

Hit 1 : Desmethylcerivastatin [M+H]<sup>+</sup> => 428.2 IT 35% P=428.2  
C25H32FNO5; MF: 0; RMF: 119; Prob 16.7%; CAS: 690952-00-2; Lib: nist\_msms; ID: 451579.

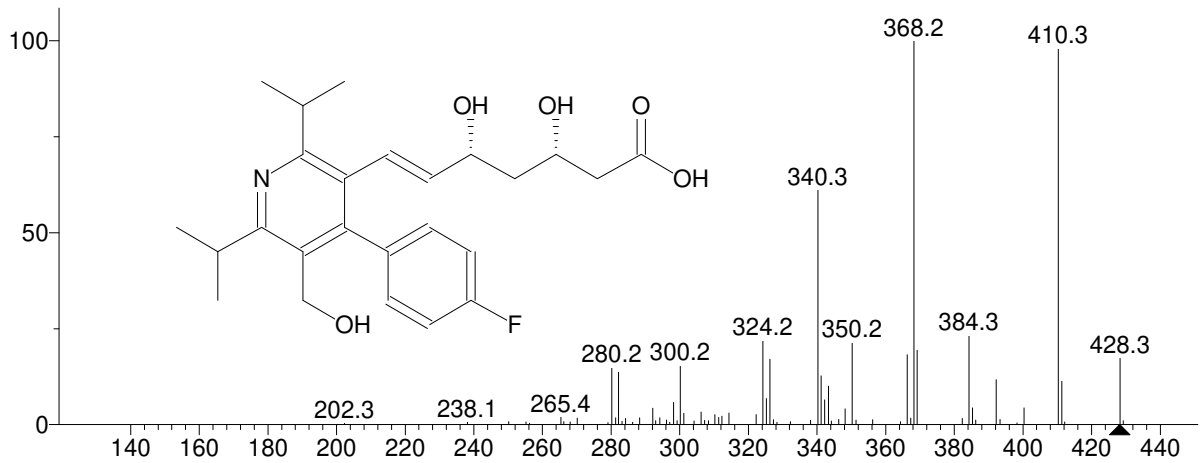

Hit 2 : ROTENONIC ACID, METHYL ETHER [M+NH4]<sup>+</sup> 35HCD P=428.2  
C24H26O6; MF: 0; RMF: 93; Prob 16.7%; Lib: mona-export-vf-npl\_qexactive; ID: 11536.

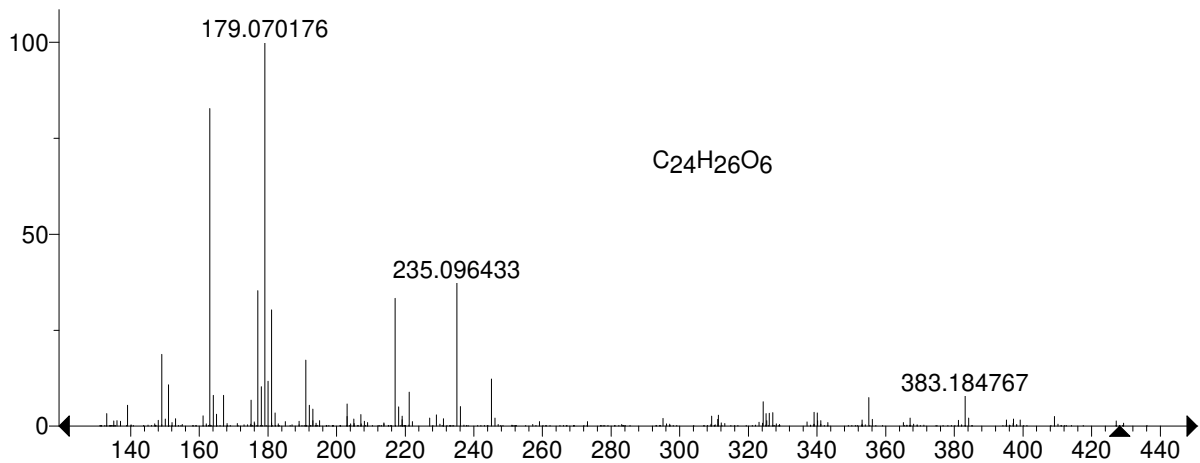

\*\* Search Report Page 2 of 2 \*\*

Hit 3 : Epothilone B [M+H-H<sub>2</sub>O]<sup>+</sup>=>472.2=>428.2 IT 35% P=428.2  
C<sub>27</sub>H<sub>41</sub>NO<sub>6</sub>S; MF: 0; RMF: 37; Prob 16.7%; CAS: 152044-54-7; Lib: nist\_msms; ID: 252242.

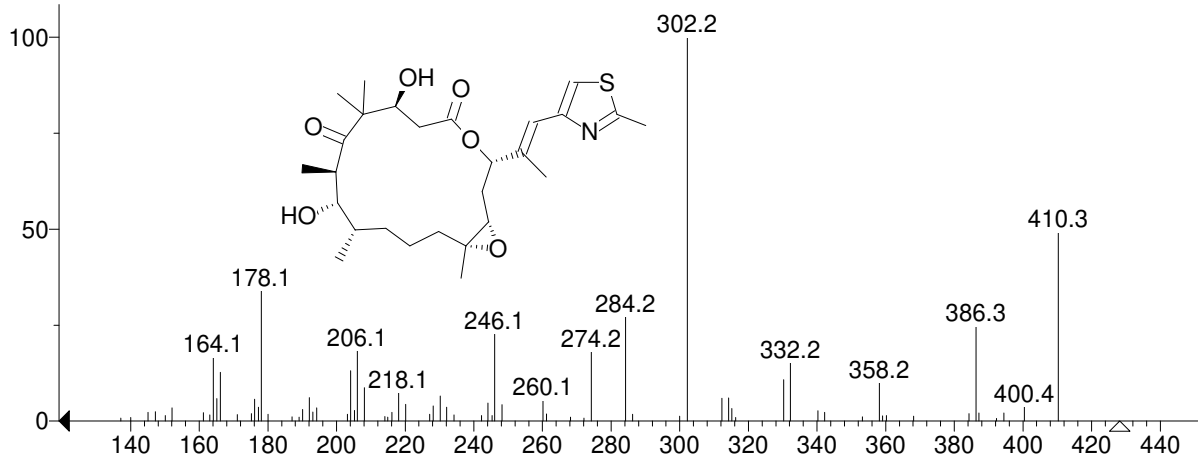

Hit 4 : Ampkinone [M+H]<sup>+</sup>=>428.2 IT 35% P=428.2  
C<sub>31</sub>H<sub>23</sub>NO<sub>6</sub>; MF: 0; RMF: 36; Prob 16.7%; CAS: 1233082-79-5; Lib: nist\_msms; ID: 265930.

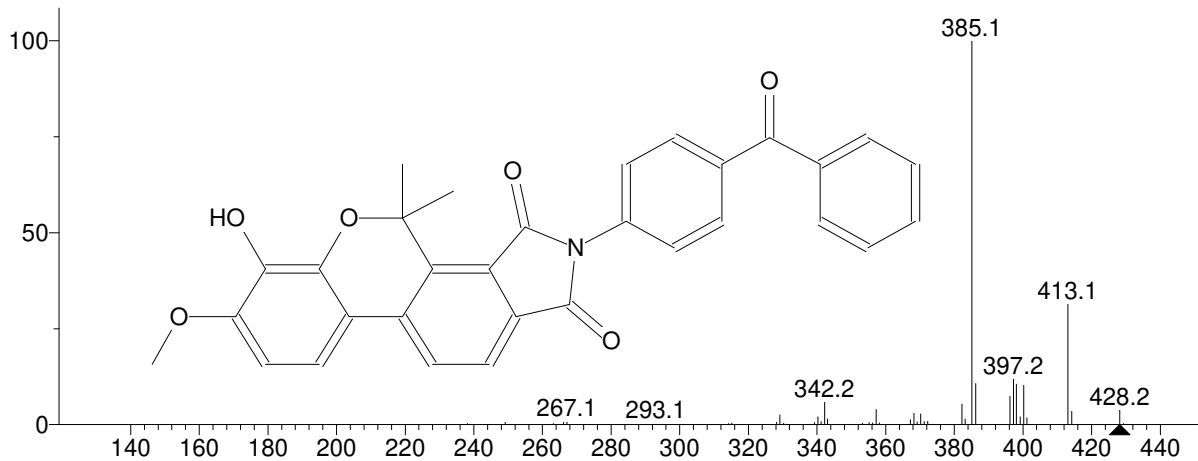

Hit 5 : 4-Hydroxynonenal glutathione [M+H-H<sub>2</sub>O]<sup>+</sup>=>428.2 IT 35% P=428.2  
C<sub>19</sub>H<sub>33</sub>N<sub>3</sub>O<sub>8</sub>S; MF: 0; RMF: 33; Prob 16.7%; CAS: 99927-70-5; Lib: nist\_msms; ID: 170262.

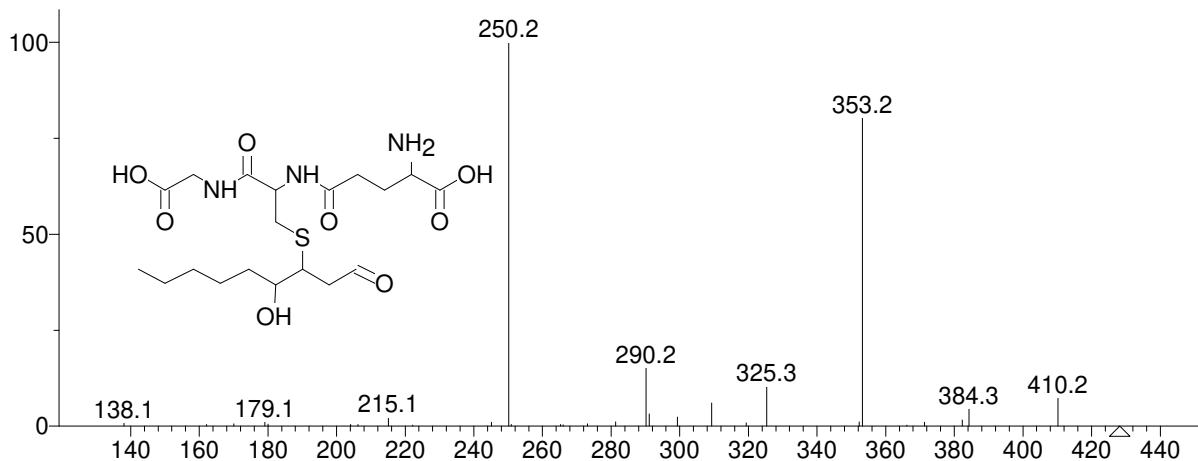

Unknown: Unknown (4.12\_446.1679m/z)  
Compound in Library Factor = 0

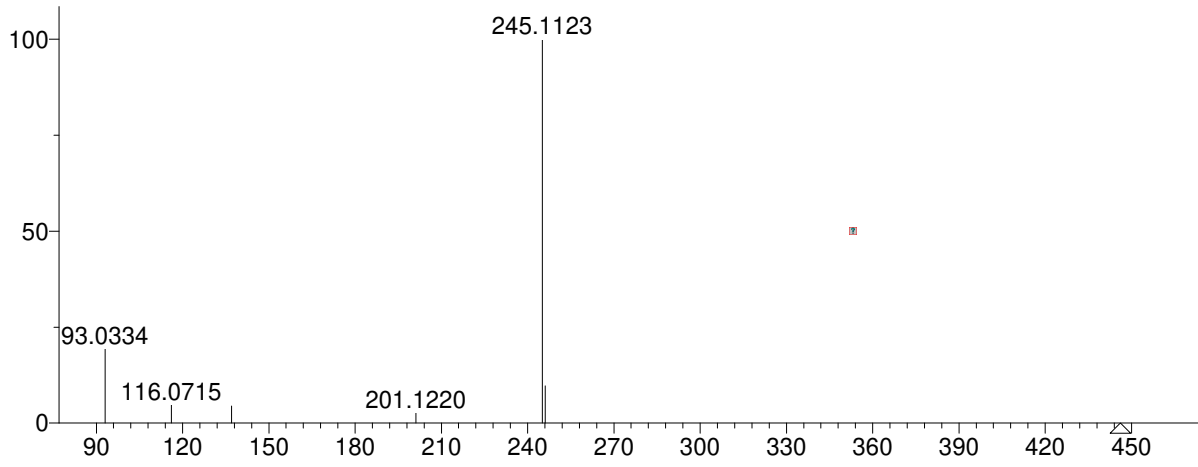

Unknown: Unknown (4.13\_387.1750m/z)  
Compound in Library Factor = 0

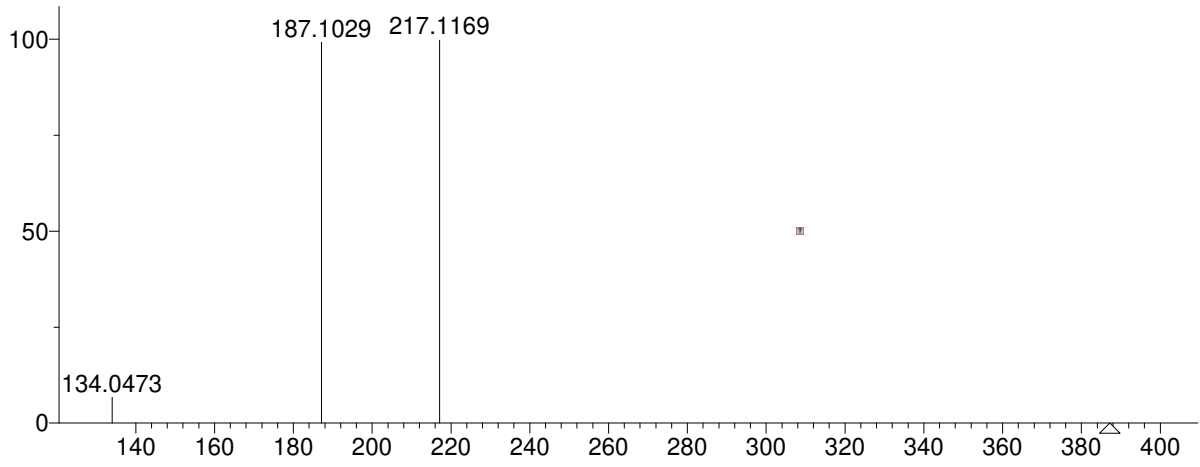

\*\* Search Report Page 1 of 2 \*\*

Unknown: Unknown (4.14\_472.1561m/z)  
Compound in Library Factor = -2176

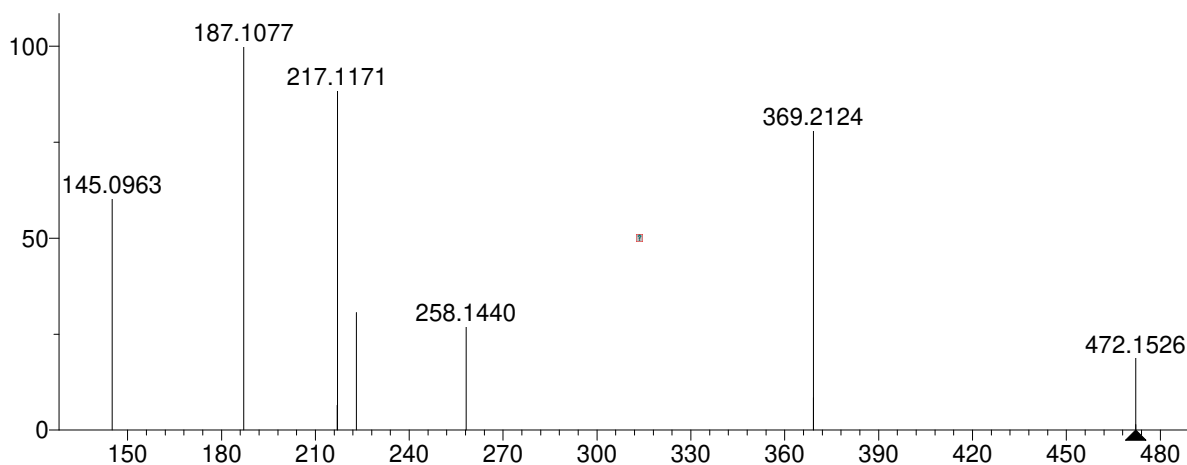

Hit 1 : Folinic acid [M-H]<sup>-</sup> HCD 18V P=472.2  
C<sub>20</sub>H<sub>23</sub>N<sub>7</sub>O<sub>7</sub>; MF: 23; RMF: 374; Prob 41.2%; CAS: 58-05-9; Lib: nist\_msms; ID: 138208.

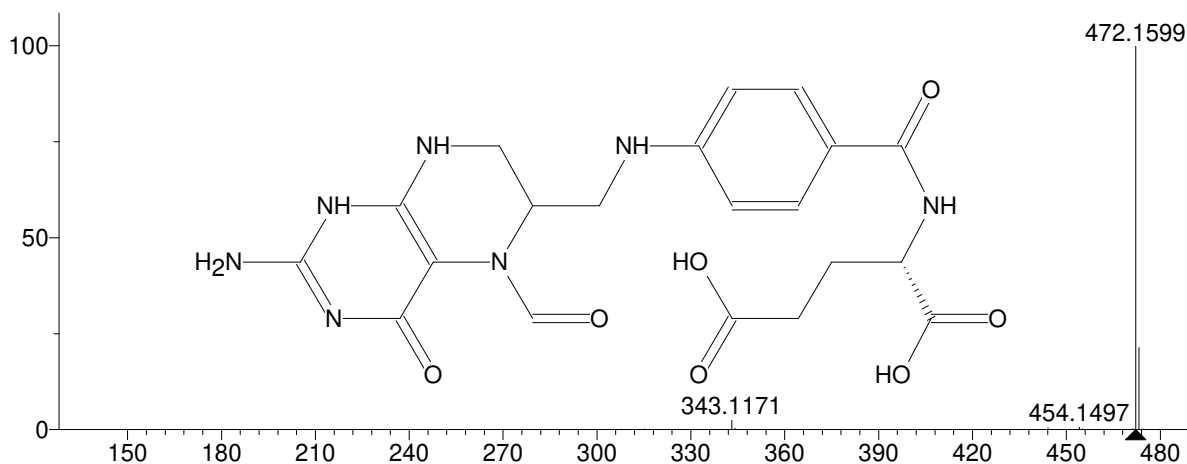

Hit 2 : 10-Formyl-7,8-dihydrofolic acid [M+H]<sup>+</sup> HCD 9V P=472.2  
C<sub>20</sub>H<sub>21</sub>N<sub>7</sub>O<sub>7</sub>; MF: 23; RMF: 224; Prob 41.2%; CAS: 28459-40-7; Lib: nist\_msms; ID: 213137.

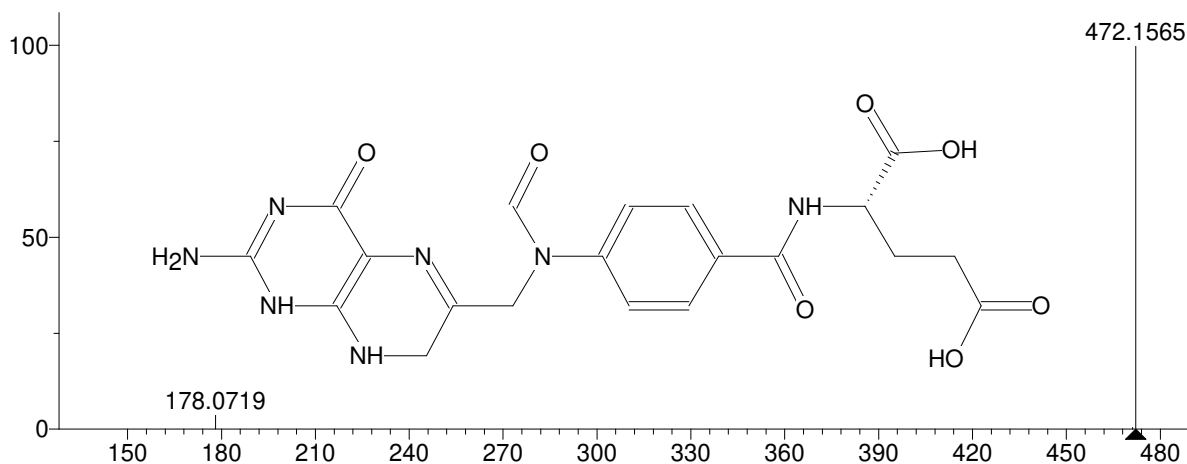

Hit 3 : Raloxifene [M-H]<sup>-</sup> 35(no P=472.2  
C<sub>28</sub>H<sub>27</sub>NO<sub>4</sub>S; MF: 2; RMF: 148; Prob 17.5%; Lib: msms-neg-casmi2016; ID: 107.

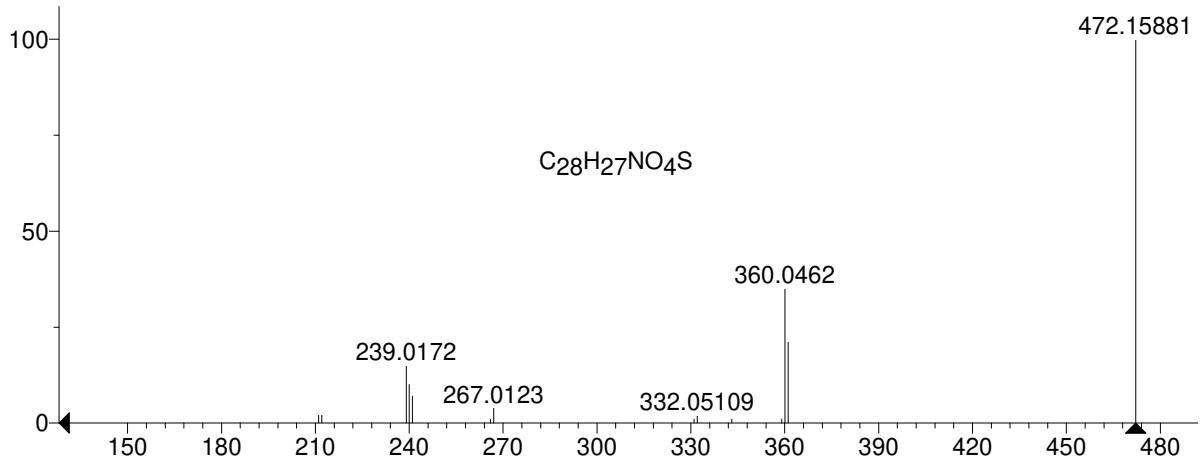

Unknown: Unknown (4.15\_530.1287m/z)  
Compound in Library Factor = 0

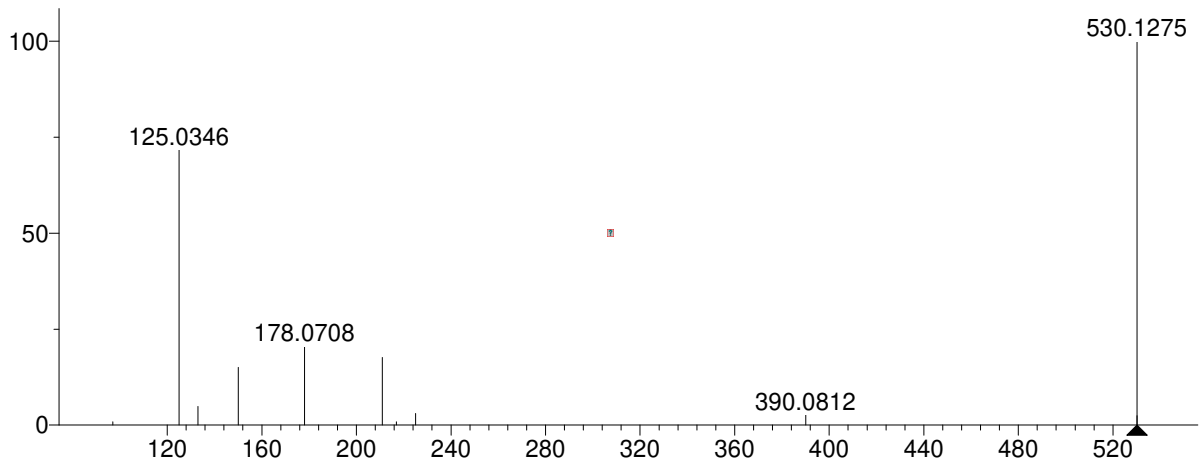

Unknown: Unknown (4.16\_285.0533m/z)  
Compound in Library Factor = 0

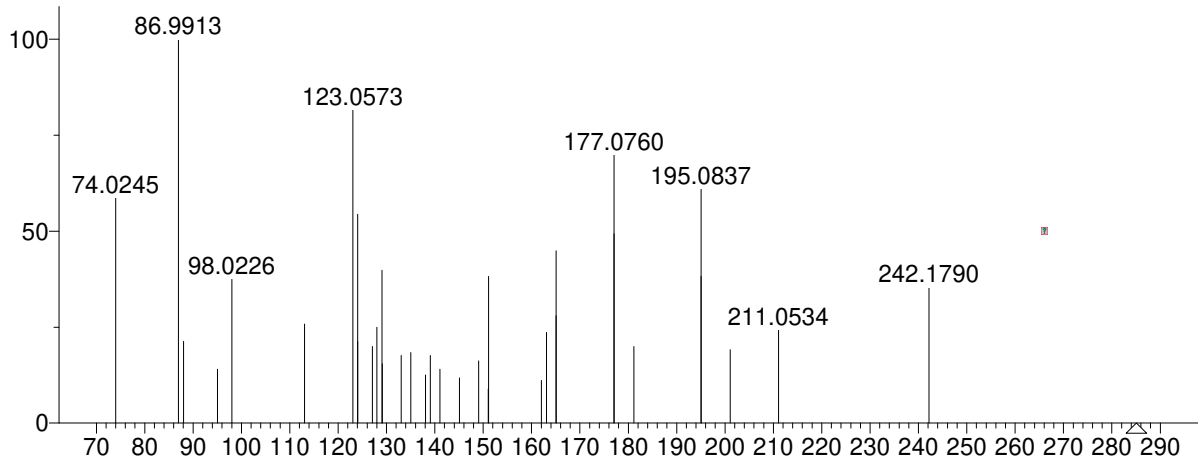

Hit 1 : columbianetin [M+K]<sup>+</sup> 65HCD P=285.1  
C<sub>14</sub>H<sub>14</sub>O<sub>4</sub>; MF: 0; RMF: 43; Prob 25.0%; Lib: mona-export-vf-npl\_qexactive; ID: 4032.

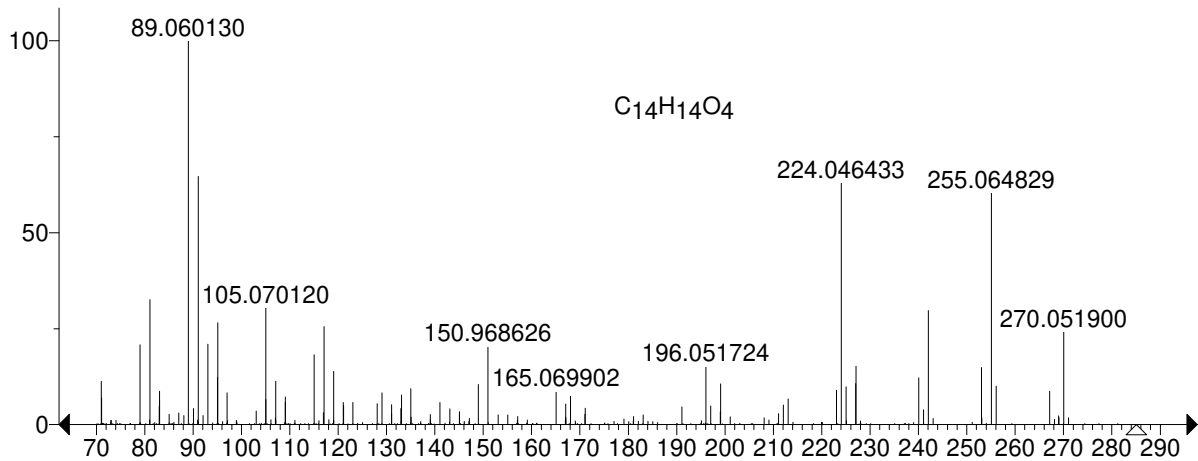

Hit 2 : Prenyletin [M+K]<sup>+</sup> 35HCD P=285.1  
C<sub>14</sub>H<sub>14</sub>O<sub>4</sub>; MF: 0; RMF: 20; Prob 25.0%; Lib: mona-export-vf-npl\_qexactive; ID: 11380.

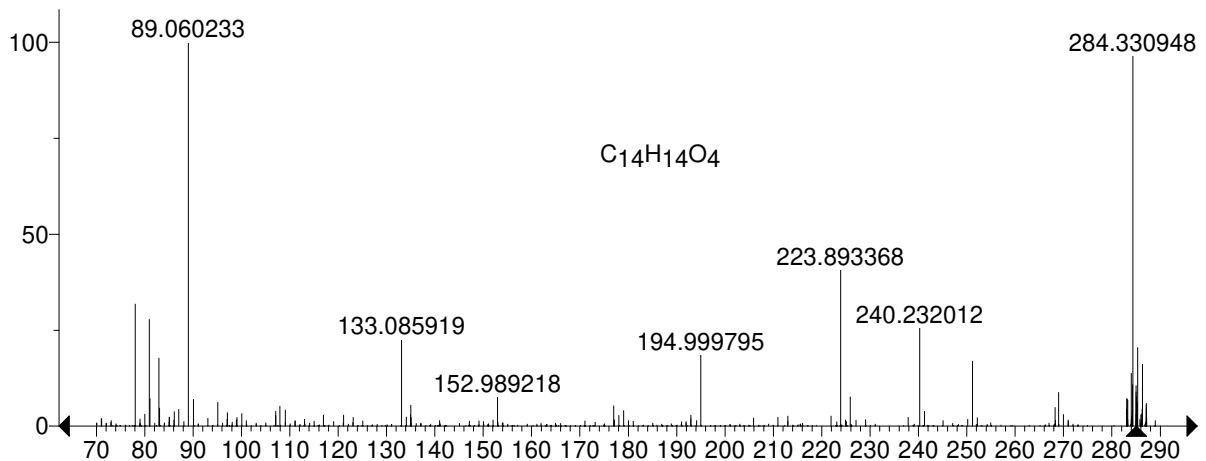



Hit 3 : (2S,3S)-3-hydroxy-4-methoxy-2-[(E)-2-phenylethenyl]-2,3-dihydropyran-6-one [M+K]<sup>+</sup> 65HCD P=285.1  
C<sub>14</sub>H<sub>14</sub>O<sub>4</sub>; MF: 0; RMF: 19; Prob 25.0%; Lib: mona-export-vf-npl\_qexactive; ID: 2397.

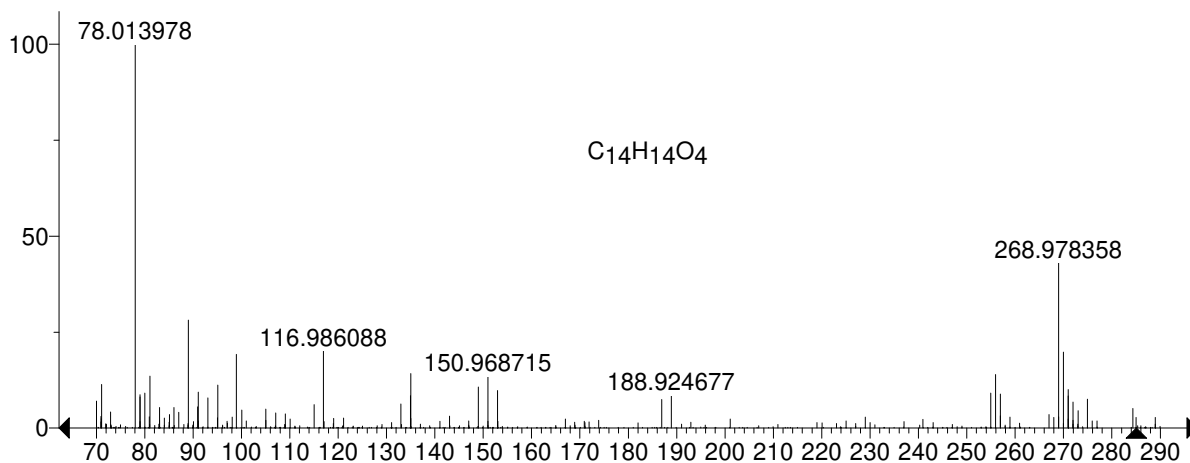

Hit 4 : Griseofulvin [M+H-C<sub>4</sub>H<sub>4</sub>O]<sup>+</sup> HCD 62V P=285.1  
C<sub>17</sub>H<sub>17</sub>ClO<sub>6</sub>; MF: 0; RMF: 9; Prob 25.0%; CAS: 126-07-8; Lib: nist\_msms; ID: 310445.

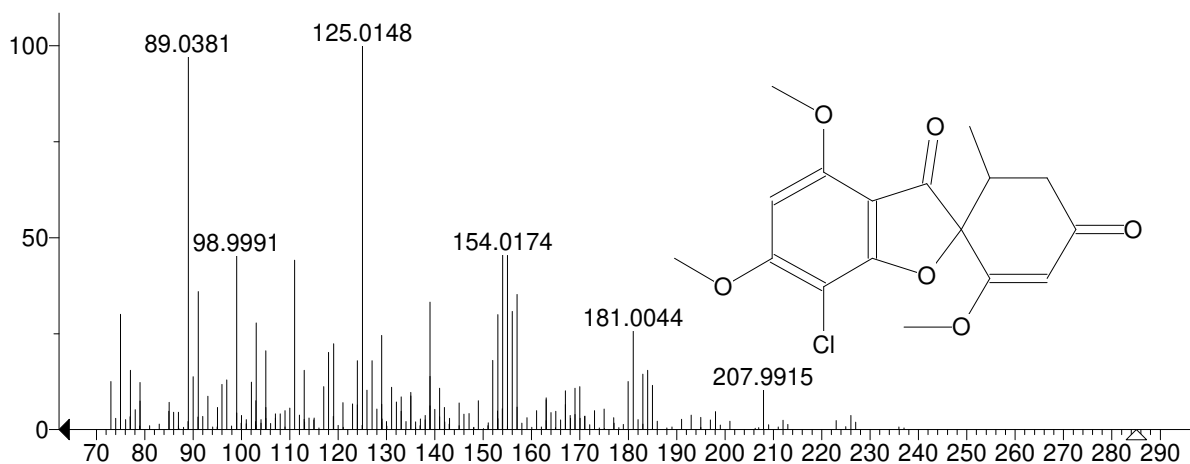

Unknown: Unknown (4.16\_529.2142m/z)  
Compound in Library Factor = 0

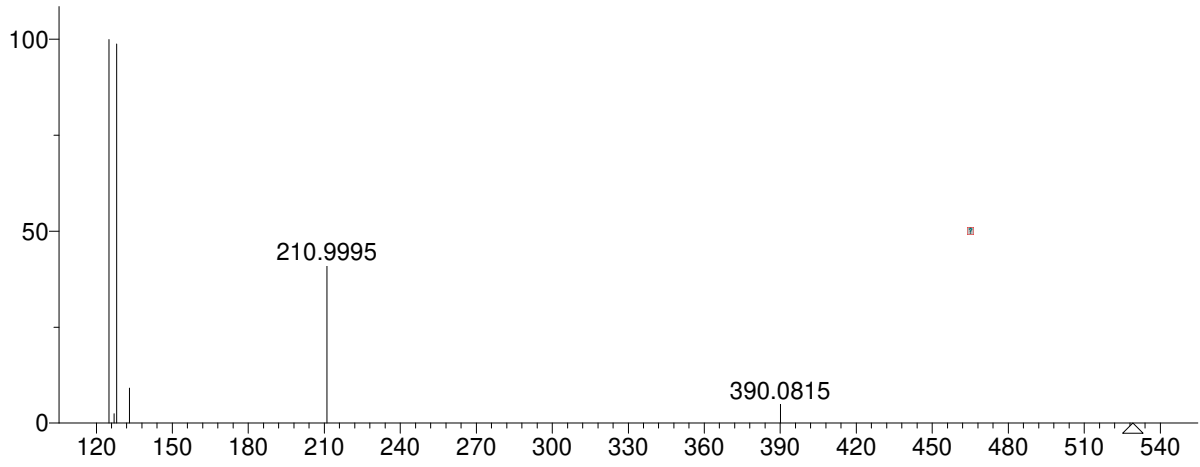

Unknown: Unknown (4.16\_570.1348m/z)  
Compound in Library Factor = 0

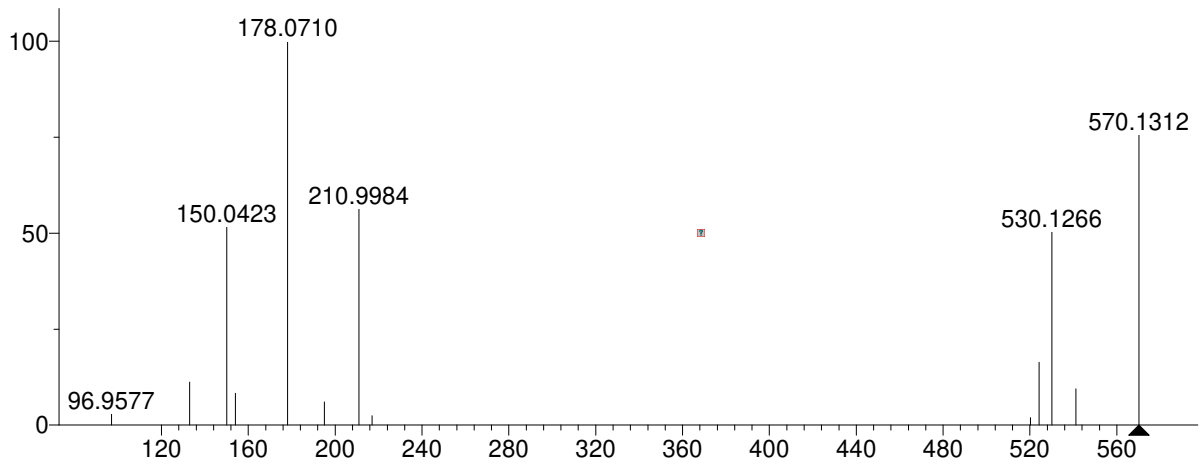

Unknown: Unknown (4.16\_616.1406m/z)  
Compound in Library Factor = 0

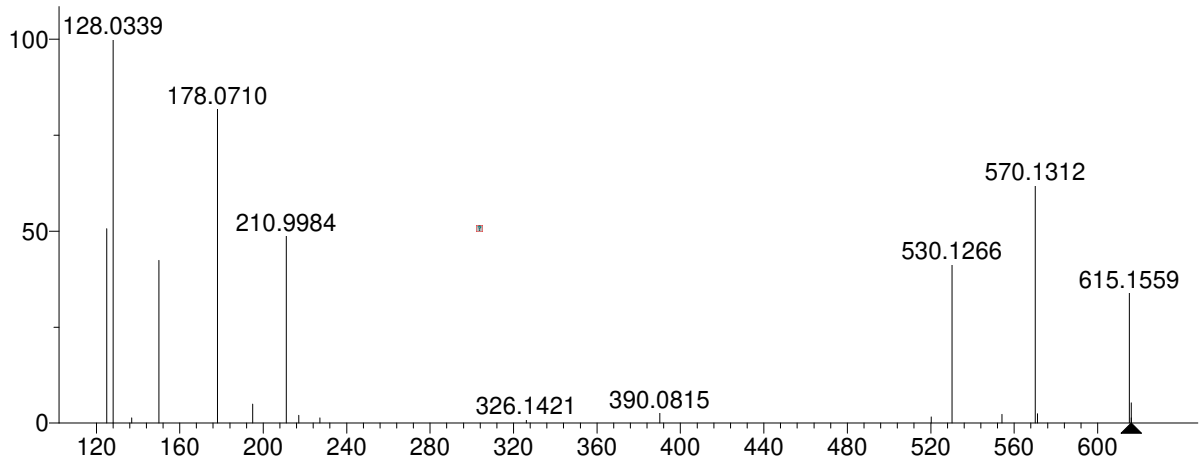

\*\* Search Report Page 1 of 2 \*\*

Unknown: Unknown (4.17\_559.2353m/z)  
Compound in Library Factor = -2387

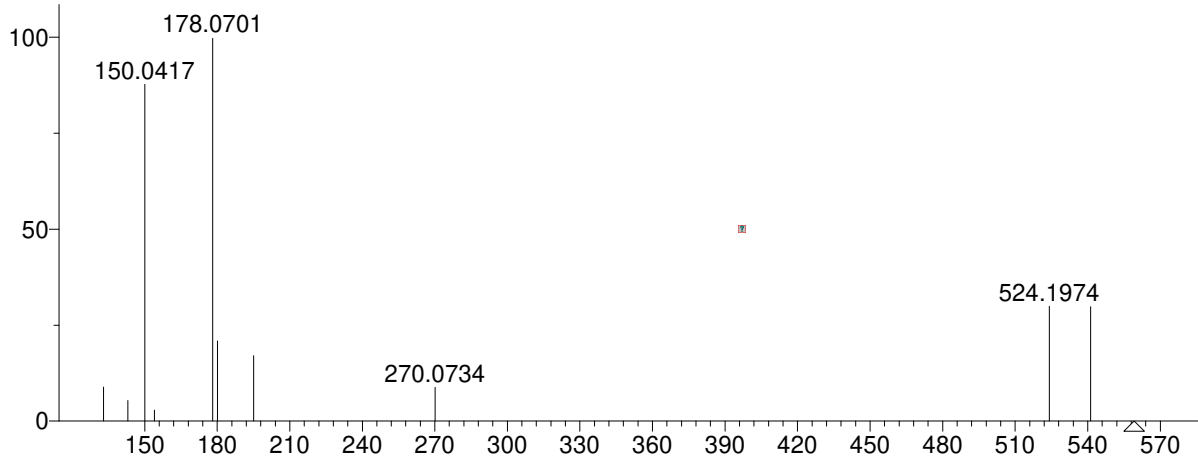

Hit 1 : Olmesartan medoxomil [M+H]<sup>+</sup> HCD 5V P=559.2  
C<sub>29</sub>H<sub>30</sub>N<sub>6</sub>O<sub>6</sub>; MF: 18; RMF: 296; Prob 48.3%; CAS: 144689-63-4; Lib: nist\_msms; ID: 255791.

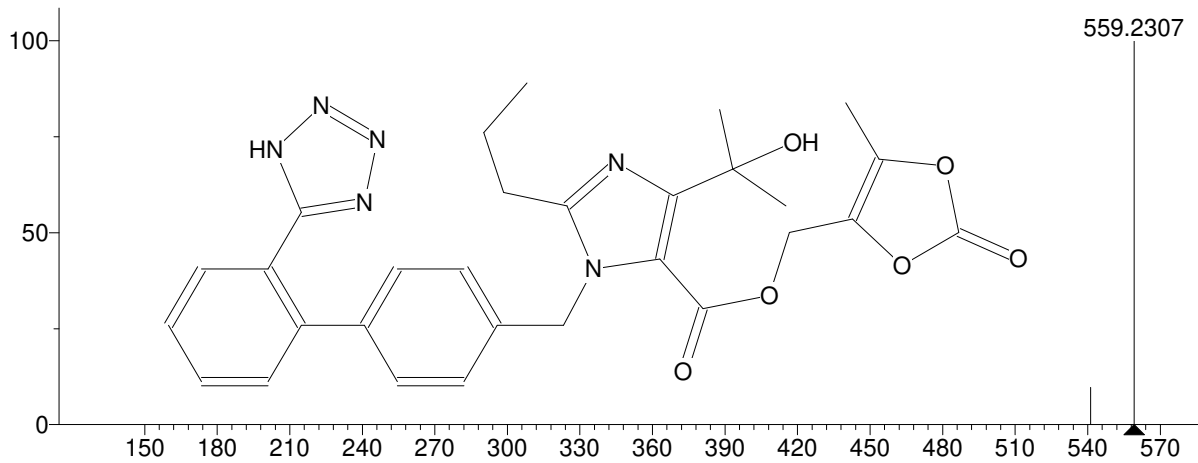

Hit 2 : Olmesartan medoxomil (Benicar) [M+H]<sup>+</sup> P=559.2  
C<sub>29</sub>H<sub>30</sub>N<sub>6</sub>O<sub>6</sub>; MF: 1; RMF: 169; Prob 26.4%; Lib: mona-export-gnps; ID: 522.

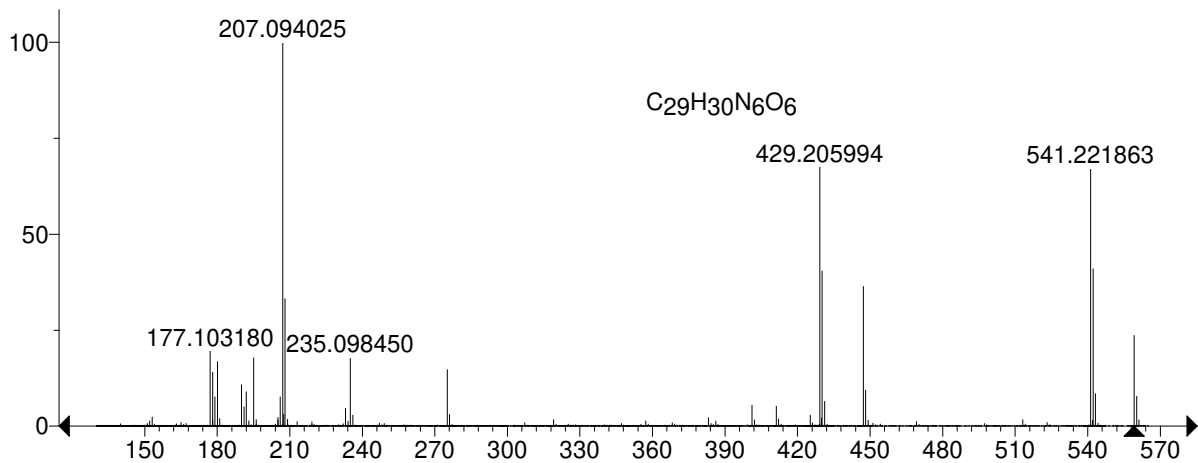

Hit 3 : Okaramine R\_120153 [M+Na]<sup>+</sup> P=559.2  
C<sub>32</sub>H<sub>32</sub>N<sub>4</sub>O<sub>4</sub>; MF: 0; RMF: 20; Prob 25.3%; Lib: mona-export-gnps; ID: 4971.

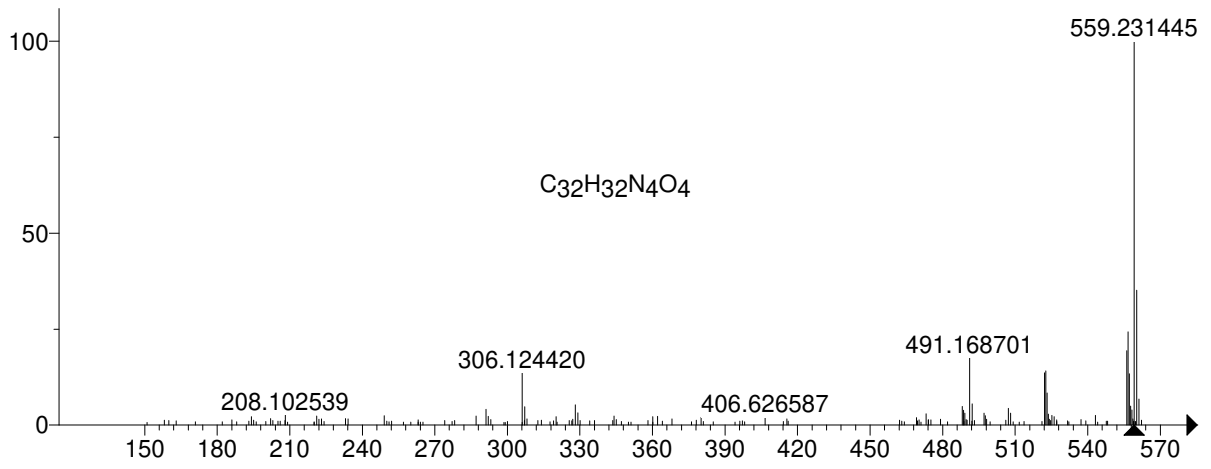

Unknown: Unknown (4.17\_698.2881m/z)  
Compound in Library Factor = 0

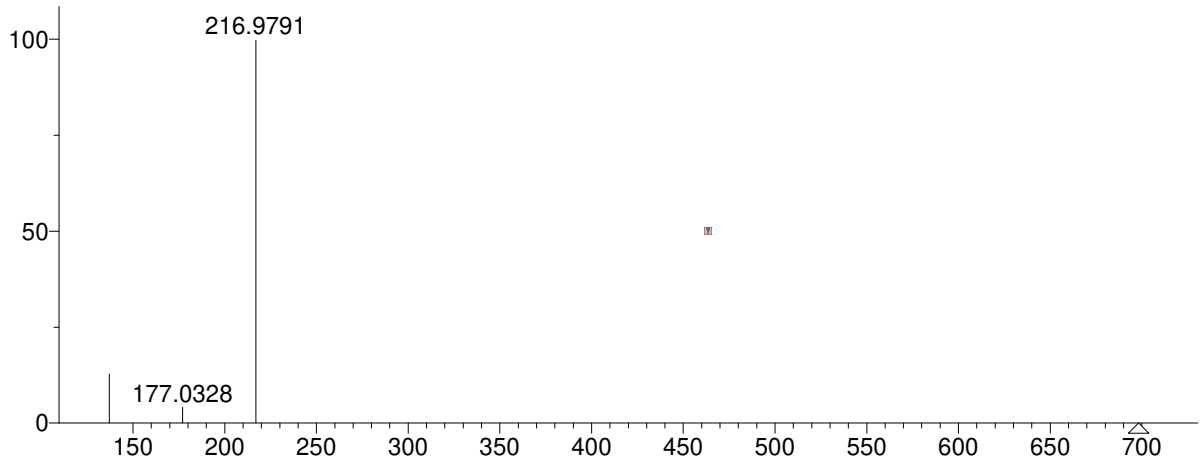

Unknown: Unknown (4.18\_693.1751m/z)  
Compound in Library Factor = 0

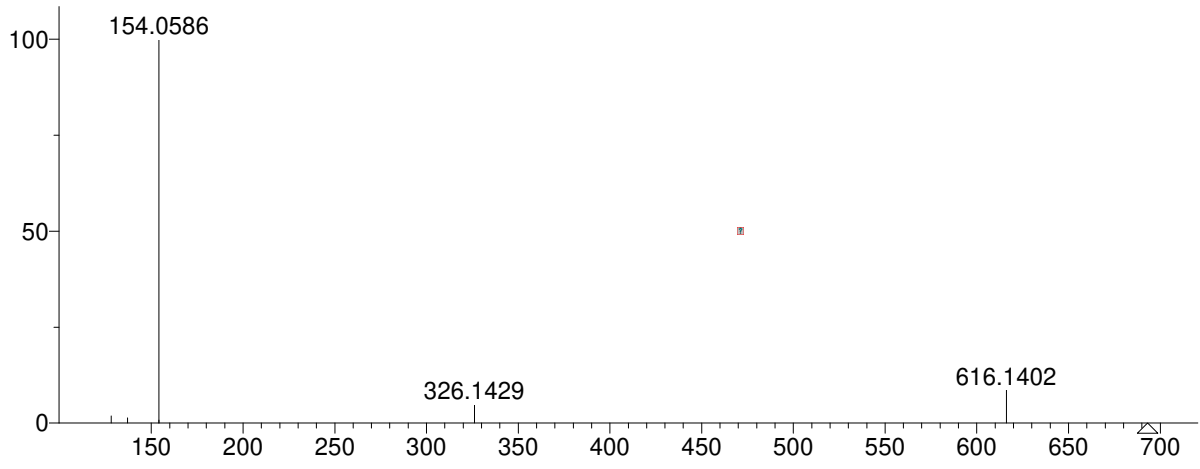



\*\* Search Report Page 1 of 2 \*\*

Unknown: Unknown (4.19\_347.1229m/z)  
Compound in Library Factor = -237

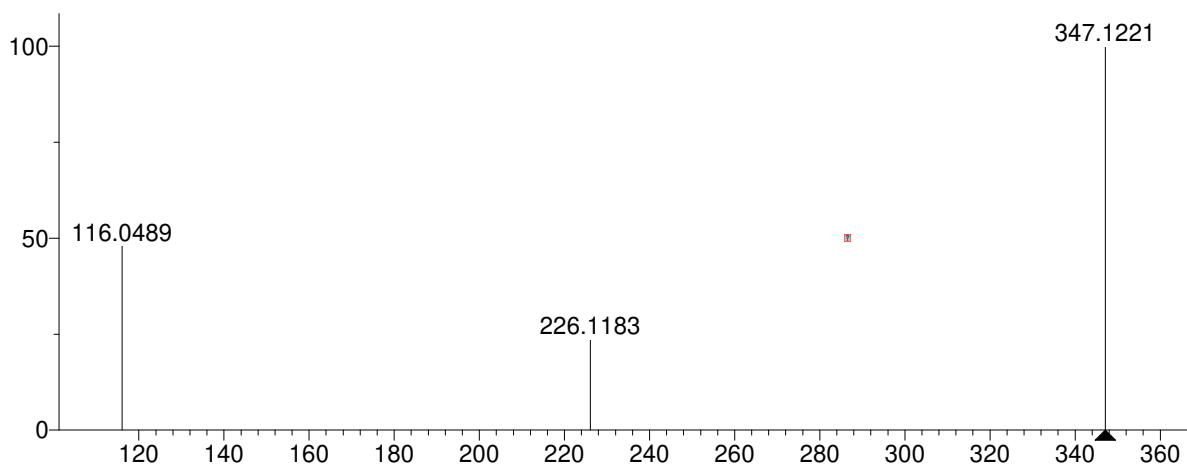

Hit 1 : 1H-Indole-1-acetic acid, 5-fluoro-2-methyl-3-(2-quinolinylmethyl)- [M-H]<sup>-</sup> HCD 10V P=347.1  
C<sub>21</sub>H<sub>17</sub>FN<sub>2</sub>O<sub>2</sub>; MF: 324; RMF: 948; Prob 98.7%; CAS: 851723-84-7; Lib: nist\_msms; ID: 273058.

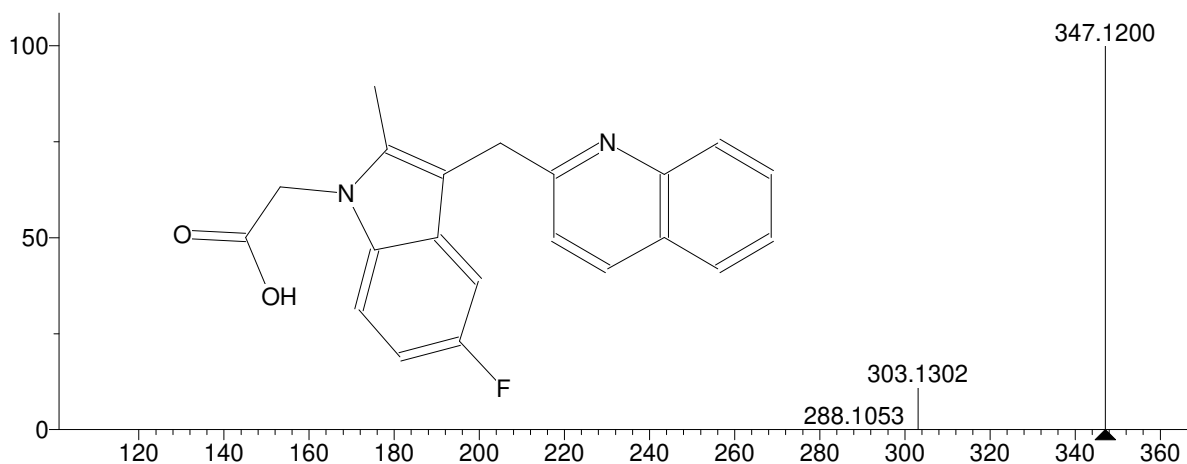

Hit 2 : Nifedipine [M+H]<sup>+</sup> HCD 3V P=347.1  
C<sub>17</sub>H<sub>18</sub>N<sub>2</sub>O<sub>6</sub>; MF: 82; RMF: 784; Prob 0.98%; CAS: 21829-25-4; Lib: nist\_msms; ID: 105423.

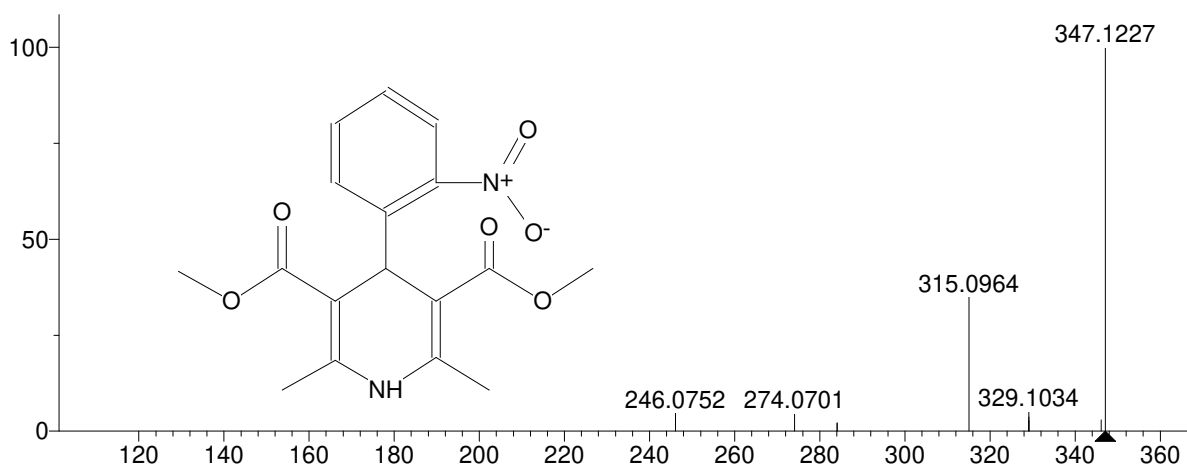

Hit 3 : (E)-1-(2,4-dihydroxyphenyl)-3-[4-(3-methylbut-2-enoxy)phenyl]prop-2-en-1-one [M+Na]<sup>+</sup> 35HCD P=347.1  
C<sub>20</sub>H<sub>20</sub>O<sub>4</sub>; MF: 0; RMF: 80; Prob 0.10%; Lib: mona-export-vf-npl\_qexactive; ID: 10435.

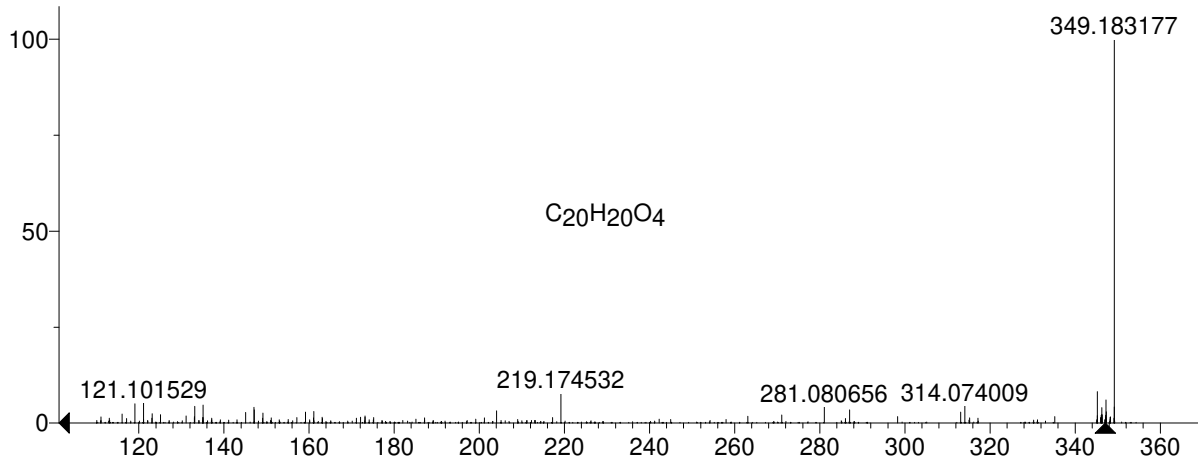

Hit 4 : Nifedipine (Adalat) [M+H]<sup>+</sup> P=347.1  
C<sub>17</sub>H<sub>18</sub>N<sub>2</sub>O<sub>6</sub>; MF: 0; RMF: 43; Prob 0.10%; Lib: mona-export-gnps; ID: 626.

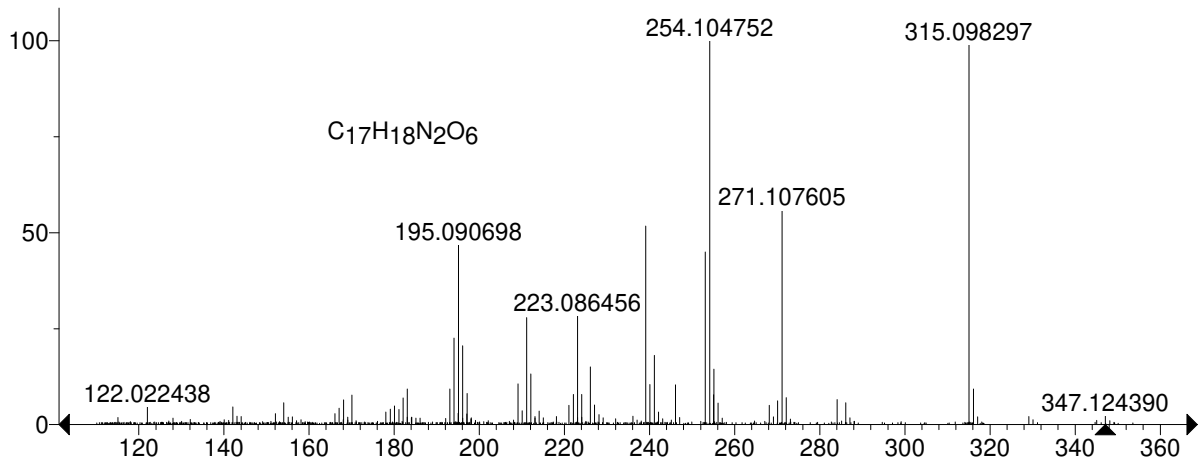

Hit 5 : 4-(8-prop-1-en-2-yl-3,4,8,9-tetrahydro-2H-furo[2,3-h]chromen-3-yl)benzene-1,3-diol [M+Na]<sup>+</sup> 35HCD P=347.1  
C<sub>20</sub>H<sub>20</sub>O<sub>4</sub>; MF: 0; RMF: 27; Prob 0.10%; Lib: mona-export-vf-npl\_qexactive; ID: 16300.

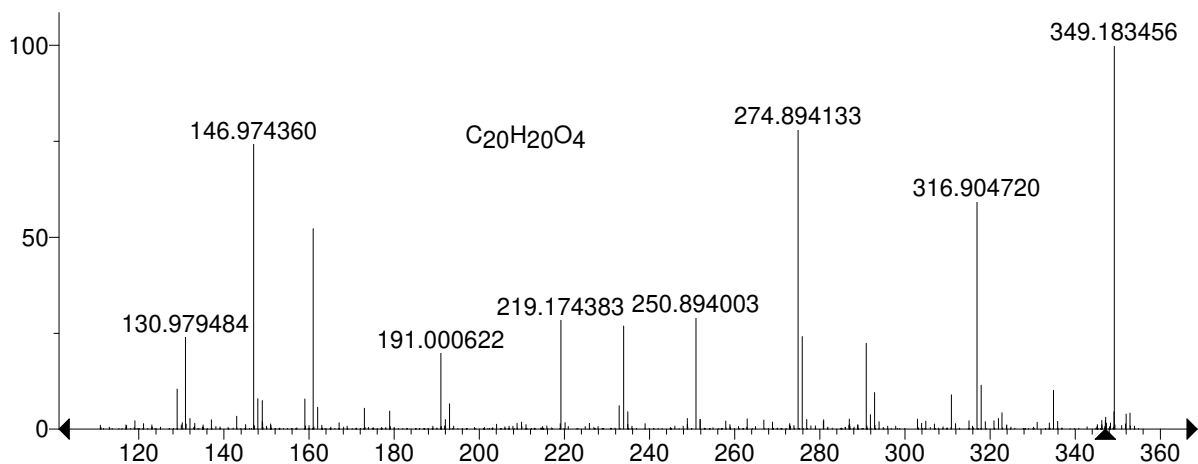

Unknown: Unknown (4.19\_359.1451m/z)  
Compound in Library Factor = 0

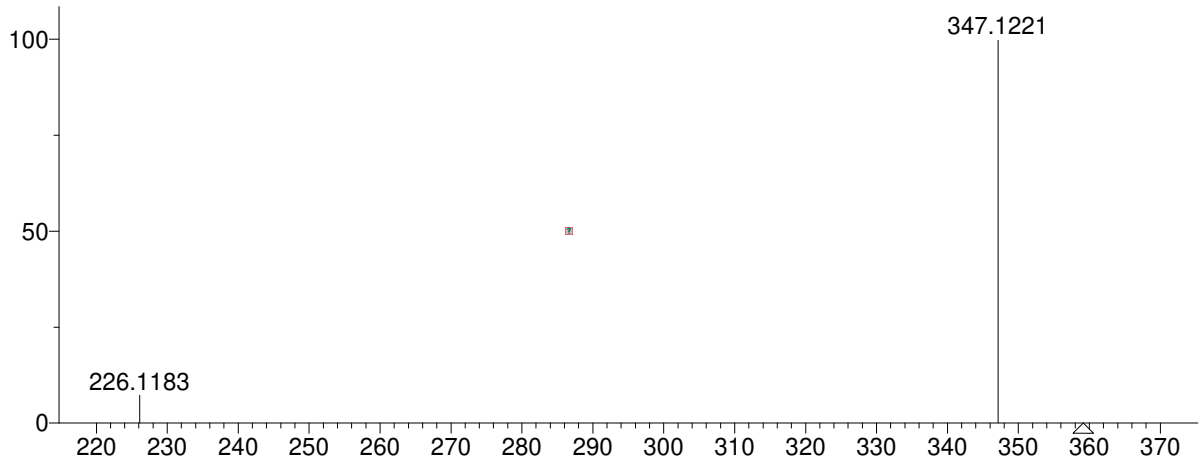

Unknown: Unknown (4.19\_461.1884m/z)  
Compound in Library Factor = 0

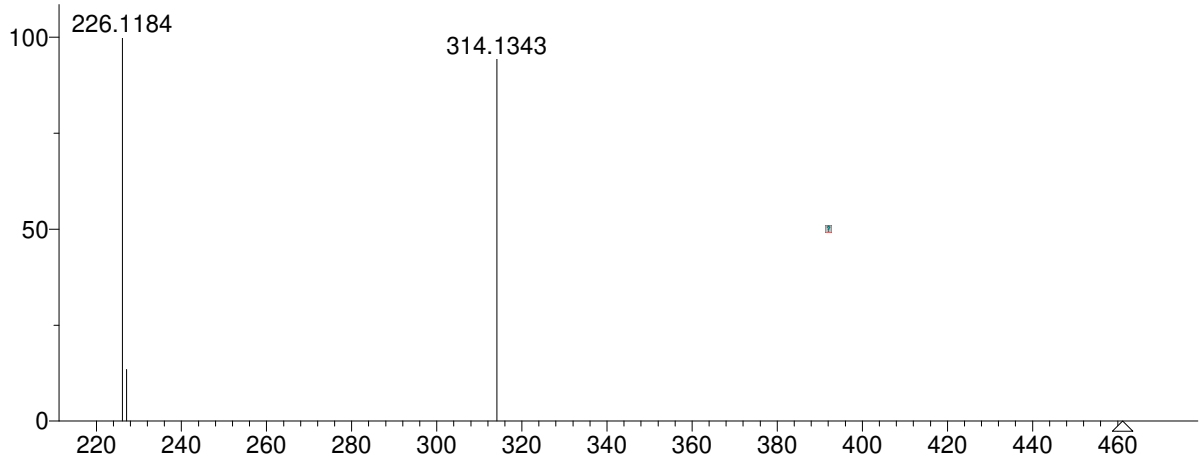

Unknown: Unknown (4.19\_626.1365m/z)  
Compound in Library Factor = 0

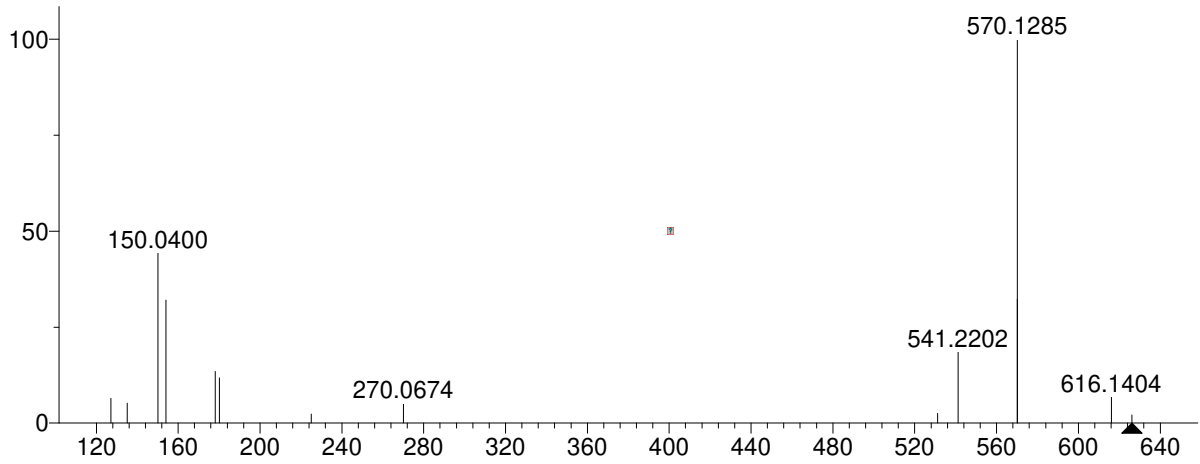

Hit 1 : Calcitonin Gene Related Peptide (8-37), rat [M+5H]<sup>5+</sup> QQQ 20V P=626.1  
C<sub>138</sub>H<sub>224</sub>N<sub>42</sub>O<sub>41</sub>; MF: 0; RMF: 22; Prob 100.0%; Lib: nist\_msms2; ID: 20967.

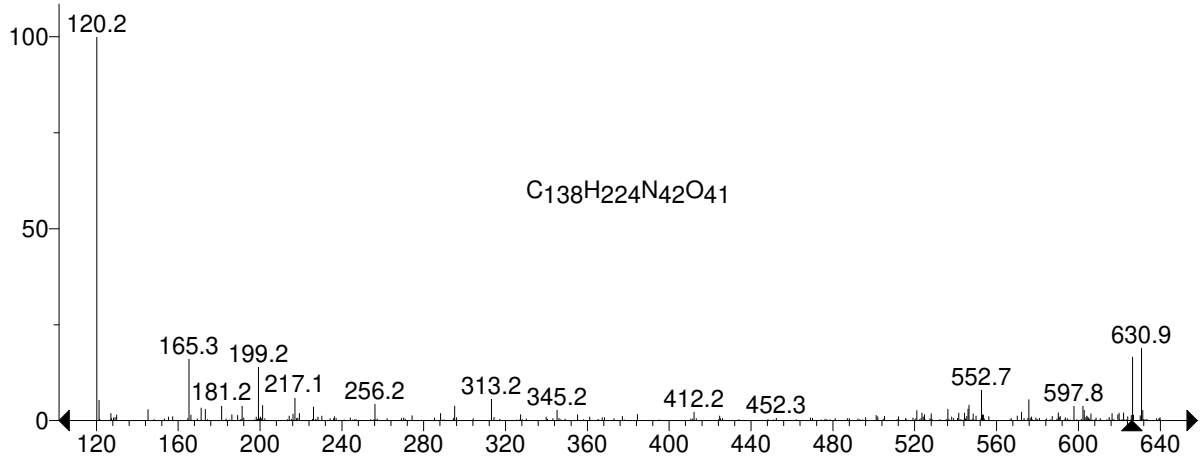

Unknown: Unknown (4.20\_332.1698m/z)  
Compound in Library Factor = 0

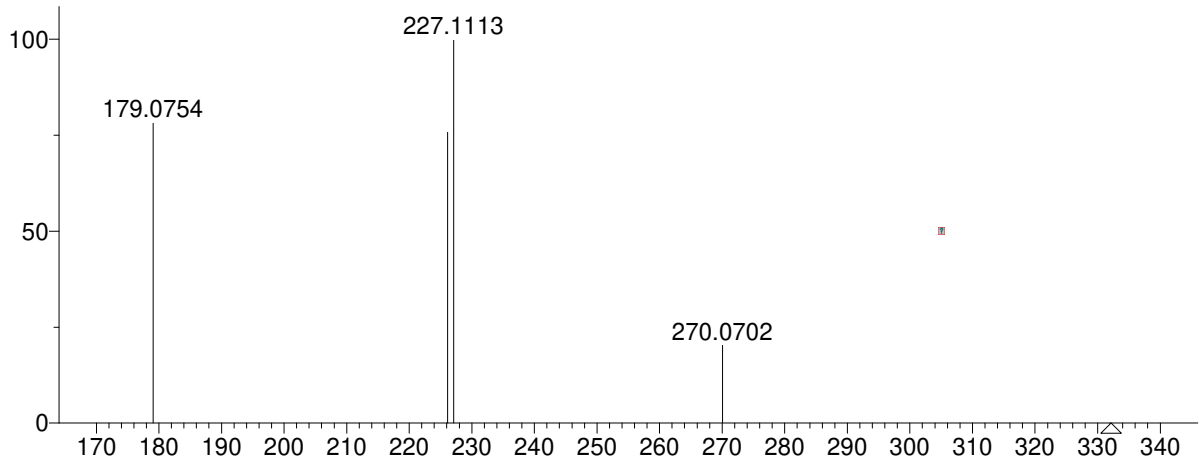

Unknown: Unknown (4.20\_587.1140m/z)  
Compound in Library Factor = 0

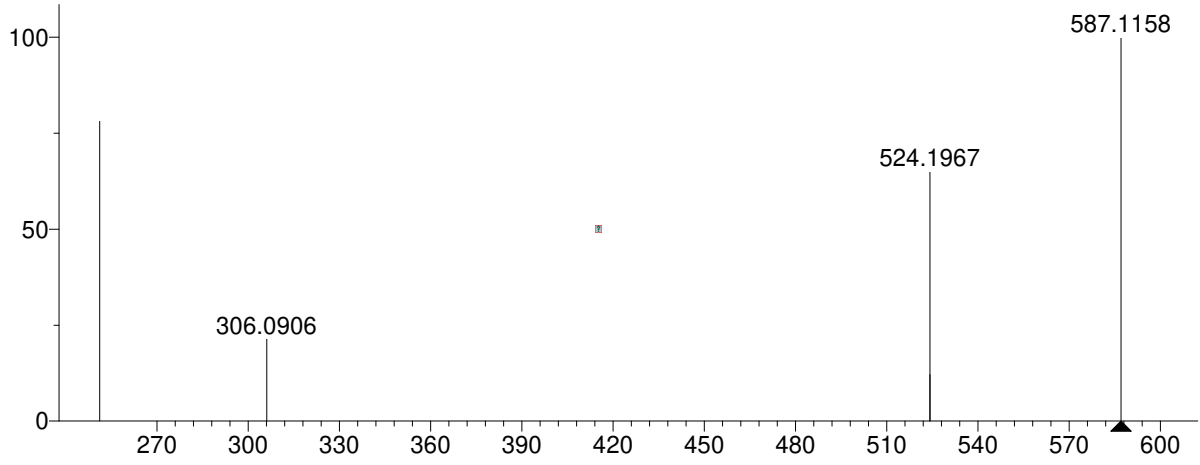

Hit 1 : 5,7-dihydroxy-2-phenyl-6-[3,4,5-trihydroxy-6-(hydroxymethyl)oxan-2-yl]-8-(3,4,5-trihydroxyoxan-2-yl)chromene  
C<sub>26</sub>H<sub>28</sub>O<sub>13</sub>; MF: 0; RMF: 28; Prob 50.0%; Lib: anthocyanins mona; ID: 8506.

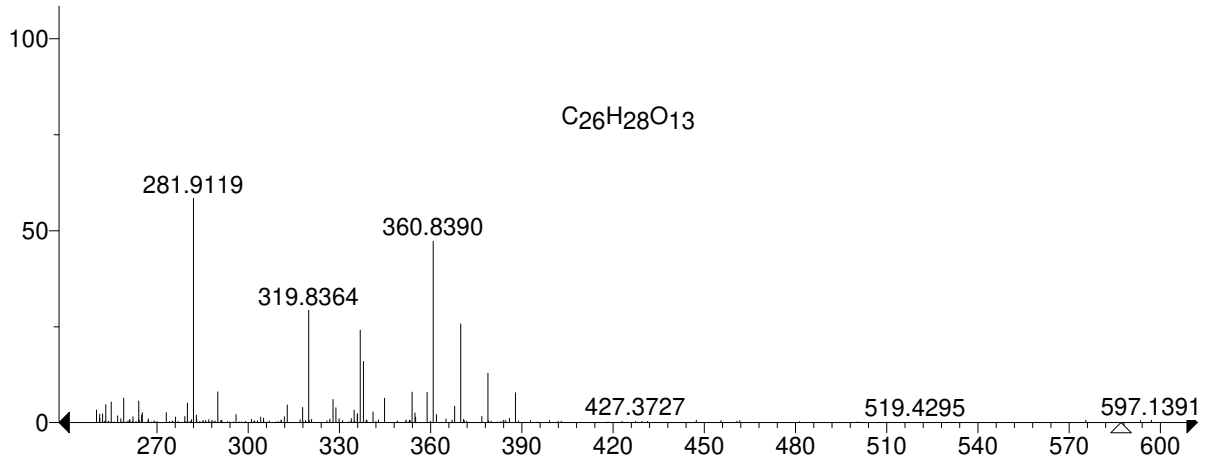

Hit 2 : Theaflavin [M+Na]<sup>+</sup> 35HCD P=587.1  
C<sub>29</sub>H<sub>24</sub>O<sub>12</sub>; MF: 0; RMF: 15; Prob 50.0%; Lib: mona-export-vf-npl\_qexactive; ID: 2698.

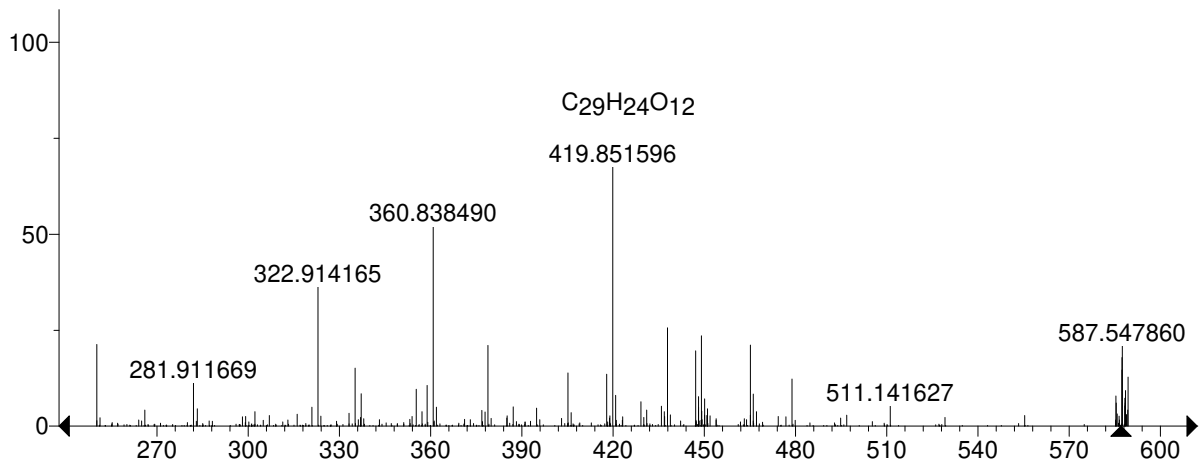

Unknown: Unknown (4.21\_458.1986m/z)  
Compound in Library Factor = 0

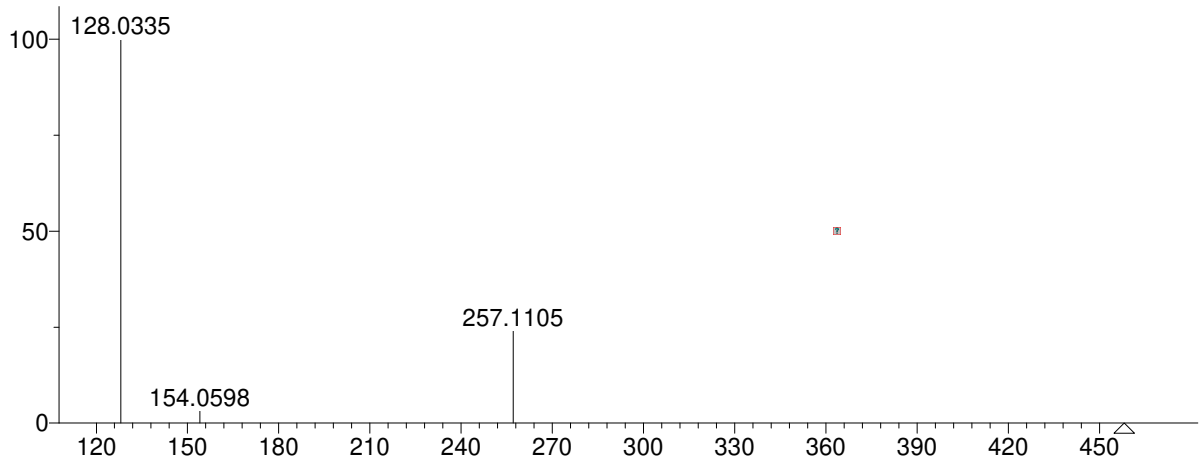



Unknown: Unknown (4.23\_453.1474m/z)  
Compound in Library Factor = 0

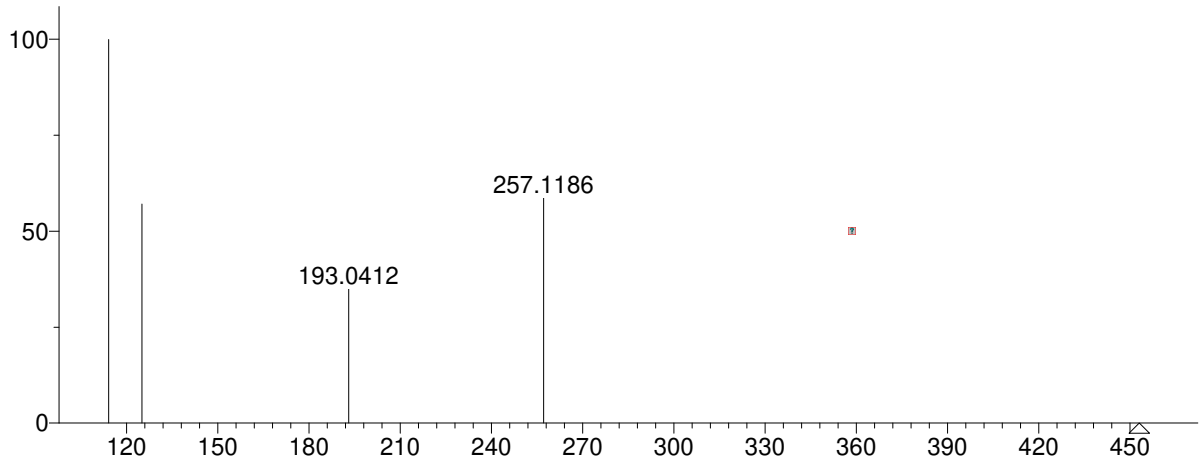

Unknown: Unknown (4.24\_341.1436m/z)  
Compound in Library Factor = 0

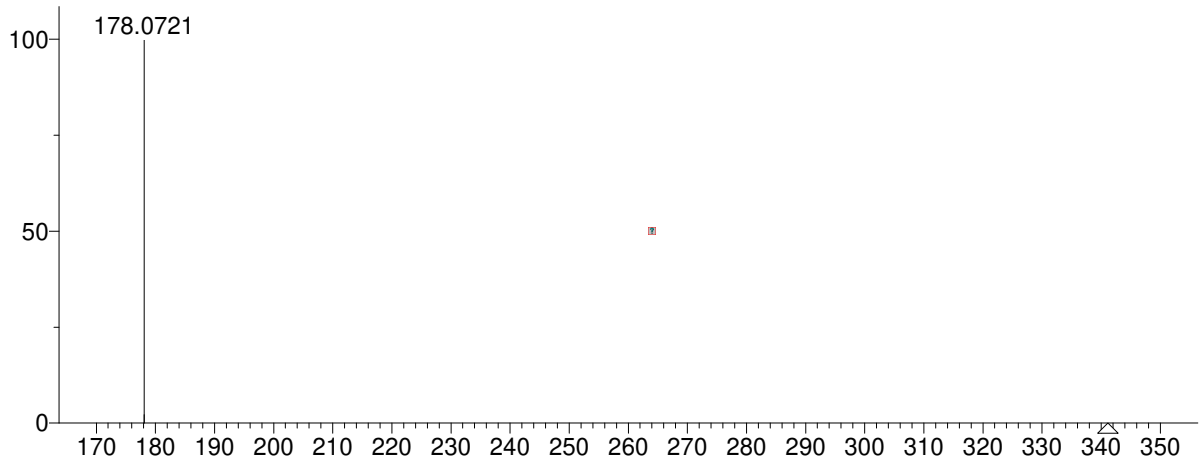

Unknown: Unknown (4.24\_354.1044m/z)  
Compound in Library Factor = -434

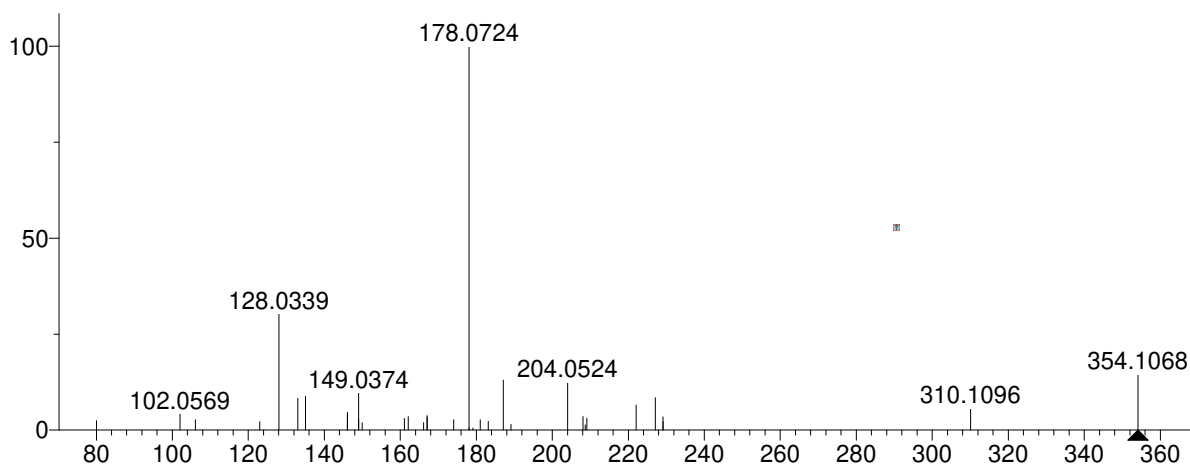

Hit 1 : Nizatidine [M+Na]<sup>+</sup> HCD 10V P=354.1  
C<sub>12</sub>H<sub>21</sub>N<sub>5</sub>O<sub>2</sub>S<sub>2</sub>; MF: 174; RMF: 820; Prob 94.3%; CAS: 76963-41-2; Lib: nist\_msms; ID: 152083.

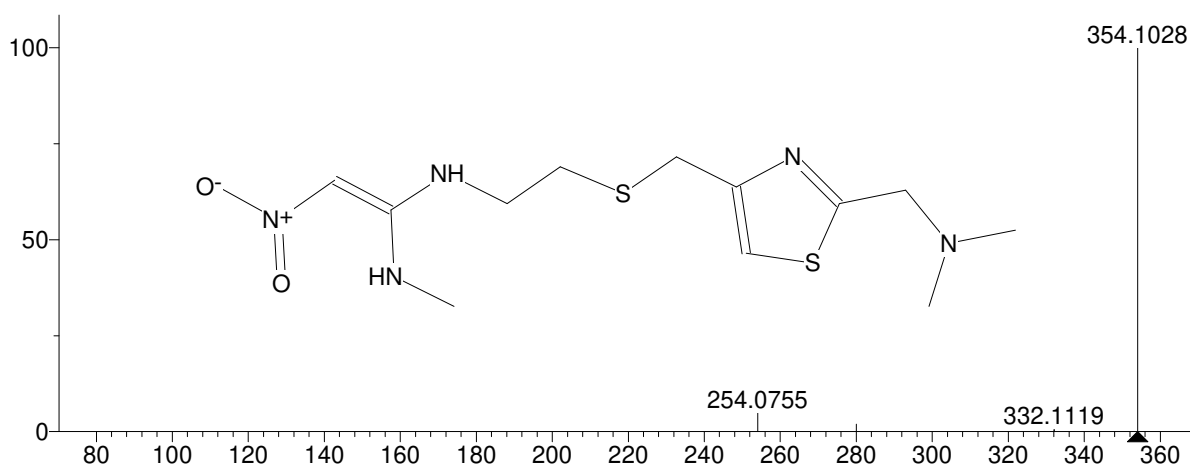

Hit 2 : 5'-O-Acetyladenosine [M+HCO<sub>2</sub>]<sup>-</sup> HCD 5V P=354.1  
C<sub>12</sub>H<sub>15</sub>N<sub>5</sub>O<sub>5</sub>; MF: 15; RMF: 224; Prob 2.37%; CAS: 2140-25-2; Lib: nist\_msms; ID: 228060.

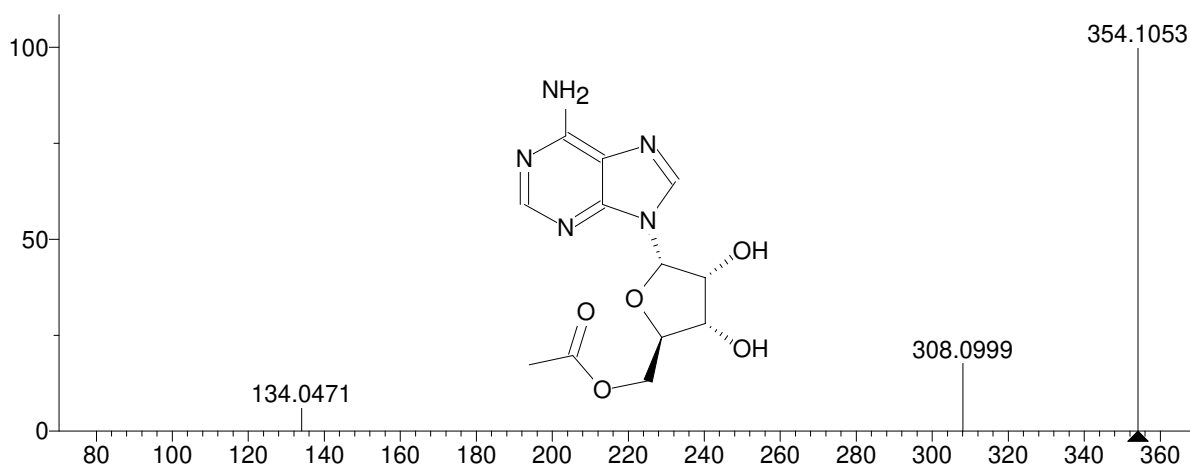

Hit 3 : rac-4-Sulfoxypropranolol [M-H]<sup>-</sup> HCD 17V P=354.1  
C<sub>16</sub>H<sub>21</sub>NO<sub>6</sub>S; MF: 9; RMF: 212; Prob 1.86%; CAS: 87075-33-0; Lib: nist\_msms; ID: 443588.

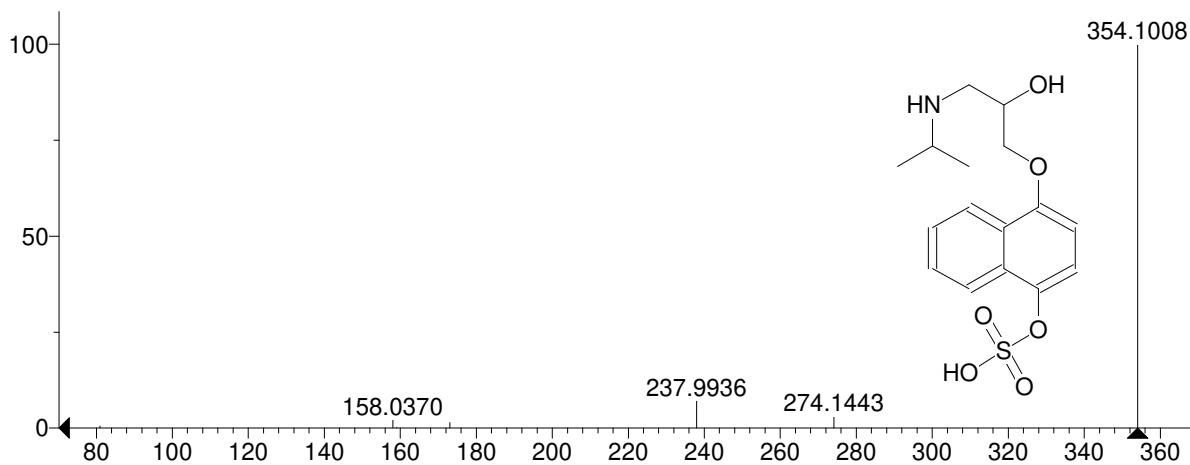

Hit 4 : 1H-Indole-2-propanoic acid, 1-[(4-chlorophenyl)methyl]-5-fluoro- $\alpha,\alpha$ ,3-trimethyl- [M-H-H<sub>2</sub>O]<sup>-</sup> HCD 31V P  
C<sub>21</sub>H<sub>21</sub>ClFNO<sub>2</sub>; MF: 4; RMF: 167; Prob 1.50%; CAS: 103253-15-2; Lib: nist\_msms; ID: 430036.

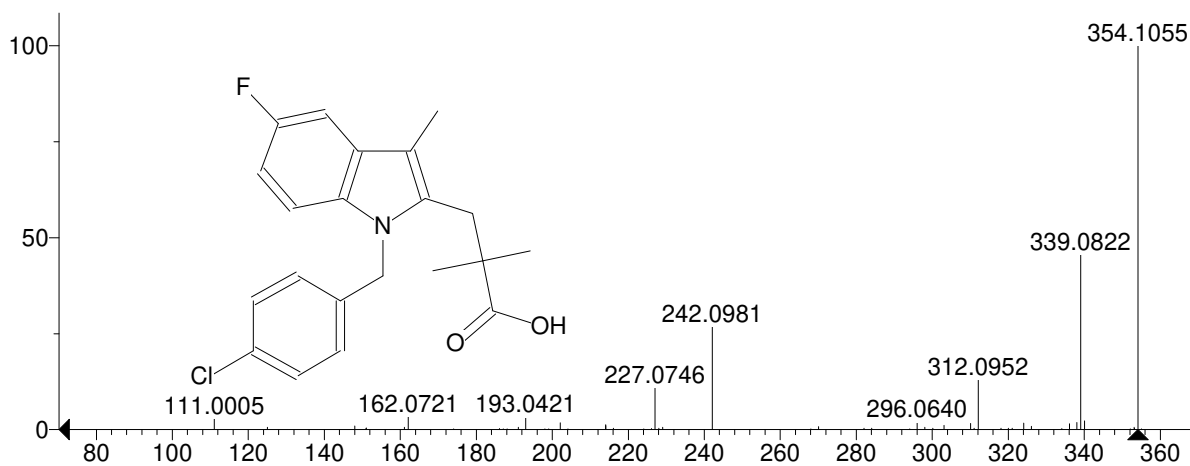

Unknown: Unknown (4.24\_374.1548m/z)  
Compound in Library Factor = 0

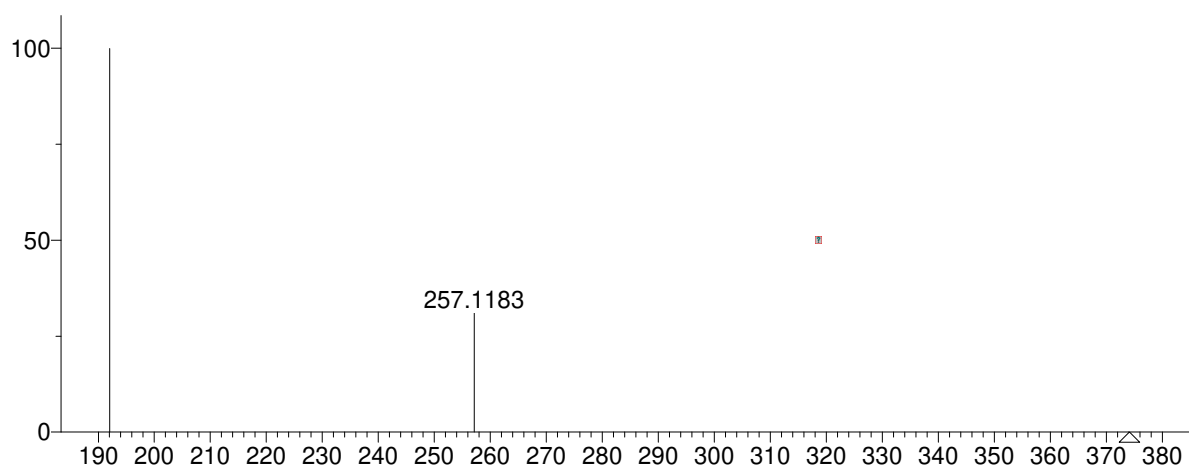

Hit 1 : Gatifloxacin [M-H]<sup>-</sup> HCD 82V P=374.2  
C<sub>19</sub>H<sub>22</sub>FN<sub>3</sub>O<sub>4</sub>; MF: 0; RMF: 143; Prob 100.0%; CAS: 112811-59-3; Lib: nist\_msms; ID: 357665.

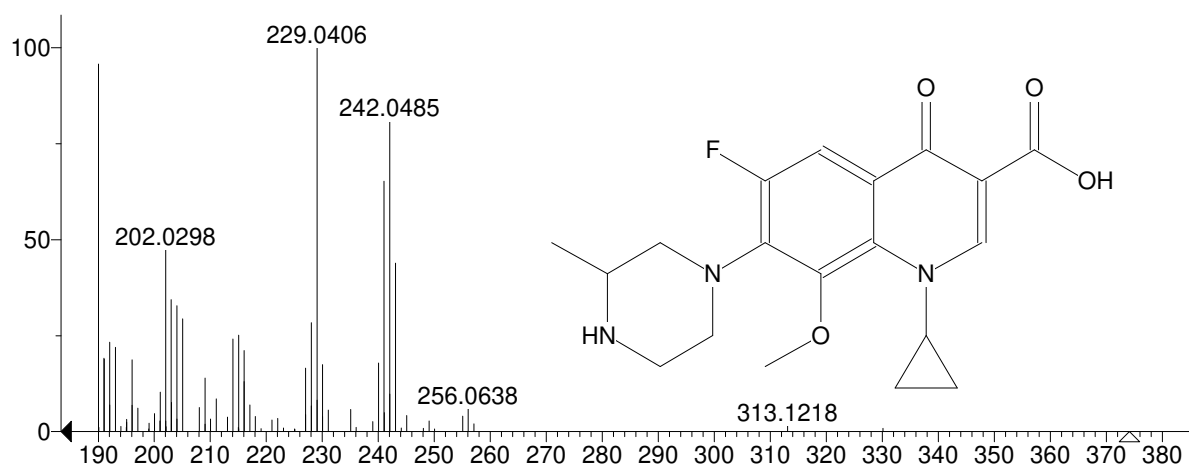

Unknown: Unknown (4.25\_420.1492m/z)  
Compound in Library Factor = 0

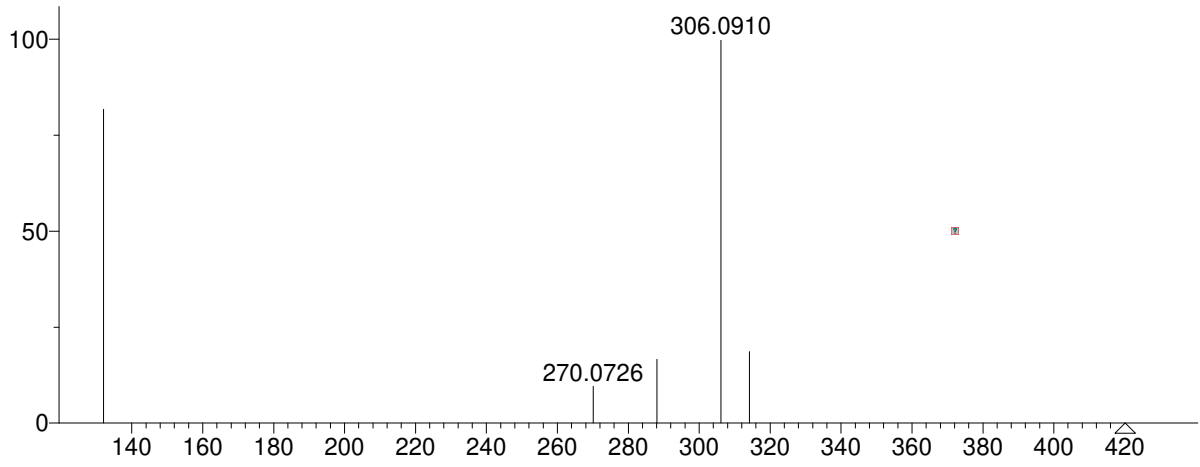

Unknown: Unknown (4.25\_476.1507m/z)  
Compound in Library Factor = 0

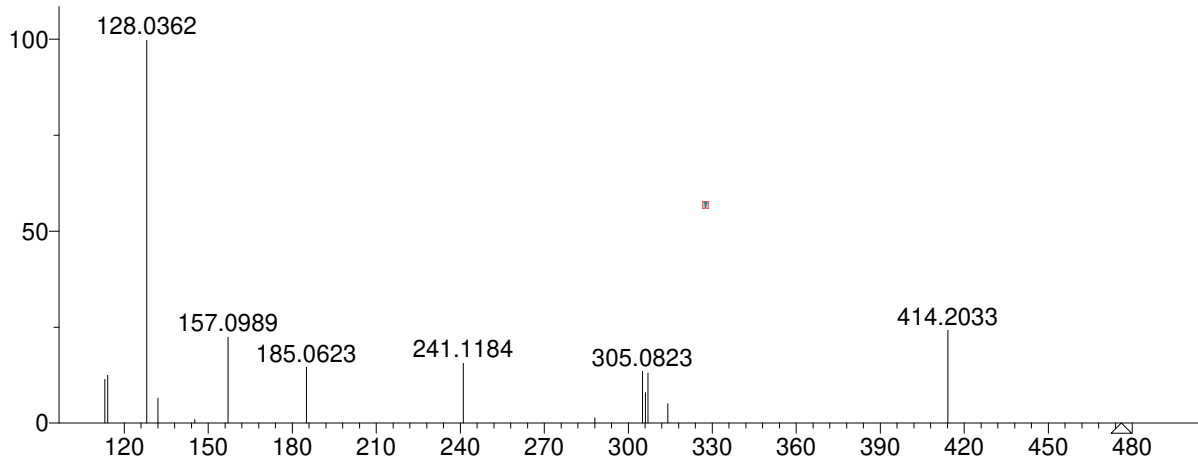

Unknown: Unknown (4.26\_502.2020m/z)  
Compound in Library Factor = 0

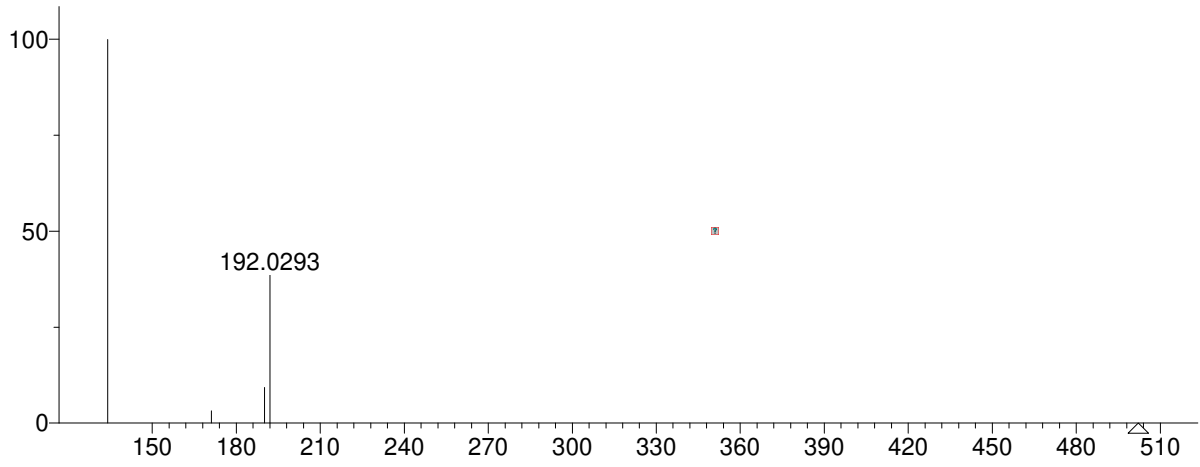



Unknown: Unknown (4.26\_586.1295m/z)  
Compound in Library Factor = 0

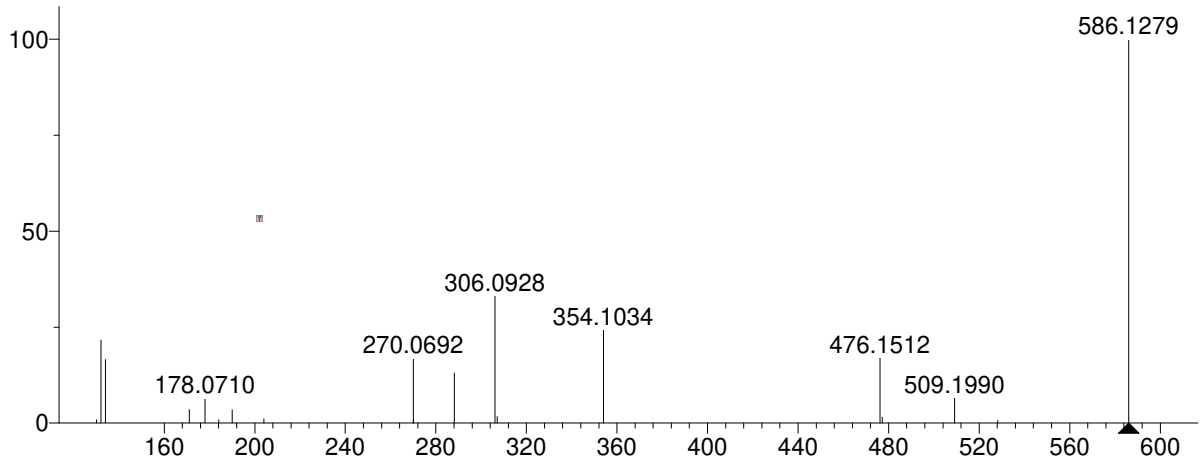

Unknown: Unknown (4.26\_646.2093m/z)  
Compound in Library Factor = 0

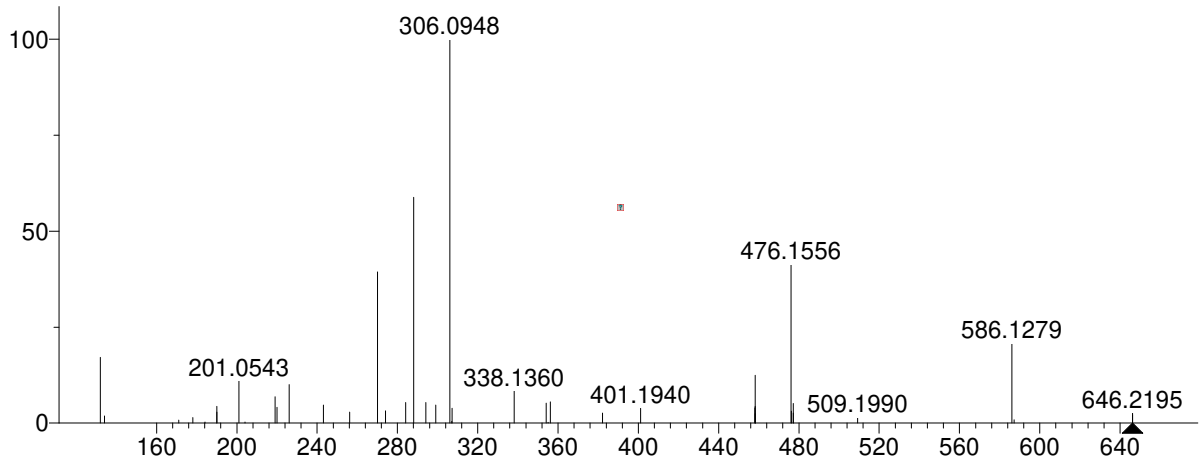

Unknown: Unknown (4.26\_647.2143m/z)  
Compound in Library Factor = 0

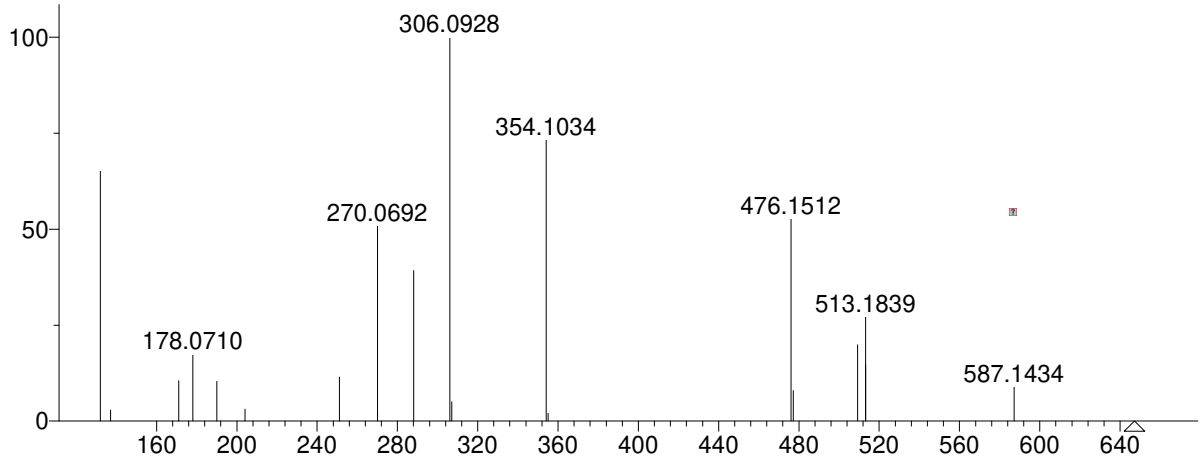

Hit 1 : NCGC00384546-01!7-[(2S,3R,4S,5S,6R)-4,5-dihydroxy-3-[(2R,3R,4R,5R,6S)-3,4,5-trihydroxy-6-methyloxa C28H38O17; MF: 0; RMF: 12; Prob 50.0%; Lib: mona-export-gnps; ID: 6655.

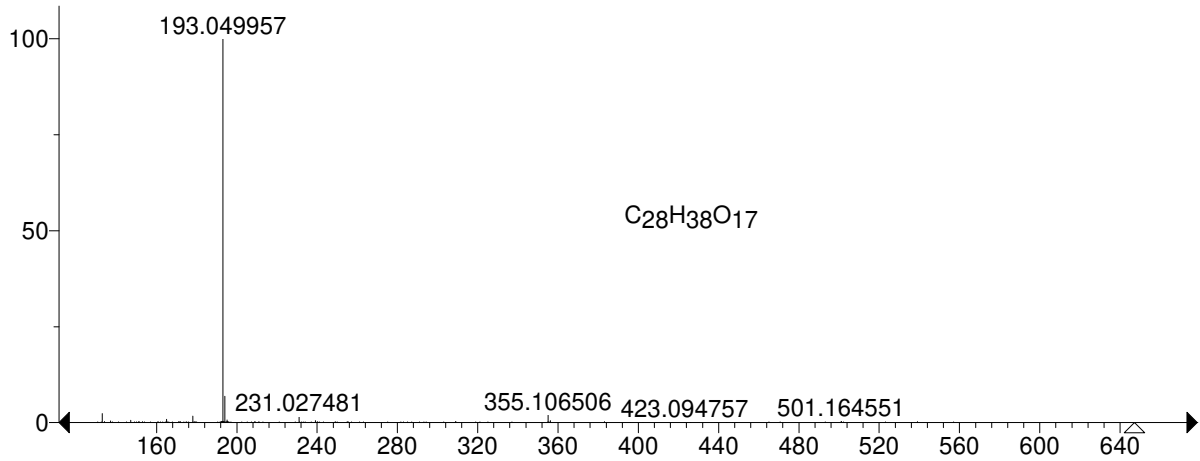

Hit 2 : 7-[(2S,3R,4S,5S,6R)-4,5-dihydroxy-3-[(2R,3R,4R,5R,6S)-3,4,5-trihydroxy-6-methyloxan-2-yl]oxy-6-[[[(2R,3F C28H38O17; MF: 0; RMF: 2; Prob 50.0%; Lib: anthocyanins mona; ID: 7149.

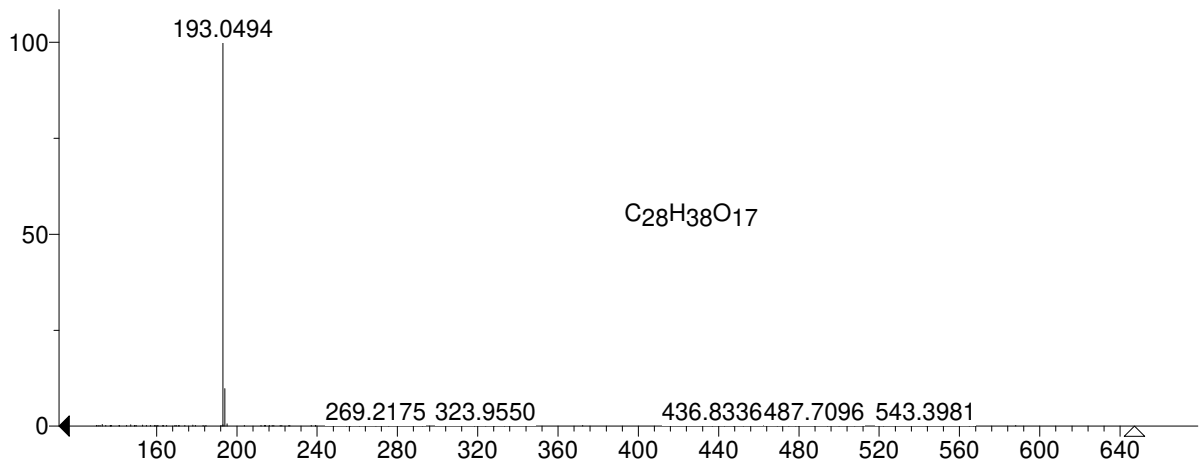

Unknown: Unknown (4.26\_699.1242m/z)  
Compound in Library Factor = 0

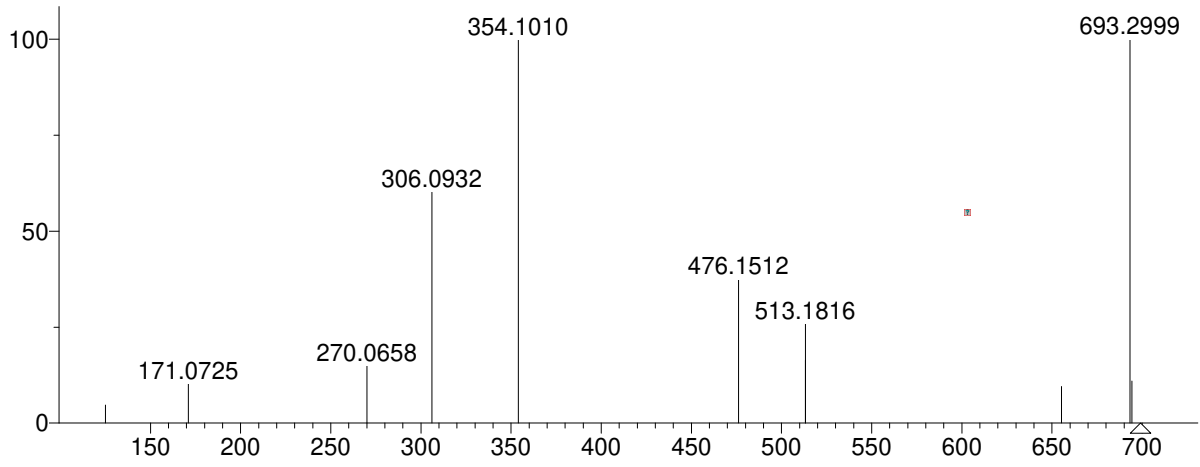

Unknown: Unknown (4.28\_683.2515m/z)  
Compound in Library Factor = 0

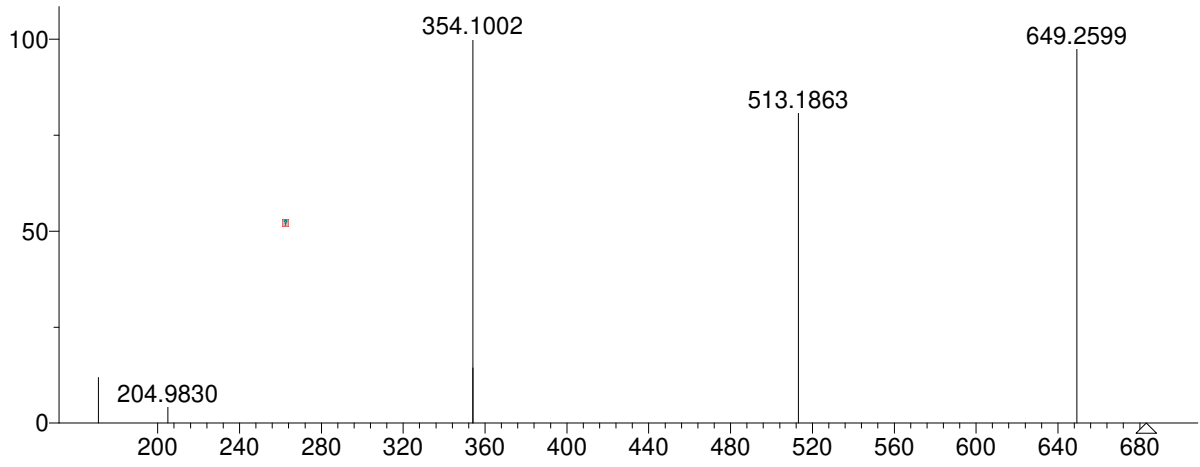

Unknown: Unknown (4.29\_204.9803m/z)  
Compound in Library Factor = 0

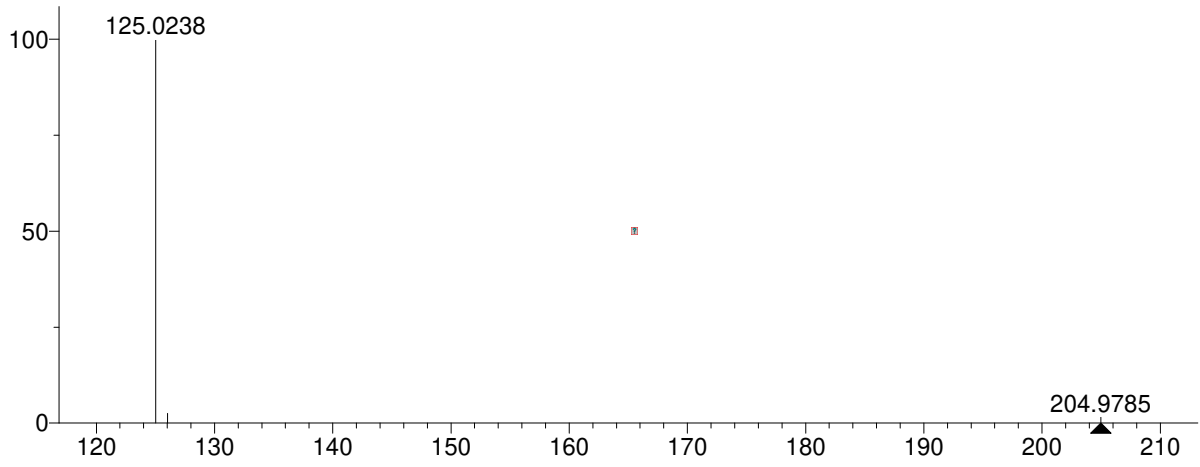

Unknown: Unknown (4.29\_693.2963m/z)  
Compound in Library Factor = -733

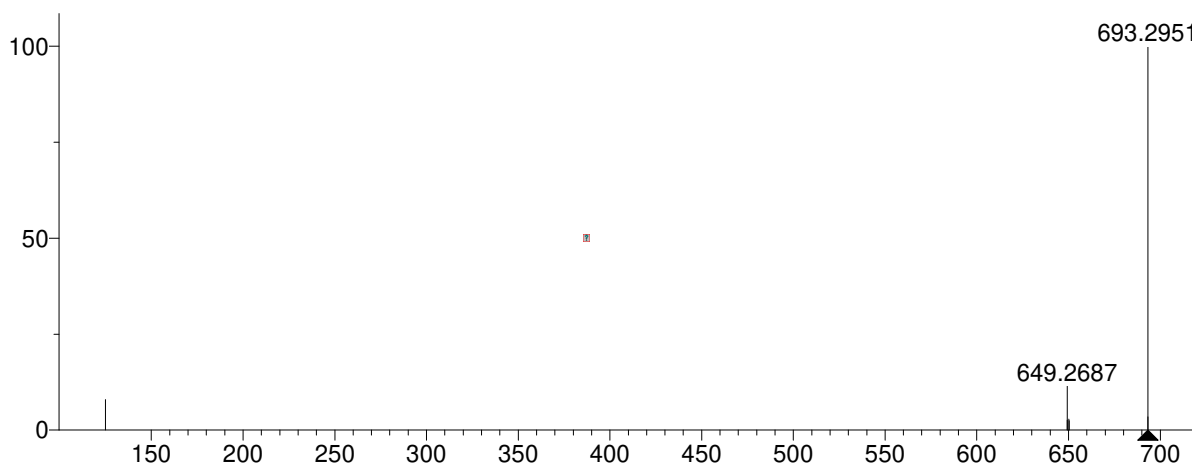

Hit 1 : Strictosidine hexoside ([H][C@@]1(C[C@]2([H])C(=CO[C@@]([H])(O[C@]3([H])O[C@]([H])(CO[C@]4([H])C33H44N2O14; MF: 10; RMF: 618; Prob 100.0%; Lib: alkaloids; ID: 27.

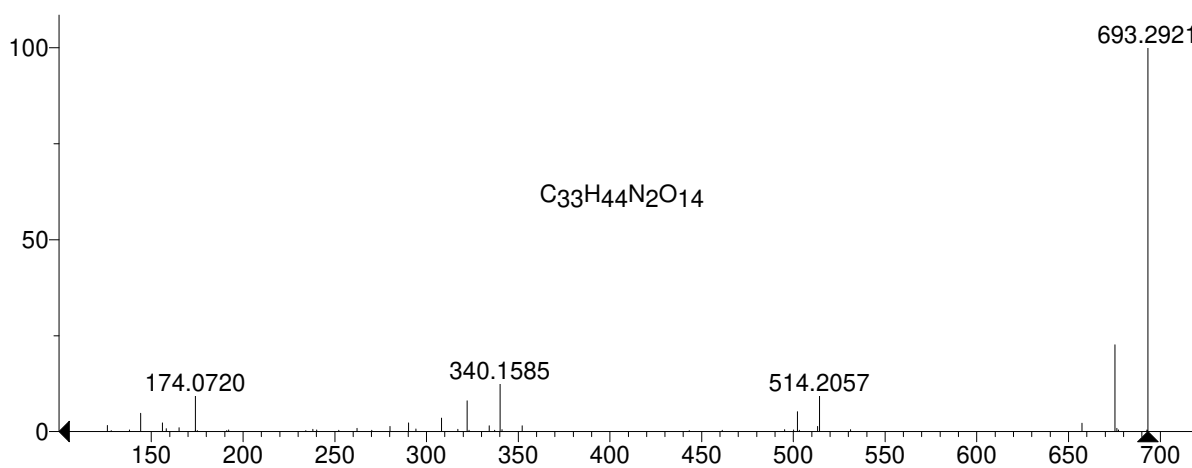

Unknown: Unknown (4.30\_481.0932m/z)  
Compound in Library Factor = 0

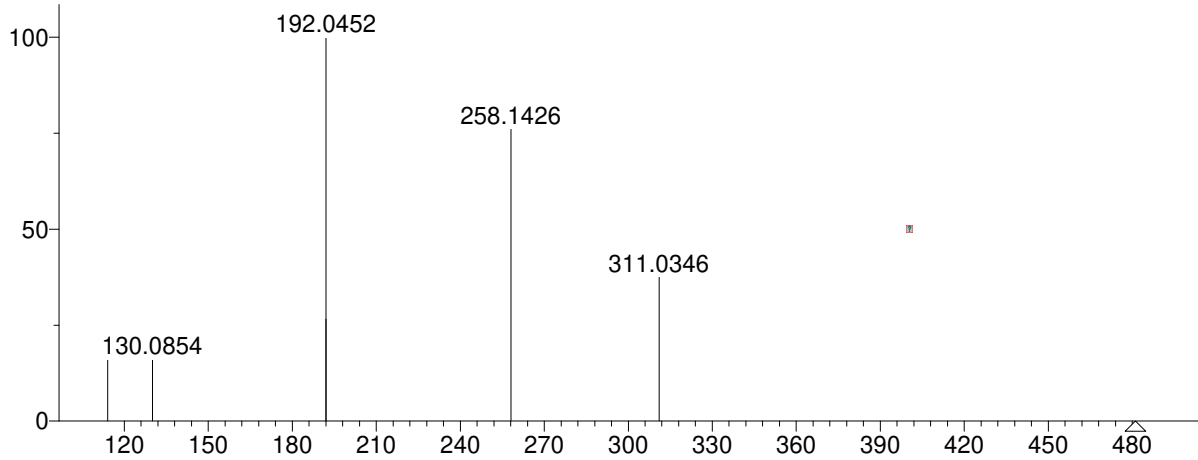

Hit 1 : Gossypin [M+H]<sup>+</sup> HCD 95V P=481.1  
C<sub>21</sub>H<sub>20</sub>O<sub>13</sub>; MF: 0; RMF: 16; Prob 50.0%; CAS: 652-78-8; Lib: nist\_msms; ID: 111983.

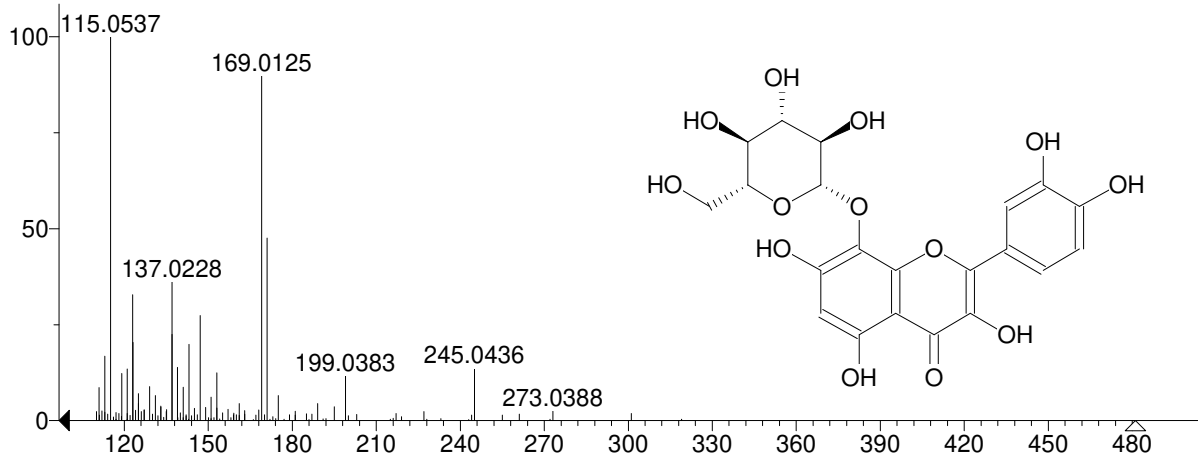

Hit 2 : Villol [M+K]<sup>+</sup> 65HCD P=481.1  
C<sub>23</sub>H<sub>22</sub>O<sub>9</sub>; MF: 0; RMF: 13; Prob 50.0%; Lib: mona-export-vf-npl\_qexactive; ID: 8049.

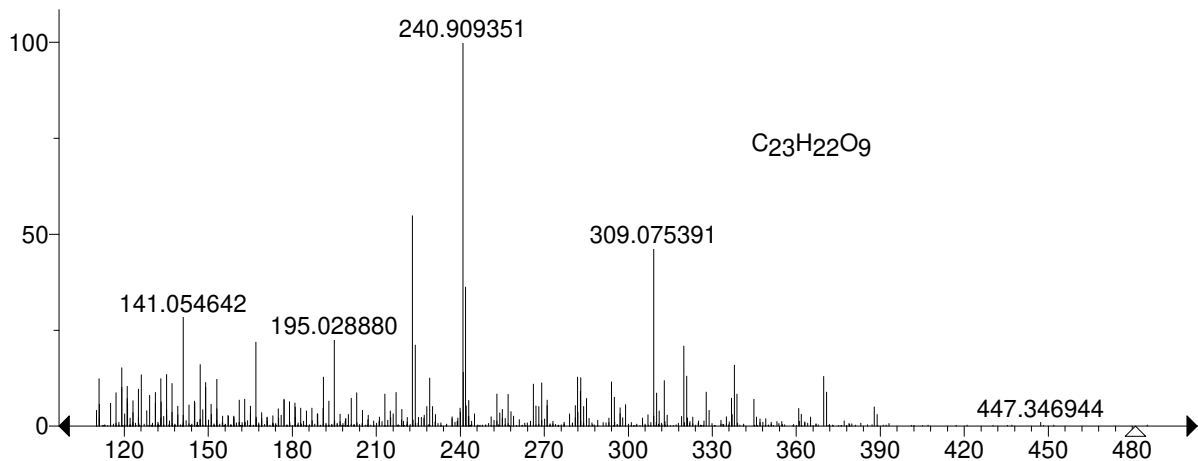



Unknown: Unknown (4.32\_364.1387m/z)  
Compound in Library Factor = 0

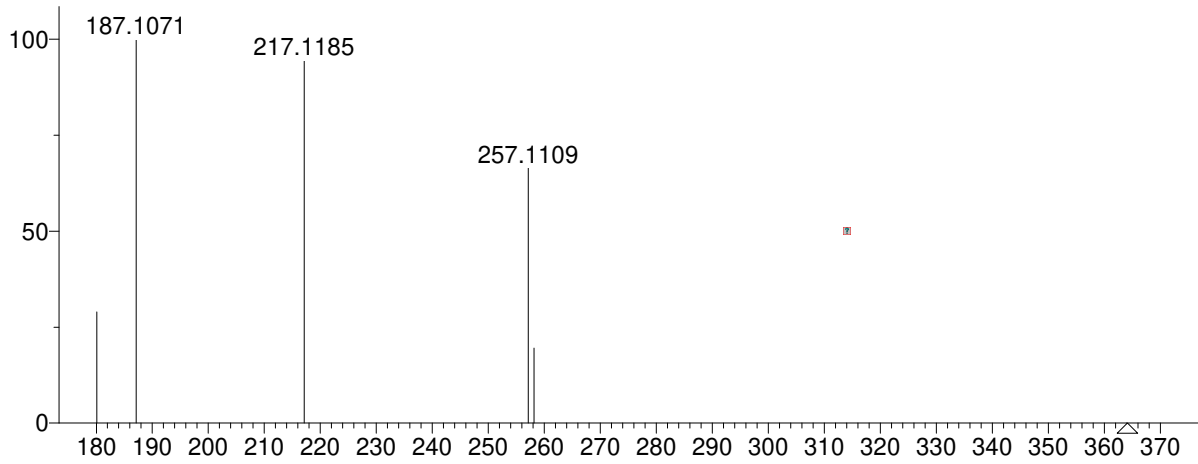

Hit 1 : methyl 2-(2,6-dihydroxy-4-methylbenzoyl)-3,5-dimethoxybenzoate [M+NH4]<sup>+</sup> 35HCD P=364.1  
C<sub>18</sub>H<sub>18</sub>O<sub>7</sub>; MF: 0; RMF: 18; Prob 100.0%; Lib: mona-export-vf-npl\_qexactive; ID: 9811.

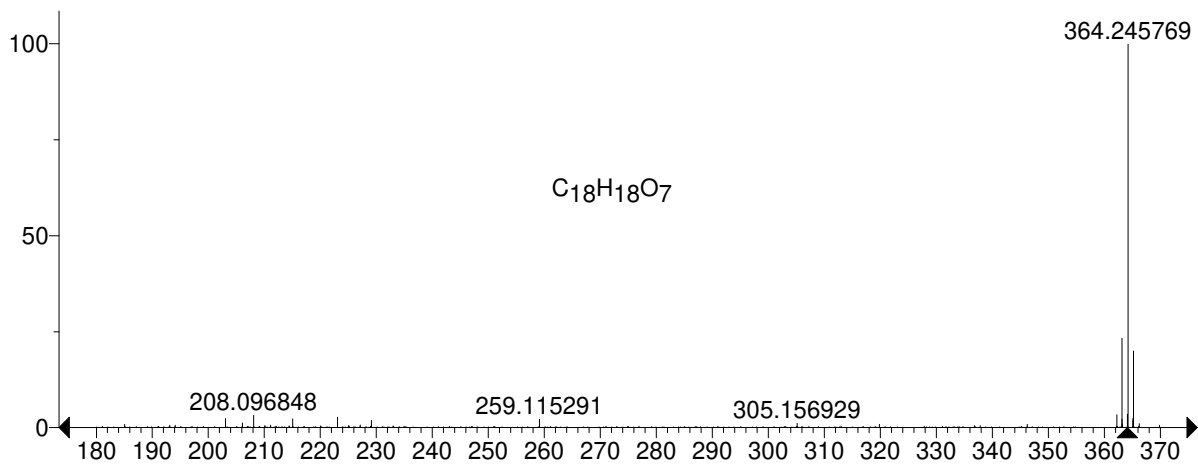

Unknown: Unknown (4.32\_441.1862m/z)  
Compound in Library Factor = 0

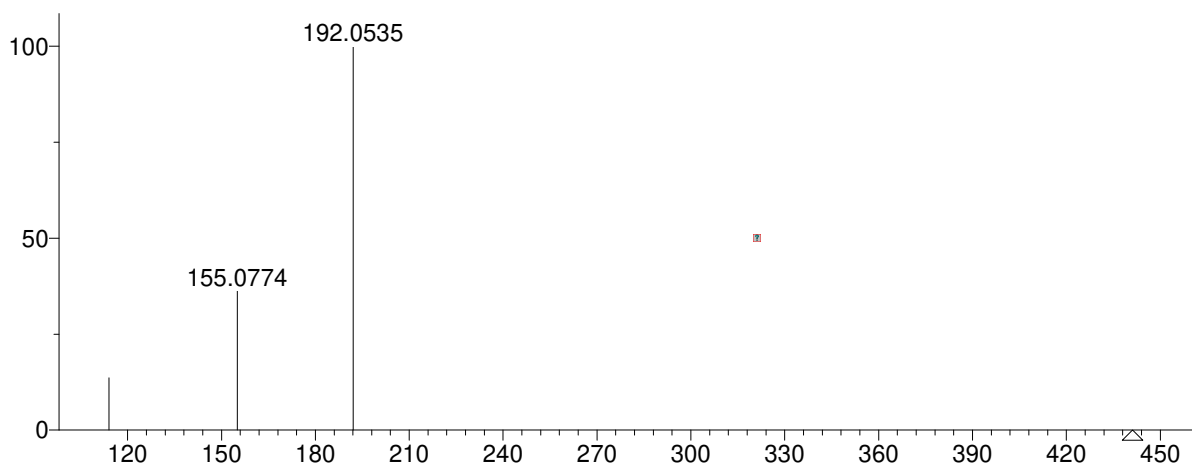

Hit 1 : NCGC00380134-01\_C25H30O8\_3-Furancarboxylic acid, (3R,5S,5aS,6S,9aR)-octahydro-9-hydroxy-2,2,5ε  
C25H30O8; MF: 0; RMF: 63; Prob 100.0%; Lib: mona-export-gnps; ID: 11250.

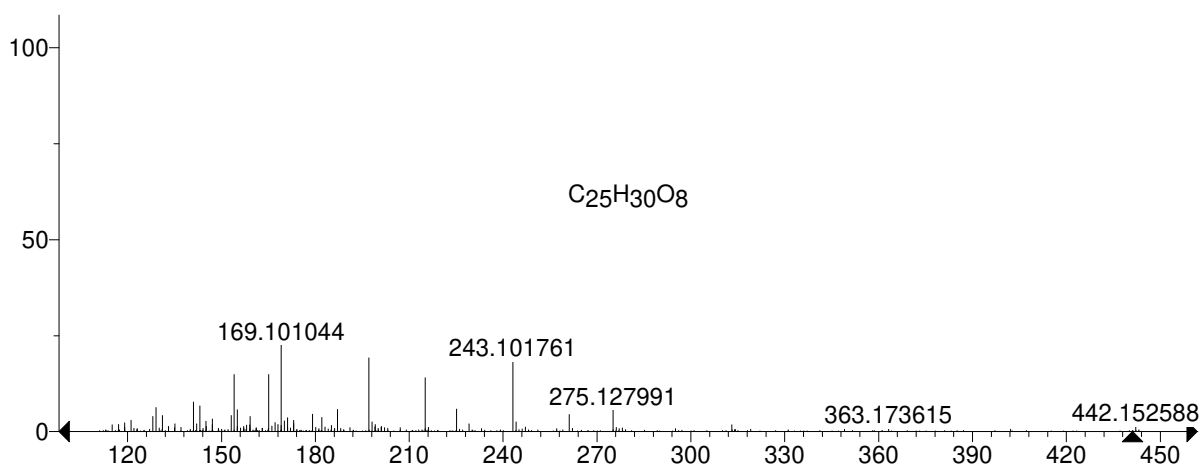

Unknown: Unknown (4.32\_563.1022m/z)  
Compound in Library Factor = 0

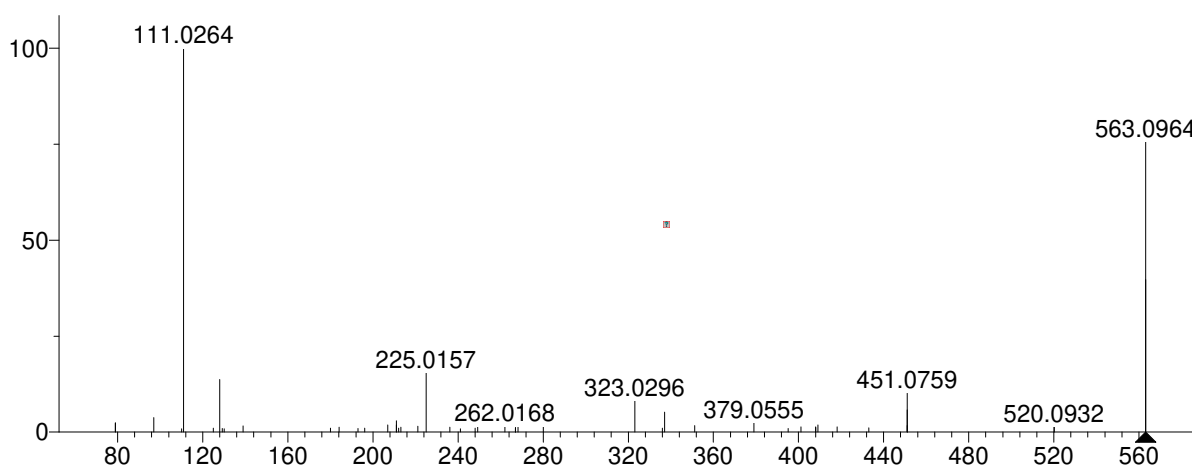

Hit 1 : Theaflavin 3-gallate [M-H]<sup>-</sup>=>563.1 IT 35% P=563.1  
C<sub>36</sub>H<sub>28</sub>O<sub>16</sub>; MF: 0; RMF: 9; Prob 100.0%; CAS: 30462-34-1; Lib: nist\_msms; ID: 394304.

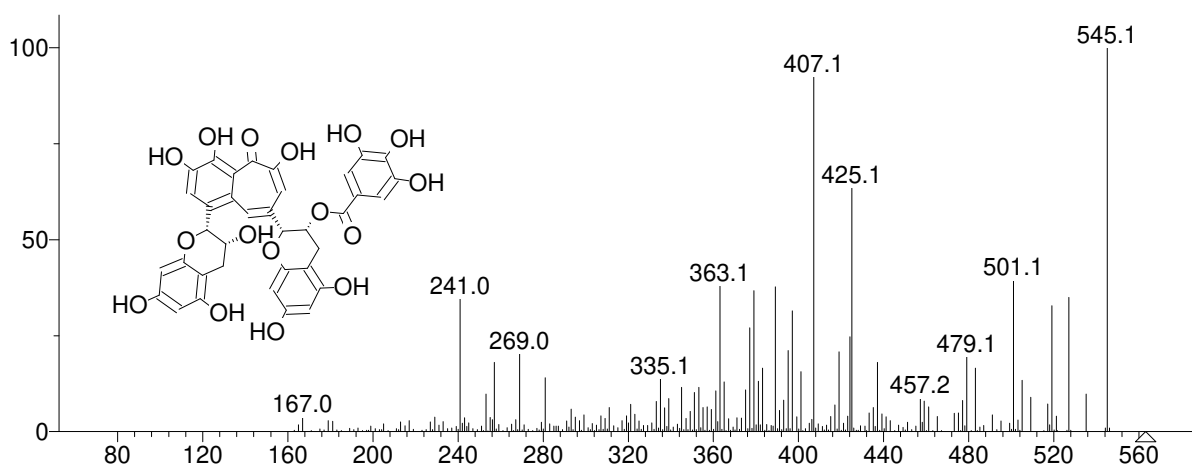

Unknown: Unknown (4.33\_284.1238m/z)  
Compound in Library Factor = -3273

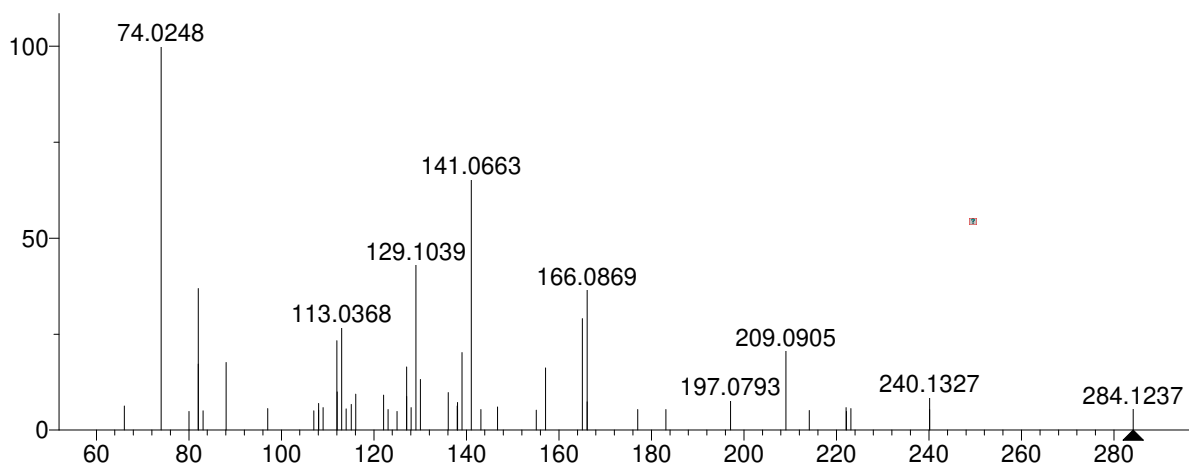

Hit 1 : O-(4-Hydroxybenzoyl)tropane [M+Na]<sup>+</sup> HCD 5V P=284.1  
C<sub>15</sub>H<sub>19</sub>NO<sub>3</sub>; MF: 3; RMF: 105; Prob 51.0%; CAS: 198898-04-3; Lib: nist\_msms; ID: 552421.

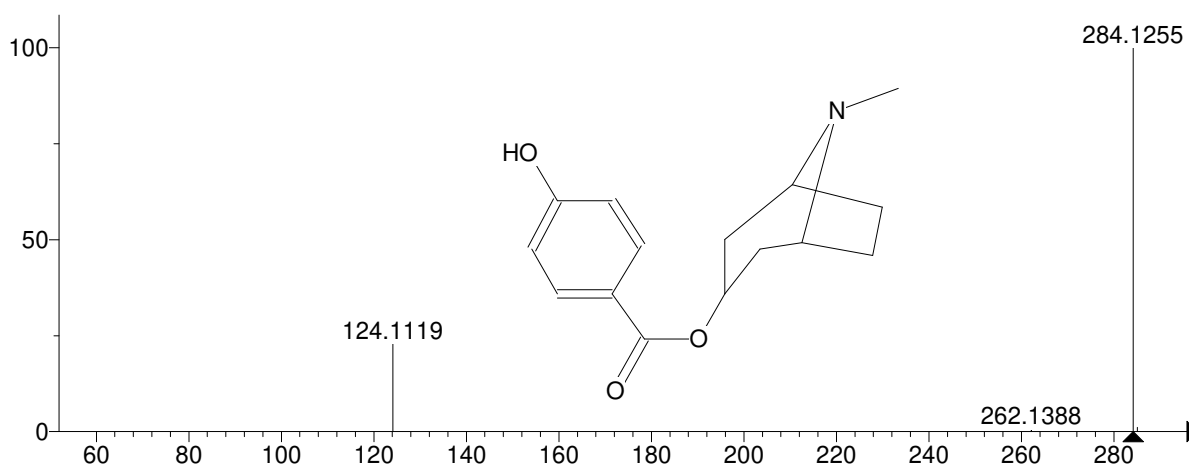

Hit 2 : Unknown (carbon number 12); PlaSMA ID-512 [M-H]<sup>-</sup> P=284.1  
C<sub>12</sub>H<sub>19</sub>N<sub>3</sub>O<sub>5</sub>; MF: 2; RMF: 99; Prob 49.0%; Lib: biomsmms-neg-plasma; ID: 1158.

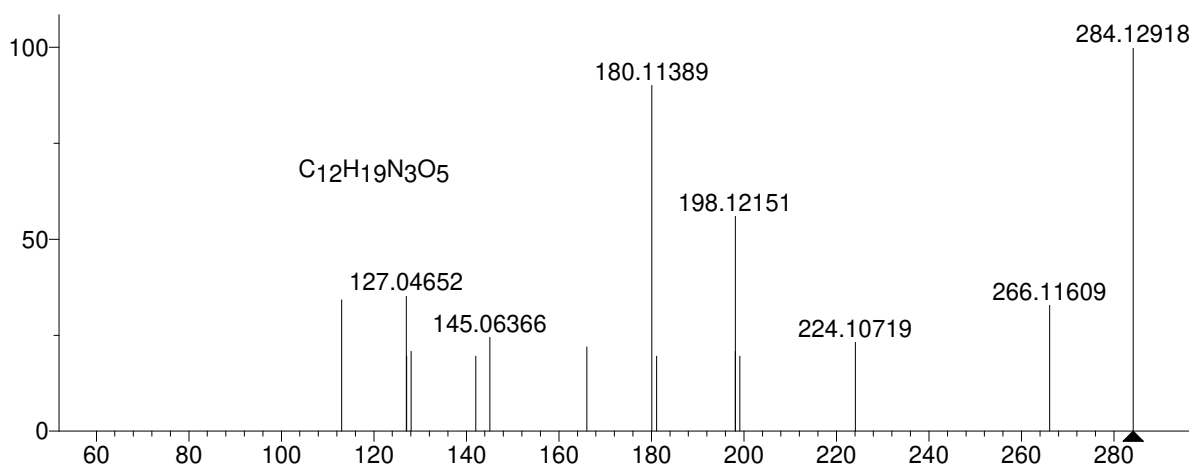

Unknown: Unknown (4.34\_330.2021m/z)  
Compound in Library Factor = -3273

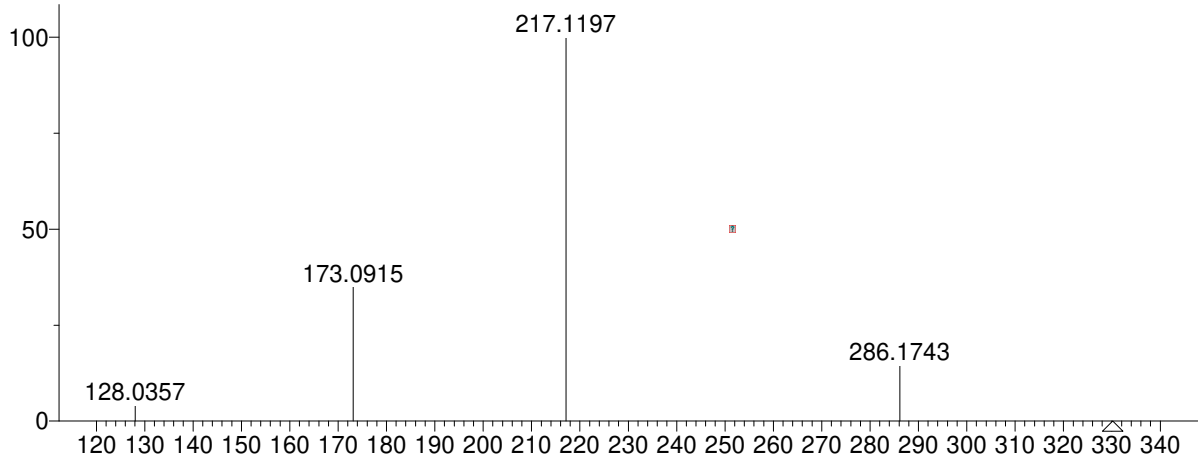

Hit 1 : Thr-Val-Leu [M-H]<sup>-</sup> IT-FT 35% P=330.2  
C<sub>15</sub>H<sub>29</sub>N<sub>3</sub>O<sub>5</sub>; MF: 6; RMF: 254; Prob 28.0%; Lib: nist\_msms; ID: 568882.

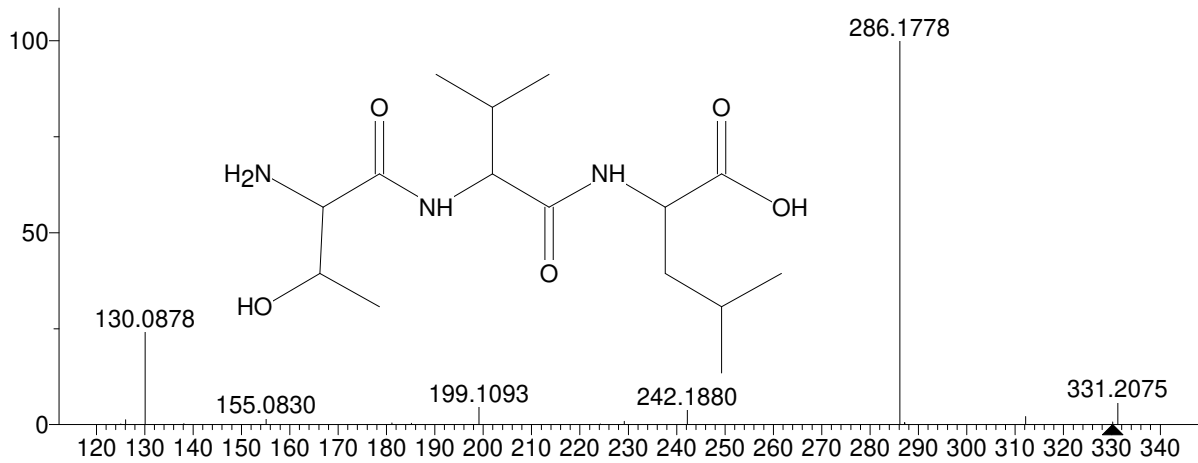

Hit 2 : Thr-Val-Leu [M-H]<sup>-</sup> IT-FT 35% P=330.2  
C<sub>15</sub>H<sub>29</sub>N<sub>3</sub>O<sub>5</sub>; MF: 6; RMF: 254; Prob 28.0%; Lib: nist\_msms2; ID: 72867.

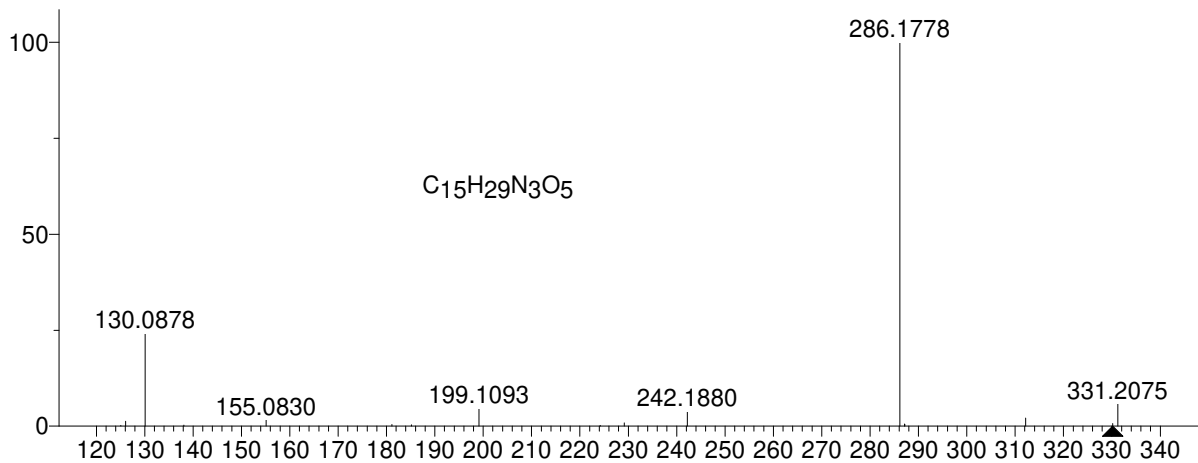

\*\* Search Report Page 2 of 2 \*\*

Hit 3 :  $\beta$ -Alanine, N-[2-(2-pyridinyl)-6-(1,2,4,5-tetrahydro-3H-3-benzazepin-3-yl)-4-pyrimidinyl]-, ethyl ester [M+H]<sup>+</sup>  
C<sub>24</sub>H<sub>27</sub>N<sub>5</sub>O<sub>2</sub>; MF: 0; RMF: 24; Prob 22.0%; CAS: 1373423-53-0; Lib: nist\_msms; ID: 274165.

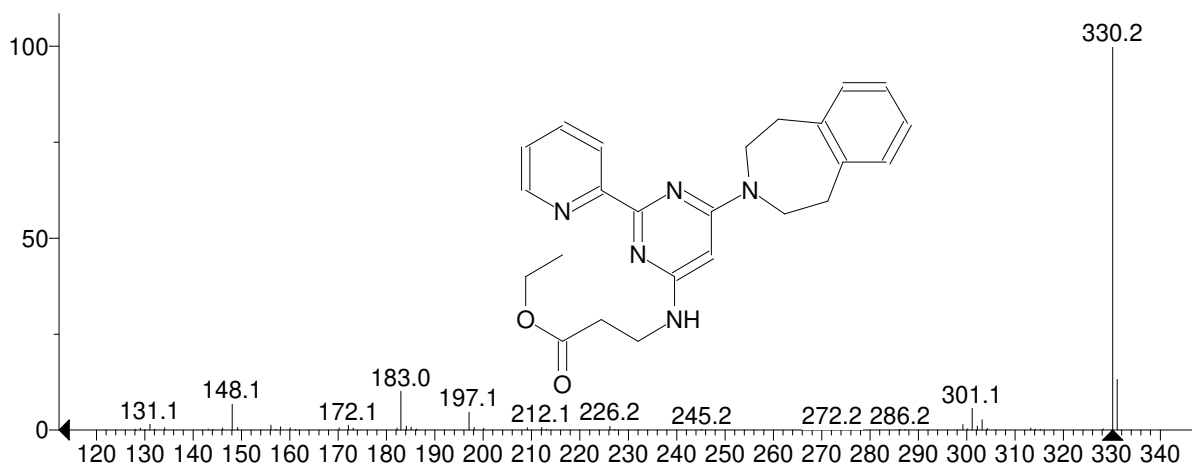

Hit 4 :  $\beta$ -Alanine, N-[2-(2-pyridinyl)-6-(1,2,4,5-tetrahydro-3H-3-benzazepin-3-yl)-4-pyrimidinyl]- [M+H-H<sub>2</sub>O]<sup>+</sup> => 33  
C<sub>22</sub>H<sub>23</sub>N<sub>5</sub>O<sub>2</sub>; MF: 0; RMF: 22; Prob 22.0%; CAS: 1373422-53-7; Lib: nist\_msms; ID: 273703.

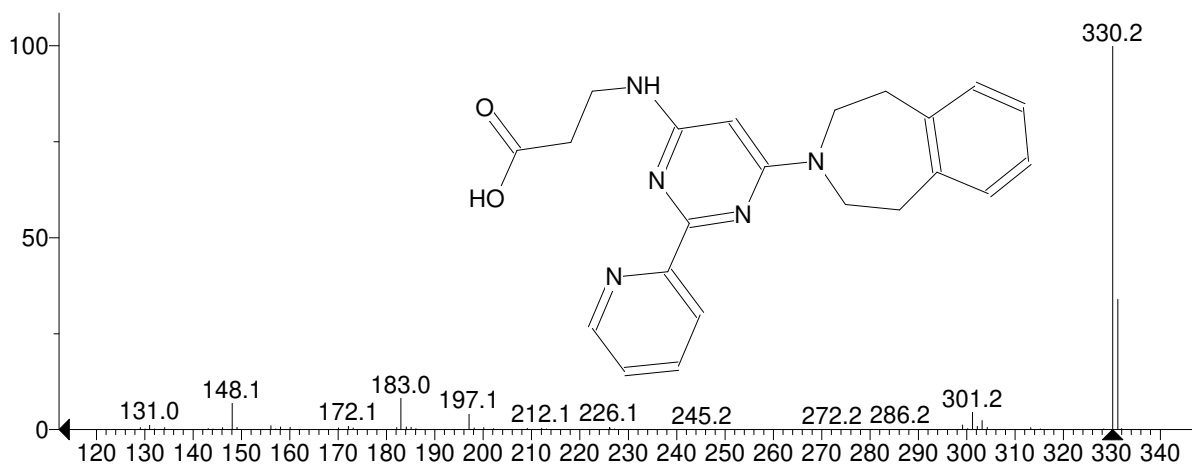

Unknown: Unknown (4.34\_433.1815m/z)  
Compound in Library Factor = -3273

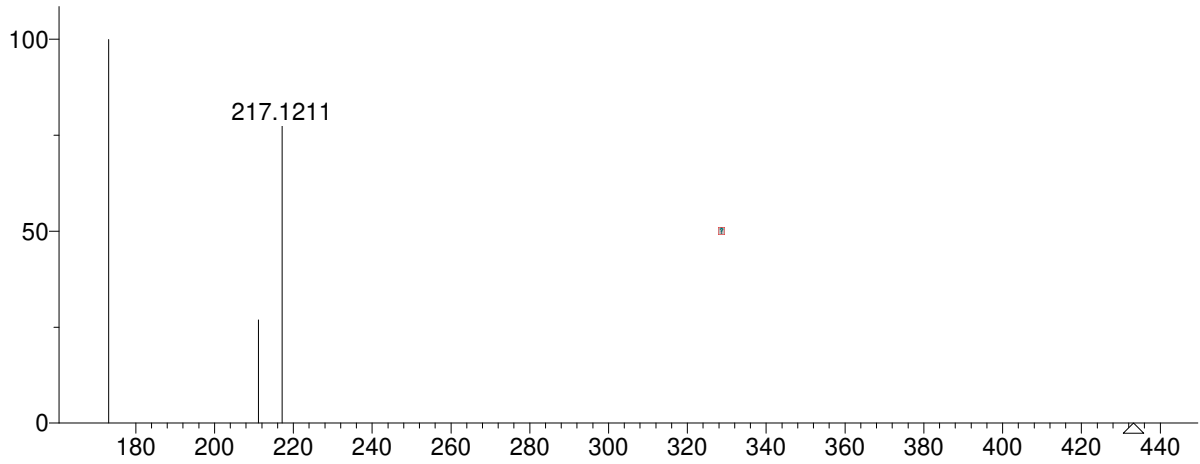

Hit 1 : Salvinorin A [M+H]<sup>+</sup> 45HCD P=433.2  
C<sub>23</sub>H<sub>28</sub>O<sub>8</sub>; MF: 1; RMF: 175; Prob 33.8%; Lib: mona-export-vf-npl\_qexactive; ID: 13790.

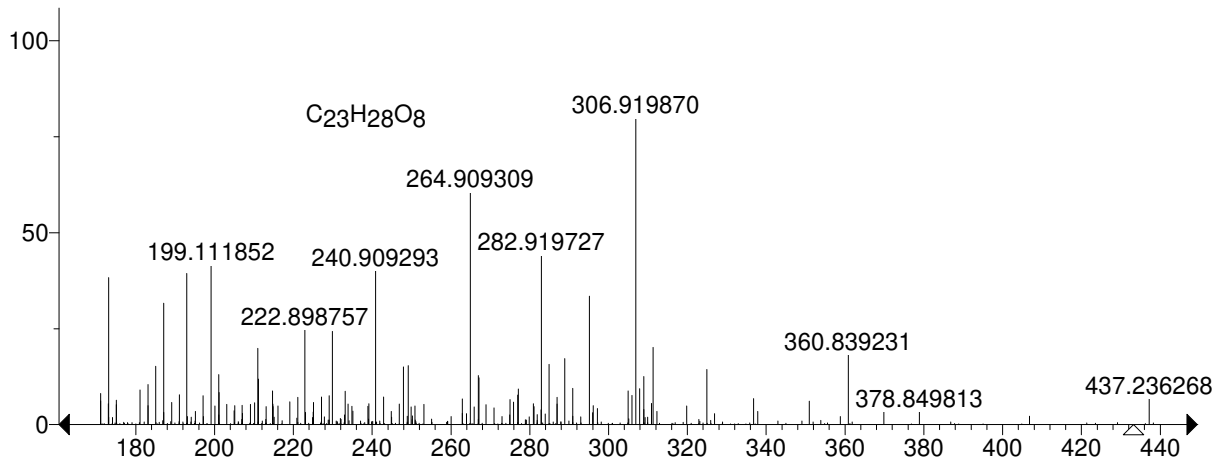

Hit 2 : Bixin [M+K]<sup>+</sup> 45HCD P=433.2  
C<sub>25</sub>H<sub>30</sub>O<sub>4</sub>; MF: 1; RMF: 153; Prob 33.8%; Lib: mona-export-vf-npl\_qexactive; ID: 26504.

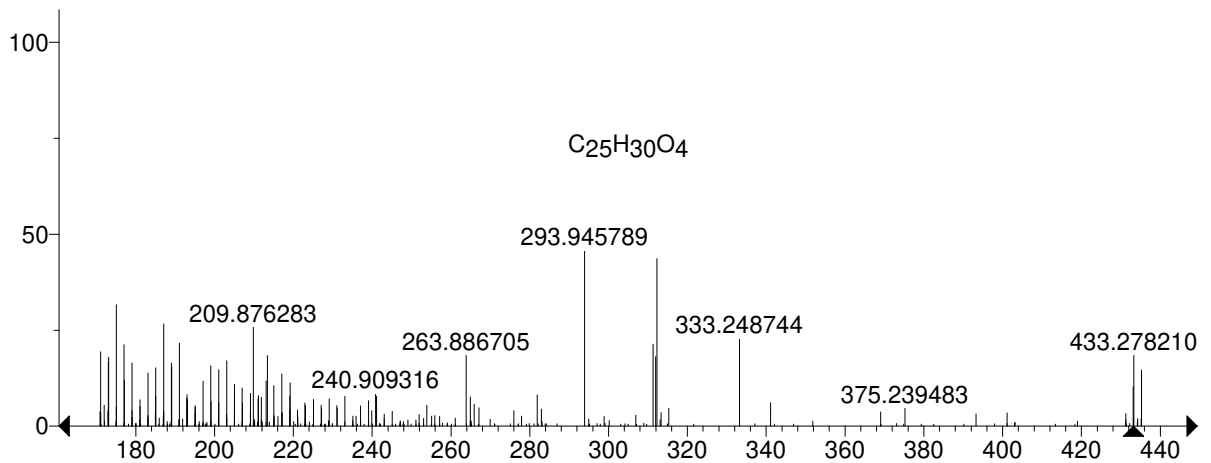

Hit 3 : 15 $\beta$ -Hydroxycyproterone acetate [M+H]<sup>+</sup> HCD 30V P=433.2  
C<sub>24</sub>H<sub>29</sub>ClO<sub>5</sub>; MF: 0; RMF: 74; Prob 32.5%; CAS: 65423-26-9; Lib: nist\_msms; ID: 440396.

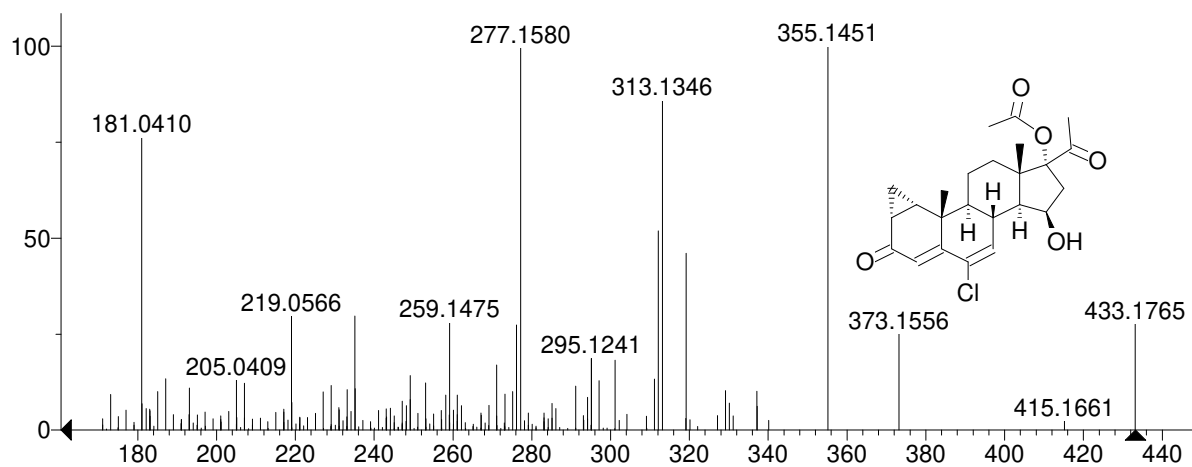



Unknown: Unknown (4.35\_305.0689m/z)  
Compound in Library Factor = -3273

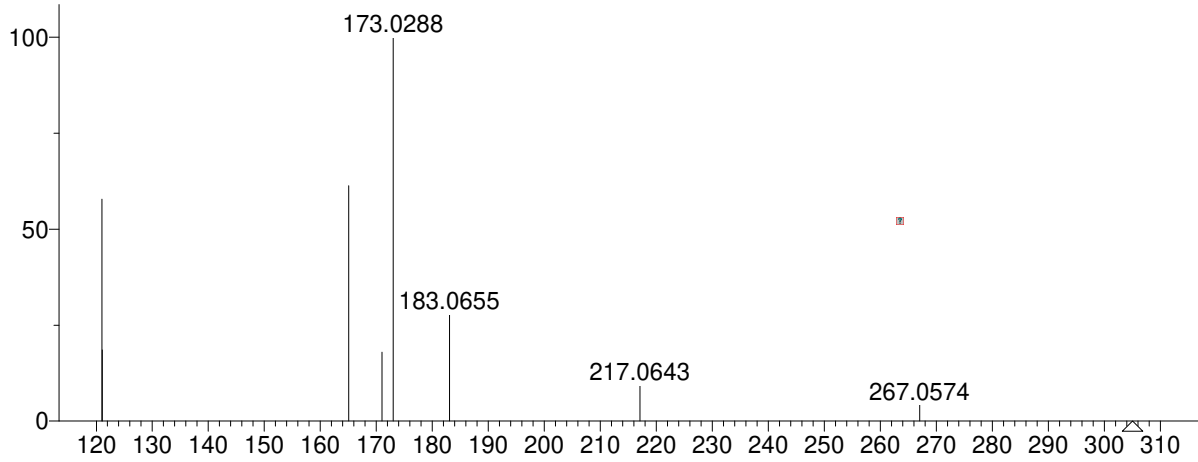

Hit 1 : Gallocatechin [M-H]<sup>-</sup> 45eV P=305.1  
C<sub>15</sub>H<sub>14</sub>O<sub>7</sub>; MF: 1; RMF: 89; Prob 12.9%; Lib: msms-neg-metabobase; ID: 808.

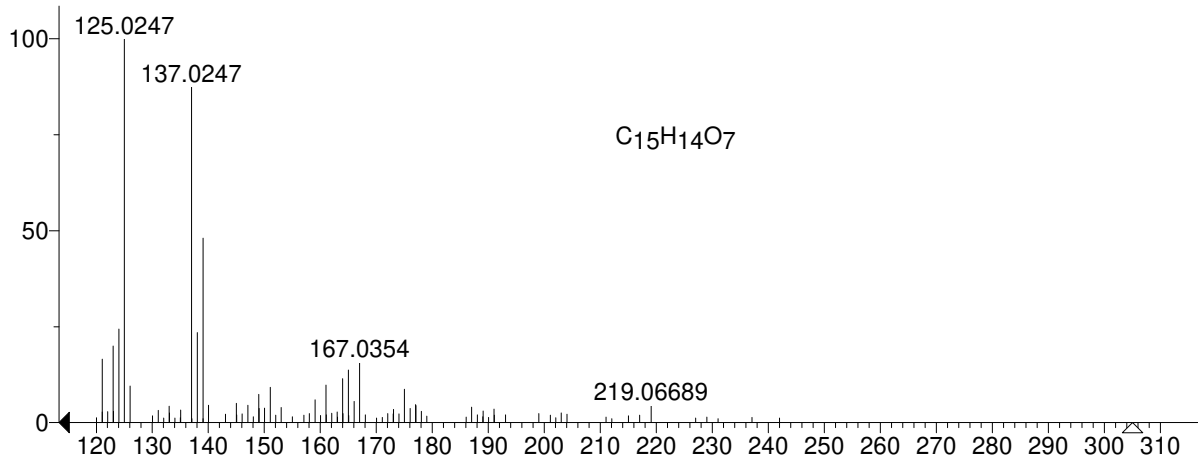

Hit 2 : Epigallocatechin [M-H]<sup>-</sup> 30 P=305.1  
C<sub>15</sub>H<sub>14</sub>O<sub>7</sub>; MF: 0; RMF: 70; Prob 12.4%; Lib: mona-export-ic-ms-ms\_negative\_mode; ID: 12420.

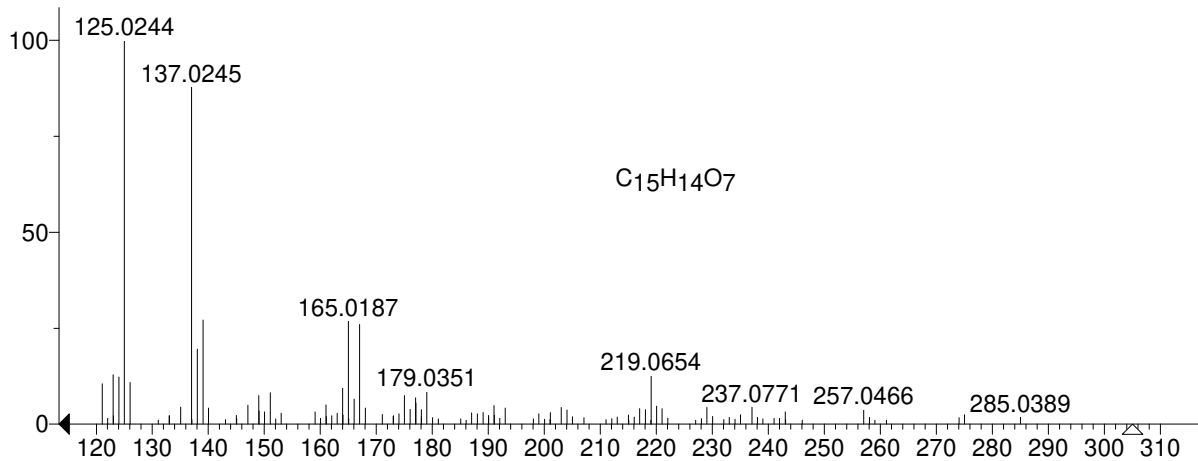

Hit 3 : (2S,3S)-2-(3,4,5-trihydroxyphenyl)-3,4-dihydro-2H-chromene-3,5,7-triol [M-H]<sup>-</sup> 65HCD P=305.1  
C<sub>15</sub>H<sub>14</sub>O<sub>7</sub>; MF: 0; RMF: 43; Prob 12.4%; Lib: mona-export-ic-ms-ms\_negative\_mode; ID: 20161.

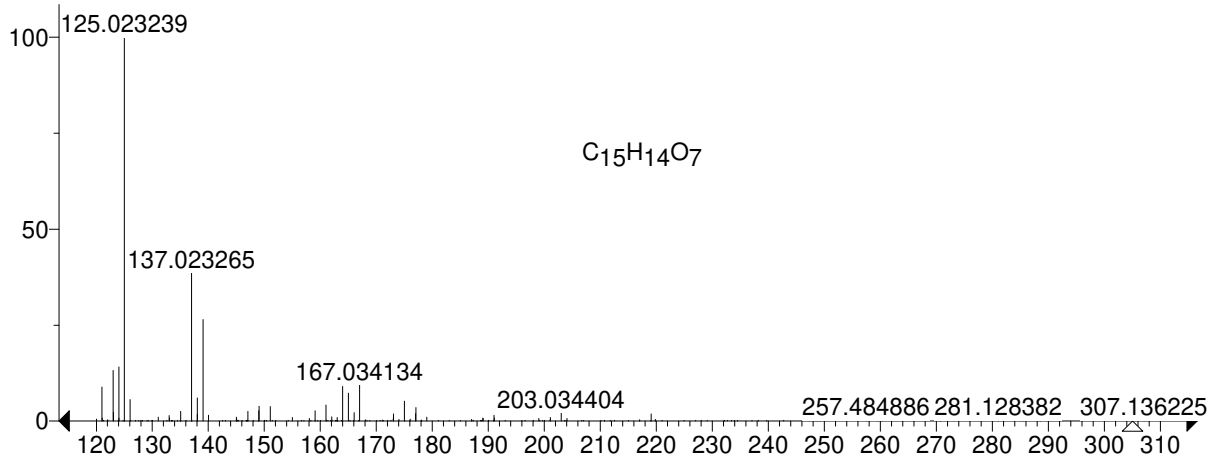

Hit 4 : 2,3-Trans-3,4-cis-Leucocyanidin [M-H]<sup>-</sup> 45eV P=305.1  
C<sub>15</sub>H<sub>14</sub>O<sub>7</sub>; MF: 0; RMF: 27; Prob 12.4%; Lib: msms-neg-metabobase; ID: 828.

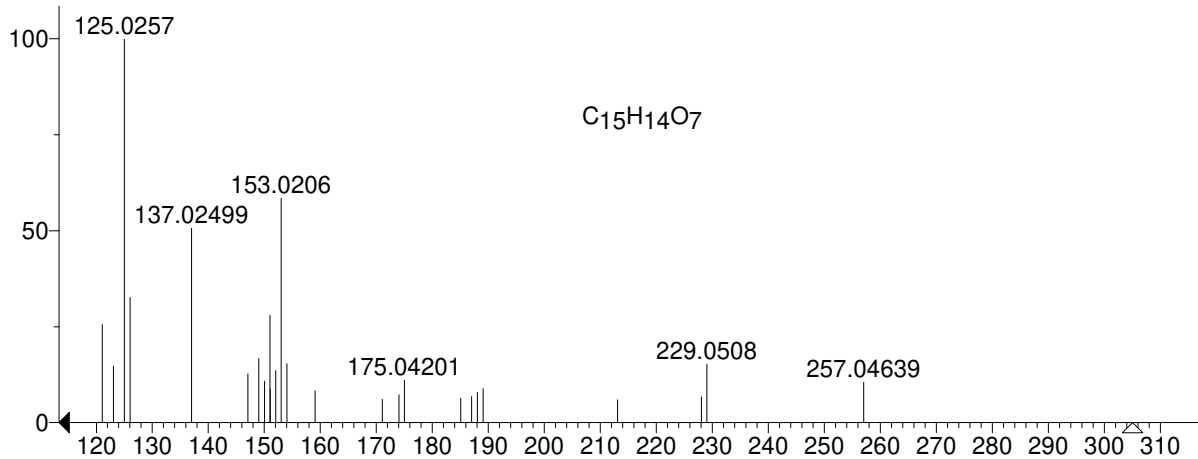

Hit 5 : (-)-Epigallocatechin [M-H]<sup>-</sup> HCD 48V P=305.1  
C<sub>15</sub>H<sub>14</sub>O<sub>7</sub>; MF: 0; RMF: 24; Prob 12.4%; CAS: 970-74-1; Lib: nist\_msms; ID: 235105.

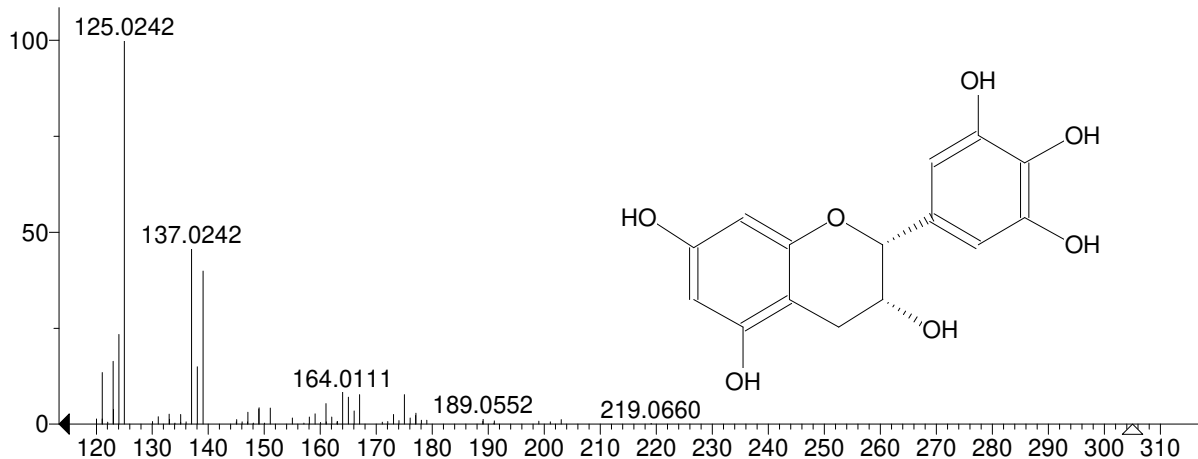

Unknown: Unknown (4.36\_611.1256m/z)  
Compound in Library Factor = 0

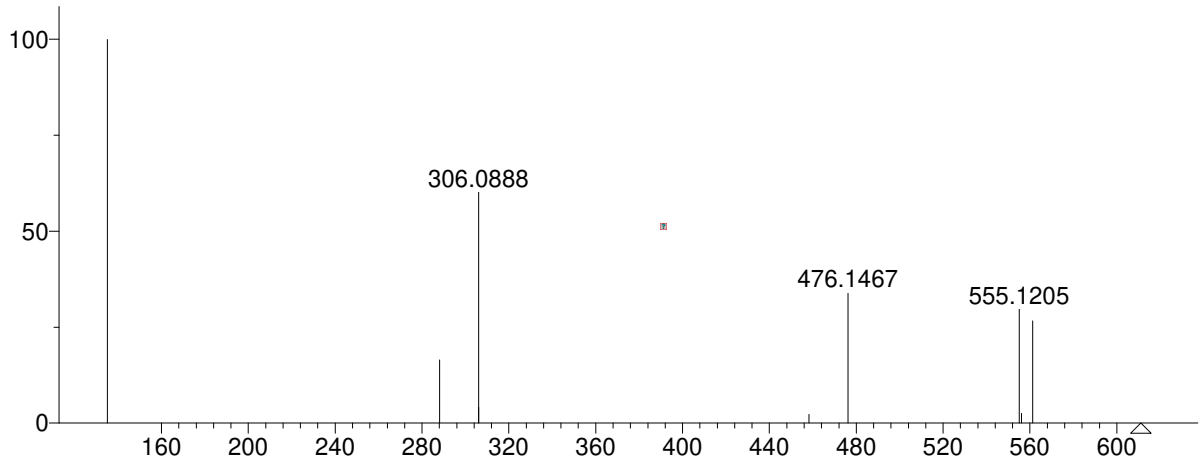

Unknown: Unknown (4.36\_698.2907m/z)  
Compound in Library Factor = 0

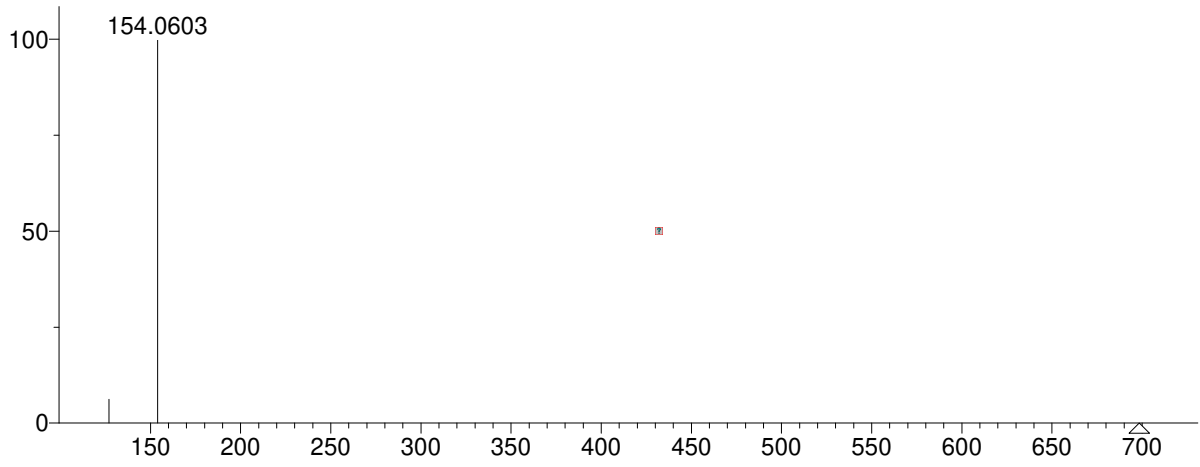

Unknown: Unknown (4.37\_326.1339m/z)  
Compound in Library Factor = -3273

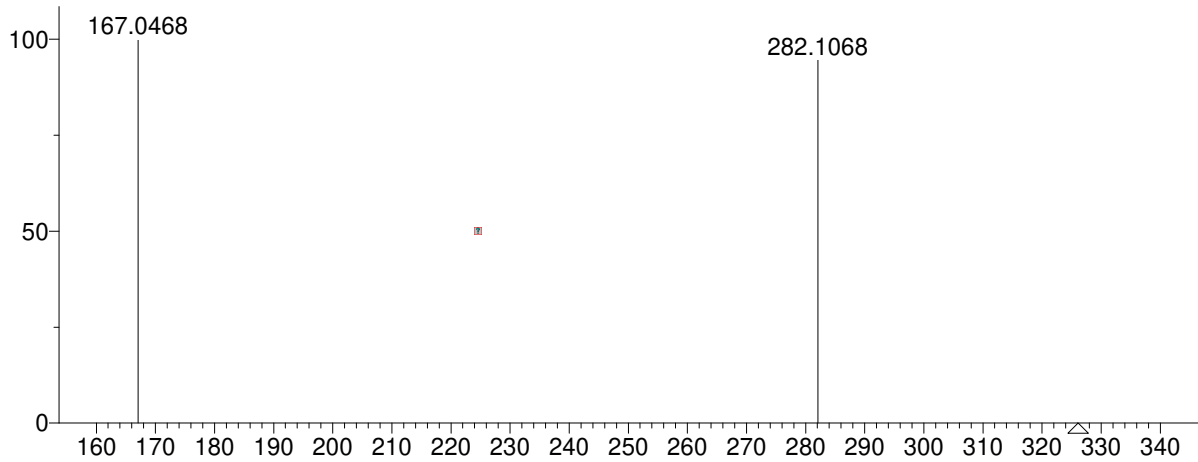

Hit 1 : Glycine, 1,1'-(1,8-dioxo-1,8-octanediy)bis[glycyl- [M-H-C<sub>2</sub>H<sub>5</sub>NO<sub>2</sub>]- IT 35% P=326.1  
C<sub>16</sub>H<sub>26</sub>N<sub>4</sub>O<sub>8</sub>; MF: 2; RMF: 307; Prob 35.1%; CAS: 143673-93-2; Lib: nist\_msms; ID: 423624.

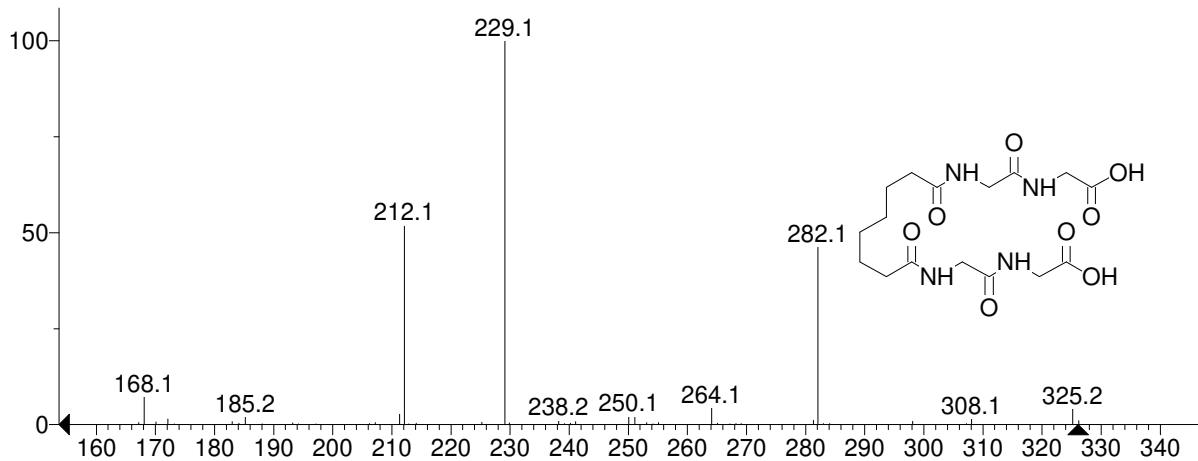

Hit 2 : Anhydrohaloxindole A [M+H]<sup>+</sup> P=326.1  
C<sub>21</sub>H<sub>21</sub>ClN<sub>2</sub>O; MF: 0; RMF: 21; Prob 32.4%; Lib: mona-export-gnps; ID: 4776.

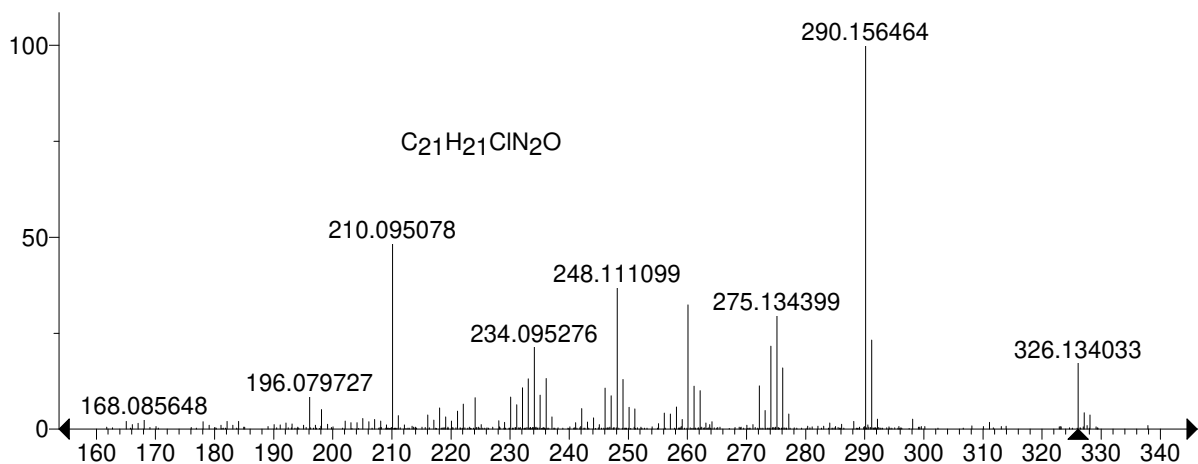

\*\* Search Report Page 2 of 2 \*\*

Hit 3 : (4-oxido-2,3,5,6,7,8-hexahydro-1H-pyrrolizin-4-ium-1-yl)methyl 2,3-dihydroxy-3-methylpentanoate [M+K]<sup>+</sup>  
C<sub>14</sub>H<sub>25</sub>NO<sub>5</sub>; MF: 0; RMF: 11; Prob 32.4%; Lib: mona-export-vf-npl\_qexactive; ID: 21020.

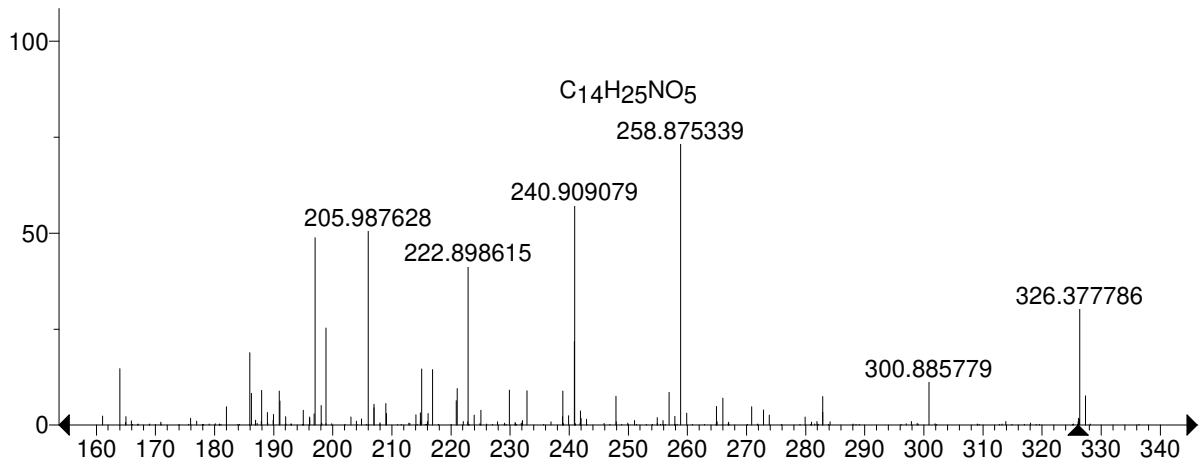

Unknown: Unknown (4.37\_378.1771m/z)  
Compound in Library Factor = -183

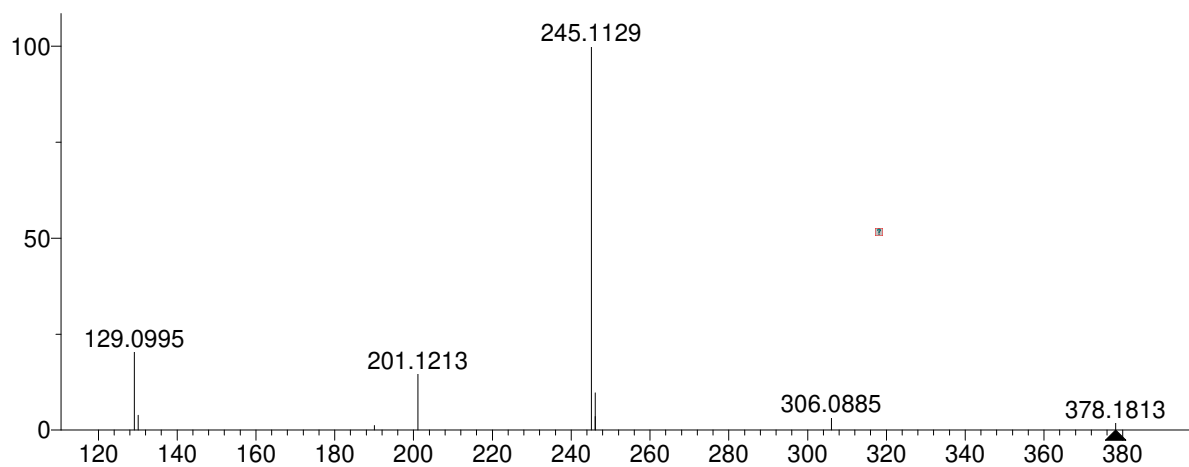

Hit 1 : 2-Oxo-3-hydroxylysergic acid diethylamide [M+Na]<sup>+</sup> HCD 11V P=378.2  
C<sub>20</sub>H<sub>25</sub>N<sub>3</sub>O<sub>3</sub>; MF: 322; RMF: 965; Prob 96.7%; CAS: 111295-09-1; Lib: nist\_msms; ID: 326233.

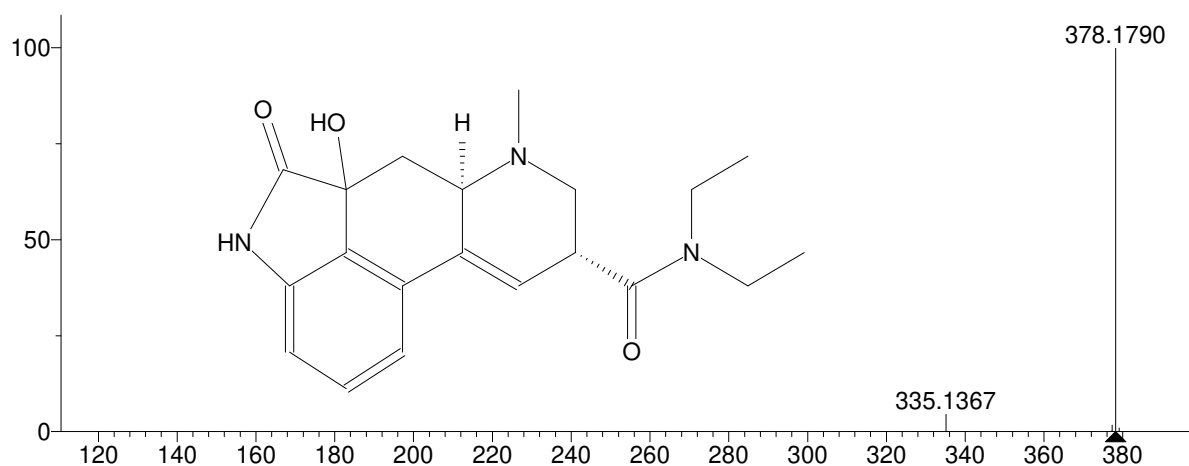

Hit 2 : Cys-Gln-Lys [M+H]<sup>+</sup> QTOF 40V P=378.2  
C<sub>14</sub>H<sub>27</sub>N<sub>5</sub>O<sub>5</sub>S; MF: 11; RMF: 264; Prob 0.96%; Lib: nist\_msms; ID: 49701.

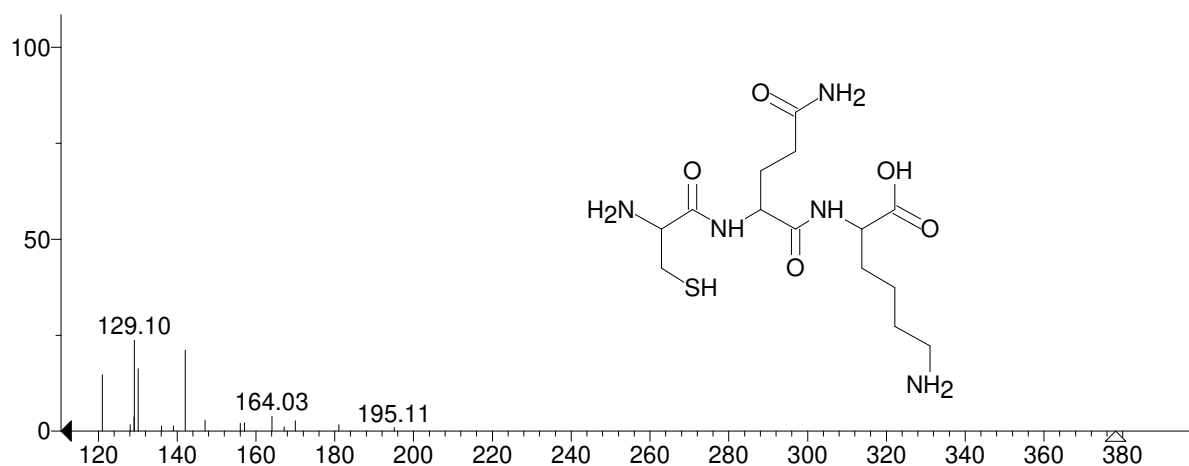

Hit 3 : Gln-Cys-Lys [M+H]<sup>+</sup> QTOF 40V P=378.2  
C<sub>14</sub>H<sub>27</sub>N<sub>5</sub>O<sub>5</sub>S; MF: 11; RMF: 225; Prob 0.96%; Lib: nist\_msms; ID: 53021.

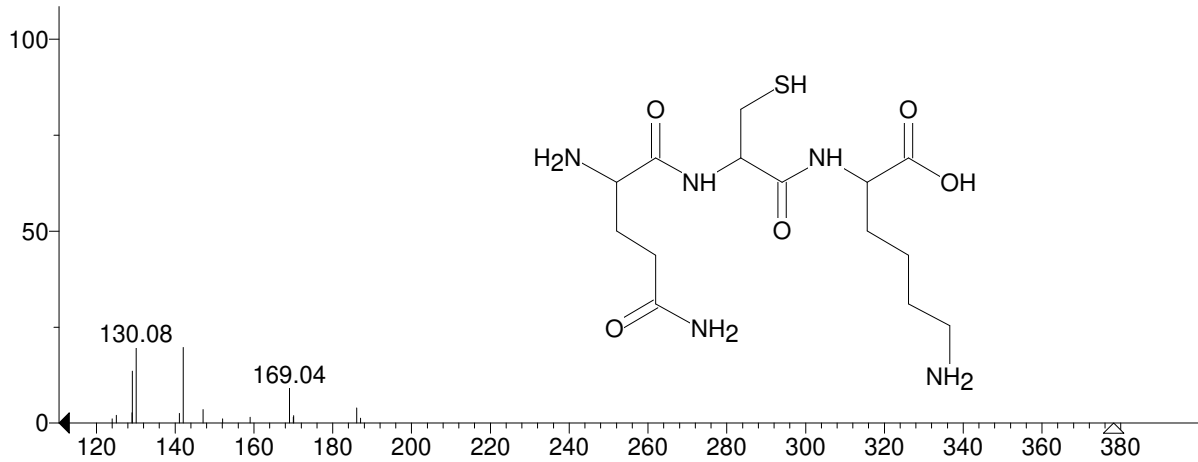

Hit 4 : Latrunculin B [M+H-H<sub>2</sub>O]<sup>+</sup> HCD 10V P=378.2  
C<sub>20</sub>H<sub>29</sub>N<sub>5</sub>O<sub>5</sub>S; MF: 3; RMF: 99; Prob 0.72%; CAS: 76343-94-7; Lib: nist\_msms; ID: 86160.

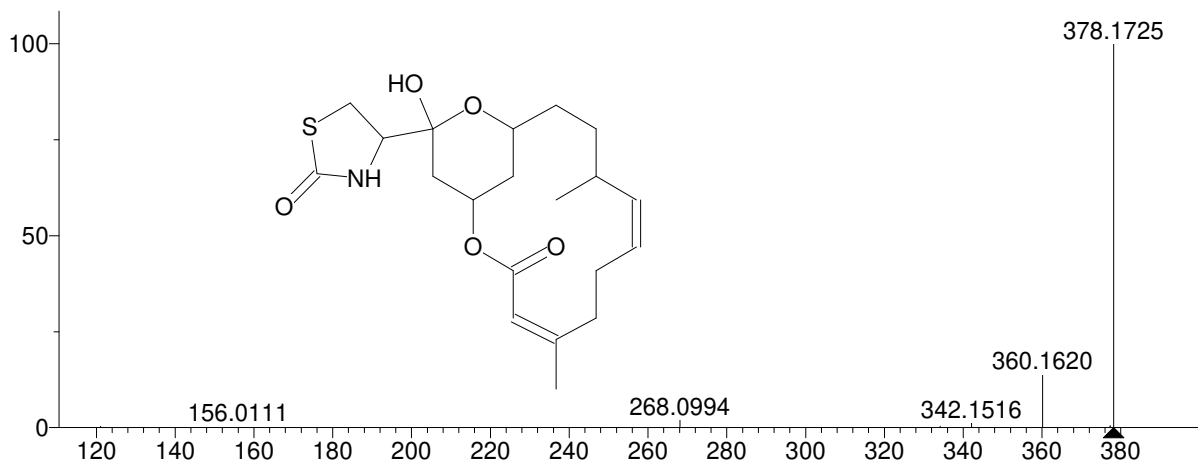

Hit 5 : (2R,3R,4S,5S,6R)-2-[3-hydroxy-2-(4-hydroxy-3-methoxyphenyl)propoxy]-6-(hydroxymethyl)oxane-3,4,5-tric  
C<sub>16</sub>H<sub>24</sub>O<sub>9</sub>; MF: 0; RMF: 1; Prob 0.63%; Lib: mona-export-vf-npl\_qexactive; ID: 10762.

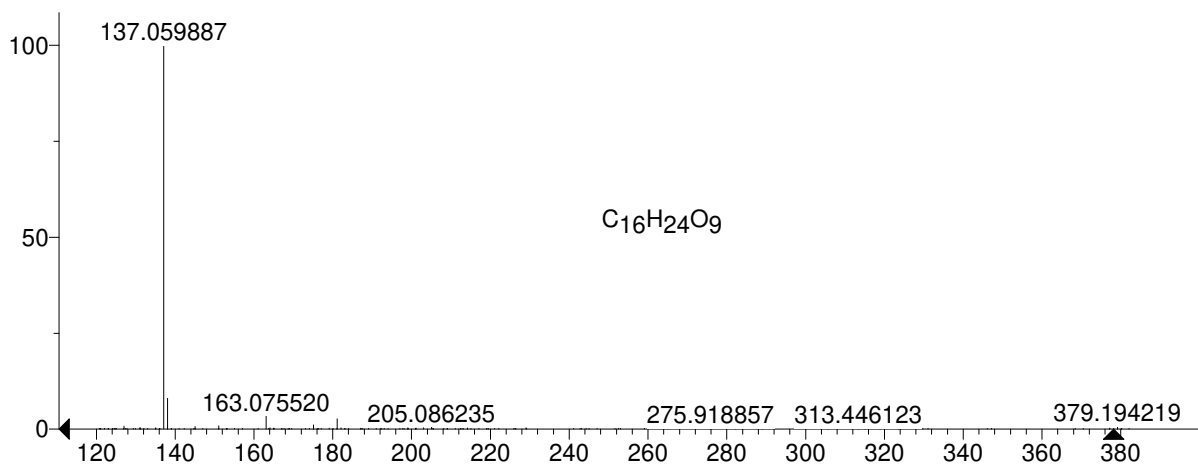



Unknown: Unknown (4.37\_555.1236m/z)  
Compound in Library Factor = 0

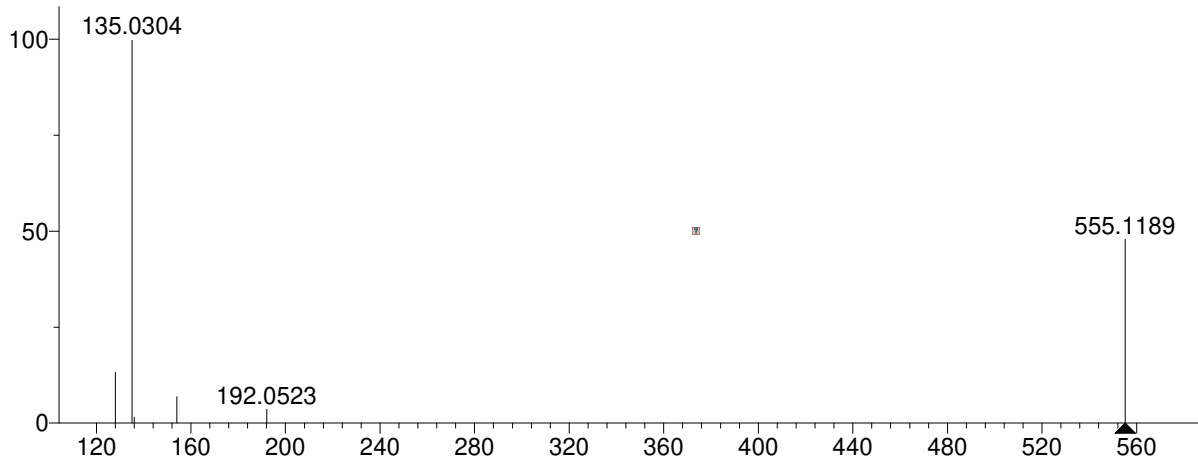

Hit 1 : Laccaic Acid A [M+NH4]<sup>+</sup> 35HCD P=555.1  
C<sub>26</sub>H<sub>19</sub>NO<sub>12</sub>; MF: 0; RMF: 5; Prob 100.0%; Lib: mona-export-vf-npl\_qexactive; ID: 27181.

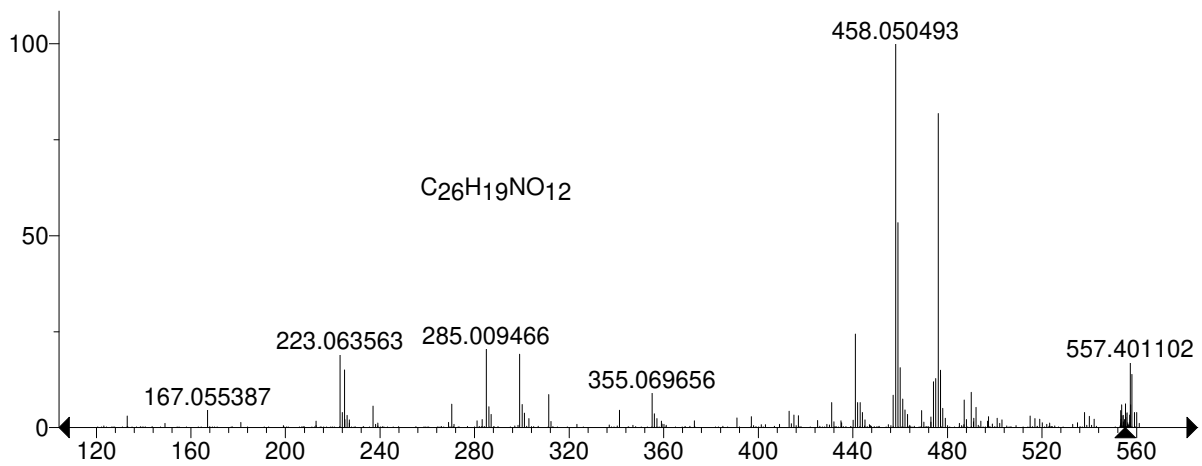

\*\* Search Report Page 1 of 2 \*\*

Unknown: Unknown (4.38\_358.1968m/z)  
Compound in Library Factor = -3273

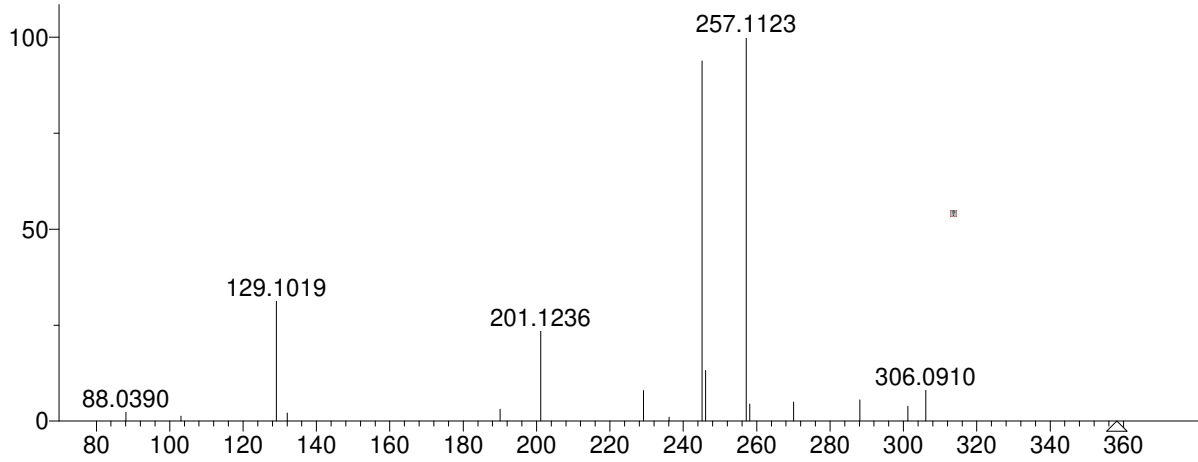

Hit 1 : Calpain Inhibitor II [M-H] $\Rightarrow$ 358.2 IT 35% P=358.2  
C19H35N3O4S; MF: 1; RMF: 150; Prob 12.9%; CAS: 145757-50-2; Lib: nist\_msms; ID: 81729.

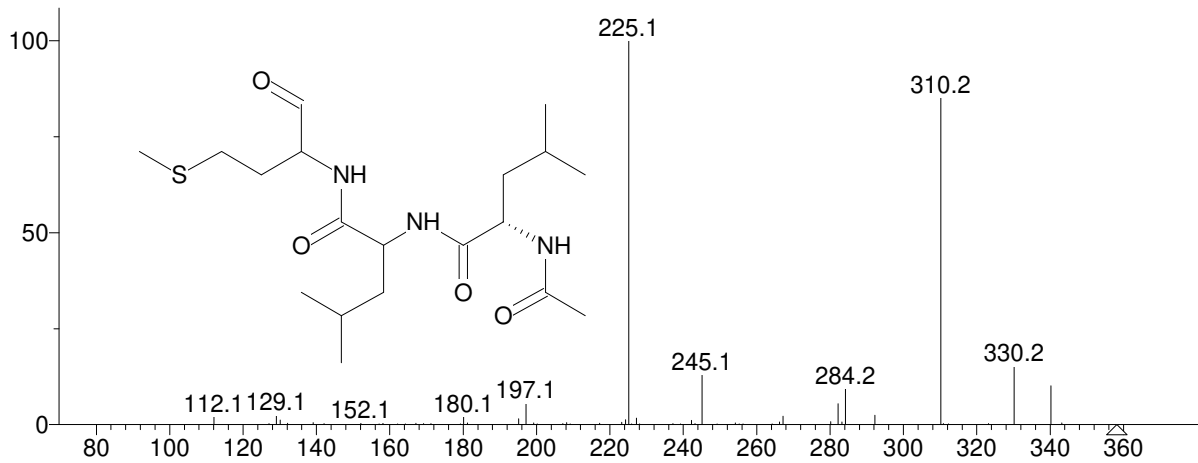

Hit 2 : Leukotriene D4 methyl ester [M+H-H<sub>2</sub>O] $\Rightarrow$ 390.2 $\Rightarrow$ 358.2 IT 35% P=358.2  
C26H42N2O6S; MF: 0; RMF: 46; Prob 12.4%; Lib: nist\_msms; ID: 92133.

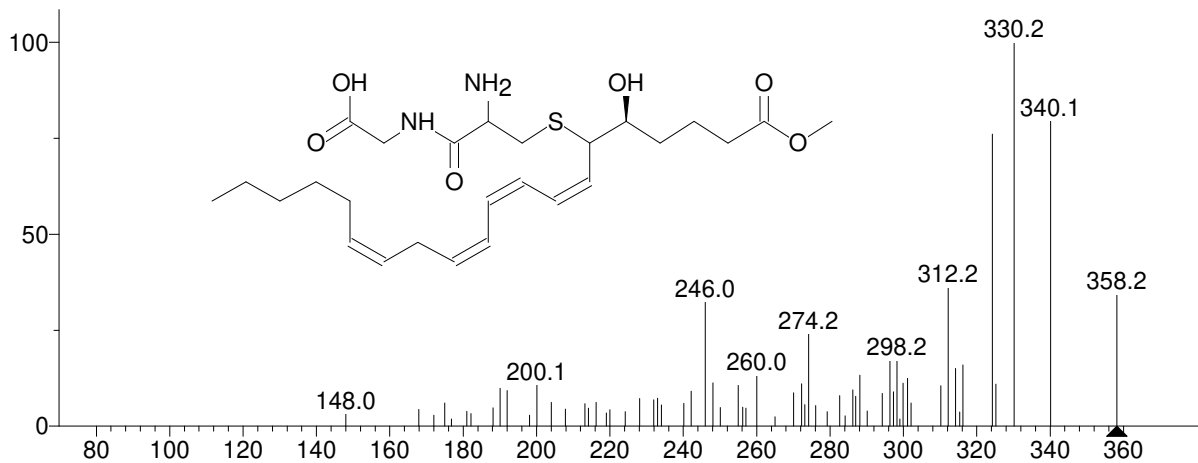

\*\* Search Report Page 2 of 2 \*\*

Hit 3 : Calpain Inhibitor II [M+Na]<sup>+</sup>=>377.2=>358.2 IT 35% P=358.2  
C19H35N3O4S; MF: 0; RMF: 41; Prob 0.00%; CAS: 145757-50-2; Lib: nist\_msms; ID: 81709.

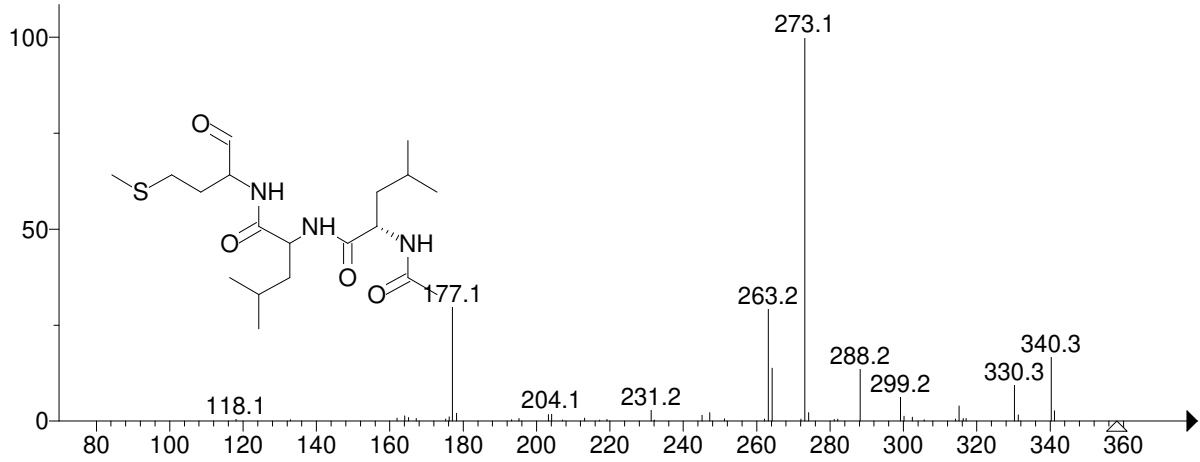

Hit 4 : cis-Moxifloxacin acyl-β-D-glucuronide [M+H-C6H8O6]<sup>+</sup>=>358.2 IT 35% P=358.2  
C27H32FN3O10; MF: 0; RMF: 28; Prob 12.4%; CAS: 733002-61-4; Lib: nist\_msms; ID: 463735.

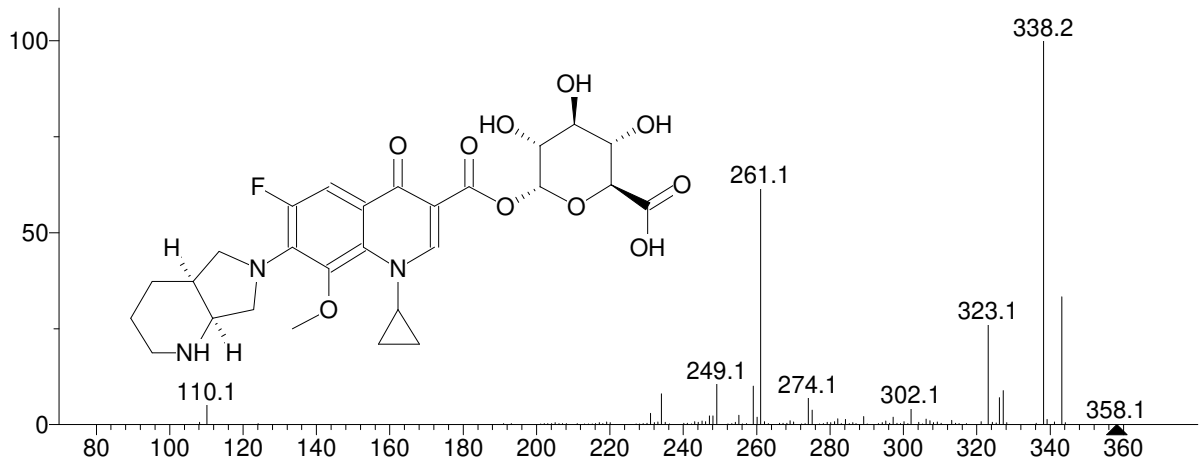

Hit 5 : Cyphenothrin [M+H]<sup>+</sup>=>358.2 IT 35% P=358.2  
C24H25NO3; MF: 0; RMF: 28; Prob 12.4%; CAS: 39515-40-7; Lib: nist\_msms; ID: 475533.

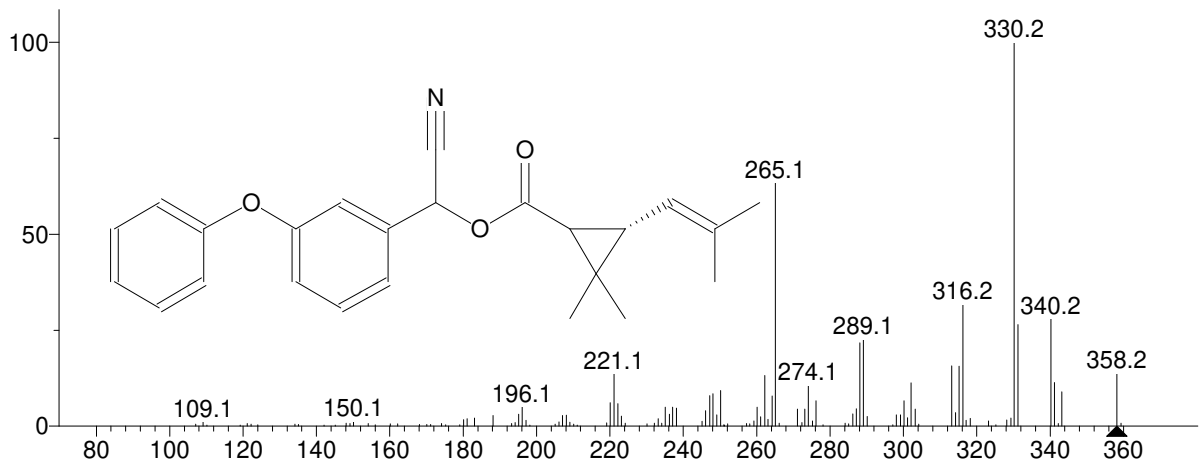

Unknown: Unknown (4.38\_698.2844m/z)  
Compound in Library Factor = 0

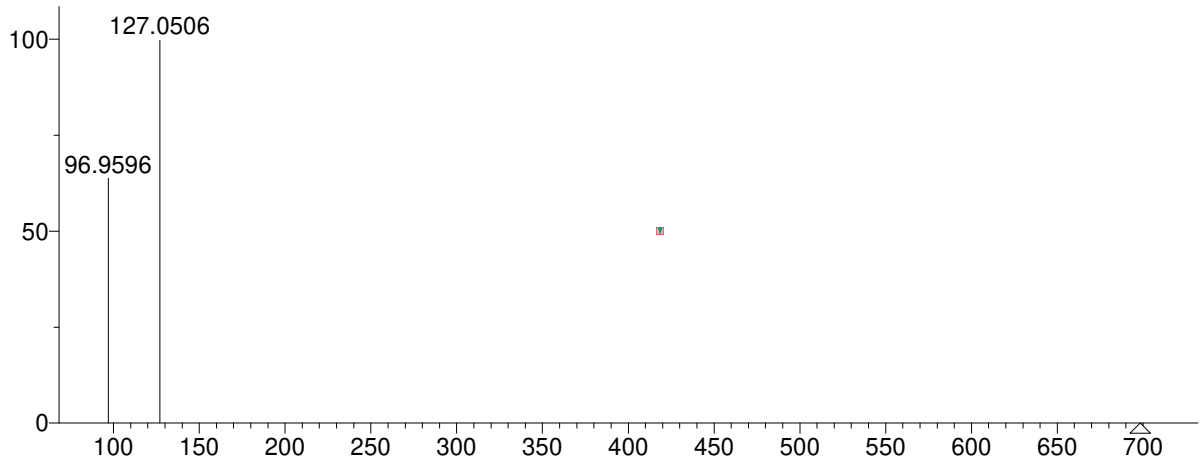

\*\* Search Report Page 1 of 2 \*\*

Unknown: Unknown (4.39\_386.1435m/z)  
Compound in Library Factor = 0

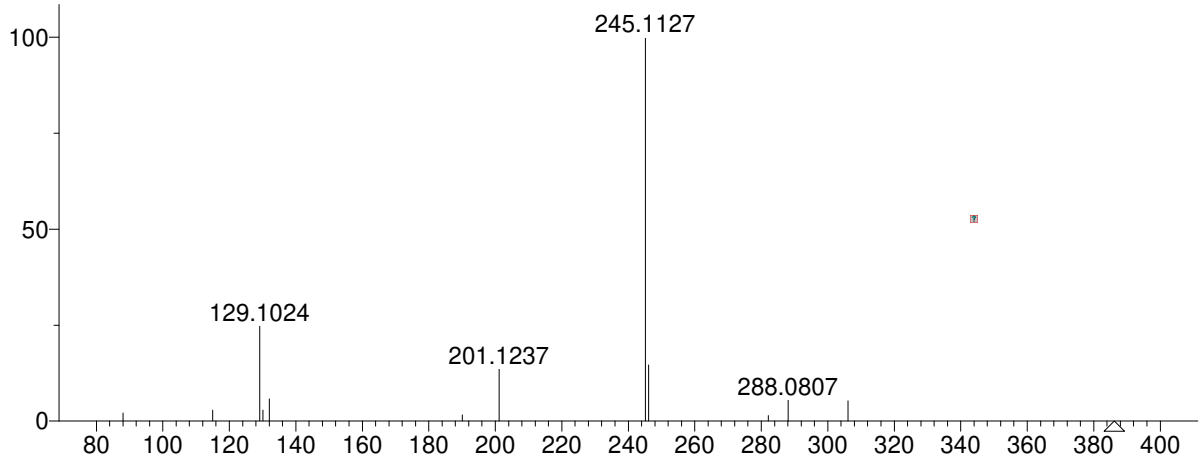

Hit 1 : 3-O-Feruloylquinic acid [M+NH4]<sup>+</sup> 45HCD P=386.1  
C17H20O9; MF: 0; RMF: 6; Prob 25.0%; Lib: mona-export-vf-npl\_qexactive; ID: 6254.

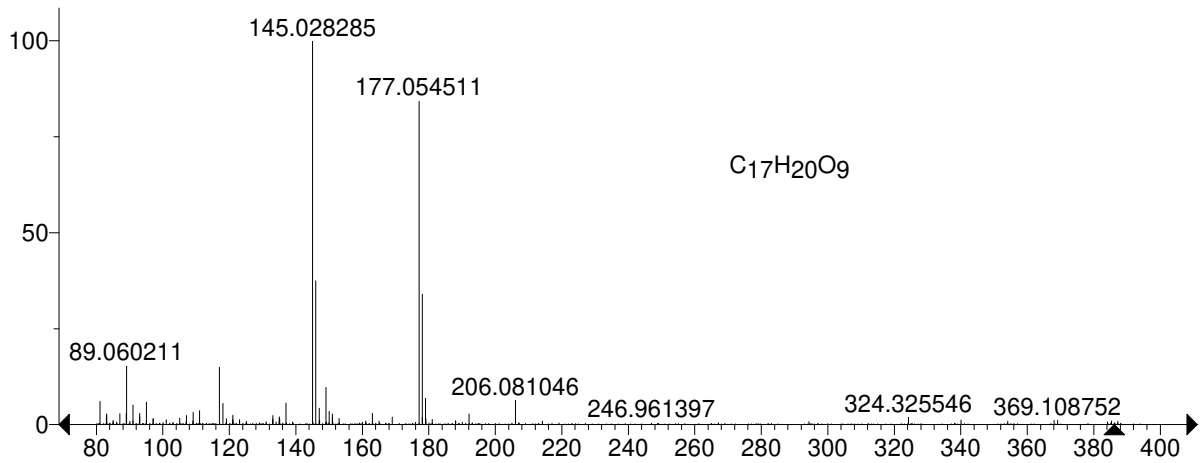

Hit 2 : methyl chlorogenate [M+NH4]<sup>+</sup> 35HCD P=386.1  
C17H20O9; MF: 0; RMF: 5; Prob 25.0%; Lib: mona-export-vf-npl\_qexactive; ID: 5491.

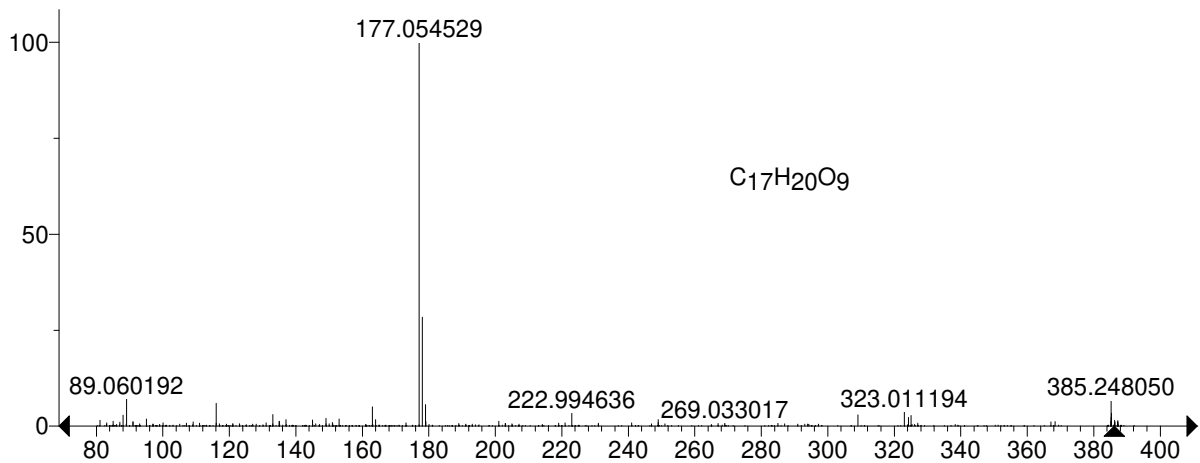

Hit 3 : (1R,3R,4S,5R)-1,3,4-trihydroxy-5-[(E)-3-(4-hydroxy-3-methoxyphenyl)prop-2-enoyl]oxycyclohexane-1-carboxylic acid  
C<sub>17</sub>H<sub>20</sub>O<sub>9</sub>; MF: 0; RMF: 3; Prob 25.0%; Lib: mona-export-vf-npl\_qexactive; ID: 7930.

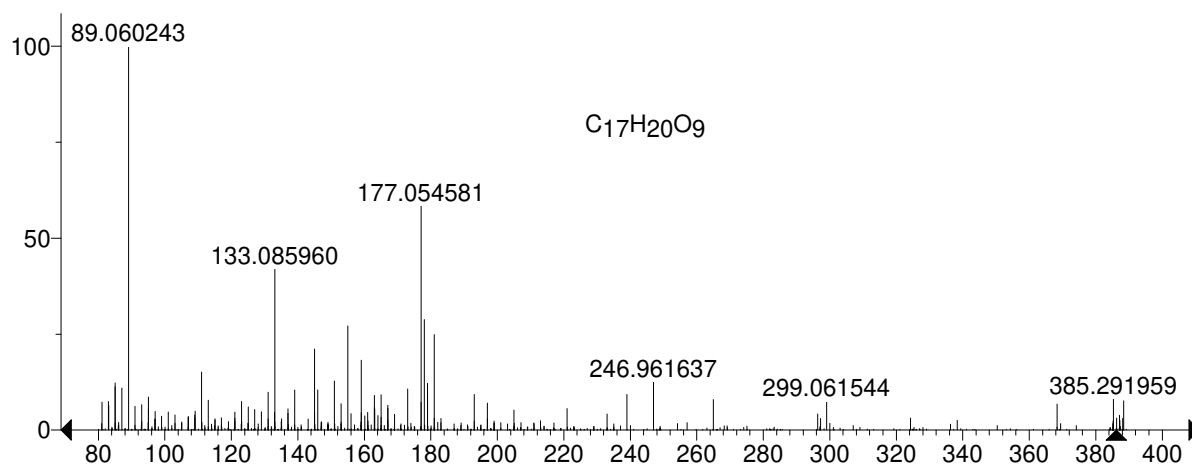

Hit 4 : [4-acetyloxy-2,5-dihydroxy-6-(hydroxymethyl)oxan-3-yl] (E)-3-(4-hydroxyphenyl)prop-2-enoate [M+NH<sub>4</sub>]<sup>+</sup>  
C<sub>17</sub>H<sub>20</sub>O<sub>9</sub>; MF: 0; RMF: 2; Prob 25.0%; Lib: mona-export-vf-npl\_qexactive; ID: 20331.

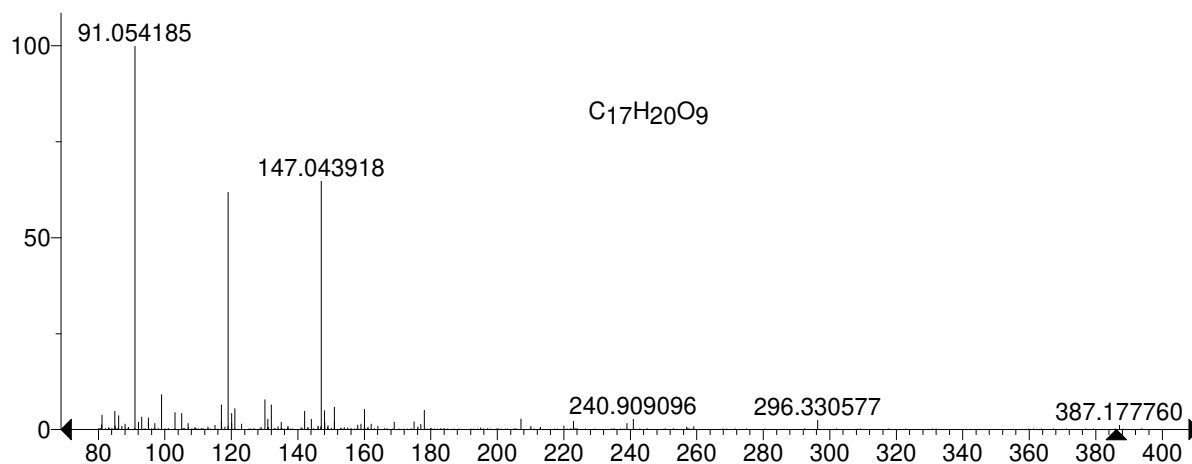

\*\* Search Report Page 1 of 2 \*\*

Unknown: Unknown (4.39\_415.1710m/z)  
Compound in Library Factor = -3273

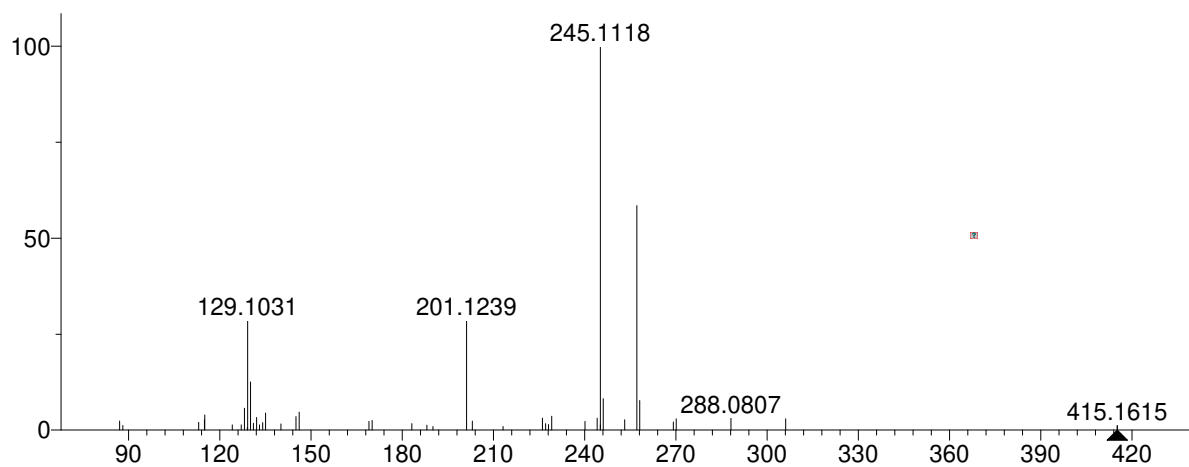

Hit 1 : Diltiazem [M+H]<sup>+</sup> QTOF 3V P=415.2  
C<sub>22</sub>H<sub>26</sub>N<sub>2</sub>O<sub>4</sub>S; MF: 6; RMF: 68; Prob 17.2%; CAS: 42399-41-7; Lib: nist\_msms; ID: 20519.

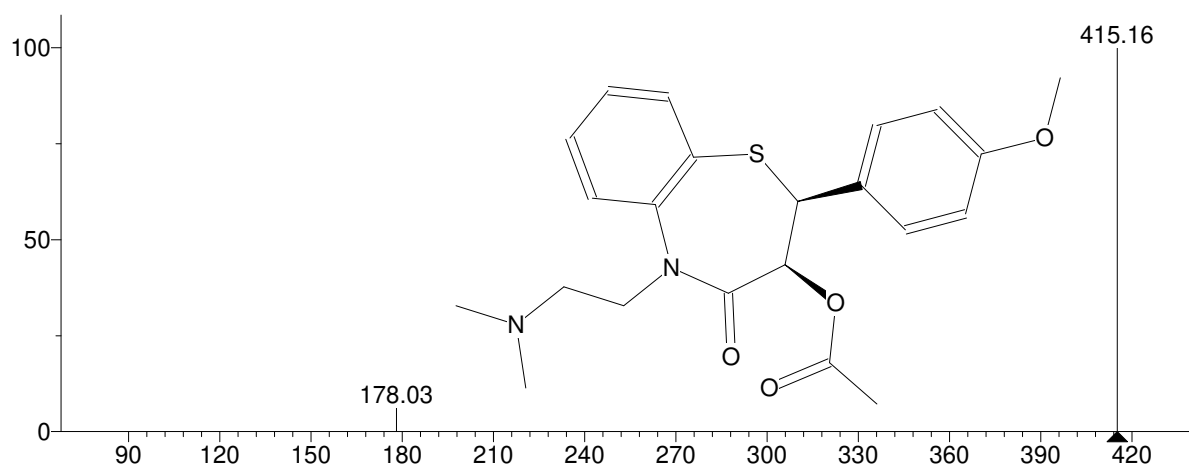

Hit 2 : Garcinone C [M+H]<sup>+</sup> HCD 8V P=415.2  
C<sub>23</sub>H<sub>26</sub>O<sub>7</sub>; MF: 2; RMF: 94; Prob 14.5%; CAS: 76996-27-5; Lib: nist\_msms; ID: 389279.

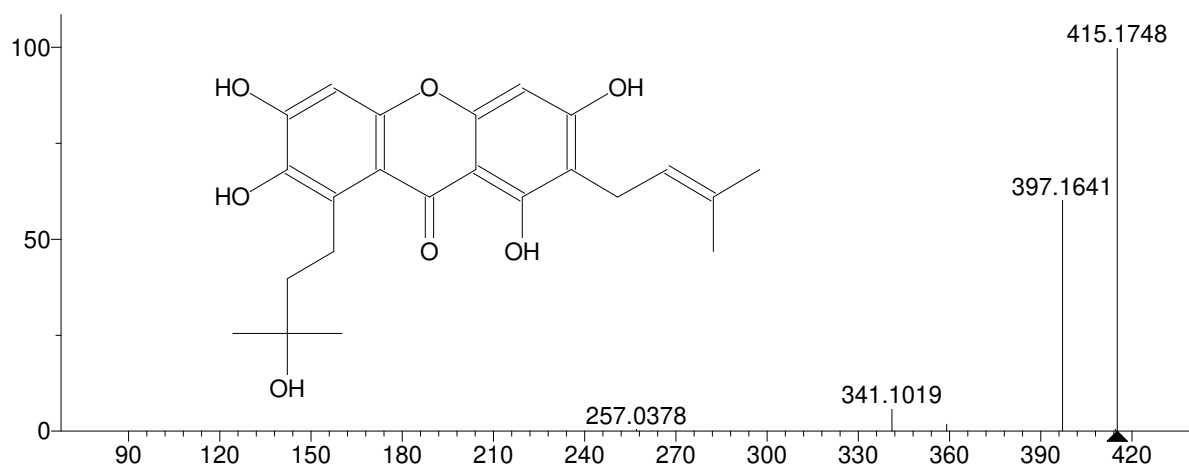

Hit 3 : 6-formyl-10-(hydroxymethyl)-5-methoxy-3-methylidene-2-oxo-2H,3H,3aH,4H,5H,8H,9H,11aH-cyclodeca[b]  
C<sub>21</sub>H<sub>28</sub>O<sub>7</sub>; MF: 2; RMF: 78; Prob 14.5%; Lib: mona-export-vf-npl\_qexactive; ID: 16435.

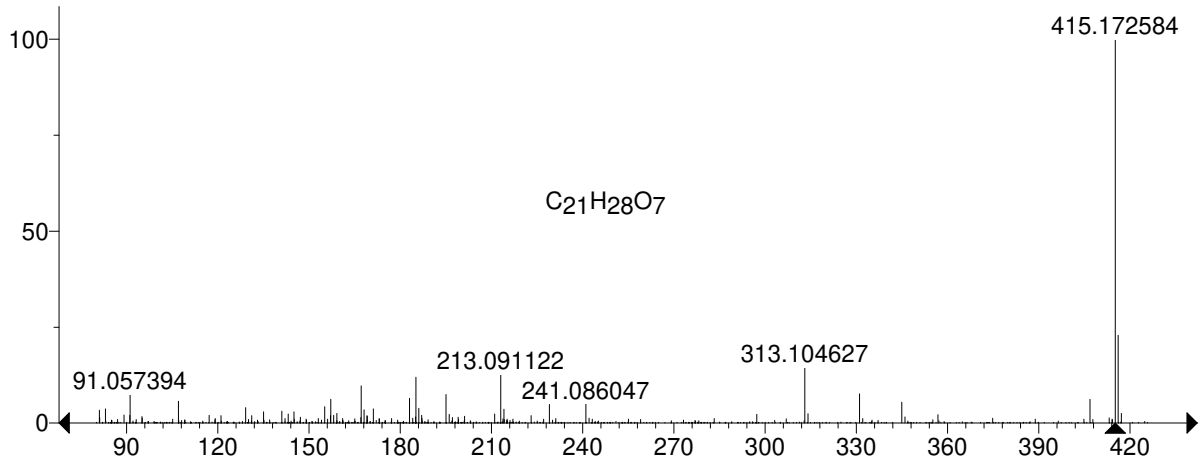

Hit 4 : Diltiazem HCl (Tiazac) [M+H]<sup>+</sup> P=415.2  
C<sub>22</sub>H<sub>27</sub>ClN<sub>2</sub>O<sub>4</sub>S; MF: 0; RMF: 25; Prob 13.4%; Lib: mona-export-gnps; ID: 648.

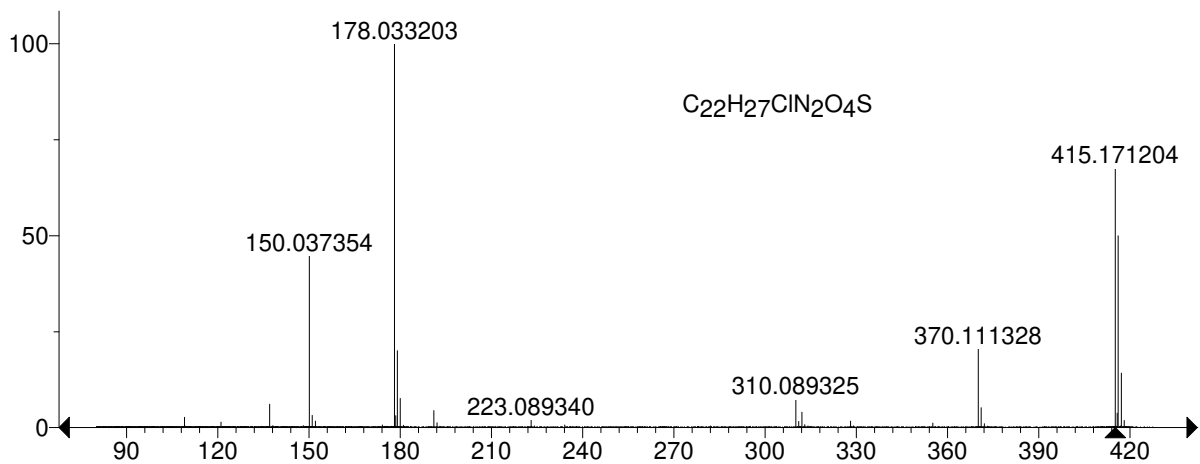

Hit 5 : NCGC00347525-02|2-amino-5-[2-[[[2,3-dihydroxy-2-(1-hydroxyethyl)butanoyl]oxymethyl]-4-hydroxyanilino]-  
C<sub>18</sub>H<sub>26</sub>N<sub>2</sub>O<sub>9</sub>; MF: 0; RMF: 23; Prob 13.4%; Lib: mona-export-gnps; ID: 6270.

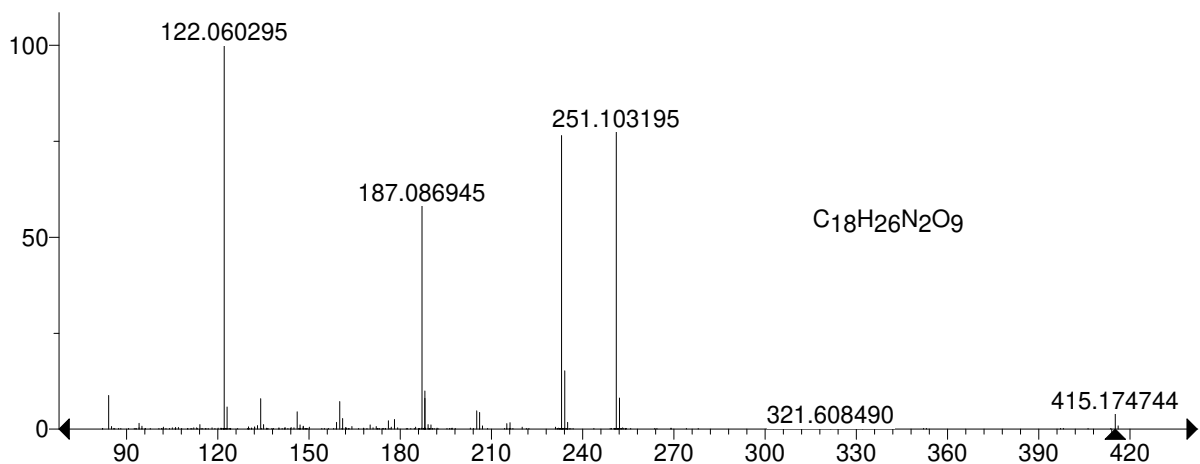



Unknown: Unknown (4.40\_476.1510m/z)  
Compound in Library Factor = 0

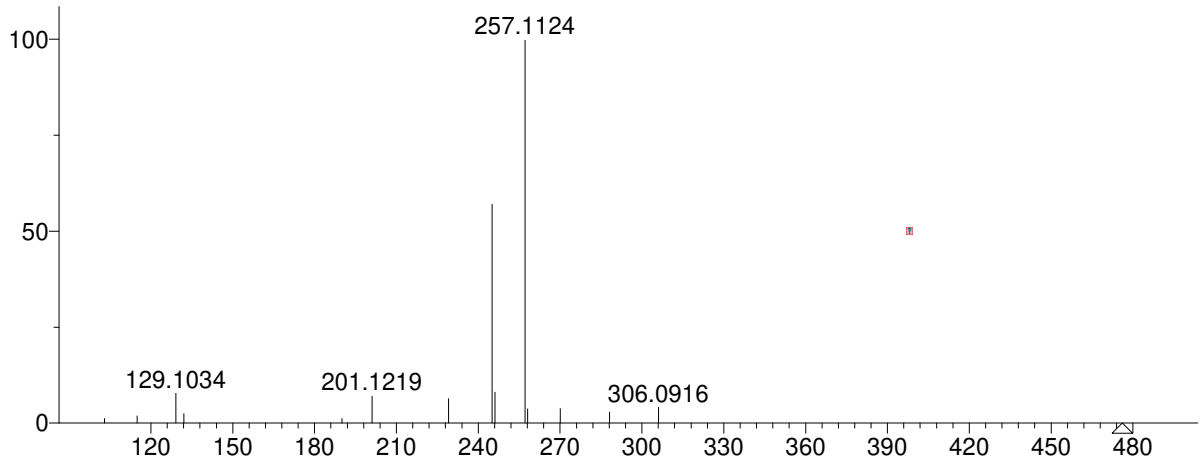

Unknown: Unknown (4.40\_646.2090m/z)  
Compound in Library Factor = 0

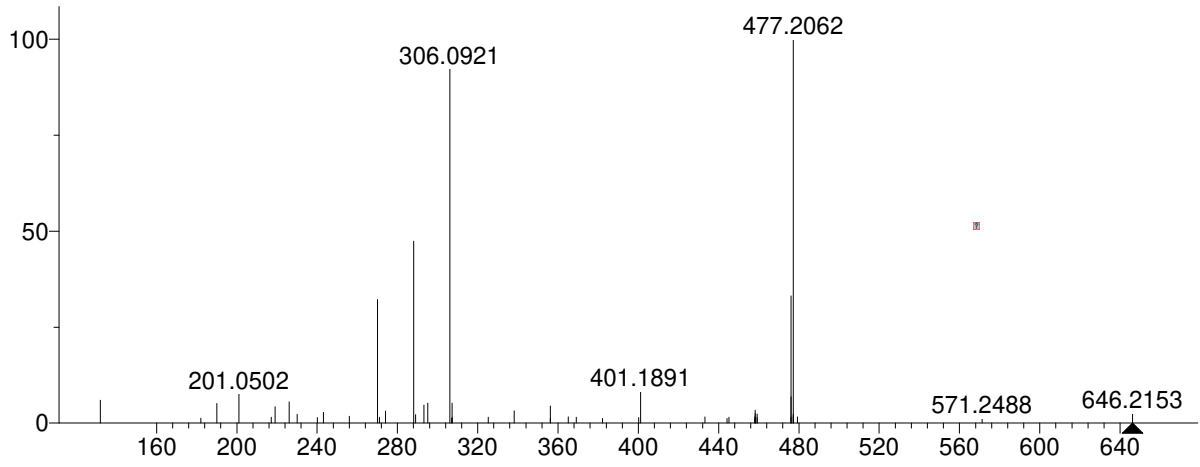

\*\* Search Report Page 1 of 2 \*\*

Unknown: Unknown (4.41\_257.1133m/z)  
Compound in Library Factor = -287

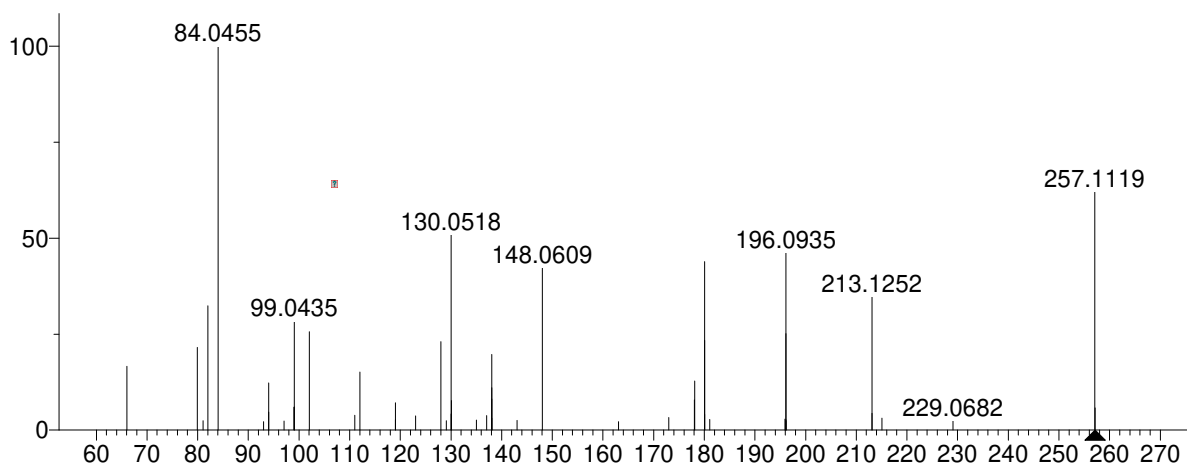

Hit 1 : L-Saccharopine [M-H-H<sub>2</sub>O]- HCD 24V P=257.1  
C<sub>11</sub>H<sub>20</sub>N<sub>2</sub>O<sub>6</sub>; MF: 285; RMF: 540; Prob 98.8%; CAS: 997-68-2; Lib: nist\_msms; ID: 125637.

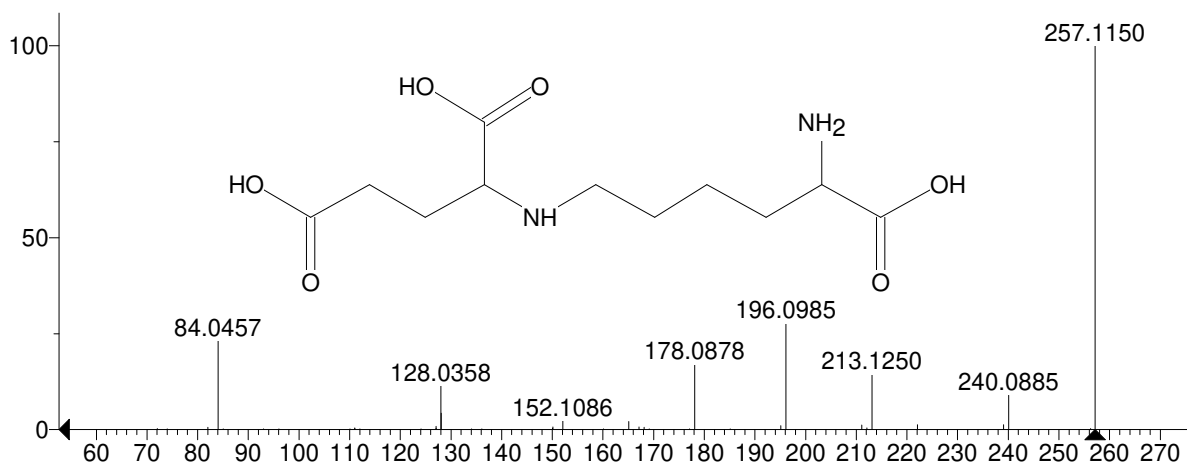

Hit 2 :  $\alpha$ -Cyclohexylmandelic acid [M+Na]<sup>+</sup> HCD 1V P=257.1  
C<sub>14</sub>H<sub>18</sub>O<sub>3</sub>; MF: 59; RMF: 534; Prob 0.98%; CAS: 4335-77-7; Lib: nist\_msms; ID: 492969.

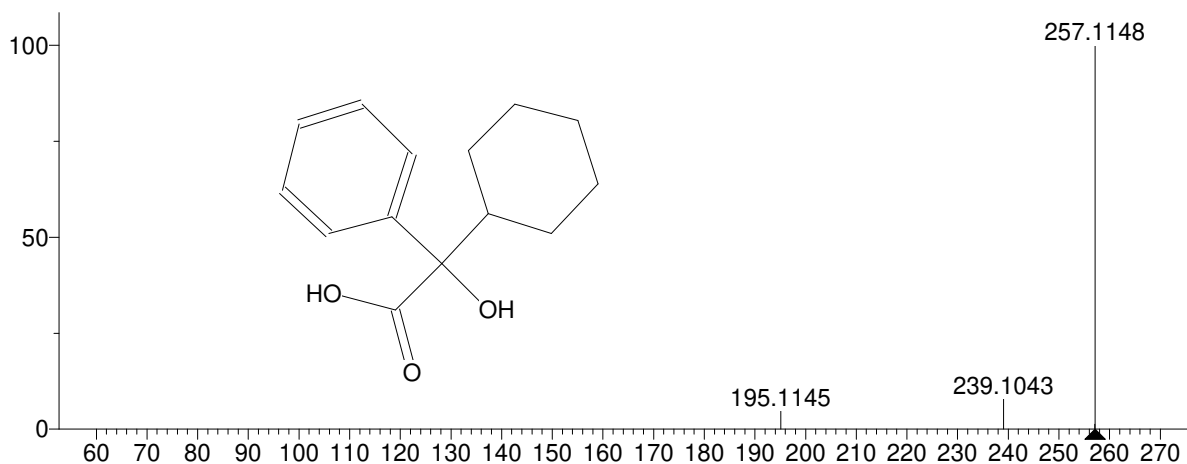

Hit 3 : 5'-O-Methylthymidine [M+H]<sup>+</sup> 35eV P=257.1  
C<sub>11</sub>H<sub>16</sub>N<sub>2</sub>O<sub>5</sub>; MF: 0; RMF: 32; Prob 0.17%; Lib: mona-export-fiehn\_hilic; ID: 1695.

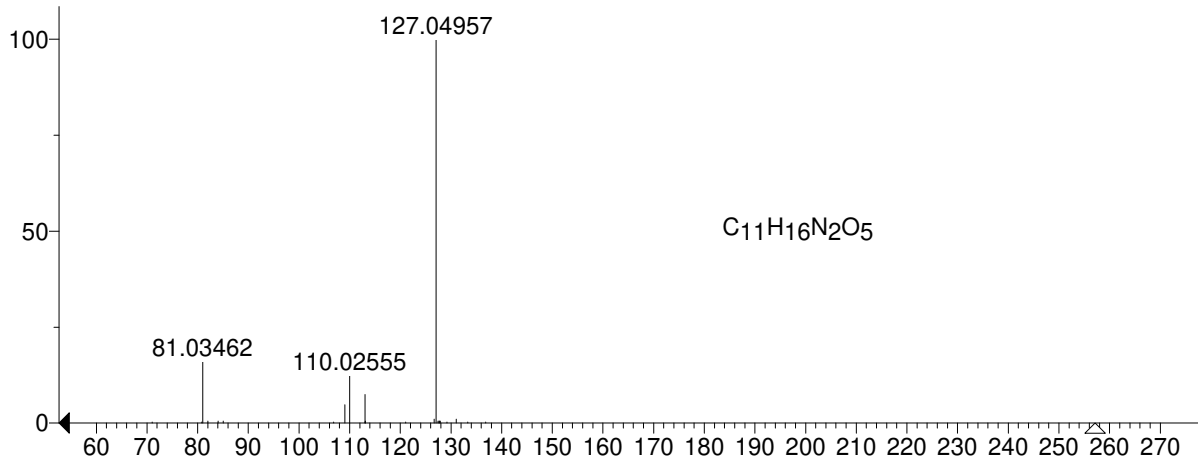

\*\* Search Report Page 1 of 2 \*\*

Unknown: Unknown (4.41\_427.1709m/z)  
Compound in Library Factor = -3273

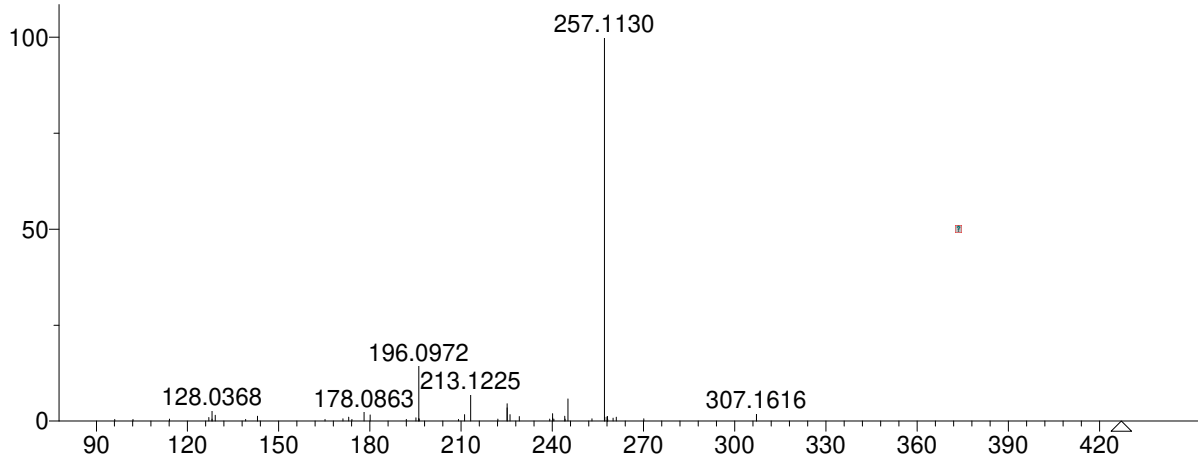

Hit 1 : [(6E,10Z)-10-(acetyloxymethyl)-6-formyl-3-methylidene-2-oxo-3a,4,5,8,9,11a-hexahydrocycloodeca[b]furan-C<sub>22</sub>H<sub>28</sub>O<sub>7</sub>; MF: 1; RMF: 80; Prob 34.2%; Lib: mona-export-vf-npl\_qexactive; ID: 23323.

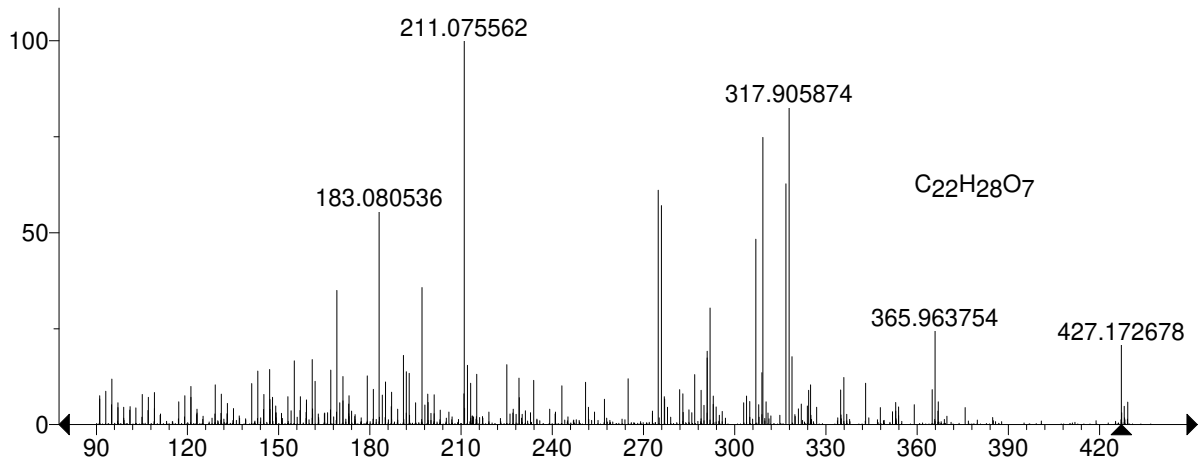

Hit 2 : Archangelicine [M+H]<sup>+</sup> 35HCD P=427.2  
C<sub>24</sub>H<sub>26</sub>O<sub>7</sub>; MF: 0; RMF: 26; Prob 32.9%; Lib: mona-export-vf-npl\_qexactive; ID: 5194.

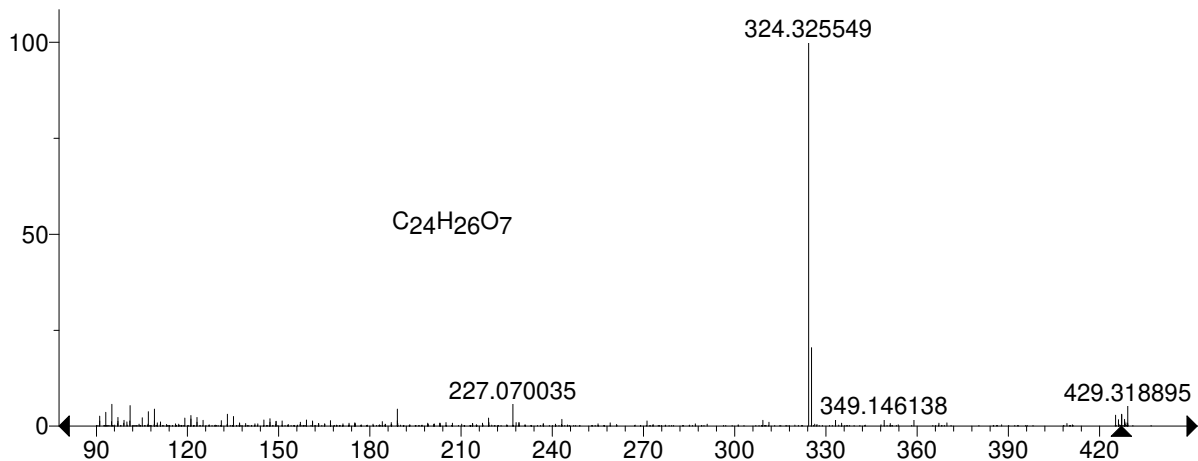

\*\* Search Report Page 2 of 2 \*\*

Hit 3 : [8,8-dimethyl-9-(3-methylbut-2-enyloxy)-2-oxo-9,10-dihydropyrano[2,3-f]chromen-10-yl] 3-methylbut-2-en  
C<sub>24</sub>H<sub>26</sub>O<sub>7</sub>; MF: 0; RMF: 19; Prob 32.9%; Lib: mona-export-vf-npl\_qexactive; ID: 4551.

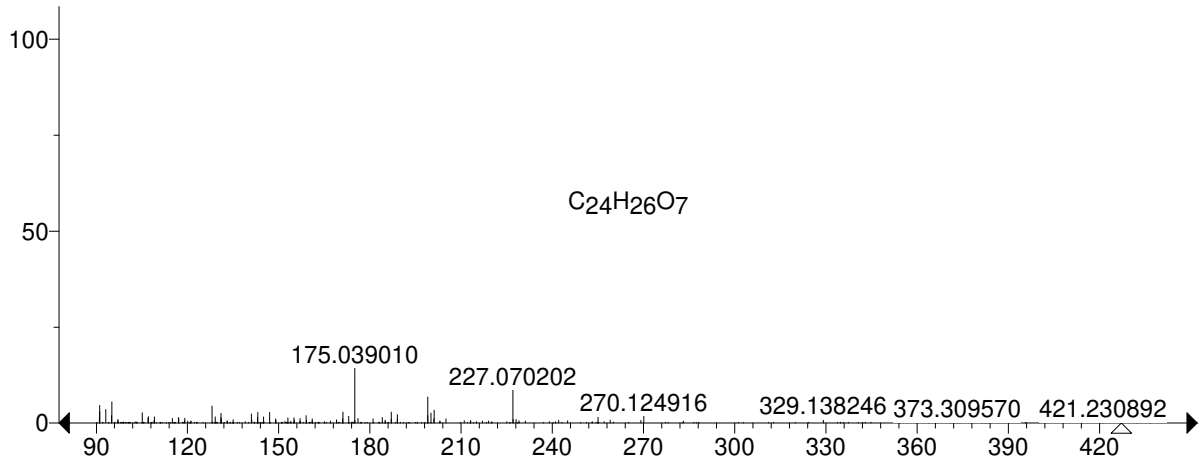

Unknown: Unknown (4.41\_660.2226m/z)  
Compound in Library Factor = 0

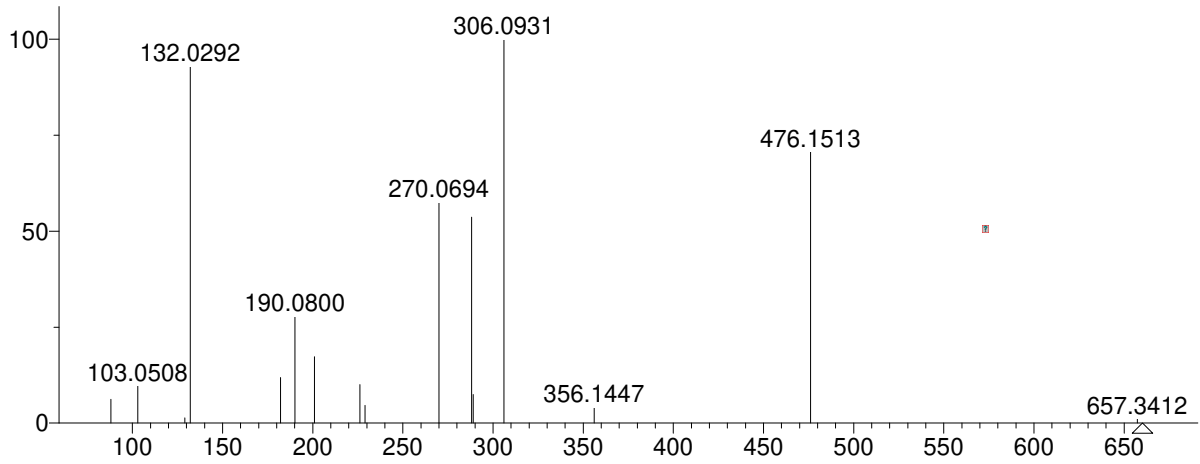

\*\* Search Report Page 1 of 2 \*\*

Unknown: Unknown (4.42\_432.2329m/z)  
Compound in Library Factor = -2176

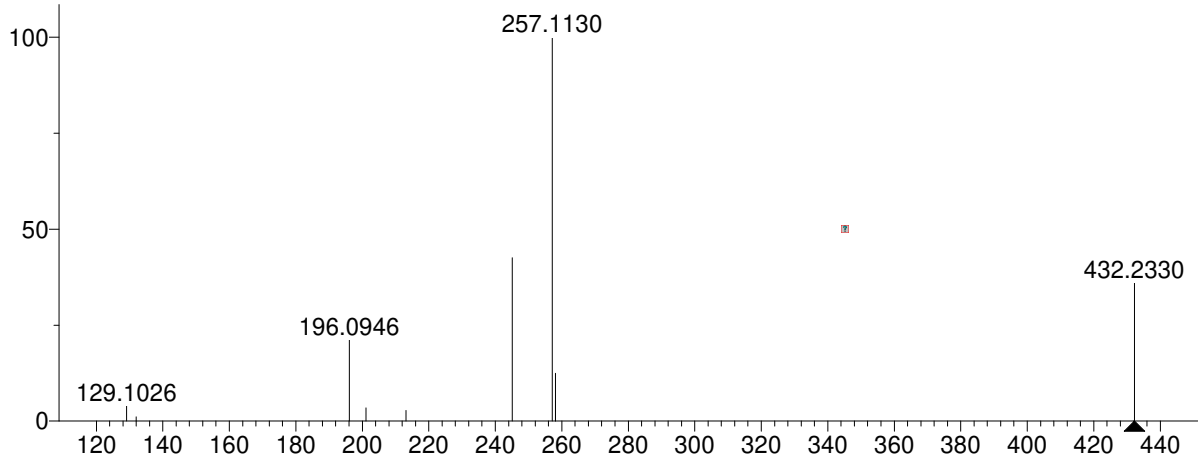

Hit 1 : Trp-Ala-Arg [M+H]<sup>+</sup> QTOF 10V P=432.2  
C<sub>20</sub>H<sub>29</sub>N<sub>7</sub>O<sub>4</sub>; MF: 44; RMF: 379; Prob 56.0%; Lib: nist\_msms; ID: 54458.

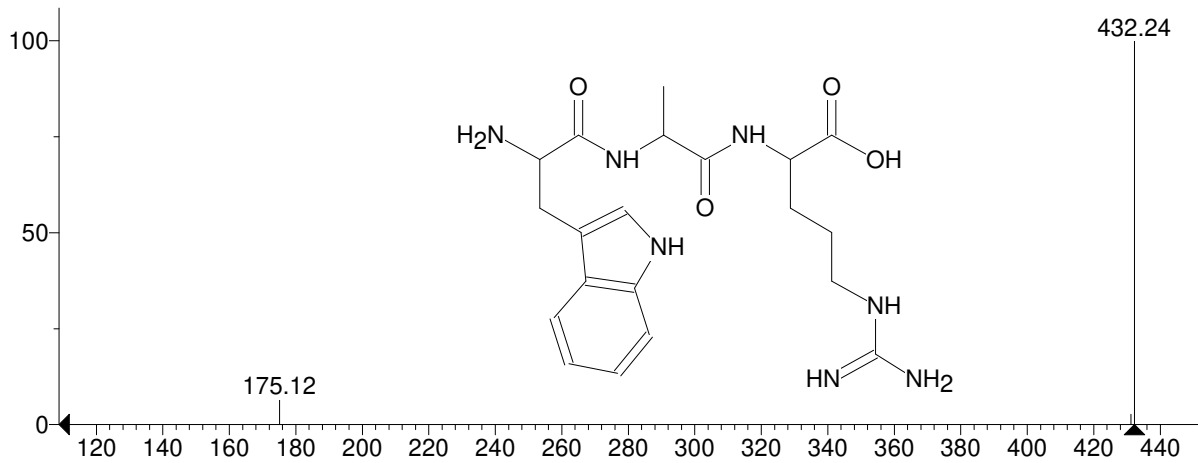

Hit 2 : Ala-Trp-Arg [M+H]<sup>+</sup> QTOF 5V P=432.2  
C<sub>20</sub>H<sub>29</sub>N<sub>7</sub>O<sub>4</sub>; MF: 22; RMF: 376; Prob 22.1%; Lib: nist\_msms; ID: 49475.

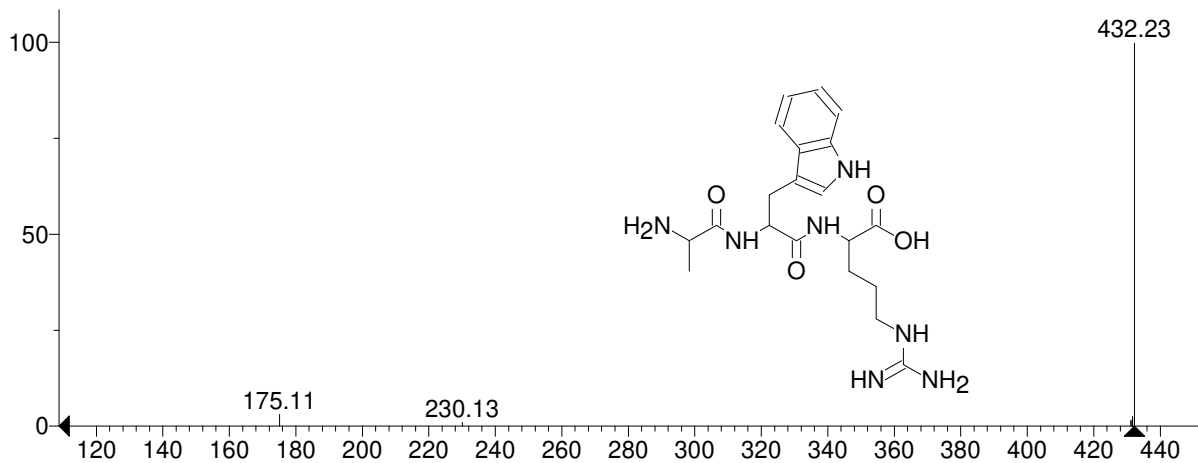



\*\* Search Report Page 2 of 2 \*\*

Hit 3 : NCGC00380807-01\_C26H31N3O3\_Pyrrolo[1,2-a]pyrazine-1,4-dione, 3-[[7-(1,1-dimethyl-2-propen-1-yl)-2, C26H31N3O3; MF: 5; RMF: 249; Prob 12.1%; Lib: msms-neg-gnps; ID: 1604.

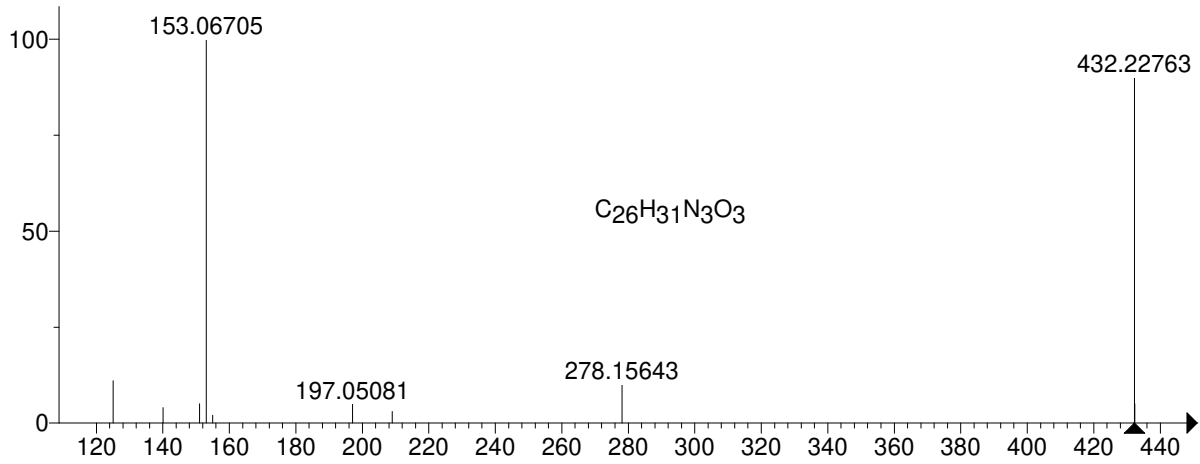

Hit 4 : Stephacidin A\_130074 [M+H]<sup>+</sup> P=432.2 C<sub>26</sub>H<sub>29</sub>N<sub>3</sub>O<sub>3</sub>; MF: 0; RMF: 186; Prob 9.74%; Lib: mona-export-gnps; ID: 5040.

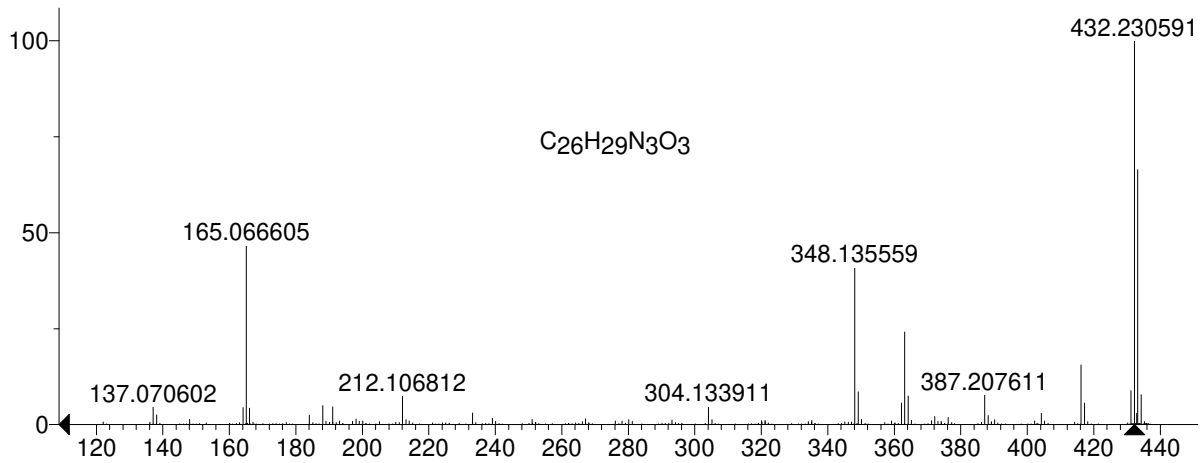

Unknown: Unknown (4.42\_699.1211m/z)  
Compound in Library Factor = 0

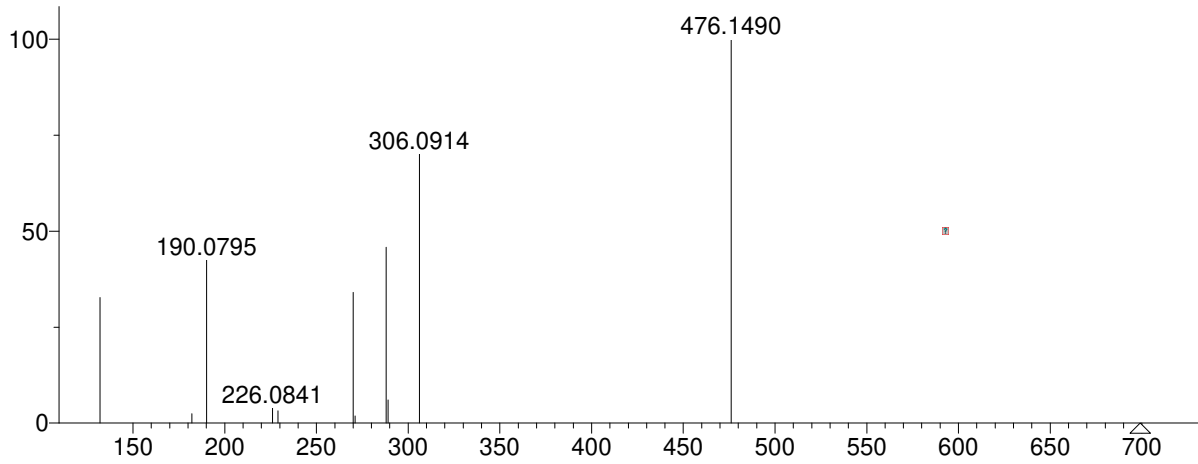

Unknown: Unknown (4.42\_699.1219m/z)  
Compound in Library Factor = 0

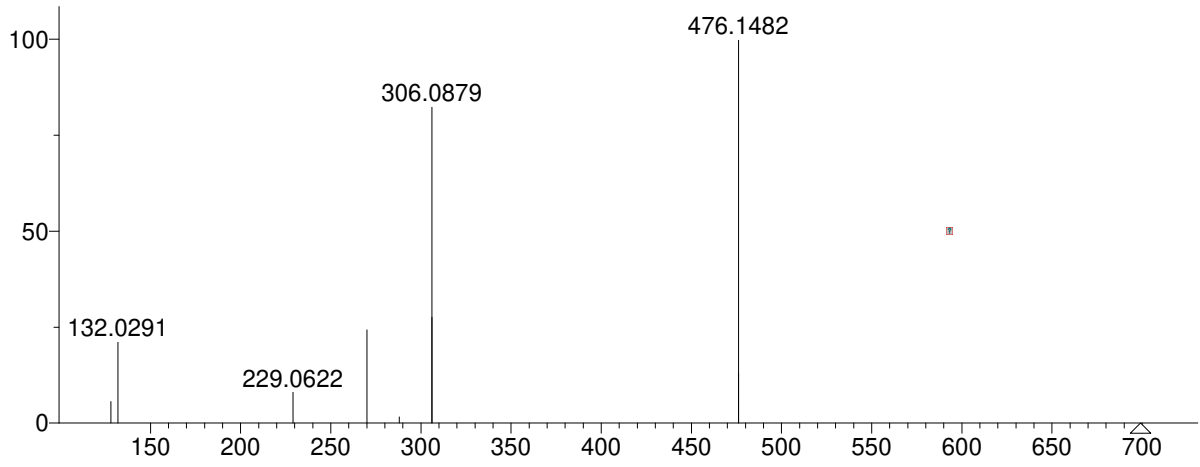

Unknown: Unknown (4.43\_465.1492m/z)  
Compound in Library Factor = 0

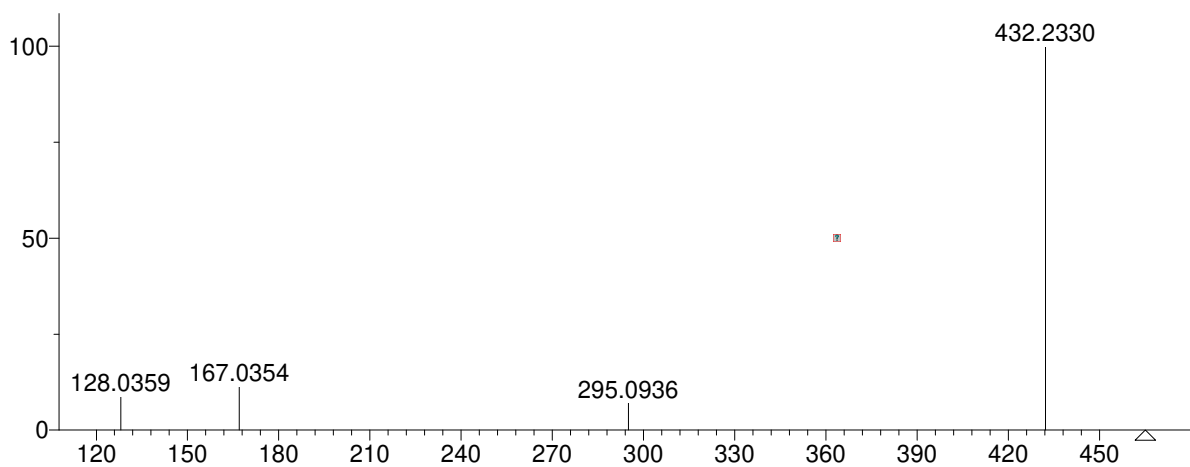

Hit 1 : [5-formyl-4,8-dihydroxy-3-(3-methoxy-3-oxoprop-1-en-2-yl)-8a-methyl-2,3,4,4a,5,6,7,8-octahydro-1H-naphth C<sub>21</sub>H<sub>30</sub>O<sub>9</sub>; MF: 0; RMF: 2; Prob 100.0%; Lib: mona-export-vf-npl\_qexactive; ID: 10594.

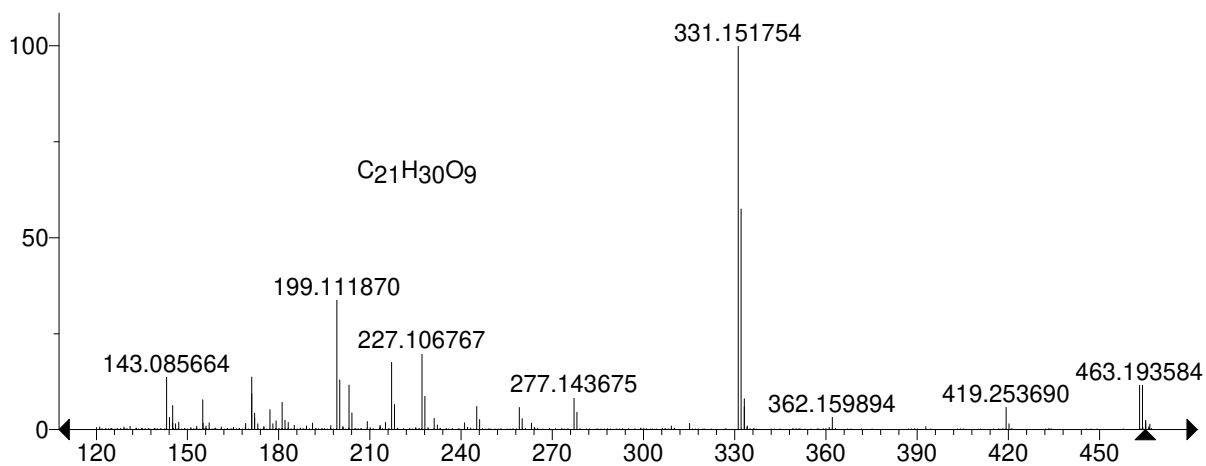

Unknown: Unknown (4.44\_373.1713m/z)  
Compound in Library Factor = 0

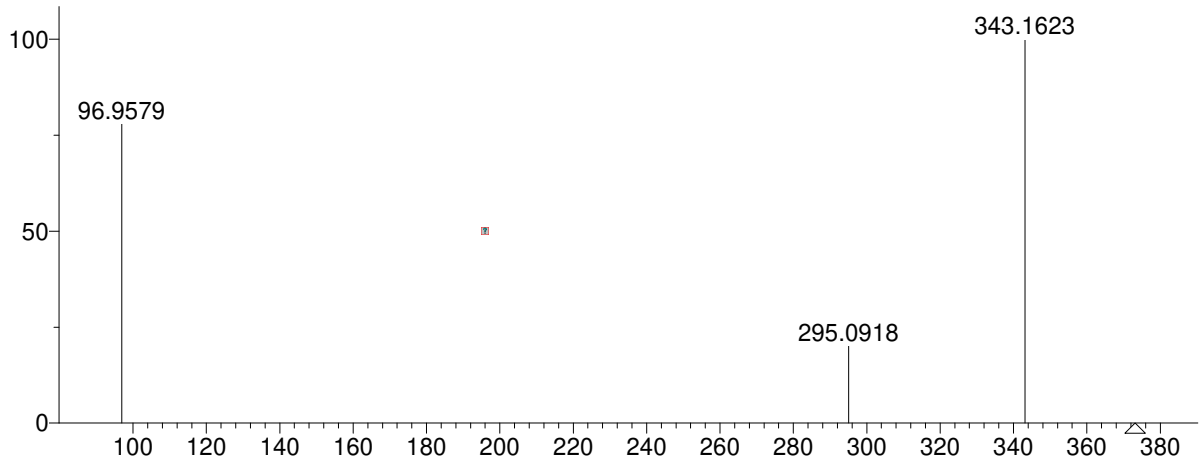

Unknown: Unknown (4.44\_399.1492m/z)  
Compound in Library Factor = 0

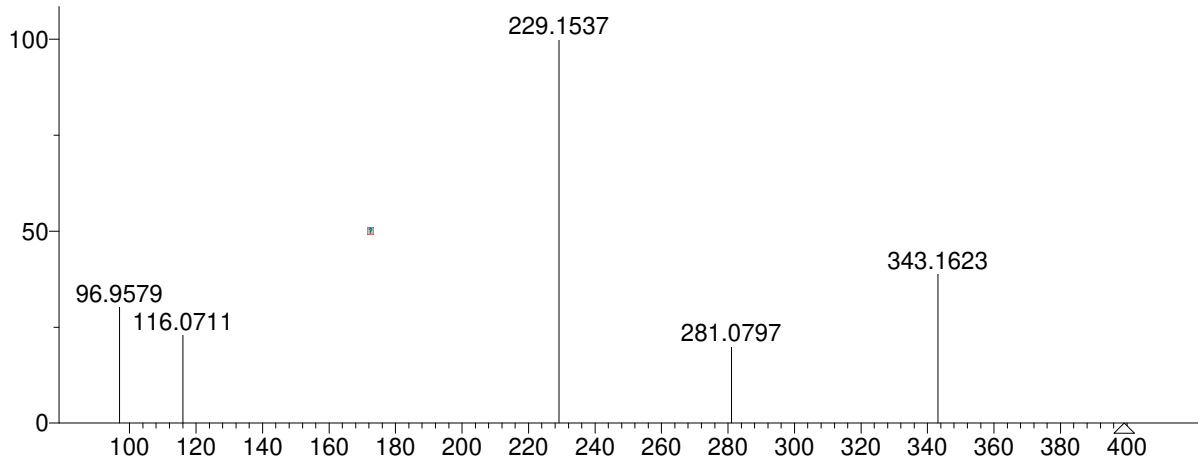

\*\* Search Report Page 1 of 2 \*\*

Unknown: Unknown (4.45\_305.0692m/z)  
Compound in Library Factor = -2387

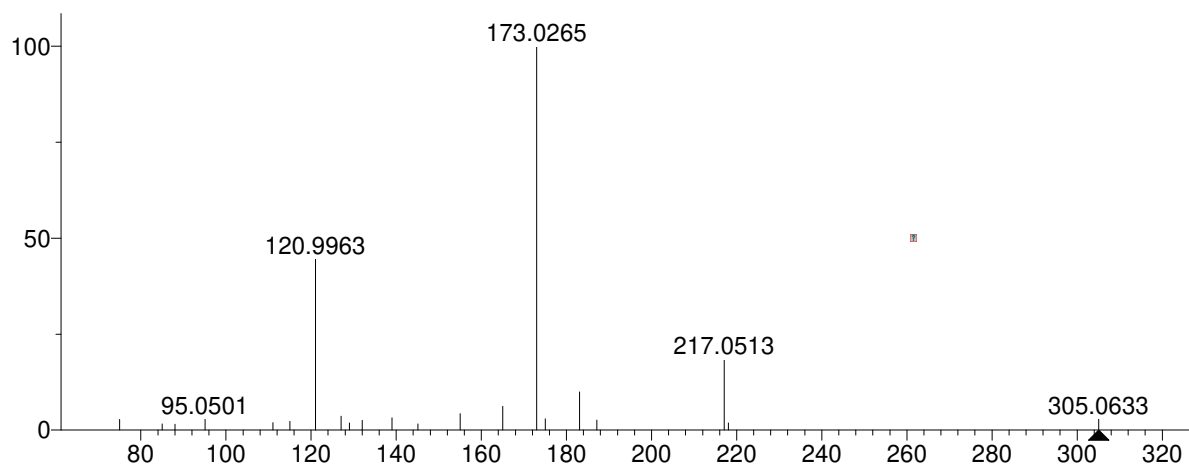

Hit 1 : Gallocatechin [M-H]<sup>-</sup> 45eV P=305.1  
C<sub>15</sub>H<sub>14</sub>O<sub>7</sub>; MF: 23; RMF: 625; Prob 15.4%; Lib: msms-neg-metabobase; ID: 810.

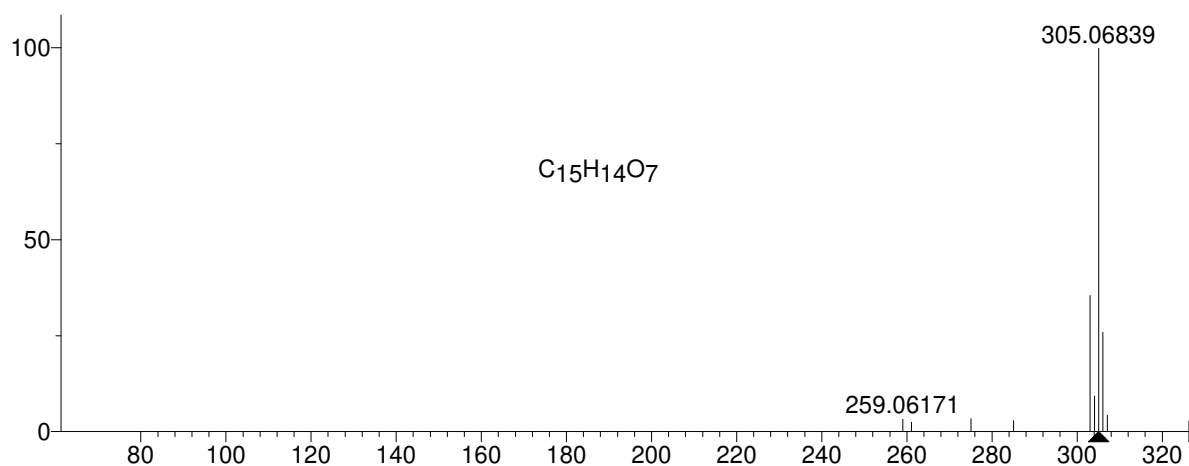

Hit 2 : 2,3-Trans-3,4-cis-Leucocyanidin [M-H]<sup>-</sup> 45eV P=305.1  
C<sub>15</sub>H<sub>14</sub>O<sub>7</sub>; MF: 13; RMF: 384; Prob 10.8%; Lib: msms-neg-metabobase; ID: 827.

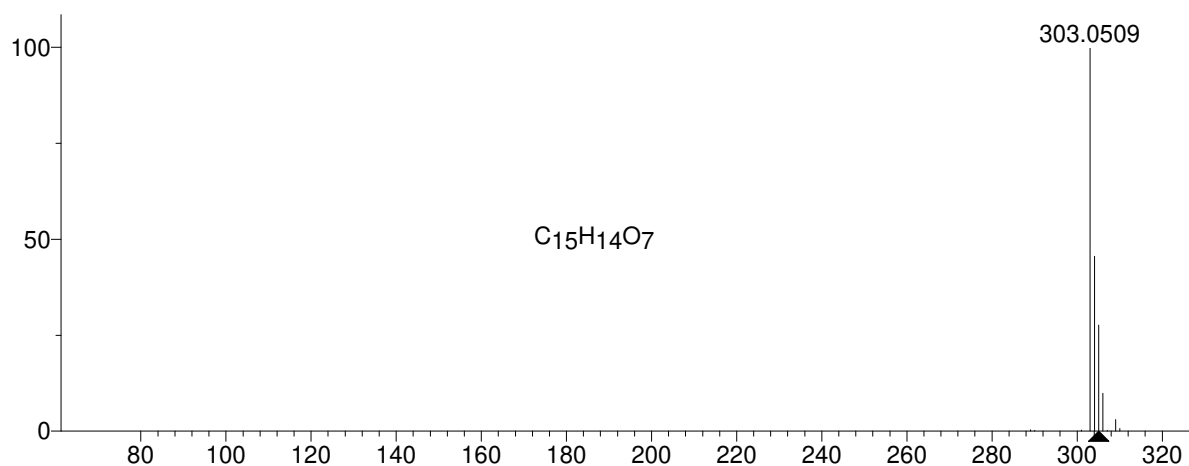

Hit 3 : Epigallocatechin [M-H]- 45eV P=305.1  
C<sub>15</sub>H<sub>14</sub>O<sub>7</sub>; MF: 11; RMF: 547; Prob 10.0%; Lib: msms-neg-metabobase; ID: 857.

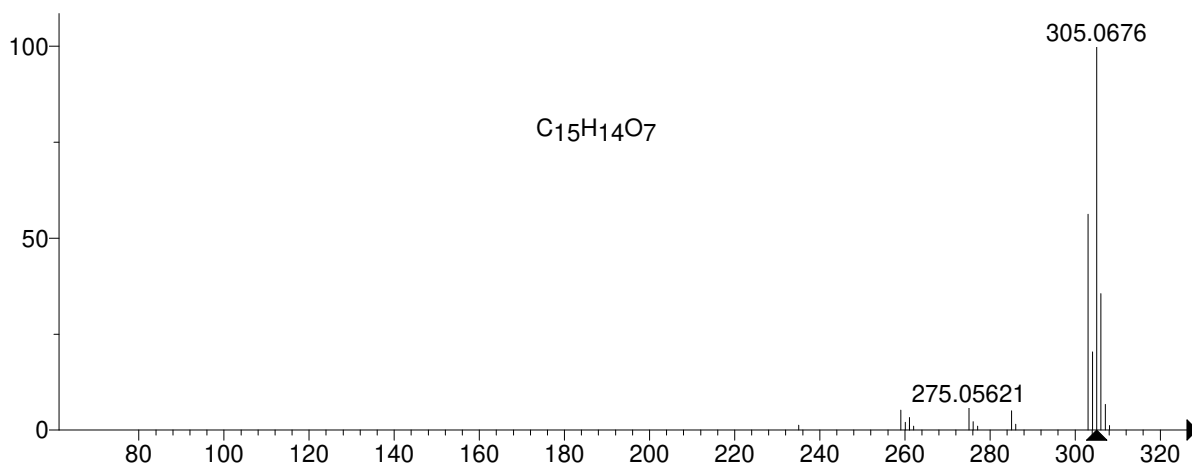

Hit 4 : (-)-Epigallocatechin [M-H]- HCD 13V P=305.1  
C<sub>15</sub>H<sub>14</sub>O<sub>7</sub>; MF: 4; RMF: 134; Prob 7.66%; CAS: 970-74-1; Lib: nist\_msms; ID: 235098.

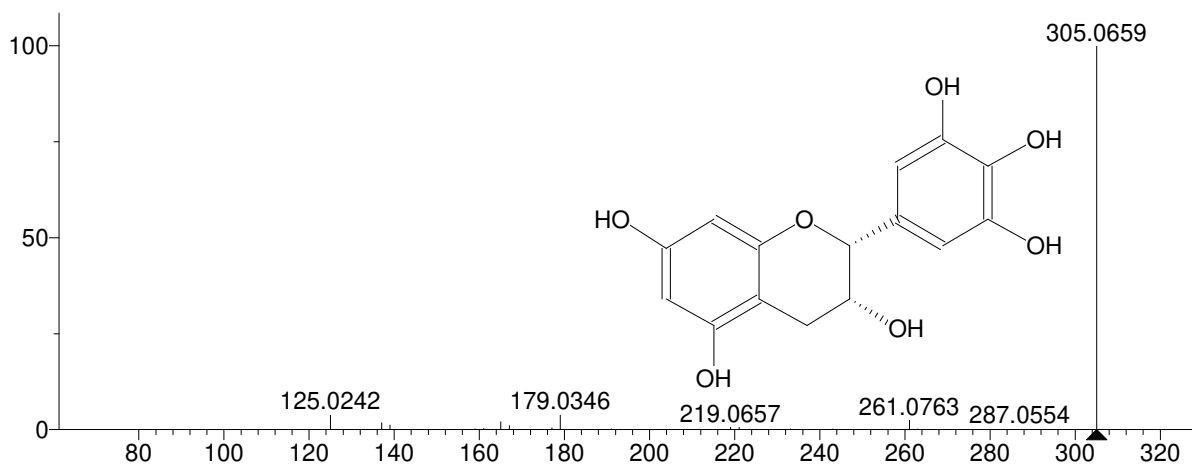

Hit 5 : Glutathione, oxidized [M-2H]<sup>2-</sup> HCD 8V P=305.1  
C<sub>20</sub>H<sub>32</sub>N<sub>6</sub>O<sub>12</sub>S<sub>2</sub>; MF: 3; RMF: 122; Prob 7.36%; CAS: 27025-41-8; Lib: nist\_msms; ID: 185529.

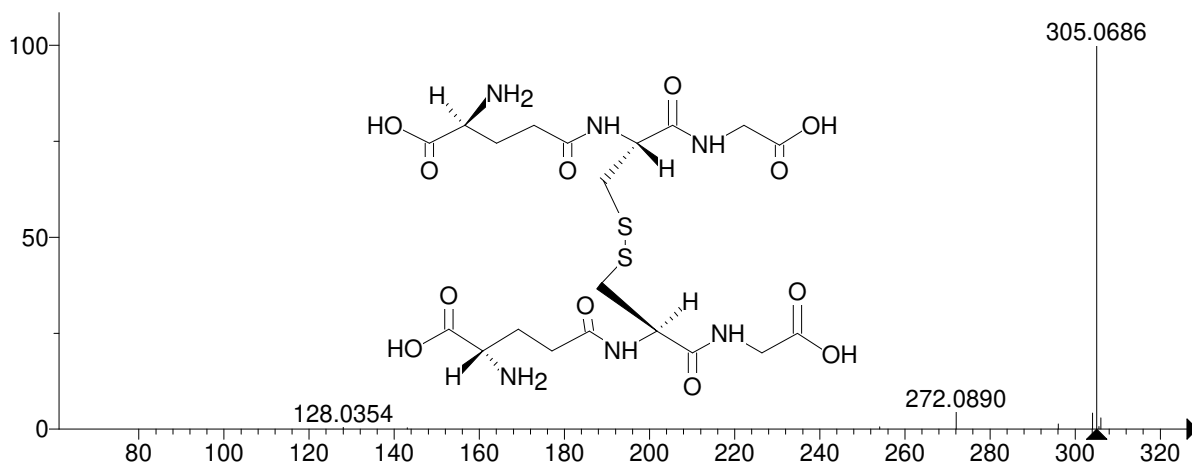



Unknown: Unknown (4.46\_278.1133m/z)  
Compound in Library Factor = 0

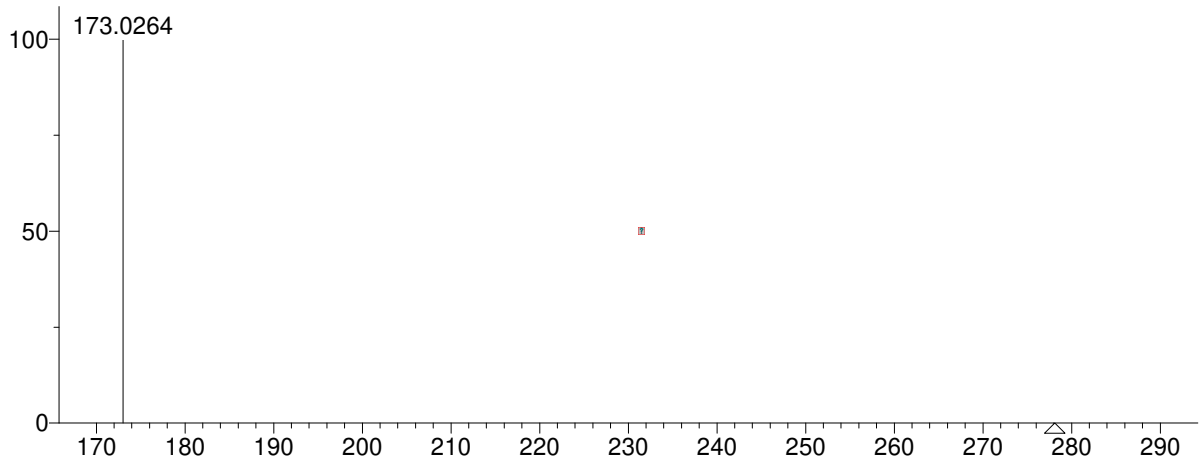

Unknown: Unknown (4.46\_391.2067m/z)  
Compound in Library Factor = 0

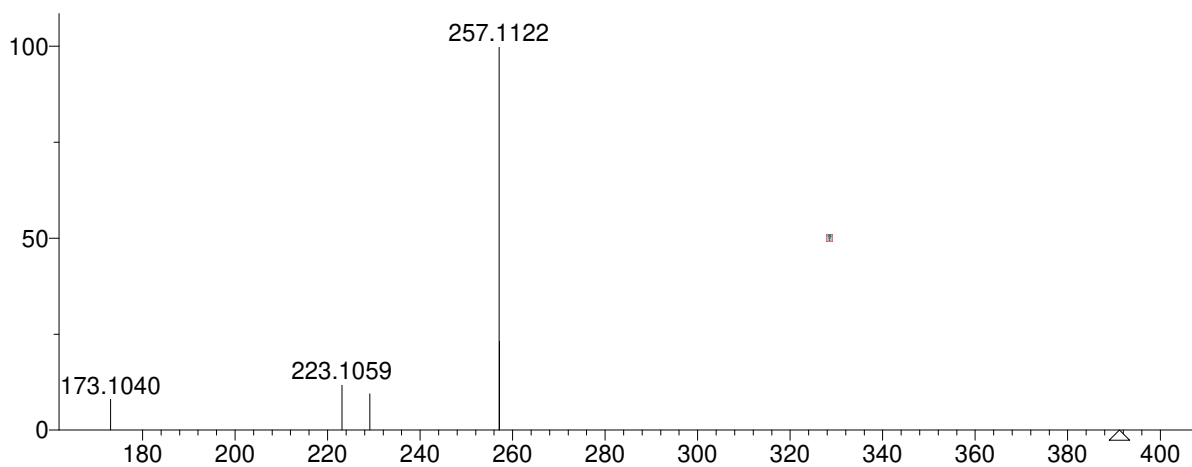

Hit 1 : Thromboxane B3 [M+Na]<sup>+</sup> IT-FT 35% P=391.2  
C<sub>20</sub>H<sub>32</sub>O<sub>6</sub>; MF: 0; RMF: 39; Prob 100.0%; CAS: 71953-80-5; Lib: nist\_msms; ID: 85864.

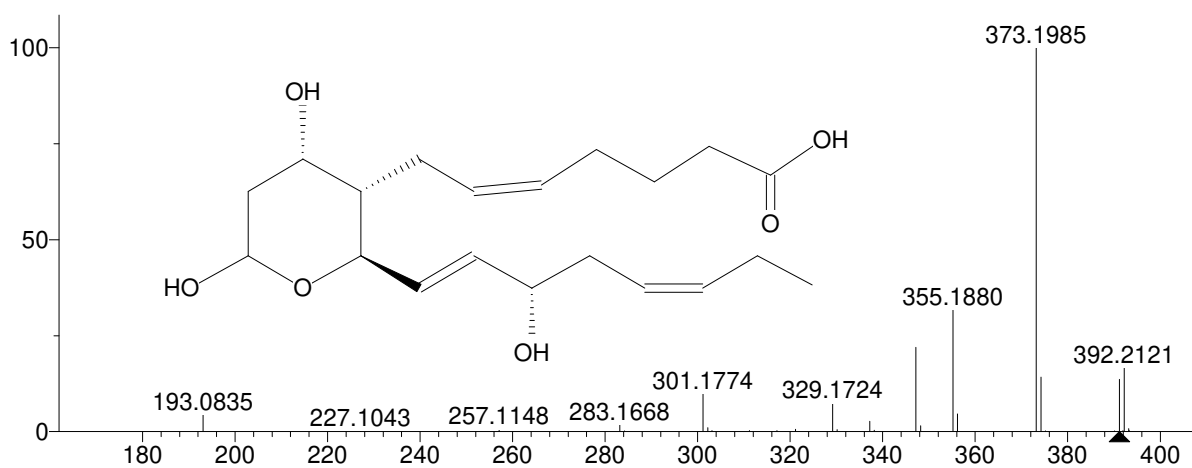

\*\* Search Report Page 1 of 2 \*\*

Unknown: Unknown (4.46\_397.2197m/z)  
Compound in Library Factor = -2176

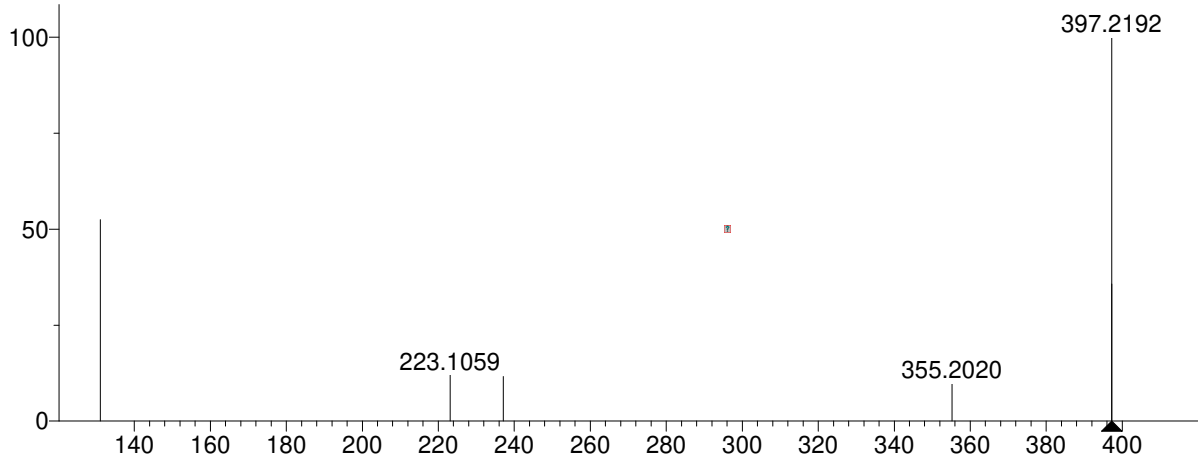

Hit 1 : NCGC00385079-01\_C19H34O7\_4-(4-Hydroxy-2,6,6-trimethyl-1-cyclohexen-1-yl)-2-butanyl beta-D-glucop; C19H34O7; MF: 21; RMF: 593; Prob 43.9%; Lib: mona-export-gnps; ID: 14159.

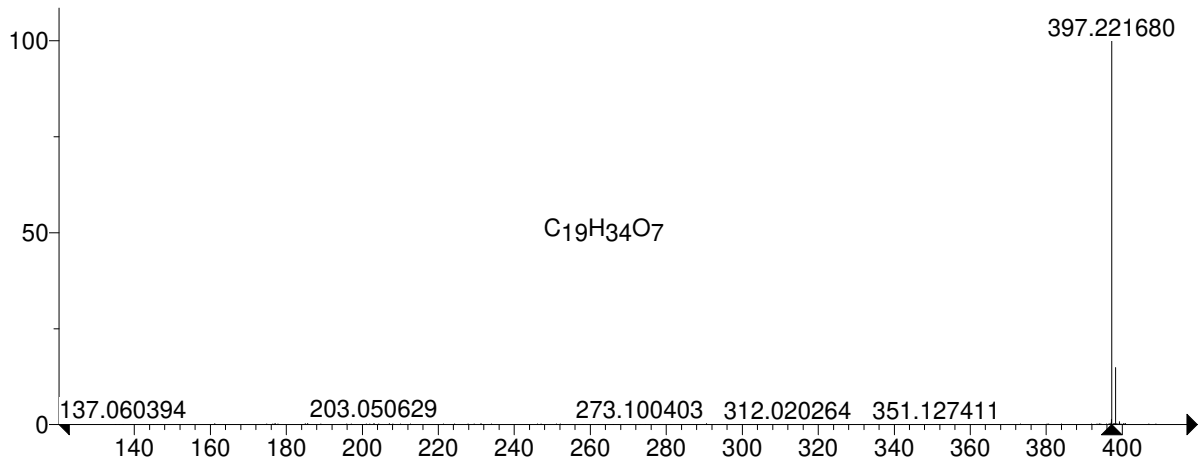

Hit 2 : (2R,3S,4S,5R,6R)-2-(hydroxymethyl)-6-[4-(4-hydroxy-2,6,6-trimethylcyclohexen-1-yl)butan-2-yloxy]oxane-3 C19H34O7; MF: 0; RMF: 516; Prob 18.7%; Lib: anthocyanins mona; ID: 7638.

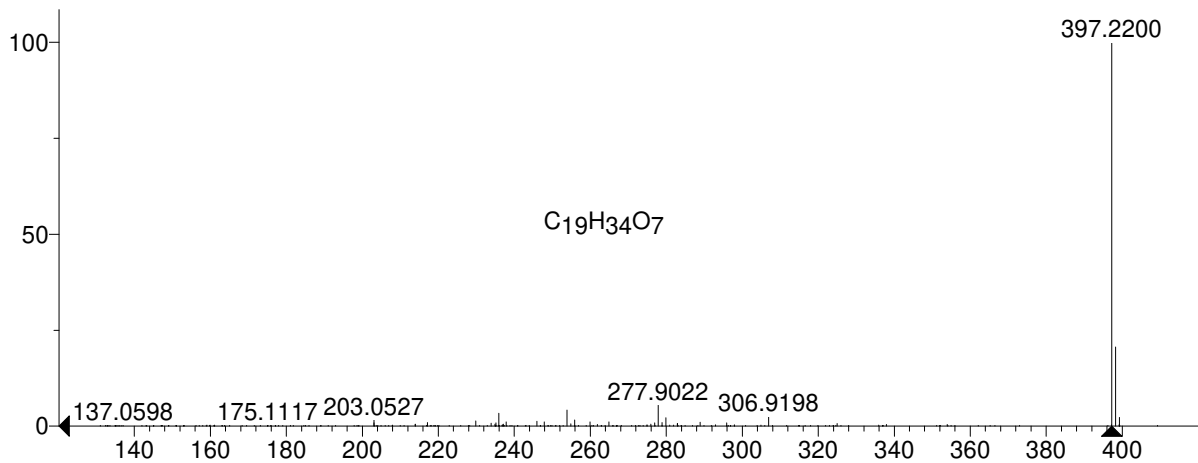

Hit 3 : O-acetylstemmadenine ([H]C(C)=C1/CN2CC[C@]1([H])[C@](COC(C)=O)(C(=O)OC)C1=C(CC2)C2=CC=C(C23H28N2O4; MF: 0; RMF: 408; Prob 18.7%; Lib: alkaloids; ID: 12.

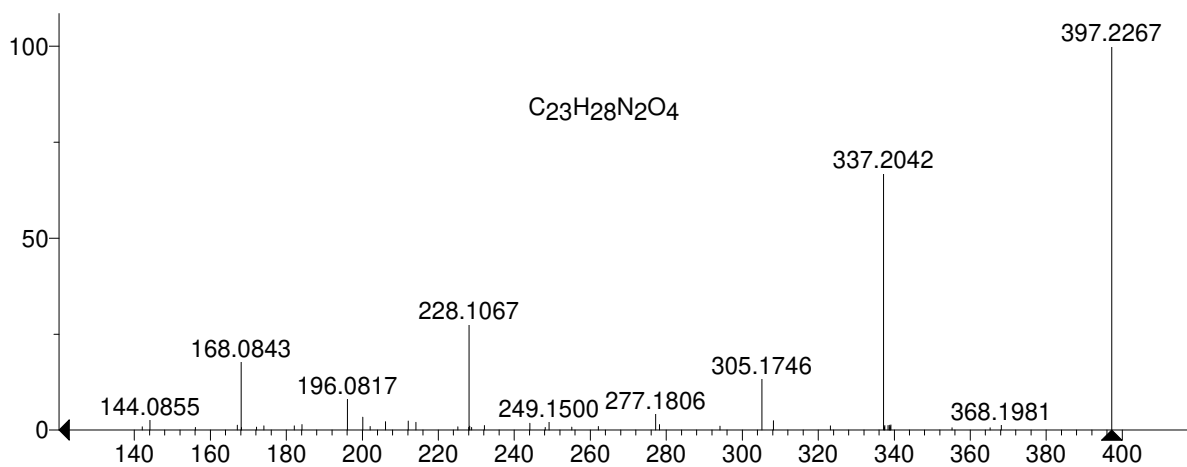

Hit 4 : 2,4-dihydroxy-5-methoxy-1'',6'',8''-trimethyldispiro[bis(oxolane)-3,2':5',7''-[3]oxatricyclo[6.3.1.0a'',A''1A''2]c C<sub>21</sub>H<sub>32</sub>O<sub>7</sub>; MF: 0; RMF: 115; Prob 18.7%; Lib: mona-export-vf-npl\_qexactive; ID: 10632.

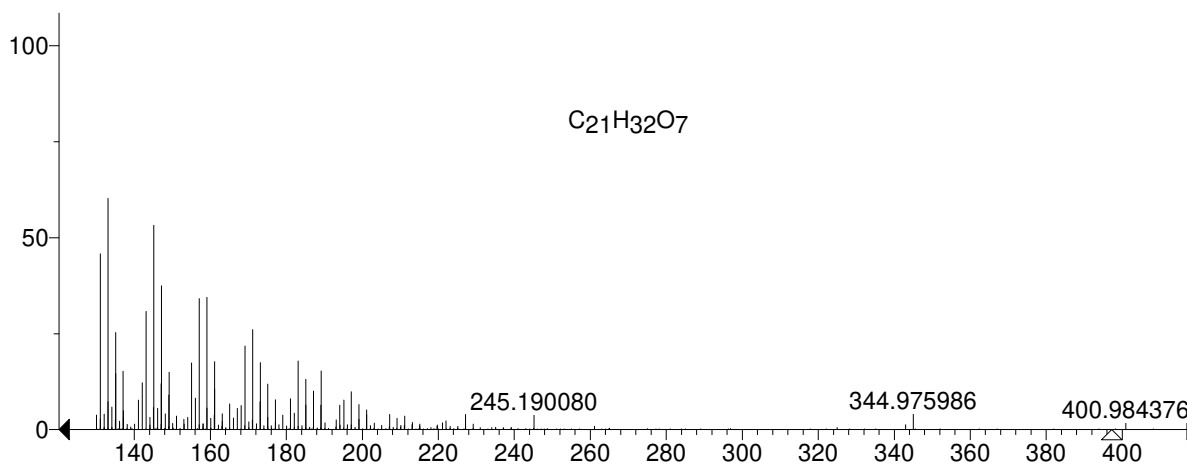

Unknown: Unknown (4.46\_415.1701m/z)  
Compound in Library Factor = 0

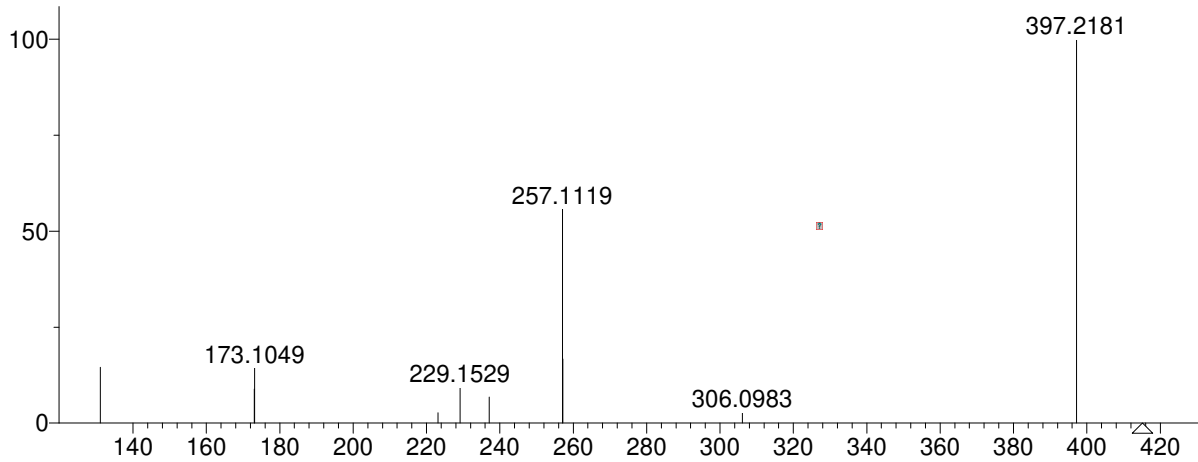

Hit 1 : 6-formyl-10-(hydroxymethyl)-5-methoxy-3-methylidene-2-oxo-2H,3H,3aH,4H,5H,8H,9H,11aH-cyclodeca[b]l  
C<sub>21</sub>H<sub>28</sub>O<sub>7</sub>; MF: 0; RMF: 46; Prob 50.0%; Lib: mona-export-vf-npl\_qexactive; ID: 16436.

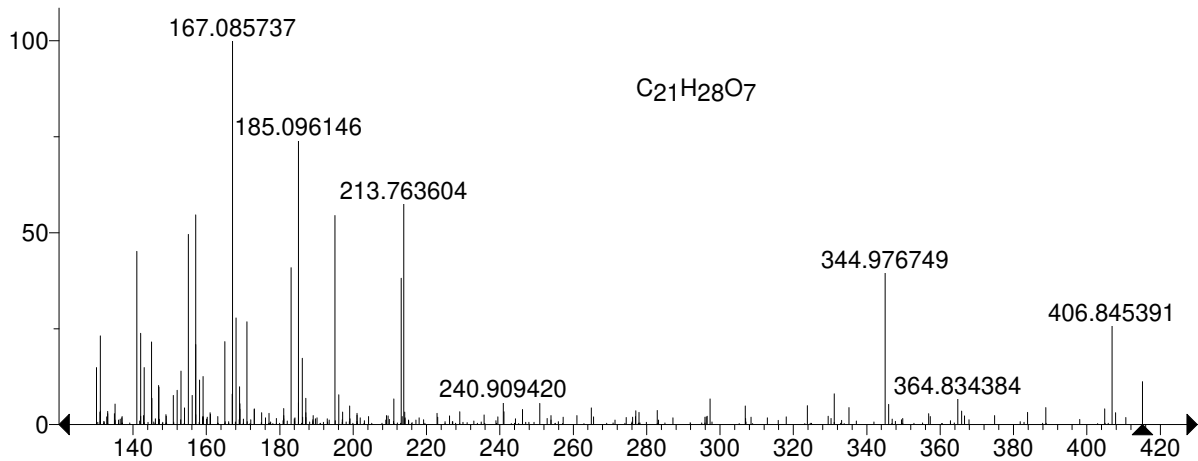

Hit 2 : Diltiazem [M+H]<sup>+</sup> IT 35% P=415.2  
C<sub>22</sub>H<sub>26</sub>N<sub>2</sub>O<sub>4</sub>S; MF: 0; RMF: 39; Prob 50.0%; CAS: 42399-41-7; Lib: nist\_msms; ID: 281174.

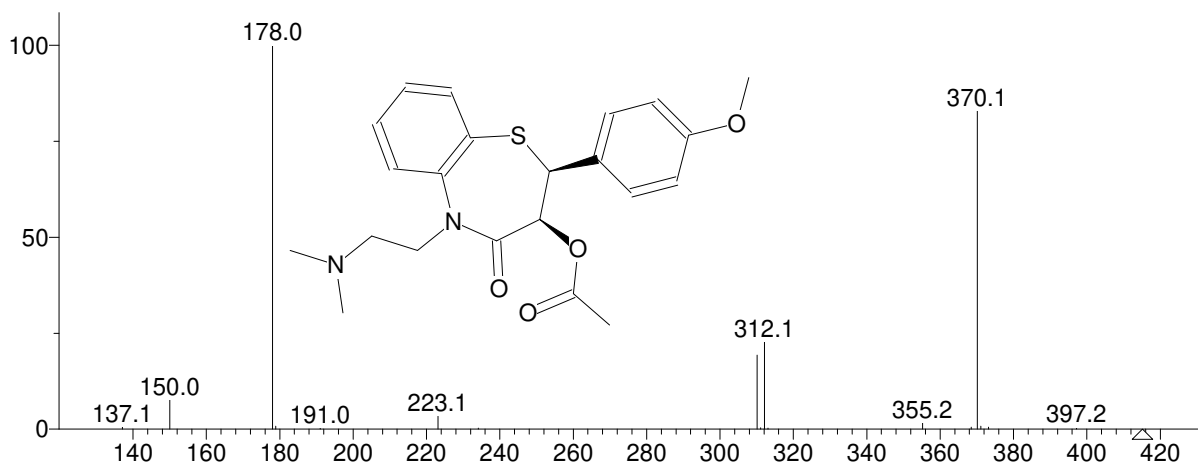

\*\* Search Report Page 1 of 2 \*\*

Unknown: Unknown (4.46\_451.1374m/z)  
Compound in Library Factor = -1309

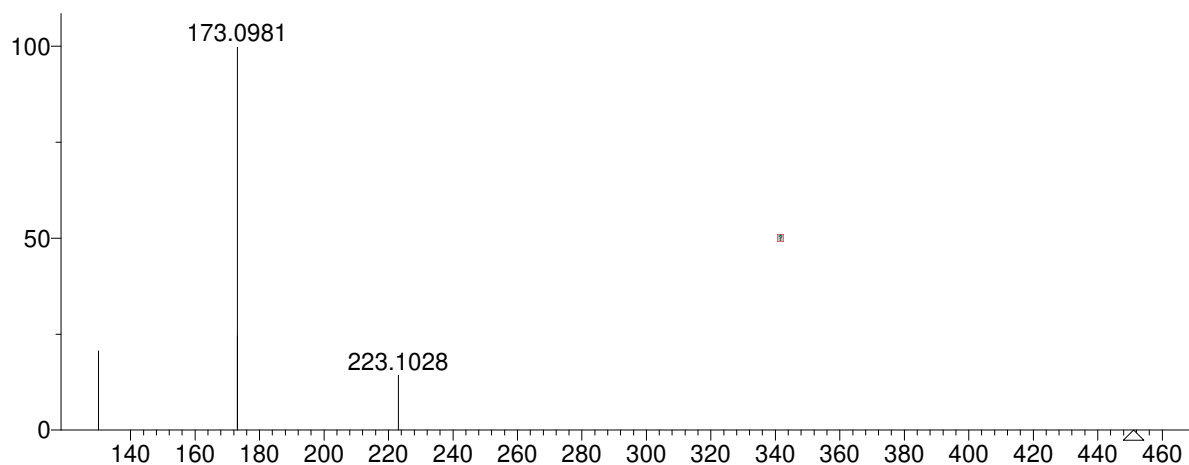

Hit 1 : 3-(N-Morpholino)-2-hydroxypropanesulfonic acid [2M+H]<sup>+</sup> HCD 107V P=451.1  
C7H15NO5S; MF: 59; RMF: 350; Prob 64.8%; CAS: 68399-77-9; Lib: nist\_msms; ID: 58588.

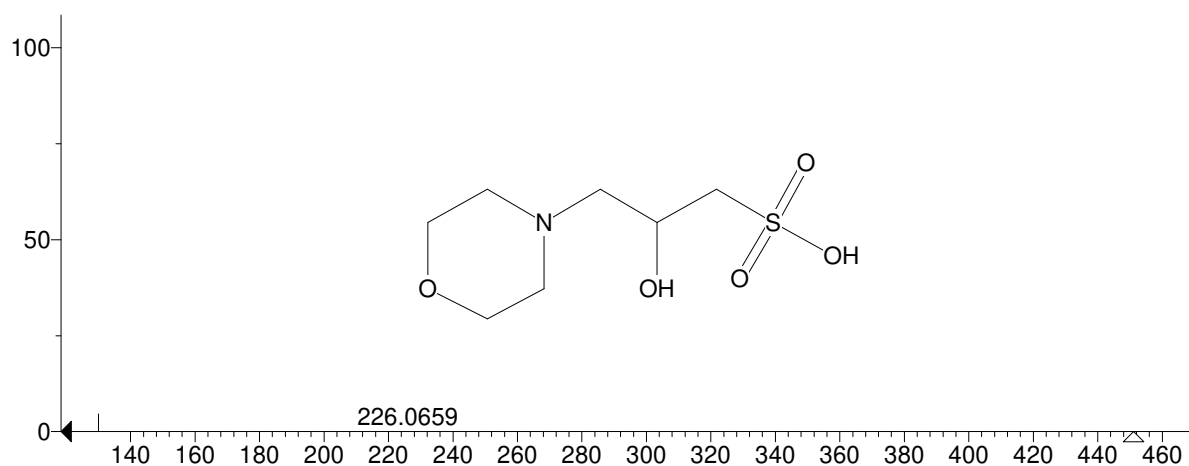

Hit 2 : [4,8-dihydroxy-3-(3-methoxy-3-oxoprop-1-en-2-yl)-8a-methyl-5-oxo-1,2,3,4,4a,6,7,8-octahydronaphthalen-2-ylidene]acetic acid  
C20H28O9; MF: 0; RMF: 78; Prob 11.7%; Lib: mona-export-vf-npl\_qexactive; ID: 10661.

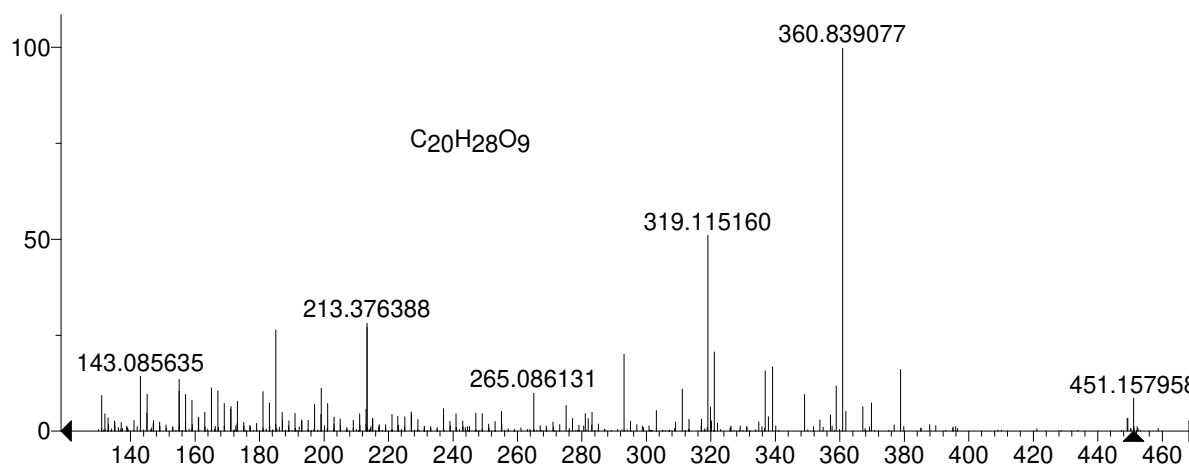

Hit 3 : 9,11,12a-trihydroxy-2,3-dimethoxy-8-(3-methylbut-2-enyl)-6,6a-dihydrochromeno[3,4-b]chromen-12-one [M  
C<sub>23</sub>H<sub>24</sub>O<sub>8</sub>; MF: 0; RMF: 28; Prob 11.7%; Lib: mona-export-vf-npl\_qexactive; ID: 18387.

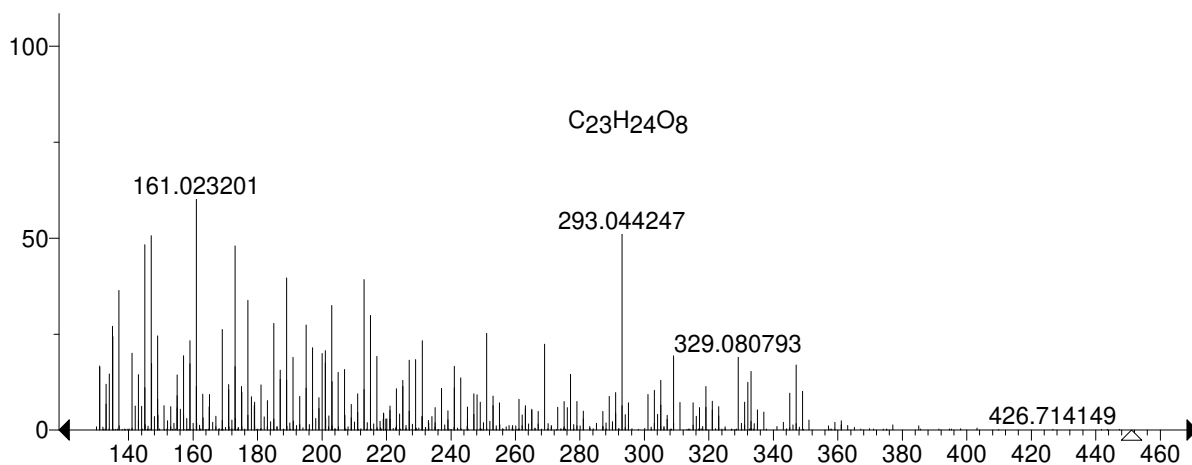

Hit 4 : 1',2'-dihydro-2',6-dihydroxyrotenone [M+Na]<sup>+</sup> 45HCD P=451.1  
C<sub>23</sub>H<sub>24</sub>O<sub>8</sub>; MF: 0; RMF: 25; Prob 11.7%; Lib: mona-export-vf-npl\_qexactive; ID: 4145.

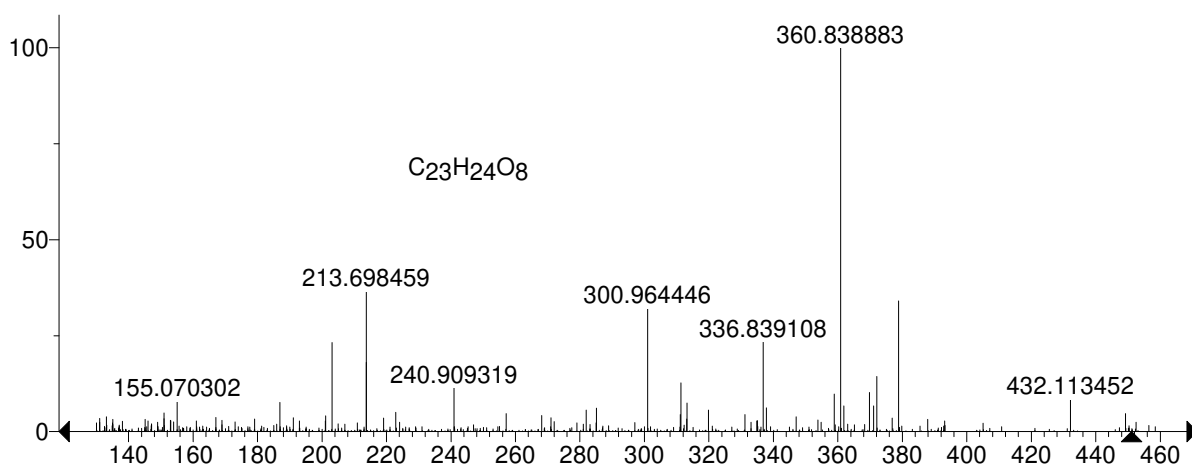

Unknown: Unknown (4.46\_646.2109m/z)  
Compound in Library Factor = 0

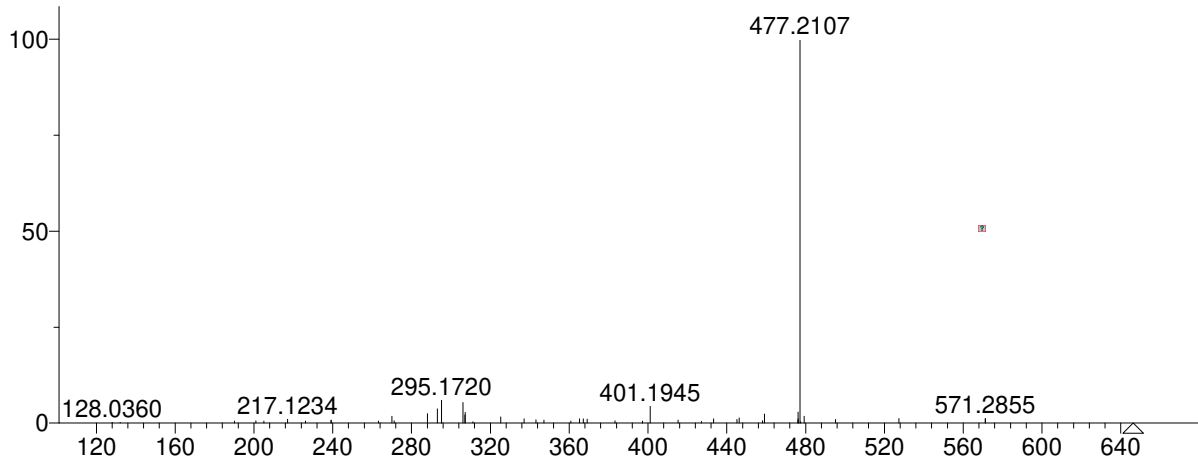



Unknown: Unknown (4.47\_336.1434m/z)  
Compound in Library Factor = 0

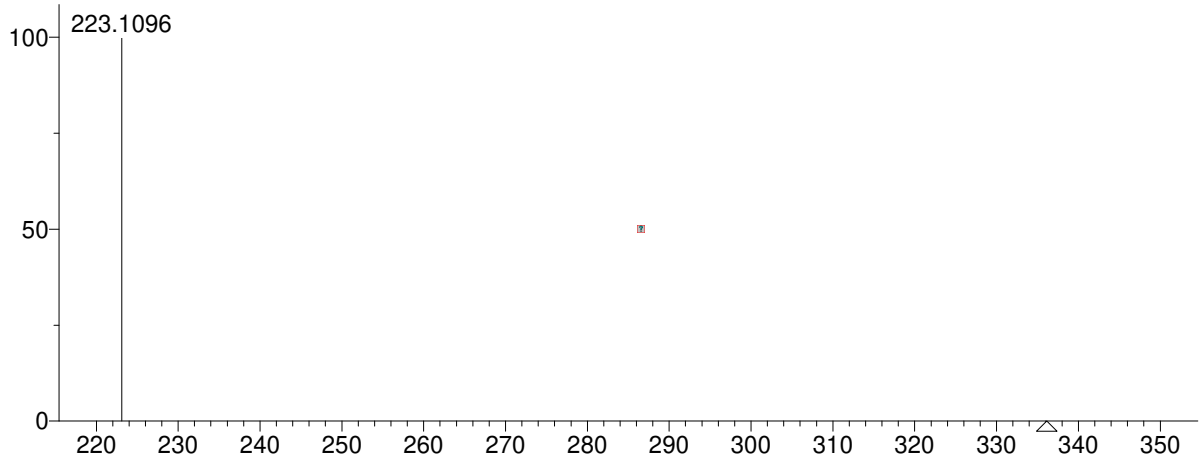

Unknown: Unknown (4.48\_328.1495m/z)  
Compound in Library Factor = 0

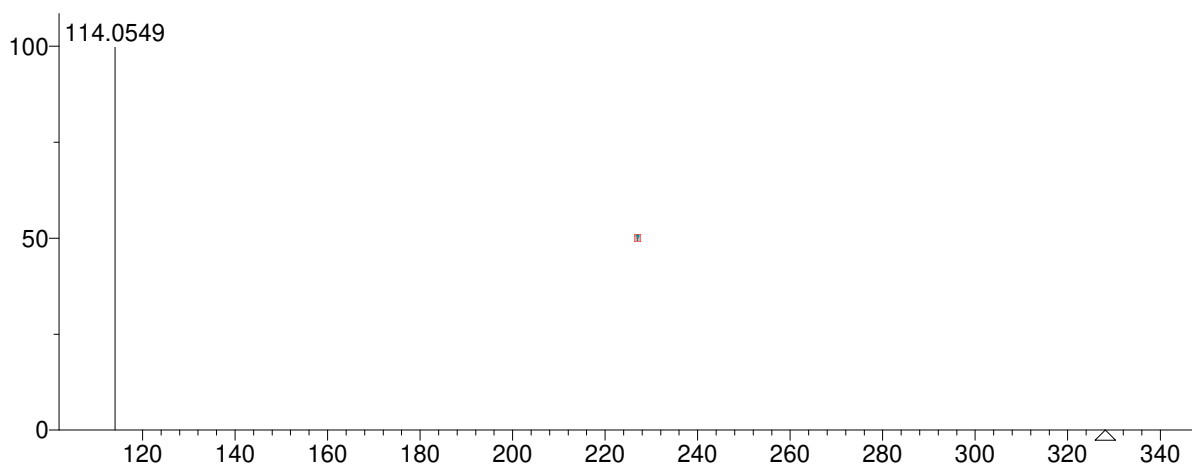

Hit 1 : Ac-Val-Ala-Asp-CHO [M-H]<sup>-</sup> QTOF 17V P=328.2  
C<sub>14</sub>H<sub>23</sub>N<sub>3</sub>O<sub>6</sub>; MF: 0; RMF: 55; Prob 100.0%; Lib: nist\_msms2; ID: 39356.

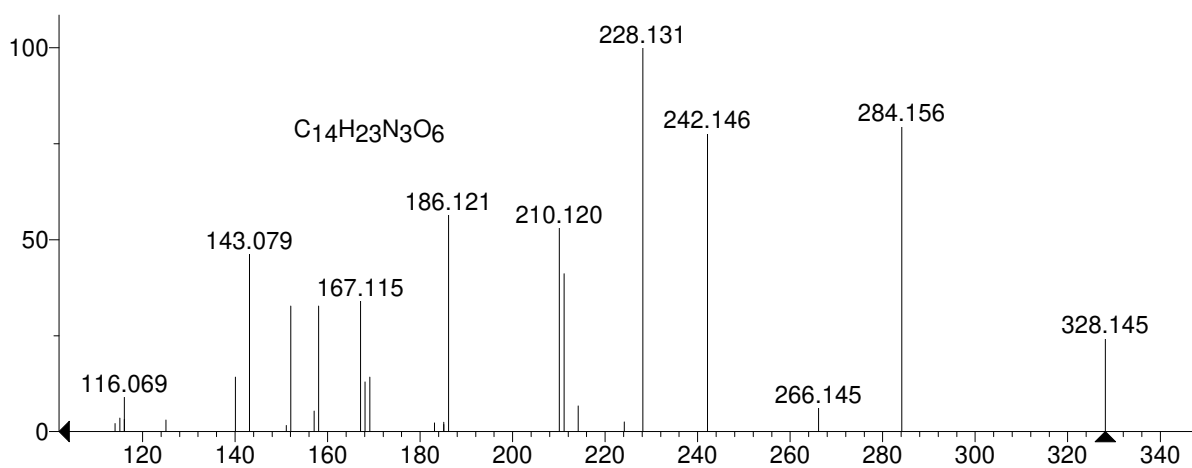

Unknown: Unknown (4.48\_587.1132m/z)  
Compound in Library Factor = 0

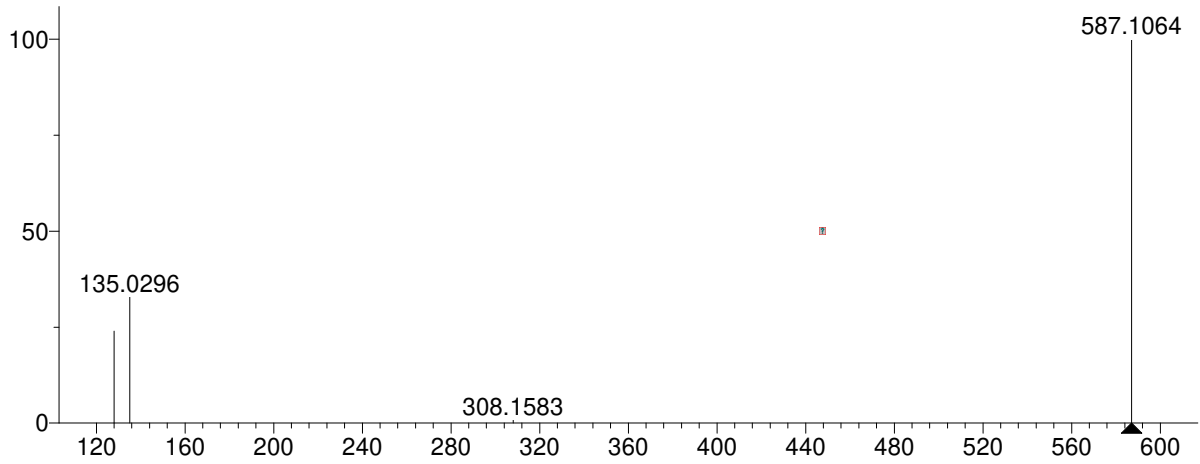

Hit 1 : 5,7-dihydroxy-2-phenyl-6-[3,4,5-trihydroxy-6-(hydroxymethyl)oxan-2-yl]-8-(3,4,5-trihydroxyoxan-2-yl)chromene  
C<sub>26</sub>H<sub>28</sub>O<sub>13</sub>; MF: 0; RMF: 14; Prob 50.0%; Lib: anthocyanins mona; ID: 8504.

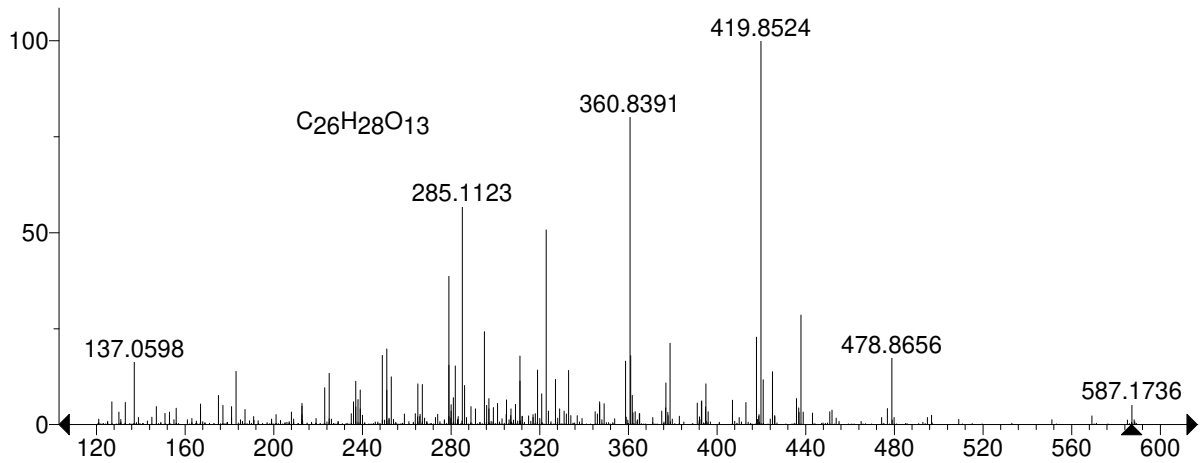

Hit 2 : Theaflavin [M+Na]<sup>+</sup> 35HCD P=587.1  
C<sub>29</sub>H<sub>24</sub>O<sub>12</sub>; MF: 0; RMF: 8; Prob 50.0%; Lib: mona-export-vf-npl\_qexactive; ID: 2698.

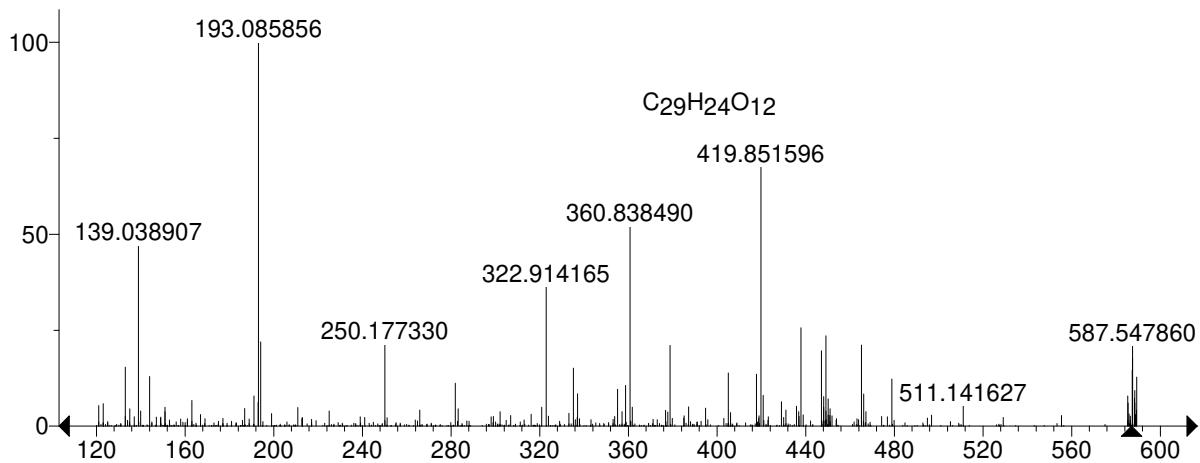

Unknown: Unknown (4.49\_611.2305m/z)  
Compound in Library Factor = -517

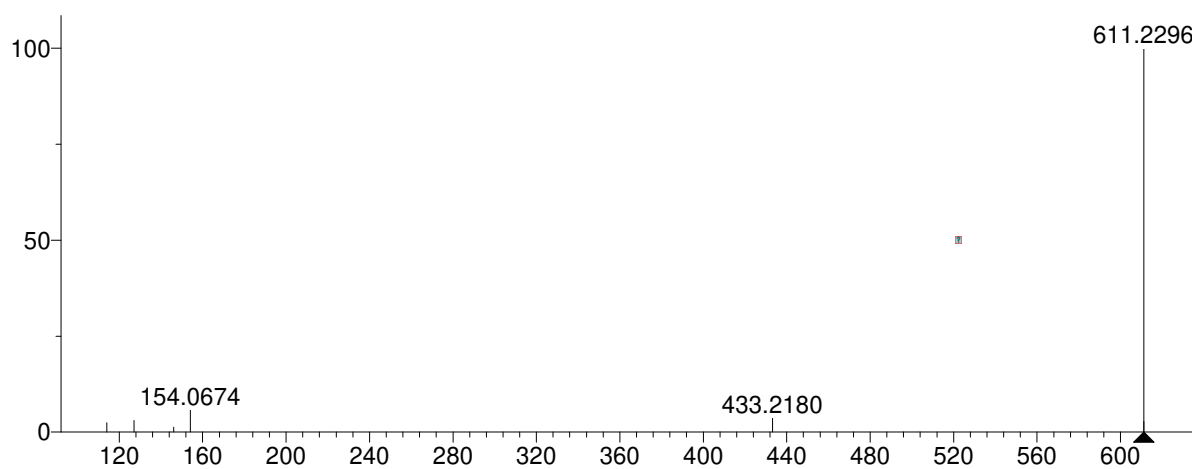

Hit 1 : NovobiocinA<sup>+</sup> [M-H]<sup>-</sup> 10eV P=611.2  
C<sub>31</sub>H<sub>36</sub>N<sub>2</sub>O<sub>11</sub>; MF: 204; RMF: 845; Prob 99.0%; Lib: mona-export-ic-ms-ms\_negative\_mode; ID: 23.

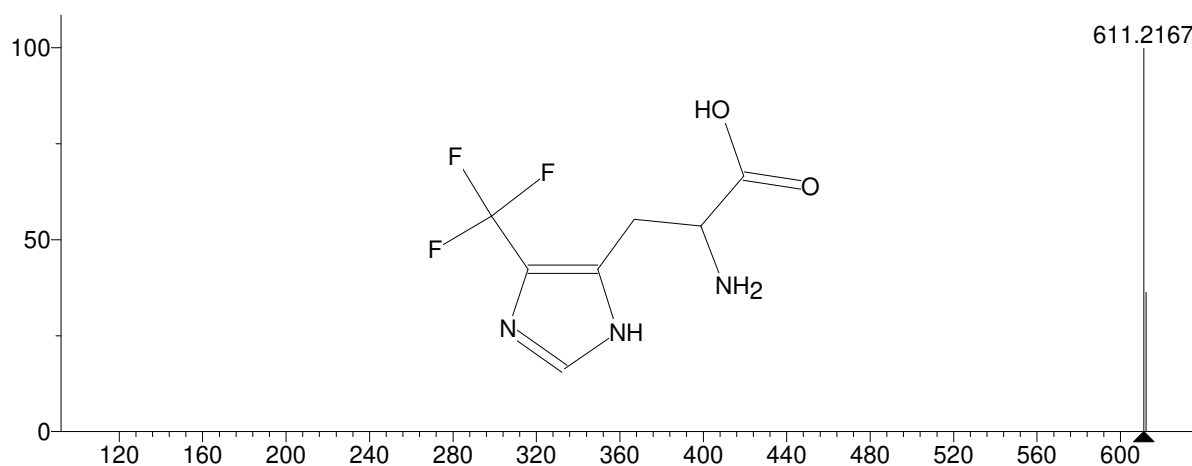

Hit 2 : 6-(furan-3-yl)-12,16,21-trihydroxy-7,15-dimethyl-9-oxo-3,17,19-trioxahaptacyclo[9.9.3.0A<sup>1</sup>,A<sup>1</sup>1a<sup>o</sup>.0A<sup>2</sup>,  
C<sub>31</sub>H<sub>40</sub>O<sub>10</sub>; MF: 0; RMF: 8; Prob 0.99%; Lib: mona-export-vf-npl\_qexactive; ID: 8395.

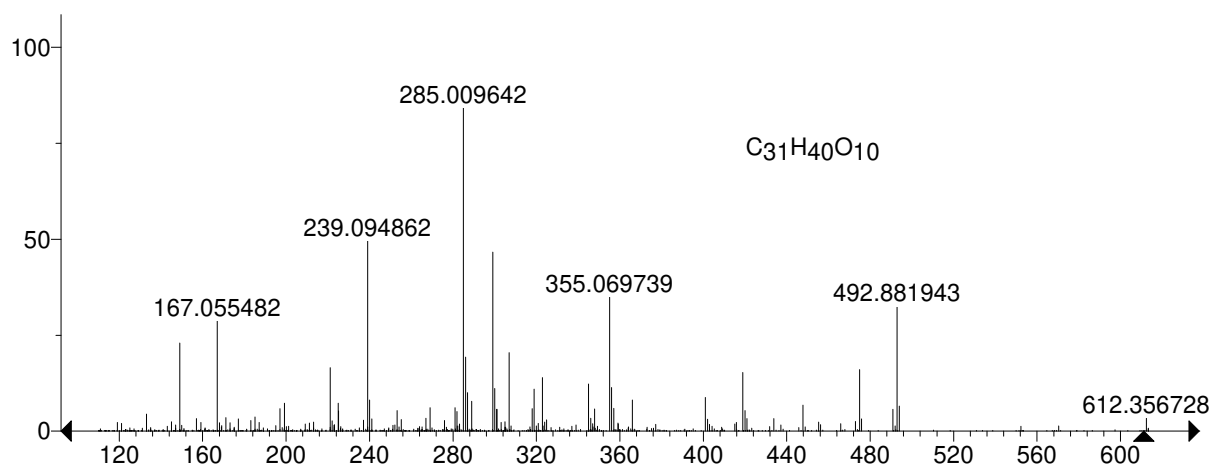

Unknown: Unknown (4.51\_526.2026m/z)  
Compound in Library Factor = 0

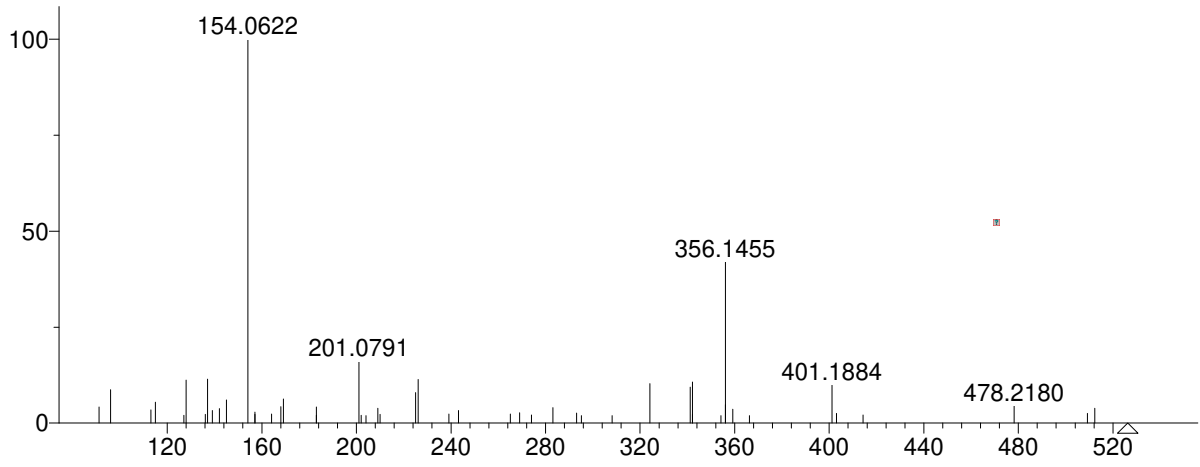

Unknown: Unknown (4.51\_647.2658m/z)  
Compound in Library Factor = 0

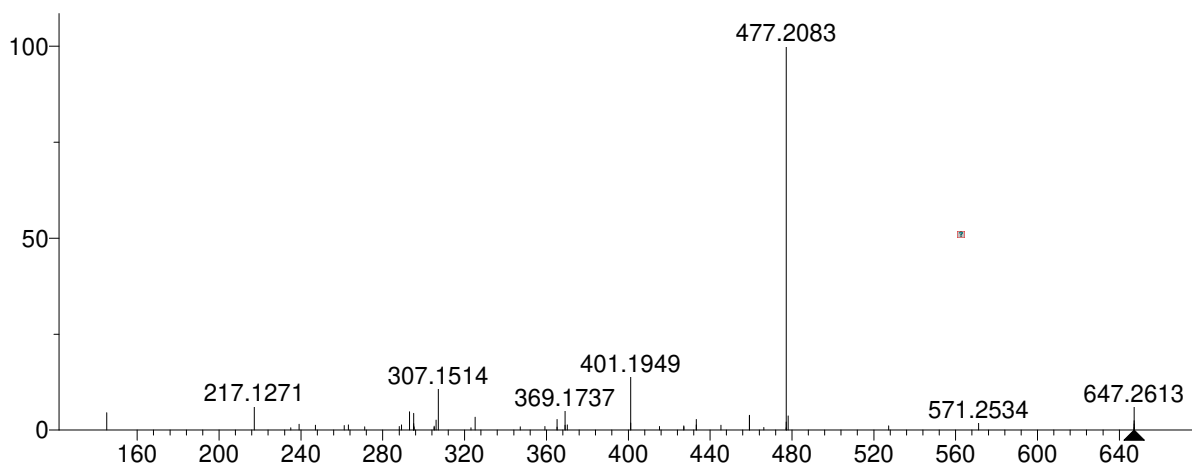

Hit 1 : Bavachin [2M-H]- HCD 9V P=647.3  
C<sub>20</sub>H<sub>20</sub>O<sub>4</sub>; MF: 0; RMF: 36; Prob 100.0%; CAS: 19879-32-4; Lib: nist\_msms; ID: 389268.

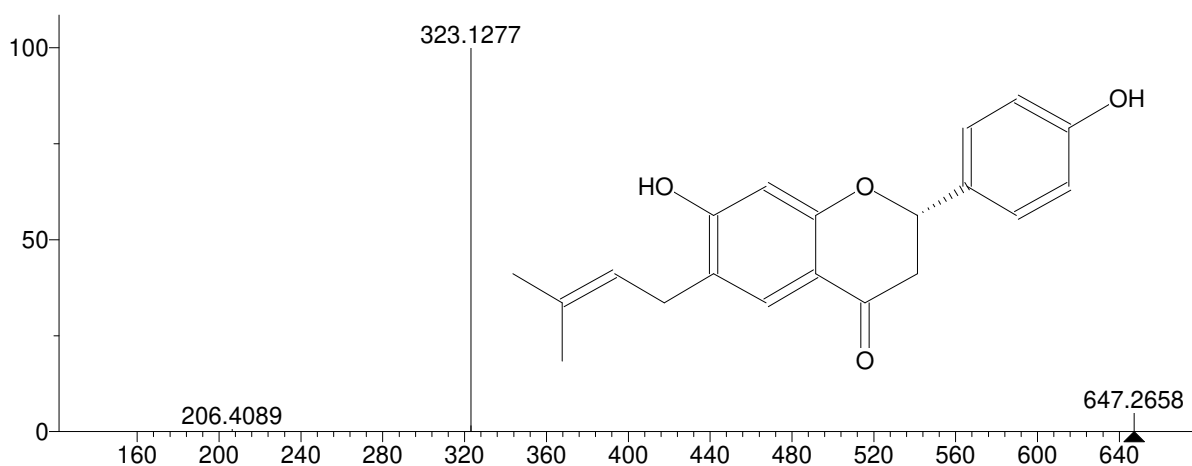

Unknown: Unknown (4.52\_354.1279m/z)  
Compound in Library Factor = 0

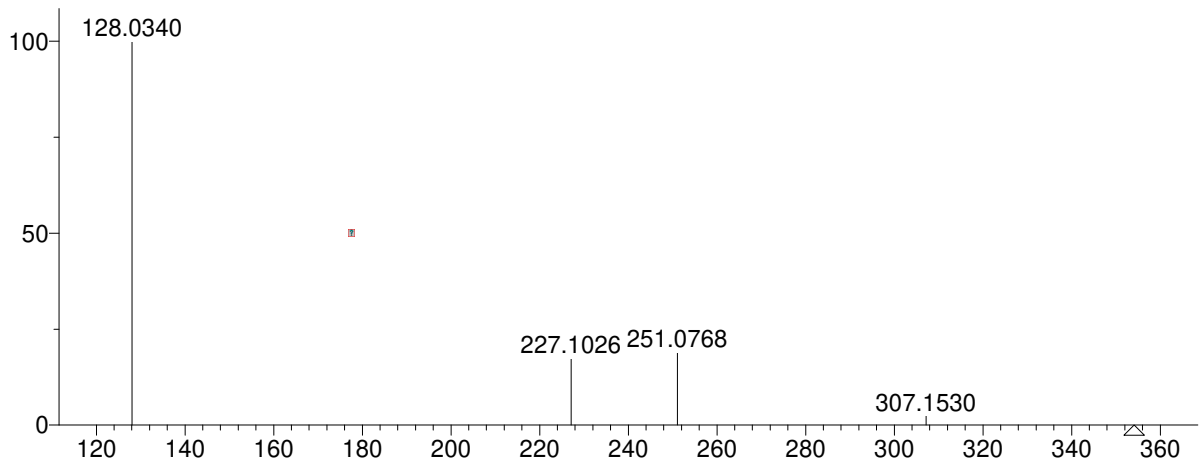

\*\* Search Report Page 1 of 2 \*\*

Unknown: Unknown (4.52\_356.1452m/z)  
Compound in Library Factor = -2387

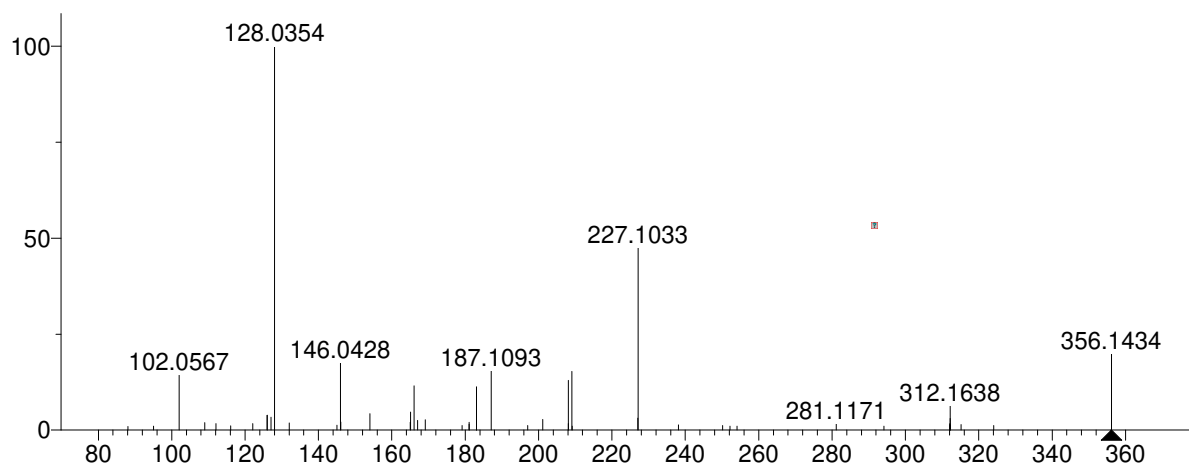

Hit 1 : Benzenesulfonamide, 4-(1,1-dimethylethyl)-N-[4-(1H-imidazol-1-yl)phenyl]- [M+H]<sup>+</sup> HCD 21V P=356.1  
C<sub>19</sub>H<sub>21</sub>N<sub>3</sub>O<sub>2</sub>S; MF: 25; RMF: 304; Prob 49.3%; CAS: 945526-43-2; Lib: nist\_msms; ID: 355342.

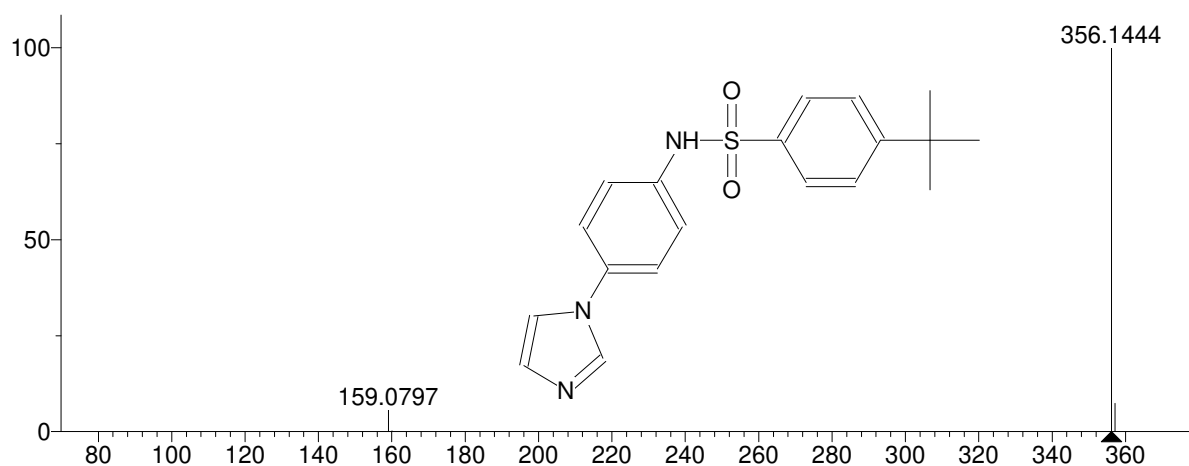

Hit 2 : Benzoic acid, 4-[[[2,4-diamino-7,8-dihydro-7-oxo-6-pteridiny]methyl]methylamino]-, methyl ester [M+H]<sup>+</sup> |  
C<sub>16</sub>H<sub>17</sub>N<sub>7</sub>O<sub>3</sub>; MF: 8; RMF: 311; Prob 26.9%; CAS: 1330264-75-9; Lib: nist\_msms; ID: 432535.

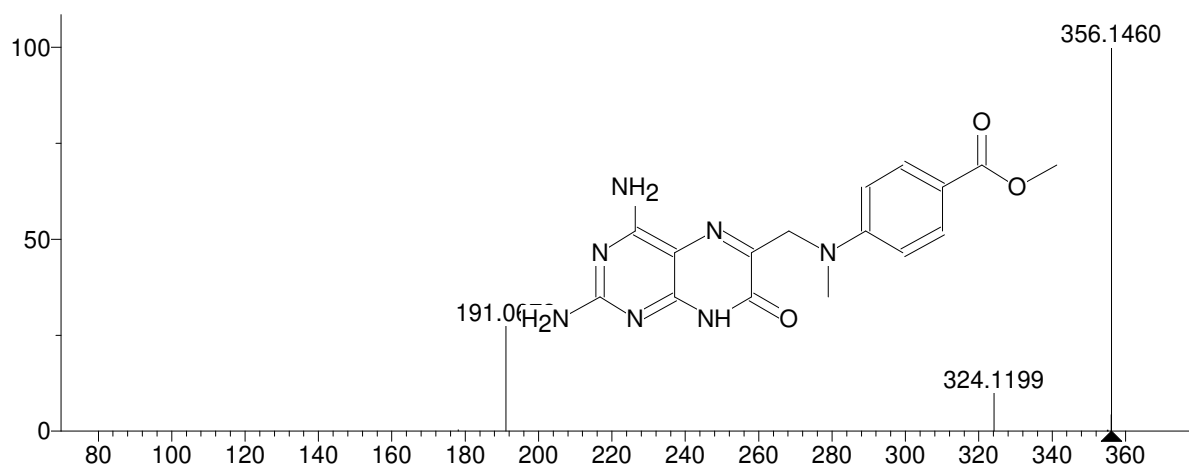



\*\* Search Report Page 2 of 2 \*\*

Hit 3 : Seneciophyllin [M+Na]<sup>+</sup> HCD 17V P=356.1

C<sub>18</sub>H<sub>23</sub>NO<sub>5</sub>; MF: 5; RMF: 209; Prob 23.8%; CAS: 480-81-9; Lib: nist\_msms; ID: 219524.

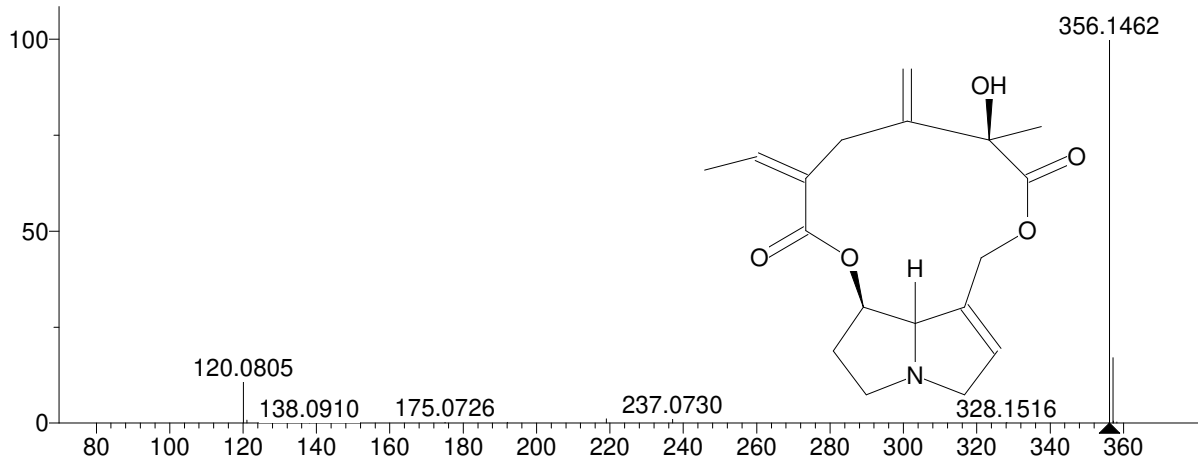

\*\* Search Report Page 1 of 2 \*\*

Unknown: Unknown (4.52\_413.1645m/z)  
Compound in Library Factor = 0

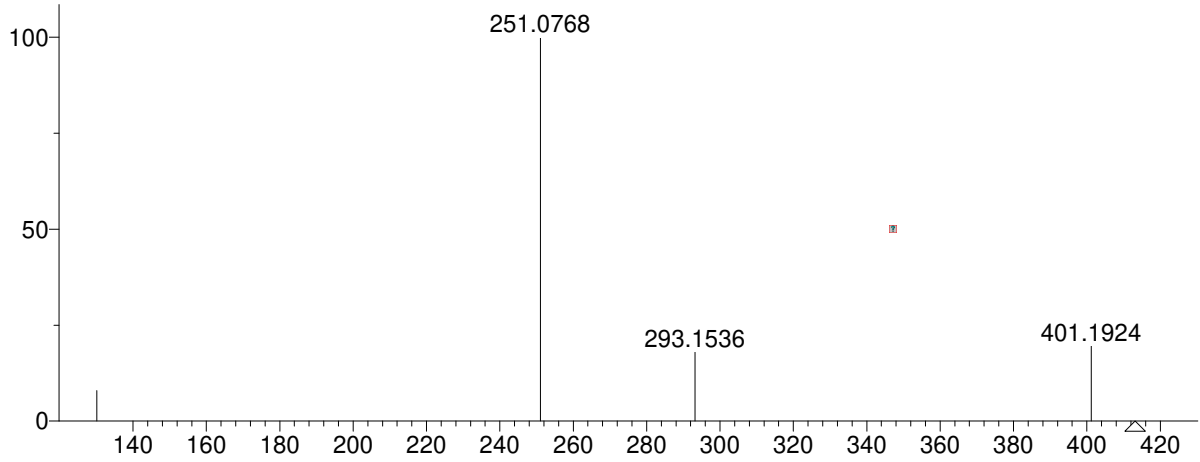

Hit 1 : purpactin A [M-H]- 45HCD P=413.2  
C23H26O7; MF: 0; RMF: 52; Prob 20.0%; Lib: mona-export-ic-ms-ms\_negative\_mode; ID: 17700.

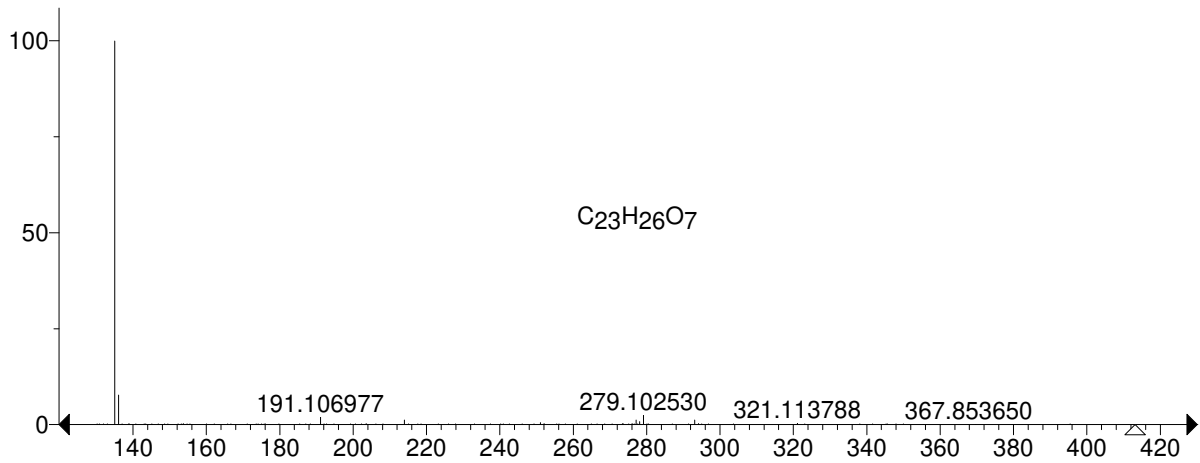

Hit 2 : 2-Hydroxymethyloratadine [M+H]<sup>+</sup> HCD 132V P=413.2  
C<sub>23</sub>H<sub>25</sub>ClN<sub>2</sub>O<sub>3</sub>; MF: 0; RMF: 44; Prob 20.0%; CAS: 609806-39-5; Lib: nist\_msms; ID: 442227.

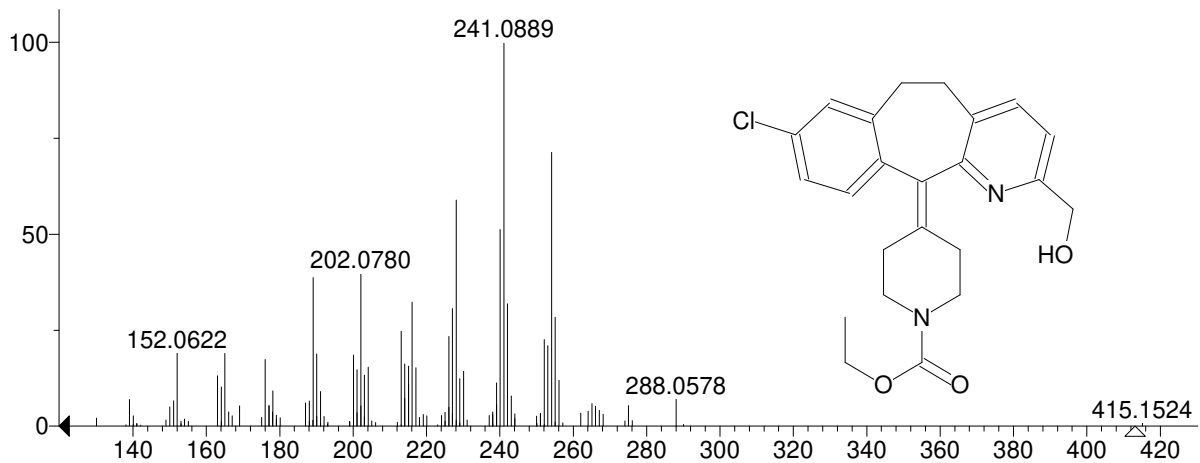

\*\* Search Report Page 2 of 2 \*\*

Hit 3 : (2S,3S)-6'-methyl-3-phenylspiro[oxirane-2,7'-quinazolino[3,2-a][1,4]benzodiazepine]-5',13'-dione [M+NH4]  
C<sub>24</sub>H<sub>17</sub>N<sub>3</sub>O<sub>3</sub>; MF: 0; RMF: 42; Prob 20.0%; Lib: mona-export-vf-npl\_qexactive; ID: 17221.

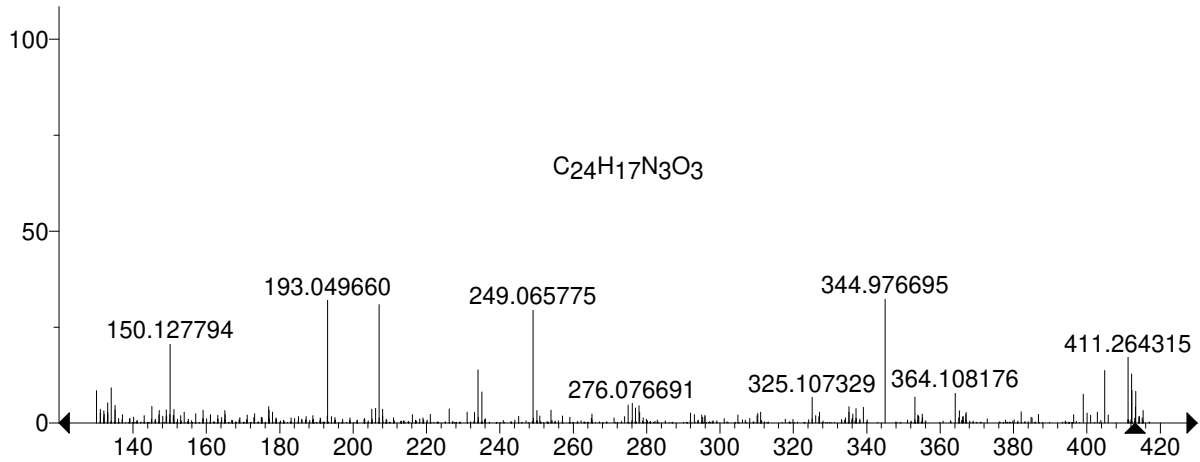

Hit 4 : Garcinone C [M-H]- HCD 90V P=413.2  
C<sub>23</sub>H<sub>26</sub>O<sub>7</sub>; MF: 0; RMF: 36; Prob 20.0%; CAS: 76996-27-5; Lib: nist\_msms; ID: 389327.

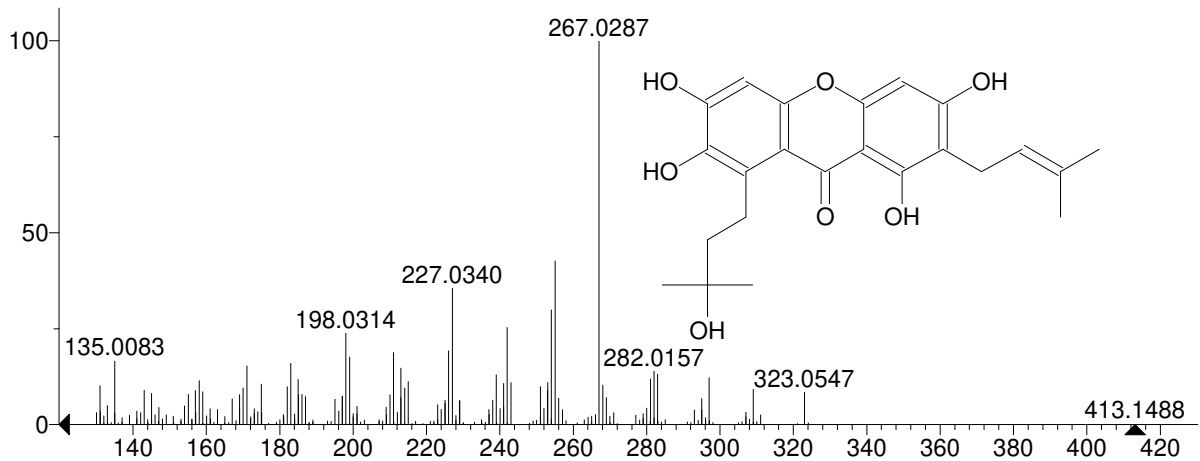

Hit 5 : 4-Hydroxymethyloratadine [M+H]<sup>+</sup> HCD 132V P=413.2  
C<sub>23</sub>H<sub>25</sub>ClN<sub>2</sub>O<sub>3</sub>; MF: 0; RMF: 24; Prob 20.0%; CAS: 609806-40-8; Lib: nist\_msms; ID: 442293.

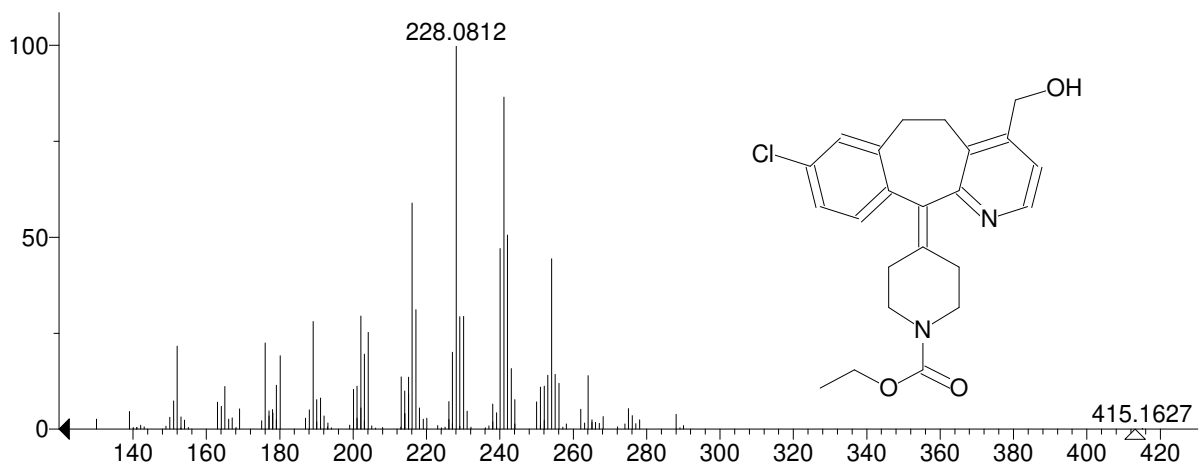

Unknown: Unknown (4.52\_477.2073m/z)  
Compound in Library Factor = -1309

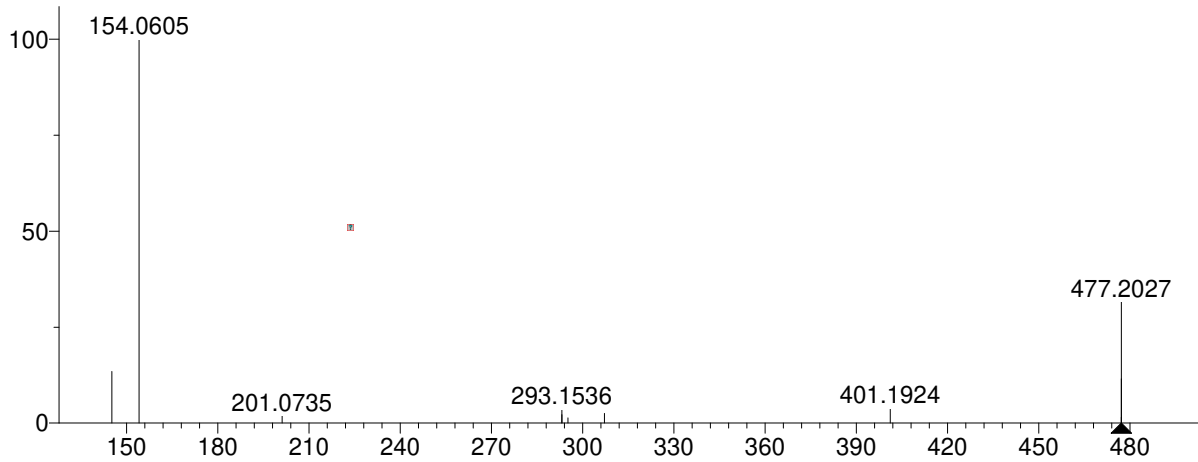

Hit 1 : 4-(2-Hydroxyethyl)piperazine-1-ethanesulfonic acid [2M+H]<sup>+</sup> HCD 4V P=477.2  
C<sub>8</sub>H<sub>18</sub>N<sub>2</sub>O<sub>4</sub>S; MF: 58; RMF: 625; Prob 73.1%; CAS: 7365-45-9; Lib: nist\_msms; ID: 58512.

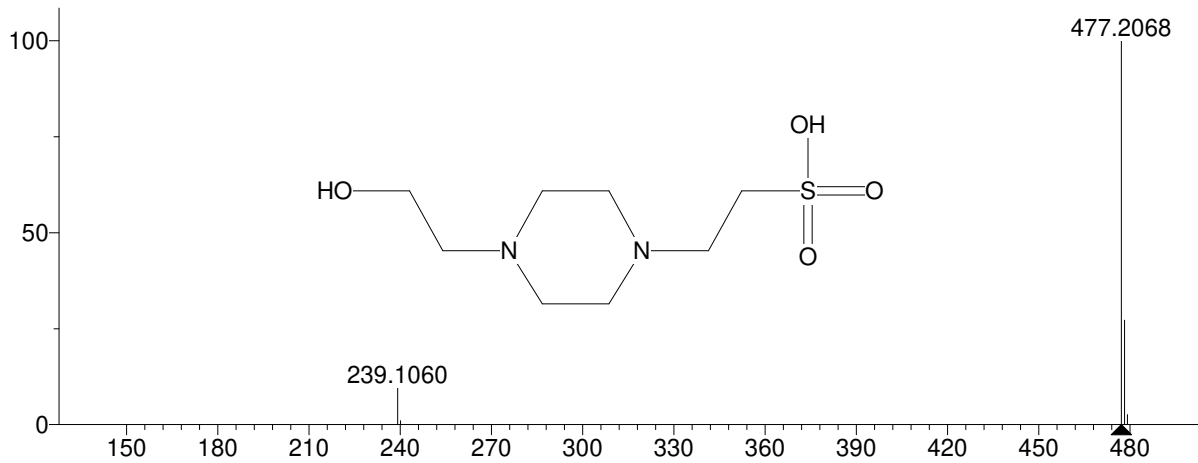

Hit 2 : 5-O-methyllicoricidin [M+K]<sup>+</sup> 35HCD P=477.2  
C<sub>27</sub>H<sub>34</sub>O<sub>5</sub>; MF: 0; RMF: 64; Prob 13.4%; Lib: mona-export-vf-npl\_qexactive; ID: 964.

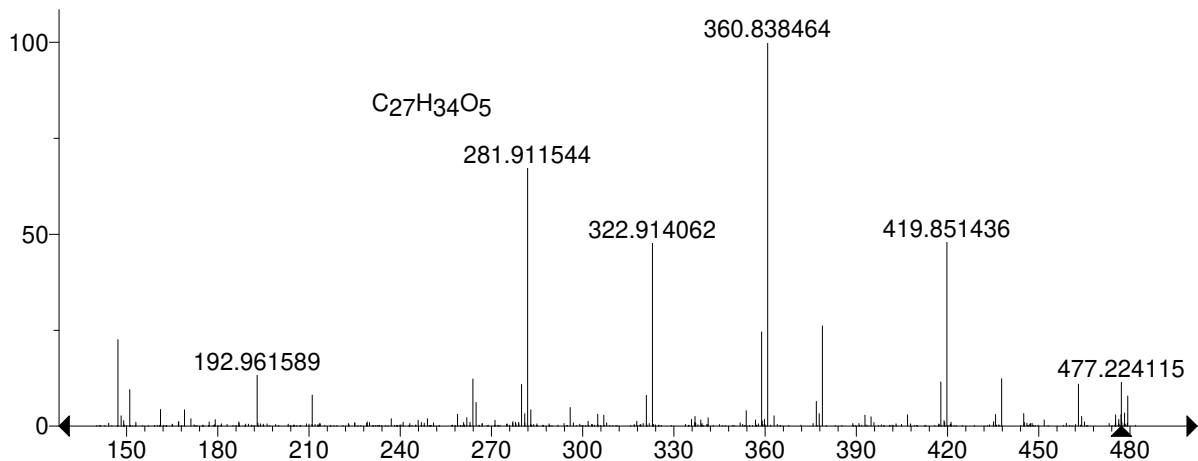

\*\* Search Report Page 2 of 2 \*\*

Hit 3 : 1,7-bis(4-hydroxyphenyl)-5-[(2R,3R,4S,5S,6R)-3,4,5-trihydroxy-6-(hydroxymethyl)oxan-2-yl]oxyheptan-3-ol  
C<sub>25</sub>H<sub>32</sub>O<sub>9</sub>; MF: 0; RMF: 3; Prob 13.4%; Lib: mona-export-vf-npl\_qexactive; ID: 7567.

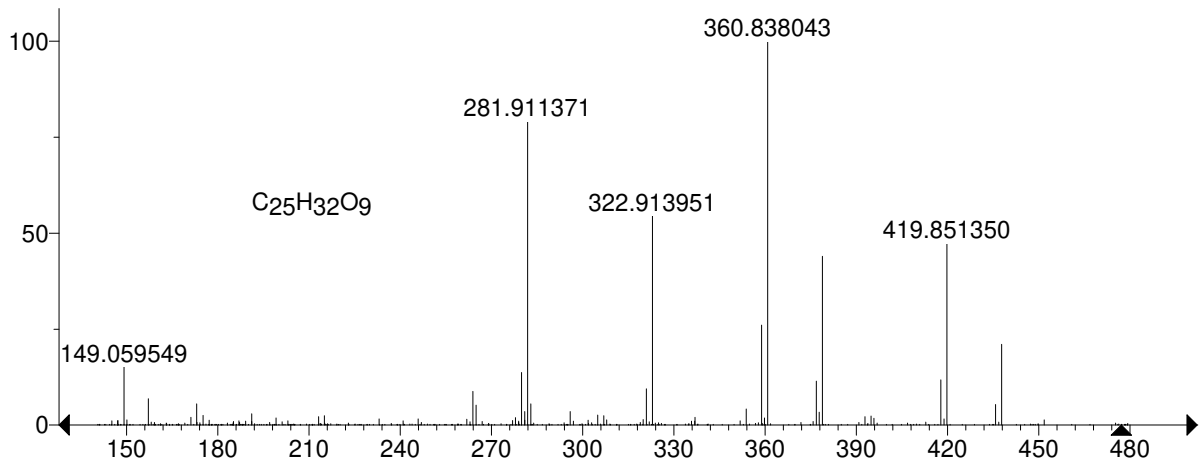

\*\* Search Report Page 1 of 2 \*\*

Unknown: Unknown (4.53\_421.1338m/z)  
Compound in Library Factor = 0

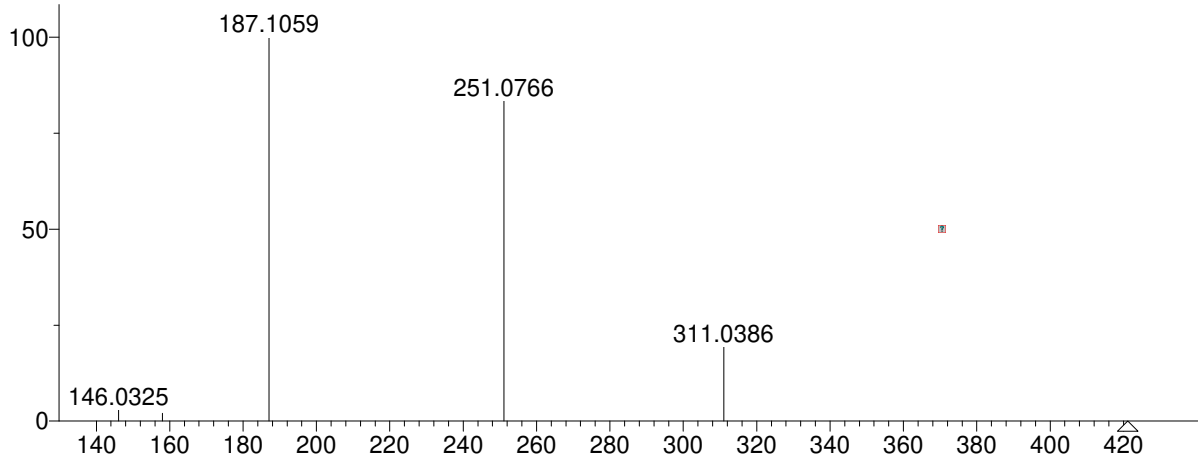

Hit 1 : lamalbid [M-H]- 35HCD P=421.1  
C17H26O12; MF: 0; RMF: 62; Prob 33.3%; Lib: mona-export-ic-ms-ms\_negative\_mode; ID: 20249.

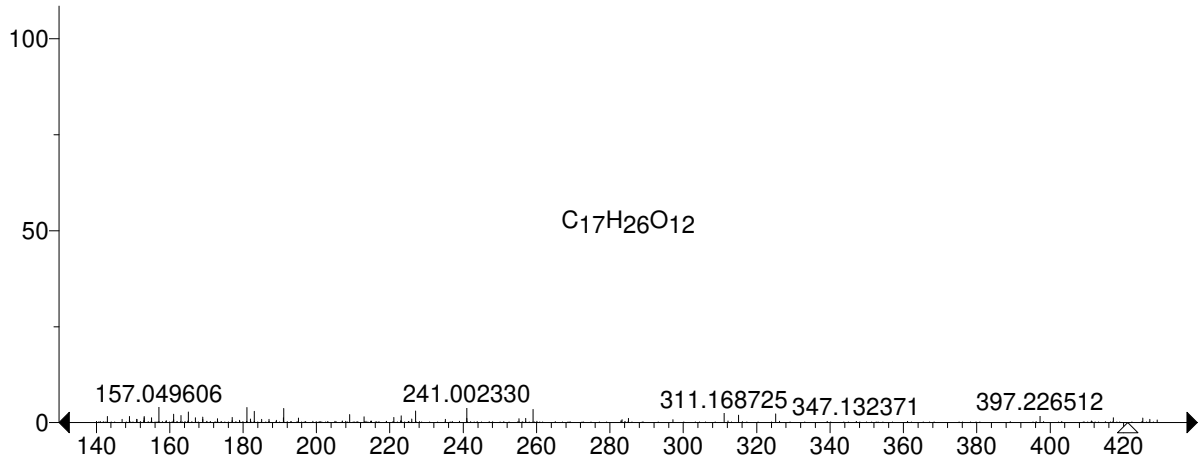

Hit 2 : Lamiide [M-H]- 65HCD P=421.1  
C17H26O12; MF: 0; RMF: 14; Prob 33.3%; Lib: anthocyanins mona; ID: 7928.

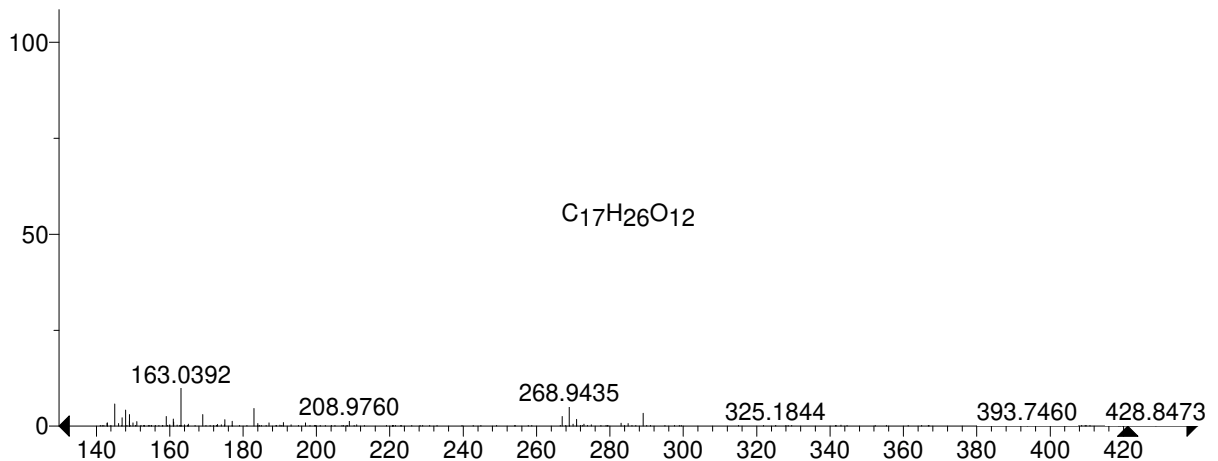

Hit 3 : methyl (1S,4aS,6R,7S,7aS)-5,6-dihydroxy-7-(hydroxymethyl)-1-[(2S,3R,4S,5S,6R)-3,4,5-trihydroxy-6-(hydr  
C17H26O12; MF: 0; RMF: 7; Prob 33.3%; Lib: mona-export-ic-ms-ms\_negative\_mode; ID: 26931.

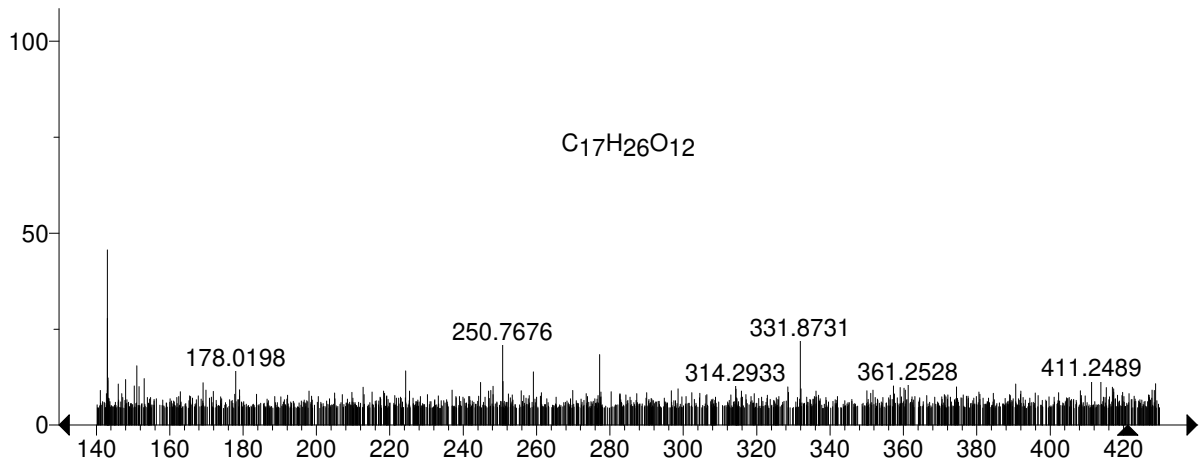

Unknown: Unknown (4.54\_180.0653m/z)  
Compound in Library Factor = 0

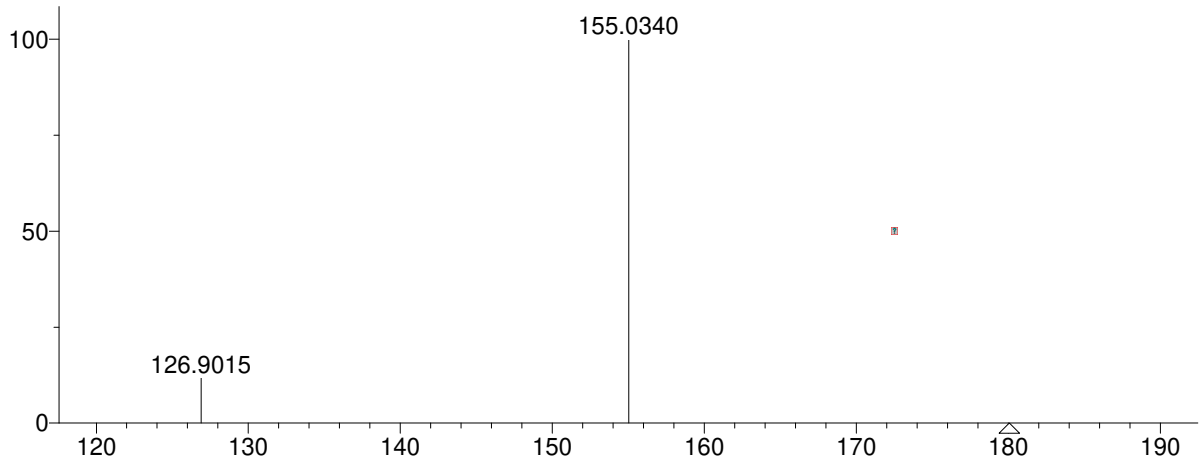



\*\* Search Report Page 1 of 2 \*\*

Unknown: Unknown (4.54\_234.9906m/z)  
Compound in Library Factor = -414

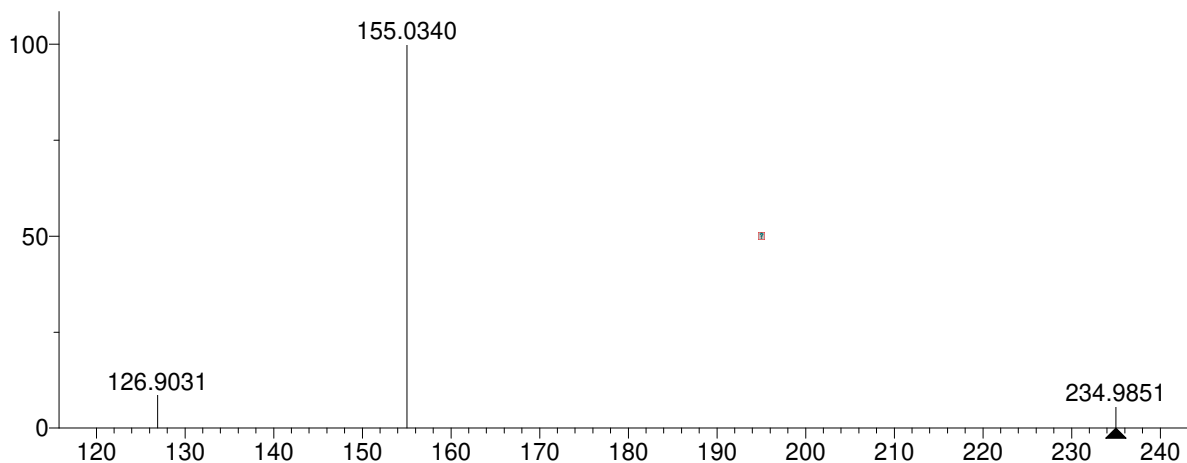

Hit 1 : (2,6-Dichlorophenoxy)acetic acid, methyl ester [M+H]<sup>+</sup> HCD 2V P=235  
C<sub>9</sub>H<sub>8</sub>Cl<sub>2</sub>O<sub>3</sub>; MF: 217; RMF: 909; Prob 56.0%; CAS: 1928-49-0; Lib: nist\_msms; ID: 475304.

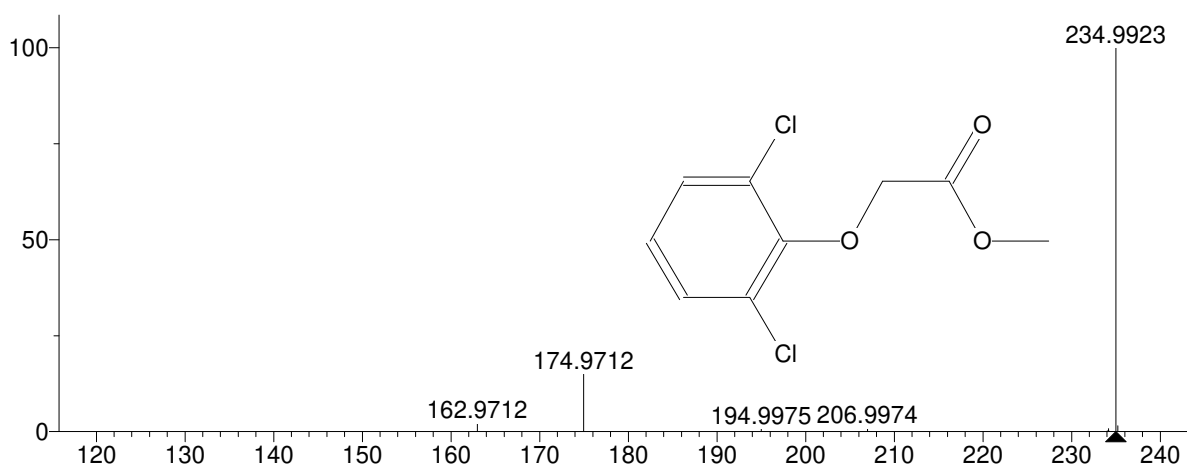

Hit 2 : Acetic acid, 2-(2,4-dichlorophenoxy)-, methyl ester [M+H]<sup>+</sup> HCD 2V P=235  
C<sub>9</sub>H<sub>8</sub>Cl<sub>2</sub>O<sub>3</sub>; MF: 210; RMF: 893; Prob 42.9%; CAS: 1928-38-7; Lib: nist\_msms; ID: 484355.

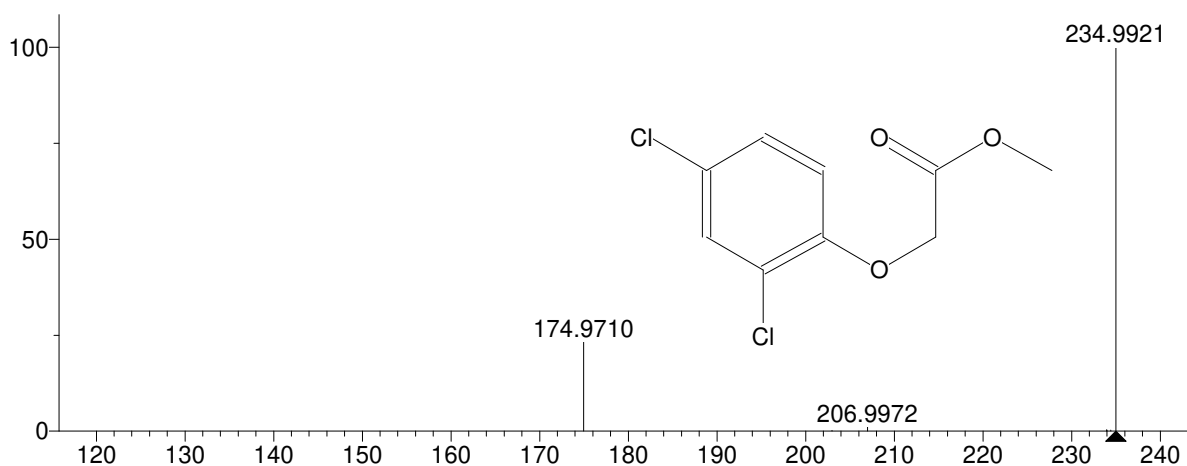

\*\* Search Report Page 2 of 2 \*\*

Hit 3 : Dicamba methyl ester [M+H]<sup>+</sup> HCD 0V P=235  
C<sub>9</sub>H<sub>8</sub>Cl<sub>2</sub>O<sub>3</sub>; MF: 55; RMF: 700; Prob 1.11%; CAS: 6597-78-0; Lib: nist\_msms; ID: 484749.

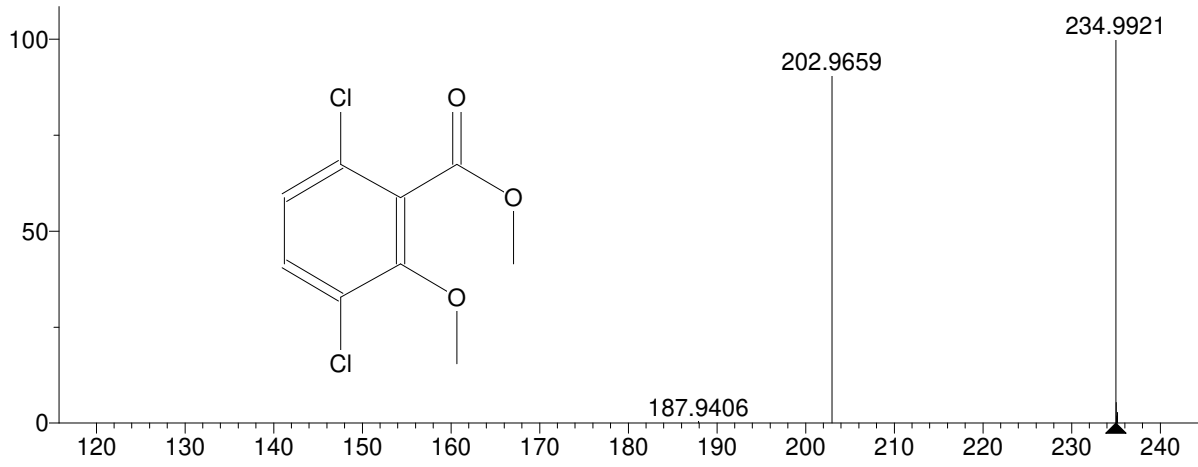

Unknown: Unknown (4.54\_314.1232m/z)  
Compound in Library Factor = 0

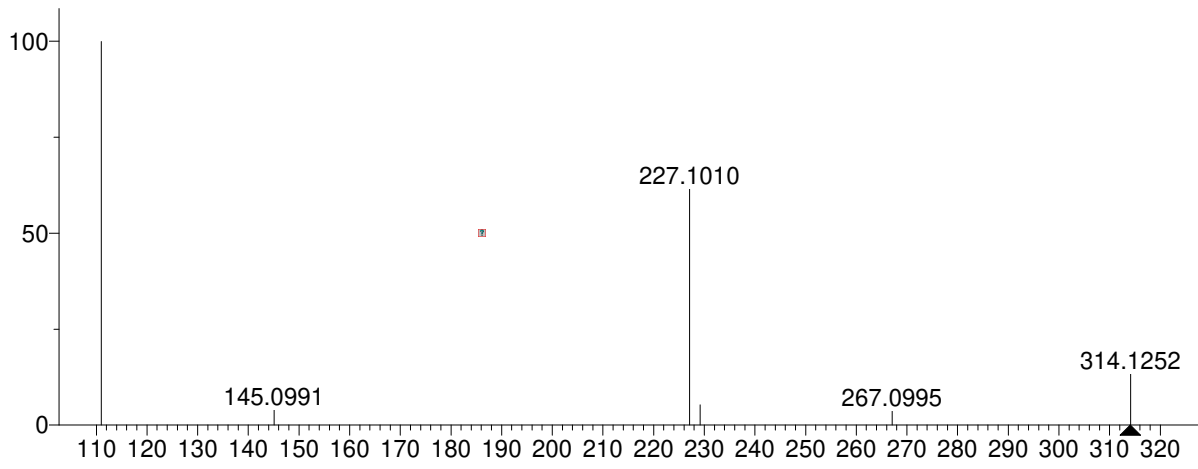

\*\* Search Report Page 1 of 2 \*\*

Unknown: Unknown (4.54\_318.0955m/z)  
Compound in Library Factor = 0

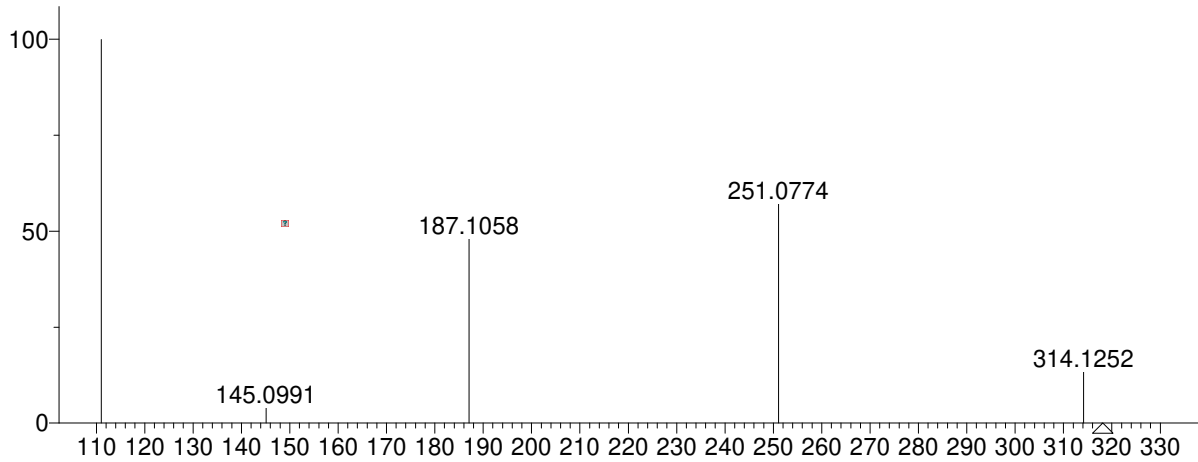

Hit 1 : (2Z)-4,6-dihydroxy-2-[(3-hydroxy-4-methoxyphenyl)methylidene]-1-benzofuran-3-one [M+NH<sub>4</sub>]<sup>+</sup> 65HCD I  
C<sub>16</sub>H<sub>12</sub>O<sub>6</sub>; MF: 0; RMF: 51; Prob 12.5%; Lib: mona-export-vf-npl\_gexactive; ID: 5508.

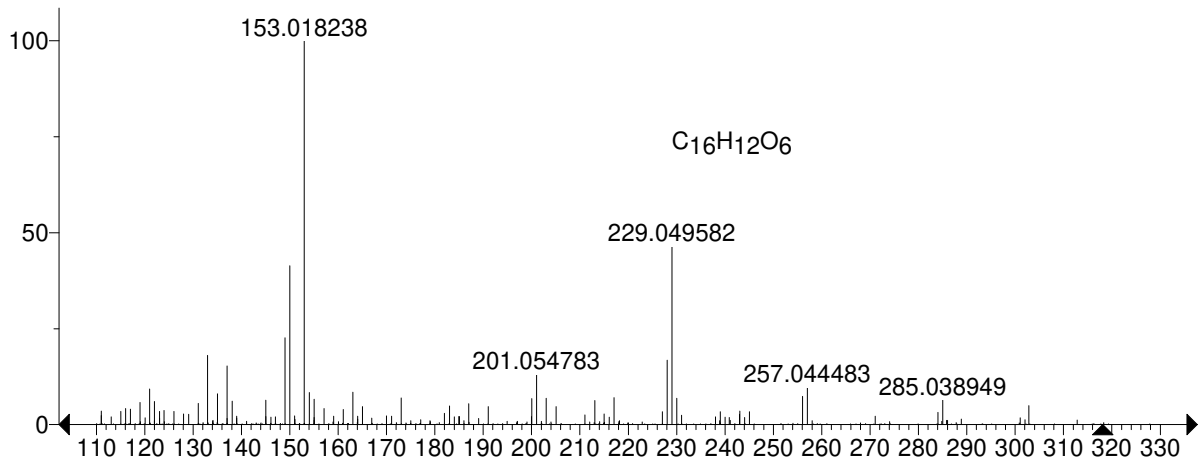

Hit 2 : Indican [M+Na]<sup>+</sup> IT 35% P=318.1  
C<sub>14</sub>H<sub>17</sub>NO<sub>6</sub>; MF: 0; RMF: 28; Prob 12.5%; CAS: 487-60-5; Lib: nist\_msms; ID: 123247.

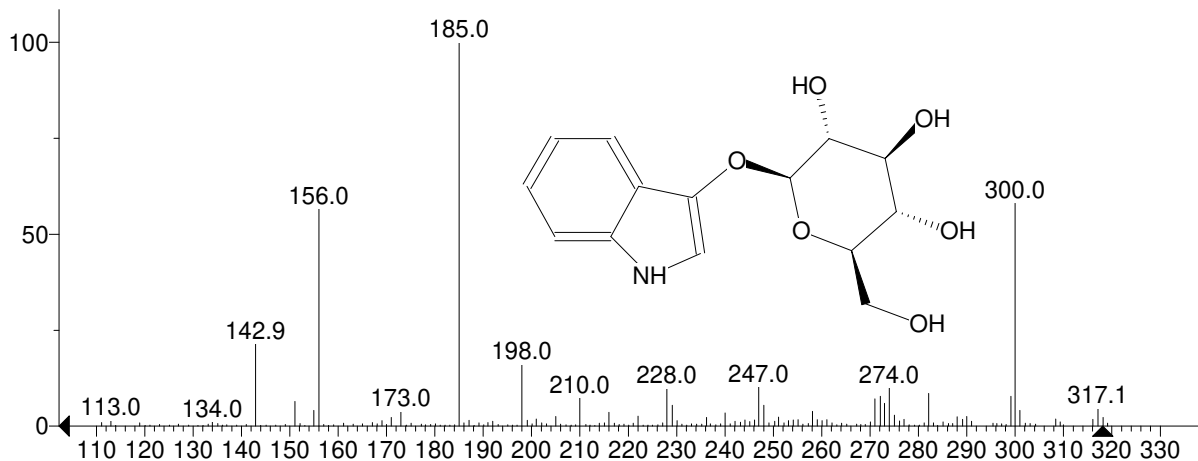

Hit 3 : carviolin [M+NH4]<sup>+</sup> 45HCD P=318.1  
C<sub>16</sub>H<sub>12</sub>O<sub>6</sub>; MF: 0; RMF: 17; Prob 12.5%; Lib: mona-export-vf-npl\_gexactive; ID: 6509.

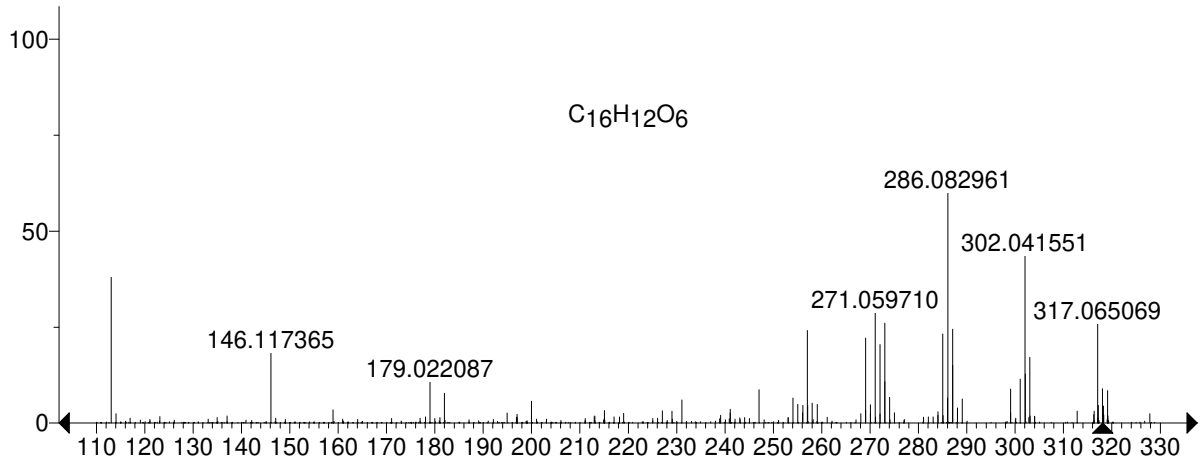

Hit 4 : Fallacinol [M+NH4]<sup>+</sup> 65HCD P=318.1  
C<sub>16</sub>H<sub>12</sub>O<sub>6</sub>; MF: 0; RMF: 15; Prob 12.5%; Lib: mona-export-vf-npl\_gexactive; ID: 4923.

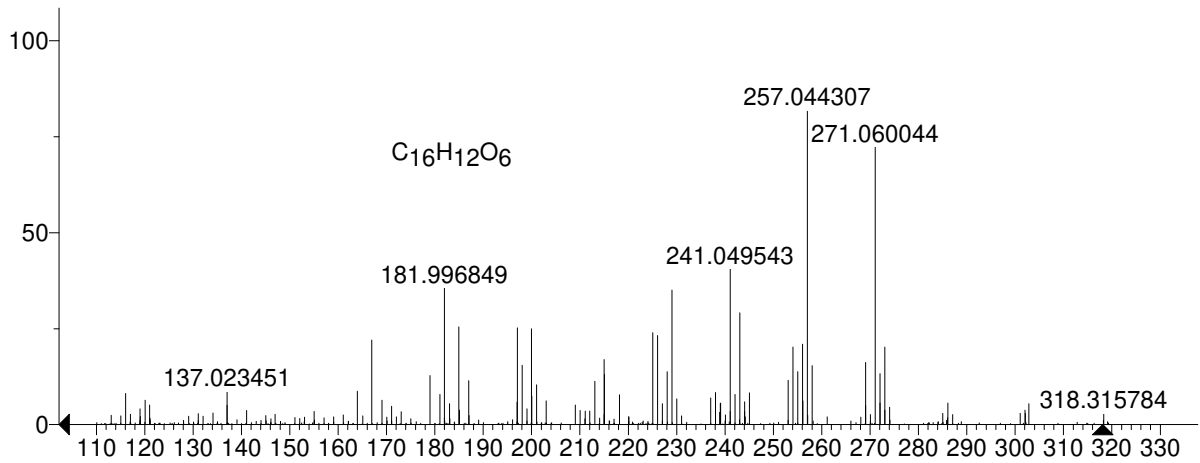

Hit 5 : (R)-Prunasin [M+Na]<sup>+</sup> IT 35% P=318.1  
C<sub>14</sub>H<sub>17</sub>NO<sub>6</sub>; MF: 0; RMF: 6; Prob 12.5%; CAS: 99-18-3; Lib: nist\_msms; ID: 356333.

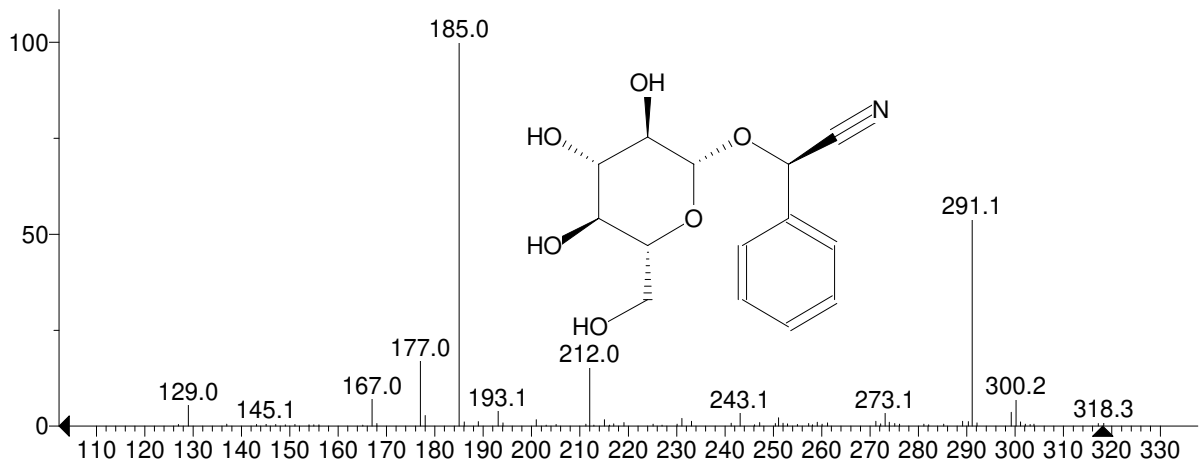

Unknown: Unknown (4.54\_357.1620m/z)  
Compound in Library Factor = 0

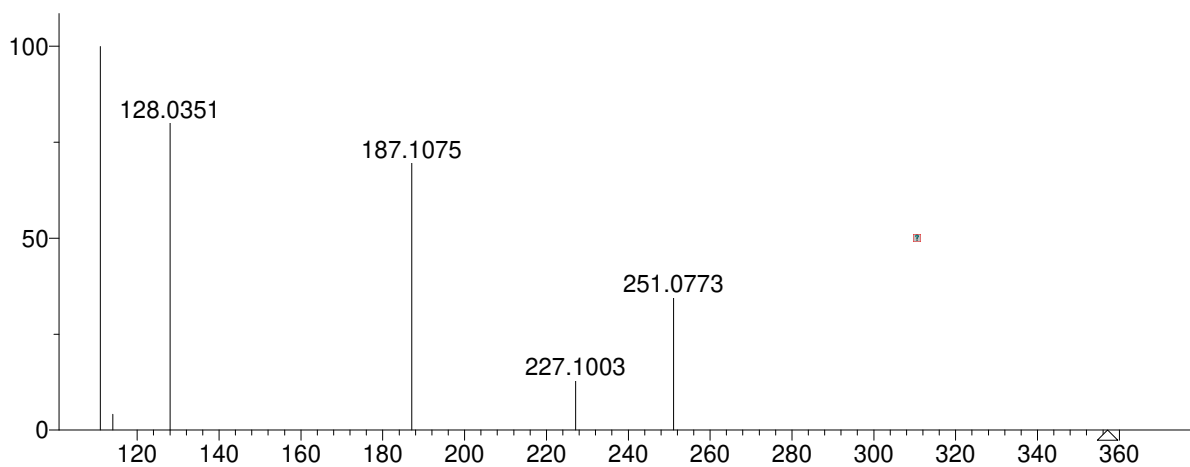

Hit 1 : NCGC00381117-01!2-amino-4-hydroxy-5-[[1-(4-methoxy-6-oxopyran-2-yl)-3-methylbutyl]amino]-5-oxopent:  
C<sub>16</sub>H<sub>24</sub>N<sub>2</sub>O<sub>7</sub>; MF: 0; RMF: 18; Prob 100.0%; Lib: mona-export-gnps; ID: 8549.

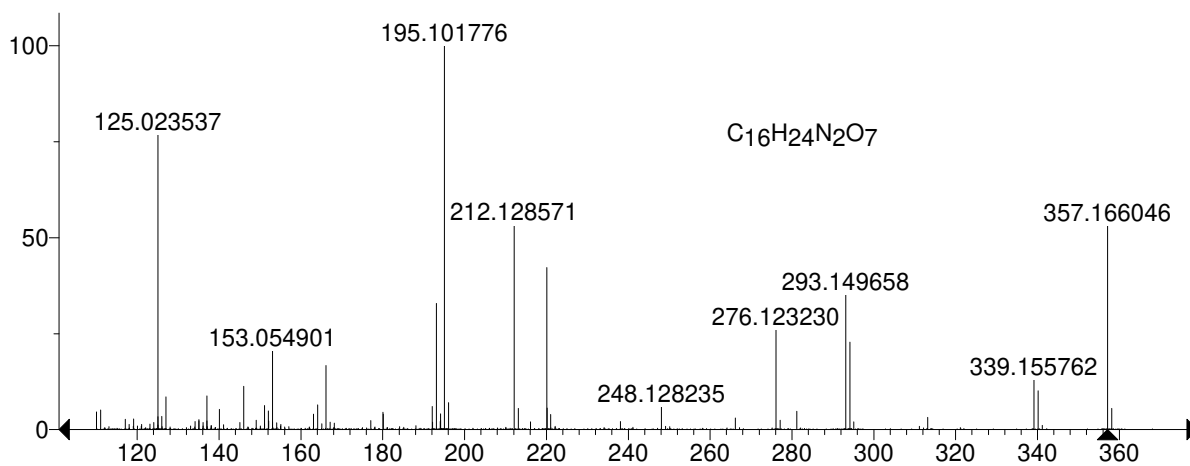

Unknown: Unknown (4.54\_481.0940m/z)  
Compound in Library Factor = 0

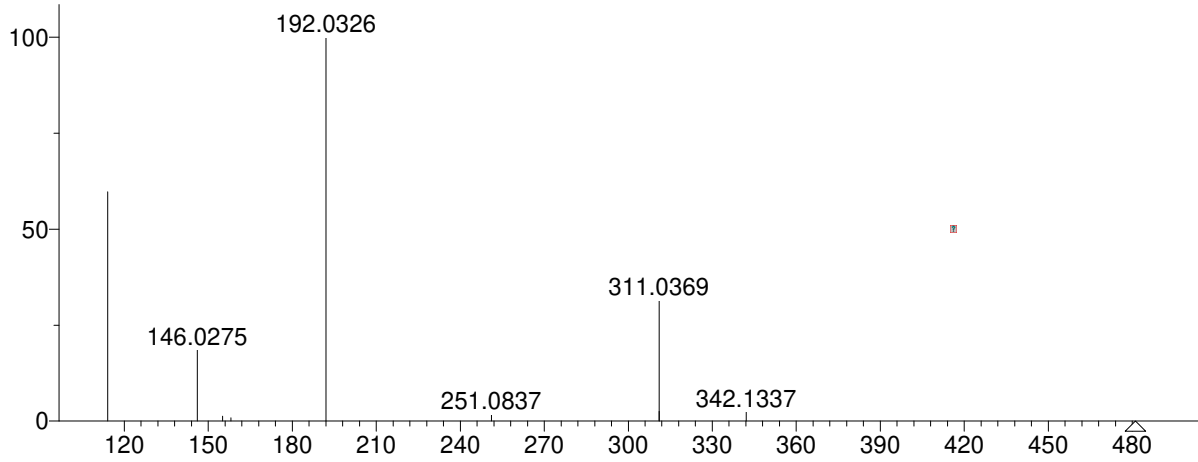

Hit 1 : Villol [M+K]<sup>+</sup> 65HCD P=481.1  
C<sub>23</sub>H<sub>22</sub>O<sub>9</sub>; MF: 0; RMF: 20; Prob 50.0%; Lib: mona-export-vf-npl\_gexactive; ID: 8049.

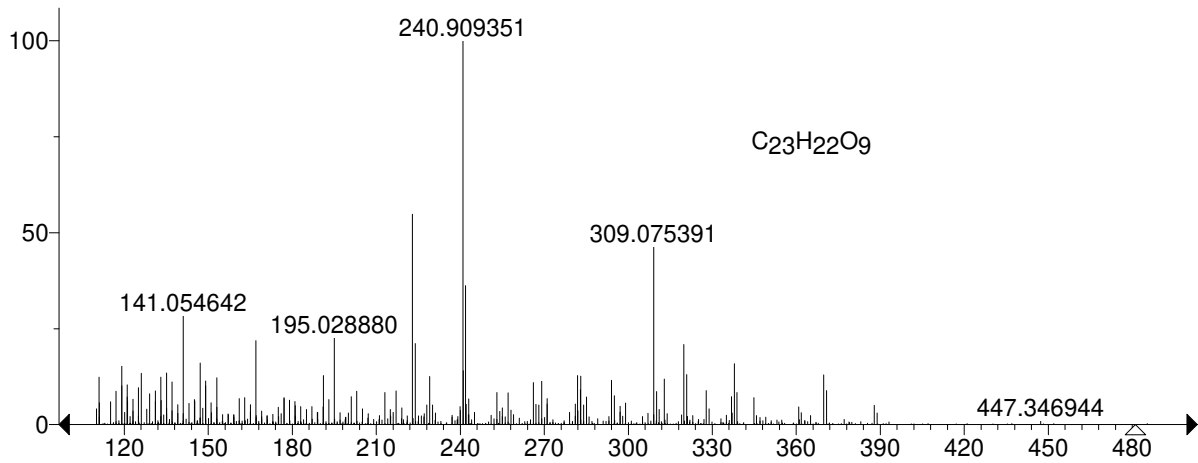

Hit 2 : Gossypin [M+H]<sup>+</sup> HCD 95V P=481.1  
C<sub>21</sub>H<sub>20</sub>O<sub>13</sub>; MF: 0; RMF: 18; Prob 50.0%; CAS: 652-78-8; Lib: nist\_msms; ID: 111983.

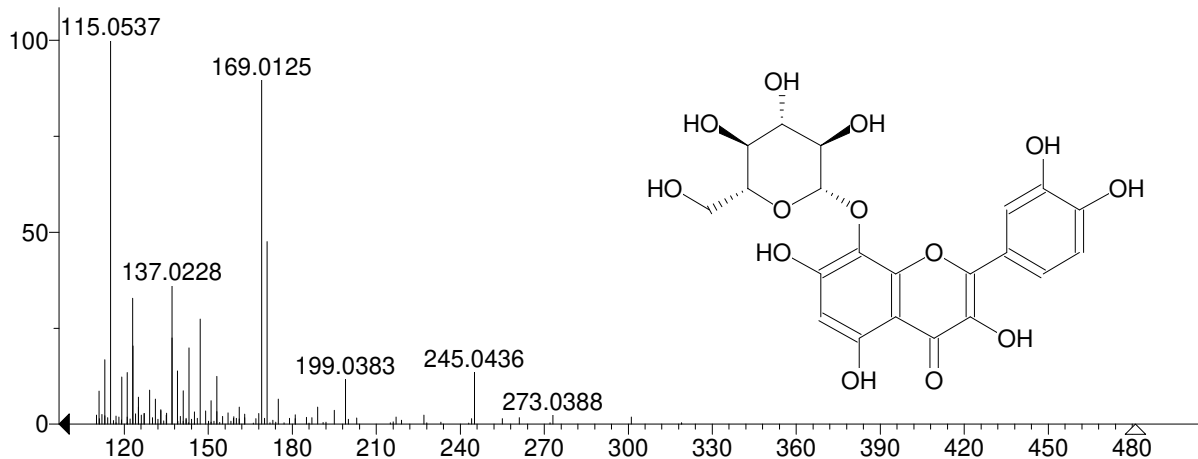

Unknown: Unknown (4.55\_375.0919m/z)  
Compound in Library Factor = 0

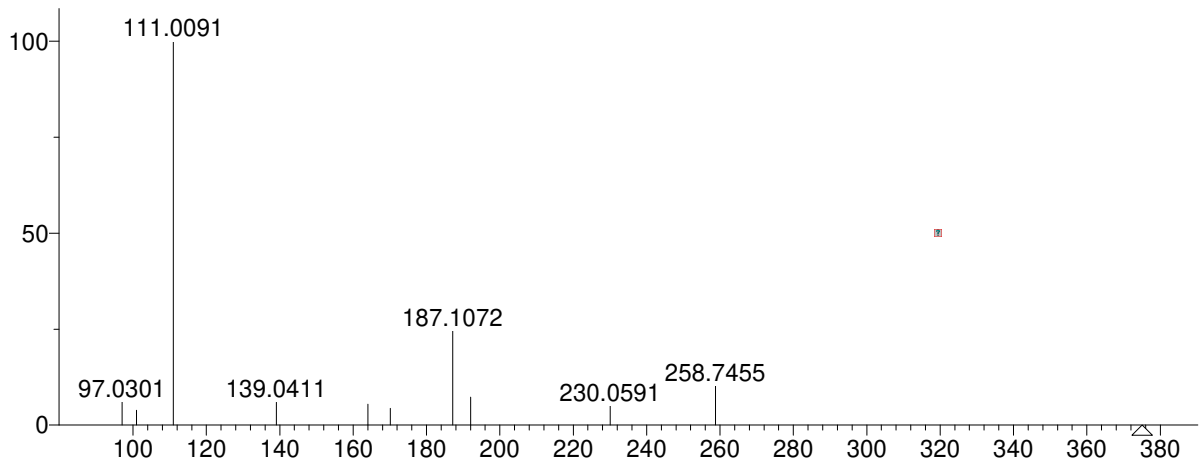



Unknown: Unknown (4.55\_451.1364m/z)  
Compound in Library Factor = 0

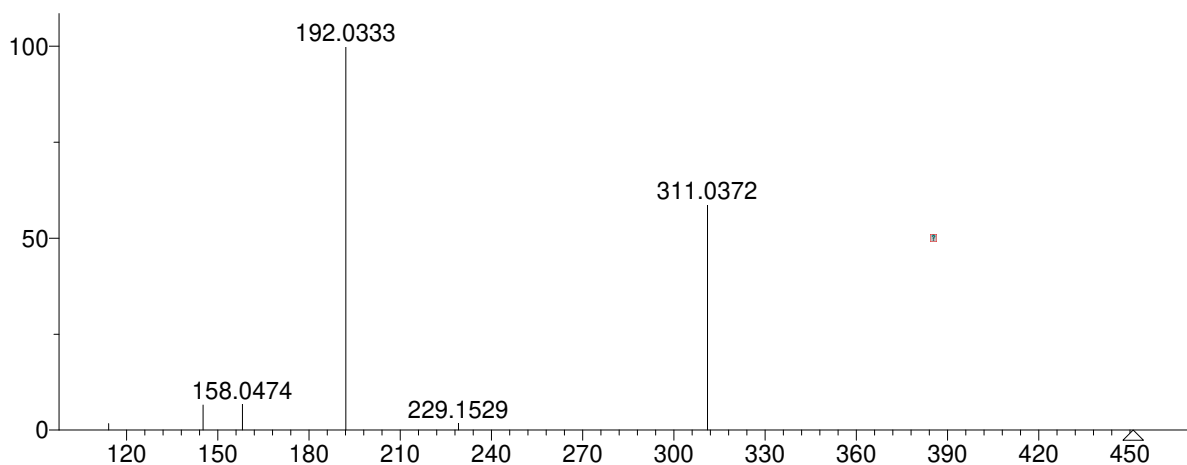

Hit 1 : NCGC00347590-0219,11,12a-trihydroxy-2,3-dimethoxy-8-(3-methylbut-2-enyl)-6,6a-dihydrochromeno[3,4-b]C23H24O8; MF: 0; RMF: 36; Prob 16.7%; Lib: mona-export-gnps; ID: 8469.

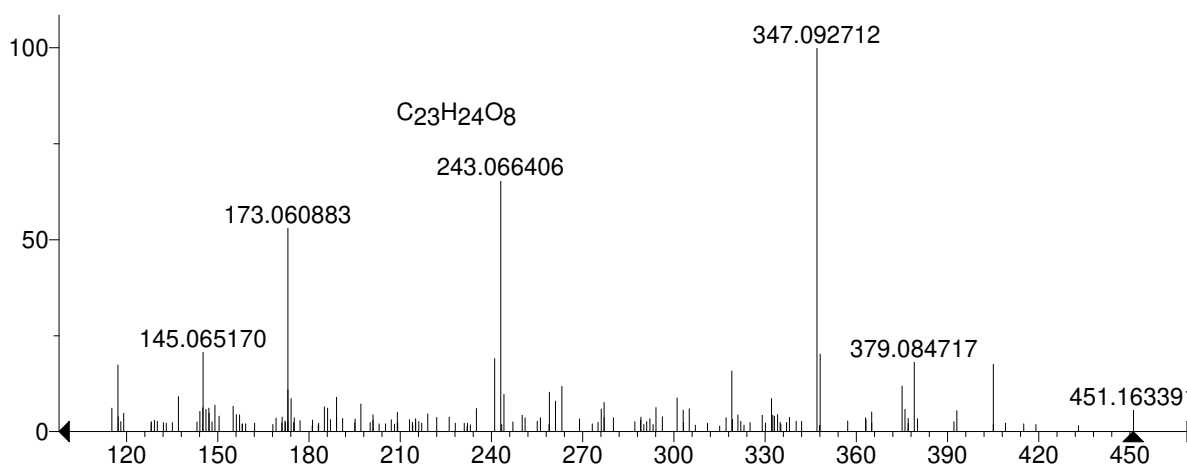

Hit 2 : [4,8-dihydroxy-3-(3-methoxy-3-oxoprop-1-en-2-yl)-8a-methyl-5-oxo-1,2,3,4,4a,6,7,8-octahydronaphthalen-2-C20H28O9; MF: 0; RMF: 19; Prob 16.7%; Lib: mona-export-vf-npl\_qexactive; ID: 10662.

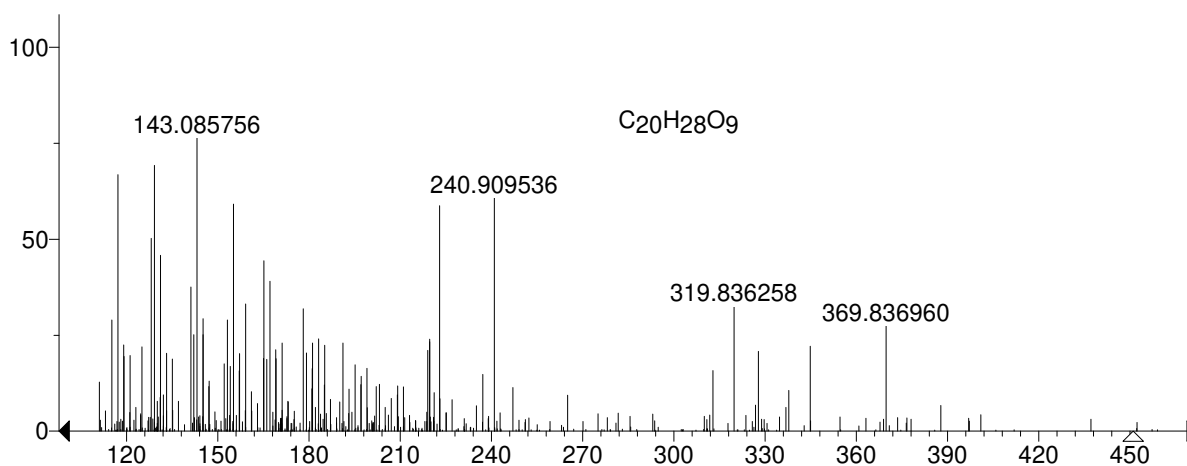

Hit 3 : 1',2'-dihydro-2',6-dihydroxyrotenone [M+Na]<sup>+</sup> 45HCD P=451.1  
C<sub>23</sub>H<sub>24</sub>O<sub>8</sub>; MF: 0; RMF: 15; Prob 16.7%; Lib: mona-export-vf-npl\_qexactive; ID: 4145.

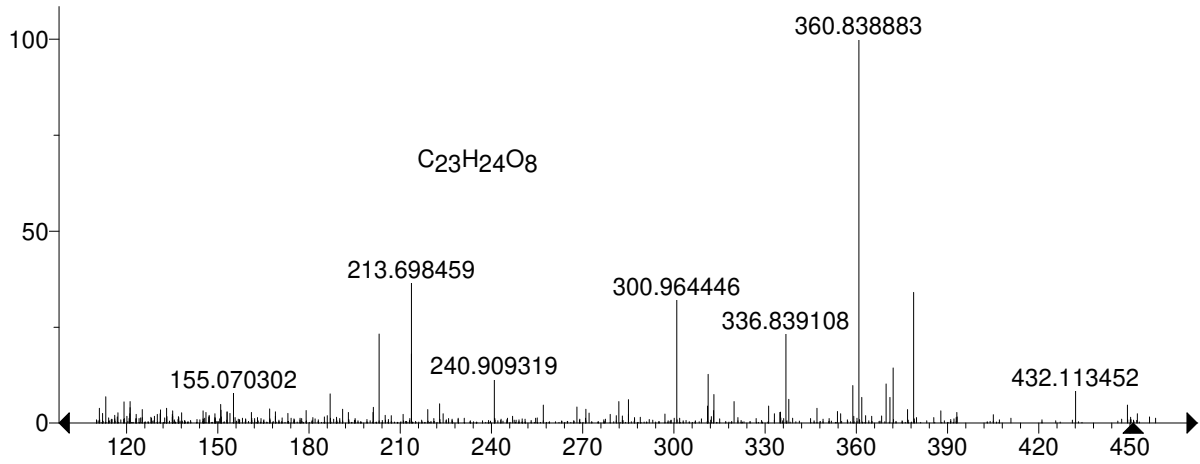

Hit 4 : 9,11,12a-trihydroxy-2,3-dimethoxy-8-(3-methylbut-2-enyl)-6,6a-dihydrochromeno[3,4-b]chromen-12-one [M  
C<sub>23</sub>H<sub>24</sub>O<sub>8</sub>; MF: 0; RMF: 11; Prob 16.7%; Lib: mona-export-vf-npl\_qexactive; ID: 18387.

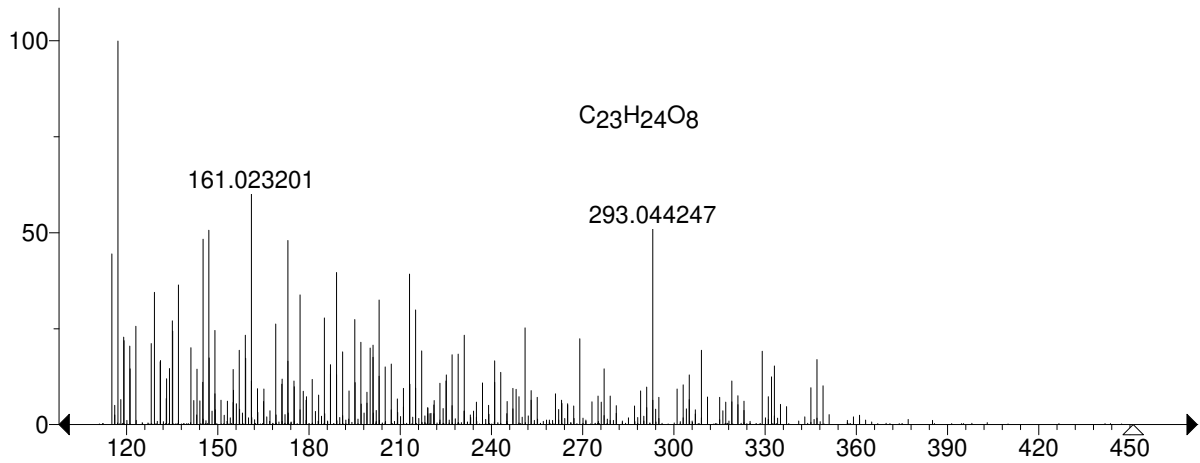

Hit 5 : 4-[(2R,3R,4S,5S,6R)-3,4,5-trihydroxy-6-(hydroxymethyl)oxan-2-yl]oxypentan-2-yl (E)-3-(4-hydroxyphenyl)p  
C<sub>20</sub>H<sub>28</sub>O<sub>9</sub>; MF: 0; RMF: 5; Prob 16.7%; Lib: anthocyanins mona; ID: 6818.

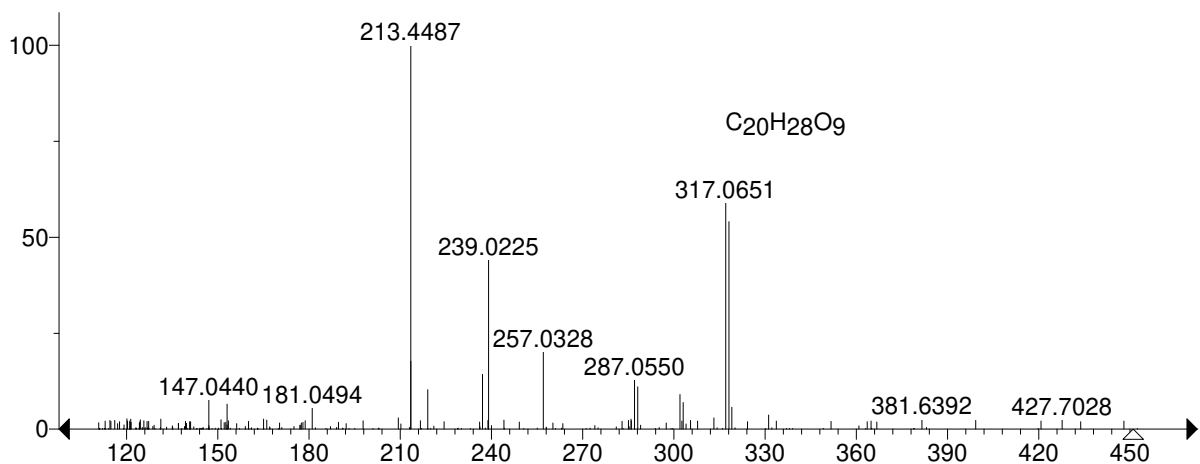

Unknown: Unknown (4.55\_538.1160m/z)  
Compound in Library Factor = 0

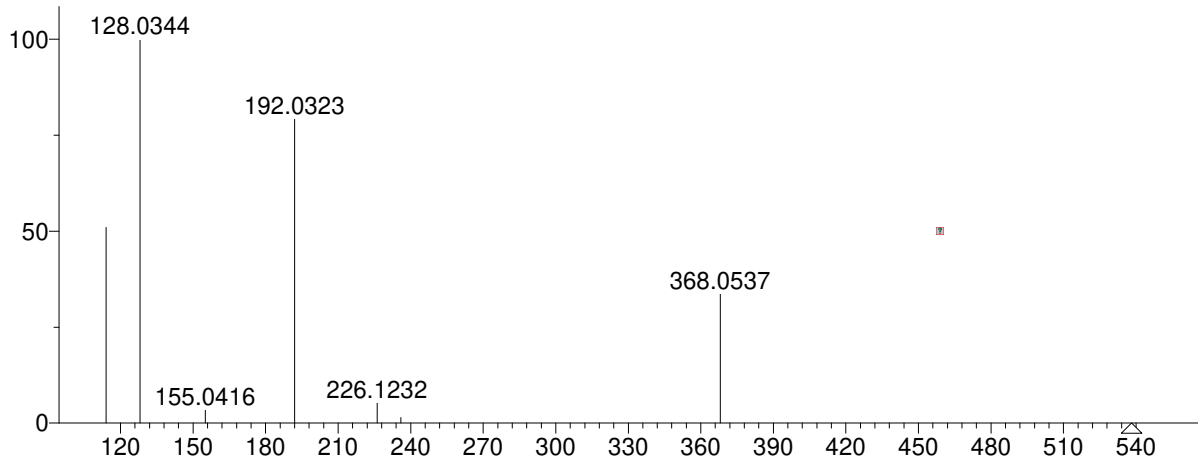

Unknown: Unknown (4.55\_754.1744m/z)  
Compound in Library Factor = 0

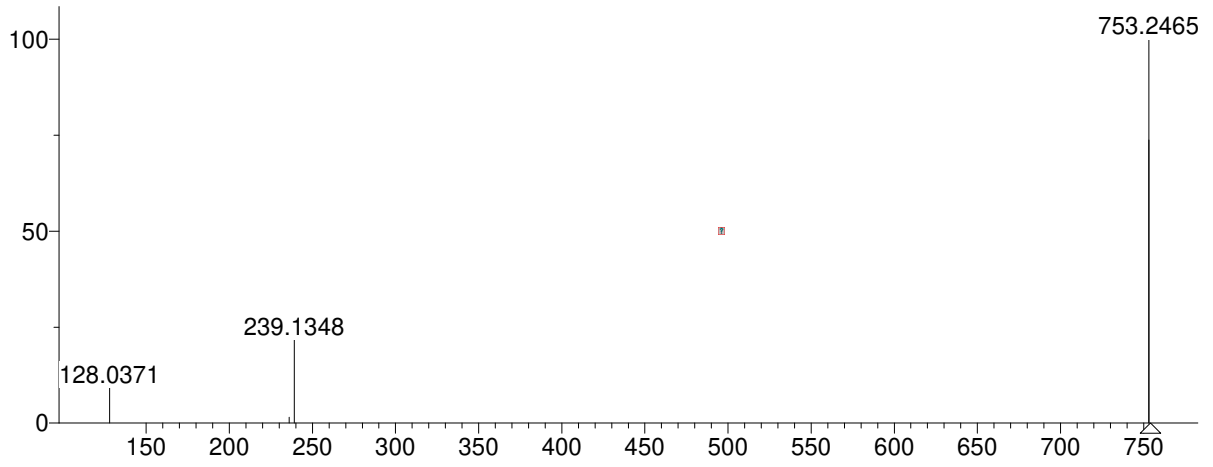

Unknown: Unknown (4.57\_228.0870m/z)  
Compound in Library Factor = 0

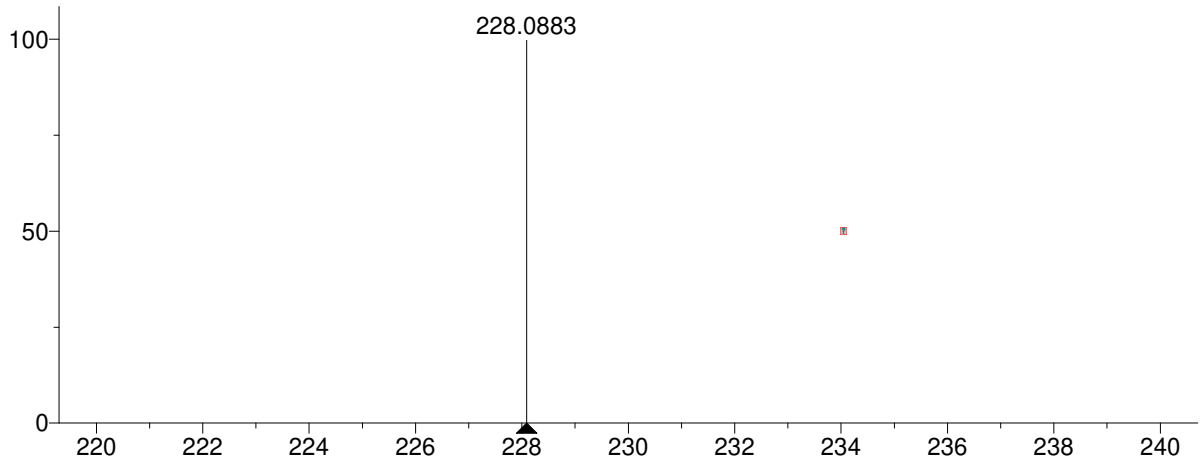

Unknown: Unknown (4.57\_229.1544m/z)  
Compound in Library Factor = -862

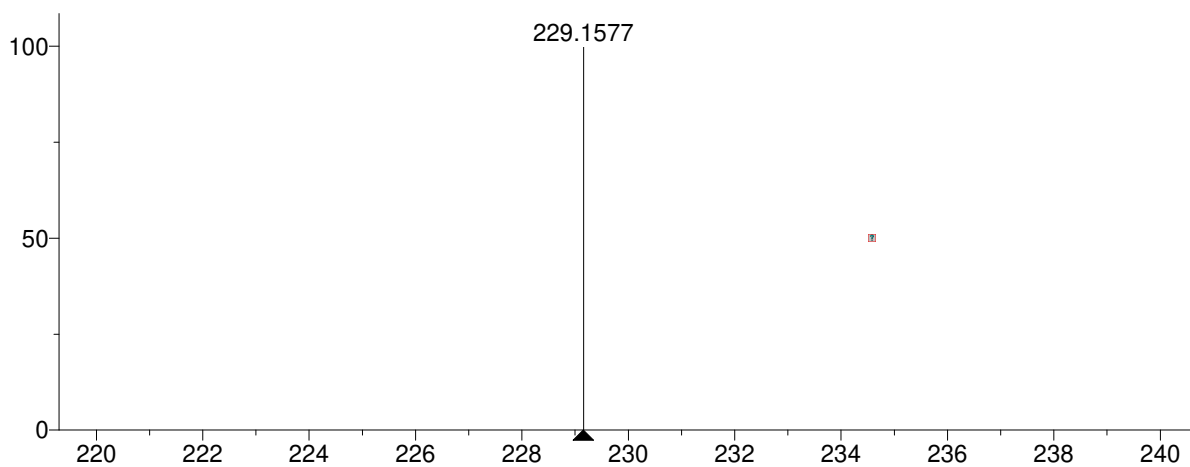

Hit 1 : Pro-Ile [M+H]<sup>+</sup> QTOF 20V P=229.2  
C<sub>11</sub>H<sub>20</sub>N<sub>2</sub>O<sub>3</sub>; MF: 364; RMF: 999; Prob 8.22%; Lib: nist\_msms; ID: 48704.

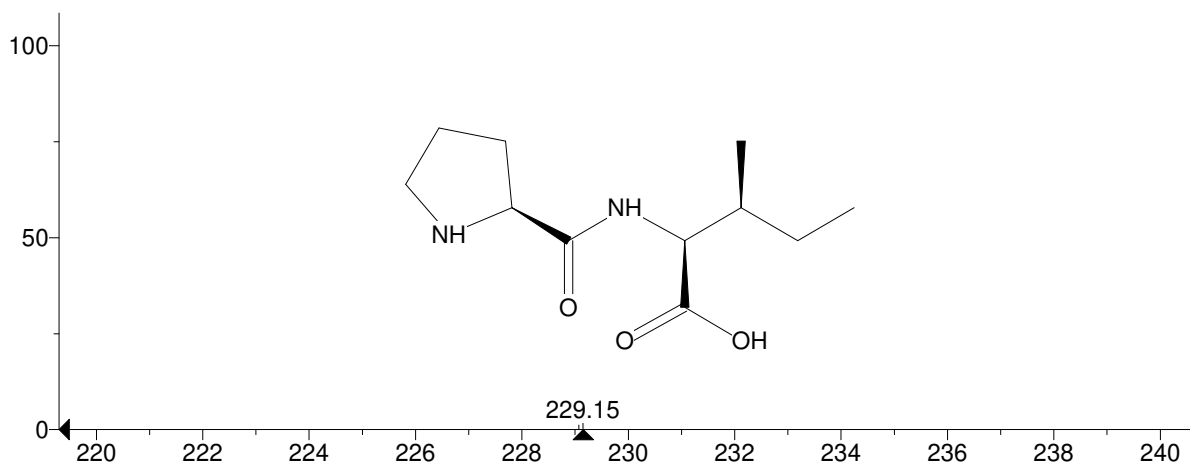

Hit 2 : Pro-Leu [M+H]<sup>+</sup> QTOF 20V P=229.2  
C<sub>11</sub>H<sub>20</sub>N<sub>2</sub>O<sub>3</sub>; MF: 364; RMF: 999; Prob 8.22%; Lib: nist\_msms; ID: 48709.

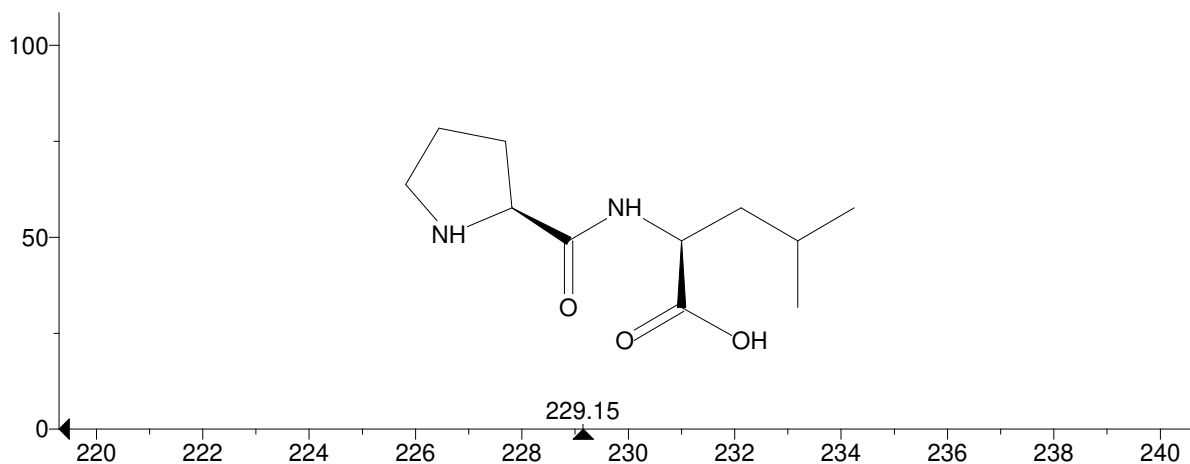

Hit 3 : Ile-Pro [M+H]<sup>+</sup> QTOF 10V P=229.2  
C<sub>11</sub>H<sub>20</sub>N<sub>2</sub>O<sub>3</sub>; MF: 364; RMF: 999; Prob 8.22%; Lib: nist\_msms; ID: 55446.

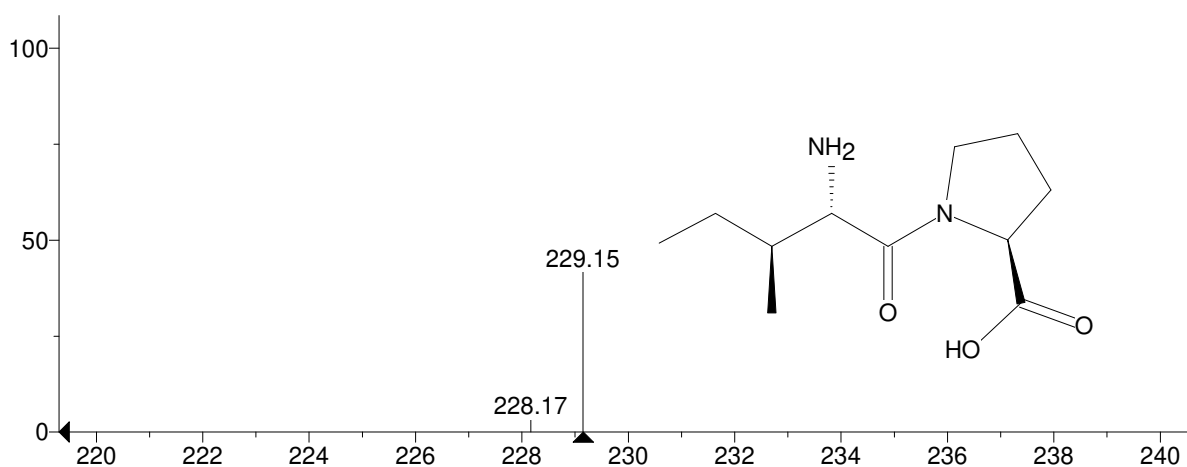

Hit 4 : DL-Leu-DL-Val [M-H]<sup>-</sup> IT-FT 35% P=229.2  
C<sub>11</sub>H<sub>22</sub>N<sub>2</sub>O<sub>3</sub>; MF: 364; RMF: 999; Prob 8.22%; CAS: 35436-83-0; Lib: nist\_msms; ID: 201269.

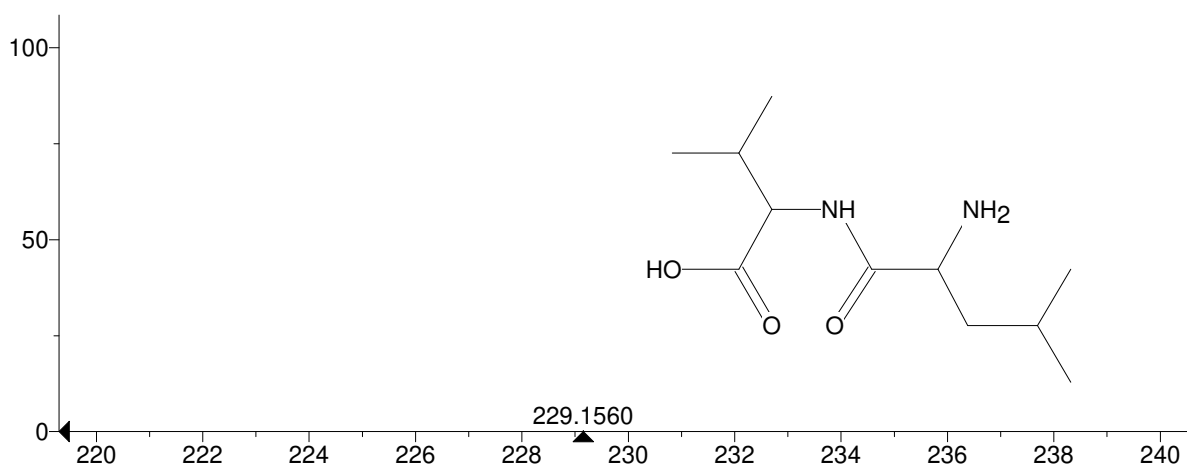

Hit 5 : Ile-Val [M-H]<sup>-</sup> HCD 25eV P=229.2  
C<sub>11</sub>H<sub>22</sub>N<sub>2</sub>O<sub>3</sub>; MF: 364; RMF: 999; Prob 8.22%; CAS: 41017-96-3; Lib: nist\_msms; ID: 567493.

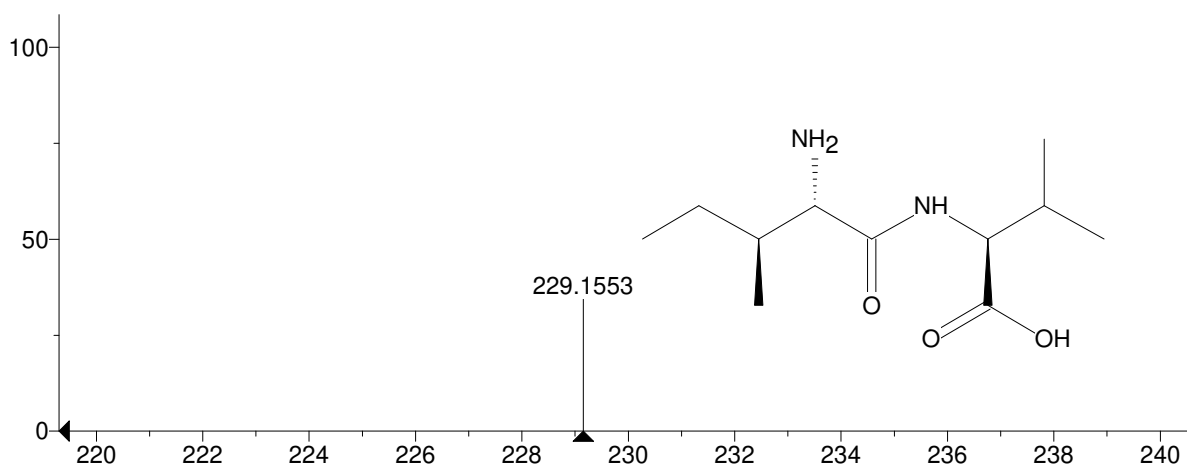

Unknown: Unknown (4.57\_296.1229m/z)  
Compound in Library Factor = 0

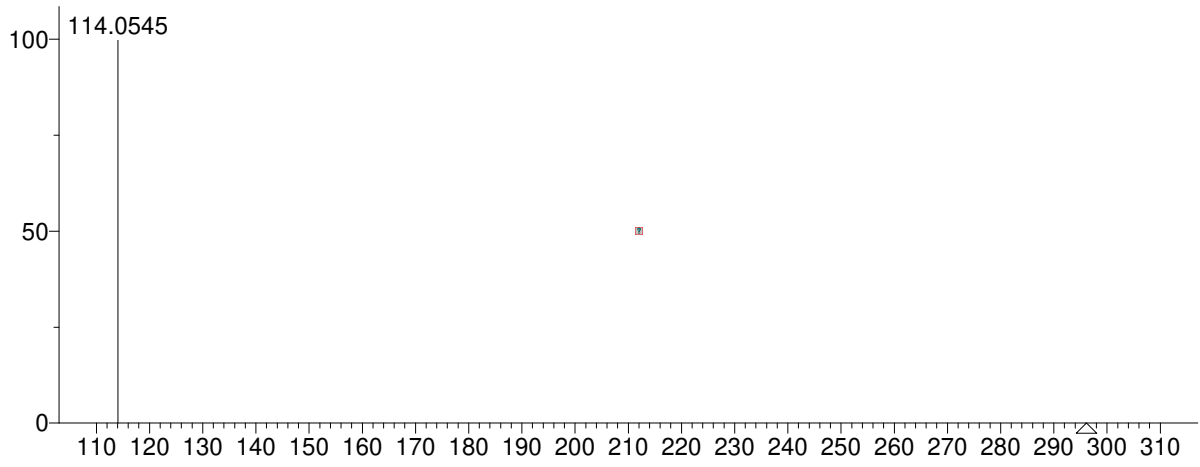



Unknown: Unknown (4.58\_753.2379m/z)  
Compound in Library Factor = 0

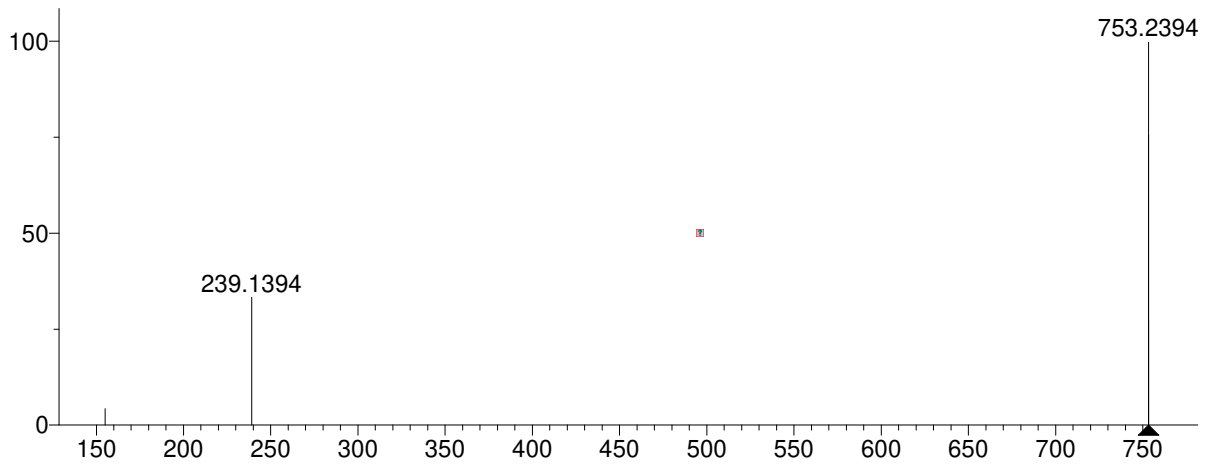

Unknown: Unknown (4.59\_257.1108m/z)  
Compound in Library Factor = 0

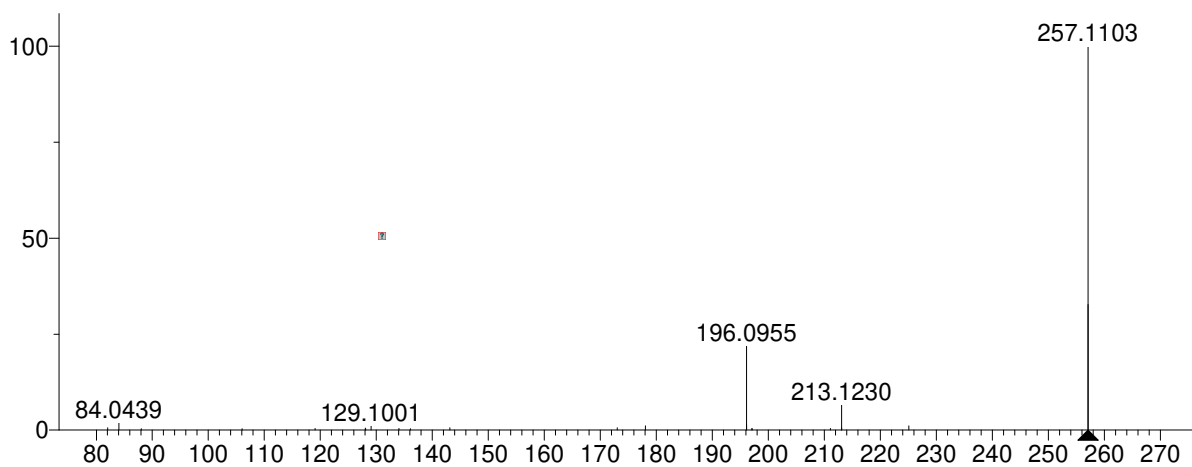

Hit 1 : 5'-O-Methylthymidine [M+H]<sup>+</sup> 35eV P=257.1  
C<sub>11</sub>H<sub>16</sub>N<sub>2</sub>O<sub>5</sub>; MF: 0; RMF: 9; Prob 100.0%; Lib: mona-export-fiehn\_hilic; ID: 1695.

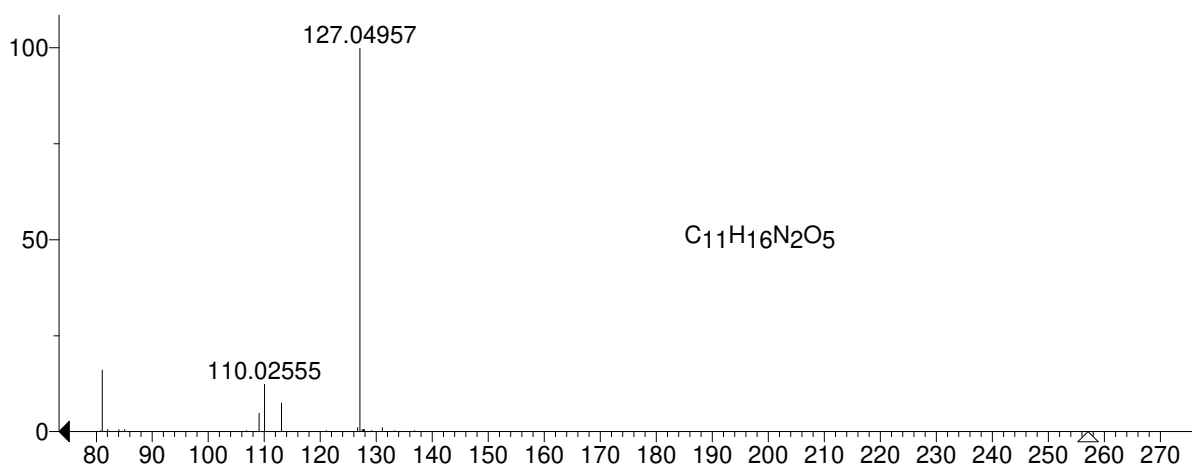

Unknown: Unknown (4.59\_754.1649m/z)  
Compound in Library Factor = 0

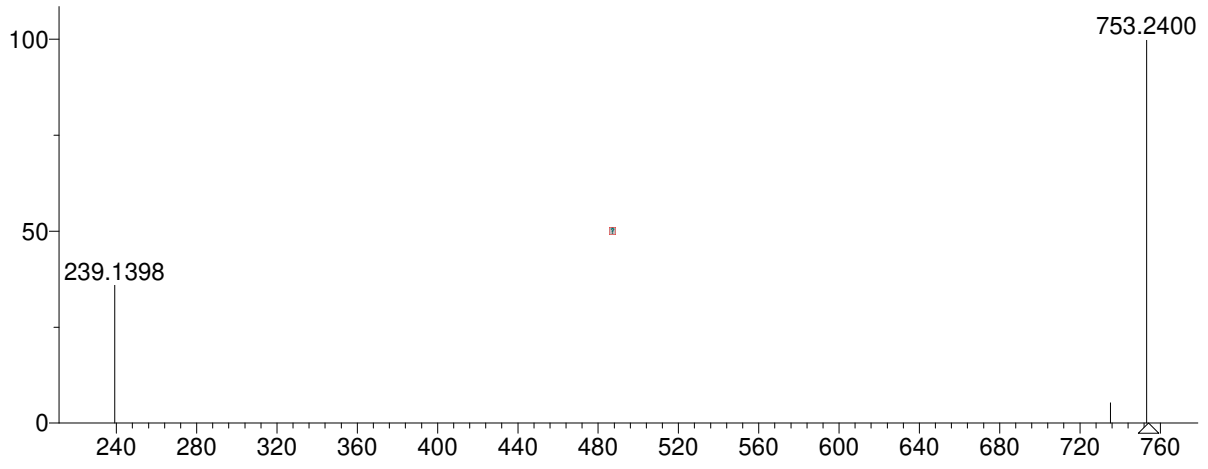

\*\* Search Report Page 1 of 2 \*\*

Unknown: Unknown (4.60\_257.1133m/z)  
Compound in Library Factor = -107

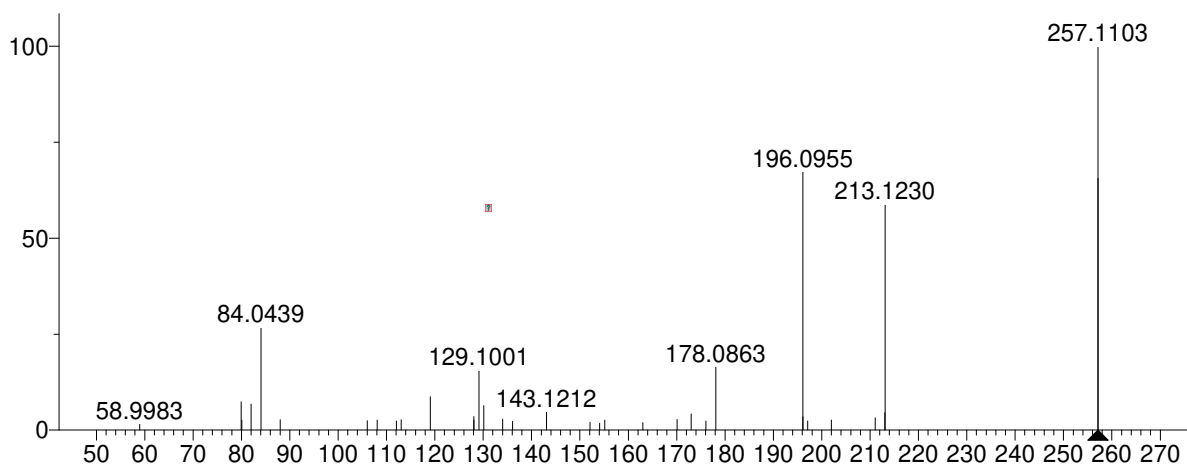

Hit 1 : L-Saccharopine [M-H-H<sub>2</sub>O]- HCD 24V P=257.1  
C<sub>11</sub>H<sub>20</sub>N<sub>2</sub>O<sub>6</sub>; MF: 461; RMF: 720; Prob 98.8%; CAS: 997-68-2; Lib: nist\_msms; ID: 125637.

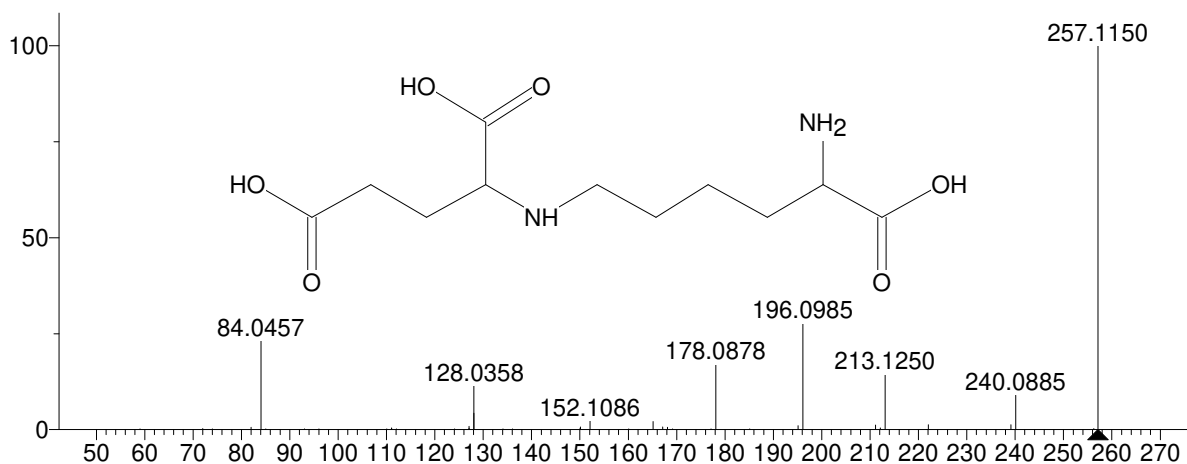

Hit 2 :  $\alpha$ -Cyclohexylmandelic acid [M+Na]<sup>+</sup> HCD 1V P=257.1  
C<sub>14</sub>H<sub>18</sub>O<sub>3</sub>; MF: 60; RMF: 534; Prob 0.98%; CAS: 4335-77-7; Lib: nist\_msms; ID: 492969.

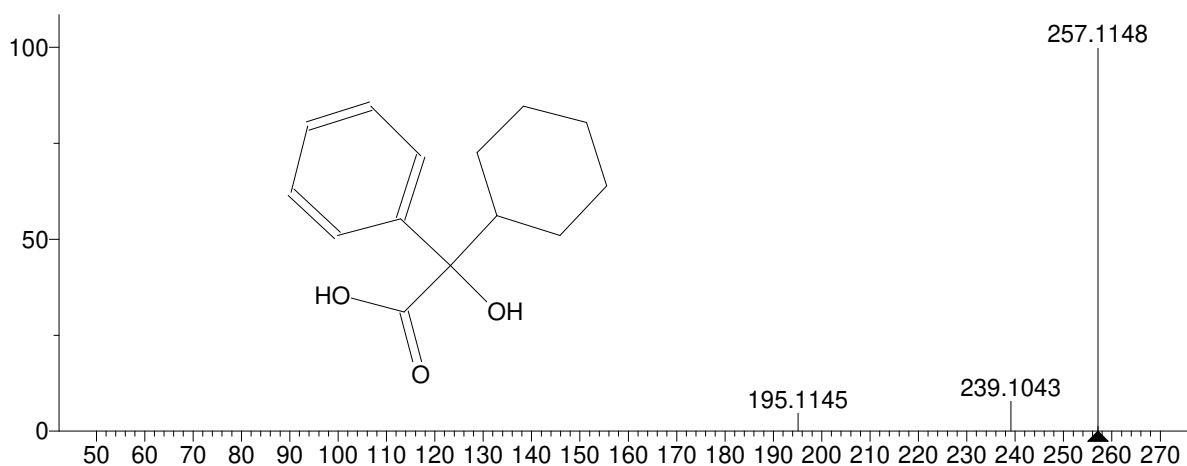

Hit 3 : 5'-O-Methylthymidine [M+H]<sup>+</sup> 35eV P=257.1  
C<sub>11</sub>H<sub>16</sub>N<sub>2</sub>O<sub>5</sub>; MF: 0; RMF: 21; Prob 0.17%; Lib: mona-export-fiehn\_hilic; ID: 1695.

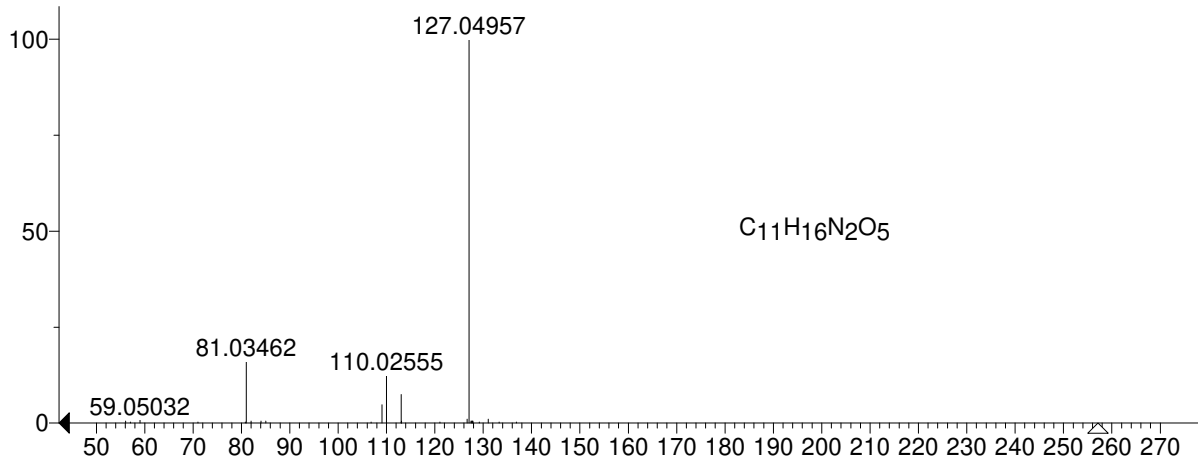

\*\* Search Report Page 1 of 2 \*\*

Unknown: Unknown (4.60\_427.1711m/z)  
Compound in Library Factor = -3273

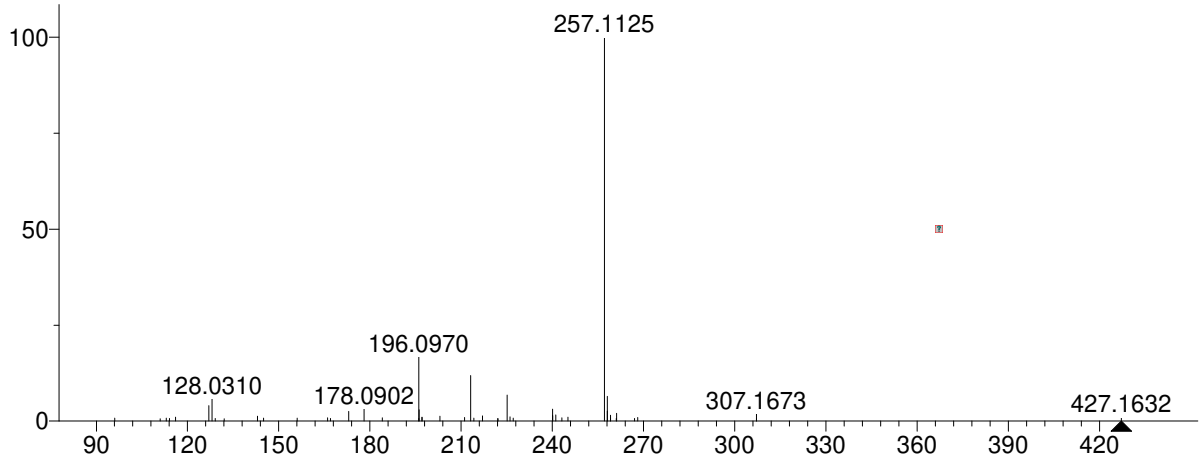

Hit 1 : [(6E,10Z)-10-(acetyloxymethyl)-6-formyl-3-methylidene-2-oxo-3a,4,5,8,9,11a-hexahydrocyclodeca[b]furan-C<sub>22</sub>H<sub>28</sub>O<sub>7</sub>; MF: 2; RMF: 96; Prob 15.2%; Lib: mona-export-vf-npl\_qexactive; ID: 23323.

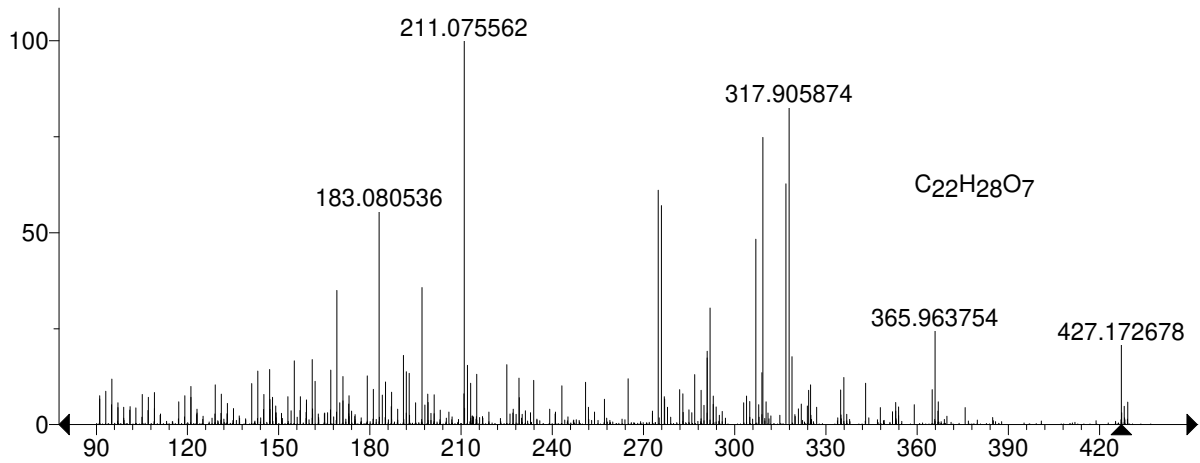

Hit 2 : Archangelicine [M+H]<sup>+</sup> 35HCD P=427.2  
C<sub>24</sub>H<sub>26</sub>O<sub>7</sub>; MF: 1; RMF: 42; Prob 14.6%; Lib: mona-export-vf-npl\_qexactive; ID: 5194.

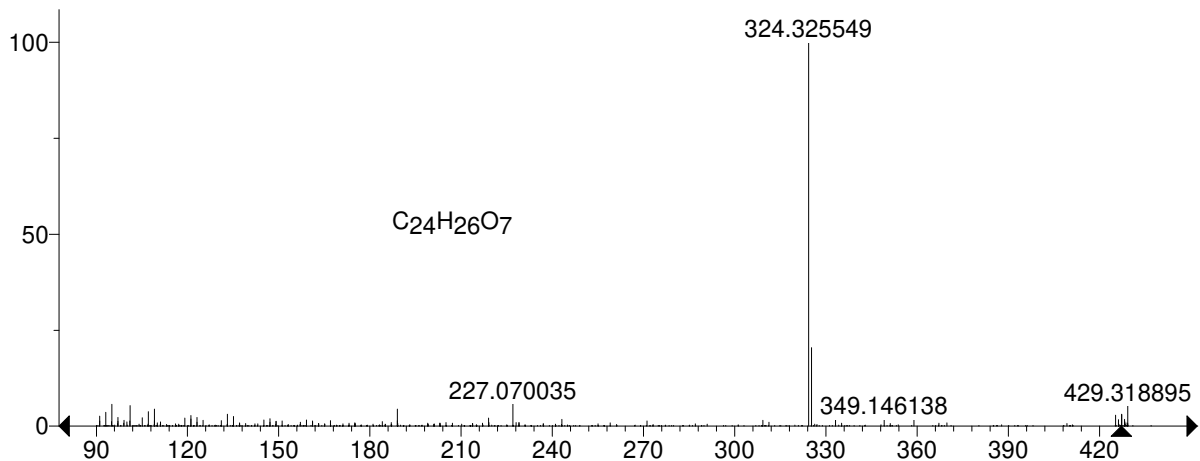

\*\* Search Report Page 2 of 2 \*\*

Hit 3 : [8,8-dimethyl-9-(3-methylbut-2-enoyloxy)-2-oxo-9,10-dihydropyrano[2,3-f]chromen-10-yl] 3-methylbut-2-en  
C<sub>24</sub>H<sub>26</sub>O<sub>7</sub>; MF: 0; RMF: 34; Prob 14.0%; Lib: mona-export-vf-npl\_qexactive; ID: 4551.

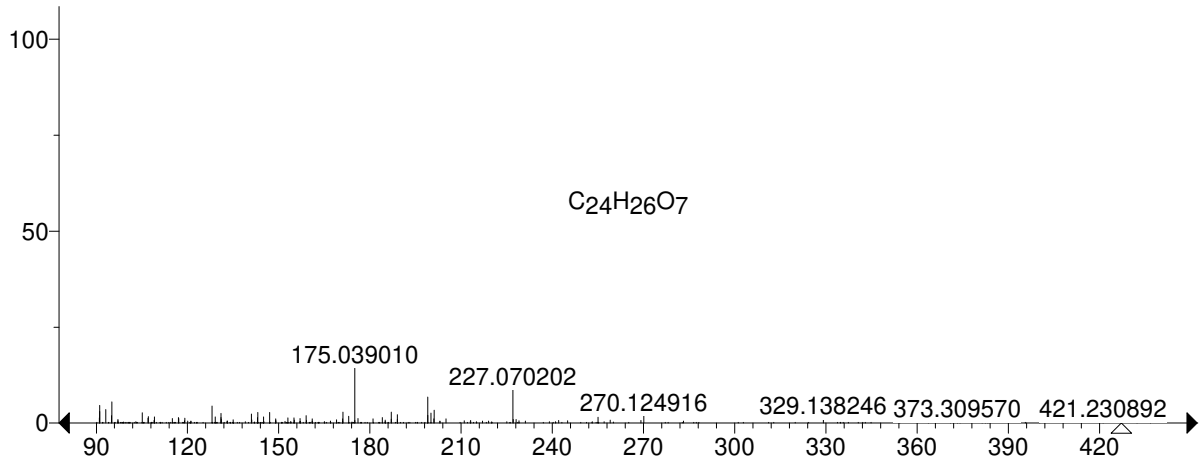

Hit 4 : PG 11:0; PG 2:0-9:0; [M-H]<sup>-</sup> [M-H]<sup>-</sup> P=427.2  
C<sub>17</sub>H<sub>33</sub>O<sub>10</sub>P; MF: 0; RMF: 34; Prob 14.0%; Lib: msdial-insilicomsm-lipids-neg; ID: 324573.

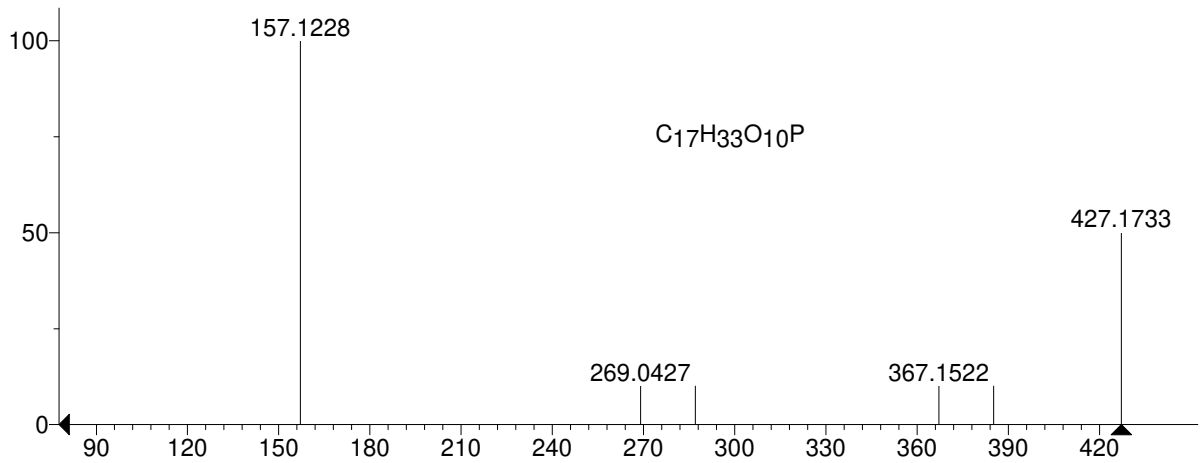

Hit 5 : PG 11:0; PG 3:0-8:0; [M-H]<sup>-</sup> [M-H]<sup>-</sup> P=427.2  
C<sub>17</sub>H<sub>33</sub>O<sub>10</sub>P; MF: 0; RMF: 34; Prob 14.0%; Lib: msdial-insilicomsm-lipids-neg; ID: 324632.

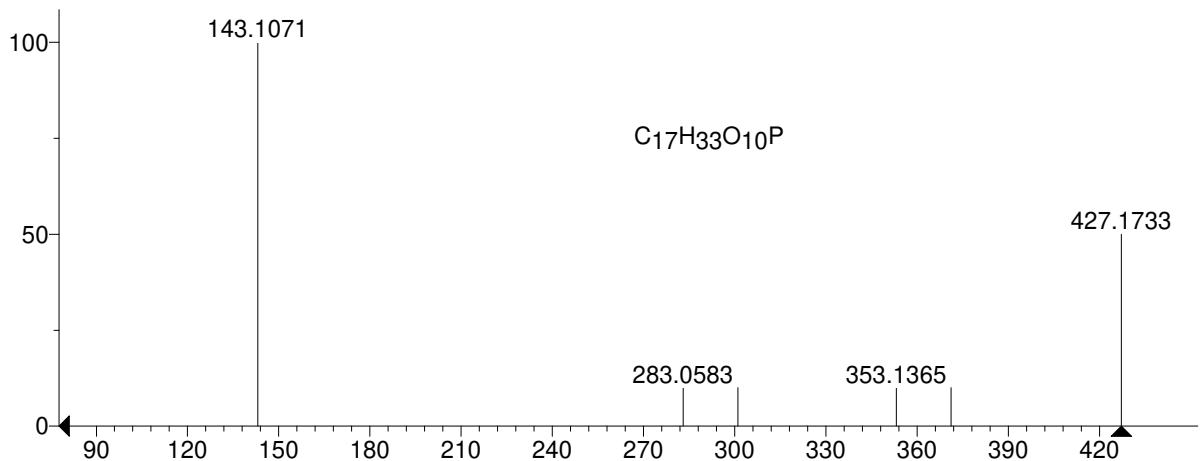

\*\* Search Report Page 1 of 2 \*\*

Unknown: Unknown (4.61\_274.1073m/z)  
Compound in Library Factor = -3273

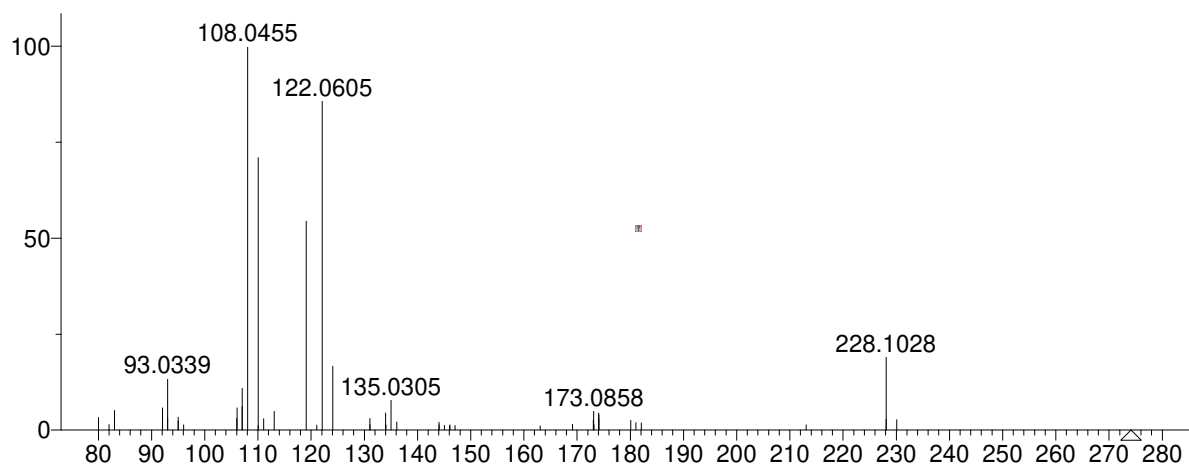

Hit 1 : L-Thyronine [M+H]<sup>+</sup> IT-FT 35% P=274.1  
C<sub>15</sub>H<sub>15</sub>NO<sub>4</sub>; MF: 12; RMF: 269; Prob 13.0%; CAS: 1596-67-4; Lib: nist\_msms; ID: 277888.

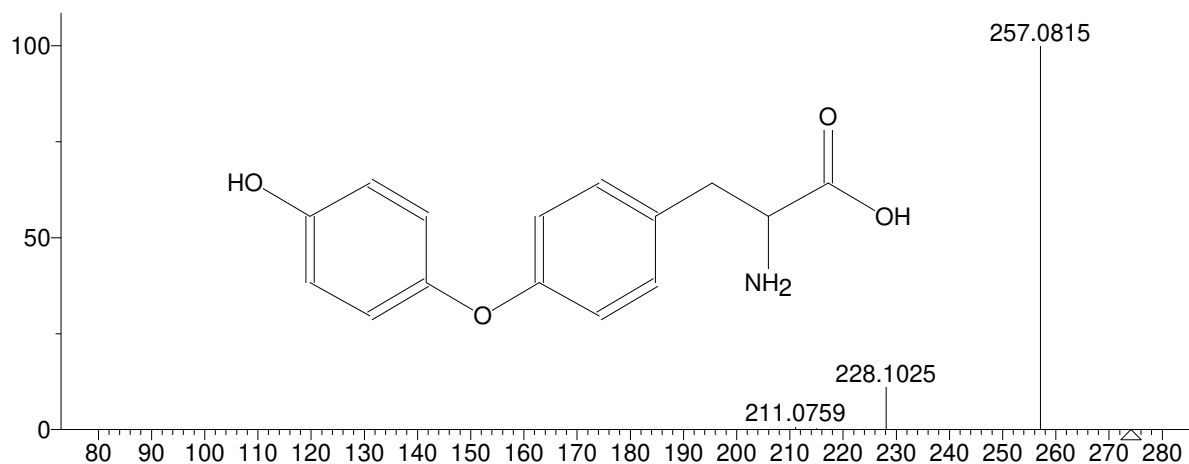

Hit 2 : Benzoic acid, 4-[[tetrahydro-2-(3-hydroxy-1-butenyl)-5-oxo-3-furanyl]amino]- [M+H-H<sub>2</sub>O]<sup>+</sup> HCD 49V P=2  
C<sub>15</sub>H<sub>17</sub>NO<sub>5</sub>; MF: 8; RMF: 132; Prob 11.0%; CAS: 144397-99-9; Lib: nist\_msms; ID: 351123.

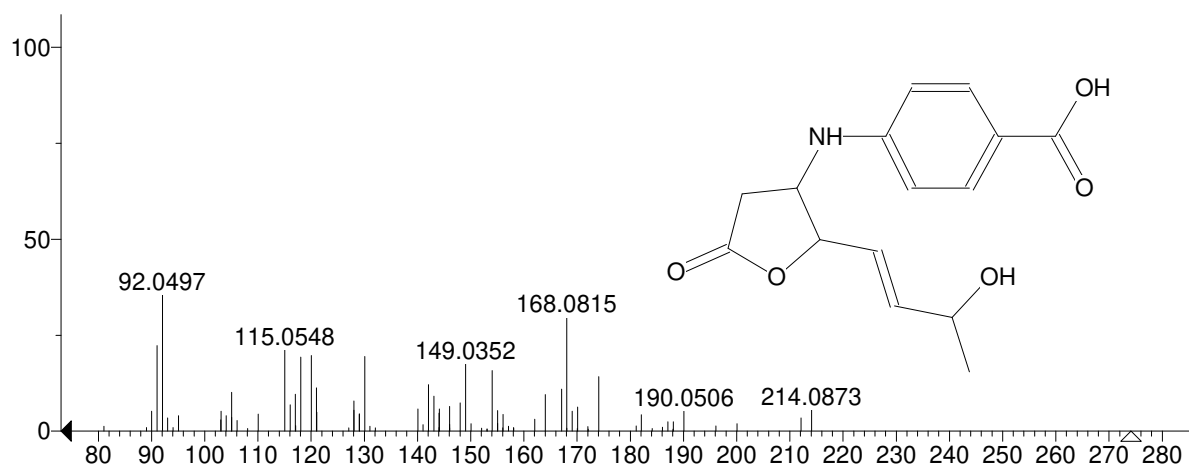



\*\* Search Report Page 2 of 2 \*\*

Hit 3 : NCGC00381099-01\_C15H17NO5\_Benzoic acid, 4-[[tetrahydro-2-[(2E)-1-hydroxy-2-buten-1-yl]-5-oxo-3-fur  
C15H17NO5; MF: 4; RMF: 89; Prob 9.29%; Lib: mona-export-gnps; ID: 13377.

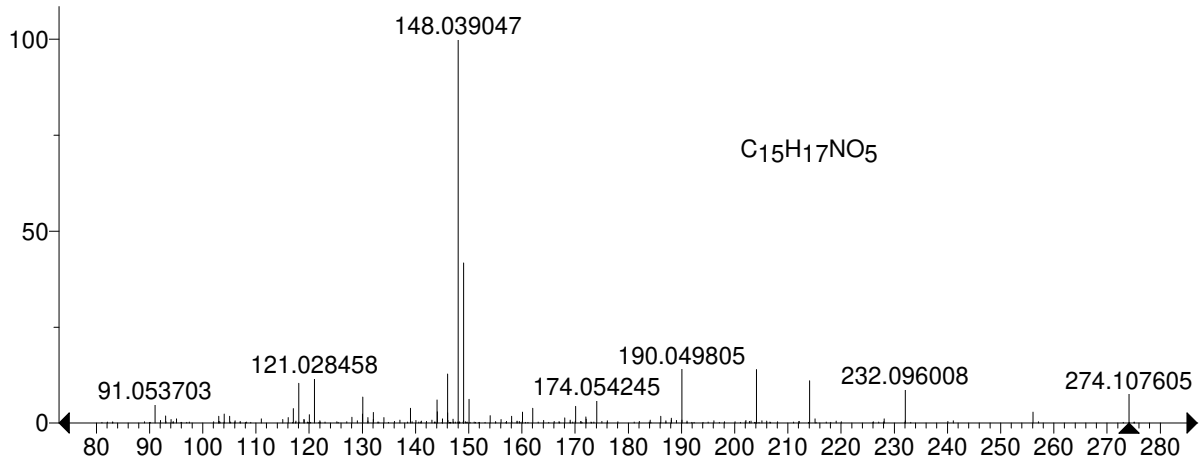

Hit 4 : NCGC00385442-01\_C13H12O4\_3-Hydroxy-2-phenyl-2,3,3a,7a-tetrahydro-5H-furo[3,2-b]pyran-5-one [M+  
C13H12O4; MF: 3; RMF: 135; Prob 8.92%; Lib: mona-export-gnps; ID: 13007.

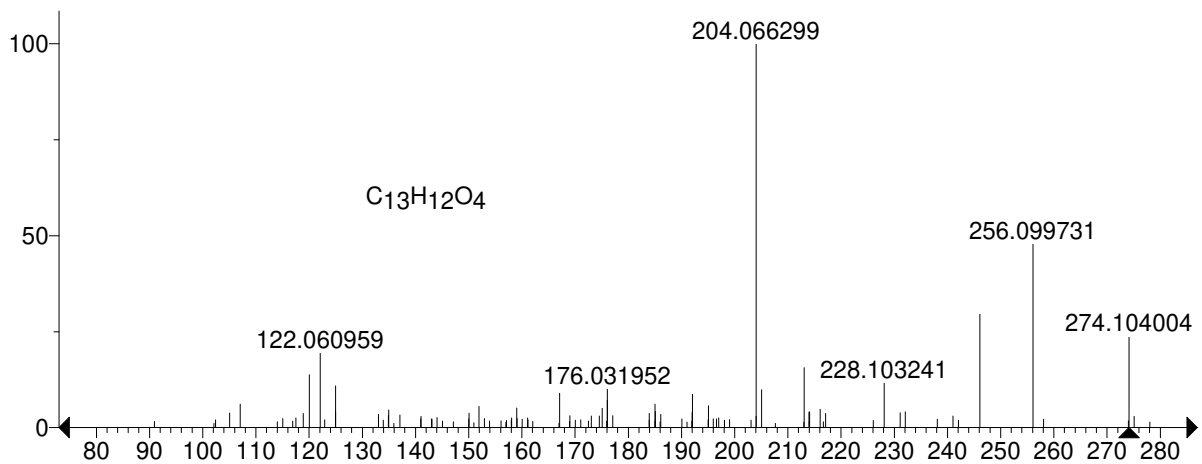

Hit 5 : NCGC00380910-01\_C15H17NO5\_2,6-Piperidinedione, 4-[2-[2-hydroxy-3-(hydroxymethyl)-5-methylphenyl]  
C15H17NO5; MF: 3; RMF: 112; Prob 8.92%; Lib: mona-export-gnps; ID: 12850.

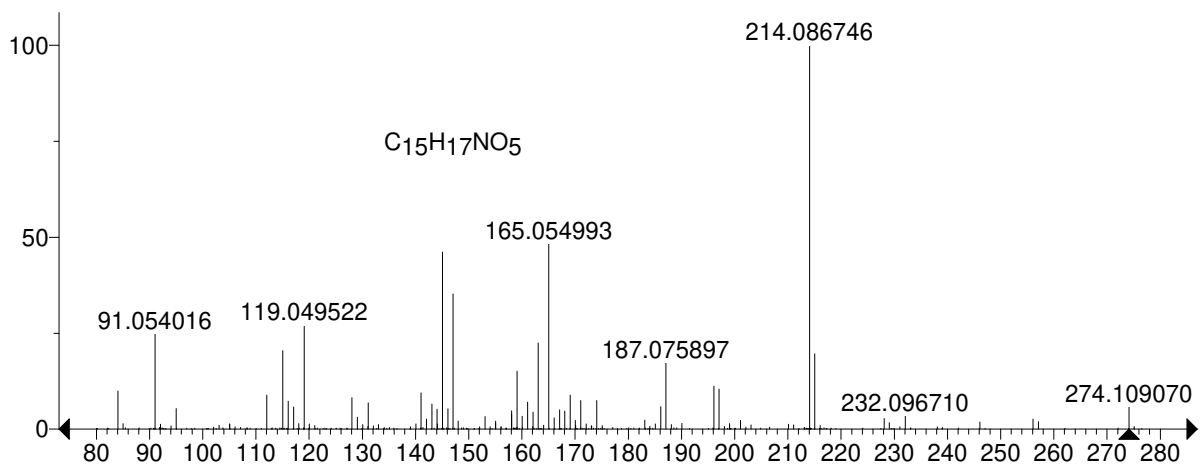

Unknown: Unknown (4.62\_470.1761m/z)  
Compound in Library Factor = 0

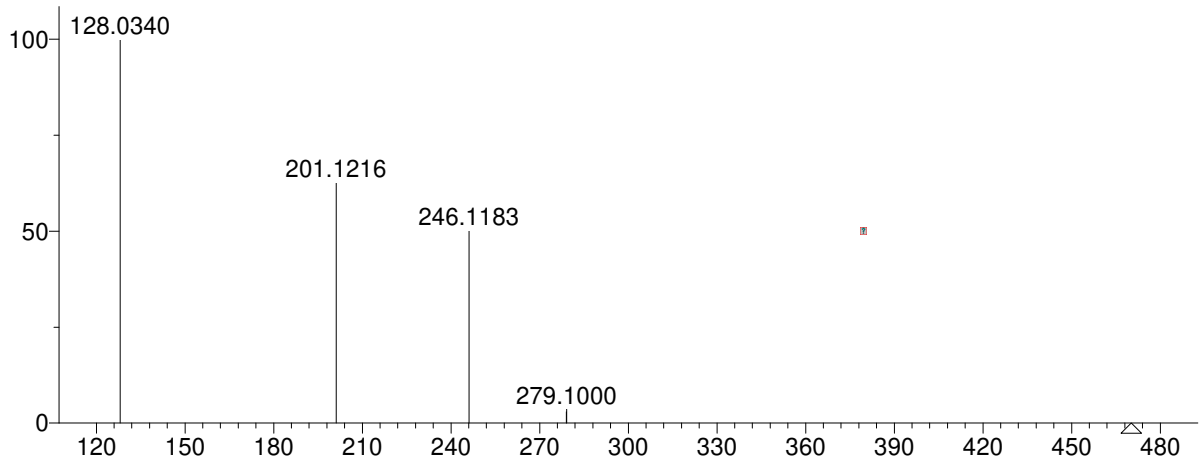

Unknown: Unknown (4.62\_636.1522m/z)  
Compound in Library Factor = 0

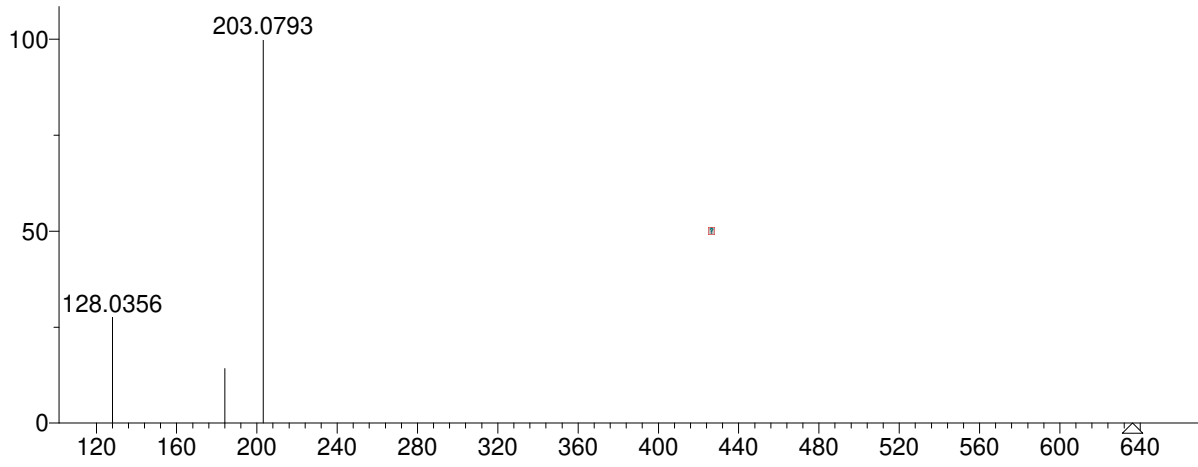

Unknown: Unknown (4.64\_245.1126m/z)  
Compound in Library Factor = -1090

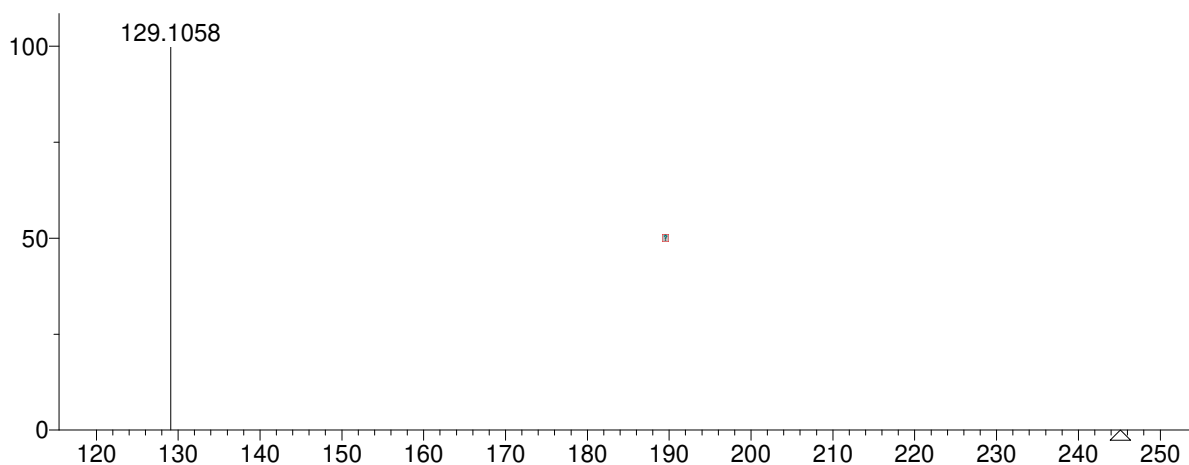

Hit 1 : Ile-Asp [M-H]<sup>-</sup> HCD 31eV P=245.1  
C<sub>10</sub>H<sub>18</sub>N<sub>2</sub>O<sub>5</sub>; MF: 204; RMF: 911; Prob 33.6%; Lib: nist\_msms; ID: 570706.

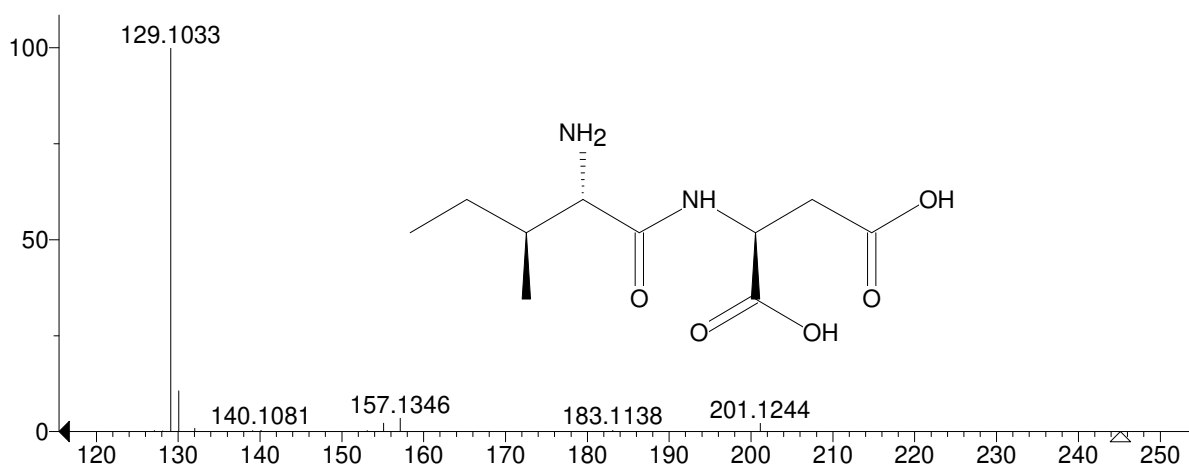

Hit 2 : Ile-Asp [M-H]<sup>-</sup> HCD 31eV P=245.1  
C<sub>10</sub>H<sub>18</sub>N<sub>2</sub>O<sub>5</sub>; MF: 204; RMF: 911; Prob 33.6%; CAS: 54532-76-2; Lib: nist\_msms2; ID: 84439.

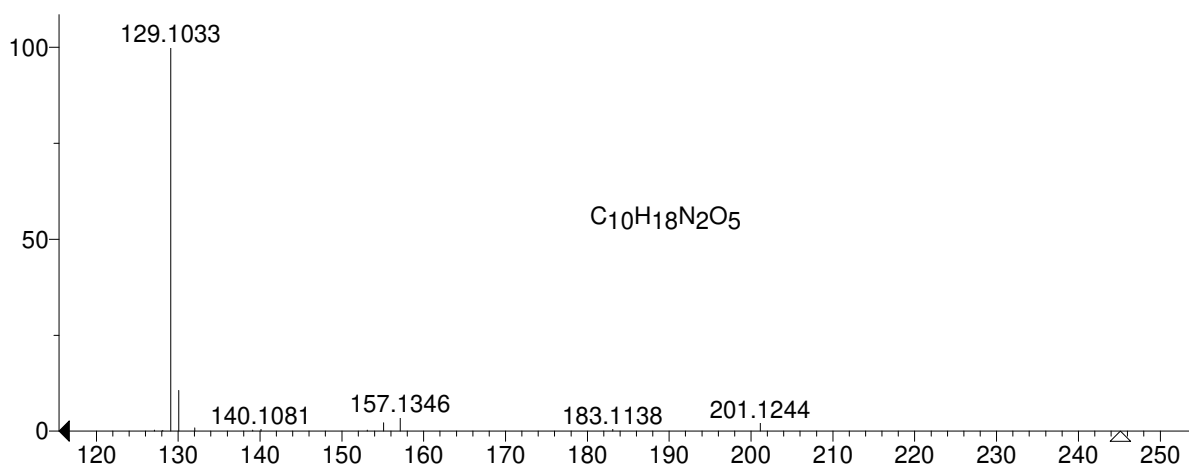

Hit 3 : Leu-Asp [M-H]<sup>-</sup> HCD 39eV P=245.1  
C<sub>10</sub>H<sub>18</sub>N<sub>2</sub>O<sub>5</sub>; MF: 184; RMF: 892; Prob 15.3%; Lib: nist\_msms; ID: 570776.

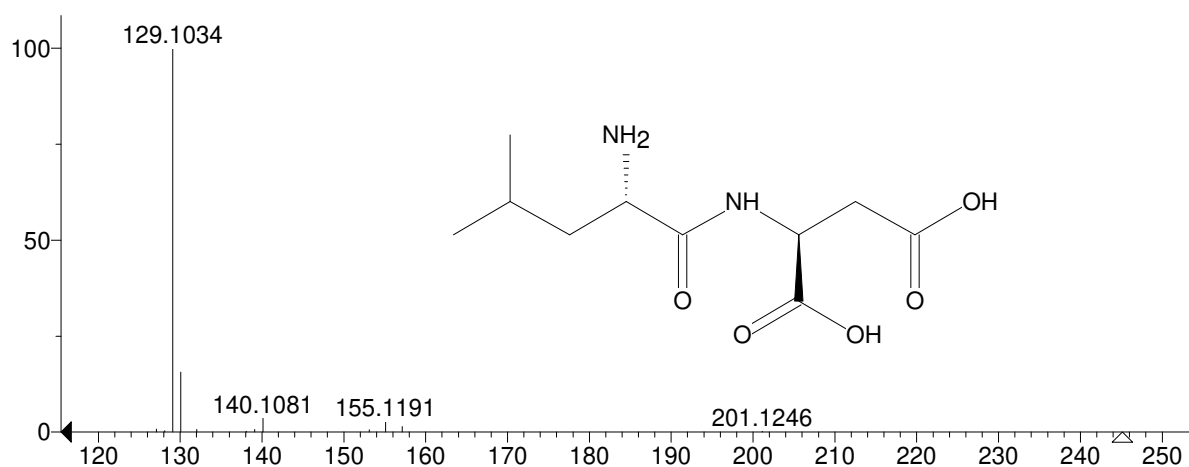

Hit 4 : Leu-Asp [M-H]<sup>-</sup> HCD 39eV P=245.1  
C<sub>10</sub>H<sub>18</sub>N<sub>2</sub>O<sub>5</sub>; MF: 184; RMF: 892; Prob 15.3%; CAS: 32949-40-9; Lib: nist\_msms2; ID: 84509.

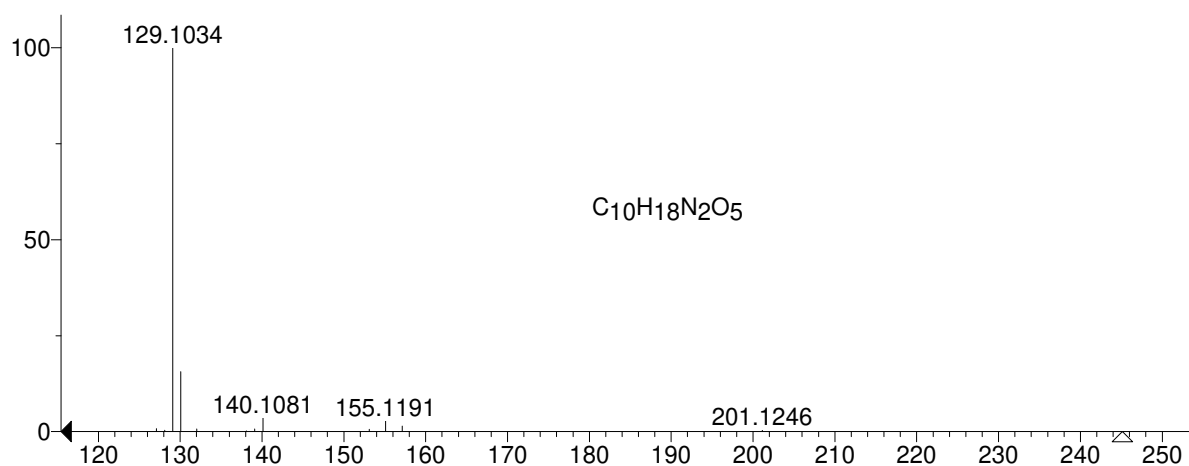

Hit 5 : Unknown (carbon number 10); PlaSMA ID-385 [M-H]<sup>-</sup> P=245.1  
C<sub>10</sub>H<sub>18</sub>N<sub>2</sub>O<sub>5</sub>; MF: 14; RMF: 370; Prob 0.33%; Lib: biomsmms-neg-plasma; ID: 1106.

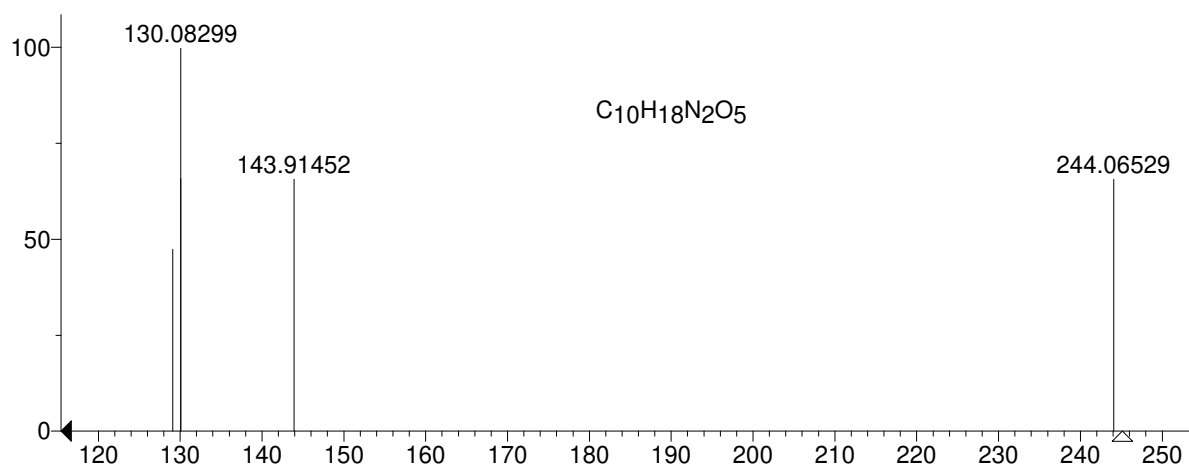

\*\* Search Report Page 1 of 2 \*\*

Unknown: Unknown (4.64\_415.1711m/z)  
Compound in Library Factor = -2387

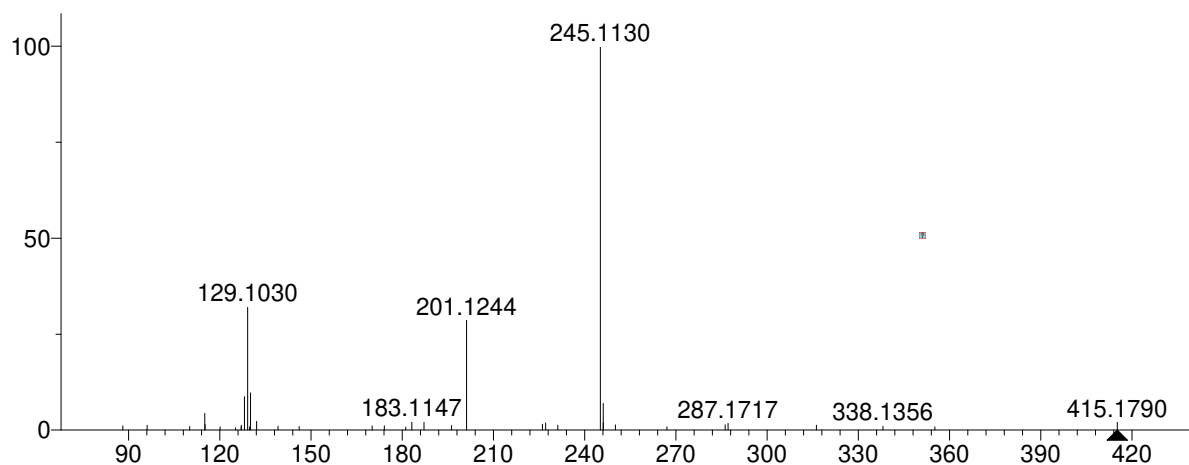

Hit 1 : Garcinone C [M+H]<sup>+</sup> HCD 8V P=415.2  
C<sub>23</sub>H<sub>26</sub>O<sub>7</sub>; MF: 14; RMF: 366; Prob 20.1%; CAS: 76996-27-5; Lib: nist\_msms; ID: 389279.

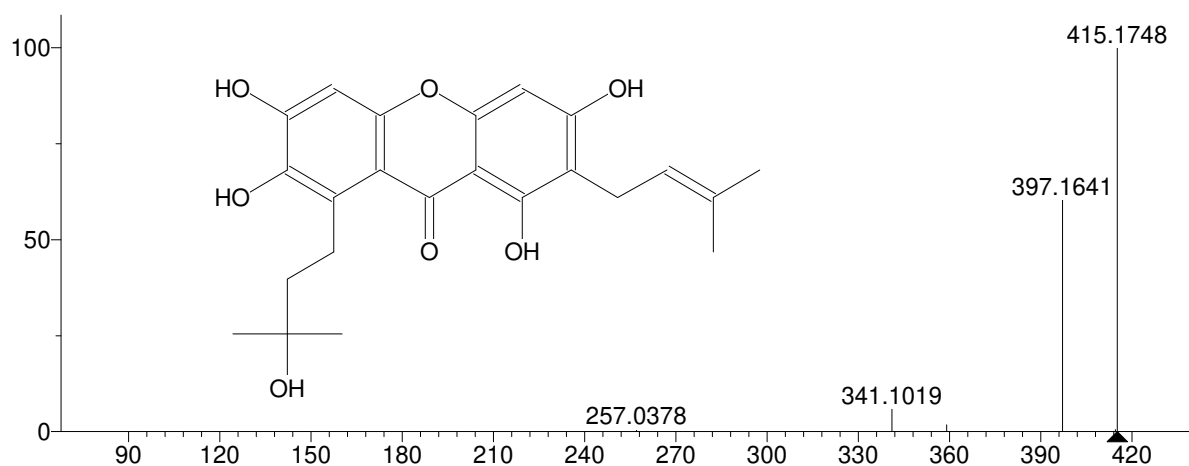

Hit 2 : Diltiazem [M+H]<sup>+</sup> QTOF 3V P=415.2  
C<sub>22</sub>H<sub>26</sub>N<sub>2</sub>O<sub>4</sub>S; MF: 12; RMF: 110; Prob 18.5%; CAS: 42399-41-7; Lib: nist\_msms; ID: 20519.

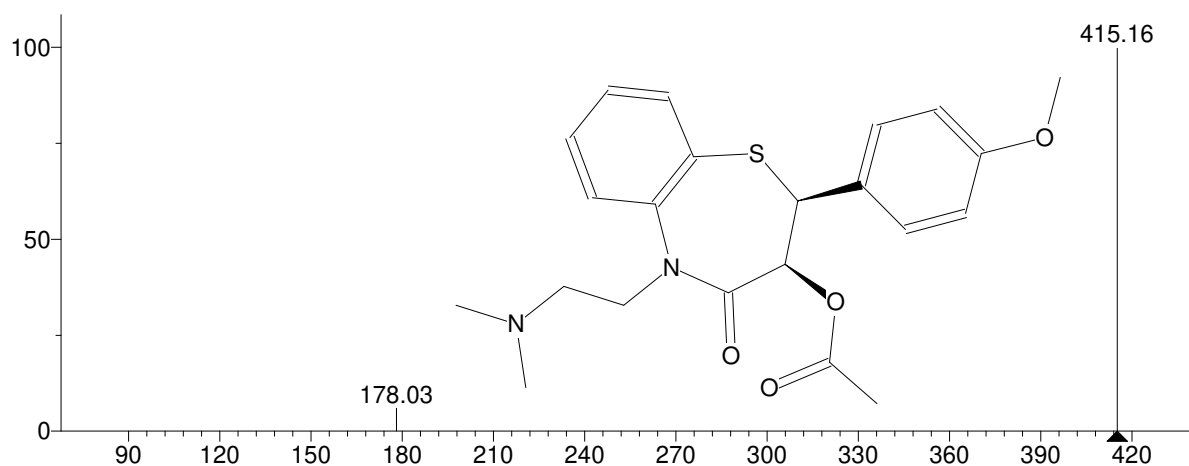

Hit 3 : 6-formyl-10-(hydroxymethyl)-5-methoxy-3-methylidene-2-oxo-2H,3H,3aH,4H,5H,8H,9H,11aH-cyclodeca[b]  
C<sub>21</sub>H<sub>28</sub>O<sub>7</sub>; MF: 2; RMF: 88; Prob 13.1%; Lib: mona-export-vf-npl\_qexactive; ID: 16435.



Hit 4 : Diltiazem HCl (Tiazac) [M+H]<sup>+</sup> P=415.2  
C<sub>22</sub>H<sub>27</sub>ClN<sub>2</sub>O<sub>4</sub>S; MF: 0; RMF: 35; Prob 12.1%; Lib: mona-export-gnps; ID: 648.

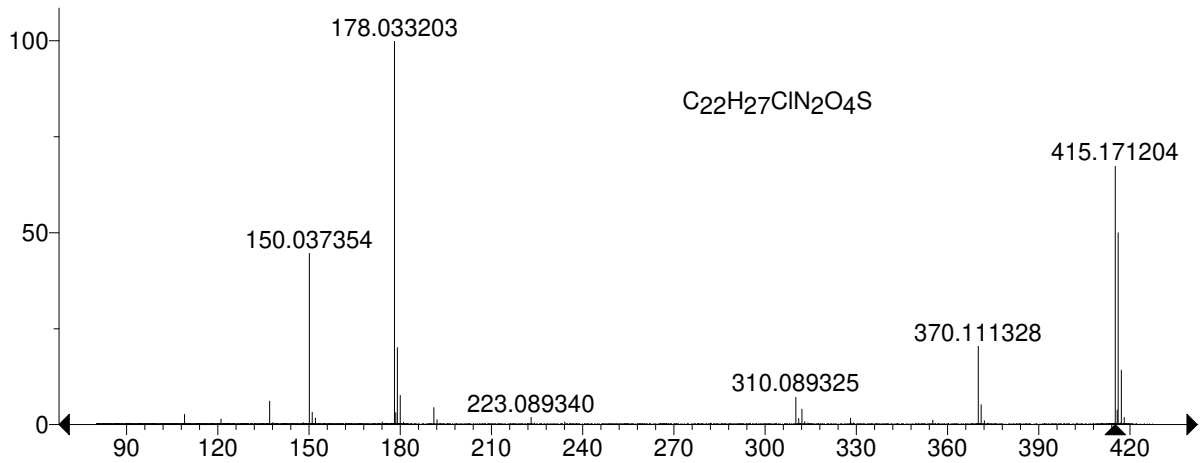

Hit 5 : NCGC00347525-03!2-amino-5-[2-[[[2,3-dihydroxy-2-(1-hydroxyethyl)butanoyl]oxymethyl]-4-hydroxyanilino]-  
C<sub>18</sub>H<sub>26</sub>N<sub>2</sub>O<sub>9</sub>; MF: 0; RMF: 21; Prob 12.1%; Lib: mona-export-gnps; ID: 9213.

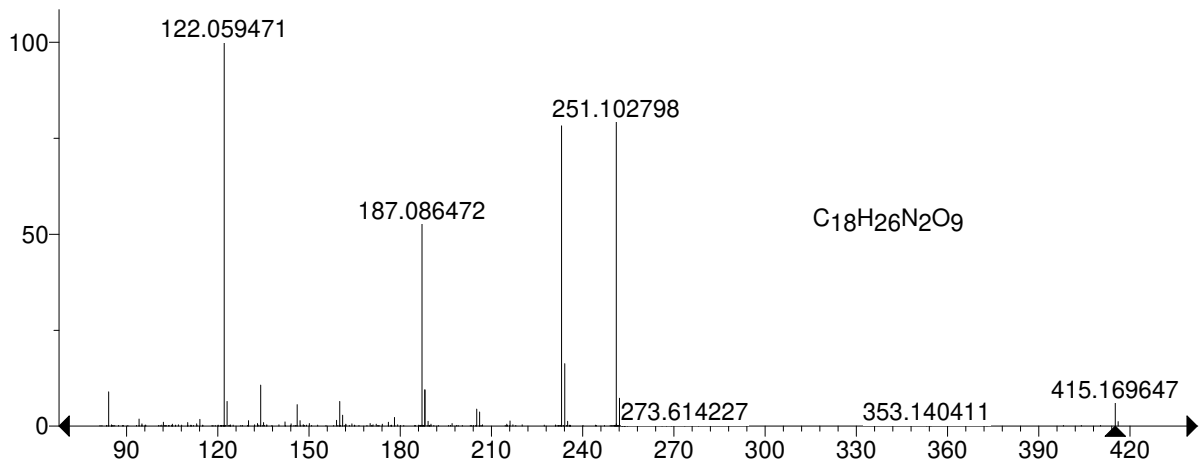

Unknown: Unknown (4.65\_428.1787m/z)  
Compound in Library Factor = 0

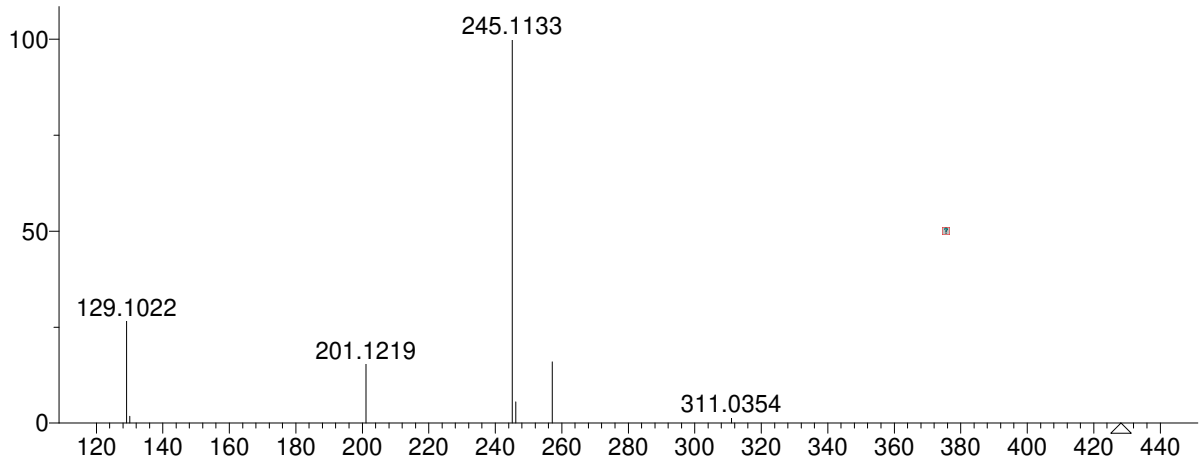



Unknown: Unknown (4.67\_530.1961m/z)  
Compound in Library Factor = 0

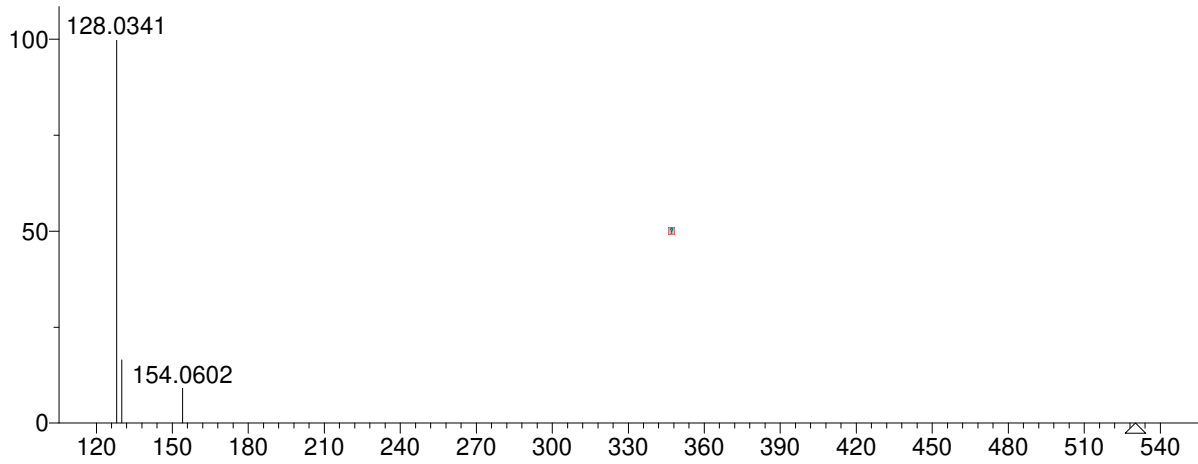

Hit 1 : Nilotinib [M+H]<sup>+</sup> HCD 164V P=530.2  
C<sub>28</sub>H<sub>22</sub>F<sub>3</sub>N<sub>7</sub>O; MF: 0; RMF: 29; Prob 100.0%; CAS: 641571-10-0; Lib: nist\_msms; ID: 165144.

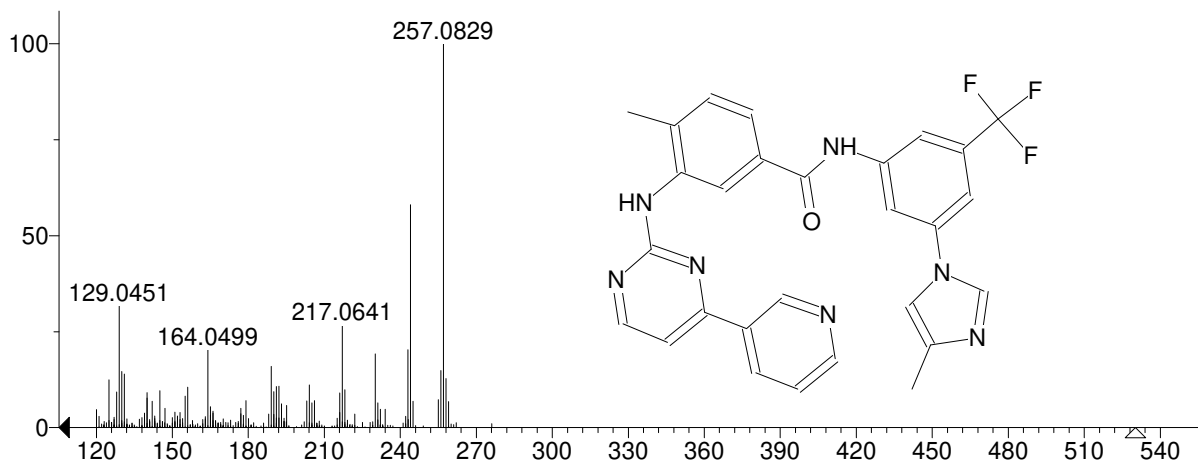

\*\* Search Report Page 1 of 2 \*\*

Unknown: Unknown (4.68\_481.0940m/z)  
Compound in Library Factor = -3273

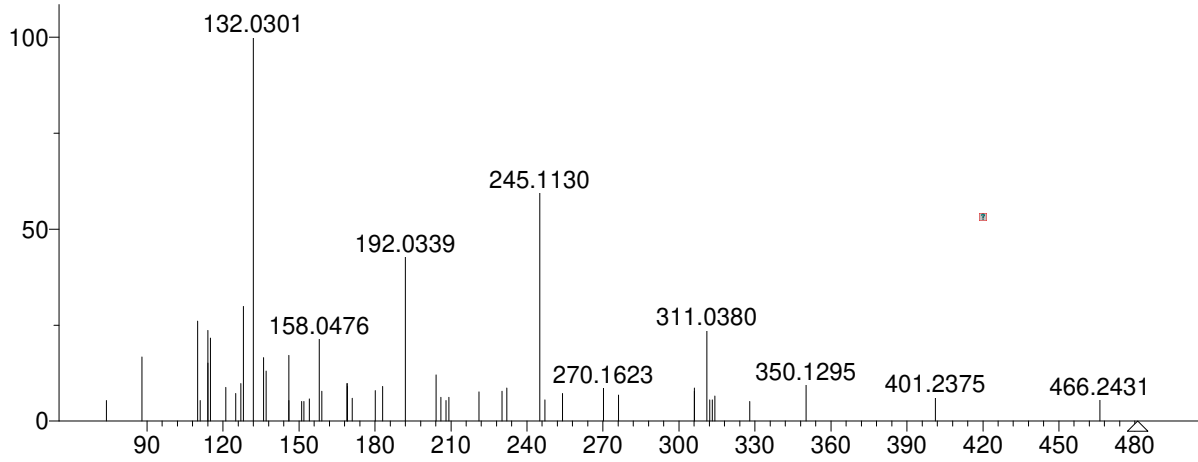

Hit 1 : Villol [M+K]<sup>+</sup> 65HCD P=481.1  
C<sub>23</sub>H<sub>22</sub>O<sub>9</sub>; MF: 1; RMF: 56; Prob 12.9%; Lib: mona-export-vf-npl\_gexactive; ID: 8049.

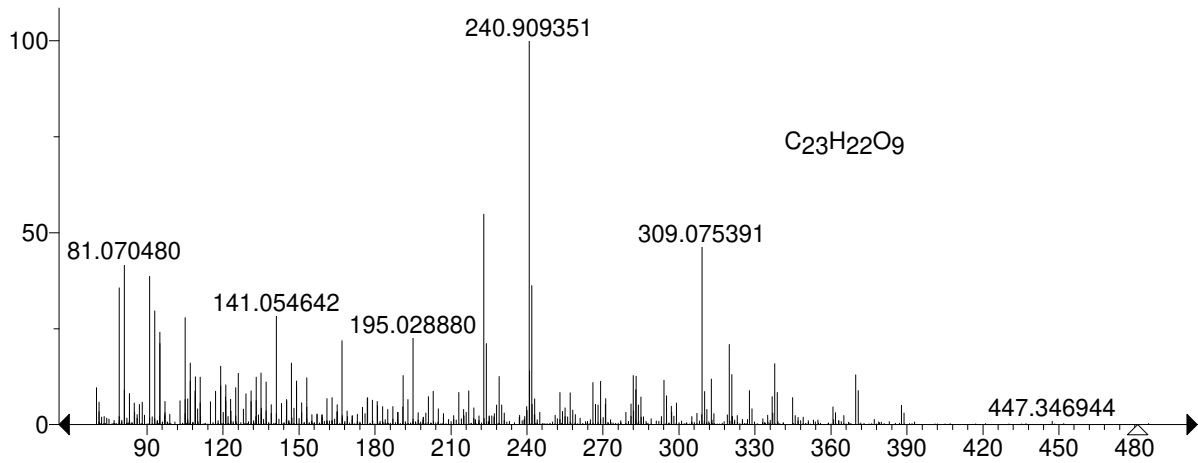

Hit 2 : Gossypin [M+H]<sup>+</sup> HCD 77V P=481.1  
C<sub>21</sub>H<sub>20</sub>O<sub>13</sub>; MF: 1; RMF: 38; Prob 12.9%; CAS: 652-78-8; Lib: nist\_msms; ID: 111982.

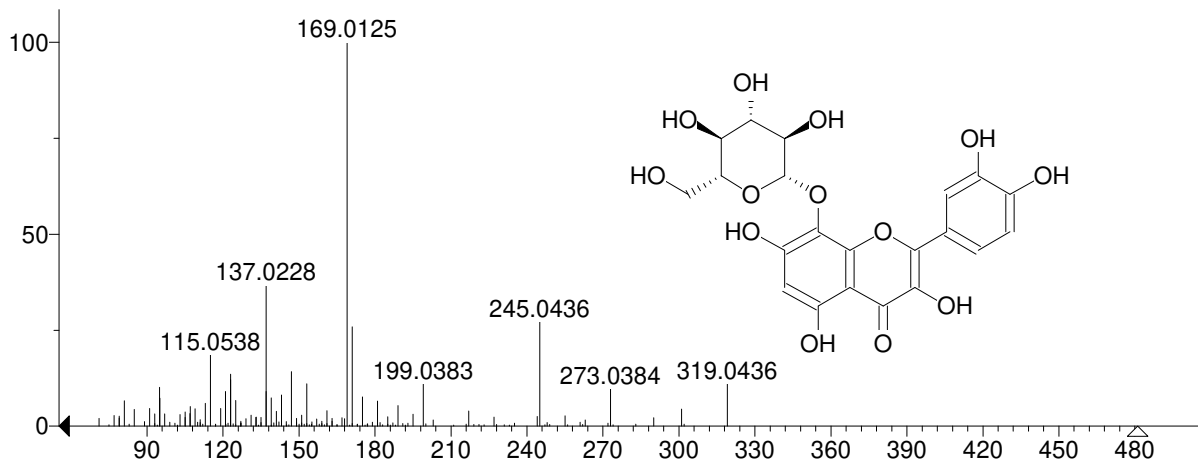

Hit 3 : Delphinidin 3-galactoside cation [Cat-H+OH]- HCD 72V P=481.1  
C21H21O12; MF: 0; RMF: 45; Prob 12.4%; CAS: 197250-28-5; Lib: nist\_msms; ID: 394731.

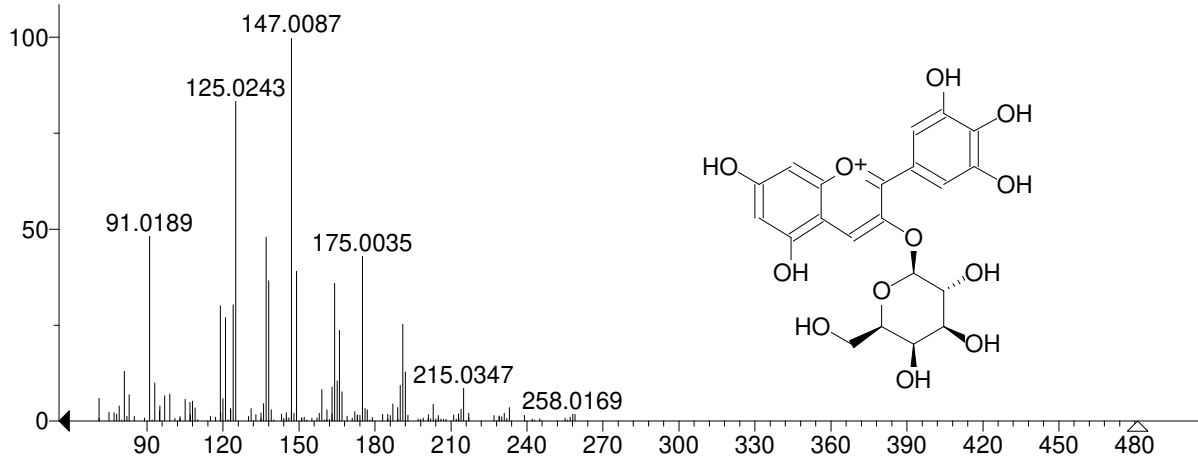

Hit 4 : Quercetagenin-7-O-glucoside [M+H]+ HCD 86V P=481.1  
C21H20O13; MF: 0; RMF: 21; Prob 12.4%; CAS: 548-75-4; Lib: nist\_msms; ID: 108302.

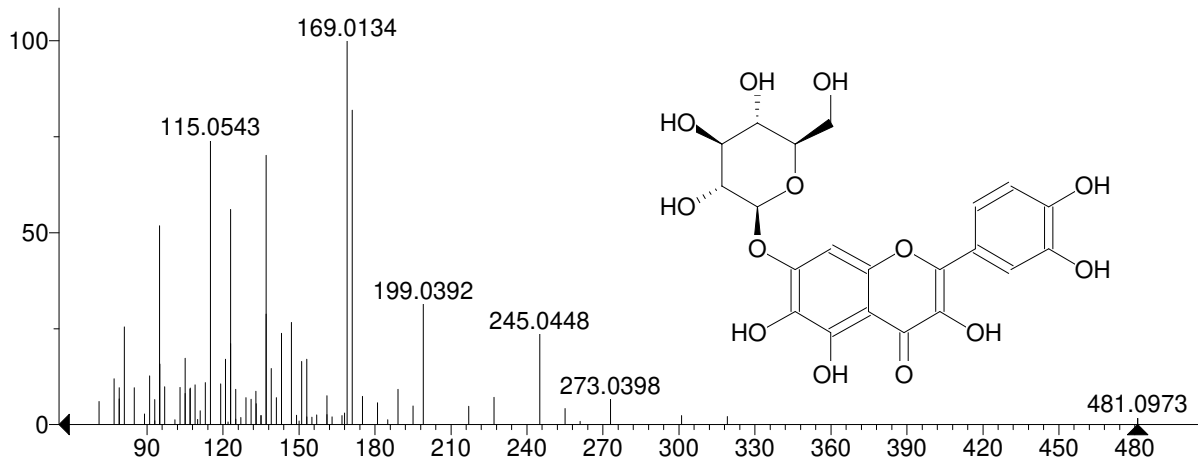

Hit 5 : Gossypetin-8-C-glucoside [M+H]+ 30eV P=481.1  
C21H20O13; MF: 0; RMF: 17; Prob 12.4%; Lib: anthocyanins mona; ID: 673.

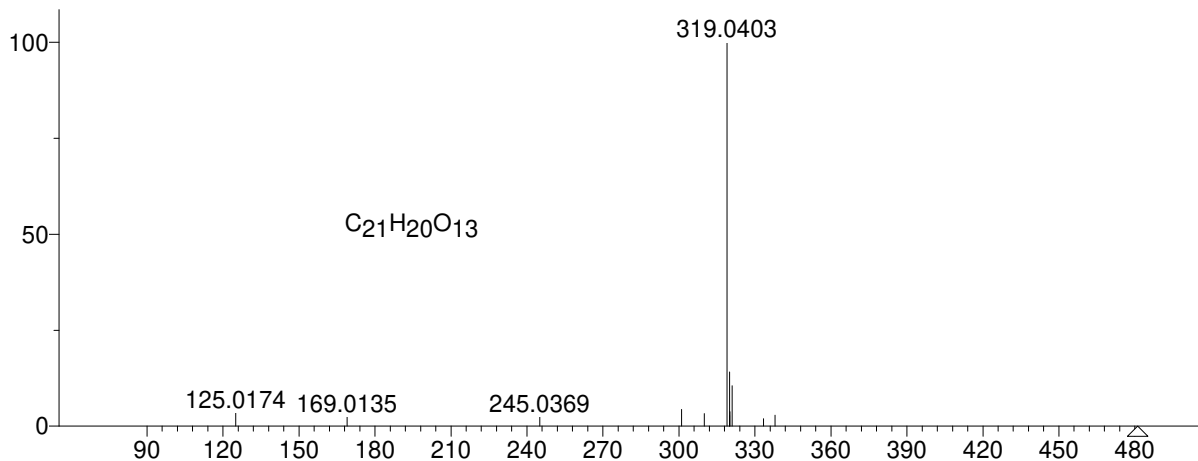

Unknown: Unknown (4.68\_527.1880m/z)  
Compound in Library Factor = 0

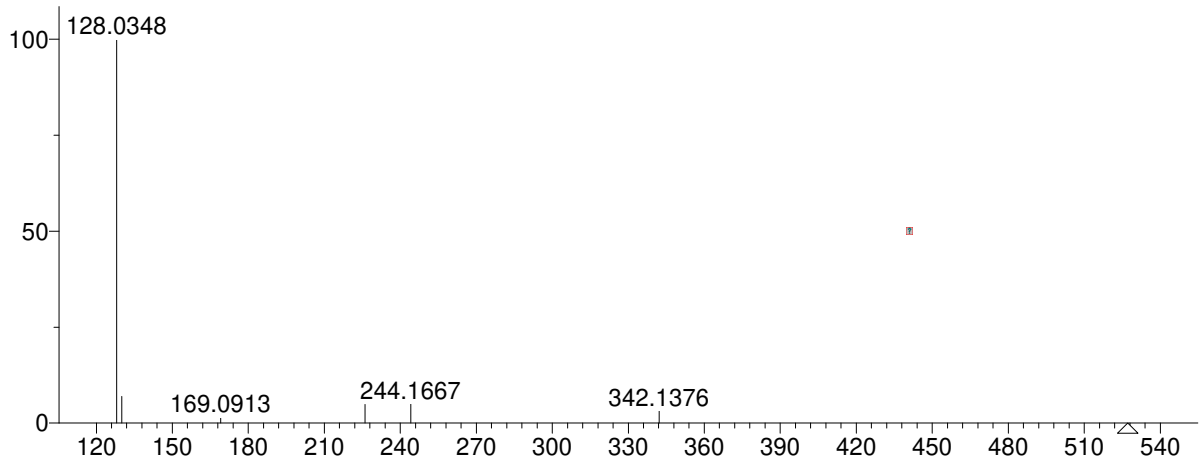

Unknown: Unknown (4.69\_492.2552m/z)  
Compound in Library Factor = 0

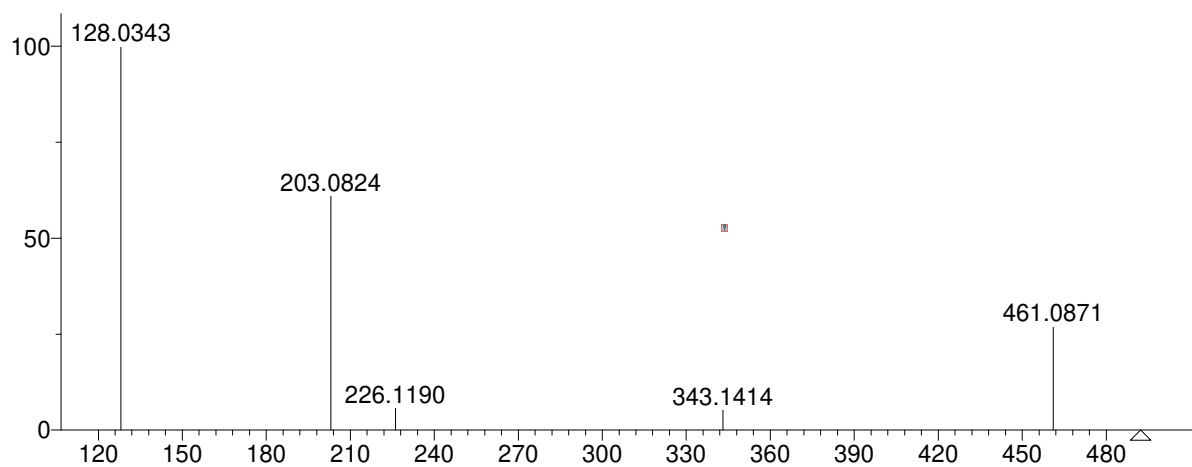

Hit 1 : Imatinib [M-H]<sup>-</sup> 120 (no P=492.3)  
C<sub>29</sub>H<sub>31</sub>N<sub>7</sub>O; MF: 0; RMF: 119; Prob 100.0%; Lib: mona-export-ic-ms-ms\_negative\_mode; ID: 4786.

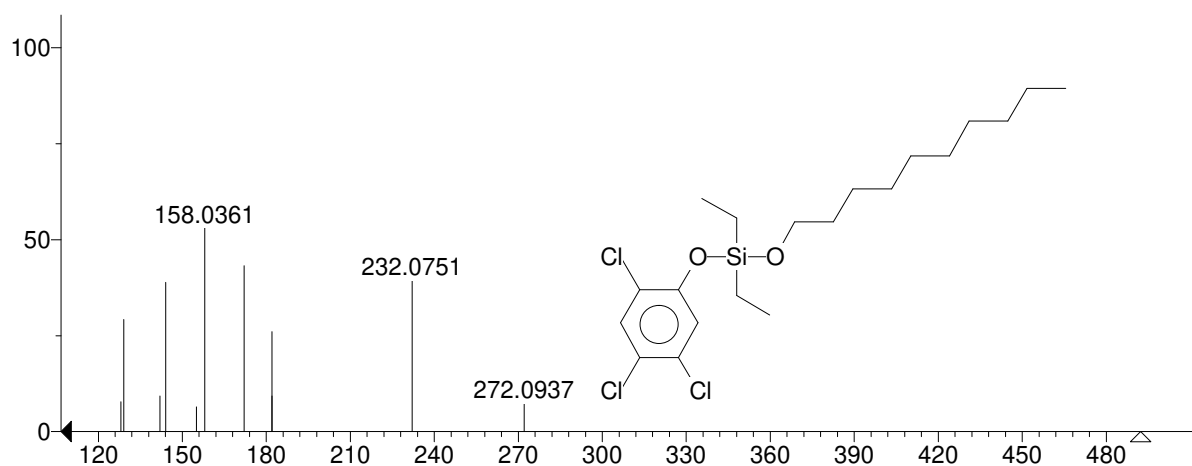

Unknown: Unknown (4.69\_594.1938m/z)  
Compound in Library Factor = 0

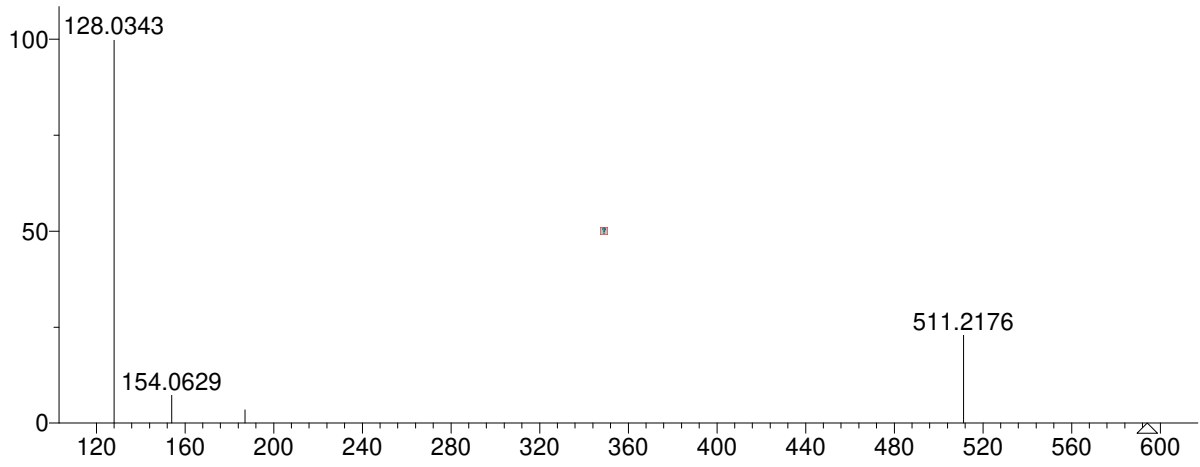

\*\* Search Report Page 1 of 2 \*\*

Unknown: Unknown (4.70\_387.1743m/z)  
Compound in Library Factor = -300

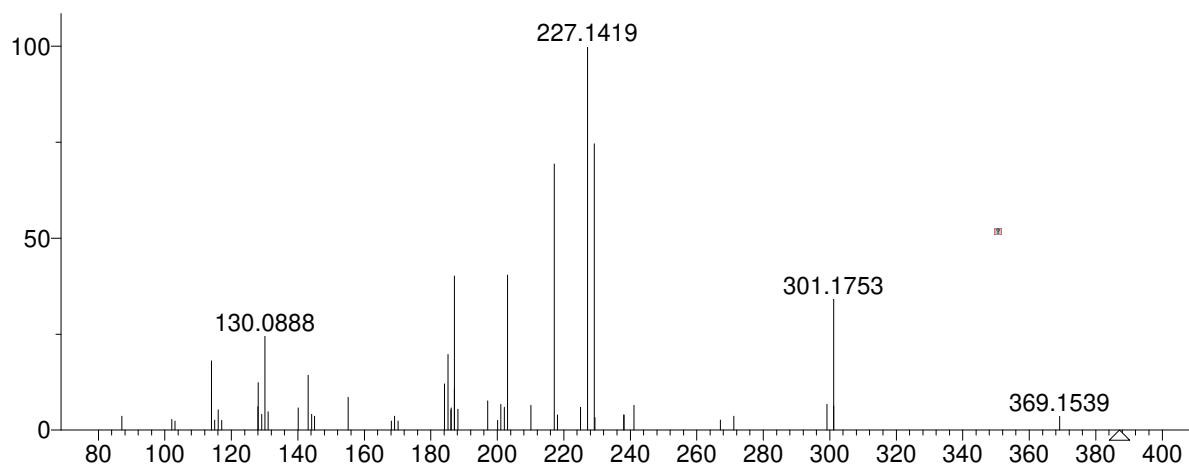

Hit 1 : Oridonin [M+Na]<sup>+</sup> IT-FT 35% P=387.2  
C<sub>20</sub>H<sub>28</sub>O<sub>6</sub>; MF: 243; RMF: 929; Prob 65.1%; CAS: 28957-04-2; Lib: nist\_msms; ID: 238379.

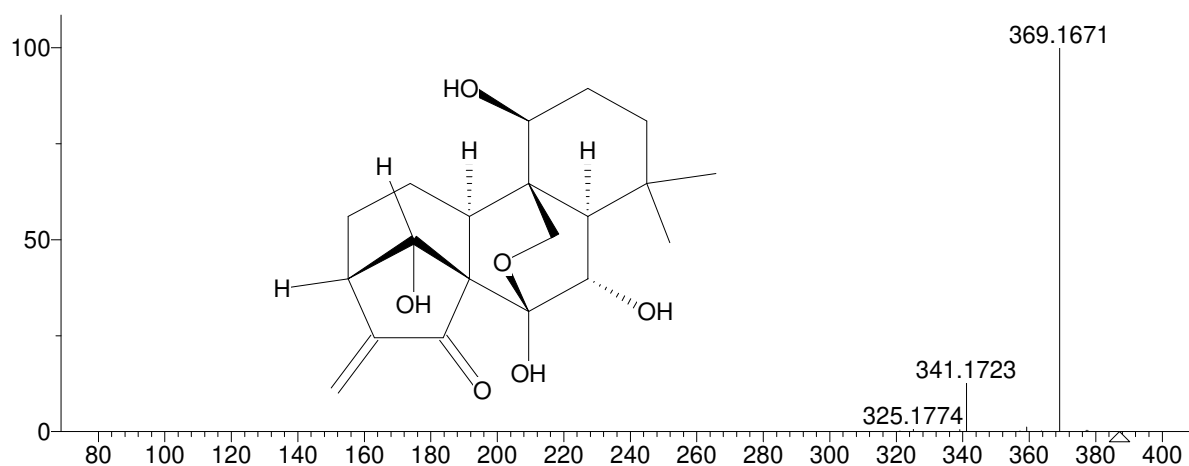

Hit 2 : Rubescensin A [M+Na]<sup>+</sup> IT-FT 35% P=387.2  
C<sub>20</sub>H<sub>28</sub>O<sub>6</sub>; MF: 225; RMF: 924; Prob 33.6%; CAS: 28957-10-0; Lib: nist\_msms; ID: 401360.

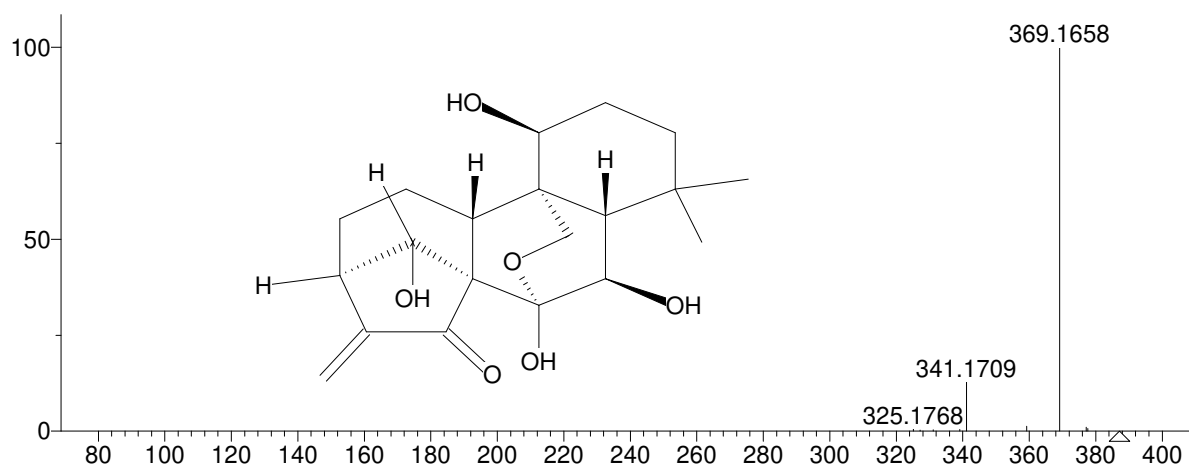

\*\* Search Report Page 2 of 2 \*\*

Hit 3 : Neurotensin (1-6) [M-2H]<sup>2-</sup> HCD 45eV P=387.2  
C<sub>35</sub>H<sub>52</sub>N<sub>8</sub>O<sub>12</sub>; MF: 2; RMF: 54; Prob 0.33%; Lib: nist\_msms2; ID: 74179.

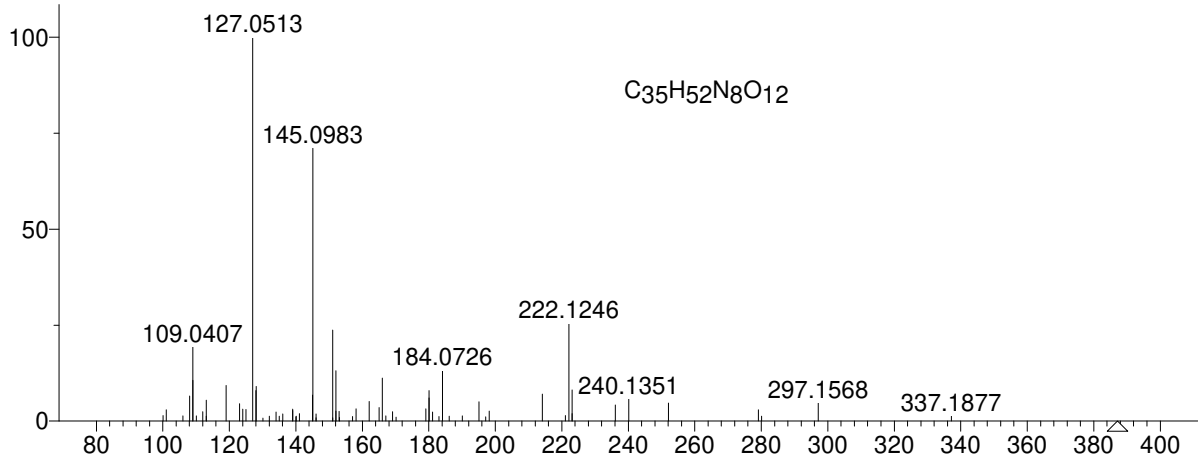

Hit 4 : N<sup>6</sup>-2-(4-Aminophenyl)ethyladenosine [M+H]<sup>+</sup> HCD 85V P=387.2  
C<sub>18</sub>H<sub>22</sub>N<sub>6</sub>O<sub>4</sub>; MF: 0; RMF: 26; Prob 0.30%; CAS: 89705-21-5; Lib: nist\_msms; ID: 298733.

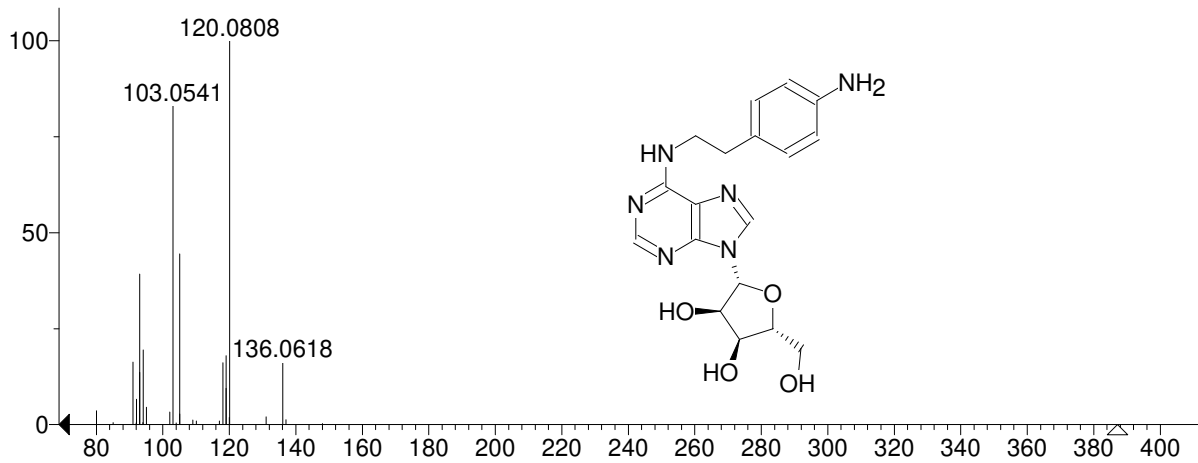

Hit 5 : NCGC00347508-0214-[2-[[[2,3-dihydroxy-2-(1-hydroxyethyl)butanoyl]oxymethyl]anilino]-4-oxobutanoic acid  
C<sub>17</sub>H<sub>23</sub>NO<sub>8</sub>; MF: 0; RMF: 16; Prob 0.30%; Lib: mona-export-gnps; ID: 6723.

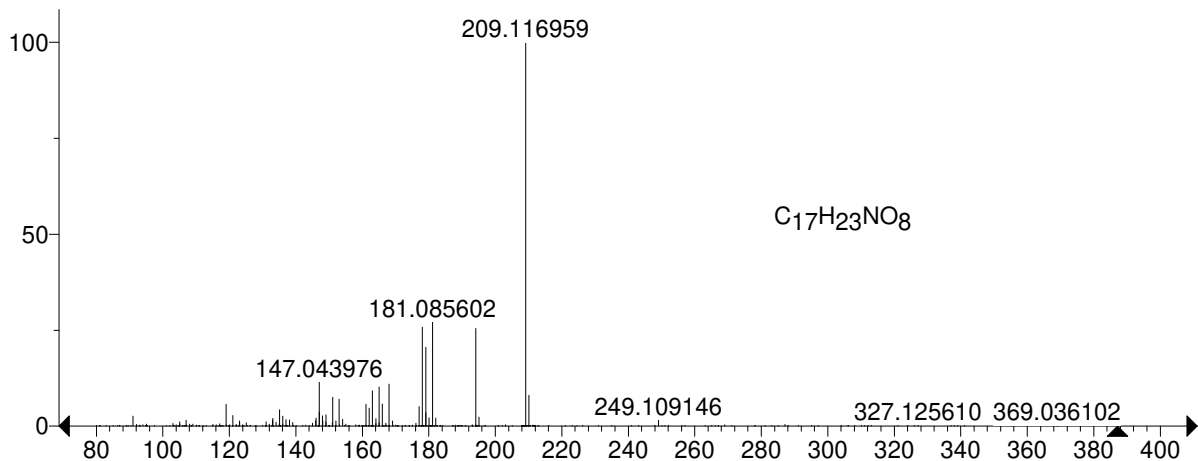



Unknown: Unknown (4.70\_483.1620m/z)  
Compound in Library Factor = 0

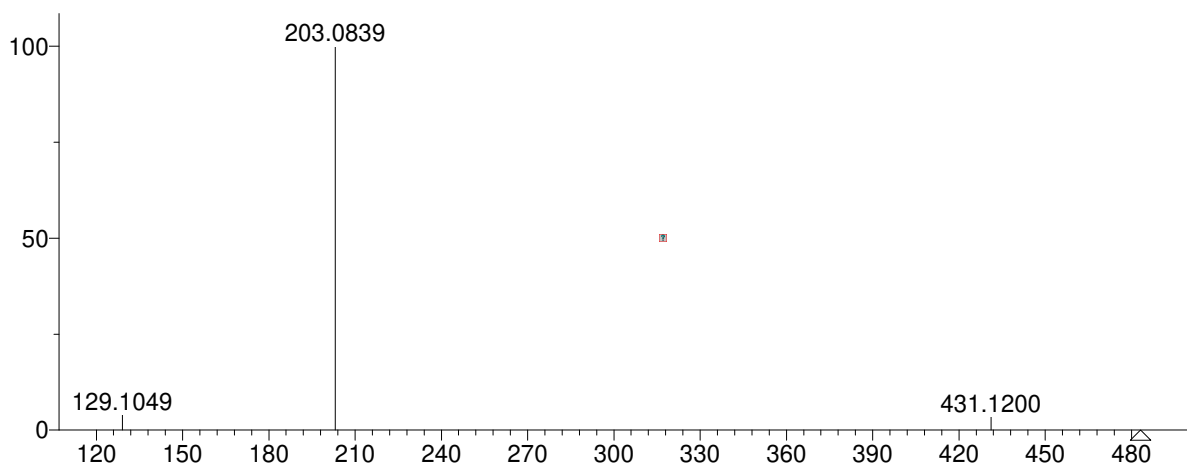

Hit 1 : [4,5,8-trihydroxy-5-(hydroxymethyl)-3-(3-methoxy-3-oxoprop-1-en-2-yl)-8a-methyl-1,2,3,4,4a,6,7,8-octahyd  
C<sub>21</sub>H<sub>32</sub>O<sub>10</sub>; MF: 0; RMF: 37; Prob 100.0%; Lib: mona-export-vf-npl\_qexactive; ID: 22398.

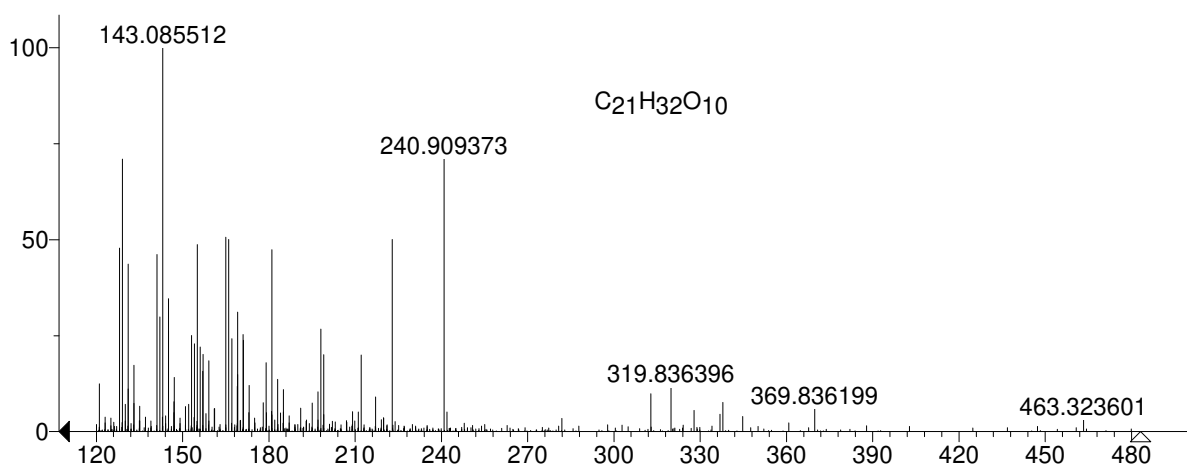

Unknown: Unknown (4.71\_402.1165m/z)  
Compound in Library Factor = 0

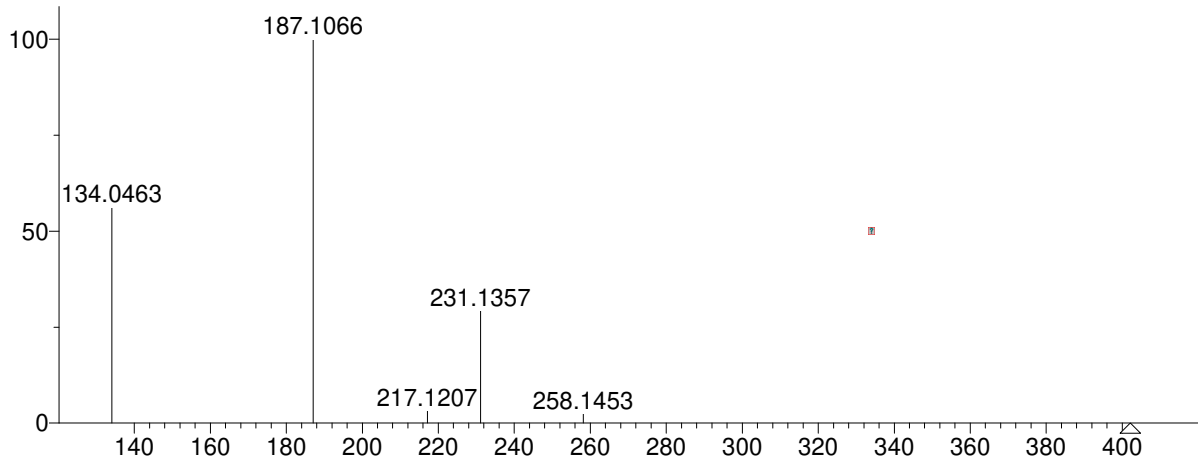

\*\* Search Report Page 1 of 2 \*\*

Unknown: Unknown (4.71\_429.1528m/z)  
Compound in Library Factor = 0

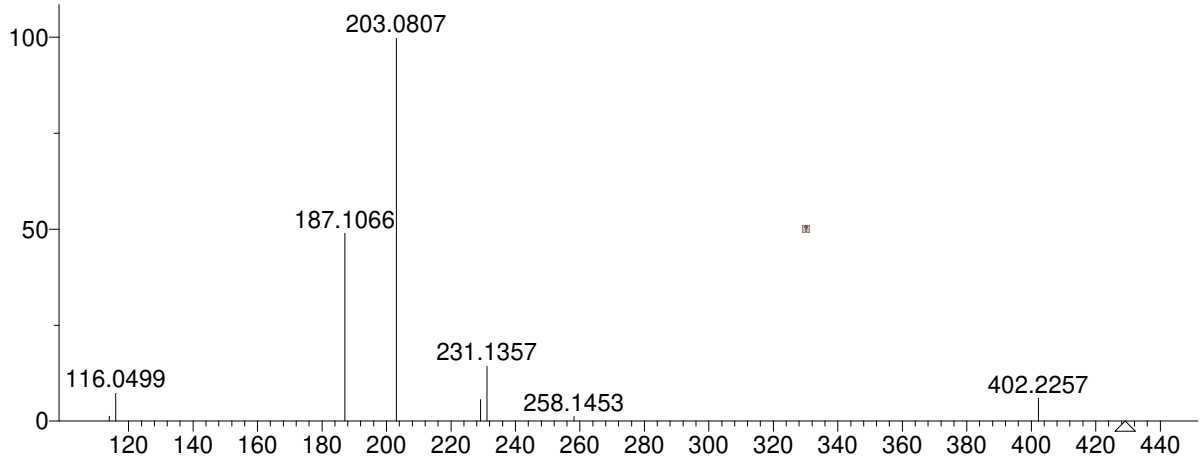

Hit 1 : 1',2'-dihydro-2',6-dihydroxyrotenone [M+H]<sup>+</sup> 45HCD P=429.2  
C<sub>23</sub>H<sub>24</sub>O<sub>8</sub>; MF: 0; RMF: 159; Prob 25.0%; Lib: mona-export-vf-npl\_qexactive; ID: 4154.

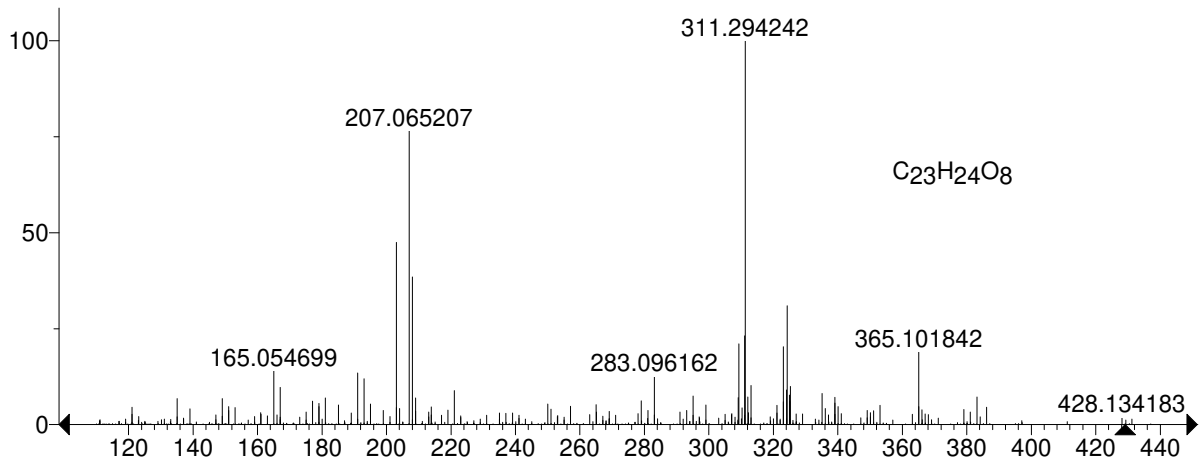

Hit 2 : Wortmannin [M+H]<sup>+</sup> HCD 64V P=429.2  
C<sub>23</sub>H<sub>24</sub>O<sub>8</sub>; MF: 0; RMF: 66; Prob 25.0%; CAS: 19545-26-7; Lib: nist\_msms; ID: 168348.

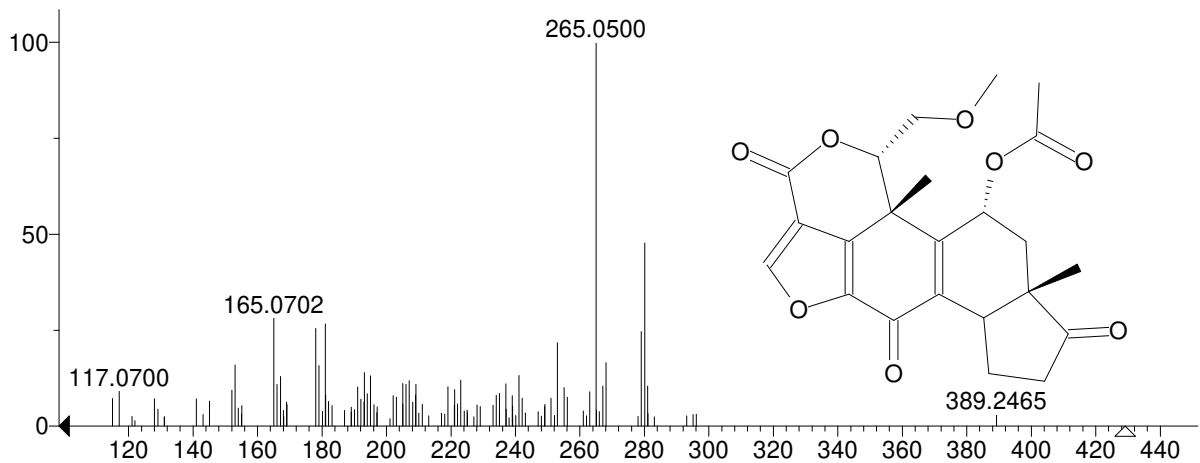

Hit 3 : 2,3-Dinorfluprostenol [M-H]- IT 35% P=429.2  
C<sub>21</sub>H<sub>25</sub>F<sub>3</sub>O<sub>6</sub>; MF: 0; RMF: 52; Prob 25.0%; Lib: nist\_msms; ID: 88297.

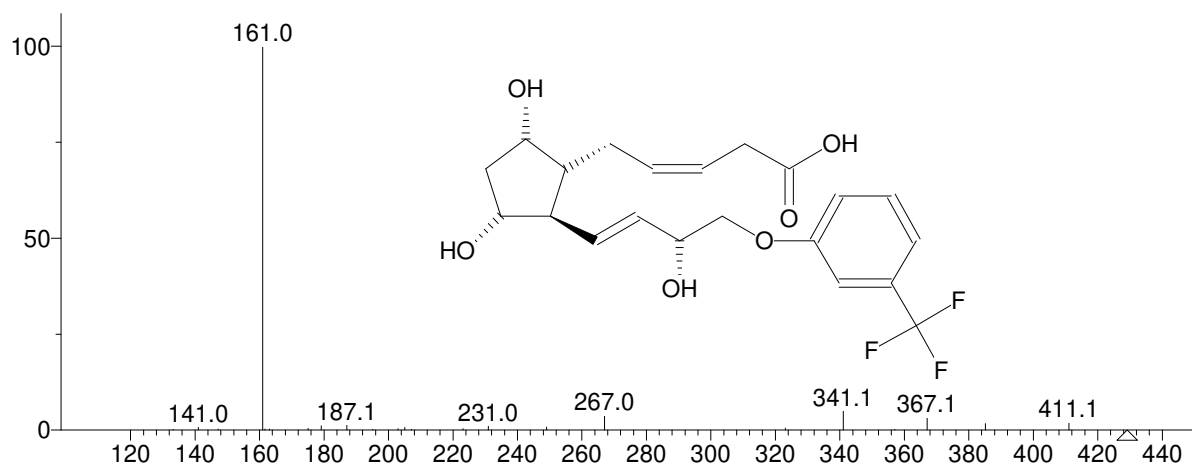

Hit 4 : 9,11,12a-trihydroxy-2,3-dimethoxy-8-(3-methylbut-2-enyl)-6,6a-dihydrochromeno[3,4-b]chromen-12-one [M  
C<sub>23</sub>H<sub>24</sub>O<sub>8</sub>; MF: 0; RMF: 39; Prob 25.0%; Lib: mona-export-vf-npl\_qexactive; ID: 18380.

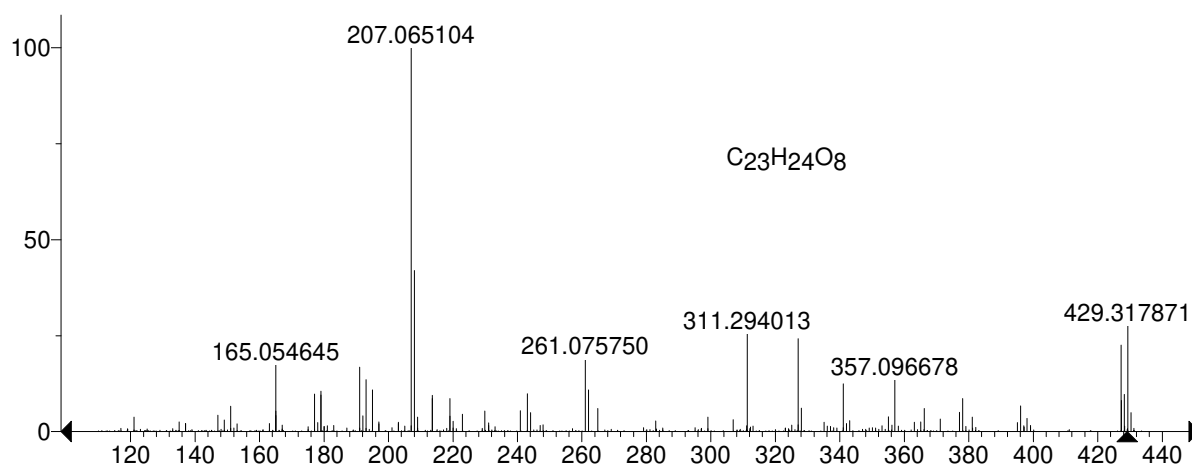

\*\* Search Report Page 1 of 2 \*\*

Unknown: Unknown (4.72\_203.0817m/z)  
Compound in Library Factor = -1323

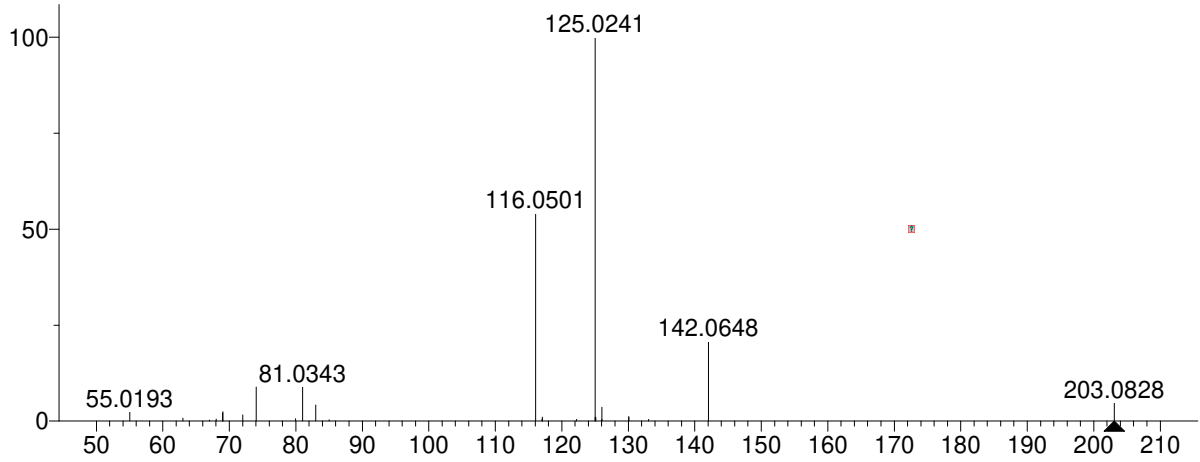

Hit 1 : D-Tryptophan [M-H]<sup>-</sup> 30 P=203.1  
C<sub>11</sub>H<sub>12</sub>N<sub>2</sub>O<sub>2</sub>; MF: 478; RMF: 627; Prob 43.2%; Lib: msms neg mona\_ipb\_gnps\_plasma; ID: 909.

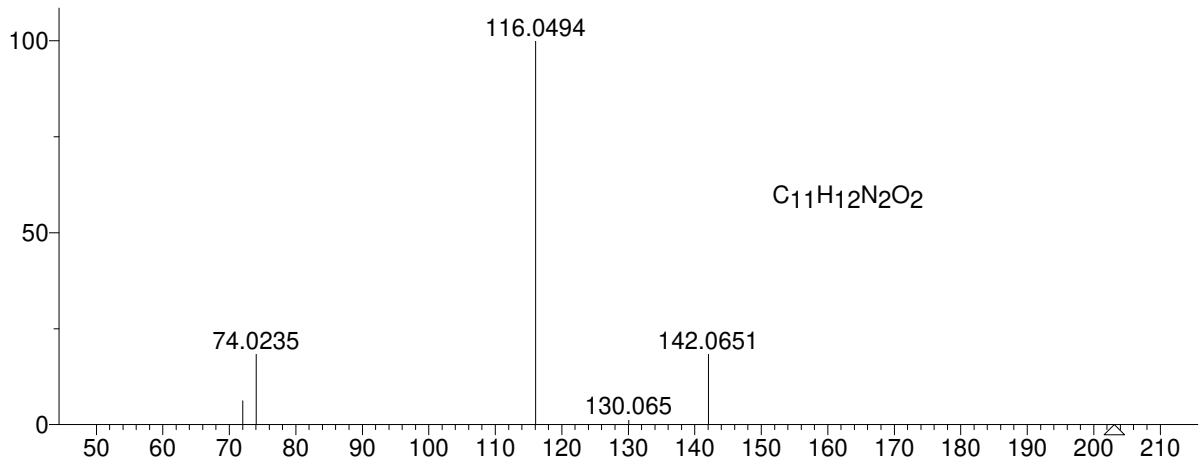

Hit 2 : L-Tryptophan [M-H]<sup>-</sup> 30 P=203.1  
C<sub>11</sub>H<sub>12</sub>N<sub>2</sub>O<sub>2</sub>; MF: 477; RMF: 625; Prob 41.6%; Lib: msms neg mona\_ipb\_gnps\_plasma; ID: 908.

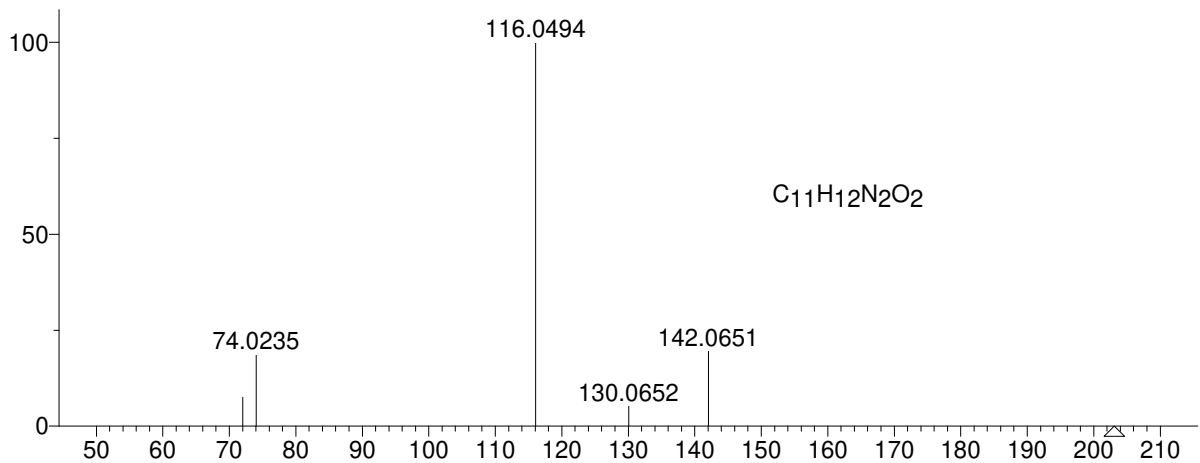

Hit 3 : L-TRYPTOPHAN

C<sub>11</sub>H<sub>12</sub>N<sub>2</sub>O<sub>2</sub>; MF: 424; RMF: 617; Prob 8.22%; Lib: embl neg mcg; ID: 600.

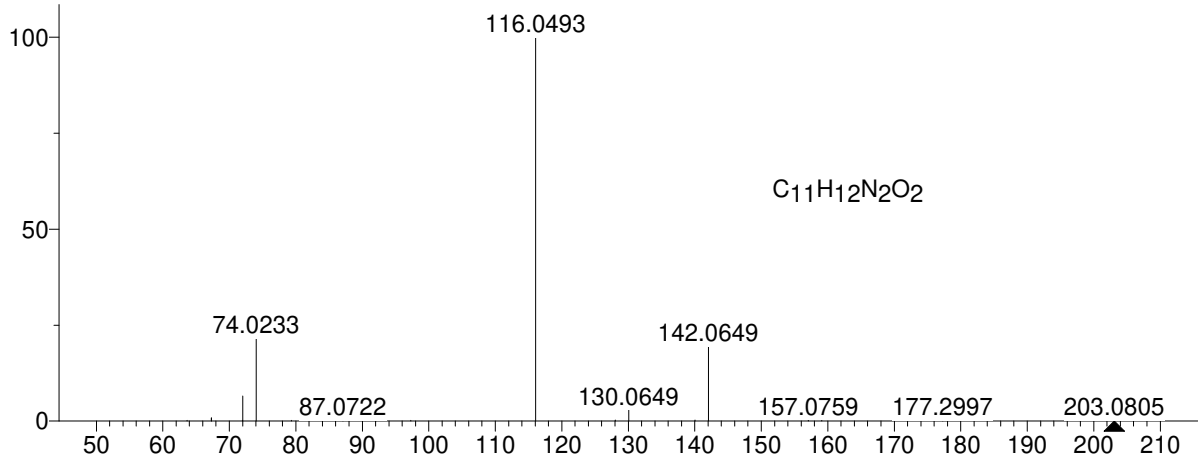

Hit 4 : Tryptophan [M-H]<sup>-</sup> 95eV P=203.1

C<sub>11</sub>H<sub>12</sub>N<sub>2</sub>O<sub>2</sub>; MF: 396; RMF: 625; Prob 2.37%; Lib: mona-export-ic-ms-ms\_negative\_mode; ID: 7650.

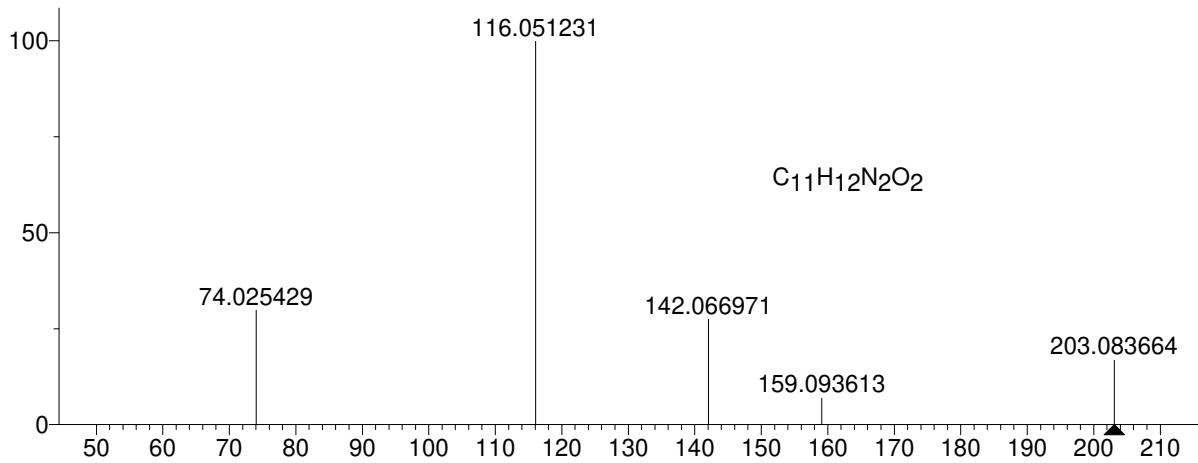

Hit 5 : Tryptophan; LC-ESI-ITFT; MS2; HCD; CE 95.0 eV; [M-H]<sup>-</sup> [M-H]<sup>-</sup> 95 P=203.1

C<sub>11</sub>H<sub>12</sub>N<sub>2</sub>O<sub>2</sub>; MF: 396; RMF: 625; Prob 2.37%; Lib: msms-neg-massbank; ID: 3682.

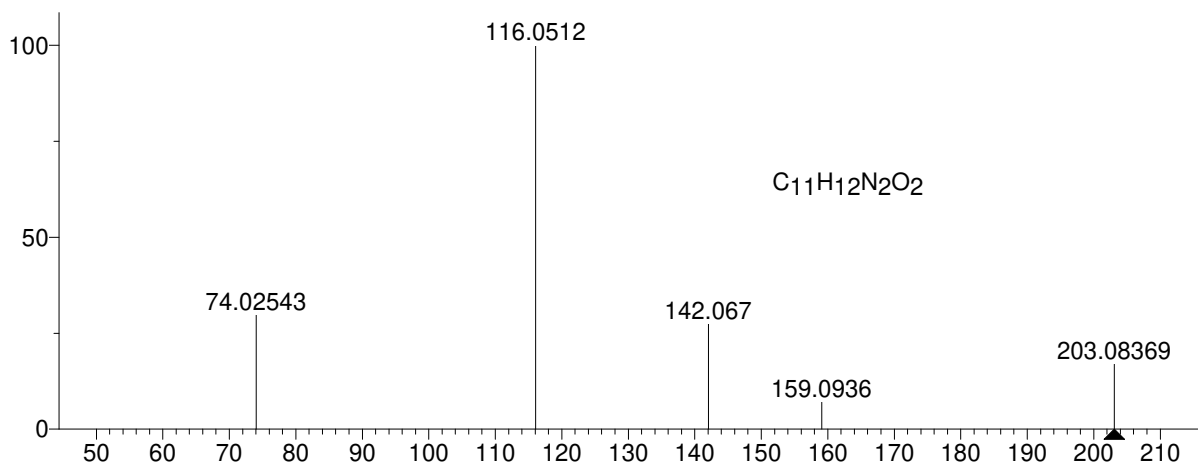

Unknown: Unknown (4.72\_401.1912m/z)  
Compound in Library Factor = 0

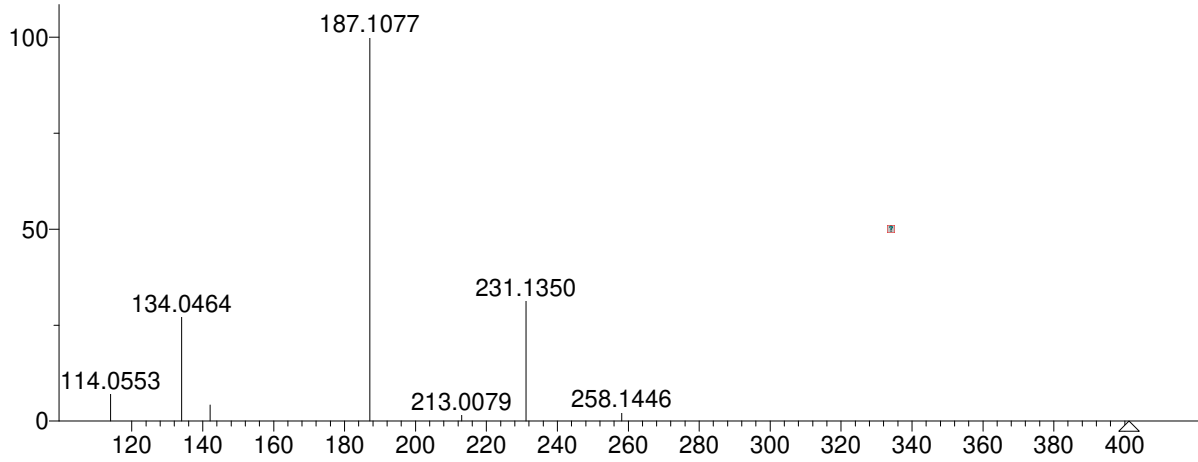

Hit 1 : NCGC00380382-01\_C23H30O7\_1-Phenanthrenecarboxylic acid, 10-(acetyloxy)-1,2,3,4,4a,9,10,10a-octal C23H30O7; MF: 0; RMF: 23; Prob 50.0%; Lib: mona-export-gnps; ID: 13719.

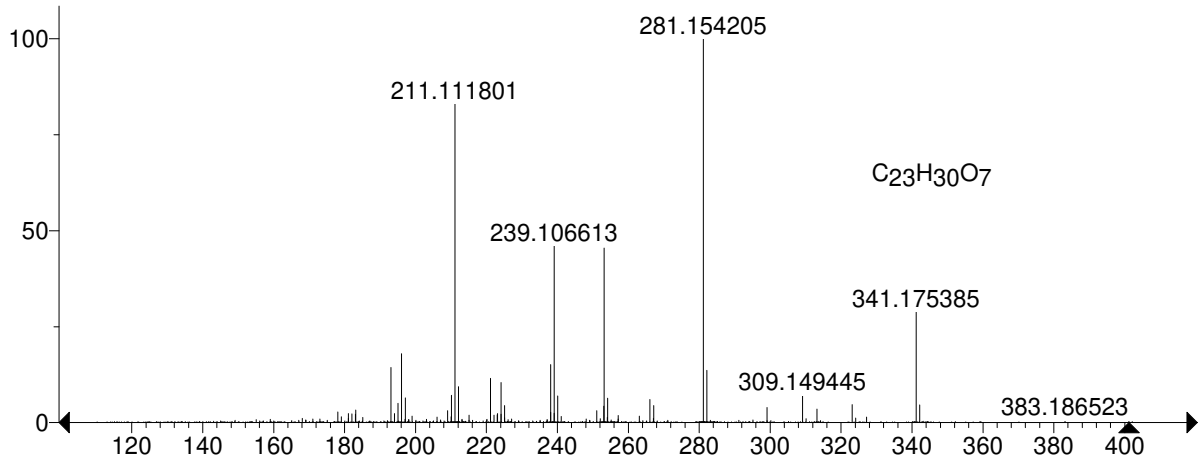

Hit 2 : NCGC00380669-0112-(2,6-dimethoxy-4-prop-2-enylphenoxy)-1-(3,4,5-trimethoxyphenyl)propan-1-ol [M-H]<sup>-</sup> C23H30O7; MF: 0; RMF: 10; Prob 50.0%; Lib: mona-export-gnps; ID: 7642.

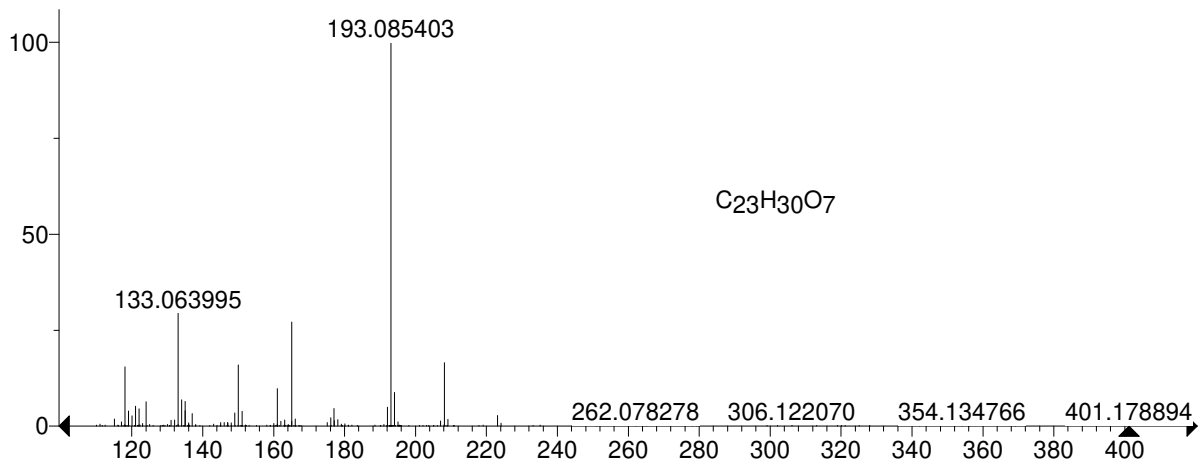

Unknown: Unknown (4.72\_428.1992m/z)  
Compound in Library Factor = 0

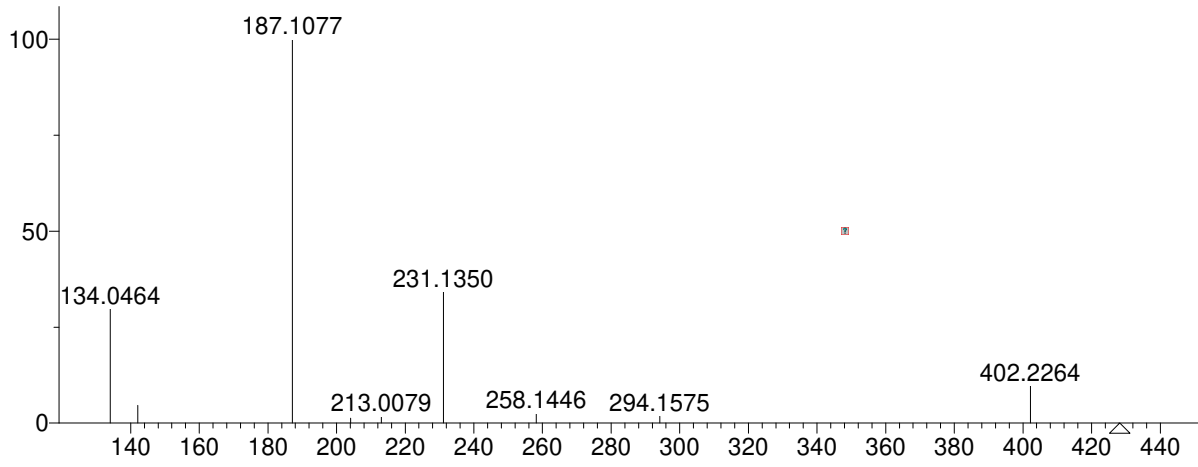



Unknown: Unknown (4.72\_438.0635m/z)  
Compound in Library Factor = 0

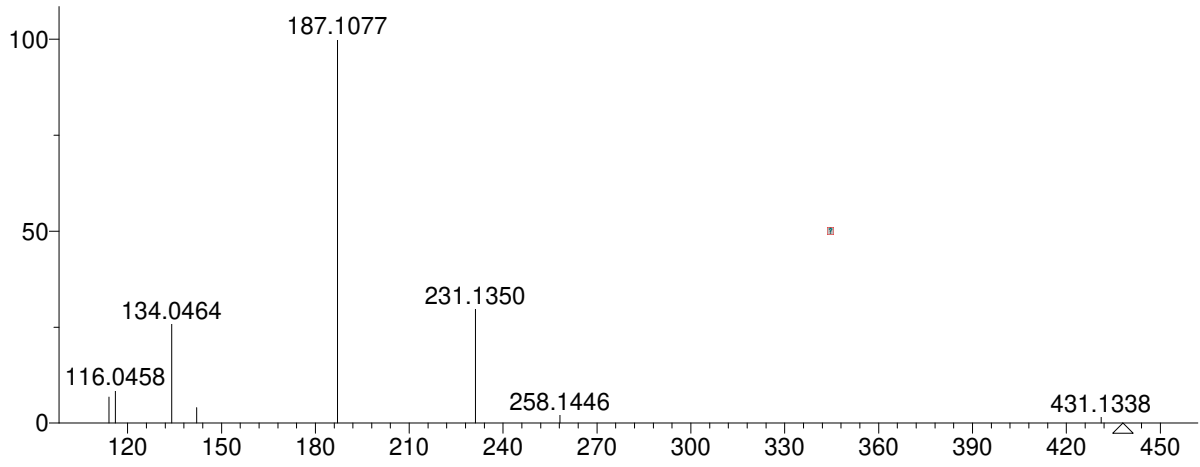

Unknown: Unknown (4.74\_516.2068m/z)  
Compound in Library Factor = 0

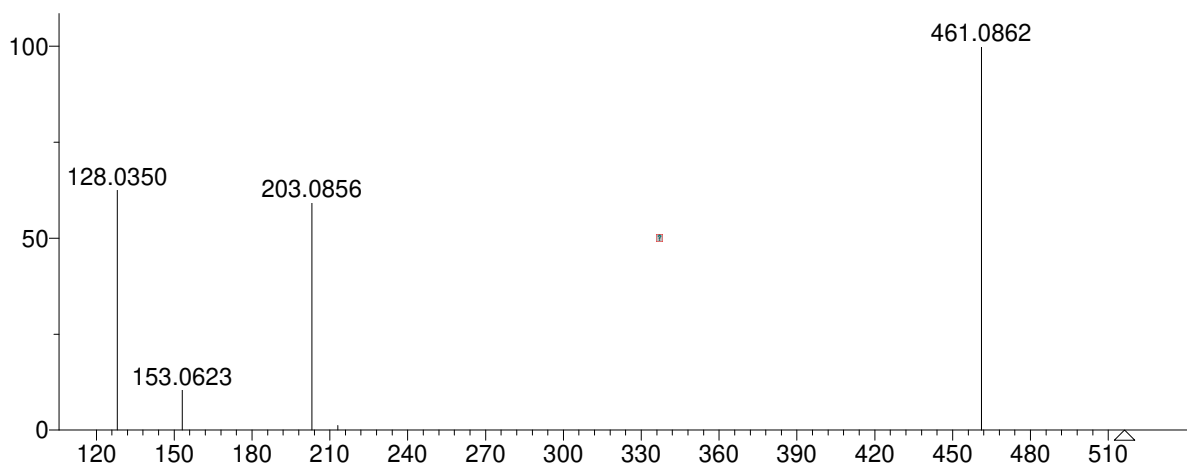

Hit 1 : 3,5-dihydroxy-4-[3,4,5-trihydroxy-6-[[4-(2-hydroxypropan-2-yl)cyclohexene-1-carbonyl]oxymethyl]oxan-2-yl]  
C<sub>23</sub>H<sub>30</sub>O<sub>12</sub>; MF: 0; RMF: 5; Prob 50.0%; Lib: mona-export-vf-npl\_qexactive; ID: 19776.

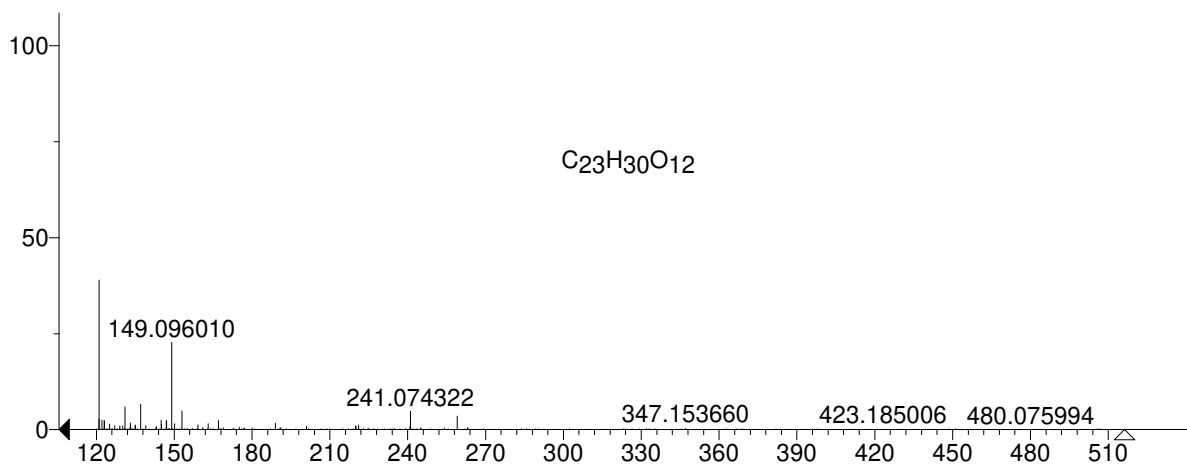

Hit 2 : 3,4-dihydroxy-5-[(2S,3R,4S,5S,6R)-3,4,5-trihydroxy-6-[[4-(2-hydroxypropan-2-yl)cyclohexene-1-carbonyl]o]  
C<sub>23</sub>H<sub>30</sub>O<sub>12</sub>; MF: 0; RMF: 2; Prob 50.0%; Lib: mona-export-vf-npl\_qexactive; ID: 24841.

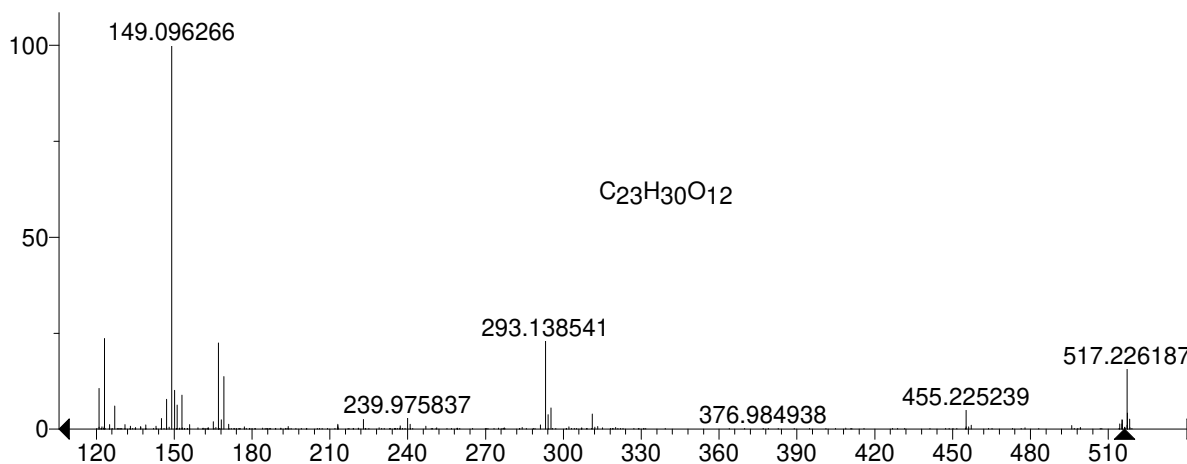

Unknown: Unknown (4.76\_391.2063m/z)  
Compound in Library Factor = 0

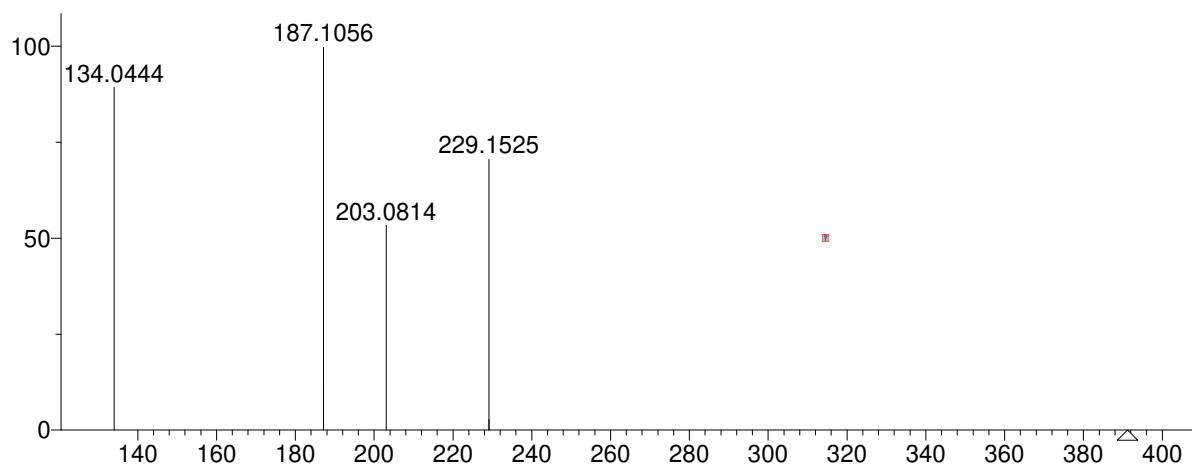

Hit 1 : Prostaglandin G2 [M+Na]<sup>+</sup> HCD 39V P=391.2  
C<sub>20</sub>H<sub>32</sub>O<sub>6</sub>; MF: 0; RMF: 19; Prob 100.0%; CAS: 51982-36-6; Lib: nist\_msms; ID: 88305.

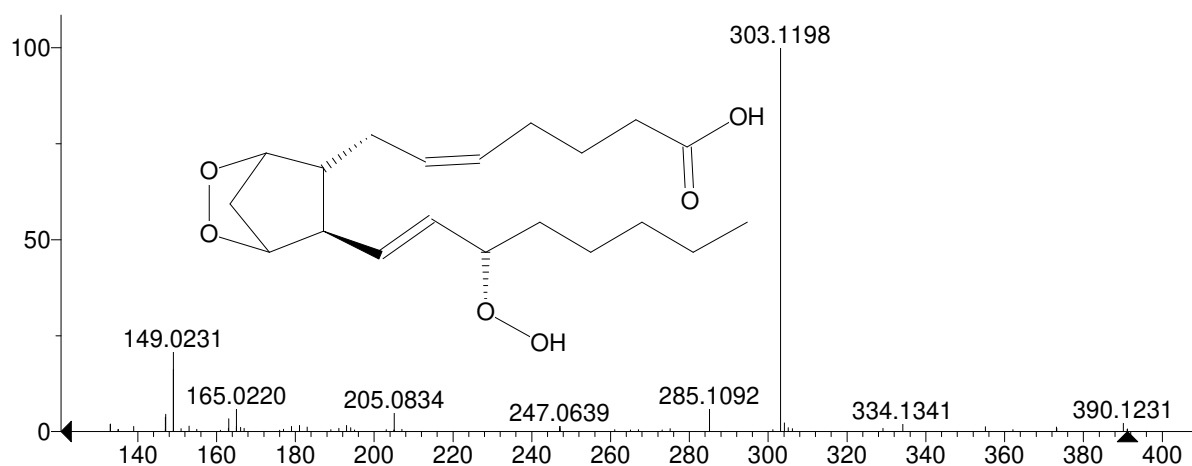

\*\* Search Report Page 1 of 2 \*\*

Unknown: Unknown (4.76\_455.2017m/z)  
Compound in Library Factor = 0

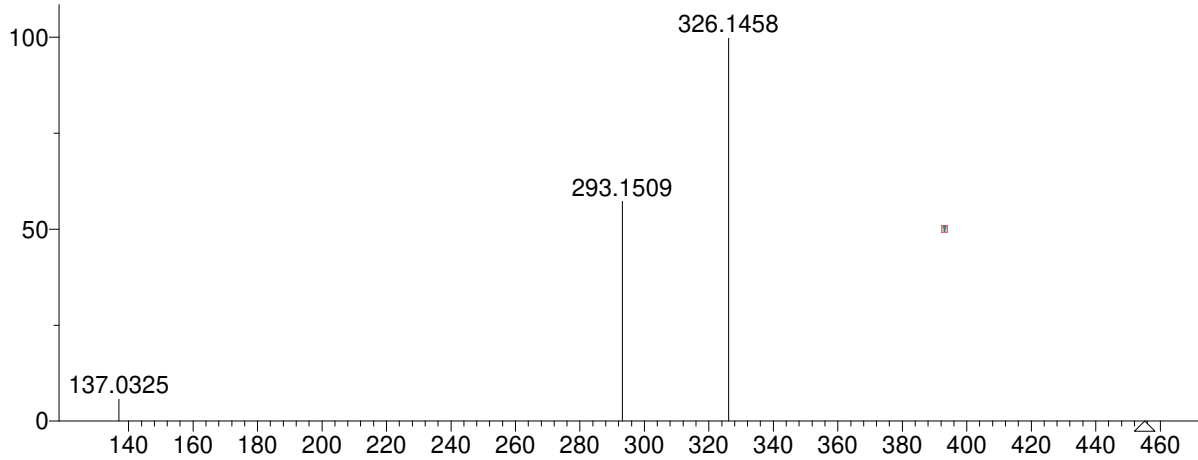

Hit 1 : 17-Trifluoromethylphenyltrilorprostaglandin F2 $\alpha$  [M-H]<sup>-</sup> HCD 43V P=455.2  
C<sub>24</sub>H<sub>31</sub>F<sub>3</sub>O<sub>5</sub>; MF: 0; RMF: 12; Prob 33.3%; CAS: 221246-34-0; Lib: nist\_msms; ID: 93944.

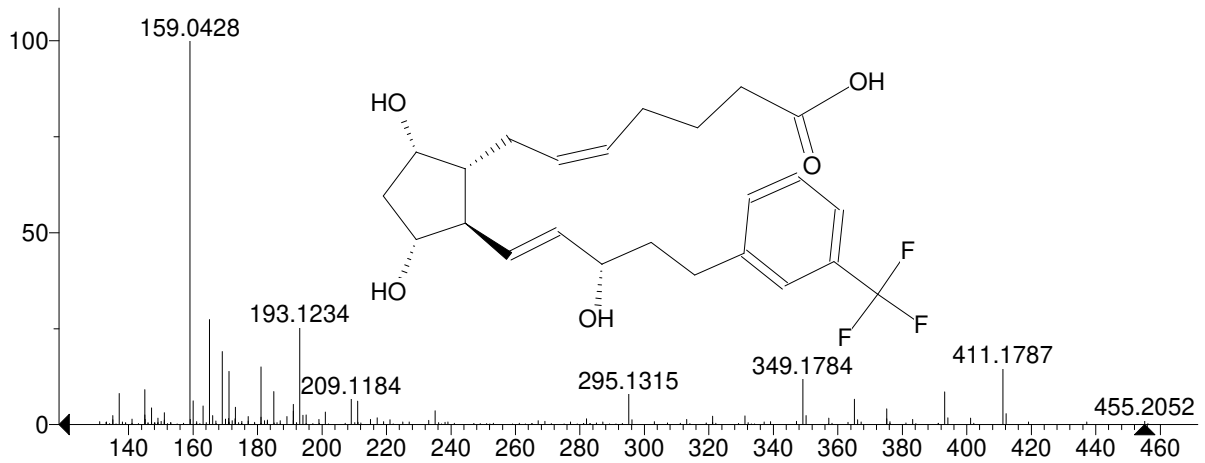

Hit 2 : Halcinonide [M+H]<sup>+</sup> IT-FT 35% P=455.2  
C<sub>24</sub>H<sub>32</sub>ClFO<sub>5</sub>; MF: 0; RMF: 8; Prob 33.3%; CAS: 3093-35-4; Lib: nist\_msms; ID: 214403.

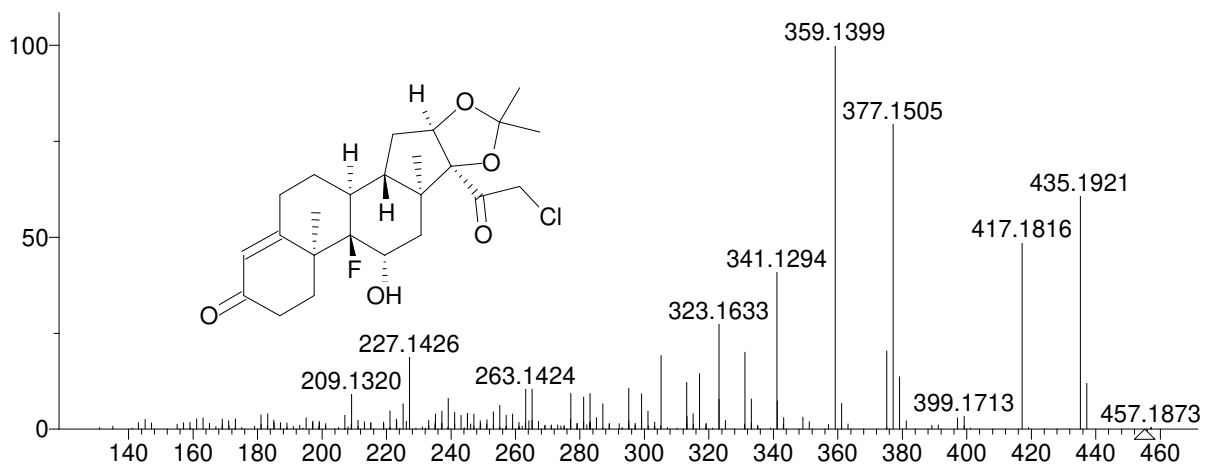

\*\* Search Report Page 2 of 2 \*\*

Hit 3 : 5-hydroxy-2,2,6,6-tetramethyl-4-[2-methyl-1-[2,4,6-trihydroxy-3-(2-methylpropanoyl)phenyl]propyl]cyclohex  
C<sub>24</sub>H<sub>32</sub>O<sub>7</sub>; MF: 0; RMF: 3; Prob 33.3%; Lib: mona-export-vf-npl\_qexactive; ID: 19755.

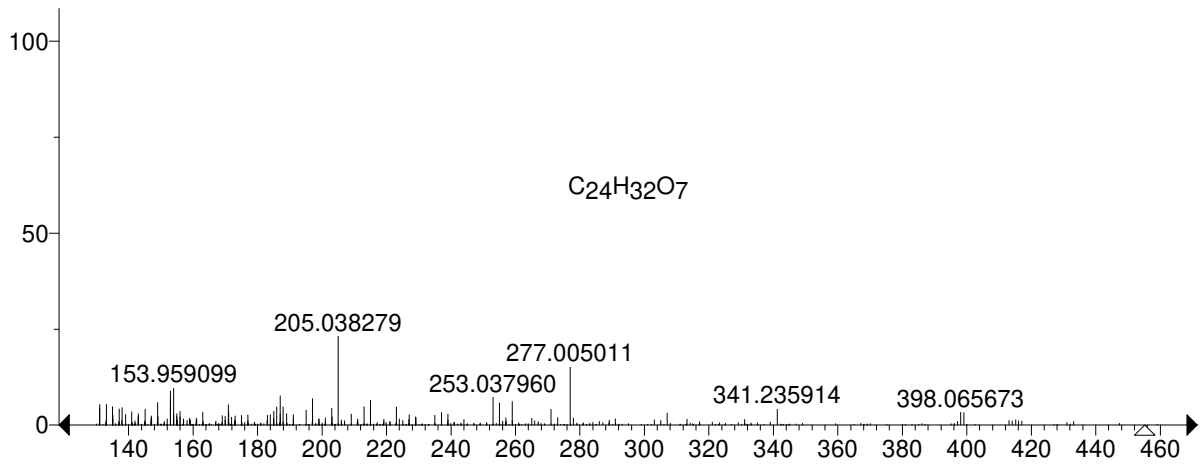

Unknown: Unknown (4.77\_496.2037m/z)  
Compound in Library Factor = -3273

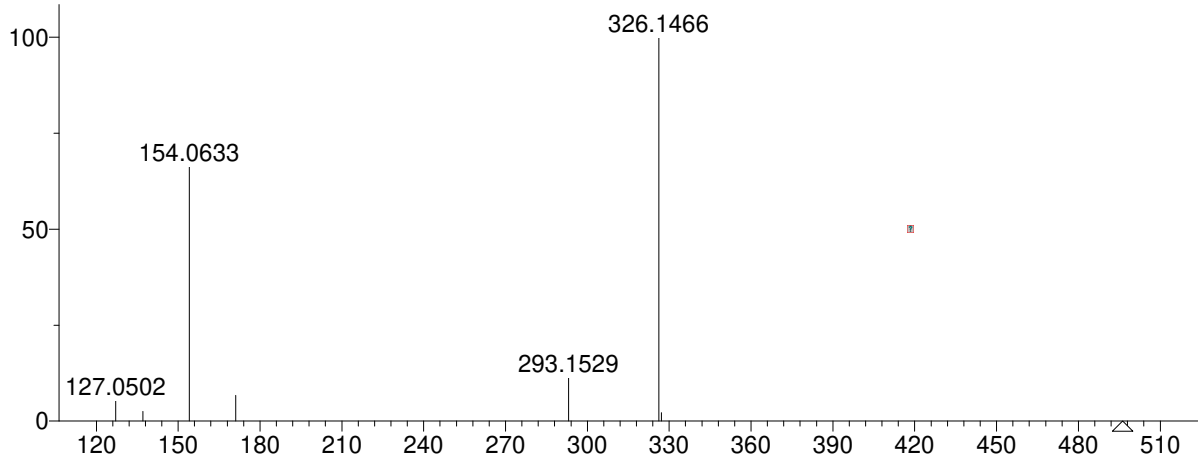

Hit 1 : (2R,3S,4S,5R,6S)-2-[(3,4,5-trihydroxyoxan-2-yl)oxymethyl]-6-(3,4,5-trimethoxyphenoxy)oxane-3,4,5-triol [†]  
C<sub>20</sub>H<sub>30</sub>O<sub>13</sub>; MF: 1; RMF: 259; Prob 25.5%; Lib: mona-export-vf-npl\_qexactive; ID: 9258.

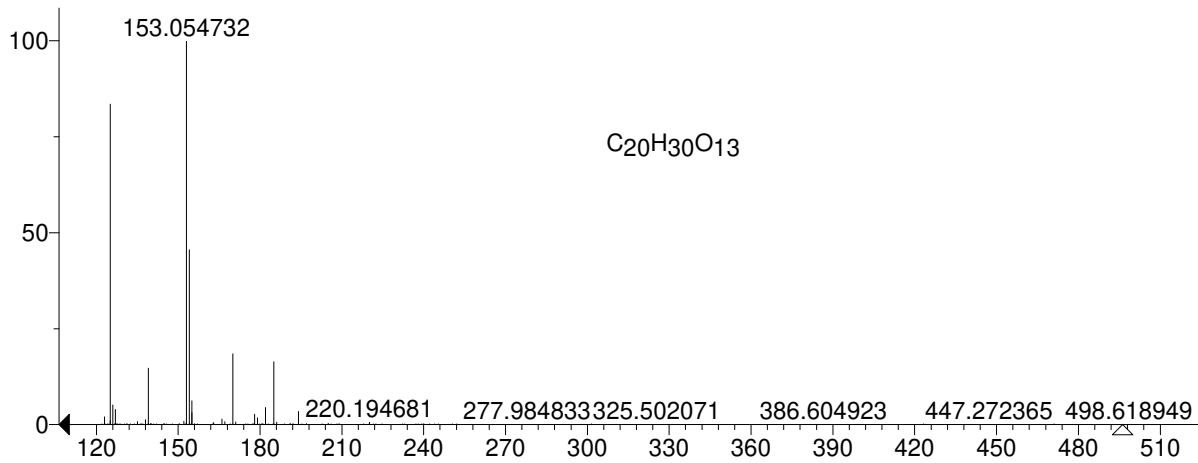

Hit 2 : (2R,3S,4S,5R,6S)-2-[[[(2S,3R,4R)-3,4-dihydroxy-4-(hydroxymethyl)oxolan-2-yl]oxymethyl]-6-(3,4,5-trimethoxyphenoxy)oxane-3,4,5-triol [†]  
C<sub>20</sub>H<sub>30</sub>O<sub>13</sub>; MF: 1; RMF: 236; Prob 25.5%; Lib: mona-export-vf-npl\_qexactive; ID: 9783.

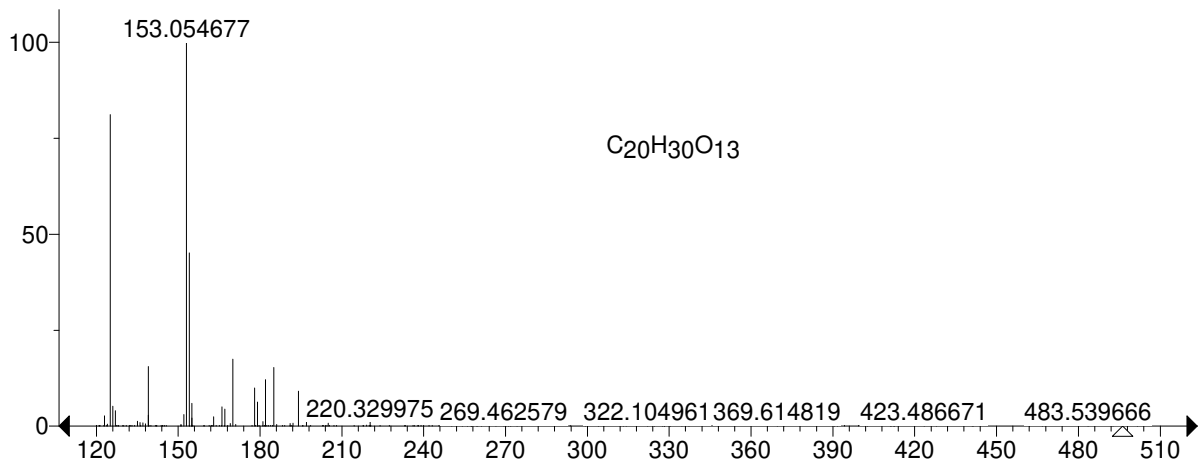



\*\* Search Report Page 1 of 2 \*\*

Unknown: Unknown (4.78\_293.1493m/z)  
Compound in Library Factor = -1453

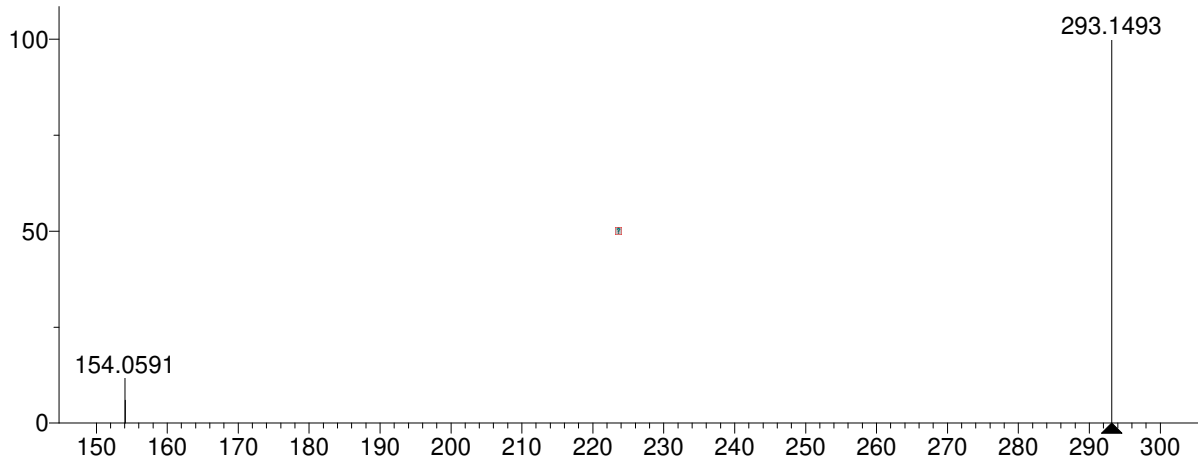

Hit 1 : Leu-Tyr [M-H]<sup>-</sup> HCD 14eV P=293.2  
C<sub>15</sub>H<sub>22</sub>N<sub>2</sub>O<sub>4</sub>; MF: 238; RMF: 901; Prob 23.8%; Lib: nist\_msms; ID: 567554.

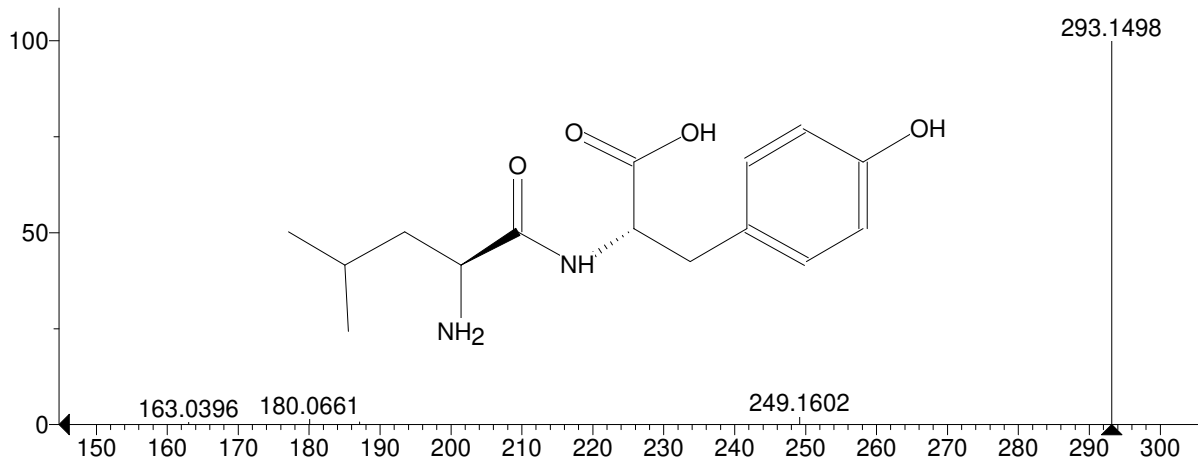

Hit 2 : Leu-Tyr [M-H]<sup>-</sup> HCD 14eV P=293.2  
C<sub>15</sub>H<sub>22</sub>N<sub>2</sub>O<sub>4</sub>; MF: 238; RMF: 901; Prob 23.8%; CAS: 968-21-8; Lib: nist\_msms2; ID: 70411.

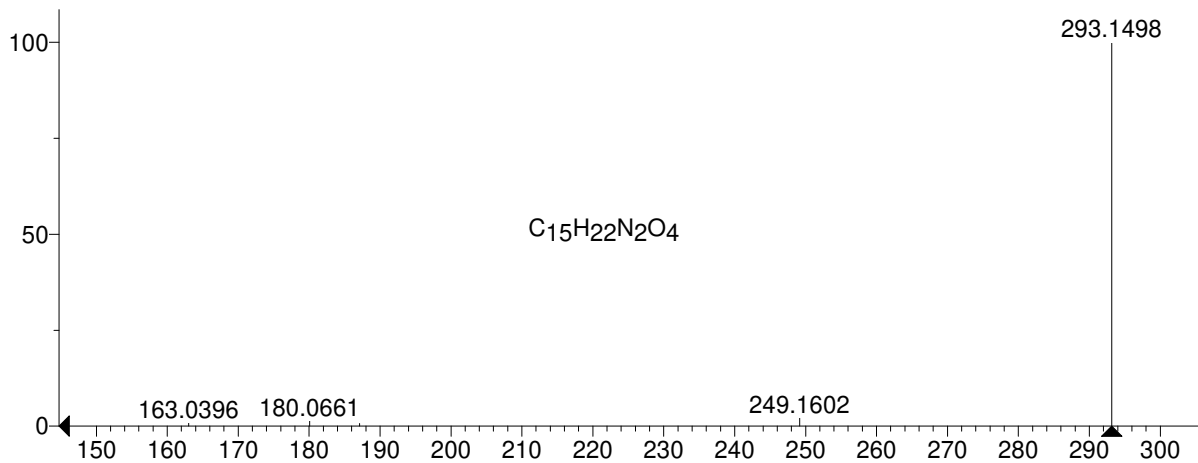



Hit 3 : Ile-Tyr [M-H]<sup>-</sup> HCD 14eV P=293.2  
C<sub>15</sub>H<sub>22</sub>N<sub>2</sub>O<sub>4</sub>; MF: 235; RMF: 899; Prob 21.0%; Lib: nist\_msms; ID: 567507.

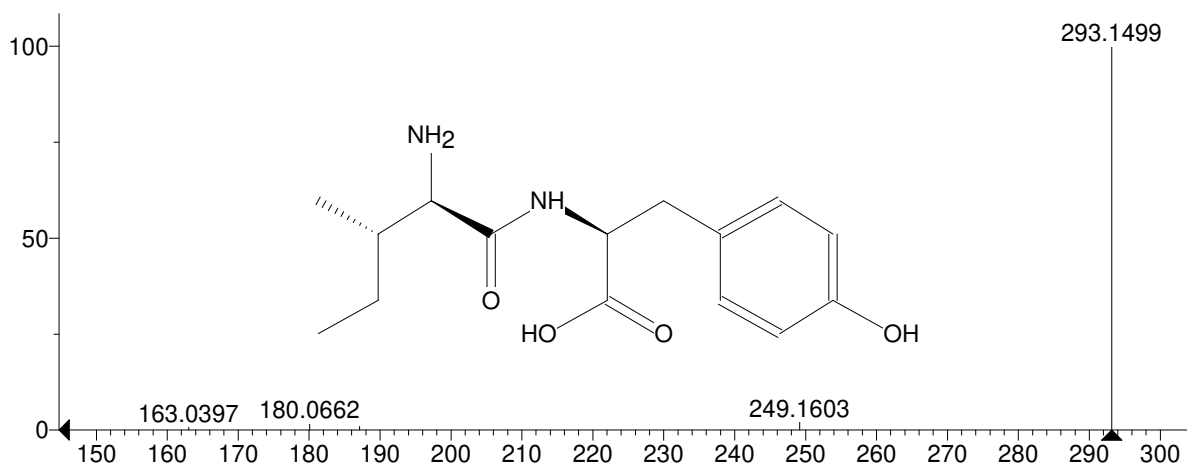

Hit 4 : Ile-Tyr [M-H]<sup>-</sup> HCD 14eV P=293.2  
C<sub>15</sub>H<sub>22</sub>N<sub>2</sub>O<sub>4</sub>; MF: 235; RMF: 899; Prob 21.0%; CAS: 38579-21-4; Lib: nist\_msms2; ID: 70364.

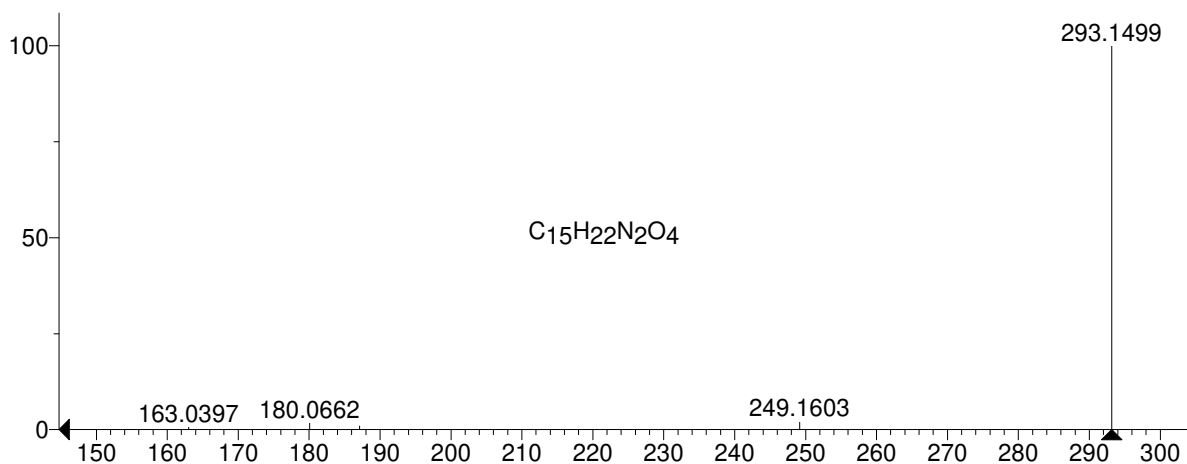

Hit 5 : Dicumyl peroxide [M+Na]<sup>+</sup> HCD 2V P=293.2  
C<sub>18</sub>H<sub>22</sub>O<sub>2</sub>; MF: 208; RMF: 888; Prob 6.17%; CAS: 80-43-3; Lib: nist\_msms; ID: 153950.

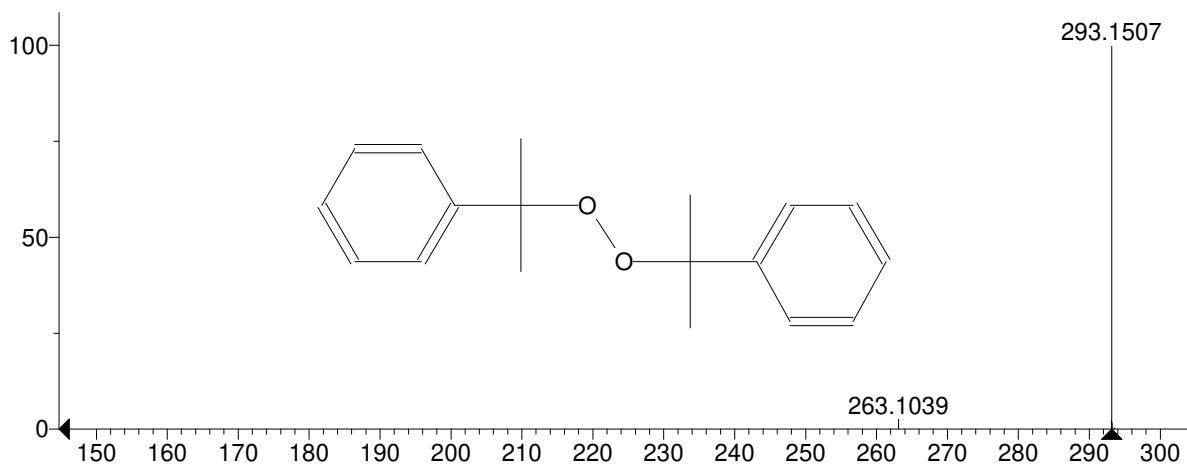

Unknown: Unknown (4.78\_305.0681m/z)  
Compound in Library Factor = -3273

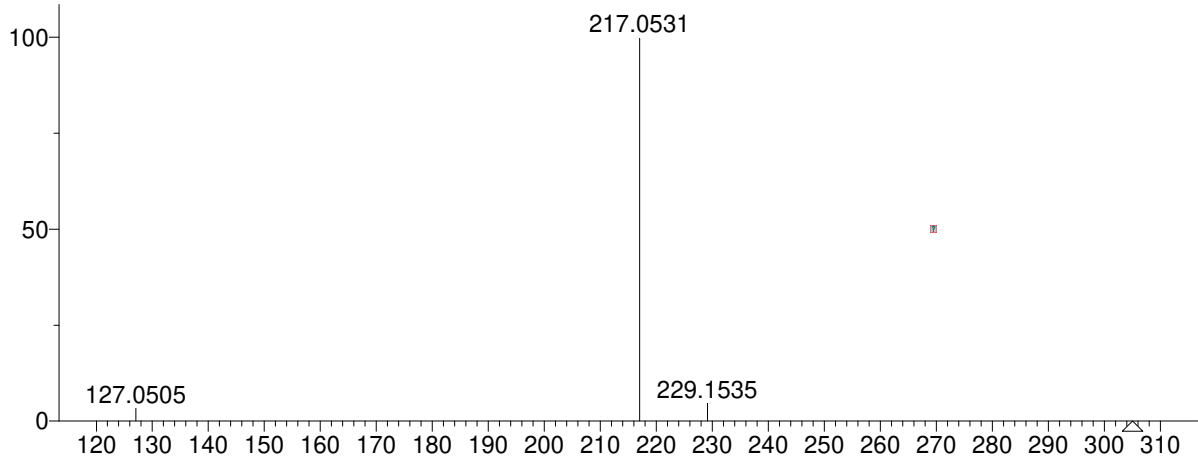

Hit 1 : 2,3-Trans-3,4-cis-Leucocyanidin [M-H]<sup>-</sup> 45eV P=305.1  
C<sub>15</sub>H<sub>14</sub>O<sub>7</sub>; MF: 1; RMF: 199; Prob 9.35%; Lib: msms-neg-metabobase; ID: 829.

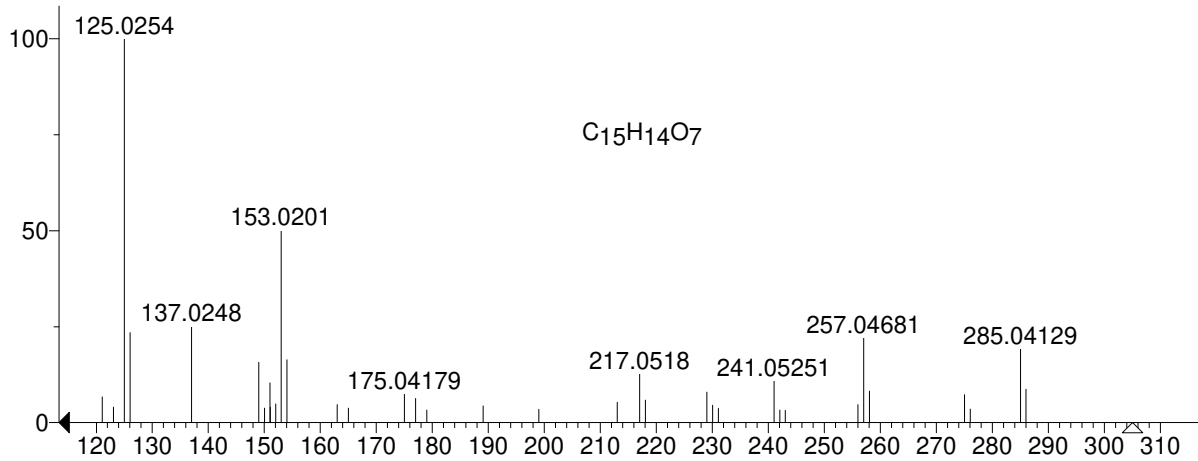

Hit 2 : 2,3-Trans-3,4-trans-Leucocyanidin [M-H]<sup>-</sup> 45eV P=305.1  
C<sub>15</sub>H<sub>14</sub>O<sub>7</sub>; MF: 1; RMF: 183; Prob 9.35%; Lib: msms-neg-metabobase; ID: 823.

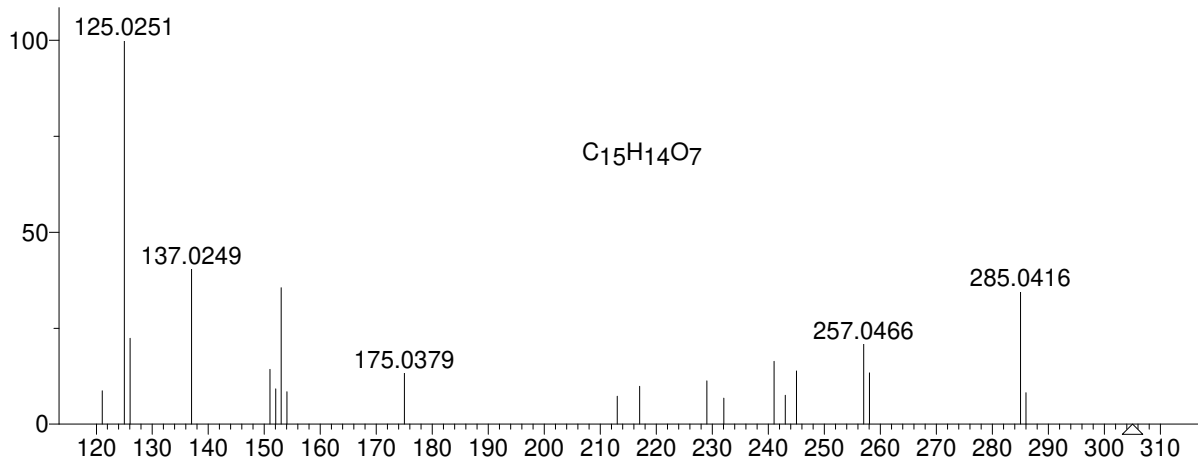

Hit 3 : 3,5,7,3',4'-Pentahydroxyflavanone [M+H]<sup>+</sup> HCD 91V P=305.1  
C<sub>15</sub>H<sub>12</sub>O<sub>7</sub>; MF: 1; RMF: 55; Prob 9.35%; CAS: 480-18-2; Lib: nist\_msms; ID: 136825.

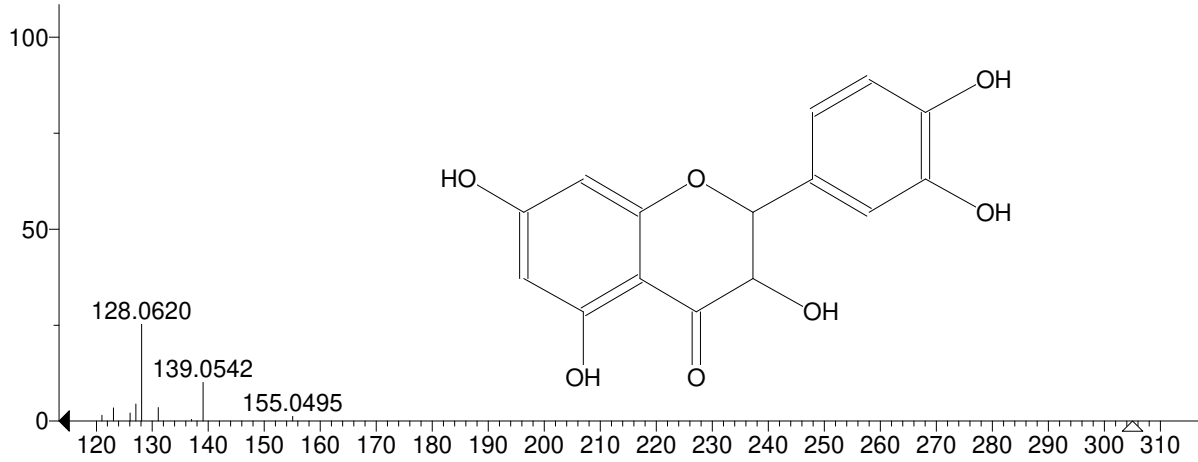

Hit 4 : Gallocatechin [M-H]<sup>-</sup> 20 P=305.1  
C<sub>15</sub>H<sub>14</sub>O<sub>7</sub>; MF: 0; RMF: 105; Prob 8.99%; Lib: mona-export-lc-ms-ms\_negative\_mode; ID: 12384.

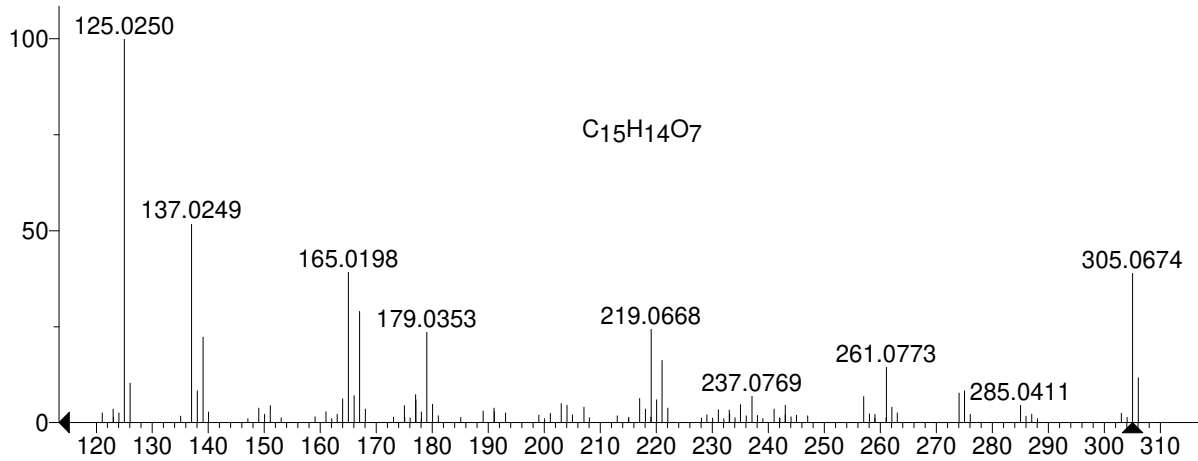

Hit 5 : Epigallocatechin [M-H]<sup>-</sup> 20 P=305.1  
C<sub>15</sub>H<sub>14</sub>O<sub>7</sub>; MF: 0; RMF: 105; Prob 8.99%; Lib: mona-export-lc-ms-ms\_negative\_mode; ID: 12421.

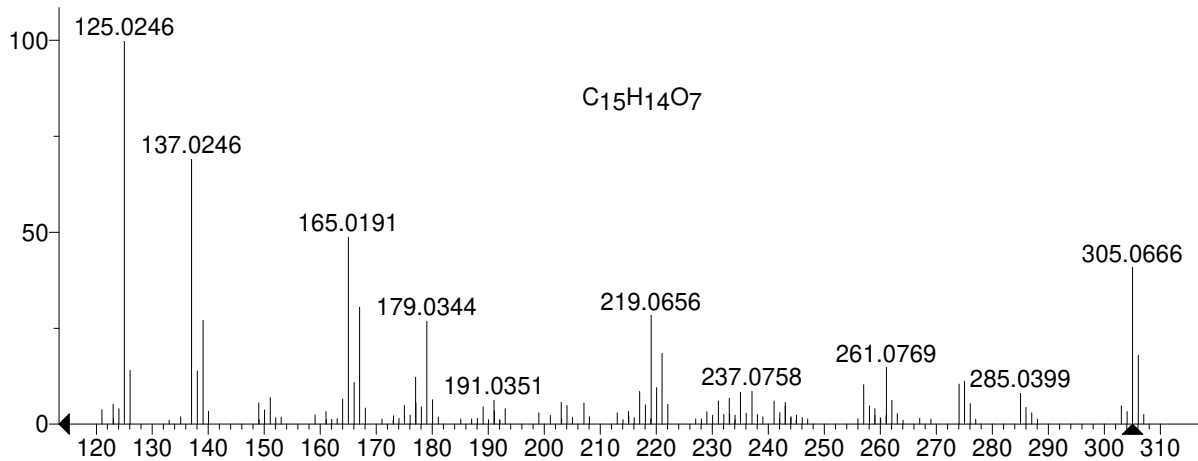

Unknown: Unknown (4.78\_348.1187m/z)  
Compound in Library Factor = 0

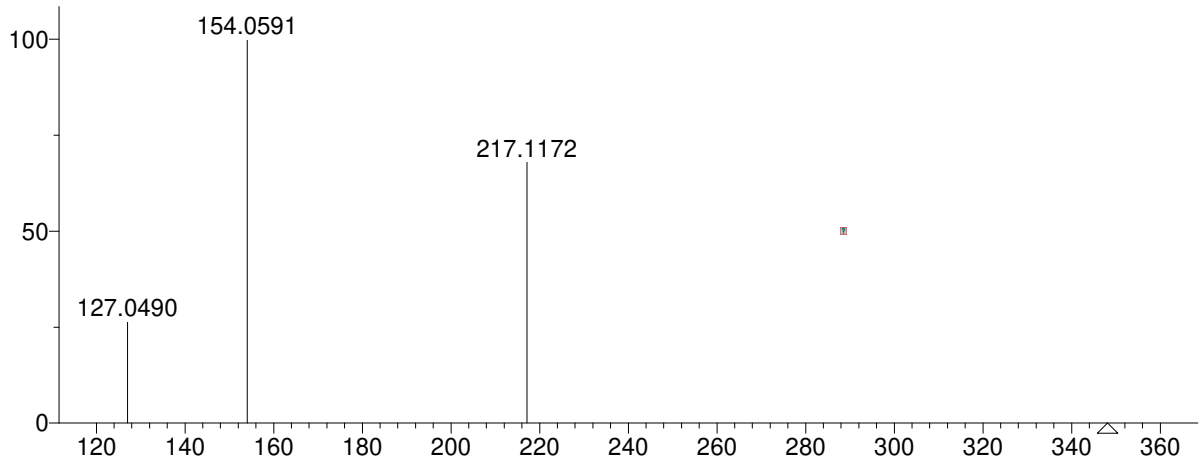

Unknown: Unknown (4.78\_666.2621m/z)  
Compound in Library Factor = 0

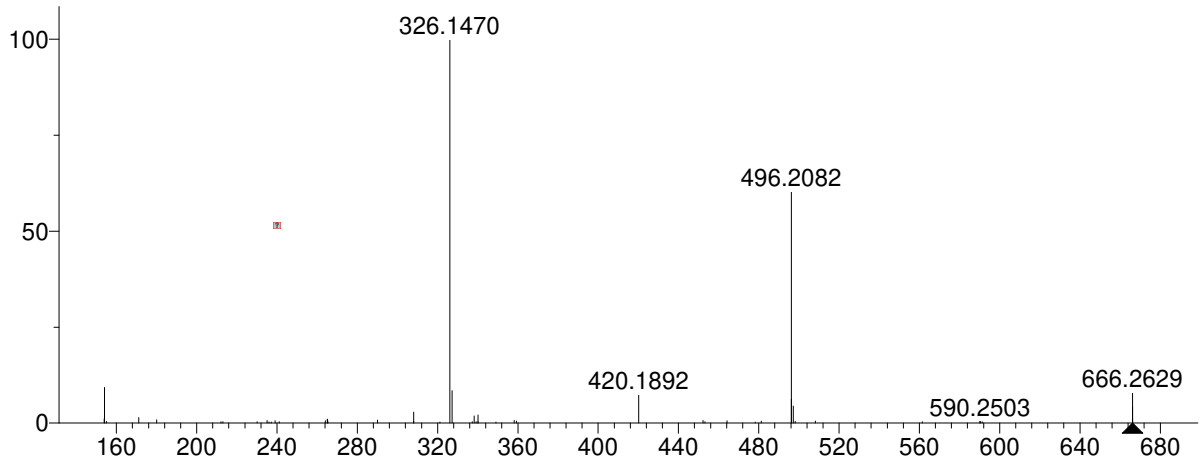

Unknown: Unknown (4.79\_456.1625m/z)  
Compound in Library Factor = 0

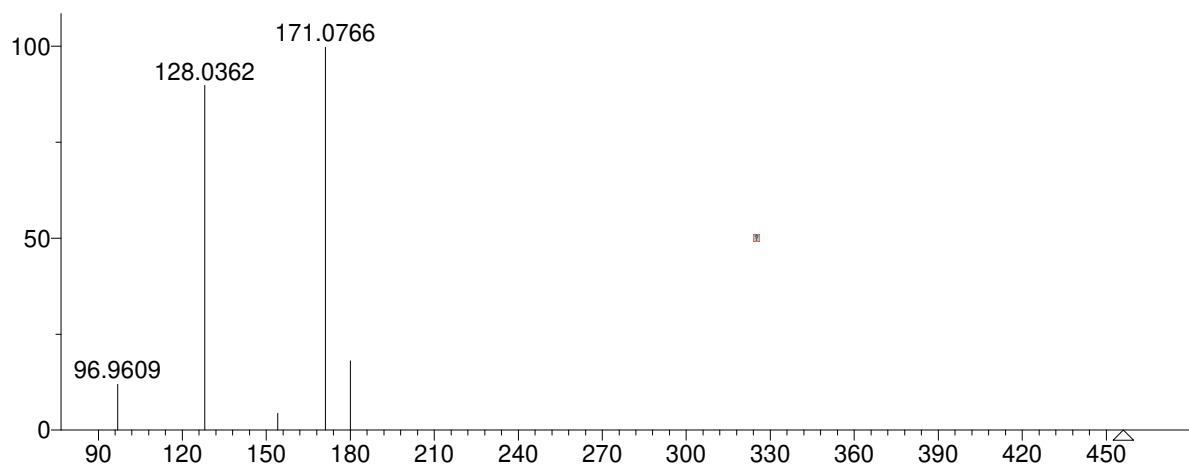

Hit 1 : Folinic acid [M+H-H<sub>2</sub>O]<sup>+</sup> HCD 118V P=456.2  
C<sub>20</sub>H<sub>23</sub>N<sub>7</sub>O<sub>7</sub>; MF: 0; RMF: 34; Prob 33.3%; CAS: 58-05-9; Lib: nist\_msms; ID: 138163.

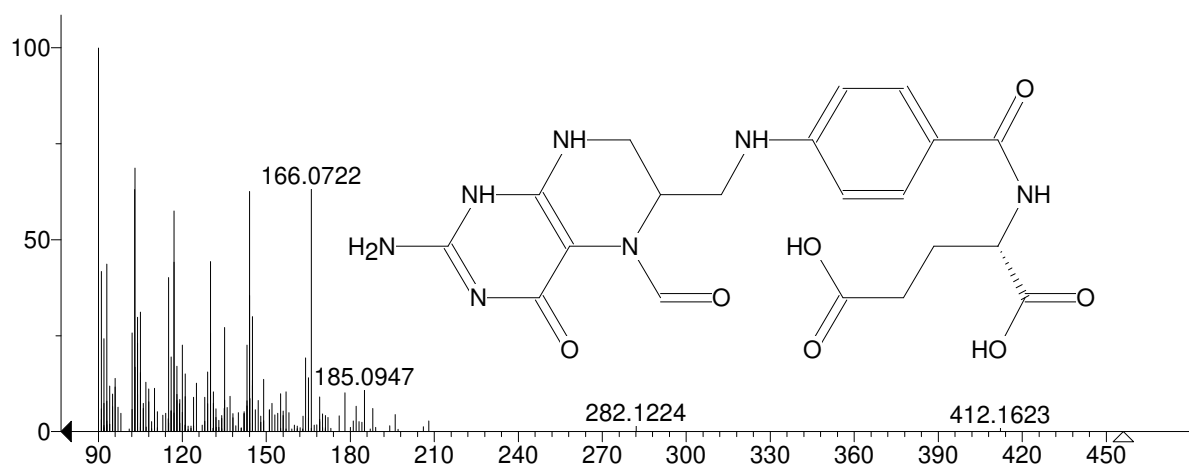

Hit 2 : Codeine-6-β-D-glucuronide [M-H-H<sub>2</sub>O]<sup>-</sup> HCD 72V P=456.2  
C<sub>24</sub>H<sub>29</sub>N<sub>1</sub>O<sub>9</sub>; MF: 0; RMF: 29; Prob 33.3%; CAS: 20736-11-2; Lib: nist\_msms; ID: 322871.

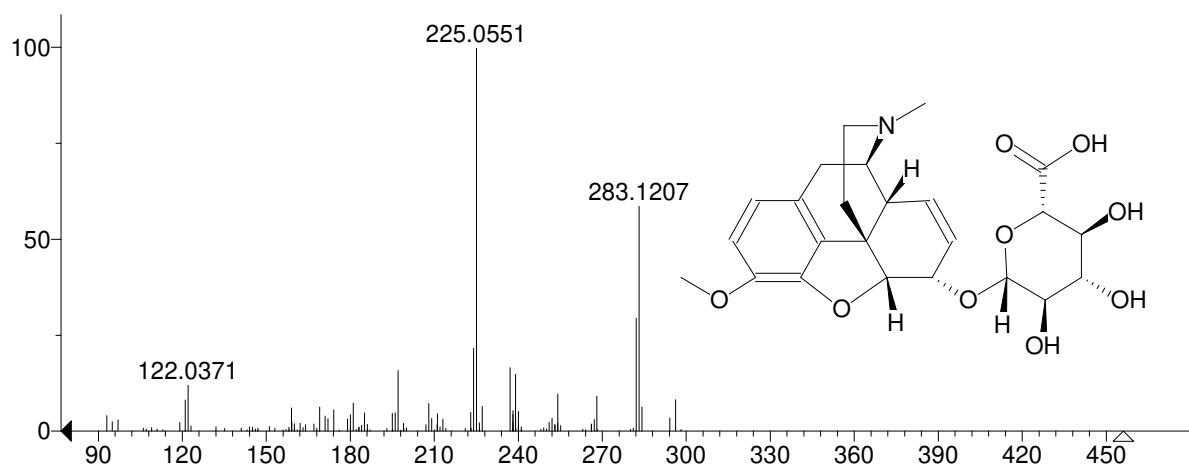

Hit 3 : Methopterine [M+H]<sup>+</sup> HCD 82V P=456.2  
C<sub>20</sub>H<sub>21</sub>N<sub>7</sub>O<sub>6</sub>; MF: 0; RMF: 8; Prob 33.3%; CAS: 2410-93-7; Lib: nist\_msms; ID: 206196.

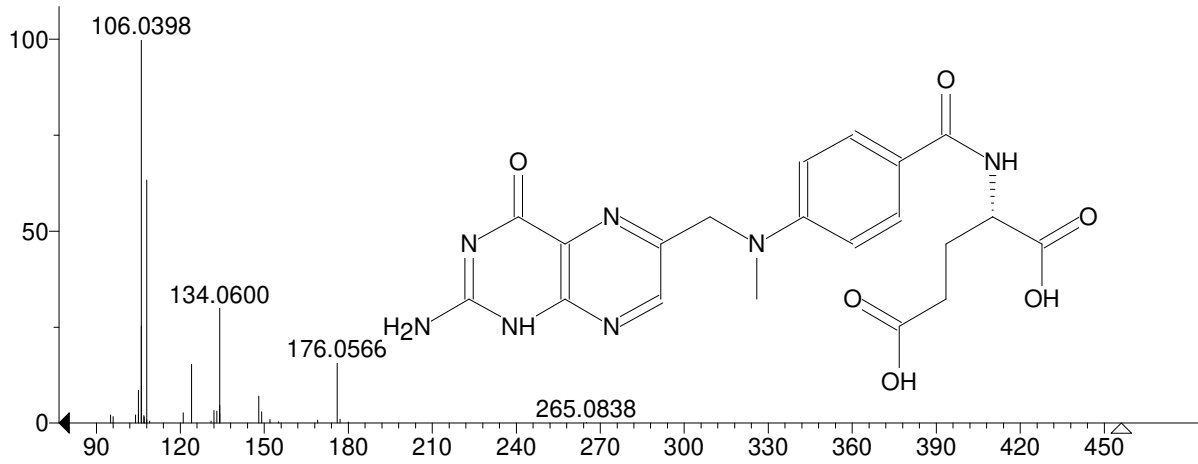

Unknown: Unknown (4.80\_639.1685m/z)  
Compound in Library Factor = -1072

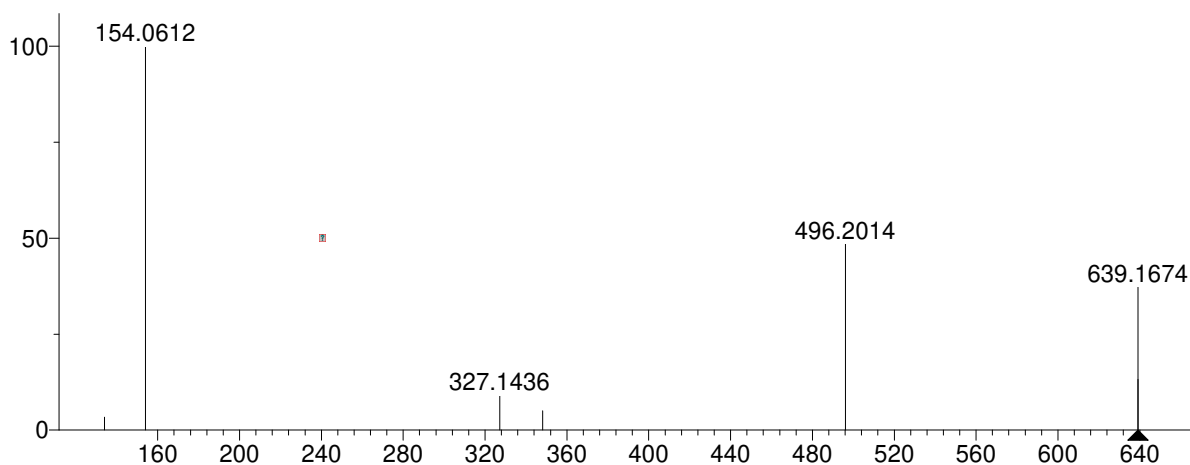

Hit 1 : 1-Naphthol  $\beta$ -D-glucuronide [2M-H]- HCD 3V P=639.2  
C16H16O7; MF: 84; RMF: 548; Prob 51.2%; CAS: 17238-47-0; Lib: nist\_msms; ID: 464073.

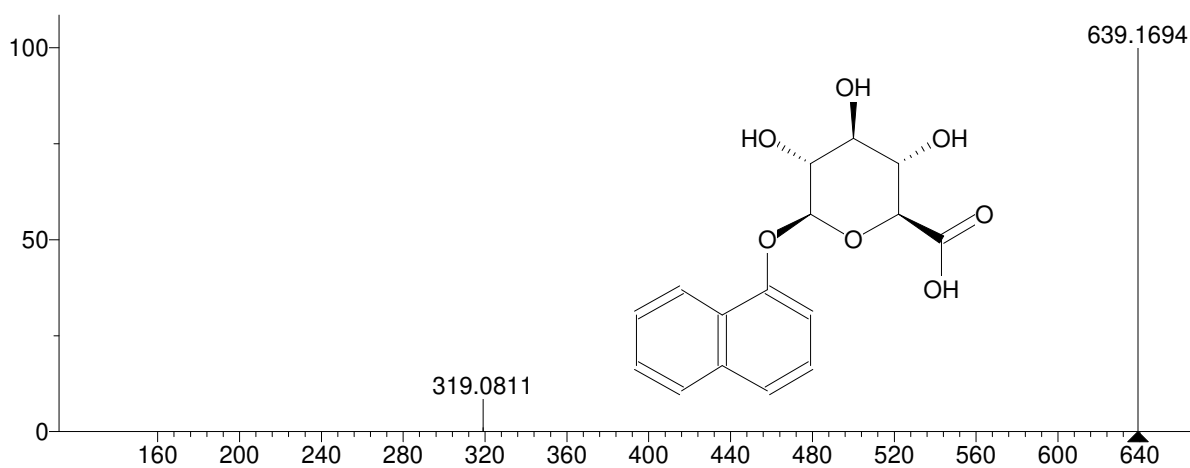

Hit 2 : NCGC00384507-01! [M-H]- P=639.2  
C32H32O14; MF: 6; RMF: 355; Prob 6.04%; Lib: msms-neg-gnps; ID: 525.

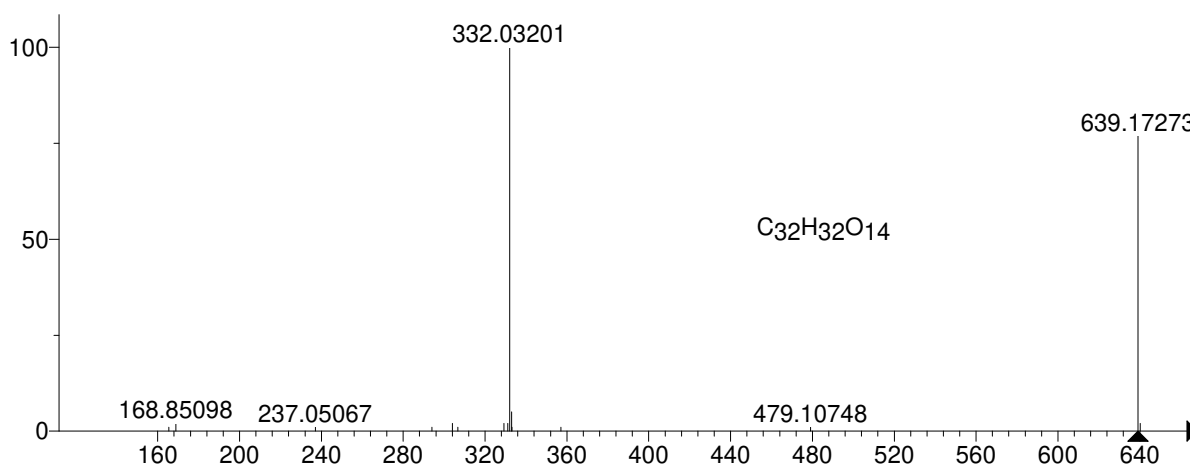



Hit 3 : \_130087 [M+H]<sup>+</sup> P=639.2  
C<sub>32</sub>H<sub>30</sub>O<sub>14</sub>; MF: 0; RMF: 195; Prob 4.74%; Lib: mona-export-gnps; ID: 5046.

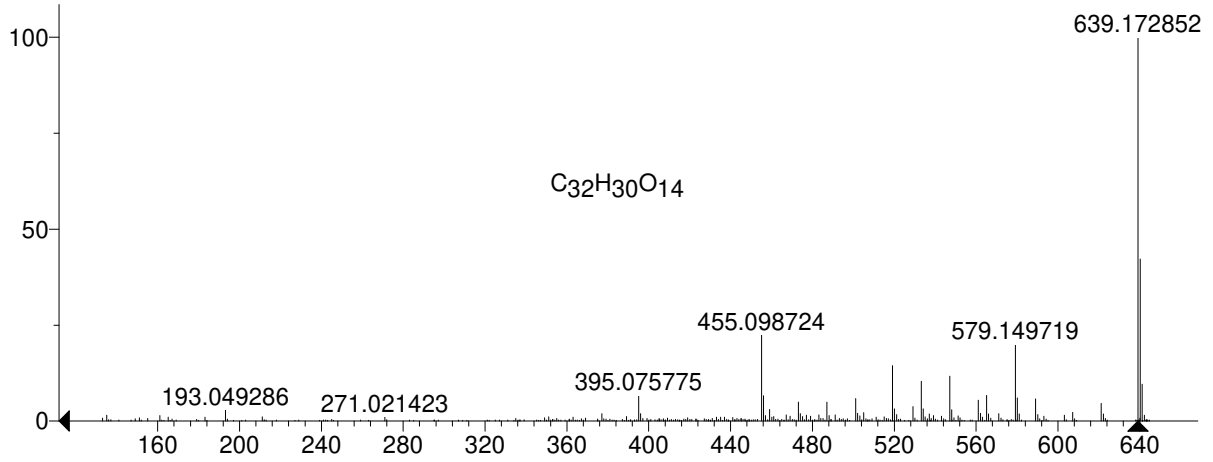

Hit 4 : NCGC00169779-03\_C<sub>30</sub>H<sub>32</sub>O<sub>14</sub>\_Spiro[cyclopenta[c]pyran-7(1H),2'(5'H)-furan]-4-carboxylic acid, 1-(beta-C<sub>30</sub>H<sub>32</sub>O<sub>14</sub>; MF: 0; RMF: 194; Prob 4.74%; Lib: mona-export-gnps; ID: 13784.

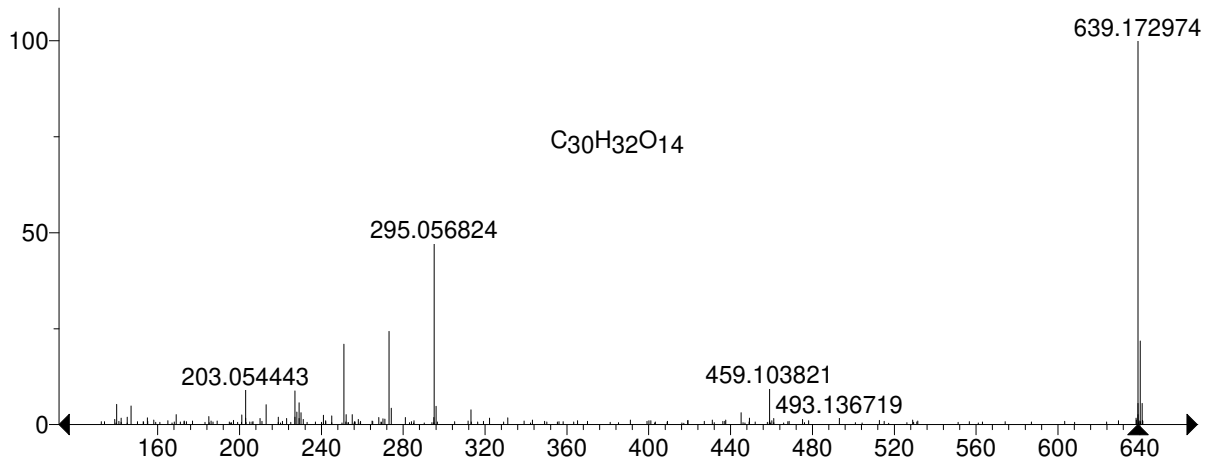

Hit 5 : \_130088 [M+H]<sup>+</sup> P=639.2  
C<sub>32</sub>H<sub>30</sub>O<sub>14</sub>; MF: 0; RMF: 191; Prob 4.74%; Lib: mona-export-gnps; ID: 5047.

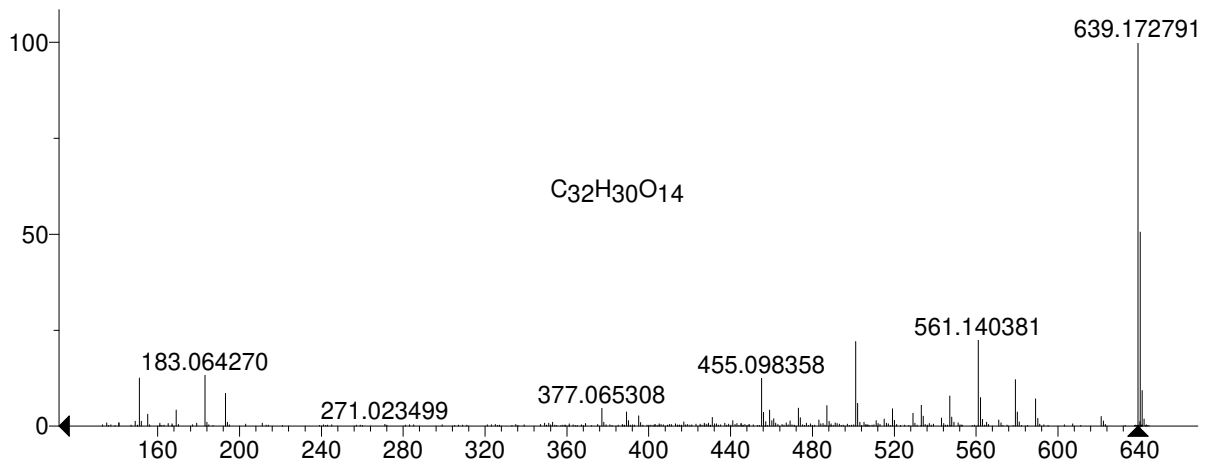

Unknown: Unknown (4.83\_479.1630m/z)  
Compound in Library Factor = 0

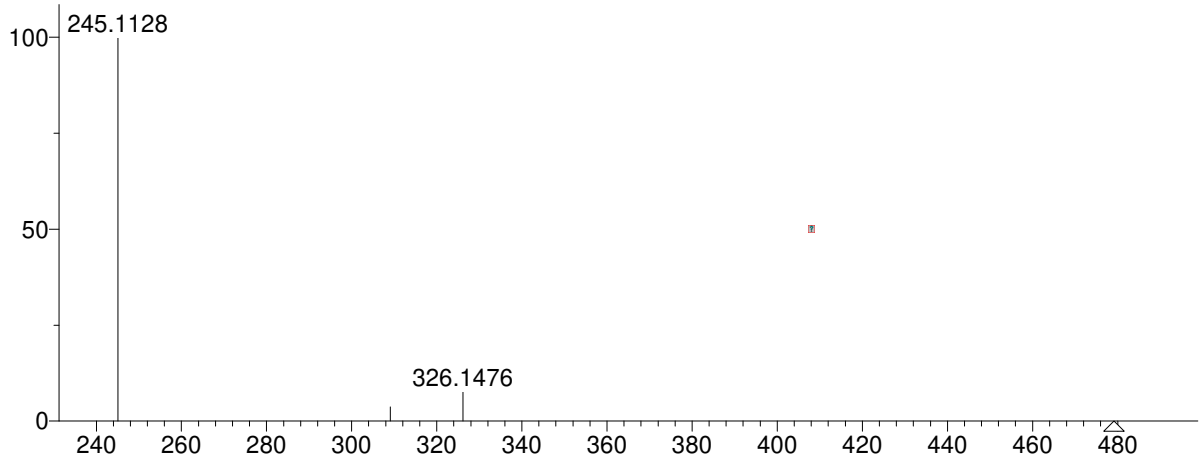

Hit 1 : 2-[3,4-dihydroxy-2,2-dimethyl-8-(3-methylbut-2-enoxy)-3,4-dihydrochromen-6-yl]-5,7-dihydroxy-2,3-dihydro  
C<sub>25</sub>H<sub>28</sub>O<sub>8</sub>; MF: 0; RMF: 23; Prob 50.0%; Lib: mona-export-vf-npl\_qexactive; ID: 16870.

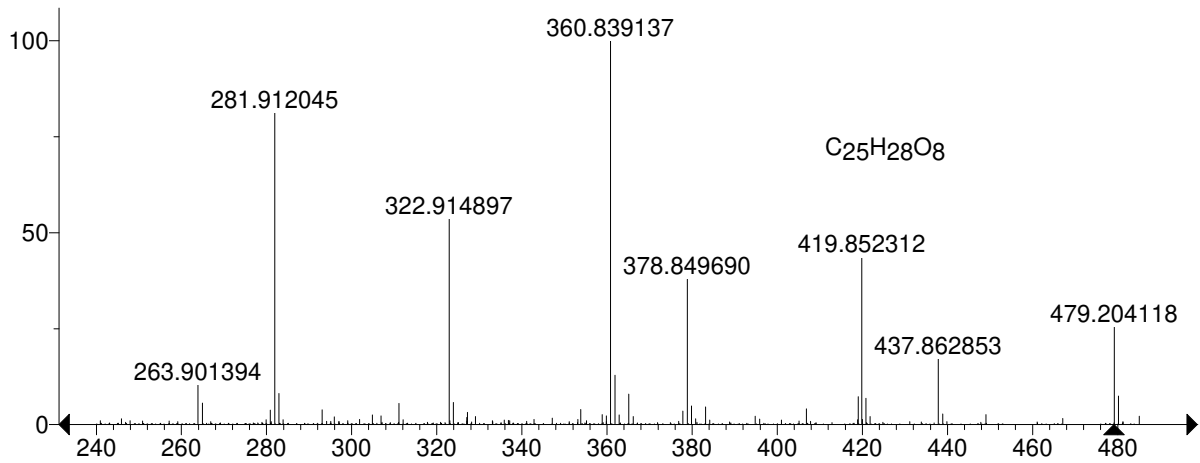

Hit 2 : 7-hydroxy-2,6,9,12,17,17-hexamethyl-22-methylidene-5,16,19,21-tetraoxaheptacyclo[10.8.1.1A<sup>3</sup>,a<sup>1</sup>.1.0A'  
C<sub>25</sub>H<sub>28</sub>O<sub>8</sub>; MF: 0; RMF: 5; Prob 50.0%; Lib: mona-export-vf-npl\_qexactive; ID: 20713.

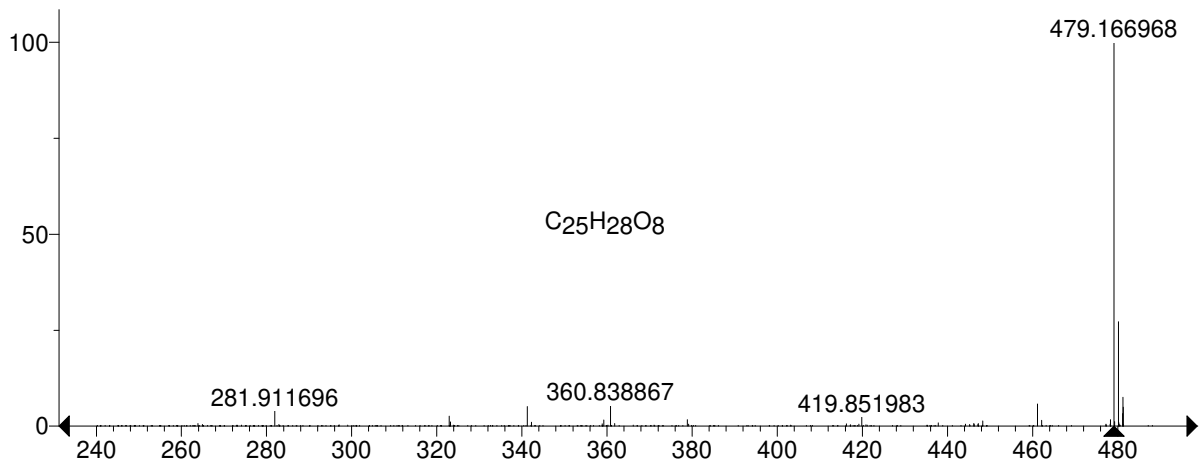

Unknown: Unknown (4.83\_616.1396m/z)  
Compound in Library Factor = 0

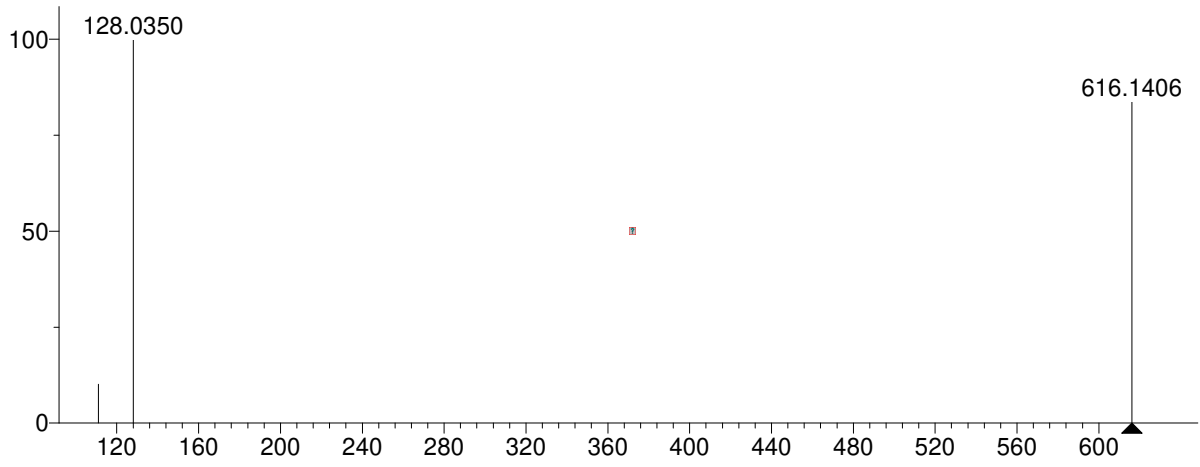

Unknown: Unknown (4.84\_387.1863m/z)  
Compound in Library Factor = 0

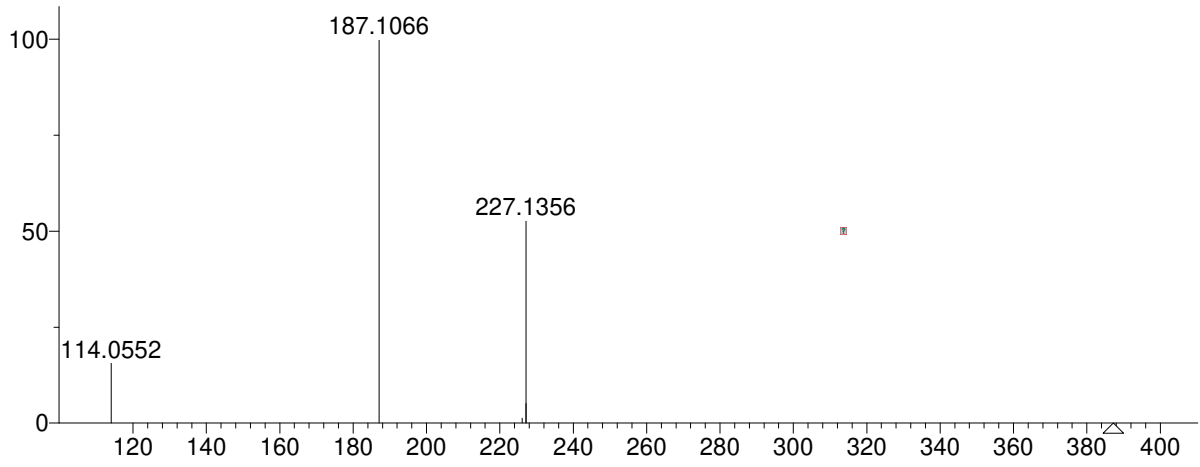

Unknown: Unknown (4.85\_298.1392m/z)  
Compound in Library Factor = 0

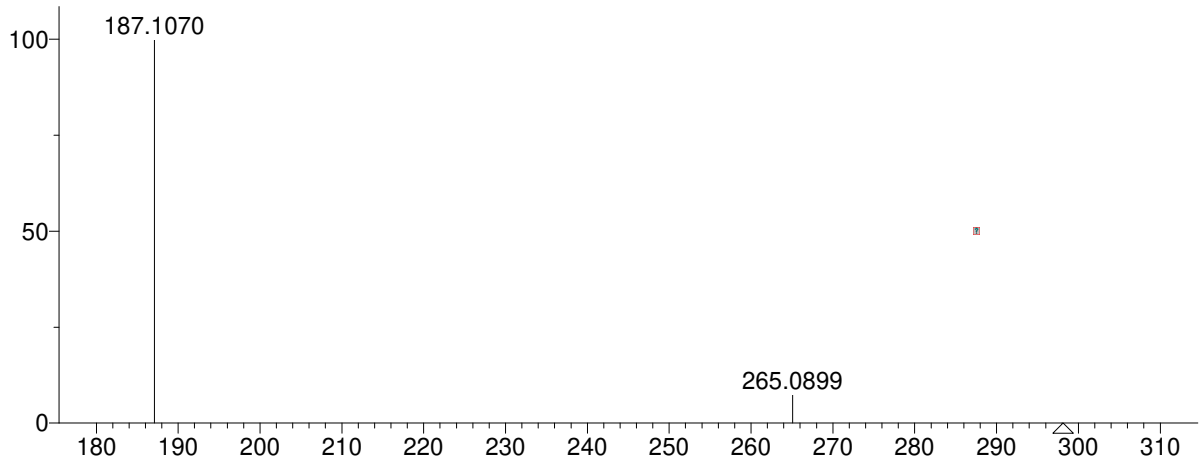

\*\* Search Report Page 1 of 1 \*\*

Unknown: Unknown (4.86\_239.0547m/z)  
Compound in Library Factor = 0

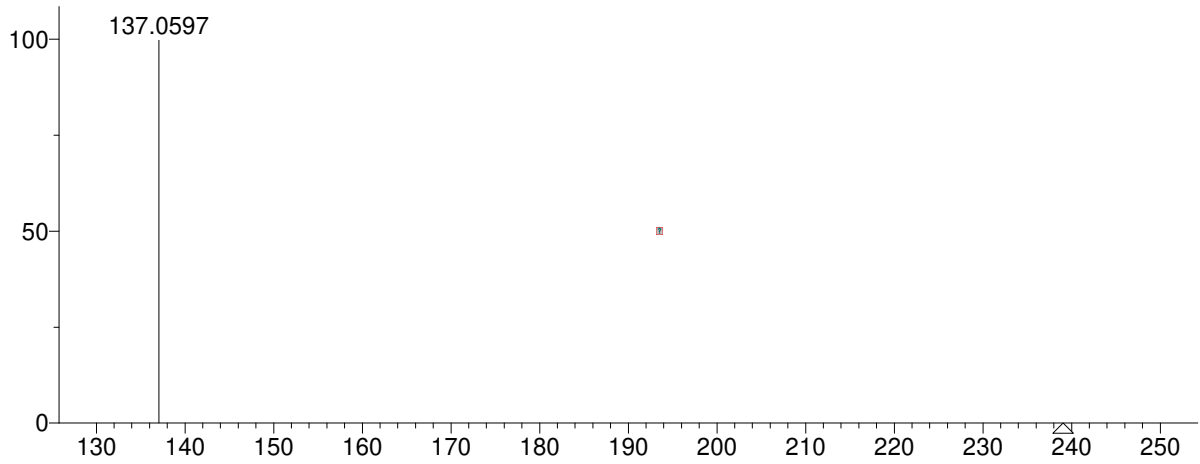

Hit 1 : NCGC00381344-01!8-hydroxy-6-methoxy-1-oxo-3,4-dihydroisochromene-7-carboxylic acid [M+H]<sup>+</sup> P=23!  
C<sub>11</sub>H<sub>10</sub>O<sub>6</sub>; MF: 0; RMF: 30; Prob 100.0%; Lib: mona-export-gnps; ID: 7519.

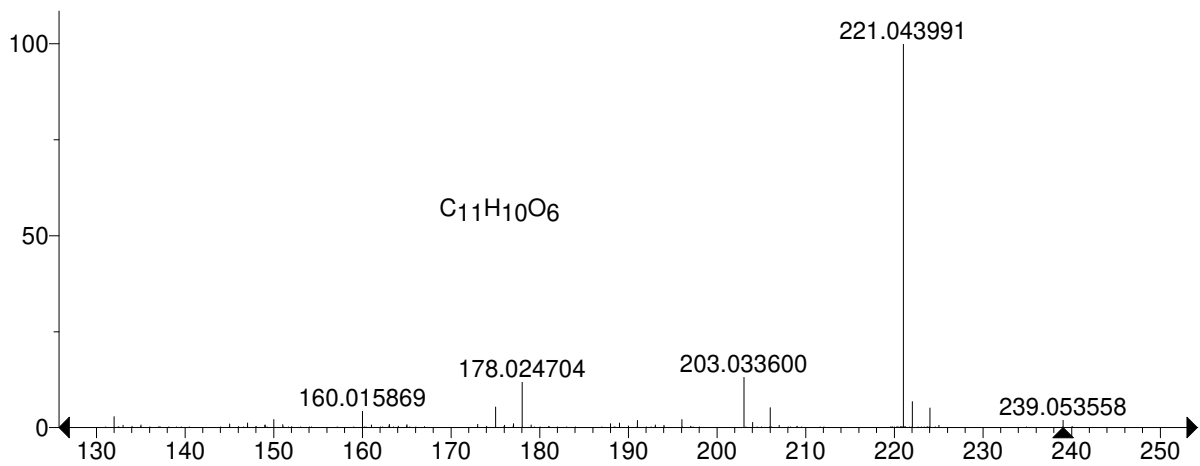

Unknown: Unknown (4.86\_346.1594m/z)  
Compound in Library Factor = 0

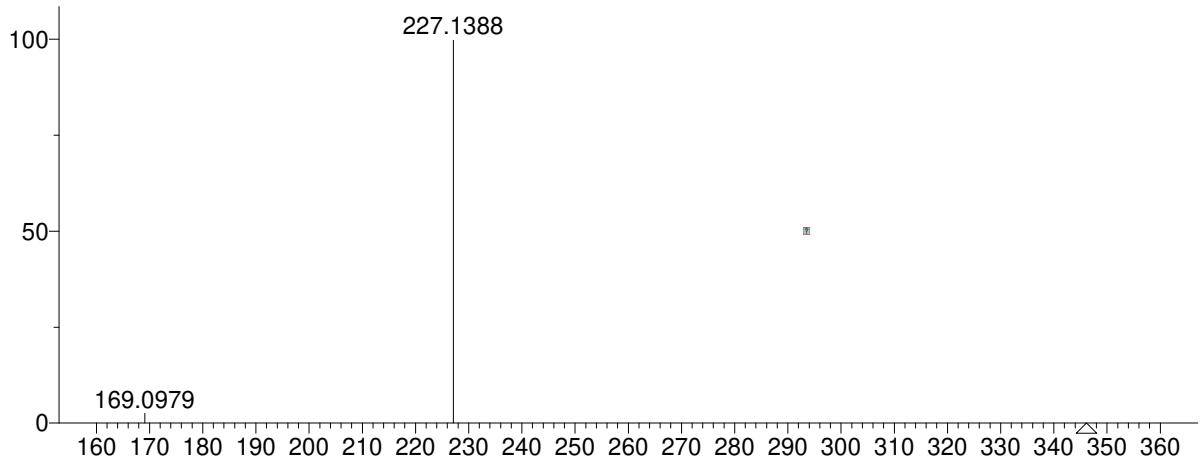

Unknown: Unknown (4.86\_357.1651m/z)  
Compound in Library Factor = 0

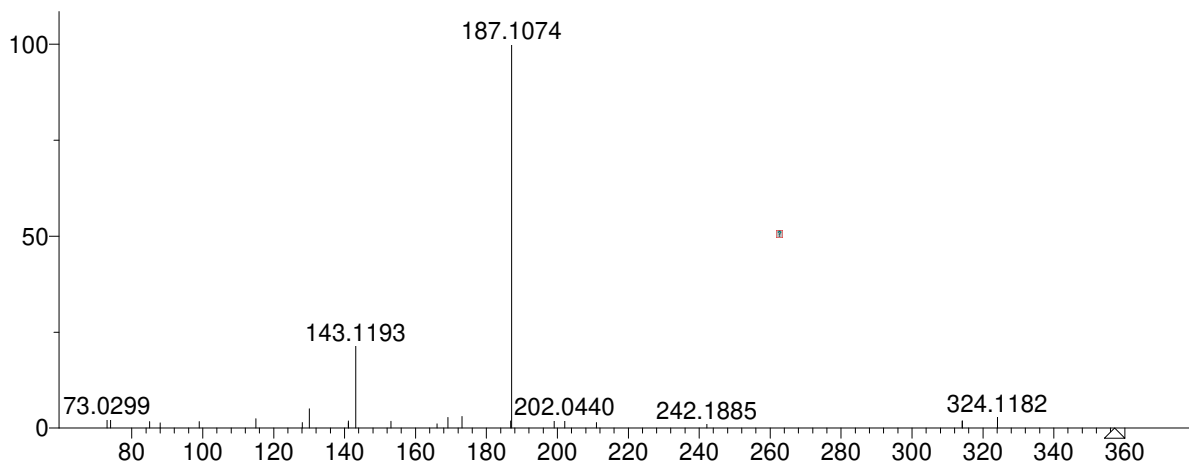

Hit 1 : [(1S,3aR,5R,5aR,8aR,9S,9aR)-1,5,8a-trimethyl-2,8-dioxo-3a,4,5,5a,9,9a-hexahydro-1H-azuleno[6,5-b]fura C<sub>19</sub>H<sub>26</sub>O<sub>5</sub>; MF: 0; RMF: 19; Prob 50.0%; Lib: mona-export-vf-npl\_gexactive; ID: 7288.

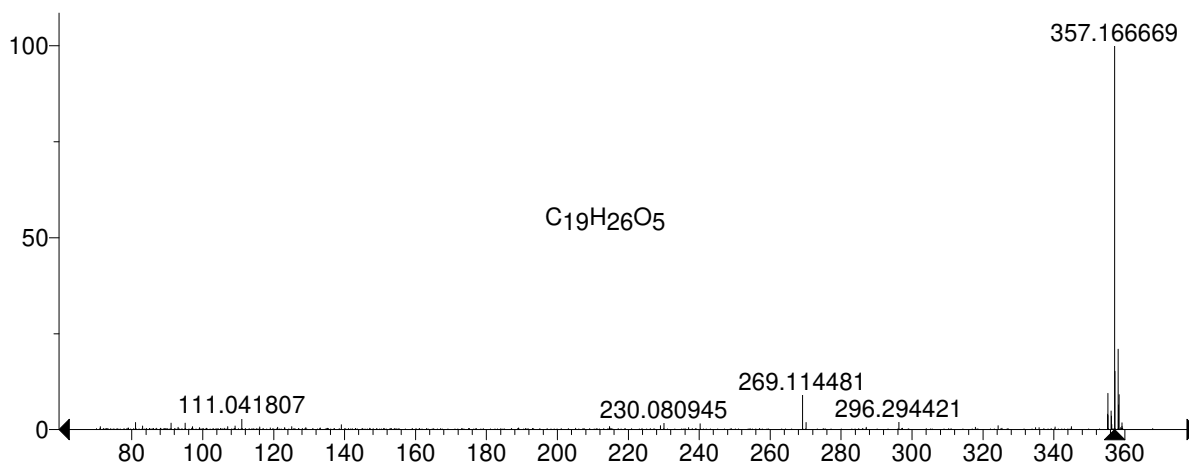

Hit 2 : NCGC00381117-01!2-amino-4-hydroxy-5-[[1-(4-methoxy-6-oxopyran-2-yl)-3-methylbutyl]amino]-5-oxopent: C<sub>16</sub>H<sub>24</sub>N<sub>2</sub>O<sub>7</sub>; MF: 0; RMF: 13; Prob 50.0%; Lib: mona-export-gnps; ID: 8549.

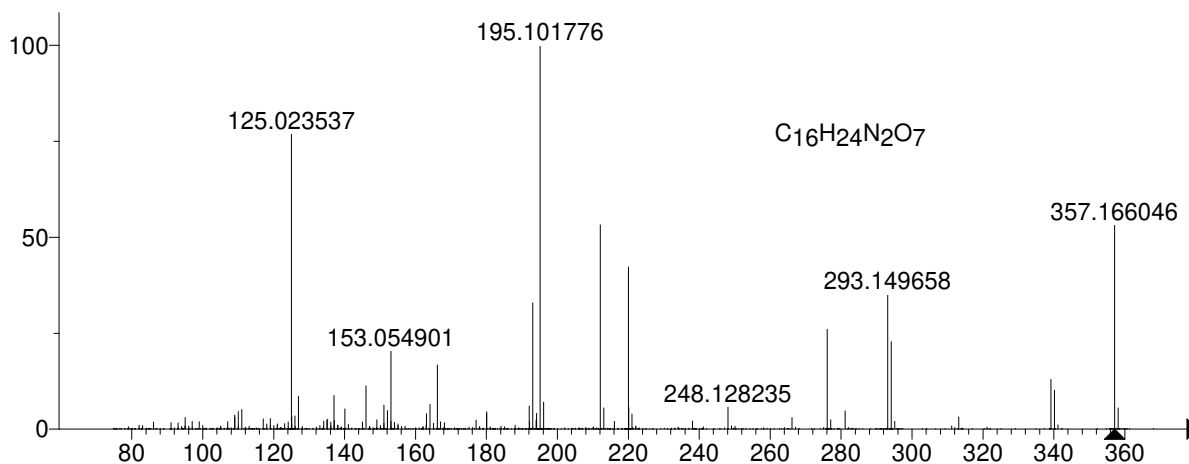



\*\* Search Report Page 1 of 2 \*\*

Unknown: Unknown (4.86\_499.2510m/z)  
Compound in Library Factor = -301

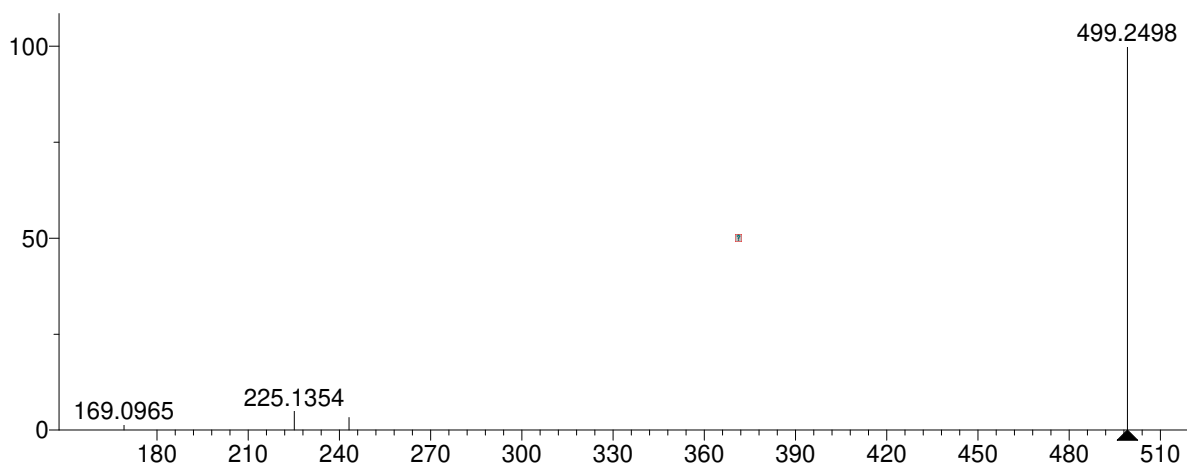

Hit 1 : Lactalbumin B (50-53) Alpha [Lactorphin Alpha], bovine [M+H]<sup>+</sup> HCD 9eV P=499.3  
C<sub>26</sub>H<sub>34</sub>N<sub>4</sub>O<sub>6</sub>; MF: 290; RMF: 937; Prob 81.3%; Lib: nist\_msms2; ID: 47148.

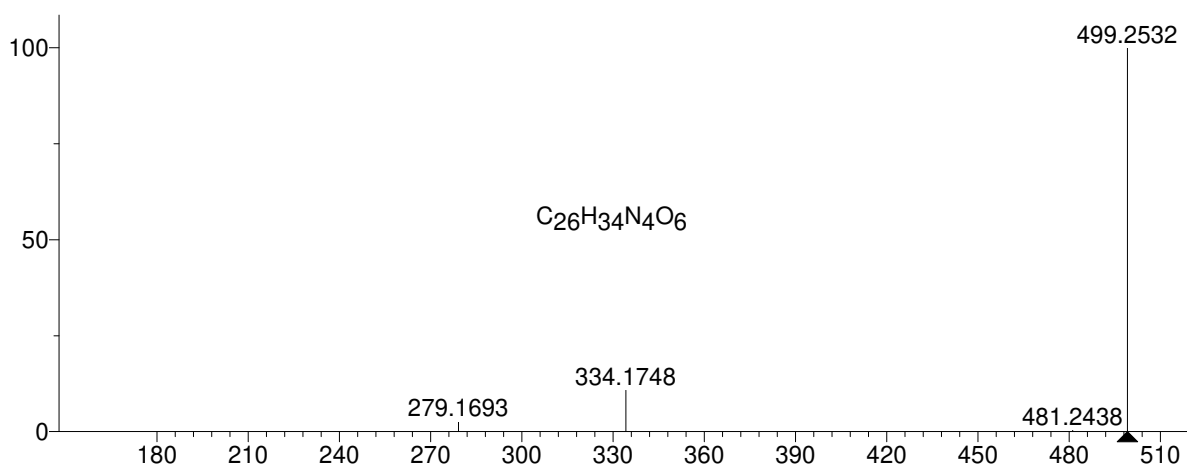

Hit 2 : Betamethasone 17-valerate [M+Na]<sup>+</sup> HCD 14V P=499.2  
C<sub>27</sub>H<sub>37</sub>FO<sub>6</sub>; MF: 247; RMF: 889; Prob 17.9%; CAS: 2152-44-5; Lib: nist\_msms; ID: 309914.

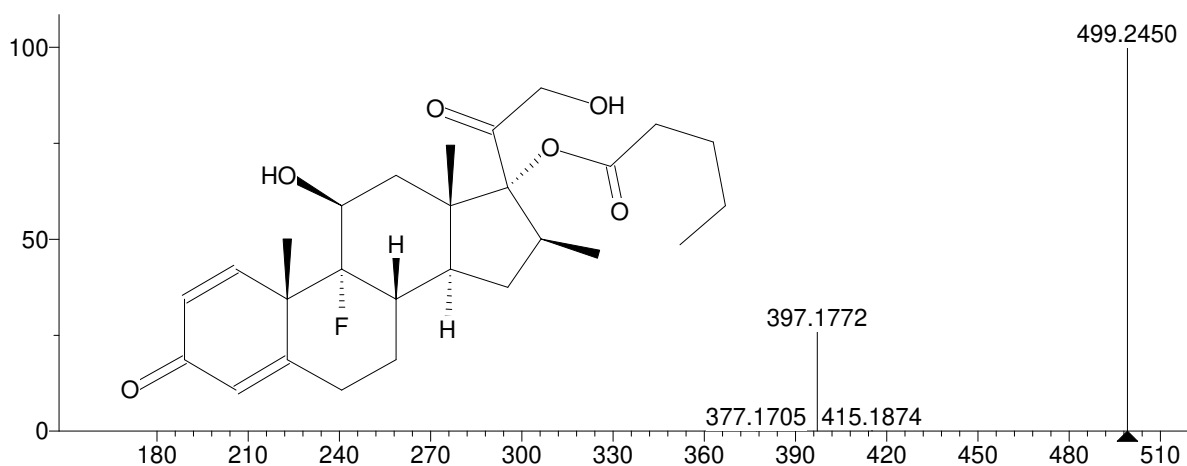

Hit 3 : PA 22:4; PA 2:0-20:4; [M-H]<sup>-</sup> [M-H]<sup>-</sup> P=499.2  
C<sub>25</sub>H<sub>41</sub>O<sub>8</sub>P; MF: 20; RMF: 450; Prob 0.17%; Lib: msdial-insilicomsm-lipids-neg; ID: 315714.

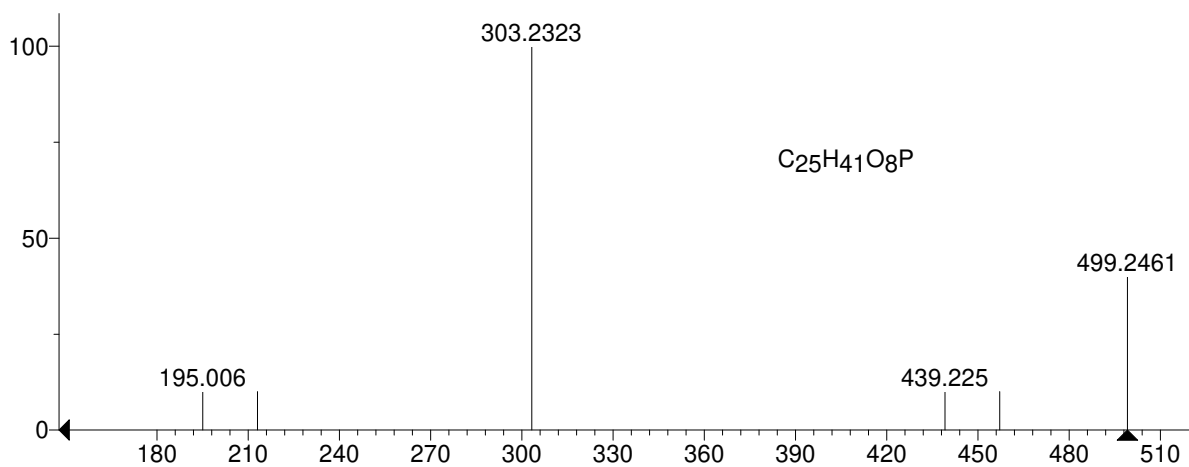

Hit 4 : PA 22:4; PA 4:0-18:4; [M-H]<sup>-</sup> [M-H]<sup>-</sup> P=499.2  
C<sub>25</sub>H<sub>41</sub>O<sub>8</sub>P; MF: 20; RMF: 450; Prob 0.17%; Lib: msdial-insilicomsm-lipids-neg; ID: 315824.

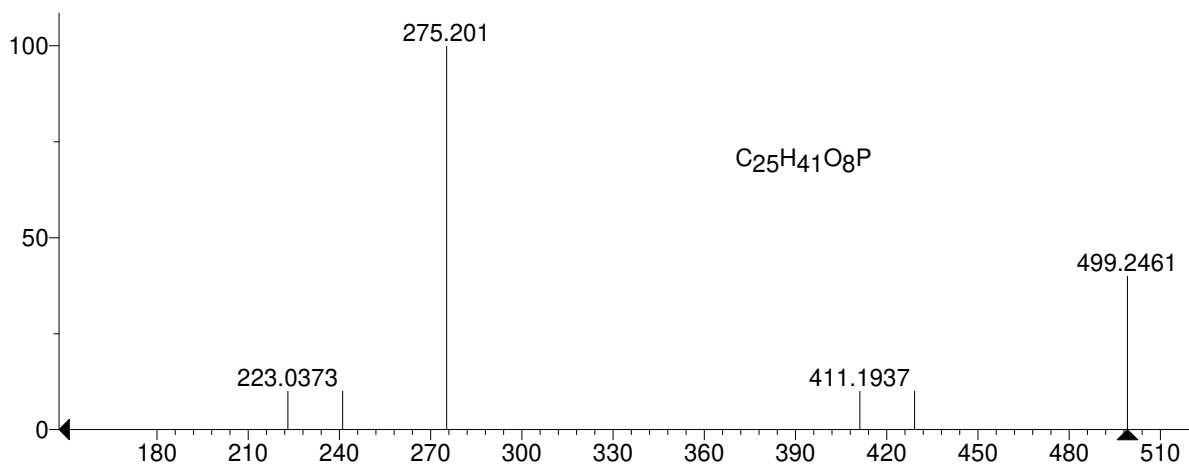

Hit 5 : PA 22:4; PA 6:0-16:4; [M-H]<sup>-</sup> [M-H]<sup>-</sup> P=499.2  
C<sub>25</sub>H<sub>41</sub>O<sub>8</sub>P; MF: 20; RMF: 450; Prob 0.17%; Lib: msdial-insilicomsm-lipids-neg; ID: 315931.

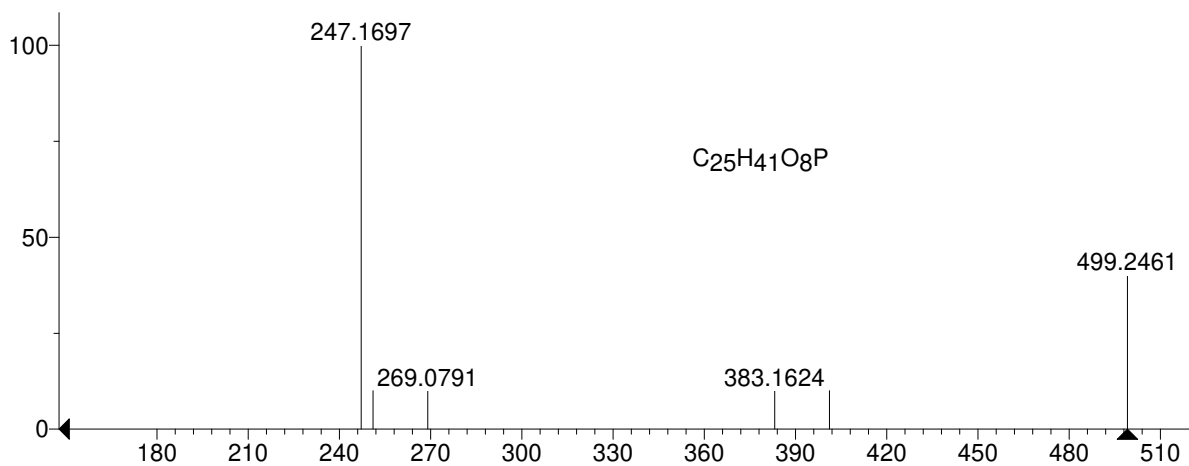

Unknown: Unknown (4.89\_259.1286m/z)  
Compound in Library Factor = -684

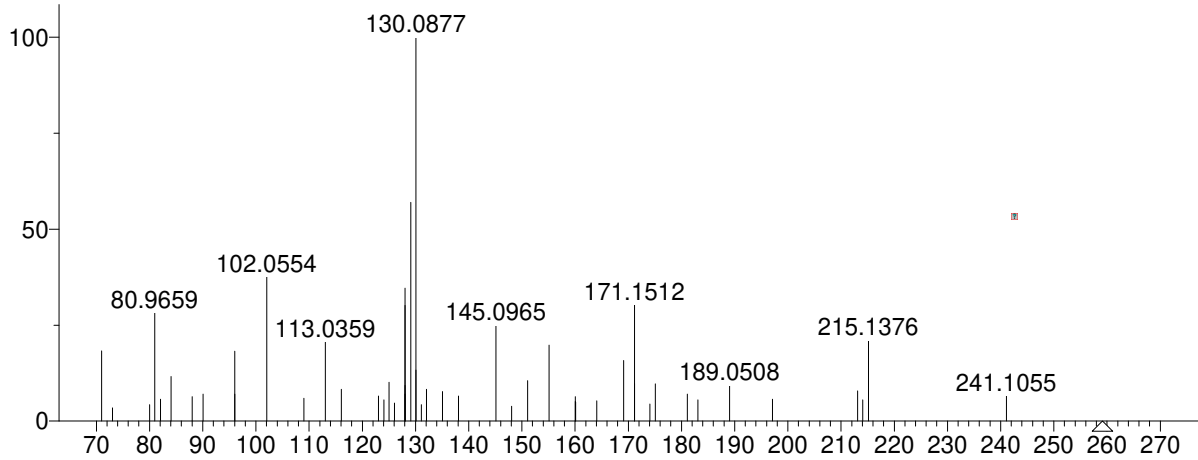

Hit 1 : Ile-Glu [M-H]<sup>-</sup> HCD 28eV P=259.1  
C<sub>11</sub>H<sub>20</sub>N<sub>2</sub>O<sub>5</sub>; MF: 383; RMF: 639; Prob 38.6%; Lib: nist\_msms; ID: 570717.

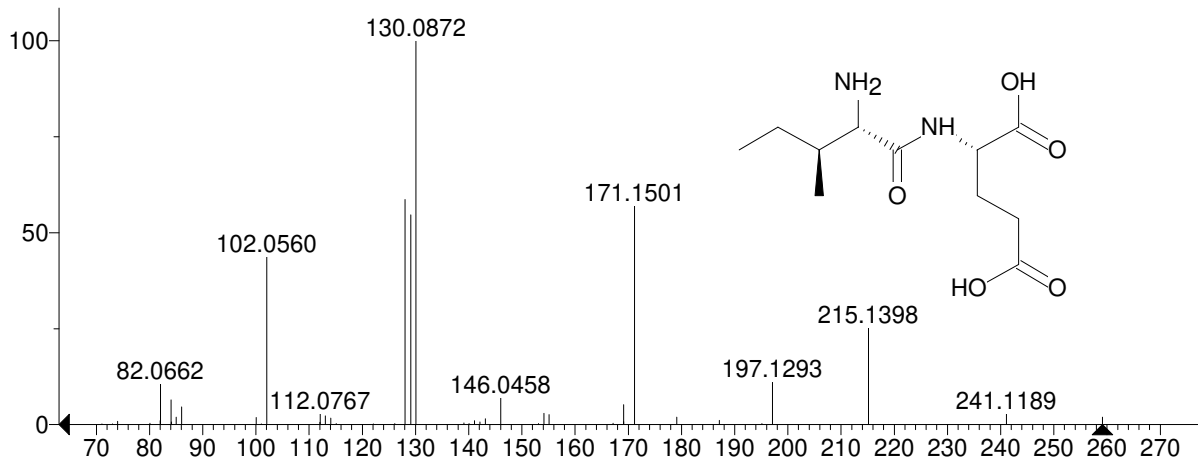

Hit 2 : Ile-Glu [M-H]<sup>-</sup> HCD 28eV P=259.1  
C<sub>11</sub>H<sub>20</sub>N<sub>2</sub>O<sub>5</sub>; MF: 383; RMF: 639; Prob 38.6%; CAS: 42516-53-0; Lib: nist\_msms2; ID: 84450.

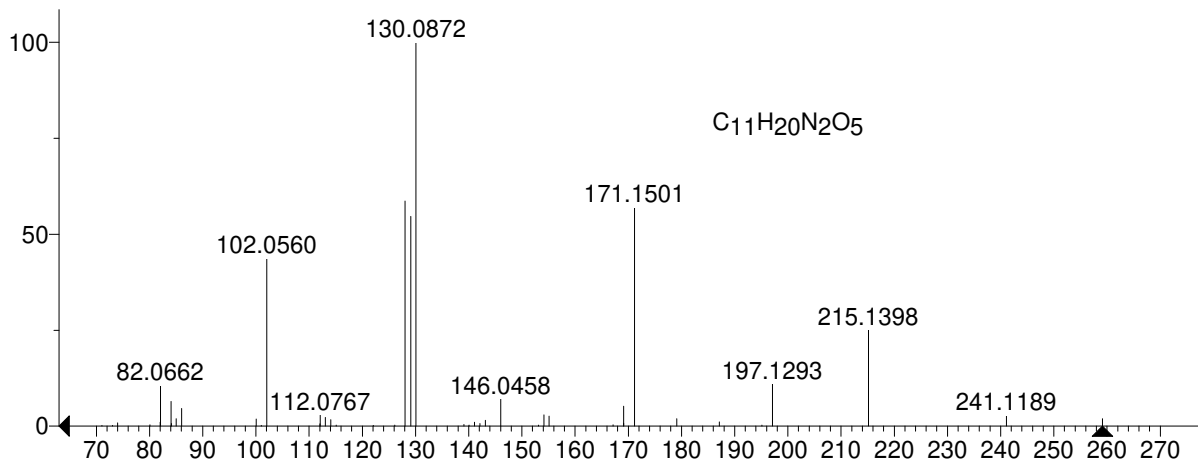

Hit 3 : Leu-Glu [M-H]<sup>-</sup> HCD 28eV P=259.1  
C<sub>11</sub>H<sub>20</sub>N<sub>2</sub>O<sub>5</sub>; MF: 355; RMF: 625; Prob 11.1%; Lib: nist\_msms; ID: 570785.

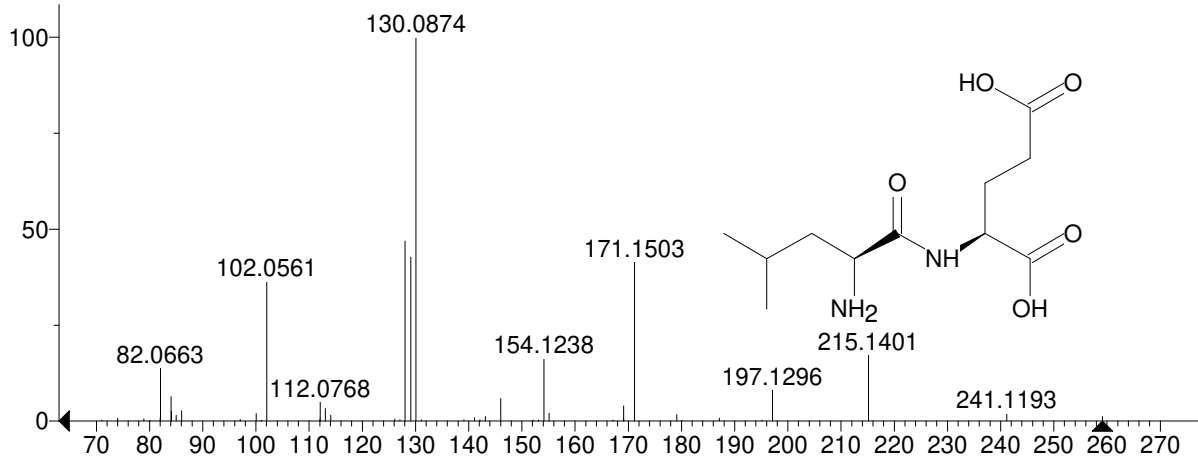

Hit 4 : Leu-Glu [M-H]<sup>-</sup> HCD 28eV P=259.1  
C<sub>11</sub>H<sub>20</sub>N<sub>2</sub>O<sub>5</sub>; MF: 355; RMF: 625; Prob 11.1%; CAS: 16364-31-1; Lib: nist\_msms2; ID: 84518.

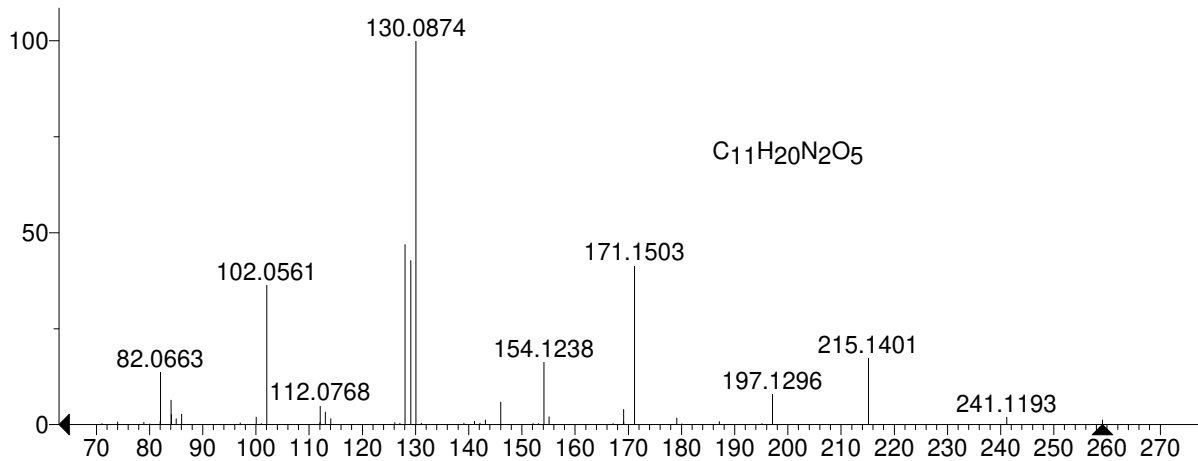

Hit 5 : Glu-Leu [M-H]<sup>-</sup> HCD 23eV P=259.1  
C<sub>11</sub>H<sub>20</sub>N<sub>2</sub>O<sub>5</sub>; MF: 190; RMF: 492; Prob 0.26%; Lib: nist\_msms; ID: 570062.

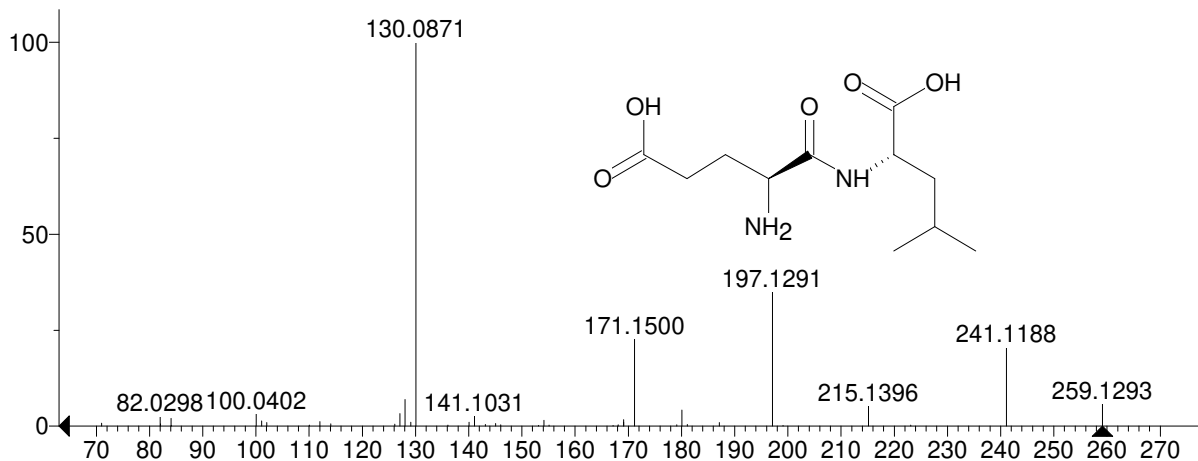

Unknown: Unknown (4.89\_429.1869m/z)  
Compound in Library Factor = -1309

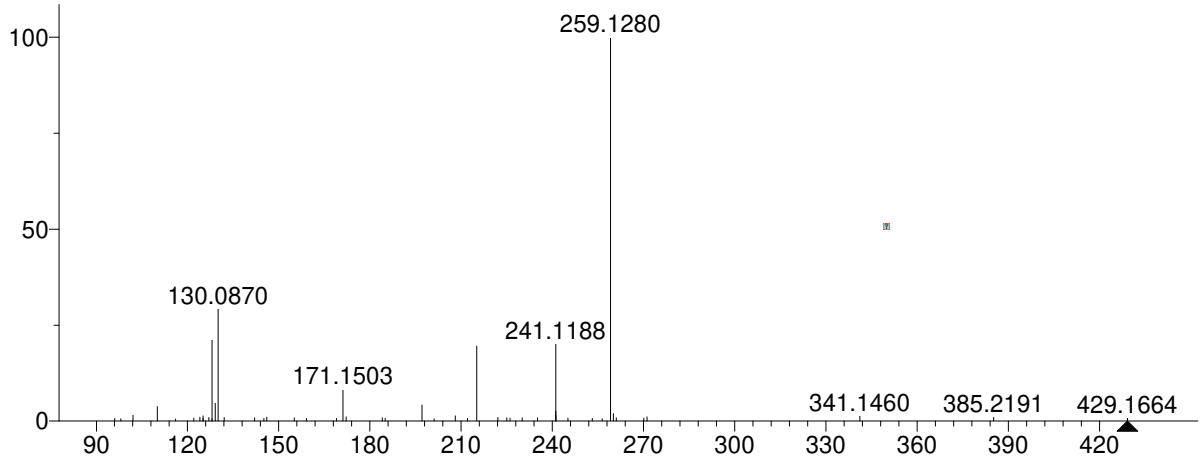

Hit 1 : Garcinone D [M+H]<sup>+</sup> HCD 4V P=429.2  
C<sub>24</sub>H<sub>28</sub>O<sub>7</sub>; MF: 57; RMF: 488; Prob 48.8%; CAS: 107390-08-9; Lib: nist\_msms; ID: 258128.

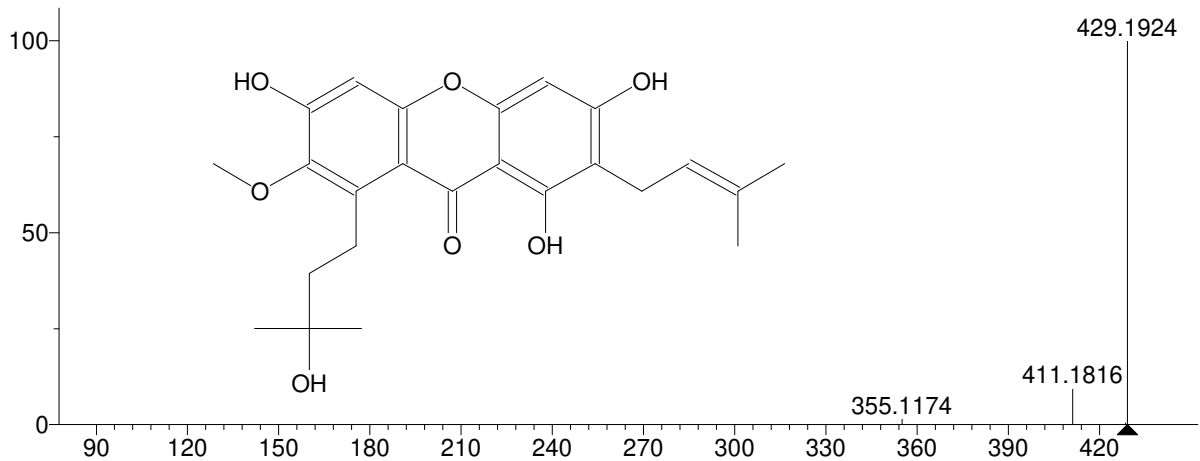

Hit 2 : 21-Carboxylic acid triamcinolone acetonide [M+H-HF]<sup>+</sup> HCD 34V P=429.2  
C<sub>24</sub>H<sub>29</sub>FO<sub>7</sub>; MF: 5; RMF: 102; Prob 9.73%; CAS: 53962-41-7; Lib: nist\_msms; ID: 449217.

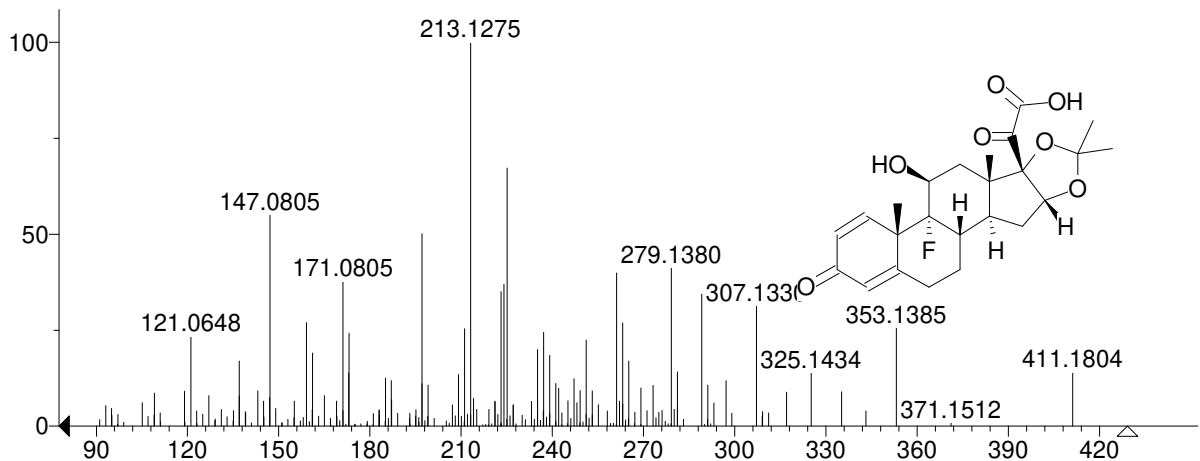

Hit 3 : Terretinin [M+H-C<sub>2</sub>H<sub>4</sub>O<sub>2</sub>]<sup>+</sup> HCD 38V P=429.2  
C<sub>26</sub>H<sub>32</sub>O<sub>9</sub>; MF: 4; RMF: 72; Prob 9.36%; CAS: 71911-90-5; Lib: nist\_msms; ID: 460560.

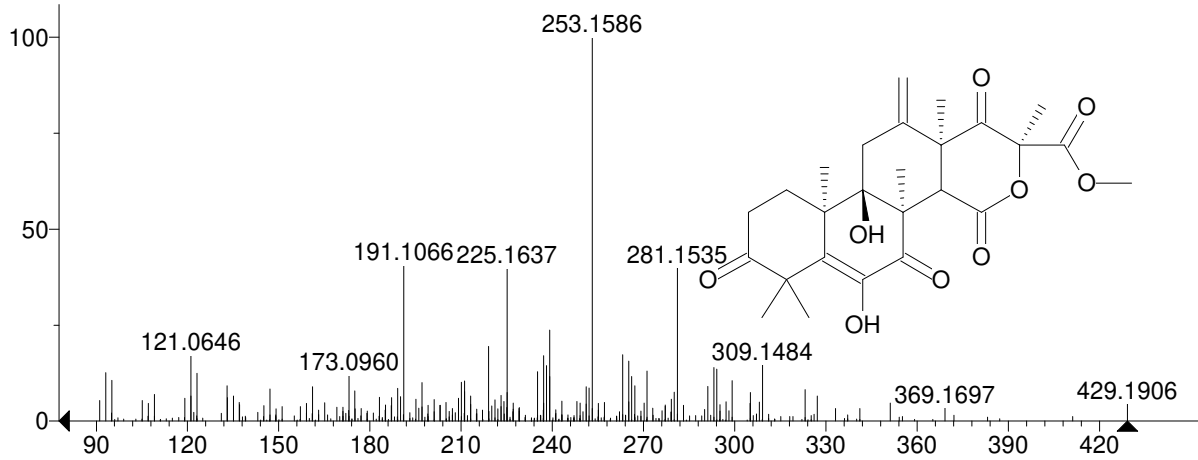

Hit 4 : (2R,3R,4S,5S,6R)-2-[6-hydroxy-3-[(E)-3-hydroxybut-1-enyl]-2,4,4-trimethylcyclohexyl]oxy-6-(hydroxymethyl) C<sub>19</sub>H<sub>34</sub>O<sub>8</sub>; MF: 1; RMF: 51; Prob 8.27%; Lib: anthocyanins mona; ID: 9985.

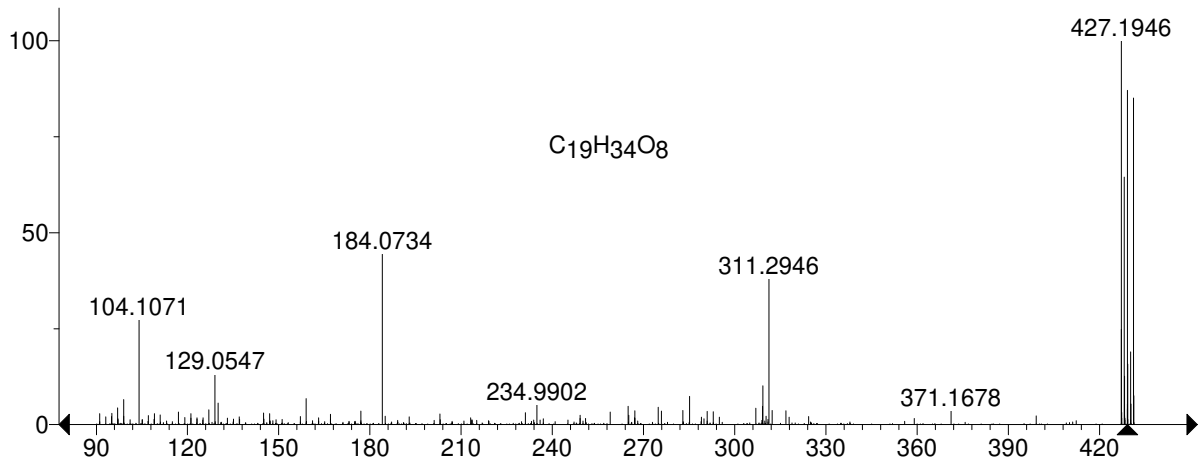

Hit 5 : [8-[2-(3-methylbutanoyloxy)propan-2-yl]-2-oxo-8,9-dihydrofuro[2,3-h]chromen-9-yl] (Z)-2-methylbut-2-enoat C<sub>24</sub>H<sub>28</sub>O<sub>7</sub>; MF: 0; RMF: 16; Prob 7.95%; Lib: mona-export-vf-npl\_qexactive; ID: 20018.

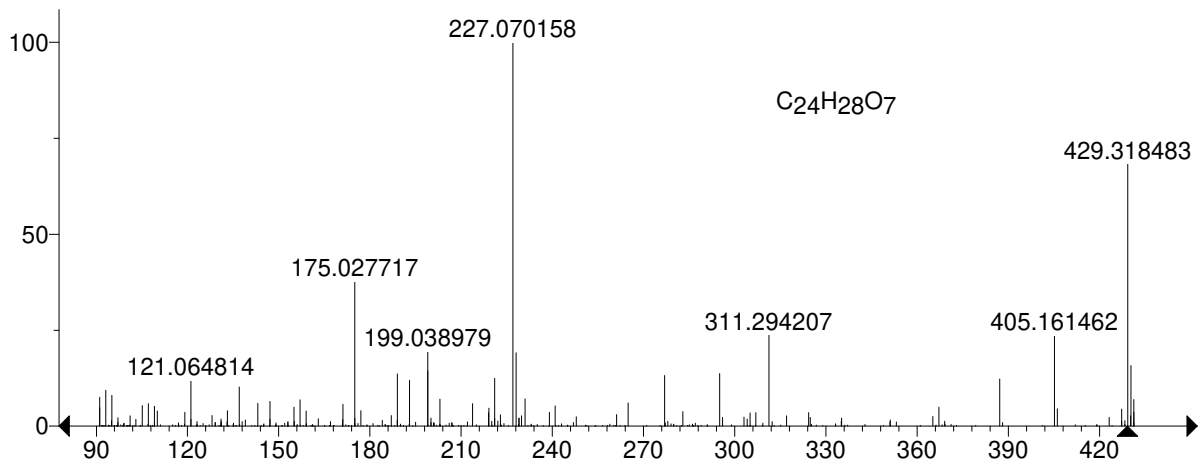

\*\* Search Report Page 1 of 2 \*\*

Unknown: Unknown (4.90\_605.2552m/z)  
Compound in Library Factor = 0

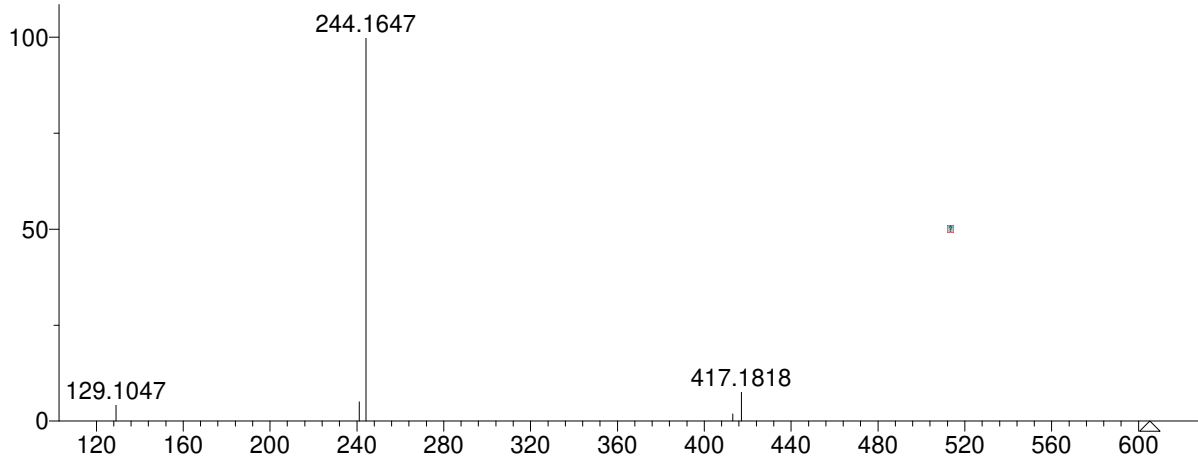

Hit 1 : 6-(furan-3-yl)-6,8,12,16,21-pentahydroxy-7,15-dimethyl-9-oxo-3,17,19-trioxaheptacyclo[9.9.3.0A<sup>1</sup>,A<sup>1</sup>1a<sup>1</sup>,A<sup>1</sup>1a<sup>1</sup>]C<sub>31</sub>H<sub>40</sub>O<sub>12</sub>; MF: 0; RMF: 12; Prob 33.3%; Lib: mona-export-vf-npl\_qexactive; ID: 8383.

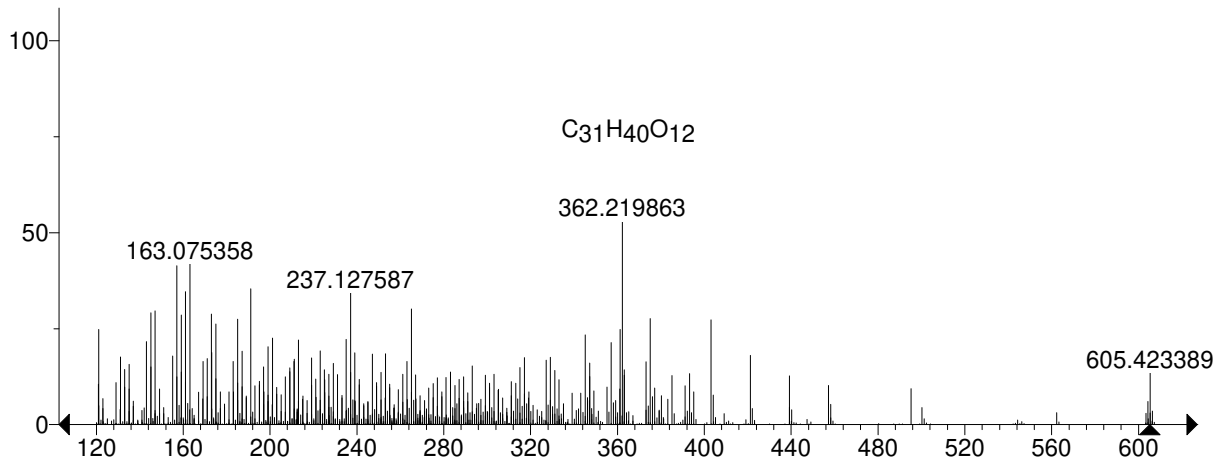

Hit 2 : [Trp7,Leu8] LH-RH, free acid [M-2H]<sup>2-</sup> HCD 70eV P=605.3  
C<sub>60</sub>H<sub>72</sub>N<sub>14</sub>O<sub>14</sub>; MF: 0; RMF: 10; Prob 33.3%; Lib: nist\_msms2; ID: 79092.

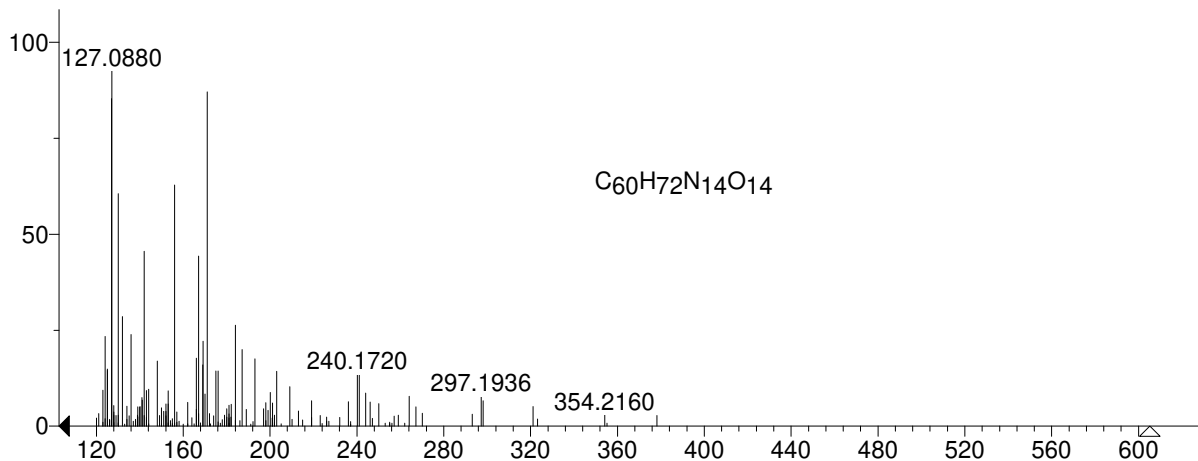

\*\* Search Report Page 2 of 2 \*\*

Hit 3 : NCGC00347665-02\_C31H40O12\_Butanoic acid, 2-methyl-, 9-(3-furanyl)decahydro-2,6,8,9,14-pentahydro  
C31H40O12; MF: 0; RMF: 8; Prob 33.3%; Lib: mona-export-gnps; ID: 13856.

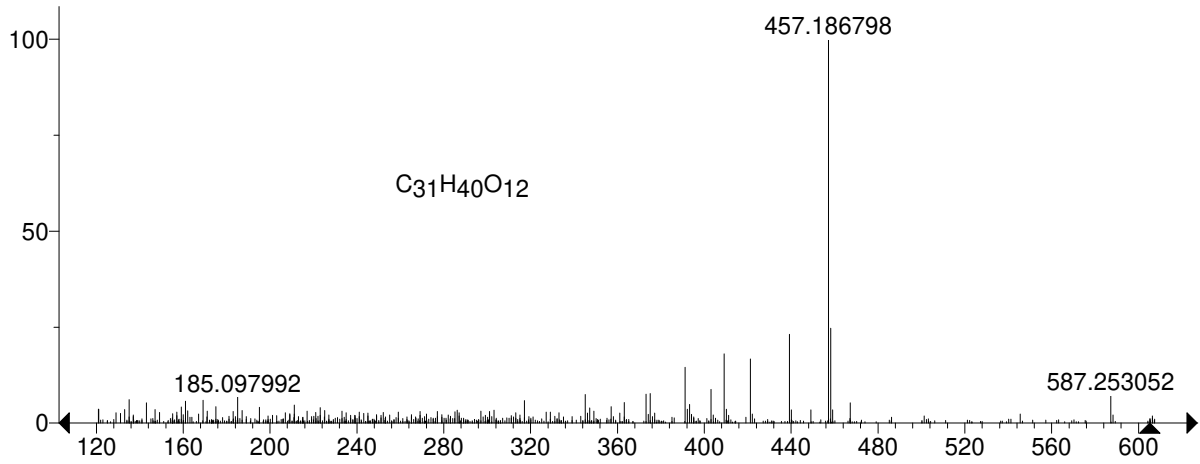



Unknown: Unknown (4.90\_680.2744m/z)  
Compound in Library Factor = 0

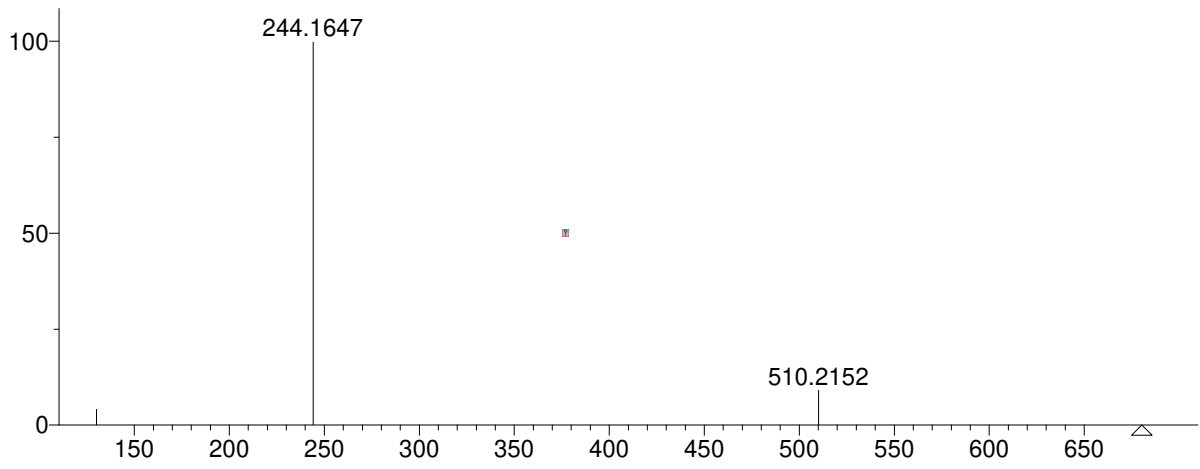

\*\* Search Report Page 1 of 2 \*\*

Unknown: Unknown (4.91\_427.1782m/z)  
Compound in Library Factor = -359

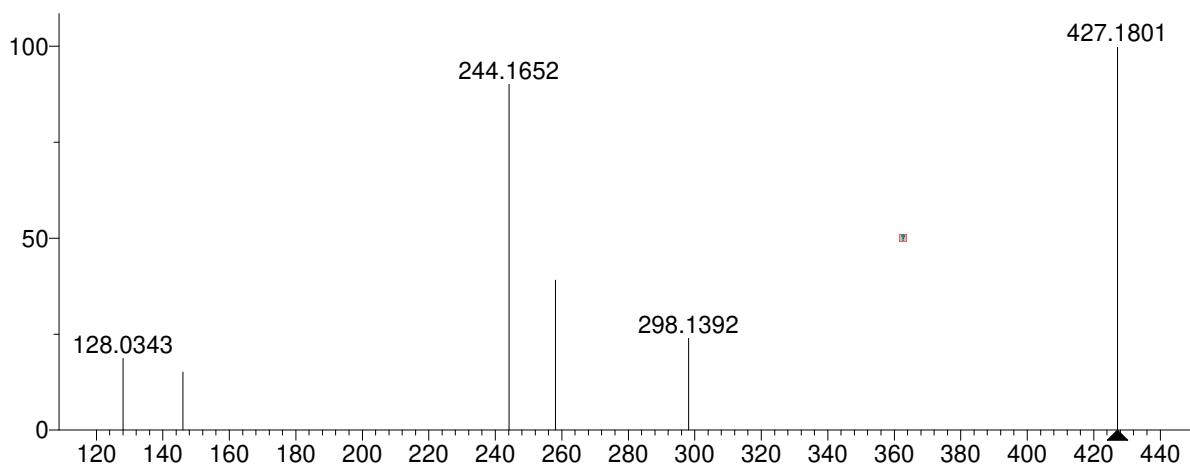

Hit 1 : 3-Isomangostin [M+OH]<sup>-</sup> HCD 21V P=427.2  
C<sub>24</sub>H<sub>26</sub>O<sub>6</sub>; MF: 333; RMF: 976; Prob 92.8%; CAS: 19275-46-8; Lib: nist\_msms; ID: 227726.

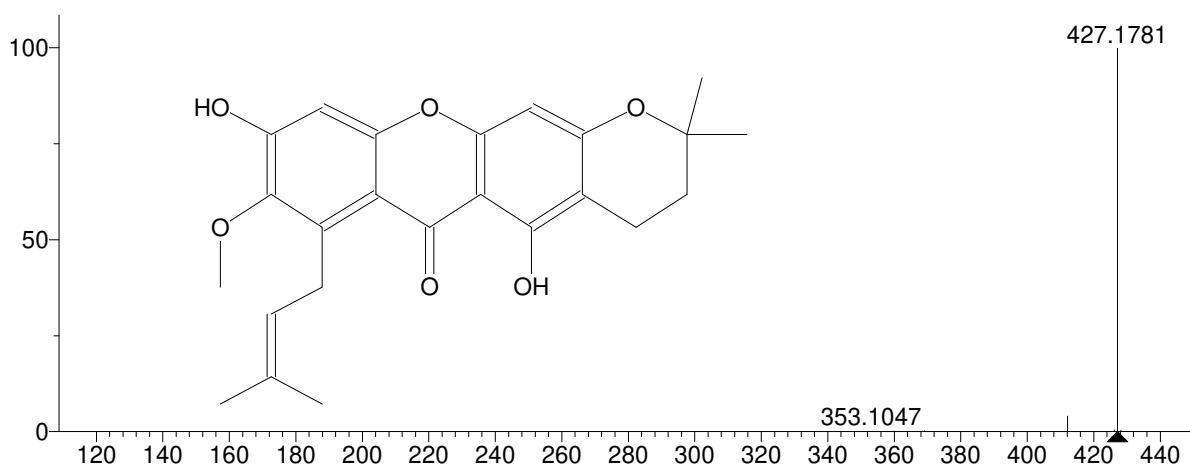

Hit 2 : Garcinone D [M-H]<sup>-</sup> HCD 25V P=427.2  
C<sub>24</sub>H<sub>28</sub>O<sub>7</sub>; MF: 233; RMF: 926; Prob 6.91%; CAS: 107390-08-9; Lib: nist\_msms; ID: 258174.

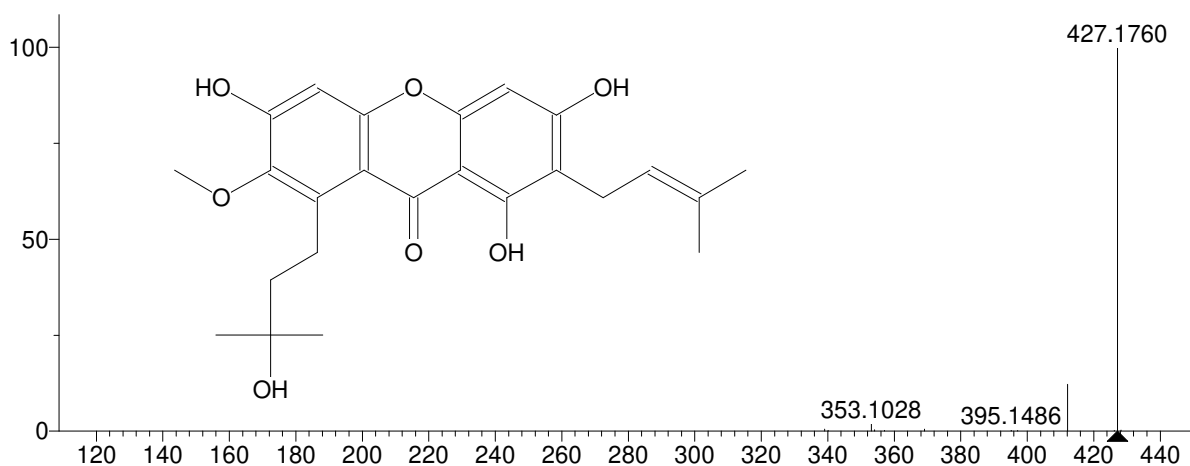

\*\* Search Report Page 2 of 2 \*\*

Hit 3 : Estrone glucuronide [M-H<sub>2</sub>O]- HCD 14V P=427.2  
C<sub>24</sub>H<sub>30</sub>O<sub>8</sub>; MF: 68; RMF: 558; Prob 0.16%; CAS: 2479-90-5; Lib: nist\_msms; ID: 144996.

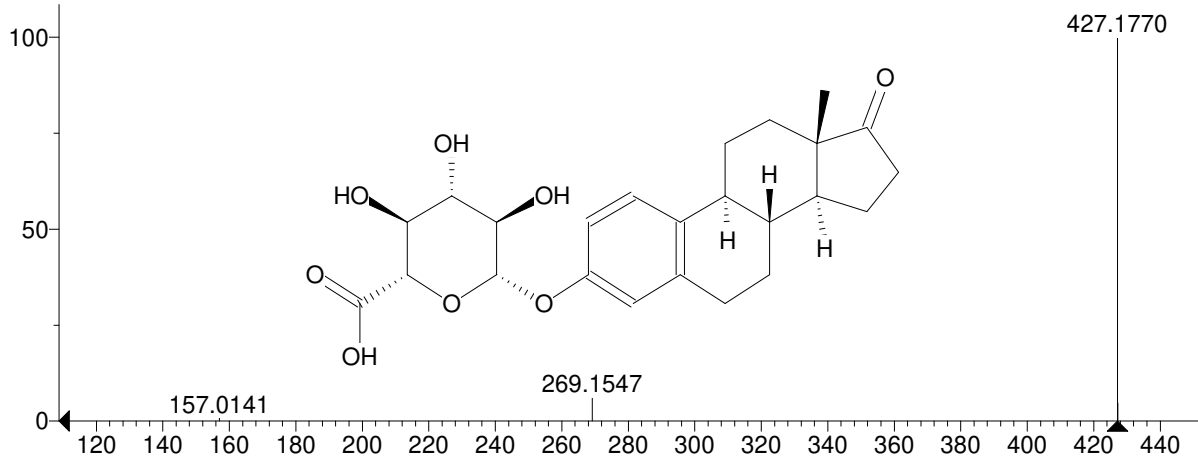

Hit 4 : [8,8-dimethyl-10-(3-methylbut-2-enyloxy)-2-oxo-9,10-dihydropyrano[2,3-f]chromen-9-yl] 3-methylbutanoat  
C<sub>24</sub>H<sub>28</sub>O<sub>7</sub>; MF: 0; RMF: 116; Prob 0.02%; Lib: mona-export-lc-ms-ms\_negative\_mode; ID: 22316.

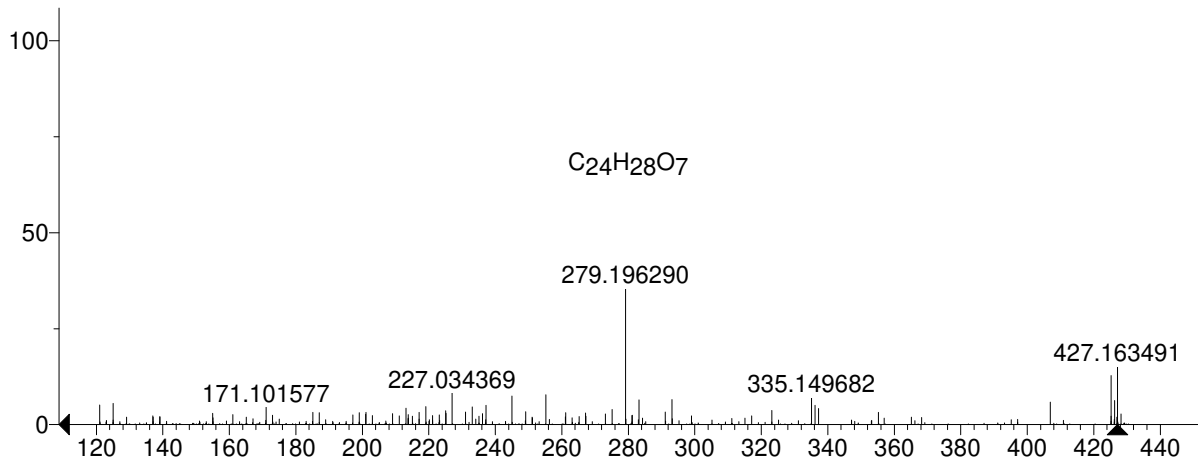

Hit 5 : NCGC00380647-01\_C<sub>17</sub>H<sub>30</sub>O<sub>12</sub>\_alpha-D-Glucopyranoside, alpha-D-glucopyranosyl, 3-(2-methylbutanoa  
C<sub>17</sub>H<sub>30</sub>O<sub>12</sub>; MF: 0; RMF: 57; Prob 0.02%; Lib: mona-export-gnps; ID: 10315.

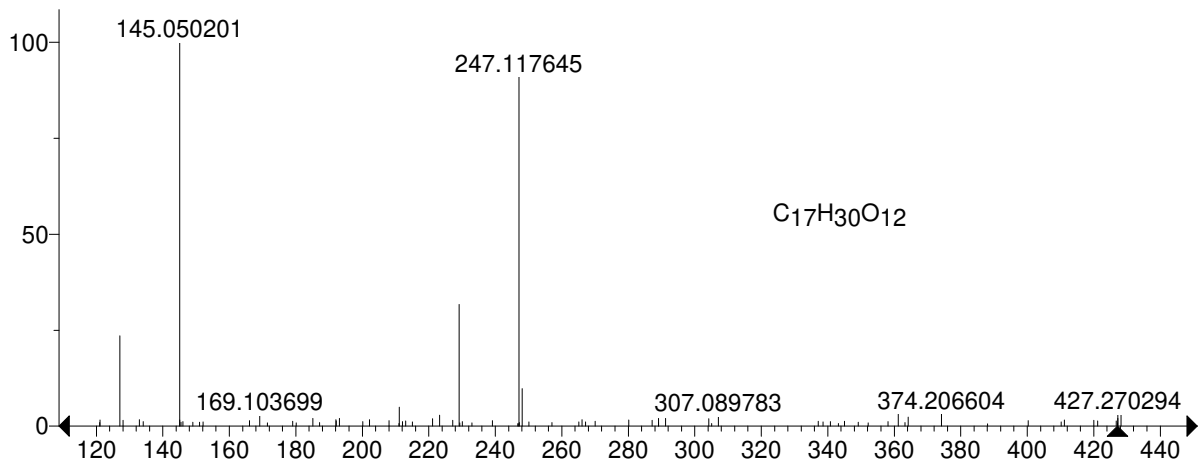

Unknown: Unknown (4.91\_544.2129m/z)  
Compound in Library Factor = 0

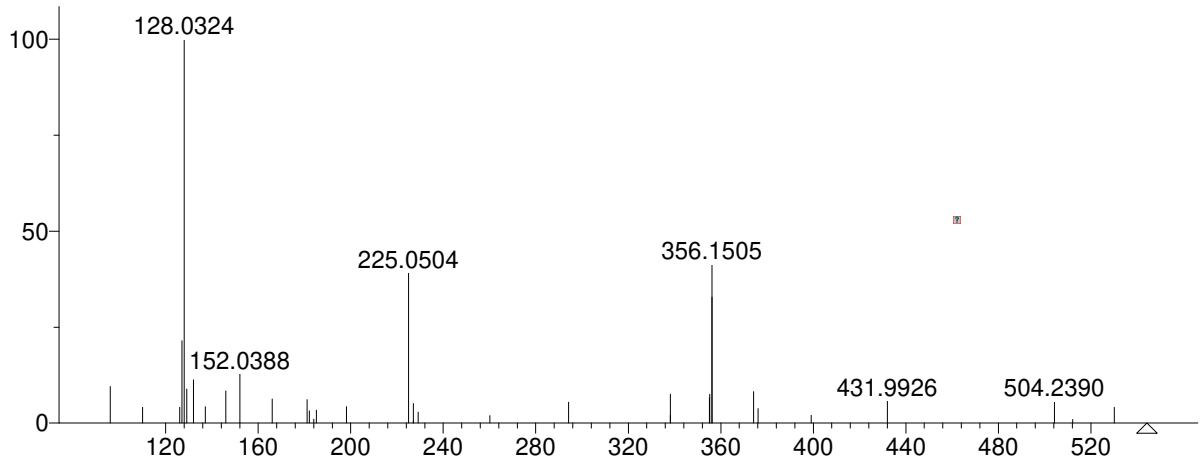

Unknown: Unknown (4.92\_365.1342m/z)  
Compound in Library Factor = 0

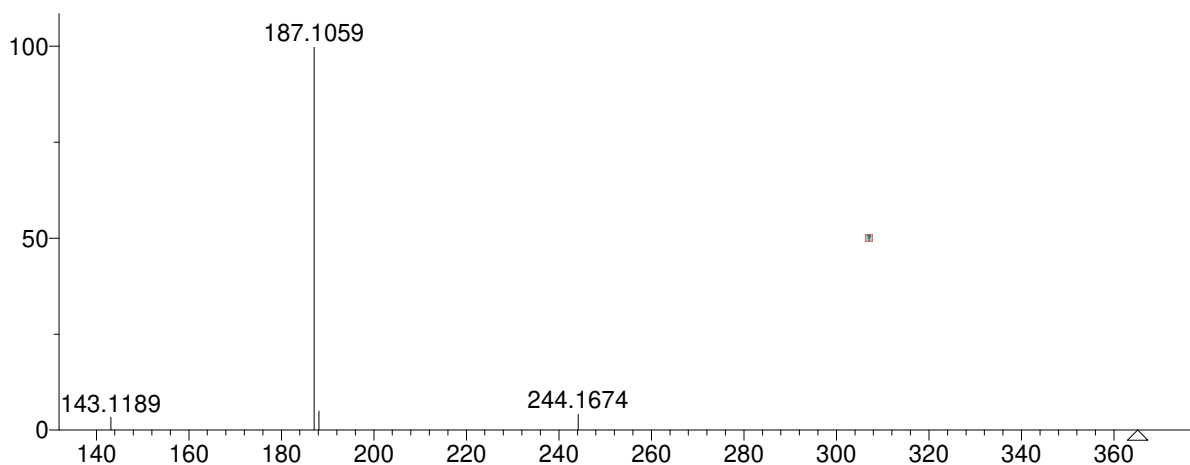

Hit 1 : [5-acetyloxy-3-(hydroxymethyl)-2-oxo-6-propan-2-ylcyclohex-3-en-1-yl] 3-methylbutanoate [M+K]<sup>+</sup> 45HCl  
C<sub>17</sub>H<sub>26</sub>O<sub>6</sub>; MF: 0; RMF: 25; Prob 100.0%; Lib: mona-export-vf-npl\_qexactive; ID: 8246.

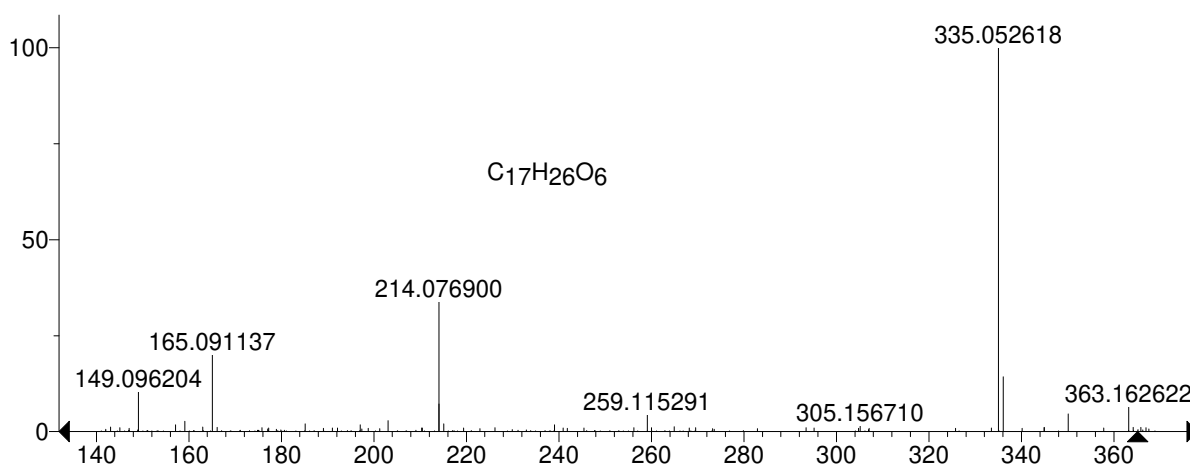

Unknown: Unknown (4.92\_701.3099m/z)  
Compound in Library Factor = 0

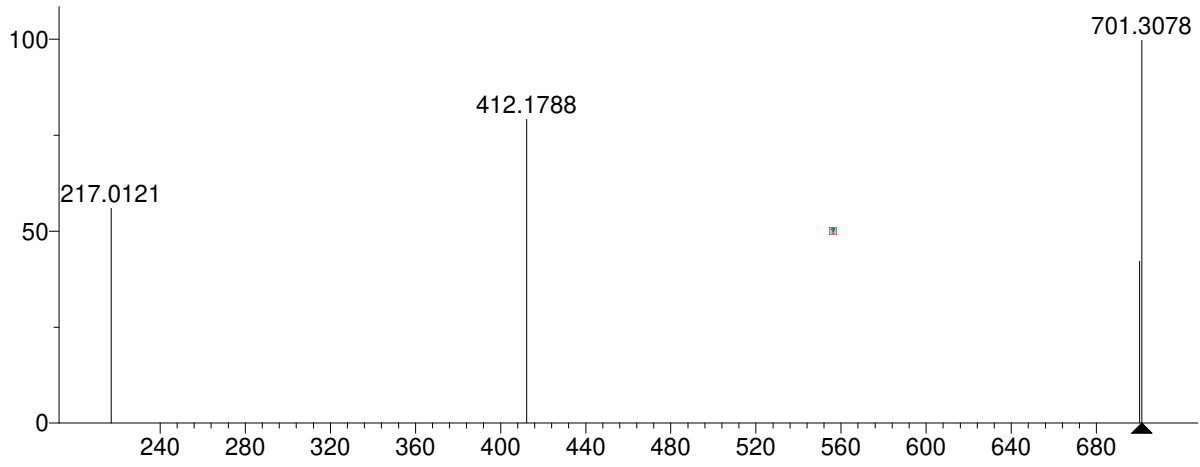

Unknown: Unknown (4.93\_357.1652m/z)  
Compound in Library Factor = 0

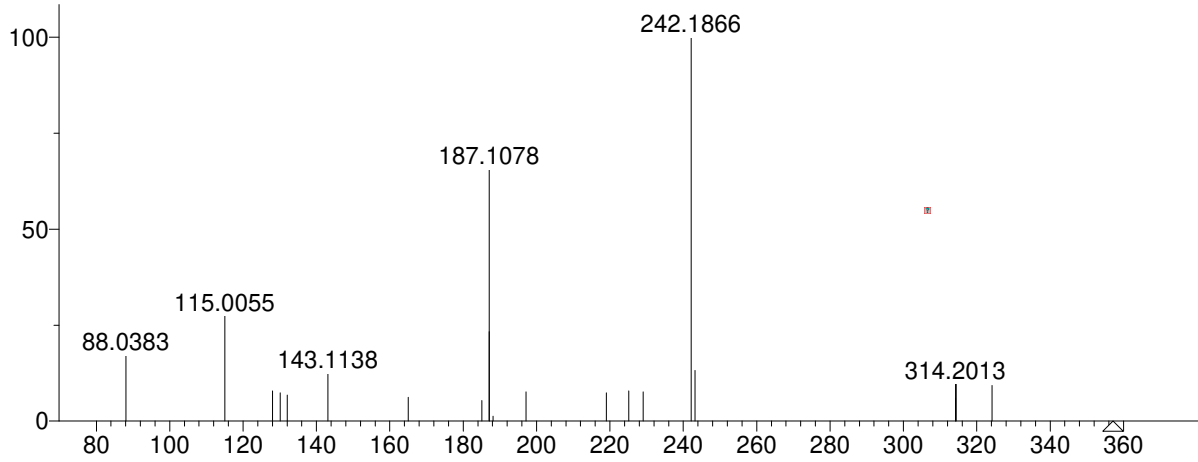

Hit 1 : [(1S,3aR,5R,5aR,8aR,9S,9aR)-1,5,8a-trimethyl-2,8-dioxo-3a,4,5,5a,9,9a-hexahydro-1H-azuleno[6,5-b]fura C<sub>19</sub>H<sub>26</sub>O<sub>5</sub>; MF: 0; RMF: 10; Prob 50.0%; Lib: mona-export-vf-npl\_gexactive; ID: 7288.

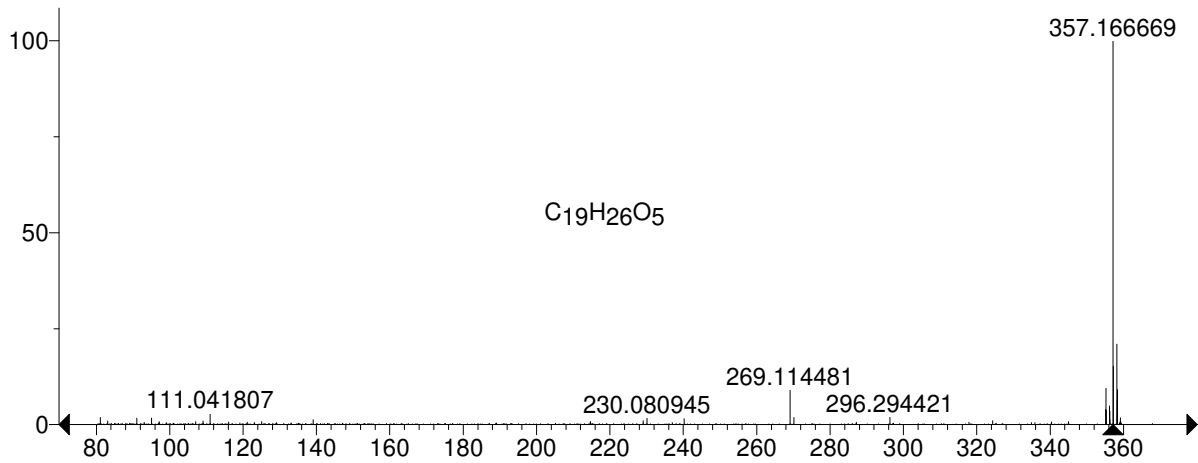

Hit 2 : NCGC00381117-01!2-amino-4-hydroxy-5-[[1-(4-methoxy-6-oxopyran-2-yl)-3-methylbutyl]amino]-5-oxopent: C<sub>16</sub>H<sub>24</sub>N<sub>2</sub>O<sub>7</sub>; MF: 0; RMF: 8; Prob 50.0%; Lib: mona-export-gnps; ID: 8549.

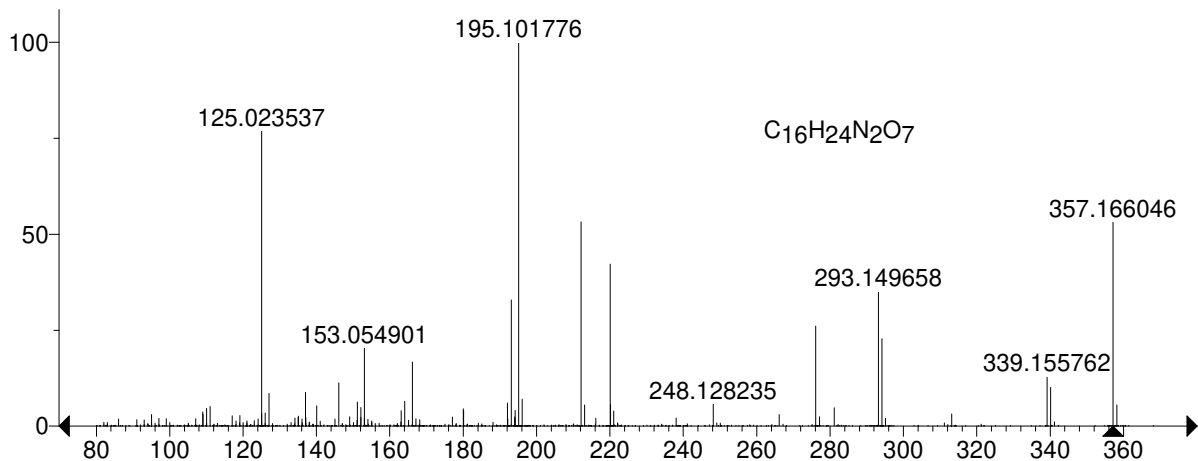

Unknown: Unknown (4.93\_832.2981m/z)  
Compound in Library Factor = 0

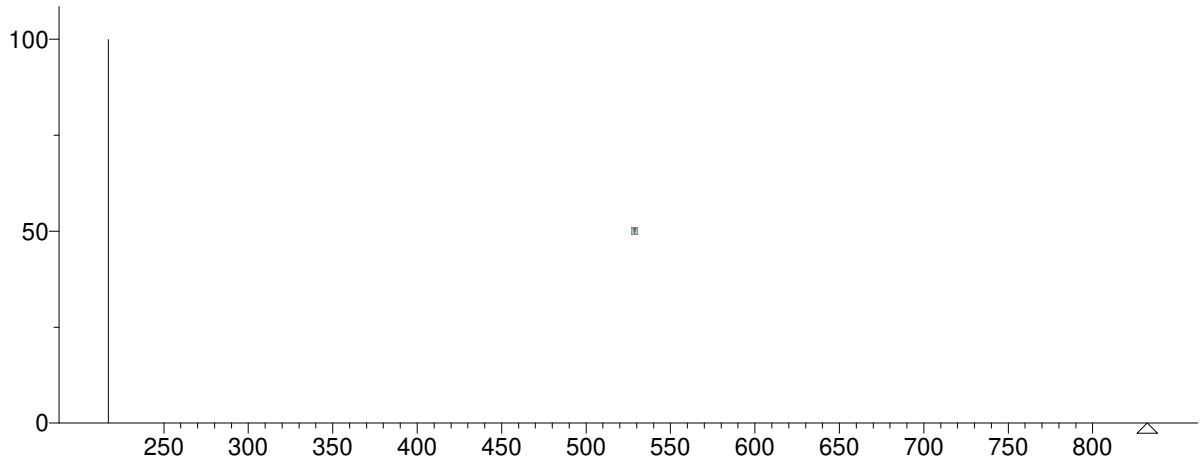



Unknown: Unknown (4.94\_472.1933m/z)  
Compound in Library Factor = 0

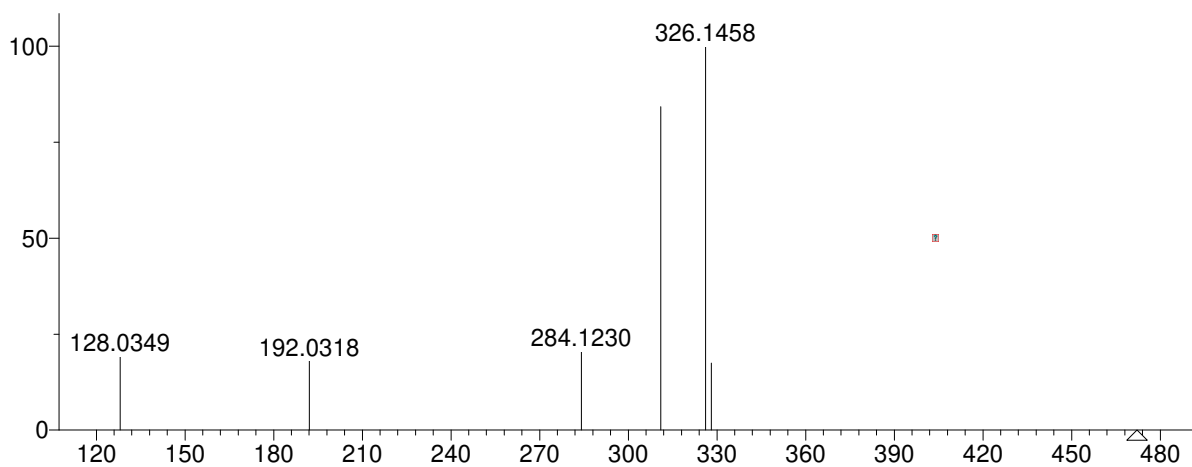

Hit 1 : methyl 3-(3,4-dihydroxyphenyl)-2-[[4-hydroxy-3-(3-methylbut-2-enyl)phenyl]methyl]-4-methoxy-5-oxofuran-  
C<sub>25</sub>H<sub>26</sub>O<sub>8</sub>; MF: 0; RMF: 12; Prob 100.0%; Lib: mona-export-vf-npl\_qexactive; ID: 9391.

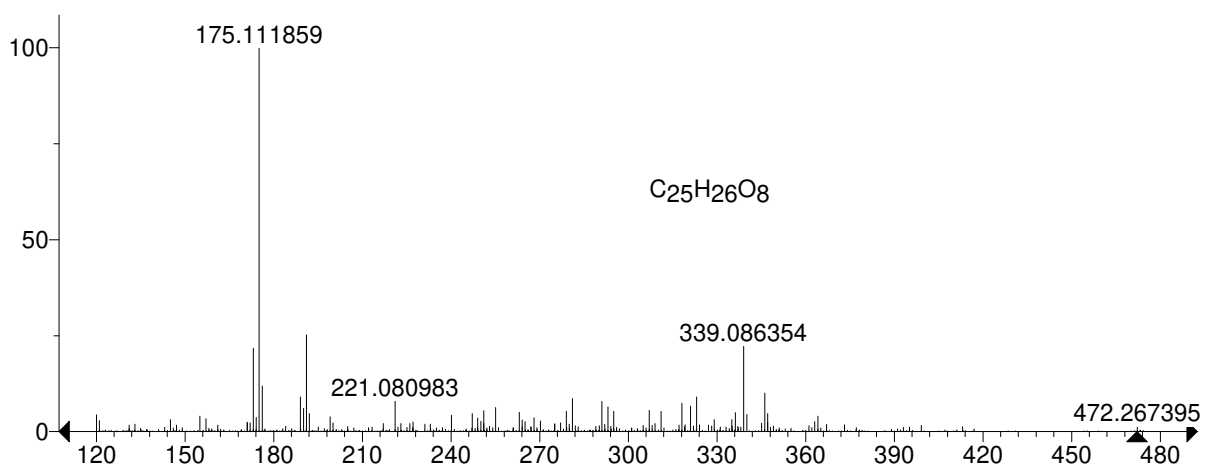

Unknown: Unknown (4.94\_832.2663m/z)  
Compound in Library Factor = 0



Unknown: Unknown (4.96\_481.0946m/z)  
Compound in Library Factor = -3273

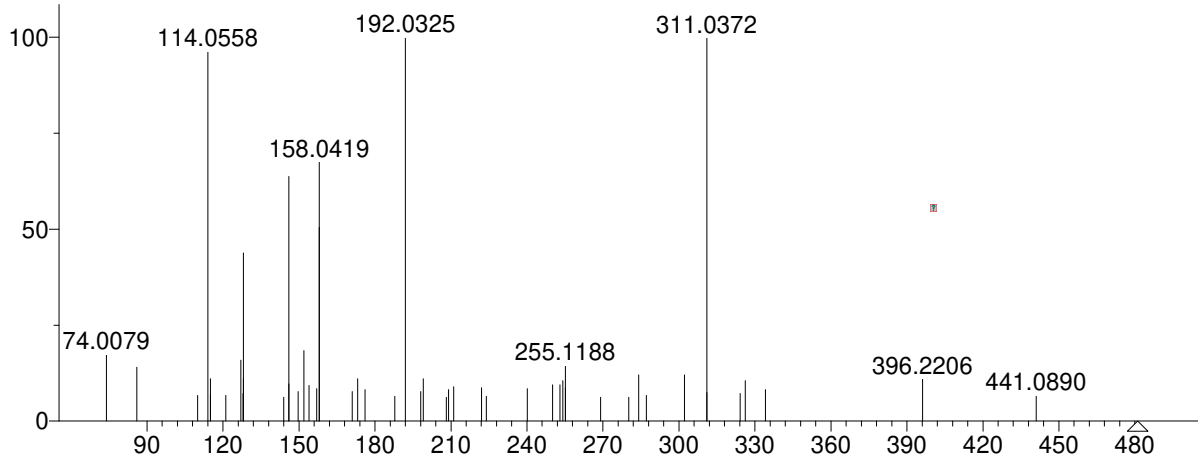

Hit 1 : Gossypin [M+H]<sup>+</sup> HCD 95V P=481.1  
C<sub>21</sub>H<sub>20</sub>O<sub>13</sub>; MF: 1; RMF: 66; Prob 17.1%; CAS: 652-78-8; Lib: nist\_msms; ID: 111983.

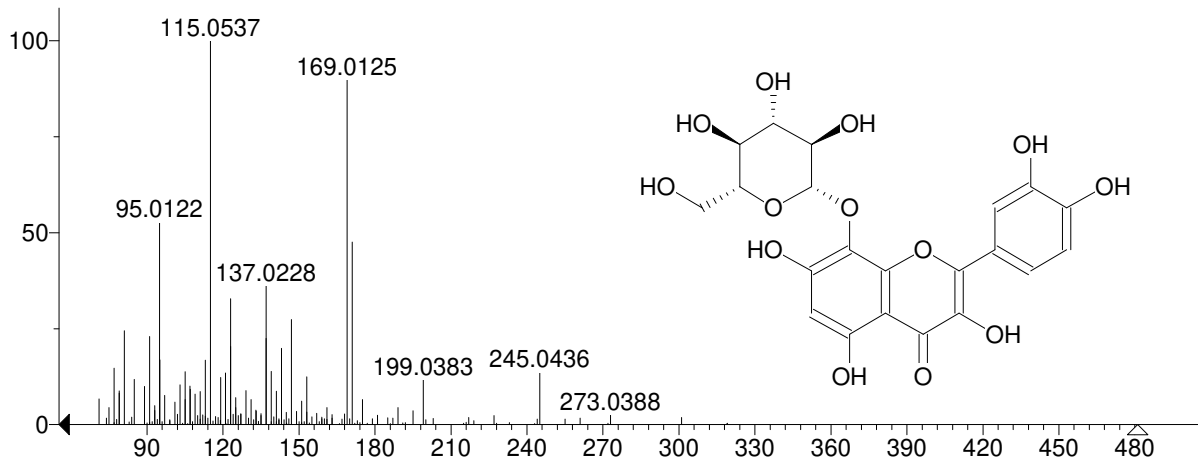

Hit 2 : Delphinidin 3-galactoside cation [Cat-H+OH]<sup>-</sup> HCD 91V P=481.1  
C<sub>21</sub>H<sub>21</sub>O<sub>12</sub>; MF: 1; RMF: 37; Prob 17.1%; CAS: 197250-28-5; Lib: nist\_msms; ID: 394733.

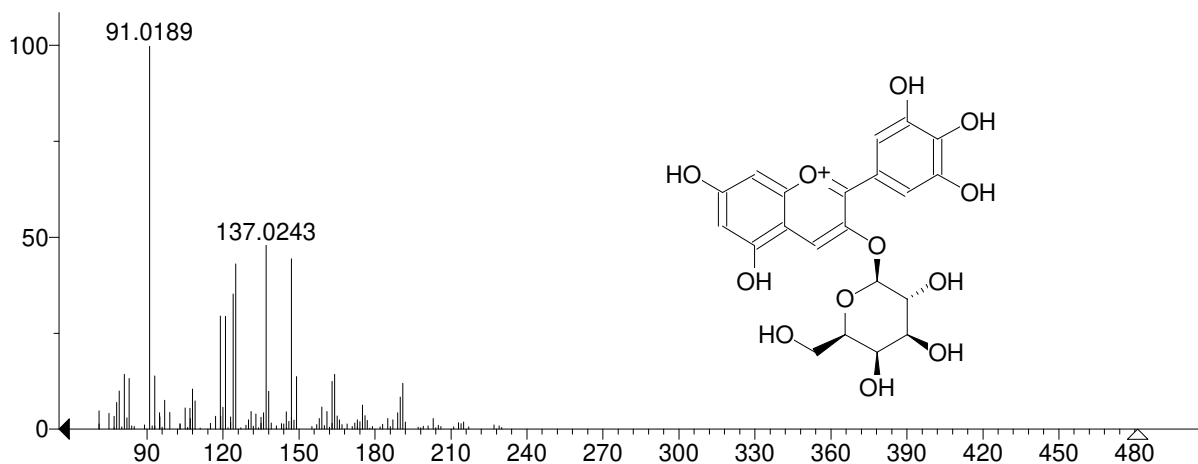

Hit 3 : Quercetagenin-7-O-glucoside [M+H]<sup>+</sup> HCD 125V P=481.1  
C<sub>21</sub>H<sub>20</sub>O<sub>13</sub>; MF: 0; RMF: 53; Prob 16.4%; CAS: 548-75-4; Lib: nist\_msms; ID: 108305.

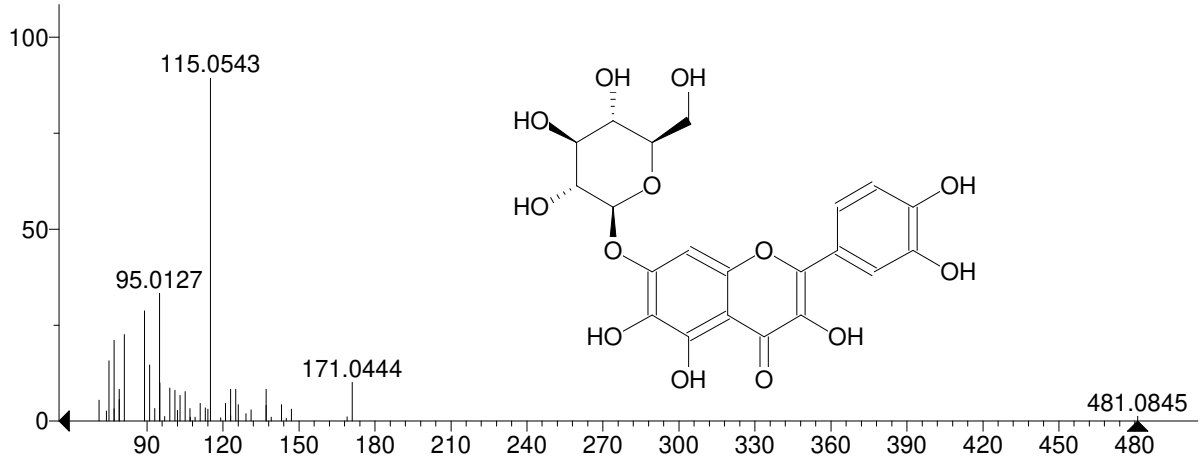

Hit 4 : Gossypetin-8-C-glucoside [M+H]<sup>+</sup> 50eV P=481.1  
C<sub>21</sub>H<sub>20</sub>O<sub>13</sub>; MF: 0; RMF: 17; Prob 16.4%; Lib: anthocyanins mona; ID: 680.

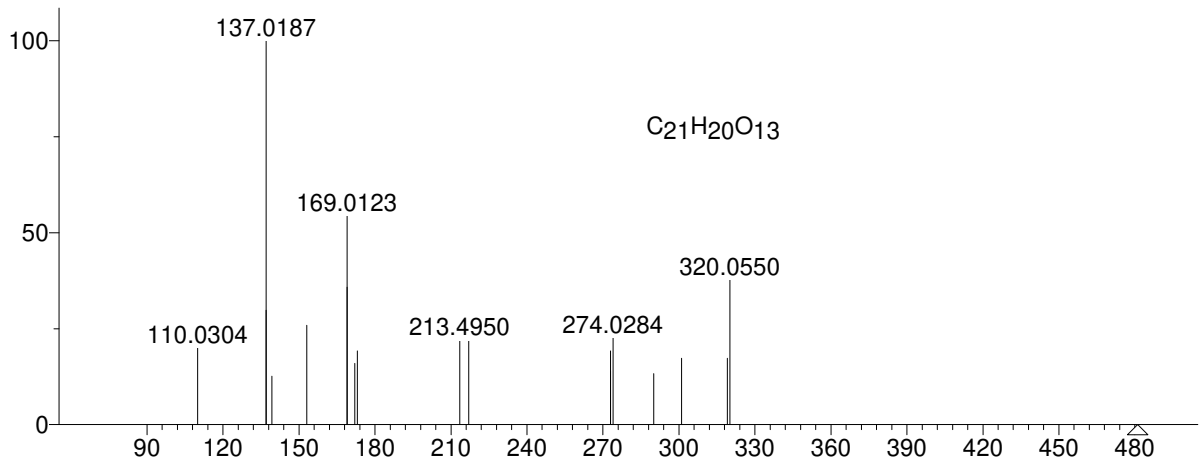

Hit 5 : NCGC00180655-0215,7-dihydroxy-3-[(2S,3R,4S,5R,6R)-3,4,5-trihydroxy-6-(hydroxymethyl)oxan-2-yl]oxy-2  
C<sub>21</sub>H<sub>20</sub>O<sub>13</sub>; MF: 0; RMF: 8; Prob 16.4%; Lib: mona-export-gnps; ID: 9816.

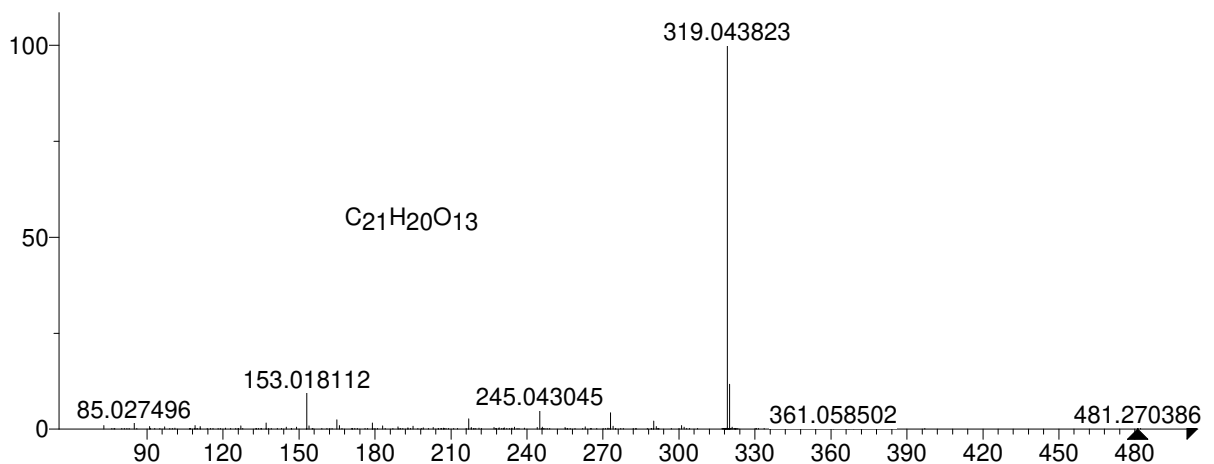

Unknown: Unknown (4.96\_496.2031m/z)  
Compound in Library Factor = -3273

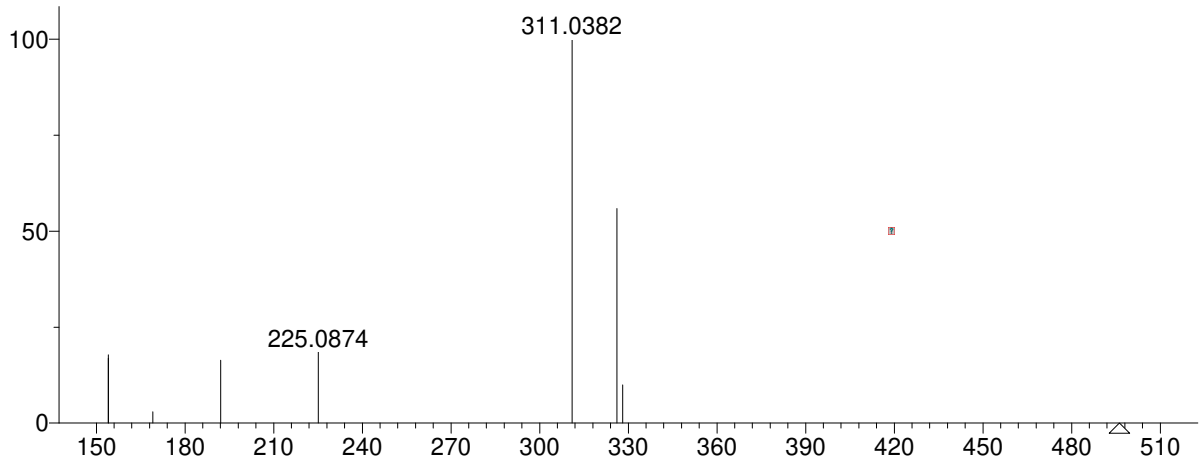

Hit 1 : (2R,3S,4S,5R,6S)-2-[(3,4,5-trihydroxyoxan-2-yl)oxymethyl]-6-(3,4,5-trimethoxyphenoxy)oxane-3,4,5-triol [†  
C<sub>20</sub>H<sub>30</sub>O<sub>13</sub>; MF: 1; RMF: 174; Prob 25.7%; Lib: mona-export-vf-npl\_qexactive; ID: 9258.

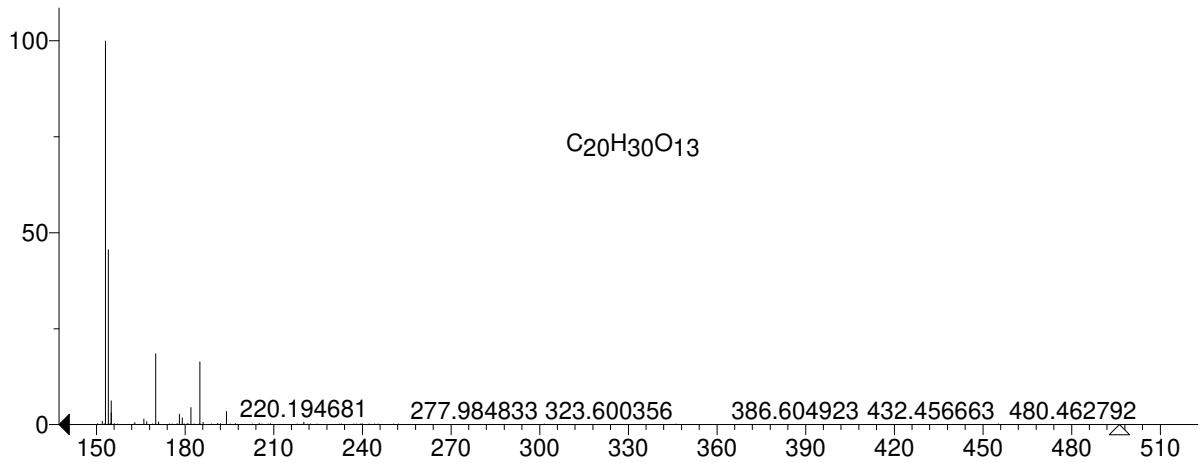

Hit 2 : (2R,3S,4S,5R,6S)-2-[[[(2S,3R,4R)-3,4-dihydroxy-4-(hydroxymethyl)oxolan-2-yl]oxymethyl]-6-(3,4,5-trimethoxyphenoxy)oxane-3,4,5-triol [†  
C<sub>20</sub>H<sub>30</sub>O<sub>13</sub>; MF: 0; RMF: 150; Prob 24.8%; Lib: mona-export-vf-npl\_qexactive; ID: 9783.

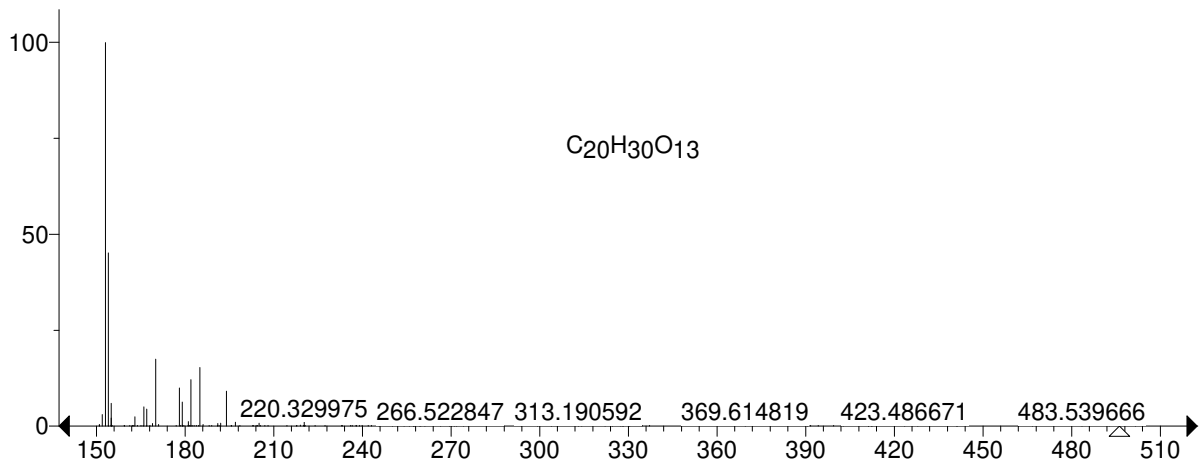



Unknown: Unknown (4.96\_516.2160m/z)  
Compound in Library Factor = 0

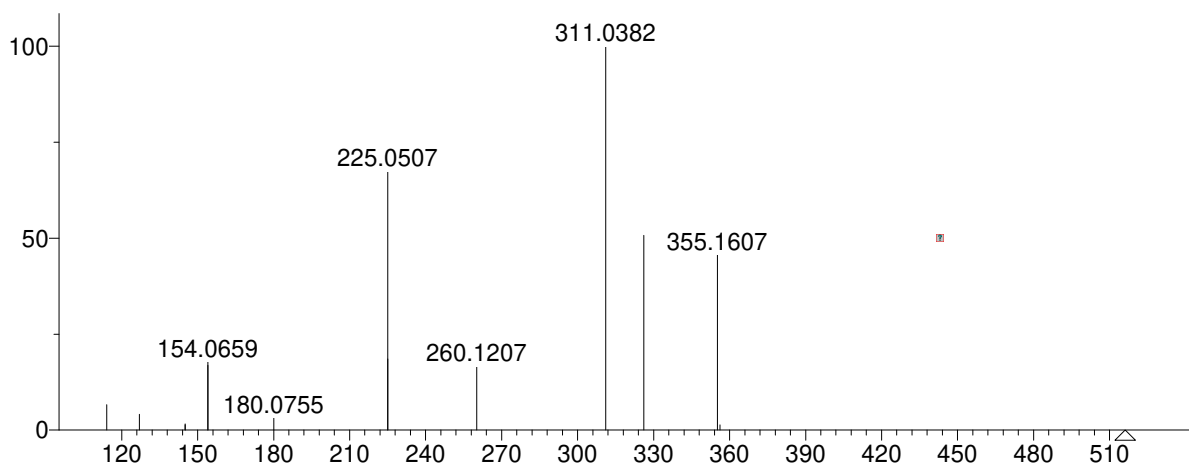

Hit 1 : Asp371, Tyrosinase (369-377), human [M+2H]<sup>2+</sup> HCD 41eV P=516.2  
C<sub>42</sub>H<sub>66</sub>N<sub>10</sub>O<sub>16</sub>S<sub>2</sub>; MF: 0; RMF: 23; Prob 100.0%; Lib: nist\_msms2; ID: 47697.

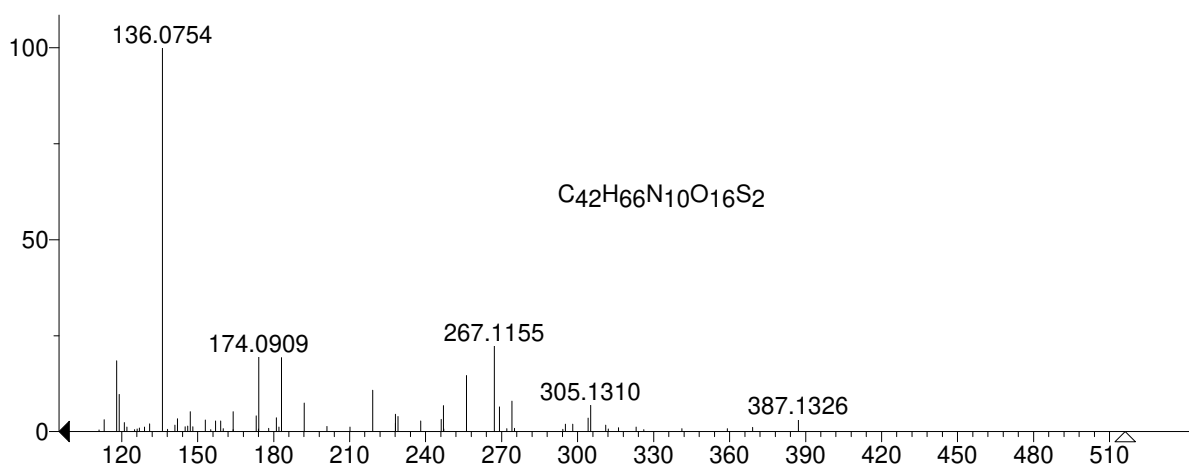

Unknown: Unknown (4.96\_543.2289m/z)  
Compound in Library Factor = 0

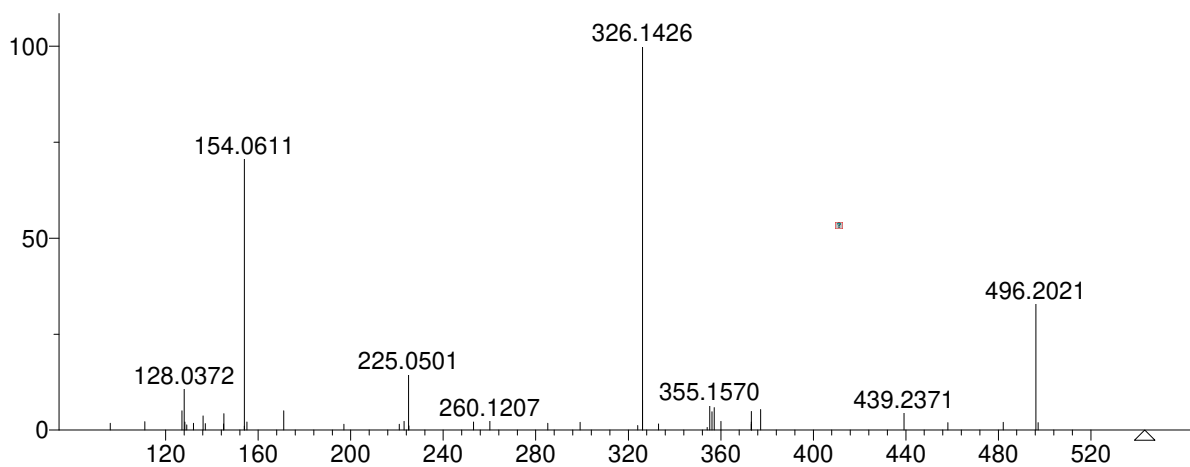

Hit 1 : methyl (2E)-3-[18-(acetyloxy)-7-(furan-3-yl)-17-hydroxy-1,8,15,15-tetramethyl-5-oxo-3,6,14-trioxapentacycl  
C<sub>29</sub>H<sub>36</sub>O<sub>10</sub>; MF: 0; RMF: 34; Prob 100.0%; Lib: mona-export-lc-ms-ms\_negative\_mode; ID: 22886.

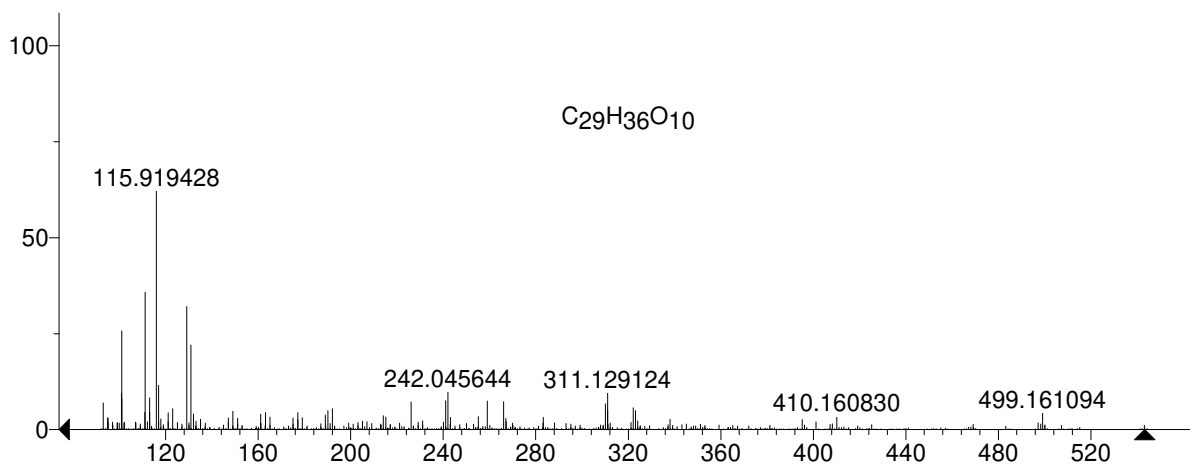



Unknown: Unknown (4.96\_600.2412m/z)  
Compound in Library Factor = 0

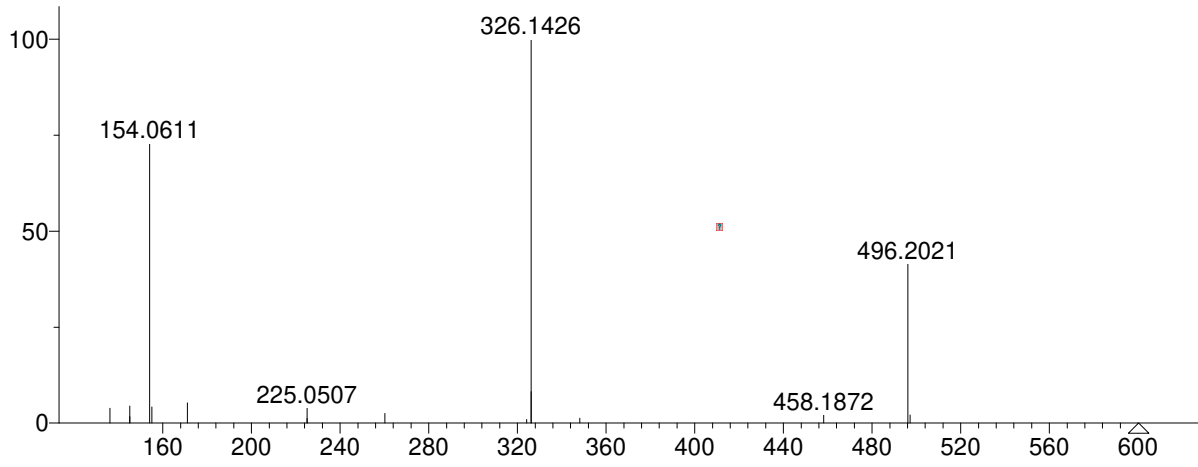

Unknown: Unknown (4.96\_646.2562m/z)  
Compound in Library Factor = 0

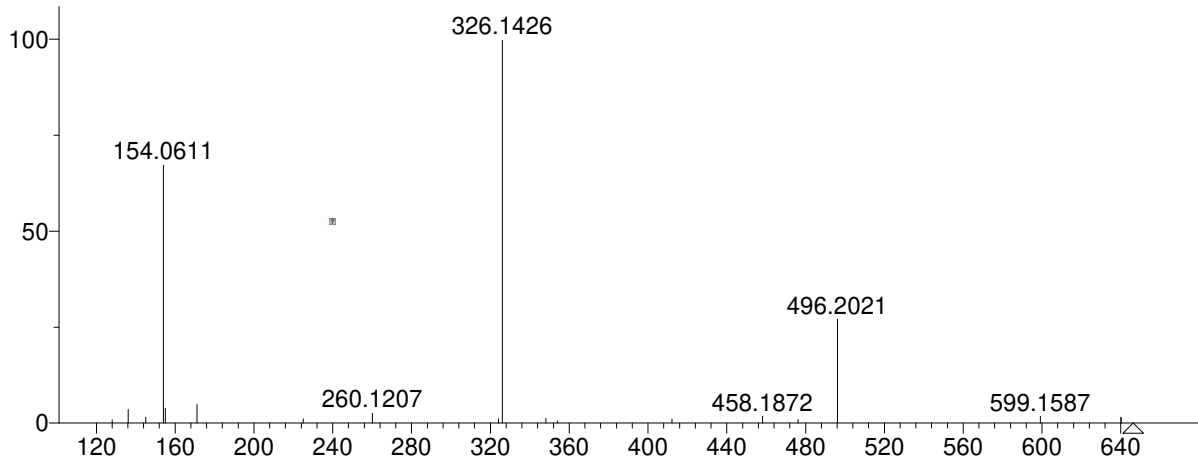

Unknown: Unknown (4.96\_666.2618m/z)  
Compound in Library Factor = 0

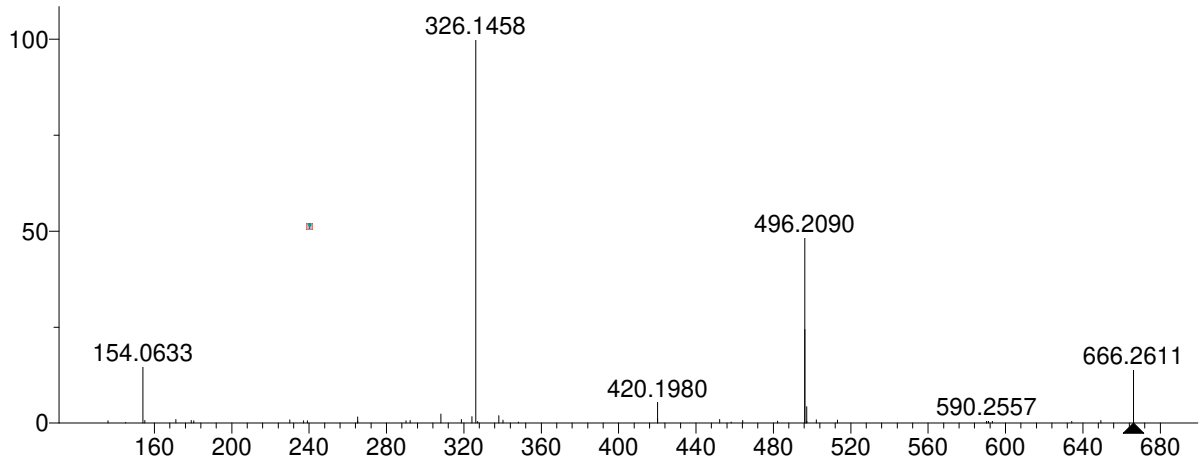

Unknown: Unknown (4.98\_336.1427m/z)  
Compound in Library Factor = 0

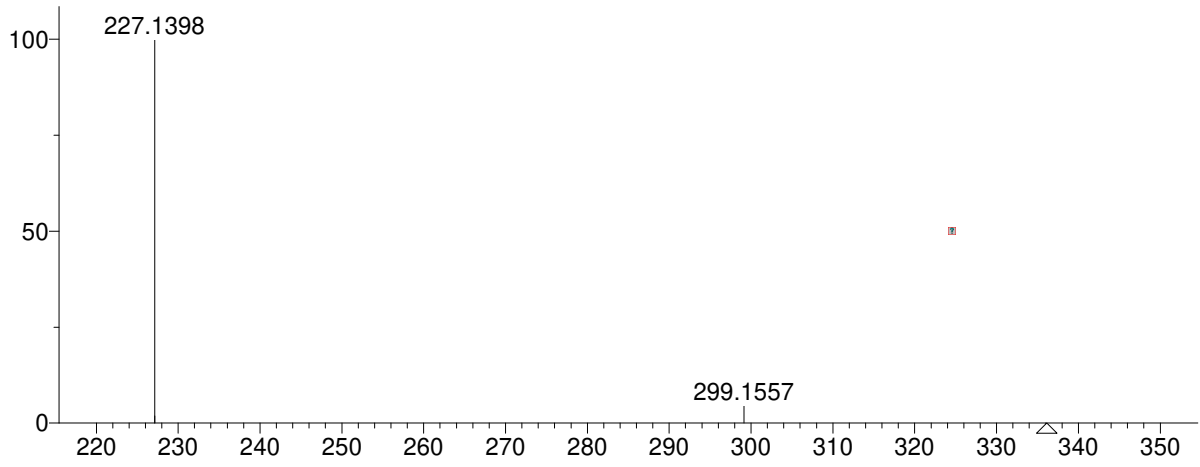

Unknown: Unknown (4.98\_404.1530m/z)  
Compound in Library Factor = 0

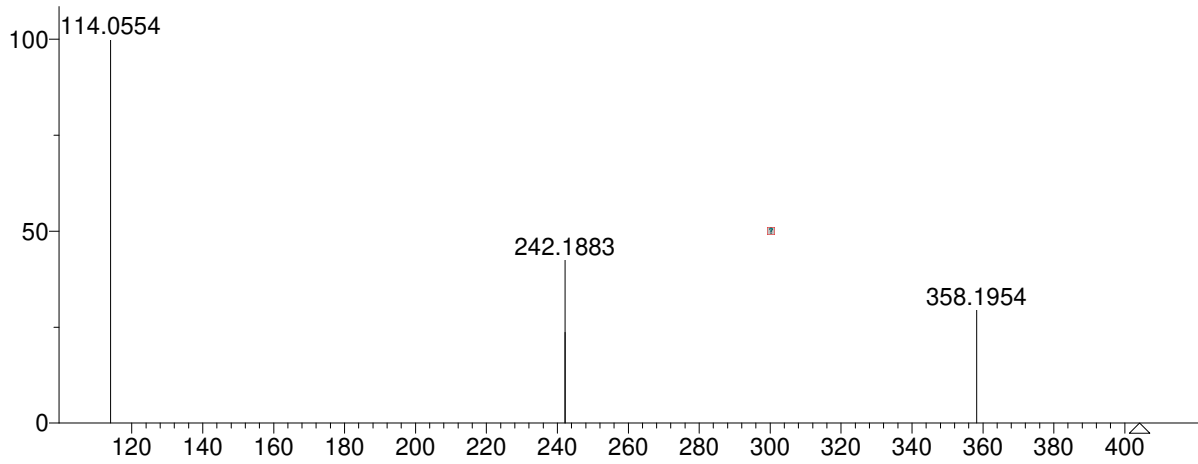

Unknown: Unknown (4.98\_688.2476m/z)  
Compound in Library Factor = 0

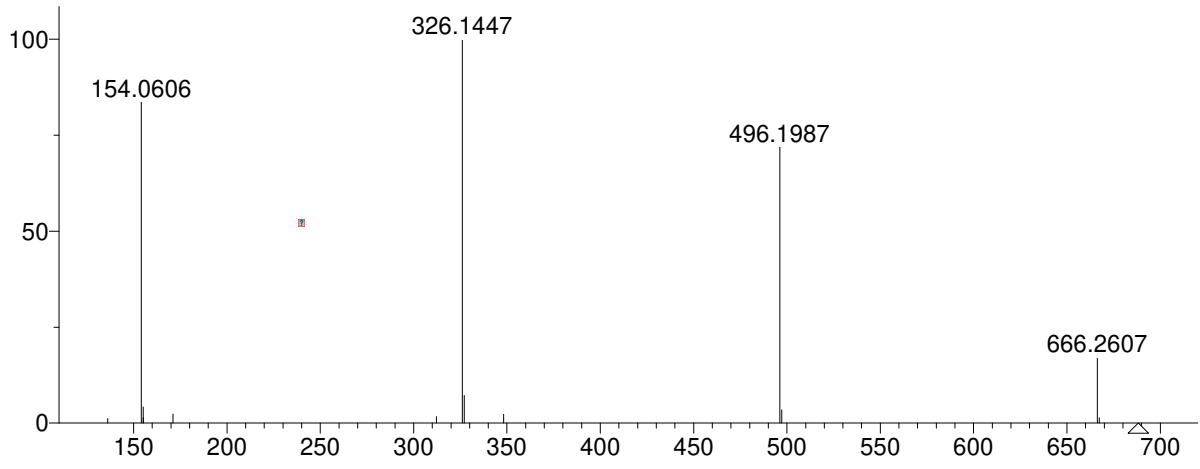

Unknown: Unknown (5.00\_600.1442m/z)  
Compound in Library Factor = 0

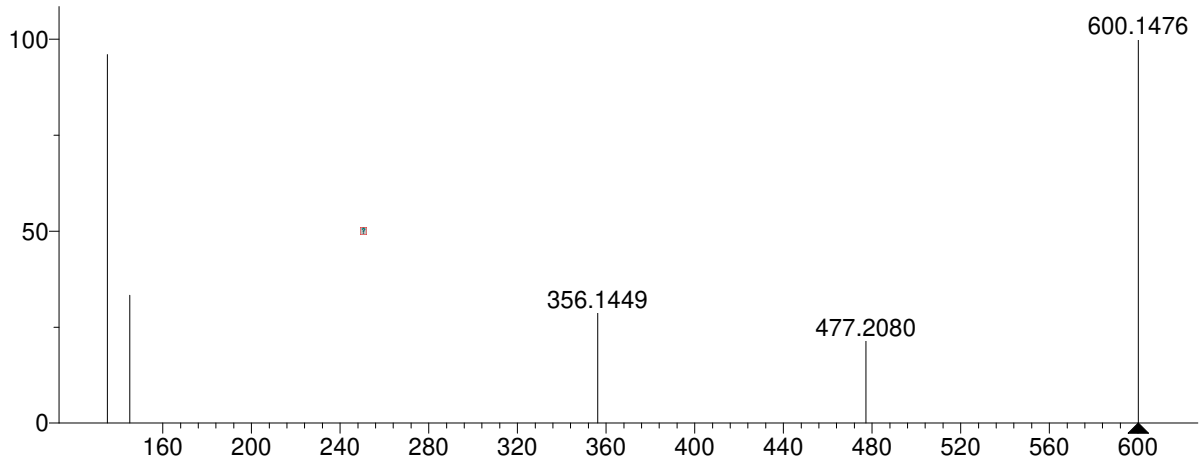

Unknown: Unknown (5.00\_809.3218m/z)  
Compound in Library Factor = 0

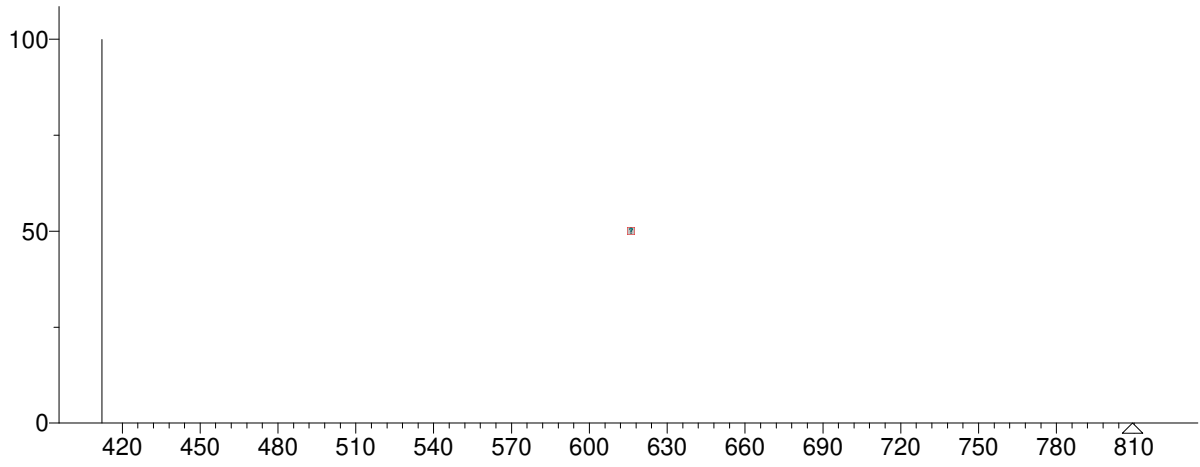



Unknown: Unknown (5.02\_314.1601m/z)  
Compound in Library Factor = 0

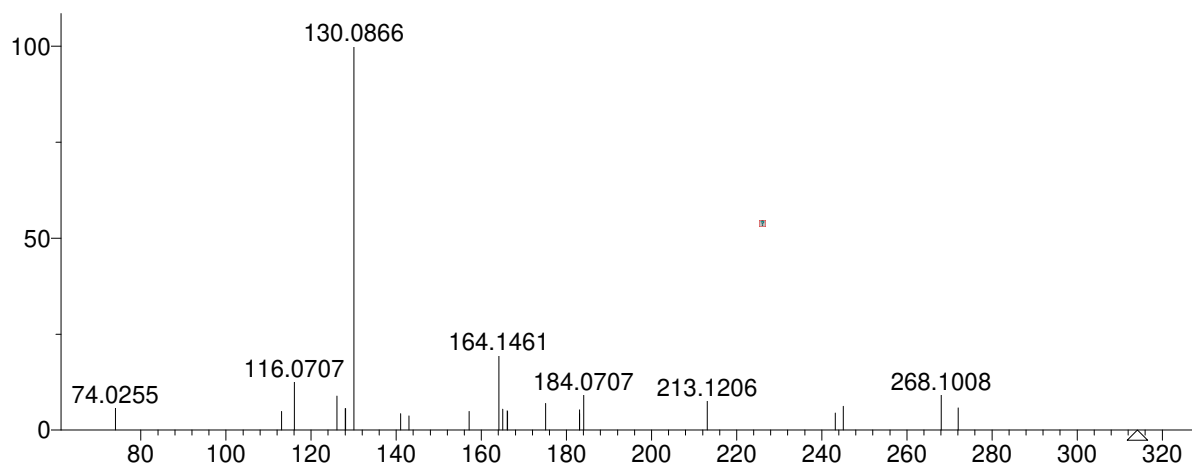

Hit 1 : [(2S,3S)-2-[(E,3R,4S)-3,4-dihydroxypent-1-enyl]-6-oxo-2,3-dihydropyran-3-yl] (E)-2-methylbut-2-enoate [M  
C<sub>15</sub>H<sub>20</sub>O<sub>6</sub>; MF: 0; RMF: 7; Prob 100.0%; Lib: mona-export-vf-npl\_qexactive; ID: 17659.

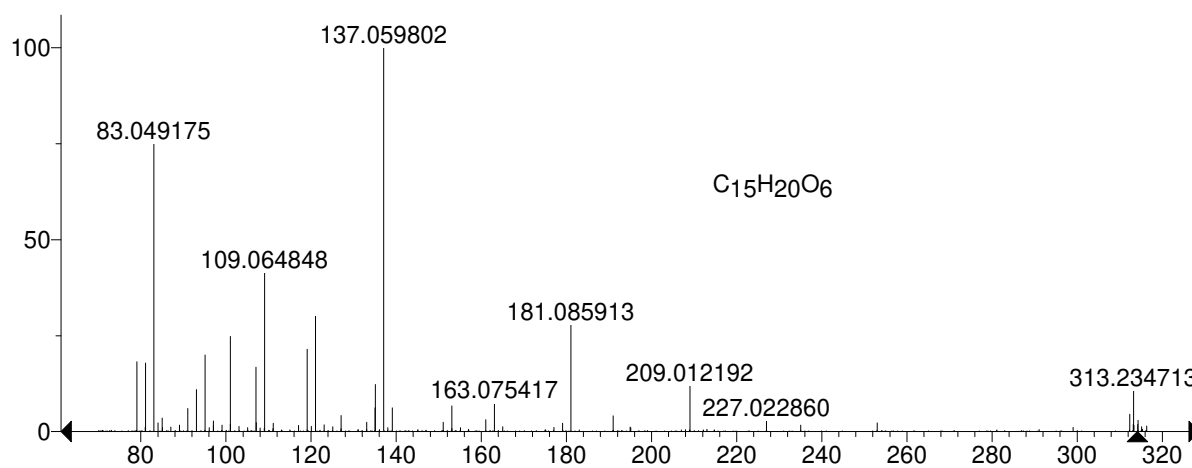

Unknown: Unknown (5.02\_358.1972m/z)  
Compound in Library Factor = -1309

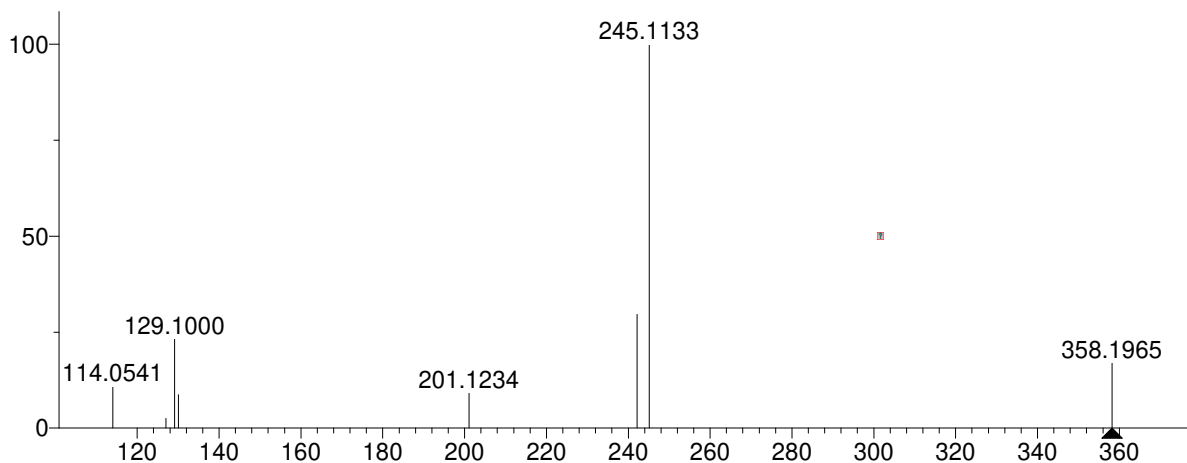

Hit 1 : 4-Hydroxyatorvastatin lactone [M-H-H<sub>2</sub>O]-=>493.2=>358.2 IT 35% P=358.2  
C<sub>33</sub>H<sub>33</sub>FN<sub>2</sub>O<sub>5</sub>; MF: 58; RMF: 579; Prob 27.2%; CAS: 163217-70-7; Lib: nist\_msms; ID: 440854.

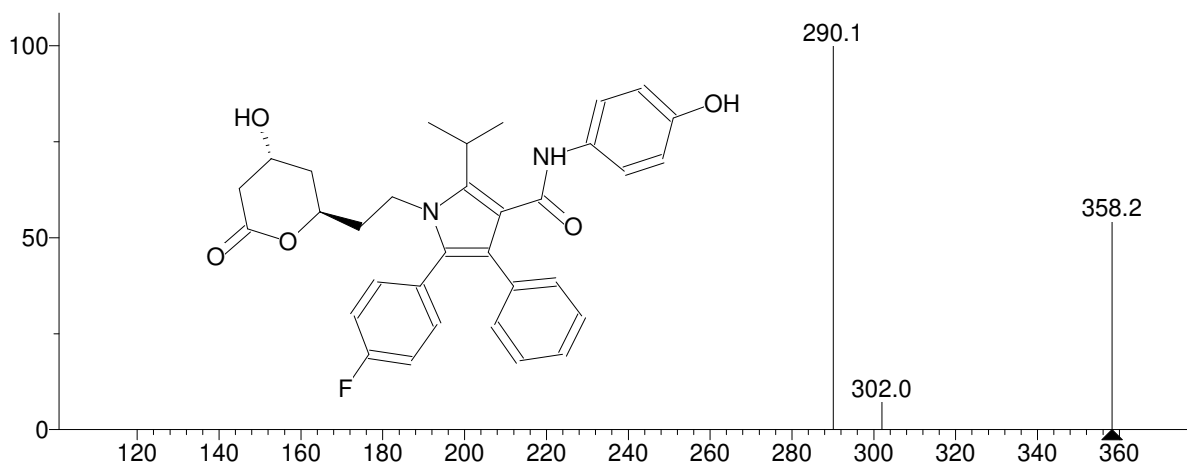

Hit 2 : 1H-Indole-3,5-dicarboxylic acid, 1-[3-[4-(decyloxy)phenoxy]-2-oxopropyl]-, 3-methyl ester [M-H]-=>358.2 I  
C<sub>30</sub>H<sub>37</sub>NO<sub>7</sub>; MF: 2; RMF: 201; Prob 5.18%; CAS: 888320-29-4; Lib: nist\_msms; ID: 374612.

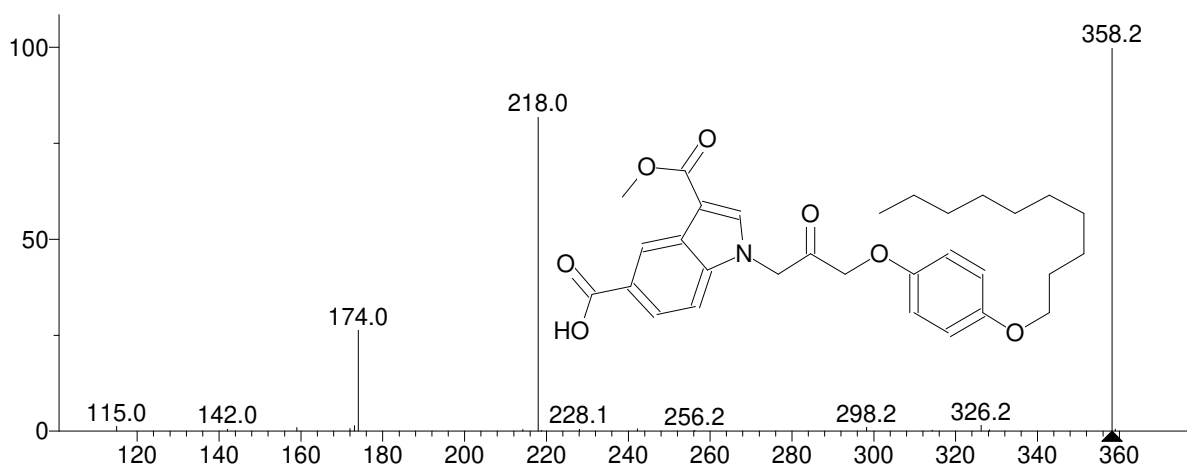

Hit 3 : Nalbuphine [M+H]<sup>+</sup> 20-30-40%) P=358.2  
C<sub>21</sub>H<sub>27</sub>NO<sub>4</sub>; MF: 1; RMF: 189; Prob 4.98%; Lib: mona-export-fiehn\_hilic; ID: 599.

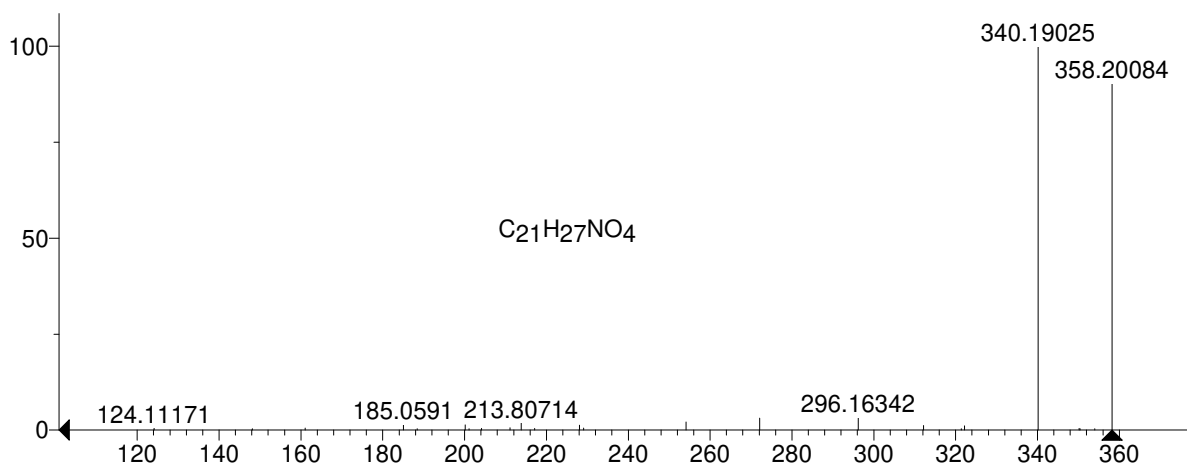

Hit 4 : Calpain Inhibitor II [M-H]<sup>-</sup>=>358.2 IT 35% P=358.2  
C<sub>19</sub>H<sub>35</sub>N<sub>3</sub>O<sub>4</sub>S; MF: 1; RMF: 185; Prob 4.98%; CAS: 145757-50-2; Lib: nist\_msms; ID: 81729.

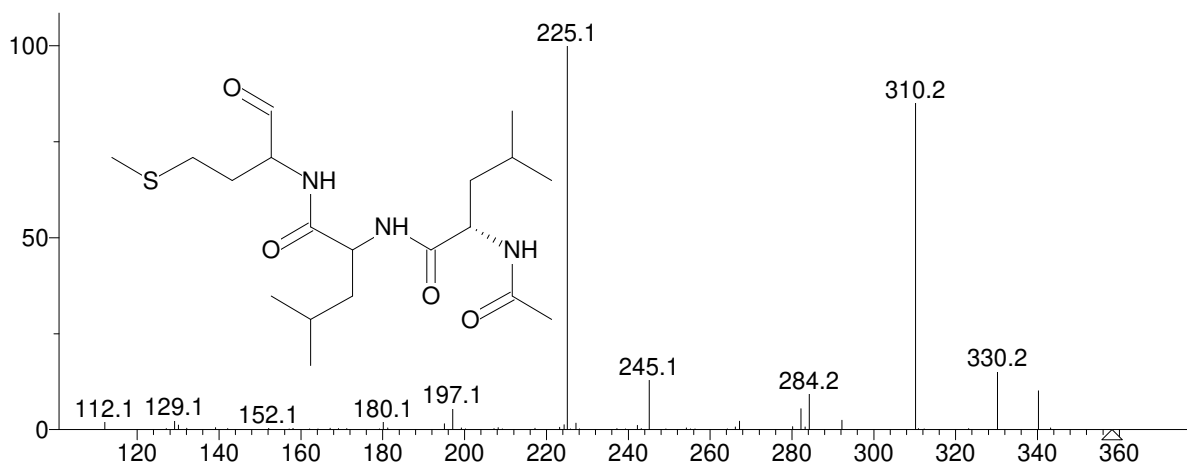

Hit 5 : 1H-Indole-3-carboxamide, 1-(5-fluoropentyl)-N-8-quinolinyl- [M+H]<sup>+</sup>=>358.2 IT 35% P=358.2  
C<sub>23</sub>H<sub>22</sub>FN<sub>3</sub>O; MF: 1; RMF: 168; Prob 4.98%; Lib: nist\_msms; ID: 344362.

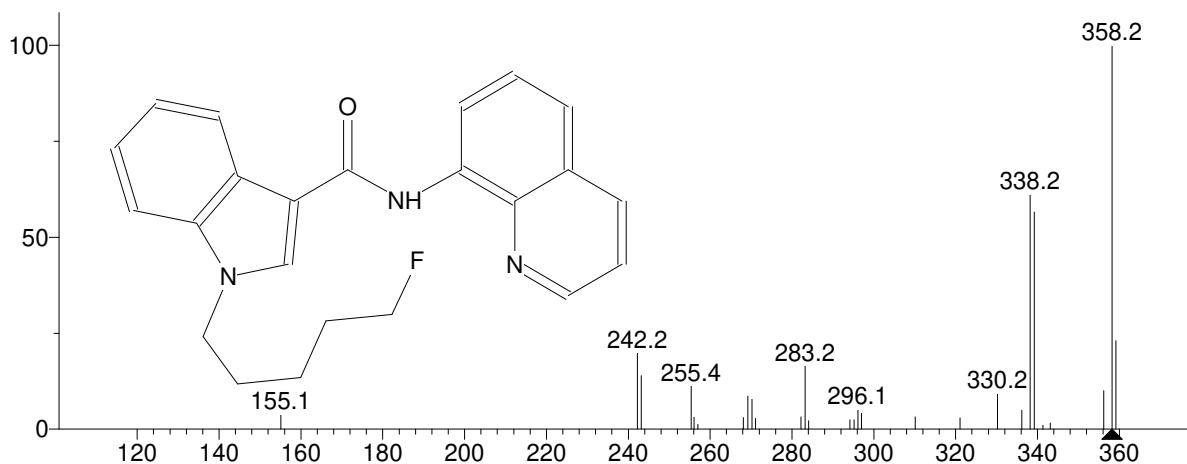

Unknown: Unknown (5.02\_544.2163m/z)  
Compound in Library Factor = 0

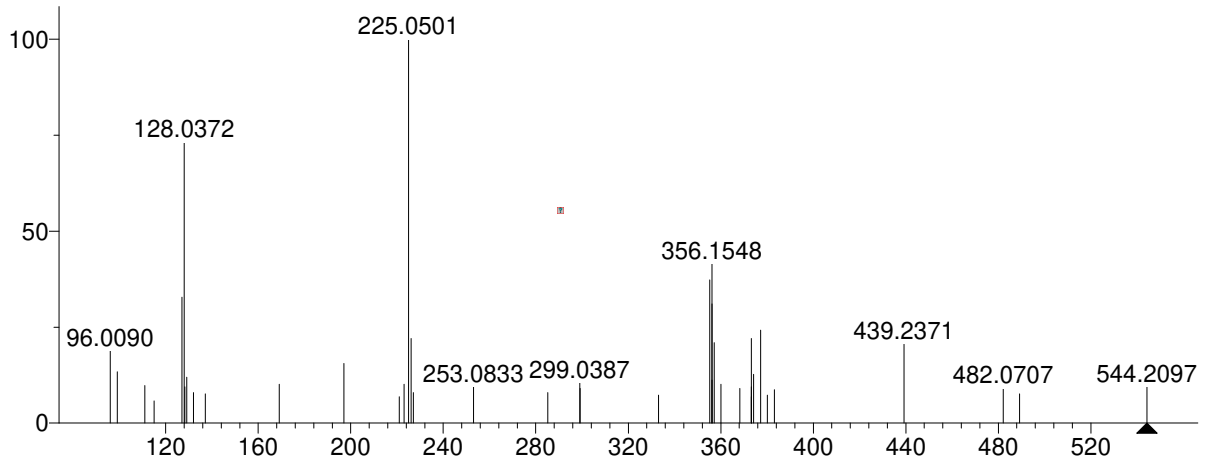

\*\* Search Report Page 1 of 2 \*\*

Unknown: Unknown (5.03\_415.1707m/z)  
Compound in Library Factor = 0

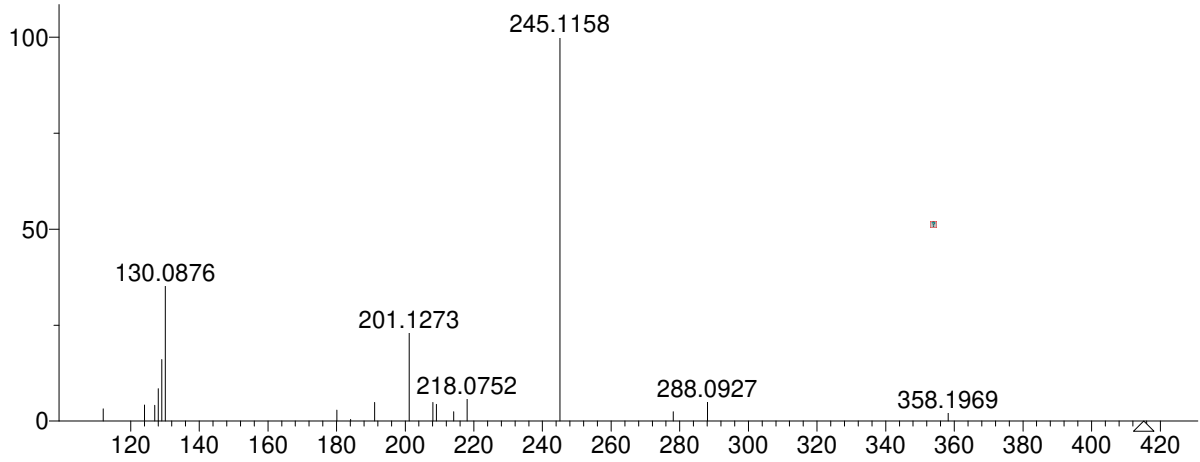

Hit 1 : 6-formyl-10-(hydroxymethyl)-5-methoxy-3-methylidene-2-oxo-2H,3H,3aH,4H,5H,8H,9H,11aH-cyclodeca[b]C21H28O7; MF: 0; RMF: 31; Prob 20.0%; Lib: mona-export-vf-npl\_qexactive; ID: 16435.

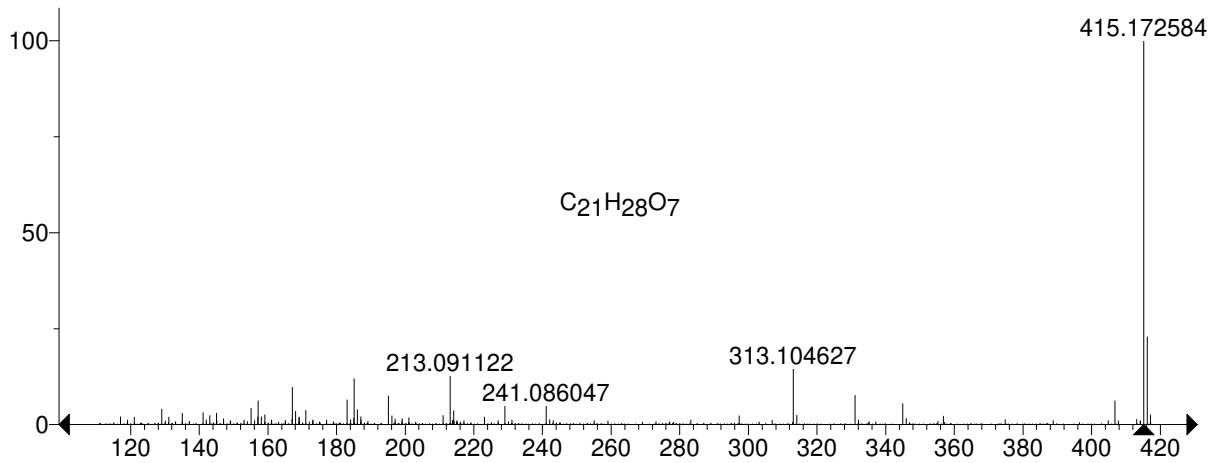

Hit 2 : NCGC00347525-03!2-amino-5-[2-[[[2,3-dihydroxy-2-(1-hydroxyethyl)butanoyl]oxymethyl]-4-hydroxyanilino]-C18H26N2O9; MF: 0; RMF: 10; Prob 20.0%; Lib: mona-export-gnps; ID: 9213.

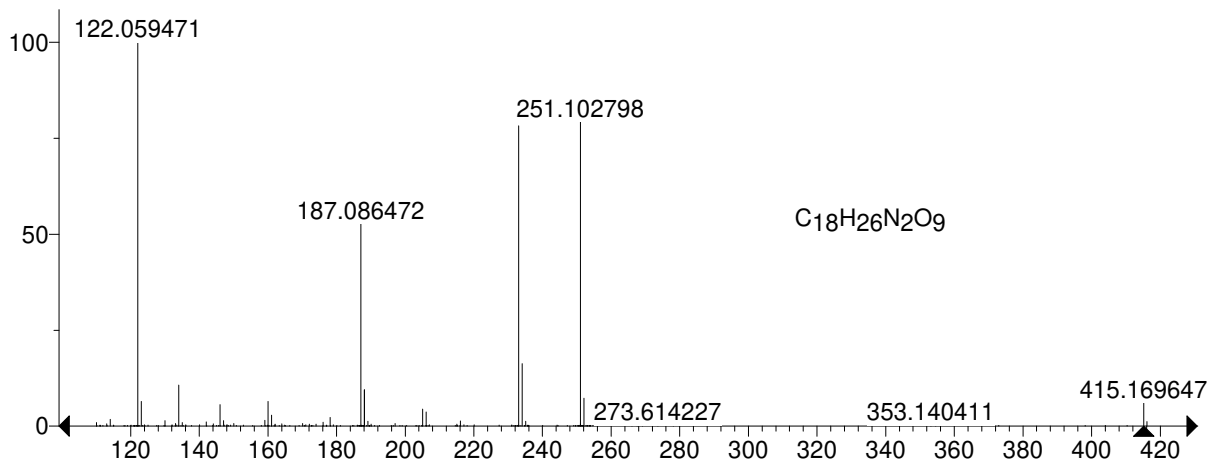

Hit 3 : Diltiazem HCl (Tiazac) [M+H]<sup>+</sup> P=415.2  
C<sub>22</sub>H<sub>27</sub>CIN<sub>2</sub>O<sub>4</sub>S; MF: 0; RMF: 3; Prob 20.0%; Lib: mona-export-gnps; ID: 648.

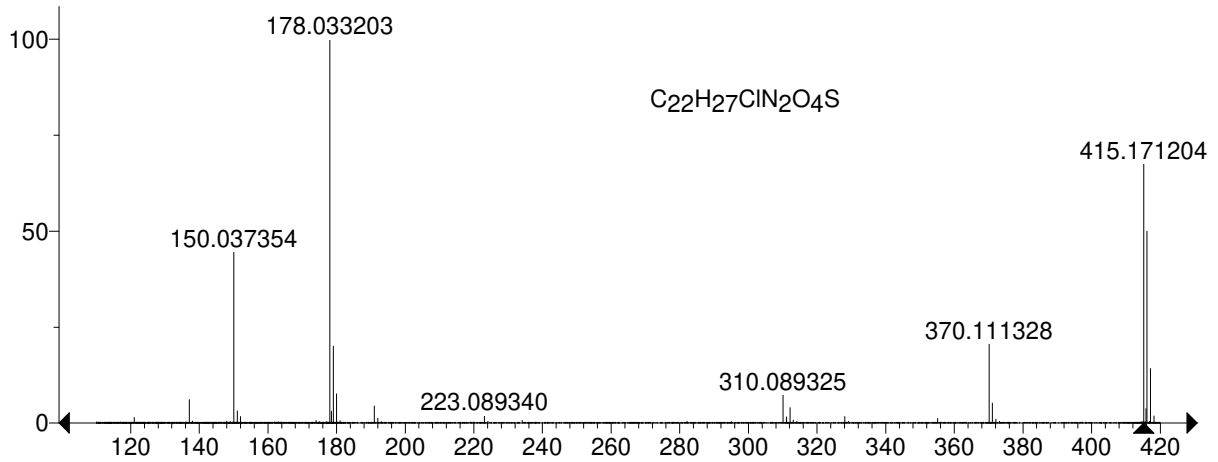

Hit 4 : NCGC00347525-02|2-amino-5-[2-[[2,3-dihydroxy-2-(1-hydroxyethyl)butanoyl]oxymethyl]-4-hydroxyanilino]-C<sub>18</sub>H<sub>26</sub>N<sub>2</sub>O<sub>9</sub>; MF: 0; RMF: 3; Prob 20.0%; Lib: mona-export-gnps; ID: 6270.

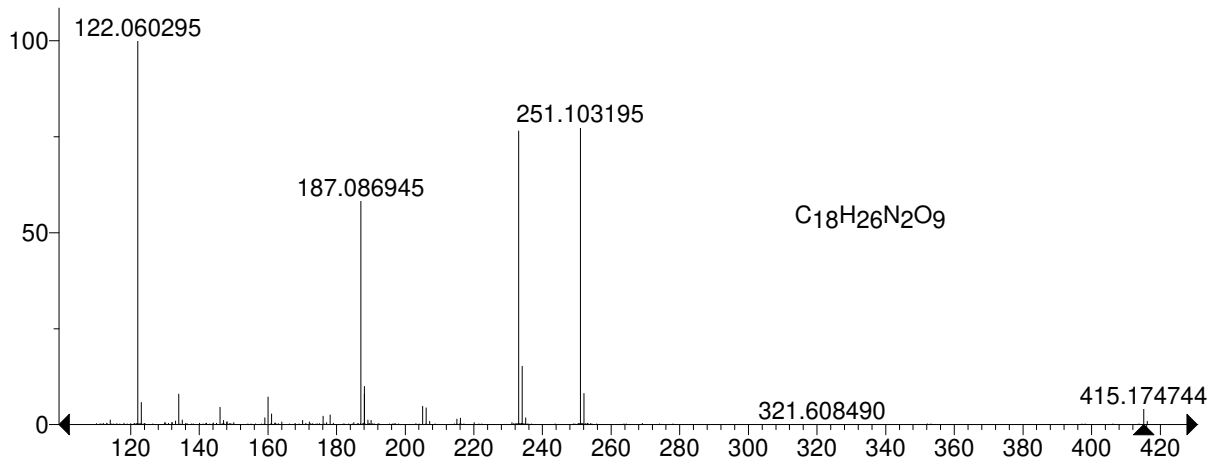

Hit 5 : 2-amino-5-[2-[[2,3-dihydroxy-2-(1-hydroxyethyl)butanoyl]oxymethyl]-4-hydroxyanilino]-5-oxopentanoic acid C<sub>18</sub>H<sub>26</sub>N<sub>2</sub>O<sub>9</sub>; MF: 0; RMF: 2; Prob 20.0%; Lib: mona-export-vf-npl\_qexactive; ID: 23034.

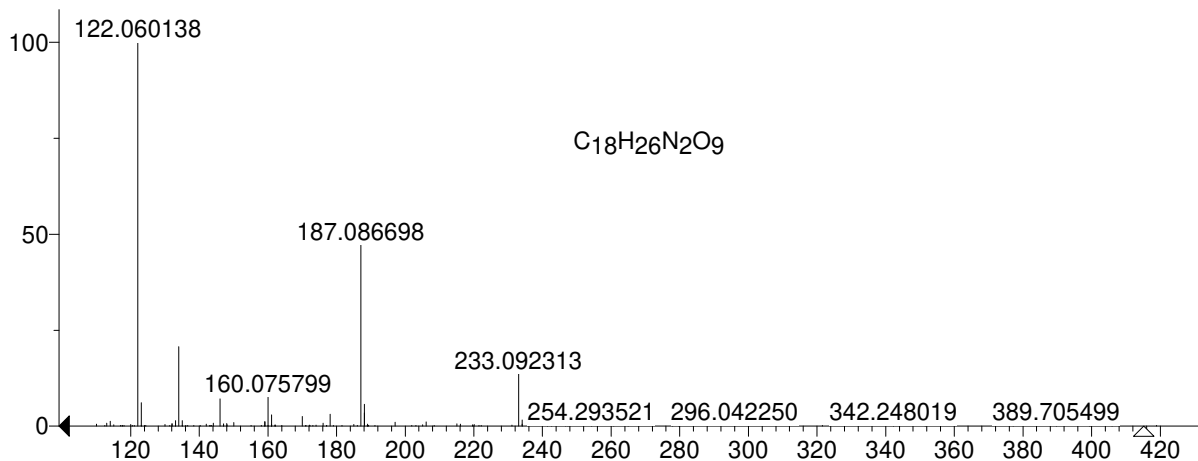

Unknown: Unknown (5.04\_356.1808m/z)  
Compound in Library Factor = 0

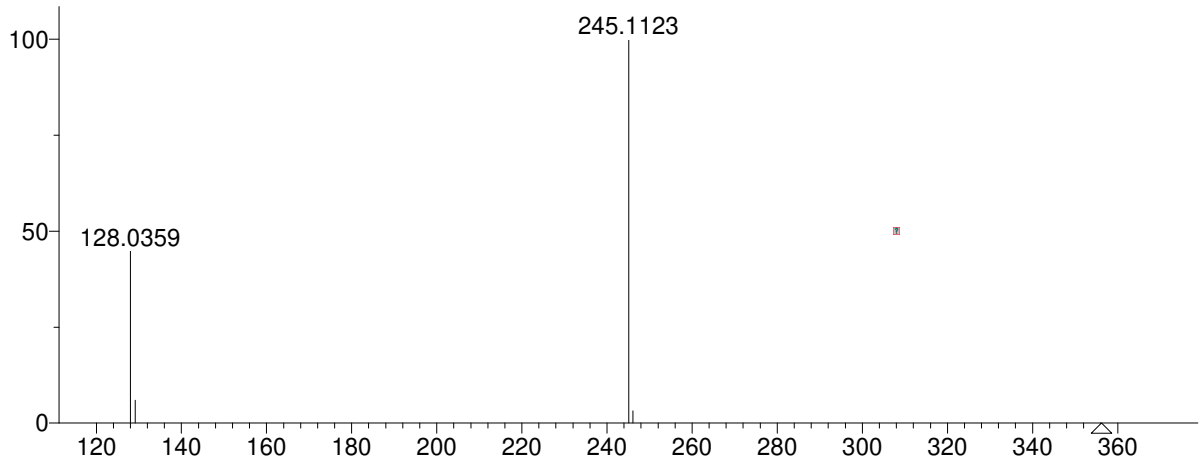

Unknown: Unknown (5.06\_600.2406m/z)  
Compound in Library Factor = 0

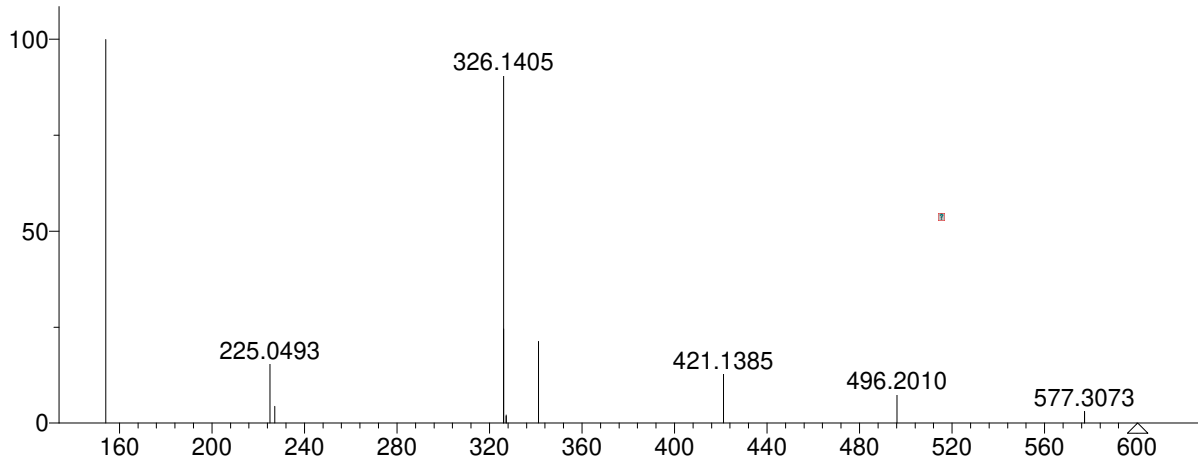



Unknown: Unknown (5.06\_660.2276m/z)  
Compound in Library Factor = 0

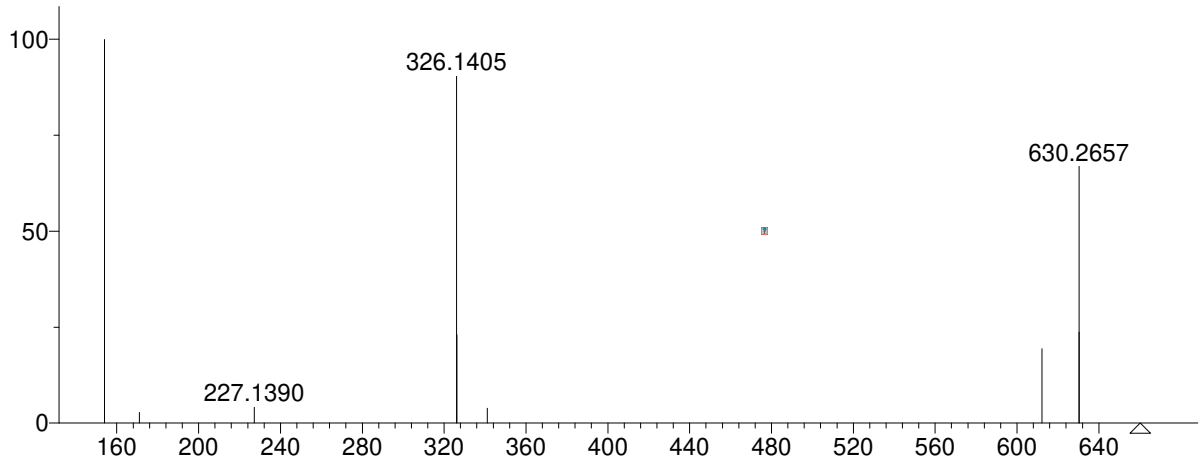

Unknown: Unknown (5.07\_516.2152m/z)  
Compound in Library Factor = 0

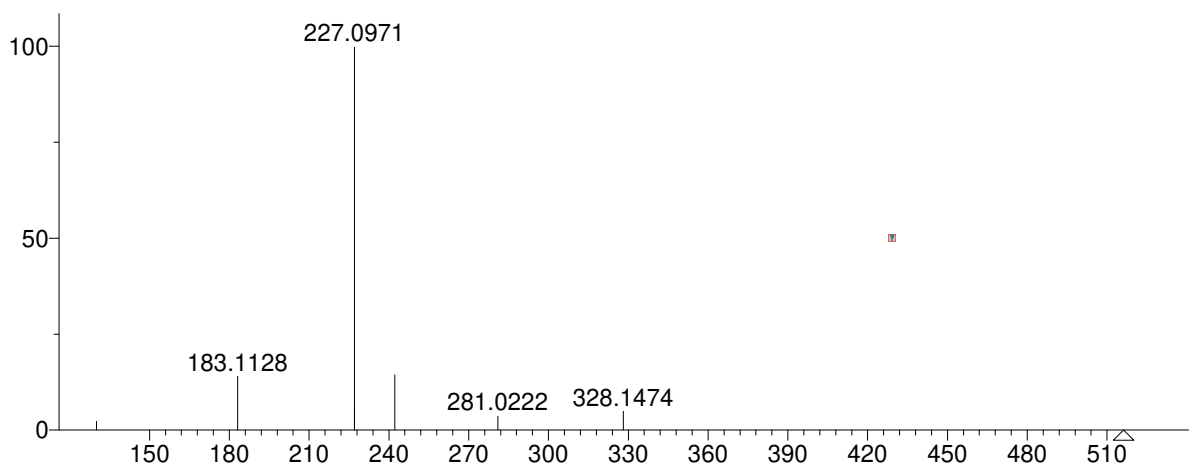

Hit 1 : Asp371, Tyrosinase (369-377), human [M+2H]<sup>2+</sup> HCD 37eV P=516.2  
C<sub>42</sub>H<sub>66</sub>N<sub>10</sub>O<sub>16</sub>S<sub>2</sub>; MF: 0; RMF: 78; Prob 100.0%; Lib: nist\_msms2; ID: 47696.

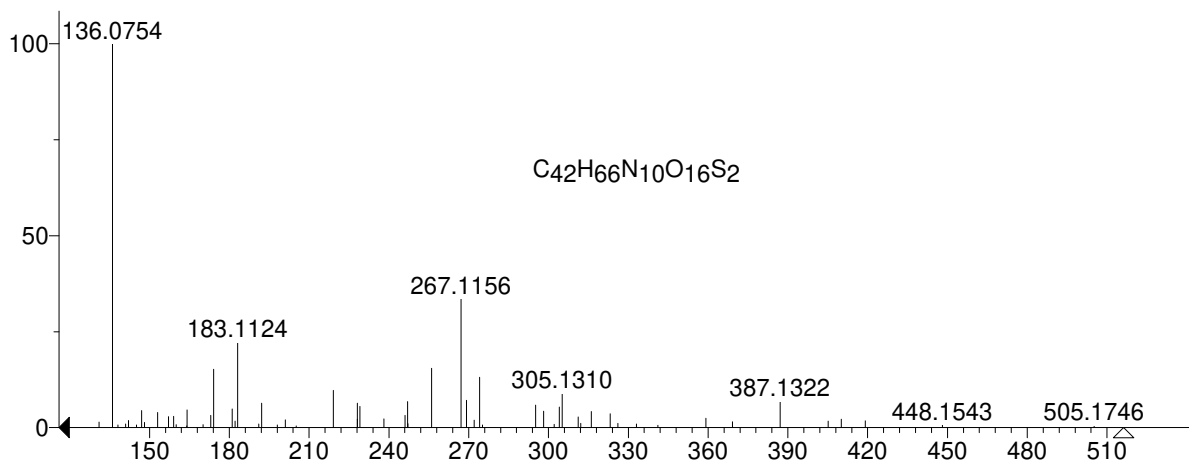

Unknown: Unknown (5.07\_680.2778m/z)  
Compound in Library Factor = 0

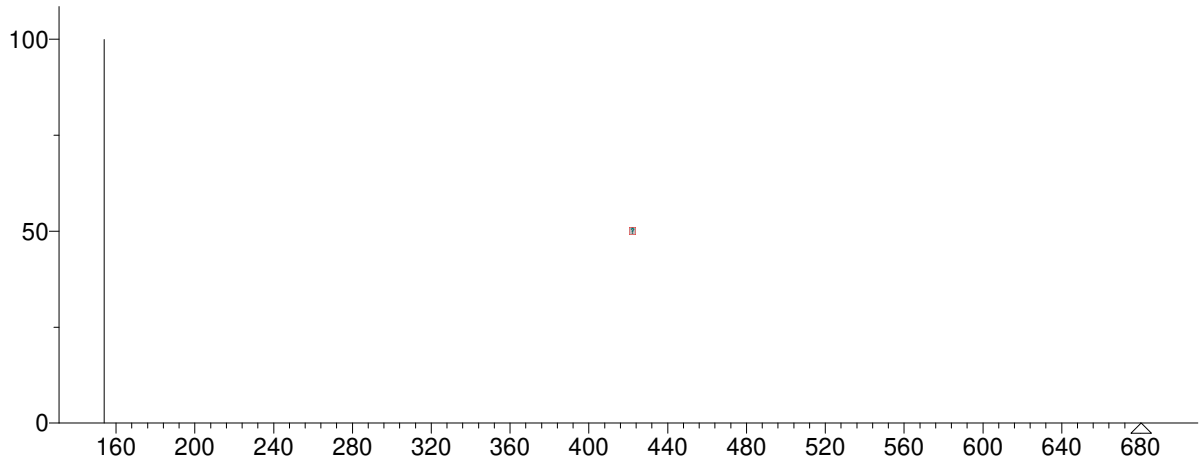

\*\* Search Report Page 1 of 2 \*\*

Unknown: Unknown (5.08\_227.1028m/z)  
Compound in Library Factor = -462

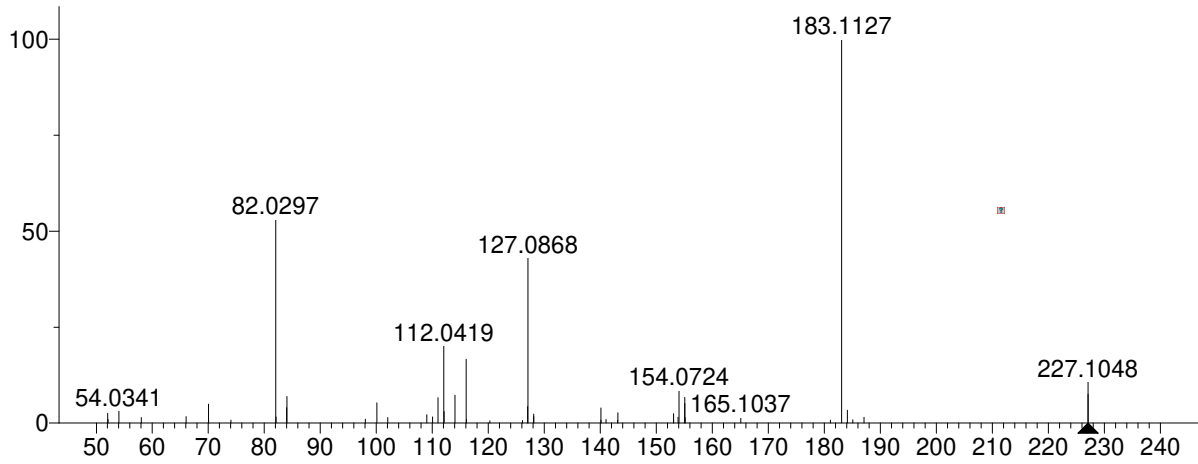

Hit 1 : Proline-hydroxyproline [M-H]<sup>-</sup> (20-30-40%) P=227.1  
C<sub>10</sub>H<sub>16</sub>N<sub>2</sub>O<sub>4</sub>; MF: 185; RMF: 380; Prob 93.2%; Lib: mona-export-fiehn\_hilic; ID: 1464.

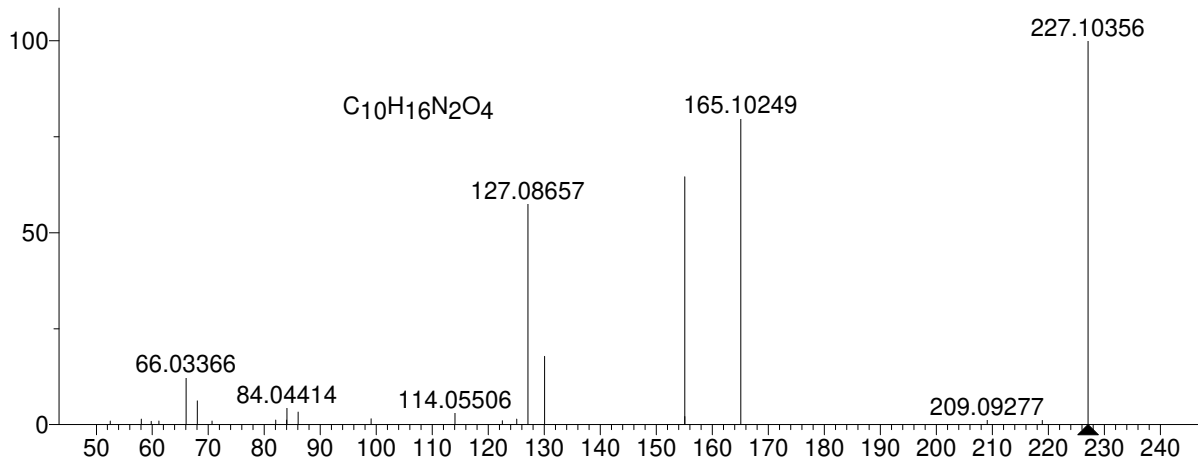

Hit 2 : PyroGlu-Pro [M+H]<sup>+</sup> QTOF 6V P=227.1  
C<sub>10</sub>H<sub>14</sub>N<sub>2</sub>O<sub>4</sub>; MF: 44; RMF: 238; Prob 3.09%; Lib: nist\_msms; ID: 47866.

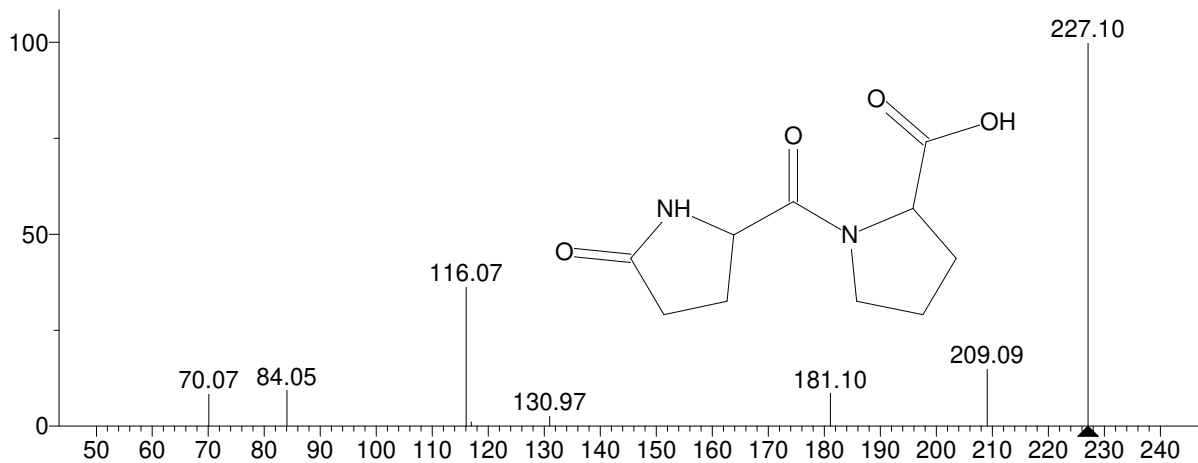

Hit 3 : Carbidopa [M+H]<sup>+</sup> QTOF 4V P=227.1

C<sub>12</sub>H<sub>14</sub>N<sub>2</sub>O<sub>4</sub>; MF: 13; RMF: 166; Prob 0.84%; CAS: 28860-95-9; Lib: nist\_msms; ID: 69025.

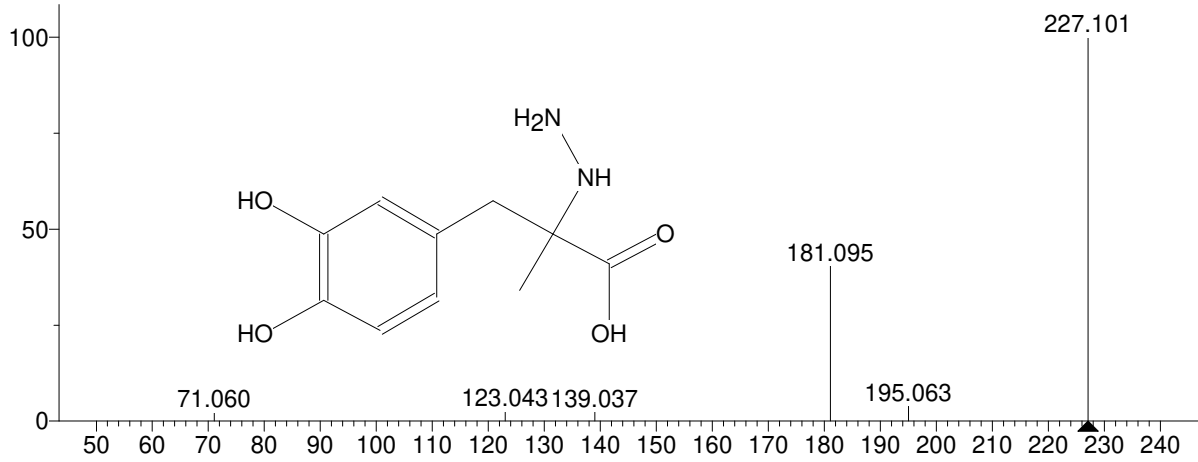

Hit 4 : (S)-Dibutyl 3-hydroxybutyl phosphate [M+H-C<sub>4</sub>H<sub>8</sub>]<sup>+</sup> HCD 4V P=227.1

C<sub>12</sub>H<sub>27</sub>O<sub>5</sub>P; MF: 4; RMF: 148; Prob 0.61%; CAS: 89197-69-3; Lib: nist\_msms; ID: 419318.

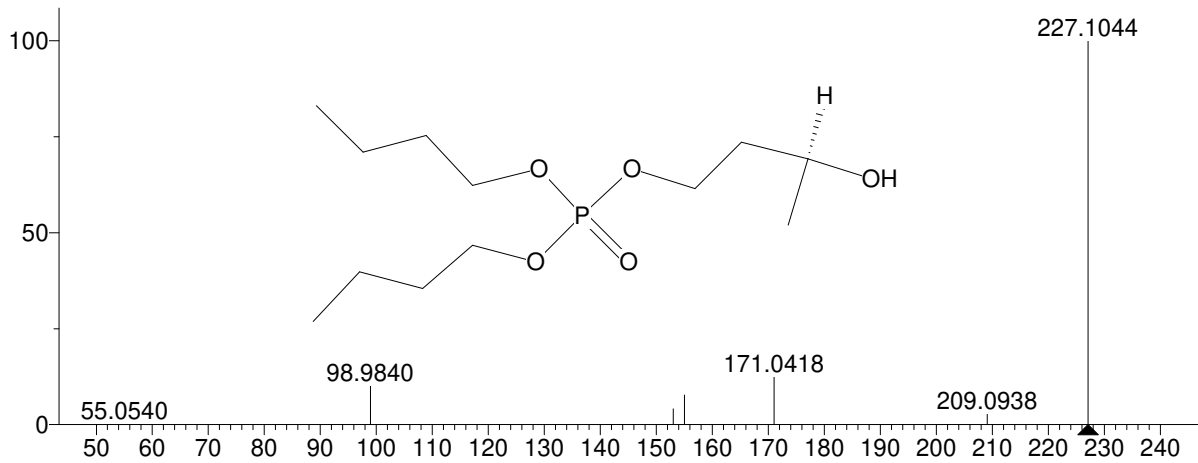

Hit 5 : Pro-Hyp [M-H]<sup>-</sup> 35eV P=227.1

C<sub>10</sub>H<sub>16</sub>N<sub>2</sub>O<sub>4</sub>; MF: 4; RMF: 99; Prob 0.61%; Lib: mona-export-fiehn\_hilic; ID: 2943.

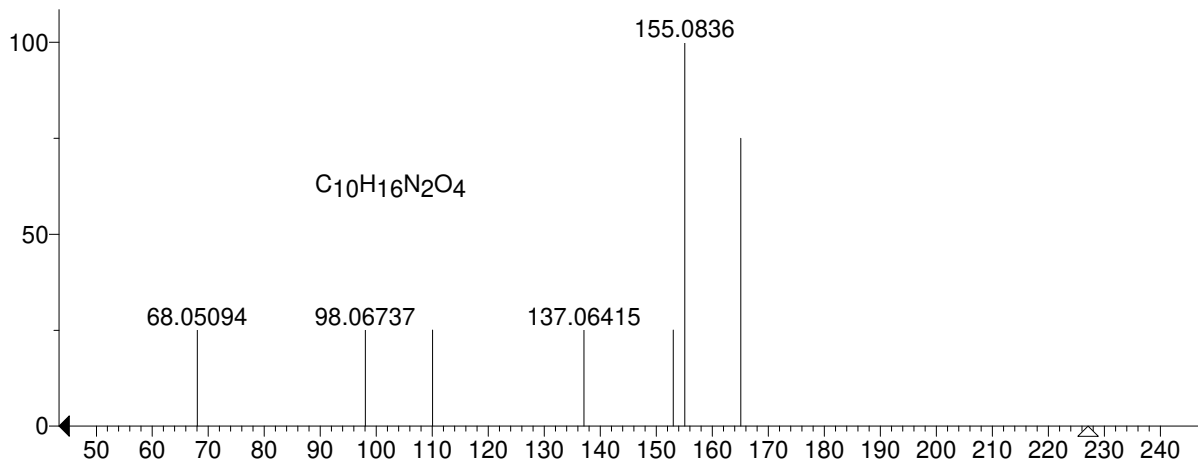

Unknown: Unknown (5.08\_374.1567m/z)  
Compound in Library Factor = 0

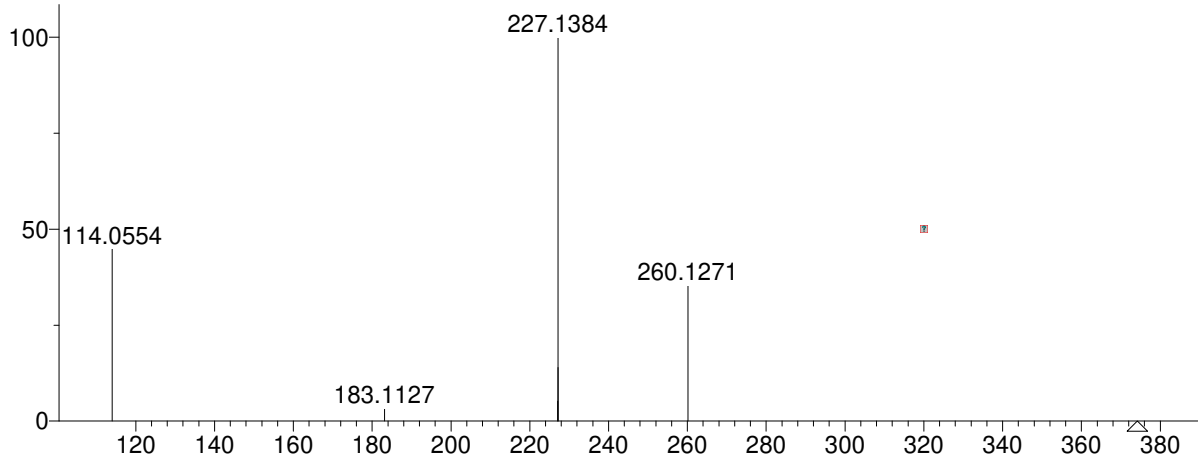

Hit 1 : (2S,3S)-3,5,7-trihydroxy-2-(4-hydroxyphenyl)-8-(3-methylbut-2-enyl)-2,3-dihydrochromen-4-one [M+NH4]<sup>+</sup>  
C<sub>20</sub>H<sub>20</sub>O<sub>6</sub>; MF: 0; RMF: 55; Prob 33.3%; Lib: mona-export-vf-npl\_qexactive; ID: 23299.

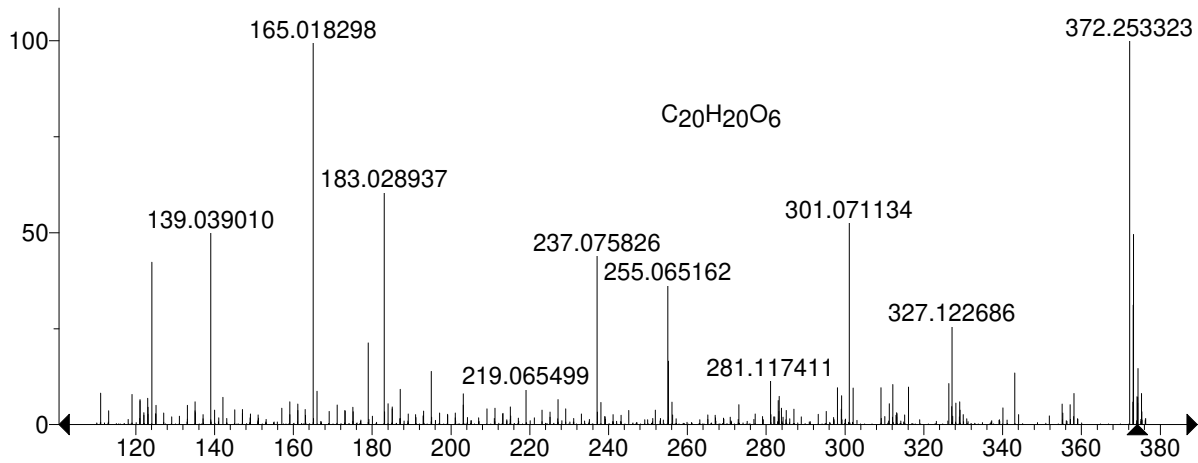

Hit 2 : dimethyl 2,4-bis(4-hydroxyphenyl)cyclobutane-1,3-dicarboxylate [M+NH4]<sup>+</sup> 35HCD P=374.2  
C<sub>20</sub>H<sub>20</sub>O<sub>6</sub>; MF: 0; RMF: 40; Prob 33.3%; Lib: mona-export-vf-npl\_qexactive; ID: 23731.

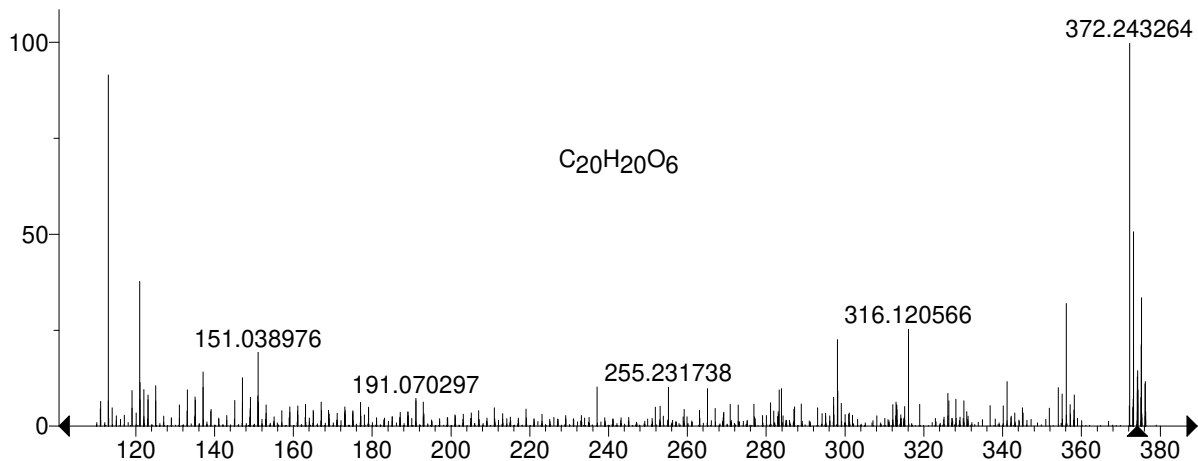

\*\* Search Report Page 2 of 2 \*\*

Hit 3 : (E)-1,4-bis(4-hydroxy-3-methoxyphenyl)-2,3-dimethylbut-2-ene-1,4-dione [M+NH4]<sup>+</sup> 65HCD P=374.2  
C<sub>20</sub>H<sub>20</sub>O<sub>6</sub>; MF: 0; RMF: 11; Prob 33.3%; Lib: mona-export-vf-npl\_qexactive; ID: 19611.

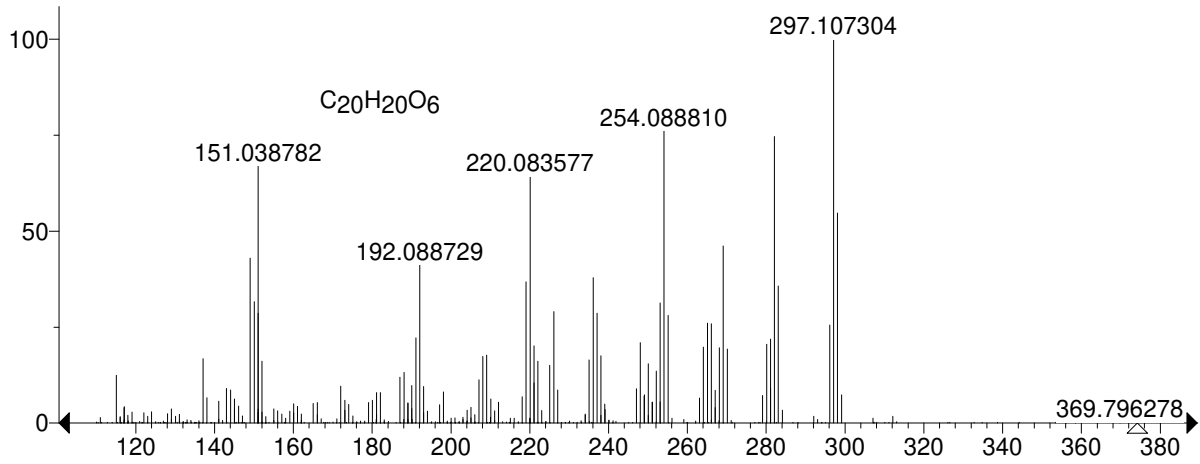

Unknown: Unknown (5.08\_451.1708m/z)  
Compound in Library Factor = 0

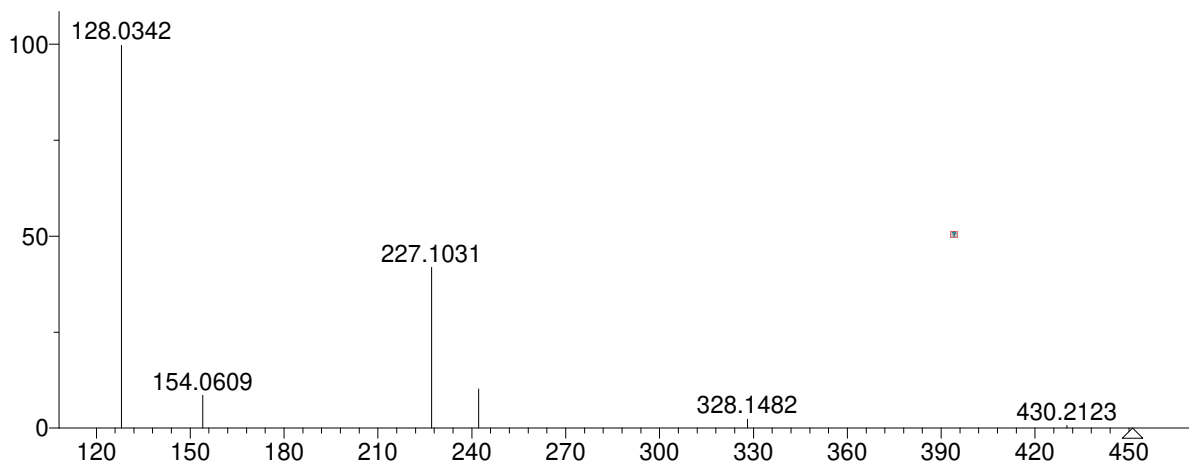

Hit 1 : 2H-Pyrido[3,2-b]-1,4-oxazin-3(4H)-one, 6-[[5-fluoro-2-[(3,4,5-trimethoxyphenyl)amino]-4-pyrimidinyl]amino]  
C22H23FN6O5; MF: 0; RMF: 57; Prob 50.0%; CAS: 841290-80-0; Lib: nist\_msms; ID: 251193.

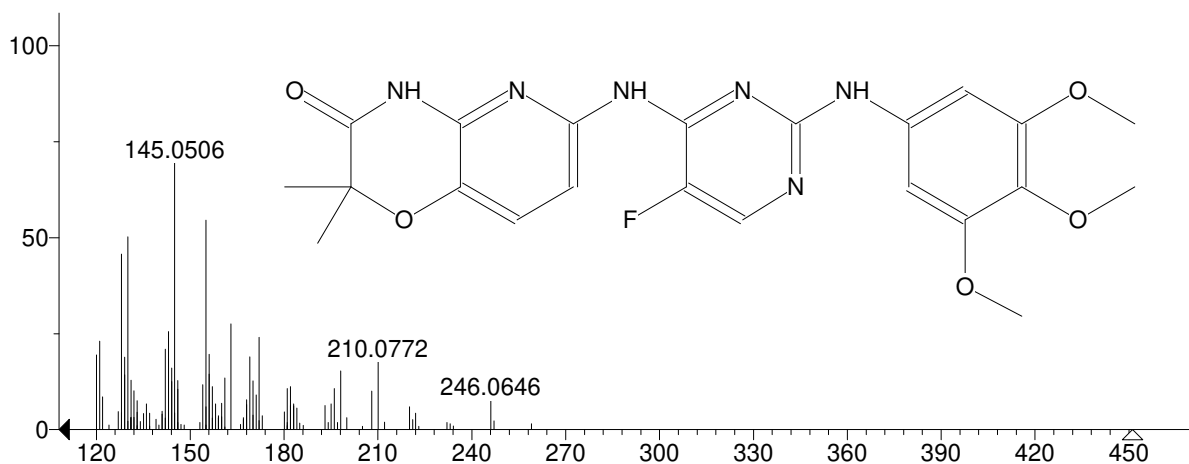

Hit 2 :  $\alpha$ -Conotoxin IMI [M+3H]<sup>3+</sup> IT 35% P=451.2  
C52H78N20O15S4; MF: 0; RMF: 19; Prob 50.0%; Lib: nist\_msms2; ID: 60571.

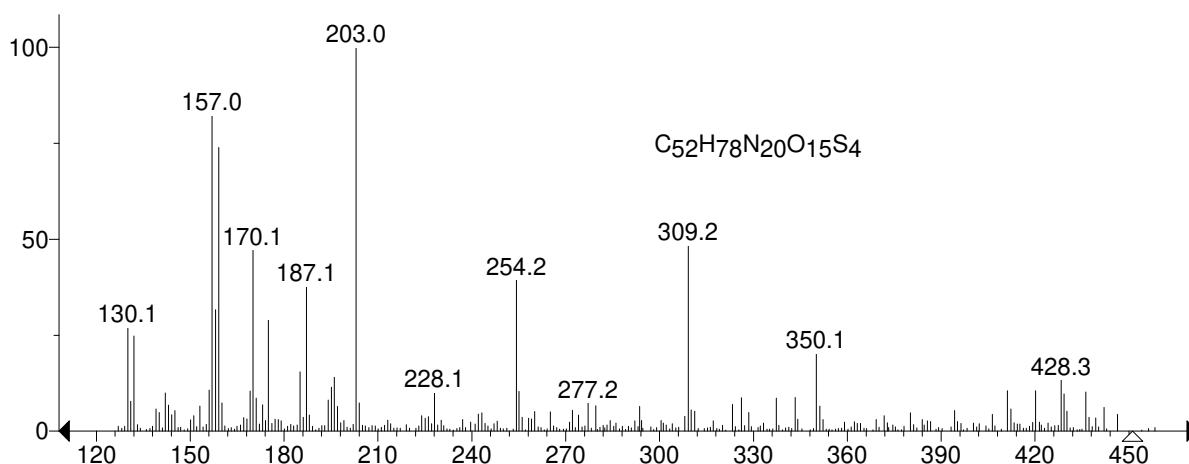



Unknown: Unknown (5.09\_183.1128m/z)  
Compound in Library Factor = -216

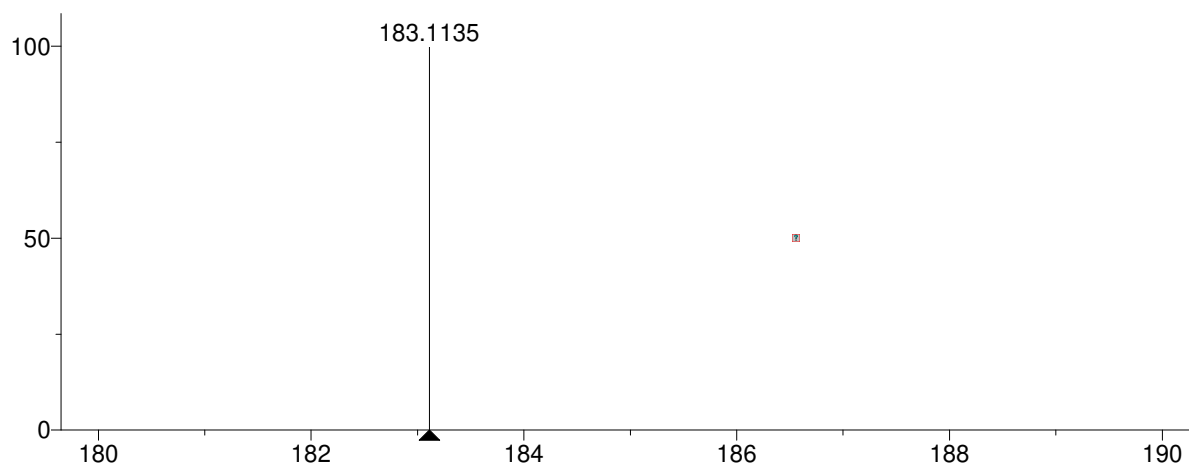

Hit 1 : 1-Trifluoromethoxyphenyl-3-(1-propionylpiperidin-4-yl)urea [M+H-C7H6F3NO]<sup>+</sup> HCD 16V P=183.1  
C16H20F3N3O3; MF: 364; RMF: 999; Prob 50.0%; CAS: 1222780-33-7; Lib: nist\_msms; ID: 253650.

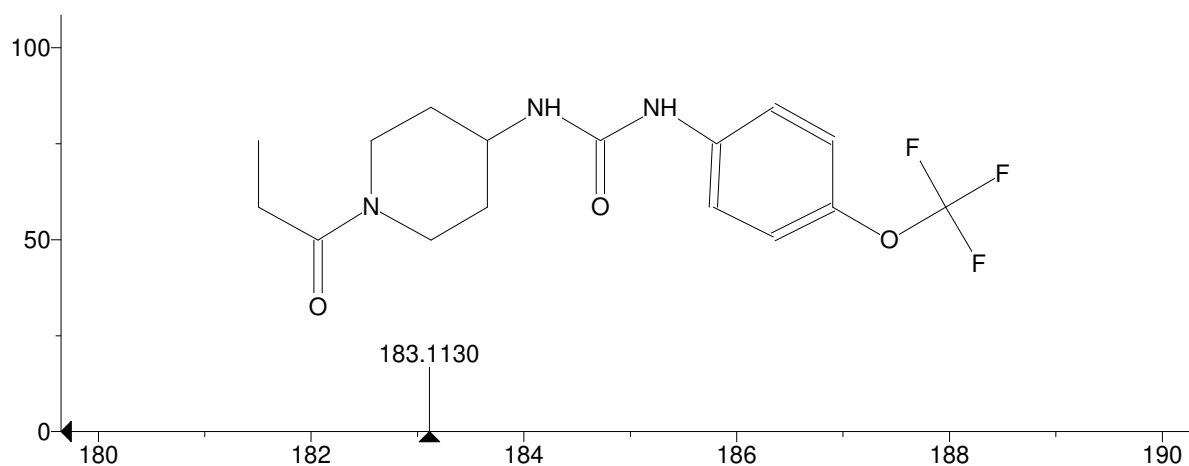

Hit 2 : Phe-Ala-Lys [M+2H]<sup>2+</sup> QTOF 15V P=183.1  
C18H28N4O4; MF: 364; RMF: 999; Prob 50.0%; Lib: nist\_msms; ID: 50307.

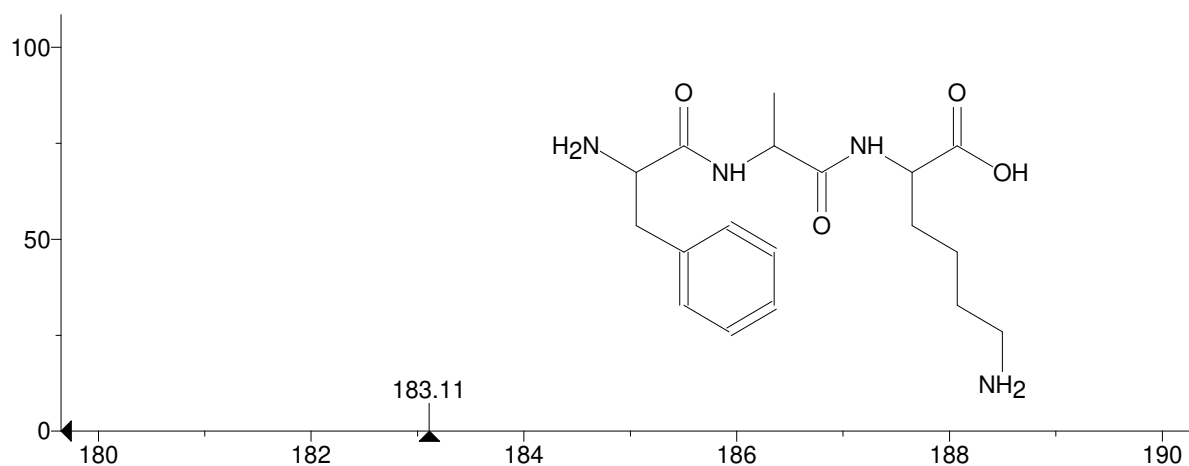

Unknown: Unknown (5.09\_293.1127m/z)  
Compound in Library Factor = 0

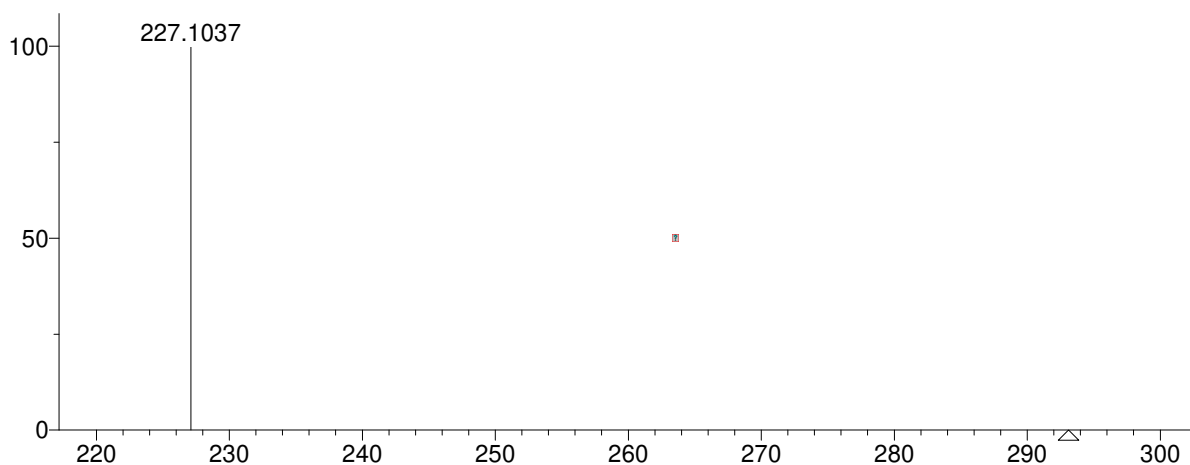

Hit 1 : (E)-2-(hydroxymethyl)-3-[3-(hydroxymethyl)-6-propan-2-ylcyclohex-2-en-1-yl]prop-2-enoic acid [M+K]<sup>+</sup> 35  
C<sub>14</sub>H<sub>22</sub>O<sub>4</sub>; MF: 0; RMF: 54; Prob 50.0%; Lib: mona-export-vf-npl\_qexactive; ID: 17503.

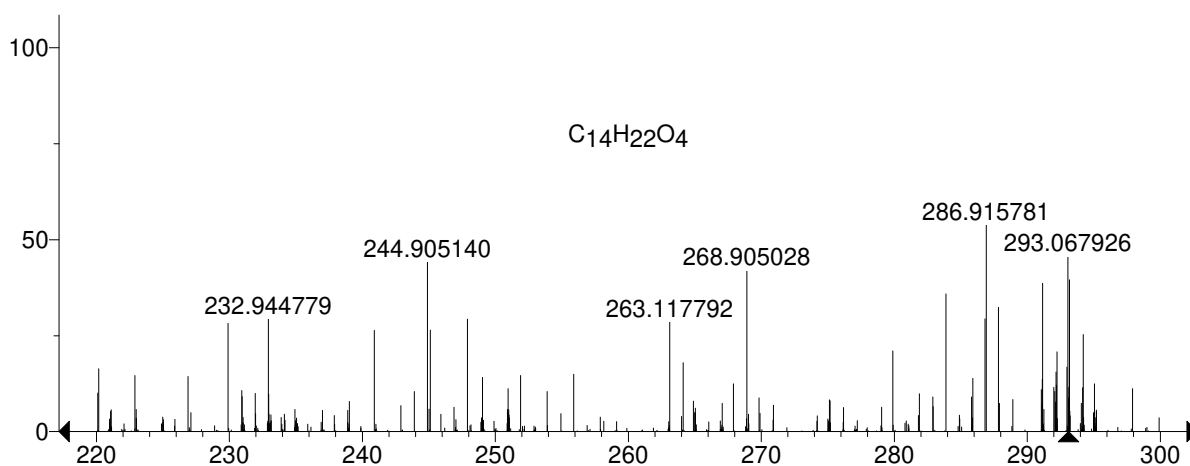

Hit 2 : 3-hydroxy-1a,5-bis(hydroxymethyl)-5,6b-dimethyl-1,3,3a,4,6,6a-hexahydrocyclopropa[e]inden-2-one [M+K]  
C<sub>14</sub>H<sub>22</sub>O<sub>4</sub>; MF: 0; RMF: 51; Prob 50.0%; Lib: mona-export-vf-npl\_qexactive; ID: 8815.

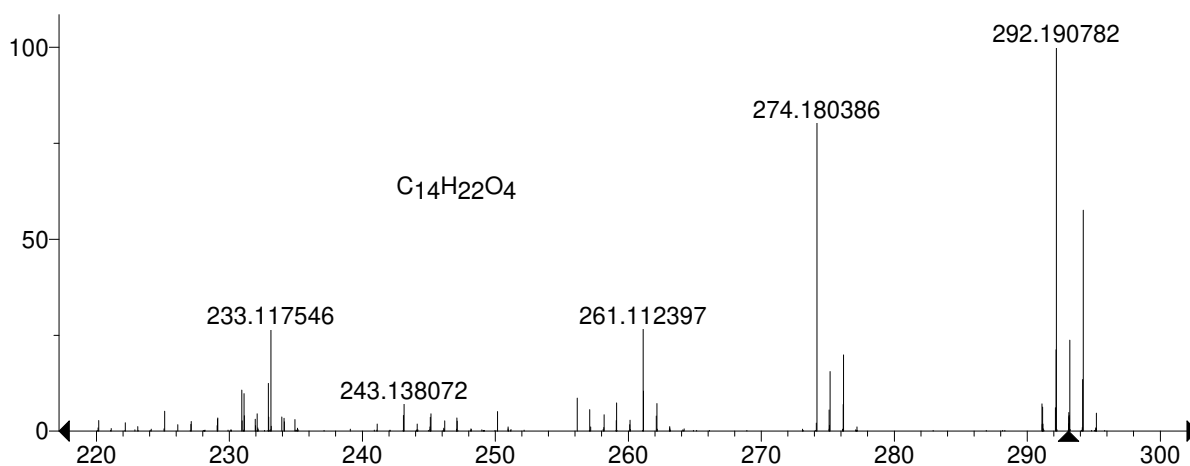

Unknown: Unknown (5.12\_259.1289m/z)  
Compound in Library Factor = 155

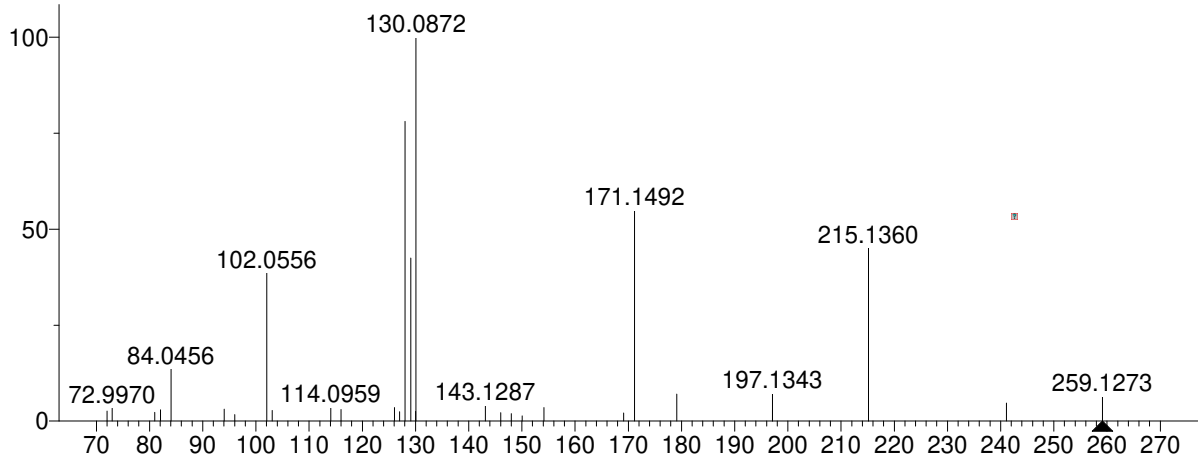

Hit 1 : Ile-Glu [M-H]<sup>-</sup> HCD 23eV P=259.1  
C<sub>11</sub>H<sub>20</sub>N<sub>2</sub>O<sub>5</sub>; MF: 845; RMF: 901; Prob 31.0%; Lib: nist\_msms; ID: 570716.

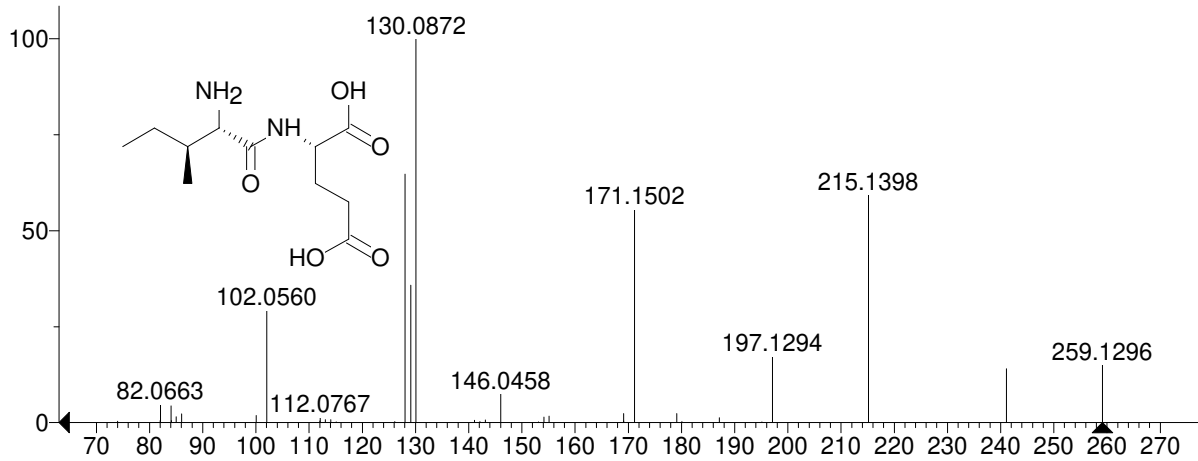

Hit 2 : Ile-Glu [M-H]<sup>-</sup> HCD 23eV P=259.1  
C<sub>11</sub>H<sub>20</sub>N<sub>2</sub>O<sub>5</sub>; MF: 845; RMF: 901; Prob 31.0%; CAS: 42516-53-0; Lib: nist\_msms2; ID: 84449.

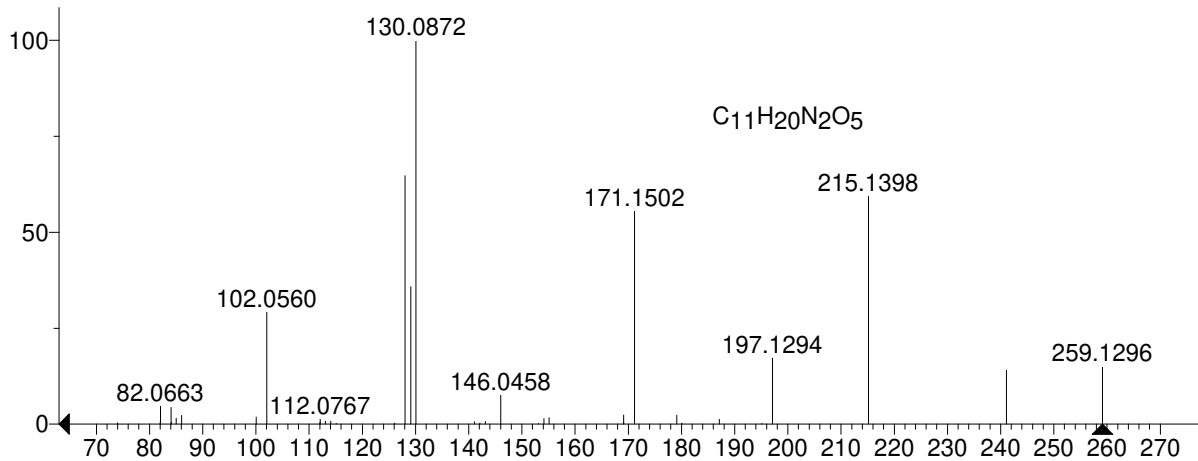

Hit 3 : Leu-Glu [M-H]<sup>-</sup> HCD 23eV P=259.1  
C<sub>11</sub>H<sub>20</sub>N<sub>2</sub>O<sub>5</sub>; MF: 830; RMF: 898; Prob 18.8%; Lib: nist\_msms; ID: 570784.

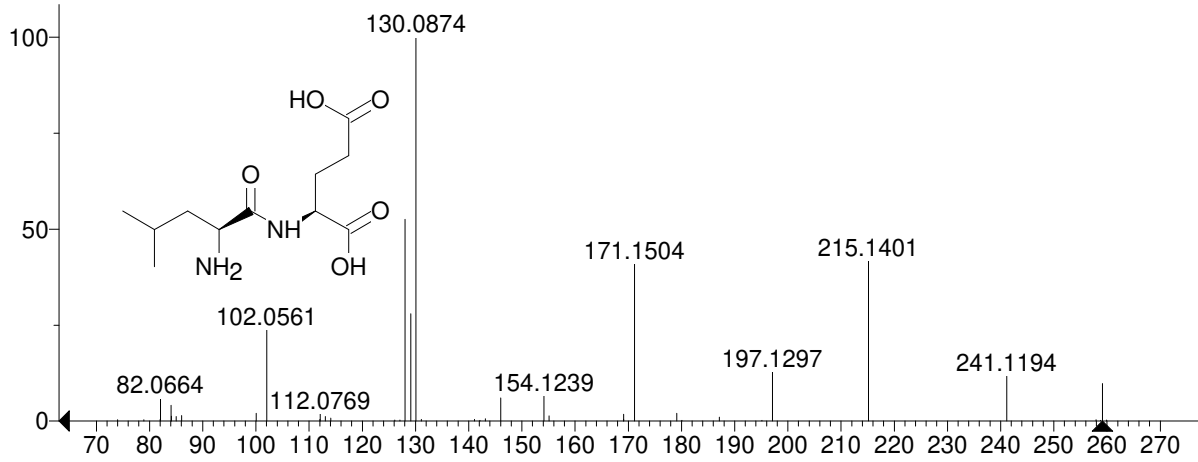

Hit 4 : Leu-Glu [M-H]<sup>-</sup> HCD 23eV P=259.1  
C<sub>11</sub>H<sub>20</sub>N<sub>2</sub>O<sub>5</sub>; MF: 830; RMF: 898; Prob 18.8%; CAS: 16364-31-1; Lib: nist\_msms2; ID: 84517.

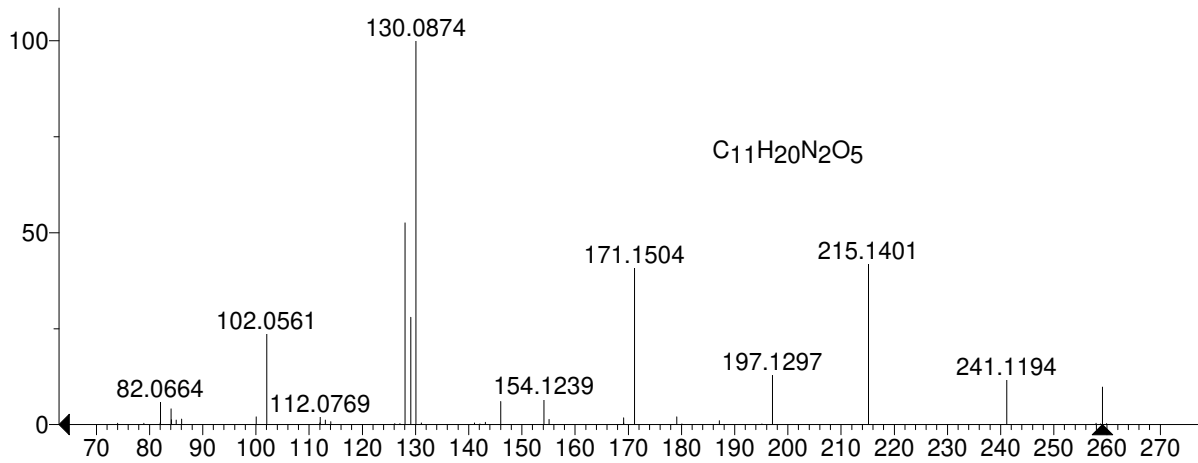

Hit 5 : Glu-Leu [M-H]<sup>-</sup> HCD 19eV P=259.1  
C<sub>11</sub>H<sub>20</sub>N<sub>2</sub>O<sub>5</sub>; MF: 571; RMF: 674; Prob 0.18%; Lib: nist\_msms; ID: 570061.

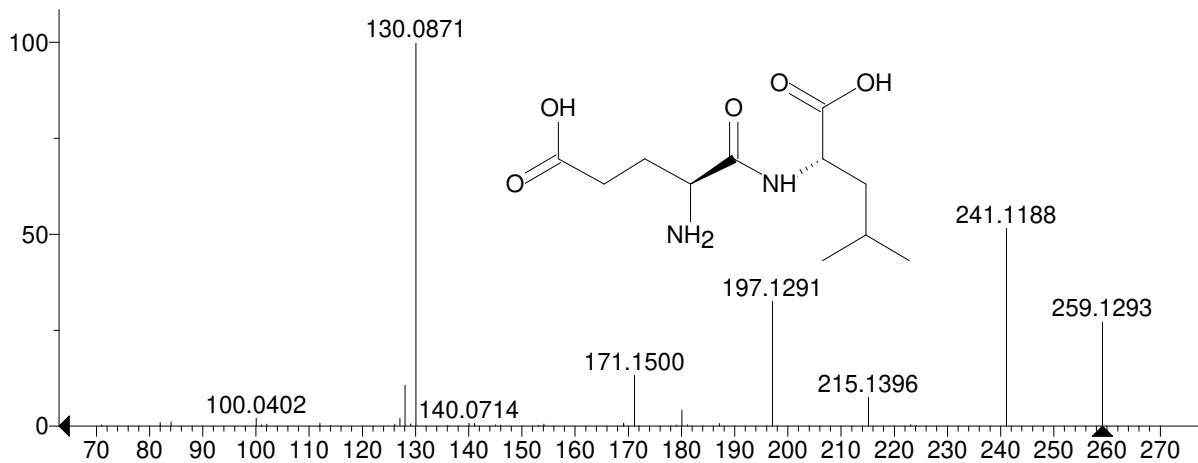

Unknown: Unknown (5.12\_405.1395m/z)  
Compound in Library Factor = 0

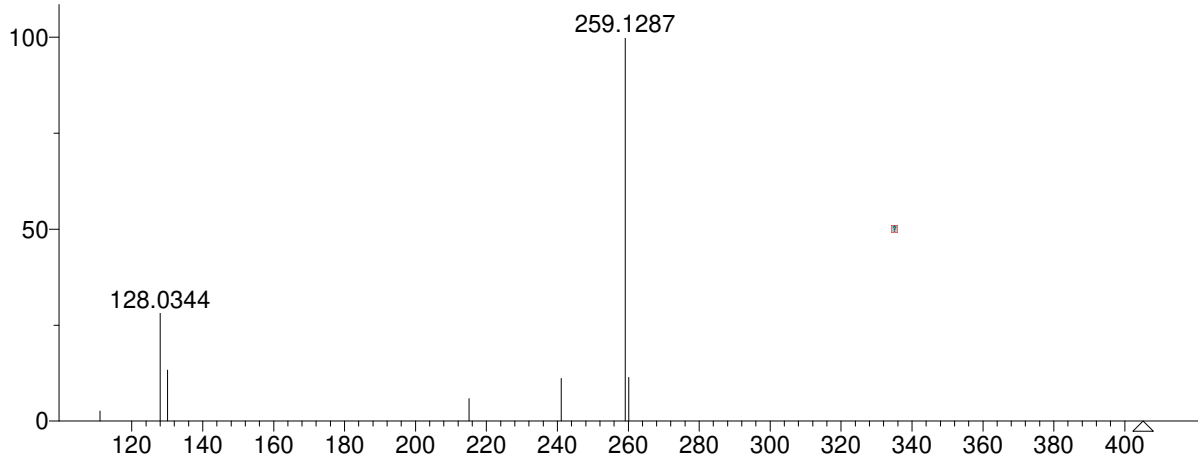

Hit 1 : Shanzhiside methyl ester [M-H]<sup>-</sup> 65HCD P=405.1  
C<sub>17</sub>H<sub>26</sub>O<sub>11</sub>; MF: 0; RMF: 53; Prob 25.0%; Lib: anthocyanins mona; ID: 8593.

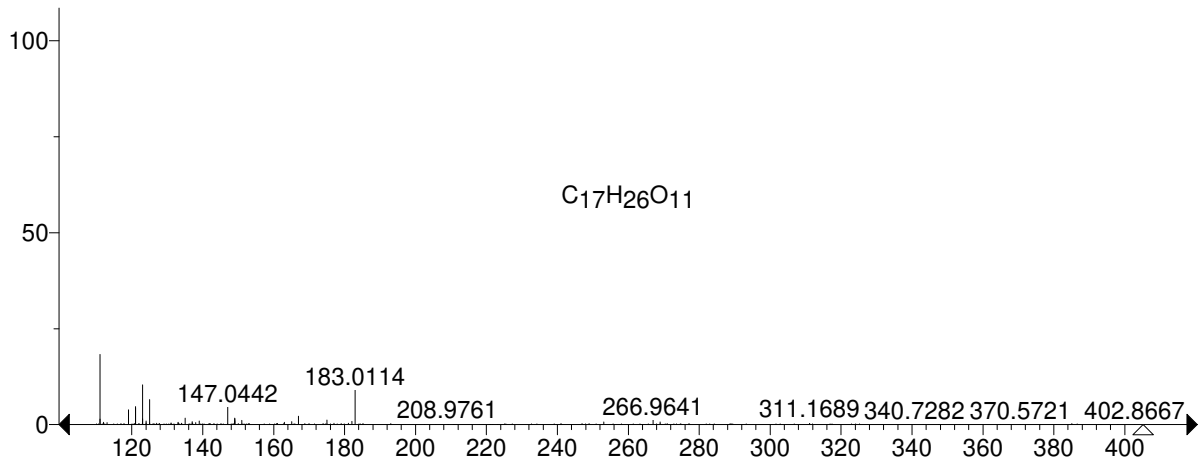

Hit 2 : methyl (1S,4aS,6R,7R,7aR)-5,6-dihydroxy-7-methyl-1-[(2S,3R,4S,5S,6R)-3,4,5-trihydroxy-6-(hydroxymethyl) C<sub>17</sub>H<sub>26</sub>O<sub>11</sub>; MF: 0; RMF: 38; Prob 25.0%; Lib: mona-export-1c-ms-ms\_negative\_mode; ID: 20385.

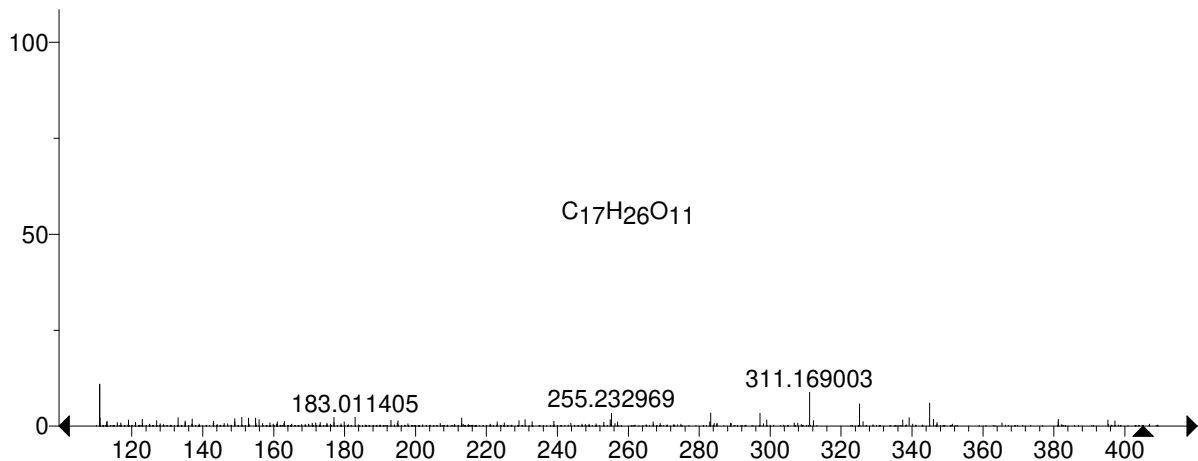

\*\* Search Report Page 2 of 2 \*\*

Hit 3 : methyl (1S,4aR,7aR)-4a-hydroxy-7-(hydroxymethyl)-1-[(2S,3R,4S,5S,6R)-3,4,5-trihydroxy-6-(hydroxymethyl) C17H24O11; MF: 0; RMF: 7; Prob 25.0%; Lib: mona-export-vf-npl\_qexactive; ID: 3655.

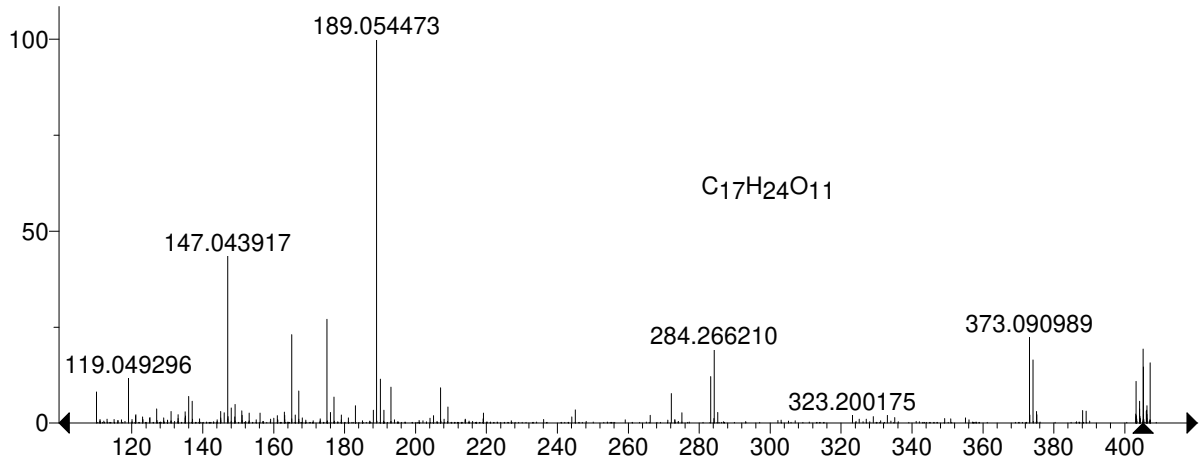

Hit 4 : gardenoside [M+H]<sup>+</sup> 65HCD P=405.1 C17H24O11; MF: 0; RMF: 1; Prob 25.0%; Lib: anthocyanins mona; ID: 9043.

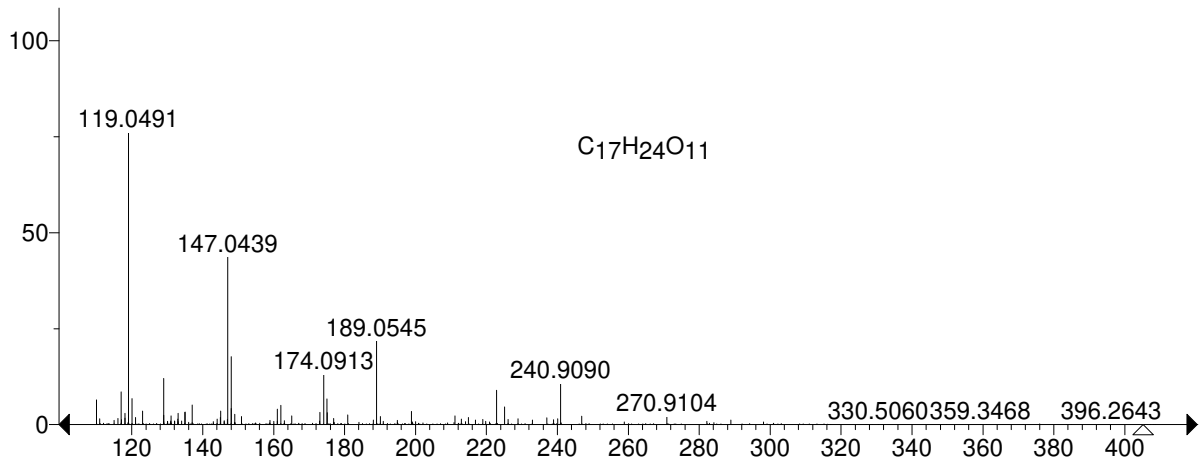

Unknown: Unknown (5.12\_427.1346m/z)  
Compound in Library Factor = 0

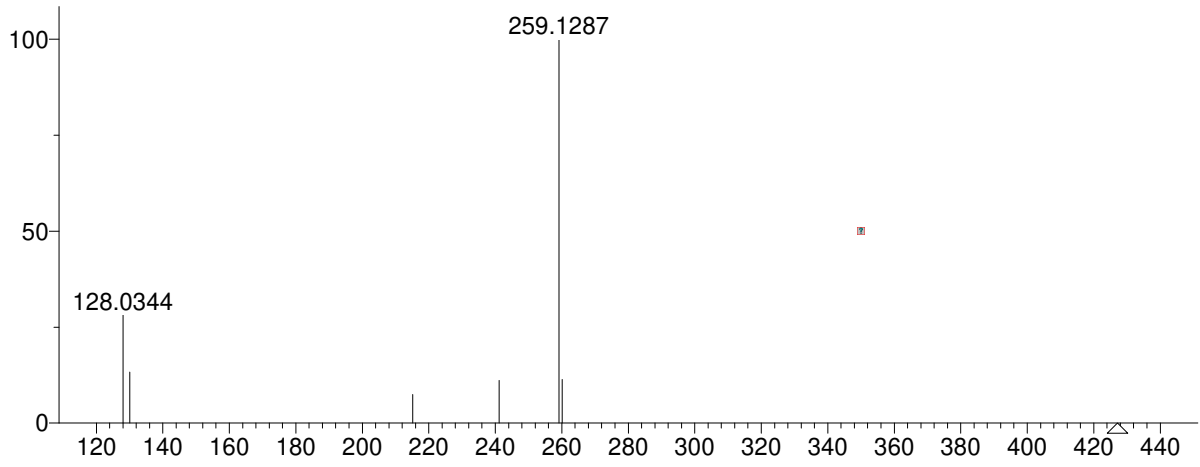

\*\* Search Report Page 1 of 2 \*\*

Unknown: Unknown (5.12\_429.1868m/z)  
Compound in Library Factor = -1142

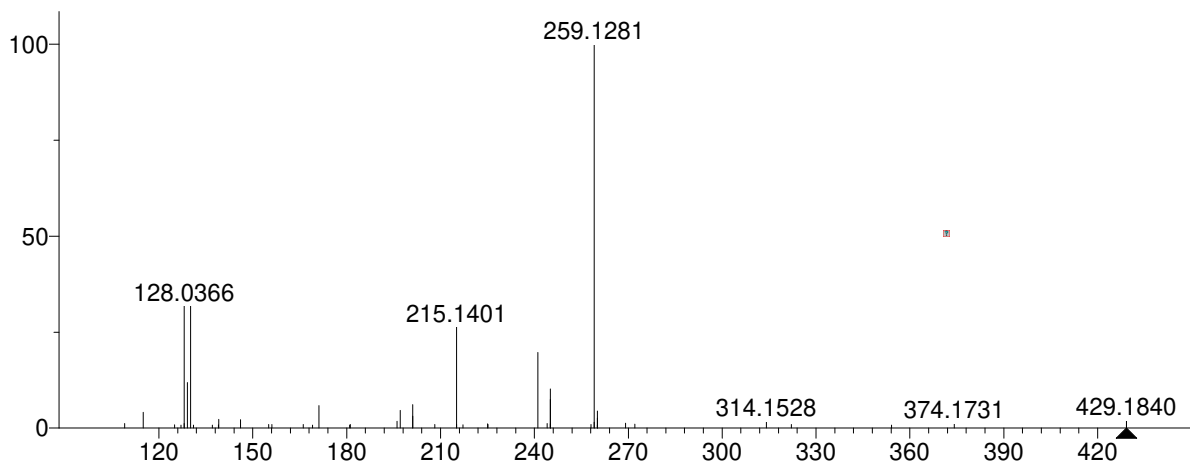

Hit 1 : Garcinone D [M+H]<sup>+</sup> HCD 4V P=429.2  
C<sub>24</sub>H<sub>28</sub>O<sub>7</sub>; MF: 71; RMF: 556; Prob 54.3%; CAS: 107390-08-9; Lib: nist\_msms; ID: 258128.

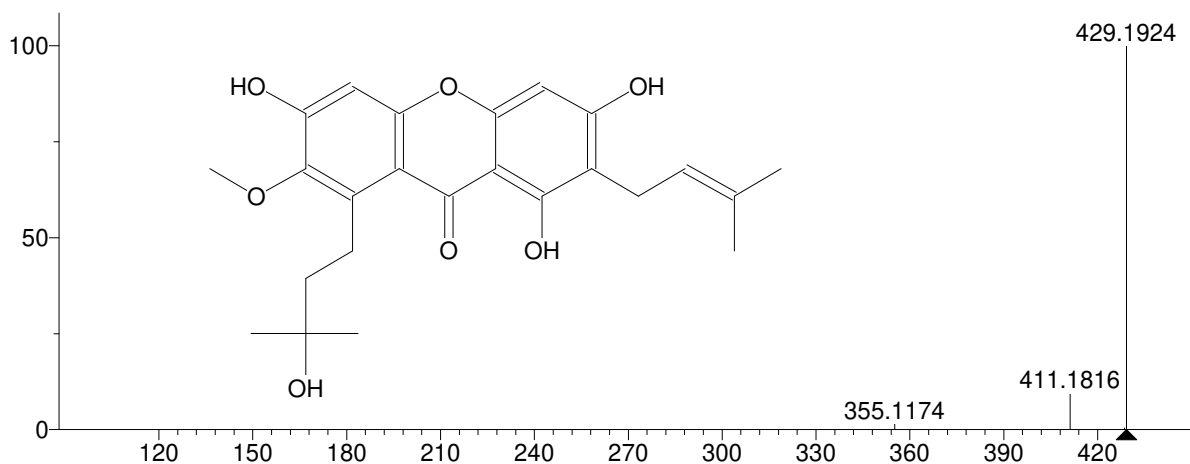

Hit 2 : 21-Carboxylic acid triamcinolone acetonide [M+H-HF]<sup>+</sup> HCD 30V P=429.2  
C<sub>24</sub>H<sub>29</sub>FO<sub>7</sub>; MF: 3; RMF: 86; Prob 8.23%; CAS: 53962-41-7; Lib: nist\_msms; ID: 449216.

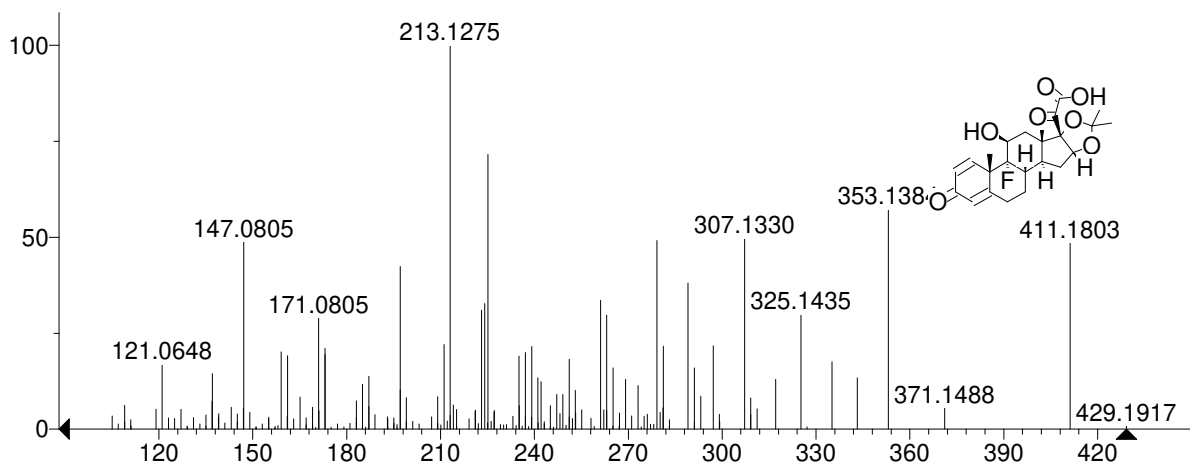



Hit 3 : Terretinin [M+H-C<sub>2</sub>H<sub>4</sub>O<sub>2</sub>]<sup>+</sup> HCD 38V P=429.2  
C<sub>26</sub>H<sub>32</sub>O<sub>9</sub>; MF: 2; RMF: 68; Prob 7.91%; CAS: 71911-90-5; Lib: nist\_msms; ID: 460560.

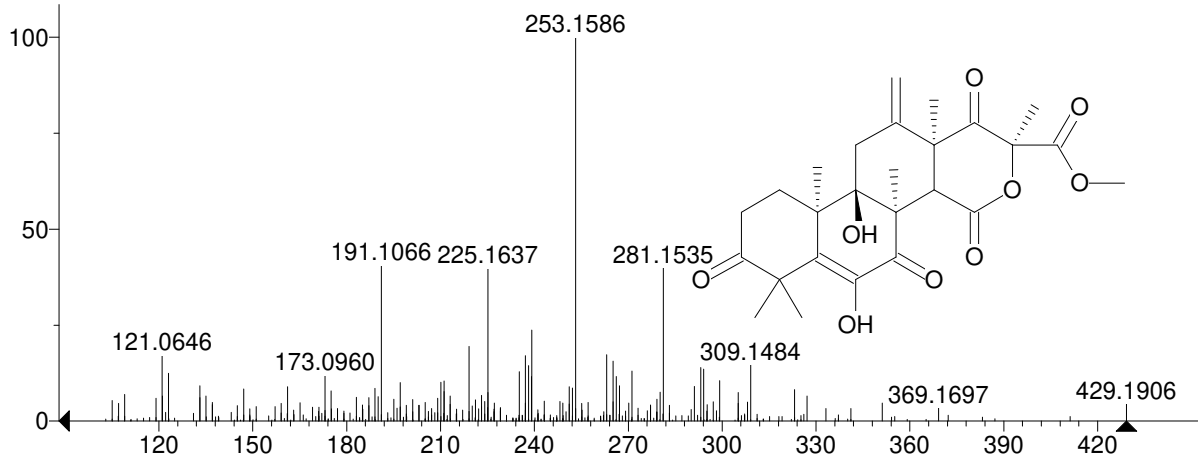

Hit 4 : (2R,3R,4S,5S,6R)-2-[6-hydroxy-3-[(E)-3-hydroxybut-1-enyl]-2,4,4-trimethylcyclohexyl]oxy-6-(hydroxymethyl) C<sub>19</sub>H<sub>34</sub>O<sub>8</sub>; MF: 1; RMF: 57; Prob 7.60%; Lib: anthocyanins mona; ID: 9985.

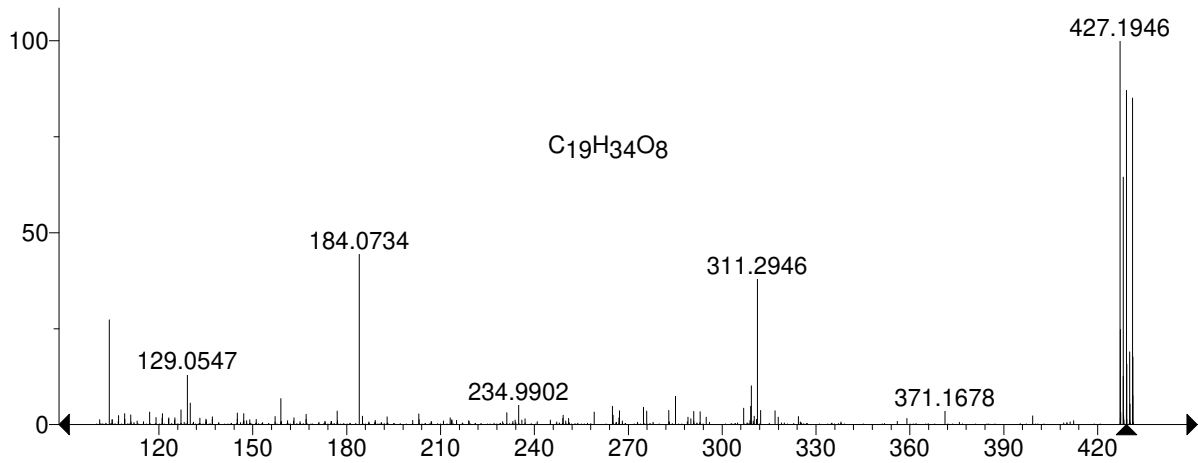

Hit 5 : [8,8-dimethyl-10-(3-methylbut-2-enoyloxy)-2-oxo-9,10-dihydropyrano[2,3-f]chromen-9-yl] 3-methylbutanoat C<sub>24</sub>H<sub>28</sub>O<sub>7</sub>; MF: 0; RMF: 25; Prob 7.31%; Lib: mona-export-vf-npl\_qexactive; ID: 19732.

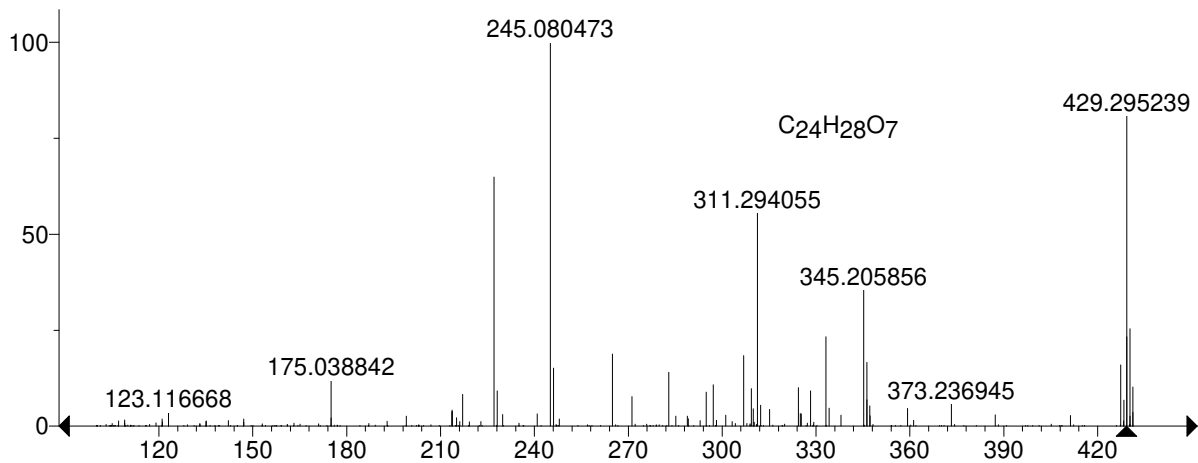

Unknown: Unknown (5.12\_500.1857m/z)  
Compound in Library Factor = 0

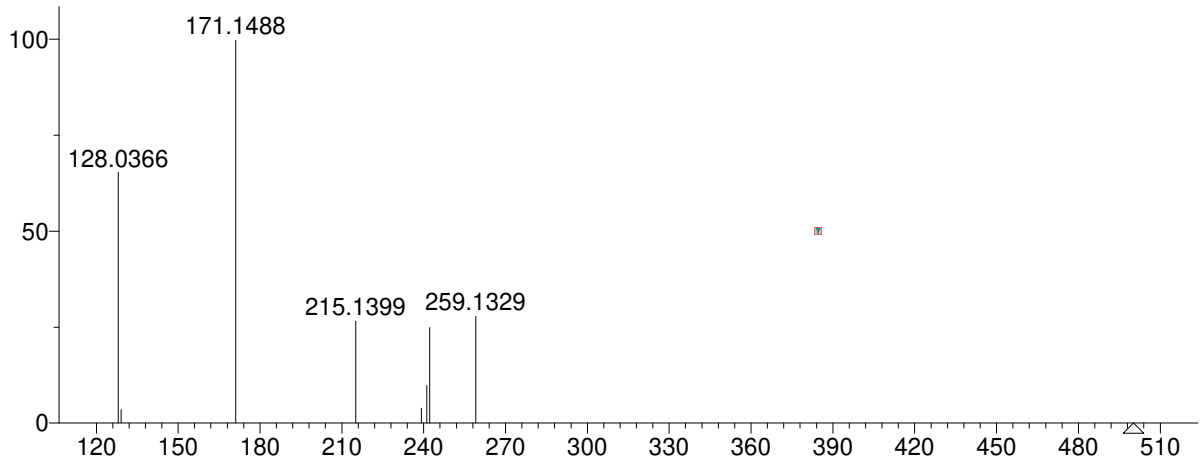

Unknown: Unknown (5.12\_520.2500m/z)  
Compound in Library Factor = 0

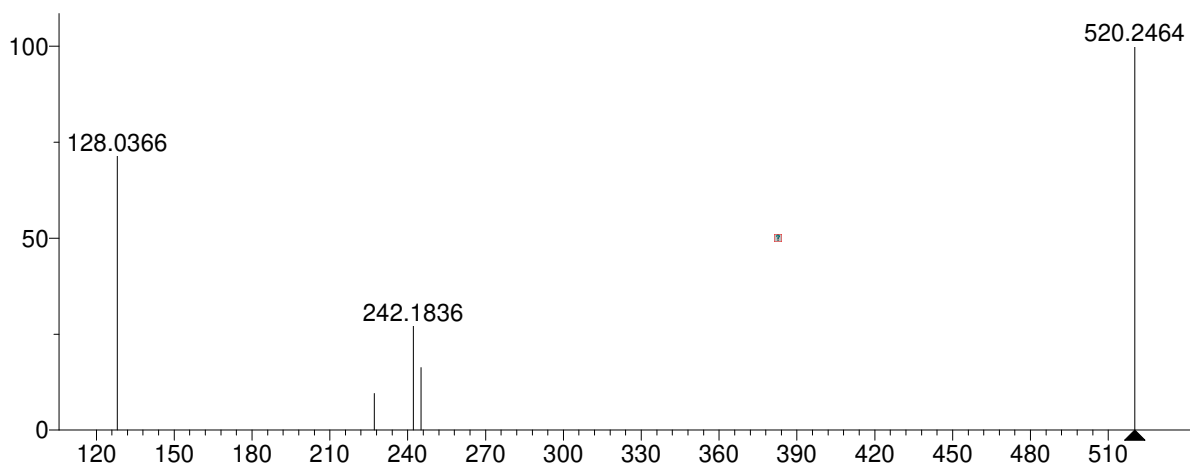

Hit 1 : NCGC00385440-01\_C27H34O9\_2-Butenoic acid, 2-(hydroxymethyl)-, (2E)-2-[[[(3aR,4R,6E,9S,10Z,11aS)-C27H34O9]; MF: 0; RMF: 7; Prob 100.0%; Lib: mona-export-gnps; ID: 10916.

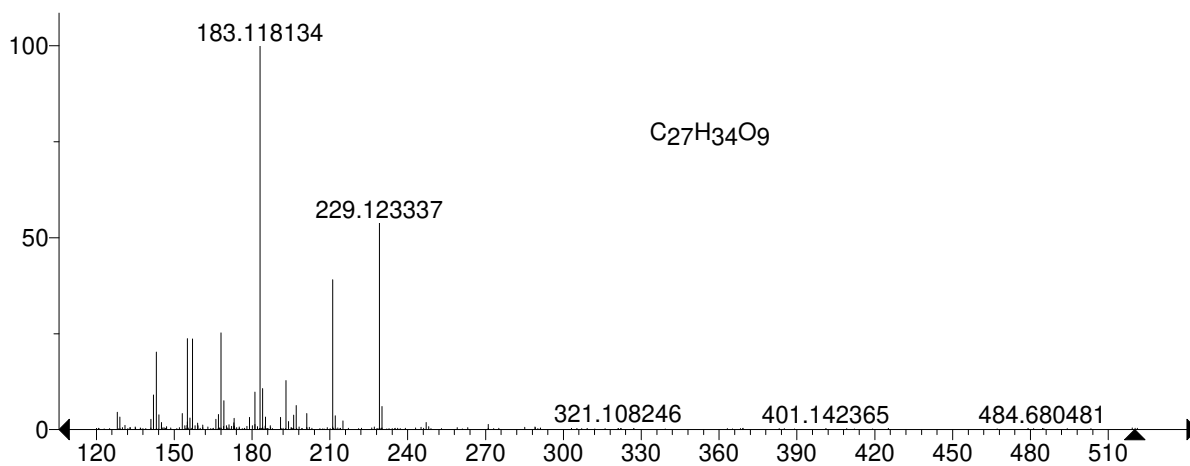

Unknown: Unknown (5.13\_374.1539m/z)  
Compound in Library Factor = 0

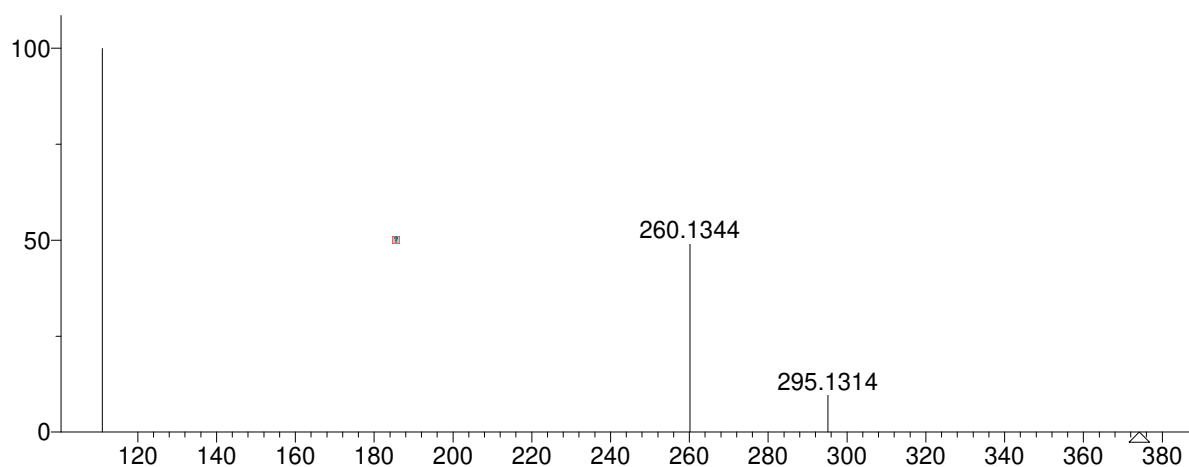

Hit 1 : Senecionine N-oxide [M+Na]<sup>+</sup> HCD 29V P=374.2  
C<sub>18</sub>H<sub>25</sub>NO<sub>6</sub>; MF: 0; RMF: 52; Prob 100.0%; CAS: 13268-67-2; Lib: nist\_msms; ID: 257184.

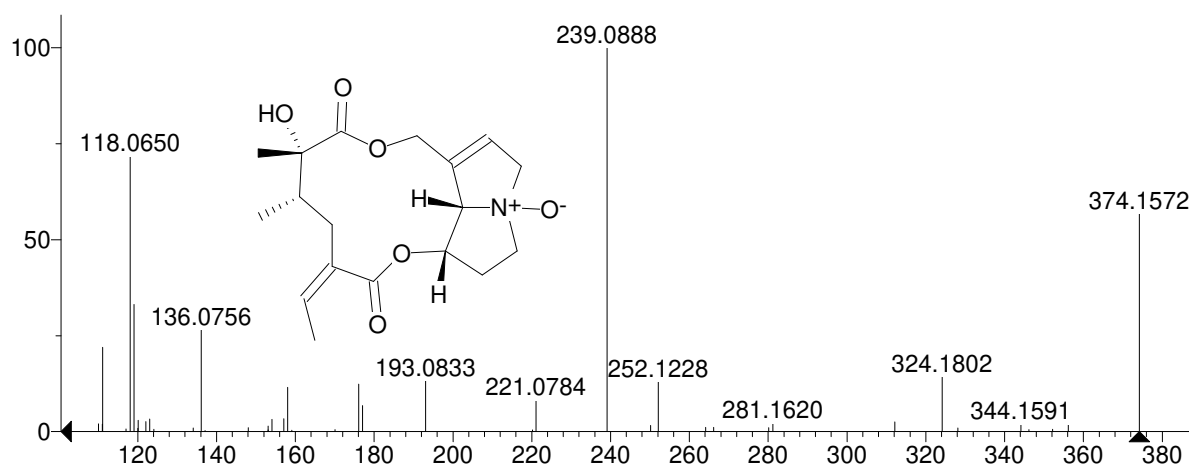

Unknown: Unknown (5.14\_913.3931m/z)  
Compound in Library Factor = 0

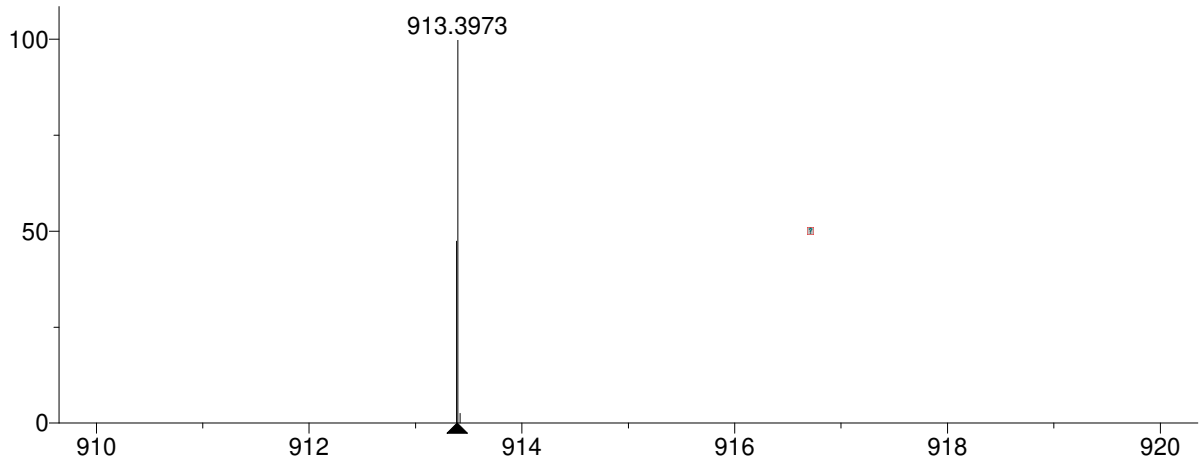

Unknown: Unknown (5.15\_376.0985m/z)  
Compound in Library Factor = 0

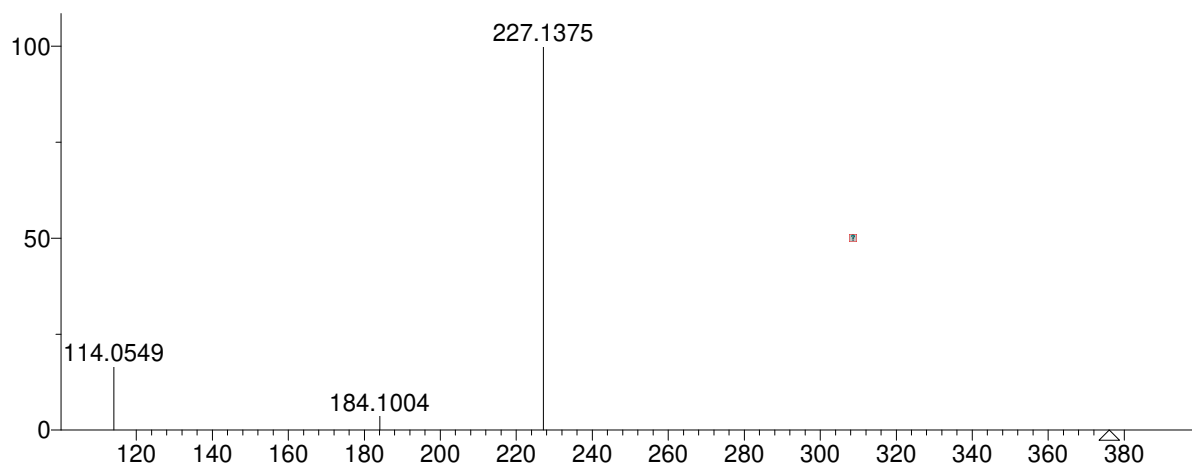

Hit 1 : 2-Pyridinecarboxylic acid, 6-[2-[5-chloro-2-[(2,4-difluorophenyl)methoxy]phenyl]-1-cyclopenten-1-yl]- [M-H]  
C<sub>24</sub>H<sub>18</sub>ClF<sub>2</sub>NO<sub>3</sub>; MF: 0; RMF: 5; Prob 100.0%; CAS: 612831-24-0; Lib: nist\_msms; ID: 371350.

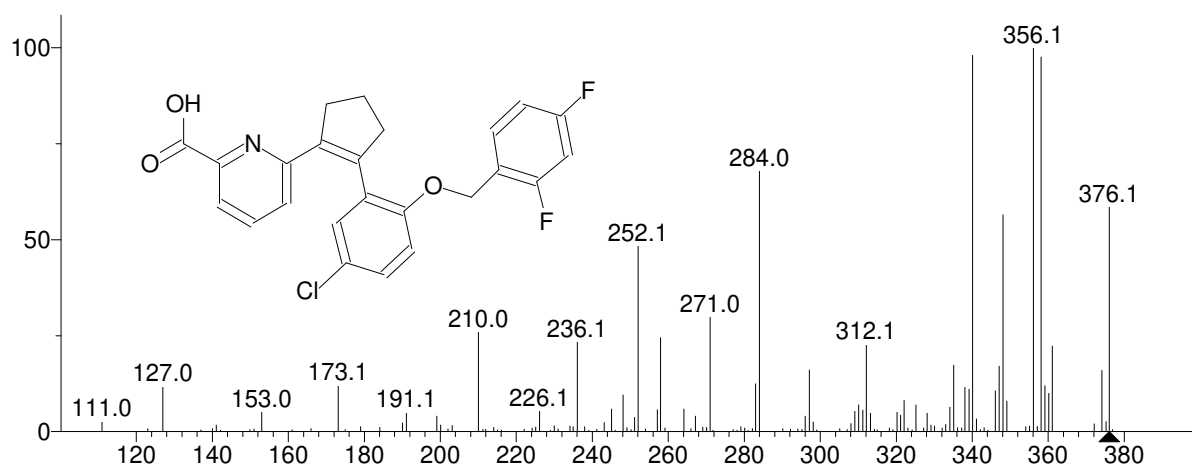

Unknown: Unknown (5.15\_518.1860m/z)  
Compound in Library Factor = 0

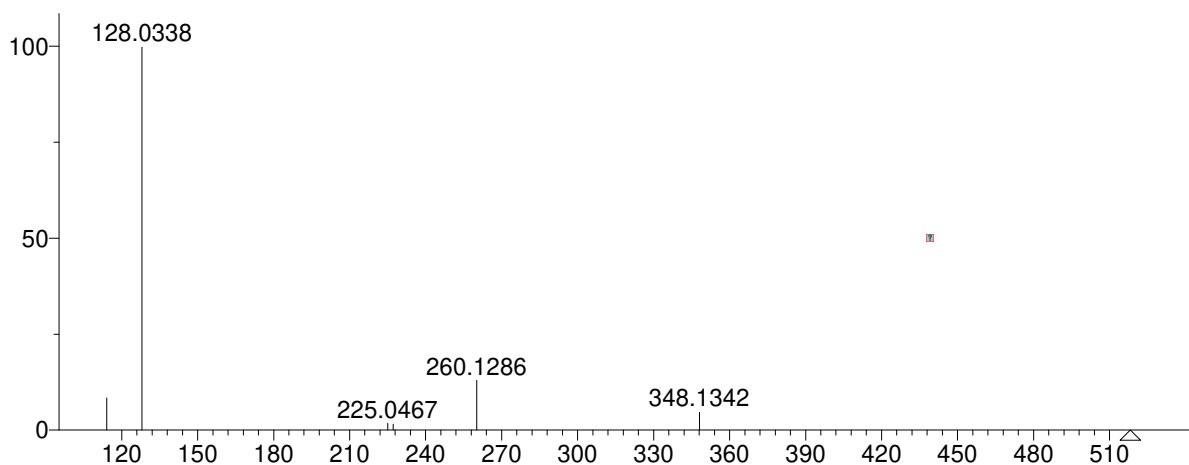

Hit 1 : 6-methoxy-7-[3,4,5-trihydroxy-6-[(3,4,5-trihydroxy-6-methyloxan-2-yl)oxymethyl]oxan-2-yl]oxychromen-2-or  
C<sub>22</sub>H<sub>28</sub>O<sub>13</sub>; MF: 0; RMF: 3; Prob 100.0%; Lib: anthocyanins mona; ID: 5871.

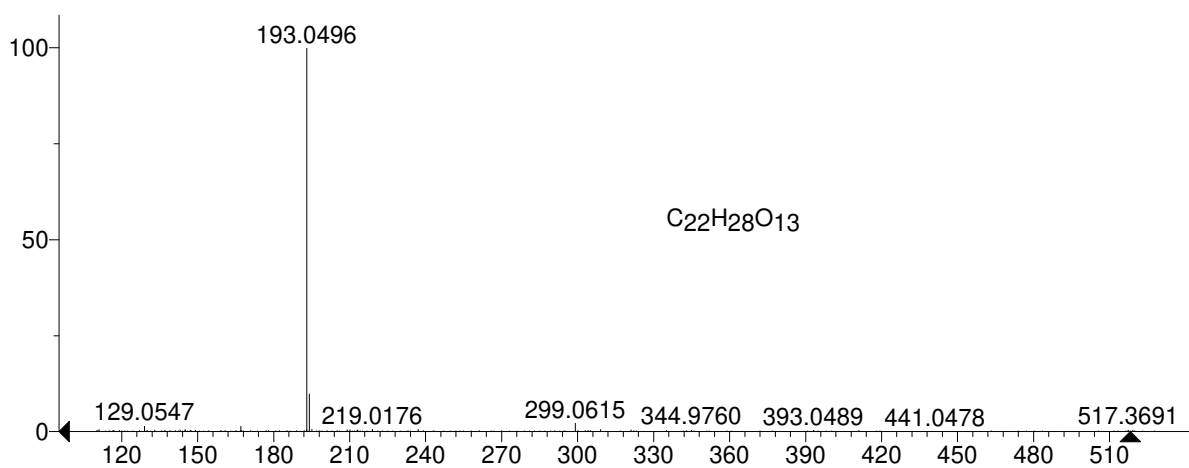

Unknown: Unknown (5.15\_600.2419m/z)  
Compound in Library Factor = 0

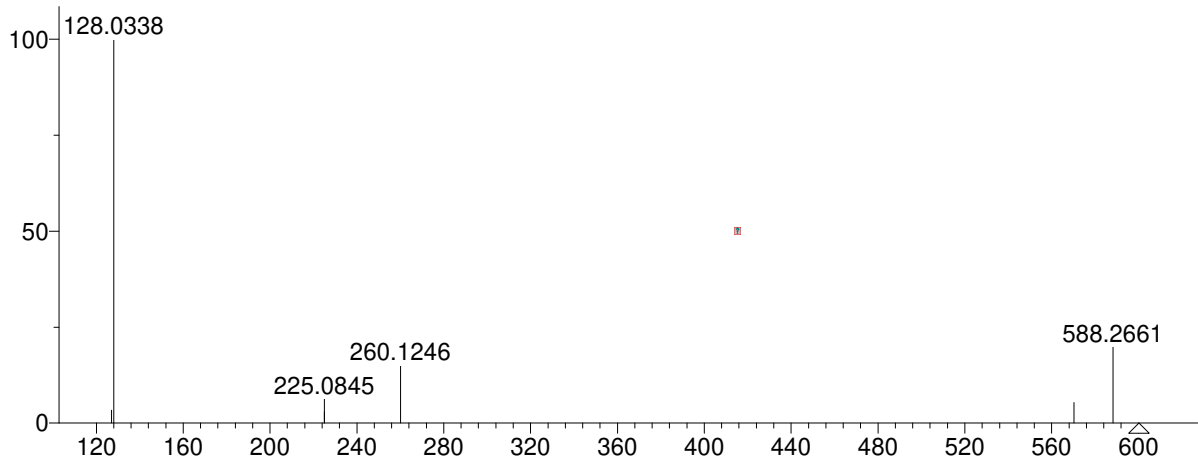



Unknown: Unknown (5.16\_409.1959m/z)  
Compound in Library Factor = 0

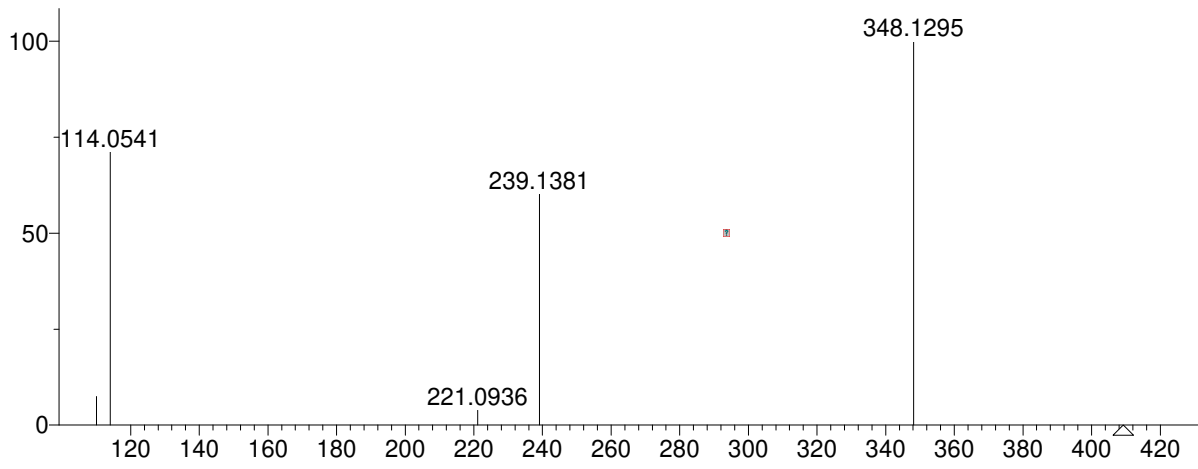

Unknown: Unknown (5.18\_420.1402m/z)  
Compound in Library Factor = 0

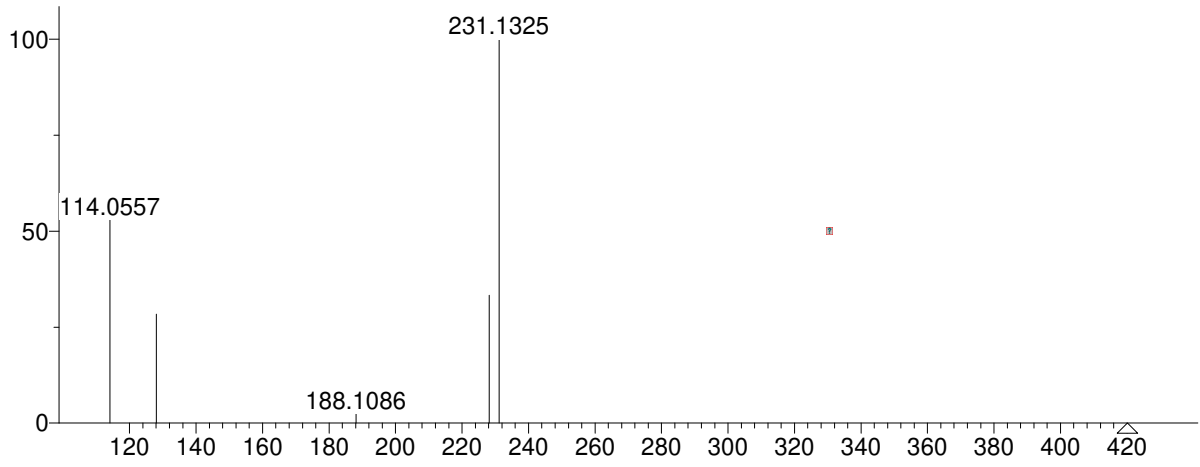

Unknown: Unknown (5.19\_456.1611m/z)  
Compound in Library Factor = 0

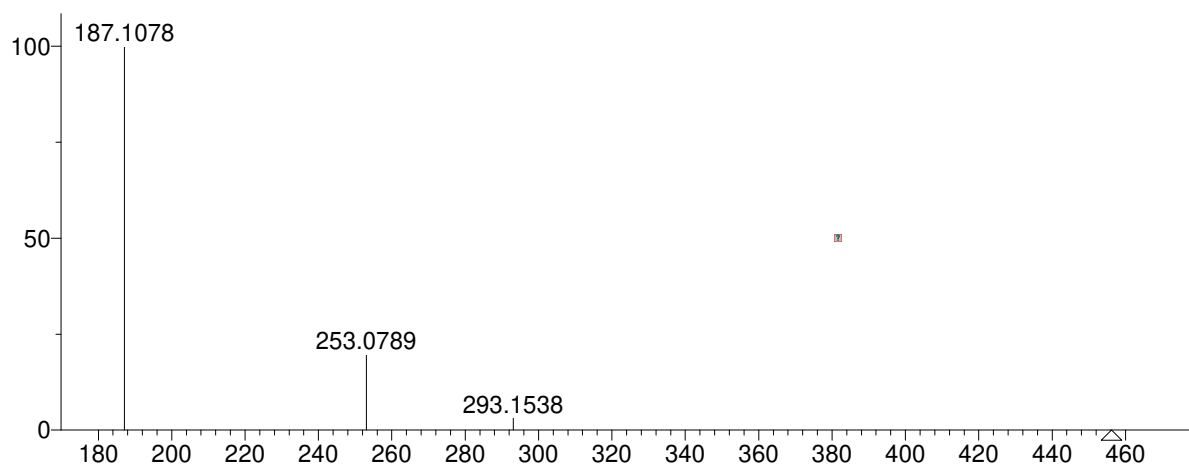

Hit 1 : Folinic acid [M+H-H<sub>2</sub>O]<sup>+</sup> HCD 72V P=456.2  
C<sub>20</sub>H<sub>23</sub>N<sub>7</sub>O<sub>7</sub>; MF: 0; RMF: 33; Prob 100.0%; CAS: 58-05-9; Lib: nist\_msms; ID: 138160.

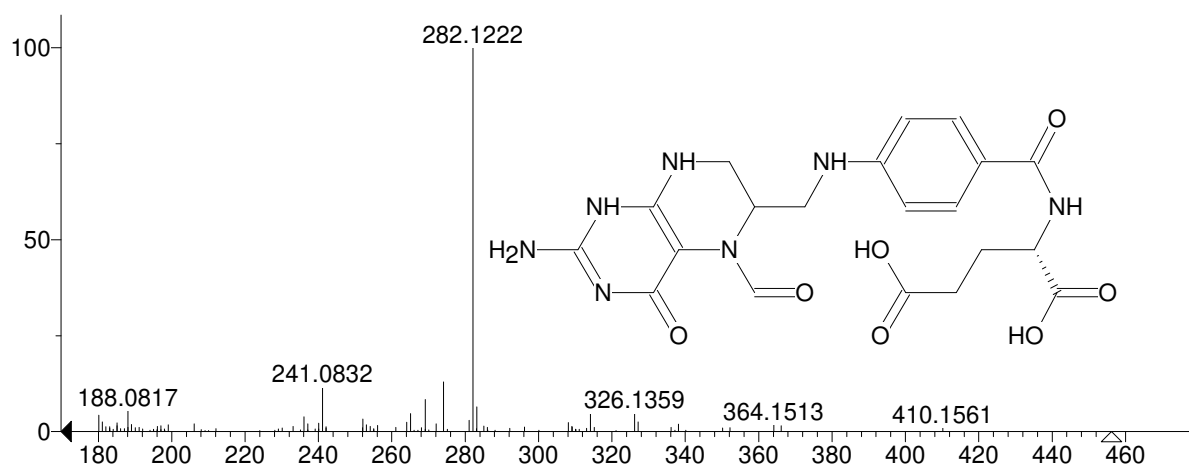

Unknown: Unknown (5.19\_584.3038m/z)  
Compound in Library Factor = -3273

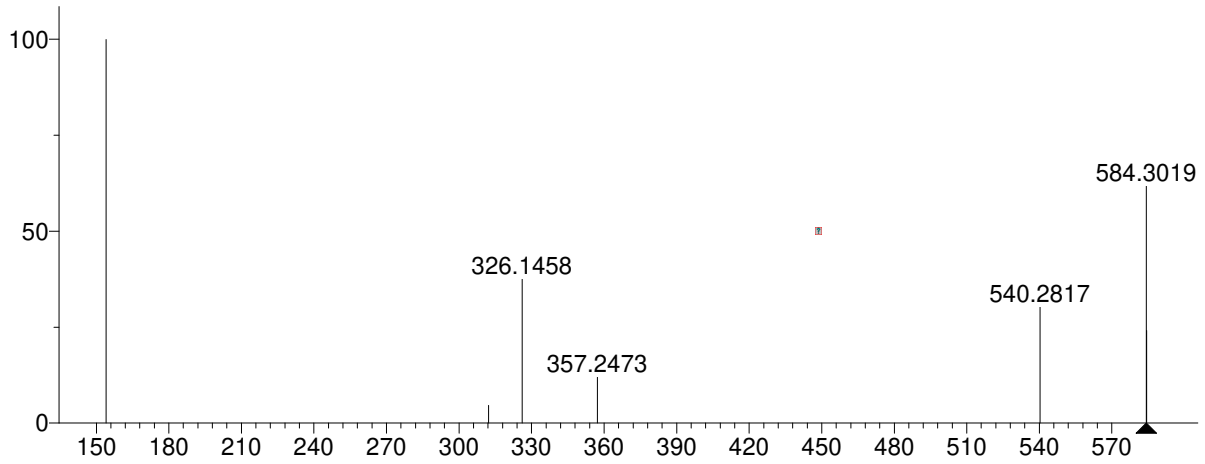

Hit 1 : [DAIa6,Des-Gly10] LH-RH, ethyl amide [M+2H]<sup>2+</sup> QTOF 4V P=584.3  
C<sub>56</sub>H<sub>78</sub>N<sub>16</sub>O<sub>12</sub>; MF: 14; RMF: 371; Prob 61.5%; Lib: nist\_msms2; ID: 38383.

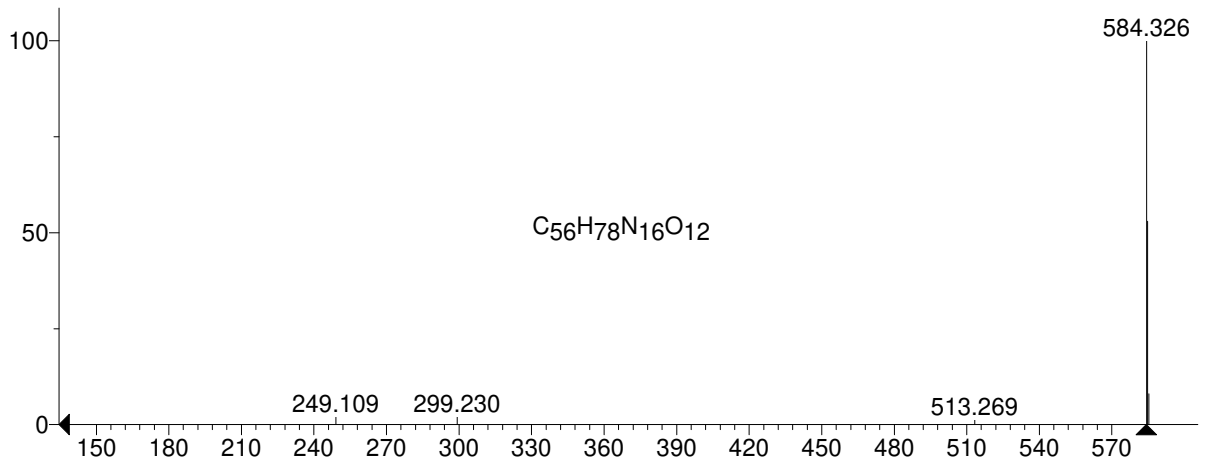

Hit 2 : NCGC00380379-01\_C29H42O11\_ [M+NH<sub>4</sub>]<sup>+</sup> P=584.3  
C<sub>29</sub>H<sub>42</sub>O<sub>11</sub>; MF: 0; RMF: 39; Prob 38.5%; Lib: mona-export-gnps; ID: 12061.

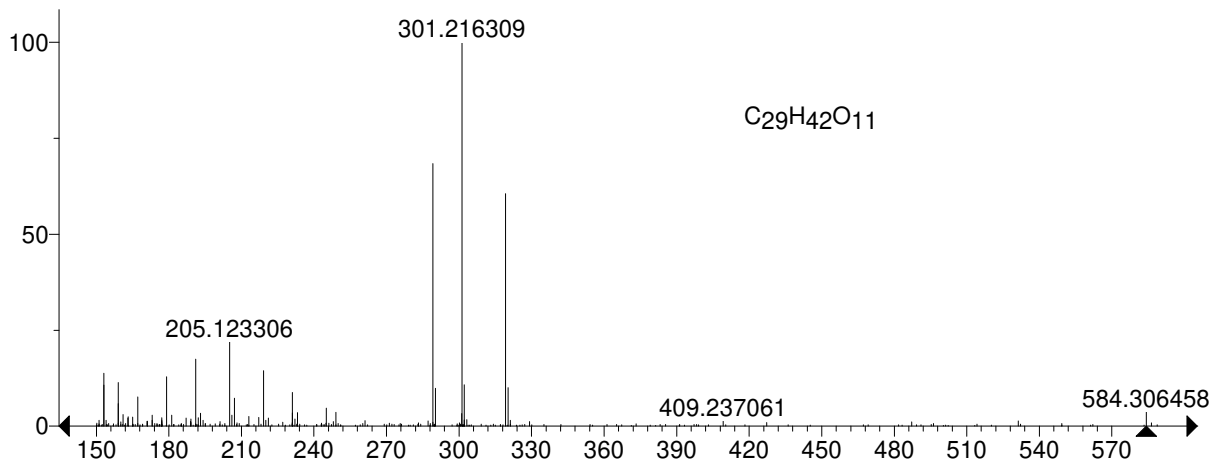

Unknown: Unknown (5.20\_401.1916m/z)  
Compound in Library Factor = 0

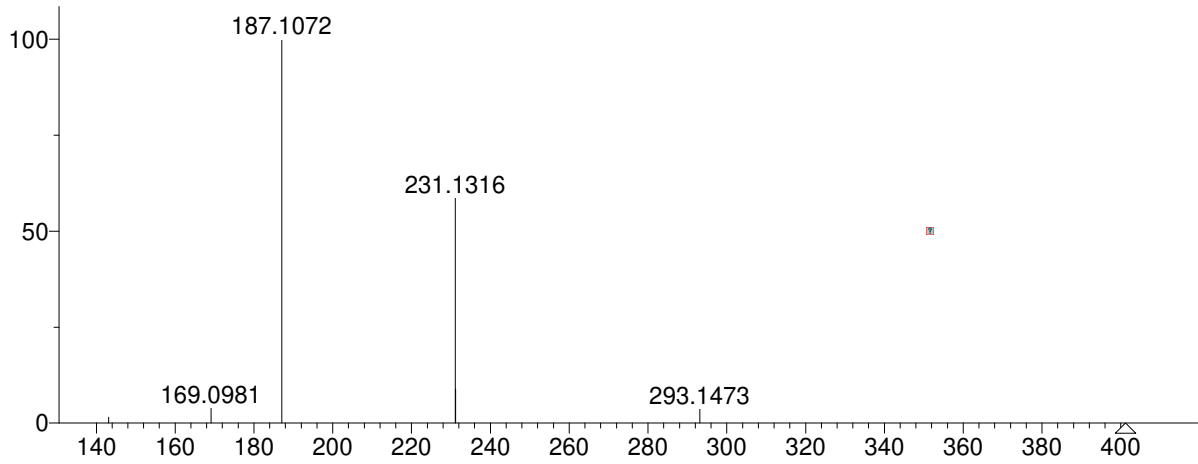

Hit 1 : NCGC00380382-01\_C23H30O7\_1-Phenanthrenecarboxylic acid, 10-(acetyloxy)-1,2,3,4,4a,9,10,10a-octa  
C23H30O7; MF: 0; RMF: 26; Prob 100.0%; Lib: mona-export-gnps; ID: 13719.

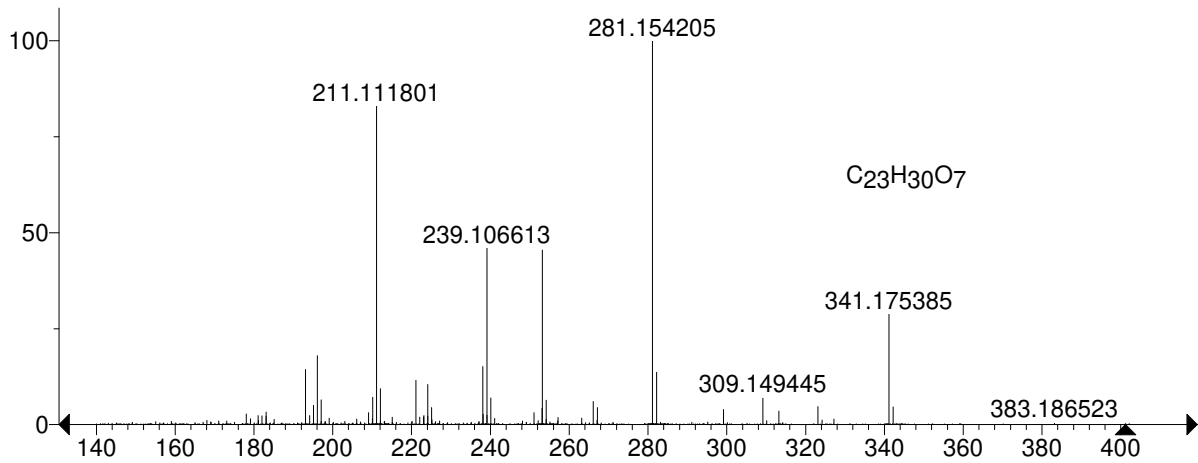

Unknown: Unknown (5.21\_355.1607m/z)  
Compound in Library Factor = 0

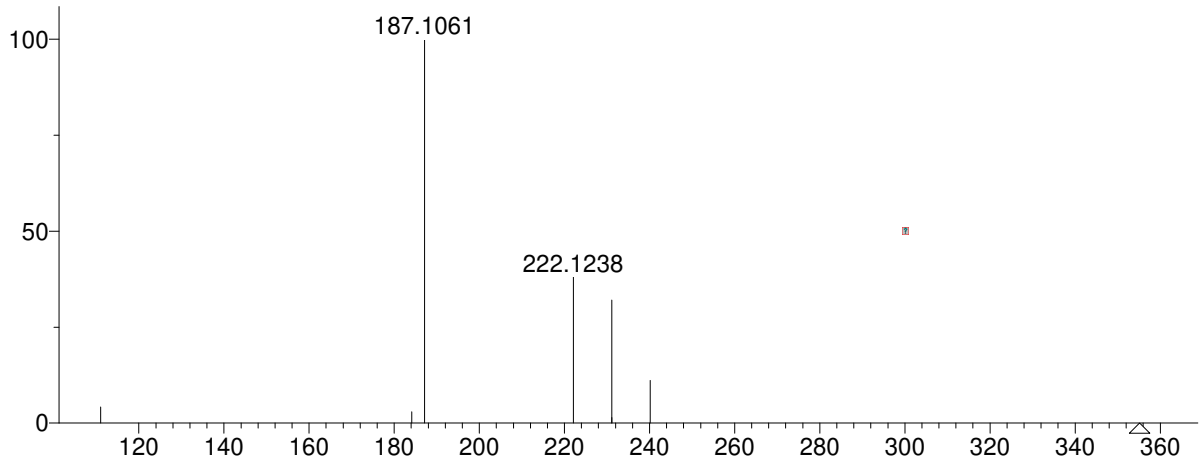

\*\* Search Report Page 1 of 2 \*\*

Unknown: Unknown (5.23\_291.0977m/z)  
Compound in Library Factor = -791

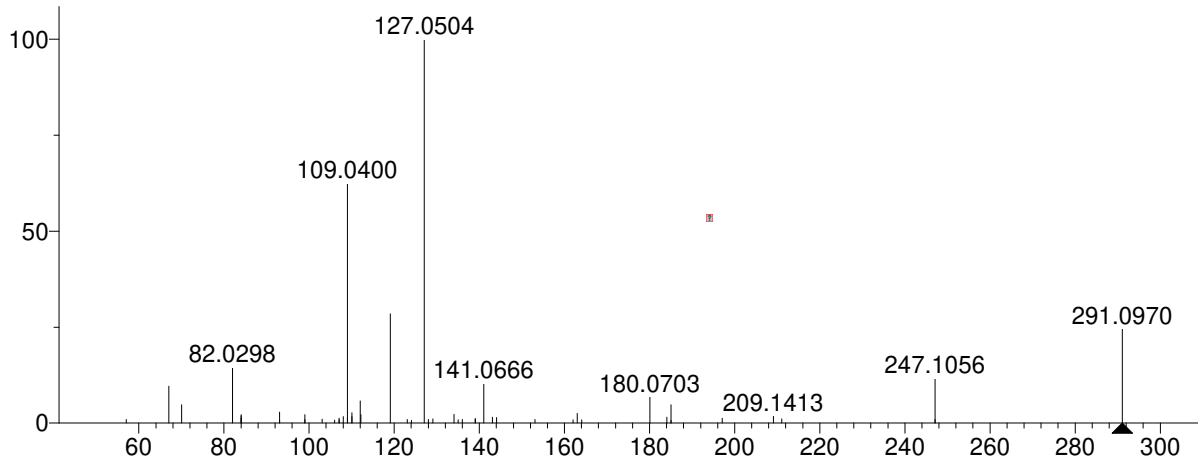

Hit 1 : N,N'-Dicarbobenzyloxy-L-ornithine [M-H-C7H8O]- HCD 0V P=291.1  
C21H24N2O6; MF: 119; RMF: 658; Prob 20.6%; CAS: 2274-58-0; Lib: nist\_msms; ID: 305180.

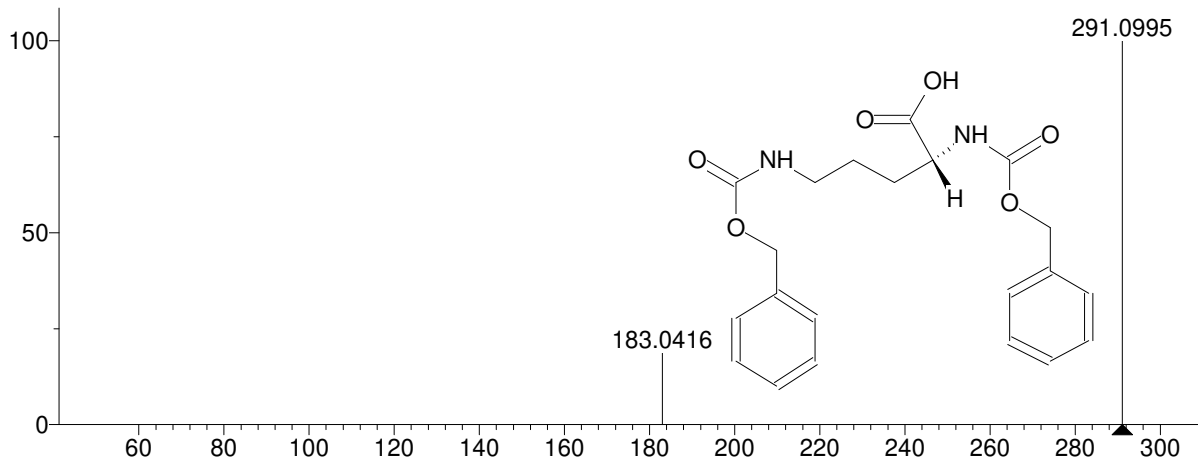

Hit 2 : 5a,6-Anhydrotetracycline [M-H-NH3]-=>319.1=>291.1 IT 35% P=291.1  
C22H22N2O7; MF: 20; RMF: 325; Prob 1.56%; CAS: 1665-56-1; Lib: nist\_msms; ID: 309452.

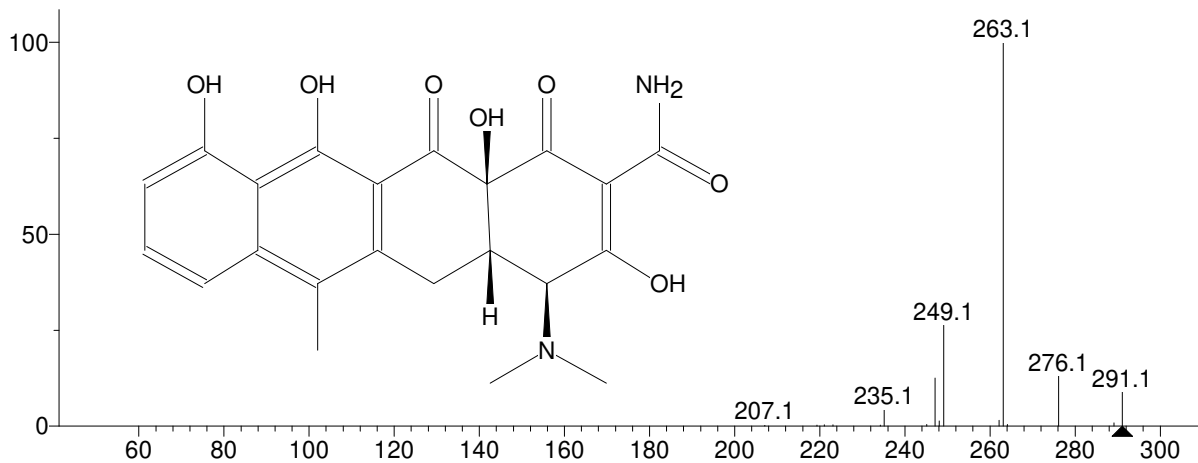

Hit 3 : Oxytetracycline [M-H-CHNO]-=>309.1=>291.1 IT 35% P=291.1  
C22H24N2O9; MF: 11; RMF: 339; Prob 1.13%; CAS: 79-57-2; Lib: nist\_msms; ID: 481729.

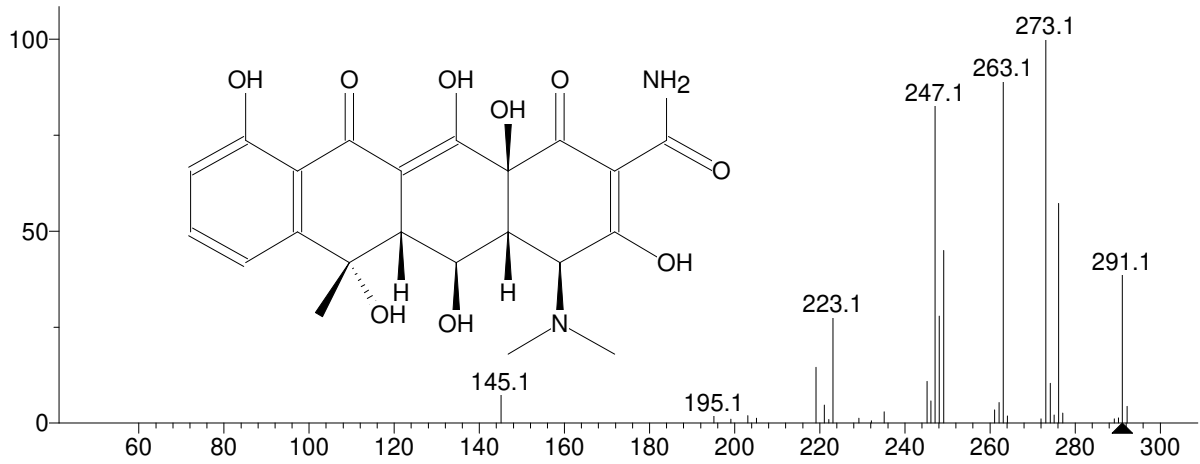

Hit 4 : Uncarine C [M+H-CH4O]+=>309.2=>291.1 IT 35% P=291.1  
C21H24N2O4; MF: 3; RMF: 198; Prob 0.84%; CAS: 5629-60-7; Lib: nist\_msms; ID: 227867.

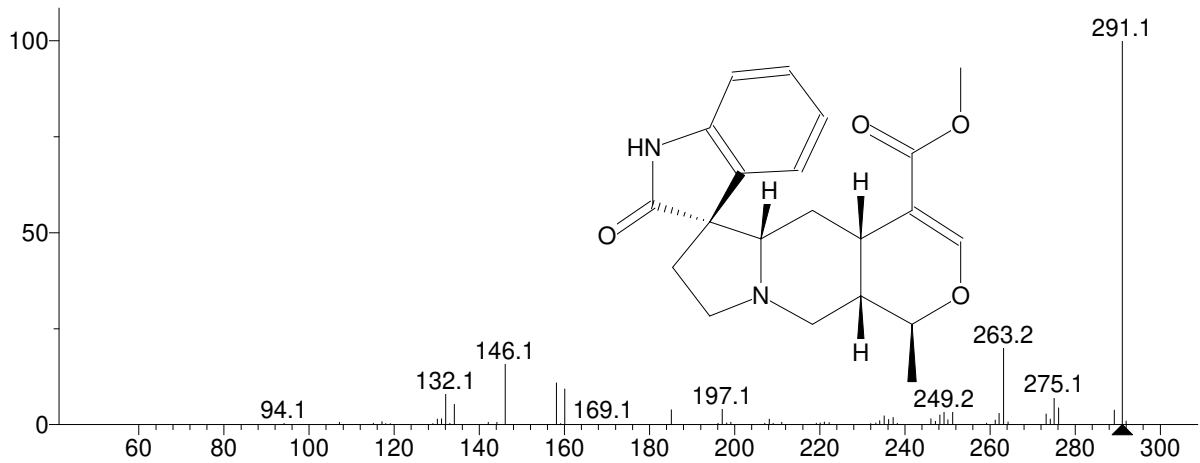

Hit 5 : 2',3'-Dihydrocephalomannine [M+H-C25H33NO10]+=>309.1=>291.1 IT 35% P=291.1  
C45H55NO14; MF: 3; RMF: 167; Prob 0.84%; CAS: 159001-25-9; Lib: nist\_msms; ID: 458904.

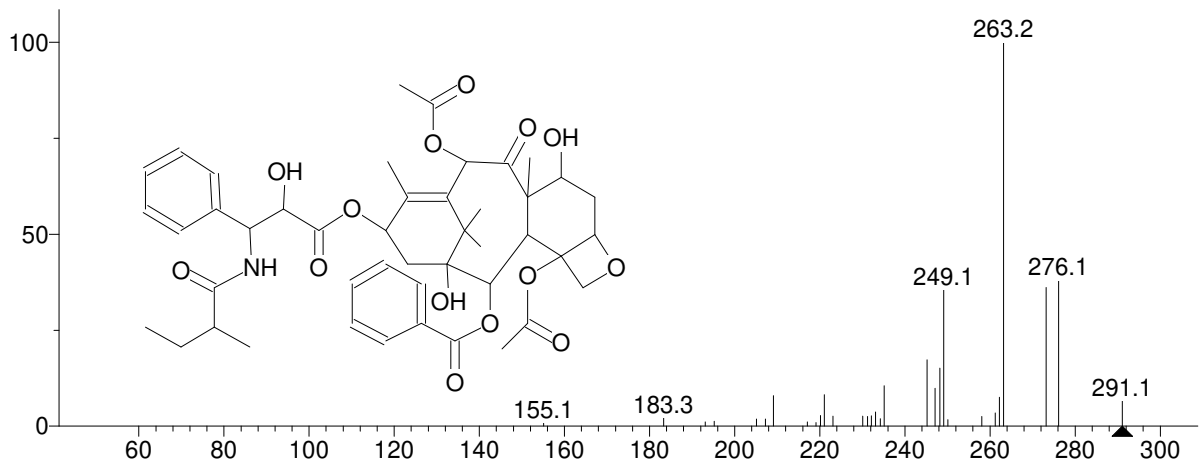



Unknown: Unknown (5.23\_348.1206m/z)  
Compound in Library Factor = 0

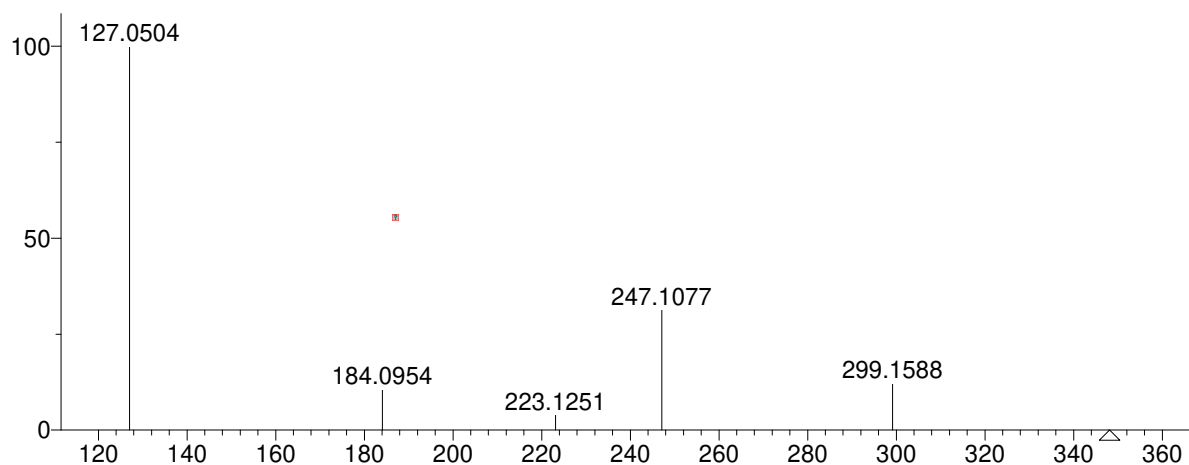

Hit 1 : Nitidine cation [Cat]<sup>+</sup> HCD 62V P=348.1  
C<sub>21</sub>H<sub>18</sub>NO<sub>4</sub>; MF: 0; RMF: 101; Prob 33.3%; CAS: 6872-57-7; Lib: nist\_msms; ID: 218853.

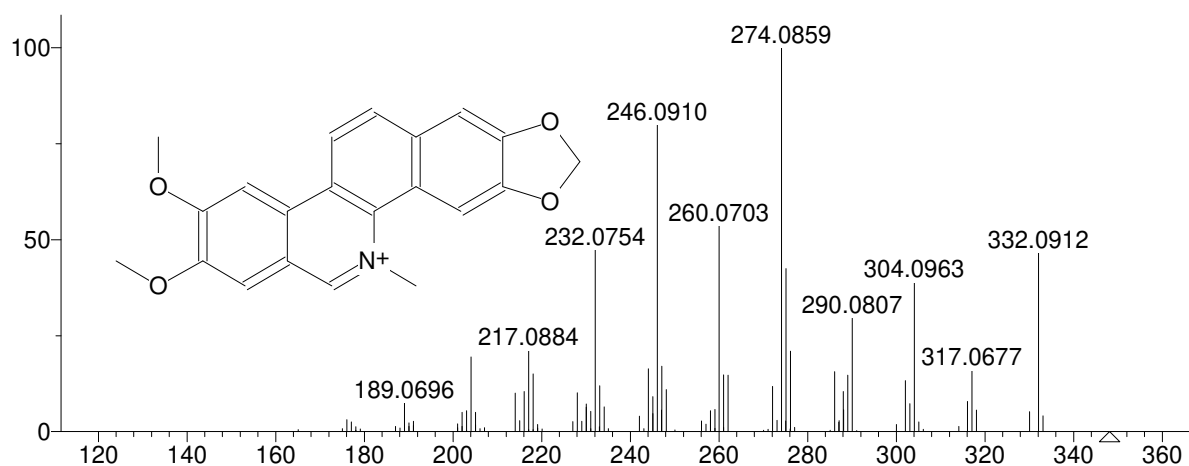

Hit 2 : (-)-Coralyne cation [Cat-CH<sub>4</sub>]<sup>+</sup> HCD 76V P=348.1  
C<sub>22</sub>H<sub>22</sub>NO<sub>4</sub>; MF: 0; RMF: 84; Prob 33.3%; CAS: 6872-73-7; Lib: nist\_msms; ID: 217308.

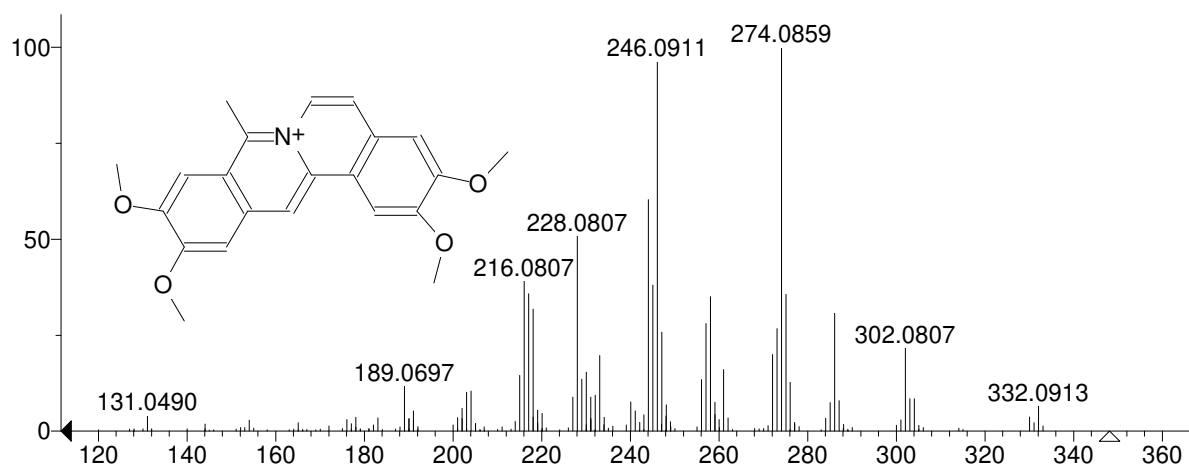

\*\* Search Report Page 2 of 2 \*\*

Hit 3 : Chelerythrine cation [Cat]<sup>+</sup> QTOF 45V P=348.1  
C<sub>21</sub>H<sub>18</sub>NO<sub>4</sub>; MF: 0; RMF: 67; Prob 33.3%; CAS: 34316-15-9; Lib: nist\_msms; ID: 66141.

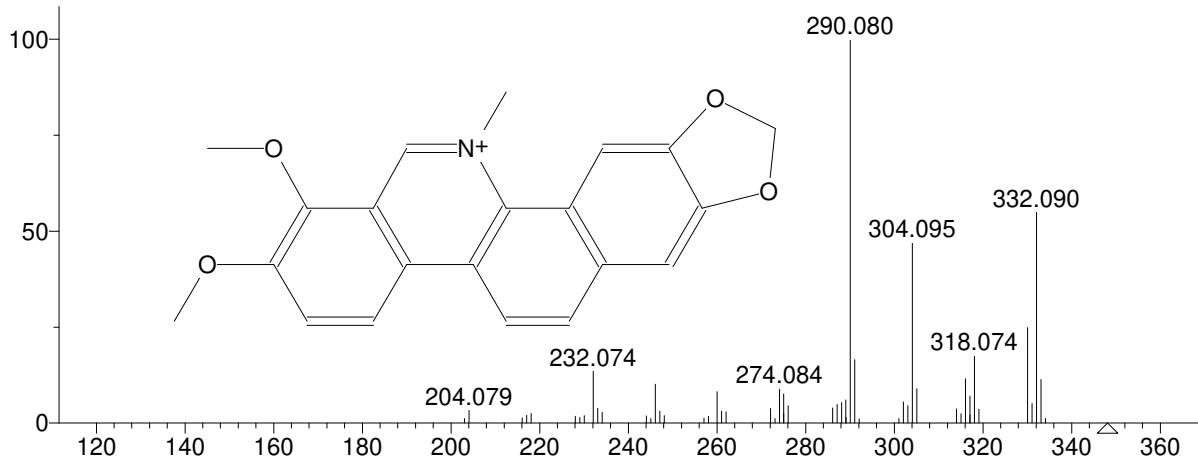

Unknown: Unknown (5.23\_372.2125m/z)  
Compound in Library Factor = 0

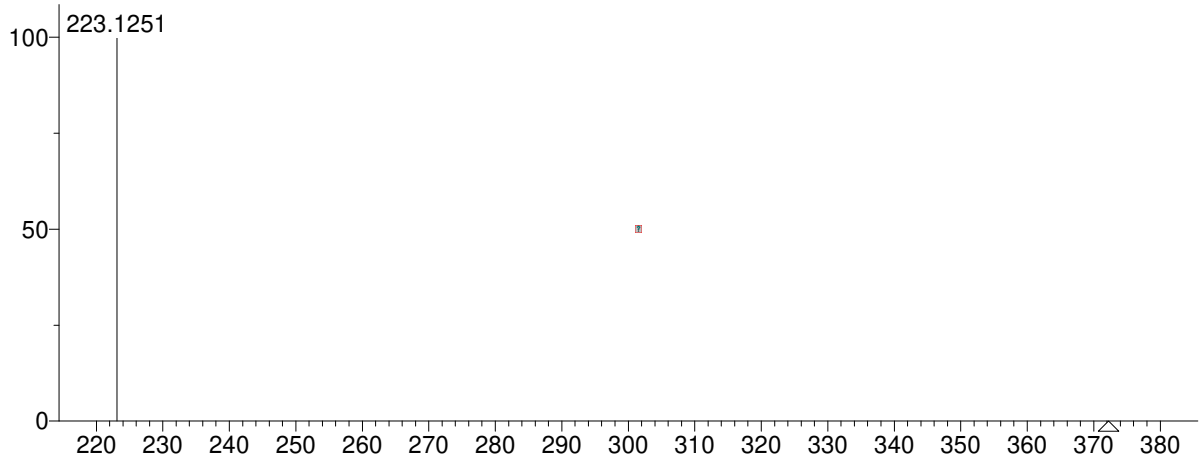

Unknown: Unknown (5.23\_680.2787m/z)  
Compound in Library Factor = 0

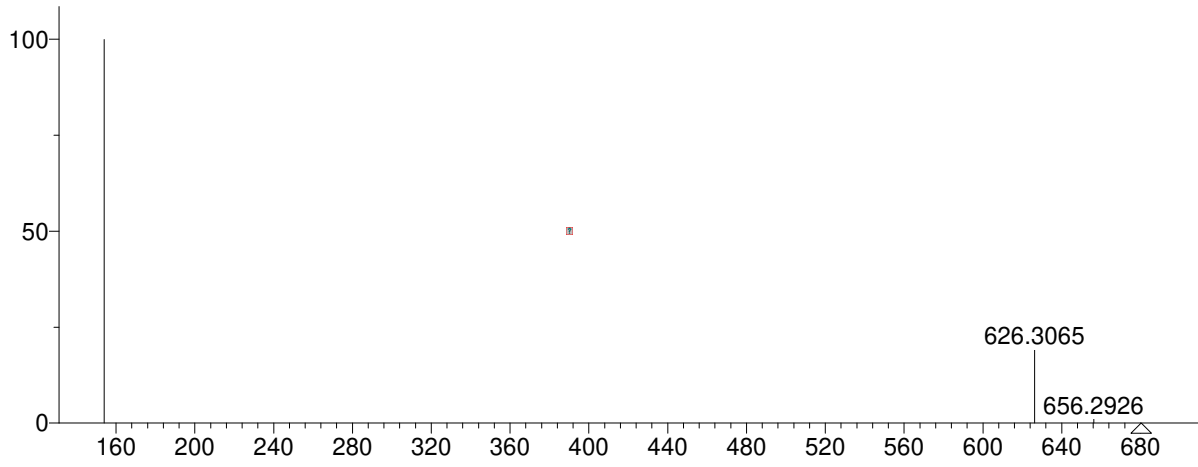

\*\* Search Report Page 1 of 2 \*\*

Unknown: Unknown (5.26\_178.1225m/z)  
Compound in Library Factor = -379

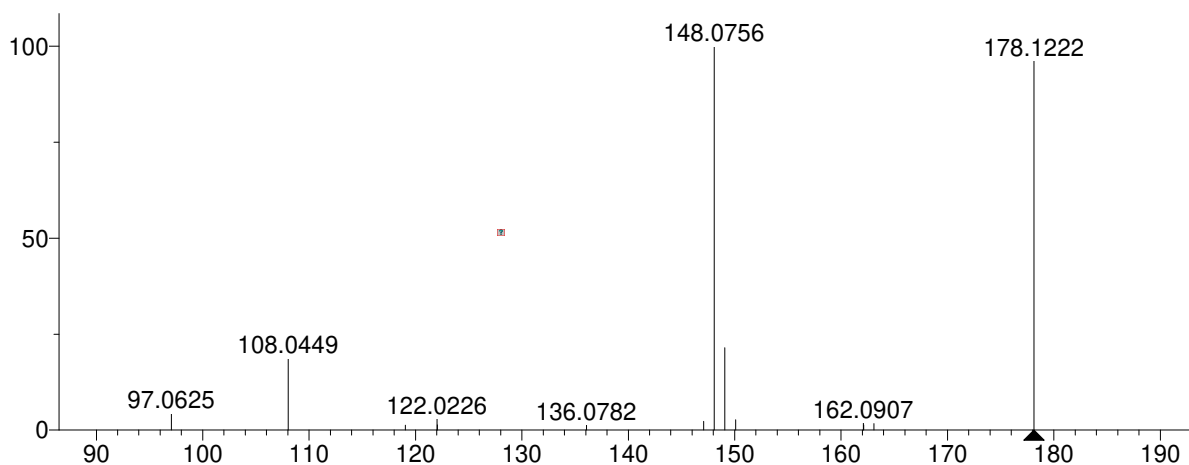

Hit 1 : 1H-Inden-2-amine, 2,3-dihydro-5-methoxy-6-methyl- [M+H]<sup>+</sup> HCD 3V P=178.1  
C<sub>11</sub>H<sub>15</sub>NO; MF: 297; RMF: 921; Prob 92.5%; CAS: 136468-19-4; Lib: nist\_msms; ID: 364124.

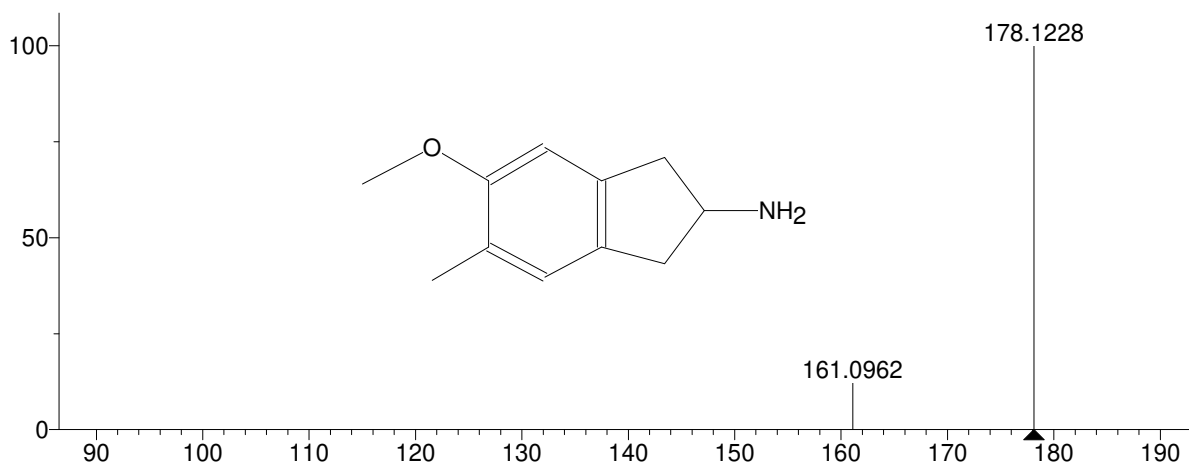

Hit 2 : 4-Benzofuranethanamine, 2,3-dihydro- $\alpha$ -methyl- [M+H]<sup>+</sup> HCD 0V P=178.1  
C<sub>11</sub>H<sub>15</sub>NO; MF: 138; RMF: 638; Prob 2.33%; CAS: 1203430-05-0; Lib: nist\_msms; ID: 426816.

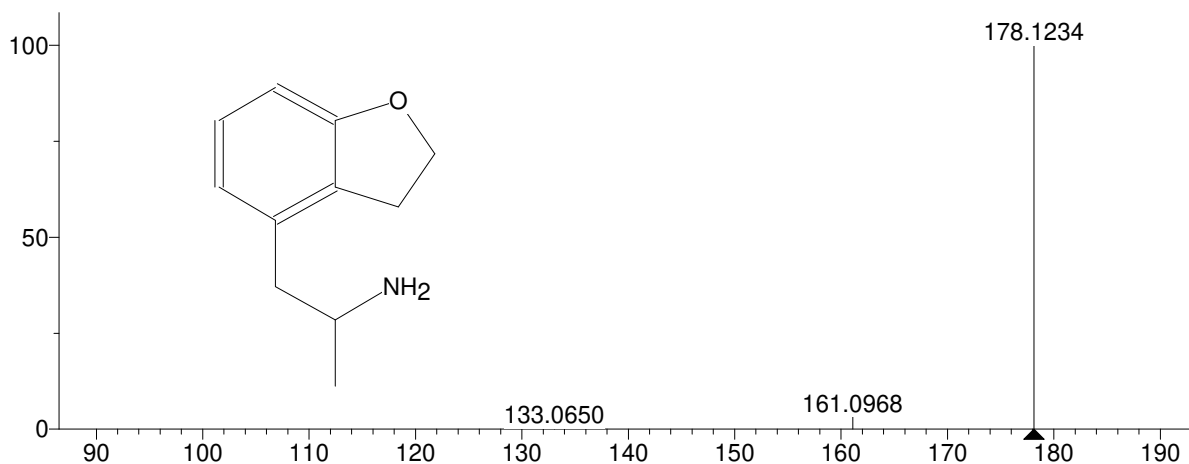

Hit 3 : 2-Methylmethcathinone [M+H]<sup>+</sup> HCD 3V P=178.1  
C<sub>11</sub>H<sub>15</sub>NO; MF: 124; RMF: 637; Prob 1.45%; CAS: 1246911-71-6; Lib: nist\_msms; ID: 249570.

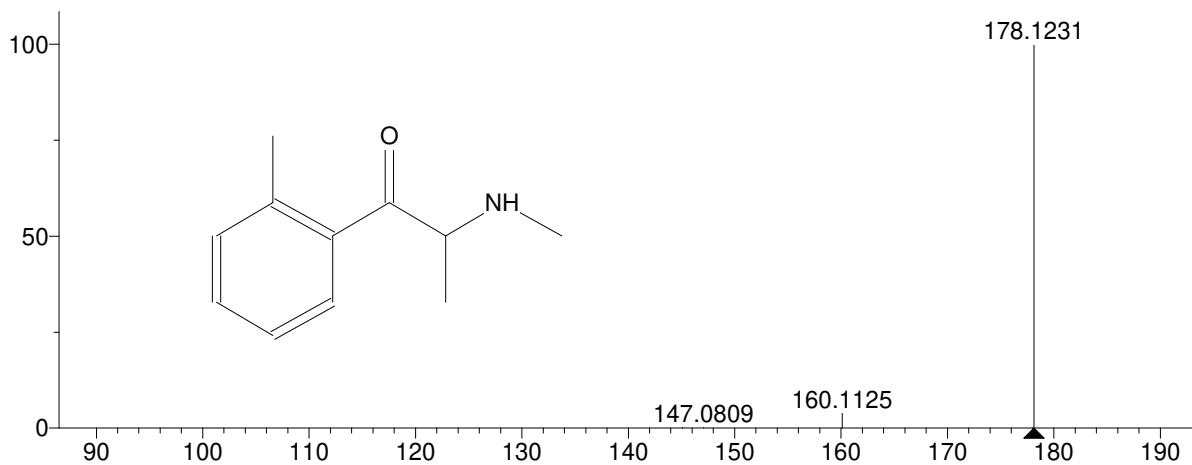

Hit 4 : 4-Methylmethcathinone [M+H]<sup>+</sup> HCD 3V P=178.1  
C<sub>11</sub>H<sub>15</sub>NO; MF: 119; RMF: 636; Prob 1.17%; CAS: 1189805-46-6; Lib: nist\_msms; ID: 325130.

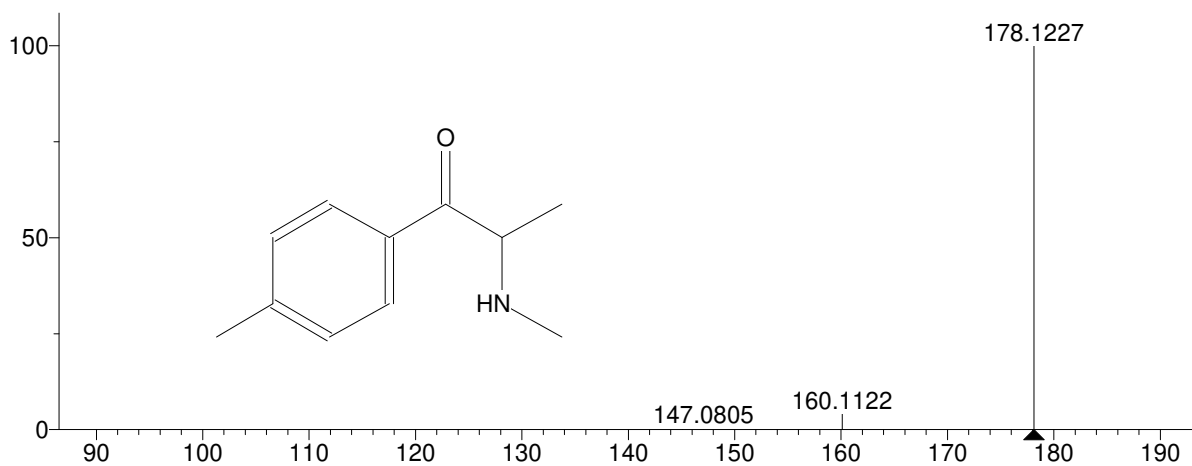

Hit 5 : 6-(2-Aminopropyl)-2,3-dihydrobenzofuran [M+H]<sup>+</sup> HCD 1V P=178.1  
C<sub>11</sub>H<sub>15</sub>NO; MF: 96; RMF: 612; Prob 0.42%; CAS: 152623-93-3; Lib: nist\_msms; ID: 253794.

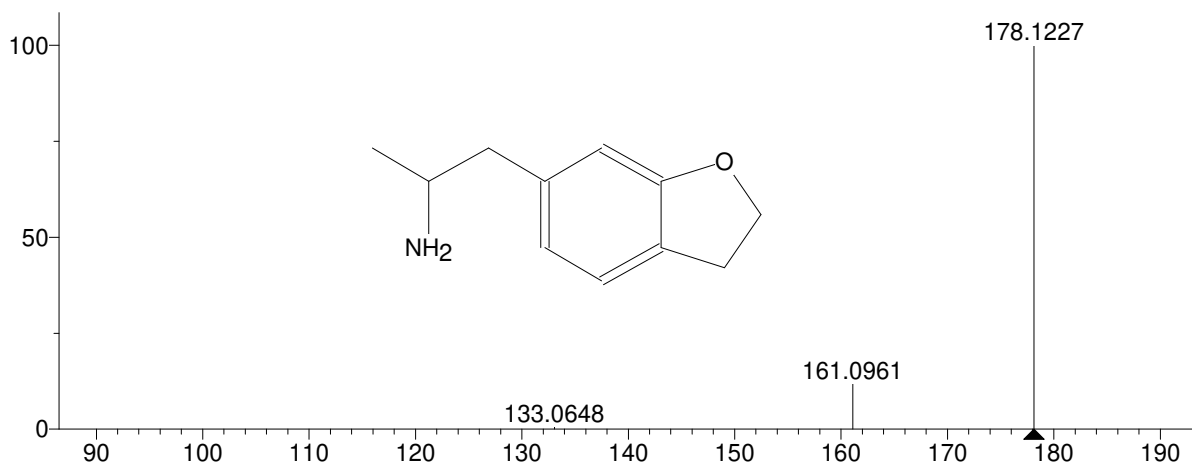

Unknown: Unknown (5.26\_222.0760m/z)  
Compound in Library Factor = -642

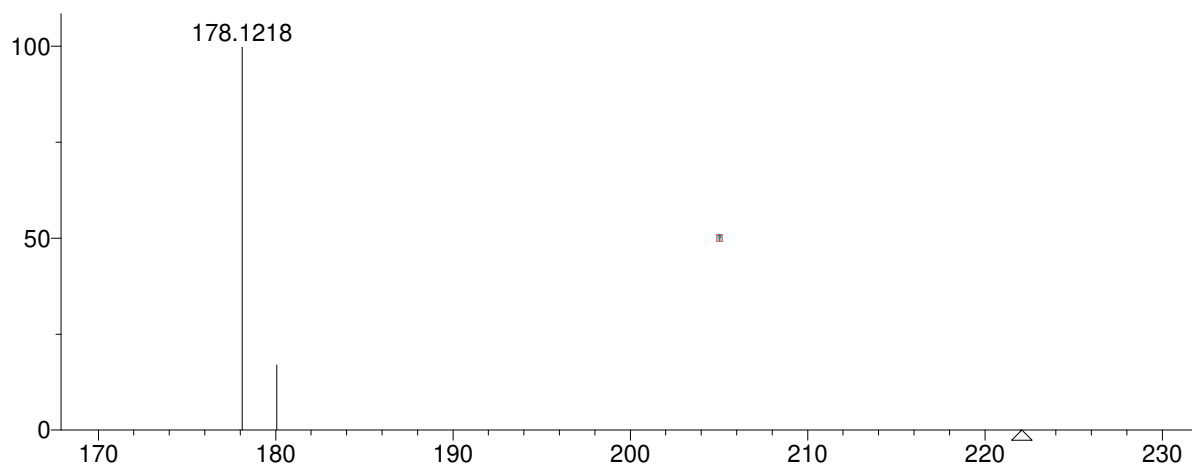

Hit 1 : N-Acetyl-L-tyrosine [M-H]<sup>-</sup> HCD 28V P=222.1  
C<sub>11</sub>H<sub>13</sub>NO<sub>4</sub>; MF: 112; RMF: 380; Prob 94.0%; CAS: 537-55-3; Lib: nist\_msms; ID: 280195.

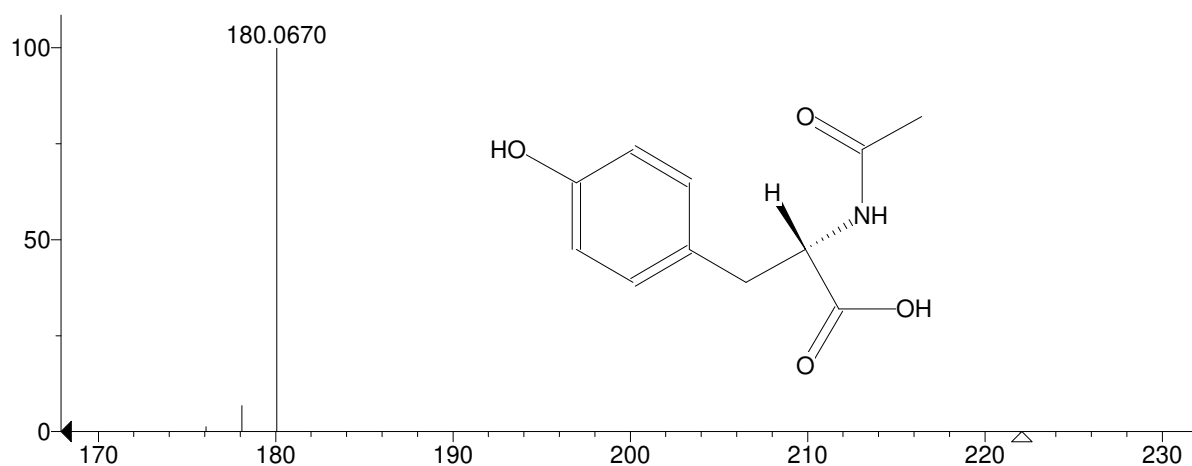

Hit 2 : NCGC00381349-01\_C<sub>11</sub>H<sub>13</sub>NO<sub>5</sub>\_1H-Pyrrole-3-propanoic acid, 5-acetyl-4-(carboxymethyl)- [M-H<sub>2</sub>O+H]<sup>+</sup>  
C<sub>11</sub>H<sub>13</sub>NO<sub>5</sub>; MF: 1; RMF: 122; Prob 5.94%; Lib: mona-export-gnps; ID: 11085.

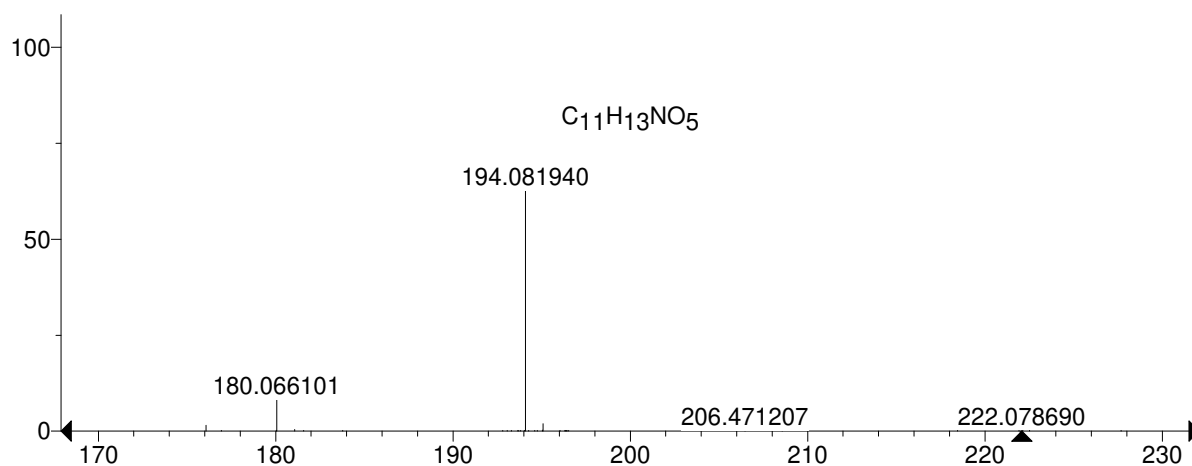

Unknown: Unknown (5.26\_224.1278m/z)  
Compound in Library Factor = -3273

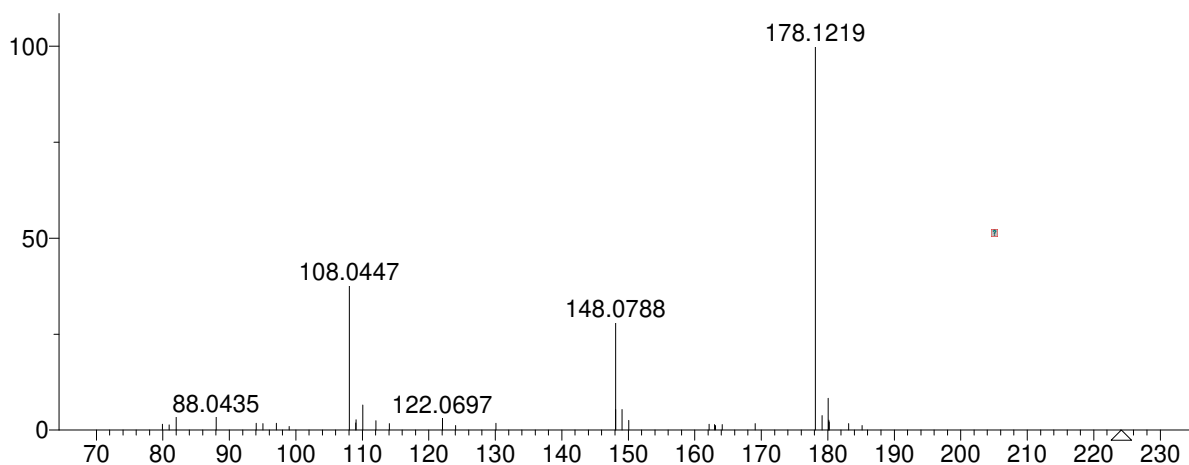

Hit 1 : 3,4-Dimethoxymethcathinone [M+H]<sup>+</sup> HCD 40V P=224.1  
C<sub>12</sub>H<sub>17</sub>NO<sub>3</sub>; MF: 2; RMF: 143; Prob 20.5%; CAS: 802301-79-7; Lib: nist\_msms; ID: 547282.

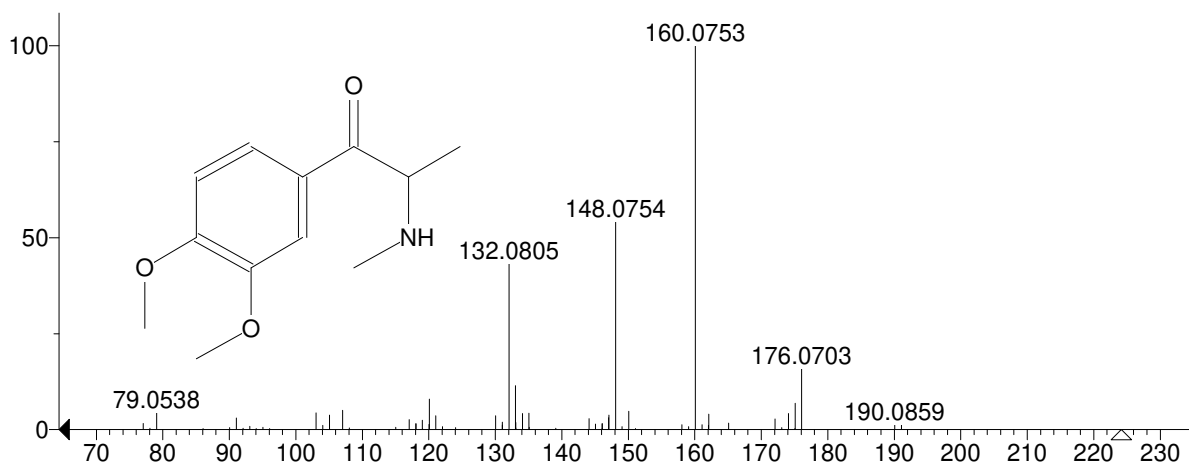

Hit 2 : Bufexamac [M+H]<sup>+</sup> IT 35% P=224.1  
C<sub>12</sub>H<sub>17</sub>NO<sub>3</sub>; MF: 2; RMF: 66; Prob 20.5%; CAS: 2438-72-4; Lib: nist\_msms; ID: 492682.

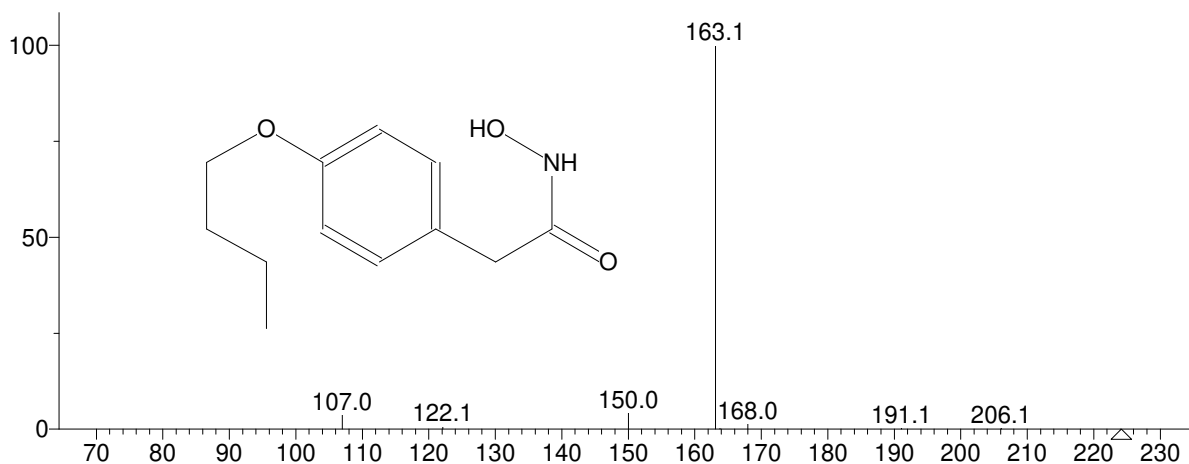



\*\* Search Report Page 2 of 2 \*\*

Hit 3 : N-(3-Oxoocctanoyl)-L-homoserine lactone [M+H-H<sub>2</sub>O]<sup>+</sup> HCD 20V P=224.1  
C<sub>12</sub>H<sub>19</sub>NO<sub>4</sub>; MF: 2; RMF: 60; Prob 20.5%; CAS: 147795-39-9; Lib: nist\_msms; ID: 315228.

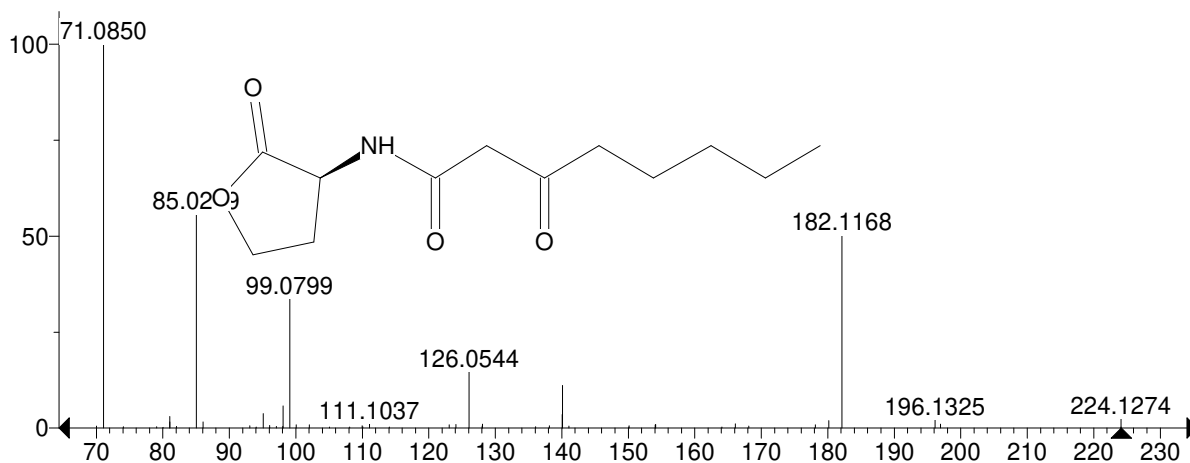

Hit 4 : 1-(3,5-Dihydroxyphenyl)-2-[(1,1-dimethylethyl)amino]ethanone [M+H]<sup>+</sup> HCD 33V P=224.1  
C<sub>12</sub>H<sub>17</sub>NO<sub>3</sub>; MF: 1; RMF: 53; Prob 19.7%; CAS: 139508-58-0; Lib: nist\_msms; ID: 437127.

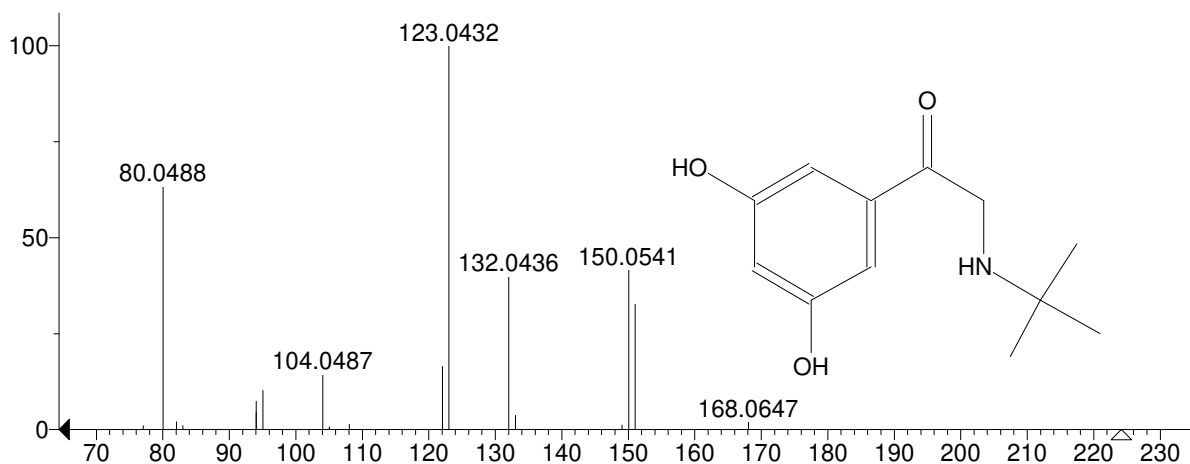

Hit 5 : Cerulenin [M+H]<sup>+</sup> IT-FT 35% P=224.1  
C<sub>12</sub>H<sub>17</sub>NO<sub>3</sub>; MF: 0; RMF: 131; Prob 18.9%; CAS: 17397-89-6; Lib: nist\_msms; ID: 538608.

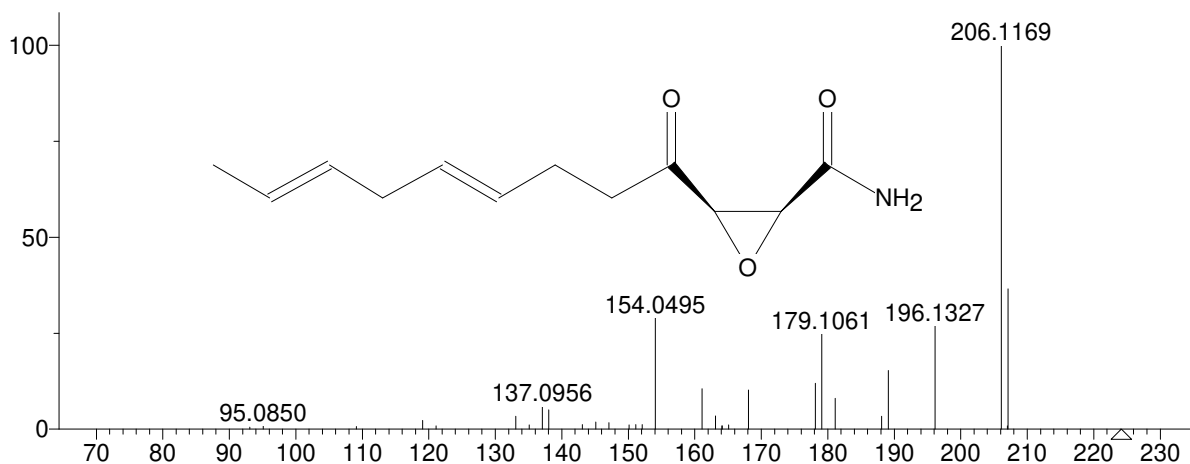

Unknown: Unknown (5.26\_366.1544m/z)  
Compound in Library Factor = -3273

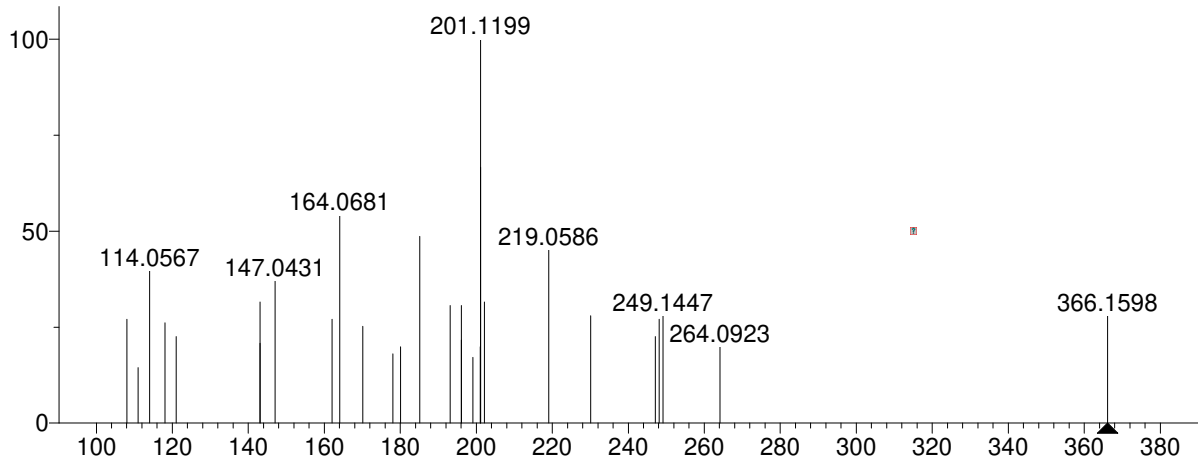

Hit 1 : Prazosin [M+H-H<sub>2</sub>O]<sup>+</sup> HCD 32V P=366.2  
C<sub>19</sub>H<sub>21</sub>N<sub>5</sub>O<sub>4</sub>; MF: 2; RMF: 117; Prob 100.0%; CAS: 19216-56-9; Lib: nist\_msms; ID: 135102.

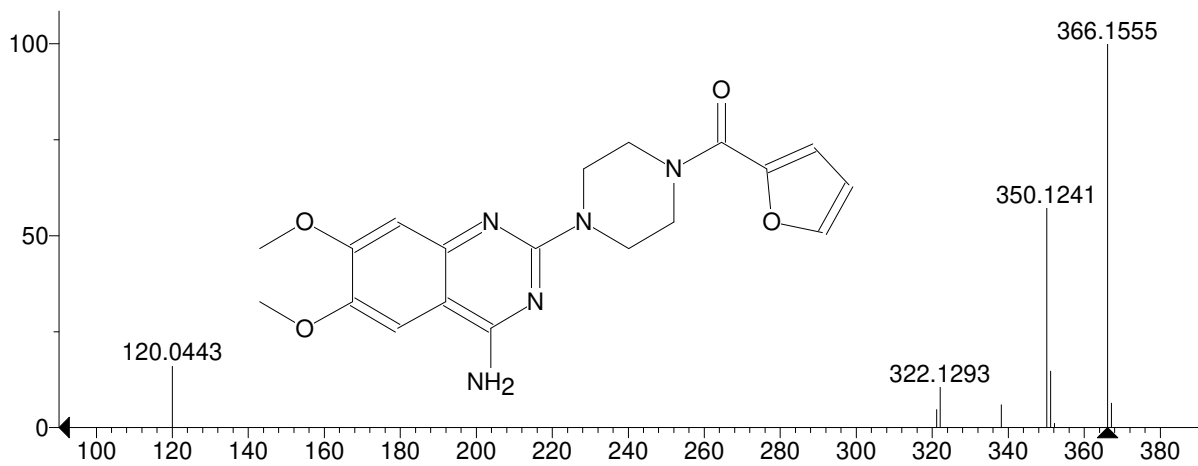

\*\* Search Report Page 1 of 1 \*\*

Unknown: Unknown (5.26\_654.2082m/z)  
Compound in Library Factor = 0

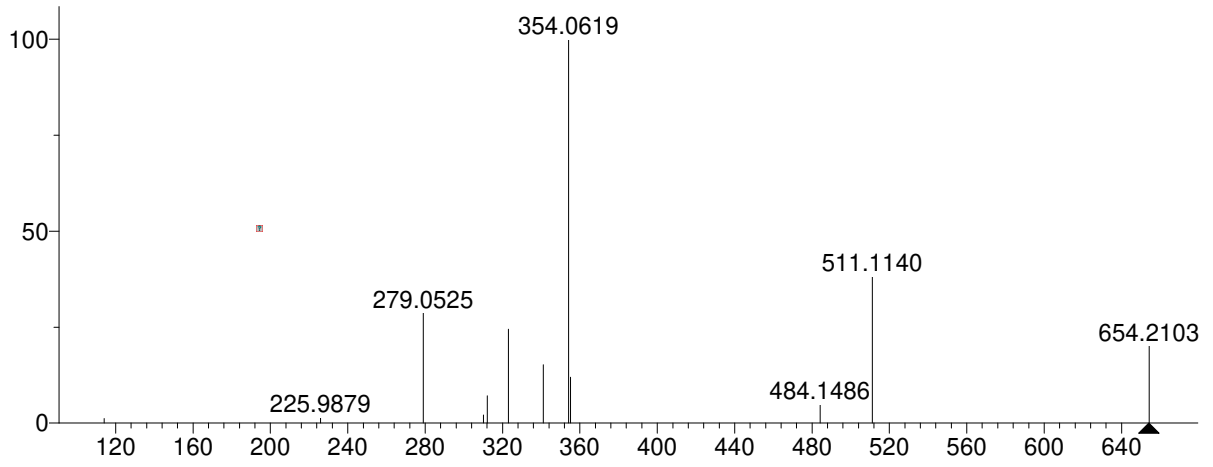

Unknown: Unknown (5.27\_625.2542m/z)  
Compound in Library Factor = -3273

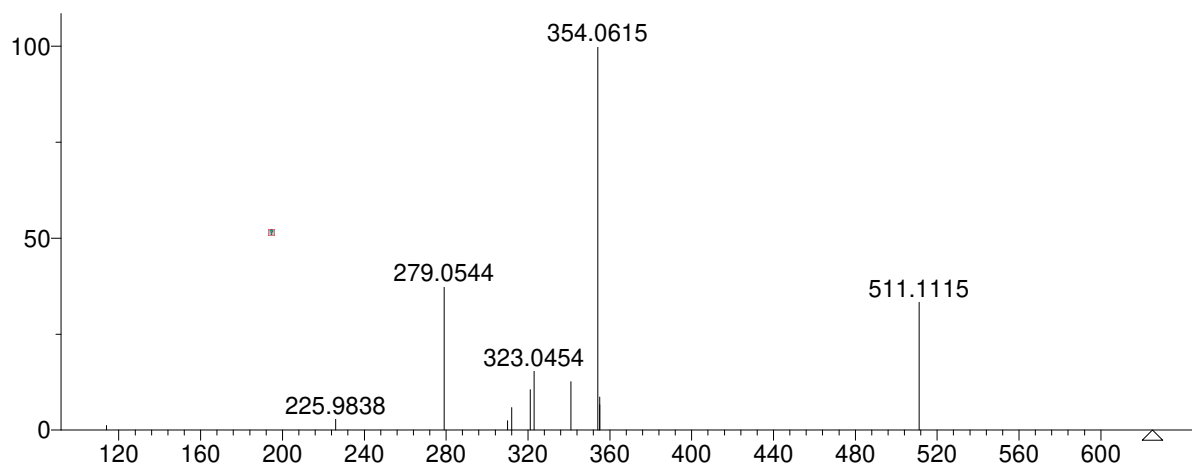

Hit 1 : N-Caffeoyl-O-methyltyramine [2M-H]- IT 35% P=625.3  
C<sub>18</sub>H<sub>19</sub>NO<sub>4</sub>; MF: 3; RMF: 146; Prob 100.0%; CAS: 189307-47-9; Lib: nist\_msms; ID: 221344.

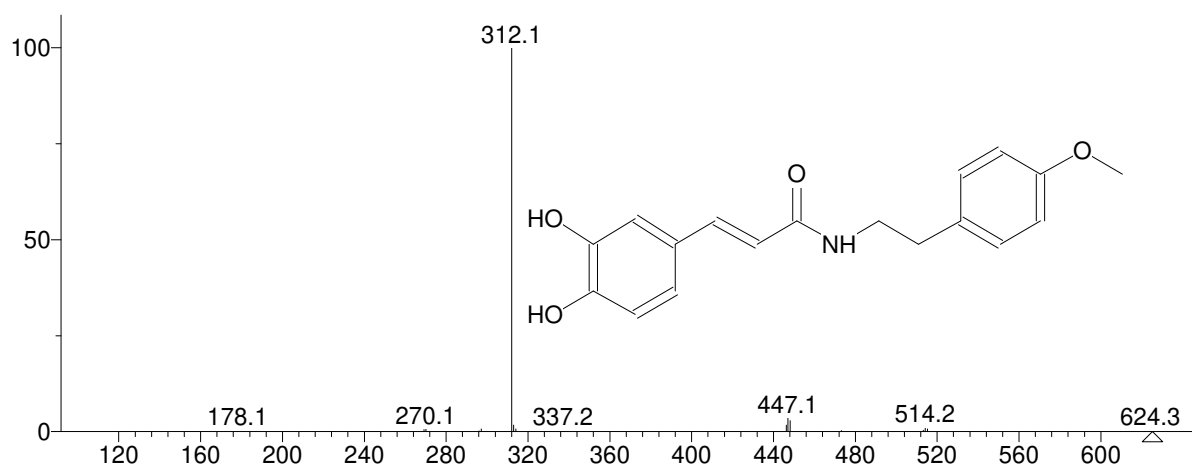

\*\* Search Report Page 1 of 2 \*\*

Unknown: Unknown (5.28\_545.1283m/z)  
Compound in Library Factor = -1523

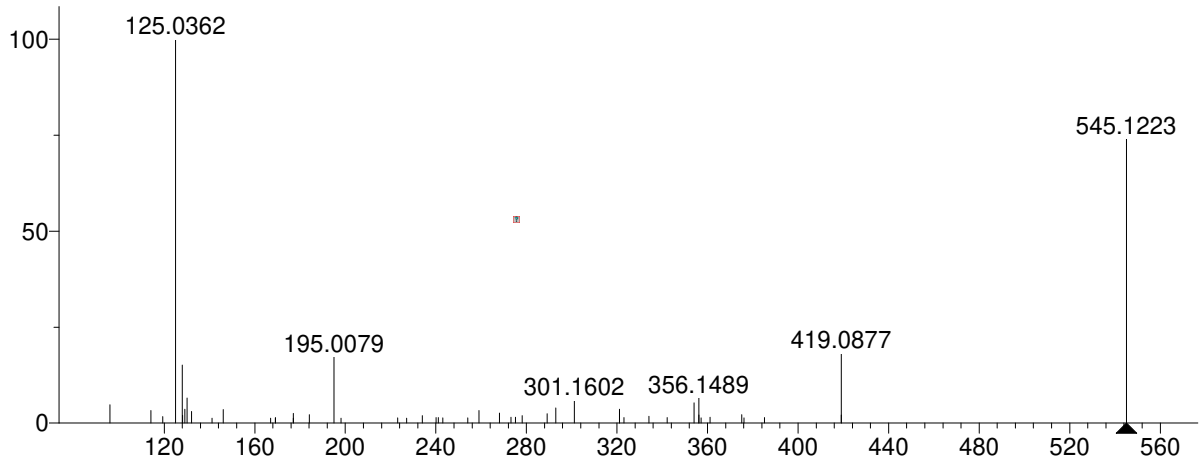

Hit 1 : Iridin [M+Na]<sup>+</sup> HCD 21V P=545.1  
C<sub>24</sub>H<sub>26</sub>O<sub>13</sub>; MF: 43; RMF: 577; Prob 47.5%; CAS: 491-74-7; Lib: nist\_msms; ID: 256973.

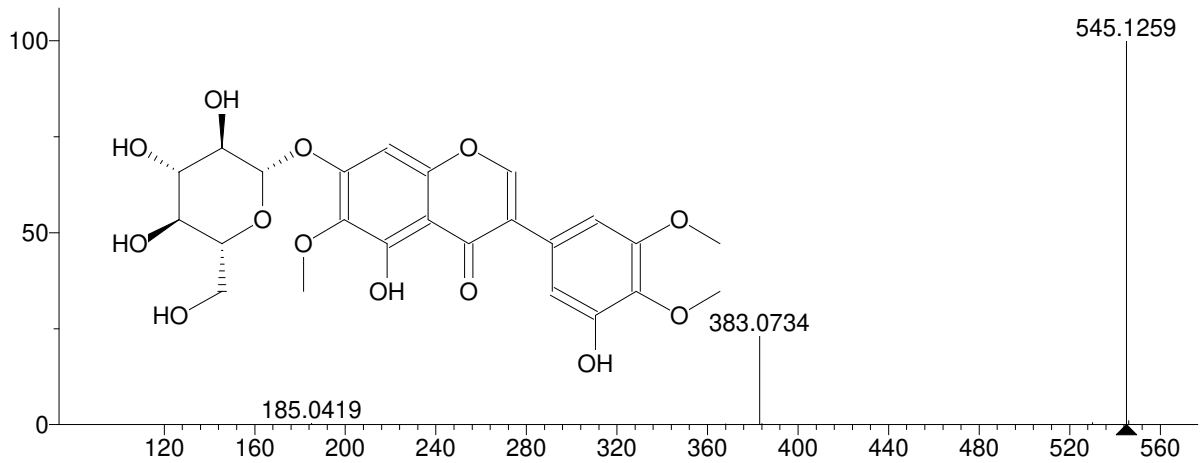

Hit 2 : (3S,5R,8S)-2-[(benzoyloxy)methyl]-8-methyl-3-[[[(2S,3R,4S,5S,6R)-3,4,5-trihydroxy-6-(hydroxymethyl)oxan

C<sub>23</sub>H<sub>28</sub>O<sub>13</sub>S; MF: 0; RMF: 51; Prob 10.5%; Lib: mona-export-vf-npl\_qexactive; ID: 21547.

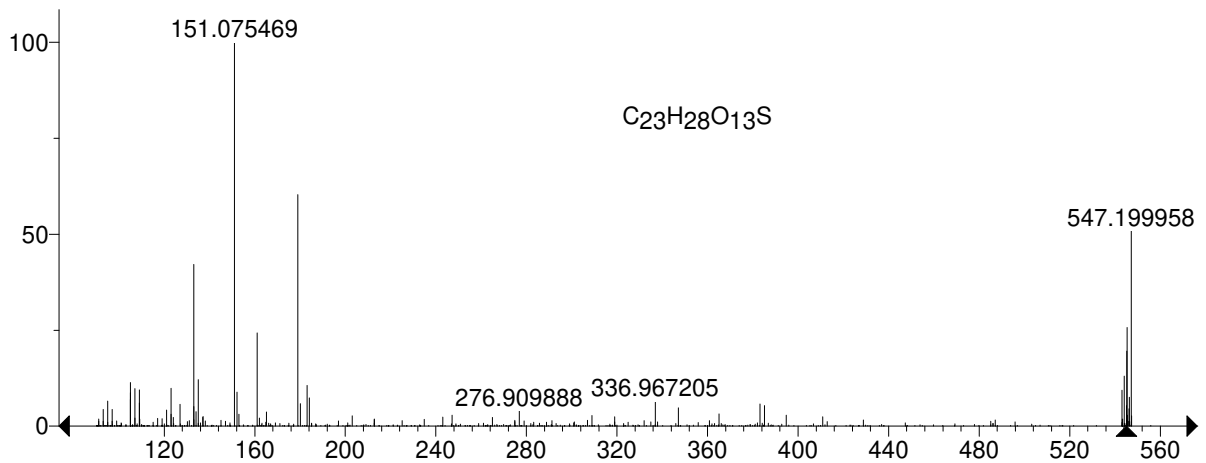

Hit 3 : salviaflaside [M+Na]<sup>+</sup> 35HCD P=545.1  
C<sub>24</sub>H<sub>26</sub>O<sub>13</sub>; MF: 0; RMF: 39; Prob 10.5%; Lib: mona-export-vf-npl\_qexactive; ID: 20881.

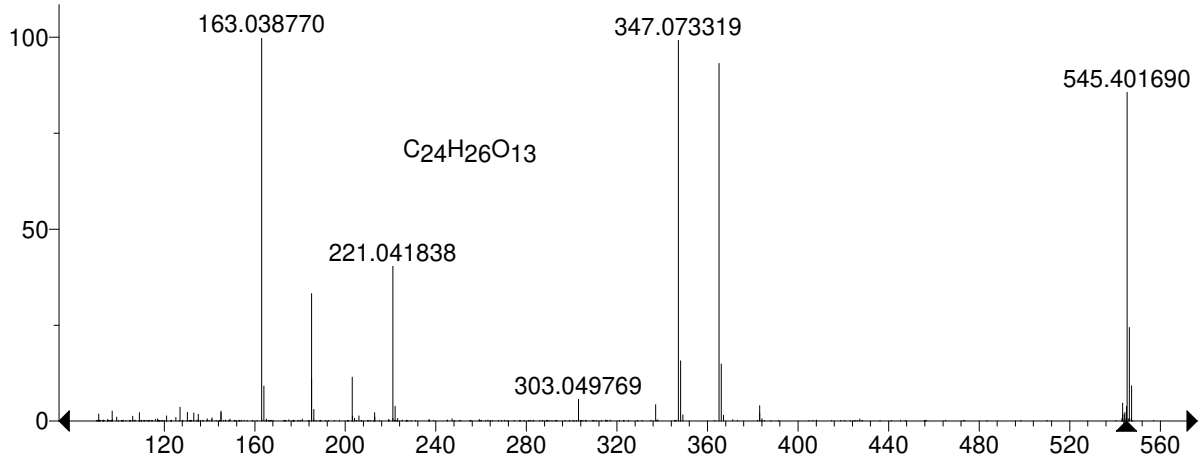

Hit 4 : Perseitol Heptaacetate [M+K]<sup>+</sup> 45HCD P=545.1  
C<sub>21</sub>H<sub>30</sub>O<sub>14</sub>; MF: 0; RMF: 25; Prob 10.5%; Lib: mona-export-vf-npl\_qexactive; ID: 26654.

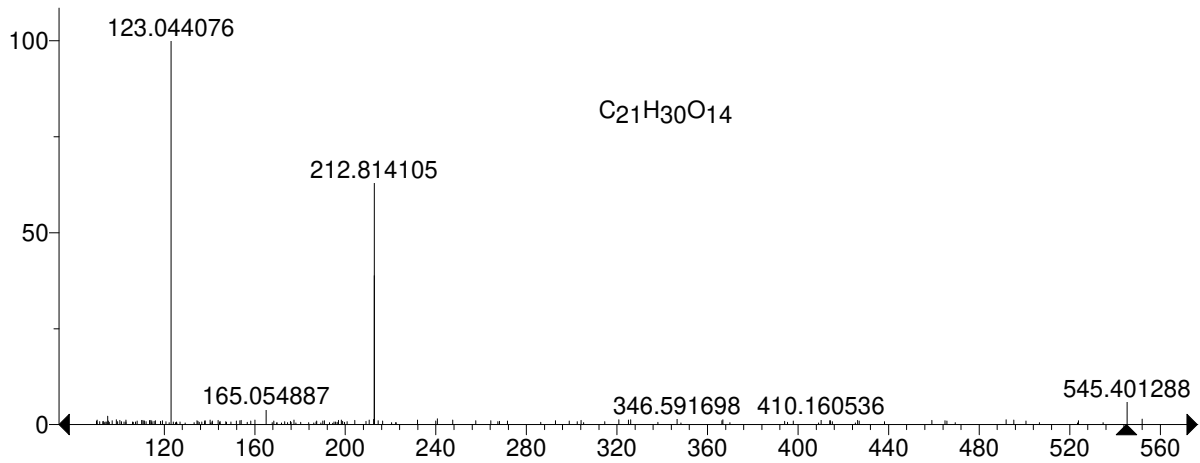

Hit 5 : 5-hydroxy-3-(5-hydroxy-2,4-dimethoxyphenyl)-6-methoxy-7-[3,4,5-trihydroxy-6-(hydroxymethyl)oxan-2-yl]ox  
C<sub>24</sub>H<sub>26</sub>O<sub>13</sub>; MF: 0; RMF: 13; Prob 10.5%; Lib: anthocyanins mona; ID: 9886.

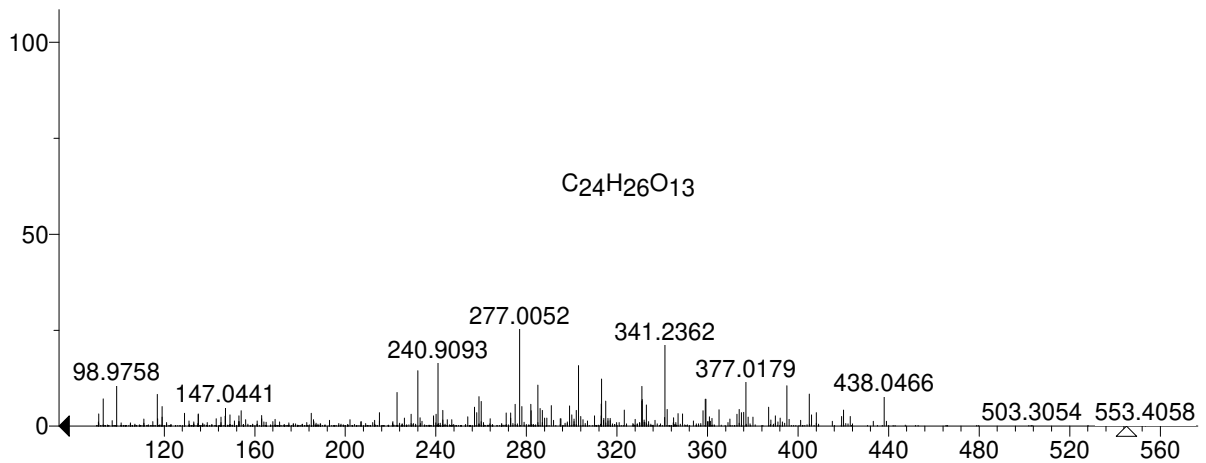

Unknown: Unknown (5.31\_378.1245m/z)  
Compound in Library Factor = 0

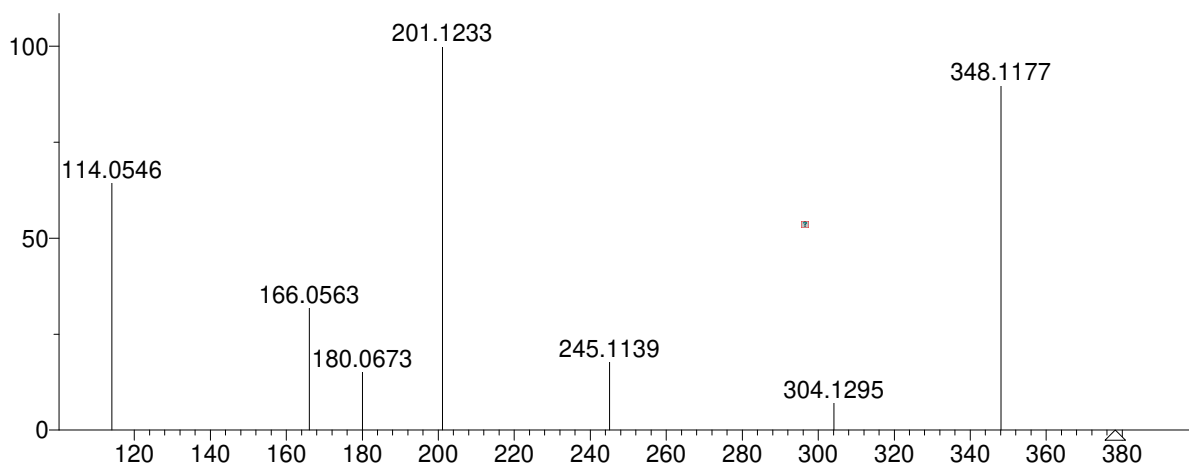

Hit 1 : Benzenesulfonamide, 4-(4,5-dihydro-3,5-diphenyl-1H-pyrazol-1-yl)- [M+H]<sup>+</sup> HCD 121V P=378.1  
C<sub>21</sub>H<sub>19</sub>N<sub>3</sub>O<sub>2</sub>S; MF: 0; RMF: 62; Prob 100.0%; CAS: 10179-57-4; Lib: nist\_msms; ID: 420765.

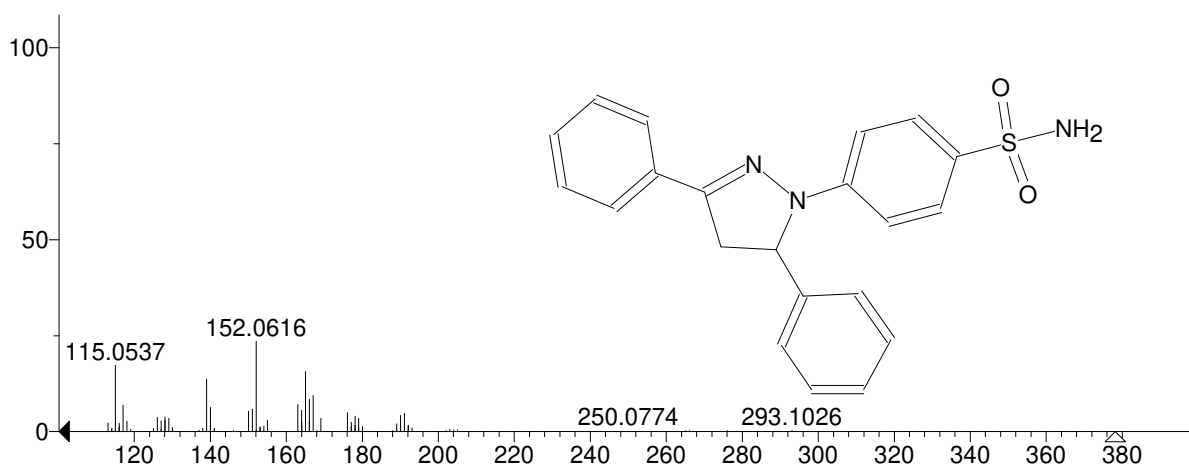

Unknown: Unknown (5.31\_389.1918m/z)  
Compound in Library Factor = 0

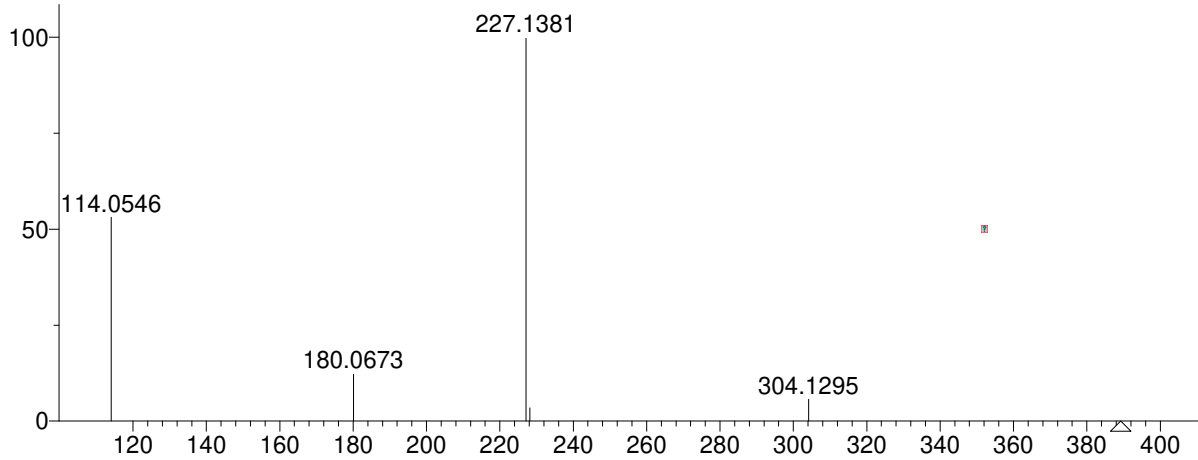

Hit 1 : 3-[2-(6,7-dihydroxy-1,2,4a-trimethylspiro[3,4,6,7,8,8a-hexahydro-2H-naphthalene-5,2'-oxirane]-1-yl)ethyl]-2  
C<sub>20</sub>H<sub>30</sub>O<sub>6</sub>; MF: 0; RMF: 20; Prob 50.0%; Lib: mona-export-vf-npl\_qexactive; ID: 9850.

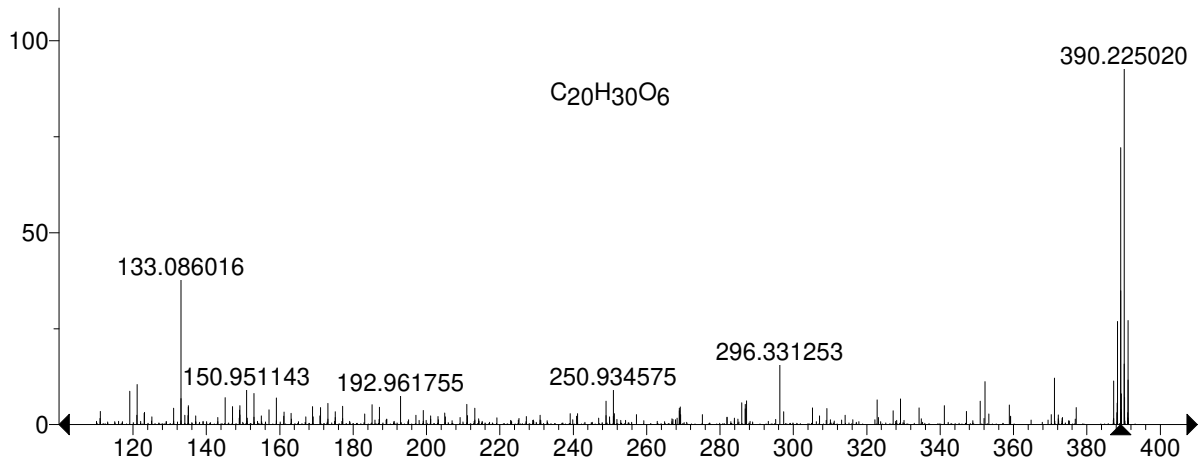

Hit 2 : 20-Trifluoroleukotriene B4 [M-H]<sup>-</sup> HCD 31V P=389.2  
C<sub>20</sub>H<sub>29</sub>F<sub>3</sub>O<sub>4</sub>; MF: 0; RMF: 7; Prob 50.0%; CAS: 115178-97-7; Lib: nist\_msms; ID: 88774.

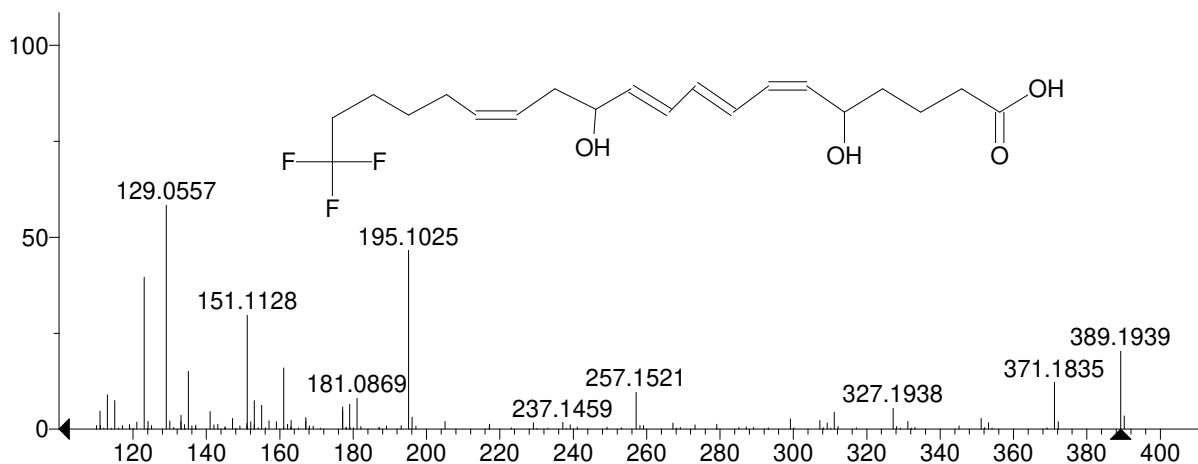



Unknown: Unknown (5.32\_419.1554m/z)  
Compound in Library Factor = -3273

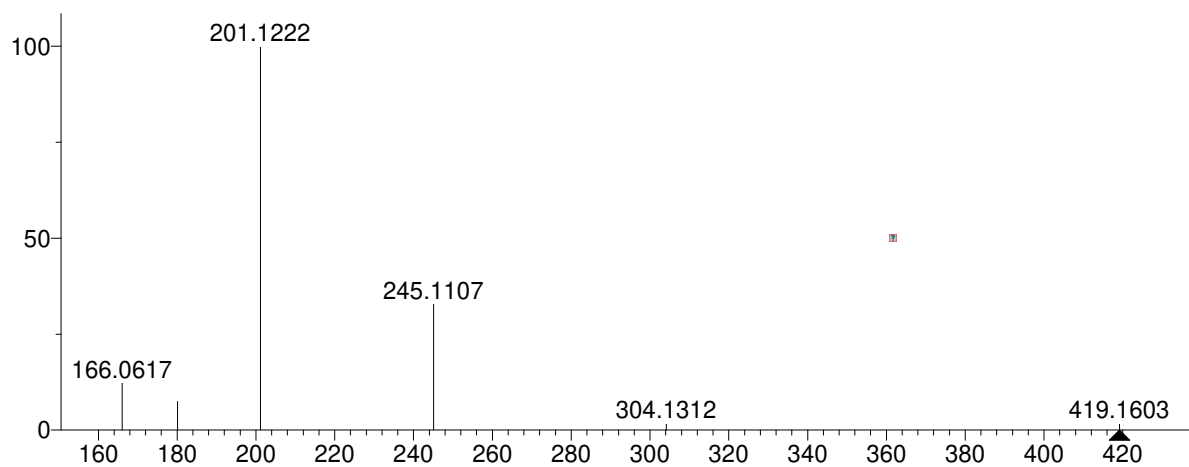

Hit 1 : 4-Morpholinopropanesulfonic acid [2M+H]<sup>+</sup> HCD 99V P=419.2  
C7H15NO4S; MF: 13; RMF: 215; Prob 100.0%; CAS: 1132-61-2; Lib: nist\_msms; ID: 58672.

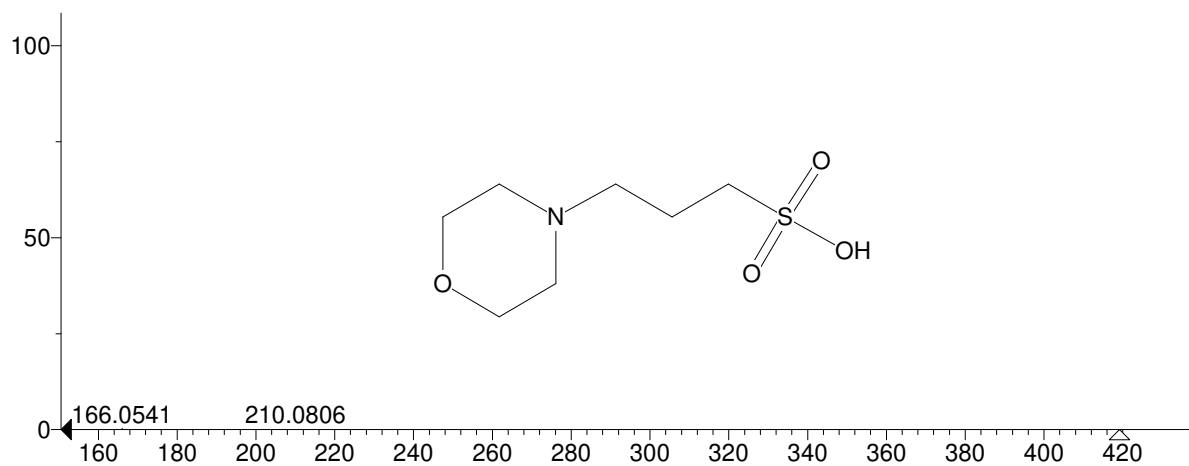

Unknown: Unknown (5.33\_371.1799m/z)  
Compound in Library Factor = 0

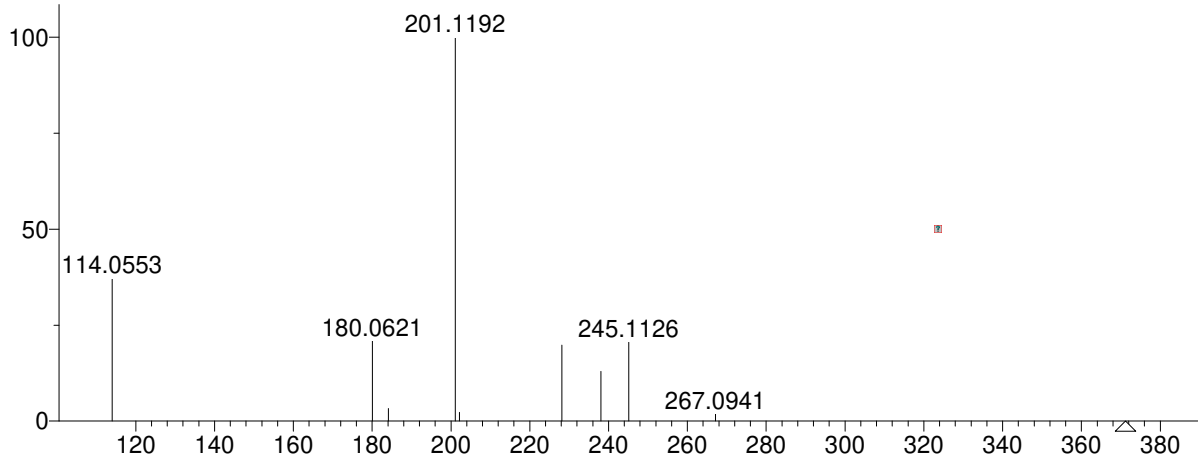

Hit 1 : 4-[2-[(2-ethyl-2,3-dihydroxybutanoyl)oxymethyl]anilino]-4-oxobutanoic acid [M+NH4]<sup>+</sup> 35HCD P=371.2  
C<sub>17</sub>H<sub>23</sub>NO<sub>7</sub>; MF: 0; RMF: 6; Prob 50.0%; Lib: mona-export-vf-npl\_qexactive; ID: 23566.

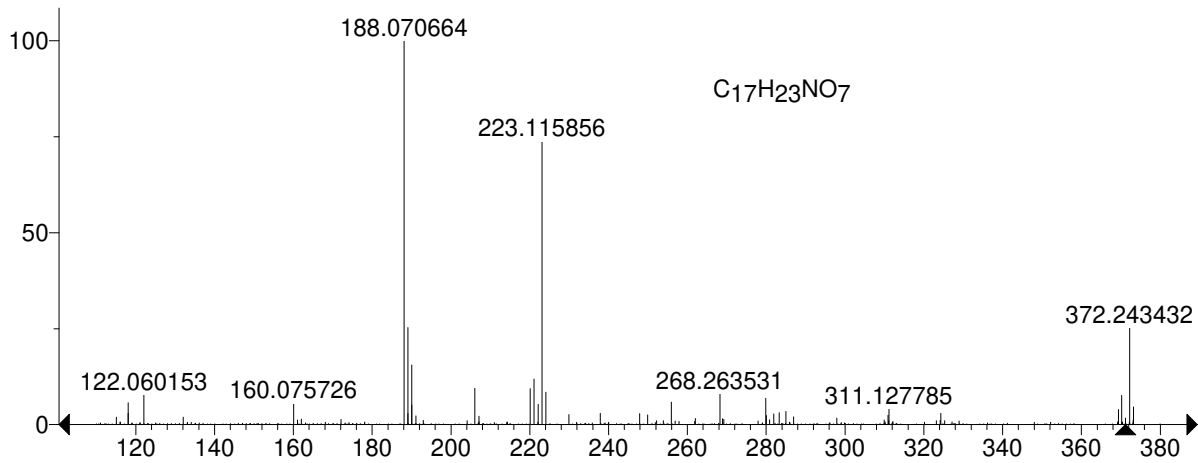

Hit 2 : Ingenol [M+Na]<sup>+</sup> IT-FT 35% P=371.2  
C<sub>20</sub>H<sub>28</sub>O<sub>5</sub>; MF: 0; RMF: 4; Prob 50.0%; CAS: 30220-46-3; Lib: nist\_msms; ID: 364298.

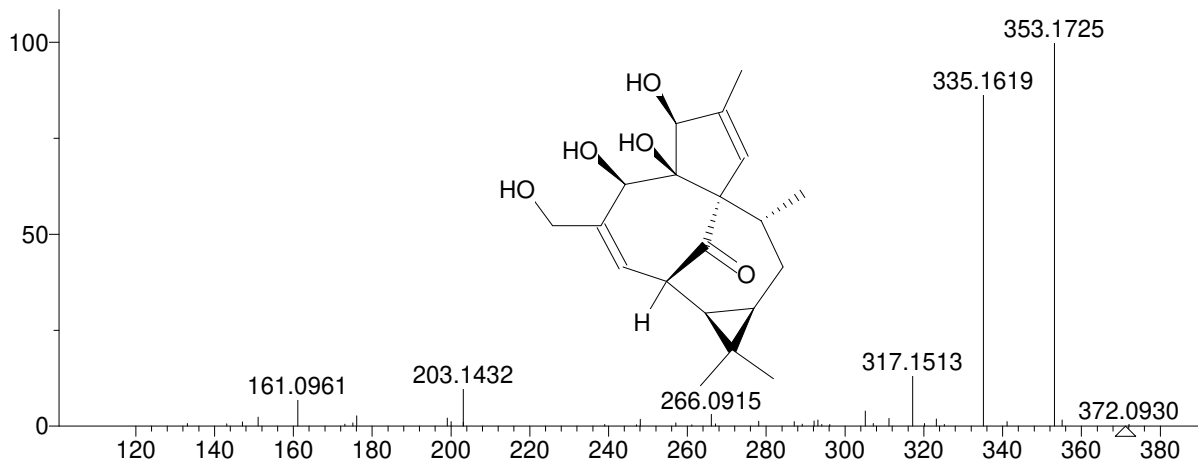

Unknown: Unknown (5.33\_543.2294m/z)  
Compound in Library Factor = 0

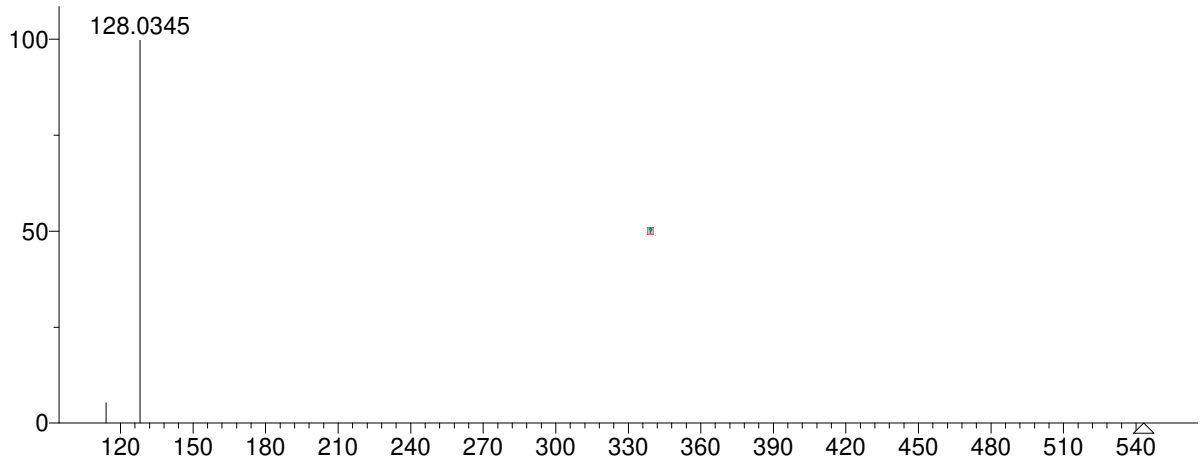

Unknown: Unknown (5.34\_229.1545m/z)  
Compound in Library Factor = -3273

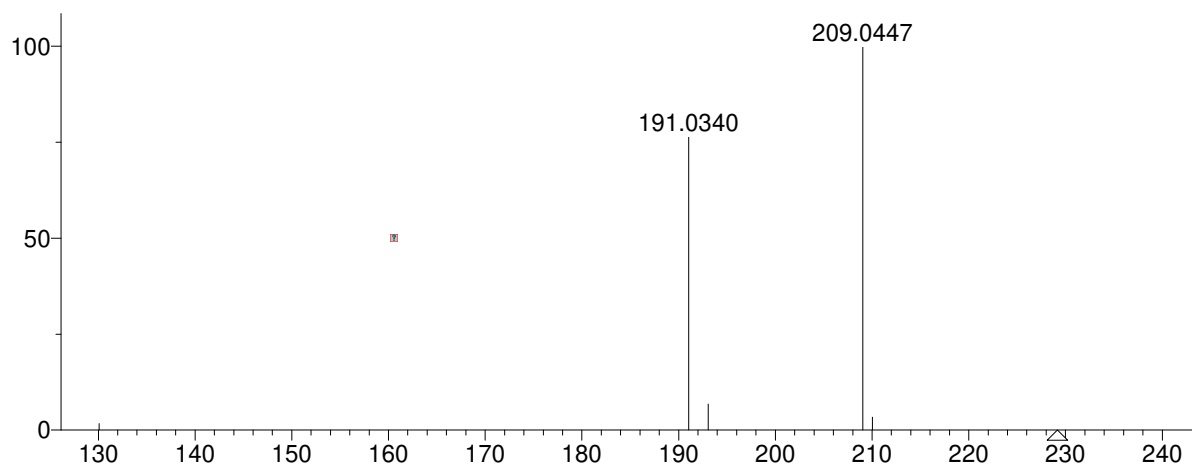

Hit 1 : Val-Leu [M-H]<sup>-</sup> HCD 36eV P=229.2  
C<sub>11</sub>H<sub>22</sub>N<sub>2</sub>O<sub>3</sub>; MF: 2; RMF: 85; Prob 50.0%; CAS: 3989-97-7; Lib: nist\_msms; ID: 568172.

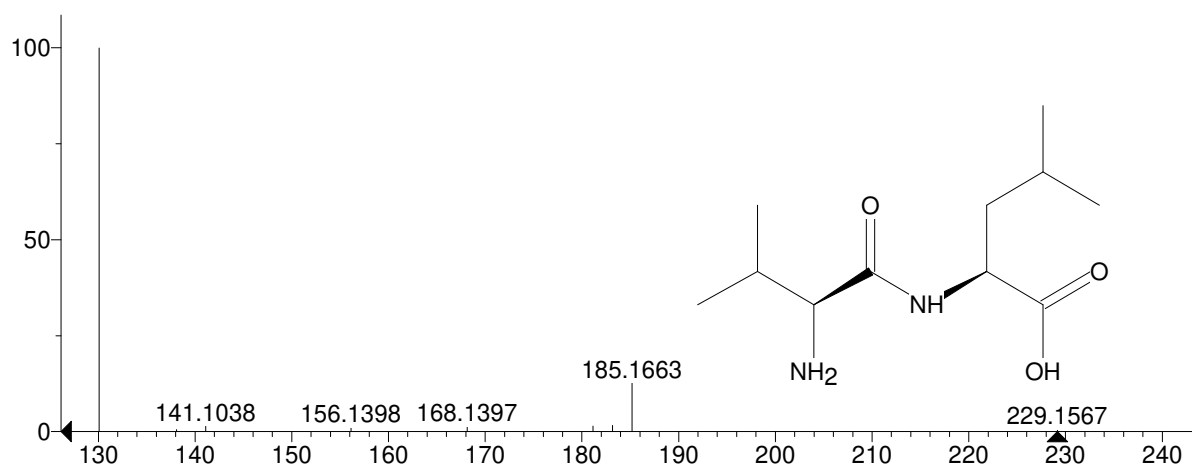

Hit 2 : Val-Ile [M-H]<sup>-</sup> HCD 36eV P=229.2  
C<sub>11</sub>H<sub>22</sub>N<sub>2</sub>O<sub>3</sub>; MF: 2; RMF: 85; Prob 50.0%; CAS: 20556-14-3; Lib: nist\_msms; ID: 571092.

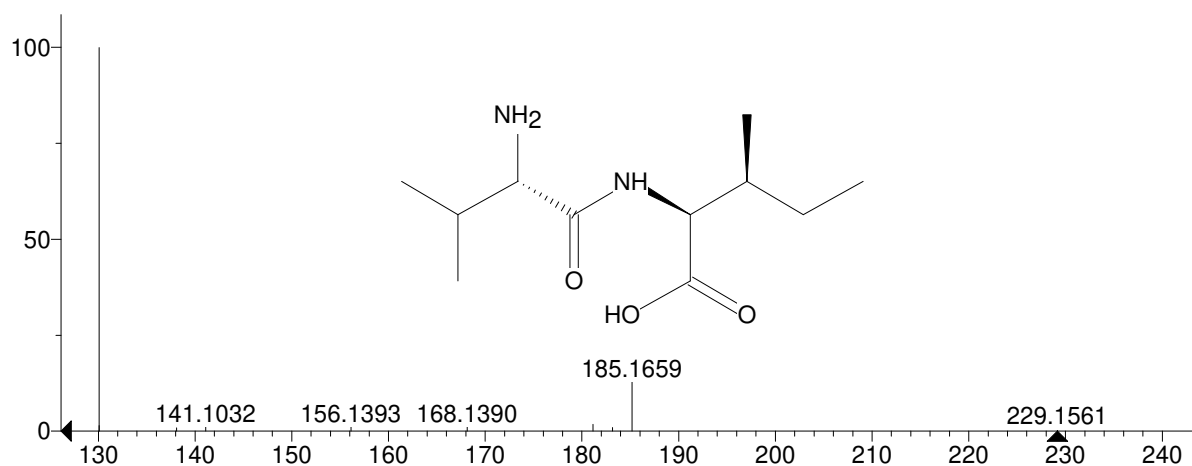

Unknown: Unknown (5.34\_289.0013m/z)  
Compound in Library Factor = -1309

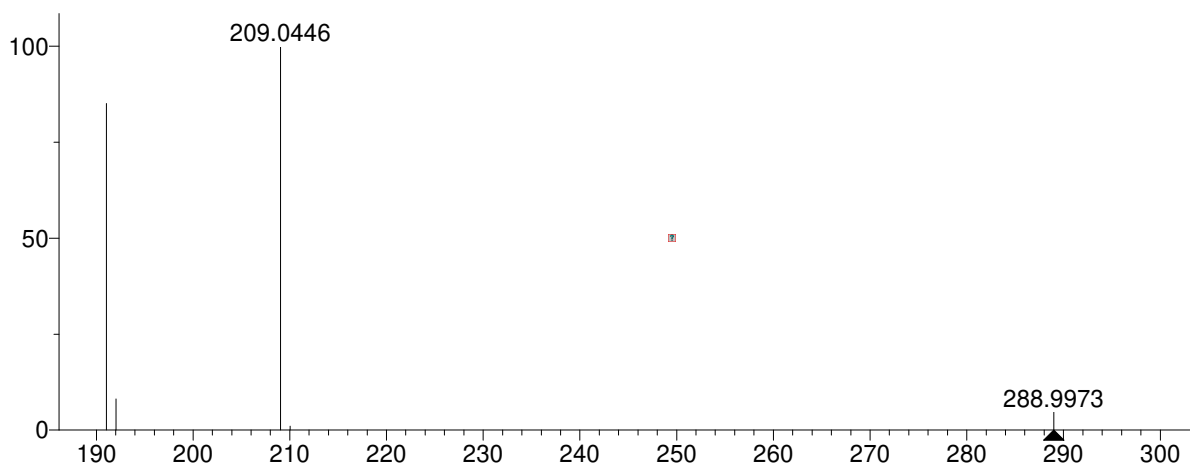

Hit 1 : Catechin [M-H]<sup>-</sup> QQQ 20V P=289  
C<sub>15</sub>H<sub>14</sub>O<sub>6</sub>; MF: 59; RMF: 534; Prob 30.4%; Lib: mona-export-lc-ms-ms\_negative\_mode; ID: 14518.

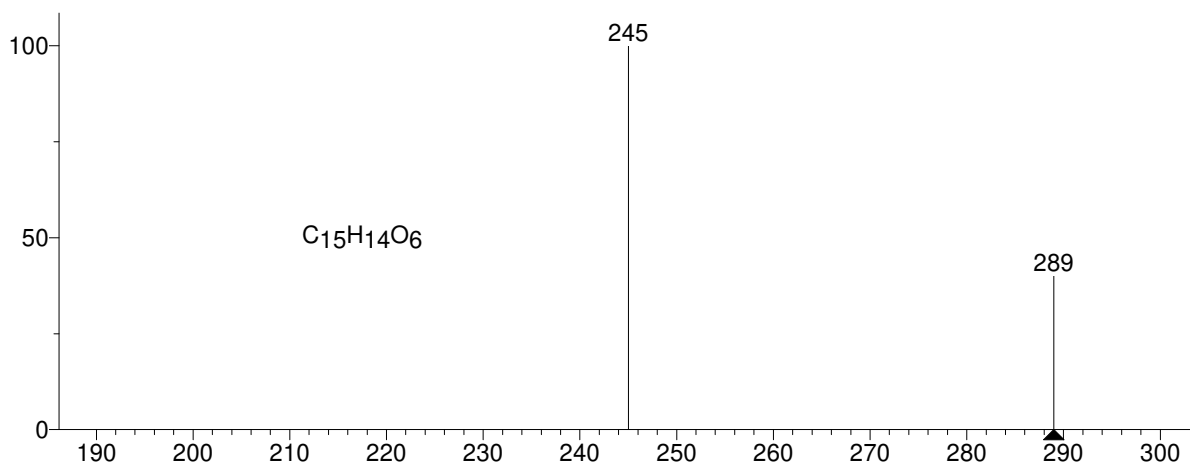

Hit 2 : Epicatechin [M-H]<sup>-</sup> QQQ 20V P=289  
C<sub>15</sub>H<sub>14</sub>O<sub>6</sub>; MF: 59; RMF: 534; Prob 30.4%; Lib: mona-export-lc-ms-ms\_negative\_mode; ID: 14624.

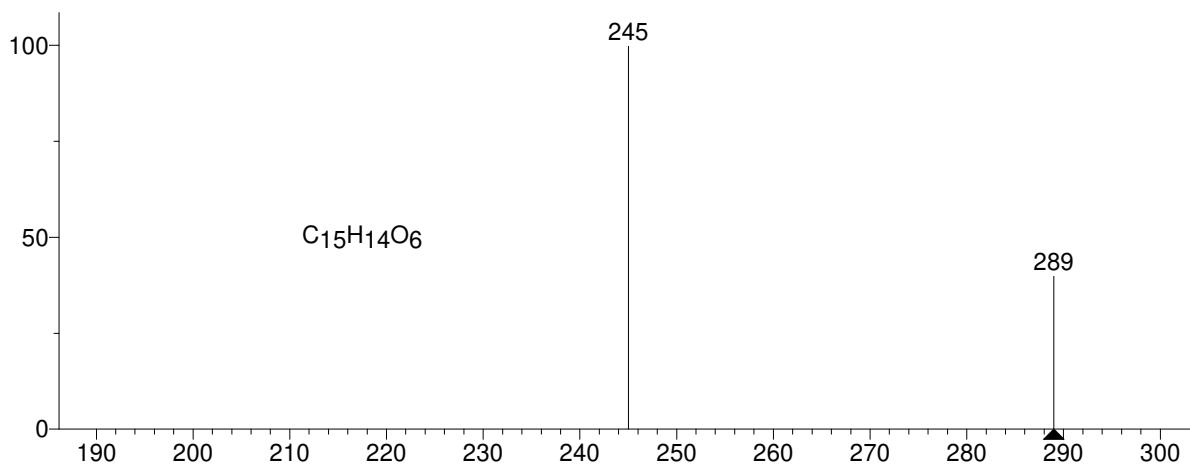

Hit 3 : Lormetazepam [M+H]<sup>+</sup> => 289.0 IT 35% P=289  
C<sub>16</sub>H<sub>12</sub>Cl<sub>2</sub>N<sub>2</sub>O<sub>2</sub>; MF: 6; RMF: 141; Prob 6.01%; CAS: 848-75-9; Lib: nist\_msms; ID: 186240.

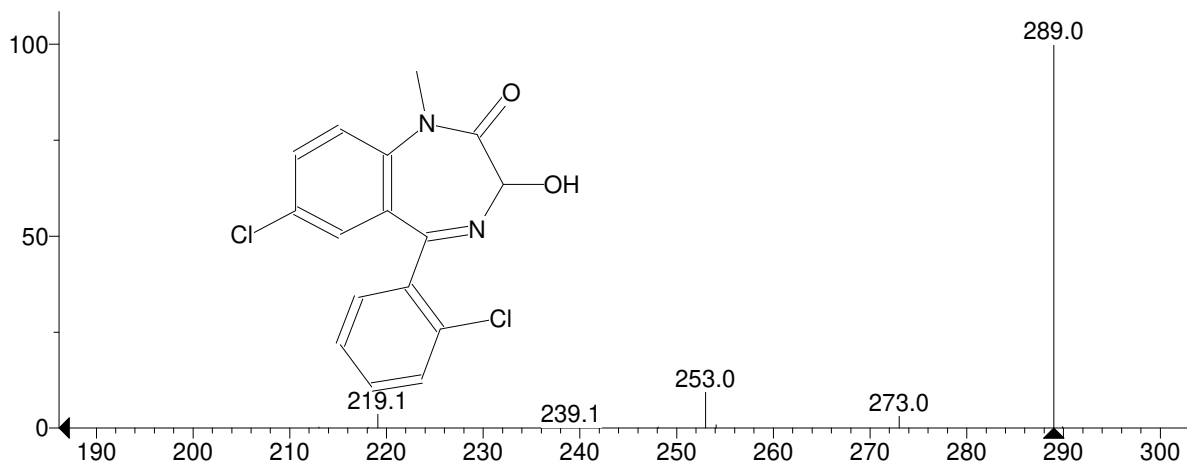

Hit 4 : Benzoic acid, 2-[(2-bromophenyl)methoxy]- [M+H]<sup>+</sup> => 289.0 IT 35% P=289  
C<sub>14</sub>H<sub>11</sub>BrO<sub>3</sub>; MF: 2; RMF: 107; Prob 5.07%; CAS: 743456-83-9; Lib: nist\_msms; ID: 420103.

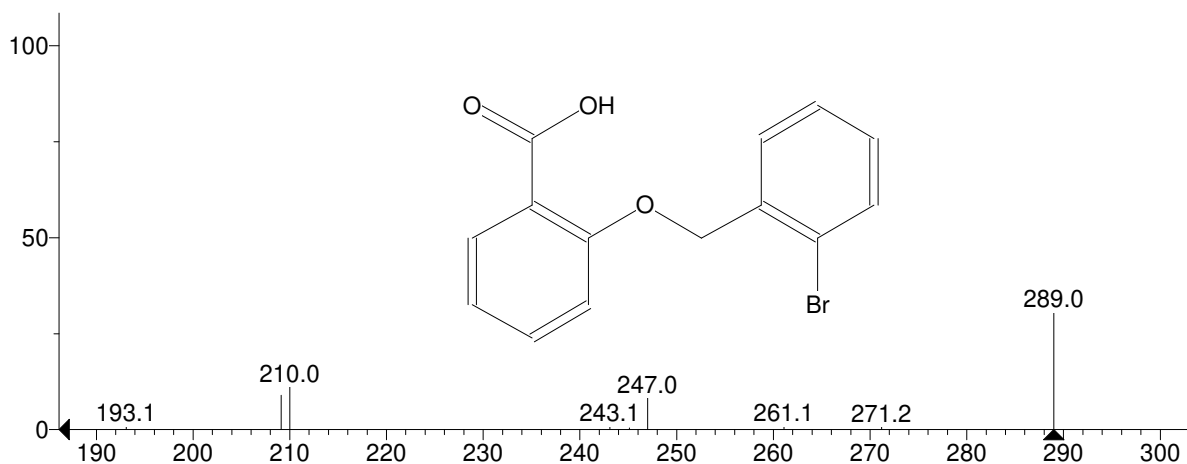

Hit 5 : Permethrin [M+H-H<sub>2</sub>O]<sup>+</sup> => 317.0 => 289.0 IT 35% P=289  
C<sub>21</sub>H<sub>20</sub>Cl<sub>2</sub>O<sub>3</sub>; MF: 0; RMF: 81; Prob 4.68%; CAS: 52645-53-1; Lib: nist\_msms; ID: 284116.

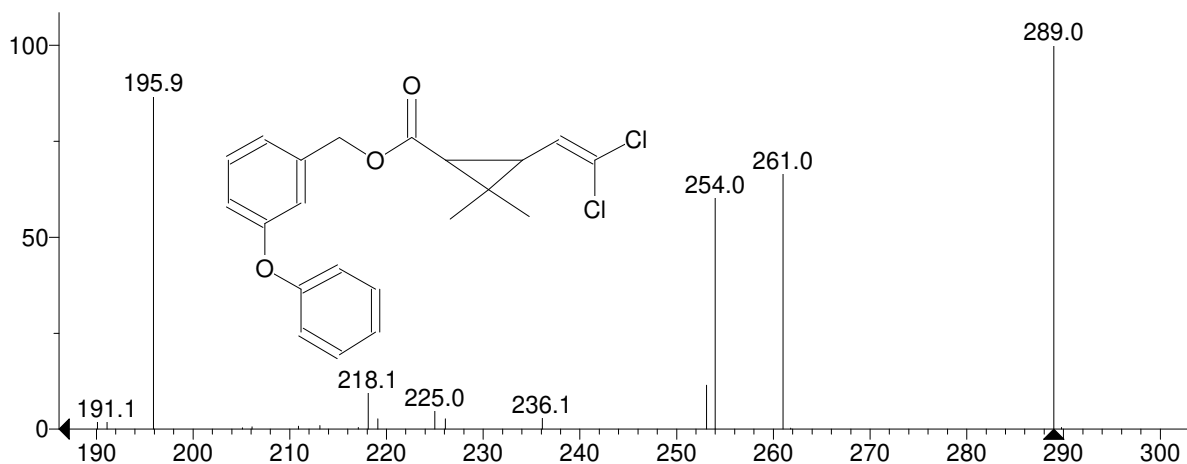

Unknown: Unknown (5.34\_599.2685m/z)  
Compound in Library Factor = 0

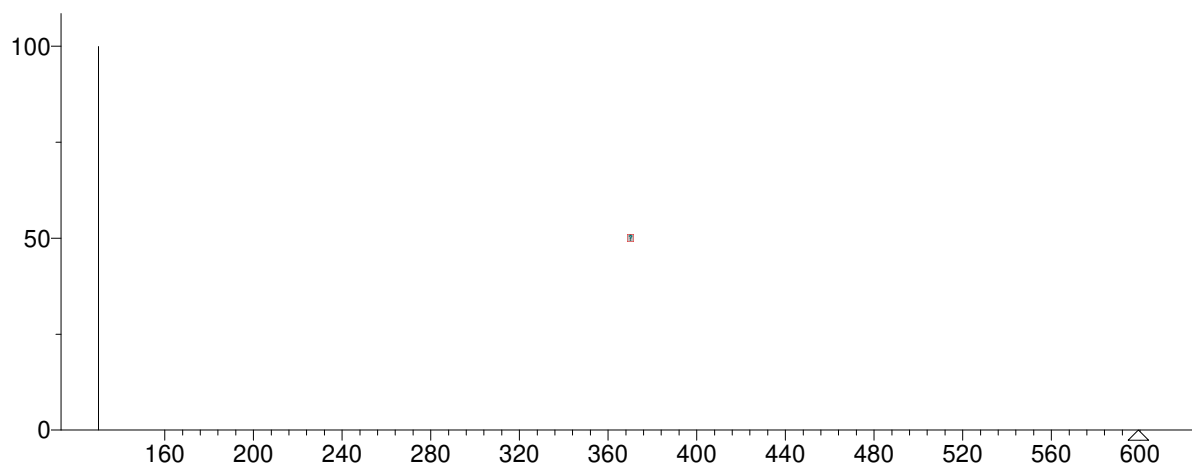

\*\* Search Report Page 1 of 2 \*\*

Unknown: Unknown (5.36\_265.0925m/z)  
Compound in Library Factor = -3273

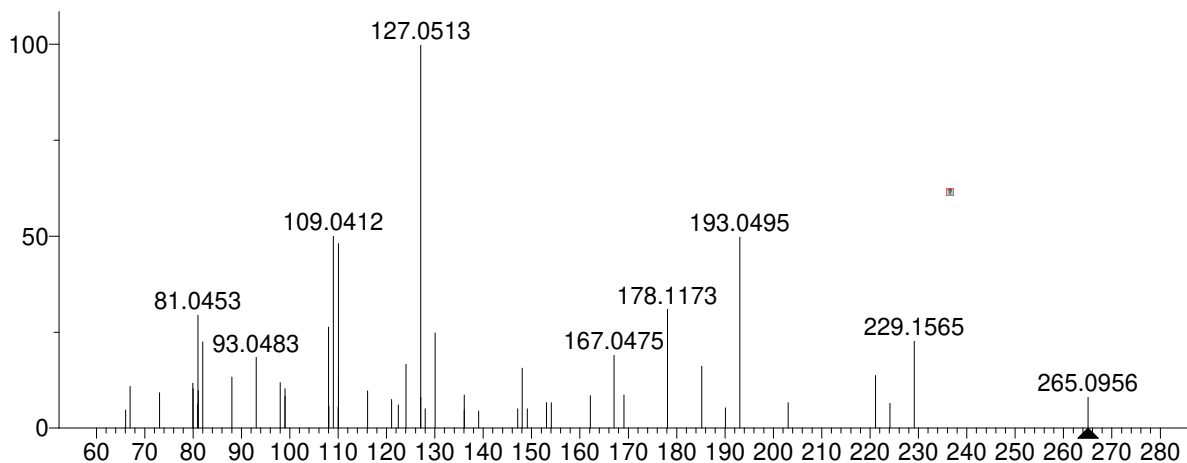

Hit 1 : Molsidomine [M+Na]<sup>+</sup> HCD 7V P=265.1  
C<sub>9</sub>H<sub>14</sub>N<sub>4</sub>O<sub>4</sub>; MF: 2; RMF: 93; Prob 35.1%; CAS: 25717-80-0; Lib: nist\_msms; ID: 189037.

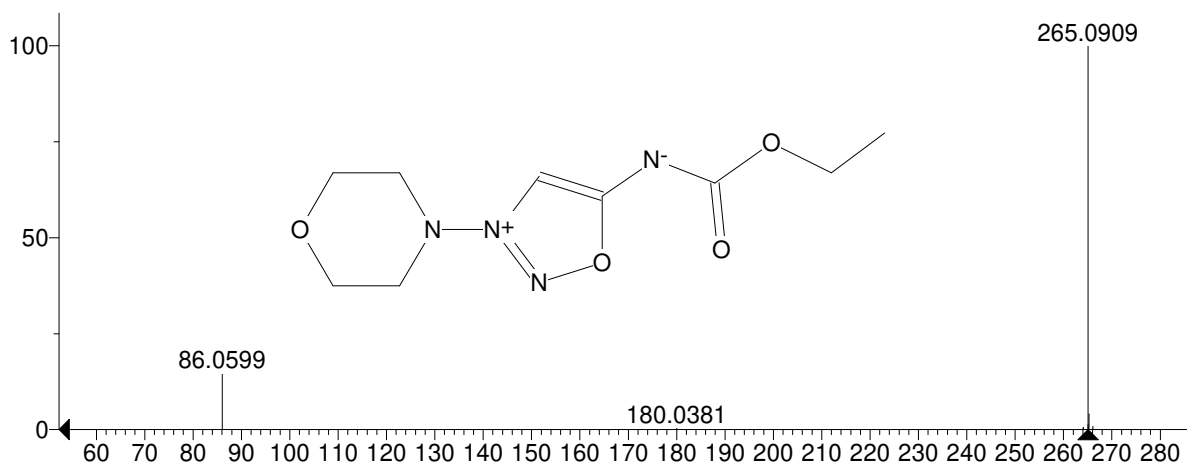

Hit 2 : Unknown (carbon number 10); PlaSMA ID-439 [M-H]<sup>-</sup> P=265.1  
C<sub>10</sub>H<sub>18</sub>O<sub>8</sub>; MF: 0; RMF: 55; Prob 32.4%; Lib: biomsms-neg-plasma; ID: 1132.

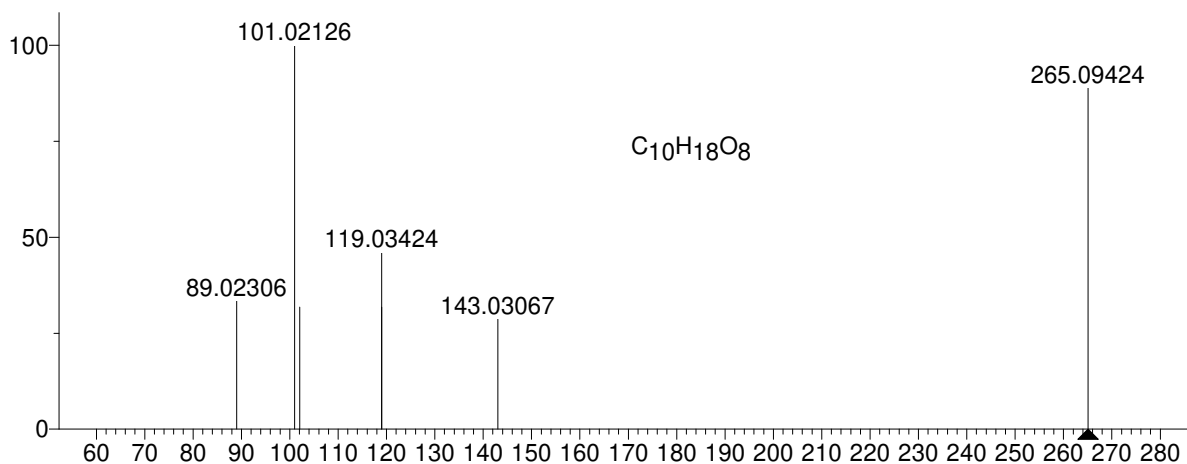



Hit 3 : 1,4-D-Xylobiose [M+H-H<sub>2</sub>O]<sup>+</sup> IT 35% P=265.1  
C<sub>10</sub>H<sub>18</sub>O<sub>9</sub>; MF: 0; RMF: 31; Prob 32.4%; CAS: 6860-47-5; Lib: nist\_msms; ID: 530813.

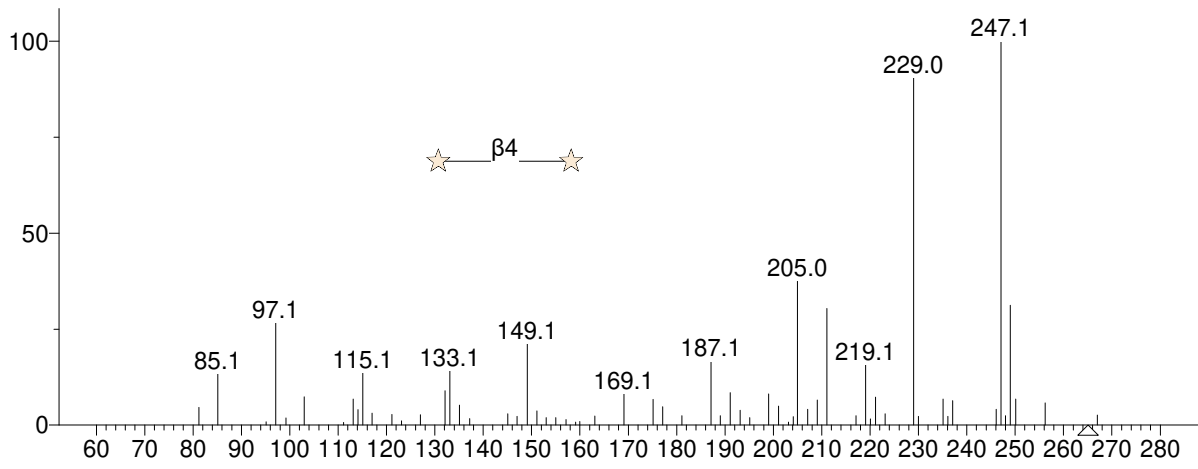

Unknown: Unknown (5.36\_273.0052m/z)  
Compound in Library Factor = -2387

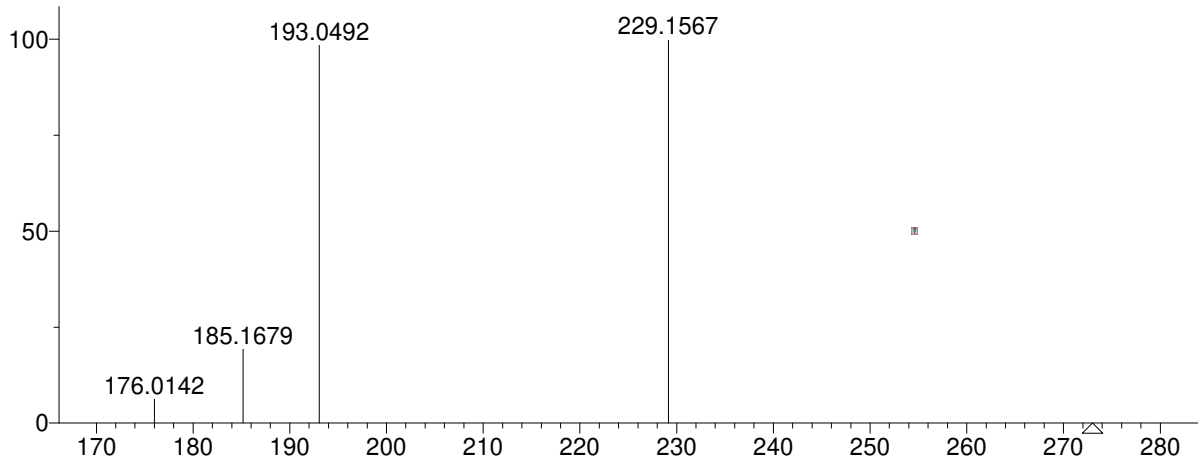

Hit 1 : ferulic acid + sulfate (CCR vessel) [M-H]<sup>-</sup> P=273  
C<sub>10</sub>H<sub>10</sub>O<sub>7</sub>S; MF: 12; RMF: 524; Prob 100.0%; Lib: phytofrag2018\_final\_060219; ID: 938.

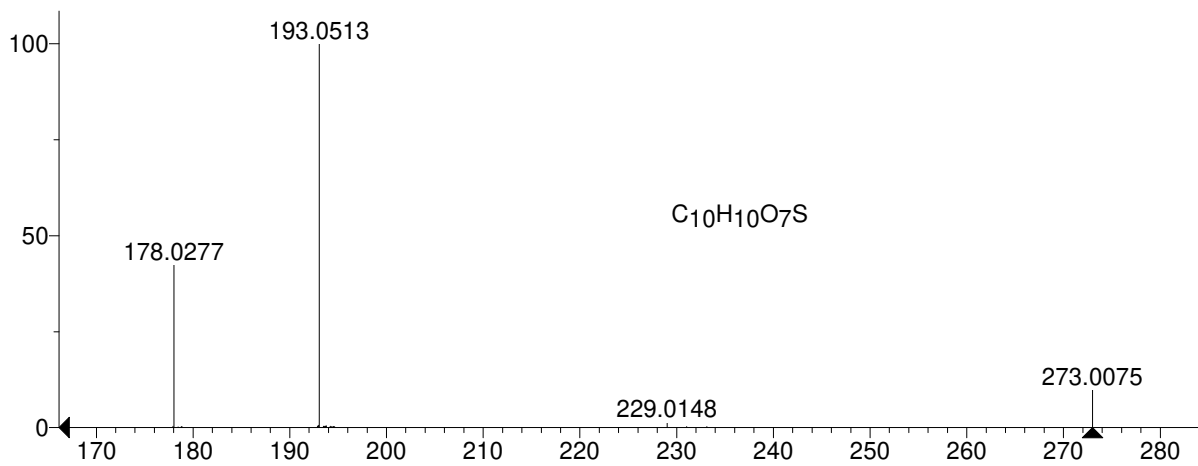

\*\* Search Report Page 1 of 1 \*\*

Unknown: Unknown (5.36\_429.1864m/z)  
Compound in Library Factor = -3273

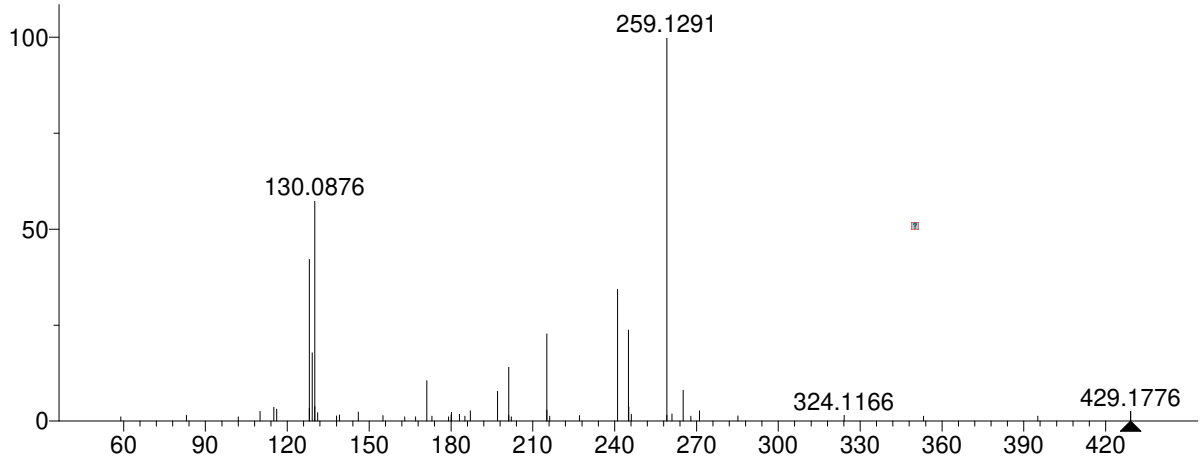

Hit 1 : (2R,3R,4S,5S,6R)-2-[6-hydroxy-3-[(E)-3-hydroxybut-1-enyl]-2,4,4-trimethylcyclohexyl]oxy-6-(hydroxymethyl)C<sub>19</sub>H<sub>34</sub>O<sub>8</sub>; MF: 1; RMF: 57; Prob 51.0%; Lib: anthocyanins mona; ID: 9985.

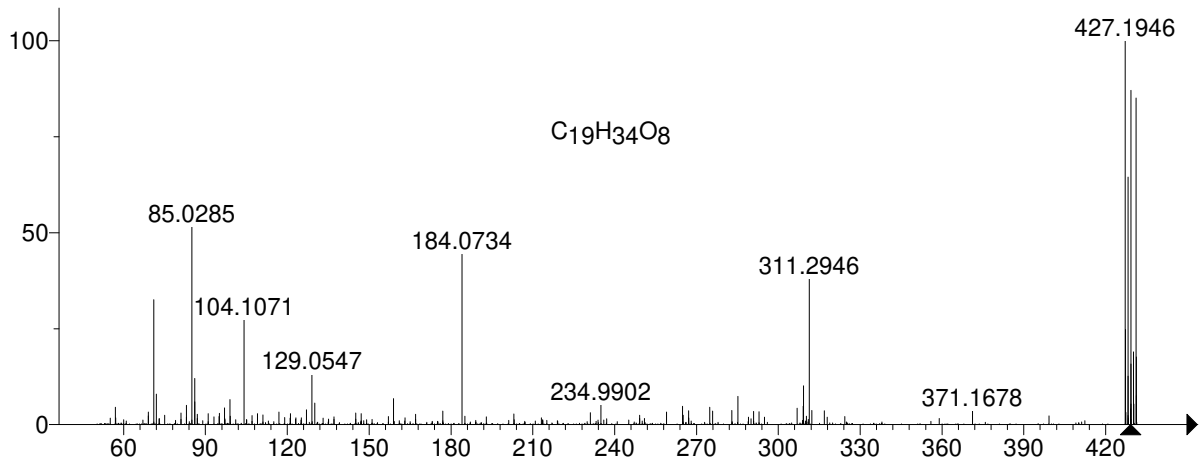

Hit 2 : NCGC00169368-02!3,6-bis(3,4,5-trimethoxyphenyl)-1,3,3a,4,6,6a-hexahydrofuro[3,4-c]furan [M-H<sub>2</sub>O+H]<sup>+</sup>C<sub>24</sub>H<sub>30</sub>O<sub>8</sub>; MF: 0; RMF: 14; Prob 49.0%; Lib: mona-export-gnps; ID: 9133.

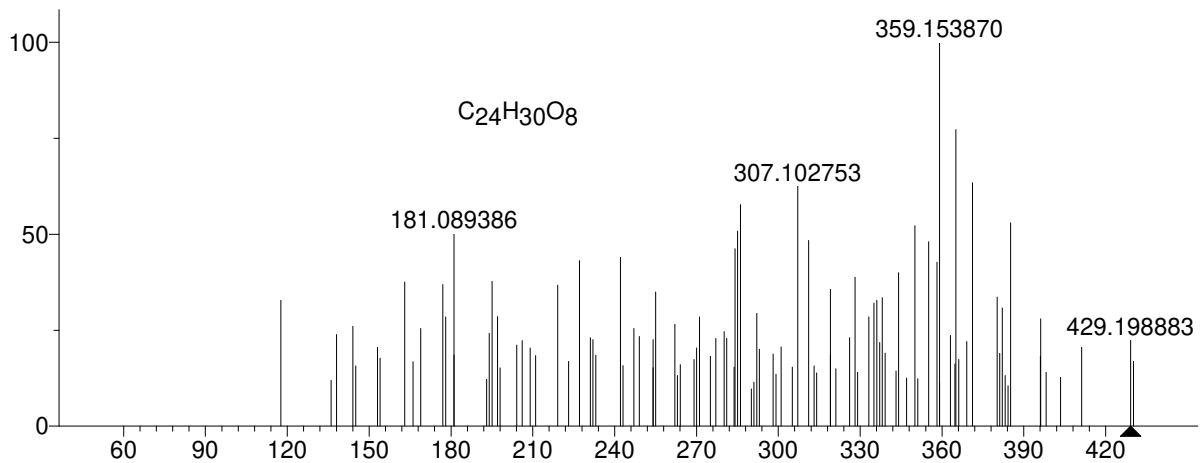

Unknown: Unknown (5.37\_435.1500m/z)  
Compound in Library Factor = -3273

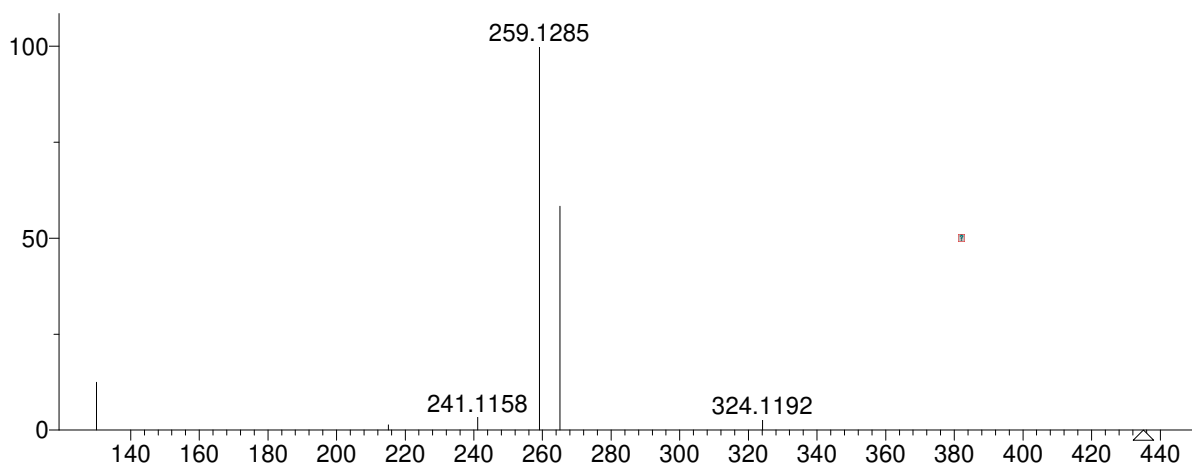

Hit 1 : Methotrexate [M-H-H<sub>2</sub>O]- HCD 13V P=435.2  
C<sub>20</sub>H<sub>22</sub>N<sub>8</sub>O<sub>5</sub>; MF: 3; RMF: 110; Prob 100.0%; CAS: 59-05-2; Lib: nist\_msms; ID: 82226.

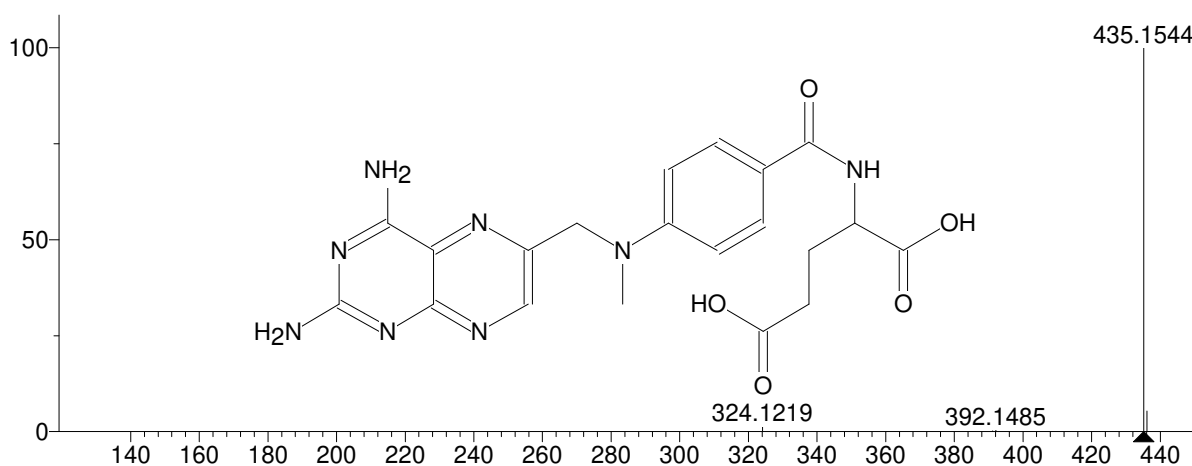

\*\* Search Report Page 1 of 1 \*\*

Unknown: Unknown (5.37\_647.2652m/z)  
Compound in Library Factor = -3273

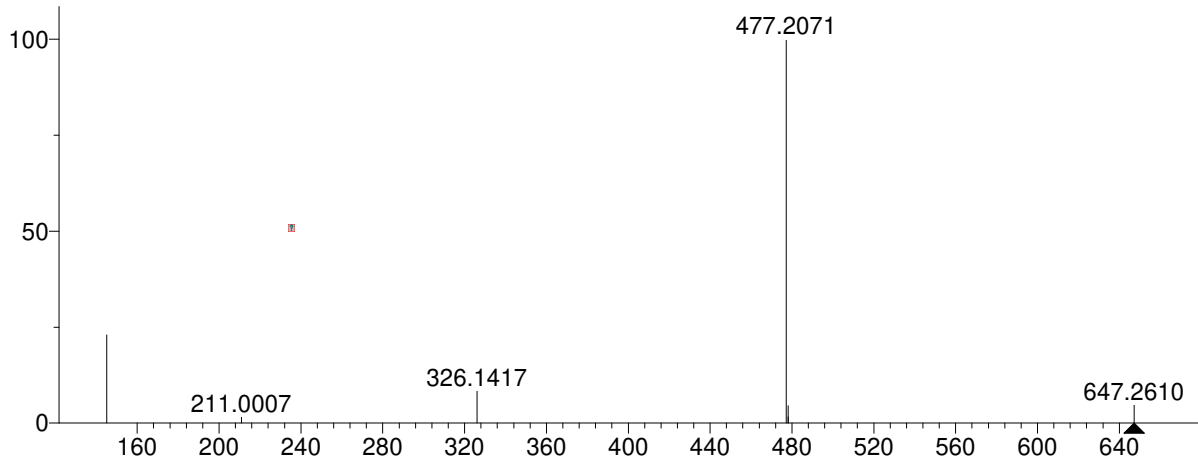

Hit 1 : Bavachin [2M-H]- HCD 9V P=647.3  
C<sub>20</sub>H<sub>20</sub>O<sub>4</sub>; MF: 1; RMF: 41; Prob 100.0%; CAS: 19879-32-4; Lib: nist\_msms; ID: 389268.

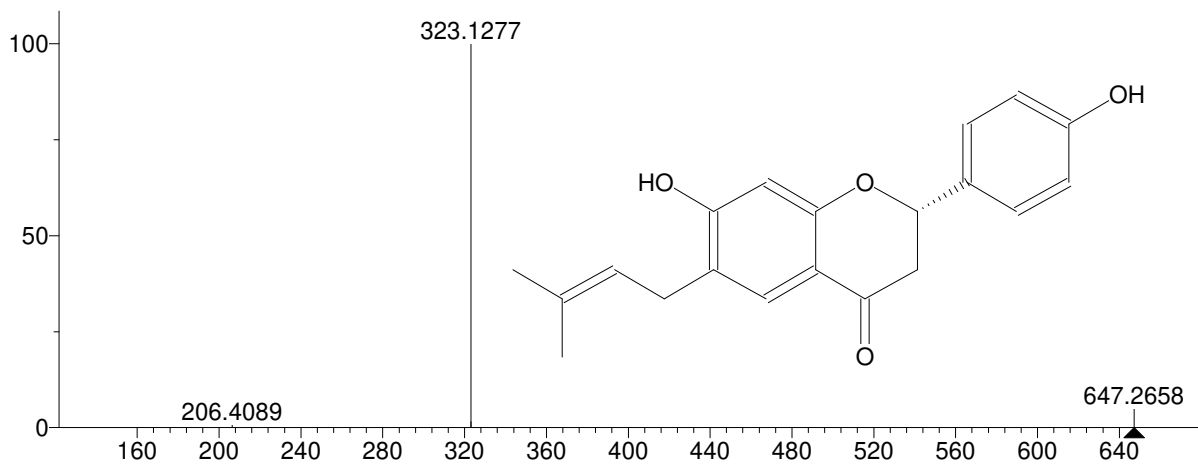

\*\* Search Report Page 1 of 2 \*\*

Unknown: Unknown (5.38\_193.0491m/z)  
Compound in Library Factor = -1389

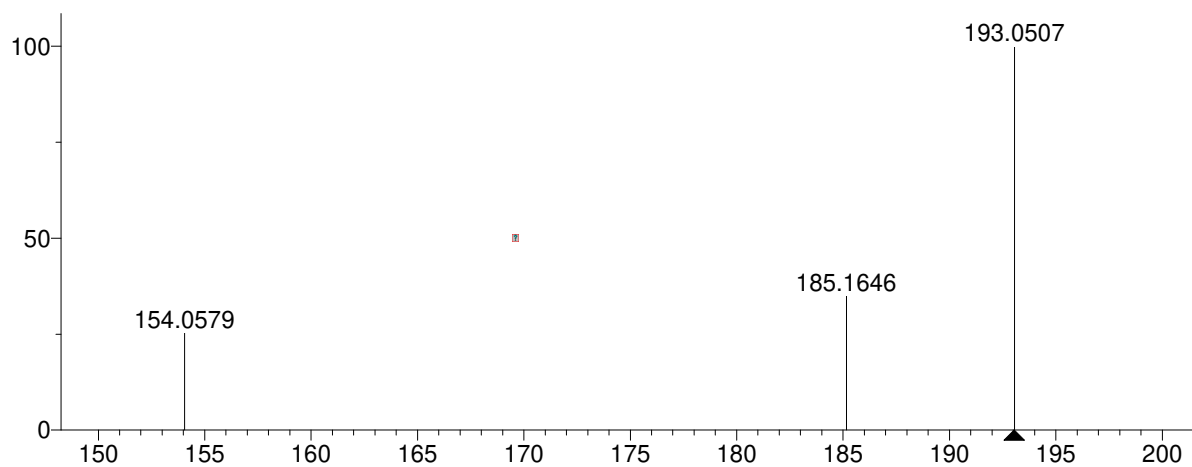

Hit 1 : 6,7-Dihydroxy-4-methylcoumarin [M+H]<sup>+</sup> HCD 42V P=193  
C<sub>10</sub>H<sub>8</sub>O<sub>4</sub>; MF: 268; RMF: 789; Prob 15.3%; CAS: 529-84-0; Lib: nist\_msms; ID: 111709.

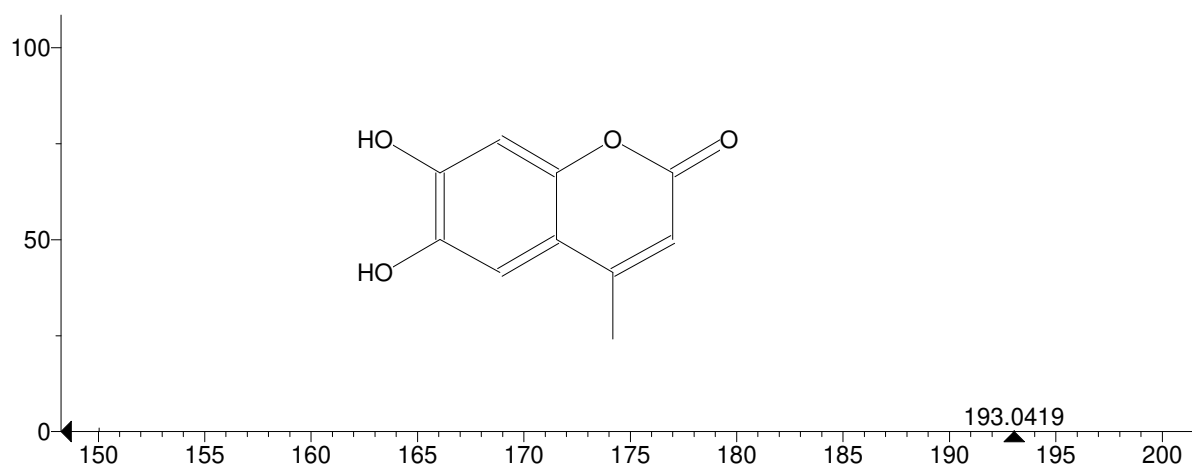

Hit 2 : 5,7-Dihydroxy-4-methylcoumarin [M+H]<sup>+</sup> HCD 42V P=193  
C<sub>10</sub>H<sub>8</sub>O<sub>4</sub>; MF: 268; RMF: 789; Prob 15.3%; CAS: 2107-76-8; Lib: nist\_msms; ID: 111824.

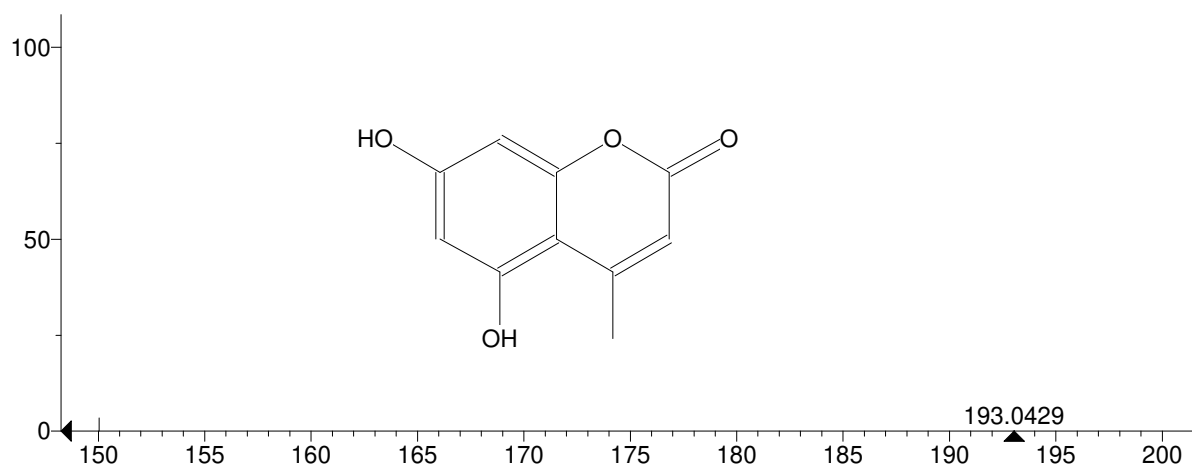

Hit 3 : 7,8-Dihydroxy-4-methylcoumarin [M+H]<sup>+</sup> HCD 42V P=193  
C<sub>10</sub>H<sub>8</sub>O<sub>4</sub>; MF: 268; RMF: 789; Prob 15.3%; CAS: 2107-77-9; Lib: nist\_msms; ID: 111845.

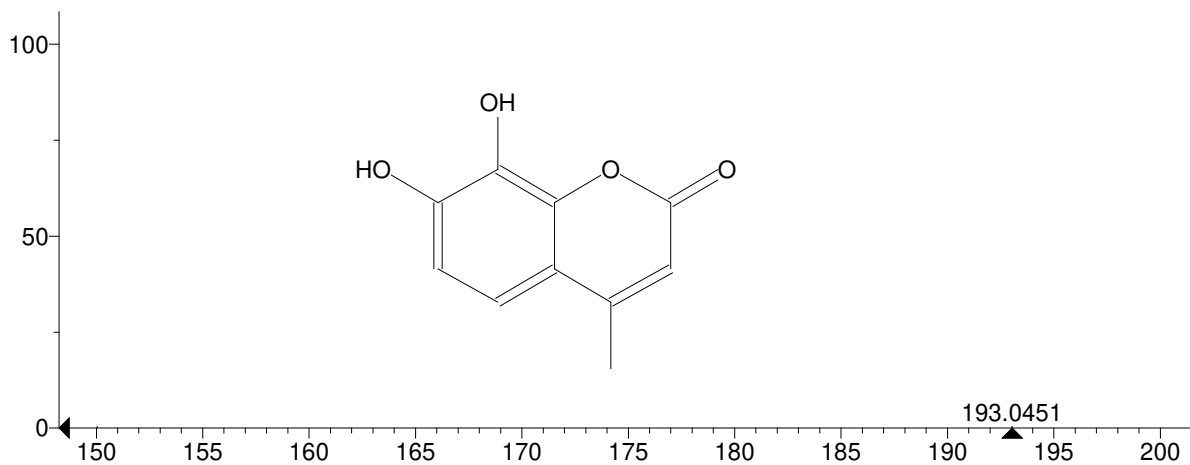

Hit 4 : 4-Hydroxy-7-methoxycoumarin [M+H]<sup>+</sup> HCD 52V P=193  
C<sub>10</sub>H<sub>8</sub>O<sub>4</sub>; MF: 268; RMF: 789; Prob 15.3%; CAS: 17575-15-4; Lib: nist\_msms; ID: 177257.

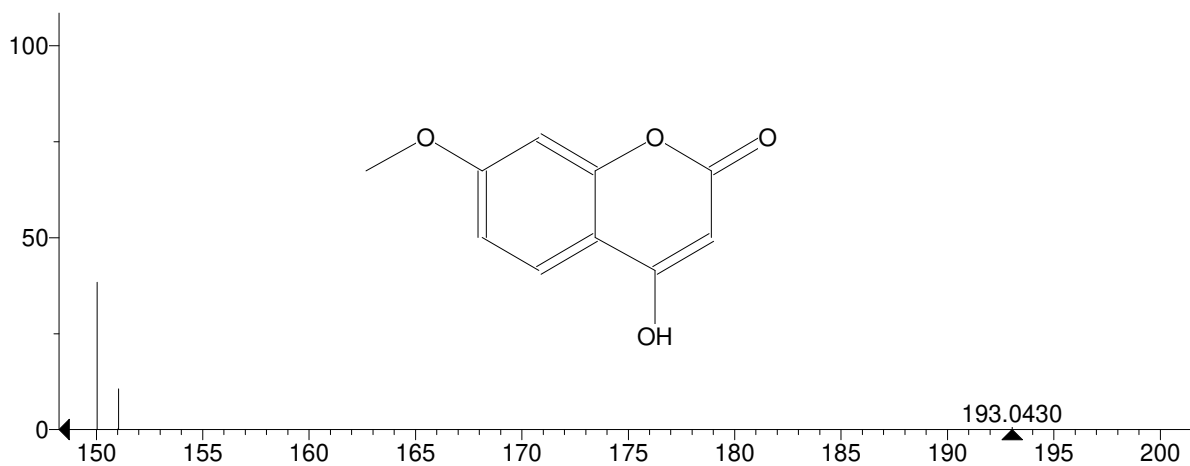

Hit 5 : 4-Hydroxy-6-methoxycoumarin [M+H]<sup>+</sup> HCD 9V P=193  
C<sub>10</sub>H<sub>8</sub>O<sub>4</sub>; MF: 268; RMF: 789; Prob 15.3%; CAS: 13252-84-1; Lib: nist\_msms; ID: 178730.

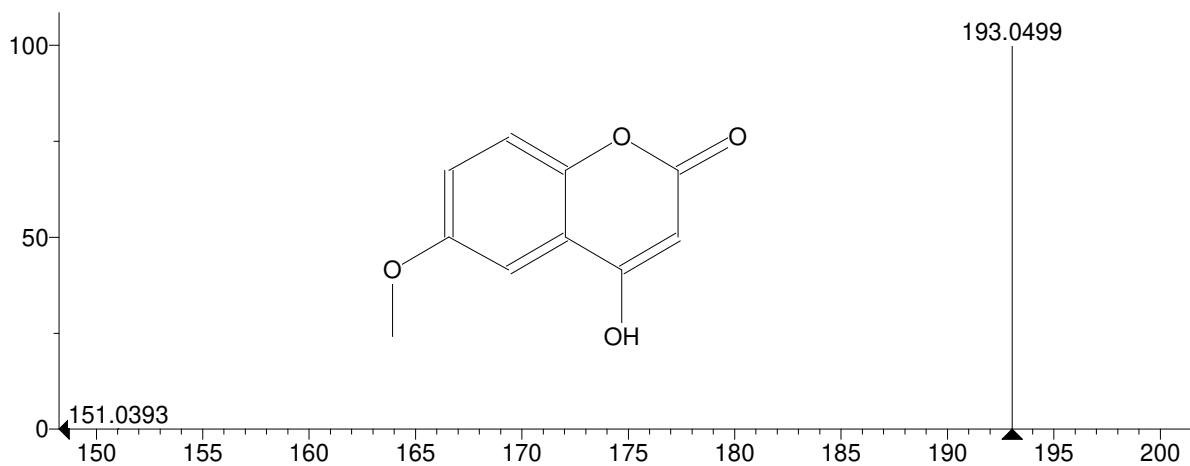

Unknown: Unknown (5.38\_446.1650m/z)  
Compound in Library Factor = 0

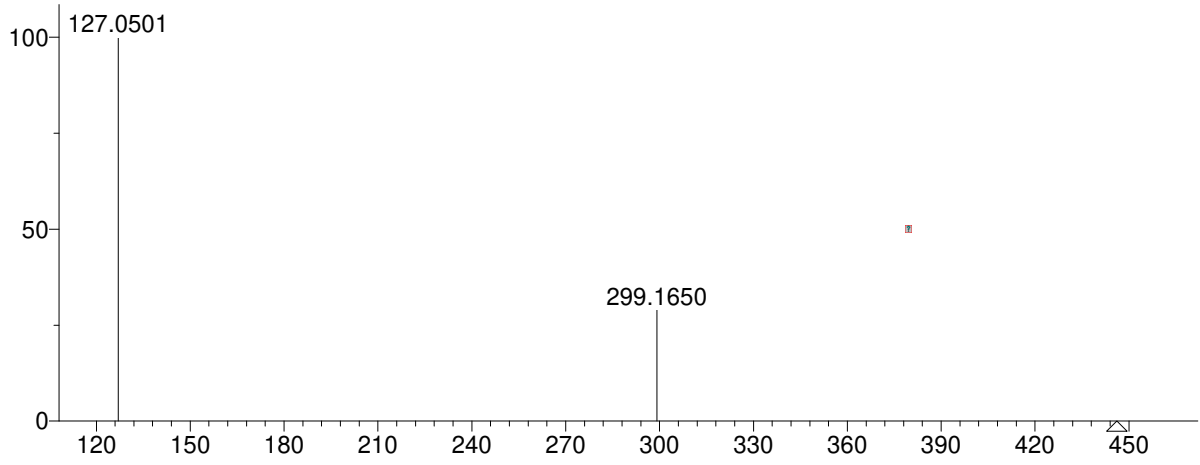



Unknown: Unknown (5.39\_529.1679m/z)  
Compound in Library Factor = 0

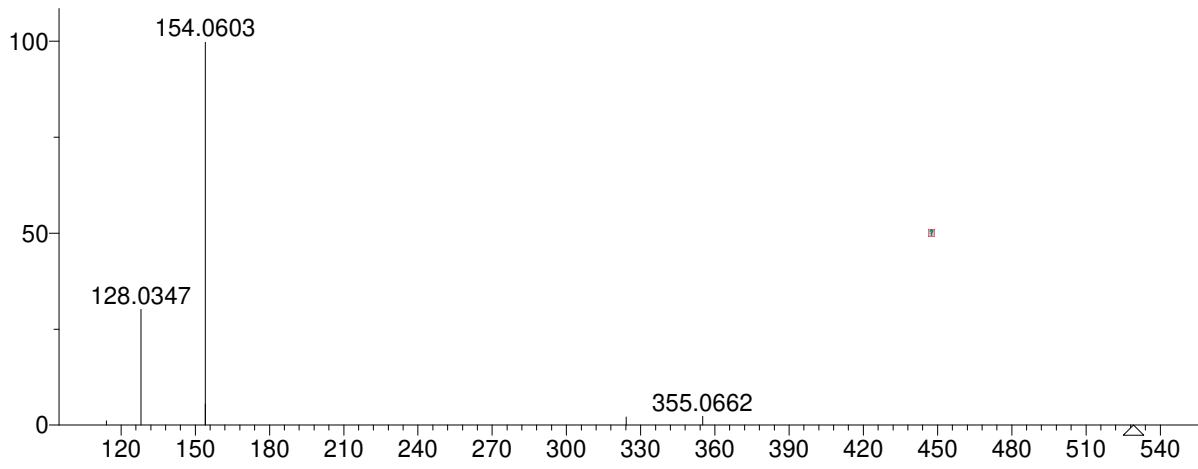

Unknown: Unknown (5.39\_654.2090m/z)  
Compound in Library Factor = 0

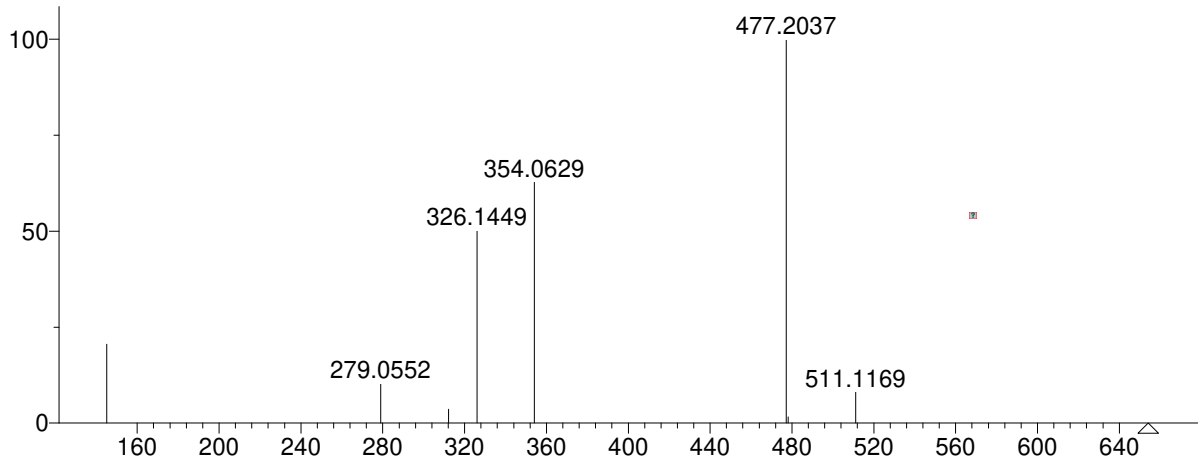

Unknown: Unknown (5.41\_178.1227m/z)  
Compound in Library Factor = -1275

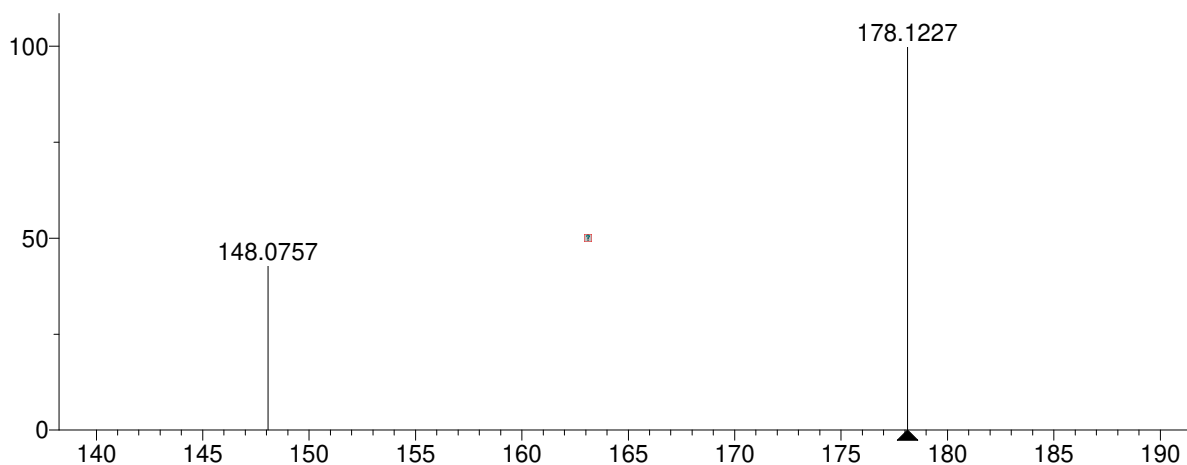

Hit 1 : 1H-Inden-2-amine, 2,3-dihydro-5-methoxy-6-methyl- [M+H]<sup>+</sup> HCD 3V P=178.1  
C<sub>11</sub>H<sub>15</sub>NO; MF: 322; RMF: 944; Prob 47.1%; CAS: 136468-19-4; Lib: nist\_msms; ID: 364124.

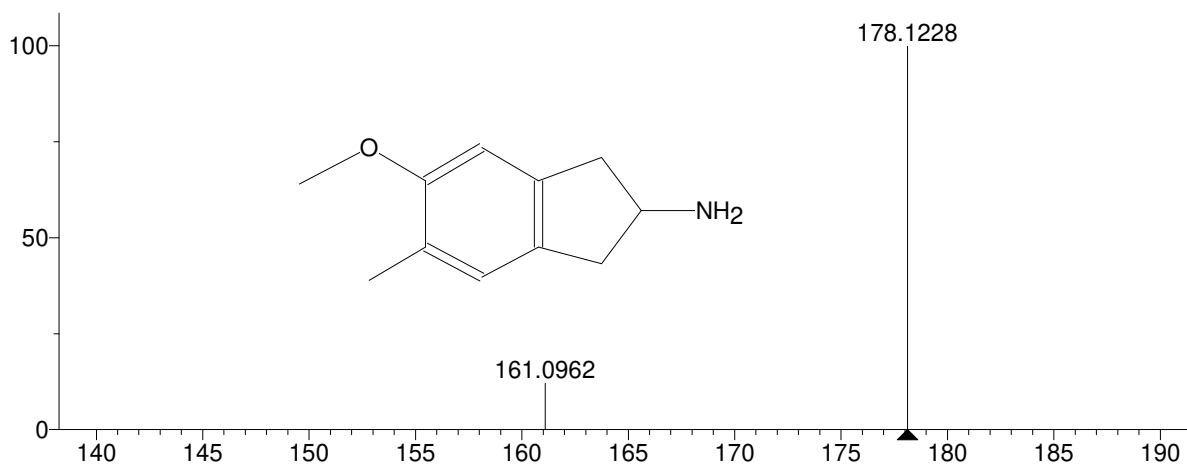

Hit 2 : Rebemide [M+H]<sup>+</sup> 30eV P=178.1  
C<sub>11</sub>H<sub>15</sub>NO; MF: 292; RMF: 836; Prob 13.1%; Lib: mona-export-massbank; ID: 26955.

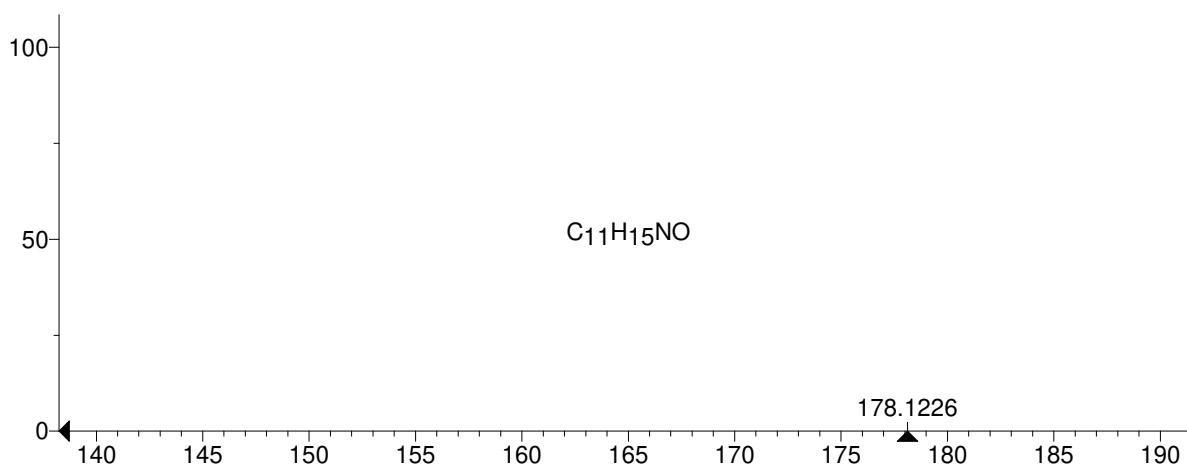

Hit 3 : N-tert-Butyl- $\alpha$ -phenylnitrone [M+H]<sup>+</sup> QTOF 3V P=178.1  
C<sub>11</sub>H<sub>15</sub>NO; MF: 292; RMF: 836; Prob 13.1%; CAS: 3376-24-7; Lib: nist\_msms; ID: 67834.

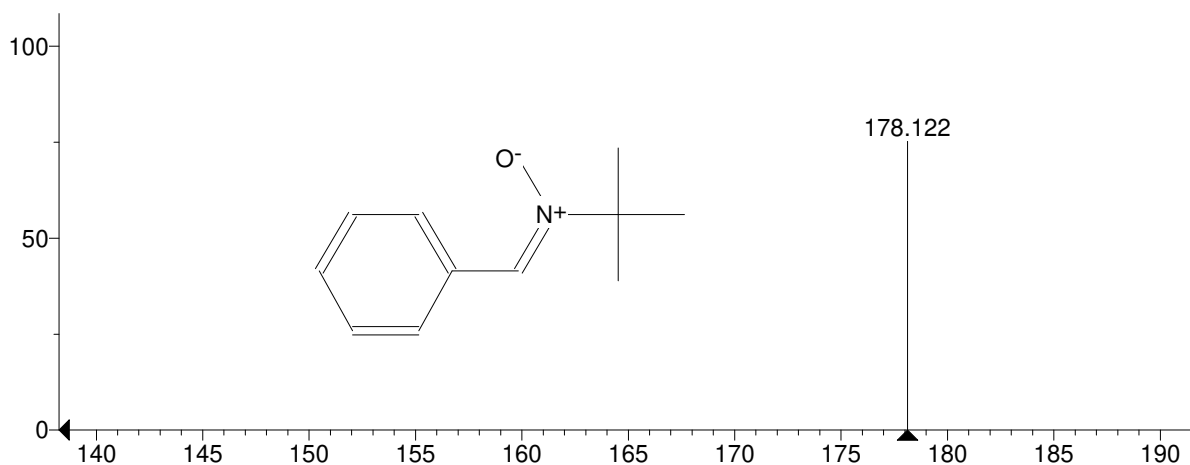

Hit 4 : N-Acetylamphetamine [M+H]<sup>+</sup> HCD 5V P=178.1  
C<sub>11</sub>H<sub>15</sub>NO; MF: 292; RMF: 836; Prob 13.1%; CAS: 14383-60-9; Lib: nist\_msms; ID: 243432.

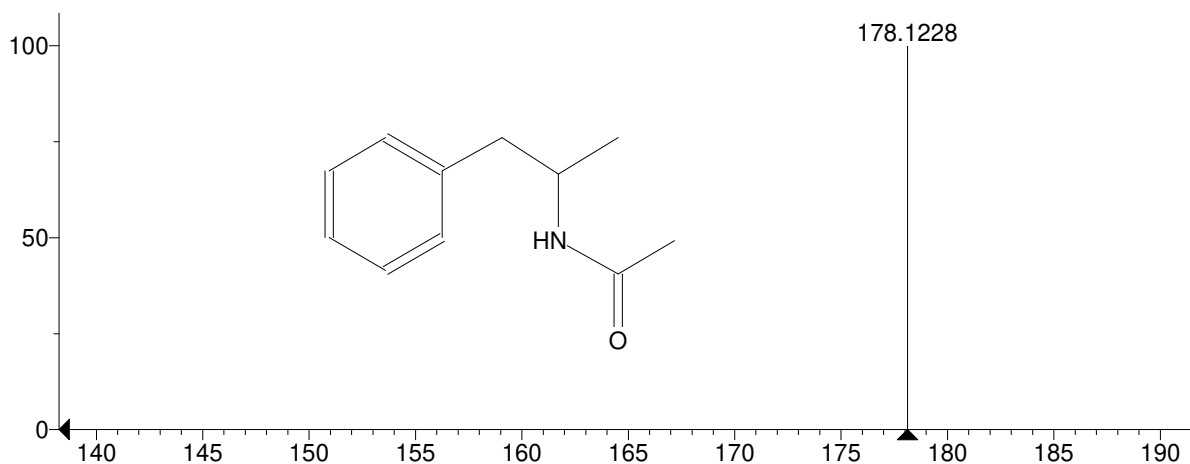

Hit 5 : 4-Benzofuranethanamine, 2,3-dihydro- $\alpha$ -methyl- [M+H]<sup>+</sup> HCD 0V P=178.1  
C<sub>11</sub>H<sub>15</sub>NO; MF: 245; RMF: 823; Prob 2.73%; CAS: 1203430-05-0; Lib: nist\_msms; ID: 426816.

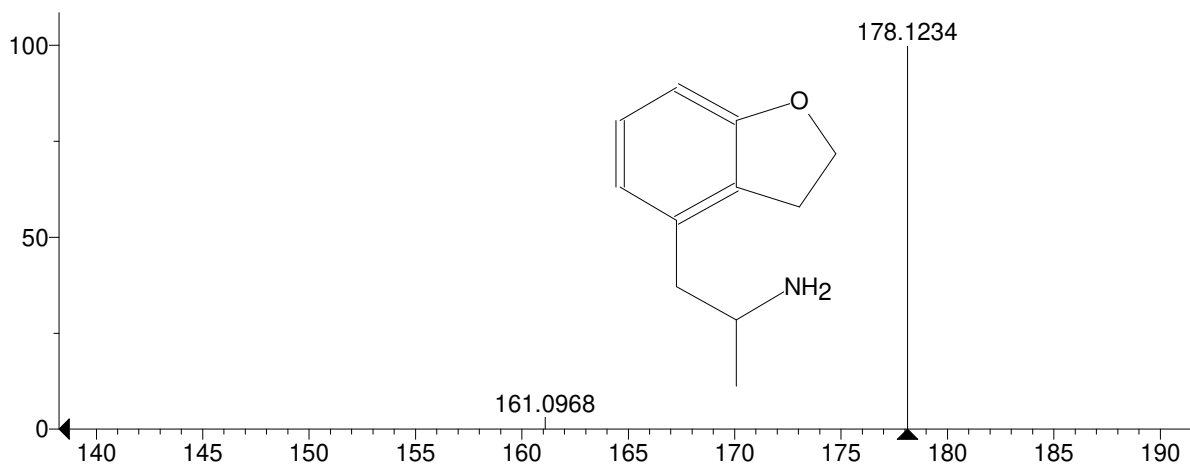

Unknown: Unknown (5.41\_494.1765m/z)  
Compound in Library Factor = 0

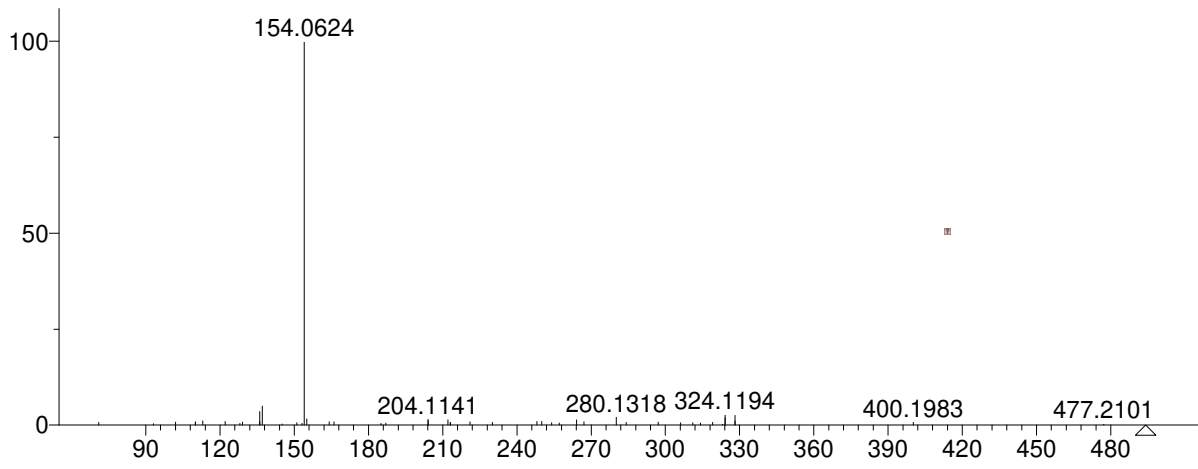

Unknown: Unknown (5.41\_625.2560m/z)  
Compound in Library Factor = -3273

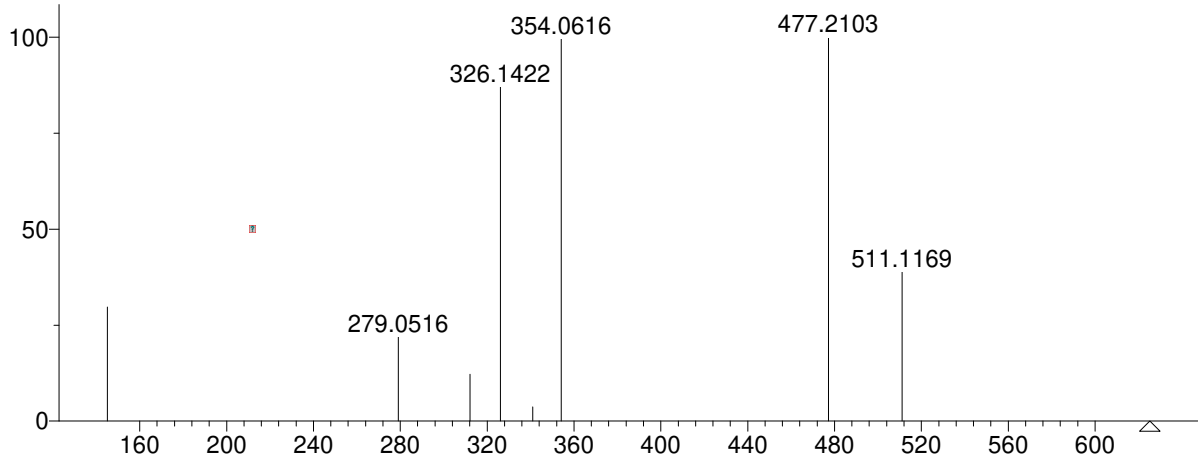

Hit 1 : N-Caffeoyl-O-methyltyramine [2M-H]- IT 35% P=625.3  
C18H19NO4; MF: 4; RMF: 170; Prob 54.2%; CAS: 189307-47-9; Lib: nist\_msms; ID: 221344.

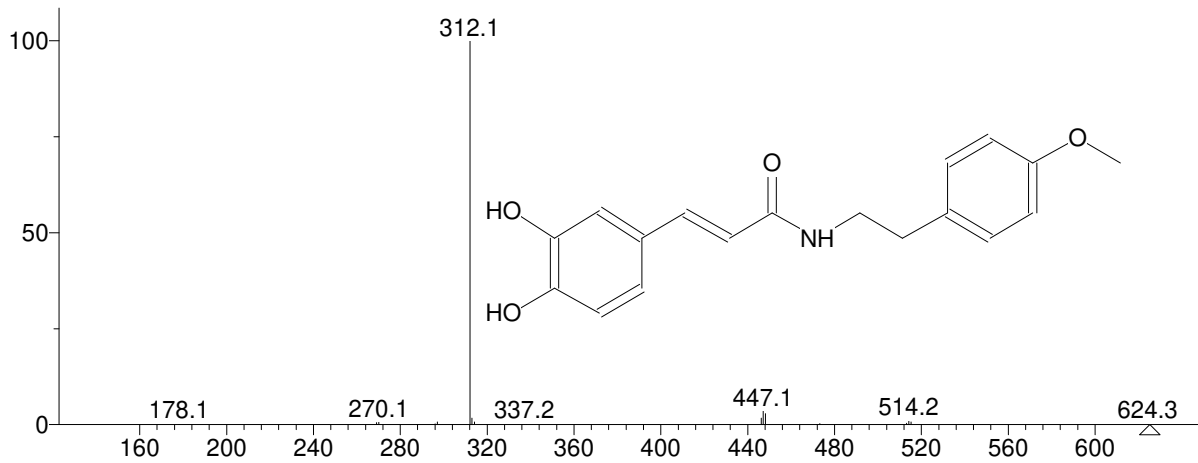

Hit 2 : Collagen Binding Fragment [M+2H]2+ QQQ 22.5V P=625.3  
C52H76N14O20S; MF: 0; RMF: 4; Prob 45.8%; CAS: 94040-53-6; Lib: nist\_msms2; ID: 3608.

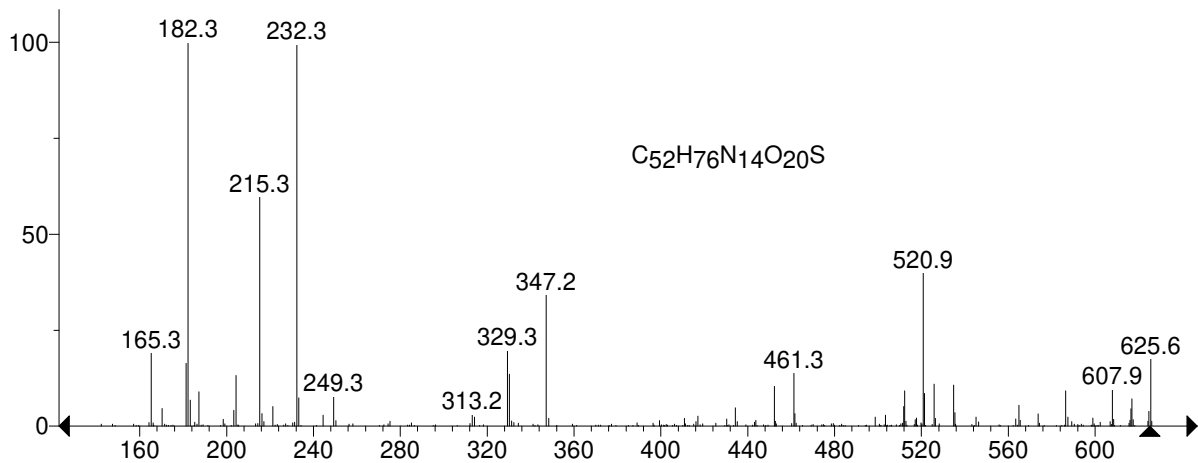

Unknown: Unknown (5.44\_376.1028m/z)  
Compound in Library Factor = 0

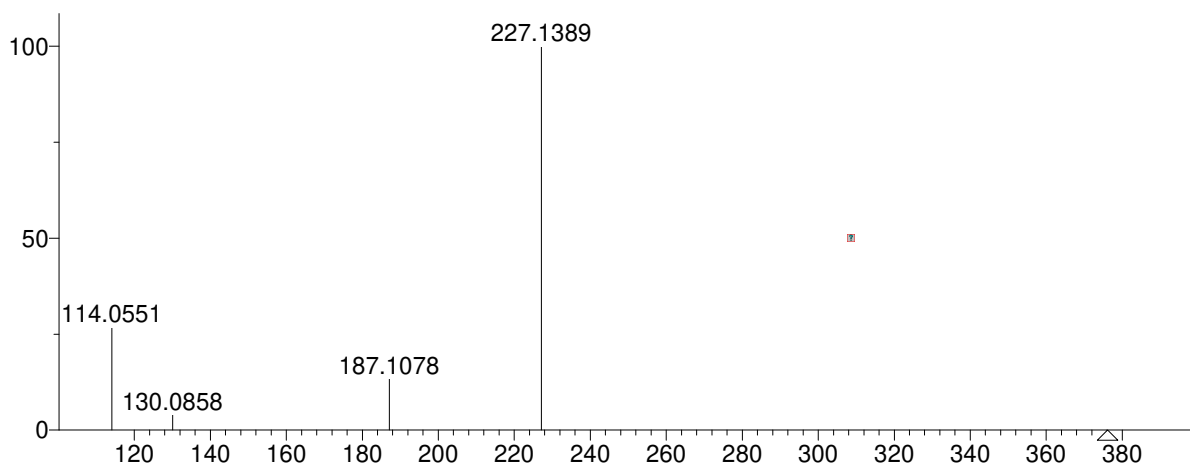

Hit 1 : 1-(3,4-dihydroxyphenyl)-6,7-dihydroxy-1,2-dihydronaphthalene-2,3-dicarboxylic acid [M+NH4]<sup>+</sup> 45HCD F  
C<sub>18</sub>H<sub>14</sub>O<sub>8</sub>; MF: 0; RMF: 5; Prob 100.0%; Lib: mona-export-vf-npl\_qexactive; ID: 24902.

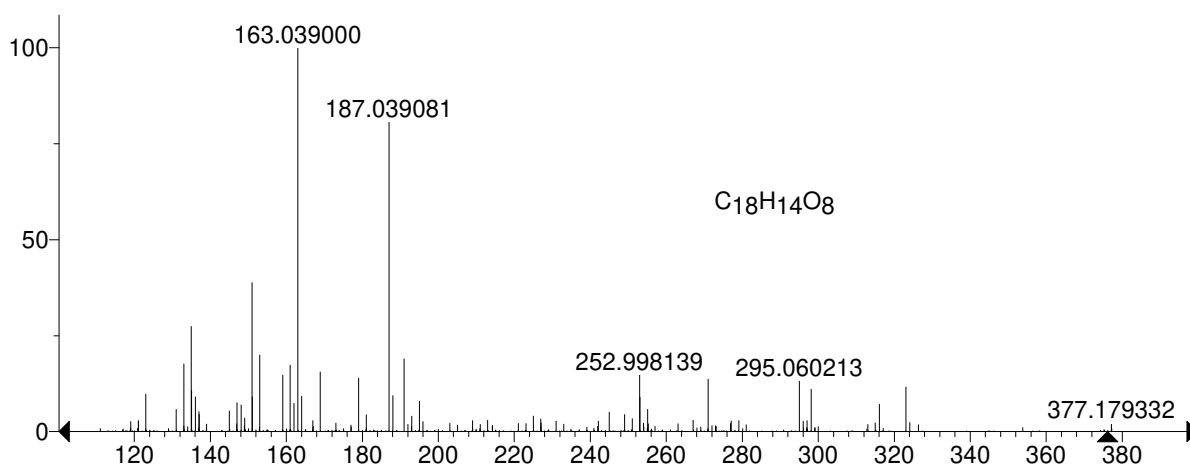

\*\* Search Report Page 1 of 2 \*\*

Unknown: Unknown (5.44\_415.1740m/z)  
Compound in Library Factor = 0

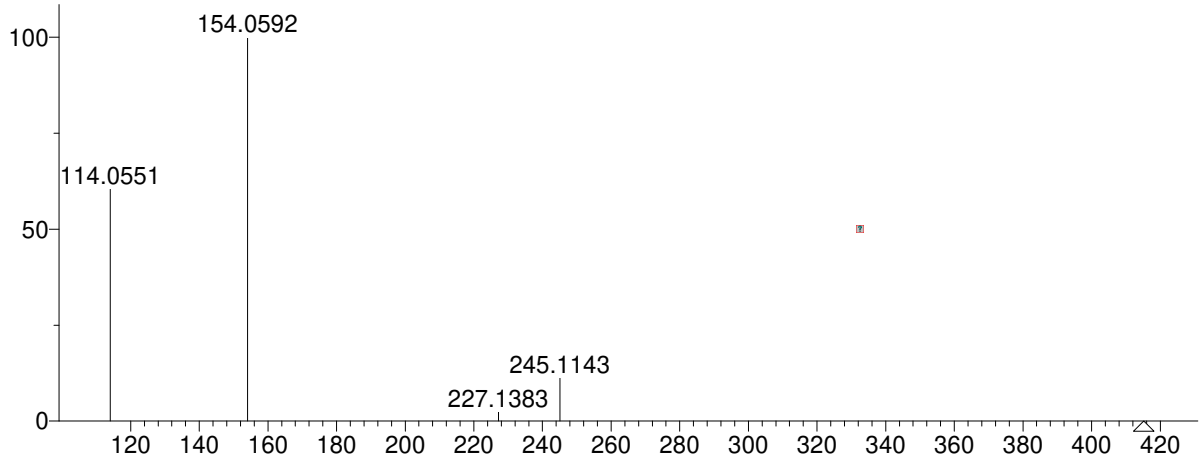

Hit 1 : 2-amino-5-[2-[[2,3-dihydroxy-2-(1-hydroxyethyl)butanoyl]oxymethyl]-4-hydroxyanilino]-5-oxopentanoic acid  
C18H26N2O9; MF: 0; RMF: 55; Prob 25.0%; Lib: mona-export-vf-npl\_qexactive; ID: 23033.

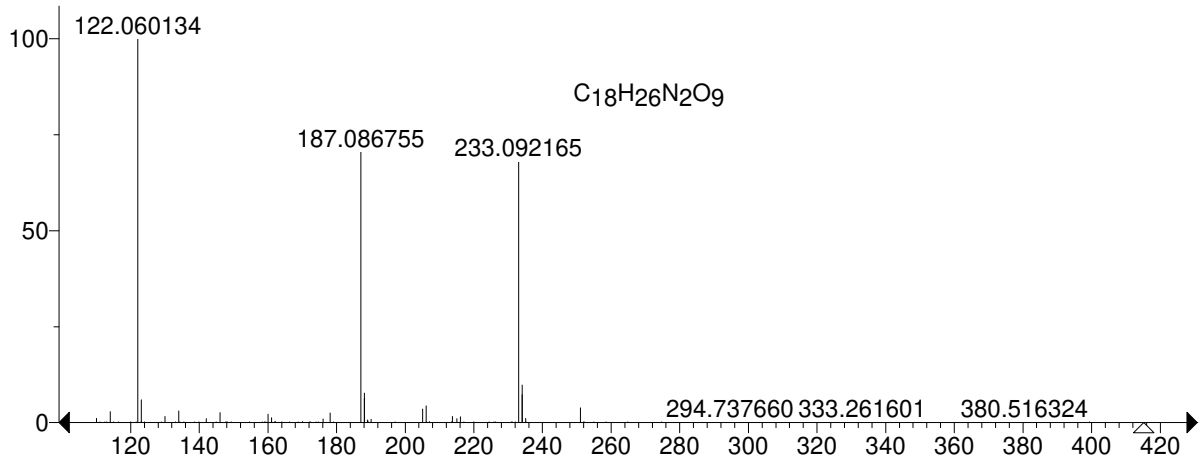

Hit 2 : NCGC00347525-03!2-amino-5-[2-[[2,3-dihydroxy-2-(1-hydroxyethyl)butanoyl]oxymethyl]-4-hydroxyanilino]-  
C18H26N2O9; MF: 0; RMF: 36; Prob 25.0%; Lib: mona-export-gnps; ID: 9213.

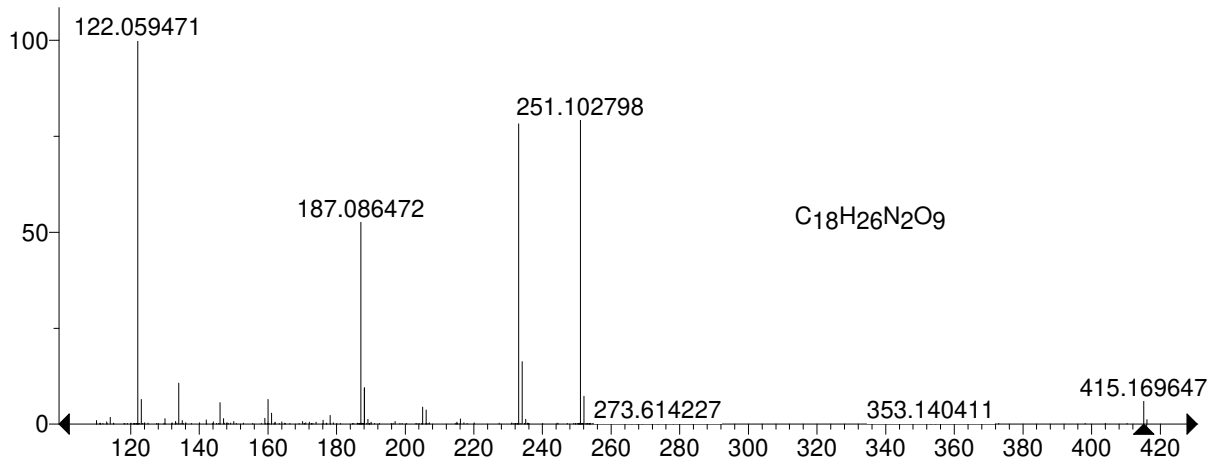



\*\* Search Report Page 2 of 2 \*\*

Hit 3 : NCGC00347525-02!2-amino-5-[2-[[2,3-dihydroxy-2-(1-hydroxyethyl)butanoyl]oxymethyl]-4-hydroxyanilino]-C<sub>18</sub>H<sub>26</sub>N<sub>2</sub>O<sub>9</sub>; MF: 0; RMF: 29; Prob 25.0%; Lib: mona-export-gnps; ID: 6270.

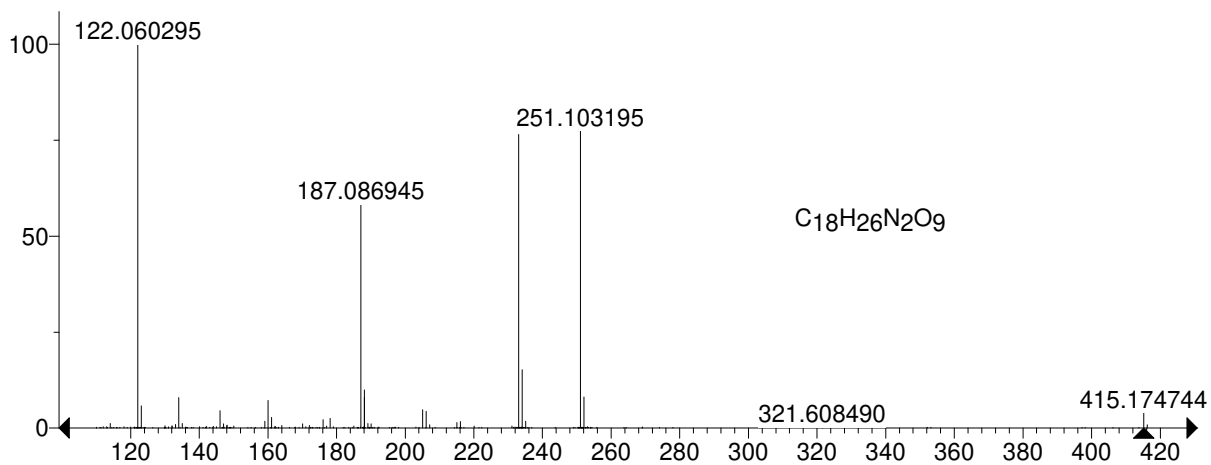

Hit 4 : 6-formyl-10-(hydroxymethyl)-5-methoxy-3-methylidene-2-oxo-2H,3H,3aH,4H,5H,8H,9H,11aH-cyclodeca[b]C<sub>21</sub>H<sub>28</sub>O<sub>7</sub>; MF: 0; RMF: 8; Prob 25.0%; Lib: mona-export-vf-npl\_qexactive; ID: 16435.

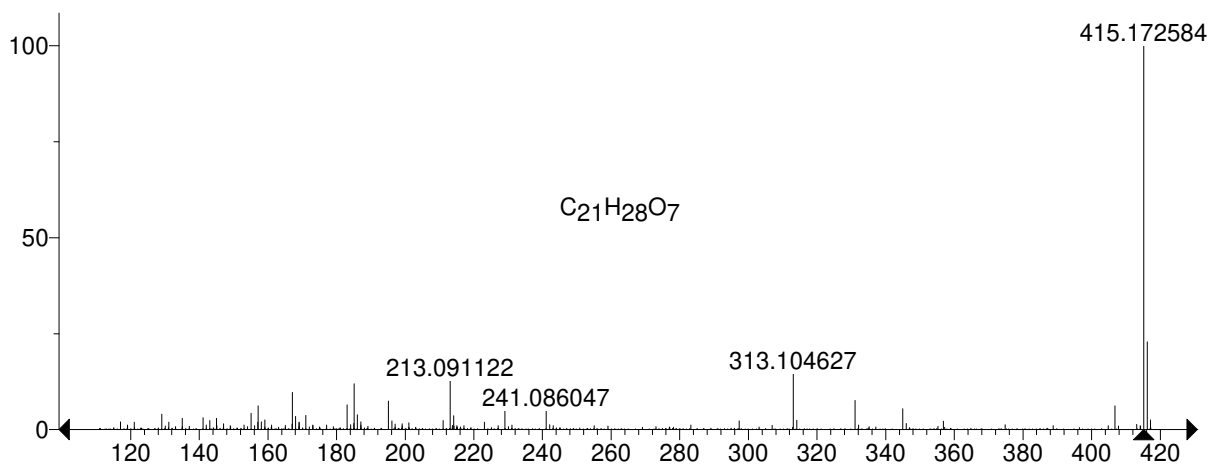

Unknown: Unknown (5.45\_486.2050m/z)  
Compound in Library Factor = 0

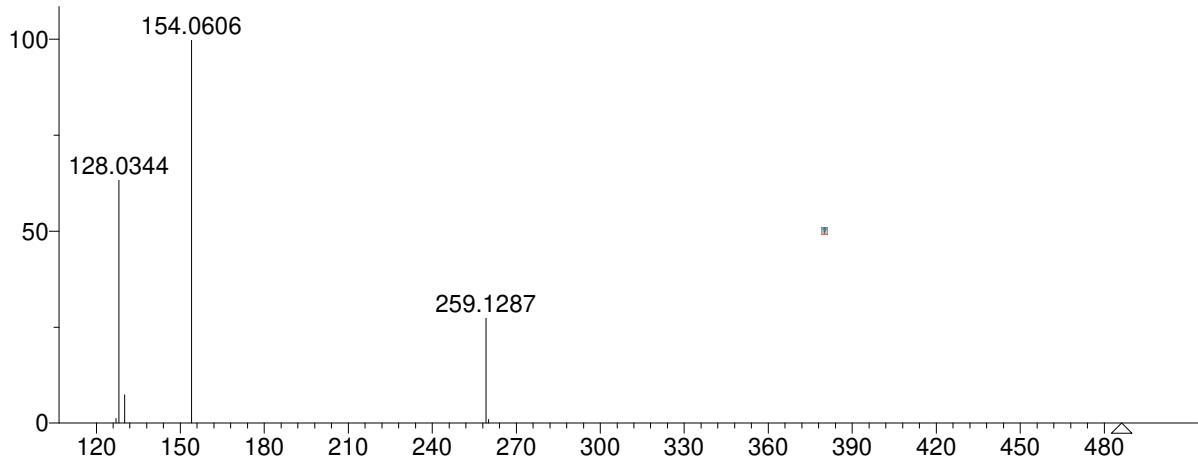

Hit 1 : rac-N-Allyloxycarbonyl-cis-moxifloxacin acyl-β-D-glucuronide allyl ester [M+H-C9H12O6]+ HCD 126V P- C34H40FN3O12; MF: 0; RMF: 93; Prob 100.0%; Lib: nist\_msms; ID: 431491.

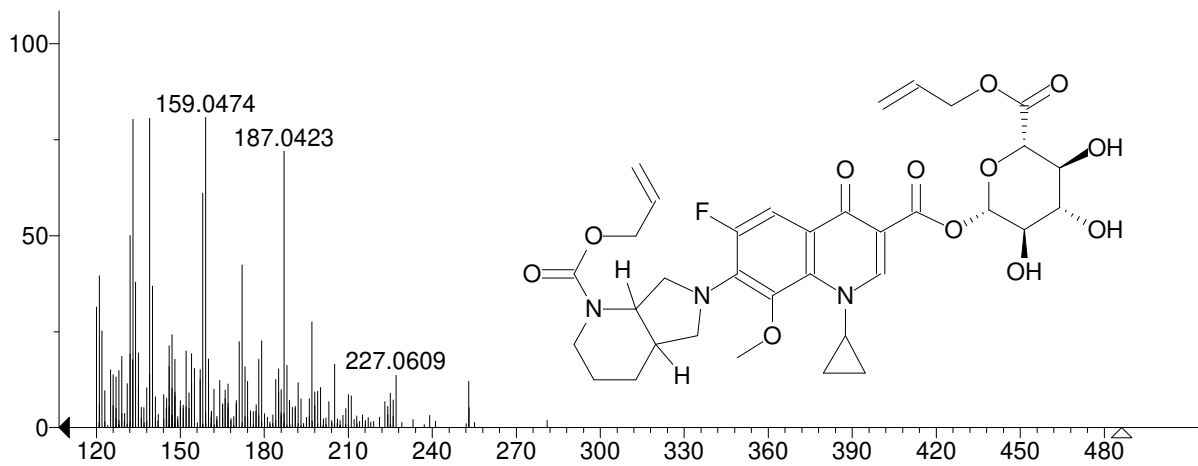

Unknown: Unknown (5.46\_429.1863m/z)  
Compound in Library Factor = 0

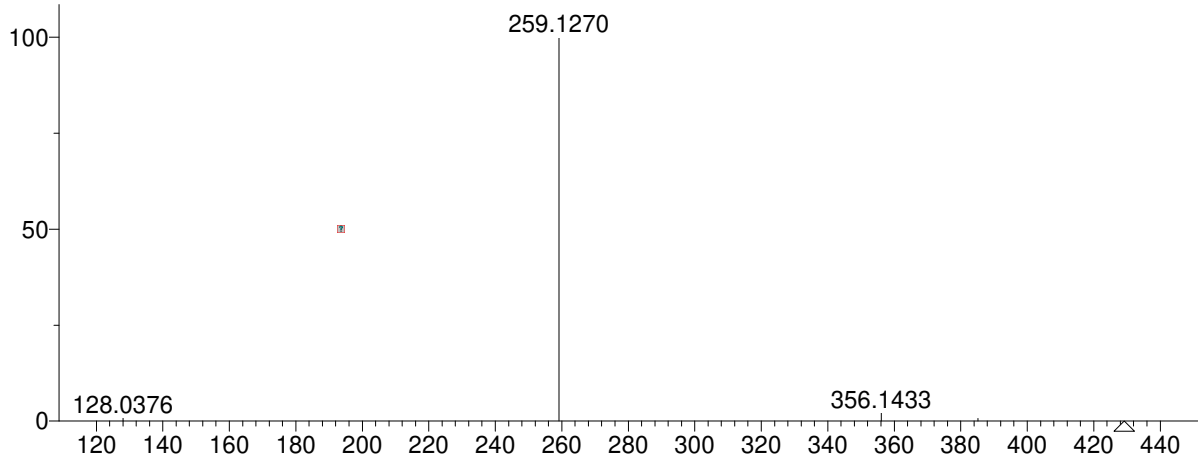

Hit 1 : (2R,3R,4S,5S,6R)-2-[6-hydroxy-3-[(E)-3-hydroxybut-1-enyl]-2,4,4-trimethylcyclohexyl]oxy-6-(hydroxymethyl) C<sub>19</sub>H<sub>34</sub>O<sub>8</sub>; MF: 0; RMF: 15; Prob 50.0%; Lib: anthocyanins mona; ID: 9988.

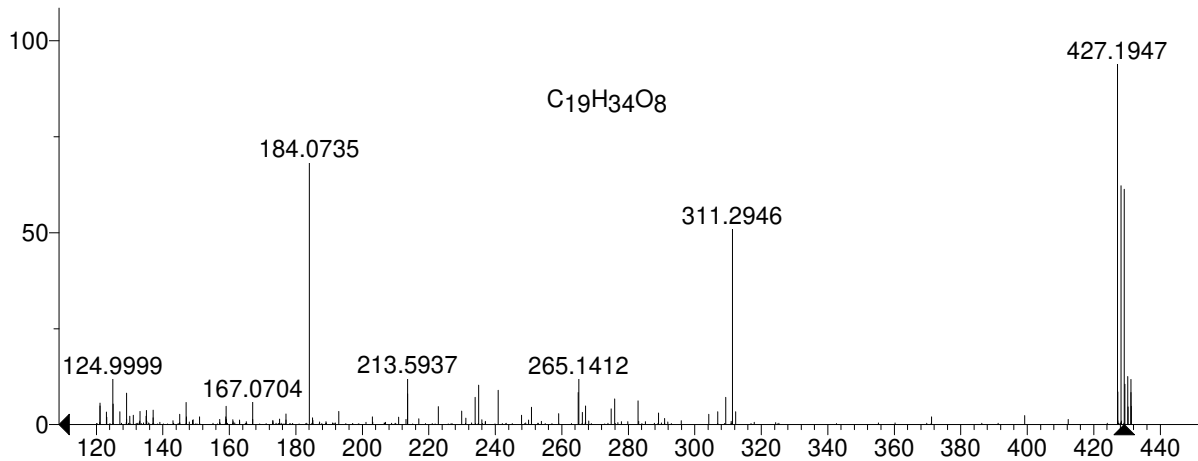

Hit 2 : NCGC00169368-02!3,6-bis(3,4,5-trimethoxyphenyl)-1,3,3a,4,6,6a-hexahydrofuro[3,4-c]furan [M-H<sub>2</sub>O+H]<sup>+</sup> C<sub>24</sub>H<sub>30</sub>O<sub>8</sub>; MF: 0; RMF: 10; Prob 50.0%; Lib: mona-export-gnps; ID: 9133.

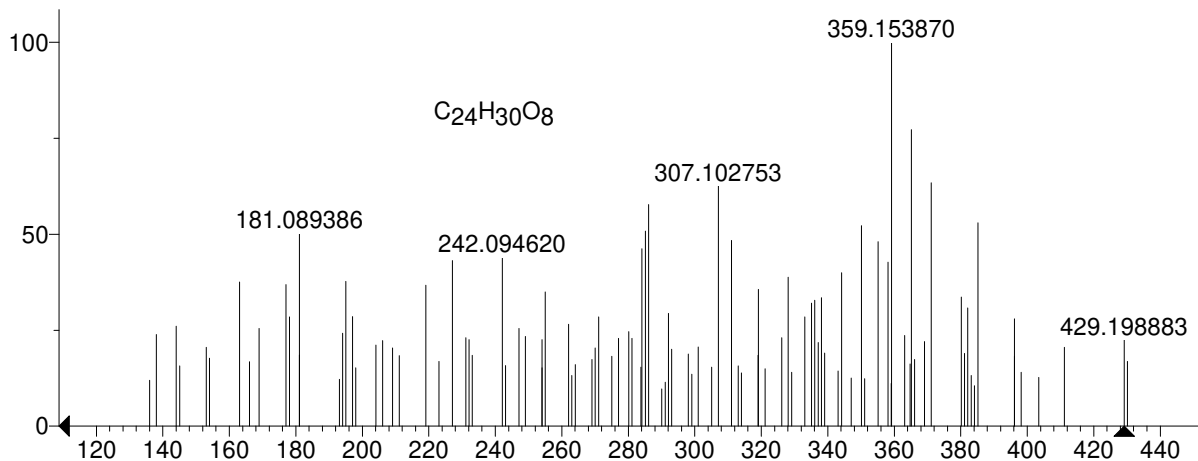

Unknown: Unknown (5.46\_544.2146m/z)  
Compound in Library Factor = 0

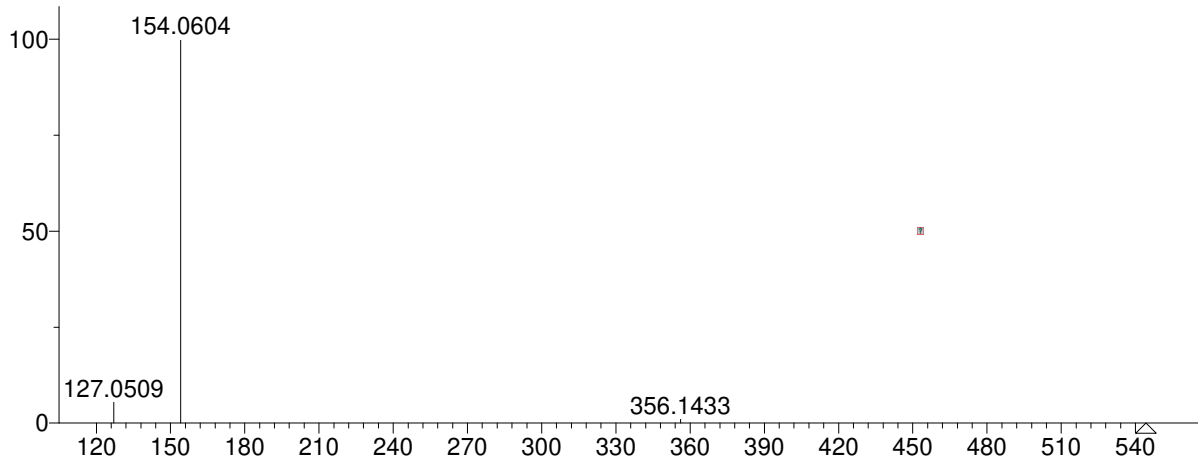

Unknown: Unknown (5.46\_750.2982m/z)  
Compound in Library Factor = 0

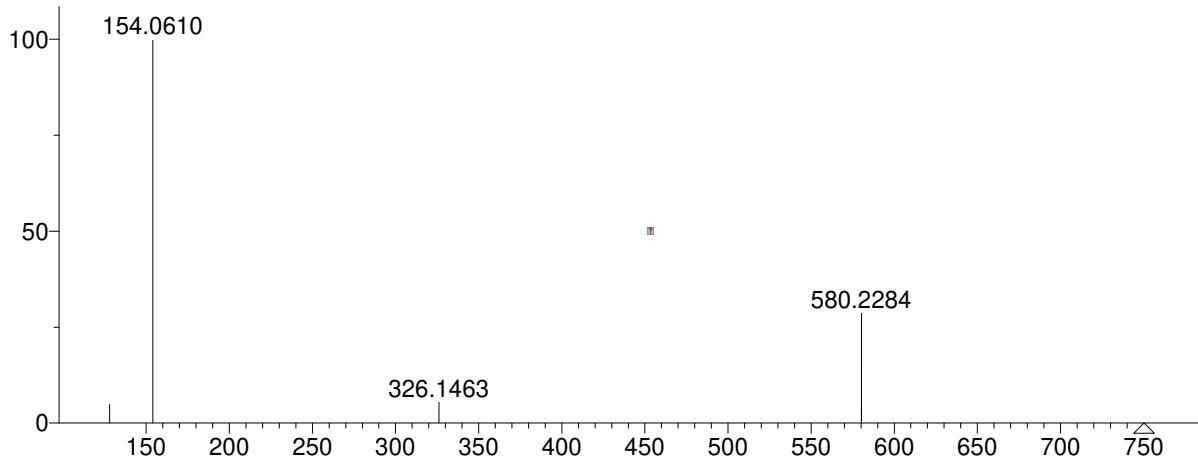

Unknown: Unknown (5.48\_314.1598m/z)  
Compound in Library Factor = -3273

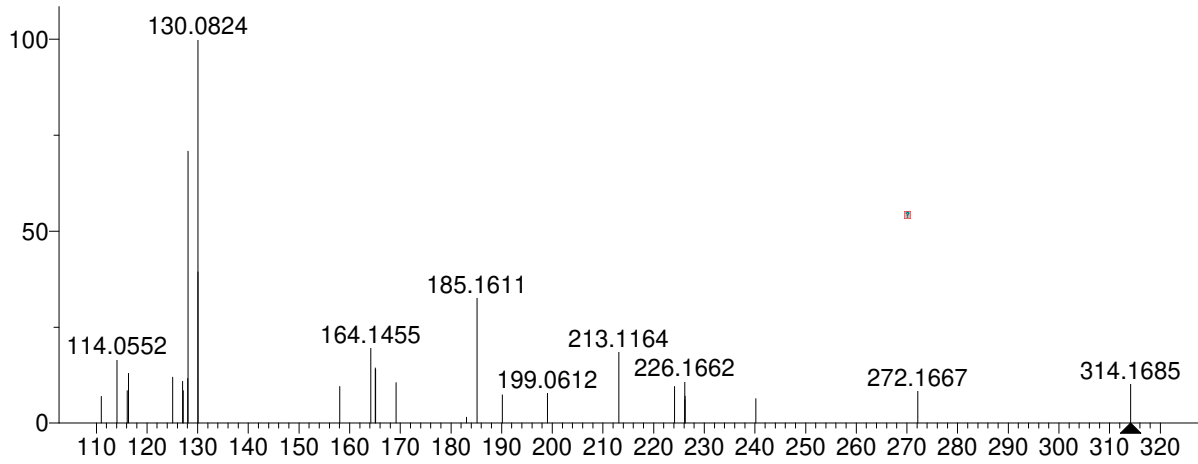

Hit 1 : MMV675993 [M+H]<sup>+</sup> (20-30-40%) P=314.2  
C<sub>16</sub>H<sub>19</sub>N<sub>5</sub>O<sub>2</sub>; MF: 1; RMF: 110; Prob 51.0%; Lib: mona-export-pathogen\_box; ID: 219.

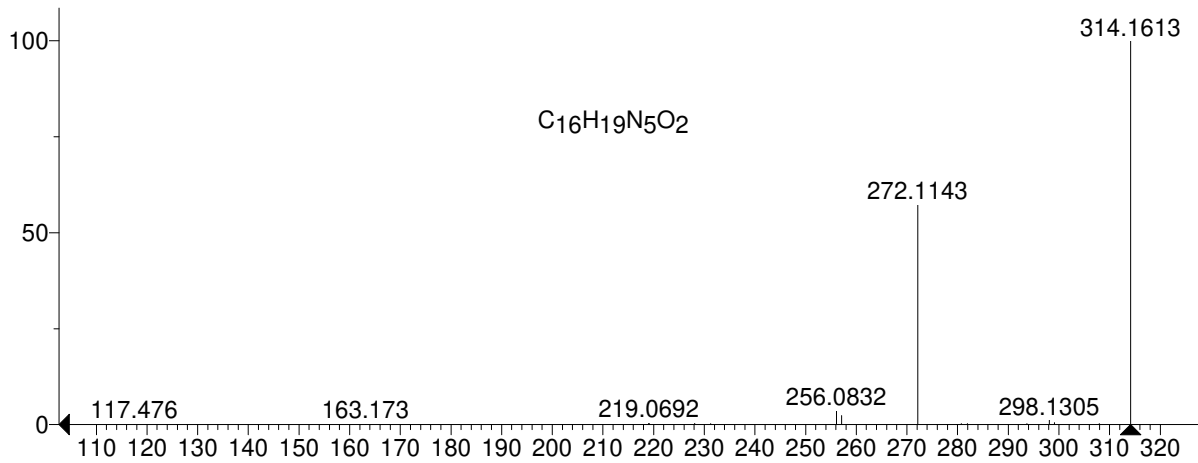

Hit 2 : [(2S,3S)-2-[(E,3R,4S)-3,4-dihydroxypent-1-enyl]-6-oxo-2,3-dihydropyran-3-yl] (E)-2-methylbut-2-enoate [M  
C<sub>15</sub>H<sub>20</sub>O<sub>6</sub>; MF: 0; RMF: 21; Prob 49.0%; Lib: mona-export-vf-npl\_qexactive; ID: 17659.

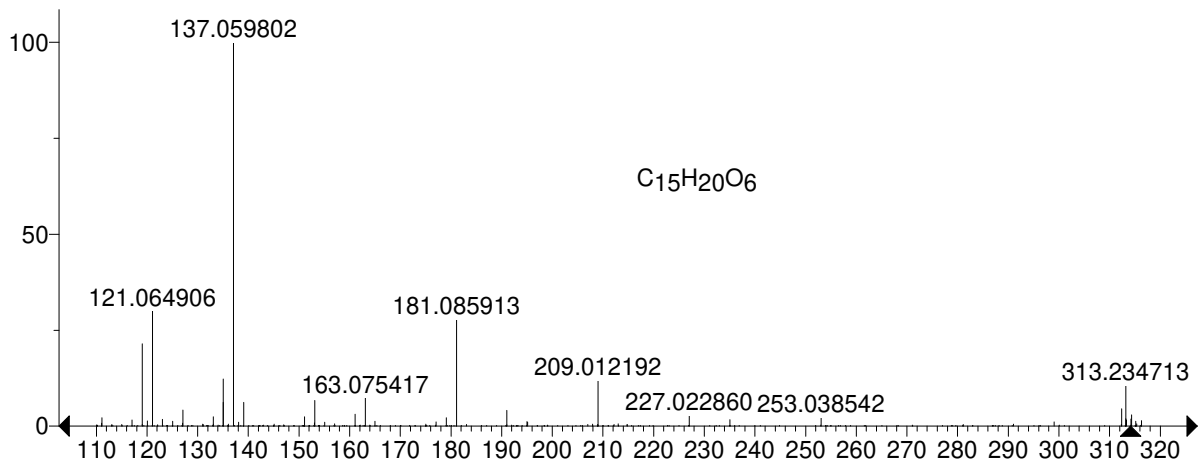

Unknown: Unknown (5.48\_891.4320m/z)  
Compound in Library Factor = -3273

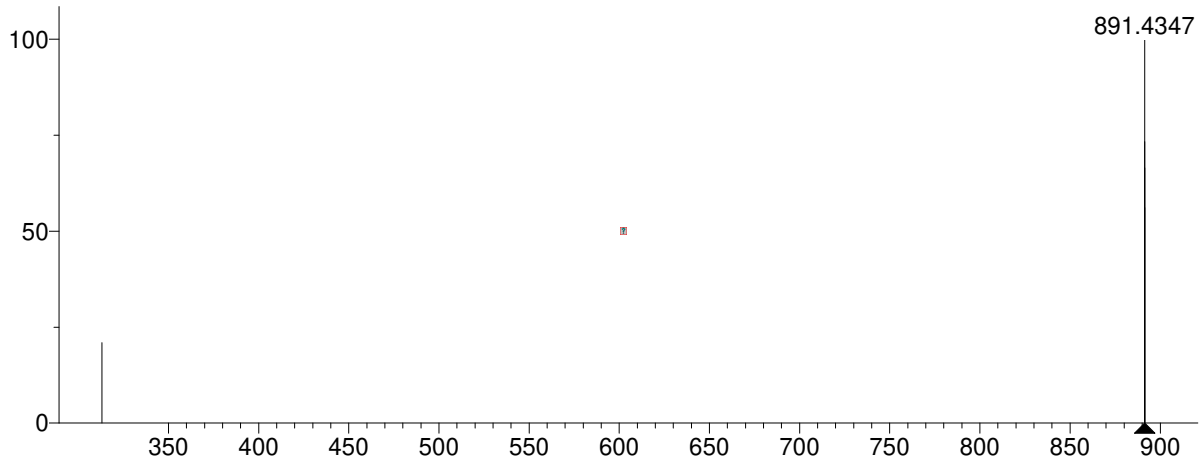

Hit 1 : Ruscin [M+Na]<sup>+</sup> HCD 64V P=891.4  
C44H68O17; MF: 5; RMF: 342; Prob 52.0%; CAS: 39491-41-3; Lib: nist\_msms; ID: 227132.

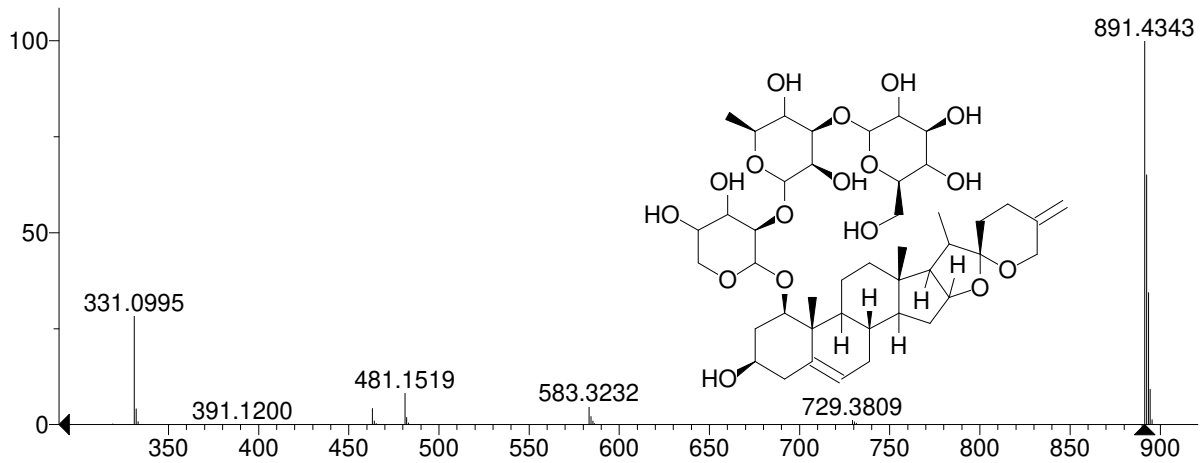

Hit 2 : NCGC00347384-02\_C44H68O17\_(1beta,3alpha,9xi,14xi)-1-Hydroxyspirosta-5,25(27)-dien-3-yl beta-D-glu  
C44H68O17; MF: 3; RMF: 401; Prob 48.0%; Lib: mona-export-gnps; ID: 10545.

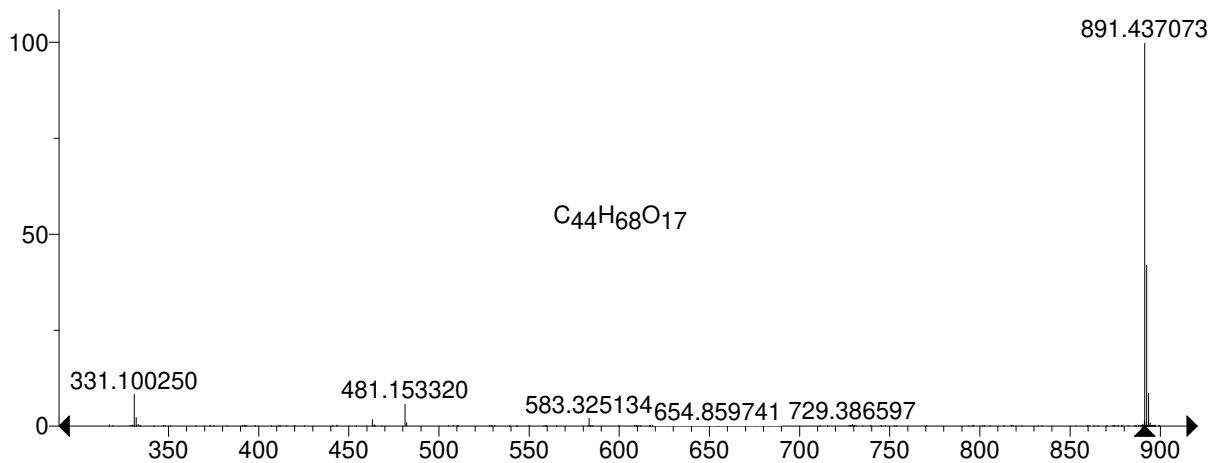

Unknown: Unknown (5.50\_401.1916m/z)  
Compound in Library Factor = 0

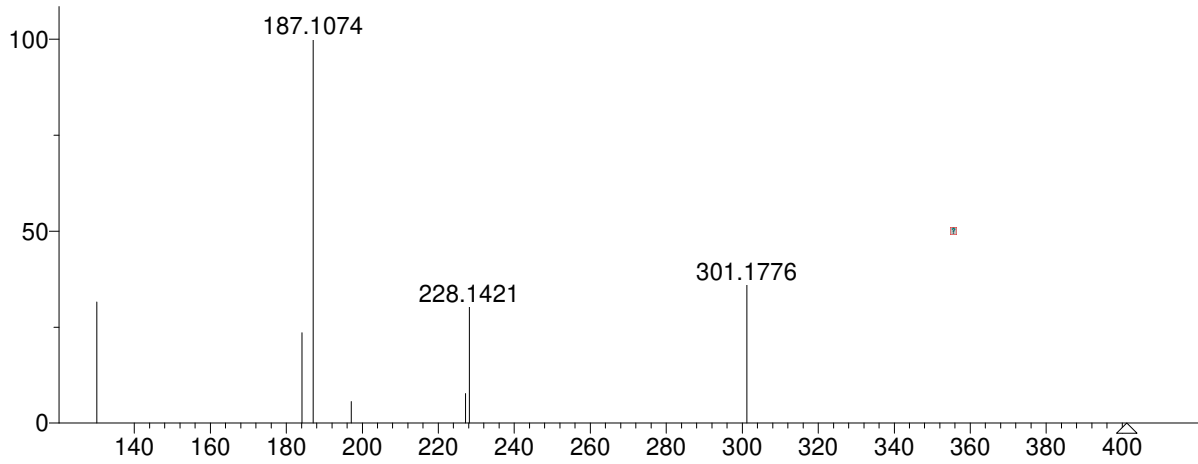

Hit 1 : NCGC00380382-01\_C23H30O7\_1-Phenanthrenecarboxylic acid, 10-(acetyloxy)-1,2,3,4,4a,9,10,10a-octal  
C23H30O7; MF: 0; RMF: 14; Prob 100.0%; Lib: mona-export-gnps; ID: 13719.

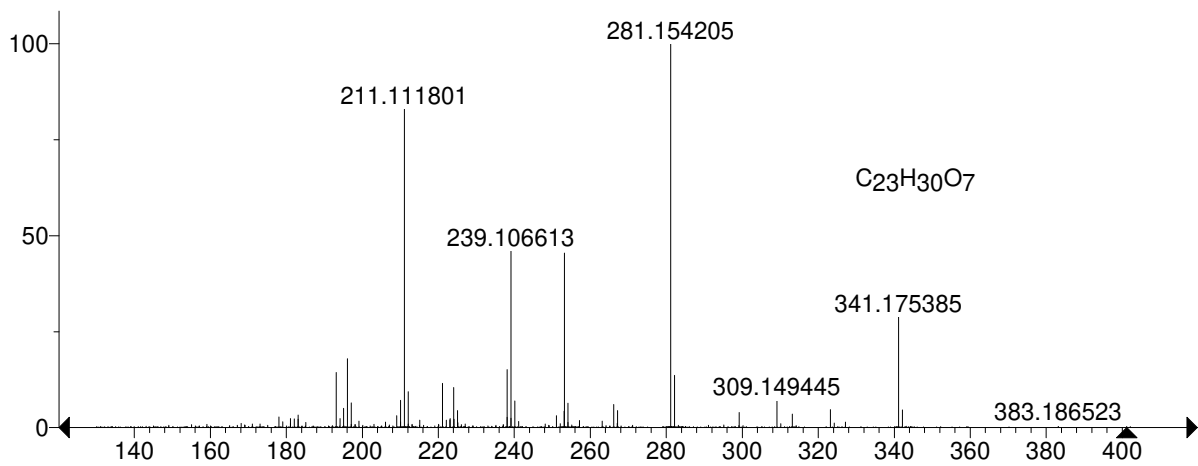



Unknown: Unknown (5.51\_431.1774m/z)  
Compound in Library Factor = 0

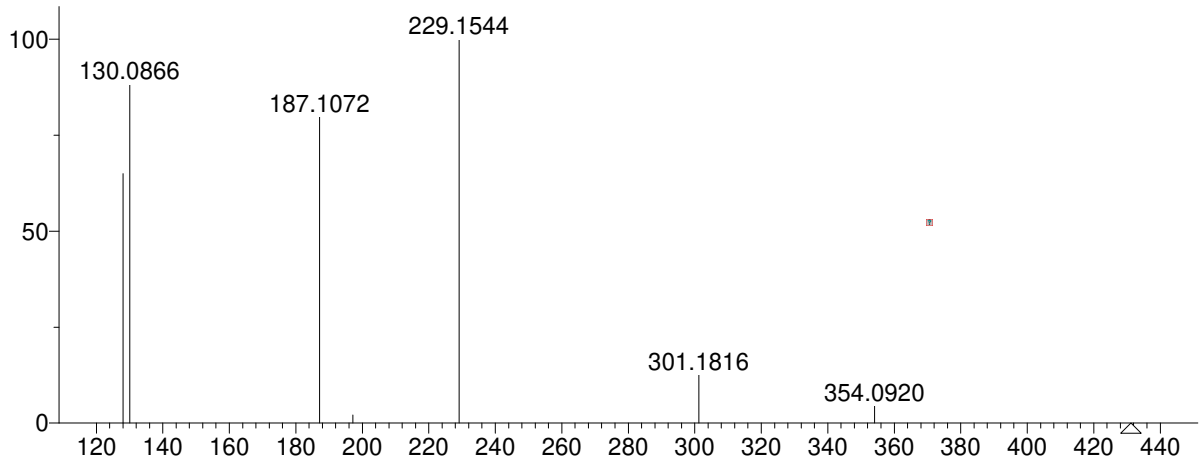

Unknown: Unknown (5.51\_516.2136m/z)  
Compound in Library Factor = 0

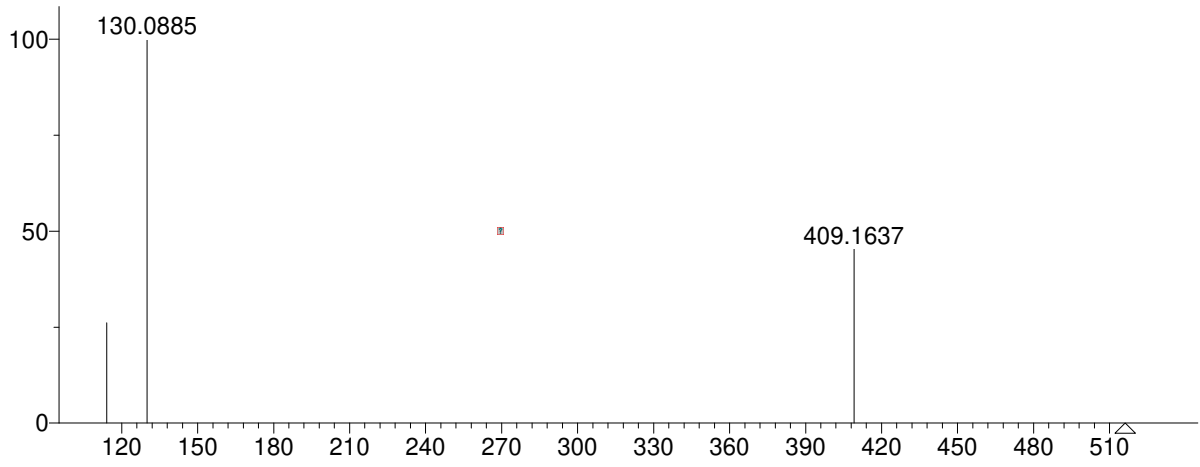

Unknown: Unknown (5.53\_371.1805m/z)  
Compound in Library Factor = 0

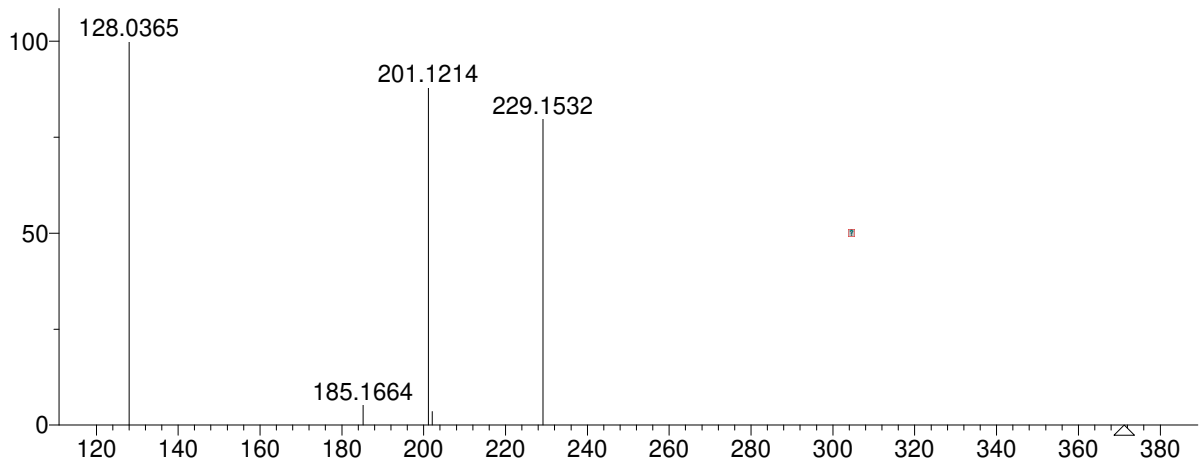

Unknown: Unknown (5.53\_433.1926m/z)  
Compound in Library Factor = 0

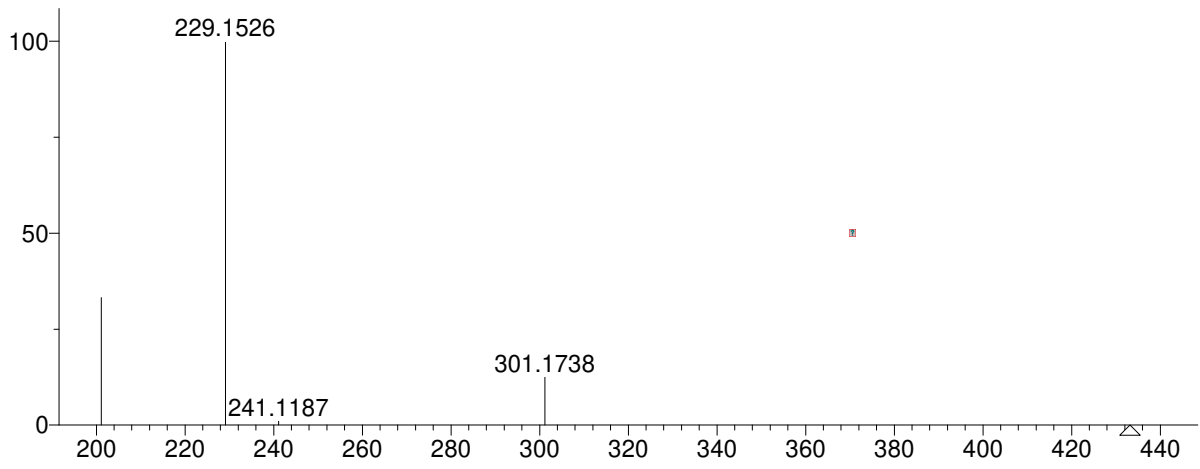

Unknown: Unknown (5.53\_440.1892m/z)  
Compound in Library Factor = 0

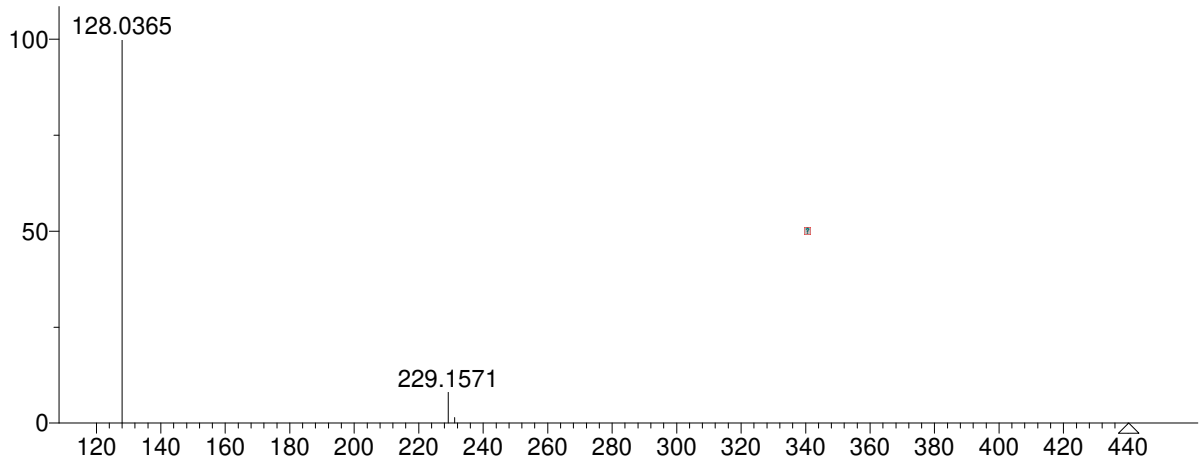

Unknown: Unknown (5.53\_527.2092m/z)  
Compound in Library Factor = -3273

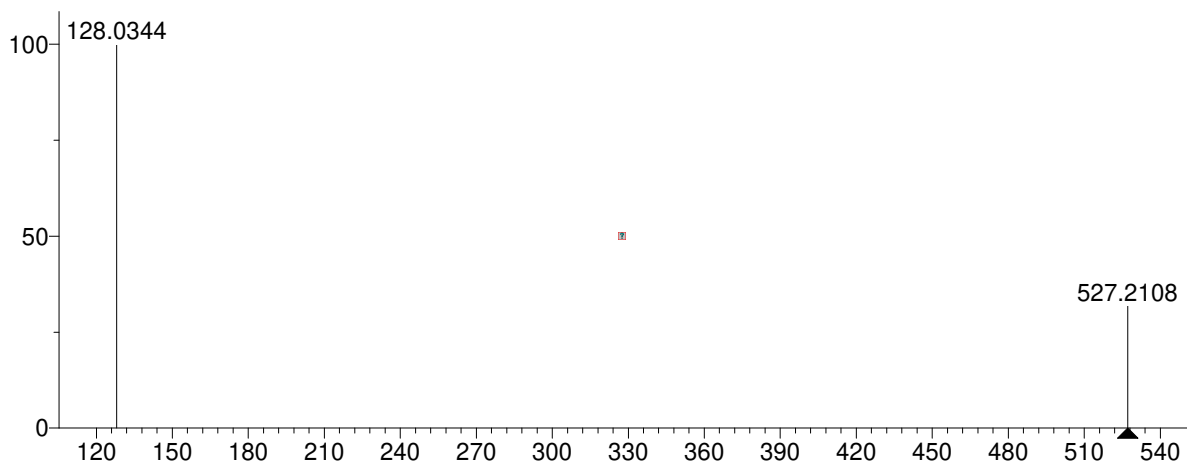

Hit 1 : NCGC00380661-01\_C23H36O12\_ [M+Na]<sup>+</sup> P=527.2  
C23H36O12; MF: 1; RMF: 310; Prob 34.2%; Lib: mona-export-gnps; ID: 13348.

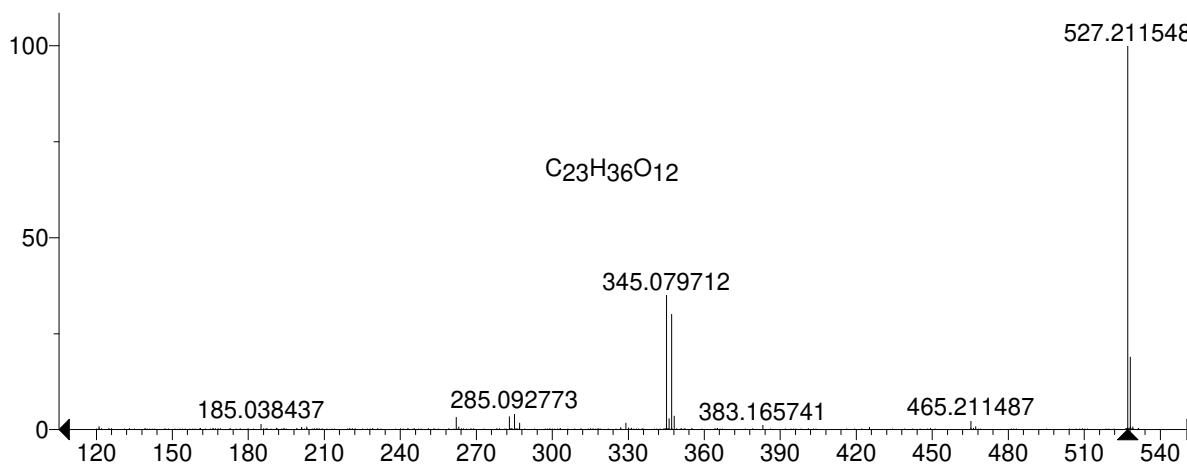

Hit 2 : 13-(acetyloxy)-1,6-dihydroxy-8-(hydroxymethyl)-4,12,12,15-tetramethyl-5-oxotetracyclo[8.5.0.0A<sup>2</sup>,a<sup>1</sup>]P.0A  
C27H36O8; MF: 0; RMF: 64; Prob 32.9%; Lib: mona-export-vf-npl\_qexactive; ID: 20116.

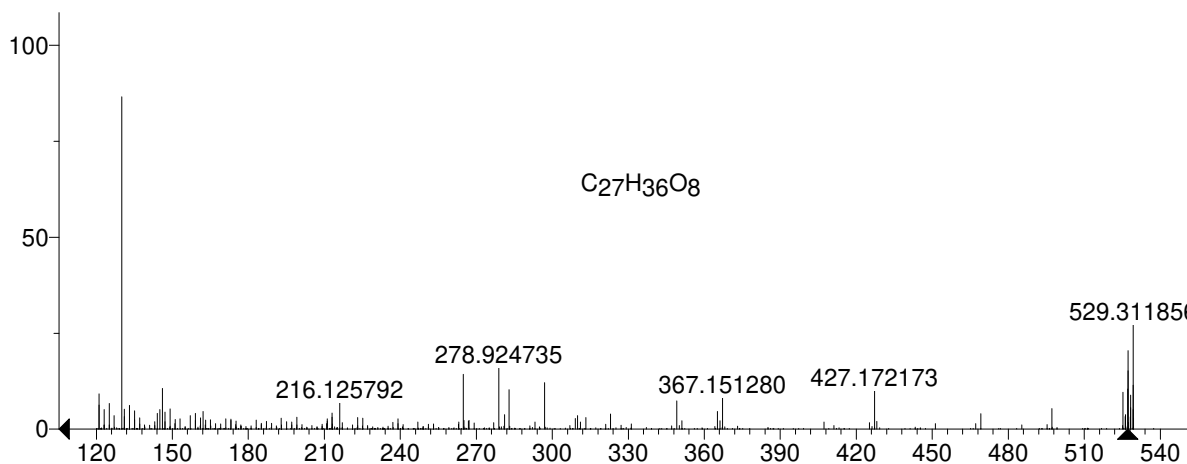

Hit 3 : [(1aR,1bS,2S,5aS,6R,6aS)-5a-hydroxy-1a-methyl-2-[(2S,3R,4S,5S,6R)-3,4,5-trihydroxy-6-(hydroxymethyl)]  
C<sub>25</sub>H<sub>36</sub>O<sub>12</sub>; MF: 0; RMF: 16; Prob 32.9%; Lib: mona-export-1c-ms-ms\_negative\_mode; ID: 27028.

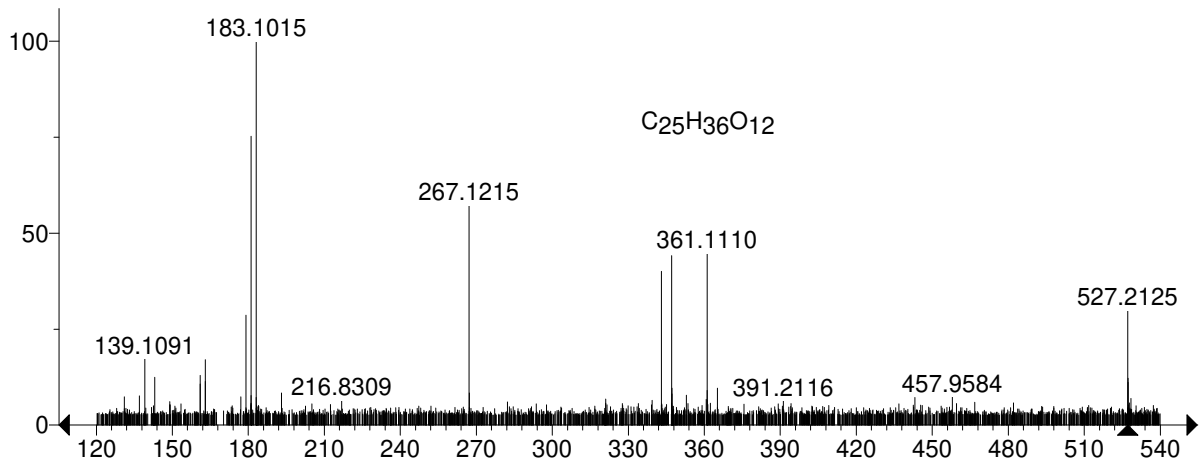

Unknown: Unknown (5.55\_659.2521m/z)  
Compound in Library Factor = -3273

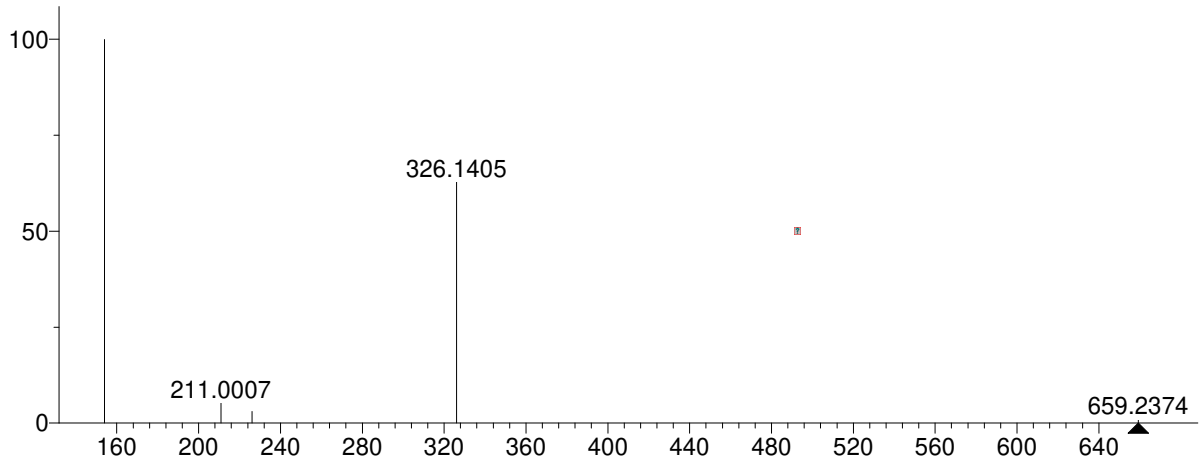

Hit 1 : Extracellular Death Factor [M-H]- HCD 26eV P=659.3  
C<sub>27</sub>H<sub>36</sub>N<sub>10</sub>O<sub>10</sub>; MF: 1; RMF: 61; Prob 51.0%; CAS: 960129-66-2; Lib: nist\_msms2; ID: 88872.

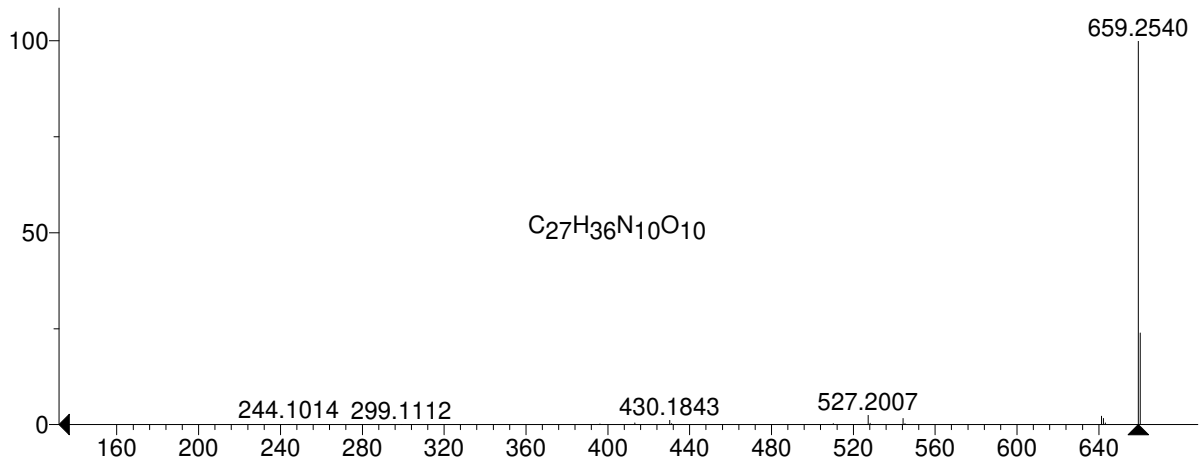

Hit 2 : G0 [M+2H]<sup>2+</sup> IT 35% P=659.3  
C<sub>50</sub>H<sub>84</sub>N<sub>4</sub>O<sub>36</sub>; MF: 0; RMF: 13; Prob 49.0%; CAS: 84808-02-6; Lib: nist\_msms; ID: 523891.

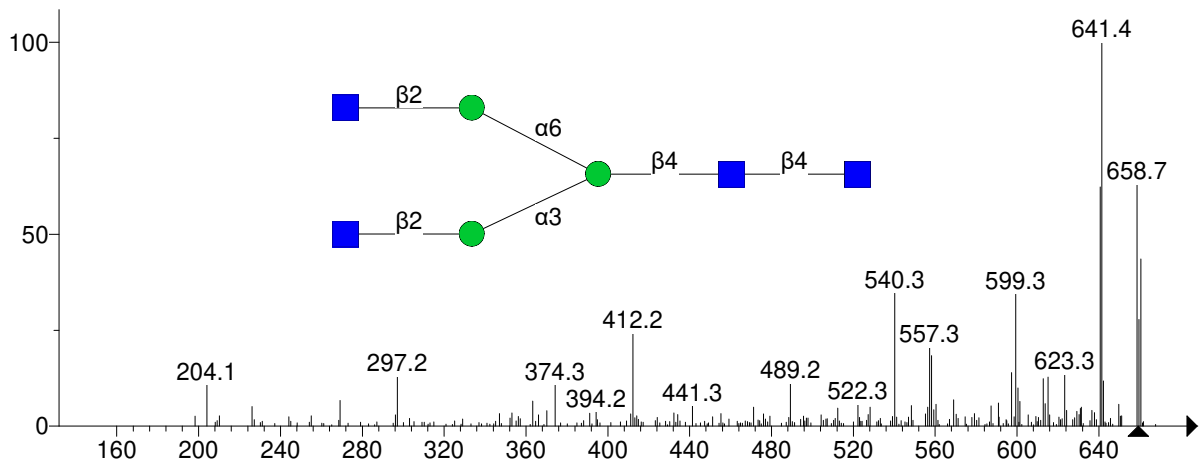



Unknown: Unknown (5.55\_718.3115m/z)  
Compound in Library Factor = 0

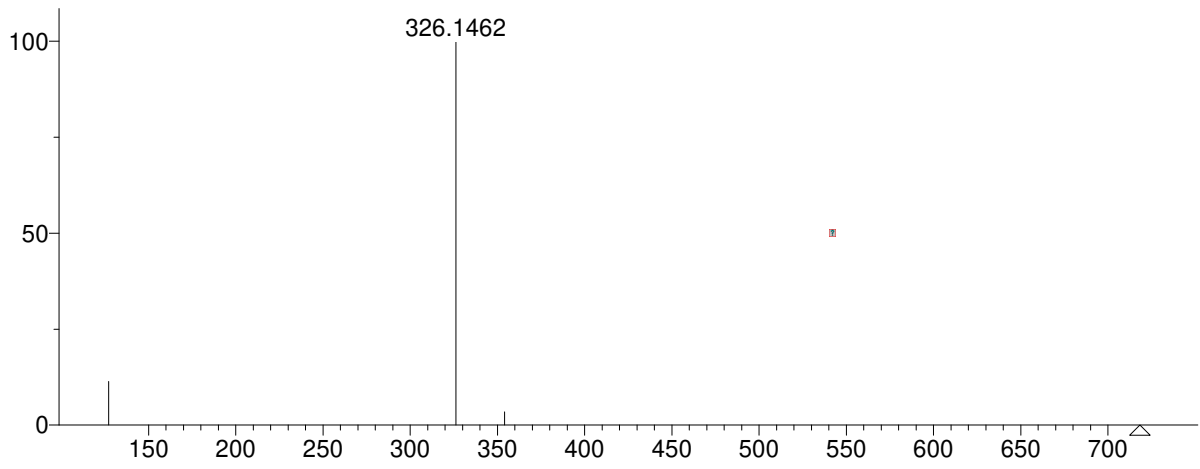

Unknown: Unknown (5.56\_391.2062m/z)  
Compound in Library Factor = 0

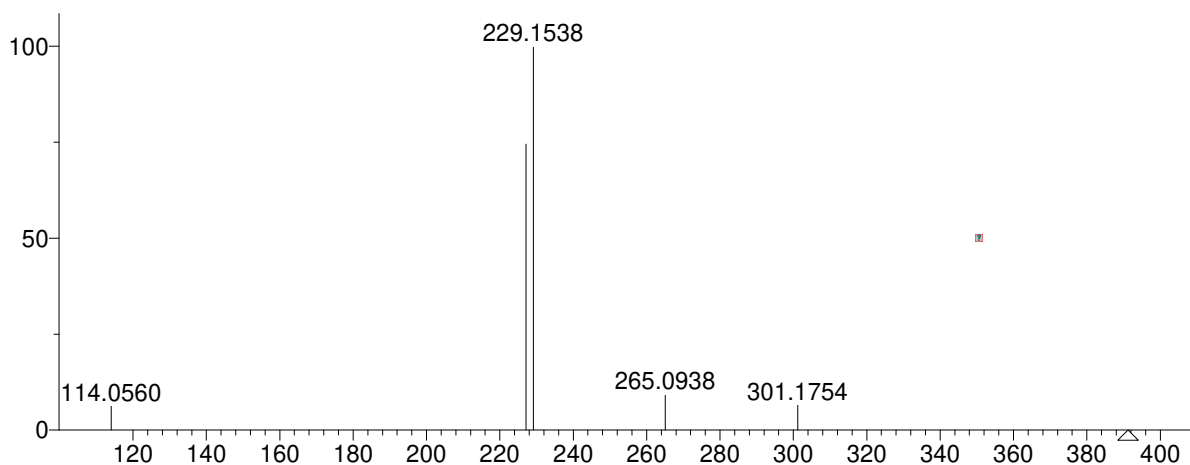

Hit 1 : Thromboxane B3 [M+Na]<sup>+</sup> HCD 31V P=391.2  
C<sub>20</sub>H<sub>32</sub>O<sub>6</sub>; MF: 0; RMF: 53; Prob 50.0%; CAS: 71953-80-5; Lib: nist\_msms; ID: 85863.

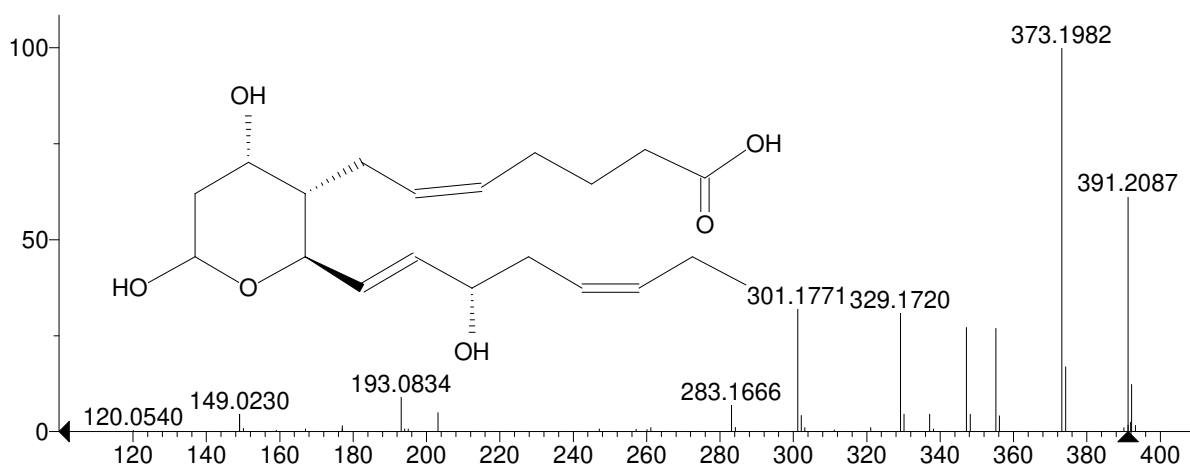

Hit 2 : Prostaglandin G2 [M+Na]<sup>+</sup> HCD 23V P=391.2  
C<sub>20</sub>H<sub>32</sub>O<sub>6</sub>; MF: 0; RMF: 12; Prob 50.0%; CAS: 51982-36-6; Lib: nist\_msms; ID: 88303.

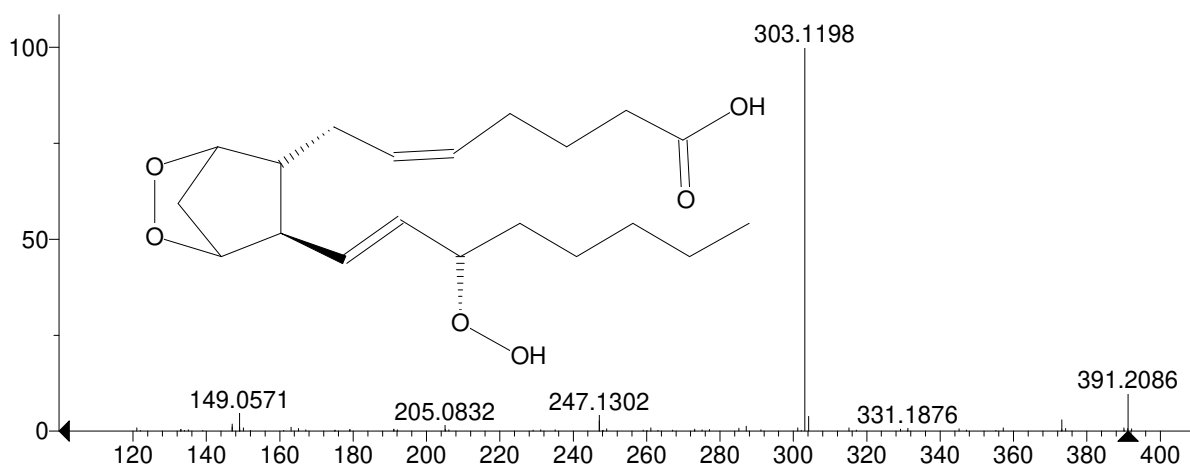

Unknown: Unknown (5.57\_582.1900m/z)  
Compound in Library Factor = 0

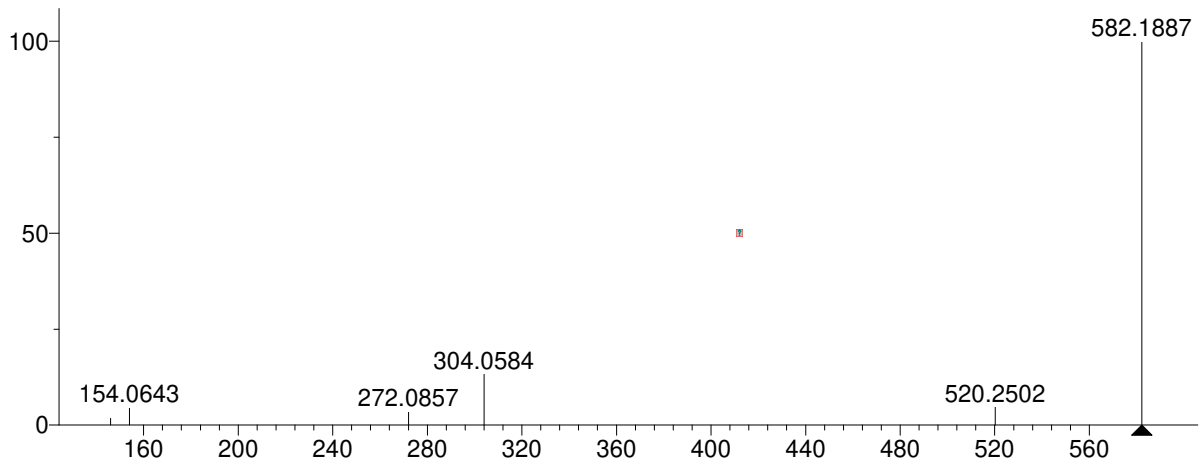

Unknown: Unknown (5.57\_680.2785m/z)  
Compound in Library Factor = 0

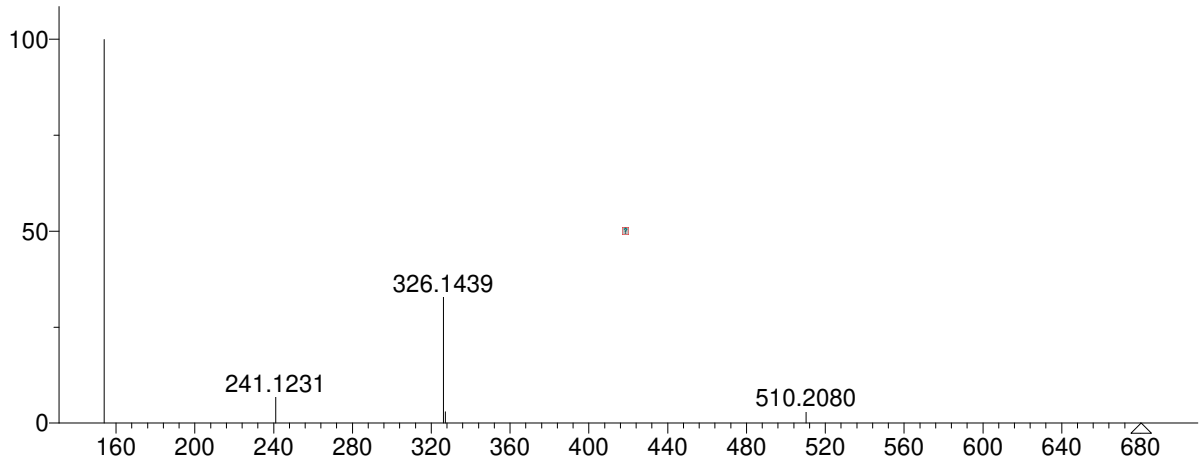

Unknown: Unknown (5.60\_328.1504m/z)  
Compound in Library Factor = -3273

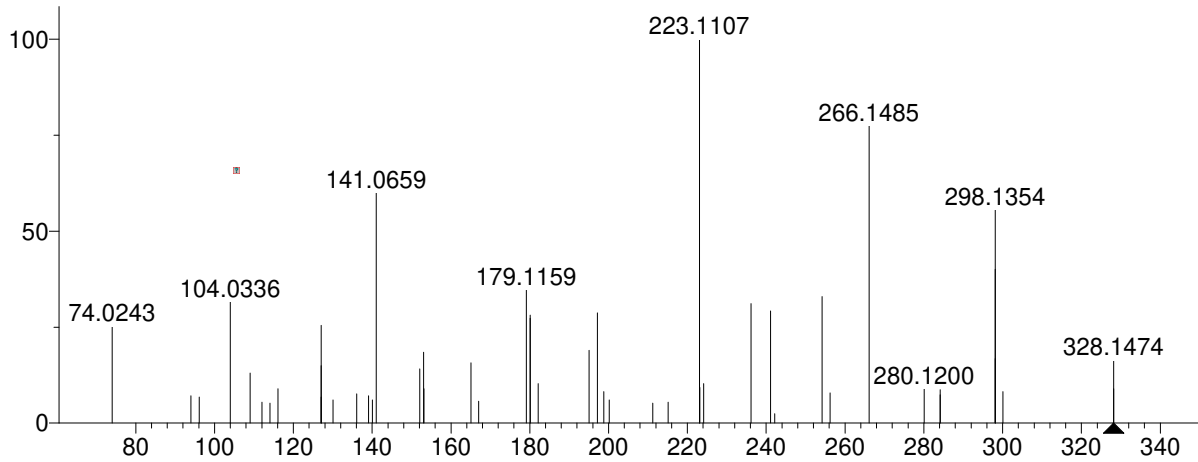

Hit 1 : Ac-Val-Ala-Asp-CHO [M-H]<sup>-</sup> HCD 11eV P=328.2  
C<sub>14</sub>H<sub>23</sub>N<sub>3</sub>O<sub>6</sub>; MF: 23; RMF: 147; Prob 53.8%; Lib: nist\_msms2; ID: 75914.

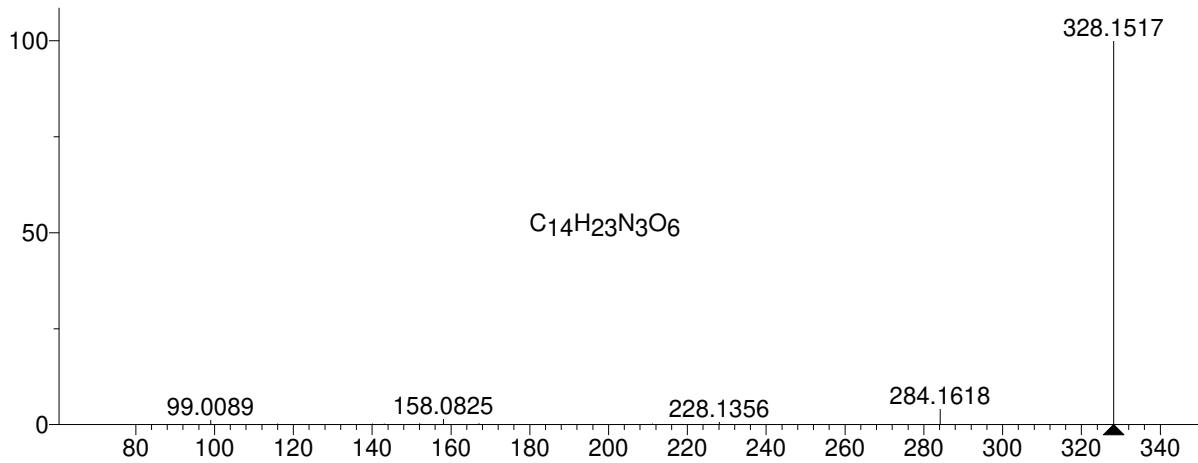

Hit 2 : Glycine, 1,1'-(1,8-dioxo-1,8-octanediyl)bis[glycyl- [M+H-C<sub>2</sub>H<sub>5</sub>NO<sub>2</sub>]<sup>+</sup> HCD 26V P=328.2  
C<sub>16</sub>H<sub>26</sub>N<sub>4</sub>O<sub>8</sub>; MF: 3; RMF: 48; Prob 24.5%; CAS: 143673-93-2; Lib: nist\_msms; ID: 423558.

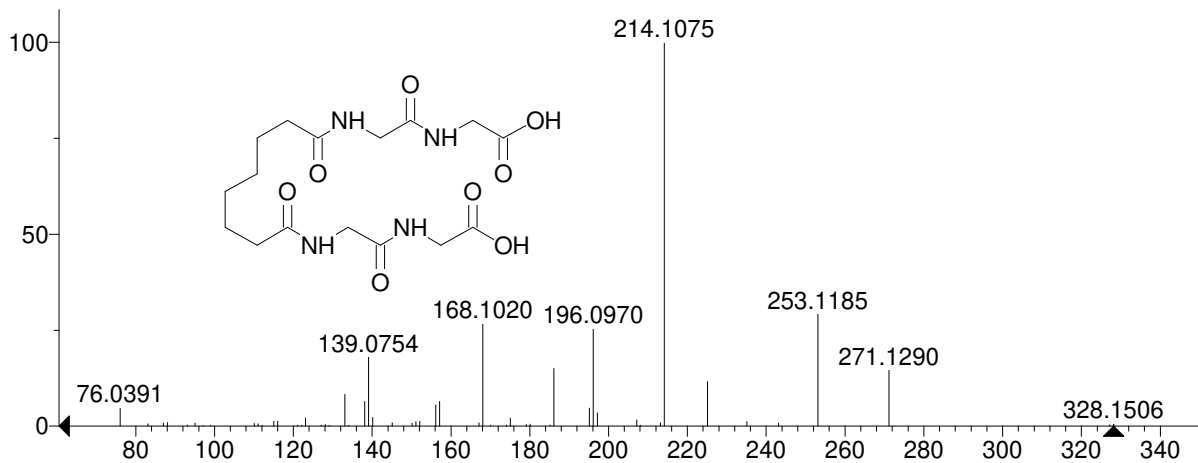

\*\* Search Report Page 2 of 2 \*\*

Hit 3 : MMV1088520 [M+H]<sup>+</sup> 20-30-40%) P=328.1  
C<sub>18</sub>H<sub>21</sub>N<sub>3</sub>OS; MF: 0; RMF: 78; Prob 21.7%; Lib: mona-export-pathogen\_box; ID: 224.

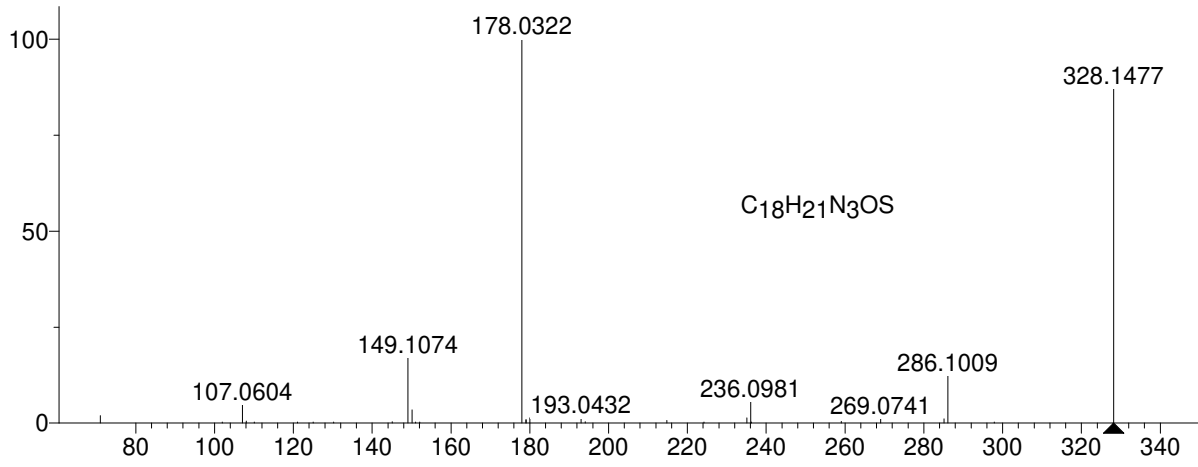

Unknown: Unknown (5.60\_352.1431m/z)  
Compound in Library Factor = 0

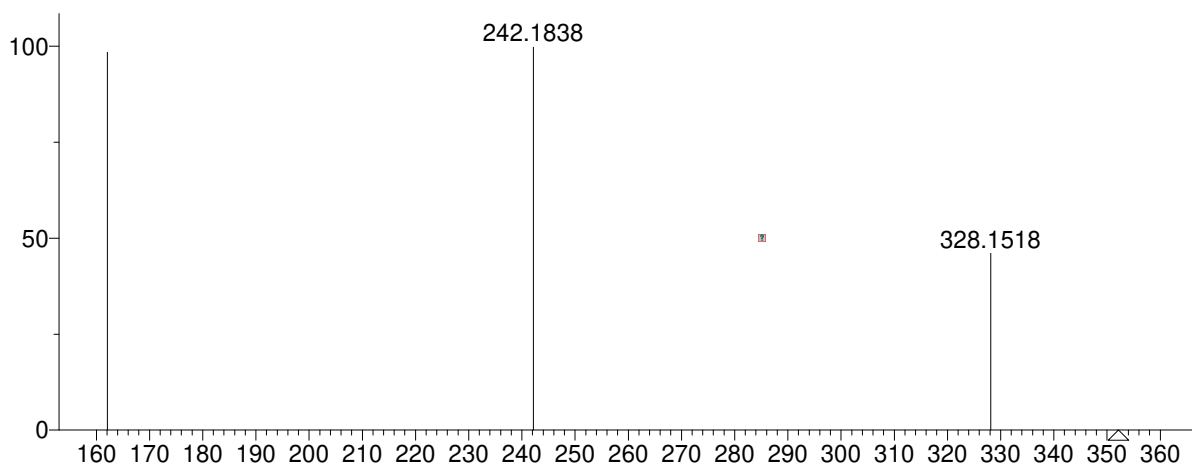

Hit 1 : Bisphenol BP [M+H-H]<sup>+</sup> HCD 112V P=352.1  
C<sub>25</sub>H<sub>20</sub>O<sub>2</sub>; MF: 0; RMF: 33; Prob 100.0%; CAS: 1844-01-5; Lib: nist\_msms; ID: 403492.

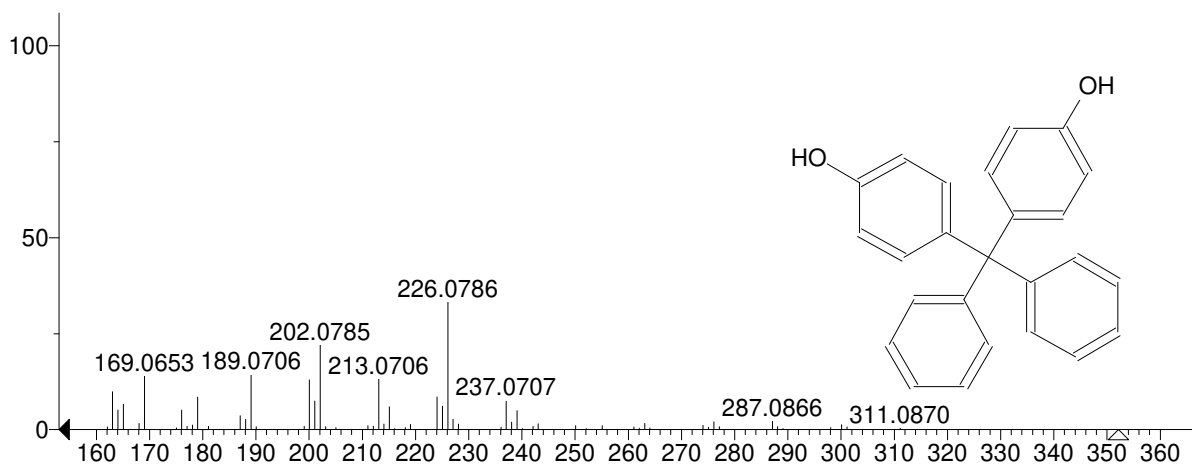

Unknown: Unknown (5.60\_514.1995m/z)  
Compound in Library Factor = 0

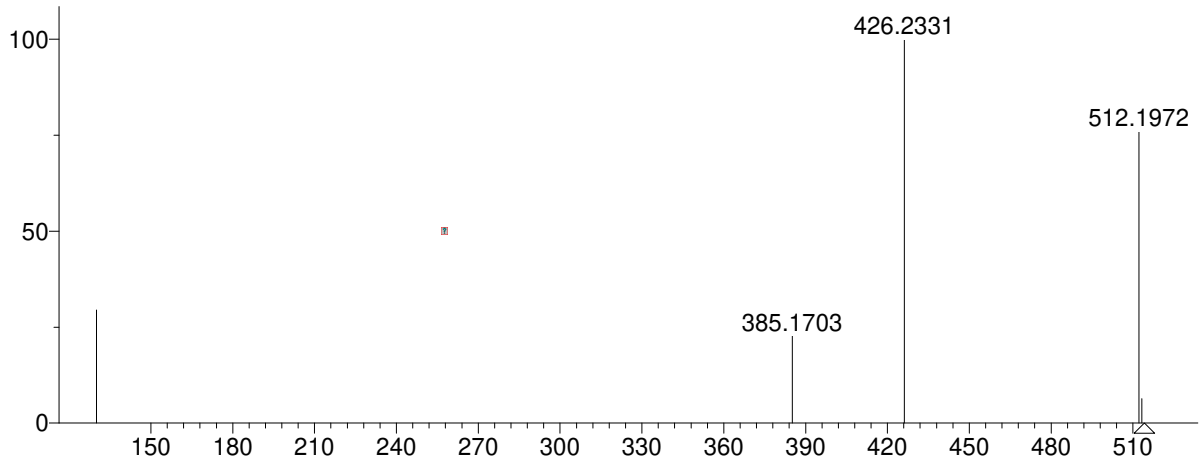



Unknown: Unknown (5.60\_520.2512m/z)  
Compound in Library Factor = 0

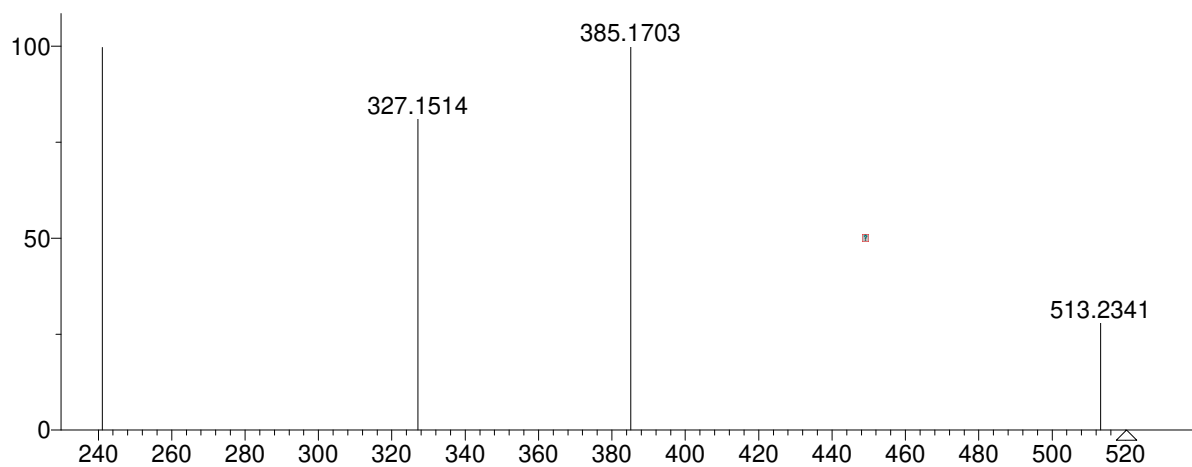

Hit 1 : NCGC00385440-01\_C27H34O9\_2-Butenoic acid, 2-(hydroxymethyl)-, (2E)-2-[[[(3aR,4R,6E,9S,10Z,11aS)-C27H34O9]; MF: 0; RMF: 39; Prob 100.0%; Lib: mona-export-gnps; ID: 10916.

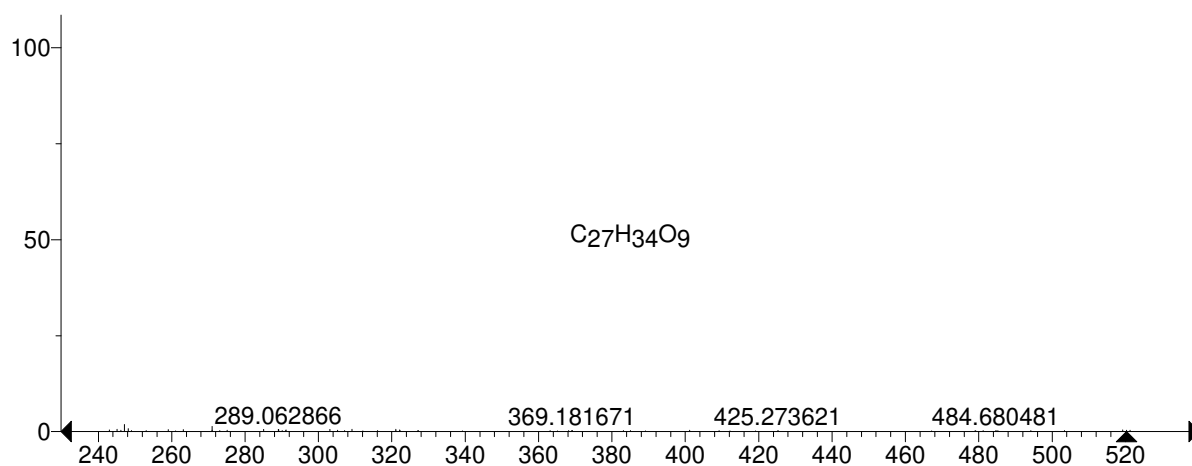

Unknown: Unknown (5.61\_350.1470m/z)  
Compound in Library Factor = 0

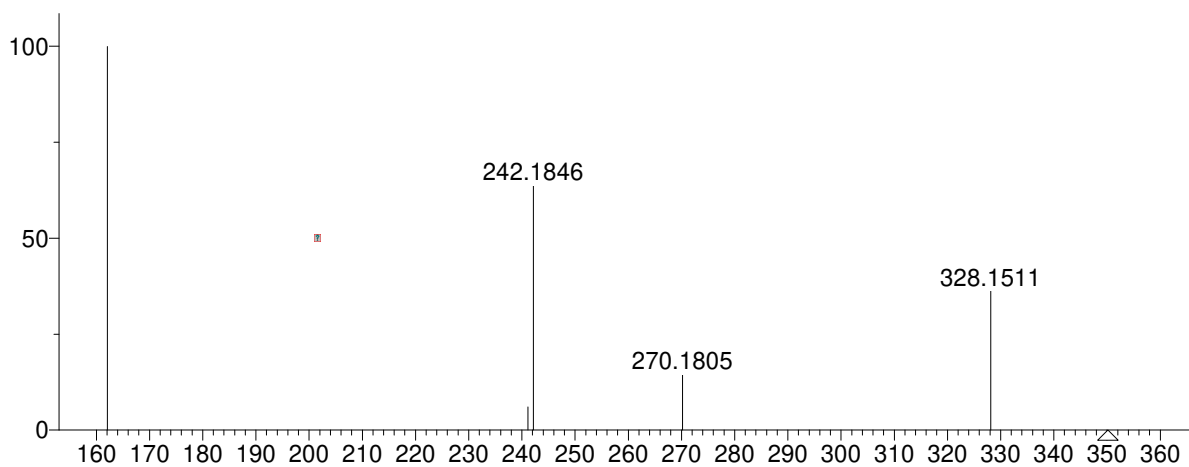

Hit 1 : 4-Methylelotinib [M+H-C3H6O]+ HCD 112V P=350.1  
C23H25N3O4; MF: 0; RMF: 57; Prob 100.0%; CAS: 1346601-52-2; Lib: nist\_msms; ID: 423719.

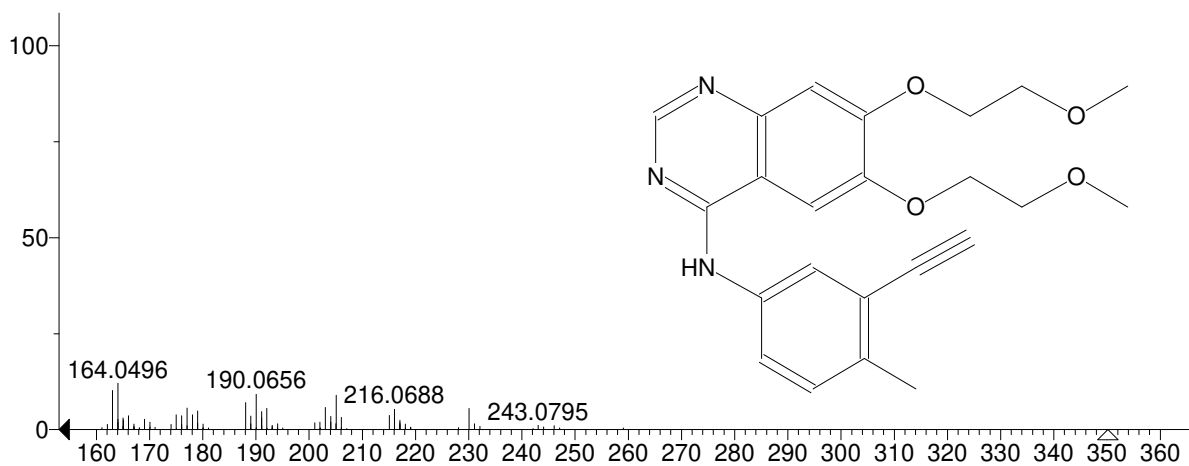

\*\* Search Report Page 1 of 1 \*\*

Unknown: Unknown (5.61\_426.2336m/z)  
Compound in Library Factor = 0

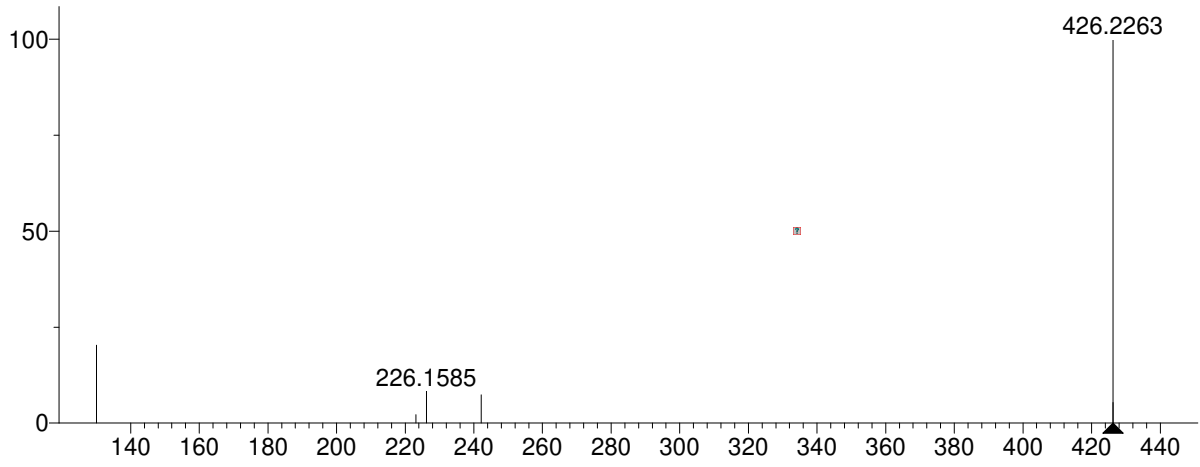

Unknown: Unknown (5.61\_512.1998m/z)  
Compound in Library Factor = -1142

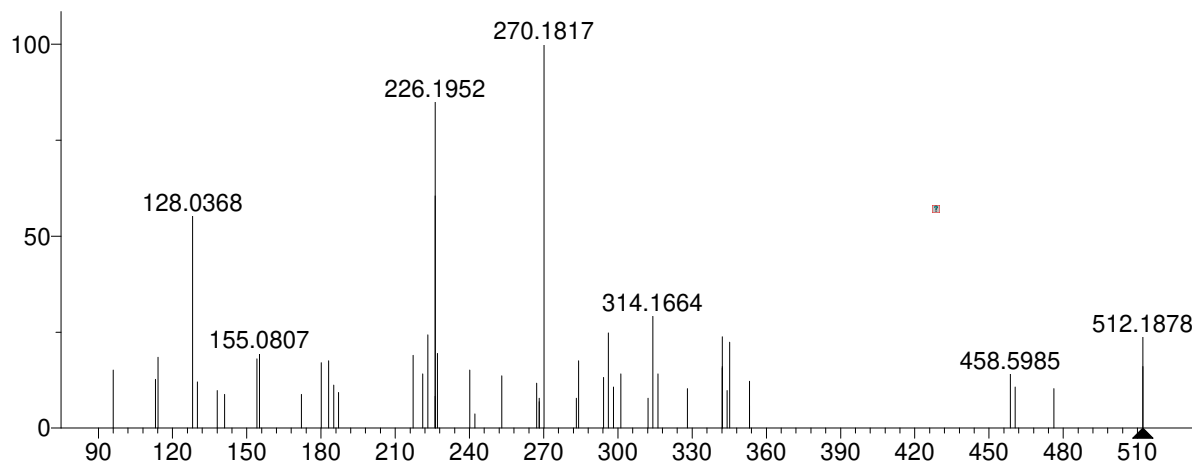

Hit 1 : Lewis X trisaccharide [M+H-H<sub>2</sub>O]<sup>+</sup> HCD 5V P=512.2  
C<sub>20</sub>H<sub>35</sub>N<sub>15</sub>O<sub>15</sub>; MF: 124; RMF: 562; Prob 79.9%; CAS: 71208-06-5; Lib: nist\_msms; ID: 184475.

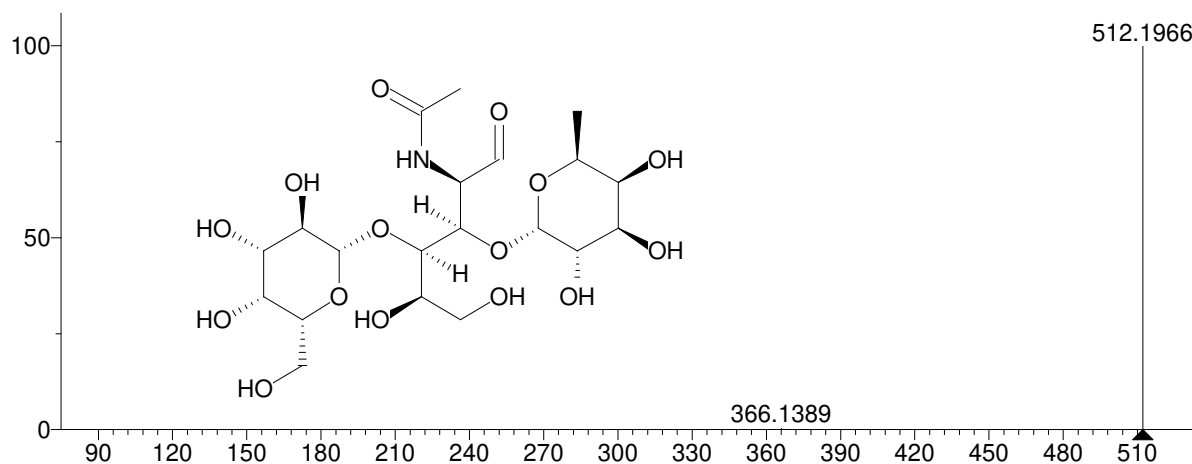

Hit 2 : Octanediamide, N1-hydroxy-N8-[4-[4-[(1-oxo-5-hexyn-1-yl)amino]benzoyl]phenyl]- [M+Cl]<sup>-</sup> HCD 17V P=1  
C<sub>27</sub>H<sub>31</sub>N<sub>3</sub>O<sub>5</sub>; MF: 57; RMF: 274; Prob 12.4%; CAS: 930772-88-6; Lib: nist\_msms; ID: 248435.

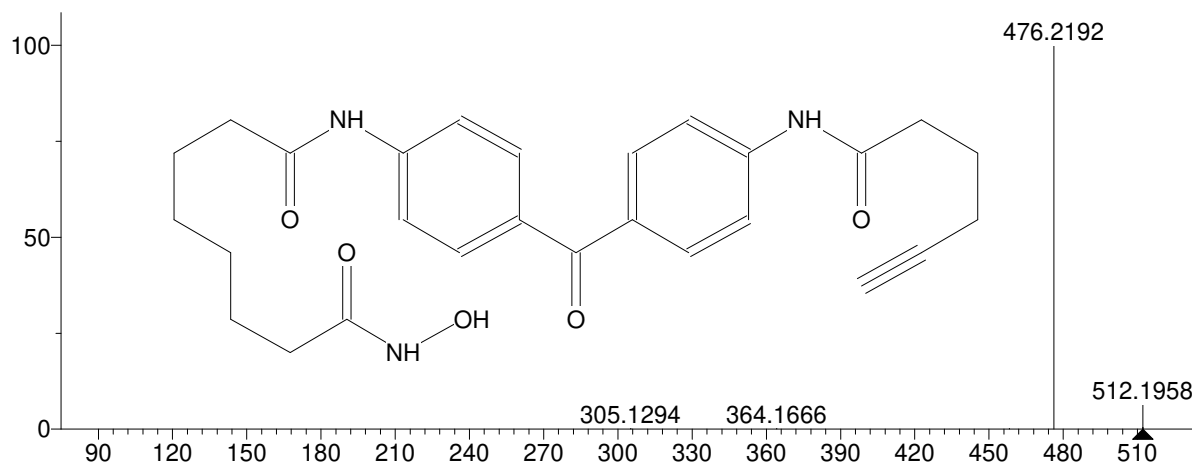

Hit 3 : Lewis A trisaccharide [M+H-H<sub>2</sub>O]<sup>+</sup> HCD 5V P=512.2  
C<sub>20</sub>H<sub>35</sub>NO<sub>15</sub>; MF: 29; RMF: 181; Prob 3.57%; CAS: 56570-03-7; Lib: nist\_msms; ID: 183642.

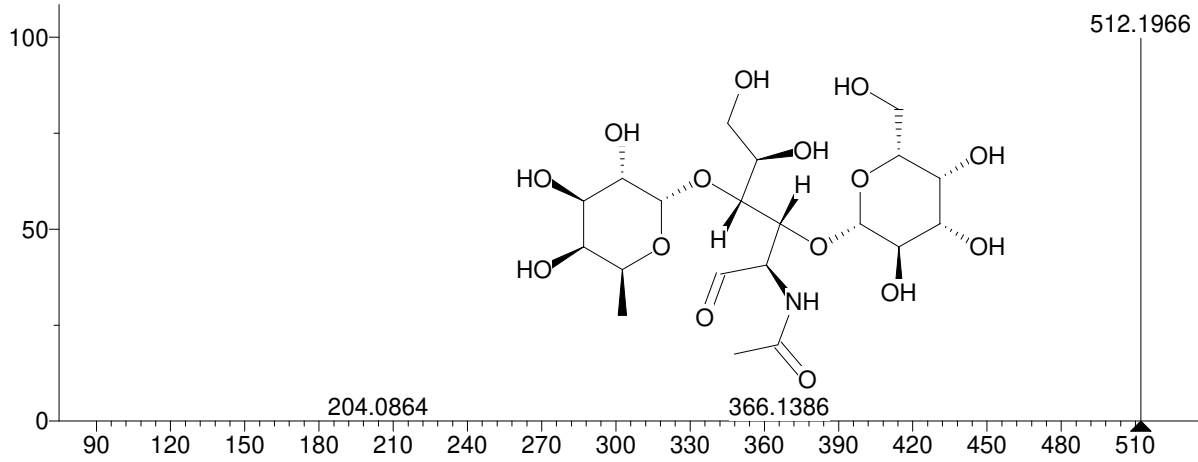

Hit 4 : Blood Group A Trisaccharide [M+H-H<sub>2</sub>O]<sup>+</sup> HCD 5V P=512.2  
C<sub>20</sub>H<sub>35</sub>NO<sub>15</sub>; MF: 9; RMF: 173; Prob 1.62%; CAS: 49777-13-1; Lib: nist\_msms; ID: 184976.

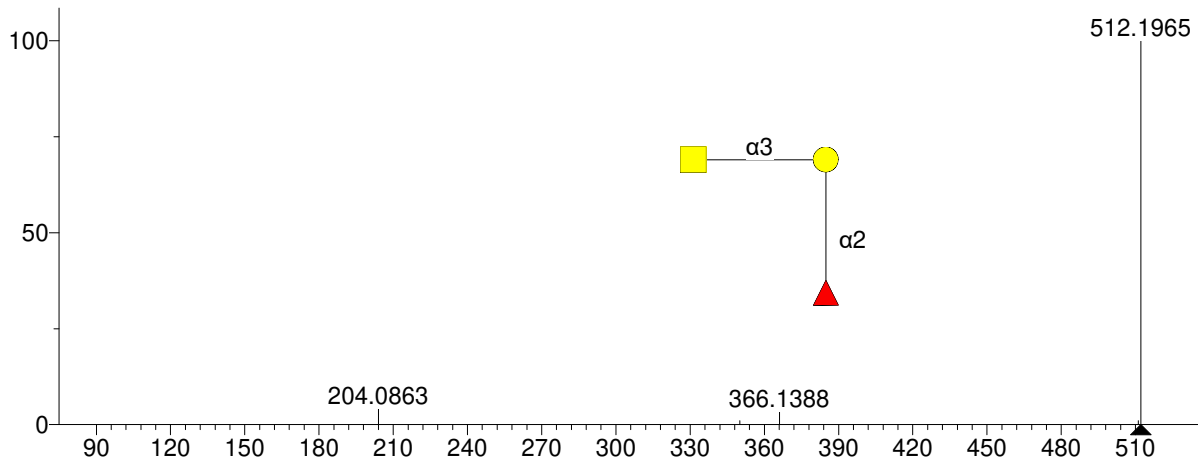

Hit 5 : Blood Group H Trisaccharide [M+H-H<sub>2</sub>O]<sup>+</sup> HCD 10V P=512.2  
C<sub>20</sub>H<sub>35</sub>NO<sub>15</sub>; MF: 6; RMF: 153; Prob 1.43%; CAS: 60797-31-1; Lib: nist\_msms; ID: 182491.

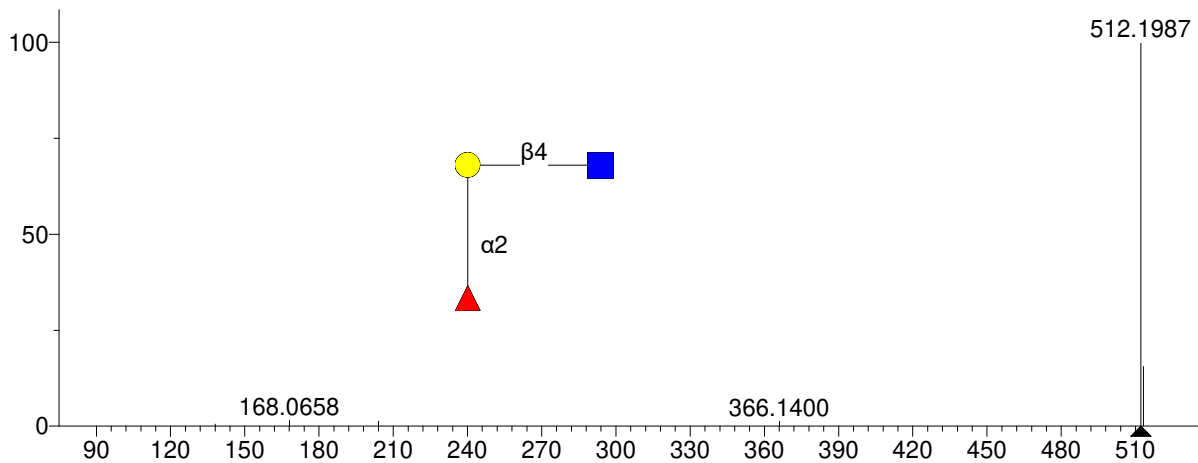

Unknown: Unknown (5.62\_500.1931m/z)  
Compound in Library Factor = 0

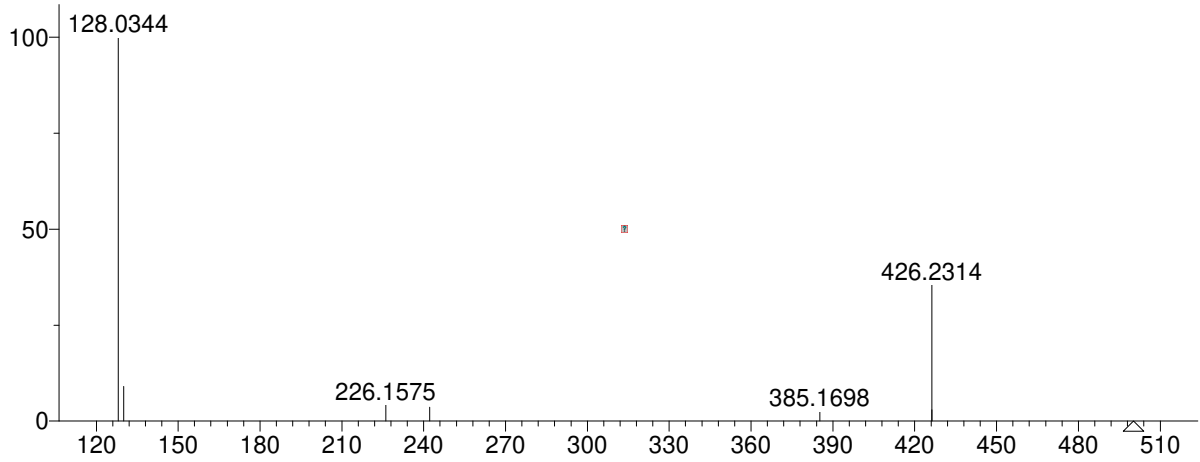

Hit 1 : N-[4,5-dihydroxy-2-[[4-[hydroxy(phenyl)methyl]-5-oxo-3-phenyl-2H-furan-2-yl]oxy]-6-(methoxymethyl)oxan-4-yl]acetamide  
C<sub>26</sub>H<sub>29</sub>NO<sub>9</sub>; MF: 0; RMF: 26; Prob 50.0%; Lib: mona-export-vf-npl\_qexactive; ID: 17390.

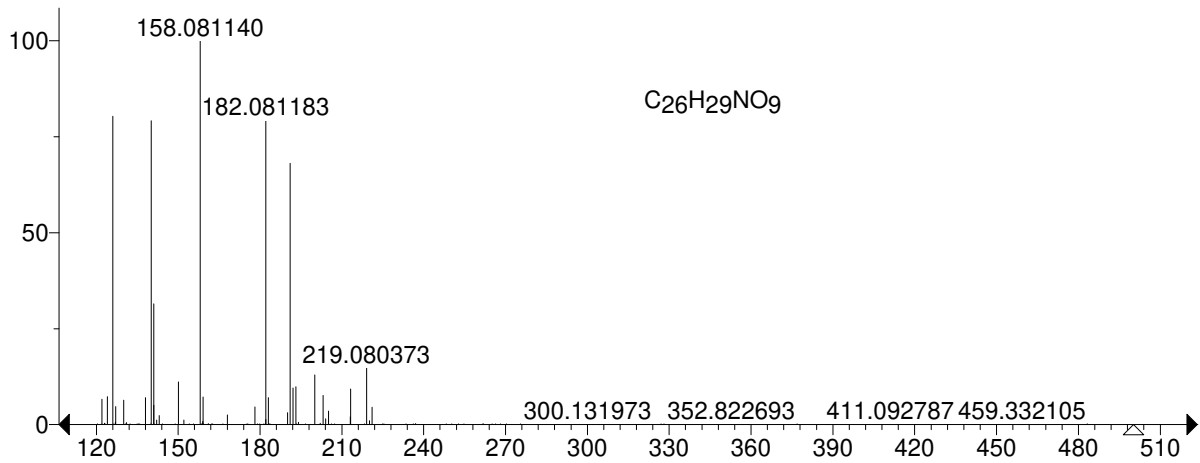

Hit 2 : NCGC00347672-02!N-[4,5-dihydroxy-2-[[4-[hydroxy(phenyl)methyl]-5-oxo-3-phenyl-2H-furan-2-yl]oxy]-6-(methoxymethyl)oxan-4-yl]acetamide  
C<sub>26</sub>H<sub>29</sub>NO<sub>9</sub>; MF: 0; RMF: 19; Prob 50.0%; Lib: mona-export-gnps; ID: 9789.

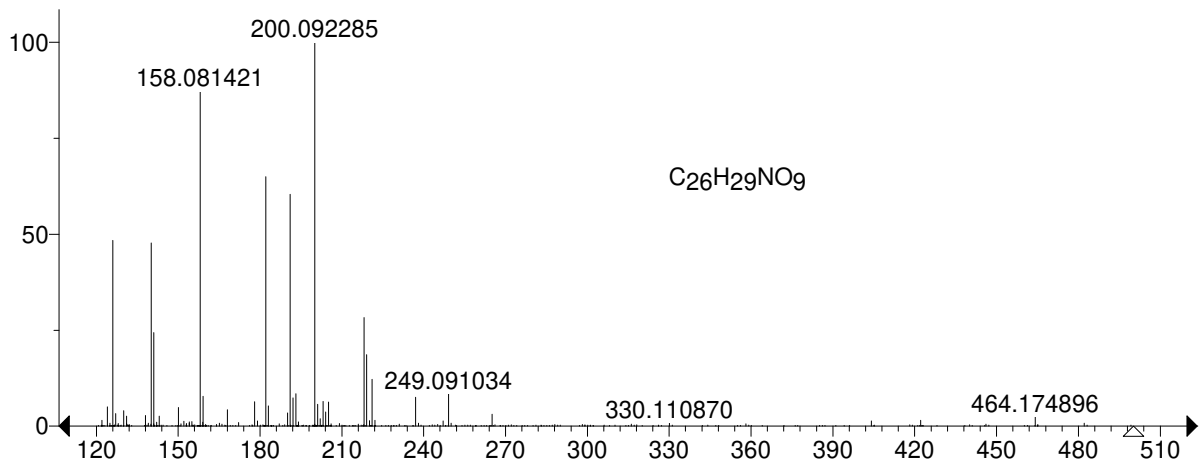

Unknown: Unknown (5.62\_541.2962m/z)  
Compound in Library Factor = -372

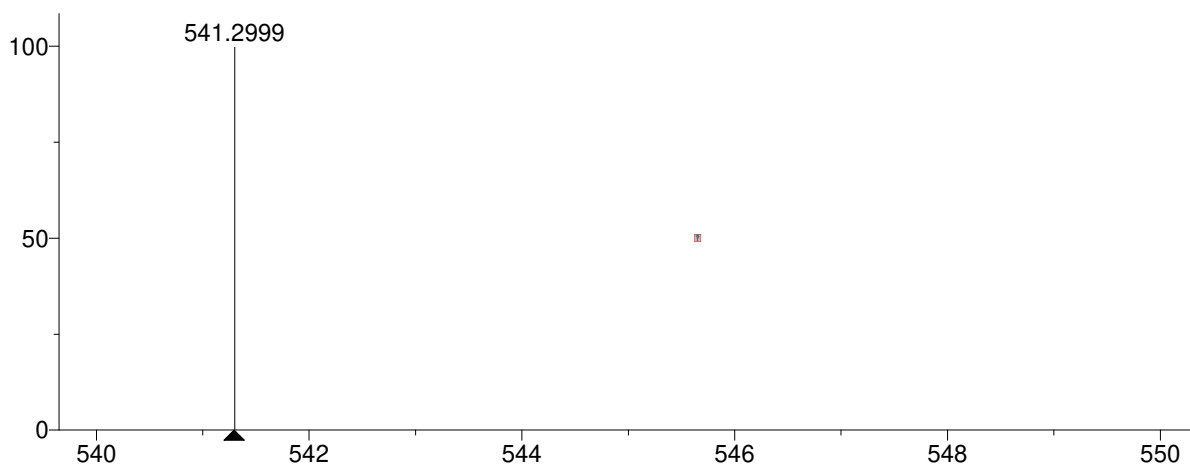

Hit 1 : Fulvestrant 9-sulfone [M-H]<sup>-</sup>=>541.3 IT 35% P=541.3  
C32H47F5O4S; MF: 364; RMF: 999; Prob 16.8%; CAS: 98008-06-1; Lib: nist\_msms; ID: 439666.

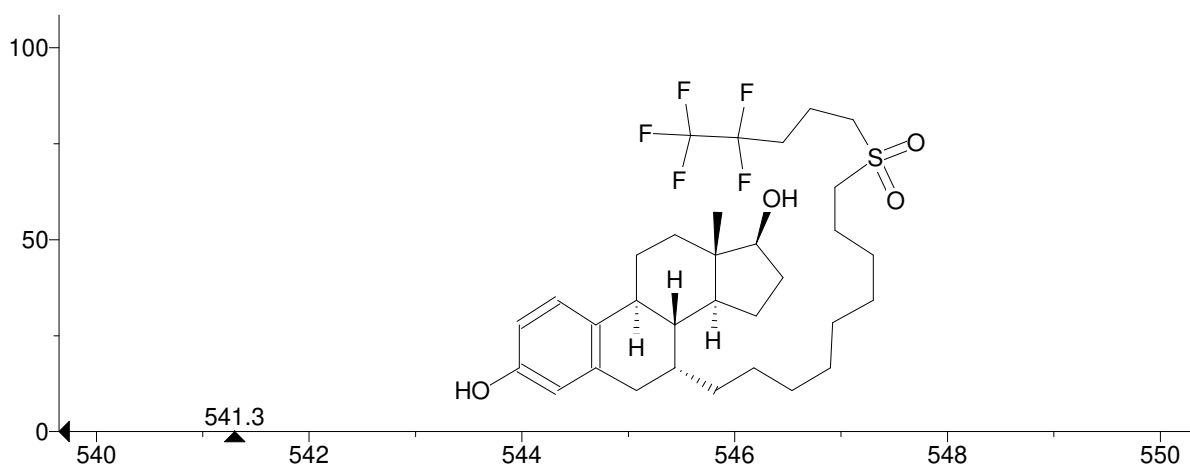

Hit 2 : PA 25:4; PA 3:0-22:4; [M-H]<sup>-</sup> [M-H]<sup>-</sup> P=541.3  
C28H47O8P; MF: 364; RMF: 999; Prob 16.8%; Lib: msdial-insilicomsmms-lipids-neg; ID: 315783.

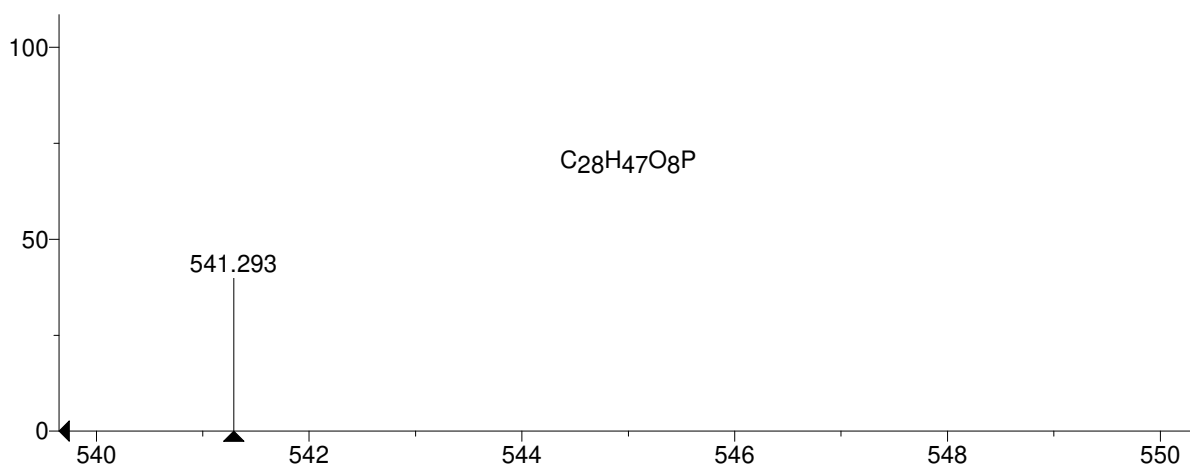

Hit 3 : PA 25:4; PA 5:0-20:4; [M-H]<sup>-</sup> [M-H]<sup>-</sup> P=541.3  
C<sub>28</sub>H<sub>47</sub>O<sub>8</sub>P; MF: 364; RMF: 999; Prob 16.8%; Lib: msdial-insilicomsm-lipids-neg; ID: 315891.

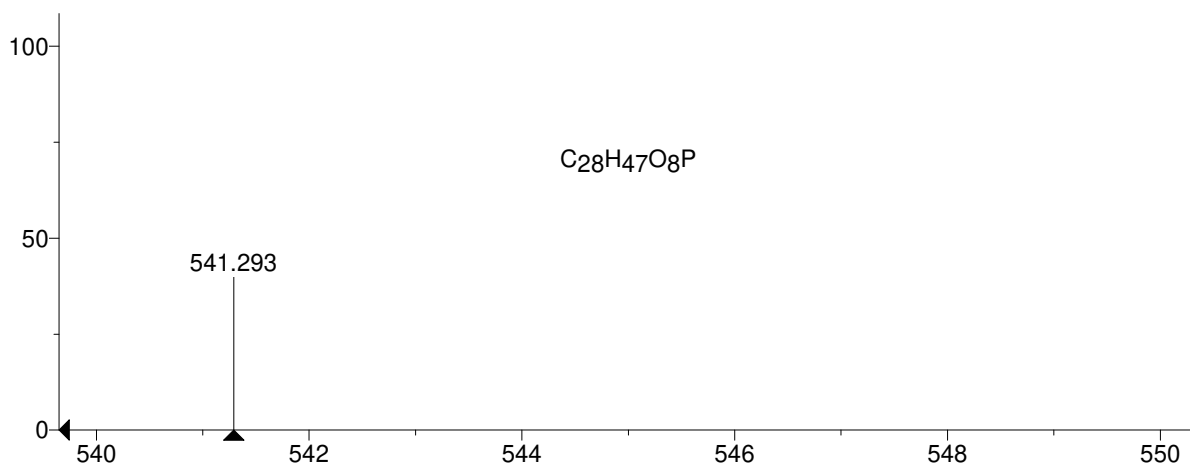

Hit 4 : PA 25:4; PA 7:0-18:4; [M-H]<sup>-</sup> [M-H]<sup>-</sup> P=541.3  
C<sub>28</sub>H<sub>47</sub>O<sub>8</sub>P; MF: 364; RMF: 999; Prob 16.8%; Lib: msdial-insilicomsm-lipids-neg; ID: 315995.

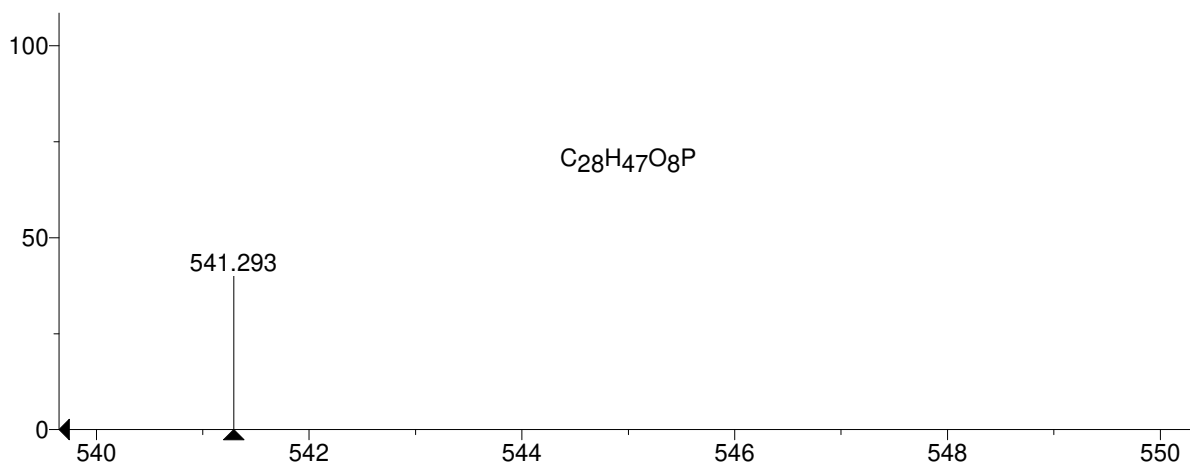

Hit 5 : PA 25:4; PA 9:0-16:4; [M-H]<sup>-</sup> [M-H]<sup>-</sup> P=541.3  
C<sub>28</sub>H<sub>47</sub>O<sub>8</sub>P; MF: 364; RMF: 999; Prob 16.8%; Lib: msdial-insilicomsm-lipids-neg; ID: 316096.

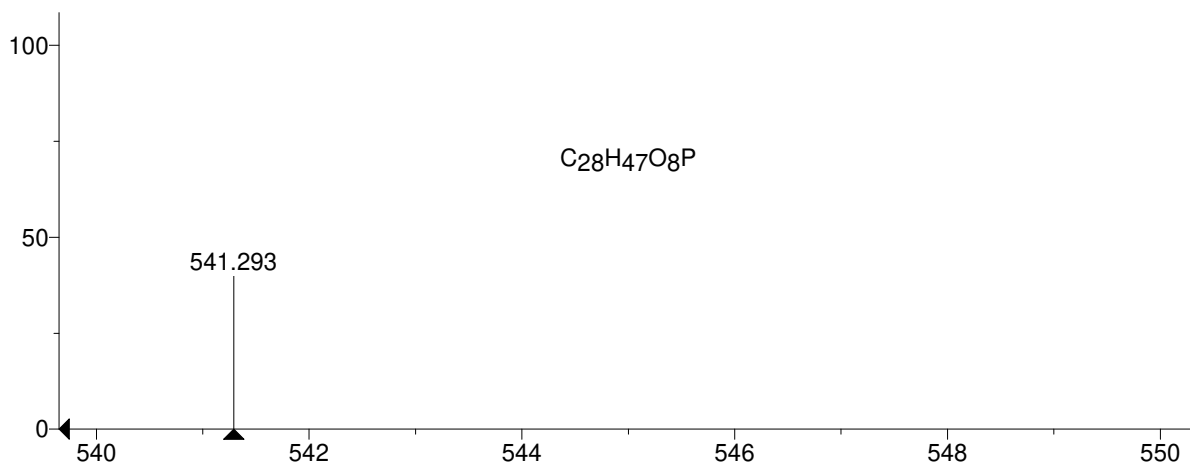



Unknown: Unknown (5.63\_490.2380m/z)  
Compound in Library Factor = 0

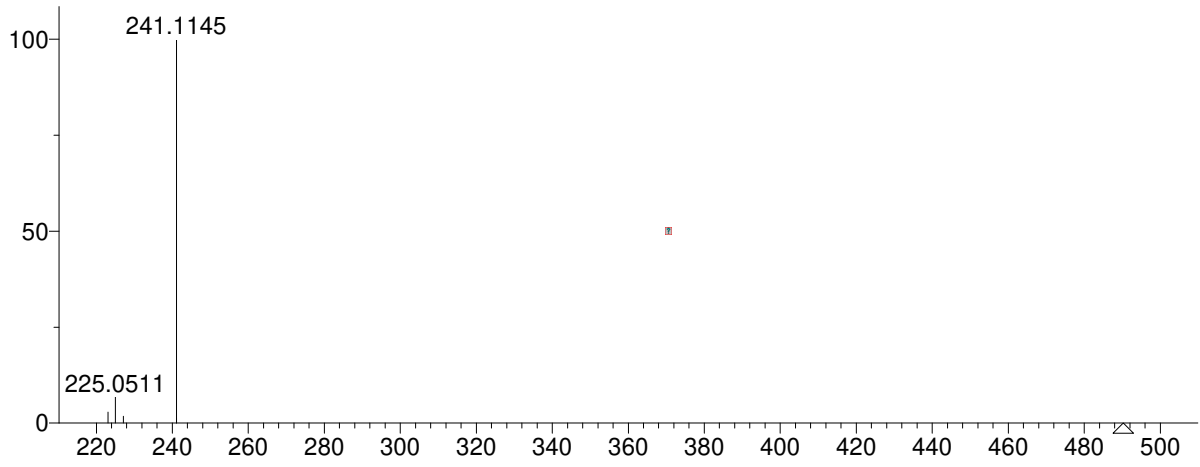

Unknown: Unknown (5.64\_369.1765m/z)  
Compound in Library Factor = -1090

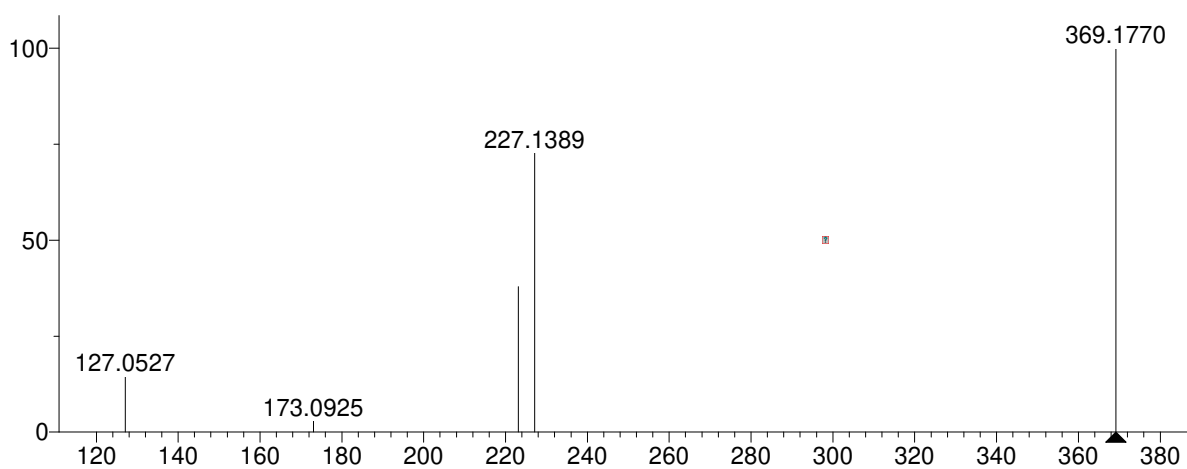

Hit 1 : 5 $\beta$ -Androstan-3 $\alpha$ -ol-17-one sulfate [M-H]<sup>-</sup> HCD 33V P=369.2  
C<sub>19</sub>H<sub>30</sub>O<sub>5</sub>S; MF: 209; RMF: 662; Prob 40.8%; CAS: 977-36-6; Lib: nist\_msms; ID: 231644.

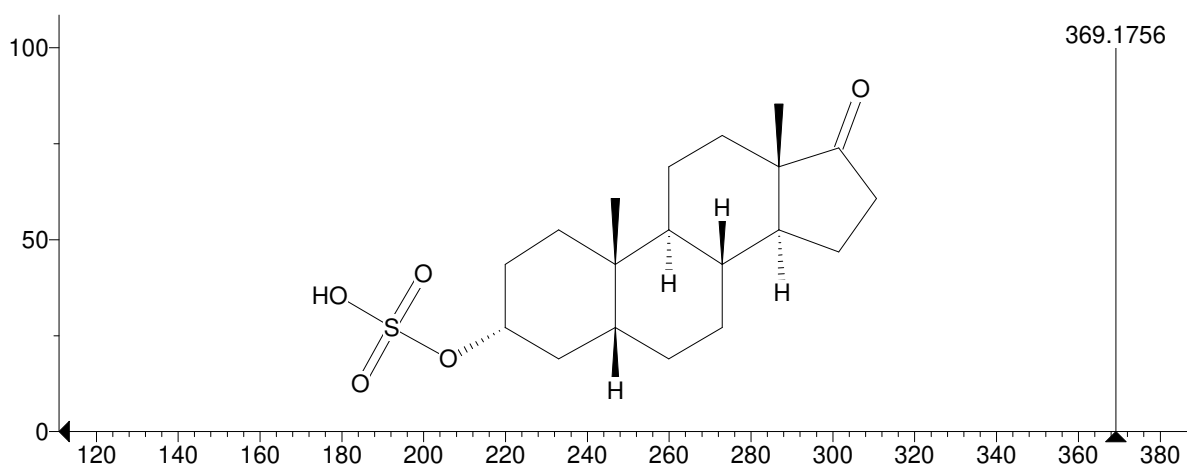

Hit 2 : 5-Androsten-3 $\beta$ ,17 $\beta$ -diol-3-sulfate [M-H]<sup>-</sup> HCD 27V P=369.2  
C<sub>19</sub>H<sub>30</sub>O<sub>5</sub>S; MF: 209; RMF: 662; Prob 40.8%; CAS: 977-33-3; Lib: nist\_msms; ID: 231655.

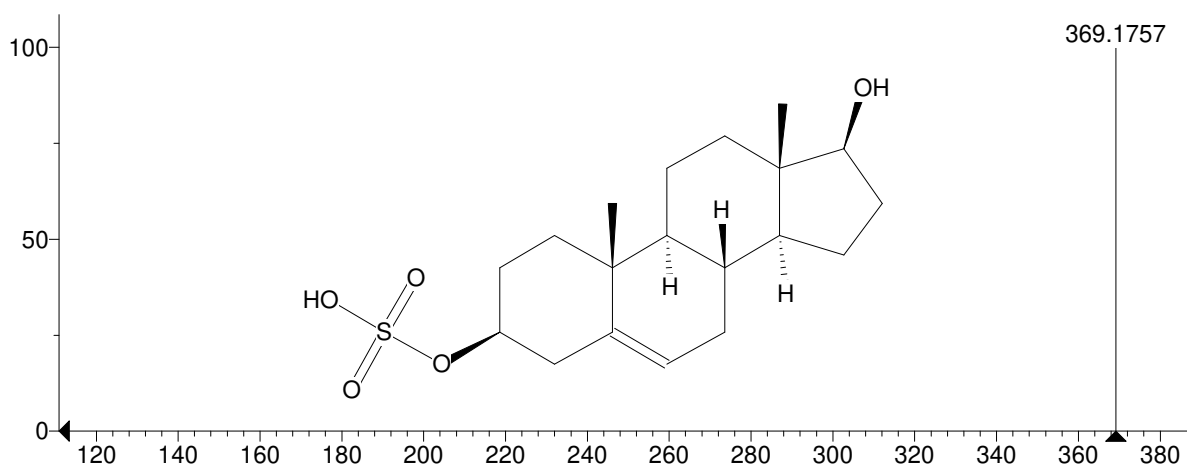

Hit 3 : 5 $\alpha$ -Androstan-3 $\beta$ -ol-17-one sulfate [M-H]<sup>-</sup> HCD 40V P=369.2  
C19H30O5S; MF: 172; RMF: 661; Prob 9.92%; CAS: 977-35-5; Lib: nist\_msms; ID: 231625.

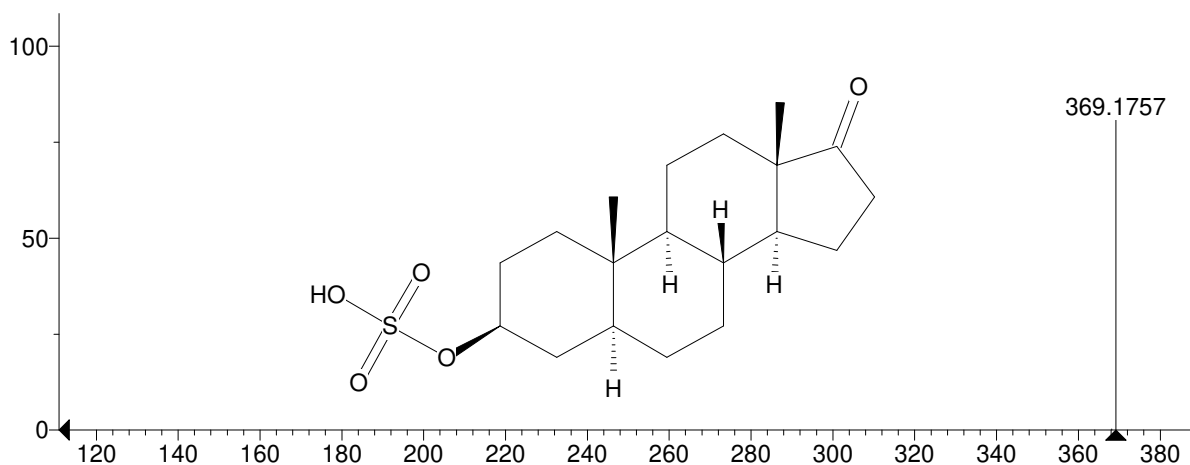

Hit 4 : 5 $\alpha$ -Androstan-17 $\beta$ -ol-3-one sulfate [M-H]<sup>-</sup> HCD 40V P=369.2  
C19H30O5S; MF: 160; RMF: 658; Prob 6.60%; CAS: 2641-48-7; Lib: nist\_msms; ID: 231920.

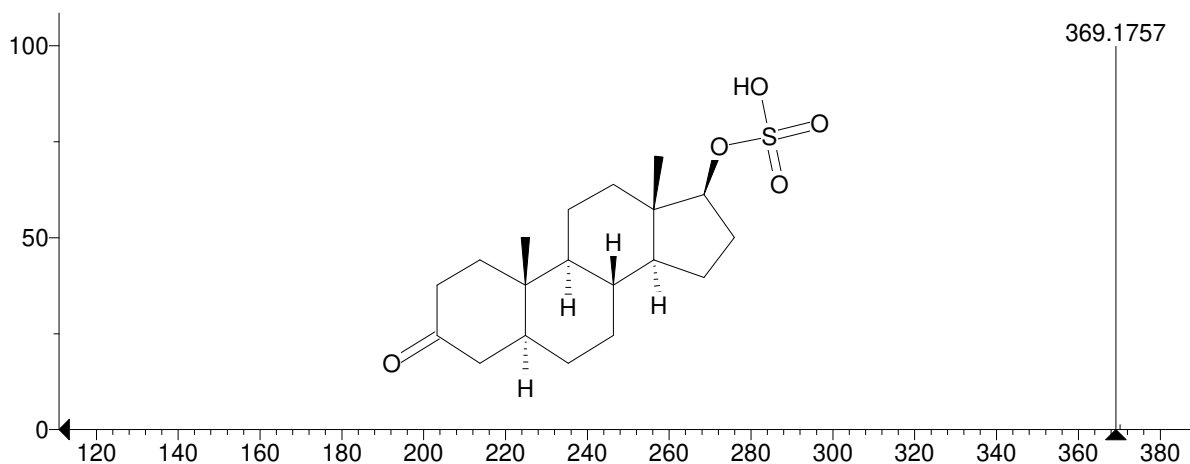

Hit 5 : 4-Androsten-17 $\beta$ -ol-3-one sulfate [M+H]<sup>+</sup> HCD 14V P=369.2  
C19H28O5S; MF: 100; RMF: 653; Prob 1.17%; CAS: 651-45-6; Lib: nist\_msms; ID: 231503.

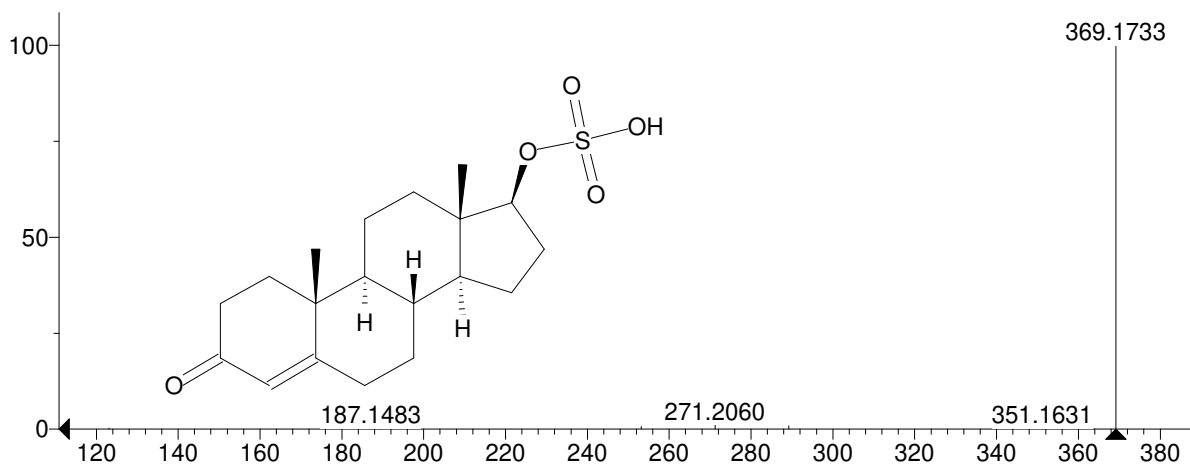

\*\* Search Report Page 1 of 2 \*\*

Unknown: Unknown (5.66\_443.1945m/z)  
Compound in Library Factor = -2387

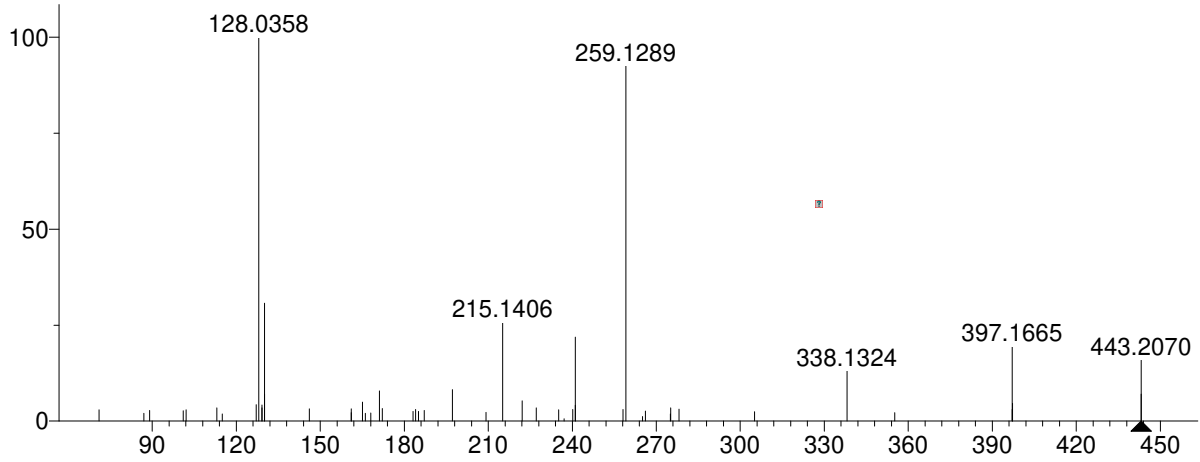

Hit 1 : Mitoxantrone [M-H]<sup>-</sup> HCD 17V P=443.2  
C<sub>22</sub>H<sub>28</sub>N<sub>4</sub>O<sub>6</sub>; MF: 28; RMF: 504; Prob 27.0%; CAS: 65271-80-9; Lib: nist\_msms; ID: 343812.

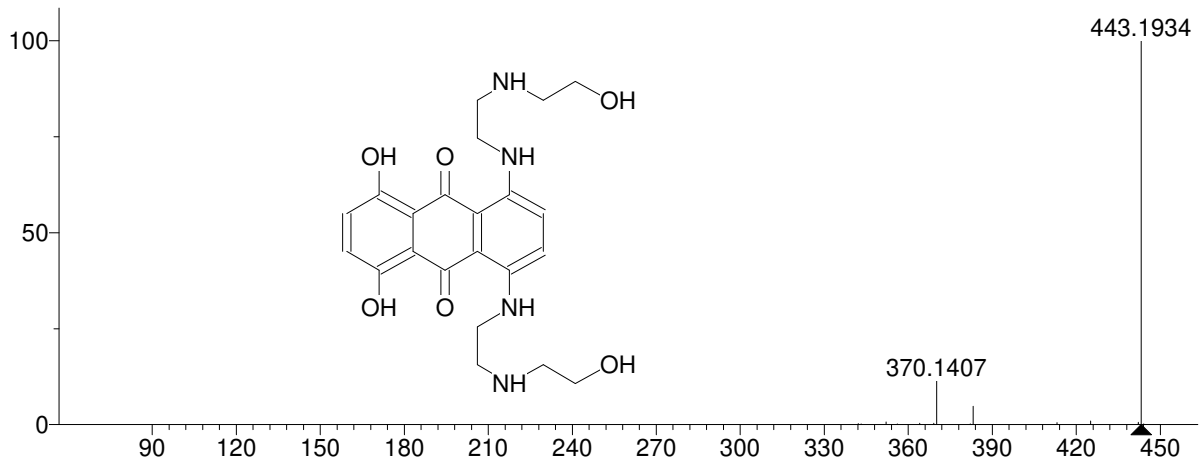

Hit 2 : C<sub>21</sub>H<sub>32</sub>O<sub>10</sub>; PlaSMA ID-1175 [M-H]<sup>-</sup> P=443.2  
C<sub>21</sub>H<sub>32</sub>O<sub>10</sub>; MF: 16; RMF: 175; Prob 18.0%; Lib: biomsmms-neg-plasma; ID: 867.

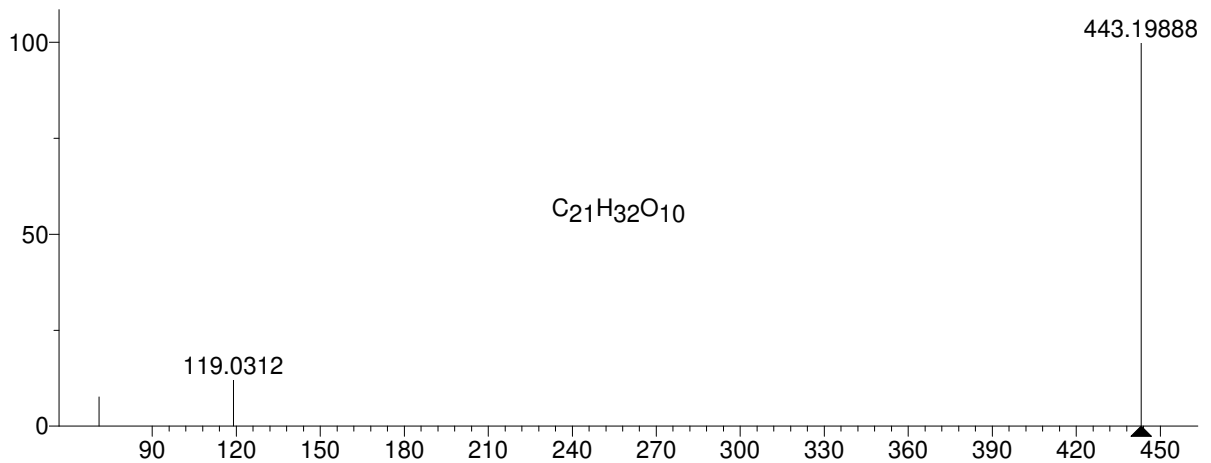

\*\* Search Report Page 2 of 2 \*\*

Hit 3 : N(6)-((Aminoethylamino)carbonyl)methylphenyladenosine [M-H-C5H8O4]- HCD 22V P=443.2  
C28H32N8O6; MF: 5; RMF: 201; Prob 12.3%; CAS: 96760-69-9; Lib: nist\_msms; ID: 298641.

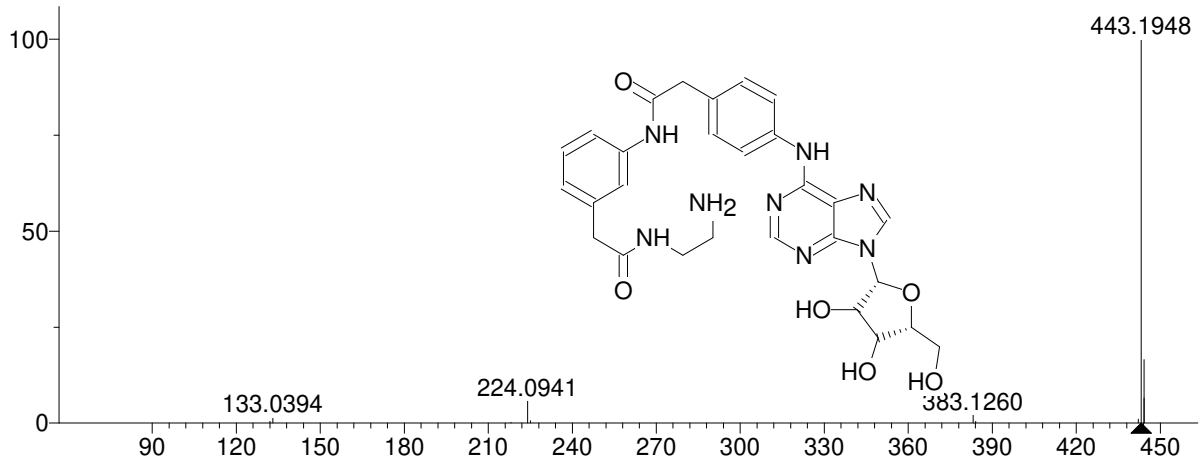

Hit 4 : [4,5,8-trihydroxy-5-(hydroxymethyl)-3-(3-methoxy-3-oxoprop-1-en-2-yl)-8a-methyl-1,2,3,4,4a,6,7,8-octahyd  
C21H32O10; MF: 5; RMF: 78; Prob 12.3%; Lib: mona-export-ic-ms-ms\_negative\_mode; ID: 22850.

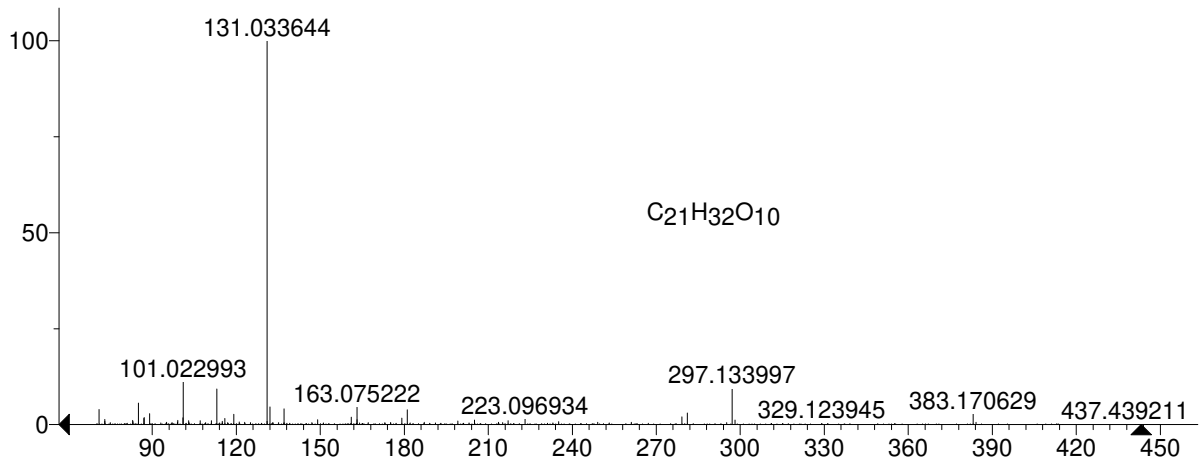

Hit 5 :  $\beta$ -Lipotropin (61-64) [M+H]<sup>+</sup> IT 35% P=443.2  
C22H26N4O6; MF: 1; RMF: 83; Prob 10.4%; Lib: nist\_msms2; ID: 1128.

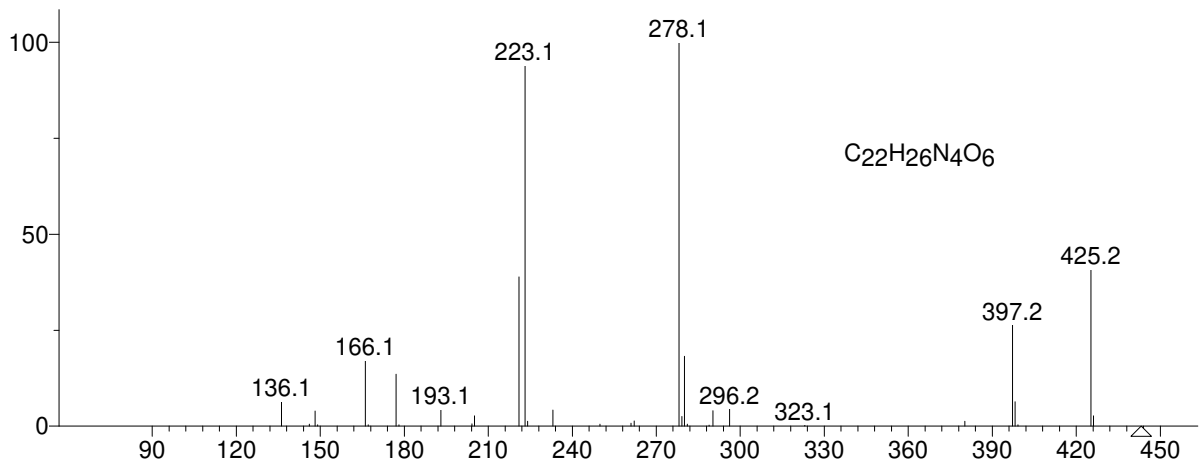

Unknown: Unknown (5.67\_344.1802m/z)  
Compound in Library Factor = 0

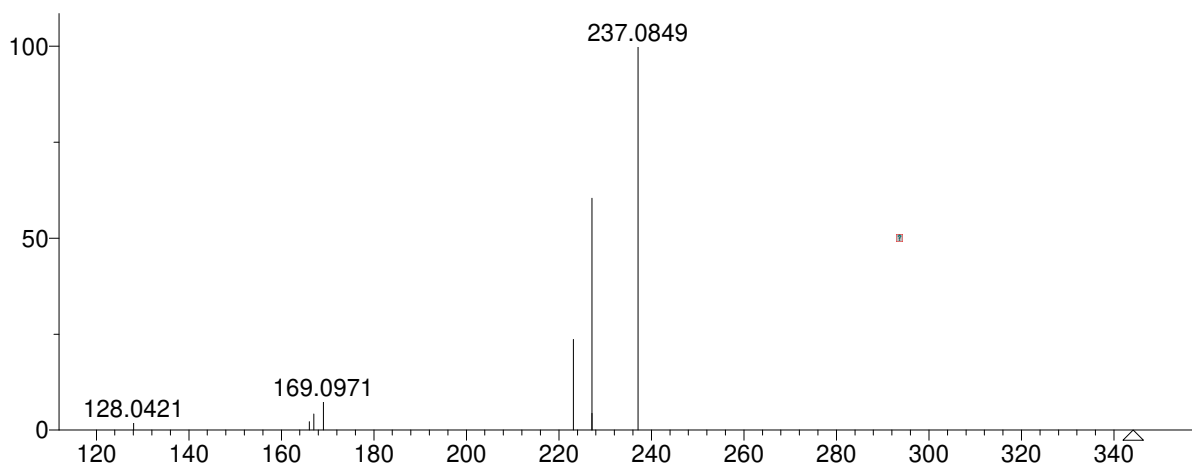

Hit 1 : Clemastine Fumarate [M+H]<sup>+</sup> P=344.2  
C<sub>25</sub>H<sub>30</sub>ClNO<sub>5</sub>; MF: 0; RMF: 6; Prob 100.0%; Lib: mona-export-gnps; ID: 639.

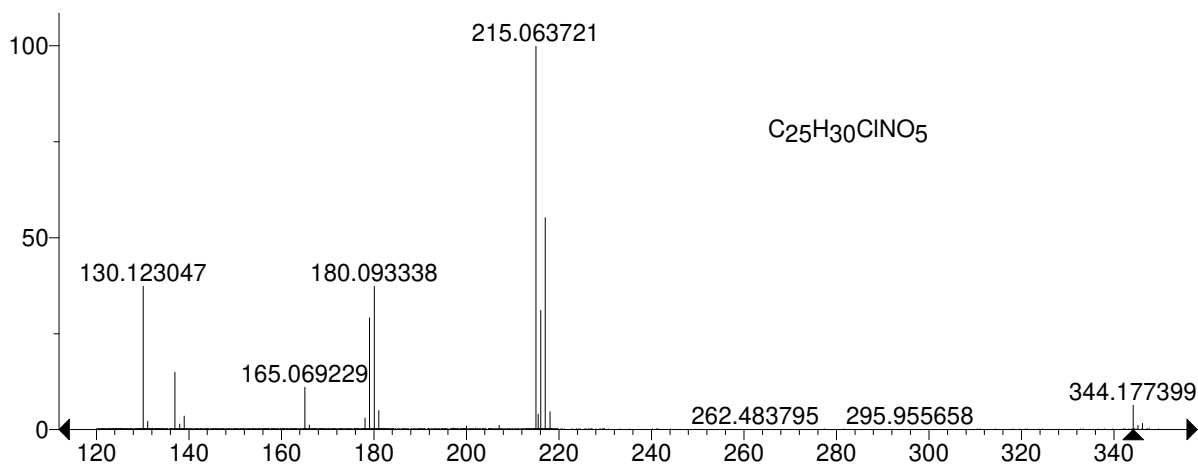

\*\* Search Report Page 1 of 2 \*\*

Unknown: Unknown (5.67\_421.1592m/z)  
Compound in Library Factor = 0

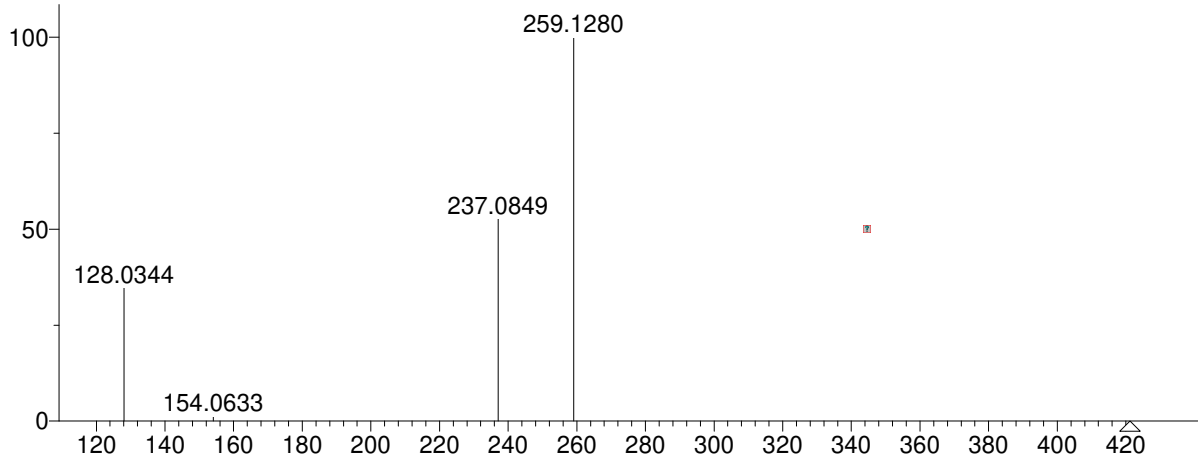

Hit 1 : 13(R),14(R)-Epoxyfluprostenol isopropyl ester [M+H-C3H12O3]+ IT-FT 35% P=421.2  
C26H35F3O7; MF: 0; RMF: 200; Prob 33.3%; Lib: nist\_msms; ID: 254119.

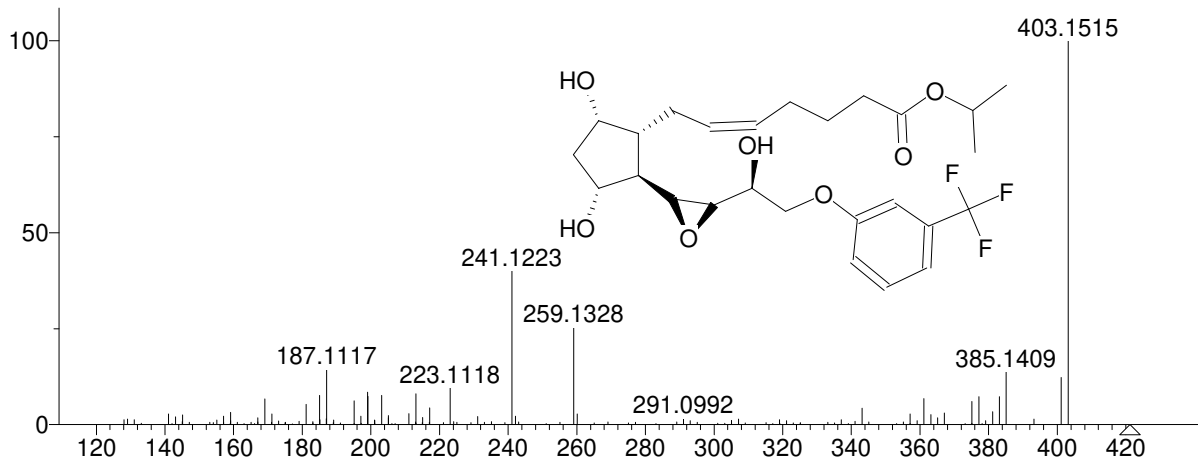

Hit 2 : 2-[[[(2R,3S)-2-(3,4-dihydroxyphenyl)-3,5-dihydroxy-3,4-dihydro-2H-chromen-7-yl]oxy]oxane-3,4,5-triol [M-H  
C20H22O10; MF: 0; RMF: 65; Prob 33.3%; Lib: mona-export-itree; ID: 2026.

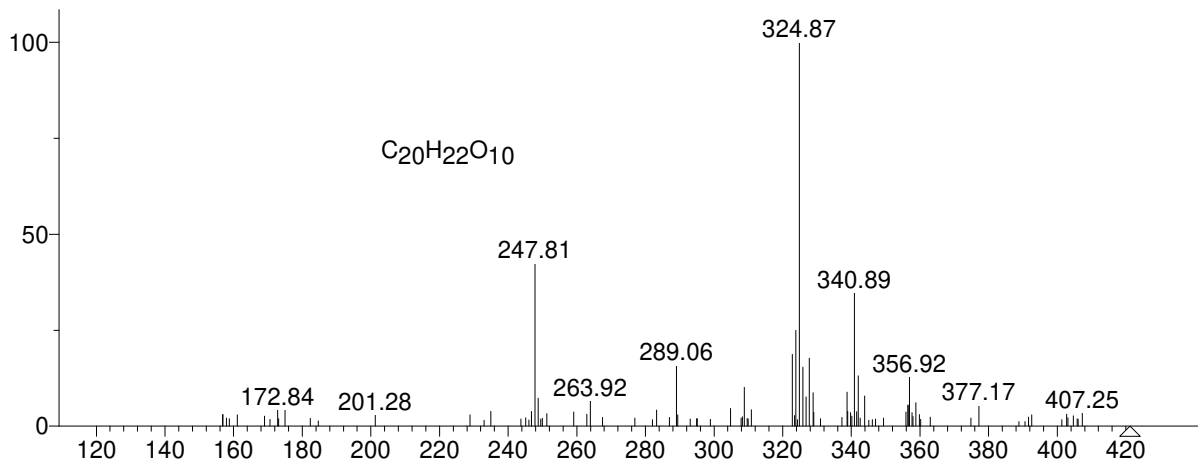

\*\* Search Report Page 2 of 2 \*\*

Hit 3 : 2-amino-5-[2-[[[(3S)-2,3-dihydroxy-2-[(1S)-1-hydroxyethyl]butanoyl]oxymethyl]anilino]-5-oxopentanoic acid  
C<sub>18</sub>H<sub>26</sub>N<sub>2</sub>O<sub>8</sub>; MF: 0; RMF: 5; Prob 33.3%; Lib: mona-export-vf-npl\_qexactive; ID: 16602.

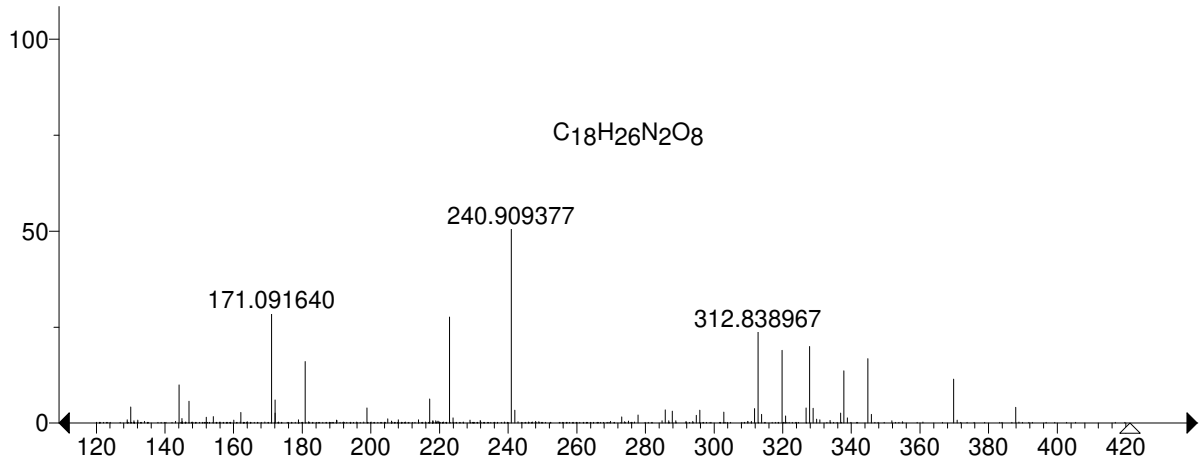



Unknown: Unknown (5.68\_376.1046m/z)  
Compound in Library Factor = -3273

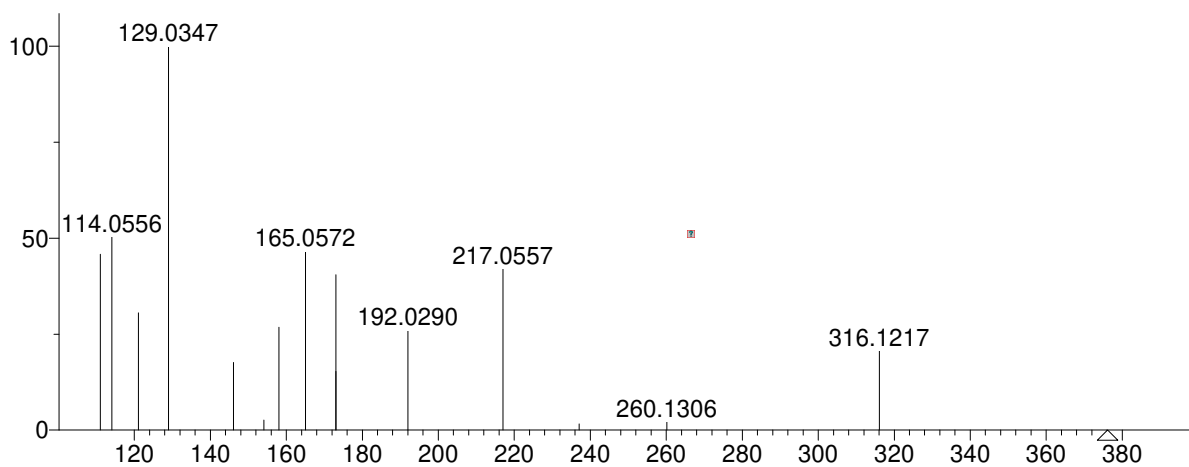

Hit 1 : 1-(3,4-dihydroxyphenyl)-6,7-dihydroxy-1,2-dihydronaphthalene-2,3-dicarboxylic acid [M+NH4]<sup>+</sup> 45HCD F  
C<sub>18</sub>H<sub>14</sub>O<sub>8</sub>; MF: 1; RMF: 65; Prob 100.0%; Lib: mona-export-vf-npl\_qexactive; ID: 24902.

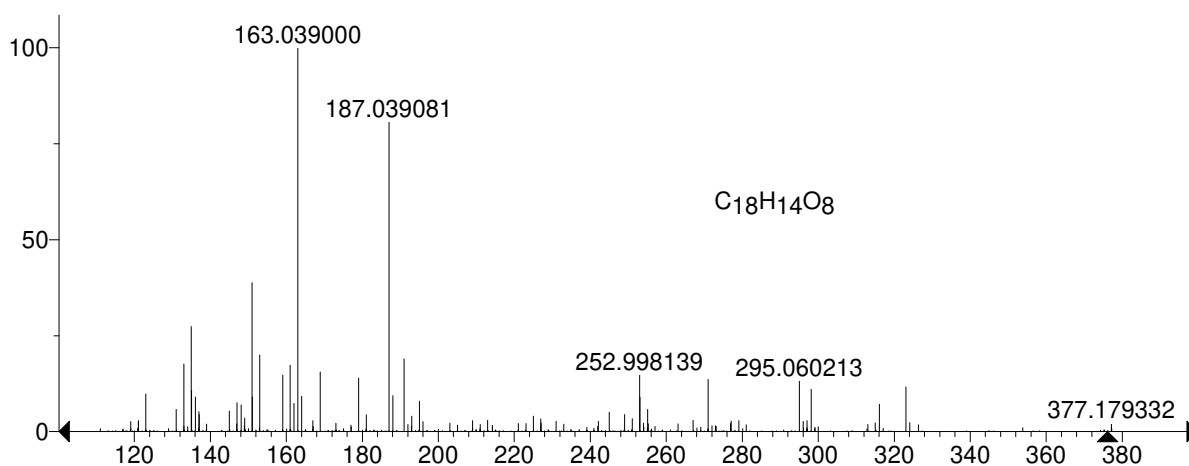

Unknown: Unknown (5.68\_380.0386m/z)  
Compound in Library Factor = 0

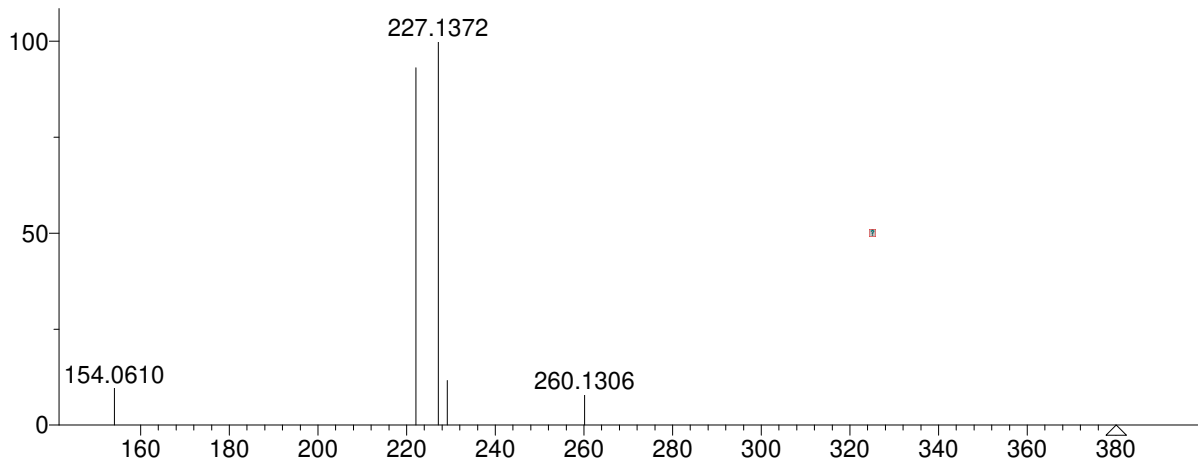

Unknown: Unknown (5.68\_397.1697m/z)  
Compound in Library Factor = -2387

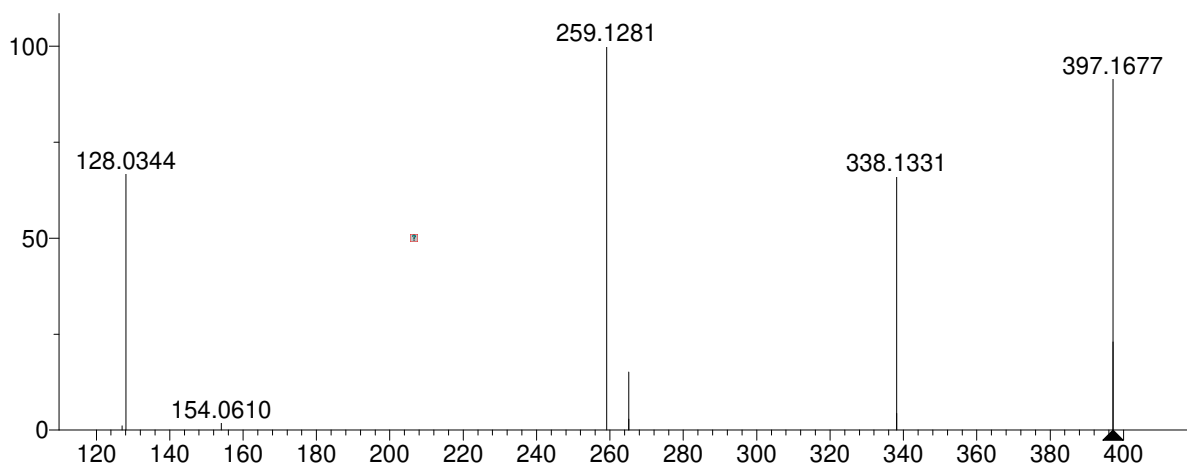

Hit 1 : Benzoic acid, 2-(diphenylphosphino)-4-[21-[(3aS,4S,6aR)-hexahydro-2-oxo-1H-thieno[3,4-d]imidazol-4-yl]-C41H53N4O8PS; MF: 40; RMF: 578; Prob 31.5%; CAS: 608514-42-7; Lib: nist\_msms; ID: 376808.

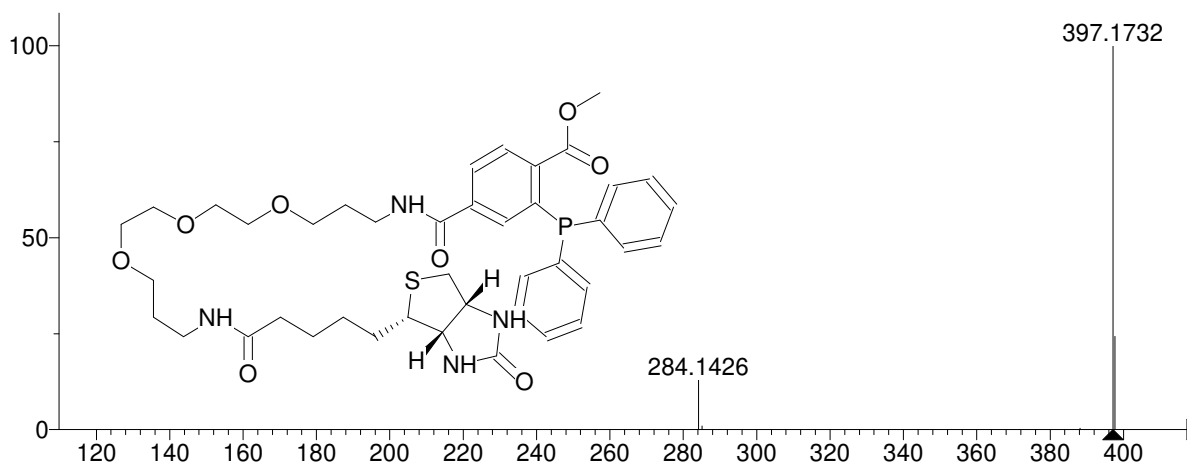

Hit 2 : 3-[1-(3-Aminopropyl)-1H-indol-3-yl]-4-(1-methyl-1H-indol-3-yl)-1H-pyrrole-2,5-dione [M-H]<sup>-</sup>; C24H22N4O2; MF: 28; RMF: 470; Prob 20.9%; CAS: 138516-31-1; Lib: nist\_msms; ID: 321330.

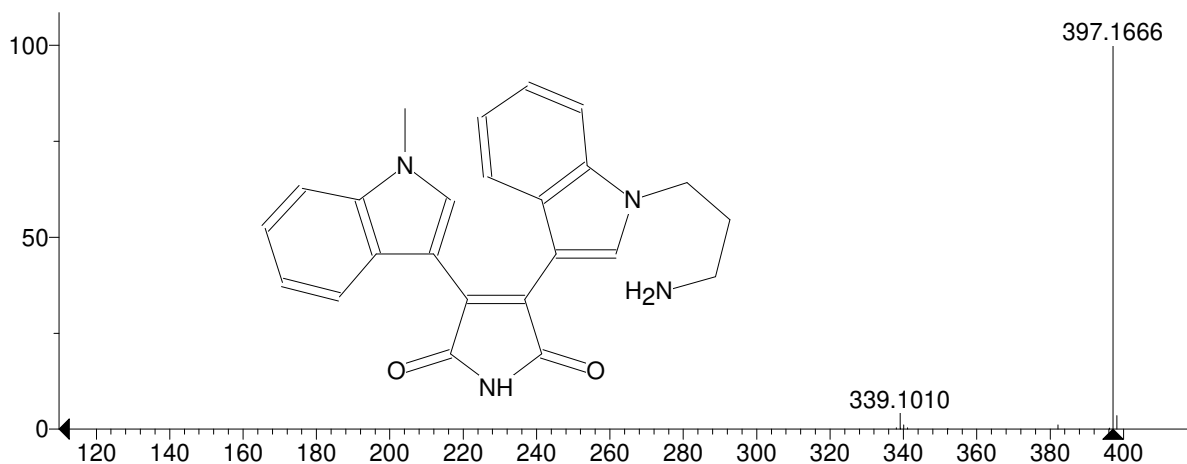

\*\* Search Report Page 2 of 2 \*\*

Hit 3 : 1-Naphthalenesulfonamide, N-(10-aminodecyl)-5-chloro- [M+H]<sup>+</sup> HCD 23V P=397.2  
C<sub>20</sub>H<sub>29</sub>ClN<sub>2</sub>O<sub>2</sub>S; MF: 22; RMF: 458; Prob 16.5%; CAS: 80467-76-1; Lib: nist\_msms; ID: 382032.

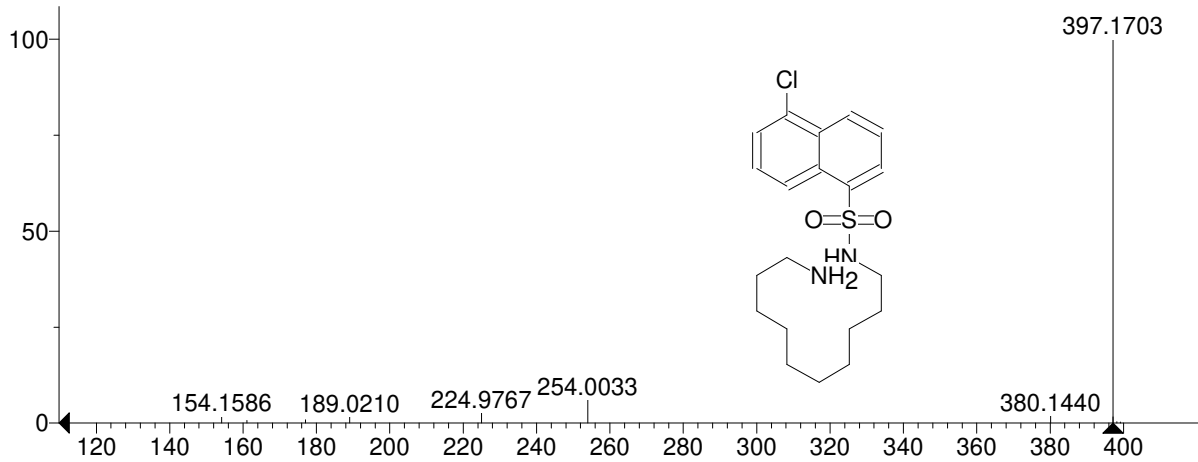

Hit 4 : Unknown (carbon number 12); PlaSMA ID-998 [M-H]<sup>-</sup> P=397.2  
C<sub>12</sub>H<sub>36</sub>N<sub>2</sub>O<sub>6</sub>P<sub>2</sub>S; MF: 13; RMF: 369; Prob 11.9%; Lib: biomsms-neg-plasma; ID: 1342.

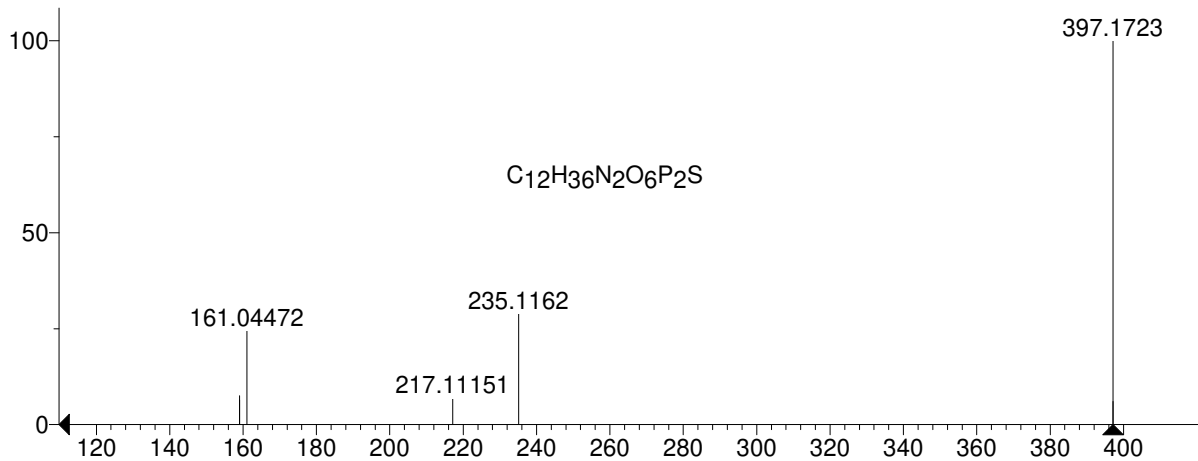

Hit 5 : Atorvastatin [M-H-C<sub>7</sub>H<sub>12</sub>O<sub>4</sub>]<sup>-</sup> HCD 17V P=397.2  
C<sub>33</sub>H<sub>35</sub>FN<sub>2</sub>O<sub>5</sub>; MF: 12; RMF: 411; Prob 11.5%; CAS: 134523-00-5; Lib: nist\_msms; ID: 322266.

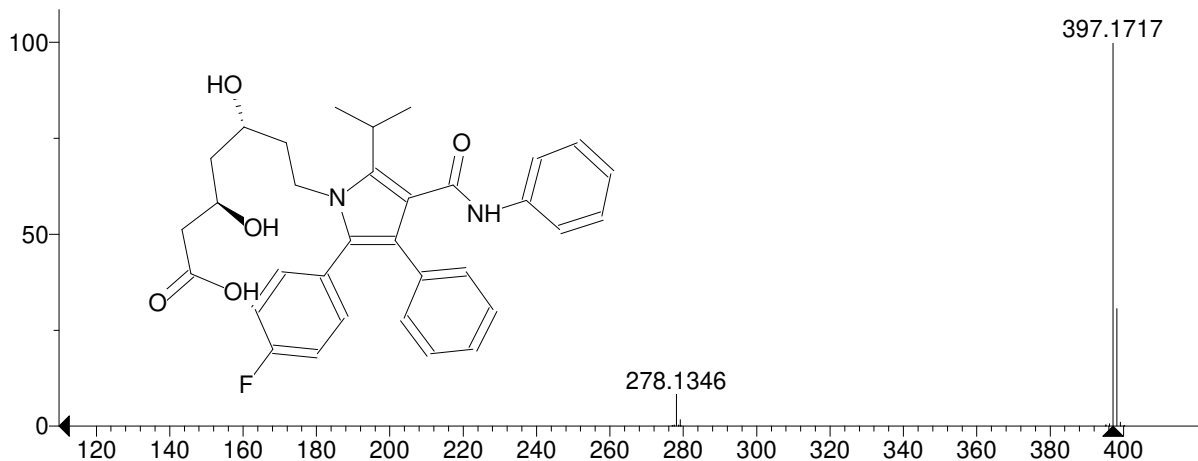

\*\* Search Report Page 1 of 1 \*\*

Unknown: Unknown (5.68\_443.1839m/z)  
Compound in Library Factor = 0

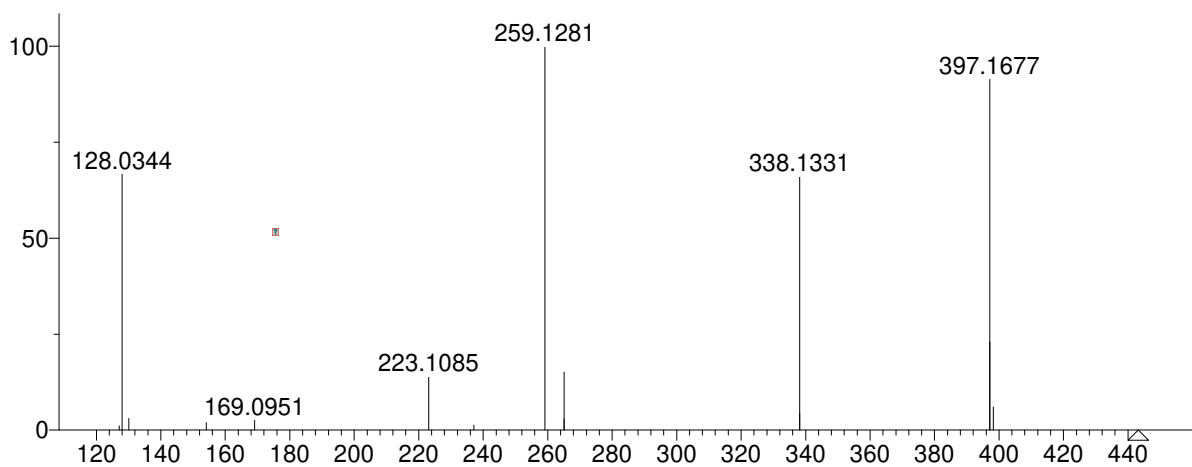

Hit 1 : Strophanthidin [M+K]<sup>+</sup> 65HCD P=443.2  
C<sub>23</sub>H<sub>32</sub>O<sub>6</sub>; MF: 0; RMF: 8; Prob 100.0%; Lib: mona-export-vf-npl\_gexactive; ID: 3261.

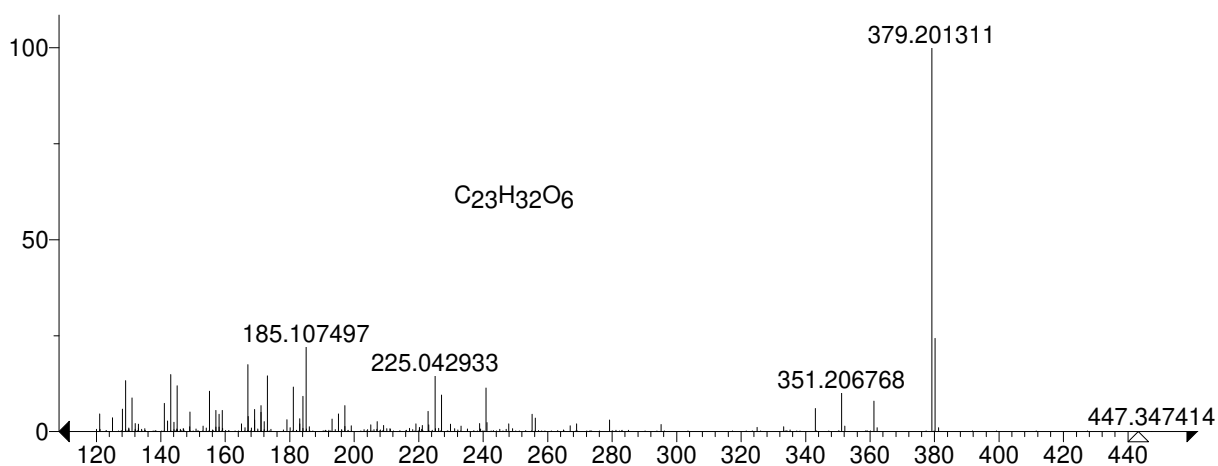

\*\* Search Report Page 1 of 2 \*\*

Unknown: Unknown (5.68\_484.2035m/z)  
Compound in Library Factor = -3273

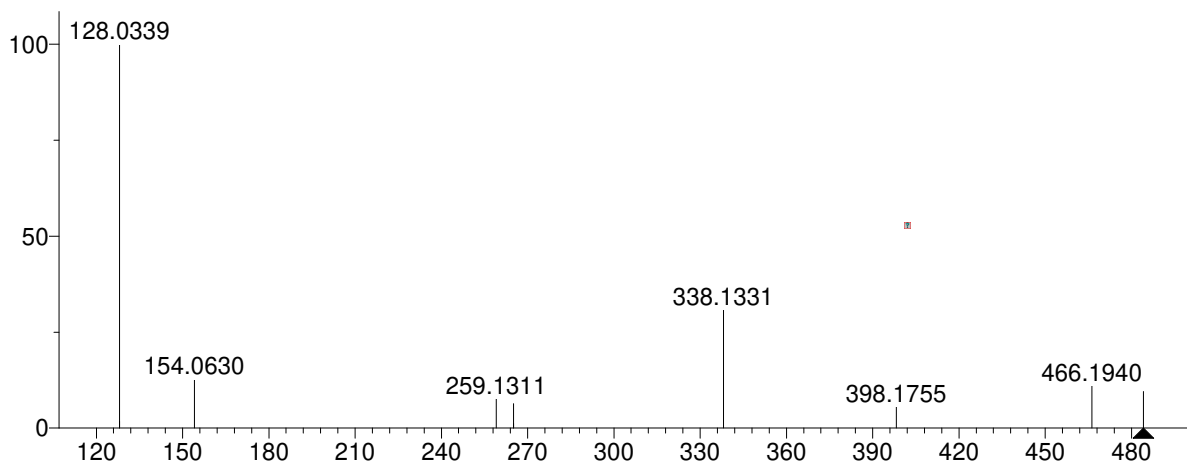

Hit 1 : Fexofenadine [M+H]<sup>+</sup>=>484.2 IT 35% P=484.2  
C32H39NO4; MF: 8; RMF: 364; Prob 30.6%; CAS: 83799-24-0; Lib: nist\_msms; ID: 123829.

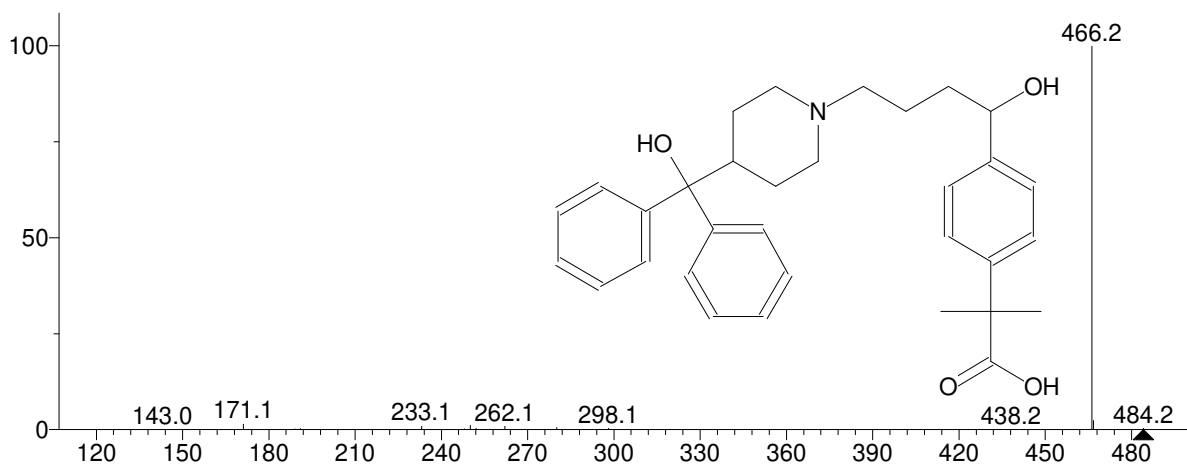

Hit 2 : [1,1'-Biphenyl]-2-carboxylic acid, 4'-[[[2,3-dimethyl-5-[[[(1S)-1-(4-nitrophenyl)ethyl]amino]carbonyl]-1H-indol-3-yl]methyl]oxy]benzyl]oxy]benzoic acid  
C33H29N3O5; MF: 1; RMF: 161; Prob 23.4%; CAS: 1338259-05-4; Lib: nist\_msms; ID: 253488.

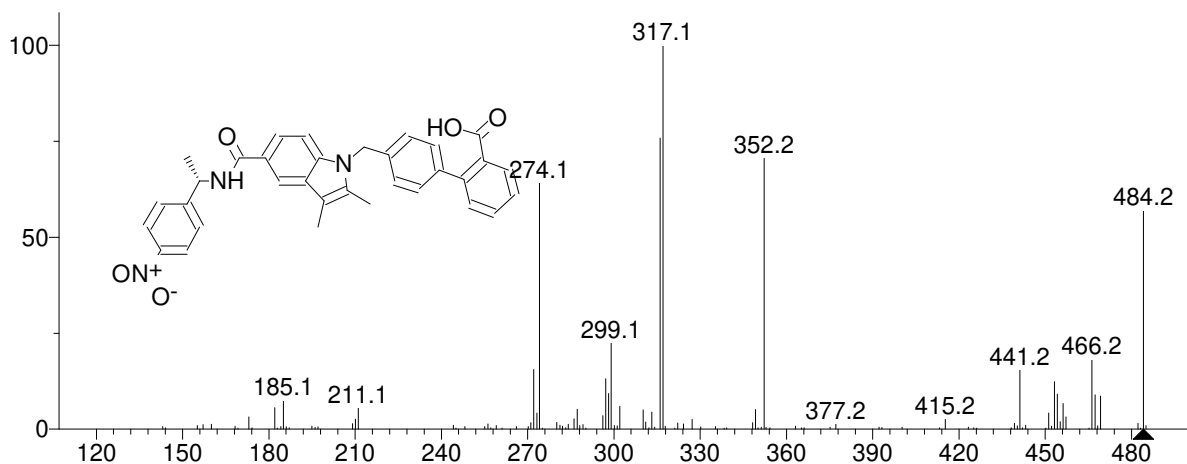

\*\* Search Report Page 2 of 2 \*\*

Hit 3 : NCGC00381190-01\_C27H29N5O5\_ [M-H2O-H]- P=484.2  
C27H29N5O5; MF: 1; RMF: 124; Prob 23.4%; Lib: msms-neg-gnps; ID: 1973.

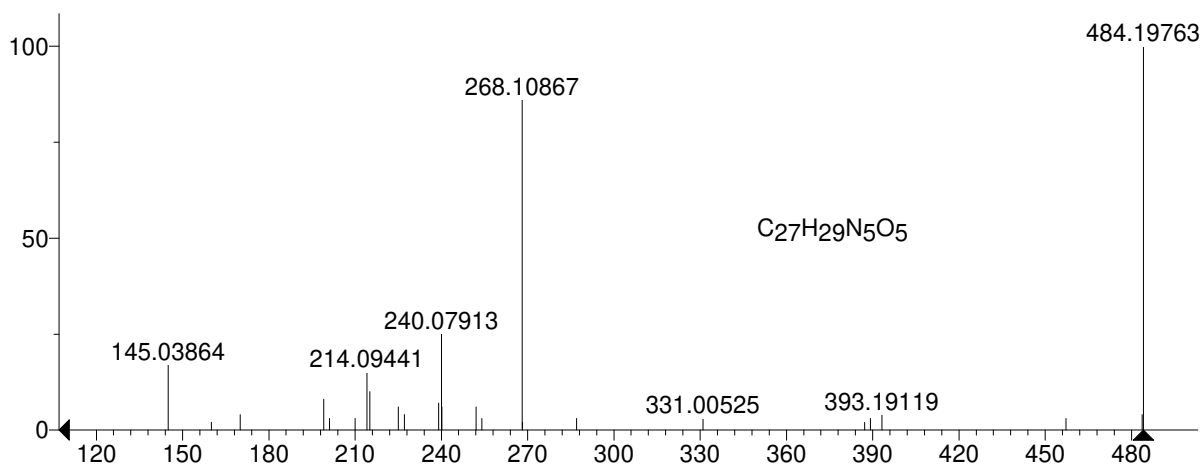

Hit 4 : Halofantrine [M+H+2i]+=>484.2 IT 35% P=484.2  
C<sub>26</sub>H<sub>30</sub>Cl<sub>2</sub>F<sub>3</sub>NO; MF: 0; RMF: 42; Prob 22.5%; CAS: 69756-53-2; Lib: nist\_msms; ID: 522837.

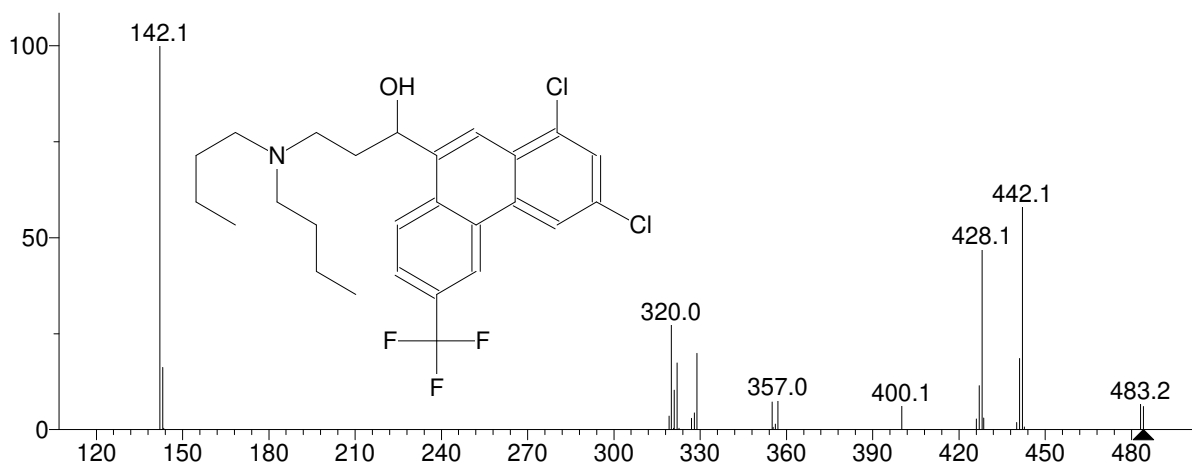

Unknown: Unknown (5.70\_355.1617m/z)  
Compound in Library Factor = 0

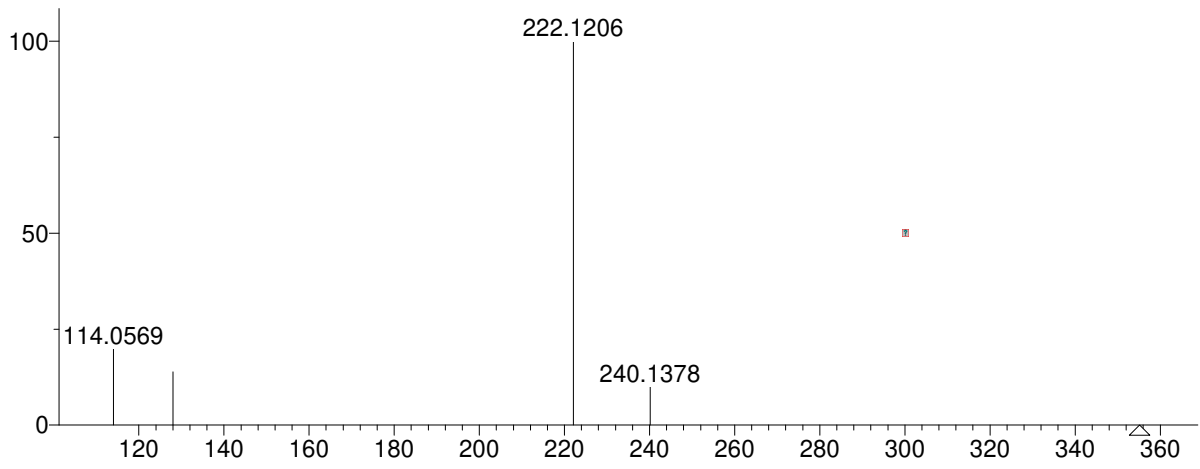



Unknown: Unknown (5.71\_707.1927m/z)  
Compound in Library Factor = 0

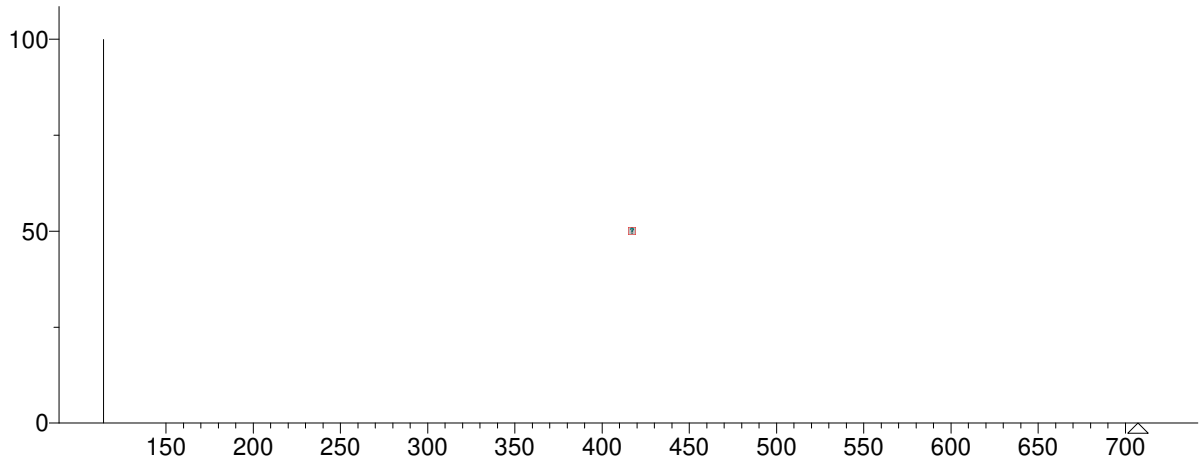

\*\* Search Report Page 1 of 2 \*\*

Unknown: Unknown (5.74\_227.1023m/z)  
Compound in Library Factor = -178

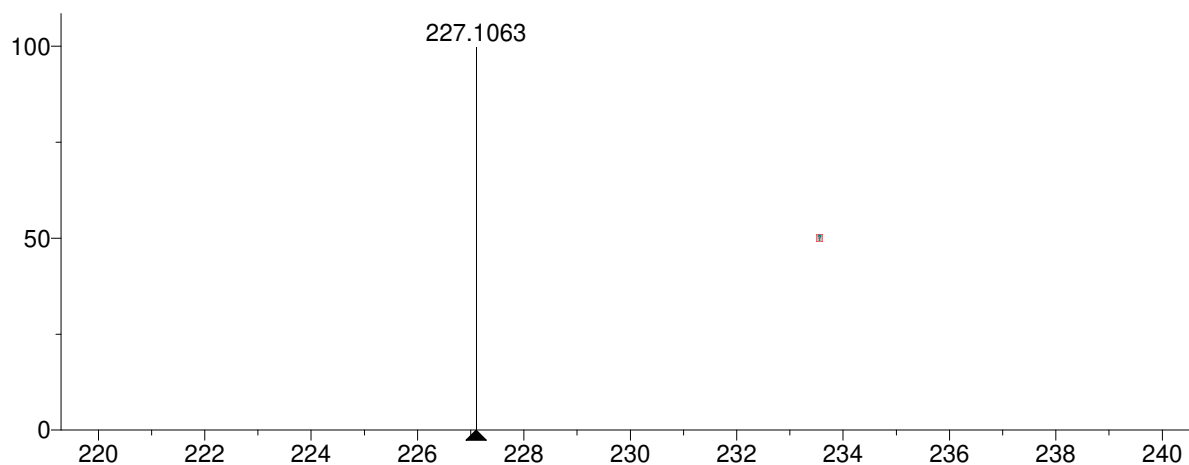

Hit 1 : PyroGlu-Pro [M+H]<sup>+</sup> QTOF 10V P=227.1  
C<sub>10</sub>H<sub>14</sub>N<sub>2</sub>O<sub>4</sub>; MF: 364; RMF: 999; Prob 16.6%; Lib: nist\_msms; ID: 47868.

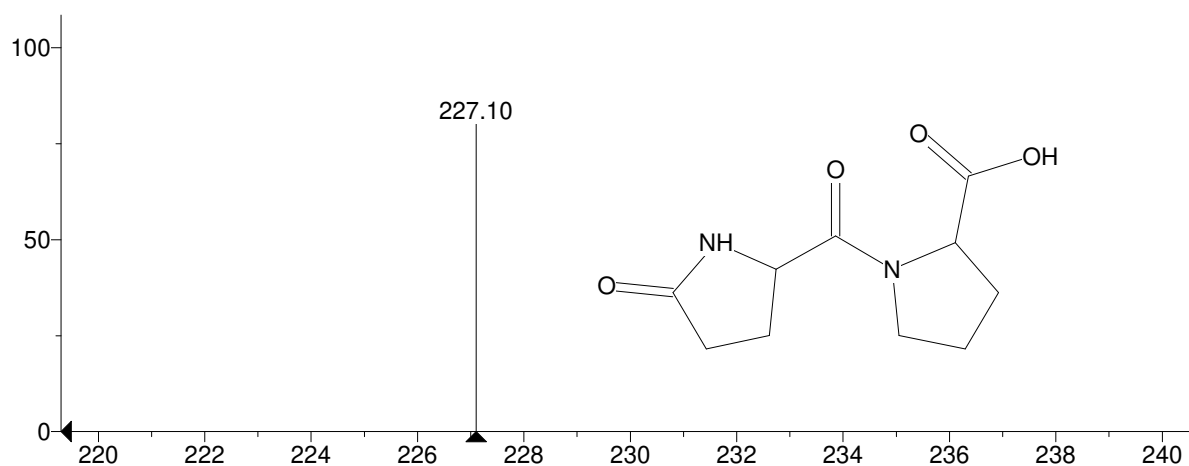

Hit 2 : Carbidopa [M+H]<sup>+</sup> QTOF 17V P=227.1  
C<sub>10</sub>H<sub>14</sub>N<sub>2</sub>O<sub>4</sub>; MF: 364; RMF: 999; Prob 16.6%; CAS: 28860-95-9; Lib: nist\_msms; ID: 69030.

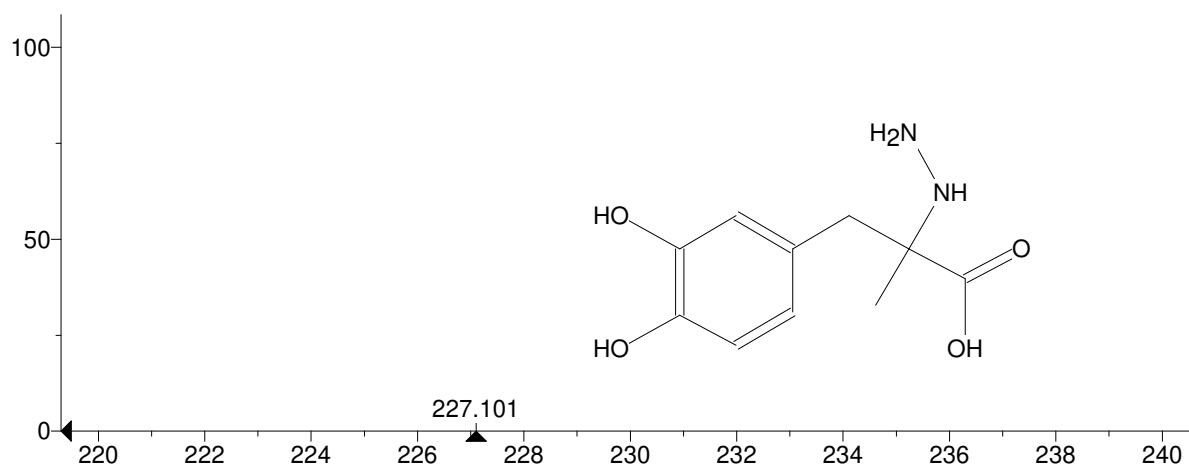

Hit 3 : 2,5-Dimethoxy-4-nitrophenethylamine [M+H]<sup>+</sup> HCD 9V P=227.1  
C<sub>12</sub>H<sub>14</sub>N<sub>2</sub>O<sub>4</sub>; MF: 364; RMF: 999; Prob 16.6%; CAS: 261789-00-8; Lib: nist\_msms; ID: 355204.

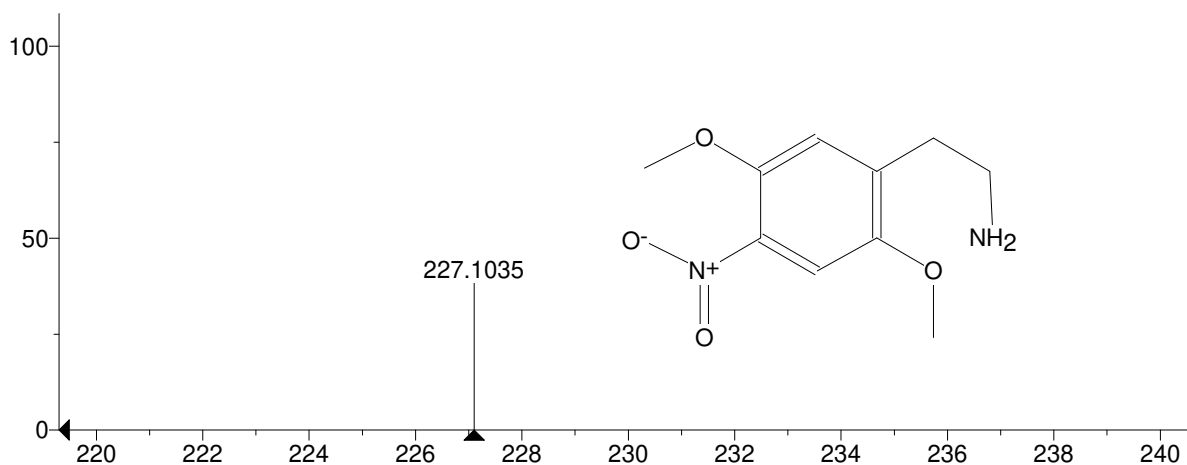

Hit 4 : (S)-Dibutyl 3-hydroxybutyl phosphate [M+H-C<sub>4</sub>H<sub>8</sub>]<sup>+</sup> HCD 9V P=227.1  
C<sub>12</sub>H<sub>27</sub>O<sub>5</sub>P; MF: 364; RMF: 999; Prob 16.6%; CAS: 89197-69-3; Lib: nist\_msms; ID: 419320.

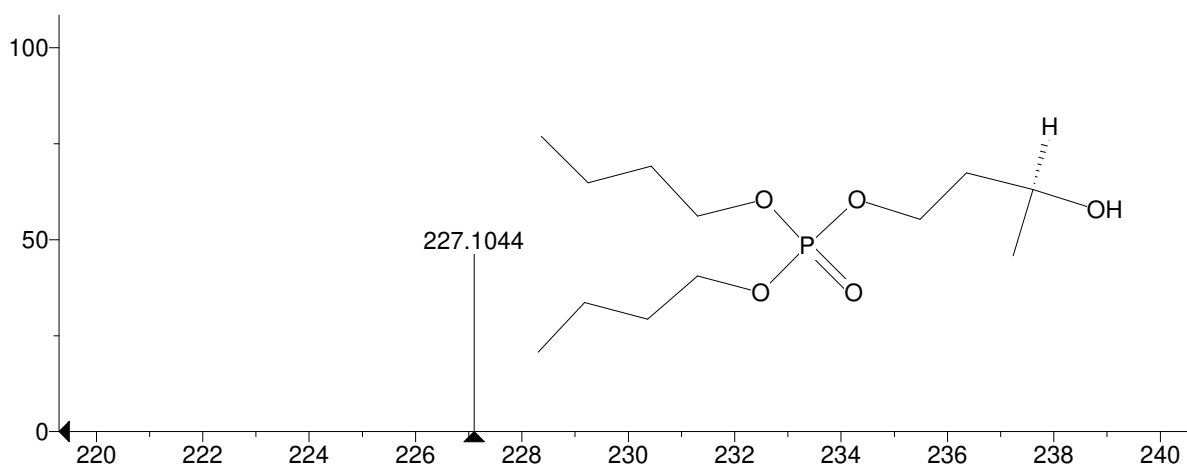

Hit 5 : Proline-hydroxyproline [M-H]<sup>-</sup> 20-30-40%) P=227.1  
C<sub>10</sub>H<sub>16</sub>N<sub>2</sub>O<sub>4</sub>; MF: 364; RMF: 999; Prob 16.6%; Lib: mona-export-fiehn\_hilic; ID: 1464.

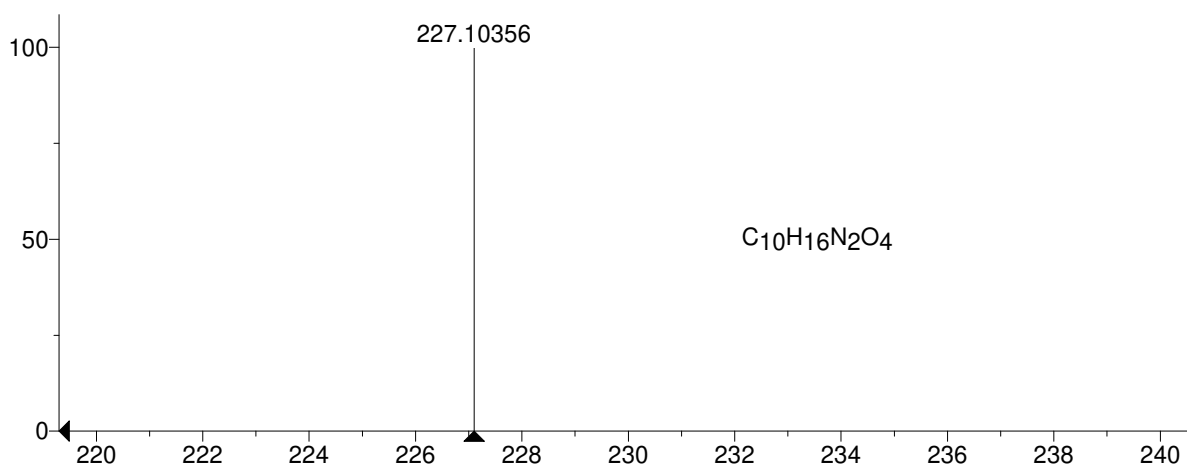

Unknown: Unknown (5.74\_393.1654m/z)  
Compound in Library Factor = -3273

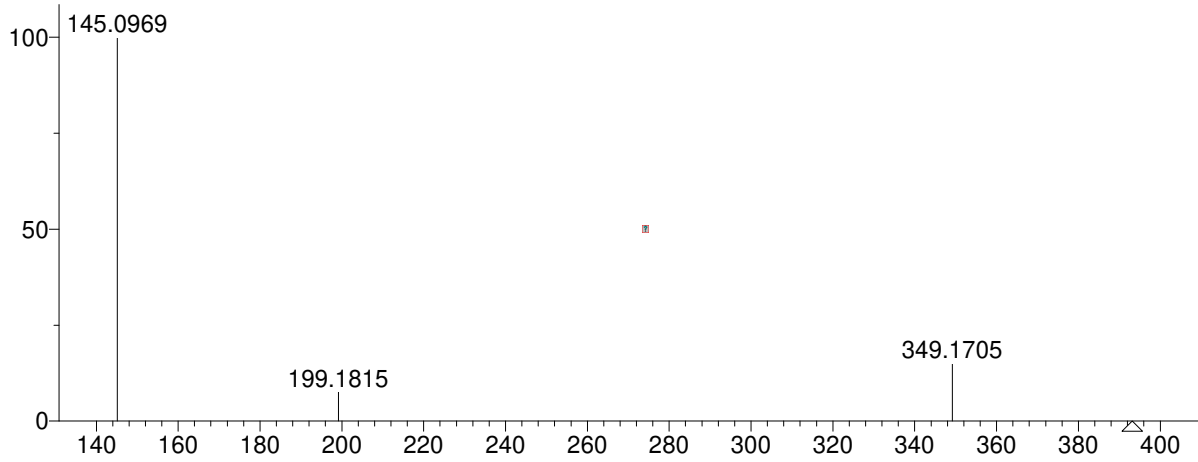

Hit 1 : Sparfloxacin [M+H]<sup>+</sup> P=393.2  
C<sub>19</sub>H<sub>22</sub>F<sub>2</sub>N<sub>4</sub>O<sub>3</sub>; MF: 4; RMF: 423; Prob 54.2%; Lib: mona-export-gnps; ID: 3028.

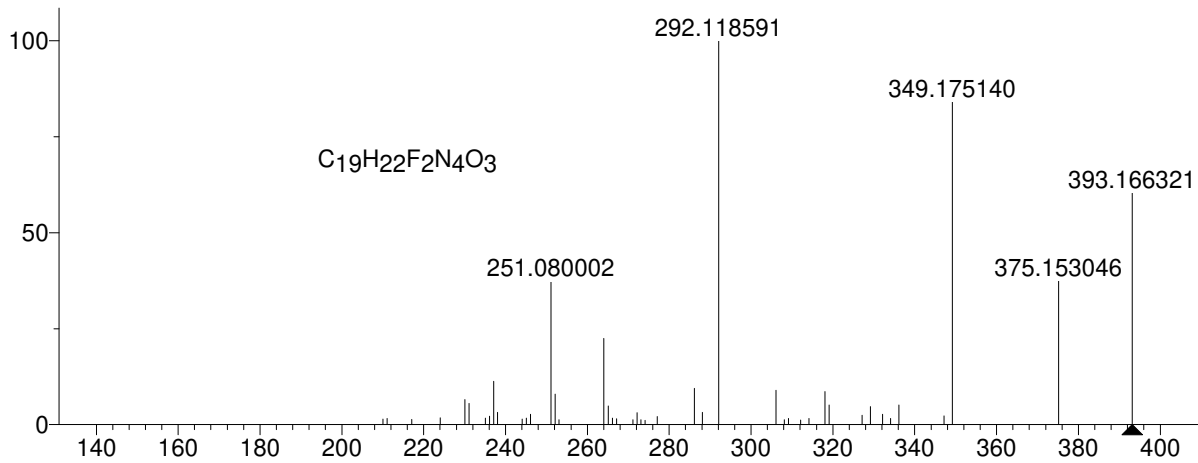

Hit 2 : (E)-3-(4-acetyloxy-2,3-dihydroxy-2,5,5,8a-tetramethyl-3,4,4a,6,7,8-hexahydro-1H-naphthalen-1-yl)prop-2-ene  
C<sub>19</sub>H<sub>30</sub>O<sub>6</sub>; MF: 0; RMF: 325; Prob 45.8%; Lib: mona-export-vf-npl\_qexactive; ID: 20133.

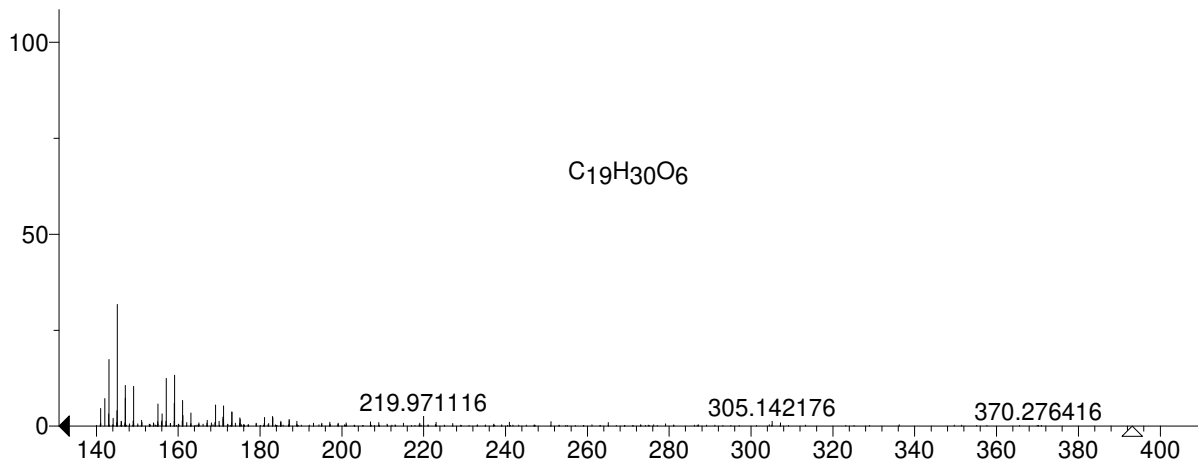

\*\* Search Report Page 1 of 2 \*\*

Unknown: Unknown (5.75\_349.1754m/z)  
Compound in Library Factor = -313

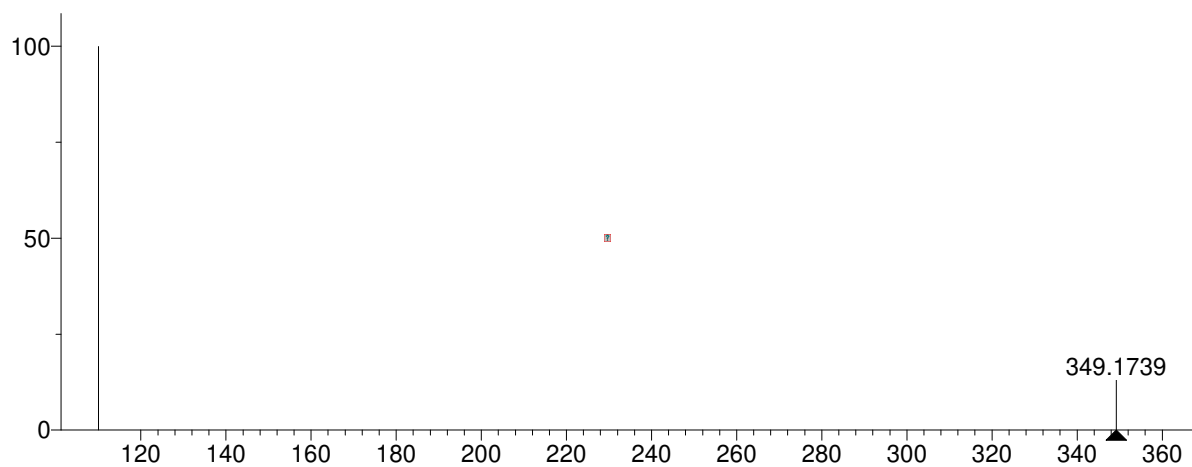

Hit 1 : Enalaprilat tert-butyl ester [M+H-C4H8]+ HCD 10V P=349.2  
C22H32N2O5; MF: 311; RMF: 956; Prob 77.9%; CAS: 674796-29-3; Lib: nist\_msms; ID: 437459.

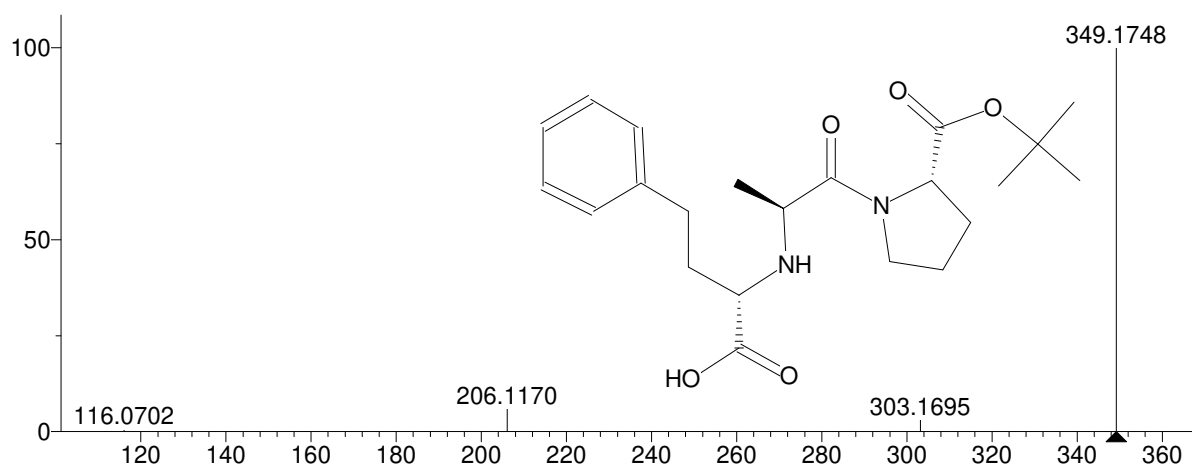

Hit 2 : Imidocarb [M+H]+ 10eV P=349.2  
C19H20N6O; MF: 280; RMF: 908; Prob 21.2%; Lib: mona-export-massbank; ID: 356.

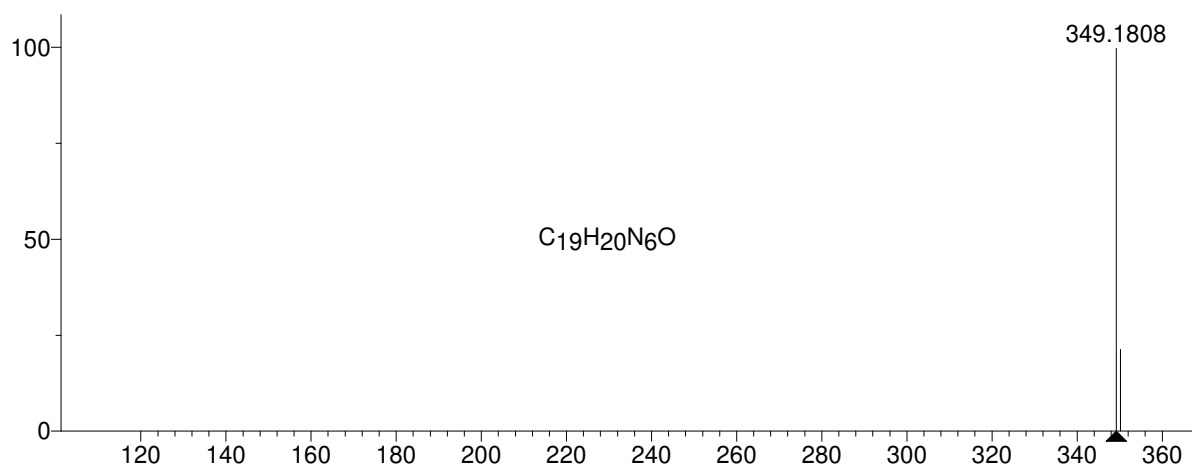

Hit 3 : MMV085071 [M+H]<sup>+</sup> 20-30-40%) P=349.2  
C<sub>19</sub>H<sub>20</sub>N<sub>6</sub>O; MF: 16; RMF: 301; Prob 0.21%; Lib: mona-export-pathogen\_box; ID: 278.

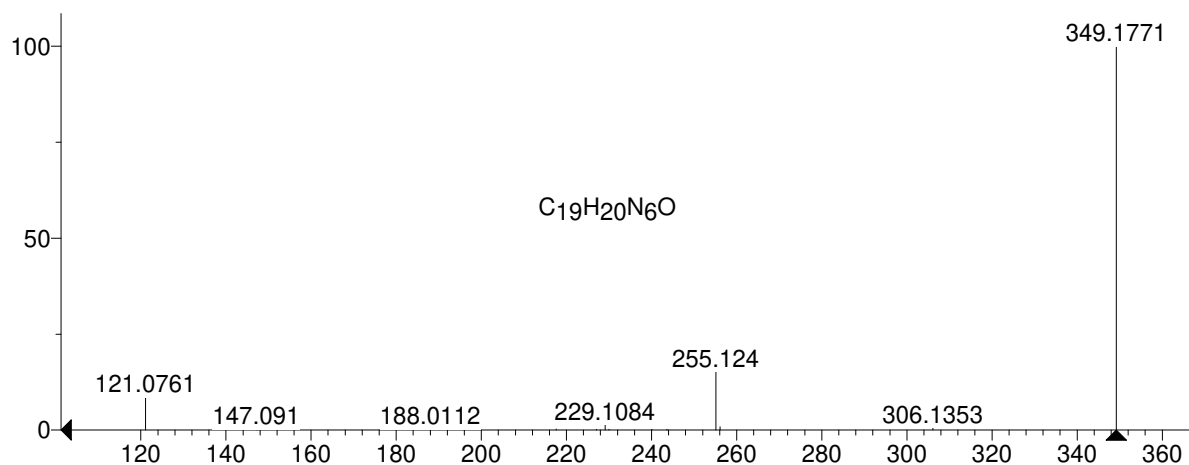

Hit 4 : Enalaprilat [M+H]<sup>+</sup> HCD 13V P=349.2  
C<sub>18</sub>H<sub>24</sub>N<sub>2</sub>O<sub>5</sub>; MF: 14; RMF: 304; Prob 0.19%; CAS: 76420-72-9; Lib: nist\_msms; ID: 120441.

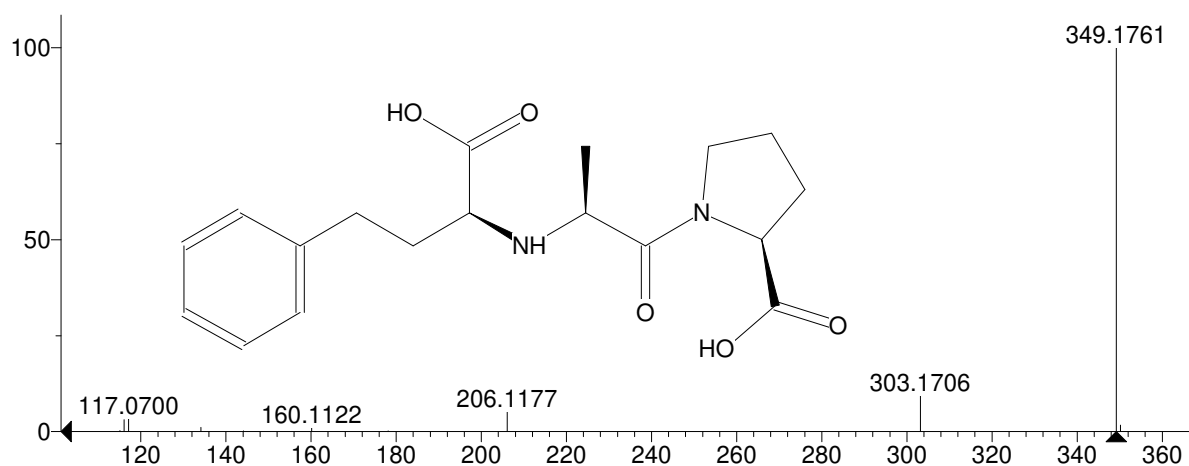

Hit 5 : methyl (2E,4E,8E)-7,13-dihydroxy-4,8,12-trimethyltetradeca-2,4,8-trienoate [M+K]<sup>+</sup> 35HCD P=349.2  
C<sub>18</sub>H<sub>30</sub>O<sub>4</sub>; MF: 1; RMF: 244; Prob 0.12%; Lib: mona-export-vf-npl\_qexactive; ID: 25033.

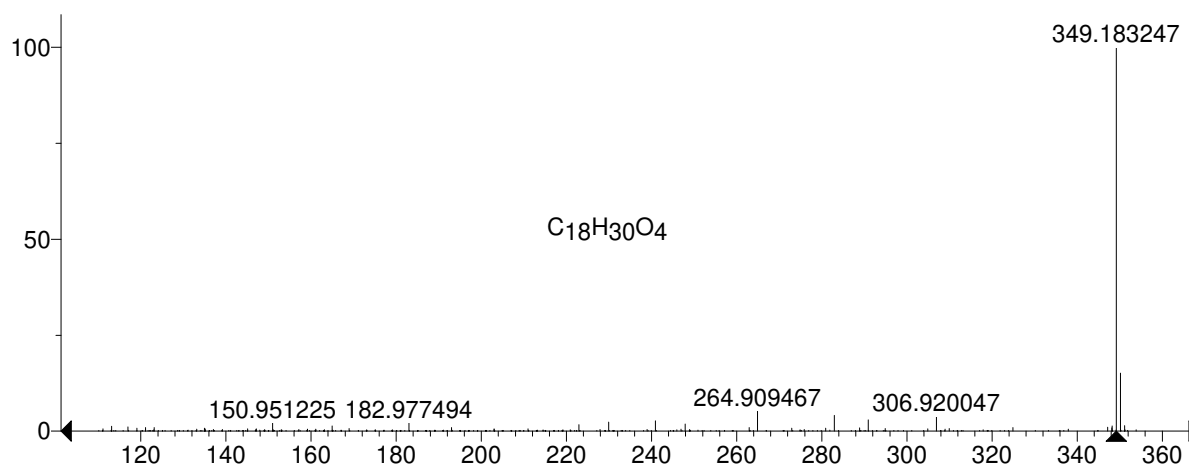

\*\* Search Report Page 1 of 2 \*\*

Unknown: Unknown (5.76\_255.1337m/z)  
Compound in Library Factor = -3273

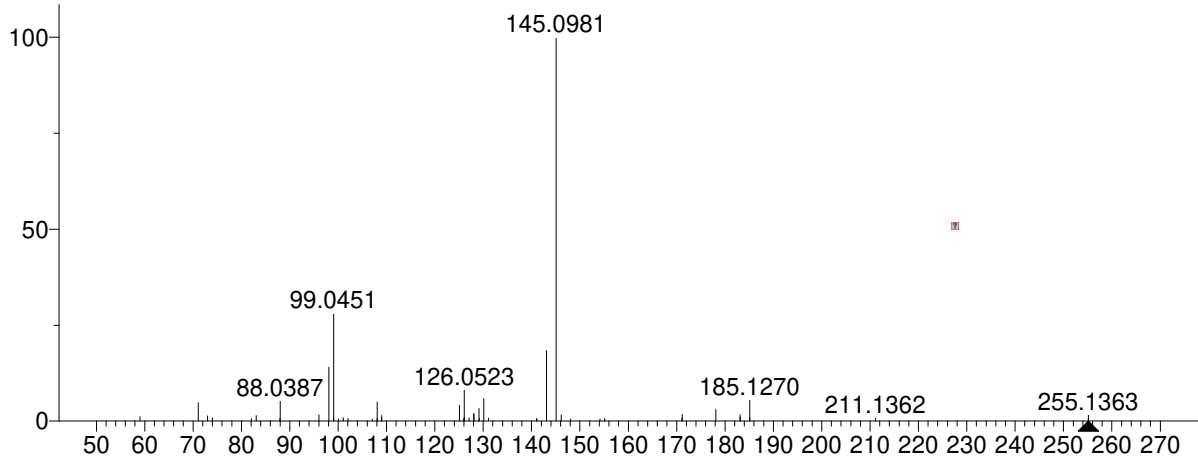

Hit 1 : N6-2-(4-Aminophenyl)ethyladenosine [M+H-C5H8O4]+ HCD 10V P=255.1  
C18H22N6O4; MF: 3; RMF: 75; Prob 27.4%; CAS: 89705-21-5; Lib: nist\_msms; ID: 298742.

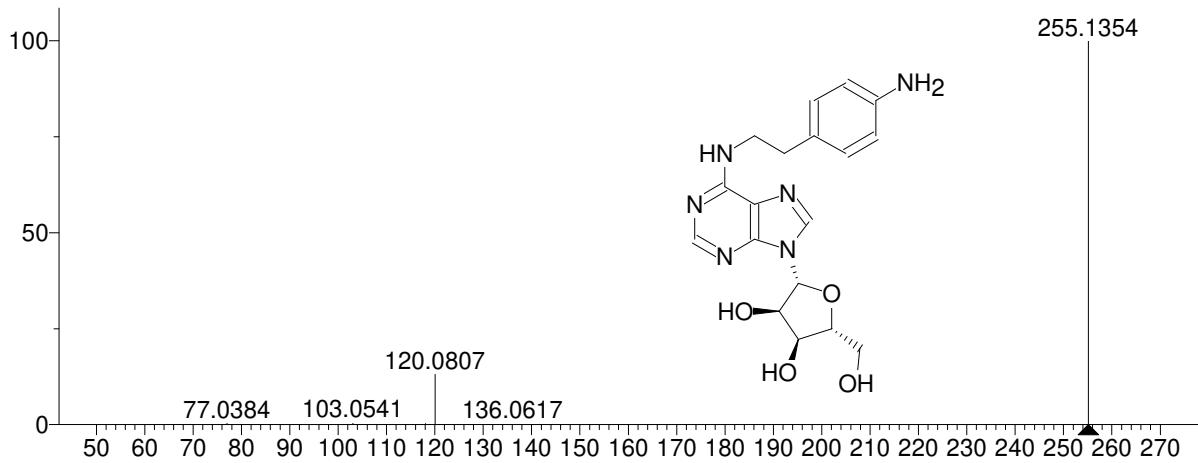

Hit 2 : Secobarbital [M+OH]- IT 35% P=255.1  
C12H18N2O3; MF: 0; RMF: 73; Prob 24.2%; CAS: 76-73-3; Lib: nist\_msms; ID: 14139.

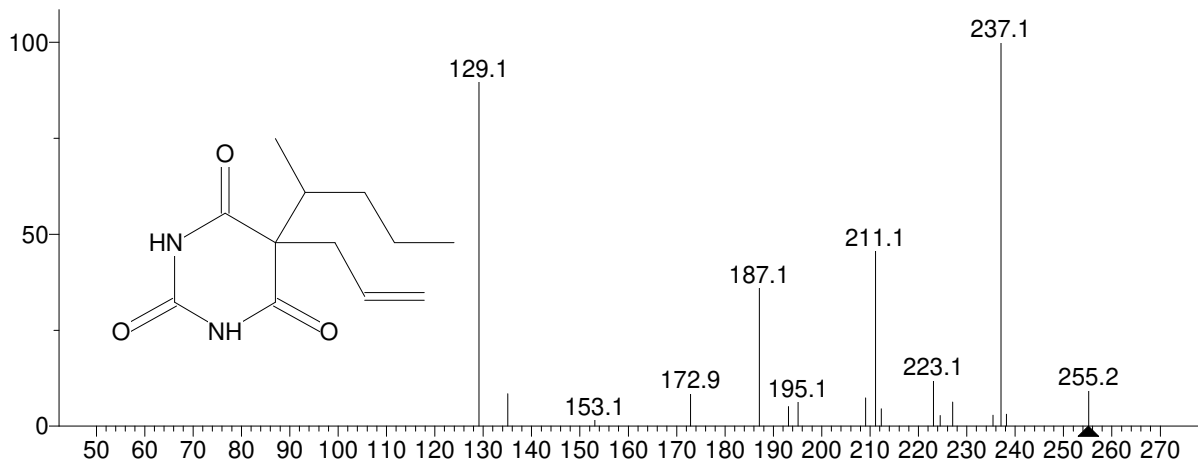

Hit 3 : Helenine [M+Na]<sup>+</sup> 35HCD P=255.1  
C<sub>15</sub>H<sub>20</sub>O<sub>2</sub>; MF: 0; RMF: 26; Prob 24.2%; Lib: mona-export-vf-npl\_qexactive; ID: 2647.

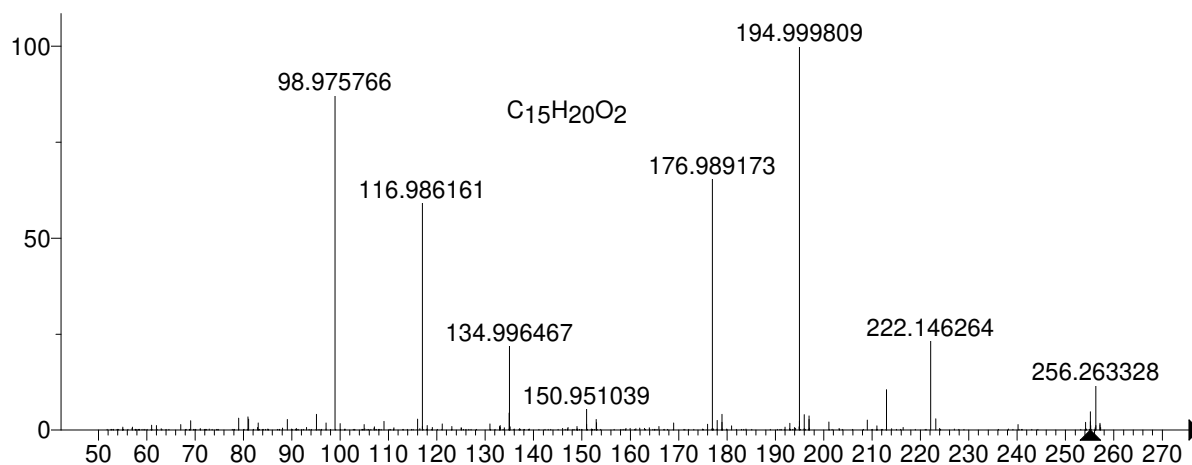

Hit 4 : Hexobarbital [M+H+H<sub>2</sub>O]<sup>+</sup> IT 35% P=255.1  
C<sub>12</sub>H<sub>16</sub>N<sub>2</sub>O<sub>3</sub>; MF: 0; RMF: 11; Prob 24.2%; CAS: 56-29-1; Lib: nist\_msms; ID: 14133.

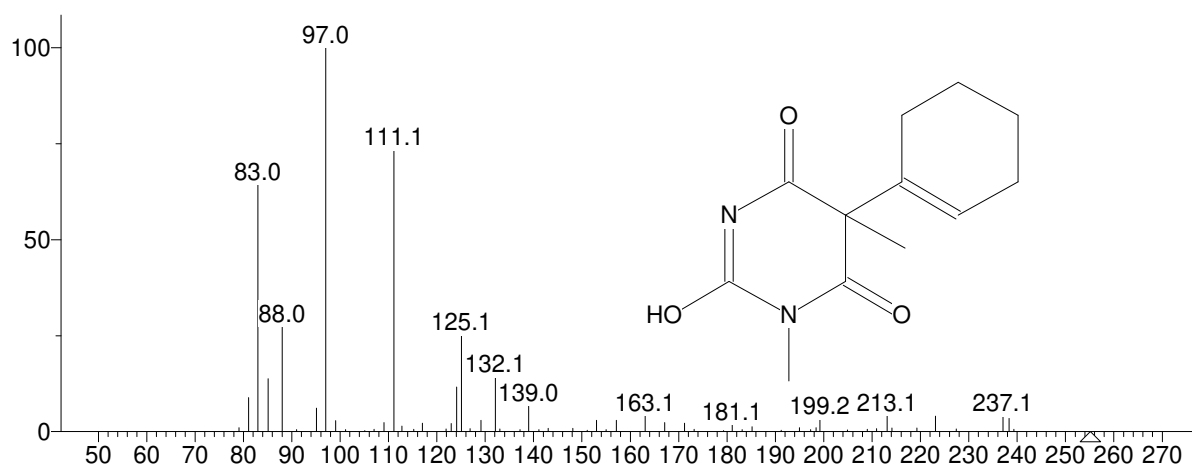



Unknown: Unknown (5.76\_367.1602m/z)  
Compound in Library Factor = 0

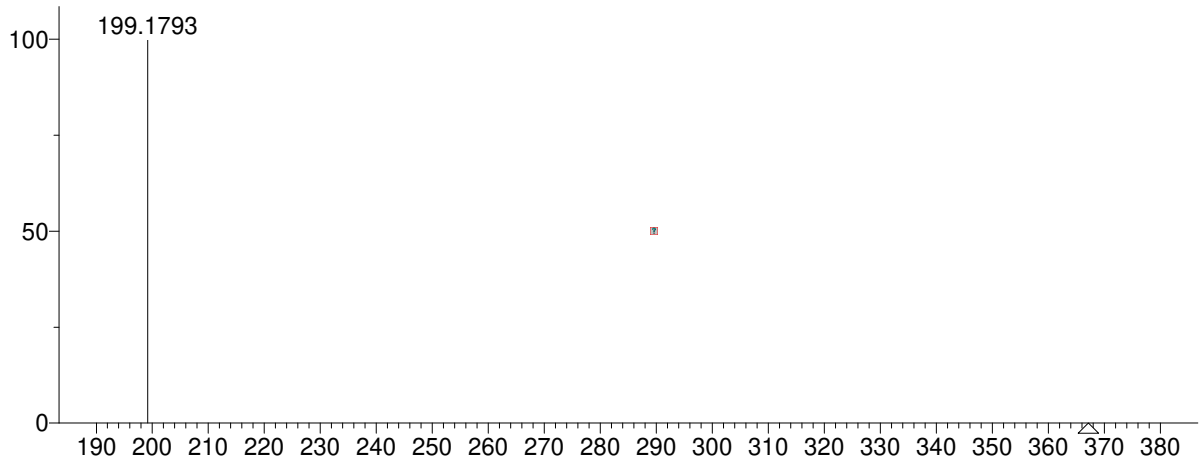

Unknown: Unknown (5.76\_743.1542m/z)  
Compound in Library Factor = 0

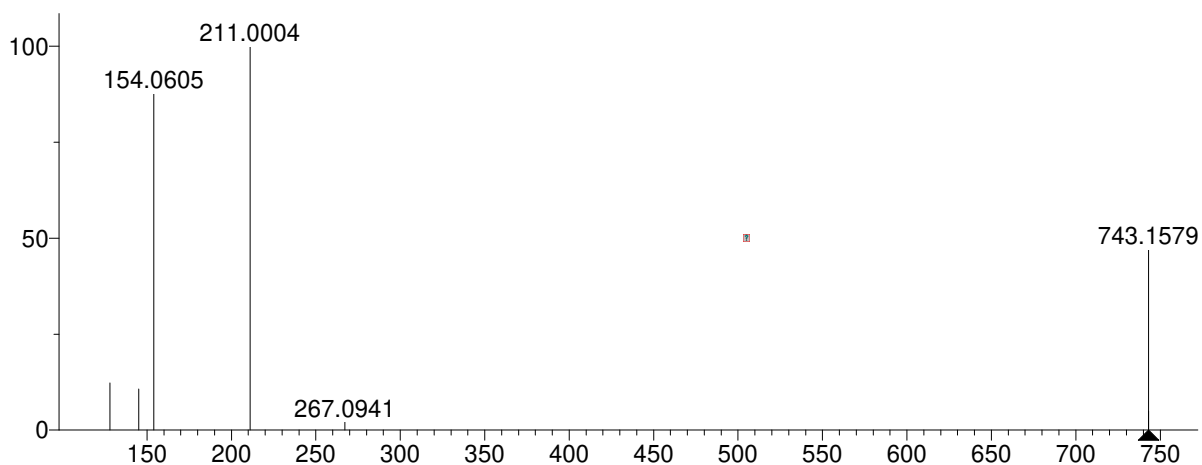

Hit 1 : [4,5-diacetyloxy-6-[7-hydroxy-5-methoxy-4-oxo-2-[4-[3,4,5-trihydroxy-6-(hydroxymethyl)oxan-2-yl]oxypheny  
C<sub>33</sub>H<sub>36</sub>O<sub>17</sub>; MF: 0; RMF: 13; Prob 100.0%; Lib: mona anthocyanidin-o-glycosides; ID: 7016.

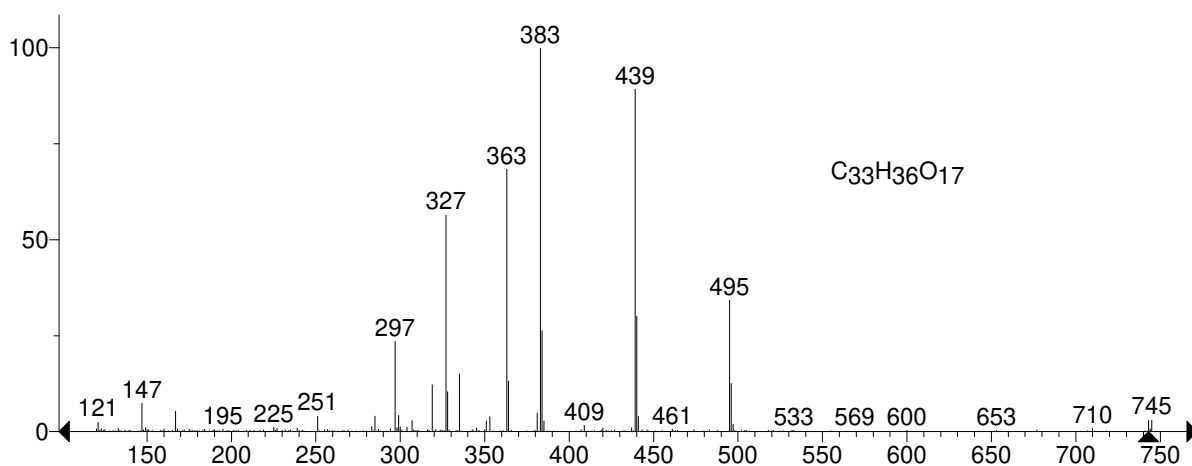

Unknown: Unknown (5.77\_385.1692m/z)  
Compound in Library Factor = 0

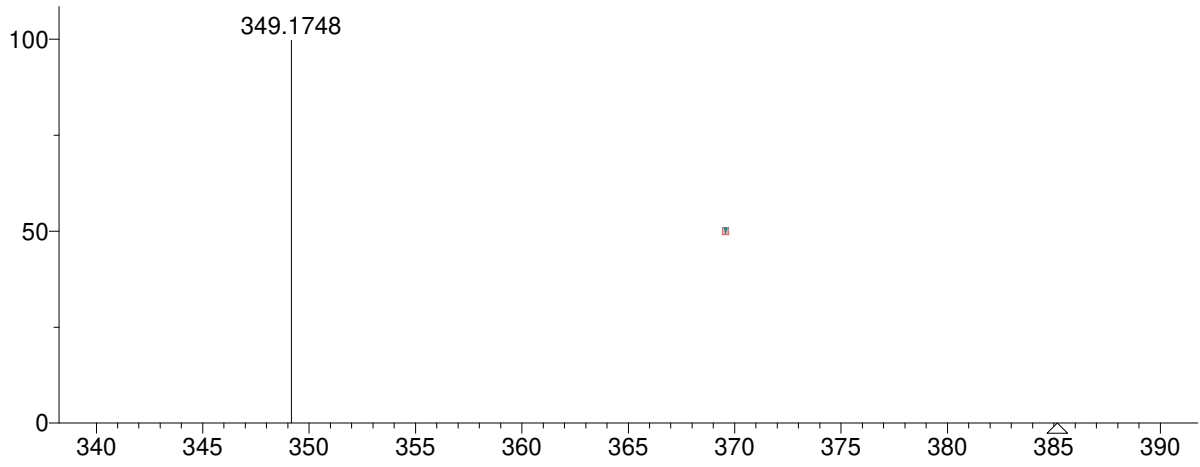

Unknown: Unknown (5.78\_372.2128m/z)  
Compound in Library Factor = 0

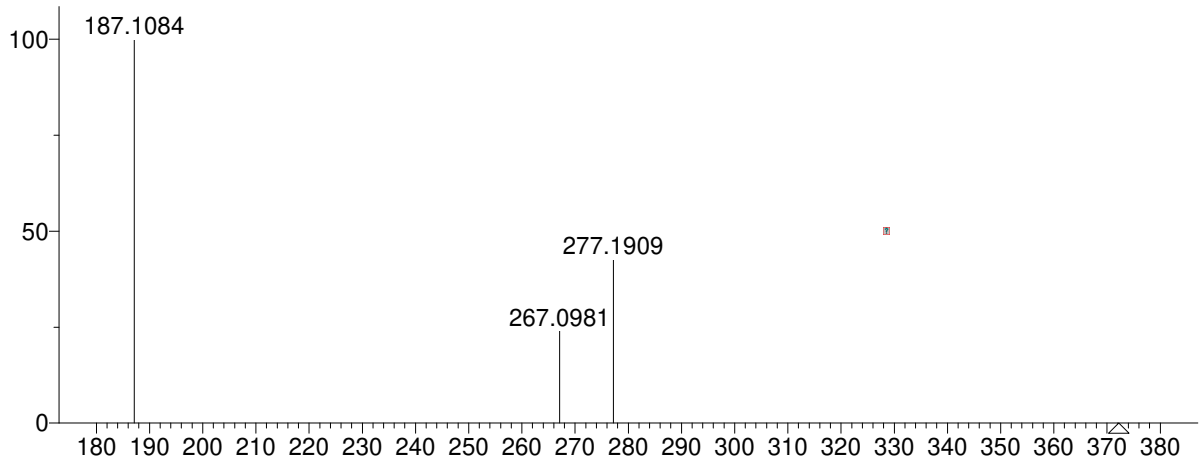

Unknown: Unknown (5.80\_298.0922m/z)  
Compound in Library Factor = 0

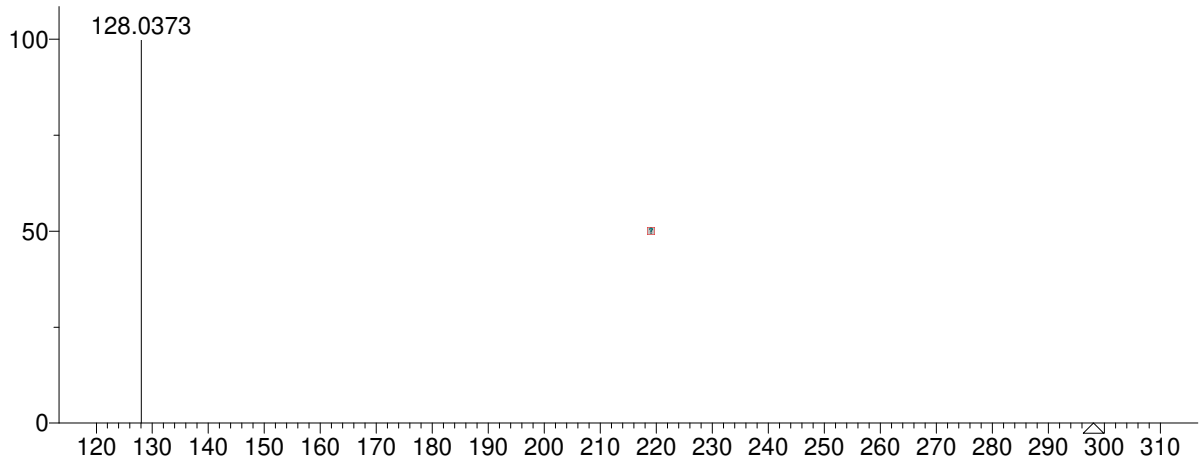

Unknown: Unknown (5.80\_420.1380m/z)  
Compound in Library Factor = 0

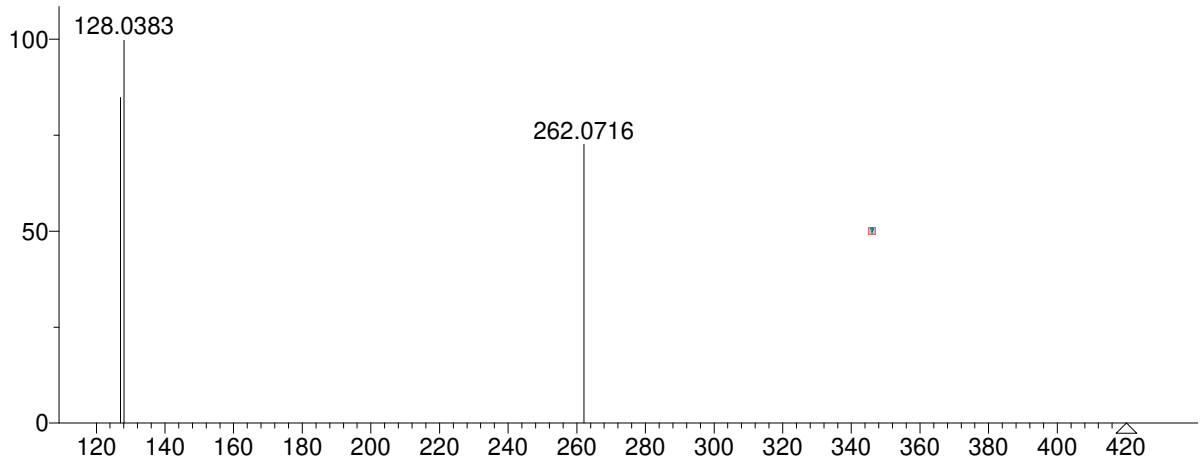

Unknown: Unknown (5.80\_510.1826m/z)  
Compound in Library Factor = 0

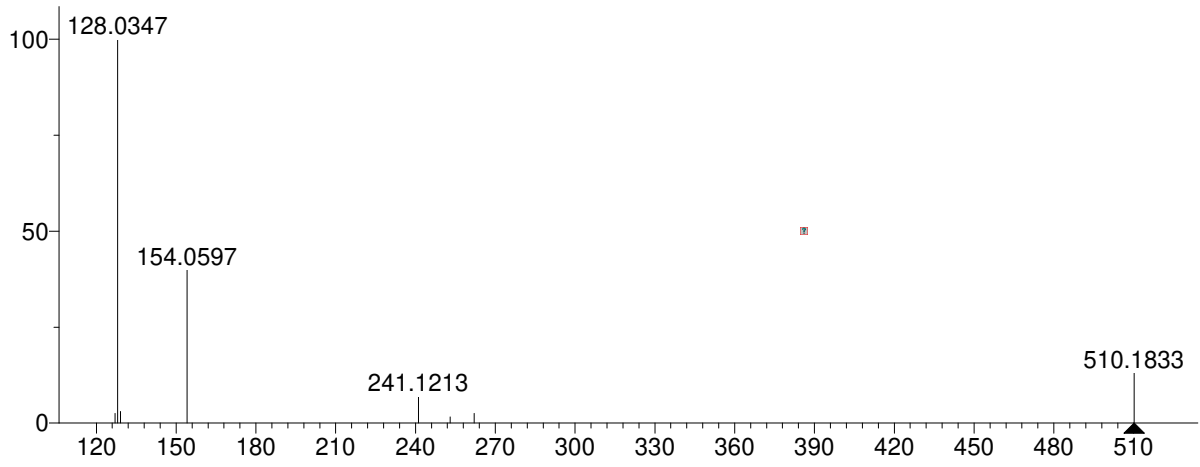

Unknown: Unknown (5.80\_680.2400m/z)  
Compound in Library Factor = 0

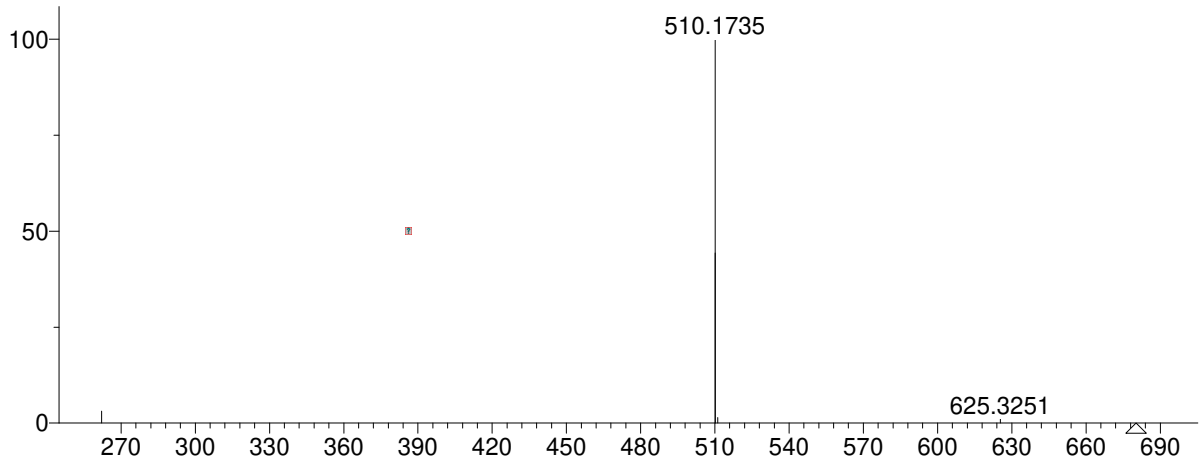



\*\* Search Report Page 1 of 2 \*\*

Unknown: Unknown (5.82\_227.1026m/z)  
Compound in Library Factor = -3273

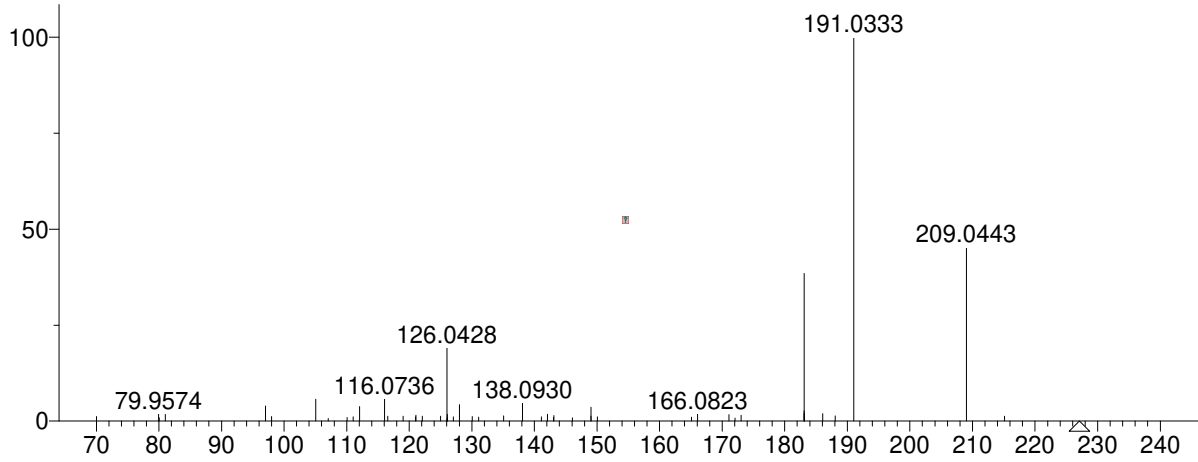

Hit 1 : 2,5-Dimethoxy-4-nitrophenethylamine [M+H]<sup>+</sup> HCD 34V P=227.1  
C<sub>10</sub>H<sub>14</sub>N<sub>2</sub>O<sub>4</sub>; MF: 2; RMF: 50; Prob 17.4%; CAS: 261789-00-8; Lib: nist\_msms; ID: 355212.

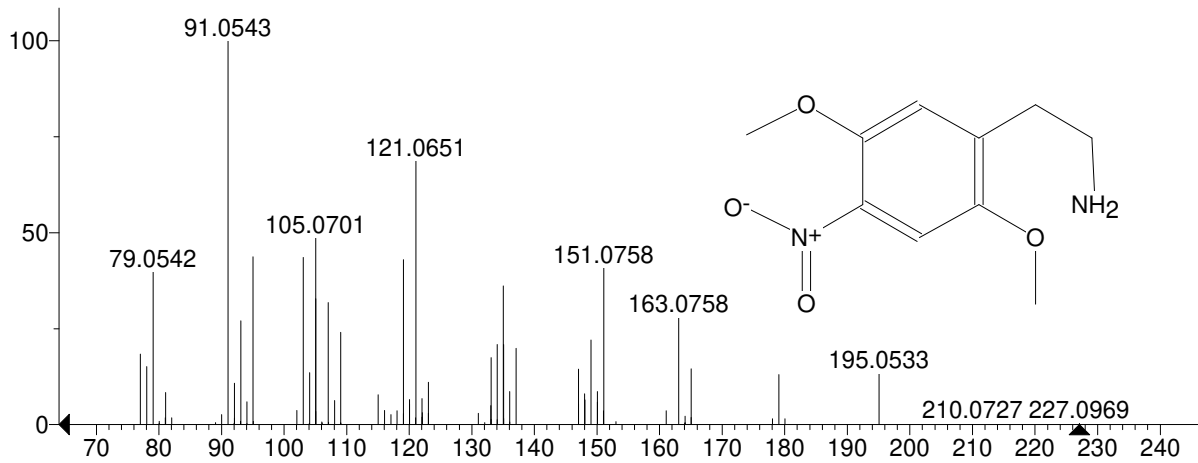

Hit 2 : Pro-Hyp [M-H]<sup>-</sup> 35eV P=227.1  
C<sub>10</sub>H<sub>16</sub>N<sub>2</sub>O<sub>4</sub>; MF: 2; RMF: 46; Prob 17.4%; Lib: mona-export-fiehn\_hilic; ID: 2943.

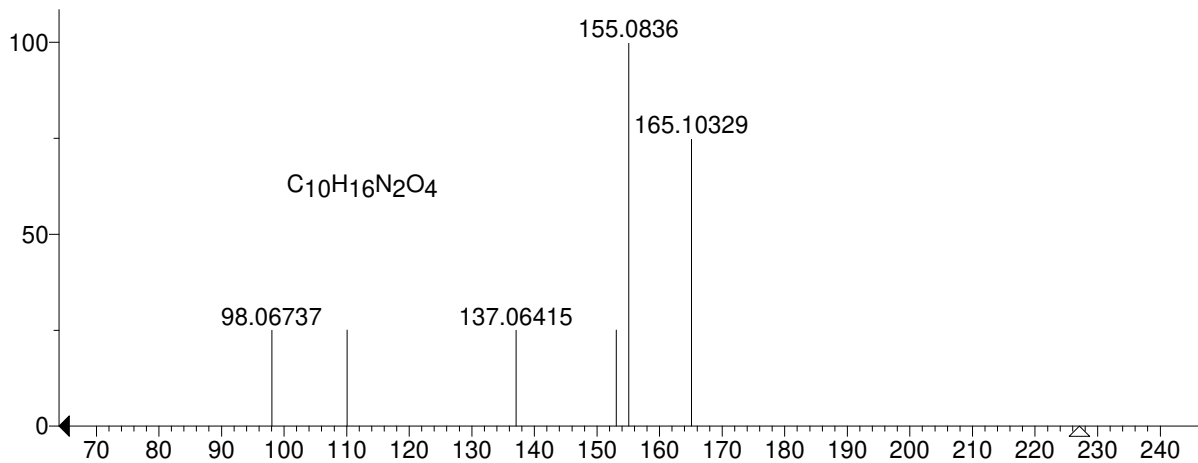

Hit 3 : PyroGlu-Pro [M+H]<sup>+</sup> QTOF 12V P=227.1  
C<sub>10</sub>H<sub>14</sub>N<sub>2</sub>O<sub>4</sub>; MF: 1; RMF: 85; Prob 16.8%; Lib: nist\_msms; ID: 47869.

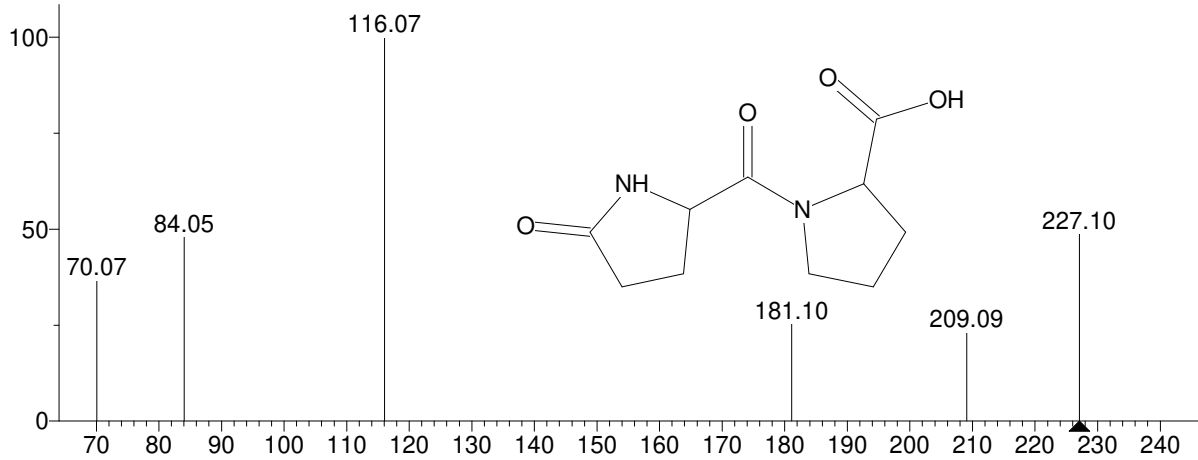

Hit 4 : Carbidopa [M+H]<sup>+</sup> HCD 40V P=227.1  
C<sub>10</sub>H<sub>14</sub>N<sub>2</sub>O<sub>4</sub>; MF: 0; RMF: 39; Prob 16.1%; CAS: 28860-95-9; Lib: nist\_msms; ID: 313736.

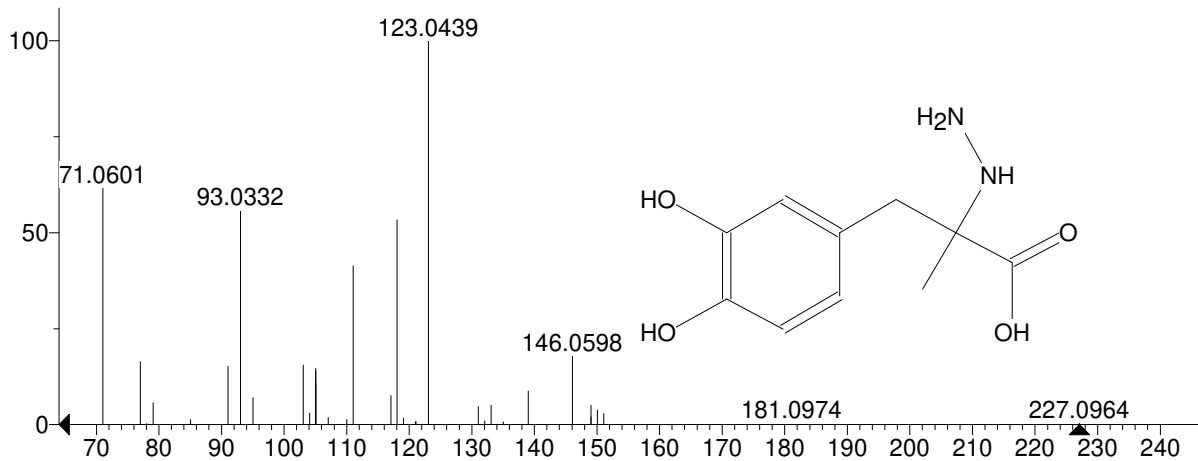

Hit 5 : Proline-hydroxyproline [M-H]<sup>-</sup> 20-30-40%) P=227.1  
C<sub>10</sub>H<sub>16</sub>N<sub>2</sub>O<sub>4</sub>; MF: 0; RMF: 27; Prob 16.1%; Lib: mona-export-fiehn\_hilic; ID: 1464.

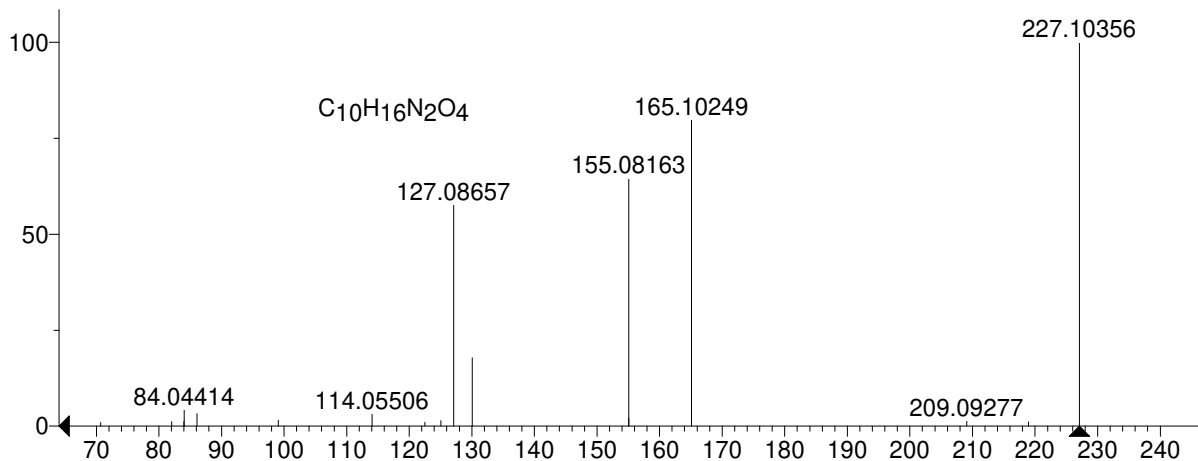

Unknown: Unknown (5.82\_470.2595m/z)  
Compound in Library Factor = -2387

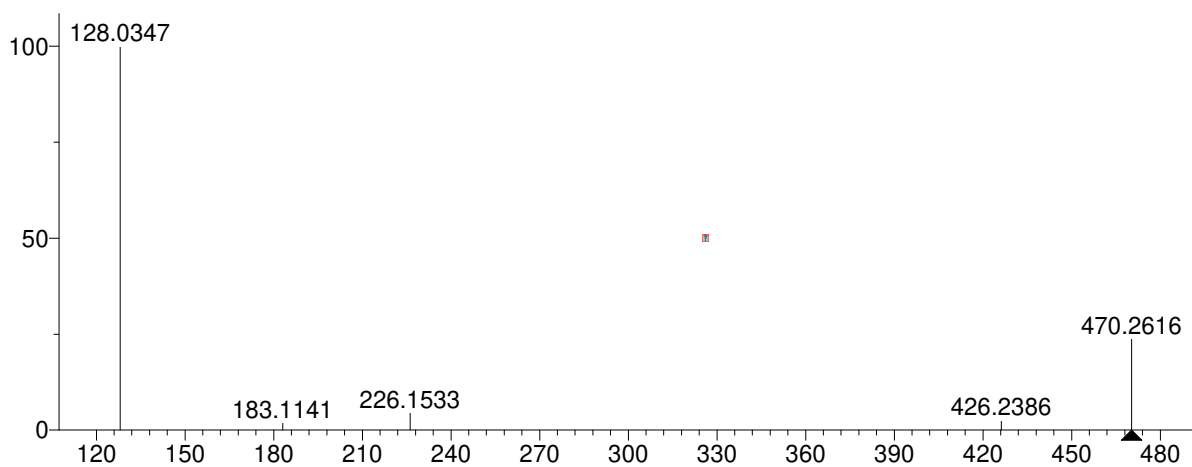

Hit 1 : Angiogenin (108-123) [M+4H]<sup>4+</sup> HCD 7eV P=470.3  
C<sub>83</sub>H<sub>132</sub>N<sub>26</sub>O<sub>24</sub>; MF: 11; RMF: 536; Prob 100.0%; Lib: nist\_msms2; ID: 51723.

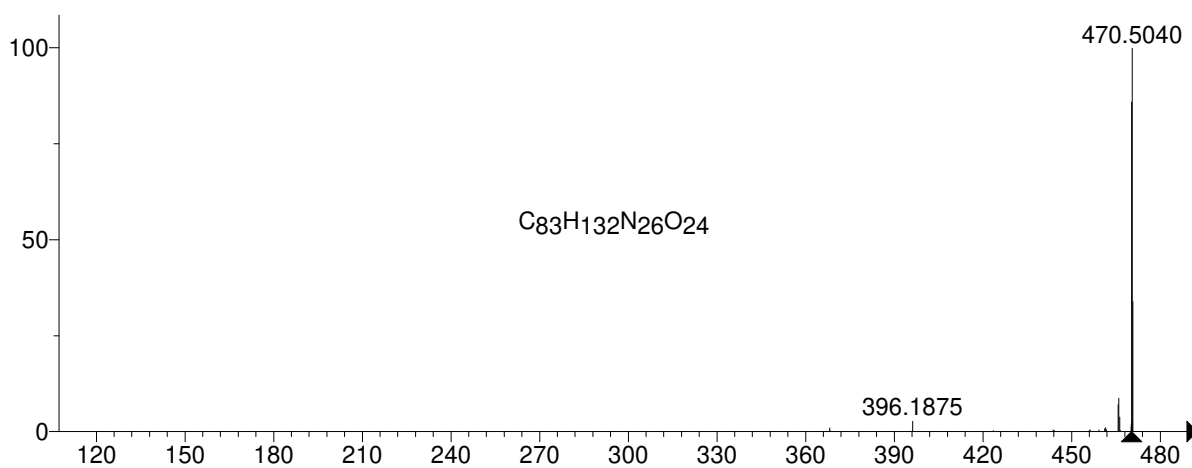

\*\* Search Report Page 1 of 2 \*\*

Unknown: Unknown (5.83\_289.0007m/z)  
Compound in Library Factor = 0

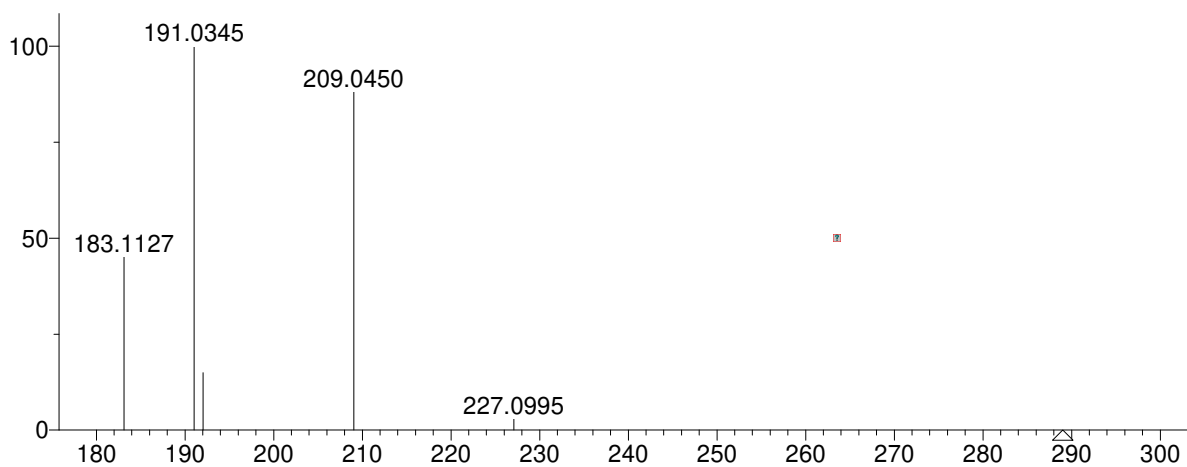

Hit 1 : Boscalid [M+H-HCl]<sup>+</sup>=>289.0 IT 35% P=289  
C<sub>18</sub>H<sub>12</sub>Cl<sub>2</sub>N<sub>2</sub>O; MF: 0; RMF: 73; Prob 14.3%; CAS: 188425-85-6; Lib: nist\_msms; ID: 472656.

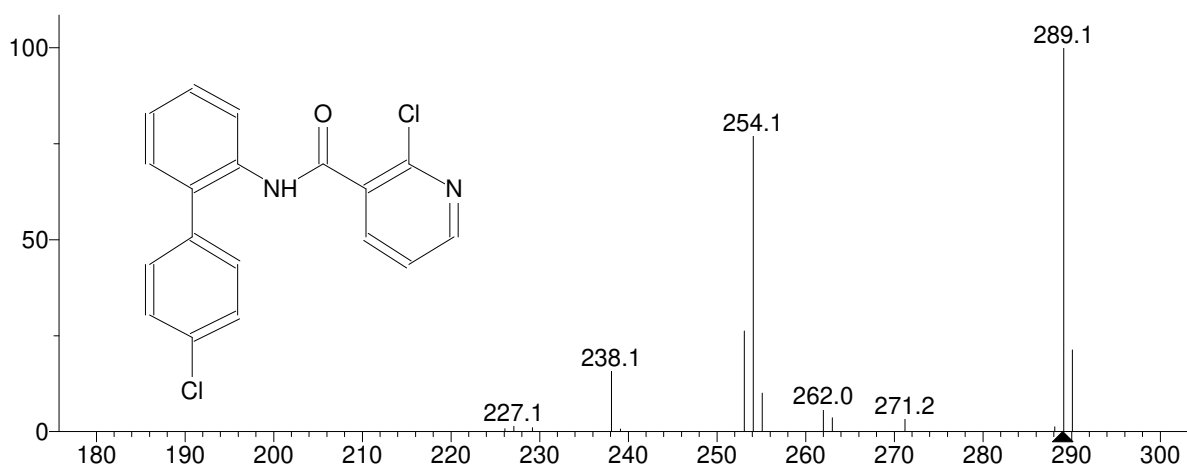

Hit 2 : Argininosuccinate [M-H]<sup>-</sup> 30V P=289  
C<sub>10</sub>H<sub>18</sub>N<sub>4</sub>O<sub>6</sub>; MF: 0; RMF: 32; Prob 14.3%; Lib: mona-export-ic-ms-ms\_negative\_mode; ID: 5510.

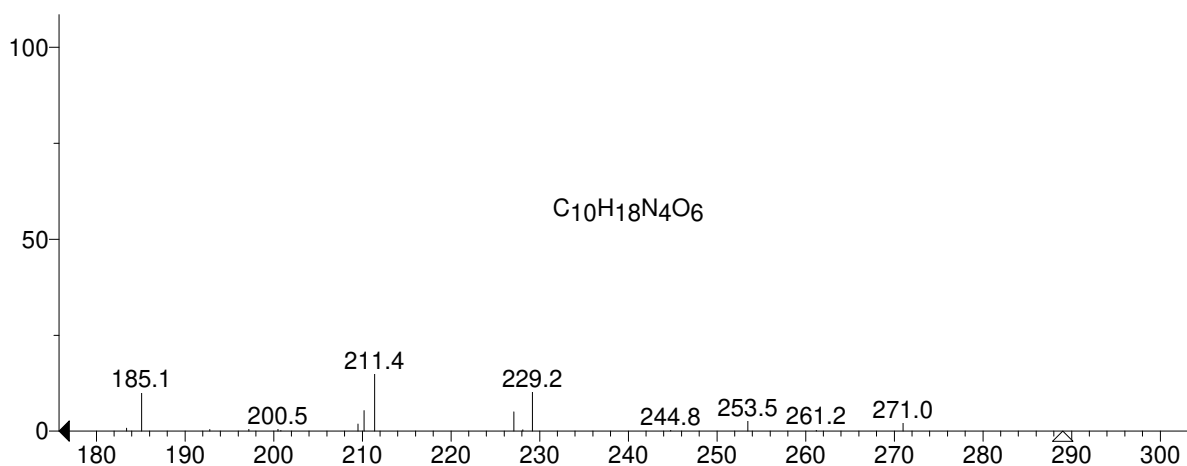

Hit 3 : Glycyrrhizic acid [M-H-C30H46O4]-=>289.0 IT 35% P=289  
C42H62O16; MF: 0; RMF: 19; Prob 14.3%; CAS: 1405-86-3; Lib: nist\_msms; ID: 233516.

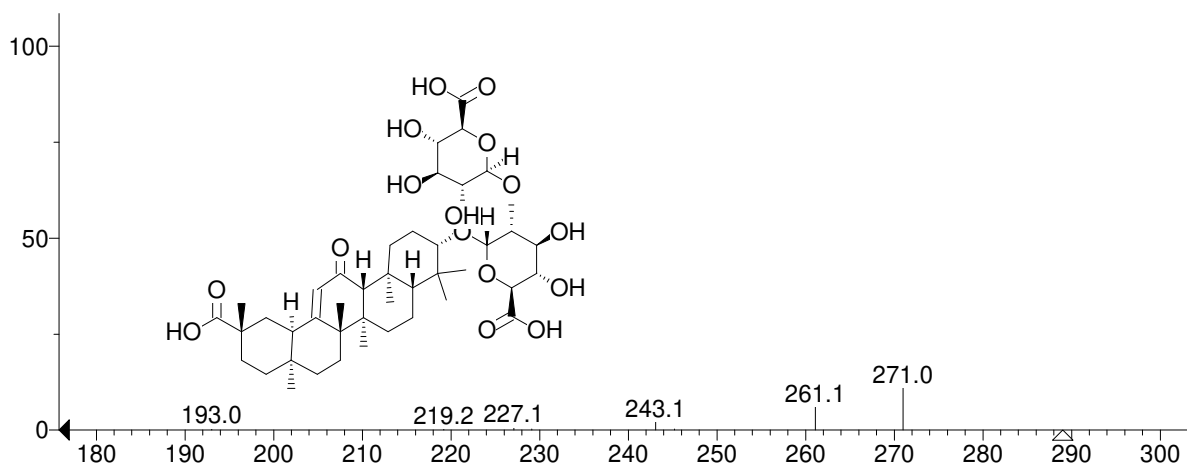

Hit 4 : (-)-Epicatechin gallate [M-H]-=>289.0 IT 35% P=289  
C22H18O10; MF: 0; RMF: 11; Prob 14.3%; CAS: 1257-08-5; Lib: nist\_msms; ID: 233423.

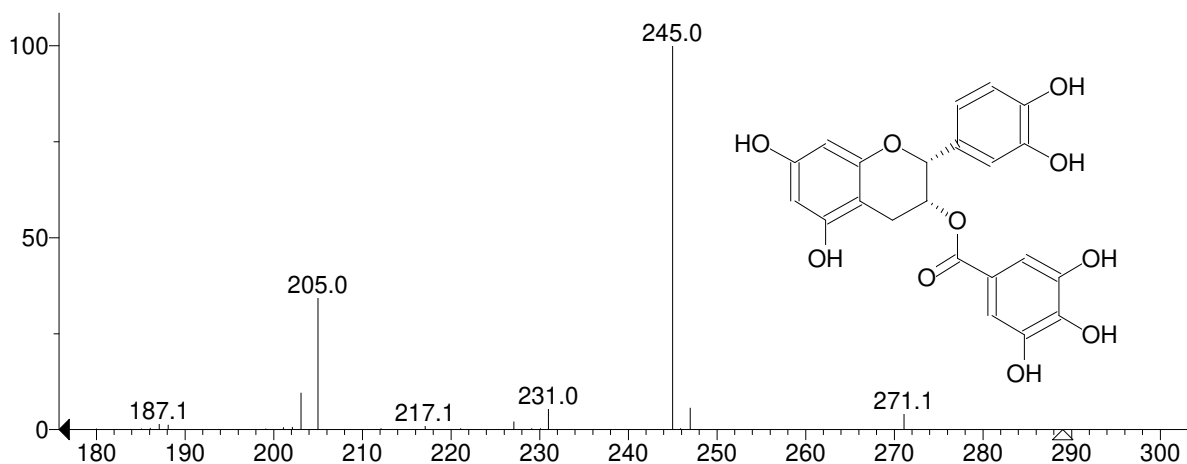

Hit 5 : D-Glucose, 2-deoxy-2-[(7-nitro-2,1,3-benzoxadiazol-4-yl)amino]- [M+H-2H2O]+=>289.0 IT 35% P=289  
C12H14N4O8; MF: 0; RMF: 8; Prob 14.3%; CAS: 186689-07-6; Lib: nist\_msms; ID: 253354.

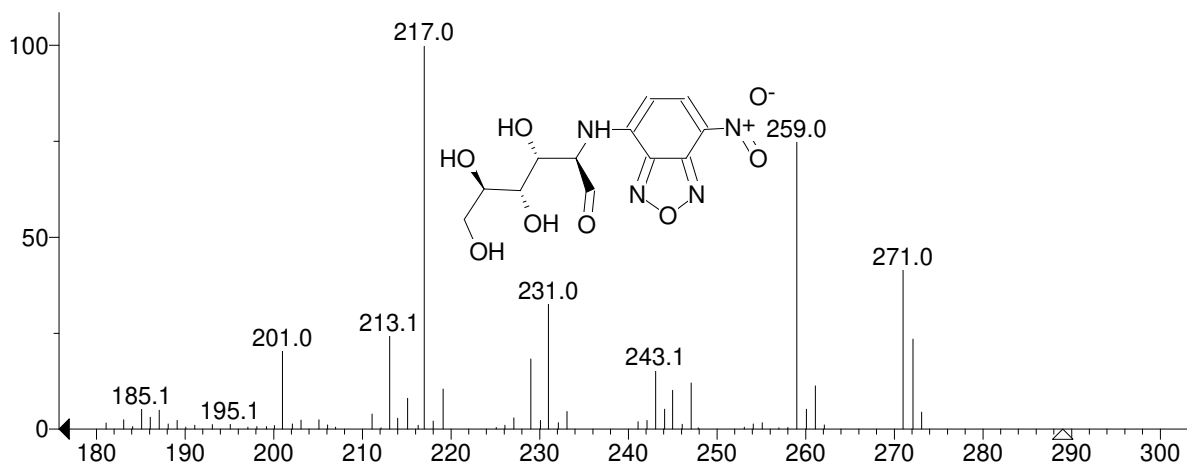

\*\* Search Report Page 1 of 2 \*\*

Unknown: Unknown (5.84\_490.2388m/z)  
Compound in Library Factor = 0

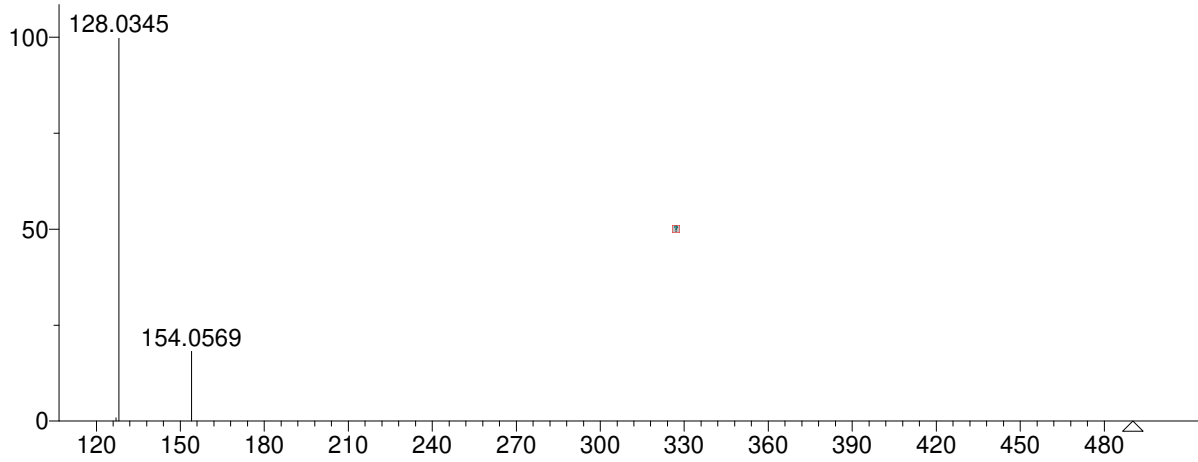

Hit 1 : Trp-Glu-Arg [M+H]<sup>+</sup> QTOF 40V P=490.2  
C22H31N7O6; MF: 0; RMF: 53; Prob 33.3%; Lib: nist\_msms; ID: 54512.

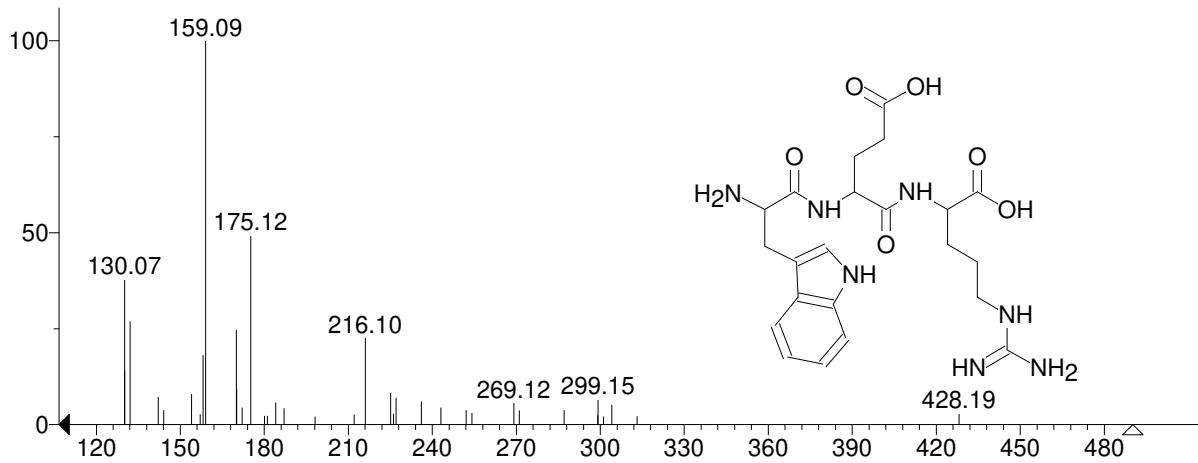

Hit 2 : Ethynylestradiol 3-β-D-glucuronide [M+NH4]<sup>+</sup> HCD 156V P=490.2  
C26H32O8; MF: 0; RMF: 24; Prob 33.3%; CAS: 60134-76-1; Lib: nist\_msms; ID: 438271.

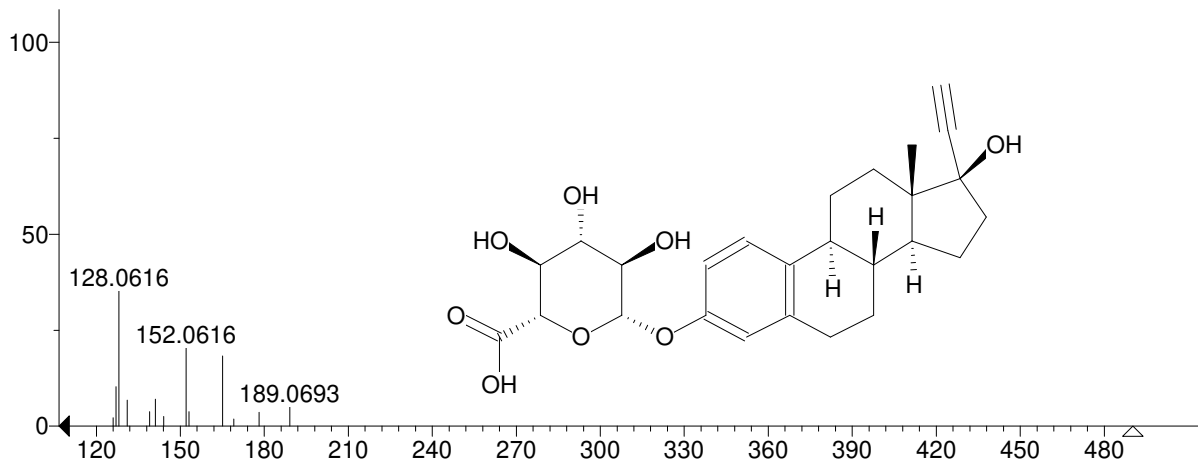

Hit 3 : Ethynylestradiol 17- $\beta$ -D-glucuronide [M+NH<sub>4</sub>]<sup>+</sup> HCD 156V P=490.2  
C<sub>26</sub>H<sub>32</sub>O<sub>8</sub>; MF: 0; RMF: 22; Prob 33.3%; CAS: 75803-39-3; Lib: nist\_msms; ID: 438418.

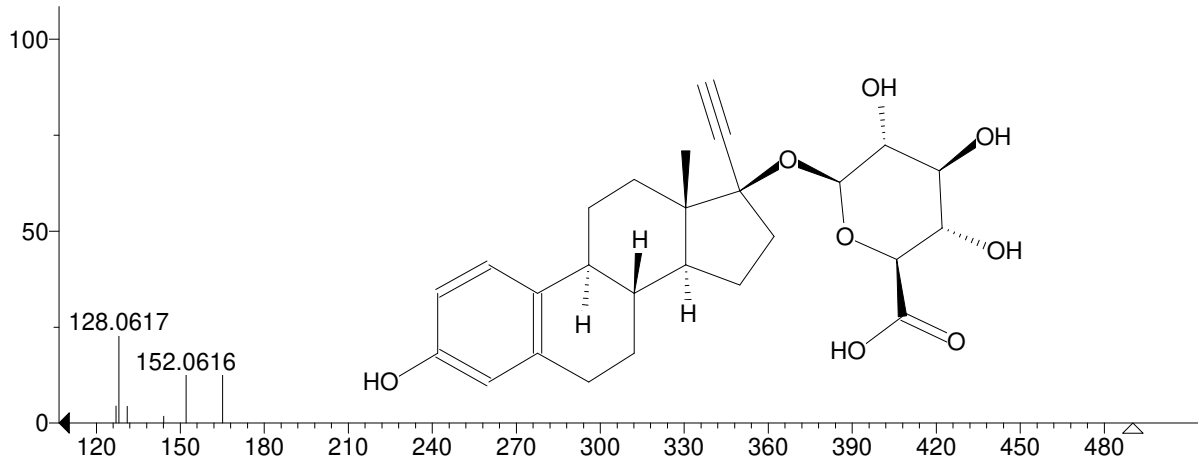

Unknown: Unknown (5.86\_356.1459m/z)  
Compound in Library Factor = 0

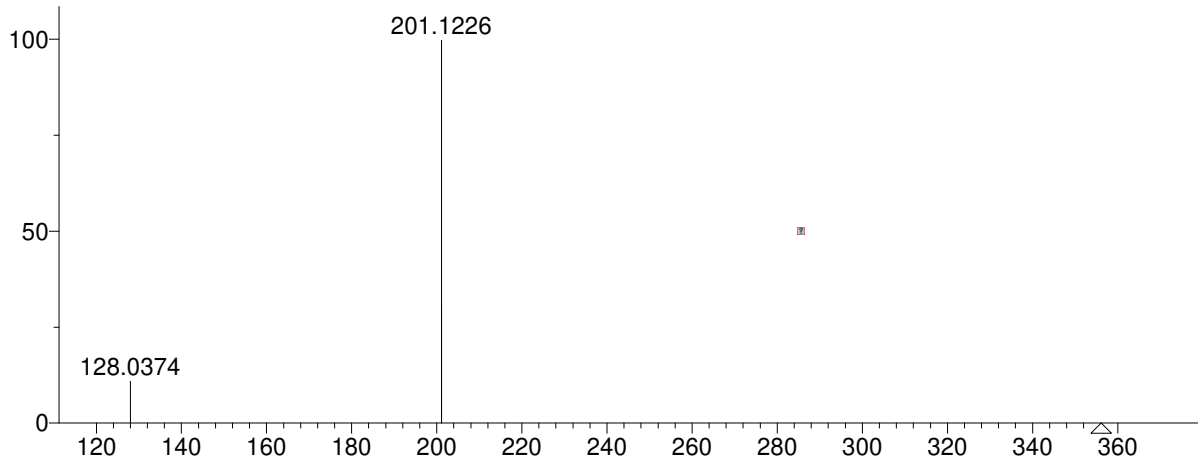



Unknown: Unknown (5.86\_516.2167m/z)  
Compound in Library Factor = 0

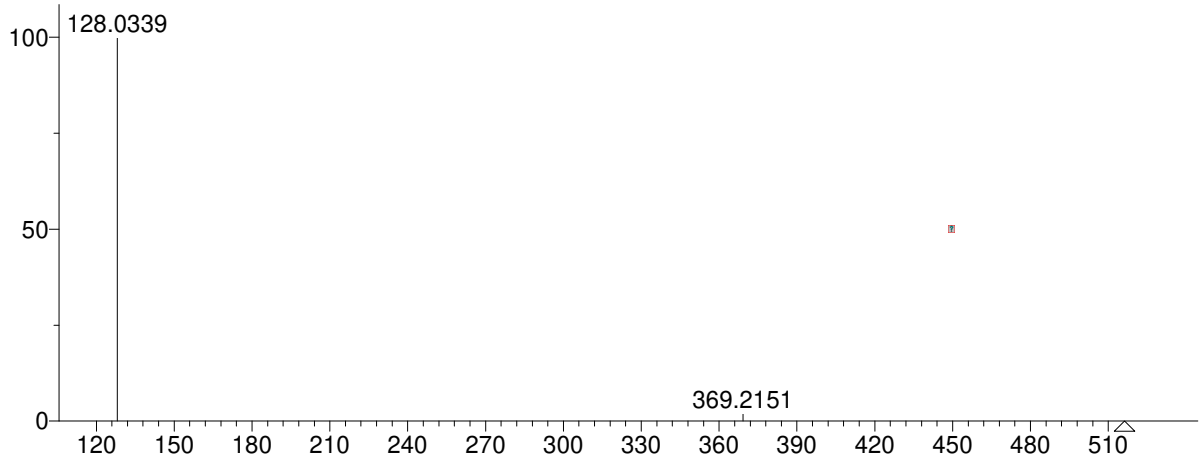

\*\* Search Report Page 1 of 1 \*\*

Unknown: Unknown (5.88\_413.1651m/z)  
Compound in Library Factor = 0

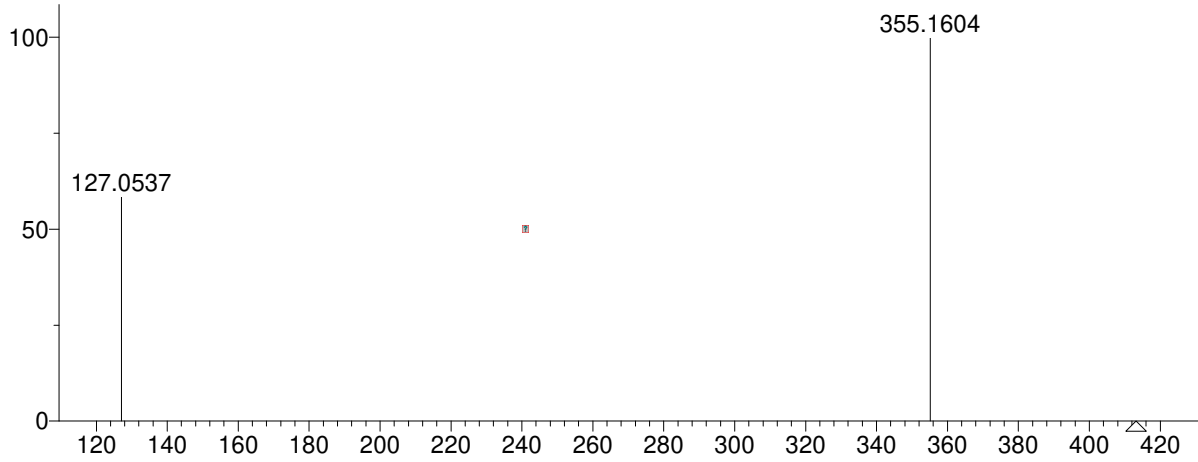

Hit 1 : 2-Hydroxymethyloratadine [M+H]<sup>+</sup> HCD 132V P=413.2  
C<sub>23</sub>H<sub>25</sub>ClN<sub>2</sub>O<sub>3</sub>; MF: 0; RMF: 27; Prob 50.0%; CAS: 609806-39-5; Lib: nist\_msms; ID: 442227.

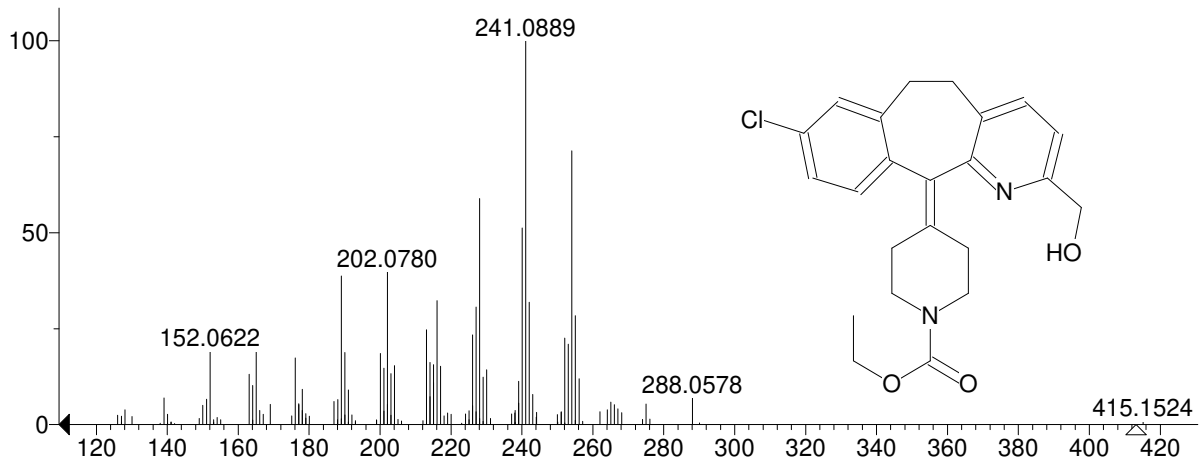

Hit 2 : 4-Hydroxymethyloratadine [M+H]<sup>+</sup> HCD 132V P=413.2  
C<sub>23</sub>H<sub>25</sub>ClN<sub>2</sub>O<sub>3</sub>; MF: 0; RMF: 23; Prob 50.0%; CAS: 609806-40-8; Lib: nist\_msms; ID: 442293.

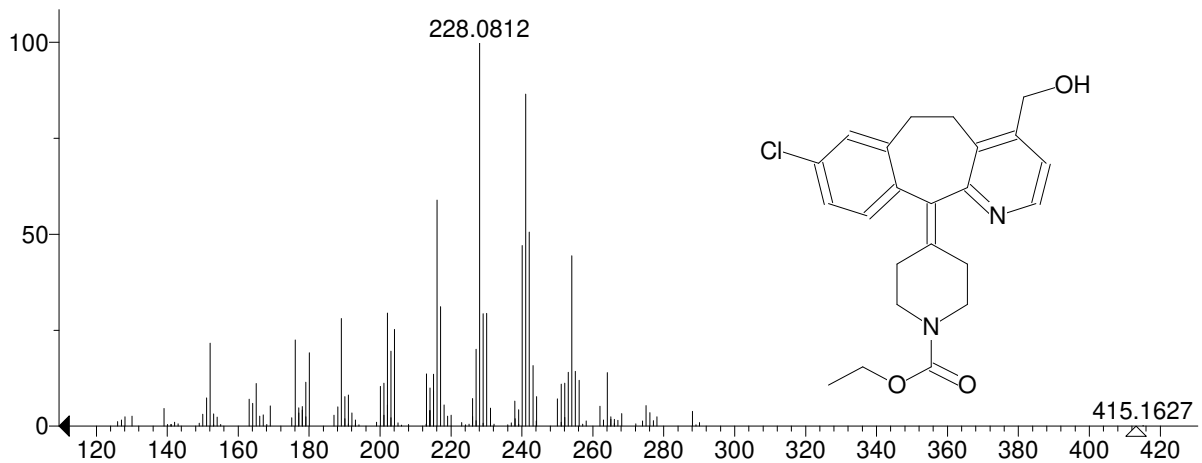

Unknown: Unknown (5.88\_486.2067m/z)  
Compound in Library Factor = 0

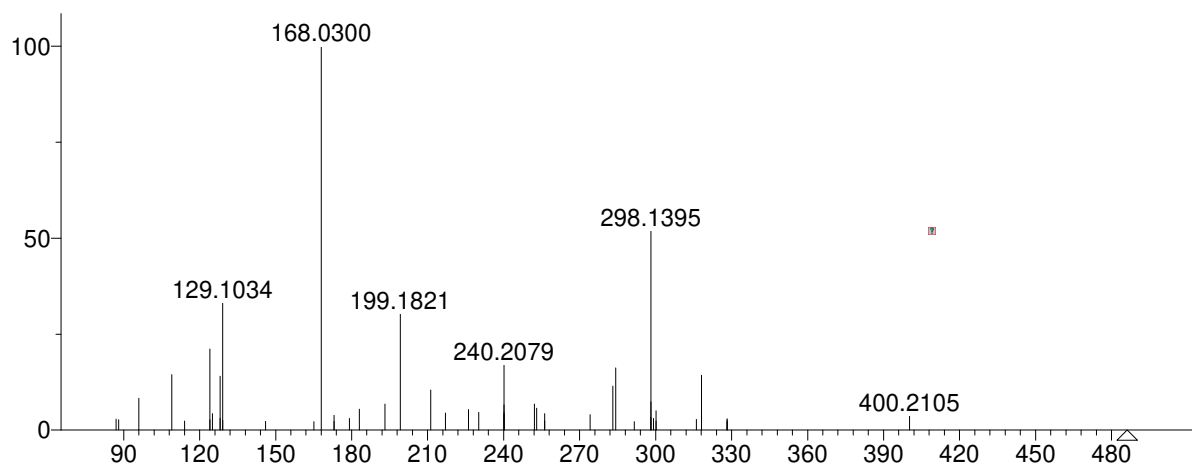

Hit 1 : rac-N-Allyloxycarbonyl-cis-moxifloxacin acyl-β-D-glucuronide allyl ester [M+H-C9H12O6]+ HCD 126V P- C34H40FN3O12; MF: 0; RMF: 27; Prob 100.0%; Lib: nist\_msms; ID: 431491.

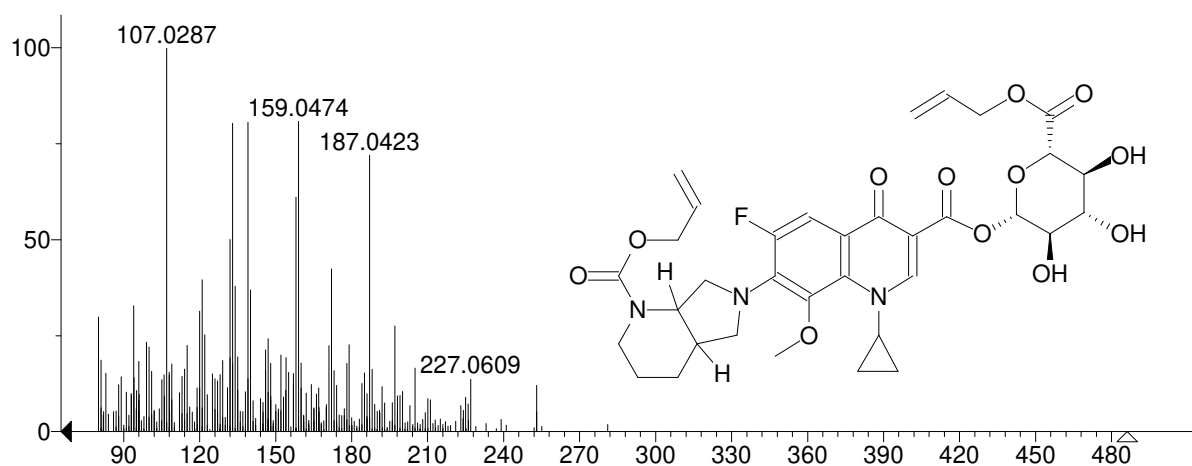

Unknown: Unknown (5.94\_246.9906m/z)  
Compound in Library Factor = 0

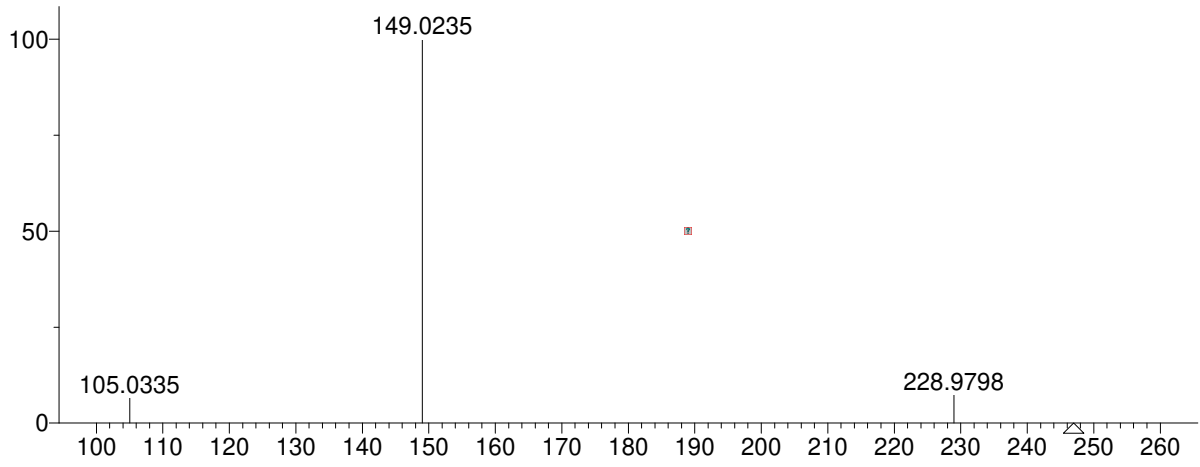

Unknown: Unknown (5.94\_472.2409m/z)  
Compound in Library Factor = -3273

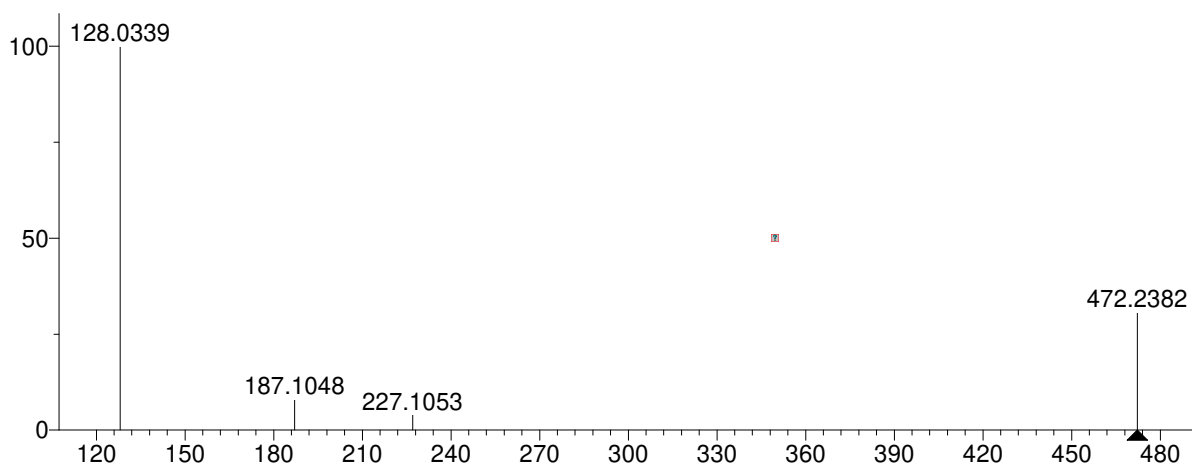

Hit 1 : lysoPE 16:2 [M+Na]<sup>+</sup> 25eV P=472.2  
C<sub>21</sub>H<sub>40</sub>NO<sub>7</sub>P; MF: 2; RMF: 98; Prob 100.0%; Lib: mona-export-in-silico\_spectra; ID: 35970.

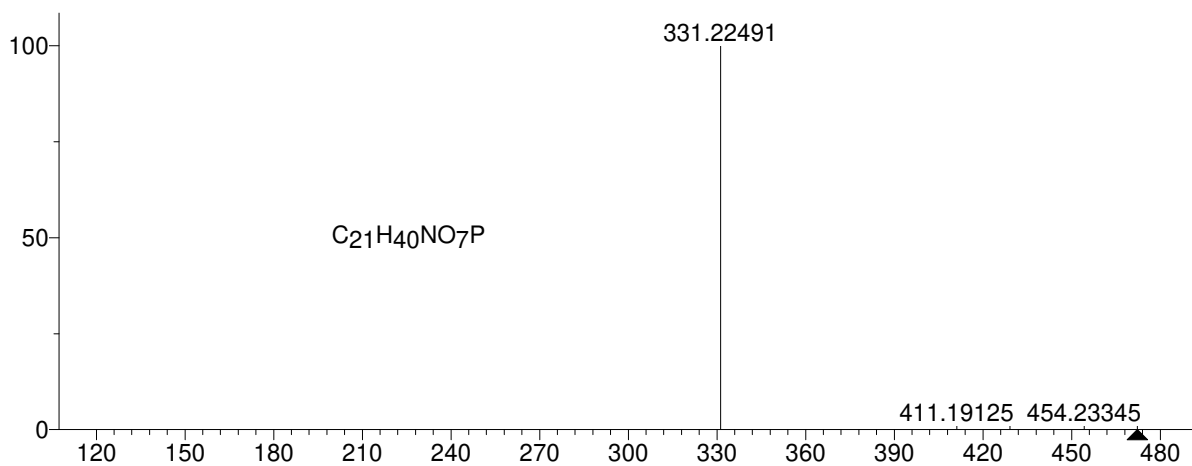

\*\* Search Report Page 1 of 2 \*\*

Unknown: Unknown (5.94\_545.1998m/z)  
Compound in Library Factor = -3273

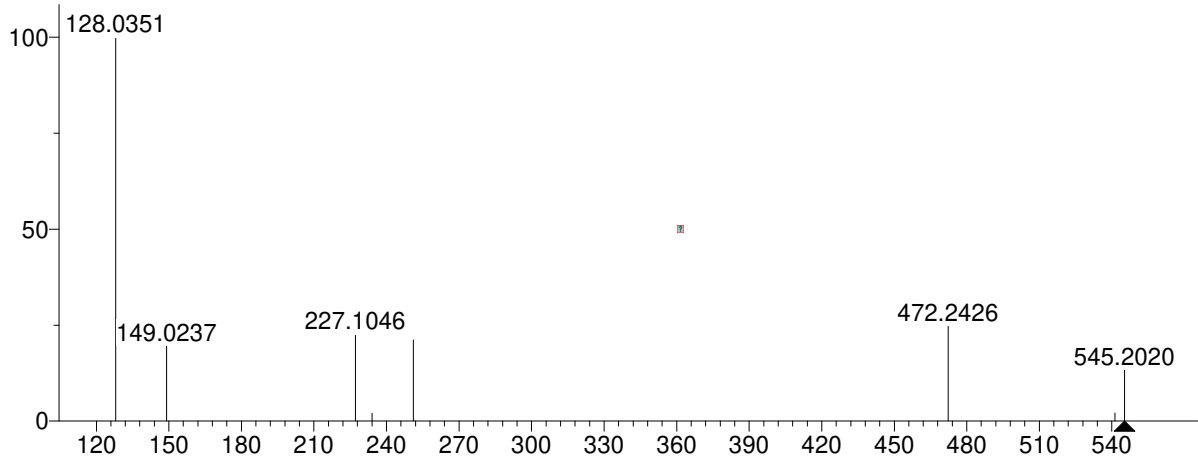

Hit 1 : 2-(hydroxymethyl)-6-[5-[3-(hydroxymethyl)-5-(3-hydroxypropyl)-7-methoxy-2,3-dihydro-1-benzofuran-2-yl]-2-C<sub>26</sub>H<sub>34</sub>O<sub>11</sub>; MF: 2; RMF: 179; Prob 10.7%; Lib: mona-export-vf-npl\_qexactive; ID: 2287.

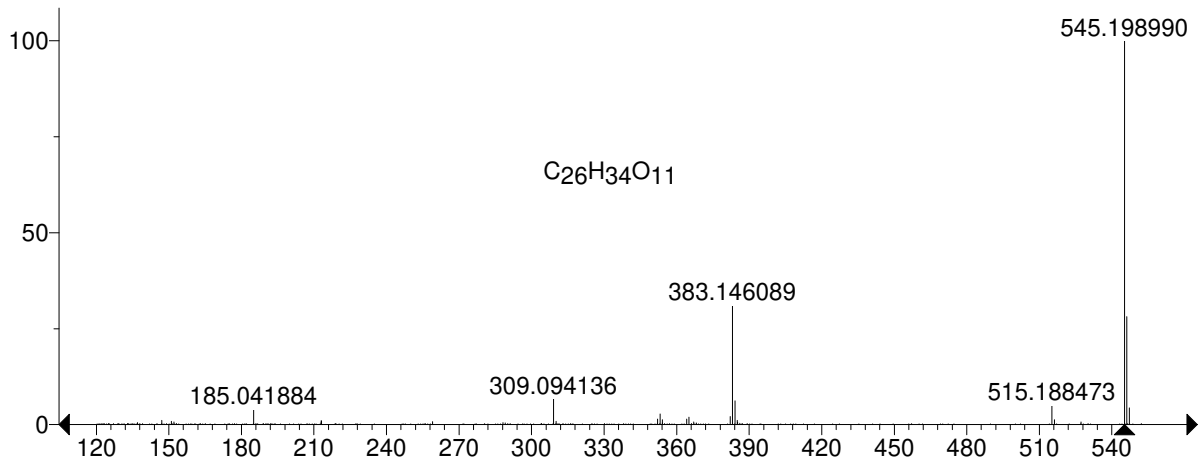

Hit 2 : (7R,8S)-dihydrodehydrodiconiferyl alcohol 9-O-beta-D-glucopyranoside [M+H]<sup>+</sup> P=545.2  
C<sub>26</sub>H<sub>34</sub>O<sub>11</sub>; MF: 1; RMF: 196; Prob 10.3%; Lib: mona-export-gnps; ID: 5804.

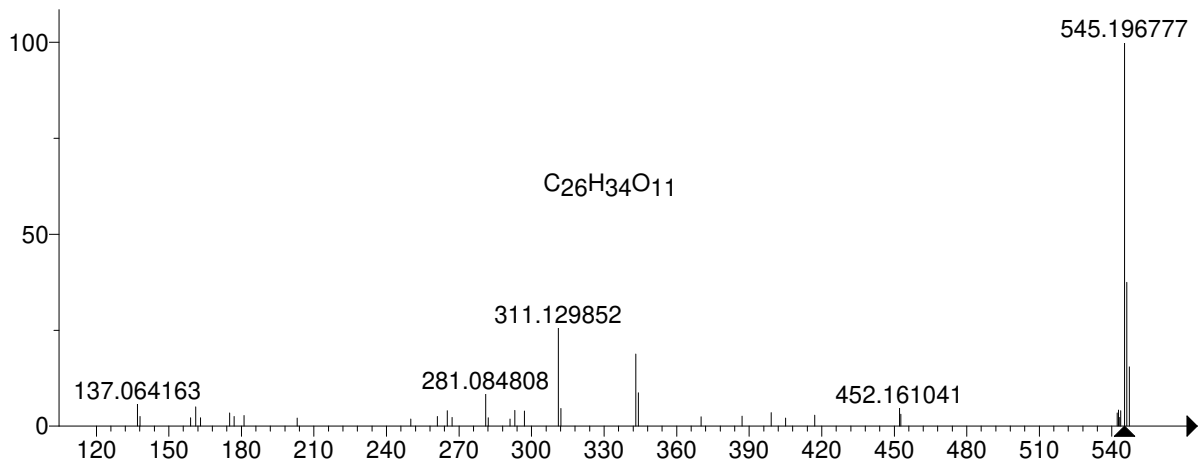

\*\* Search Report Page 2 of 2 \*\*

Hit 3 : NCGC00384838-01\_C26H34O11\_3-[2-(4-Hydroxy-3-methoxyphenyl)-3-(hydroxymethyl)-7-methoxy-2,3-dihydro-1-benzofuran-2-yl]-3-(4-hydroxy-3-methoxyphenyl)-3-(hydroxymethyl)-7-methoxy-2,3-dihydro-1-benzofuran-2-yl; MF: 0; RMF: 205; Prob 9.87%; Lib: mona-export-gnps; ID: 10977.

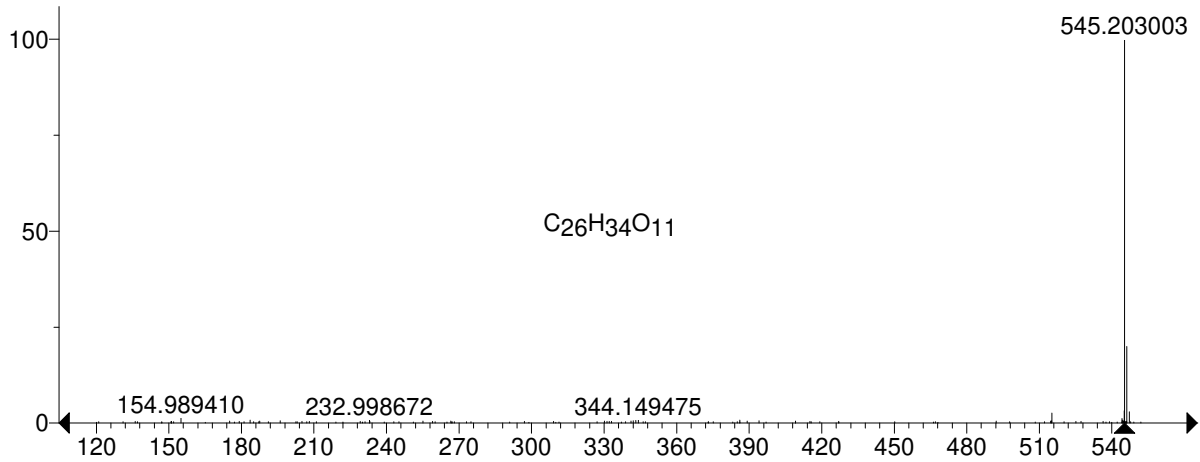

Hit 4 : (2R,3R,4S,5S,6R)-2-[3-[2-(4-hydroxy-3-methoxyphenyl)-3-(hydroxymethyl)-7-methoxy-2,3-dihydro-1-benzofuran-2-yl]-3-(4-hydroxy-3-methoxyphenyl)-3-(hydroxymethyl)-7-methoxy-2,3-dihydro-1-benzofuran-2-yl]; MF: 0; RMF: 184; Prob 9.87%; Lib: anthocyanins mona; ID: 7235.

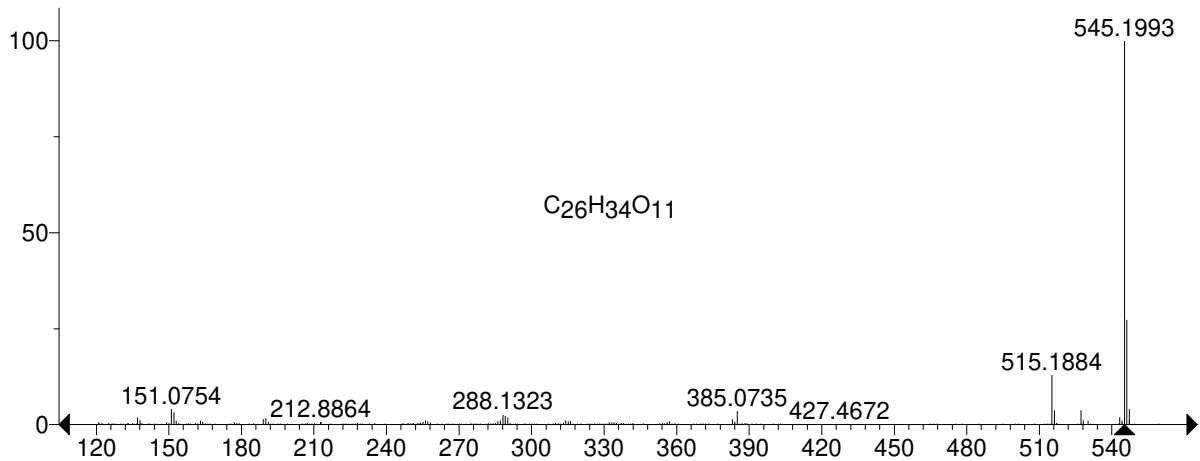

Hit 5 : NCGC00385233-01\_C26H34O11\_2-[2-Hydroxy-5-[(1E)-3-hydroxy-1-propen-1-yl]-3-methoxyphenyl]-3-(4-hydroxy-3-methoxyphenyl)-3-(hydroxymethyl)-7-methoxy-2,3-dihydro-1-benzofuran-2-yl; MF: 0; RMF: 184; Prob 9.87%; Lib: mona-export-gnps; ID: 12015.

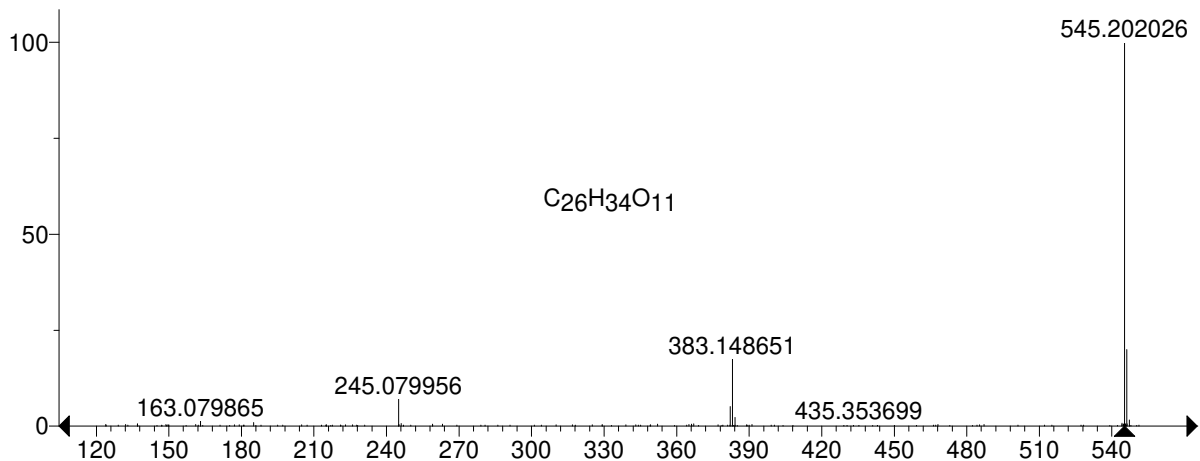

Unknown: Unknown (5.94\_609.2043m/z)  
Compound in Library Factor = 0

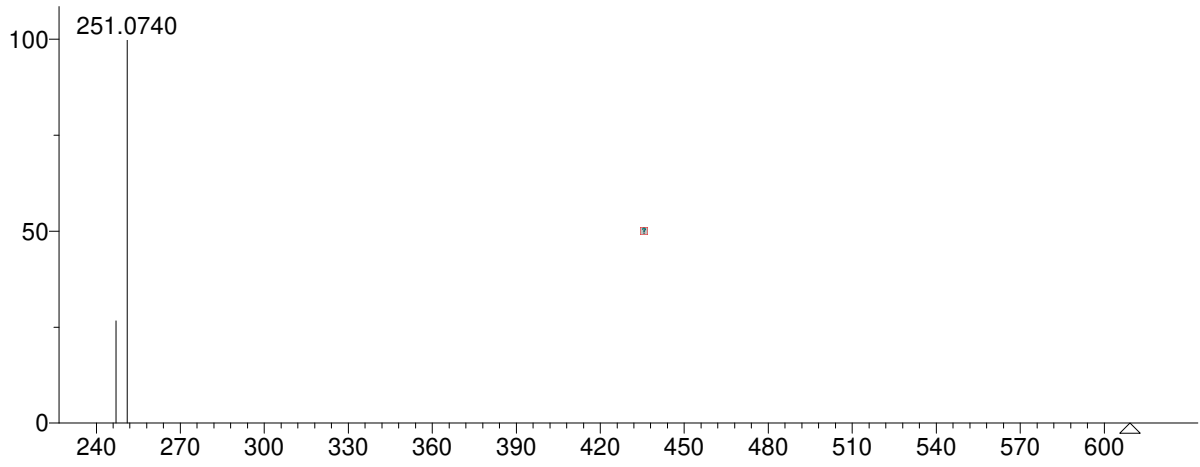



Unknown: Unknown (5.96\_328.1871m/z)  
Compound in Library Factor = 0

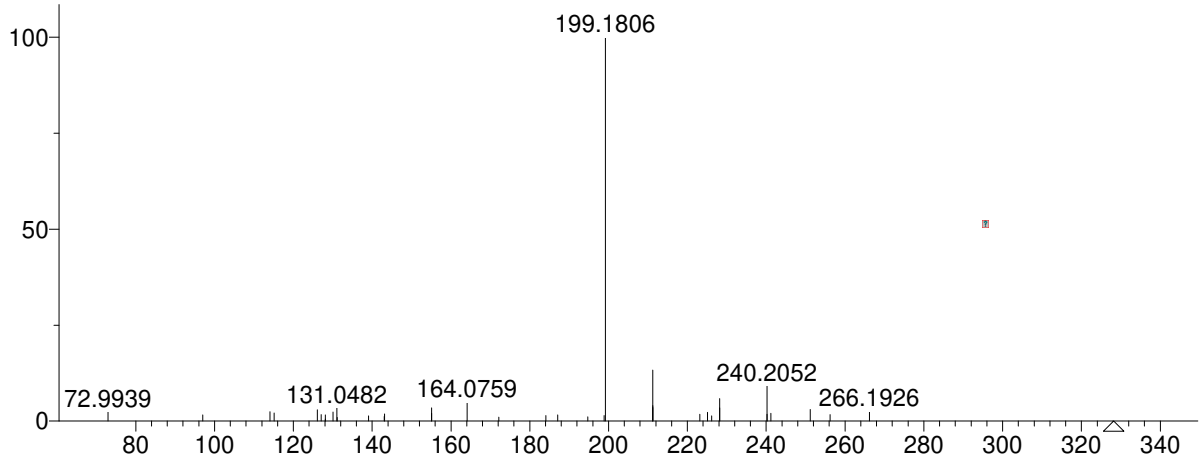

Hit 1 : CAPSAICIN [M+Na]<sup>+</sup> 65HCD P=328.2  
C<sub>18</sub>H<sub>27</sub>NO<sub>3</sub>; MF: 0; RMF: 4; Prob 33.3%; Lib: mona-export-vf-npl\_qexactive; ID: 2967.

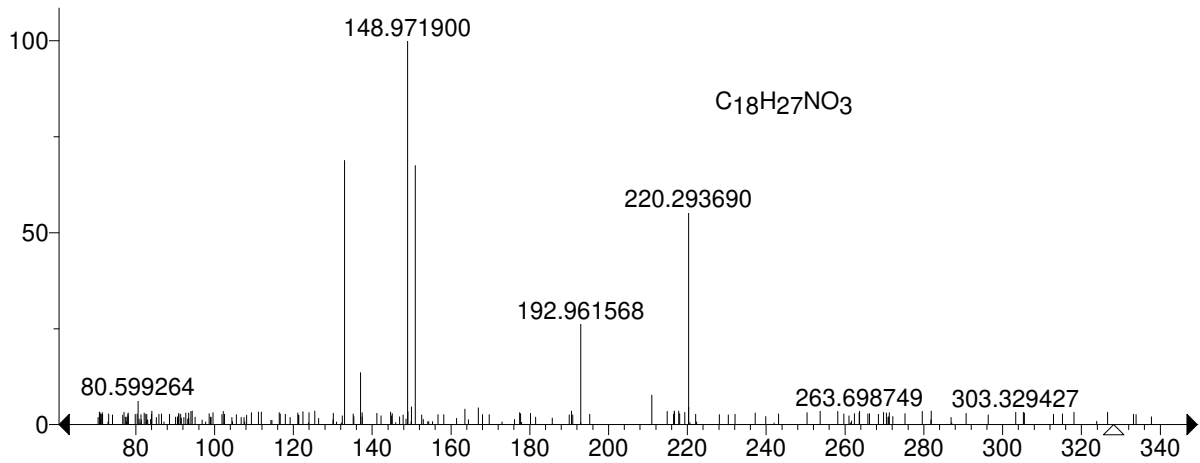

Hit 2 : Capsaicin [M+Na]<sup>+</sup> 35HCD P=328.2  
C<sub>18</sub>H<sub>27</sub>NO<sub>3</sub>; MF: 0; RMF: 2; Prob 33.3%; Lib: mona-export-vf-npl\_qexactive; ID: 647.

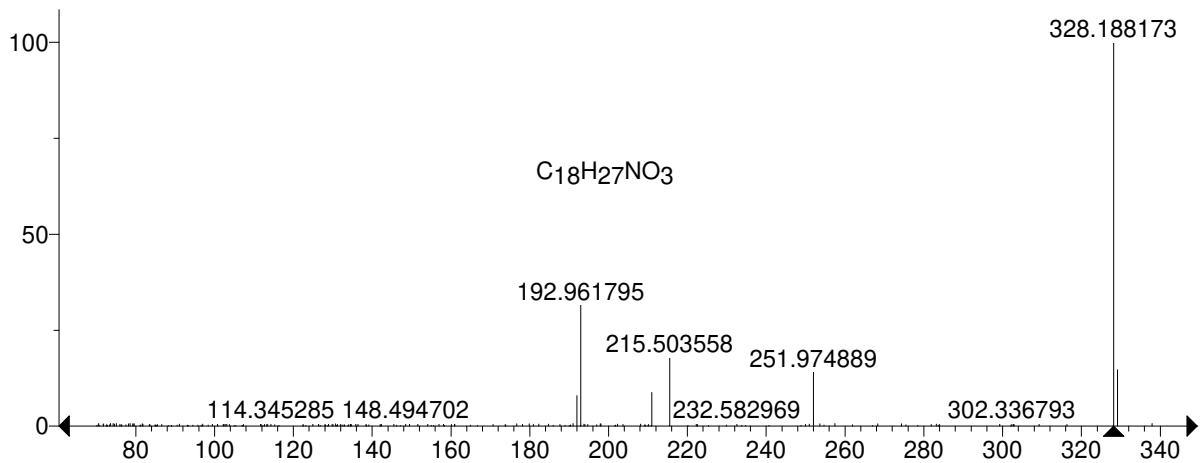

Hit 3 : Benactyzine [M+H]<sup>+</sup> 20-30-40% P=328.2  
C<sub>20</sub>H<sub>25</sub>NO<sub>3</sub>; MF: 0; RMF: 1; Prob 33.3%; Lib: mona-export-fiehn\_hilic; ID: 218.

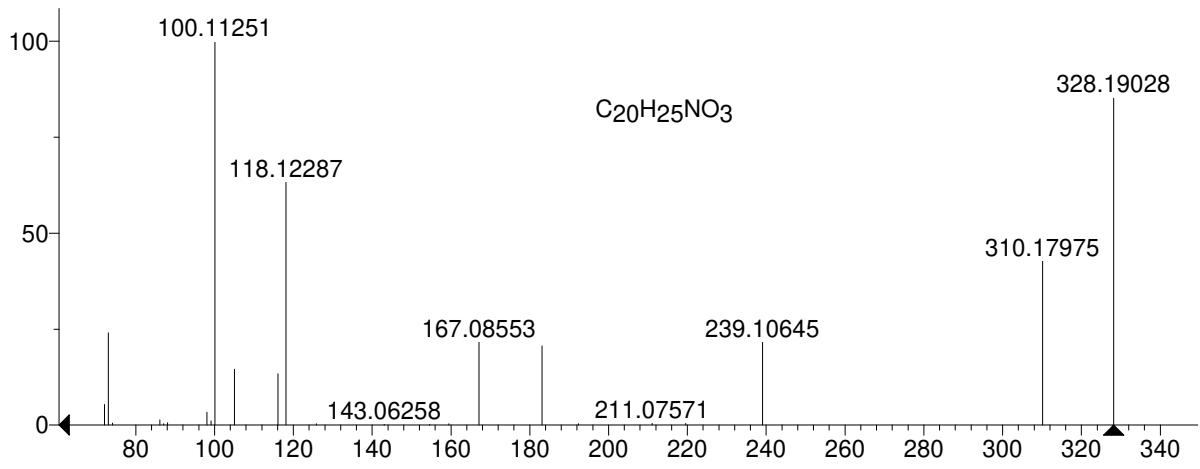

Unknown: Unknown (5.96\_368.1362m/z)  
Compound in Library Factor = 0

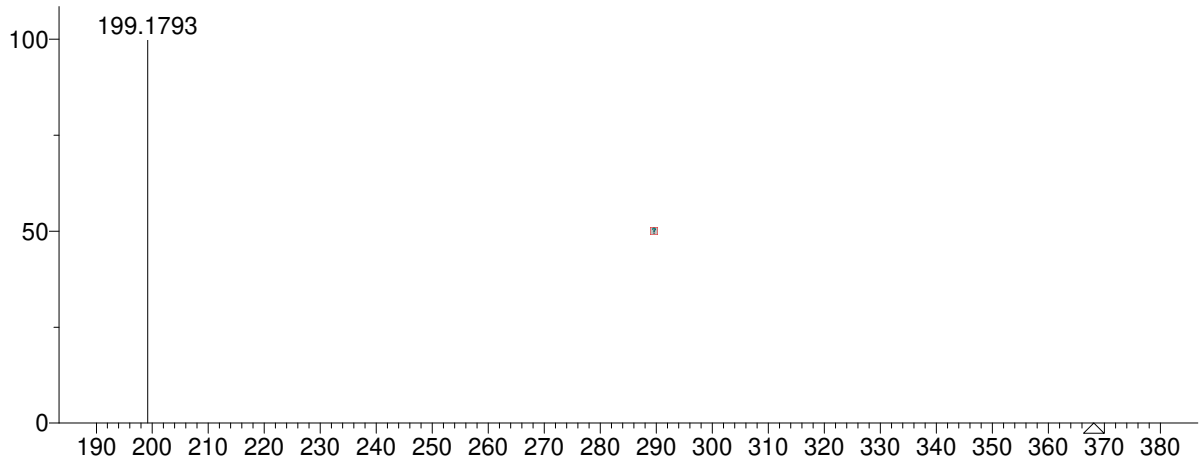

Unknown: Unknown (5.96\_527.2093m/z)  
Compound in Library Factor = 0

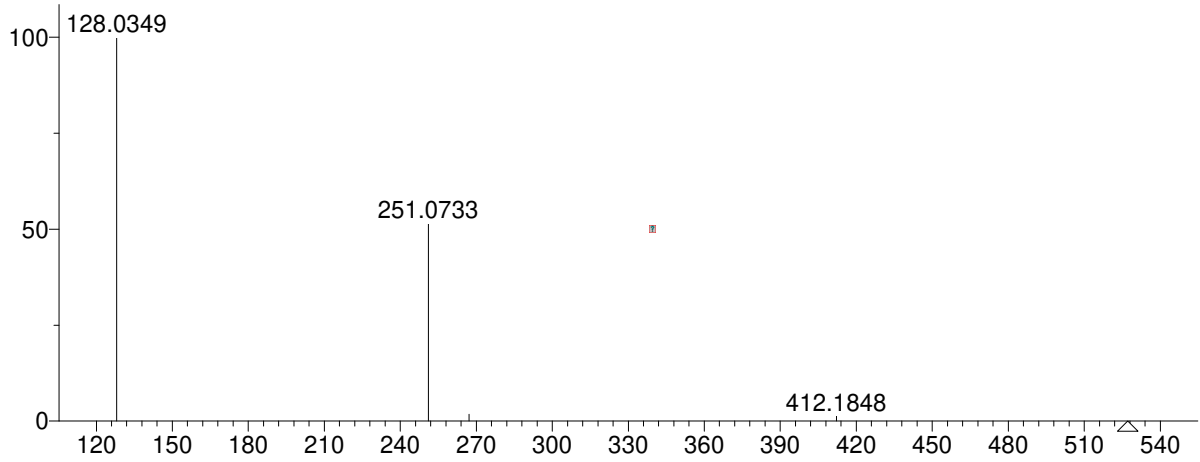

Hit 1 : [(1aR,1bS,2S,5aS,6R,6aS)-5a-hydroxy-1a-methyl-2-[(2S,3R,4S,5S,6R)-3,4,5-trihydroxy-6-(hydroxymethyl)C25H36O12; MF: 0; RMF: 12; Prob 50.0%; Lib: mona-export-1c-ms-ms\_negative\_mode; ID: 20478.

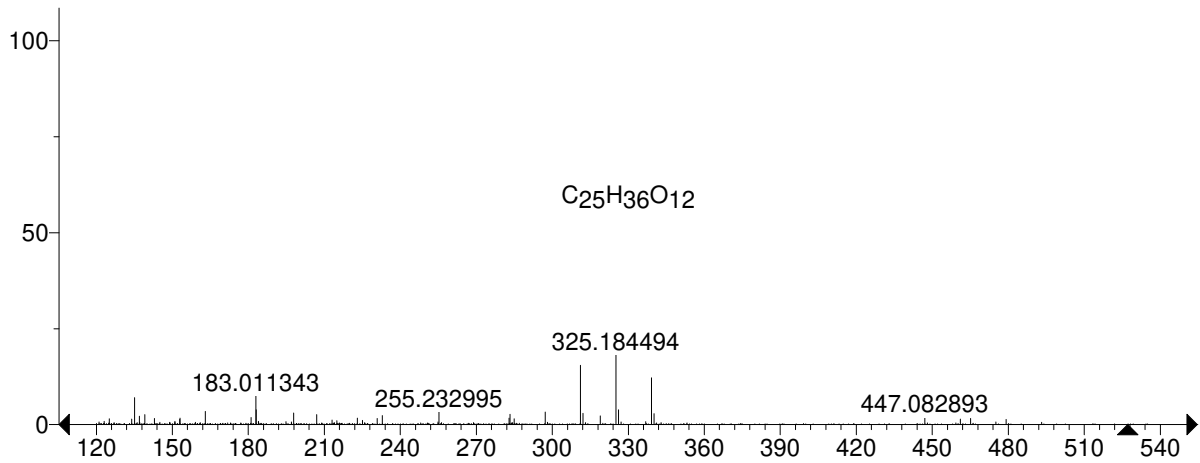

Hit 2 : 13-(acetyloxy)-1,6-dihydroxy-8-(hydroxymethyl)-4,12,12,15-tetramethyl-5-oxotetracyclo[8.5.0.0A<sup>2</sup>,a<sup>1</sup>]P.0A C27H36O8; MF: 0; RMF: 2; Prob 50.0%; Lib: mona-export-vf-npl\_qexactive; ID: 20116.

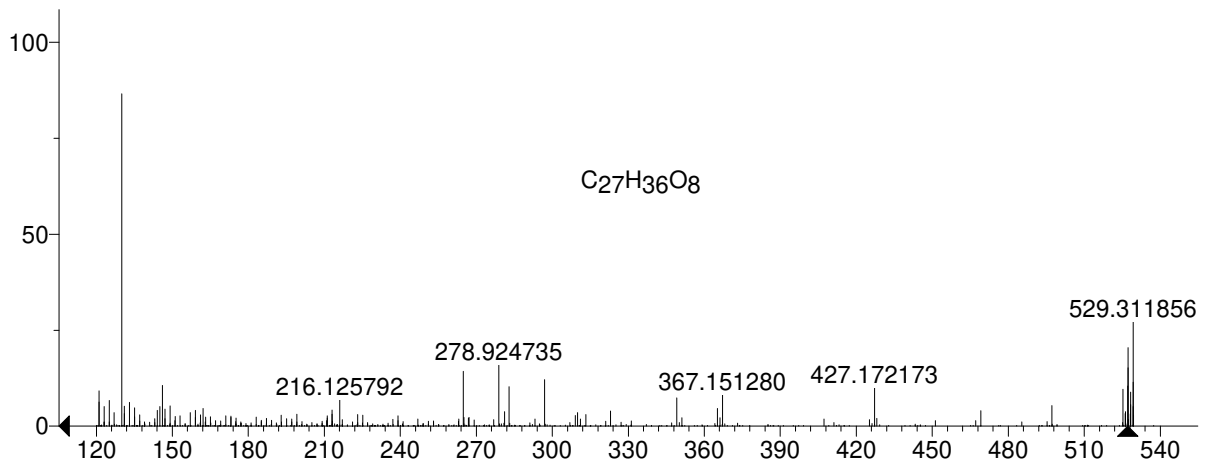

Unknown: Unknown (5.97\_367.1603m/z)  
Compound in Library Factor = 0

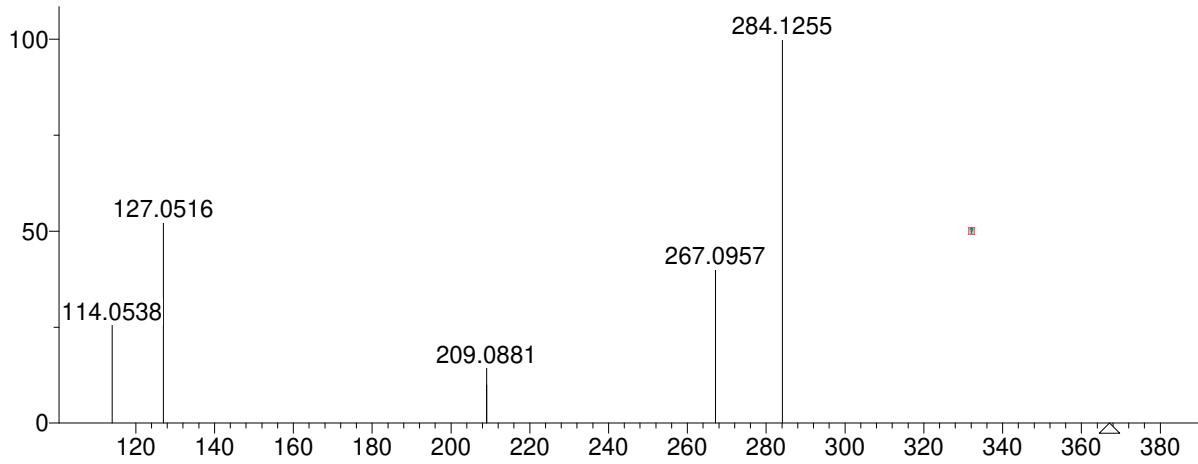

Hit 1 : Boldenone sulfate [M+H]<sup>+</sup> HCD 117V P=367.2  
C19H26O5S; MF: 0; RMF: 78; Prob 100.0%; CAS: 87331-43-9; Lib: nist\_msms; ID: 383658.

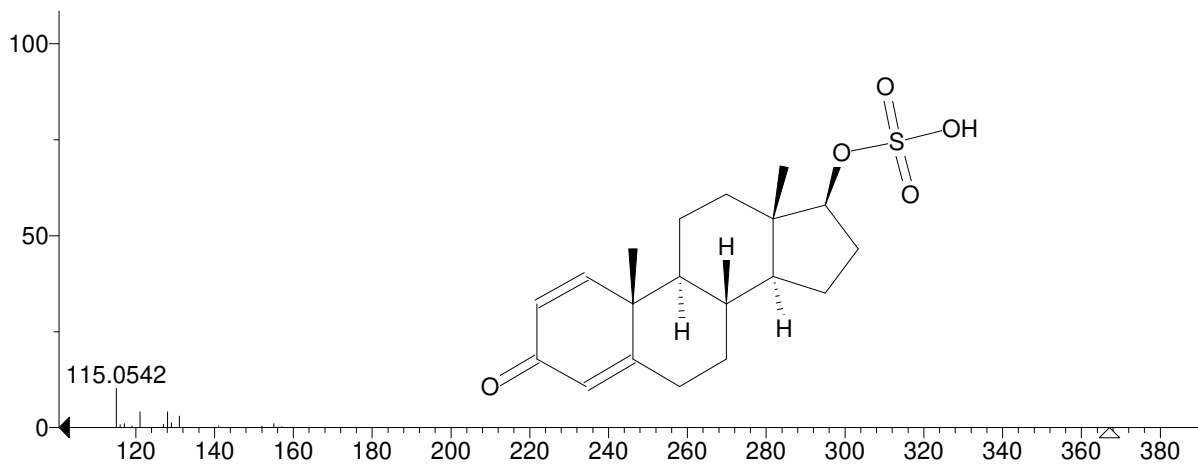

Unknown: Unknown (5.98\_412.1823m/z)  
Compound in Library Factor = 0

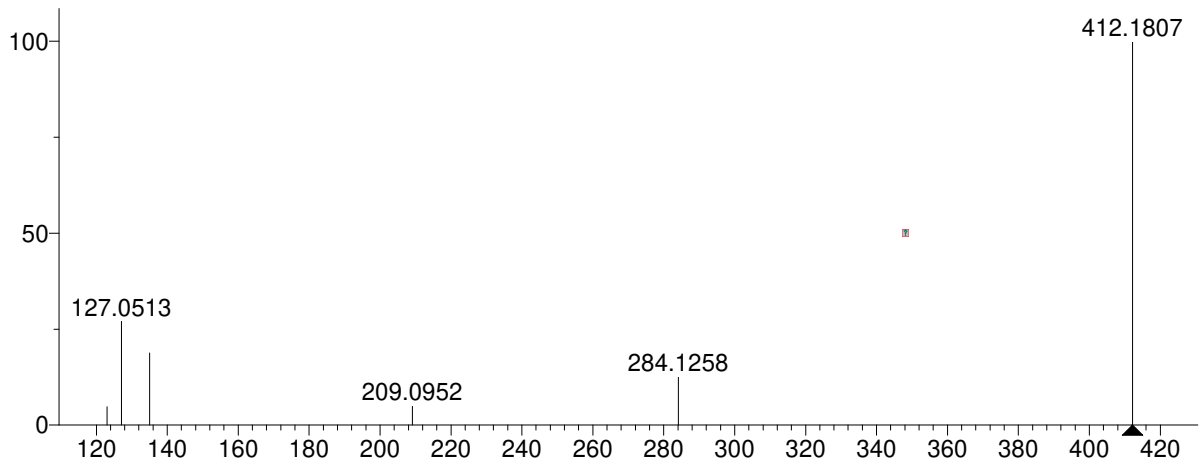

Unknown: Unknown (6.00\_178.1230m/z)  
Compound in Library Factor = -1144

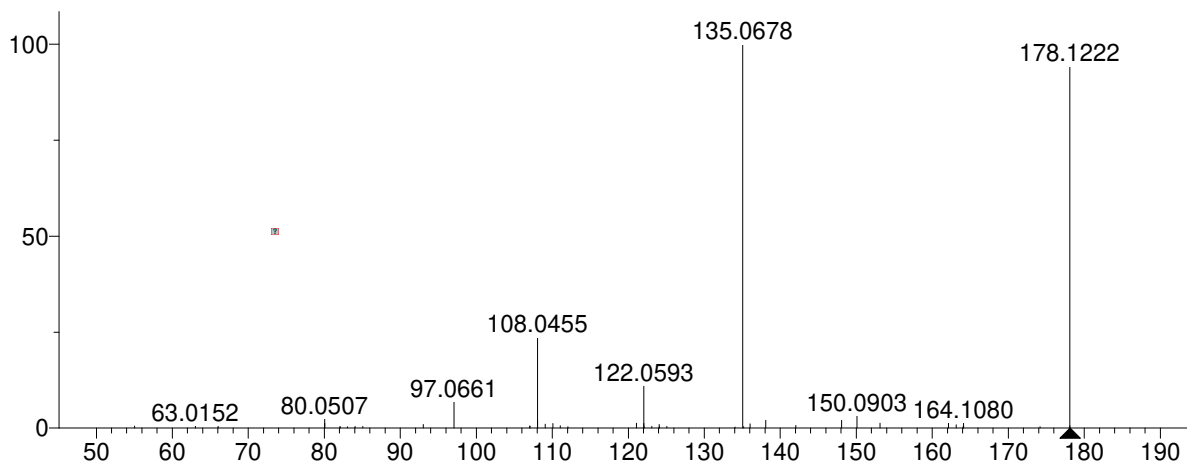

Hit 1 : 1H-Inden-2-amine, 2,3-dihydro-5-methoxy-6-methyl- [M+H]<sup>+</sup> HCD 3V P=178.1  
C<sub>11</sub>H<sub>15</sub>NO; MF: 292; RMF: 920; Prob 34.8%; CAS: 136468-19-4; Lib: nist\_msms; ID: 364124.

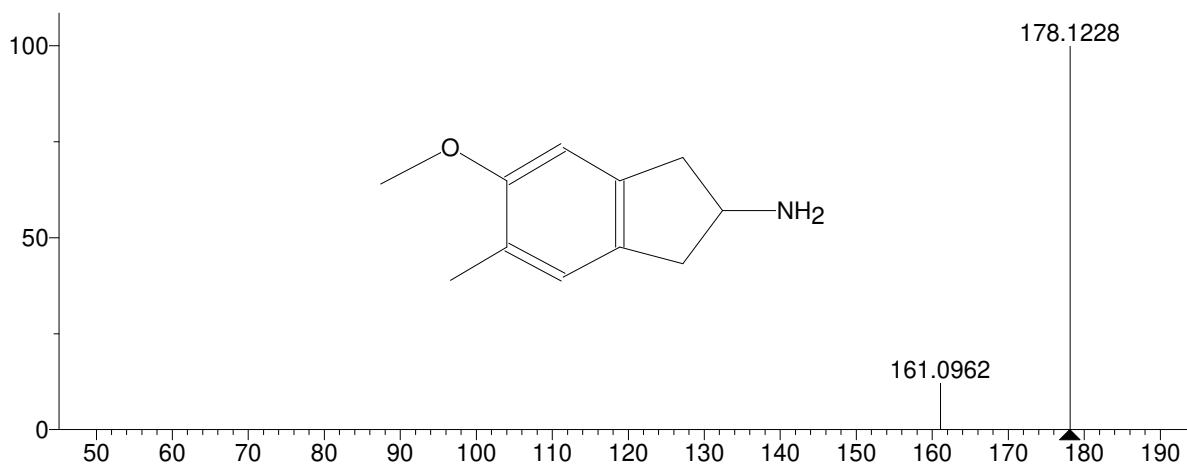

Hit 2 : 2-Methylmethcathinone [M+H]<sup>+</sup> HCD 3V P=178.1  
C<sub>11</sub>H<sub>15</sub>NO; MF: 289; RMF: 926; Prob 30.7%; CAS: 1246911-71-6; Lib: nist\_msms; ID: 249570.

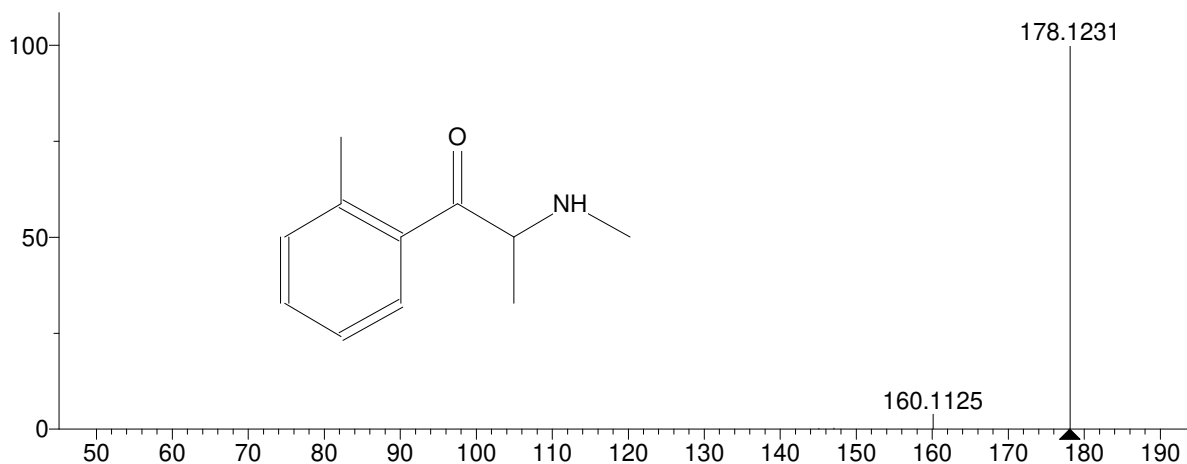

Hit 3 : 4-Methylmethcathinone [M+H]<sup>+</sup> HCD 3V P=178.1  
C<sub>11</sub>H<sub>15</sub>NO; MF: 286; RMF: 925; Prob 27.2%; CAS: 1189805-46-6; Lib: nist\_msms; ID: 325130.

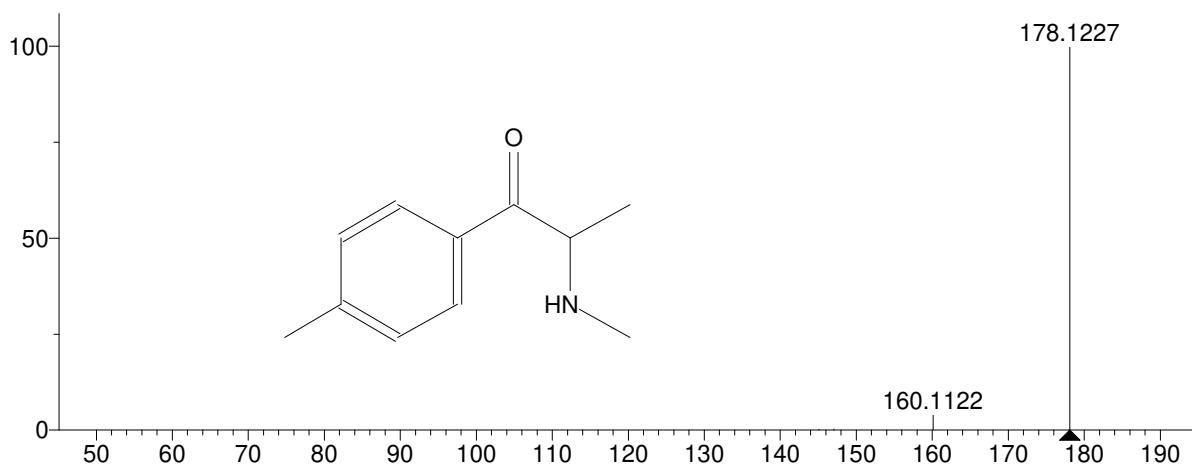

Hit 4 : 3-Methylmethcathinone [M+H]<sup>+</sup> HCD 5V P=178.1  
C<sub>11</sub>H<sub>15</sub>NO; MF: 238; RMF: 899; Prob 5.63%; CAS: 1246911-86-3; Lib: nist\_msms; ID: 249602.

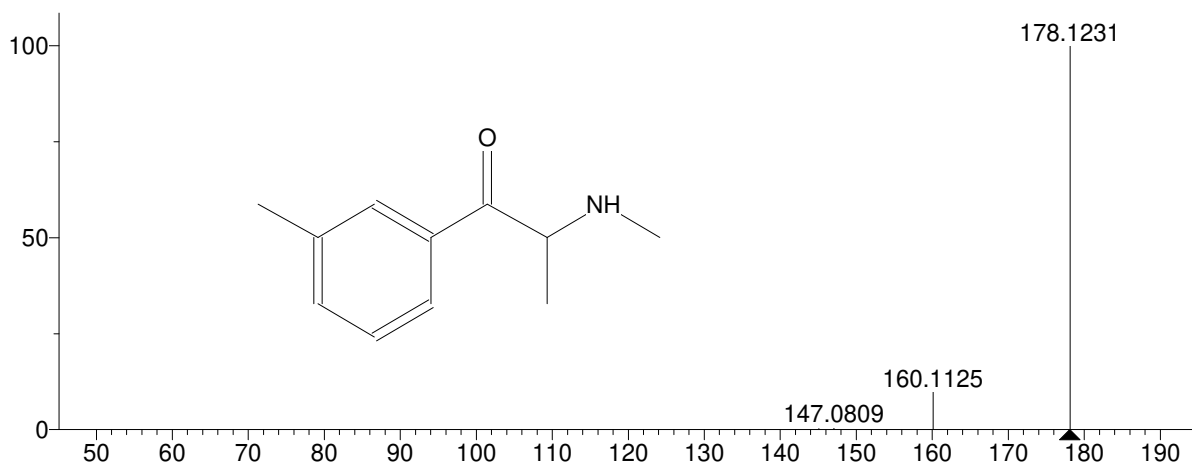

Hit 5 : N-tert-Butyl- $\alpha$ -phenylnitronium [M+H]<sup>+</sup> HCD 1V P=178.1  
C<sub>11</sub>H<sub>15</sub>NO; MF: 183; RMF: 644; Prob 1.09%; CAS: 3376-24-7; Lib: nist\_msms; ID: 313590.

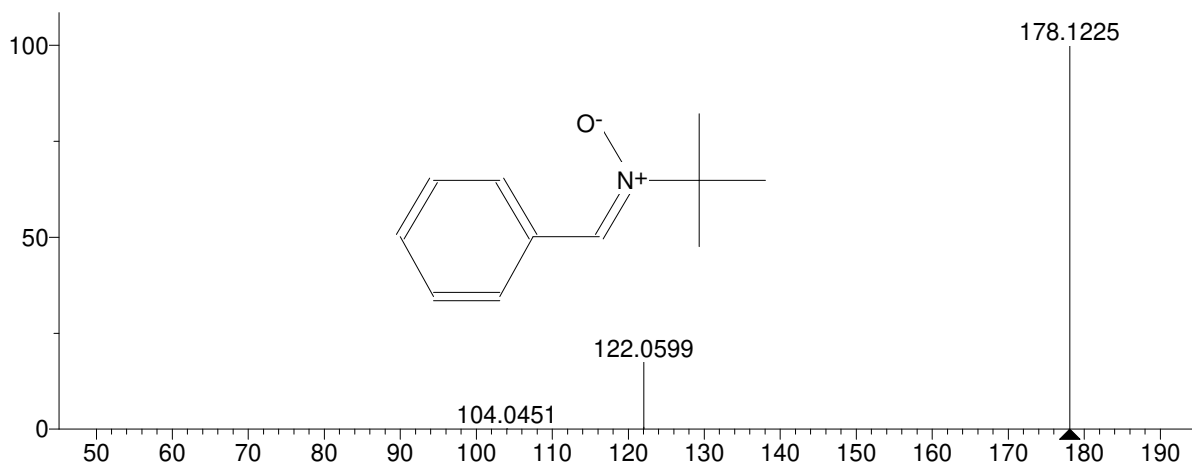



\*\* Search Report Page 1 of 2 \*\*

Unknown: Unknown (6.00\_224.1283m/z)  
Compound in Library Factor = -3273

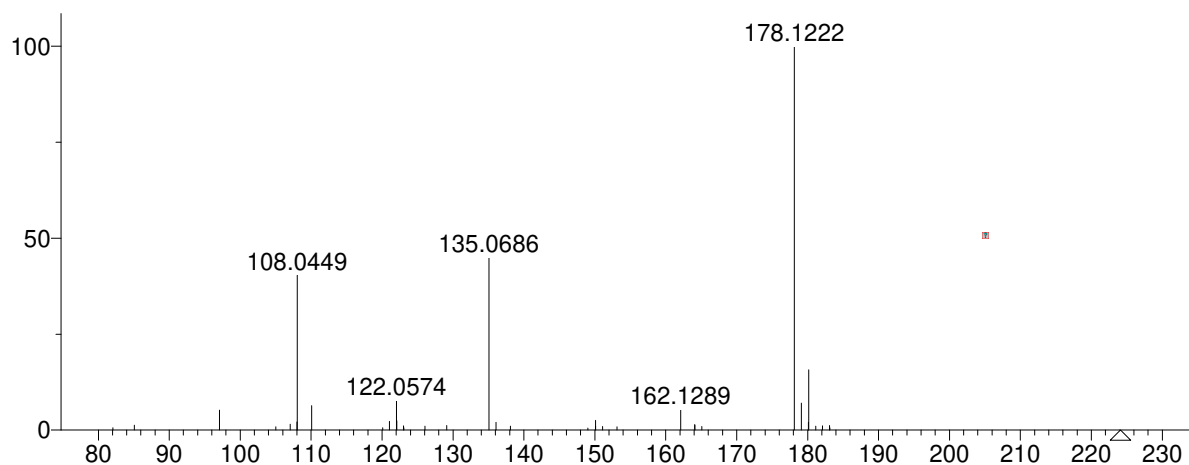

Hit 1 : 1-(3,5-Dihydroxyphenyl)-2-[(1,1-dimethylethyl)amino]ethanone [M+H]<sup>+</sup> HCD 33V P=224.1  
C<sub>12</sub>H<sub>17</sub>NO<sub>3</sub>; MF: 12; RMF: 110; Prob 22.6%; CAS: 139508-58-0; Lib: nist\_msms; ID: 437127.

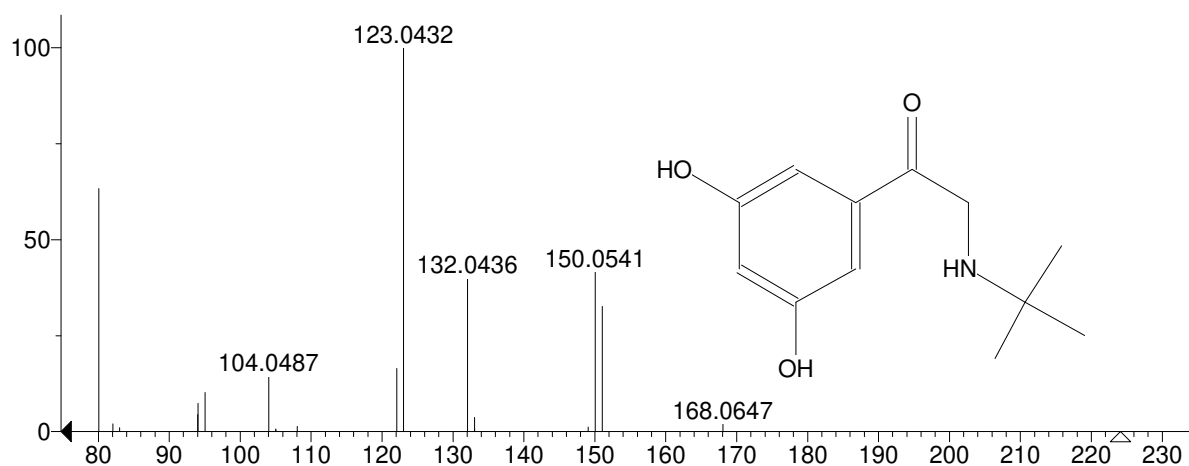

Hit 2 : N-(3-Oxoocctanoyl)-L-homoserine lactone [M+H-H<sub>2</sub>O]<sup>+</sup> HCD 20V P=224.1  
C<sub>12</sub>H<sub>19</sub>NO<sub>4</sub>; MF: 9; RMF: 106; Prob 19.9%; CAS: 147795-39-9; Lib: nist\_msms; ID: 315228.

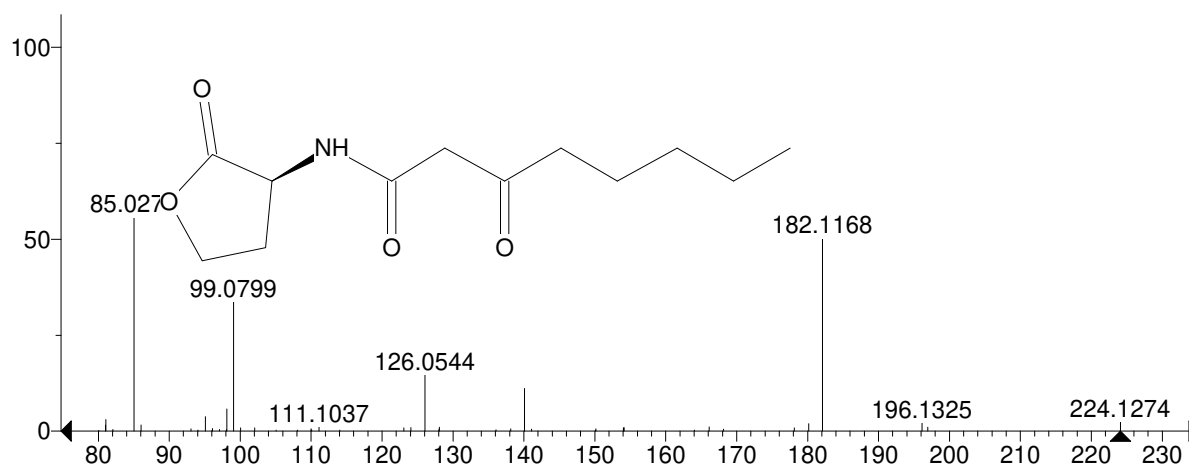

Hit 3 : Bufexamac [M+H]<sup>+</sup> 45(no P=224.1  
C<sub>12</sub>H<sub>17</sub>NO<sub>3</sub>; MF: 2; RMF: 72; Prob 15.3%; Lib: mona-export-massbank; ID: 12554.

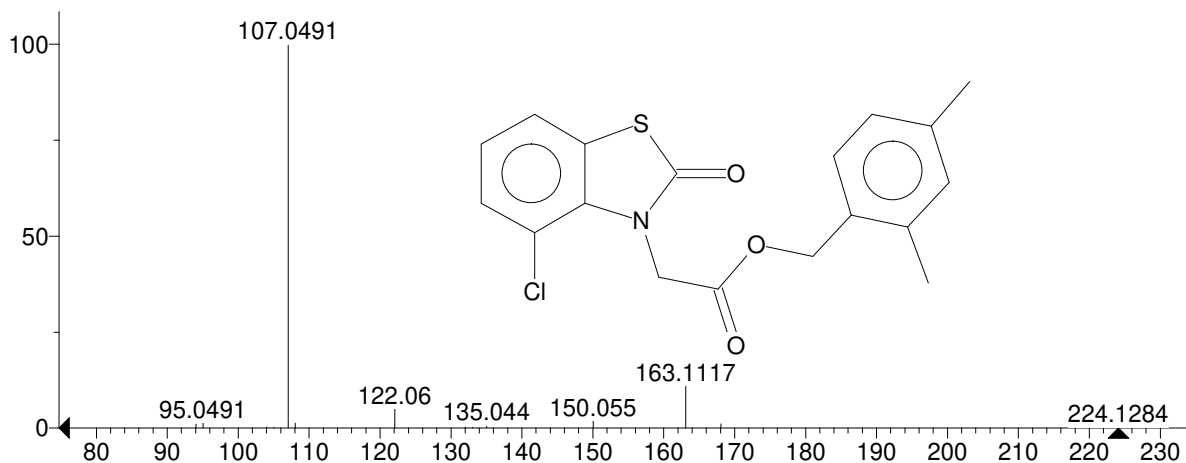

Hit 4 : Cerulenin [M+H]<sup>+</sup> IT-FT 35% P=224.1  
C<sub>12</sub>H<sub>17</sub>NO<sub>3</sub>; MF: 0; RMF: 124; Prob 14.1%; CAS: 17397-89-6; Lib: nist\_msms; ID: 538608.

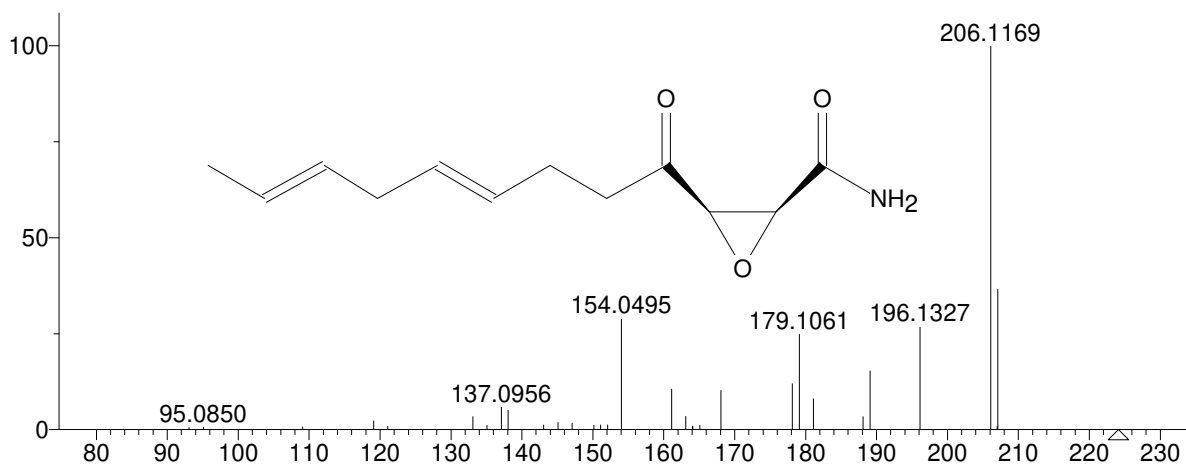

Hit 5 : Vanillic acid diethylamide [M+H]<sup>+</sup> HCD 80V P=224.1  
C<sub>12</sub>H<sub>17</sub>NO<sub>3</sub>; MF: 0; RMF: 19; Prob 14.1%; CAS: 304-84-7; Lib: nist\_msms; ID: 133849.

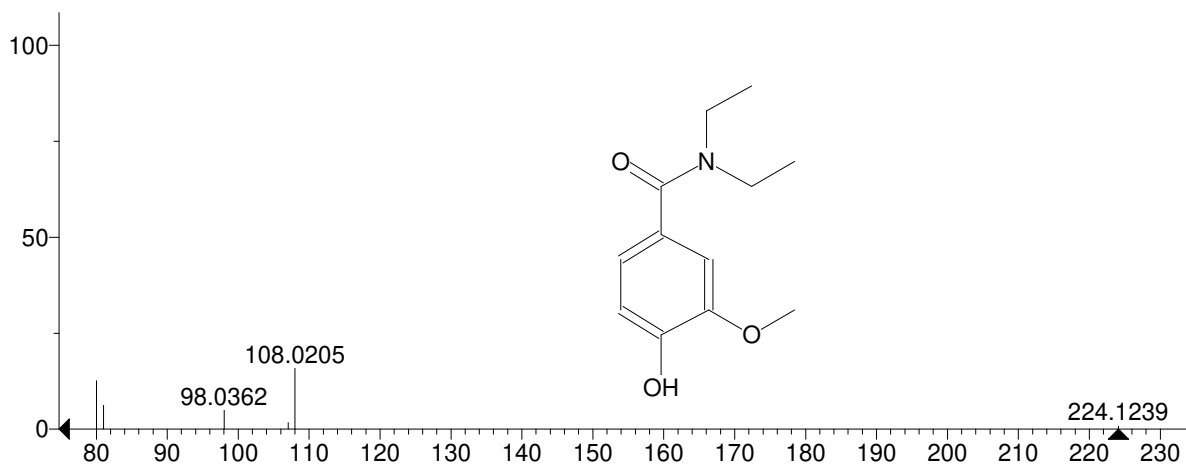

\*\* Search Report Page 1 of 1 \*\*

Unknown: Unknown (6.00\_625.2534m/z)  
Compound in Library Factor = -3273

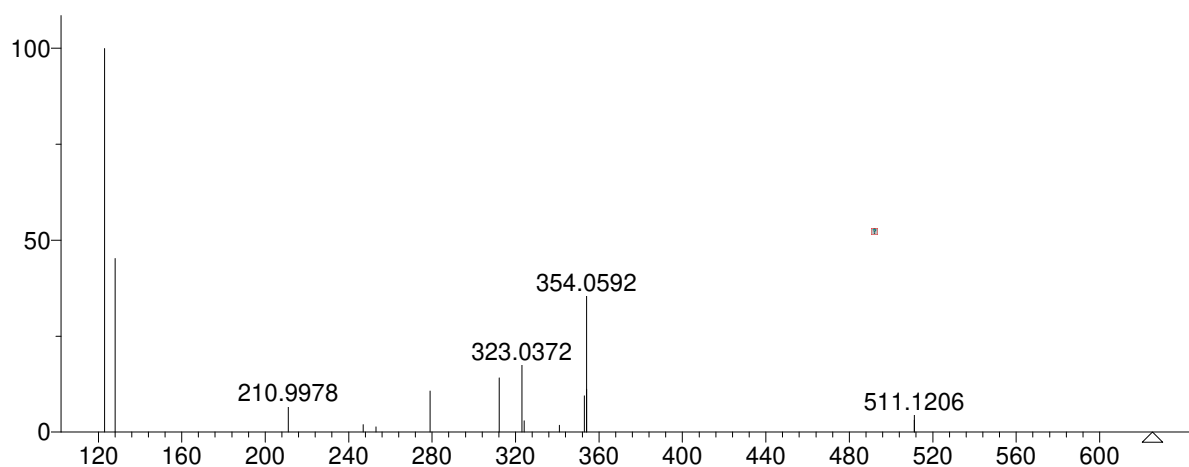

Hit 1 : N-Caffeoyl-O-methyltyramine [2M-H]- IT 35% P=625.3  
C18H19NO4; MF: 9; RMF: 319; Prob 57.9%; CAS: 189307-47-9; Lib: nist\_msms; ID: 221344.

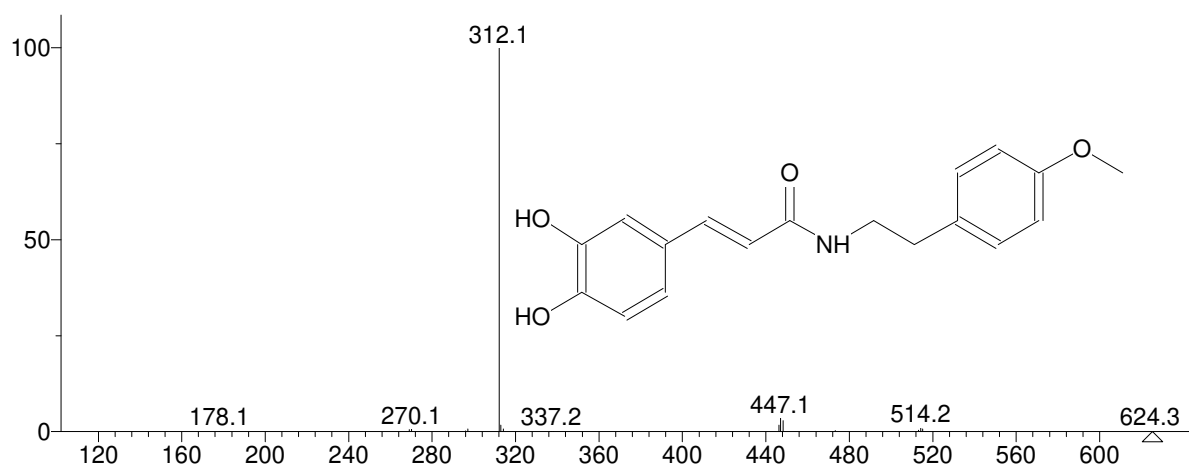

Hit 2 : NCGC00385791-01! [M+FA-H]- P=625.3  
C29H40O12; MF: 0; RMF: 43; Prob 42.1%; Lib: mona-export-gnps; ID: 6389.

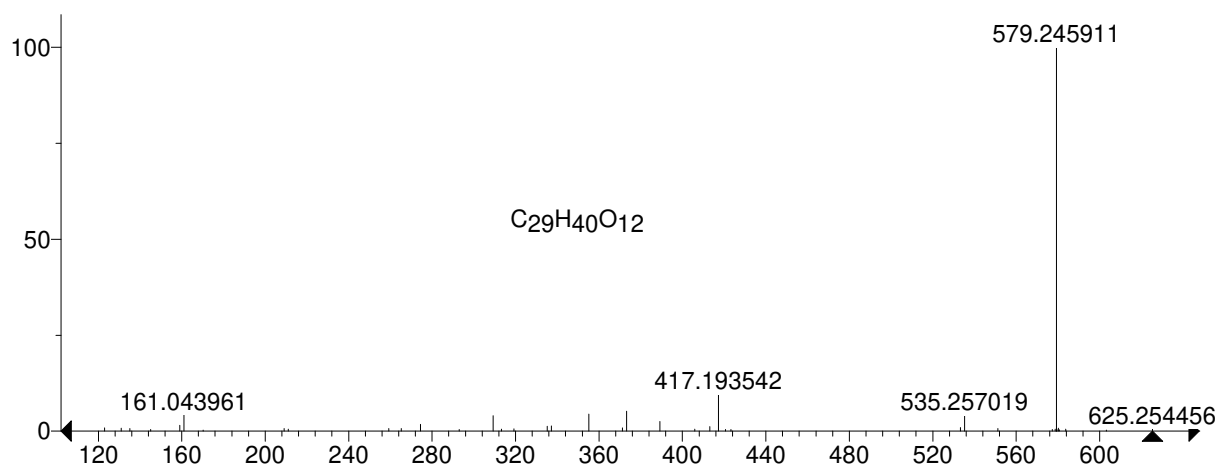

Unknown: Unknown (6.02\_654.2085m/z)  
Compound in Library Factor = 0

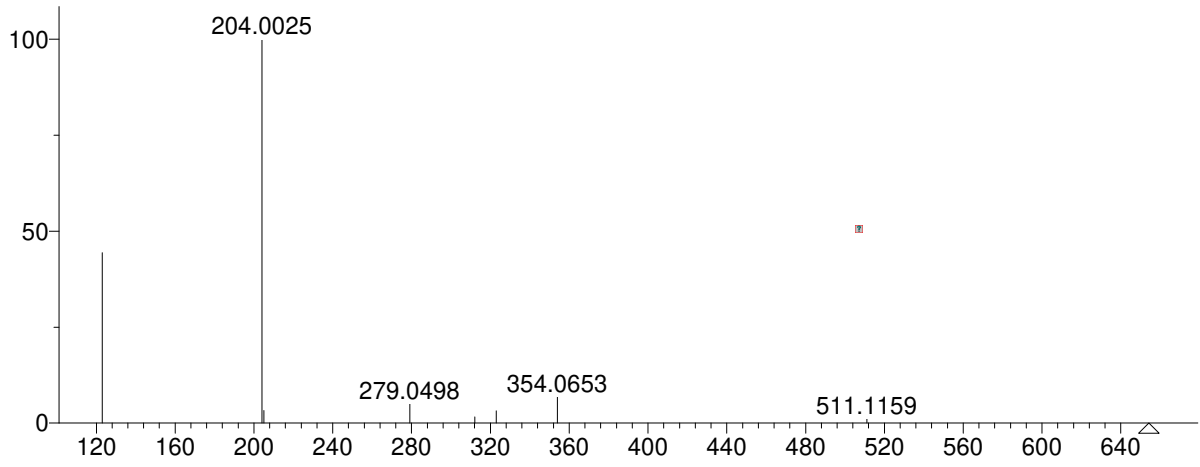

Unknown: Unknown (6.03\_356.1447m/z)  
Compound in Library Factor = -3273

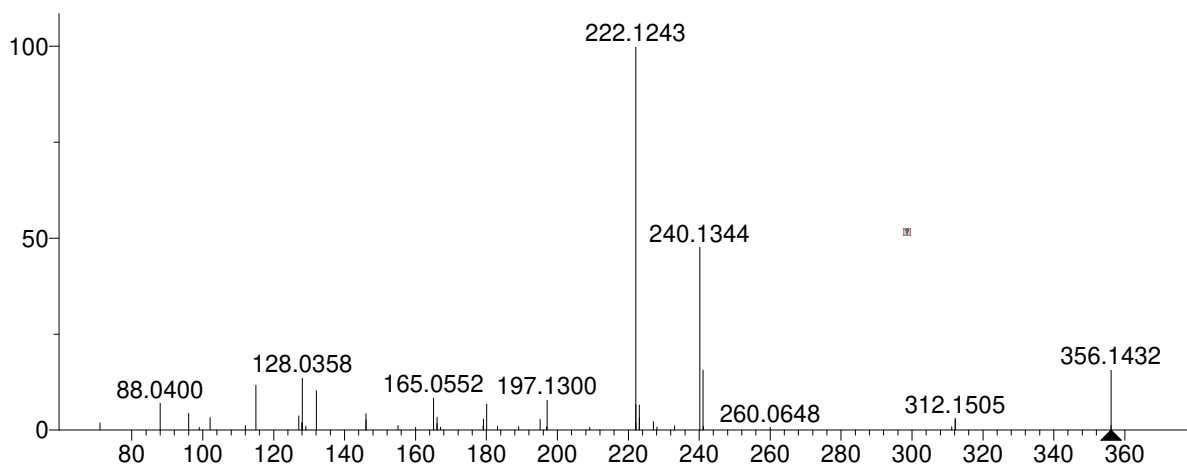

Hit 1 : Benzenesulfonamide, 4-(1,1-dimethylethyl)-N-[4-(1H-imidazol-1-yl)phenyl]- [M+H]<sup>+</sup> HCD 21V P=356.1  
C<sub>19</sub>H<sub>21</sub>N<sub>3</sub>O<sub>2</sub>S; MF: 18; RMF: 235; Prob 26.5%; CAS: 945526-43-2; Lib: nist\_msms; ID: 355342.

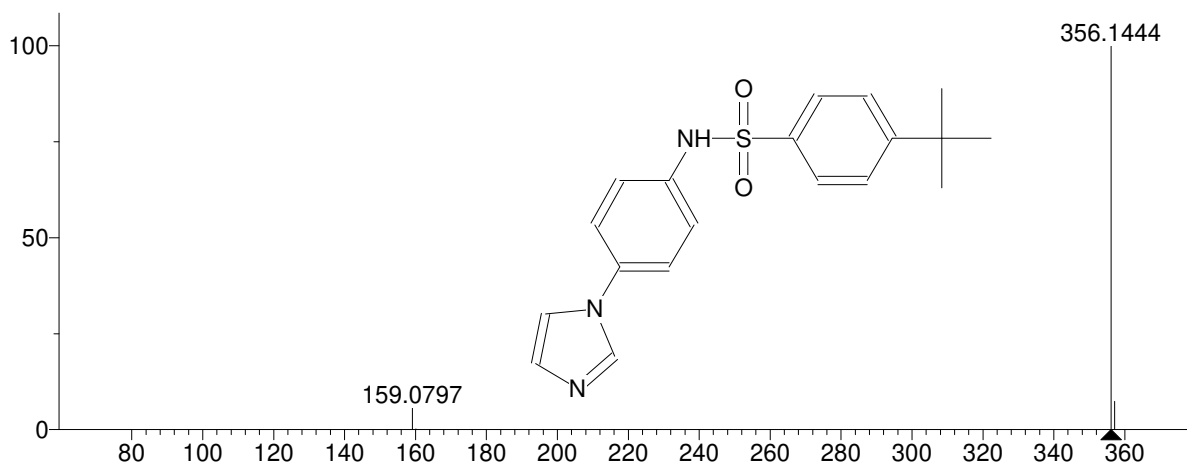

Hit 2 : Ethanone, 2-(2-chlorophenyl)-1-[1-(5-hydroxypentyl)-1H-indol-3-yl]- [M+H]<sup>+</sup> HCD 12V P=356.1  
C<sub>21</sub>H<sub>22</sub>ClNO<sub>2</sub>; MF: 12; RMF: 221; Prob 20.8%; CAS: 1449690-09-8; Lib: nist\_msms; ID: 269487.

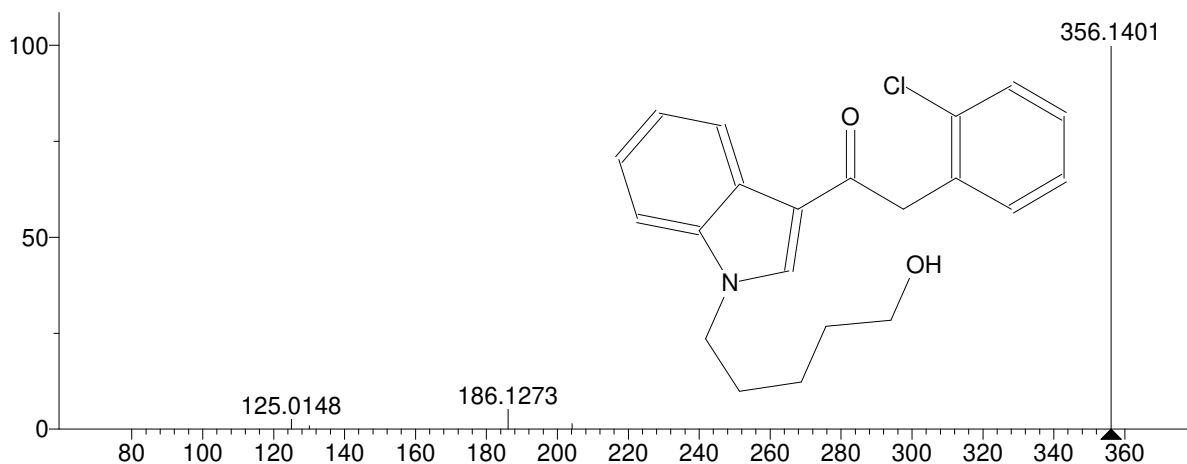

\*\* Search Report Page 2 of 2 \*\*

Hit 3 : Ethanone, 2-(2-chlorophenyl)-1-[1-(4-hydroxypentyl)-1H-indol-3-yl]- [M+H]<sup>+</sup> HCD 10V P=356.1  
C<sub>21</sub>H<sub>22</sub>ClNO<sub>2</sub>; MF: 8; RMF: 229; Prob 17.6%; Lib: nist\_msms; ID: 347686.

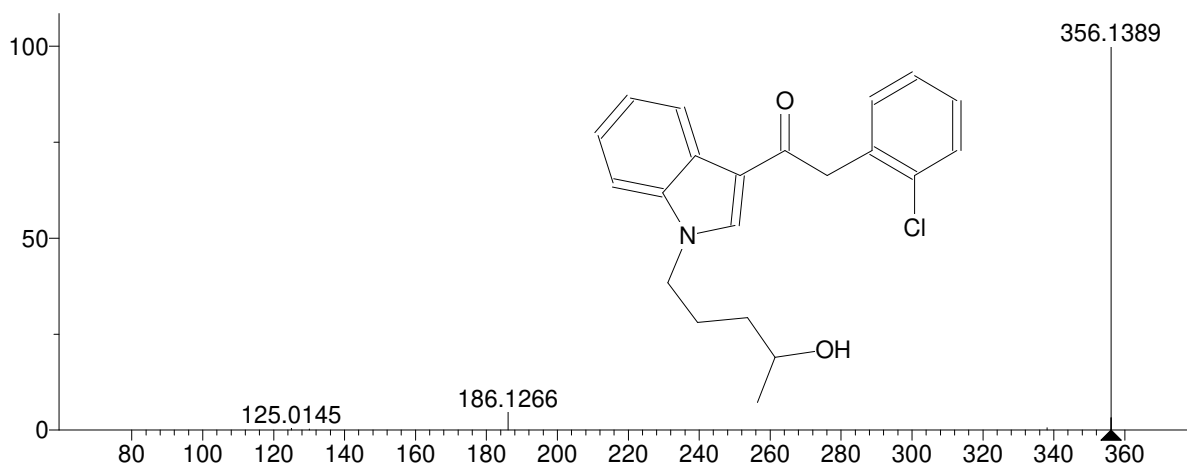

Hit 4 : Benzoic acid, 4-[[[(2,4-diamino-7,8-dihydro-7-oxo-6-pteridiny)methyl]methylamino]-, methyl ester [M+H]<sup>+</sup> |  
C<sub>16</sub>H<sub>17</sub>N<sub>7</sub>O<sub>3</sub>; MF: 8; RMF: 217; Prob 17.6%; CAS: 1330264-75-9; Lib: nist\_msms; ID: 432535.

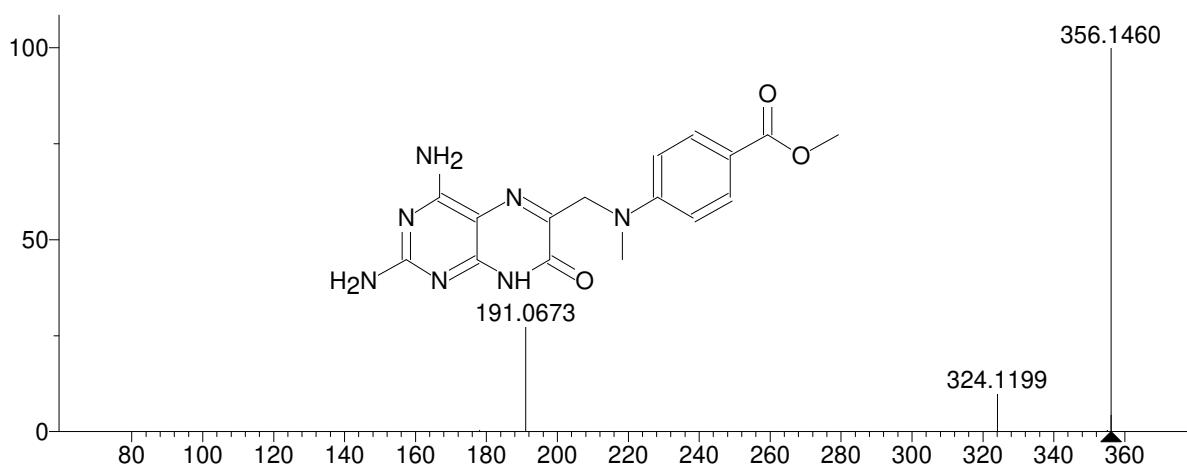

Hit 5 : Seneciophyllin [M+Na]<sup>+</sup> HCD 21V P=356.1  
C<sub>18</sub>H<sub>23</sub>NO<sub>5</sub>; MF: 8; RMF: 182; Prob 17.6%; CAS: 480-81-9; Lib: nist\_msms; ID: 219526.

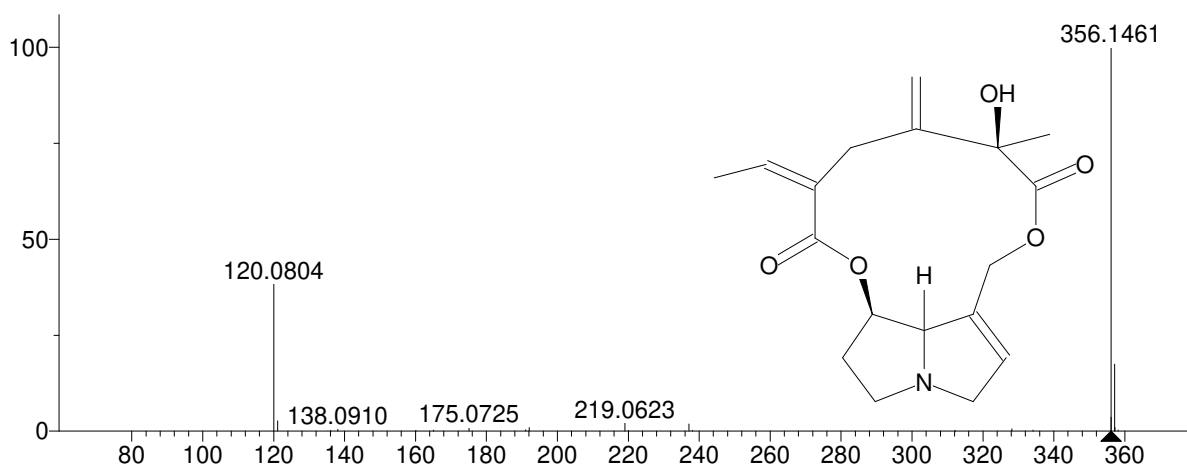

Unknown: Unknown (6.04\_793.3395m/z)  
Compound in Library Factor = 0

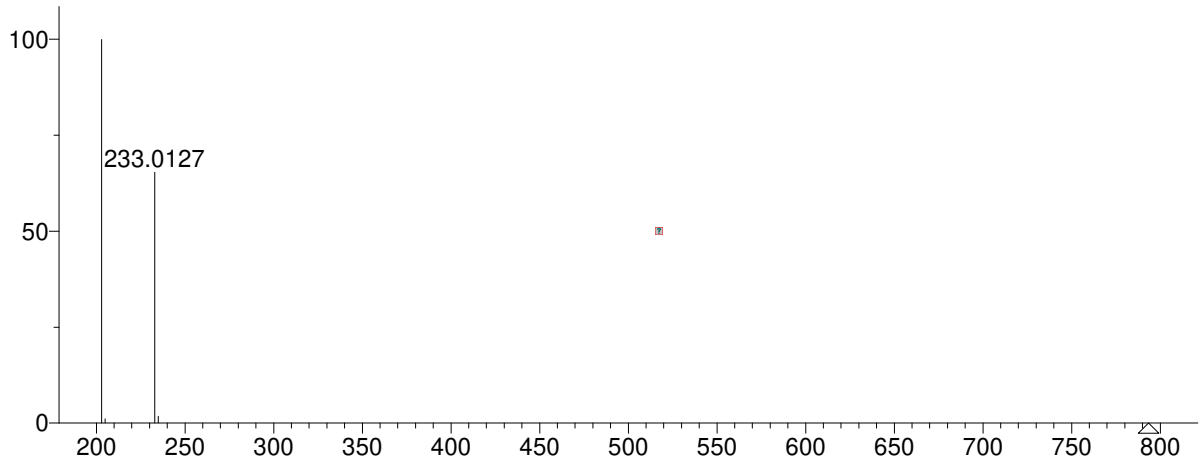

Hit 1 : [(1R,3R,10S,13R,14S,17R)-3-[(2R)-5-(3,5-dihydroxy-4-methoxy-6-methyloxan-2-yl)oxy-3,4-dihydroxy-6-(hy  
C<sub>38</sub>H<sub>58</sub>O<sub>15</sub>; MF: 0; RMF: 56; Prob 100.0%; Lib: mona-export-vf-npl\_qexactive; ID: 14720.

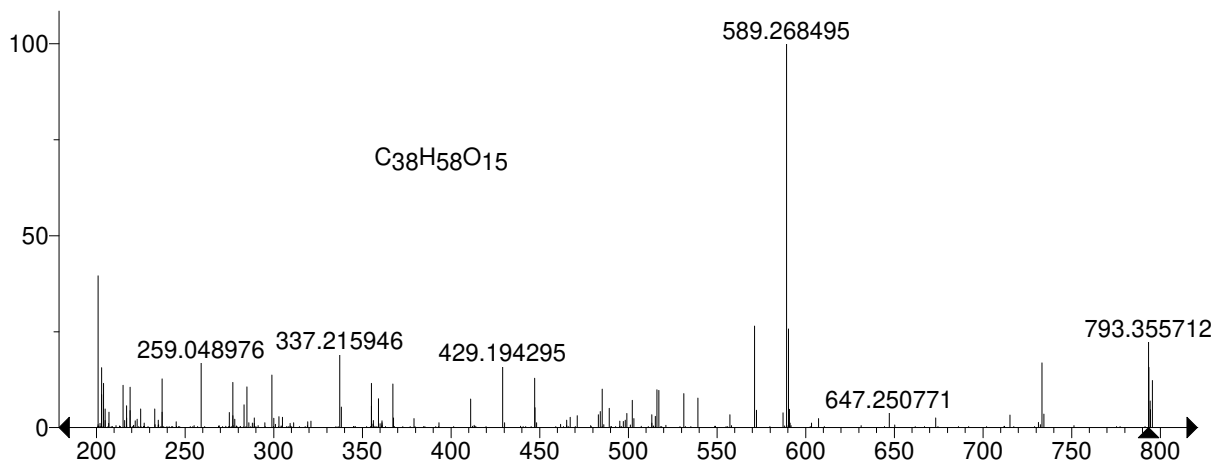

Unknown: Unknown (6.05\_328.1499m/z)  
Compound in Library Factor = 0

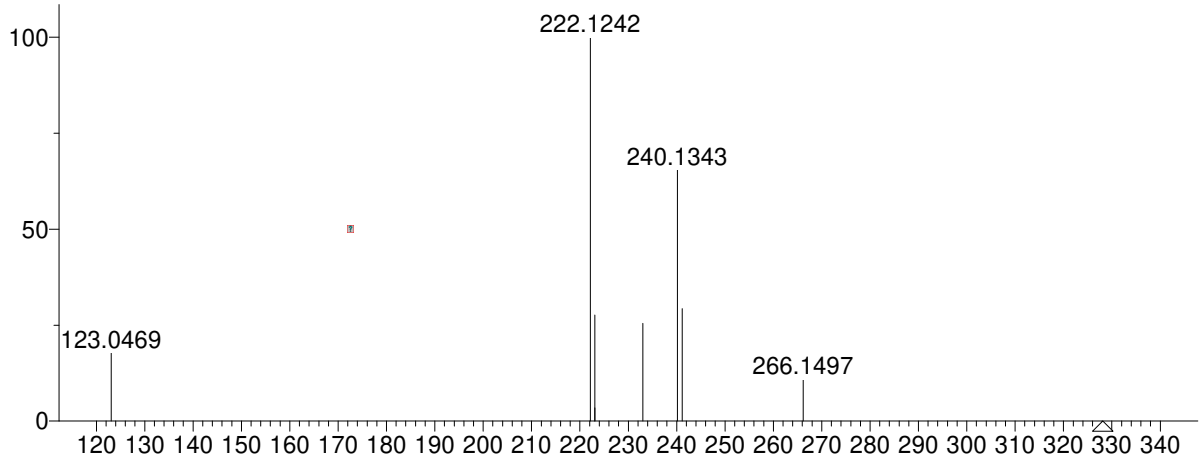

Hit 1 : Ac-Val-Ala-Asp-CHO [M-H]<sup>-</sup> QTOF 17V P=328.2  
C<sub>14</sub>H<sub>23</sub>N<sub>3</sub>O<sub>6</sub>; MF: 0; RMF: 19; Prob 100.0%; Lib: nist\_msms2; ID: 39356.

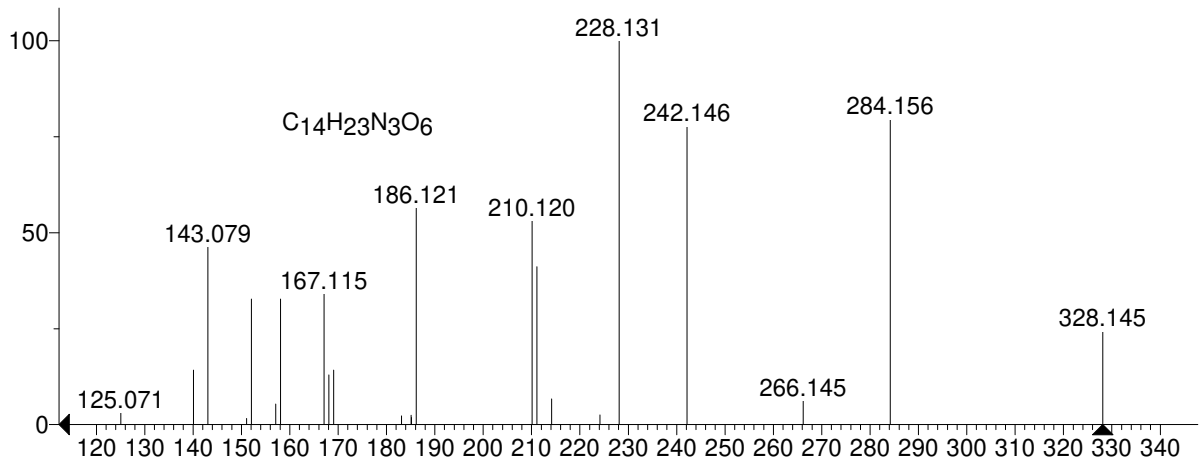



\*\* Search Report Page 1 of 1 \*\*

Unknown: Unknown (6.06\_233.0118m/z)  
Compound in Library Factor = -3273

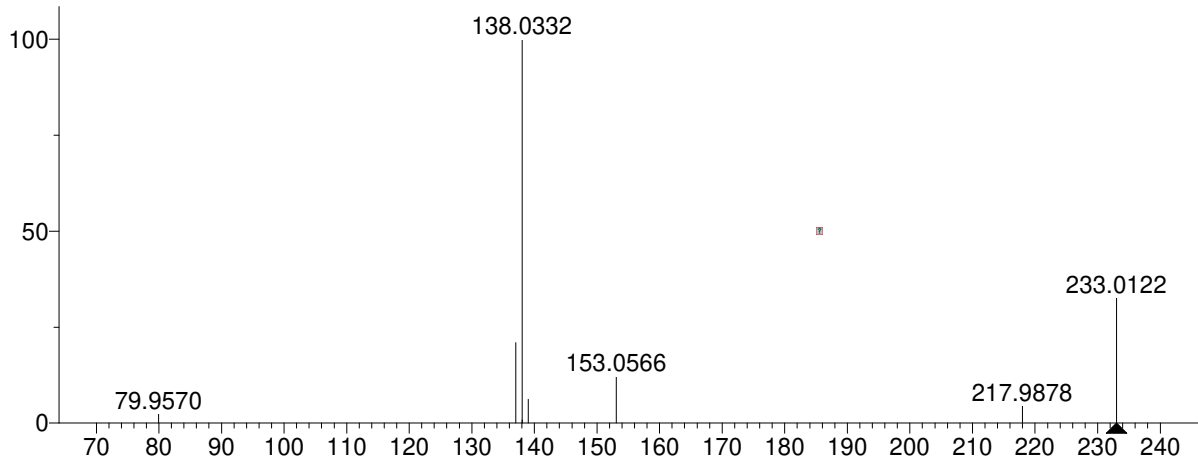

Hit 1 : Phaclofen [M+H-NH3]+ HCD 9V P=233  
C9H13ClNO3P; MF: 7; RMF: 262; Prob 100.0%; CAS: 114012-12-3; Lib: nist\_msms; ID: 119883.

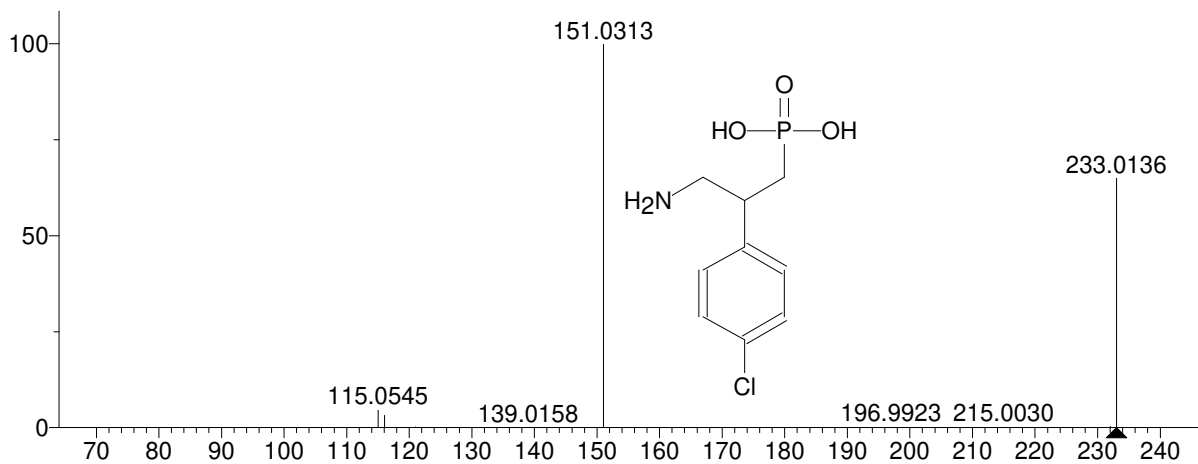

Unknown: Unknown (6.06\_459.0010m/z)  
Compound in Library Factor = 0

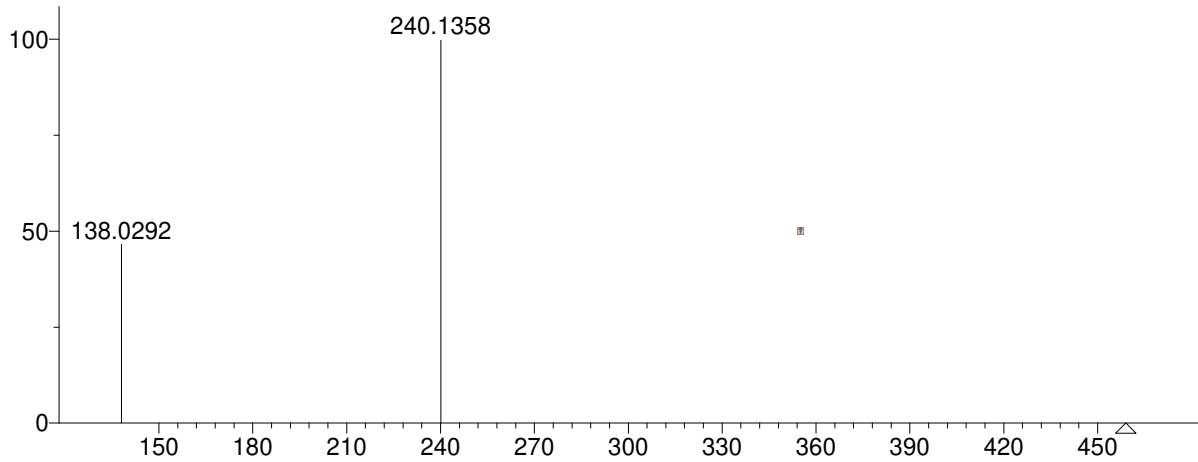

Hit 1 : Selumetinib [M+H+2i]+ HCD 146V P=459  
C17H15BrClFN4O3; MF: 0; RMF: 105; Prob 100.0%; CAS: 606143-52-6; Lib: nist\_msms; ID: 520928.

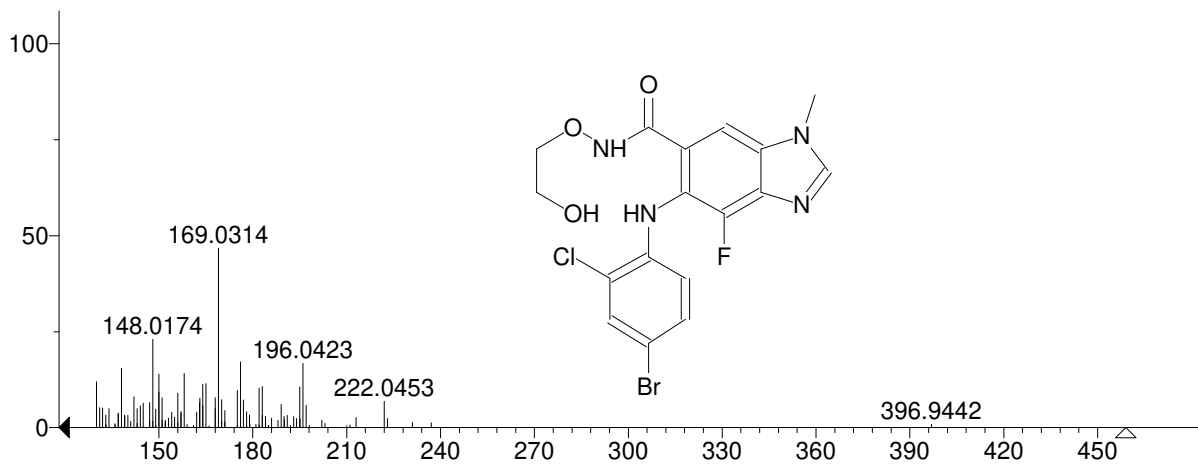

Unknown: Unknown (6.07\_233.1552m/z)  
Compound in Library Factor = 0

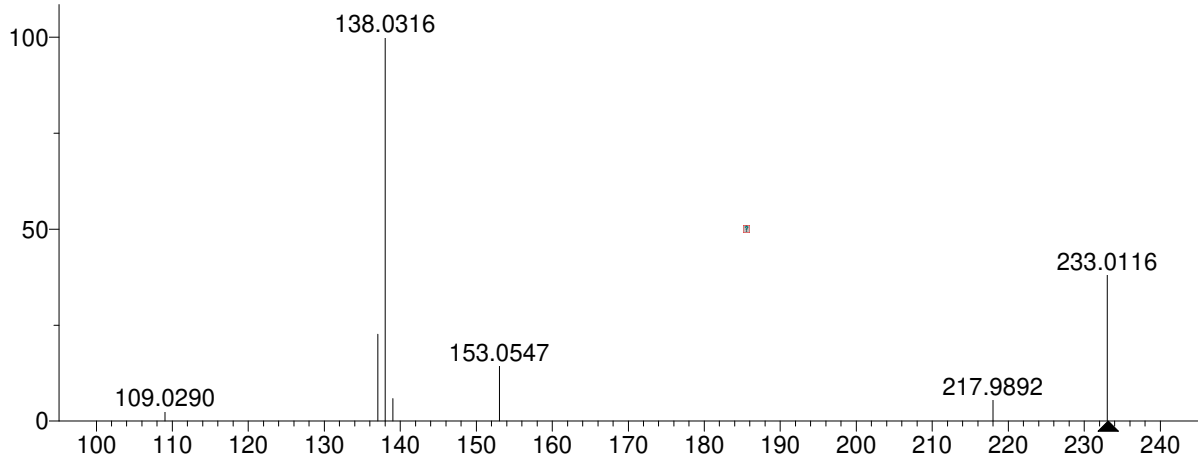

Hit 1 : COSTUNOLIDE [M+H]<sup>+</sup> 10 P=233.2  
C<sub>15</sub>H<sub>20</sub>O<sub>2</sub>; MF: 0; RMF: 77; Prob 14.3%; Lib: mona-export-vf-npl\_qtof; ID: 2204.

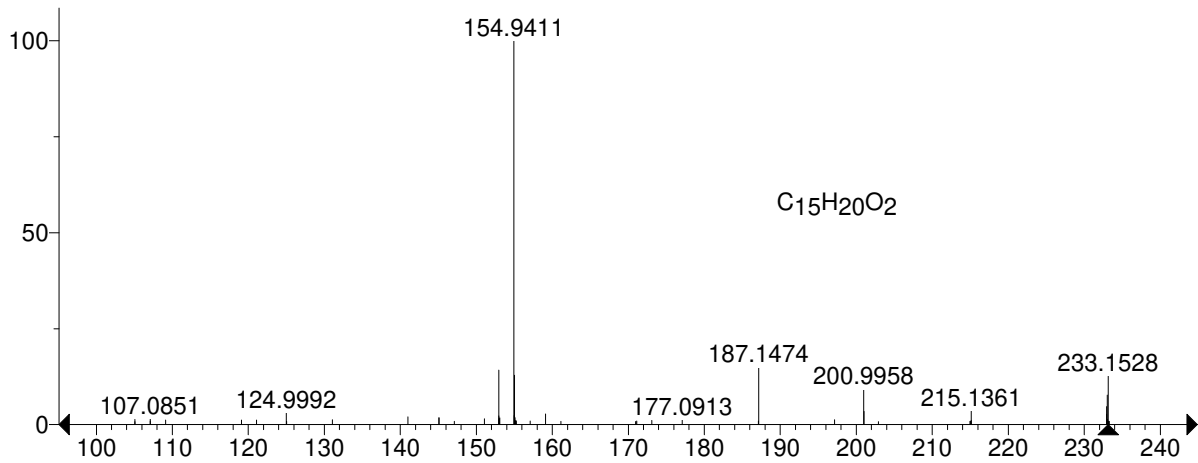

Hit 2 : NCGC00384653-01\_C<sub>15</sub>H<sub>22</sub>O<sub>3</sub>\_2-[(1S,2S,4aR,8aS)-1-Hydroxy-4a-methyl-8-methylenedecahydro-2-naph  
C<sub>15</sub>H<sub>22</sub>O<sub>3</sub>; MF: 0; RMF: 13; Prob 14.3%; Lib: mona-export-gnps; ID: 13411.

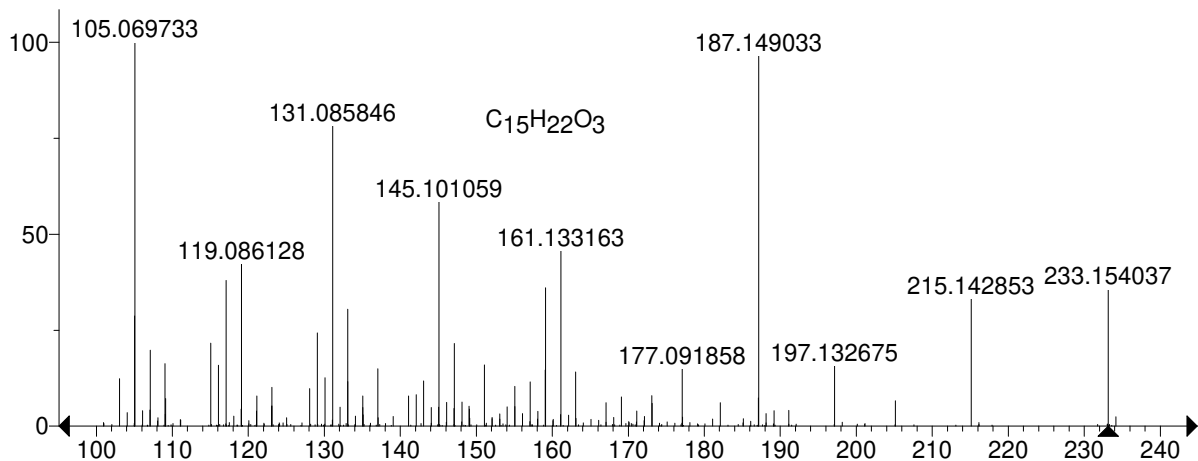

\*\* Search Report Page 2 of 2 \*\*

Hit 3 : NCGC00385912-01\_C15H22O3\_3-Cycloheptene-1-acetic acid, 5-methyl-alpha-methylene-4-(3-oxobutyl)-, C15H22O3; MF: 0; RMF: 11; Prob 14.3%; Lib: mona-export-gnps; ID: 14383.

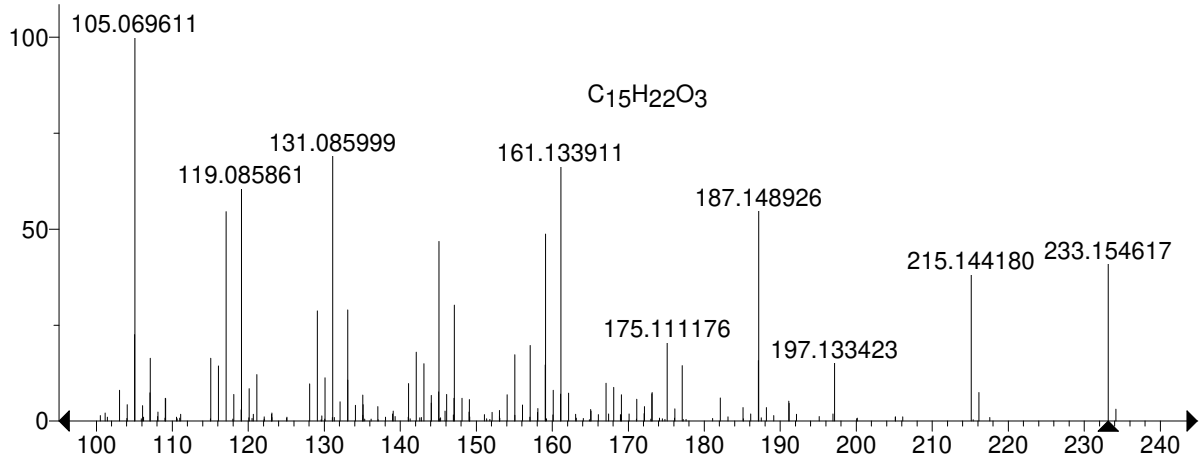

Hit 4 : (4S,5Z,6S)-4-(2-methoxy-2-oxoethyl)-5-[2-[(E)-3-phenylprop-2-enoyl]oxyethylidene]-6-[(2S,3R,4S,5S,6R)-3 C15H22O2; MF: 0; RMF: 8; Prob 14.3%; Lib: mona-export-lc-ms-ms\_negative\_mode; ID: 19611.

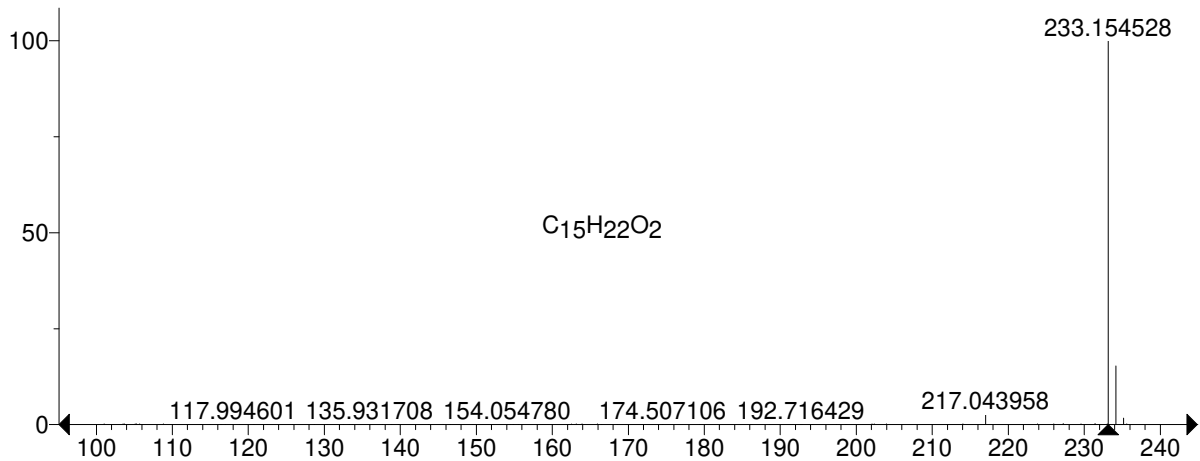

Hit 5 : 5,8,11,14-Eicosatetraenoic acid, 16-hydroxy-, (5Z,8Z,11Z,14Z,16R)- [M-H-C5H10O]- IT 35% P=233.2 C20H32O3; MF: 0; RMF: 4; Prob 14.3%; CAS: 183509-22-0; Lib: nist\_msms; ID: 193173.

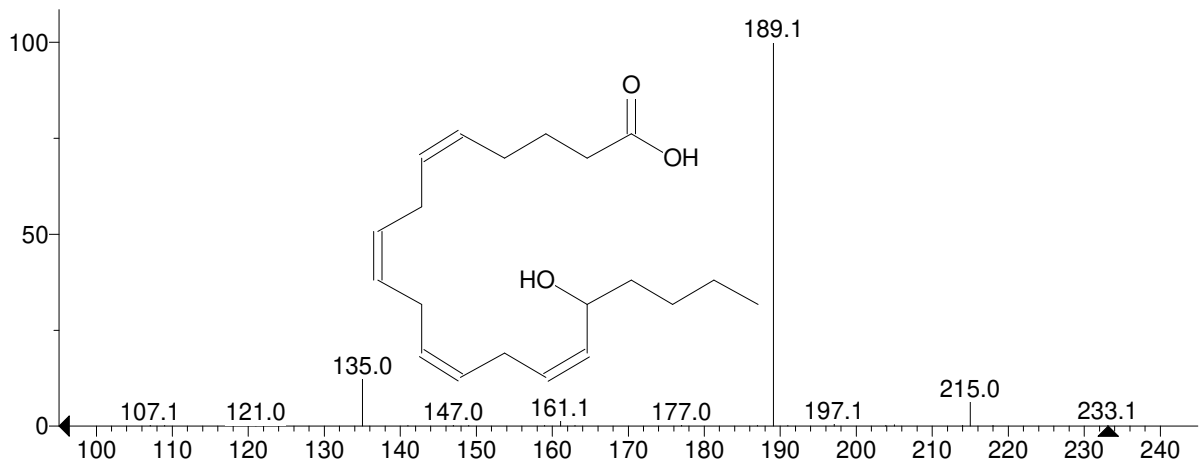

Unknown: Unknown (6.07\_489.0120m/z)  
Compound in Library Factor = 0

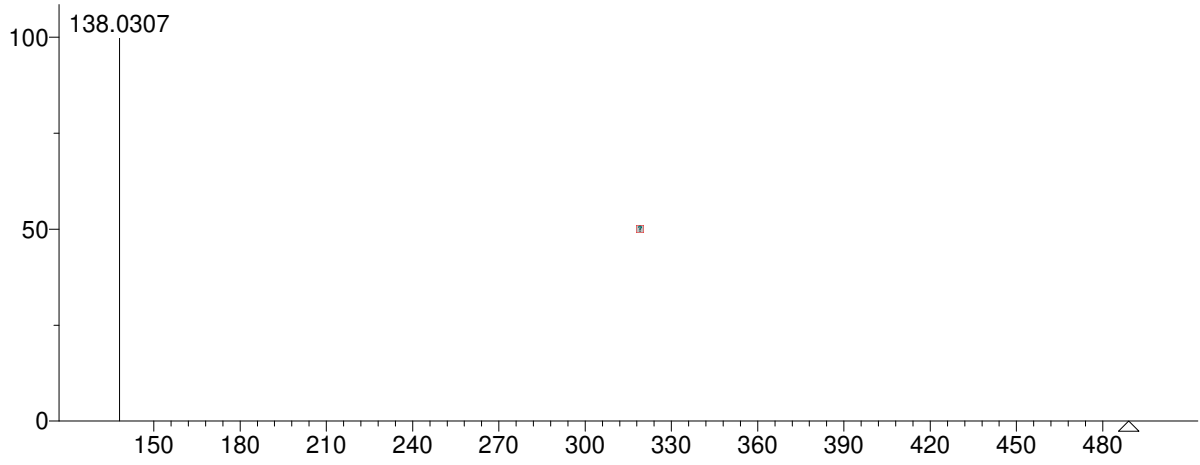

Unknown: Unknown (6.14\_390.1330m/z)  
Compound in Library Factor = 0

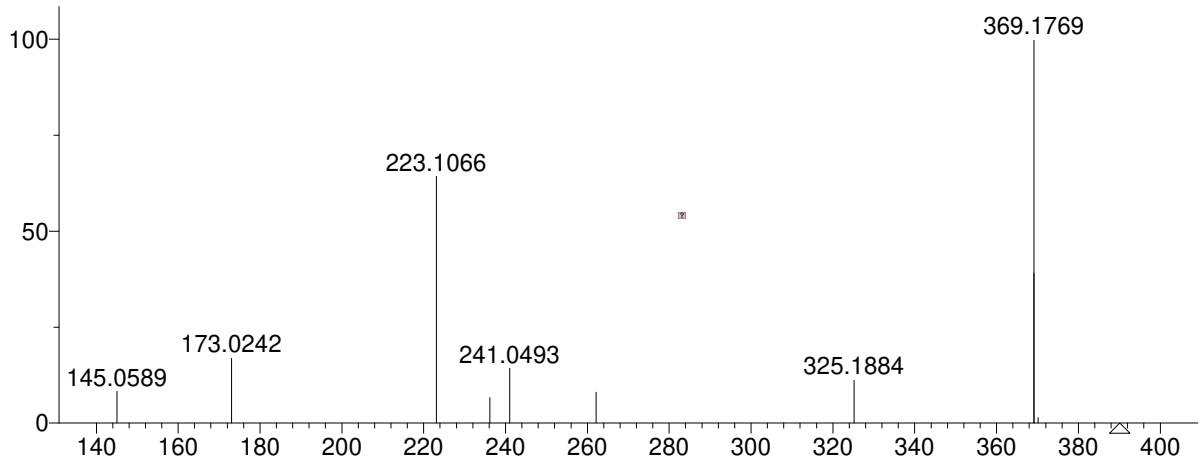

\*\* Search Report Page 1 of 1 \*\*

Unknown: Unknown (6.14\_565.2231m/z)  
Compound in Library Factor = 0

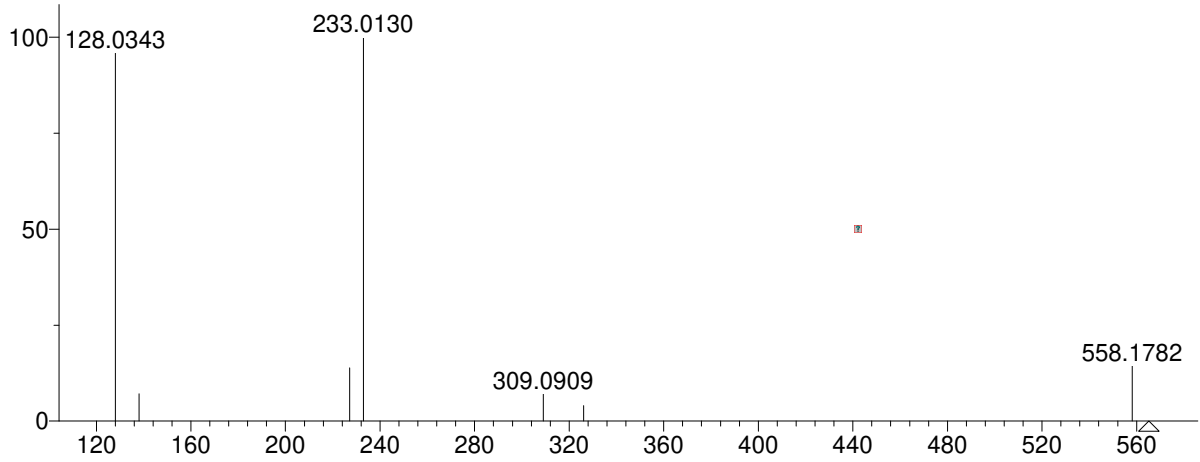

Hit 1 : Theaflavin [M+H]<sup>+</sup> 35% P=565.2  
C<sub>29</sub>H<sub>24</sub>O<sub>12</sub>; MF: 0; RMF: 13; Prob 50.0%; Lib: mona-export-itree; ID: 673.

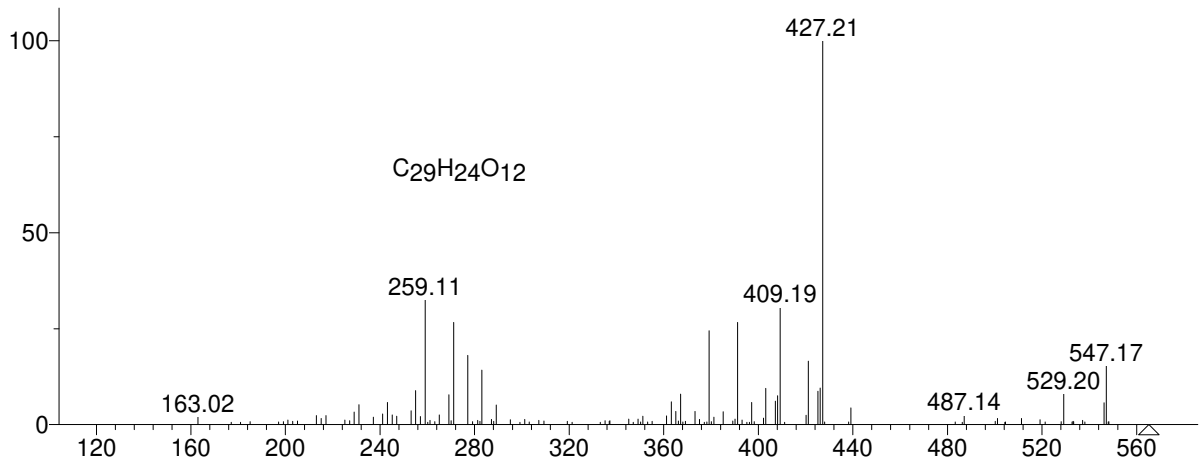

Hit 2 : (1R,7S,8E,9S,14S,15S,17R)-8-ethylidene-15-(1-hydroxypropan-2-yl)-17-methyl-7-[[[(2S,3R,4S,5S,6R)-3,4,4-trimethyl-5-oxotetrahydro-2H-pyridin-2-ylidene]amino]propanoic acid  
C<sub>26</sub>H<sub>38</sub>O<sub>12</sub>; MF: 0; RMF: 1; Prob 50.0%; Lib: mona-export-vf-npl\_qexactive; ID: 12805.

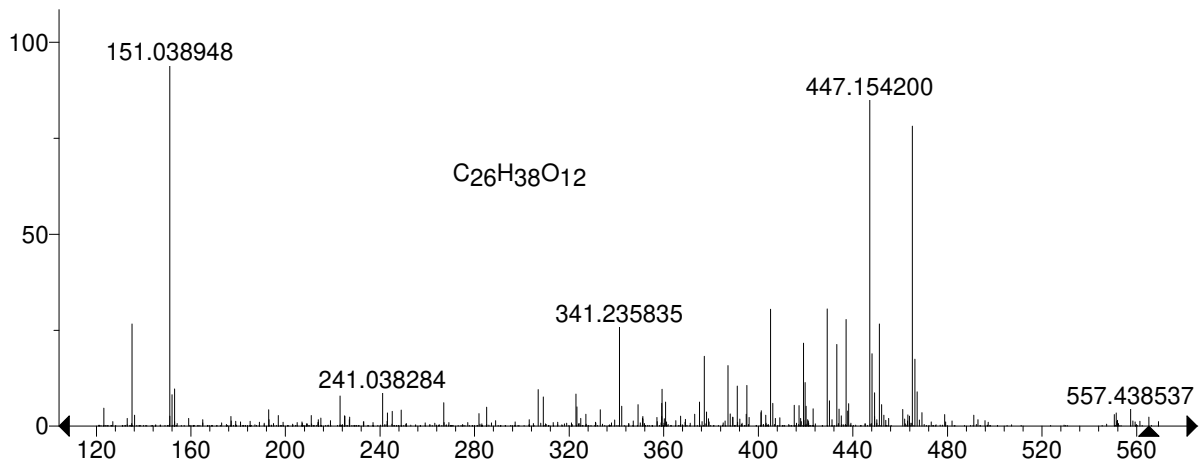

Unknown: Unknown (6.15\_369.1772m/z)  
Compound in Library Factor = -791

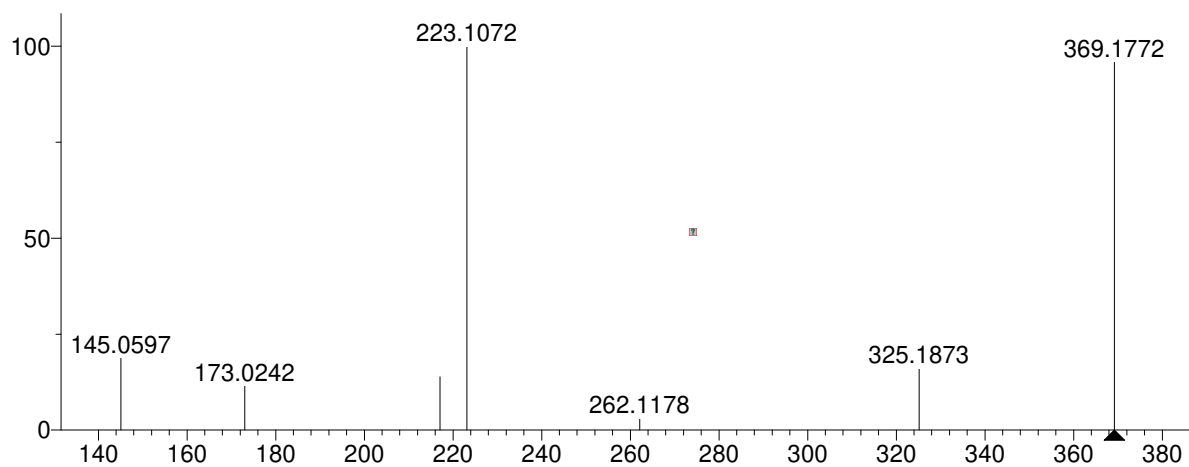

Hit 1 : 5 $\beta$ -Androstan-3 $\alpha$ -ol-17-one sulfate [M-H]<sup>-</sup> HCD 33V P=369.2  
C<sub>19</sub>H<sub>30</sub>O<sub>5</sub>S; MF: 185; RMF: 608; Prob 41.1%; CAS: 977-36-6; Lib: nist\_msms; ID: 231644.

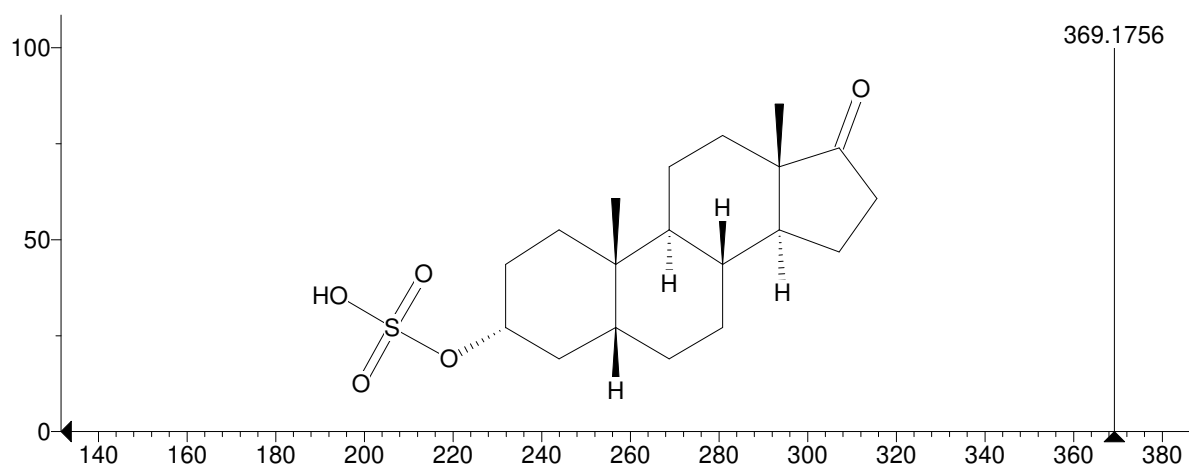

Hit 2 : 5-Androsten-3 $\beta$ ,17 $\beta$ -diol-3-sulfate [M-H]<sup>-</sup> HCD 27V P=369.2  
C<sub>19</sub>H<sub>30</sub>O<sub>5</sub>S; MF: 185; RMF: 608; Prob 41.1%; CAS: 977-33-3; Lib: nist\_msms; ID: 231655.

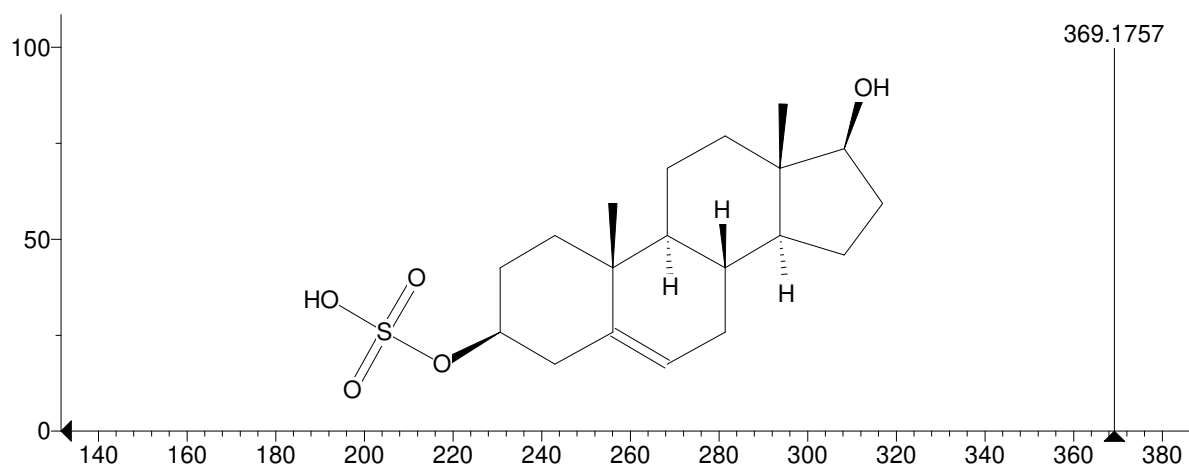



Hit 3 : 5 $\alpha$ -Androstan-3 $\beta$ -ol-17-one sulfate [M-H]<sup>-</sup> HCD 40V P=369.2  
C19H30O5S; MF: 148; RMF: 607; Prob 10.0%; CAS: 977-35-5; Lib: nist\_msms; ID: 231625.

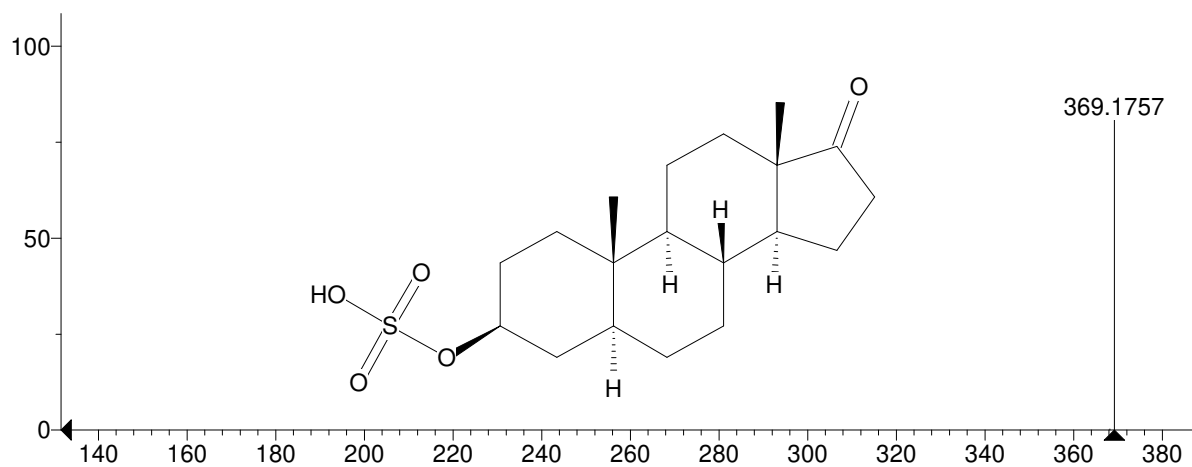

Hit 4 : 5 $\alpha$ -Androstan-17 $\beta$ -ol-3-one sulfate [M-H]<sup>-</sup> HCD 40V P=369.2  
C19H30O5S; MF: 137; RMF: 604; Prob 6.87%; CAS: 2641-48-7; Lib: nist\_msms; ID: 231920.

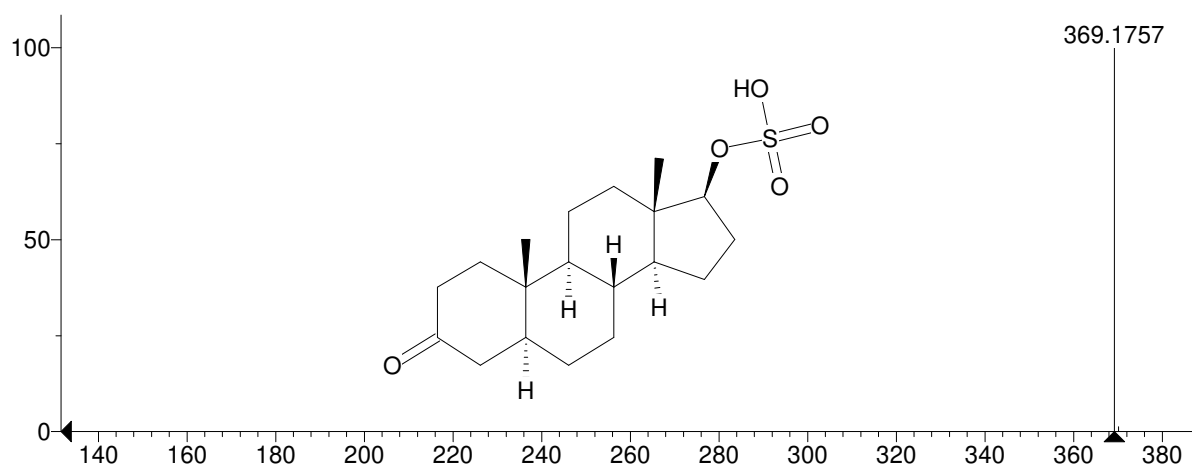

Hit 5 : Androsterone sulfate [M-H]<sup>-</sup> HCD 35V P=369.2  
C19H30O5S; MF: 41; RMF: 547; Prob 0.54%; CAS: 2479-86-9; Lib: nist\_msms; ID: 117993.

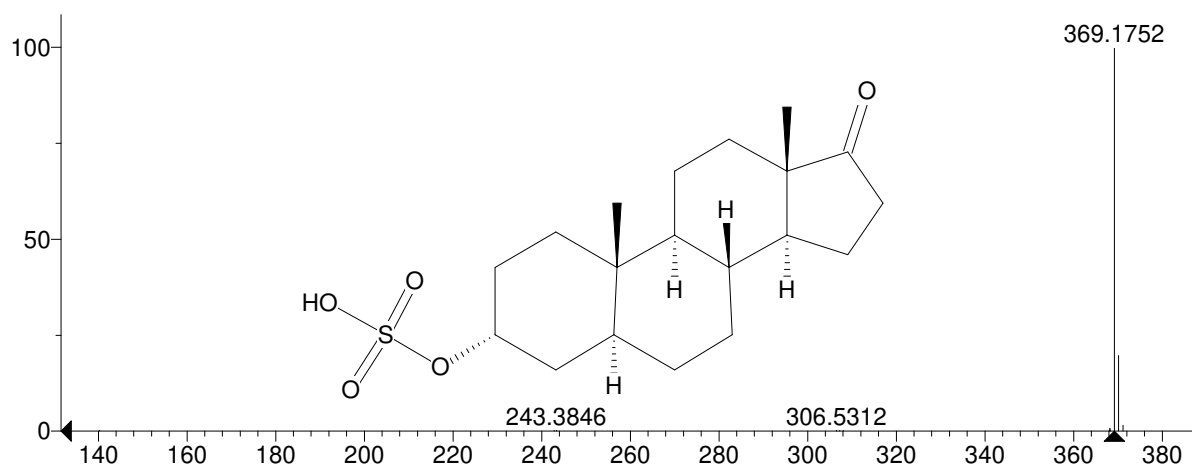

Unknown: Unknown (6.15\_488.1581m/z)  
Compound in Library Factor = 0

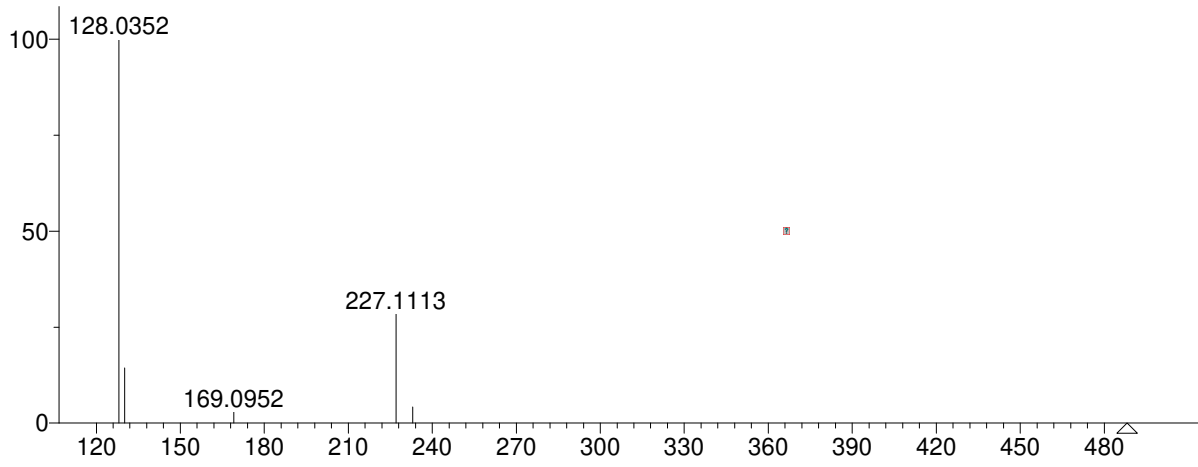

Unknown: Unknown (6.16\_609.2057m/z)  
Compound in Library Factor = 0

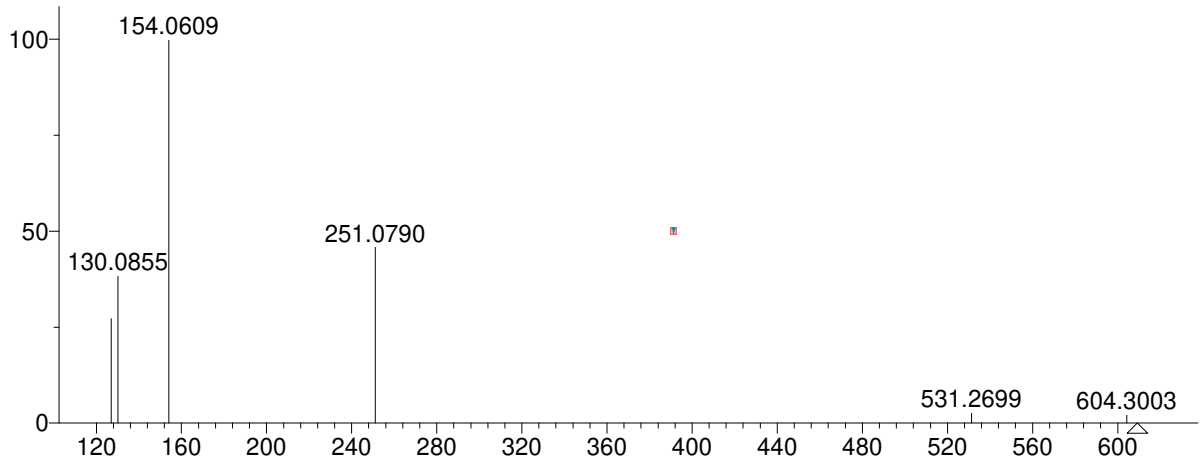

Unknown: Unknown (6.18\_531.2658m/z)  
Compound in Library Factor = 0

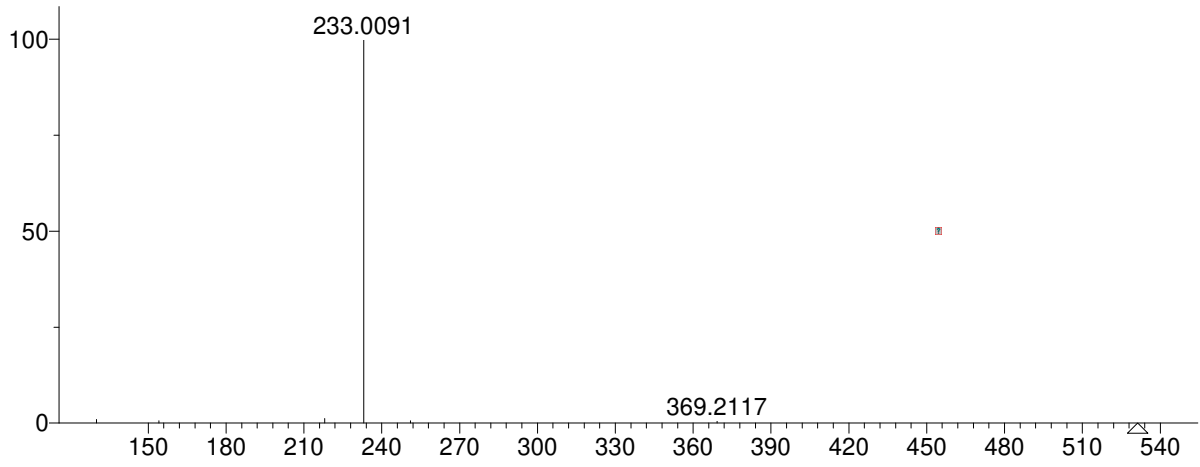

\*\* Search Report Page 1 of 2 \*\*

Unknown: Unknown (6.20\_243.1703m/z)  
Compound in Library Factor = -2176

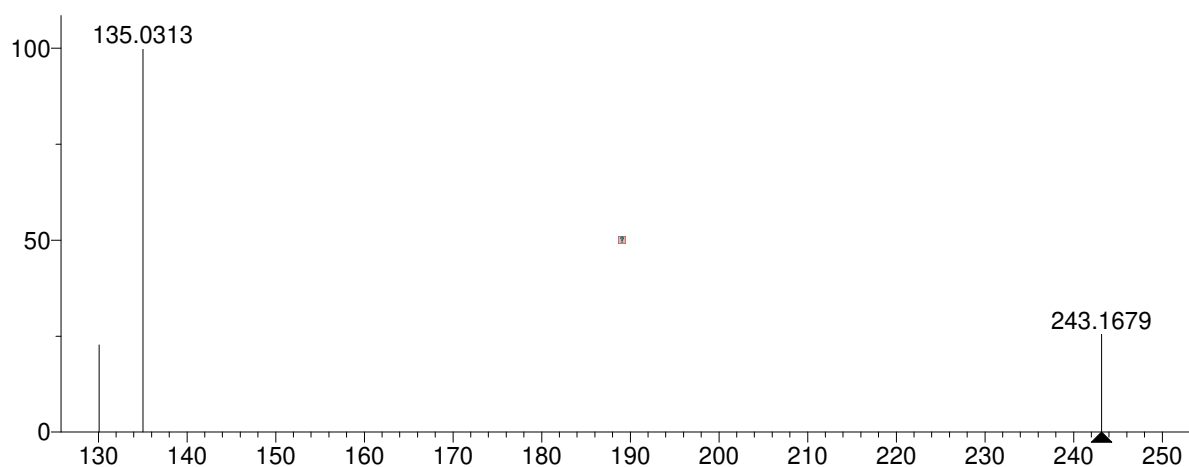

Hit 1 : Leu-Leu [M-H]<sup>-</sup> HCD 14eV P=243.2  
C<sub>12</sub>H<sub>24</sub>N<sub>2</sub>O<sub>3</sub>; MF: 144; RMF: 487; Prob 31.0%; CAS: 3303-31-9; Lib: nist\_msms; ID: 568071.

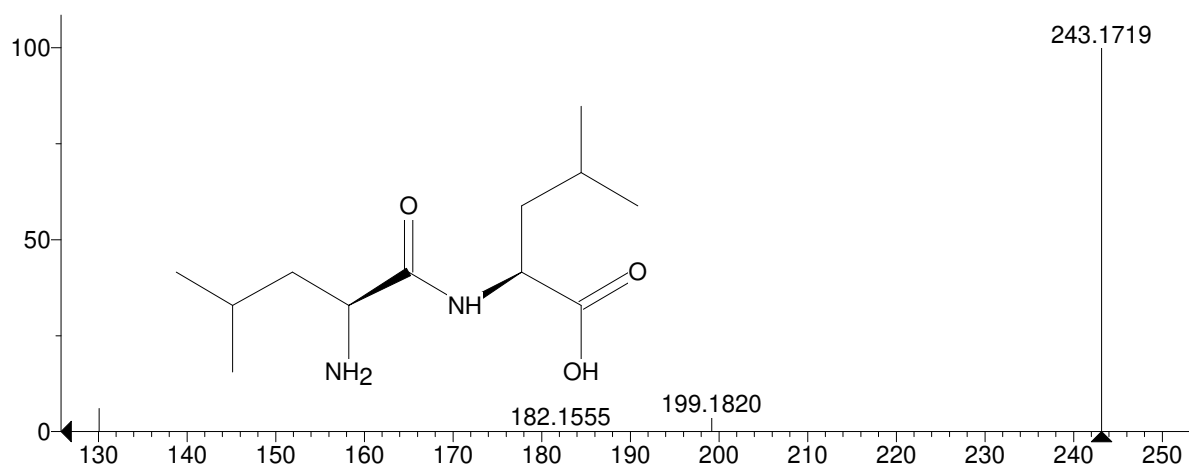

Hit 2 : Ile-Leu [M-H]<sup>-</sup> HCD 14eV P=243.2  
C<sub>12</sub>H<sub>24</sub>N<sub>2</sub>O<sub>3</sub>; MF: 134; RMF: 479; Prob 21.9%; Lib: nist\_msms; ID: 570160.

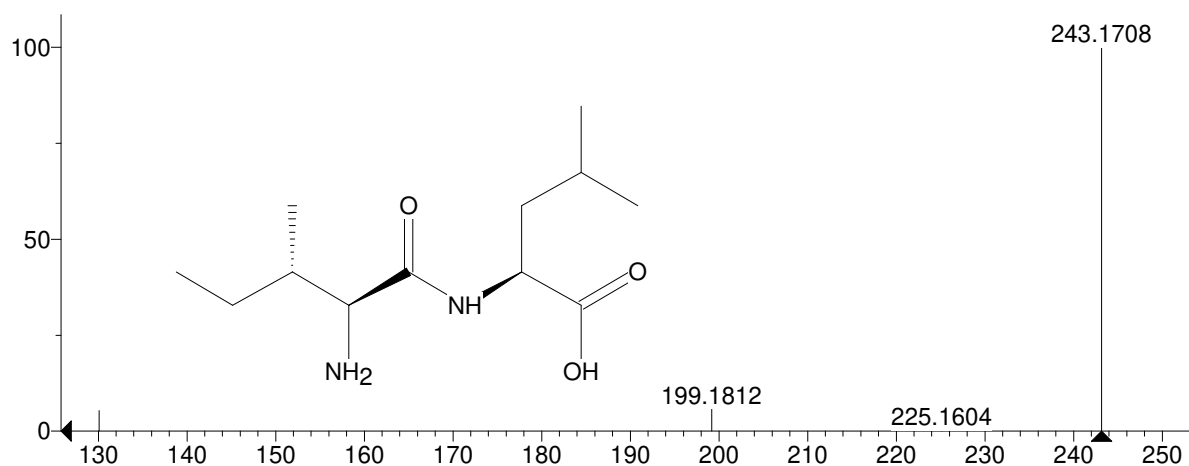

Hit 3 : Ile-Leu [M-H]<sup>-</sup> HCD 14eV P=243.2  
C<sub>12</sub>H<sub>24</sub>N<sub>2</sub>O<sub>3</sub>; MF: 134; RMF: 479; Prob 21.9%; CAS: 26462-22-6; Lib: nist\_msms2; ID: 83886.

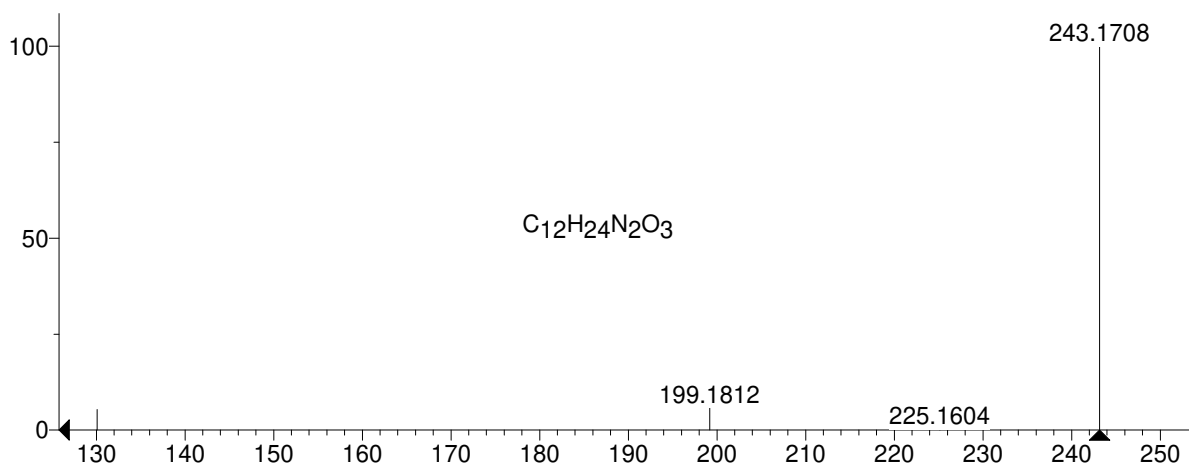

Hit 4 : Leu-Ile [M-H]<sup>-</sup> HCD 14eV P=243.2  
C<sub>12</sub>H<sub>24</sub>N<sub>2</sub>O<sub>3</sub>; MF: 105; RMF: 474; Prob 6.20%; Lib: nist\_msms2; ID: 571156.

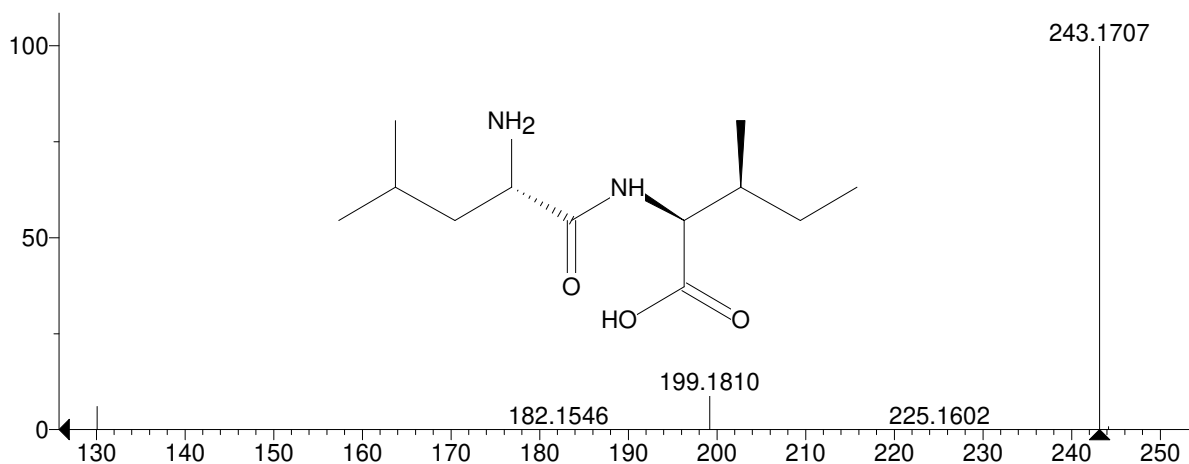

Hit 5 : Leu-Ile [M-H]<sup>-</sup> HCD 14eV P=243.2  
C<sub>12</sub>H<sub>24</sub>N<sub>2</sub>O<sub>3</sub>; MF: 105; RMF: 474; Prob 6.20%; CAS: 36077-41-5; Lib: nist\_msms2; ID: 84889.

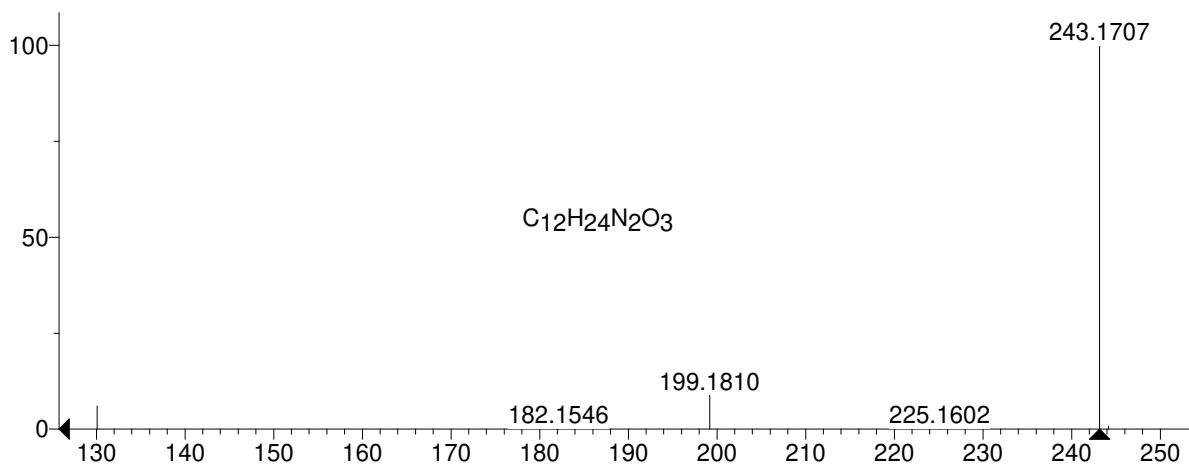

\*\* Search Report Page 1 of 2 \*\*

Unknown: Unknown (6.20\_369.2134m/z)  
Compound in Library Factor = -3273

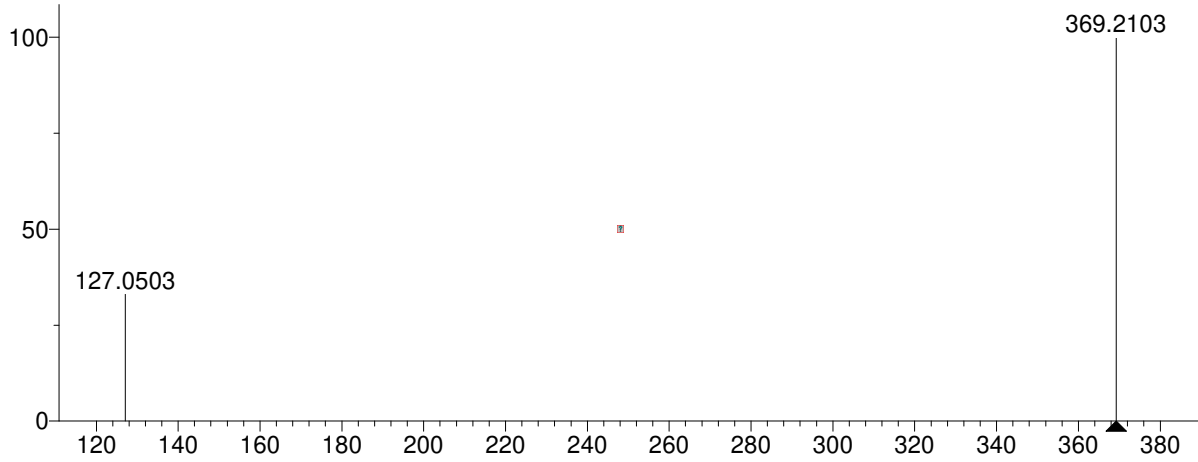

Hit 1 : Neuropeptide S, rat [M+6H]<sup>6+</sup> QTOF 2V P=369.2  
C<sub>95</sub>H<sub>160</sub>N<sub>34</sub>O<sub>27</sub>; MF: 7; RMF: 434; Prob 24.7%; Lib: nist\_msms2; ID: 35976.

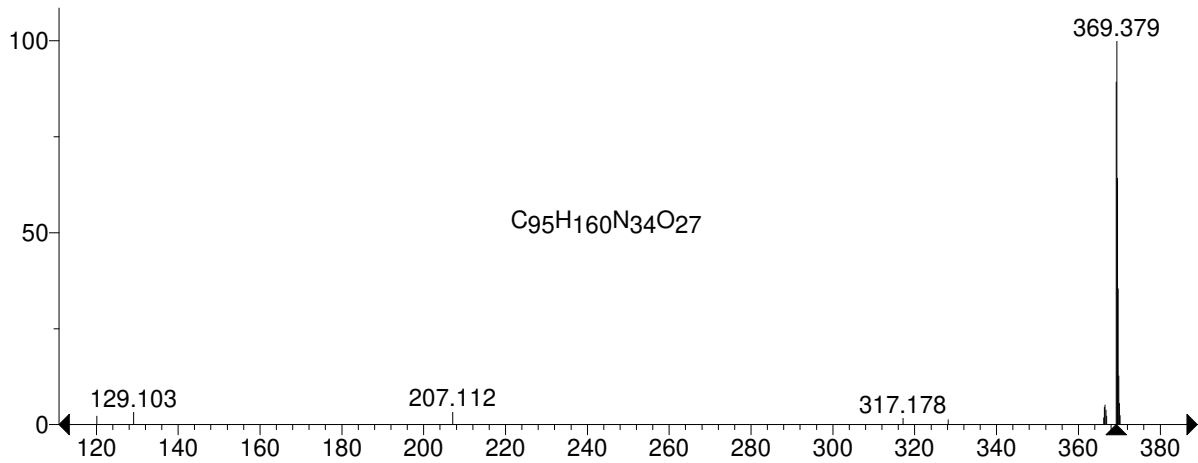

Hit 2 : Corynantheidine [M+H]<sup>+</sup> P=369.2  
C<sub>22</sub>H<sub>28</sub>N<sub>2</sub>O<sub>3</sub>; MF: 1; RMF: 168; Prob 19.4%; Lib: mona-export-gnps; ID: 15019.

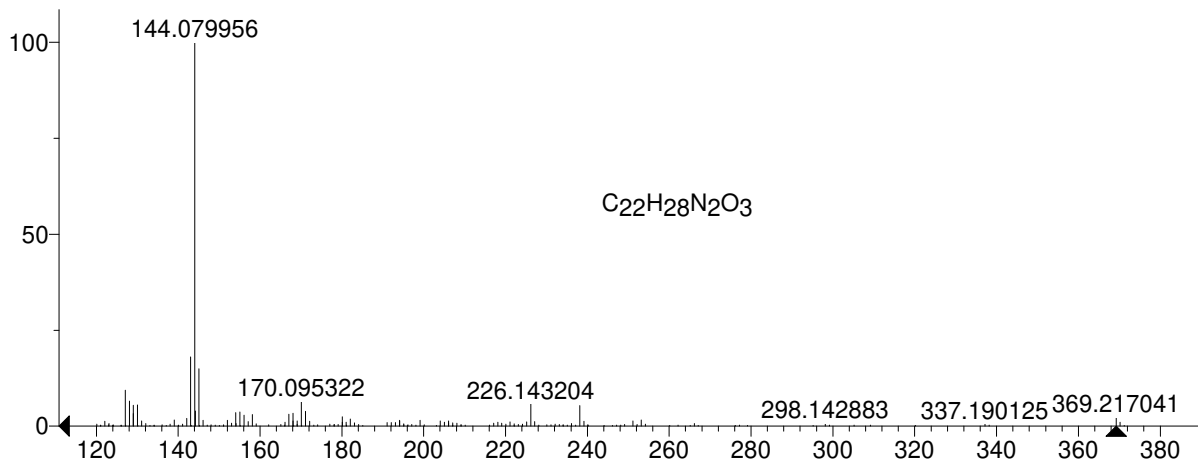

Hit 3 : Voacangine [M+H]<sup>+</sup> P=369.2  
C<sub>22</sub>H<sub>28</sub>N<sub>2</sub>O<sub>3</sub>; MF: 0; RMF: 303; Prob 18.6%; Lib: mona-export-gnps; ID: 15078.

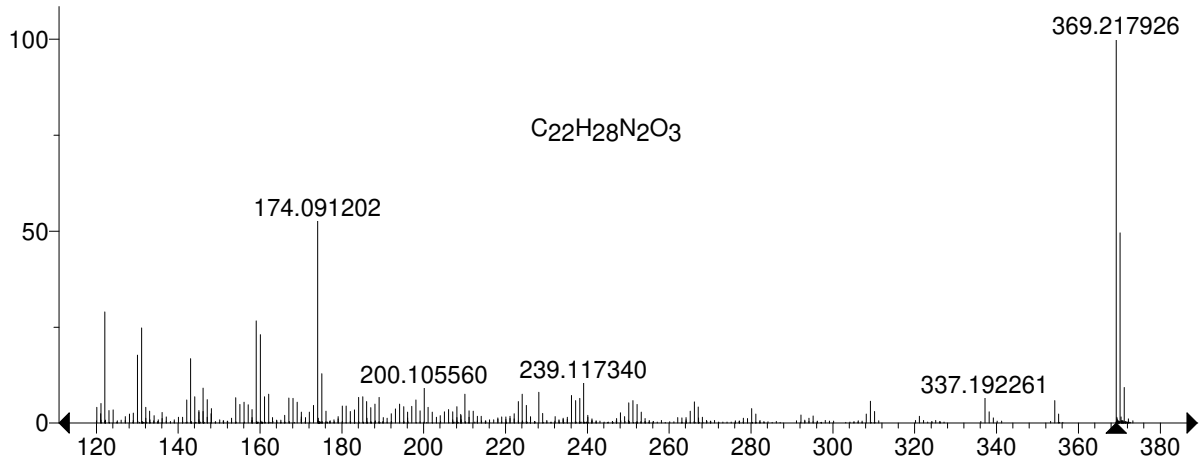

Hit 4 : Alpha-methylyohimbine [M+H]<sup>+</sup> P=369.2  
C<sub>22</sub>H<sub>28</sub>N<sub>2</sub>O<sub>3</sub>; MF: 0; RMF: 246; Prob 18.6%; Lib: mona-export-gnps; ID: 14961.

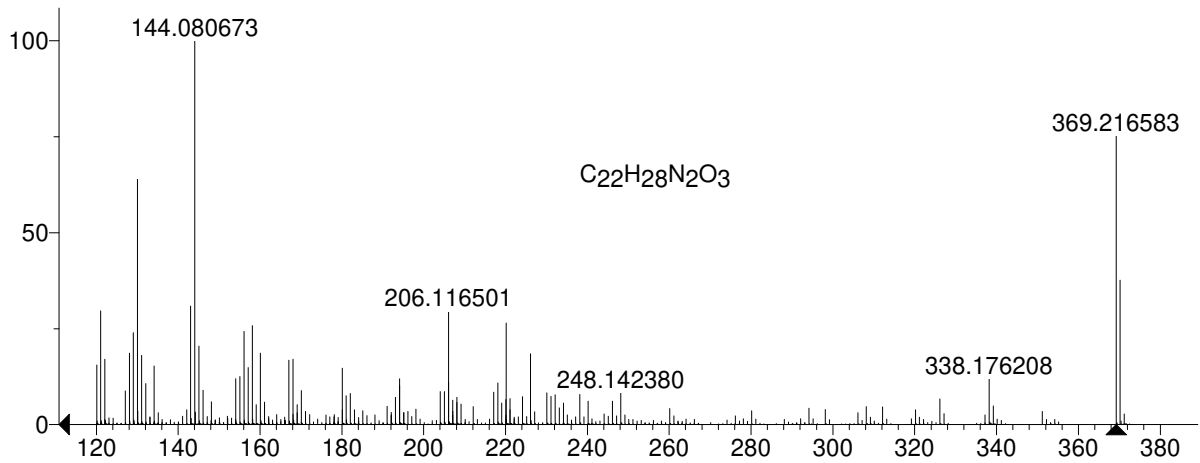

Hit 5 : Pesticide4\_Boscalid\_C<sub>18</sub>H<sub>12</sub>Cl<sub>2</sub>N<sub>2</sub>O\_3-Pyridinecarboxamide, 2-chloro-N-(4'-chloro[1,1'-biphenyl]-2-yl)- [C<sub>18</sub>H<sub>12</sub>Cl<sub>2</sub>N<sub>2</sub>O; MF: 0; RMF: 3; Prob 18.6%; Lib: mona-export-gnps; ID: 10170.

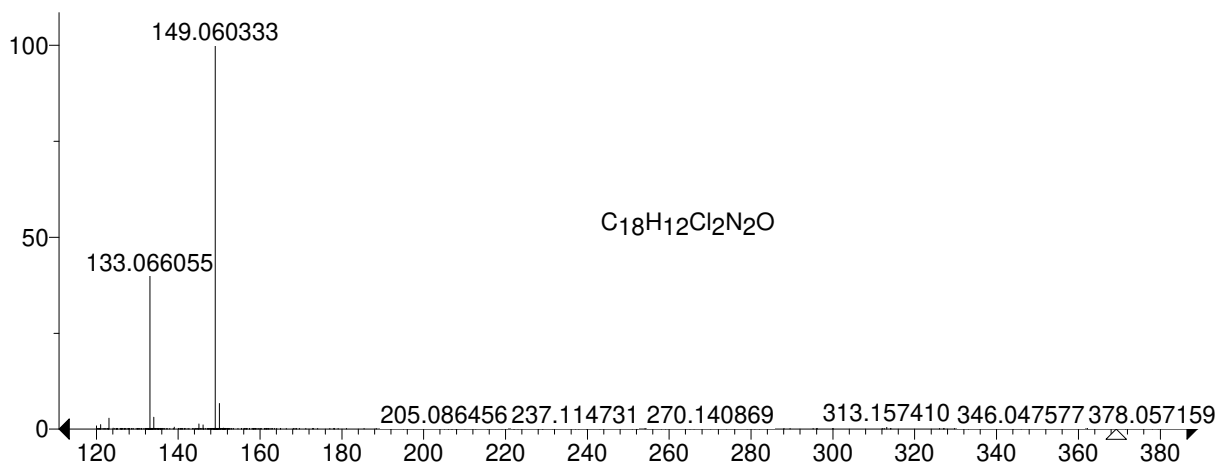



\*\* Search Report Page 1 of 2 \*\*

Unknown: Unknown (6.20\_386.1909m/z)  
Compound in Library Factor = -287

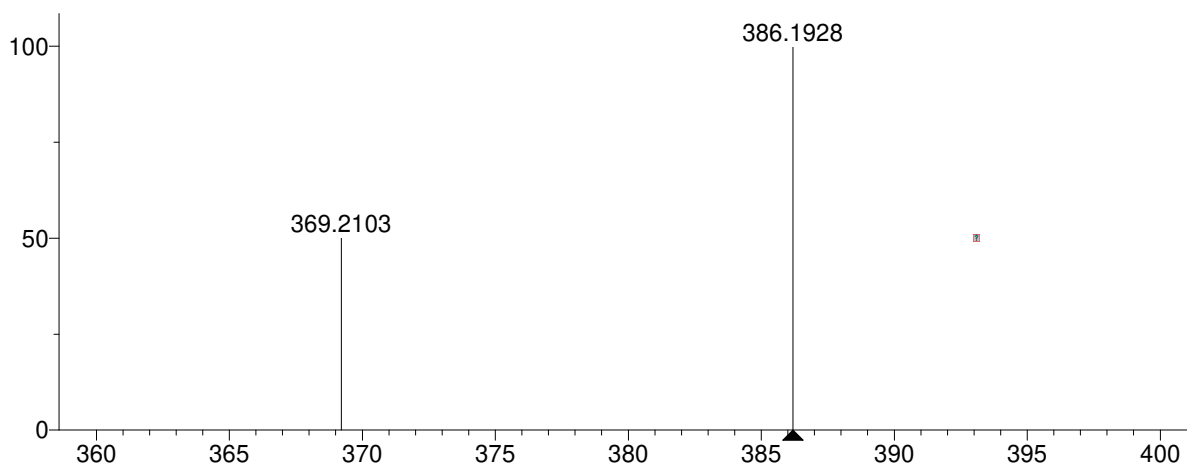

Hit 1 : Methanone, [5-(2-fluorophenyl)-1-pentyl-1H-pyrrol-3-yl]-1-naphthalenyl- [M+H]<sup>+</sup> HCD 11V P=386.2  
C<sub>26</sub>H<sub>24</sub>FNO; MF: 282; RMF: 815; Prob 49.8%; CAS: 914458-26-7; Lib: nist\_msms; ID: 248825.

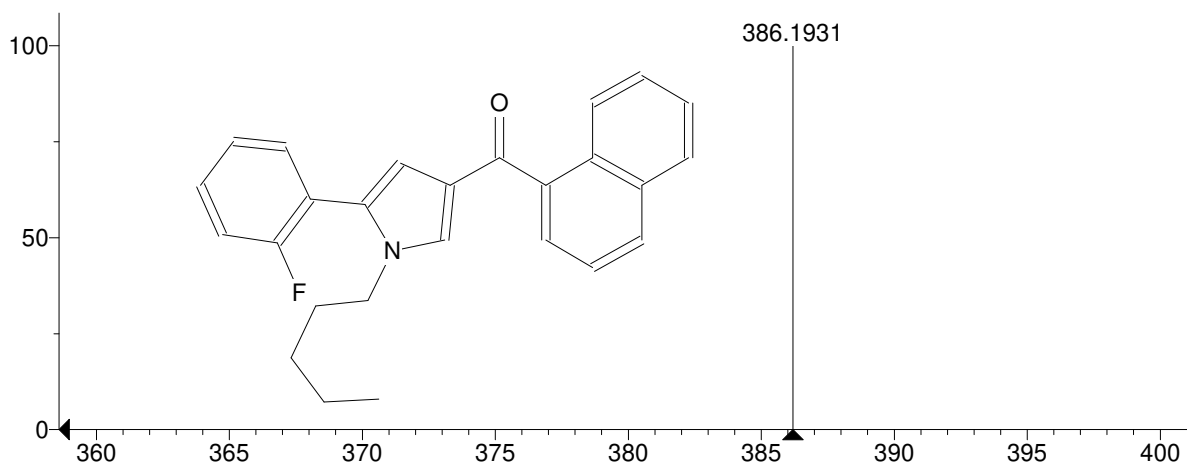

Hit 2 : Methanone, [5-(3-fluorophenyl)-1-pentyl-1H-pyrrol-3-yl]-1-naphthalenyl- [M+H]<sup>+</sup> HCD 11V P=386.2  
C<sub>26</sub>H<sub>24</sub>FNO; MF: 282; RMF: 815; Prob 49.8%; CAS: 914458-31-4; Lib: nist\_msms; ID: 248873.

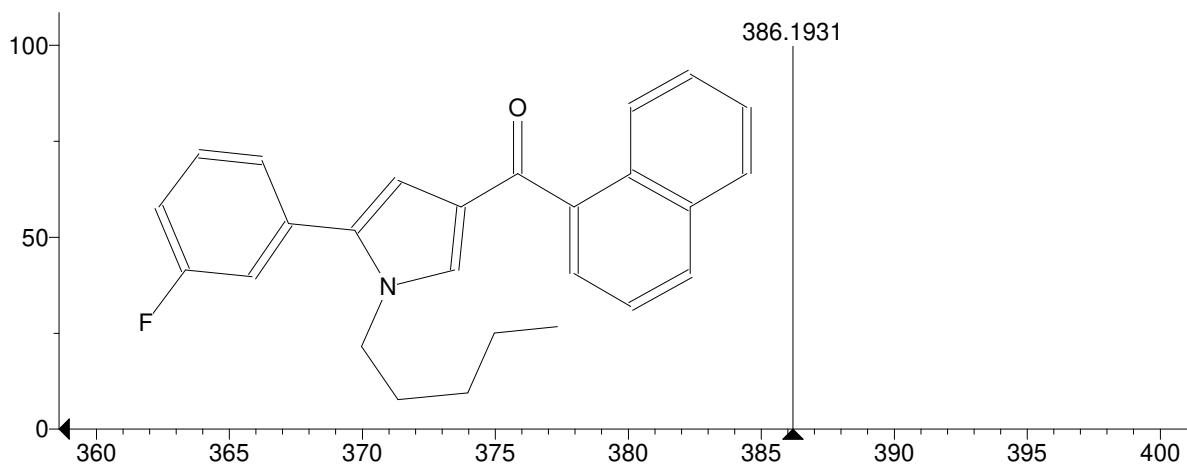

\*\* Search Report Page 2 of 2 \*\*

Hit 3 : Pro-His-Cys-Lys-Arg-Met [M+2H]<sup>2+</sup> HCD 13eV P=386.2  
C<sub>31</sub>H<sub>54</sub>N<sub>12</sub>O<sub>7</sub>S<sub>2</sub>; MF: 60; RMF: 707; Prob 0.49%; Lib: nist\_msms2; ID: 44917.

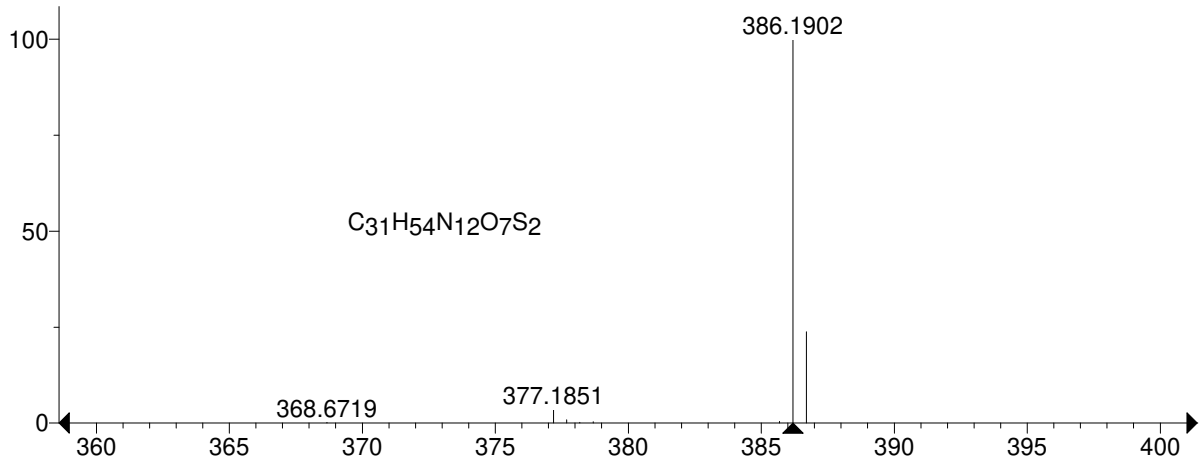

Unknown: Unknown (6.21\_293.1130m/z)  
Compound in Library Factor = -3273

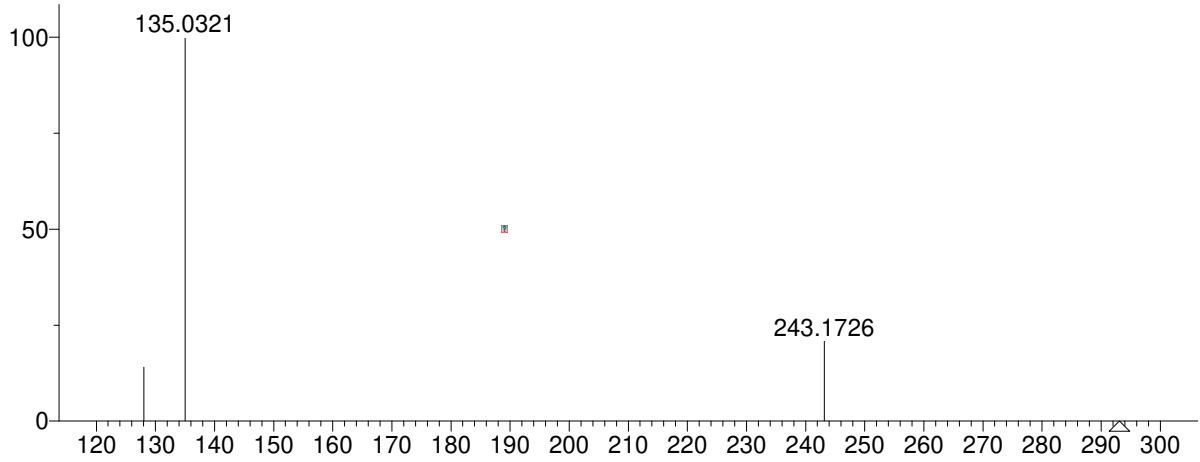

Hit 1 : Phe-Glu [M-H]<sup>-</sup> HCD 46eV P=293.1  
C<sub>14</sub>H<sub>18</sub>N<sub>2</sub>O<sub>5</sub>; MF: 1; RMF: 166; Prob 16.9%; Lib: nist\_msms; ID: 570598.

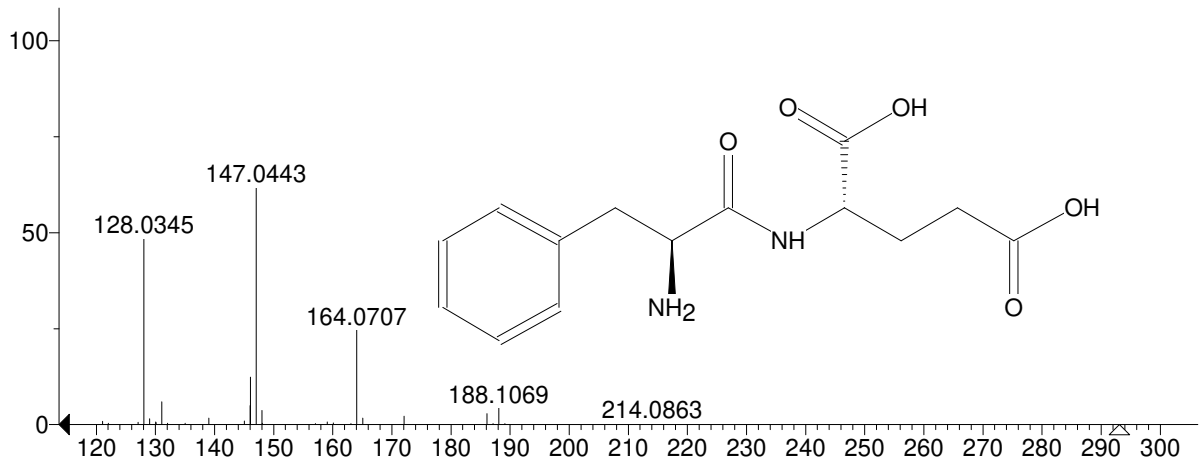

Hit 2 : Phe-Glu [M-H]<sup>-</sup> HCD 46eV P=293.1  
C<sub>14</sub>H<sub>18</sub>N<sub>2</sub>O<sub>5</sub>; MF: 1; RMF: 166; Prob 16.9%; CAS: 3617-45-6; Lib: nist\_msms2; ID: 84331.

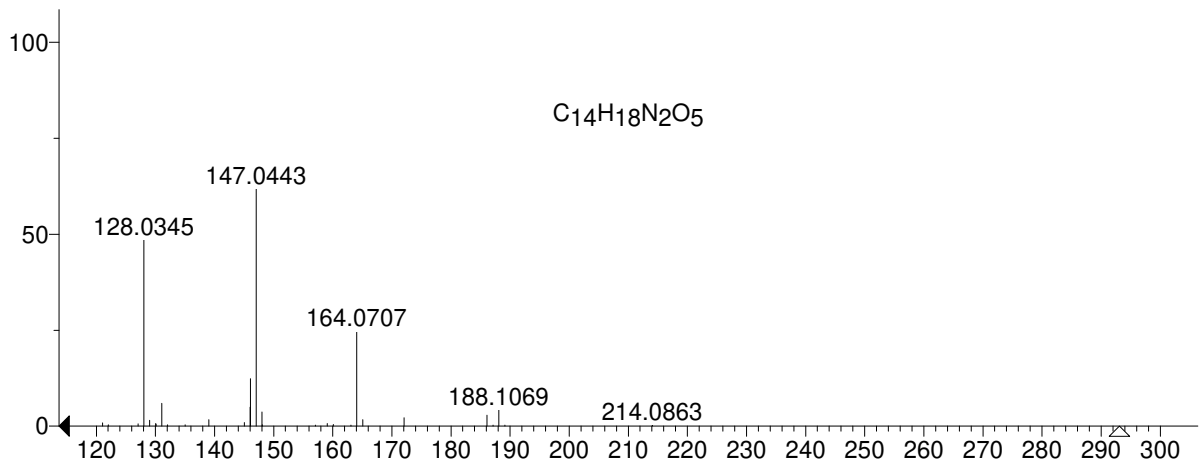

Hit 3 : Glu-Phe [M-H]<sup>-</sup> IT-FT 35% P=293.1  
C<sub>14</sub>H<sub>18</sub>N<sub>2</sub>O<sub>5</sub>; MF: 1; RMF: 60; Prob 16.9%; Lib: nist\_msms; ID: 570035.

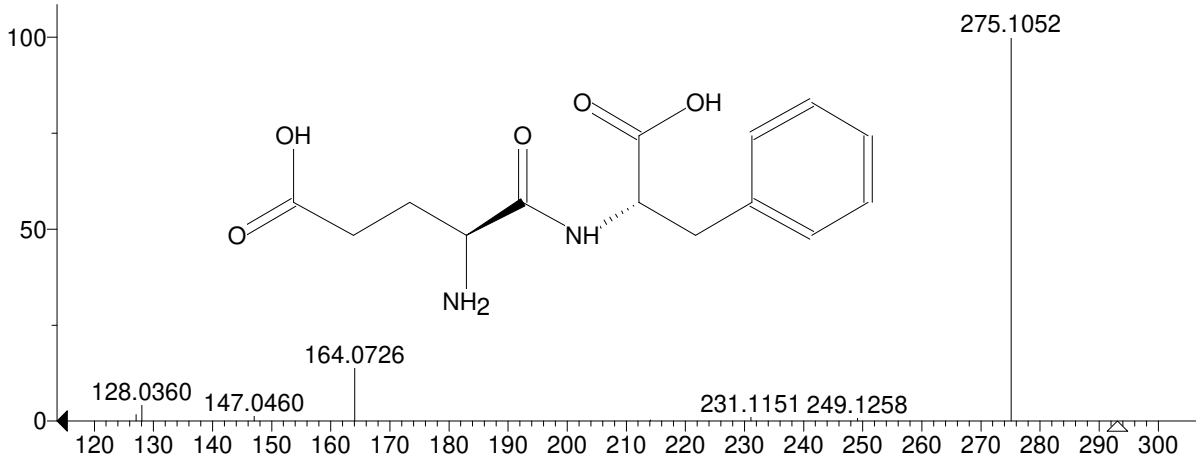

Hit 4 : Glu-Phe [M-H]<sup>-</sup> IT-FT 35% P=293.1  
C<sub>14</sub>H<sub>18</sub>N<sub>2</sub>O<sub>5</sub>; MF: 1; RMF: 60; Prob 16.9%; CAS: 20556-22-3; Lib: nist\_msms2; ID: 83761.

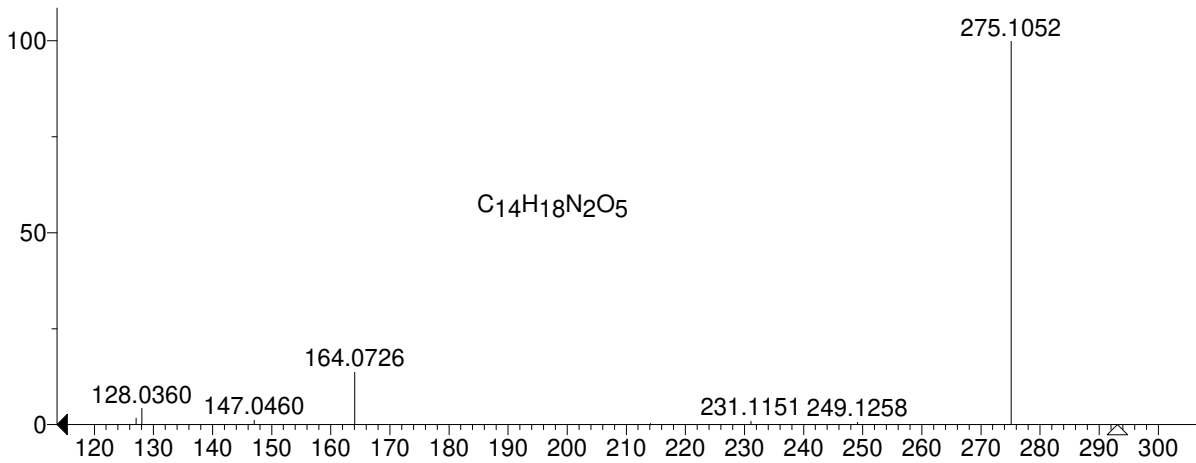

Hit 5 : Unknown (carbon number 14); PlaSMA ID-549 [M-H]<sup>-</sup> P=293.1  
C<sub>14</sub>H<sub>18</sub>N<sub>2</sub>O<sub>5</sub>; MF: 0; RMF: 72; Prob 16.2%; Lib: biomsmms-neg-plasma; ID: 1167.

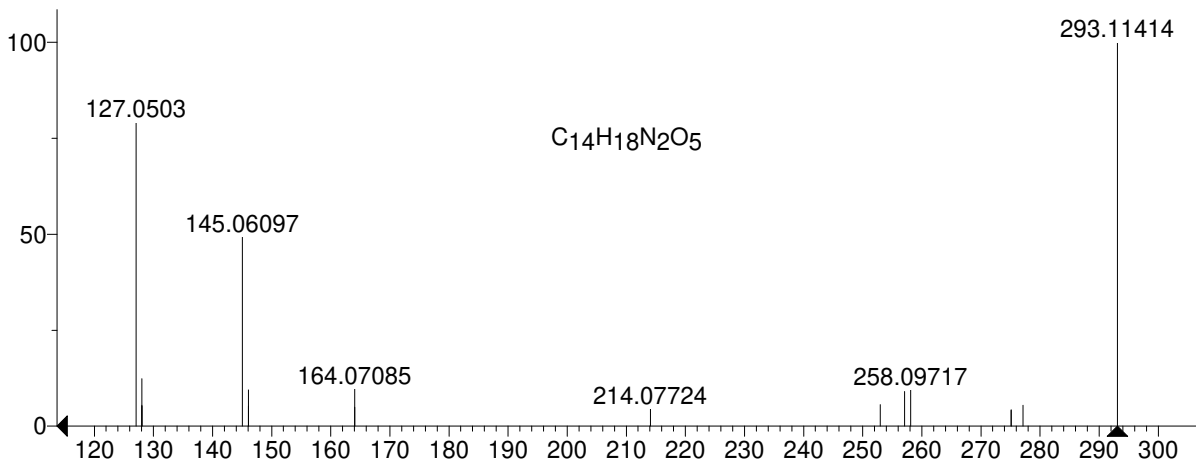

Unknown: Unknown (6.23\_557.2081m/z)  
Compound in Library Factor = 0

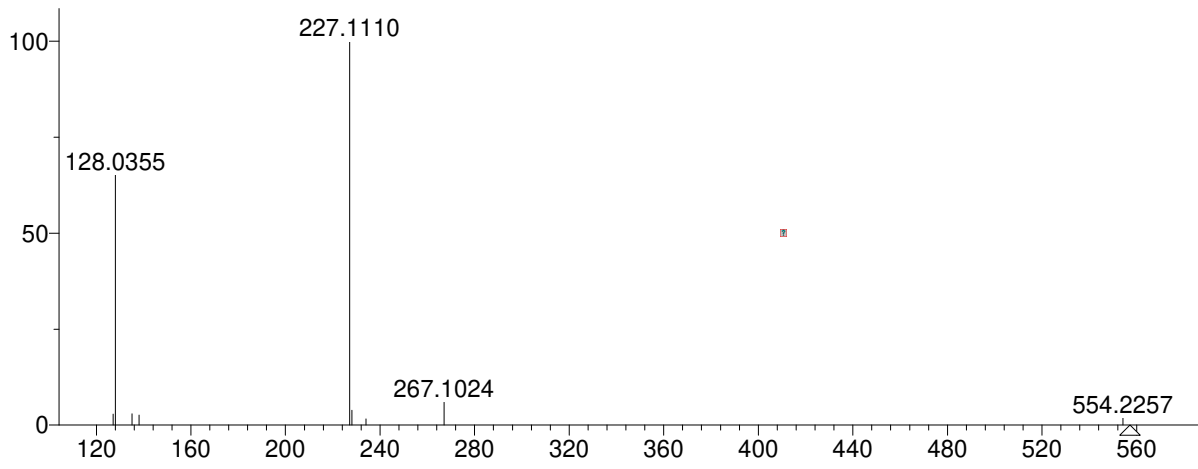

Unknown: Unknown (6.24\_567.2285m/z)  
Compound in Library Factor = 0

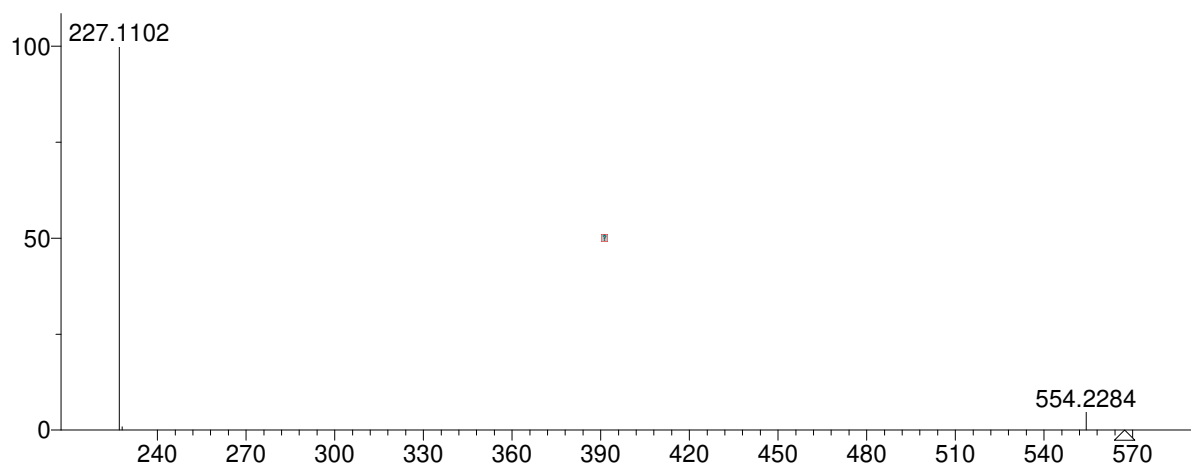

Hit 1 : chaetoglobosins [M+K]<sup>+</sup> 35HCD P=567.2  
C<sub>32</sub>H<sub>36</sub>N<sub>2</sub>O<sub>5</sub>; MF: 0; RMF: 10; Prob 100.0%; Lib: mona-export-vf-npl\_qexactive; ID: 23206.

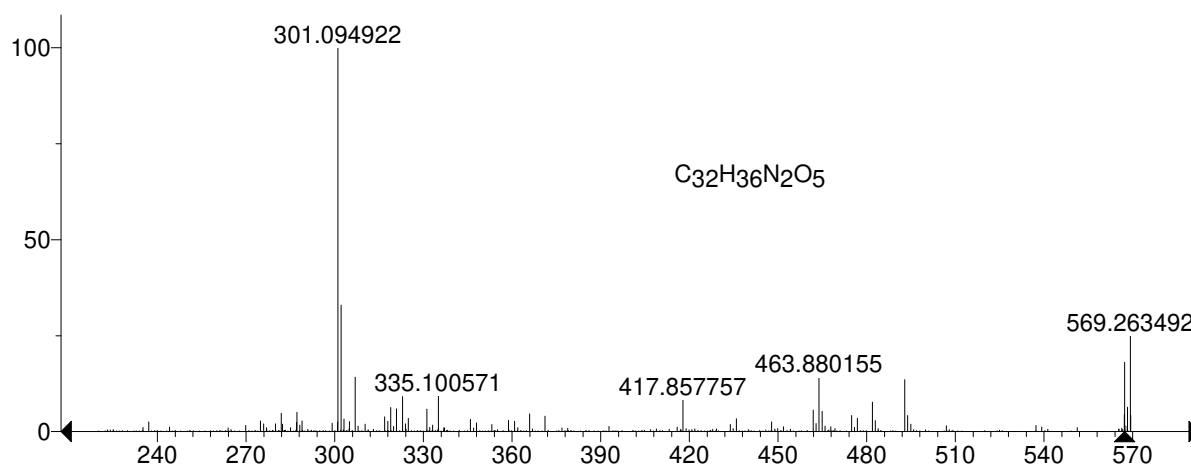

Unknown: Unknown (6.26\_178.1227m/z)  
Compound in Library Factor = -862

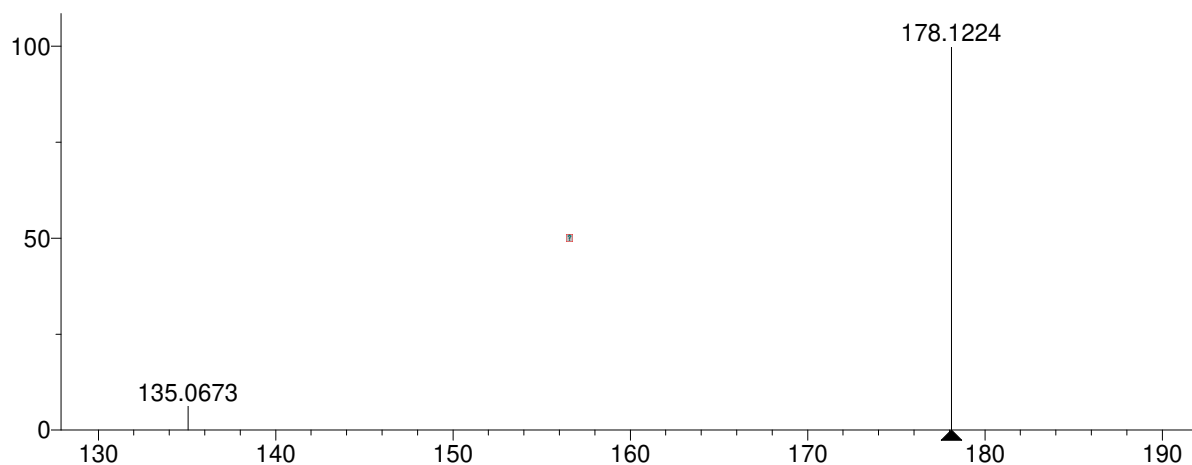

Hit 1 : Rebemide [M+H]<sup>+</sup> 30eV P=178.1  
C<sub>11</sub>H<sub>15</sub>NO; MF: 352; RMF: 970; Prob 15.3%; Lib: mona-export-massbank; ID: 26955.

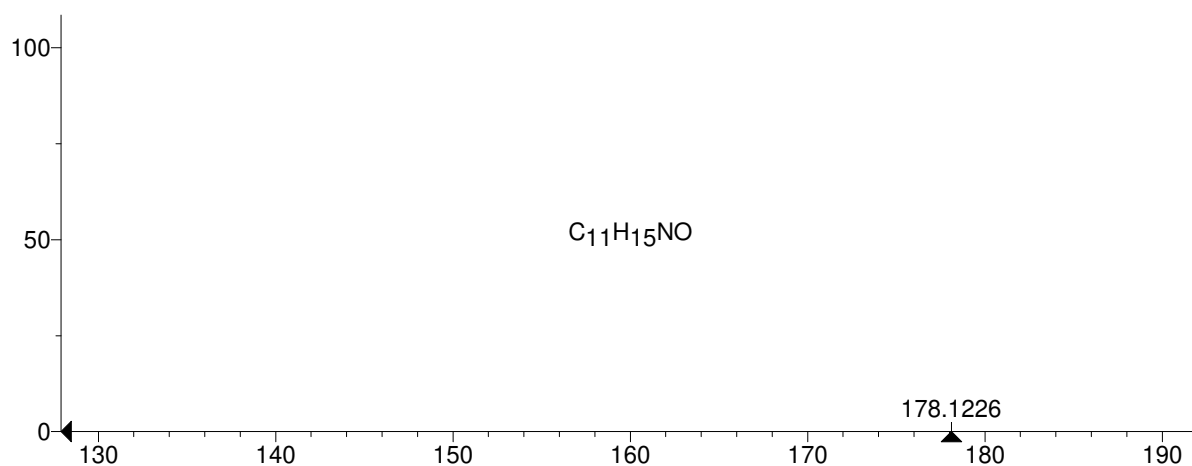

Hit 2 : N-tert-Butyl- $\alpha$ -phenylnitronium [M+H]<sup>+</sup> QTOF 3V P=178.1  
C<sub>11</sub>H<sub>15</sub>NO; MF: 352; RMF: 970; Prob 15.3%; CAS: 3376-24-7; Lib: nist\_msms; ID: 67834.

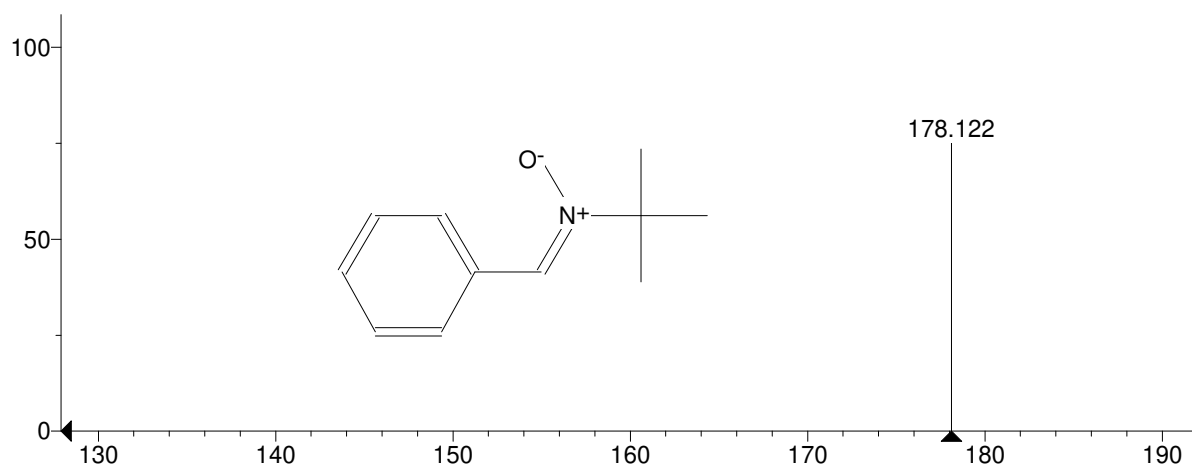

Hit 3 : N-Acetylamphetamine [M+H]<sup>+</sup> HCD 46V P=178.1  
C<sub>11</sub>H<sub>15</sub>NO; MF: 352; RMF: 970; Prob 15.3%; CAS: 14383-60-9; Lib: nist\_msms; ID: 243444.

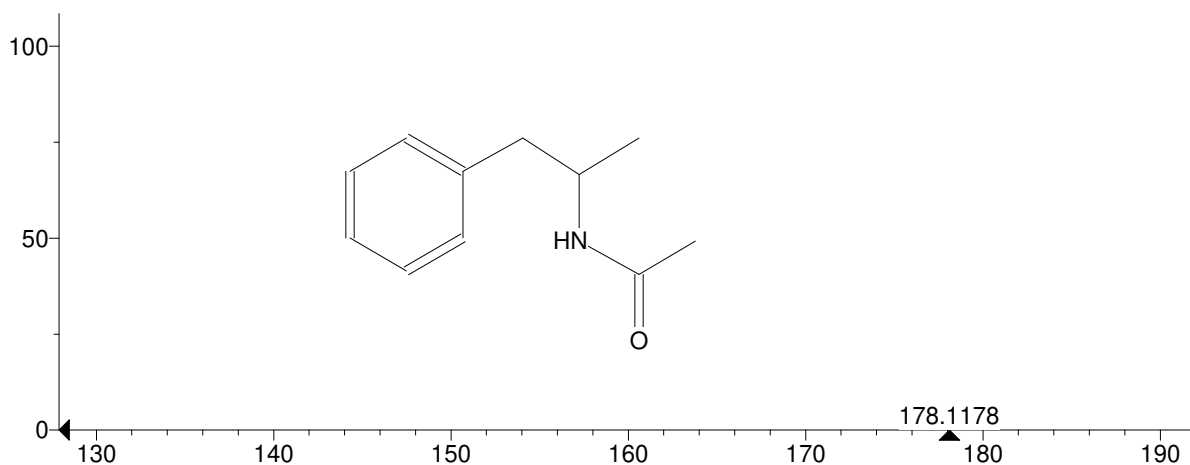

Hit 4 : 2-Methylmethcathinone [M+H]<sup>+</sup> HCD 3V P=178.1  
C<sub>11</sub>H<sub>15</sub>NO; MF: 346; RMF: 978; Prob 12.0%; CAS: 1246911-71-6; Lib: nist\_msms; ID: 249570.

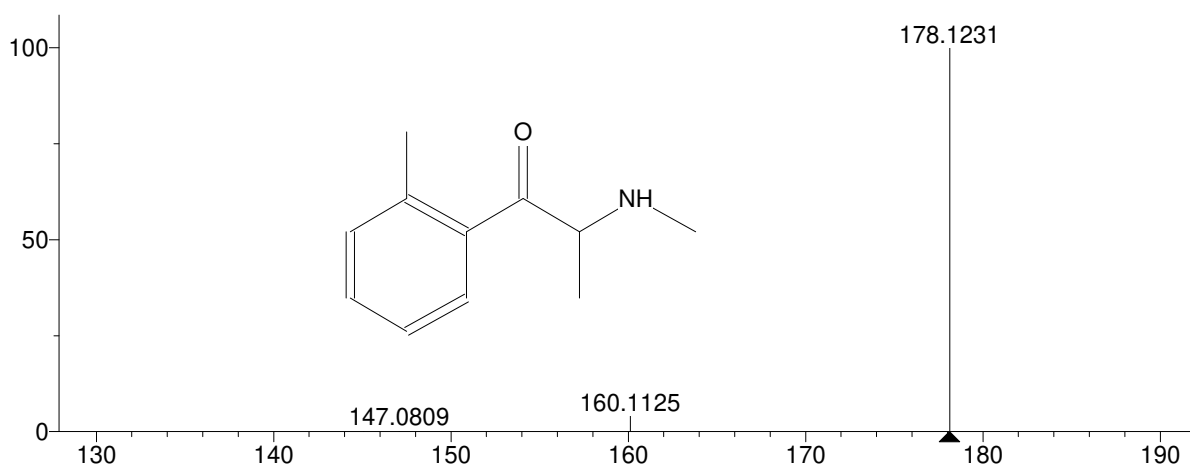

Hit 5 : 4-Methylmethcathinone [M+H]<sup>+</sup> HCD 3V P=178.1  
C<sub>11</sub>H<sub>15</sub>NO; MF: 345; RMF: 978; Prob 11.5%; CAS: 1189805-46-6; Lib: nist\_msms; ID: 325130.

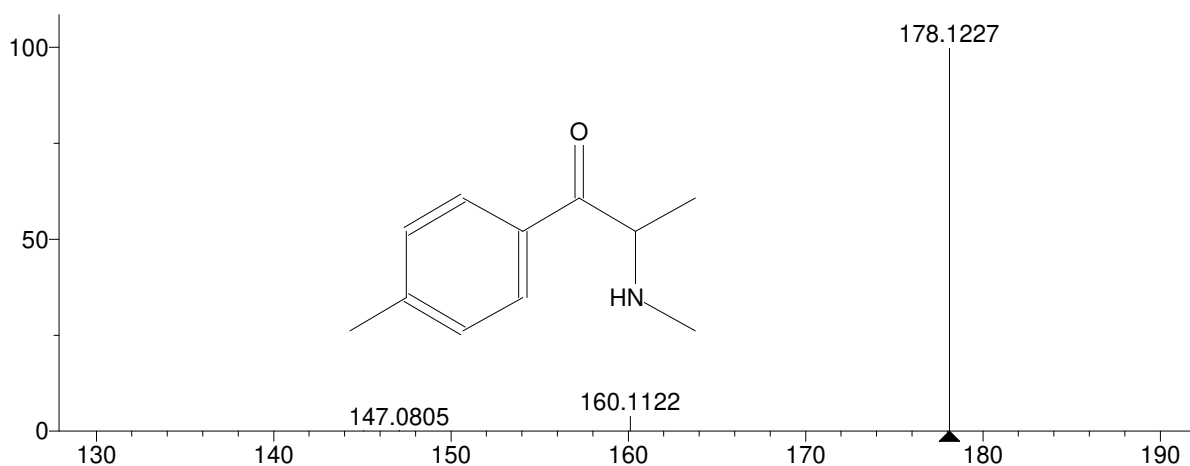



\*\* Search Report Page 1 of 2 \*\*

Unknown: Unknown (6.26\_180.1379m/z)  
Compound in Library Factor = -1848

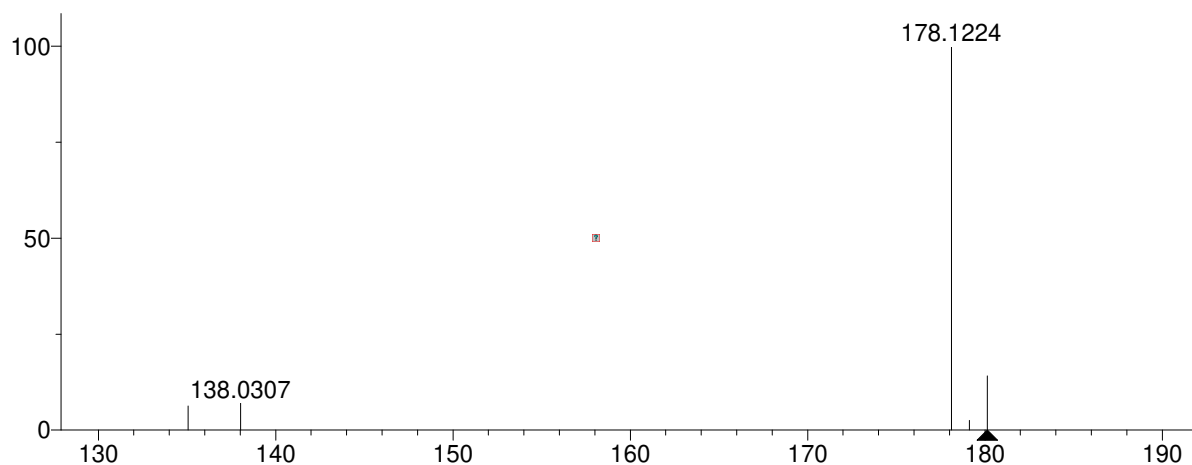

Hit 1 : Mexiletine [M+H]<sup>+</sup> HCD 1V P=180.1  
C<sub>11</sub>H<sub>17</sub>NO; MF: 88; RMF: 329; Prob 17.9%; CAS: 31828-71-4; Lib: nist\_msms; ID: 134450.

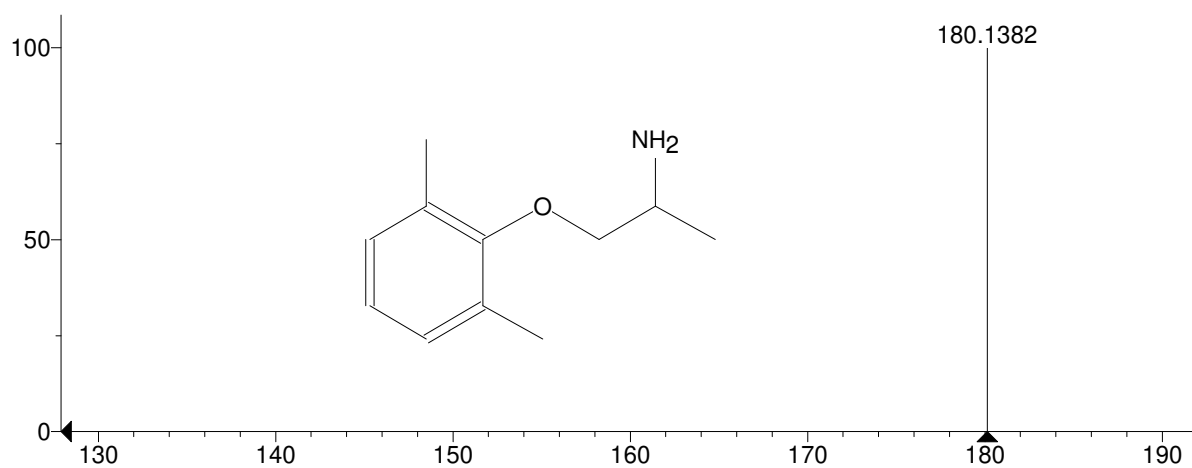

Hit 2 : p-(Isoamyloxy)aniline [M+H]<sup>+</sup> HCD 10V P=180.1  
C<sub>11</sub>H<sub>17</sub>NO; MF: 88; RMF: 329; Prob 17.9%; CAS: 5198-05-0; Lib: nist\_msms; ID: 190379.

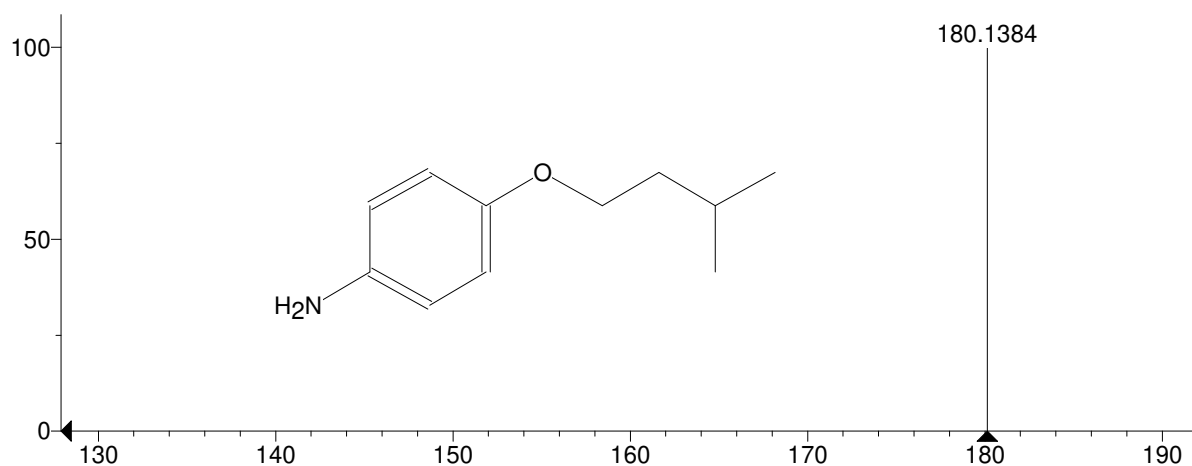

Hit 3 : Thiocarbide [M+H-C<sub>12</sub>H<sub>15</sub>SON]<sup>+</sup> HCD 12V P=180.1  
C<sub>23</sub>H<sub>32</sub>N<sub>2</sub>O<sub>2</sub>S; MF: 88; RMF: 329; Prob 17.9%; CAS: 910-86-1; Lib: nist\_msms; ID: 333192.

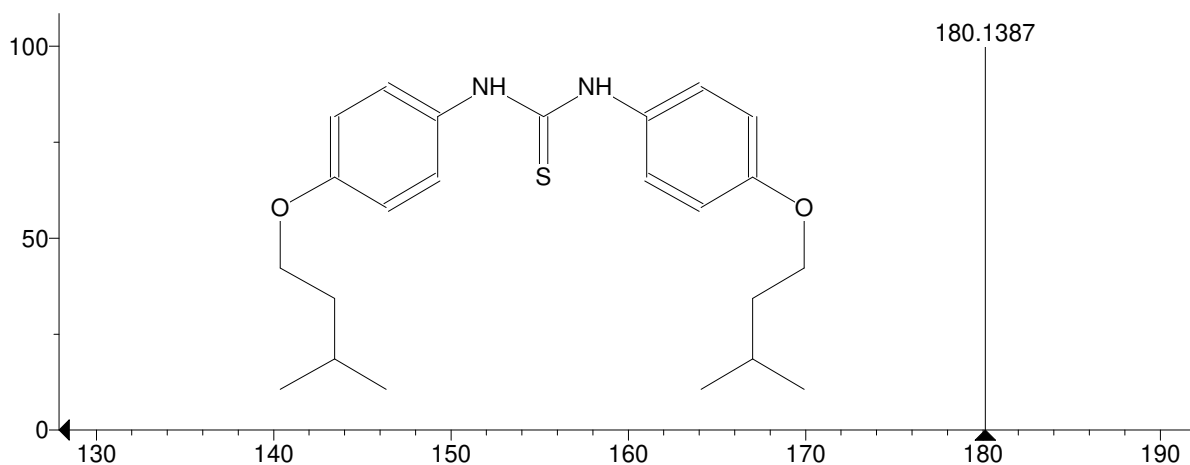

Hit 4 : 1-(Cyclopentylcarbonyl)-4-piperidinamine [M+H-NH<sub>3</sub>]<sup>+</sup> HCD 27V P=180.1  
C<sub>11</sub>H<sub>20</sub>N<sub>2</sub>O; MF: 88; RMF: 329; Prob 17.9%; CAS: 926234-06-2; Lib: nist\_msms; ID: 560807.

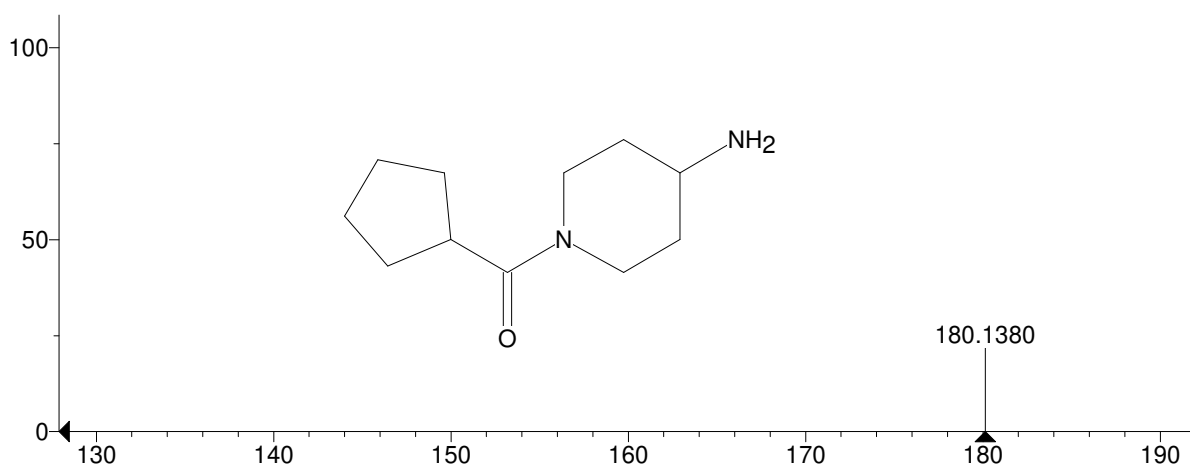

Hit 5 : 4-Methylephedrine [M+H]<sup>+</sup> HCD 1V P=180.1  
C<sub>11</sub>H<sub>17</sub>NO; MF: 58; RMF: 338; Prob 4.97%; CAS: 27465-54-9; Lib: nist\_msms; ID: 196793.

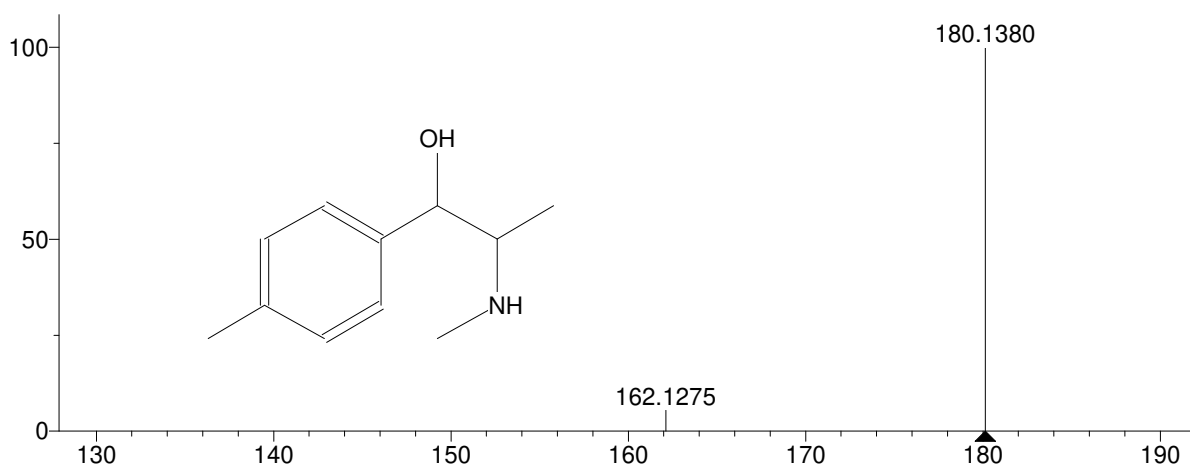

Unknown: Unknown (6.26\_224.1280m/z)  
Compound in Library Factor = -3273

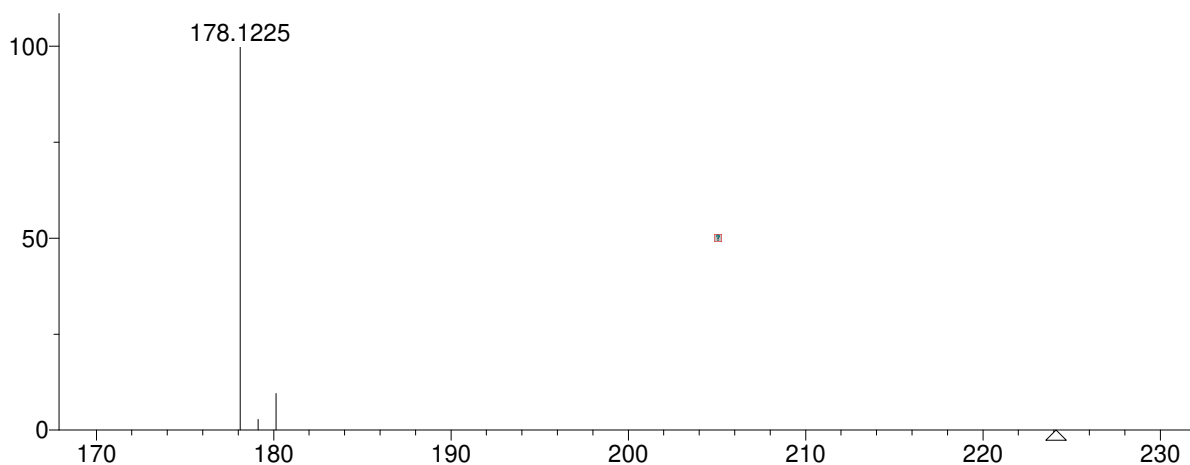

Hit 1 : N-(3-Oxoocctanoyl)-L-homoserine lactone [M+H-H<sub>2</sub>O]<sup>+</sup> IT-FT 35% P=224.1  
C<sub>12</sub>H<sub>19</sub>NO<sub>4</sub>; MF: 10; RMF: 140; Prob 56.6%; CAS: 147795-39-9; Lib: nist\_msms; ID: 315231.

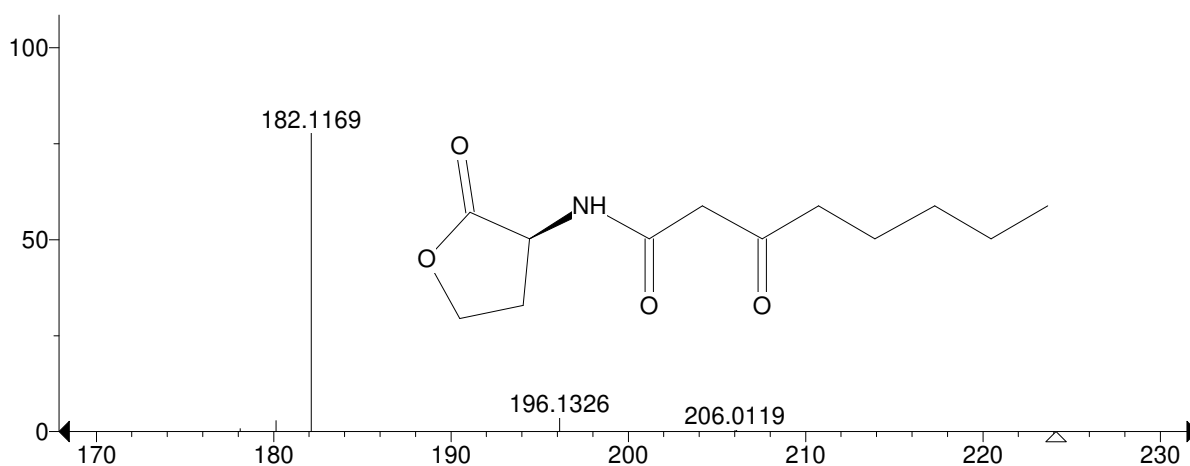

Hit 2 : Cerulenin [M+H]<sup>+</sup> IT-FT 35% P=224.1  
C<sub>12</sub>H<sub>17</sub>NO<sub>3</sub>; MF: 3; RMF: 216; Prob 43.4%; CAS: 17397-89-6; Lib: nist\_msms; ID: 538608.

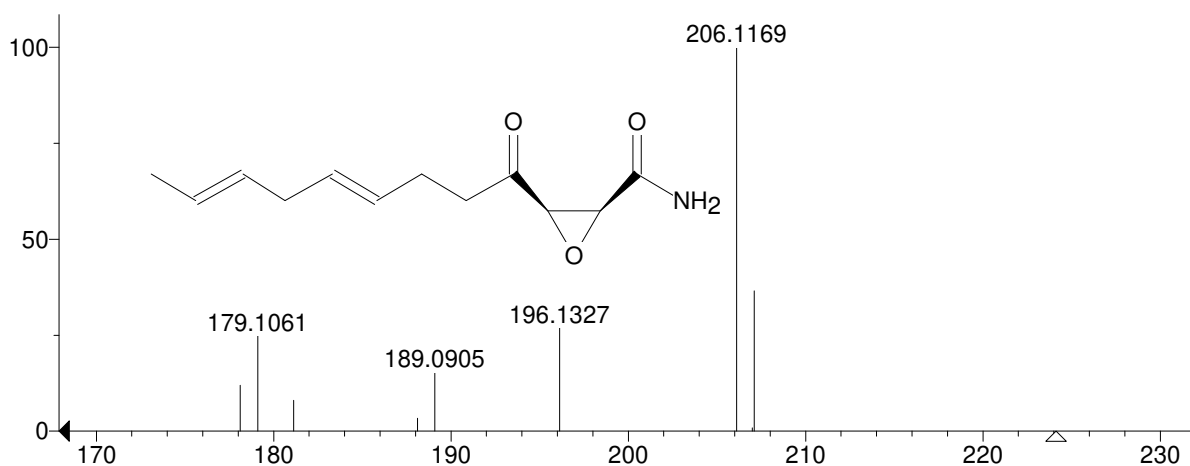

Unknown: Unknown (6.26\_449.1544m/z)  
Compound in Library Factor = 0

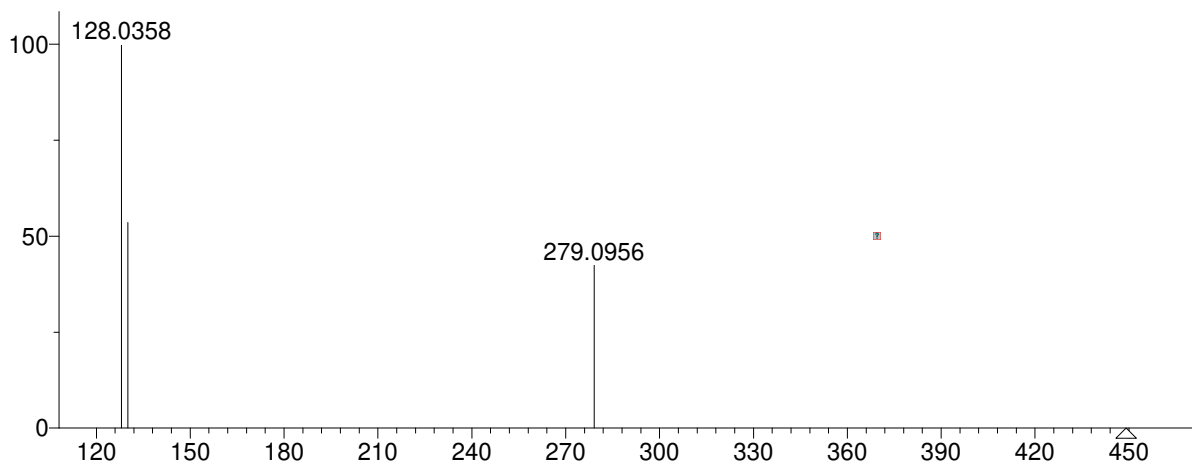

Hit 1 : NCGC00385098-01! [8,8-dimethyl-9-(3-methylbut-2-enoyloxy)-2-oxo-9,10-dihydropyrano[2,3-f]chromen-10-C<sub>24</sub>H<sub>26</sub>O<sub>7</sub>; MF: 0; RMF: 54; Prob 100.0%; Lib: mona-export-gnps; ID: 7369.

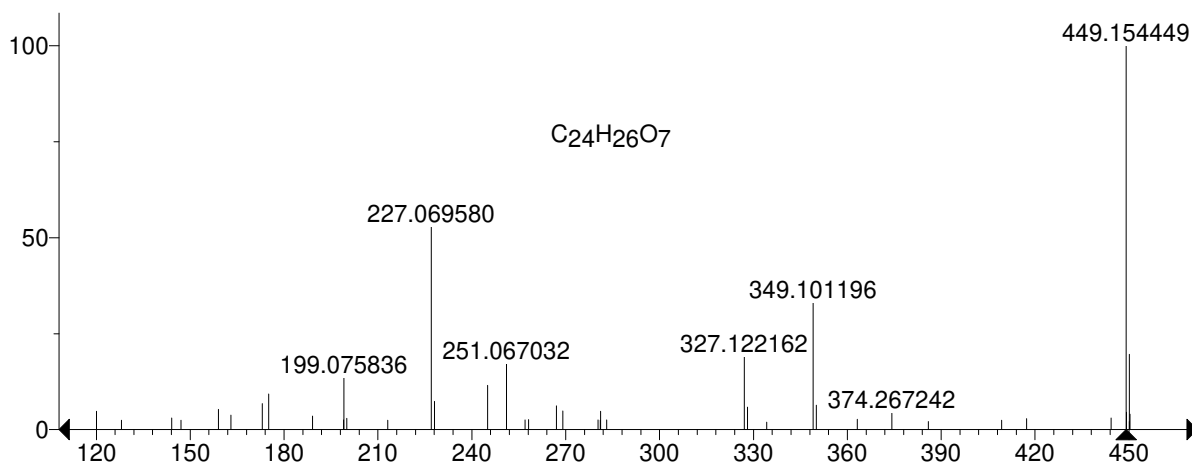

Unknown: Unknown (6.26\_625.2551m/z)  
Compound in Library Factor = -3273

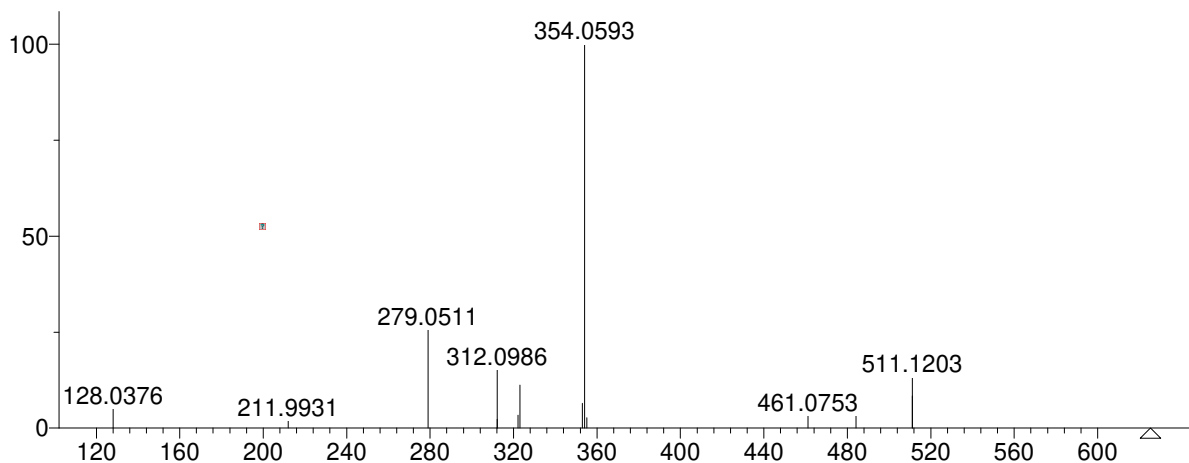

Hit 1 : N-Caffeoyl-O-methyltyramine [2M-H]- IT 35% P=625.3  
C18H19NO4; MF: 6; RMF: 259; Prob 56.0%; CAS: 189307-47-9; Lib: nist\_msms; ID: 221344.

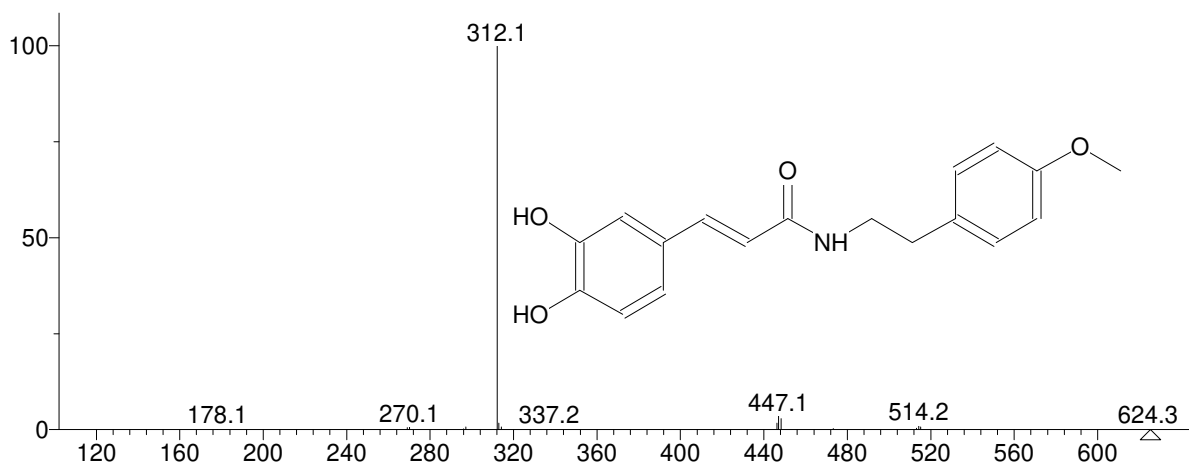

Hit 2 : Collagen Binding Fragment [M+2H]2+ QQQ 22.5V P=625.3  
C52H76N14O20S; MF: 0; RMF: 6; Prob 44.0%; CAS: 94040-53-6; Lib: nist\_msms2; ID: 3608.

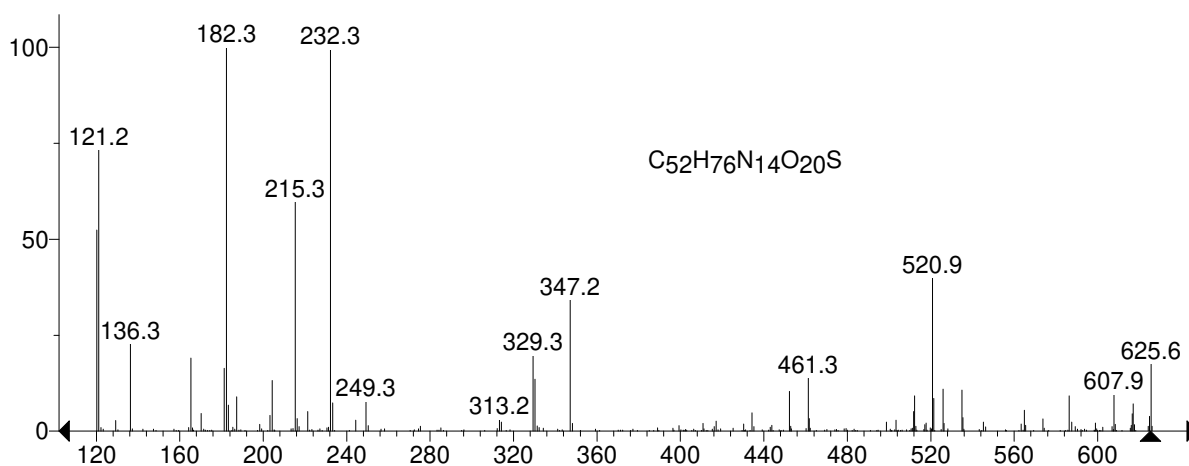

Unknown: Unknown (6.26\_654.2087m/z)  
Compound in Library Factor = 0

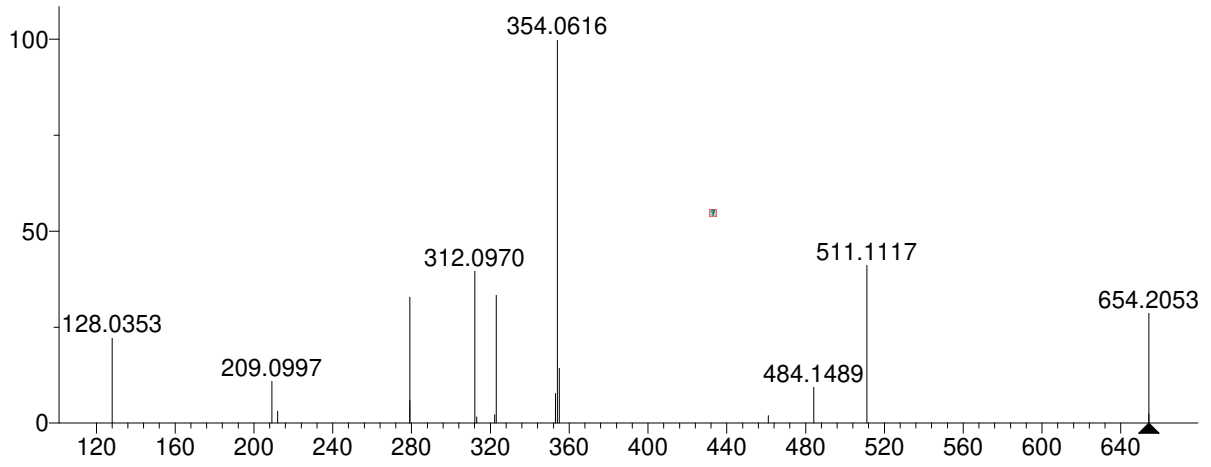

Unknown: Unknown (6.27\_405.2218m/z)  
Compound in Library Factor = 0

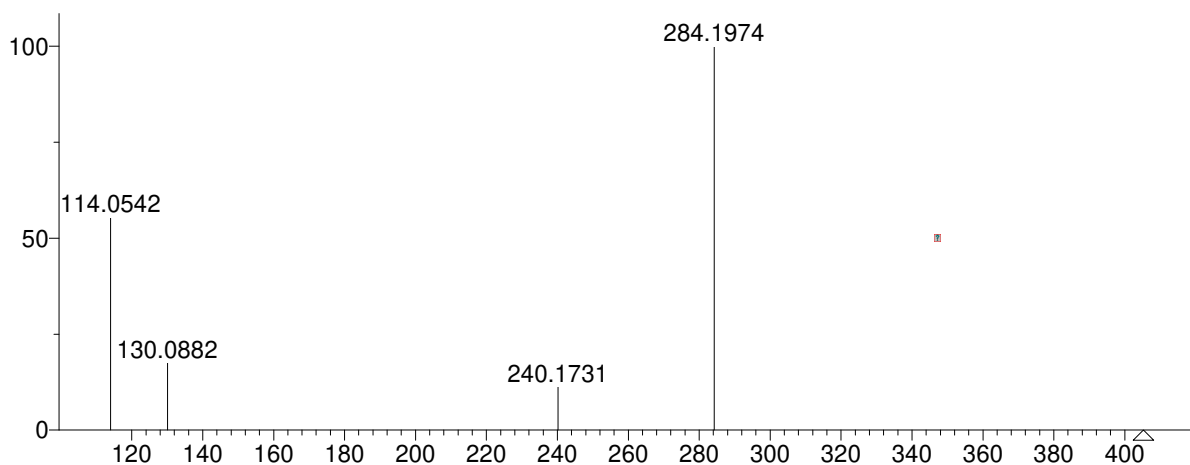

Hit 1 : MLS001076491-01!Cortell [M+H]<sup>+</sup> P=405.2  
C<sub>23</sub>H<sub>32</sub>O<sub>6</sub>; MF: 0; RMF: 12; Prob 100.0%; Lib: mona-export-gnps; ID: 4335.

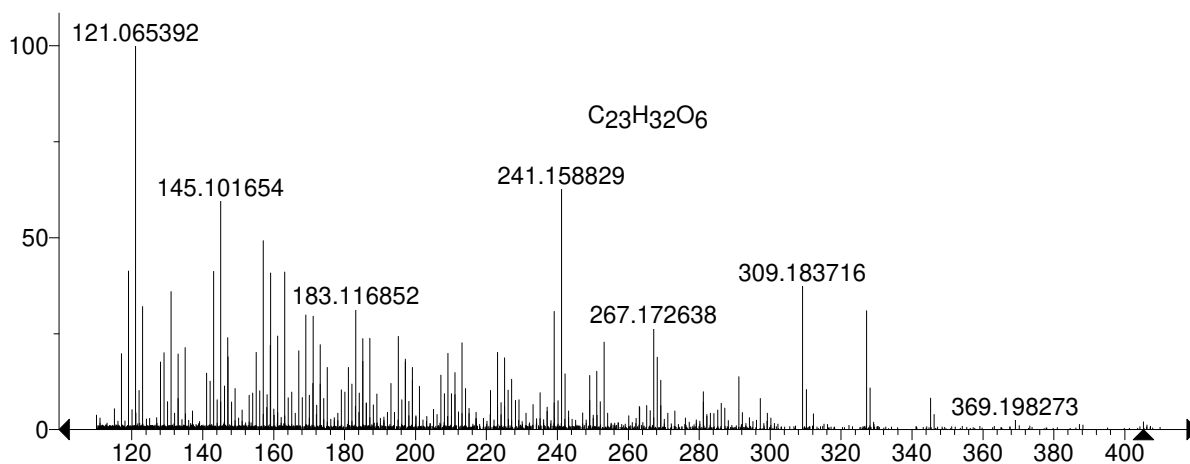

Unknown: Unknown (6.29\_528.2129m/z)  
Compound in Library Factor = 0

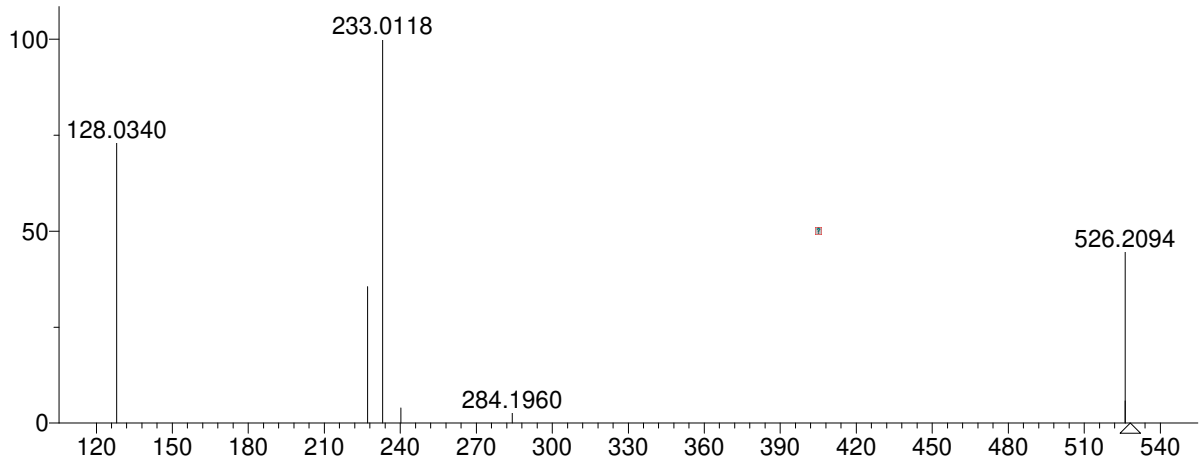



Unknown: Unknown (6.30\_517.1680m/z)  
Compound in Library Factor = 0

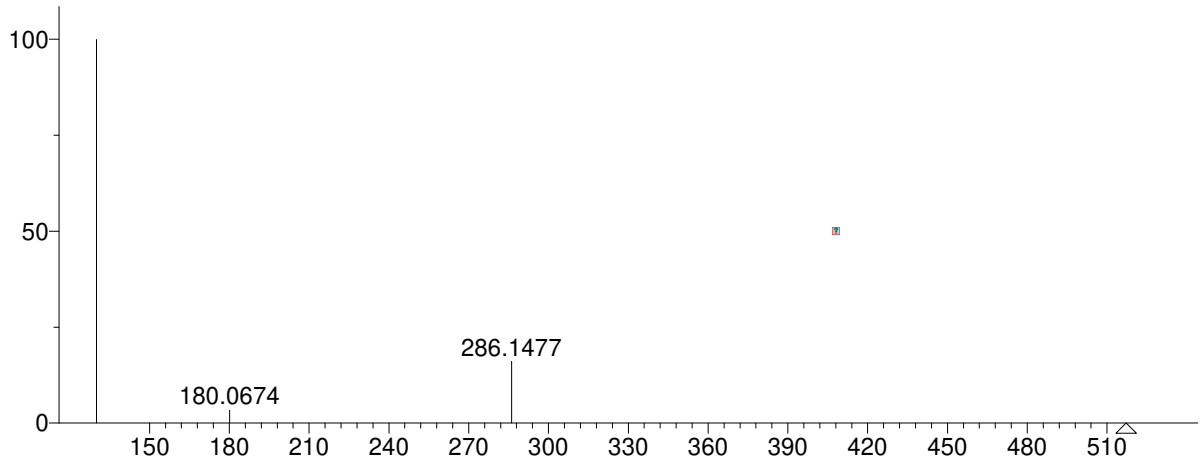

Unknown: Unknown (6.31\_267.0719m/z)  
Compound in Library Factor = -862

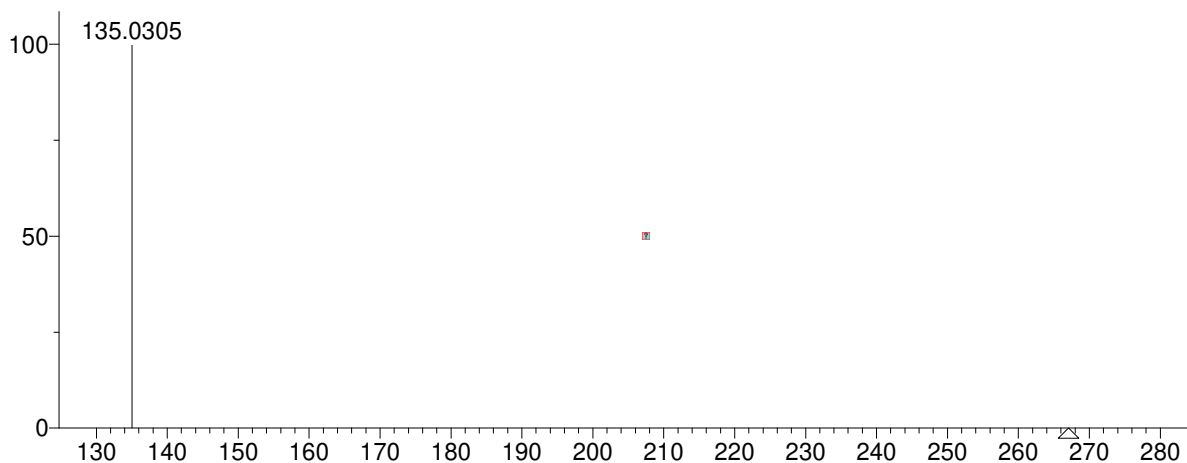

Hit 1 : Inosine [M-H]<sup>-</sup> 60 P=267.1  
C<sub>10</sub>H<sub>12</sub>N<sub>4</sub>O<sub>5</sub>; MF: 364; RMF: 999; Prob 58.5%; Lib: msms neg mona\_ipb\_gnps\_plasma; ID: 950.

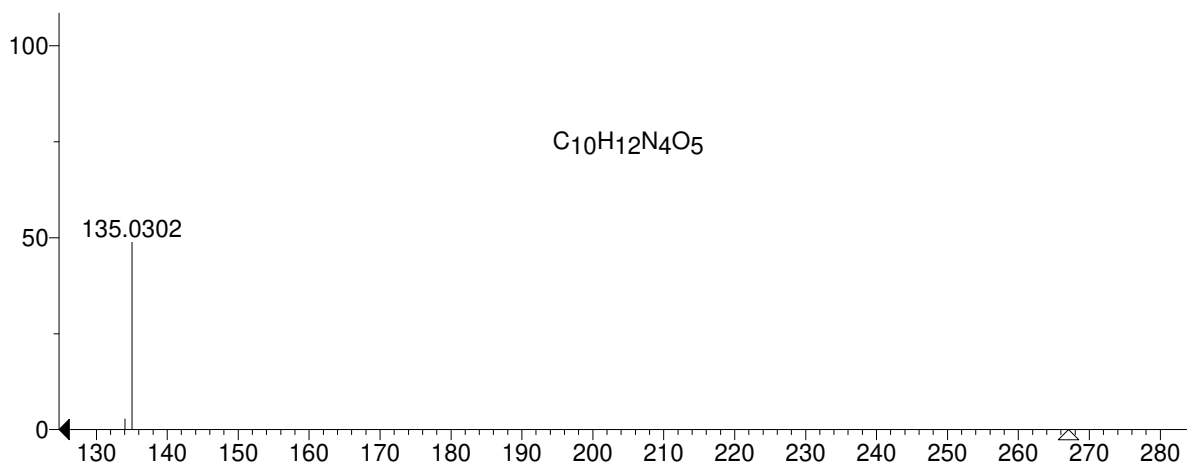

Hit 2 : Ribavirin [M+Na]<sup>+</sup> HCD 24V P=267.1  
C<sub>8</sub>H<sub>12</sub>N<sub>4</sub>O<sub>5</sub>; MF: 353; RMF: 989; Prob 40.1%; CAS: 36791-04-5; Lib: nist\_msms; ID: 489043.

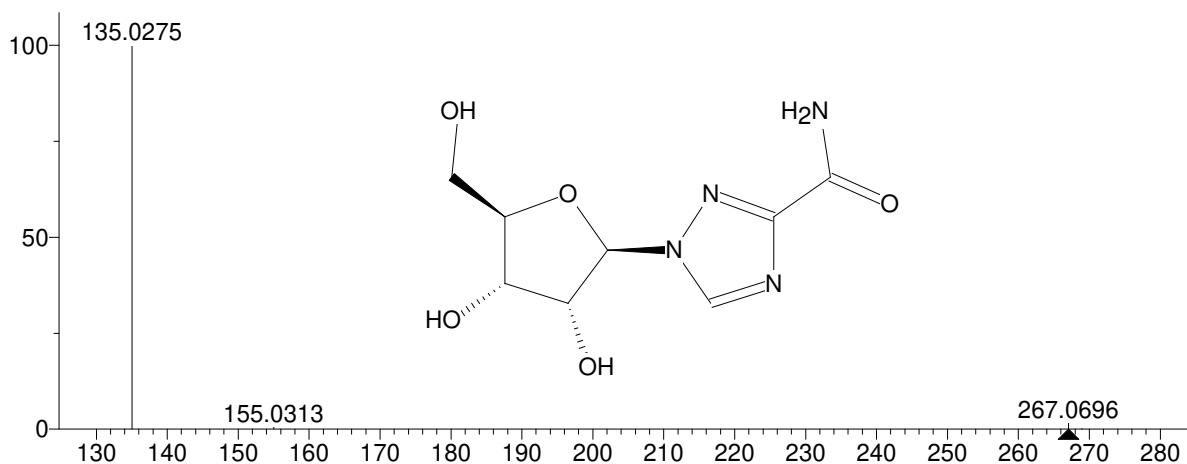

Hit 3 : Inosine; LC-ESI-QTOF; MS2; CE [M-H]- P=267.1  
C<sub>10</sub>H<sub>12</sub>N<sub>4</sub>O<sub>5</sub>; MF: 209; RMF: 849; Prob 1.23%; Lib: msms-neg-massbank; ID: 4345.

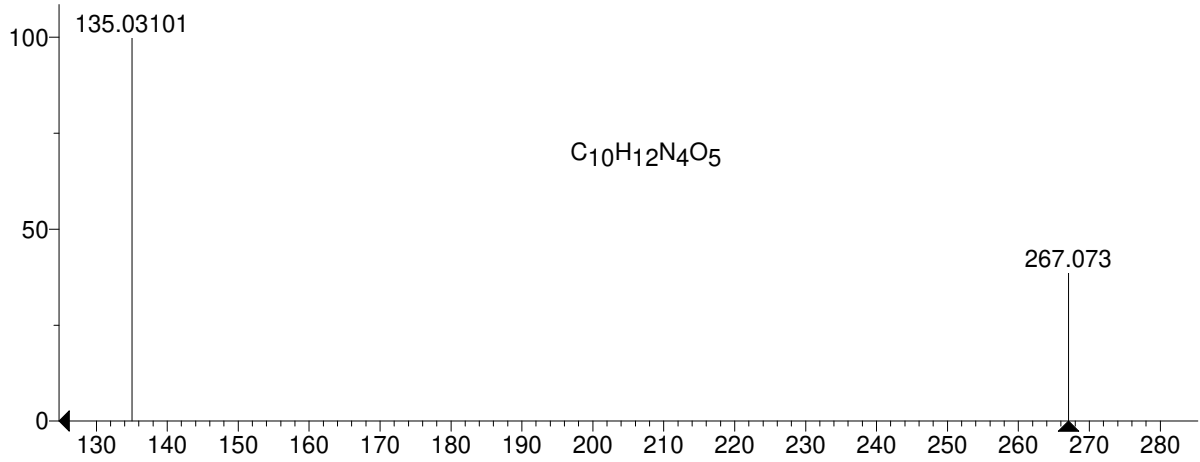

Hit 4 : INOSINE [M-H]- P=267.1  
C<sub>10</sub>H<sub>12</sub>N<sub>4</sub>O<sub>5</sub>; MF: 86; RMF: 708; Prob 0.05%; Lib: msms-neg-gnps; ID: 167.

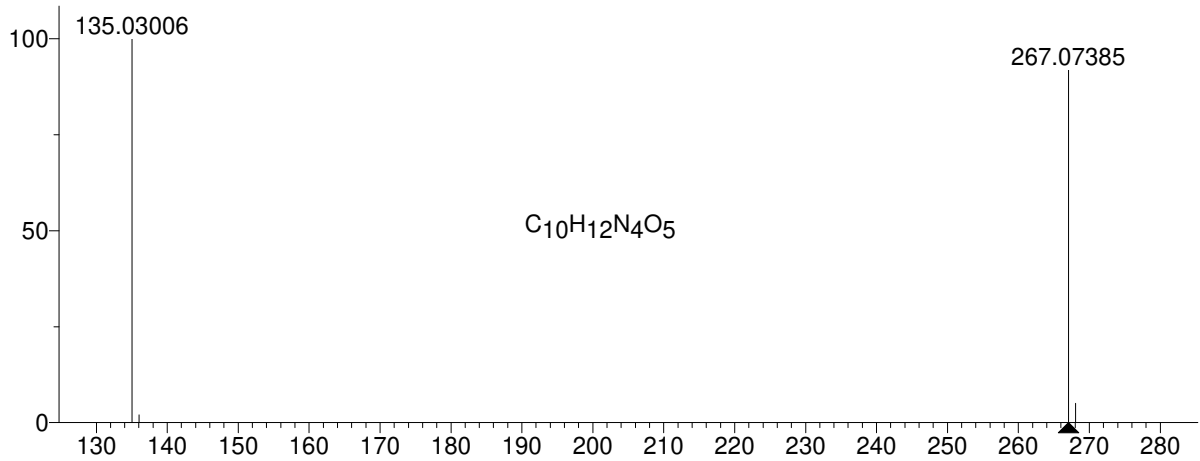

Hit 5 : INOSINE  
C<sub>10</sub>H<sub>12</sub>N<sub>4</sub>O<sub>5</sub>; MF: 71; RMF: 707; Prob 0.03%; Lib: embl neg mcg; ID: 113.

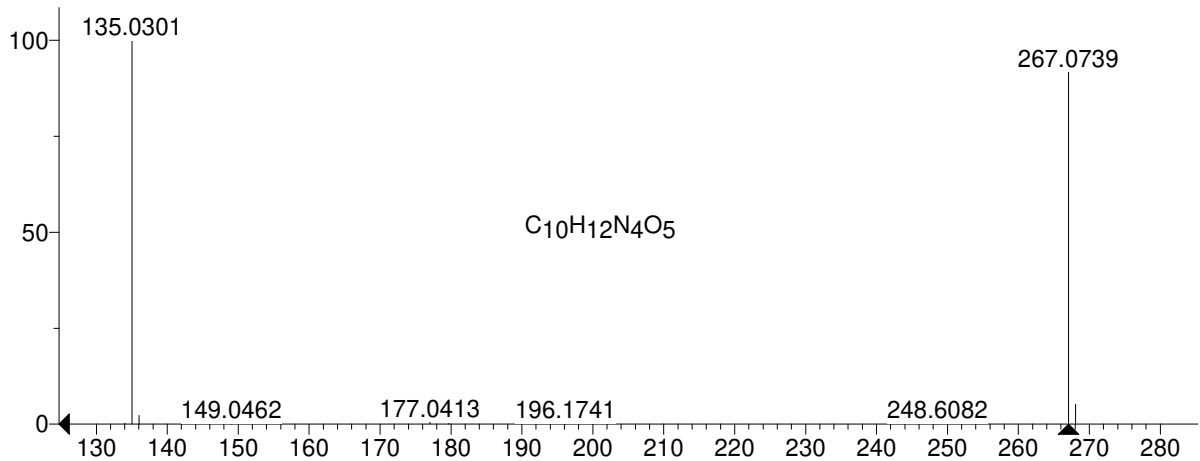

\*\* Search Report Page 1 of 2 \*\*

Unknown: Unknown (6.31\_328.1852m/z)  
Compound in Library Factor = 0

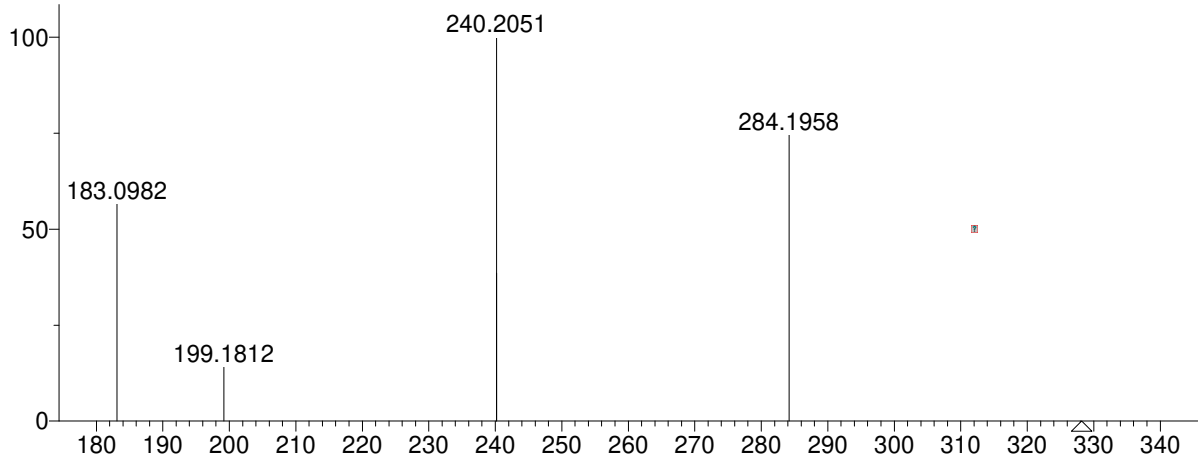

Hit 1 : Methanone, [1-(2-chloropentyl)-1H-indol-3-yl](2,2,3,3-tetramethylcyclopropyl)- [M+H-H<sub>2</sub>O]<sup>+</sup> IT 35% P=3: C<sub>21</sub>H<sub>28</sub>ClNO; MF: 0; RMF: 29; Prob 20.0%; Lib: nist\_msms; ID: 260480.

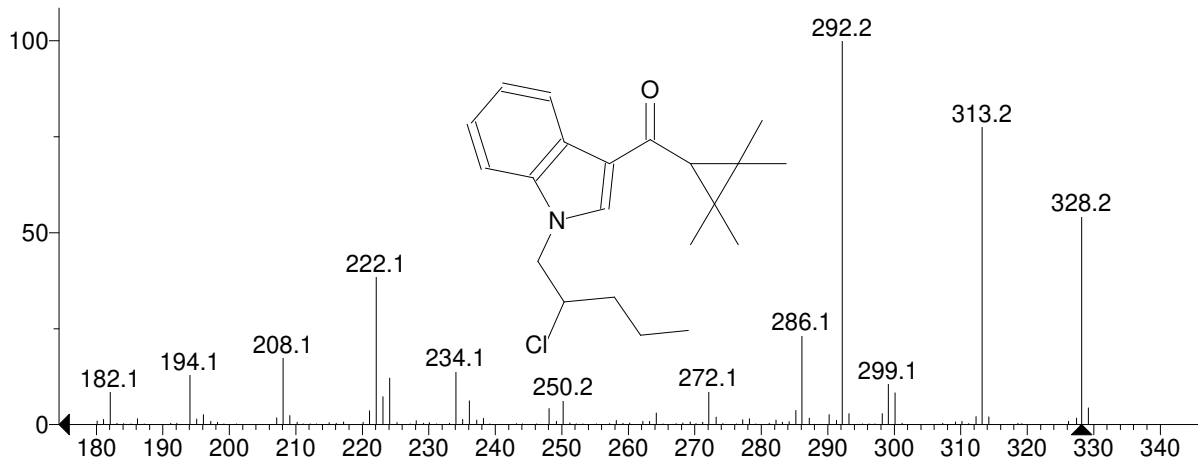

Hit 2 : Methanone, [1-(3-chloropentyl)-1H-indol-3-yl](2,2,3,3-tetramethylcyclopropyl)- [M+H-H<sub>2</sub>O]<sup>+</sup> HCD 59V P: C<sub>21</sub>H<sub>28</sub>ClNO; MF: 0; RMF: 22; Prob 20.0%; Lib: nist\_msms; ID: 260534.

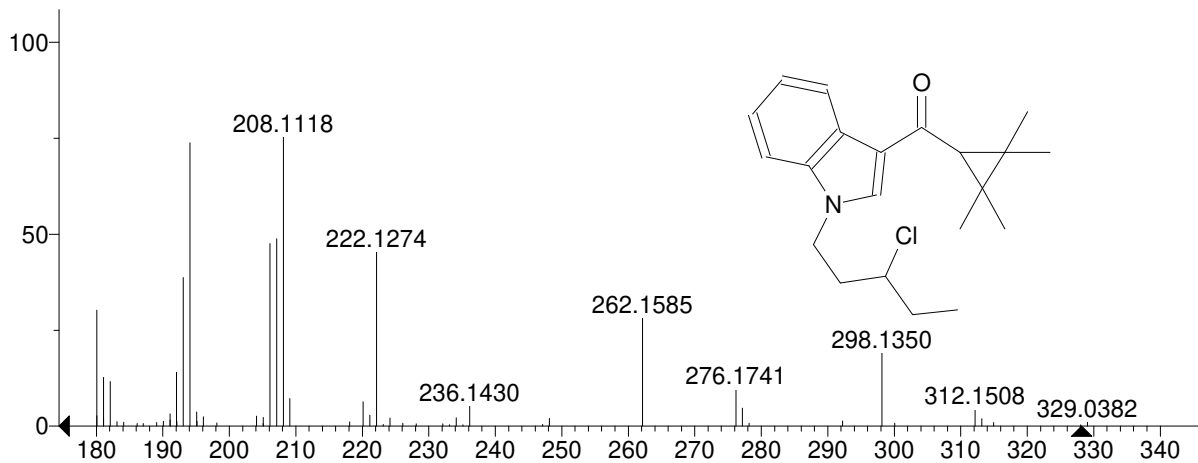

\*\* Search Report Page 2 of 2 \*\*

Hit 3 : Methanone, [1-(5-chloropentyl)-1H-indol-3-yl](2,2,3,3-tetramethylcyclopropyl)- [M+H-H<sub>2</sub>O]<sup>+</sup> HCD 49V P- C<sub>21</sub>H<sub>28</sub>ClNO; MF: 0; RMF: 20; Prob 20.0%; CAS: 1445577-42-3; Lib: nist\_msms; ID: 271990.

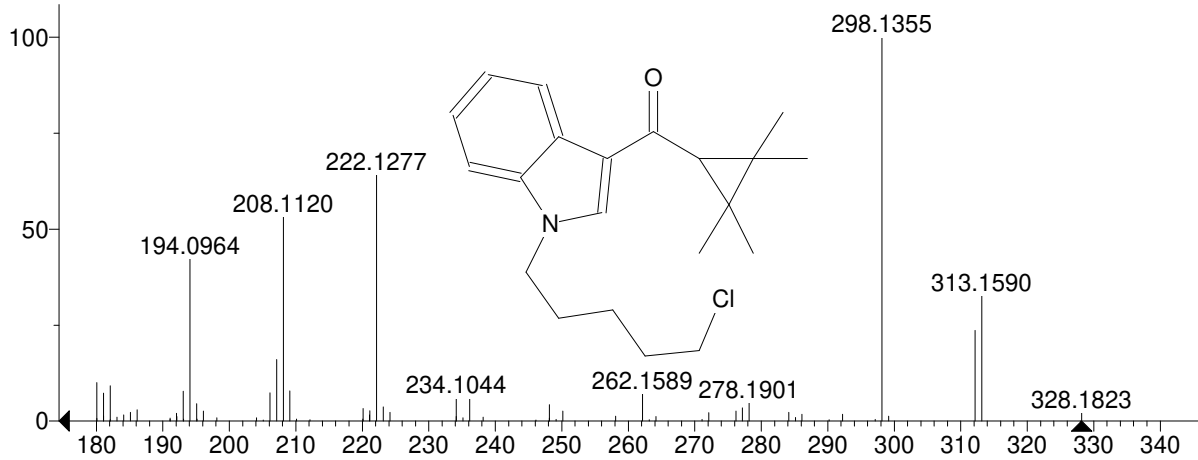

Hit 4 : Methanone, [1-(4-chloropentyl)-1H-indol-3-yl](2,2,3,3-tetramethylcyclopropyl)- [M+H-H<sub>2</sub>O]<sup>+</sup> IT 35% P=3: C<sub>21</sub>H<sub>28</sub>ClNO; MF: 0; RMF: 15; Prob 20.0%; Lib: nist\_msms; ID: 260614.

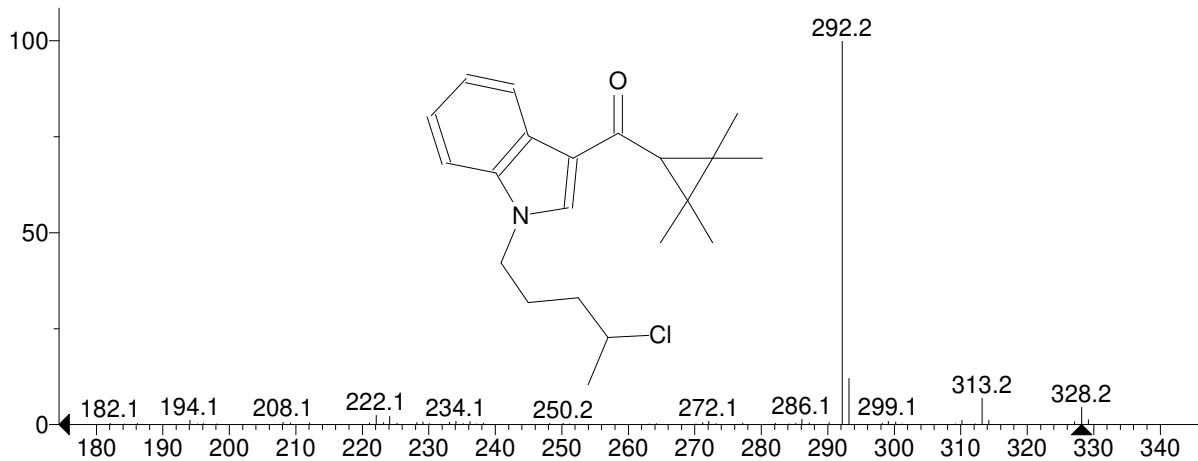

Hit 5 : CAPSAICIN [M+Na]<sup>+</sup> 35HCD P=328.2 C<sub>18</sub>H<sub>27</sub>NO<sub>3</sub>; MF: 0; RMF: 3; Prob 20.0%; Lib: mona-export-vf-npl\_qexactive; ID: 2965.

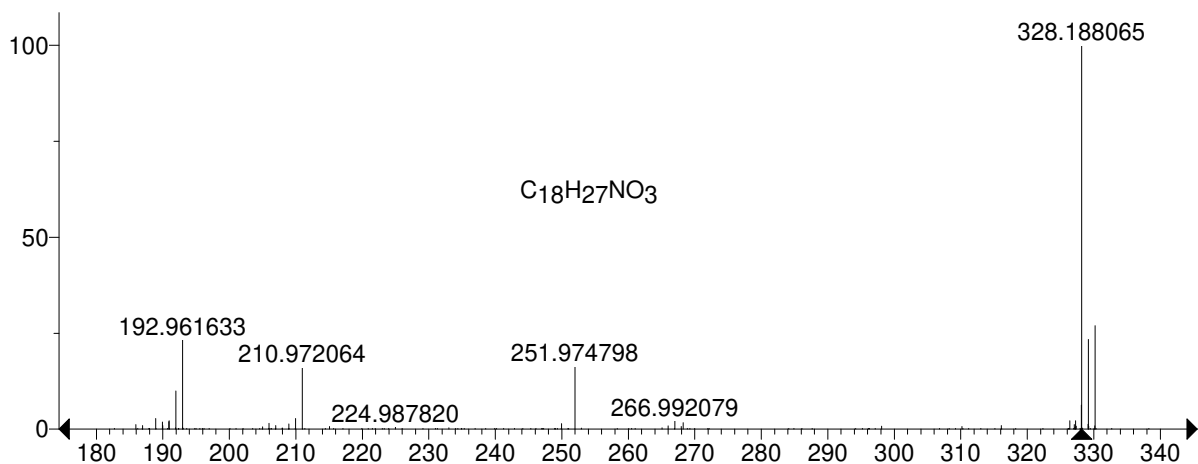

Unknown: Unknown (6.31\_364.1632m/z)  
Compound in Library Factor = 0

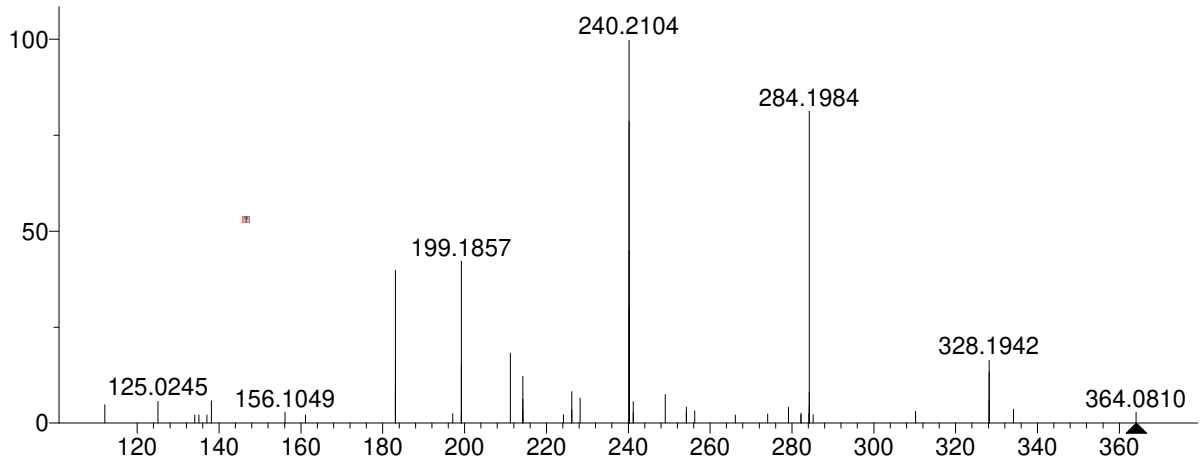

Hit 1 : Cys-Asn-Lys [M+H]<sup>+</sup> QQQ 20V P=364.2  
C13H25N5O5S; MF: 0; RMF: 44; Prob 12.5%; Lib: nist\_msms; ID: 42766.

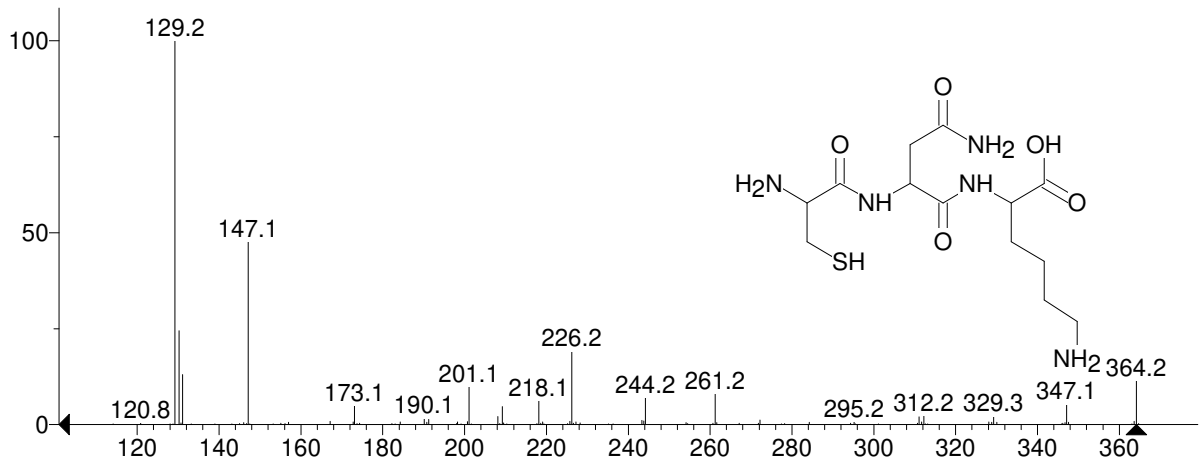

Hit 2 : (2R,3S,4S,5R,6S)-2-(hydroxymethyl)-6-(3,4,5-trimethoxyphenoxy)oxane-3,4,5-triol [M+NH4]<sup>+</sup> 35HCD P=  
C15H22O9; MF: 0; RMF: 26; Prob 12.5%; Lib: mona-export-vf-npl\_qexactive; ID: 9871.

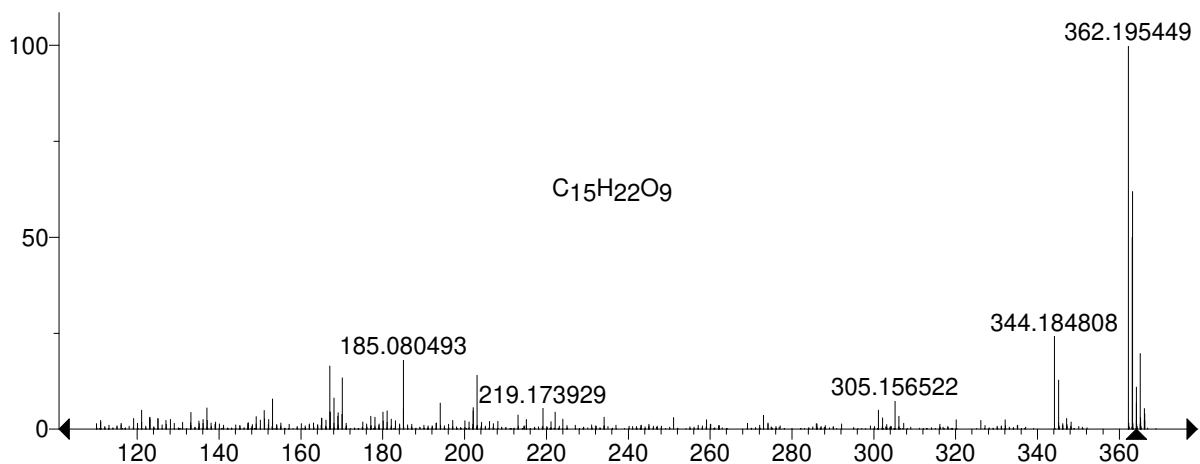

Hit 3 : aucubin [M+NH4]<sup>+</sup> 65HCD P=364.2  
C<sub>15</sub>H<sub>22</sub>O<sub>9</sub>; MF: 0; RMF: 24; Prob 12.5%; Lib: mona-export-vf-npl\_qexactive; ID: 3774.

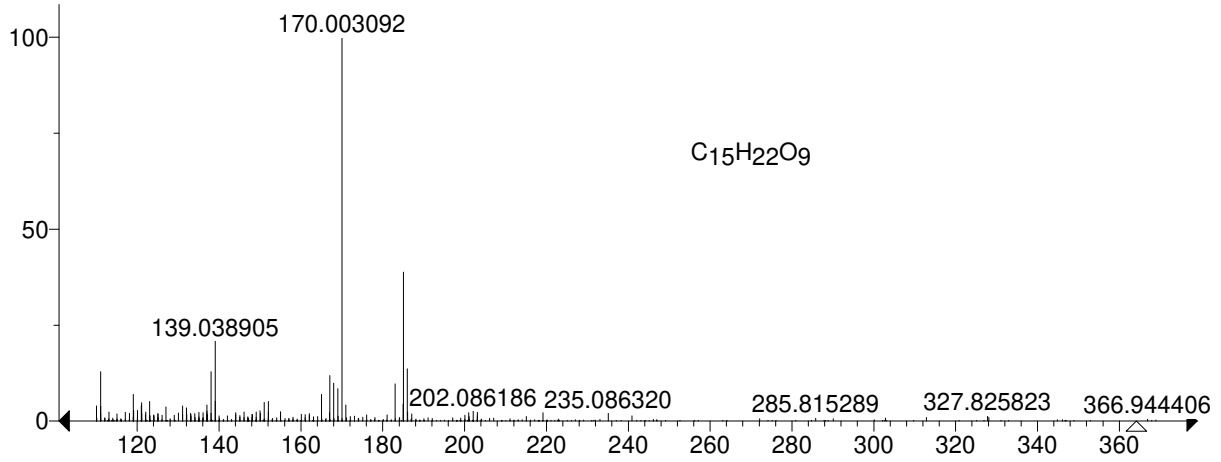

Hit 4 : Asn-Cys-Lys [M+H]<sup>+</sup> IT 35% P=364.2  
C<sub>13</sub>H<sub>25</sub>N<sub>5</sub>O<sub>5</sub>S; MF: 0; RMF: 23; Prob 12.5%; Lib: nist\_msms; ID: 46916.

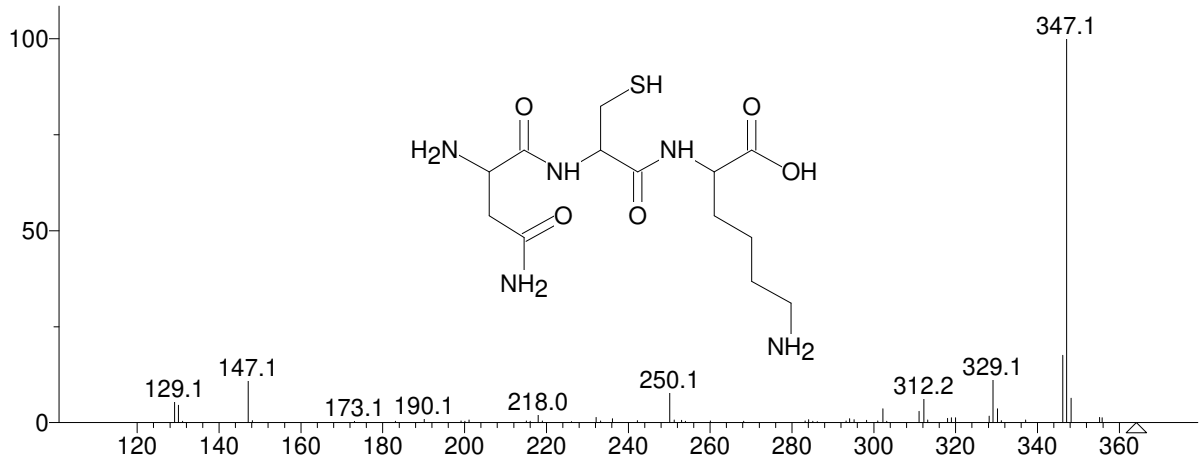

Hit 5 : NCGC00380729-01\_C<sub>21</sub>H<sub>21</sub>N<sub>3</sub>O<sub>3</sub>\_8',8'-Dimethyl-5a',6'-dihydro-3'H,5'H,8'H-spiro[indole-2,7'-pyrrolo[1',2':4  
C<sub>21</sub>H<sub>21</sub>N<sub>3</sub>O<sub>3</sub>; MF: 0; RMF: 14; Prob 12.5%; Lib: mona-export-gnps; ID: 11547.

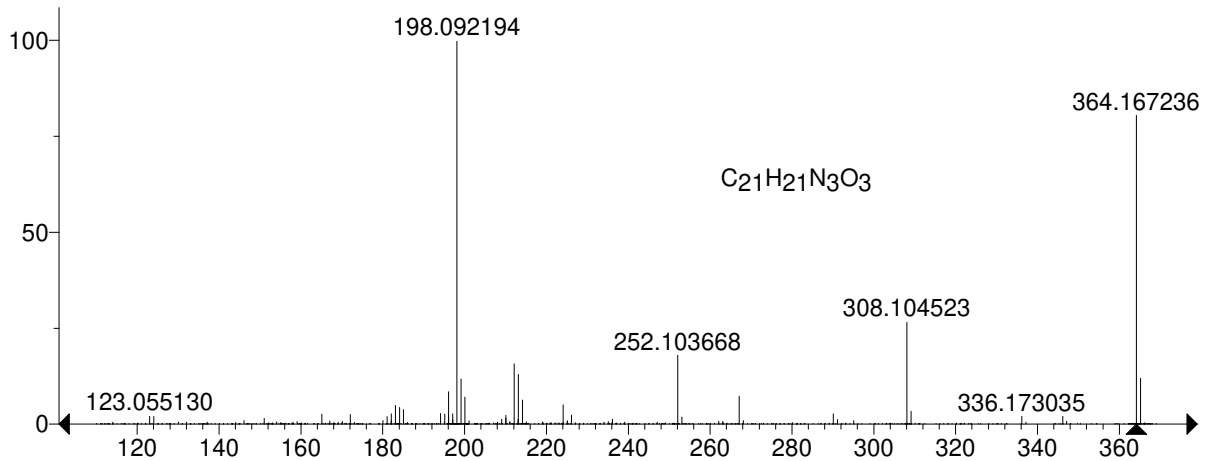

Unknown: Unknown (6.31\_558.1803m/z)  
Compound in Library Factor = -3273

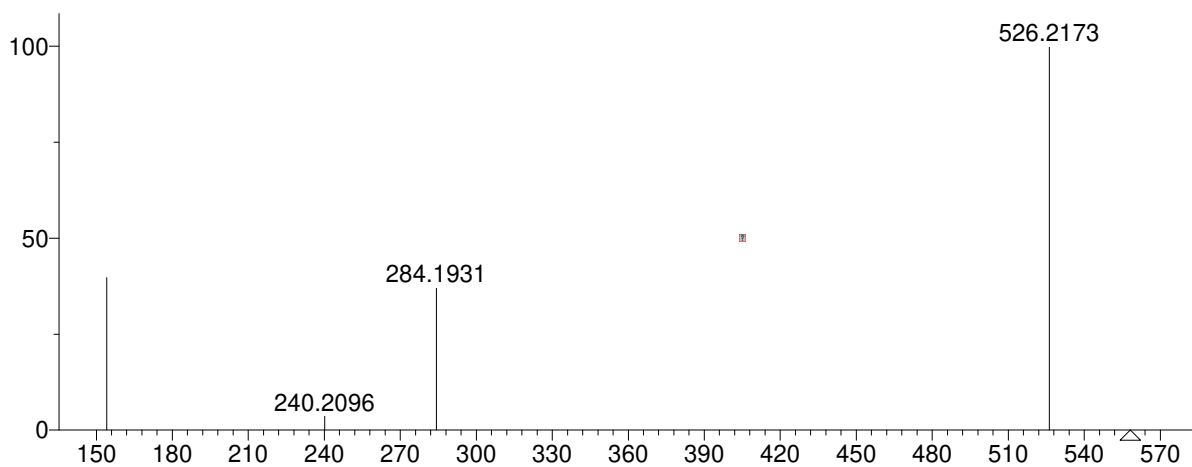

Hit 1 : LNH [M-H+HCO<sub>2</sub>]<sup>2-</sup> IT 35% P=558.2  
C<sub>40</sub>H<sub>68</sub>N<sub>2</sub>O<sub>3</sub>1; MF: 2; RMF: 266; Prob 100.0%; CAS: 64003-51-6; Lib: nist\_msms; ID: 532404.

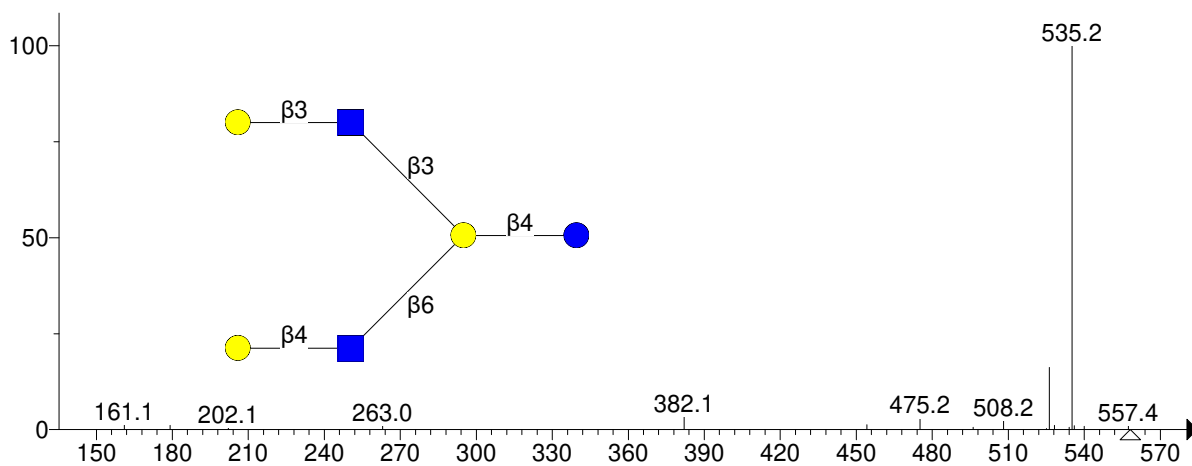



Unknown: Unknown (6.32\_378.1765m/z)  
Compound in Library Factor = 0

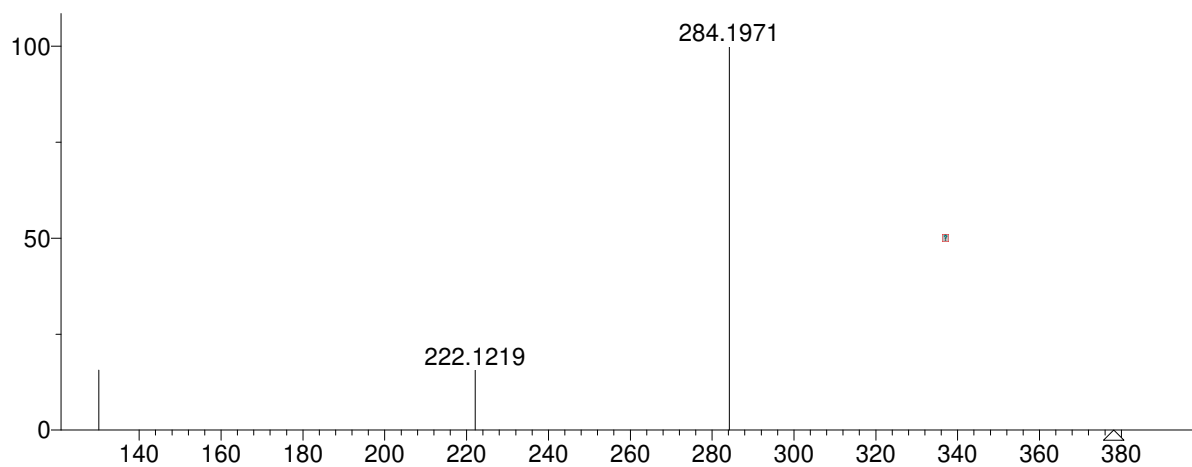

Hit 1 : (2R,3R,4S,5S,6R)-2-[3-hydroxy-2-(4-hydroxy-3-methoxyphenyl)propoxy]-6-(hydroxymethyl)oxane-3,4,5-tric  
C<sub>16</sub>H<sub>24</sub>O<sub>9</sub>; MF: 0; RMF: 2; Prob 100.0%; Lib: mona-export-vf-npl\_qexactive; ID: 10762.

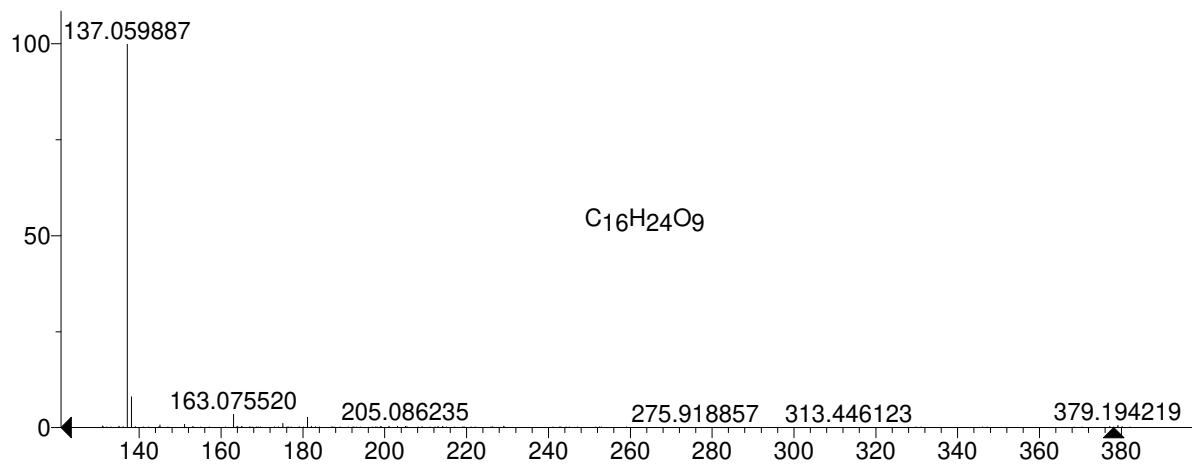

Unknown: Unknown (6.32\_516.1858m/z)  
Compound in Library Factor = 0

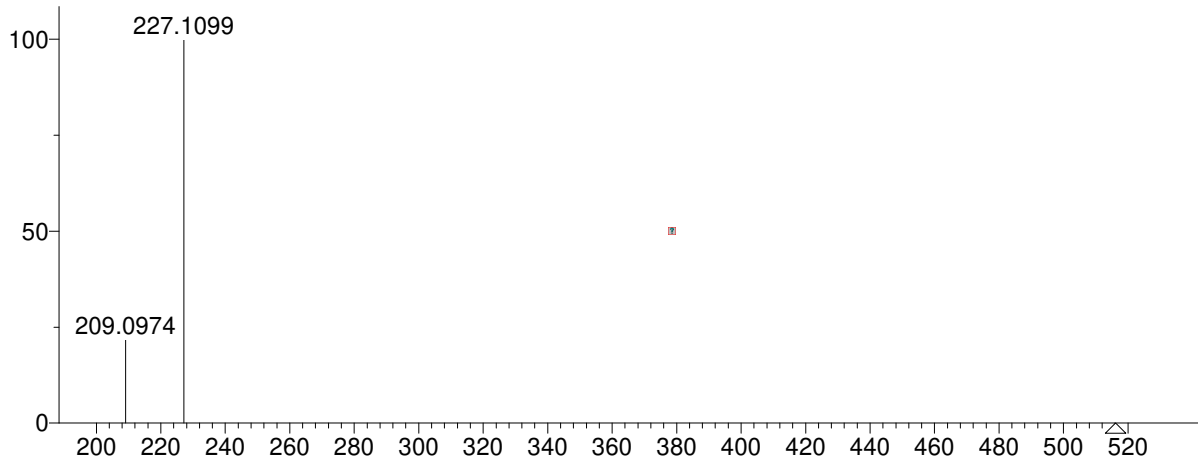

Unknown: Unknown (6.33\_526.2159m/z)  
Compound in Library Factor = 0

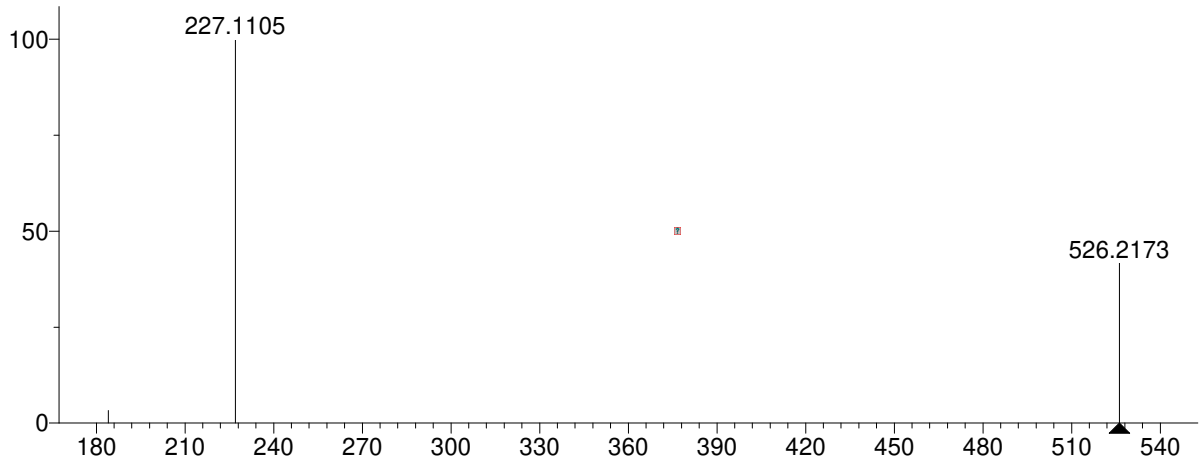

Unknown: Unknown (6.33\_567.2282m/z)  
Compound in Library Factor = 0

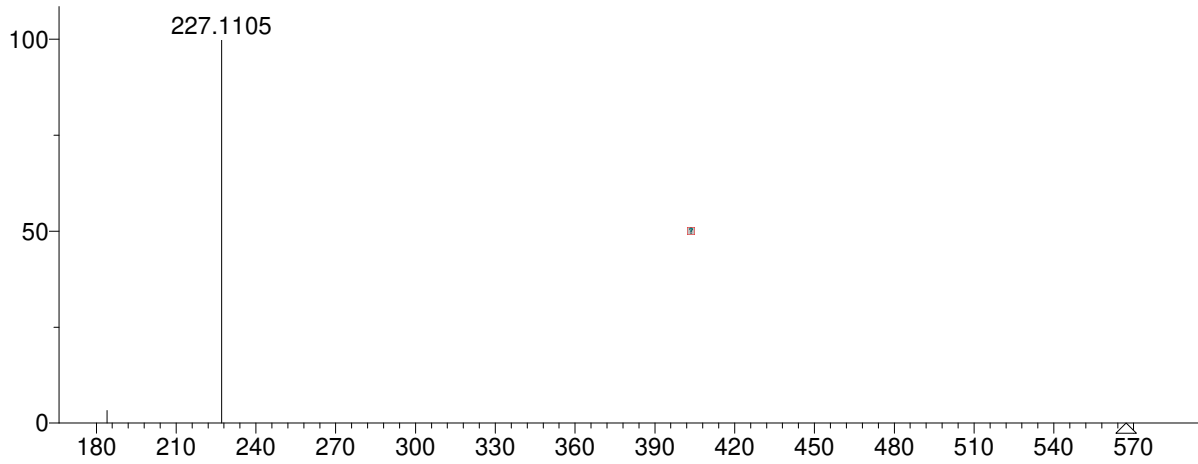

Hit 1 : chaetoglobosins [M+K]<sup>+</sup> 35HCD P=567.2  
C<sub>32</sub>H<sub>36</sub>N<sub>2</sub>O<sub>5</sub>; MF: 0; RMF: 11; Prob 100.0%; Lib: mona-export-vf-npl\_qexactive; ID: 23206.

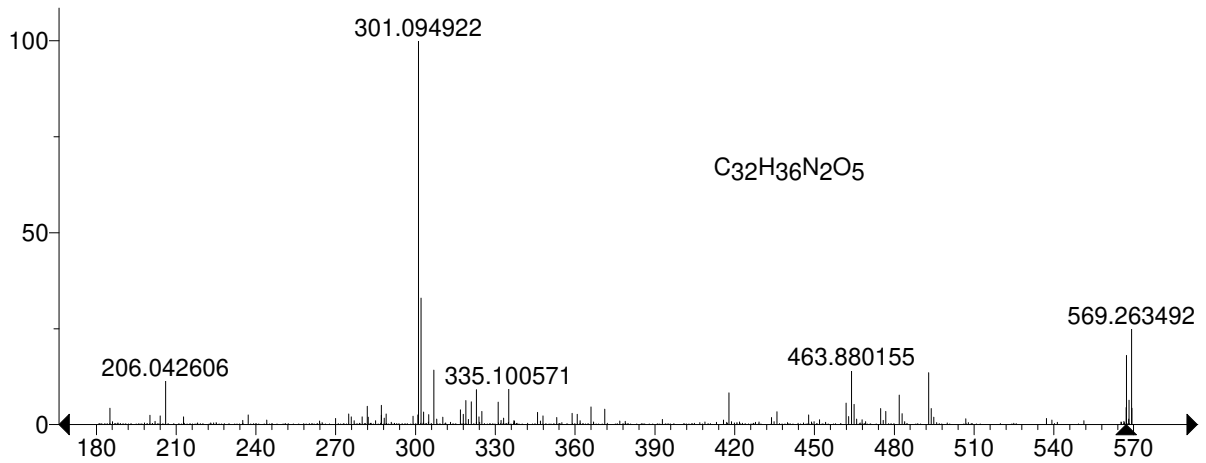

\*\* Search Report Page 1 of 2 \*\*

Unknown: Unknown (6.35\_403.1695m/z)  
Compound in Library Factor = -3273

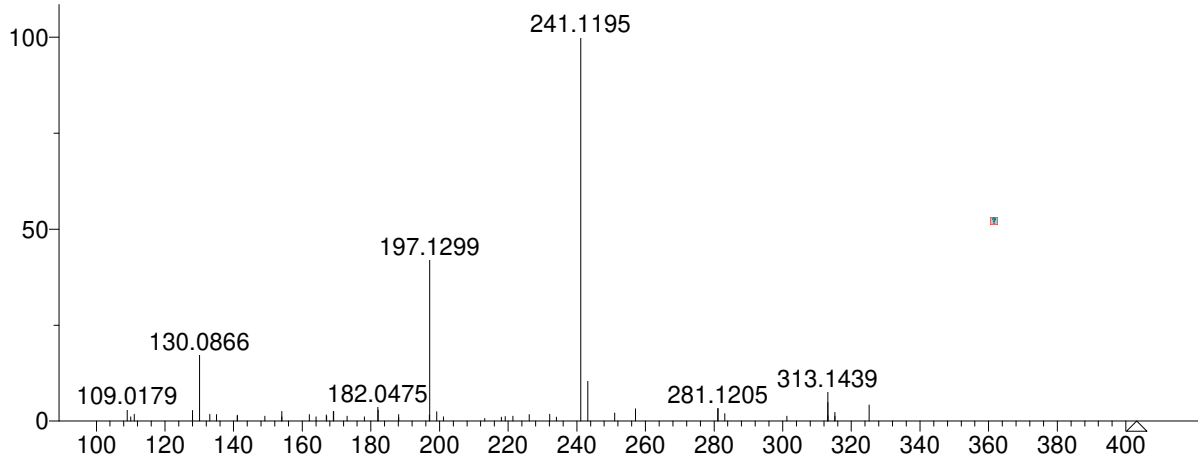

Hit 1 : (+)-Cloprostenol methyl ester [M+H-2H<sub>2</sub>O]<sup>+</sup> HCD 32V P=403.2  
C<sub>23</sub>H<sub>31</sub>ClO<sub>6</sub>; MF: 4; RMF: 89; Prob 28.3%; CAS: 56687-85-5; Lib: nist\_msms; ID: 544277.

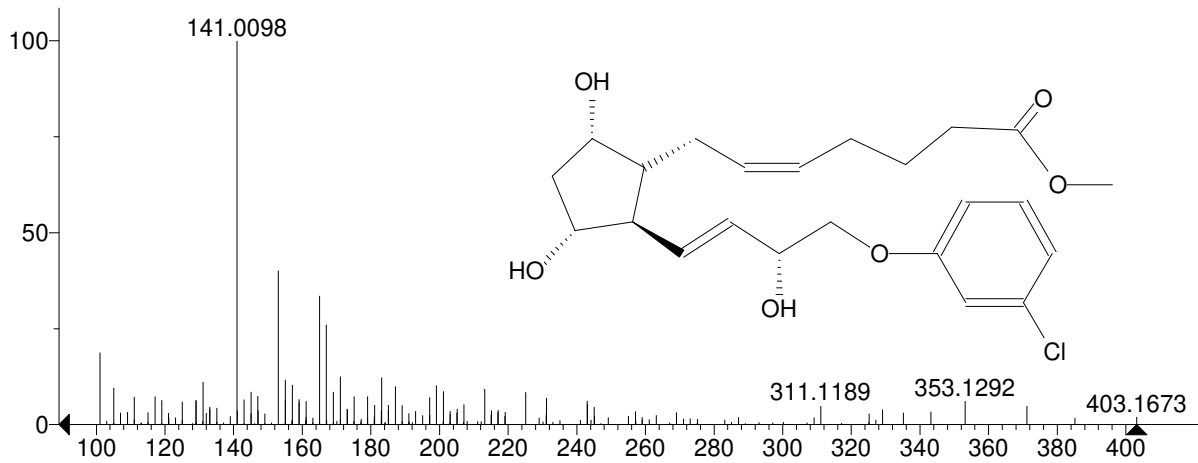

Hit 2 : NCGC00380324-01\_C<sub>23</sub>H<sub>29</sub>ClO<sub>5</sub>\_Benzaldehyde, 3-chloro-4,6-dihydroxy-2-methyl-5-[(2E,6E)-3-methyl-7-C<sub>23</sub>H<sub>29</sub>ClO<sub>5</sub>; MF: 0; RMF: 24; Prob 23.9%; Lib: mona-export-gnps; ID: 13042.

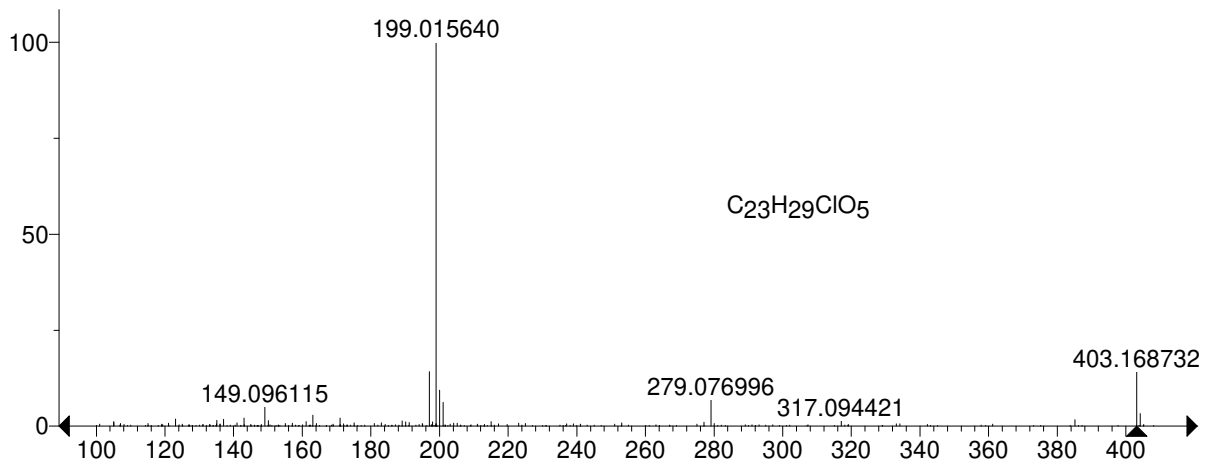

Hit 3 : [(1R,5S,6S)-3-(hydroxymethyl)-5-[(Z)-2-methylbut-2-enoyl]oxy-2-oxo-6-propan-2-ylcyclohex-3-en-1-yl] (E)-4-C<sub>20</sub>H<sub>28</sub>O<sub>7</sub>; MF: 0; RMF: 24; Prob 23.9%; Lib: mona-export-vf-npl\_qexactive; ID: 1510.

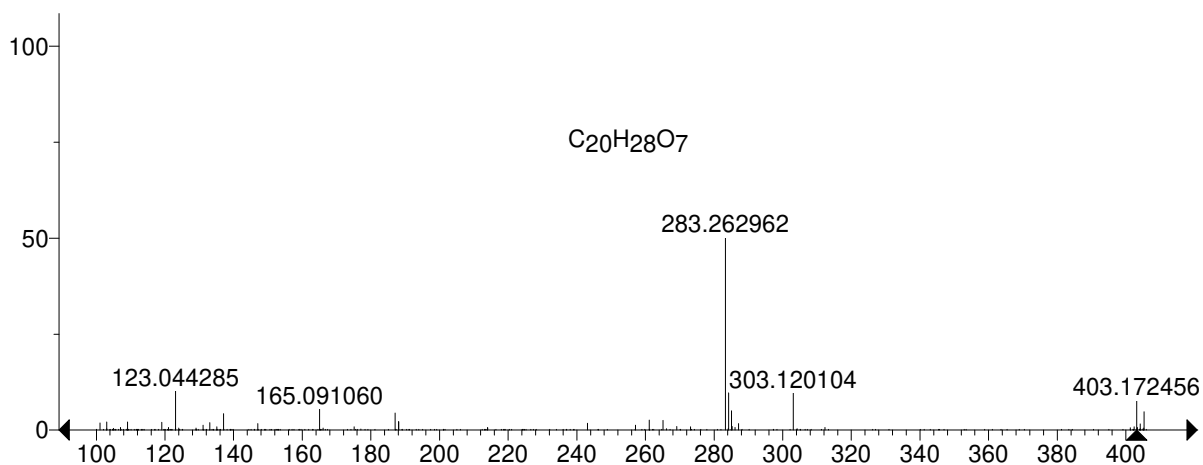

Hit 4 : 17-Phenyltrilorprostaglandin A2 [M+Cl]<sup>-</sup> HCD 30V P=403.2  
C<sub>23</sub>H<sub>28</sub>O<sub>4</sub>; MF: 0; RMF: 4; Prob 23.9%; CAS: 38315-51-4; Lib: nist\_msms; ID: 319742.

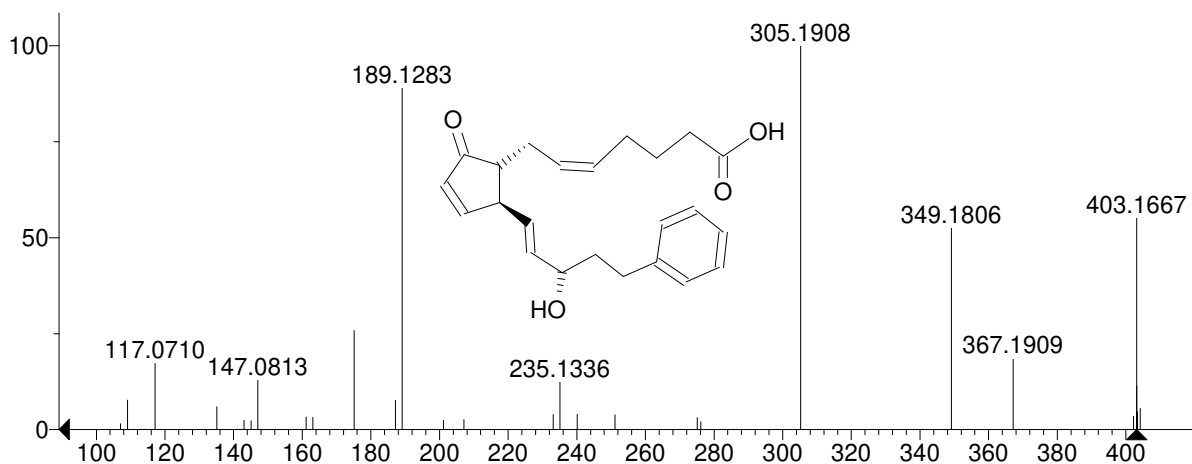

Unknown: Unknown (6.37\_355.1605m/z)  
Compound in Library Factor = -2632

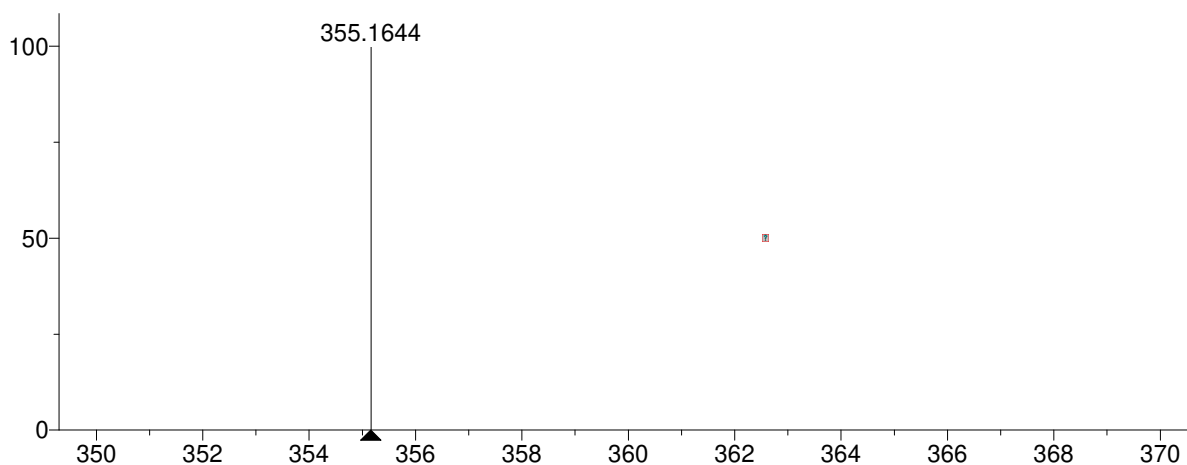

Hit 1 : Isoxaben [M+Na]<sup>+</sup> HCD 17V P=355.2  
C<sub>18</sub>H<sub>24</sub>N<sub>2</sub>O<sub>4</sub>; MF: 364; RMF: 999; Prob 50.0%; CAS: 82558-50-7; Lib: nist\_msms; ID: 397190.

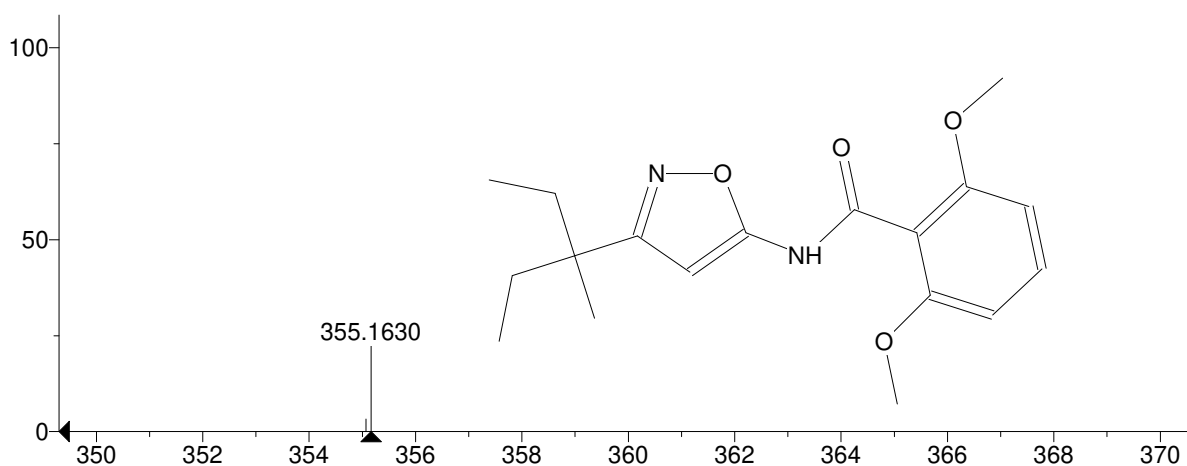

Hit 2 : pGlu-Glu-Pro-amide [M+H]<sup>+</sup> HCD 7eV P=355.2  
C<sub>15</sub>H<sub>22</sub>N<sub>4</sub>O<sub>6</sub>; MF: 364; RMF: 999; Prob 50.0%; CAS: 85541-78-2; Lib: nist\_msms; ID: 564355.

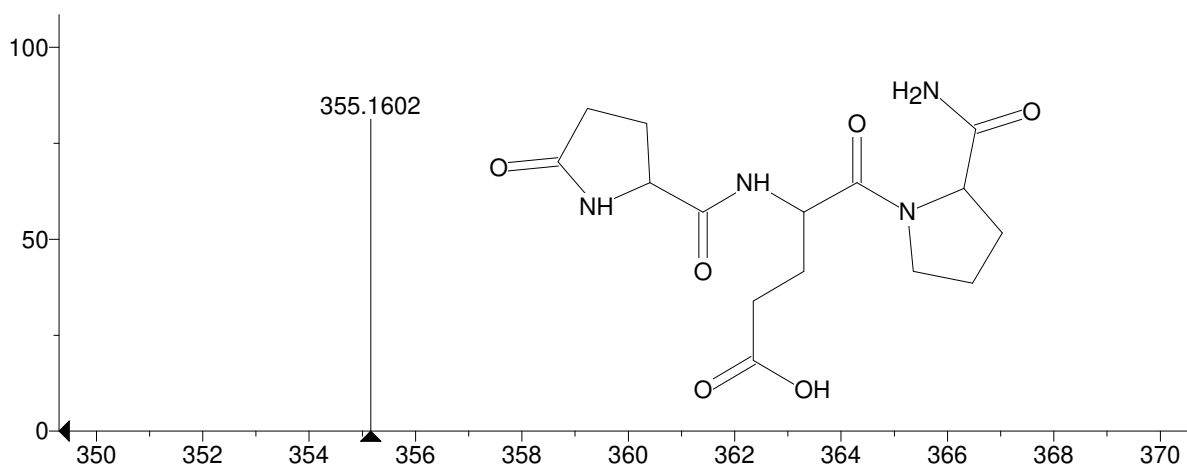

\*\* Search Report Page 1 of 2 \*\*

Unknown: Unknown (6.37\_427.1787m/z)  
Compound in Library Factor = 0

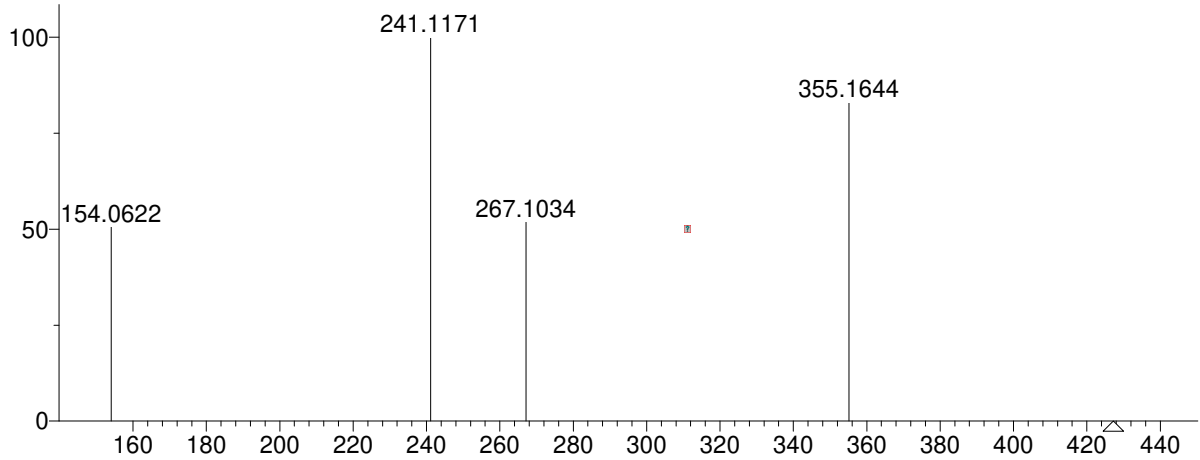

Hit 1 : [8,8-dimethyl-9-(3-methylbut-2-enoyloxy)-2-oxo-9,10-dihydropyrano[2,3-f]chromen-10-yl] 3-methylbut-2-en-  
C<sub>24</sub>H<sub>26</sub>O<sub>7</sub>; MF: 0; RMF: 20; Prob 33.3%; Lib: mona-export-vf-npl\_gexactive; ID: 4551.

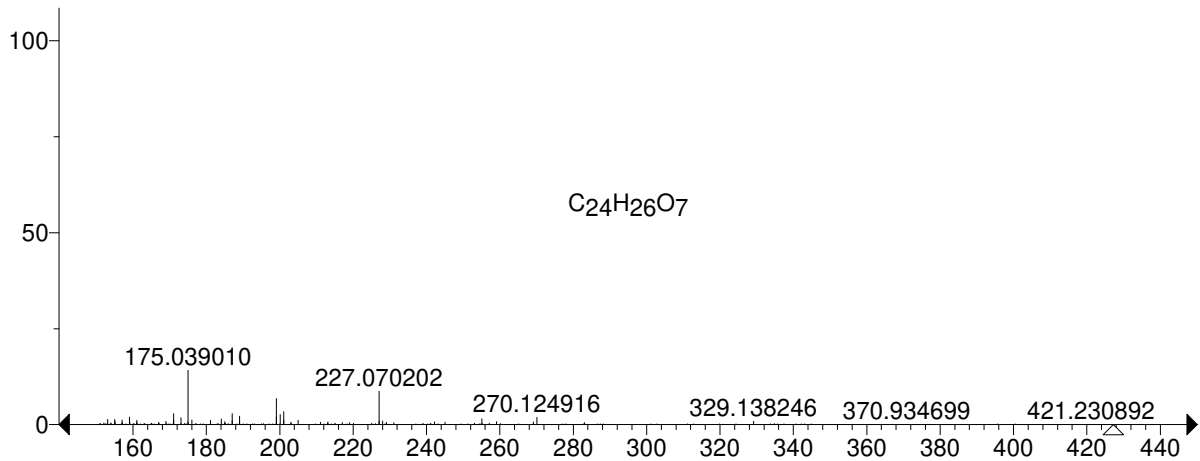

Hit 2 : Garcinone D [M-H]<sup>-</sup> HCD 55V P=427.2  
C<sub>24</sub>H<sub>28</sub>O<sub>7</sub>; MF: 0; RMF: 9; Prob 33.3%; CAS: 107390-08-9; Lib: nist\_msms; ID: 258178.

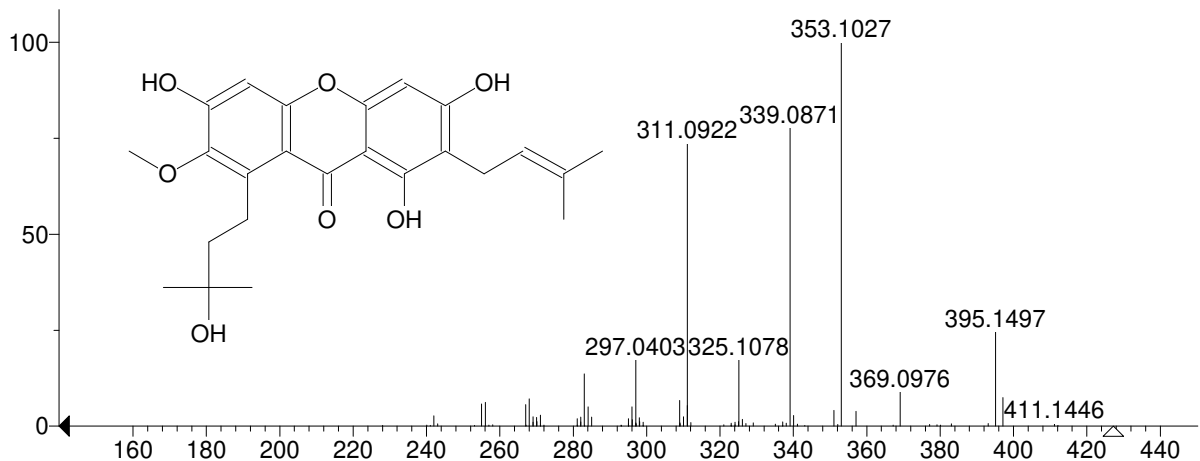



Hit 3 : Archangelicine [M+H]<sup>+</sup> 35HCD P=427.2  
C<sub>24</sub>H<sub>26</sub>O<sub>7</sub>; MF: 0; RMF: 3; Prob 33.3%; Lib: mona-export-vf-npl\_qexactive; ID: 5194.

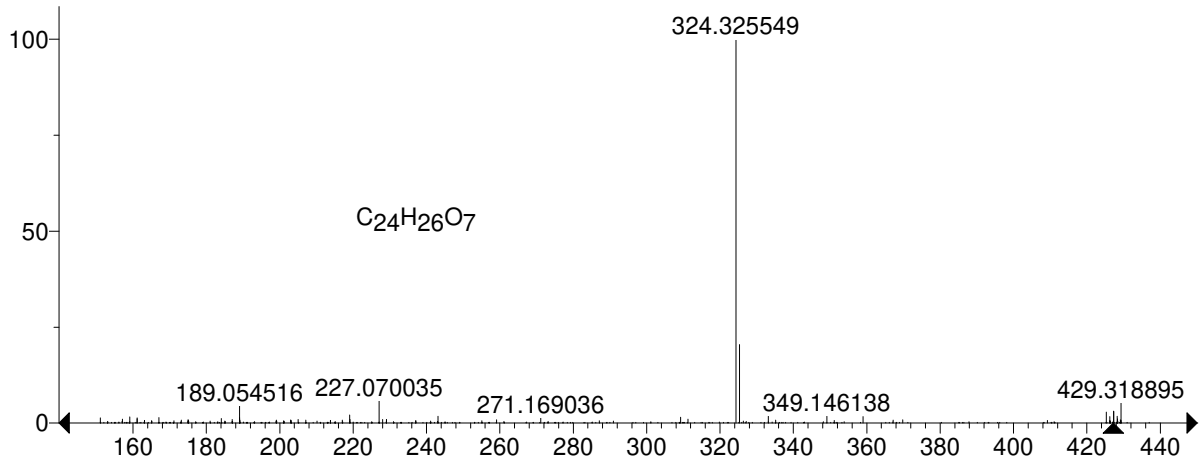

Unknown: Unknown (6.37\_484.2041m/z)  
Compound in Library Factor = 0

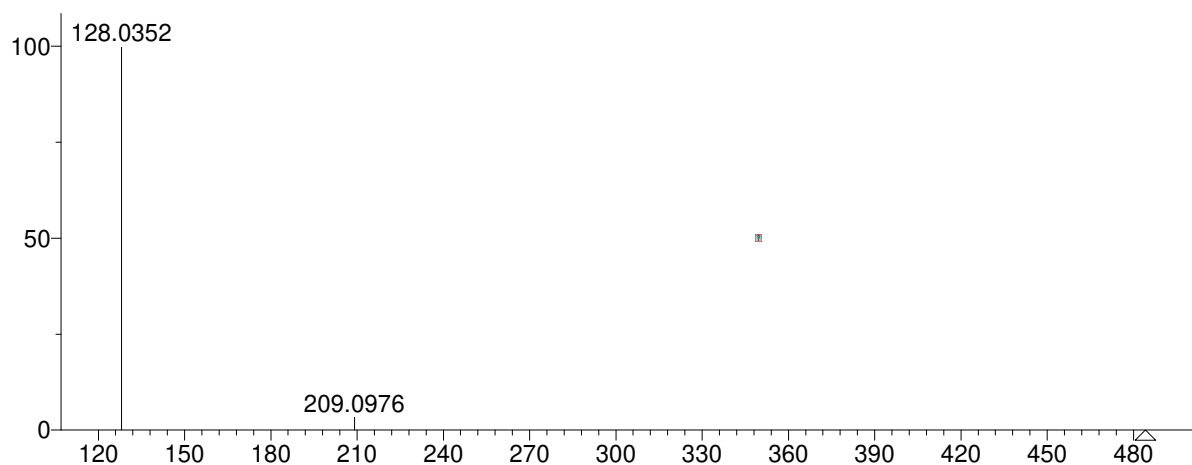

Hit 1 : [1,1'-Biphenyl]-2-carboxylic acid, 4'-[[[2,3-dimethyl-5-[[[(1S)-1-(4-nitrophenyl)ethyl]amino]carbonyl]-1H-indol-3-yl]methyl]phenyl]acetic acid  
C33H29N3O5; MF: 0; RMF: 46; Prob 100.0%; CAS: 1338259-05-4; Lib: nist\_msms; ID: 253488.

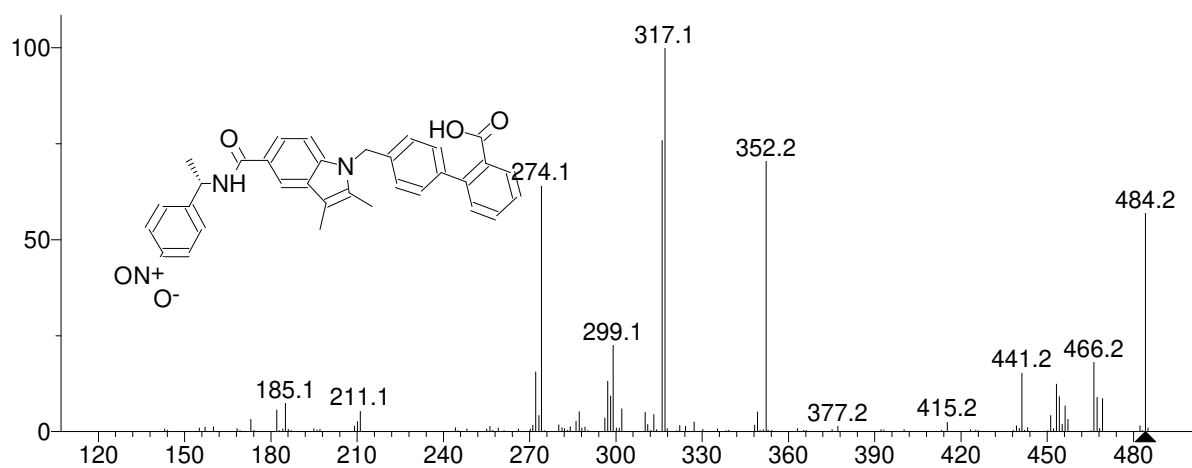

Unknown: Unknown (6.37\_486.2075m/z)  
Compound in Library Factor = 0

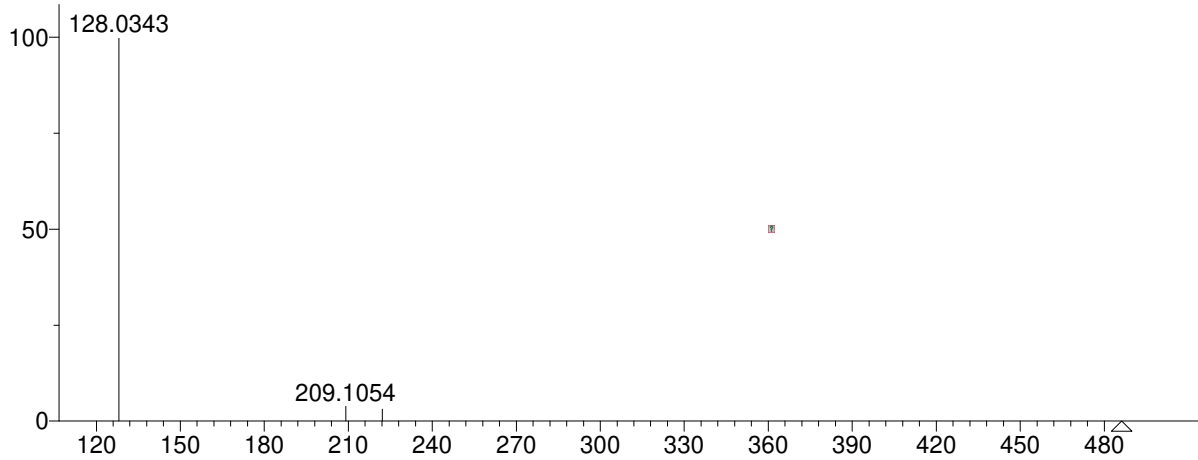

Hit 1 : rac-N-Allyloxycarbonyl-cis-moxifloxacin acyl-β-D-glucuronide allyl ester [M+H-C9H12O6]+ HCD 126V P- C34H40FN3O12; MF: 0; RMF: 20; Prob 50.0%; Lib: nist\_msms; ID: 431491.

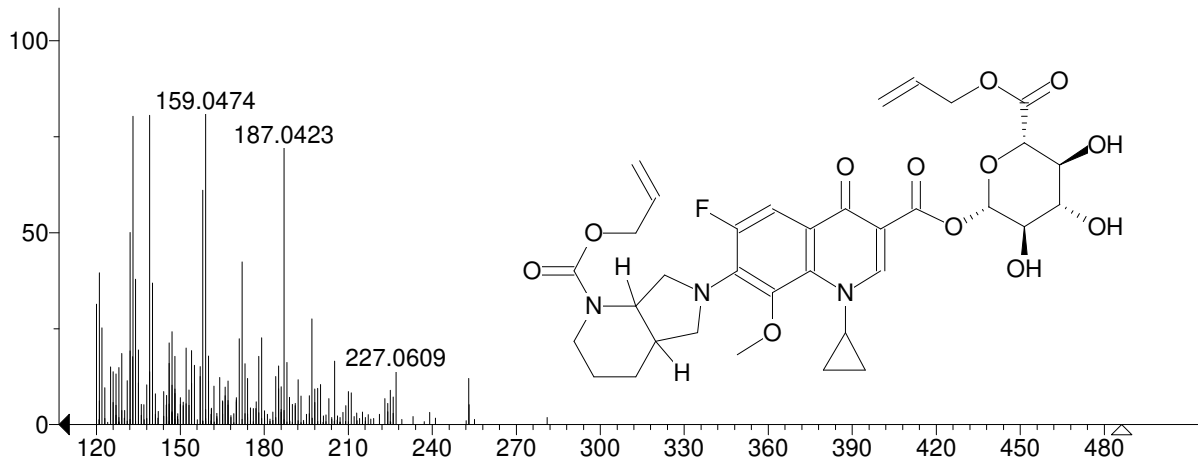

Hit 2 : 6-(furan-3-yl)-13-hydroxy-5,12,16,16-tetramethyl-7,10,17-trioxahexacyclo[13.3.3.0A^1,A^1a^\*u.0A^2,A^1.C26H28O8; MF: 0; RMF: 19; Prob 50.0%; Lib: mona-export-vf-npl\_qexactive; ID: 18767.

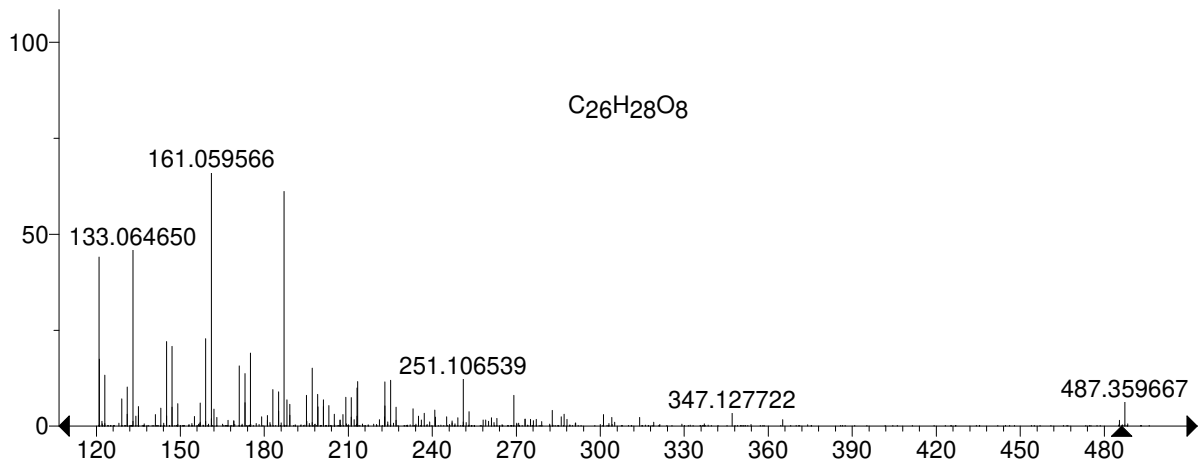

Unknown: Unknown (6.38\_282.0969m/z)  
Compound in Library Factor = -3273

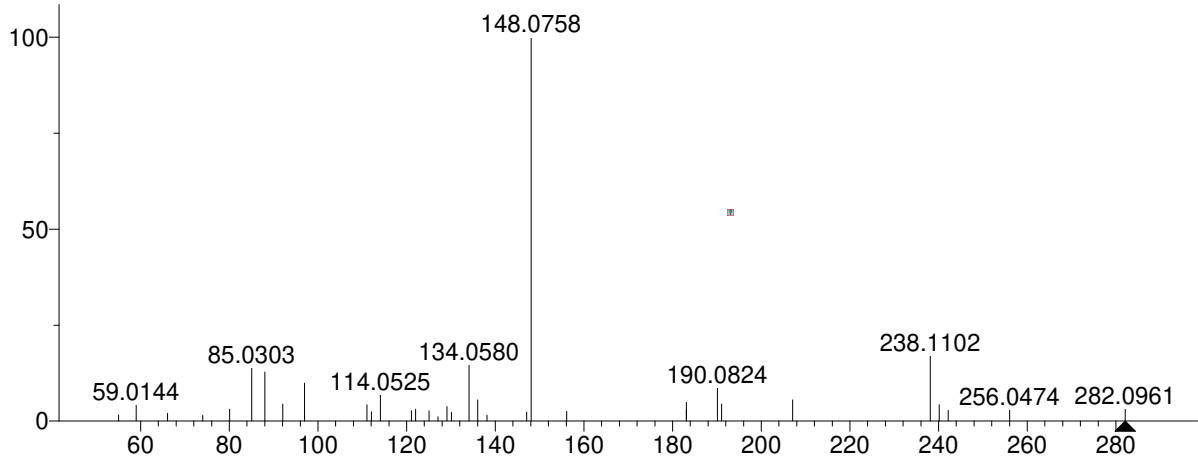

Hit 1 : (Z)-2-methyl-4-[(2R,3R,4S,5S,6R)-3,4,5-trihydroxy-6-(hydroxymethyl)oxan-2-yl]oxybut-2-enenitrile [M+Na]  
C<sub>11</sub>H<sub>17</sub>NO<sub>6</sub>; MF: 2; RMF: 99; Prob 52.0%; Lib: anthocyanins mona; ID: 4576.

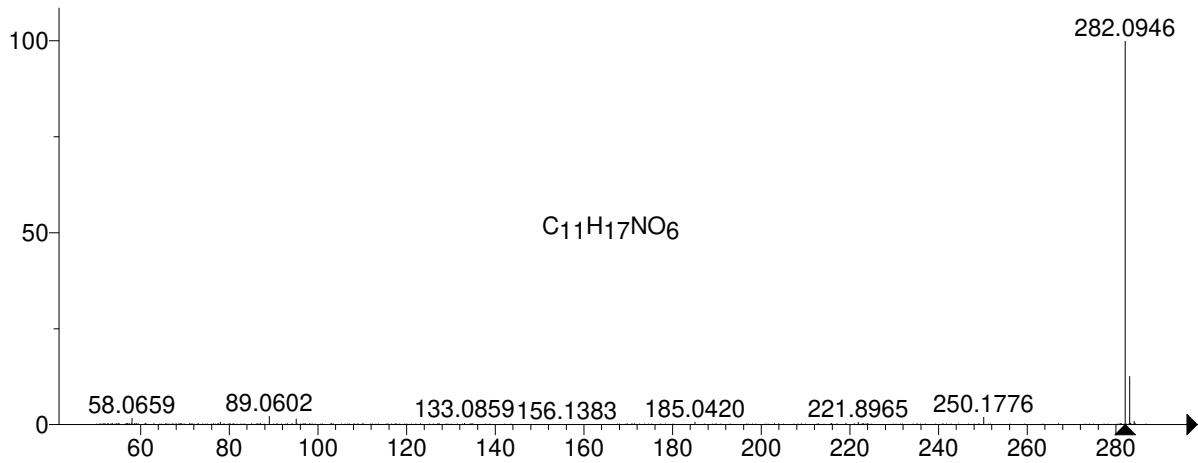

Hit 2 : 4-hydroxy-3-[(4-hydroxy-6-methyl-2-oxopyran-3-yl)methyl]-6-methylpyran-2-one [M+NH<sub>4</sub>]<sup>+</sup> 65HCD P=28:  
C<sub>13</sub>H<sub>12</sub>O<sub>6</sub>; MF: 0; RMF: 65; Prob 48.0%; Lib: mona-export-vf-npl\_qexactive; ID: 21516.

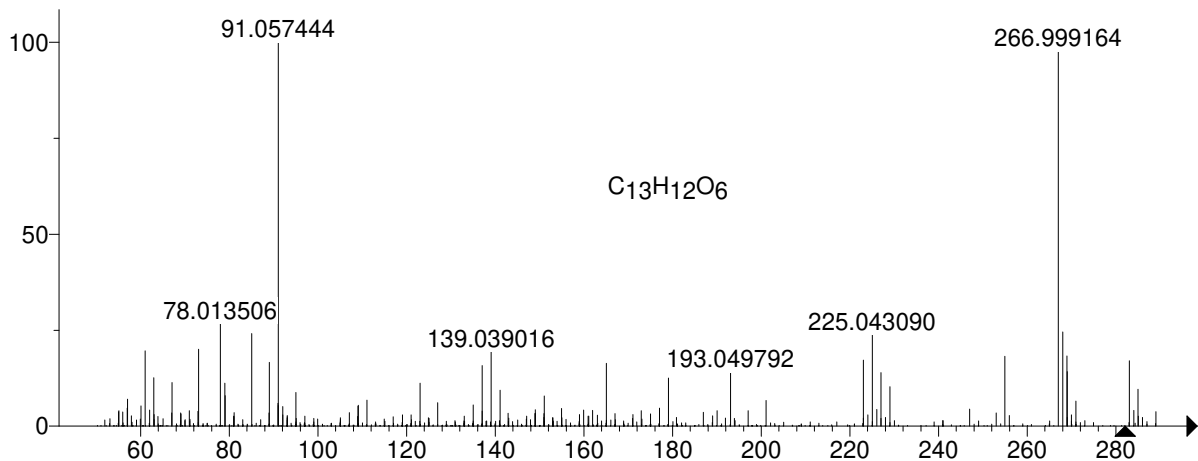

Unknown: Unknown (6.39\_417.0935m/z)  
Compound in Library Factor = 0

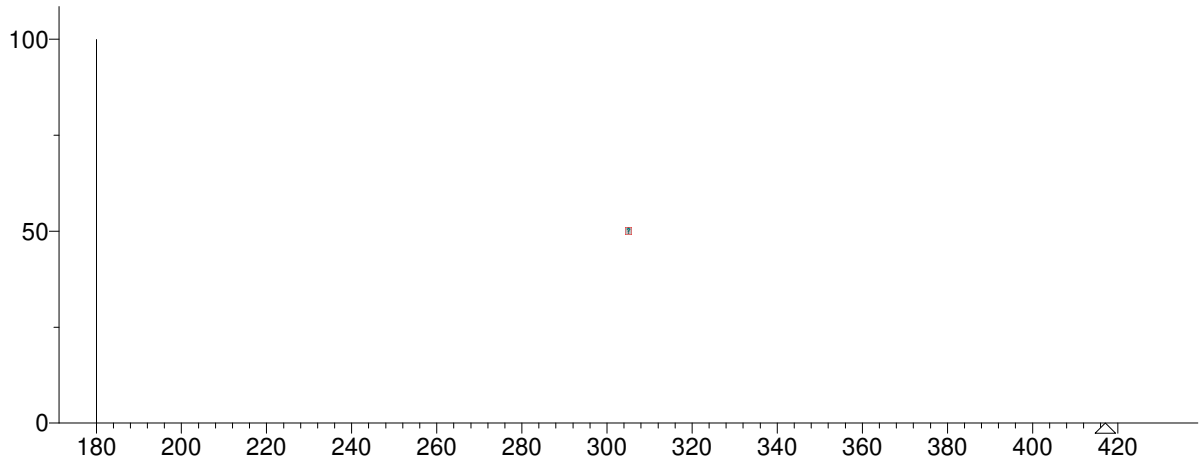

Unknown: Unknown (6.43\_284.1952m/z)  
Compound in Library Factor = 0

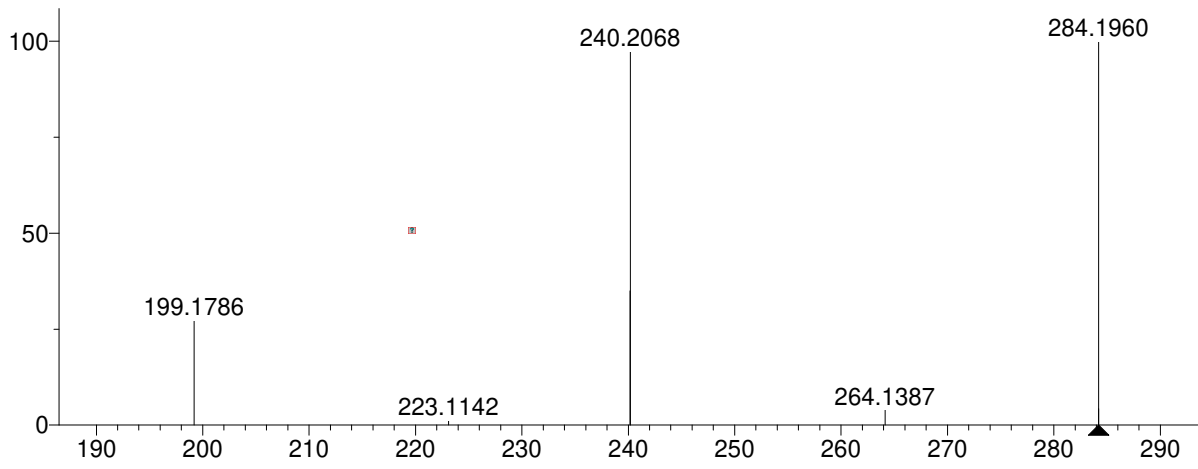

Unknown: Unknown (6.43\_298.1398m/z)  
Compound in Library Factor = -3273

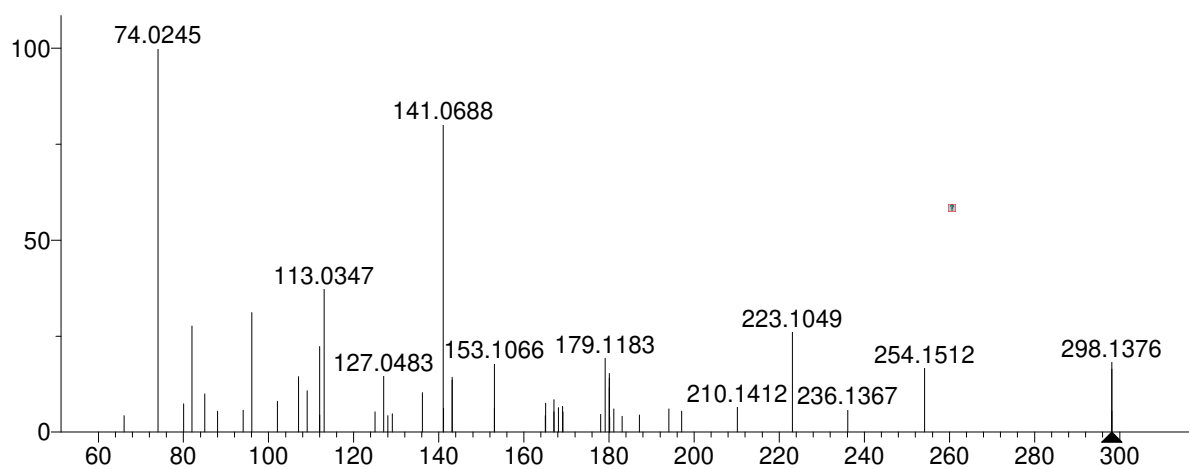

Hit 1 : Noratropine [M+Na]<sup>+</sup> HCD 8V P=298.1  
C<sub>16</sub>H<sub>21</sub>NO<sub>3</sub>; MF: 5; RMF: 183; Prob 100.0%; CAS: 16839-98-8; Lib: nist\_msms; ID: 197150.

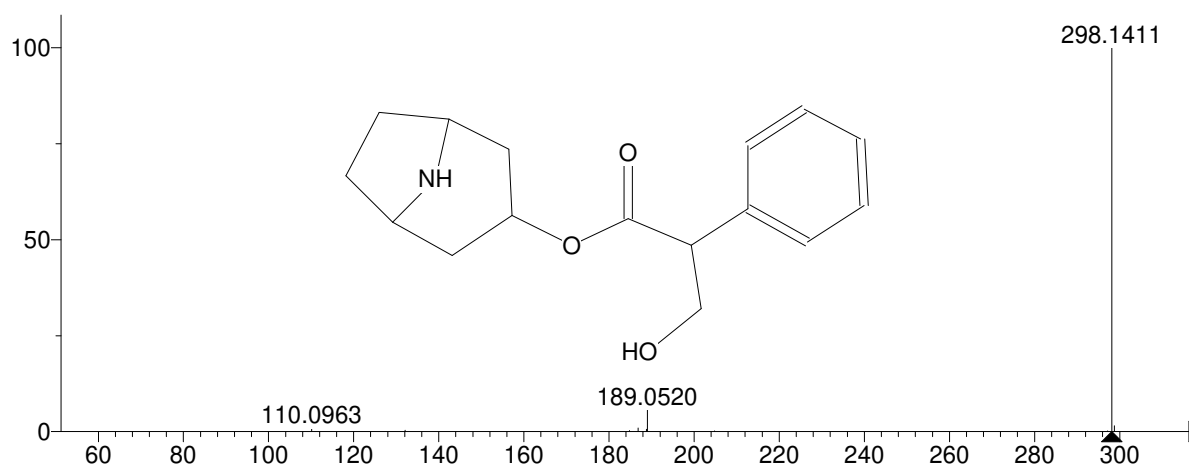

Unknown: Unknown (6.44\_328.1862m/z)  
Compound in Library Factor = 0

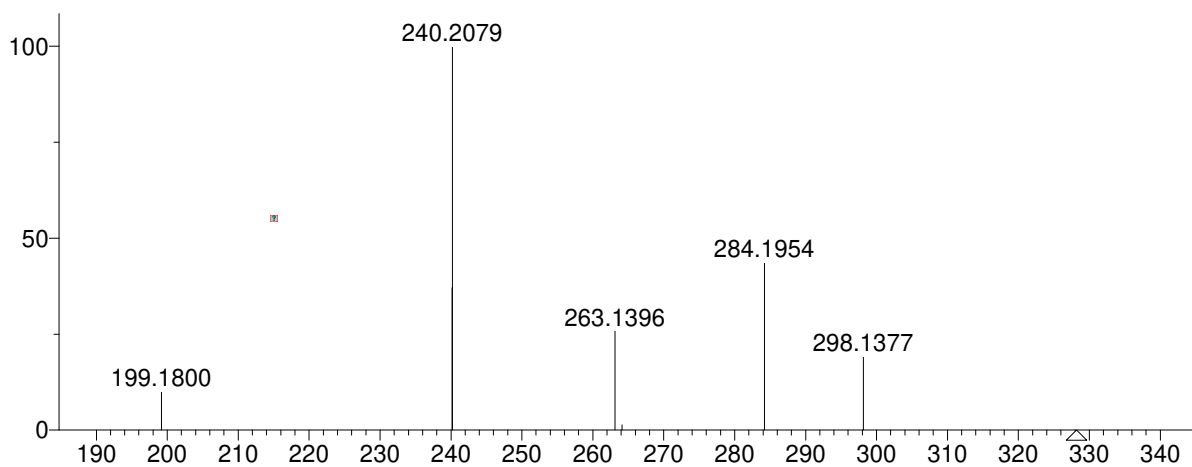

Hit 1 : CAPSAICIN [M+Na]<sup>+</sup> 35HCD P=328.2  
C<sub>18</sub>H<sub>27</sub>NO<sub>3</sub>; MF: 0; RMF: 4; Prob 100.0%; Lib: mona-export-vf-npl\_qexactive; ID: 2965.

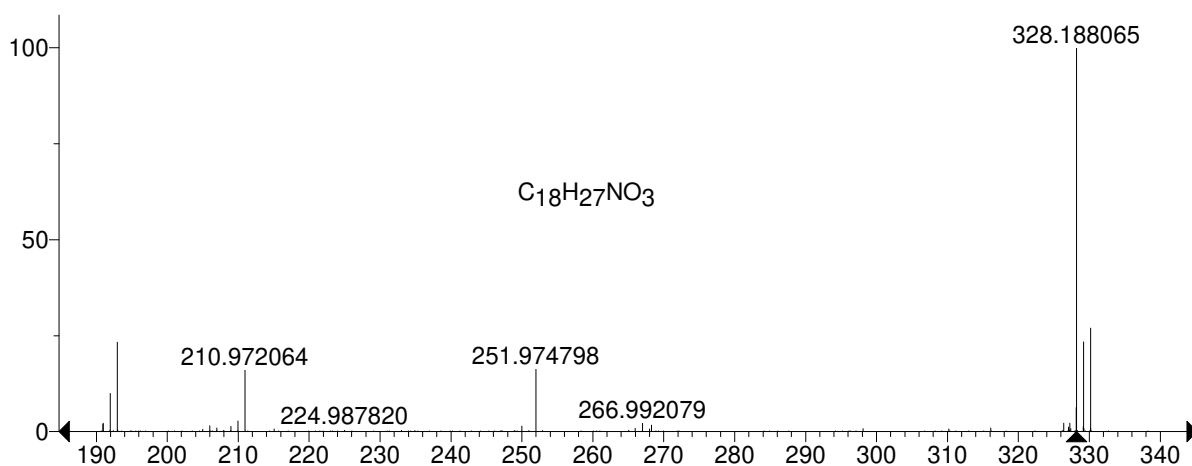



Unknown: Unknown (6.44\_366.1603m/z)  
Compound in Library Factor = 0

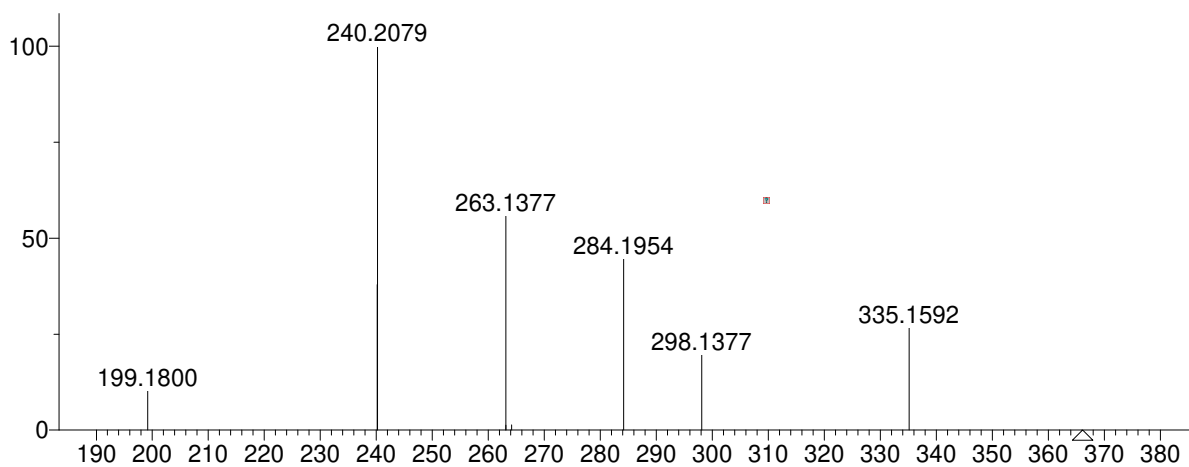

Hit 1 : Amyloid  $\beta$ -Protein (1-15) [M+5H]<sup>5+</sup> HCD 24eV P=366.2  
C<sub>78</sub>H<sub>107</sub>N<sub>25</sub>O<sub>27</sub>; MF: 0; RMF: 53; Prob 100.0%; CAS: 183745-81-5; Lib: nist\_msms2; ID: 57159.

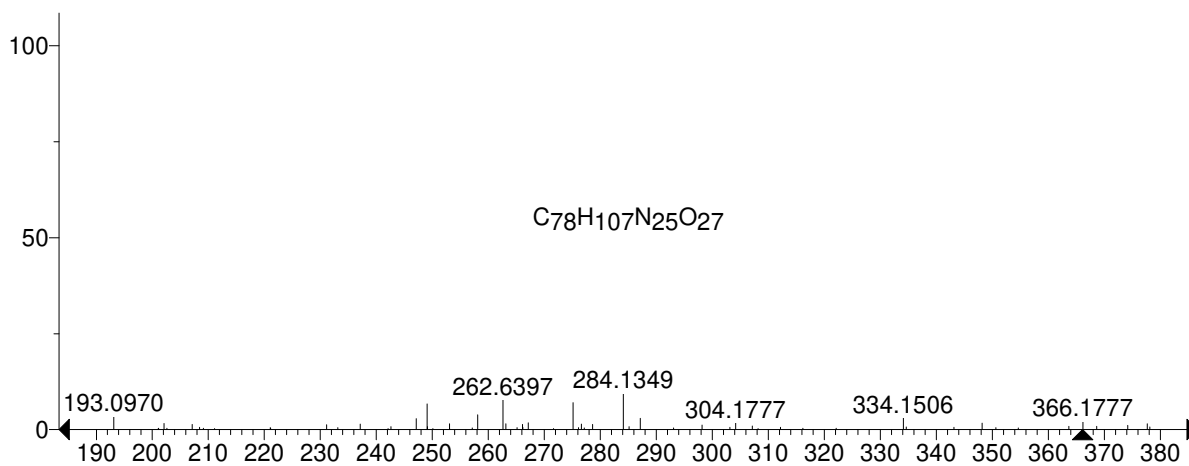

Unknown: Unknown (6.45\_342.1657m/z)  
Compound in Library Factor = 0

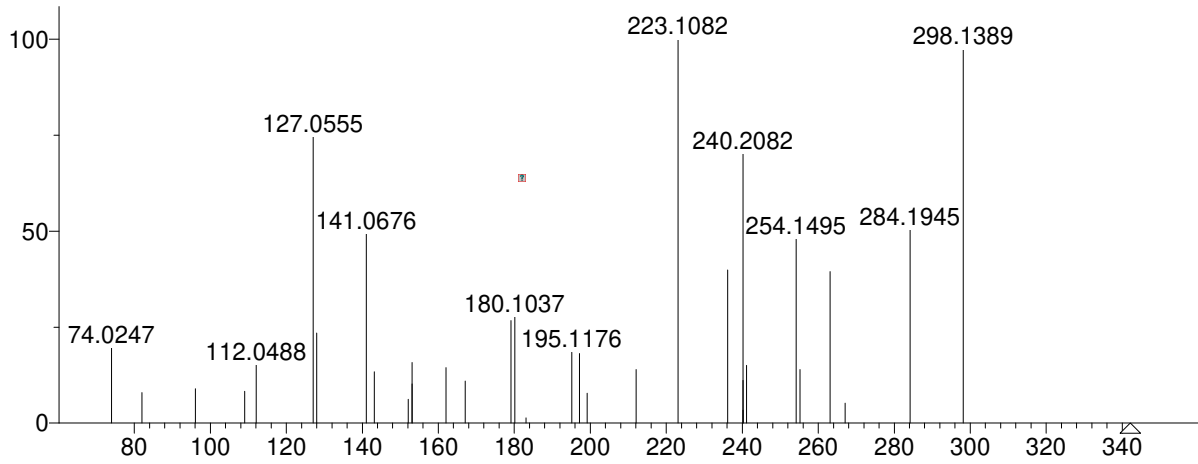

\*\* Search Report Page 1 of 2 \*\*

Unknown: Unknown (6.45\_364.1632m/z)  
Compound in Library Factor = 0

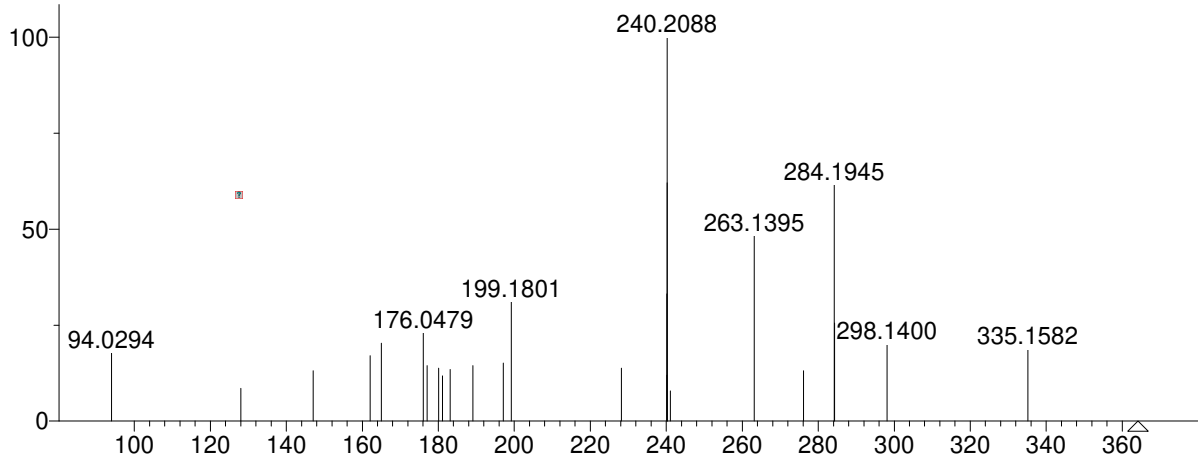

Hit 1 : (2R,3S,4S,5R,6S)-2-(hydroxymethyl)-6-(3,4,5-trimethoxyphenoxy)oxane-3,4,5-triol [M+NH4]<sup>+</sup> 65HCD P=C15H22O9; MF: 0; RMF: 46; Prob 12.5%; Lib: mona-export-vf-npl\_qexactive; ID: 9873.

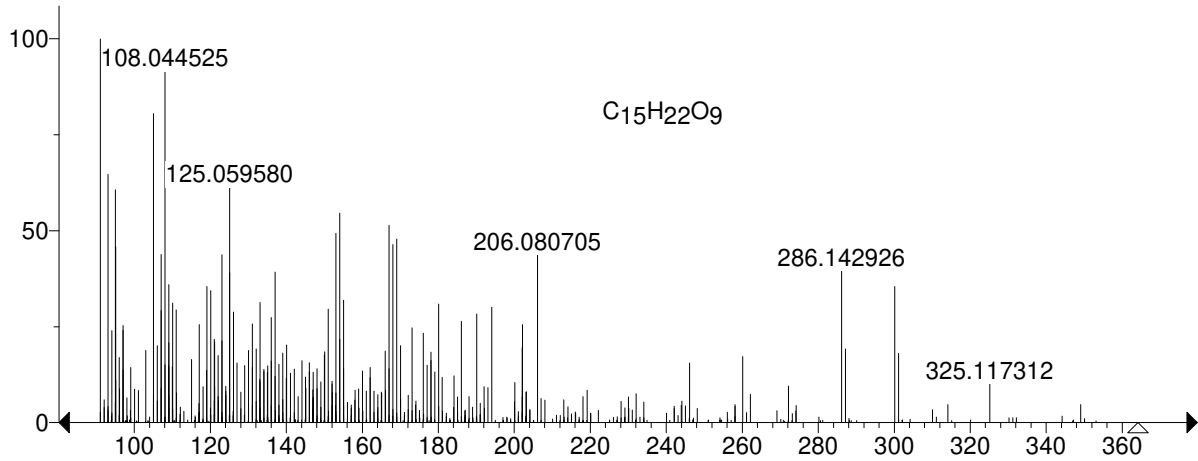

Hit 2 : aucubin [M+NH4]<sup>+</sup> 65HCD P=364.2  
C15H22O9; MF: 0; RMF: 31; Prob 12.5%; Lib: mona-export-vf-npl\_qexactive; ID: 3774.

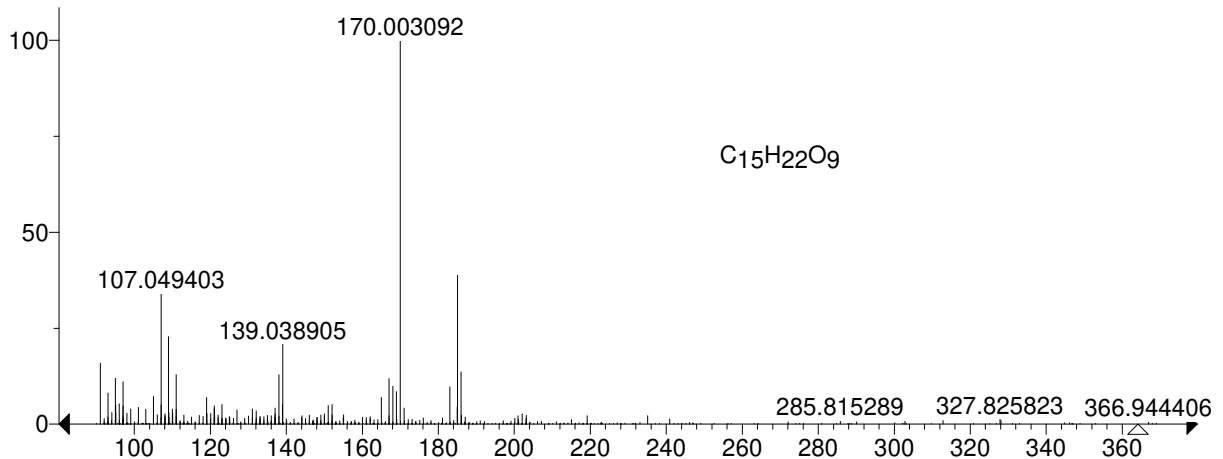

\*\* Search Report Page 2 of 2 \*\*

Hit 3 : NCGC00380729-01\_C21H21N3O3\_8',8'-Dimethyl-5a',6'-dihydro-3'H,5'H,8'H-spiro[indole-2,7'-pyrrolo[1',2':-C21H21N3O3; MF: 0; RMF: 20; Prob 12.5%; Lib: mona-export-gnps; ID: 11547.

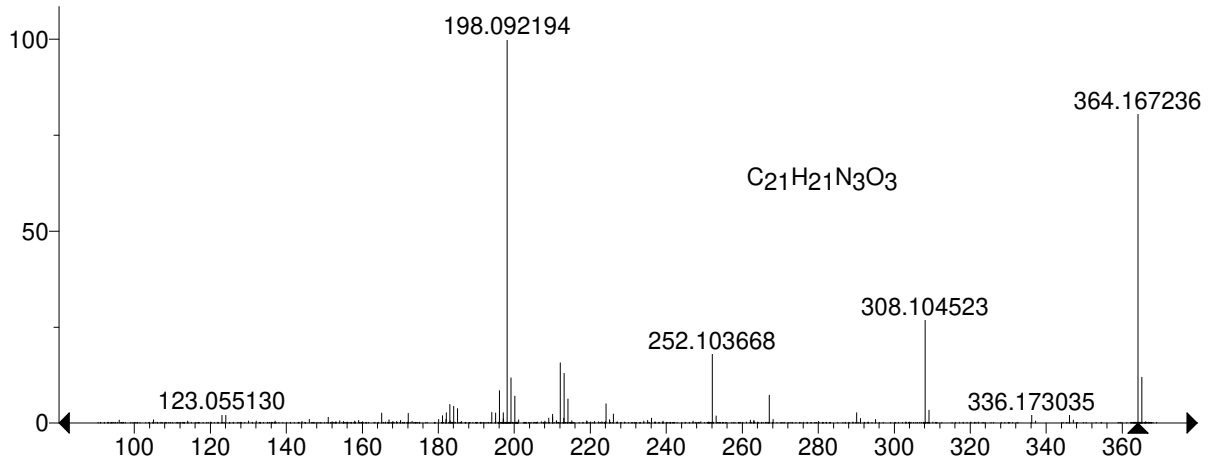

Hit 4 : Cys-Asn-Lys [M+H]<sup>+</sup> QQQ 20V P=364.2  
C13H25N5O5S; MF: 0; RMF: 18; Prob 12.5%; Lib: nist\_msms; ID: 42766.

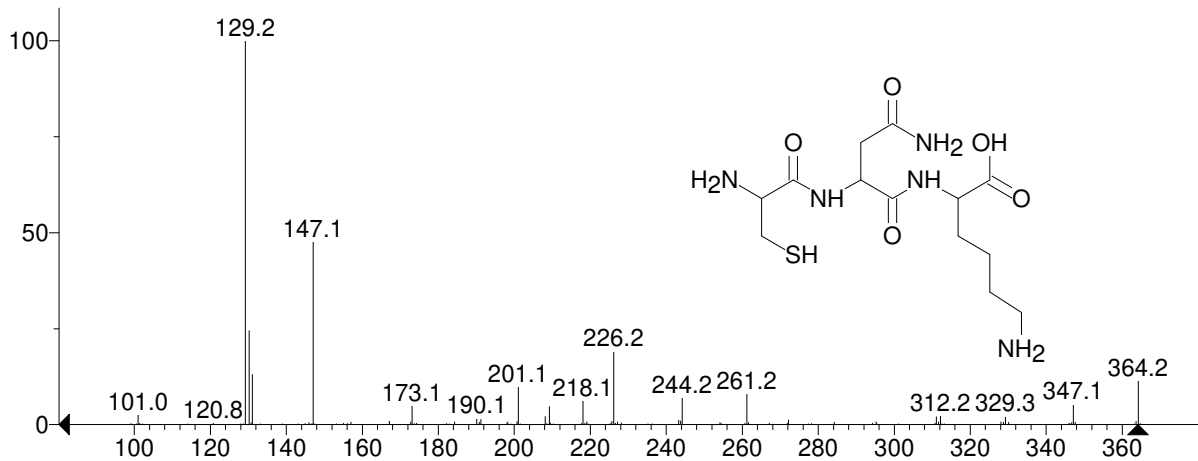

Hit 5 : 2-[(4-hydroxy-3,5-dimethoxyphenyl)methoxy]-6-(hydroxymethyl)oxane-3,4,5-triol [M+NH<sub>4</sub>]<sup>+</sup> 35HCD P=36  
C15H22O<sub>9</sub>; MF: 0; RMF: 13; Prob 12.5%; Lib: mona-export-vf-npl\_qexactive; ID: 20389.

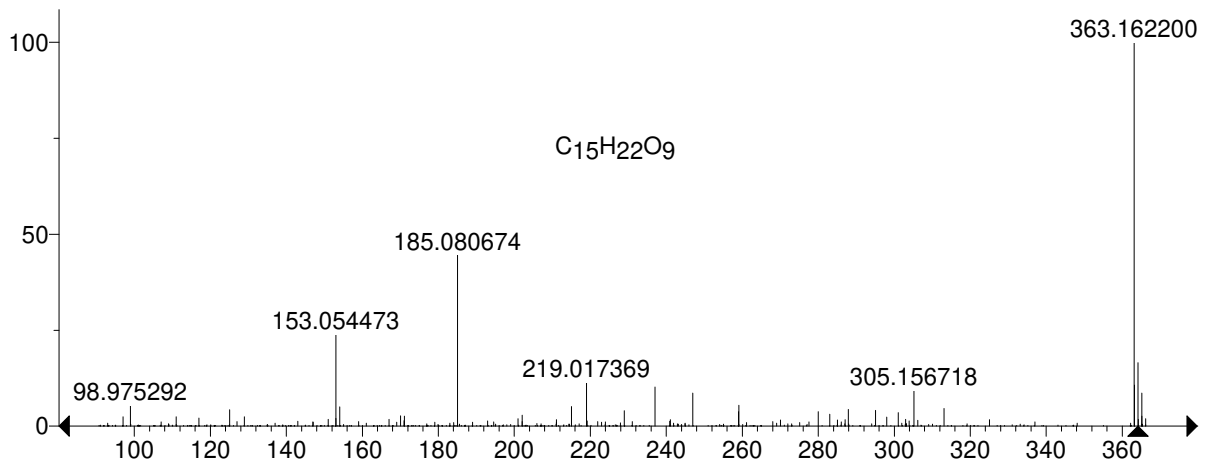

\*\* Search Report Page 1 of 2 \*\*

Unknown: Unknown (6.45\_425.1913m/z)  
Compound in Library Factor = -3273

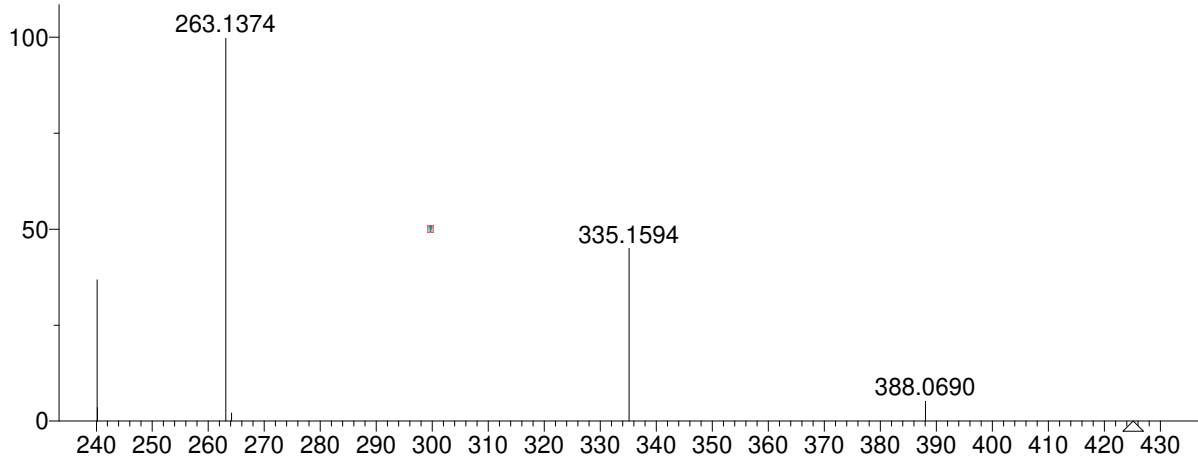

Hit 1 : Clindamycin [M+H]<sup>+</sup> 45% ( P=425.2  
C<sub>18</sub>H<sub>33</sub>ClN<sub>2</sub>O<sub>5</sub>S; MF: 11; RMF: 271; Prob 42.1%; Lib: mona-export-massbank; ID: 7097.

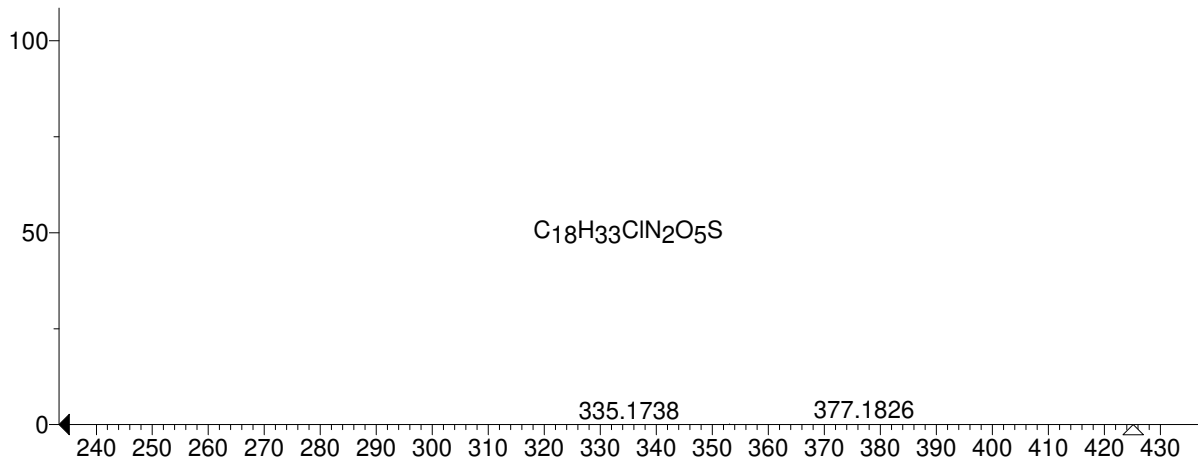

Hit 2 : MLS001304044-01! [M+H]<sup>+</sup> P=425.2  
C<sub>18</sub>H<sub>36</sub>Cl<sub>2</sub>N<sub>2</sub>O<sub>6</sub>S; MF: 0; RMF: 30; Prob 28.9%; Lib: mona-export-gnps; ID: 3214.

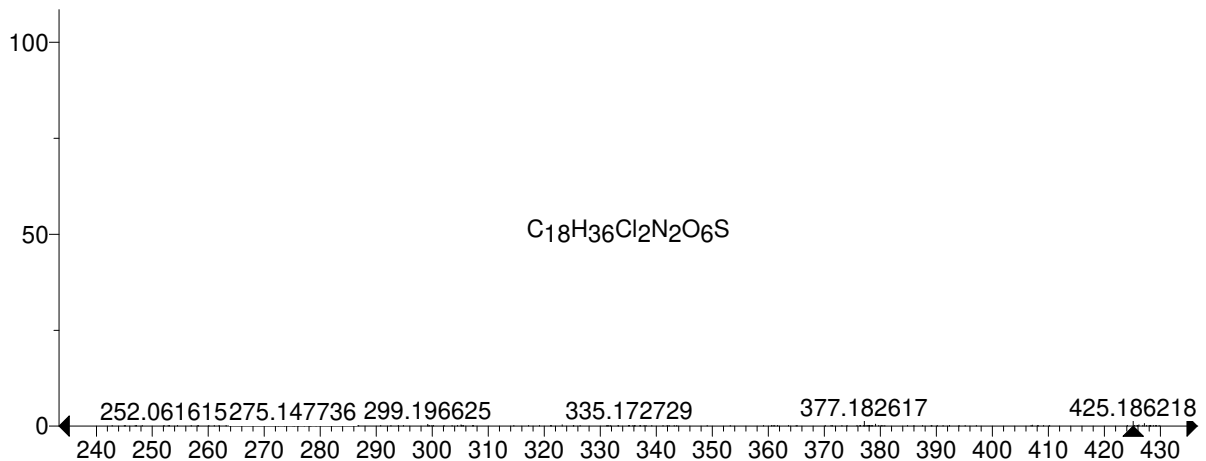

Hit 3 : MLS001183714-01!Clindamycin [M+H]<sup>+</sup> P=425.2  
C<sub>18</sub>H<sub>33</sub>ClN<sub>2</sub>O<sub>5</sub>S; MF: 0; RMF: 29; Prob 28.9%; Lib: mona-export-gnps; ID: 3814.

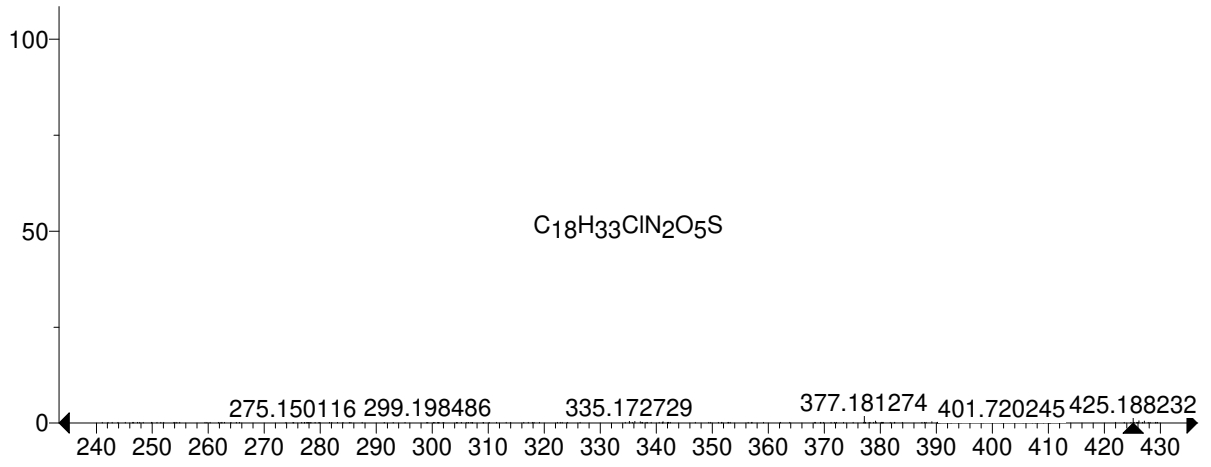

Unknown: Unknown (6.45\_464.0891m/z)  
Compound in Library Factor = 0

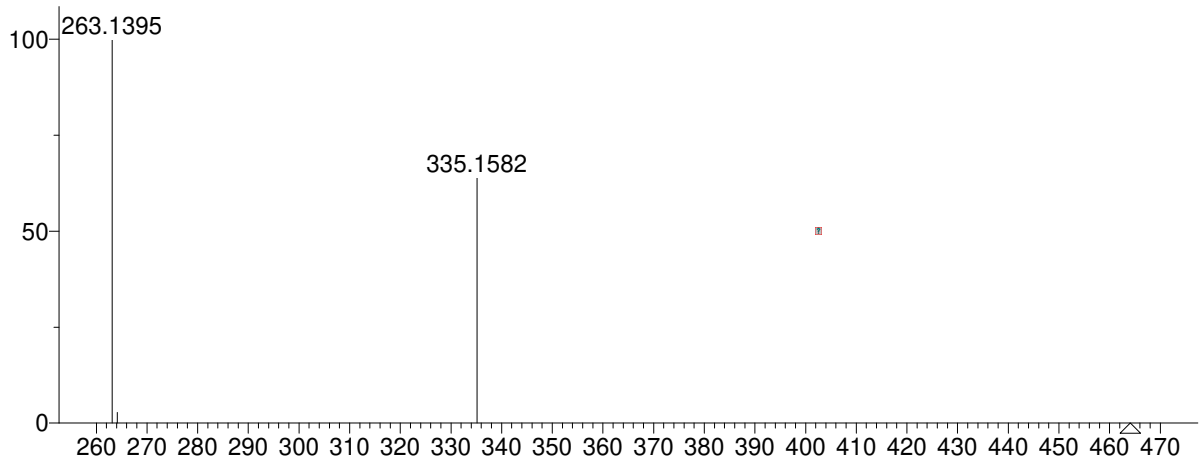

Unknown: Unknown (6.47\_293.1490m/z)  
Compound in Library Factor = -349

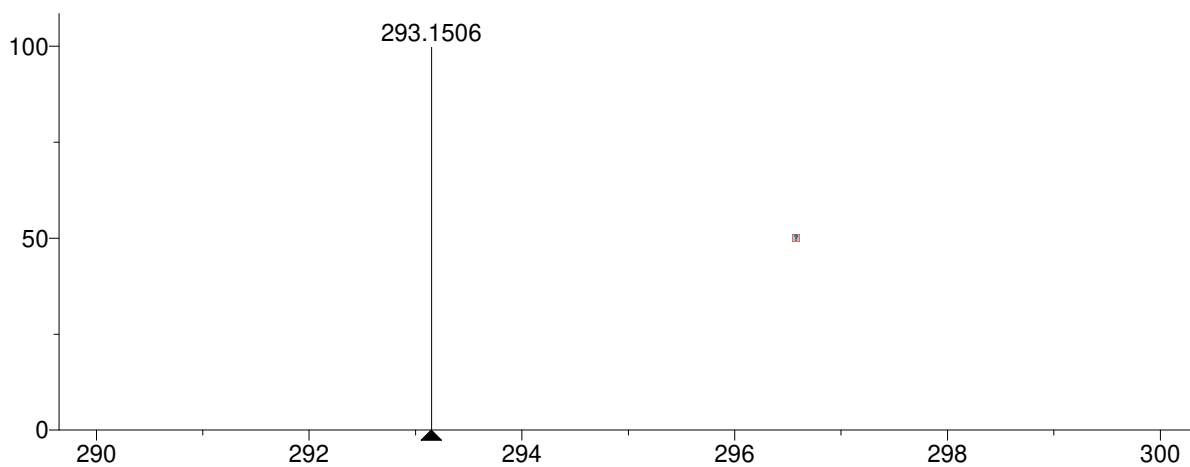

Hit 1 : Dicumyl peroxide [M+Na]<sup>+</sup> HCD 26V P=293.2  
C<sub>18</sub>H<sub>22</sub>O<sub>2</sub>; MF: 364; RMF: 999; Prob 11.1%; CAS: 80-43-3; Lib: nist\_msms; ID: 153958.

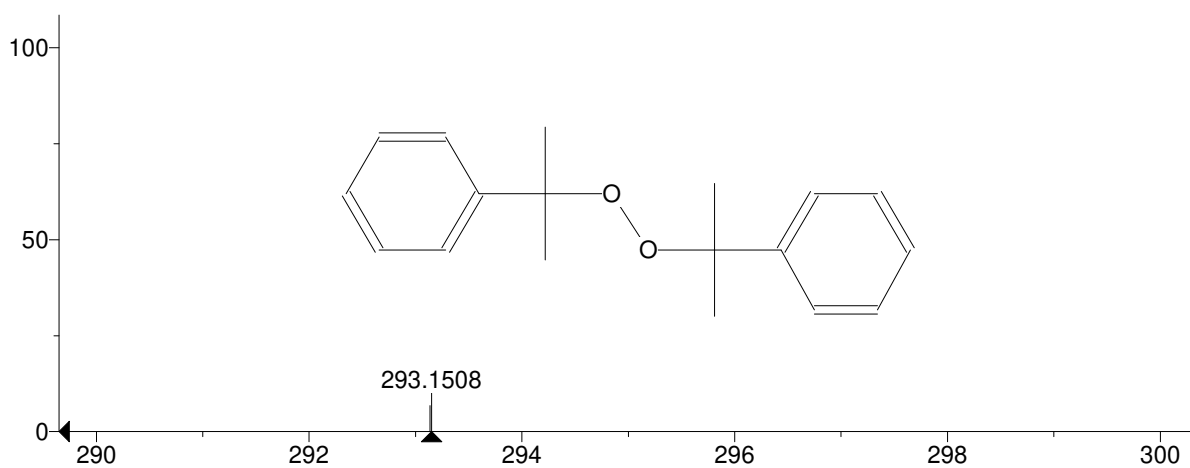

Hit 2 : Ile-Tyr [M-H]<sup>-</sup> HCD 29eV P=293.2  
C<sub>15</sub>H<sub>22</sub>N<sub>2</sub>O<sub>4</sub>; MF: 364; RMF: 999; Prob 11.1%; Lib: nist\_msms; ID: 567514.

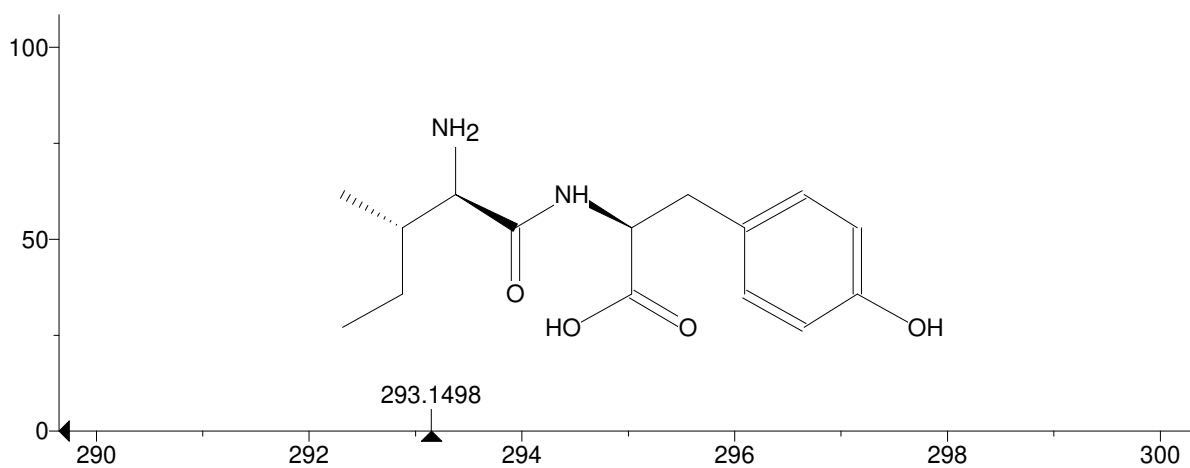



Hit 3 : Ile-Tyr [M-H]<sup>-</sup> HCD 29eV P=293.2  
C<sub>15</sub>H<sub>22</sub>N<sub>2</sub>O<sub>4</sub>; MF: 364; RMF: 999; Prob 11.1%; CAS: 38579-21-4; Lib: nist\_msms2; ID: 70371.

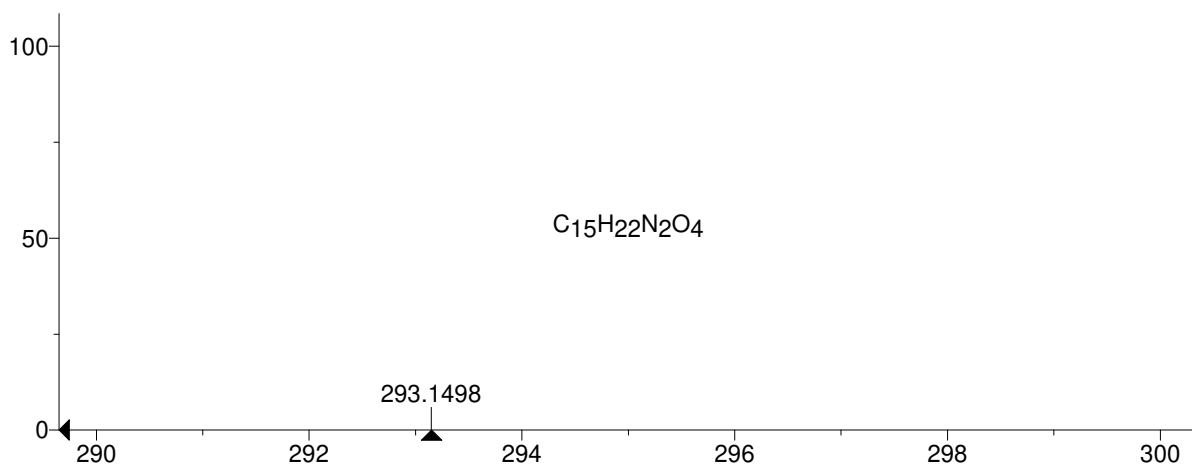

Hit 4 : Leu-Tyr [M-H]<sup>-</sup> HCD 14eV P=293.2  
C<sub>15</sub>H<sub>22</sub>N<sub>2</sub>O<sub>4</sub>; MF: 364; RMF: 999; Prob 11.1%; Lib: nist\_msms; ID: 567554.

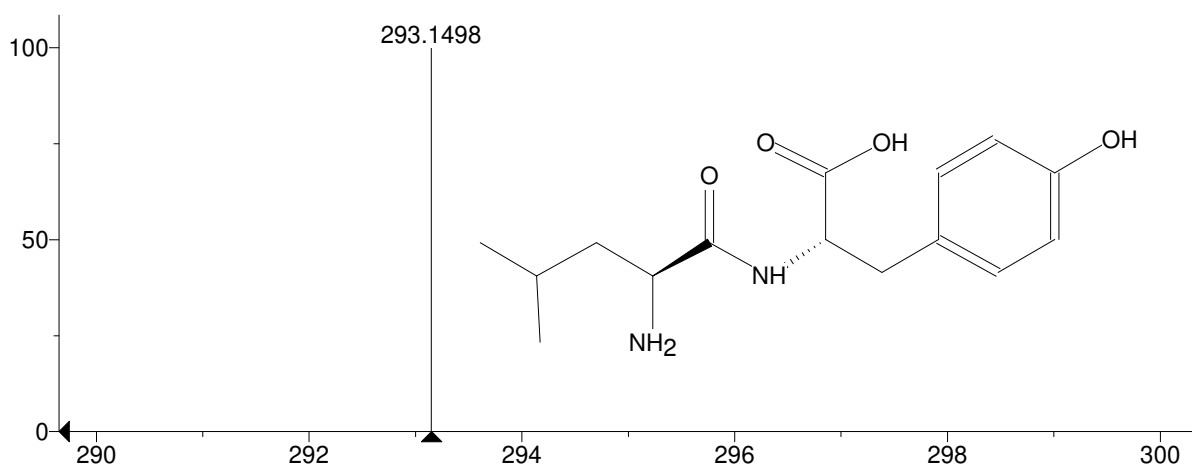

Hit 5 : Tyr-Leu [M-H]<sup>-</sup> HCD 38eV P=293.2  
C<sub>15</sub>H<sub>22</sub>N<sub>2</sub>O<sub>4</sub>; MF: 364; RMF: 999; Prob 11.1%; Lib: nist\_msms; ID: 570430.

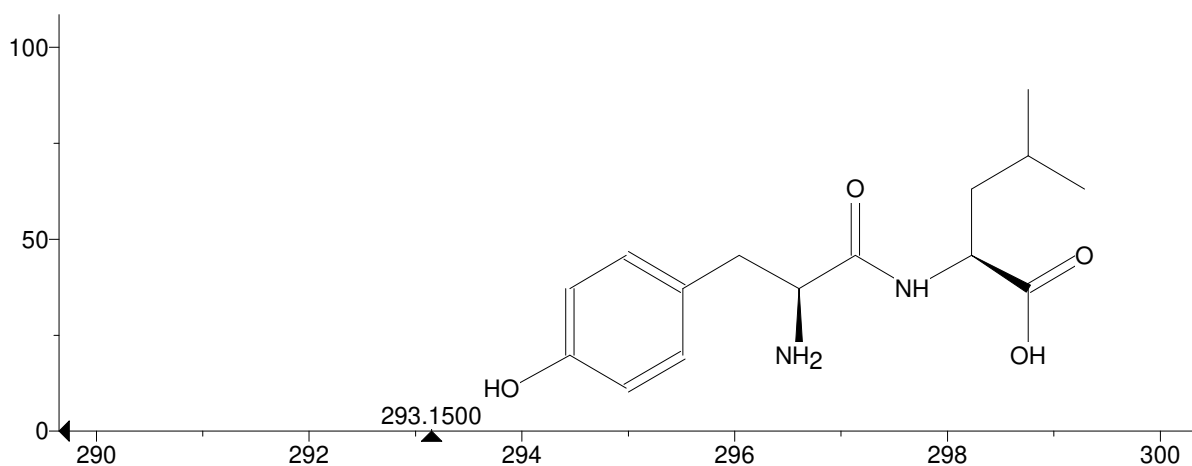

Unknown: Unknown (6.47\_415.1799m/z)  
Compound in Library Factor = 0

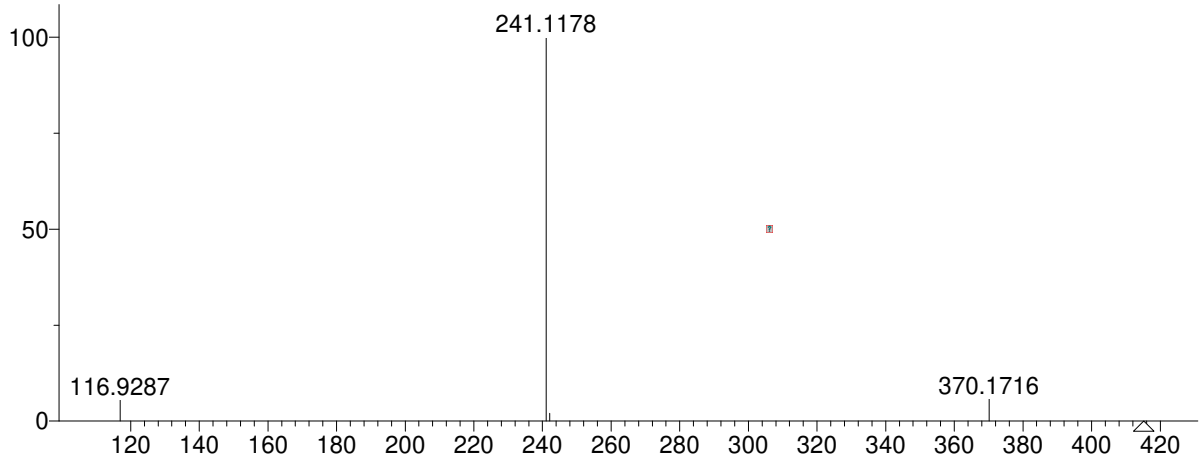

Hit 1 : methyl (1R,4aS,9S,10S)-10-acetyloxy-5,9-dihydroxy-1,4a-dimethyl-2-oxo-7-propan-2-yl-10,10a-dihydro-9H-C23H28O7; MF: 0; RMF: 119; Prob 50.0%; Lib: mona-export-lc-ms-ms\_negative\_mode; ID: 22118.

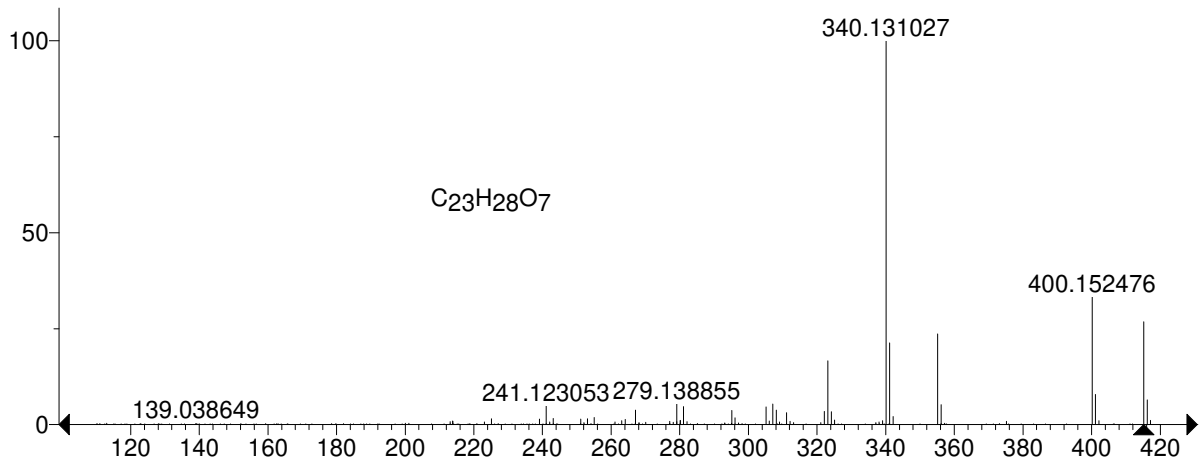

Hit 2 : Dehydrorotenone [M+Na]<sup>+</sup> 35% P=415.2  
C<sub>23</sub>H<sub>20</sub>O<sub>6</sub>; MF: 0; RMF: 15; Prob 50.0%; Lib: mona-export-itree; ID: 708.

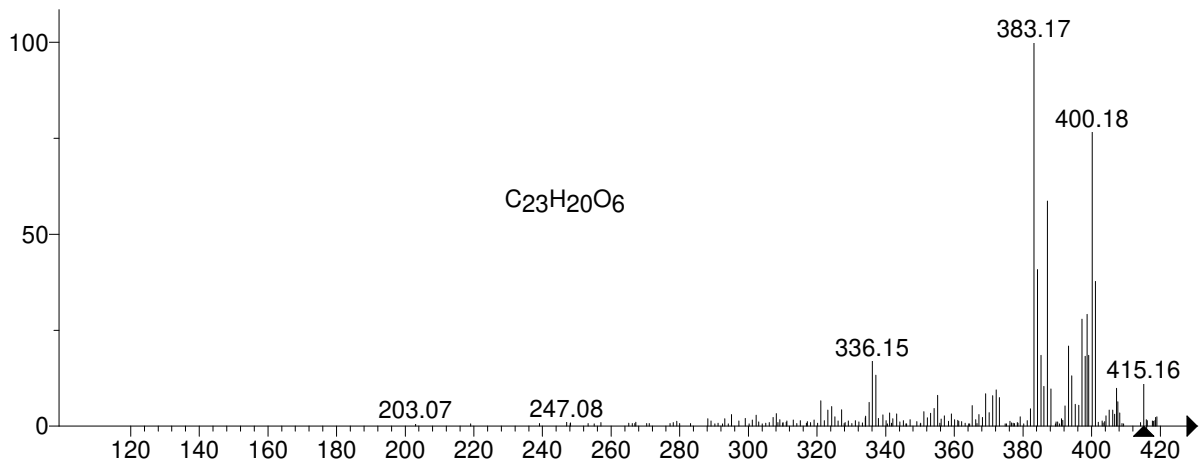

Unknown: Unknown (6.48\_642.2137m/z)  
Compound in Library Factor = 0

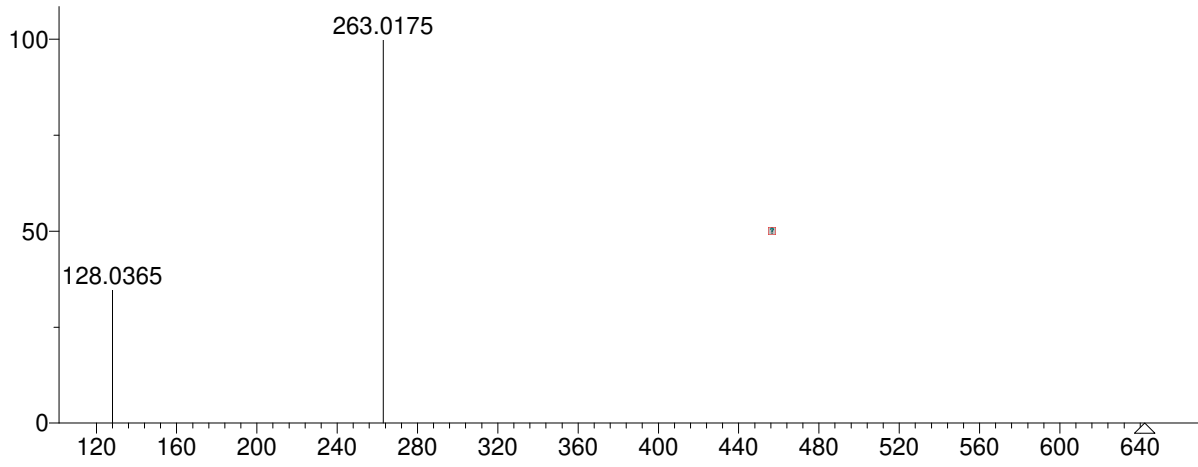

Unknown: Unknown (6.49\_370.1609m/z)  
Compound in Library Factor = -2387

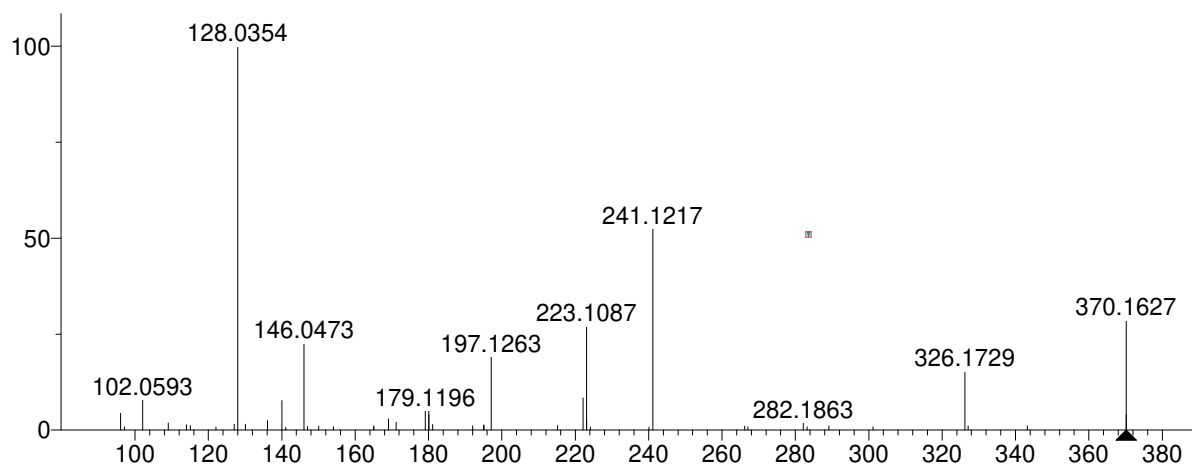

Hit 1 : Tenovin-1 [M+H]<sup>+</sup> HCD 11V P=370.2  
C<sub>20</sub>H<sub>23</sub>N<sub>3</sub>O<sub>2</sub>S; MF: 19; RMF: 343; Prob 100.0%; CAS: 380315-80-0; Lib: nist\_msms; ID: 334898.

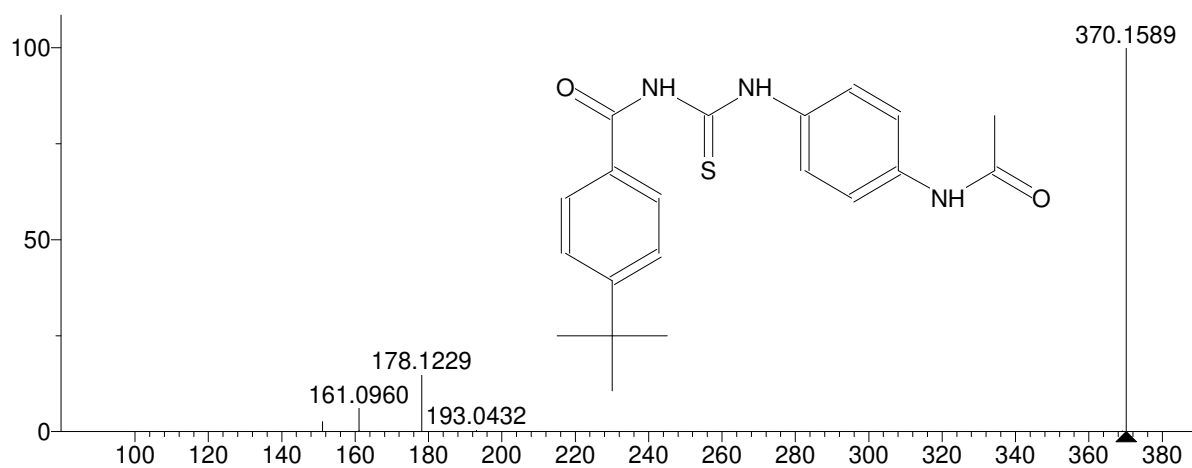

Unknown: Unknown (6.49\_397.1686m/z)  
Compound in Library Factor = 0

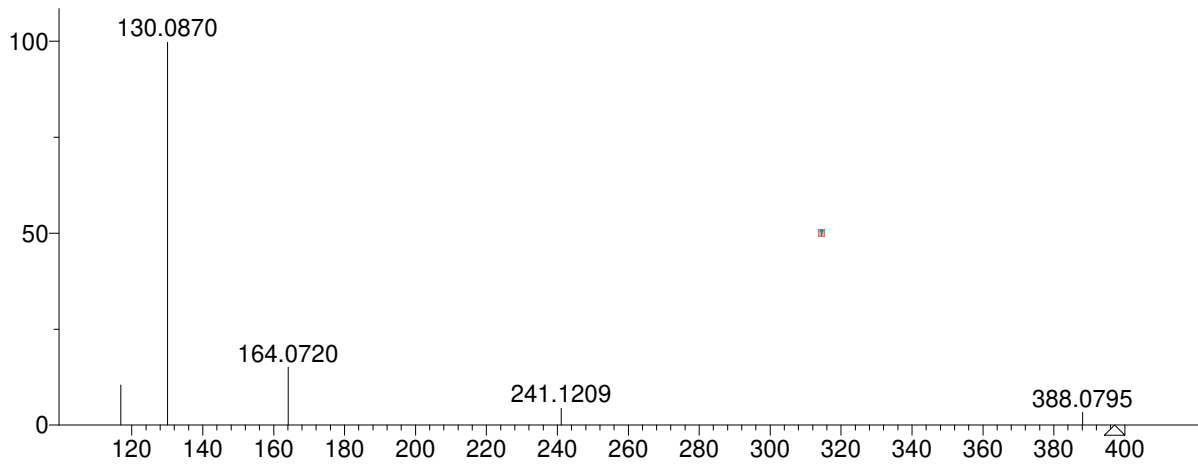

Unknown: Unknown (6.49\_799.2444m/z)  
Compound in Library Factor = -2387

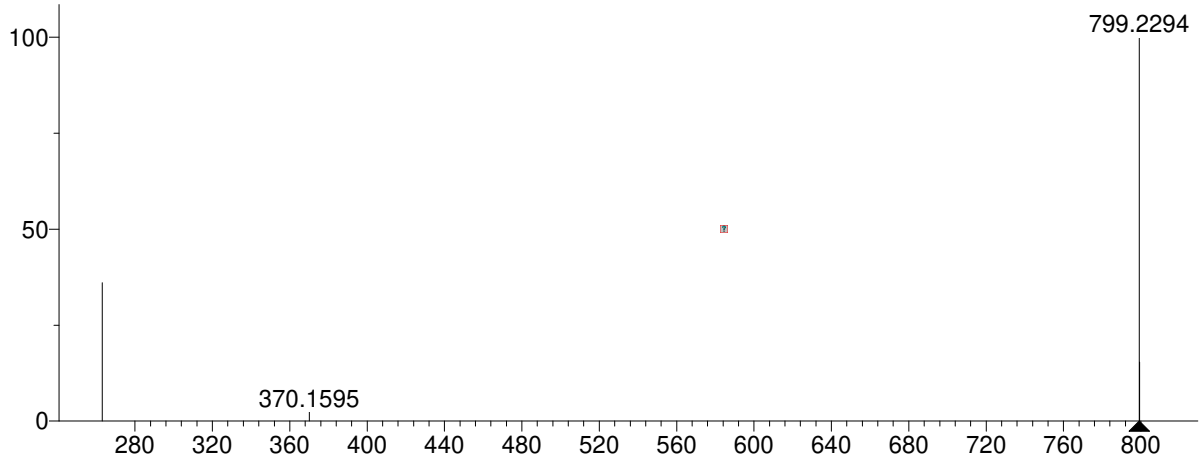

Hit 1 : NCGC00380574-01\_C39H44O18\_beta-D-Glucopyranoside, (1aS,1bS,2S,5aR,6S,6aS)-6-[[6-deoxy-3,4-bis C39H44O18; MF: 18; RMF: 522; Prob 64.7%; Lib: msms-neg-gnps; ID: 1536.

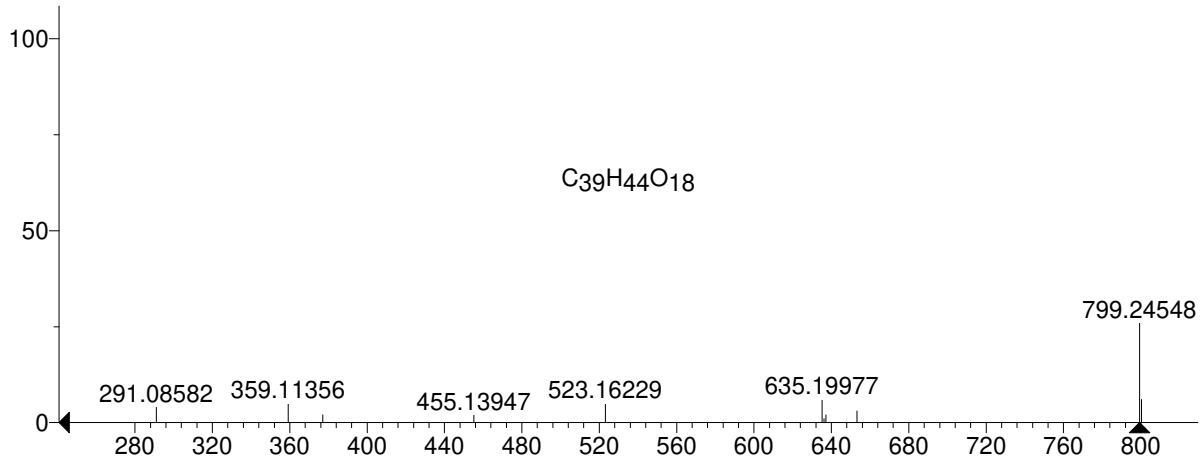

Hit 2 : Corticotropin Releasing Factor, porcine [M+6H]6+ QTOF 5V P=799.2  
C209H337N61O64S2; MF: 1; RMF: 178; Prob 35.3%; Lib: nist\_msms2; ID: 33744.

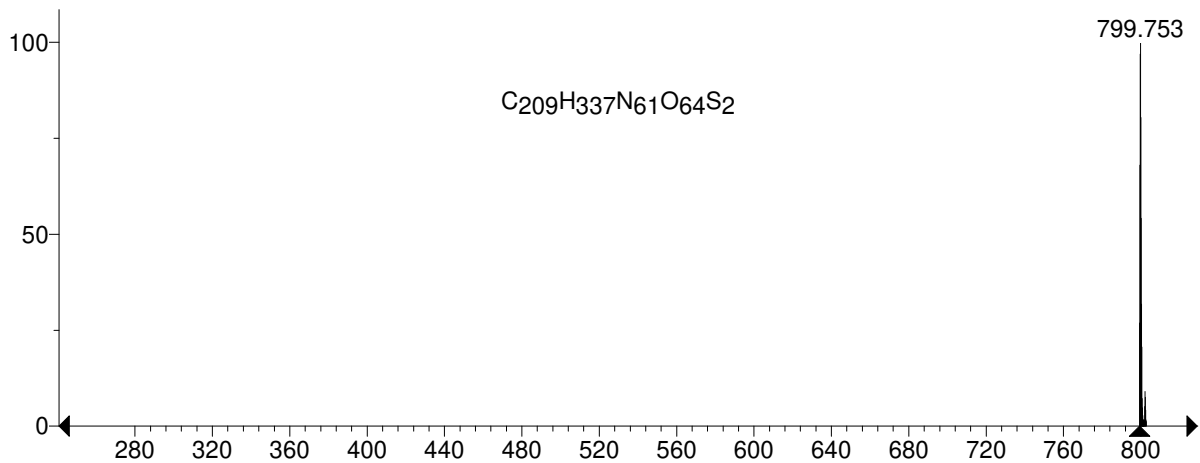

Unknown: Unknown (6.51\_301.0912m/z)  
Compound in Library Factor = 0

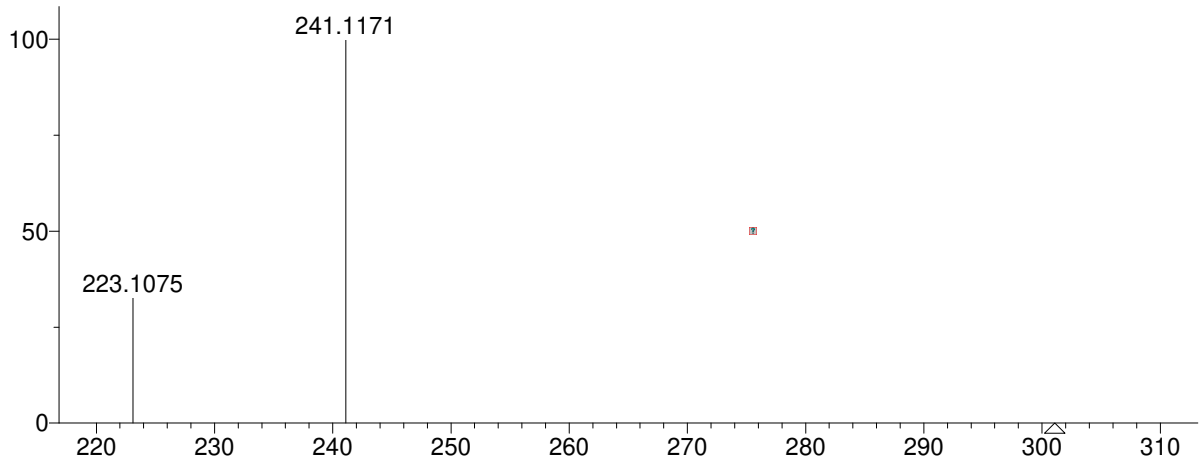

\*\* Search Report Page 1 of 2 \*\*

Unknown: Unknown (6.51\_327.1331m/z)  
Compound in Library Factor = -3273

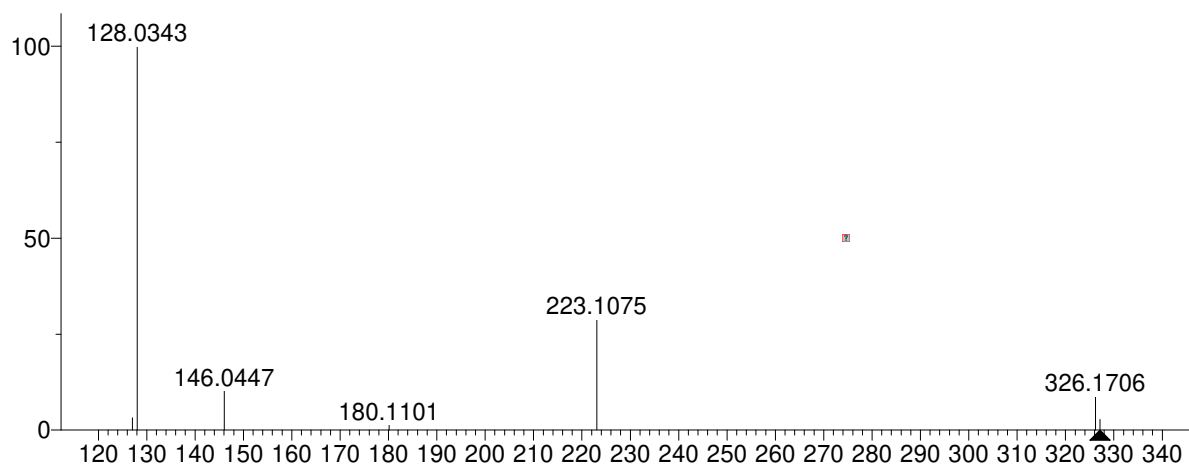

Hit 1 : Coumarin-suberoylanilide hydroxamic acid [M-H-H<sub>2</sub>O]- HCD 9V P=327.1  
C<sub>18</sub>H<sub>22</sub>N<sub>2</sub>O<sub>5</sub>; MF: 22; RMF: 143; Prob 25.6%; Lib: nist\_msms; ID: 154743.

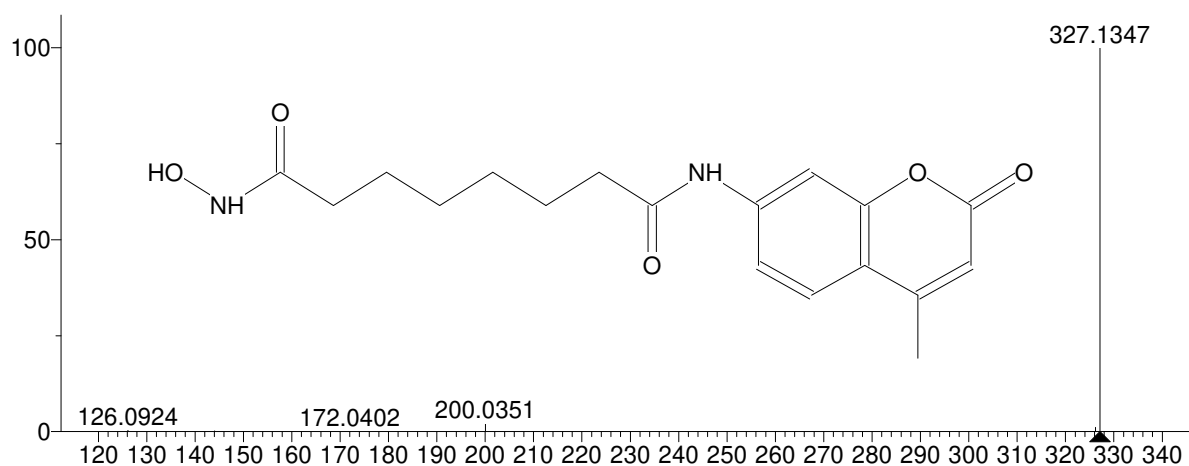

Hit 2 : Scriptaid [M+H]<sup>+</sup> HCD 6V P=327.1  
C<sub>18</sub>H<sub>18</sub>N<sub>2</sub>O<sub>4</sub>; MF: 19; RMF: 228; Prob 22.6%; CAS: 287383-59-9; Lib: nist\_msms; ID: 319992.

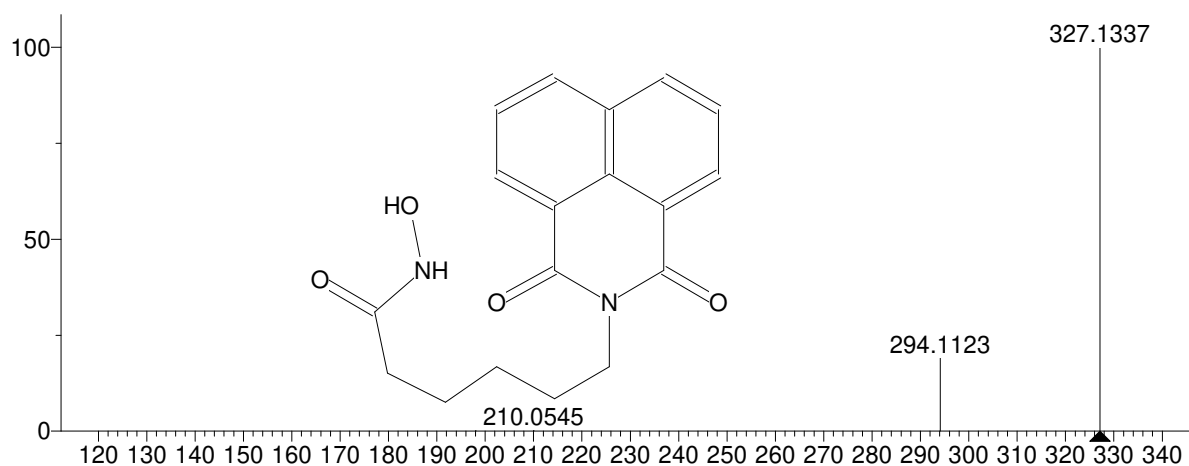



Hit 3 : 5-Hydroxy-3,4-dihydro-2(1H)-quinolinone [2M+H]<sup>+</sup> HCD 1V P=327.1  
C<sub>9</sub>H<sub>9</sub>NO<sub>2</sub>; MF: 6; RMF: 168; Prob 14.6%; CAS: 30389-33-4; Lib: nist\_msms; ID: 441569.

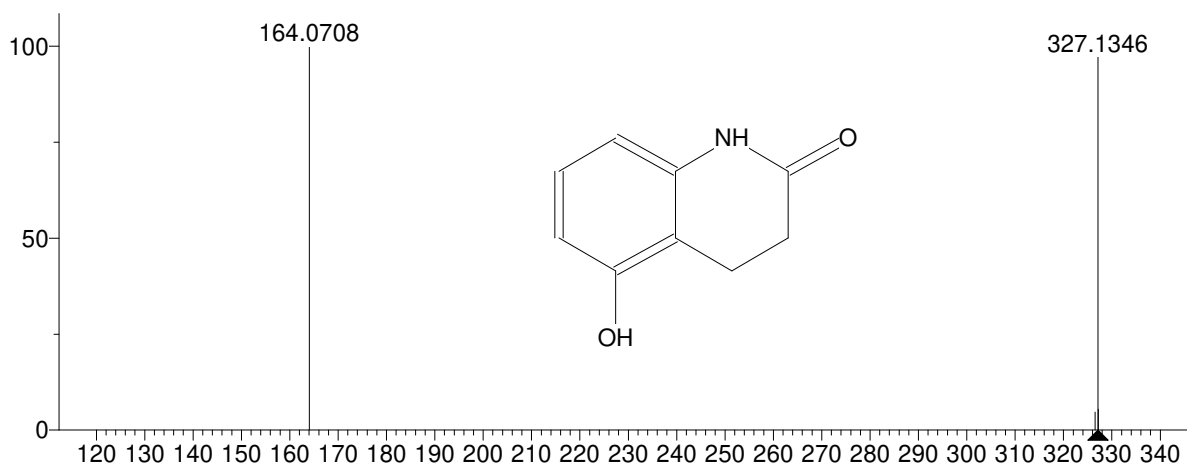

Hit 4 : Phe-Tyr [M-H]<sup>-</sup> HCD 16eV P=327.1  
C<sub>18</sub>H<sub>20</sub>N<sub>2</sub>O<sub>4</sub>; MF: 3; RMF: 121; Prob 12.9%; Lib: nist\_msms; ID: 567427.

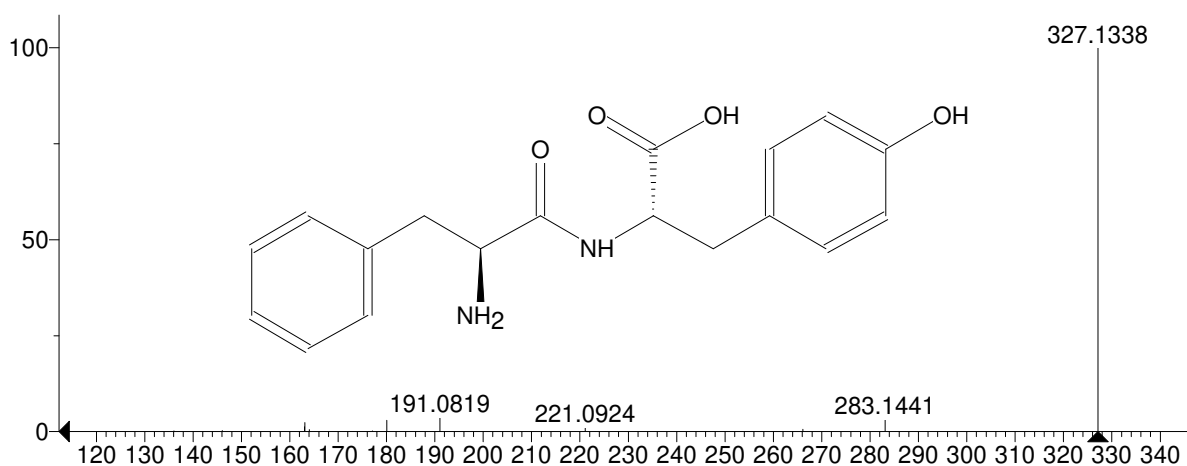

Hit 5 : Phe-Tyr [M-H]<sup>-</sup> HCD 16eV P=327.1  
C<sub>18</sub>H<sub>20</sub>N<sub>2</sub>O<sub>4</sub>; MF: 3; RMF: 121; Prob 12.9%; CAS: 17355-18-9; Lib: nist\_msms2; ID: 70284.

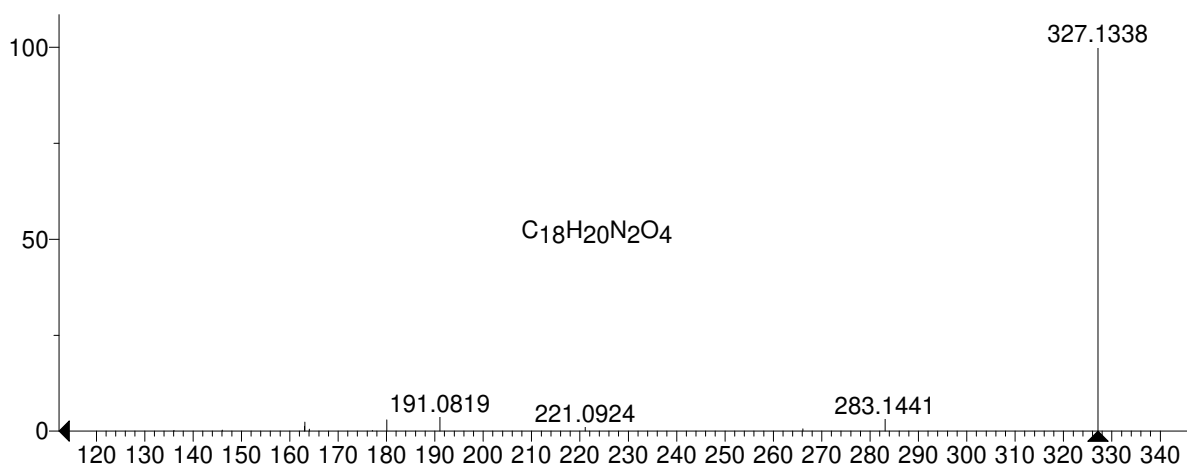

\*\* Search Report Page 1 of 2 \*\*

Unknown: Unknown (6.51\_397.2199m/z)  
Compound in Library Factor = -2387

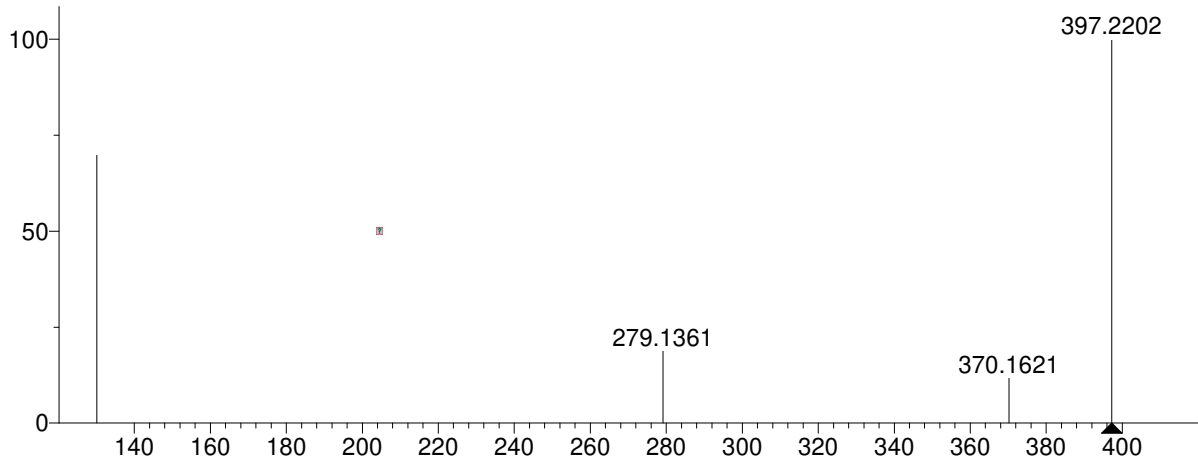

Hit 1 : NCGC00385079-01\_C19H34O7\_4-(4-Hydroxy-2,6,6-trimethyl-1-cyclohexen-1-yl)-2-butanyl beta-D-glucop; C19H34O7; MF: 24; RMF: 623; Prob 41.8%; Lib: mona-export-gnps; ID: 14159.



Hit 2 : (2R,3S,4S,5R,6R)-2-(hydroxymethyl)-6-[4-(4-hydroxy-2,6,6-trimethylcyclohexen-1-yl)butan-2-yloxy]oxane-3 C19H34O7; MF: 6; RMF: 537; Prob 21.5%; Lib: anthocyanins mona; ID: 7638.



\*\* Search Report Page 2 of 2 \*\*

Hit 3 : O-acetylstemmadenine ([H]C(C)=C1/CN2CC[C@]1([H])[C@](COC(C)=O)(C(=O)OC)C1=C(CC2)C2=CC=C(C23H28N2O4; MF: 4; RMF: 419; Prob 19.9%; Lib: alkaloids; ID: 12.



Hit 4 : 2,4-dihydroxy-5-methoxy-1",6",8"-trimethylspiro[bis(oxolane)-3,2':5',7"-[3]oxatricyclo[6.3.1.0a^",A^1A^2]c C<sub>21</sub>H<sub>32</sub>O<sub>7</sub>; MF: 0; RMF: 75; Prob 16.8%; Lib: mona-export-vf-npl\_qexactive; ID: 10630.

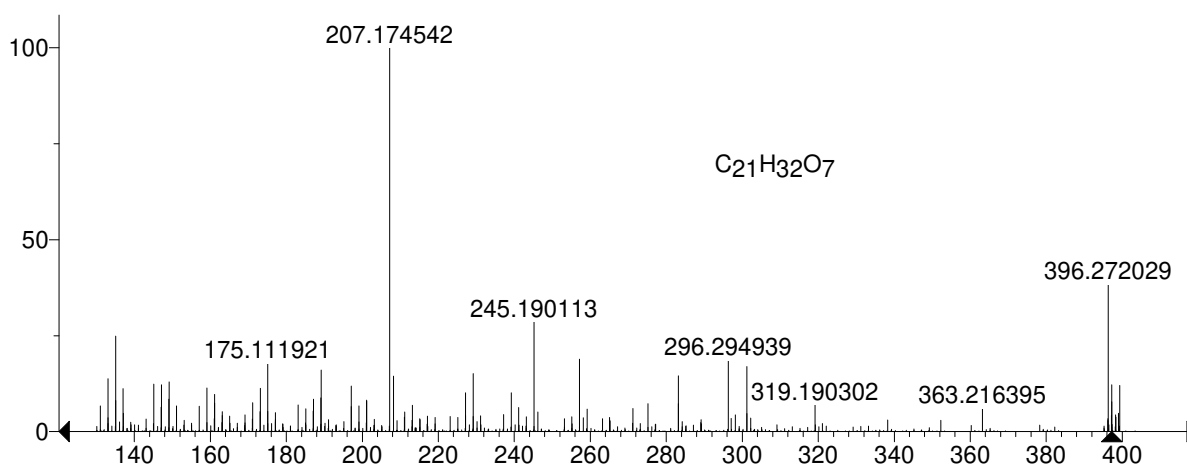

Unknown: Unknown (6.54\_590.2881m/z)  
Compound in Library Factor = 0

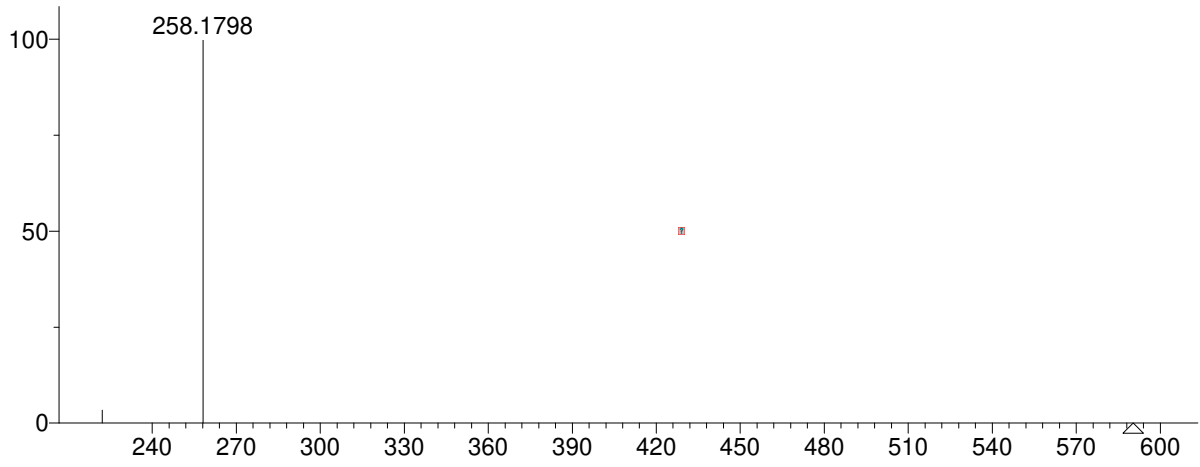

Unknown: Unknown (6.55\_356.1455m/z)  
Compound in Library Factor = -3273

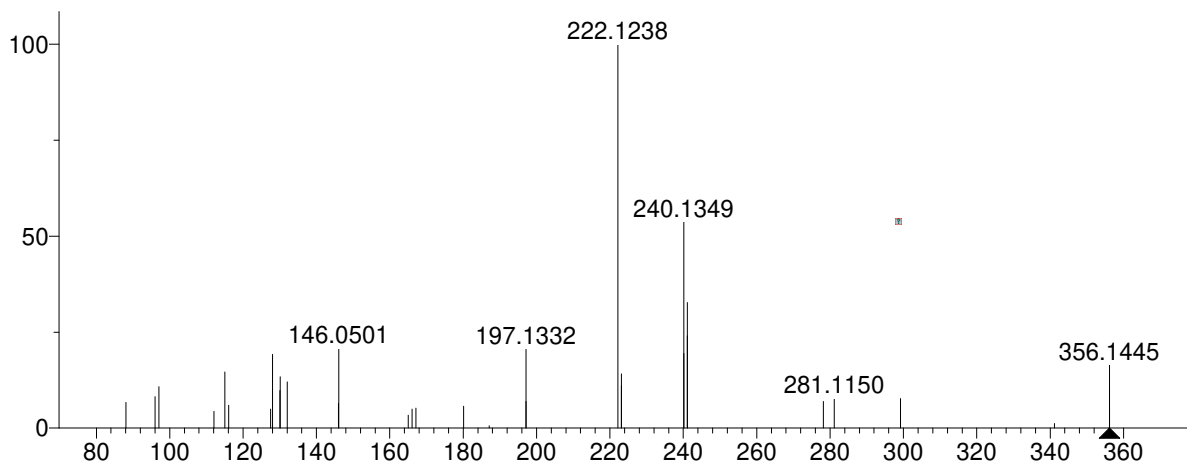

Hit 1 : Benzenesulfonamide, 4-(1,1-dimethylethyl)-N-[4-(1H-imidazol-1-yl)phenyl]- [M+H]<sup>+</sup> HCD 21V P=356.1  
C<sub>19</sub>H<sub>21</sub>N<sub>3</sub>O<sub>2</sub>S; MF: 15; RMF: 201; Prob 42.2%; CAS: 945526-43-2; Lib: nist\_msms; ID: 355342.

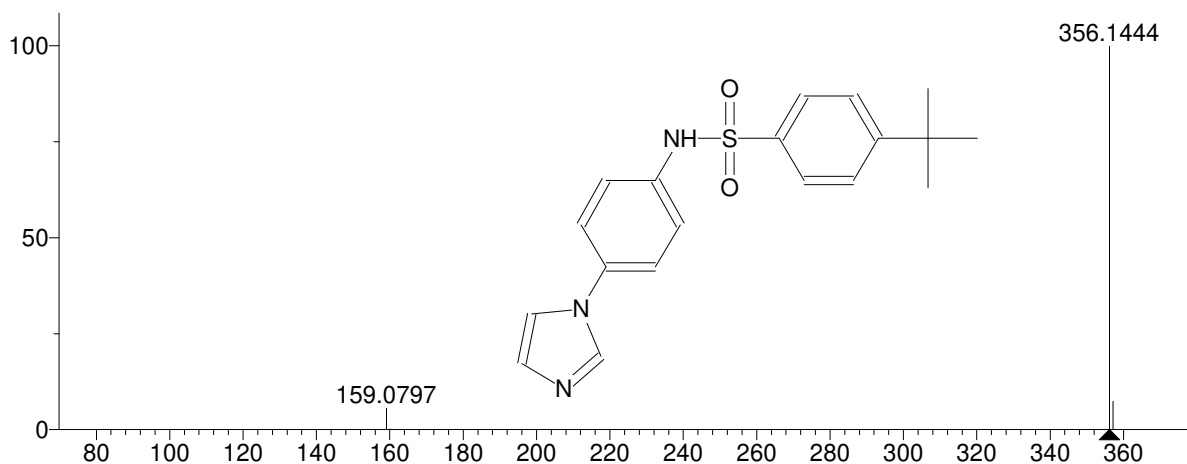

Hit 2 : Benzoic acid, 4-[[[(2,4-diamino-7,8-dihydro-7-oxo-6-pteridiny)methyl]methylamino]-, methyl ester [M+H]<sup>+</sup> |  
C<sub>16</sub>H<sub>17</sub>N<sub>7</sub>O<sub>3</sub>; MF: 6; RMF: 182; Prob 30.7%; CAS: 1330264-75-9; Lib: nist\_msms; ID: 432535.

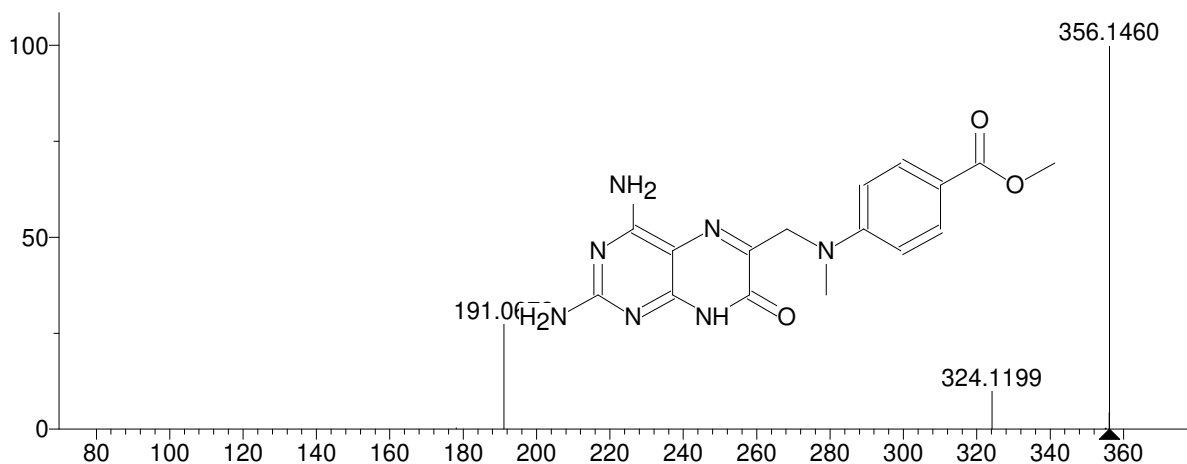

\*\* Search Report Page 2 of 2 \*\*

Hit 3 : Seneciophyllin [M+Na]<sup>+</sup> HCD 17V P=356.1  
C<sub>18</sub>H<sub>23</sub>NO<sub>5</sub>; MF: 3; RMF: 163; Prob 27.1%; CAS: 480-81-9; Lib: nist\_msms; ID: 219524.

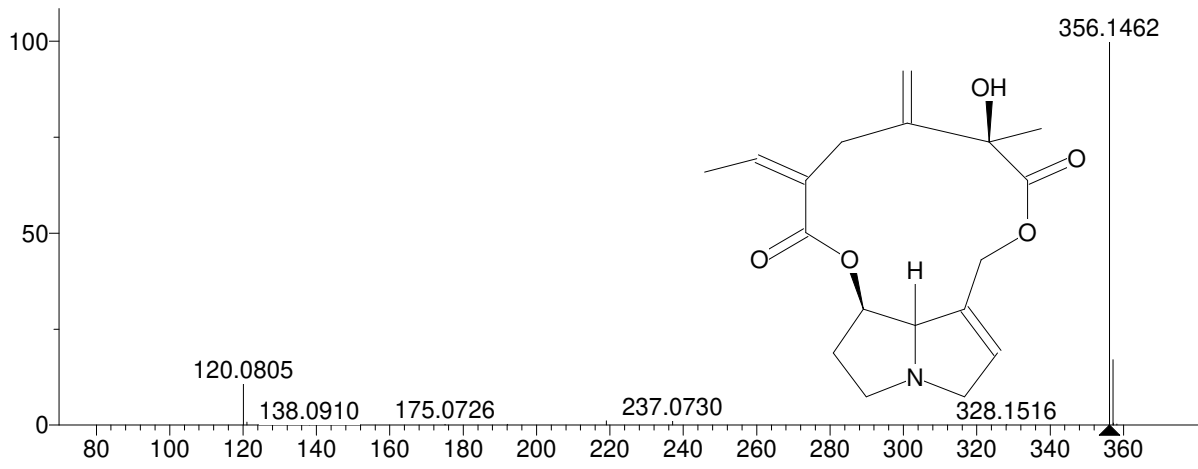

\*\* Search Report Page 1 of 2 \*\*

Unknown: Unknown (6.55\_395.1500m/z)  
Compound in Library Factor = 0

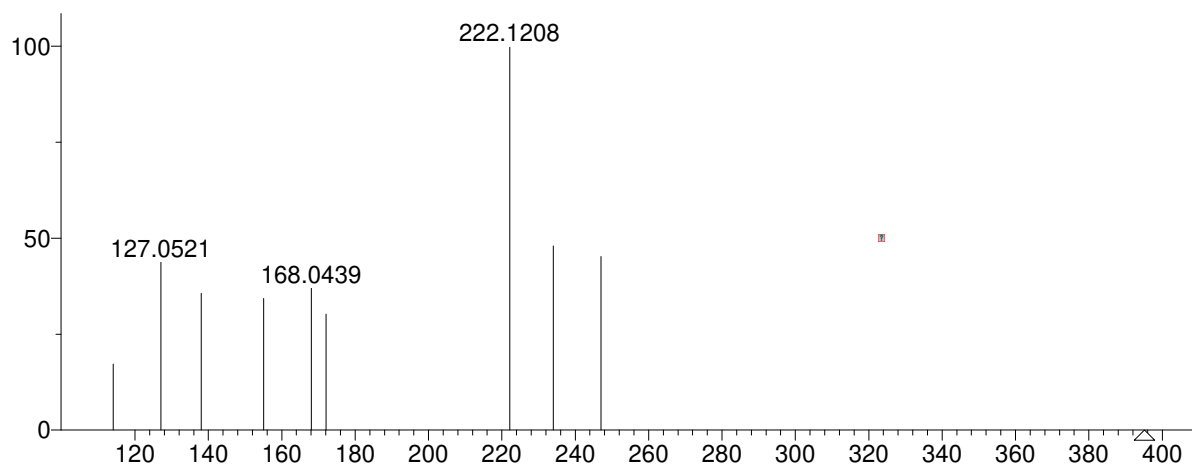

Hit 1 : Rotenone [M+H]<sup>+</sup> HCD 126V P=395.1  
C<sub>23</sub>H<sub>22</sub>O<sub>6</sub>; MF: 0; RMF: 47; Prob 10.0%; CAS: 83-79-4; Lib: nist\_msms; ID: 491890.

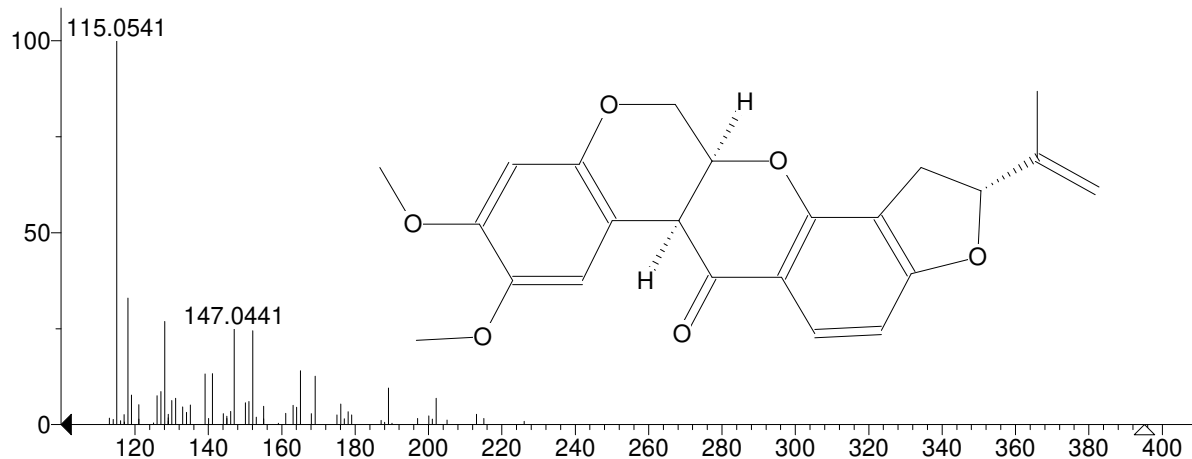

Hit 2 : (-)-Deguelin [M+H]<sup>+</sup> HCD 154V P=395.1  
C<sub>23</sub>H<sub>22</sub>O<sub>6</sub>; MF: 0; RMF: 46; Prob 10.0%; CAS: 522-17-8; Lib: nist\_msms; ID: 165224.

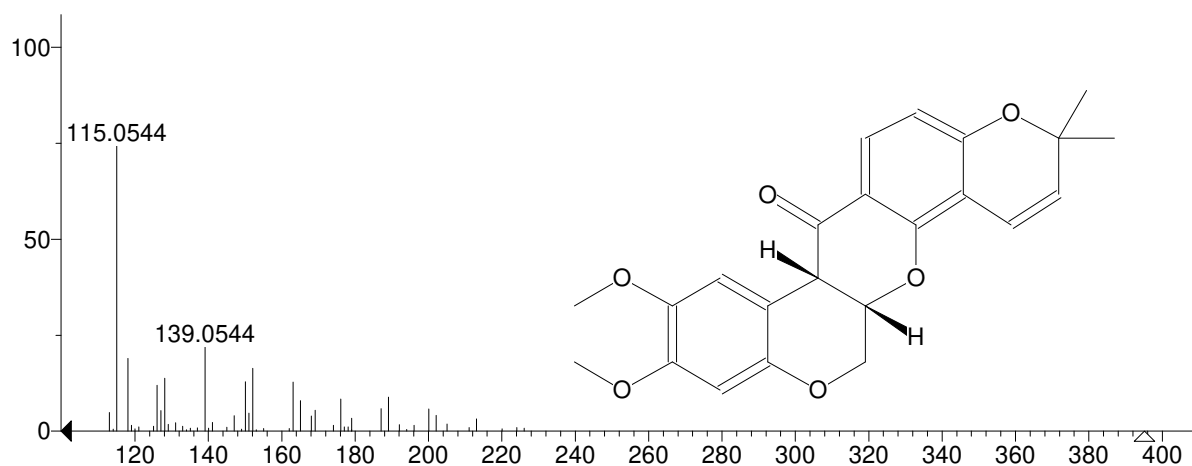

Hit 3 : Garcinone C [M-H-H<sub>2</sub>O]- HCD 126V P=395.2  
C<sub>23</sub>H<sub>26</sub>O<sub>7</sub>; MF: 0; RMF: 28; Prob 10.0%; CAS: 76996-27-5; Lib: nist\_msms; ID: 389342.

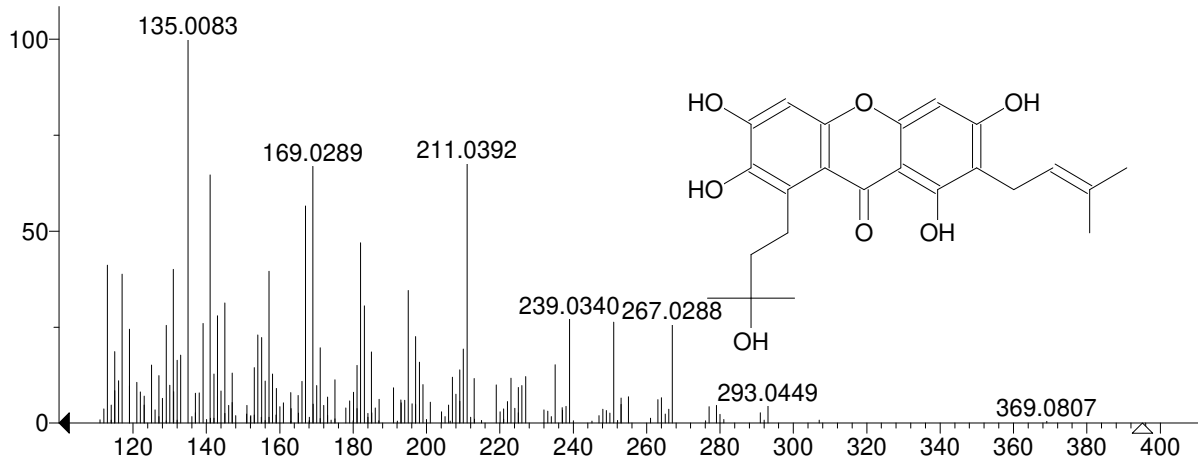

Hit 4 : NCGC00160168-01!MACLUROXANTHONE [M+H]<sup>+</sup> P=395.1  
C<sub>23</sub>H<sub>22</sub>O<sub>6</sub>; MF: 0; RMF: 23; Prob 10.0%; Lib: mona-export-gnps; ID: 1120.

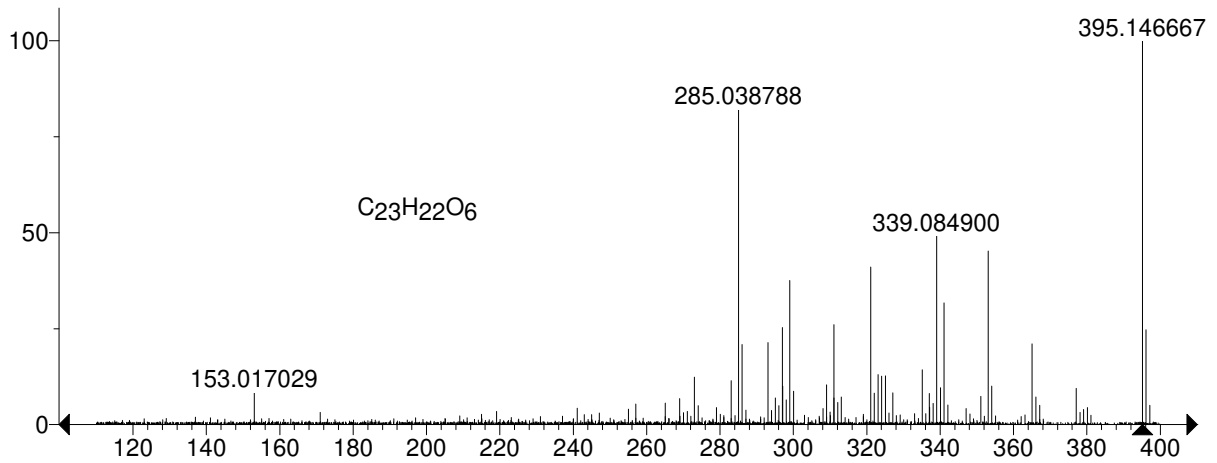

Hit 5 : NCGC00386021-01!8,8-dimethyl-3-(2,4,5-trimethoxyphenyl)pyrano[2,3-f]chromen-4-one [M+H]<sup>+</sup> P=395.1  
C<sub>23</sub>H<sub>22</sub>O<sub>6</sub>; MF: 0; RMF: 23; Prob 10.0%; Lib: mona-export-gnps; ID: 9396.

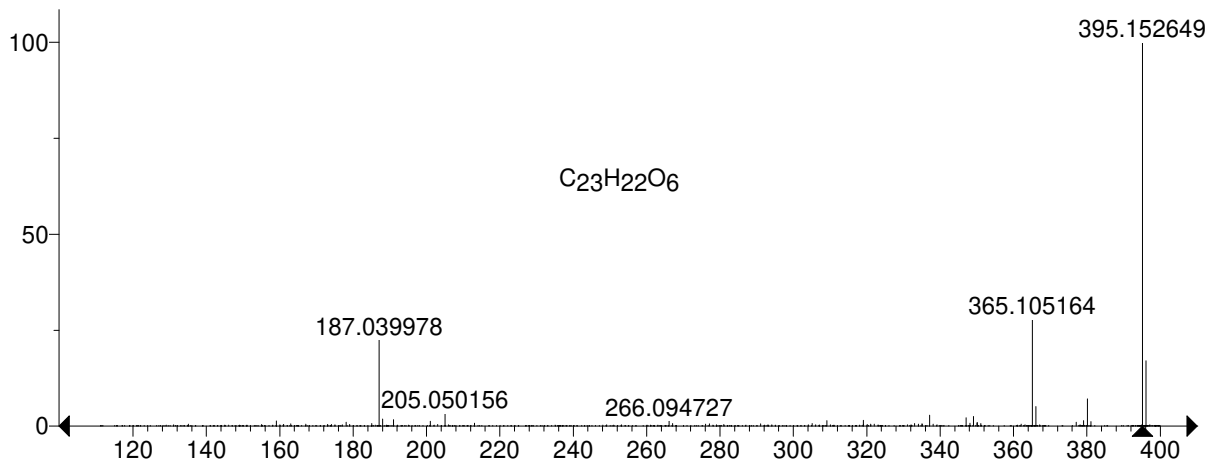



\*\* Search Report Page 1 of 1 \*\*

Unknown: Unknown (6.58\_564.2410m/z)  
Compound in Library Factor = -3273

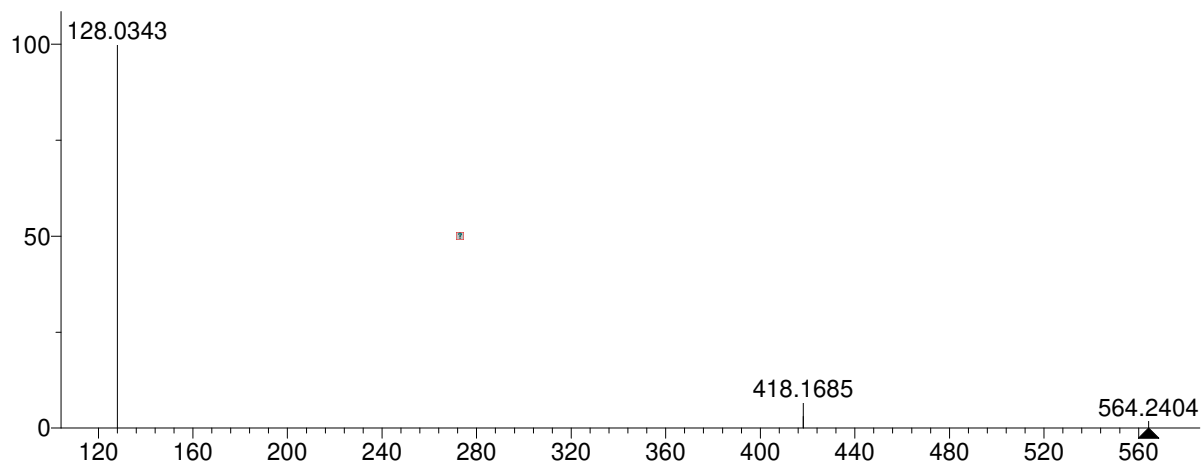

Hit 1 : Curine [M+H-CH5N]+ HCD 33V P=564.2  
C36H38N2O6; MF: 5; RMF: 278; Prob 55.4%; CAS: 436-05-5; Lib: nist\_msms; ID: 385681.

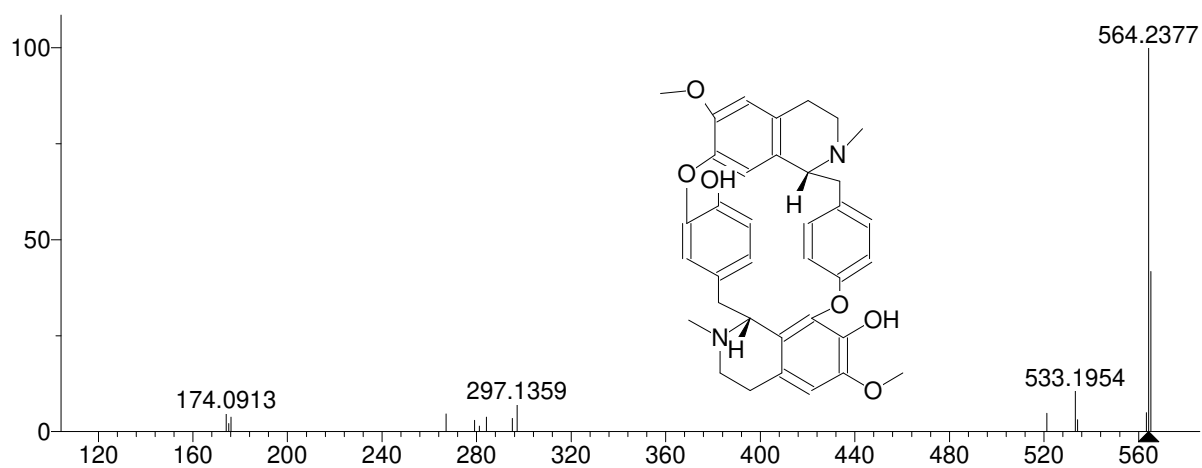

Hit 2 : Cepharanthine [M+H-C2H5N]+ HCD 33V P=564.2  
C37H38N2O6; MF: 0; RMF: 72; Prob 44.6%; CAS: 481-49-2; Lib: nist\_msms; ID: 217080.

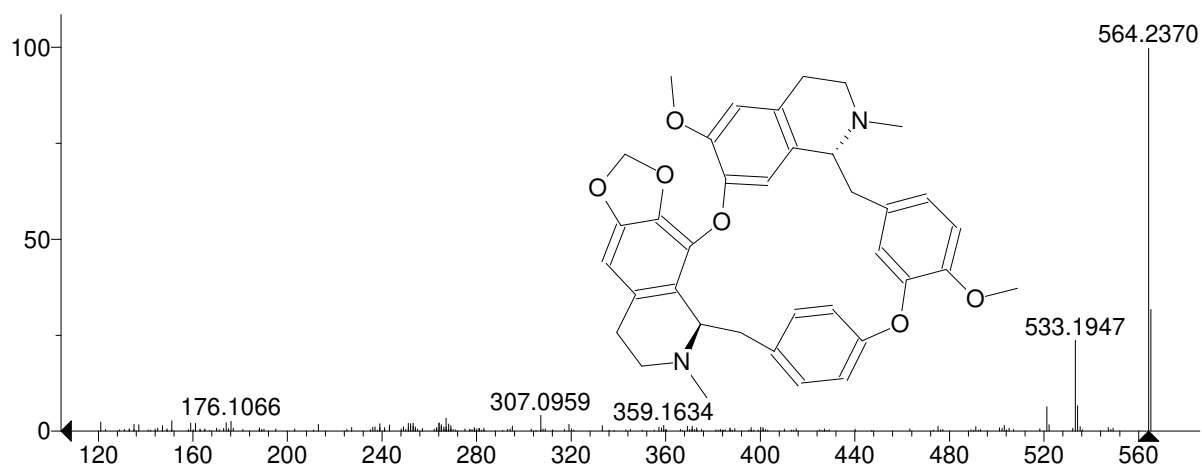

Unknown: Unknown (6.59\_530.1985m/z)  
Compound in Library Factor = 0

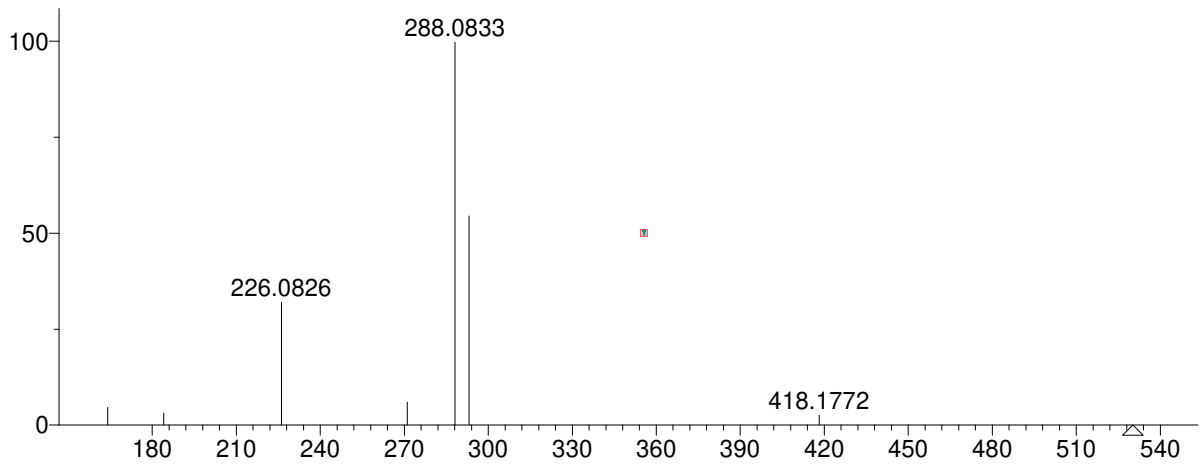

Unknown: Unknown (6.60\_630.2065m/z)  
Compound in Library Factor = 0

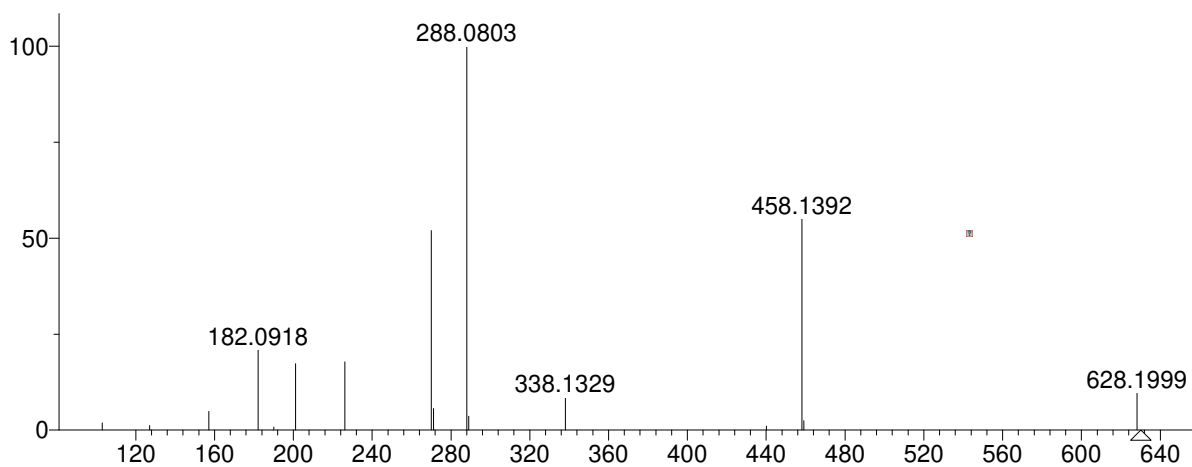

Hit 1 : NCGC00384724-01\_C27H32O16\_beta-D-Glucopyranoside, 4-carboxy-2-methoxyphenyl 2-O-[(2S,3R,4S)-C27H32O16; MF: 0; RMF: 16; Prob 100.0%; Lib: mona-export-gnps; ID: 11374.

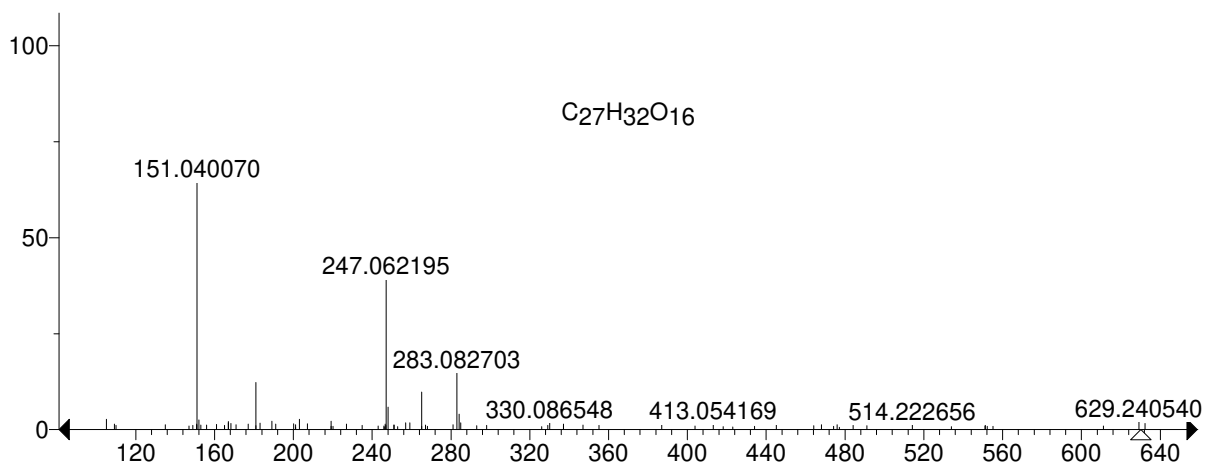

Unknown: Unknown (6.61\_458.1396m/z)  
Compound in Library Factor = 0

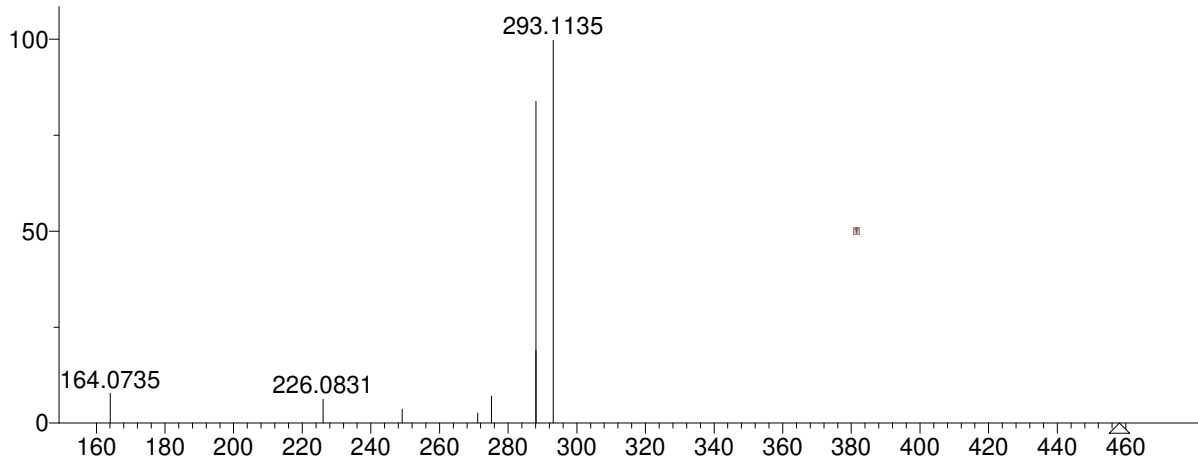

Unknown: Unknown (6.61\_463.1711m/z)  
Compound in Library Factor = 0

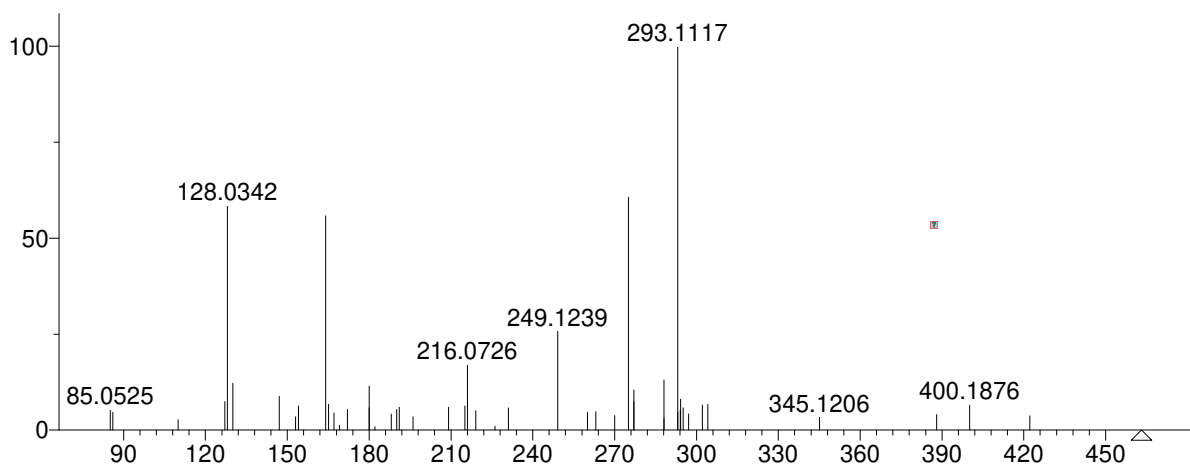

Hit 1 : [(1S,6S,7R)-6-acetyloxy-1-(3-methylbutanoyloxy)spiro[4a,5,6,7a-tetrahydro-1H-cyclopenta[c]pyran-7,2'-oxii  
C<sub>22</sub>H<sub>32</sub>O<sub>8</sub>; MF: 0; RMF: 31; Prob 100.0%; Lib: mona-export-vf-npl\_qexactive; ID: 1819.

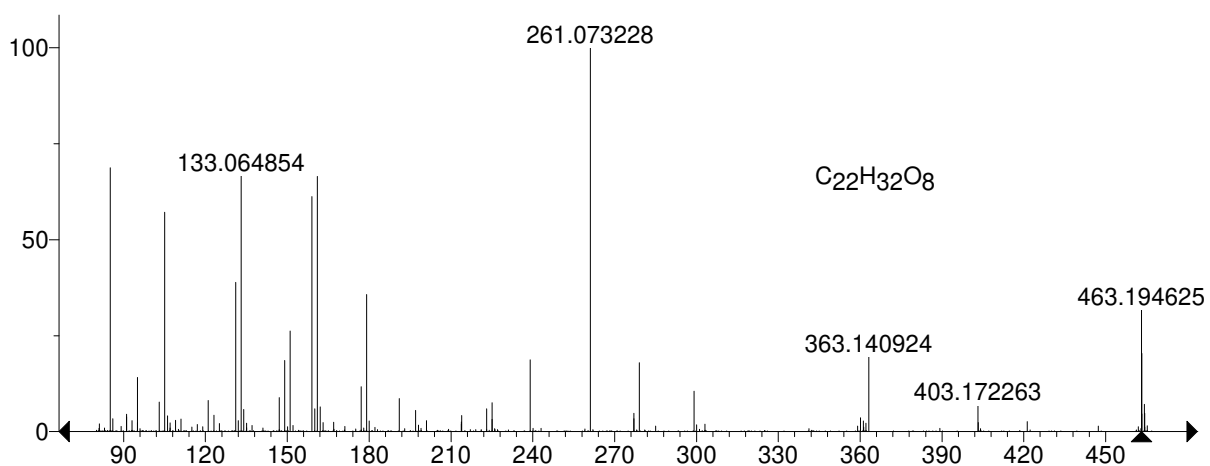

Unknown: Unknown (6.61\_628.1987m/z)  
Compound in Library Factor = 0

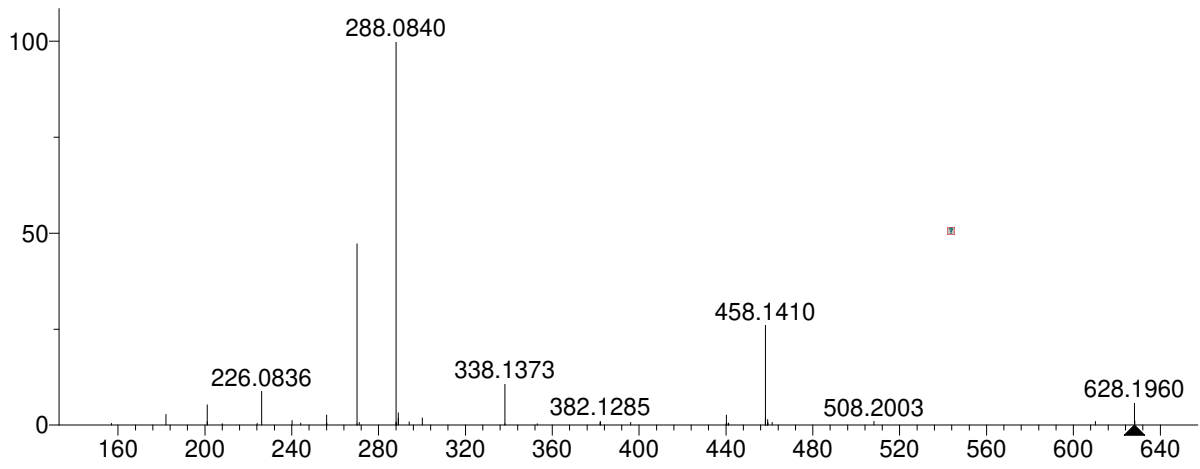

Unknown: Unknown (6.62\_453.1499m/z)  
Compound in Library Factor = 0

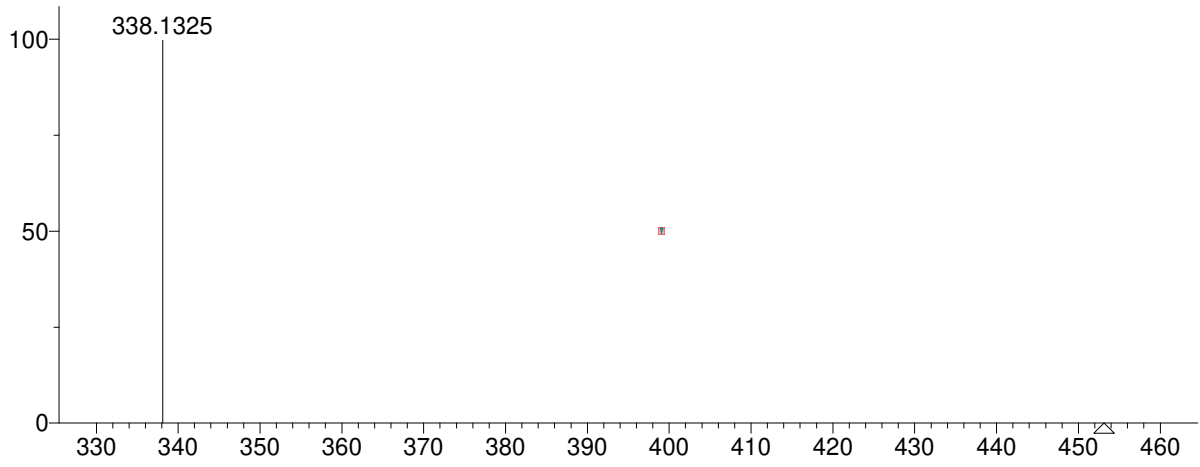

Unknown: Unknown (6.63\_854.4749m/z)  
Compound in Library Factor = -2860

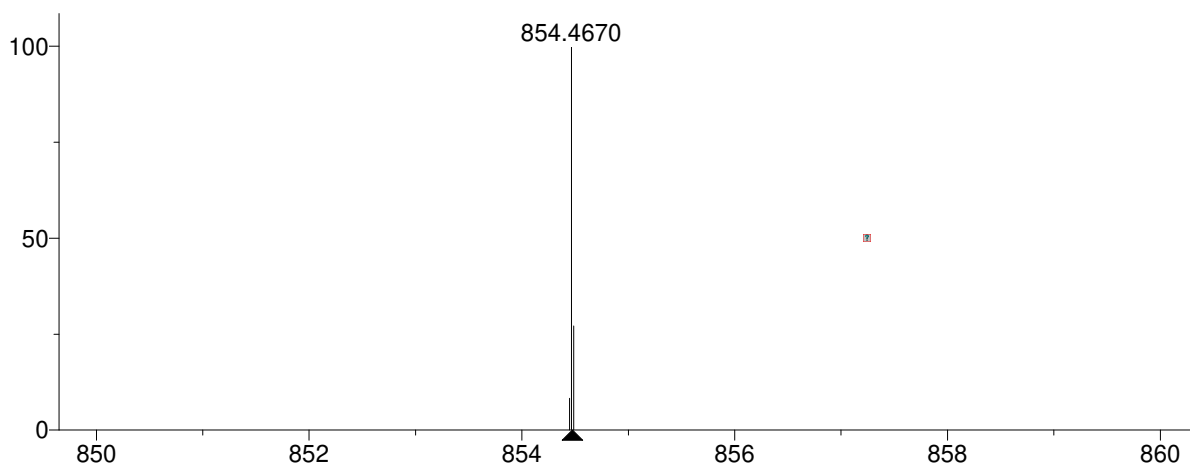

Hit 1 : OxPS 38:6+3O; OxPS 16:0-22:6+3O; [M-H]<sup>-</sup> [M-H]<sup>-</sup> P=854.5  
C<sub>44</sub>H<sub>74</sub>NO<sub>13</sub>P; MF: 302; RMF: 859; Prob 33.3%; Lib: msdial-insilicomsm-lipids-neg; ID: 315604.

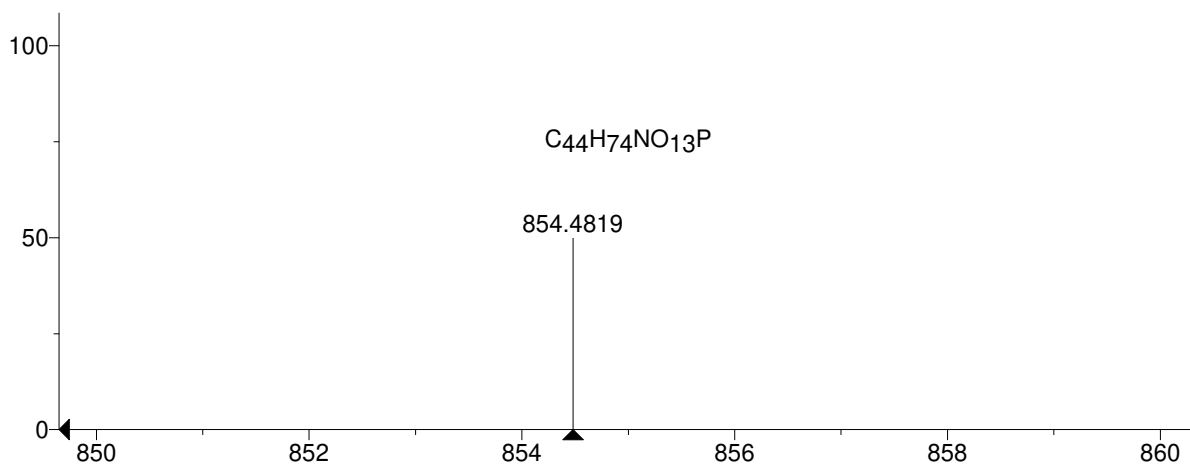

Hit 2 : OxPS 38:6+3O; OxPS 18:1-20:5+3O; [M-H]<sup>-</sup> [M-H]<sup>-</sup> P=854.5  
C<sub>44</sub>H<sub>74</sub>NO<sub>13</sub>P; MF: 302; RMF: 859; Prob 33.3%; Lib: msdial-insilicomsm-lipids-neg; ID: 315667.

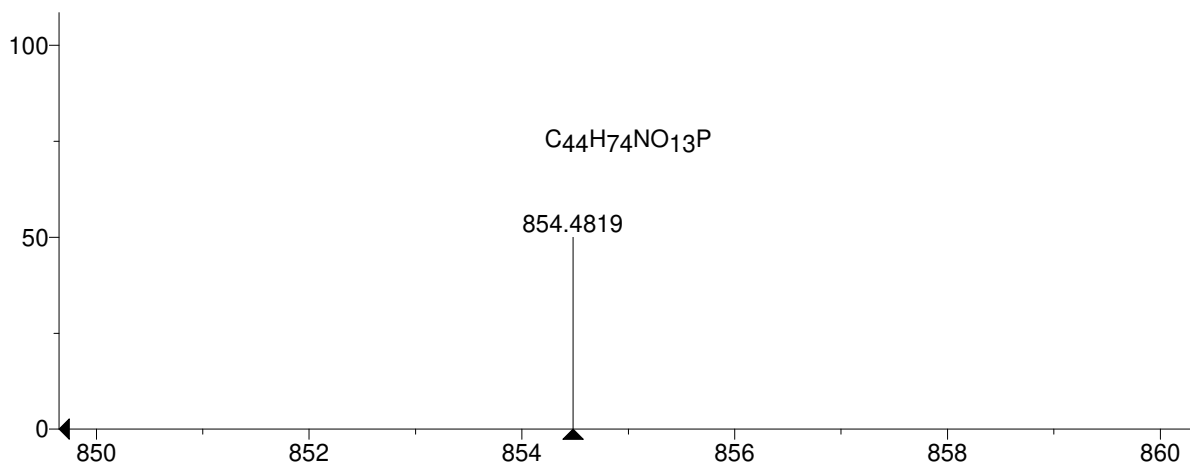



\*\* Search Report Page 2 of 2 \*\*

Hit 3 : OxPS 38:6+3O(2Cyc); OxPS 18:1-20:5+3O(2Cyc); [M-H]<sup>-</sup> [M-H]<sup>-</sup> P=854.5  
C<sub>44</sub>H<sub>74</sub>NO<sub>13</sub>P; MF: 302; RMF: 859; Prob 33.3%; Lib: msdial-insilicomsm-lipids-neg; ID: 315668.

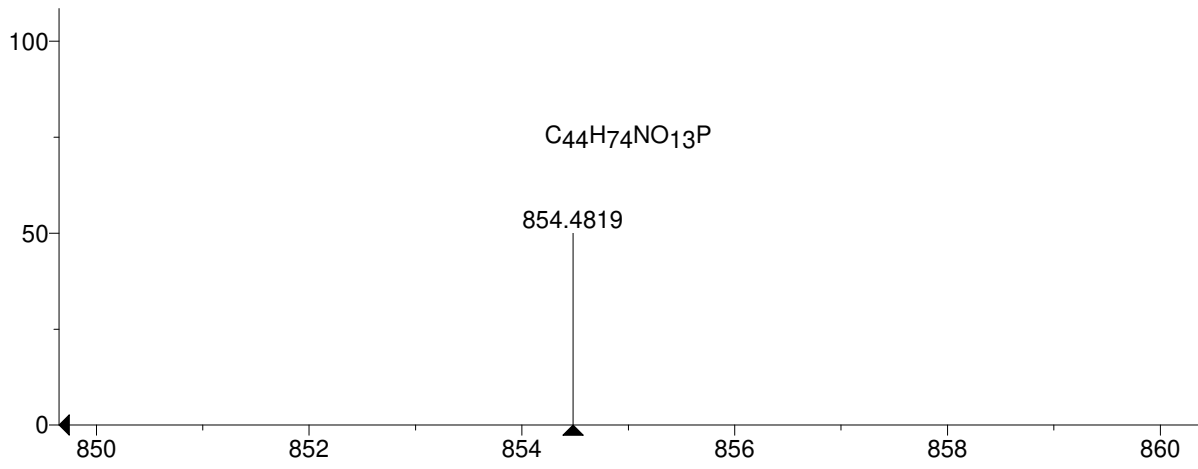

\*\* Search Report Page 1 of 1 \*\*

Unknown: Unknown (6.66\_546.2404m/z)  
Compound in Library Factor = 0

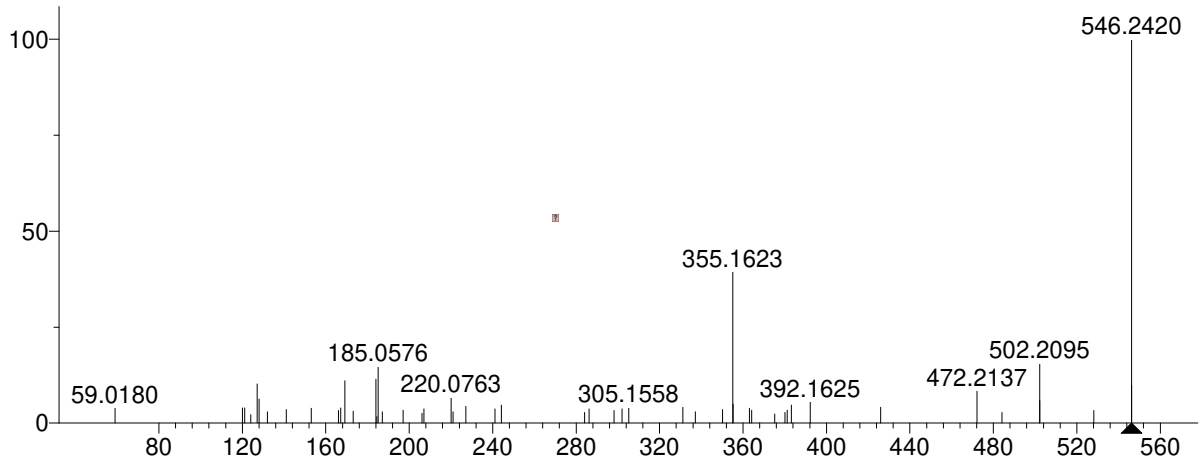

Unknown: Unknown (6.67\_479.1688m/z)  
Compound in Library Factor = -2387

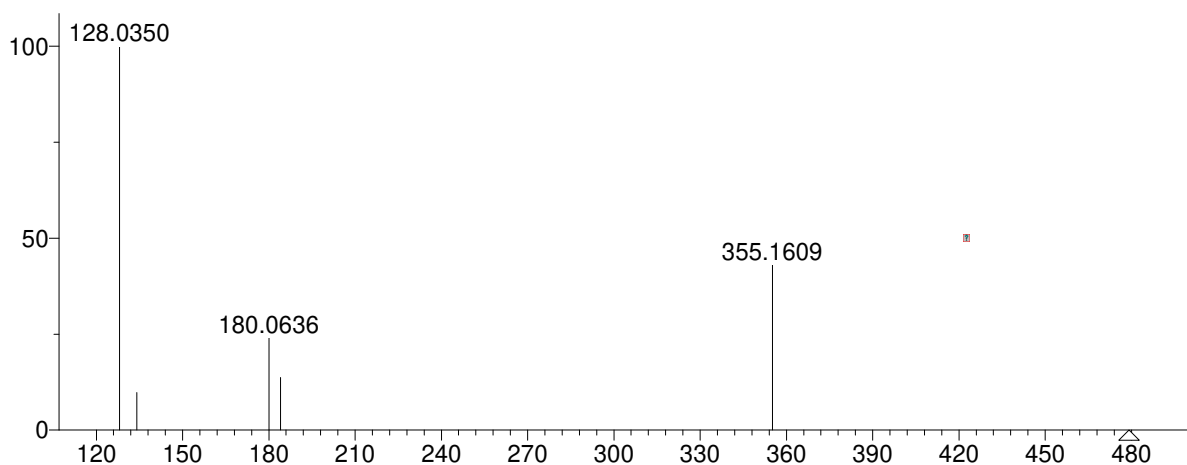

Hit 1 :  $\beta$ -Carboline-1-propionic acid [2M-H]- HCD 62V P=479.2  
C<sub>14</sub>H<sub>12</sub>N<sub>2</sub>O<sub>2</sub>; MF: 10; RMF: 266; Prob 32.1%; CAS: 89915-39-9; Lib: nist\_msms; ID: 217004.

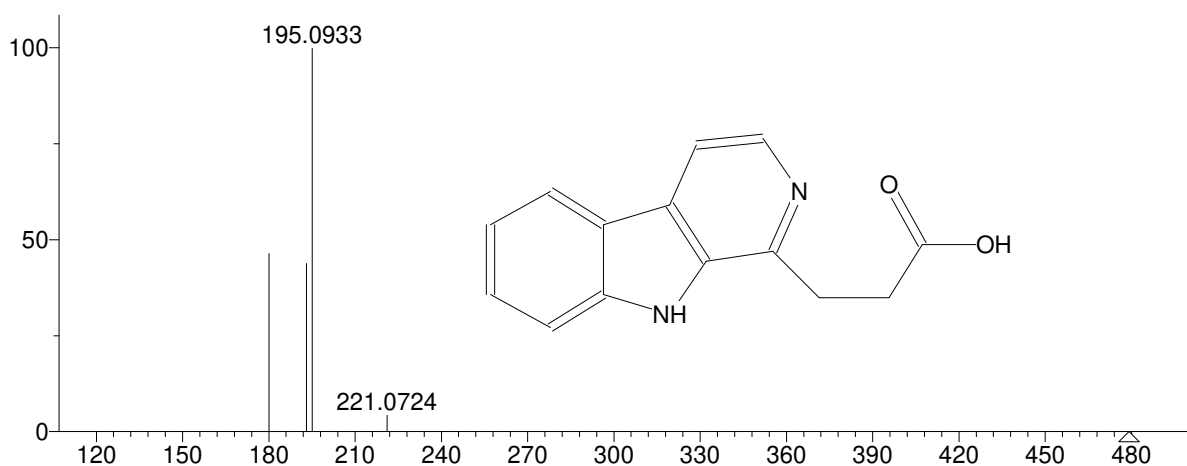

Hit 2 : 2-[3,4-dihydroxy-2,2-dimethyl-8-(3-methylbut-2-enoxy)-3,4-dihydrochromen-6-yl]-5,7-dihydroxy-2,3-dihydro  
C<sub>25</sub>H<sub>28</sub>O<sub>8</sub>; MF: 0; RMF: 16; Prob 22.6%; Lib: mona-export-vf-npl\_qexactive; ID: 16870.

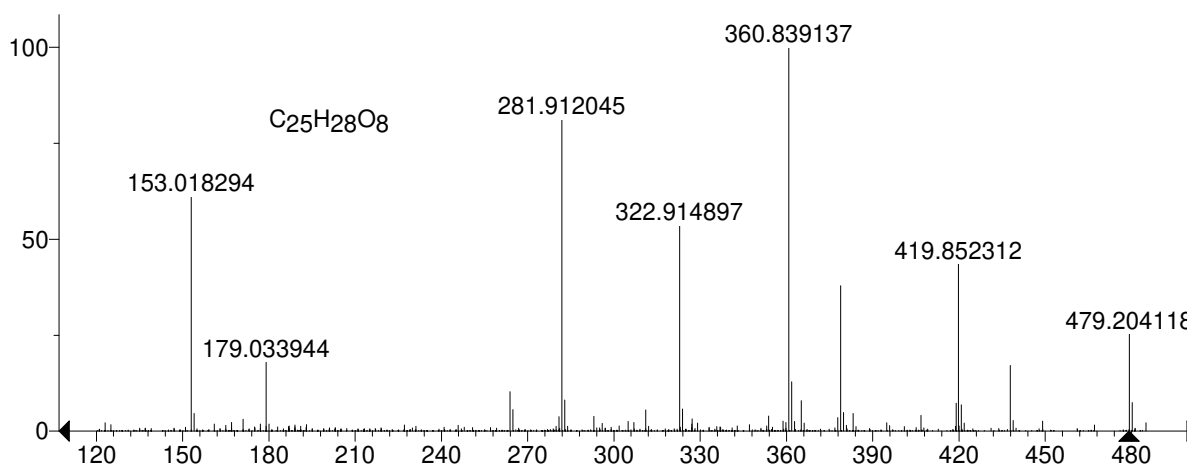

Hit 3 : 7-hydroxy-2,6,9,12,17,17-hexamethyl-22-methylidene-5,16,19,21-tetraoxaheptacyclo[10.8.1.1A^3,a^1.0A^1.0A^1]C<sub>25</sub>H<sub>28</sub>O<sub>8</sub>; MF: 0; RMF: 10; Prob 22.6%; Lib: mona-export-vf-npl\_qexactive; ID: 20713.

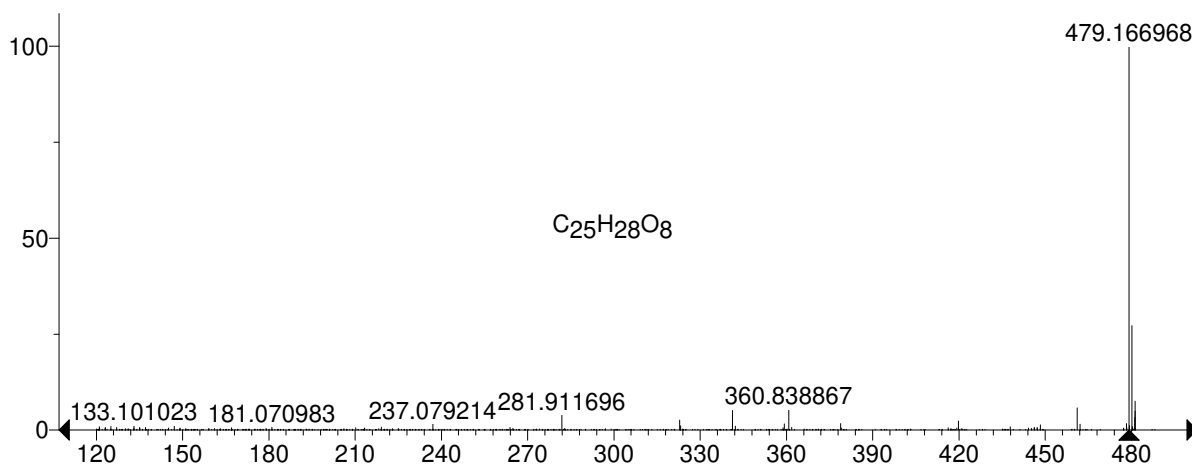

Hit 4 : Chrysomycin B [M+H-H<sub>2</sub>O]<sup>+</sup> HCD 124V P=479.2  
C<sub>27</sub>H<sub>28</sub>O<sub>9</sub>; MF: 0; RMF: 10; Prob 22.6%; CAS: 83852-56-6; Lib: nist\_msms; ID: 379206.

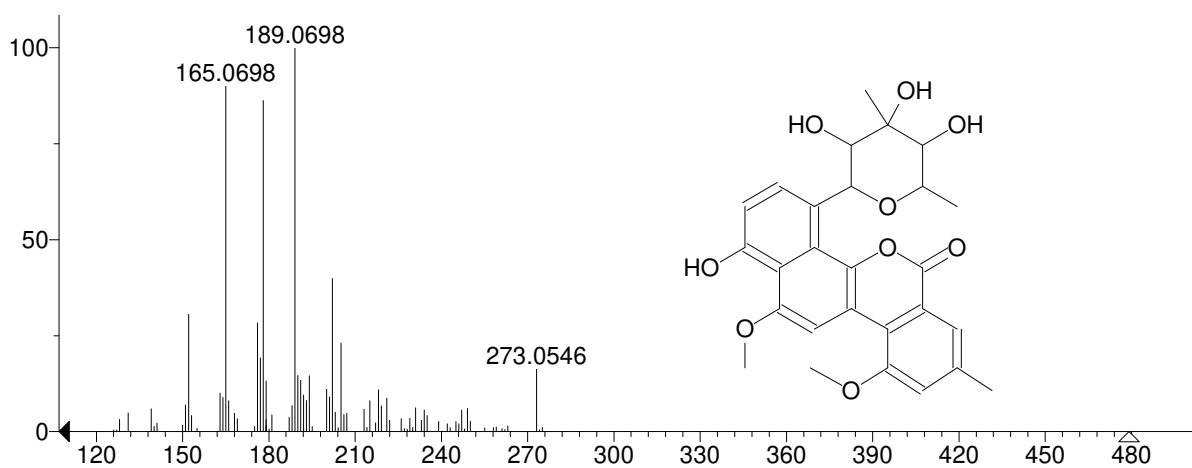

Unknown: Unknown (6.67\_498.2194m/z)  
Compound in Library Factor = 0

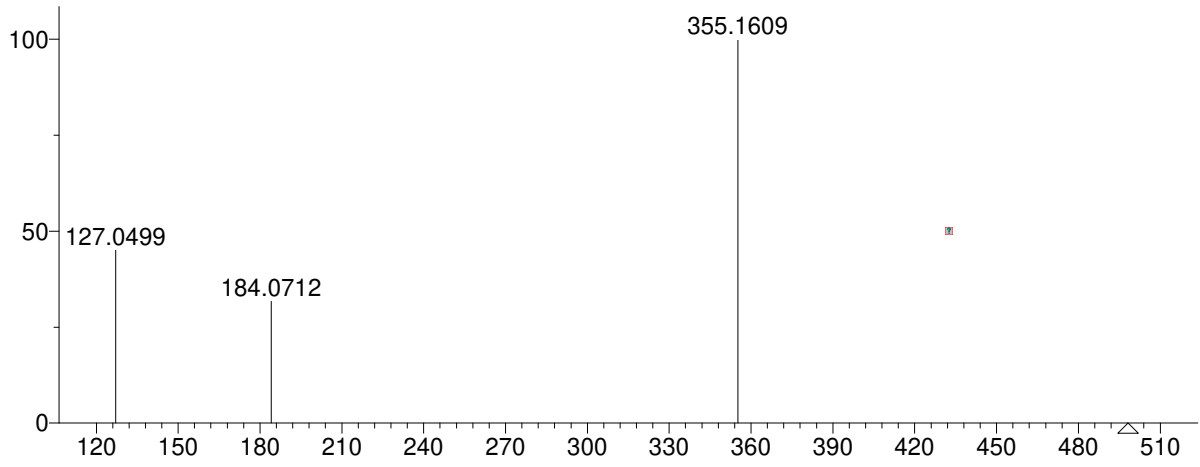

Unknown: Unknown (6.69\_402.1175m/z)  
Compound in Library Factor = 0

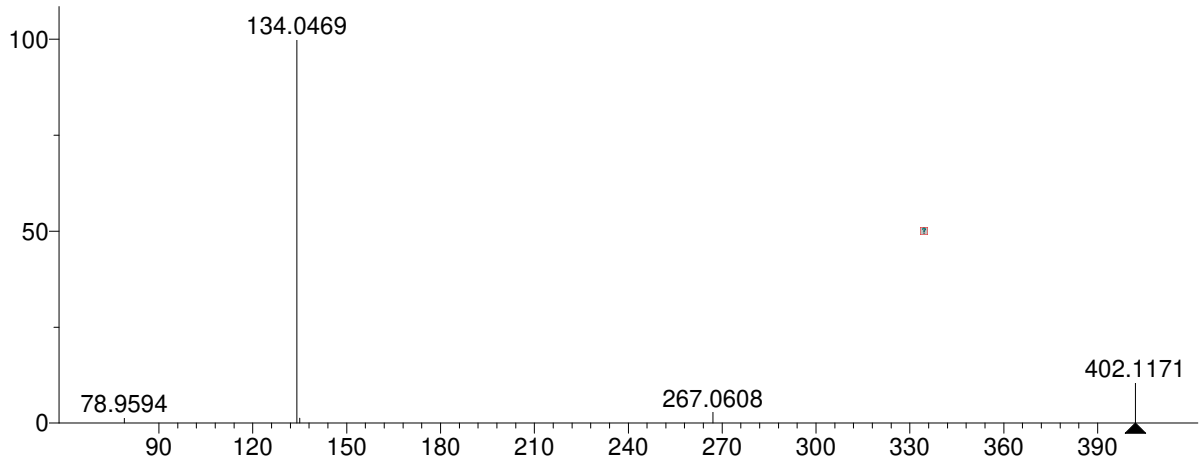

Unknown: Unknown (6.69\_402.1756m/z)  
Compound in Library Factor = 0

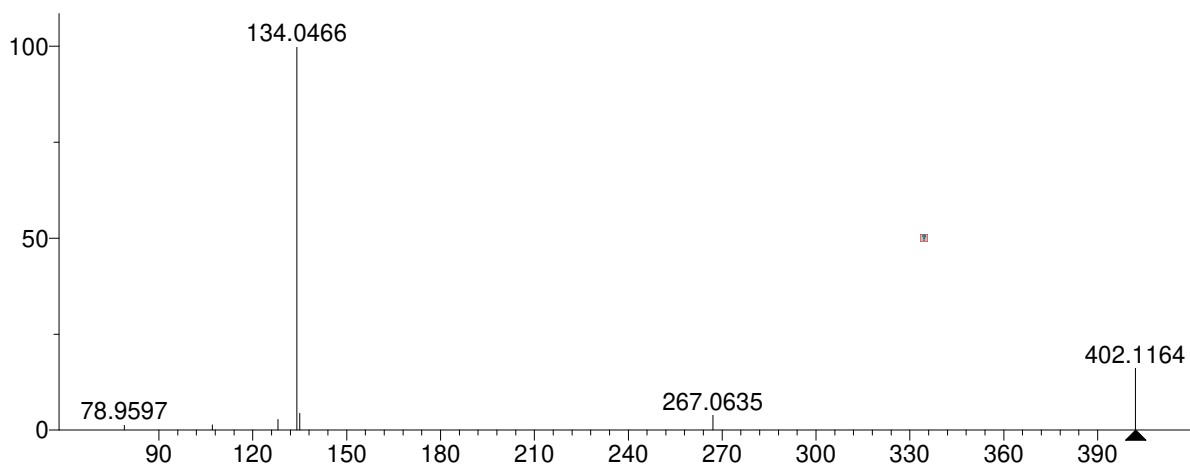

Hit 1 : Fumitremorgin C [M+Na]<sup>+</sup> IT 35% P=402.2  
C<sub>22</sub>H<sub>25</sub>N<sub>3</sub>O<sub>3</sub>; MF: 0; RMF: 68; Prob 100.0%; CAS: 118974-02-0; Lib: nist\_msms; ID: 362872.

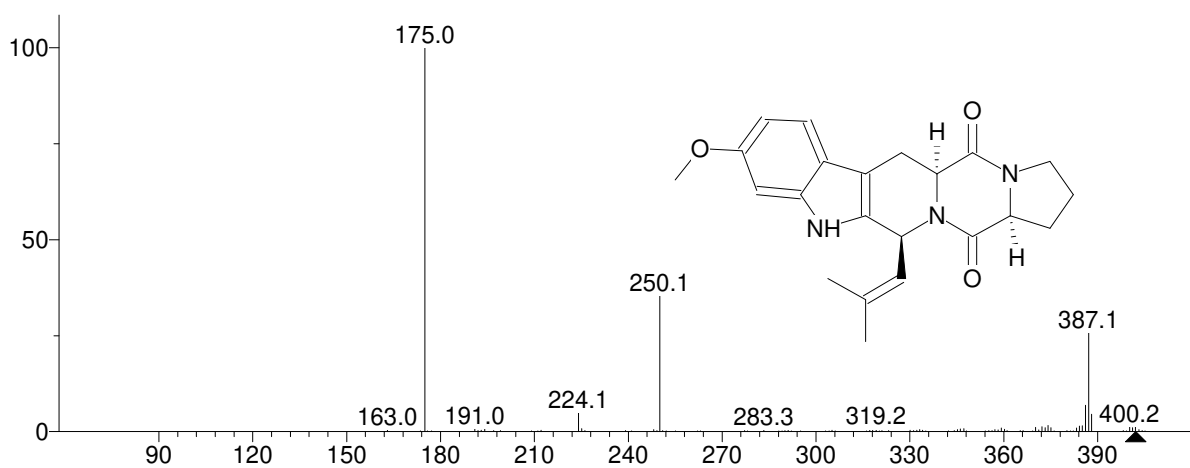

Unknown: Unknown (6.71\_242.9953m/z)  
Compound in Library Factor = 0

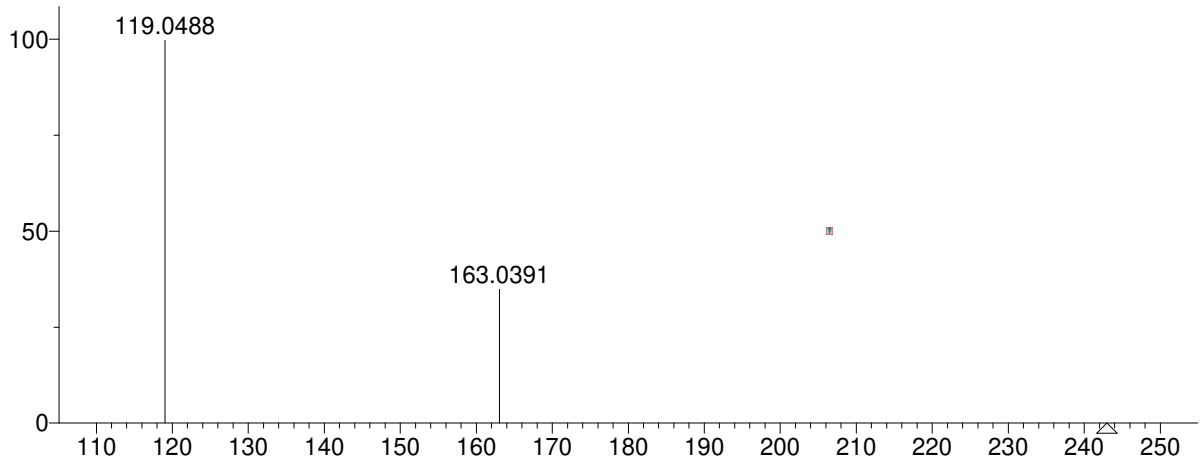



Unknown: Unknown (6.71\_842.4260m/z)  
Compound in Library Factor = -3273

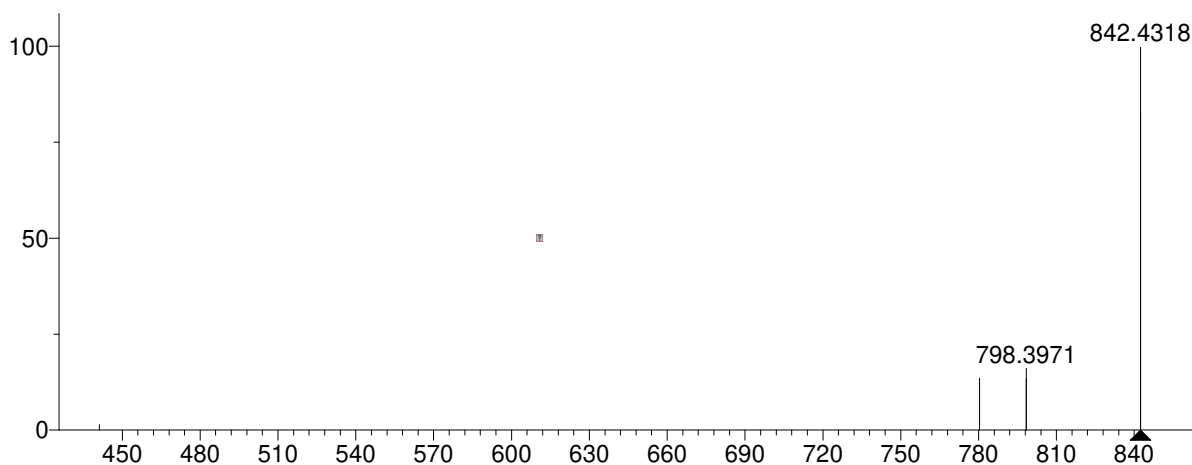

Hit 1 : L-Glutamic acid, L-methionyl-L-alanylglycyl-L-prolyl-L-histidyl-L-prolyl-L-valyl-L-isoleucyl-L-valyl-L-isoleucyl  
C75H118N20O22S; MF: 7; RMF: 437; Prob 100.0%; CAS: 249537-73-3; Lib: nist\_msms; ID: 265777.

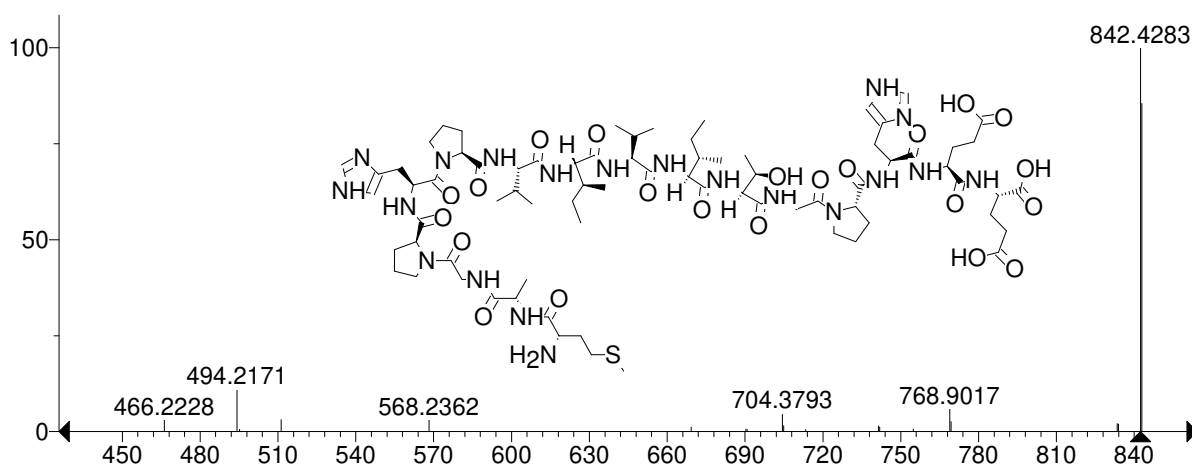

Unknown: Unknown (6.73\_329.0861m/z)  
Compound in Library Factor = 0

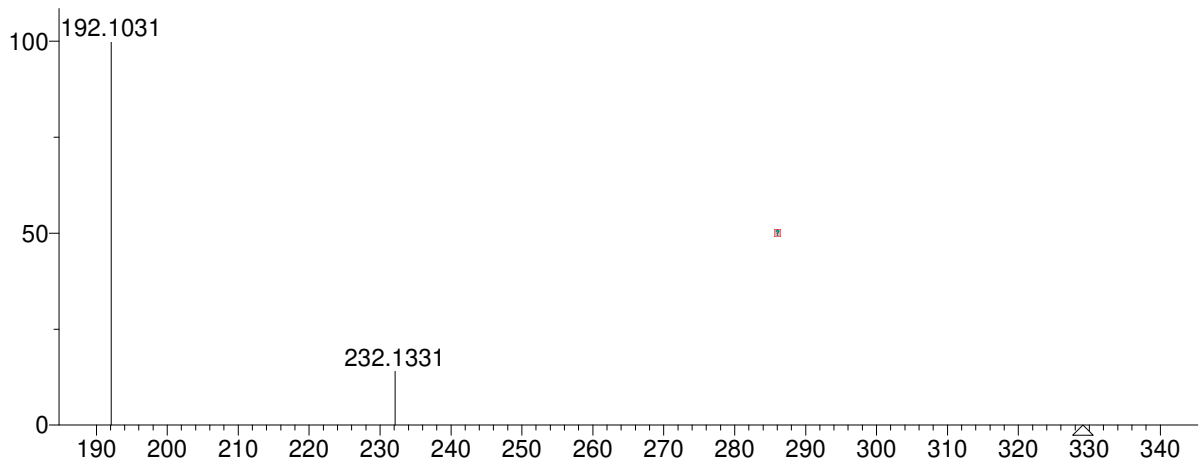

Unknown: Unknown (6.73\_338.1236m/z)  
Compound in Library Factor = 0

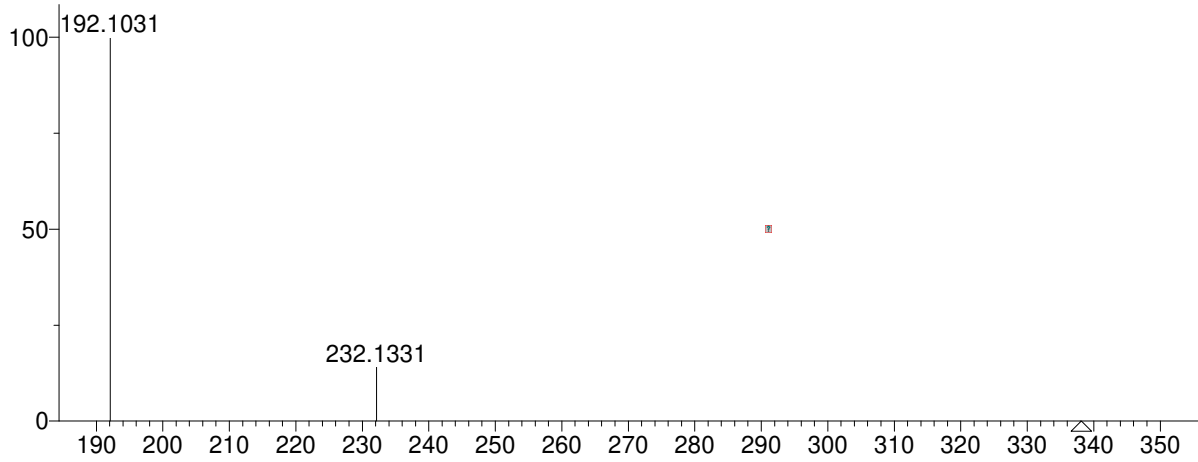

Hit 1 : barceloneic acid A [M+NH4]<sup>+</sup> 35HCD P=338.1  
C16H16O7; MF: 0; RMF: 20; Prob 50.0%; Lib: mona-export-vf-npl\_gexactive; ID: 6133.

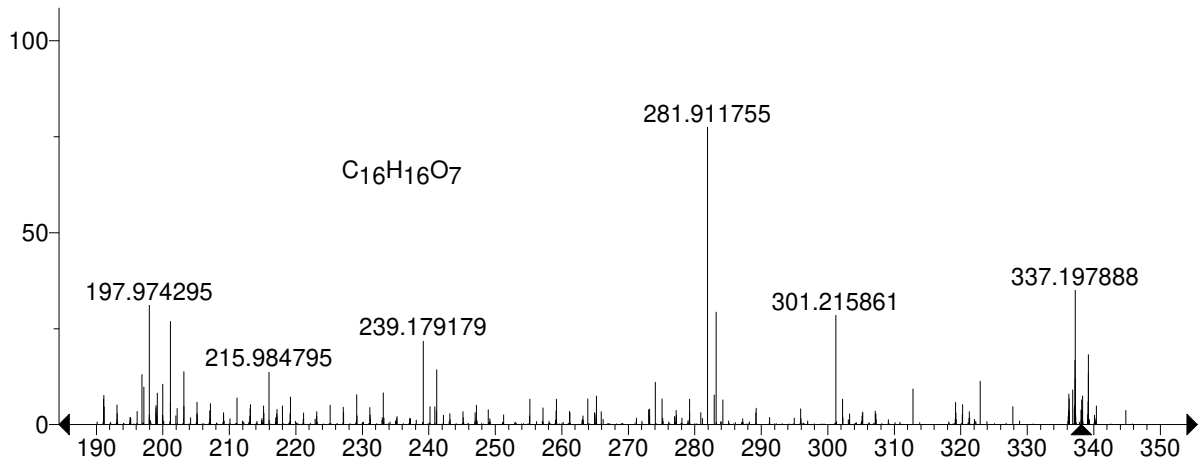

Hit 2 : Met-Gly-Met [M+H]<sup>+</sup> QQQ 14V P=338.1  
C12H23N3O4S2; MF: 0; RMF: 9; Prob 50.0%; Lib: nist\_msms; ID: 9505.

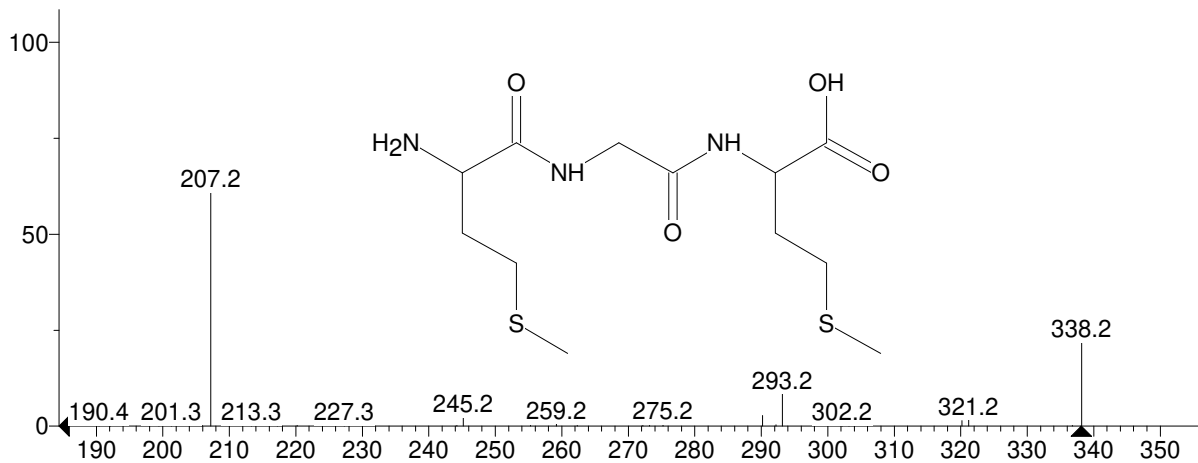

Unknown: Unknown (6.73\_341.1229m/z)  
Compound in Library Factor = 0

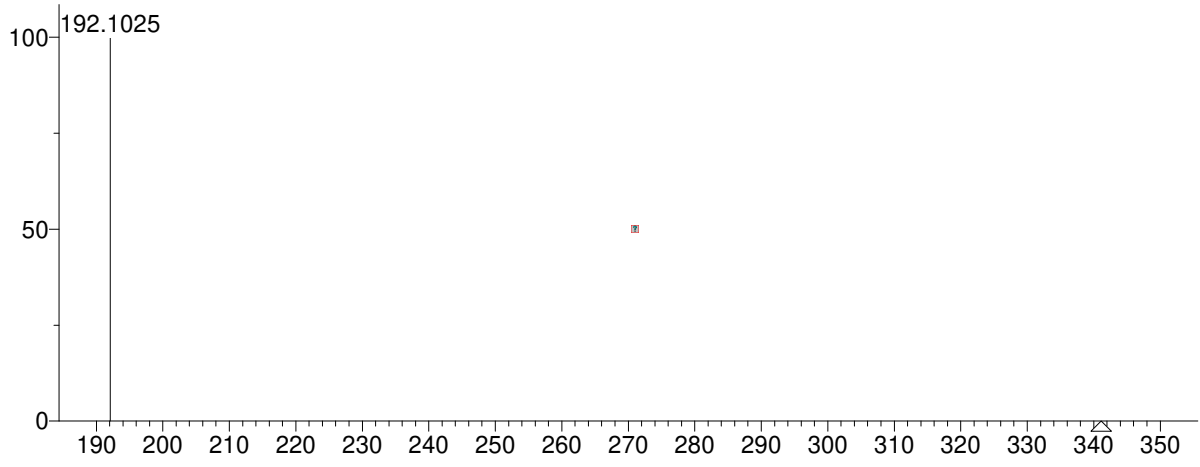

Unknown: Unknown (6.75\_263.1391m/z)  
Compound in Library Factor = -201

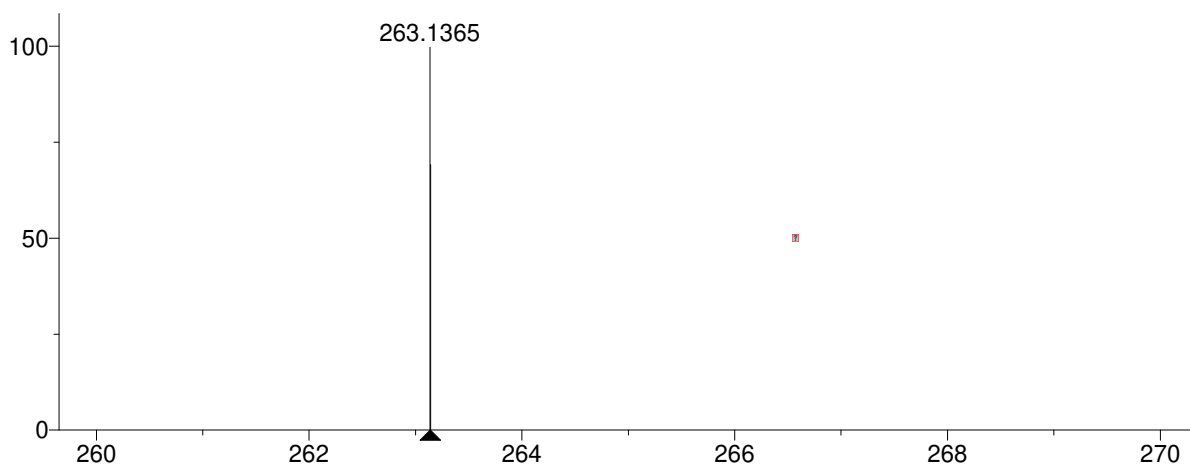

Hit 1 : Unknown (carbon number 14); PlaSMA ID-436 [M-H]<sup>-</sup> P=263.1  
C<sub>14</sub>H<sub>20</sub>N<sub>2</sub>O<sub>3</sub>; MF: 470; RMF: 872; Prob 90.9%; Lib: biomsms-neg-plasma; ID: 1129.

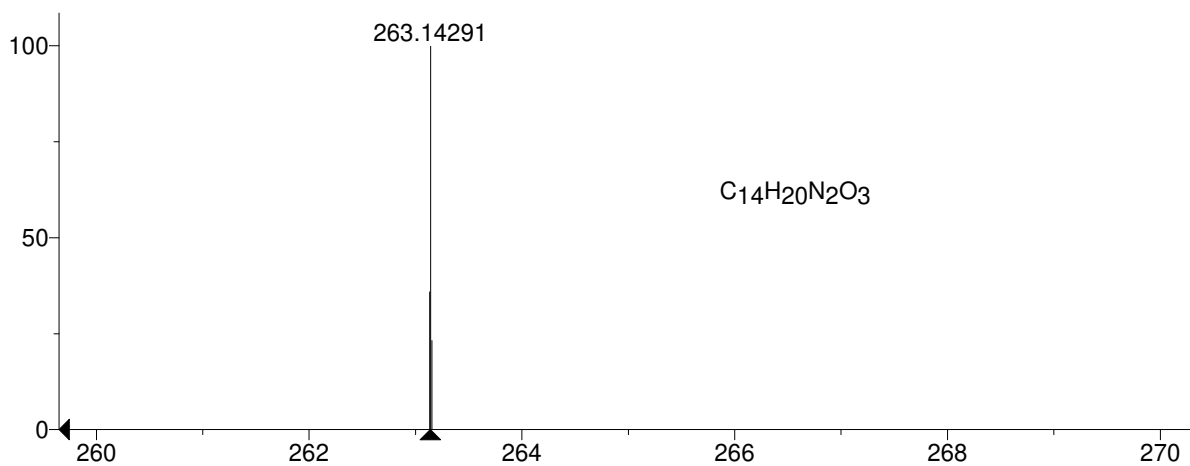

Hit 2 : Methohexital [M+H]<sup>+</sup> 20-30-40%) P=263.1  
C<sub>14</sub>H<sub>18</sub>N<sub>2</sub>O<sub>3</sub>; MF: 262; RMF: 768; Prob 0.90%; Lib: mona-export-fiehn\_hilic; ID: 520.

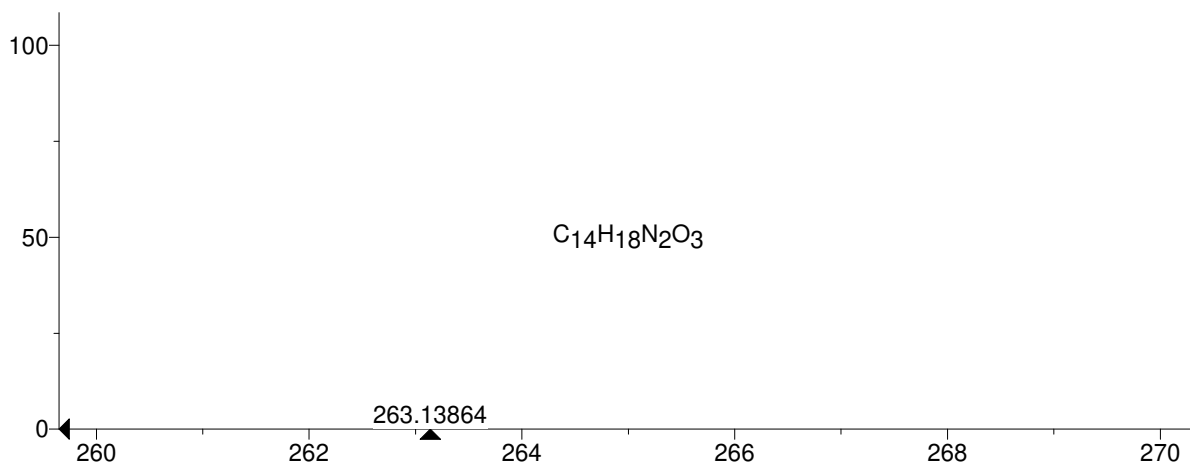

Hit 3 : Phe-Pro [M+H]<sup>+</sup> QTOF 4V P=263.1  
C<sub>14</sub>H<sub>18</sub>N<sub>2</sub>O<sub>3</sub>; MF: 262; RMF: 768; Prob 0.90%; Lib: nist\_msms; ID: 47950.

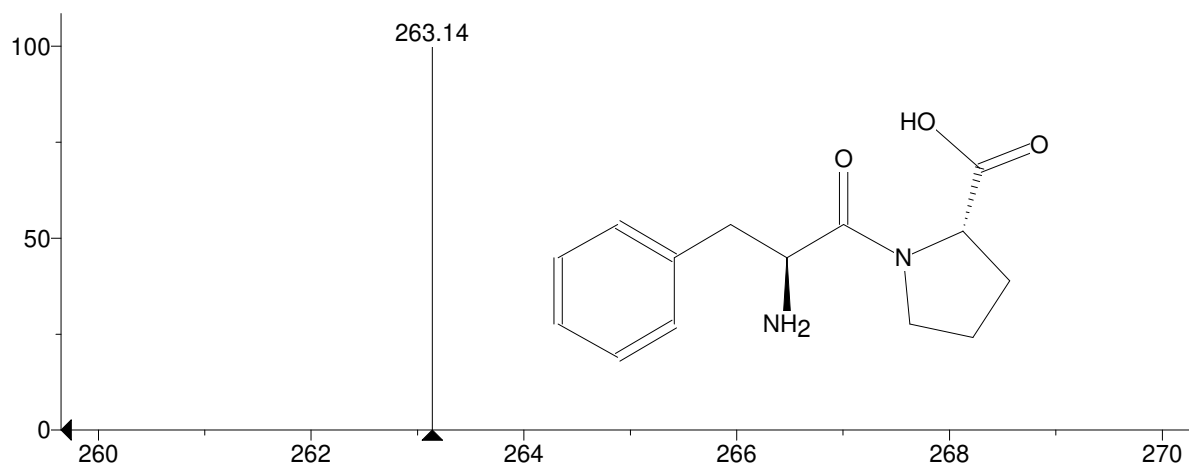

Hit 4 : Pro-Phe [M+H]<sup>+</sup> QTOF 4V P=263.1  
C<sub>14</sub>H<sub>18</sub>N<sub>2</sub>O<sub>3</sub>; MF: 262; RMF: 768; Prob 0.90%; Lib: nist\_msms; ID: 48686.

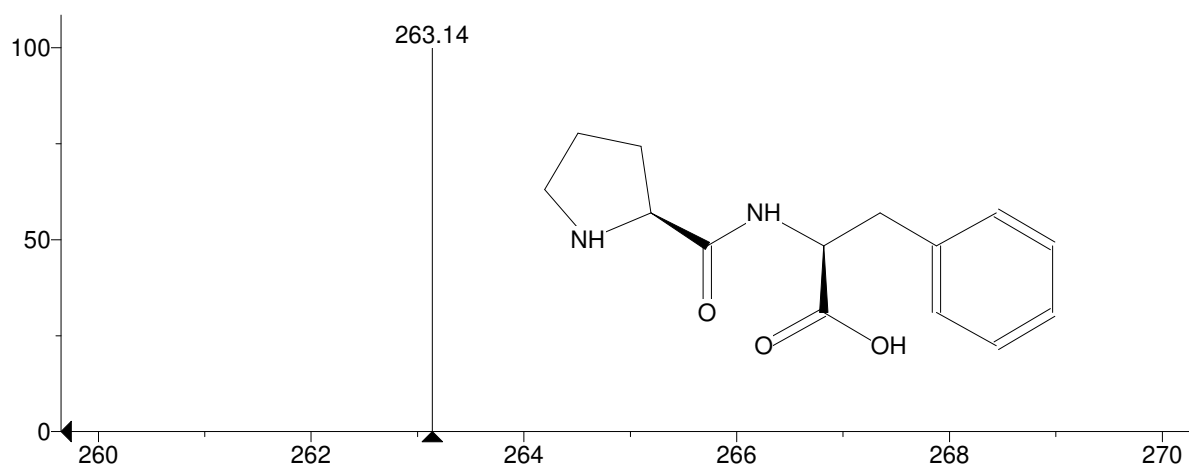

Hit 5 : Suberoylanilide hydroxamic acid [M-H]<sup>-</sup> HCD 10V P=263.1  
C<sub>14</sub>H<sub>20</sub>N<sub>2</sub>O<sub>3</sub>; MF: 262; RMF: 768; Prob 0.90%; CAS: 149647-78-9; Lib: nist\_msms; ID: 159154.

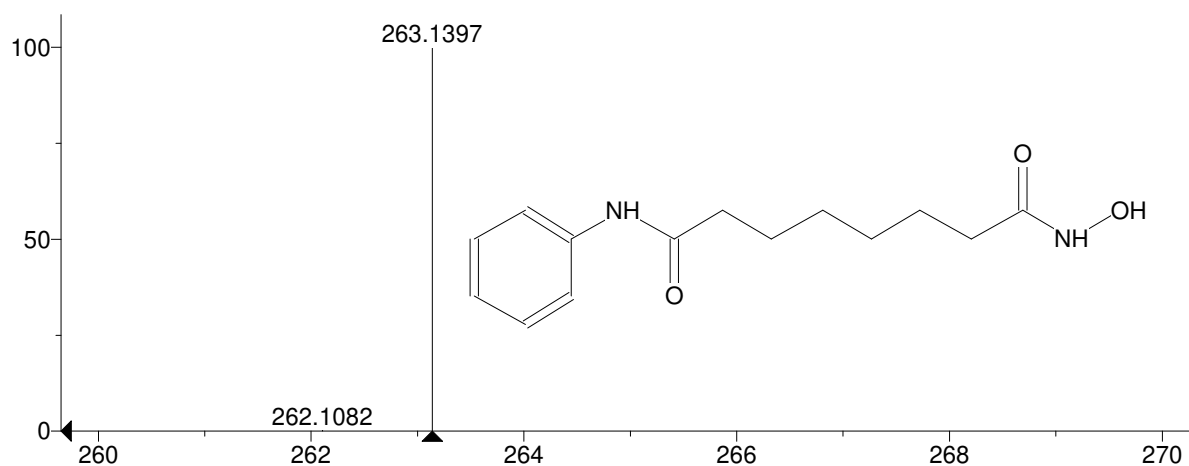

Unknown: Unknown (6.75\_589.2713m/z)  
Compound in Library Factor = 0

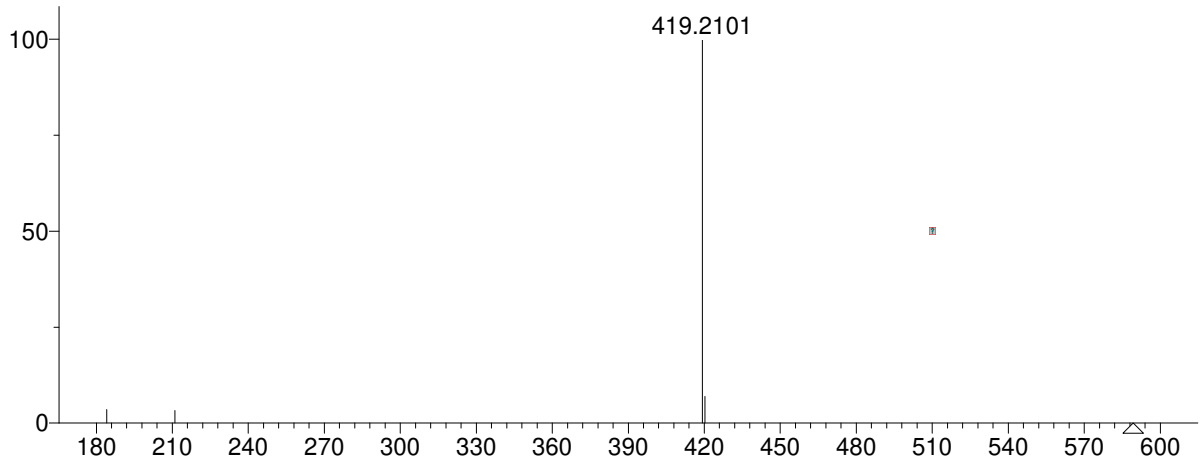

Unknown: Unknown (6.77\_462.1622m/z)  
Compound in Library Factor = 0

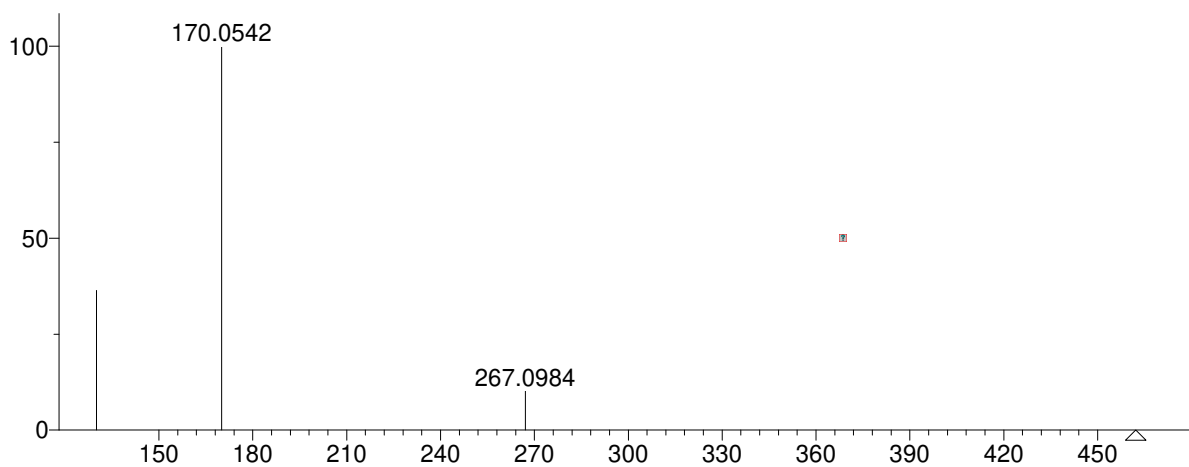

Hit 1 : 4-(2-Nitroethyl)phenyl 6-O- $\beta$ -D-xylopyranosyl- $\beta$ -D-glucopyranoside [M+H]<sup>+</sup> 35HCD P=462.2  
C<sub>19</sub>H<sub>27</sub>NO<sub>12</sub>; MF: 0; RMF: 1; Prob 100.0%; Lib: mona-export-vf-npl\_qexactive; ID: 21502.

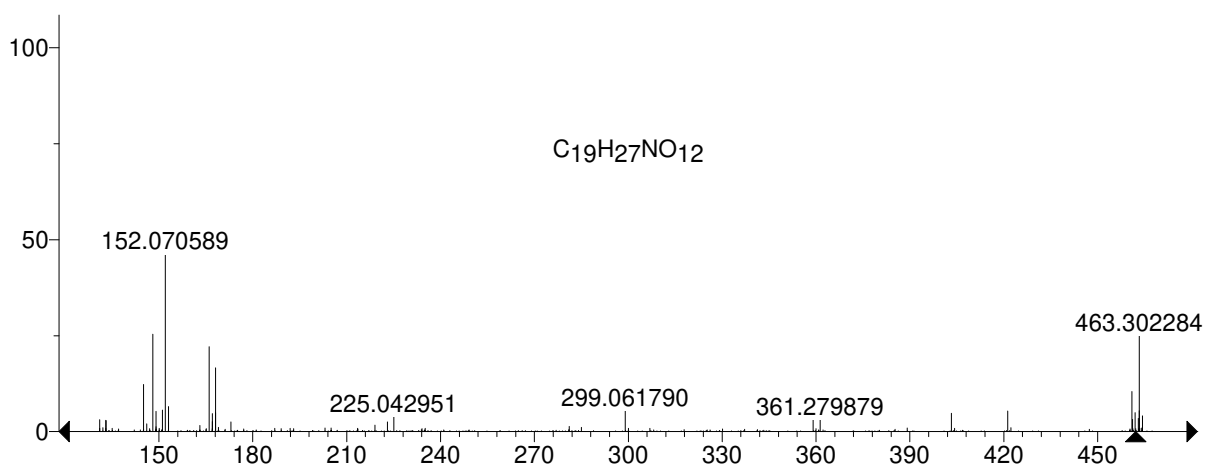



\*\* Search Report Page 1 of 2 \*\*

Unknown: Unknown (6.80\_241.1183m/z)  
Compound in Library Factor = -3273

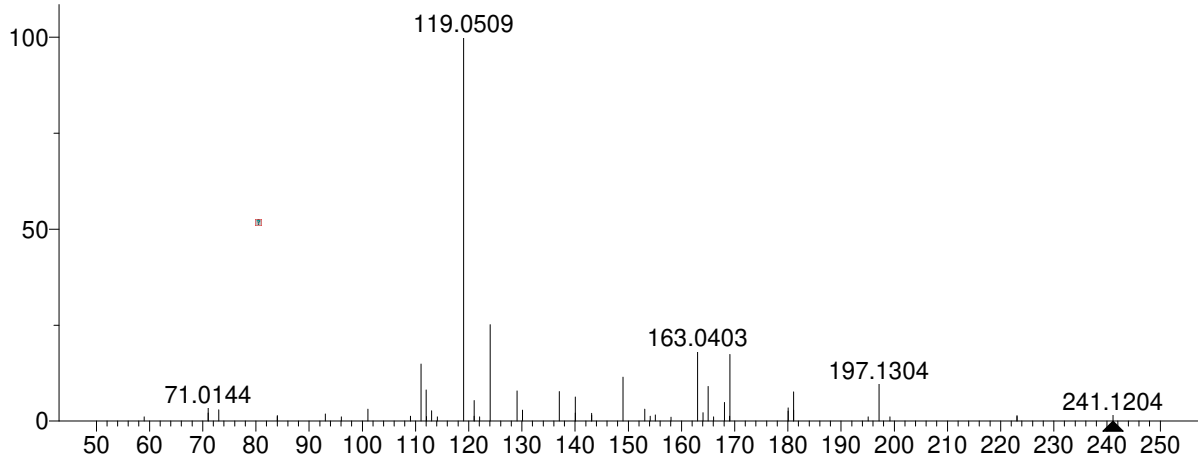

Hit 1 : Pyroglutamyl-Isoleucine; PlaSMA ID-369 [M-H]<sup>-</sup> P=241.1  
C<sub>11</sub>H<sub>18</sub>N<sub>2</sub>O<sub>4</sub>; MF: 8; RMF: 118; Prob 30.9%; Lib: biomsms-neg-plasma; ID: 400.

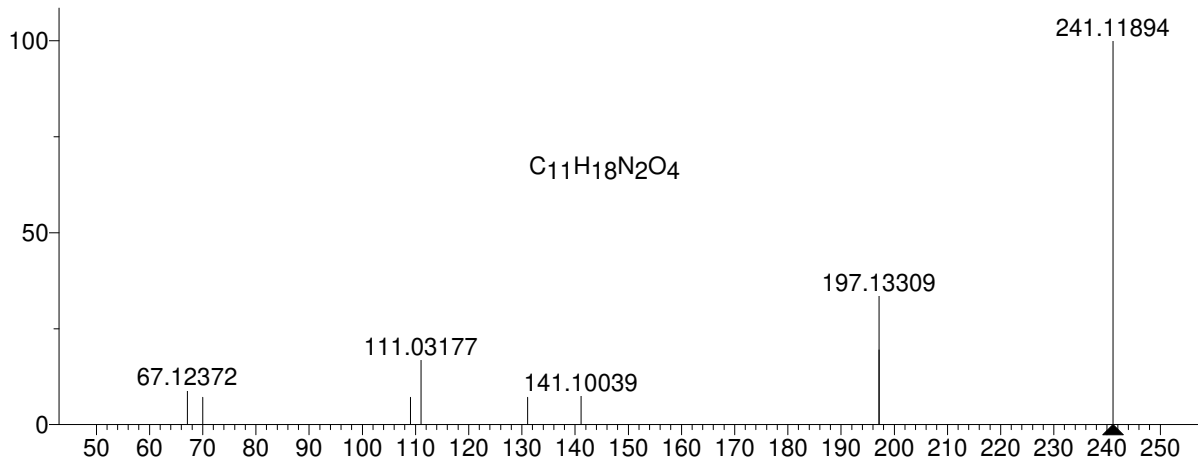

Hit 2 : Meprobamate [M+Na]<sup>+</sup> HCD 19V P=241.1  
C<sub>9</sub>H<sub>18</sub>N<sub>2</sub>O<sub>4</sub>; MF: 3; RMF: 66; Prob 24.9%; CAS: 57-53-4; Lib: nist\_msms; ID: 196308.

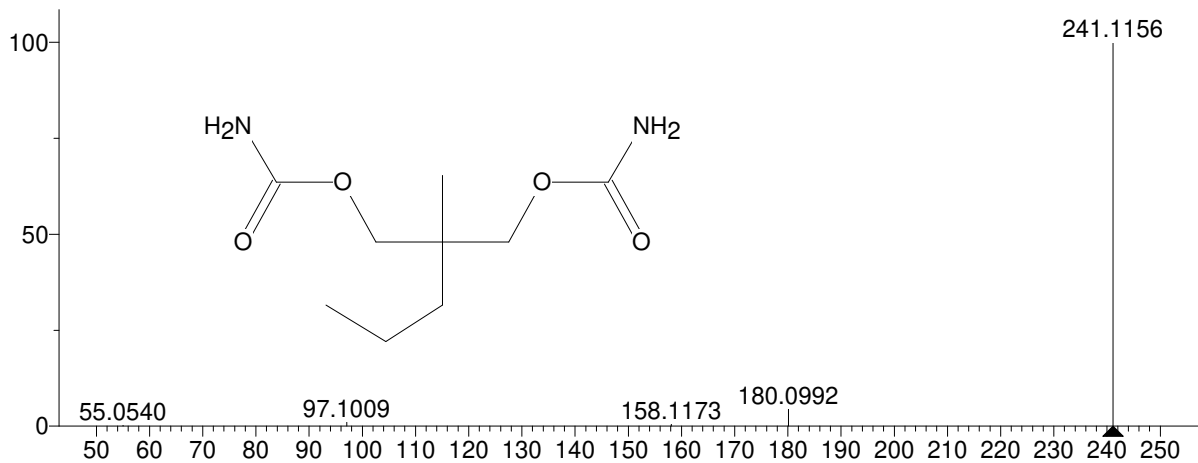

Hit 3 : Dictazoline E [M+H]<sup>+</sup> P=241.1  
C<sub>27</sub>H<sub>26</sub>N<sub>8</sub>O<sub>2</sub>; MF: 0; RMF: 37; Prob 22.0%; Lib: mona-export-gnps; ID: 4845.

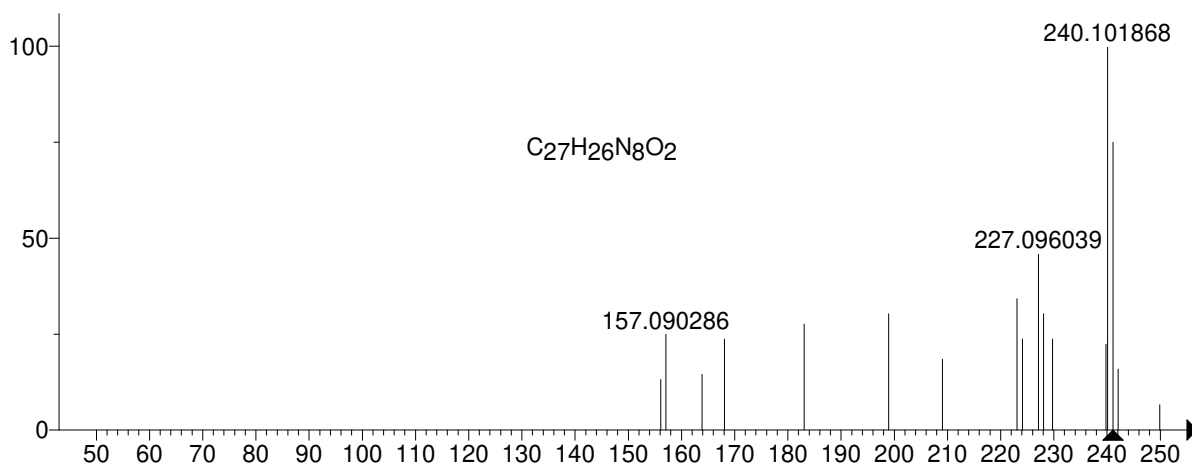

Hit 4 : Ser-Leu [M+Na]<sup>+</sup> IT 35% P=241.1  
C<sub>9</sub>H<sub>18</sub>N<sub>2</sub>O<sub>4</sub>; MF: 0; RMF: 2; Prob 22.0%; CAS: 6665-16-3; Lib: nist\_msms; ID: 45588.

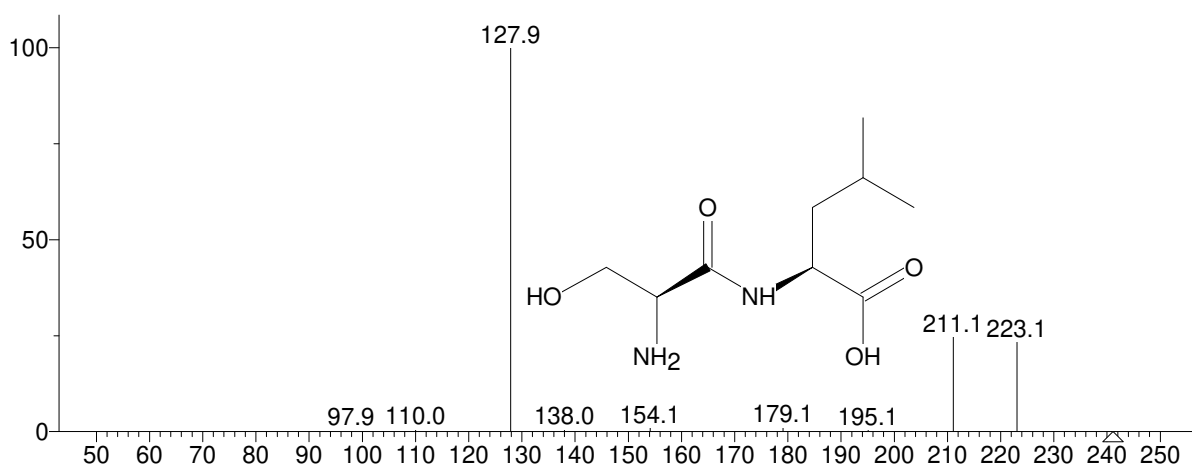

Unknown: Unknown (6.83\_298.1394m/z)  
Compound in Library Factor = 0

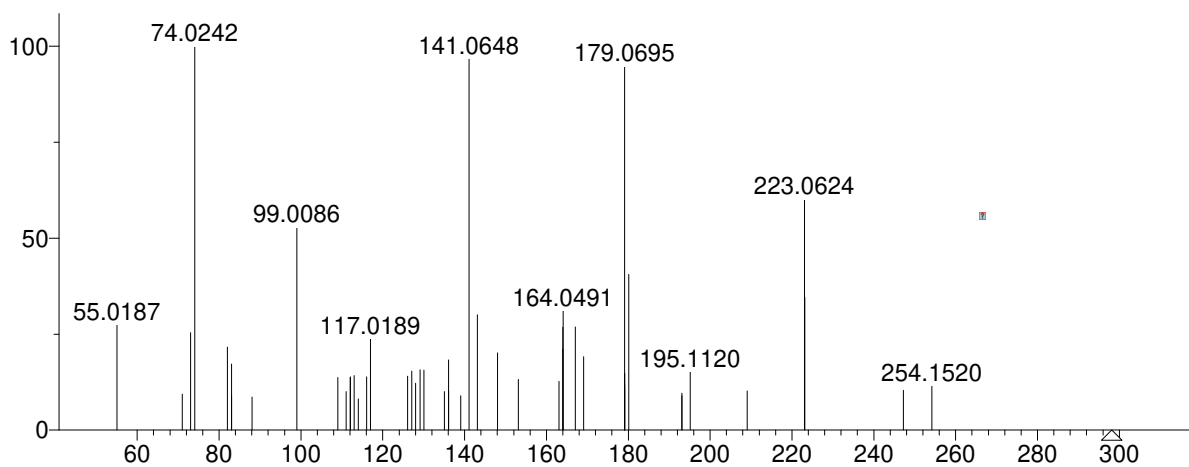

Hit 1 : Noratropine [M+Na]<sup>+</sup> IT 35% P=298.1  
C<sub>16</sub>H<sub>21</sub>NO<sub>3</sub>; MF: 0; RMF: 7; Prob 100.0%; CAS: 16839-98-8; Lib: nist\_msms; ID: 197153.

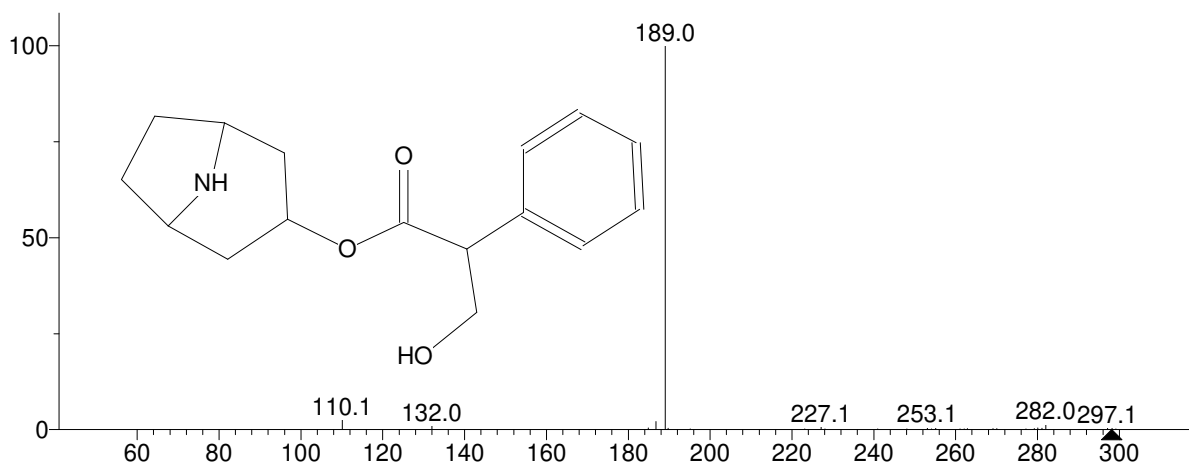

Unknown: Unknown (6.83\_756.1864m/z)  
Compound in Library Factor = 0

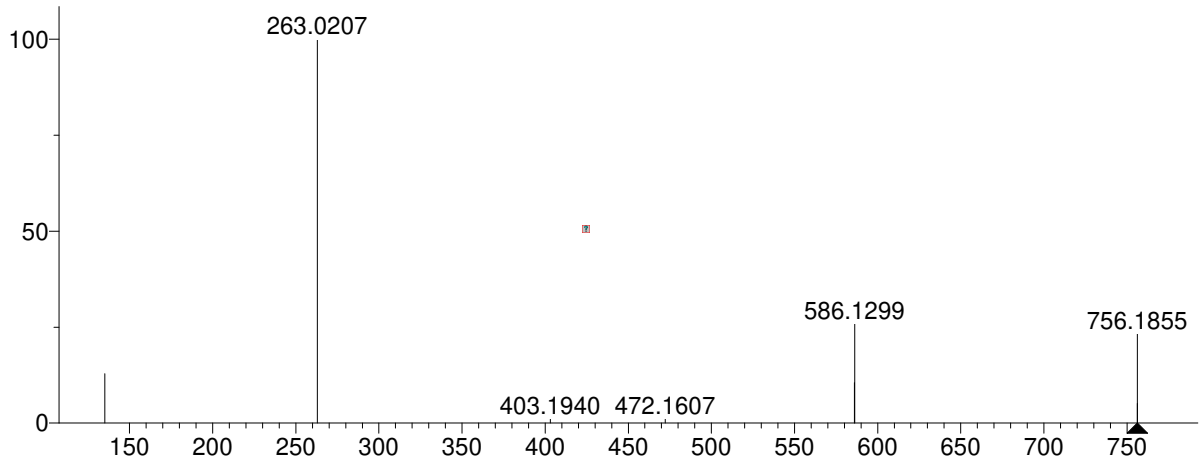

Unknown: Unknown (6.84\_263.0221m/z)  
Compound in Library Factor = 0

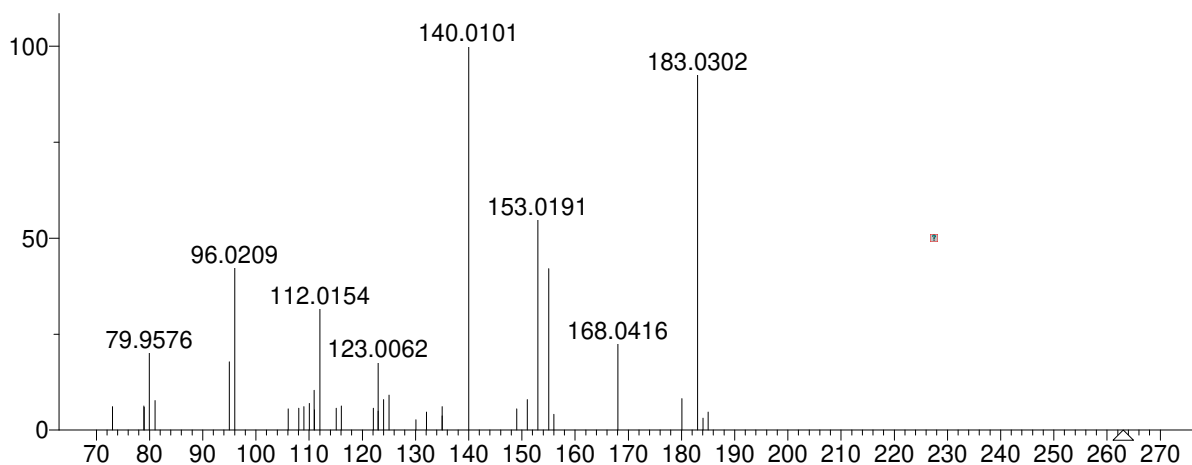

Hit 1 : 3-Methoxy-4-hydroxyphenylglycol sulfate [M-H]<sup>-</sup> QTOF 20V P=263  
C<sub>9</sub>H<sub>12</sub>O<sub>7</sub>S; MF: 0; RMF: 44; Prob 100.0%; CAS: 3415-67-6; Lib: nist\_msms; ID: 29981.

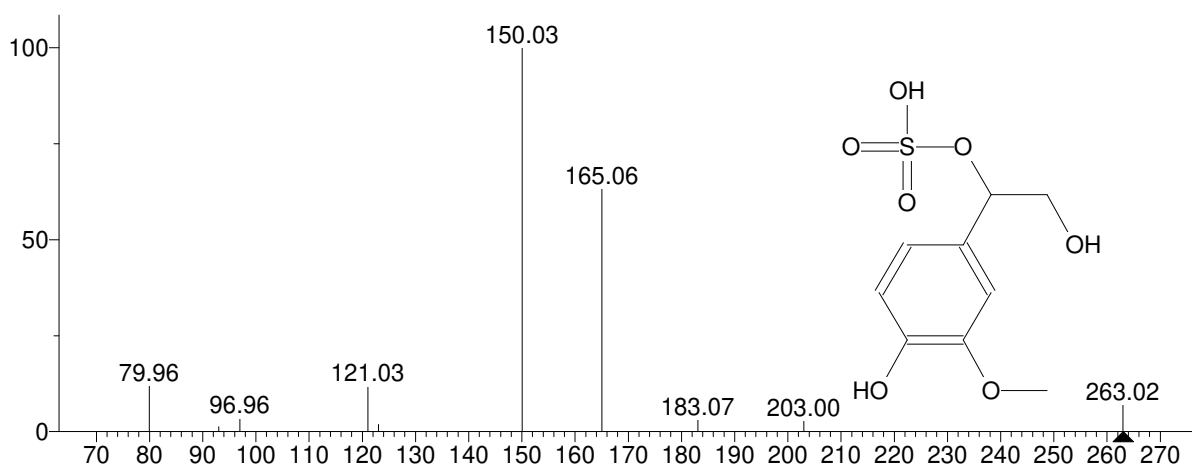

Unknown: Unknown (6.84\_453.1503m/z)  
Compound in Library Factor = 0

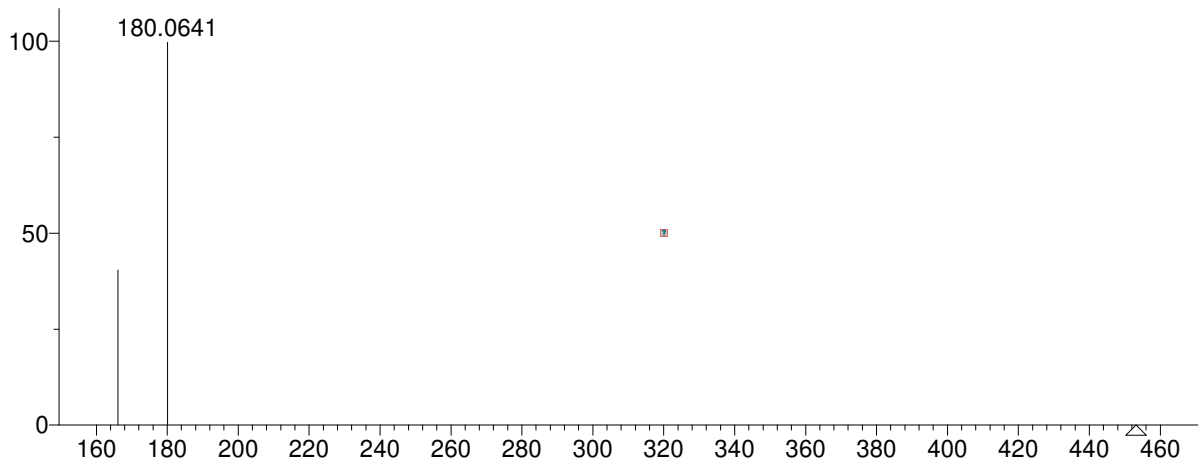

Unknown: Unknown (6.84\_642.2164m/z)  
Compound in Library Factor = 0

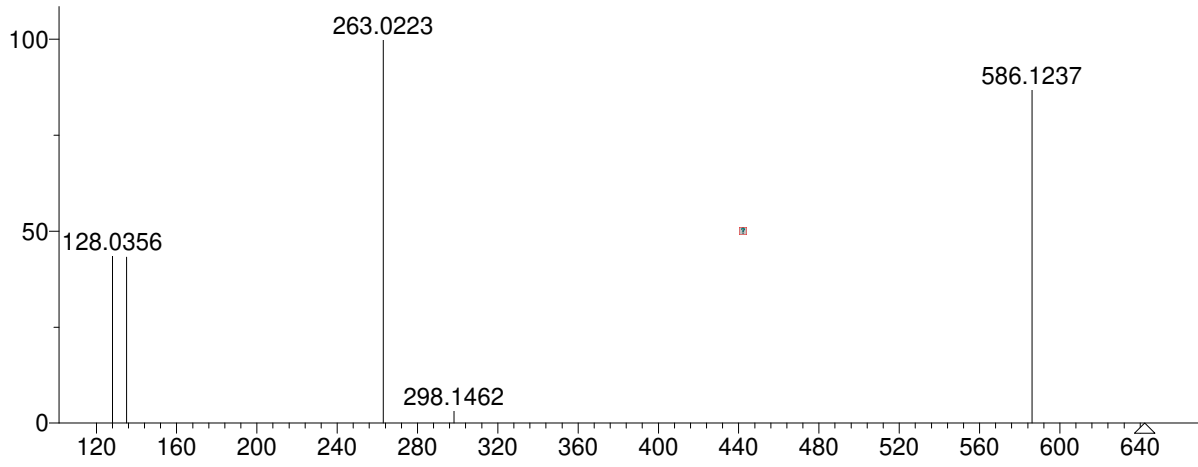

Unknown: Unknown (6.85\_408.1762m/z)  
Compound in Library Factor = 0

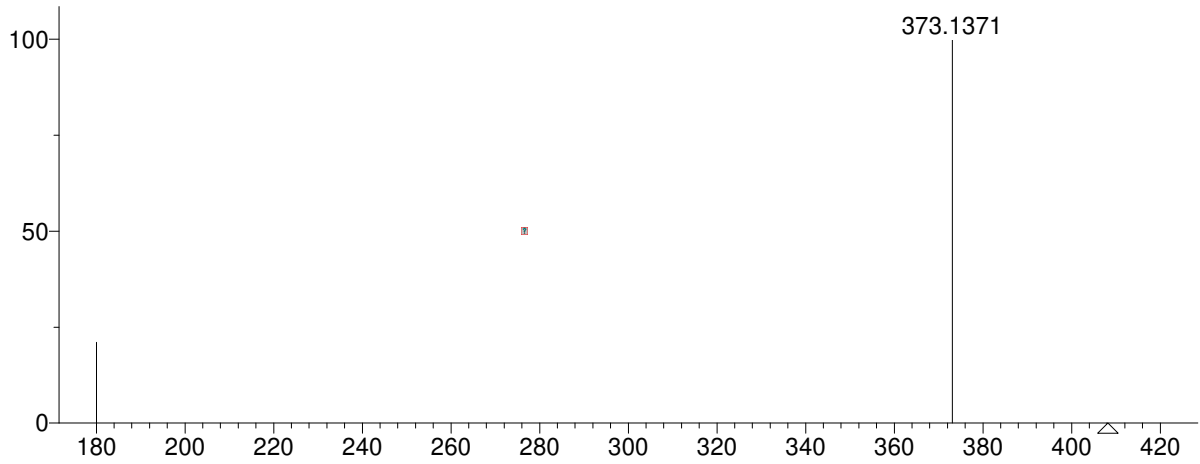

Hit 1 : Trifluoperazine [M+H]<sup>+</sup> 35eV P=408.2  
C<sub>21</sub>H<sub>24</sub>F<sub>3</sub>N<sub>3</sub>S; MF: 0; RMF: 33; Prob 100.0%; Lib: mona-export-fiehn\_hilic; ID: 2383.

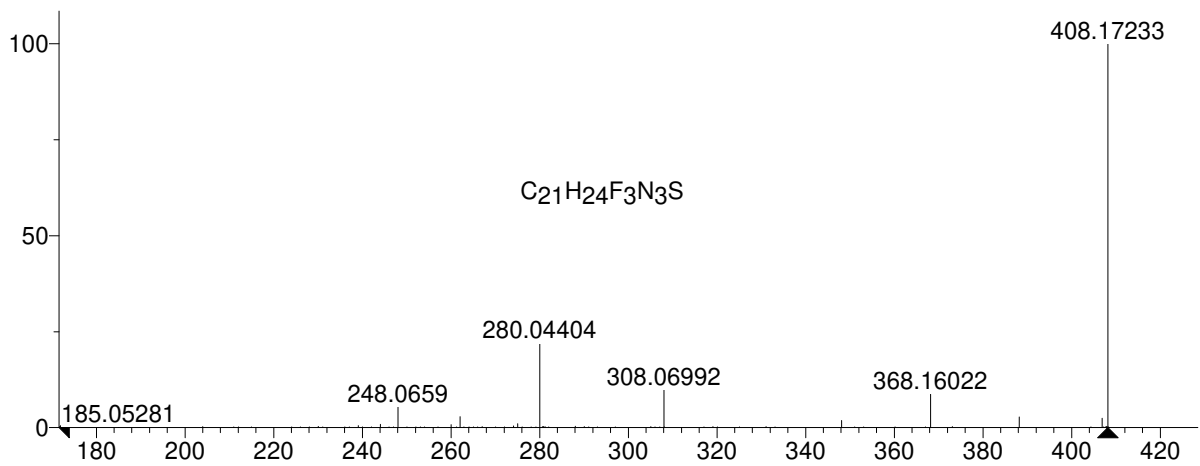



Unknown: Unknown (6.86\_358.1972m/z)  
Compound in Library Factor = -1523

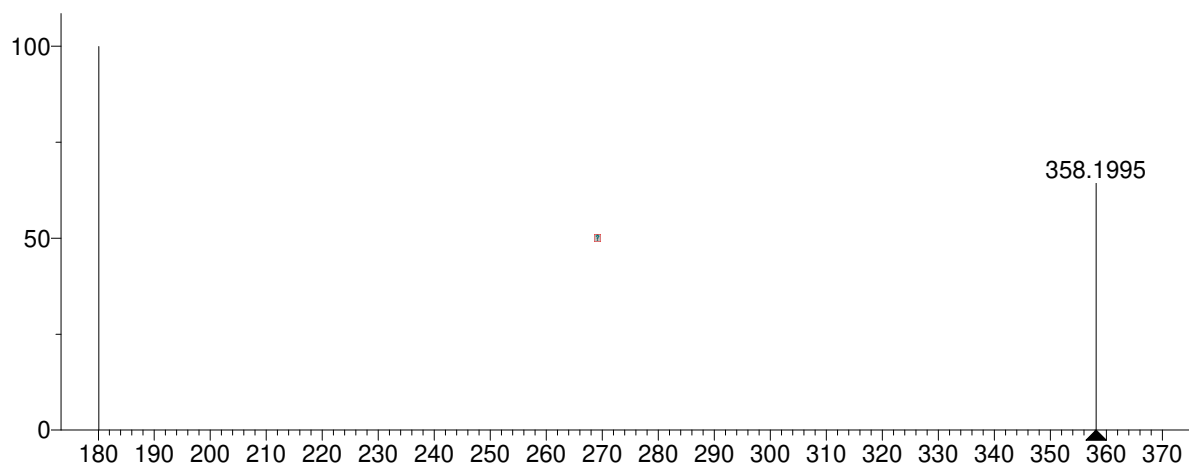

Hit 1 : 4-Hydroxyatorvastatin lactone [M-H-H<sub>2</sub>O]-=>493.2=>358.2 IT 35% P=358.2  
C<sub>33</sub>H<sub>33</sub>FN<sub>2</sub>O<sub>5</sub>; MF: 58; RMF: 579; Prob 39.4%; CAS: 163217-70-7; Lib: nist\_msms; ID: 440854.

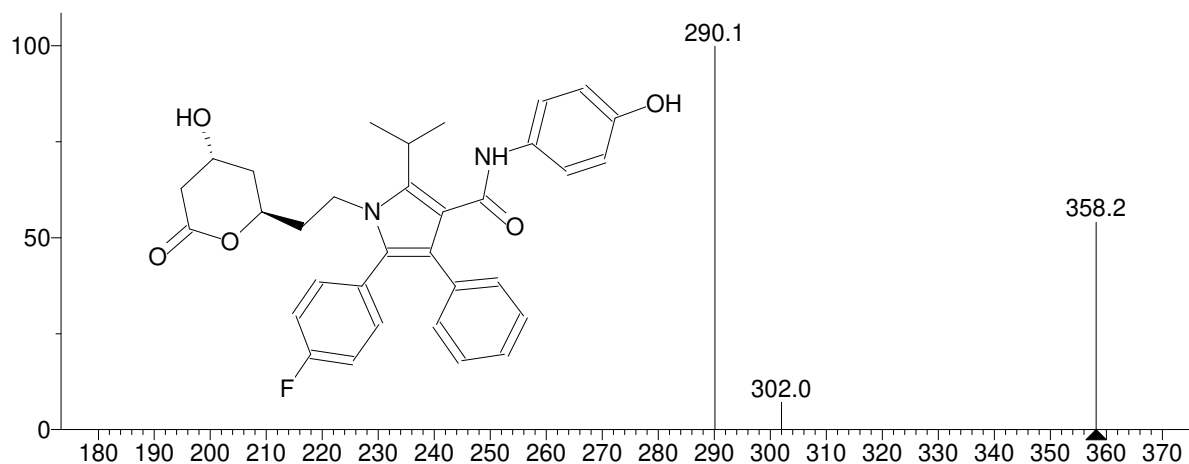

Hit 2 : 1H-Indole-3,5-dicarboxylic acid, 1-[3-[4-(decyloxy)phenoxy]-2-oxopropyl]-, 3-methyl ester [M-H]-=>358.2 I  
C<sub>30</sub>H<sub>37</sub>NO<sub>7</sub>; MF: 15; RMF: 456; Prob 8.69%; CAS: 888320-29-4; Lib: nist\_msms; ID: 374612.

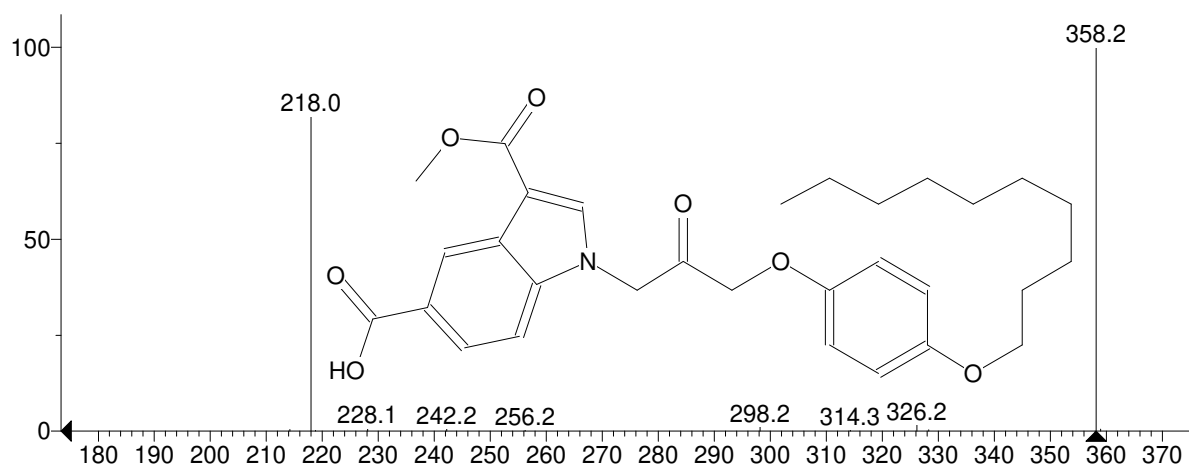

\*\* Search Report Page 2 of 2 \*\*

Hit 3 : Nalbuphine [M+H]<sup>+</sup> 20-30-40%) P=358.2  
C<sub>21</sub>H<sub>27</sub>NO<sub>4</sub>; MF: 6; RMF: 410; Prob 6.31%; Lib: mona-export-fiehn\_hilic; ID: 599.

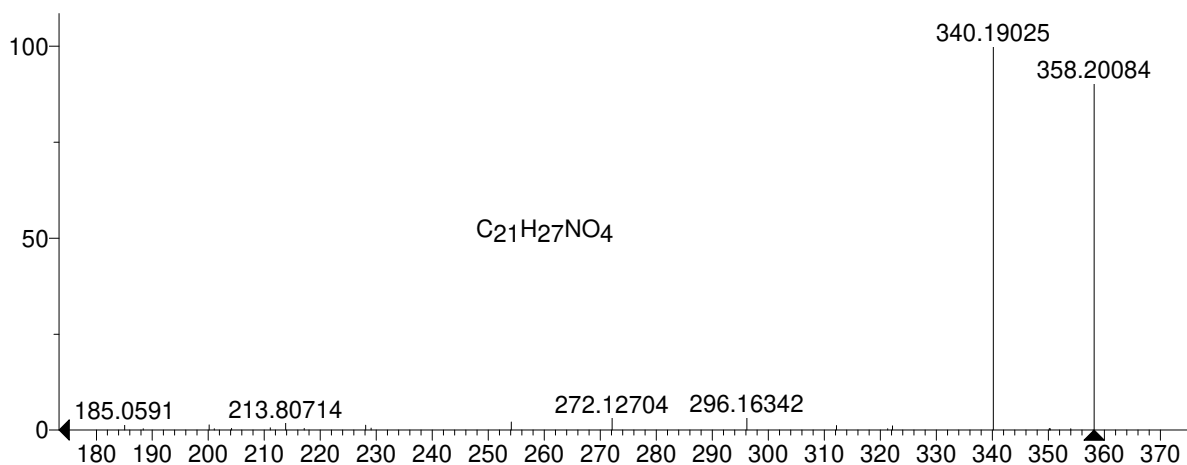

Hit 4 : 1H-Indole-3-carboxamide, 1-(5-fluoropentyl)-N-8-quinolinyl- [M+H]<sup>+</sup>=>358.2 IT 35% P=358.2  
C<sub>23</sub>H<sub>22</sub>FN<sub>3</sub>O; MF: 4; RMF: 320; Prob 5.82%; Lib: nist\_msms; ID: 344362.

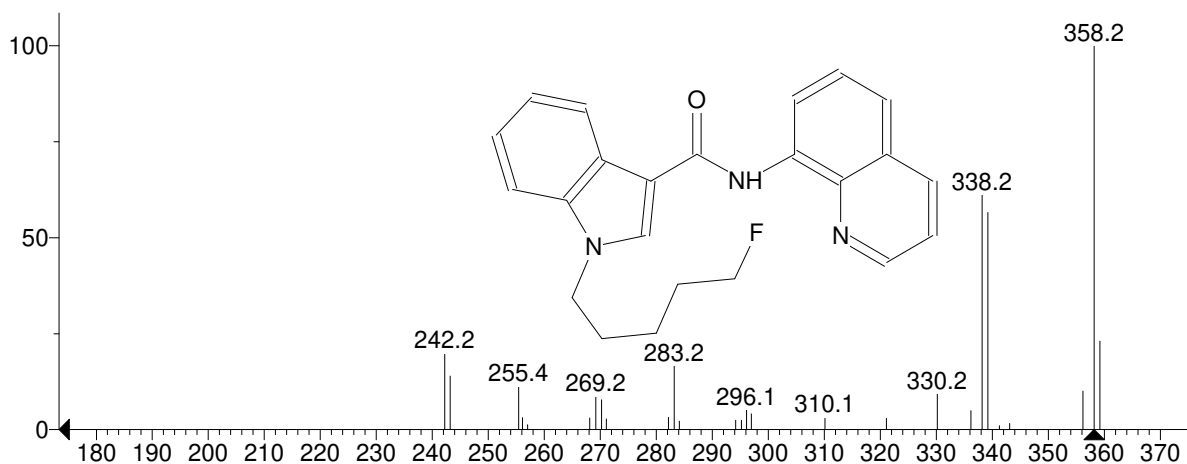

Hit 5 : Propanoic acid, 2-[[4-[2-[[[(cyclohexylamino)carbonyl](4-cyclohexylbutyl)amino]ethyl]phenyl]thio]-2-methyl-  
C<sub>29</sub>H<sub>46</sub>N<sub>2</sub>O<sub>3</sub>S; MF: 1; RMF: 241; Prob 5.14%; CAS: 265129-71-3; Lib: nist\_msms; ID: 374428.

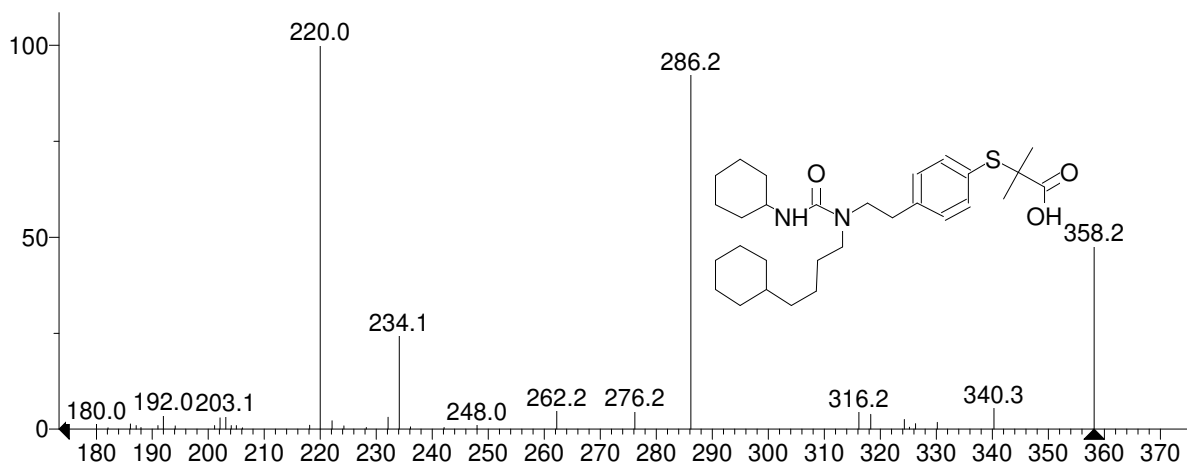

\*\* Search Report Page 1 of 2 \*\*

Unknown: Unknown (6.86\_405.1643m/z)  
Compound in Library Factor = 0

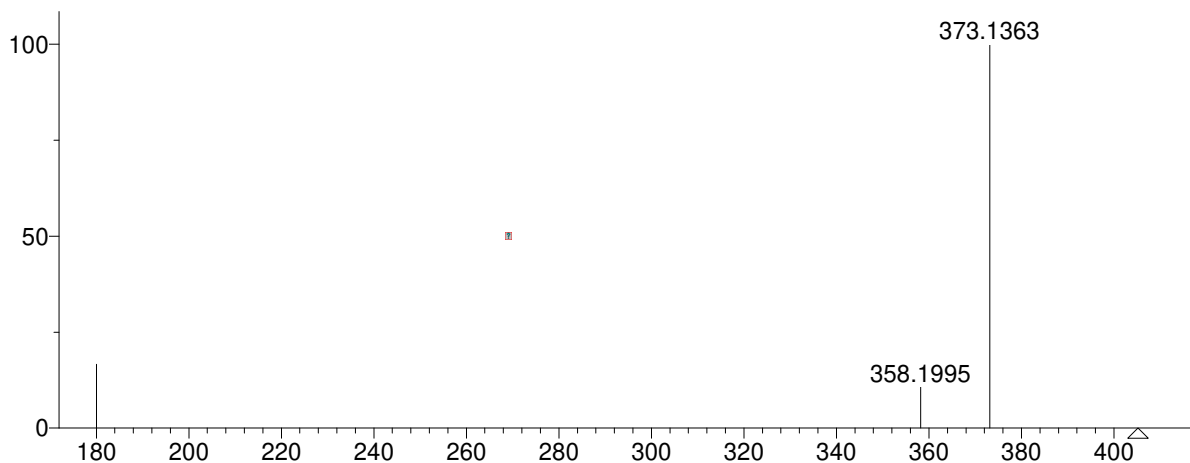

Hit 1 : NCGC00169052-03\_C23H26O5\_6H-Furo[2,3-h]-2-benzopyran-6,8(6aH)-dione, 9-acetyl-3-[(1E,3E,5S)-3,5 C23H26O5; MF: 0; RMF: 41; Prob 33.3%; Lib: mona-export-gnps; ID: 14072.

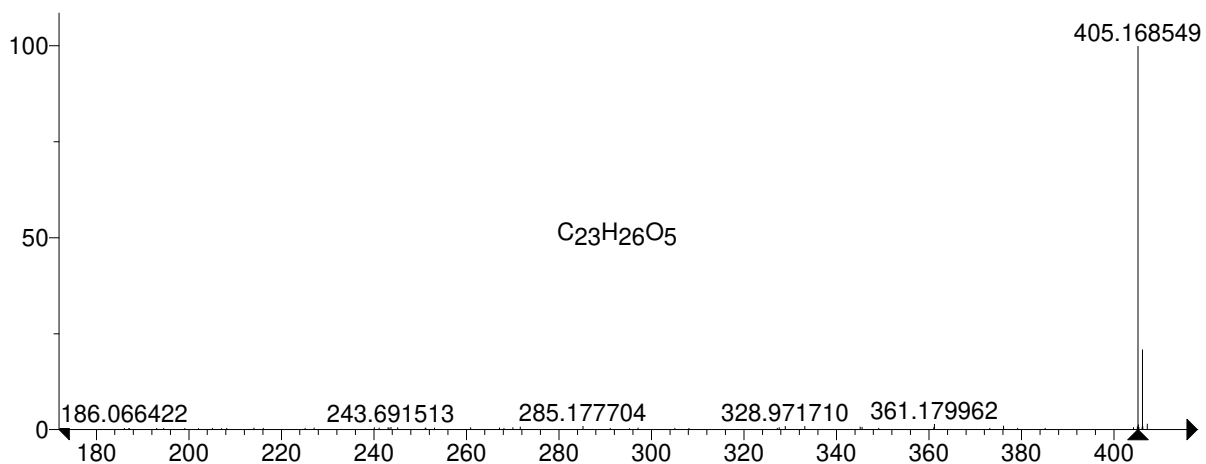

Hit 2 : Methanone, [1-(5-fluoropentyl)-6-nitro-1H-indol-3-yl]-1-naphthalenyl- [M+H]<sup>+</sup> IT 35% P=405.2  
C24H21FN2O3; MF: 0; RMF: 13; Prob 33.3%; CAS: 335161-27-8; Lib: nist\_msms; ID: 422537.

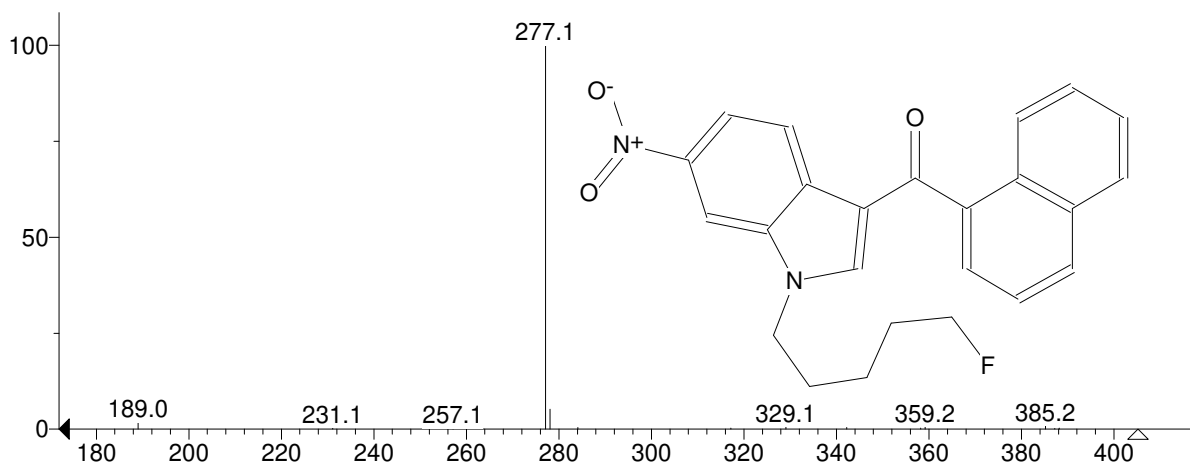

Hit 3 : Ochrephilone [M+Na]<sup>+</sup> 35HCD P=405.2  
C<sub>23</sub>H<sub>26</sub>O<sub>5</sub>; MF: 0; RMF: 5; Prob 33.3%; Lib: mona-export-vf-npl\_qexactive; ID: 21688.

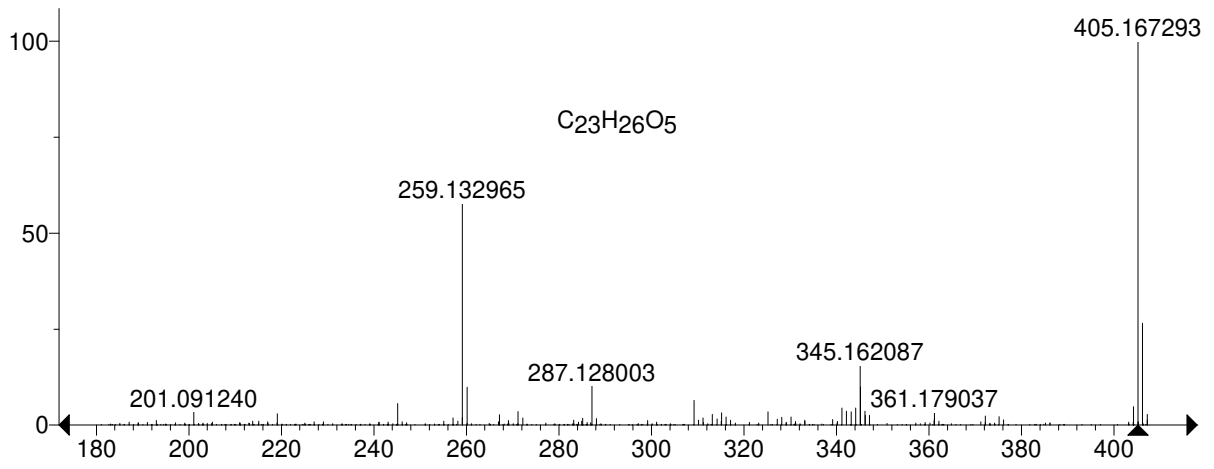

Unknown: Unknown (6.87\_169.0130m/z)  
Compound in Library Factor = -349

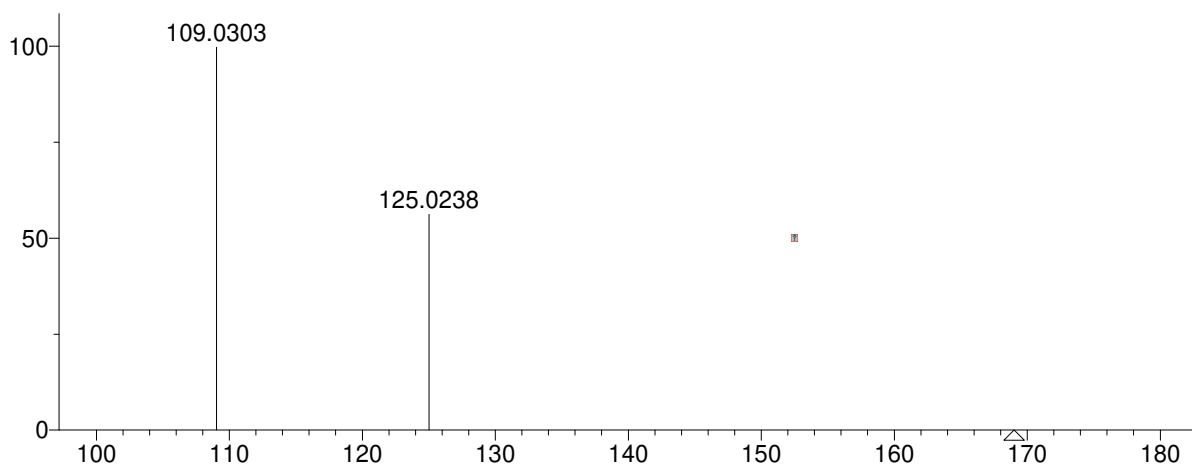

Hit 1 : (-)-Gallocatechin 3-gallate [M-H-C15H12O6]- IT-FT 35% P=169  
C22H18O11; MF: 364; RMF: 999; Prob 20.9%; CAS: 4233-96-9; Lib: nist\_msms; ID: 390513.

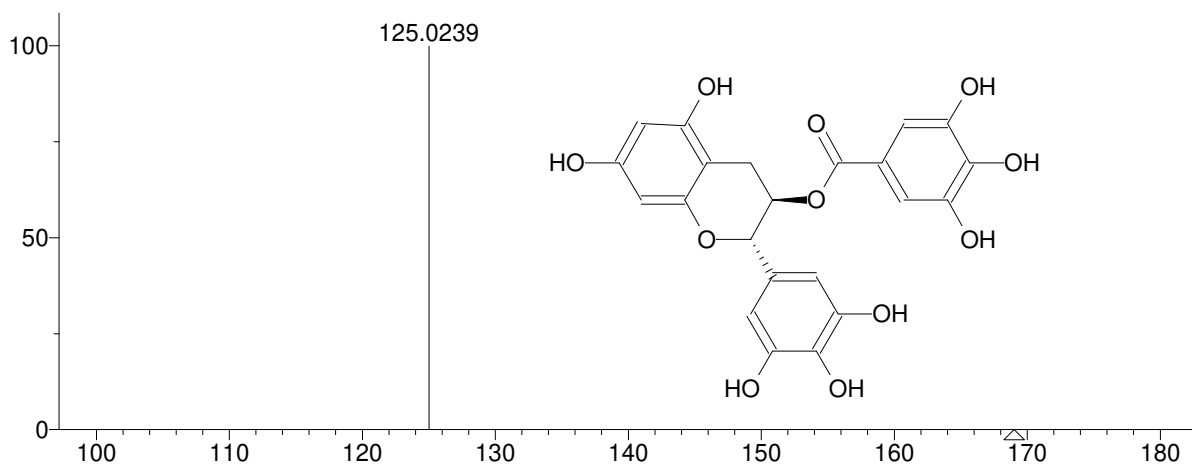

Hit 2 : (-)-Epicatechin gallate [M-H-C15H12O5]- IT-FT 35% P=169  
C22H18O10; MF: 361; RMF: 995; Prob 18.5%; CAS: 1257-08-5; Lib: nist\_msms; ID: 459026.

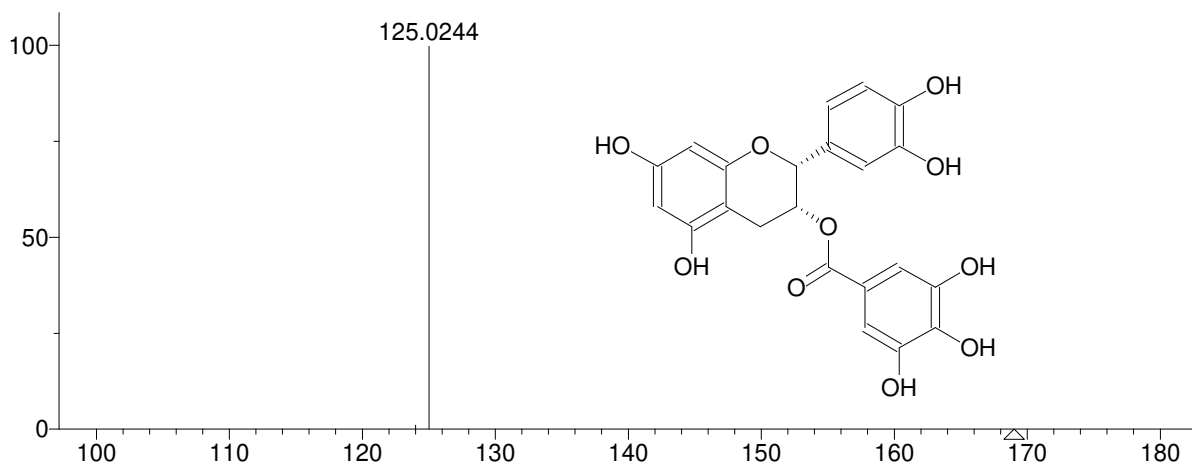

Hit 3 : (-)-Catechin gallate [M-H-C15H12O5]- IT-FT 35% P=169  
C22H18O10; MF: 360; RMF: 993; Prob 17.8%; CAS: 130405-40-2; Lib: nist\_msms; ID: 552347.

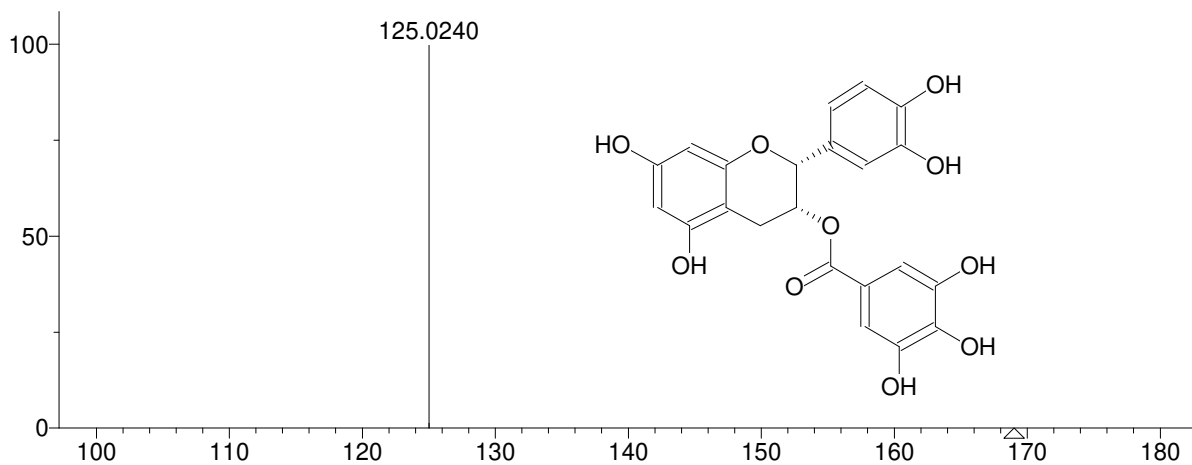

Hit 4 : Epigallocatechin gallate [M-H-C15H12O6]- IT-FT 35% P=169  
C22H18O11; MF: 359; RMF: 992; Prob 17.1%; CAS: 989-51-5; Lib: nist\_msms; ID: 336528.

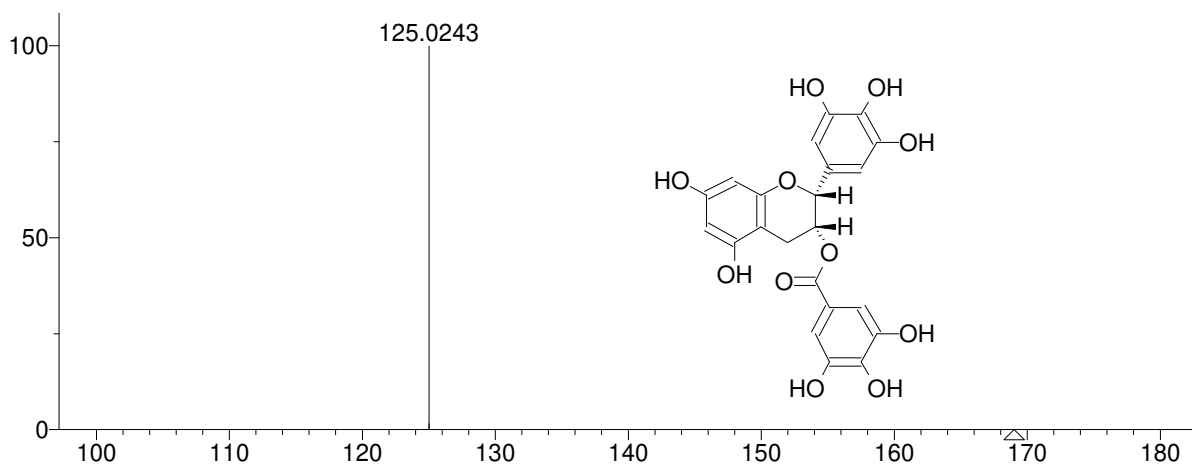

Hit 5 : Gallic acid [M-H]- IT-FT 35% P=169  
C7H6O5; MF: 354; RMF: 986; Prob 13.8%; CAS: 149-91-7; Lib: nist\_msms; ID: 285660.

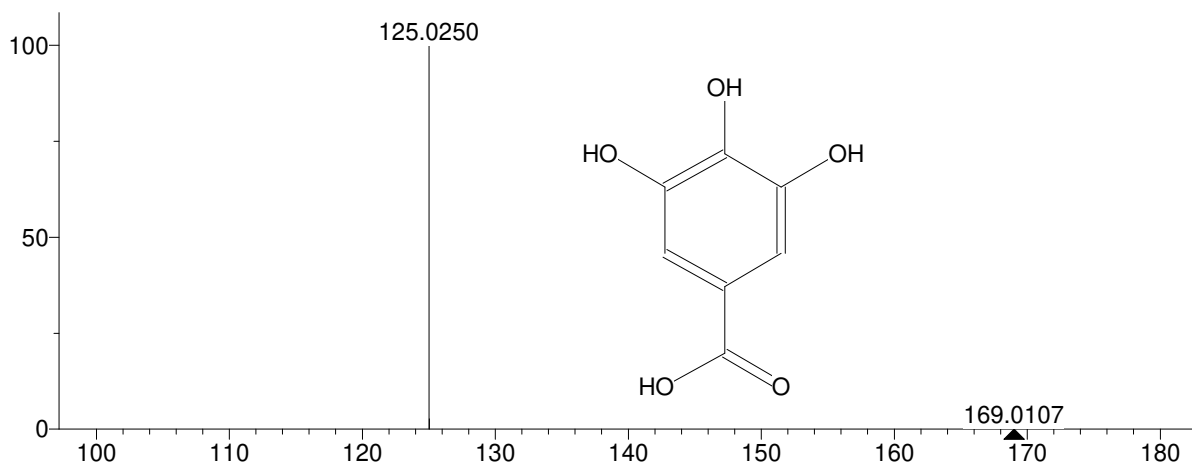

Unknown: Unknown (6.89\_418.1118m/z)  
Compound in Library Factor = -1309

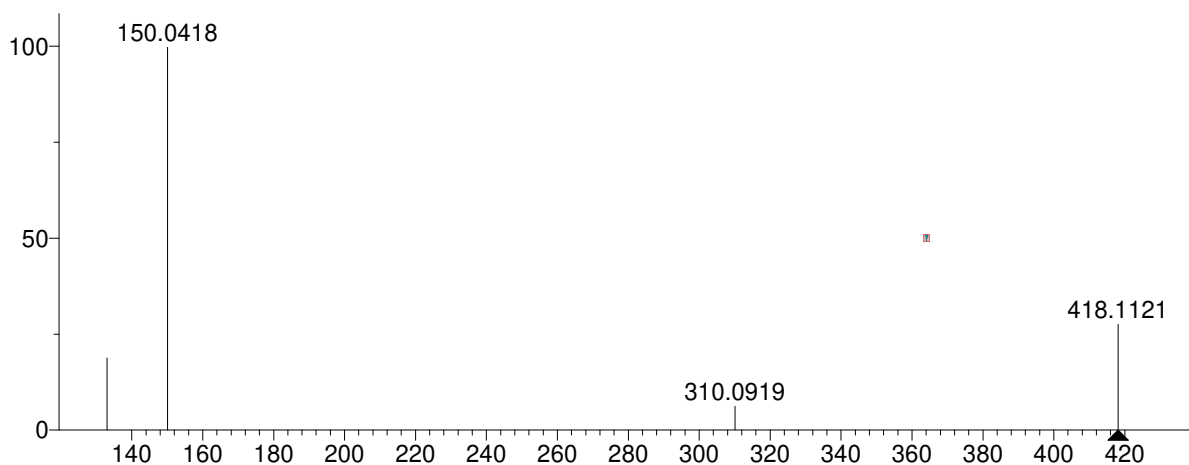

Hit 1 : 1H- Pyrazole-4-carboxylic acid, 1-(2,4-difluorophenyl)-5-[[2-[[[(1,1-dimethylethyl)amino] thioxomethyl]hydraz

C17H19F2N5O2S; MF: 124; RMF: 785; Prob 76.7%; CAS: 264233-05-8; Lib: nist\_msms; ID: 273564.

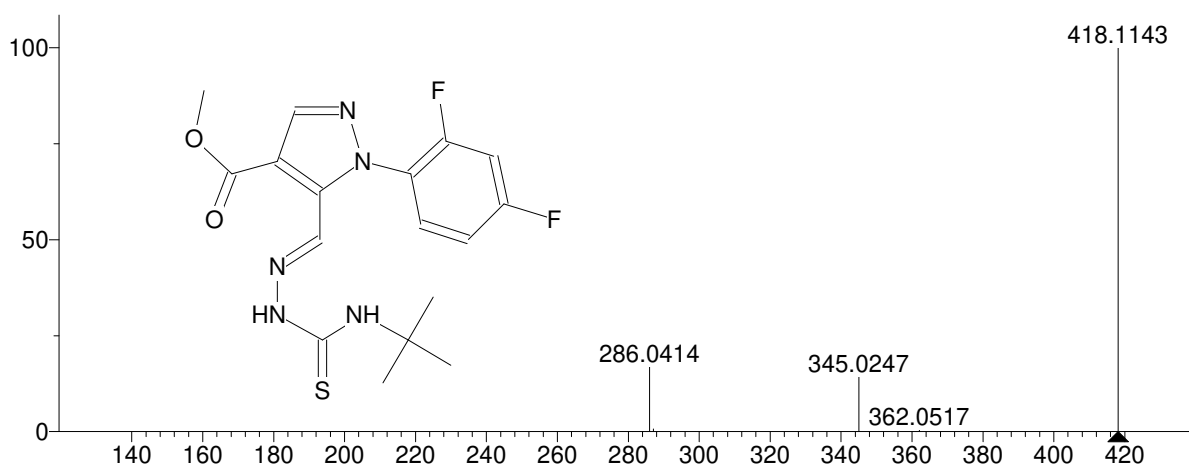

Hit 2 : Galacto-N-biose [M+Cl]- HCD 8V P=418.1

C14H25NO11; MF: 68; RMF: 451; Prob 14.6%; CAS: 20972-29-6; Lib: nist\_msms; ID: 531643.

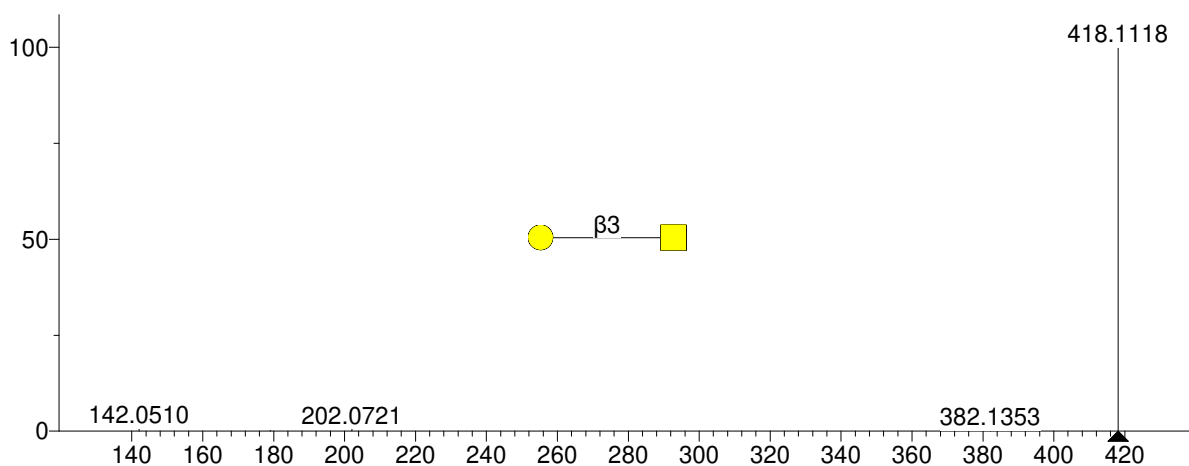

Hit 3 : 2-Acetamido-2-deoxy-3-O-( $\beta$ -D-galactopyranosyl)-D-glucopyranose [M+Cl]<sup>-</sup> HCD 8V P=418.1  
C<sub>14</sub>H<sub>25</sub>NO<sub>11</sub>; MF: 47; RMF: 448; Prob 6.22%; CAS: 489-52-1; Lib: nist\_msms; ID: 534172.

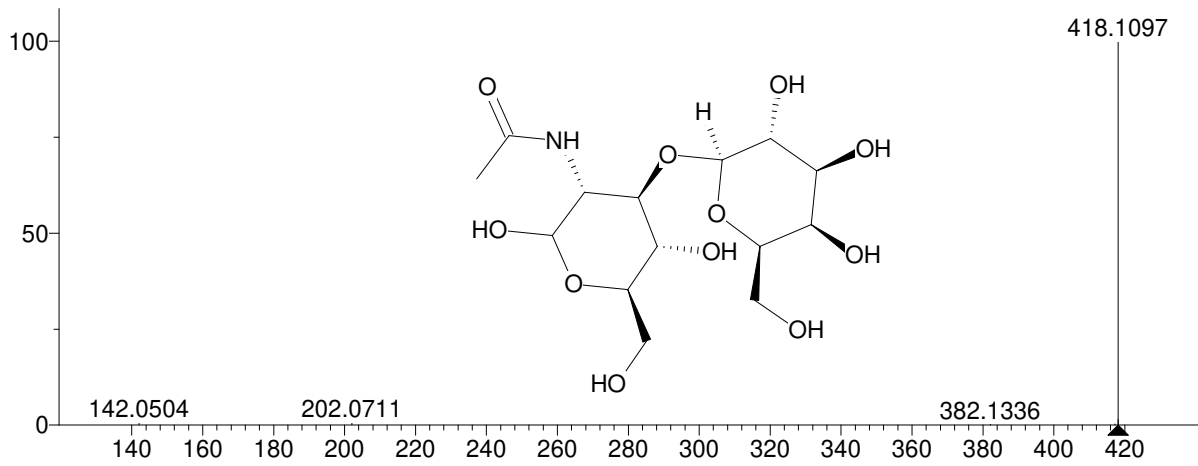

Hit 4 : N-Acetyl-D-lactosamine [M+Cl]<sup>-</sup> HCD 12V P=418.1  
C<sub>14</sub>H<sub>25</sub>NO<sub>11</sub>; MF: 25; RMF: 400; Prob 2.45%; CAS: 32181-59-2; Lib: nist\_msms; ID: 478644.

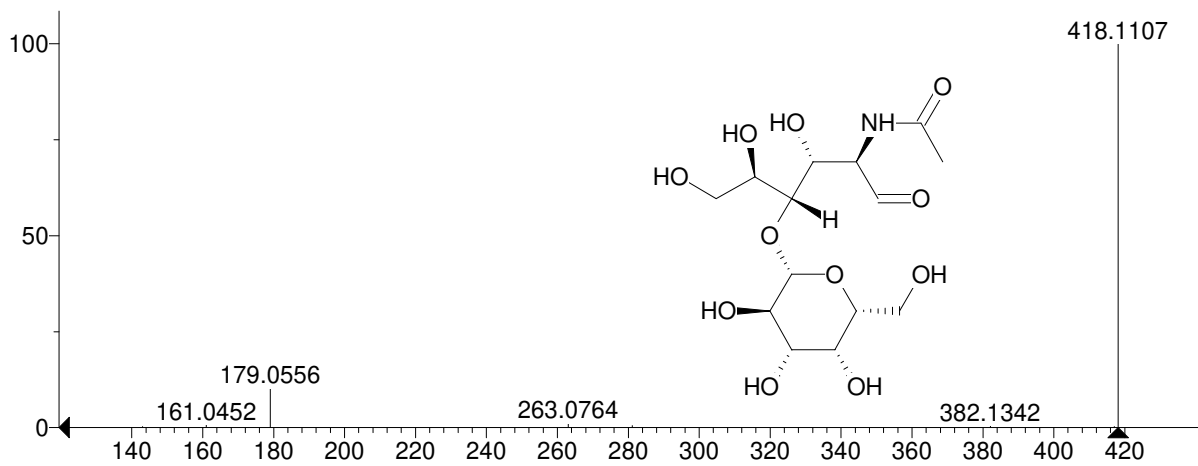



Unknown: Unknown (6.91\_427.1725m/z)  
Compound in Library Factor = 0

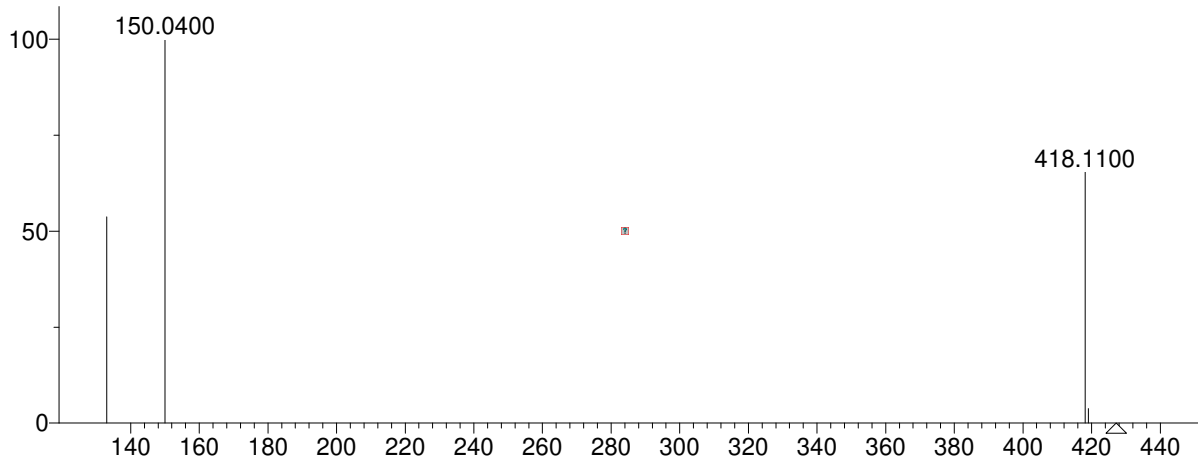

Hit 1 : [(6E,10Z)-10-(acetyloxymethyl)-6-formyl-3-methylidene-2-oxo-3a,4,5,8,9,11a-hexahydrocycloodeca[b]furan-C22H28O7; MF: 0; RMF: 6; Prob 100.0%; Lib: mona-export-vf-npl\_qexactive; ID: 23325.

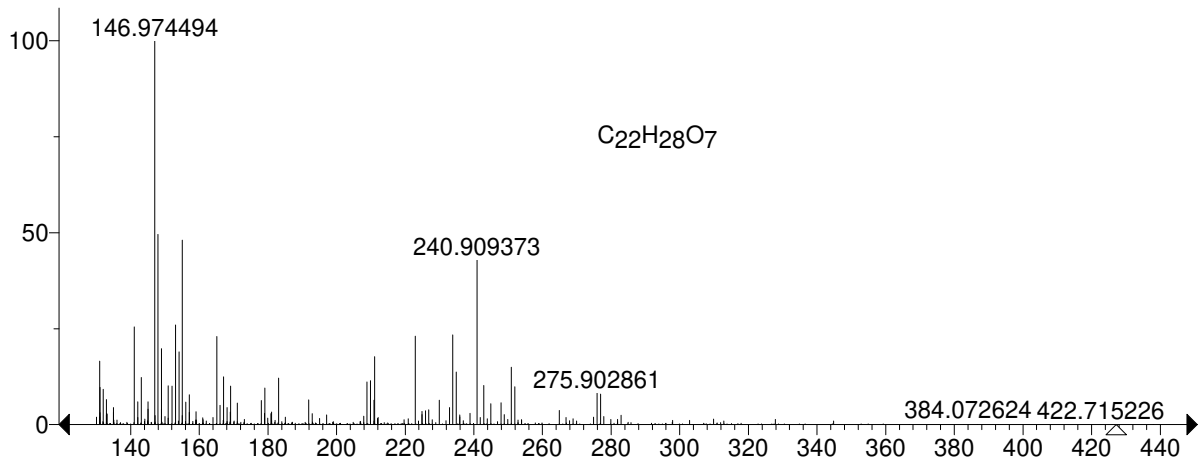

Unknown: Unknown (6.92\_312.1554m/z)  
Compound in Library Factor = -2176

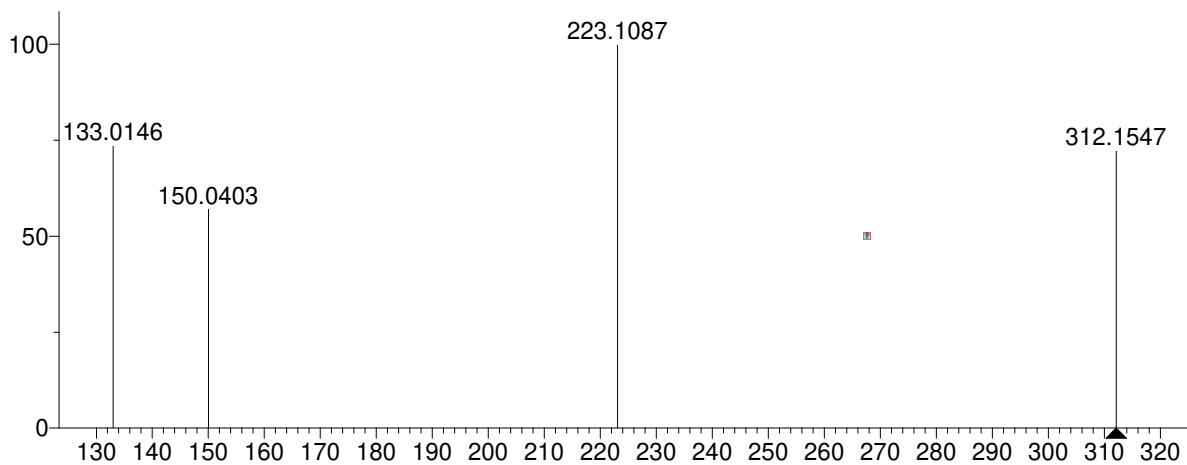

Hit 1 : (-)-Atropine [M+Na]<sup>+</sup> HCD 16V P=312.2  
C<sub>17</sub>H<sub>23</sub>NO<sub>3</sub>; MF: 86; RMF: 471; Prob 52.4%; CAS: 101-31-5; Lib: nist\_msms; ID: 385892.

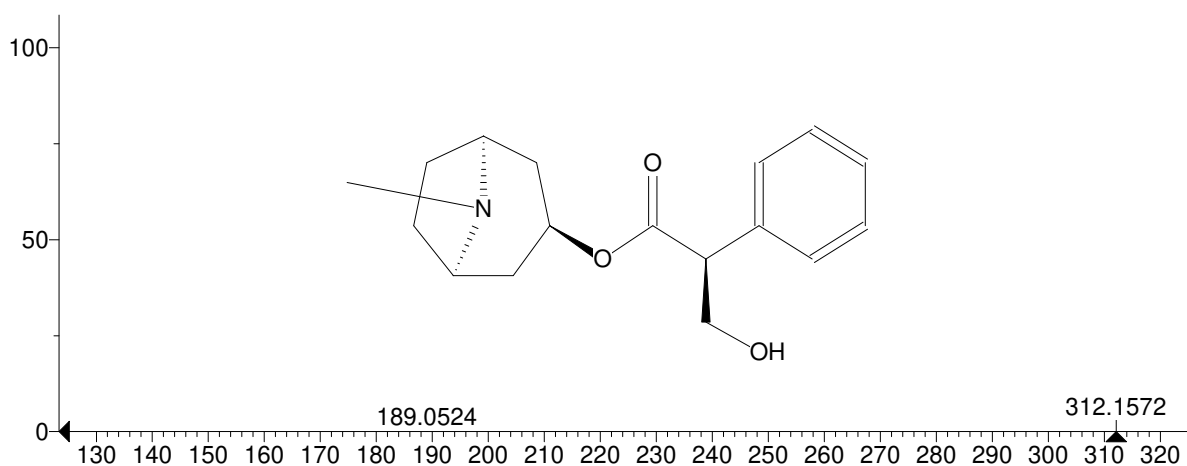

Hit 2 : Atropine [M+Na]<sup>+</sup> HCD 6V P=312.2  
C<sub>17</sub>H<sub>23</sub>NO<sub>3</sub>; MF: 60; RMF: 473; Prob 15.7%; CAS: 51-55-8; Lib: nist\_msms; ID: 385579.

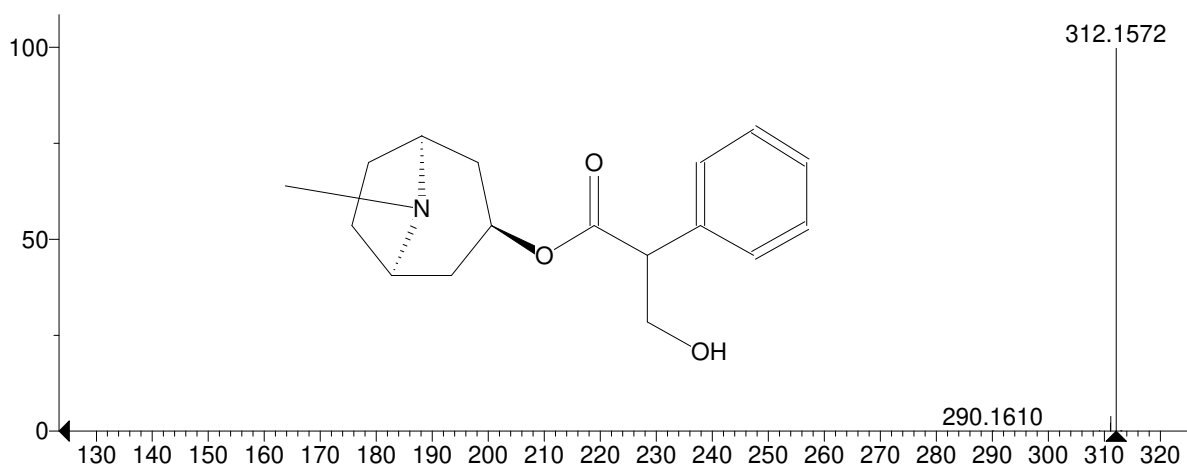

\*\* Search Report Page 2 of 2 \*\*

Hit 3 : Leonurine [M+H]<sup>+</sup> HCD 15V P=312.2  
C<sub>14</sub>H<sub>21</sub>N<sub>3</sub>O<sub>5</sub>; MF: 49; RMF: 462; Prob 10.8%; CAS: 24697-74-3; Lib: nist\_msms; ID: 234001.

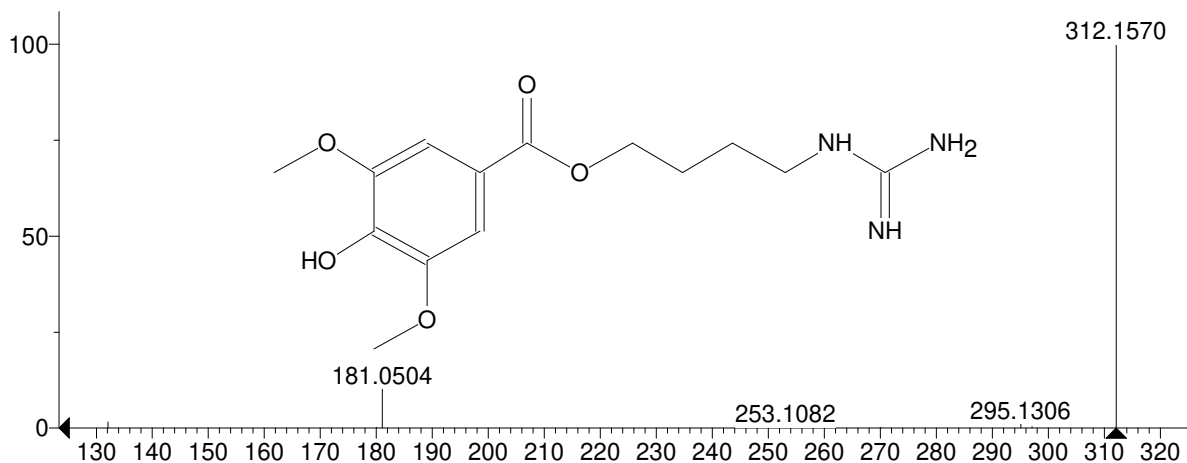

Hit 4 : Ac-Pro-Gly-Pro (PGP) [M+H]<sup>+</sup> HCD 6eV P=312.2  
C<sub>14</sub>H<sub>21</sub>N<sub>3</sub>O<sub>5</sub>; MF: 42; RMF: 450; Prob 8.25%; CAS: 292171-04-1; Lib: nist\_msms; ID: 564205.

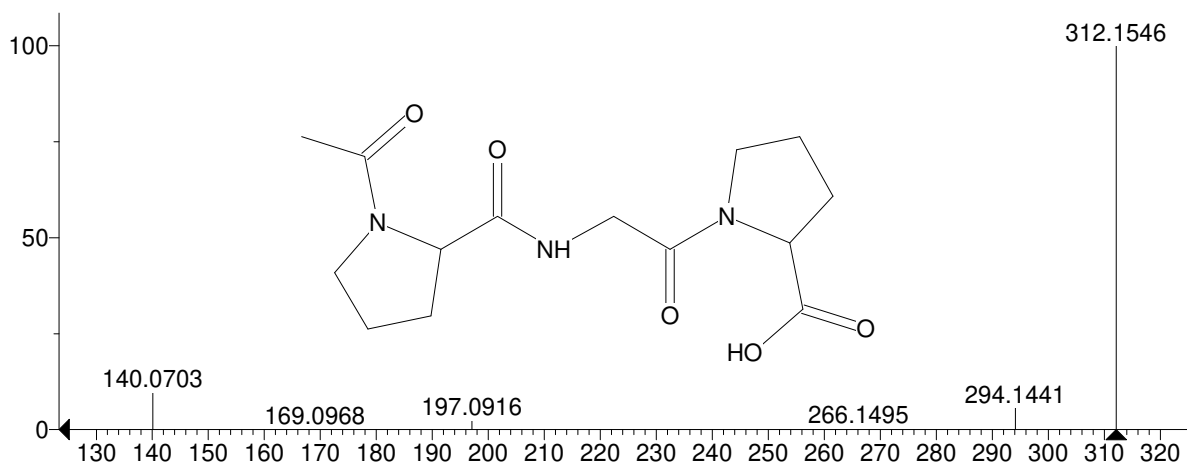

Hit 5 : Vardenafil [M+H-C<sub>6</sub>H<sub>13</sub>SO<sub>2</sub>N<sub>2</sub>]<sup>+</sup> HCD 21V P=312.2  
C<sub>23</sub>H<sub>32</sub>N<sub>6</sub>O<sub>4</sub>S; MF: 35; RMF: 557; Prob 6.32%; CAS: 224785-90-4; Lib: nist\_msms; ID: 329143.

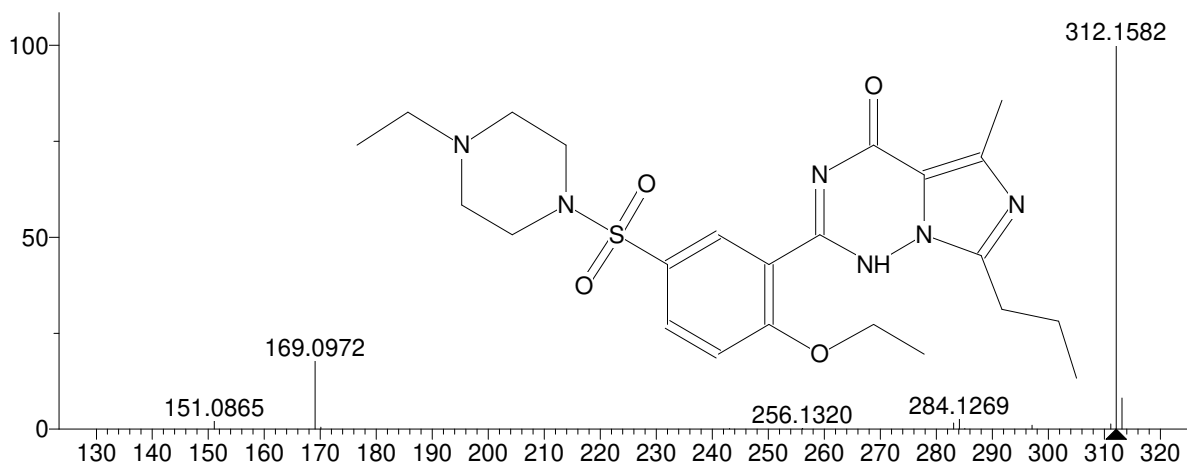

Unknown: Unknown (6.93\_343.1963m/z)  
Compound in Library Factor = 0

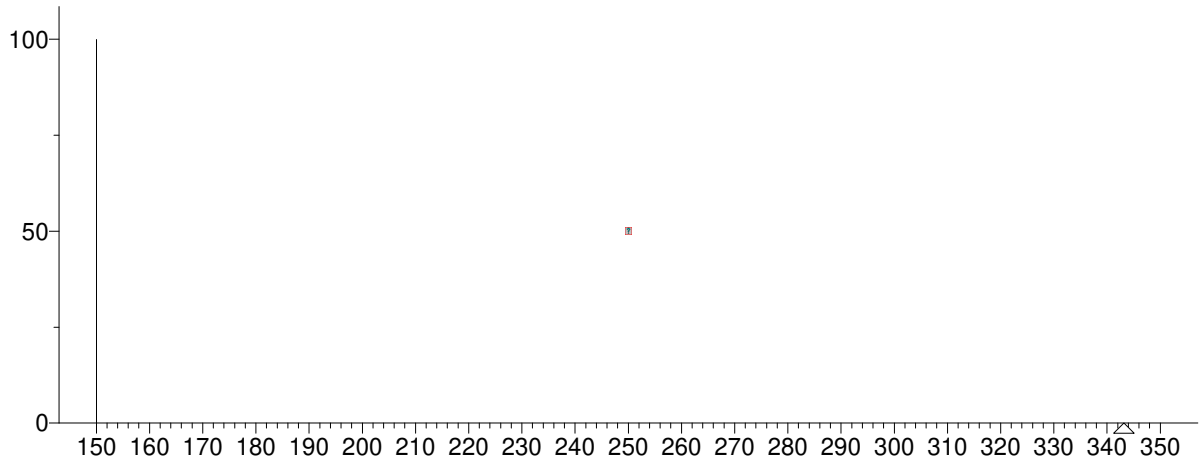

Unknown: Unknown (6.94\_366.1543m/z)  
Compound in Library Factor = 0

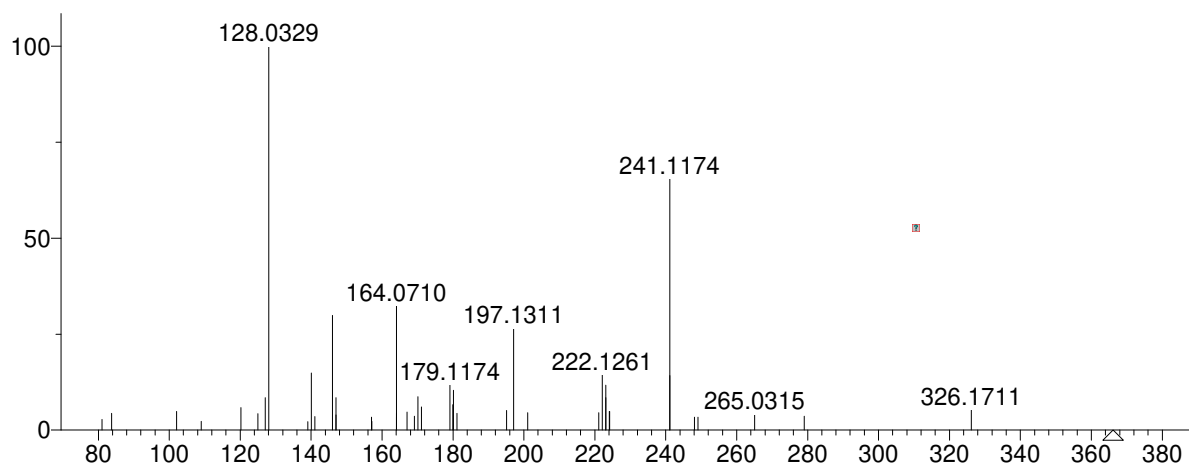

Hit 1 : Prazosin [M+H-H<sub>2</sub>O]<sup>+</sup> HCD 62V P=366.2  
C<sub>19</sub>H<sub>21</sub>N<sub>5</sub>O<sub>4</sub>; MF: 0; RMF: 16; Prob 100.0%; CAS: 19216-56-9; Lib: nist\_msms; ID: 135105.

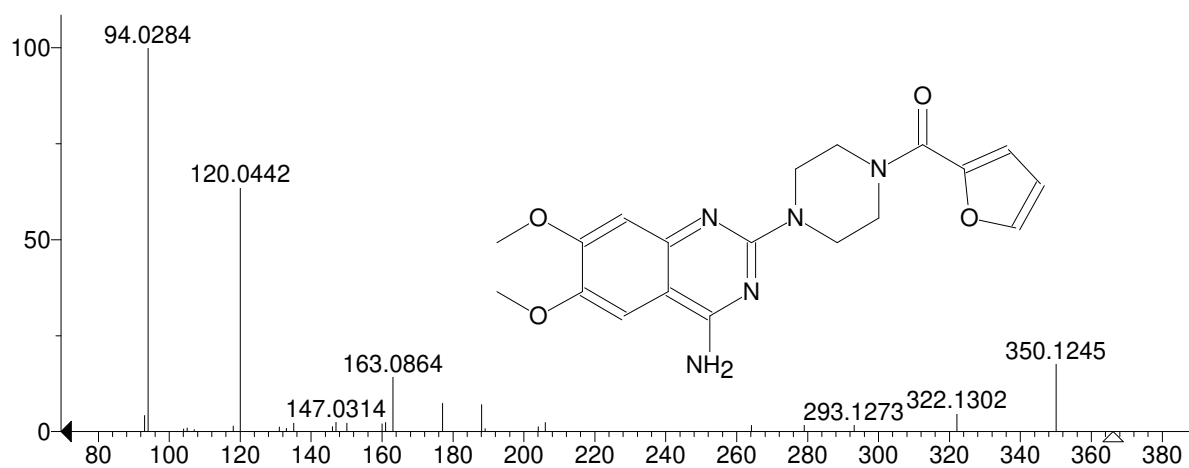

Unknown: Unknown (6.94\_373.1585m/z)  
Compound in Library Factor = 0

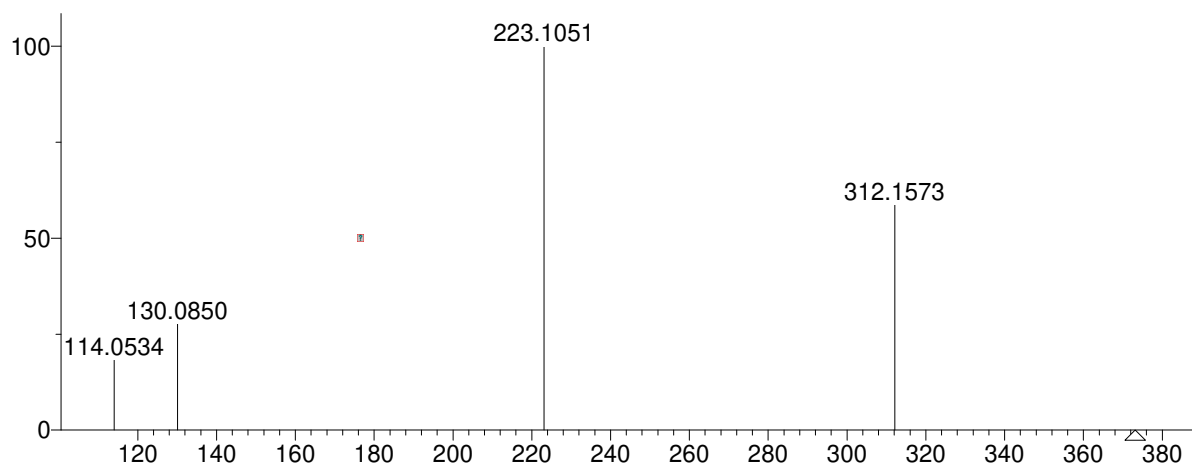

Hit 1 : 15 $\beta$ -Hydroxycyproterone acetate [M+H-C<sub>2</sub>H<sub>4</sub>O<sub>2</sub>]<sup>+</sup> HCD 33V P=373.2  
C<sub>24</sub>H<sub>29</sub>ClO<sub>5</sub>; MF: 0; RMF: 59; Prob 100.0%; CAS: 65423-26-9; Lib: nist\_msms; ID: 440422.

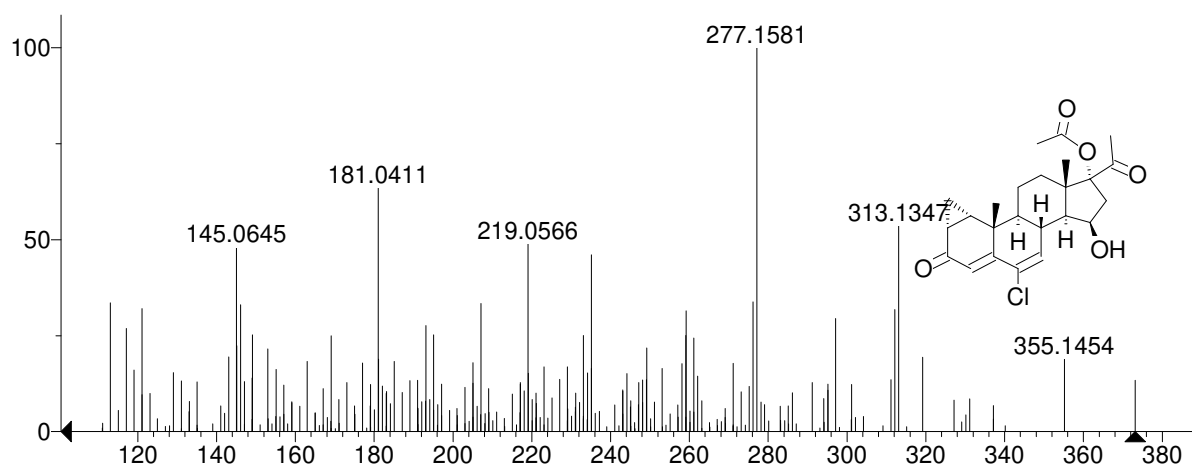

Unknown: Unknown (6.97\_642.2129m/z)  
Compound in Library Factor = 0

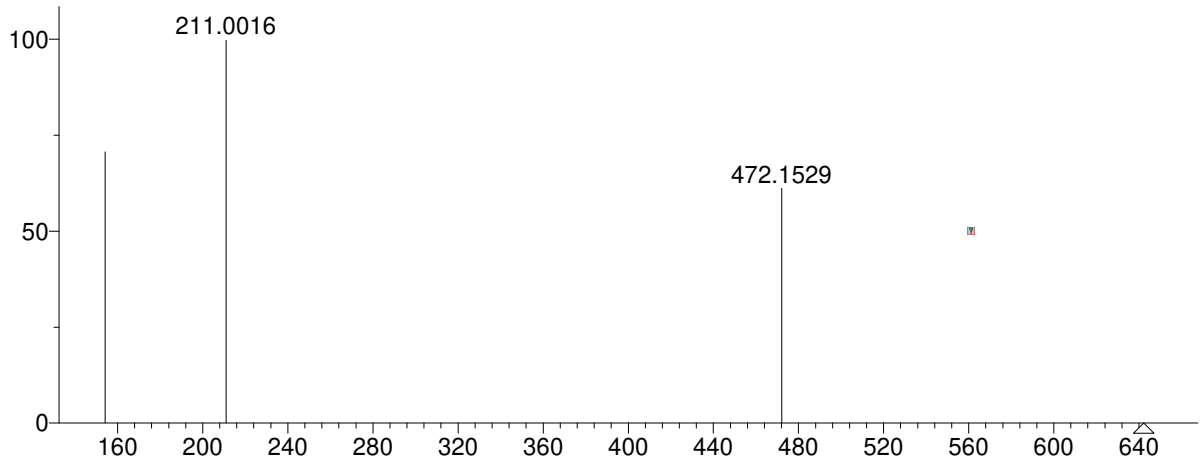

\*\* Search Report Page 1 of 2 \*\*

Unknown: Unknown (7.01\_344.1814m/z)  
Compound in Library Factor = -3273

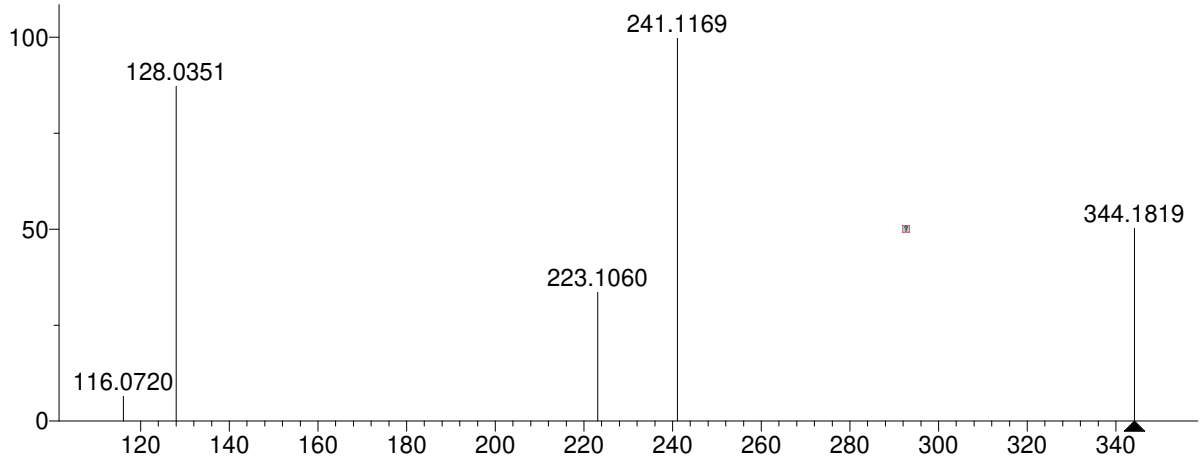

Hit 1 : NCGC00347618-02!3-hydroxy-N-(1-hydroxy-4-methylpentan-2-yl)-5-oxo-6-phenylhexanamide [M+Na]<sup>+</sup> P  
C<sub>18</sub>H<sub>27</sub>NO<sub>4</sub>; MF: 8; RMF: 341; Prob 40.1%; Lib: mona-export-gnps; ID: 9879.

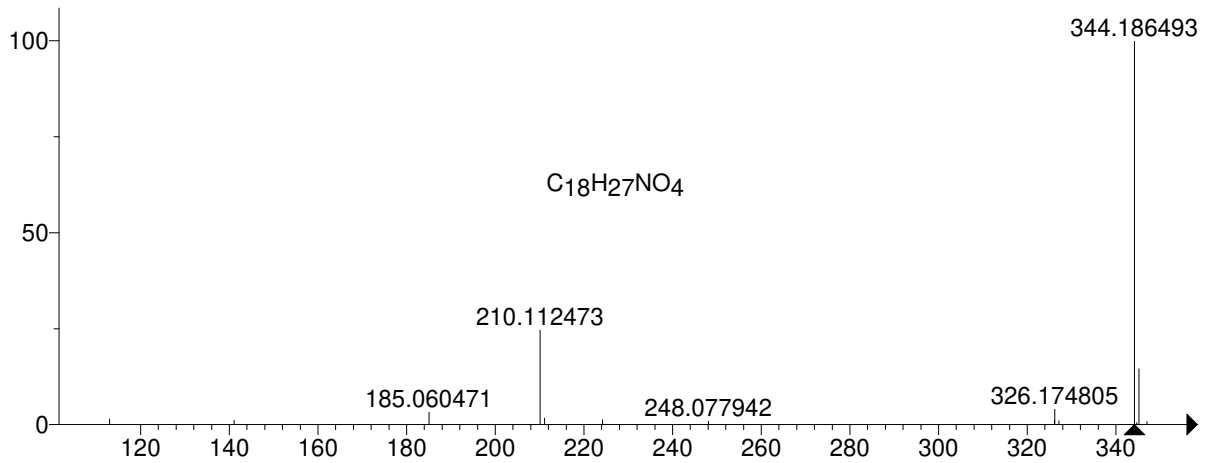

Hit 2 : Clemastine Fumarate [M+H]<sup>+</sup> P=344.2  
C<sub>25</sub>H<sub>30</sub>ClNO<sub>5</sub>; MF: 0; RMF: 48; Prob 29.9%; Lib: mona-export-gnps; ID: 639.

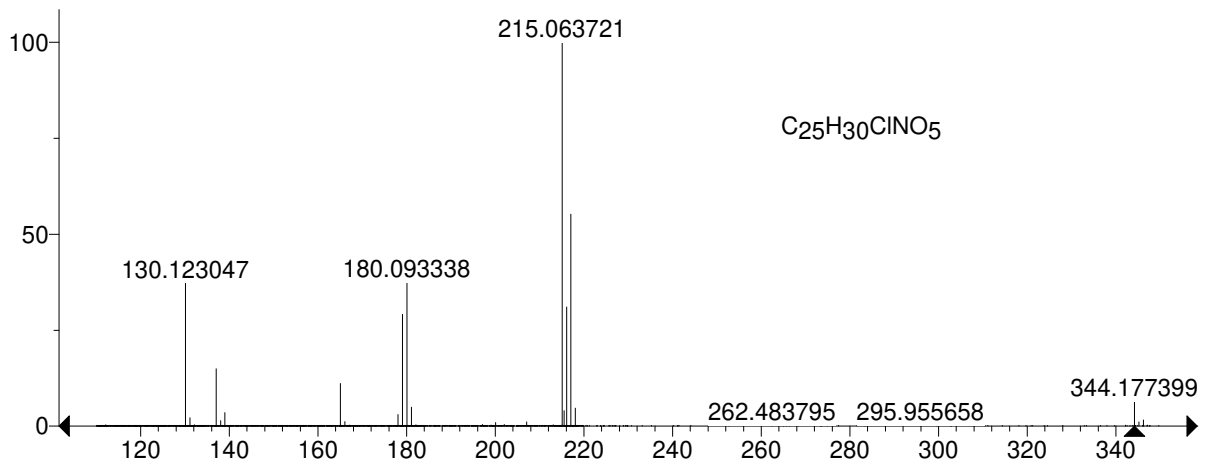



\*\* Search Report Page 2 of 2 \*\*

Hit 3 : 4-amino-2-hydroxy-5-[[1-hydroxy-1-(5-oxo-6-bicyclo[4.1.0]hept-3-enyl)propan-2-yl]amino]-5-oxopentanoic acid  
C<sub>15</sub>H<sub>22</sub>N<sub>2</sub>O<sub>6</sub>; MF: 0; RMF: 16; Prob 29.9%; Lib: mona-export-vf-npl\_qexactive; ID: 16561.

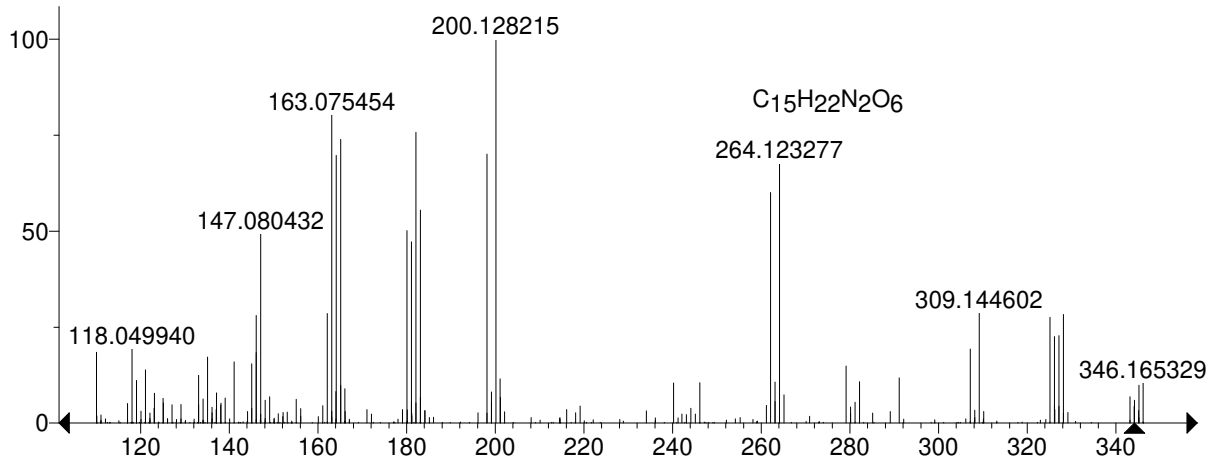

Unknown: Unknown (7.01\_370.1610m/z)  
Compound in Library Factor = -1523

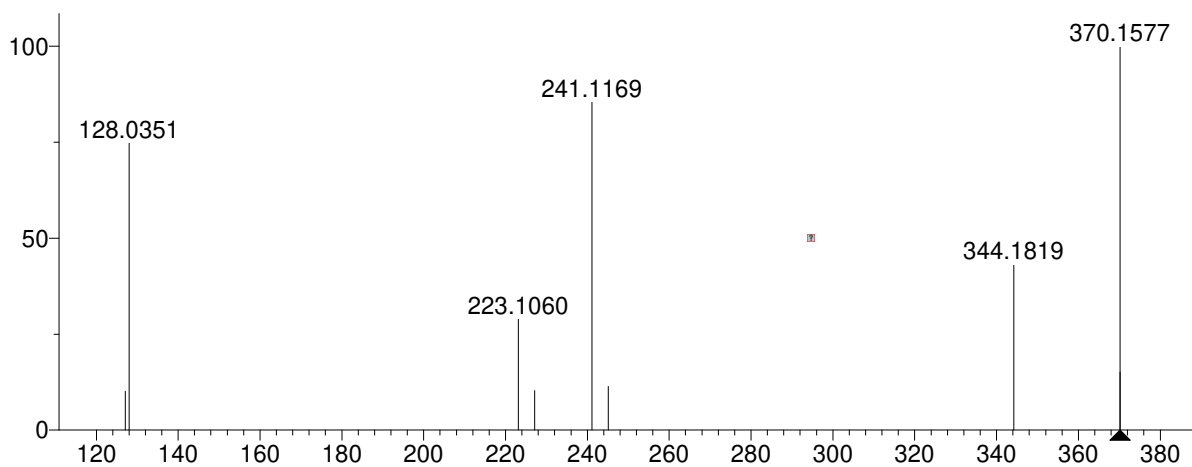

Hit 1 : Tenovin-1 [M+H]<sup>+</sup> HCD 11V P=370.2  
C<sub>20</sub>H<sub>23</sub>N<sub>3</sub>O<sub>2</sub>S; MF: 44; RMF: 522; Prob 100.0%; CAS: 380315-80-0; Lib: nist\_msms; ID: 334898.

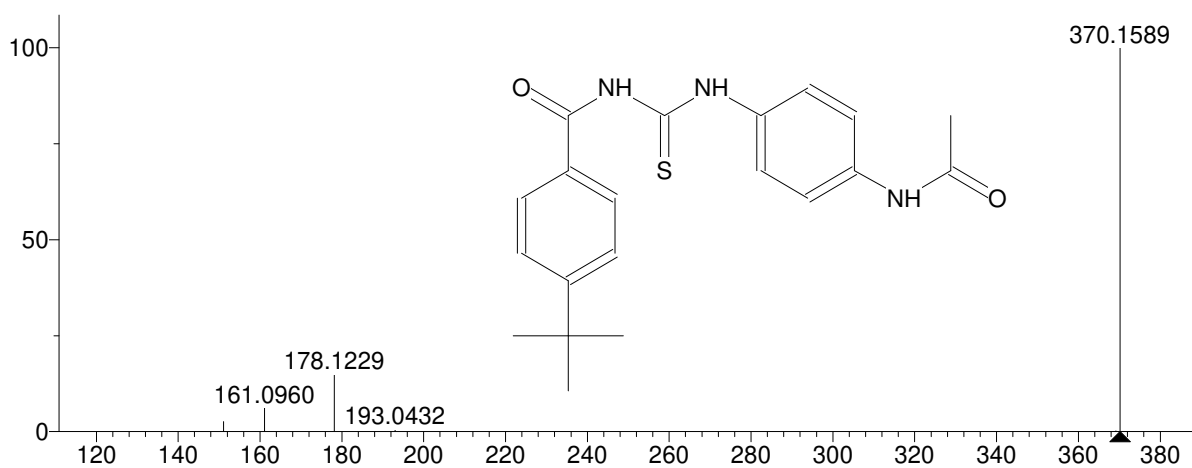

Unknown: Unknown (7.01\_429.1857m/z)  
Compound in Library Factor = 0

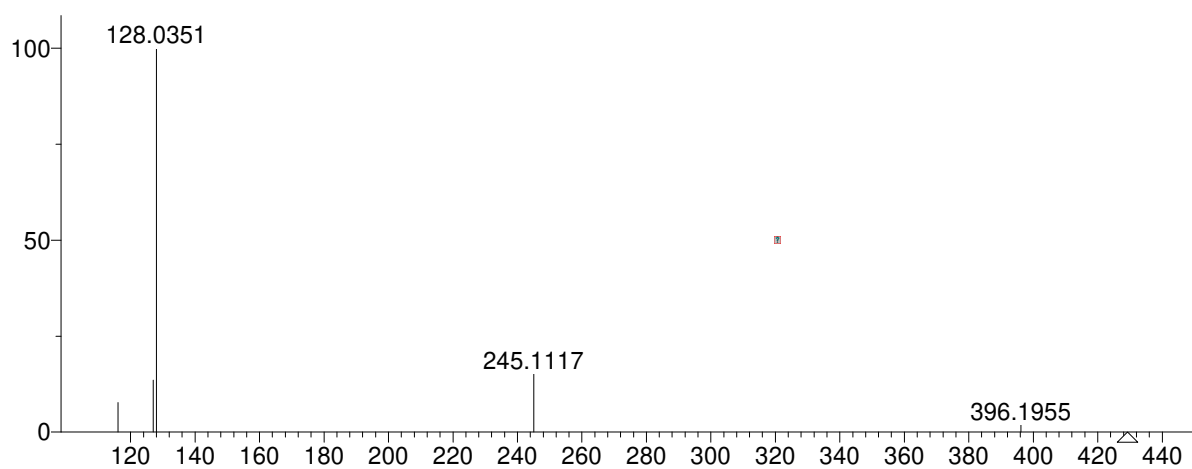

Hit 1 : (2R,3R,4S,5S,6R)-2-[6-hydroxy-3-[(E)-3-hydroxybut-1-enyl]-2,4,4-trimethylcyclohexyl]oxy-6-(hydroxymethyl) C<sub>19</sub>H<sub>34</sub>O<sub>8</sub>; MF: 0; RMF: 3; Prob 100.0%; Lib: anthocyanins mona; ID: 9985.

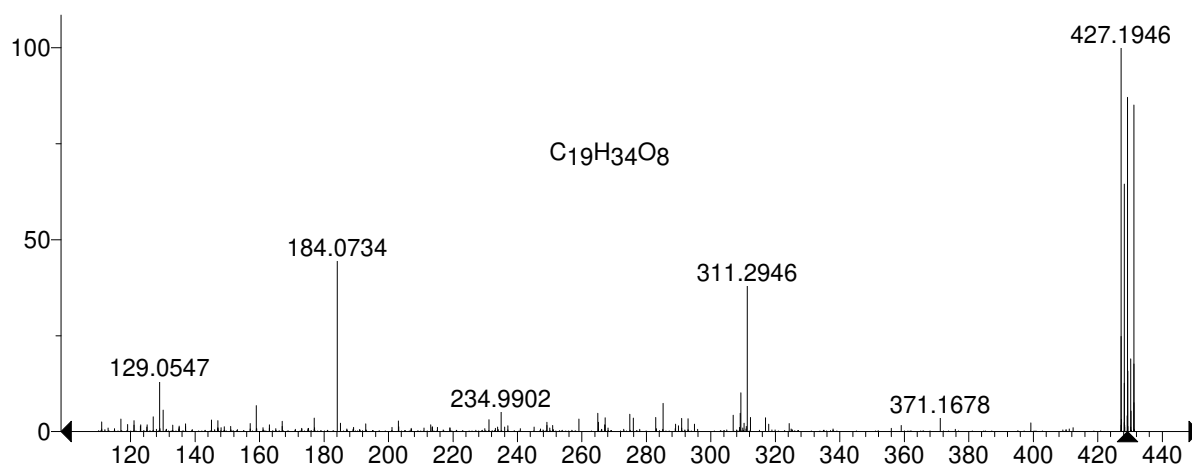

Unknown: Unknown (7.01\_783.3779m/z)  
Compound in Library Factor = 0

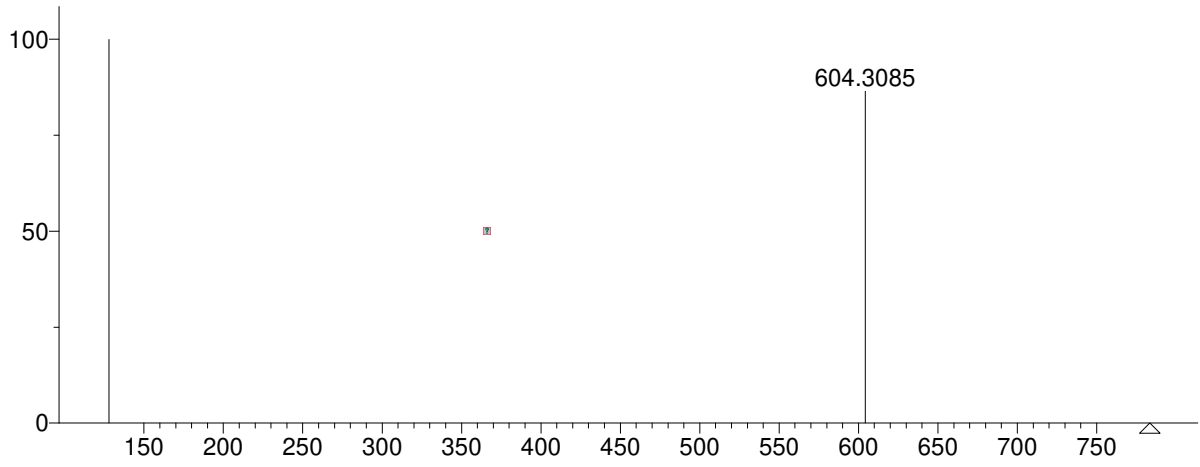

\*\* Search Report Page 1 of 2 \*\*

Unknown: Unknown (7.02\_425.2029m/z)  
Compound in Library Factor = -404

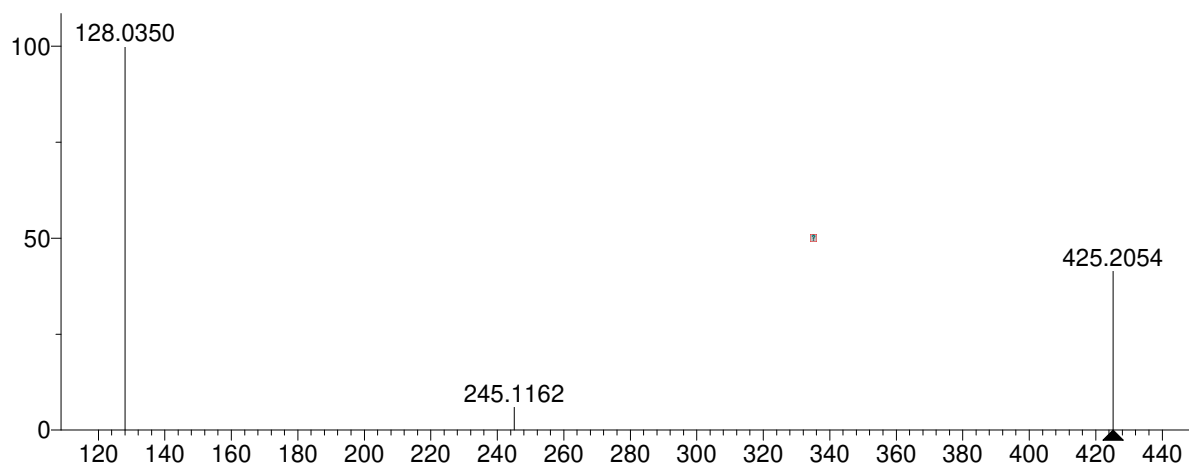

Hit 1 : Benazepril [M+H]<sup>+</sup> HCD 13V P=425.2  
C<sub>24</sub>H<sub>28</sub>N<sub>2</sub>O<sub>5</sub>; MF: 287; RMF: 917; Prob 94.6%; CAS: 86541-75-5; Lib: nist\_msms; ID: 119286.

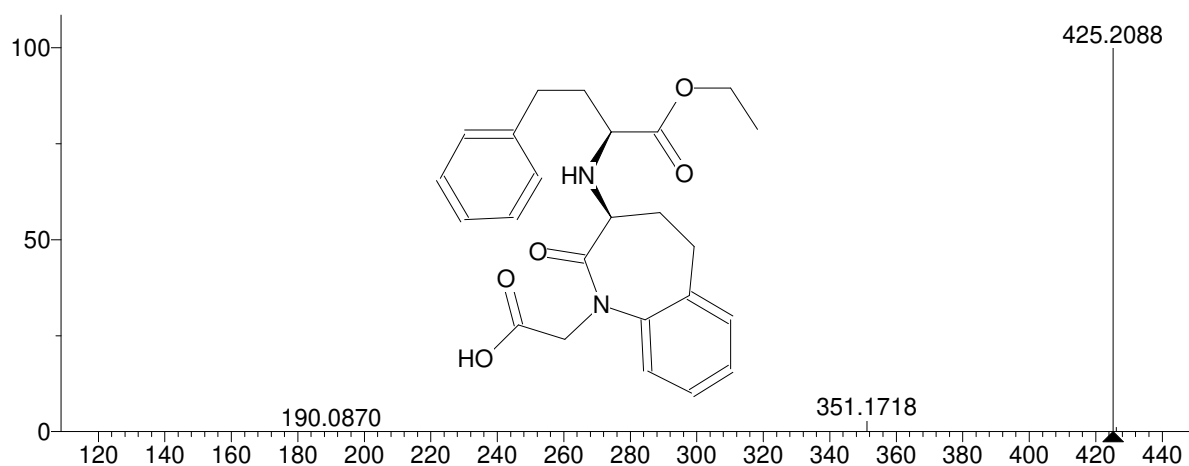

Hit 2 : Telmisartan [M-H-CO<sub>2</sub>]<sup>-</sup> =>440.3=>425.2 IT 35% P=425.2  
C<sub>33</sub>H<sub>30</sub>N<sub>4</sub>O<sub>2</sub>; MF: 139; RMF: 840; Prob 2.72%; CAS: 144701-48-4; Lib: nist\_msms; ID: 255935.

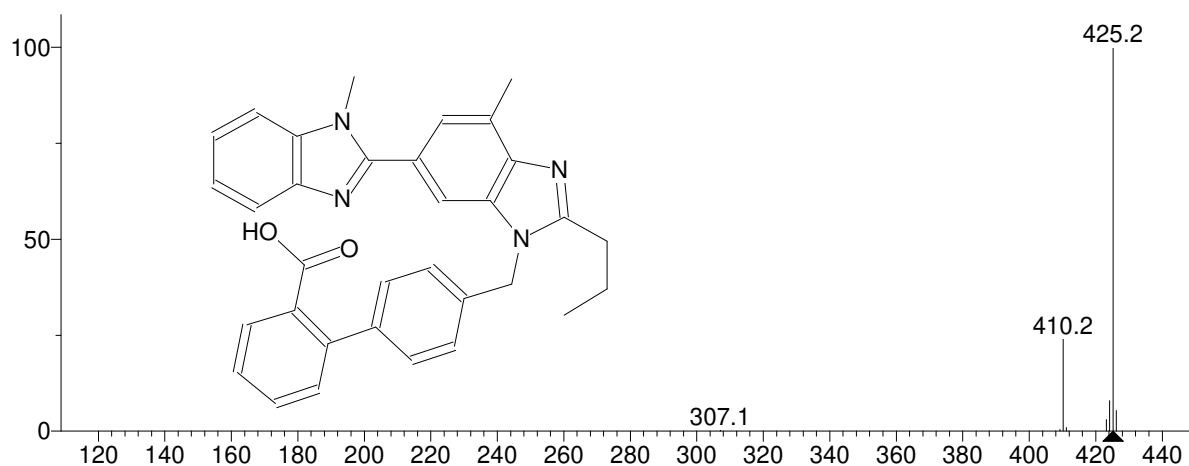

Hit 3 : Trandolaprilat [M+Na]<sup>+</sup> HCD 15V P=425.2  
C<sub>22</sub>H<sub>30</sub>N<sub>2</sub>O<sub>5</sub>; MF: 134; RMF: 811; Prob 2.19%; CAS: 87679-71-8; Lib: nist\_msms; ID: 434140.

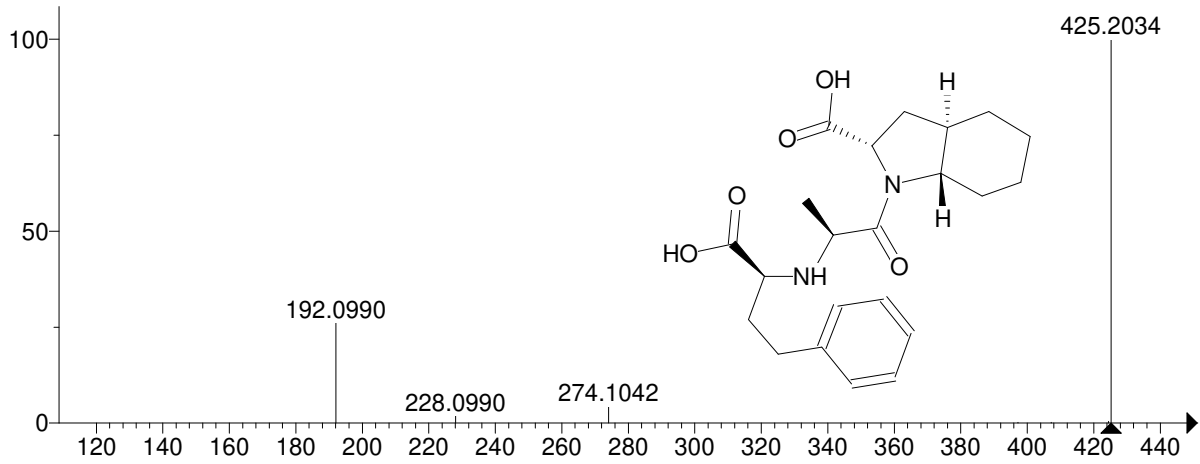

Hit 4 : Tyr-Asp-Lys [M+H]<sup>+</sup> QQQ 14V P=425.2  
C<sub>19</sub>H<sub>28</sub>N<sub>4</sub>O<sub>7</sub>; MF: 16; RMF: 460; Prob 0.12%; Lib: nist\_msms; ID: 42317.

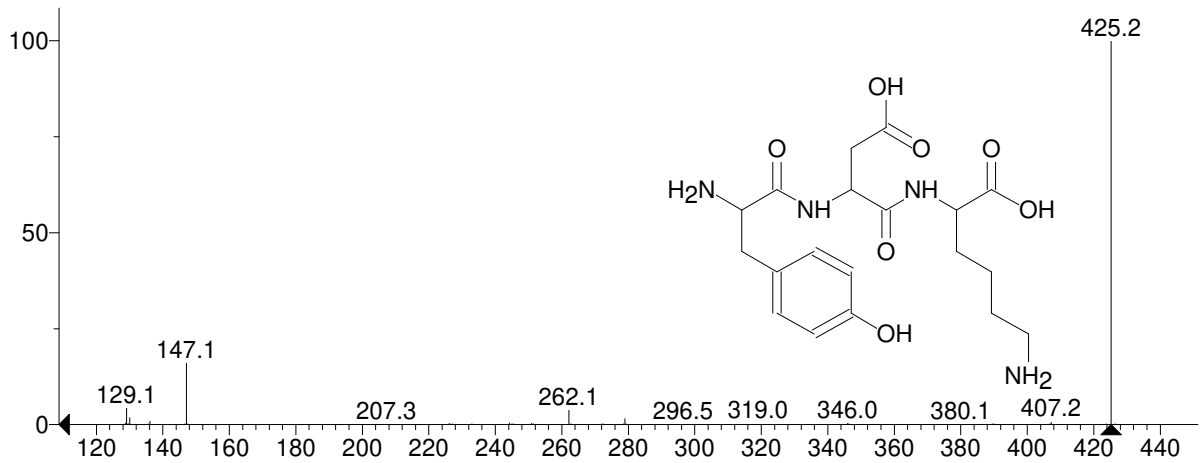

Hit 5 : Asp-Tyr-Lys [M+H]<sup>+</sup> QTOF 10V P=425.2  
C<sub>19</sub>H<sub>28</sub>N<sub>4</sub>O<sub>7</sub>; MF: 6; RMF: 339; Prob 0.08%; Lib: nist\_msms; ID: 50040.

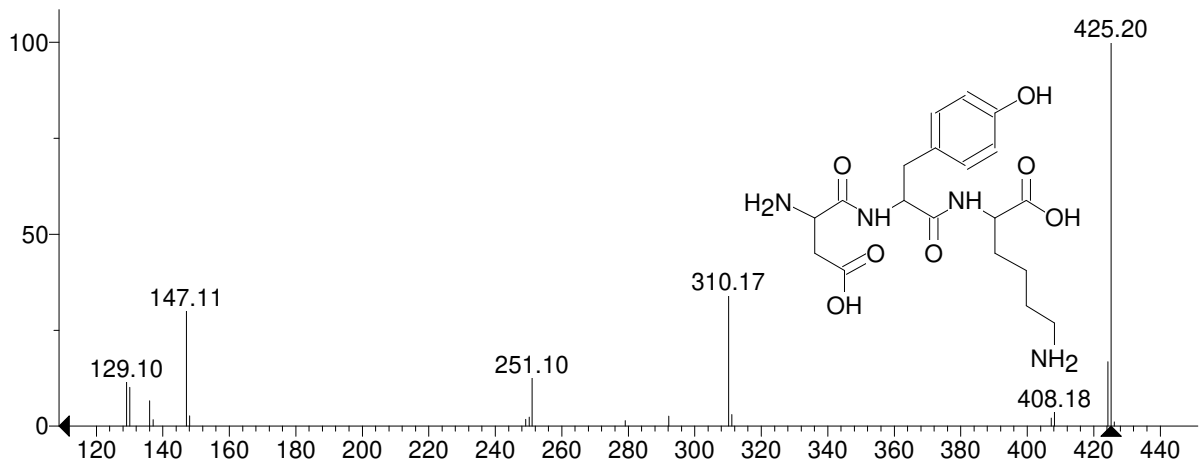

\*\* Search Report Page 1 of 2 \*\*

Unknown: Unknown (7.02\_467.1660m/z)  
Compound in Library Factor = 0

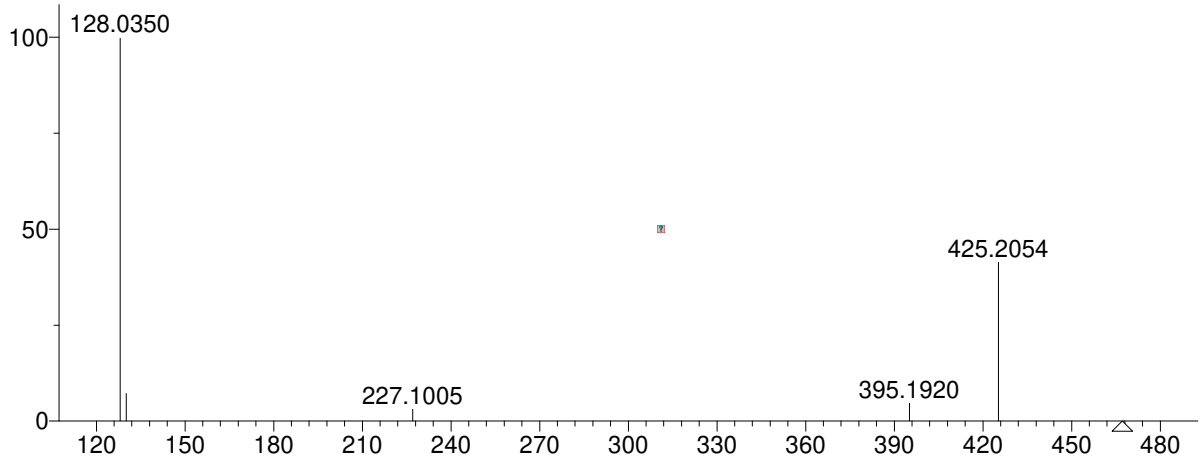

Hit 1 : MMV689243 [M+H]<sup>+</sup> (20-30-40%) P=467.2  
C<sub>23</sub>H<sub>20</sub>F<sub>6</sub>N<sub>4</sub>; MF: 0; RMF: 89; Prob 16.7%; Lib: mona-export-pathogen\_box; ID: 361.

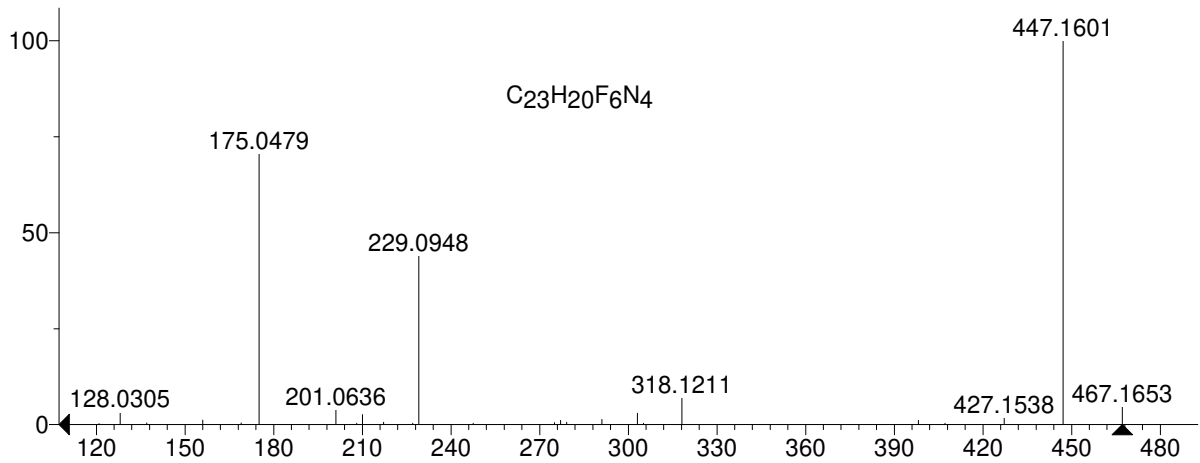

Hit 2 : 11-(hydroxymethyl)-2,6,6,14,19-pentamethyl-7,16,18-trioxapentacyclo[12.6.1.0A<sup>2</sup>,A<sup>1</sup>1A<sup>2</sup>.0a<sup>u</sup>,A<sup>1</sup>1a<sup>c</sup>  
C<sub>24</sub>H<sub>28</sub>O<sub>8</sub>; MF: 0; RMF: 51; Prob 16.7%; Lib: mona-export-vf-npl\_qexactive; ID: 21163.

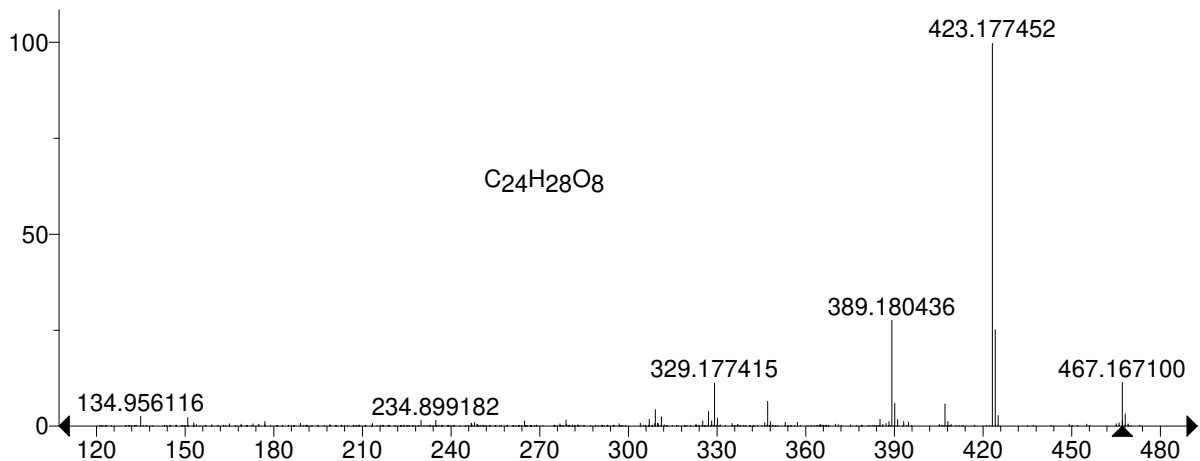

Hit 3 : 11,17-Difuroatemometasone [M+H-C5H5ClO3]+ IT 35% P=467.2  
C33H32Cl2O8; MF: 0; RMF: 48; Prob 16.7%; CAS: 1370190-33-2; Lib: nist\_msms; ID: 436547.

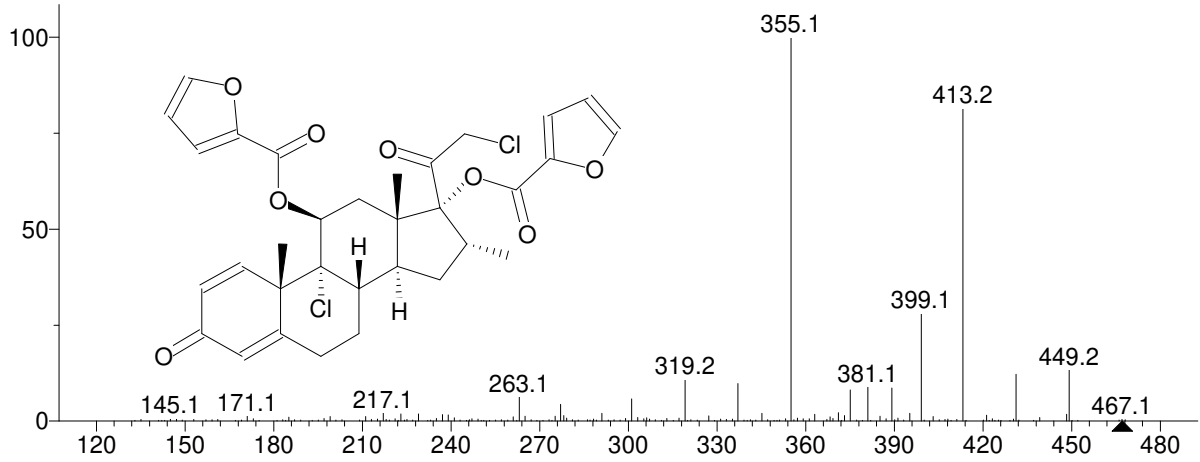

Hit 4 : Azadirachtin B [M+H-C7H16O6]+ IT 35% P=467.2  
C33H42O14; MF: 0; RMF: 36; Prob 16.7%; CAS: 95507-03-2; Lib: nist\_msms; ID: 223464.

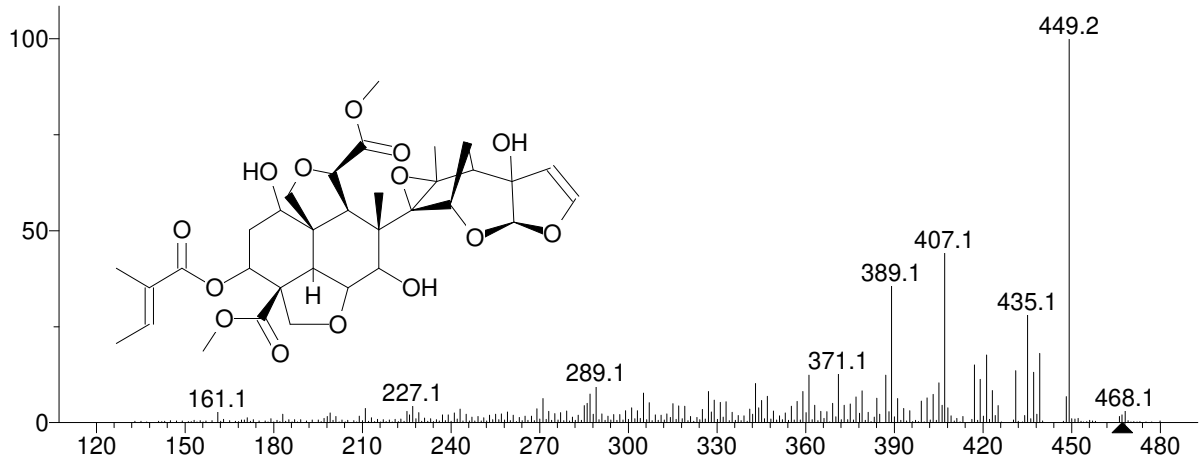

Hit 5 : Man3 b [M+H+Na]2+ IT 35% P=467.2  
C34H58N2O26; MF: 0; RMF: 19; Prob 16.7%; Lib: nist\_msms; ID: 184041.

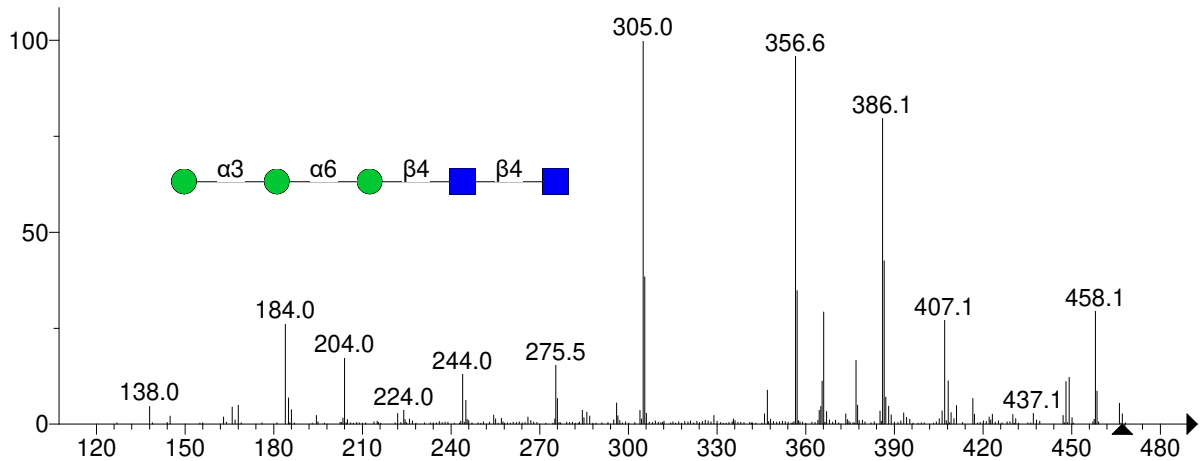



Unknown: Unknown (7.03\_283.1532m/z)  
Compound in Library Factor = 0

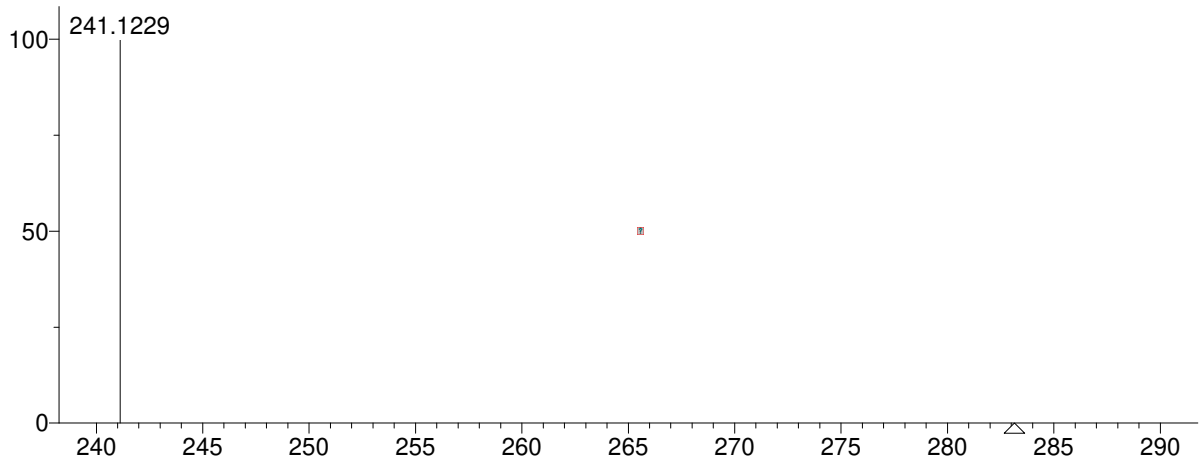

\*\* Search Report Page 1 of 2 \*\*

Unknown: Unknown (7.03\_415.1695m/z)  
Compound in Library Factor = -3273

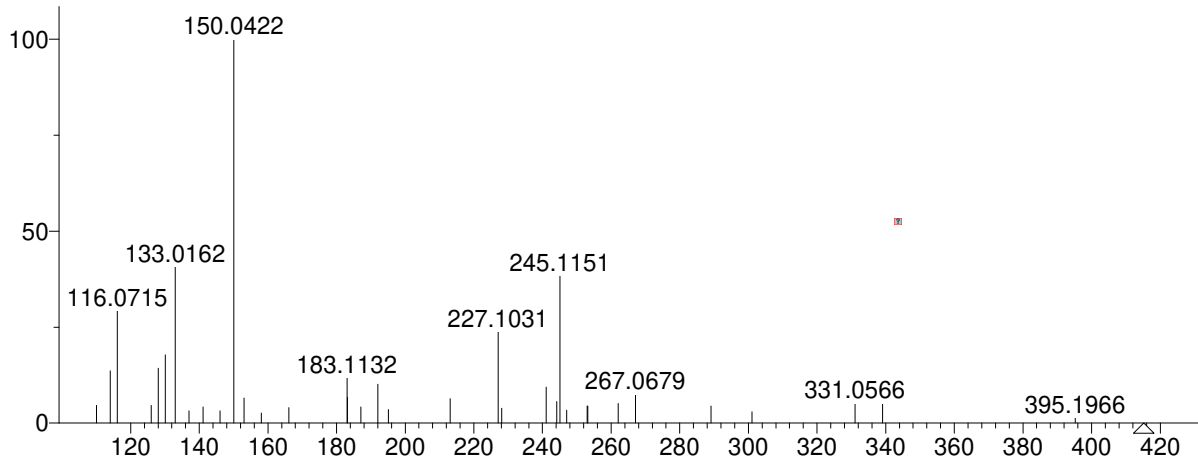

Hit 1 : Diltiazem [M+H]<sup>+</sup> HCD 74V P=415.2  
C<sub>22</sub>H<sub>26</sub>N<sub>2</sub>O<sub>4</sub>S; MF: 10; RMF: 417; Prob 22.1%; CAS: 42399-41-7; Lib: nist\_msms; ID: 281169.

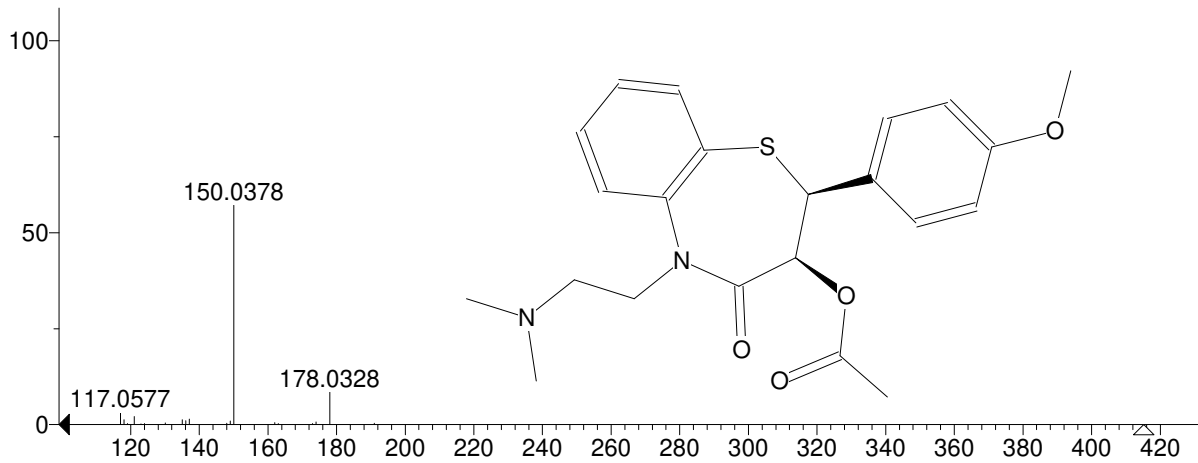

Hit 2 : 6-formyl-10-(hydroxymethyl)-5-methoxy-3-methylidene-2-oxo-2H,3H,3aH,4H,5H,8H,9H,11aH-cyclodeca[b]  
C<sub>21</sub>H<sub>28</sub>O<sub>7</sub>; MF: 1; RMF: 54; Prob 16.1%; Lib: mona-export-vf-npl\_qexactive; ID: 16435.

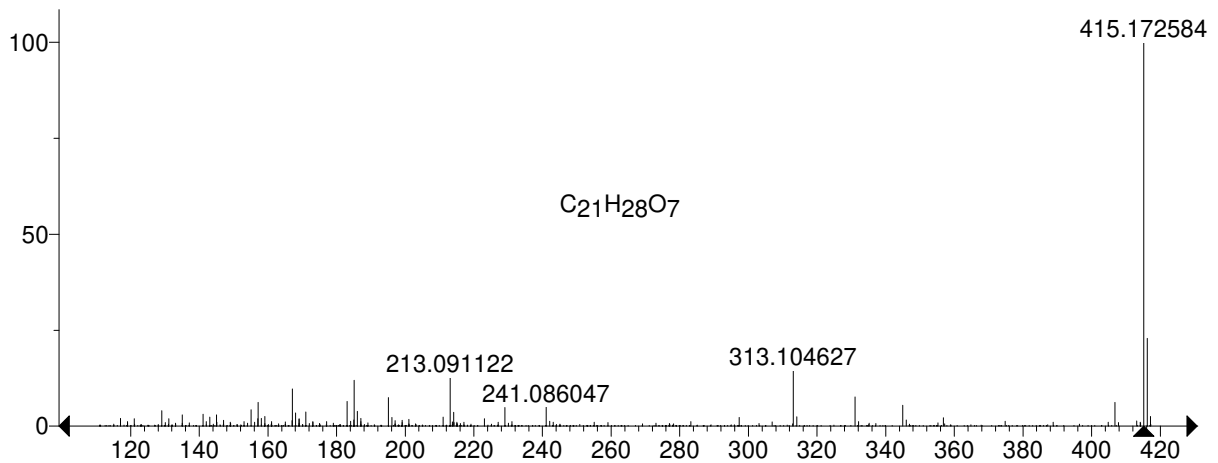

Hit 3 : Diltiazem HCl (Tiazac) [M+H]<sup>+</sup> P=415.2  
C<sub>22</sub>H<sub>27</sub>CIN<sub>2</sub>O<sub>4</sub>S; MF: 0; RMF: 155; Prob 15.4%; Lib: mona-export-gnps; ID: 648.

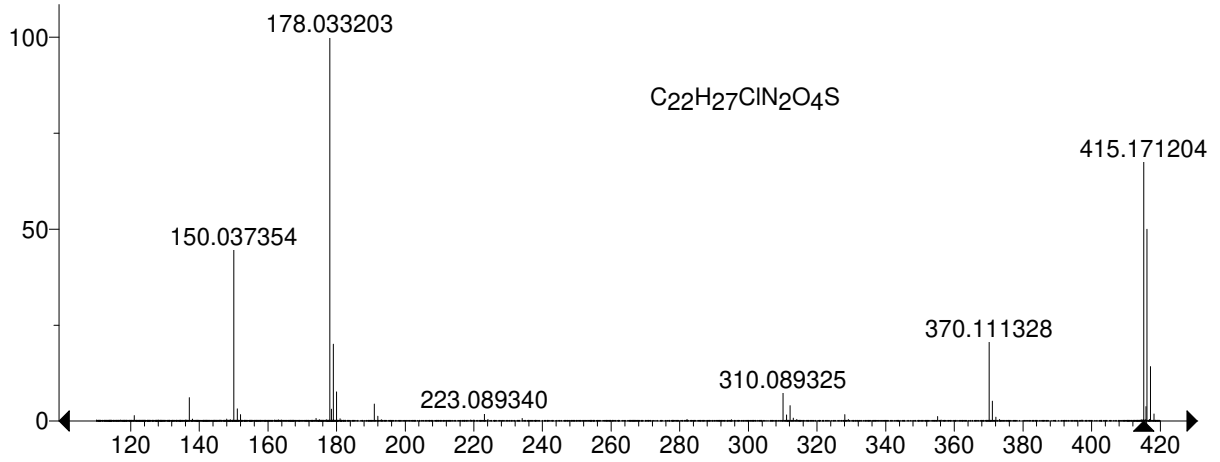

Hit 4 : 2-amino-5-[2-[[2,3-dihydroxy-2-(1-hydroxyethyl)butanoyl]oxymethyl]-4-hydroxyanilino]-5-oxopentanoic acid  
C<sub>18</sub>H<sub>26</sub>N<sub>2</sub>O<sub>9</sub>; MF: 0; RMF: 16; Prob 15.4%; Lib: mona-export-vf-npl\_qexactive; ID: 23033.

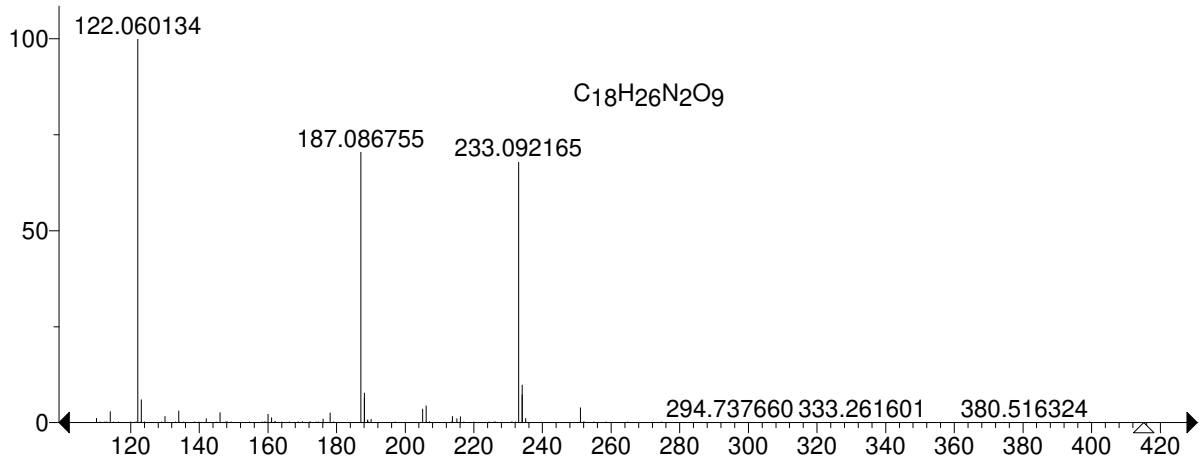

Hit 5 : NCGC00347525-03!2-amino-5-[2-[[2,3-dihydroxy-2-(1-hydroxyethyl)butanoyl]oxymethyl]-4-hydroxyanilino]-  
C<sub>18</sub>H<sub>26</sub>N<sub>2</sub>O<sub>9</sub>; MF: 0; RMF: 15; Prob 15.4%; Lib: mona-export-gnps; ID: 9213.

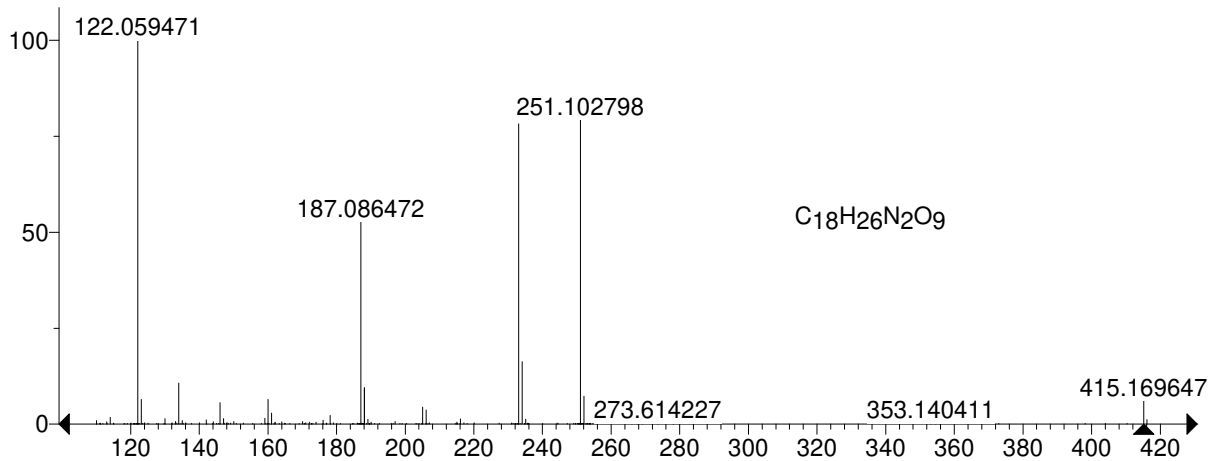

Unknown: Unknown (7.04\_241.1184m/z)  
Compound in Library Factor = -3273

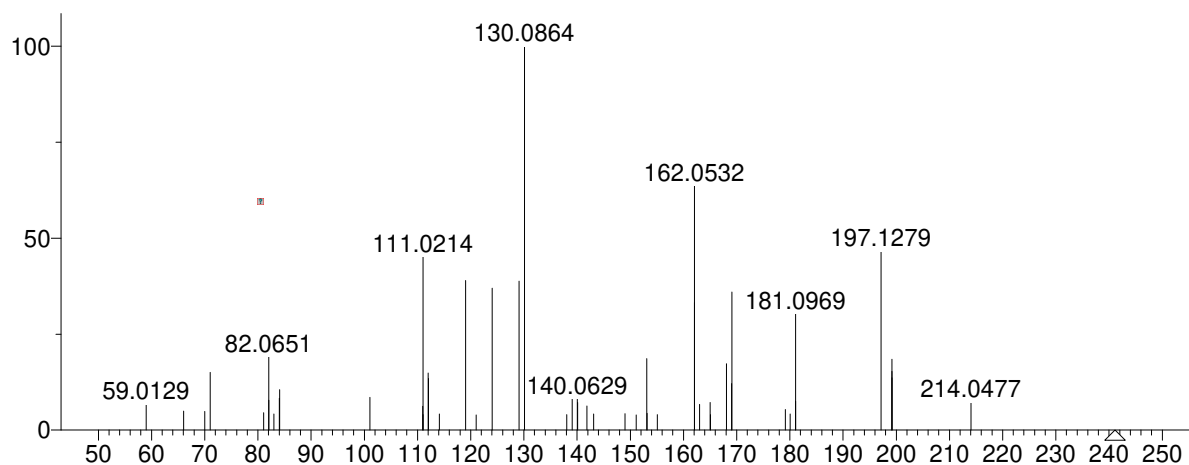

Hit 1 : Pyroglutamyl-Isoleucine; PlaSMA ID-369 [M-H]<sup>-</sup> P=241.1  
C<sub>11</sub>H<sub>18</sub>N<sub>2</sub>O<sub>4</sub>; MF: 1; RMF: 112; Prob 100.0%; Lib: biomsmms-neg-plasma; ID: 400.

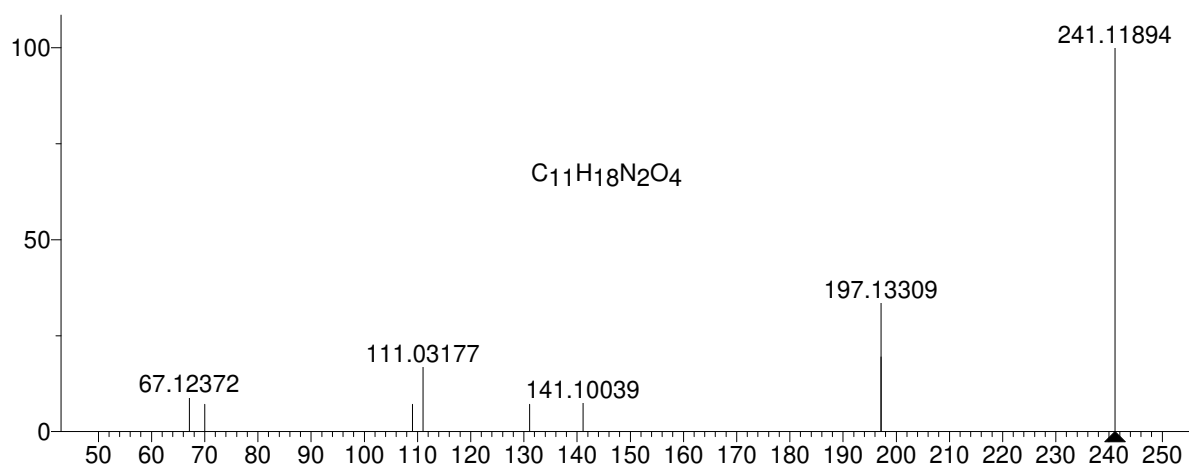

\*\* Search Report Page 1 of 2 \*\*

Unknown: Unknown (7.04\_559.2717m/z)  
Compound in Library Factor = -2387

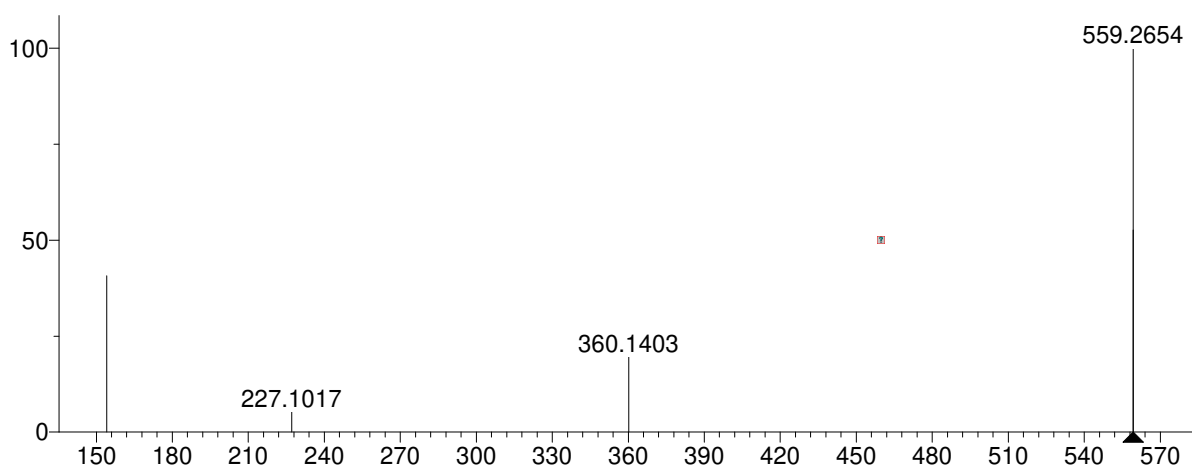

Hit 1 : PG 21:4; PG 3:0-18:4; [M-H]<sup>-</sup> [M-H]<sup>-</sup> P=559.3  
C<sub>27</sub>H<sub>45</sub>O<sub>10</sub>P; MF: 12; RMF: 347; Prob 37.5%; Lib: msdial-insilicomsm-lipids-neg; ID: 324655.

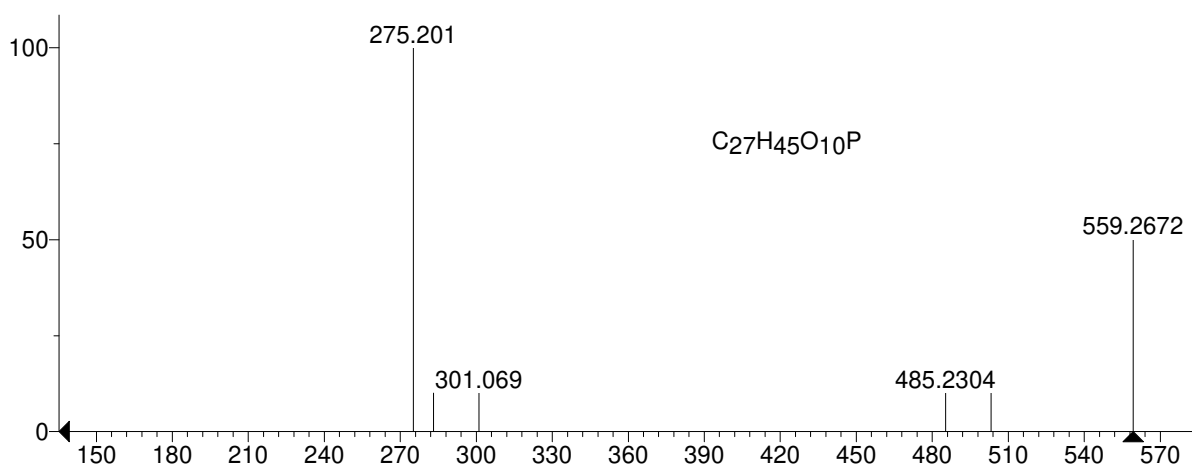

Hit 2 : PG 21:4; PG 5:0-16:4; [M-H]<sup>-</sup> [M-H]<sup>-</sup> P=559.3  
C<sub>27</sub>H<sub>45</sub>O<sub>10</sub>P; MF: 12; RMF: 347; Prob 37.5%; Lib: msdial-insilicomsm-lipids-neg; ID: 324764.

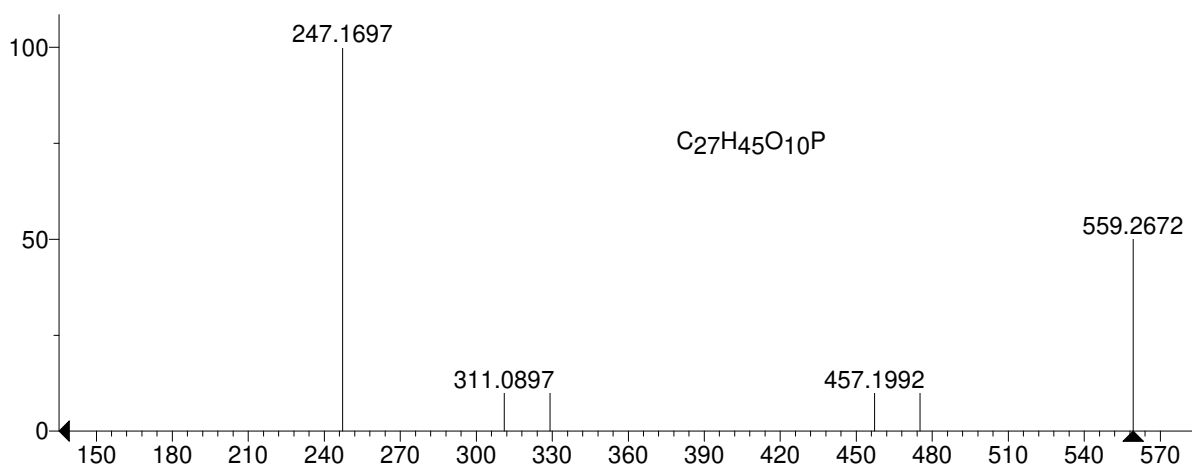

\*\* Search Report Page 2 of 2 \*\*

Hit 3 : (3S,4S,5R)-4-[(2R,3R)-2,3-dihydroxy-3-[(2S,3R,5R,10R,13R,14S,17S)-2,3,14-trihydroxy-10,13-dimethyl-6-C<sub>29</sub>H<sub>44</sub>O<sub>8</sub>; MF: 0; RMF: 334; Prob 25.0%; Lib: mona-export-vf-npl\_qexactive; ID: 9538.

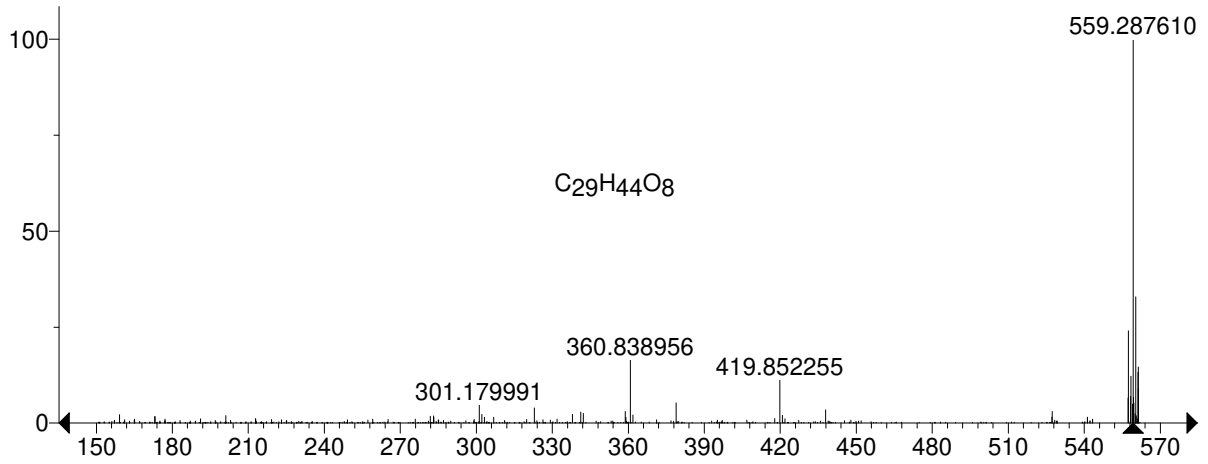

Unknown: Unknown (7.05\_530.1961m/z)  
Compound in Library Factor = 0

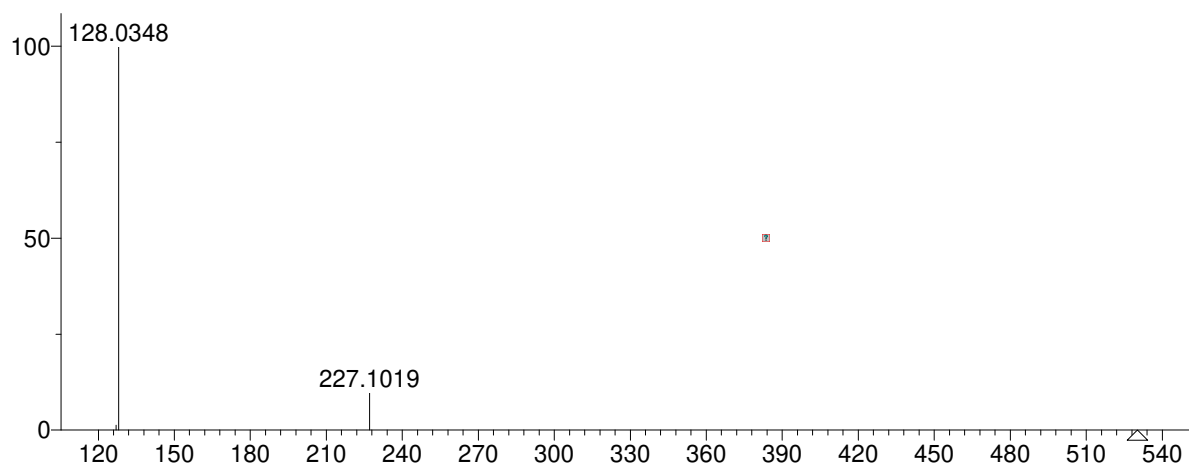

Hit 1 : Nilotinib [M+H]<sup>+</sup> HCD 196V P=530.2  
C<sub>28</sub>H<sub>22</sub>F<sub>3</sub>N<sub>7</sub>O; MF: 0; RMF: 25; Prob 50.0%; CAS: 641571-10-0; Lib: nist\_msms; ID: 165147.

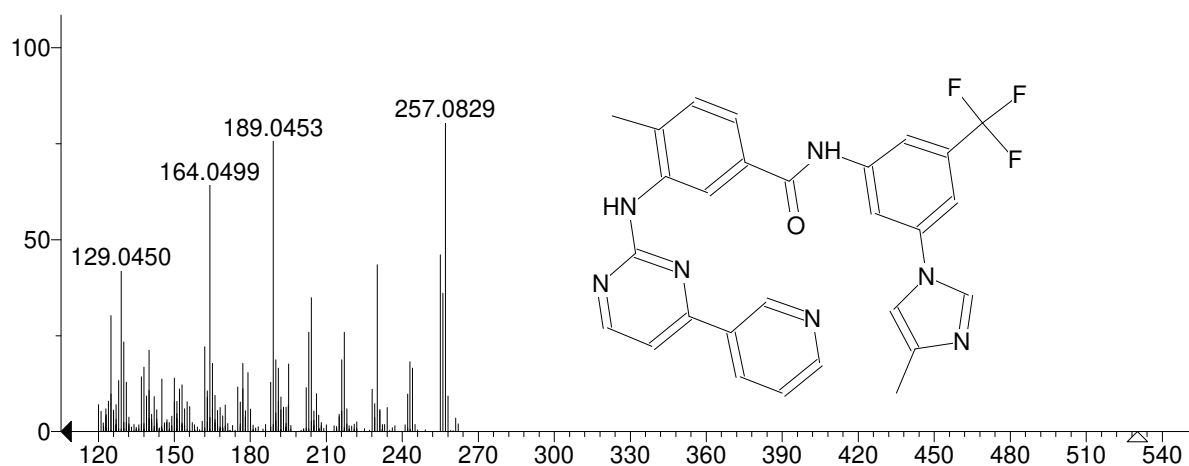

Hit 2 : Nilotinib (AMN-107) [M+H]<sup>+</sup> P=530.2  
C<sub>28</sub>H<sub>22</sub>F<sub>3</sub>N<sub>7</sub>O; MF: 0; RMF: 1; Prob 50.0%; Lib: mona-export-gnps; ID: 336.

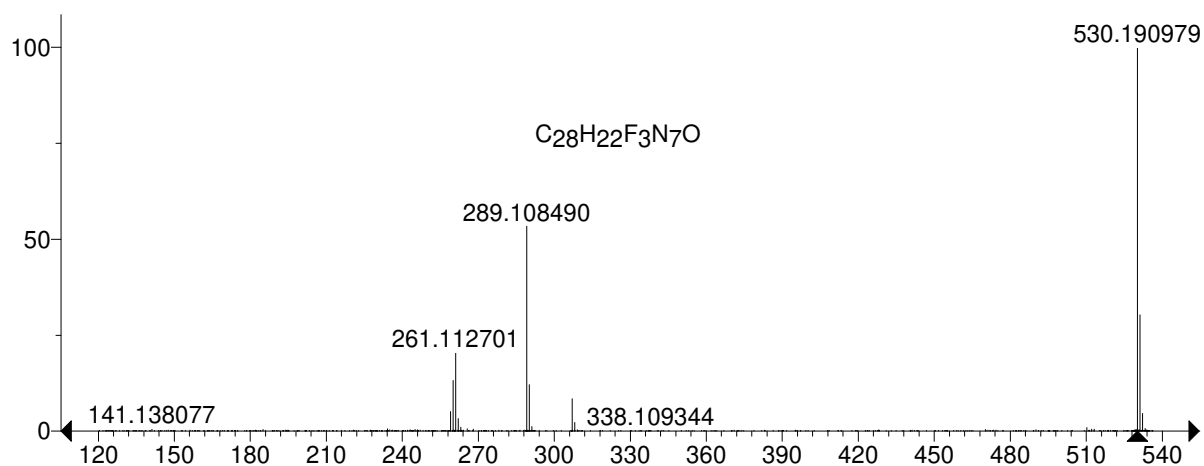

Unknown: Unknown (7.06\_787.3338m/z)  
Compound in Library Factor = 0

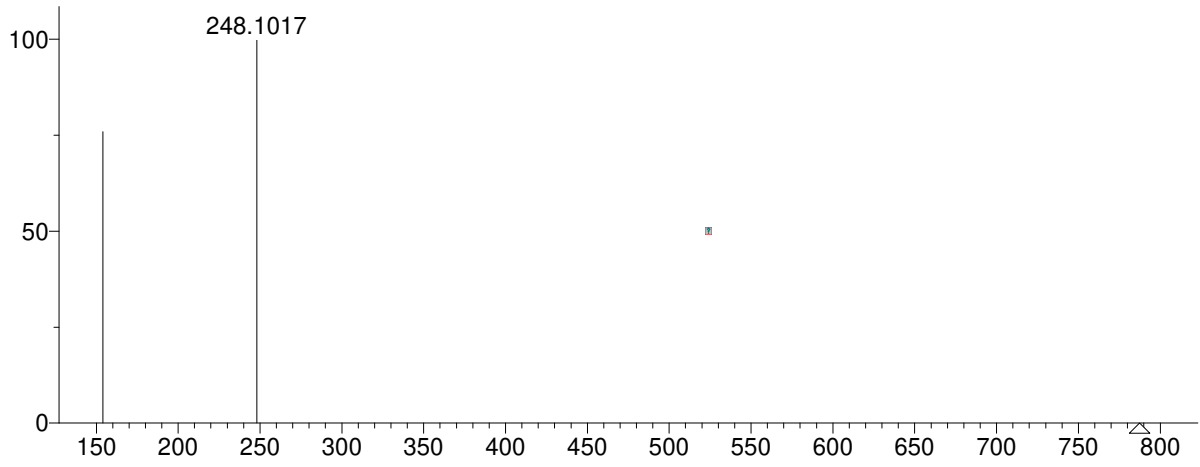



Unknown: Unknown (7.07\_403.1006m/z)  
Compound in Library Factor = 0

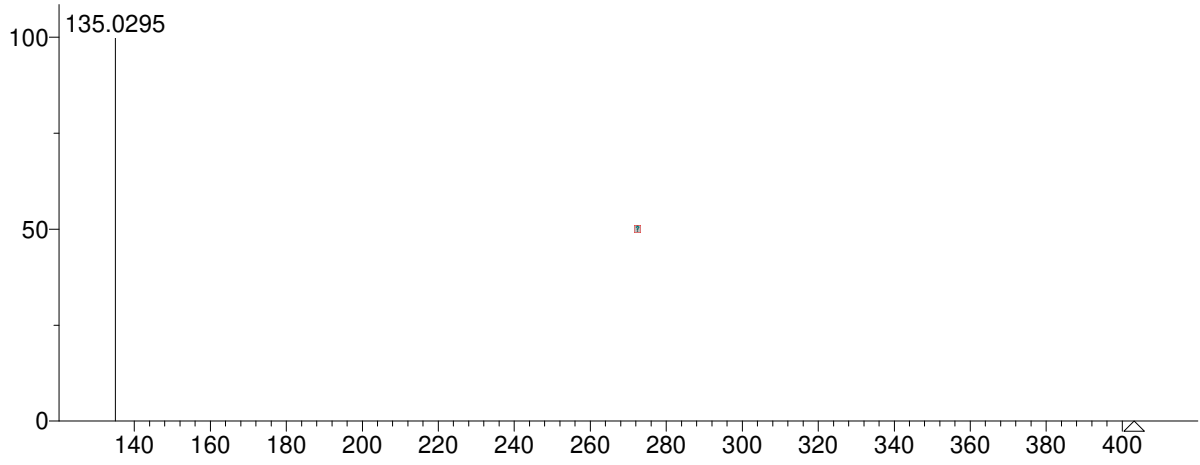

Unknown: Unknown (7.08\_386.1047m/z)  
Compound in Library Factor = 0

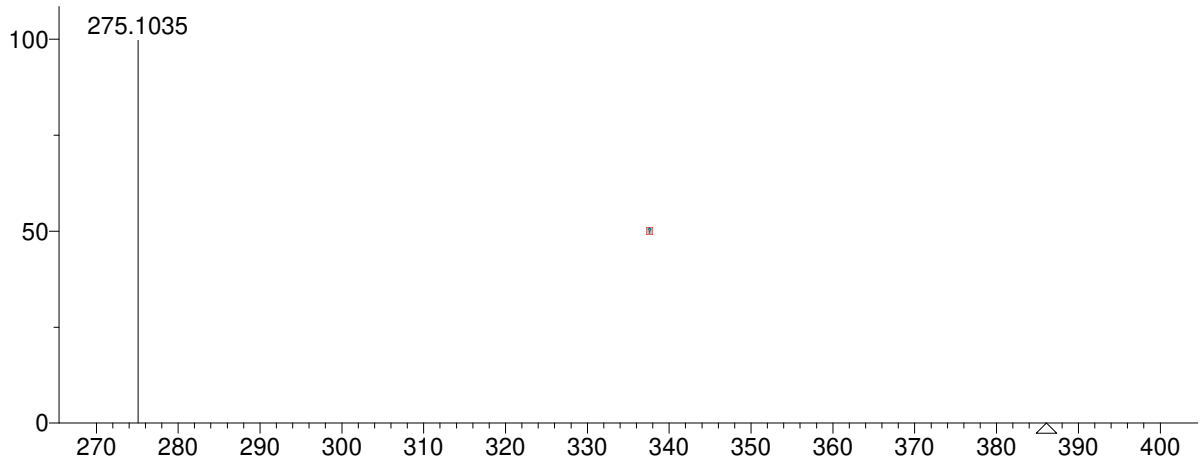

\*\* Search Report Page 1 of 2 \*\*

Unknown: Unknown (7.08\_424.1203m/z)  
Compound in Library Factor = -472

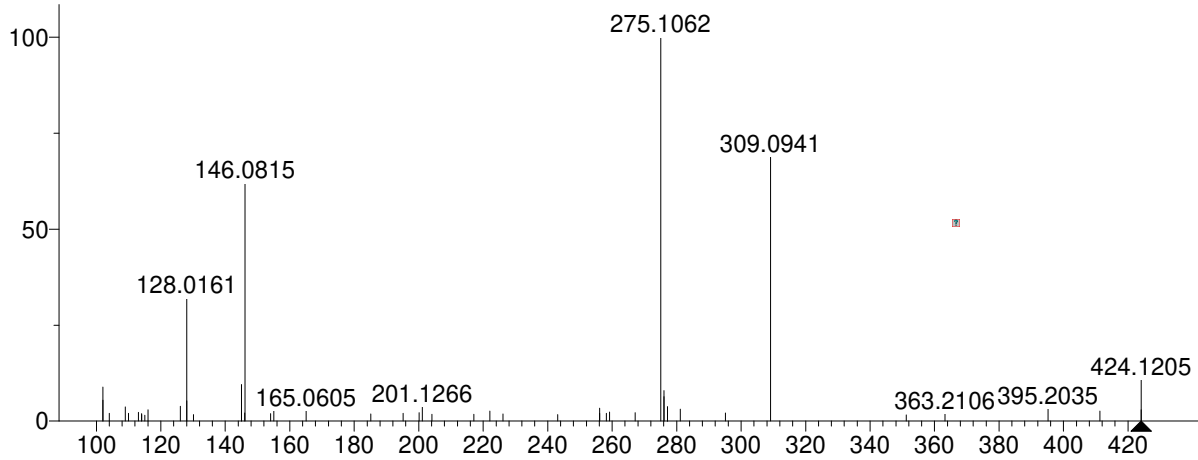

Hit 1 : Benzenesulfonamide, N-[[[(1,1-dimethylethyl)amino]carbonyl]-2-(3-methoxyphenoxy)-5-nitro- [M+H]<sup>+</sup> HCD  
C18H21N3O7S; MF: 153; RMF: 698; Prob 94.1%; CAS: 945716-28-9; Lib: nist\_msms; ID: 371131.

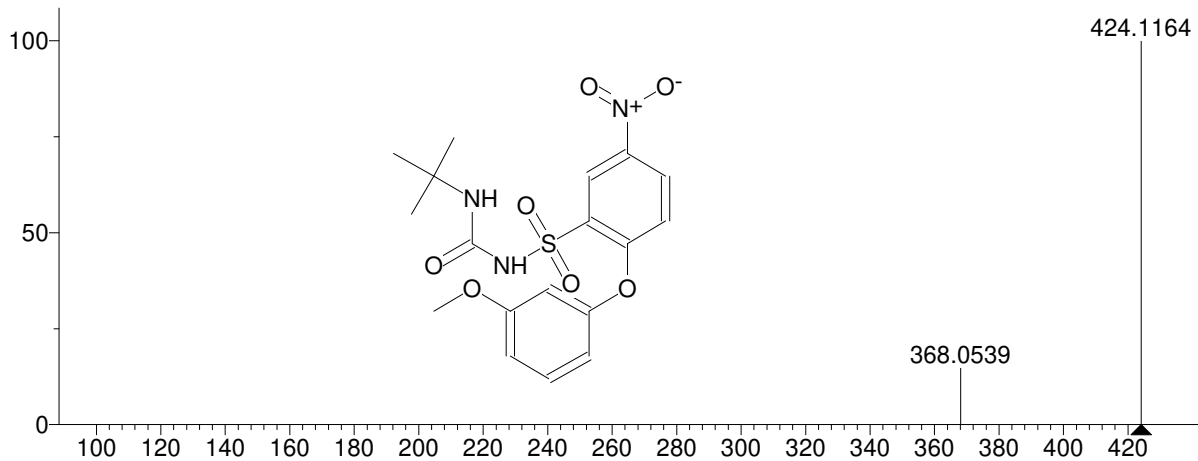

Hit 2 : N6-(4-Methoxybenzoyl)adenosine [M+Na]<sup>+</sup> HCD 12V P=424.1  
C18H19N5O6; MF: 14; RMF: 208; Prob 3.27%; CAS: 56883-05-7; Lib: nist\_msms; ID: 298845.

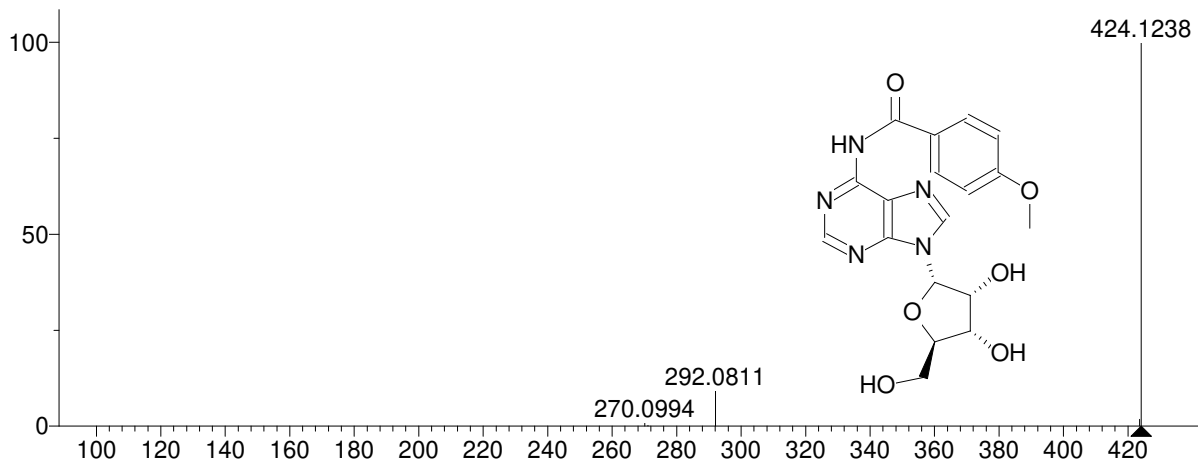

\*\* Search Report Page 2 of 2 \*\*

Hit 3 : Spiro[isobenzofuran-1(3H),9'-[9H]xanthen]-3-one, 3'-(4-aminophenoxy)-6'-hydroxy- [M+H]<sup>+</sup> IT-FT 35% P  
C<sub>26</sub>H<sub>17</sub>NO<sub>5</sub>; MF: 8; RMF: 289; Prob 2.57%; CAS: 359010-70-1; Lib: nist\_msms; ID: 376892.

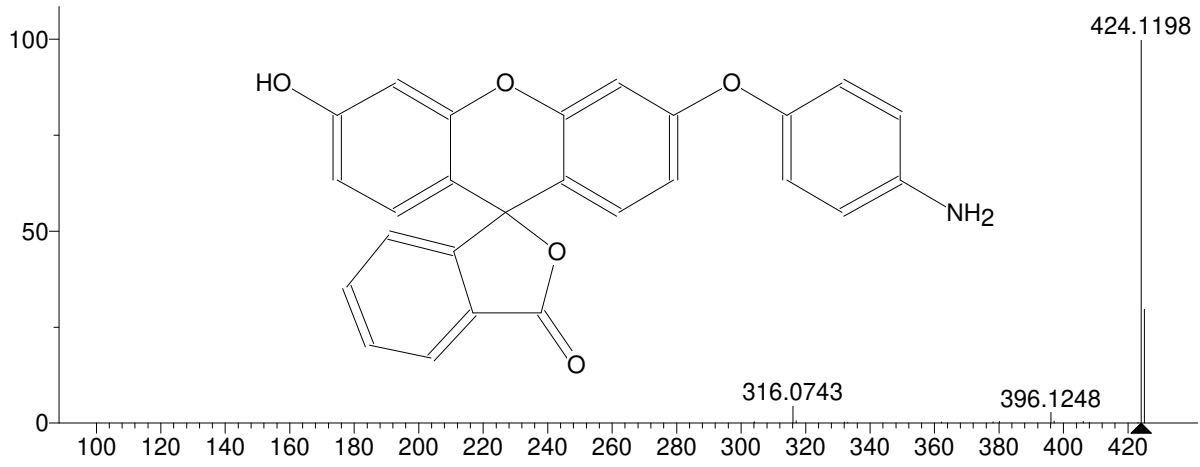

\*\* Search Report Page 1 of 2 \*\*

Unknown: Unknown (7.10\_431.2032m/z)  
Compound in Library Factor = -1523

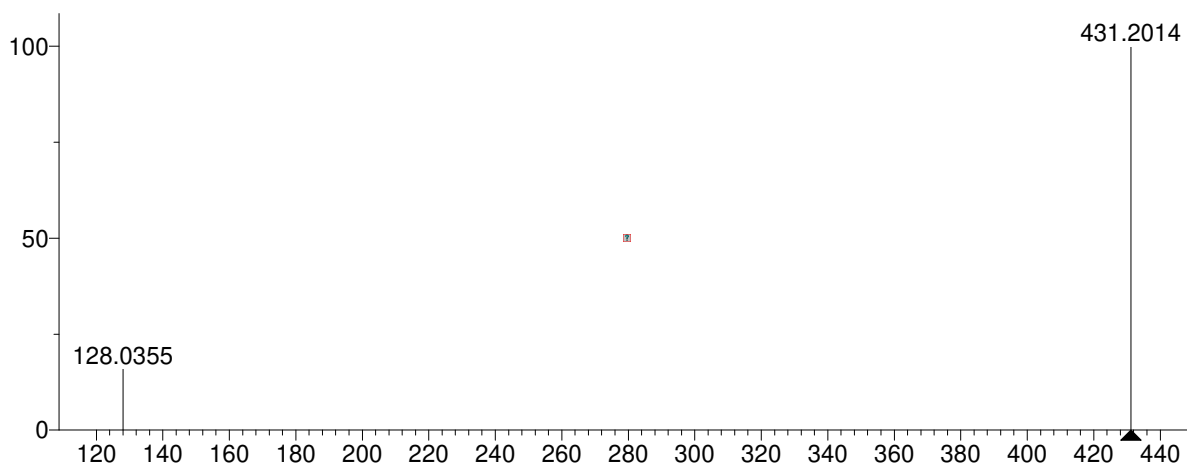

Hit 1 : Eplerenone hydroxy acid [M-H]<sup>-</sup> HCD 19V P=431.2  
C<sub>24</sub>H<sub>32</sub>O<sub>7</sub>; MF: 136; RMF: 868; Prob 65.9%; CAS: 579484-30-3; Lib: nist\_msms; ID: 437832.

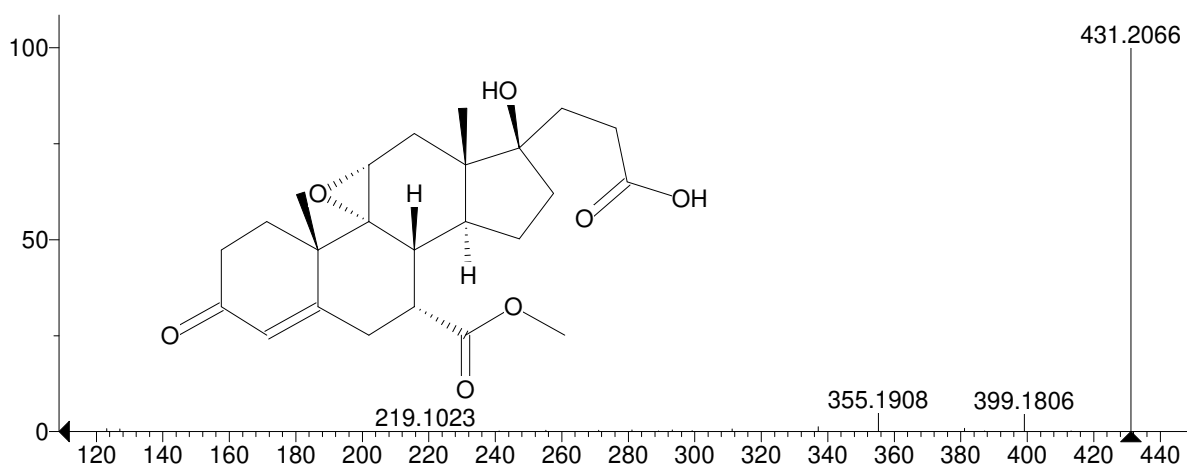

Hit 2 : 6 $\beta$ -Hydroxyeplerenone [M+H]<sup>+</sup> HCD 12V P=431.2  
C<sub>24</sub>H<sub>30</sub>O<sub>7</sub>; MF: 90; RMF: 852; Prob 13.9%; CAS: 209253-80-5; Lib: nist\_msms; ID: 441588.

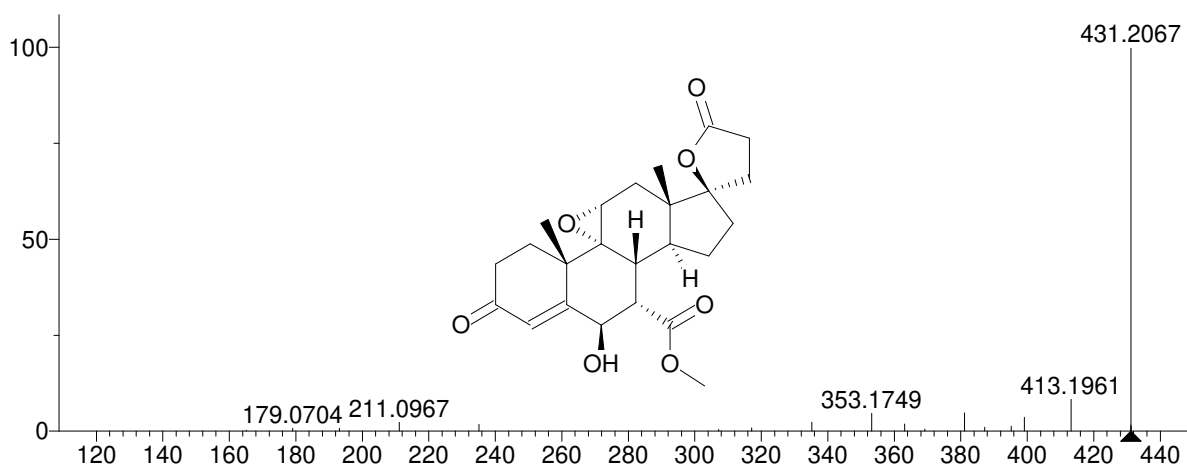

\*\* Search Report Page 2 of 2 \*\*

Hit 3 : NCGC00381060-01\_C24H32O7\_Benzoic acid, 4-hydroxy-, (1aS,2aR,3S,5R,6S,7aR)-3-(acetyloxy)decahy  
C24H32O7; MF: 79; RMF: 771; Prob 9.54%; Lib: msms-neg-gnps; ID: 1864.

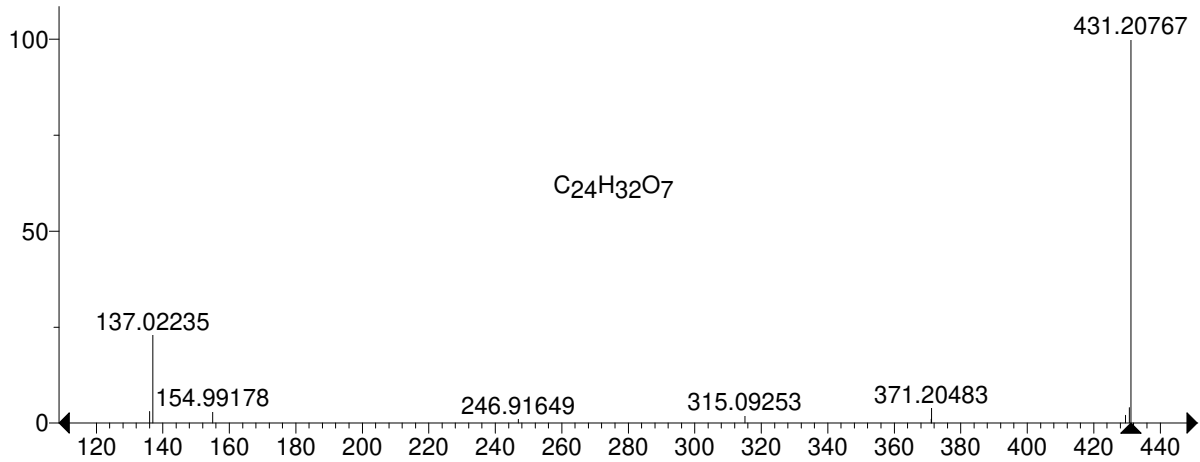

Hit 4 : NCGC00380477-01\_C24H32O7\_Benzoic acid, 4-hydroxy-, (3R,4S,8aS)-2-(acetyloxy)-1,2,3,3a,4,7,8,8a-oc  
C24H32O7; MF: 59; RMF: 663; Prob 4.35%; Lib: msms-neg-gnps; ID: 1602.

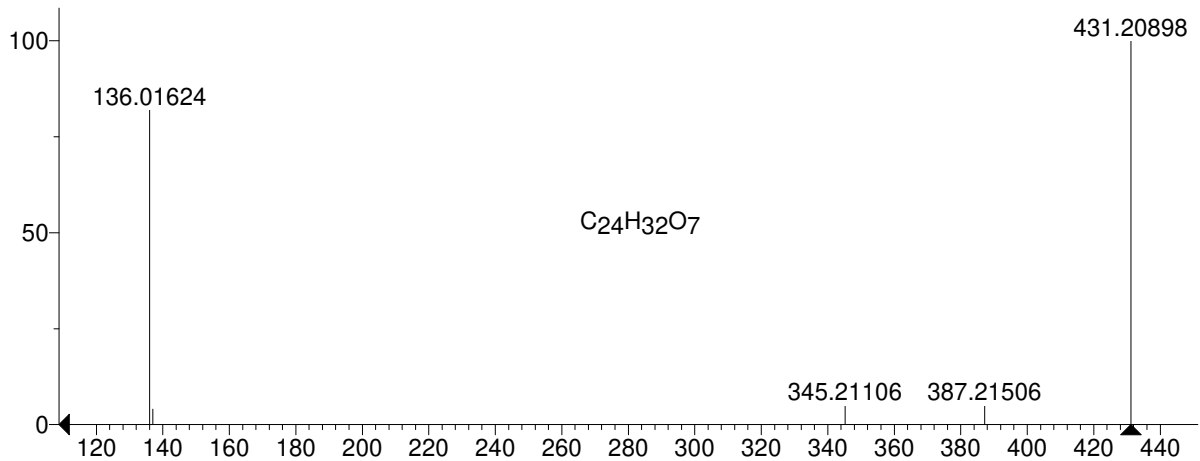

Hit 5 : NCGC00347874-02!5-hydroxy-2,2,6,6-tetramethyl-4-[2-methyl-1-[2,4,6-trihydroxy-3-(2-methylpropanoyl)ph  
C24H32O7; MF: 13; RMF: 378; Prob 0.91%; Lib: msms-neg-gnps; ID: 896.

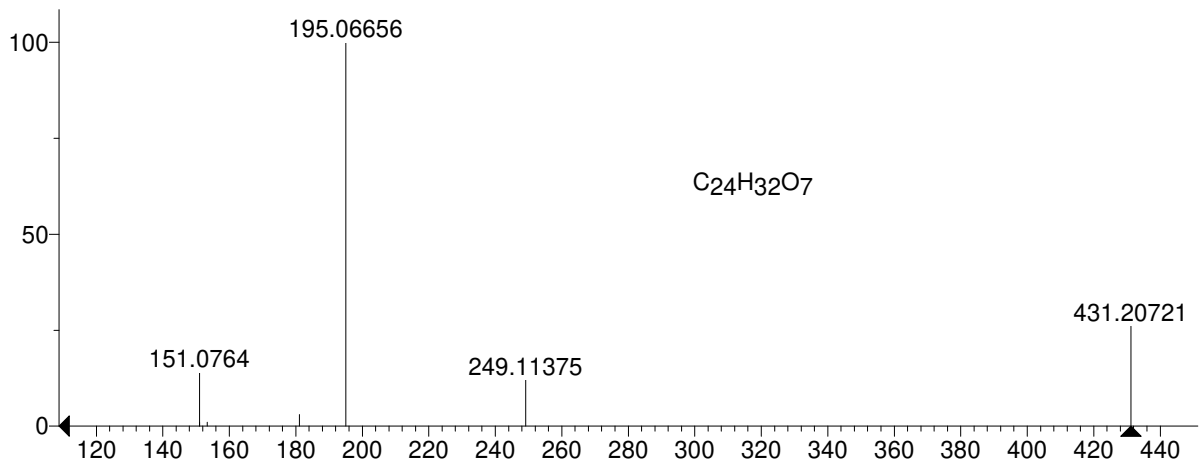

Unknown: Unknown (7.11\_419.1560m/z)  
Compound in Library Factor = 0

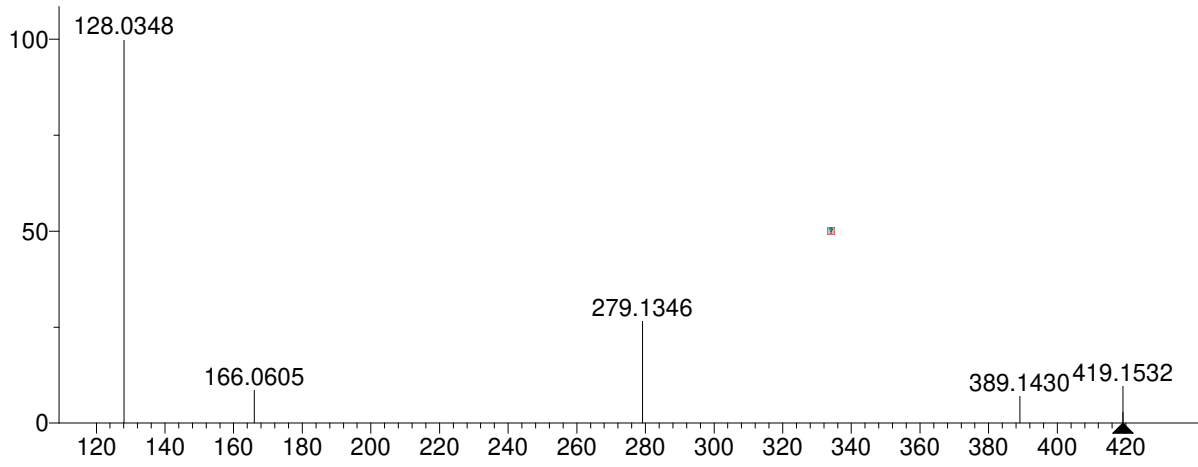

Unknown: Unknown (7.12\_355.1611m/z)  
Compound in Library Factor = 0

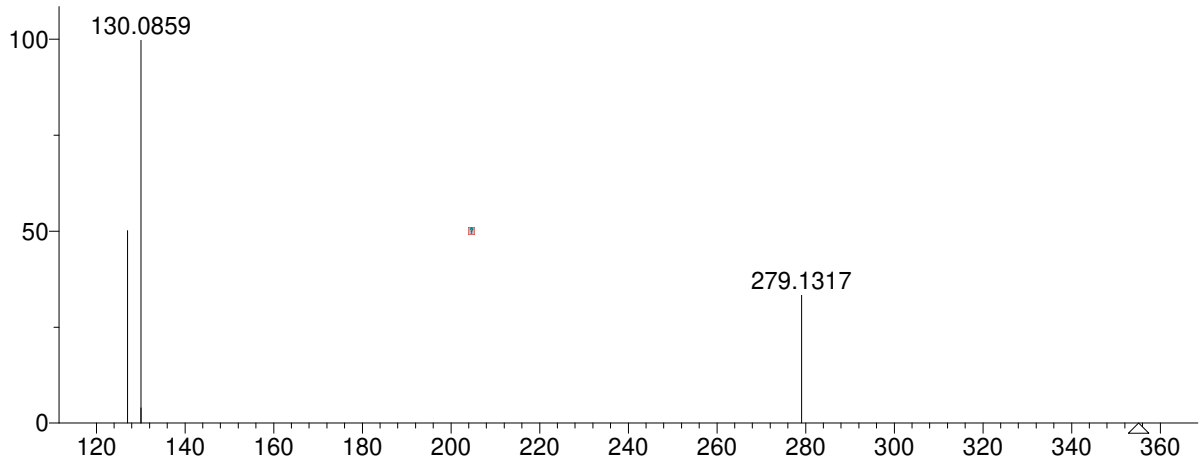



Unknown: Unknown (7.12\_787.3384m/z)  
Compound in Library Factor = 0

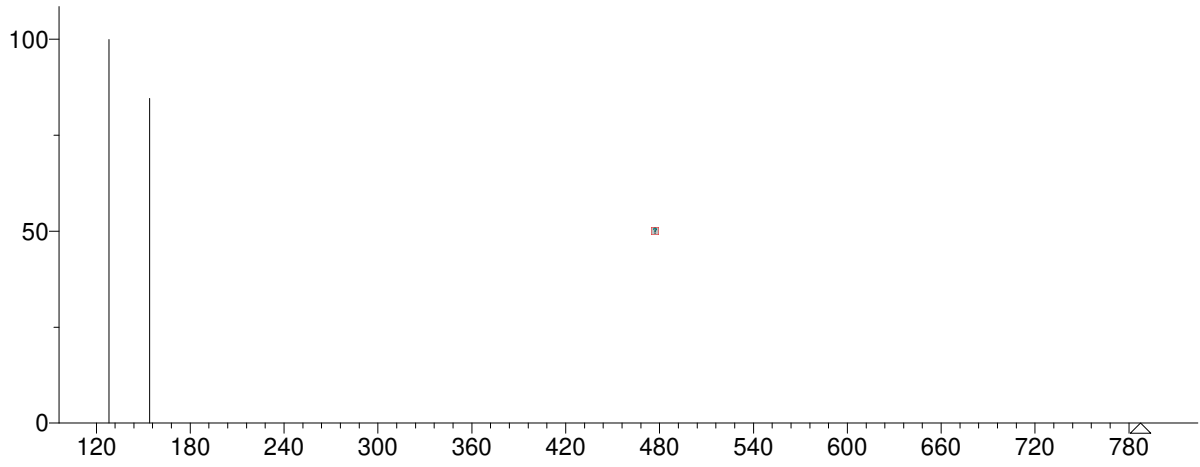

Unknown: Unknown (7.13\_338.1245m/z)  
Compound in Library Factor = 0

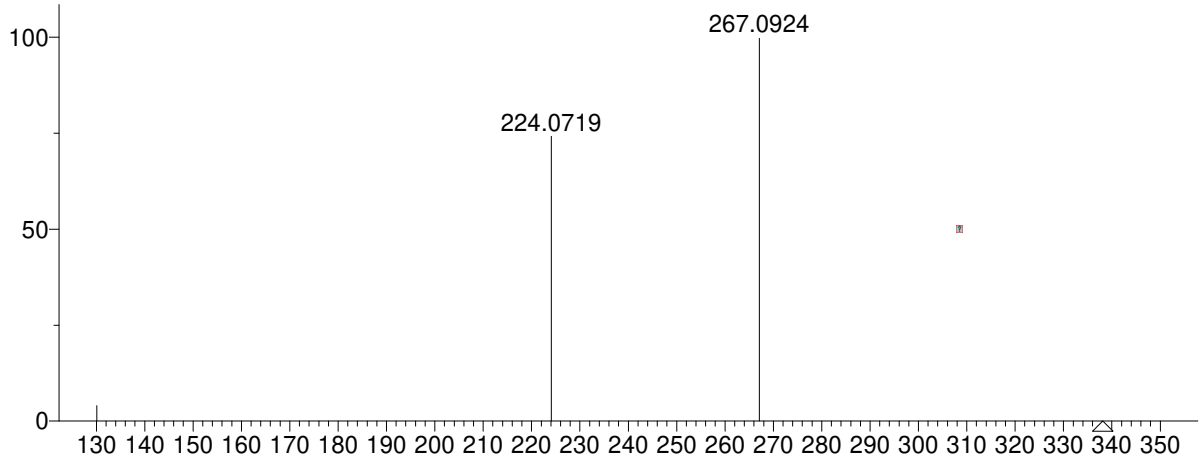

Hit 1 : 1-Naphthol  $\beta$ -D-glucuronide [M+NH<sub>4</sub>]<sup>+</sup> IT 35% P=338.1  
C<sub>16</sub>H<sub>16</sub>O<sub>7</sub>; MF: 0; RMF: 45; Prob 50.0%; CAS: 17238-47-0; Lib: nist\_msms; ID: 464034.

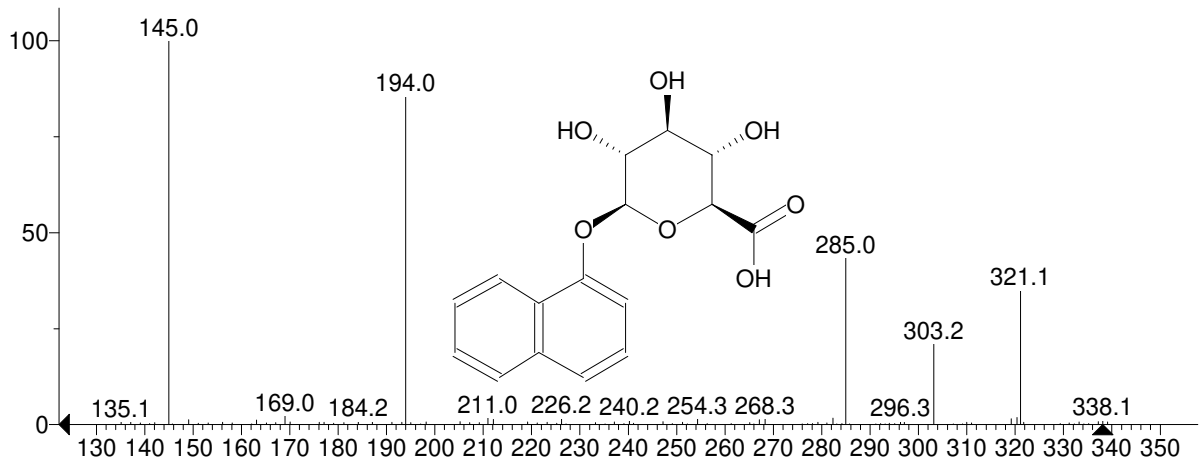

Hit 2 : barceloneic acid A [M+NH<sub>4</sub>]<sup>+</sup> 35HCD P=338.1  
C<sub>16</sub>H<sub>16</sub>O<sub>7</sub>; MF: 0; RMF: 6; Prob 50.0%; Lib: mona-export-vf-npl\_qexactive; ID: 6133.

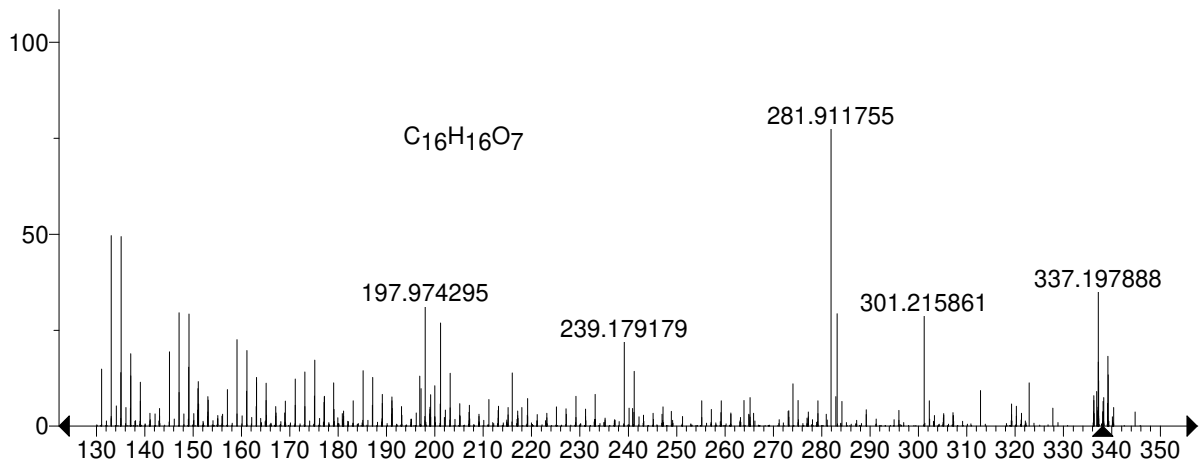

Unknown: Unknown (7.13\_426.1964m/z)  
Compound in Library Factor = 0

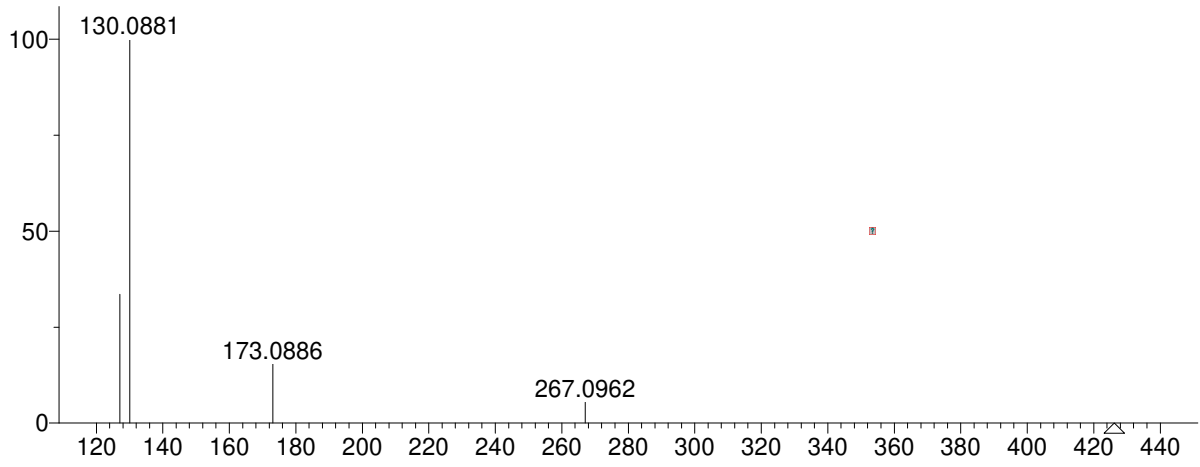

Unknown: Unknown (7.14\_387.1755m/z)  
Compound in Library Factor = 0

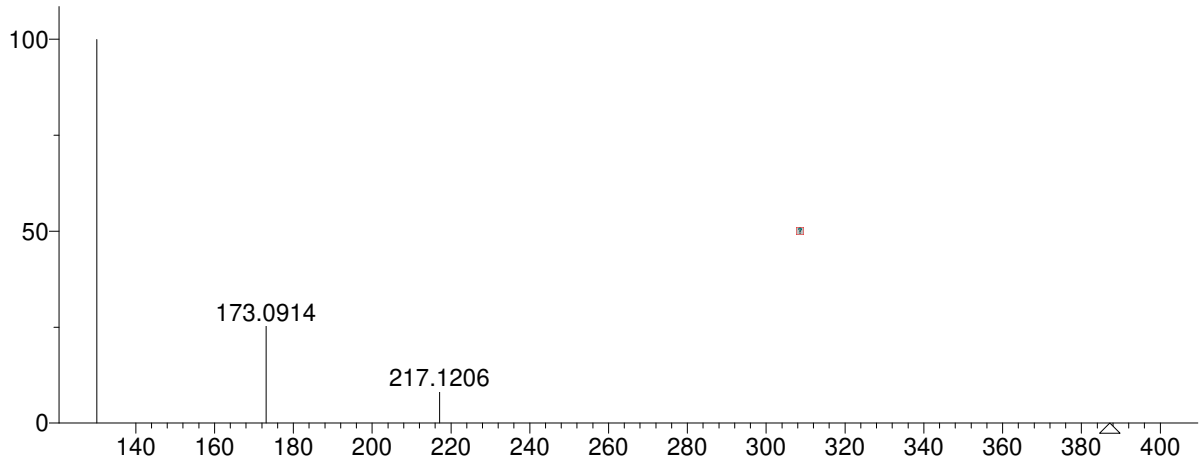

Unknown: Unknown (7.15\_338.1215m/z)  
Compound in Library Factor = 0

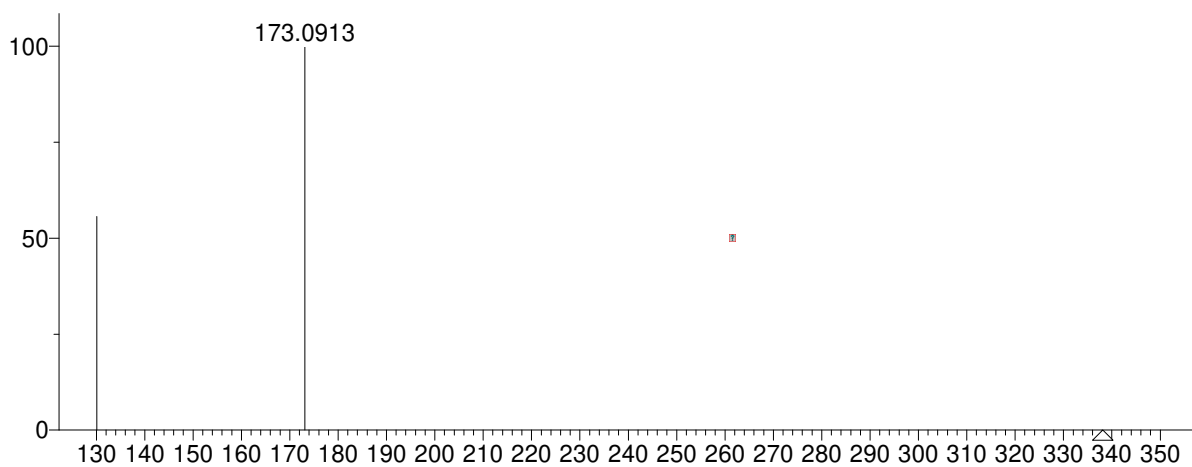

Hit 1 : barceloneic acid A [M+NH4]<sup>+</sup> 45HCD P=338.1  
C<sub>16</sub>H<sub>16</sub>O<sub>7</sub>; MF: 0; RMF: 59; Prob 100.0%; Lib: mona-export-vf-npl\_qexactive; ID: 6134.

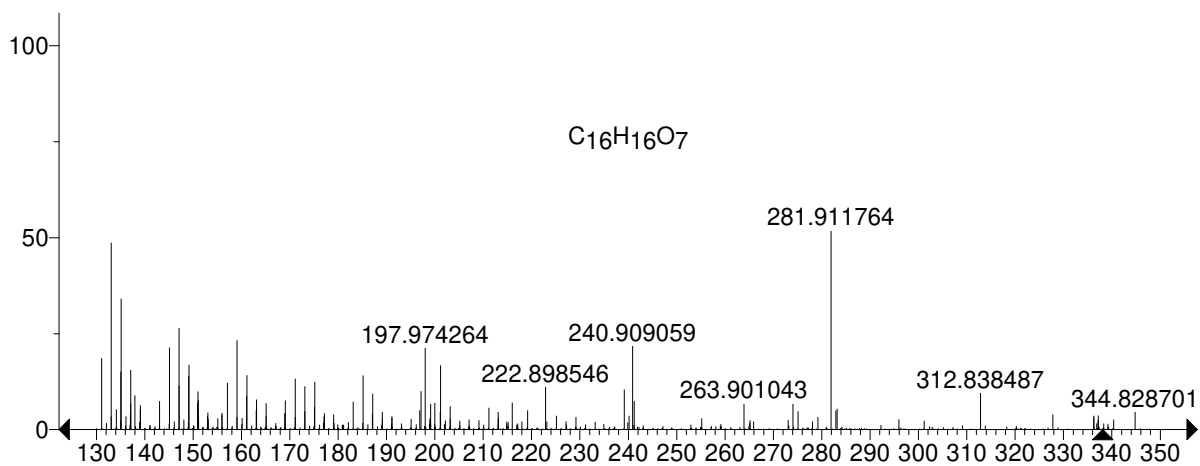

Unknown: Unknown (7.16\_396.1241m/z)  
Compound in Library Factor = -3273

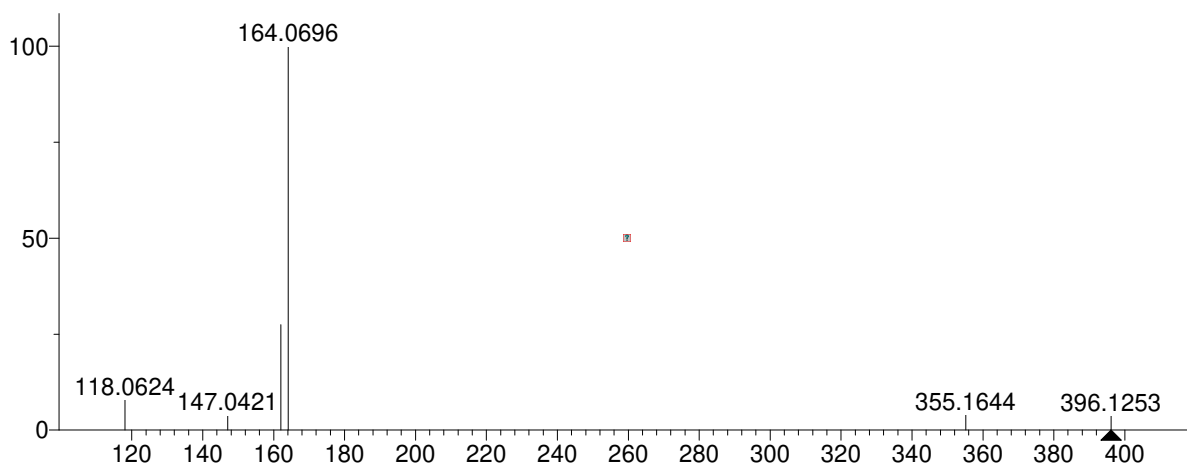

Hit 1 : 2-Oxiraneacetic acid, 3-phenyl-, cyano(6-methoxy-2-naphthalenyl)methyl ester [M+Na]<sup>+</sup> HCD 7V P=396  
C<sub>23</sub>H<sub>19</sub>NO<sub>4</sub>; MF: 75; RMF: 650; Prob 100.0%; CAS: 1028430-42-3; Lib: nist\_msms; ID: 375384.

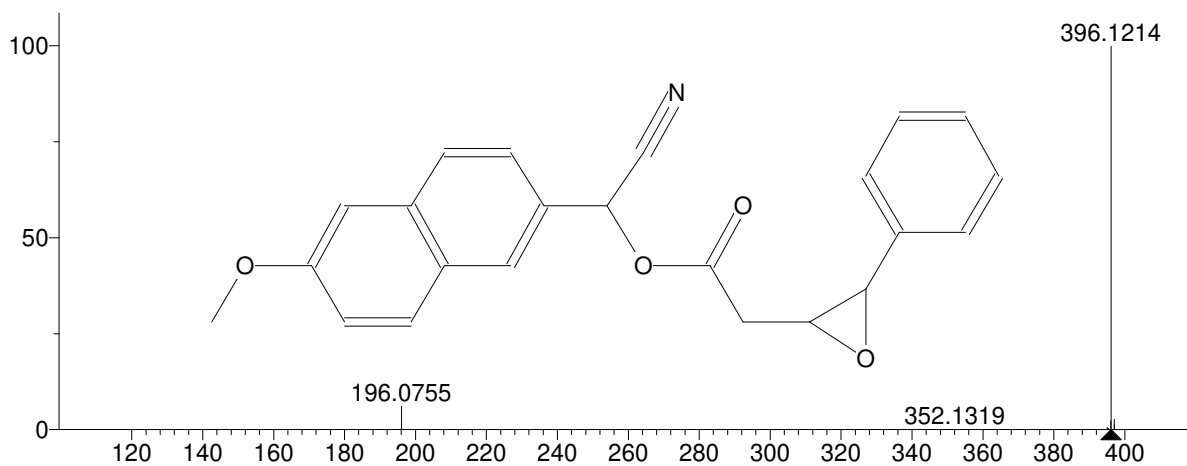

Unknown: Unknown (7.16\_566.1841m/z)  
Compound in Library Factor = 0

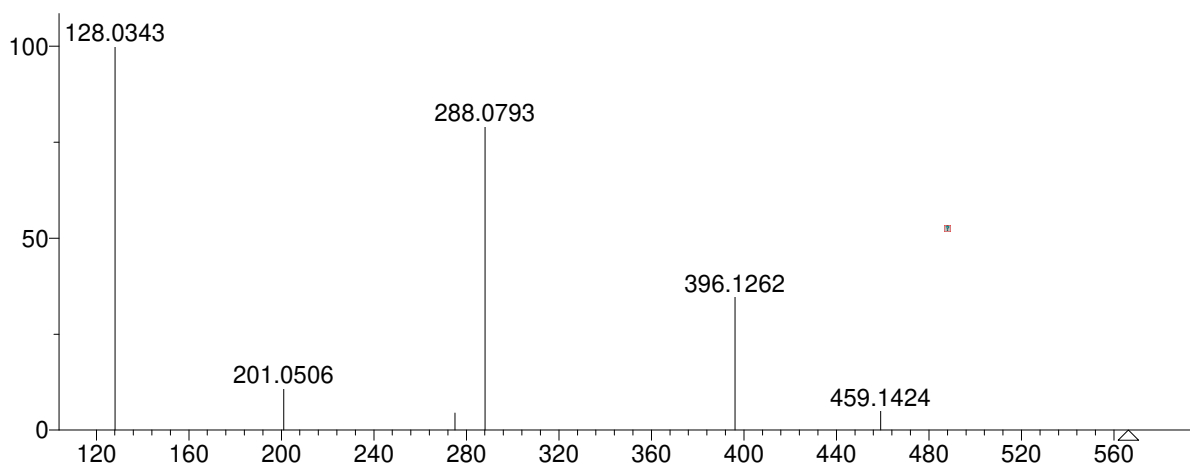

Hit 1 : 5,7-dihydroxy-2-phenyl-6-[3,4,5-trihydroxy-6-(hydroxymethyl)oxan-2-yl]-8-(3,4,5-trihydroxyoxan-2-yl)chromane  
C<sub>26</sub>H<sub>28</sub>O<sub>13</sub>; MF: 0; RMF: 15; Prob 100.0%; Lib: anthocyanins mona; ID: 8496.

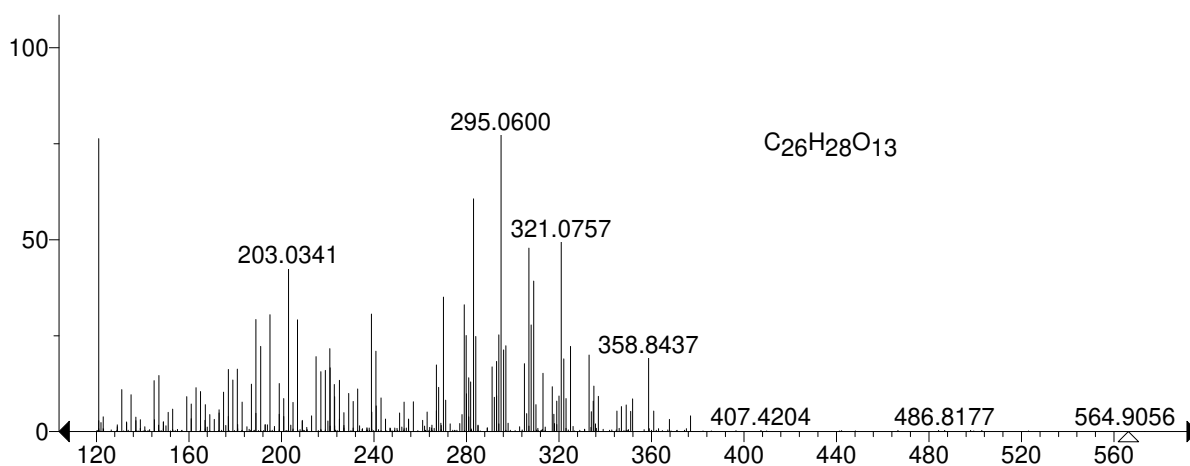

Unknown: Unknown (7.17\_348.1441m/z)  
Compound in Library Factor = -1072

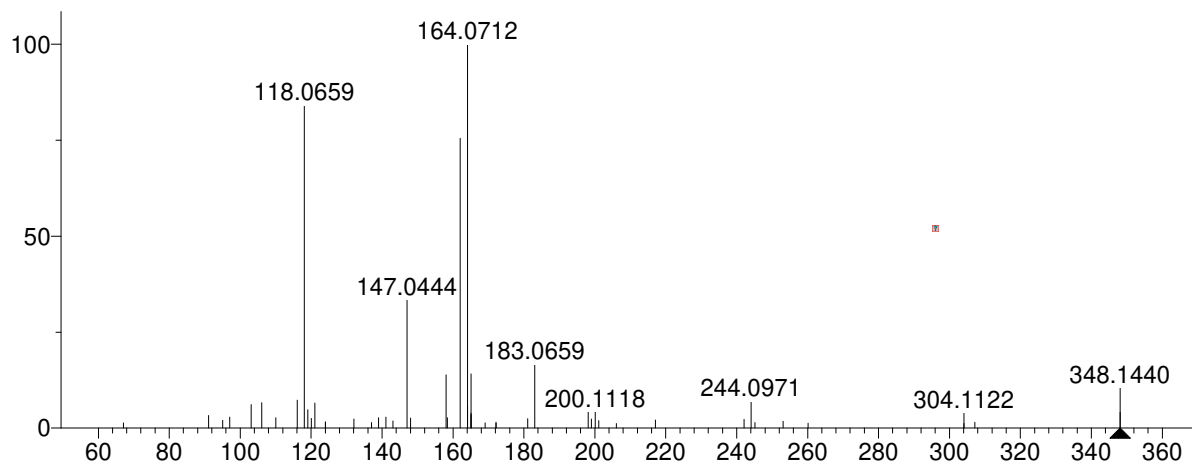

Hit 1 : 1H-Indazole-3-carboxamide, N-[(1S)-1-(aminocarbonyl)-2-methylpropyl]-1-(5-chloropentyl)- [M+H-NH3]<sup>+</sup> | C<sub>18</sub>H<sub>25</sub>ClN<sub>4</sub>O<sub>2</sub>; MF: 108; RMF: 649; Prob 69.2%; CAS: 1801552-02-2; Lib: nist\_msms; ID: 426676.

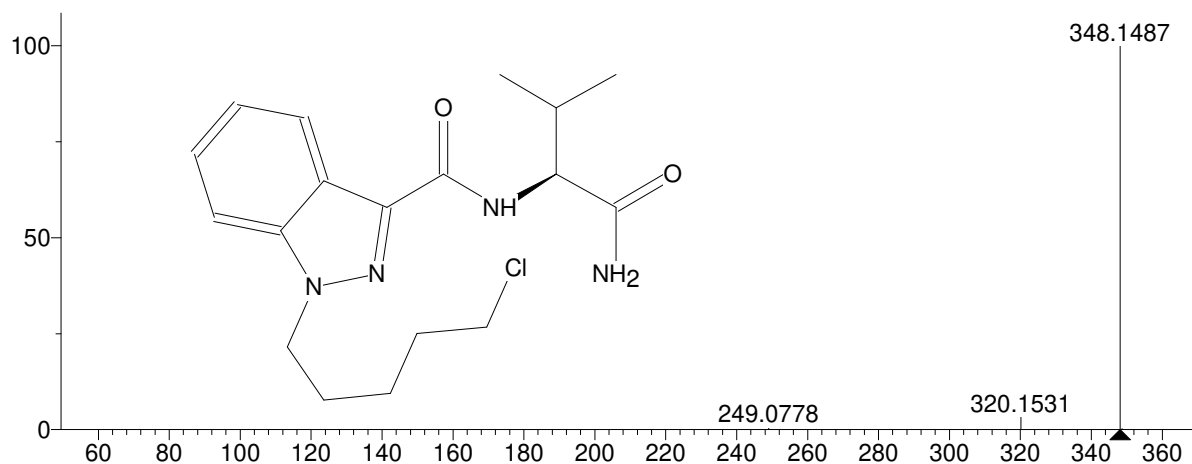

Hit 2 : Monocrotaline [M+Na]<sup>+</sup> HCD 41V P=348.1  
C<sub>16</sub>H<sub>23</sub>NO<sub>6</sub>; MF: 38; RMF: 140; Prob 10.1%; CAS: 315-22-0; Lib: nist\_msms; ID: 187311.

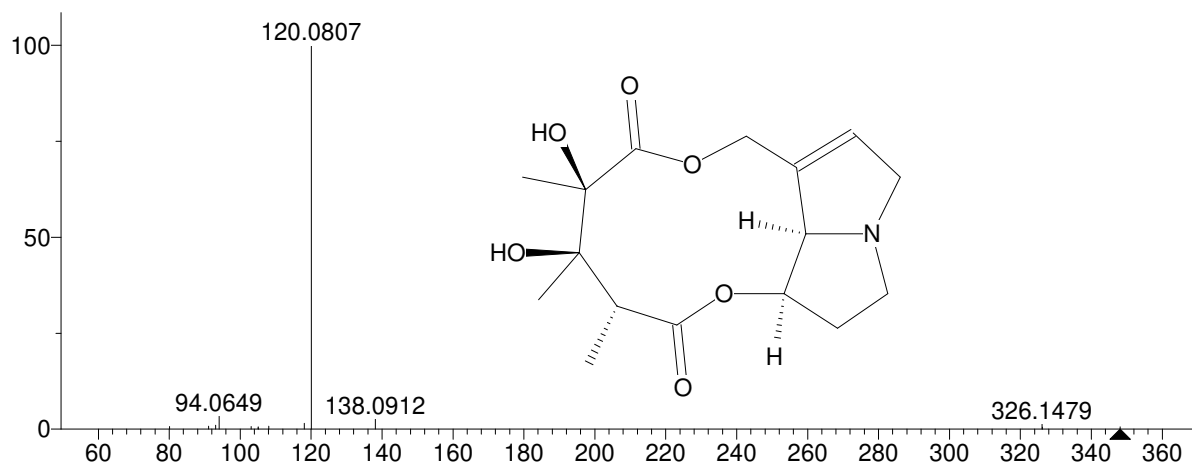



\*\* Search Report Page 2 of 2 \*\*

Hit 3 : 3-Pyridinecarboxamide, 6-amino-N-[3-[4-(4-morpholinyl)pyrido[3',2':4,5]furo[3,2-d]pyrimidin-2-yl]phenyl]- [M-]  
C<sub>25</sub>H<sub>21</sub>N<sub>7</sub>O<sub>3</sub>; MF: 17; RMF: 177; Prob 4.28%; CAS: 371942-69-7; Lib: nist\_msms; ID: 262100.

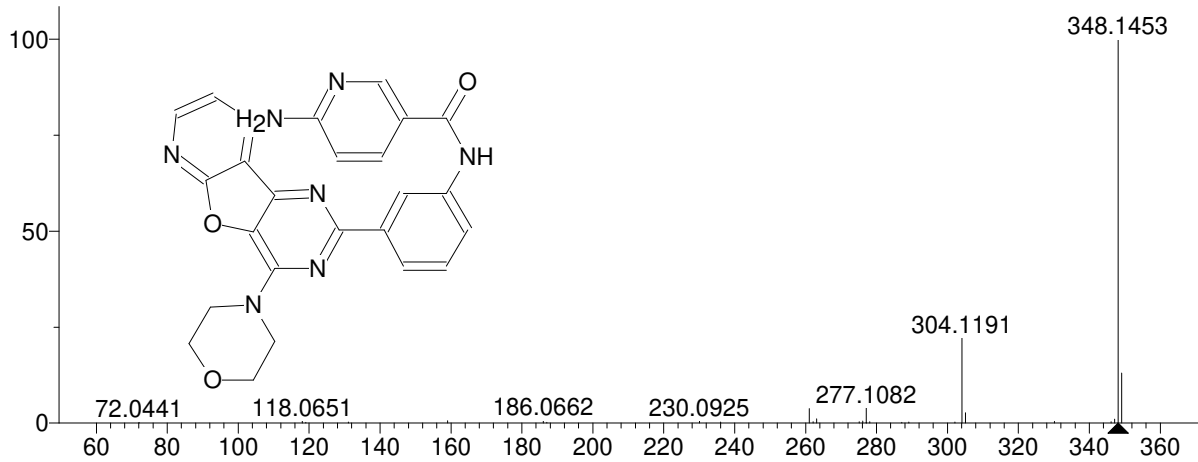

Hit 4 : His-Gly-His [M-H]- HCD 13eV P=348.1  
C<sub>14</sub>H<sub>19</sub>N<sub>7</sub>O<sub>4</sub>; MF: 7; RMF: 181; Prob 3.02%; Lib: nist\_msms; ID: 574325.

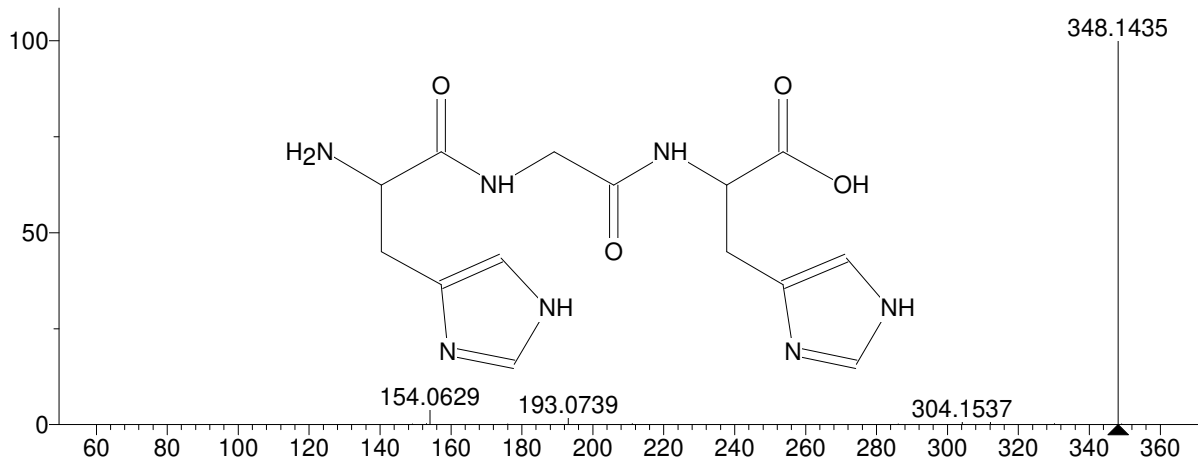

Hit 5 : His-Gly-His [M-H]- HCD 13eV P=348.1  
C<sub>14</sub>H<sub>19</sub>N<sub>7</sub>O<sub>4</sub>; MF: 7; RMF: 181; Prob 3.02%; CAS: 38689-38-2; Lib: nist\_msms2; ID: 89451.

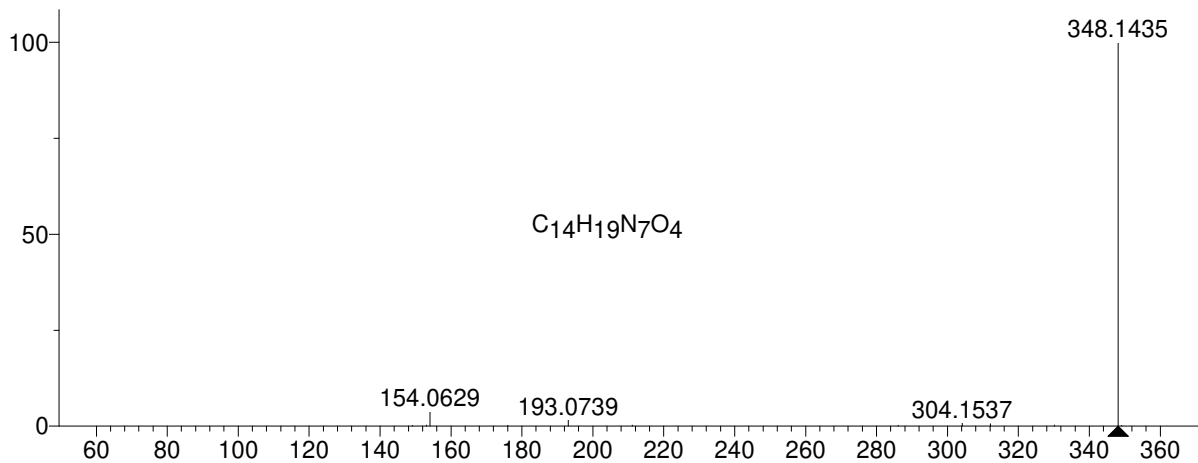

Unknown: Unknown (7.18\_787.3366m/z)  
Compound in Library Factor = 0

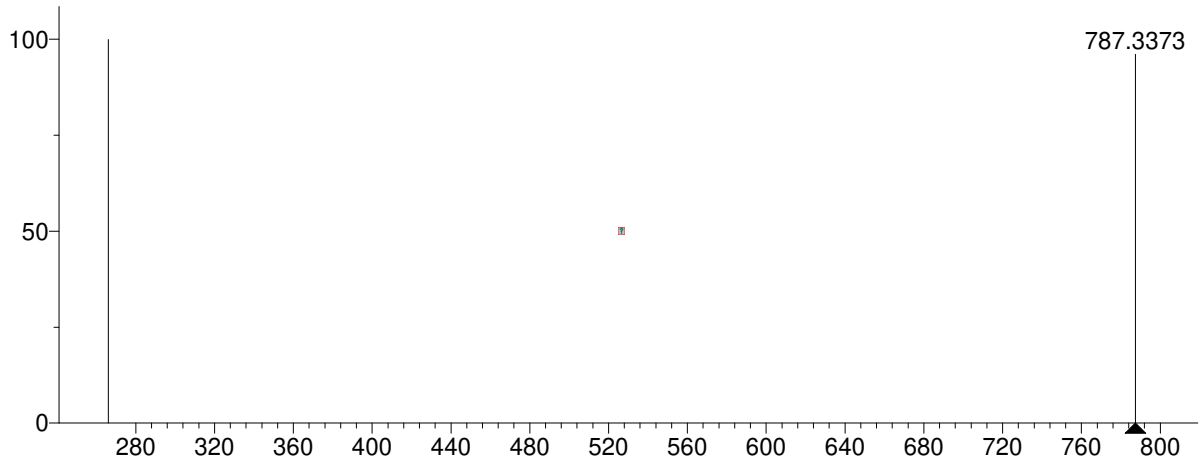

Unknown: Unknown (7.19\_458.1409m/z)  
Compound in Library Factor = 0

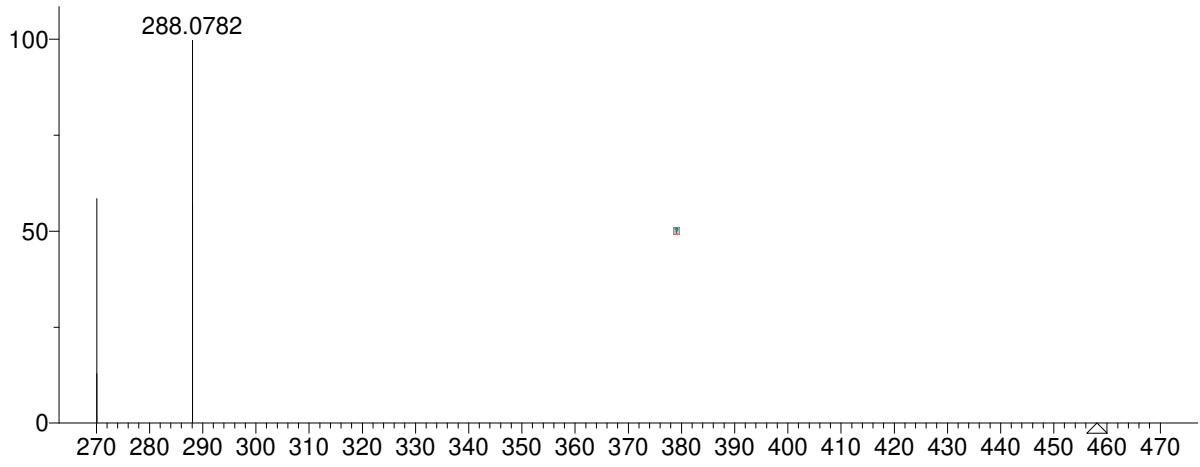

Unknown: Unknown (7.19\_628.1990m/z)  
Compound in Library Factor = 0

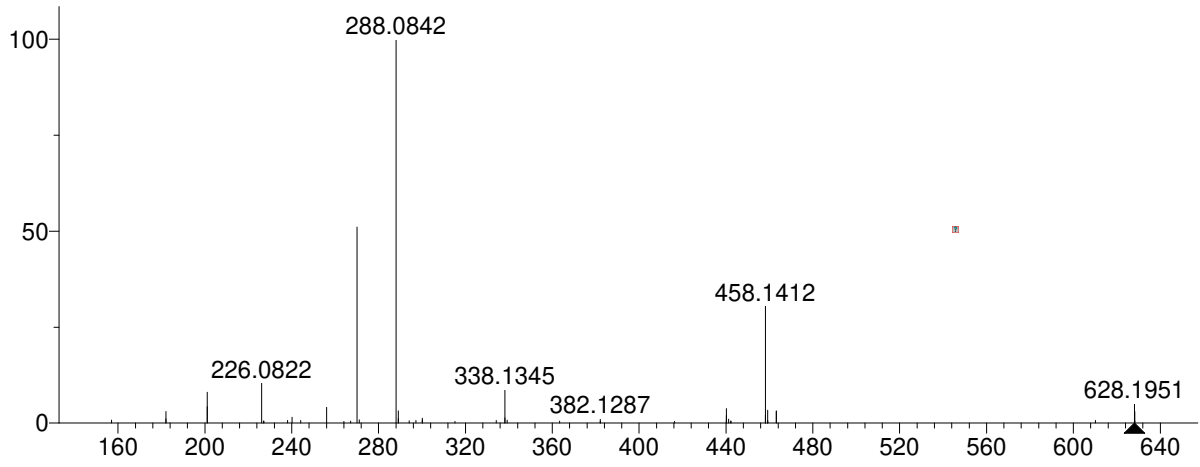

\*\* Search Report Page 1 of 2 \*\*

Unknown: Unknown (7.20\_243.1706m/z)  
Compound in Library Factor = -526

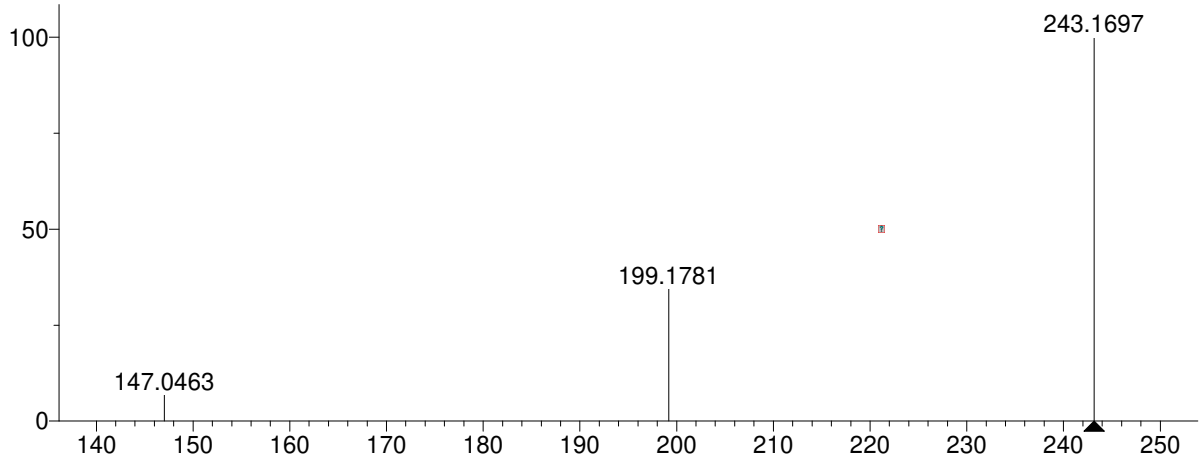

Hit 1 : Ile-Leu [M-H]<sup>-</sup> HCD 18eV P=243.2  
C<sub>12</sub>H<sub>24</sub>N<sub>2</sub>O<sub>3</sub>; MF: 569; RMF: 971; Prob 29.5%; Lib: nist\_msms; ID: 570161.

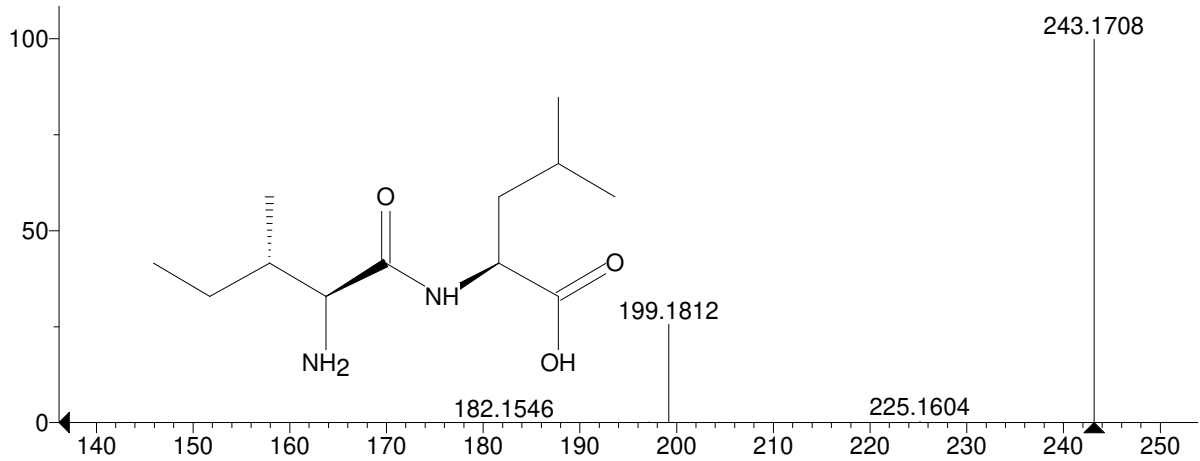

Hit 2 : Ile-Leu [M-H]<sup>-</sup> HCD 18eV P=243.2  
C<sub>12</sub>H<sub>24</sub>N<sub>2</sub>O<sub>3</sub>; MF: 569; RMF: 971; Prob 29.5%; CAS: 26462-22-6; Lib: nist\_msms2; ID: 83887.

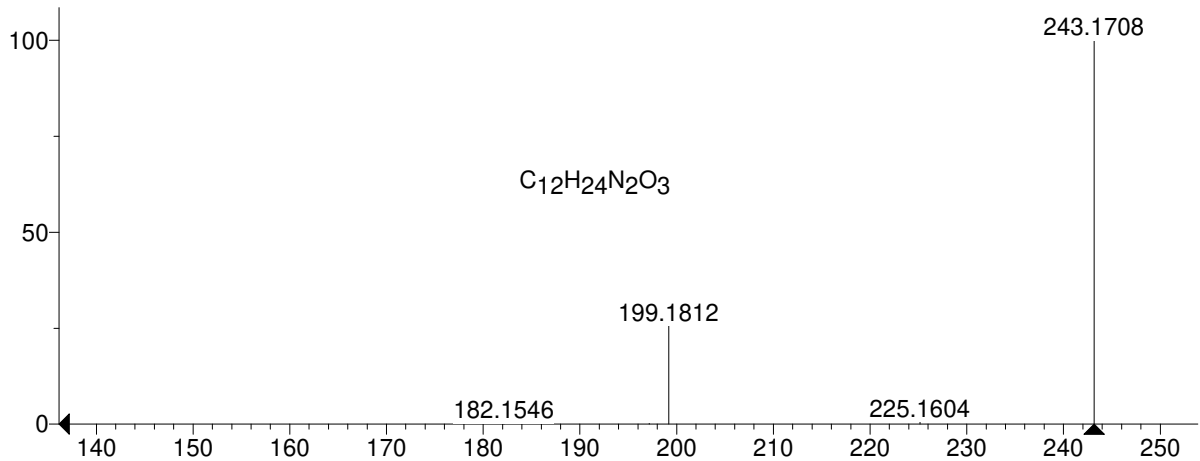

Hit 3 : Leu-Ile [M-H]<sup>-</sup> HCD 18eV P=243.2  
C<sub>12</sub>H<sub>24</sub>N<sub>2</sub>O<sub>3</sub>; MF: 540; RMF: 965; Prob 8.36%; Lib: nist\_msms; ID: 571157.

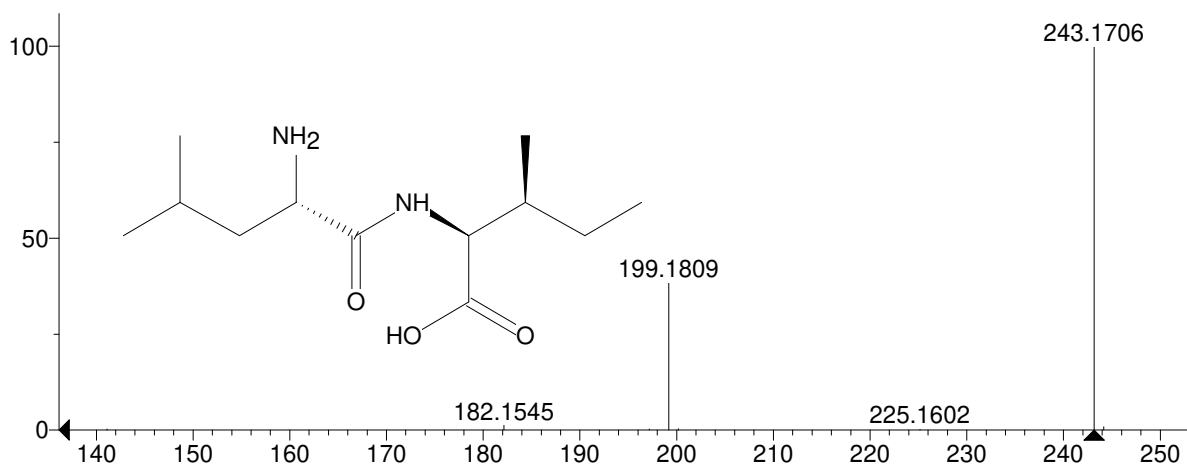

Hit 4 : Leu-Ile [M-H]<sup>-</sup> HCD 18eV P=243.2  
C<sub>12</sub>H<sub>24</sub>N<sub>2</sub>O<sub>3</sub>; MF: 540; RMF: 965; Prob 8.36%; CAS: 36077-41-5; Lib: nist\_msms2; ID: 84890.

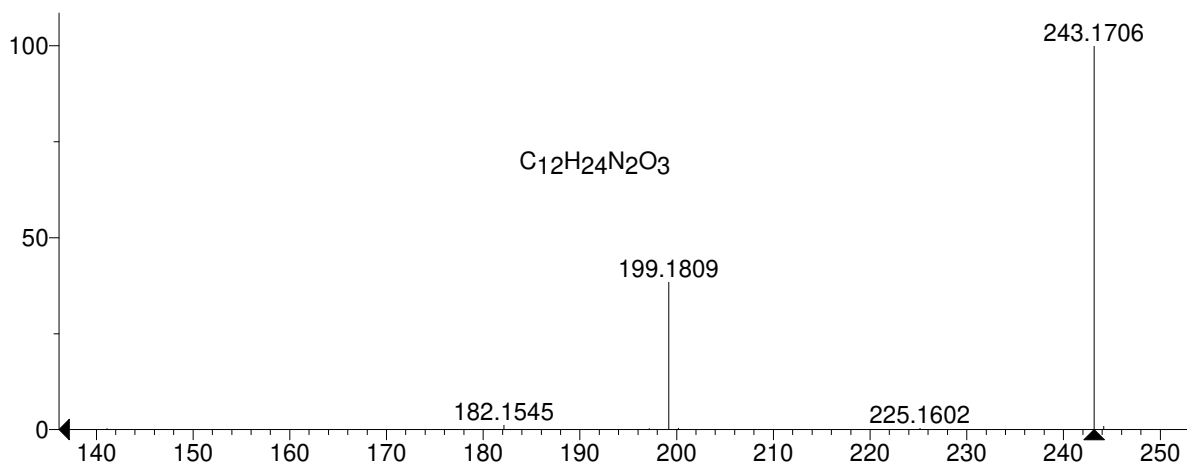

Hit 5 : Leu-Leu [M-H]<sup>-</sup> HCD 18eV P=243.2  
C<sub>12</sub>H<sub>24</sub>N<sub>2</sub>O<sub>3</sub>; MF: 539; RMF: 958; Prob 8.04%; CAS: 3303-31-9; Lib: nist\_msms; ID: 568072.

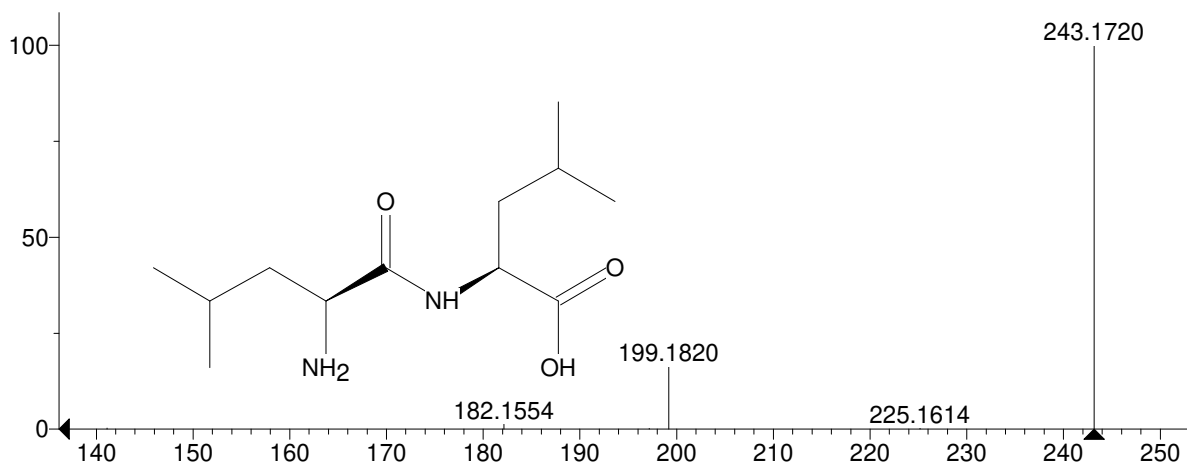

\*\* Search Report Page 1 of 2 \*\*

Unknown: Unknown (7.25\_415.1709m/z)  
Compound in Library Factor = -3273

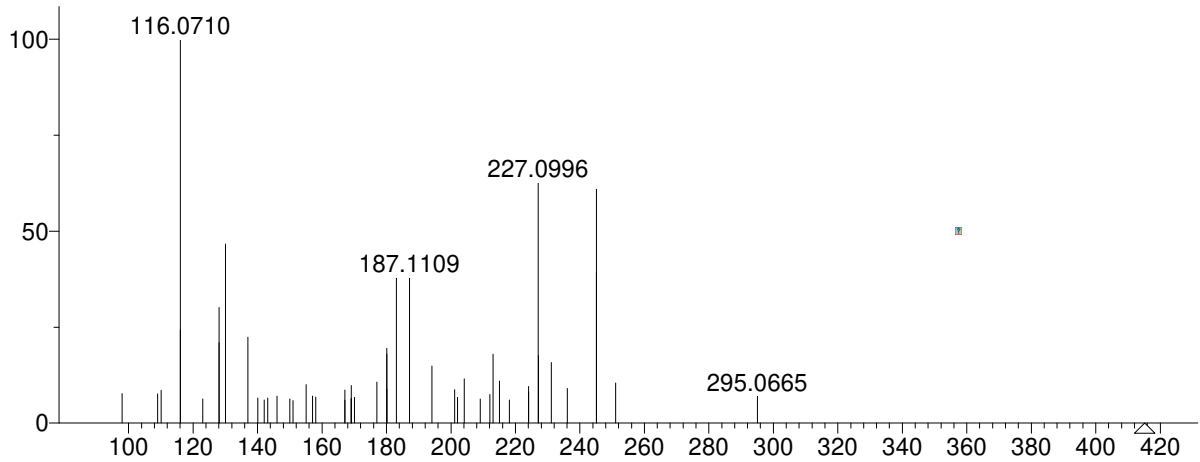

Hit 1 : 6-formyl-10-(hydroxymethyl)-5-methoxy-3-methylidene-2-oxo-2H,3H,3aH,4H,5H,8H,9H,11aH-cyclodeca[b]l  
C<sub>21</sub>H<sub>28</sub>O<sub>7</sub>; MF: 7; RMF: 111; Prob 20.6%; Lib: mona-export-vf-npl\_qexactive; ID: 16435.

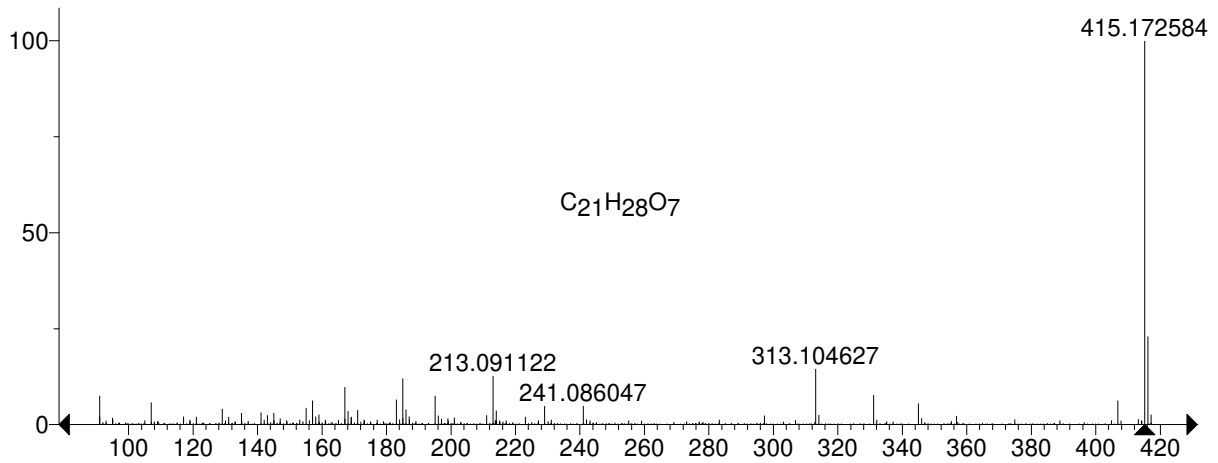

Hit 2 : NCGC00347525-03!2-amino-5-[2-[[[2,3-dihydroxy-2-(1-hydroxyethyl)butanoyl]oxymethyl]-4-hydroxyanilino]-  
C<sub>18</sub>H<sub>26</sub>N<sub>2</sub>O<sub>9</sub>; MF: 2; RMF: 65; Prob 16.6%; Lib: mona-export-gnps; ID: 9213.

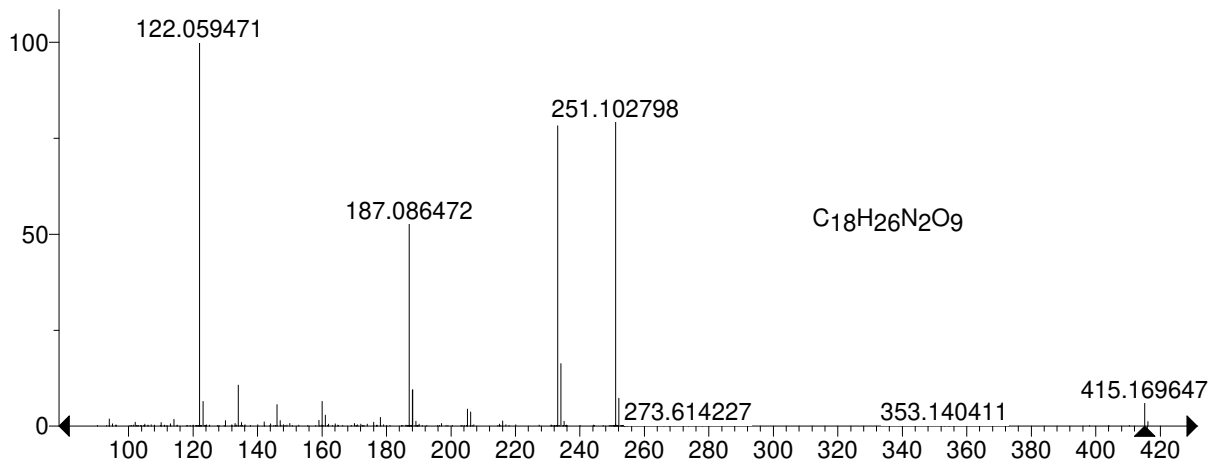

\*\* Search Report Page 2 of 2 \*\*

Hit 3 : NCGC00347525-02|2-amino-5-[2-[[2,3-dihydroxy-2-(1-hydroxyethyl)butanoyl]oxymethyl]-4-hydroxyanilino]-C<sub>18</sub>H<sub>26</sub>N<sub>2</sub>O<sub>9</sub>; MF: 1; RMF: 63; Prob 16.0%; Lib: mona-export-gnps; ID: 6270.

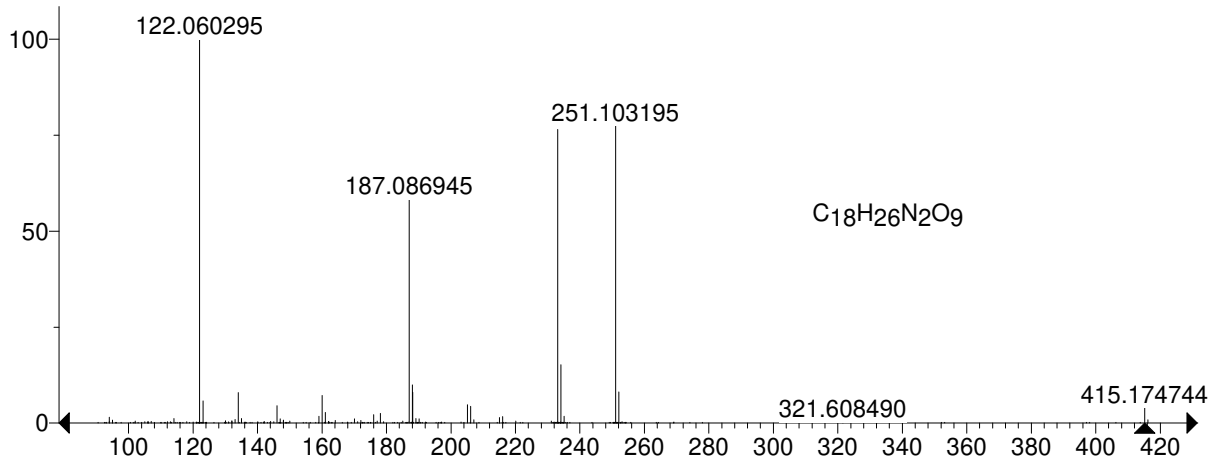

Hit 4 : 2-amino-5-[2-[[2,3-dihydroxy-2-(1-hydroxyethyl)butanoyl]oxymethyl]-4-hydroxyanilino]-5-oxopentanoic acid C<sub>18</sub>H<sub>26</sub>N<sub>2</sub>O<sub>9</sub>; MF: 1; RMF: 53; Prob 16.0%; Lib: mona-export-vf-npl\_qexactive; ID: 23032.

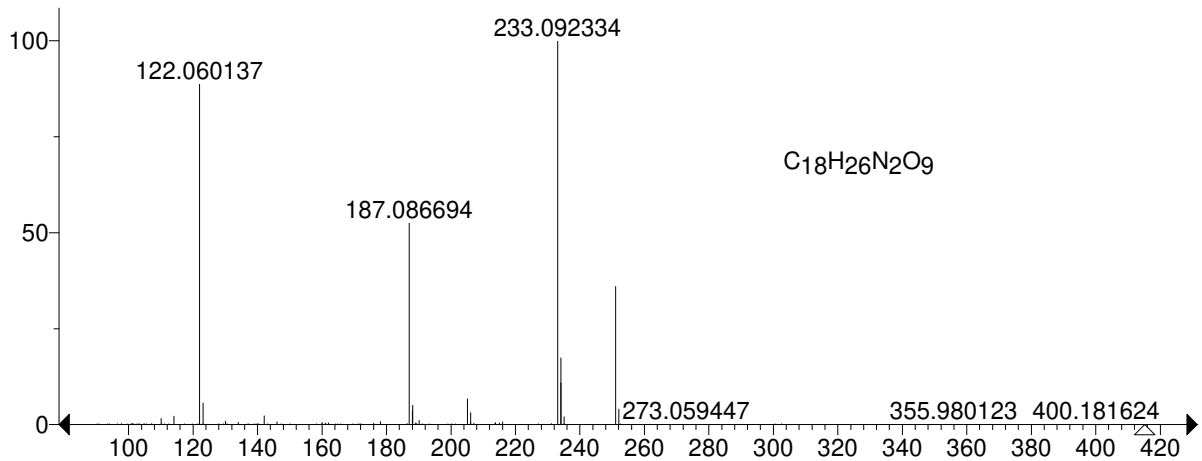

Hit 5 : Diltiazem HCl (Tiazac) [M+H]<sup>+</sup> P=415.2 C<sub>22</sub>H<sub>27</sub>ClN<sub>2</sub>O<sub>4</sub>S; MF: 0; RMF: 19; Prob 15.4%; Lib: mona-export-gnps; ID: 648.

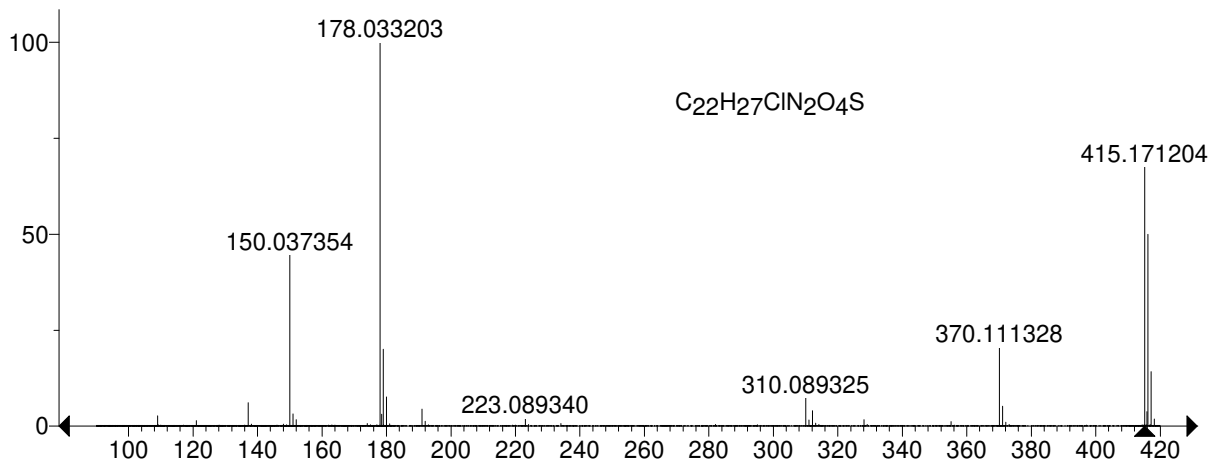



Unknown: Unknown (7.27\_444.1866m/z)  
Compound in Library Factor = 0

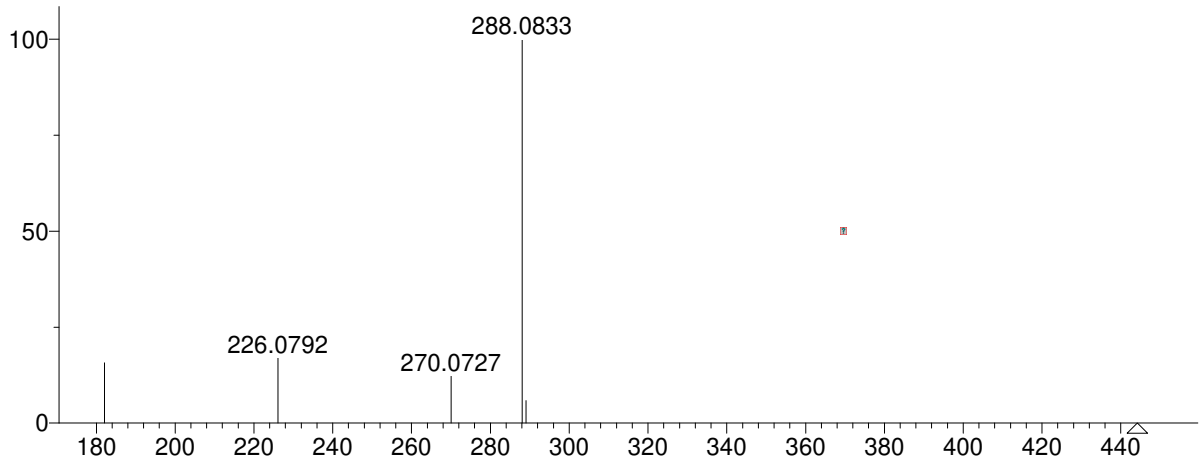

Unknown: Unknown (7.27\_628.1985m/z)  
Compound in Library Factor = 0

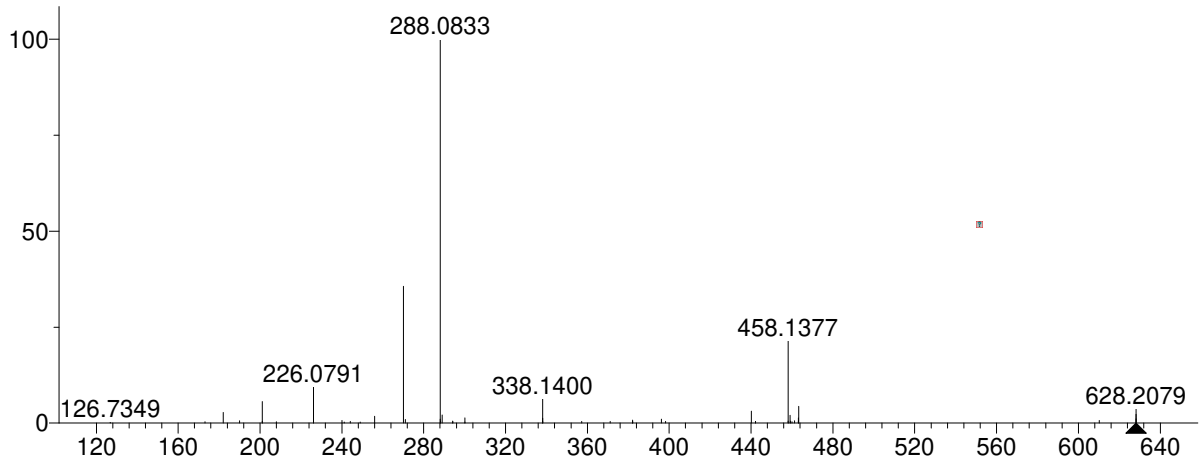

Unknown: Unknown (7.28\_458.1397m/z)  
Compound in Library Factor = 0

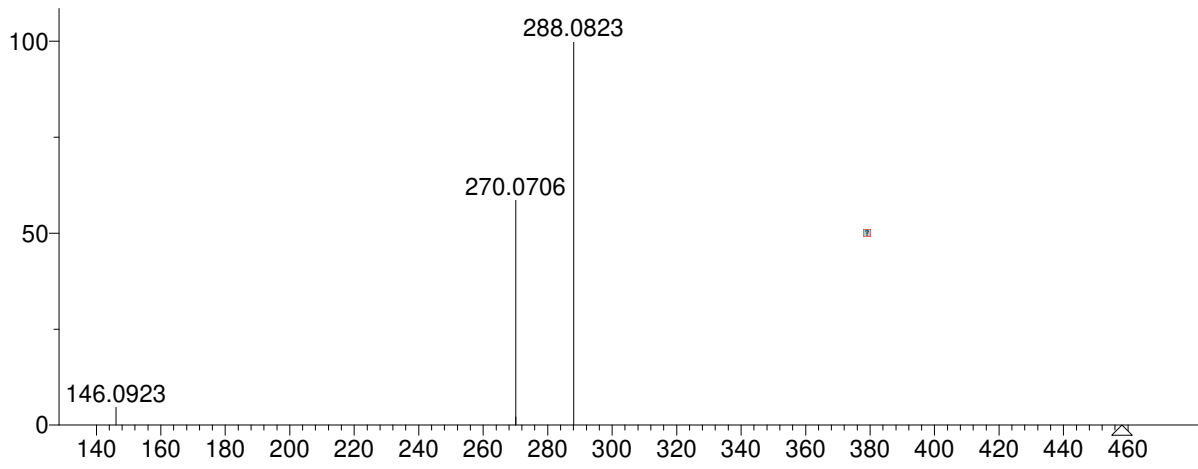

Unknown: Unknown (7.32\_275.1024m/z)  
Compound in Library Factor = 0

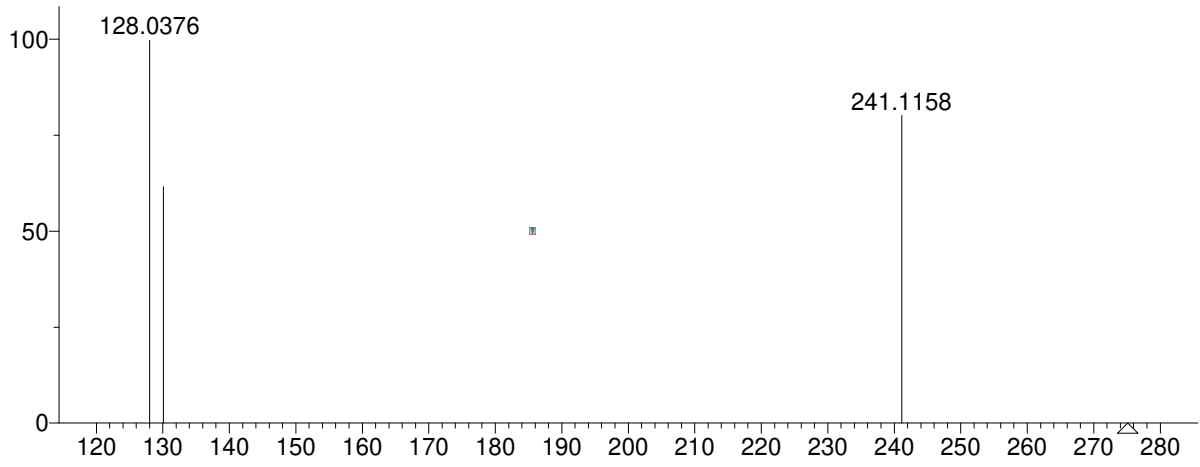

Unknown: Unknown (7.32\_484.2071m/z)  
Compound in Library Factor = 0

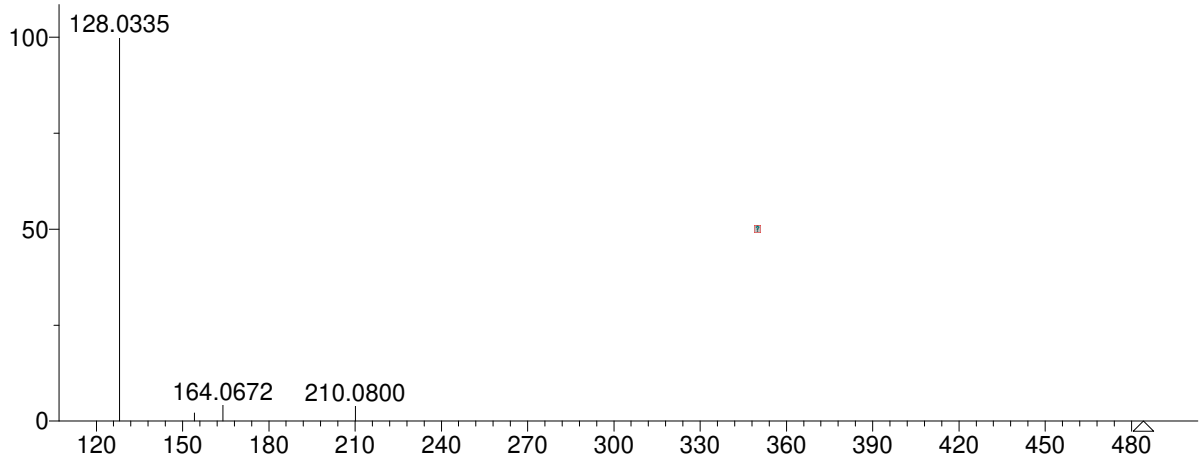

Unknown: Unknown (7.33\_437.0864m/z)  
Compound in Library Factor = 0

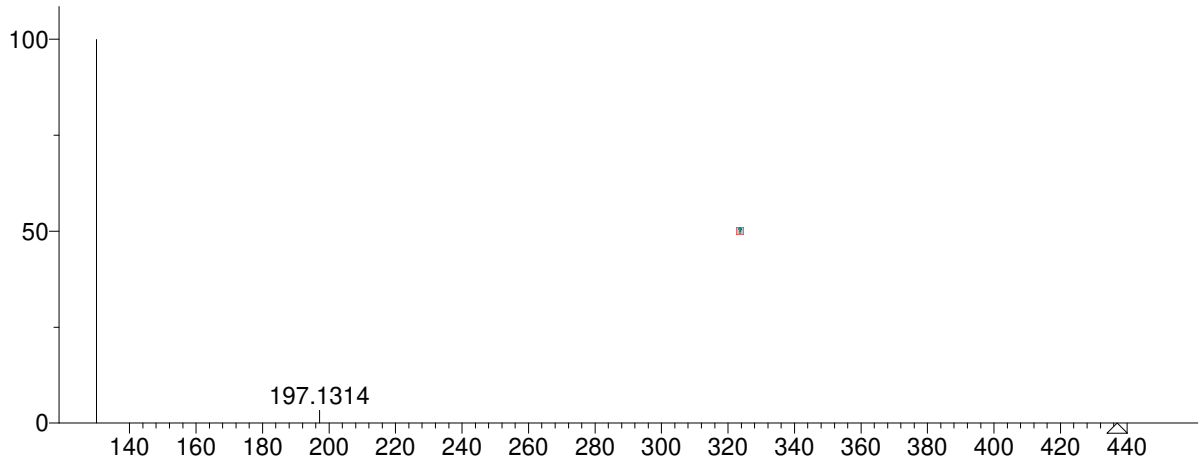

Unknown: Unknown (7.33\_612.3720m/z)  
Compound in Library Factor = -2632

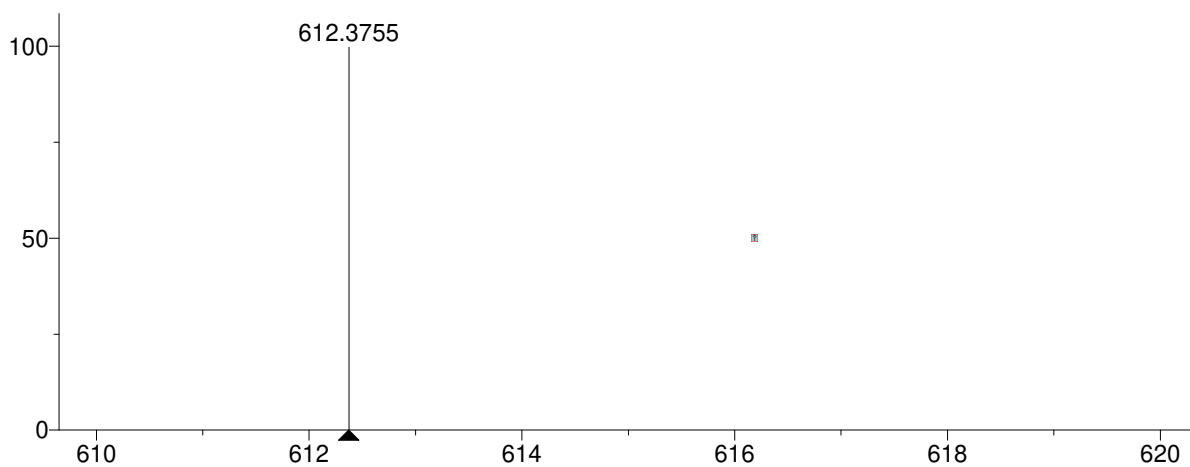

Hit 1 : PE 27:4 [M-H]<sup>-</sup> 40eV P=612.4  
C<sub>32</sub>H<sub>56</sub>NO<sub>8</sub>P; MF: 364; RMF: 999; Prob 14.3%; Lib: mona-export-in-silico\_spectra; ID: 82189.

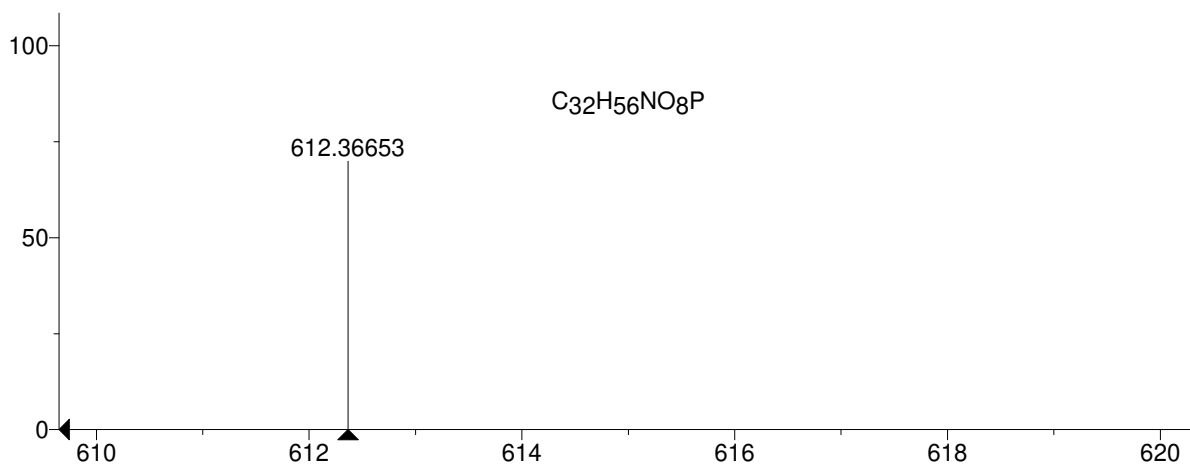

Hit 2 : PE 27:5 [M+H]<sup>+</sup> 25eV P=612.4  
C<sub>32</sub>H<sub>54</sub>NO<sub>8</sub>P; MF: 364; RMF: 999; Prob 14.3%; Lib: mona-export-in-silico\_spectra; ID: 86869.

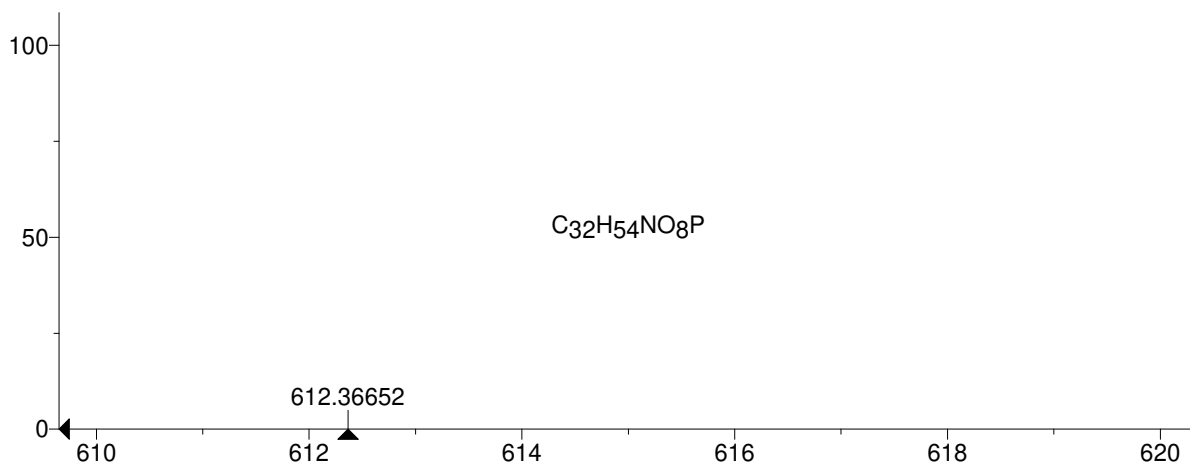

Hit 3 : PE 27:4; PE 3:0-24:4; [M-H]<sup>-</sup> [M-H]<sup>-</sup> P=612.4  
C<sub>32</sub>H<sub>56</sub>NO<sub>8</sub>P; MF: 364; RMF: 999; Prob 14.3%; Lib: msdial-insilicomsm-lipids-neg; ID: 322789.

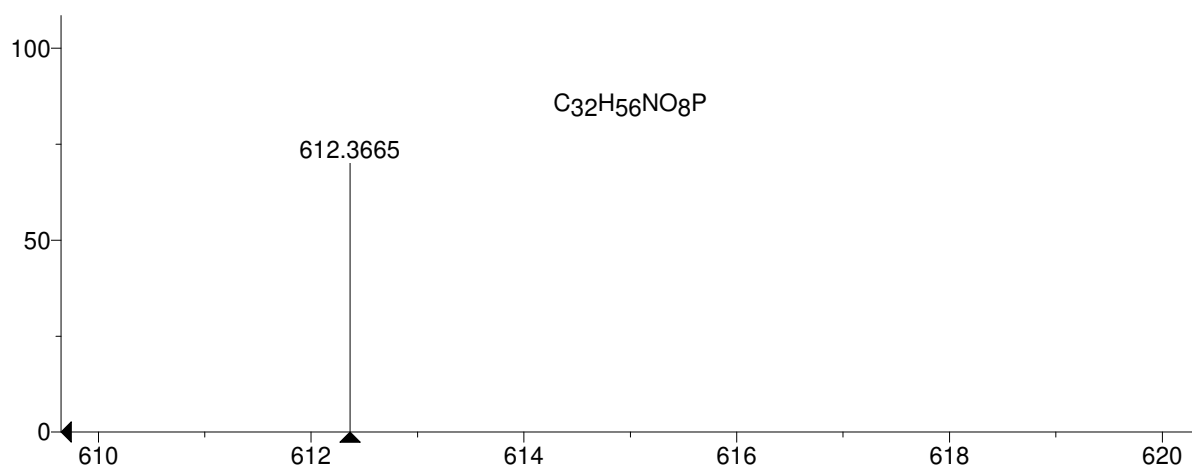

Hit 4 : PE 27:4; PE 5:0-22:4; [M-H]<sup>-</sup> [M-H]<sup>-</sup> P=612.4  
C<sub>32</sub>H<sub>56</sub>NO<sub>8</sub>P; MF: 364; RMF: 999; Prob 14.3%; Lib: msdial-insilicomsm-lipids-neg; ID: 322899.

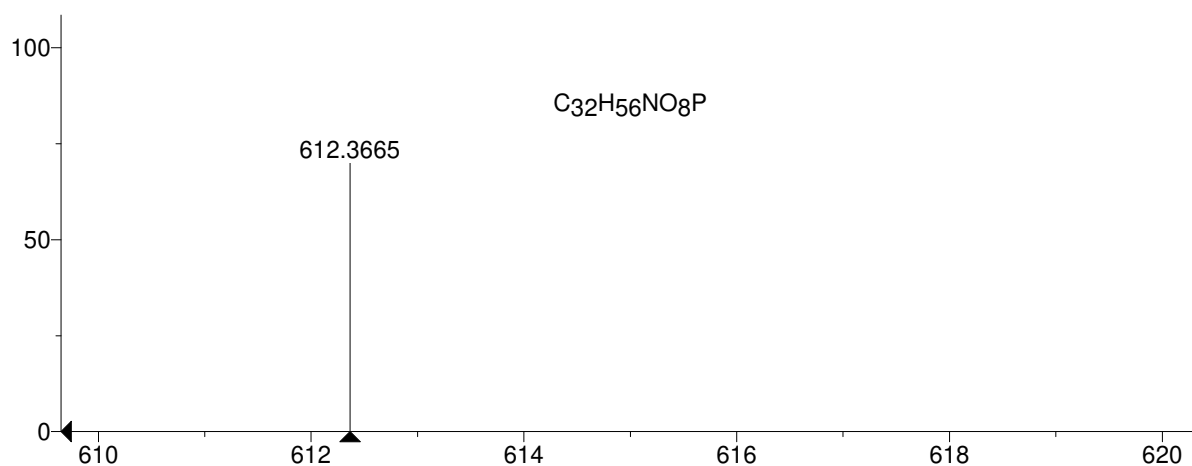

Hit 5 : PE 27:4; PE 7:0-20:4; [M-H]<sup>-</sup> [M-H]<sup>-</sup> P=612.4  
C<sub>32</sub>H<sub>56</sub>NO<sub>8</sub>P; MF: 364; RMF: 999; Prob 14.3%; Lib: msdial-insilicomsm-lipids-neg; ID: 323003.

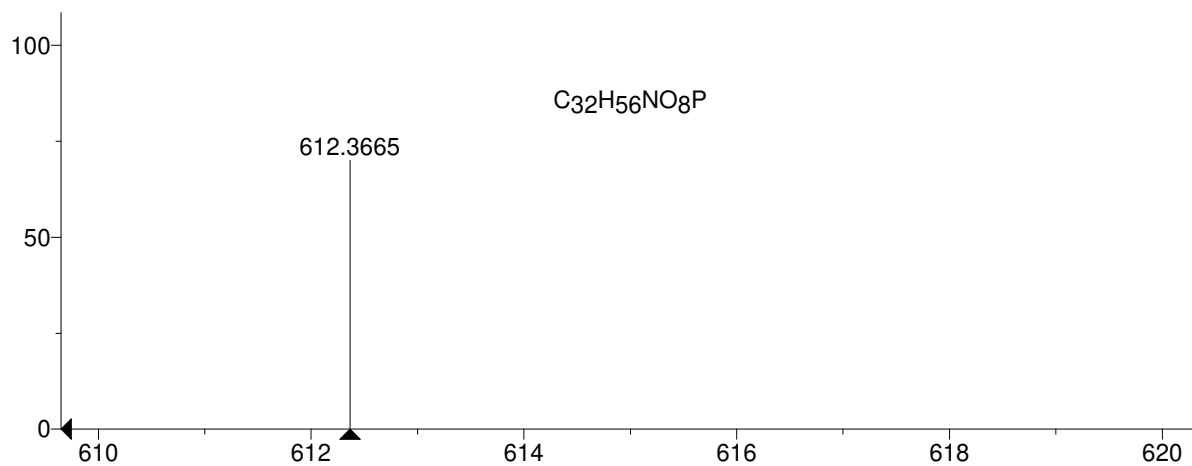



Unknown: Unknown (7.34\_388.1714m/z)  
Compound in Library Factor = 0

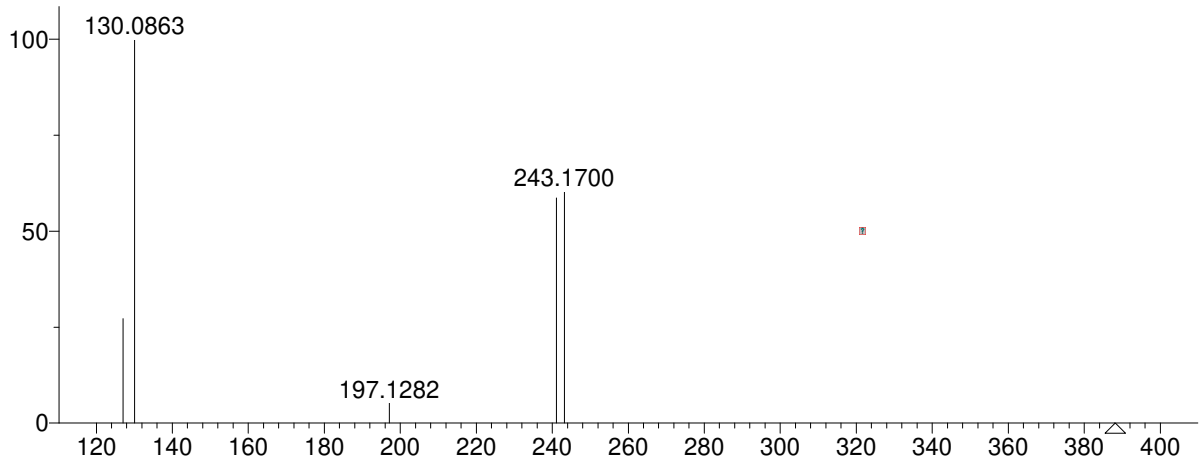

Unknown: Unknown (7.34\_549.2259m/z)  
Compound in Library Factor = 0

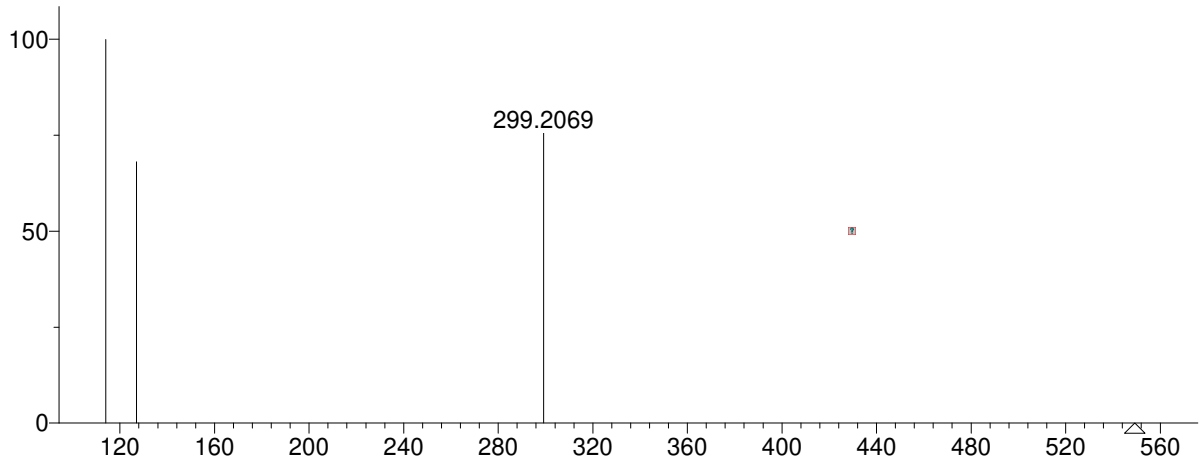

Unknown: Unknown (7.34\_634.2461m/z)  
Compound in Library Factor = 0

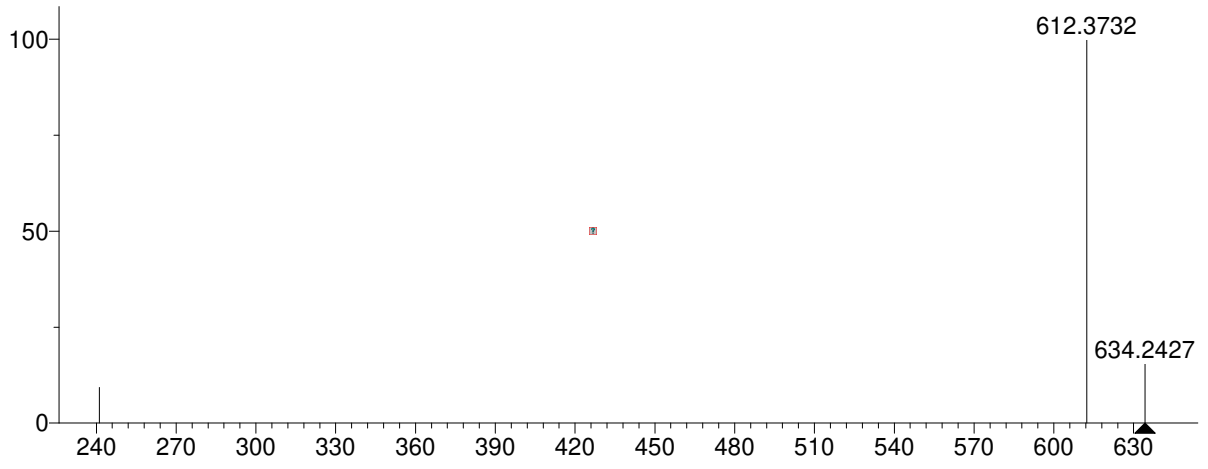

Unknown: Unknown (7.34\_656.2787m/z)  
Compound in Library Factor = 0

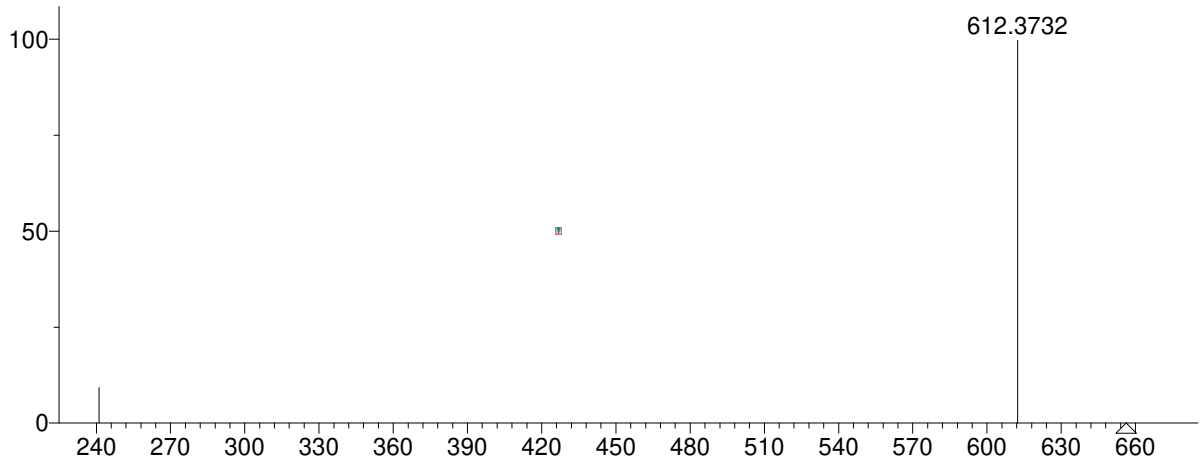

Unknown: Unknown (7.36\_405.2229m/z)  
Compound in Library Factor = 0

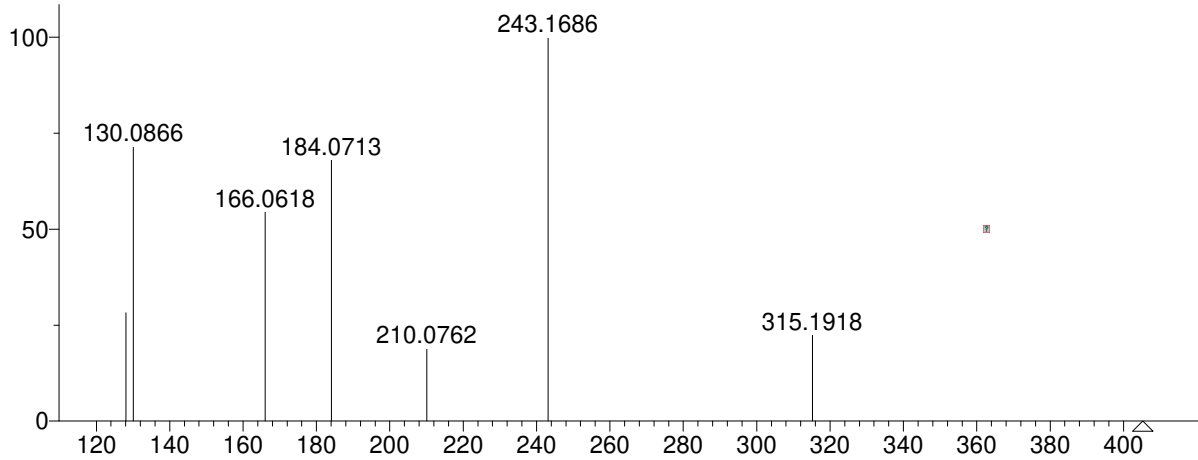

Hit 1 : MLS002637530-01!Cortell50-03-3 [M+H]<sup>+</sup> P=405.2  
C<sub>23</sub>H<sub>32</sub>O<sub>6</sub>; MF: 0; RMF: 31; Prob 50.0%; Lib: mona-export-gnps; ID: 3679.

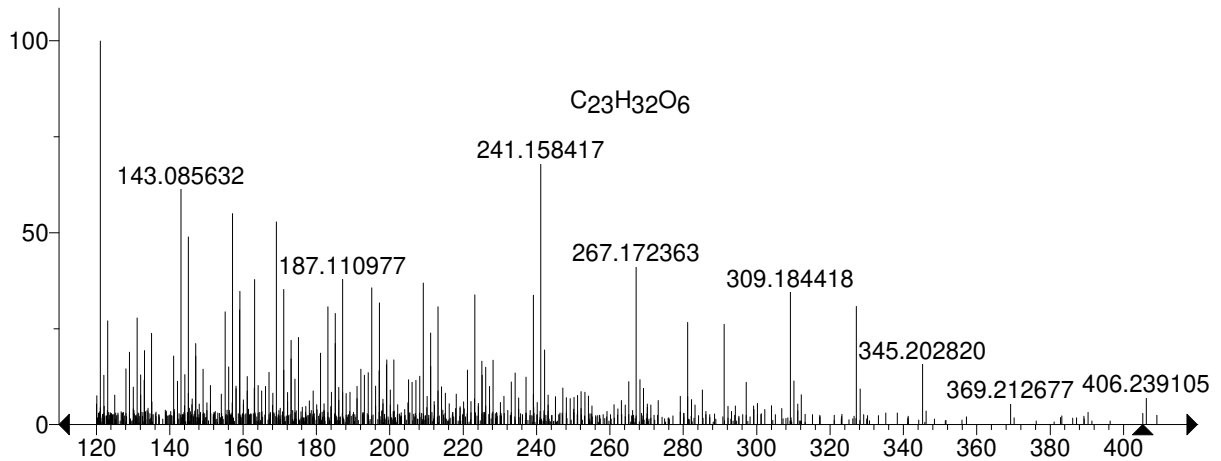

Hit 2 : MLS001076491-01!Cortell [M+H]<sup>+</sup> P=405.2  
C<sub>23</sub>H<sub>32</sub>O<sub>6</sub>; MF: 0; RMF: 27; Prob 50.0%; Lib: mona-export-gnps; ID: 4335.

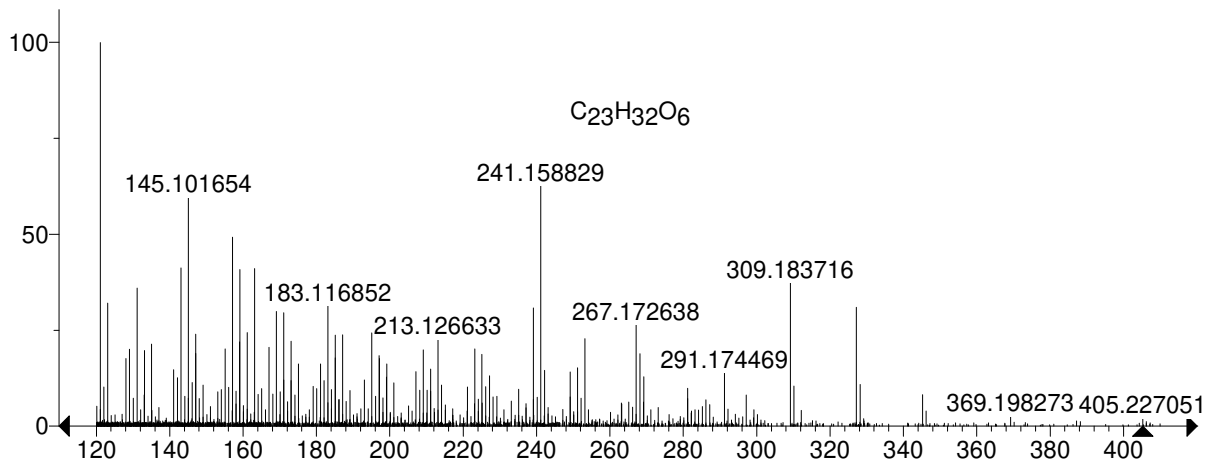

Unknown: Unknown (7.37\_465.1983m/z)  
Compound in Library Factor = 0

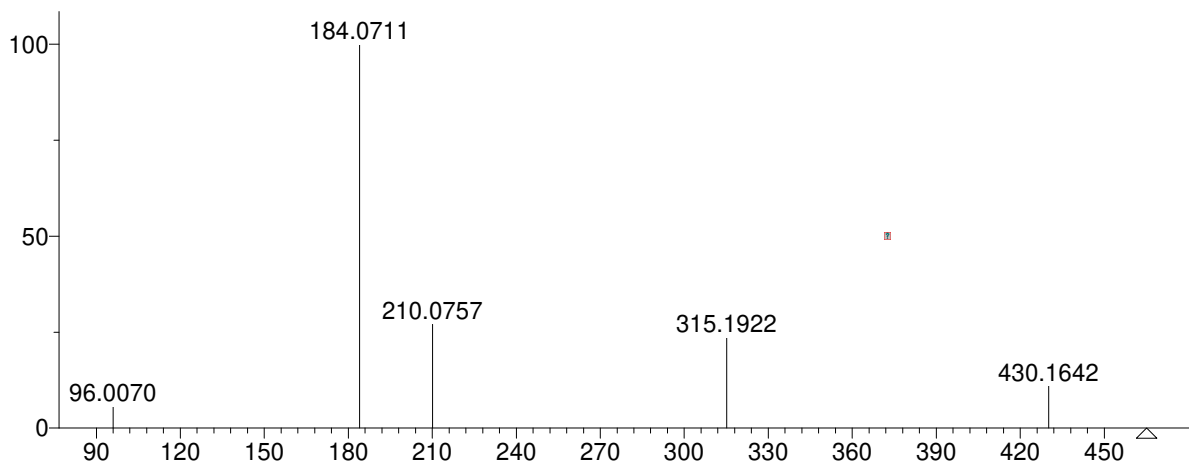

Hit 1 : Salannin [M+H]<sup>+</sup>=>565.3=>465.2 IT 35% P=465.2  
C34H44O9; MF: 0; RMF: 45; Prob 50.0%; CAS: 992-20-1; Lib: nist\_msms; ID: 223511.

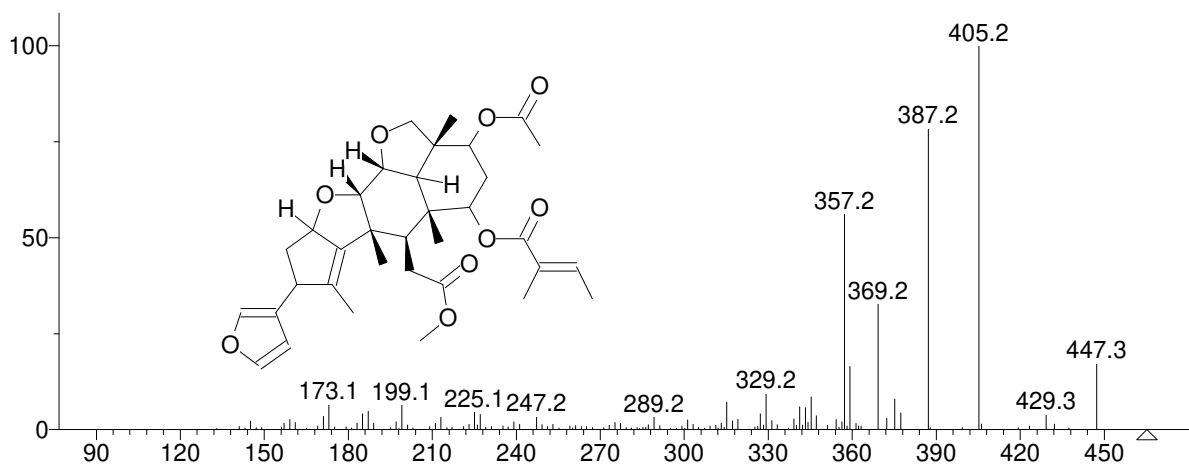

Hit 2 : Azadirachtin A [M+H-C7H16O6]<sup>+</sup>=>465.2 IT 35% P=465.2  
C35H44O16; MF: 0; RMF: 33; Prob 50.0%; CAS: 11141-17-6; Lib: nist\_msms; ID: 223393.

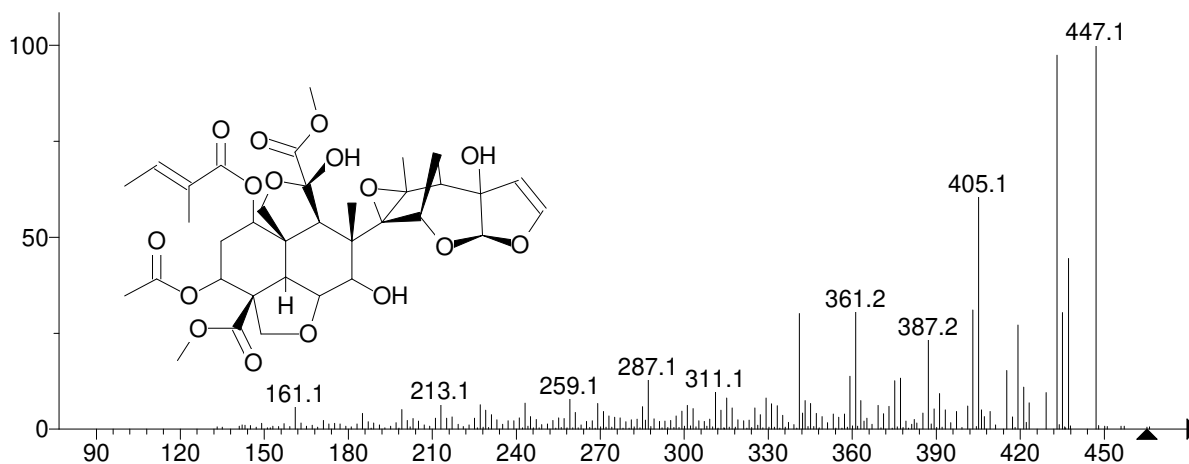

Unknown: Unknown (7.37\_476.1674m/z)  
Compound in Library Factor = 0

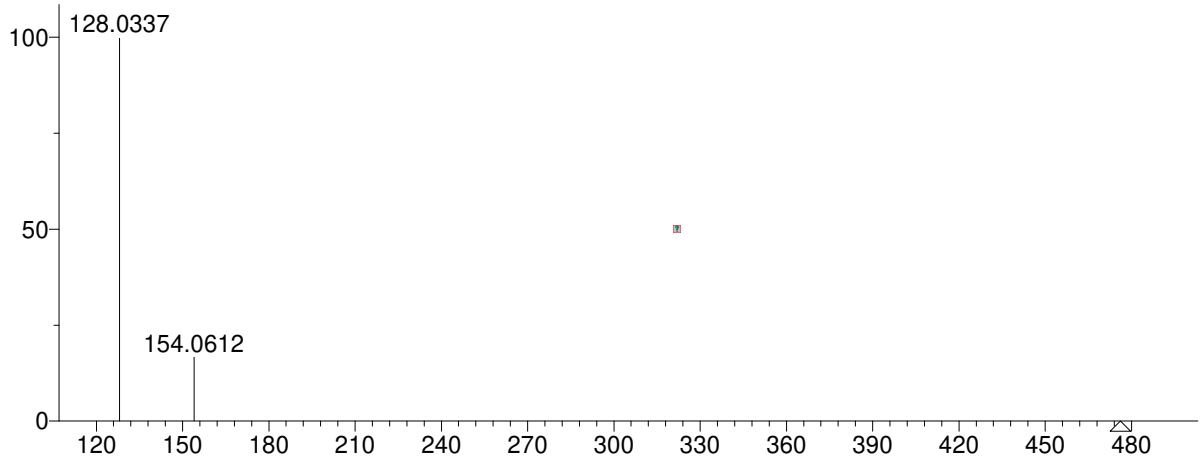

Unknown: Unknown (7.38\_381.1756m/z)  
Compound in Library Factor = 0

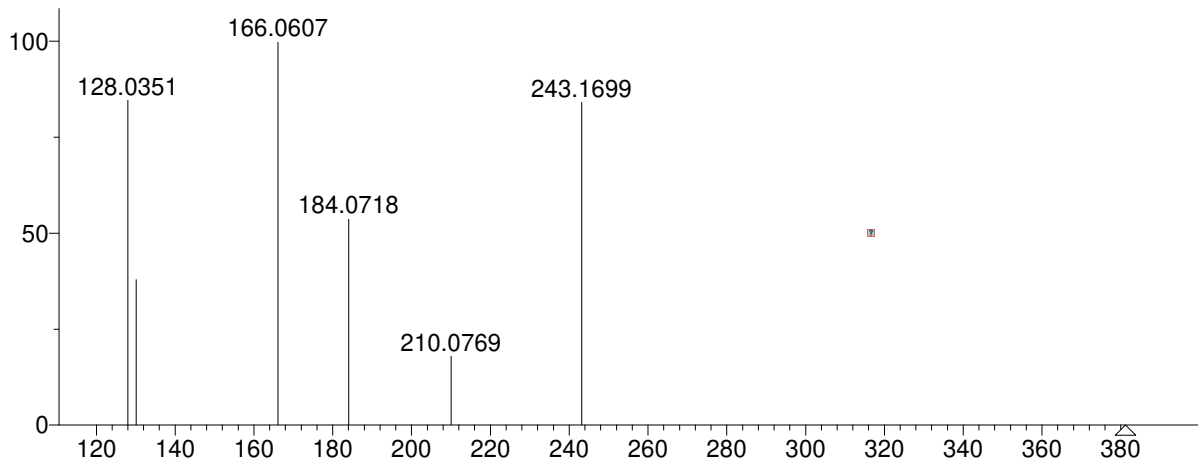



\*\* Search Report Page 1 of 2 \*\*

Unknown: Unknown (7.38\_413.1665m/z)  
Compound in Library Factor = -3273

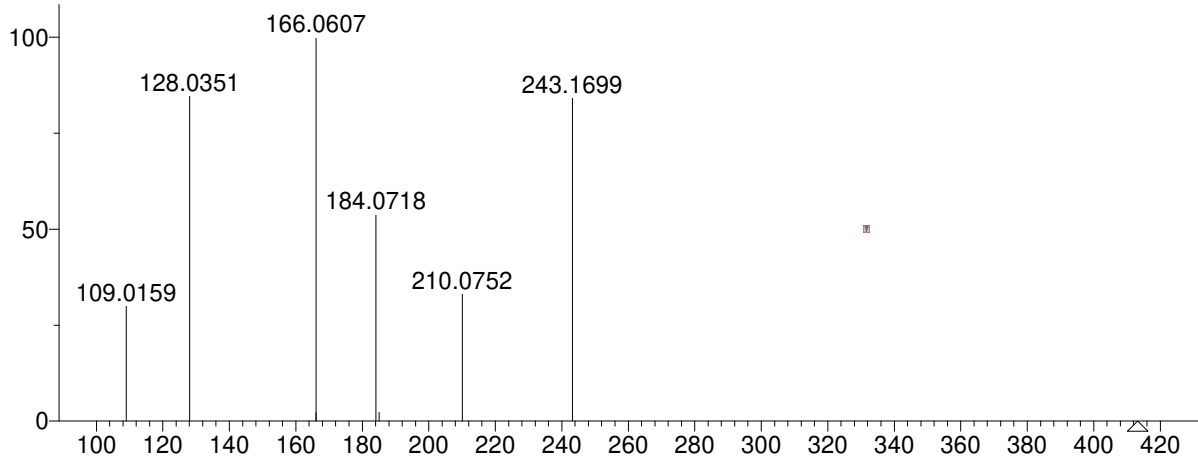

Hit 1 : N-(sec-Butyl)-N-(4-(sec-butyl(trifluoroacetyl)amino)phenyl)-2,2,2-trifluoroacetamide [M+H]<sup>+</sup> HCD 107V P:  
C<sub>18</sub>H<sub>22</sub>F<sub>6</sub>N<sub>2</sub>O<sub>2</sub>; MF: 1; RMF: 166; Prob 25.7%; CAS: 883829-91-2; Lib: nist\_msms; ID: 199644.

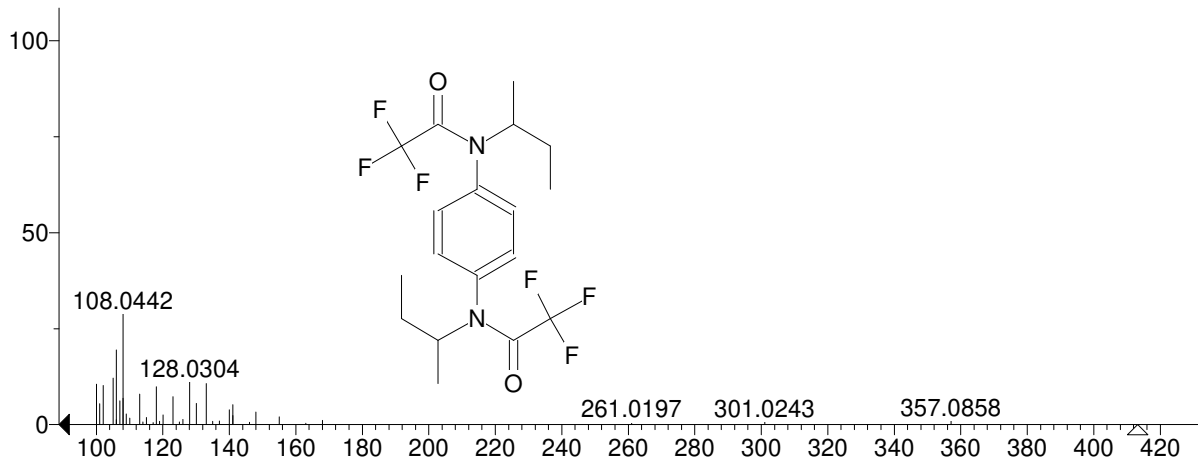

Hit 2 : 2-Hydroxymethyloratadine [M+H]<sup>+</sup> HCD 132V P=413.2  
C<sub>23</sub>H<sub>25</sub>ClN<sub>2</sub>O<sub>3</sub>; MF: 0; RMF: 28; Prob 24.8%; CAS: 609806-39-5; Lib: nist\_msms; ID: 442227.

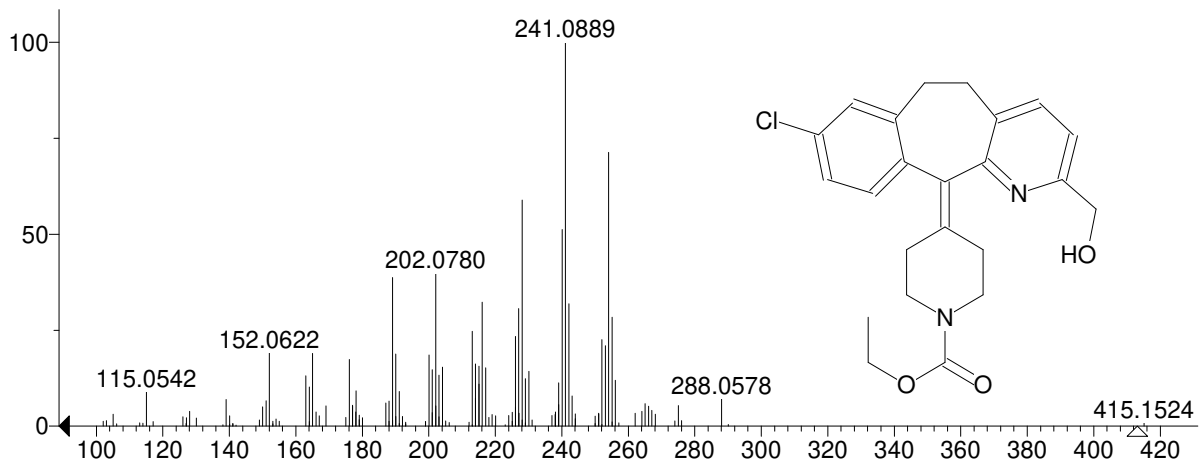

Hit 3 : 4-Hydroxymethyloratadine [M+H]<sup>+</sup> HCD 132V P=413.2  
C<sub>23</sub>H<sub>25</sub>ClN<sub>2</sub>O<sub>3</sub>; MF: 0; RMF: 24; Prob 24.8%; CAS: 609806-40-8; Lib: nist\_msms; ID: 442293.

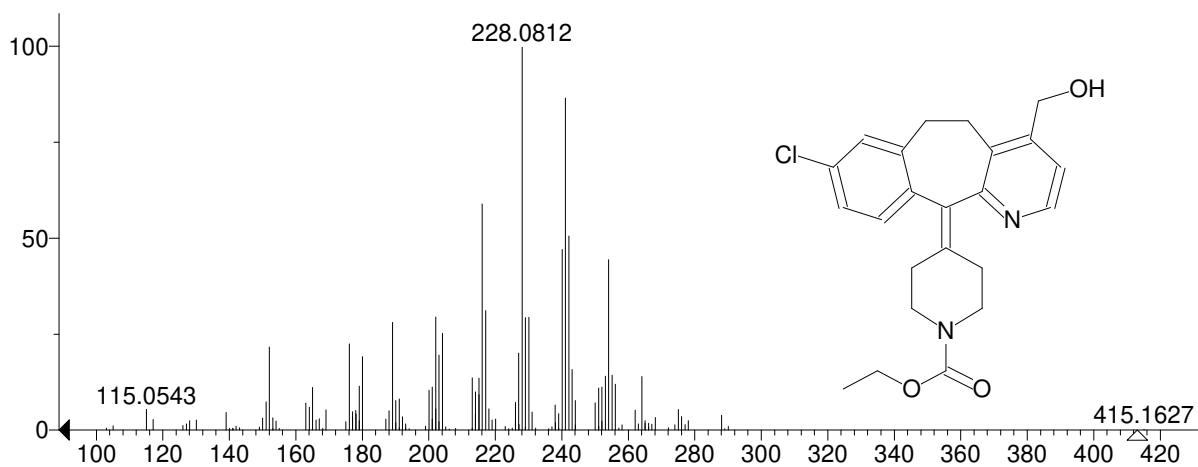

Hit 4 : NCGC00380162-01\_C<sub>16</sub>H<sub>28</sub>O<sub>12</sub>\_alpha-D-Glucopyranoside, alpha-D-glucopyranosyl, 3-(2-methylpropanoic acid)  
C<sub>16</sub>H<sub>28</sub>O<sub>12</sub>; MF: 0; RMF: 7; Prob 24.8%; Lib: mona-export-gnps; ID: 12080.

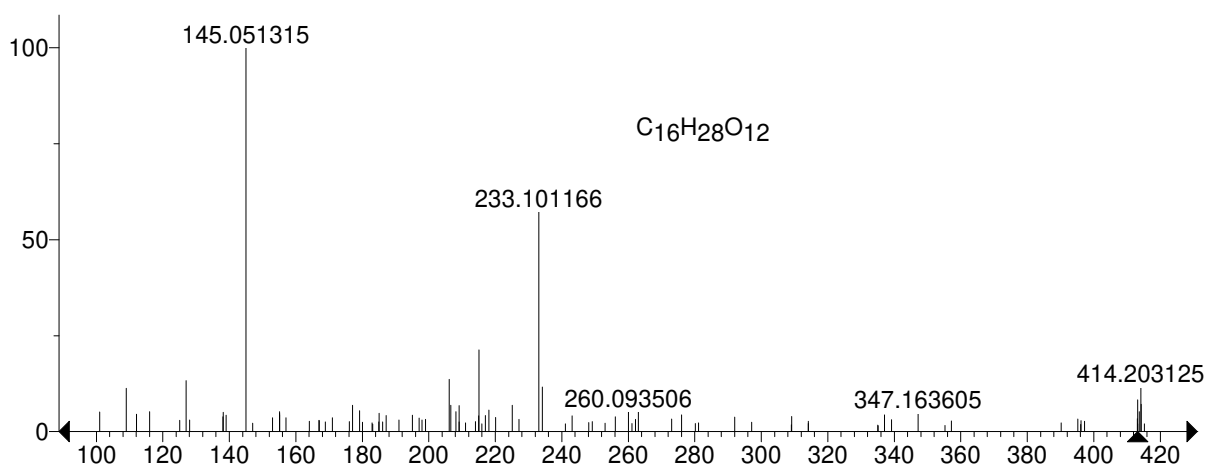

\*\* Search Report Page 1 of 2 \*\*

Unknown: Unknown (7.38\_467.1654m/z)  
Compound in Library Factor = -3273

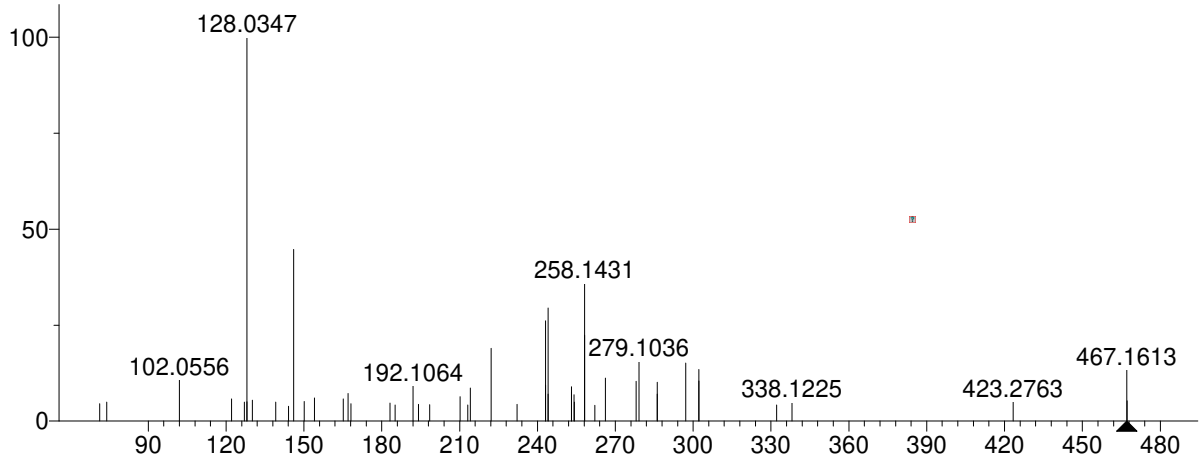

Hit 1 : Man3 a [M+H+Na]<sup>2+</sup> HCD 8V P=467.2  
C<sub>34</sub>H<sub>58</sub>N<sub>2</sub>O<sub>26</sub>; MF: 2; RMF: 162; Prob 17.2%; CAS: 70858-45-6; Lib: nist\_msms; ID: 184753.

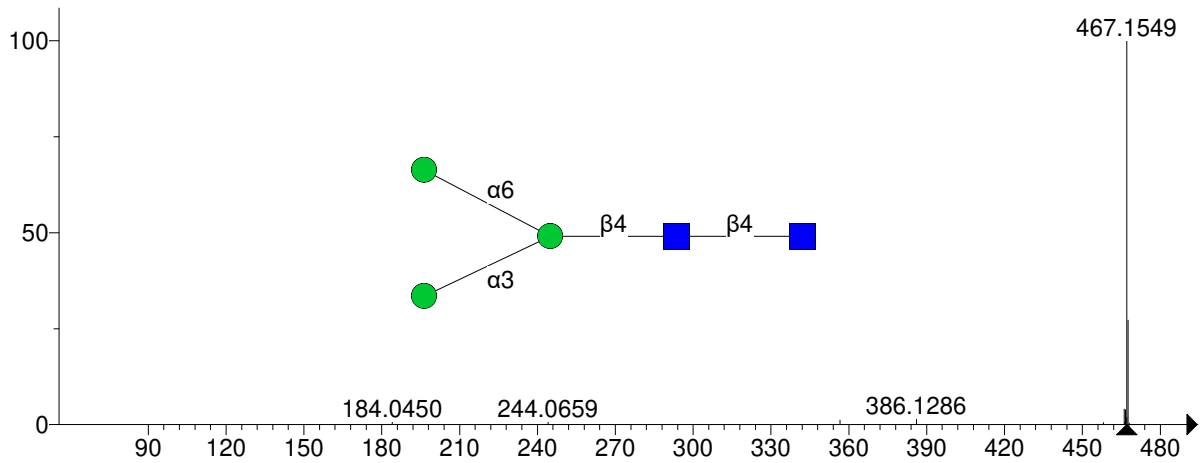

Hit 2 : 11,17-Difuroatemometasone [M+H-C<sub>5</sub>H<sub>5</sub>ClO<sub>3</sub>]<sup>+</sup> HCD 9V P=467.2  
C<sub>32</sub>H<sub>32</sub>Cl<sub>2</sub>O<sub>8</sub>; MF: 2; RMF: 139; Prob 17.2%; CAS: 1370190-33-2; Lib: nist\_msms; ID: 436531.

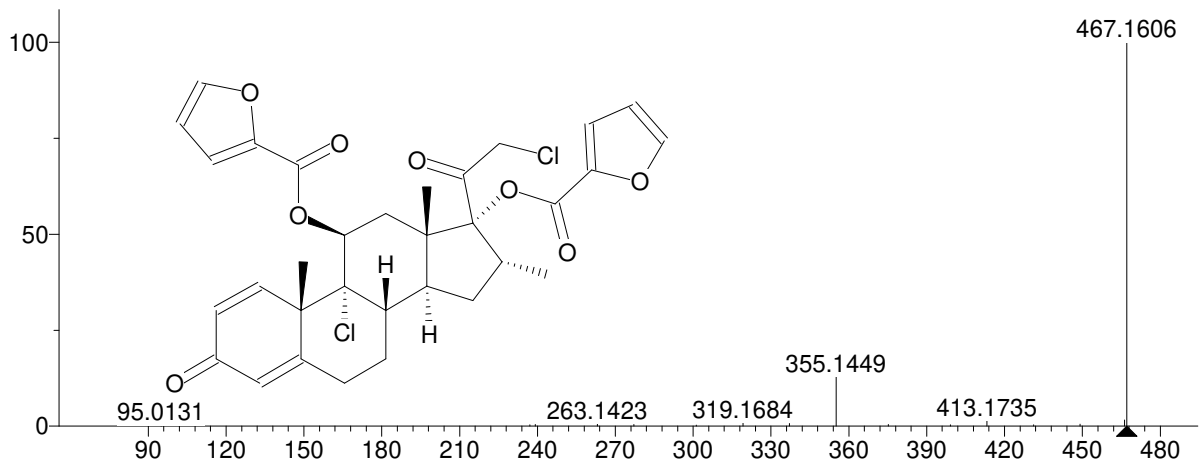

Hit 3 : MMV689243 [M+H]<sup>+</sup> 20-30-40%) P=467.2  
C<sub>23</sub>H<sub>20</sub>F<sub>6</sub>N<sub>4</sub>; MF: 2; RMF: 74; Prob 17.2%; Lib: mona-export-pathogen\_box; ID: 361.

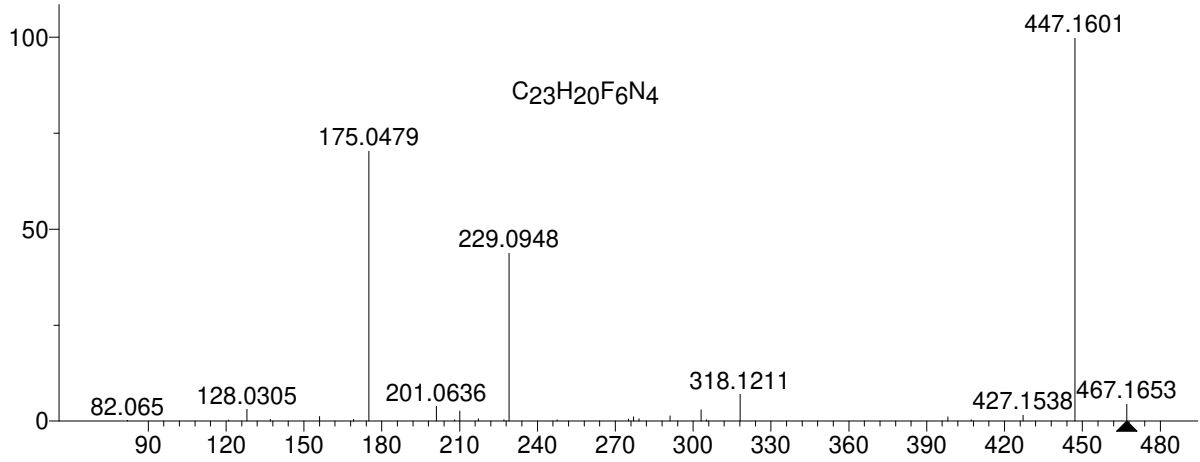

Hit 4 : Man3 b [M+H+Na]<sup>2+</sup> HCD 8V P=467.2  
C<sub>34</sub>H<sub>58</sub>N<sub>2</sub>O<sub>26</sub>; MF: 1; RMF: 153; Prob 16.5%; Lib: nist\_msms; ID: 184028.

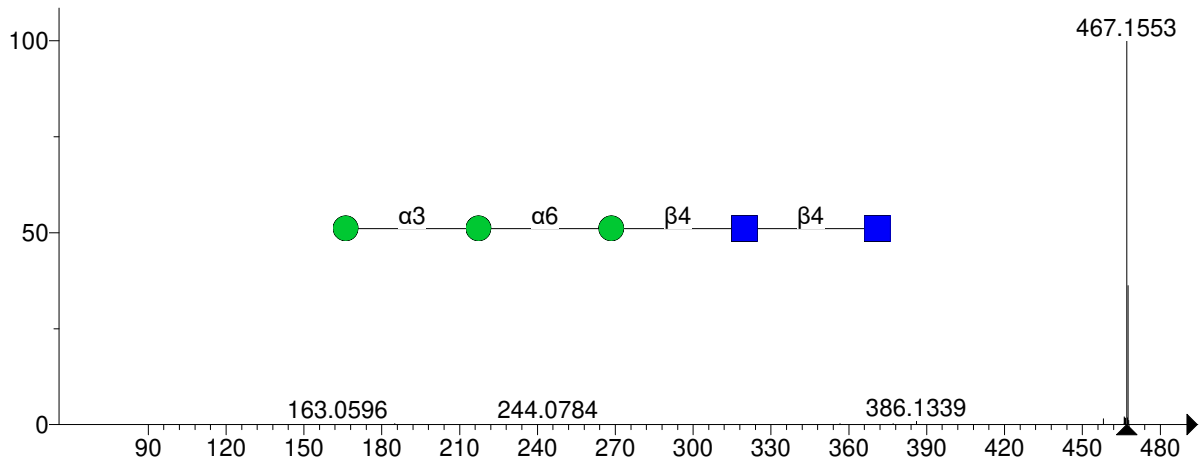

Hit 5 : Azadirachtin B [M+H-C<sub>7</sub>H<sub>16</sub>O<sub>6</sub>]<sup>+</sup> IT-FT 35% P=467.2  
C<sub>33</sub>H<sub>42</sub>O<sub>14</sub>; MF: 0; RMF: 43; Prob 15.9%; CAS: 95507-03-2; Lib: nist\_msms; ID: 223463.

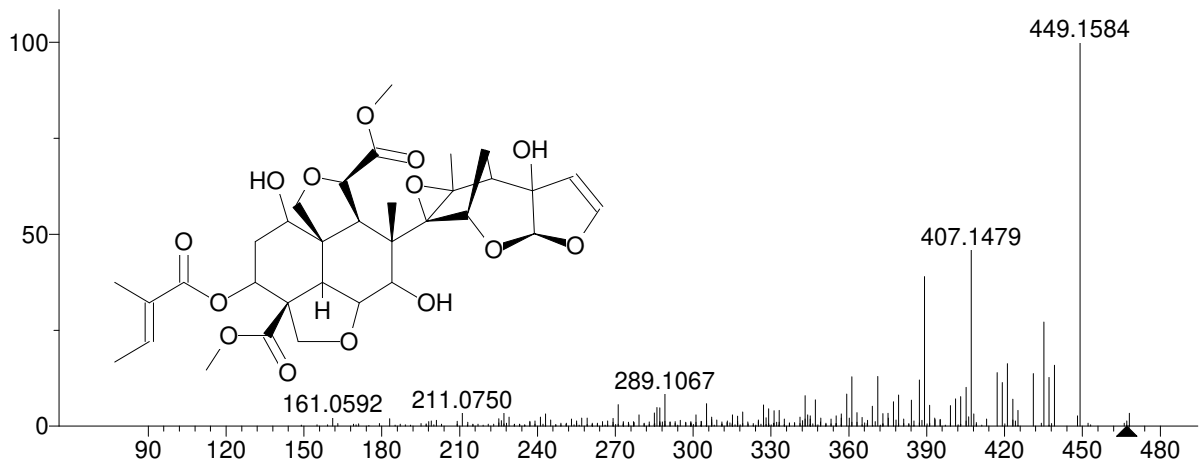

Unknown: Unknown (7.38\_502.2038m/z)  
Compound in Library Factor = 0

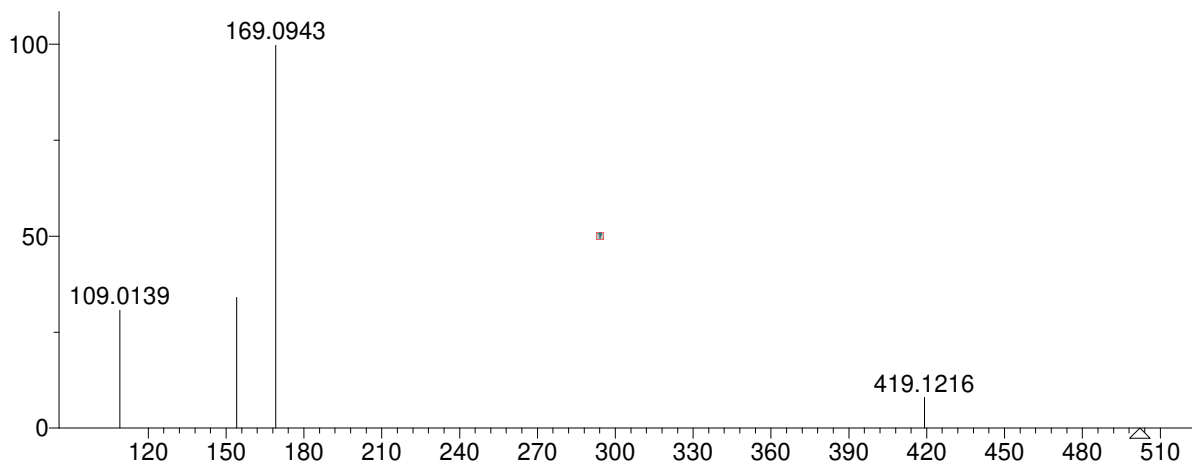

Hit 1 : (2R,7S,13R,14R,16S,19R,20S)-19-(furan-3-yl)-11-hydroxy-9,9,13,20-tetramethyl-4,8,15,18-tetraoxahexacyclopentane; MF: 0; RMF: 88; Prob 100.0%; Lib: mona-export-vf-npl\_qexactive; ID: 9558.

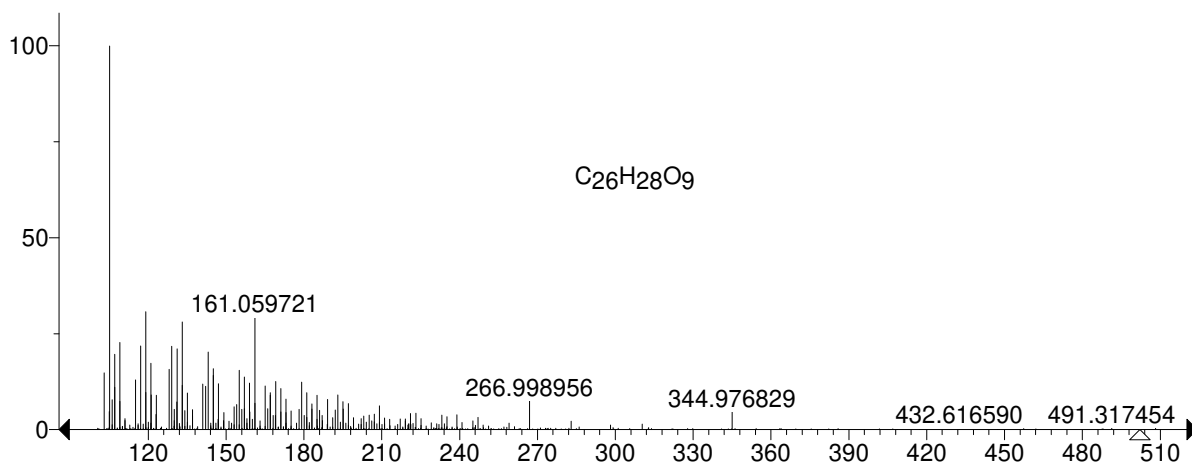

Unknown: Unknown (7.39\_389.1454m/z)  
Compound in Library Factor = 0

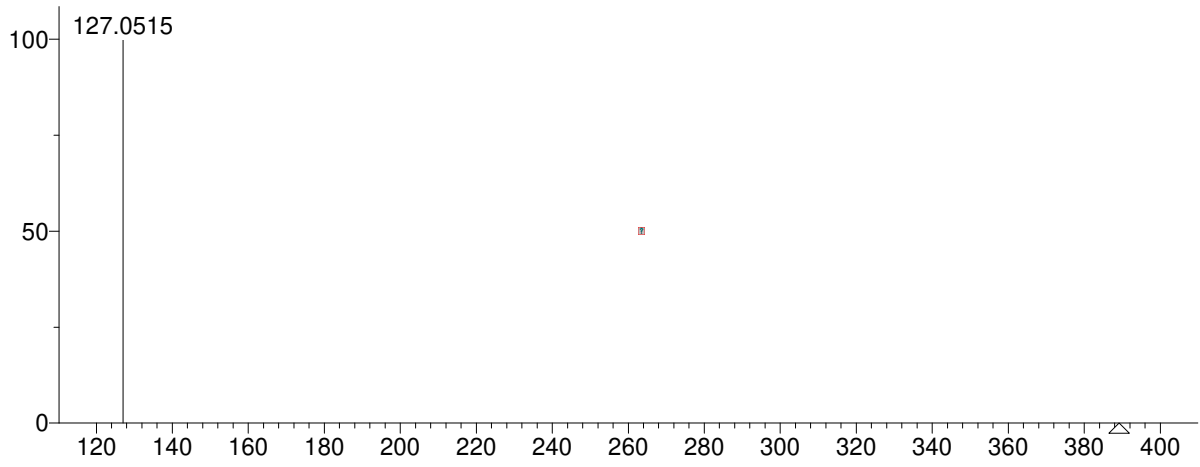

Unknown: Unknown (7.43\_413.2016m/z)  
Compound in Library Factor = 0

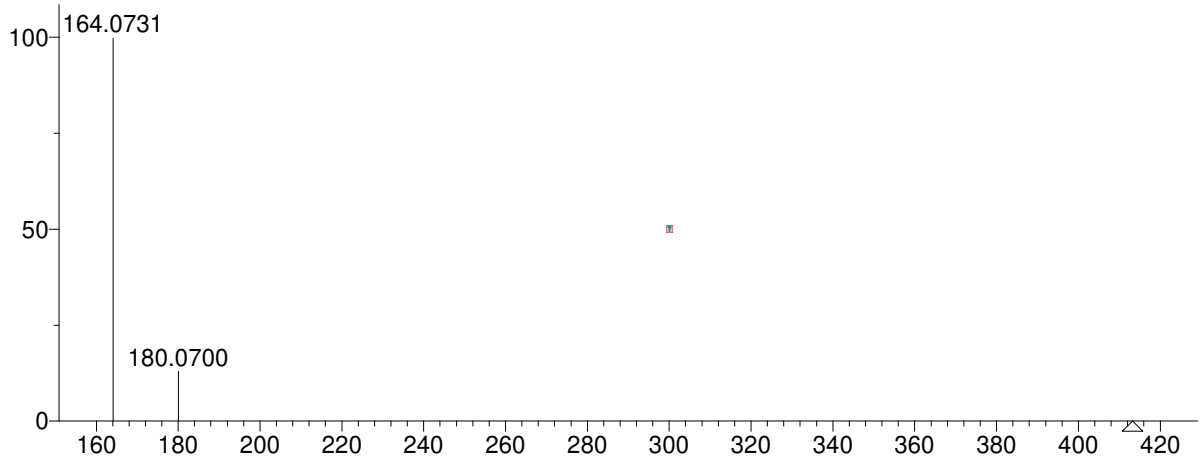

Unknown: Unknown (7.44\_526.2869m/z)  
Compound in Library Factor = 0

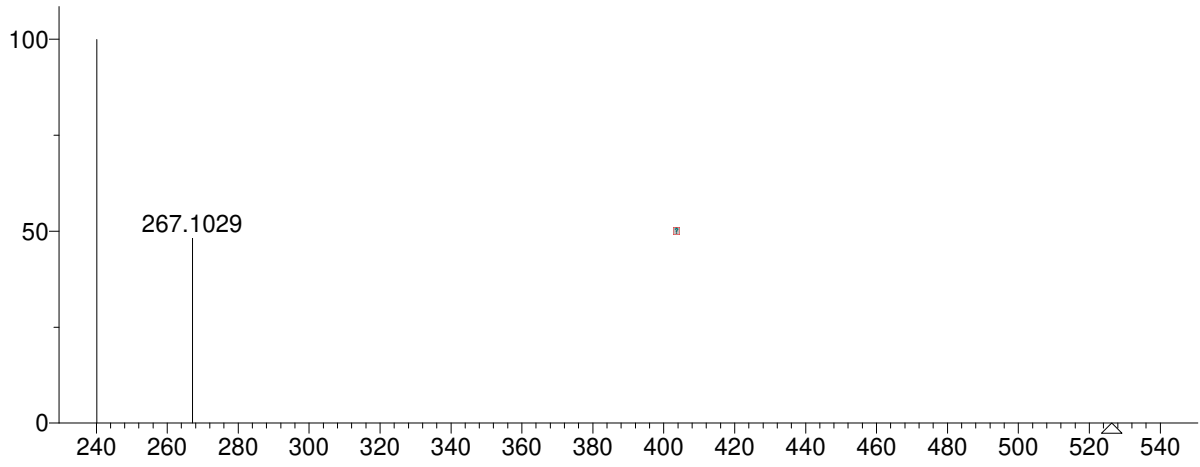



Unknown: Unknown (7.45\_344.1810m/z)  
Compound in Library Factor = 0

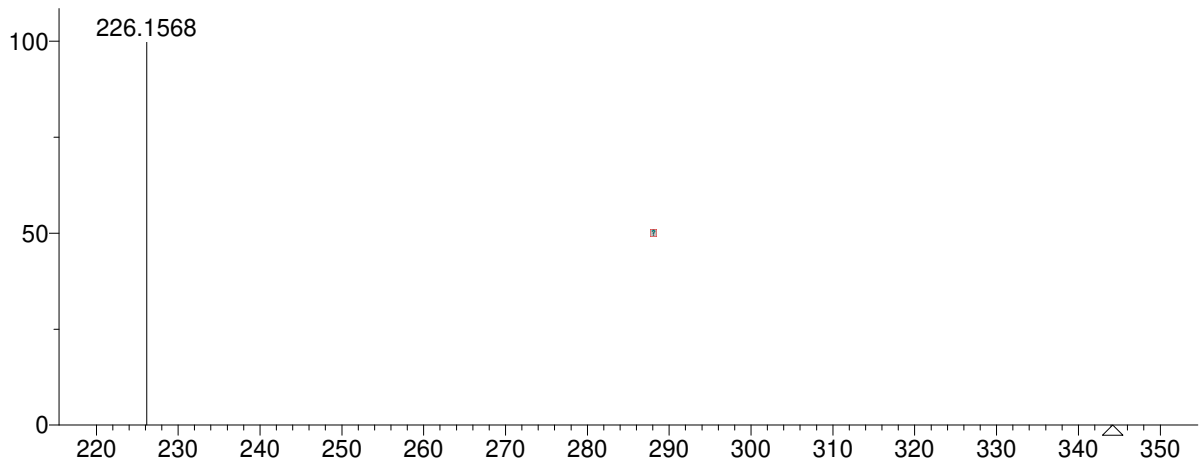

Unknown: Unknown (7.45\_441.1862m/z)  
Compound in Library Factor = 0

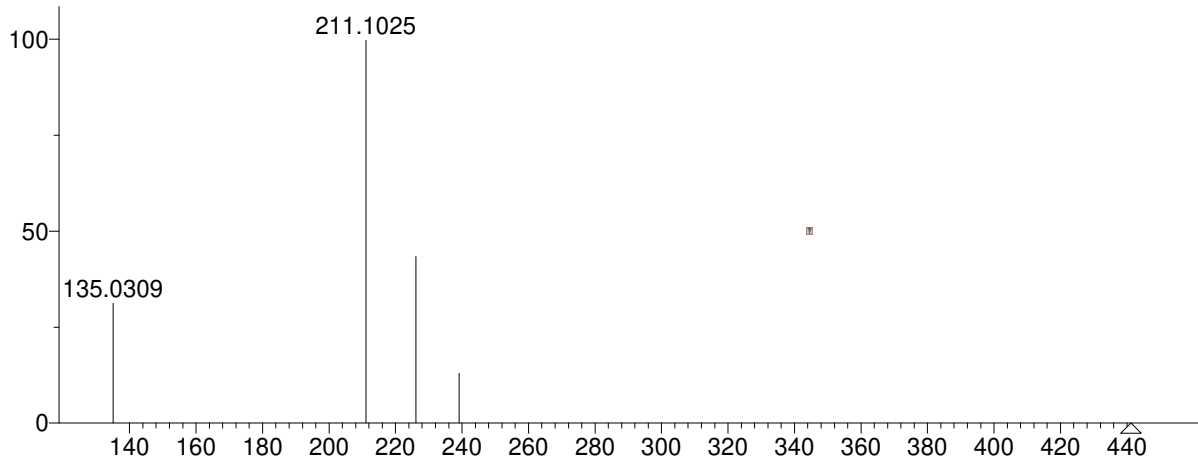

Unknown: Unknown (7.45\_722.1774m/z)  
Compound in Library Factor = 0

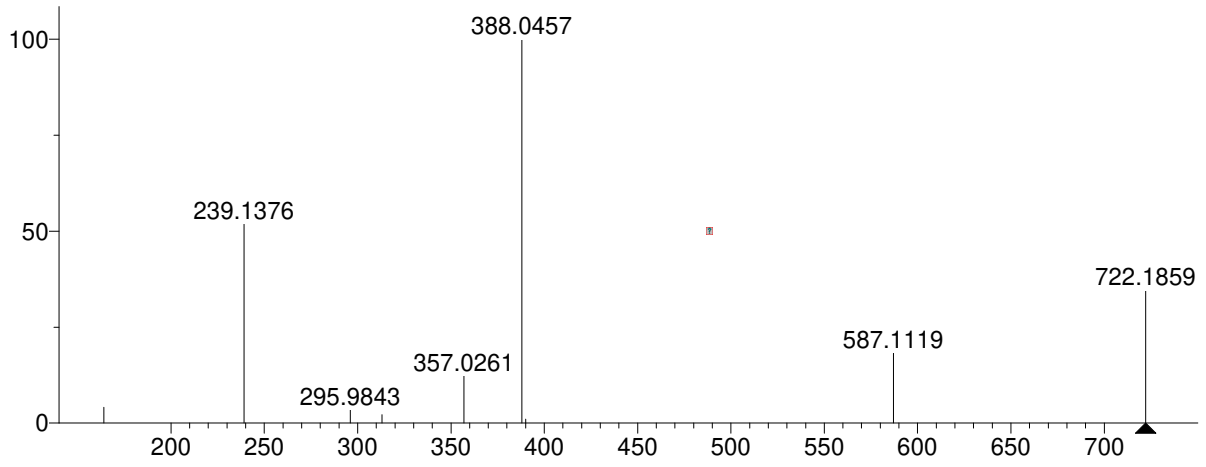

Unknown: Unknown (7.46\_757.1732m/z)  
Compound in Library Factor = 0

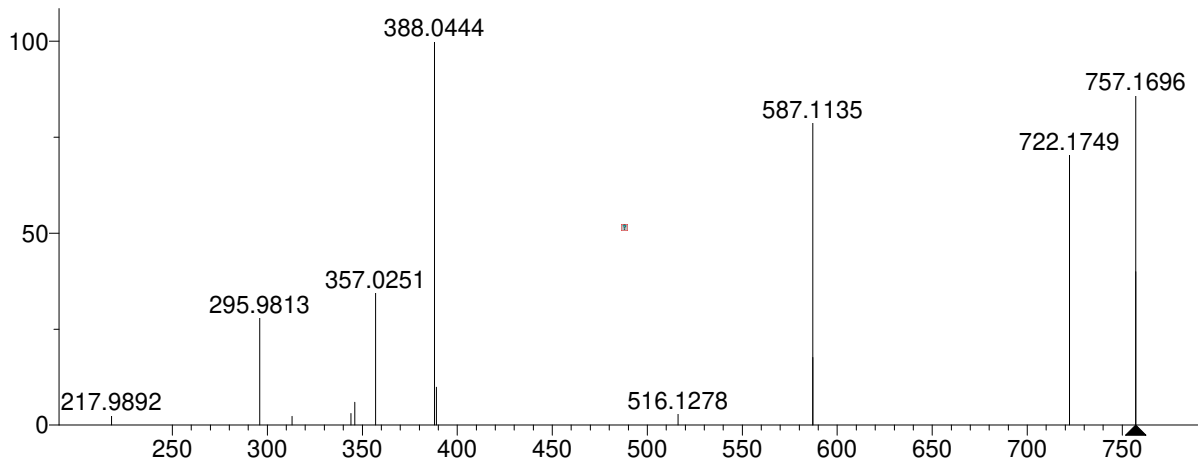

\*\* Search Report Page 1 of 2 \*\*

Unknown: Unknown (7.47\_258.1126m/z)  
Compound in Library Factor = -1309

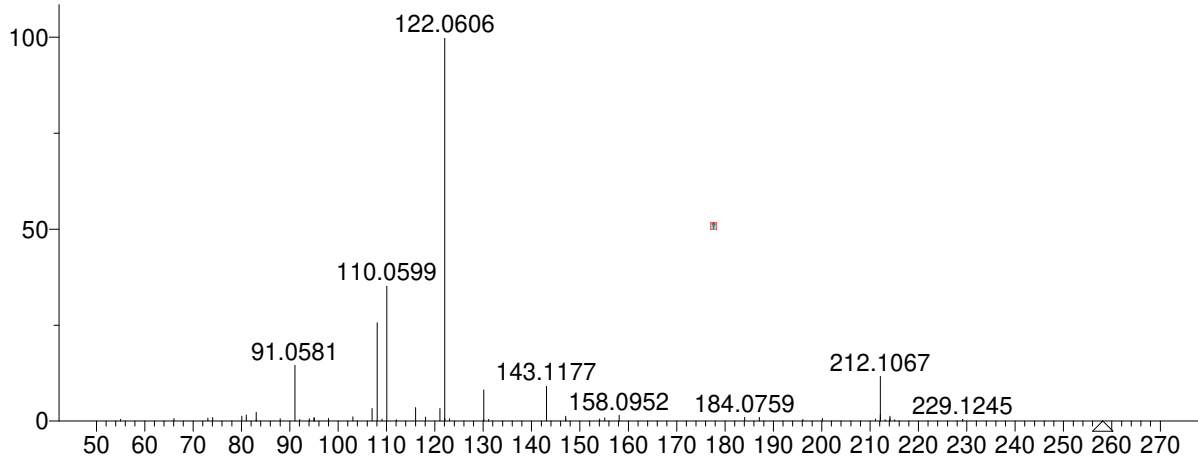

Hit 1 : Tolmetin [M+H]<sup>+</sup> HCD 49V P=258.1  
C<sub>15</sub>H<sub>15</sub>NO<sub>3</sub>; MF: 59; RMF: 261; Prob 42.4%; CAS: 26171-23-3; Lib: nist\_msms; ID: 135560.

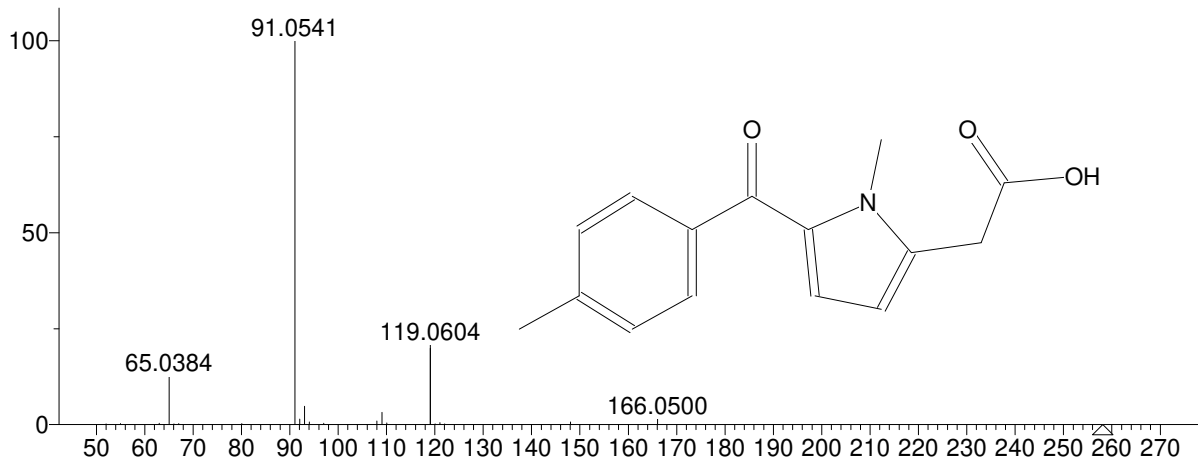

Hit 2 : NCGC00017285-06\_C<sub>15</sub>H<sub>15</sub>NO<sub>3</sub>\_9-Methoxy-2,2-dimethyl-2,6-dihydro-5H-pyrano[3,2-c]quinolin-5-one [M  
C<sub>15</sub>H<sub>15</sub>NO<sub>3</sub>; MF: 5; RMF: 186; Prob 8.30%; Lib: mona-export-gnps; ID: 11787.

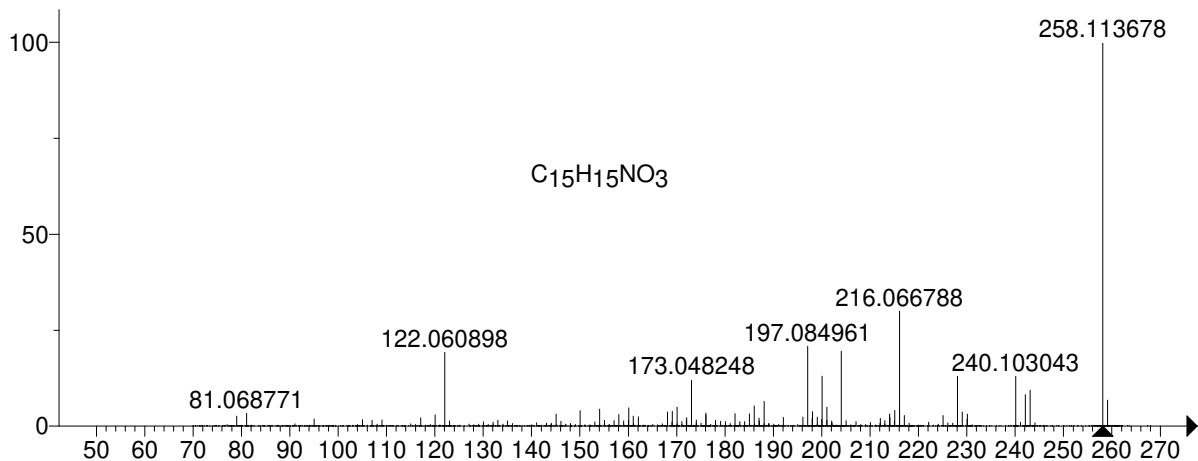

Hit 3 : 9-Methoxy-2,2-dimethyl-2,6-dihydro-pyrano[3,2-c]quinolin-5-one [M+H]<sup>+</sup> 65HCD P=258.1  
C<sub>15</sub>H<sub>15</sub>NO<sub>3</sub>; MF: 5; RMF: 156; Prob 8.30%; Lib: mona-export-vf-npl\_qexactive; ID: 17121.

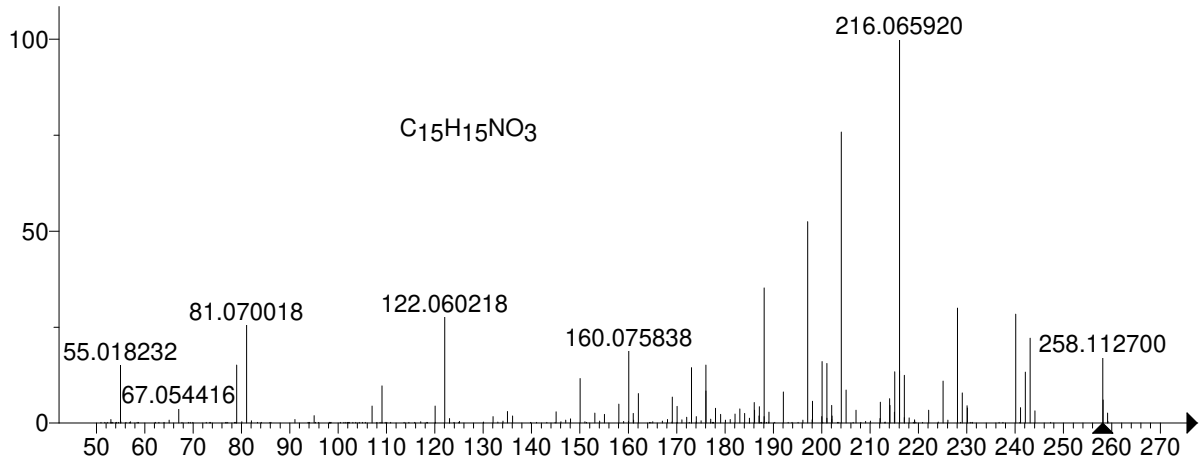

Hit 4 : NCGC00017285-04!HAPLAMINE [M+H]<sup>+</sup> P=258.1  
C<sub>15</sub>H<sub>15</sub>NO<sub>3</sub>; MF: 1; RMF: 140; Prob 7.01%; Lib: mona-export-gnps; ID: 1103.

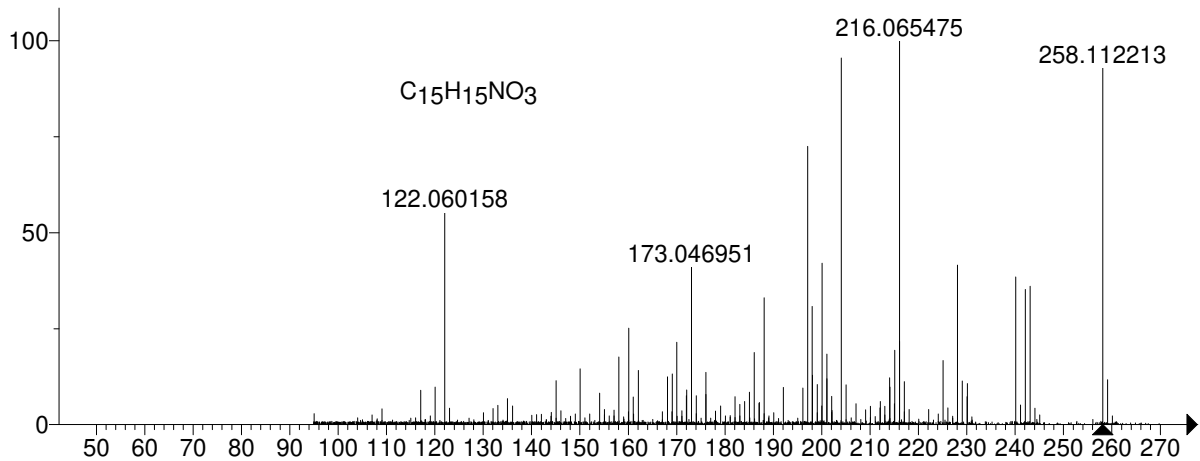

Hit 5 : NCGC00244969-01!4-[[2-[(E)-3-hydroxybut-1-enyl]-5-oxoxolan-3-yl]amino]benzaldehyde [M-H<sub>2</sub>O+H]<sup>+</sup> P  
C<sub>15</sub>H<sub>17</sub>NO<sub>4</sub>; MF: 1; RMF: 72; Prob 7.01%; Lib: mona-export-gnps; ID: 8338.

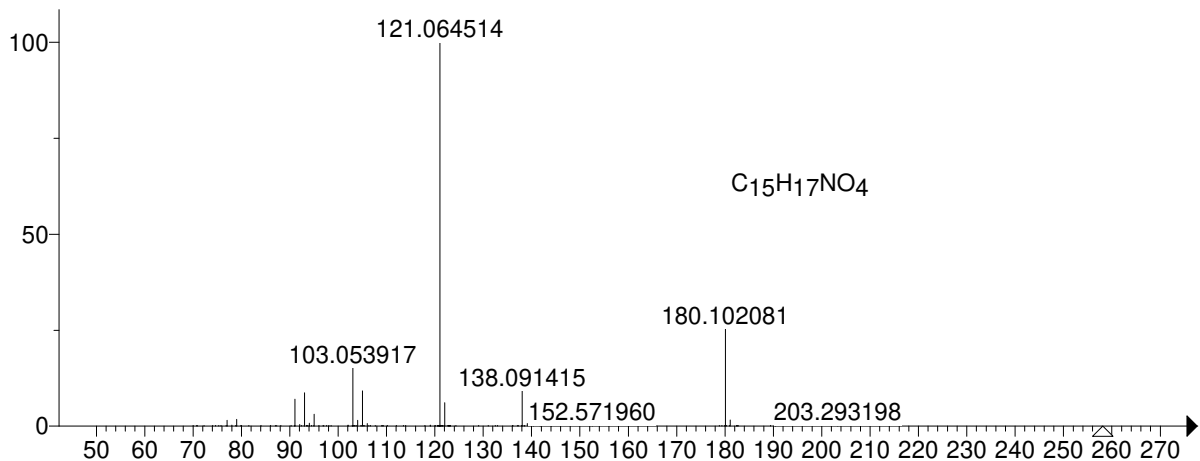

Unknown: Unknown (7.48\_445.1912m/z)  
Compound in Library Factor = 0

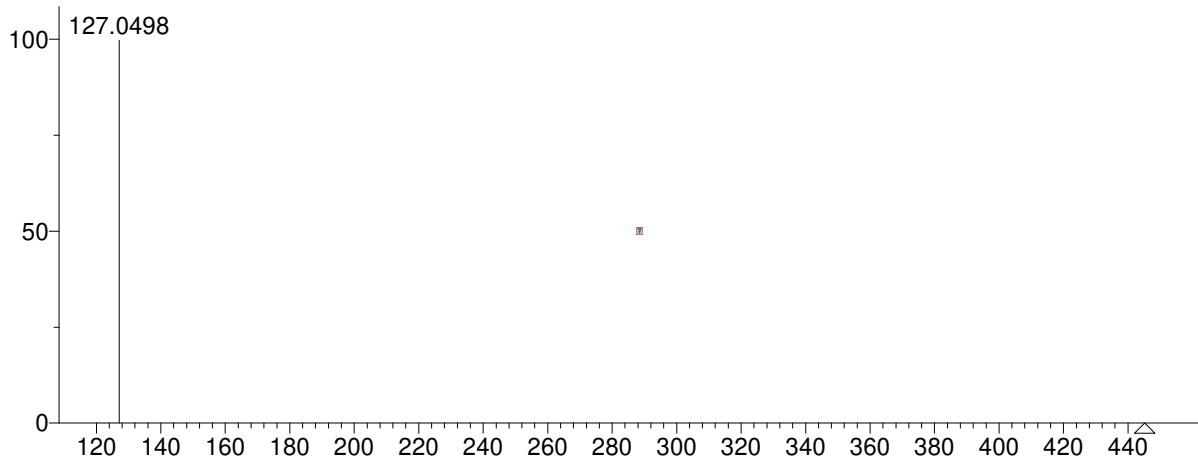

Hit 1 : epiyangambin [M-H]- 45HCD P=445.2  
C<sub>24</sub>H<sub>30</sub>O<sub>8</sub>; MF: 0; RMF: 33; Prob 100.0%; Lib: mona-export-ic-ms-ms\_negative\_mode; ID: 18558.

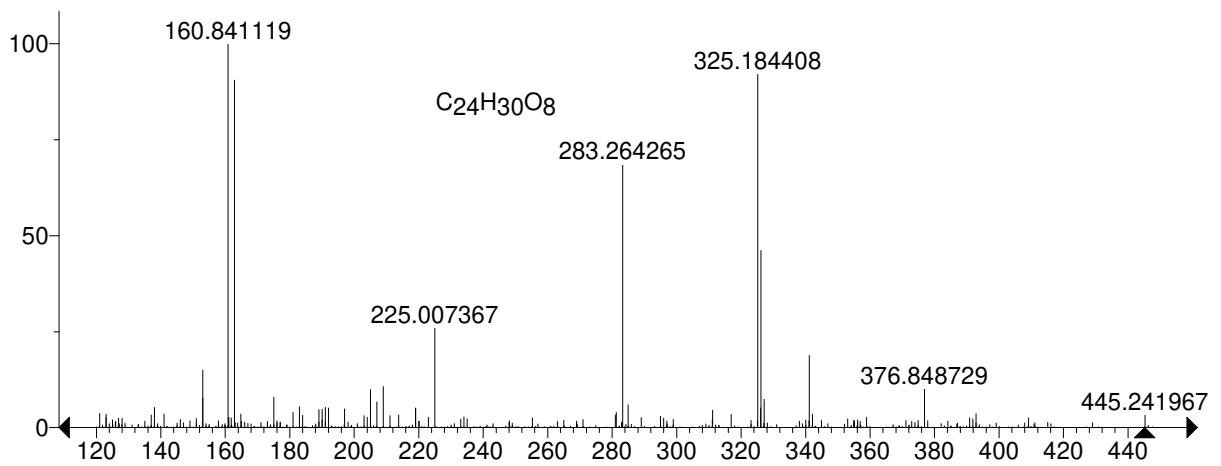

Unknown: Unknown (7.48\_679.1020m/z)  
Compound in Library Factor = 0

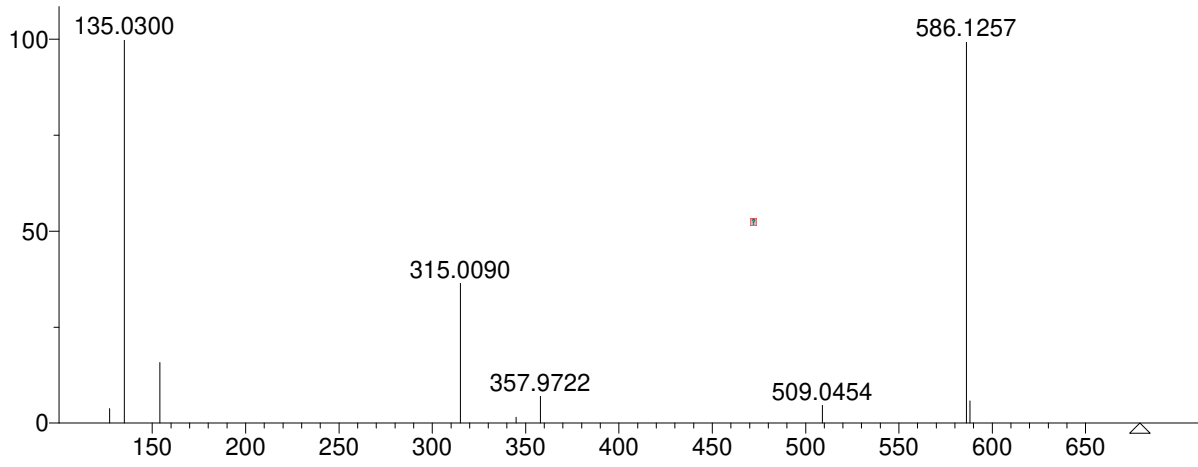



\*\* Search Report Page 1 of 2 \*\*

Unknown: Unknown (7.48\_695.3736m/z)  
Compound in Library Factor = -3273

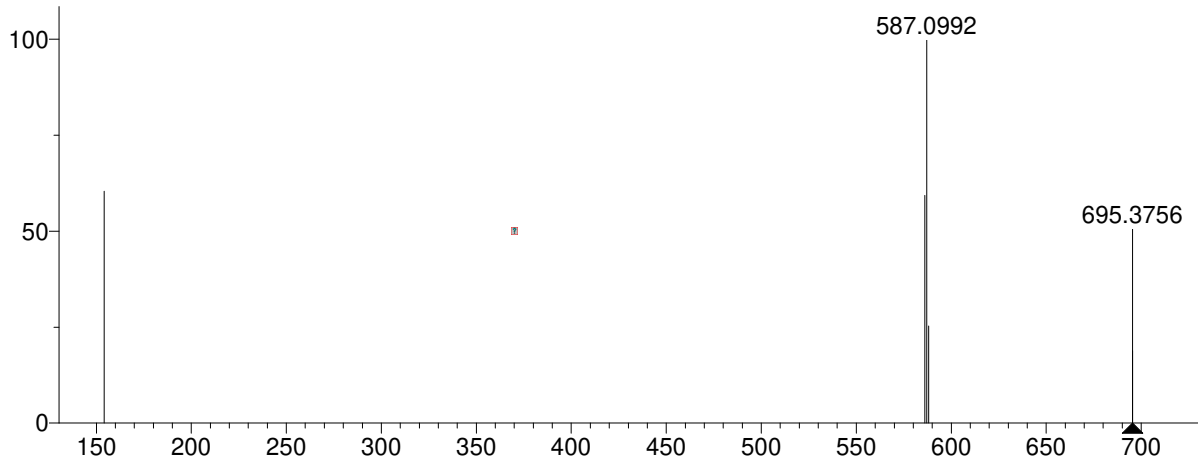

Hit 1 : PI 24:1 [M-H]<sup>-</sup> 40eV P=695.4  
C<sub>33</sub>H<sub>61</sub>O<sub>13</sub>P; MF: 8; RMF: 301; Prob 9.09%; Lib: mona-export-in-silico\_spectra; ID: 96230.

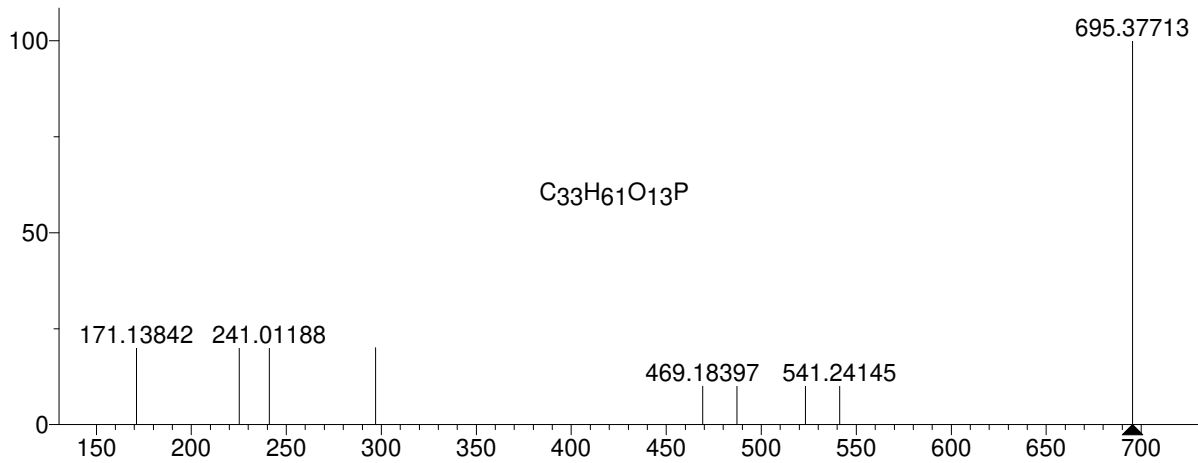

Hit 2 : PI 24:1; PI 9:0-15:1; [M-H]<sup>-</sup> [M-H]<sup>-</sup> P=695.4  
C<sub>33</sub>H<sub>61</sub>O<sub>13</sub>P; MF: 8; RMF: 301; Prob 9.09%; Lib: msdial-insilicomsmms-lipids-neg; ID: 326872.

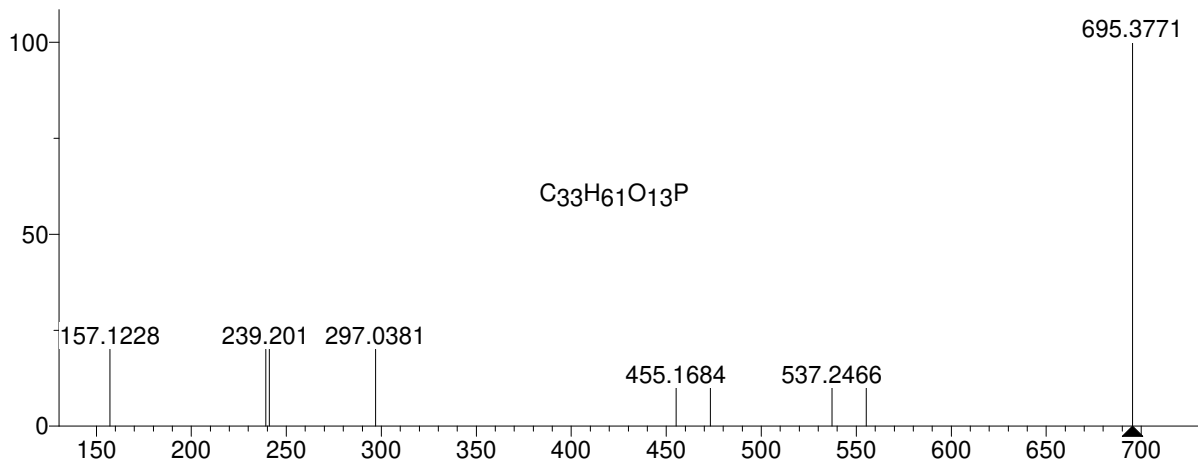

\*\* Search Report Page 2 of 2 \*\*

Hit 3 : PI 24:1; PI 10:0-14:1; [M-H]<sup>-</sup> [M-H]<sup>-</sup> P=695.4  
C<sub>33</sub>H<sub>61</sub>O<sub>13</sub>P; MF: 8; RMF: 301; Prob 9.09%; Lib: msdial-insilicomsm-lipids-neg; ID: 326923.

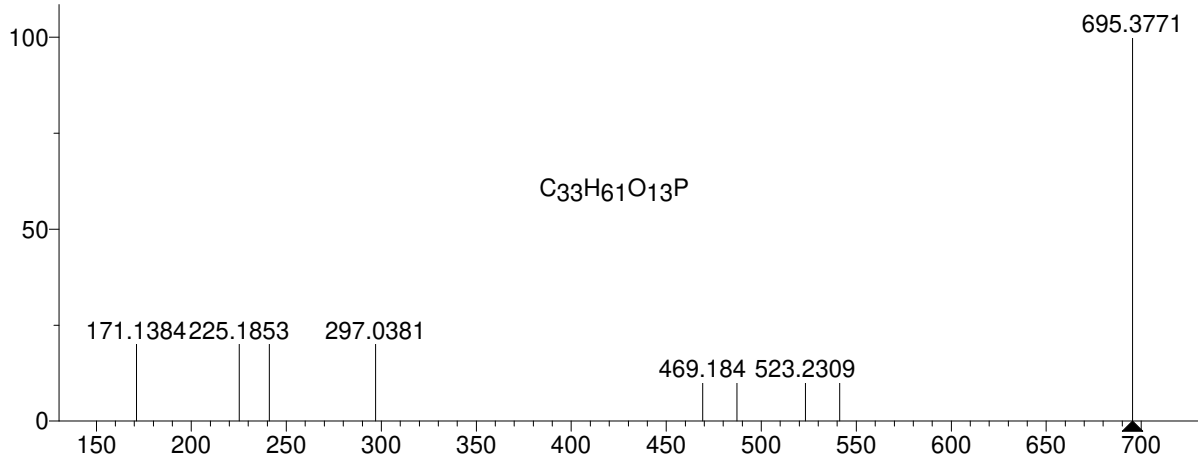

Hit 4 : PI 24:1; PI 11:0-13:1; [M-H]<sup>-</sup> [M-H]<sup>-</sup> P=695.4  
C<sub>33</sub>H<sub>61</sub>O<sub>13</sub>P; MF: 8; RMF: 301; Prob 9.09%; Lib: msdial-insilicomsm-lipids-neg; ID: 326973.

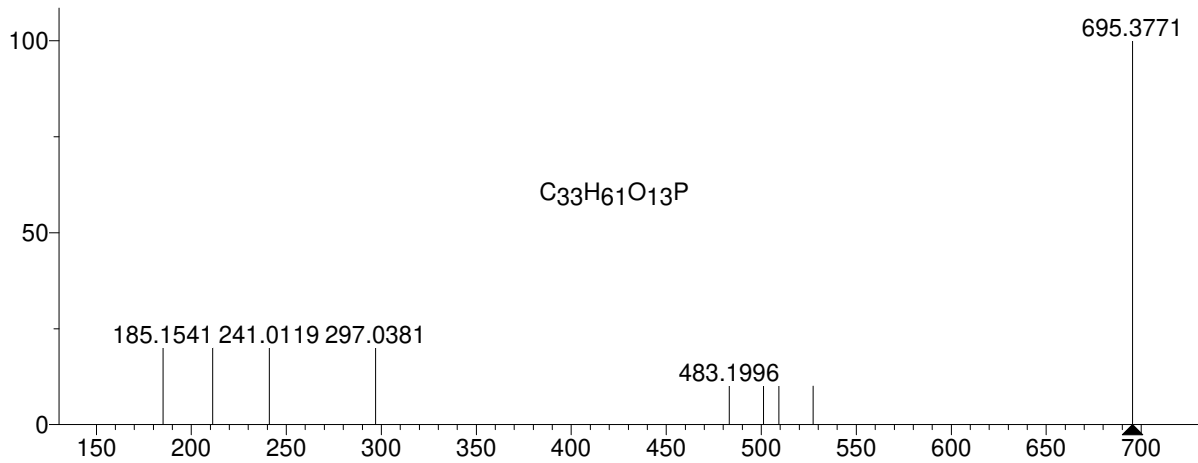

Hit 5 : PI 24:1; PI 2:0-22:1; [M-H]<sup>-</sup> [M-H]<sup>-</sup> P=695.4  
C<sub>33</sub>H<sub>61</sub>O<sub>13</sub>P; MF: 8; RMF: 283; Prob 9.09%; Lib: msdial-insilicomsm-lipids-neg; ID: 326501.

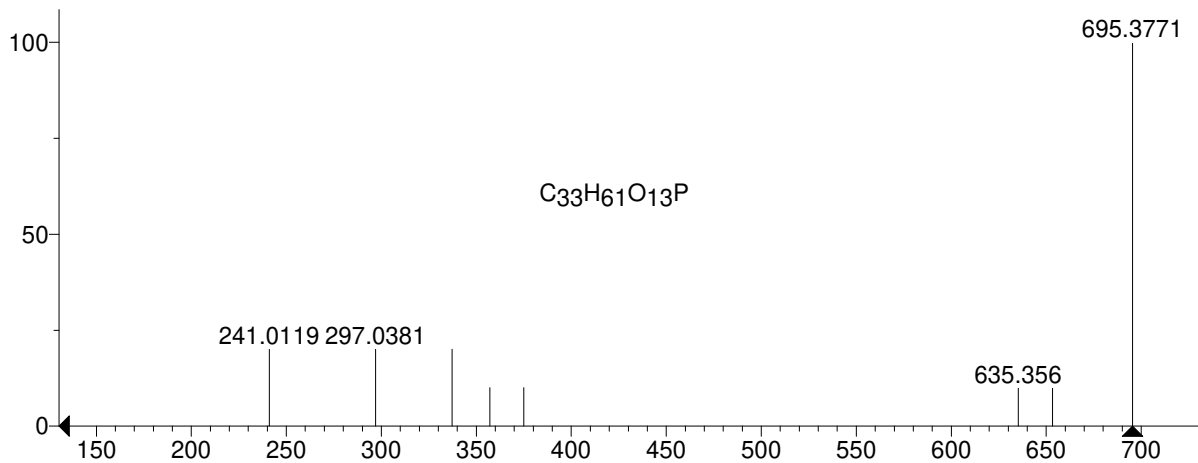

Unknown: Unknown (7.48\_723.1822m/z)  
Compound in Library Factor = 0

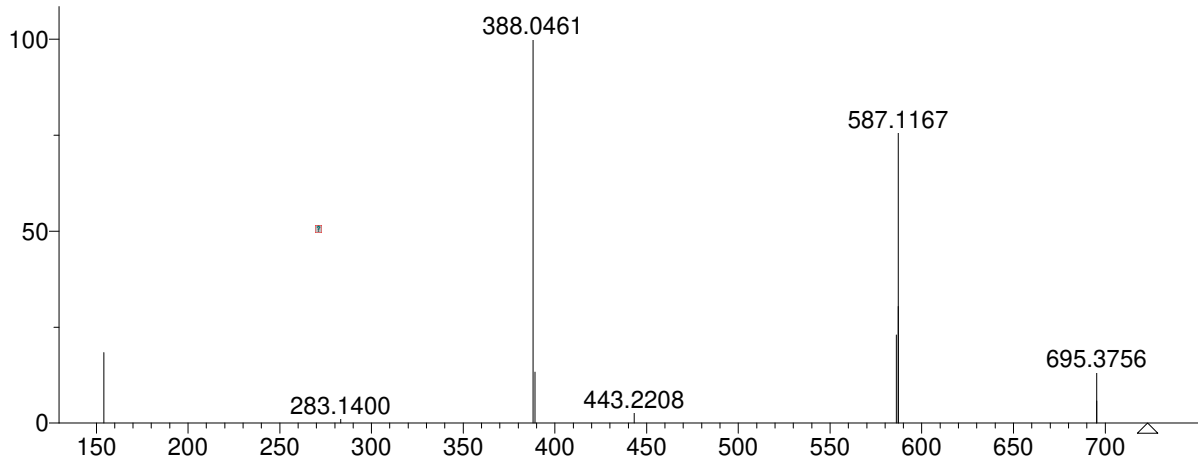

Unknown: Unknown (7.49\_477.1831m/z)  
Compound in Library Factor = 0

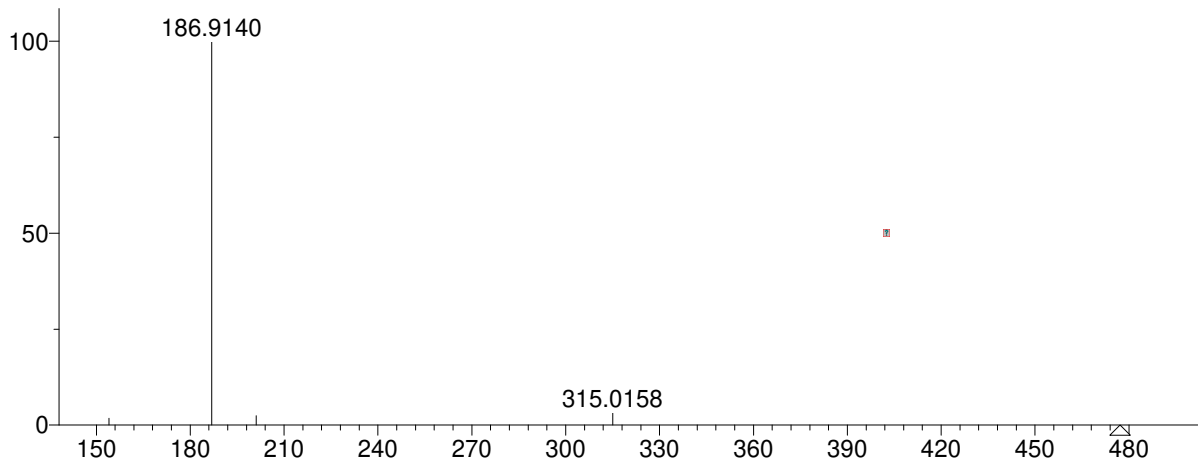

Unknown: Unknown (7.49\_648.0272m/z)  
Compound in Library Factor = 0

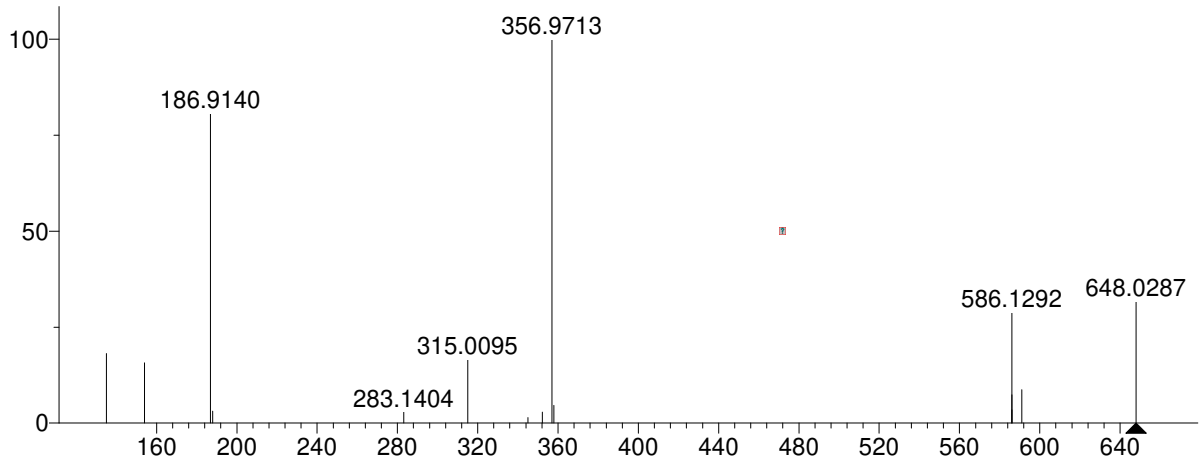

Unknown: Unknown (7.51\_559.2237m/z)  
Compound in Library Factor = 0

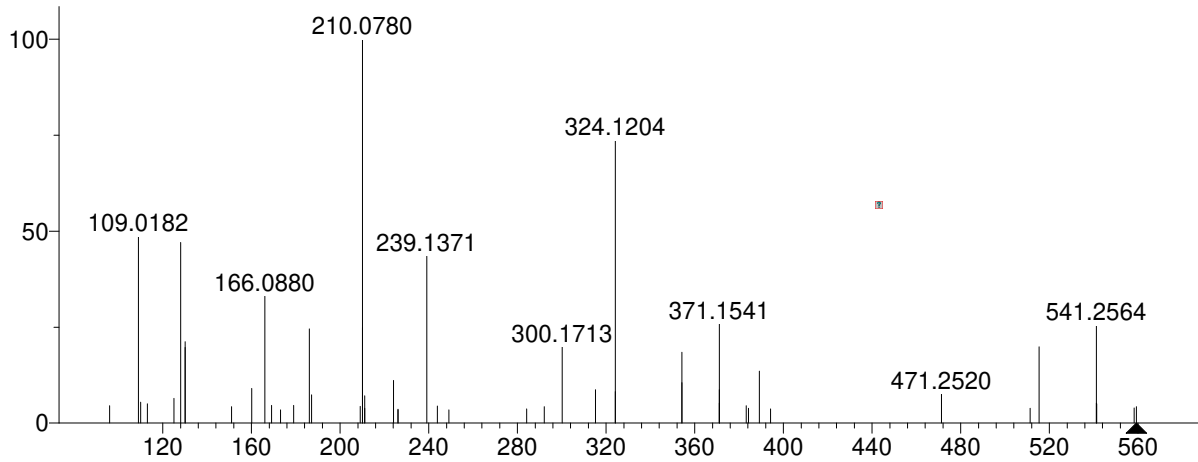

Hit 1 : methyl (2R)-2-[(1S,2R,4S,9R,10R,14S,15S,17S)-17-(acetyloxy)-9-(furan-3-yl)-1-hydroxy-10,14,16,16-tetrao  
C<sub>29</sub>H<sub>36</sub>O<sub>11</sub>; MF: 0; RMF: 41; Prob 100.0%; Lib: mona-export-1c-ms-ms\_negative\_mode; ID: 20348.

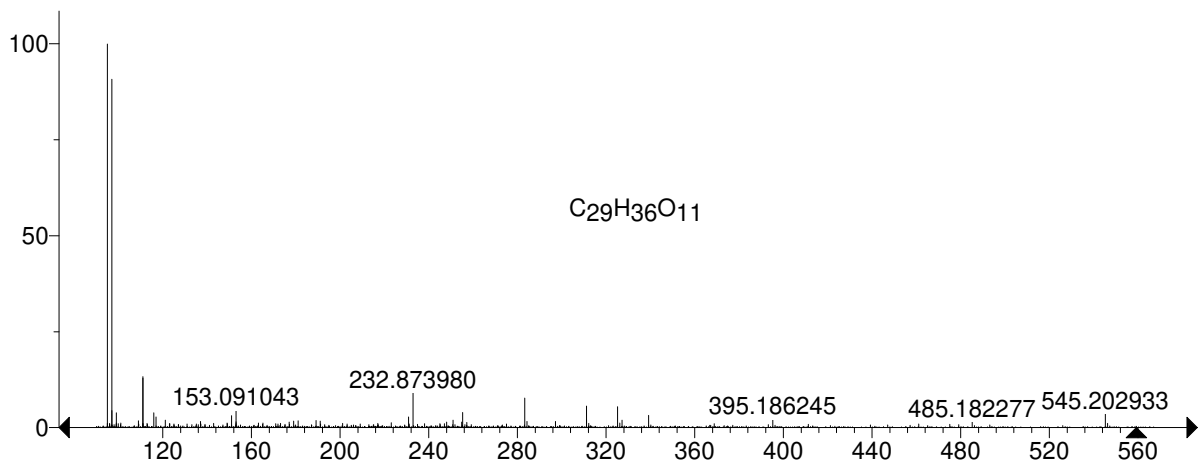

\*\* Search Report Page 1 of 2 \*\*

Unknown: Unknown (7.52\_369.1772m/z)  
Compound in Library Factor = -885

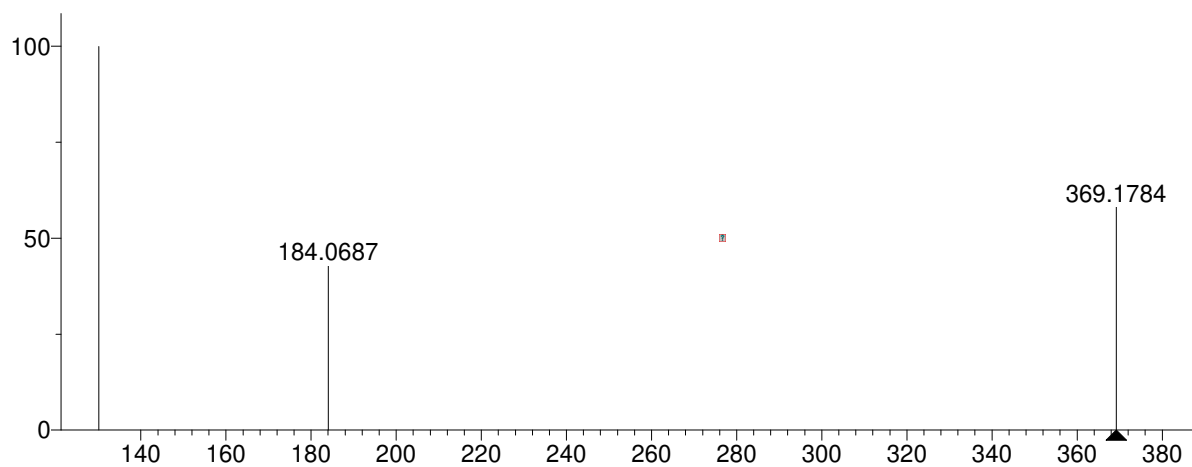

Hit 1 : 5 $\beta$ -Androstan-3 $\alpha$ -ol-17-one sulfate [M-H]<sup>-</sup> HCD 33V P=369.2  
C<sub>19</sub>H<sub>30</sub>O<sub>5</sub>S; MF: 165; RMF: 537; Prob 41.0%; CAS: 977-36-6; Lib: nist\_msms; ID: 231644.

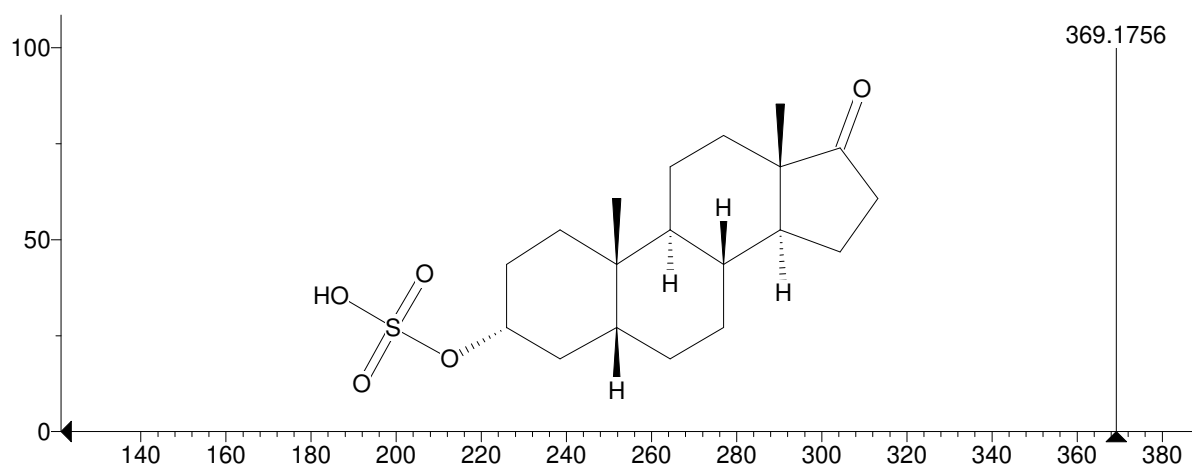

Hit 2 : 5-Androsten-3 $\beta$ ,17 $\beta$ -diol-3-sulfate [M-H]<sup>-</sup> HCD 27V P=369.2  
C<sub>19</sub>H<sub>30</sub>O<sub>5</sub>S; MF: 165; RMF: 537; Prob 41.0%; CAS: 977-33-3; Lib: nist\_msms; ID: 231655.

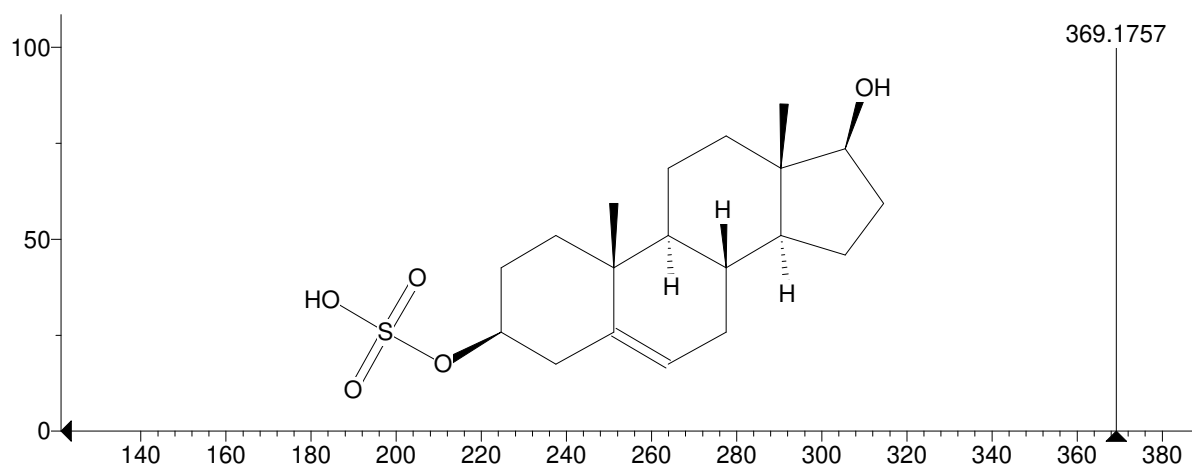

Hit 3 : 5 $\alpha$ -Androstan-3 $\beta$ -ol-17-one sulfate [M-H]<sup>-</sup> HCD 40V P=369.2  
C19H30O5S; MF: 129; RMF: 537; Prob 10.1%; CAS: 977-35-5; Lib: nist\_msms; ID: 231625.

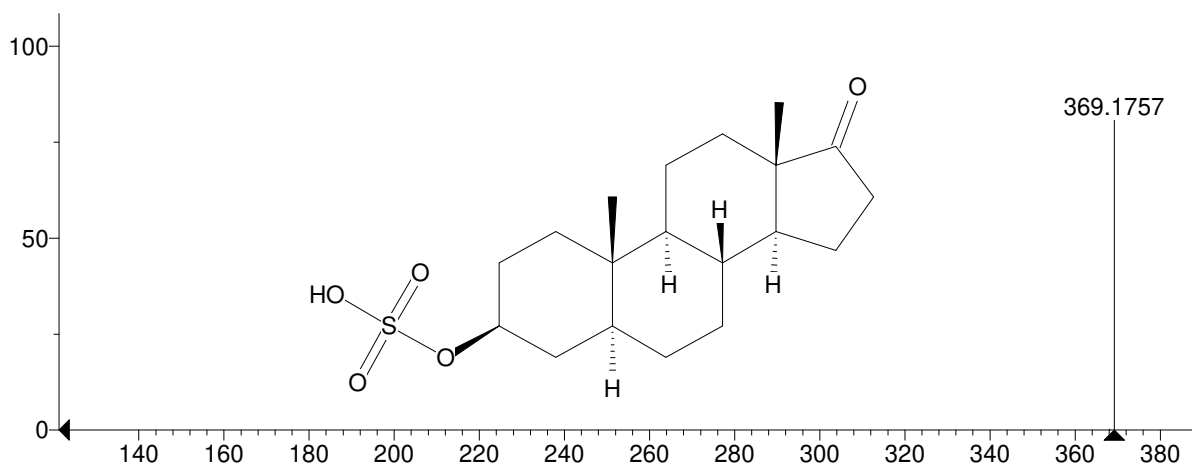

Hit 4 : 5 $\alpha$ -Androstan-17 $\beta$ -ol-3-one sulfate [M-H]<sup>-</sup> HCD 40V P=369.2  
C19H30O5S; MF: 118; RMF: 534; Prob 6.95%; CAS: 2641-48-7; Lib: nist\_msms; ID: 231920.

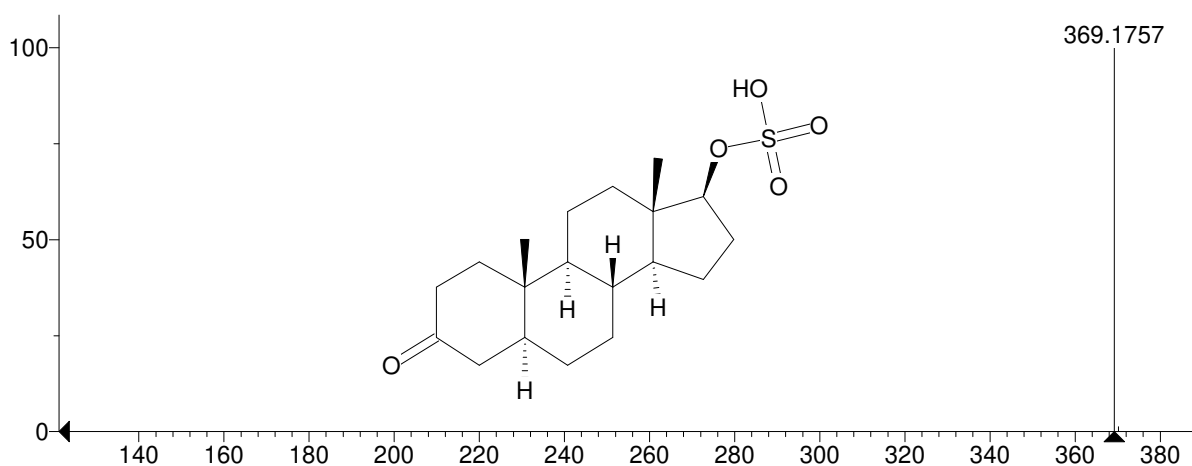

Hit 5 : Androsterone sulfate [M-H]<sup>-</sup> HCD 35V P=369.2  
C19H30O5S; MF: 34; RMF: 484; Prob 0.65%; CAS: 2479-86-9; Lib: nist\_msms; ID: 117993.

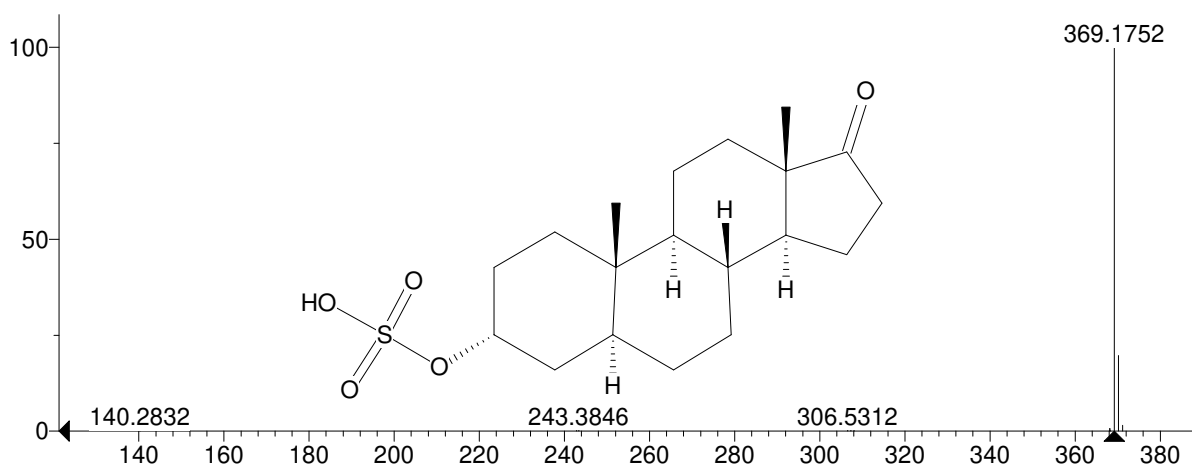



Unknown: Unknown (7.53\_226.1548m/z)  
Compound in Library Factor = 0

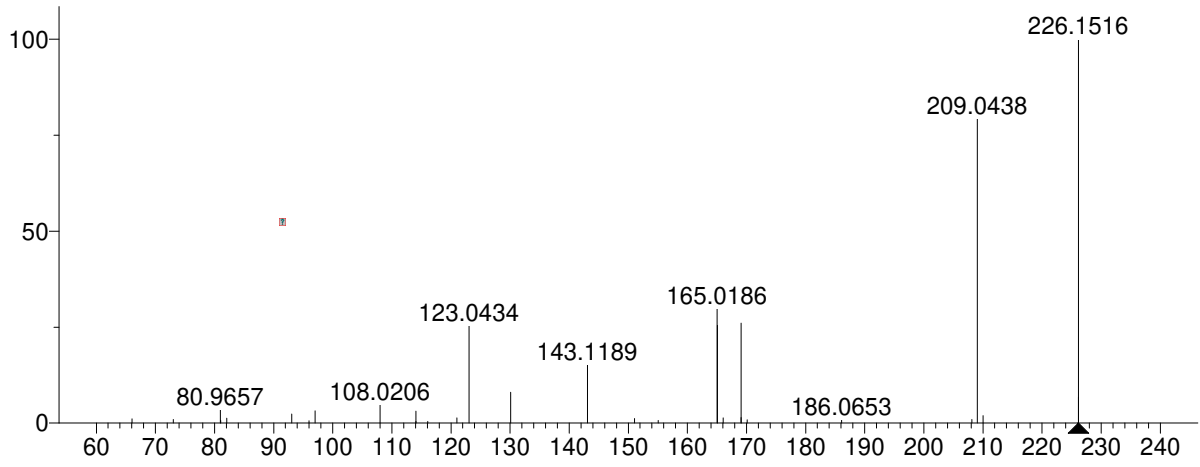

\*\* Search Report Page 1 of 2 \*\*

Unknown: Unknown (7.53\_653.3601m/z)  
Compound in Library Factor = -3273

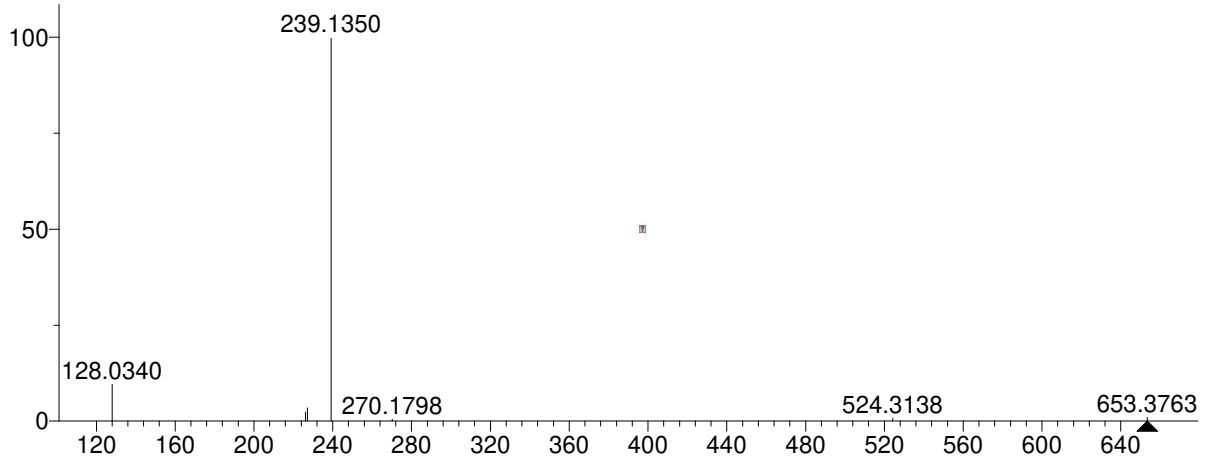

Hit 1 : SQDG 22:0 [M-H]<sup>-</sup> 40eV P=653.4  
C<sub>31</sub>H<sub>58</sub>O<sub>12</sub>S; MF: 3; RMF: 81; Prob 18.4%; Lib: mona-export-in-silico\_spectra; ID: 119065.

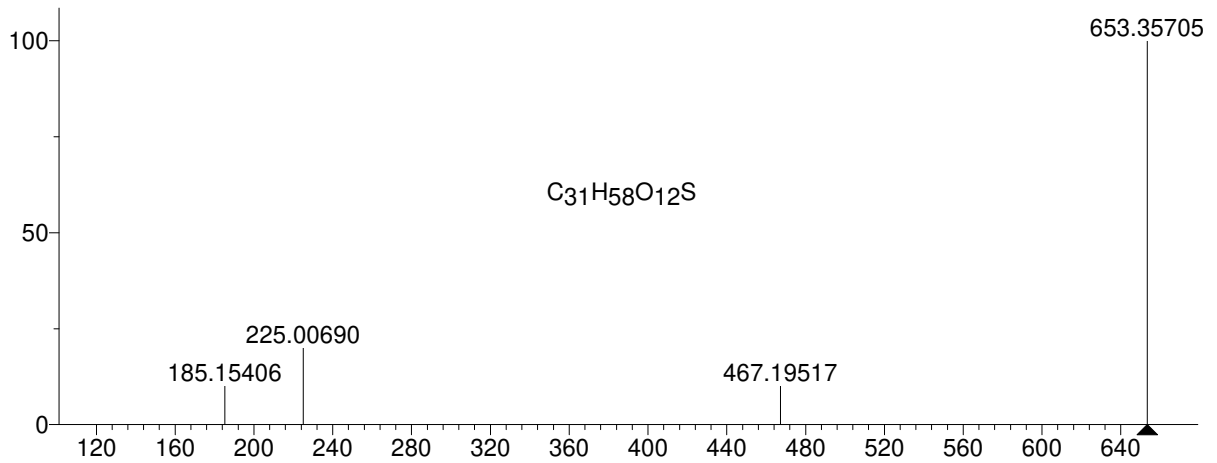

Hit 2 : MGDG 24:5; MGDG 2:0-22:5; [M+FA-H]<sup>-</sup> [M+FA-H]<sup>-</sup> P=653.4  
C<sub>33</sub>H<sub>52</sub>O<sub>10</sub>; MF: 0; RMF: 40; Prob 16.3%; Lib: msdial-insilicomsm-lipids-neg; ID: 311312.

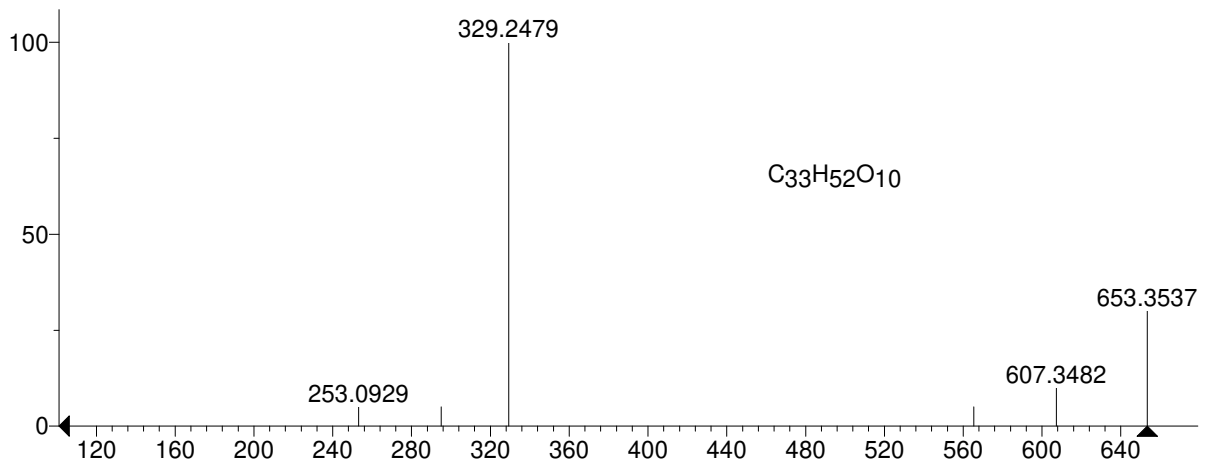

\*\* Search Report Page 2 of 2 \*\*

Hit 3 : MGDG 24:5; MGDG 4:0-20:5; [M+FA-H]- [M+FA-H]- P=653.4  
C<sub>33</sub>H<sub>52</sub>O<sub>10</sub>; MF: 0; RMF: 40; Prob 16.3%; Lib: msdial-insilicomsm-lipids-neg; ID: 311422.

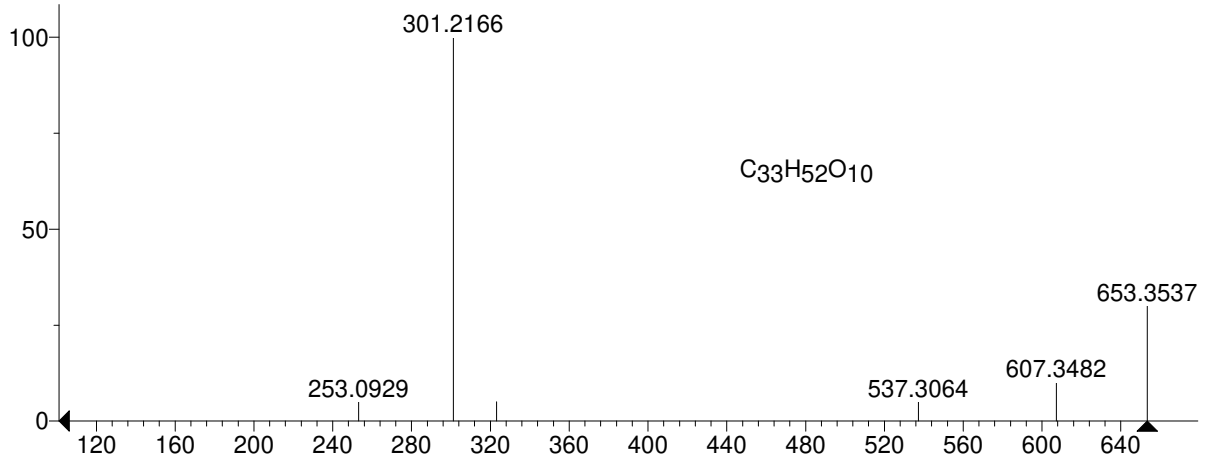

Hit 4 : MGDG 24:5; MGDG 6:0-18:5; [M+FA-H]- [M+FA-H]- P=653.4  
C<sub>33</sub>H<sub>52</sub>O<sub>10</sub>; MF: 0; RMF: 40; Prob 16.3%; Lib: msdial-insilicomsm-lipids-neg; ID: 311528.

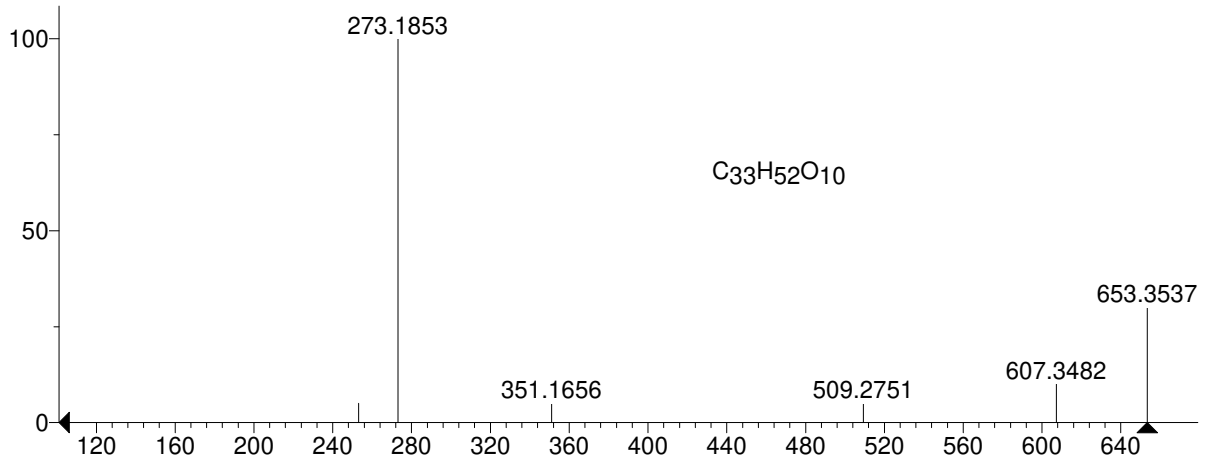

Hit 5 : MGDG 23:5; MGDG 3:0-20:5; [M+Hac-H]- [M+Hac-H]- P=653.4  
C<sub>32</sub>H<sub>50</sub>O<sub>10</sub>; MF: 0; RMF: 40; Prob 16.3%; Lib: msdial-insilicomsm-lipids-neg; ID: 313254.

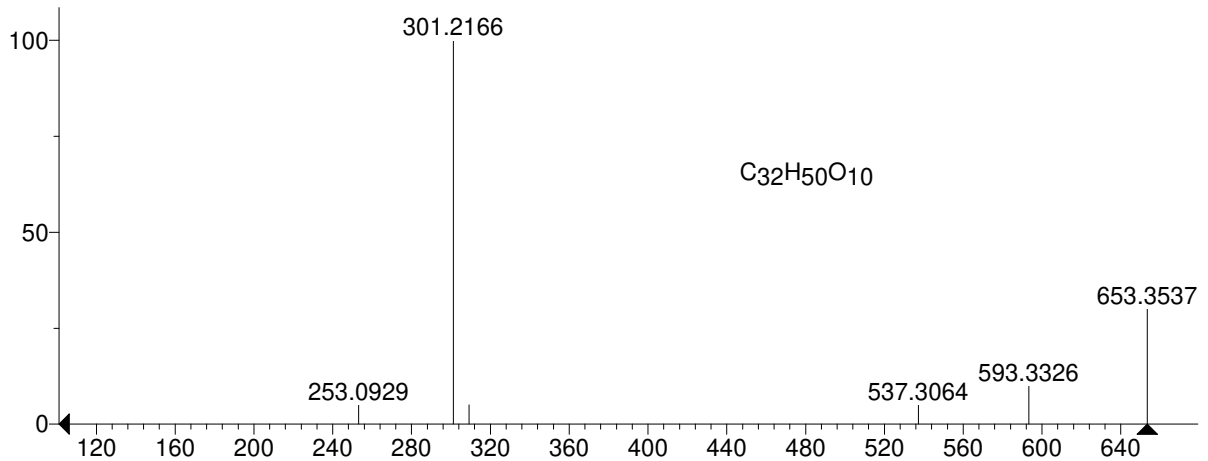

\*\* Search Report Page 1 of 2 \*\*

Unknown: Unknown (7.54\_289.0014m/z)  
Compound in Library Factor = -1523

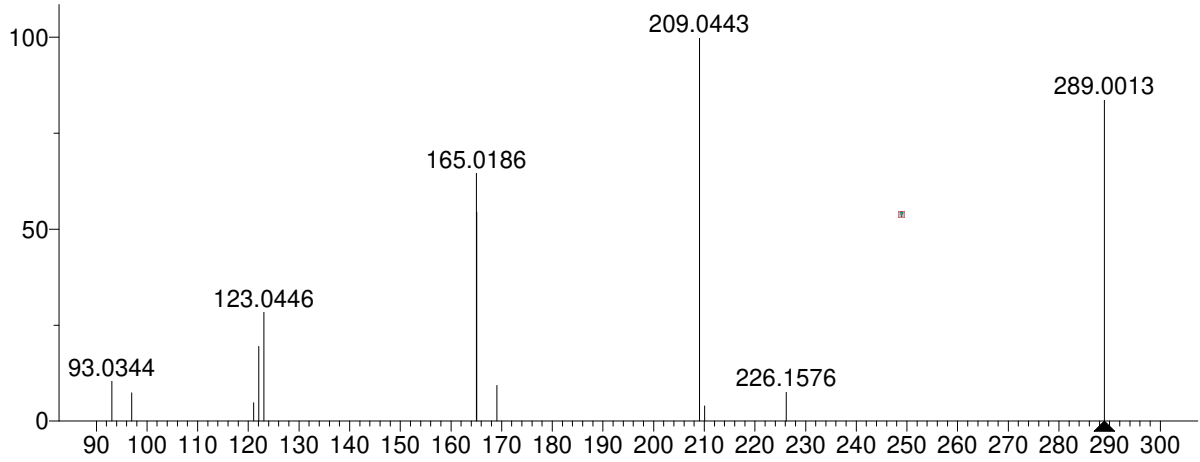

Hit 1 : Catechin [M-H]<sup>-</sup> QQQ 20V P=289  
C<sub>15</sub>H<sub>14</sub>O<sub>6</sub>; MF: 59; RMF: 534; Prob 32.0%; Lib: mona-export-1c-ms-ms\_negative\_mode; ID: 14518.

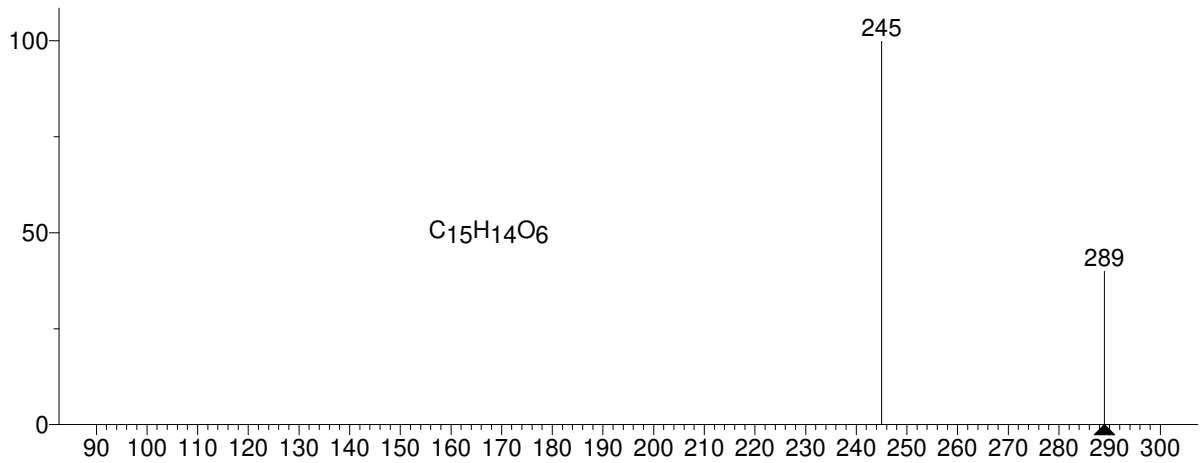

Hit 2 : Epicatechin [M-H]<sup>-</sup> QQQ 20V P=289  
C<sub>15</sub>H<sub>14</sub>O<sub>6</sub>; MF: 59; RMF: 534; Prob 32.0%; Lib: mona-export-1c-ms-ms\_negative\_mode; ID: 14624.

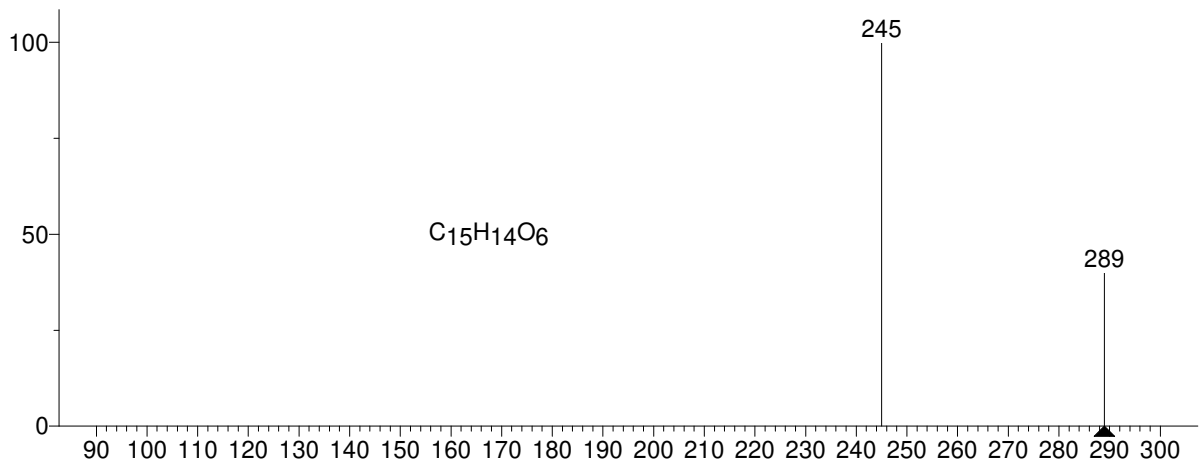

Hit 3 : Lormetazepam [M+H]<sup>+</sup> => 289.0 IT 35% P=289  
C<sub>16</sub>H<sub>12</sub>Cl<sub>2</sub>N<sub>2</sub>O<sub>2</sub>; MF: 17; RMF: 416; Prob 7.18%; CAS: 848-75-9; Lib: nist\_msms; ID: 186240.

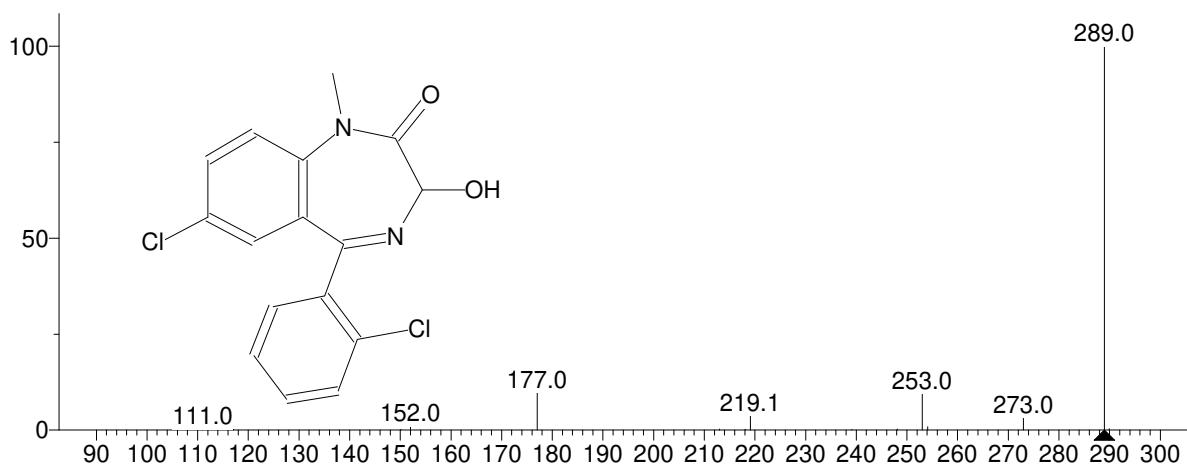

Hit 4 : Permethrin [M+H-H<sub>2</sub>O]<sup>+</sup> => 317.0 => 289.0 IT 35% P=289  
C<sub>21</sub>H<sub>20</sub>Cl<sub>2</sub>O<sub>3</sub>; MF: 4; RMF: 344; Prob 4.64%; CAS: 52645-53-1; Lib: nist\_msms; ID: 284116.

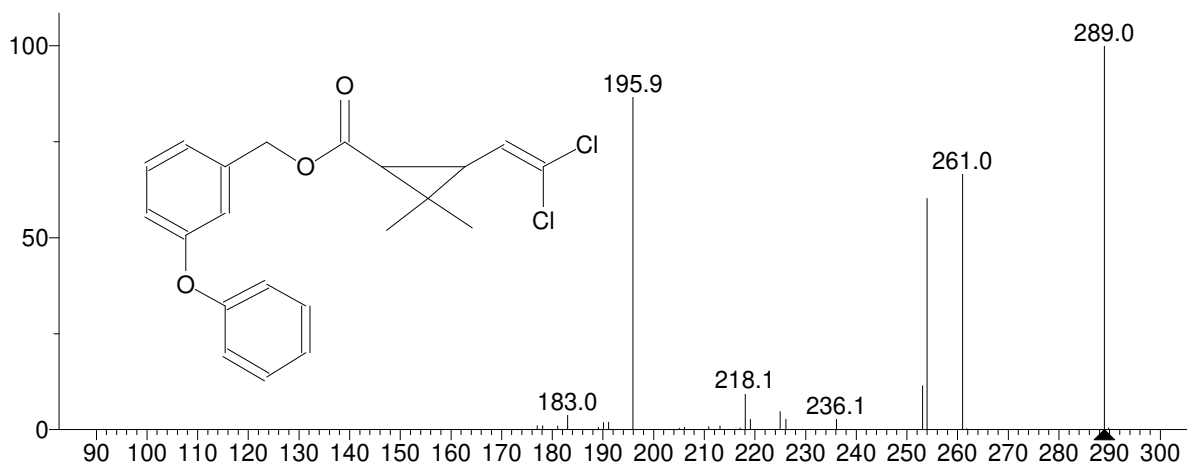

Hit 5 : Lignan J1 [M+H-CH<sub>2</sub>O]<sup>+</sup> => 317.0 => 289.0 IT 35% P=289  
C<sub>21</sub>H<sub>14</sub>O<sub>7</sub>; MF: 1; RMF: 153; Prob 4.10%; CAS: 27041-98-1; Lib: nist\_msms; ID: 400690.

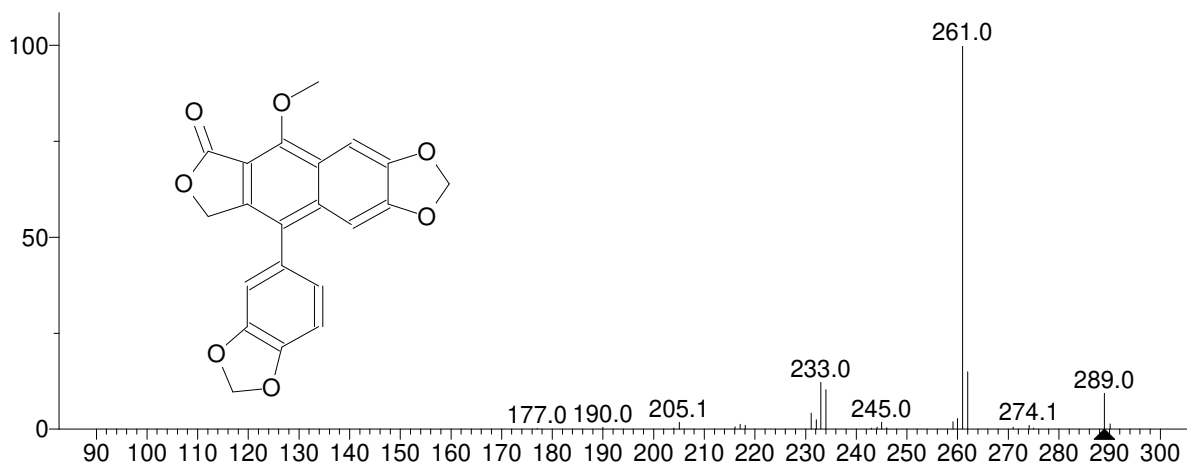

Unknown: Unknown (7.54\_524.1543m/z)  
Compound in Library Factor = 0

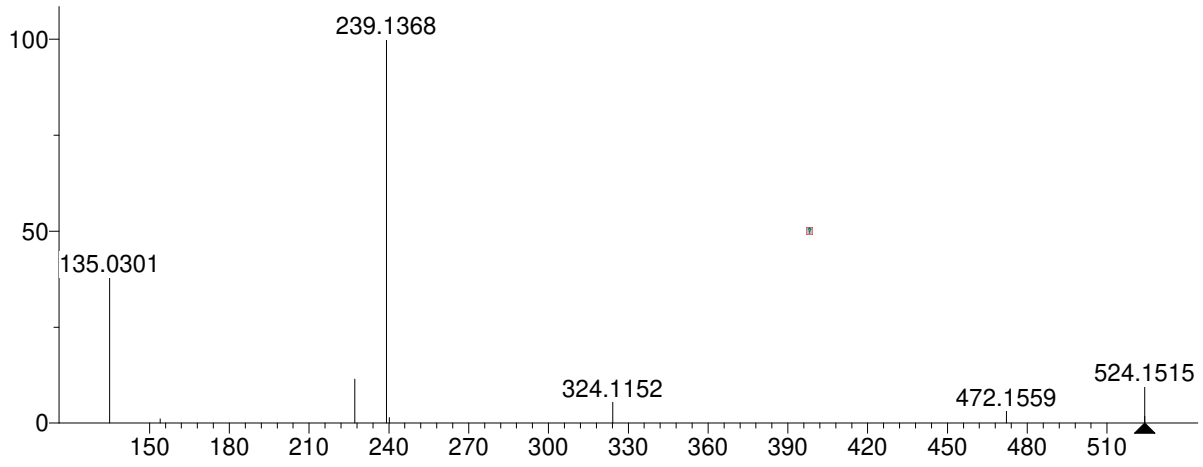

Unknown: Unknown (7.54\_623.2424m/z)  
Compound in Library Factor = 0

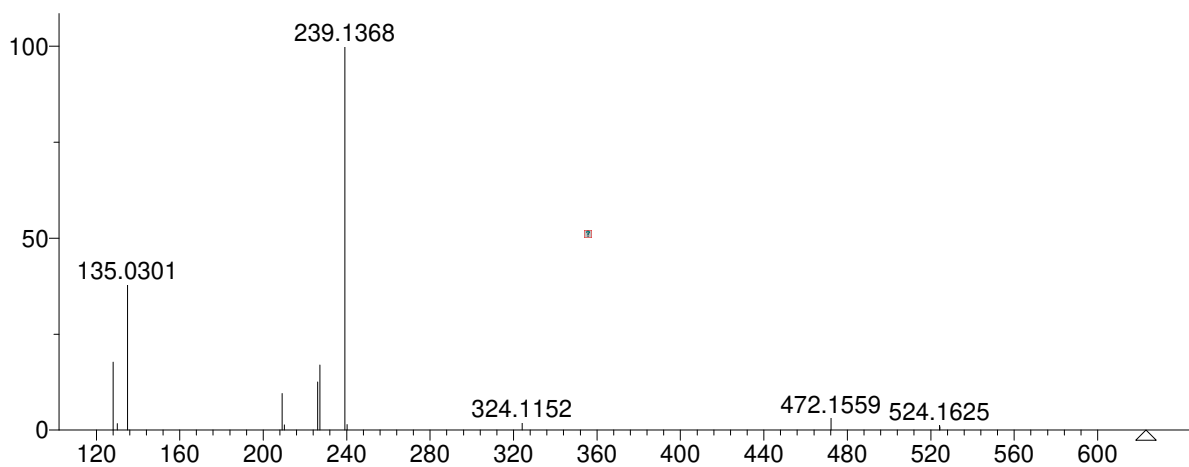

Hit 1 : Grossamide or its isomer (Not validated) ; PlaSMA ID-1722 [M-H]<sup>-</sup> P=623.2  
C<sub>36</sub>H<sub>36</sub>N<sub>2</sub>O<sub>8</sub>; MF: 0; RMF: 8; Prob 100.0%; Lib: biomsms-neg-plasma; ID: 728.

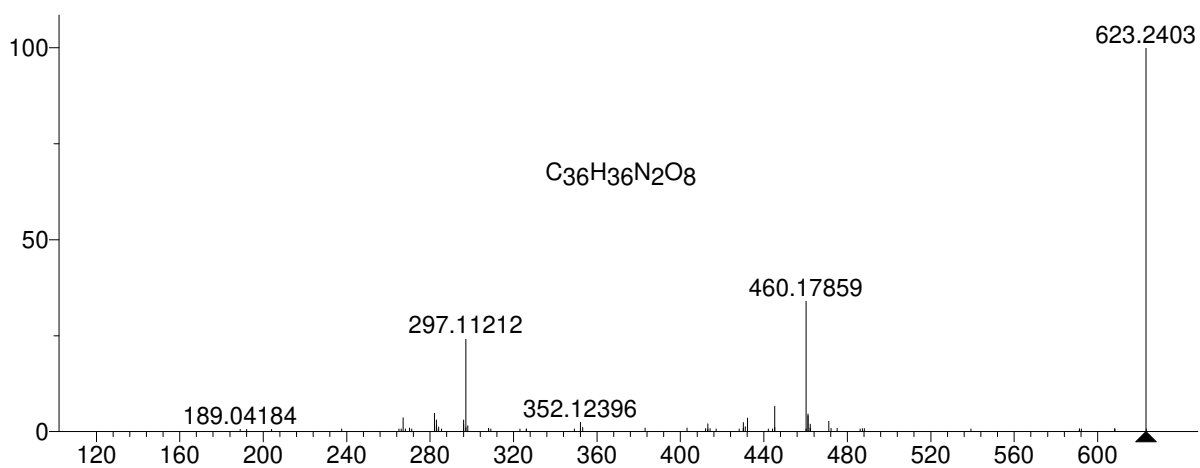

Unknown: Unknown (7.54\_642.2151m/z)  
Compound in Library Factor = 0

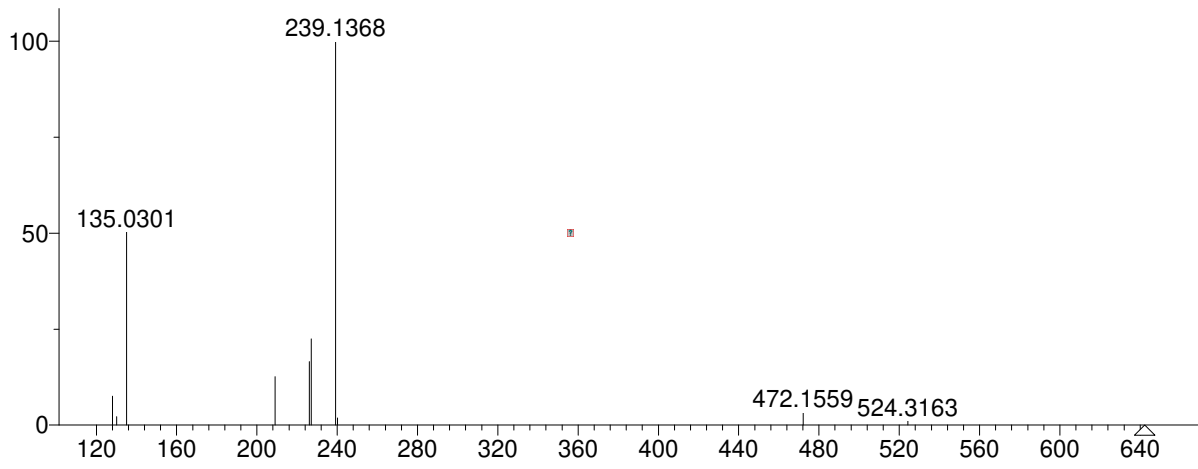



Unknown: Unknown (7.54\_725.1844m/z)  
Compound in Library Factor = 0

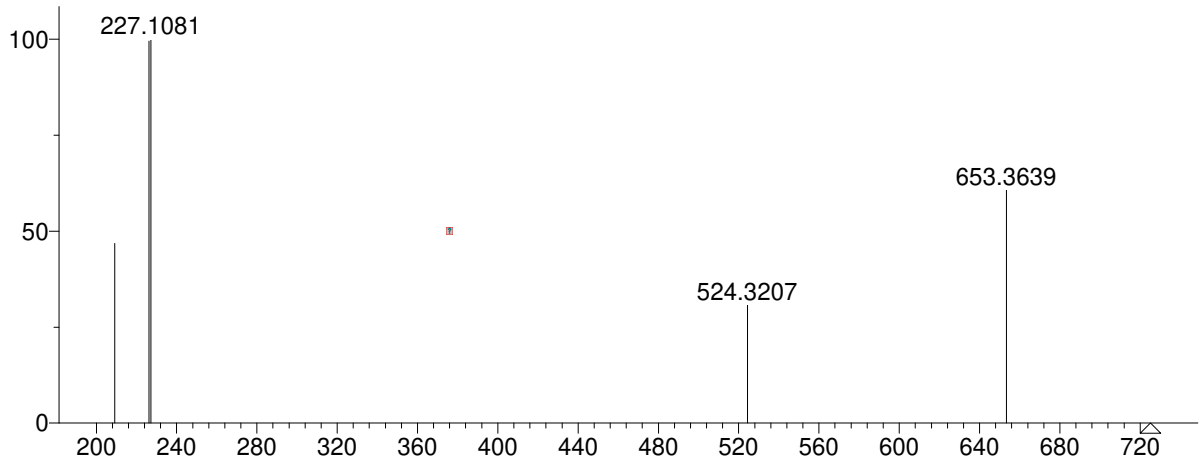

Unknown: Unknown (7.56\_559.2716m/z)  
Compound in Library Factor = 0

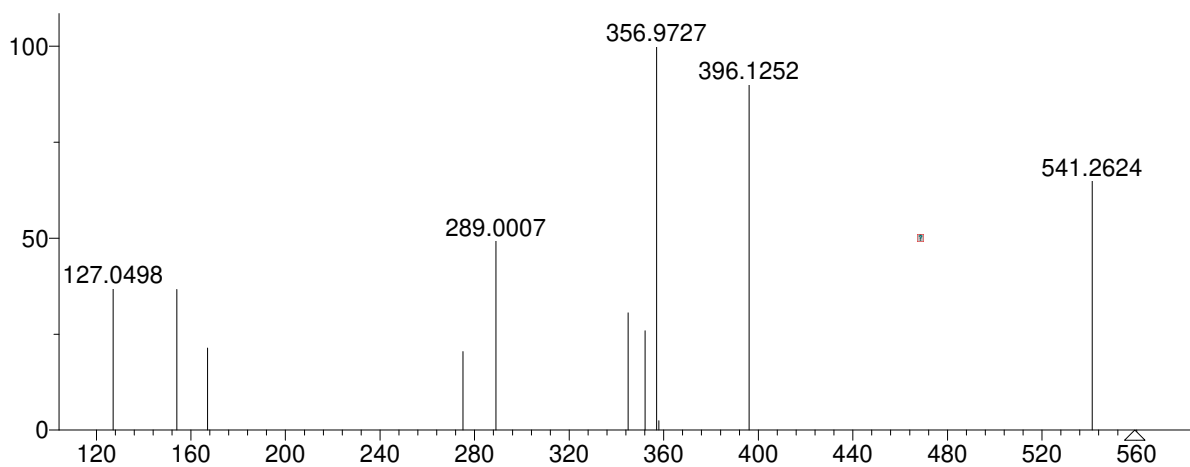

Hit 1 : (3S,4S,5R)-4-[(2R,3R)-2,3-dihydroxy-3-[(2S,3R,5R,10R,13R,14S,17S)-2,3,14-trihydroxy-10,13-dimethyl-6-C<sub>29</sub>H<sub>44</sub>O<sub>8</sub>; MF: 0; RMF: 39; Prob 100.0%; Lib: mona-export-vf-npl\_qexactive; ID: 9539.

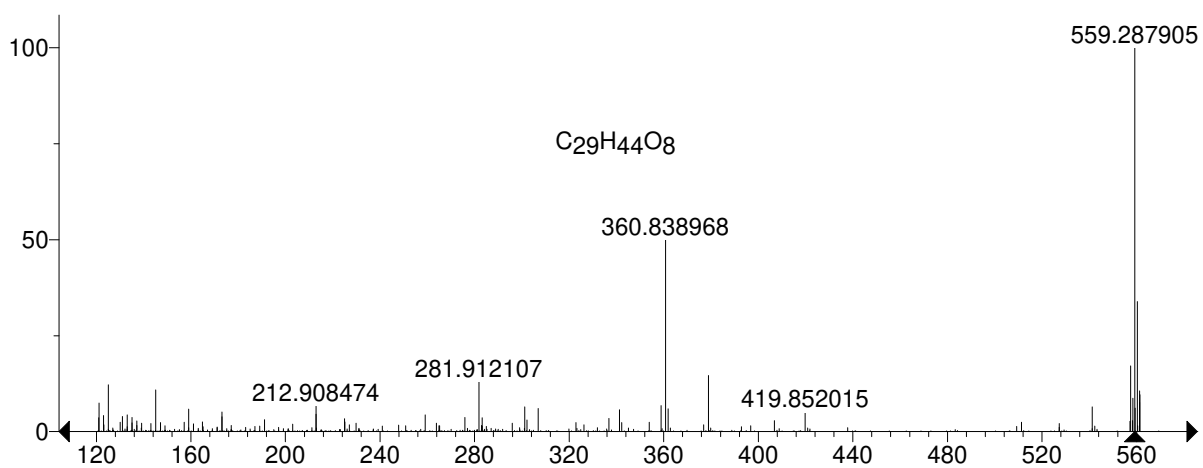

\*\* Search Report Page 1 of 2 \*\*

Unknown: Unknown (7.57\_289.0014m/z)  
Compound in Library Factor = -1523

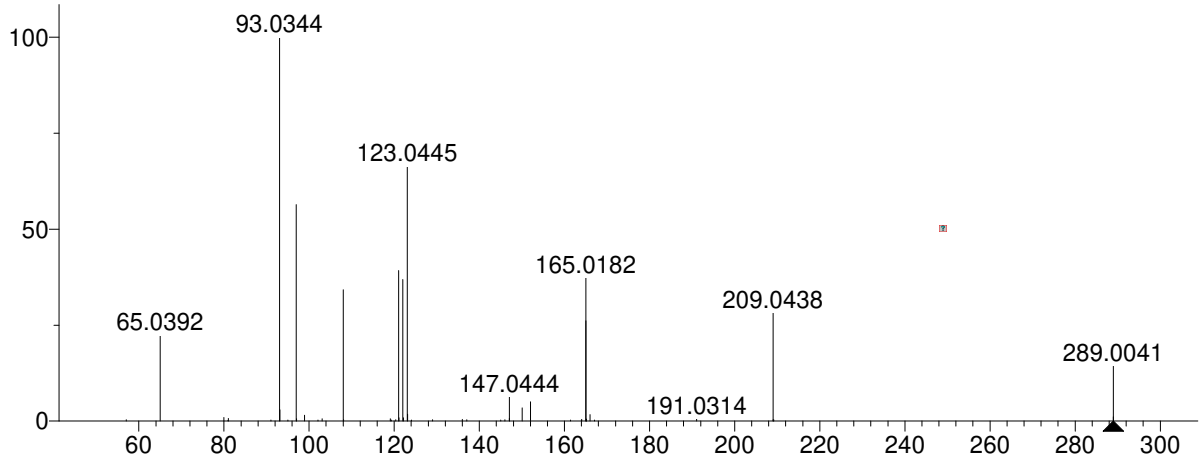

Hit 1 : Catechin [M-H]<sup>-</sup> QQQ 20V P=289  
C<sub>15</sub>H<sub>14</sub>O<sub>6</sub>; MF: 51; RMF: 515; Prob 28.9%; Lib: mona-export-lc-ms-ms\_negative\_mode; ID: 14518.

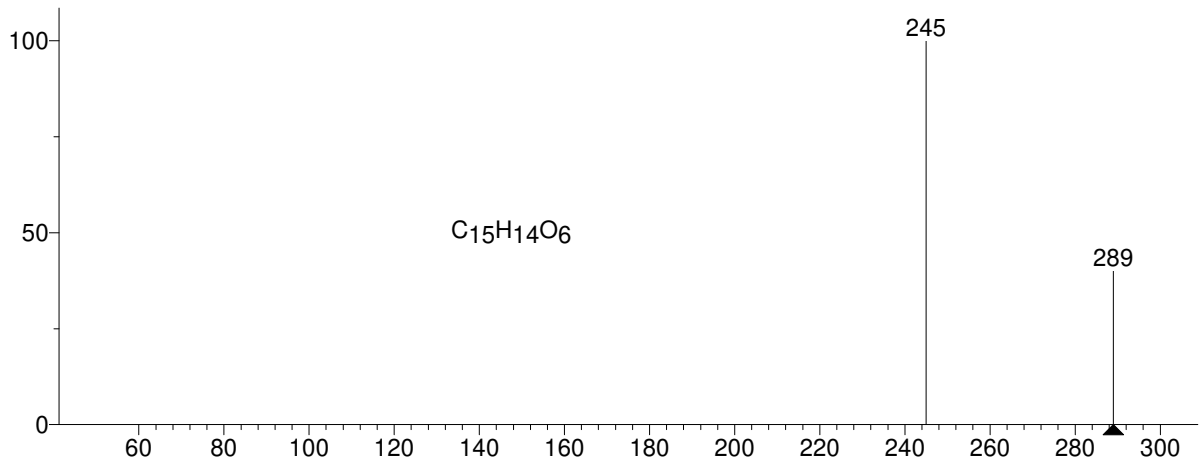

Hit 2 : Epicatechin [M-H]<sup>-</sup> QQQ 20V P=289  
C<sub>15</sub>H<sub>14</sub>O<sub>6</sub>; MF: 51; RMF: 515; Prob 28.9%; Lib: mona-export-lc-ms-ms\_negative\_mode; ID: 14624.

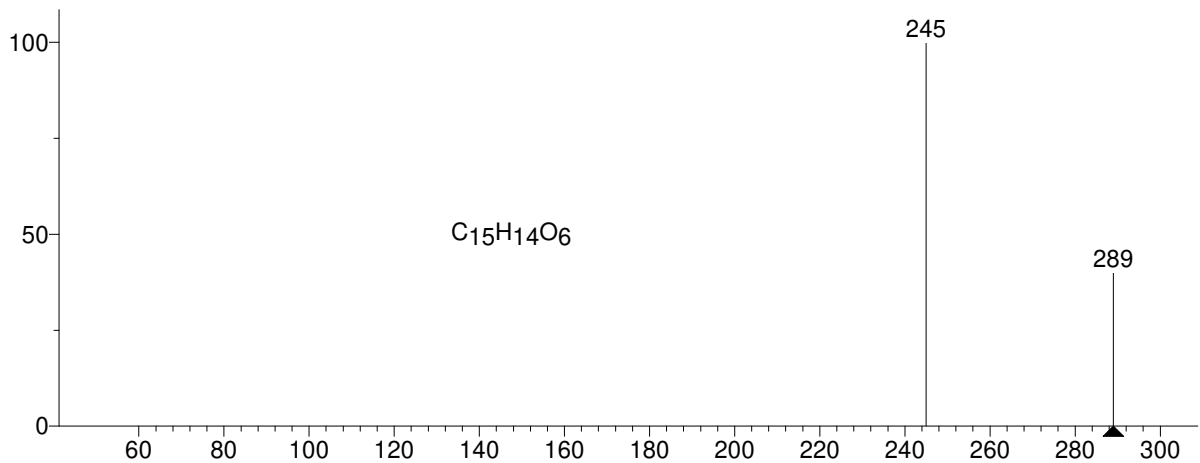

Hit 3 : Lormetazepam [M+H]<sup>+</sup> => 289.0 IT 35% P=289  
C<sub>16</sub>H<sub>12</sub>Cl<sub>2</sub>N<sub>2</sub>O<sub>2</sub>; MF: 5; RMF: 200; Prob 6.10%; CAS: 848-75-9; Lib: nist\_msms; ID: 186240.

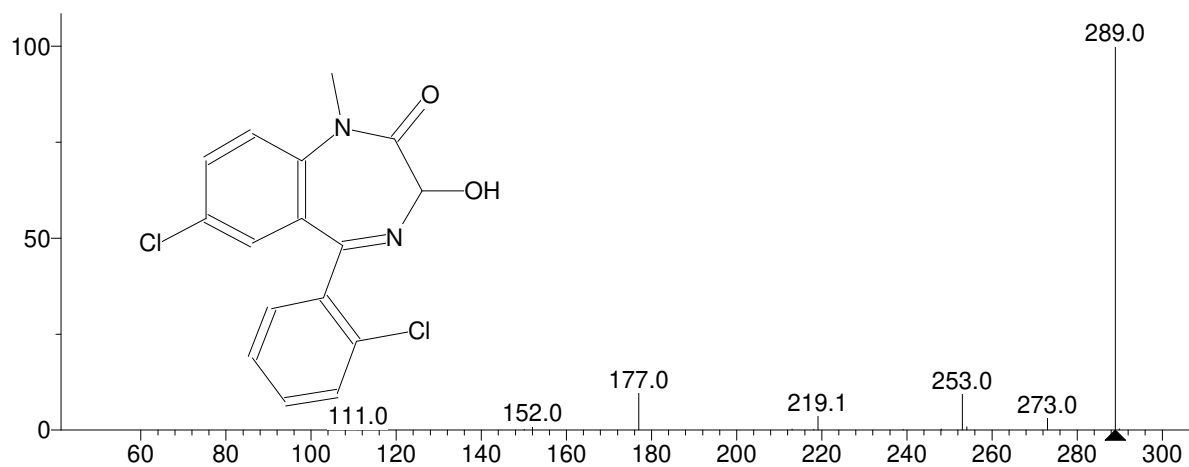

Hit 4 : Permethrin [M+H-H<sub>2</sub>O]<sup>+</sup> => 317.0 => 289.0 IT 35% P=289  
C<sub>21</sub>H<sub>20</sub>Cl<sub>2</sub>O<sub>3</sub>; MF: 3; RMF: 297; Prob 5.63%; CAS: 52645-53-1; Lib: nist\_msms; ID: 284116.

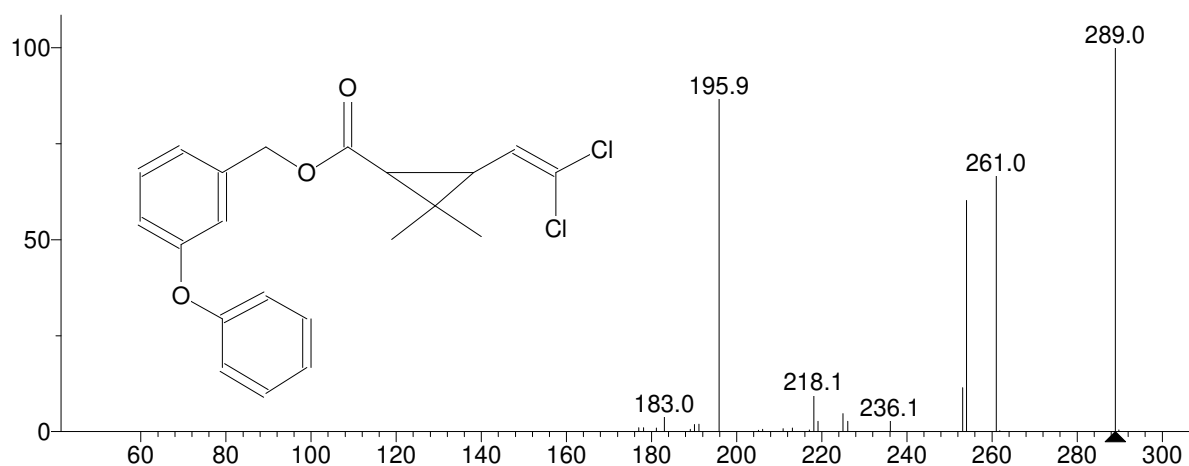

Hit 5 : Lignan J1 [M+H-CH<sub>2</sub>O]<sup>+</sup> => 317.0 => 289.0 IT 35% P=289  
C<sub>21</sub>H<sub>14</sub>O<sub>7</sub>; MF: 1; RMF: 132; Prob 5.19%; CAS: 27041-98-1; Lib: nist\_msms; ID: 400690.

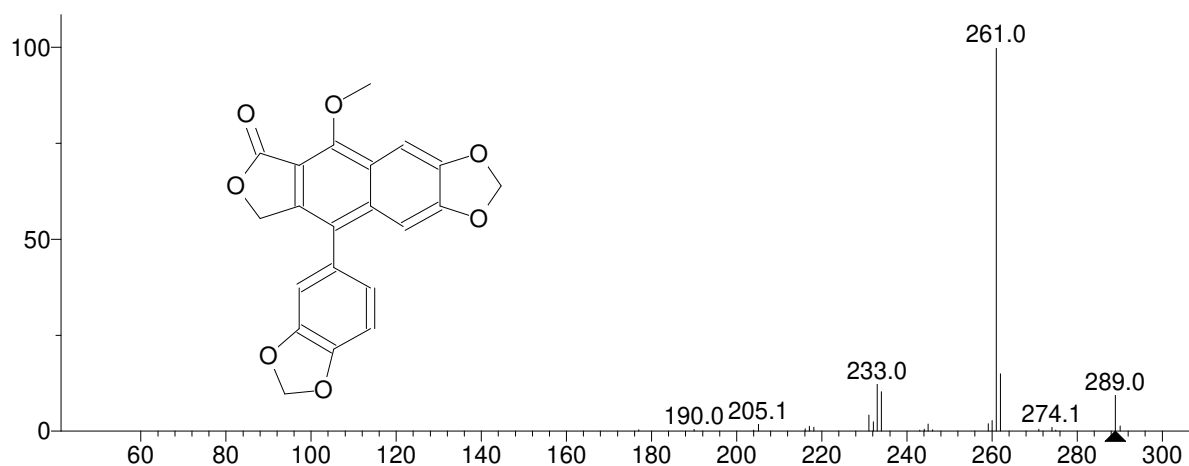

Unknown: Unknown (7.58\_624.2501m/z)  
Compound in Library Factor = -3273

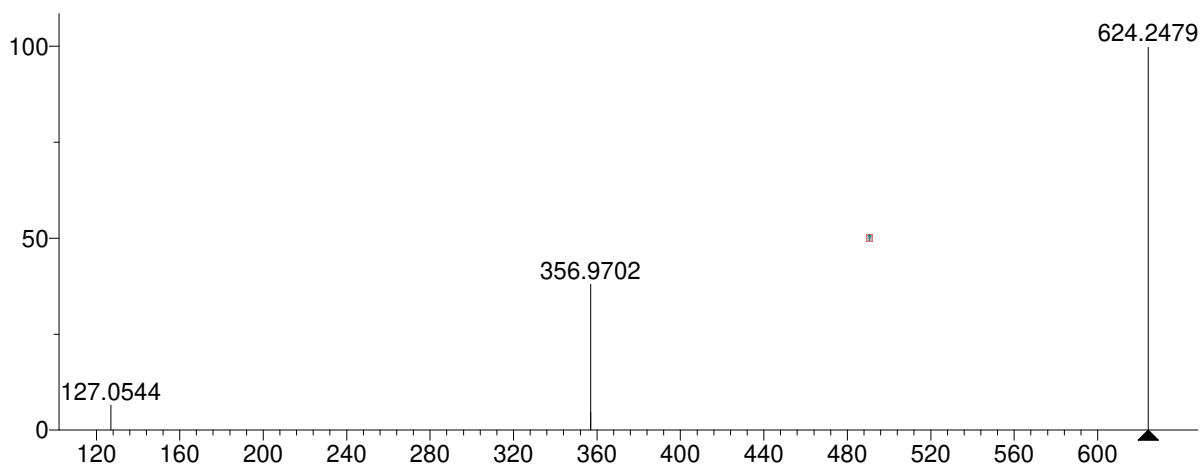

Hit 1 : (Thr28,Nle31)-Cholecystokinin-33 (25-33) (sulfated) [M-2H]<sup>2-</sup> HCD 25eV P=624.2  
C<sub>55</sub>H<sub>74</sub>N<sub>14</sub>O<sub>18</sub>S; MF: 10; RMF: 541; Prob 100.0%; Lib: nist\_msms2; ID: 80226.

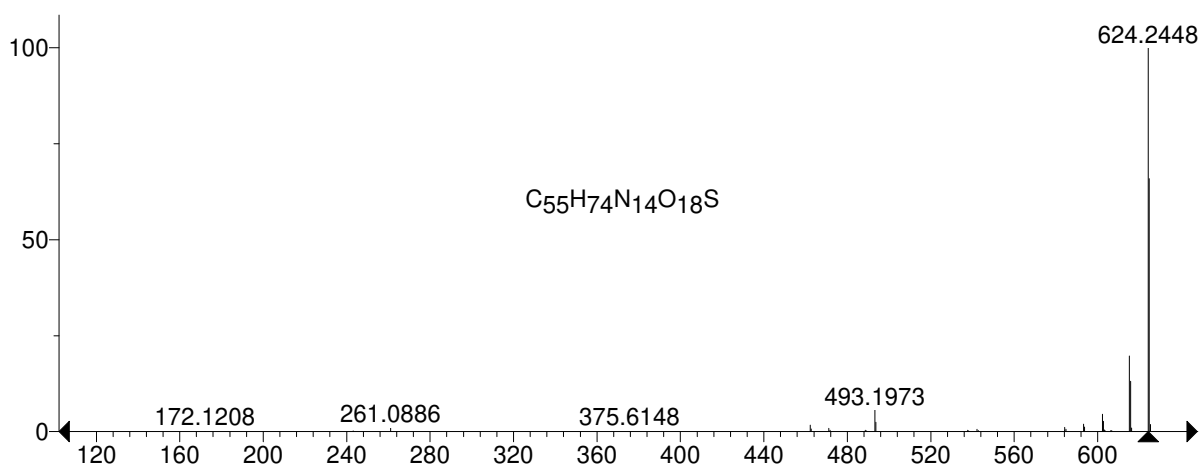

Unknown: Unknown (7.58\_649.0267m/z)  
Compound in Library Factor = 0

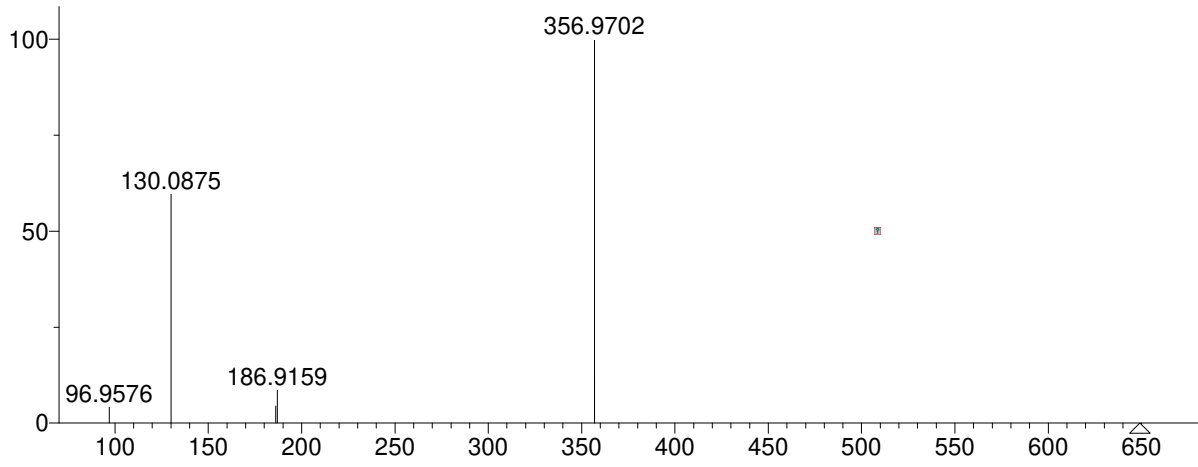

\*\* Search Report Page 1 of 2 \*\*

Unknown: Unknown (7.59\_468.1469m/z)  
Compound in Library Factor = -3273

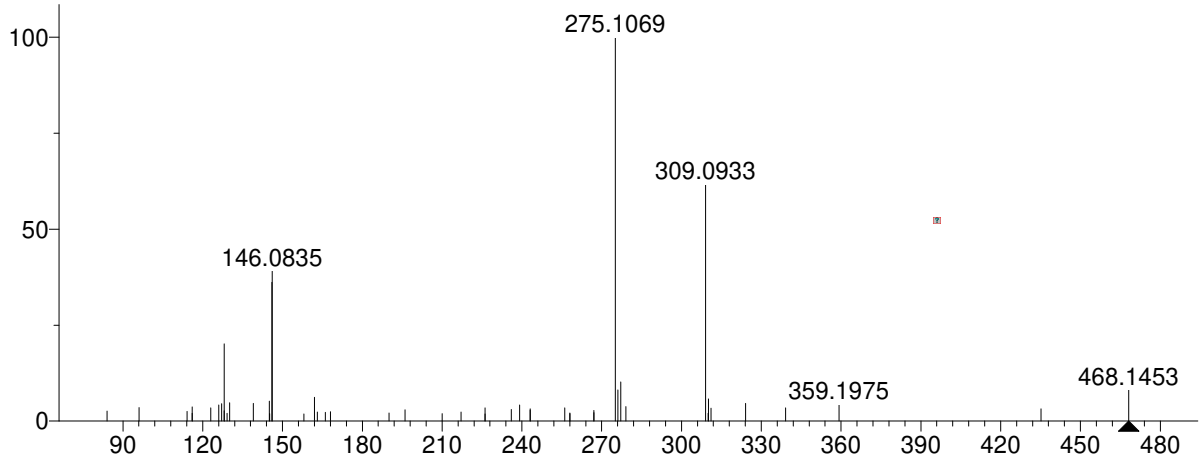

Hit 1 : NCGC00380387-01\_C21H27NO11\_ [M-H]- P=468.2  
C21H27NO11; MF: 1; RMF: 106; Prob 25.7%; Lib: msms-neg-gnps; ID: 1703.

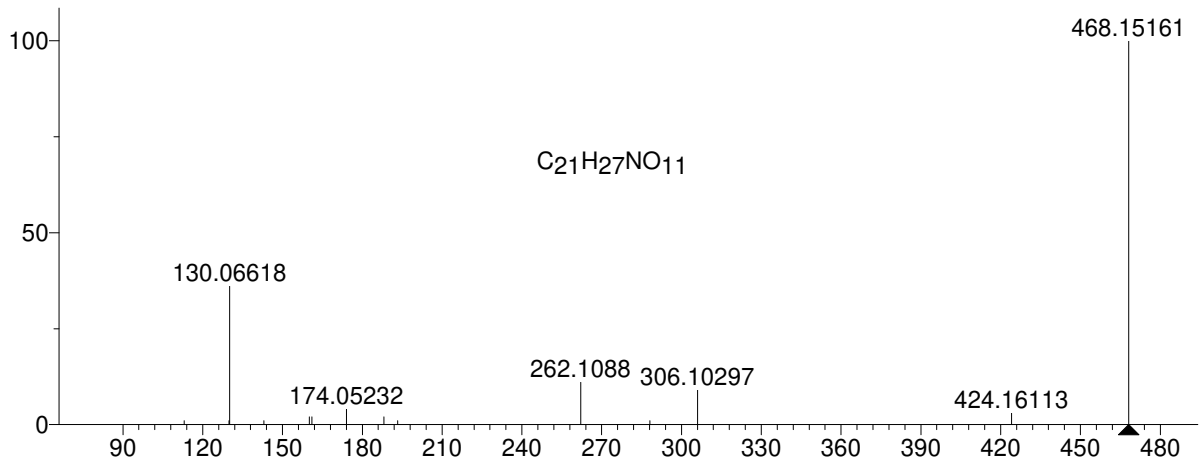

Hit 2 : astilbin [M+NH4]<sup>+</sup> 45HCD P=468.2  
C21H22O11; MF: 0; RMF: 20; Prob 24.8%; Lib: anthocyanins mona; ID: 5106.

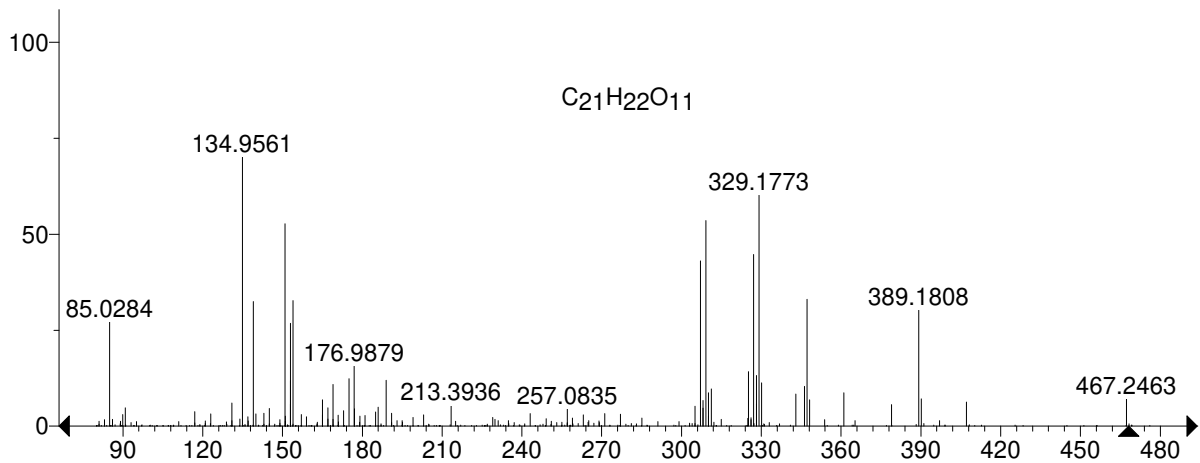

Hit 3 : 2-[1-[4,5-dihydroxy-3-[(2S,3R,4S,5S,6R)-3,4,5-trihydroxy-6-(hydroxymethyl)oxan-2-yl]oxyoxan-2-yl]indol-3-yl]acetic acid  
C<sub>21</sub>H<sub>27</sub>NO<sub>11</sub>; MF: 0; RMF: 11; Prob 24.8%; Lib: mona-export-1c-ms-ms\_negative\_mode; ID: 22556.

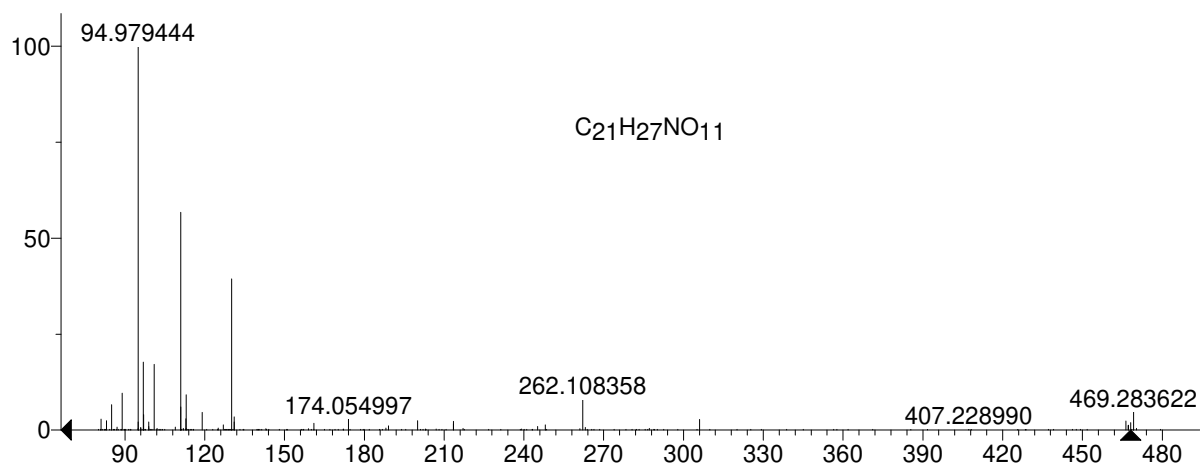

Hit 4 : Rhizocarpic Acid [M-H]<sup>-</sup> 65HCD P=468.1  
C<sub>28</sub>H<sub>23</sub>NO<sub>6</sub>; MF: 0; RMF: 1; Prob 24.8%; Lib: mona-export-1c-ms-ms\_negative\_mode; ID: 23806.

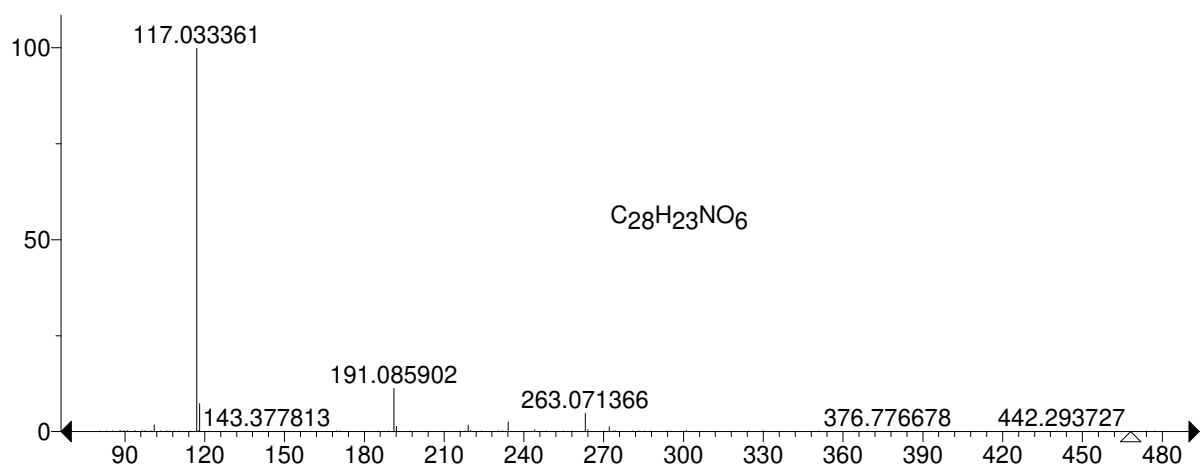



Unknown: Unknown (7.59\_725.1823m/z)  
Compound in Library Factor = 0

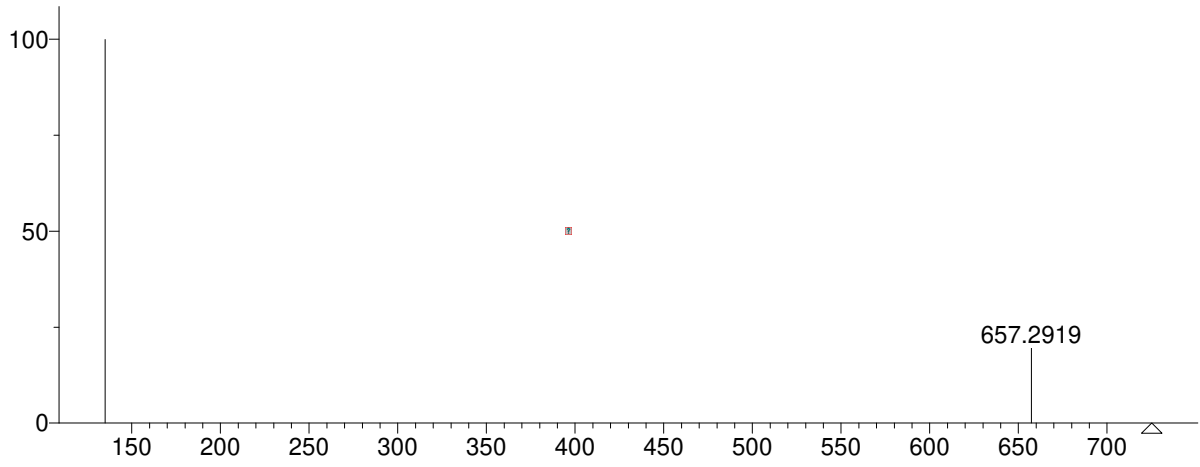

Unknown: Unknown (7.60\_433.1707m/z)  
Compound in Library Factor = 0

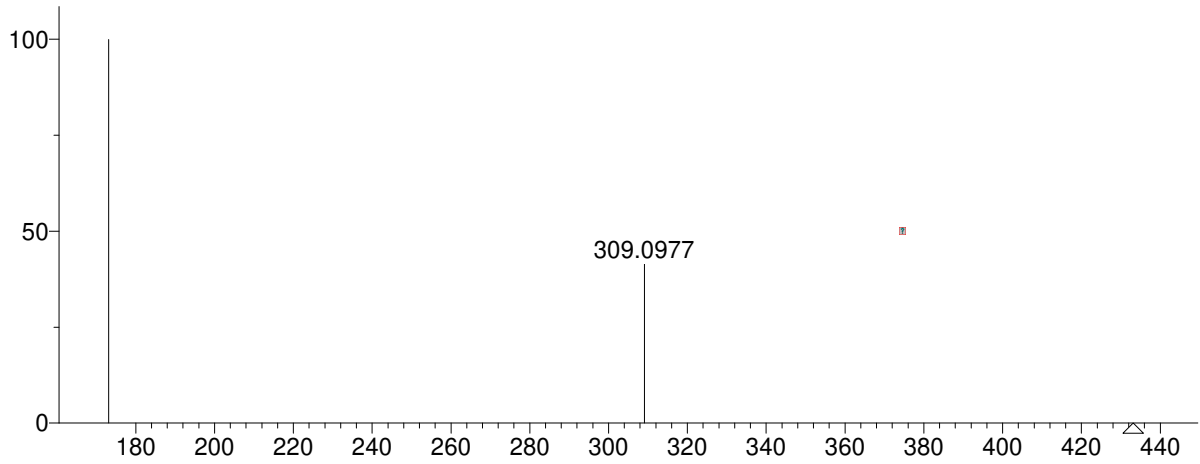

Hit 1 : osmanthuside H [M+H]<sup>+</sup> 65HCD P=433.2  
C<sub>19</sub>H<sub>28</sub>O<sub>11</sub>; MF: 0; RMF: 153; Prob 100.0%; Lib: mona-export-vf-npl\_qexactive; ID: 4341.

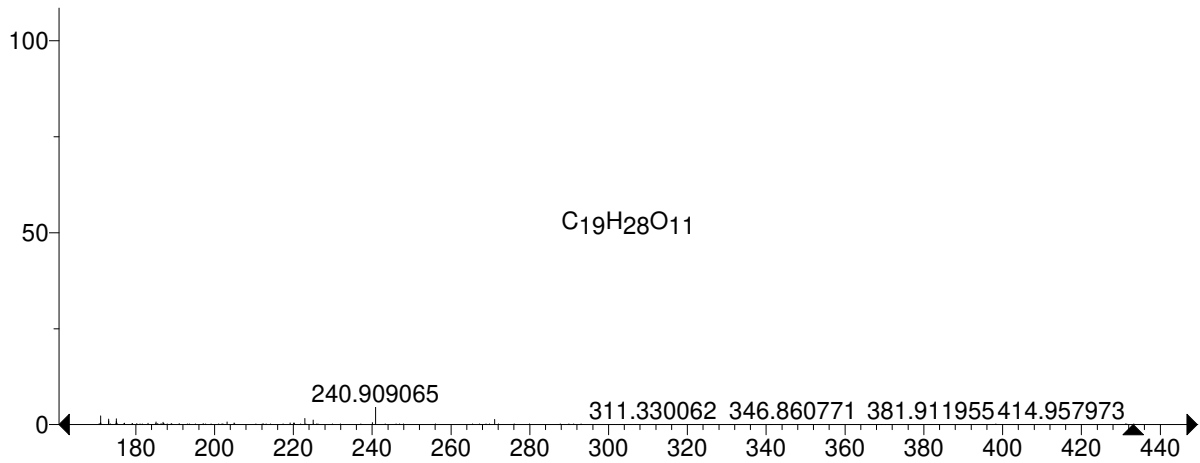

Unknown: Unknown (7.60\_656.2881m/z)  
Compound in Library Factor = 0

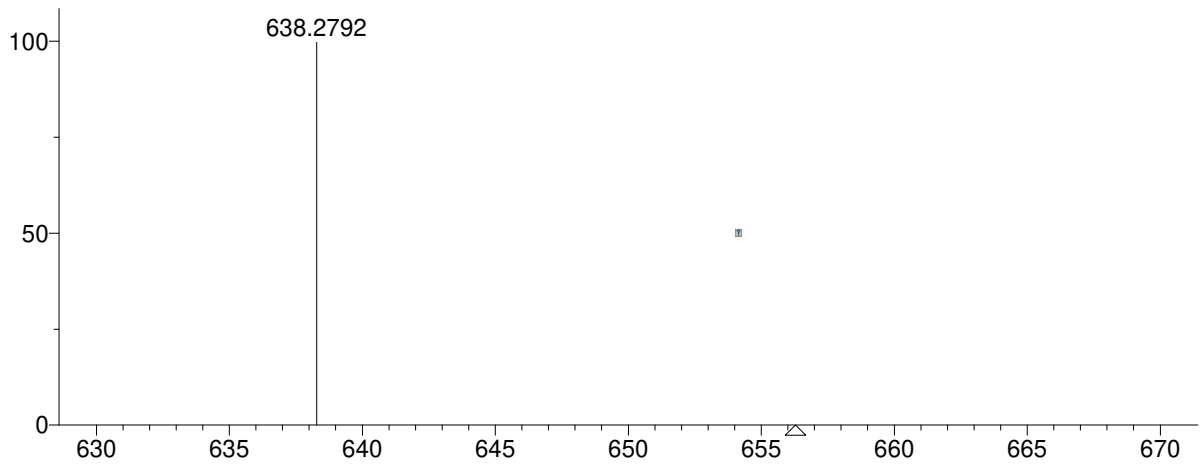

Unknown: Unknown (7.61\_385.1949m/z)  
Compound in Library Factor = 0

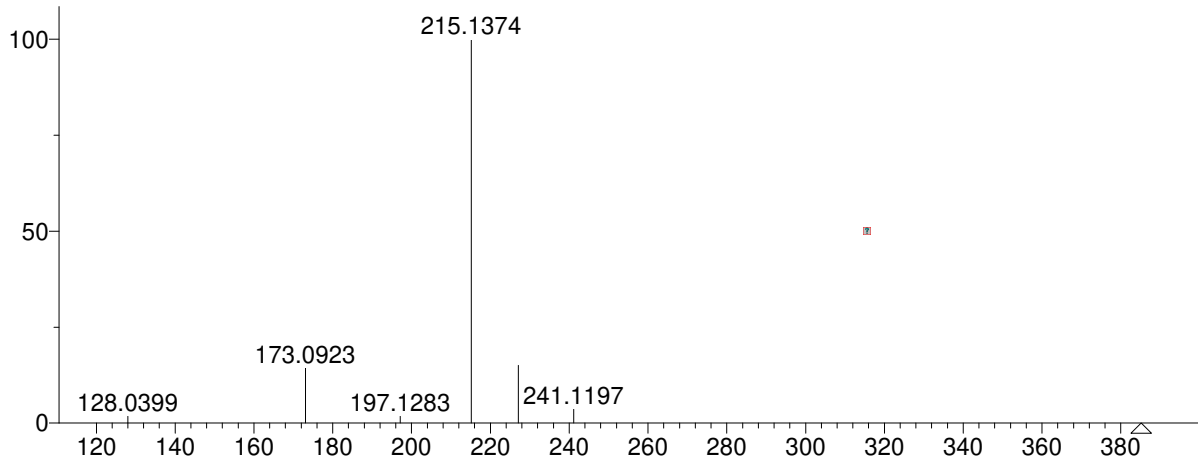

\*\* Search Report Page 1 of 2 \*\*

Unknown: Unknown (7.62\_197.1282m/z)  
Compound in Library Factor = -1072

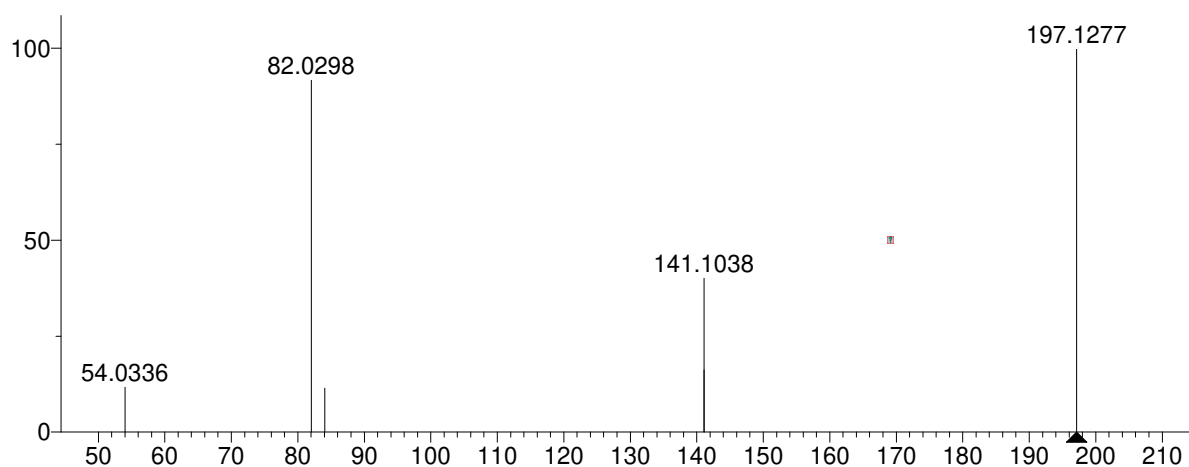

Hit 1 : L-N5-(1-Imino-3-pentenyl)ornithine [M+H-NH3]<sup>+</sup> HCD 9V P=197.1  
C10H19N3O2; MF: 88; RMF: 609; Prob 71.7%; CAS: 751479-44-4; Lib: nist\_msms; ID: 165493.

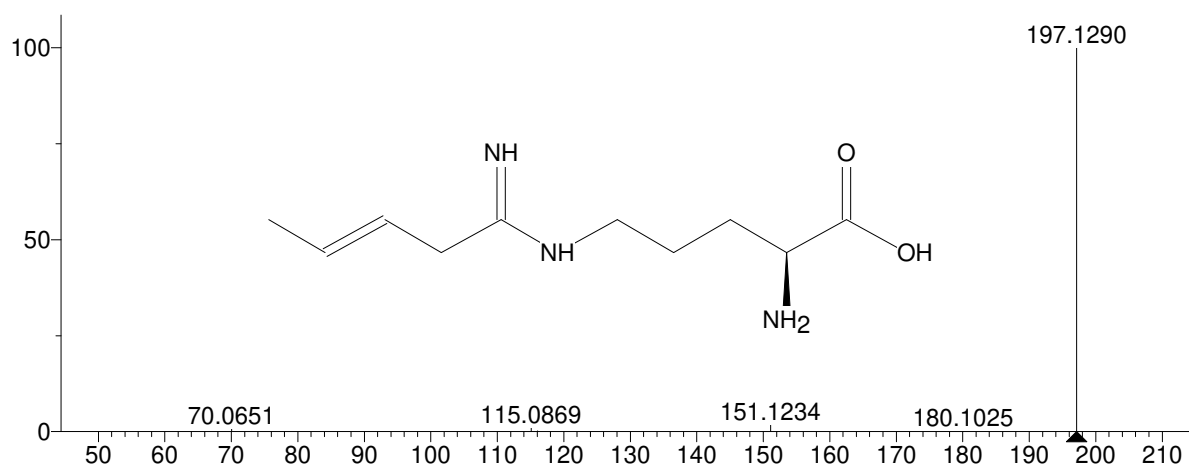

Hit 2 : D-Desthiobiotin [M+H-H2O]<sup>+</sup> HCD 15V P=197.1  
C10H18N2O3; MF: 18; RMF: 544; Prob 10.4%; CAS: 533-48-2; Lib: nist\_msms; ID: 489080.

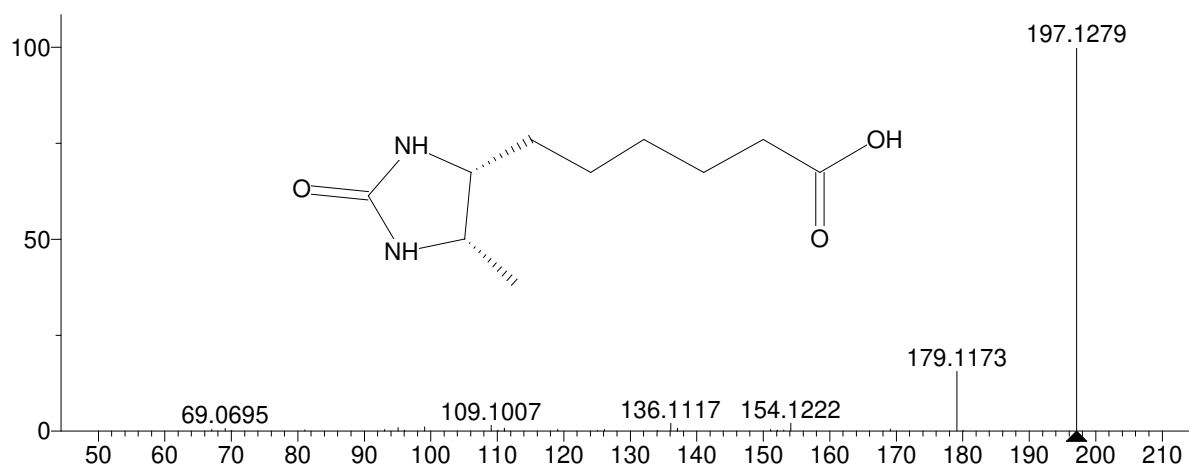

Hit 3 : NCGC00381364-01!3-propan-2-yl-2,3,6,7,8,8a-hexahydropyrrolo[1,2-a]pyrazine-1,4-dione [M+H]<sup>+</sup> P=197  
C<sub>10</sub>H<sub>16</sub>N<sub>2</sub>O<sub>2</sub>; MF: 5; RMF: 378; Prob 6.73%; Lib: mona-export-gnps; ID: 6310.

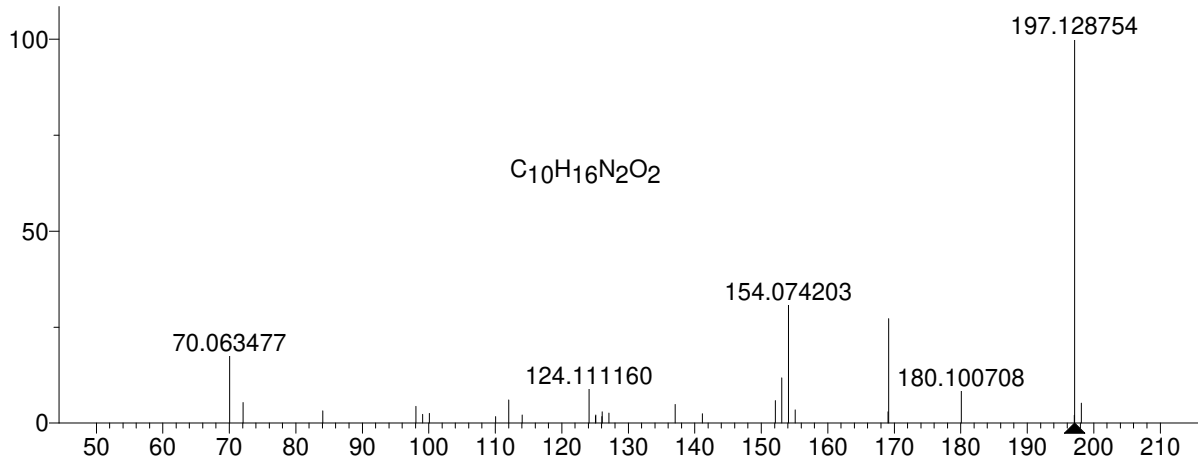

Hit 4 : Val-Phe-Lys [M+2H]<sup>2+</sup> QTOF 5V P=197.1  
C<sub>20</sub>H<sub>32</sub>N<sub>4</sub>O<sub>4</sub>; MF: 1; RMF: 232; Prob 5.69%; Lib: nist\_msms; ID: 54272.

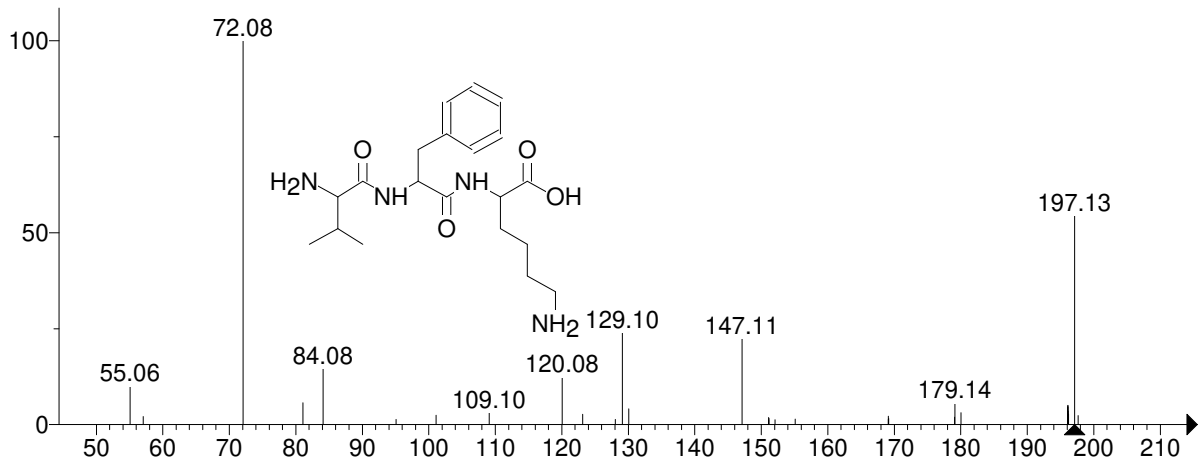

Hit 5 : NCGC00381364-02\_C10H16N2O2\_Pyrrolo[1,2-a]pyrazine-1,4-dione, hexahydro-3-(1-methylethyl)- [M+H]<sup>+</sup>  
C<sub>10</sub>H<sub>16</sub>N<sub>2</sub>O<sub>2</sub>; MF: 0; RMF: 255; Prob 5.47%; Lib: mona-export-gnps; ID: 10512.

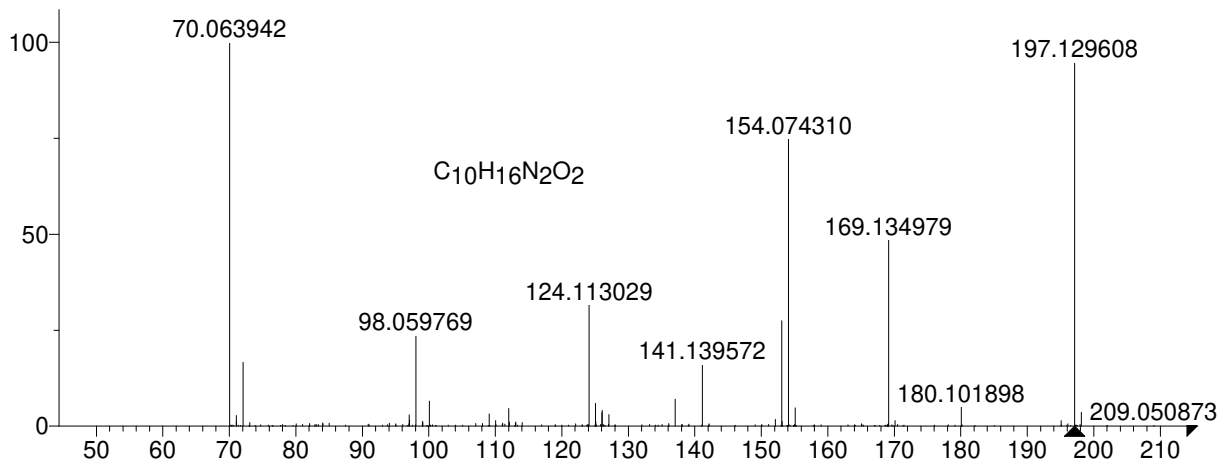

Unknown: Unknown (7.62\_387.1743m/z)  
Compound in Library Factor = -3273

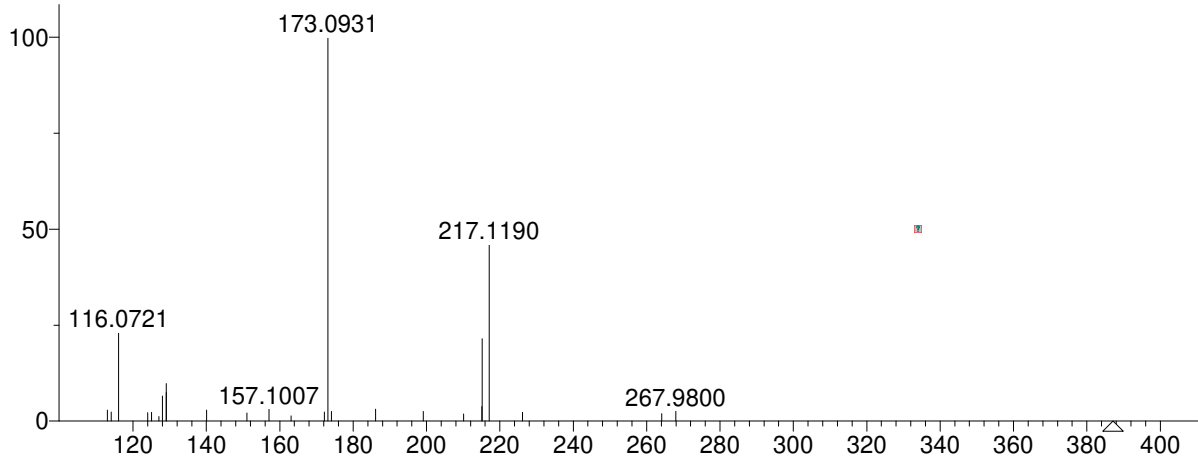

Hit 1 : Neurotensin (1-6) [M-2H]<sup>2-</sup> HCD 55eV P=387.2  
C<sub>35</sub>H<sub>52</sub>N<sub>8</sub>O<sub>12</sub>; MF: 13; RMF: 117; Prob 60.8%; Lib: nist\_msms2; ID: 74180.

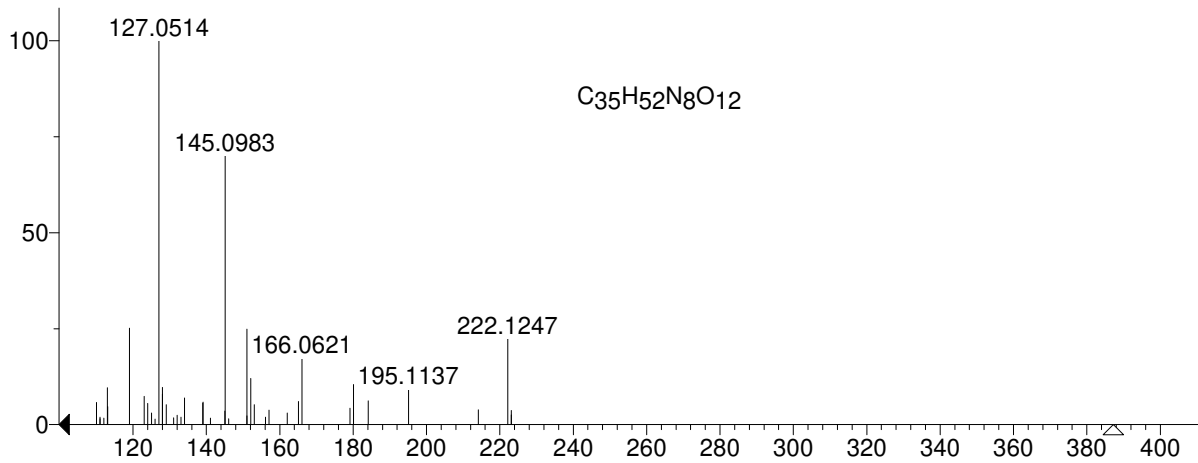

Hit 2 : NCGC00347508-02!4-[2-[[[2,3-dihydroxy-2-(1-hydroxyethyl)butanoyl]oxymethyl]anilino]-4-oxobutanoic acid  
C<sub>17</sub>H<sub>23</sub>NO<sub>8</sub>; MF: 0; RMF: 4; Prob 39.2%; Lib: mona-export-gnps; ID: 6723.

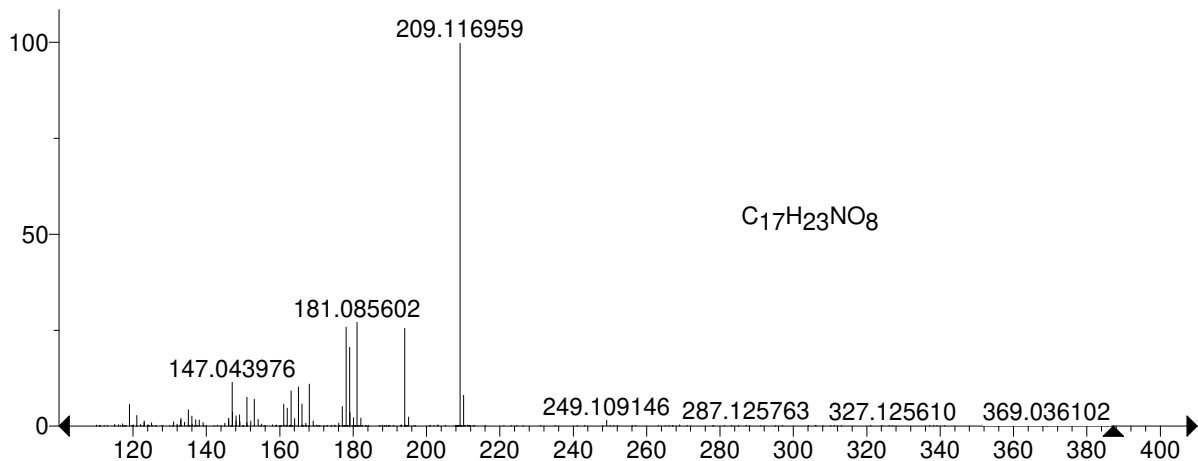

Unknown: Unknown (7.63\_241.1186m/z)  
Compound in Library Factor = -566

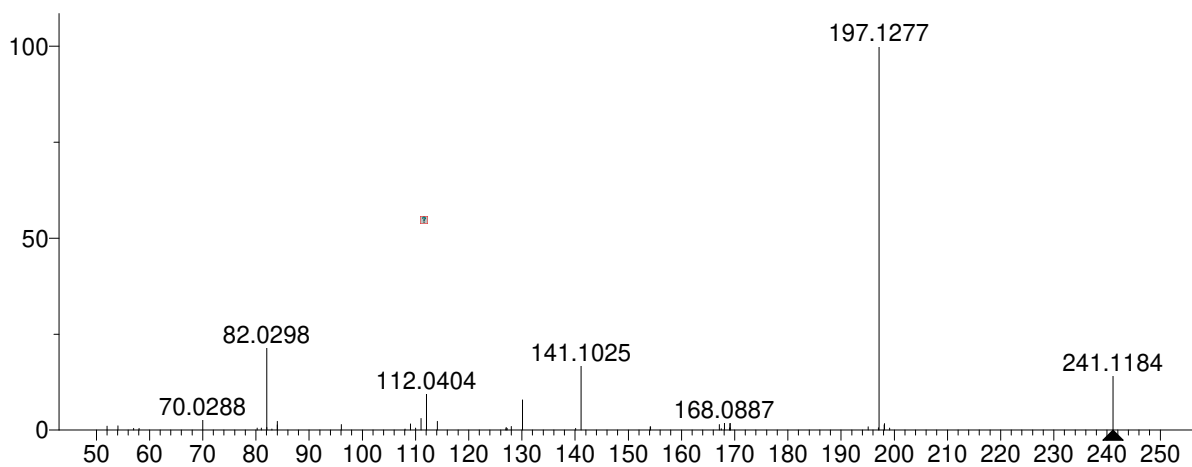

Hit 1 : Pyroglutamyl-Isoleucine; PlaSMA ID-369 [M-H]<sup>-</sup> P=241.1  
C<sub>11</sub>H<sub>18</sub>N<sub>2</sub>O<sub>4</sub>; MF: 401; RMF: 590; Prob 100.0%; Lib: biomsmms-neg-plasma; ID: 400.

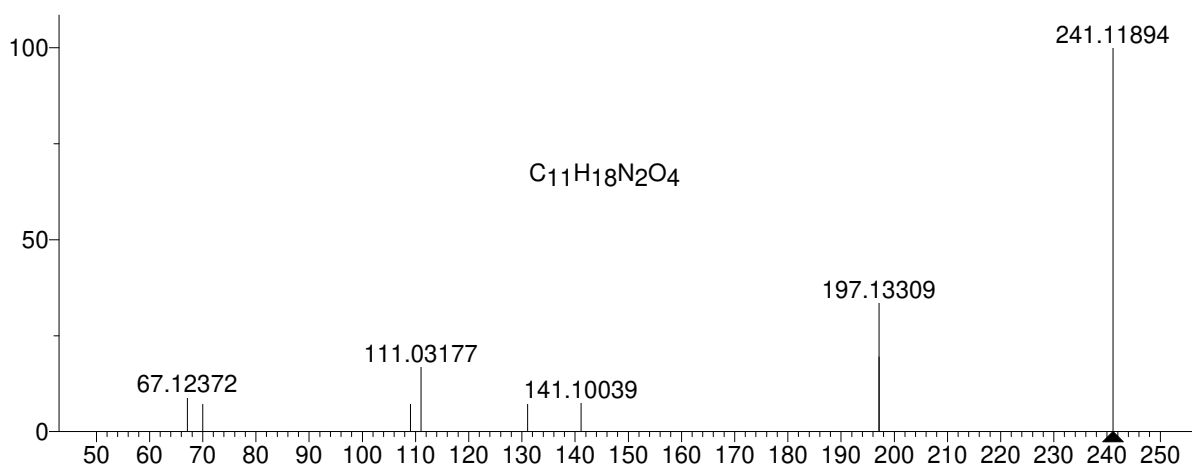



Unknown: Unknown (7.64\_371.1229m/z)  
Compound in Library Factor = 0

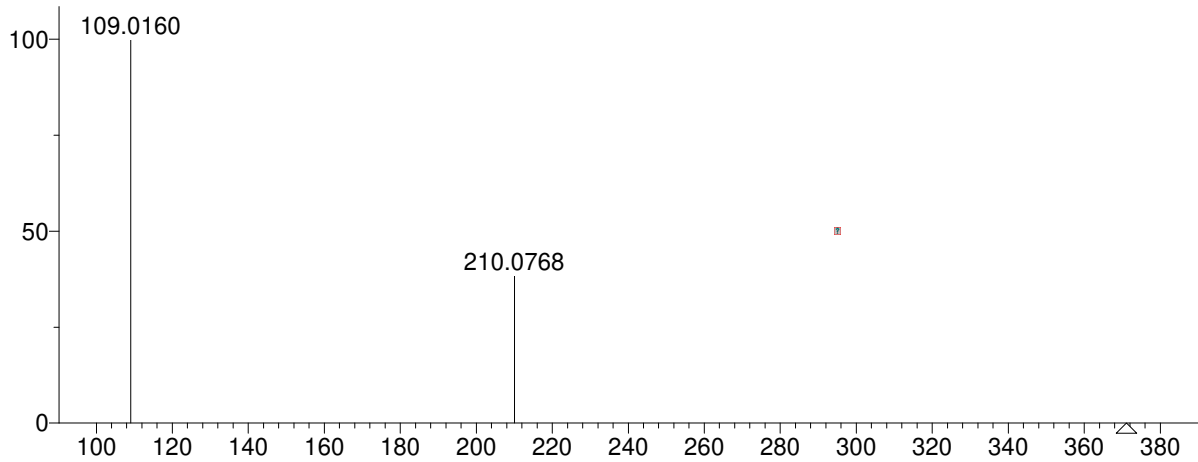

Hit 1 : 7,8-dihydroxy-3-[(1E,3E)-7-hydroxy-3,5-dimethylhepta-1,3-dienyl]-7-methyl-8H-isochromen-6-one [M+K]+  
C19H24O5; MF: 0; RMF: 29; Prob 50.0%; Lib: mona-export-vf-npl\_qexactive; ID: 16500.

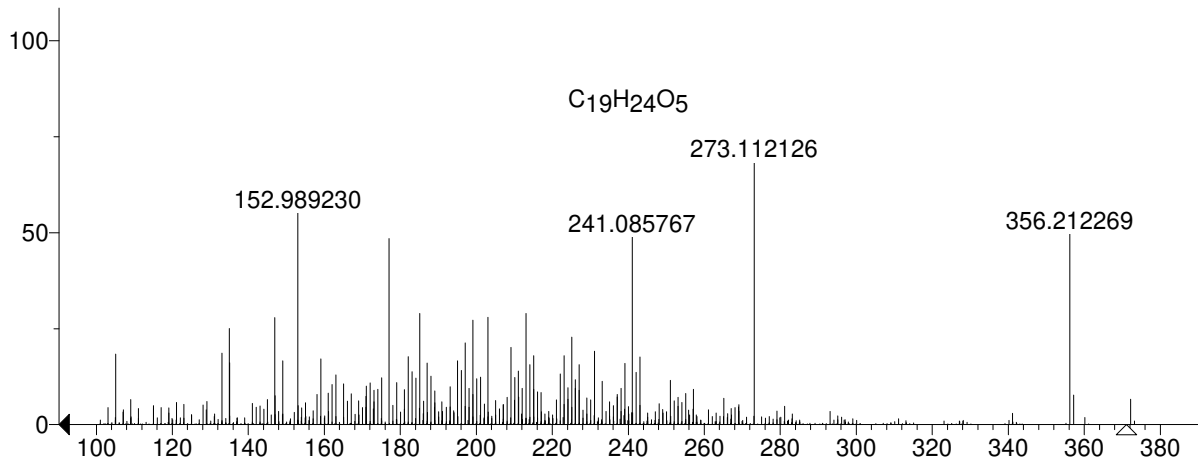

Hit 2 : 1-[2-hydroxy-4-(3-hydroxy-5-methylphenoxy)-6-methylphenyl]-3-methylbutane-2,3-diol [M+K]+ 65HCD P-  
C19H24O5; MF: 0; RMF: 8; Prob 50.0%; Lib: mona-export-vf-npl\_qexactive; ID: 22293.

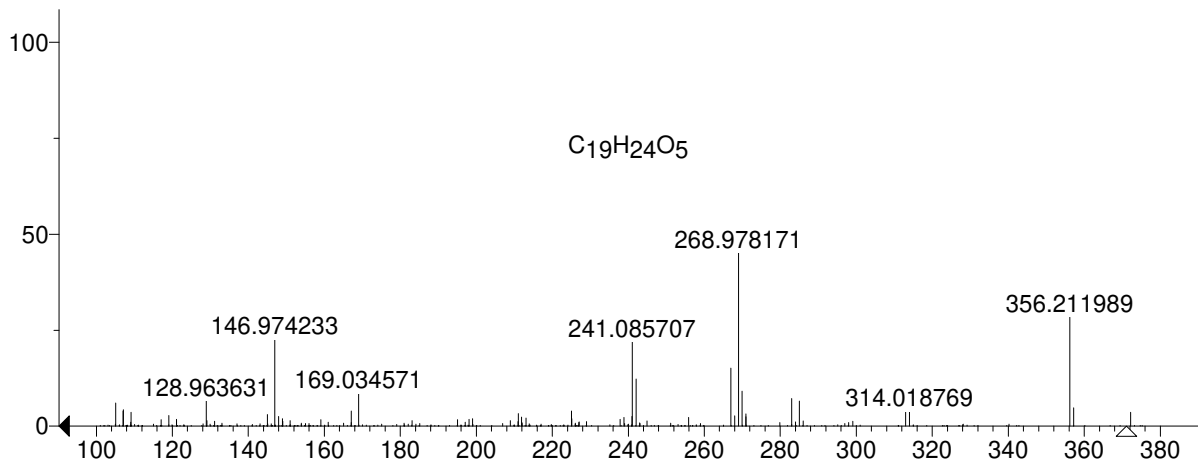

Unknown: Unknown (7.64\_726.3414m/z)  
Compound in Library Factor = 0

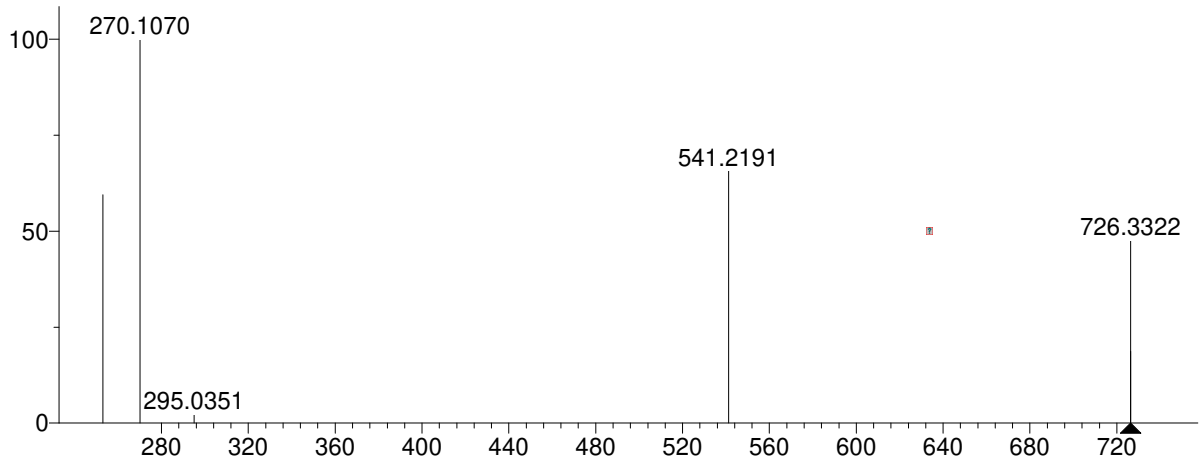

Unknown: Unknown (7.65\_302.1490m/z)  
Compound in Library Factor = 0

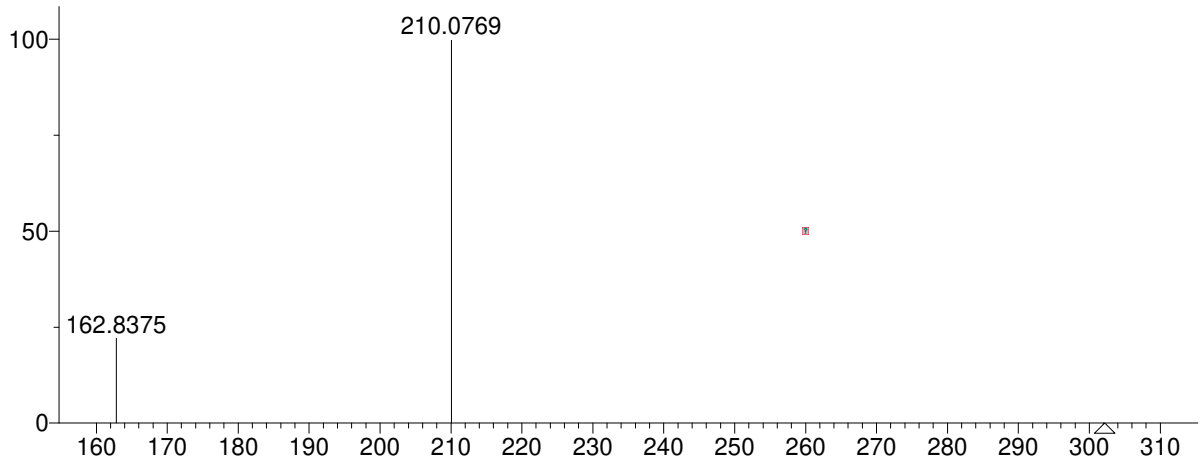

Unknown: Unknown (7.66\_338.1323m/z)  
Compound in Library Factor = 0

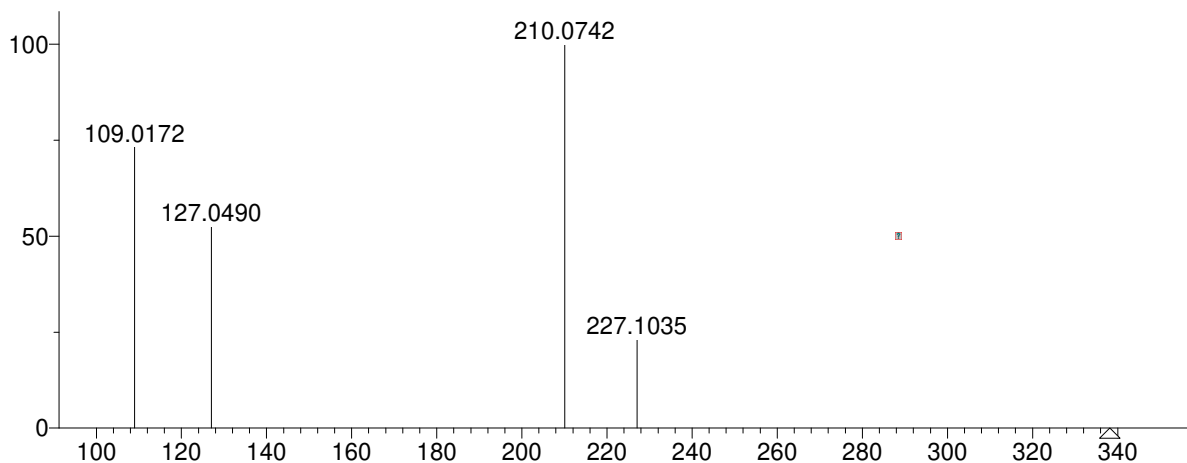

Hit 1 : Ethanone, 2-(2-chlorophenyl)-1-[1-(4-hydroxypentyl)-1H-indol-3-yl]- [M+H-H<sub>2</sub>O]<sup>+</sup> HCD 108V P=338.1  
C<sub>21</sub>H<sub>22</sub>ClNO<sub>2</sub>; MF: 0; RMF: 48; Prob 50.0%; Lib: nist\_msms; ID: 347725.

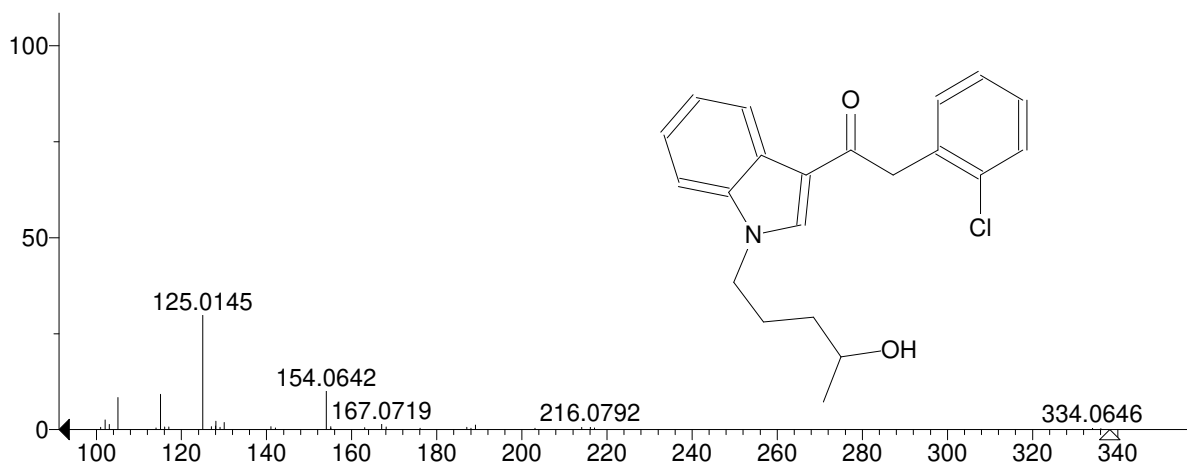

Hit 2 : Ethanone, 2-(2-chlorophenyl)-1-[1-(5-hydroxypentyl)-1H-indol-3-yl]- [M+H-H<sub>2</sub>O]<sup>+</sup> HCD 108V P=338.1  
C<sub>21</sub>H<sub>22</sub>ClNO<sub>2</sub>; MF: 0; RMF: 43; Prob 50.0%; CAS: 1449690-09-8; Lib: nist\_msms; ID: 269519.

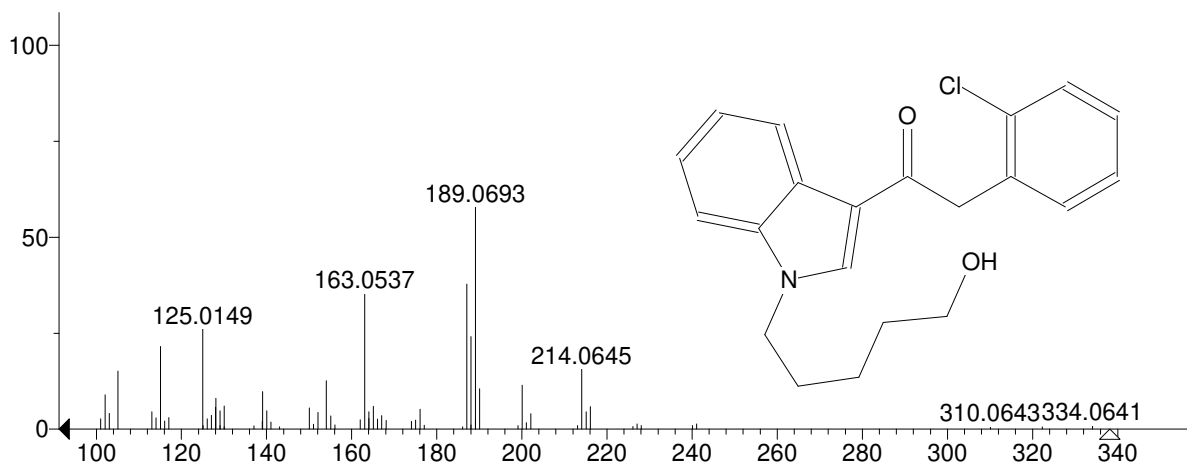

Unknown: Unknown (7.66\_356.1453m/z)  
Compound in Library Factor = 0

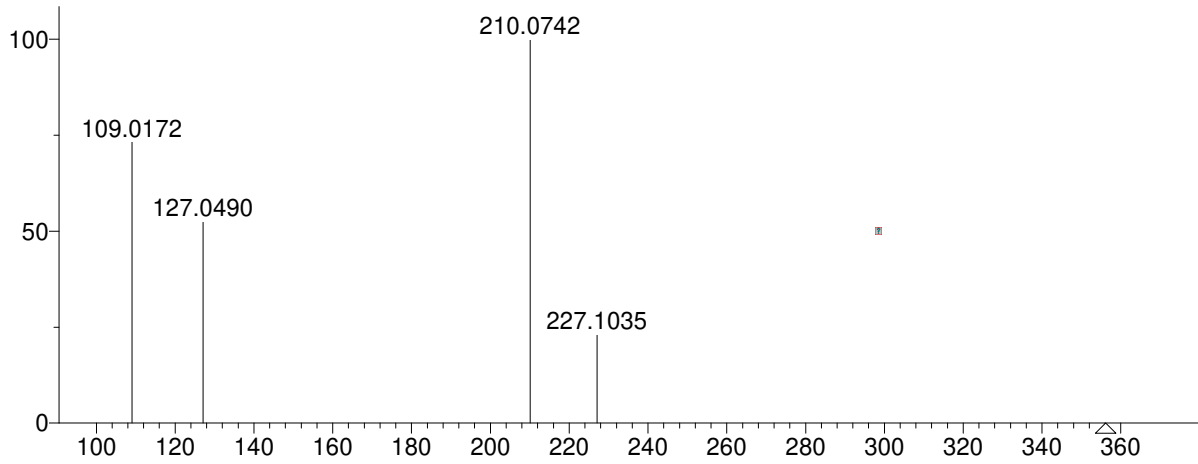

Hit 1 : Benzoic acid, 4-[[[(2,4-diamino-7,8-dihydro-7-oxo-6-pteridiny)methyl]methylamino]-, methyl ester [M+H]<sup>+</sup> | C<sub>16</sub>H<sub>17</sub>N<sub>7</sub>O<sub>3</sub>; MF: 0; RMF: 61; Prob 100.0%; CAS: 1330264-75-9; Lib: nist\_msms; ID: 432548.

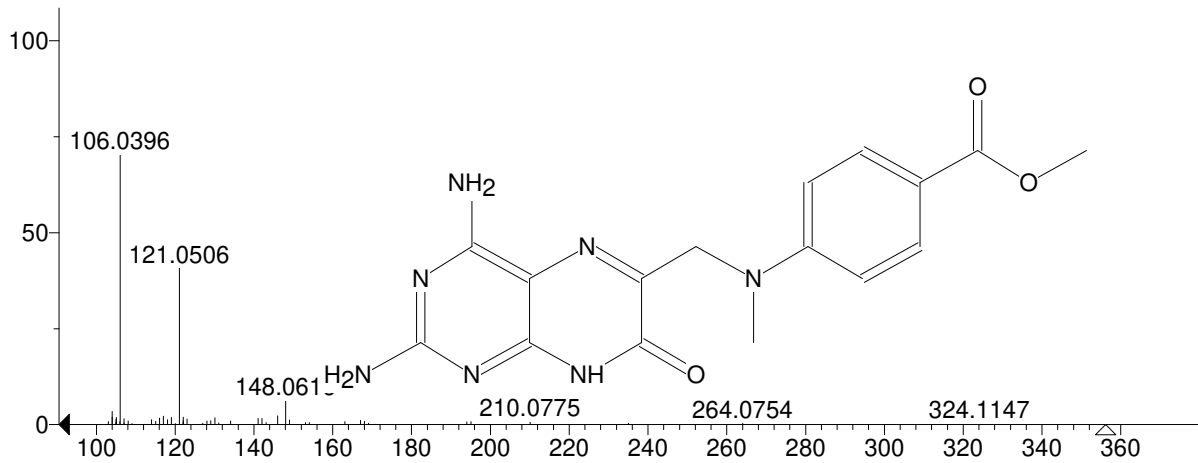

\*\* Search Report Page 1 of 2 \*\*

Unknown: Unknown (7.67\_553.2609m/z)  
Compound in Library Factor = -791

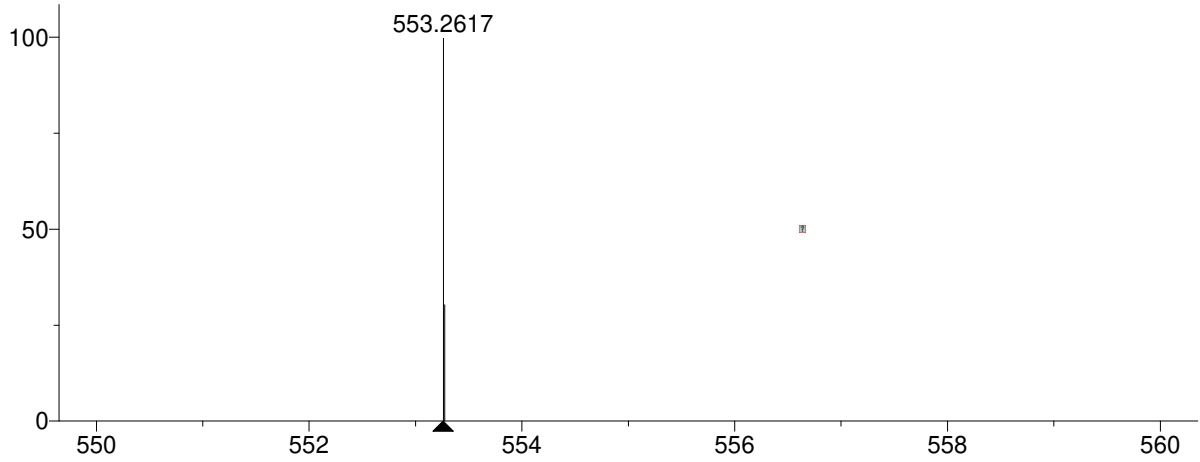

Hit 1 : (2S,3R,5S,9R)-2,3-dihydroxy-14-(hydroxymethyl)-5,9-dimethyl-14-[[[(2S,3R,4S,5S,6R)-3,4,5-trihydroxy-6-(h  
C26H42O11; MF: 142; RMF: 769; Prob 45.2%; Lib: anthocyanins mona; ID: 5886.

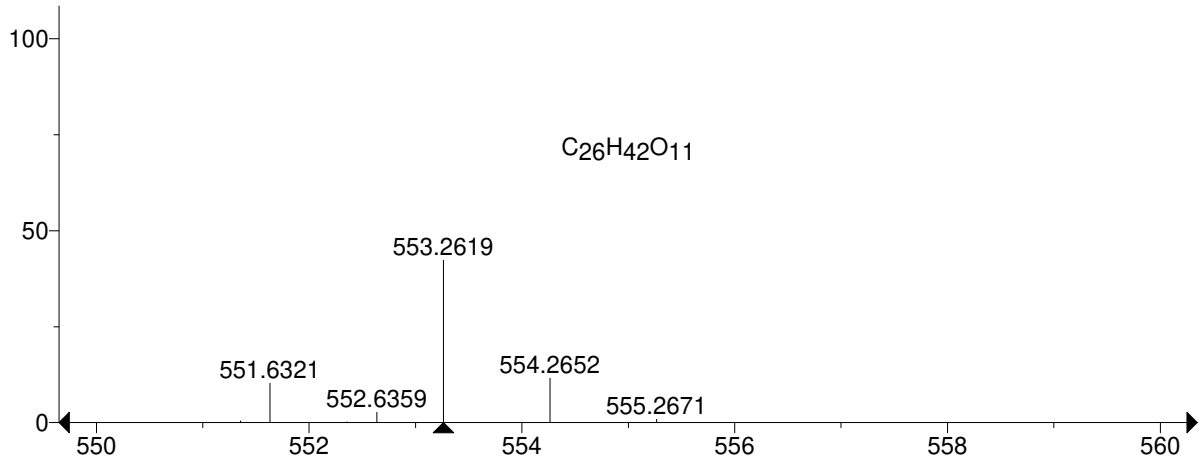

Hit 2 : (2S,3R,5S,9R)-2,3-dihydroxy-14-(hydroxymethyl)-5,9-dimethyl-14-[[[(2S,3R,4S,5S,6R)-3,4,5-trihydroxy-6-(h  
C26H42O11; MF: 142; RMF: 769; Prob 45.2%; Lib: mona-export-vf-npl\_qexactive; ID: 17888.

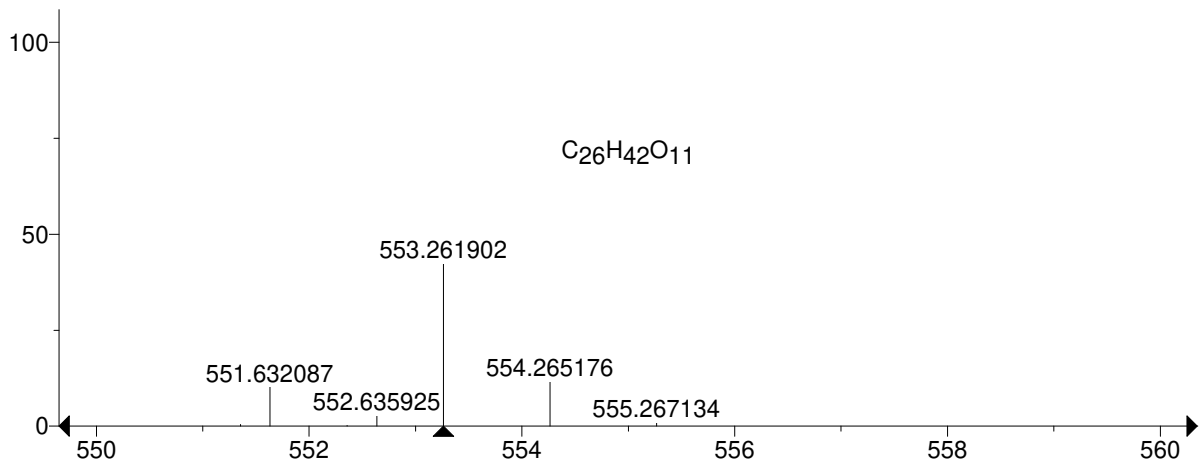

\*\* Search Report Page 2 of 2 \*\*

Hit 3 : NCGC00380707-01\_C26H42O11\_(5xi,6alpha,7alpha,9xi,16xi)-16-(beta-D-Glucopyranosyloxy)-6,7,17-trihy  
C26H42O11; MF: 96; RMF: 786; Prob 9.54%; Lib: mona-export-gnps; ID: 13741.

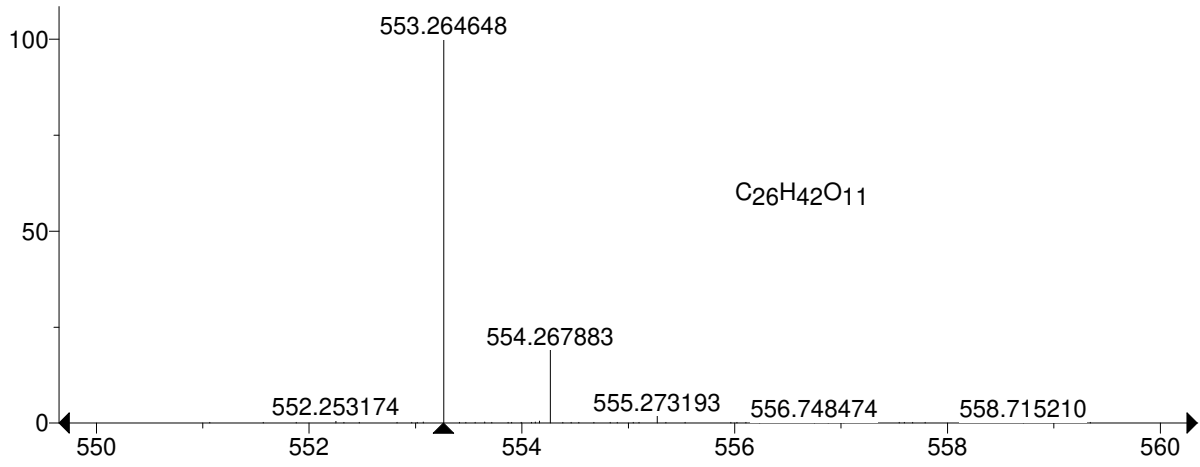

Unknown: Unknown (7.68\_401.1531m/z)  
Compound in Library Factor = 0

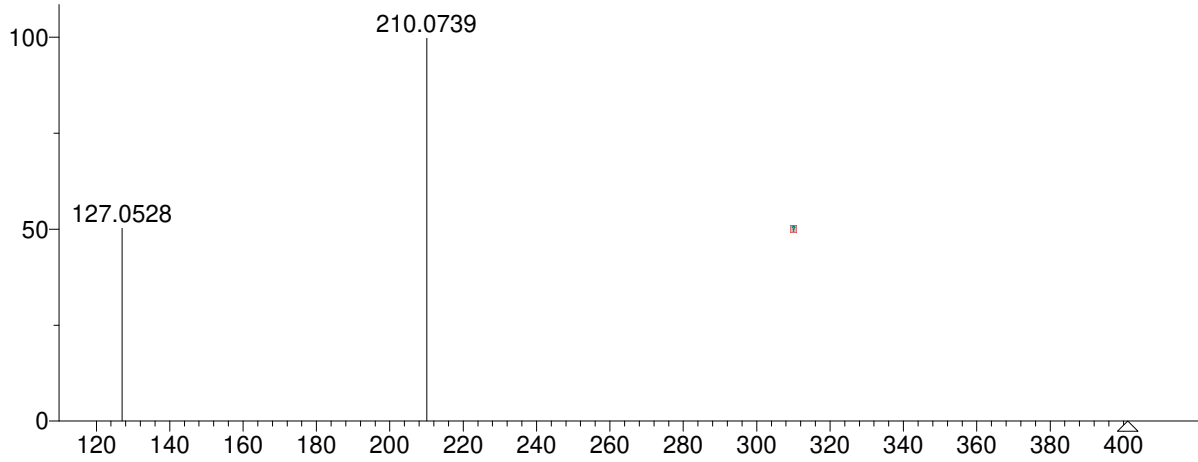

Hit 1 : Cnicin [M+Na]<sup>+</sup> HCD 104V P=401.2  
C<sub>20</sub>H<sub>26</sub>O<sub>7</sub>; MF: 0; RMF: 109; Prob 50.0%; CAS: 24394-09-0; Lib: nist\_msms; ID: 236009.

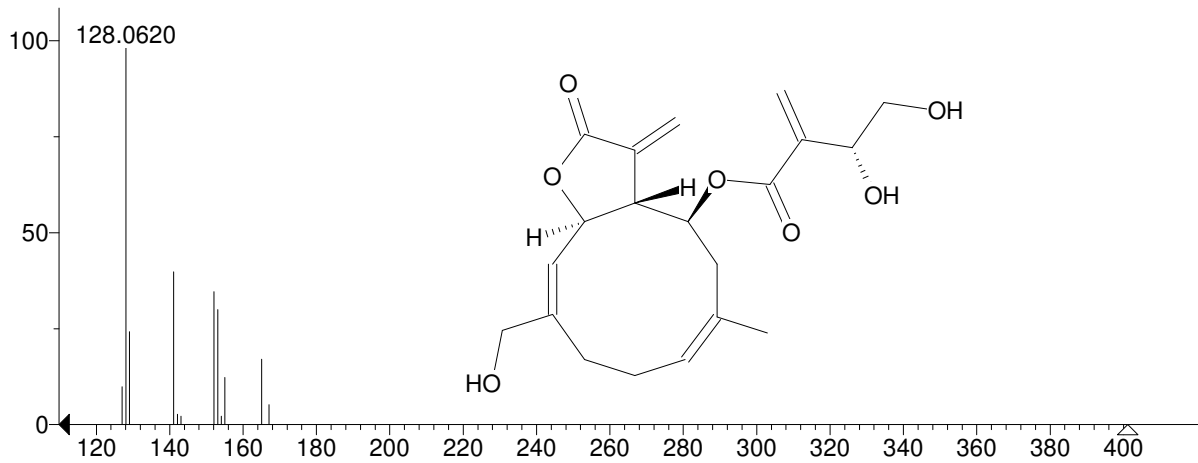

Hit 2 : (2aR,4S,6R,7R,9R,9aR)-5'-(furan-3-yl)-4,9-dihydroxy-2a-(hydroxymethyl)-7-methylspiro[1,3,4,5,5a,7,8,9-oc  
C<sub>20</sub>H<sub>26</sub>O<sub>7</sub>; MF: 0; RMF: 7; Prob 50.0%; Lib: mona-export-vf-npl\_qexactive; ID: 23517.

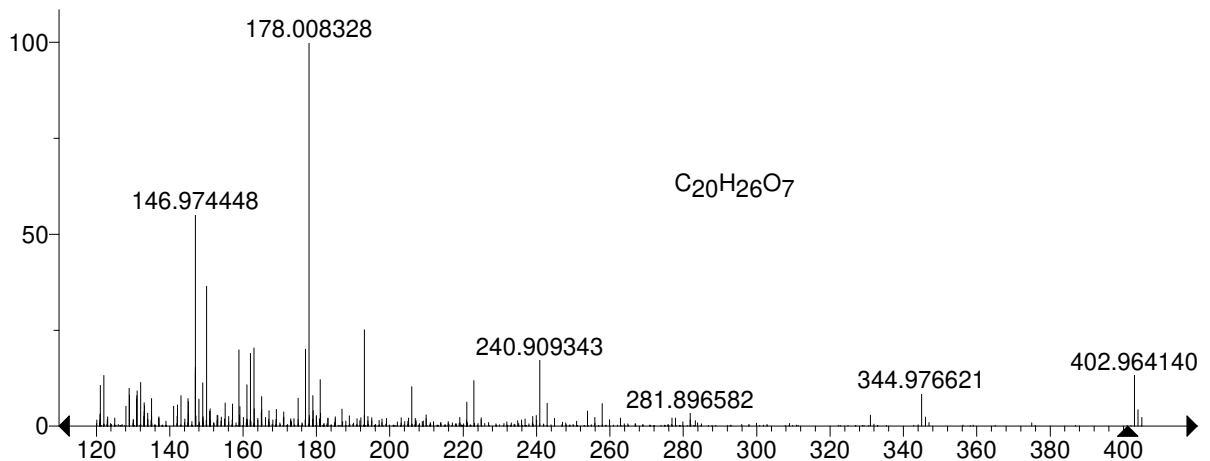



Unknown: Unknown (7.69\_344.1809m/z)  
Compound in Library Factor = 0

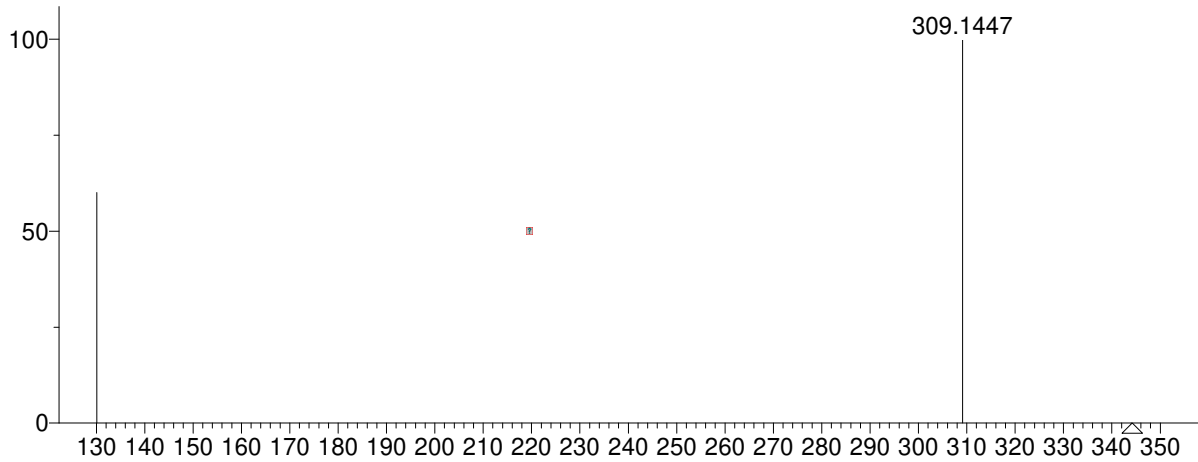

Hit 1 : 4-amino-2-hydroxy-5-[[1-hydroxy-1-(5-oxo-6-bicyclo[4.1.0]hept-3-enyl)propan-2-yl]amino]-5-oxopentanoic acid  
C<sub>15</sub>H<sub>22</sub>N<sub>2</sub>O<sub>6</sub>; MF: 0; RMF: 107; Prob 100.0%; Lib: mona-export-vf-npl\_qexactive; ID: 16561.

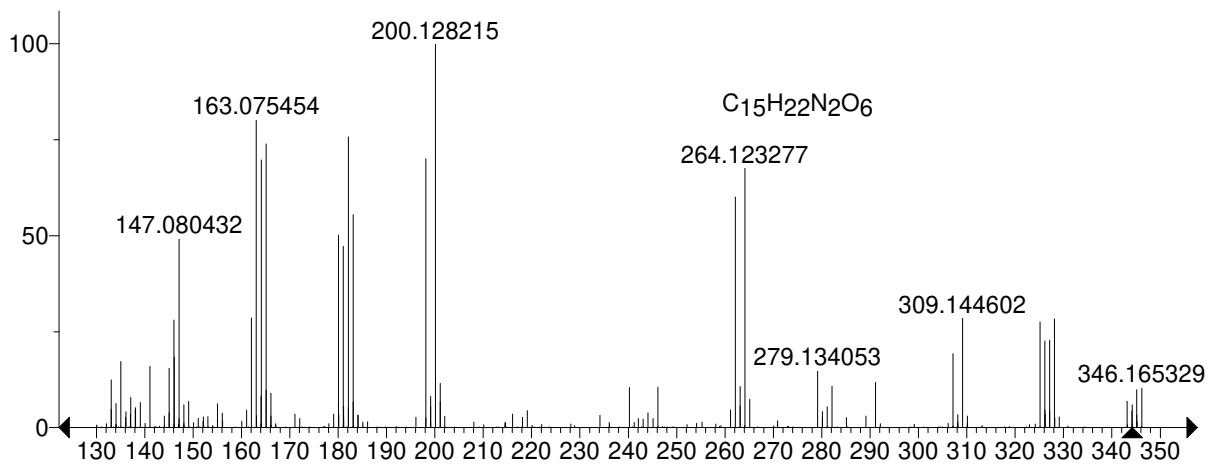

Unknown: Unknown (7.72\_281.0868m/z)  
Compound in Library Factor = -441

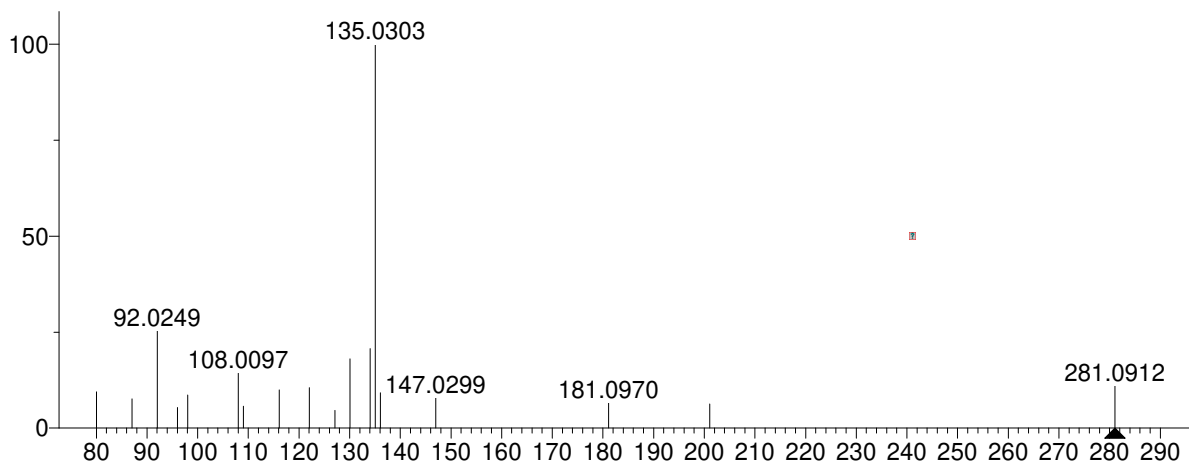

Hit 1 : 1H- Pyrazole-4-carboxylic acid, 1-(2,4-difluorophenyl)-5-[[2-[[[(1,1-dimethylethyl)amino] thioxomethyl]hydraz

C17H19F2N5O2S; MF: 210; RMF: 870; Prob 38.5%; CAS: 264233-05-8; Lib: nist\_msms; ID: 273544.

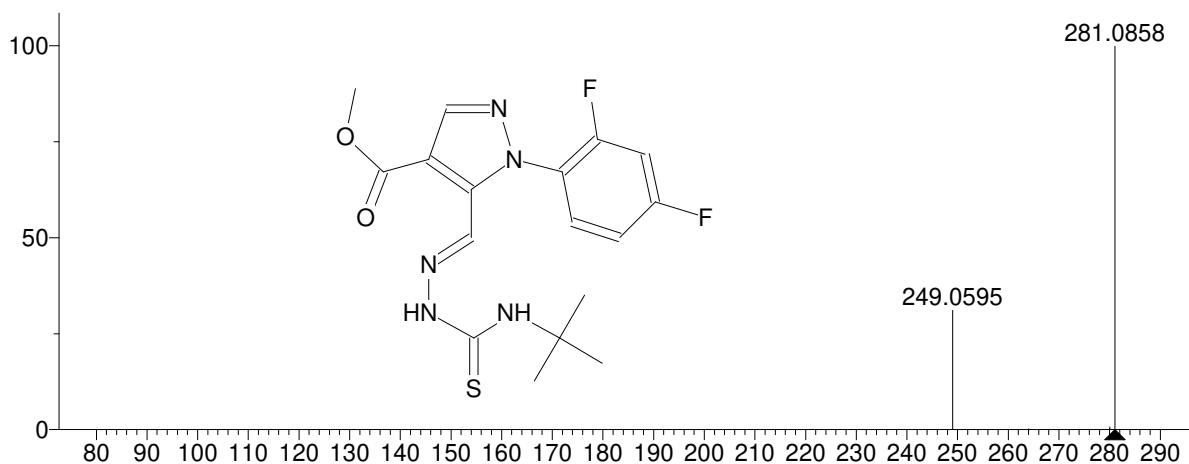

Hit 2 : 2'-O-Methylinosine [M-H]- 20-30-40%) P=281.1

C11H14N4O5; MF: 210; RMF: 575; Prob 38.5%; Lib: msms-neg-fiehnlic; ID: 31.

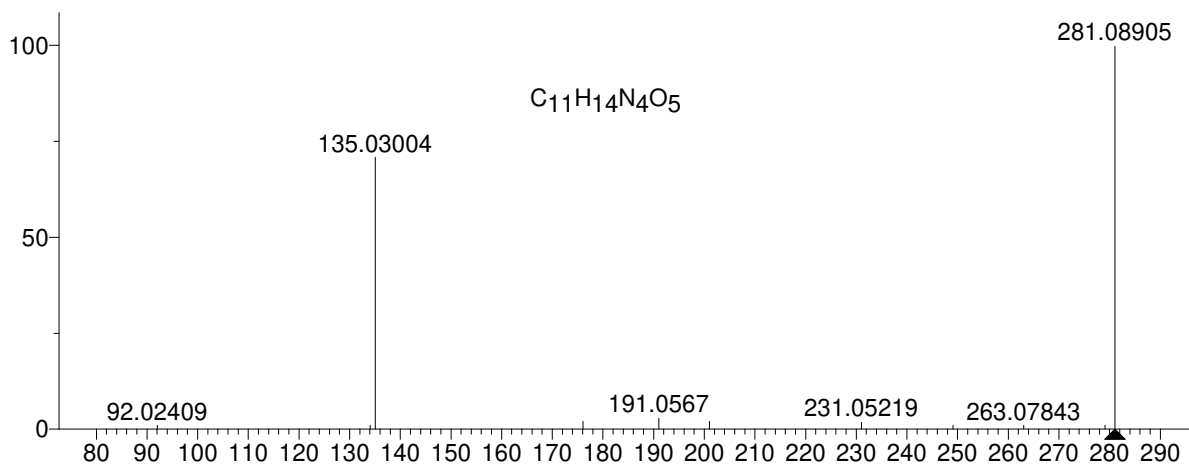

Hit 3 : 3'-O-Methylinosine [M-H]- 20-30-40%) P=281.1  
C<sub>11</sub>H<sub>14</sub>N<sub>4</sub>O<sub>5</sub>; MF: 182; RMF: 614; Prob 11.1%; Lib: mona-export-fiehn\_hilic; ID: 938.

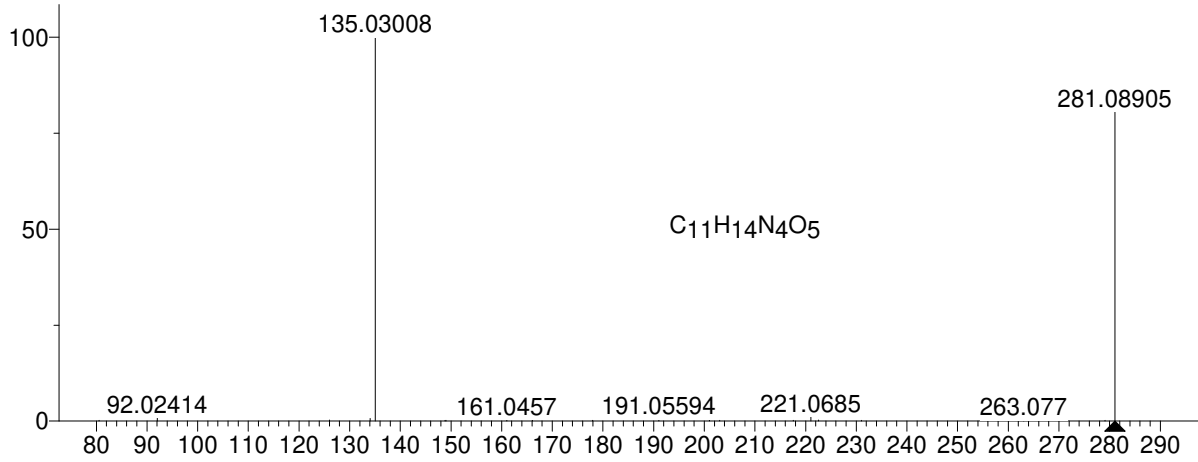

Hit 4 : 1,4-D-Xylobiose [M-H]- HCD 4V P=281.1  
C<sub>10</sub>H<sub>18</sub>O<sub>9</sub>; MF: 169; RMF: 674; Prob 7.18%; CAS: 6860-47-5; Lib: nist\_msms; ID: 530861.

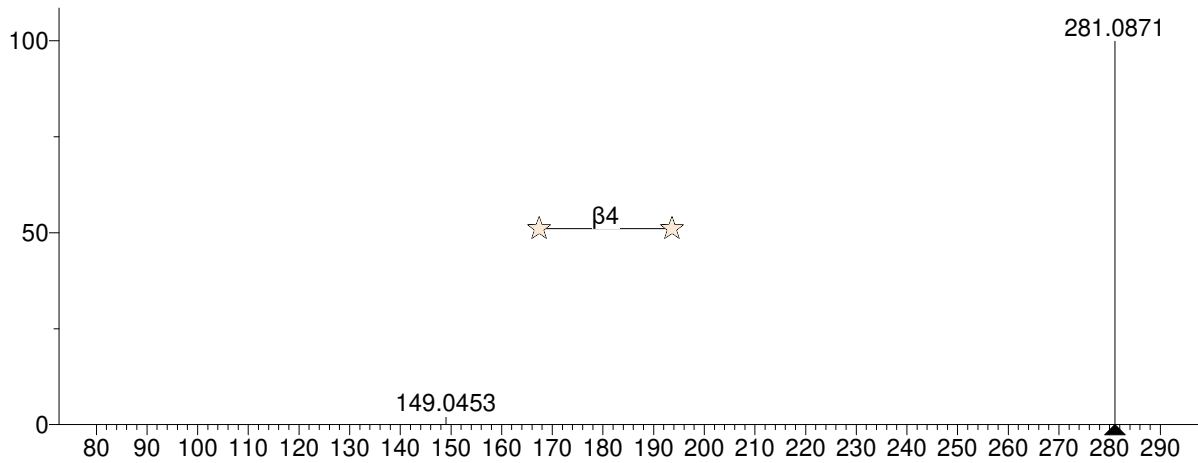

Hit 5 : NCGC00380761-01\_C<sub>11</sub>H<sub>14</sub>N<sub>4</sub>O<sub>5</sub>\_6H-Purin-6-one, 1,9-dihydro-9-(3-O-methylpentofuranosyl)- [M-H]- P:  
C<sub>11</sub>H<sub>14</sub>N<sub>4</sub>O<sub>5</sub>; MF: 155; RMF: 575; Prob 4.49%; Lib: mona-export-gnps; ID: 13281.

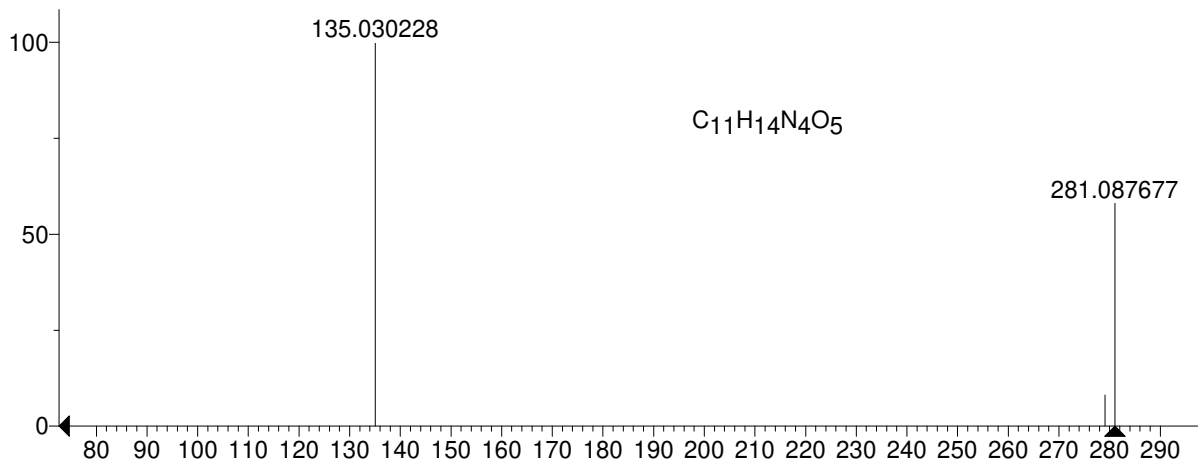

Unknown: Unknown (7.73\_400.1704m/z)  
Compound in Library Factor = 0

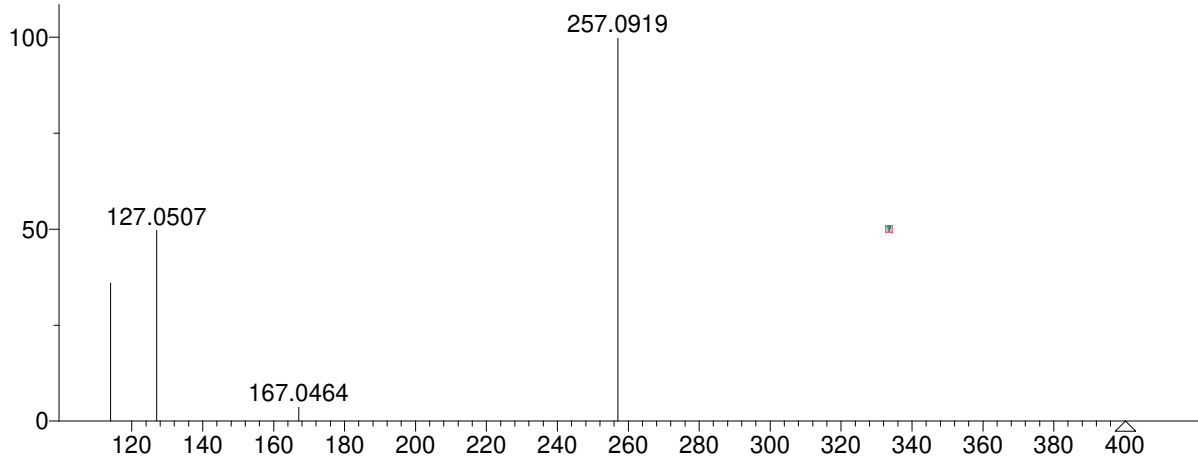

Hit 1 : 7-Hydroxyquetiapine [M+H]<sup>+</sup> HCD 128V P=400.2  
C<sub>21</sub>H<sub>25</sub>N<sub>3</sub>O<sub>3</sub>S; MF: 0; RMF: 106; Prob 50.0%; CAS: 139079-39-3; Lib: nist\_msms; ID: 324168.

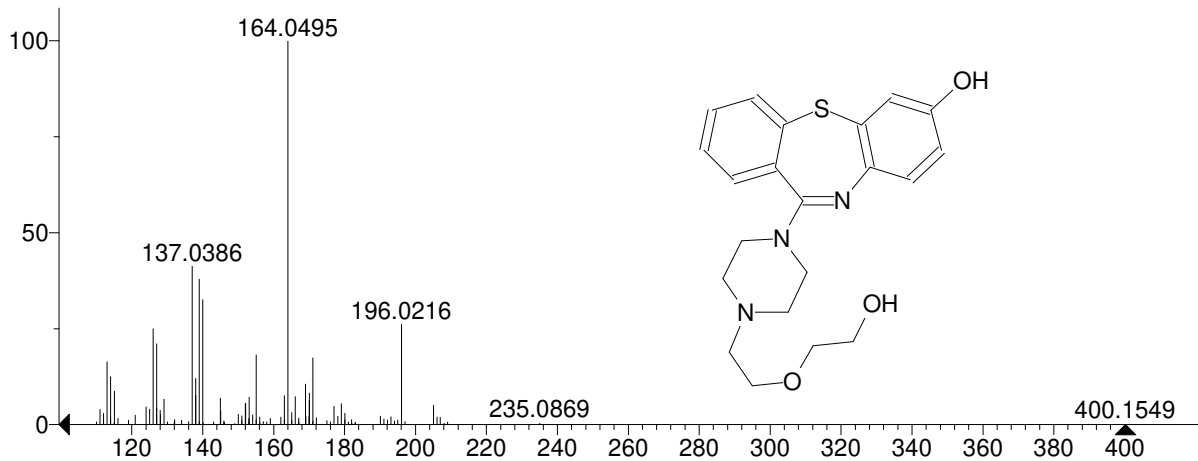

Hit 2 : Quetiapine sulfoxide [M+H]<sup>+</sup> HCD 128V P=400.2  
C<sub>21</sub>H<sub>25</sub>N<sub>3</sub>O<sub>3</sub>S; MF: 0; RMF: 61; Prob 50.0%; CAS: 329216-63-9; Lib: nist\_msms; ID: 452545.

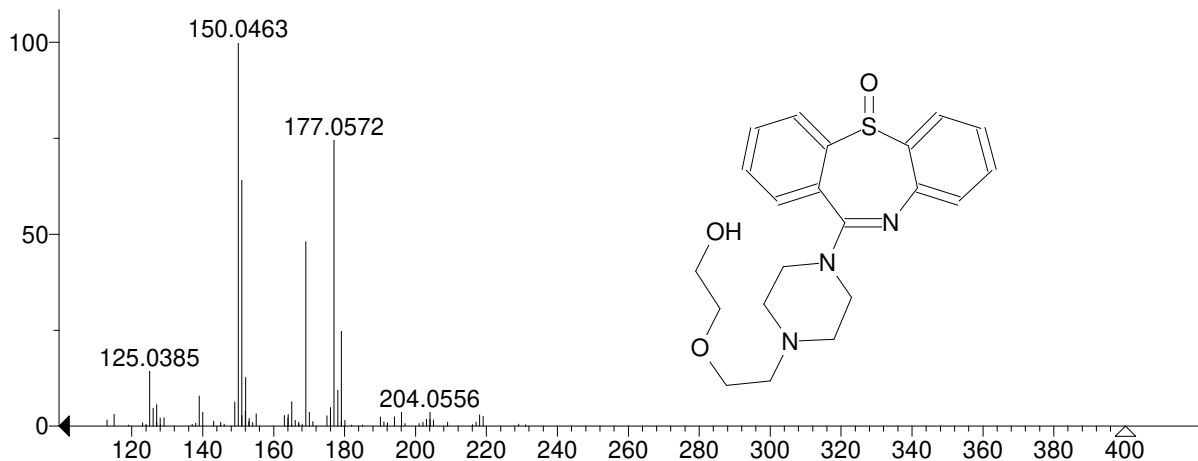

Unknown: Unknown (7.73\_419.0634m/z)  
Compound in Library Factor = 0

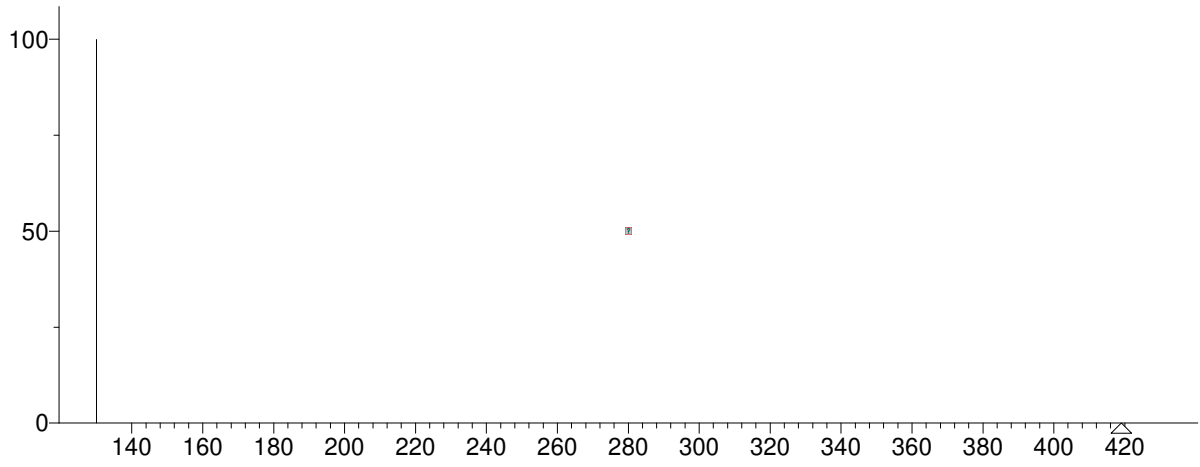

Unknown: Unknown (7.75\_327.1327m/z)  
Compound in Library Factor = 0

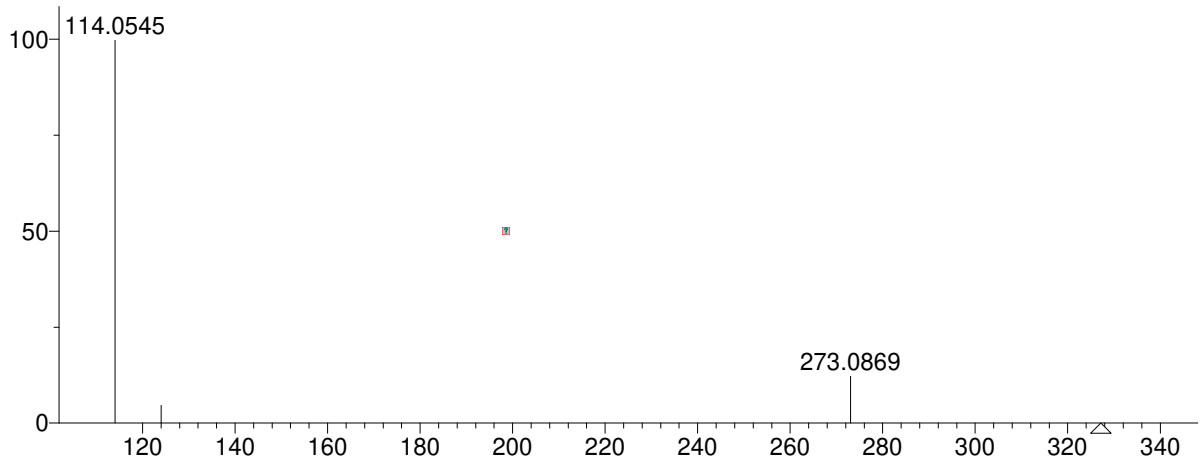

Unknown: Unknown (7.75\_403.1614m/z)  
Compound in Library Factor = -2387

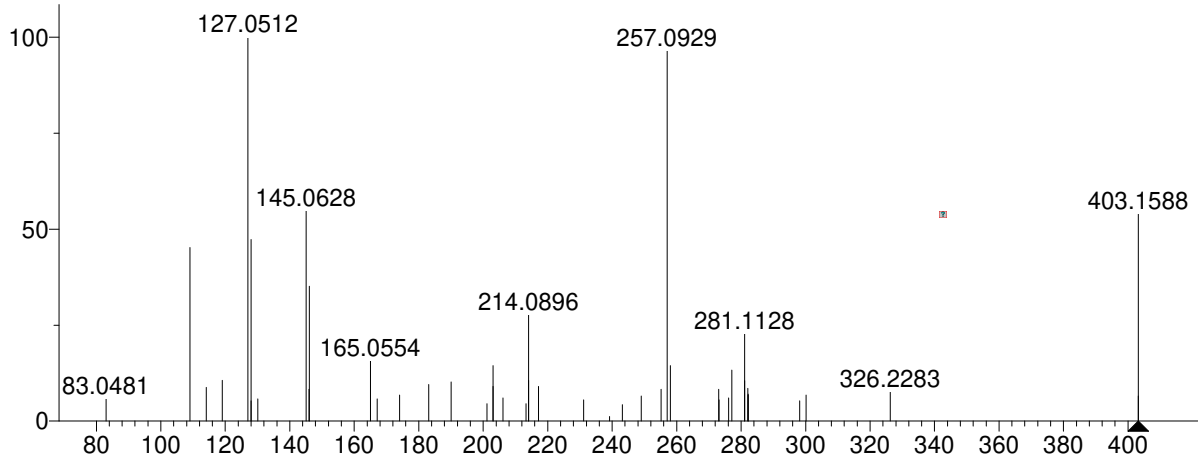

Hit 1 : C<sub>18</sub>H<sub>28</sub>O<sub>10</sub>; PlaSMA ID-1025 [M-H]<sup>-</sup> P=403.2  
C<sub>18</sub>H<sub>28</sub>O<sub>10</sub>; MF: 15; RMF: 247; Prob 44.1%; Lib: biomsms-neg-plasma; ID: 839.

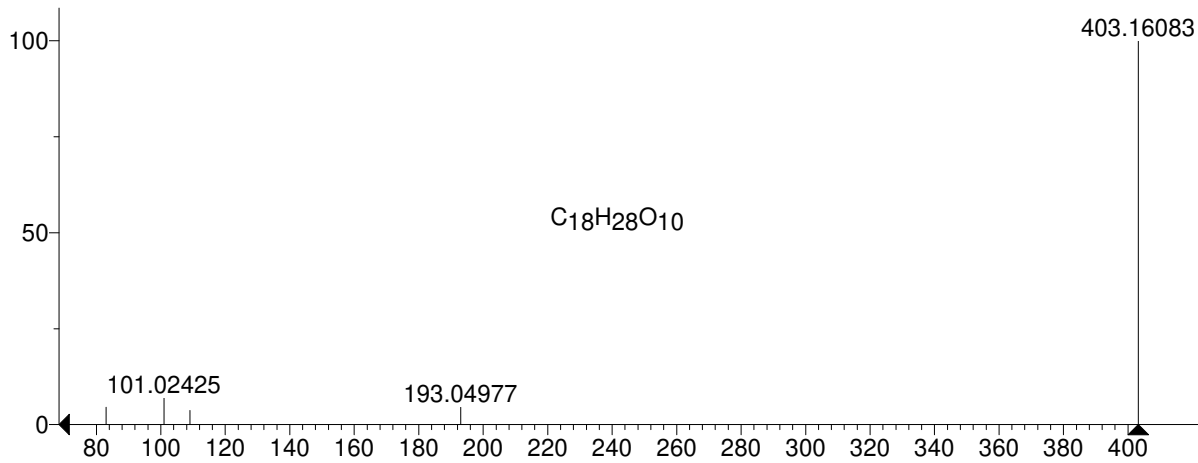

Hit 2 : (Z)-3-(4-hydroxyphenyl)-N-[4-[[*E*]-3-(4-hydroxyphenyl)prop-2-enoyl]amino]butyl]prop-2-enamide [M+Na]<sup>+</sup>  
C<sub>22</sub>H<sub>24</sub>N<sub>2</sub>O<sub>4</sub>; MF: 2; RMF: 225; Prob 28.5%; Lib: mona-export-vf-npl\_qexactive; ID: 17140.

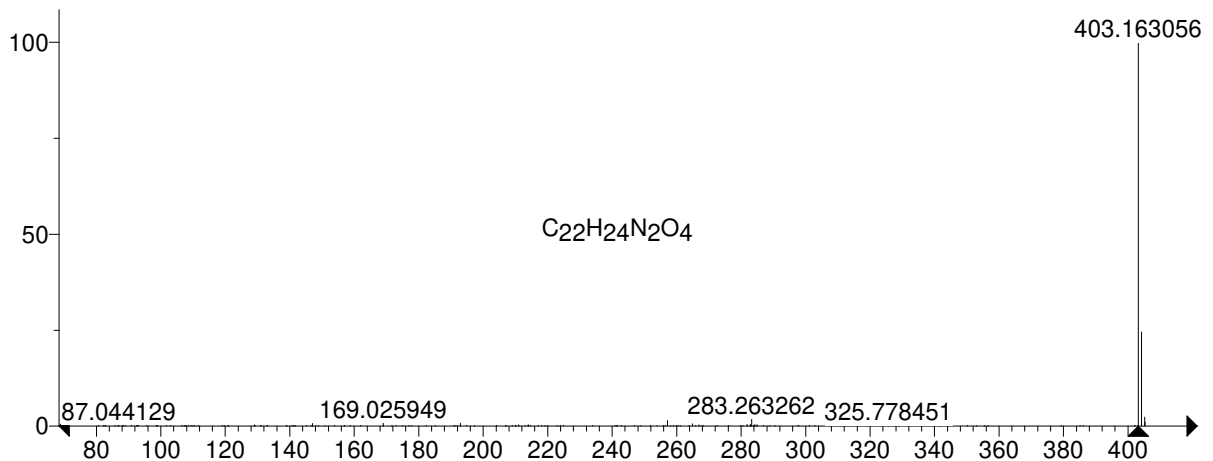

Hit 3 : 12:4+4O fatty acyl hexoside; PlaSMA ID-1026 [M-H]<sup>-</sup> P=403.2  
C<sub>18</sub>H<sub>28</sub>O<sub>10</sub>; MF: 1; RMF: 204; Prob 27.4%; Lib: biomsms-neg-plasma; ID: 674.

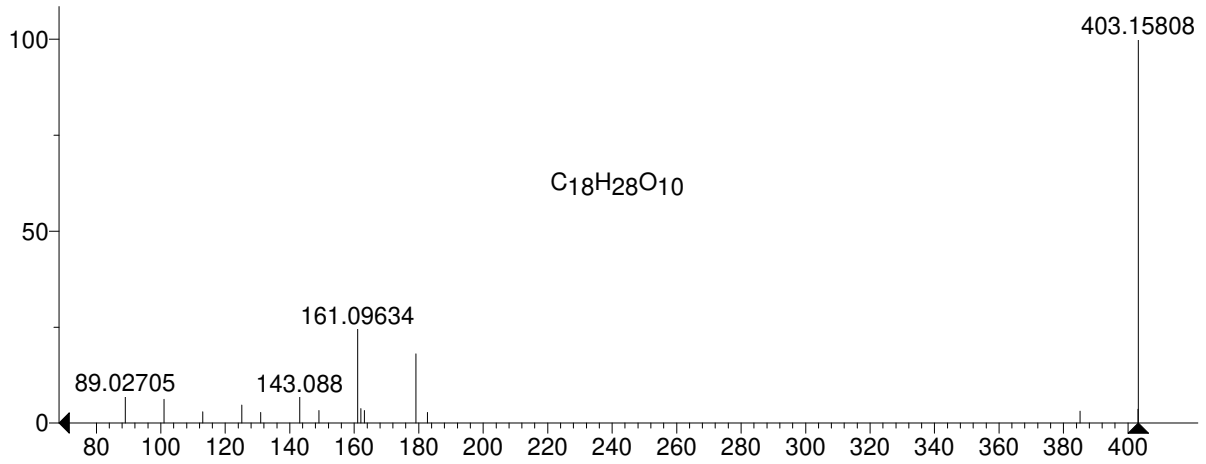



Unknown: Unknown (7.76\_579.2575m/z)  
Compound in Library Factor = 0

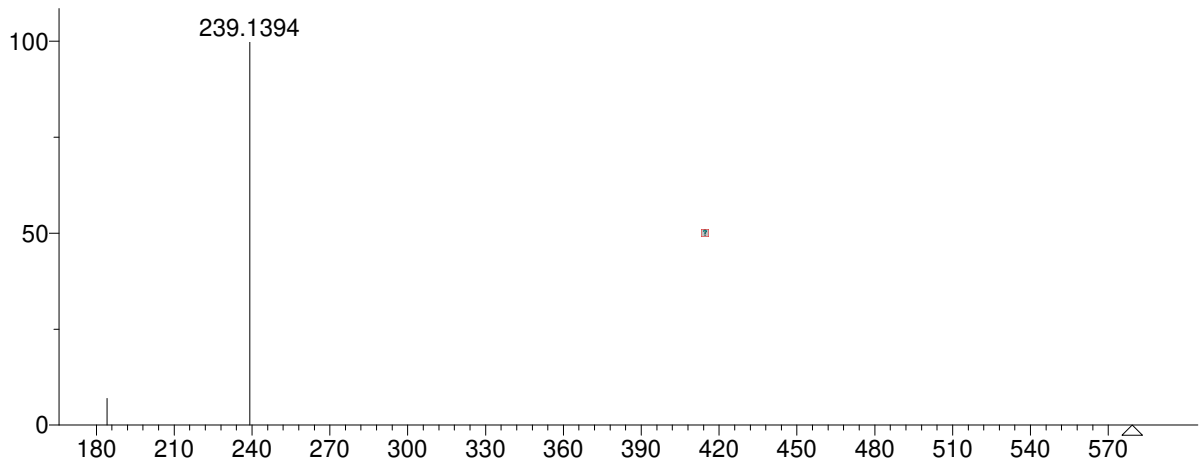

Unknown: Unknown (7.76\_990.5013m/z)  
Compound in Library Factor = 0

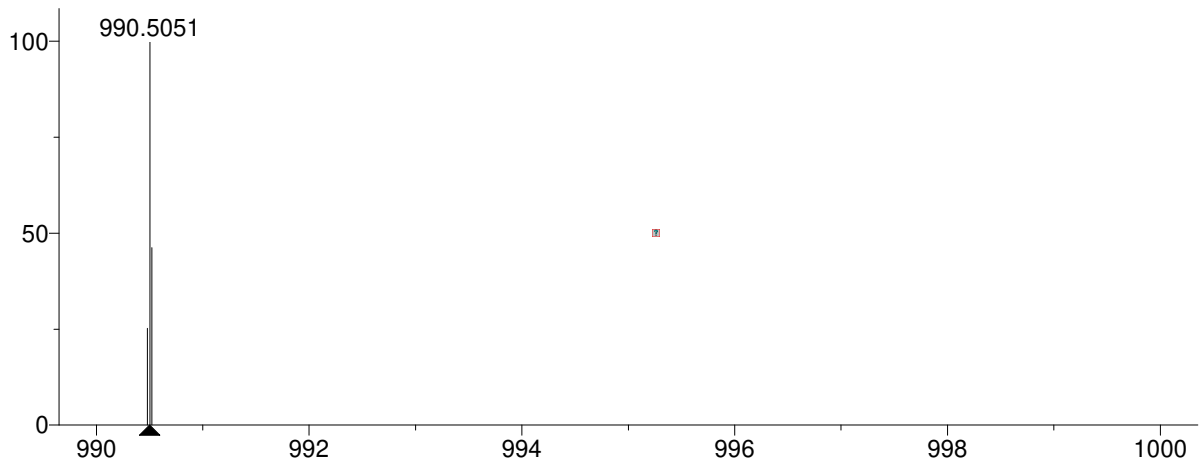

Unknown: Unknown (7.77\_298.1396m/z)  
Compound in Library Factor = -3273

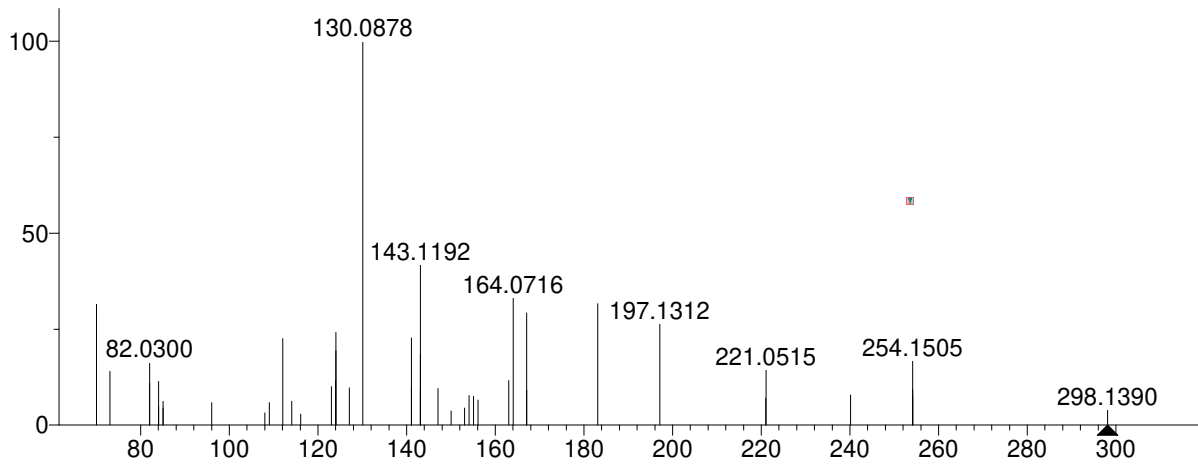

Hit 1 : Noratropine [M+Na]<sup>+</sup> HCD 8V P=298.1  
C<sub>16</sub>H<sub>21</sub>NO<sub>3</sub>; MF: 1; RMF: 77; Prob 100.0%; CAS: 16839-98-8; Lib: nist\_msms; ID: 197150.

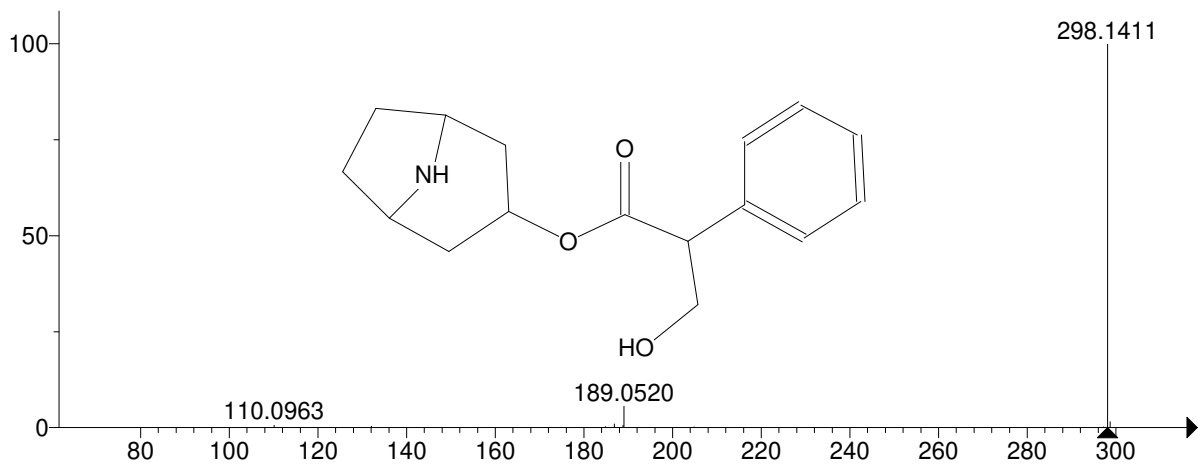

Unknown: Unknown (7.77\_388.1502m/z)  
Compound in Library Factor = 0

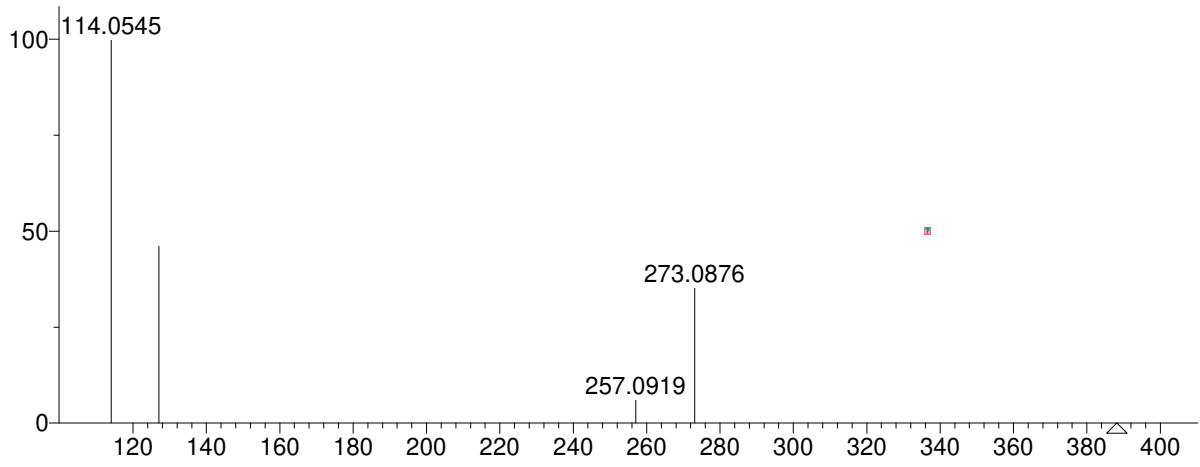

Unknown: Unknown (7.77\_542.2090m/z)  
Compound in Library Factor = 0

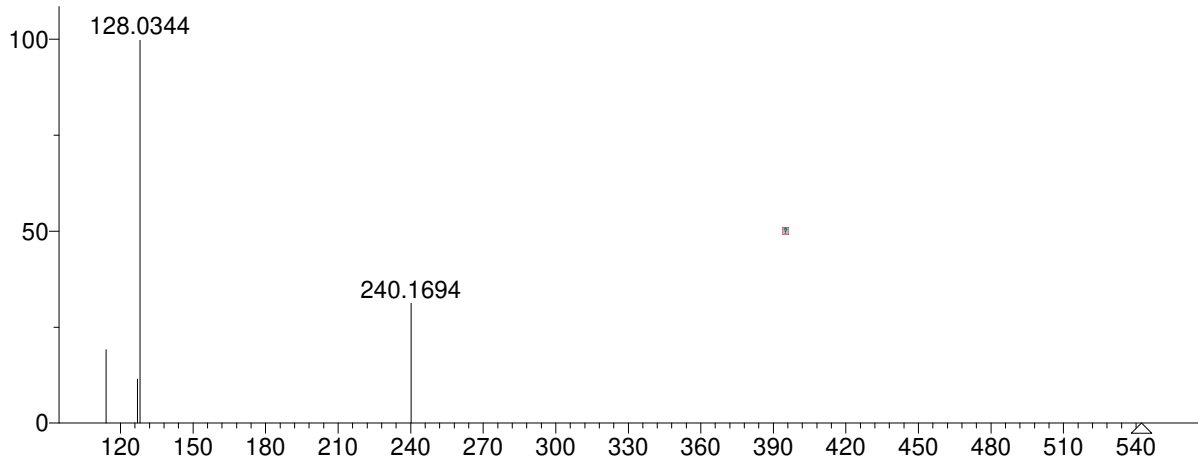

Unknown: Unknown (7.78\_348.1441m/z)  
Compound in Library Factor = 0

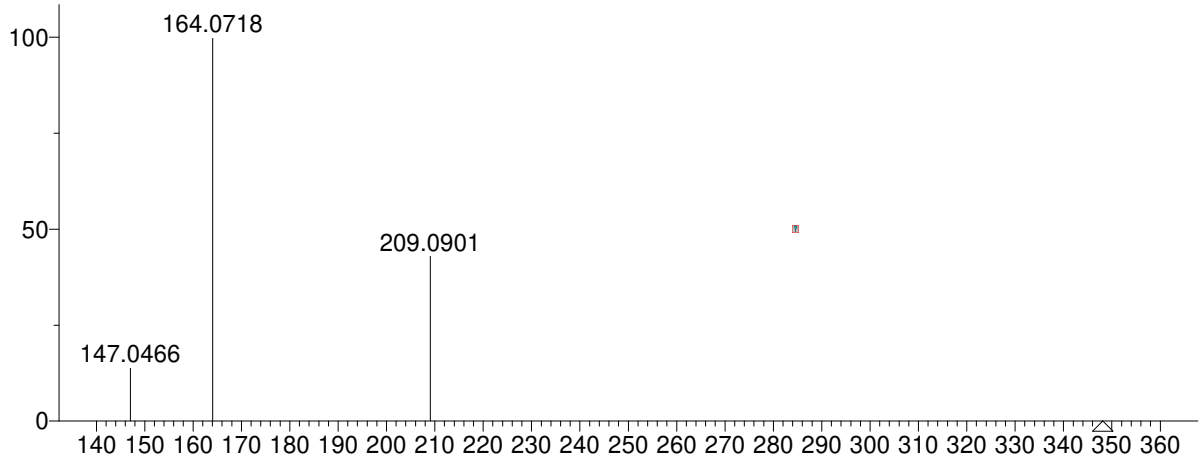

Hit 1 : 4,5-dihydroxy-4,5,6-trimethyl-2,8-dioxo-13-azatricyclo[8.5.1.0A<sup>1</sup>A<sup>3</sup>,A<sup>1</sup>a<sup>1</sup>P]hexadec-10-ene-3,7-dione  
C<sub>16</sub>H<sub>23</sub>NO<sub>6</sub>; MF: 0; RMF: 76; Prob 50.0%; Lib: mona-export-vf-npl\_qexactive; ID: 24612.

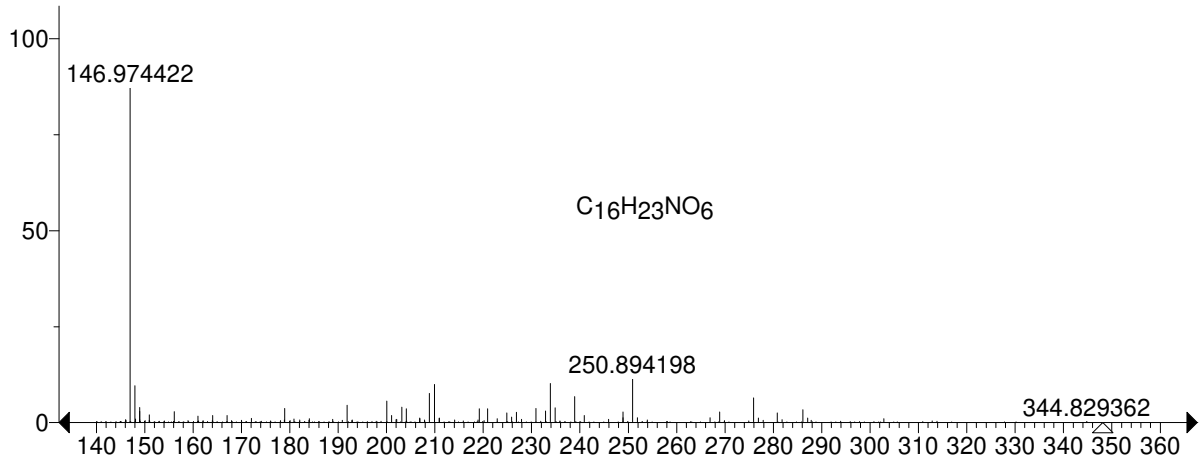

Hit 2 : Nafamostat mesylate [M+H]<sup>+</sup> P=348.1  
C<sub>21</sub>H<sub>25</sub>N<sub>5</sub>O<sub>8</sub>S<sub>2</sub>; MF: 0; RMF: 43; Prob 50.0%; Lib: mona-export-gnps; ID: 457.

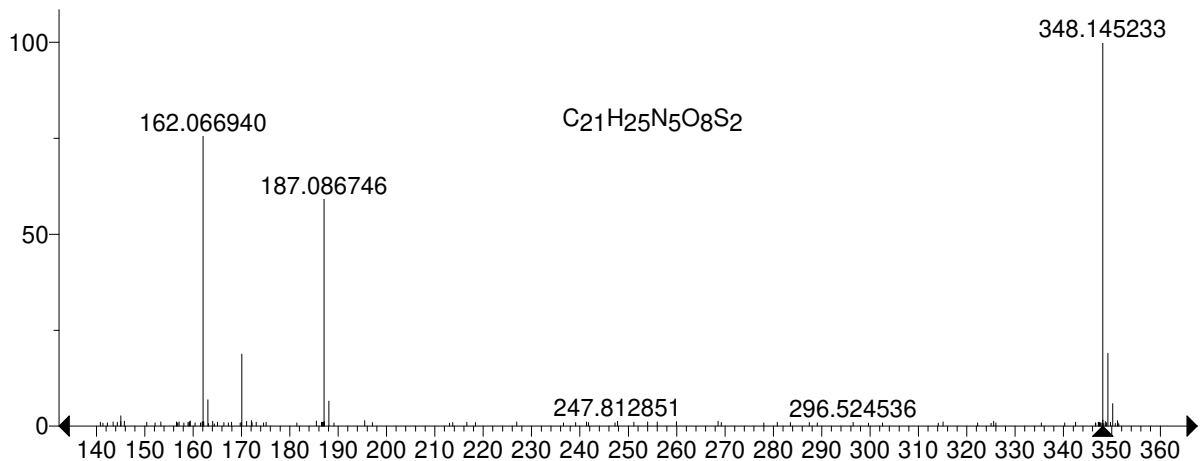

Unknown: Unknown (7.79\_364.1623m/z)  
Compound in Library Factor = -3273

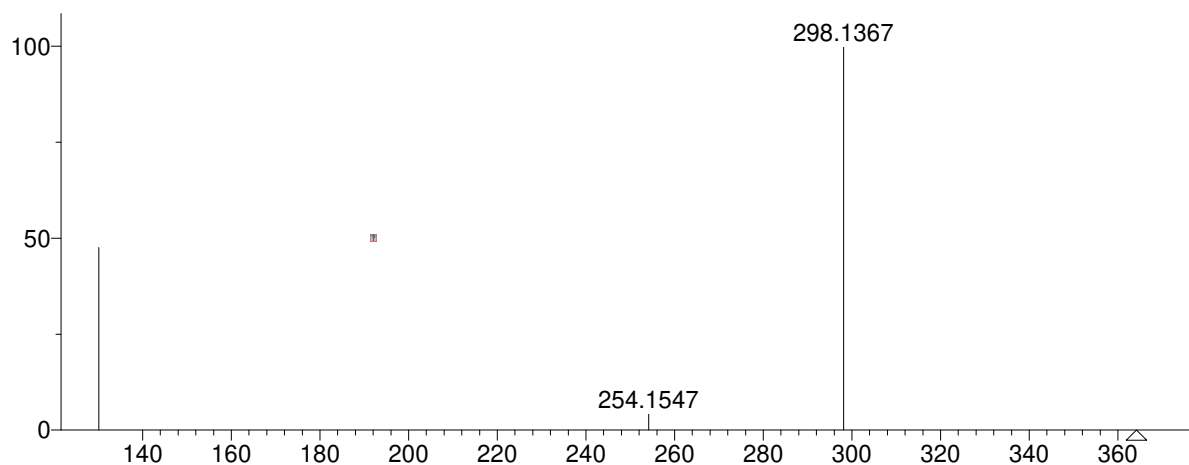

Hit 1 : Asn-Cys-Lys [M+H]<sup>+</sup> QTOF 40V P=364.2  
C<sub>13</sub>H<sub>25</sub>N<sub>5</sub>O<sub>5</sub>S; MF: 13; RMF: 382; Prob 33.4%; Lib: nist\_msms; ID: 52440.

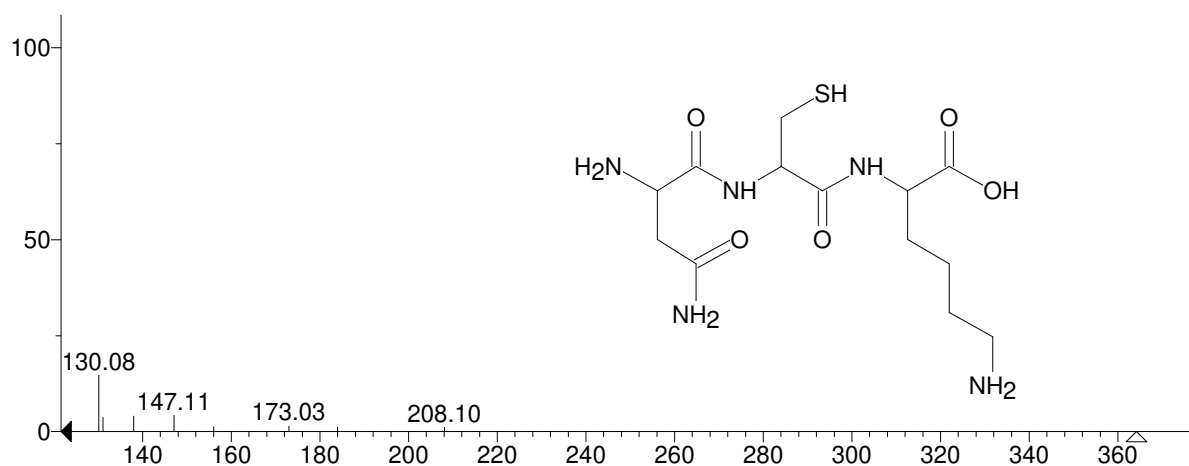

Hit 2 : Cys-Asn-Lys [M+H]<sup>+</sup> QTOF 40V P=364.2  
C<sub>13</sub>H<sub>25</sub>N<sub>5</sub>O<sub>5</sub>S; MF: 7; RMF: 259; Prob 26.3%; Lib: nist\_msms; ID: 49672.

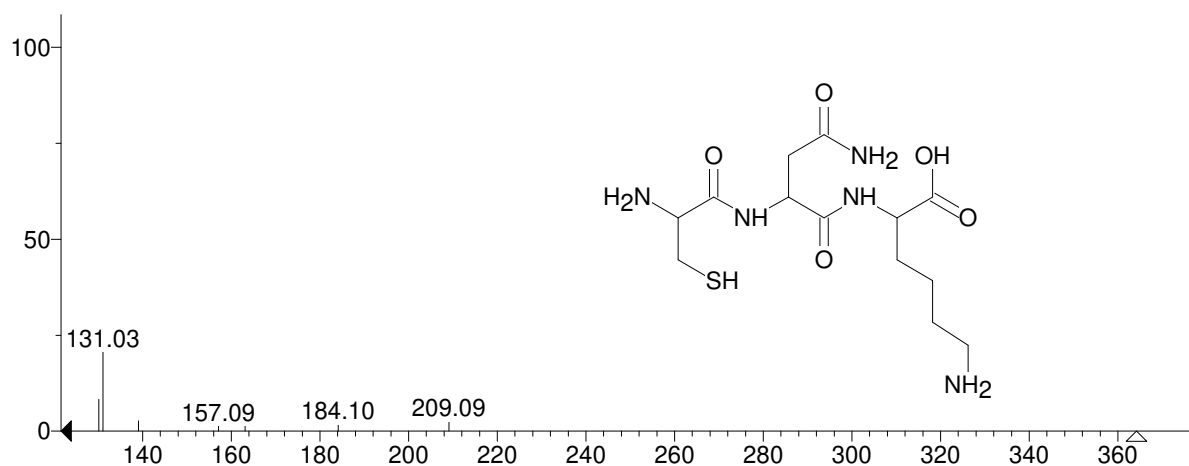

Hit 3 : aucubin [M+NH4]<sup>+</sup> 45HCD P=364.2  
C<sub>15</sub>H<sub>22</sub>O<sub>9</sub>; MF: 0; RMF: 19; Prob 20.1%; Lib: mona-export-vf-npl\_qexactive; ID: 3773.

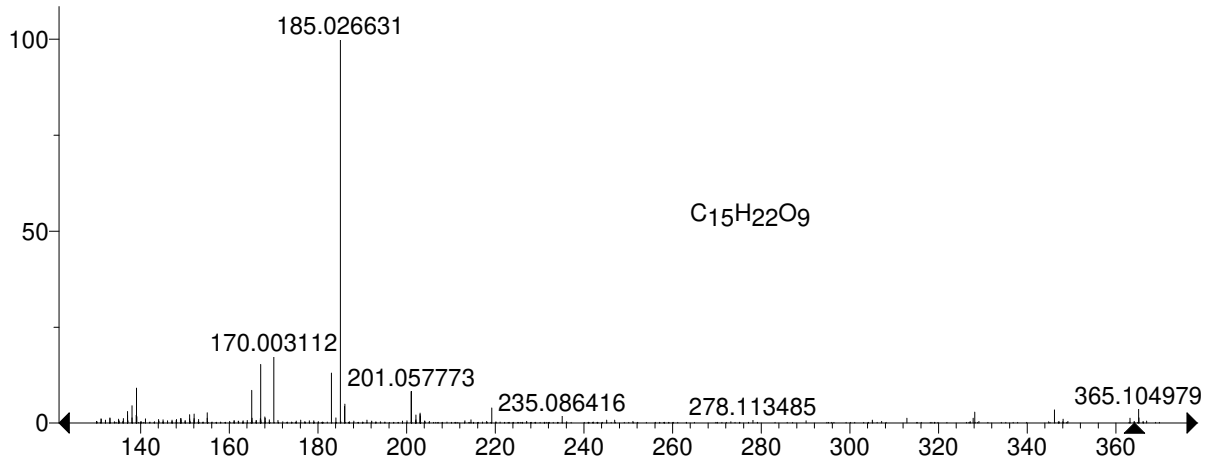

Hit 4 : (2R,3S,4S,5R,6S)-2-(hydroxymethyl)-6-(3,4,5-trimethoxyphenoxy)oxane-3,4,5-triol [M+NH4]<sup>+</sup> 45HCD P=  
C<sub>15</sub>H<sub>22</sub>O<sub>9</sub>; MF: 0; RMF: 12; Prob 20.1%; Lib: mona-export-vf-npl\_qexactive; ID: 9872.

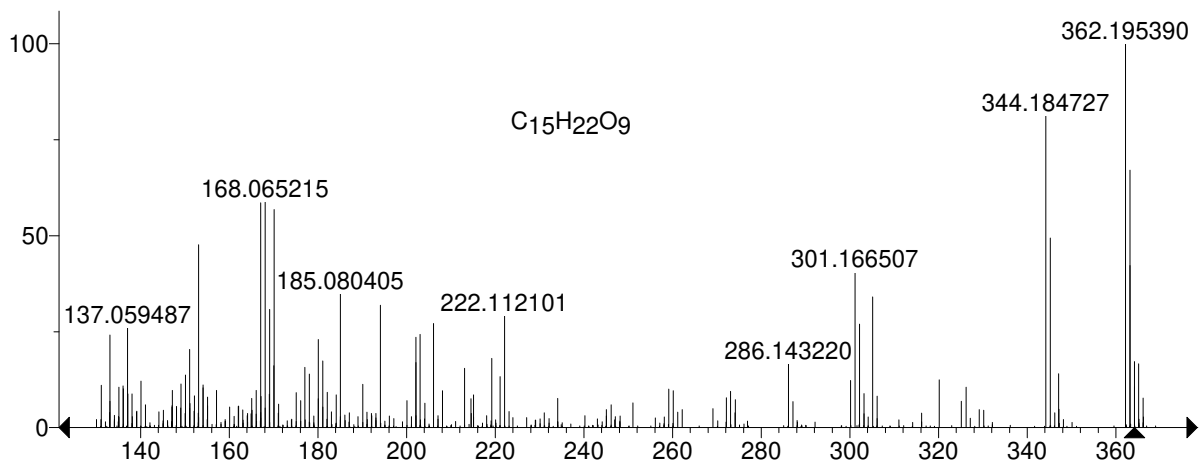



Unknown: Unknown (7.80\_240.1710m/z)  
Compound in Library Factor = 0

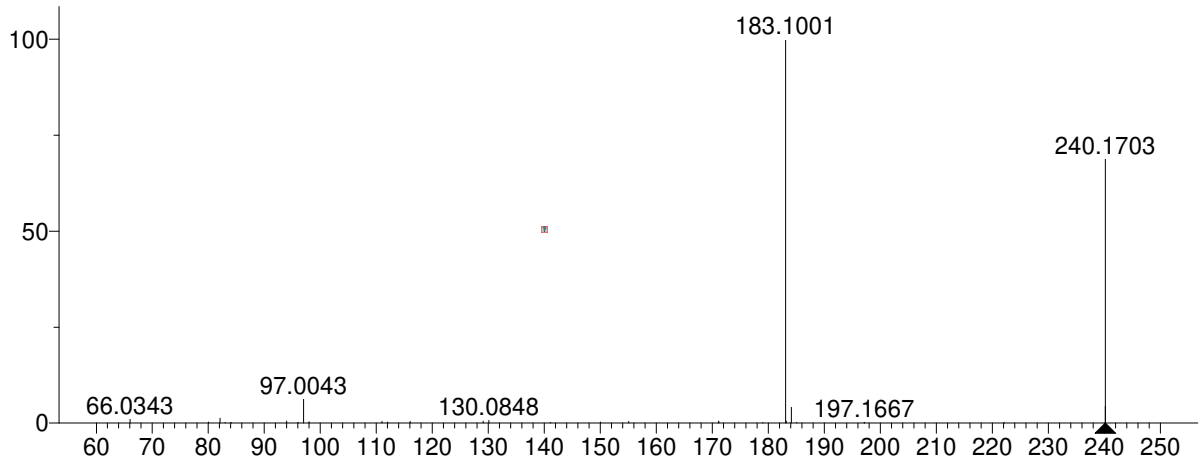

Unknown: Unknown (7.81\_284.1970m/z)  
Compound in Library Factor = 0

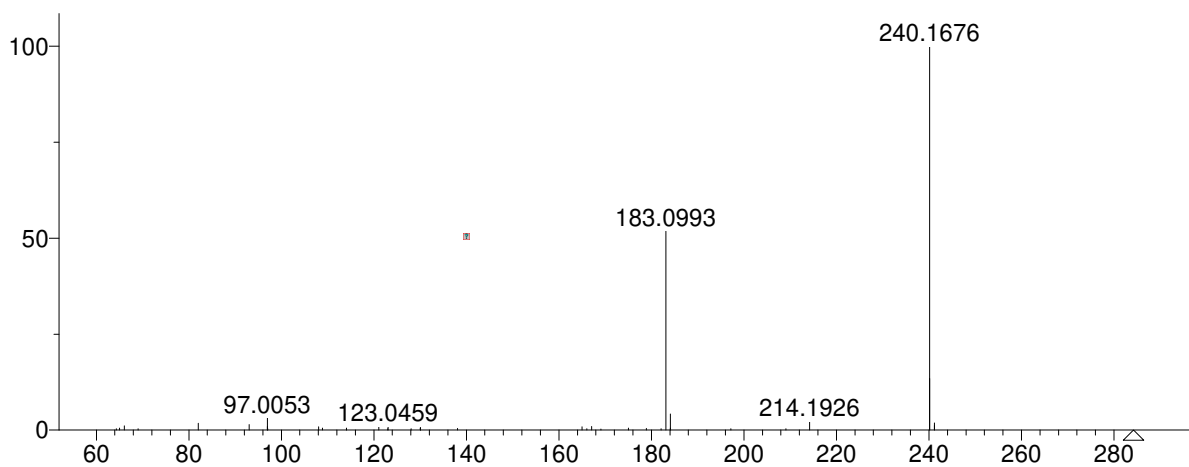

Hit 1 : Dodecyl phosphate [M+NH4]<sup>+</sup> QQQ 7V P=284.2  
C<sub>12</sub>H<sub>27</sub>O<sub>4</sub>P; MF: 0; RMF: 2; Prob 100.0%; CAS: 2627-35-2; Lib: nist\_msms; ID: 180585.

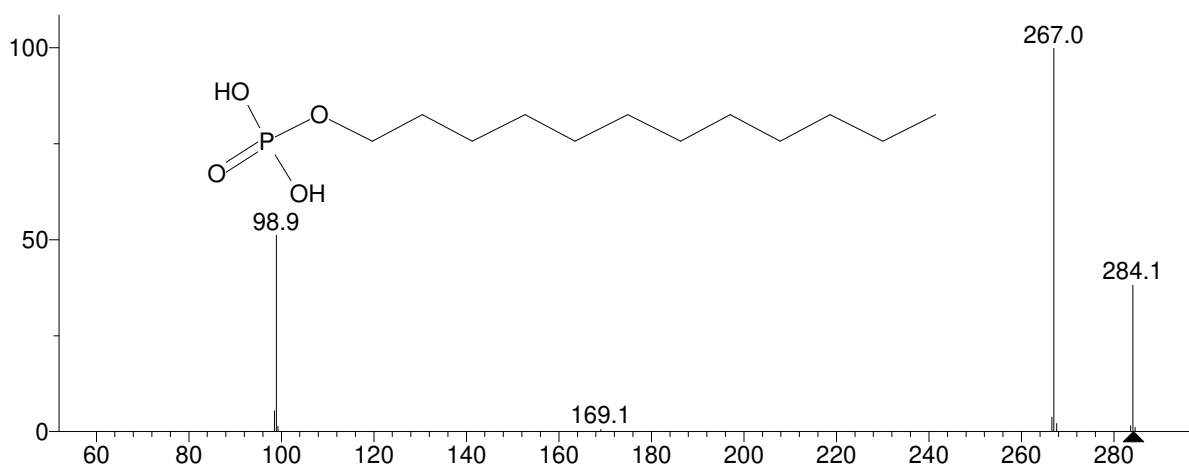

Unknown: Unknown (7.81\_328.1502m/z)  
Compound in Library Factor = 0

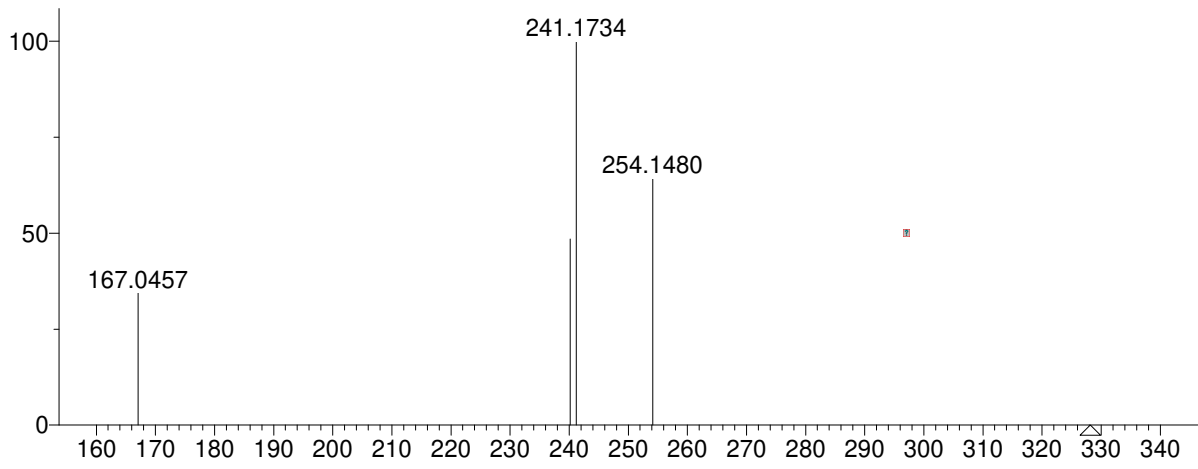

\*\* Search Report Page 1 of 1 \*\*

Unknown: Unknown (7.81\_410.1447m/z)  
Compound in Library Factor = 0

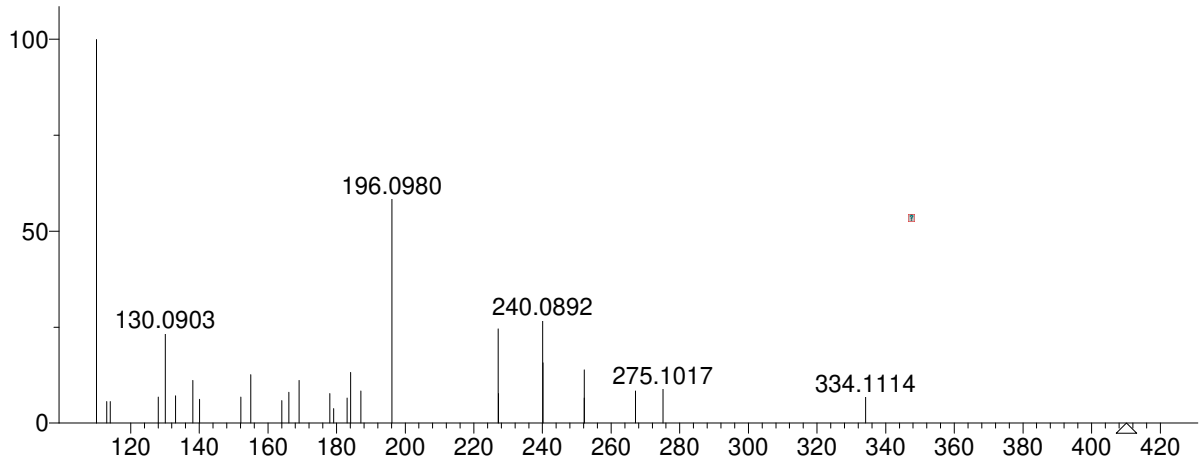

Hit 1 : NCGC00179757-02![(2R,3S,4S,5R,6S)-3,4,5-trihydroxy-6-(4-hydroxyphenoxy)oxan-2-yl]methyl 4-hydroxyb  
C19H20O9; MF: 0; RMF: 15; Prob 50.0%; Lib: mona-export-gnps; ID: 9157.

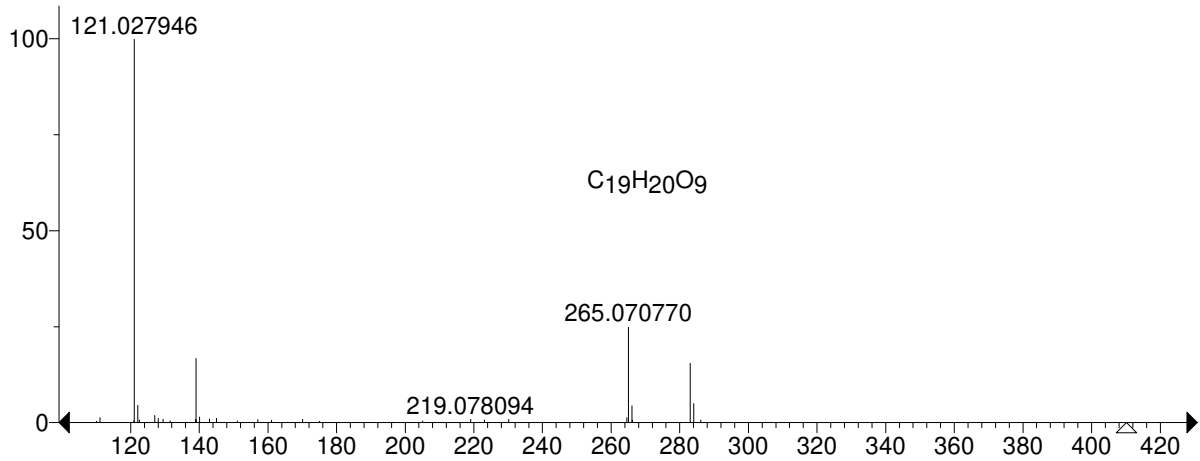

Hit 2 : Pemetrexed [M+H-H2O]<sup>+</sup> HCD 49V P=410.1  
C20H21N5O6; MF: 0; RMF: 3; Prob 50.0%; CAS: 137281-23-3; Lib: nist\_msms; ID: 349927.

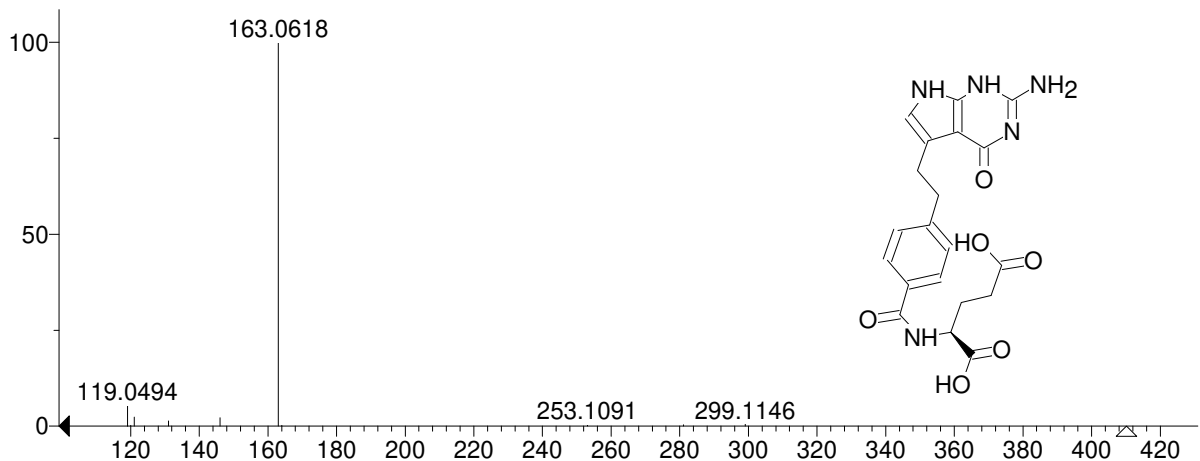

Unknown: Unknown (7.81\_606.2376m/z)  
Compound in Library Factor = 0

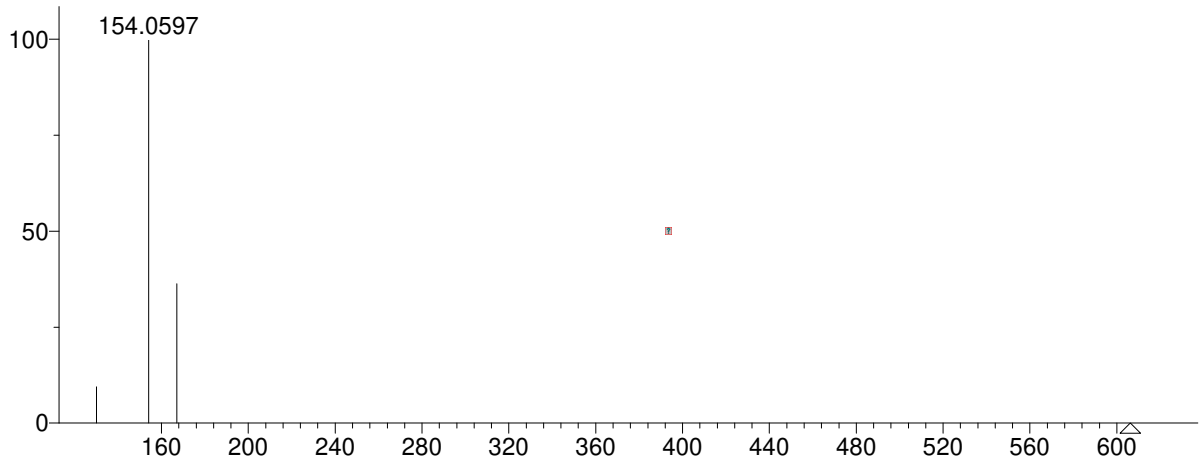

\*\* Search Report Page 1 of 2 \*\*

Unknown: Unknown (7.82\_628.3305m/z)  
Compound in Library Factor = -3273

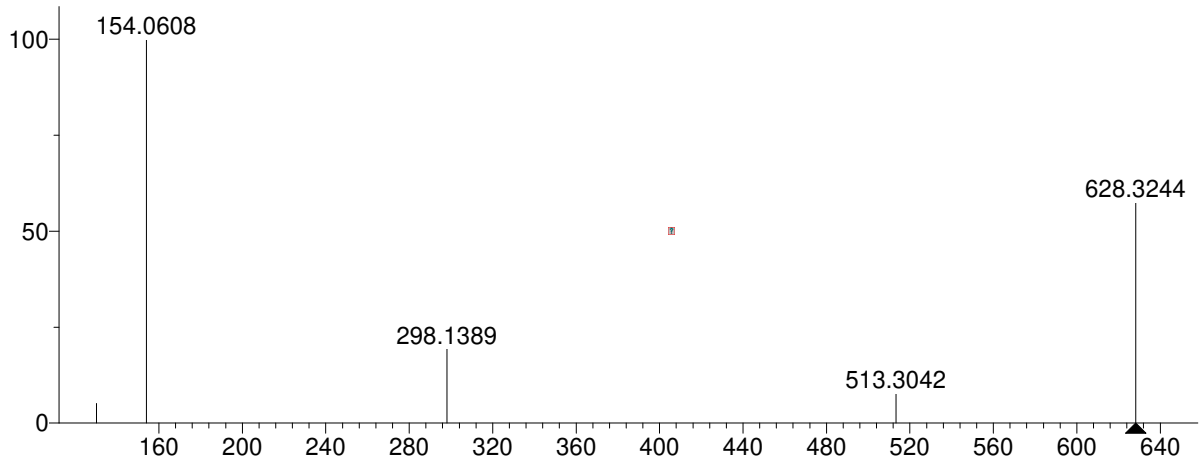

Hit 1 : PS 25:4; PS 9:0-16:4; [M-H]<sup>-</sup> [M-H]<sup>-</sup> P=628.3  
C<sub>31</sub>H<sub>52</sub>NO<sub>10</sub>P; MF: 6; RMF: 295; Prob 15.6%; Lib: msdial-insilicomsm-lipids-neg; ID: 330095.

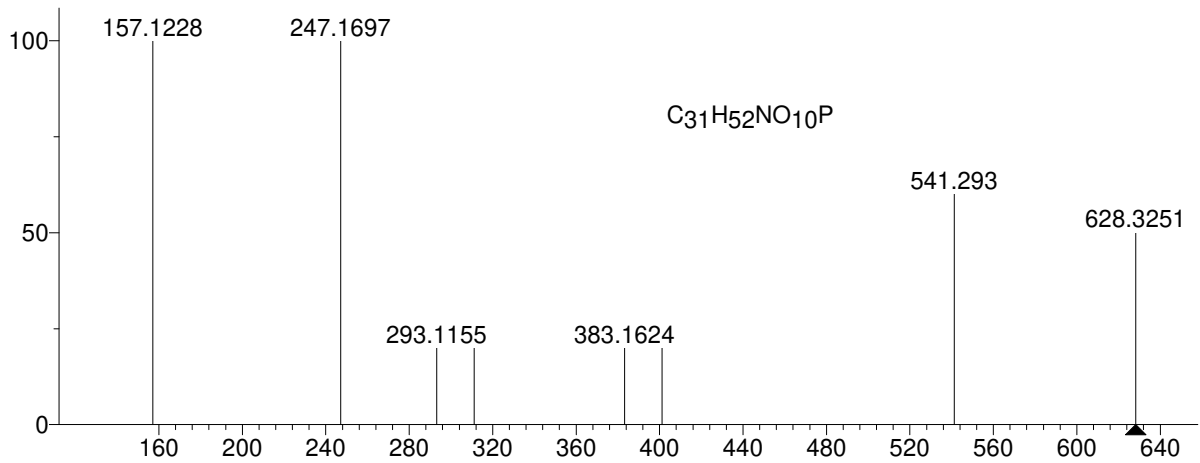

Hit 2 : PS 25:4; PS 3:0-22:4; [M-H]<sup>-</sup> [M-H]<sup>-</sup> P=628.3  
C<sub>31</sub>H<sub>52</sub>NO<sub>10</sub>P; MF: 4; RMF: 228; Prob 14.4%; Lib: msdial-insilicomsm-lipids-neg; ID: 329782.

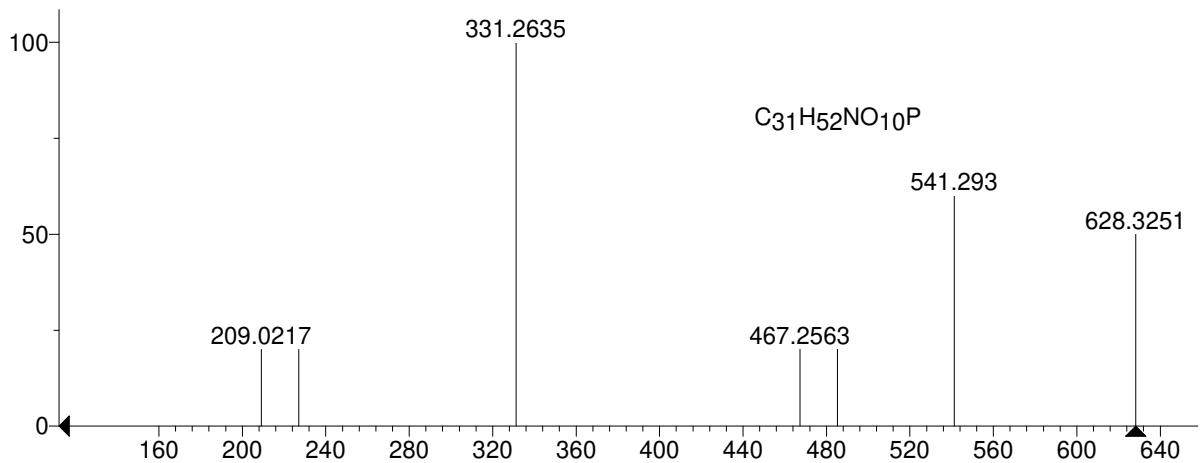

\*\* Search Report Page 2 of 2 \*\*

Hit 3 : PS 25:4; PS 5:0-20:4; [M-H]<sup>-</sup> [M-H]<sup>-</sup> P=628.3  
C<sub>31</sub>H<sub>52</sub>NO<sub>10</sub>P; MF: 4; RMF: 228; Prob 14.4%; Lib: msdial-insilicomsms-lipids-neg; ID: 329890.

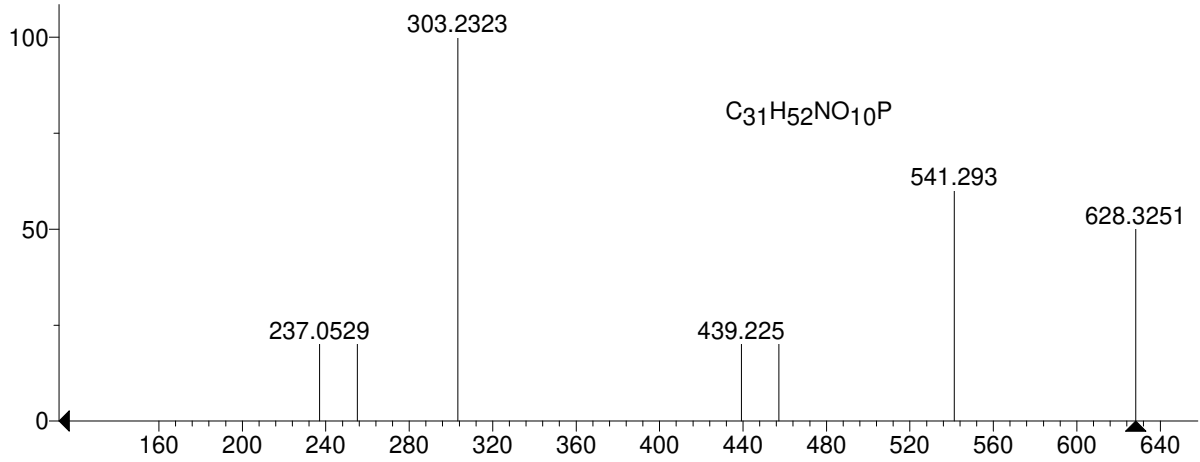

Hit 4 : PS 25:4; PS 7:0-18:4; [M-H]<sup>-</sup> [M-H]<sup>-</sup> P=628.3  
C<sub>31</sub>H<sub>52</sub>NO<sub>10</sub>P; MF: 4; RMF: 228; Prob 14.4%; Lib: msdial-insilicomsms-lipids-neg; ID: 329994.

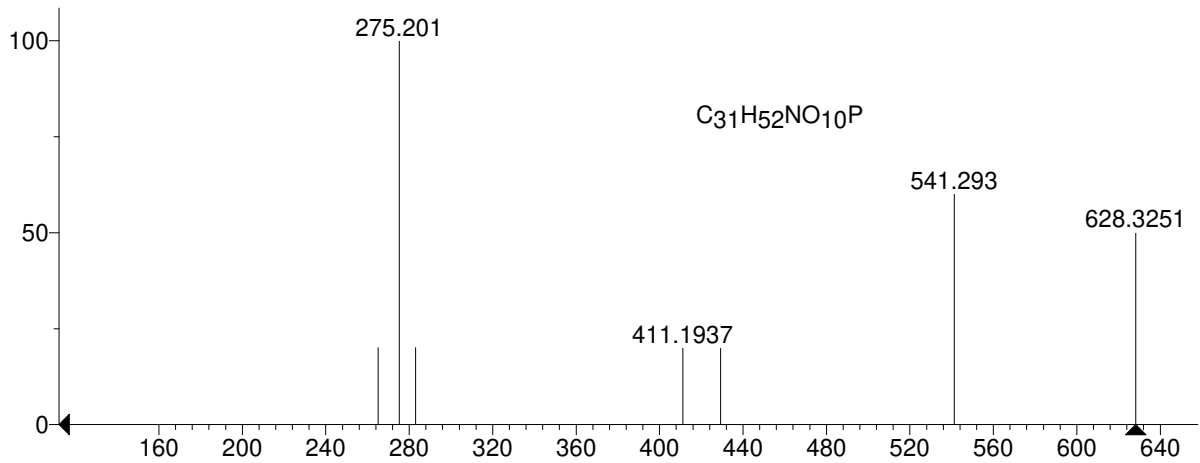

Hit 5 : PC 22:5; PC 2:0-20:5; [M+FA-H]<sup>-</sup> [M+FA-H]<sup>-</sup> P=628.3  
C<sub>30</sub>H<sub>50</sub>NO<sub>8</sub>P; MF: 3; RMF: 170; Prob 13.8%; Lib: msdial-insilicomsms-lipids-neg; ID: 317606.

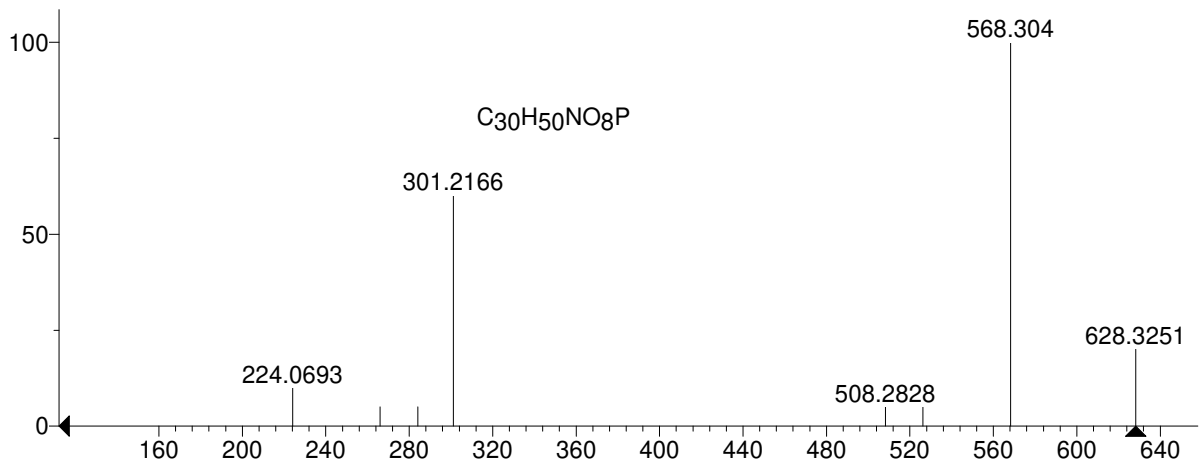

Unknown: Unknown (7.84\_279.0169m/z)  
Compound in Library Factor = 0

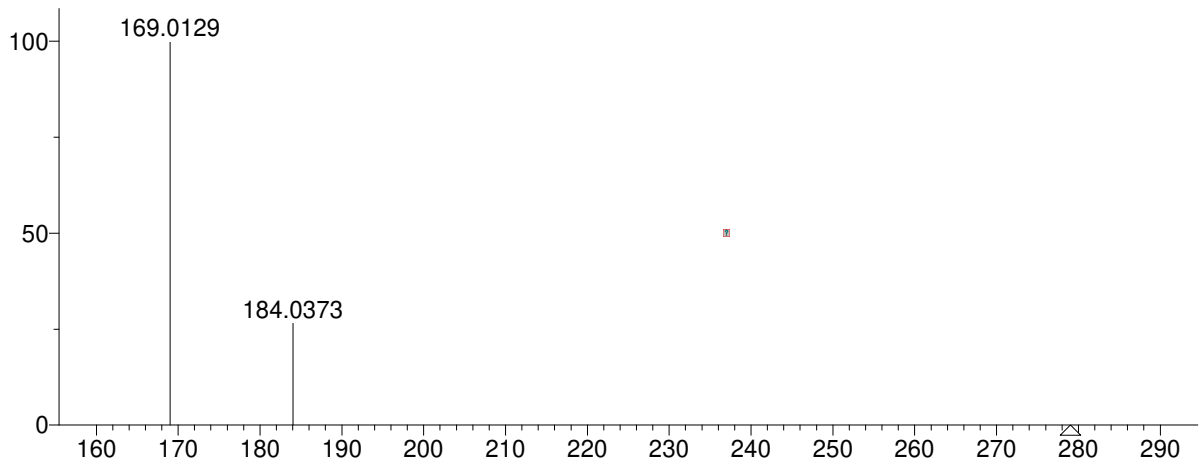



Unknown: Unknown (7.85\_324.1538m/z)  
Compound in Library Factor = 0

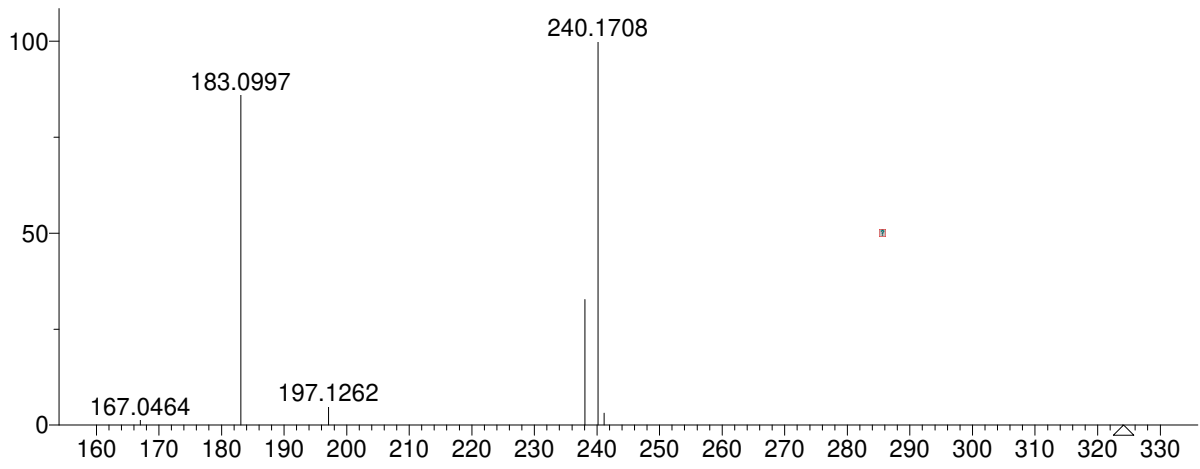

Unknown: Unknown (7.85\_357.1631m/z)  
Compound in Library Factor = 0

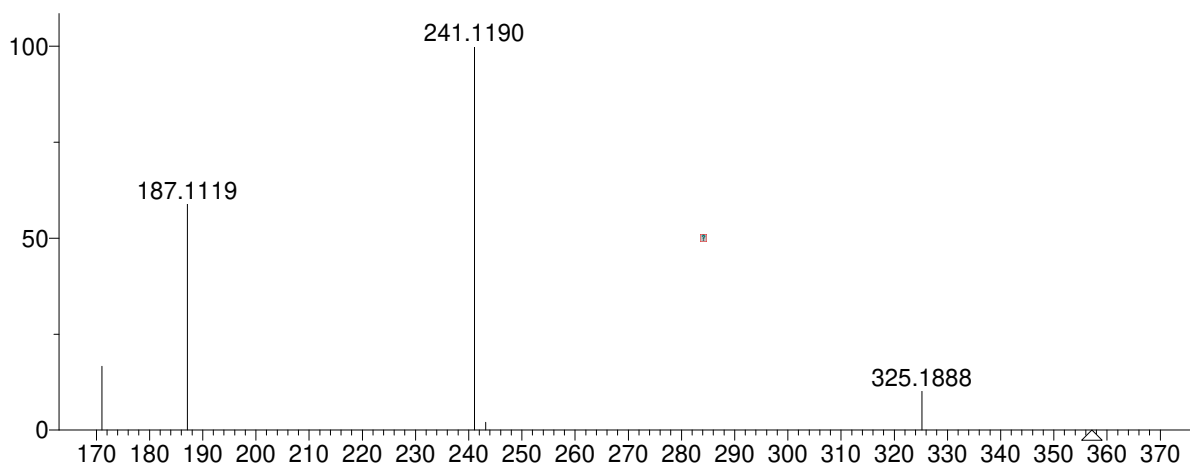

Hit 1 : NCGC00381117-01!2-amino-4-hydroxy-5-[[1-(4-methoxy-6-oxopyran-2-yl)-3-methylbutyl]amino]-5-oxopent:  
C<sub>16</sub>H<sub>24</sub>N<sub>2</sub>O<sub>7</sub>; MF: 0; RMF: 28; Prob 100.0%; Lib: mona-export-gnps; ID: 8549.

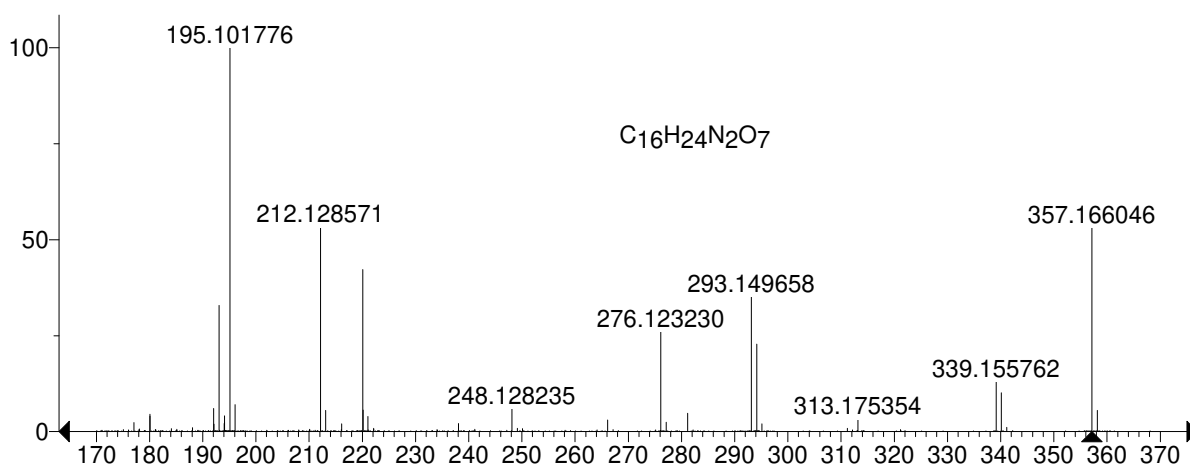

\*\* Search Report Page 1 of 2 \*\*

Unknown: Unknown (7.85\_369.1771m/z)  
Compound in Library Factor = -2387

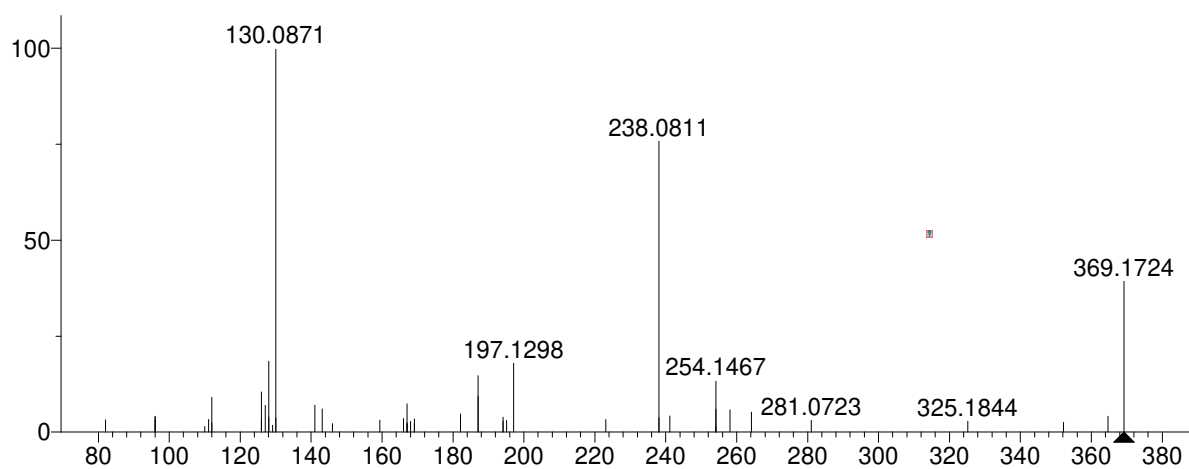

Hit 1 : 5-Androsten-3 $\beta$ ,17 $\beta$ -diol-3-sulfate [M-H]<sup>-</sup> HCD 27V P=369.2  
C<sub>19</sub>H<sub>30</sub>O<sub>5</sub>S; MF: 24; RMF: 274; Prob 19.5%; CAS: 977-33-3; Lib: nist\_msms; ID: 231655.

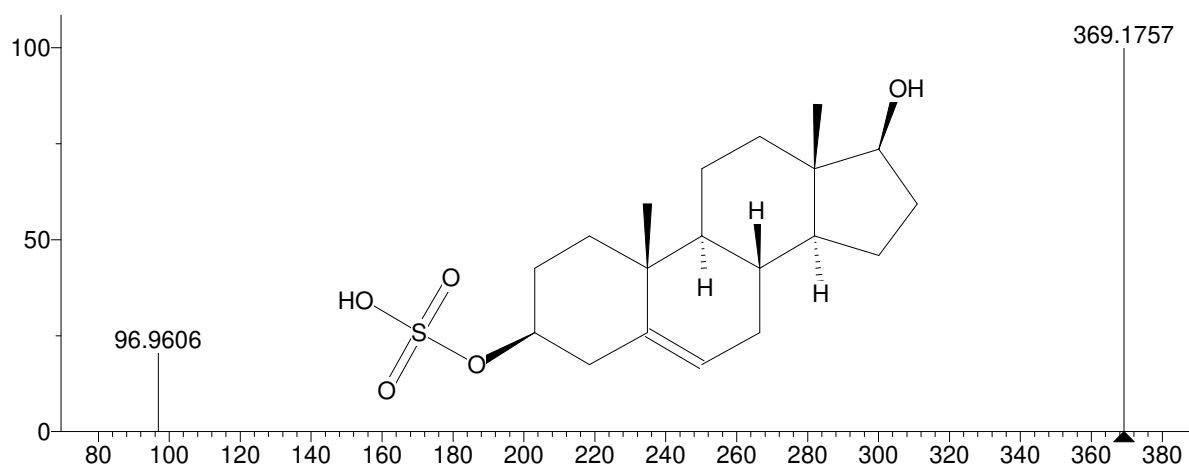

Hit 2 : 5 $\beta$ -Androstan-3 $\alpha$ -ol-17-one sulfate [M-H]<sup>-</sup> HCD 33V P=369.2  
C<sub>19</sub>H<sub>30</sub>O<sub>5</sub>S; MF: 19; RMF: 266; Prob 15.7%; CAS: 977-36-6; Lib: nist\_msms; ID: 231644.

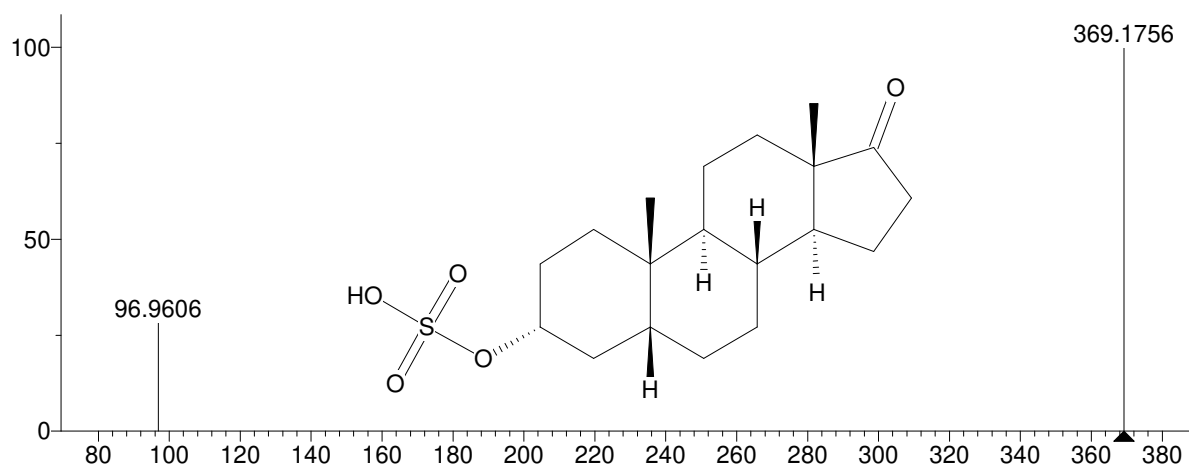

Hit 3 : 5 $\alpha$ -Androstan-3 $\beta$ -ol-17-one sulfate [M-H]<sup>-</sup> HCD 33V P=369.2  
C<sub>19</sub>H<sub>30</sub>O<sub>5</sub>S; MF: 18; RMF: 276; Prob 15.1%; CAS: 977-35-5; Lib: nist\_msms; ID: 231624.

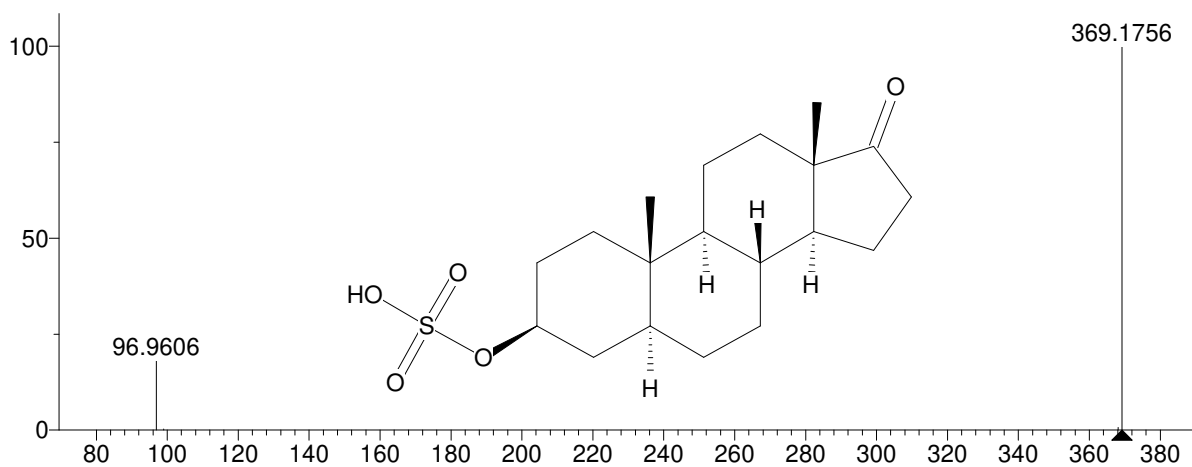

Hit 4 : 5 $\alpha$ -Androstan-17 $\beta$ -ol-3-one sulfate [M-H]<sup>-</sup> HCD 40V P=369.2  
C<sub>19</sub>H<sub>30</sub>O<sub>5</sub>S; MF: 18; RMF: 269; Prob 15.1%; CAS: 2641-48-7; Lib: nist\_msms; ID: 231920.

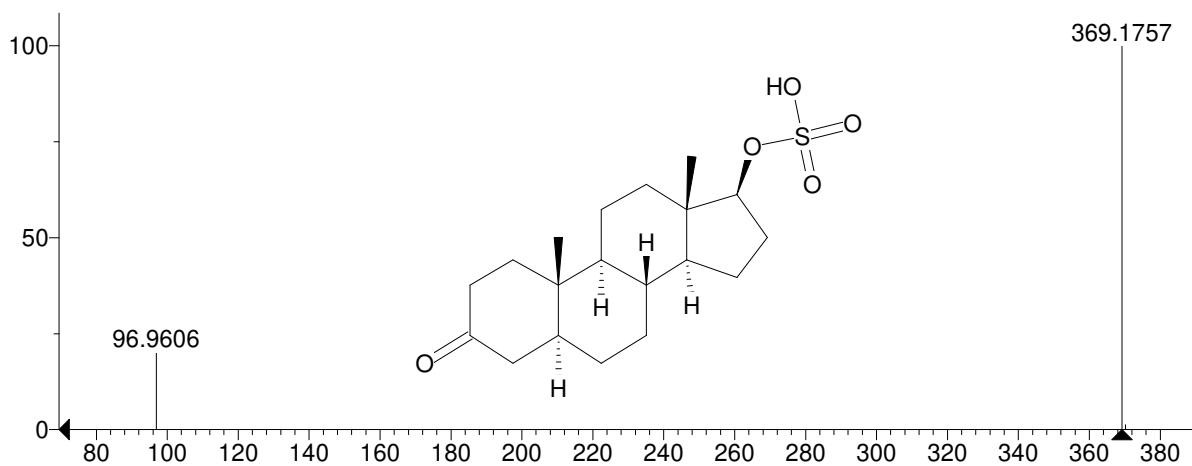

Hit 5 : Androsterone sulfate [M-H]<sup>-</sup> HCD 29V P=369.2  
C<sub>19</sub>H<sub>30</sub>O<sub>5</sub>S; MF: 5; RMF: 250; Prob 9.75%; CAS: 2479-86-9; Lib: nist\_msms; ID: 117992.

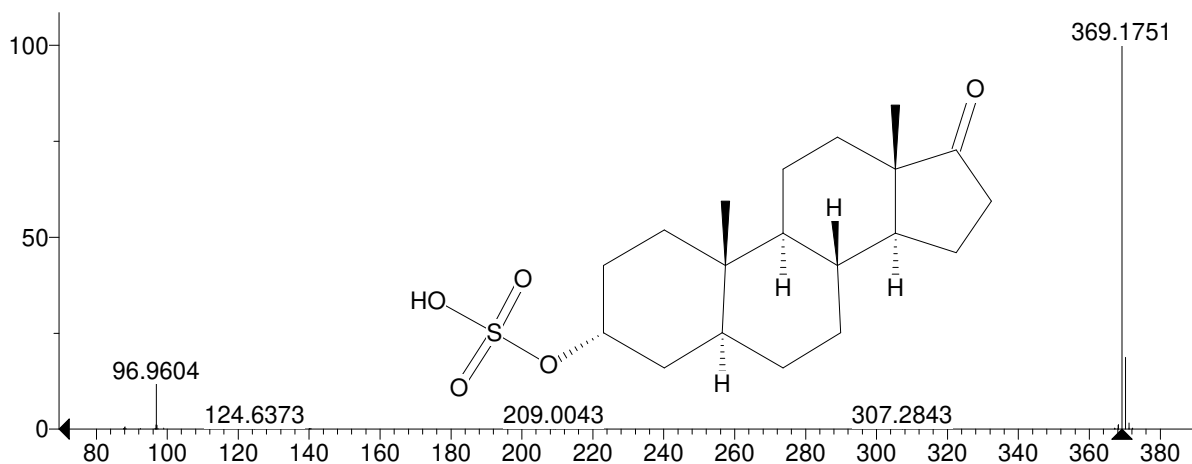

Unknown: Unknown (7.85\_472.1921m/z)  
Compound in Library Factor = 0

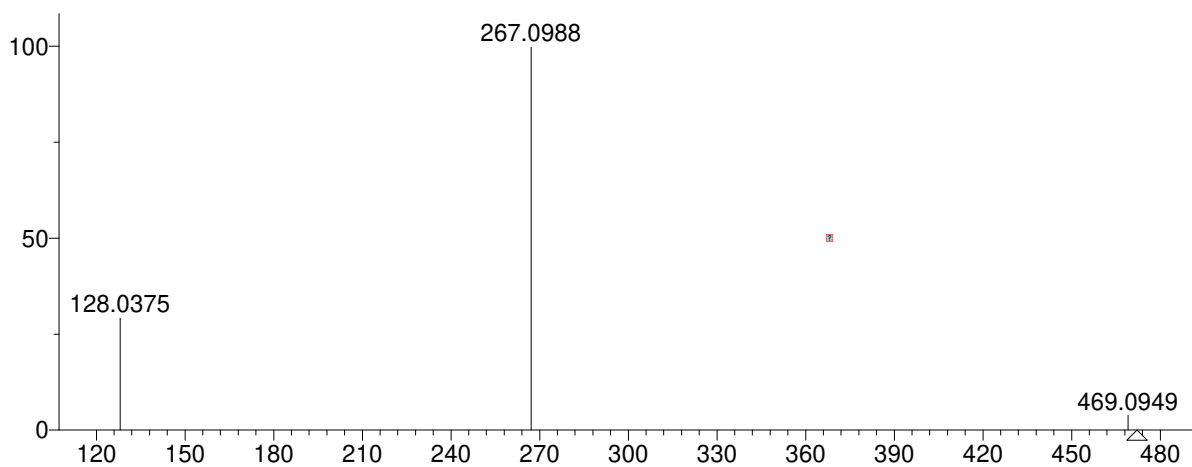

Hit 1 : methyl 3-(3,4-dihydroxyphenyl)-2-[[4-hydroxy-3-(3-methylbut-2-enyl)phenyl]methyl]-4-methoxy-5-oxofuran-  
C<sub>25</sub>H<sub>26</sub>O<sub>8</sub>; MF: 0; RMF: 38; Prob 100.0%; Lib: mona-export-vf-npl\_qexactive; ID: 9392.

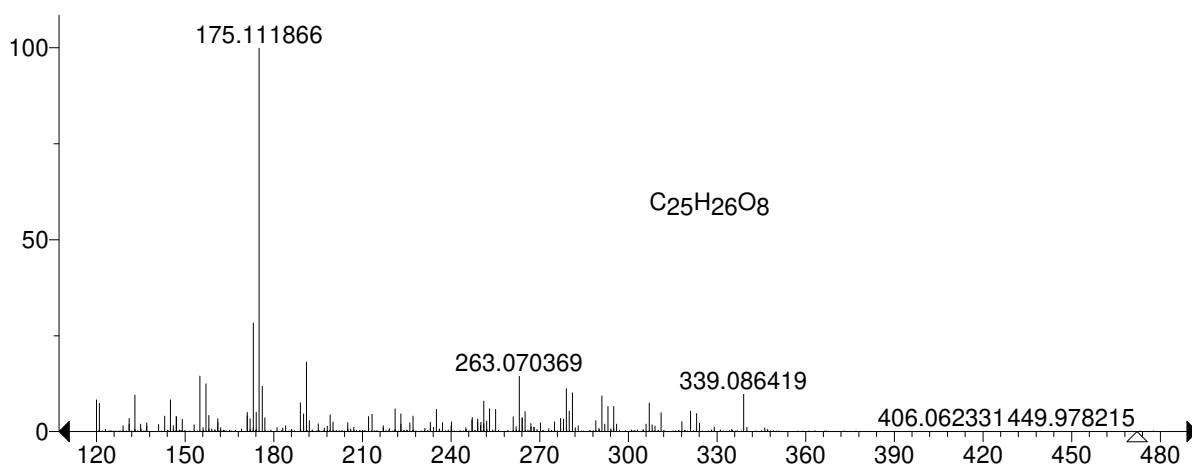

Unknown: Unknown (7.87\_243.1703m/z)  
Compound in Library Factor = 0

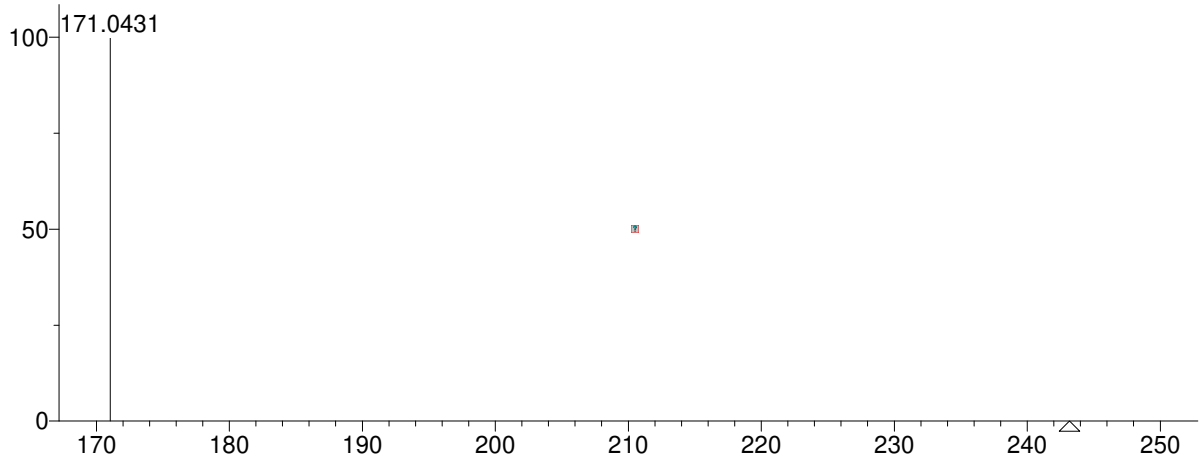

Unknown: Unknown (7.88\_387.0857m/z)  
Compound in Library Factor = 0

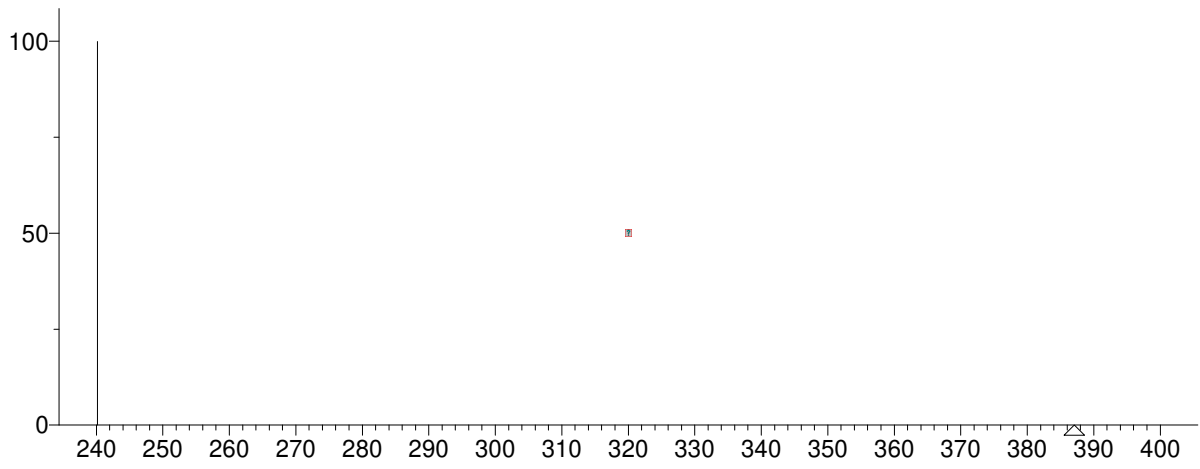

Unknown: Unknown (7.88\_429.1856m/z)  
Compound in Library Factor = 0

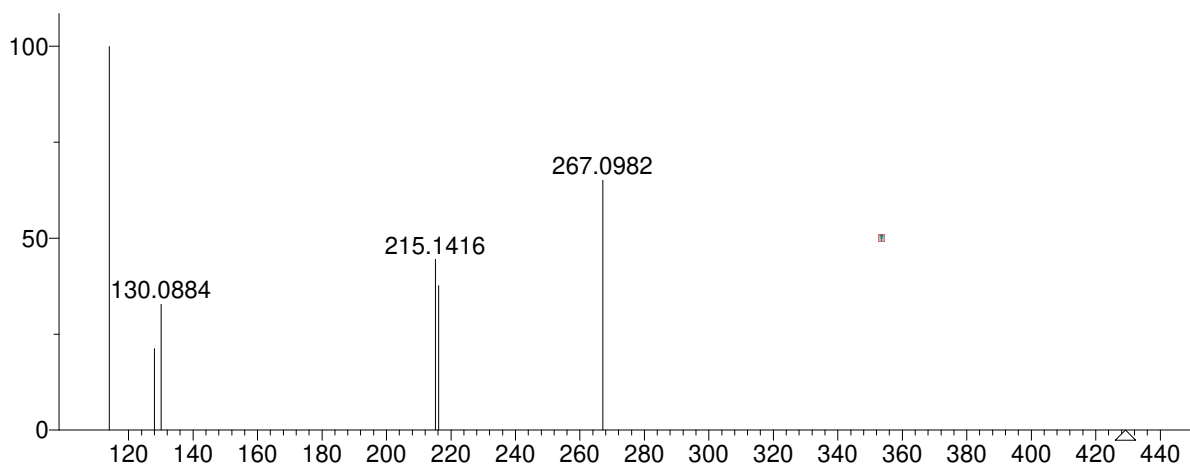

Hit 1 : (2R,3R,4S,5S,6R)-2-[6-hydroxy-3-[(E)-3-hydroxybut-1-enyl]-2,4,4-trimethylcyclohexyl]oxy-6-(hydroxymethyl) C<sub>19</sub>H<sub>34</sub>O<sub>8</sub>; MF: 0; RMF: 41; Prob 100.0%; Lib: anthocyanins mona; ID: 9985.

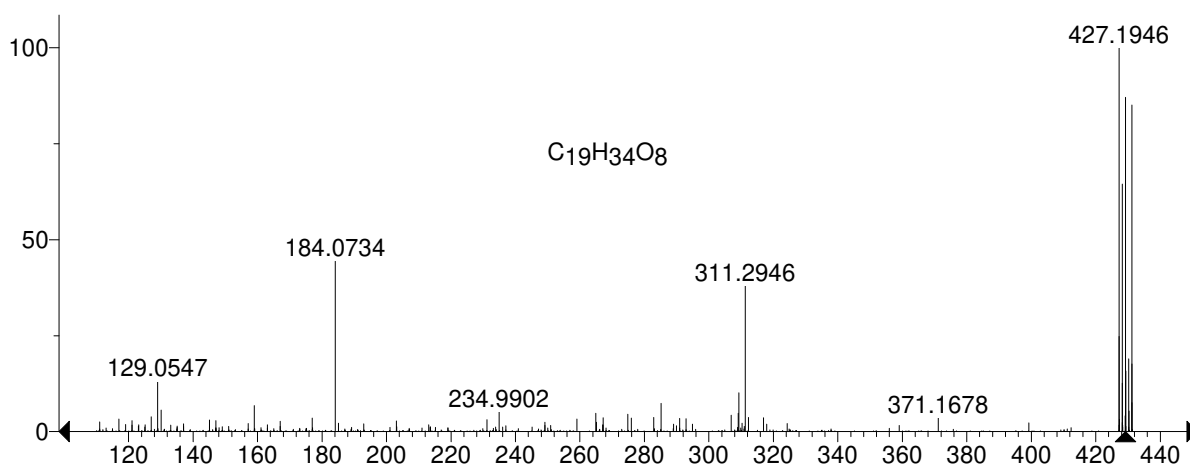



Unknown: Unknown (7.88\_579.2579m/z)  
Compound in Library Factor = 0

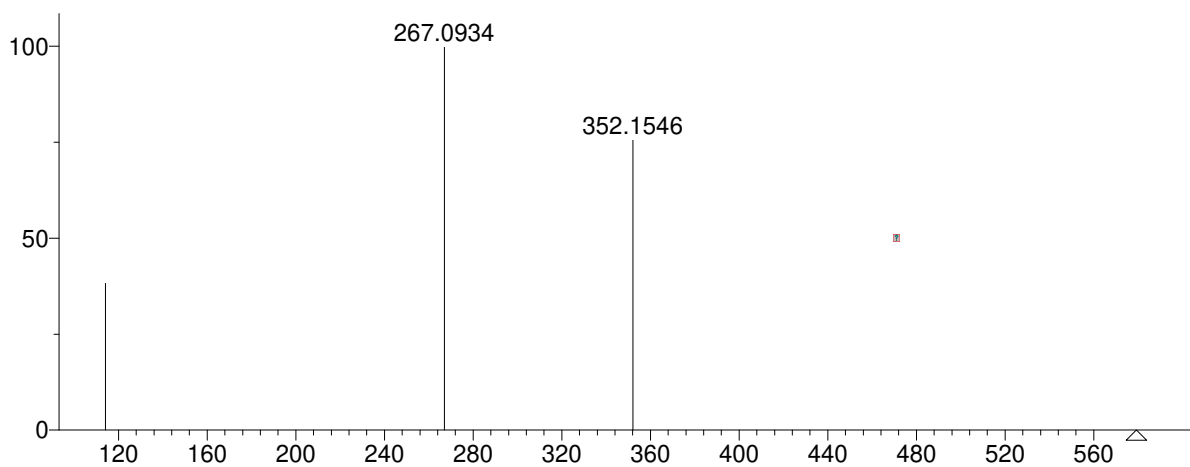

Hit 1 : Hematoporphyrin [M-H<sub>2</sub>O]- HCD 75V P=579.3  
C<sub>34</sub>H<sub>38</sub>N<sub>4</sub>O<sub>6</sub>; MF: 0; RMF: 15; Prob 100.0%; CAS: 14459-29-1; Lib: nist\_msms; ID: 289029.

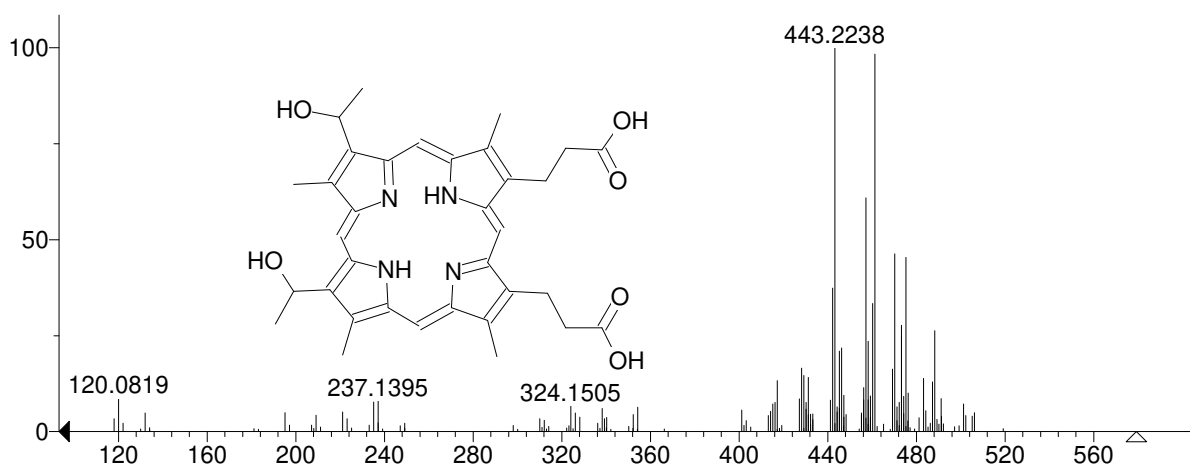

Unknown: Unknown (7.89\_240.1708m/z)  
Compound in Library Factor = 0

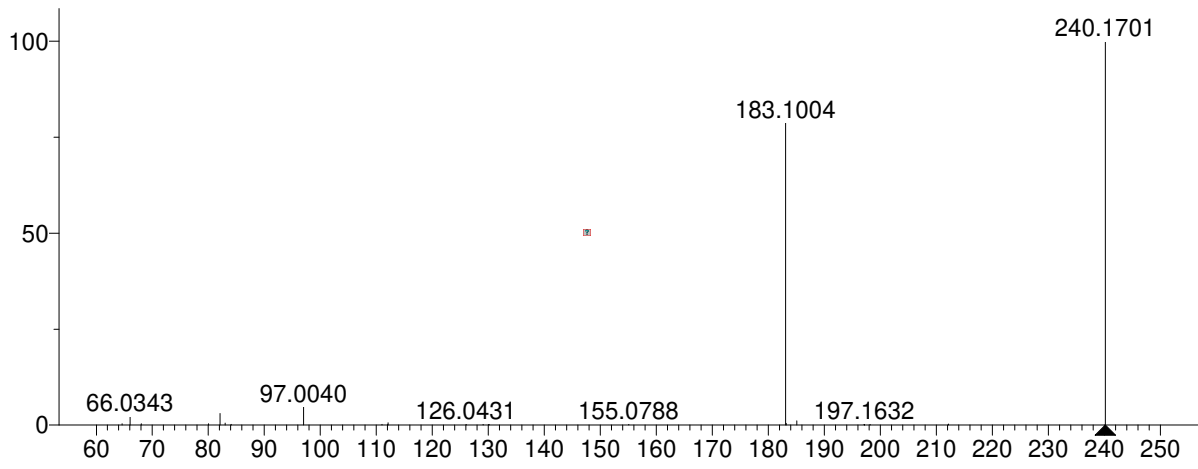

Unknown: Unknown (7.89\_284.1970m/z)  
Compound in Library Factor = 0

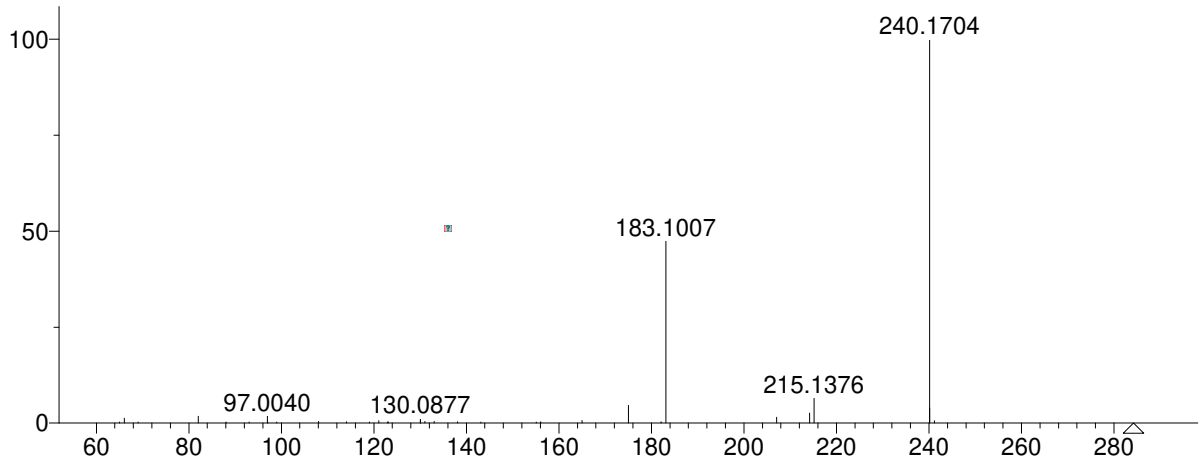

Unknown: Unknown (7.89\_500.2347m/z)  
Compound in Library Factor = 0

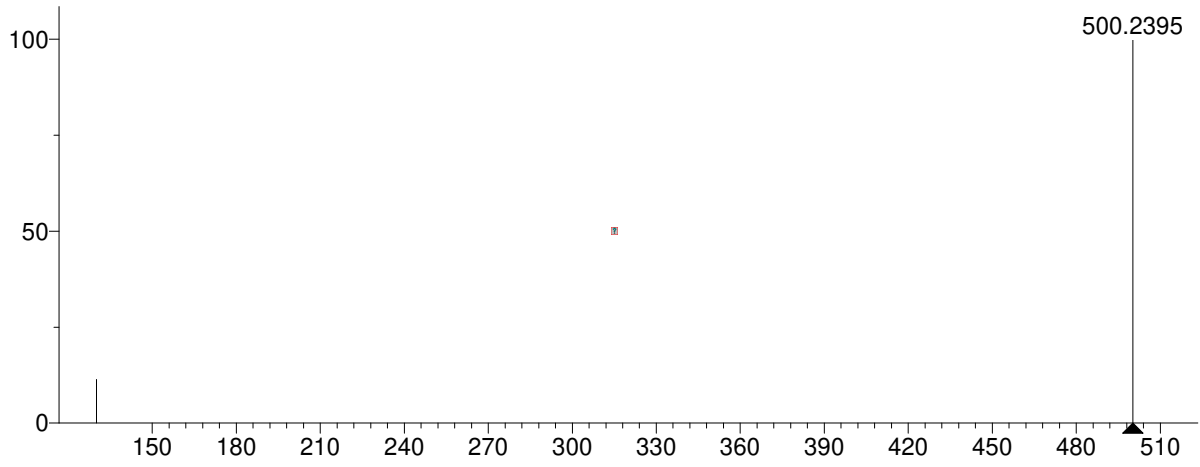

Unknown: Unknown (7.89\_770.2049m/z)  
Compound in Library Factor = 0

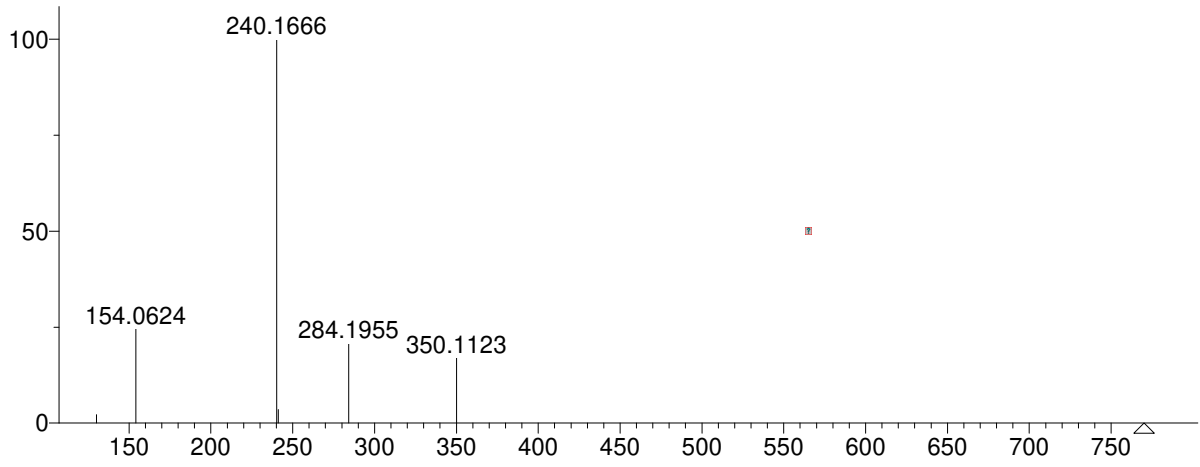

Unknown: Unknown (7.90\_385.1962m/z)  
Compound in Library Factor = 0

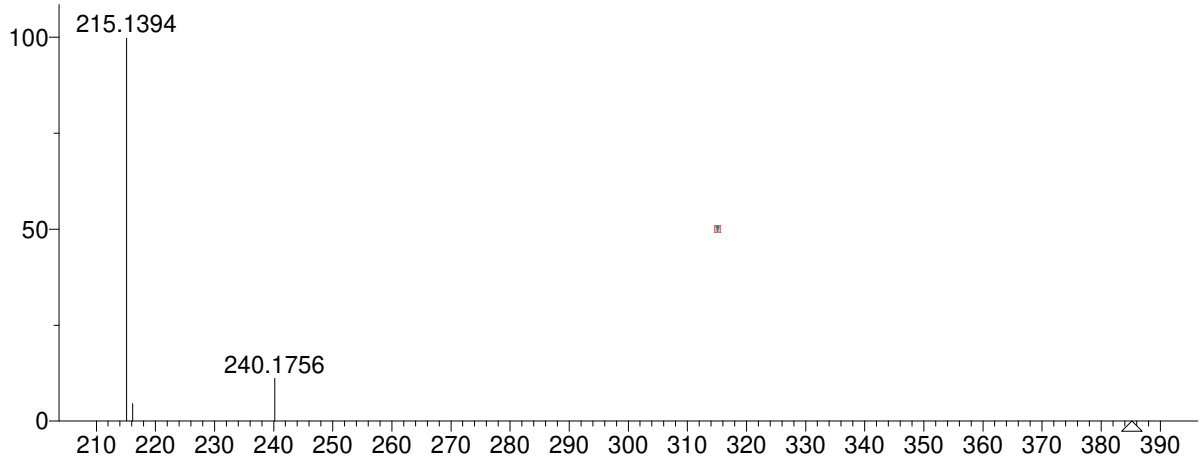

Unknown: Unknown (7.92\_514.2128m/z)  
Compound in Library Factor = 0

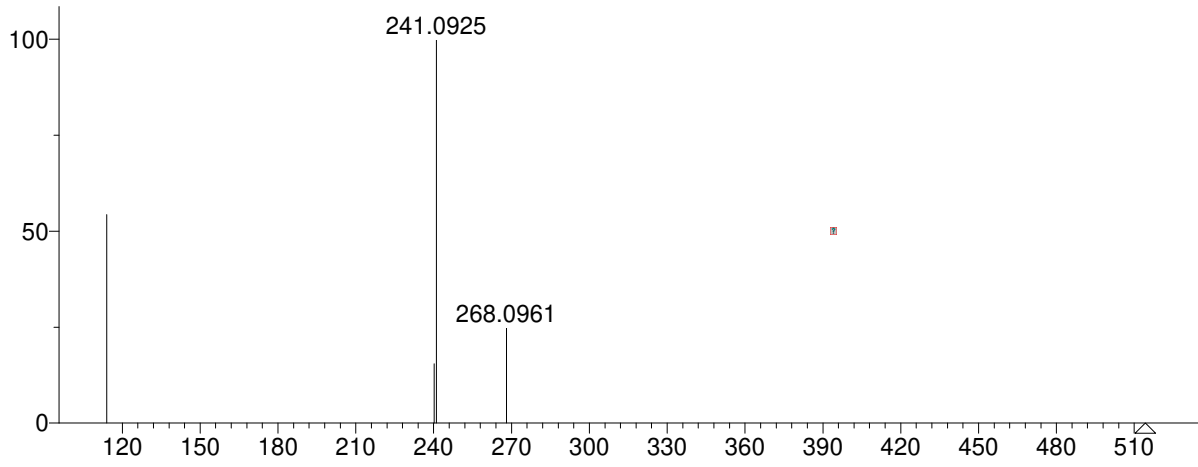

Unknown: Unknown (7.94\_324.1461m/z)  
Compound in Library Factor = 0

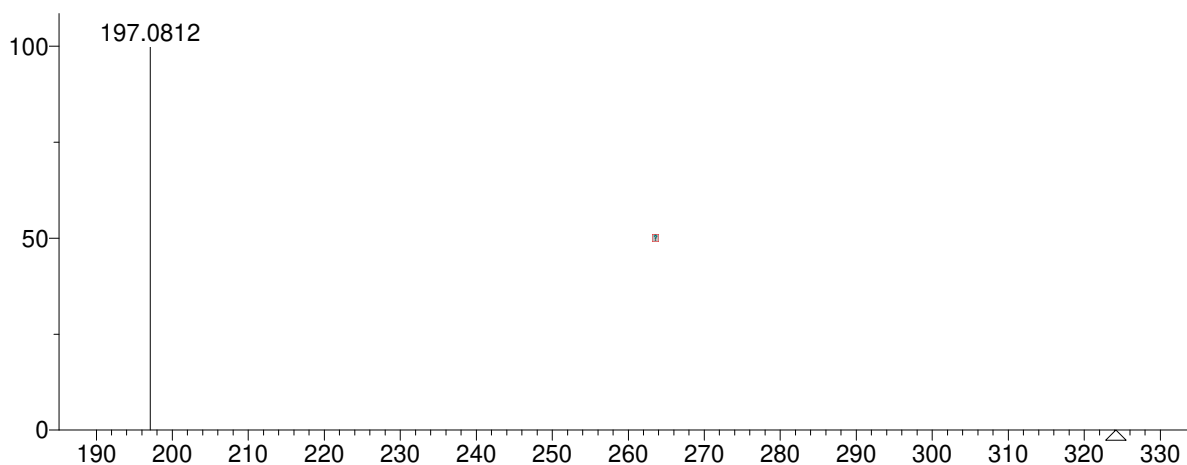

Hit 1 : NCGC00169062-03! [M+NH4]<sup>+</sup> P=324.1  
C<sub>16</sub>H<sub>18</sub>O<sub>6</sub>; MF: 0; RMF: 59; Prob 33.3%; Lib: mona-export-gnps; ID: 6069.

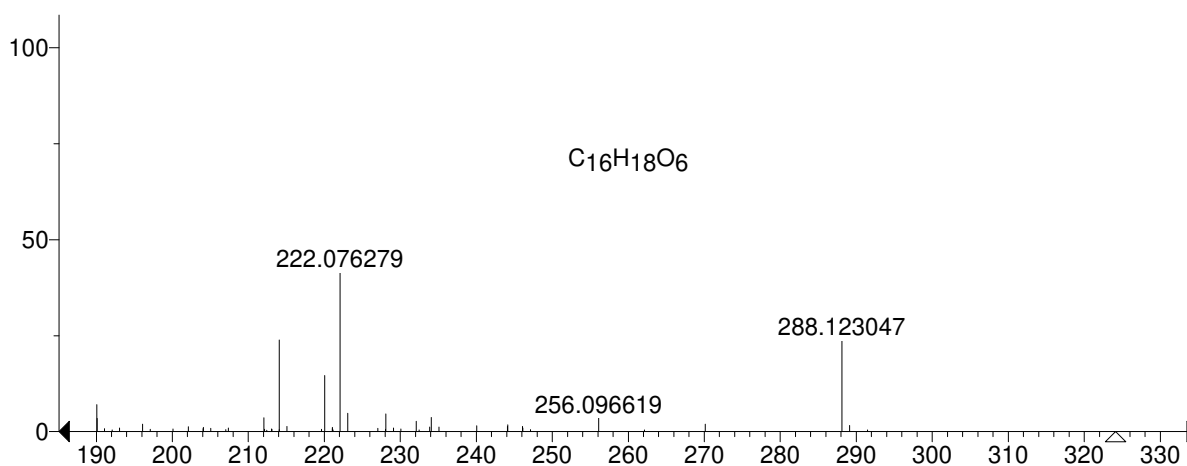

Hit 2 : NCGC00385408-01\_C<sub>17</sub>H<sub>17</sub>N<sub>5</sub>O<sub>2</sub>\_3-(1H-imidazol-4-ylmethyl)-6-(1H-indol-3-ylmethyl)-2,5-piperazinedion  
C<sub>17</sub>H<sub>17</sub>N<sub>5</sub>O<sub>2</sub>; MF: 0; RMF: 41; Prob 33.3%; Lib: mona-export-gnps; ID: 10874.

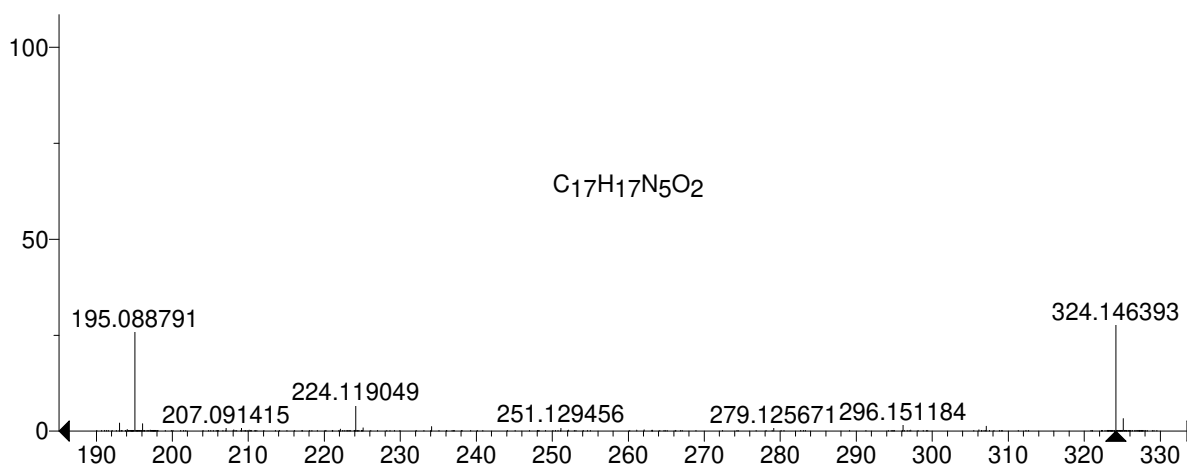



\*\* Search Report Page 2 of 2 \*\*

Hit 3 : 15,17-dihydroxy-9-methyl-4,10-dioxatricyclo[11.4.0.0A^3,a^\*u]heptadeca-1(17),13,15-triene-2,11-dione [M C<sub>16</sub>H<sub>18</sub>O<sub>6</sub>; MF: 0; RMF: 36; Prob 33.3%; Lib: mona-export-vf-npl\_gexactive; ID: 1491.

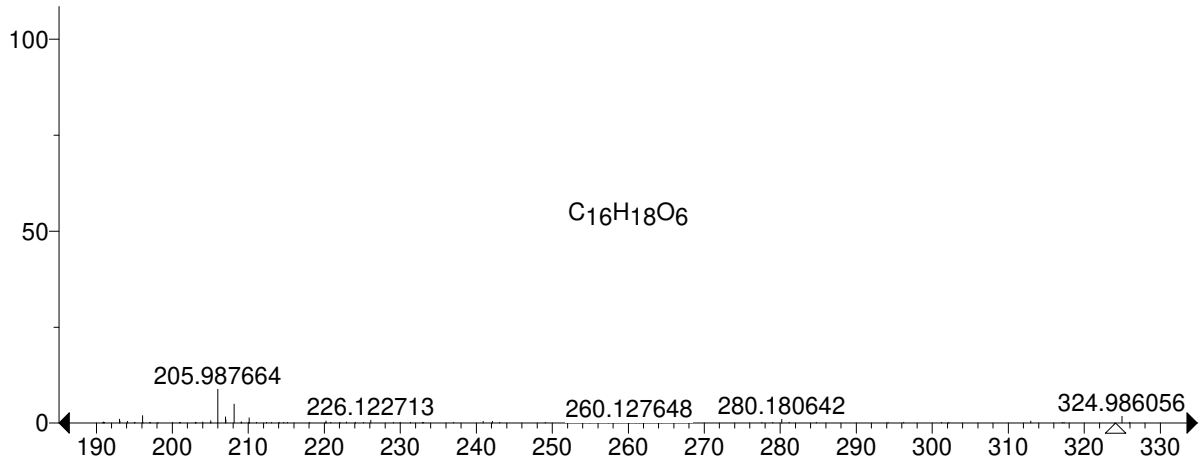

Unknown: Unknown (7.94\_406.1831m/z)  
Compound in Library Factor = 0

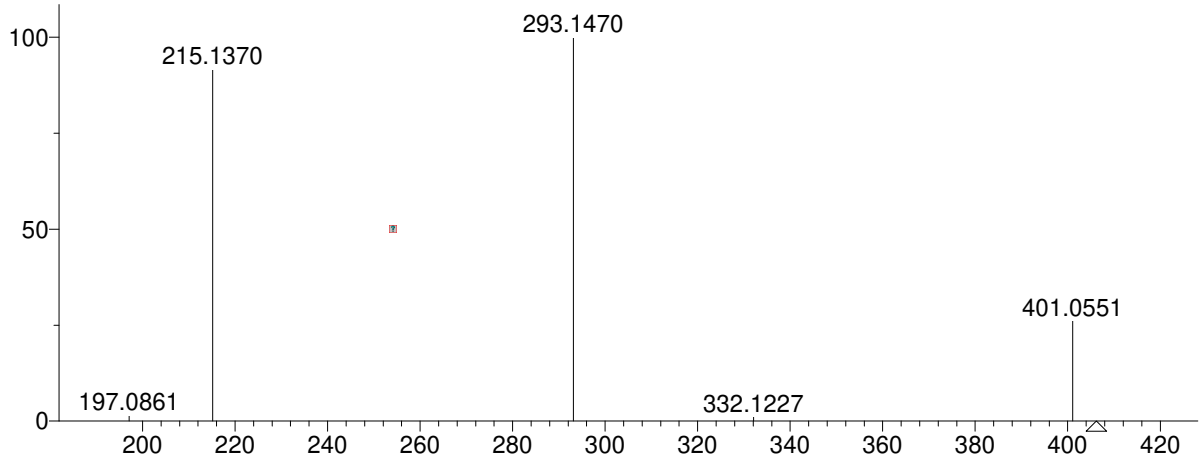

Hit 1 : 2-[(8S,9R)-9-acetyloxy-2-oxo-8,9-dihydrofuro[2,3-h]chromen-8-yl]propan-2-yl 3-methylbutanoate [M+NH4]  
C<sub>21</sub>H<sub>24</sub>O<sub>7</sub>; MF: 0; RMF: 3; Prob 33.3%; Lib: mona-export-vf-npl\_qexactive; ID: 9901.

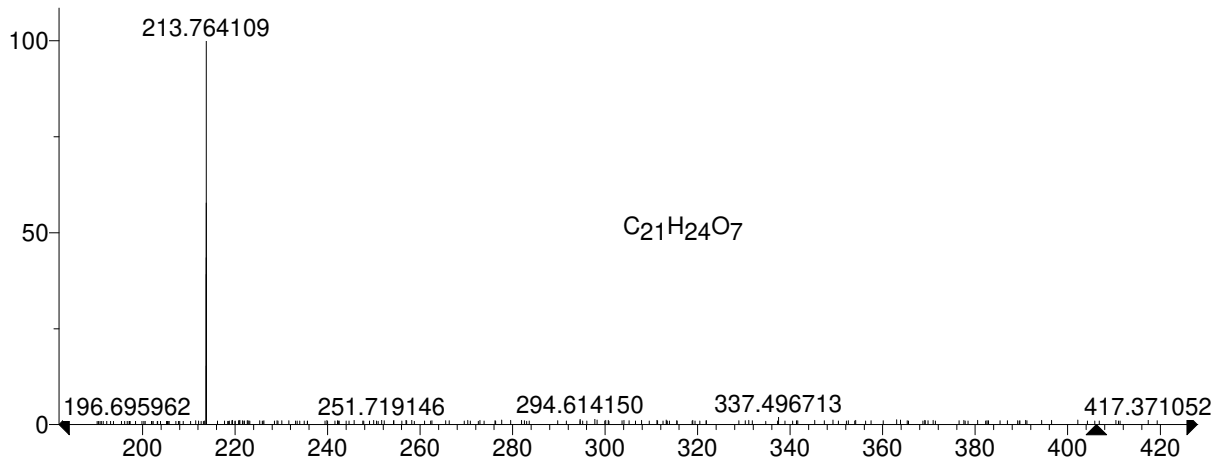

Hit 2 : NCGC00384593-01![[3-hydroxy-3-methyl-1-(7-oxofuro[3,2-g]chromen-9-yl)oxybutan-2-yl] 3-methylbutanoat  
C<sub>21</sub>H<sub>24</sub>O<sub>7</sub>; MF: 0; RMF: 2; Prob 33.3%; Lib: mona-export-gnps; ID: 9744.

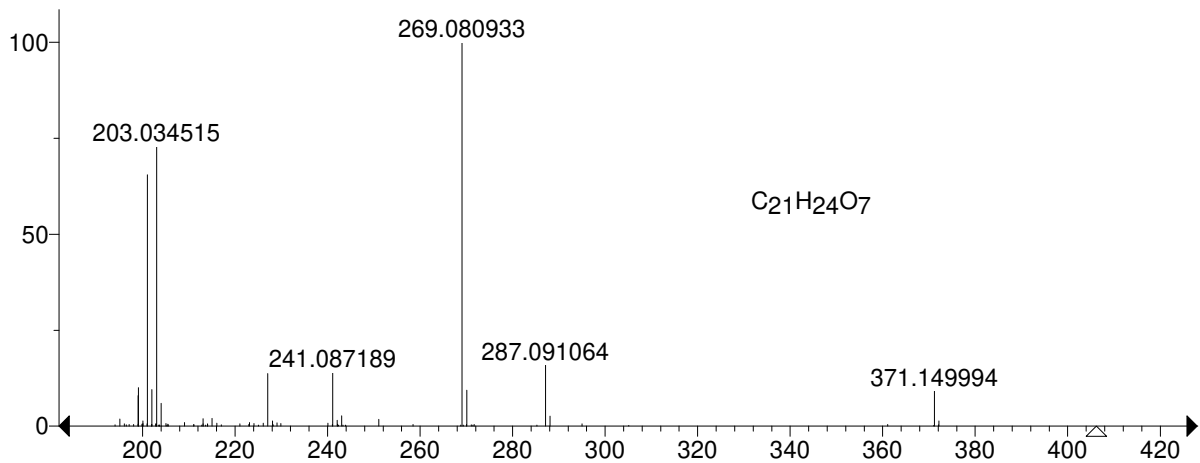

\*\* Search Report Page 2 of 2 \*\*

Hit 3 : Nebivolol (Bystolic) [M+H]<sup>+</sup> P=406.2  
C<sub>22</sub>H<sub>26</sub>ClF<sub>2</sub>NO<sub>4</sub>; MF: 0; RMF: 1; Prob 33.3%; Lib: mona-export-gnps; ID: 512.

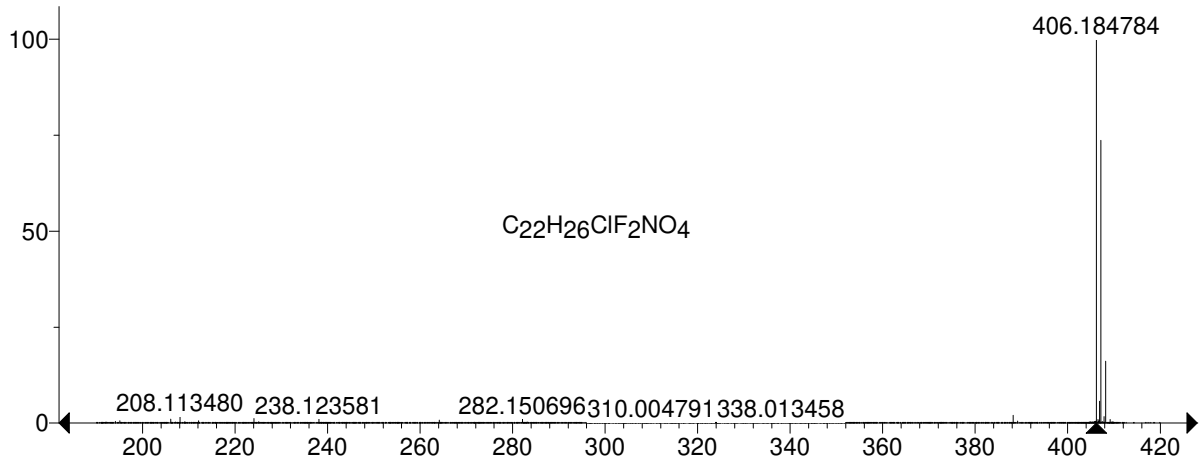

Unknown: Unknown (7.94\_463.2065m/z)  
Compound in Library Factor = 0

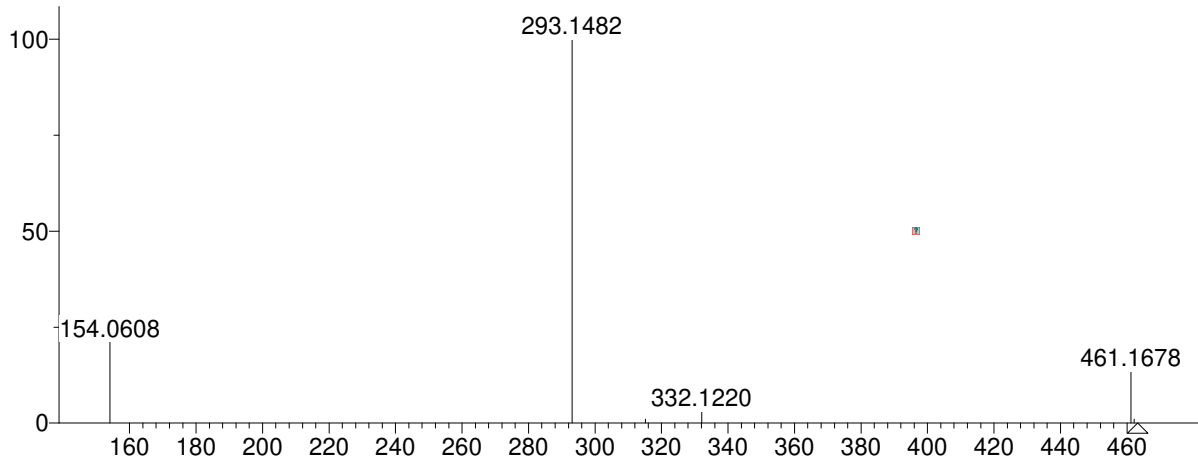

Unknown: Unknown (7.95\_289.0371m/z)  
Compound in Library Factor = -2176

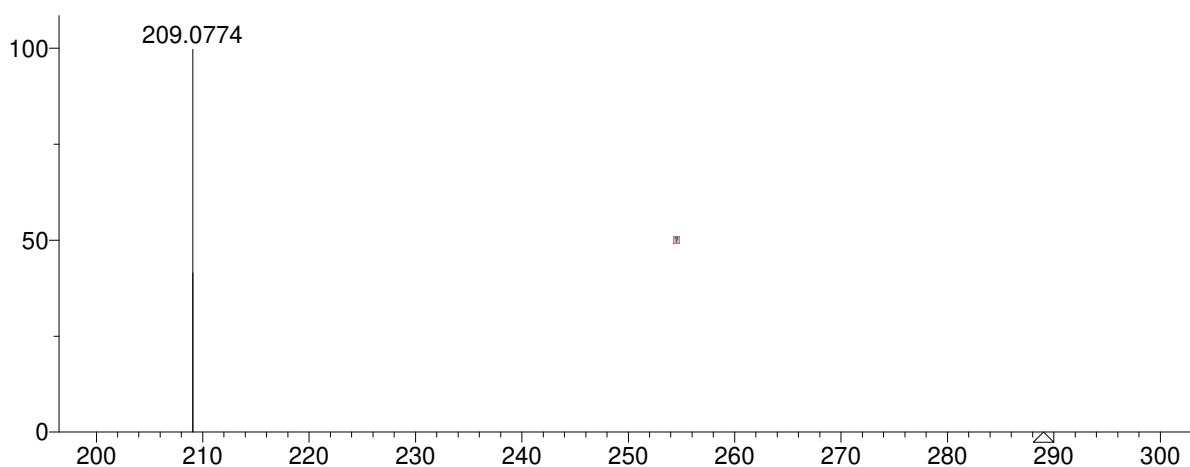

Hit 1 : Unknown (carbon number 11); PlaSMA ID-529 [M-H]<sup>-</sup> P=289  
C<sub>11</sub>H<sub>14</sub>O<sub>7</sub>S; MF: 27; RMF: 445; Prob 77.3%; Lib: biomsms-neg-plasma; ID: 1163.

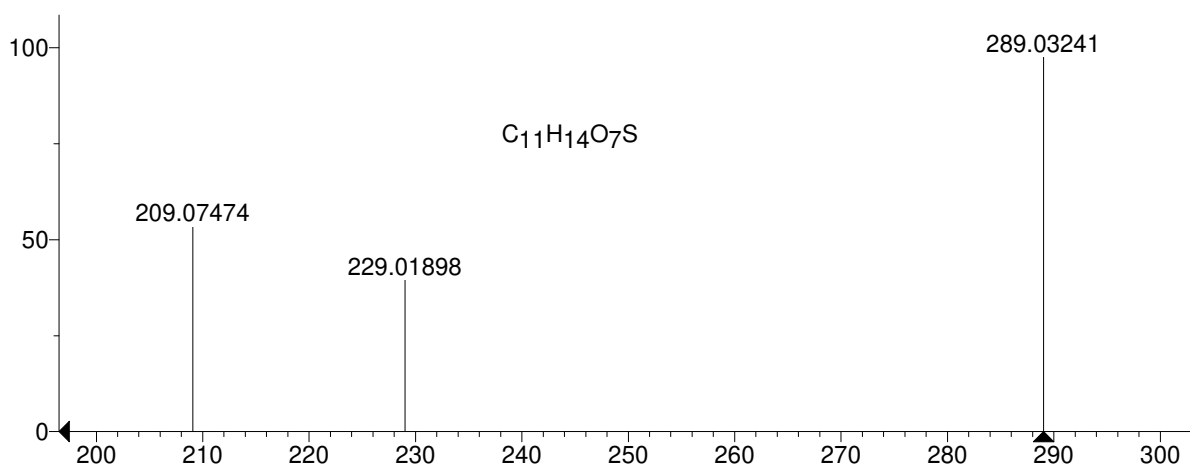

Hit 2 : 13-methoxy-1,6-diazatetracyclo[7.6.1.0a<sup>u</sup>,A<sup>1</sup>1a<sup>!P</sup>.0A<sup>1</sup>1a<sup>o</sup>,A<sup>1</sup>1a<sup>\*u</sup>]hexadeca-3,5,7,9(16),10,12,14-he  
C<sub>15</sub>H<sub>10</sub>N<sub>2</sub>O<sub>2</sub>; MF: 0; RMF: 15; Prob 22.7%; Lib: mona-export-vf-npl\_qexactive; ID: 23654.

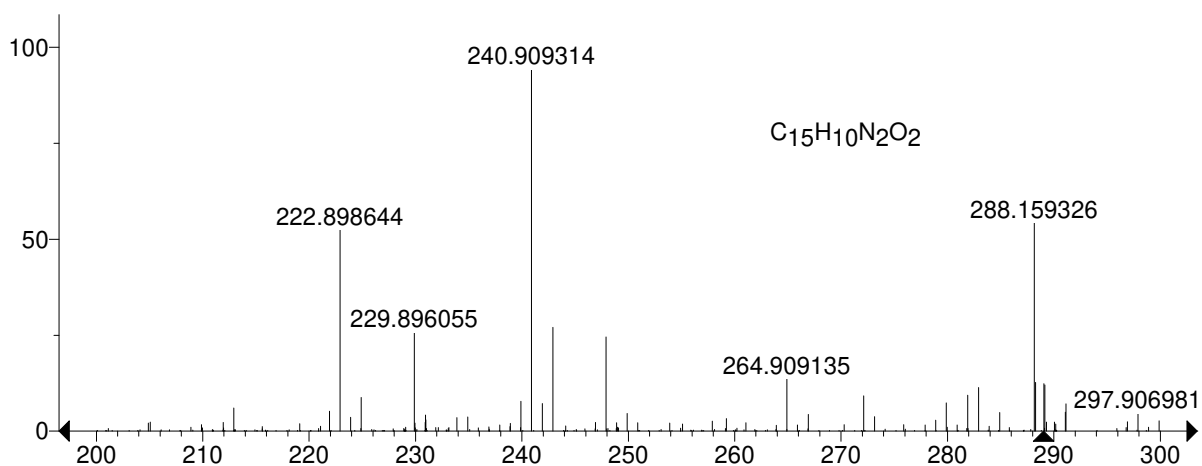

Unknown: Unknown (7.95\_401.0522m/z)  
Compound in Library Factor = 0

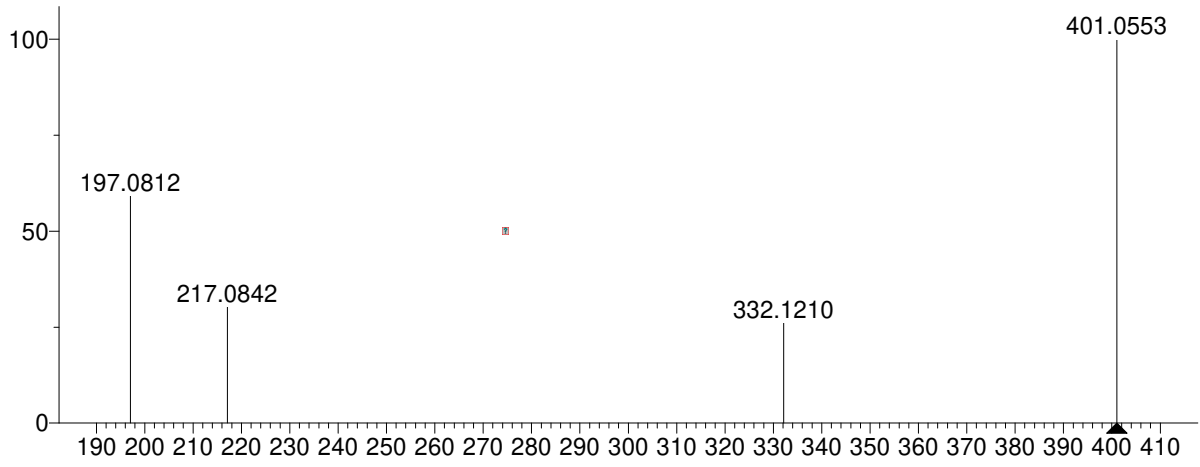

Unknown: Unknown (7.97\_423.1748m/z)  
Compound in Library Factor = 0

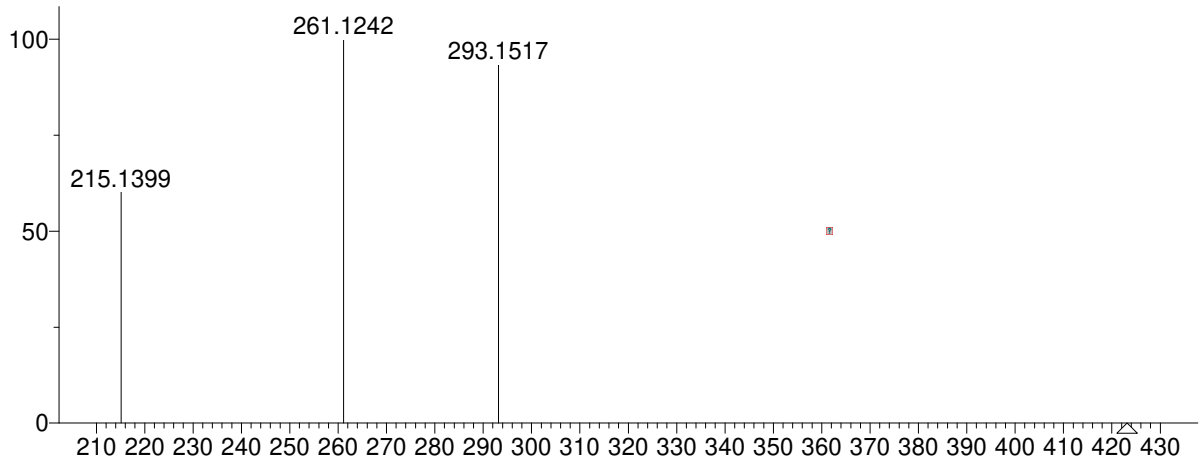

\*\* Search Report Page 1 of 2 \*\*

Unknown: Unknown (7.98\_468.1470m/z)  
Compound in Library Factor = -3273

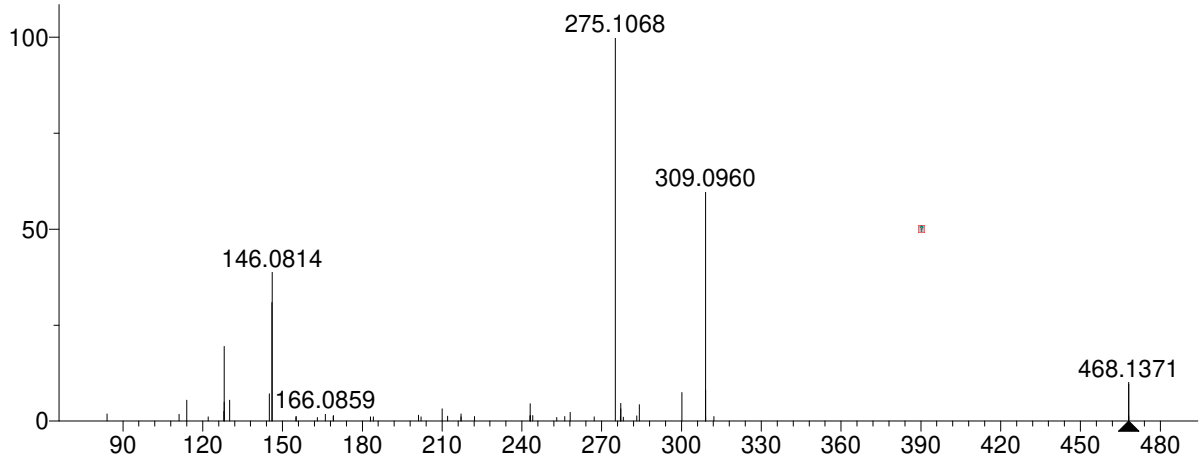

Hit 1 : NCGC00380387-01\_C21H27NO11\_ [M-H]- P=468.2  
C21H27NO11; MF: 1; RMF: 126; Prob 25.7%; Lib: msms-neg-gnps; ID: 1703.



Hit 2 : 5'-O-b-D dihydroascorbigen (CCR vessel) [M-H]- P=468.2  
C21H27NO11; MF: 0; RMF: 77; Prob 24.8%; Lib: phytofrag2018\_final\_060219; ID: 941.

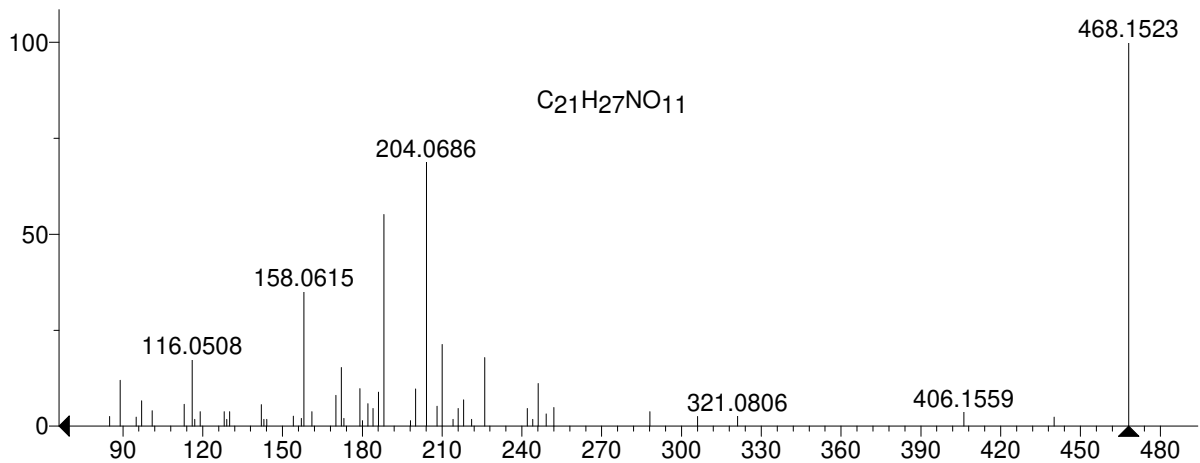





Unknown: Unknown (7.98\_714.3311m/z)  
Compound in Library Factor = 0

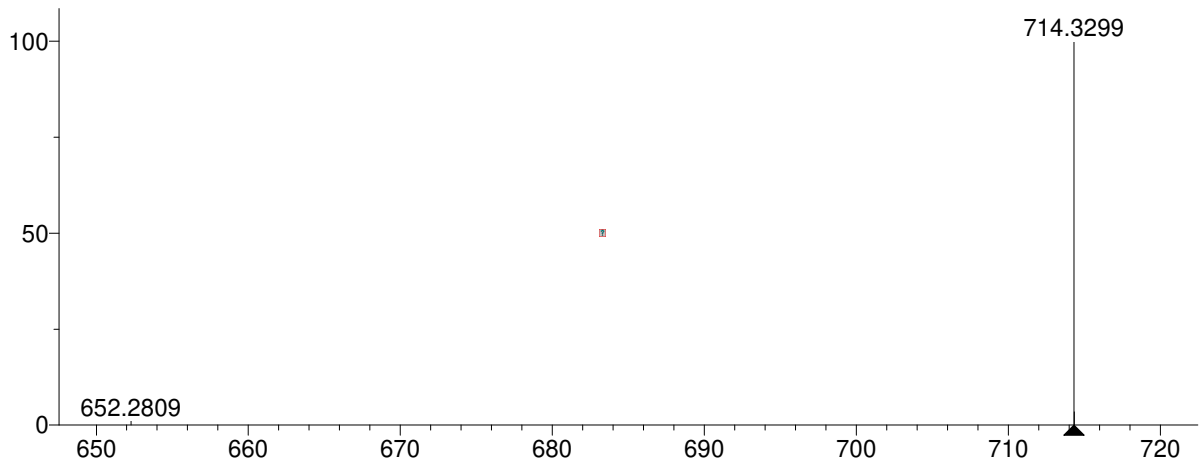

Unknown: Unknown (7.99\_387.1576m/z)  
Compound in Library Factor = 0

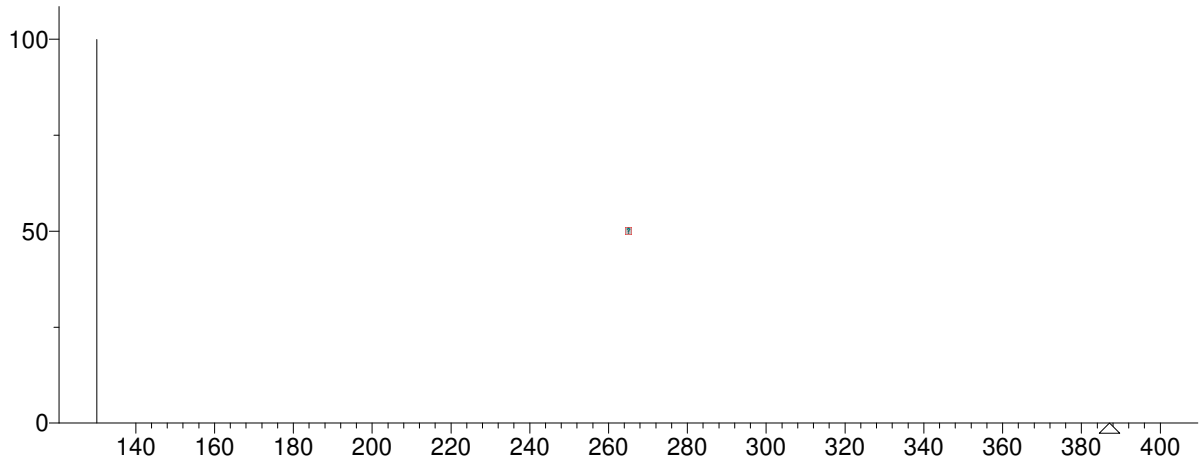

Unknown: Unknown (8.02\_405.2221m/z)  
Compound in Library Factor = 0

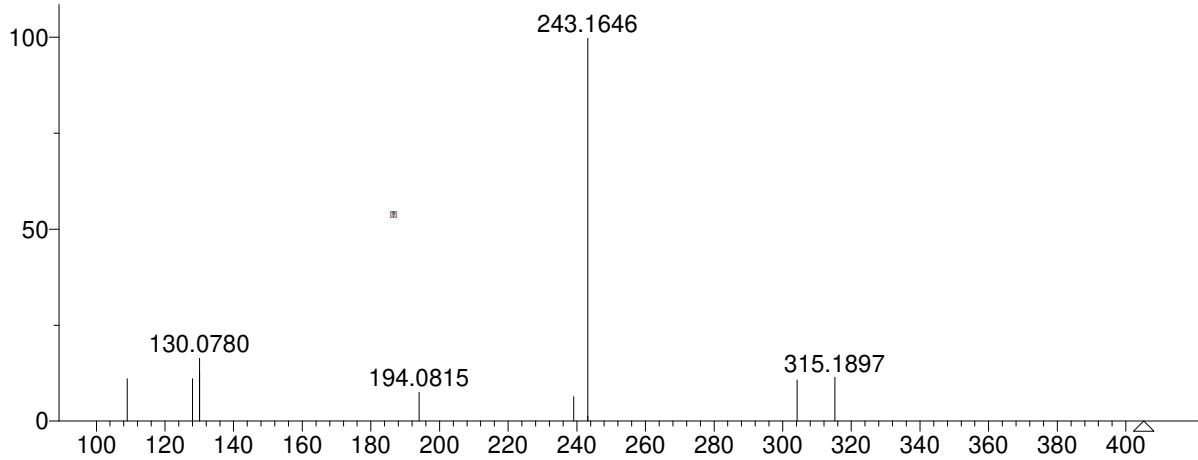

Hit 1 : MLS002637530-01!Cortell50-03-3 [M+H]<sup>+</sup> P=405.2  
C<sub>23</sub>H<sub>32</sub>O<sub>6</sub>; MF: 0; RMF: 57; Prob 50.0%; Lib: mona-export-gnps; ID: 3679.

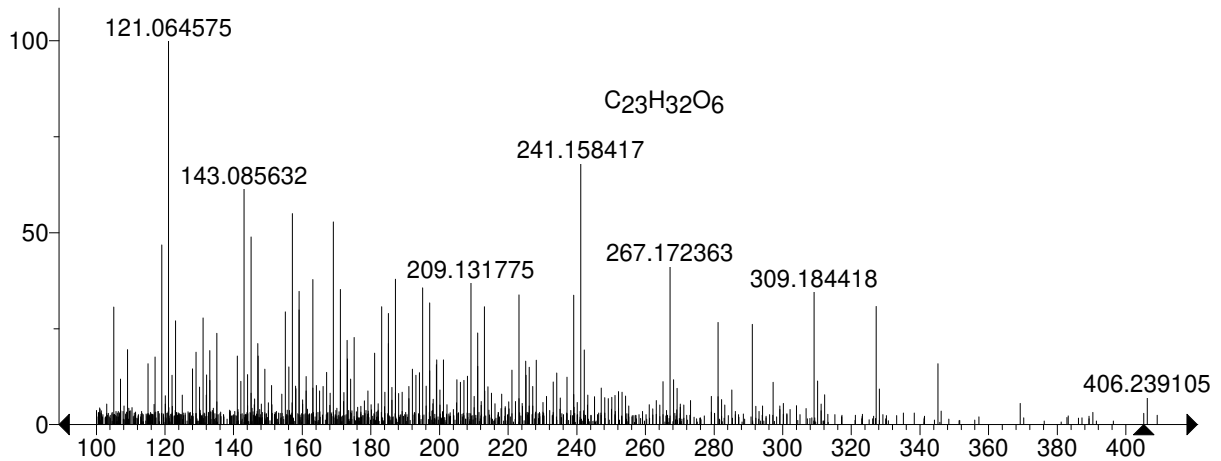

Hit 2 : MLS001076491-01!Cortell [M+H]<sup>+</sup> P=405.2  
C<sub>23</sub>H<sub>32</sub>O<sub>6</sub>; MF: 0; RMF: 48; Prob 50.0%; Lib: mona-export-gnps; ID: 4335.

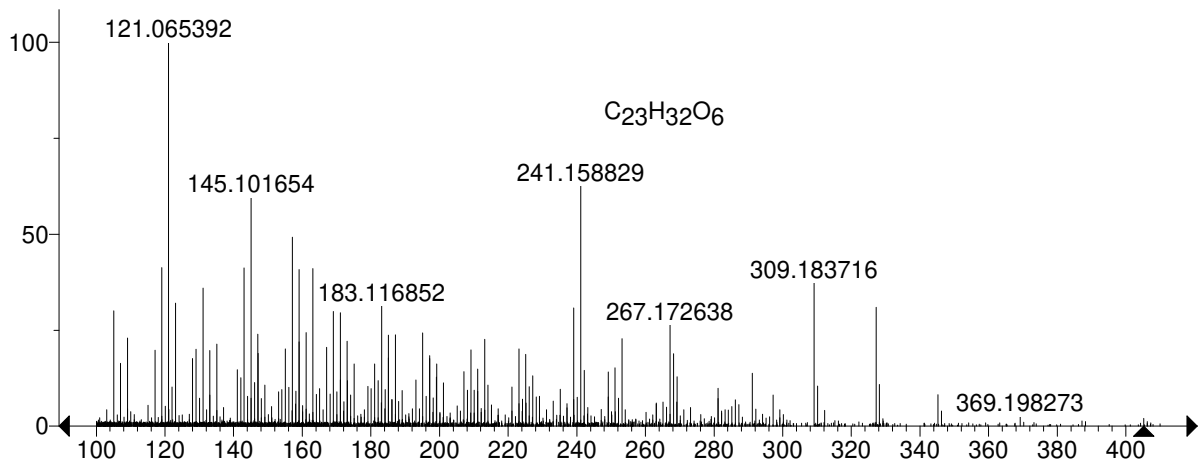

Unknown: Unknown (8.04\_549.2256m/z)  
Compound in Library Factor = 0

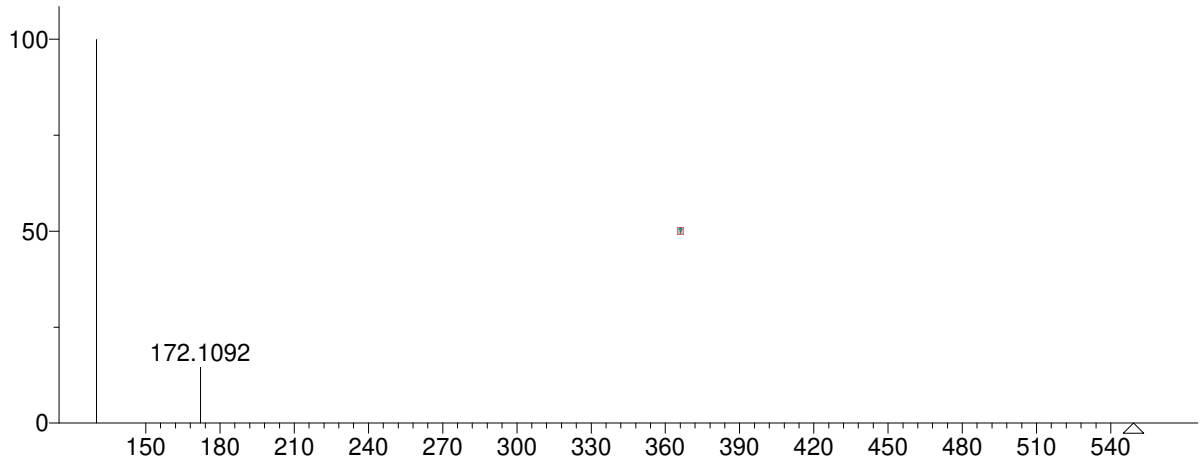

Unknown: Unknown (8.05\_656.2835m/z)  
Compound in Library Factor = 0

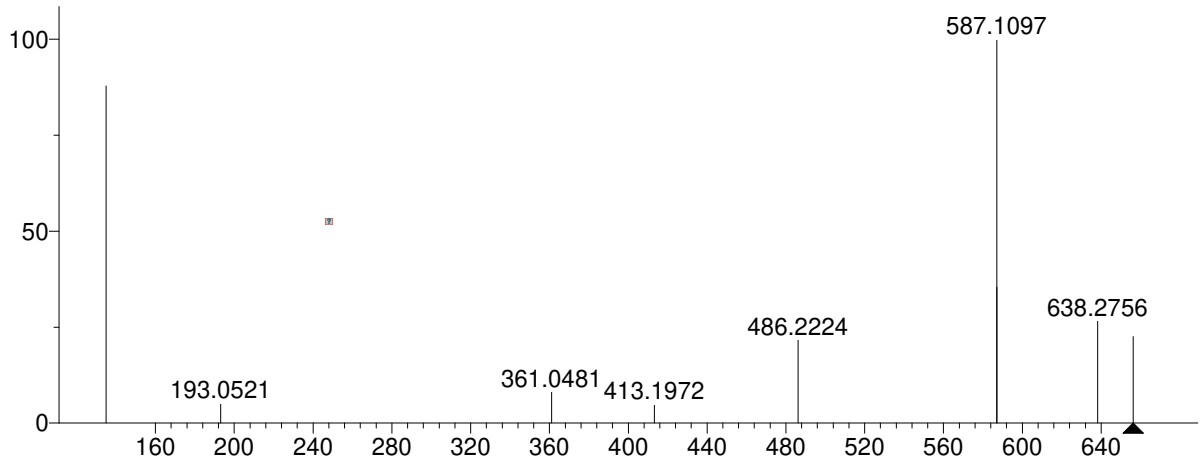

Unknown: Unknown (8.05\_757.1726m/z)  
Compound in Library Factor = 0

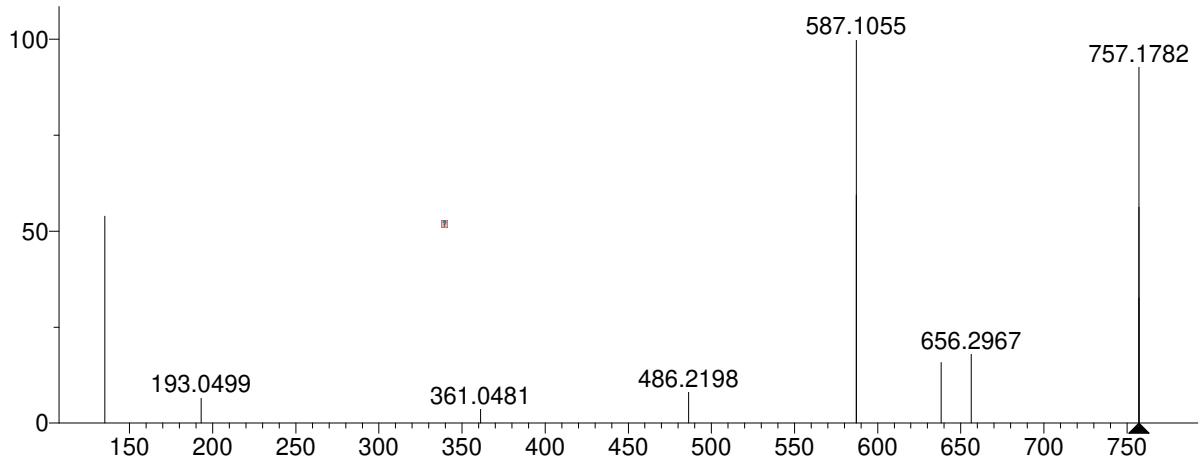

Unknown: Unknown (8.06\_387.0845m/z)  
Compound in Library Factor = -3273

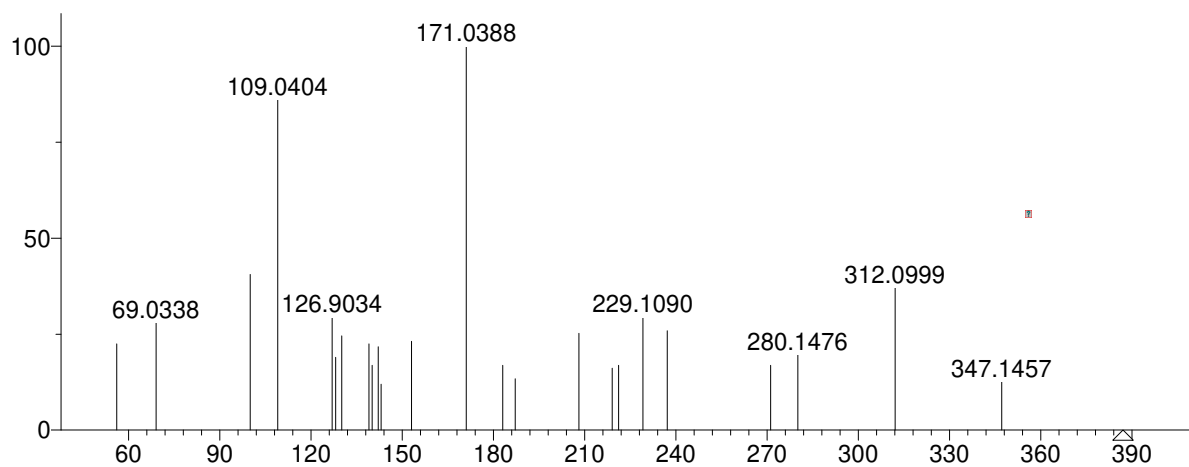

Hit 1 : Pamoic acid [M-H]<sup>-</sup> HCD 61V P=387.1  
C<sub>23</sub>H<sub>16</sub>O<sub>6</sub>; MF: 12; RMF: 151; Prob 100.0%; CAS: 130-85-8; Lib: nist\_msms; ID: 152472.

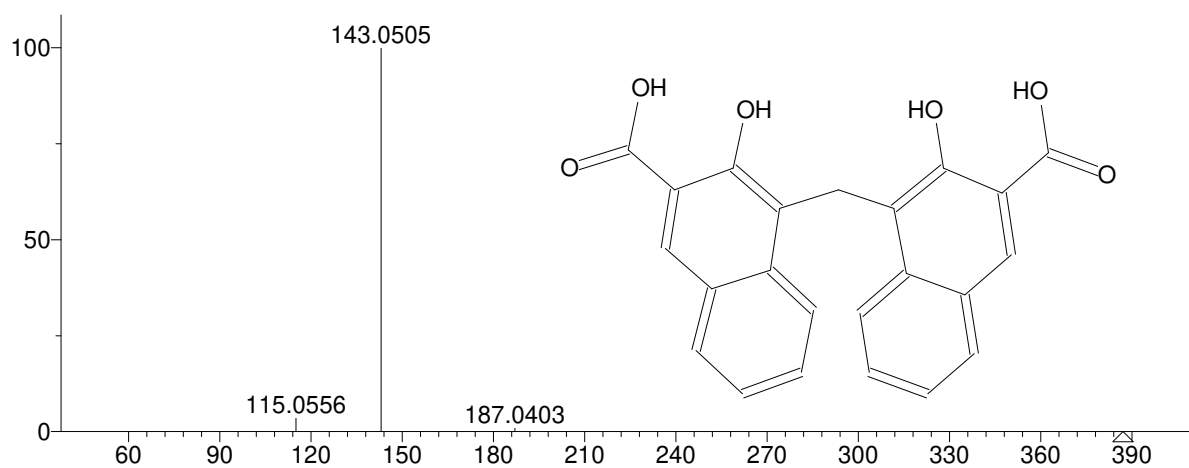



\*\* Search Report Page 1 of 2 \*\*

Unknown: Unknown (8.07\_253.1184m/z)  
Compound in Library Factor = -3273

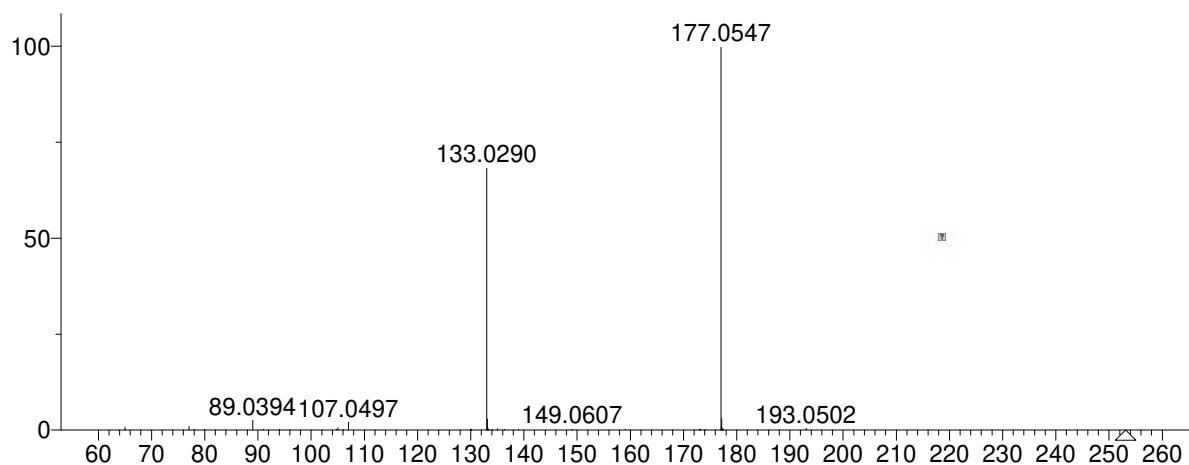

Hit 1 : Tyr-Ala [M+H]<sup>+</sup> HCD 80eV P=253.1  
C<sub>12</sub>H<sub>16</sub>N<sub>2</sub>O<sub>4</sub>; MF: 12; RMF: 71; Prob 16.5%; CAS: 730-08-5; Lib: nist\_msms; ID: 564073.

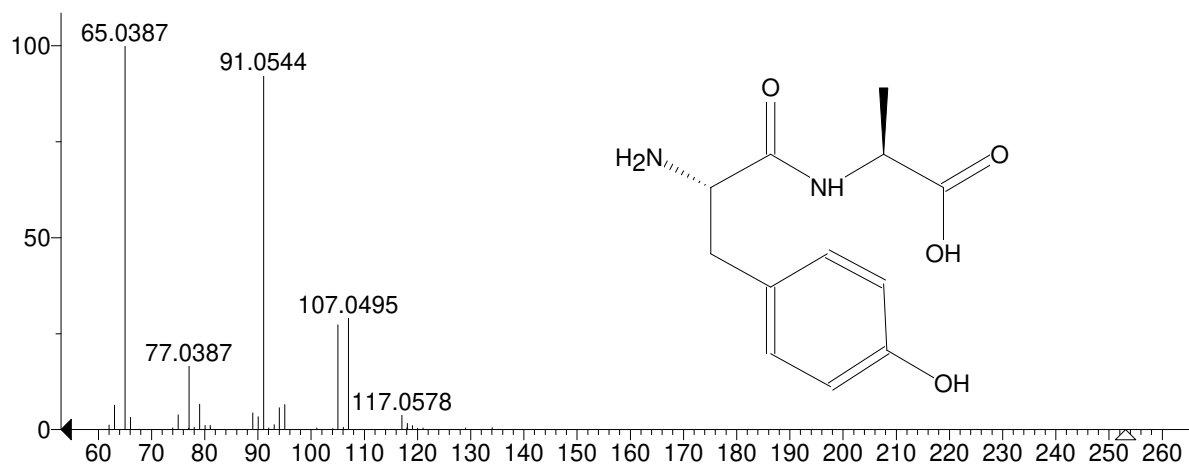

Hit 2 : Ala-Tyr [M+H]<sup>+</sup> HCD 80eV P=253.1  
C<sub>12</sub>H<sub>16</sub>N<sub>2</sub>O<sub>4</sub>; MF: 11; RMF: 67; Prob 15.8%; CAS: 3061-88-9; Lib: nist\_msms; ID: 562749.

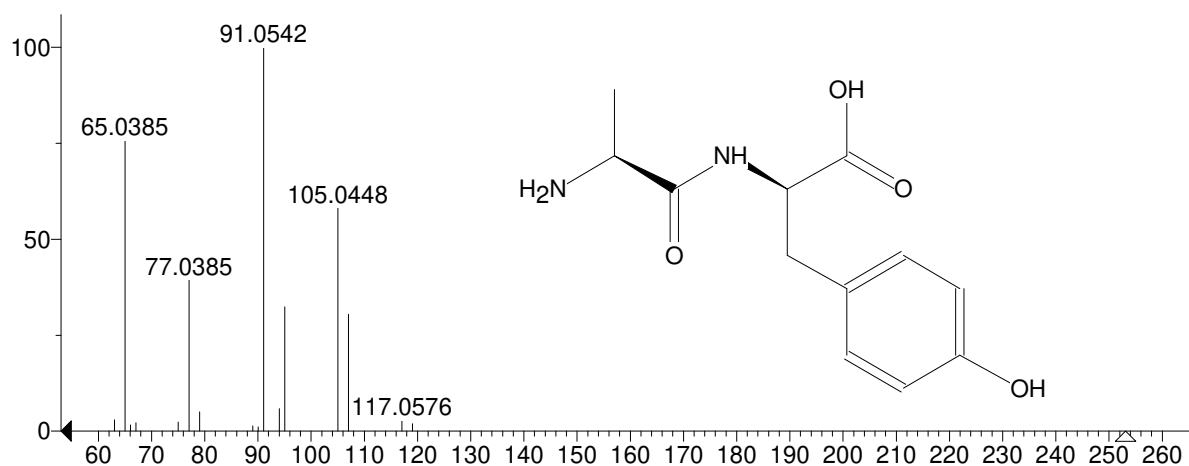

Hit 3 : Phe-Ser [M+H]<sup>+</sup> HCD 80eV P=253.1  
C<sub>12</sub>H<sub>16</sub>N<sub>2</sub>O<sub>4</sub>; MF: 9; RMF: 43; Prob 14.6%; Lib: nist\_msms; ID: 562028.

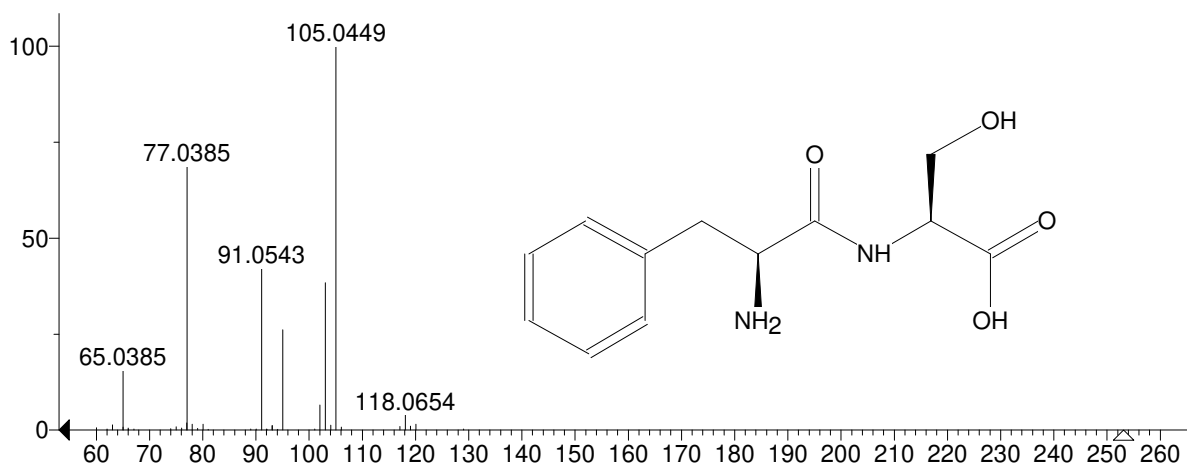

Hit 4 : Phe-Ser [M+H]<sup>+</sup> HCD 80eV P=253.1  
C<sub>12</sub>H<sub>16</sub>N<sub>2</sub>O<sub>4</sub>; MF: 9; RMF: 43; Prob 14.6%; CAS: 16053-39-7; Lib: nist\_msms2; ID: 41828.

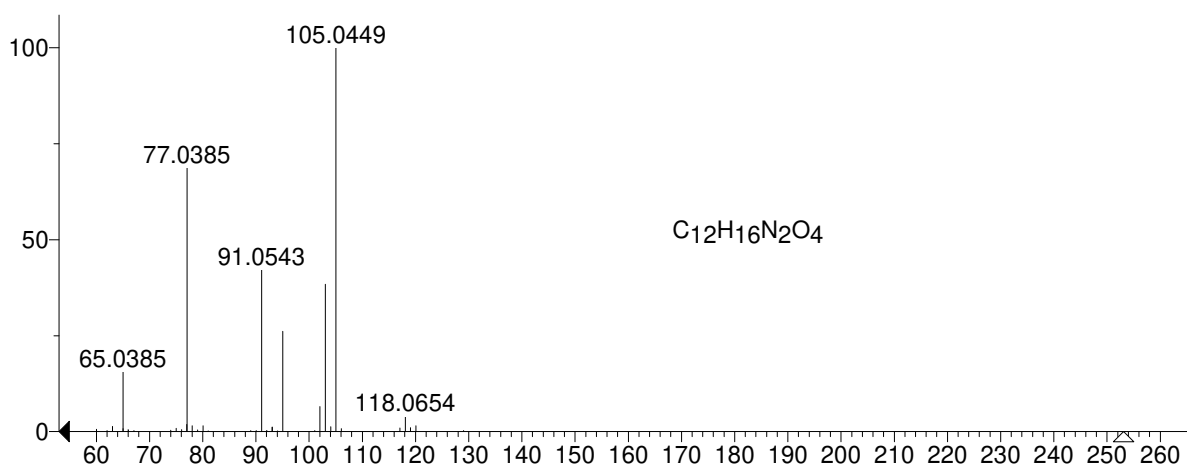

Hit 5 : Ser-Phe [M+H]<sup>+</sup> HCD 80eV P=253.1  
C<sub>12</sub>H<sub>16</sub>N<sub>2</sub>O<sub>4</sub>; MF: 8; RMF: 39; Prob 14.0%; Lib: nist\_msms; ID: 571676.

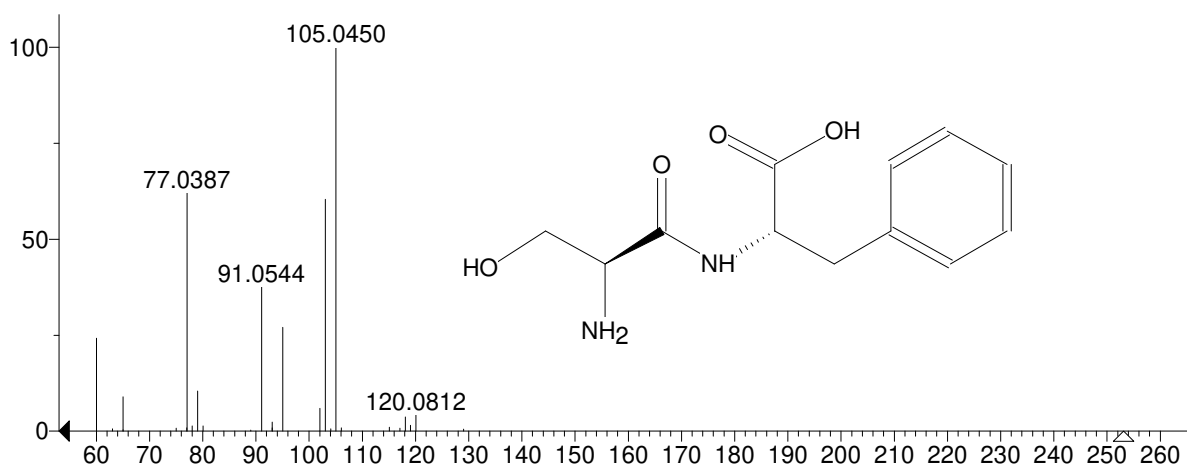

Unknown: Unknown (8.07\_656.2897m/z)  
Compound in Library Factor = 0

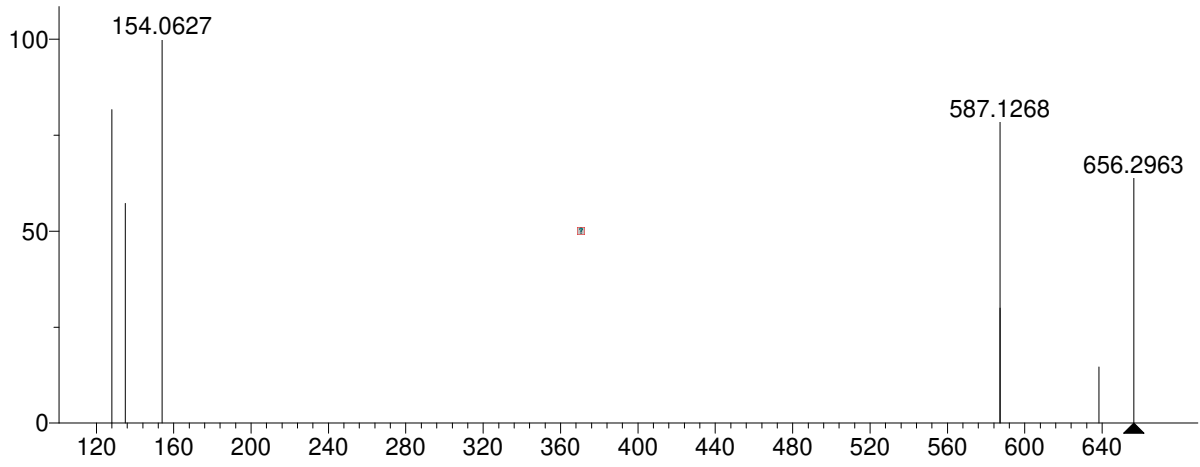

Unknown: Unknown (8.09\_302.1024m/z)  
Compound in Library Factor = 0

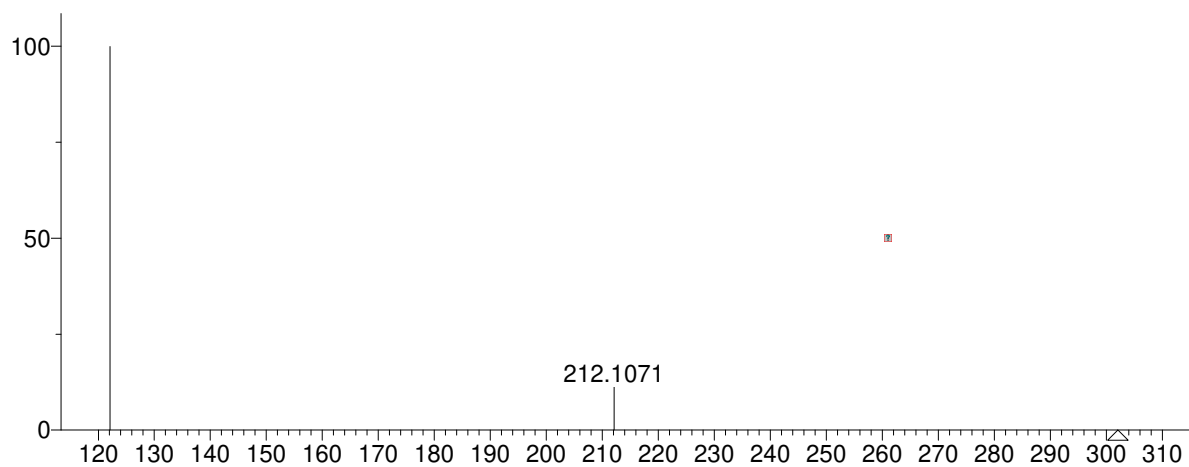

Hit 1 : Petunidin 3-glucoside cation [Cat] $\Rightarrow$ 317.1 $\Rightarrow$ 302.1 IT 35% P=302.1  
C<sub>22</sub>H<sub>23</sub>O<sub>12</sub>; MF: 0; RMF: 67; Prob 8.33%; CAS: 71991-88-3; Lib: nist\_msms; ID: 394992.

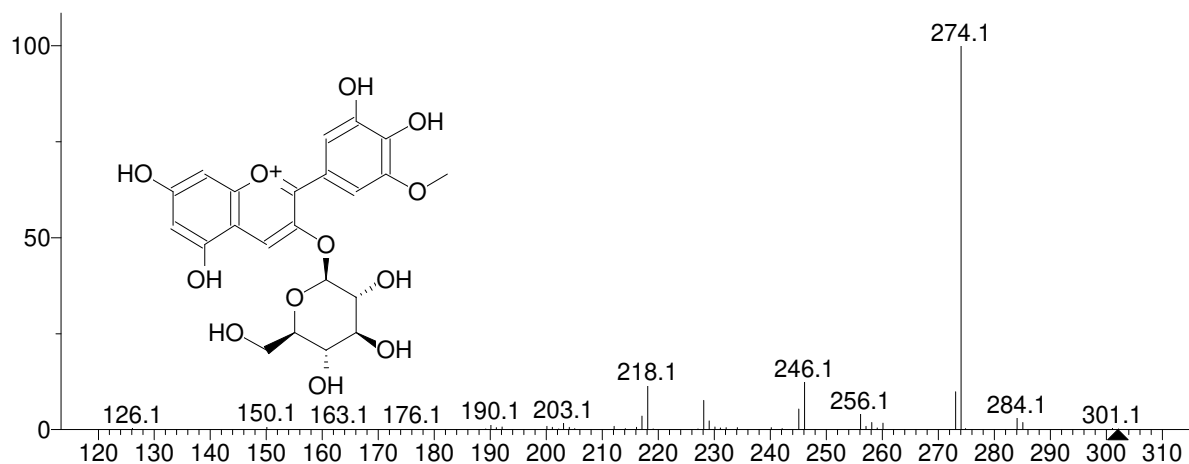

Hit 2 : Quinapril [M+Na] $\Rightarrow$ 302.1 IT 35% P=302.1  
C<sub>25</sub>H<sub>30</sub>N<sub>2</sub>O<sub>5</sub>; MF: 0; RMF: 60; Prob 8.33%; CAS: 85441-61-8; Lib: nist\_msms; ID: 127674.

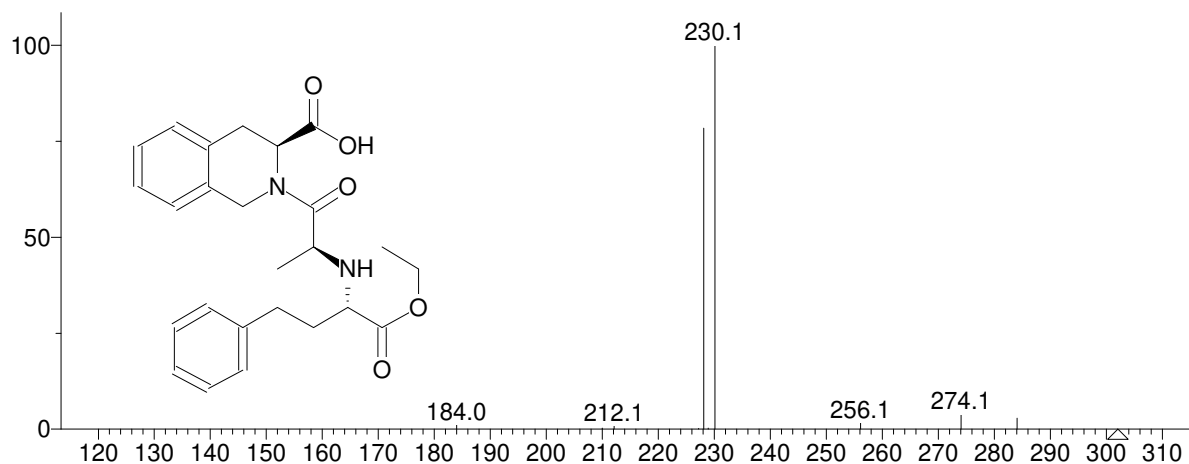

Hit 3 : Trandolapril [M+Na]<sup>+</sup>=>302.1 IT 35% P=302.1  
C<sub>24</sub>H<sub>34</sub>N<sub>2</sub>O<sub>5</sub>; MF: 0; RMF: 50; Prob 8.33%; CAS: 87679-37-6; Lib: nist\_msms; ID: 116294.

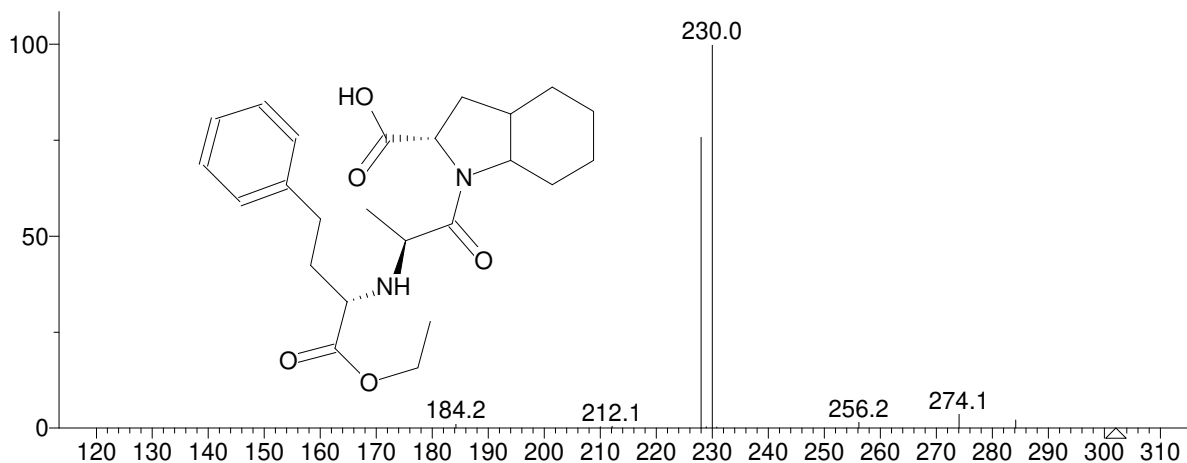

Hit 4 : Dipyridamole [M+H]<sup>+</sup>=>385.3=>302.1 IT 35% P=302.1  
C<sub>24</sub>H<sub>40</sub>N<sub>8</sub>O<sub>4</sub>; MF: 0; RMF: 34; Prob 8.33%; CAS: 58-32-2; Lib: nist\_msms; ID: 314331.

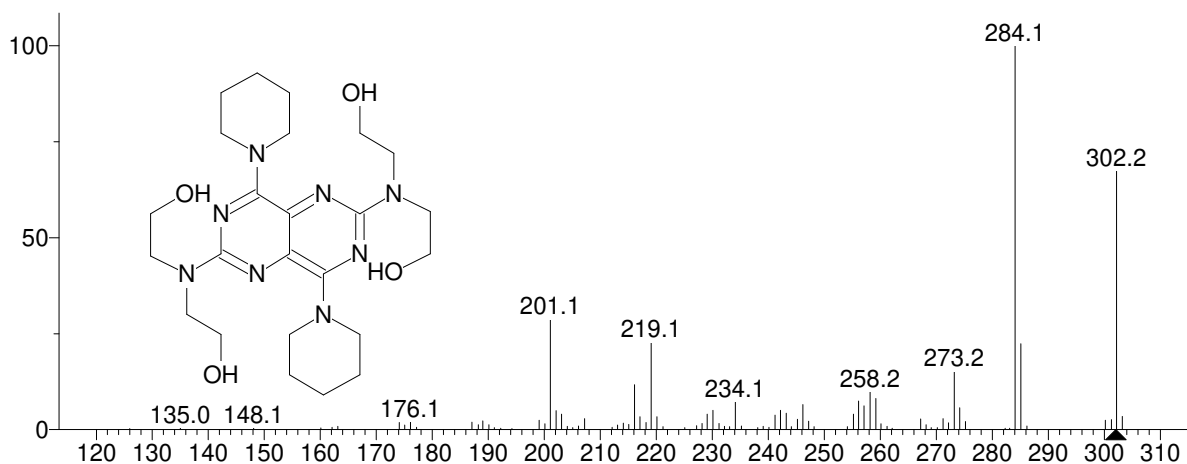

Hit 5 : Norfloxacin [M+H]<sup>+</sup>=>302.1 IT 35% P=302.1  
C<sub>16</sub>H<sub>18</sub>FN<sub>3</sub>O<sub>3</sub>; MF: 0; RMF: 32; Prob 8.33%; CAS: 70458-96-7; Lib: nist\_msms; ID: 282030.

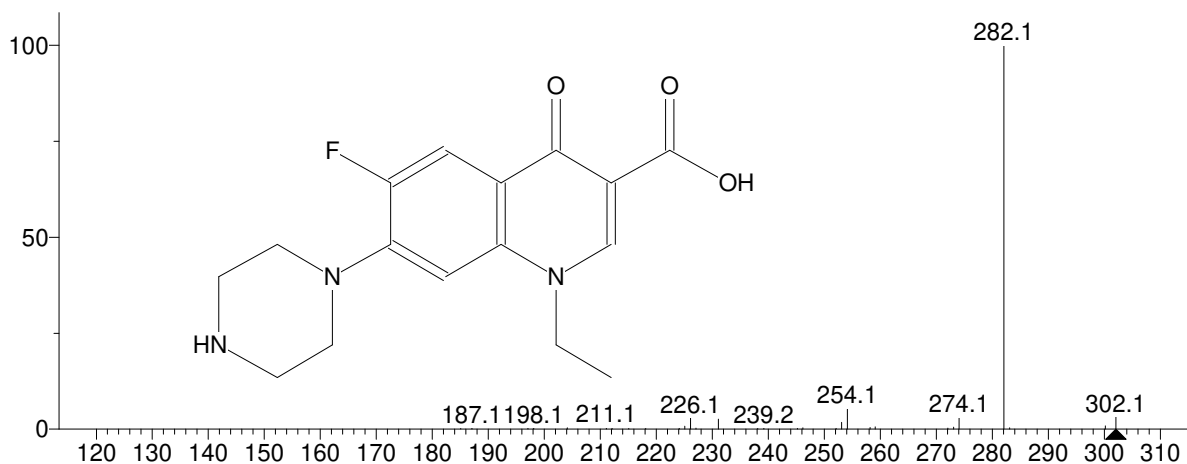

Unknown: Unknown (8.09\_434.0519m/z)  
Compound in Library Factor = 0

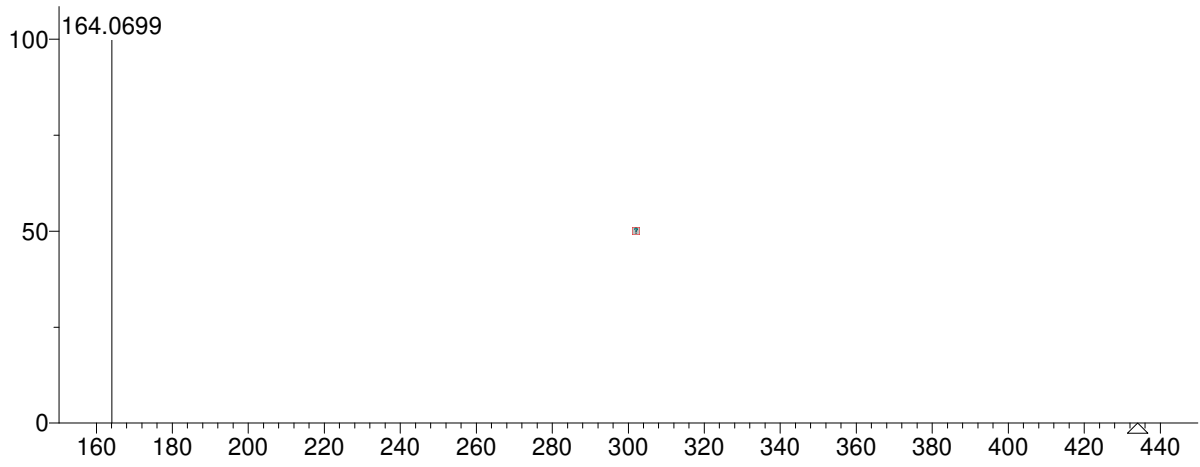

\*\* Search Report Page 1 of 2 \*\*

Unknown: Unknown (8.10\_258.1124m/z)  
Compound in Library Factor = -2387

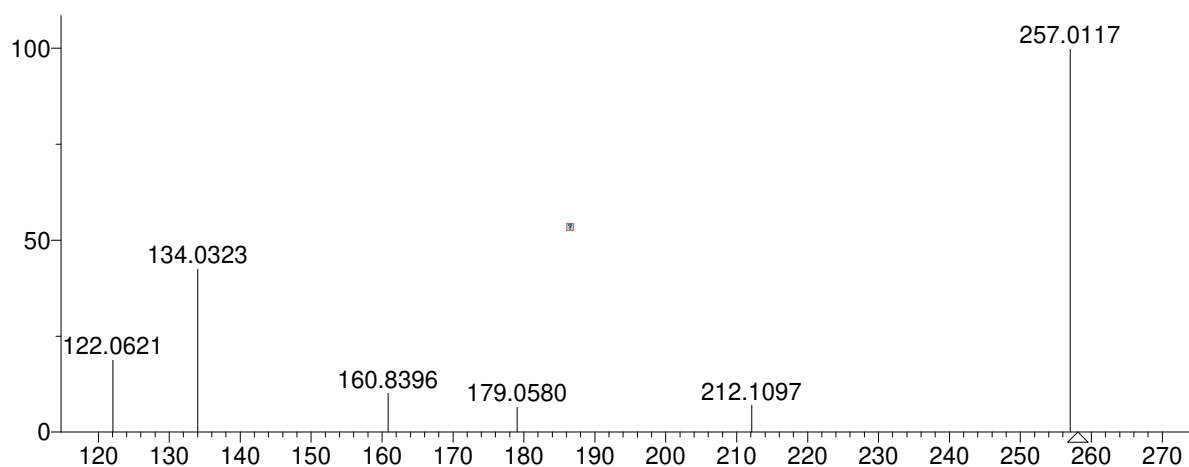

Hit 1 : Tolmetin [M+H]<sup>+</sup> IT-FT 35% P=258.1  
C<sub>15</sub>H<sub>15</sub>NO<sub>3</sub>; MF: 17; RMF: 261; Prob 23.4%; CAS: 26171-23-3; Lib: nist\_msms; ID: 135565.

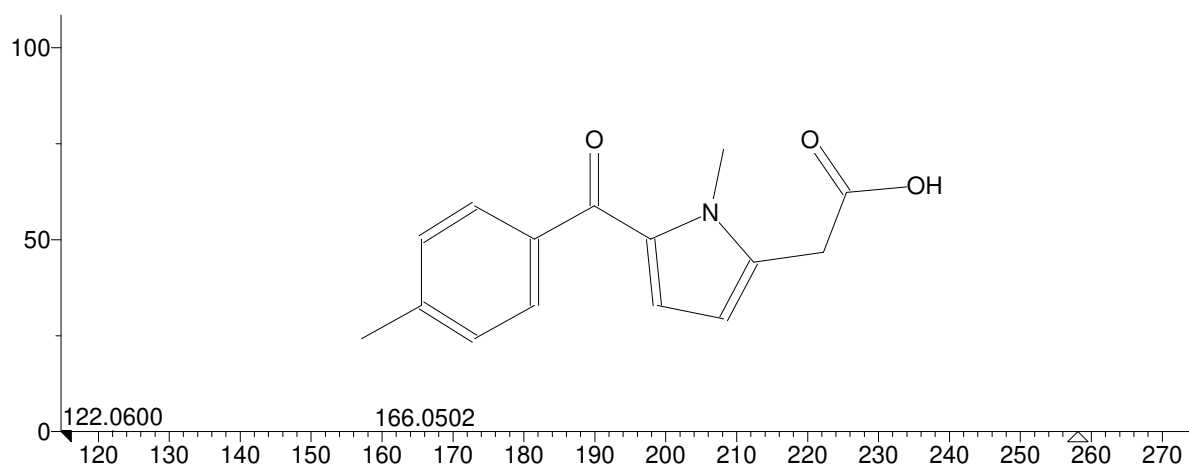

Hit 2 : NCGC00244969-01!4-[[2-[(E)-3-hydroxybut-1-enyl]-5-oxoxolan-3-yl]amino]benzaldehyde [M-H<sub>2</sub>O+H]<sup>+</sup> P  
C<sub>15</sub>H<sub>17</sub>NO<sub>4</sub>; MF: 0; RMF: 115; Prob 12.8%; Lib: mona-export-gnps; ID: 8338.

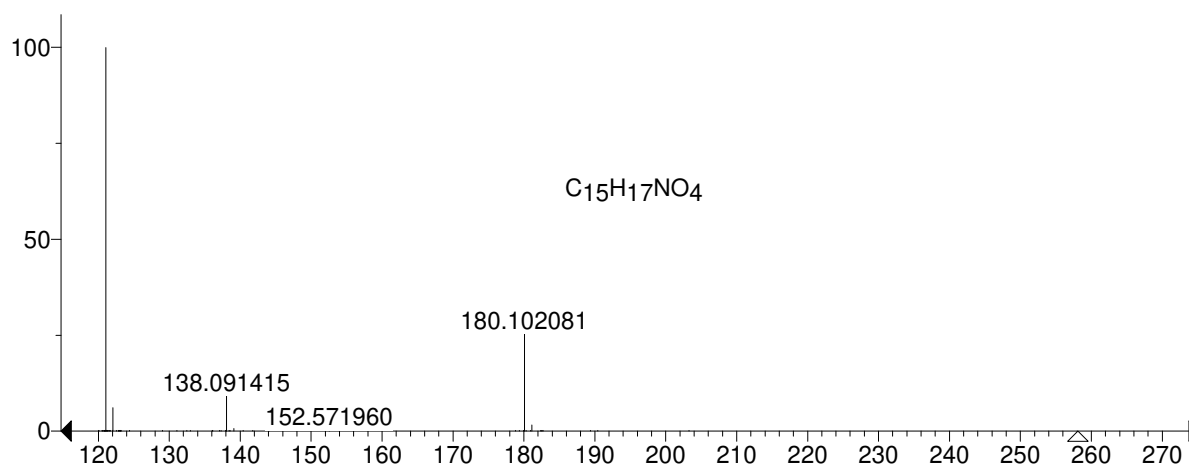

Hit 3 : NCGC00017285-06\_C15H15NO3\_9-Methoxy-2,2-dimethyl-2,6-dihydro-5H-pyrano[3,2-c]quinolin-5-one [M C15H15NO3; MF: 0; RMF: 83; Prob 12.8%; Lib: mona-export-gnps; ID: 11787.

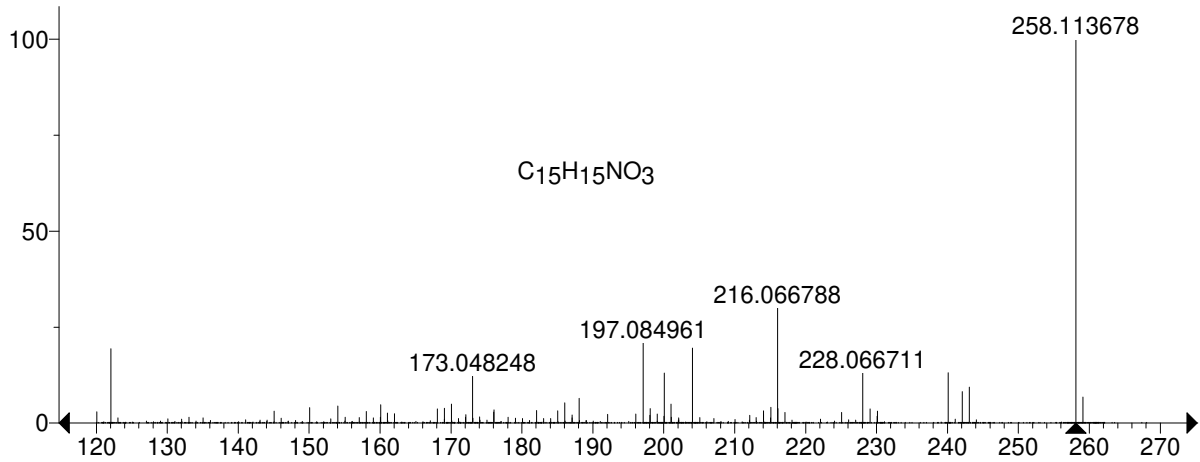

Hit 4 : 9-Methoxy-2,2-dimethyl-2,6-dihydro-pyrano[3,2-c]quinolin-5-one [M+H]<sup>+</sup> 65HCD P=258.1 C15H15NO3; MF: 0; RMF: 77; Prob 12.8%; Lib: mona-export-vf-npl\_qexactive; ID: 17121.

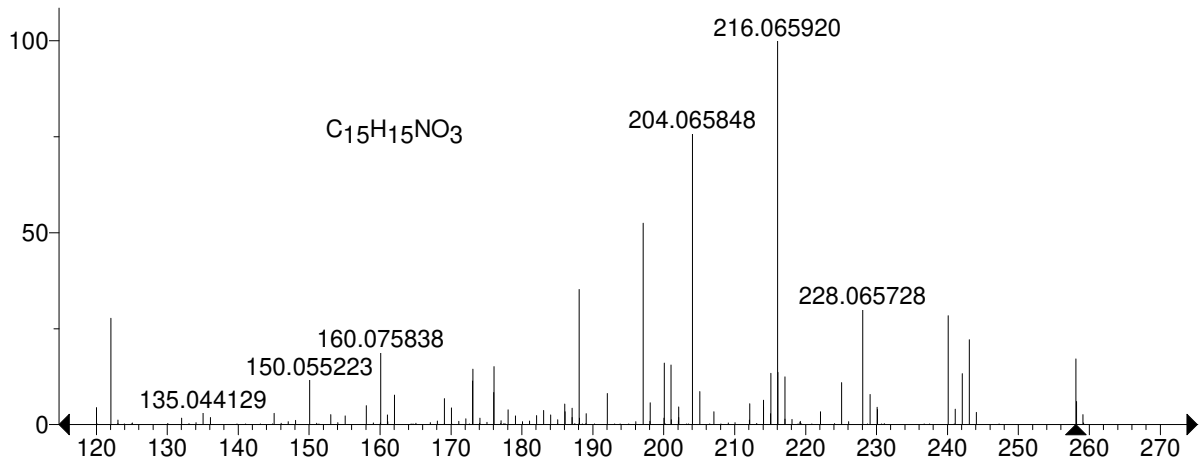

Hit 5 : NCGC00017285-04!HAPLAMINE [M+H]<sup>+</sup> P=258.1 C15H15NO3; MF: 0; RMF: 60; Prob 12.8%; Lib: mona-export-gnps; ID: 1103.

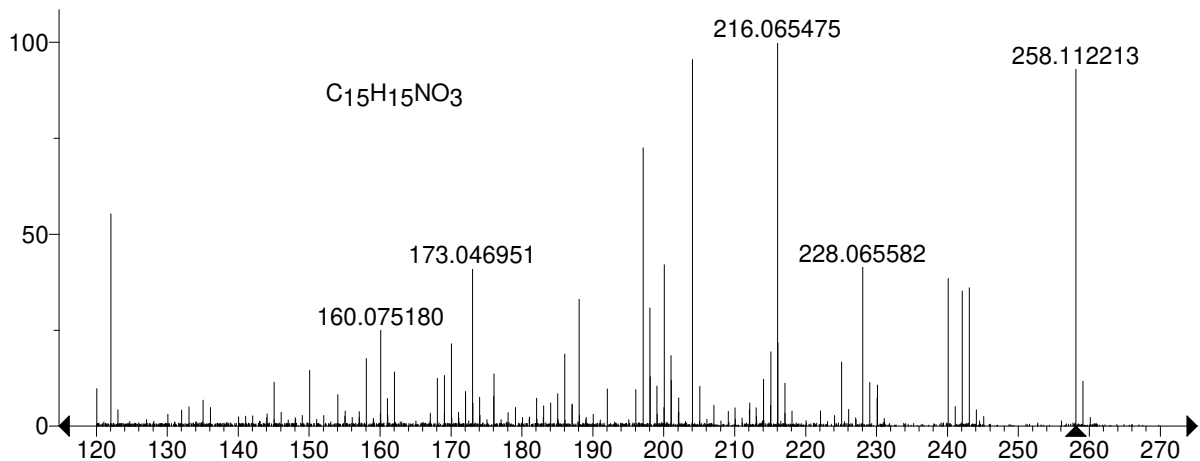



Unknown: Unknown (8.10\_693.2246m/z)  
Compound in Library Factor = 0

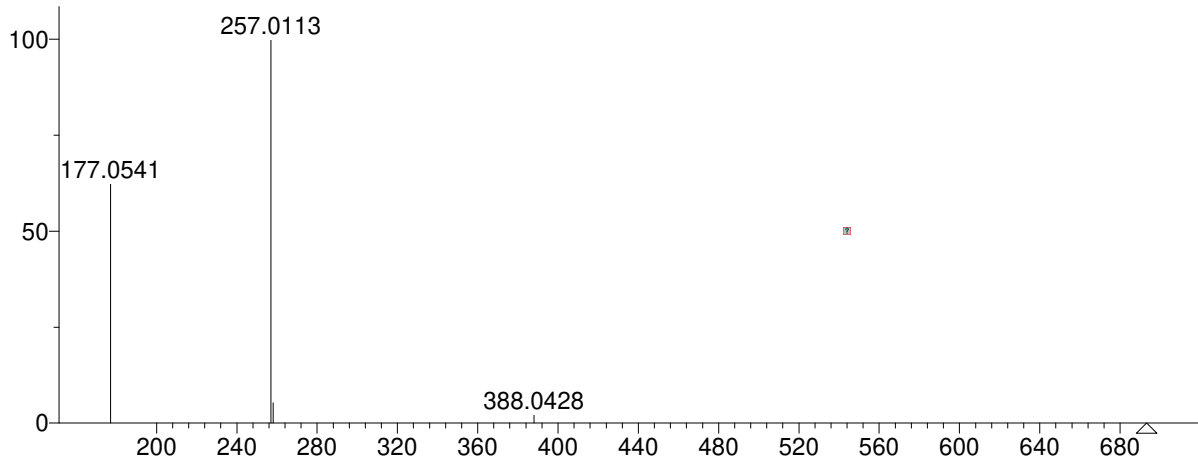

Unknown: Unknown (8.10\_722.1788m/z)  
Compound in Library Factor = 0

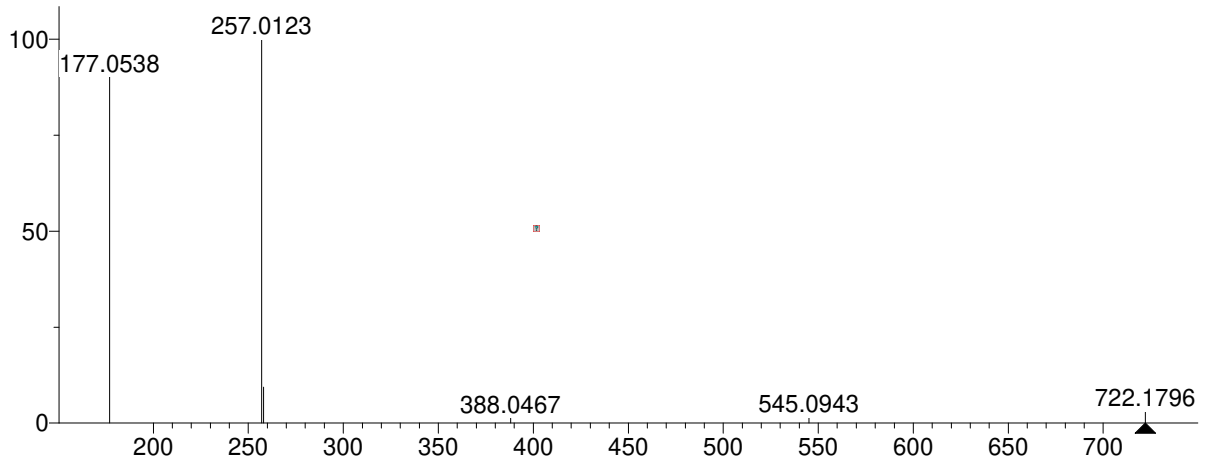

Unknown: Unknown (8.11\_305.0689m/z)  
Compound in Library Factor = -1142

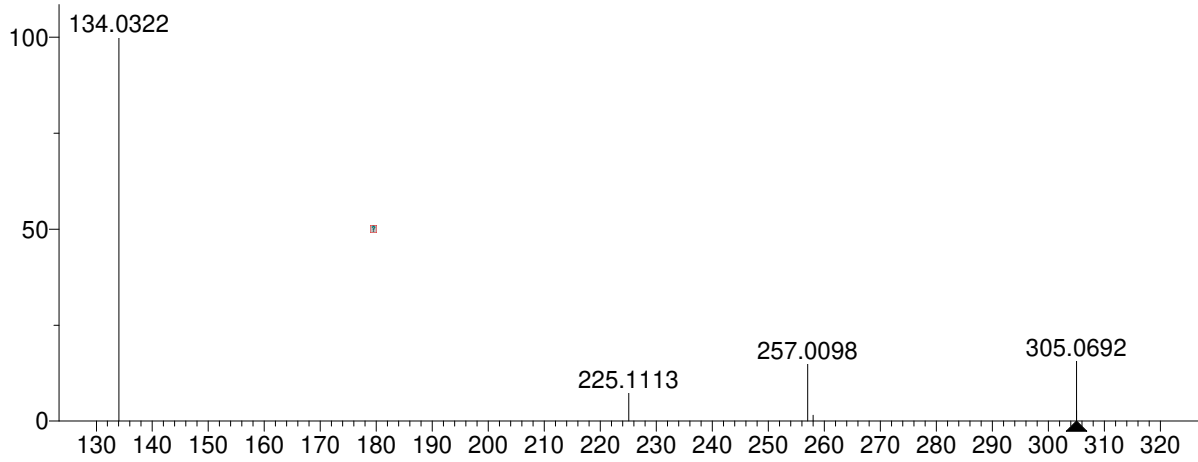

Hit 1 : 12-hydroxy Jasmonic acid sulfate ( ) [M-H]<sup>-</sup> P=305.1  
C<sub>12</sub>H<sub>18</sub>O<sub>7</sub>S; MF: 114; RMF: 429; Prob 65.2%; Lib: phytofrag2018\_final\_060219; ID: 8.

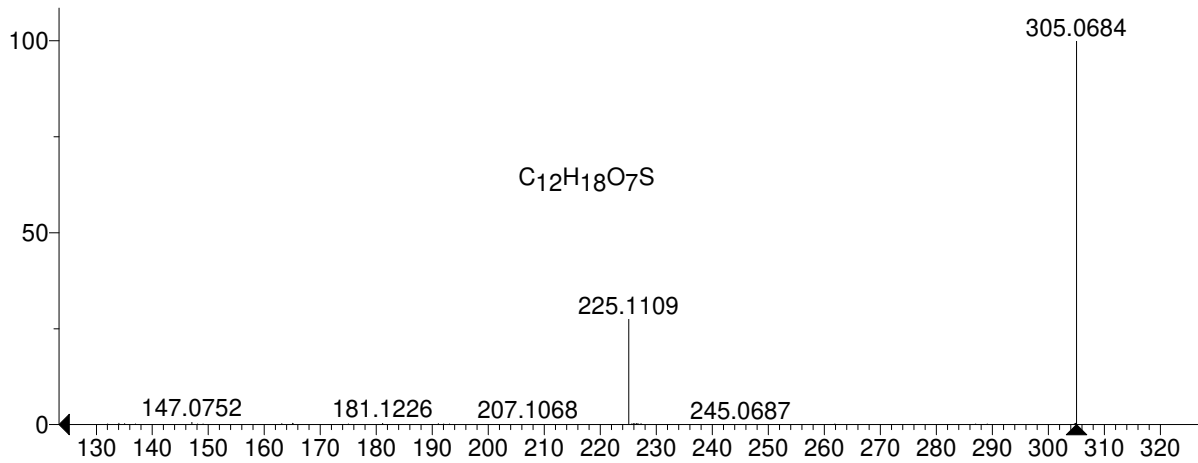

Hit 2 : Sulfo jasmonate; PlaSMA ID-611 [M-H]<sup>-</sup> P=305.1  
C<sub>12</sub>H<sub>18</sub>O<sub>7</sub>S; MF: 77; RMF: 367; Prob 15.9%; Lib: biomsms-neg-plasma; ID: 293.

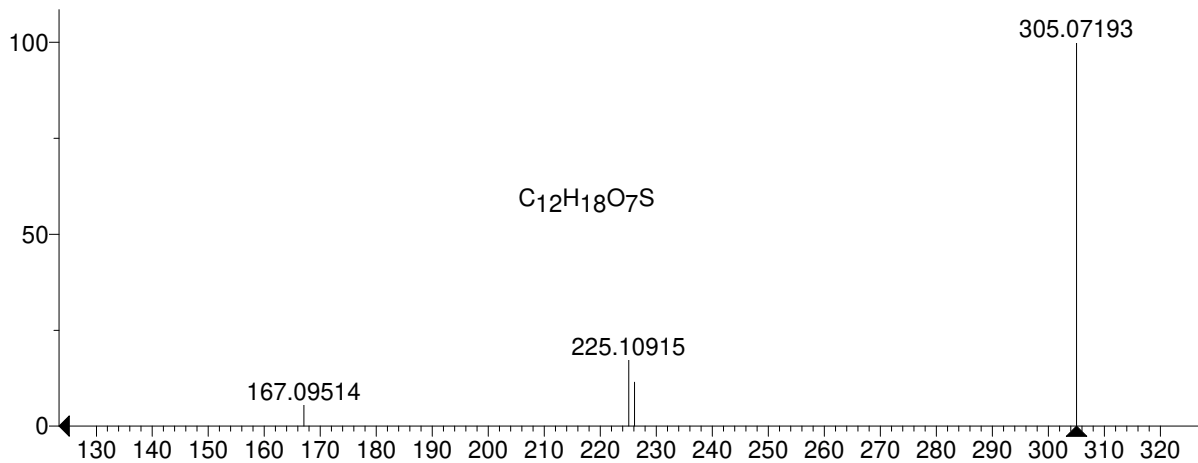

Hit 3 : Gallocatechin [M-H]- 45eV P=305.1  
C<sub>15</sub>H<sub>14</sub>O<sub>7</sub>; MF: 17; RMF: 577; Prob 2.81%; Lib: msms-neg-metabobase; ID: 810.

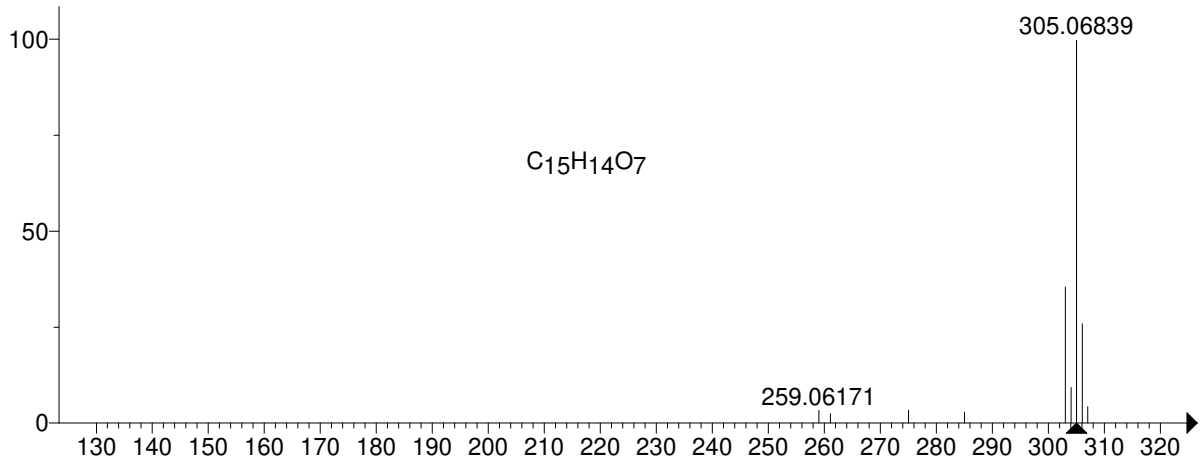

Hit 4 : Glutathione, oxidized [M-2H]2- HCD 8V P=305.1  
C<sub>20</sub>H<sub>32</sub>N<sub>6</sub>O<sub>12</sub>S<sub>2</sub>; MF: 13; RMF: 307; Prob 2.38%; CAS: 27025-41-8; Lib: nist\_msms; ID: 185529.

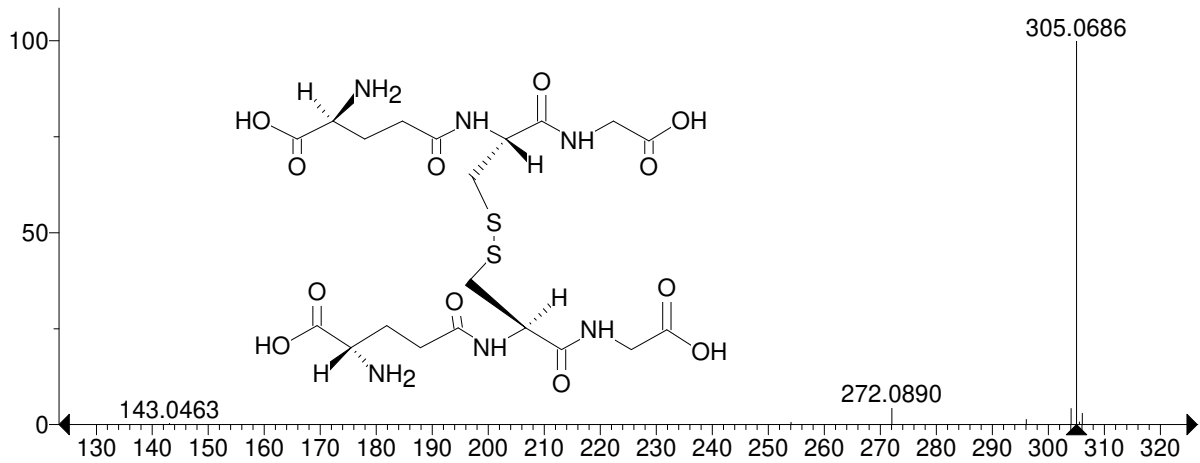

Hit 5 : (-)-Epigallocatechin [M-H]- HCD 13V P=305.1  
C<sub>15</sub>H<sub>14</sub>O<sub>7</sub>; MF: 11; RMF: 310; Prob 2.19%; CAS: 970-74-1; Lib: nist\_msms; ID: 235098.

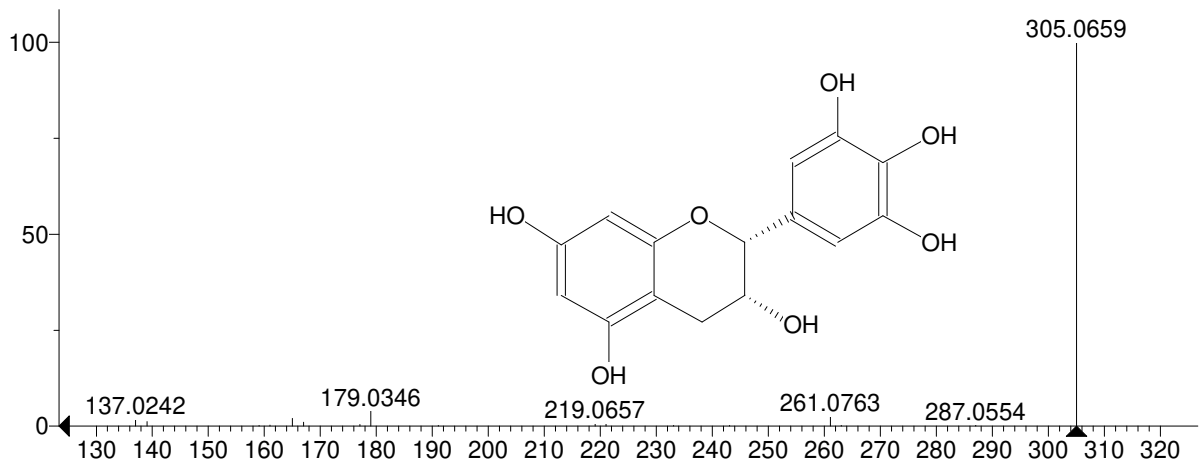

Unknown: Unknown (8.11\_414.0856m/z)  
Compound in Library Factor = 0

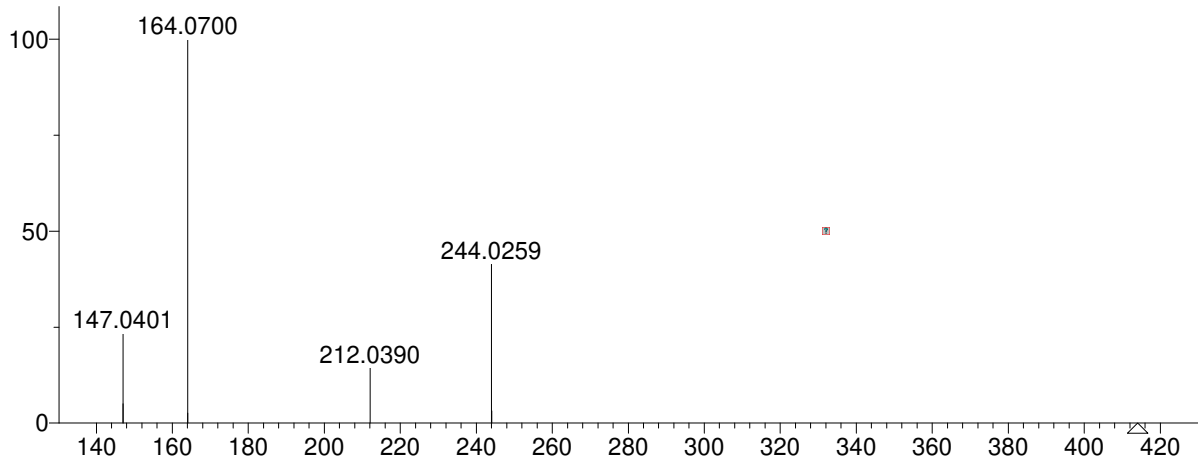

Hit 1 : 3H-Cyclopenta[c]quinoline, 4-(6-bromo-1,3-benzodioxol-5-yl)-3a,4,5,9b-tetrahydro-8-(1-methylethyl)-, (3aR  
C22H22BrNO2; MF: 0; RMF: 89; Prob 100.0%; CAS: 1392487-51-2; Lib: nist\_msms; ID: 509997.

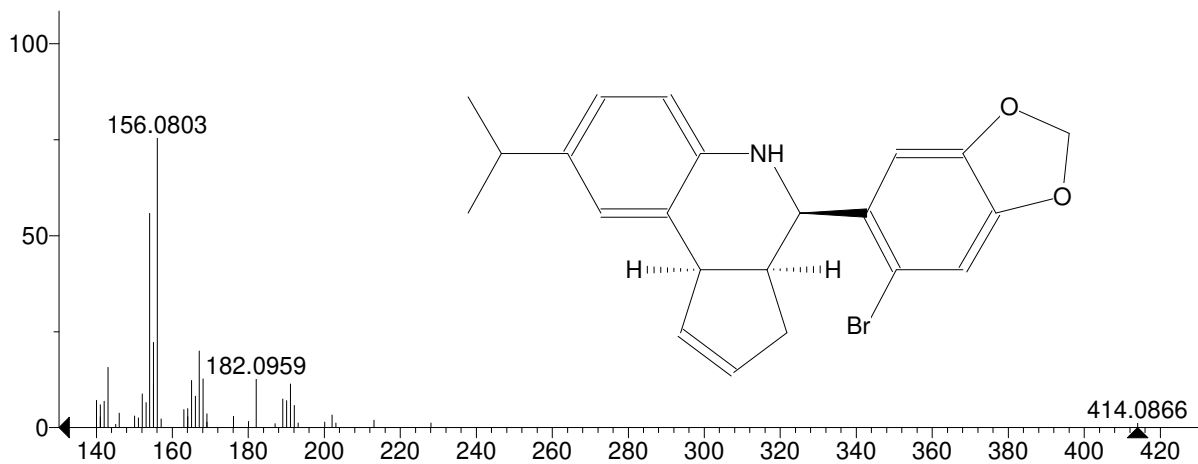

Unknown: Unknown (8.11\_722.1756m/z)  
Compound in Library Factor = 0

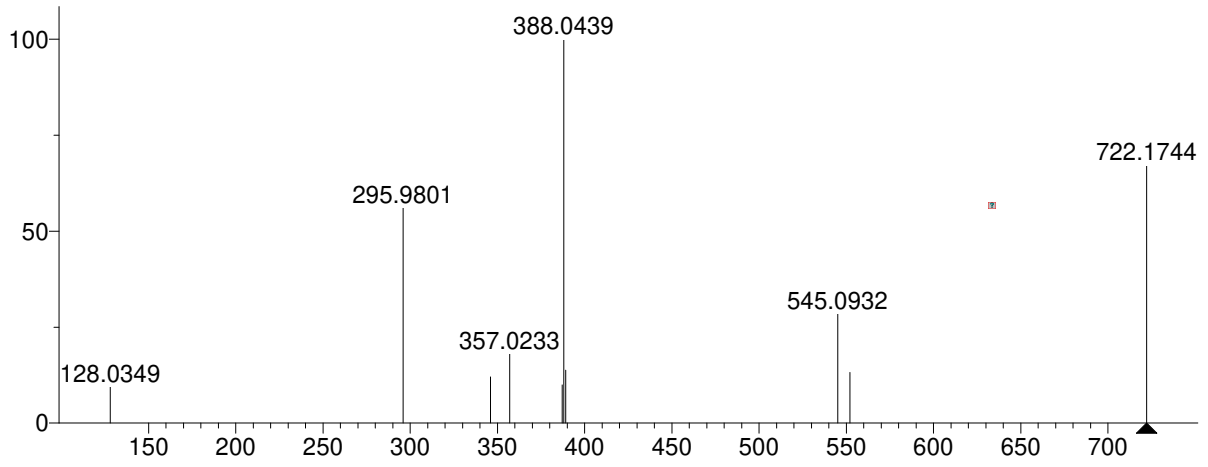

Unknown: Unknown (8.15\_257.1622m/z)  
Compound in Library Factor = 0

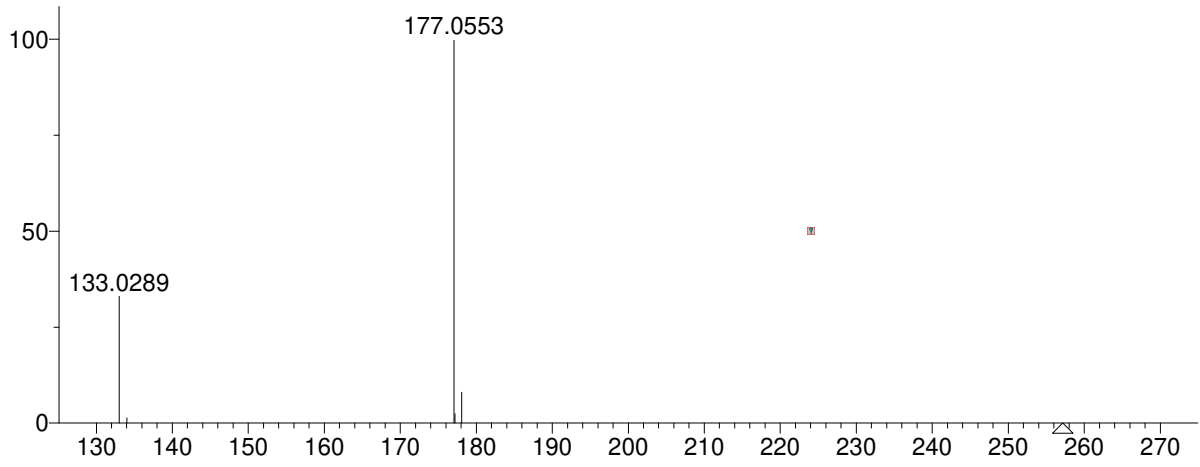

Unknown: Unknown (8.15\_481.0820m/z)  
Compound in Library Factor = 0

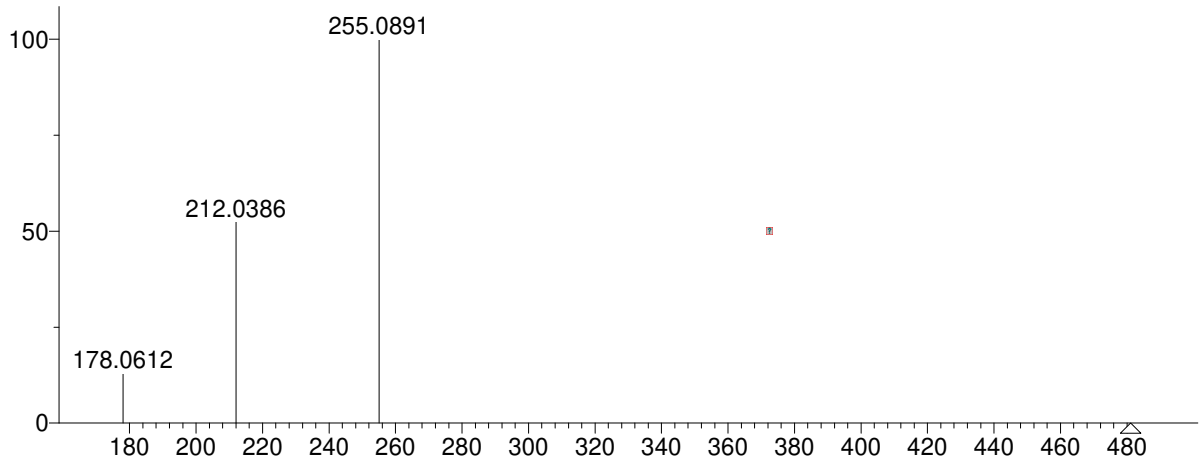



Unknown: Unknown (8.16\_255.0874m/z)  
Compound in Library Factor = 0

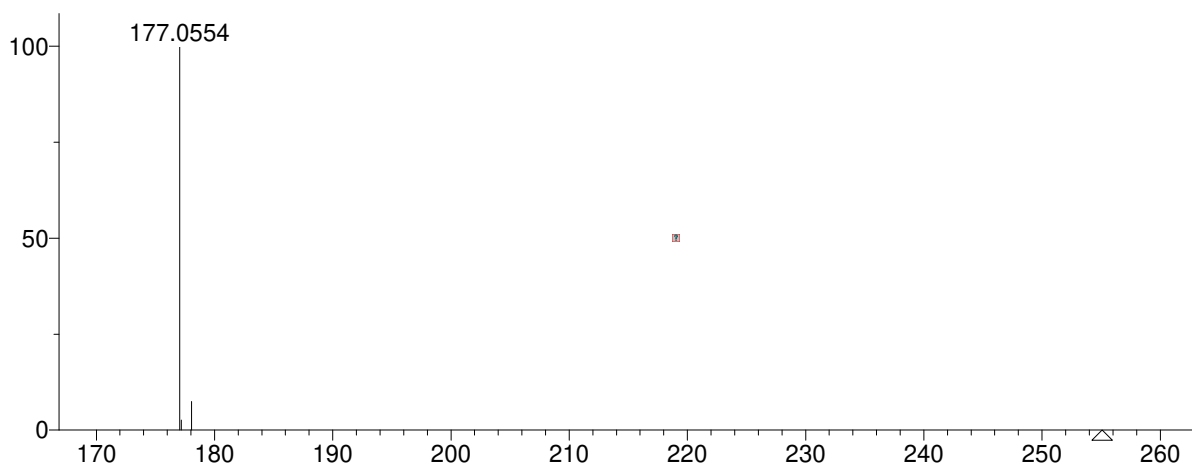

Hit 1 : phenylglucoside [M-H]<sup>-</sup> 65HCD P=255.1  
C<sub>12</sub>H<sub>16</sub>O<sub>6</sub>; MF: 0; RMF: 41; Prob 100.0%; Lib: mona-export-1c-ms-ms\_negative\_mode; ID: 17536.

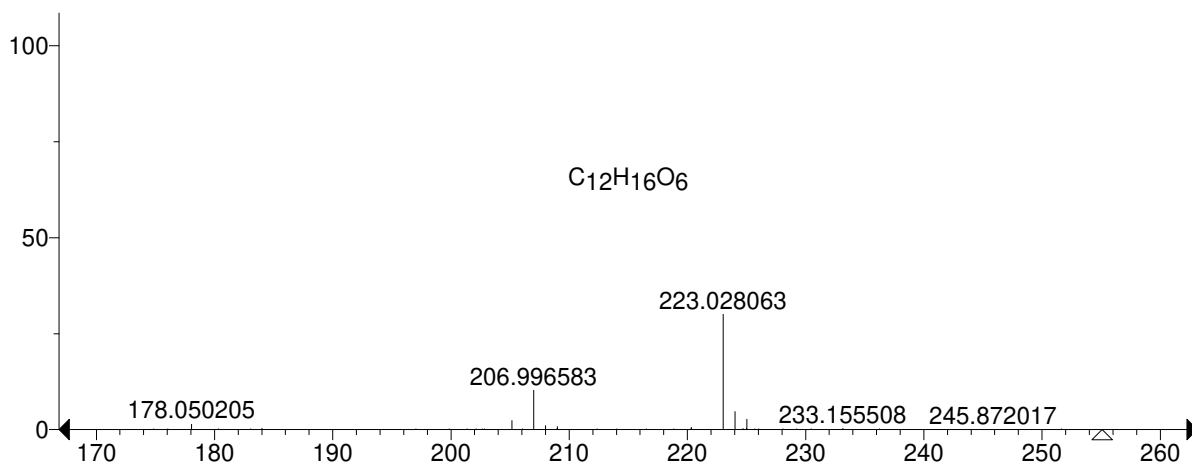

Unknown: Unknown (8.16\_375.1300m/z)  
Compound in Library Factor = -979

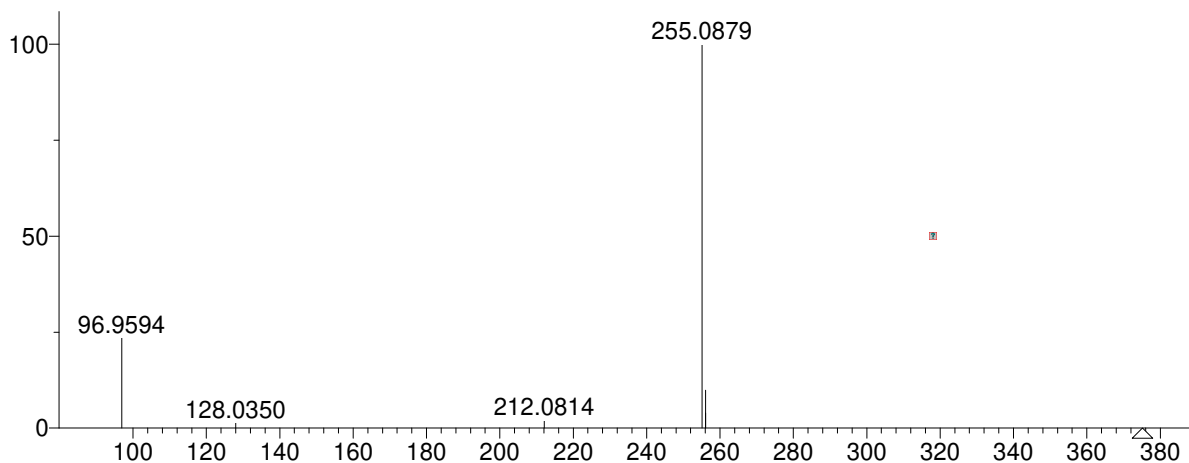

Hit 1 : (-)-Riboflavin [M-H]<sup>-</sup> IT 35% P=375.1  
C<sub>17</sub>H<sub>20</sub>N<sub>4</sub>O<sub>6</sub>; MF: 278; RMF: 926; Prob 84.9%; CAS: 83-88-5; Lib: nist\_msms; ID: 280474.

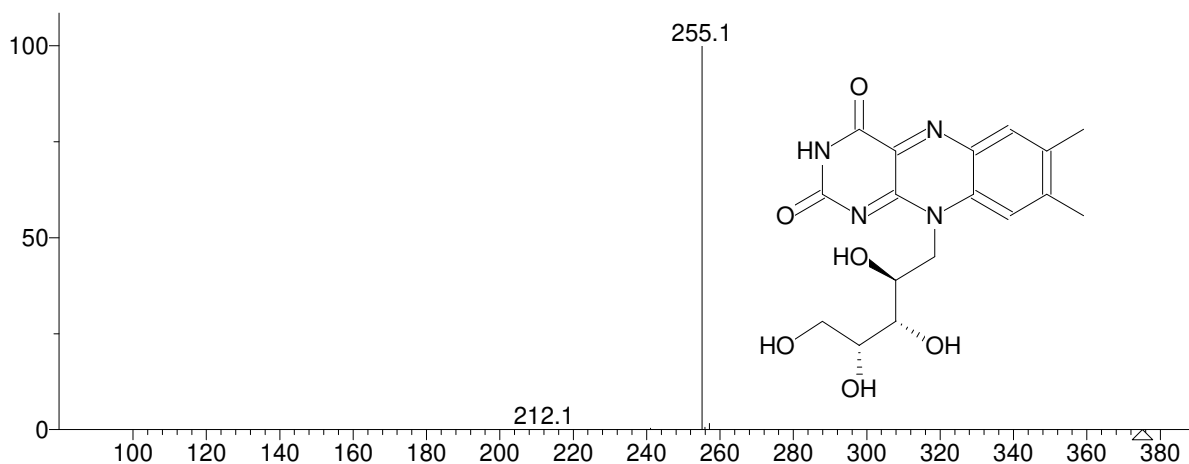

Hit 2 : RIBOFLAVIN [M-H]<sup>-</sup> P=375.1  
C<sub>17</sub>H<sub>20</sub>N<sub>4</sub>O<sub>6</sub>; MF: 208; RMF: 804; Prob 12.4%; Lib: msms-neg-gnps; ID: 298.

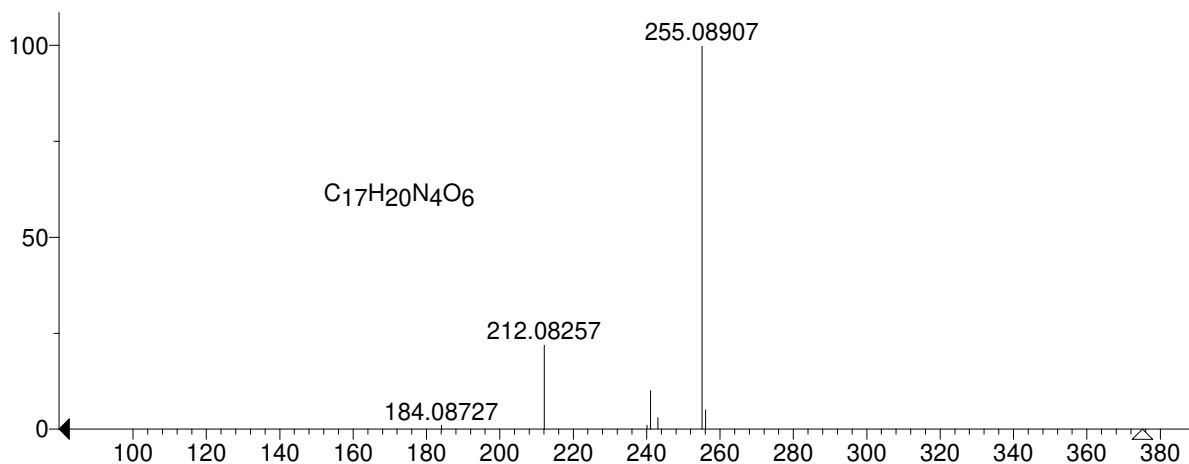

Hit 3 : RIBOFLAVIN

C<sub>17</sub>H<sub>20</sub>N<sub>4</sub>O<sub>6</sub>; MF: 94; RMF: 782; Prob 0.75%; Lib: embl neg mcg; ID: 324.

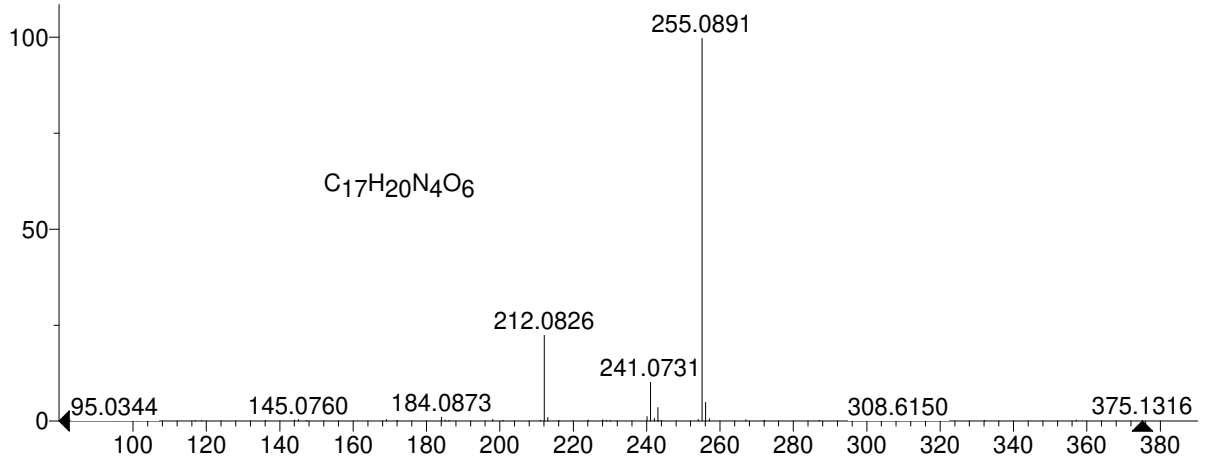

Hit 4 : Riboflavin [M-H]<sup>-</sup> 35eV P=375.1

C<sub>17</sub>H<sub>20</sub>N<sub>4</sub>O<sub>6</sub>; MF: 91; RMF: 664; Prob 0.66%; Lib: msms-neg-fiehhilic; ID: 1245.

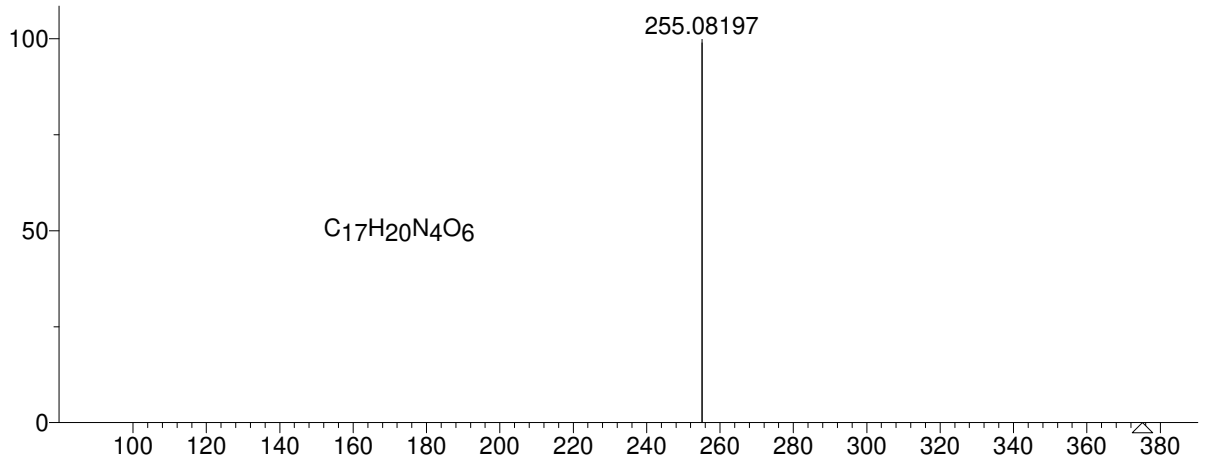

Hit 5 : (-)-Riboflavin; LC-ESI-QTOF; MS2; CE [M-H]<sup>-</sup> P=375.1

C<sub>17</sub>H<sub>20</sub>N<sub>4</sub>O<sub>6</sub>; MF: 85; RMF: 790; Prob 0.52%; Lib: msms-neg-massbank; ID: 4608.

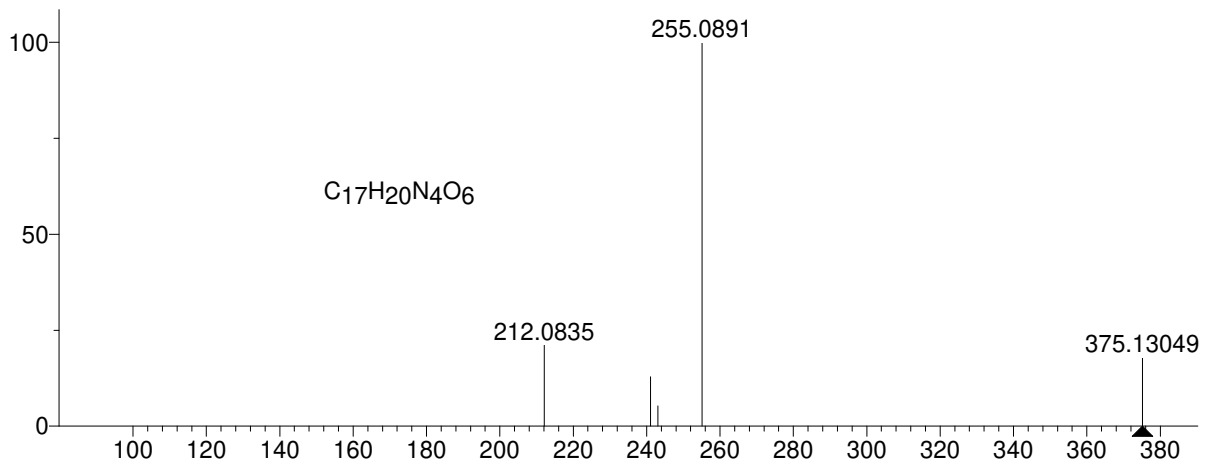

Unknown: Unknown (8.17\_257.0120m/z)  
Compound in Library Factor = 0

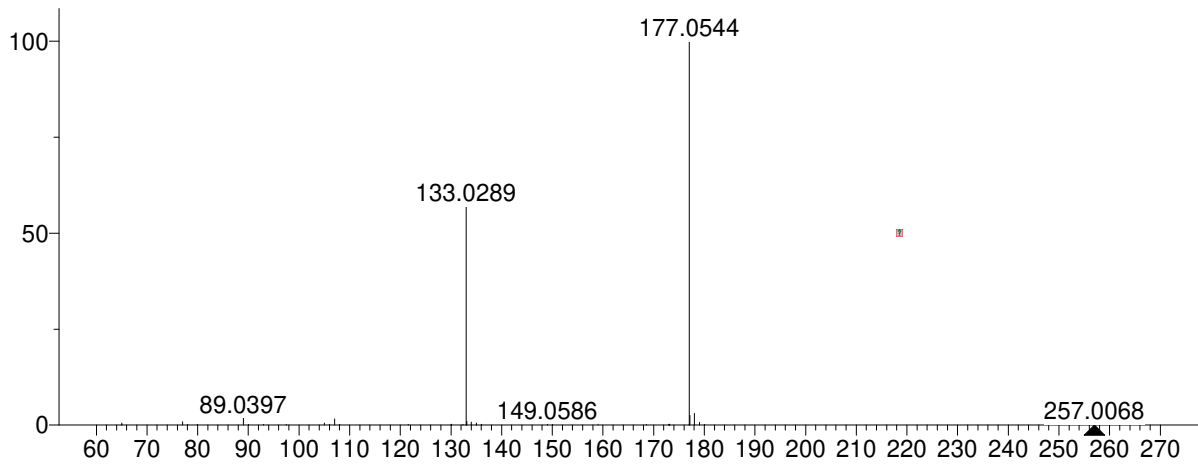

Unknown: Unknown (8.18\_537.0116m/z)  
Compound in Library Factor = 0

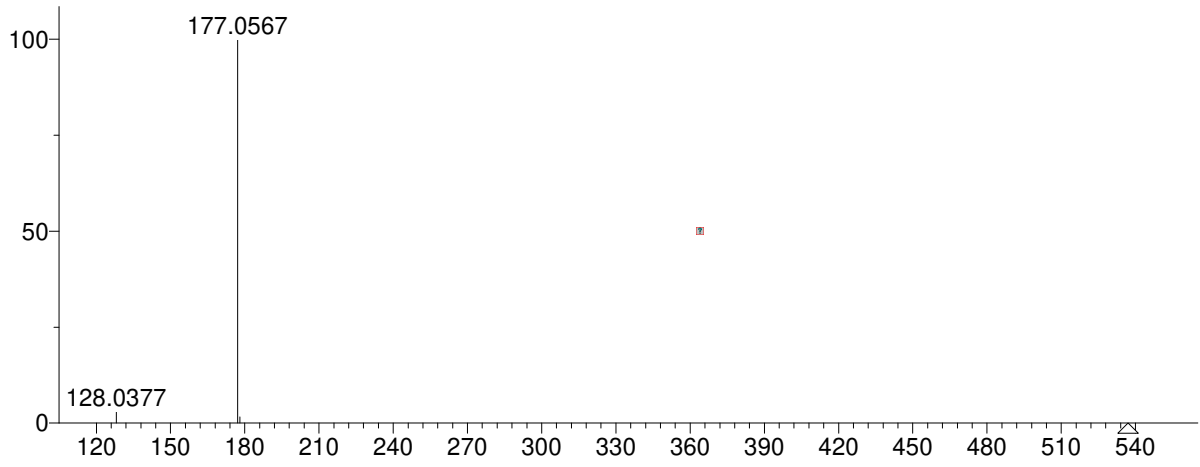

Unknown: Unknown (8.27\_389.1458m/z)  
Compound in Library Factor = 0

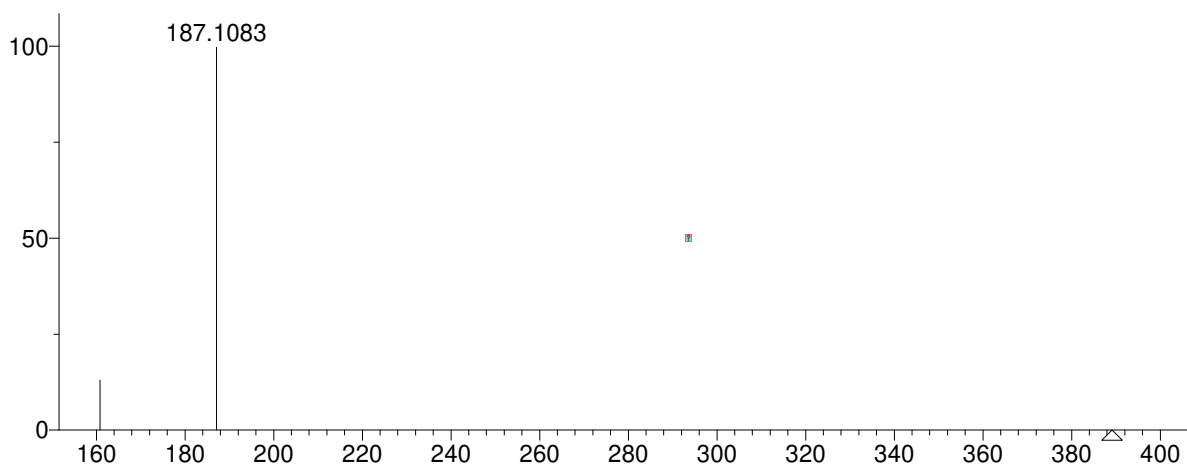

Hit 1 : geniposide [M+H]<sup>+</sup> 40 P=389.1  
; MF: 0; RMF: 9; Prob 50.0%; Lib: mona-export-vf-npl\_qtof; ID: 1651.

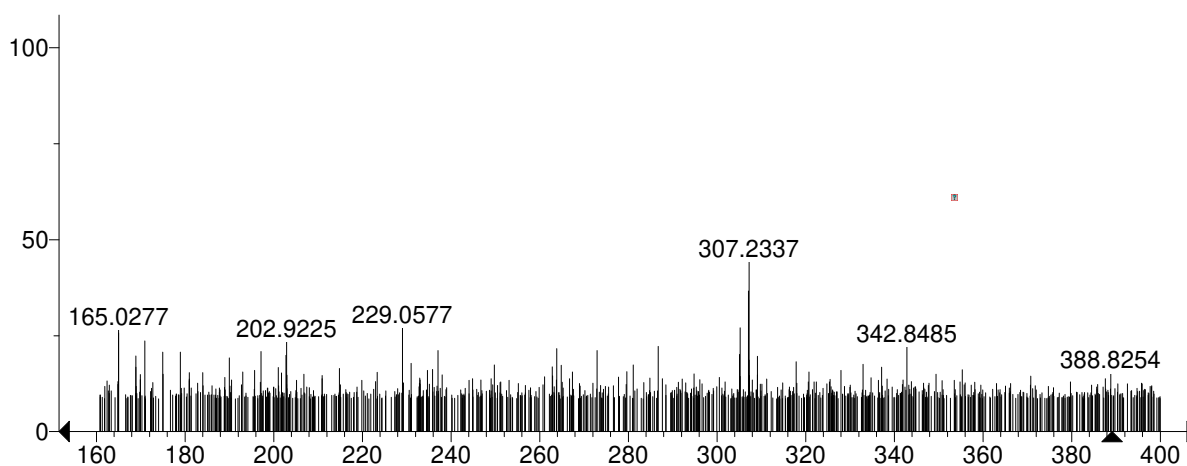

Hit 2 : methyl (1S)-7-hydroxy-7-methyl-1-[(2S,3R,4S,5S,6R)-3,4,5-trihydroxy-6-(hydroxymethyl)oxan-2-yl]oxy-4a,5  
C<sub>17</sub>H<sub>26</sub>O<sub>10</sub>; MF: 0; RMF: 4; Prob 50.0%; Lib: mona-export-lc-ms-ms\_negative\_mode; ID: 20423.

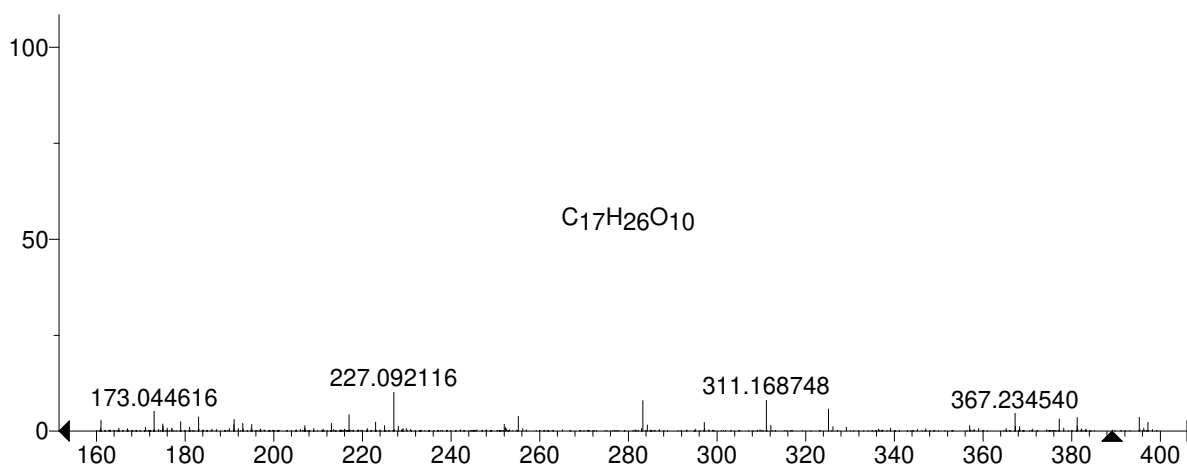

\*\* Search Report Page 1 of 2 \*\*

Unknown: Unknown (8.31\_197.1282m/z)  
Compound in Library Factor = -344

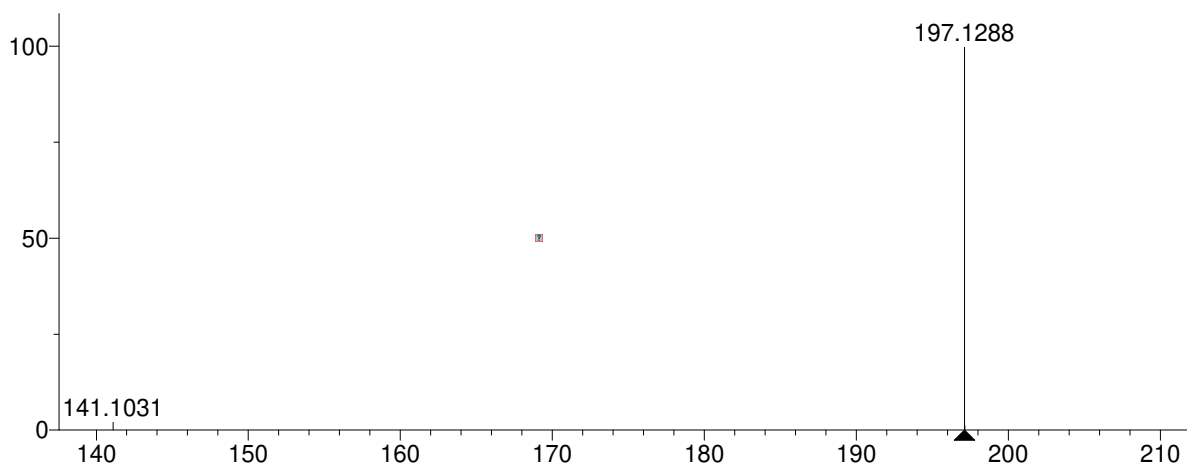

Hit 1 : L-N5-(1-Imino-3-pentenyl)ornithine [M+H-NH3]<sup>+</sup> HCD 61V P=197.1  
C<sub>10</sub>H<sub>19</sub>N<sub>3</sub>O<sub>2</sub>; MF: 357; RMF: 984; Prob 97.2%; CAS: 751479-44-4; Lib: nist\_msms; ID: 165506.

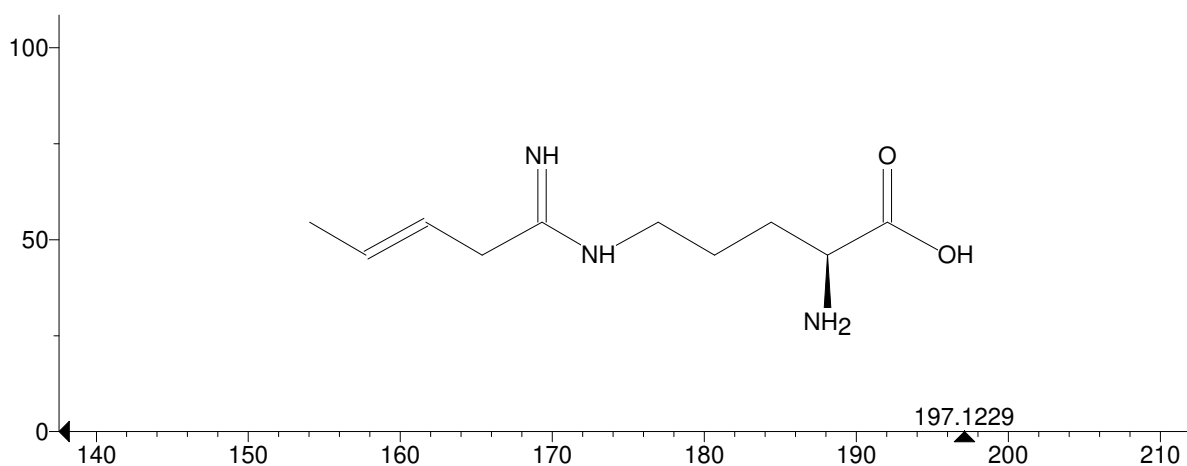

Hit 2 : D-Desthiobiotin [M+H-H<sub>2</sub>O]<sup>+</sup> HCD 15V P=197.1  
C<sub>10</sub>H<sub>18</sub>N<sub>2</sub>O<sub>3</sub>; MF: 207; RMF: 901; Prob 2.72%; CAS: 533-48-2; Lib: nist\_msms; ID: 489080.

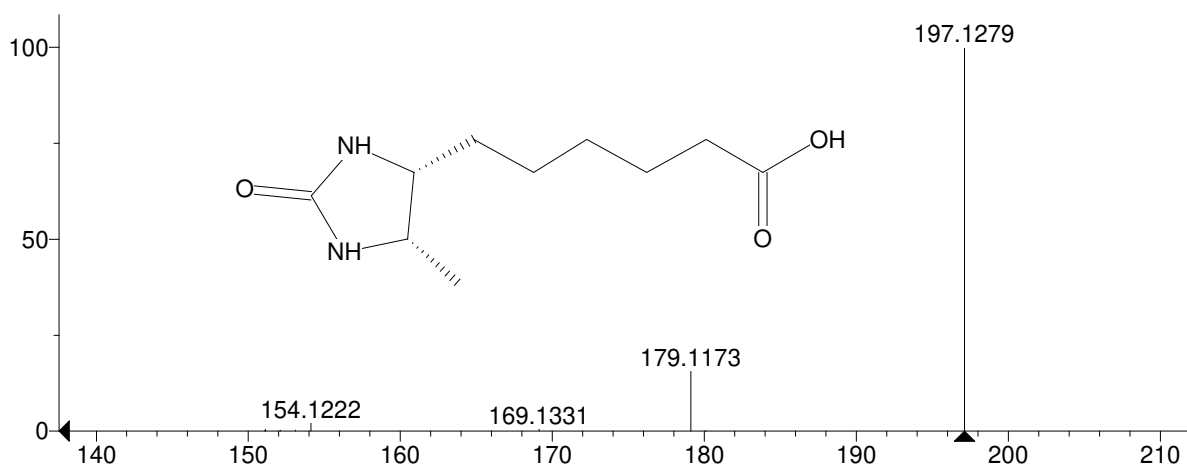

\*\* Search Report Page 2 of 2 \*\*

Hit 3 : NCGC00381364-01|3-propan-2-yl-2,3,6,7,8,8a-hexahydropyrrolo[1,2-a]pyrazine-1,4-dione [M+H]<sup>+</sup> P=197  
C<sub>10</sub>H<sub>16</sub>N<sub>2</sub>O<sub>2</sub>; MF: 43; RMF: 696; Prob 0.06%; Lib: mona-export-gnps; ID: 6310.

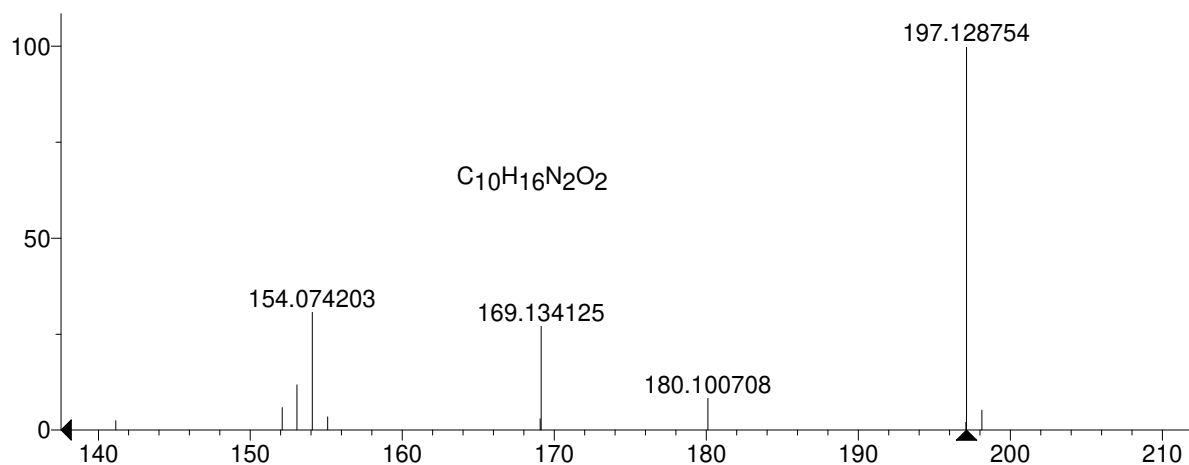

Hit 4 : Val-Phe-Lys [M+2H]<sup>2+</sup> QTOF 20V P=197.1  
C<sub>20</sub>H<sub>32</sub>N<sub>4</sub>O<sub>4</sub>; MF: 23; RMF: 406; Prob 0.02%; Lib: nist\_msms; ID: 54274.

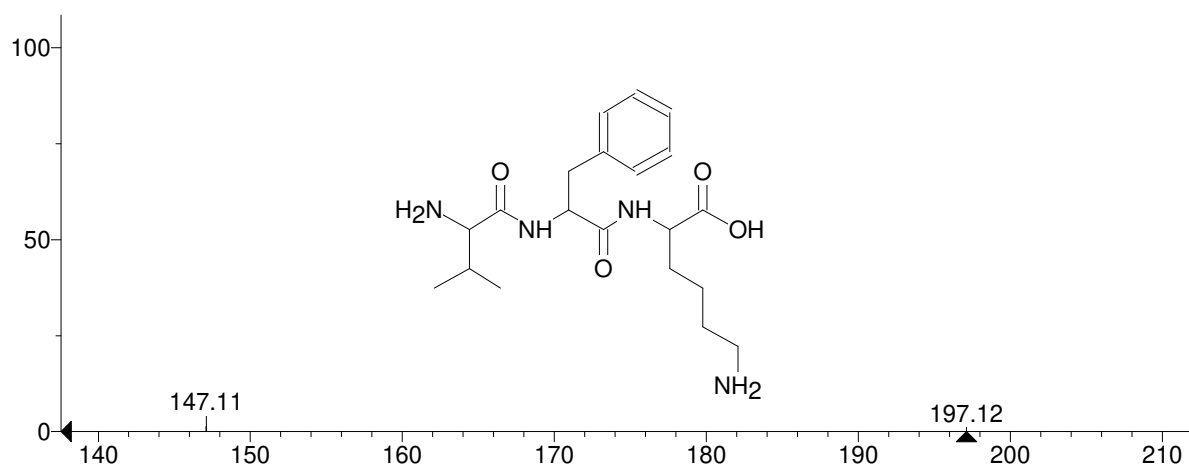

Hit 5 : NCGC00381364-02\_C10H16N2O2\_Pyrrolo[1,2-a]pyrazine-1,4-dione, hexahydro-3-(1-methylethyl)- [M+H]  
C<sub>10</sub>H<sub>16</sub>N<sub>2</sub>O<sub>2</sub>; MF: 5; RMF: 551; Prob 0.01%; Lib: mona-export-gnps; ID: 10512.

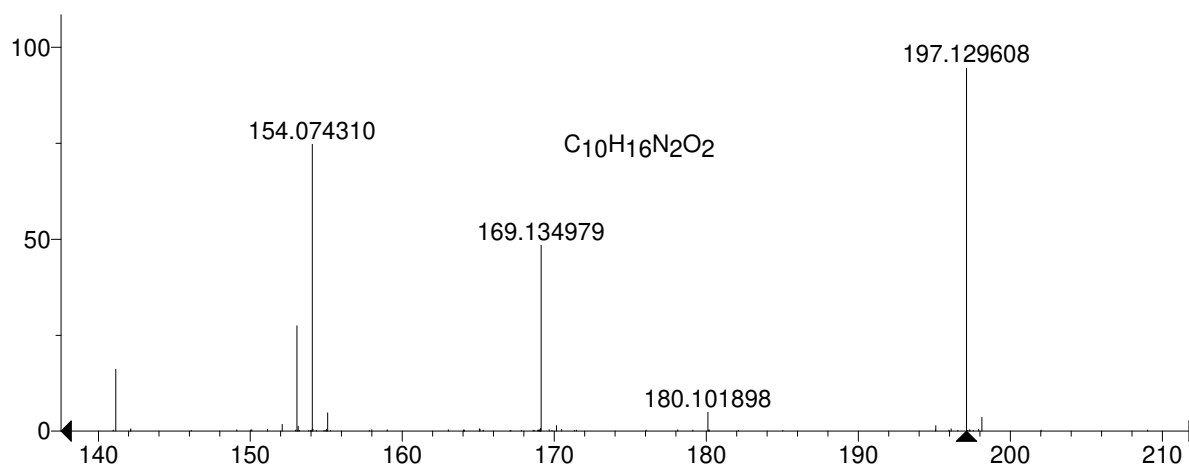



Unknown: Unknown (8.31\_241.1188m/z)  
Compound in Library Factor = -589

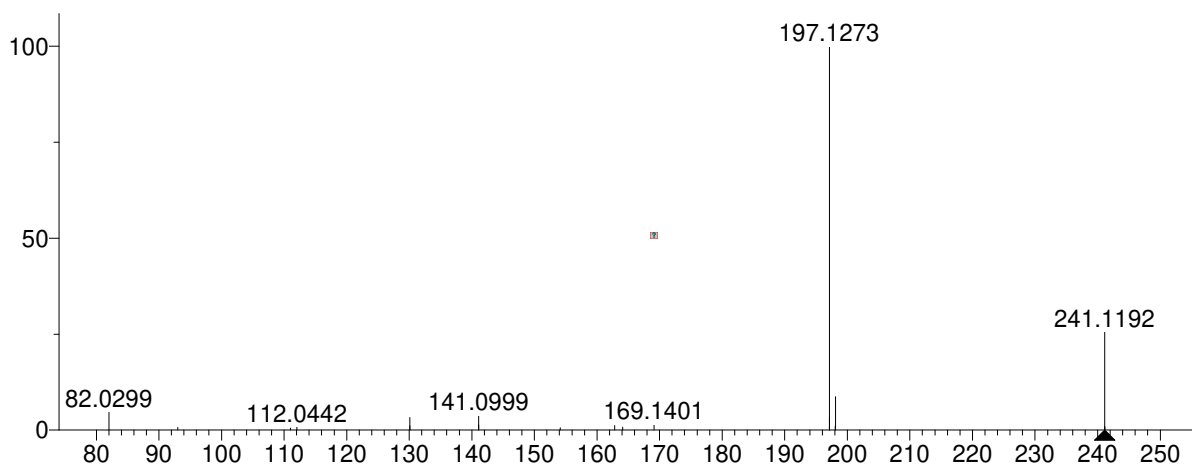

Hit 1 : Pyroglutamyl-Isoleucine; PlaSMA ID-369 [M-H]<sup>-</sup> P=241.1  
C<sub>11</sub>H<sub>18</sub>N<sub>2</sub>O<sub>4</sub>; MF: 378; RMF: 665; Prob 100.0%; Lib: biomsmms-neg-plasma; ID: 400.

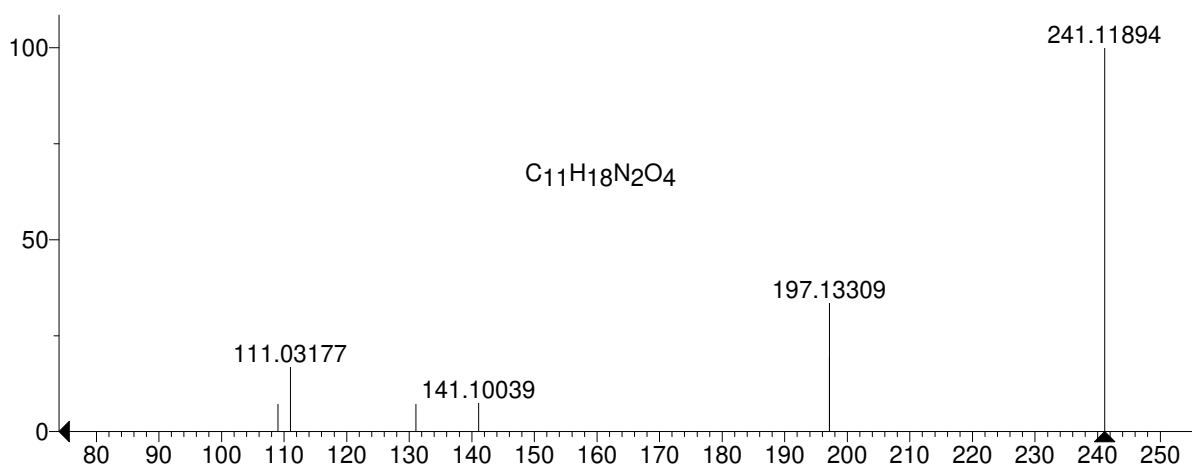

Unknown: Unknown (8.31\_401.9606m/z)  
Compound in Library Factor = 0

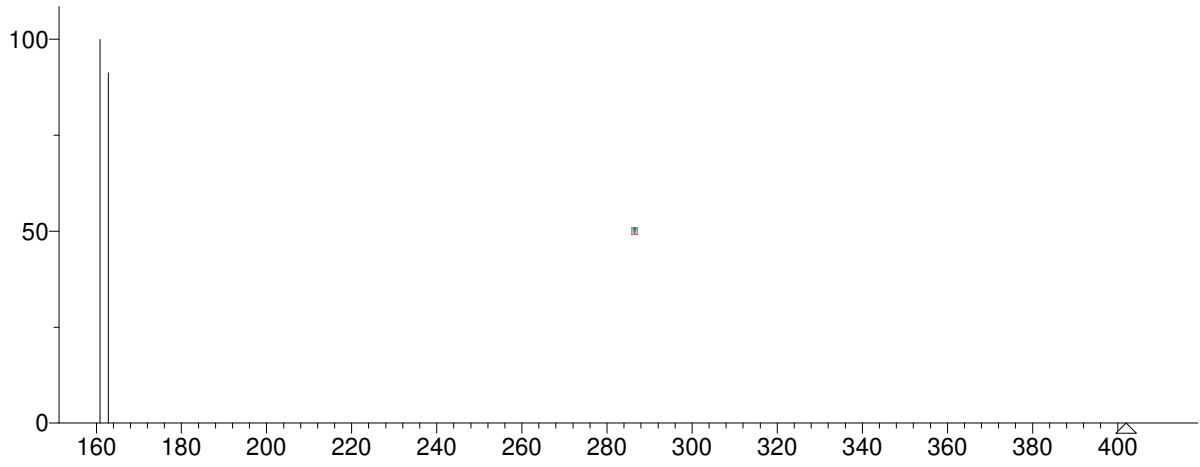

Unknown: Unknown (8.31\_403.9564m/z)  
Compound in Library Factor = 0

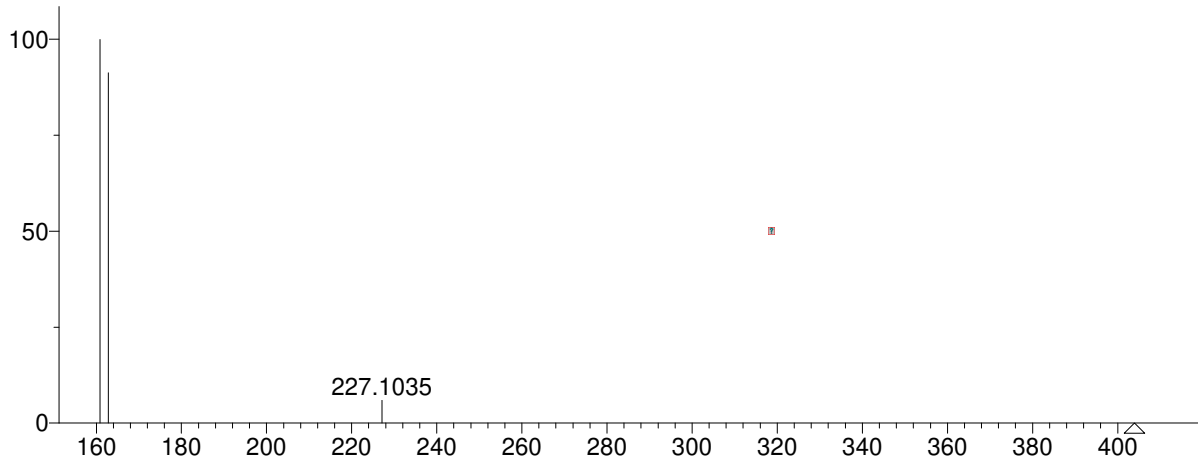

Unknown: Unknown (8.31\_483.2463m/z)  
Compound in Library Factor = -2176

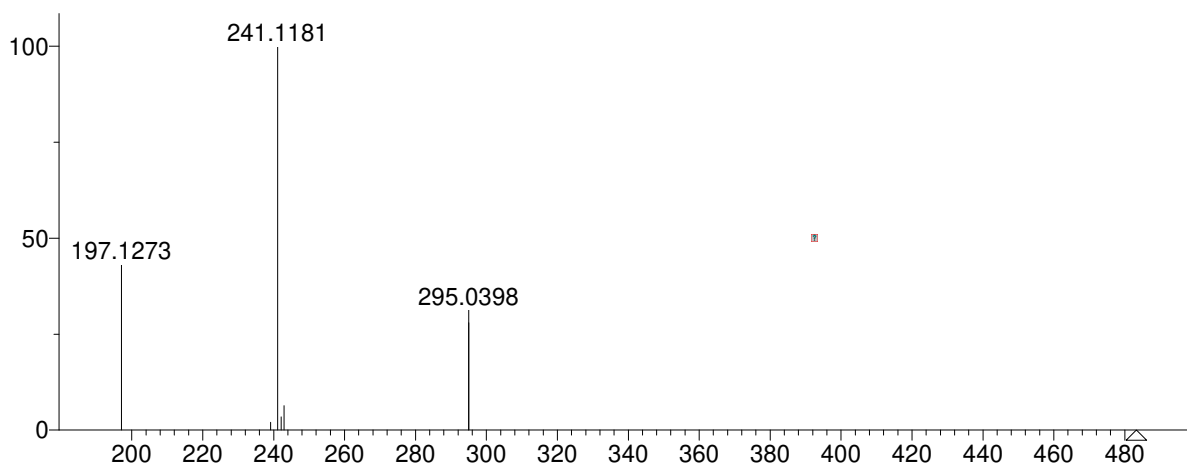

Hit 1 : Tetrahydro-L-biopterin [2M+H]<sup>+</sup> HCD 14V P=483.2  
C<sub>9</sub>H<sub>15</sub>N<sub>5</sub>O<sub>3</sub>; MF: 27; RMF: 125; Prob 51.9%; CAS: 62989-33-7; Lib: nist\_msms; ID: 318091.

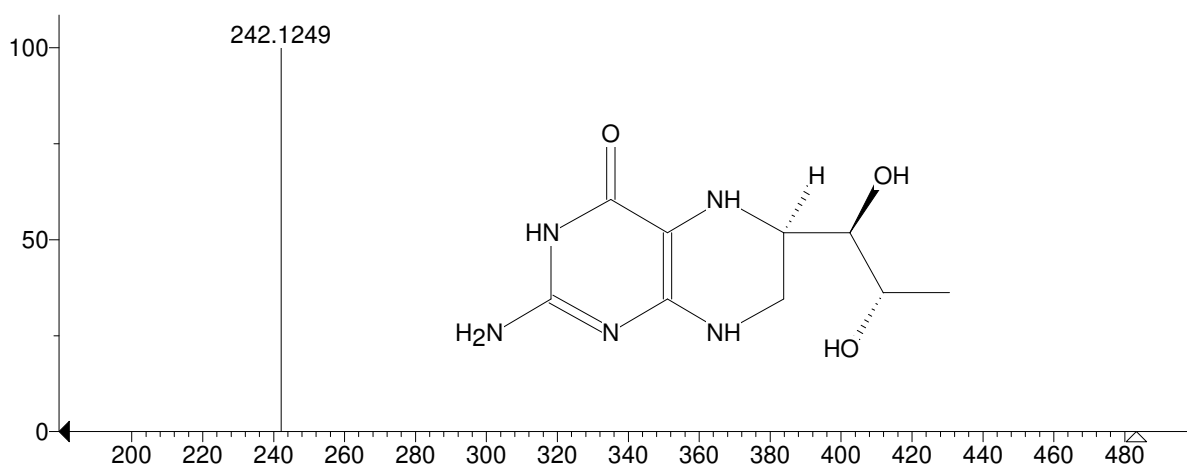

Hit 2 : 4-(Dimethylamino)azobenzene N-oxide [2M+H]<sup>+</sup> HCD 15V P=483.3  
C<sub>14</sub>H<sub>15</sub>N<sub>3</sub>O; MF: 3; RMF: 101; Prob 17.4%; CAS: 2747-31-1; Lib: nist\_msms; ID: 119538.

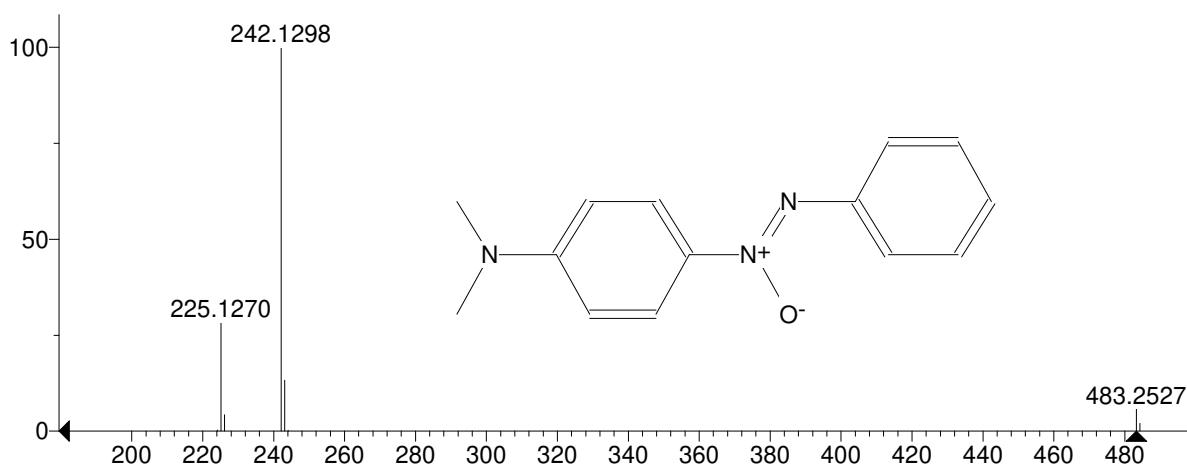

\*\* Search Report Page 2 of 2 \*\*

Hit 3 : 4-[5-[[4-[5-[acetyl(hydroxy)amino]pentylamino]-4-oxobutanoyl]-hydroxyamino]pentylamino]-4-oxobutanoic acid  
C<sub>20</sub>H<sub>36</sub>N<sub>4</sub>O<sub>8</sub>; MF: 0; RMF: 64; Prob 15.4%; Lib: mona-export-vf-npl\_qexactive; ID: 19031.

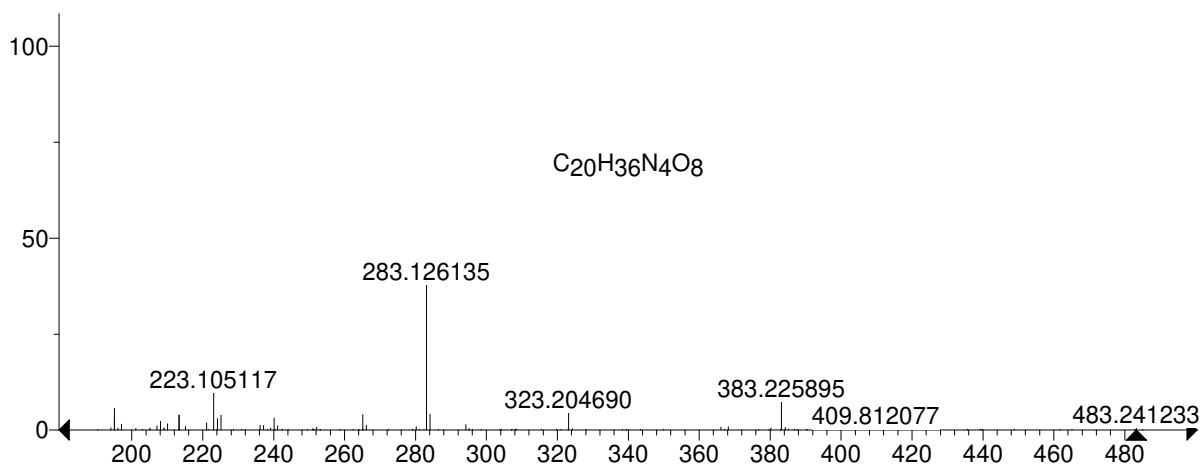

Hit 4 : NCGC00380283-01!4-[5-[[4-[5-[acetyl(hydroxy)amino]pentylamino]-4-oxobutanoyl]-hydroxyamino]pentylamino]-4-oxobutanoic acid  
C<sub>20</sub>H<sub>36</sub>N<sub>4</sub>O<sub>8</sub>; MF: 0; RMF: 38; Prob 15.4%; Lib: mona-export-gnps; ID: 6572.

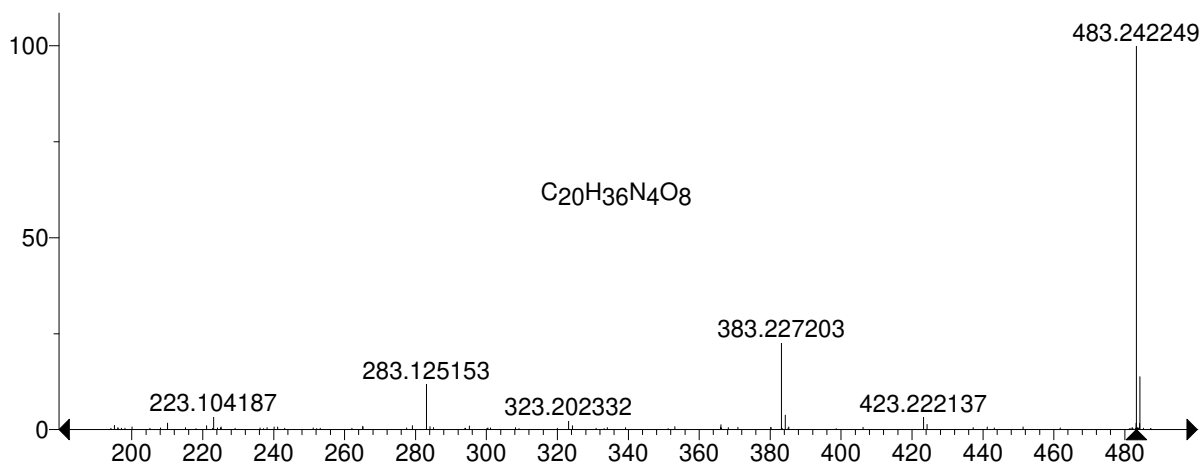

Unknown: Unknown (8.38\_579.2537m/z)  
Compound in Library Factor = 0

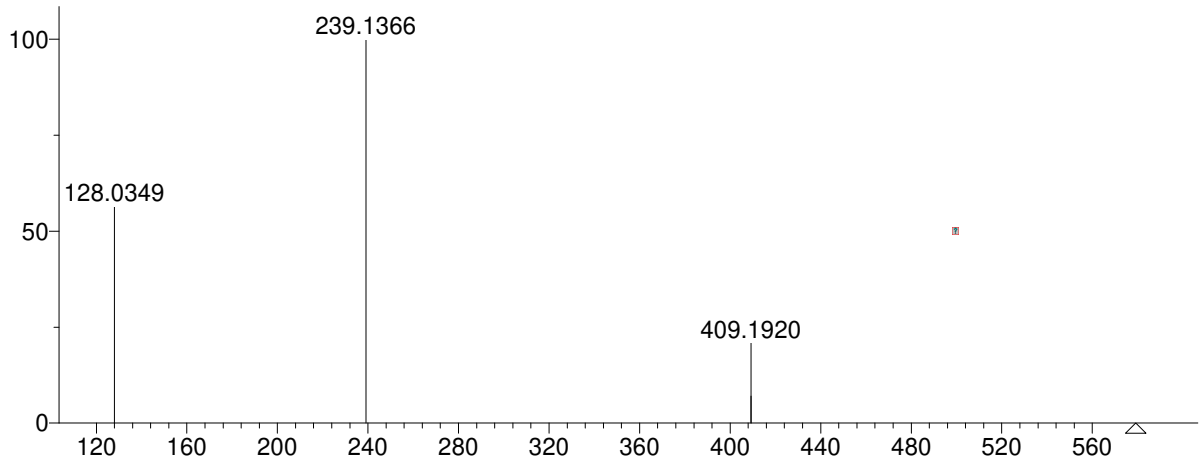

Unknown: Unknown (8.40\_356.1277m/z)  
Compound in Library Factor = -1072

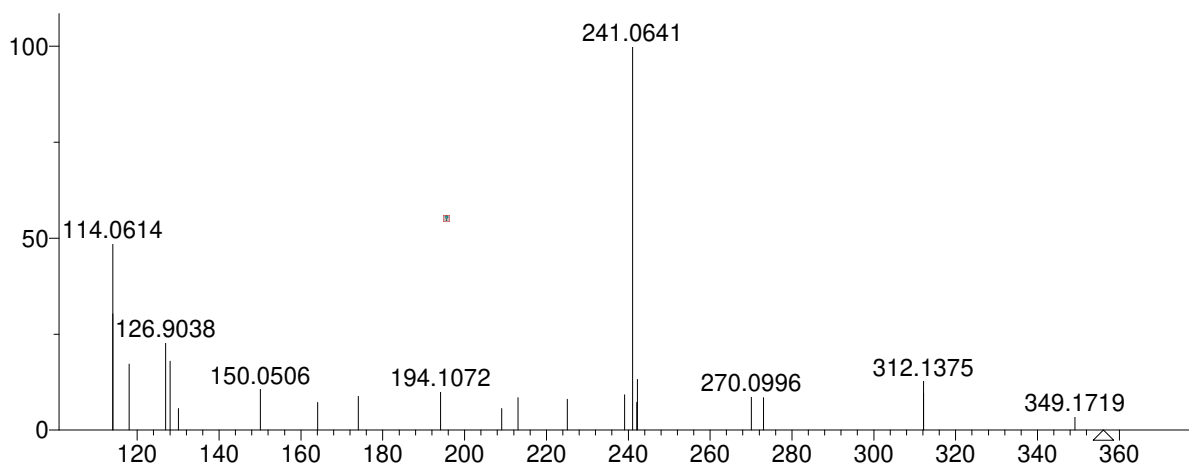

Hit 1 : 1H-Indole-1-butanoic acid, 3-(1-naphthalenylcarbonyl)- [M-H]<sup>-</sup> IT 35% P=356.1  
C<sub>23</sub>H<sub>19</sub>NO<sub>3</sub>; MF: 76; RMF: 449; Prob 100.0%; CAS: 1307803-52-6; Lib: nist\_msms; ID: 346136.

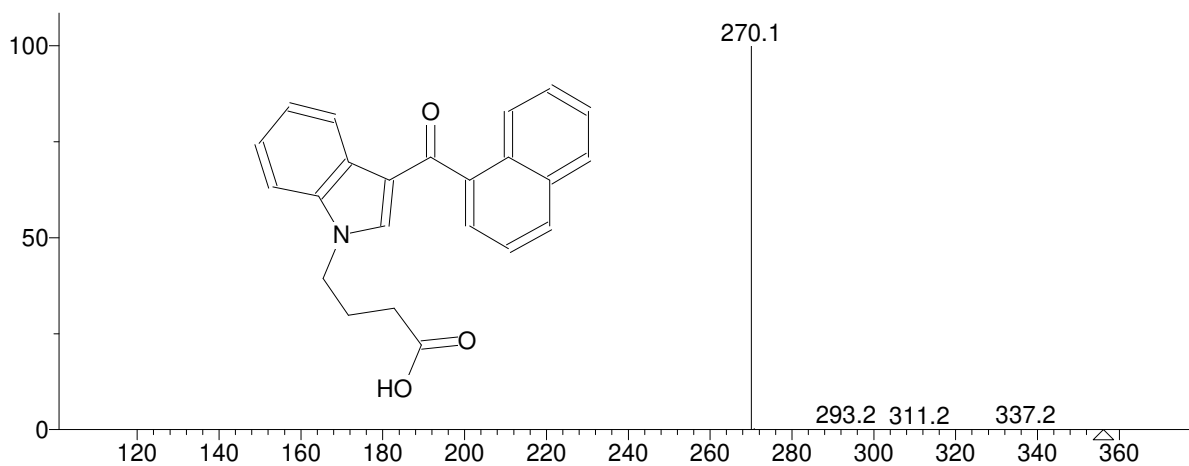

Unknown: Unknown (8.40\_409.1966m/z)  
Compound in Library Factor = 0

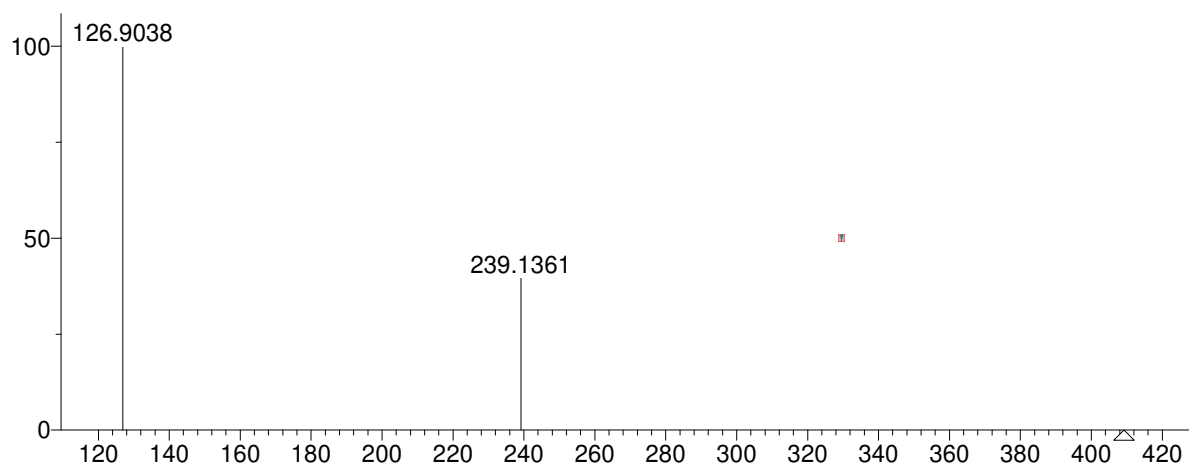

Hit 1 : Met-Met-Lys [M+H]<sup>+</sup> QQQ 32V P=409.2  
C16H32N4O4S2; MF: 0; RMF: 15; Prob 100.0%; Lib: nist\_msms; ID: 40876.

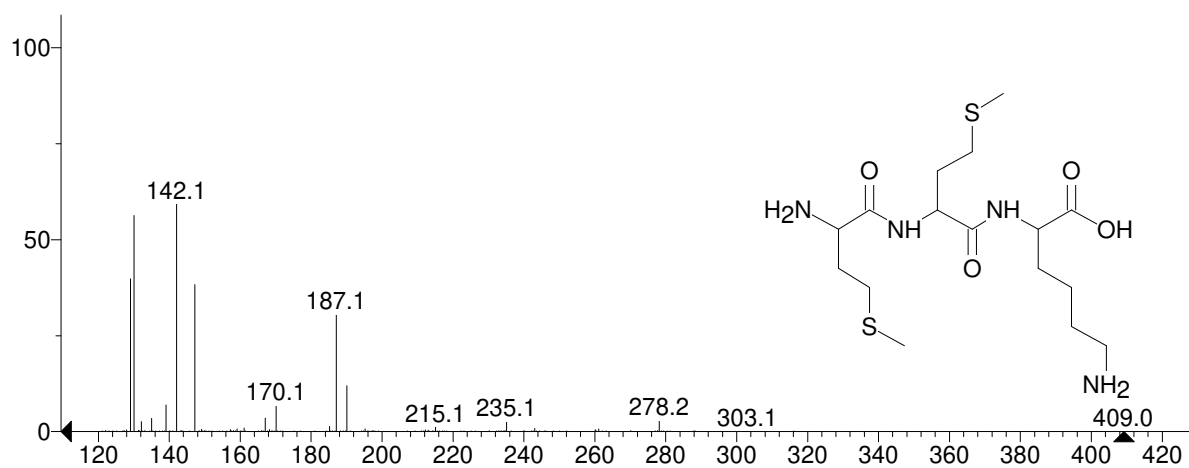



Unknown: Unknown (8.41\_400.0035m/z)  
Compound in Library Factor = 0

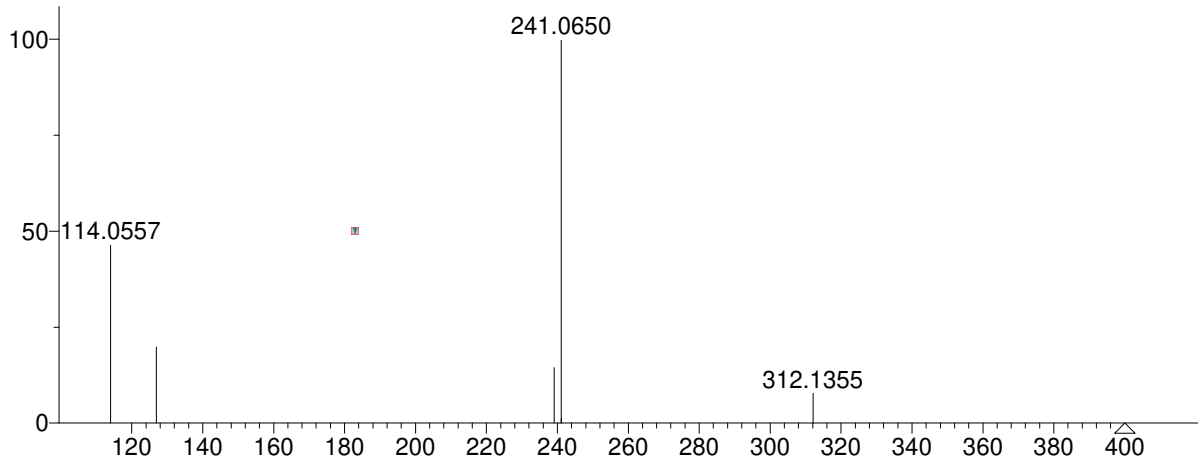

Unknown: Unknown (8.41\_579.2468m/z)  
Compound in Library Factor = 0

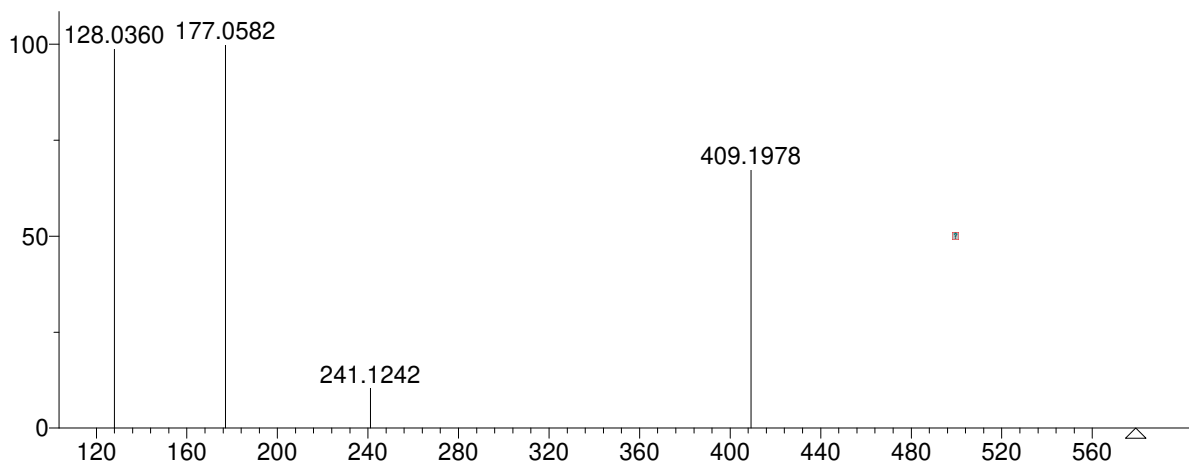

Hit 1 : HYDRANGENOSIDE C [M+H]<sup>+</sup> 35HCD P=579.2  
C<sub>29</sub>H<sub>38</sub>O<sub>12</sub>; MF: 0; RMF: 71; Prob 50.0%; Lib: mona-export-vf-npl\_qexactive; ID: 1009.

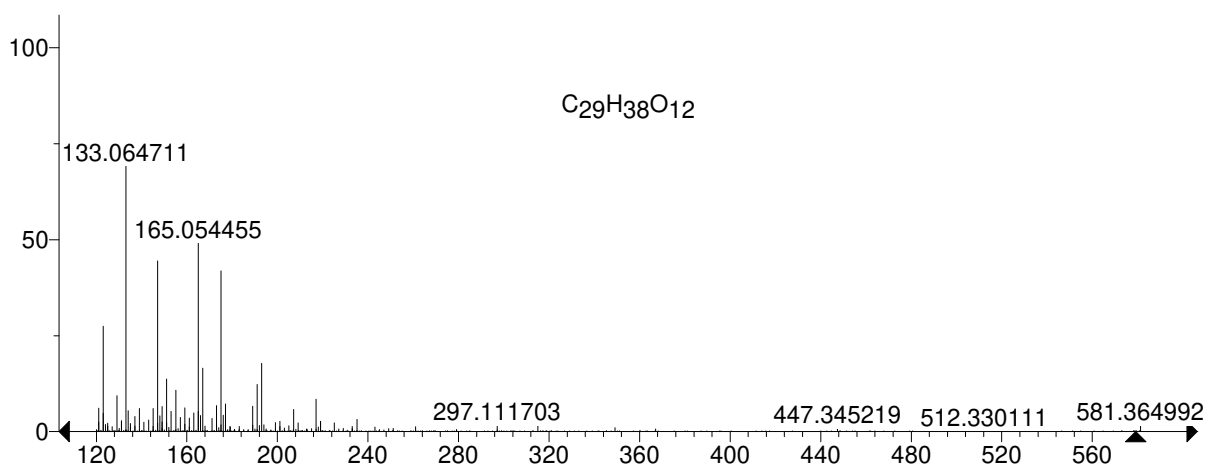

Hit 2 : NCGC00385509-01\_C<sub>29</sub>H<sub>38</sub>O<sub>12</sub>\_Methyl 2-(hexopyranosyloxy)-4-({[6-[2-(4-hydroxyphenyl)ethyl]-4-oxotetr: C<sub>29</sub>H<sub>38</sub>O<sub>12</sub>; MF: 0; RMF: 49; Prob 50.0%; Lib: mona-export-gnps; ID: 11095.

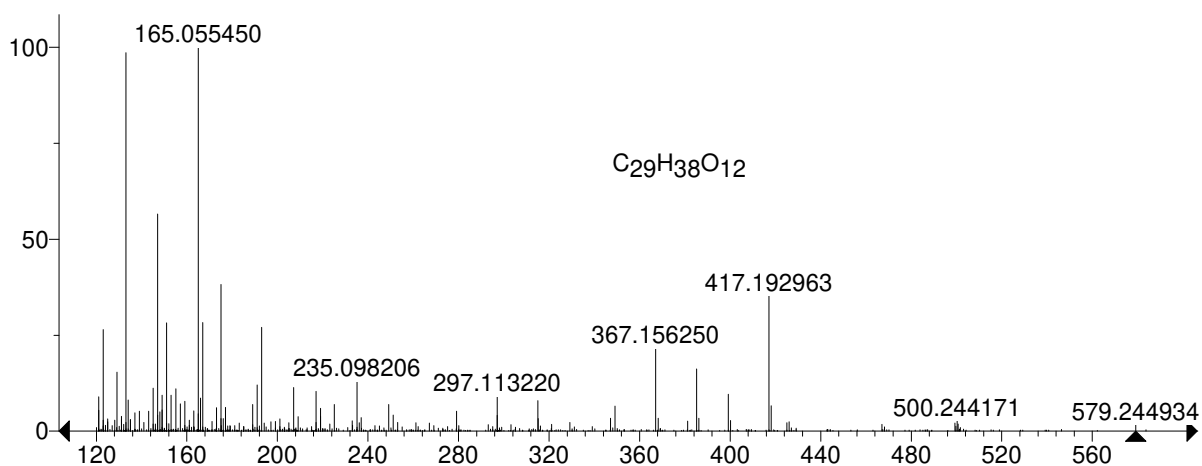

\*\* Search Report Page 1 of 1 \*\*

Unknown: Unknown (8.43\_387.1541m/z)  
Compound in Library Factor = -3273

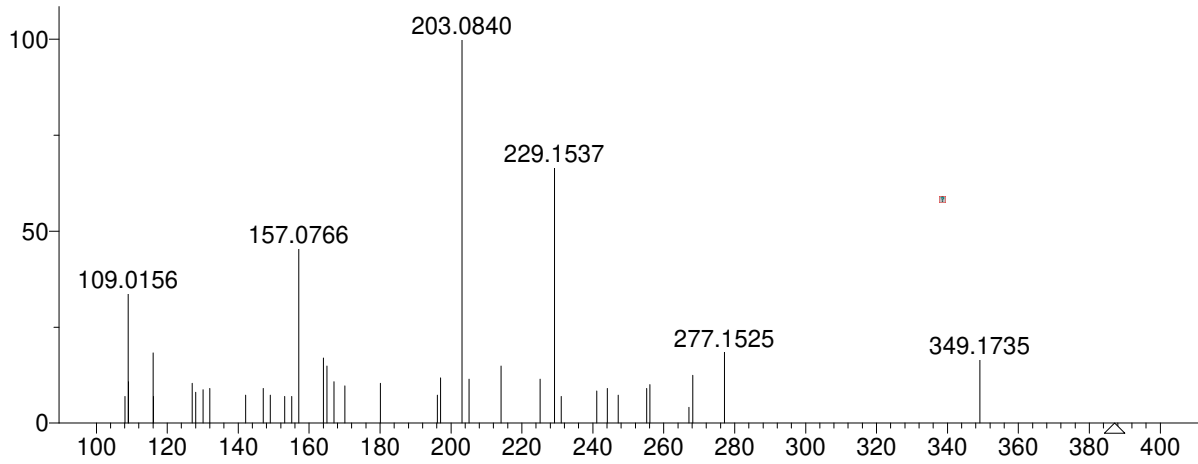

Hit 1 : NCGC00179845-03!5-chloro-3-[(E)-3,4-dihydroxy-3,5-dimethylhept-1-enyl]-7,8-dihydroxy-7-methyl-8,8a-dihydro-1H-indazole-3-carboxamide; MF: 1; RMF: 43; Prob 51.0%; Lib: mona-export-gnps; ID: 8510.

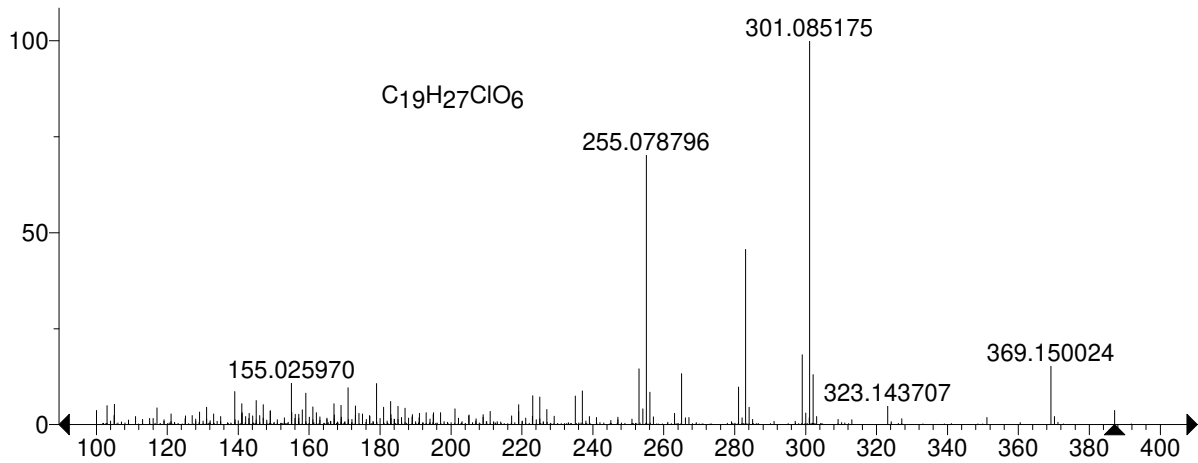

Hit 2 : 1H-Indazole-3-carboxamide, N-[(1S)-1-(aminocarbonyl)-2-methylpropyl]-1-(5-chloropentyl)- [M+Na]+ HCl; C18H25ClN4O2; MF: 0; RMF: 17; Prob 49.0%; CAS: 1801552-02-2; Lib: nist\_msms; ID: 426703.

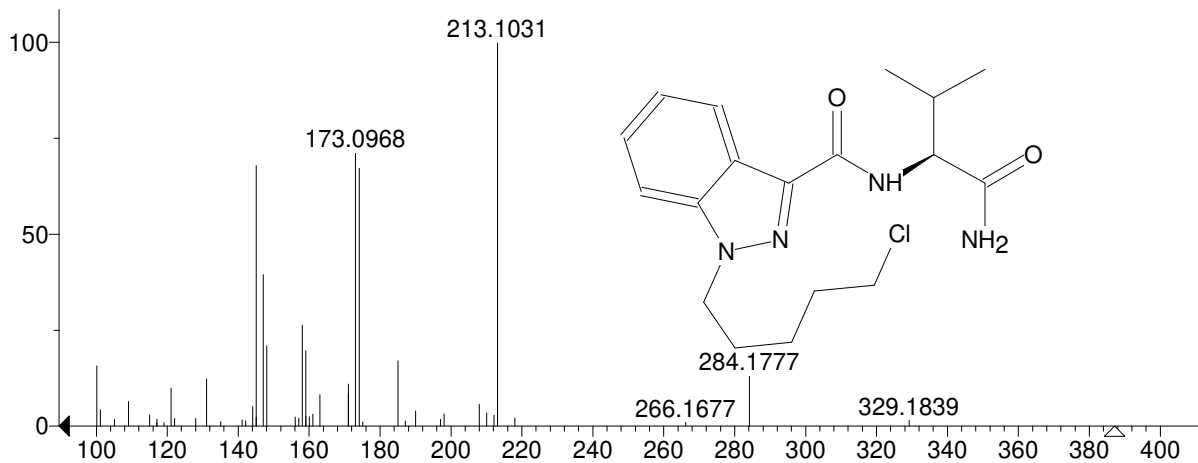

Unknown: Unknown (8.43\_443.9918m/z)  
Compound in Library Factor = 0

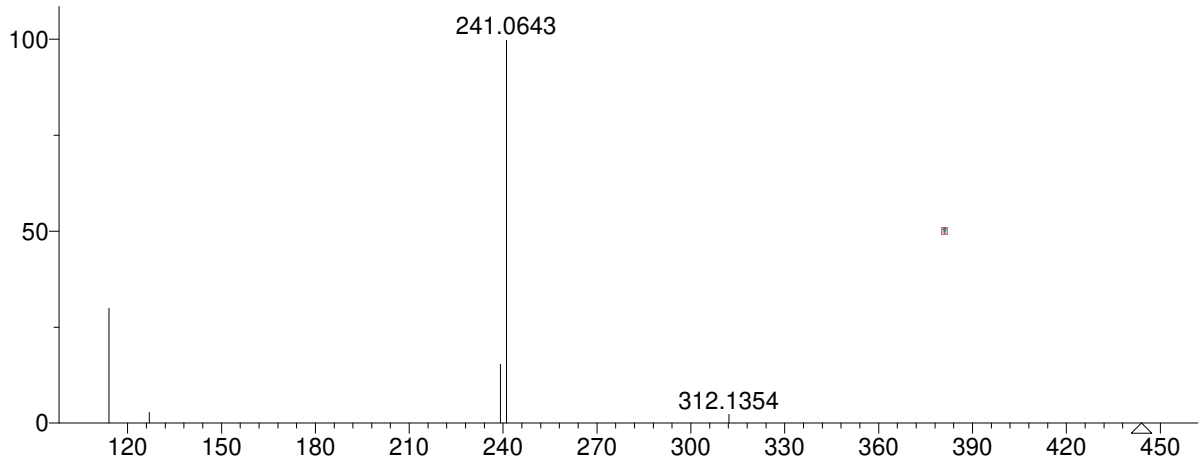

Unknown: Unknown (8.44\_300.0170m/z)  
Compound in Library Factor = 0

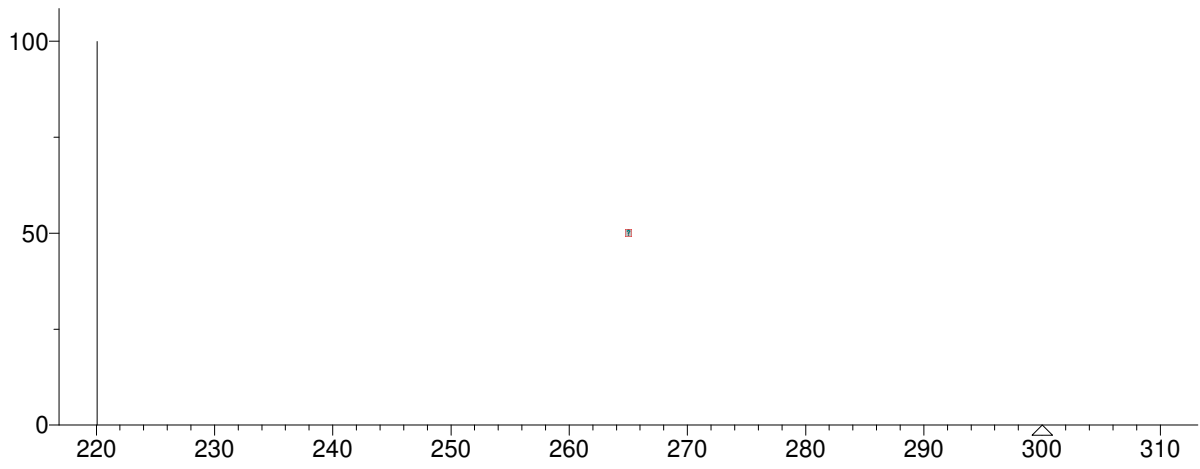

\*\* Search Report Page 1 of 2 \*\*

Unknown: Unknown (8.44\_439.2073m/z)  
Compound in Library Factor = -3273

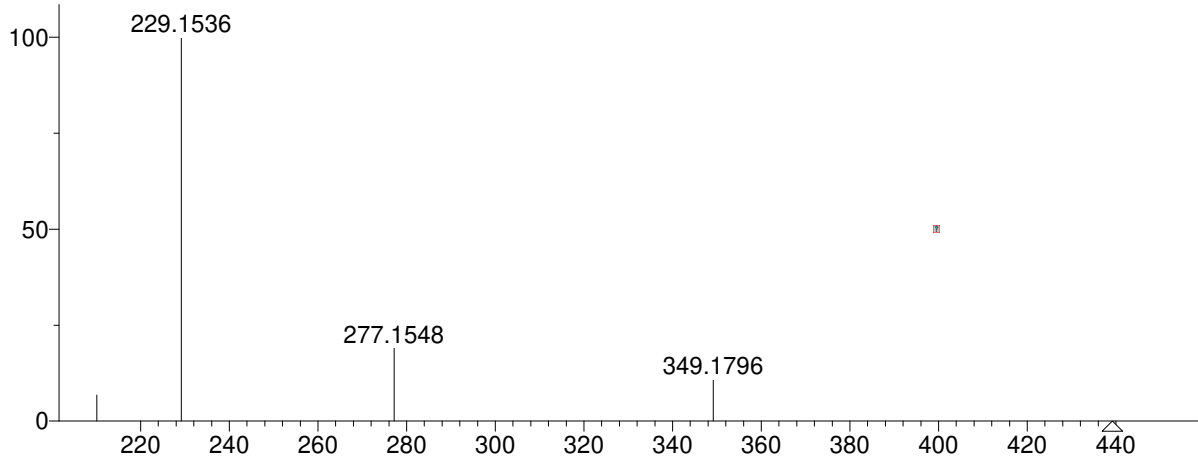

Hit 1 : Deacetoxy-7-Oxogedunin [M+H]<sup>+</sup> 35HCD P=439.2  
C<sub>26</sub>H<sub>30</sub>O<sub>6</sub>; MF: 1; RMF: 90; Prob 34.2%; Lib: mona-export-vf-npl\_gexactive; ID: 25777.

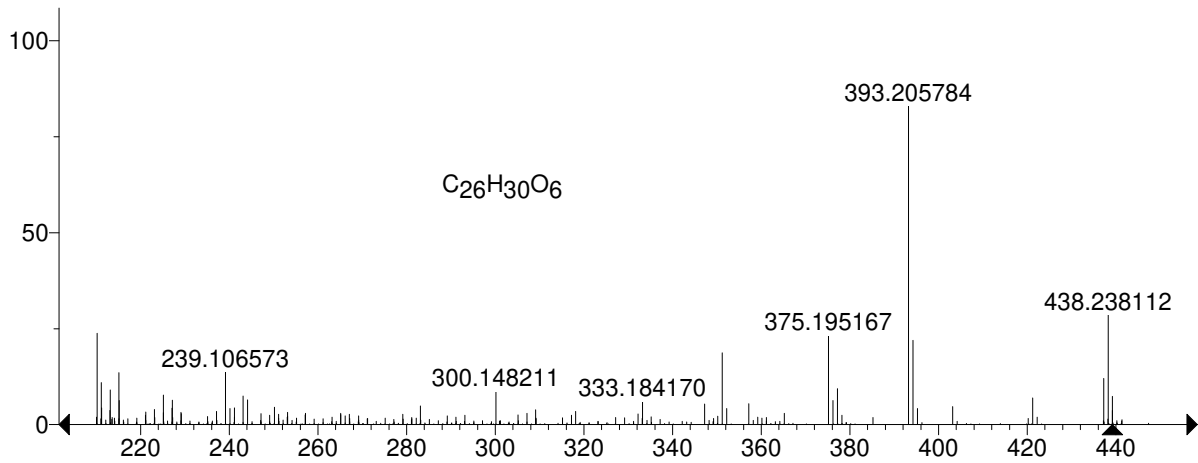

Hit 2 : 17-Trifluoromethylphenyl-13,14-dihydrotriorprostaglandin F<sub>2</sub>α [M-H-H<sub>2</sub>O]<sup>-</sup> HCD 41V P=439.2  
C<sub>24</sub>H<sub>33</sub>F<sub>3</sub>O<sub>5</sub>; MF: 0; RMF: 13; Prob 32.9%; CAS: 294856-01-2; Lib: nist\_msms; ID: 93984.

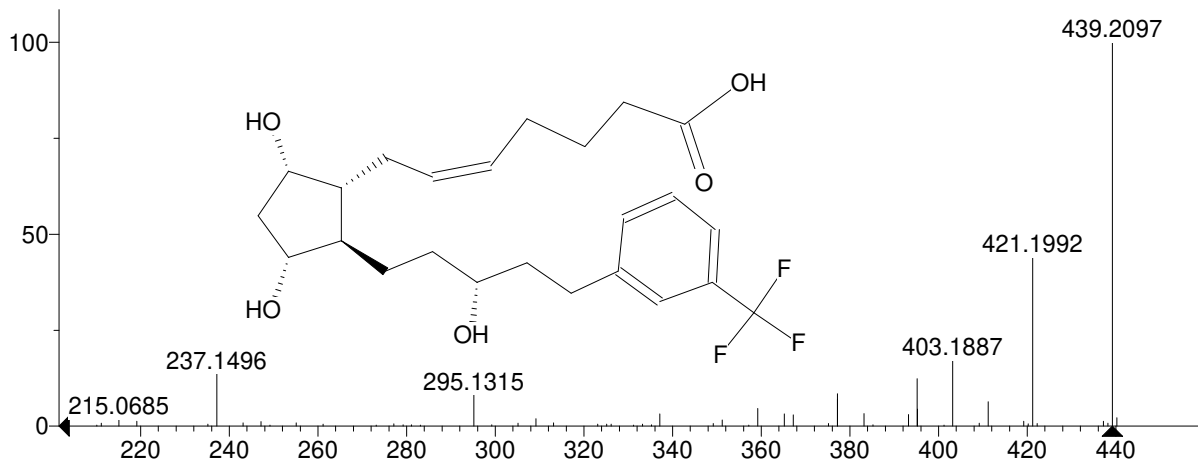

\*\* Search Report Page 2 of 2 \*\*

Hit 3 : NCGC00385780-01!5,7-dihydroxy-3-[4-hydroxy-2-methoxy-3-(3-methylbut-2-enyl)phenyl]-6-(3-methylbut-2-C<sub>26</sub>H<sub>30</sub>O<sub>6</sub>; MF: 0; RMF: 10; Prob 32.9%; Lib: mona-export-gnps; ID: 8555.

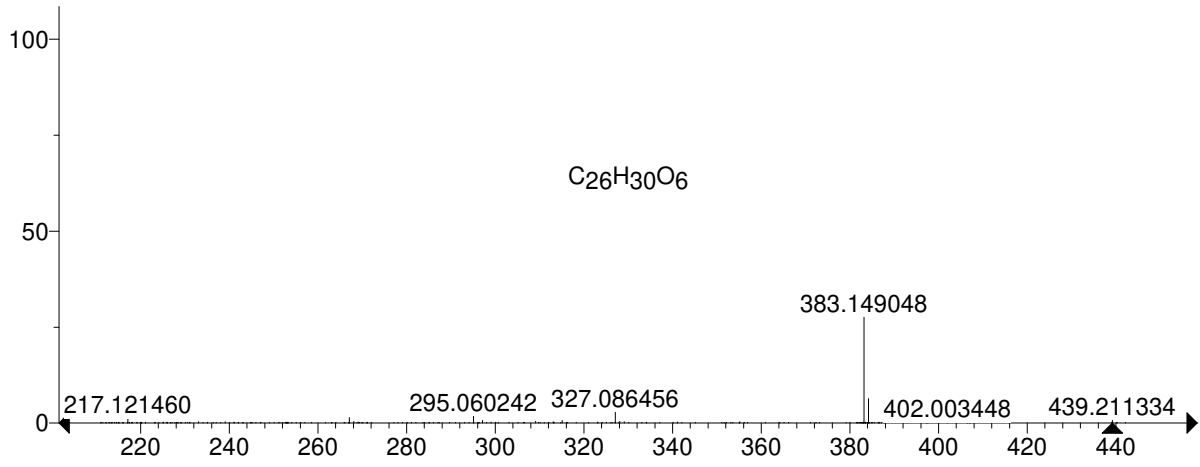

Unknown: Unknown (8.44\_736.4349m/z)  
Compound in Library Factor = -3273

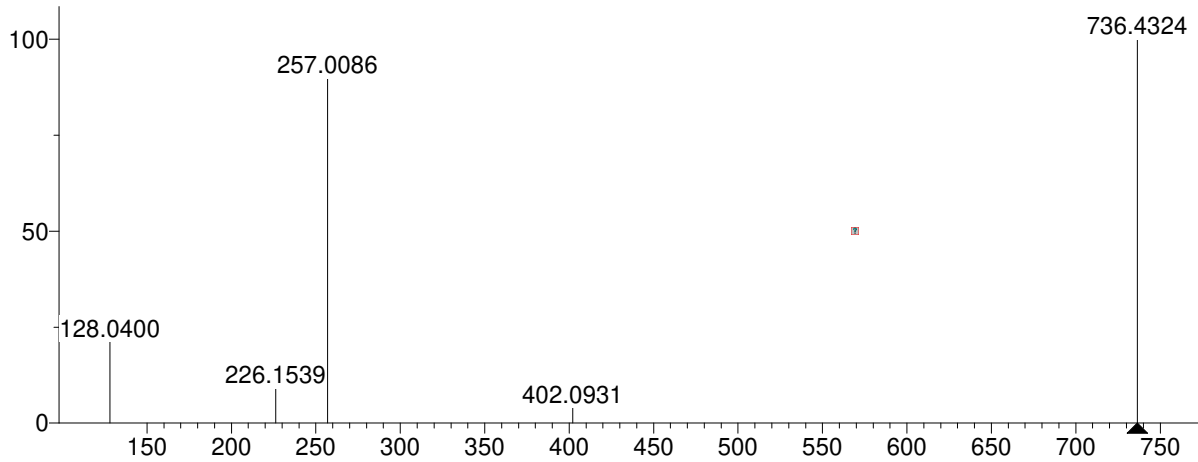

Hit 1 : Dynorphin A (1-12), porcine [M-2H]<sup>2-</sup> HCD 39eV P=736.4  
C<sub>69</sub>H<sub>114</sub>N<sub>22</sub>O<sub>14</sub>; MF: 2; RMF: 423; Prob 52.0%; Lib: nist\_msms2; ID: 77027.

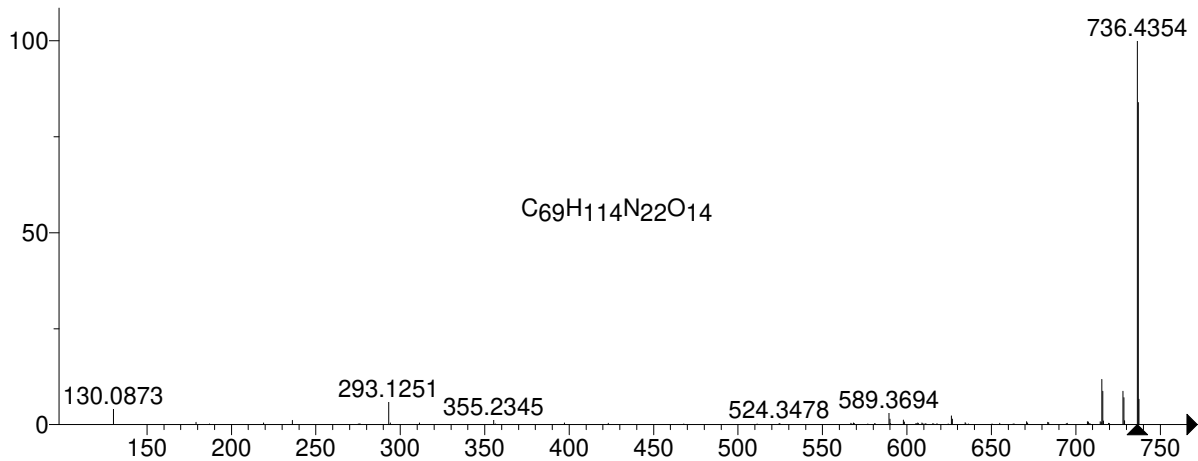

Hit 2 : 16-[[[(2R,3R,4S,5S,6R)-4,5-dihydroxy-6-(hydroxymethyl)-3-[[[(2S,3R,4R,5R,6S)-3,4,5-trihydroxy-6-methylx  
C<sub>39</sub>H<sub>63</sub>NO<sub>12</sub>; MF: 0; RMF: 40; Prob 48.0%; Lib: mona-export-lc-ms-ms\_negative\_mode; ID: 22838.

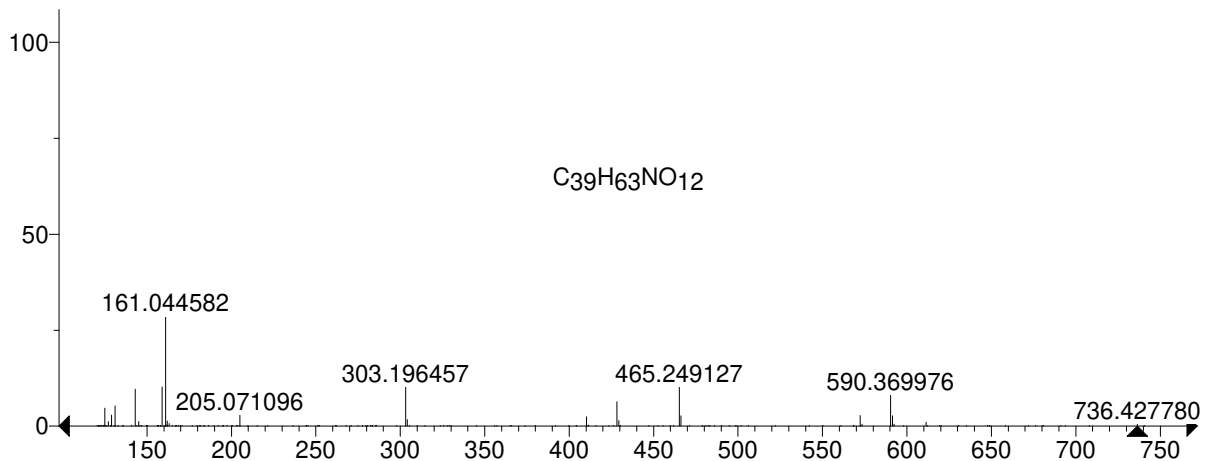



Unknown: Unknown (8.45\_502.2016m/z)  
Compound in Library Factor = 0

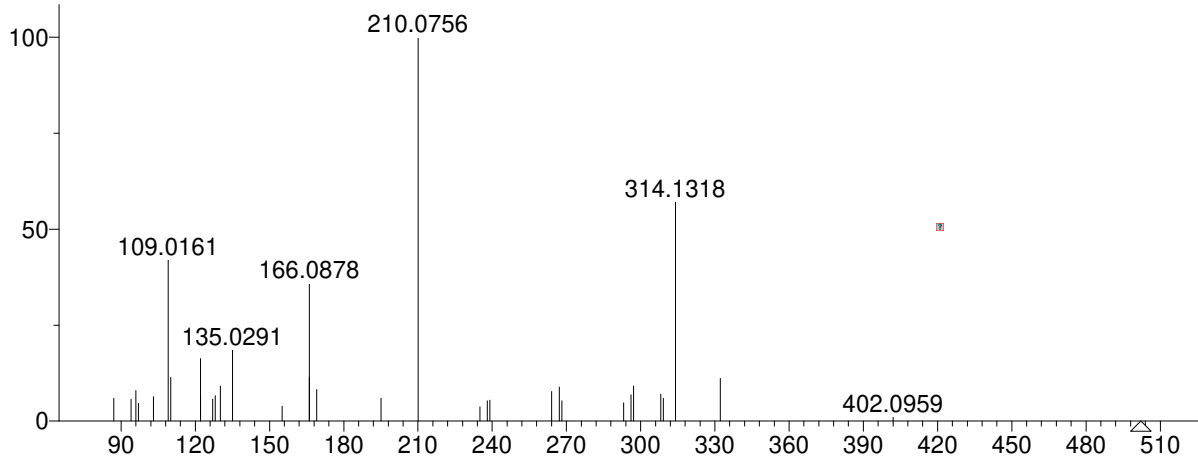

Hit 1 : Irinotecan [M+H-C5H11N]+ HCD 130V P=502.2  
C33H38N4O6; MF: 0; RMF: 40; Prob 50.0%; CAS: 97682-44-5; Lib: nist\_msms; ID: 218337.

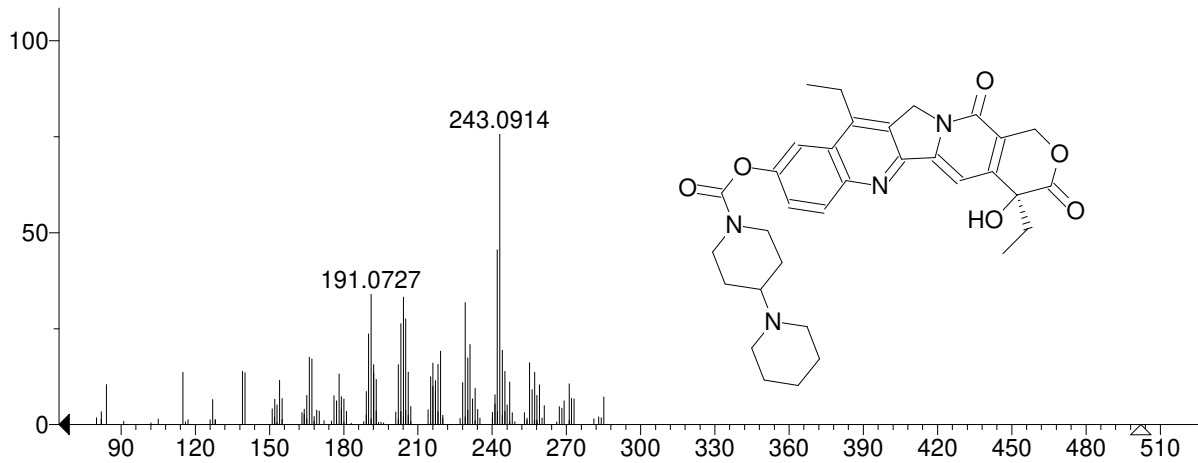

Hit 2 : "Adefovir Dipivoxil (Preveon, Hepsera)" [M+H]+ P=502.2  
C20H32N5O8P; MF: 0; RMF: 13; Prob 50.0%; Lib: mona-export-gnps; ID: 580.

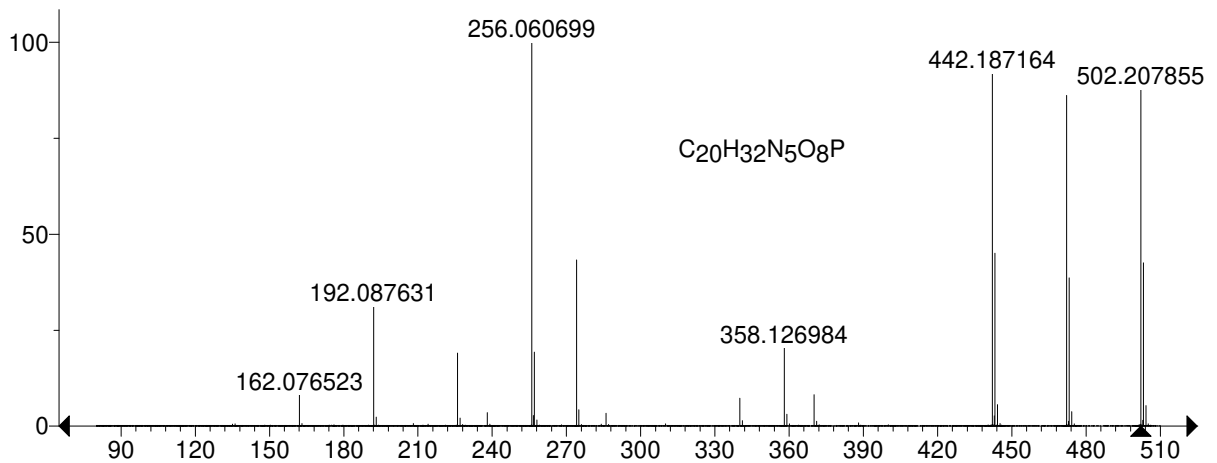

Unknown: Unknown (8.46\_300.1330m/z)  
Compound in Library Factor = 0

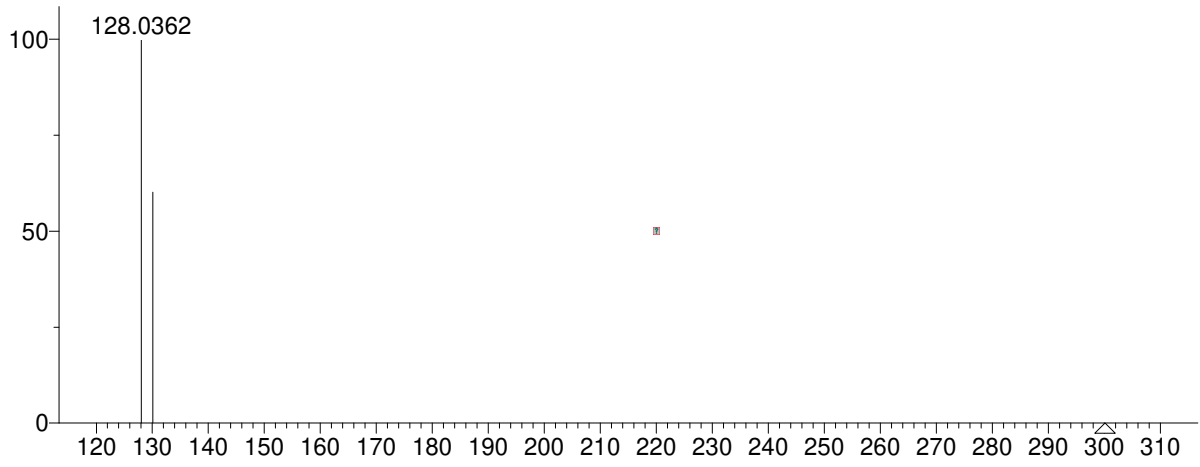

Unknown: Unknown (8.46\_399.2118m/z)  
Compound in Library Factor = -3273

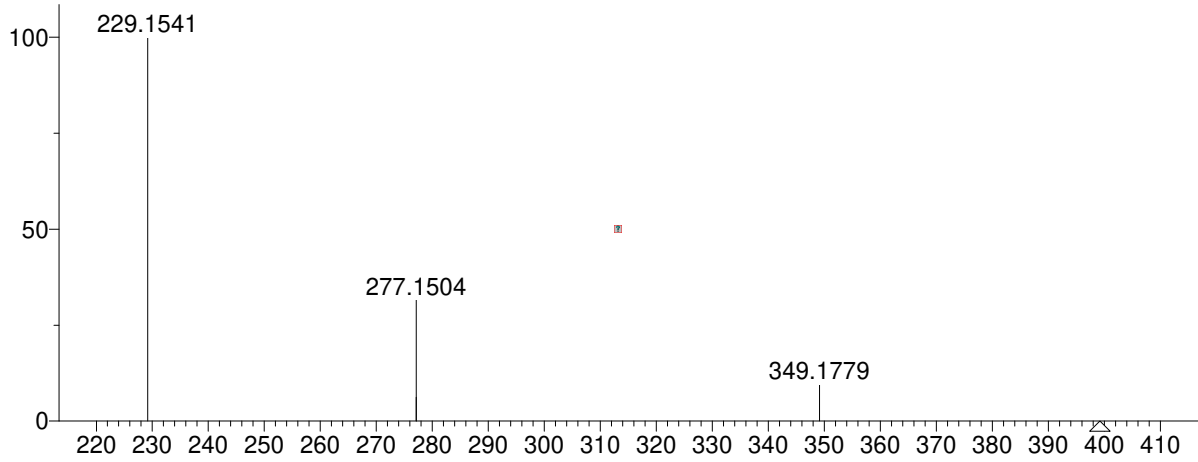

Hit 1 : Ser-His-Arg [M+H]<sup>+</sup> QTOF 30V P=399.2  
C<sub>15</sub>H<sub>26</sub>N<sub>8</sub>O<sub>5</sub>; MF: 1; RMF: 135; Prob 51.0%; Lib: nist\_msms; ID: 53772.

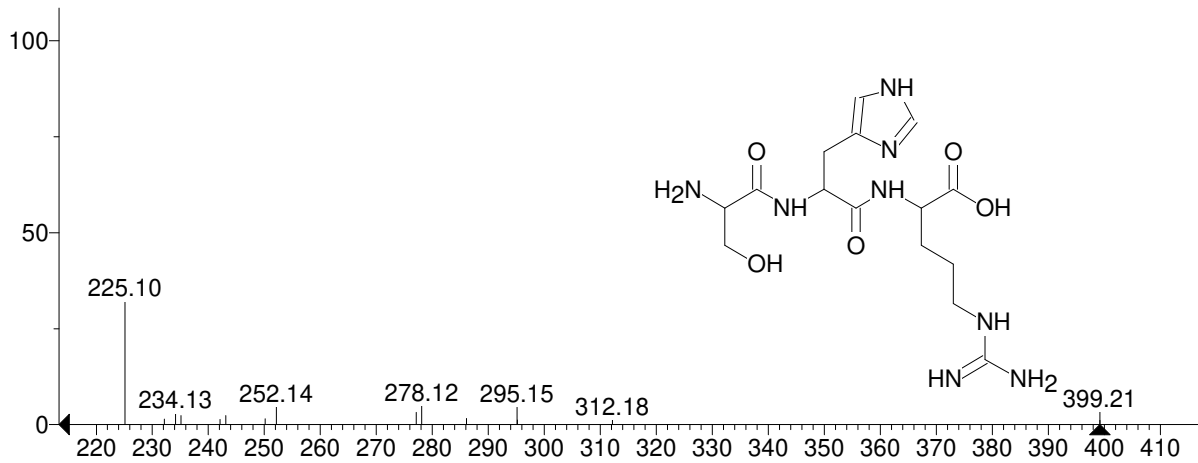

Hit 2 : N-Desmethylvinblastine [M+2H]<sup>2+</sup> HCD 43V P=399.2  
C<sub>45</sub>H<sub>56</sub>N<sub>4</sub>O<sub>9</sub>; MF: 0; RMF: 29; Prob 49.0%; CAS: 18172-50-4; Lib: nist\_msms; ID: 435593.

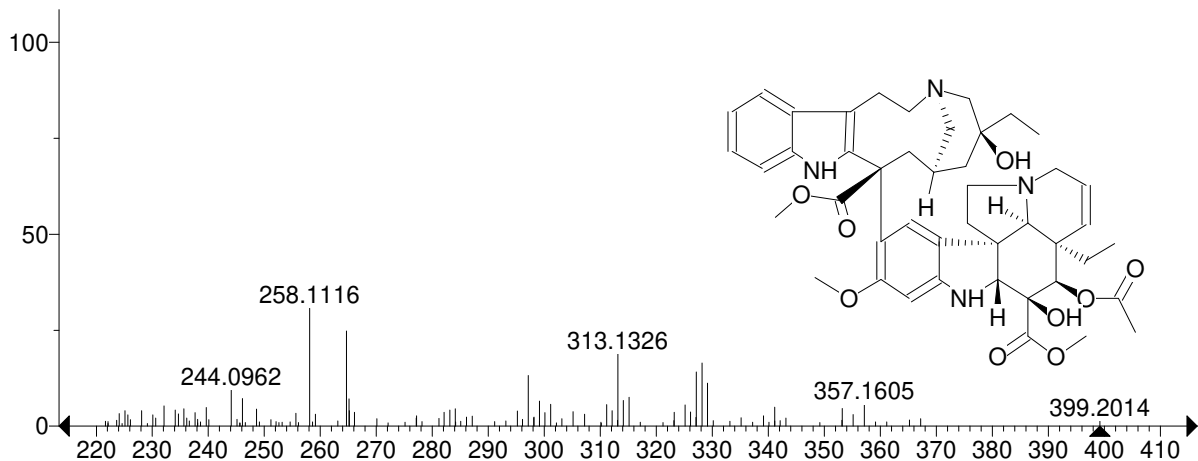

Unknown: Unknown (8.48\_770.2048m/z)  
Compound in Library Factor = 0

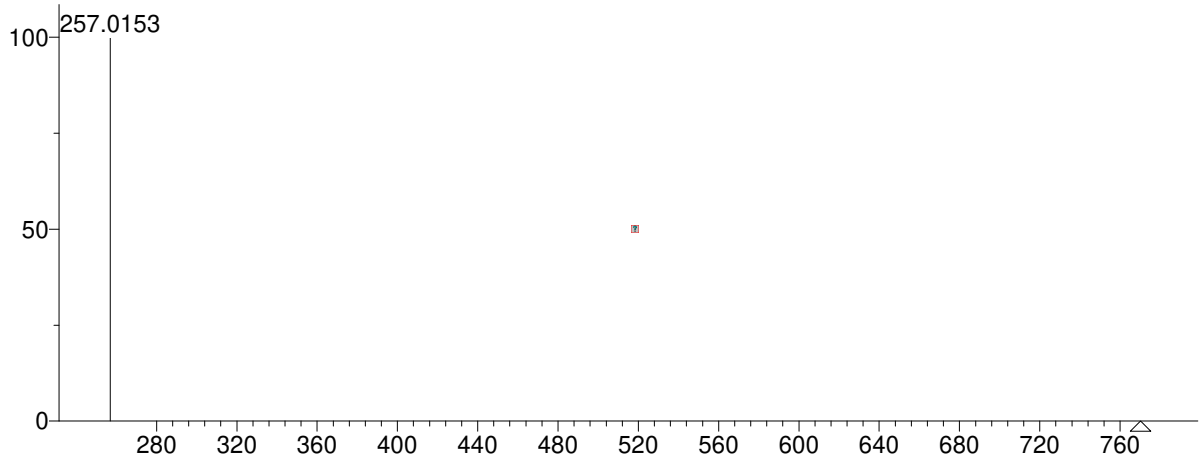

Unknown: Unknown (8.49\_370.1608m/z)  
Compound in Library Factor = 0

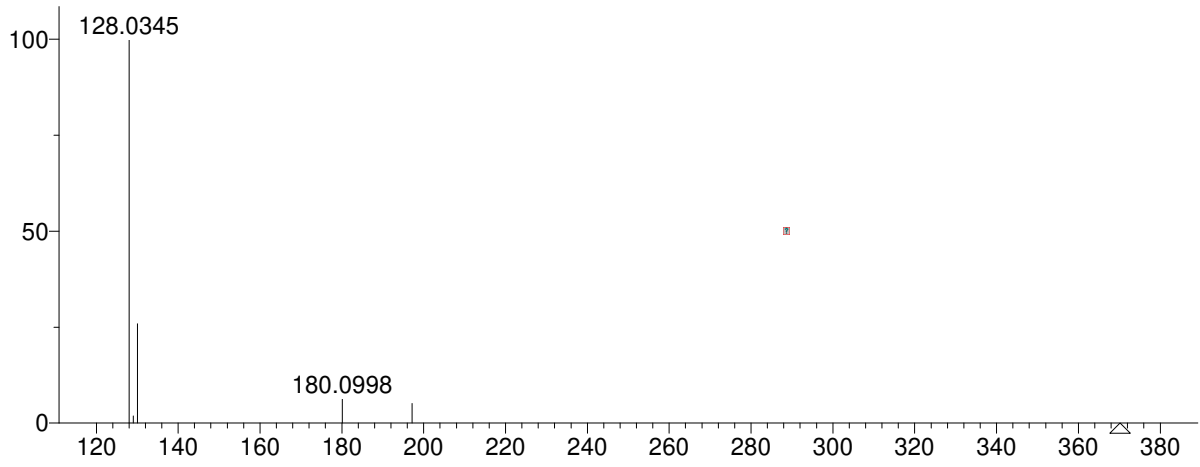

Unknown: Unknown (8.49\_449.1546m/z)  
Compound in Library Factor = 0

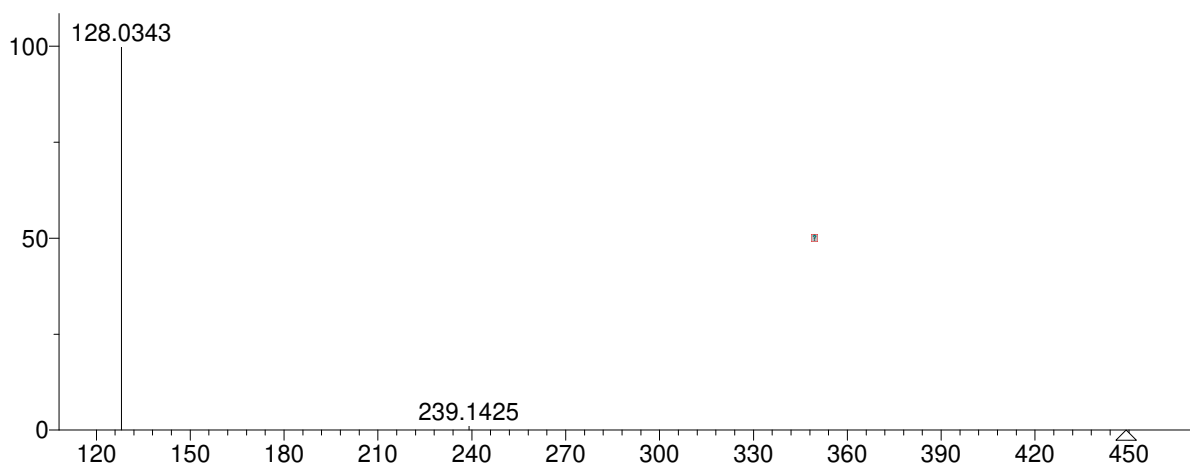

Hit 1 : NCGC00385098-01! [8,8-dimethyl-9-(3-methylbut-2-enyloxy)-2-oxo-9,10-dihydropyrano[2,3-f]chromen-10-C<sub>24</sub>H<sub>26</sub>O<sub>7</sub>; MF: 0; RMF: 75; Prob 100.0%; Lib: mona-export-gnps; ID: 7369.

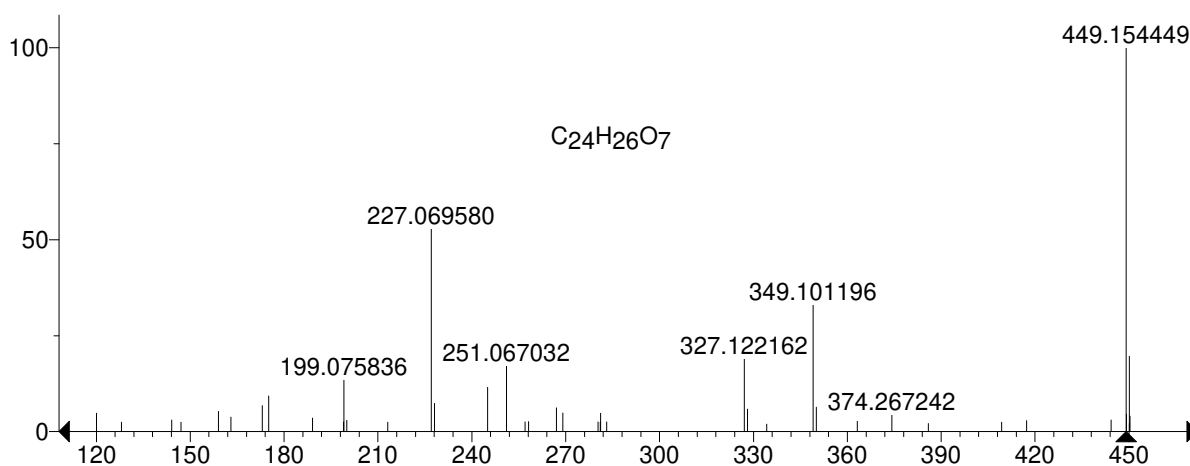

Unknown: Unknown (8.52\_468.0824m/z)  
Compound in Library Factor = 0

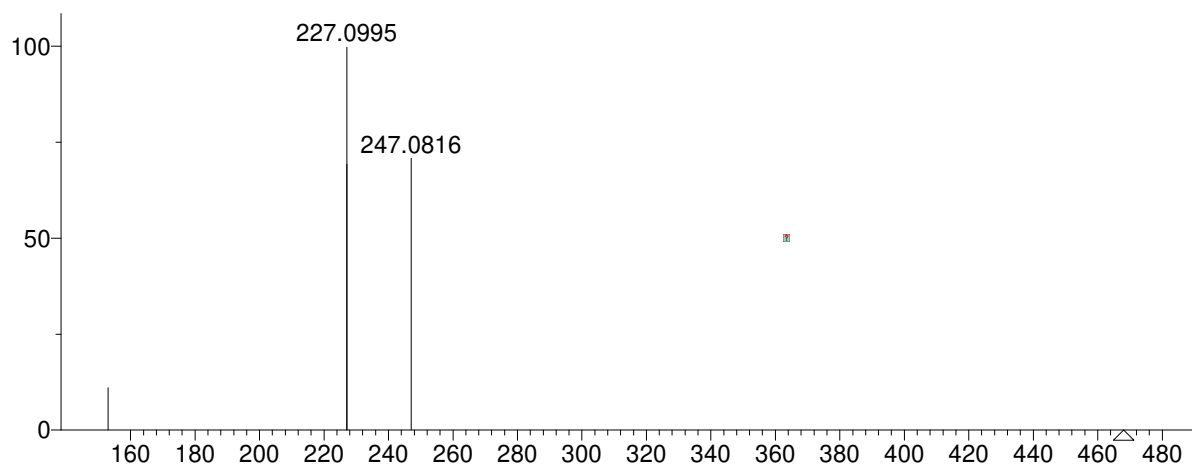

Hit 1 : 1H-Indole-5-sulfonamide, N-(3-chlorophenyl)-3-[[[3,5-dimethyl-4-[(4-methyl-1-piperazinyl)carbonyl]-1H-pyrro

C<sub>28</sub>H<sub>30</sub>CIN<sub>5</sub>O<sub>4</sub>S; MF: 0; RMF: 17; Prob 100.0%; CAS: 658084-23-2; Lib: nist\_msms; ID: 347792.

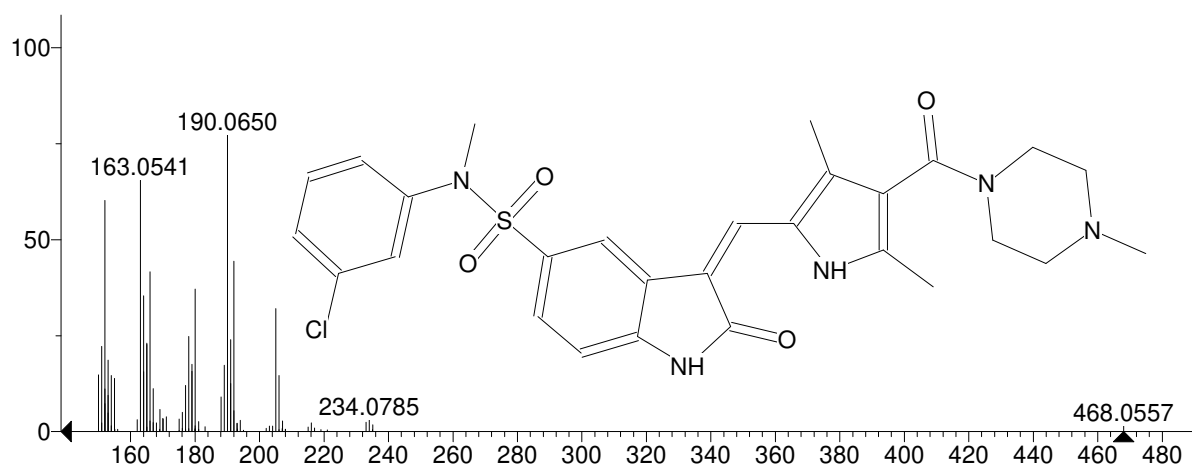

Unknown: Unknown (8.52\_493.1565m/z)  
Compound in Library Factor = 0

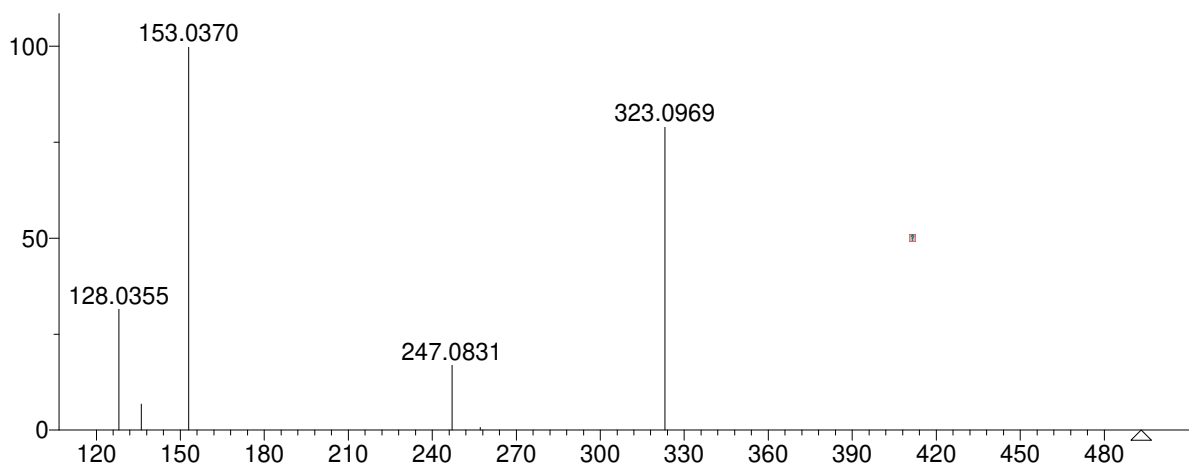

Hit 1 : Blood Group B Trisaccharide [M+Na-H<sub>2</sub>O]<sup>+</sup> IT 35% P=493.2  
C<sub>18</sub>H<sub>32</sub>O<sub>15</sub>; MF: 0; RMF: 2; Prob 100.0%; CAS: 49777-14-2; Lib: nist\_msms; ID: 533822.

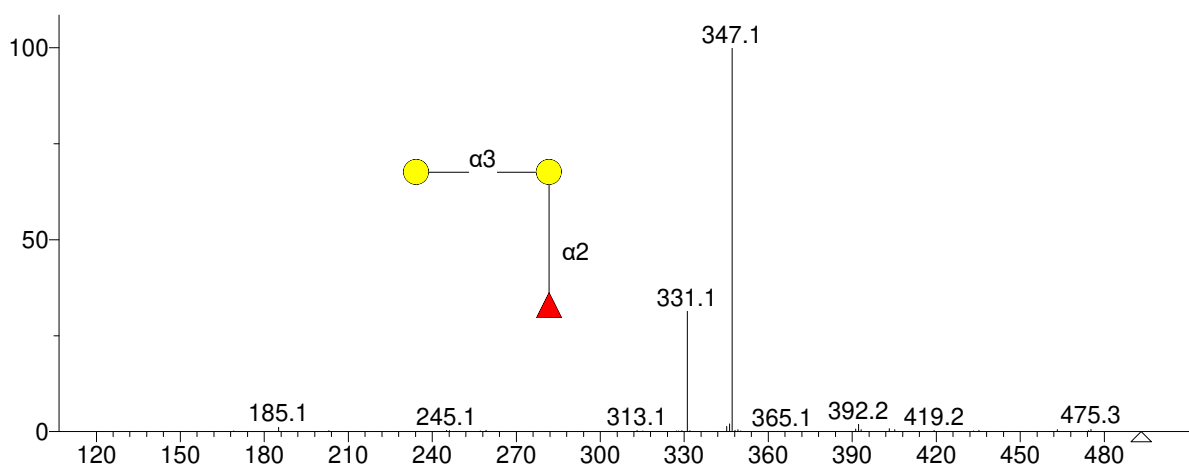



\*\* Search Report Page 1 of 2 \*\*

Unknown: Unknown (8.53\_332.1244m/z)  
Compound in Library Factor = -3273

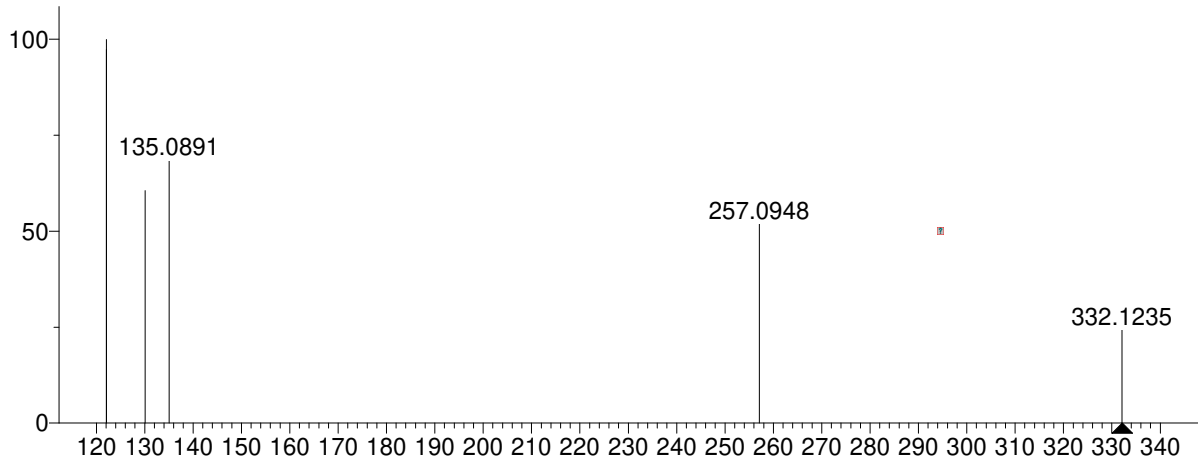

Hit 1 : Glu-Trp [M-H]<sup>-</sup> HCD 9eV P=332.1  
C<sub>16</sub>H<sub>19</sub>N<sub>3</sub>O<sub>5</sub>; MF: 19; RMF: 237; Prob 23.0%; Lib: nist\_msms; ID: 567396.

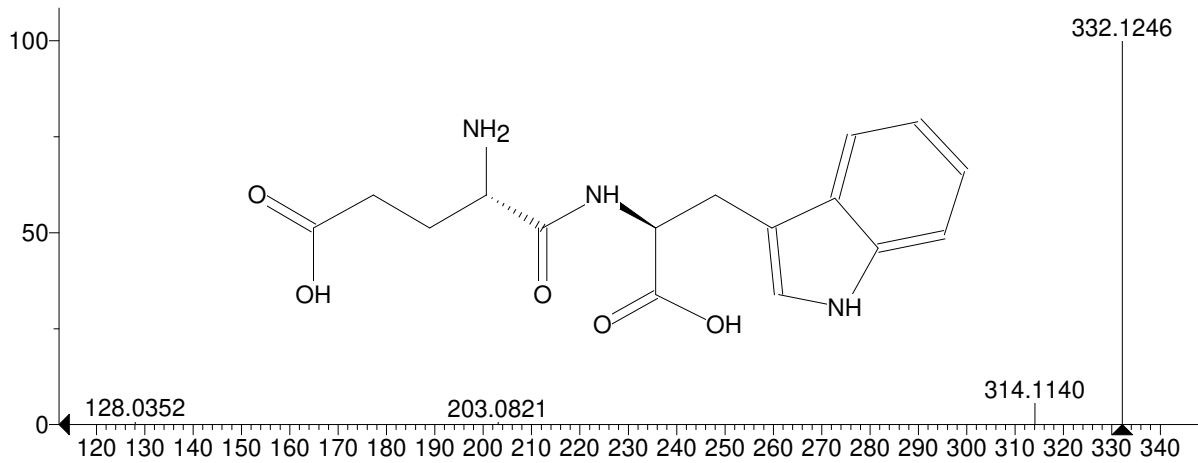

Hit 2 : Glu-Trp [M-H]<sup>-</sup> HCD 9eV P=332.1  
C<sub>16</sub>H<sub>19</sub>N<sub>3</sub>O<sub>5</sub>; MF: 19; RMF: 237; Prob 23.0%; CAS: 38101-59-6; Lib: nist\_msms2; ID: 70253.

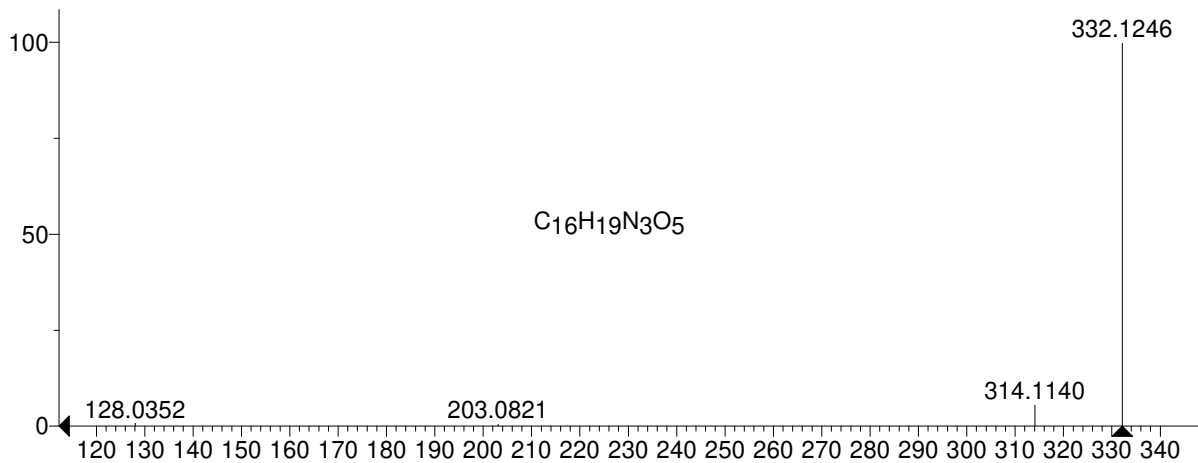

Hit 3 : Ciodrin [M+NH4]<sup>+</sup> HCD 1V P=332.1  
C<sub>14</sub>H<sub>19</sub>O<sub>6</sub>P; MF: 10; RMF: 279; Prob 16.7%; CAS: 7700-17-6; Lib: nist\_msms; ID: 472079.

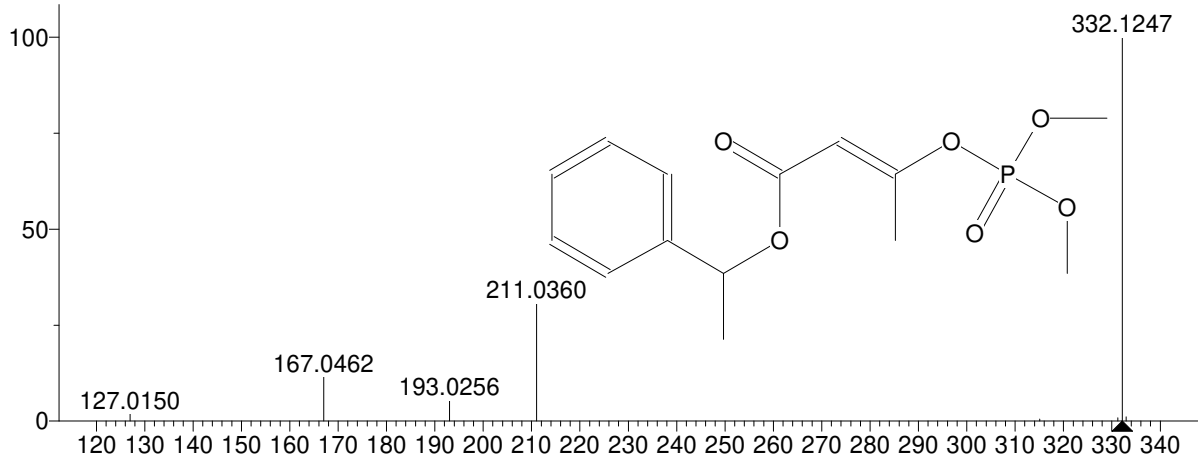

Hit 4 : Trp-Glu [M-H]<sup>-</sup> HCD 14eV P=332.1  
C<sub>16</sub>H<sub>19</sub>N<sub>3</sub>O<sub>5</sub>; MF: 4; RMF: 210; Prob 13.1%; Lib: nist\_msms; ID: 566618.

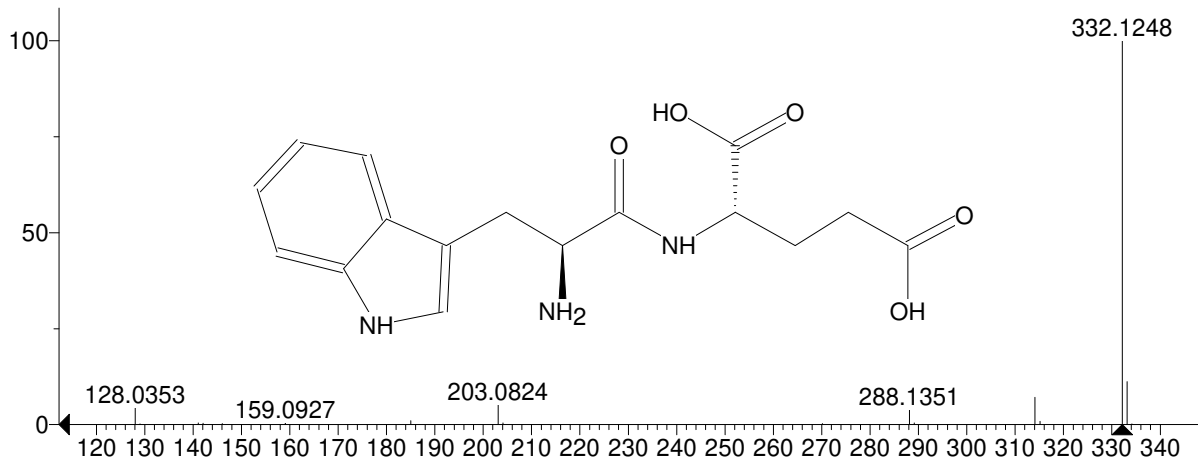

Hit 5 : Trp-Glu [M-H]<sup>-</sup> HCD 14eV P=332.1  
C<sub>16</sub>H<sub>19</sub>N<sub>3</sub>O<sub>5</sub>; MF: 4; RMF: 210; Prob 13.1%; CAS: 36099-95-3; Lib: nist\_msms2; ID: 69475.

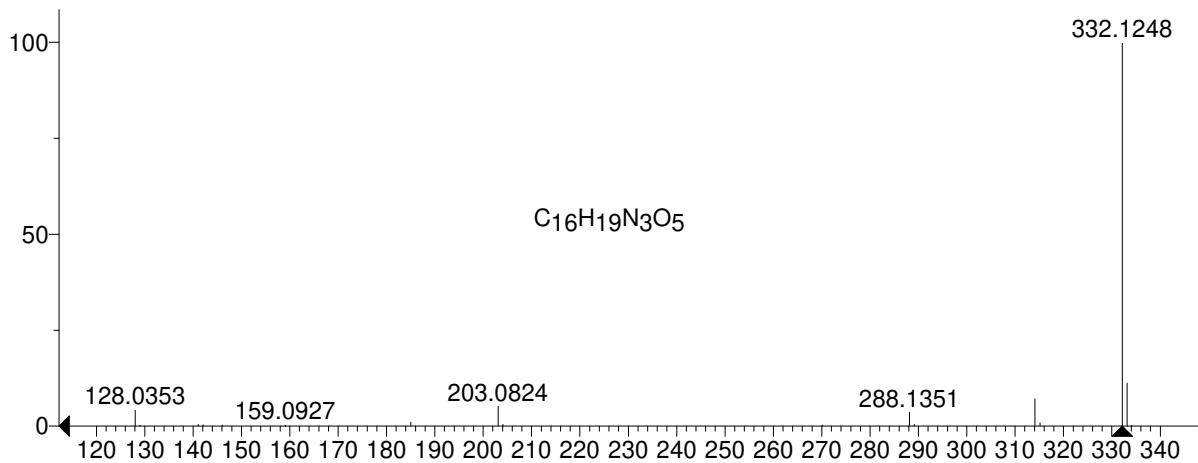

Unknown: Unknown (8.55\_503.1763m/z)  
Compound in Library Factor = -885

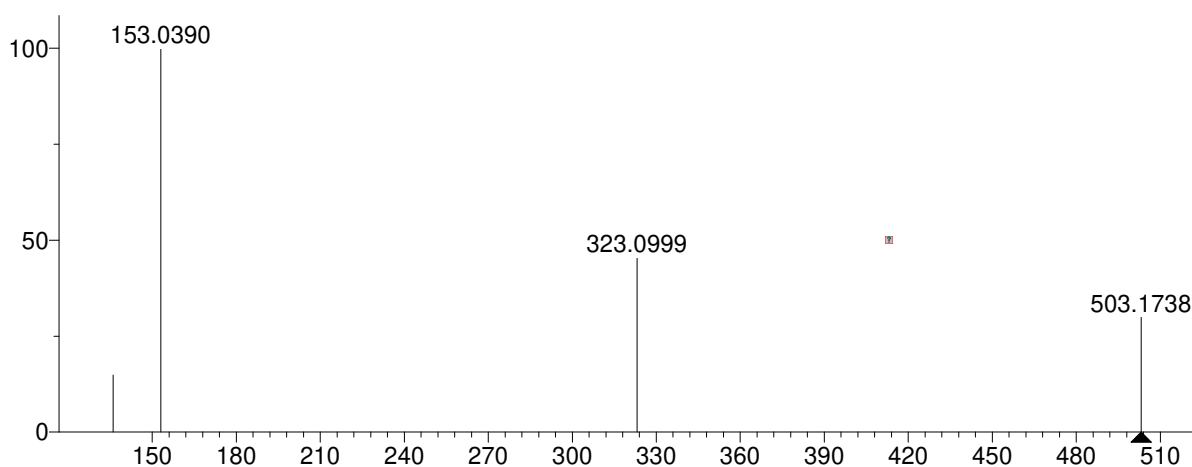

Hit 1 : Melezitose [M-H]<sup>-</sup> 35% P=503.2  
C<sub>18</sub>H<sub>32</sub>O<sub>16</sub>; MF: 99; RMF: 707; Prob 87.1%; Lib: mona-export-itree; ID: 3188.

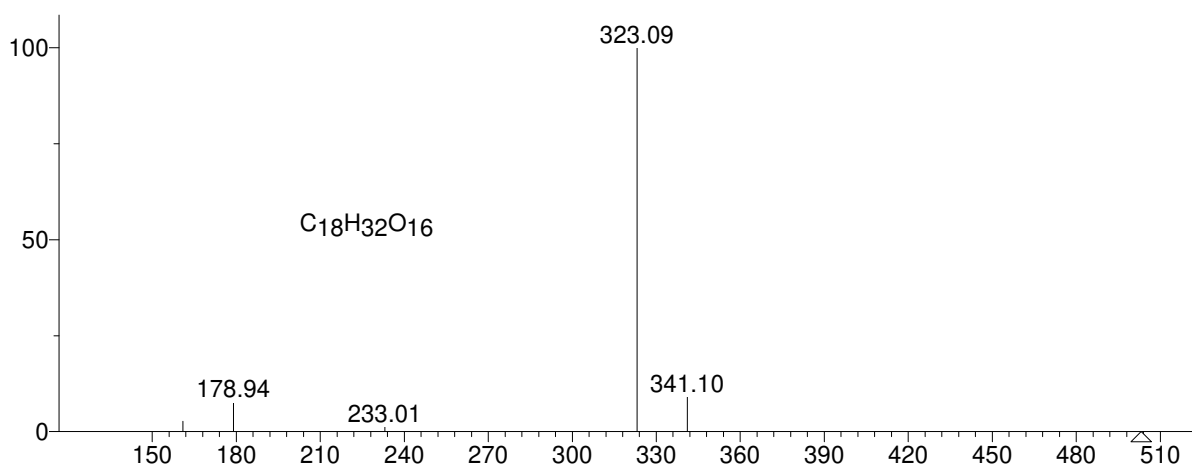

Hit 2 : NCGC00380568-0112-(hydroxymethyl)-6-[[[3,4,5-trihydroxy-6-(4-prop-2-enylphenoxy)oxan-2-yl]methoxy]ox  
C<sub>21</sub>H<sub>30</sub>O<sub>11</sub>; MF: 9; RMF: 344; Prob 7.45%; Lib: mona-export-gnps; ID: 8317.

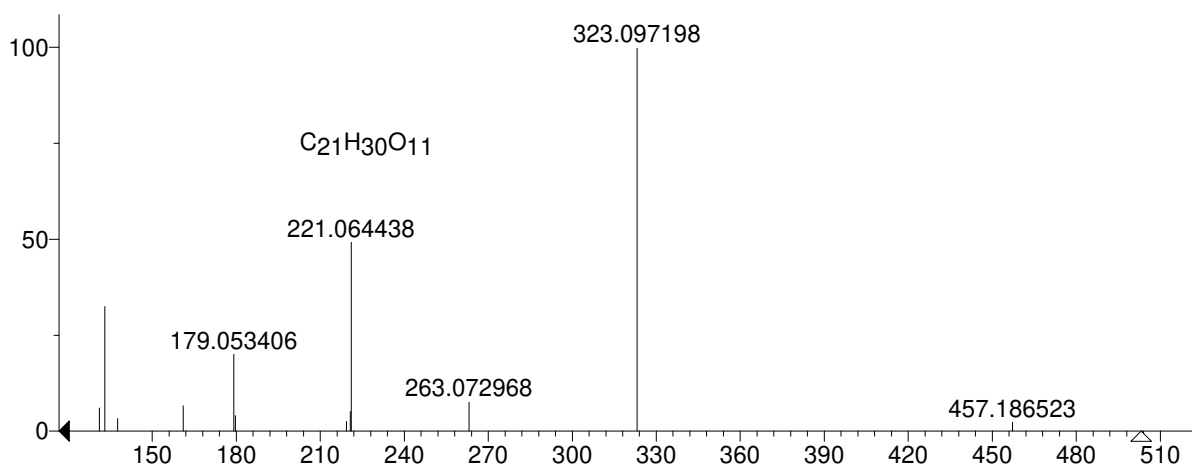

Hit 3 : [3-(13-methyltetradecyl)-5-sulfoxyphenyl] hydrogen sulfate [M+Na]<sup>+</sup> 65HCD P=503.2  
C<sub>21</sub>H<sub>36</sub>O<sub>8</sub>S<sub>2</sub>; MF: 0; RMF: 38; Prob 5.40%; Lib: mona-export-vf-npl\_qexactive; ID: 18237.

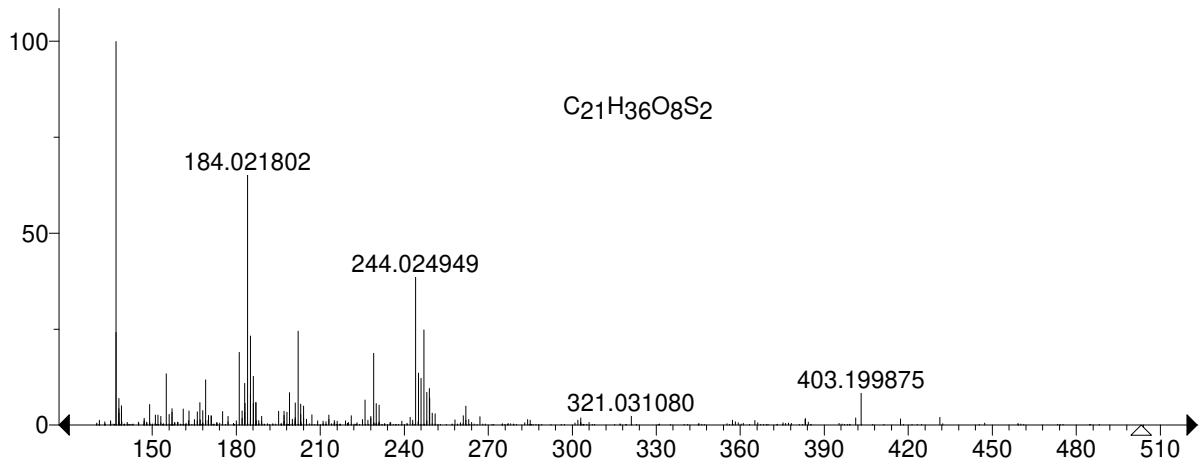

Unknown: Unknown (8.55\_579.2545m/z)  
Compound in Library Factor = 0

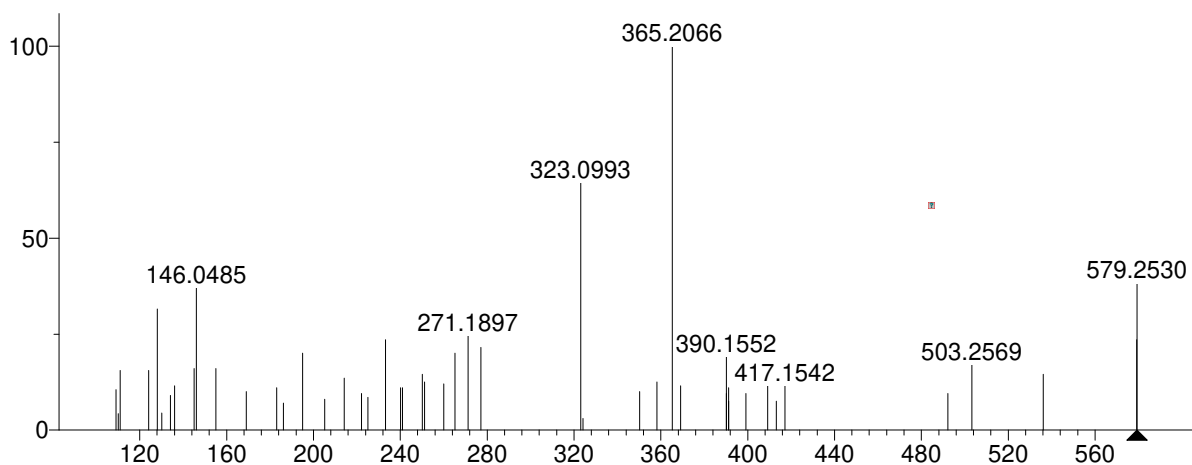

Hit 1 : Naringin M-H 35 P=579.2  
C<sub>27</sub>H<sub>32</sub>O<sub>14</sub>; MF: 0; RMF: 21; Prob 100.0%; Lib: anthocyanins mona; ID: 1179.

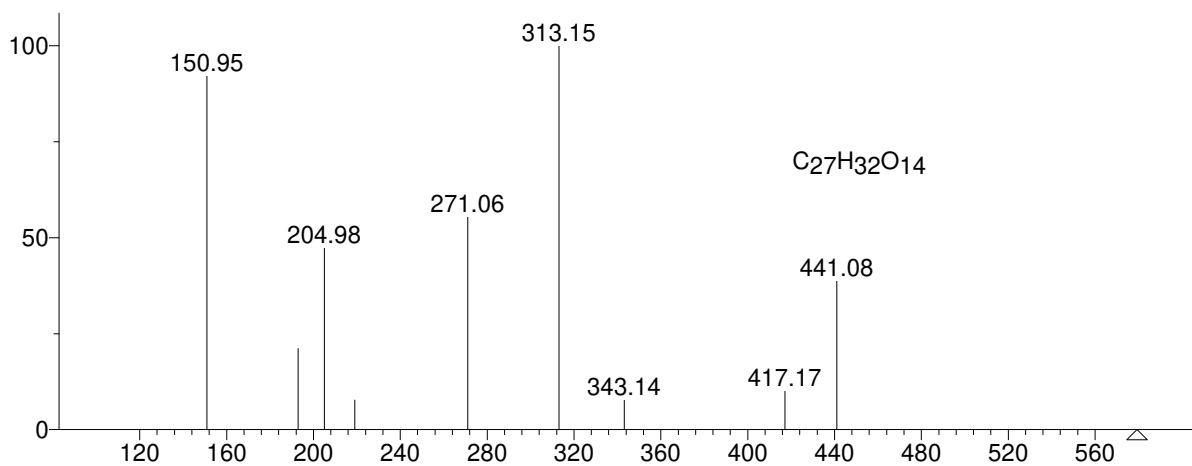

Unknown: Unknown (8.57\_431.0641m/z)  
Compound in Library Factor = -885

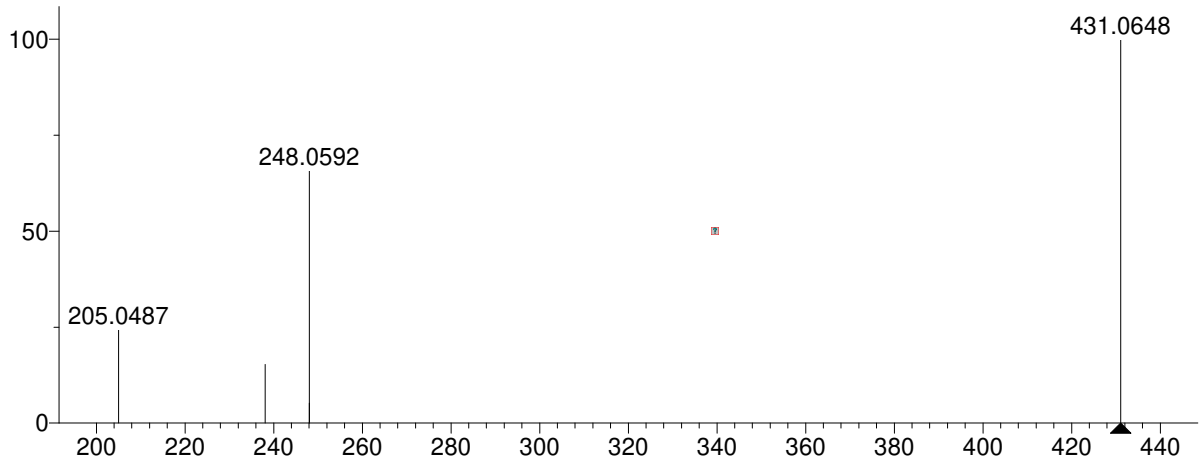

Hit 1 : Bicalutamide [M+H]<sup>+</sup> HCD 7V P=431.1  
C<sub>18</sub>H<sub>14</sub>F<sub>4</sub>N<sub>2</sub>O<sub>4</sub>S; MF: 112; RMF: 664; Prob 94.0%; CAS: 90357-06-5; Lib: nist\_msms; ID: 116227.

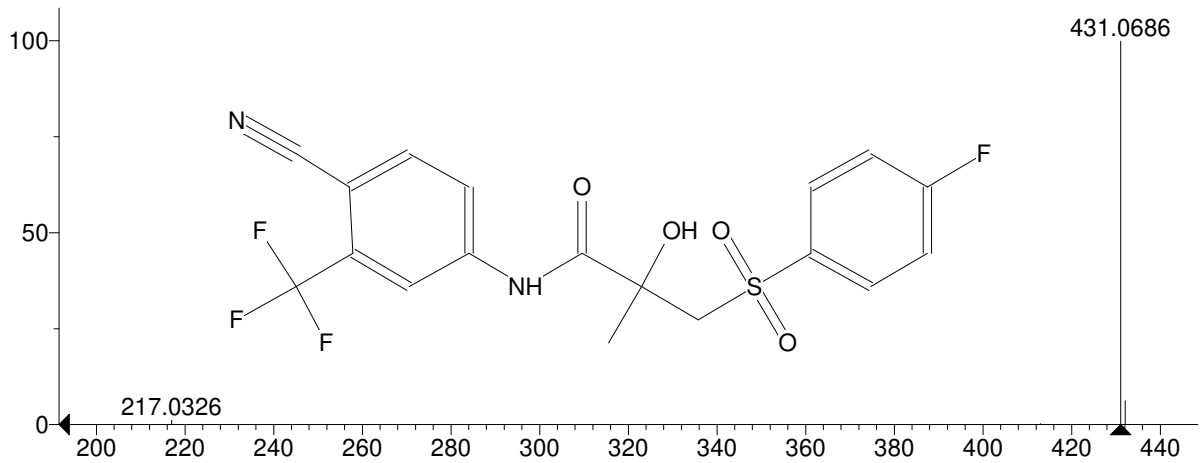

Hit 2 : Bicalutamide (Casodex) [M+H]<sup>+</sup> P=431.1  
C<sub>18</sub>H<sub>14</sub>F<sub>4</sub>N<sub>2</sub>O<sub>4</sub>S; MF: 1; RMF: 195; Prob 5.94%; Lib: mona-export-gnps; ID: 365.

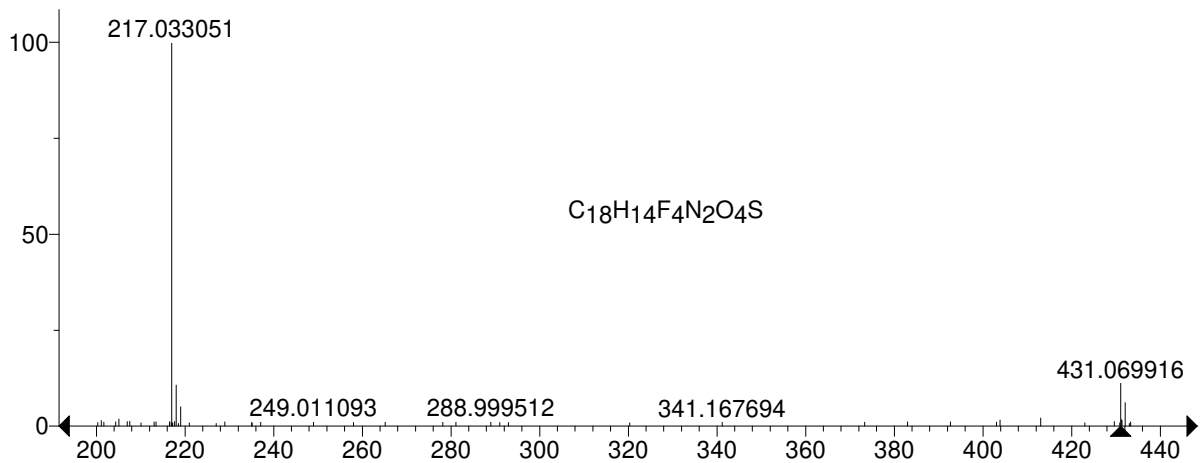

Unknown: Unknown (8.58\_403.1608m/z)  
Compound in Library Factor = 0

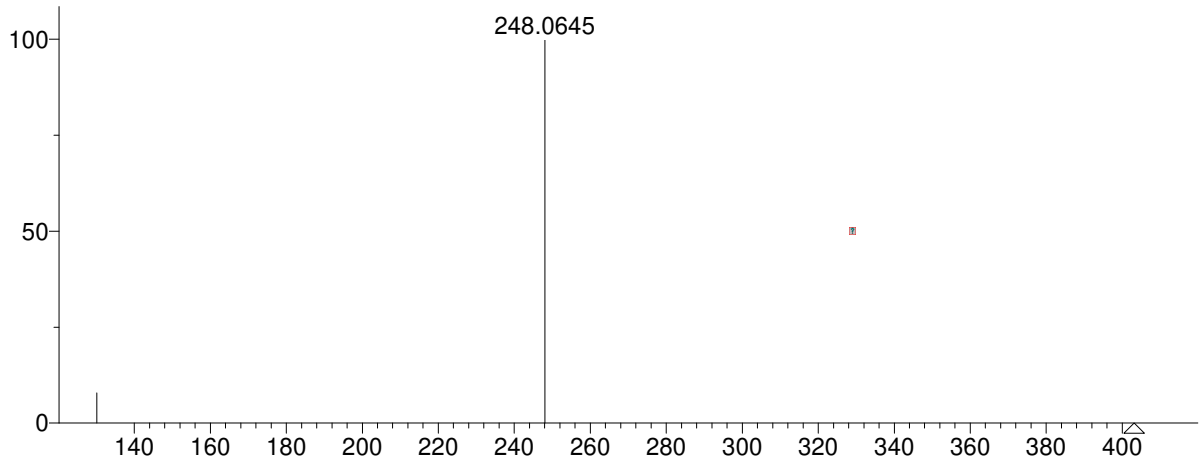

Unknown: Unknown (8.58\_493.1560m/z)  
Compound in Library Factor = 0

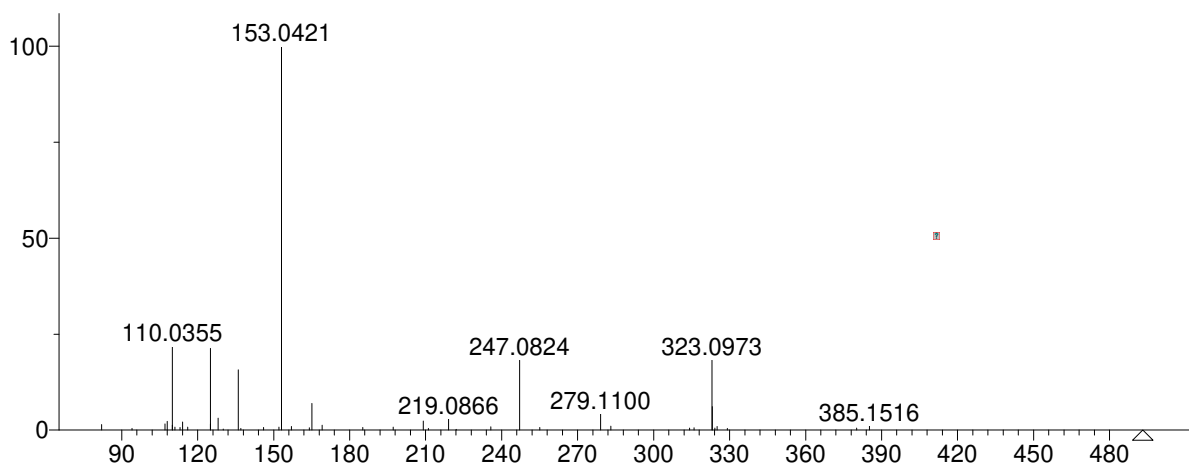

Hit 1 : Blood Group B Trisaccharide [M+Na-H<sub>2</sub>O]<sup>+</sup> HCD 44V P=493.2  
C<sub>18</sub>H<sub>32</sub>O<sub>15</sub>; MF: 0; RMF: 3; Prob 100.0%; CAS: 49777-14-2; Lib: nist\_msms; ID: 533818.

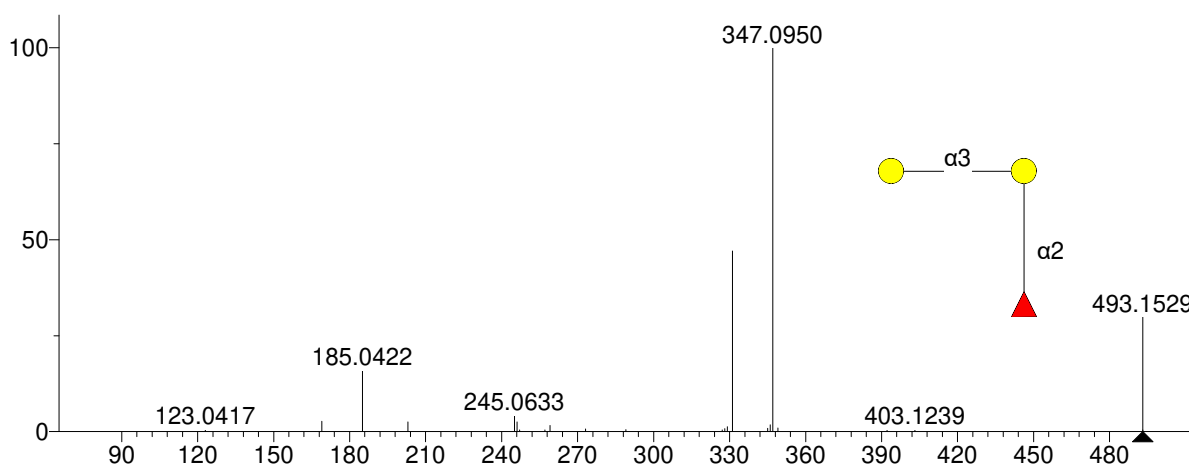



\*\* Search Report Page 1 of 2 \*\*

Unknown: Unknown (8.61\_557.1987m/z)  
Compound in Library Factor = 0

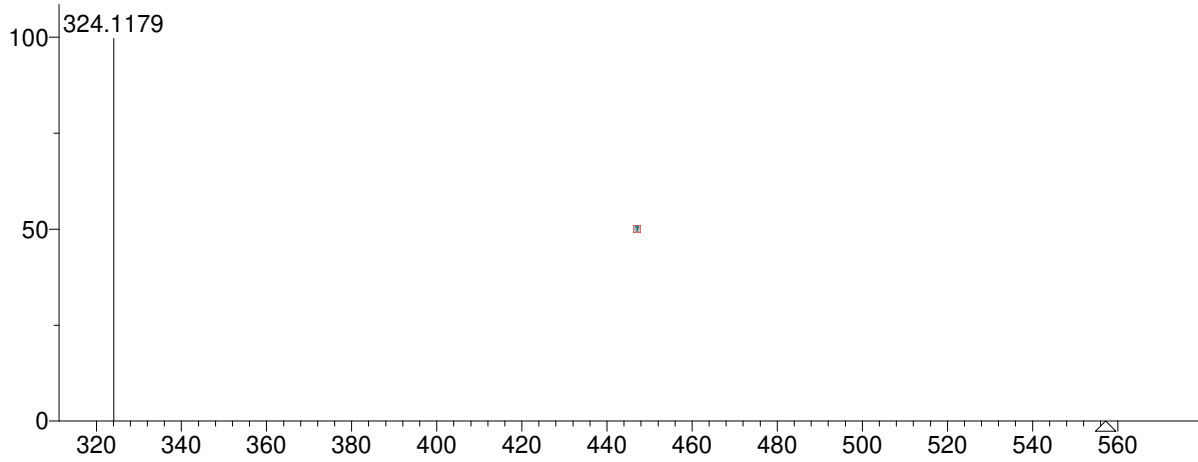

Hit 1 : NCGC00381419-01\_C28H30N4O7\_ [M+Na]<sup>+</sup> P=557.2  
C28H30N4O7; MF: 0; RMF: 178; Prob 33.3%; Lib: mona-export-gnps; ID: 12094.

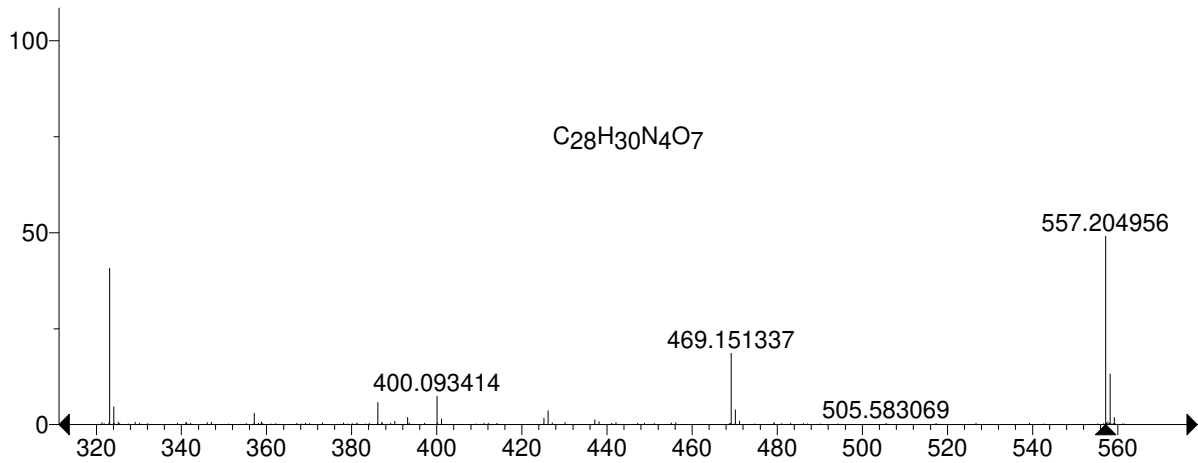

Hit 2 : 2-[4-[(3R,3aR,6S,6aR)-3-(3,4-dimethoxyphenyl)-1,3,3a,4,6,6a-hexahydrofuro[3,4-c]furan-6-yl]-2-methoxypl  
C<sub>27</sub>H<sub>34</sub>O<sub>11</sub>; MF: 0; RMF: 61; Prob 33.3%; Lib: anthocyanins mona; ID: 3790.

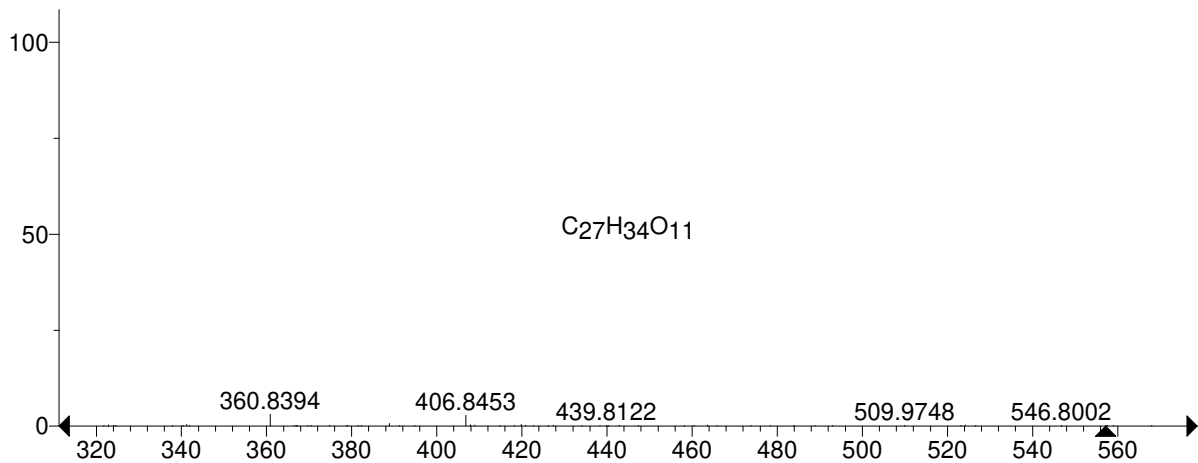

Hit 3 : arctiin [M+Na]<sup>+</sup> 35HCD P=557.2  
C<sub>27</sub>H<sub>34</sub>O<sub>11</sub>; MF: 0; RMF: 5; Prob 33.3%; Lib: anthocyanins mona; ID: 3554.

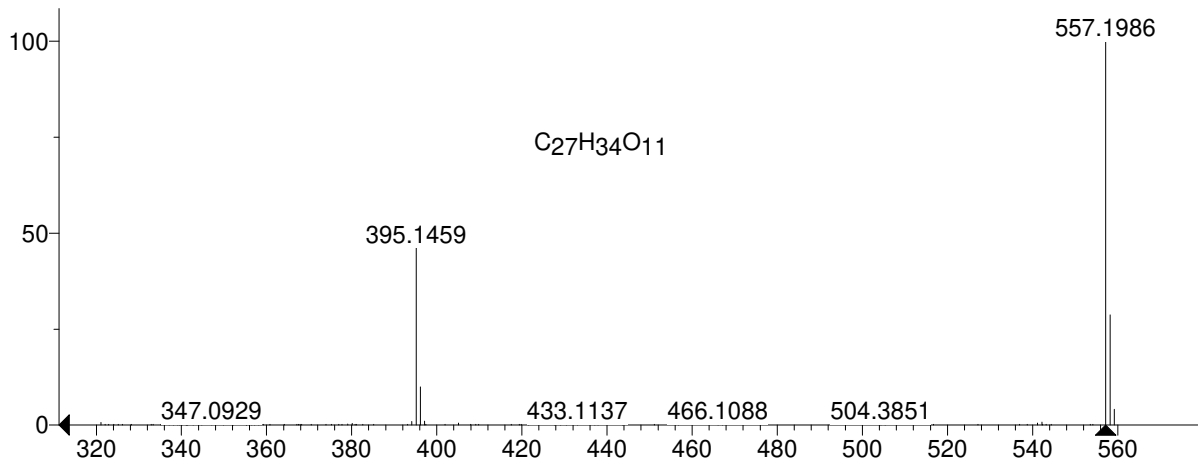

\*\* Search Report Page 1 of 1 \*\*

Unknown: Unknown (8.62\_362.1341m/z)  
Compound in Library Factor = 0

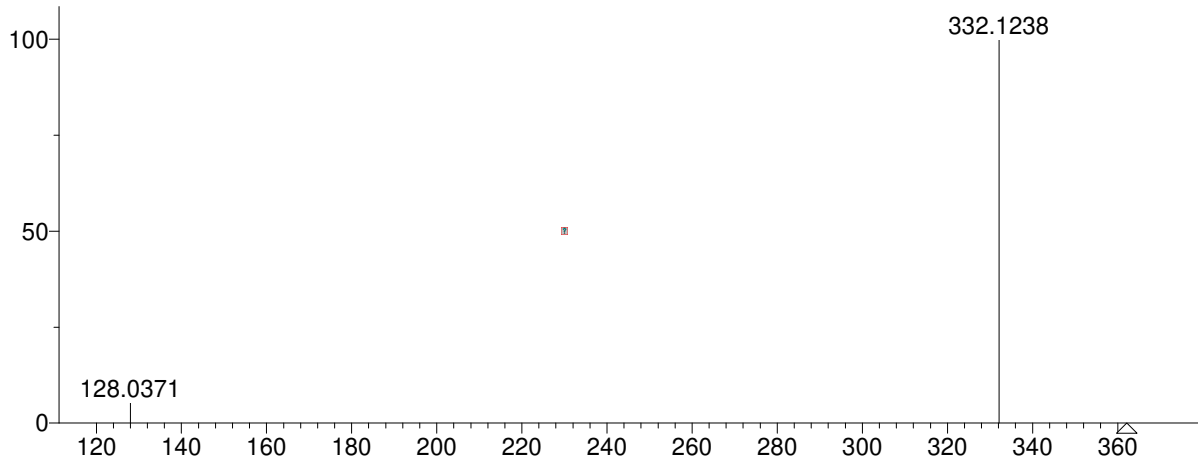

Hit 1 : (Z)-Pyriminobac-methyl [M+H]<sup>+</sup> HCD 115V P=362.1  
C<sub>17</sub>H<sub>19</sub>N<sub>3</sub>O<sub>6</sub>; MF: 0; RMF: 45; Prob 100.0%; CAS: 147411-70-9; Lib: nist\_msms; ID: 469207.

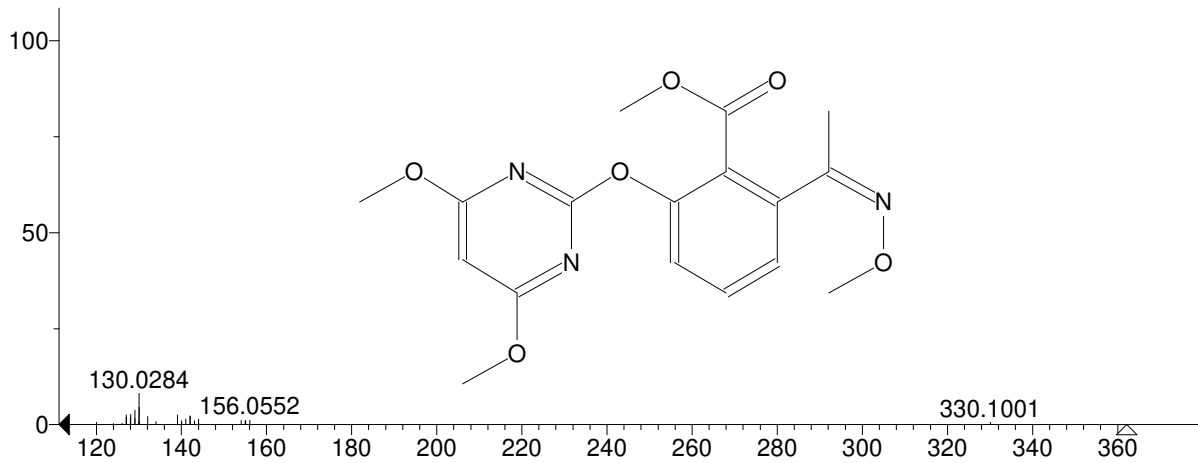

Unknown: Unknown (8.67\_401.0537m/z)  
Compound in Library Factor = 0

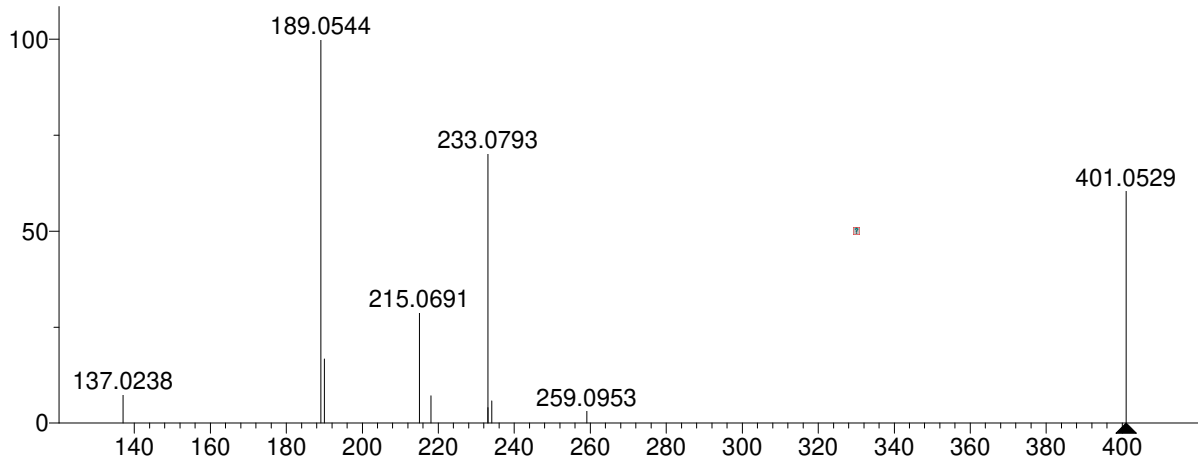

Unknown: Unknown (8.68\_472.1934m/z)  
Compound in Library Factor = 0

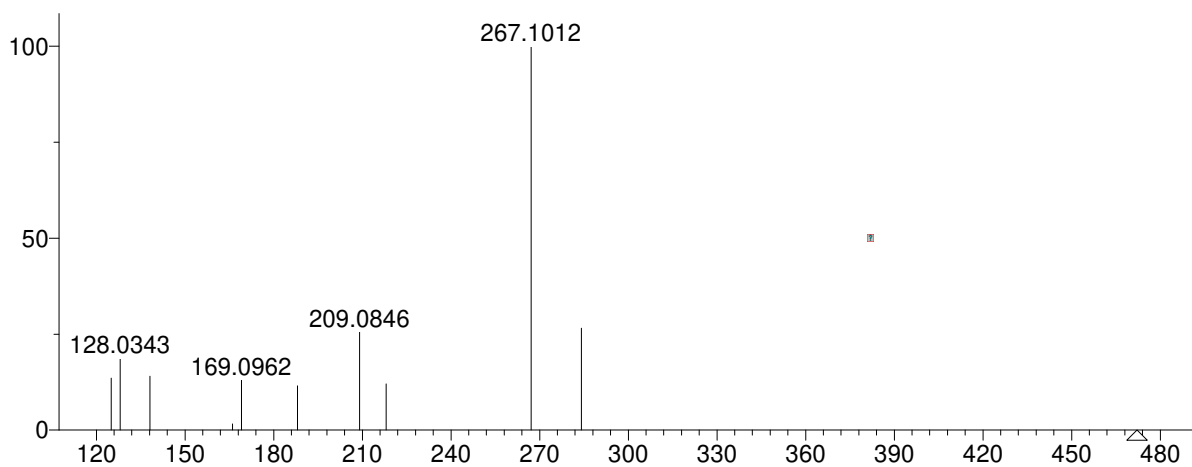

Hit 1 : methyl 3-(3,4-dihydroxyphenyl)-2-[[4-hydroxy-3-(3-methylbut-2-enyl)phenyl]methyl]-4-methoxy-5-oxofuran-  
C<sub>25</sub>H<sub>26</sub>O<sub>8</sub>; MF: 0; RMF: 39; Prob 100.0%; Lib: mona-export-vf-npl\_qexactive; ID: 9391.



Unknown: Unknown (8.69\_544.2140m/z)  
Compound in Library Factor = 0

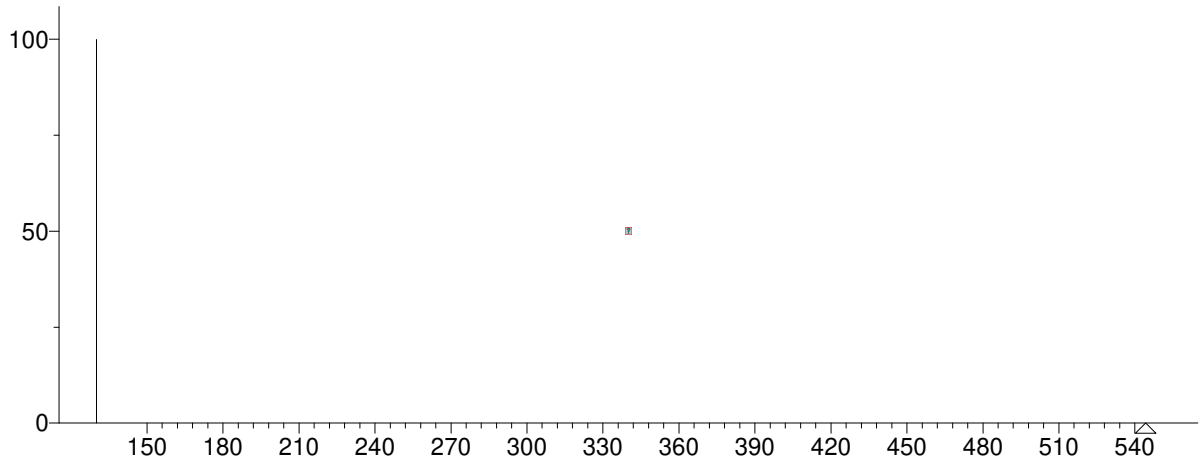

\*\* Search Report Page 1 of 2 \*\*

Unknown: Unknown (8.72\_332.1241m/z)  
Compound in Library Factor = -2387

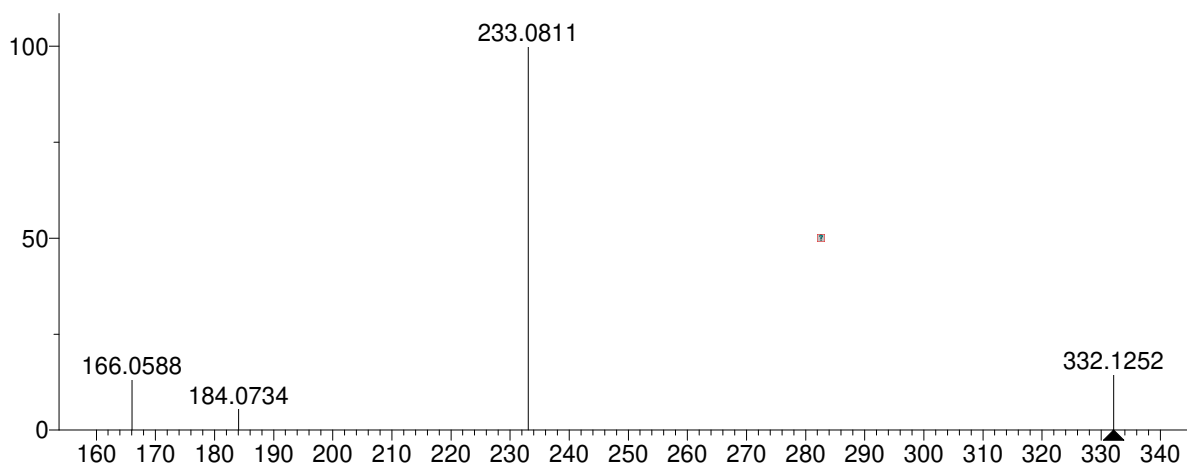

Hit 1 : Glu-Trp [M-H]<sup>-</sup> HCD 9eV P=332.1  
C<sub>16</sub>H<sub>19</sub>N<sub>3</sub>O<sub>5</sub>; MF: 39; RMF: 319; Prob 32.1%; Lib: nist\_msms; ID: 567396.

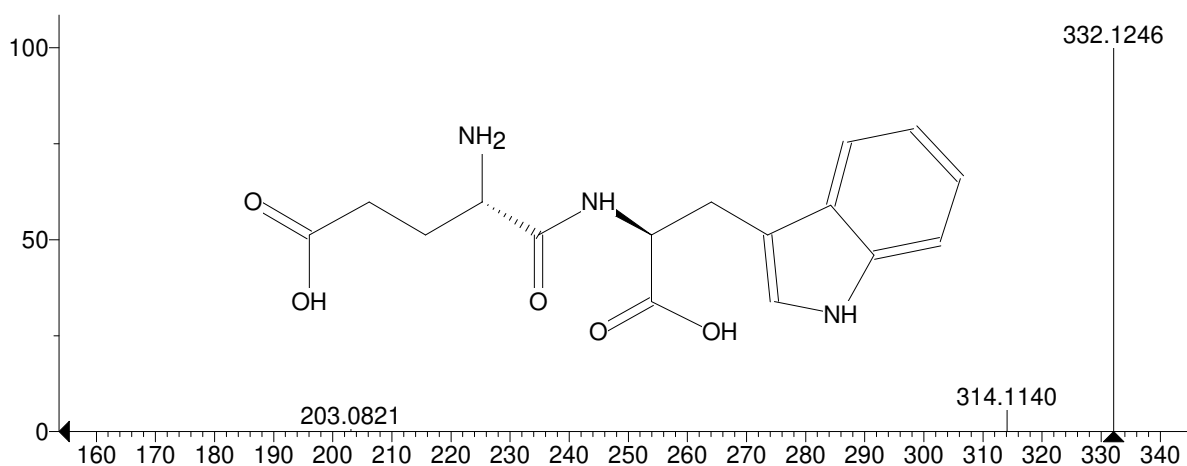

Hit 2 : Glu-Trp [M-H]<sup>-</sup> HCD 9eV P=332.1  
C<sub>16</sub>H<sub>19</sub>N<sub>3</sub>O<sub>5</sub>; MF: 39; RMF: 319; Prob 32.1%; CAS: 38101-59-6; Lib: nist\_msms2; ID: 70253.

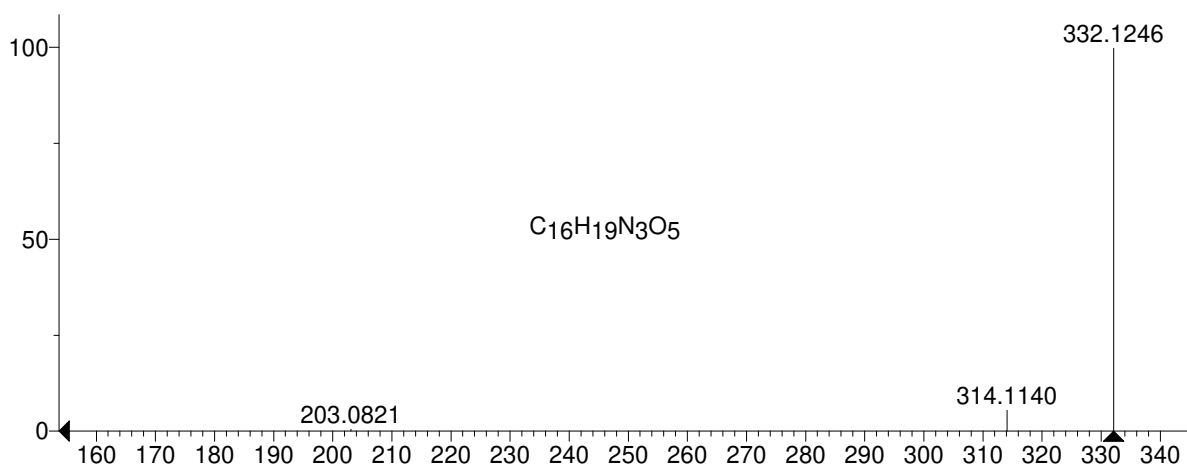

Hit 3 : Nizatidine [M+H]<sup>+</sup> HCD 13V P=332.1  
C<sub>12</sub>H<sub>21</sub>N<sub>5</sub>O<sub>2</sub>S<sub>2</sub>; MF: 13; RMF: 306; Prob 9.60%; CAS: 76963-41-2; Lib: nist\_msms; ID: 152049.

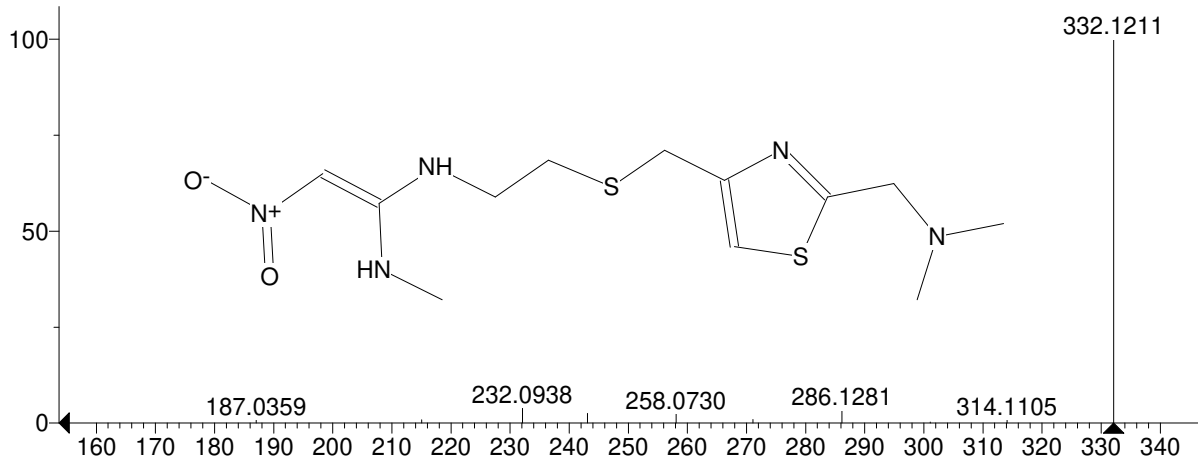

Hit 4 : Trp-Glu [M-H]<sup>-</sup> HCD 14eV P=332.1  
C<sub>16</sub>H<sub>19</sub>N<sub>3</sub>O<sub>5</sub>; MF: 11; RMF: 288; Prob 8.86%; Lib: nist\_msms; ID: 566618.

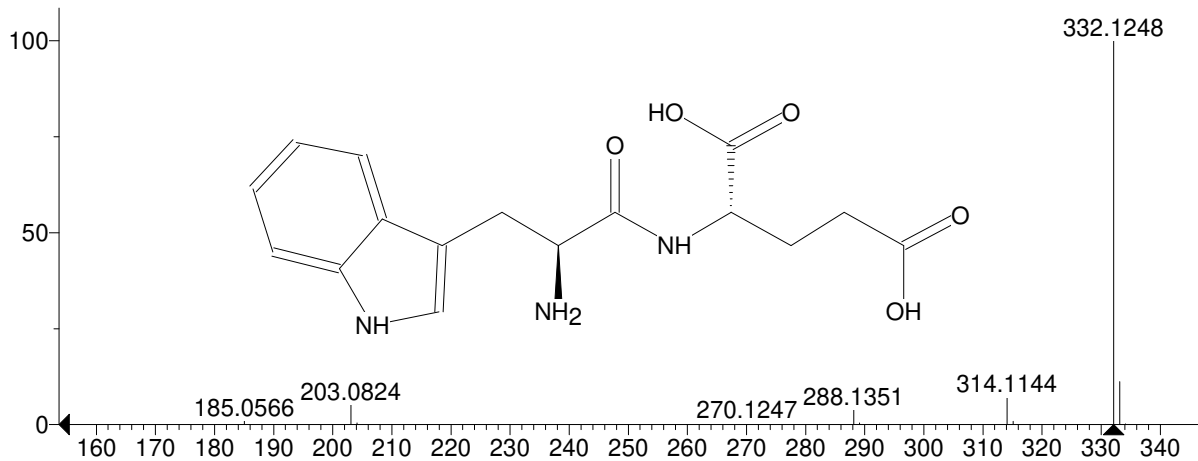

Hit 5 : Trp-Glu [M-H]<sup>-</sup> HCD 14eV P=332.1  
C<sub>16</sub>H<sub>19</sub>N<sub>3</sub>O<sub>5</sub>; MF: 11; RMF: 288; Prob 8.86%; CAS: 36099-95-3; Lib: nist\_msms2; ID: 69475.

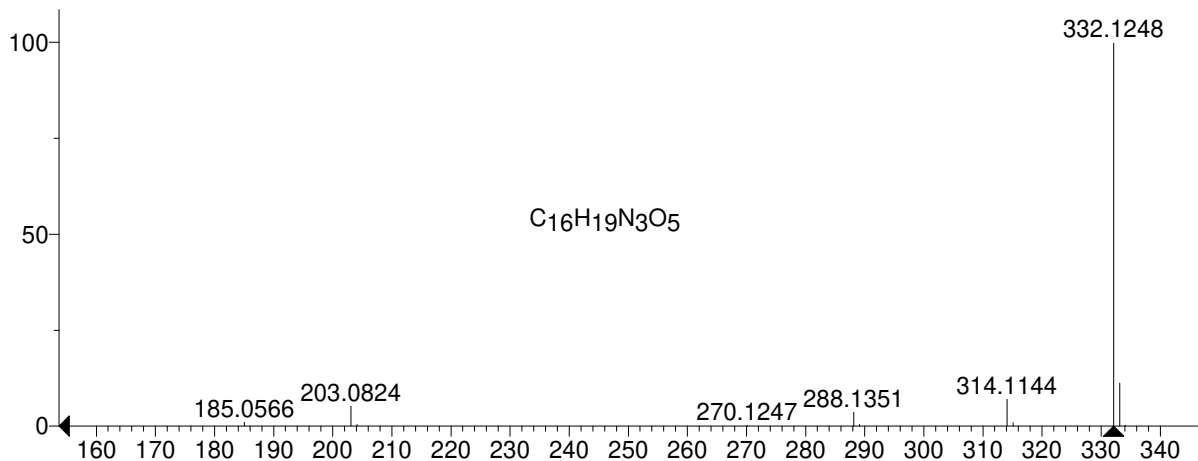



Unknown: Unknown (8.72\_443.9930m/z)  
Compound in Library Factor = 0

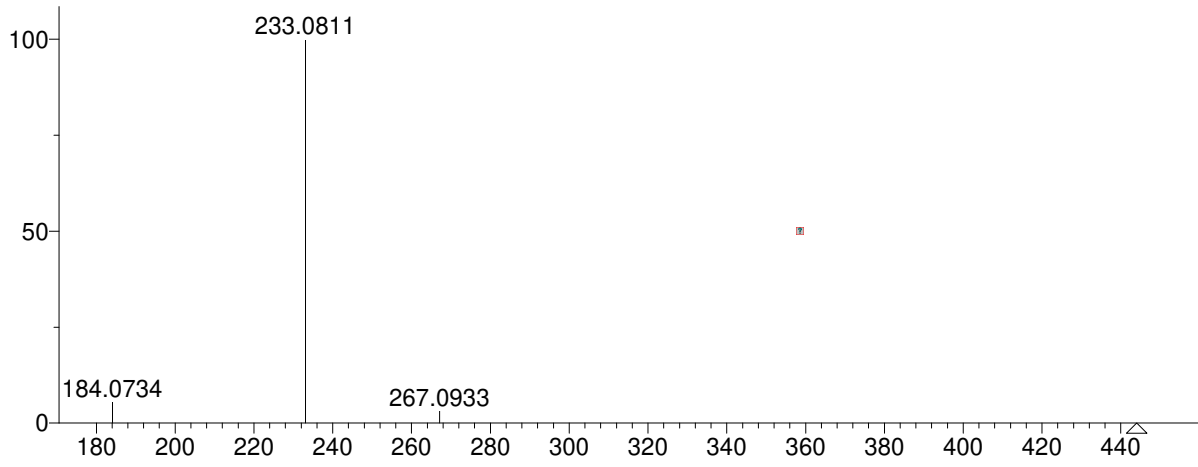

\*\* Search Report Page 1 of 1 \*\*

Unknown: Unknown (8.74\_614.2961m/z)  
Compound in Library Factor = -733

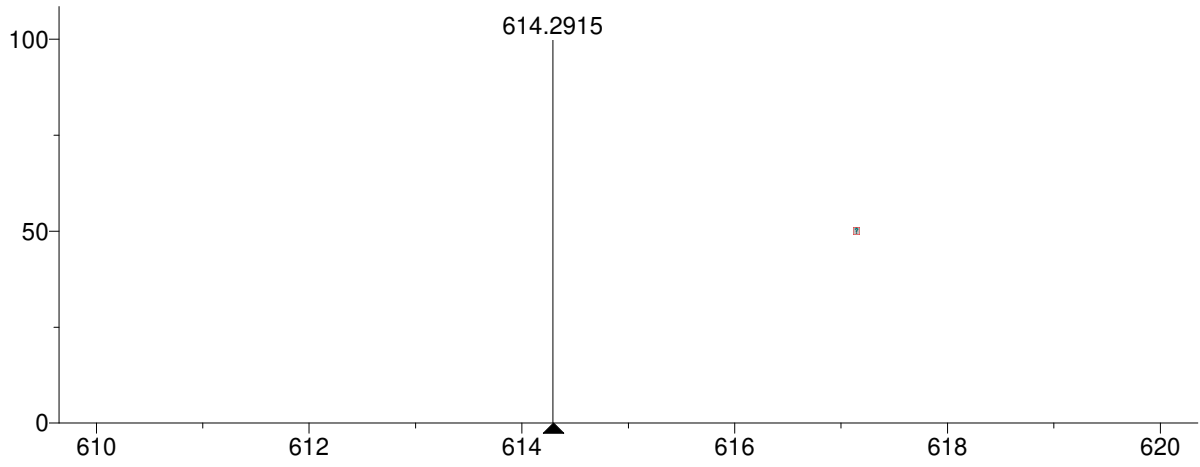

Hit 1 : NCGC00381019-01\_C33H40O10\_1H-Cyclopentacyclododecene-4,10(2H,5H)-dione, 3a,9,13-tris(acetylox;  
C33H40O10; MF: 5; RMF: 373; Prob 100.0%; Lib: mona-export-gnps; ID: 11327.

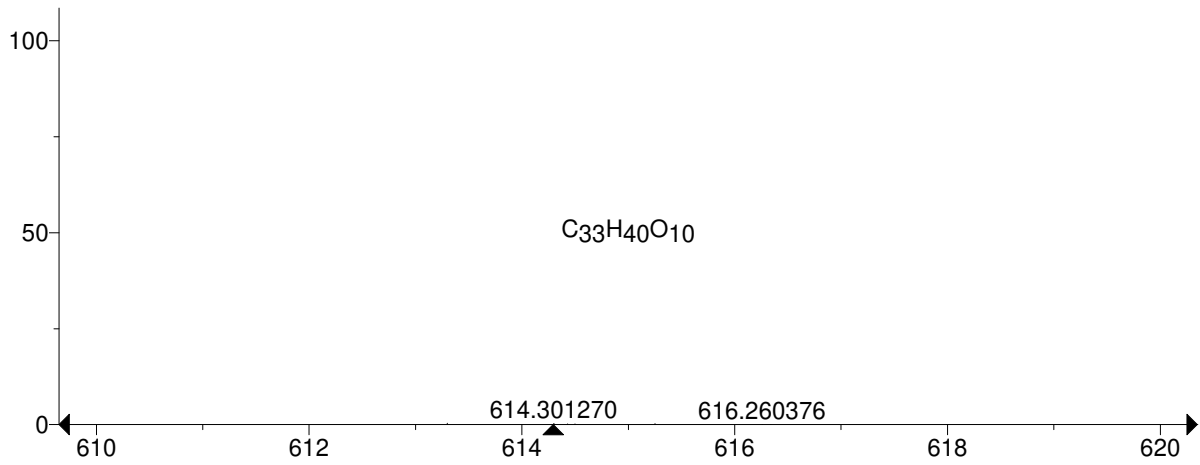

\*\* Search Report Page 1 of 2 \*\*

Unknown: Unknown (8.77\_209.0443m/z)  
Compound in Library Factor = -1309

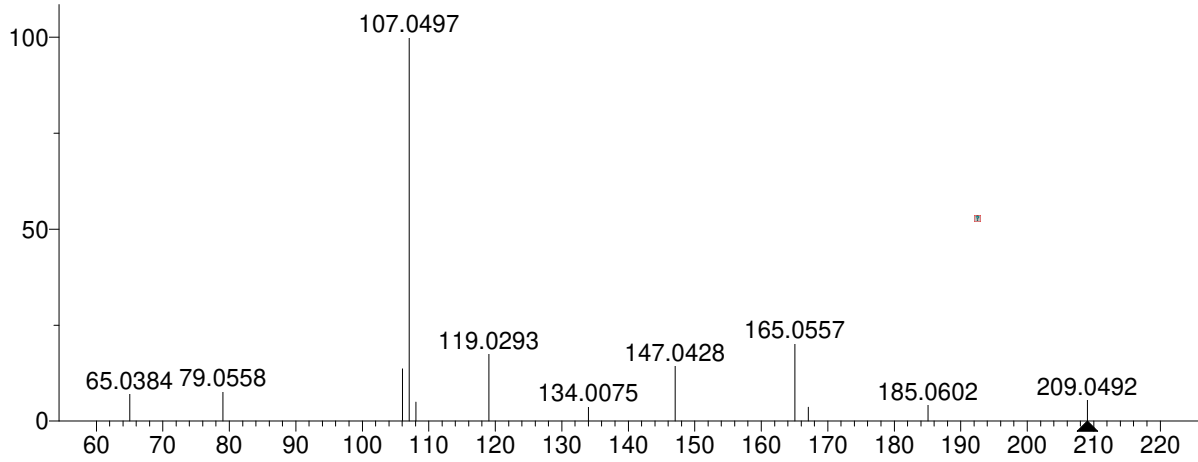

Hit 1 : Fraxetin [M+H]<sup>+</sup> HCD 10V P=209  
C<sub>10</sub>H<sub>8</sub>O<sub>5</sub>; MF: 78; RMF: 280; Prob 37.5%; CAS: 574-84-5; Lib: nist\_msms; ID: 106679.

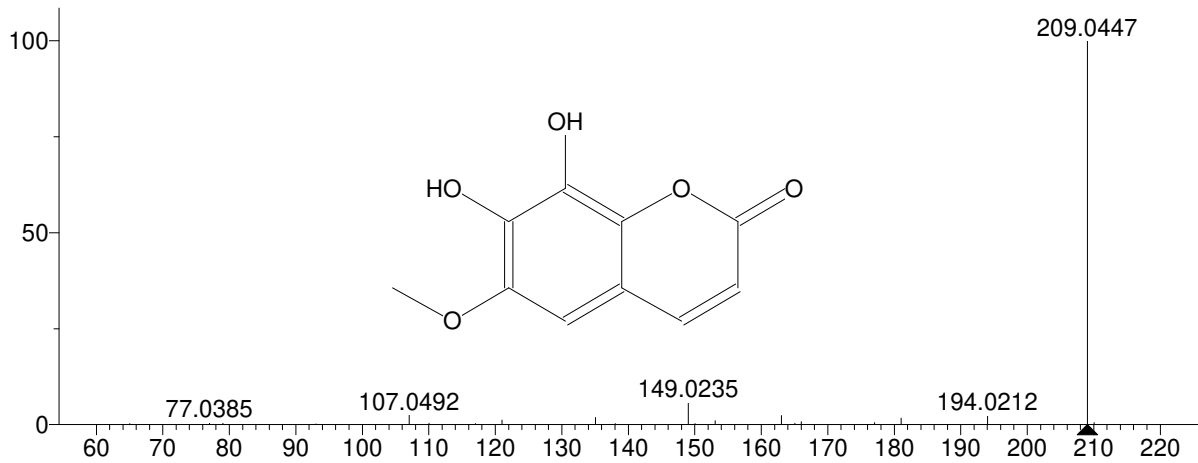

Hit 2 : Hydroxyferulic acid ; PlaSMA ID-282 [M-H]<sup>-</sup> P=209  
C<sub>10</sub>H<sub>10</sub>O<sub>5</sub>; MF: 71; RMF: 323; Prob 28.7%; Lib: biomsmms-neg-plasma; ID: 535.

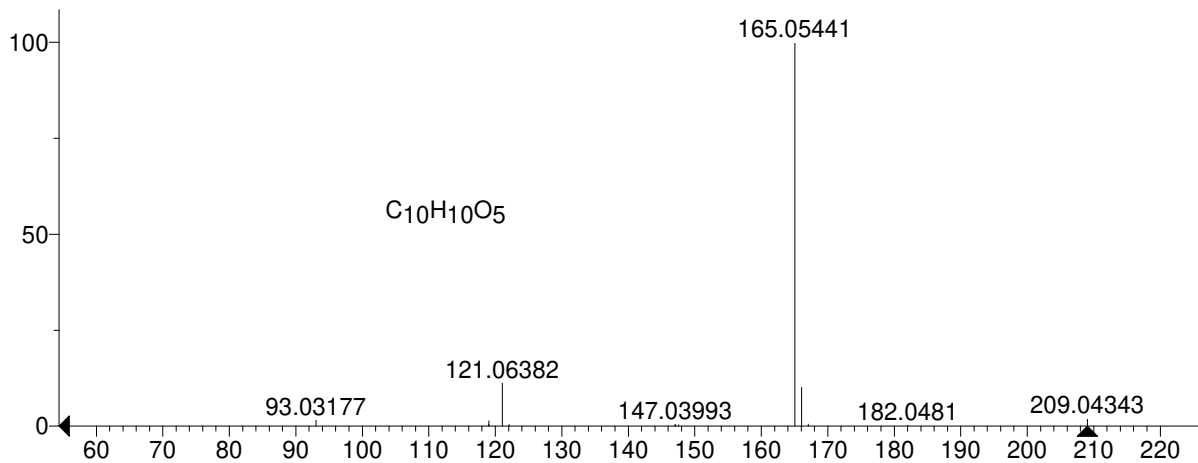

Hit 3 : Chorismic acid [M+H-H<sub>2</sub>O]<sup>+</sup> HCD 20V P=209  
C<sub>10</sub>H<sub>10</sub>O<sub>6</sub>; MF: 18; RMF: 215; Prob 5.67%; CAS: 617-12-9; Lib: nist\_msms; ID: 242934.

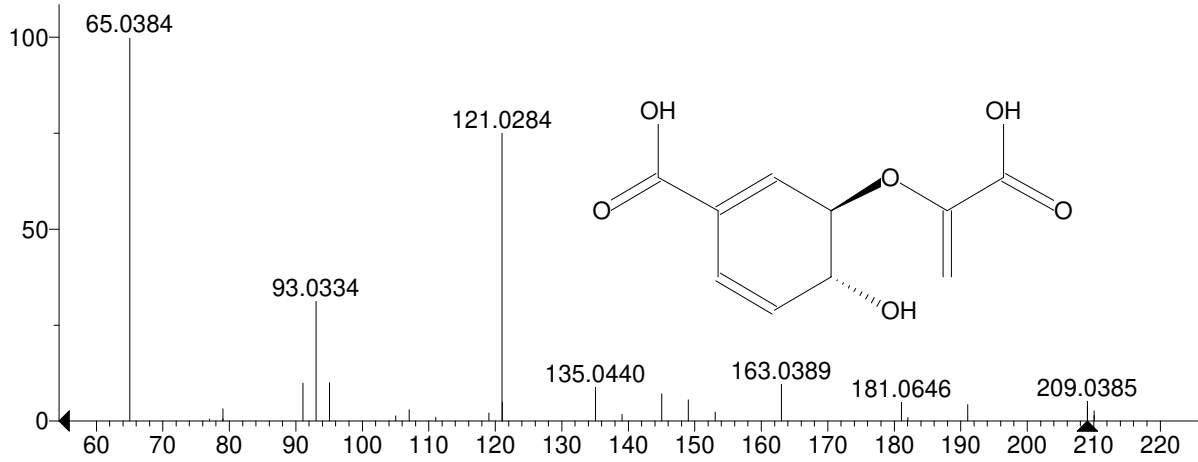

Hit 4 : NCGC00017270-0717,8-dihydroxy-6-methoxychromen-2-one [M+H]<sup>+</sup> P=209  
C<sub>10</sub>H<sub>8</sub>O<sub>5</sub>; MF: 8; RMF: 200; Prob 4.00%; Lib: mona-export-gnps; ID: 6636.

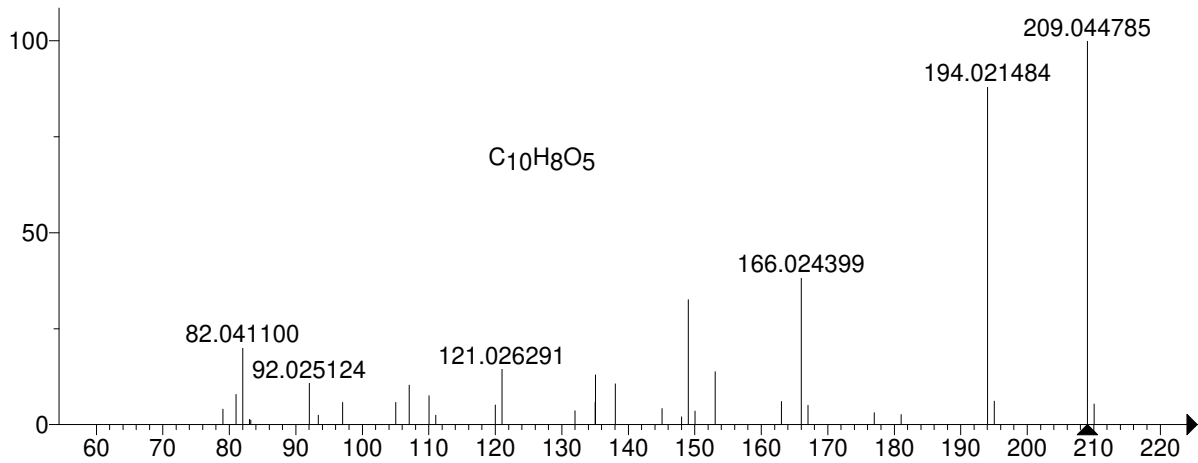

Hit 5 : 2,4-diacetylphloroglucinol [M-H]<sup>-</sup> 35HCD P=209  
C<sub>10</sub>H<sub>10</sub>O<sub>5</sub>; MF: 5; RMF: 189; Prob 3.54%; Lib: mona-export-lc-ms-ms\_negative\_mode; ID: 18149.

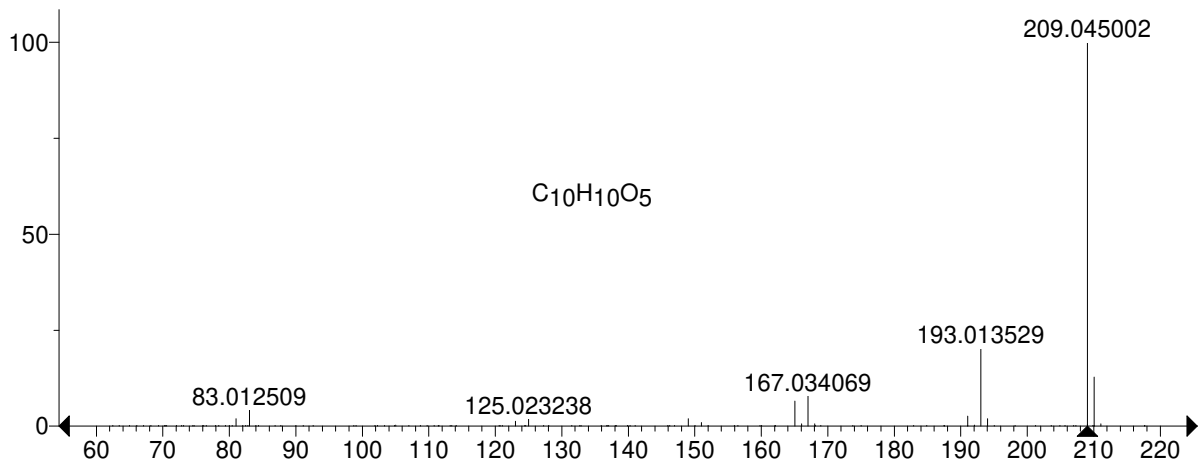

Unknown: Unknown (8.77\_371.1331m/z)  
Compound in Library Factor = 0

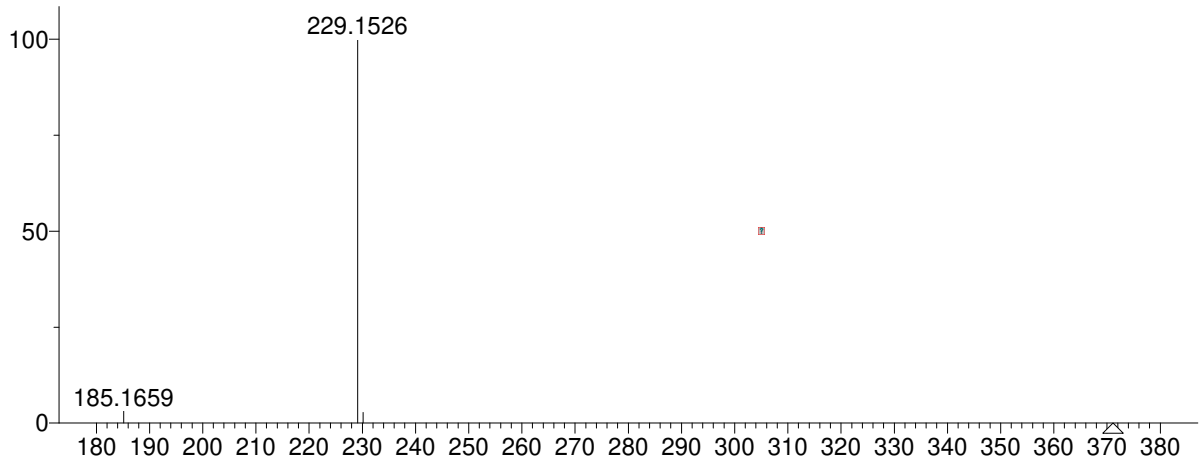

Unknown: Unknown (8.77\_399.2115m/z)  
Compound in Library Factor = -3273

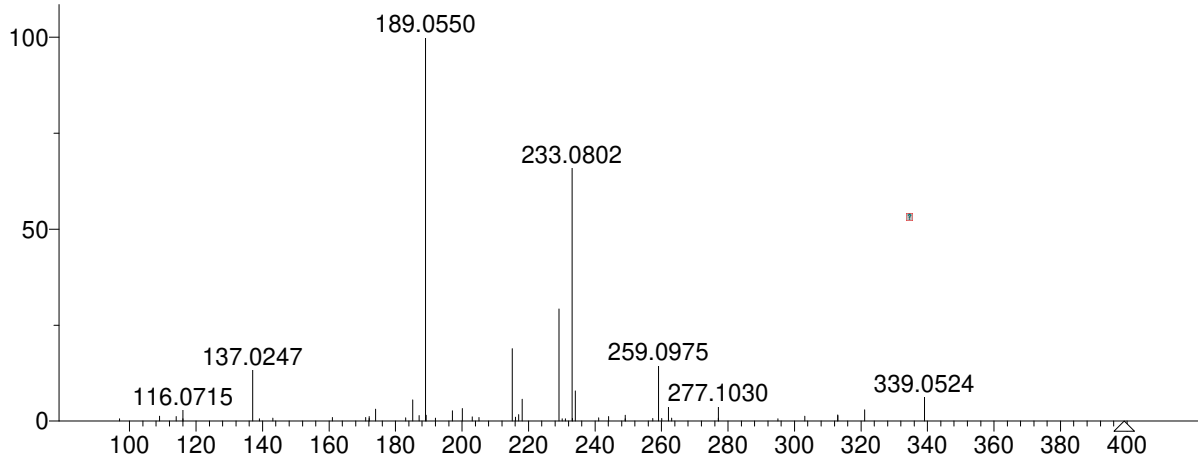

Hit 1 : N-Desmethylvinblastine [M+2H]<sup>2+</sup> HCD 114V P=399.2  
C<sub>45</sub>H<sub>56</sub>N<sub>4</sub>O<sub>9</sub>; MF: 1; RMF: 54; Prob 25.7%; CAS: 18172-50-4; Lib: nist\_msms; ID: 435598.

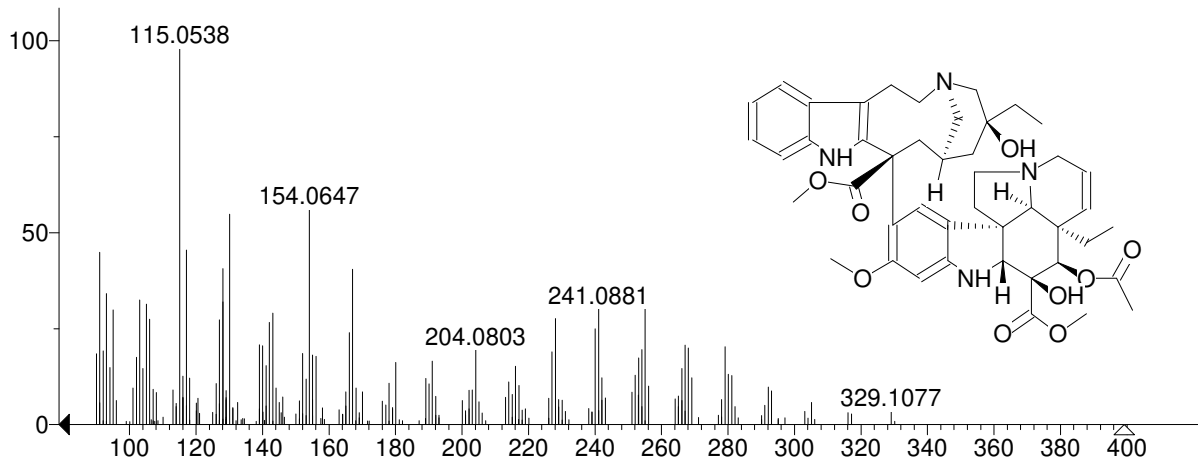

Hit 2 : His-Ser-Arg [M+H]<sup>+</sup> QTOF 40V P=399.2  
C<sub>15</sub>H<sub>26</sub>N<sub>8</sub>O<sub>5</sub>; MF: 0; RMF: 20; Prob 24.8%; Lib: nist\_msms; ID: 51161.

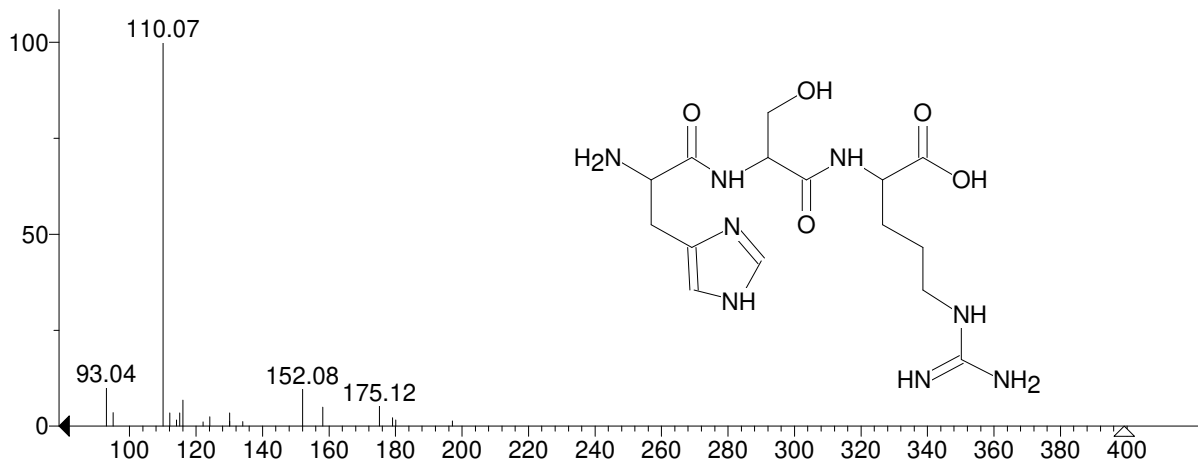

Hit 3 : Ser-His-Arg [M+H]<sup>+</sup> QTOF 30V P=399.2  
C<sub>15</sub>H<sub>26</sub>N<sub>8</sub>O<sub>5</sub>; MF: 0; RMF: 18; Prob 24.8%; Lib: nist\_msms; ID: 53772.

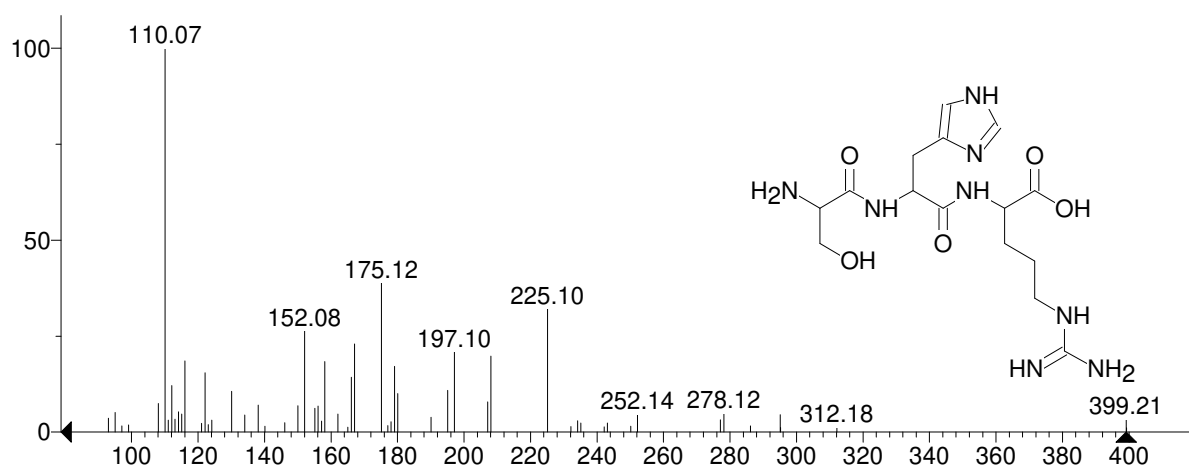

Hit 4 : NCGC00380576-01\_C<sub>22</sub>H<sub>32</sub>O<sub>5</sub>\_2-Pentenoic acid, 3-[(acetyloxy)methyl]-5-[(1S,4aR,8aR)-2-formyl-1,4,4a,

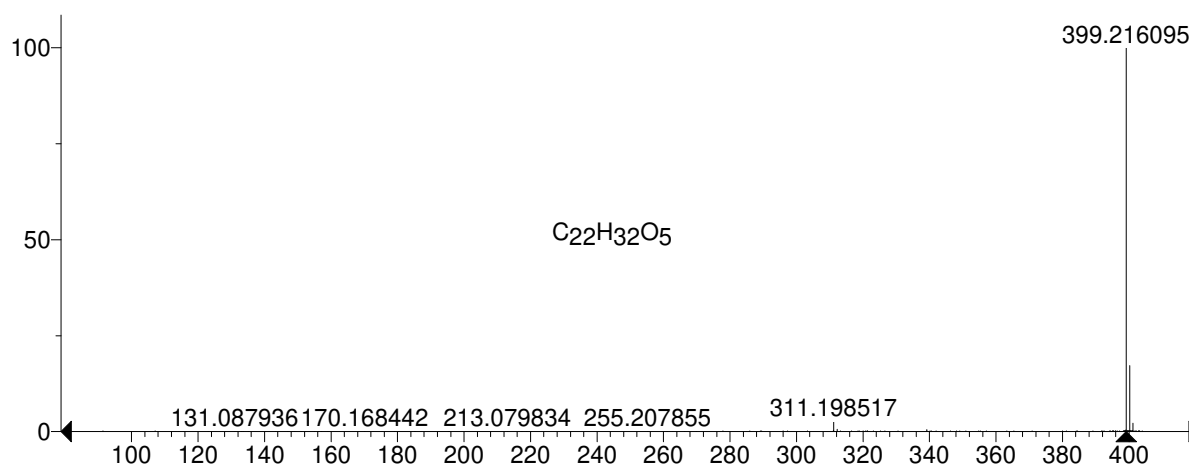

Unknown: Unknown (8.77\_437.1022m/z)  
Compound in Library Factor = 0

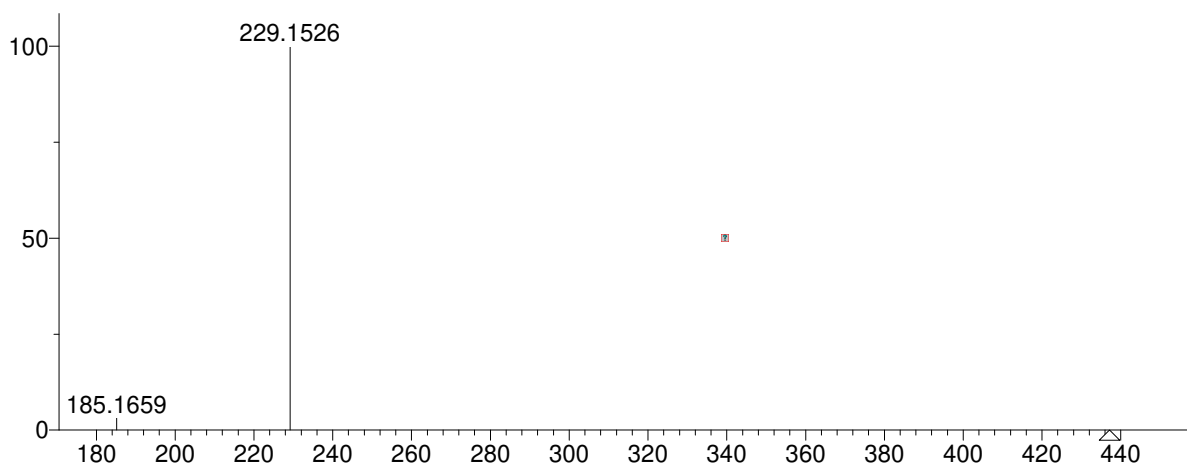

Hit 1 : (5-benzoyloxy-4,6-dihydroxy-3-methoxycyclohexen-1-yl)methyl benzoate [M+K]<sup>+</sup> 45HCD P=437.1  
C<sub>22</sub>H<sub>22</sub>O<sub>7</sub>; MF: 0; RMF: 15; Prob 100.0%; Lib: mona-export-vf-npl\_qexactive; ID: 1880.

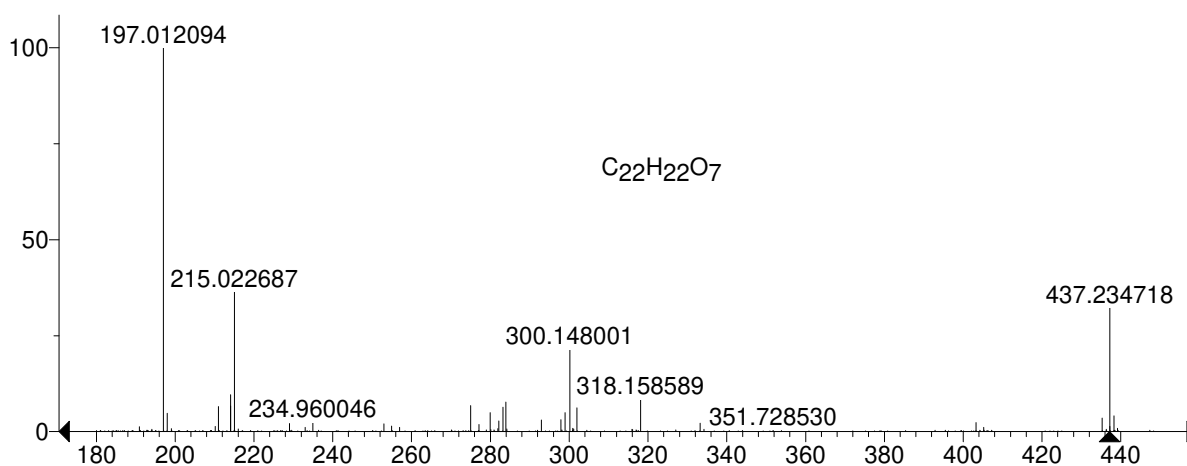



Unknown: Unknown (8.77\_586.2720m/z)  
Compound in Library Factor = 0

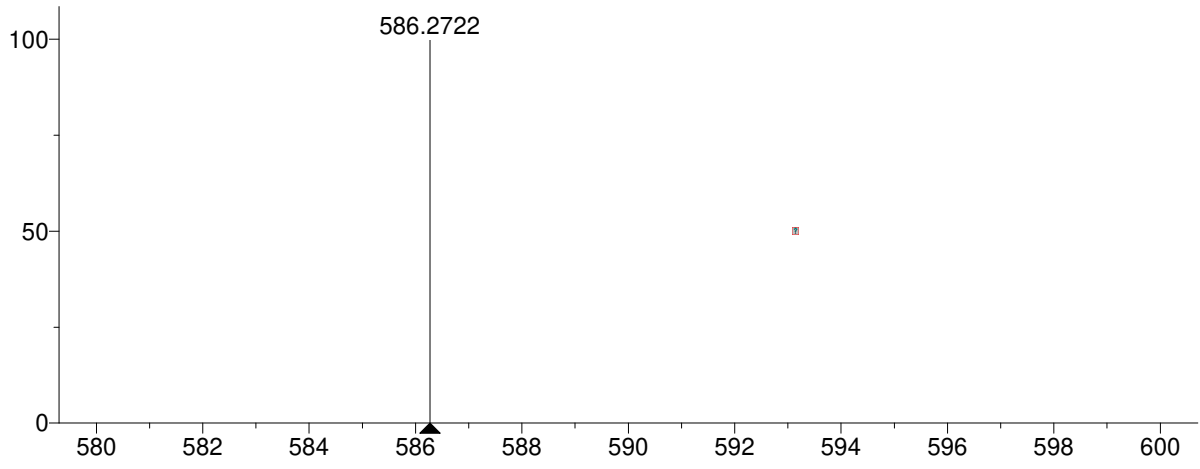

Unknown: Unknown (8.77\_640.3310m/z)  
Compound in Library Factor = -2632

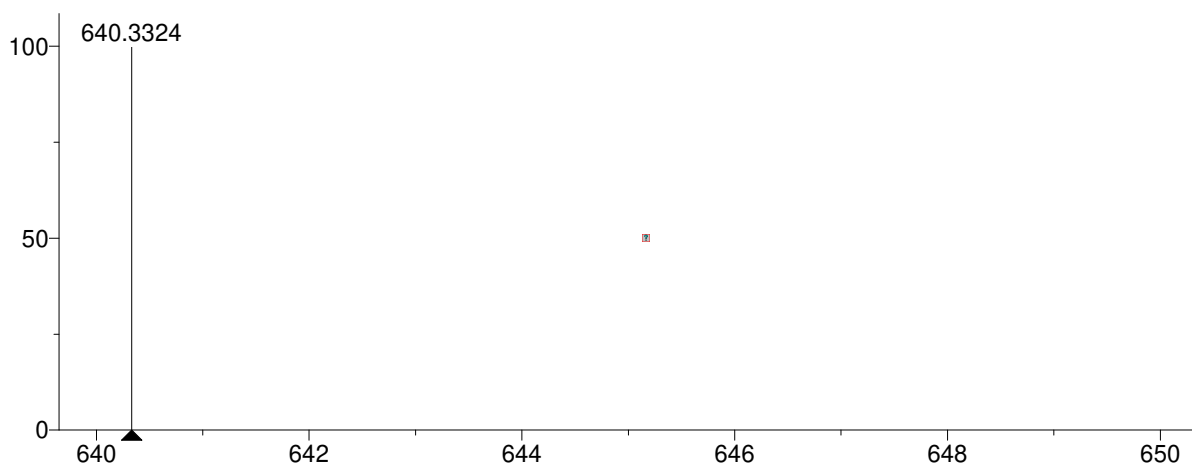

Hit 1 : PS 26:5 [M-H]<sup>-</sup> 40eV P=640.3  
C<sub>32</sub>H<sub>52</sub>NO<sub>10</sub>P; MF: 364; RMF: 999; Prob 20.0%; Lib: mona-export-in-silico\_spectra; ID: 106181.

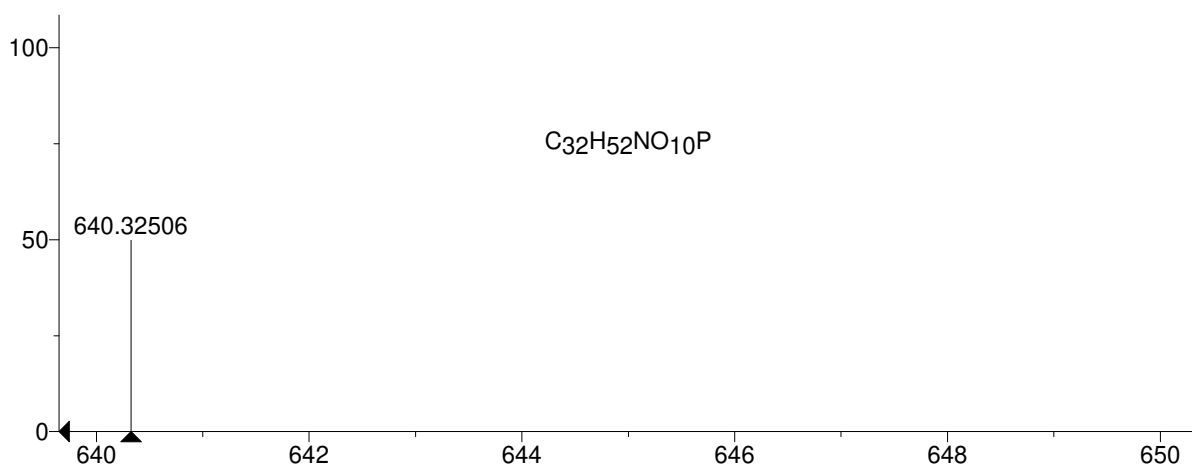

Hit 2 : PS 26:5; PS 4:0-22:5; [M-H]<sup>-</sup> [M-H]<sup>-</sup> P=640.3  
C<sub>32</sub>H<sub>52</sub>NO<sub>10</sub>P; MF: 364; RMF: 999; Prob 20.0%; Lib: msdial-insilicomsmms-lipids-neg; ID: 329842.

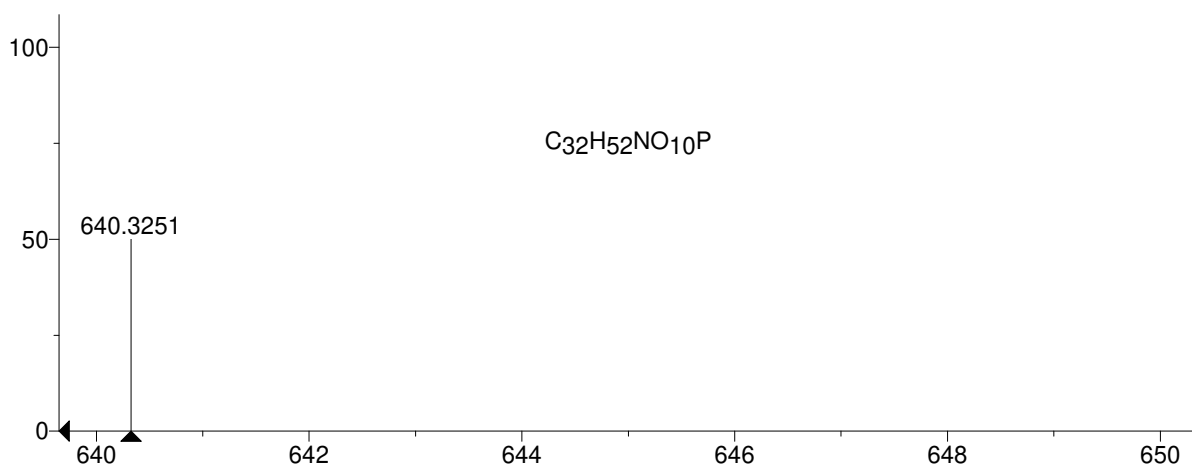

Hit 3 : PS 26:5; PS 6:0-20:5; [M-H]<sup>-</sup> [M-H]<sup>-</sup> P=640.3  
C<sub>32</sub>H<sub>52</sub>NO<sub>10</sub>P; MF: 364; RMF: 999; Prob 20.0%; Lib: msdial-insilicomsm-lipids-neg; ID: 329948.

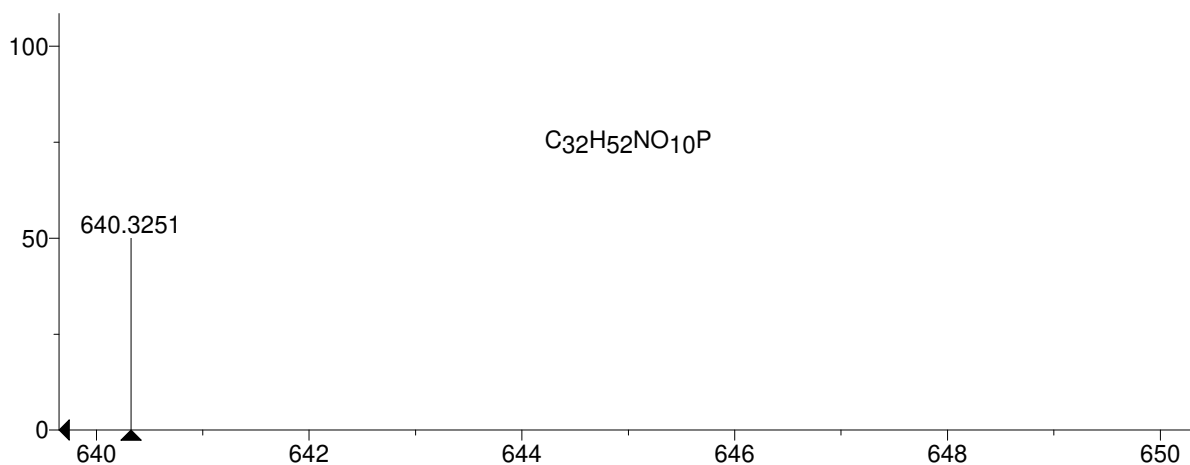

Hit 4 : PS 26:5; PS 8:0-18:5; [M-H]<sup>-</sup> [M-H]<sup>-</sup> P=640.3  
C<sub>32</sub>H<sub>52</sub>NO<sub>10</sub>P; MF: 364; RMF: 999; Prob 20.0%; Lib: msdial-insilicomsm-lipids-neg; ID: 330050.

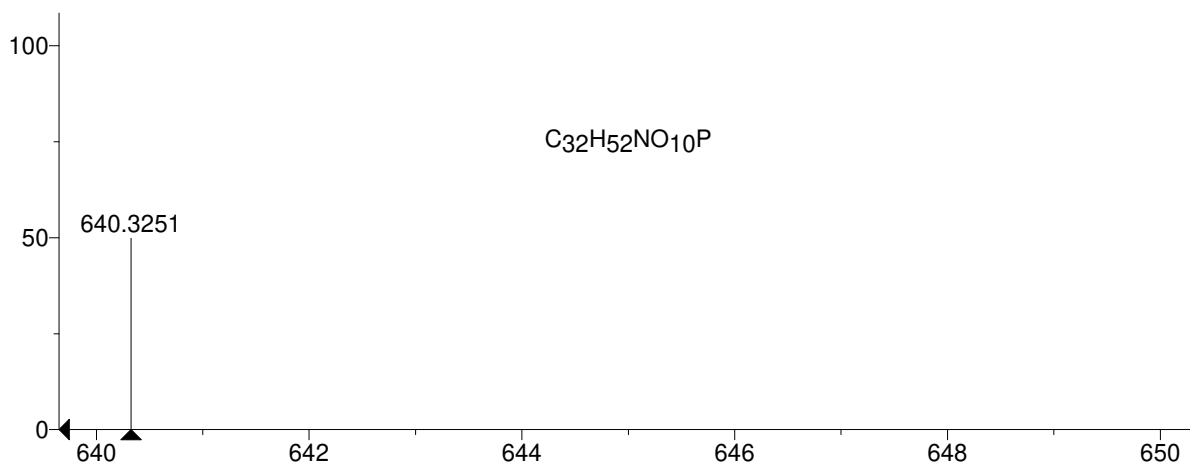

Hit 5 : PS 26:6 [M+H]<sup>+</sup> 25eV P=640.3  
C<sub>32</sub>H<sub>50</sub>NO<sub>10</sub>P; MF: 364; RMF: 999; Prob 20.0%; Lib: mona-export-in-silico\_spectra; ID: 110545.

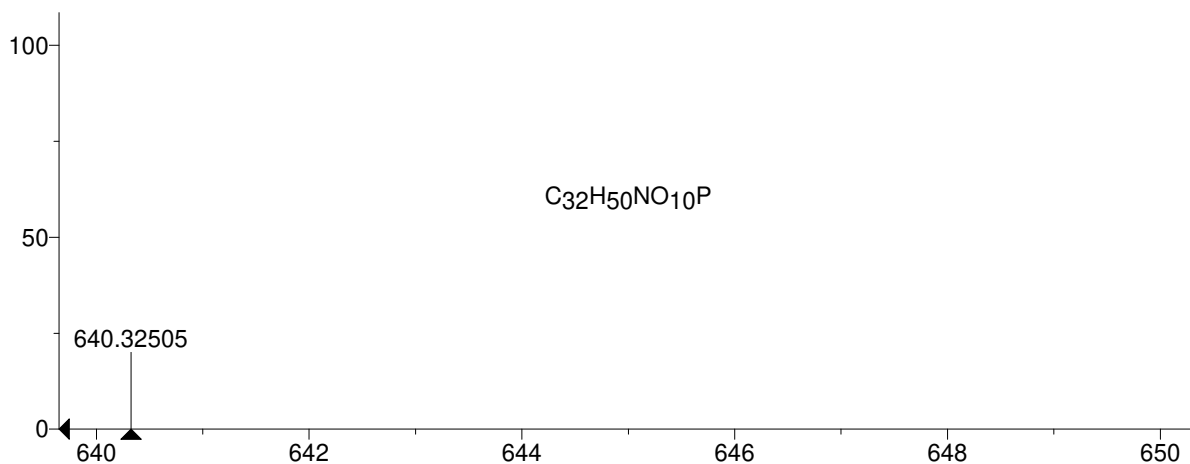

Unknown: Unknown (8.79\_520.2040m/z)  
Compound in Library Factor = -3273

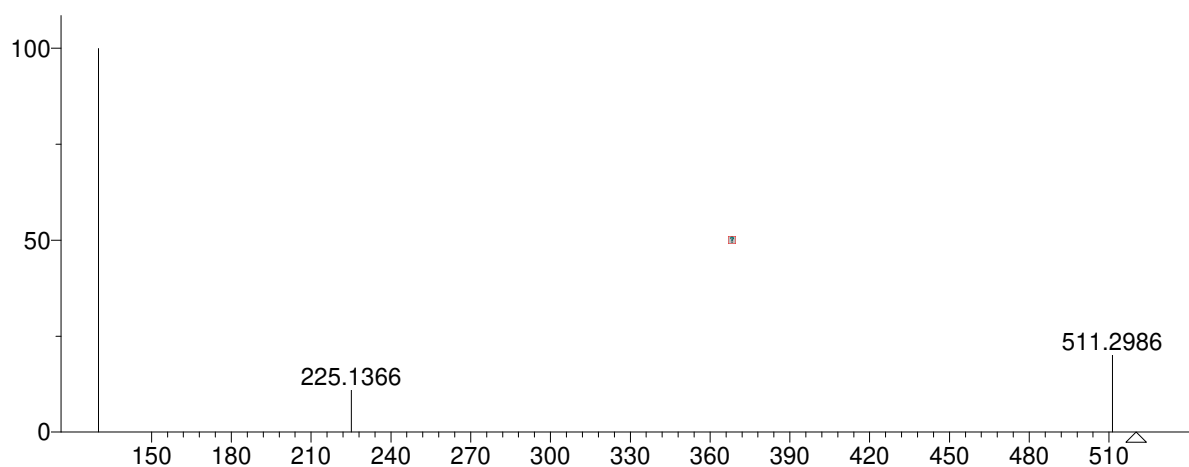

Hit 1 : [Lys8]-Vasopressin [M+2H]<sup>2+</sup>=>520.2 IT 35% P=520.2  
C46H65N13O12S2; MF: 1; RMF: 369; Prob 100.0%; CAS: 50-57-7; Lib: nist\_msms; ID: 113393.

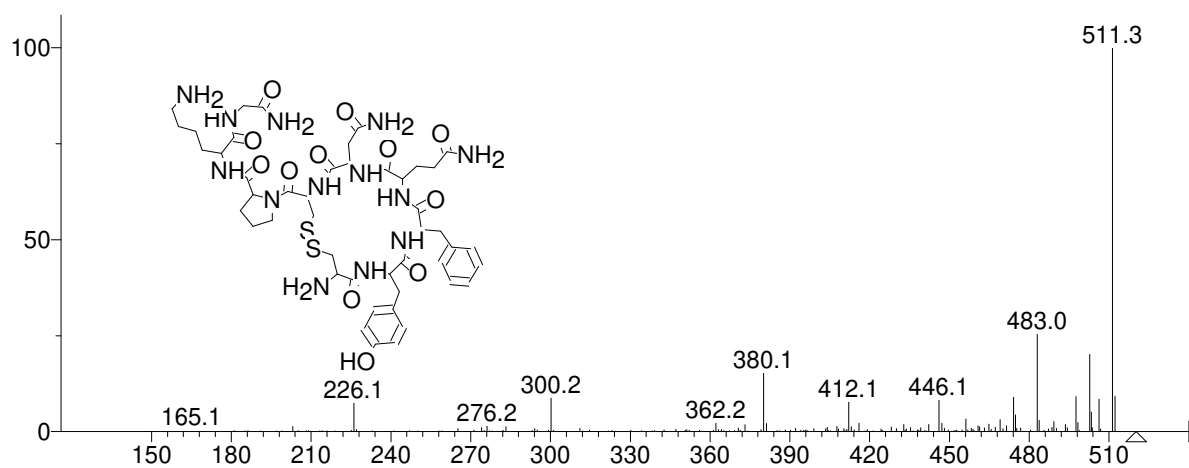

\*\* Search Report Page 1 of 2 \*\*

Unknown: Unknown (8.80\_222.0754m/z)  
Compound in Library Factor = -2387

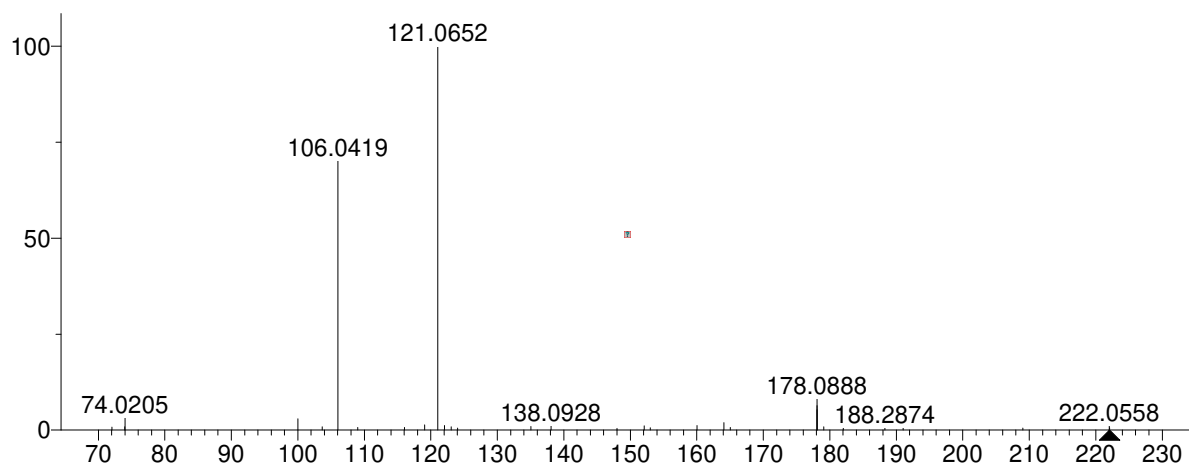

Hit 1 : N-Acetyl-L-tyrosine [M-H]<sup>-</sup> HCD 19V P=222.1  
C<sub>11</sub>H<sub>13</sub>NO<sub>4</sub>; MF: 20; RMF: 172; Prob 51.2%; CAS: 537-55-3; Lib: nist\_msms; ID: 280193.

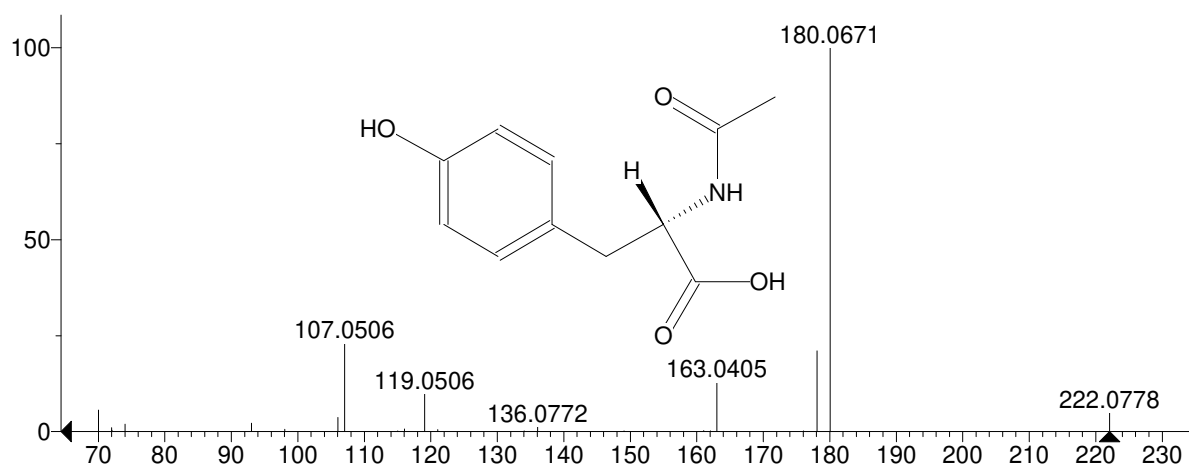

Hit 2 : N-Benzoylaminopurine [M+H-H<sub>2</sub>O]<sup>+</sup> HCD 11V P=222.1  
C<sub>12</sub>H<sub>9</sub>N<sub>5</sub>O; MF: 1; RMF: 44; Prob 24.9%; CAS: 4005-49-6; Lib: nist\_msms; ID: 144557.

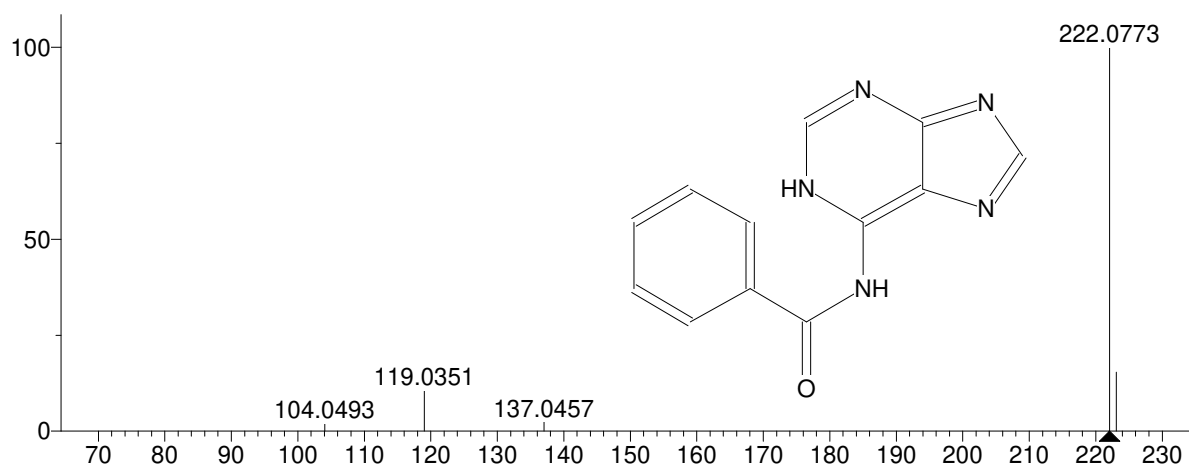

\*\* Search Report Page 2 of 2 \*\*

Hit 3 : NCGC00381349-01\_C11H13NO5\_1H-Pyrrole-3-propanoic acid, 5-acetyl-4-(carboxymethyl)- [M-H2O+H]+  
C11H13NO5; MF: 0; RMF: 13; Prob 23.9%; Lib: mona-export-gnps; ID: 11085.

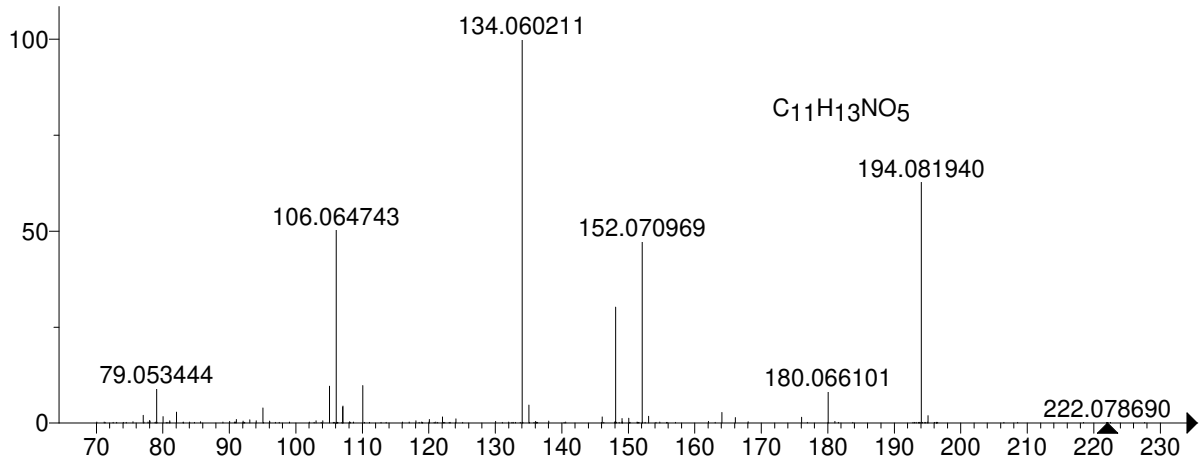

\*\* Search Report Page 1 of 2 \*\*

Unknown: Unknown (8.80\_277.1549m/z)  
Compound in Library Factor = -344

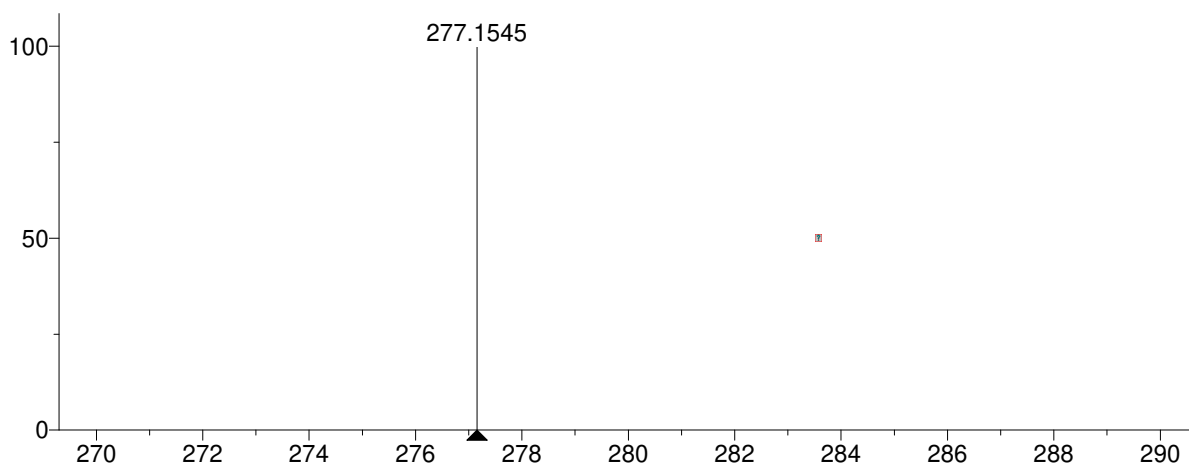

Hit 1 : Phe-Leu [M-H]<sup>-</sup> HCD 24eV P=277.2  
C<sub>15</sub>H<sub>22</sub>N<sub>2</sub>O<sub>3</sub>; MF: 364; RMF: 999; Prob 12.4%; Lib: nist\_msms; ID: 570091.

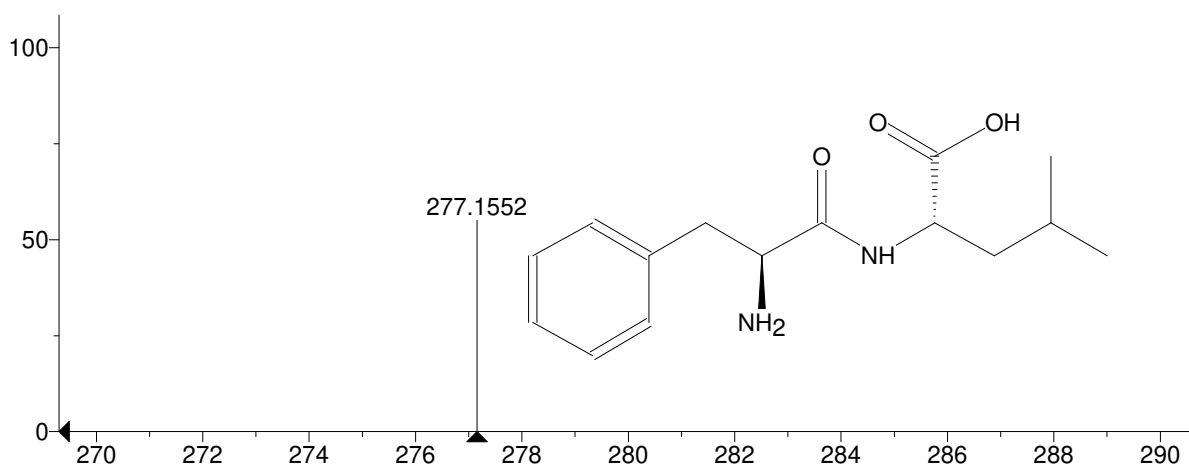

Hit 2 : Ile-Phe [M-H]<sup>-</sup> HCD 20eV P=277.2  
C<sub>15</sub>H<sub>22</sub>N<sub>2</sub>O<sub>3</sub>; MF: 364; RMF: 999; Prob 12.4%; Lib: nist\_msms; ID: 570144.

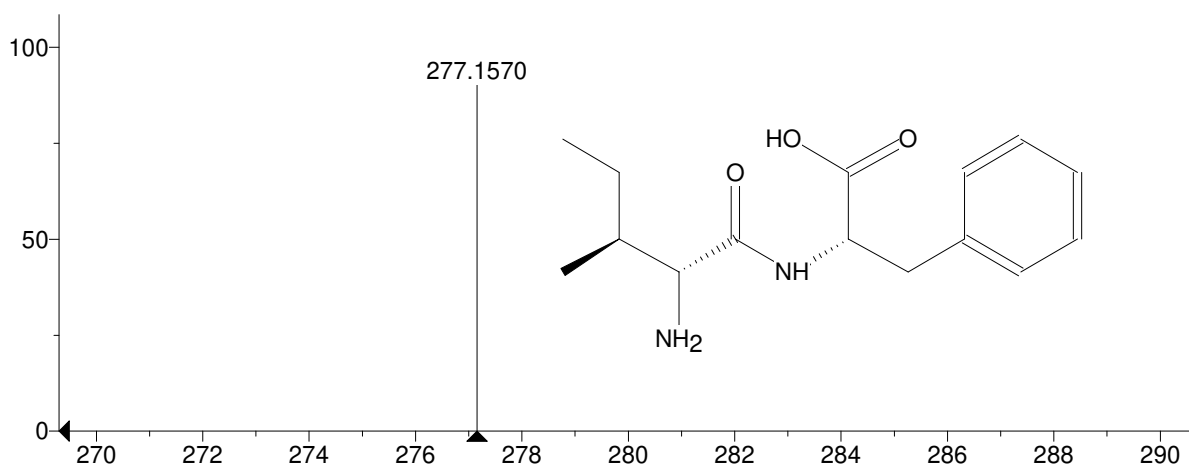

Hit 3 : Leu-Phe [M-H]<sup>-</sup> HCD 24eV P=277.2  
C<sub>15</sub>H<sub>22</sub>N<sub>2</sub>O<sub>3</sub>; MF: 364; RMF: 999; Prob 12.4%; Lib: nist\_msms; ID: 570205.

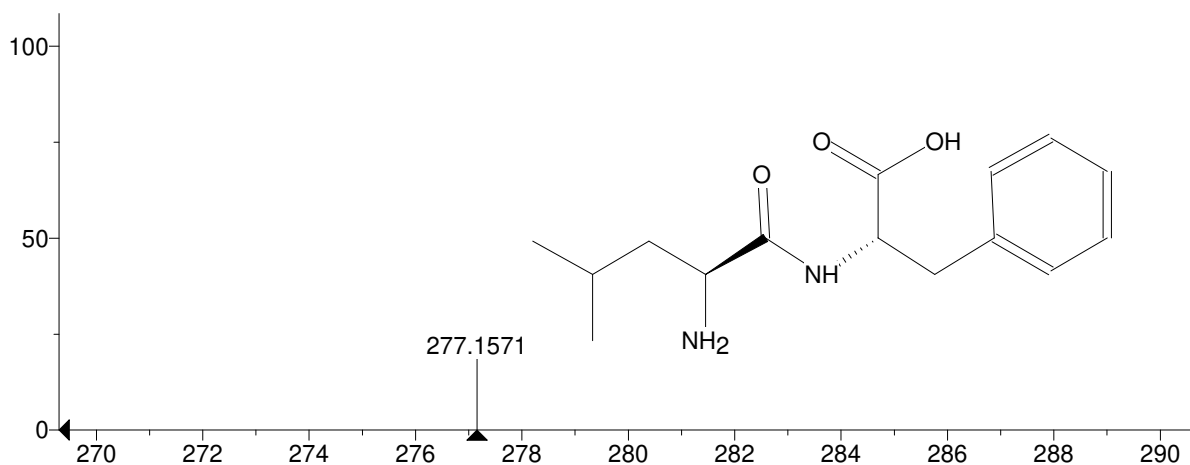

Hit 4 : Phe-Ile [M-H]<sup>-</sup> HCD 36eV P=277.2  
C<sub>15</sub>H<sub>22</sub>N<sub>2</sub>O<sub>3</sub>; MF: 364; RMF: 999; Prob 12.4%; Lib: nist\_msms; ID: 570606.

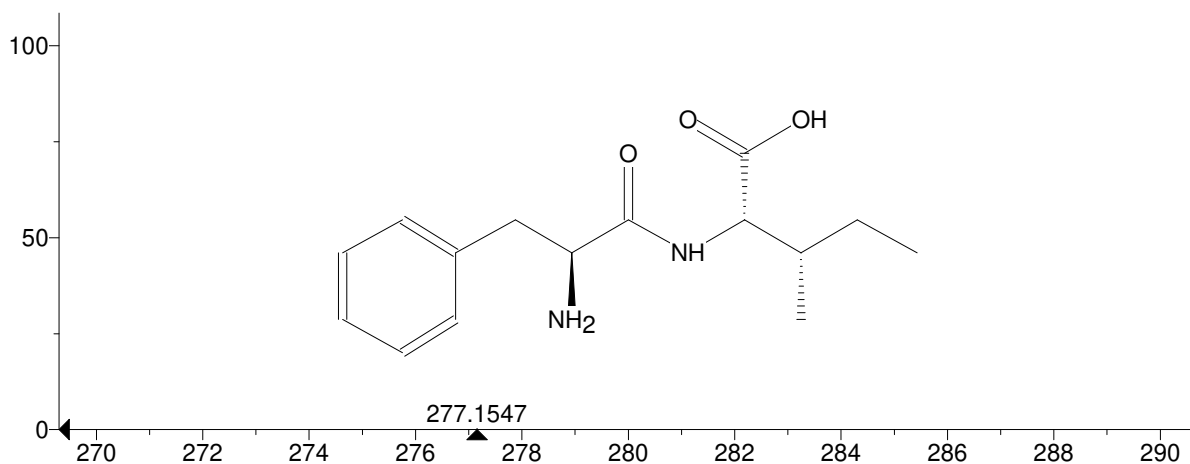

Hit 5 : Phe-Leu [M-H]<sup>-</sup> HCD 24eV P=277.2  
C<sub>15</sub>H<sub>22</sub>N<sub>2</sub>O<sub>3</sub>; MF: 364; RMF: 999; Prob 12.4%; CAS: 3303-55-7; Lib: nist\_msms2; ID: 83817.

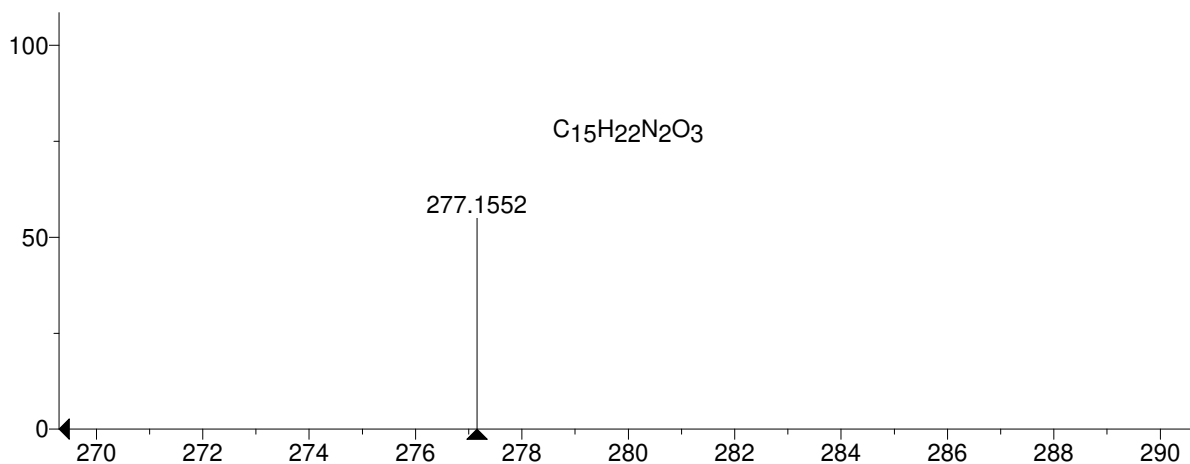



Unknown: Unknown (8.81\_387.0854m/z)  
Compound in Library Factor = -3273

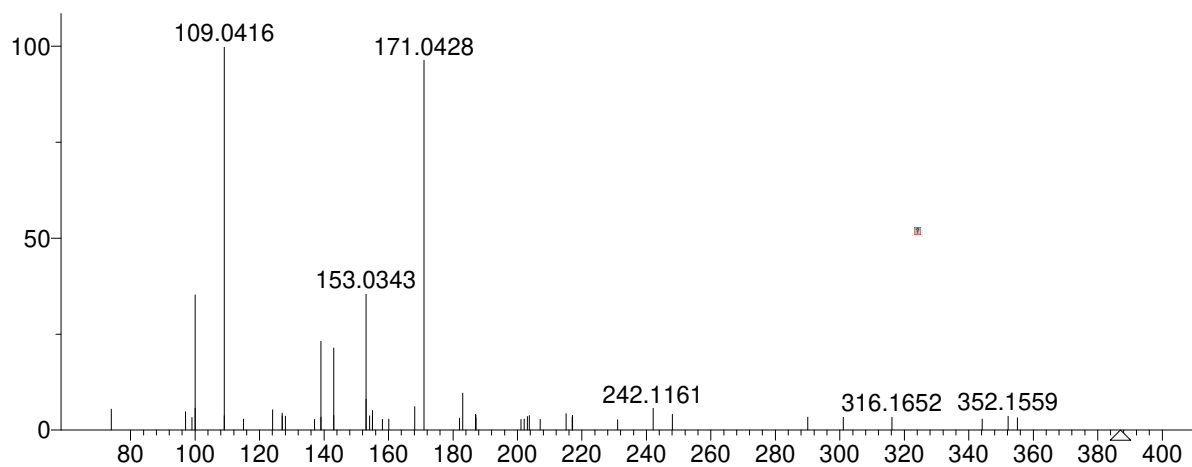

Hit 1 : Pamoic acid [M-H]<sup>-</sup> HCD 61V P=387.1  
C<sub>23</sub>H<sub>16</sub>O<sub>6</sub>; MF: 22; RMF: 249; Prob 100.0%; CAS: 130-85-8; Lib: nist\_msms; ID: 152472.

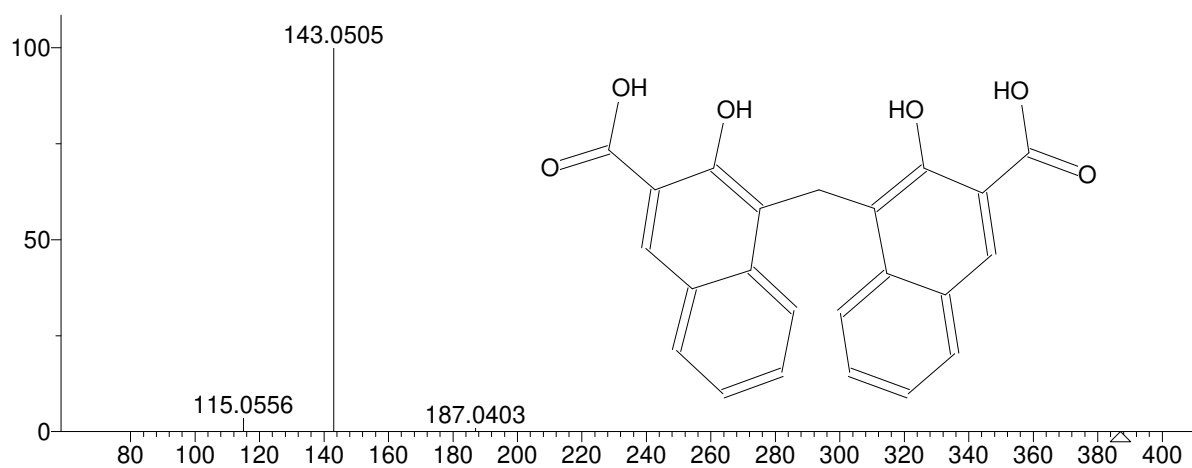

Unknown: Unknown (8.83\_352.1399m/z)  
Compound in Library Factor = 0

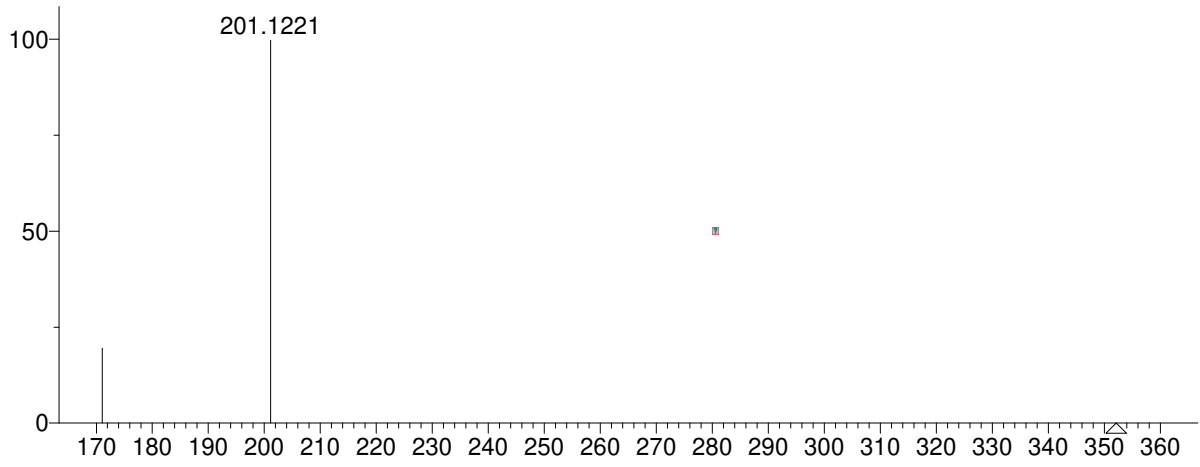

Unknown: Unknown (8.83\_371.1804m/z)  
Compound in Library Factor = 0

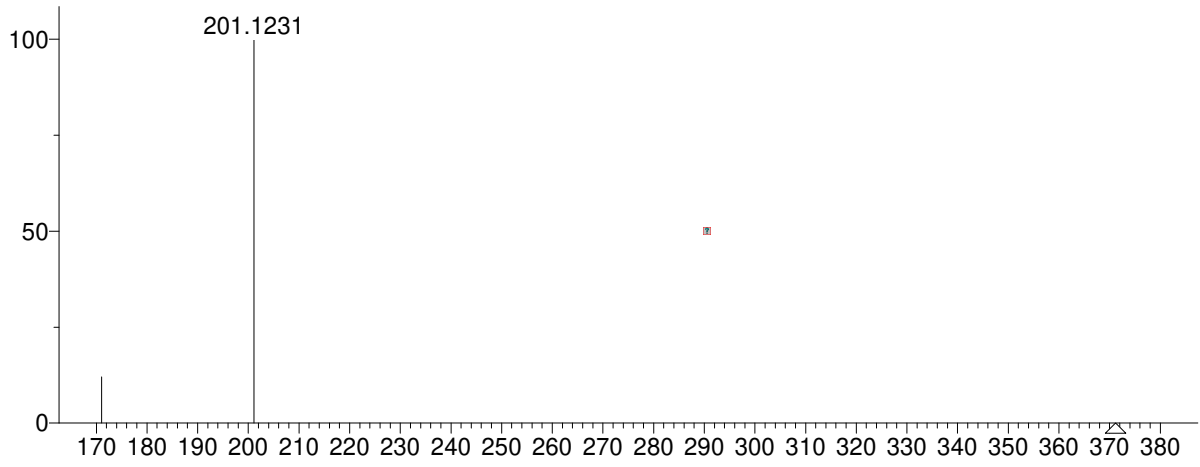

Unknown: Unknown (8.84\_517.2286m/z)  
Compound in Library Factor = -2176

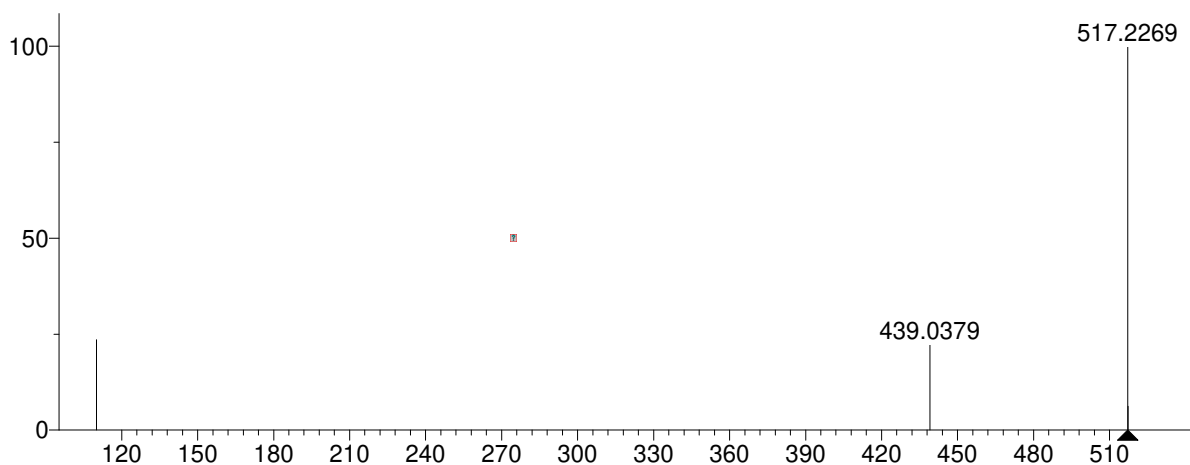

Hit 1 : Experimental Allergic Encephalitogenic Peptide [M-2H]<sup>2-</sup> HCD 20eV P=517.2  
C<sub>46</sub>H<sub>64</sub>N<sub>14</sub>O<sub>14</sub>; MF: 39; RMF: 695; Prob 100.0%; Lib: nist\_msms2; ID: 78587.

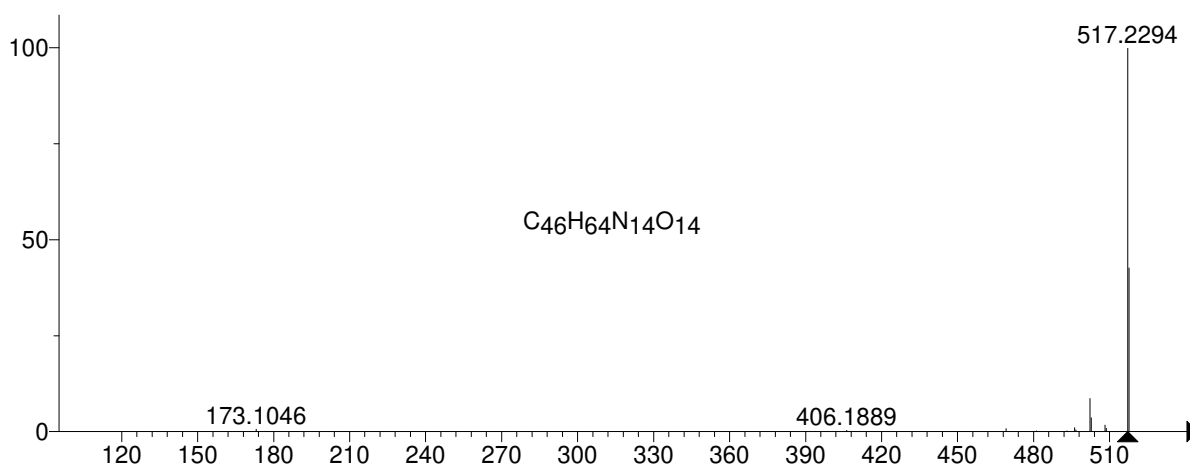

Unknown: Unknown (8.84\_608.0820m/z)  
Compound in Library Factor = 0

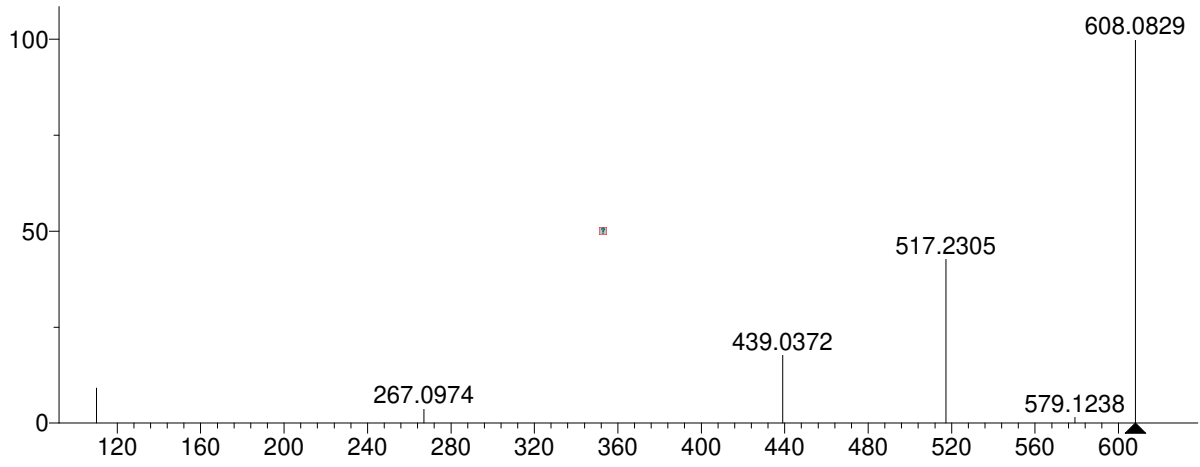

Unknown: Unknown (8.84\_658.2354m/z)  
Compound in Library Factor = 0

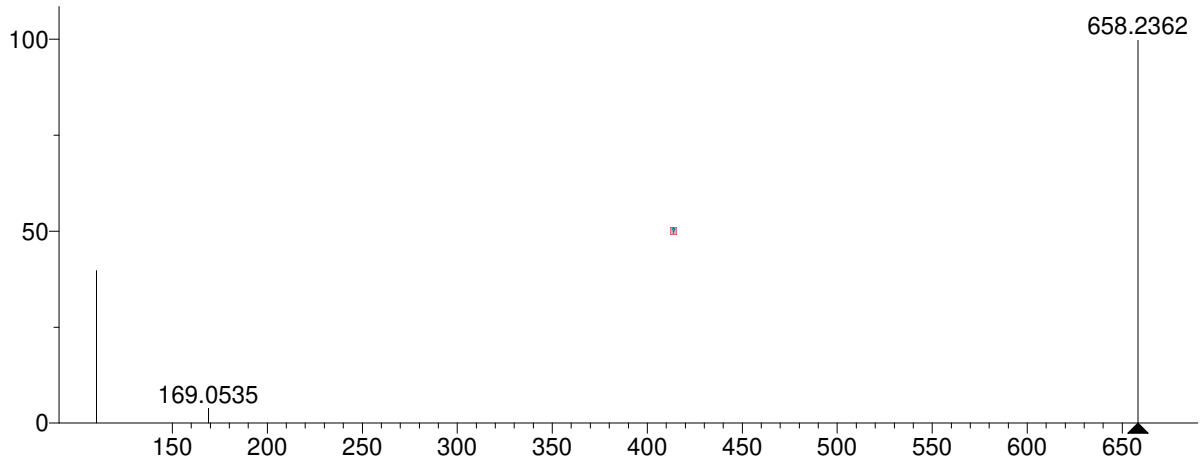

Unknown: Unknown (8.84\_998.5149m/z)  
Compound in Library Factor = 0

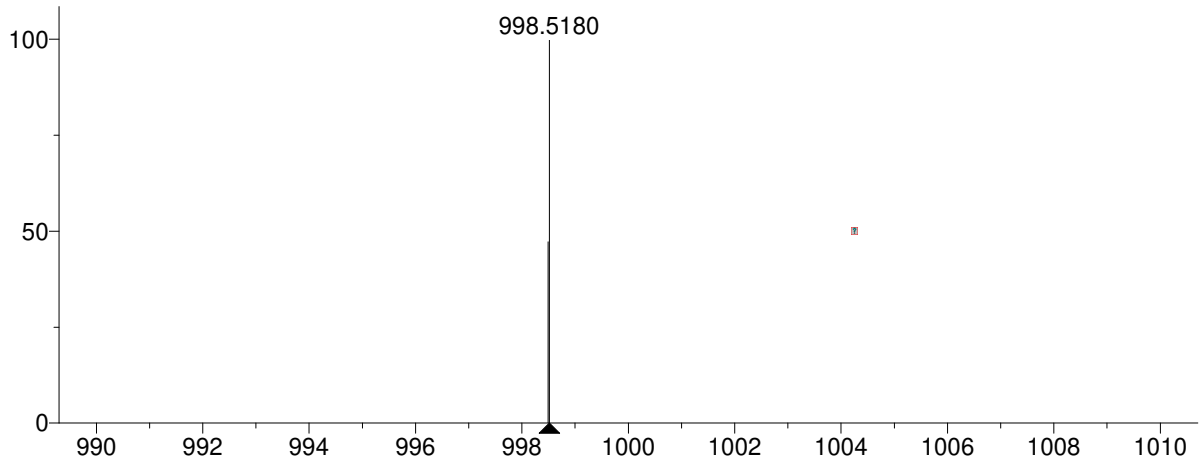

Unknown: Unknown (8.85\_463.9725m/z)  
Compound in Library Factor = 0

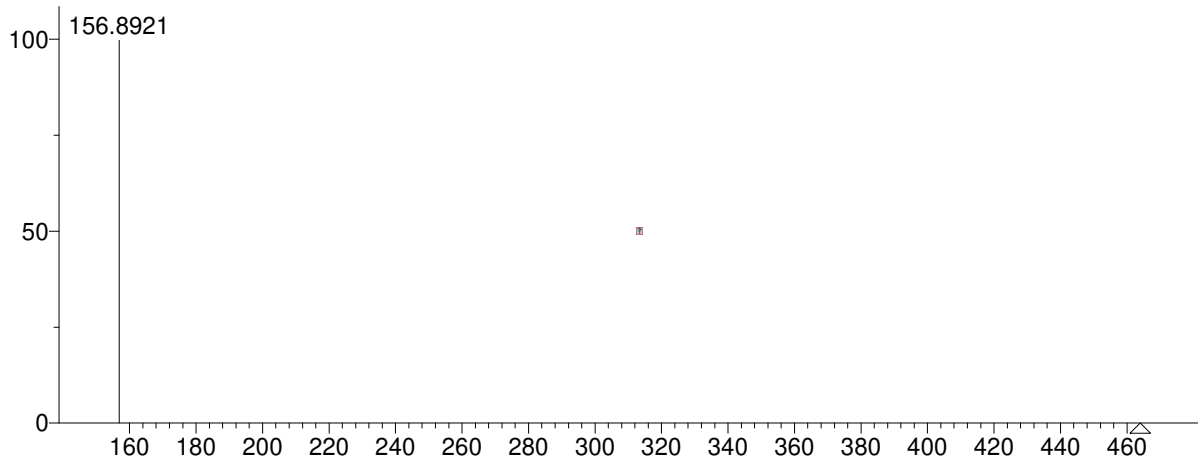



Unknown: Unknown (8.85\_473.9997m/z)  
Compound in Library Factor = 0

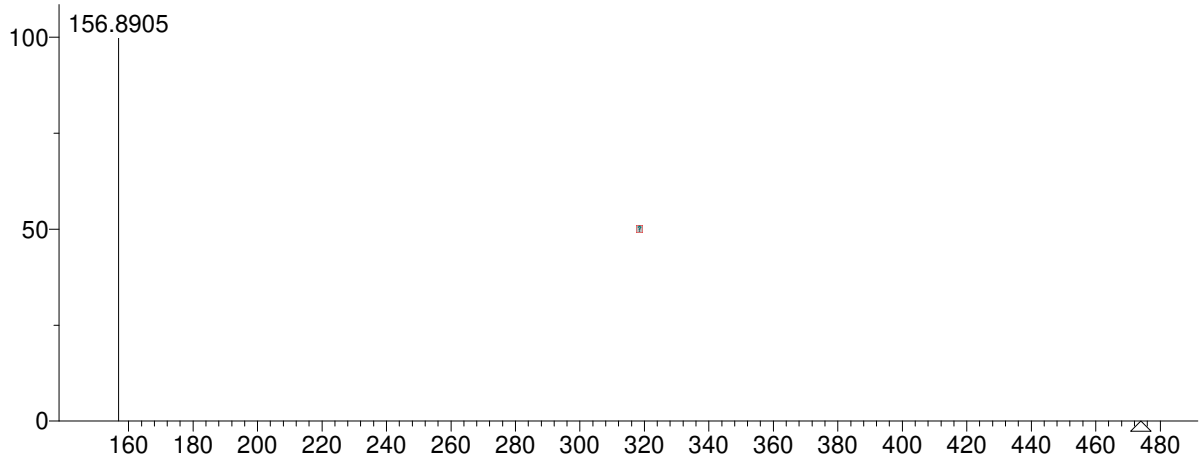

\*\* Search Report Page 1 of 2 \*\*

Unknown: Unknown (8.85\_517.2247m/z)  
Compound in Library Factor = -2176

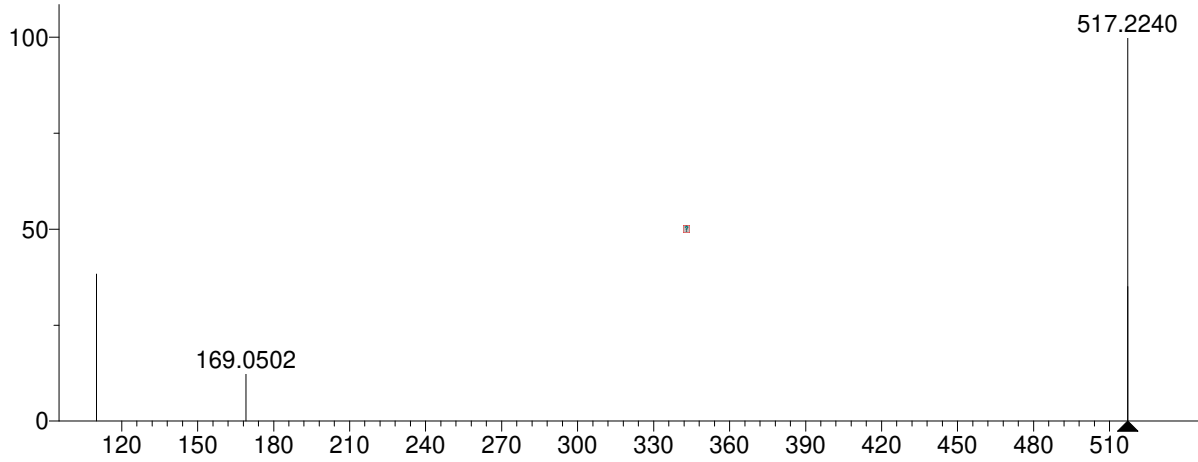

Hit 1 : Experimental Allergic Encephalitogenic Peptide [M-2H]<sup>2-</sup> HCD 20eV P=517.2  
C<sub>46</sub>H<sub>64</sub>N<sub>14</sub>O<sub>14</sub>; MF: 36; RMF: 678; Prob 60.9%; Lib: nist\_msms2; ID: 78587.

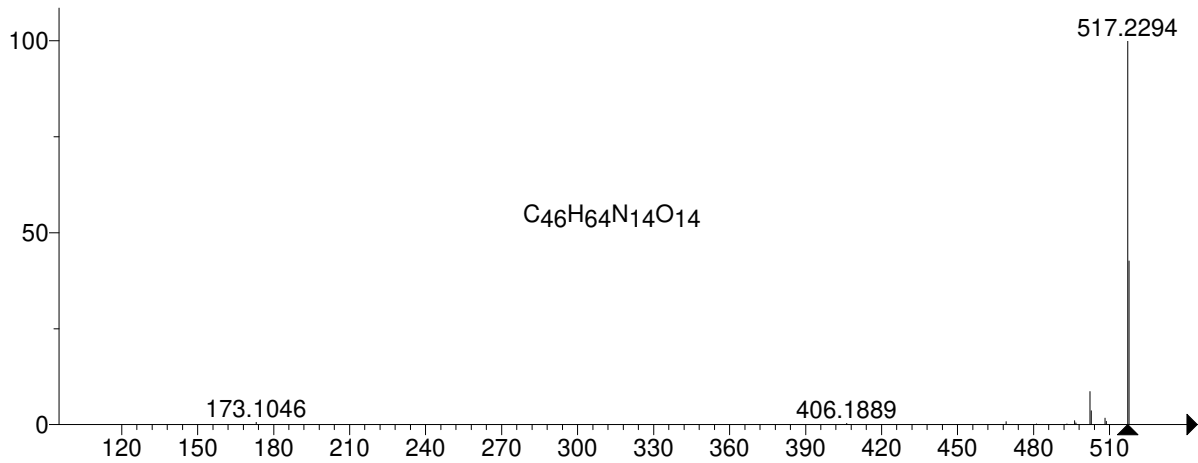

Hit 2 : PG 18:4; PG 2:0-16:4; [M-H]<sup>-</sup> [M-H]<sup>-</sup> P=517.2  
C<sub>24</sub>H<sub>39</sub>O<sub>10</sub>P; MF: 14; RMF: 376; Prob 24.1%; Lib: msdial-insilicomsmms-lipids-neg; ID: 324587.

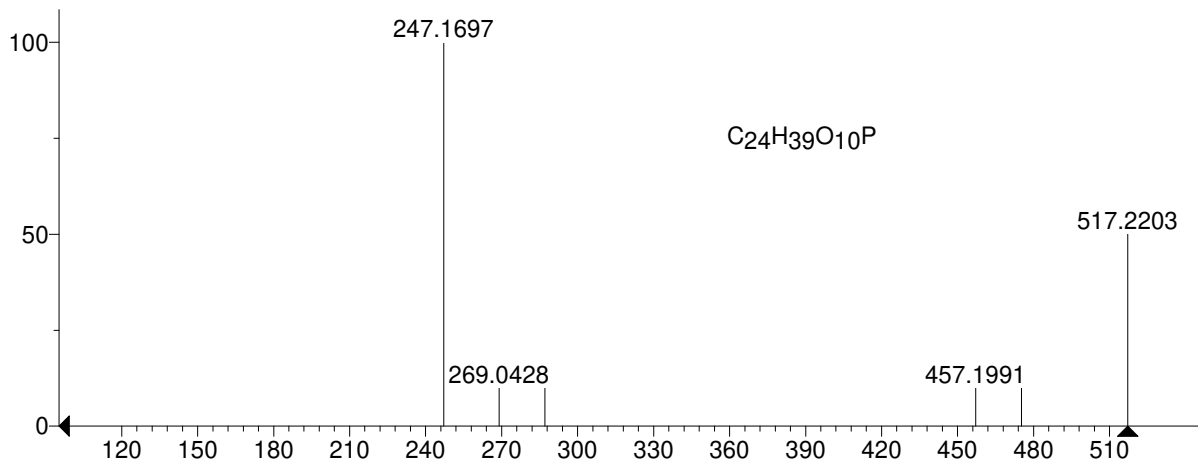

\*\* Search Report Page 2 of 2 \*\*

Hit 3 : (2R,4'aR,5'S,6'R,6'aS,10'aR,10'bR)-6'-(acetyloxy)-4'a,6'a,10'b-trimethyl-5"-oxo-decahydro-1'H-dispiro[oxira  
C<sub>26</sub>H<sub>38</sub>O<sub>8</sub>; MF: 0; RMF: 219; Prob 15.1%; Lib: mona-export-vf-npl\_qexactive; ID: 8713.

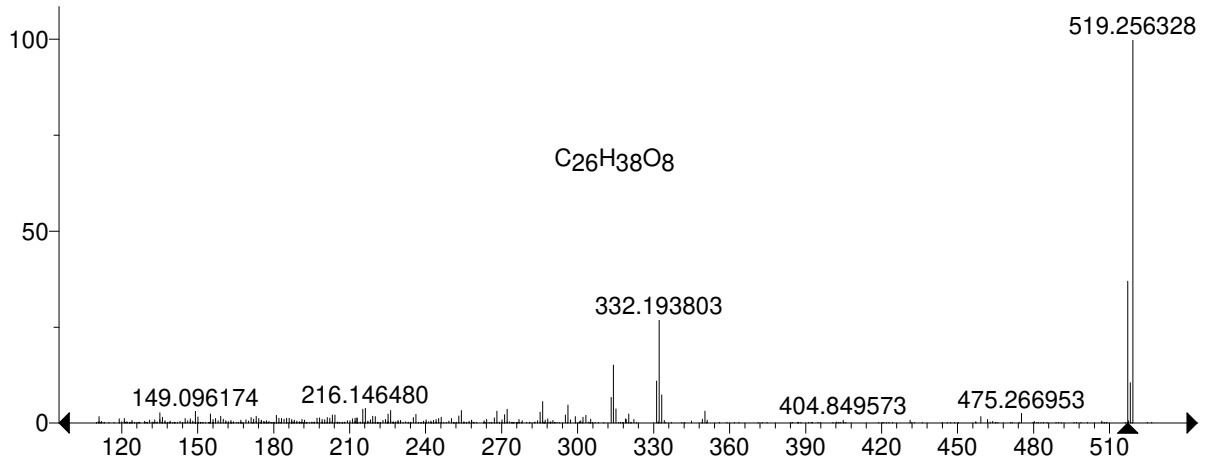

Unknown: Unknown (8.85\_732.1352m/z)  
Compound in Library Factor = 0

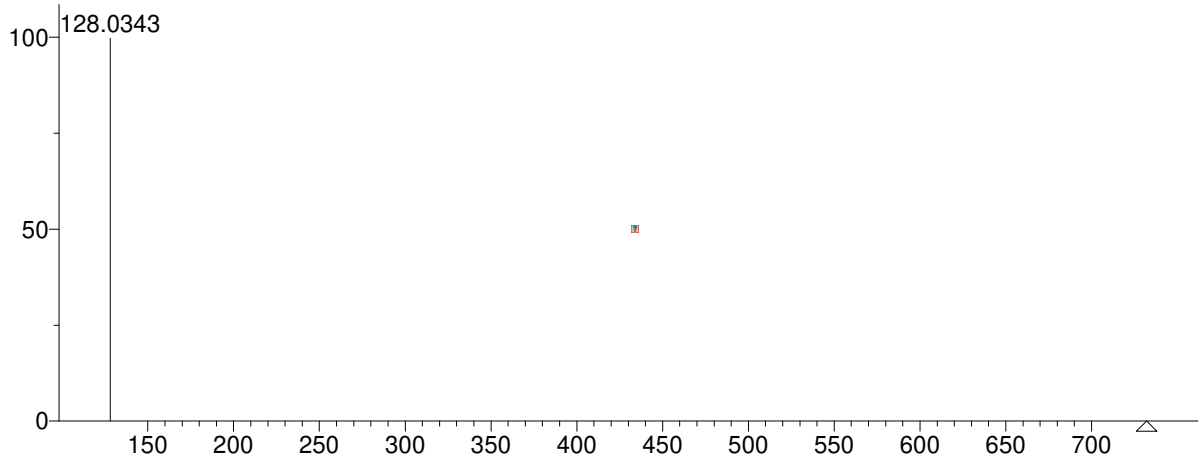

Unknown: Unknown (8.86\_598.0523m/z)  
Compound in Library Factor = 0

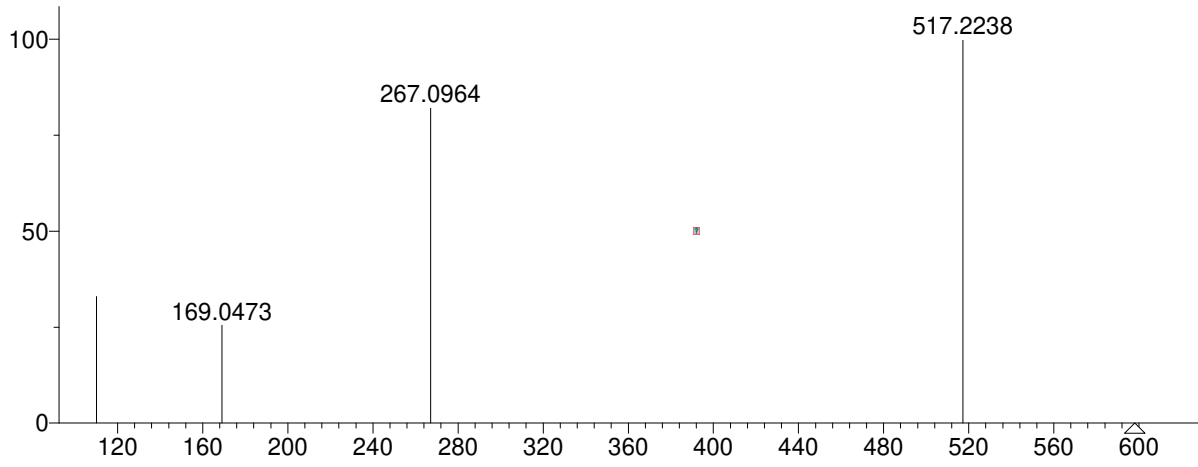

Unknown: Unknown (8.88\_800.1985m/z)  
Compound in Library Factor = 0

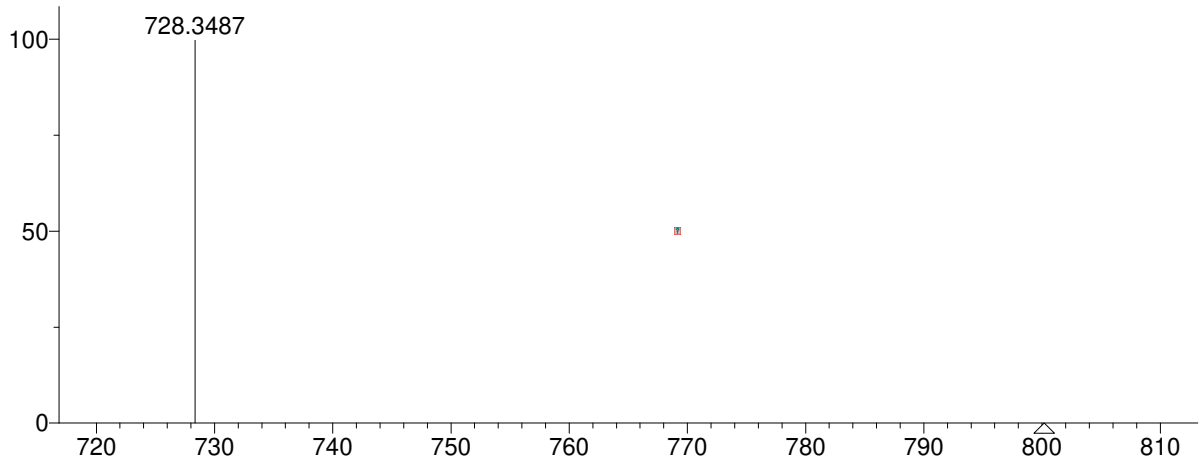

Unknown: Unknown (8.89\_253.1330m/z)  
Compound in Library Factor = -156

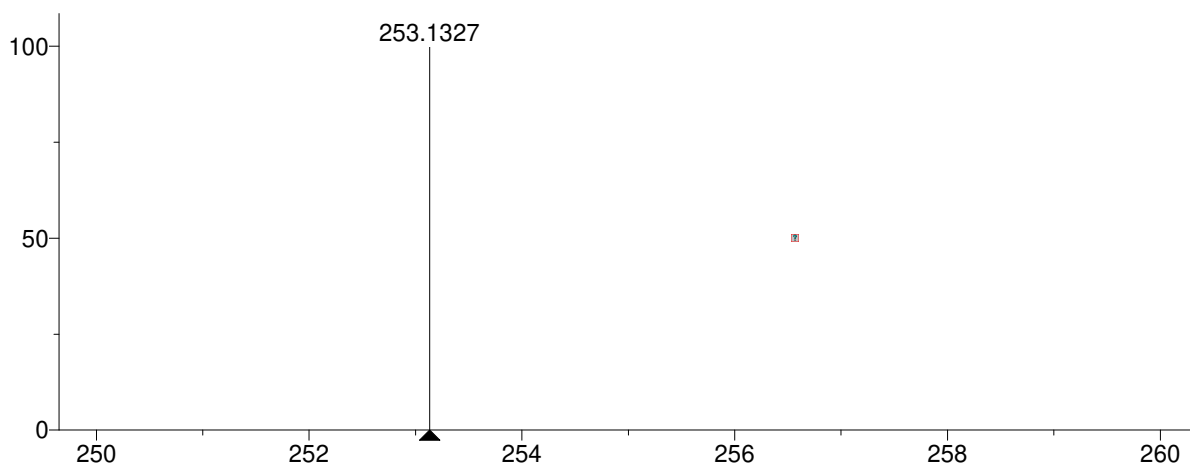

Hit 1 : His-Val [M-H]<sup>-</sup> HCD 32eV P=253.1  
C<sub>11</sub>H<sub>18</sub>N<sub>4</sub>O<sub>3</sub>; MF: 364; RMF: 999; Prob 14.4%; Lib: nist\_msms; ID: 567465.

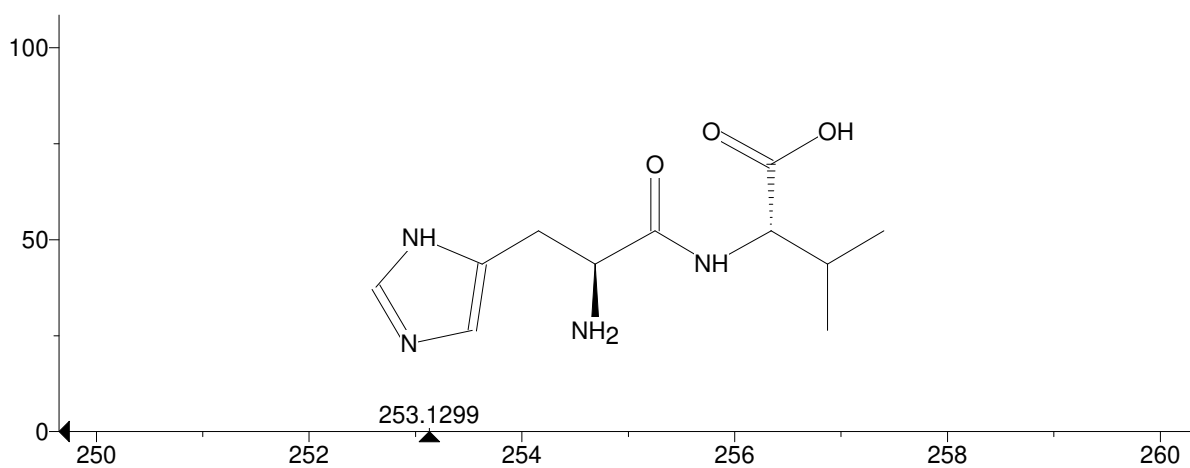

Hit 2 : Val-His [M-H]<sup>-</sup> HCD 22eV P=253.1  
C<sub>11</sub>H<sub>18</sub>N<sub>4</sub>O<sub>3</sub>; MF: 364; RMF: 999; Prob 14.4%; Lib: nist\_msms; ID: 568742.

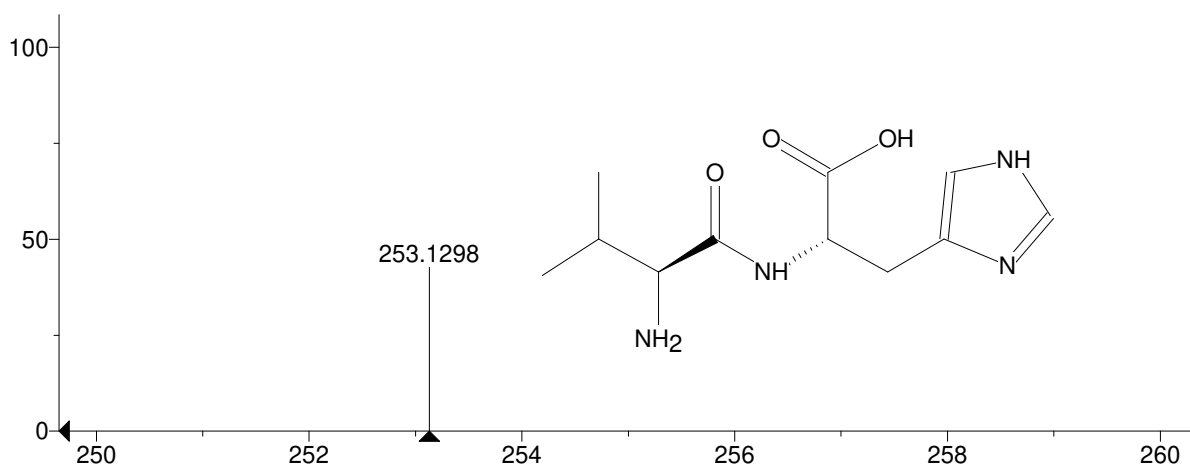

Hit 3 : His-Val [M-H]<sup>-</sup> HCD 32eV P=253.1  
C<sub>11</sub>H<sub>18</sub>N<sub>4</sub>O<sub>3</sub>; MF: 364; RMF: 999; Prob 14.4%; CAS: 76019-15-3; Lib: nist\_msms2; ID: 70322.

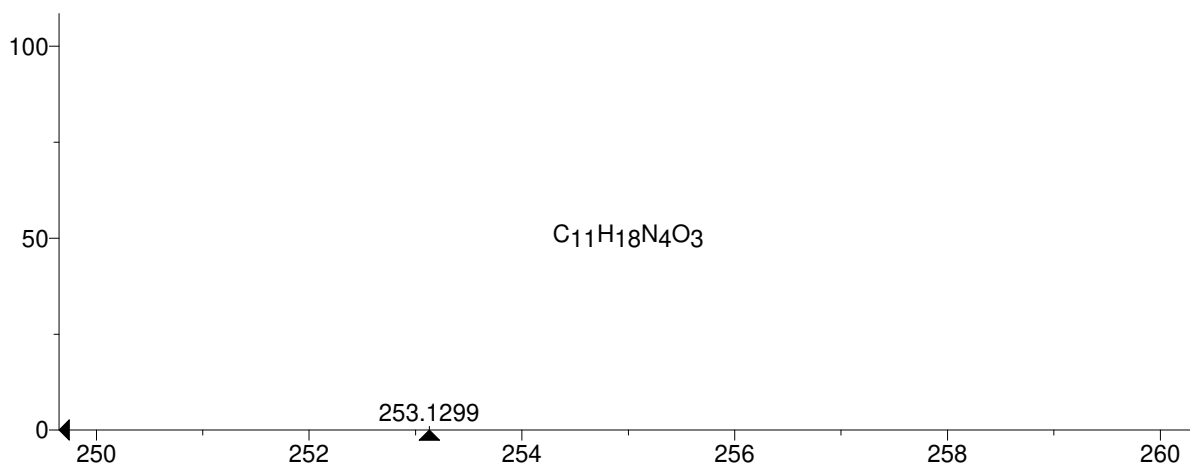

Hit 4 : Val-His [M-H]<sup>-</sup> HCD 22eV P=253.1  
C<sub>11</sub>H<sub>18</sub>N<sub>4</sub>O<sub>3</sub>; MF: 364; RMF: 999; Prob 14.4%; Lib: nist\_msms2; ID: 71676.

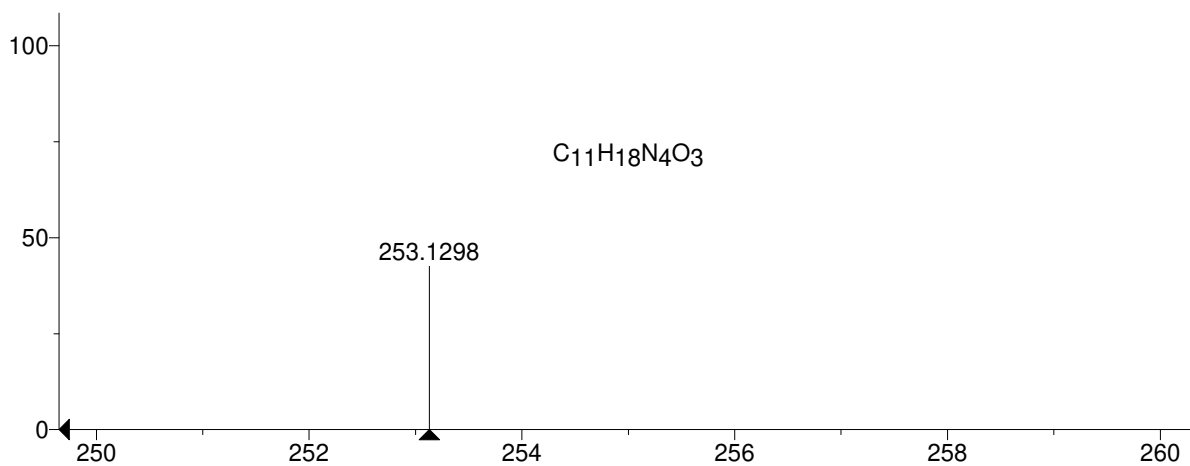

Hit 5 : Eremanthin [M+Na]<sup>+</sup> P=253.1  
C<sub>15</sub>H<sub>18</sub>O<sub>2</sub>; MF: 364; RMF: 999; Prob 14.4%; Lib: mona-export-gnps; ID: 2910.

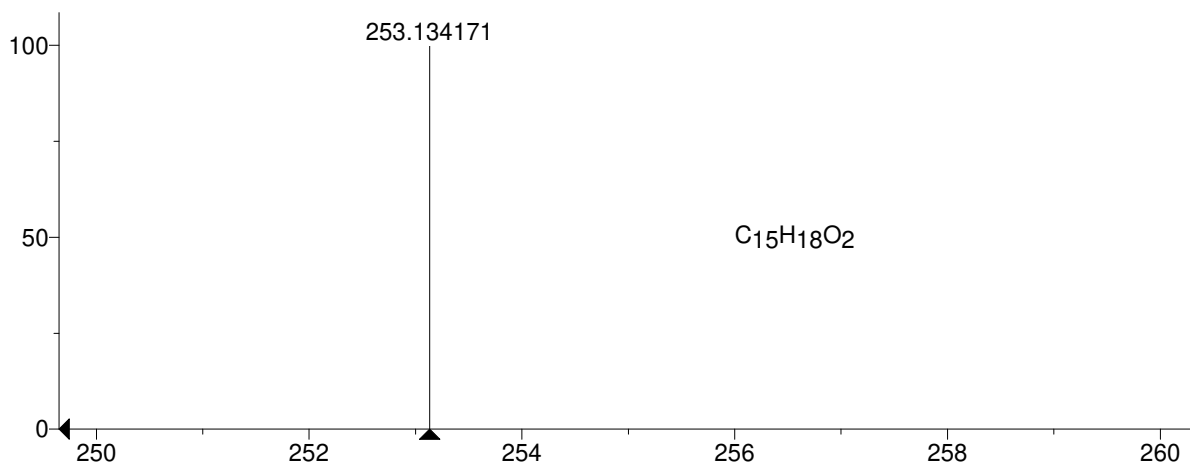



Unknown: Unknown (8.89\_297.1235m/z)  
Compound in Library Factor = 0

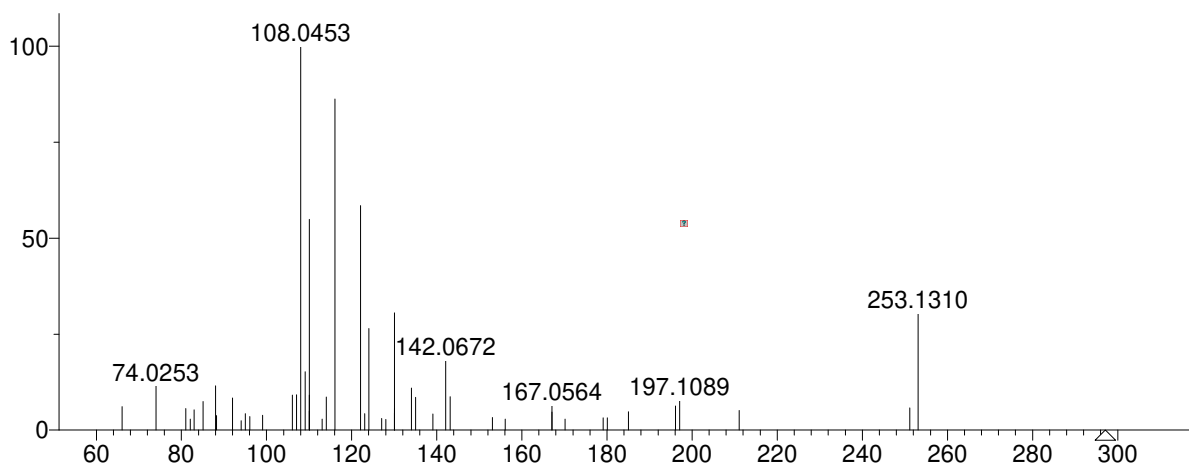

Hit 1 : 1H-Indole-6-carboxamide, N-hydroxy-1-[(4-methoxyphenyl)methyl]- [M+H]<sup>+</sup> IT-FT 35% P=297.1  
C<sub>17</sub>H<sub>16</sub>N<sub>2</sub>O<sub>3</sub>; MF: 0; RMF: 30; Prob 100.0%; CAS: 950762-95-5; Lib: nist\_msms; ID: 254263.

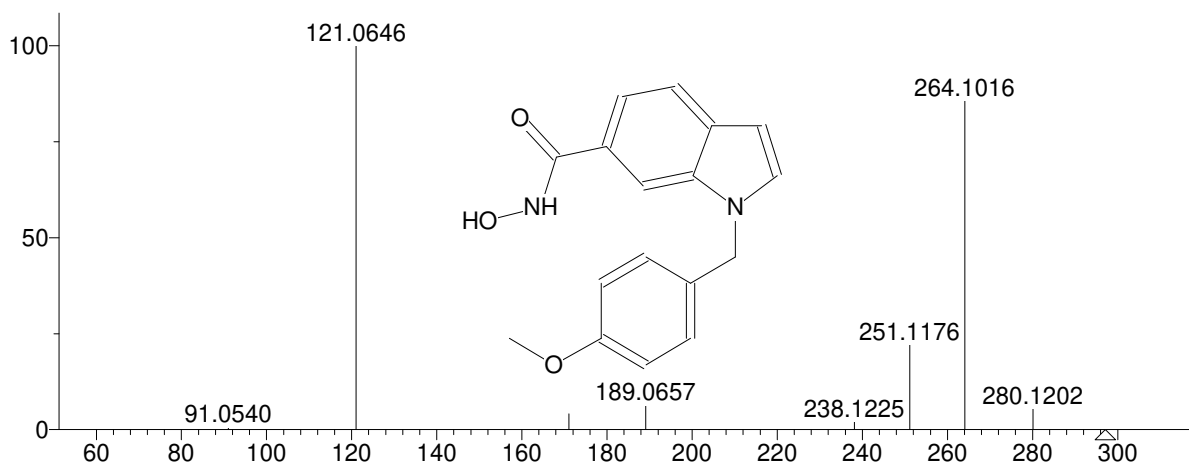

Unknown: Unknown (8.91\_508.1815m/z)  
Compound in Library Factor = 0

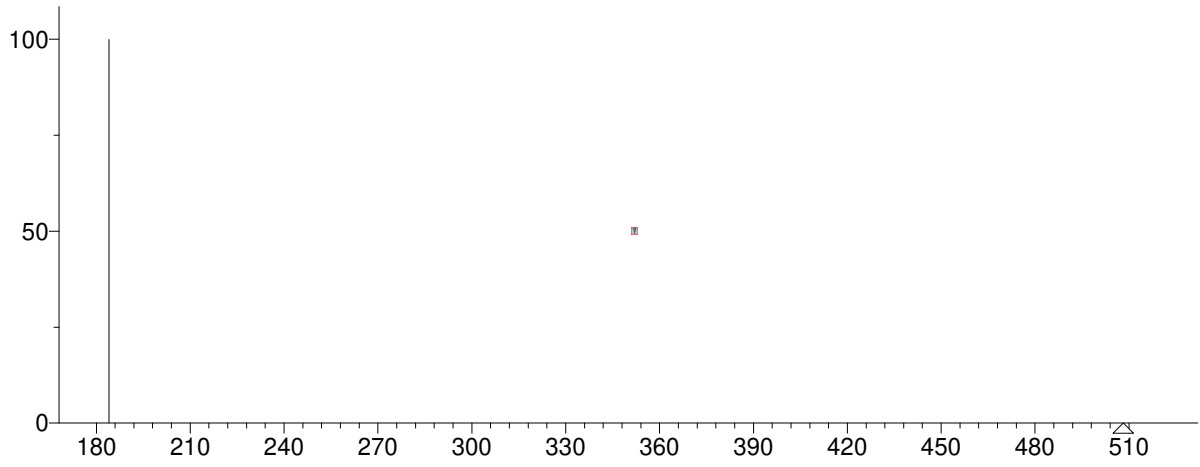

\*\* Search Report Page 1 of 2 \*\*

Unknown: Unknown (8.94\_433.0803m/z)  
Compound in Library Factor = -674

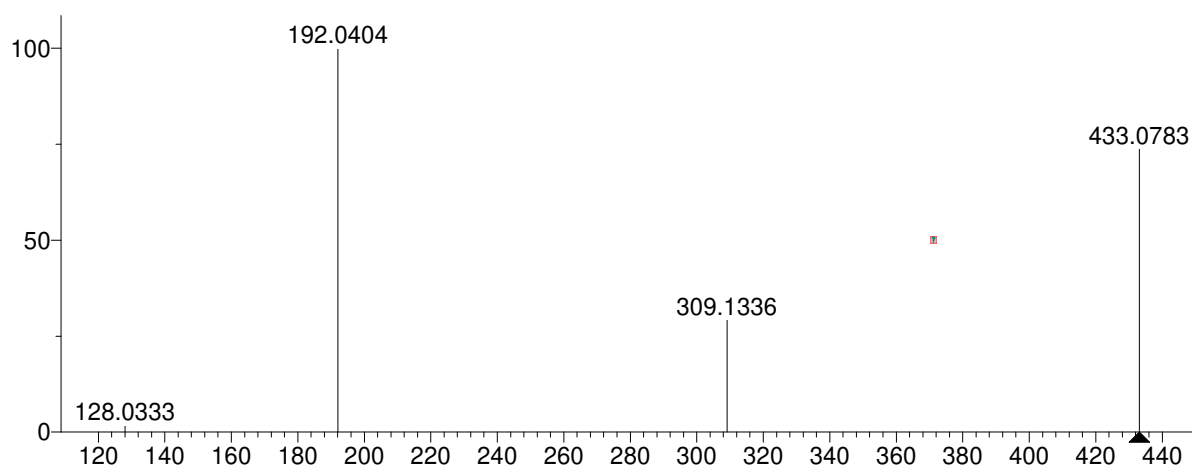

Hit 1 : Avicularin [M-H]<sup>-</sup> HCD 12V P=433.1  
C<sub>20</sub>H<sub>18</sub>O<sub>11</sub>; MF: 175; RMF: 806; Prob 84.8%; CAS: 572-30-5; Lib: nist\_msms; ID: 385062.

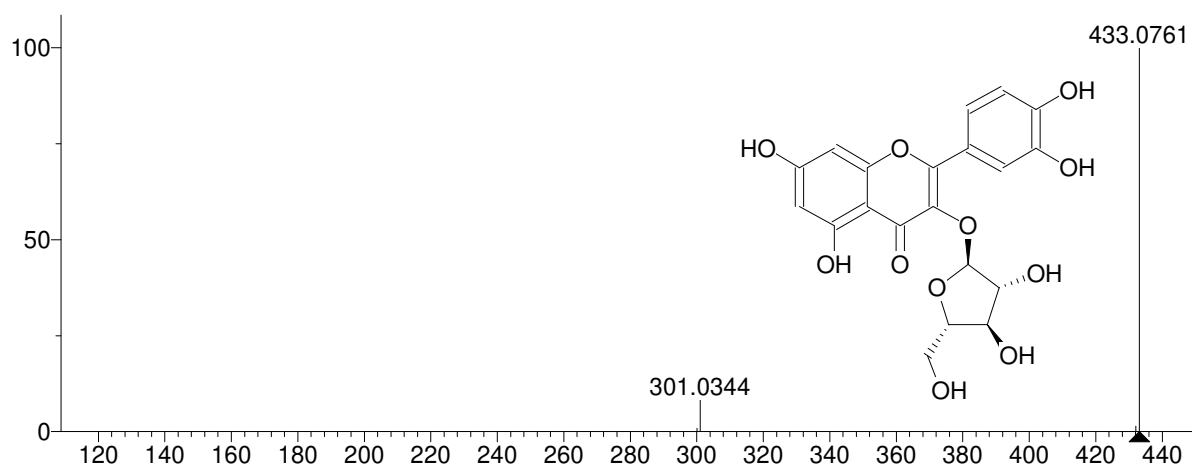

Hit 2 : Quercetin-3-O-xyloside [M-H]<sup>-</sup> 10eV P=433.1  
C<sub>20</sub>H<sub>18</sub>O<sub>11</sub>; MF: 75; RMF: 709; Prob 6.31%; Lib: anthocyanins\_mona; ID: 2984.

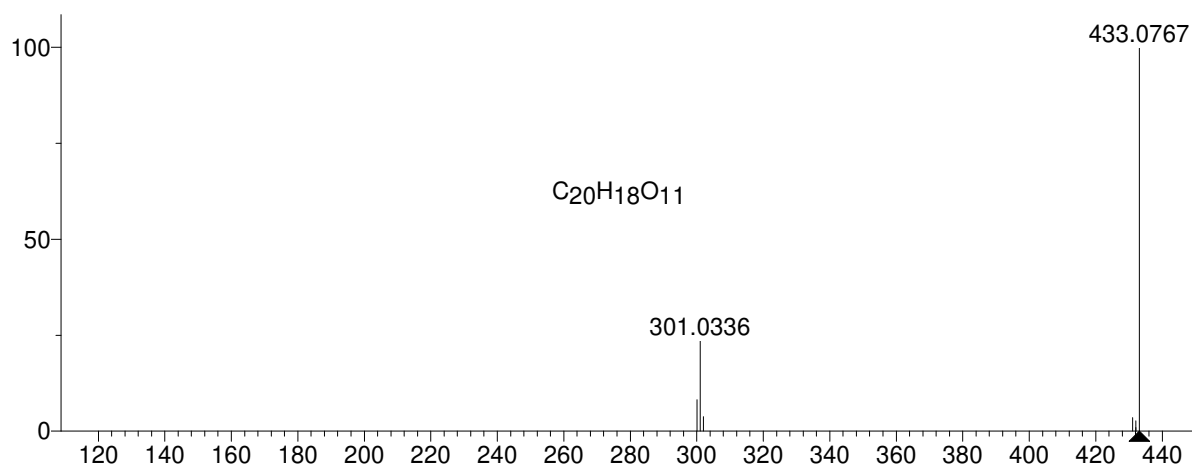

Hit 3 : Guaiaverin [M-H]- HCD 17V P=433.1  
C<sub>20</sub>H<sub>18</sub>O<sub>11</sub>; MF: 55; RMF: 550; Prob 2.87%; CAS: 22255-13-6; Lib: nist\_msms; ID: 389162.

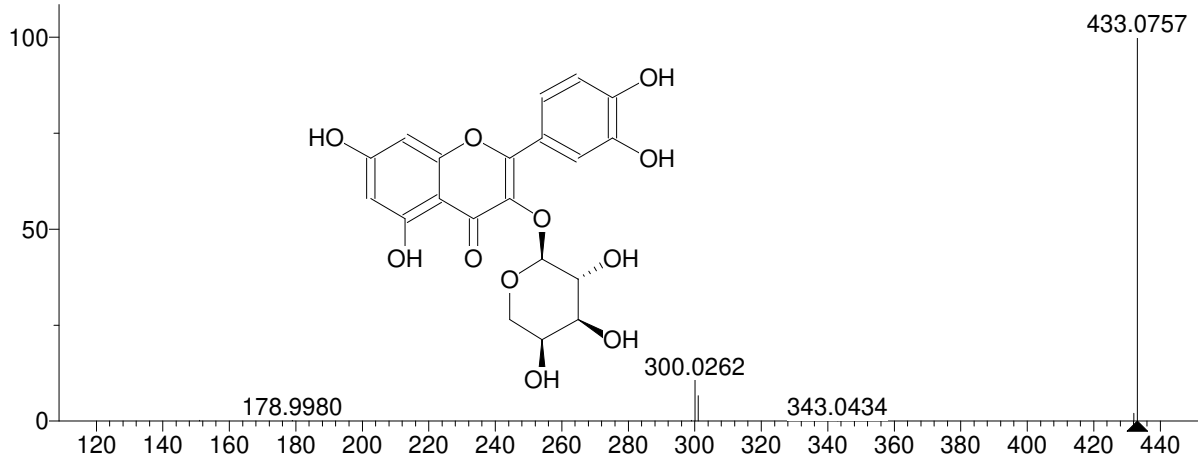

Hit 4 : Bensulfuron-methyl [M+Na]+ HCD 12V P=433.1  
C<sub>16</sub>H<sub>18</sub>N<sub>4</sub>O<sub>7</sub>S; MF: 40; RMF: 513; Prob 1.74%; CAS: 83055-99-6; Lib: nist\_msms; ID: 139117.

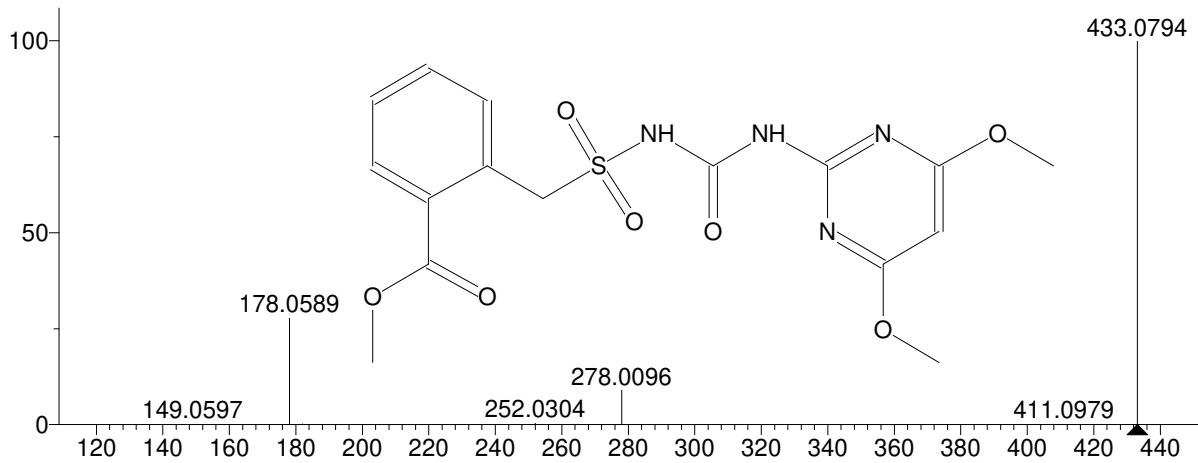

Hit 5 : quercetin-3-O-pentoside [M-H]- P=433.1  
C<sub>20</sub>H<sub>18</sub>O<sub>11</sub>; MF: 10; RMF: 375; Prob 0.48%; Lib: msms-neg-gnps; ID: 2272.

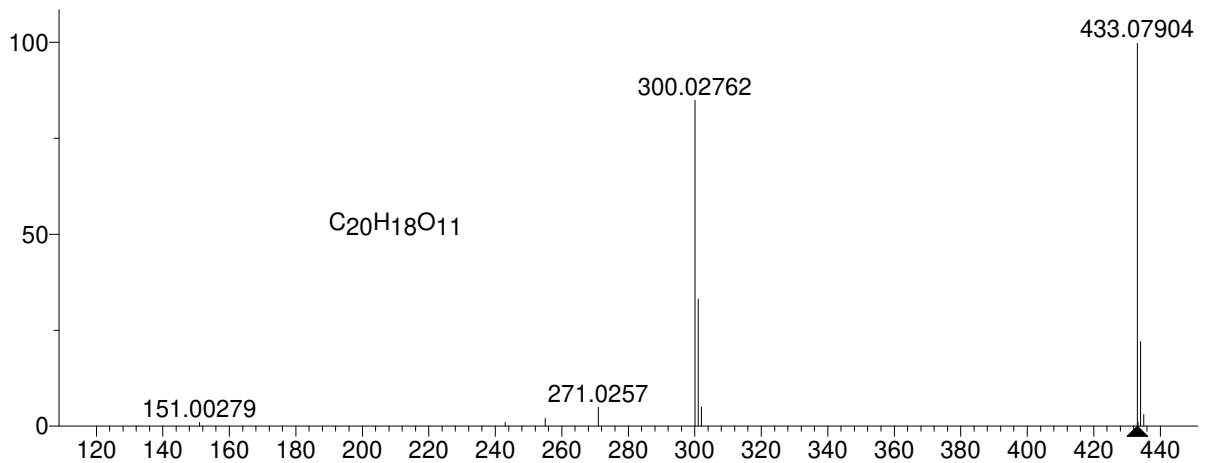

Unknown: Unknown (8.94\_544.2115m/z)  
Compound in Library Factor = 0

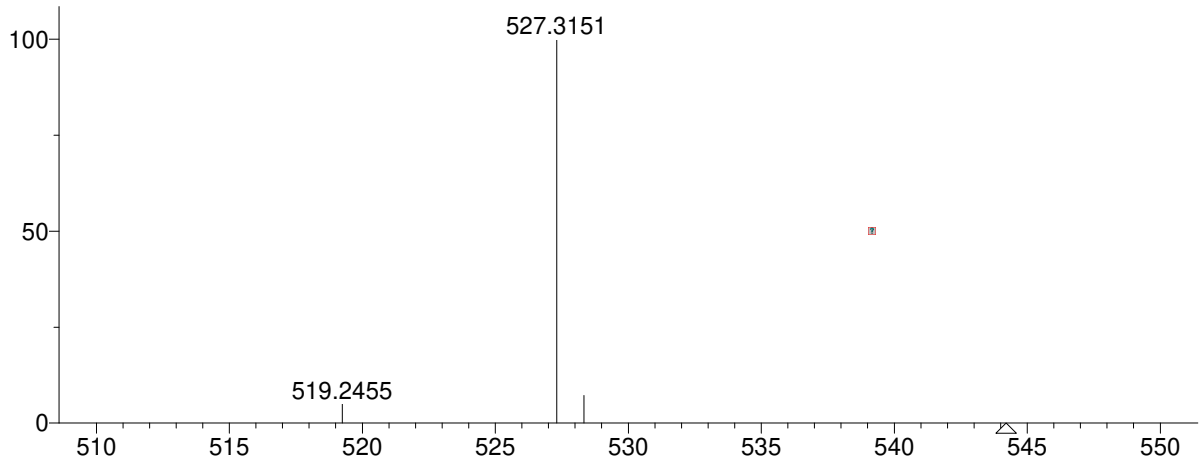

Unknown: Unknown (8.96\_371.1799m/z)  
Compound in Library Factor = 0

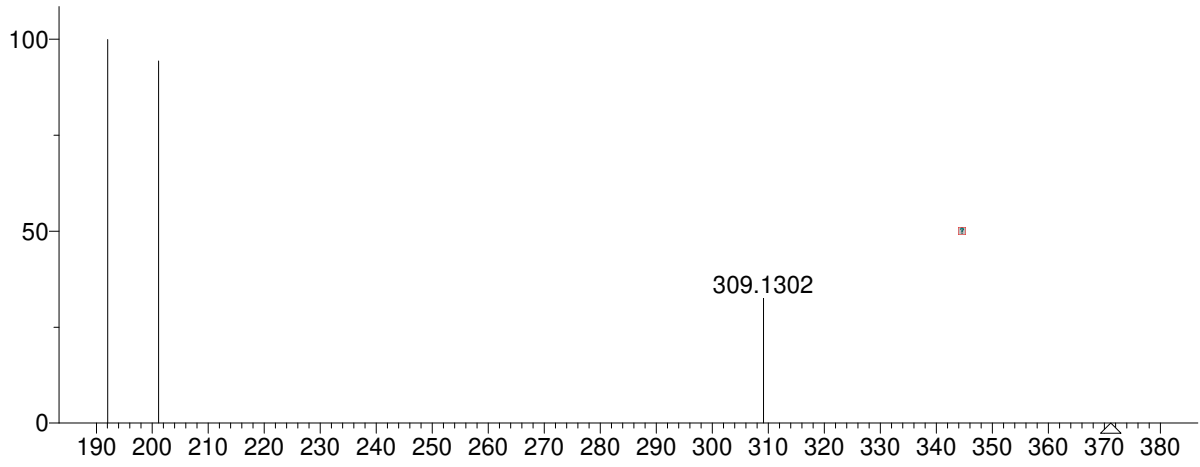

Unknown: Unknown (8.97\_387.1762m/z)  
Compound in Library Factor = 0

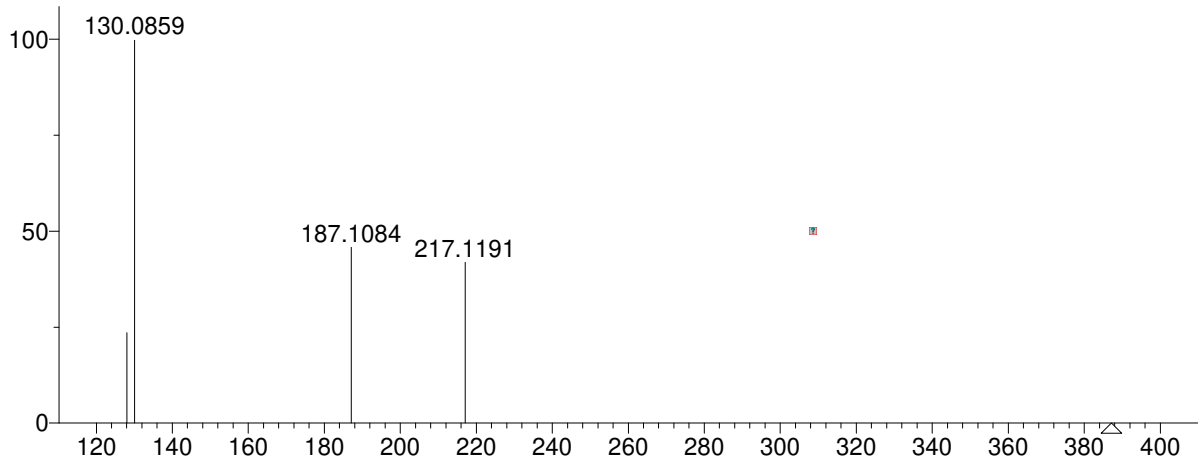

Hit 1 : Neurotensin (1-6) [M-2H]<sup>2-</sup> HCD 55eV P=387.2  
C<sub>35</sub>H<sub>52</sub>N<sub>8</sub>O<sub>12</sub>; MF: 0; RMF: 63; Prob 50.0%; Lib: nist\_msms2; ID: 74180.

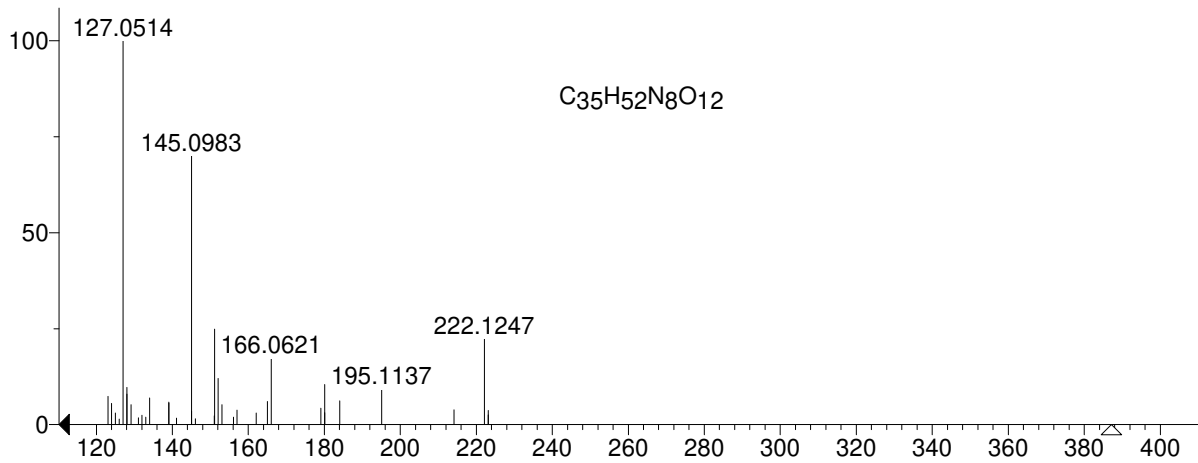

Hit 2 : NCGC00380363-0118-(2,3-dihydroxy-3-methylbutyl)-5,7-dimethoxy-2-phenyl-2,3-dihydrochromen-4-one [M  
C<sub>22</sub>H<sub>26</sub>O<sub>6</sub>; MF: 0; RMF: 11; Prob 50.0%; Lib: mona-export-gnps; ID: 9549.

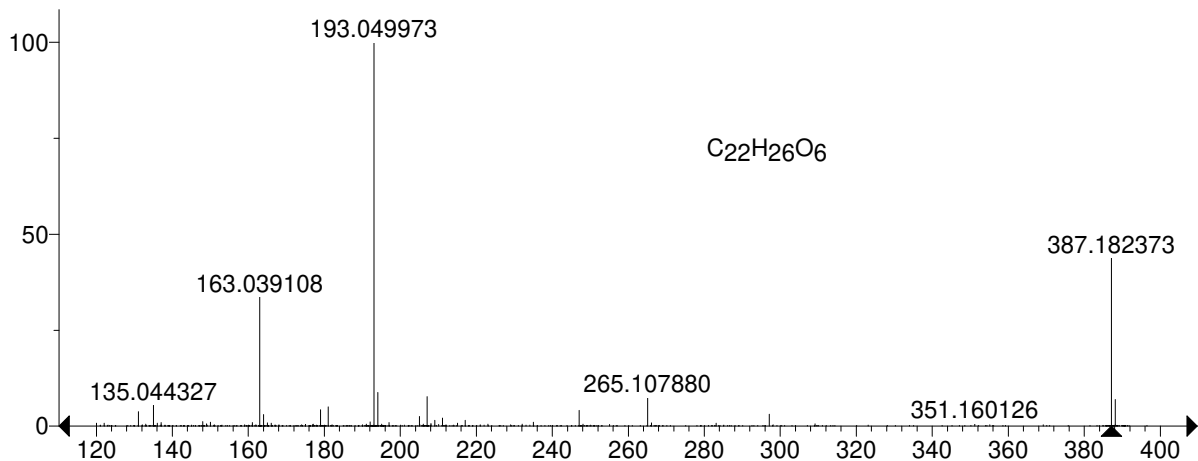

Unknown: Unknown (8.97\_516.2188m/z)  
Compound in Library Factor = 0

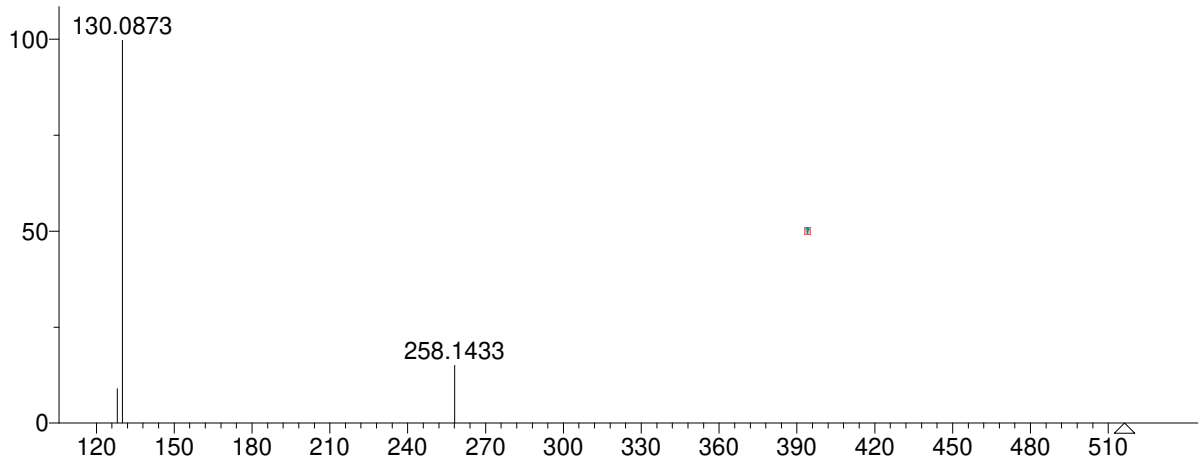



Unknown: Unknown (8.97\_527.3187m/z)  
Compound in Library Factor = 0

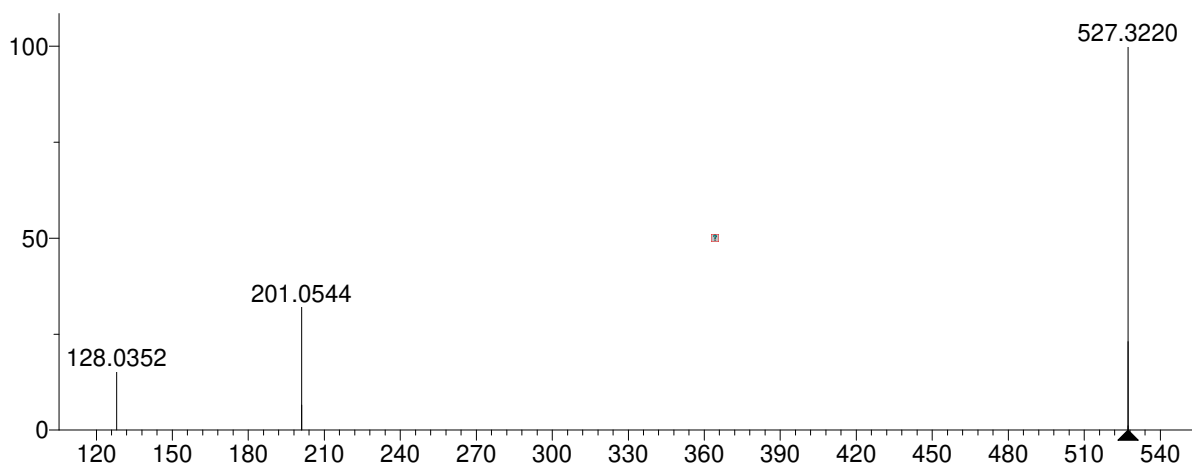

Hit 1 : [(1R)-1-[(2S,4aR,4bS,7S,8aS)-7-hydroxy-2,4b,8,8-tetramethyl-4,4a,5,6,7,8a,9,10-octahydro-3H-phenanthrene-10-carboxamide]-2,3-dihydroquinoline-2-carboxamide] C<sub>28</sub>H<sub>46</sub>O<sub>9</sub>; MF: 0; RMF: 101; Prob 100.0%; Lib: mona-export-vf-npl\_qtof; ID: 1224.

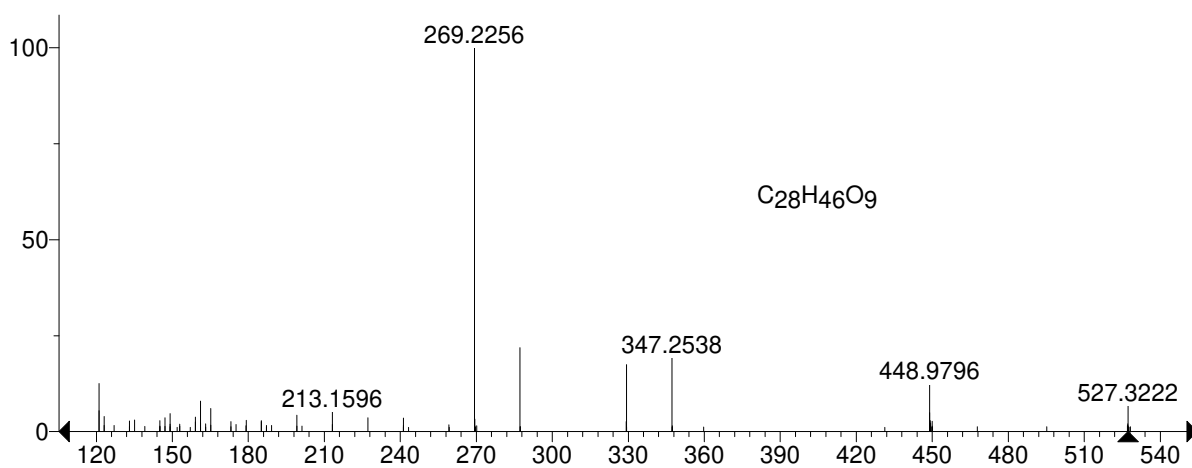

\*\* Search Report Page 1 of 1 \*\*

Unknown: Unknown (8.98\_541.1685m/z)  
Compound in Library Factor = 0

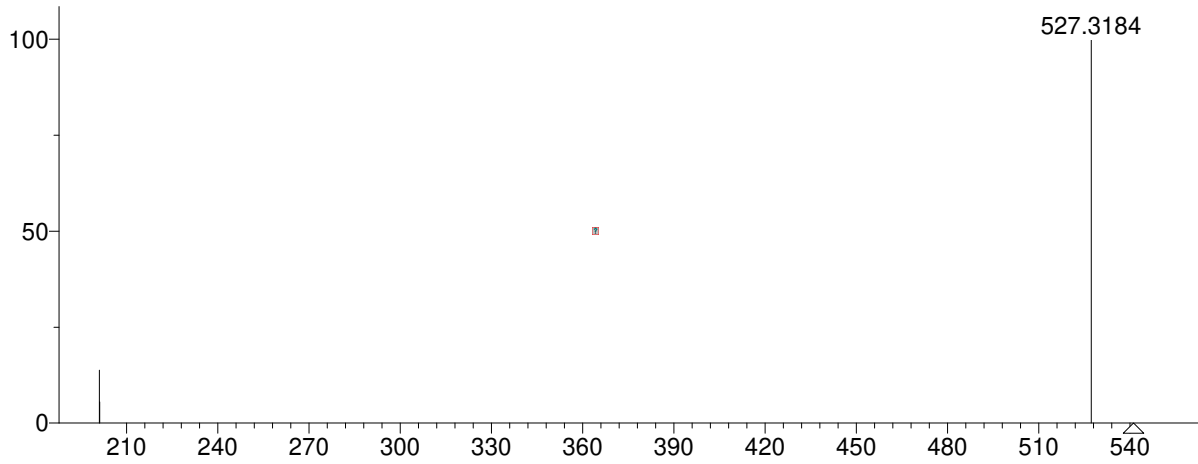

Hit 1 : 7-Benzyloxy-2-(2,2-diphenyl-1,3-benzodioxol-5-yl)-5-hydroxy-H-1-benzopyran-4-one [M+H]<sup>+</sup> HCD 48V F  
C<sub>35</sub>H<sub>24</sub>O<sub>6</sub>; MF: 0; RMF: 31; Prob 100.0%; CAS: 1391054-52-6; Lib: nist\_msms; ID: 448012.

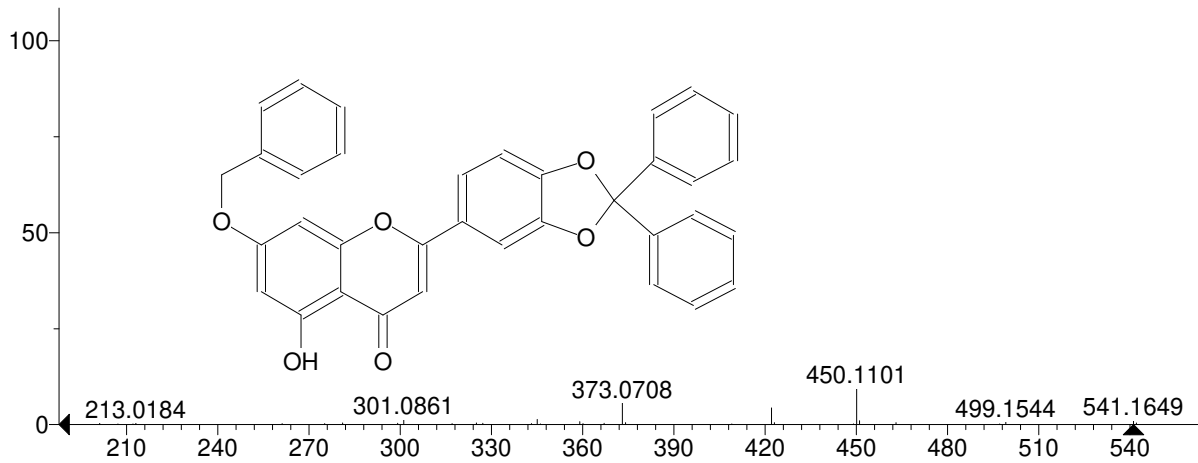

Unknown: Unknown (9.01\_472.1918m/z)  
Compound in Library Factor = 0

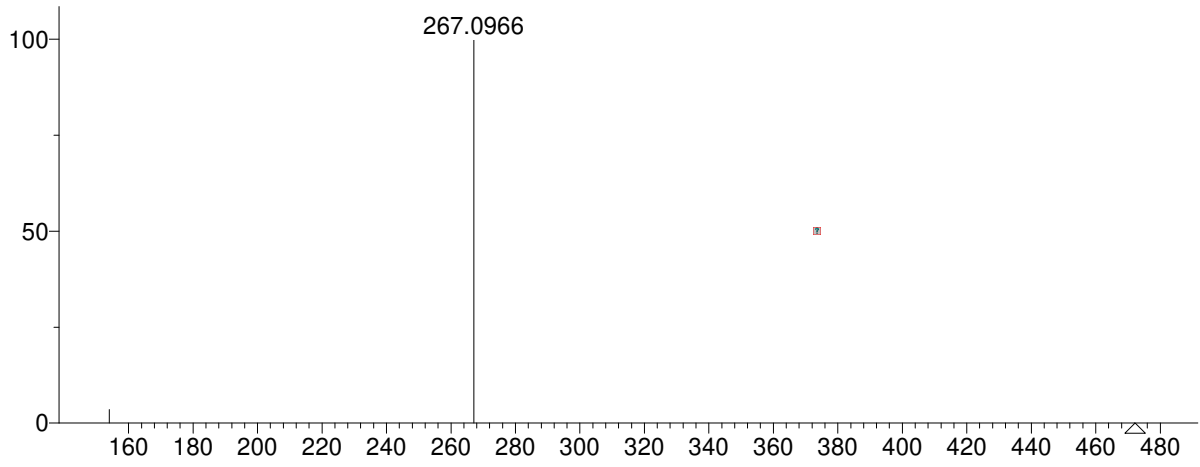

Unknown: Unknown (9.04\_500.1774m/z)  
Compound in Library Factor = 0

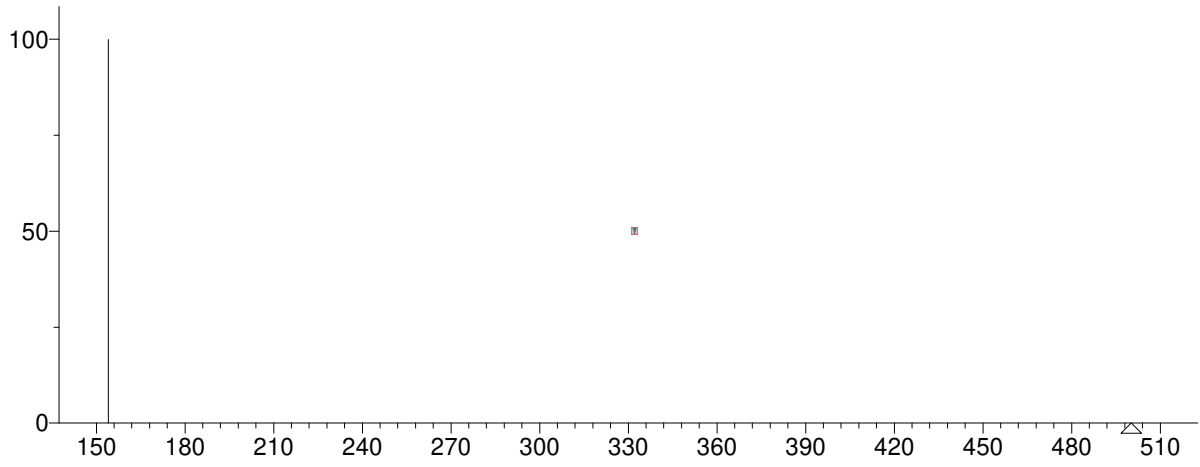

Unknown: Unknown (9.05\_470.0149m/z)  
Compound in Library Factor = 0

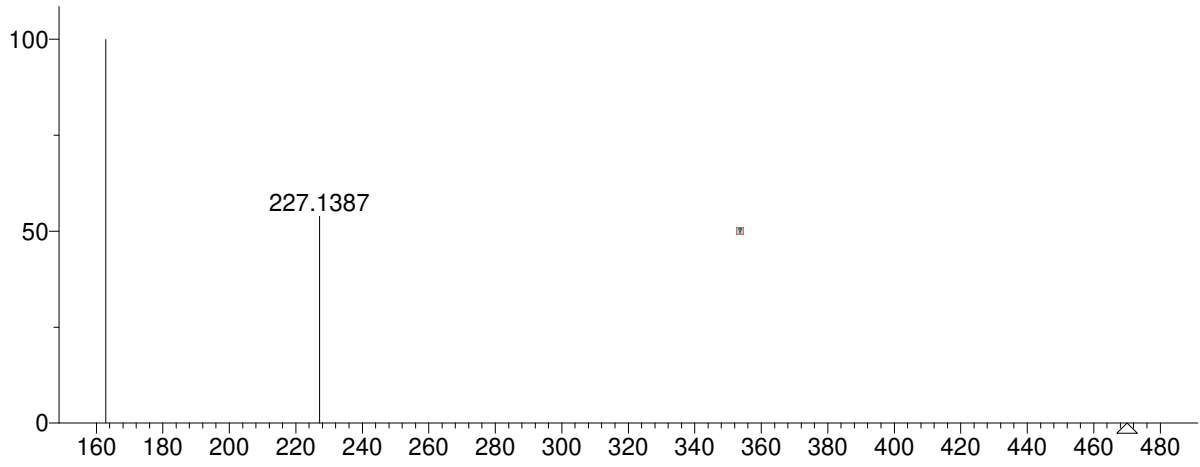

Unknown: Unknown (9.06\_704.1041m/z)  
Compound in Library Factor = 0

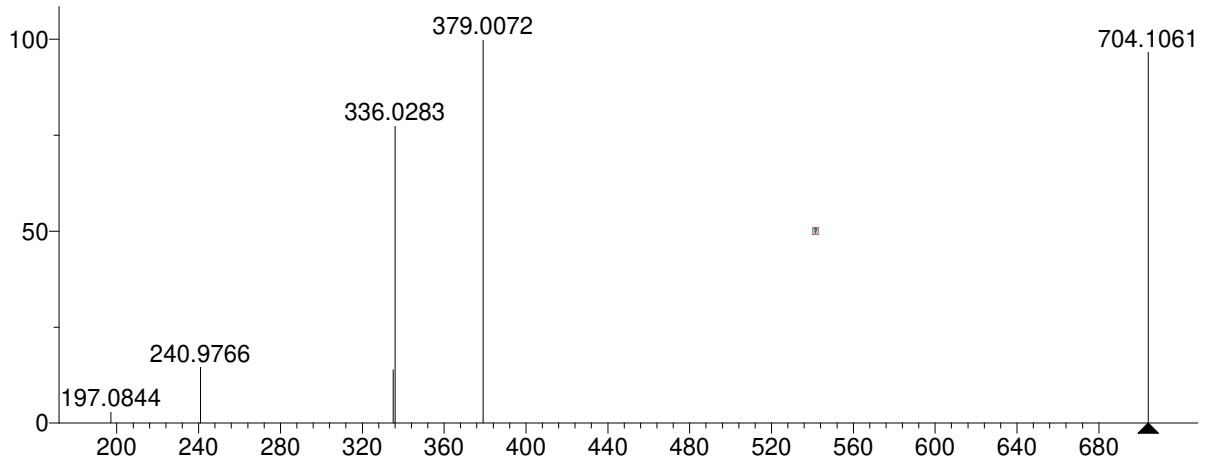

Unknown: Unknown (9.07\_520.2290m/z)  
Compound in Library Factor = -3273

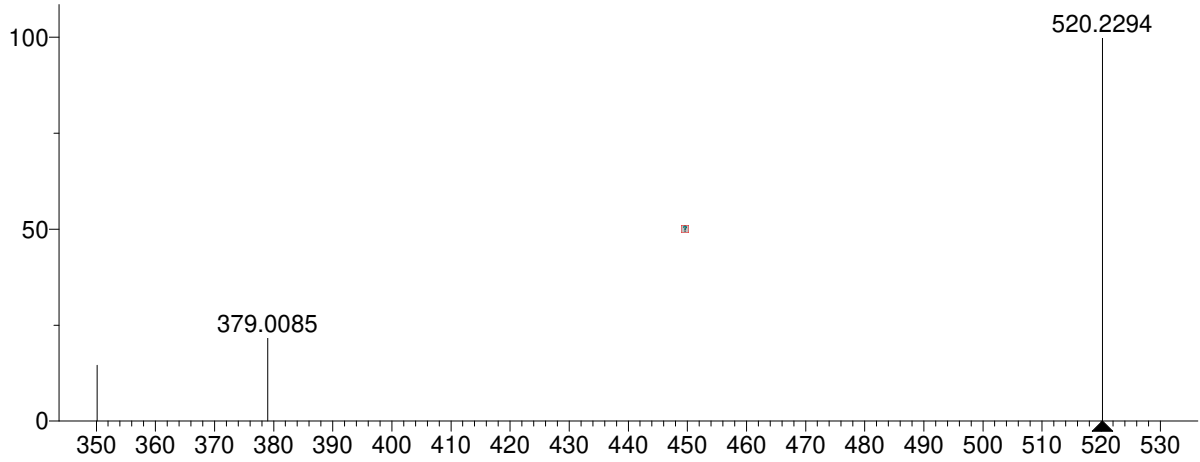

Hit 1 : NCGC00380810-01! [M+H]<sup>+</sup> P=520.2  
C<sub>30</sub>H<sub>33</sub>NO<sub>7</sub>; MF: 7; RMF: 620; Prob 56.0%; Lib: mona-export-gnps; ID: 6611.

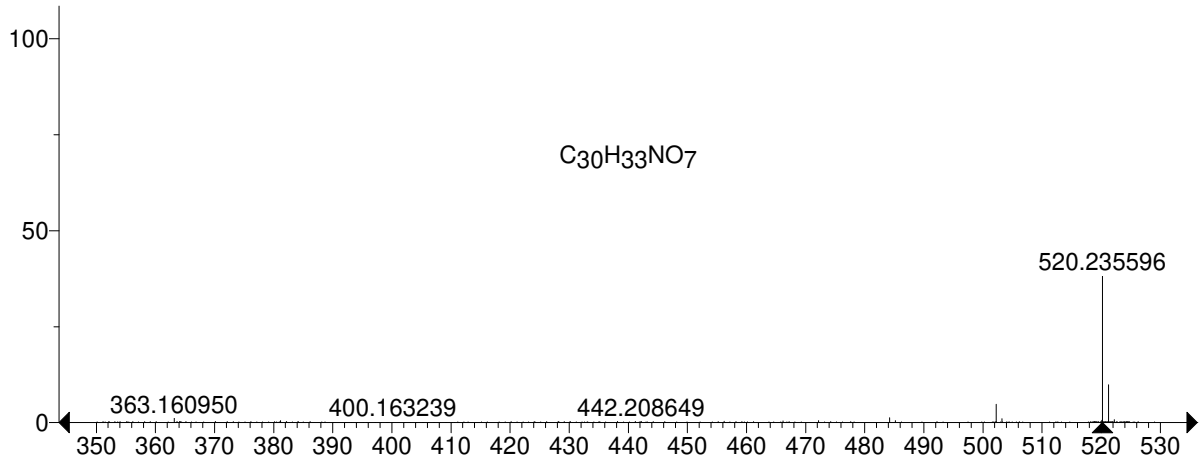

Hit 2 : \_130047 [M+Na]<sup>+</sup> P=520.2  
C<sub>28</sub>H<sub>35</sub>NO<sub>7</sub>; MF: 1; RMF: 233; Prob 44.0%; Lib: mona-export-gnps; ID: 5021.

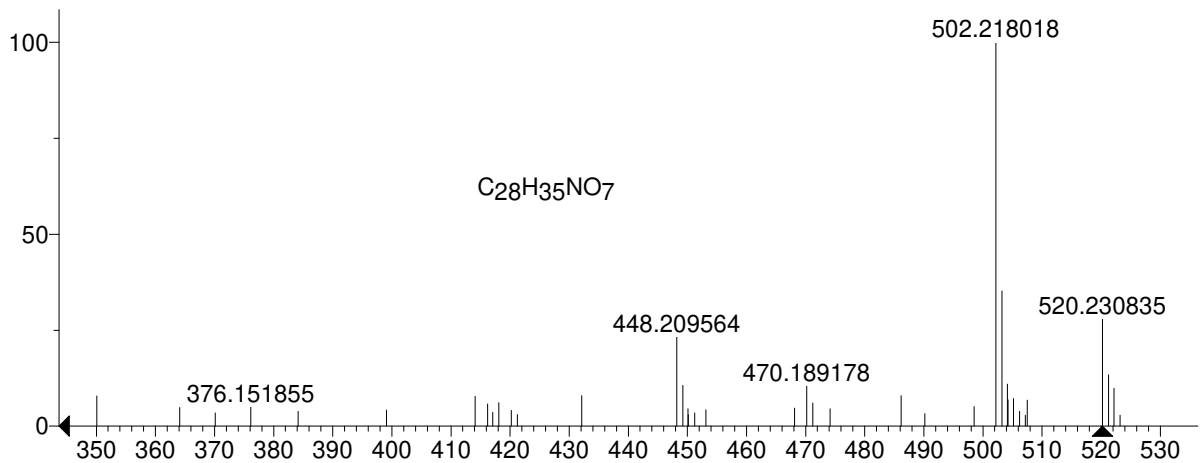

Unknown: Unknown (9.08\_429.1860m/z)  
Compound in Library Factor = 0

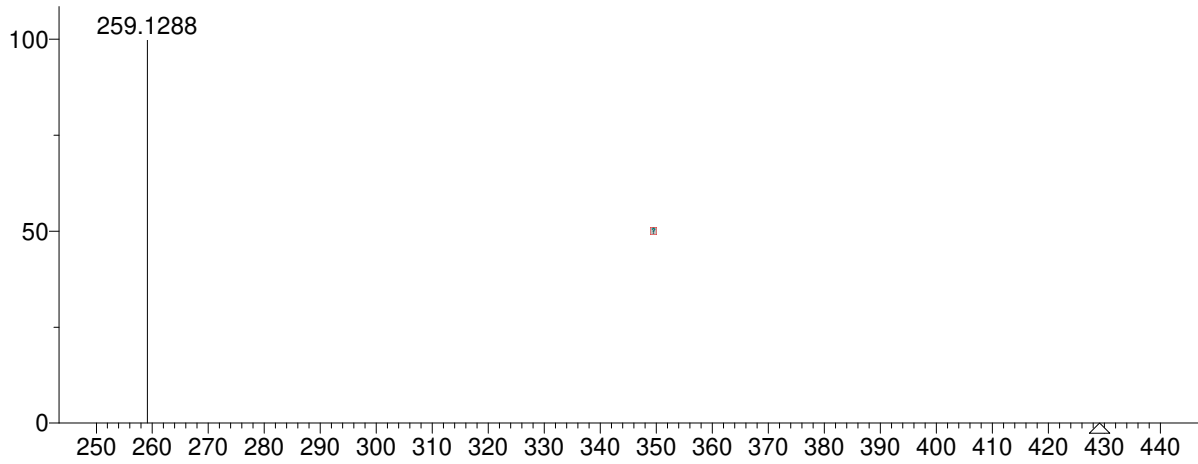

Hit 1 : (2R,3R,4S,5S,6R)-2-[6-hydroxy-3-[(E)-3-hydroxybut-1-enyl]-2,4,4-trimethylcyclohexyl]oxy-6-(hydroxymethyl) C<sub>19</sub>H<sub>34</sub>O<sub>8</sub>; MF: 0; RMF: 19; Prob 100.0%; Lib: anthocyanins mona; ID: 9988.

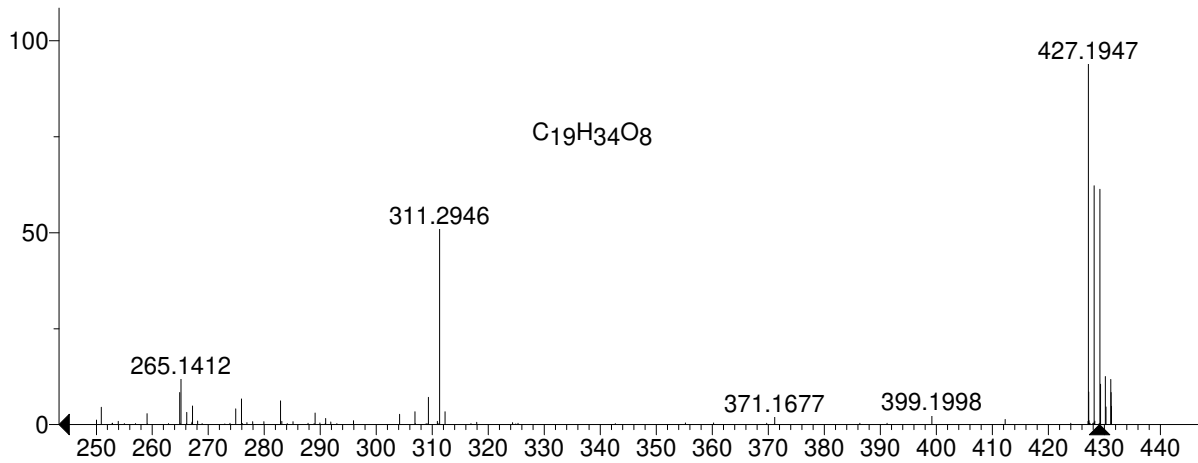



\*\* Search Report Page 1 of 2 \*\*

Unknown: Unknown (9.09\_437.1028m/z)  
Compound in Library Factor = 0

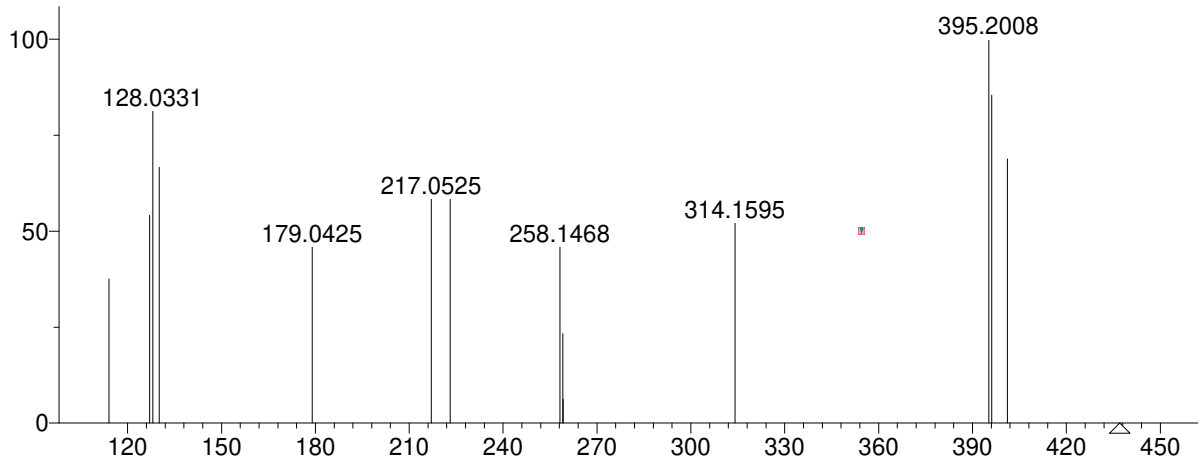

Hit 1 : asperuloside [M+Na]<sup>+</sup> 35HCD P=437.1  
C<sub>18</sub>H<sub>22</sub>O<sub>11</sub>; MF: 0; RMF: 18; Prob 20.0%; Lib: mona-export-vf-npl\_qexactive; ID: 10939.

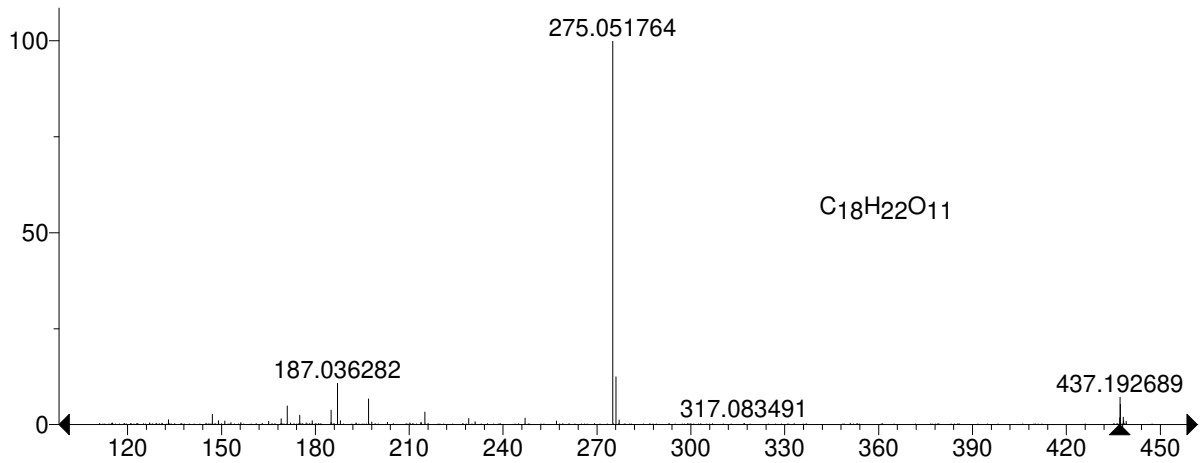

Hit 2 : Ouabain [M-H]<sup>-</sup>=>437.1 IT 35% P=437.1  
C<sub>29</sub>H<sub>44</sub>O<sub>12</sub>; MF: 0; RMF: 10; Prob 20.0%; CAS: 630-60-4; Lib: nist\_msms; ID: 153450.

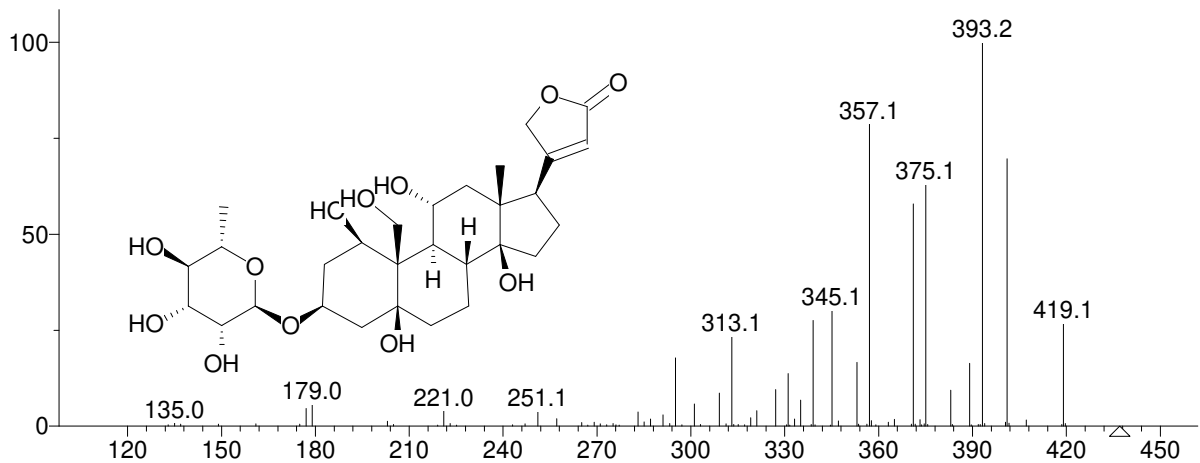

\*\* Search Report Page 2 of 2 \*\*

Hit 3 : (5-benzoyloxy-4,6-dihydroxy-3-methoxycyclohexen-1-yl)methyl benzoate [M+K]<sup>+</sup> 35HCD P=437.1  
C<sub>22</sub>H<sub>22</sub>O<sub>7</sub>; MF: 0; RMF: 7; Prob 20.0%; Lib: mona-export-vf-npl\_qexactive; ID: 1879.

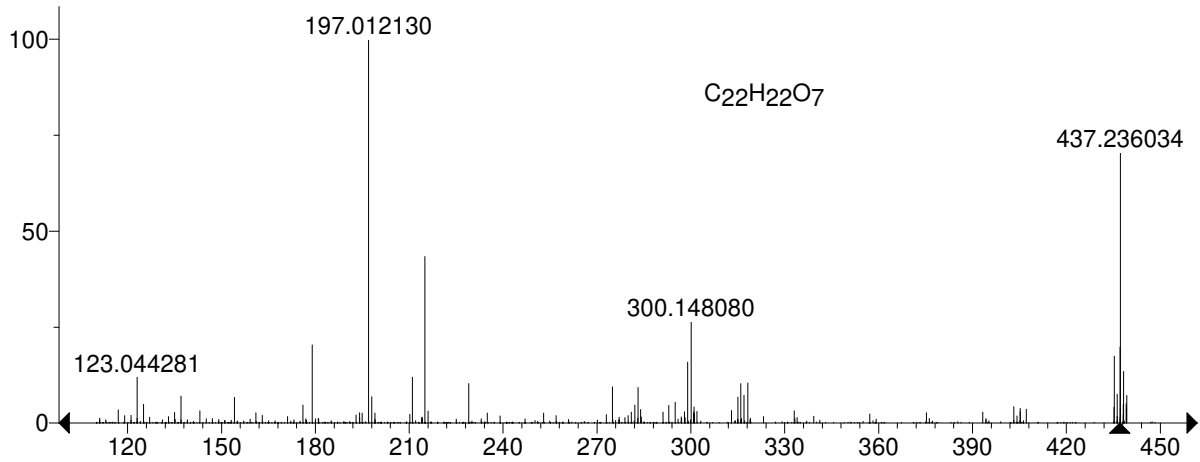

Hit 4 : Pranlukast [M+H-N<sub>2</sub>]<sup>+</sup>=>437.1 IT 35% P=437.1  
C<sub>27</sub>H<sub>23</sub>N<sub>5</sub>O<sub>4</sub>; MF: 0; RMF: 7; Prob 20.0%; CAS: 103177-37-3; Lib: nist\_msms; ID: 334232.

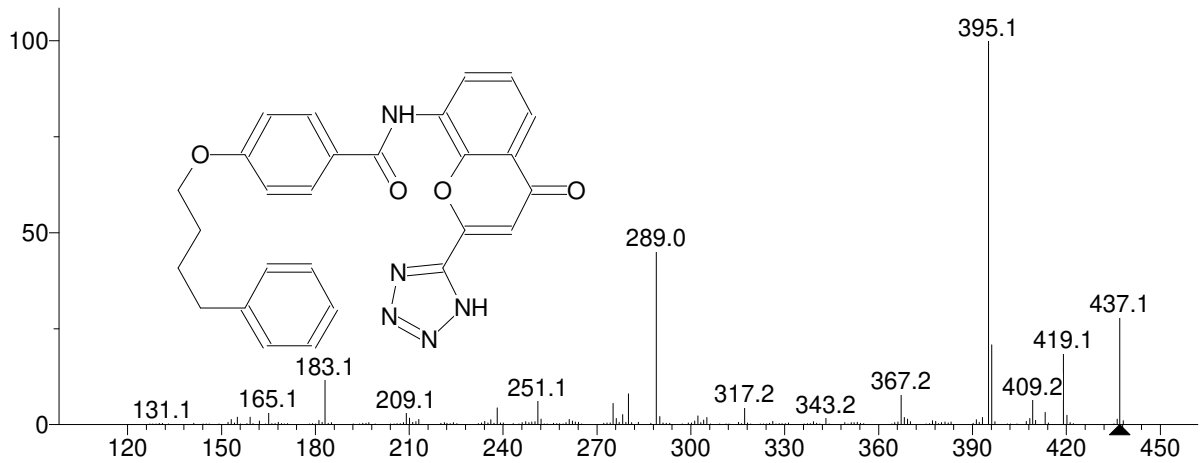

Hit 5 : 3-[3-[3,4-dihydroxy-5-(6-oxo-3H-purin-9-yl)oxolan-2-yl]propanoyl]benzoic acid [M+Na]<sup>+</sup> 45HCD P=437.1  
C<sub>19</sub>H<sub>18</sub>N<sub>4</sub>O<sub>7</sub>; MF: 0; RMF: 3; Prob 20.0%; Lib: mona-export-vf-npl\_qexactive; ID: 17321.

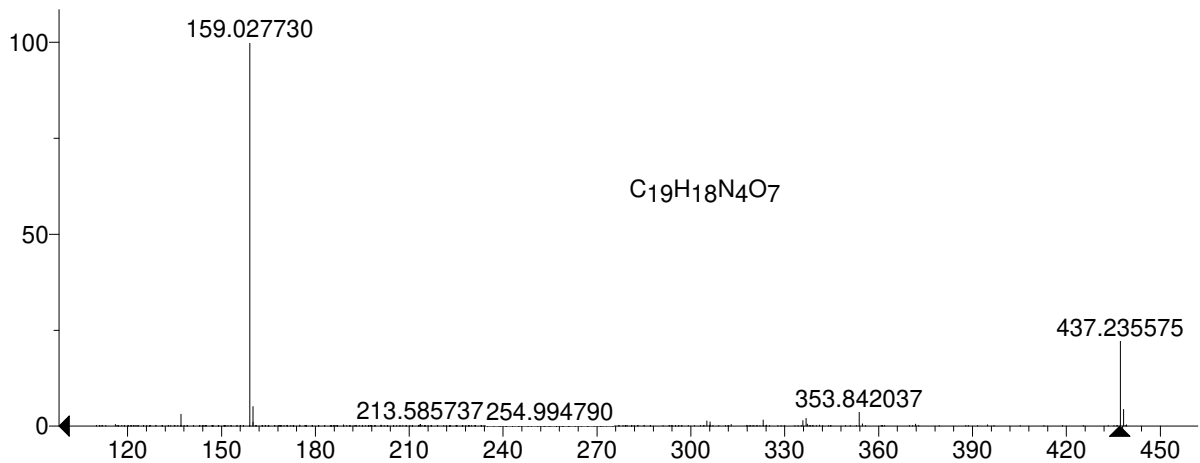

Unknown: Unknown (9.09\_508.1820m/z)  
Compound in Library Factor = 0

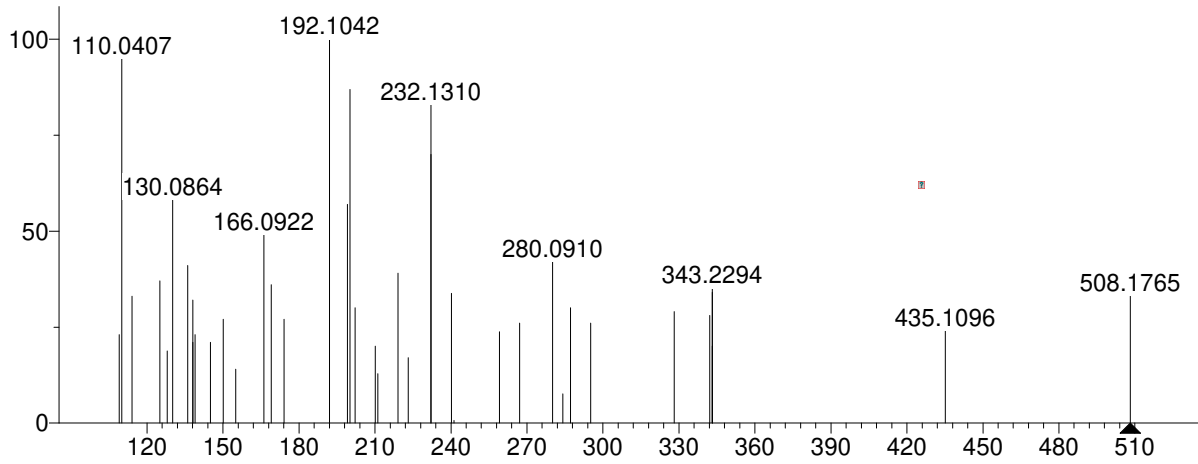

Unknown: Unknown (9.10\_383.1330m/z)  
Compound in Library Factor = 0

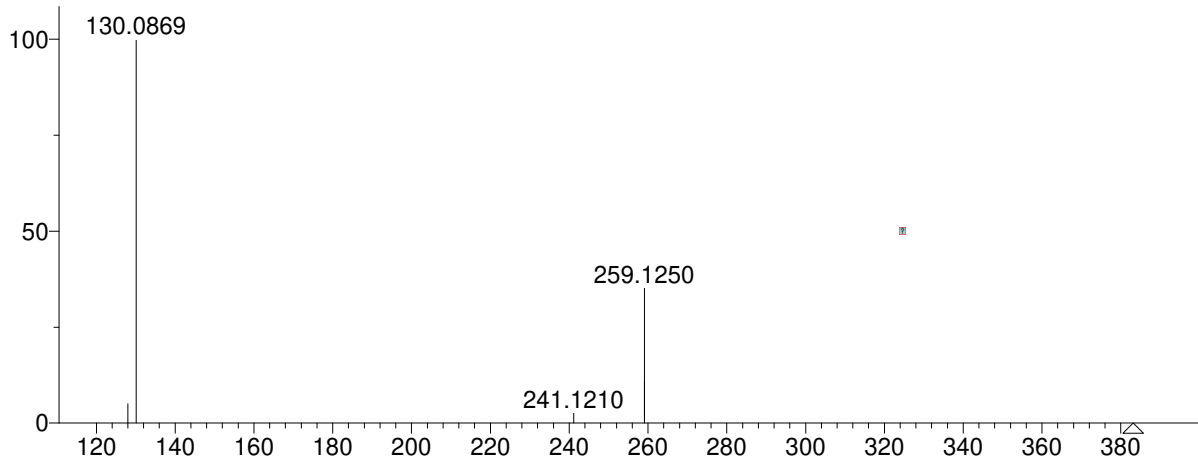

Hit 1 : dihydroferuloyl-beta-keto acid + deoxyhexose (curcumin) [M-H]<sup>-</sup> P=383.1  
C<sub>18</sub>H<sub>24</sub>O<sub>9</sub>; MF: 0; RMF: 8; Prob 100.0%; Lib: phytofrag2018\_final\_060219; ID: 1018.

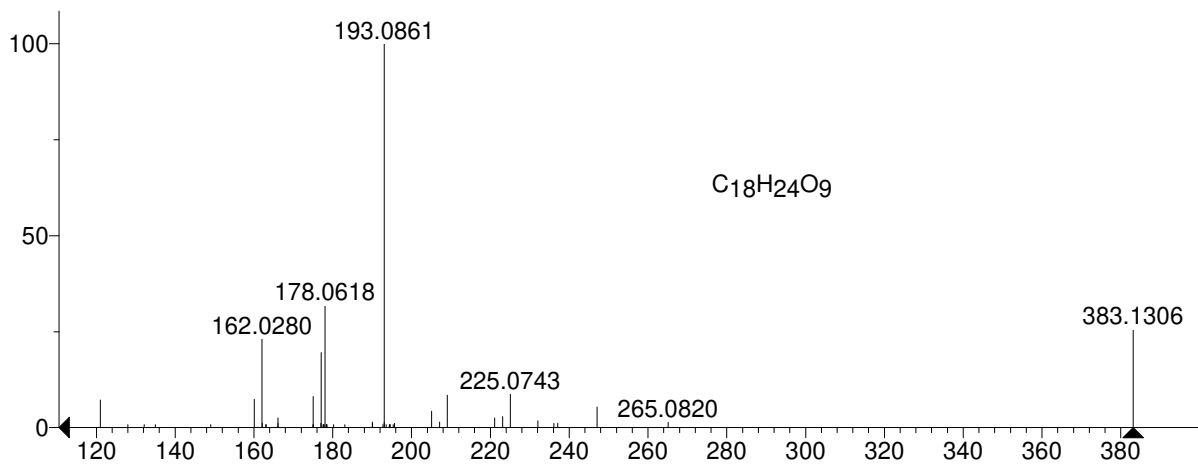

\*\* Search Report Page 1 of 2 \*\*

Unknown: Unknown (9.10\_498.2445m/z)  
Compound in Library Factor = 0

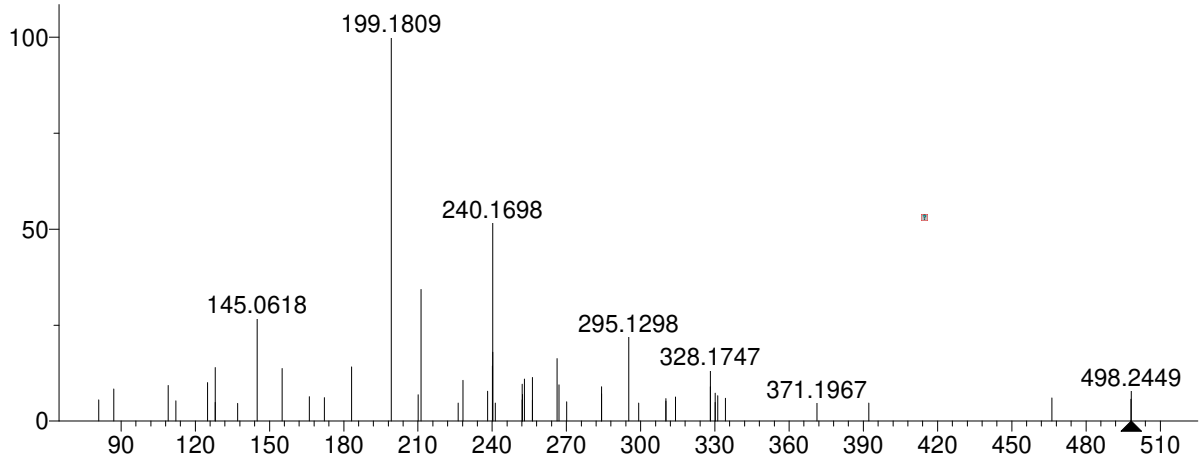

Hit 1 : NCGC00169355-02\_C28H37NO8\_Pentanedioic acid, 2-[(6'S,8a'S)-3',4',4'a,5',6,6',7',8,8',8'a-decahydro-4,6-dihydro-2H-pyridin-2-ylidene]pentanoic acid; MF: 0; RMF: 52; Prob 8.33%; Lib: mona-export-gnps; ID: 10695.

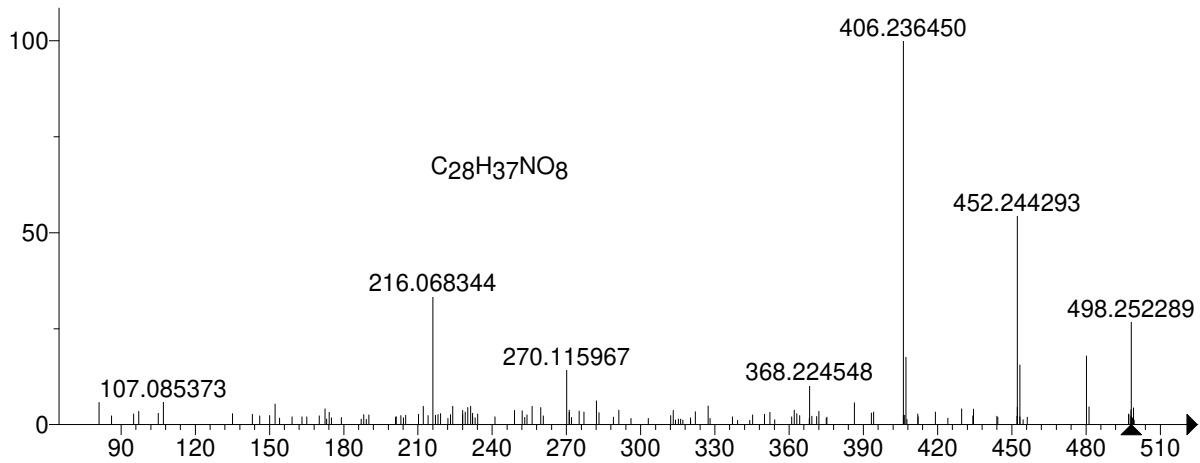

Hit 2 : PC 12:0; PC 6:0-6:0; [M+FA-H]- [M+FA-H]- P=498.2  
C20H40NO8P; MF: 0; RMF: 37; Prob 8.33%; Lib: msdial-insilicomsms-lipids-neg; ID: 317805.

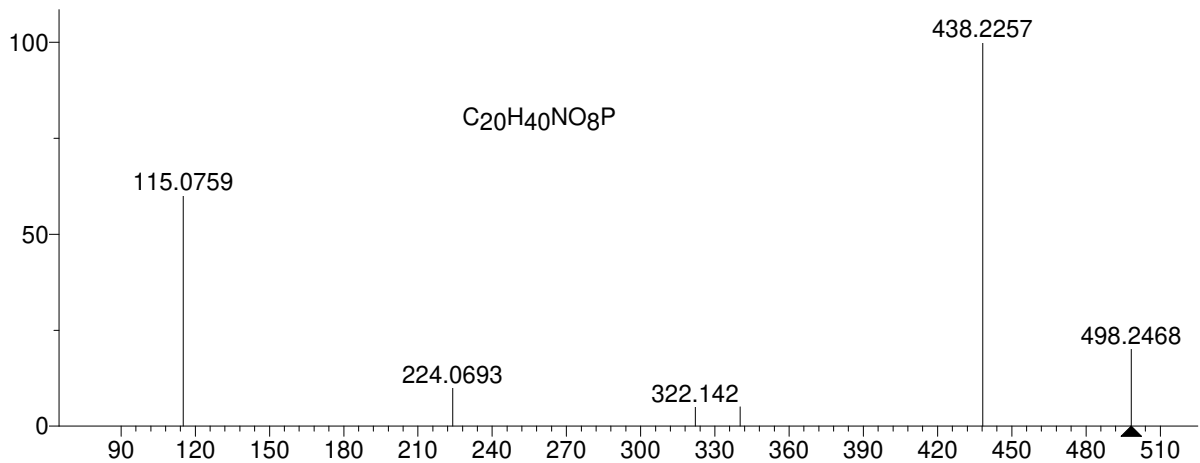

Hit 3 : PC 12:0; PC 2:0-10:0; [M+FA-H]- [M+FA-H]- P=498.2  
C<sub>20</sub>H<sub>40</sub>NO<sub>8</sub>P; MF: 0; RMF: 35; Prob 8.33%; Lib: msdial-insilicomsm-lipids-neg; ID: 317575.

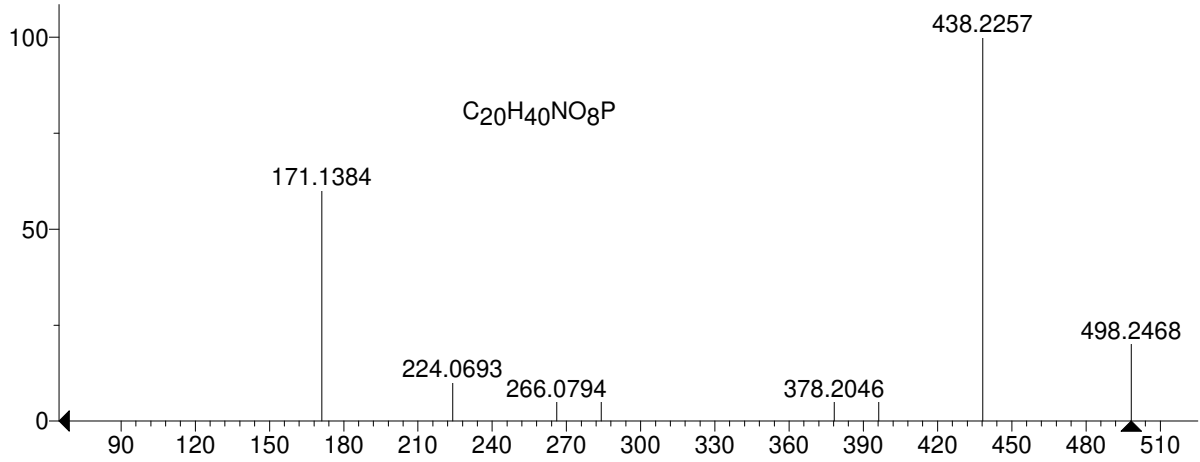

Hit 4 : PC 12:0; PC 3:0-9:0; [M+FA-H]- [M+FA-H]- P=498.2  
C<sub>20</sub>H<sub>40</sub>NO<sub>8</sub>P; MF: 0; RMF: 35; Prob 8.33%; Lib: msdial-insilicomsm-lipids-neg; ID: 317634.

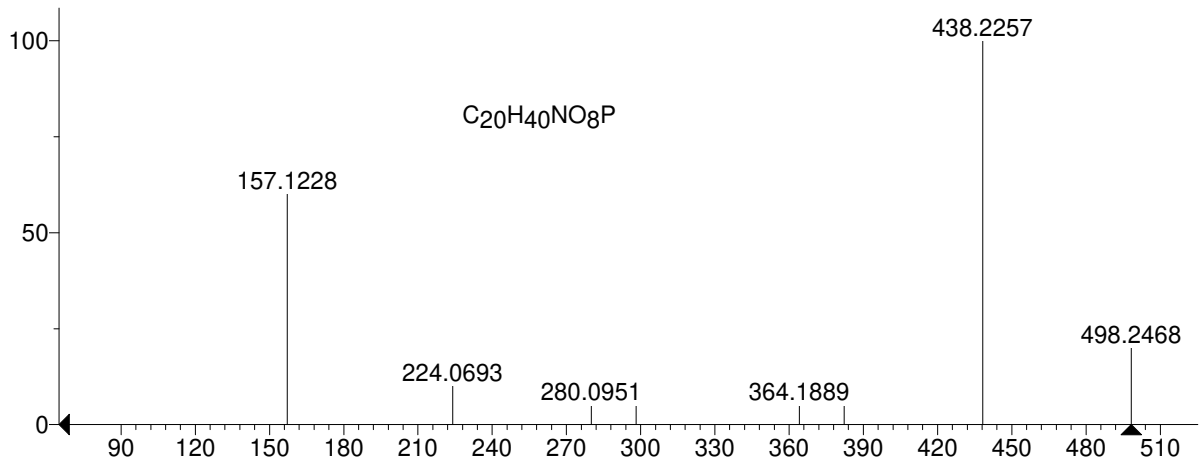

Hit 5 : PC 11:0; PC 2:0-9:0; [M+Hac-H]- [M+Hac-H]- P=498.2  
C<sub>19</sub>H<sub>38</sub>NO<sub>8</sub>P; MF: 0; RMF: 35; Prob 8.33%; Lib: msdial-insilicomsm-lipids-neg; ID: 319465.

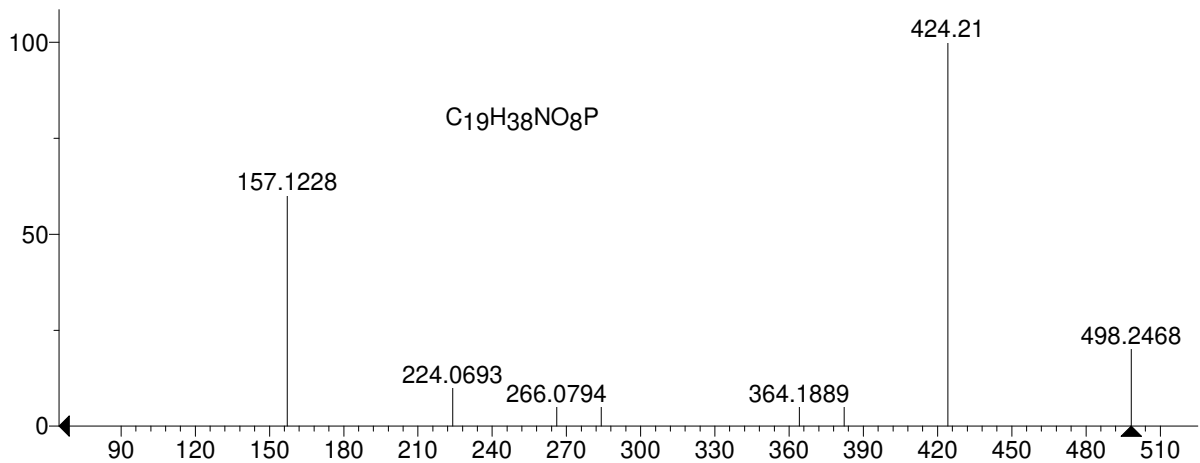

Unknown: Unknown (9.11\_337.0917m/z)  
Compound in Library Factor = -3273

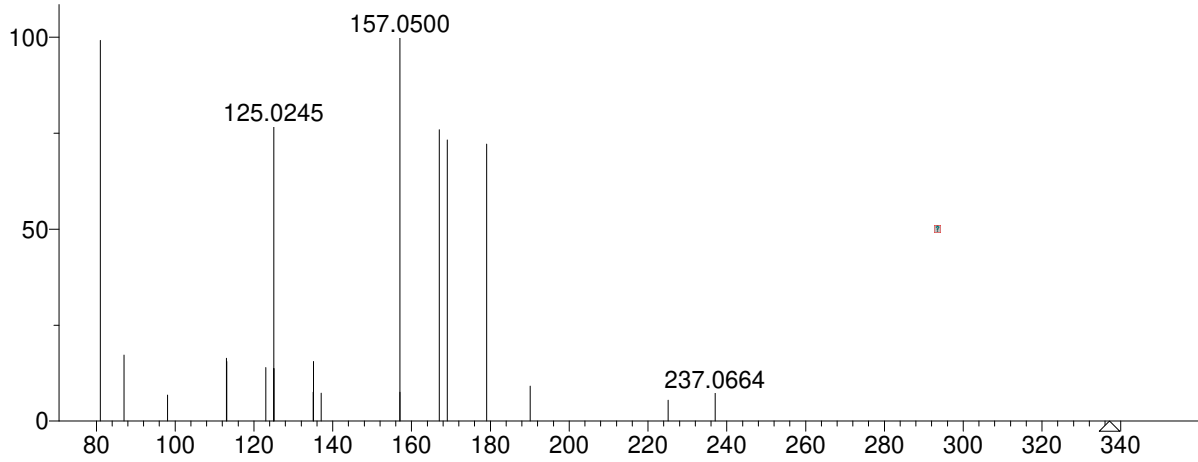

Hit 1 : Chlorogenic acid [M+H-H<sub>2</sub>O]<sup>+</sup> HCD 87V P=337.1  
C<sub>16</sub>H<sub>18</sub>O<sub>9</sub>; MF: 1; RMF: 36; Prob 10.4%; CAS: 327-97-9; Lib: nist\_msms; ID: 100727.

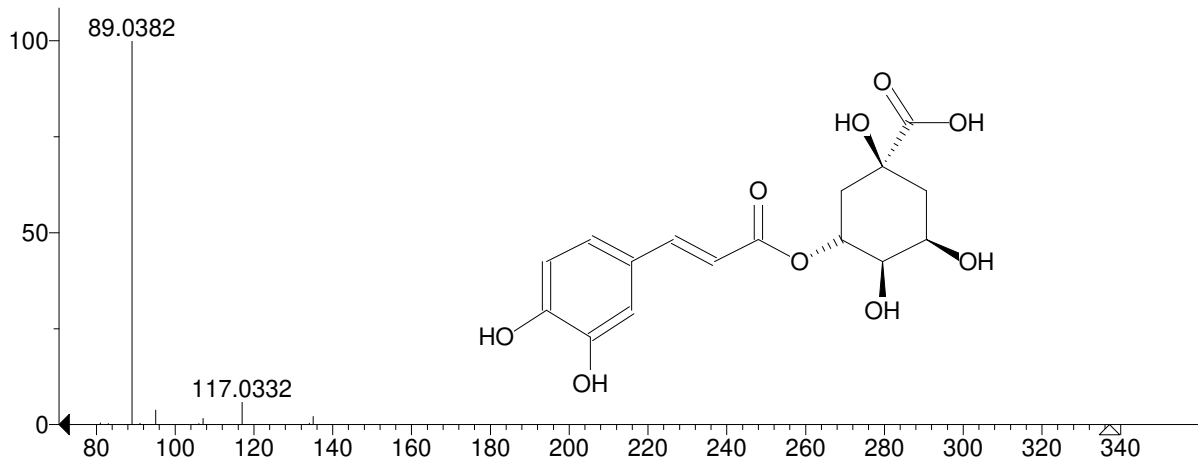

Hit 2 : Neochlorogenic acid [M+H-H<sub>2</sub>O]<sup>+</sup> HCD 60V P=337.1  
C<sub>16</sub>H<sub>18</sub>O<sub>9</sub>; MF: 0; RMF: 57; Prob 9.95%; CAS: 906-33-2; Lib: nist\_msms; ID: 239448.

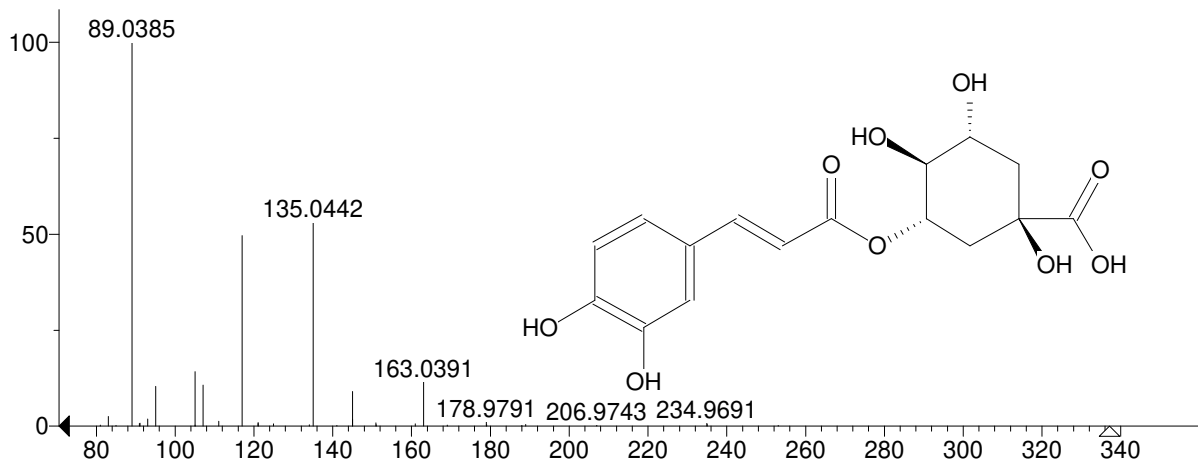

\*\* Search Report Page 2 of 2 \*\*

Hit 3 : NCGC00180823-02!(3R,4R,5R)-5-[(E)-3-(3,4-dihydroxyphenyl)prop-2-enoyl]oxy-3,4-dihydroxycyclohexene  
C<sub>16</sub>H<sub>16</sub>O<sub>8</sub>; MF: 0; RMF: 51; Prob 9.95%; Lib: mona-export-gnps; ID: 9151.



Hit 4 : NCGC00380360-01!7-methoxy-6-[(2S,3R,4S,5S,6R)-3,4,5-trihydroxy-6-(hydroxymethyl)oxan-2-yl]oxychron  
C<sub>16</sub>H<sub>18</sub>O<sub>9</sub>; MF: 0; RMF: 46; Prob 9.95%; Lib: mona-export-gnps; ID: 9547.

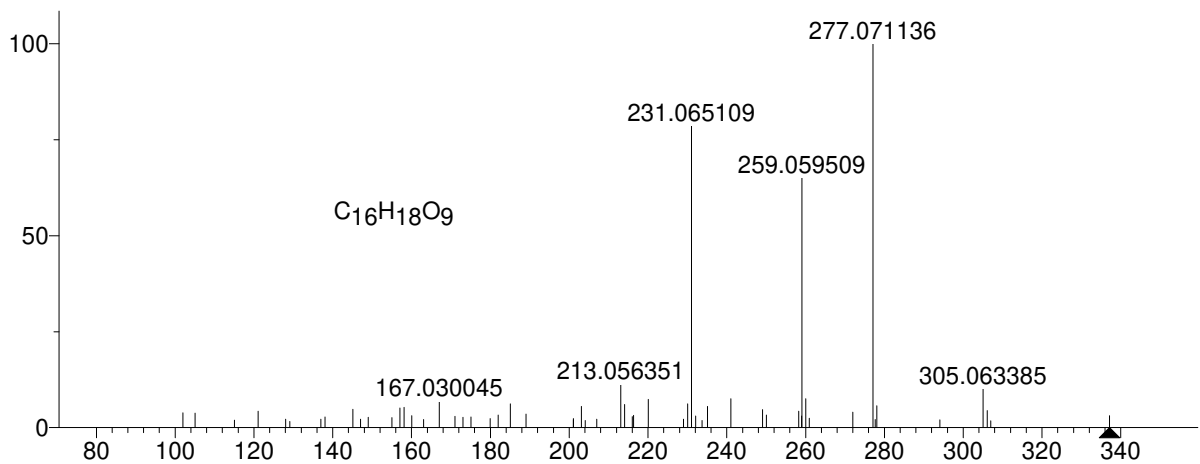

Hit 5 : (1R,3R,4S,5R)-1,3,4-trihydroxy-5-[(E)-3-(4-hydroxyphenyl)prop-2-enoyl]oxycyclohexane-1-carboxylic acid  
C<sub>16</sub>H<sub>18</sub>O<sub>8</sub>; MF: 0; RMF: 39; Prob 9.95%; Lib: mona-export-lc-ms-ms\_negative\_mode; ID: 19000.

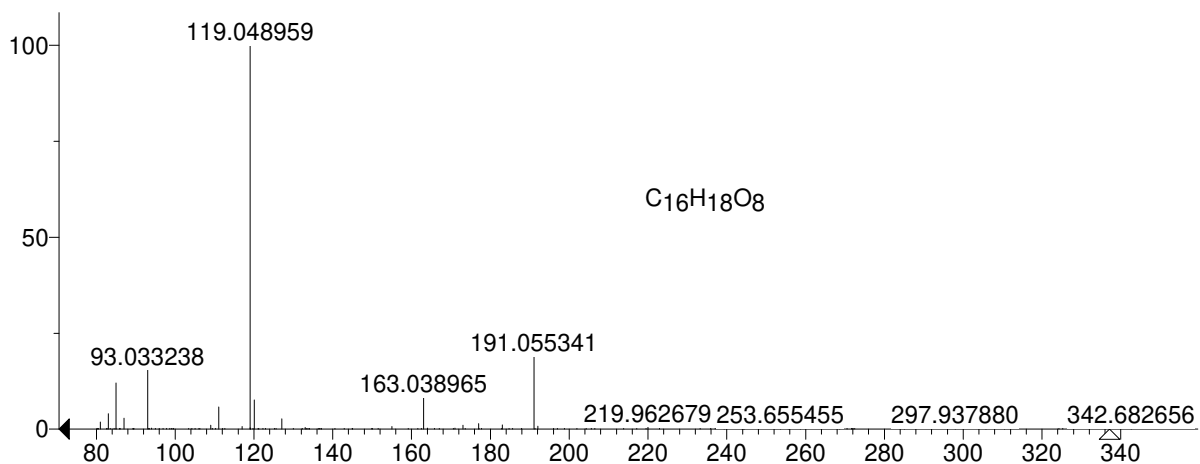



Unknown: Unknown (9.11\_378.1655m/z)  
Compound in Library Factor = 0

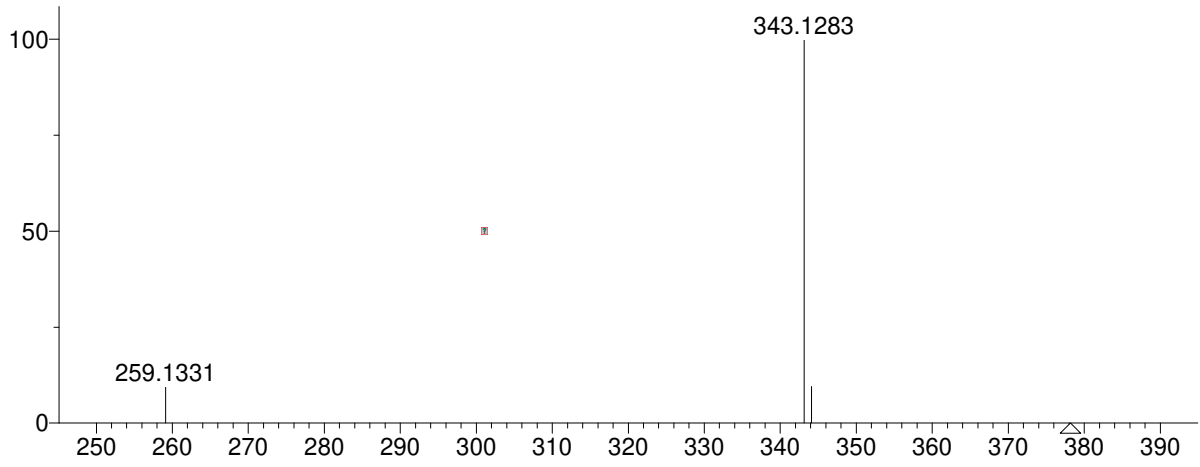

Unknown: Unknown (9.13\_381.1178m/z)  
Compound in Library Factor = 0

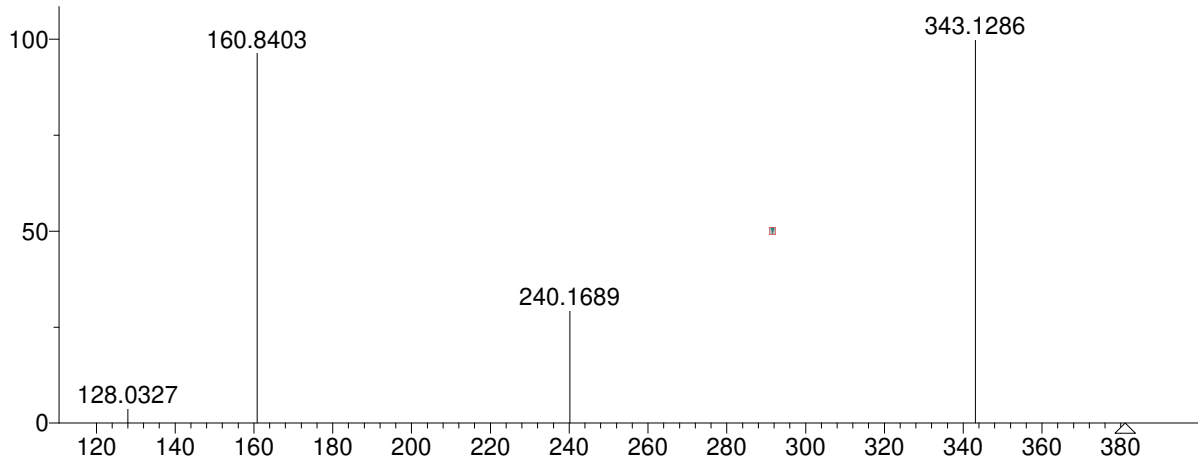

Unknown: Unknown (9.13\_433.0800m/z)  
Compound in Library Factor = -3273

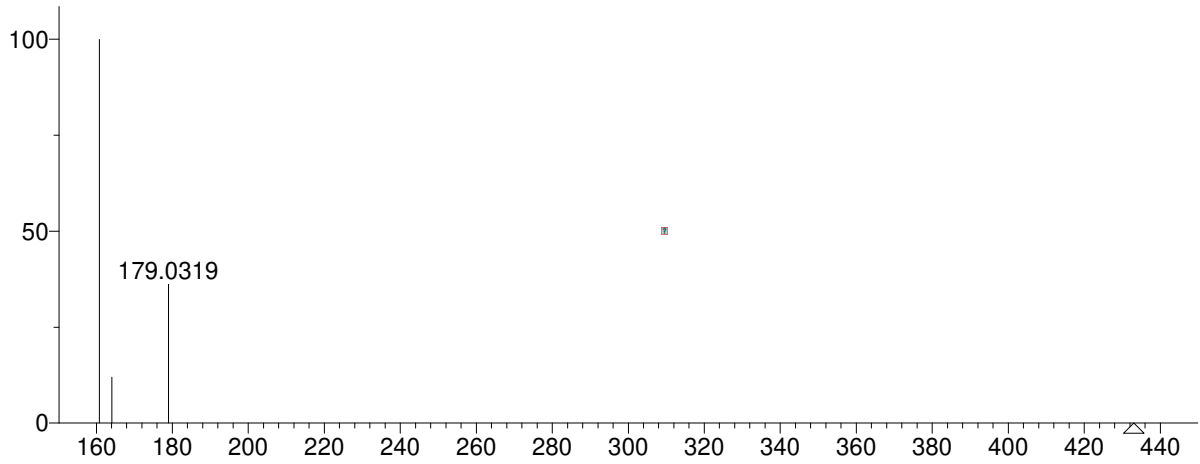

Hit 1 : NCGC00168846-02!(2R,3S)-2-[(3,4-dihydroxyphenyl)methyl]-3-[(E)-3-(3,4-dihydroxyphenyl)prop-2-enoyl]o  
C<sub>20</sub>H<sub>18</sub>O<sub>11</sub>; MF: 4; RMF: 258; Prob 100.0%; Lib: mona-export-gnps; ID: 8149.

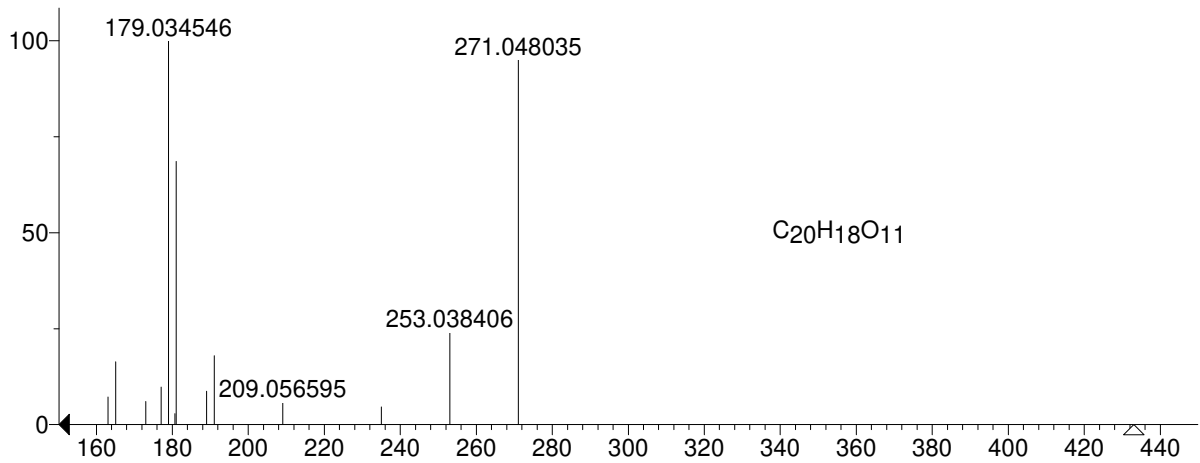

Unknown: Unknown (9.14\_439.2188m/z)  
Compound in Library Factor = 0

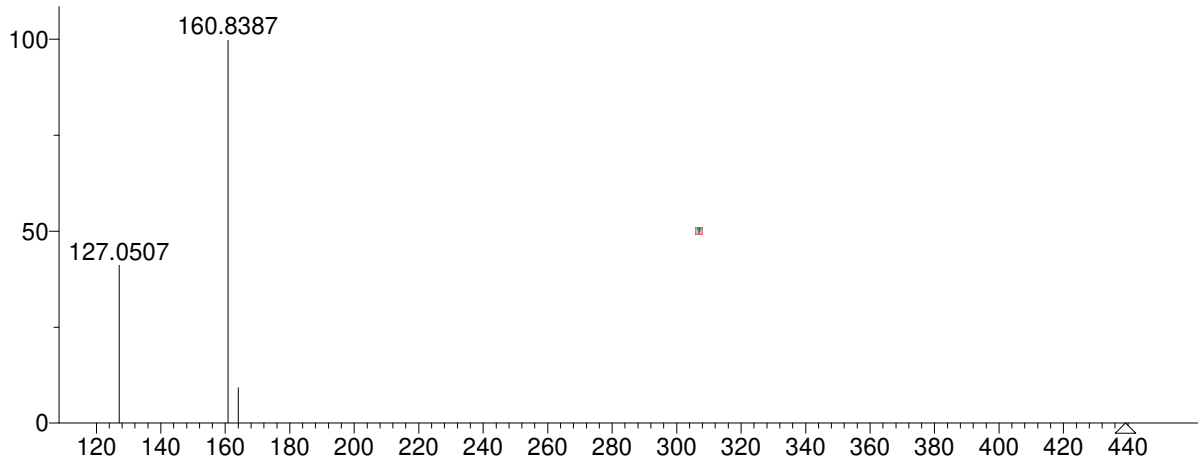

Unknown: Unknown (9.15\_339.1073m/z)  
Compound in Library Factor = 0

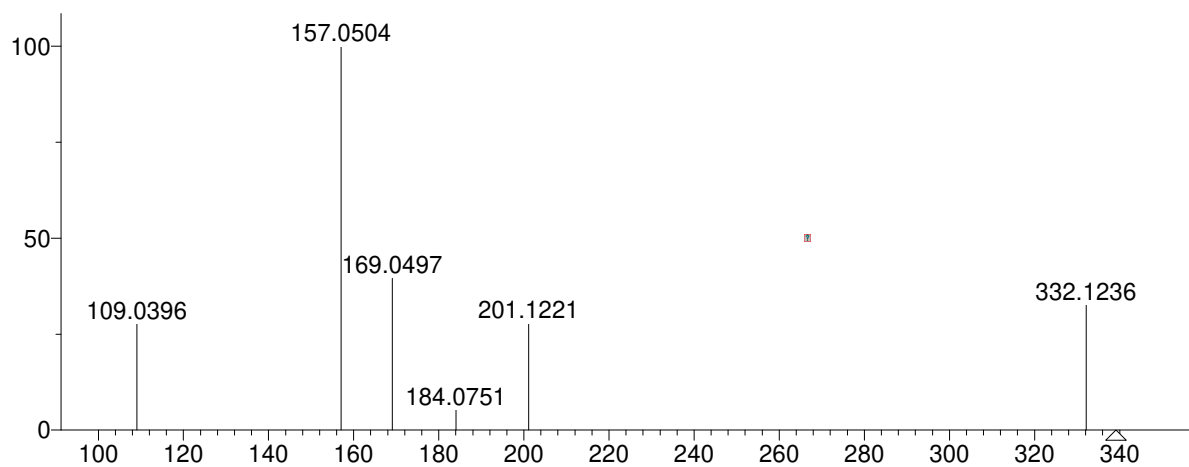

Hit 1 : (1R,3R,4S,5R)-1,3,4-trihydroxy-5-[(E)-3-(4-hydroxyphenyl)prop-2-enoyl]oxycyclohexane-1-carboxylic acid  
C<sub>16</sub>H<sub>18</sub>O<sub>8</sub>; MF: 0; RMF: 12; Prob 100.0%; Lib: mona-export-vf-npl\_qexactive; ID: 6316.

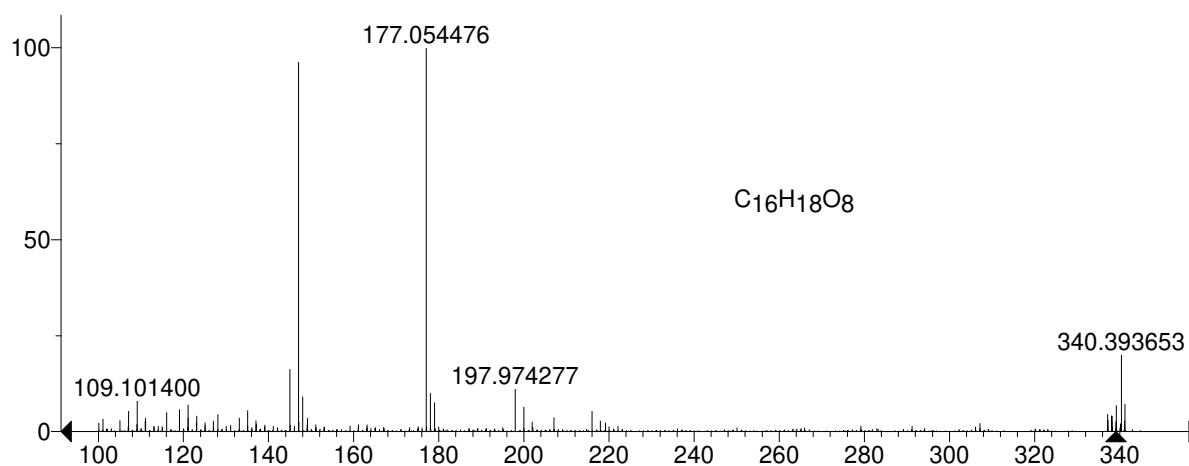

Unknown: Unknown (9.15\_342.9132m/z)  
Compound in Library Factor = 0

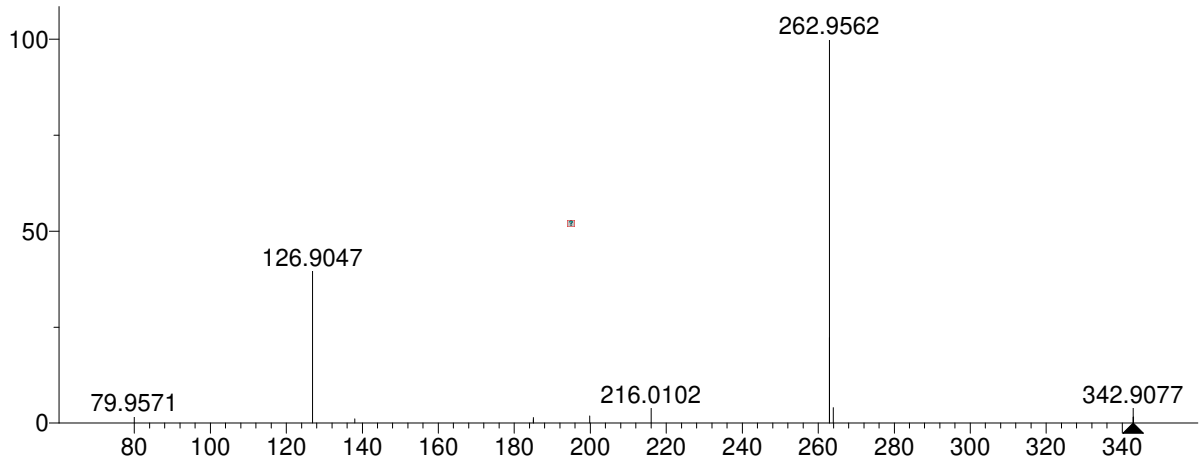

Unknown: Unknown (9.15\_534.2217m/z)  
Compound in Library Factor = 0

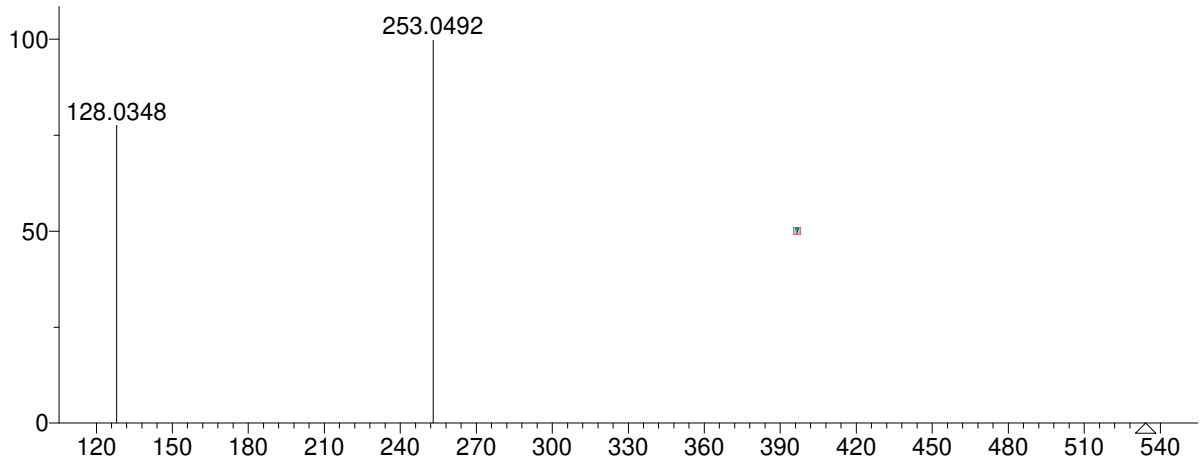

Unknown: Unknown (9.17\_387.0861m/z)  
Compound in Library Factor = 0

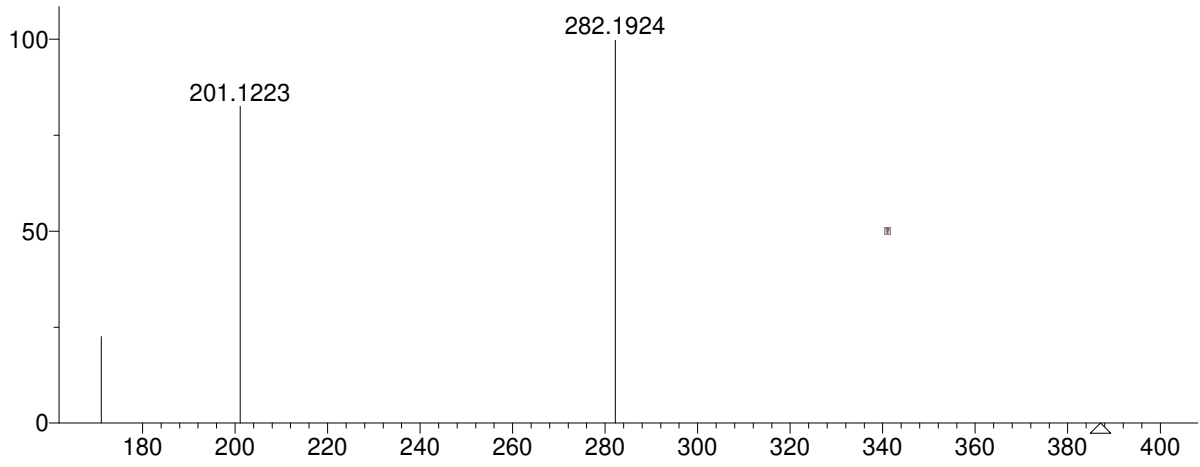



Unknown: Unknown (9.19\_359.0327m/z)  
Compound in Library Factor = -3273

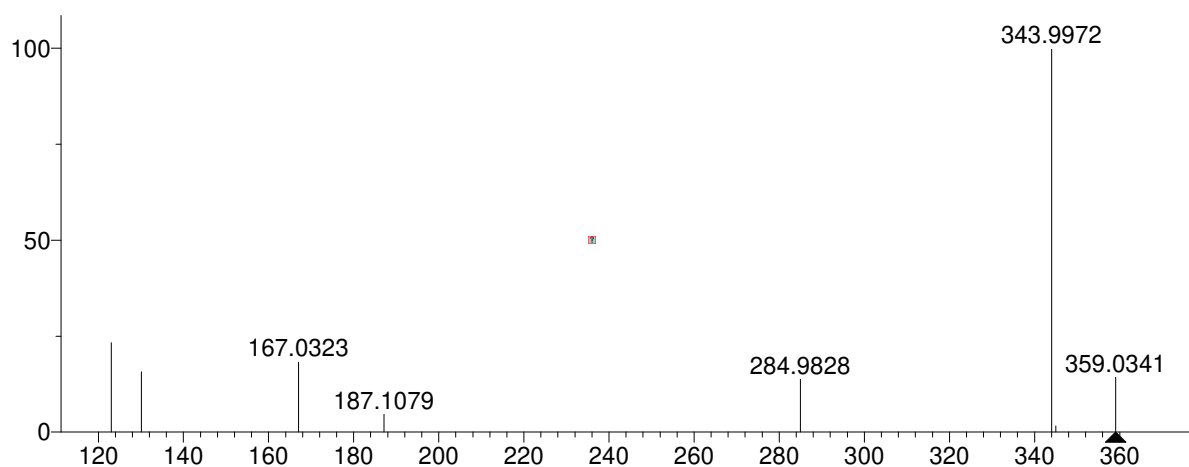

Hit 1 : 8-Chloroquinolin-2-ol [2M+H]<sup>+</sup> HCD 1V P=359  
C<sub>9</sub>H<sub>6</sub>ClNO; MF: 7; RMF: 177; Prob 54.2%; CAS: 23981-25-1; Lib: nist\_msms; ID: 535966.

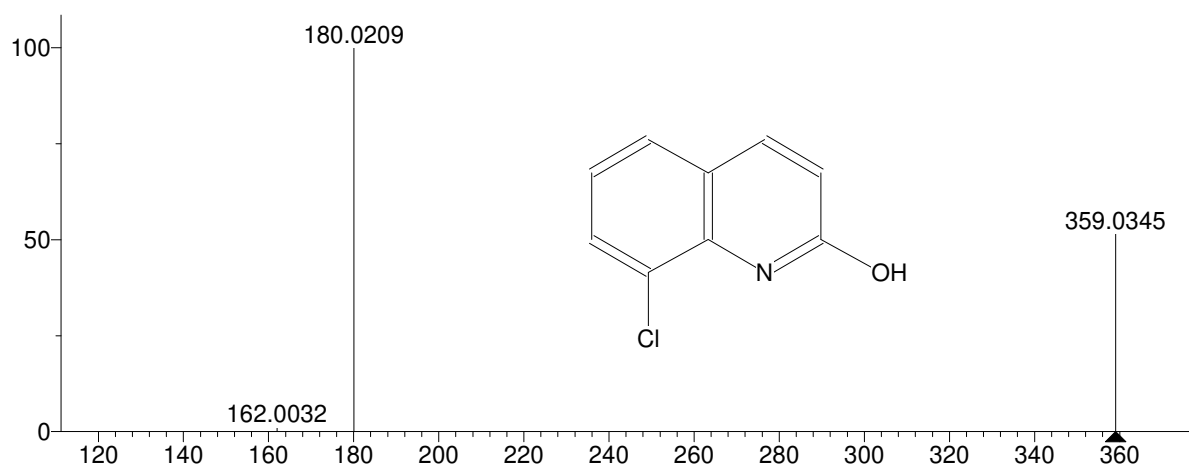

Hit 2 : 6-Chloroquinolin-2-ol [2M+H]<sup>+</sup> HCD 1V P=359  
C<sub>9</sub>H<sub>6</sub>ClNO; MF: 3; RMF: 138; Prob 45.8%; CAS: 1810-67-9; Lib: nist\_msms; ID: 535872.

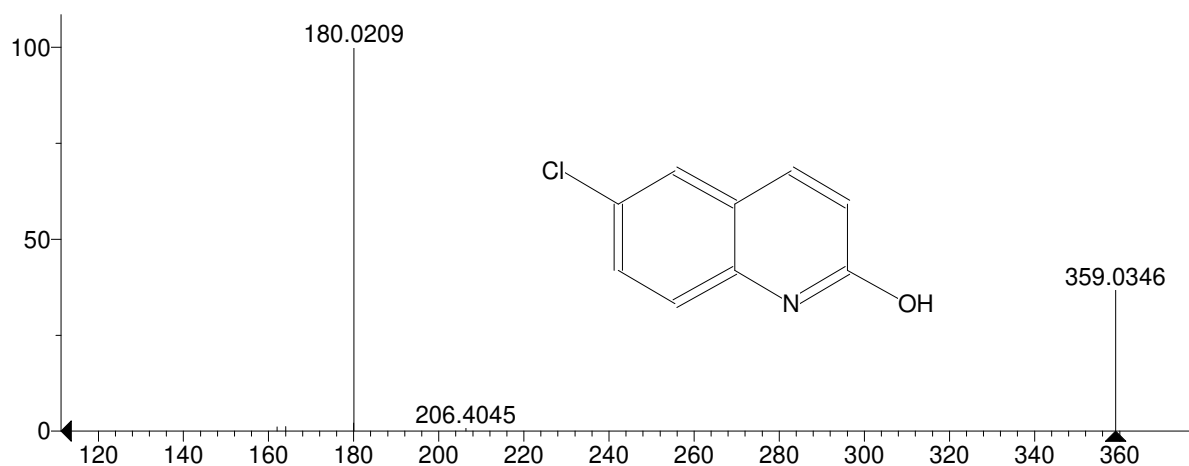

Unknown: Unknown (9.21\_167.0343m/z)  
Compound in Library Factor = 785

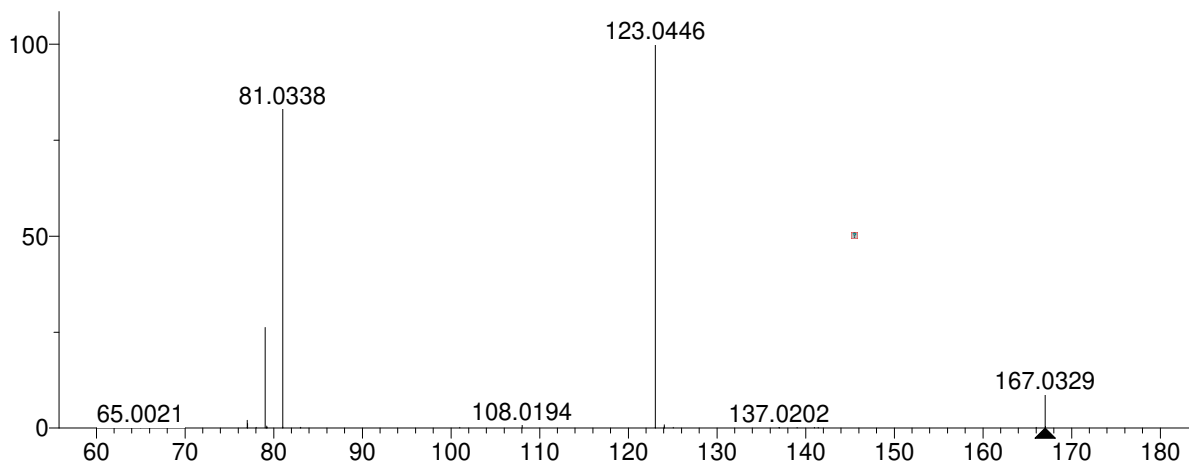

Hit 1 : Lecanoric acid [M-H-C<sub>8</sub>H<sub>6</sub>O<sub>3</sub>]- HCD 21V P=167  
C<sub>16</sub>H<sub>14</sub>O<sub>7</sub>; MF: 967; RMF: 977; Prob 98.7%; CAS: 480-56-8; Lib: nist\_msms; ID: 455654.

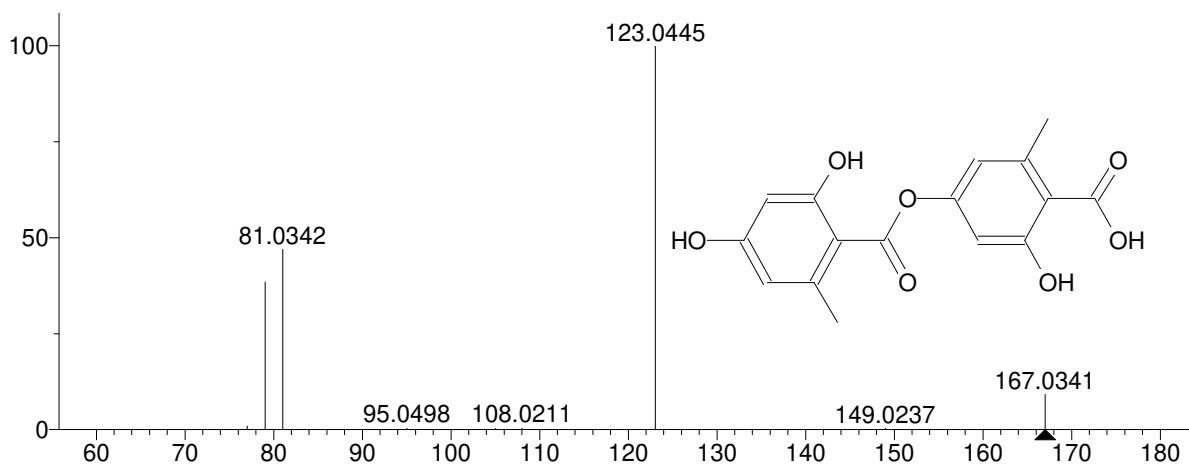

Hit 2 : Evernic acid [M-H-C<sub>9</sub>H<sub>8</sub>O<sub>3</sub>]- HCD 21V P=167  
C<sub>17</sub>H<sub>16</sub>O<sub>7</sub>; MF: 725; RMF: 854; Prob 0.98%; CAS: 537-09-7; Lib: nist\_msms; ID: 459272.

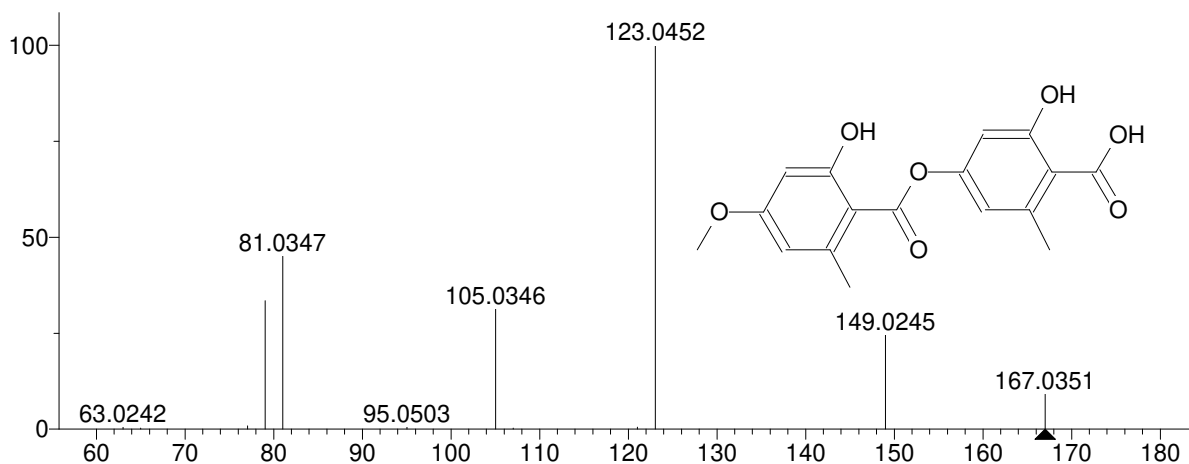

Hit 3 : Homogentisic acid [M-H]<sup>-</sup> HCD 6V P=167  
C<sub>8</sub>H<sub>8</sub>O<sub>4</sub>; MF: 699; RMF: 871; Prob 0.29%; CAS: 451-13-8; Lib: nist\_msms; ID: 545998.

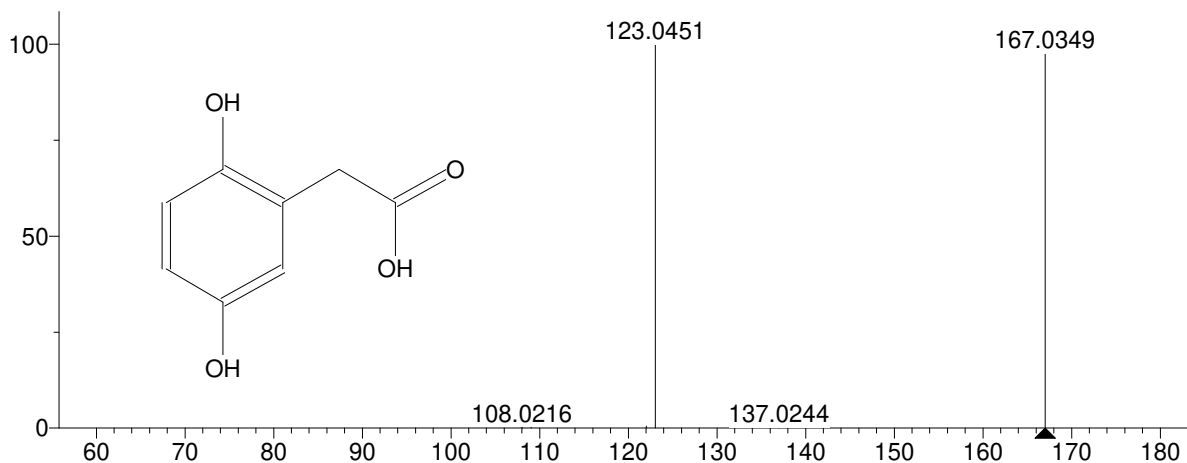

Hit 4 : 2,6-Dihydroxy-4-methylbenzoic acid [M-H]<sup>-</sup> HCD 25V P=167  
C<sub>8</sub>H<sub>8</sub>O<sub>4</sub>; MF: 626; RMF: 792; Prob 0.04%; CAS: 480-67-1; Lib: nist\_msms; ID: 534660.

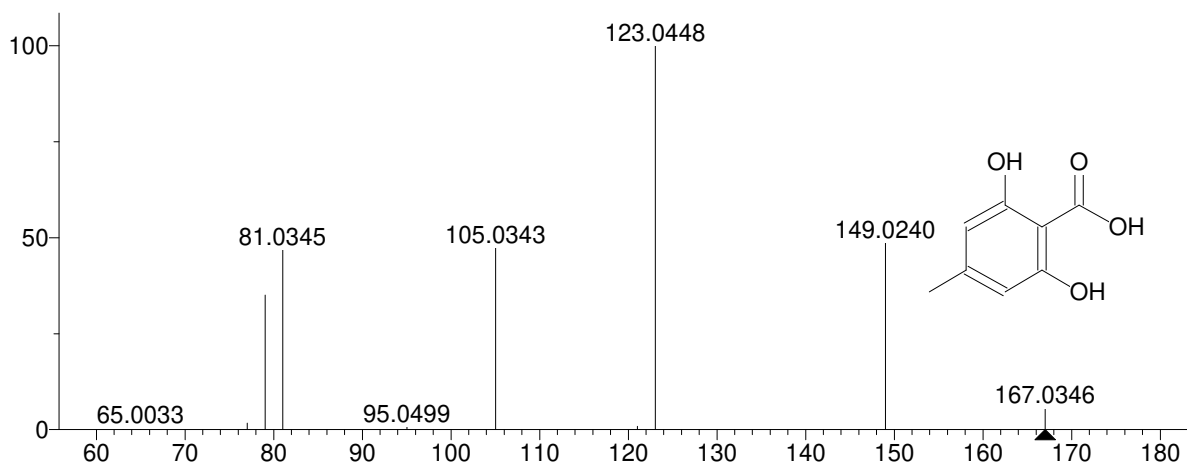

Hit 5 : 3,4-Dihydroxyphenylacetic acid [M-H]<sup>-</sup> HCD 3V P=167  
C<sub>8</sub>H<sub>8</sub>O<sub>4</sub>; MF: 551; RMF: 941; Prob 0.00%; CAS: 102-32-9; Lib: nist\_msms; ID: 286720.

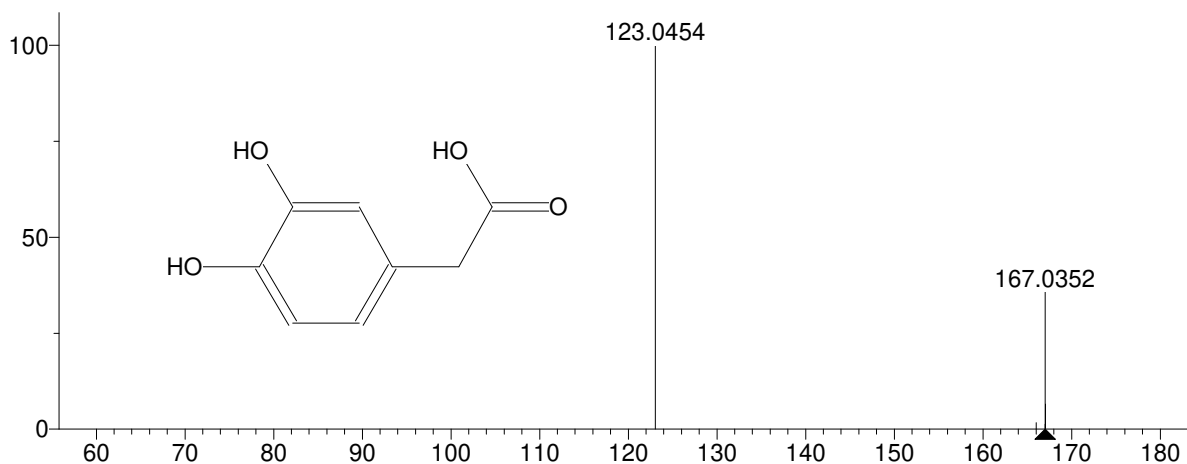

Unknown: Unknown (9.21\_401.1908m/z)  
Compound in Library Factor = 0

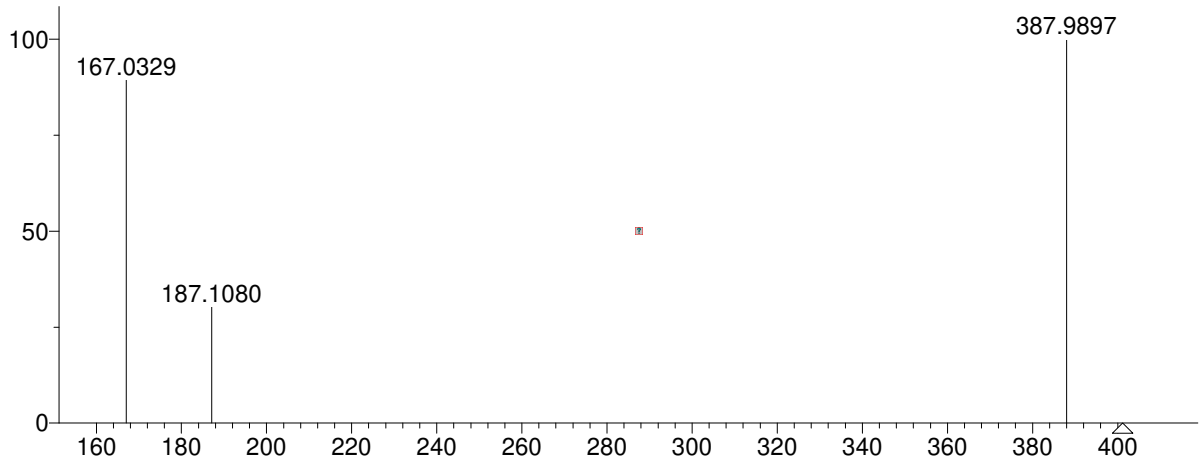

Unknown: Unknown (9.21\_425.0169m/z)  
Compound in Library Factor = 0

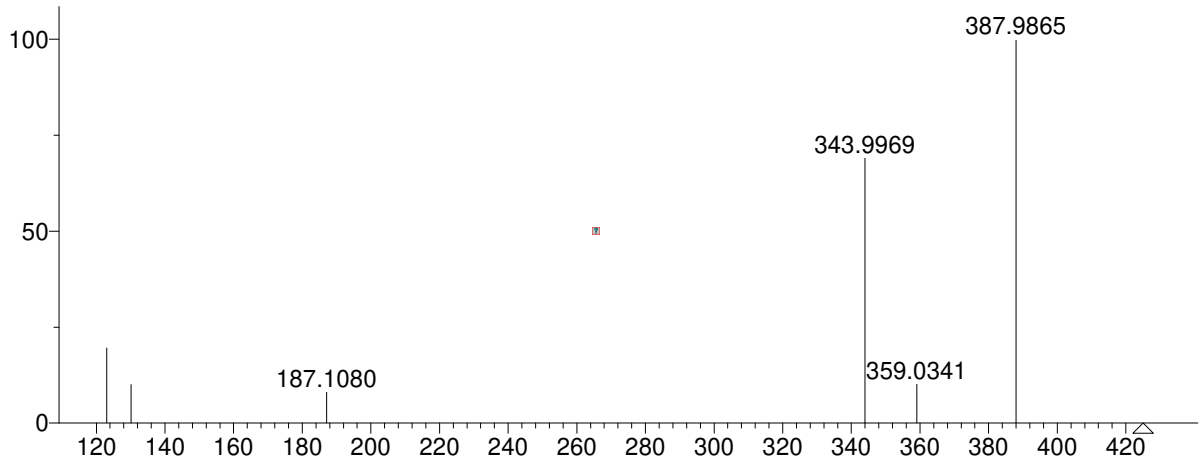

Unknown: Unknown (9.21\_546.0459m/z)  
Compound in Library Factor = 0

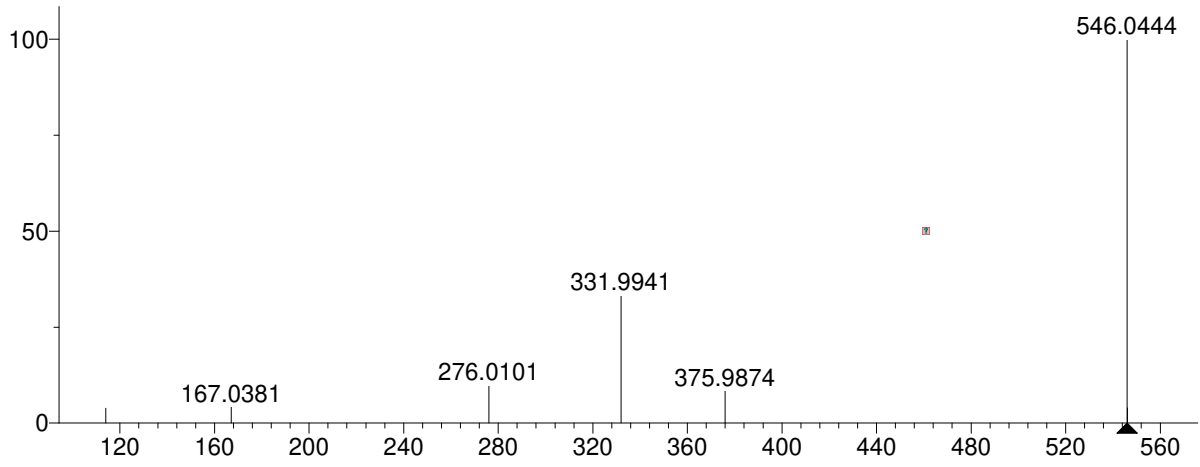

\*\* Search Report Page 1 of 2 \*\*

Unknown: Unknown (9.22\_123.0445m/z)  
Compound in Library Factor = -302

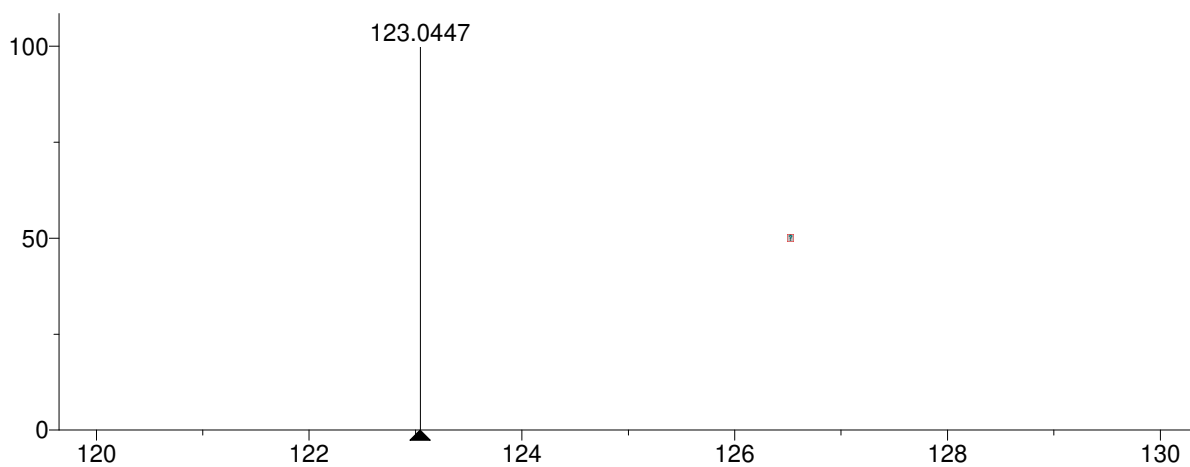

Hit 1 : 4-Hydroxybenzaldehyde [M+H]<sup>+</sup> HCD 12V P=123  
C<sub>7</sub>H<sub>6</sub>O<sub>2</sub>; MF: 364; RMF: 999; Prob 2.33%; CAS: 123-08-0; Lib: nist\_msms; ID: 136890.

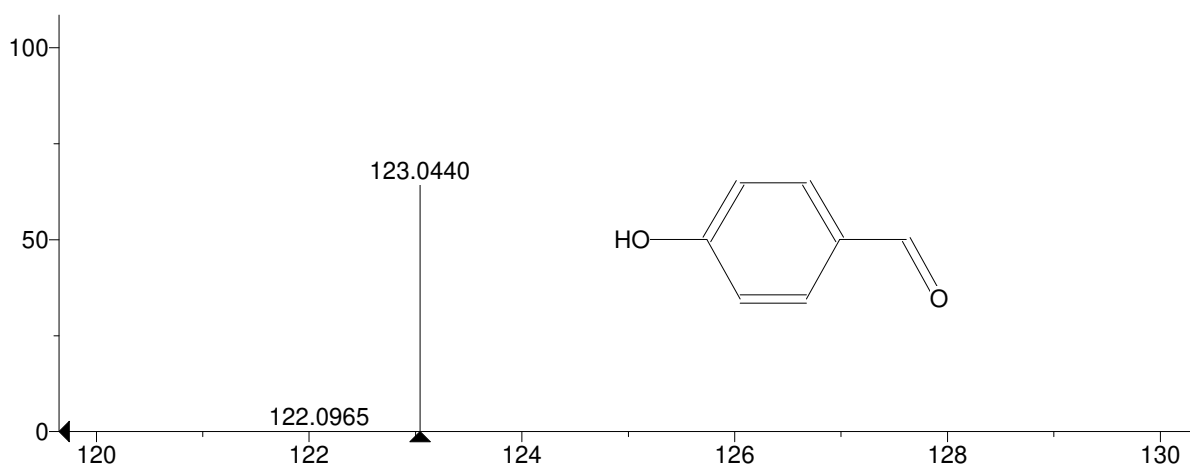

Hit 2 : Maackiaine [M+H-C<sub>9</sub>H<sub>6</sub>O<sub>3</sub>]<sup>+</sup> HCD 22V P=123  
C<sub>16</sub>H<sub>12</sub>O<sub>5</sub>; MF: 364; RMF: 999; Prob 2.33%; CAS: 2035-15-6; Lib: nist\_msms; ID: 223828.

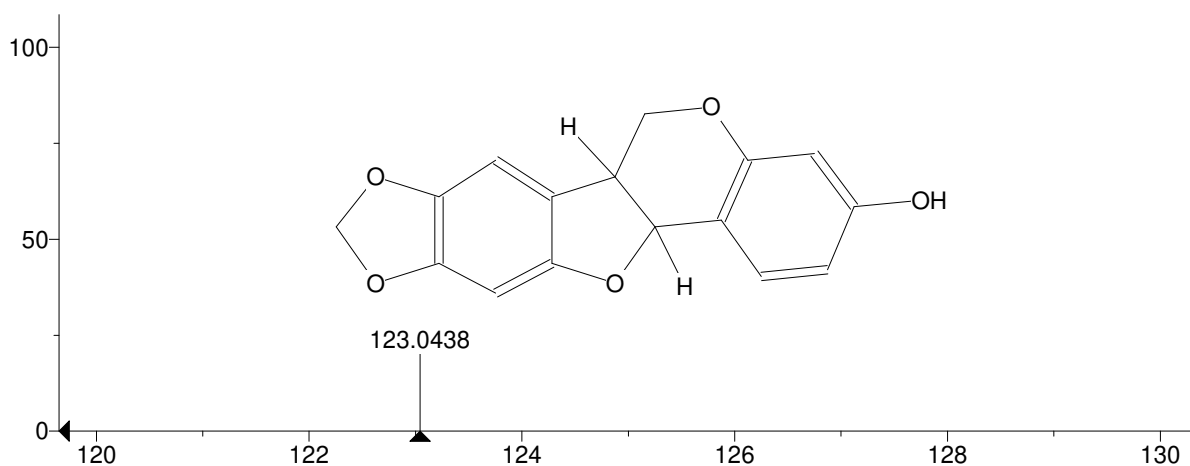

Hit 3 : Helicid [M+H-C<sub>6</sub>H<sub>10</sub>O<sub>5</sub>]<sup>+</sup> HCD 14V P=123  
C<sub>13</sub>H<sub>16</sub>O<sub>7</sub>; MF: 364; RMF: 999; Prob 2.33%; CAS: 80154-34-3; Lib: nist\_msms; ID: 256928.

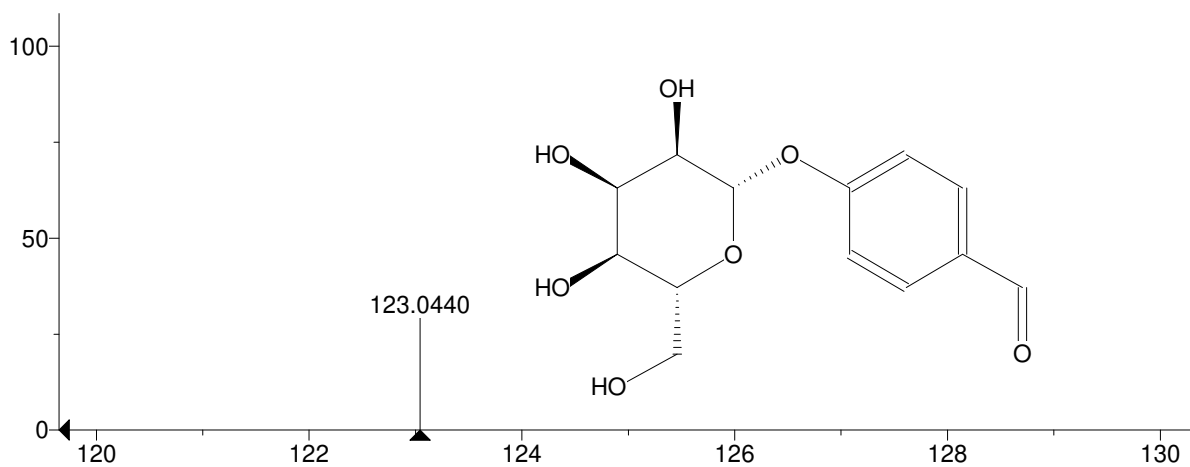

Hit 4 : Glabridin [M+H-C<sub>13</sub>H<sub>14</sub>O<sub>2</sub>]<sup>+</sup> HCD 31V P=123  
C<sub>20</sub>H<sub>20</sub>O<sub>4</sub>; MF: 364; RMF: 999; Prob 2.33%; CAS: 59870-68-7; Lib: nist\_msms; ID: 257694.

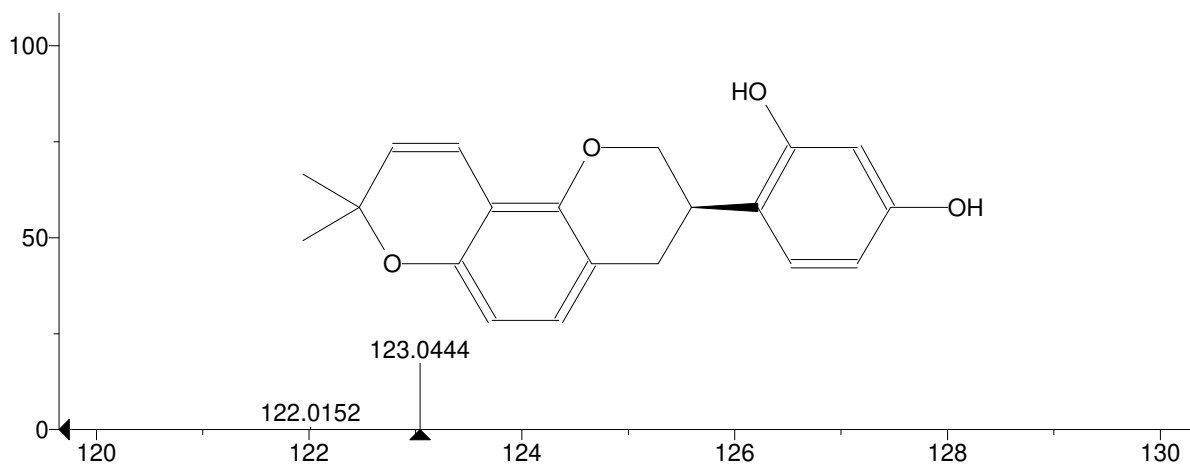

Hit 5 : 3-Hydroxybenzyl alcohol [M-H]<sup>-</sup> IT-FT 35% P=123  
C<sub>7</sub>H<sub>8</sub>O<sub>2</sub>; MF: 364; RMF: 999; Prob 2.33%; CAS: 620-24-6; Lib: nist\_msms; ID: 278139.

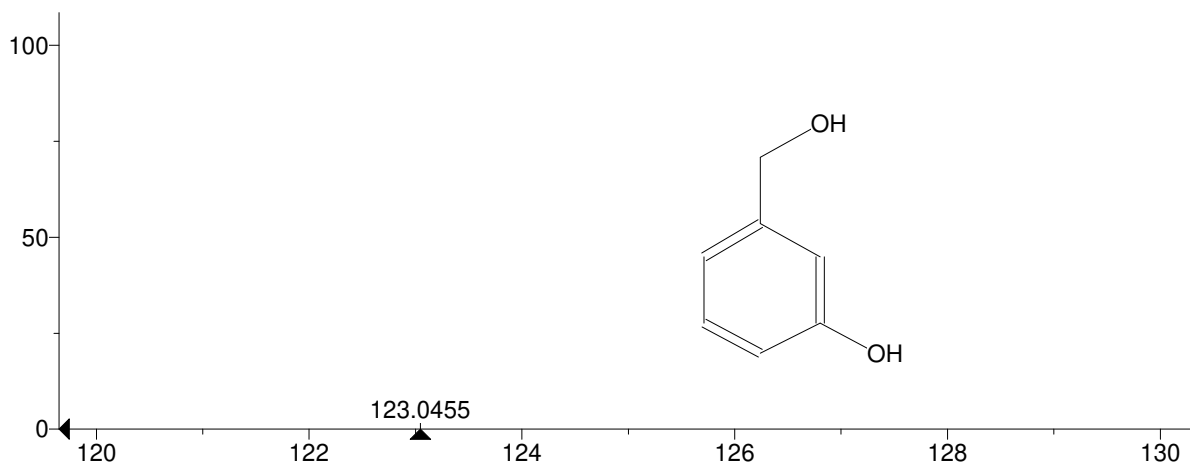



Unknown: Unknown (9.22\_357.2118m/z)  
Compound in Library Factor = 0

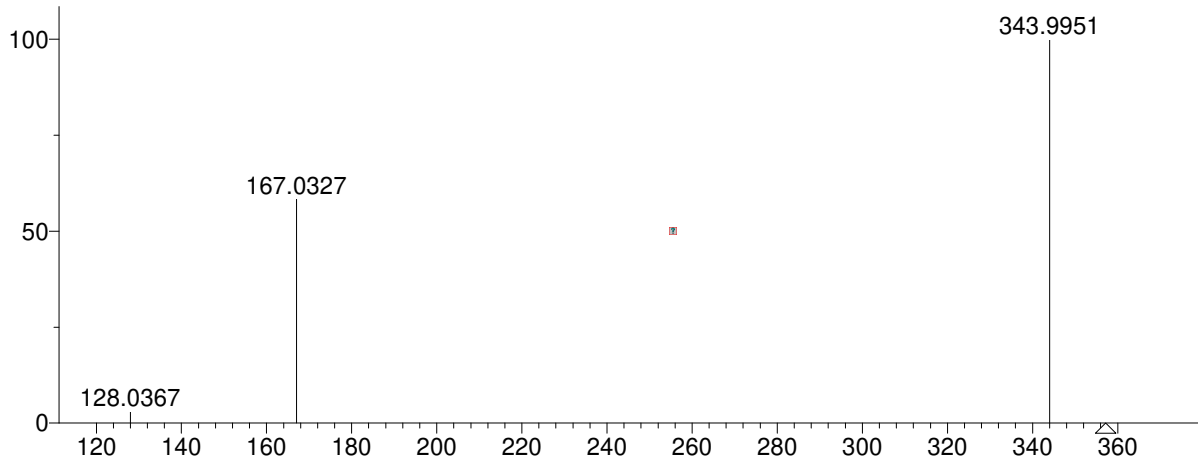

Unknown: Unknown (9.22\_387.9876m/z)  
Compound in Library Factor = 0

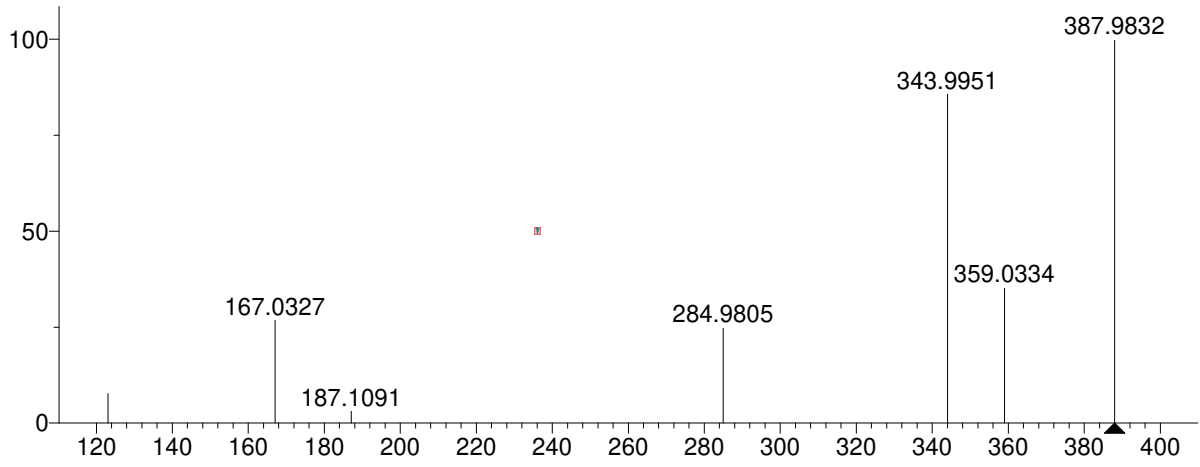

Unknown: Unknown (9.23\_167.1560m/z)  
Compound in Library Factor = 0

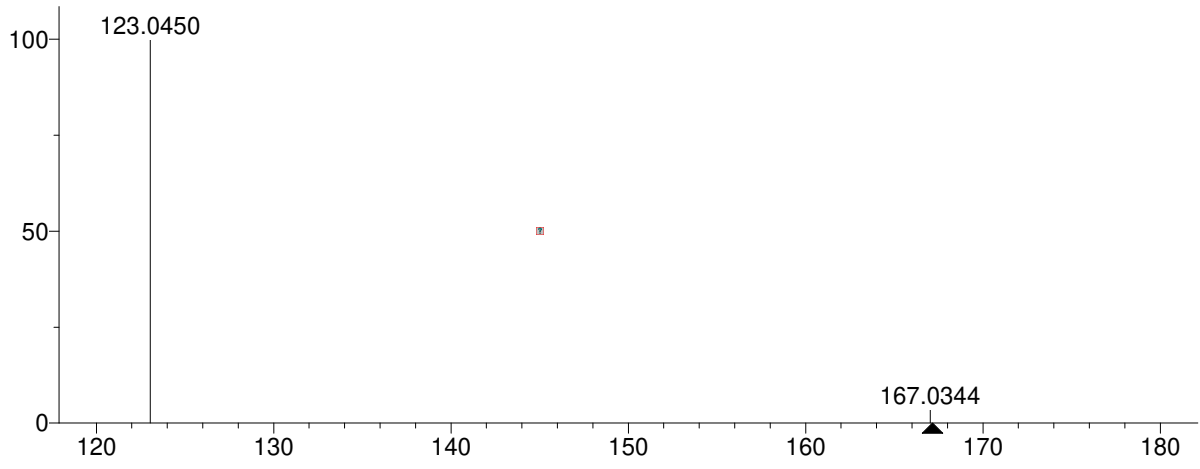

Unknown: Unknown (9.24\_357.0560m/z)  
Compound in Library Factor = 0

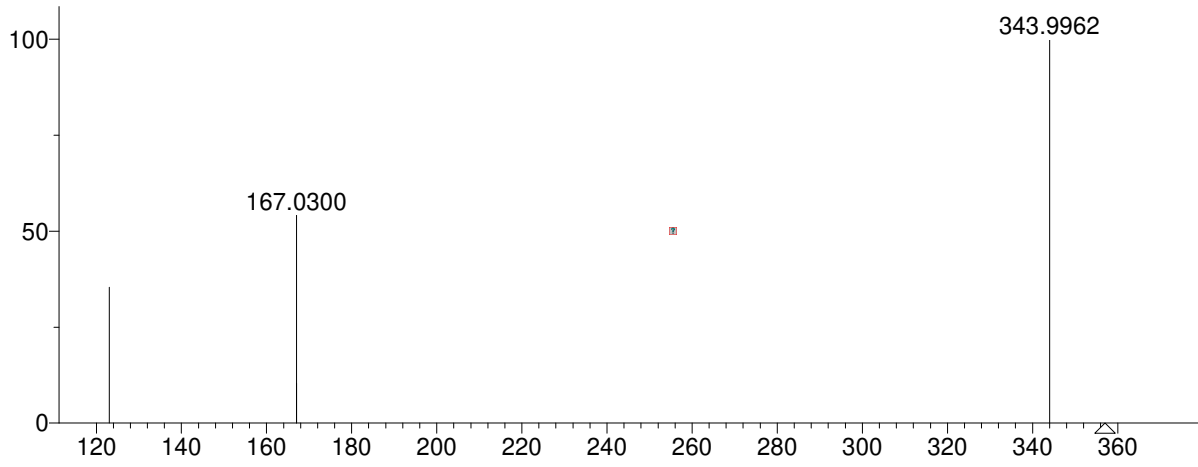

\*\* Search Report Page 1 of 2 \*\*

Unknown: Unknown (9.28\_316.1654m/z)  
Compound in Library Factor = -1523

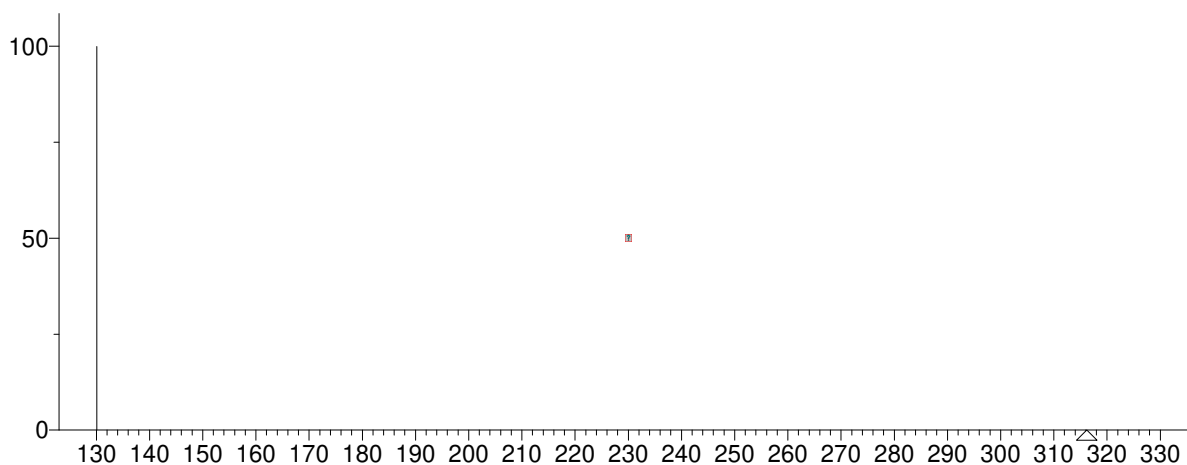

Hit 1 : Trp-Leu [M-H]<sup>-</sup> HCD 50eV P=316.2  
C<sub>17</sub>H<sub>23</sub>N<sub>3</sub>O<sub>3</sub>; MF: 79; RMF: 827; Prob 62.2%; CAS: 13123-35-8; Lib: nist\_msms; ID: 570423.

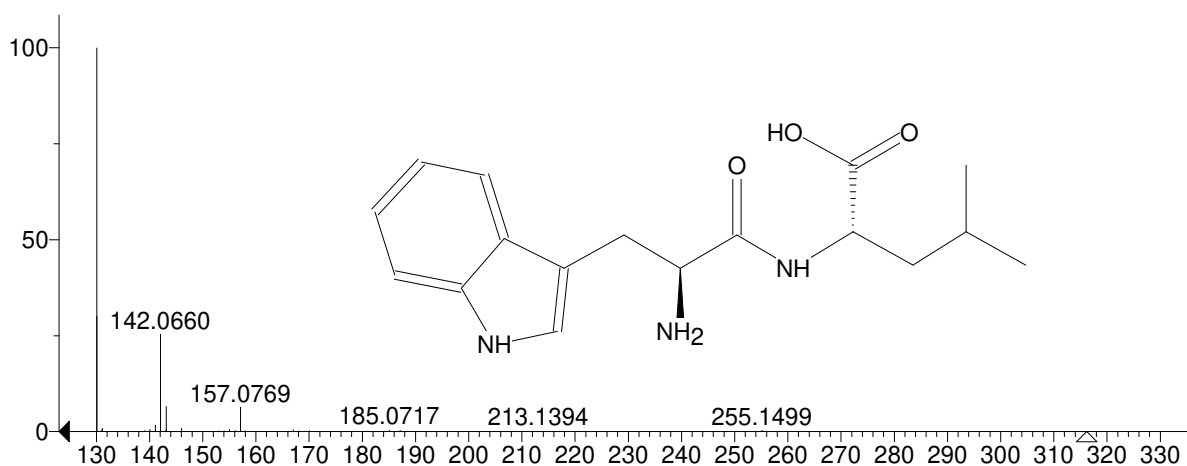

Hit 2 : Trp-Ile [M-H]<sup>-</sup> HCD 41eV P=316.2  
C<sub>17</sub>H<sub>23</sub>N<sub>3</sub>O<sub>3</sub>; MF: 36; RMF: 757; Prob 13.7%; Lib: nist\_msms; ID: 571121.

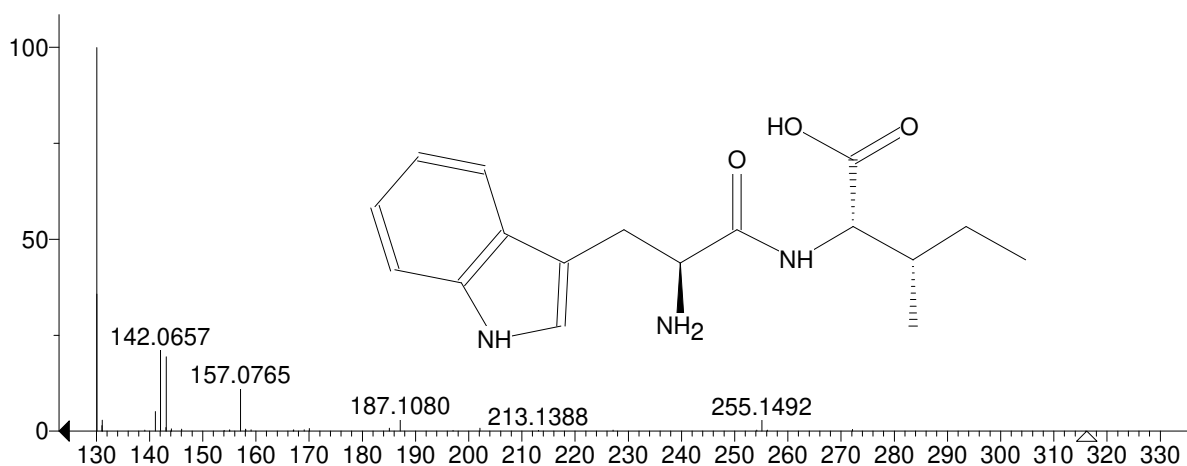

Hit 3 : Trp-Ile [M-H]<sup>-</sup> HCD 41eV P=316.2  
C<sub>17</sub>H<sub>23</sub>N<sub>3</sub>O<sub>3</sub>; MF: 36; RMF: 757; Prob 13.7%; CAS: 64339-42-0; Lib: nist\_msms2; ID: 84854.

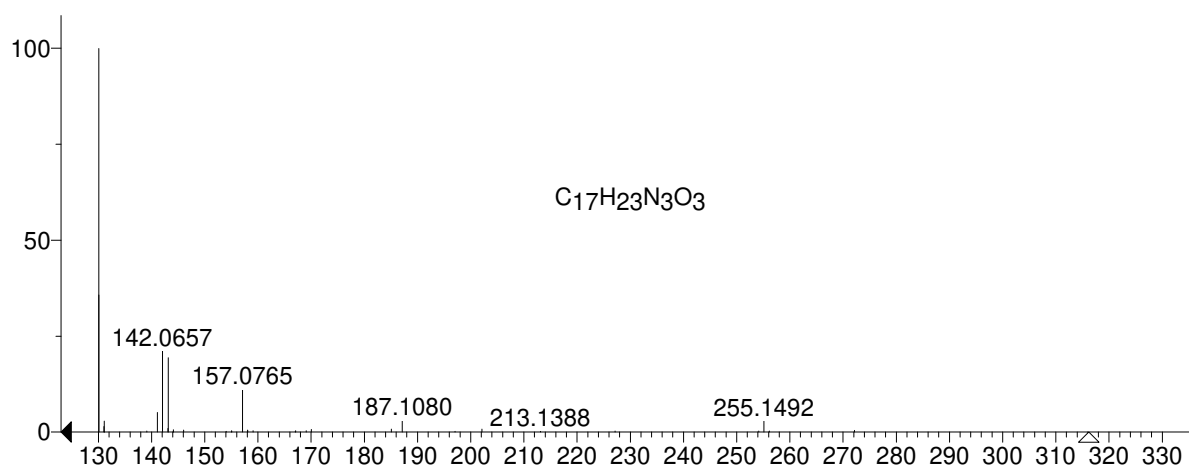

Hit 4 : Ile-Trp [M-H]<sup>-</sup> HCD 50eV P=316.2  
C<sub>17</sub>H<sub>23</sub>N<sub>3</sub>O<sub>3</sub>; MF: 1; RMF: 125; Prob 3.44%; Lib: nist\_msms2; ID: 567504.

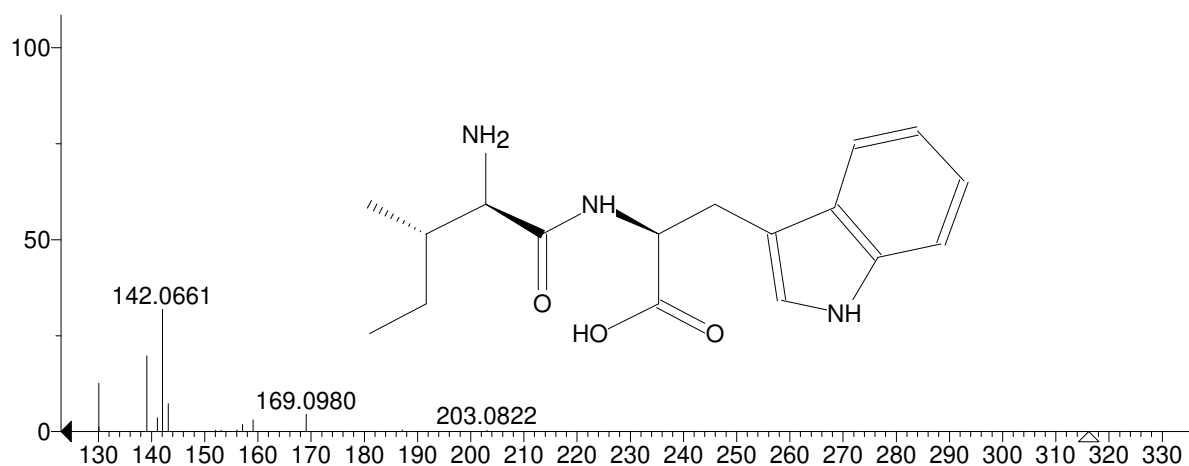

Hit 5 : Ile-Trp [M-H]<sup>-</sup> HCD 50eV P=316.2  
C<sub>17</sub>H<sub>23</sub>N<sub>3</sub>O<sub>3</sub>; MF: 1; RMF: 125; Prob 3.44%; CAS: 13589-06-5; Lib: nist\_msms2; ID: 70361.

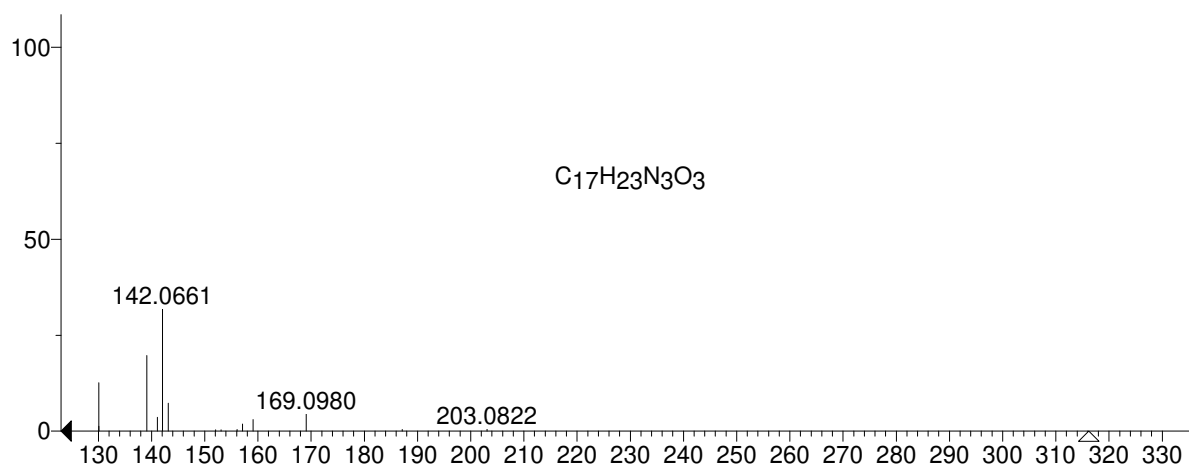

Unknown: Unknown (9.30\_356.1807m/z)  
Compound in Library Factor = 0

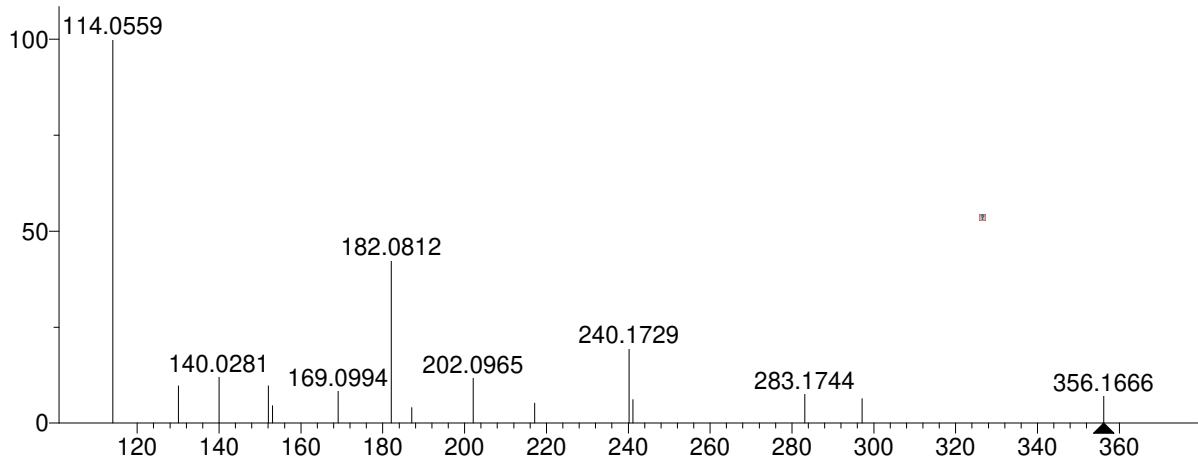

Unknown: Unknown (9.30\_428.2011m/z)  
Compound in Library Factor = 0

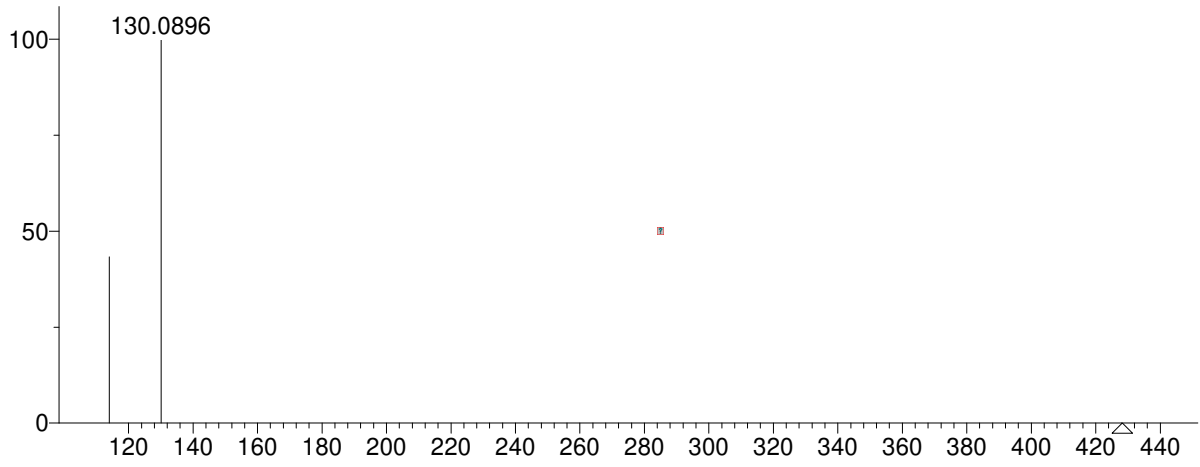



\*\* Search Report Page 1 of 2 \*\*

Unknown: Unknown (9.32\_253.1318m/z)  
Compound in Library Factor = -1309

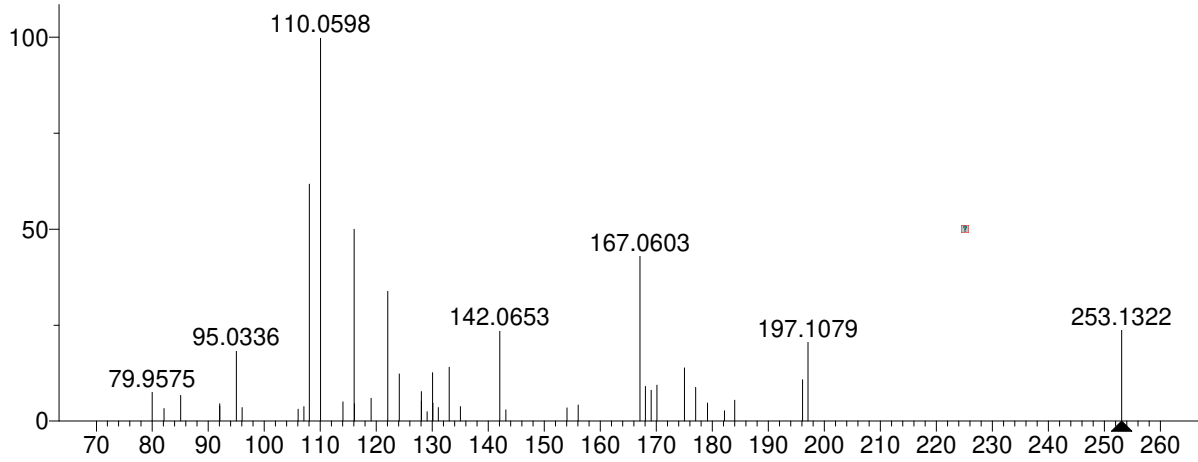

Hit 1 : 1-Piperidinecarboxamide, N-phenyl-4-(3-quinolinylmethyl)- [M+H-C6H7N]+ HCD 12V P=253.1  
C22H23N3O; MF: 102; RMF: 455; Prob 45.3%; CAS: 959151-50-9; Lib: nist\_msms; ID: 371887.

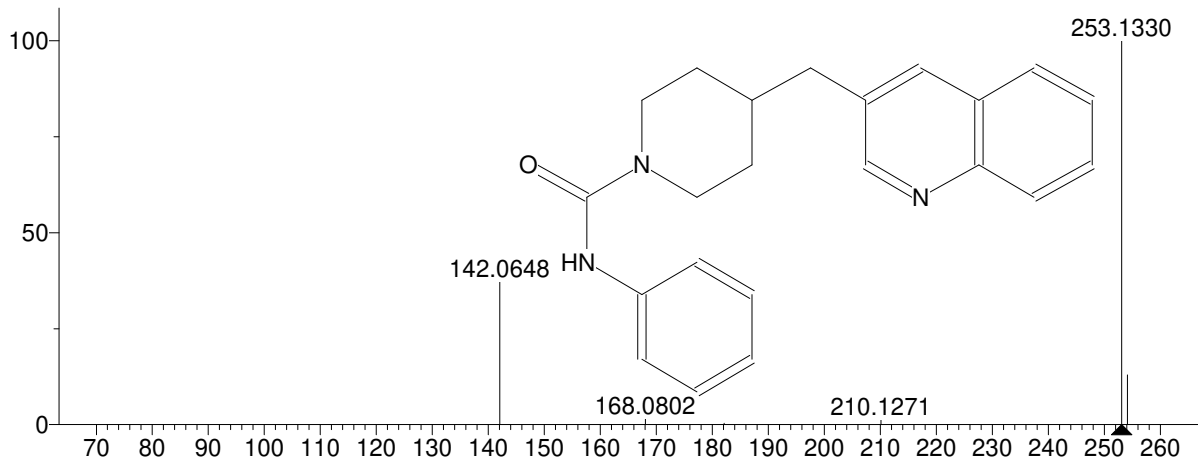

Hit 2 : His-Pro [M+H]+ HCD 5eV P=253.1  
C11H16N4O3; MF: 50; RMF: 257; Prob 9.03%; Lib: nist\_msms; ID: 561427.

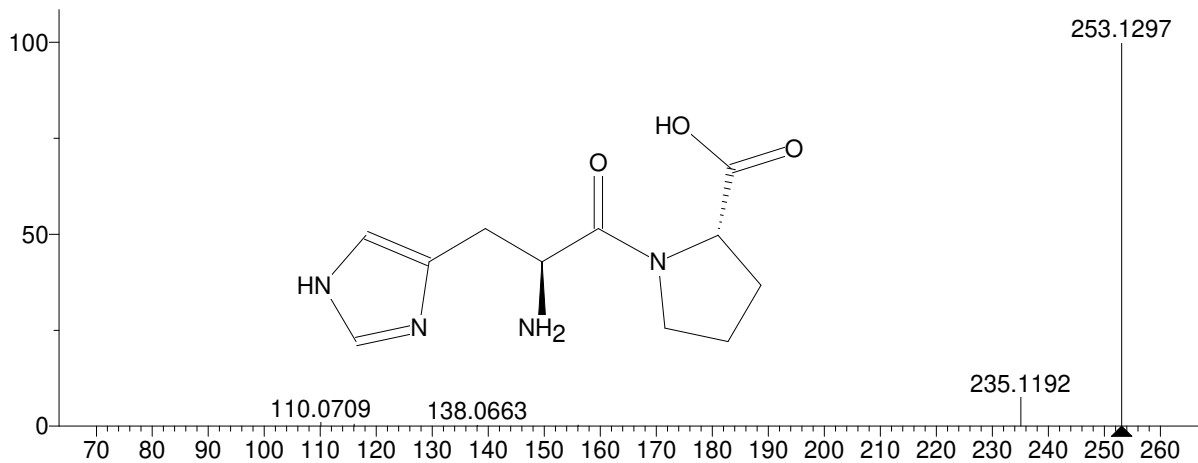

Hit 3 : His-Pro [M+H]<sup>+</sup> HCD 5eV P=253.1  
C<sub>11</sub>H<sub>16</sub>N<sub>4</sub>O<sub>3</sub>; MF: 50; RMF: 257; Prob 9.03%; CAS: 20930-58-9; Lib: nist\_msms2; ID: 41227.

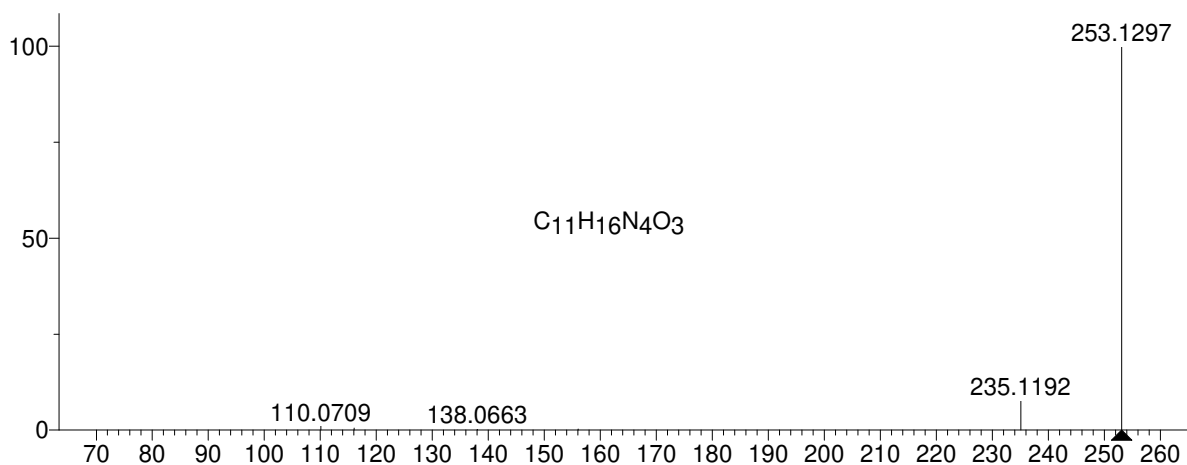

Hit 4 : Pro-His [M+H]<sup>+</sup> HCD 6eV P=253.1  
C<sub>11</sub>H<sub>16</sub>N<sub>4</sub>O<sub>3</sub>; MF: 40; RMF: 207; Prob 6.38%; Lib: nist\_msms; ID: 565663.

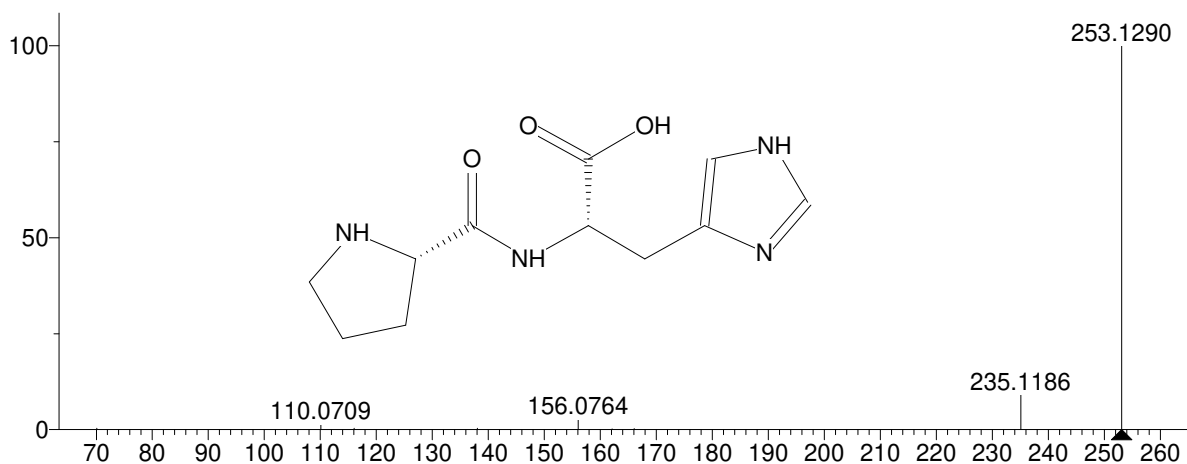

Hit 5 : Pro-His [M+H]<sup>+</sup> HCD 6eV P=253.1  
C<sub>11</sub>H<sub>16</sub>N<sub>4</sub>O<sub>3</sub>; MF: 40; RMF: 207; Prob 6.38%; Lib: nist\_msms2; ID: 68520.

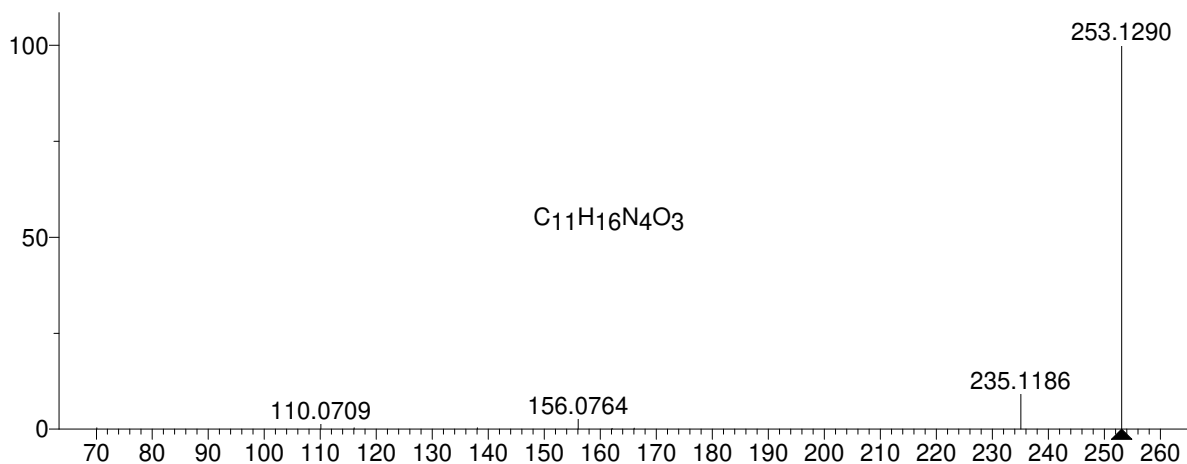

Unknown: Unknown (9.32\_297.1237m/z)  
Compound in Library Factor = -3273

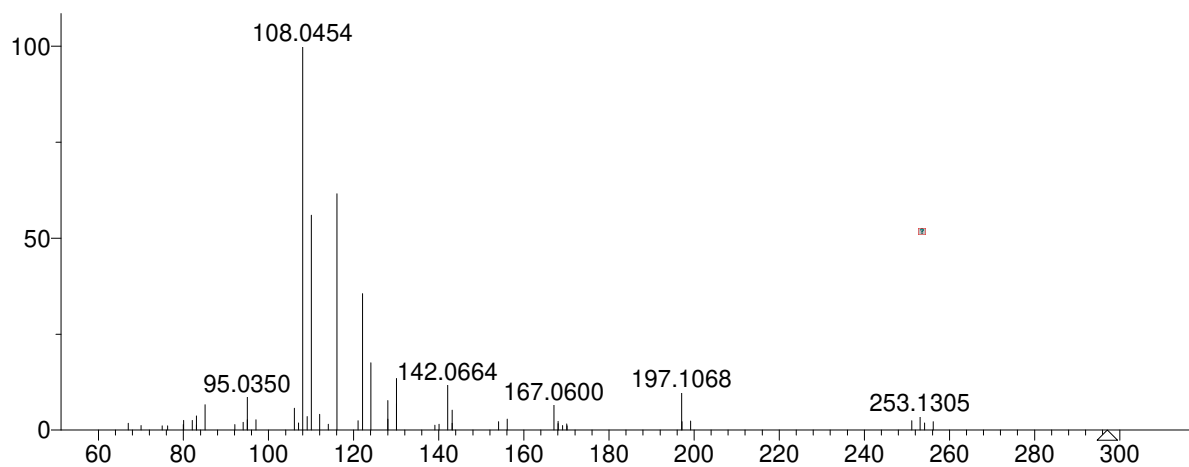

Hit 1 : 1H-Indole-6-carboxamide, N-hydroxy-1-[(4-methoxyphenyl)methyl]- [M+H]<sup>+</sup> HCD 53V P=297.1  
C<sub>17</sub>H<sub>16</sub>N<sub>2</sub>O<sub>3</sub>; MF: 2; RMF: 41; Prob 100.0%; CAS: 950762-95-5; Lib: nist\_msms; ID: 254260.

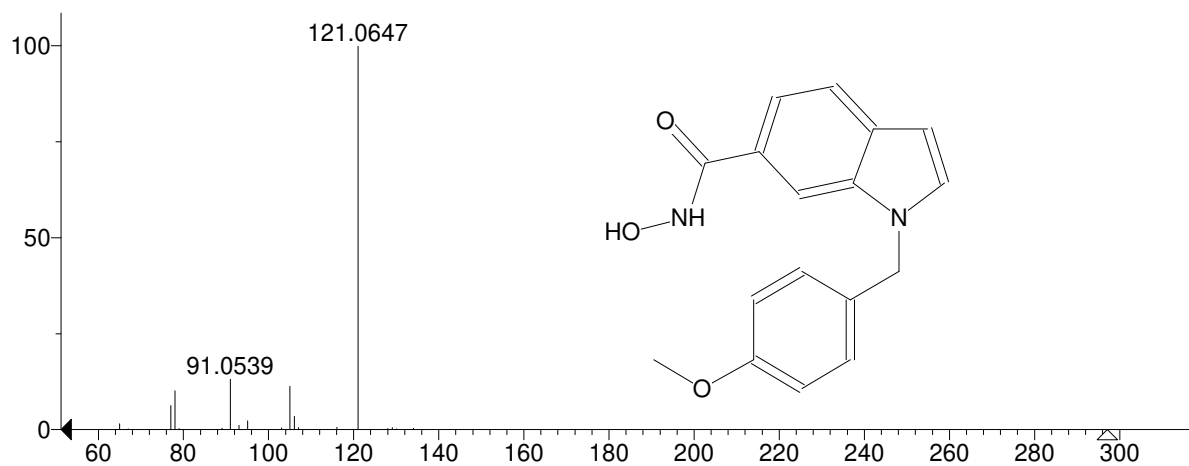

Unknown: Unknown (9.32\_387.1756m/z)  
Compound in Library Factor = 0

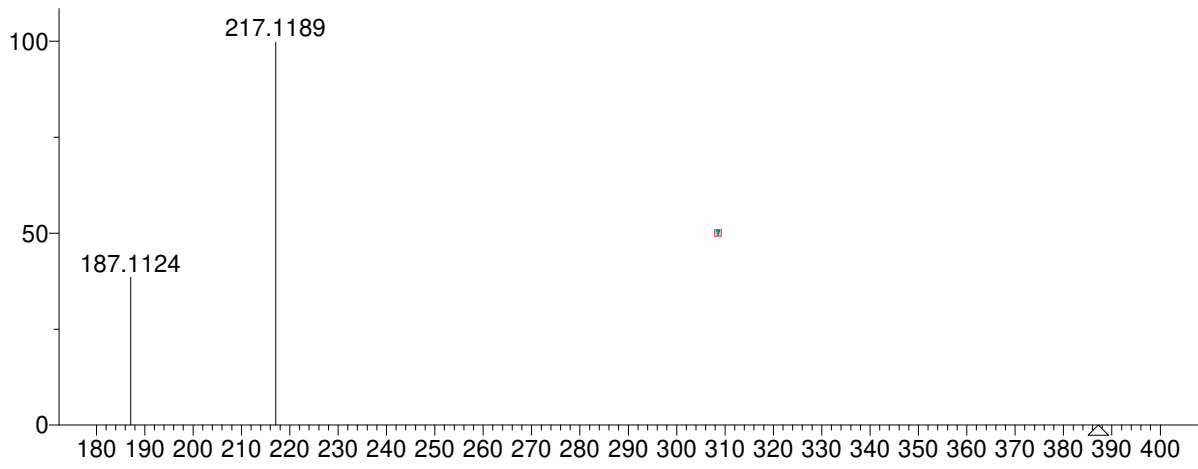

Unknown: Unknown (9.32\_404.1449m/z)  
Compound in Library Factor = 0

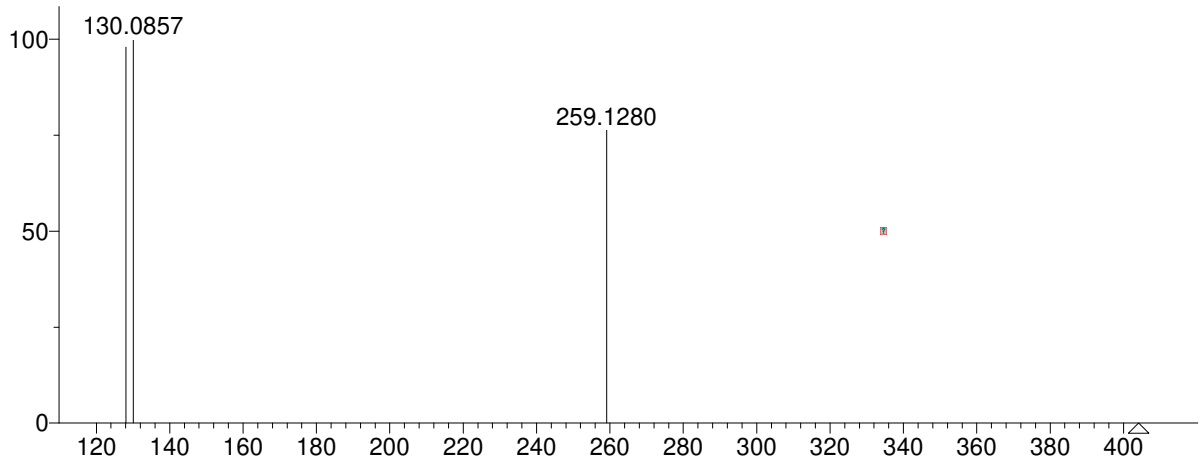

Unknown: Unknown (9.34\_457.1839m/z)  
Compound in Library Factor = -3273

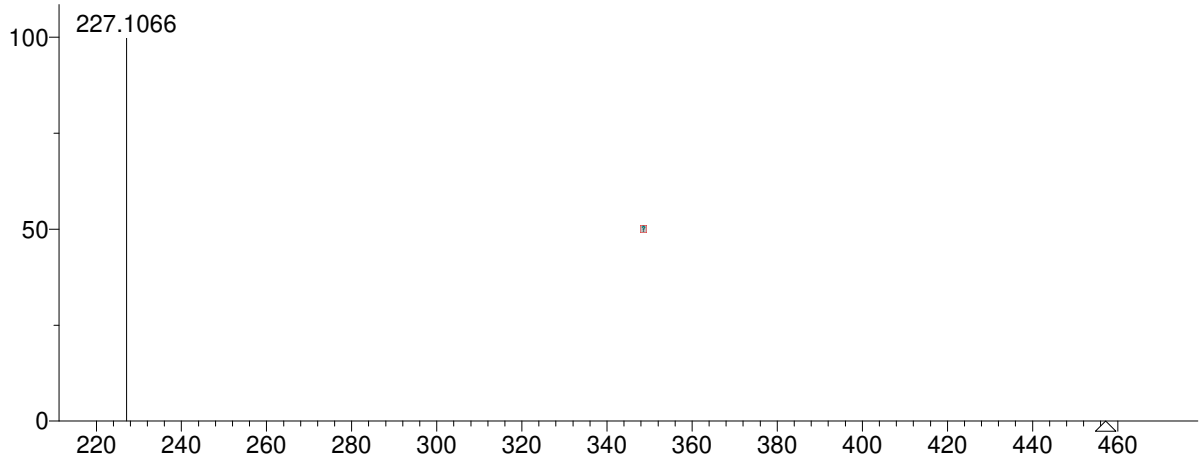

Hit 1 : NCGC00179819-03\_C25H30O9\_(4R,6aR,9S,9aR,9bR)-9-Methyl-3,6-bis(methylene)-2,8-dioxododecahyd  
C25H30O9; MF: 2; RMF: 340; Prob 17.8%; Lib: mona-export-gnps; ID: 13119.

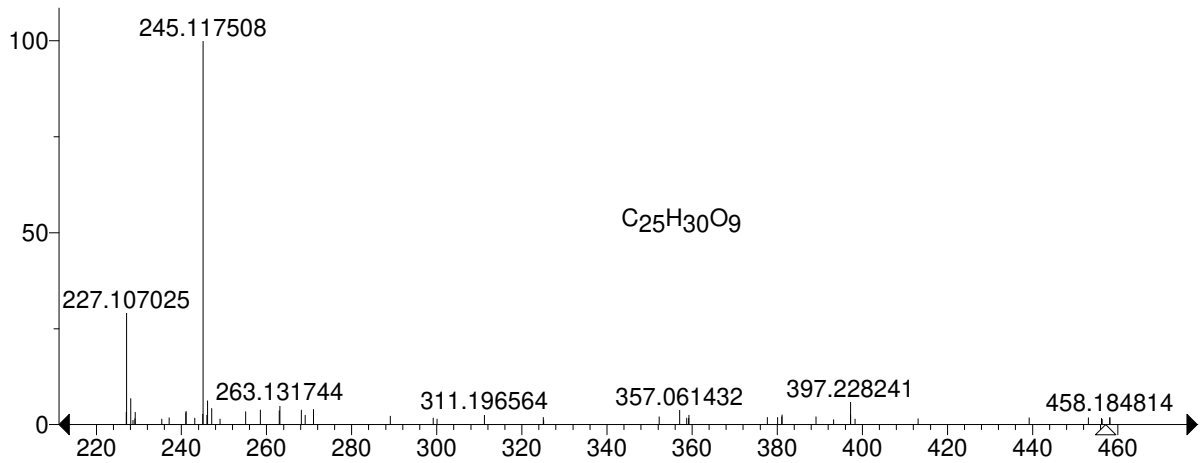

Hit 2 : 7-hydroxy-2,6,9,12,17,17-hexamethyl-22-methylidene-5,16,19,21-tetraoxaheptacyclo[10.8.1.1A^3,a^1.0A'  
C25H28O8; MF: 0; RMF: 124; Prob 16.4%; Lib: mona-export-vf-npl\_qexactive; ID: 20723.

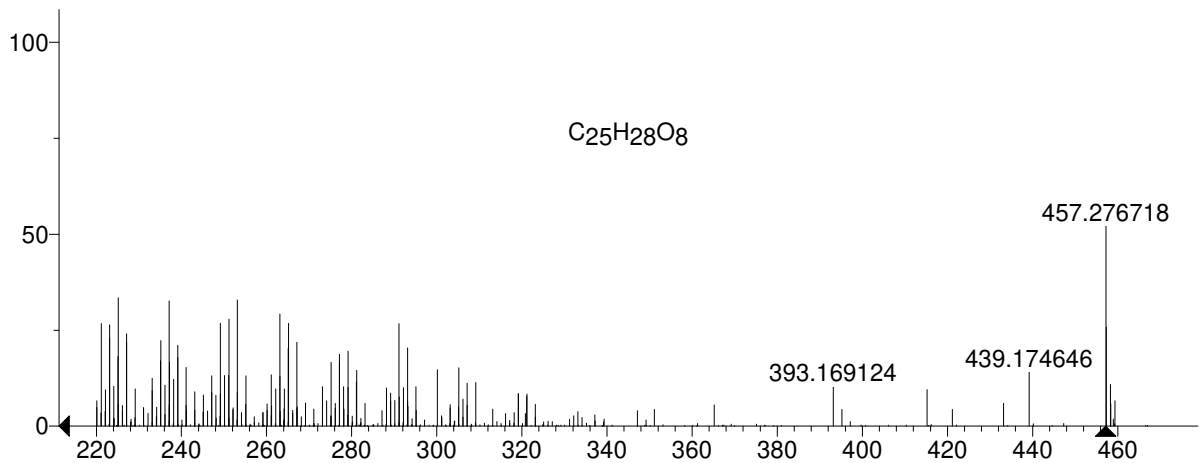

\*\* Search Report Page 2 of 2 \*\*

Hit 3 : NCGC00347648-02\_C25H28O8\_12H-6,13-Epoxy-8,12a-methano-2H,7H-furo[3',4':6,7]oxireno[3,4]heptale  
C25H28O8; MF: 0; RMF: 87; Prob 16.4%; Lib: mona-export-gnps; ID: 10982.

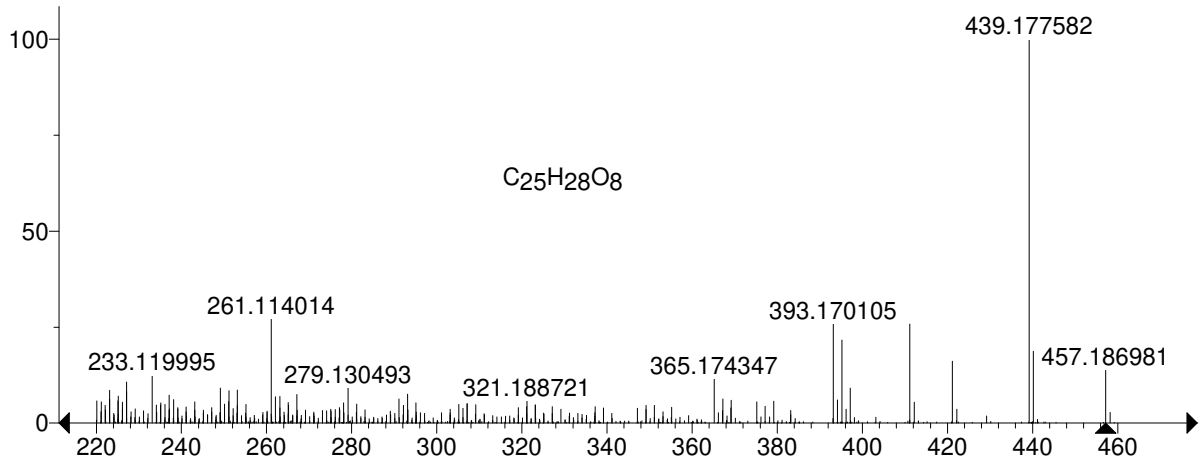

Hit 4 : 2-[3,4-dihydroxy-2,2-dimethyl-8-(3-methylbut-2-enoxy)-3,4-dihydrochromen-6-yl]-5,7-dihydroxy-2,3-dihydro  
C25H28O8; MF: 0; RMF: 81; Prob 16.4%; Lib: mona-export-vf-npl\_qexactive; ID: 16880.

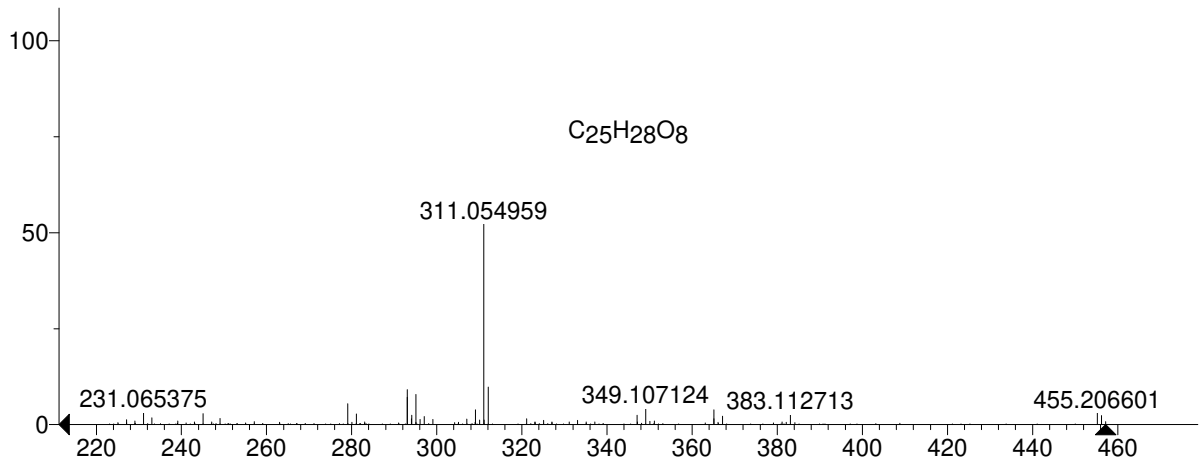

Hit 5 : Lobaric Acid [M+H]<sup>+</sup> 65HCD P=457.2  
C25H28O8; MF: 0; RMF: 42; Prob 16.4%; Lib: mona-export-vf-npl\_qexactive; ID: 27036.

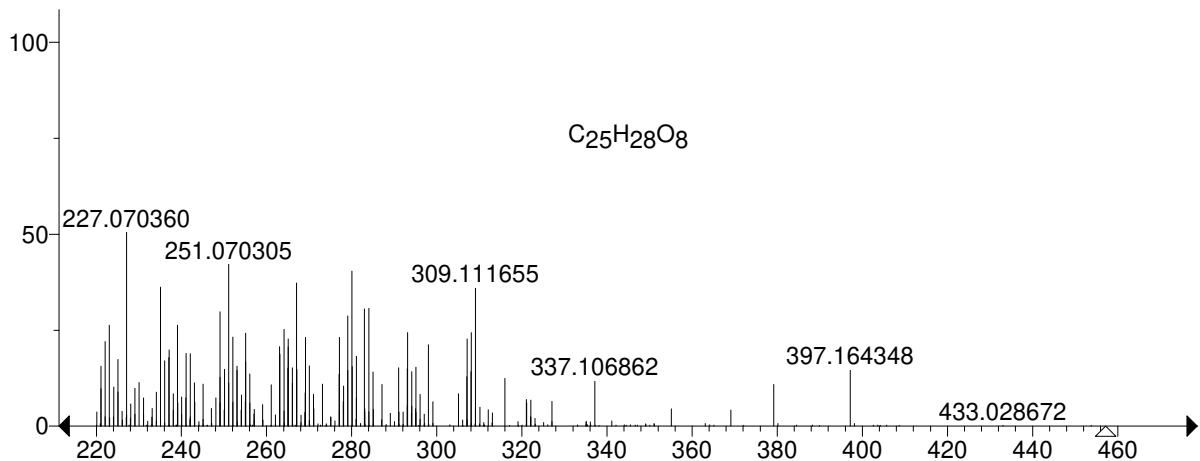

\*\* Search Report Page 1 of 2 \*\*

Unknown: Unknown (9.34\_498.2437m/z)  
Compound in Library Factor = 0

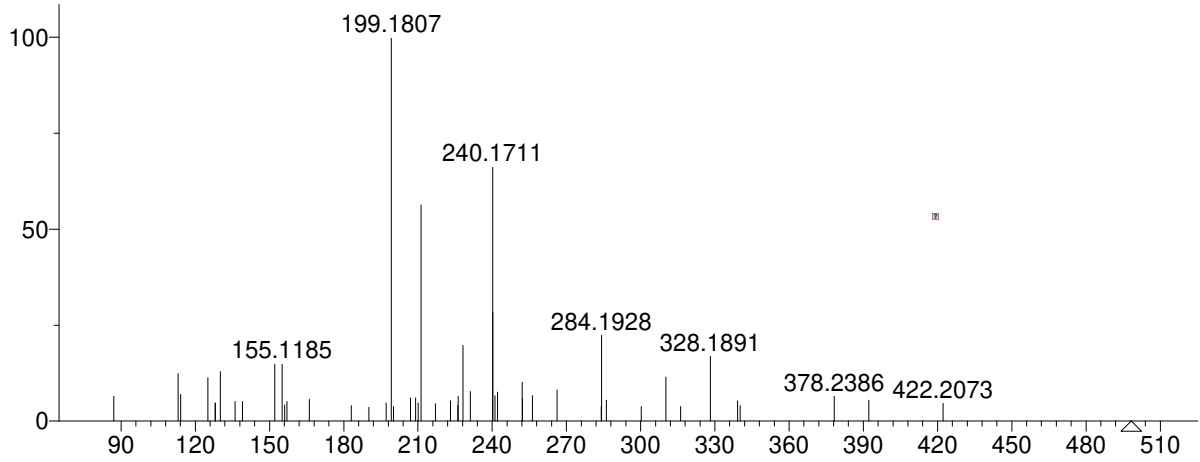

Hit 1 : \_130048 [M+H]<sup>+</sup> P=498.2  
C<sub>28</sub>H<sub>35</sub>NO<sub>7</sub>; MF: 0; RMF: 32; Prob 33.3%; Lib: mona-export-gnps; ID: 5022.

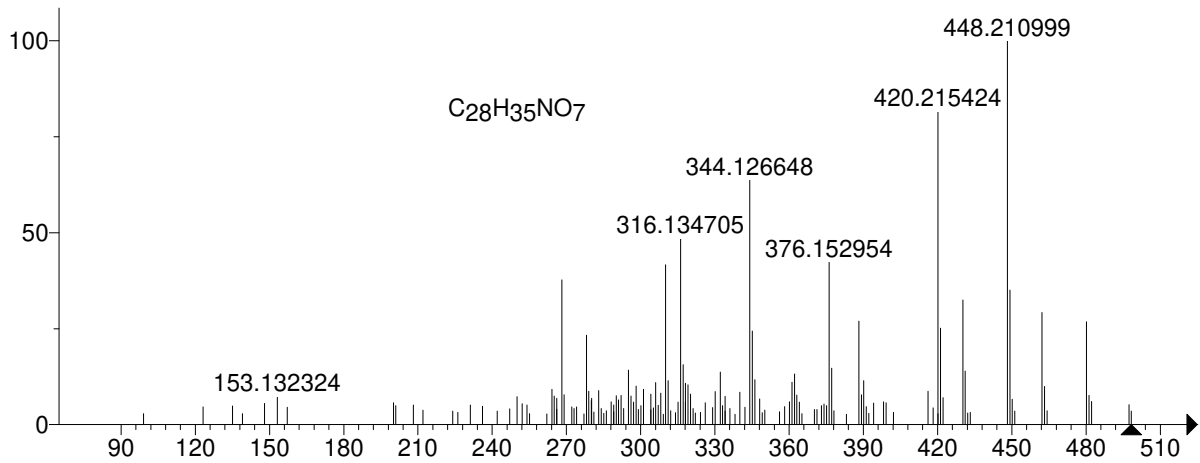

Hit 2 : \_130047 [M+H]<sup>+</sup> P=498.2  
C<sub>28</sub>H<sub>35</sub>NO<sub>7</sub>; MF: 0; RMF: 26; Prob 33.3%; Lib: mona-export-gnps; ID: 5020.

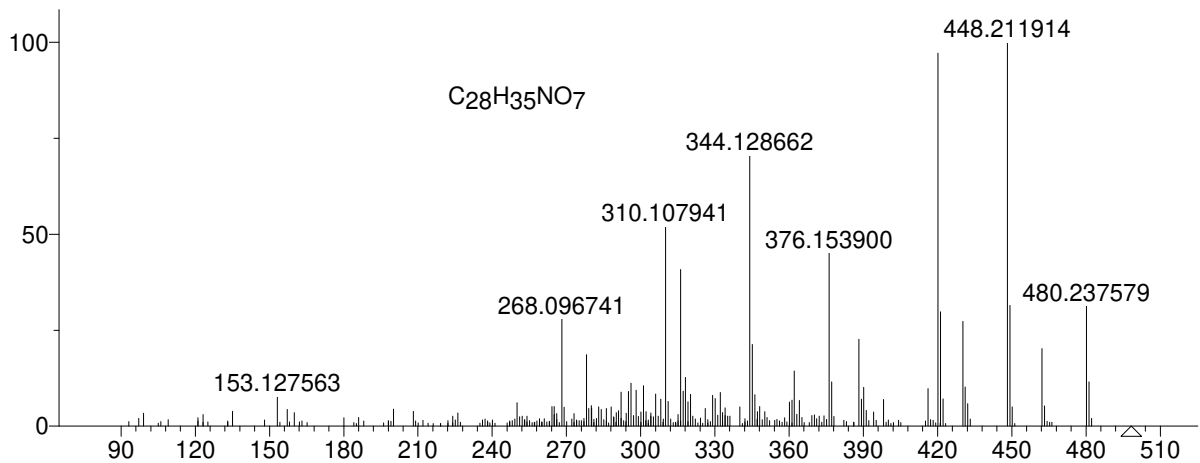



\*\* Search Report Page 2 of 2 \*\*

Hit 3 : NCGC00169355-02\_C28H37NO8\_Pentanedioic acid, 2-[(6'S,8a'S)-3',4',4'a,5',6,6',7',8,8',8'a-decahydro-4,6-dihydro-2H-pyridin-2-ylidene]pentanedioic acid; MF: 0; RMF: 11; Prob 33.3%; Lib: mona-export-gnps; ID: 10695.

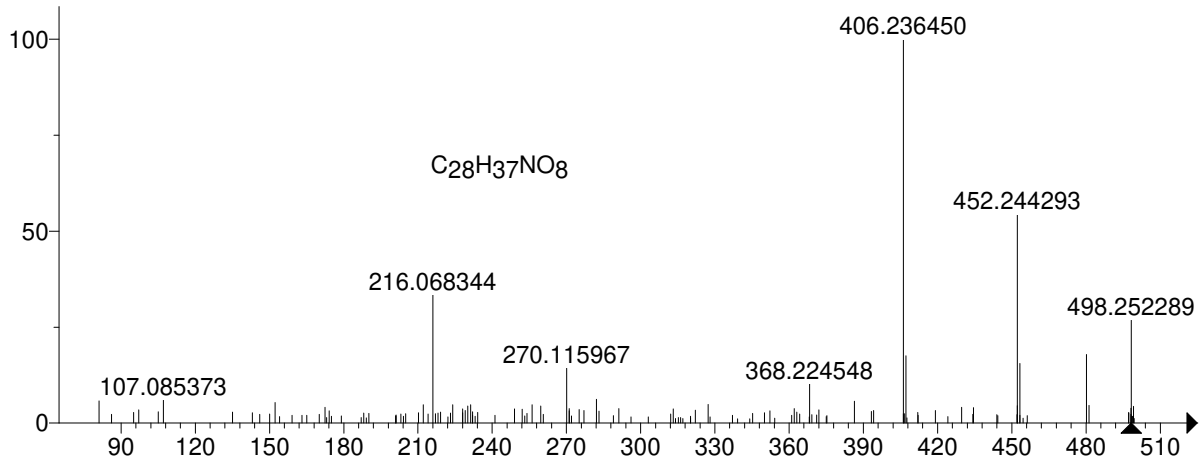

Unknown: Unknown (9.34\_800.2006m/z)  
Compound in Library Factor = 0

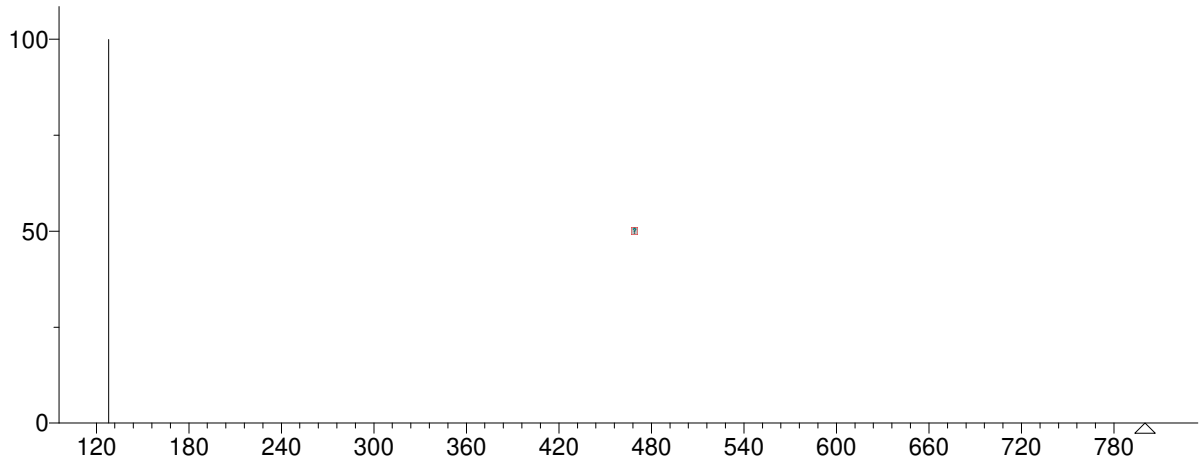

\*\* Search Report Page 1 of 2 \*\*

Unknown: Unknown (9.35\_329.1054m/z)  
Compound in Library Factor = -674

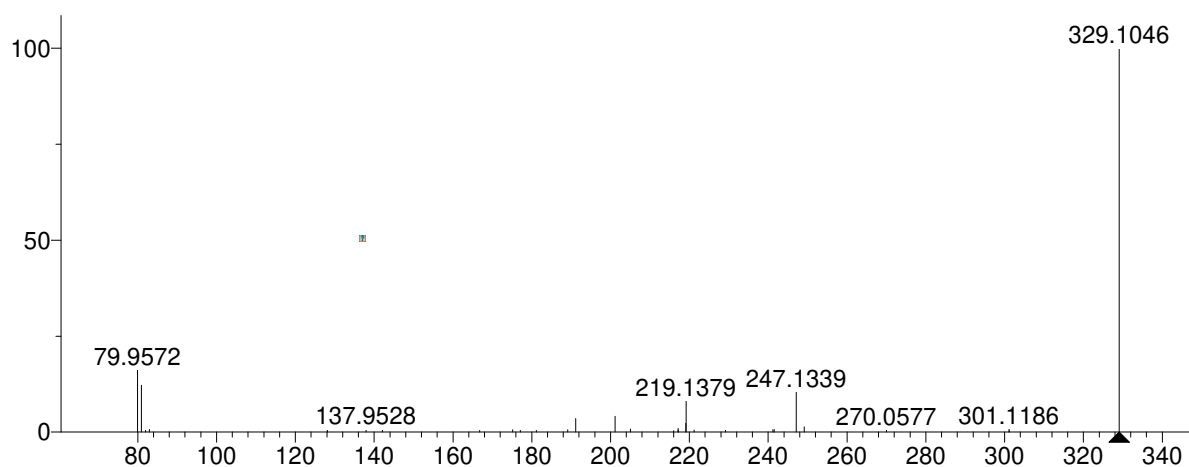

Hit 1 : 4,2'-Dihydroxy-3,4',6'-trimethoxychalcone [M-H]<sup>-</sup> HCD 11V P=329.1  
C<sub>18</sub>H<sub>18</sub>O<sub>6</sub>; MF: 175; RMF: 817; Prob 81.3%; CAS: 1013916-01-2; Lib: nist\_msms; ID: 145423.

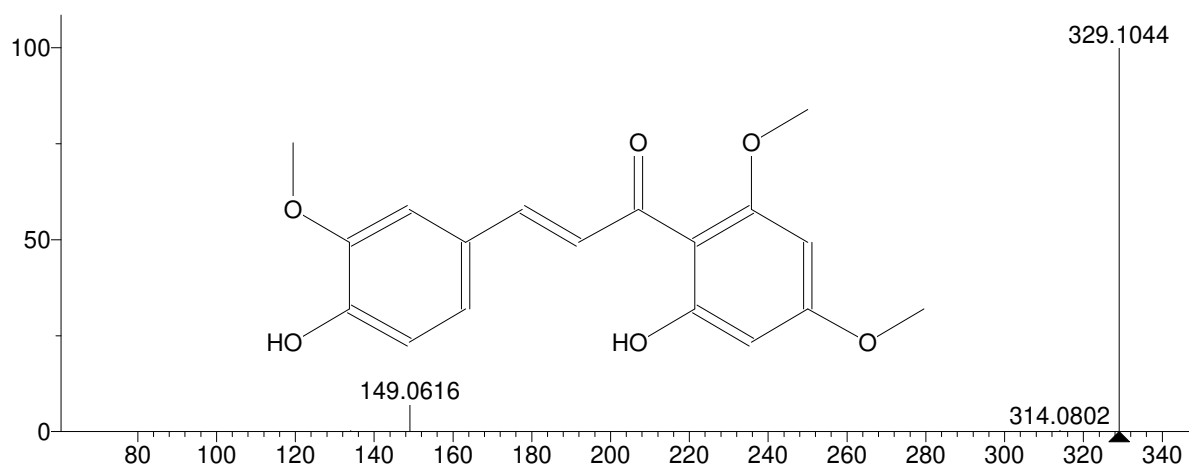

Hit 2 : 3,2'-Dihydroxy-4,4',6'-trimethoxychalcone [M-H]<sup>-</sup> HCD 9V P=329.1  
C<sub>18</sub>H<sub>18</sub>O<sub>6</sub>; MF: 117; RMF: 776; Prob 15.0%; CAS: 38186-71-9; Lib: nist\_msms; ID: 145561.

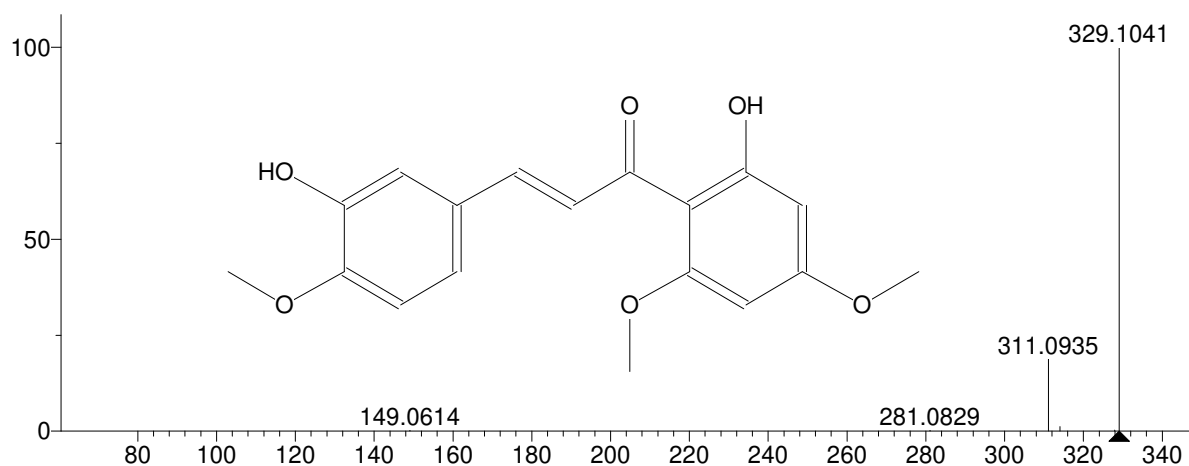

Hit 3 : Pesticide4\_Halofenozide\_C18H19ClN2O2\_N'-Benzoyl-4-chloro-N'-(2-methyl-2-propanyl)benzohydrazide [C18H19ClN2O2; MF: 10; RMF: 300; Prob 0.99%; Lib: msms-neg-gnps; ID: 1678.

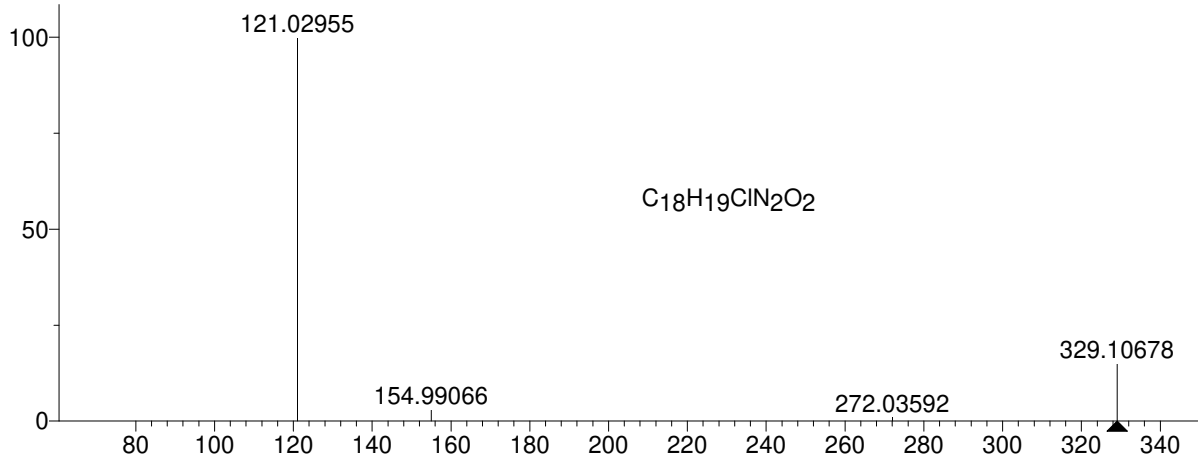

Hit 4 : 3OH-pCAIc(8-O-4)3OH-pCAIc2 (YT3-073) [M-H]<sup>-</sup> P=329.1  
C18H18O6; MF: 4; RMF: 531; Prob 0.78%; Lib: phytofrag2018\_final\_060219; ID: 47.

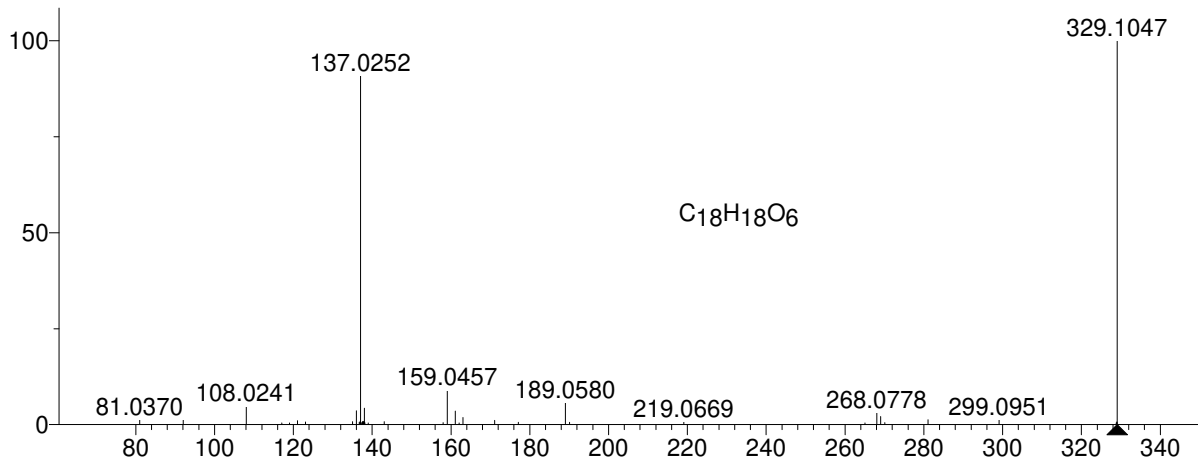

Hit 5 : "NCGC00160293-01!6-Methyl-5,7a,13,13b-tetraaza-pentaphene-8,14-dione" [M+H]<sup>+</sup> P=329.1  
C19H12N4O2; MF: 0; RMF: 350; Prob 0.65%; Lib: mona-export-gnps; ID: 1015.

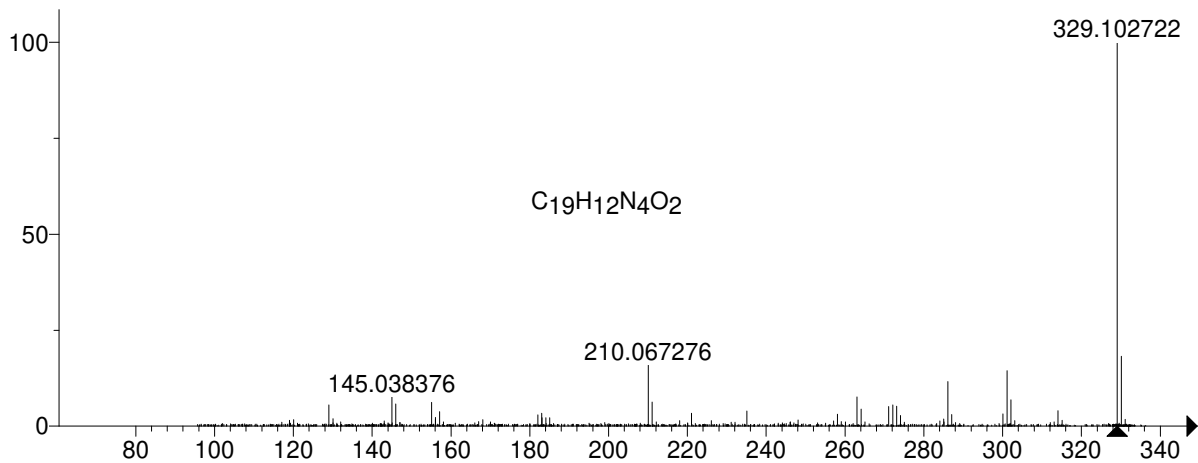

Unknown: Unknown (9.36\_429.1862m/z)  
Compound in Library Factor = 0

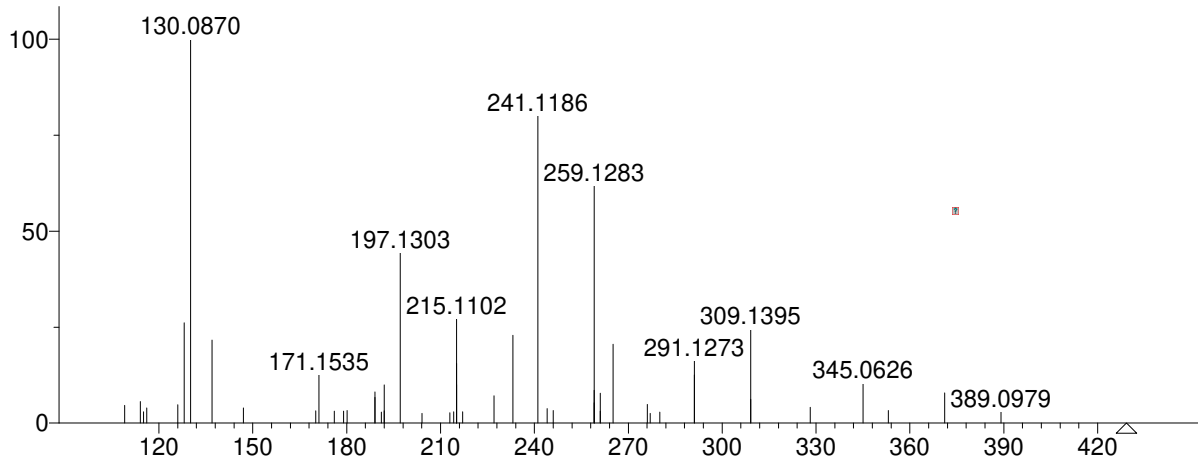

Hit 1 : (2R,3R,4S,5S,6R)-2-[6-hydroxy-3-[(E)-3-hydroxybut-1-enyl]-2,4,4-trimethylcyclohexyl]oxy-6-(hydroxymethyl) C<sub>19</sub>H<sub>34</sub>O<sub>8</sub>; MF: 0; RMF: 25; Prob 50.0%; Lib: anthocyanins mona; ID: 9985.



Hit 2 : NCGC00169368-02!3,6-bis(3,4,5-trimethoxyphenyl)-1,3,3a,4,6,6a-hexahydrofuro[3,4-c]furan [M-H<sub>2</sub>O+H]<sup>+</sup> C<sub>24</sub>H<sub>30</sub>O<sub>8</sub>; MF: 0; RMF: 14; Prob 50.0%; Lib: mona-export-gnps; ID: 9133.

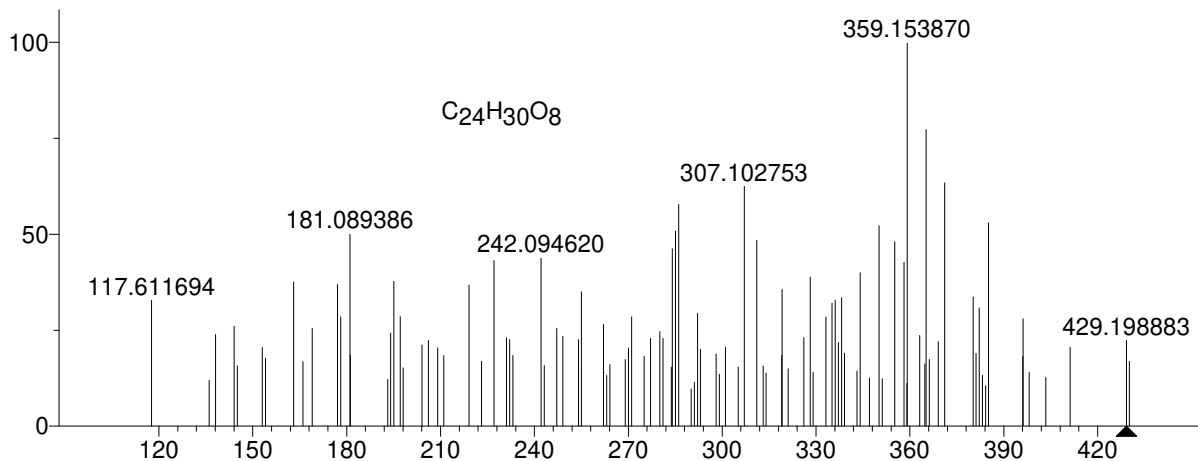

Unknown: Unknown (9.36\_476.0702m/z)  
Compound in Library Factor = 0

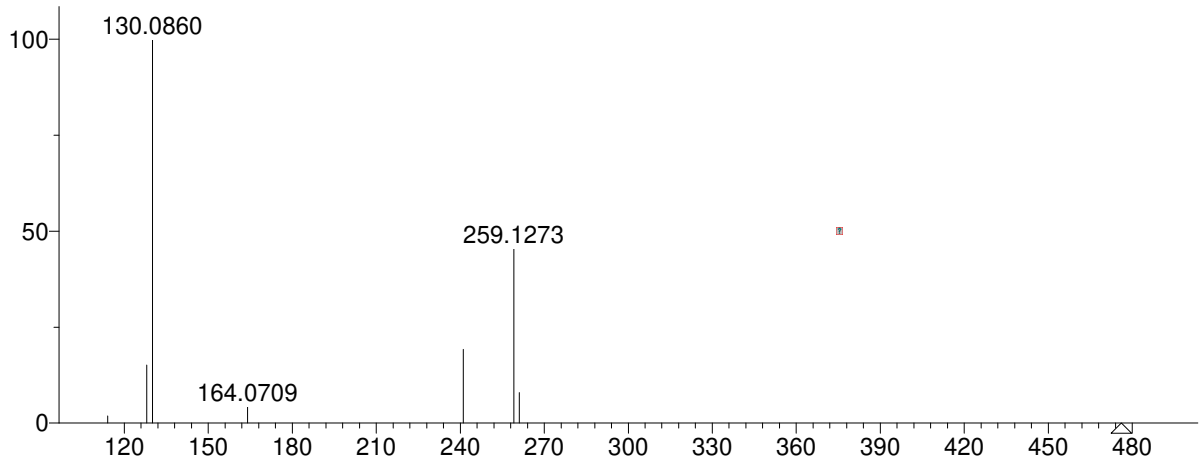

Unknown: Unknown (9.36\_576.2302m/z)  
Compound in Library Factor = 0

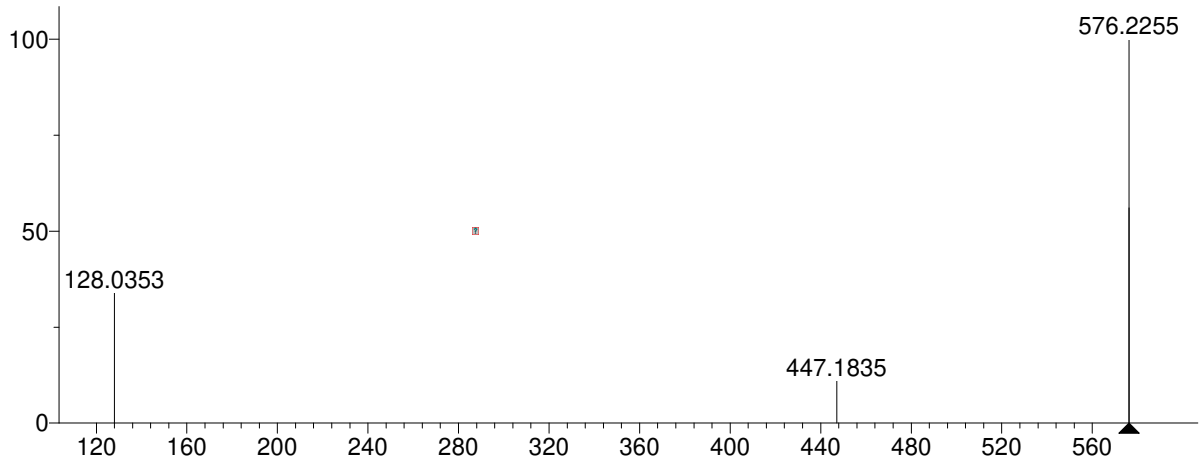

Unknown: Unknown (9.37\_339.1073m/z)  
Compound in Library Factor = 0

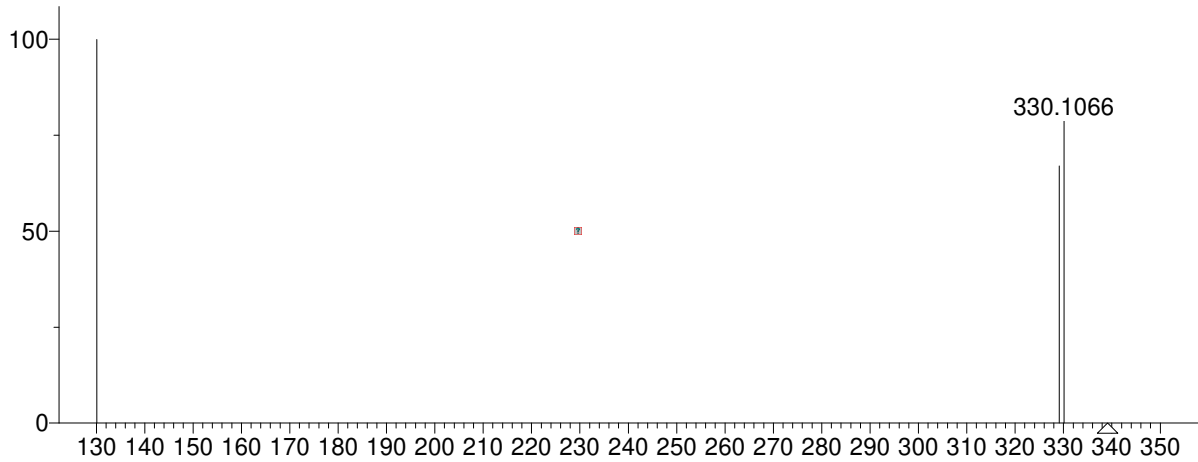

Hit 1 : (1R,3R,4S,5R)-1,3,4-trihydroxy-5-[(E)-3-(4-hydroxyphenyl)prop-2-enoyl]oxycyclohexane-1-carboxylic acid  
C<sub>16</sub>H<sub>18</sub>O<sub>8</sub>; MF: 0; RMF: 19; Prob 50.0%; Lib: mona-export-vf-npl\_gexactive; ID: 6316.

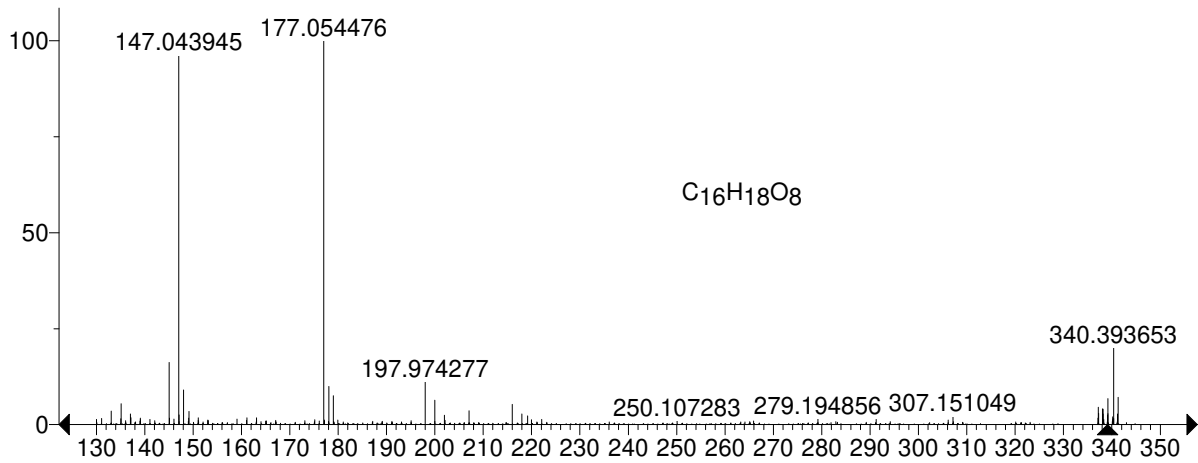

Hit 2 : NCGC00384821-01\_C16H18O8\_Cyclohexanecarboxylic acid, 1,3,4-trihydroxy-5-[(2E)-3-(4-hydroxyphenyl)  
C<sub>16</sub>H<sub>18</sub>O<sub>8</sub>; MF: 0; RMF: 10; Prob 50.0%; Lib: mona-export-gnps; ID: 10980.

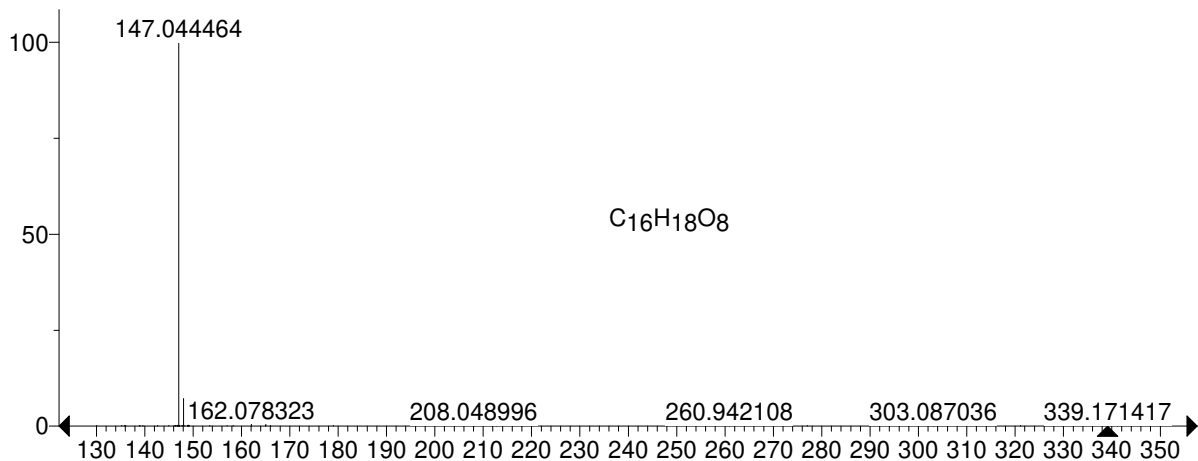



Unknown: Unknown (9.37\_356.8917m/z)  
Compound in Library Factor = 0

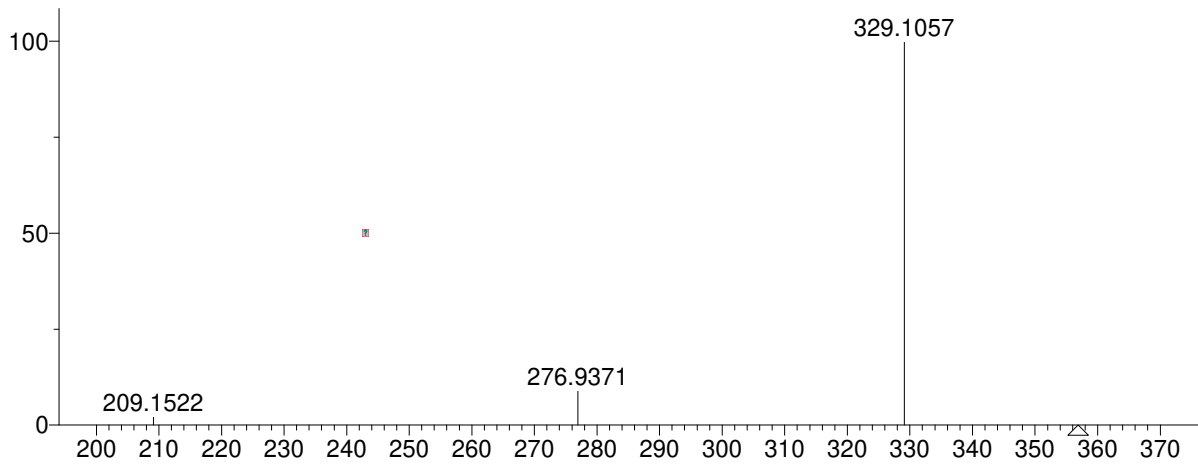

Unknown: Unknown (9.37\_425.1442m/z)  
Compound in Library Factor = 0

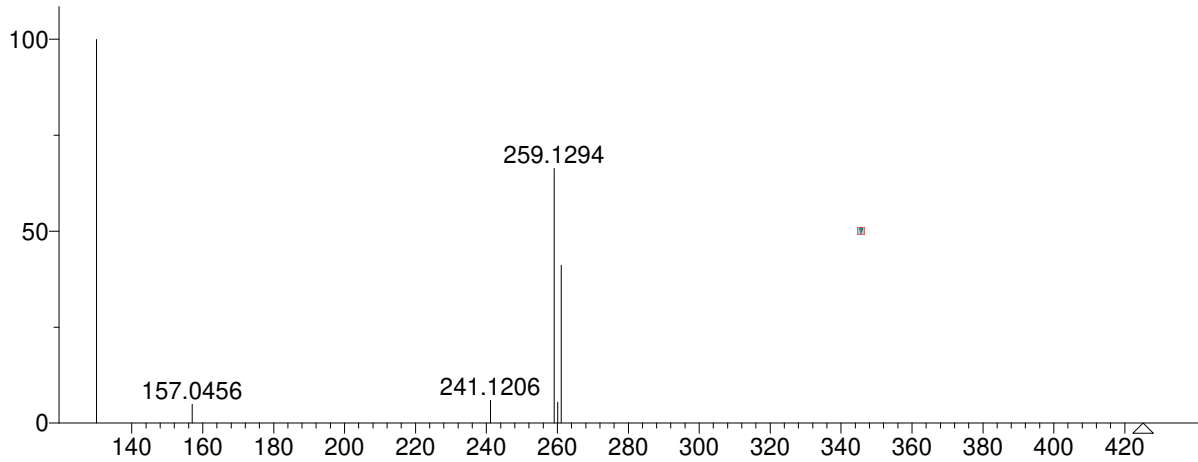

Hit 1 : Ginkgolide B [M+H]<sup>+</sup> HCD 34V P=425.1  
C<sub>20</sub>H<sub>24</sub>O<sub>10</sub>; MF: 0; RMF: 89; Prob 20.0%; CAS: 15291-77-7; Lib: nist\_msms; ID: 352887.

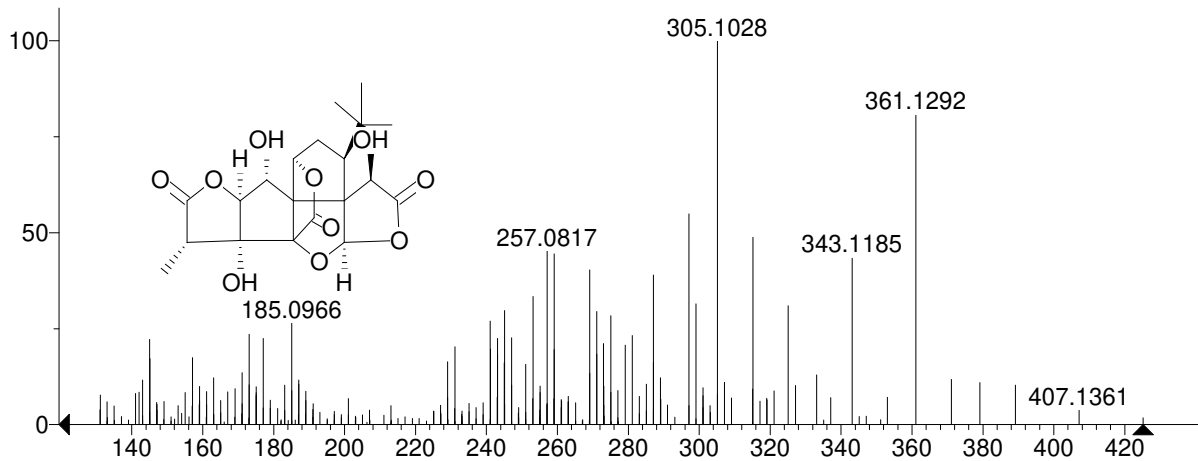

Hit 2 : NCGC00381128-01\_C<sub>18</sub>H<sub>26</sub>O<sub>10</sub>\_4-(beta-D-Glucopyranosyloxy)benzyl 2,3-dihydroxy-3-methylbutanoate  
C<sub>18</sub>H<sub>26</sub>O<sub>10</sub>; MF: 0; RMF: 80; Prob 20.0%; Lib: mona-export-gnps; ID: 11687.

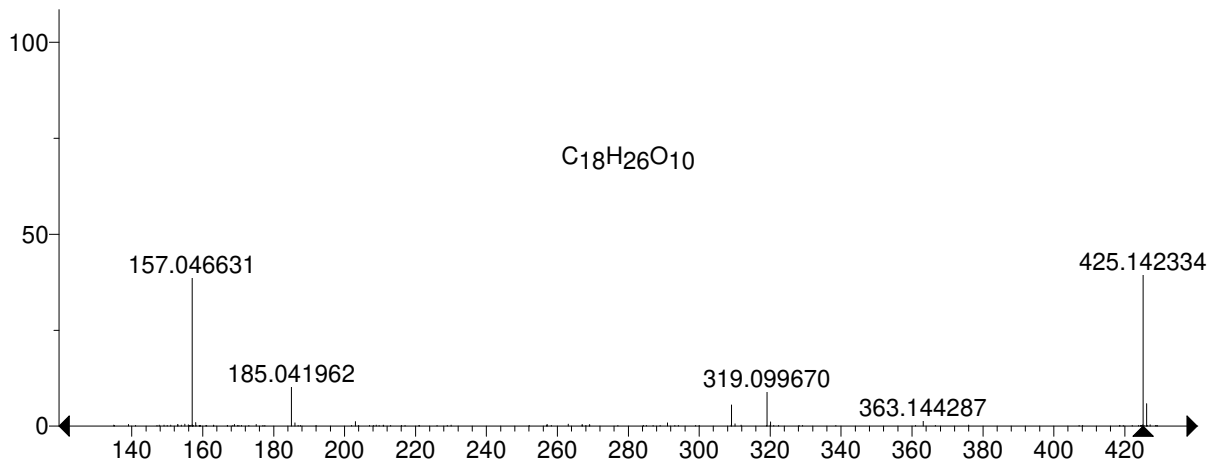

Hit 3 : ginkgolide B [M+H]<sup>+</sup> 35HCD P=425.1  
C<sub>20</sub>H<sub>24</sub>O<sub>10</sub>; MF: 0; RMF: 60; Prob 20.0%; Lib: mona-export-vf-npl\_qexactive; ID: 5950.

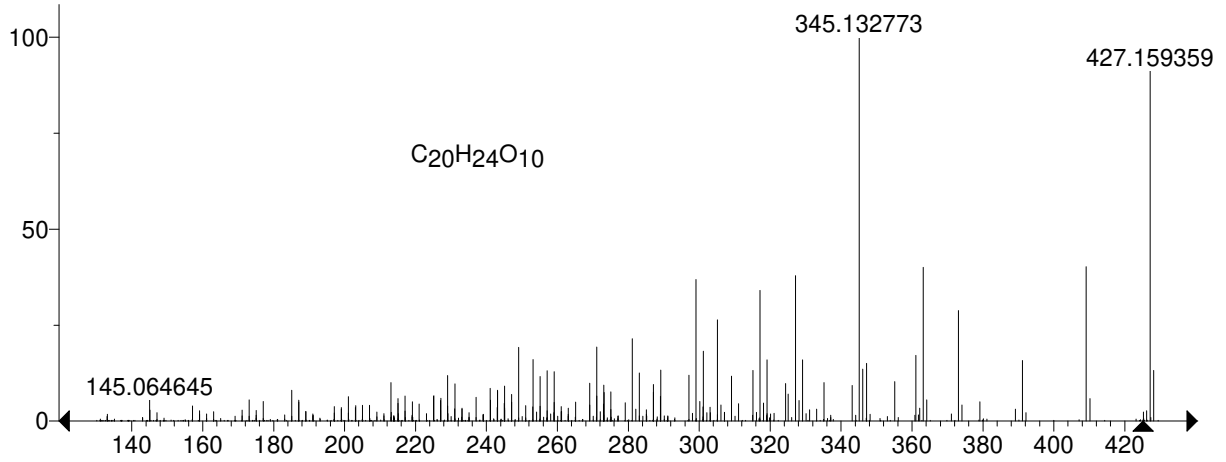

Hit 4 : [(2R,3S,4S,5R,6S)-3,4,5-trihydroxy-6-[(E)-3-phenylprop-2-enoyl]oxyoxan-2-yl]methyl 3,4-dihydroxy-2-methoxybenzoate  
C<sub>20</sub>H<sub>24</sub>O<sub>10</sub>; MF: 0; RMF: 10; Prob 20.0%; Lib: mona-export-vf-npl\_qexactive; ID: 9484.

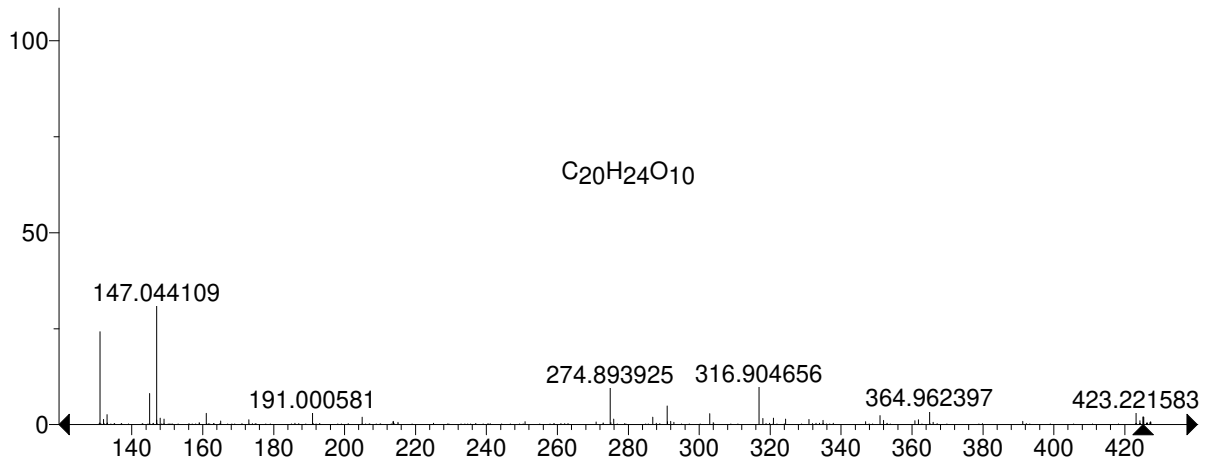

Hit 5 : NCGC00380741-01\_C<sub>20</sub>H<sub>24</sub>O<sub>10</sub>\_6-O-(3,4-Dihydroxy-2-methylenebutanoyl)-1-O-[(2E)-3-phenyl-2-propenoic acid]  
C<sub>20</sub>H<sub>24</sub>O<sub>10</sub>; MF: 0; RMF: 9; Prob 20.0%; Lib: mona-export-gnps; ID: 11636.

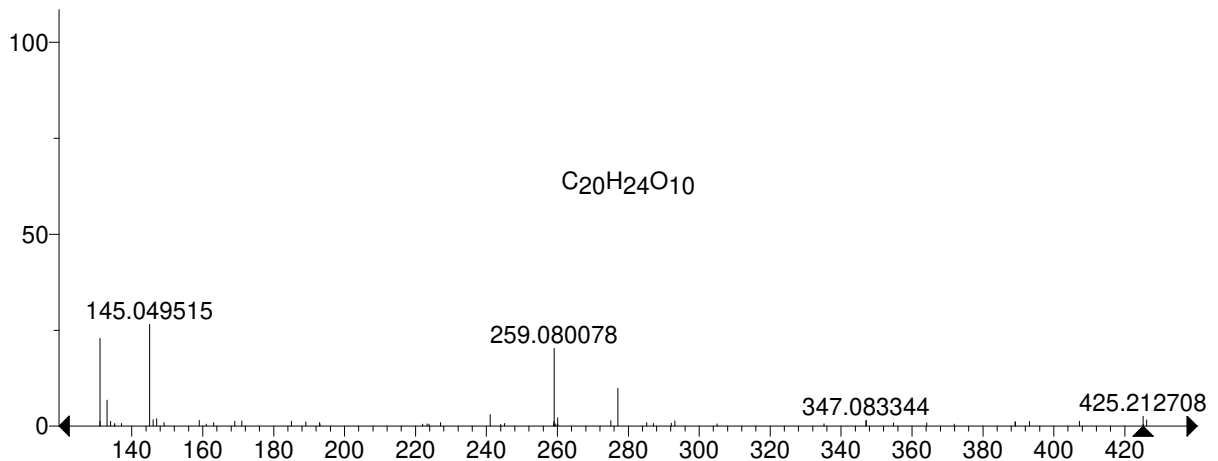

Unknown: Unknown (9.38\_387.9947m/z)  
Compound in Library Factor = 0

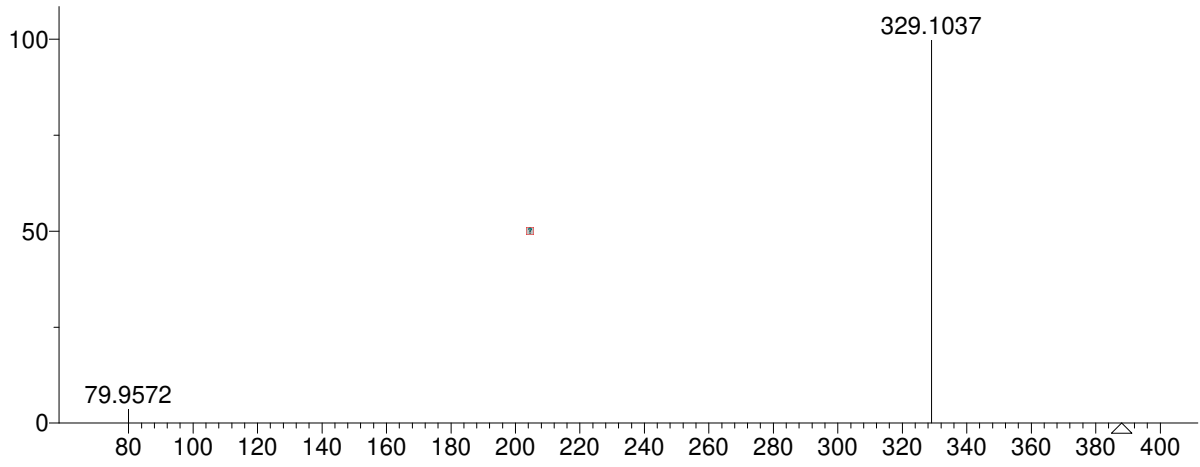

Unknown: Unknown (9.38\_494.1639m/z)  
Compound in Library Factor = 0

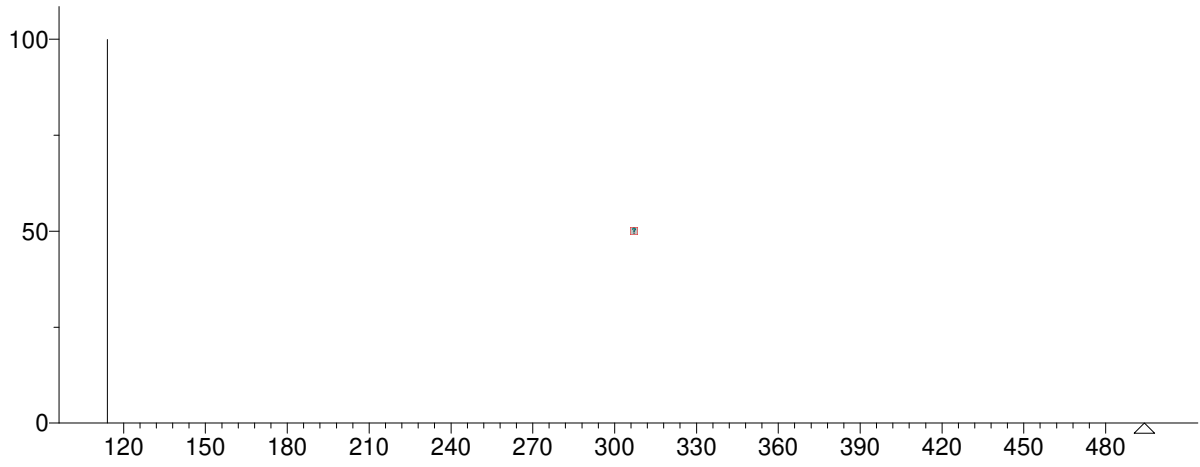

Unknown: Unknown (9.39\_356.1807m/z)  
Compound in Library Factor = 0

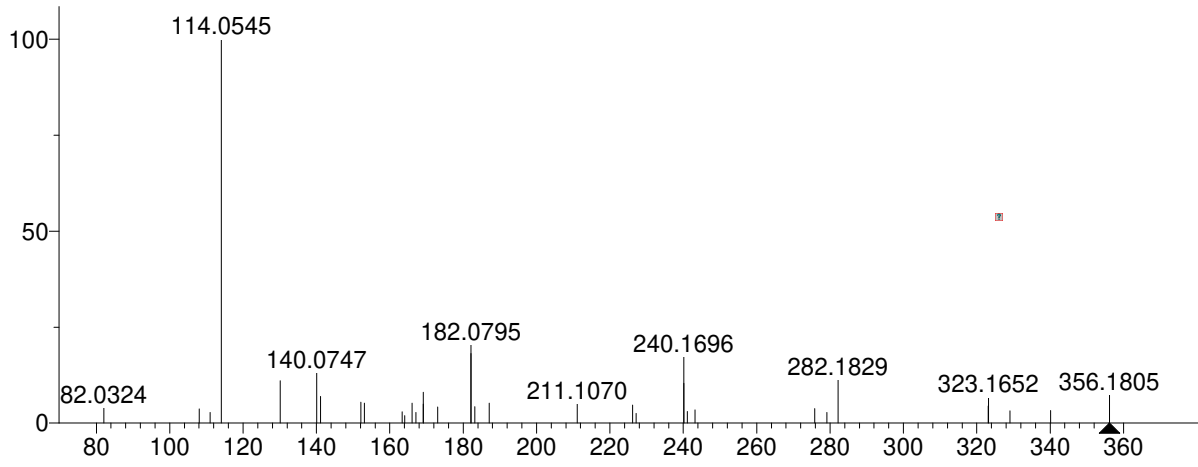

Unknown: Unknown (9.39\_449.1526m/z)  
Compound in Library Factor = 0

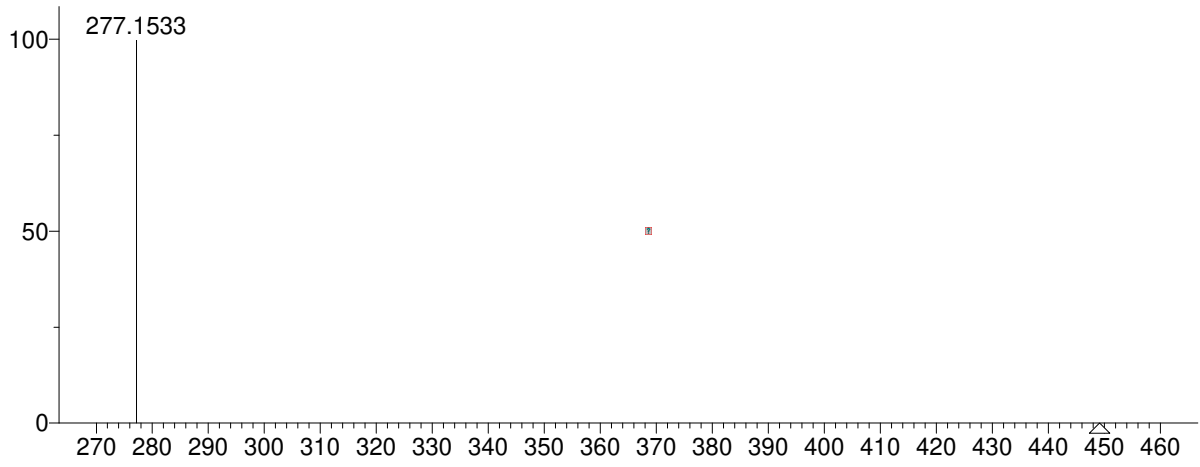

Unknown: Unknown (9.41\_439.2073m/z)  
Compound in Library Factor = 0

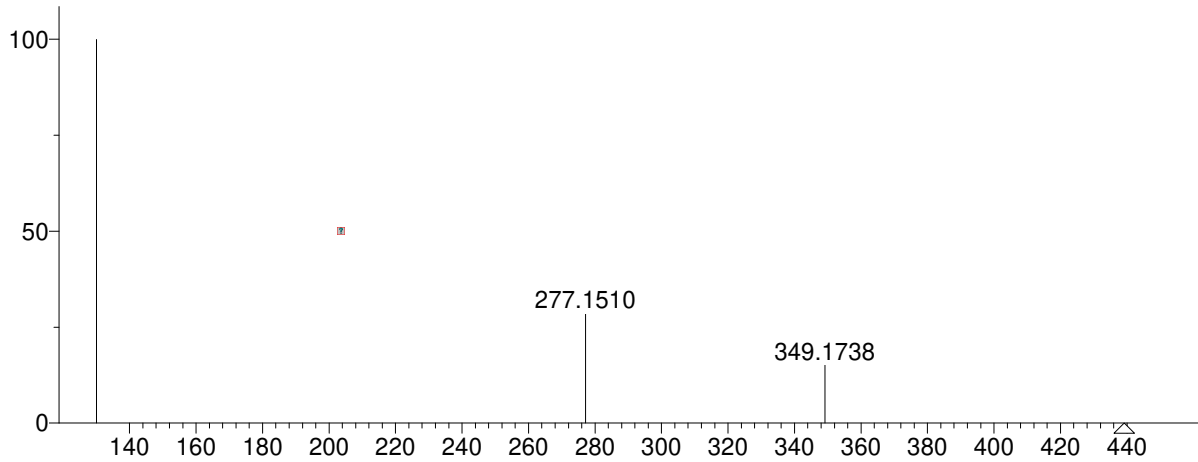

Hit 1 : Deacetoxy-7-Oxogedunin [M+H]<sup>+</sup> 35HCD P=439.2  
C<sub>26</sub>H<sub>30</sub>O<sub>6</sub>; MF: 0; RMF: 17; Prob 50.0%; Lib: mona-export-vf-npl\_gexactive; ID: 25777.

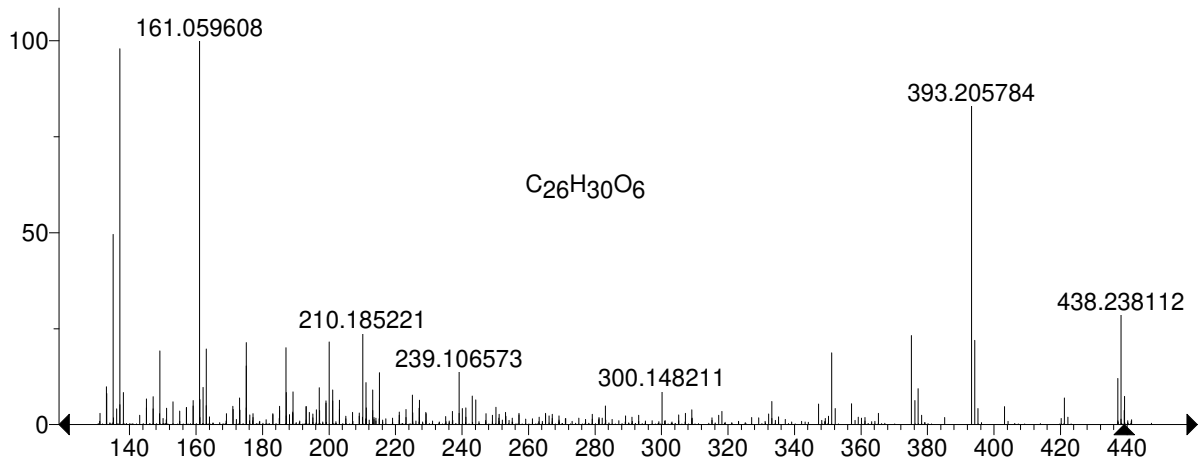

Hit 2 : 17-Trifluoromethylphenyl-13,14-dihydrotrinarprostaglandin F2 $\alpha$  [M-H-H<sub>2</sub>O]<sup>-</sup> HCD 41V P=439.2  
C<sub>24</sub>H<sub>33</sub>F<sub>3</sub>O<sub>5</sub>; MF: 0; RMF: 10; Prob 50.0%; CAS: 294856-01-2; Lib: nist\_msms; ID: 93984.

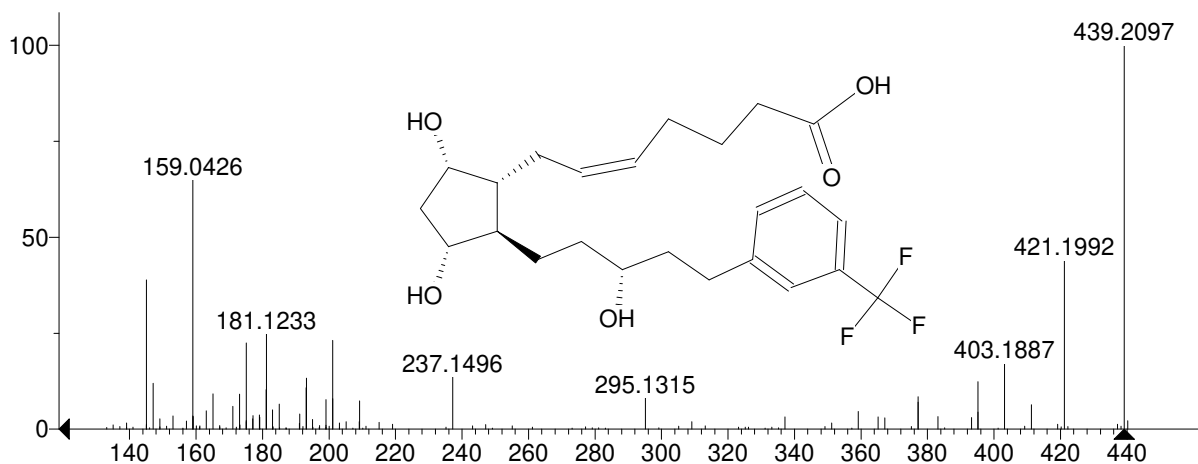



\*\* Search Report Page 1 of 2 \*\*

Unknown: Unknown (9.44\_277.1549m/z)  
Compound in Library Factor = -1453

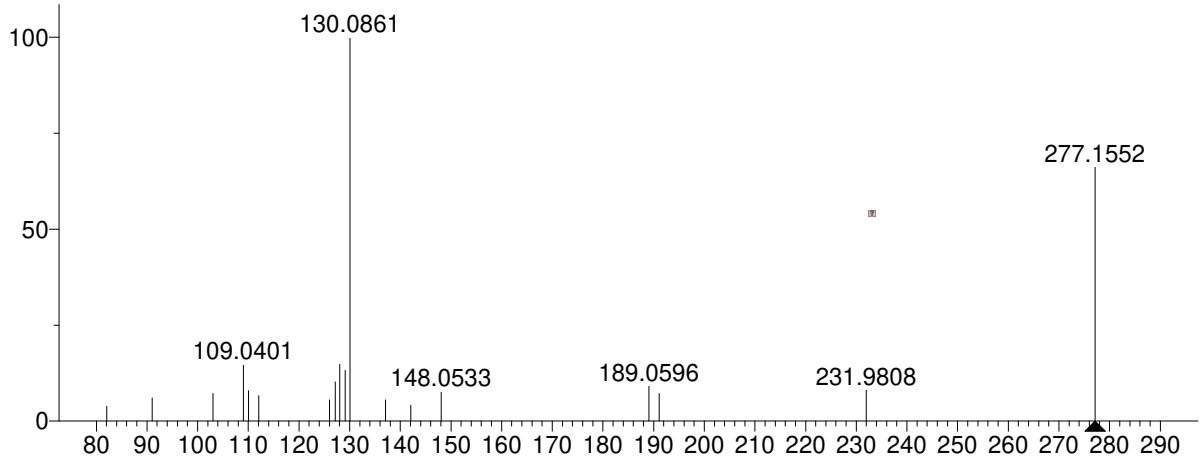

Hit 1 : Phe-Leu [M-H]<sup>-</sup> HCD 13eV P=277.2  
C<sub>15</sub>H<sub>22</sub>N<sub>2</sub>O<sub>3</sub>; MF: 236; RMF: 564; Prob 43.1%; Lib: nist\_msms; ID: 570088.

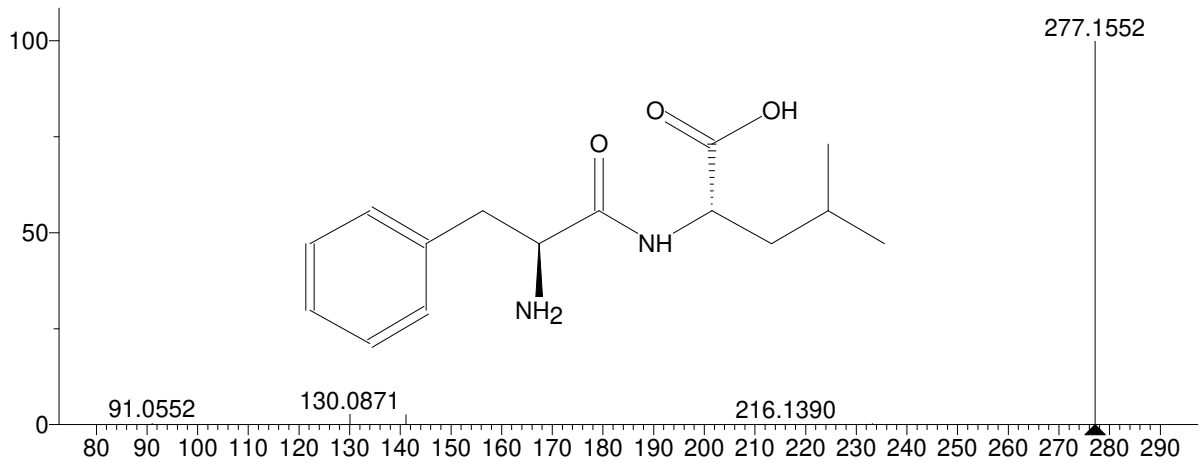

Hit 2 : Phe-Leu [M-H]<sup>-</sup> HCD 13eV P=277.2  
C<sub>15</sub>H<sub>22</sub>N<sub>2</sub>O<sub>3</sub>; MF: 236; RMF: 564; Prob 43.1%; CAS: 3303-55-7; Lib: nist\_msms2; ID: 83814.

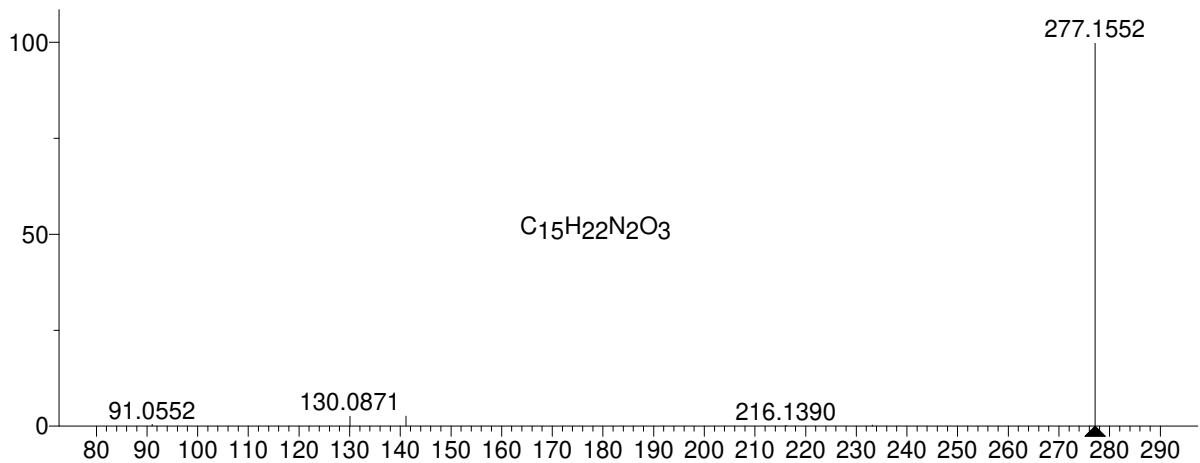

Hit 3 : Phe-Ile [M-H]<sup>-</sup> HCD 16eV P=277.2  
C<sub>15</sub>H<sub>22</sub>N<sub>2</sub>O<sub>3</sub>; MF: 127; RMF: 582; Prob 2.79%; Lib: nist\_msms; ID: 570602.

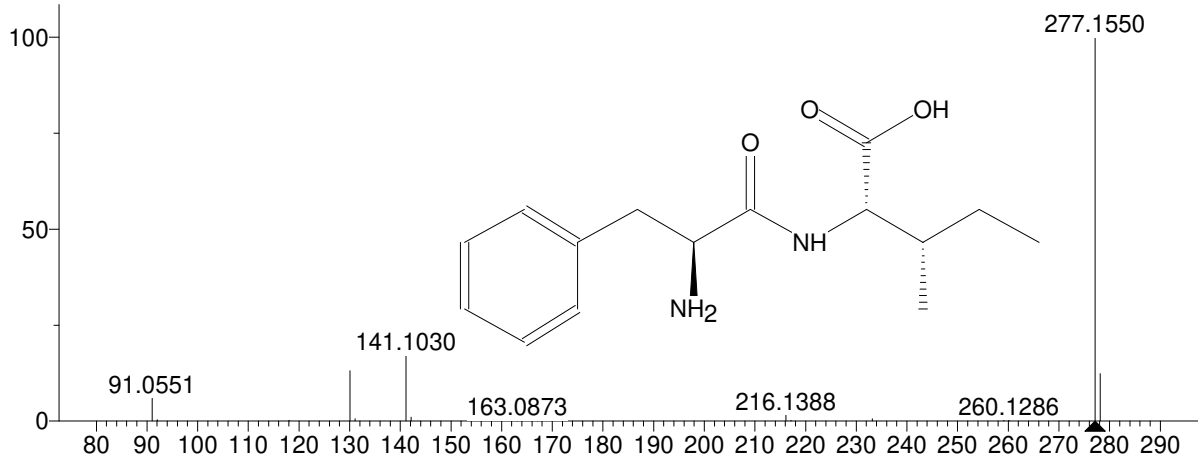

Hit 4 : Phe-Ile [M-H]<sup>-</sup> HCD 16eV P=277.2  
C<sub>15</sub>H<sub>22</sub>N<sub>2</sub>O<sub>3</sub>; MF: 127; RMF: 582; Prob 2.79%; CAS: 22951-94-6; Lib: nist\_msms2; ID: 84335.

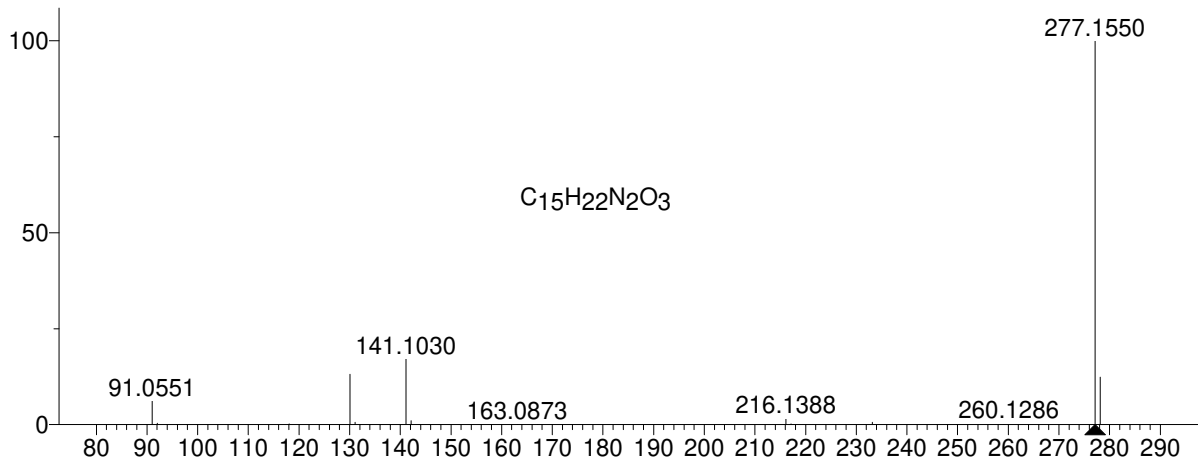

Hit 5 : Ile-Phe [M-H]<sup>-</sup> HCD 13eV P=277.2  
C<sub>15</sub>H<sub>22</sub>N<sub>2</sub>O<sub>3</sub>; MF: 116; RMF: 502; Prob 1.91%; Lib: nist\_msms; ID: 570142.

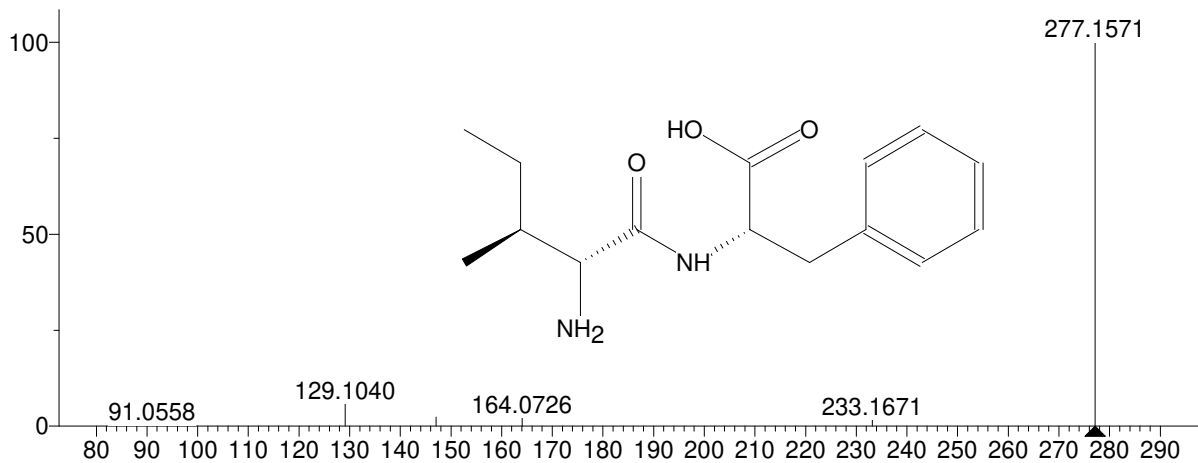

Unknown: Unknown (9.44\_586.0112m/z)  
Compound in Library Factor = 0

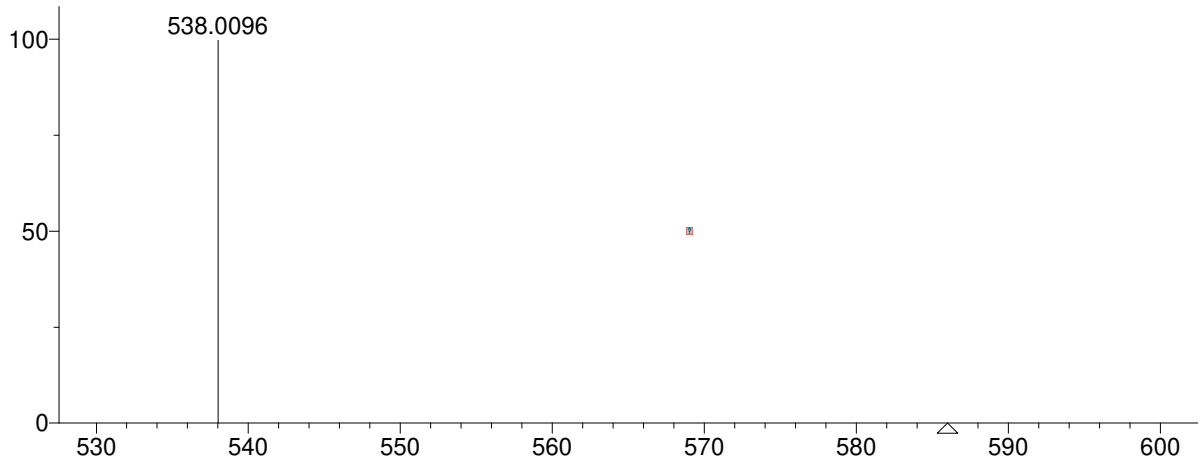

\*\* Search Report Page 1 of 2 \*\*

Unknown: Unknown (9.45\_165.0548m/z)  
Compound in Library Factor = -1224

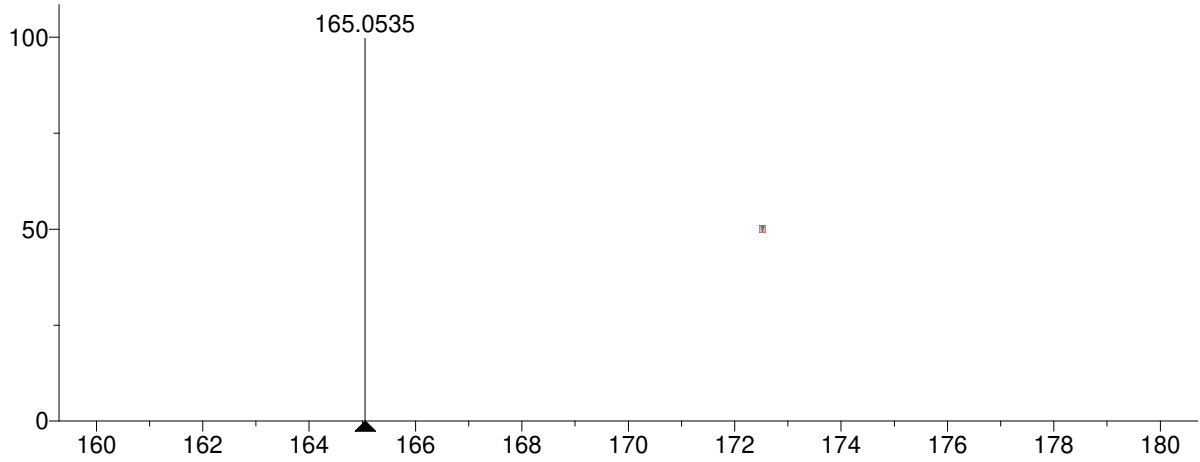

Hit 1 : Caffeyl alcohol; PlaSMA ID-148 [M-H]- P=165.1  
C9H10O3; MF: 364; RMF: 999; Prob 2.07%; Lib: biomsms-neg-plasma; ID: 778.

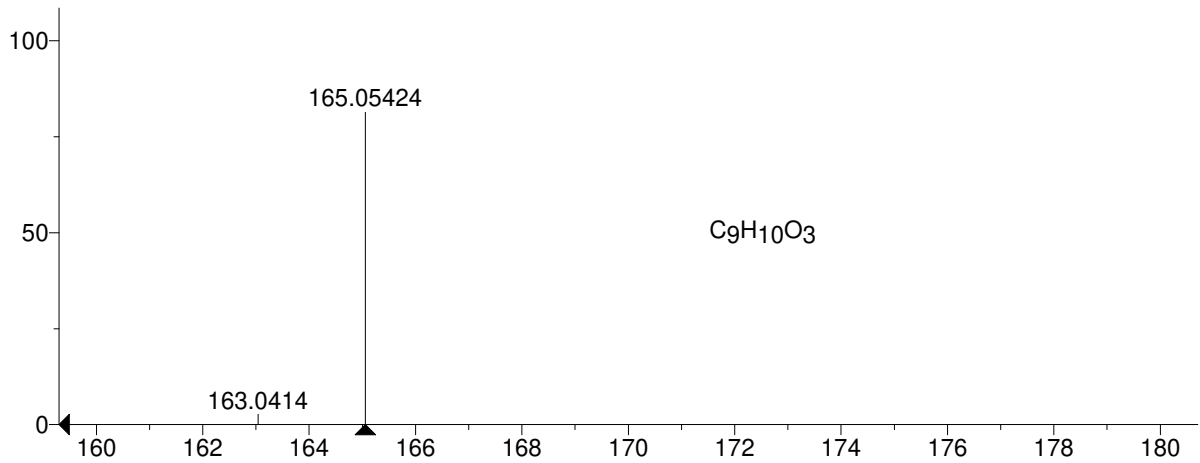

Hit 2 : 3-(3-Hydroxyphenyl)propionic acid [M-H]- 20-30-40% P=165.1  
C9H10O3; MF: 364; RMF: 999; Prob 2.07%; Lib: mona-export-fiehn\_hilic; ID: 947.

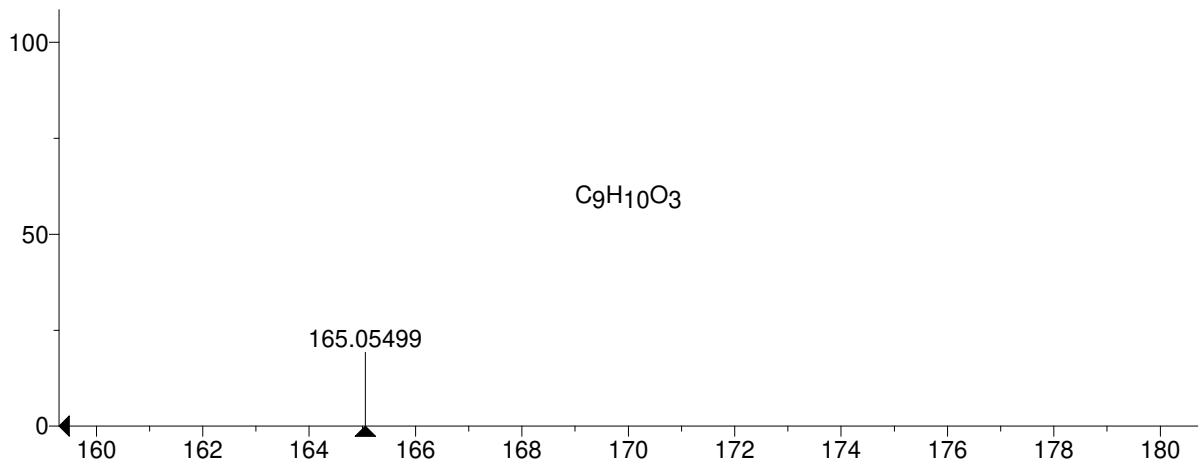

Hit 3 : 3-(2-Hydroxyphenyl)propanoic acid [M-H]<sup>-</sup> 35eV P=165.1  
C<sub>9</sub>H<sub>10</sub>O<sub>3</sub>; MF: 364; RMF: 999; Prob 2.07%; Lib: mona-export-fiehn\_hilic; ID: 2491.

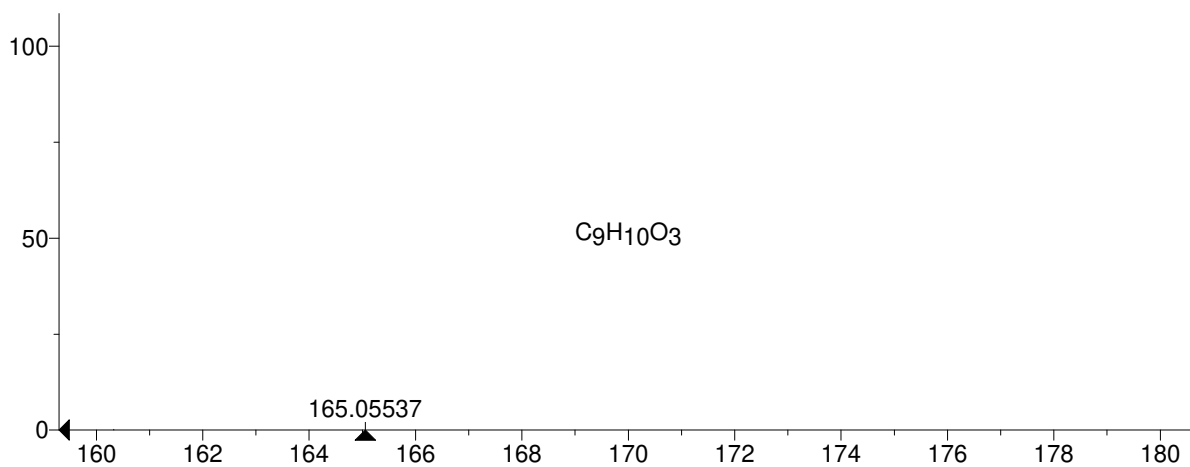

Hit 4 : 3-Phenyllactic acid [M-H]<sup>-</sup> 35eV P=165.1  
C<sub>9</sub>H<sub>10</sub>O<sub>3</sub>; MF: 364; RMF: 999; Prob 2.07%; Lib: mona-export-fiehn\_hilic; ID: 2516.

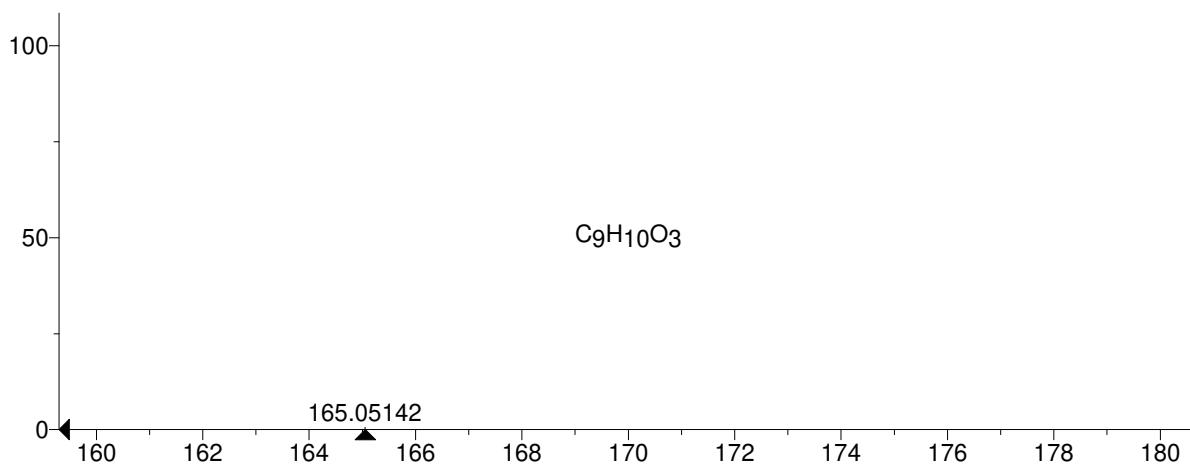

Hit 5 : p-coumaric acid [M+H]<sup>+</sup> P=165.1  
C<sub>9</sub>H<sub>8</sub>O<sub>3</sub>; MF: 364; RMF: 999; Prob 2.07%; Lib: mona-export-gnps; ID: 5826.

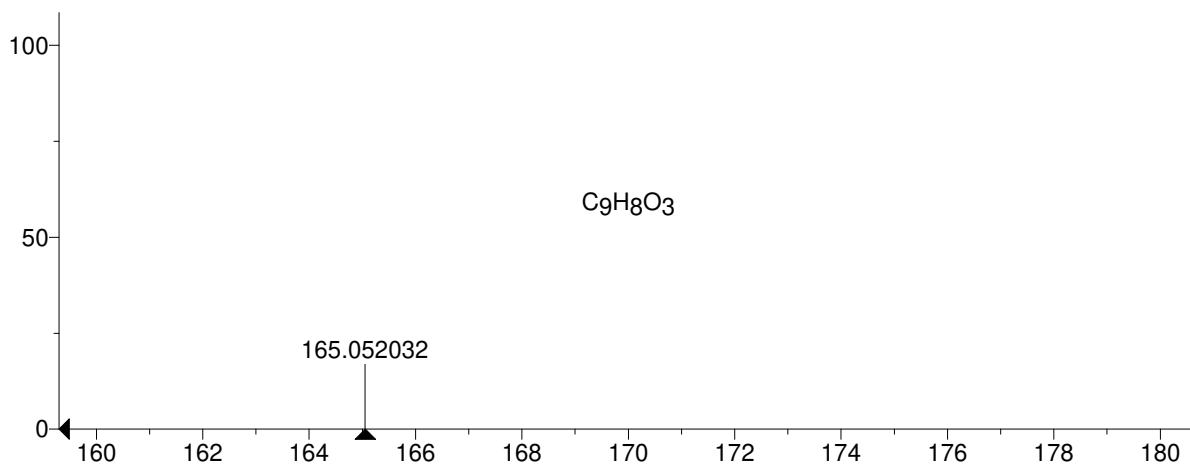

Unknown: Unknown (9.45\_484.0206m/z)  
Compound in Library Factor = 0

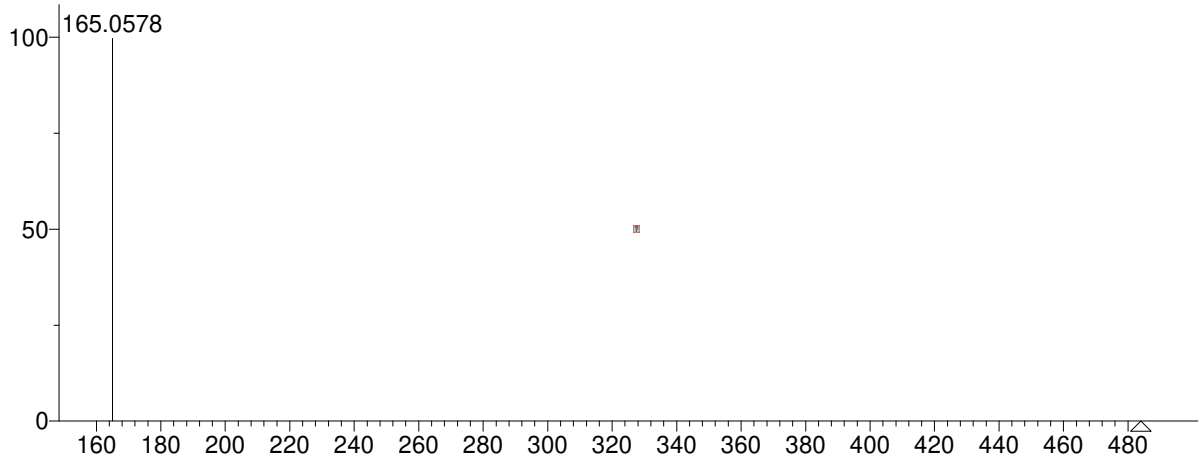

Unknown: Unknown (9.46\_494.1676m/z)  
Compound in Library Factor = 0

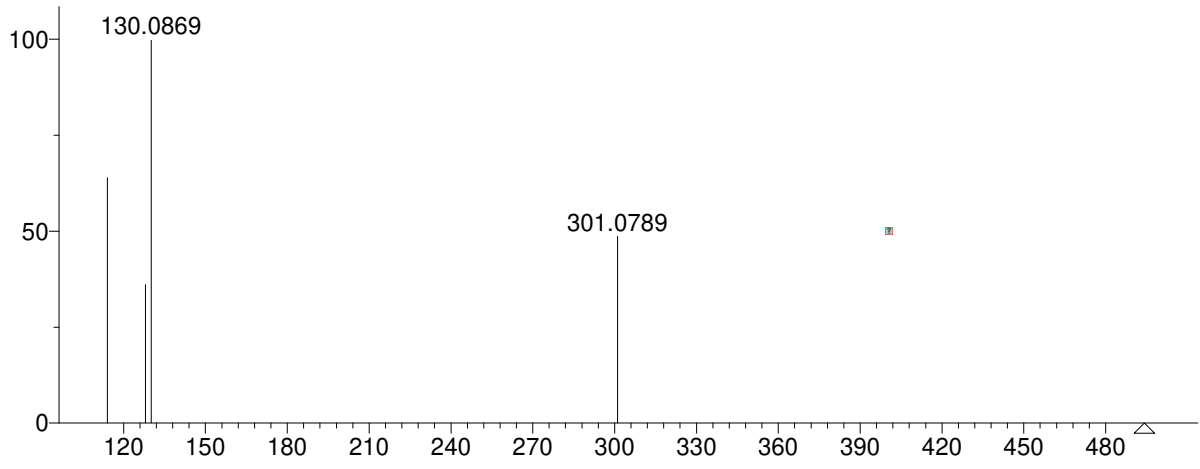

Unknown: Unknown (9.47\_325.0910m/z)  
Compound in Library Factor = 0

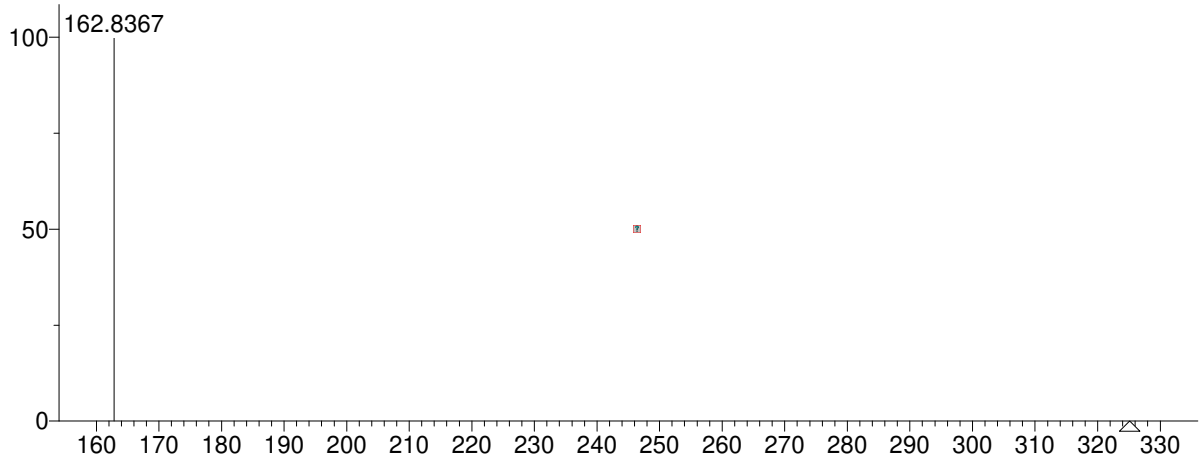



Unknown: Unknown (9.47\_401.1908m/z)  
Compound in Library Factor = 0

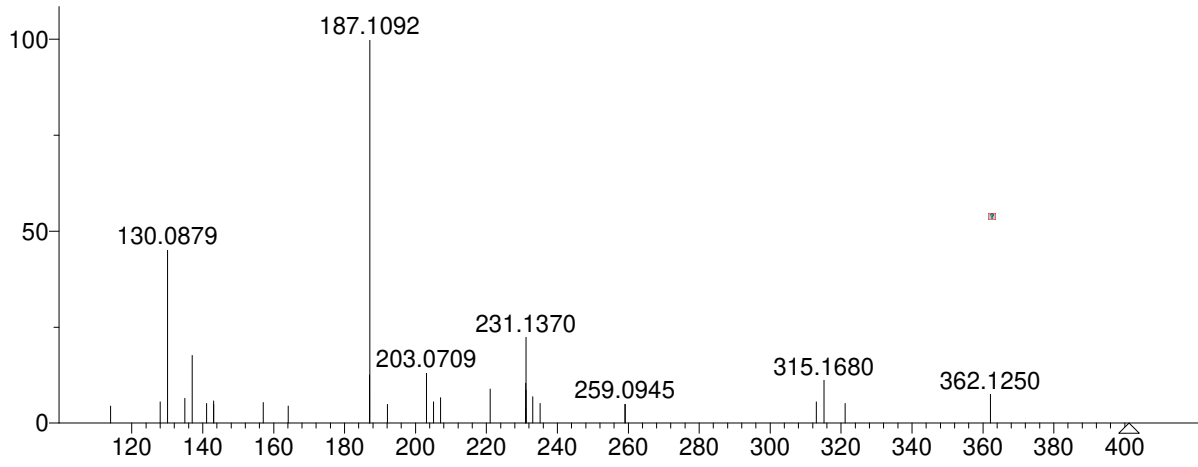

Unknown: Unknown (9.47\_506.1770m/z)  
Compound in Library Factor = 0

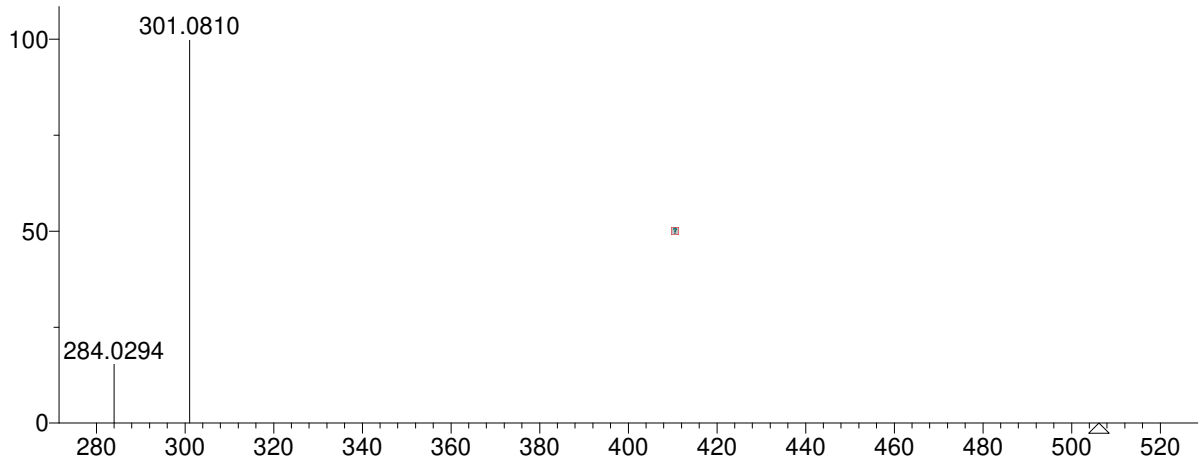

Unknown: Unknown (9.47\_584.0141m/z)  
Compound in Library Factor = 0

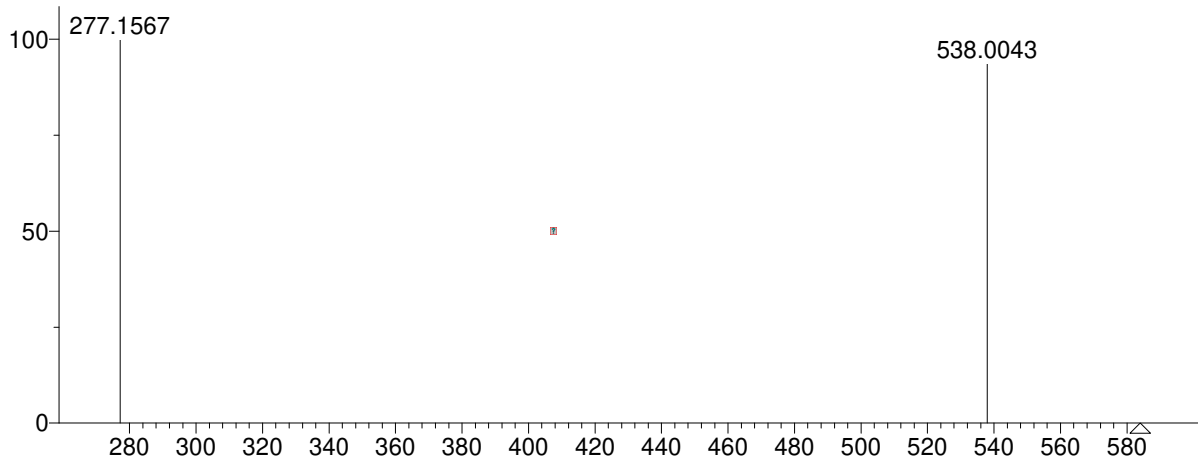

Unknown: Unknown (9.49\_409.9693m/z)  
Compound in Library Factor = 0

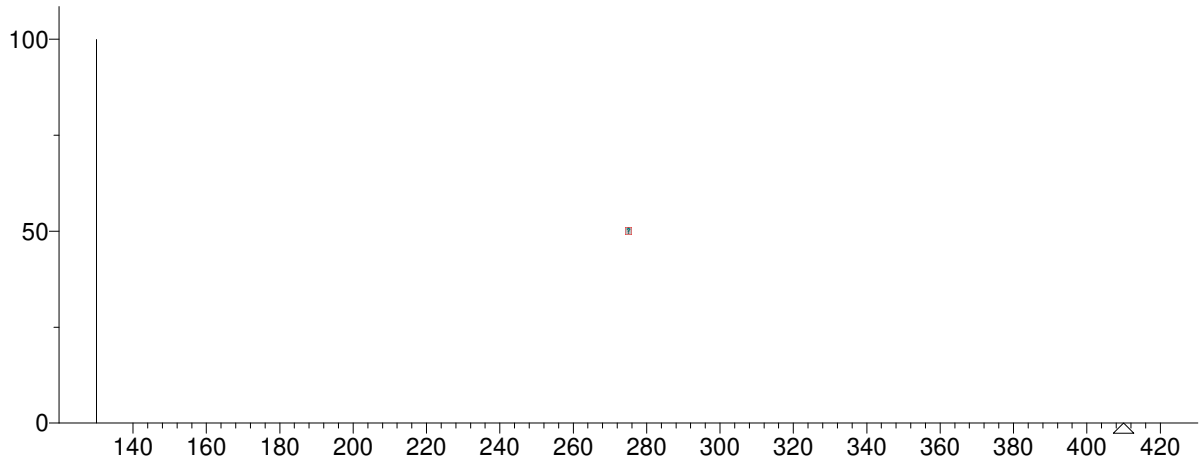

Unknown: Unknown (9.49\_415.2064m/z)  
Compound in Library Factor = 0

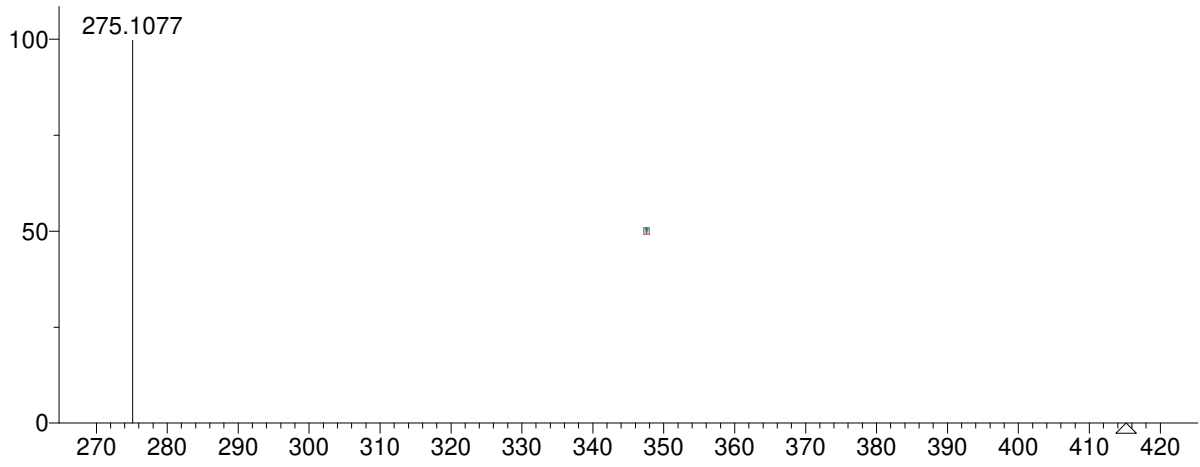

Unknown: Unknown (9.50\_437.9407m/z)  
Compound in Library Factor = 0

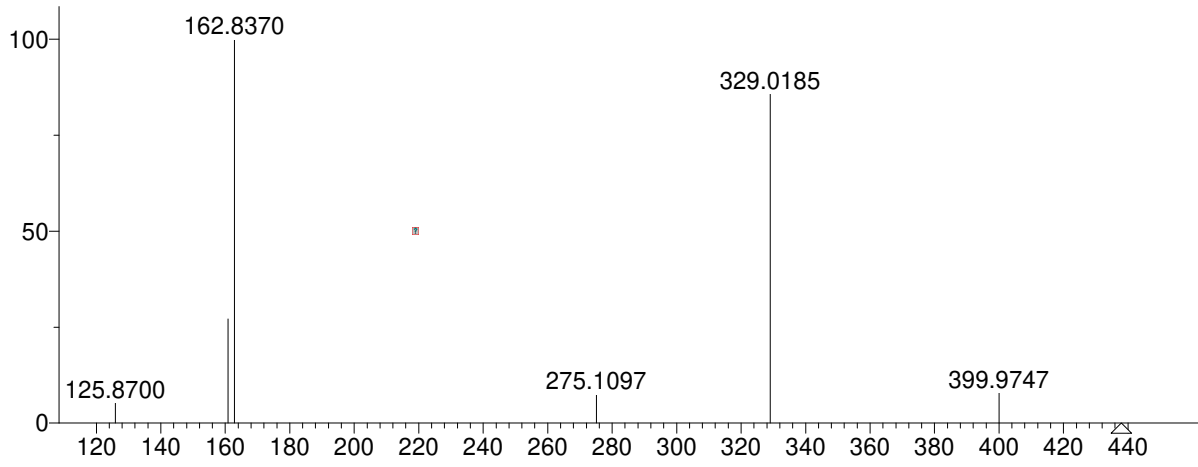

Unknown: Unknown (9.51\_275.1030m/z)  
Compound in Library Factor = 114

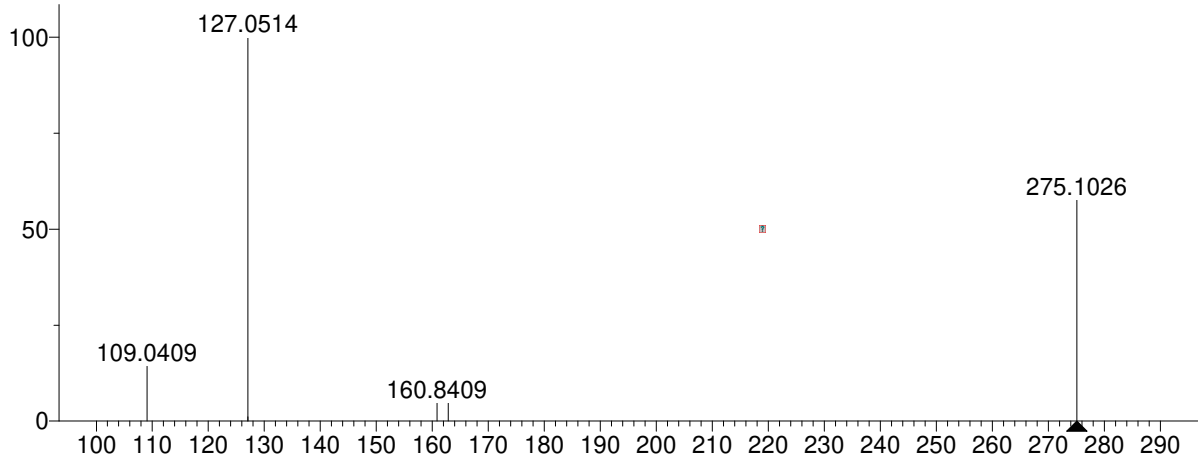

Hit 1 : Unknown (carbon number 14); PlaSMA ID-486 [M-H]<sup>-</sup> P=275.1  
C<sub>14</sub>H<sub>16</sub>N<sub>2</sub>O<sub>4</sub>; MF: 696; RMF: 952; Prob 99.0%; Lib: biomsms-neg-plasma; ID: 1148.

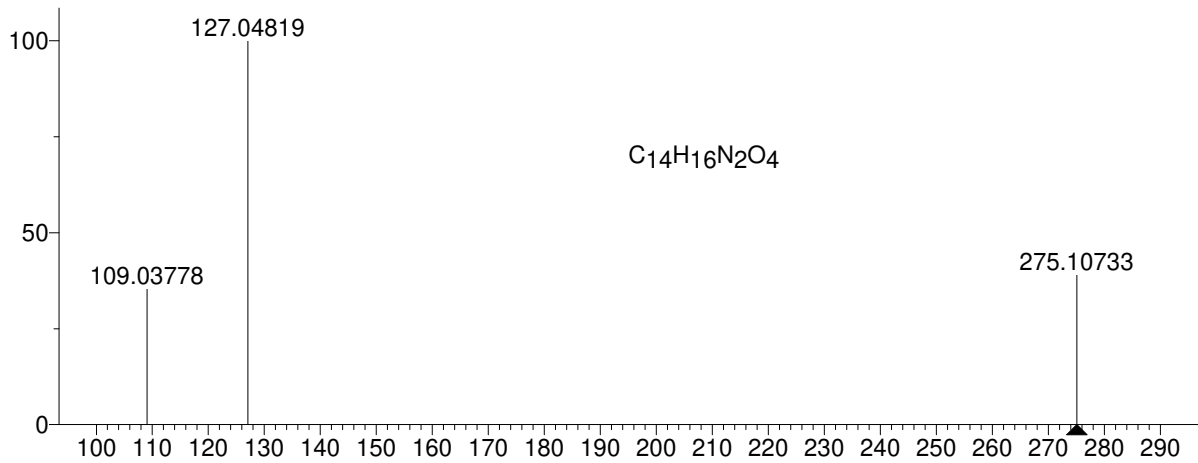

Hit 2 : Unknown (carbon number 14); PlaSMA ID-487 [M-H]<sup>-</sup> P=275.1  
C<sub>14</sub>H<sub>16</sub>N<sub>2</sub>O<sub>4</sub>; MF: 399; RMF: 862; Prob 0.98%; Lib: biomsms-neg-plasma; ID: 1149.

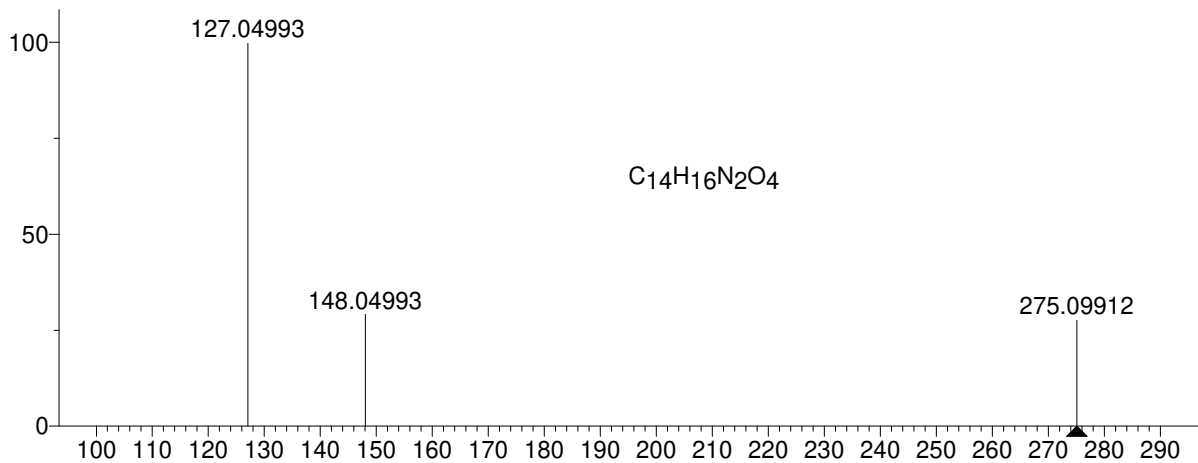

\*\* Search Report Page 2 of 2 \*\*

Hit 3 : PRI\_275.1026\_12.7 [M+H]<sup>+</sup> 15(no P=275.1  
; MF: 63; RMF: 535; Prob 0.00%; Lib: mona-export-massbank\_eu; ID: 429.

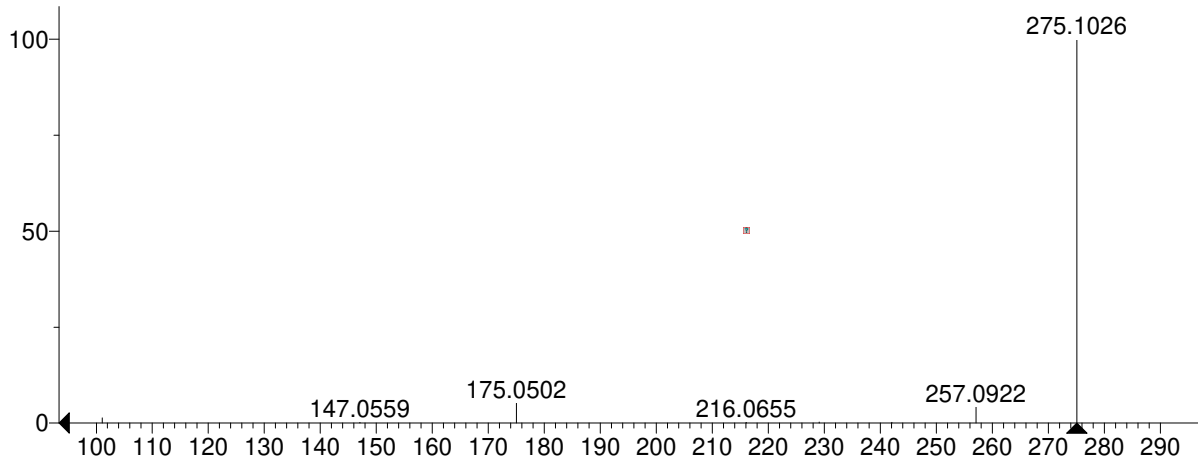

Hit 4 : Trigonelline [2M+H]<sup>+</sup> HCD 1V P=275.1  
C7H7NO2; MF: 43; RMF: 536; Prob 0.00%; CAS: 535-83-1; Lib: nist\_msms; ID: 118719.

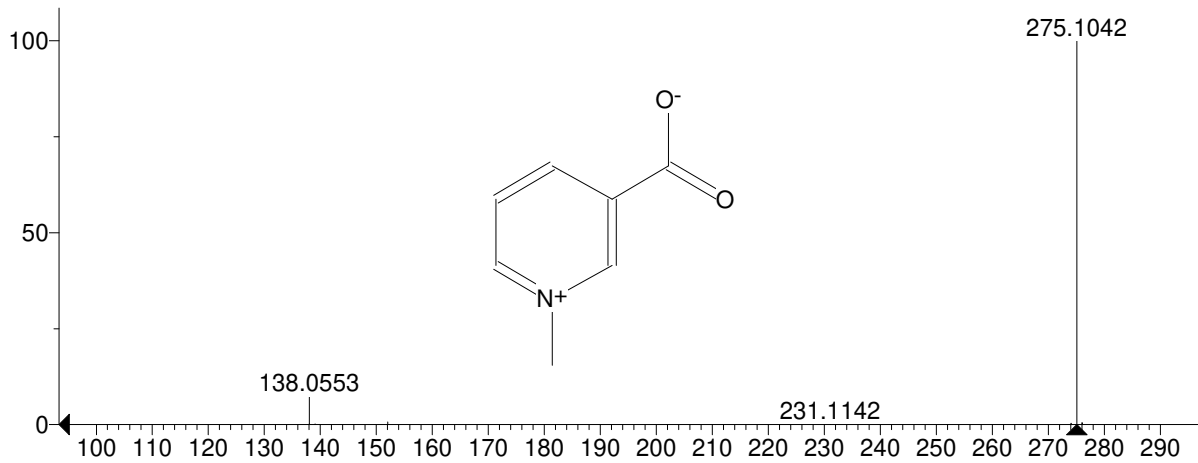

Hit 5 : NCGC00381382-01\_C14H14N2O4\_Cyclohepta[b]pyrrole-3-propanoic acid, alpha-(acetylamino)-1,4-dihyd  
C14H14N2O4; MF: 0; RMF: 30; Prob 0.00%; Lib: mona-export-gnps; ID: 12062.

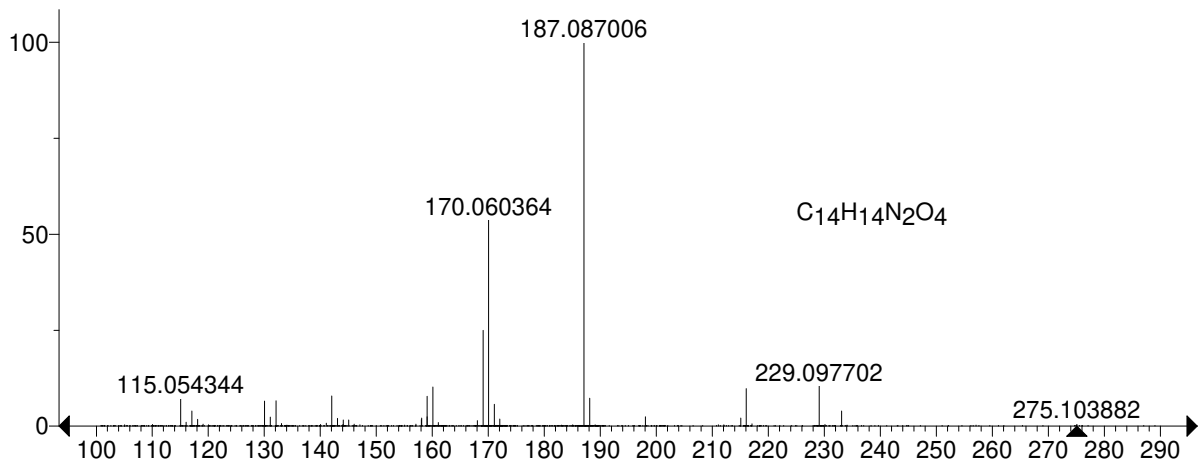



Unknown: Unknown (9.51\_548.2359m/z)  
Compound in Library Factor = -3273

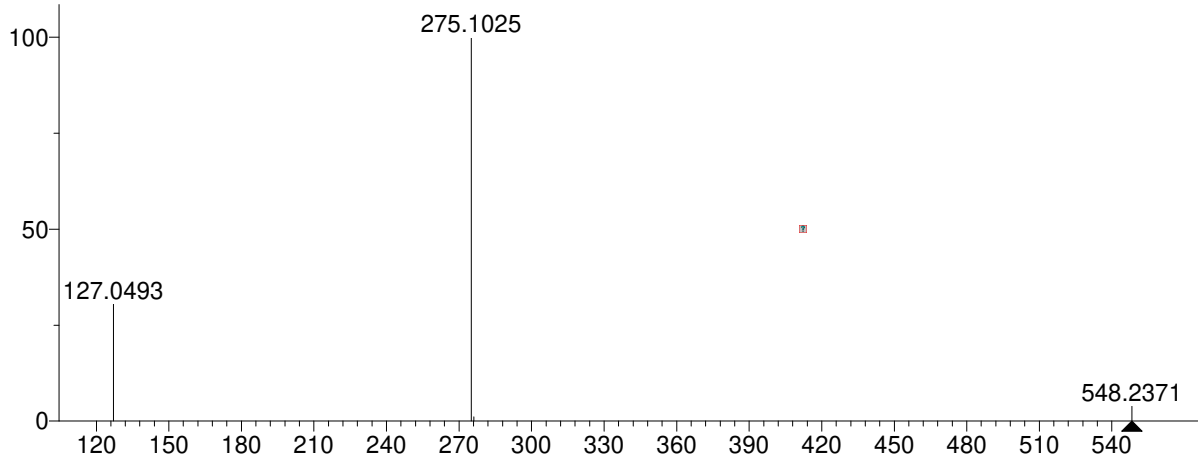

Hit 1 : Virginiamycin component b [M+Na]<sup>+</sup> HCD 32V P=548.2  
C<sub>28</sub>H<sub>35</sub>N<sub>3</sub>O<sub>7</sub>; MF: 5; RMF: 152; Prob 55.4%; Lib: nist\_msms; ID: 353177.

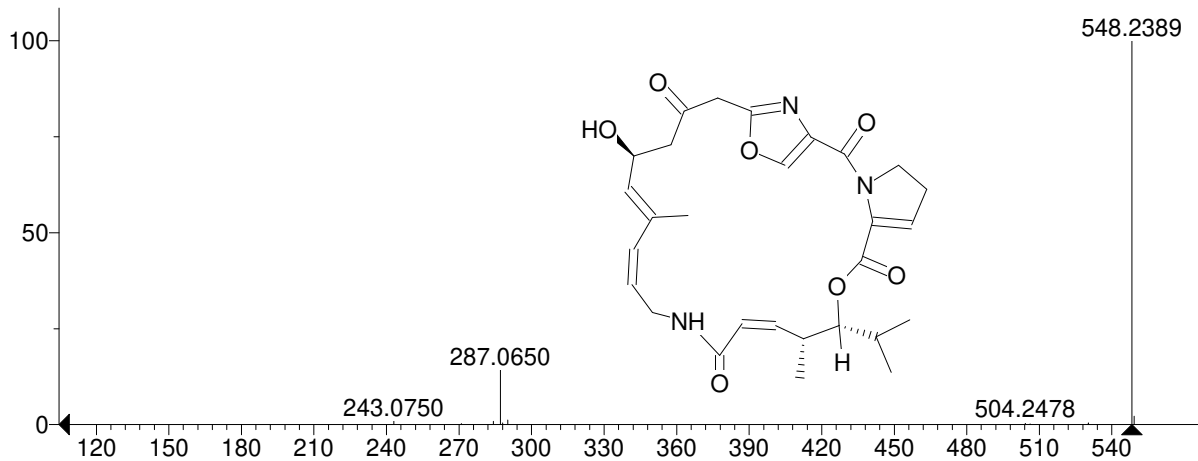

Hit 2 : Tobramycin, inactivated by 2" phosphorylation [M+H]<sup>+</sup> P=548.2  
C<sub>18</sub>H<sub>38</sub>N<sub>5</sub>O<sub>12</sub>P; MF: 0; RMF: 12; Prob 44.6%; Lib: anthocyanins mona; ID: 9671.

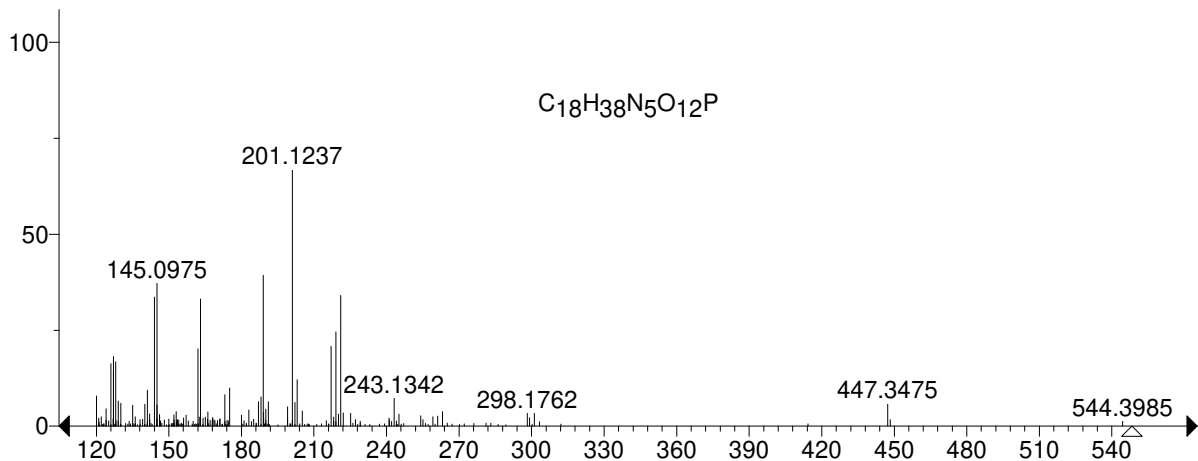

Unknown: Unknown (9.52\_435.9433m/z)  
Compound in Library Factor = 0

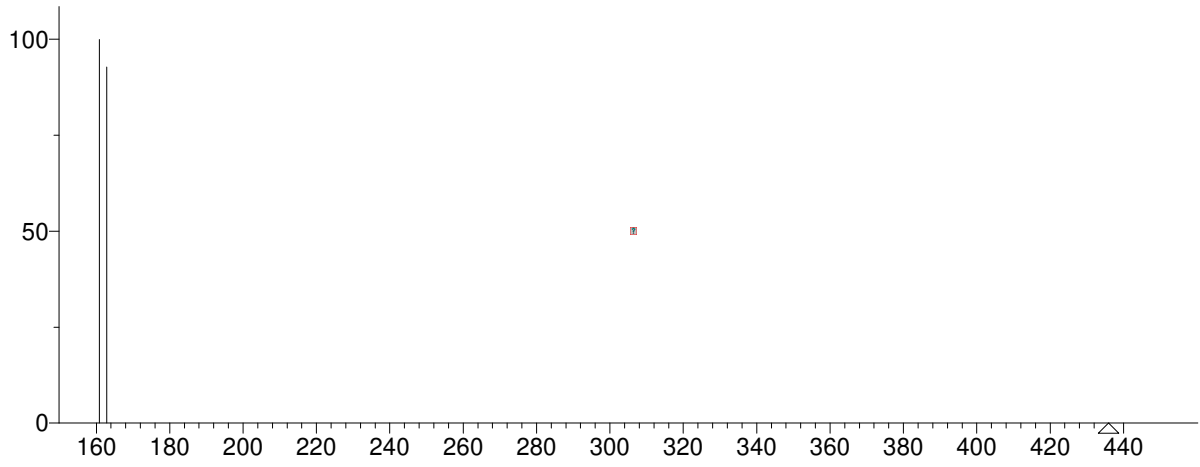

Unknown: Unknown (9.53\_375.0270m/z)  
Compound in Library Factor = 0

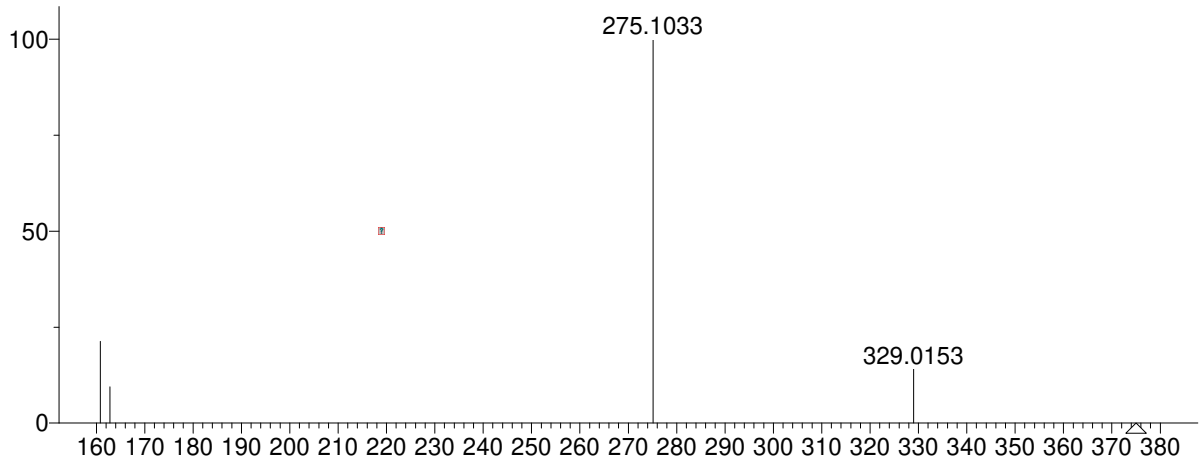

Unknown: Unknown (9.55\_425.1442m/z)  
Compound in Library Factor = -3273

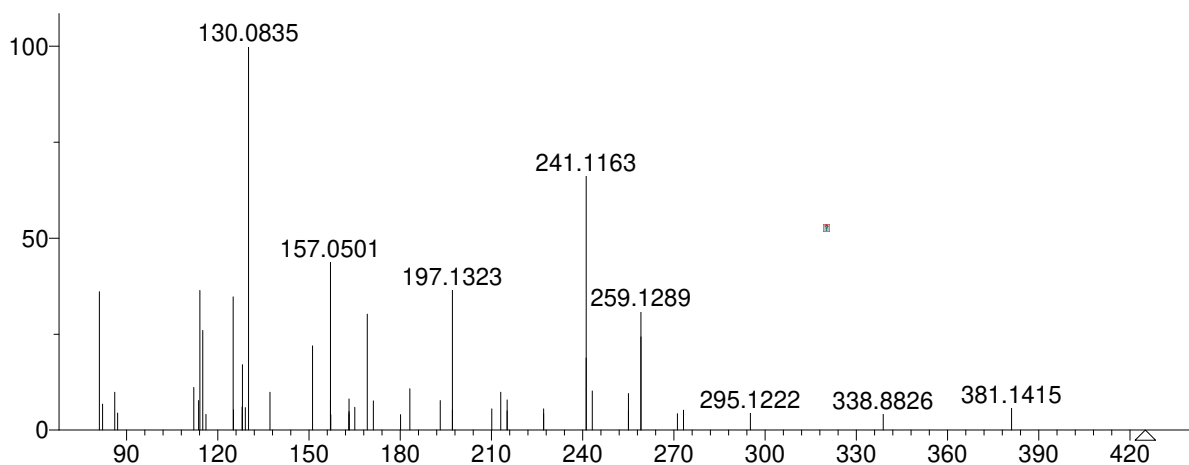

Hit 1 : Ginkgolide B [M+H]<sup>+</sup> HCD 51V P=425.1  
C<sub>20</sub>H<sub>24</sub>O<sub>10</sub>; MF: 8; RMF: 161; Prob 12.8%; CAS: 15291-77-7; Lib: nist\_msms; ID: 352890.

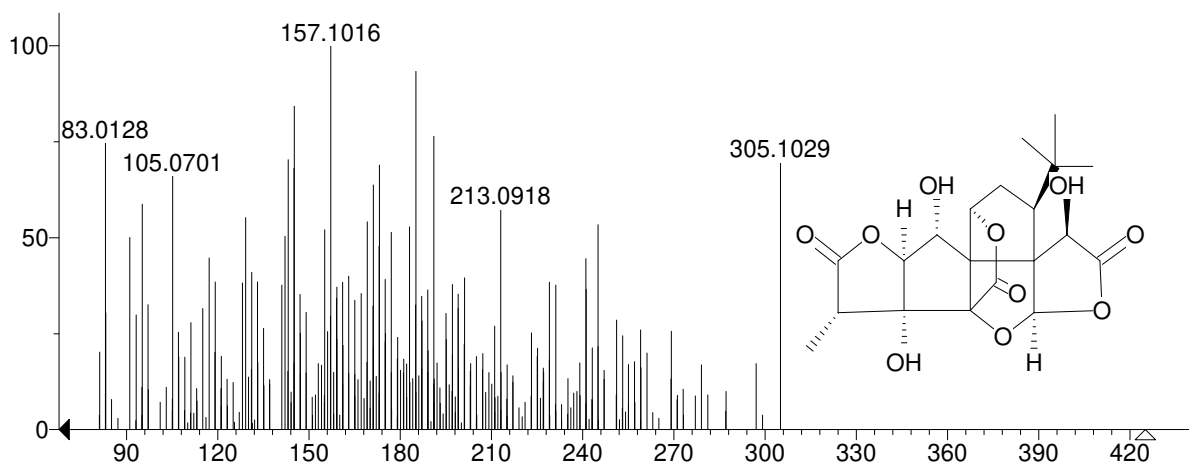

Hit 2 : ginkgolide B [M+H]<sup>+</sup> 45HCD P=425.1  
C<sub>20</sub>H<sub>24</sub>O<sub>10</sub>; MF: 7; RMF: 150; Prob 12.3%; Lib: mona-export-vf-npl\_qexactive; ID: 5951.

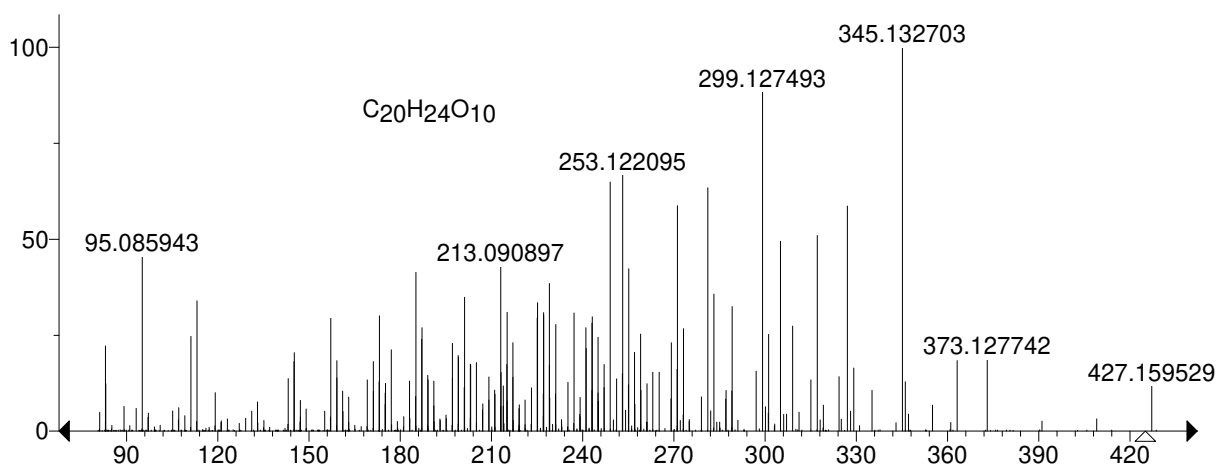

\*\* Search Report Page 2 of 2 \*\*

Hit 3 : [(2R,3S,4S,5R,6S)-3,4,5-trihydroxy-6-[(E)-3-phenylprop-2-enoyl]oxyoxan-2-yl]methyl 3,4-dihydroxy-2-methoxybutanoate  
C<sub>20</sub>H<sub>24</sub>O<sub>10</sub>; MF: 1; RMF: 46; Prob 9.68%; Lib: mona-export-vf-npl\_qexactive; ID: 9484.

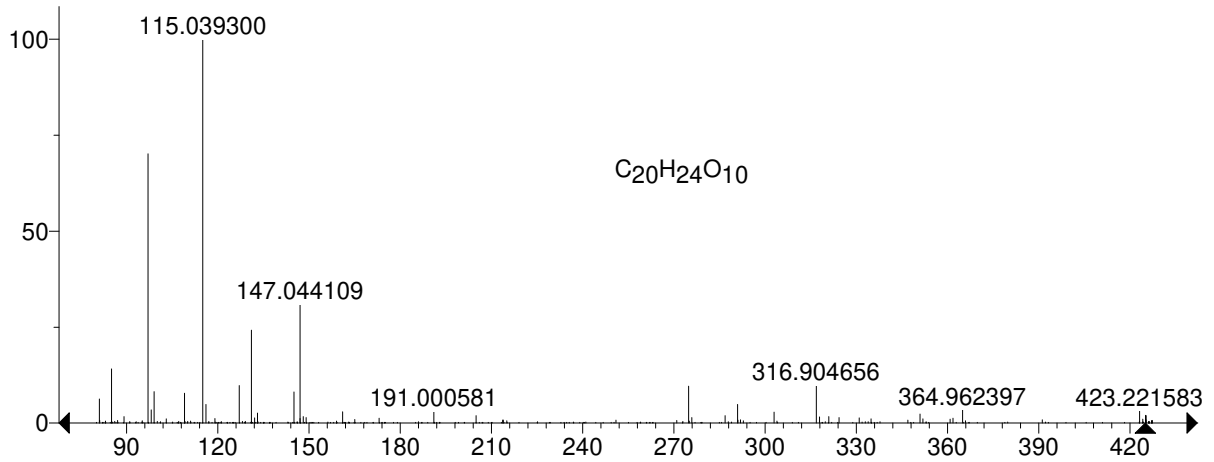

Hit 4 : NCGC00381128-01\_C18H26O10\_4-(beta-D-Glucopyranosyloxy)benzyl 2,3-dihydroxy-3-methylbutanoate  
C<sub>18</sub>H<sub>26</sub>O<sub>10</sub>; MF: 0; RMF: 102; Prob 9.31%; Lib: mona-export-gnps; ID: 11687.

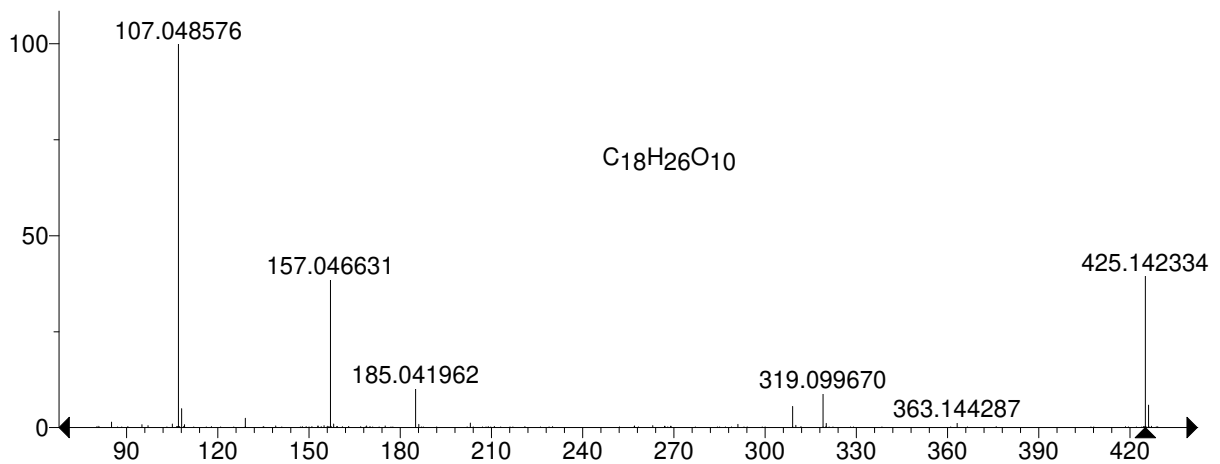

Hit 5 : NCGC00380741-01\_C20H24O10\_6-O-(3,4-Dihydroxy-2-methylenebutanoyl)-1-O-[(2E)-3-phenyl-2-propenoic acid]  
C<sub>20</sub>H<sub>24</sub>O<sub>10</sub>; MF: 0; RMF: 49; Prob 9.31%; Lib: mona-export-gnps; ID: 11636.

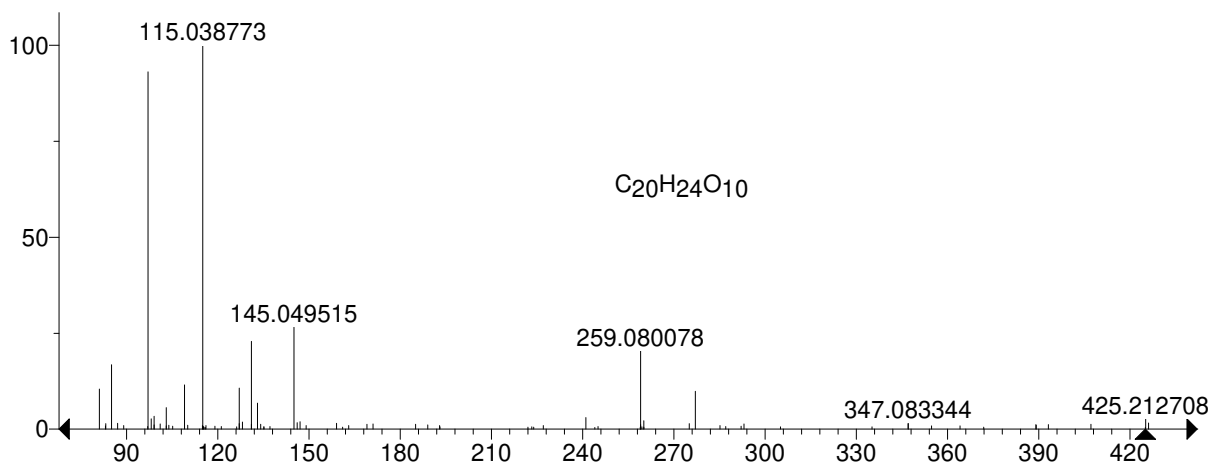

Unknown: Unknown (9.55\_429.1868m/z)  
Compound in Library Factor = 0

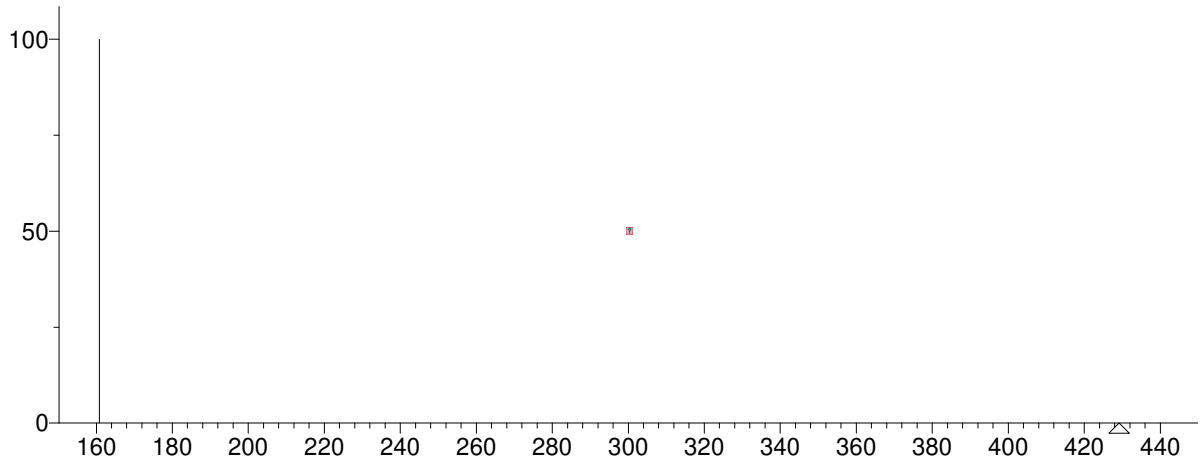

Unknown: Unknown (9.55\_534.2213m/z)  
Compound in Library Factor = 0

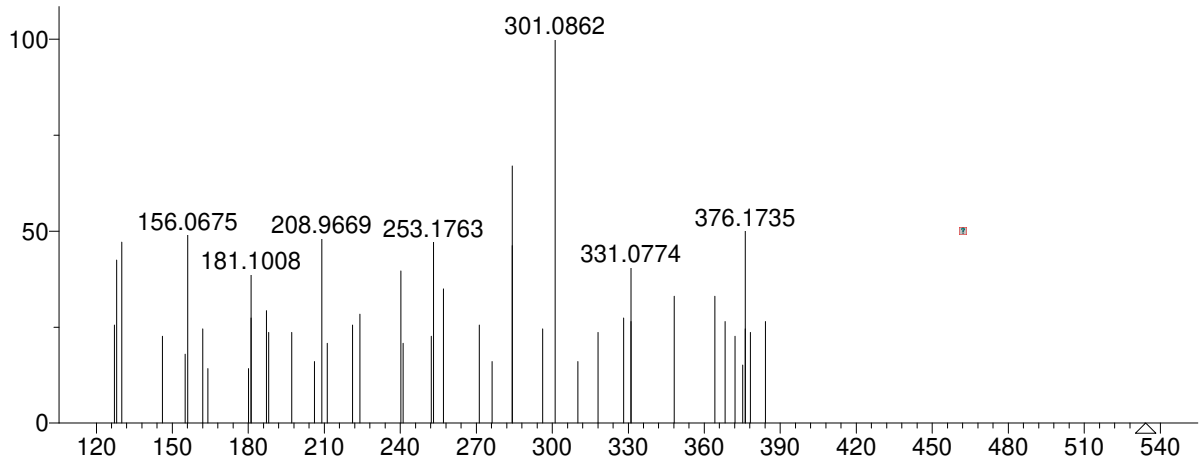

Unknown: Unknown (9.57\_358.1957m/z)  
Compound in Library Factor = 0

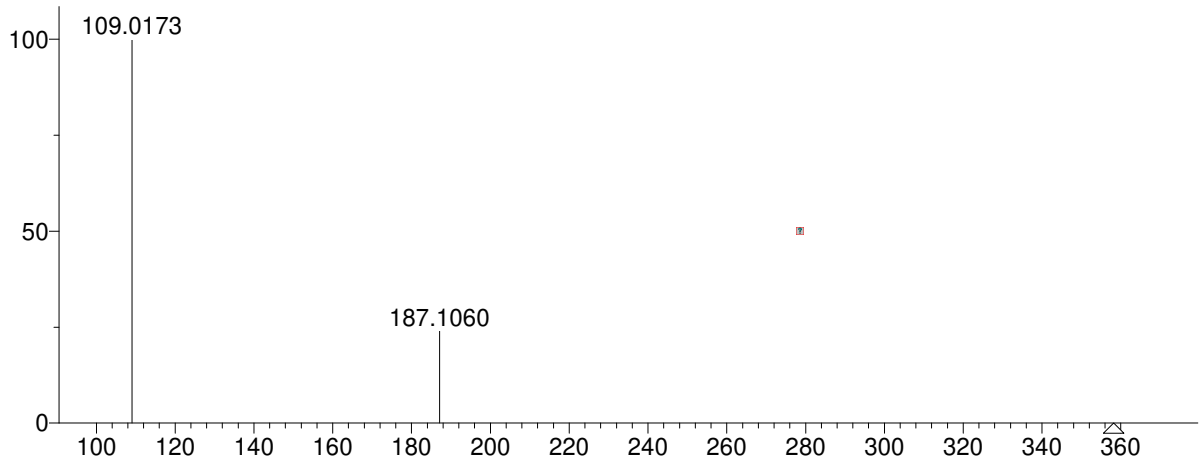



Unknown: Unknown (9.58\_447.1865m/z)  
Compound in Library Factor = -264

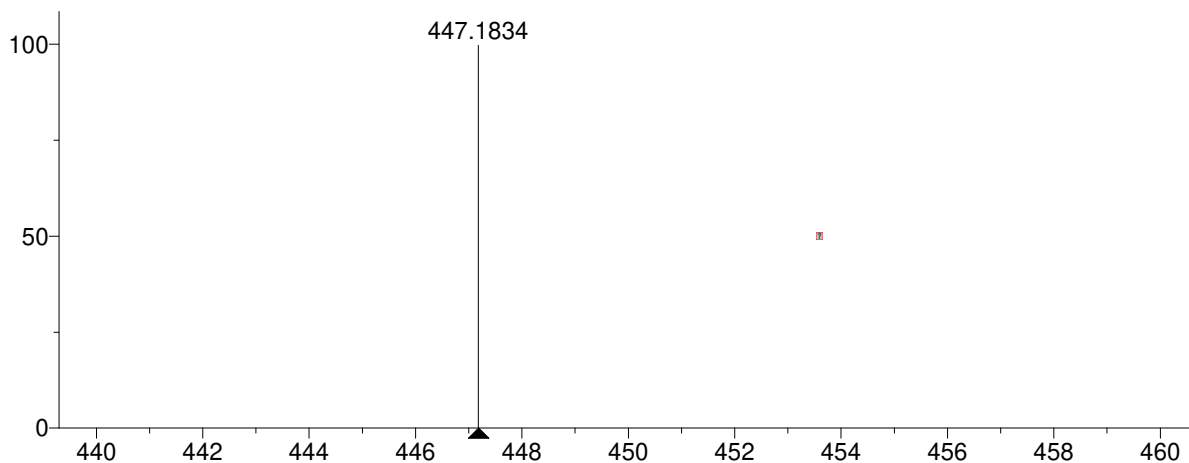

Hit 1 : 21-Carboxylic acid triamcinolone acetoneide [M-H]<sup>-</sup> HCD 40V P=447.2  
C<sub>24</sub>H<sub>29</sub>FO<sub>7</sub>; MF: 364; RMF: 999; Prob 92.2%; CAS: 53962-41-7; Lib: nist\_msms; ID: 449262.

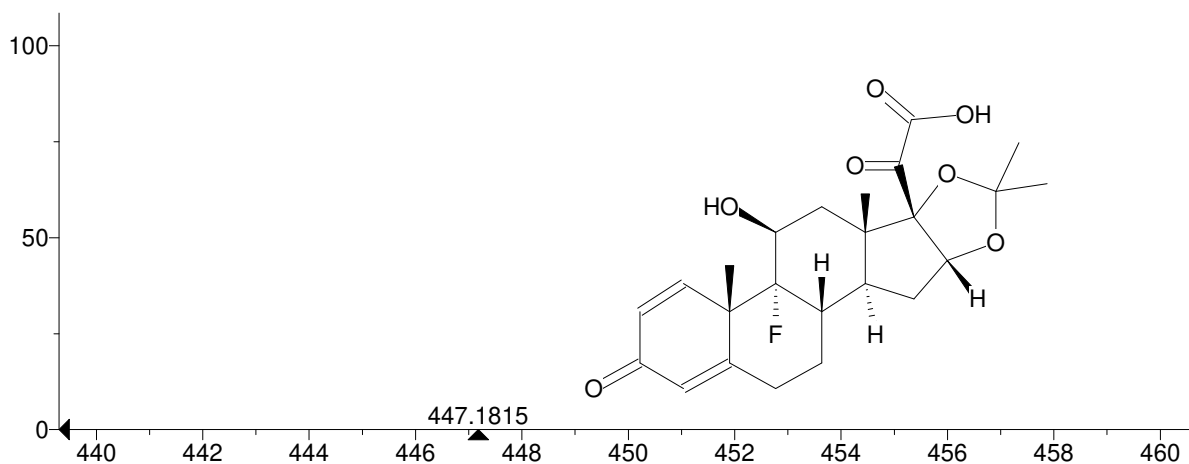

Hit 2 : [(2R,3R,4S,5S,6R)-2-(acetyloxymethyl)-3,5-dihydroxy-6-[(2S,3R)-2,3,4-trihydroxybutoxy]oxan-4-yl] hexano:  
C<sub>18</sub>H<sub>32</sub>O<sub>11</sub>; MF: 257; RMF: 906; Prob 6.12%; Lib: anthocyanins mona; ID: 5054.

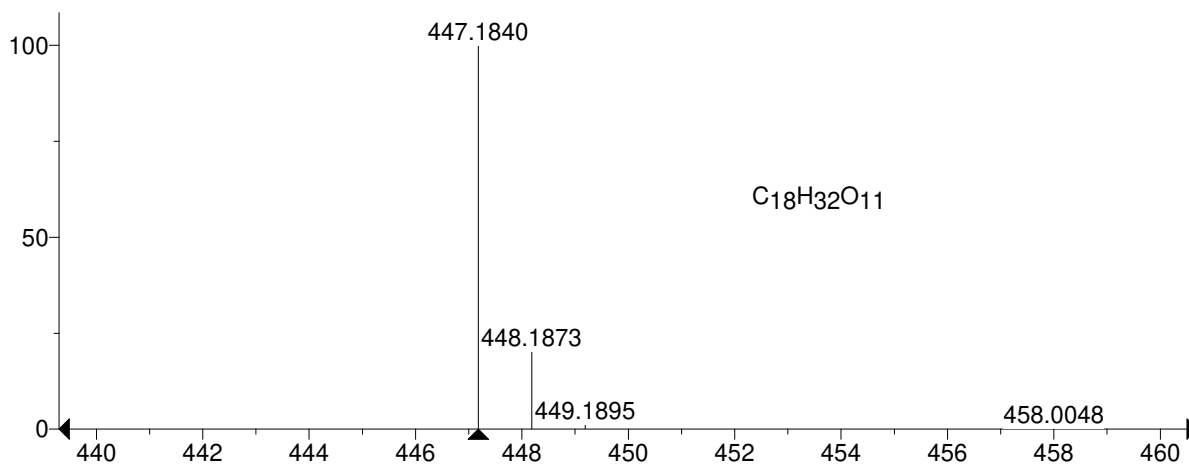

\*\* Search Report Page 2 of 2 \*\*

Hit 3 : NCGC00381210-01\_C18H32O11\_(2E)-4-Hydroxy-3,4-dimethyl-2-penten-1-yl 6-O-[(2S,3R,4R)-3,4-dihydro  
C18H32O11; MF: 227; RMF: 925; Prob 1.70%; Lib: mona-export-gnps; ID: 12907.

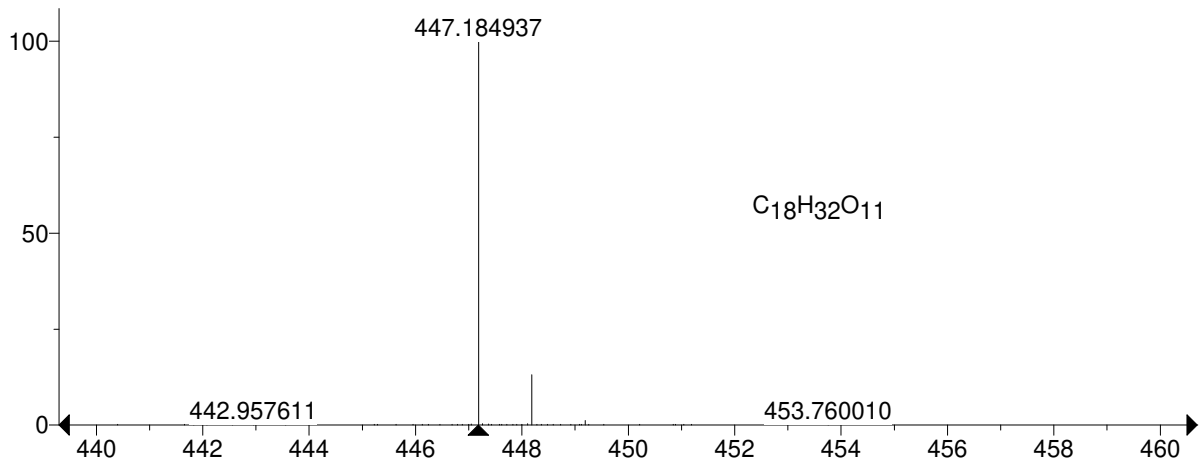

\*\* Search Report Page 1 of 2 \*\*

Unknown: Unknown (9.59\_525.2660m/z)  
Compound in Library Factor = -3273

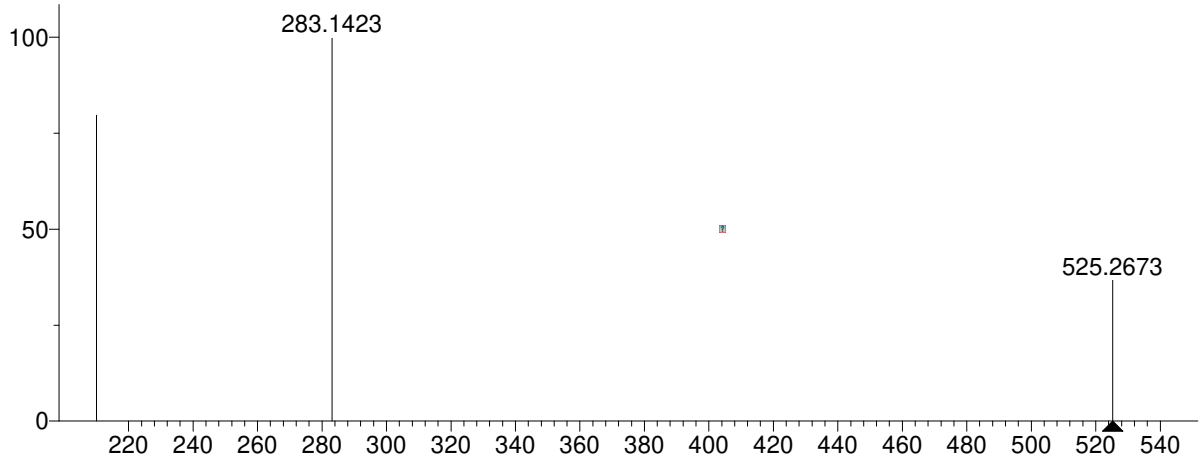

Hit 1 : PA 24:5; PA 2:0-22:5; [M-H]<sup>-</sup> [M-H]<sup>-</sup> P=525.3  
C<sub>27</sub>H<sub>43</sub>O<sub>8</sub>P; MF: 6; RMF: 199; Prob 26.5%; Lib: msdial-insilicomsm-lipids-neg; ID: 315724.

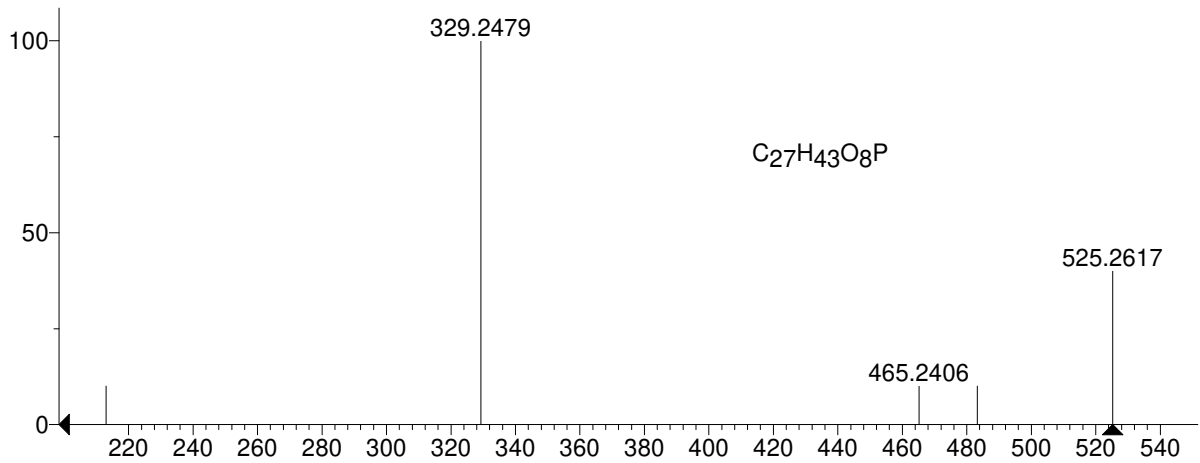

Hit 2 : PA 24:5; PA 4:0-20:5; [M-H]<sup>-</sup> [M-H]<sup>-</sup> P=525.3  
C<sub>27</sub>H<sub>43</sub>O<sub>8</sub>P; MF: 5; RMF: 194; Prob 25.5%; Lib: msdial-insilicomsm-lipids-neg; ID: 315834.

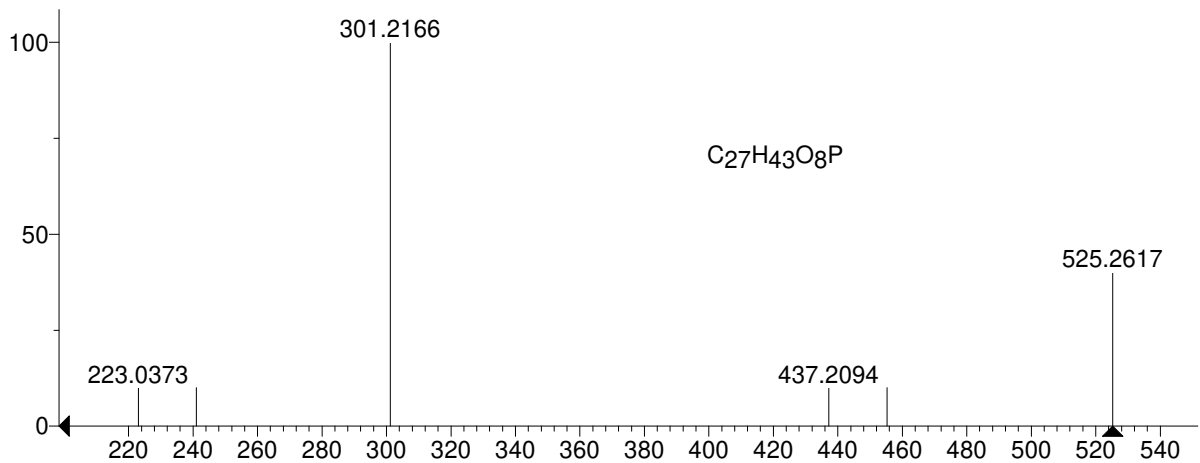

\*\* Search Report Page 2 of 2 \*\*

Hit 3 : PA 24:5; PA 6:0-18:5; [M-H]<sup>-</sup> [M-H]<sup>-</sup> P=525.3  
C<sub>27</sub>H<sub>43</sub>O<sub>8</sub>P; MF: 5; RMF: 194; Prob 25.5%; Lib: msdial-insilicomsms-lipids-neg; ID: 315940.

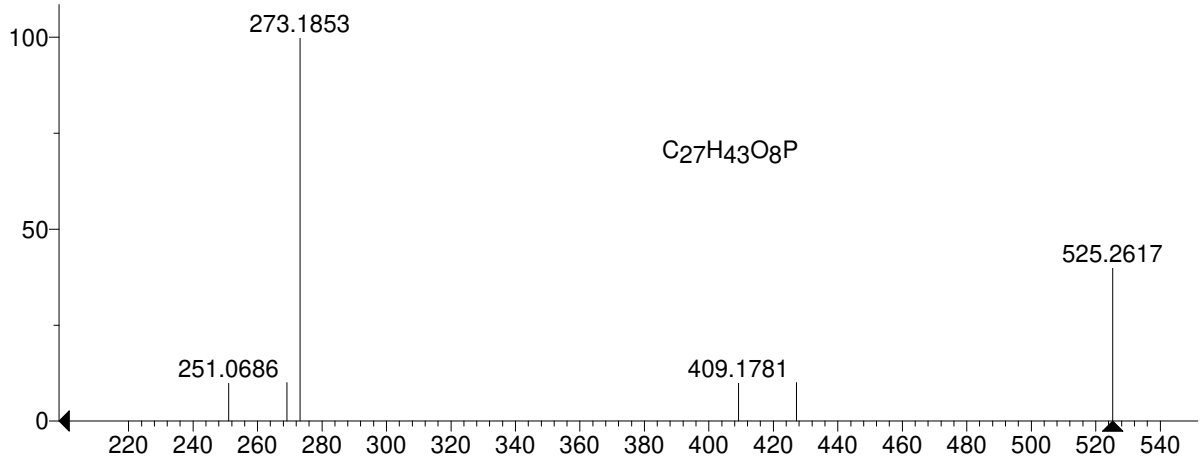

Hit 4 : FMRF Amide-Like Peptide I, lobster [M-2H]<sup>2-</sup> HCD 18eV P=525.3  
C<sub>47</sub>H<sub>72</sub>N<sub>16</sub>O<sub>12</sub>; MF: 2; RMF: 284; Prob 22.5%; Lib: nist\_msms2; ID: 79285.

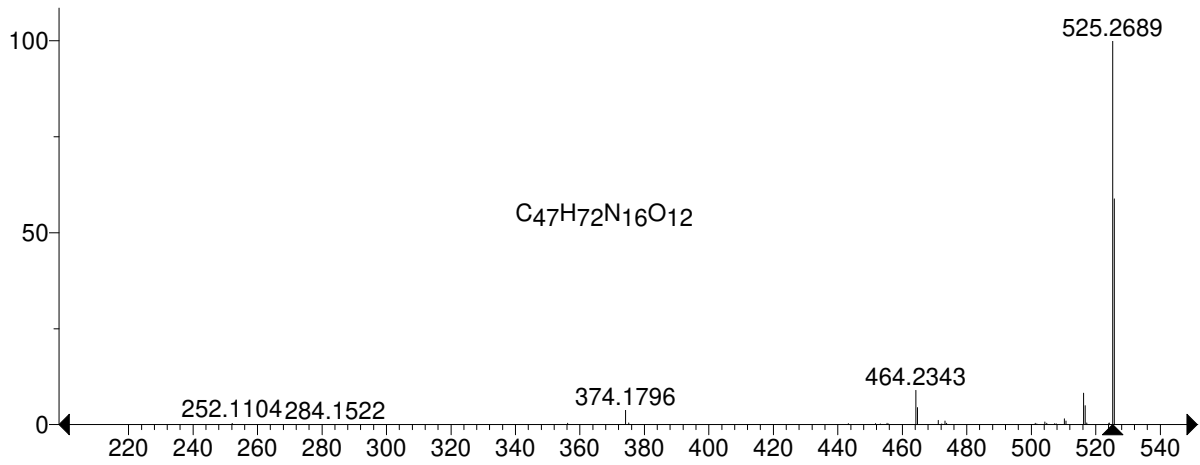

\*\* Search Report Page 1 of 2 \*\*

Unknown: Unknown (9.61\_277.1547m/z)  
Compound in Library Factor = -216

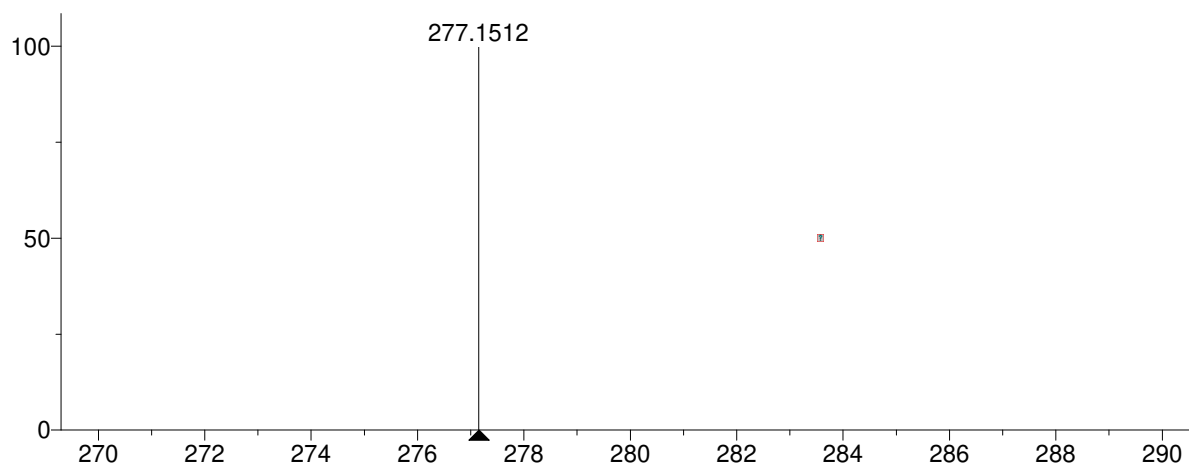

Hit 1 : Phe-Leu [M-H]<sup>-</sup> HCD 24eV P=277.2  
C<sub>15</sub>H<sub>22</sub>N<sub>2</sub>O<sub>3</sub>; MF: 364; RMF: 999; Prob 12.5%; Lib: nist\_msms; ID: 570091.

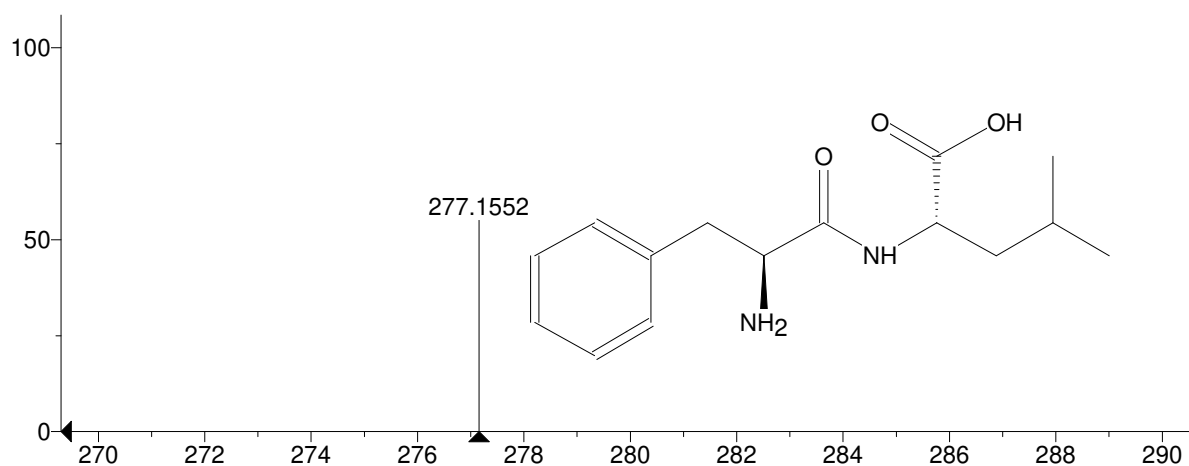

Hit 2 : Ile-Phe [M-H]<sup>-</sup> HCD 20eV P=277.2  
C<sub>15</sub>H<sub>22</sub>N<sub>2</sub>O<sub>3</sub>; MF: 364; RMF: 999; Prob 12.5%; Lib: nist\_msms; ID: 570144.

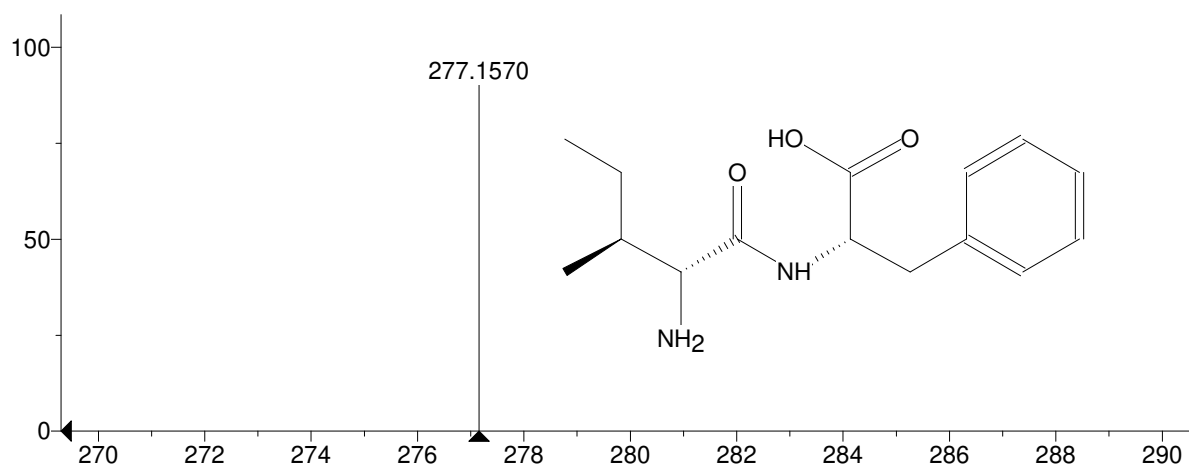

Hit 3 : Leu-Phe [M-H]<sup>-</sup> HCD 24eV P=277.2  
C<sub>15</sub>H<sub>22</sub>N<sub>2</sub>O<sub>3</sub>; MF: 364; RMF: 999; Prob 12.5%; Lib: nist\_msms; ID: 570205.

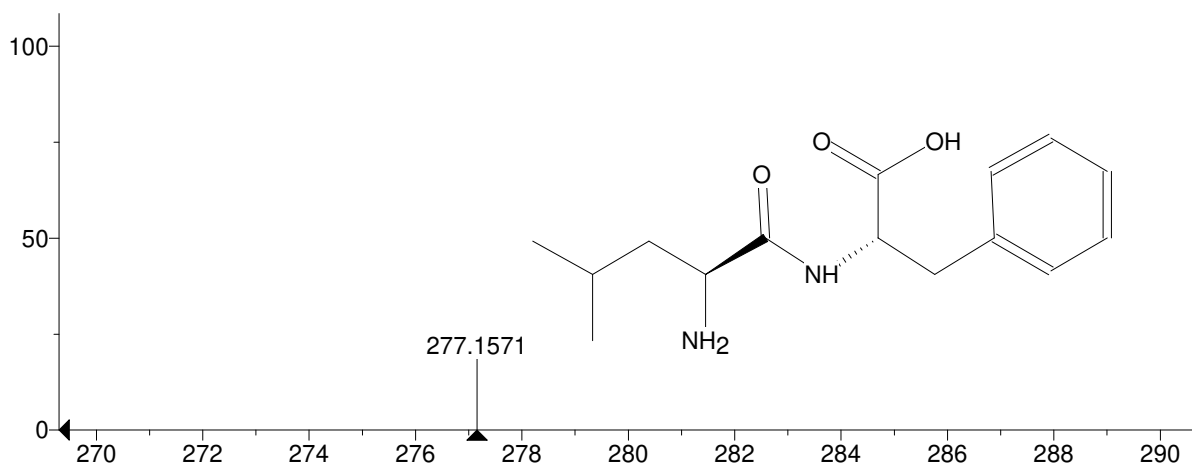

Hit 4 : Phe-Ile [M-H]<sup>-</sup> HCD 36eV P=277.2  
C<sub>15</sub>H<sub>22</sub>N<sub>2</sub>O<sub>3</sub>; MF: 364; RMF: 999; Prob 12.5%; Lib: nist\_msms; ID: 570606.

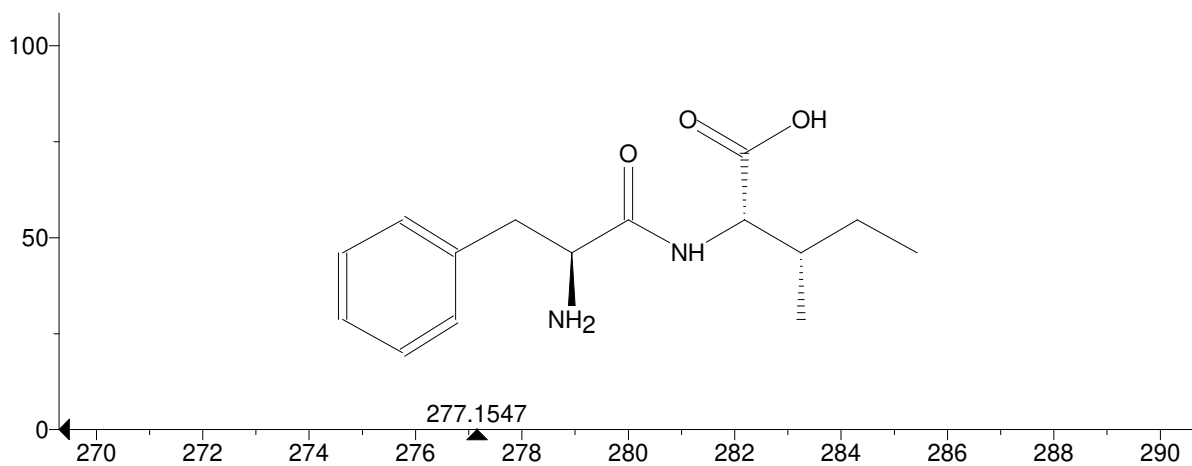

Hit 5 : Phe-Leu [M-H]<sup>-</sup> HCD 24eV P=277.2  
C<sub>15</sub>H<sub>22</sub>N<sub>2</sub>O<sub>3</sub>; MF: 364; RMF: 999; Prob 12.5%; CAS: 3303-55-7; Lib: nist\_msms2; ID: 83817.

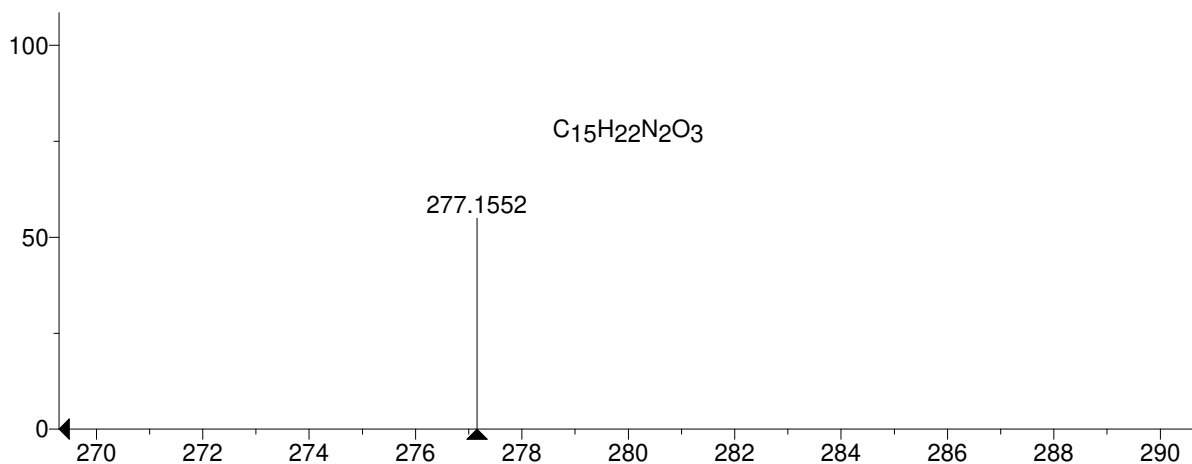

Unknown: Unknown (9.61\_289.0009m/z)  
Compound in Library Factor = 0

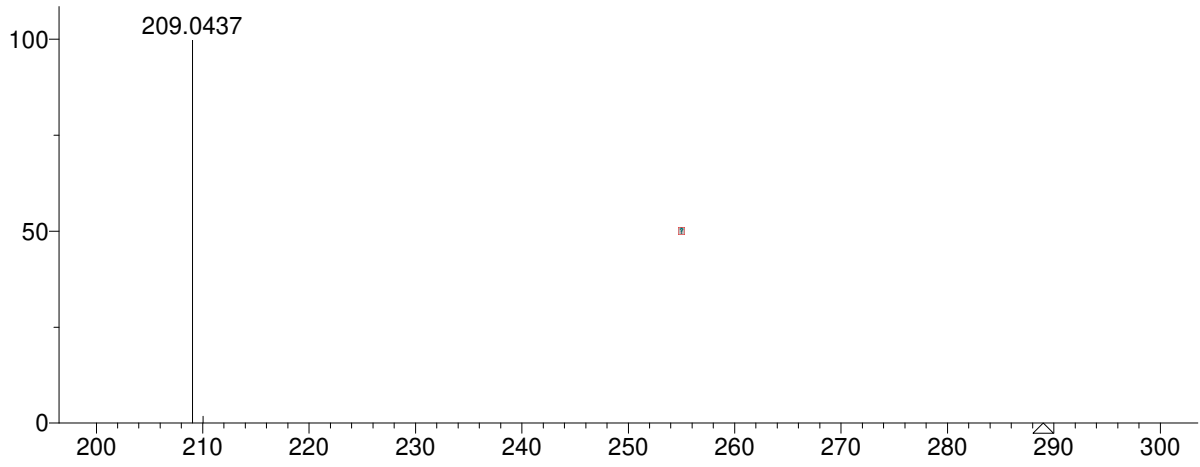

Unknown: Unknown (9.64\_417.0841m/z)  
Compound in Library Factor = 0

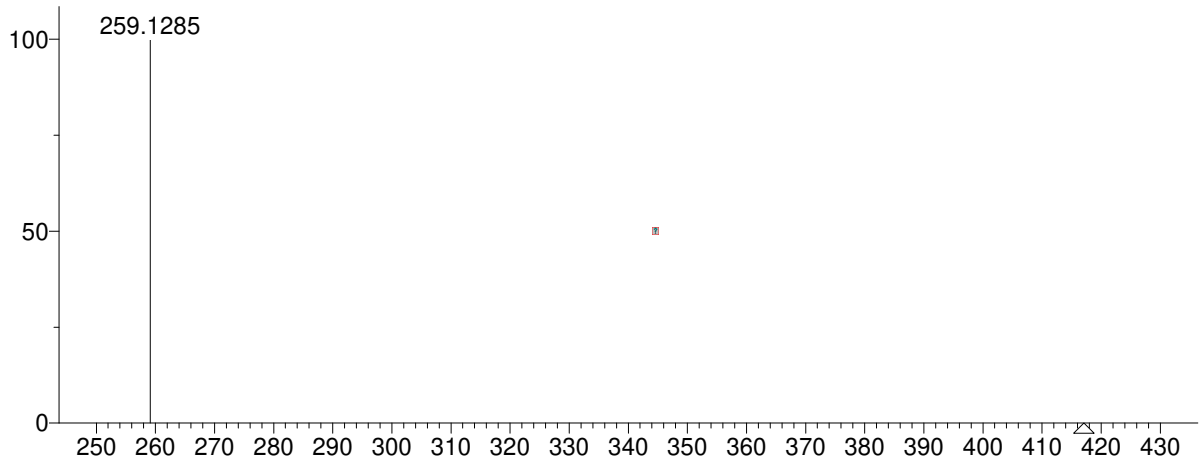



Unknown: Unknown (9.66\_429.1860m/z)  
Compound in Library Factor = 0

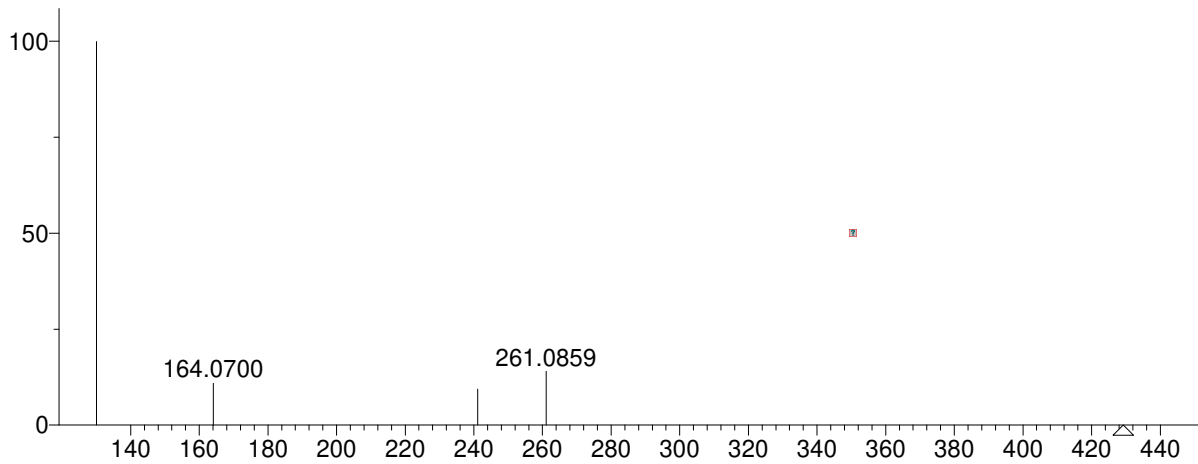

Hit 1 : (2R,3R,4S,5S,6R)-2-[6-hydroxy-3-[(E)-3-hydroxybut-1-enyl]-2,4,4-trimethylcyclohexyl]oxy-6-(hydroxymethyl) C<sub>19</sub>H<sub>34</sub>O<sub>8</sub>; MF: 0; RMF: 7; Prob 100.0%; Lib: anthocyanins mona; ID: 9963.

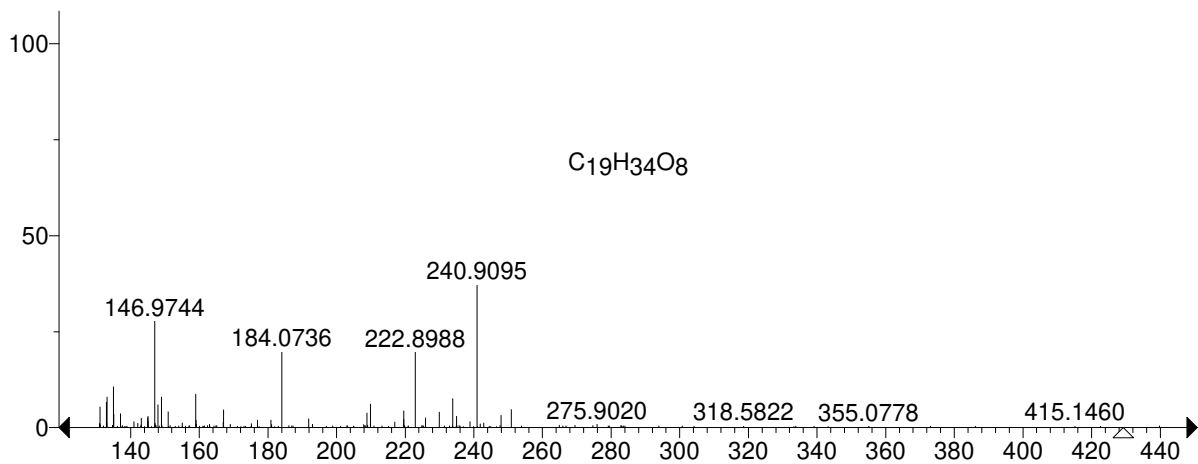

Unknown: Unknown (9.66\_449.1548m/z)  
Compound in Library Factor = 0

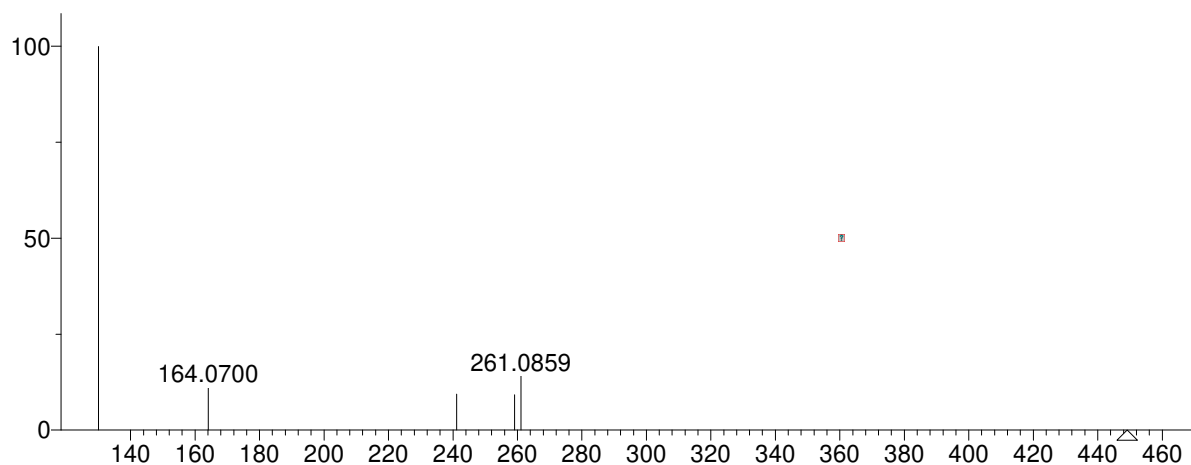

Hit 1 : Archangelicine [M+Na]<sup>+</sup> 35HCD P=449.2  
C<sub>24</sub>H<sub>26</sub>O<sub>7</sub>; MF: 0; RMF: 1; Prob 100.0%; Lib: mona-export-vf-npl\_gexactive; ID: 5185.

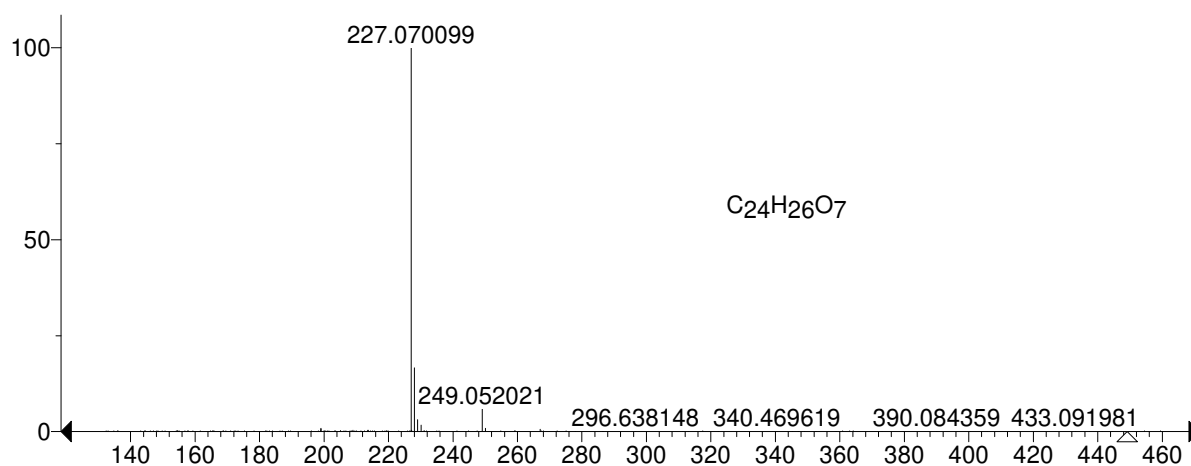

\*\* Search Report Page 1 of 2 \*\*

Unknown: Unknown (9.66\_514.2395m/z)  
Compound in Library Factor = 0

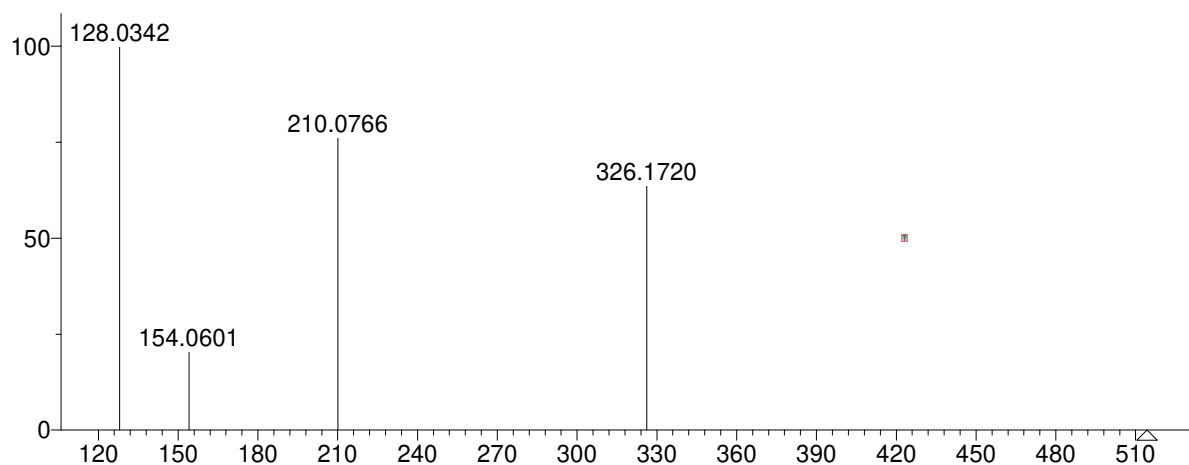

Hit 1 : Harringtonine [M+H-H<sub>2</sub>O]<sup>+</sup> HCD 164V P=514.2  
C<sub>28</sub>H<sub>37</sub>NO<sub>9</sub>; MF: 0; RMF: 66; Prob 16.7%; CAS: 26833-85-2; Lib: nist\_msms; ID: 359996.

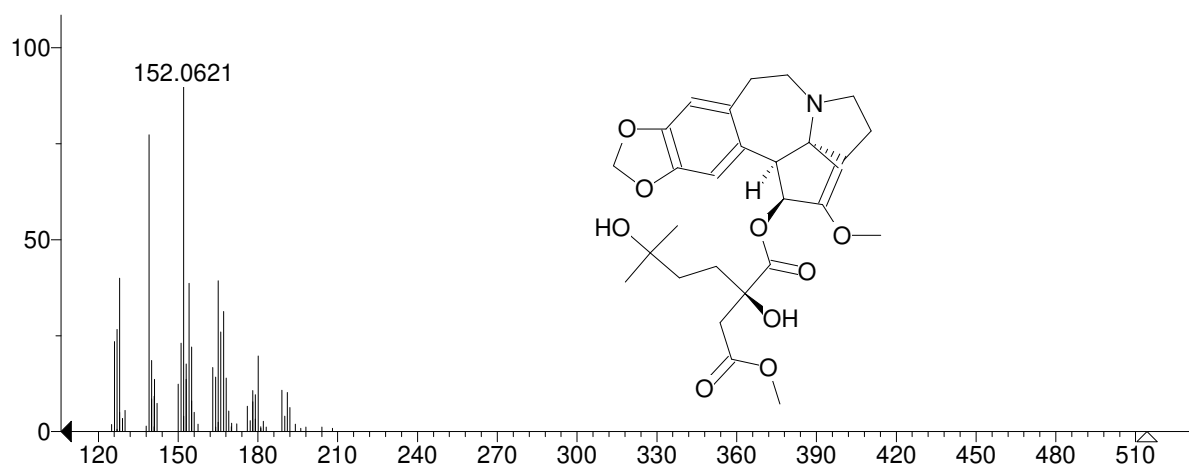

Hit 2 : (2S)-2-[(3R,7R,8R,8aS)-3,4'-dihydroxy-4,4,7,8a-tetramethyl-6'-oxospiro[2,3,4a,5,6,7-hexahydro-1H-naphth  
C<sub>28</sub>H<sub>37</sub>NO<sub>8</sub>; MF: 0; RMF: 25; Prob 16.7%; Lib: mona-export-lc-ms-ms\_negative\_mode; ID: 19562.

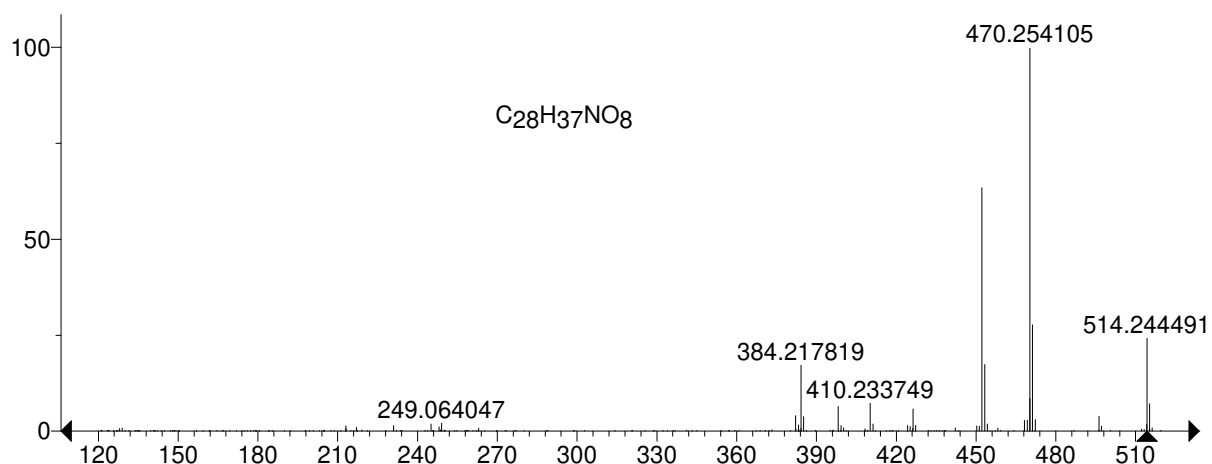

Hit 3 : 2-[(3R,8aS)-3,4'-dihydroxy-4,4,7,8a-tetramethyl-6'-oxospiro[2,3,4a,5,6,7-hexahydro-1H-naphthalene-8,2'-3, C<sub>28</sub>H<sub>37</sub>NO<sub>8</sub>; MF: 0; RMF: 15; Prob 16.7%; Lib: mona-export-lc-ms-ms\_negative\_mode; ID: 19532.

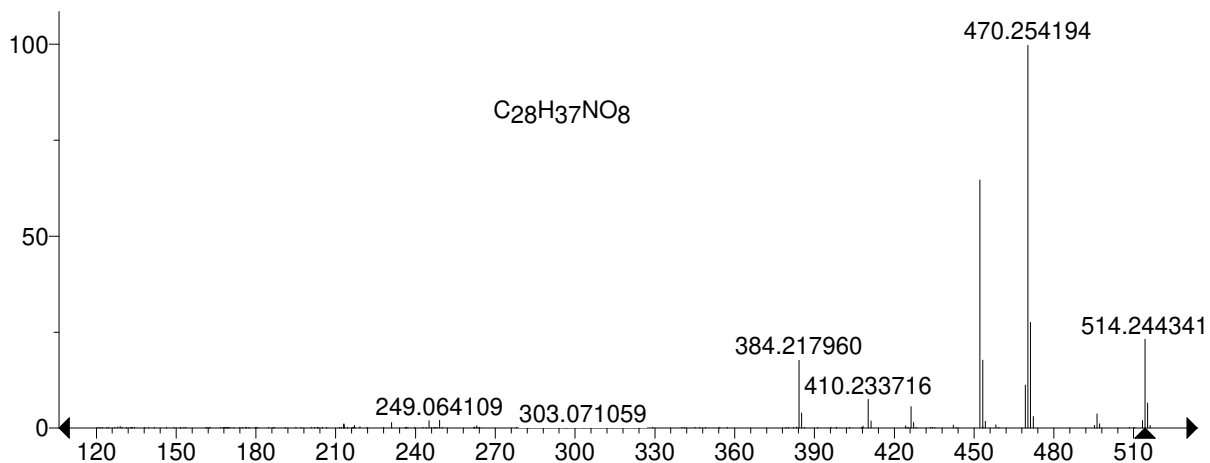

Hit 4 : (1R,4S,7R,8S)-7-[(2E,4E)-hexa-2,4-dienyl]-3-hydroxy-8-[(2S)-3-hydroxy-2,4-dimethyl-5-oxo-2,5-dihydrofuf C<sub>28</sub>H<sub>32</sub>O<sub>8</sub>; MF: 0; RMF: 11; Prob 16.7%; Lib: mona-export-vf-npl\_qexactive; ID: 21801.

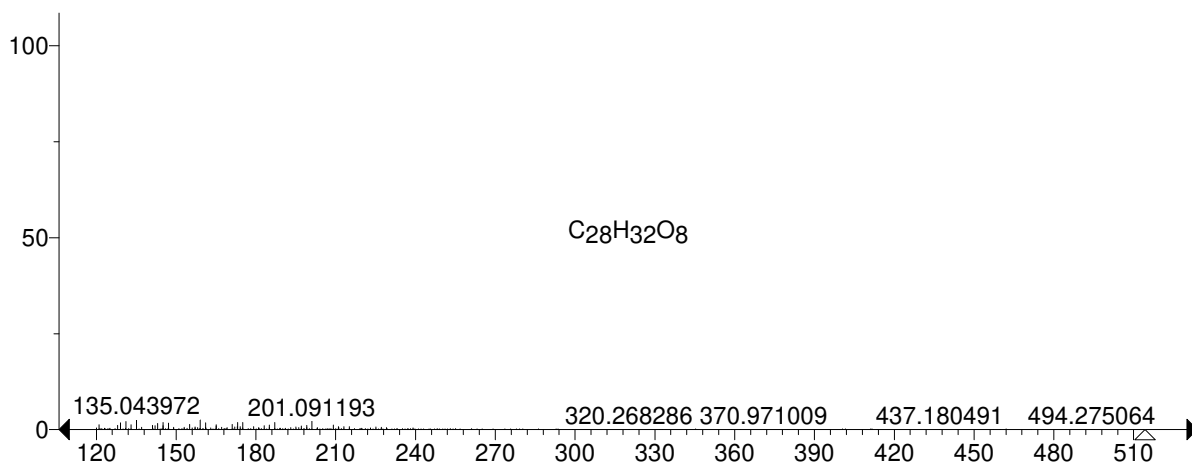

Hit 5 : (2E,4E)-1-[(1R,3S,8R,10S,14S)-12-[(2E,4E)-hexa-2,4-dienyl]-1,6,8,13-tetrahydroxy-3,7,10,14-tetramethyl C<sub>28</sub>H<sub>32</sub>O<sub>8</sub>; MF: 0; RMF: 9; Prob 16.7%; Lib: mona-export-vf-npl\_qexactive; ID: 20659.

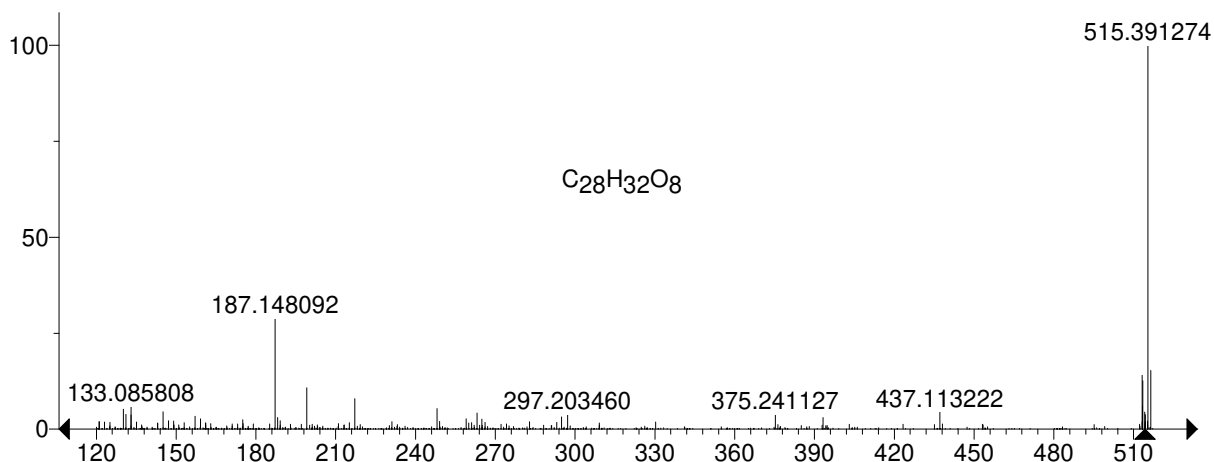

Unknown: Unknown (9.67\_443.2028m/z)  
Compound in Library Factor = -3273

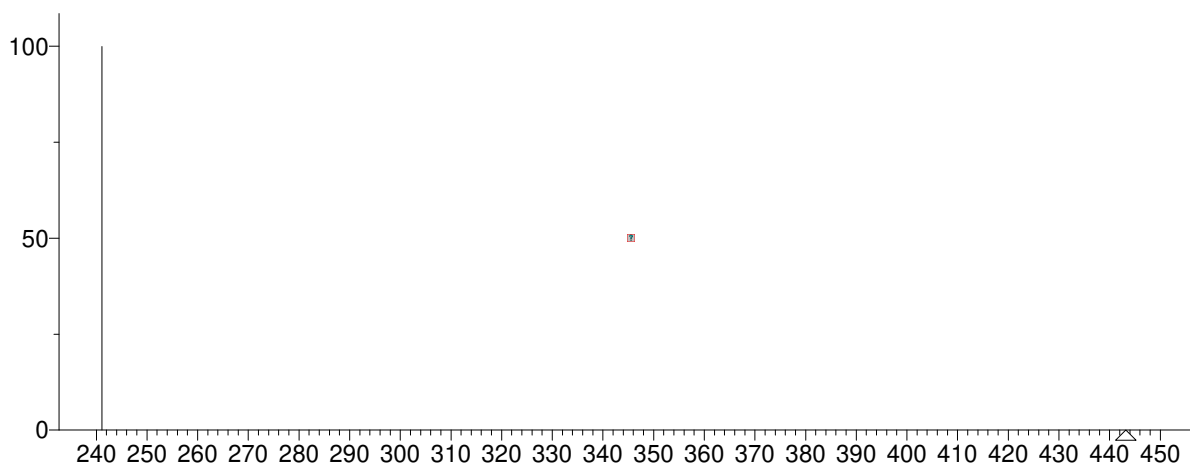

Hit 1 : methyl 10-acetyloxy-4,5,9-trihydroxy-1,4a-dimethyl-7-propan-2-yl-2,3,4,9,10,10a-hexahydrophenanthrene-  
C<sub>23</sub>H<sub>32</sub>O<sub>7</sub>; MF: 2; RMF: 307; Prob 52.0%; Lib: mona-export-vf-npl\_qexactive; ID: 22545.

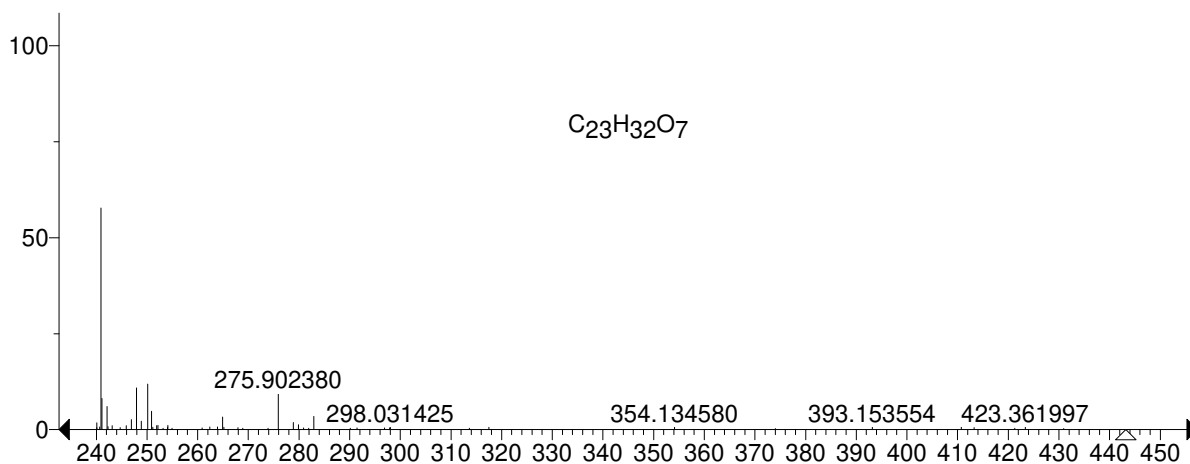

Hit 2 : NCGC00380442-01\_C<sub>25</sub>H<sub>30</sub>O<sub>7</sub>\_3H-5,13b-Methano-1H-furo[3',4':6,7]heptaleno[3,2-c]pyran-1,4,9(3aH,7H)-  
C<sub>25</sub>H<sub>30</sub>O<sub>7</sub>; MF: 0; RMF: 55; Prob 48.0%; Lib: mona-export-gnps; ID: 13756.

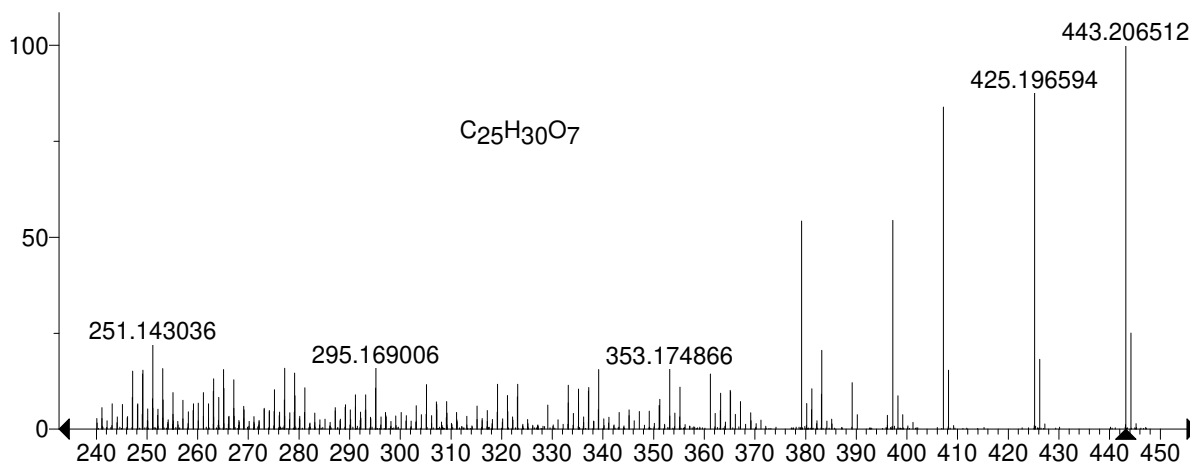

Unknown: Unknown (9.68\_534.2214m/z)  
Compound in Library Factor = 0

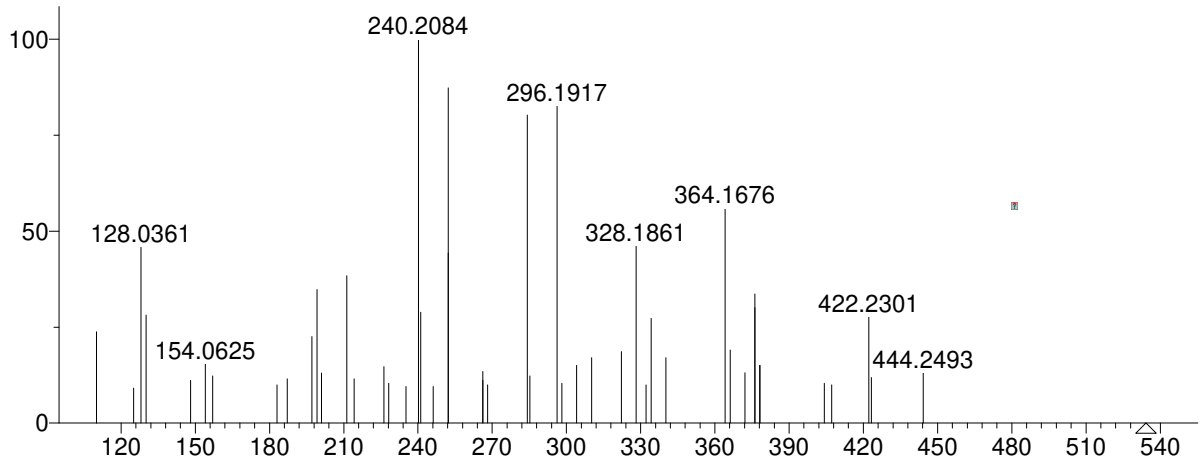

Unknown: Unknown (9.68\_536.2153m/z)  
Compound in Library Factor = 0

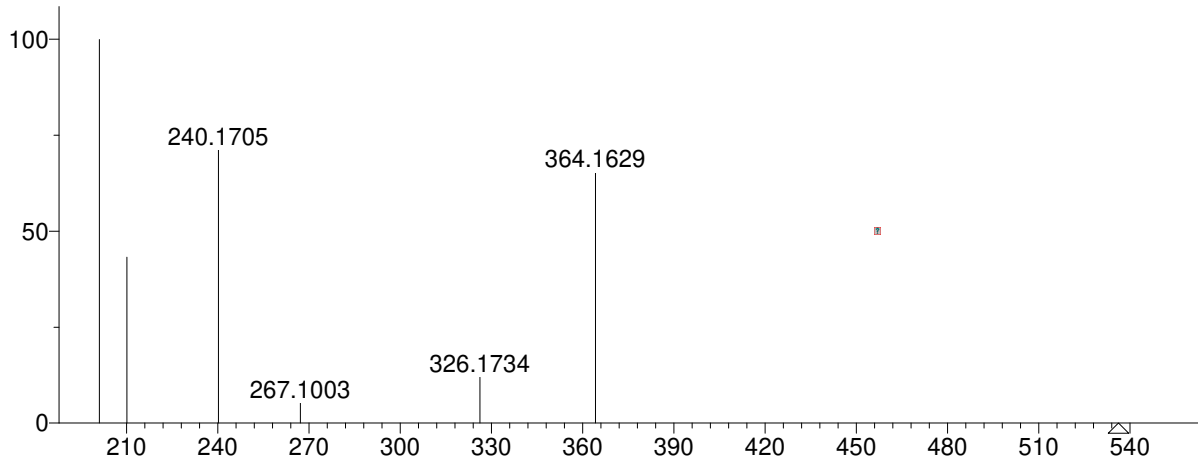

Unknown: Unknown (9.68\_663.2492m/z)  
Compound in Library Factor = 0

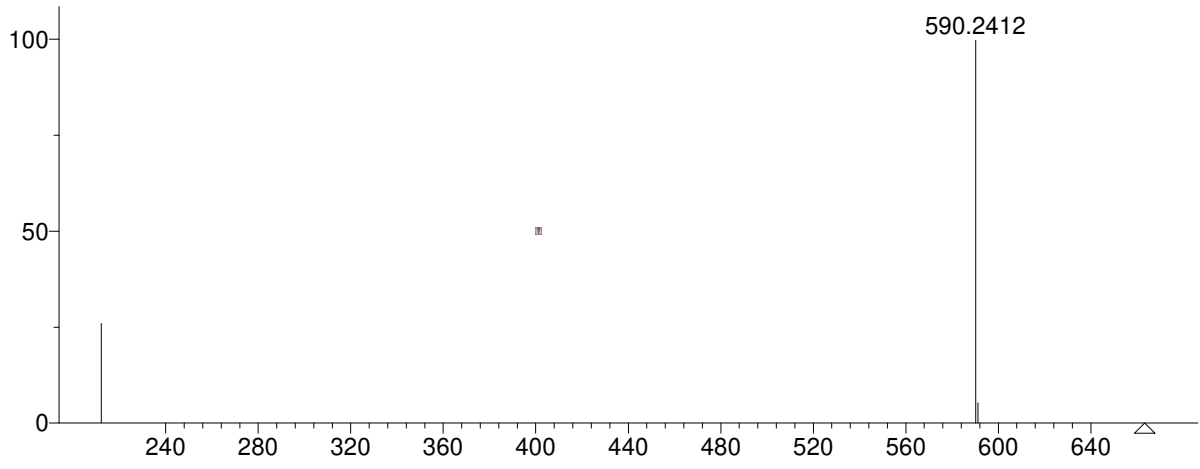



\*\* Search Report Page 1 of 2 \*\*

Unknown: Unknown (9.69\_548.2381m/z)  
Compound in Library Factor = -235

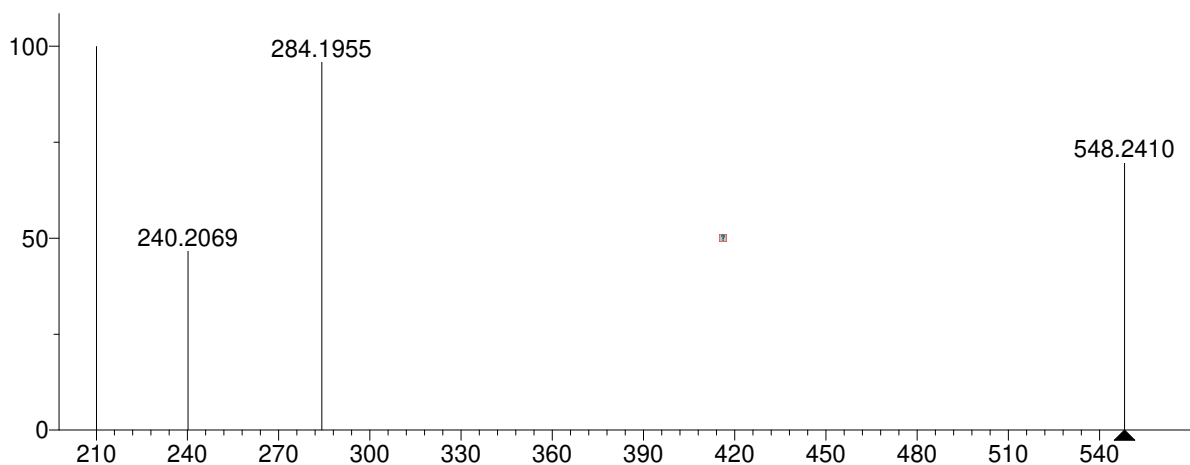

Hit 1 : Darunavir [M+H]<sup>+</sup> HCD 5V P=548.2  
C27H37N3O7S; MF: 288; RMF: 924; Prob 98.6%; CAS: 206361-99-1; Lib: nist\_msms; ID: 355571.

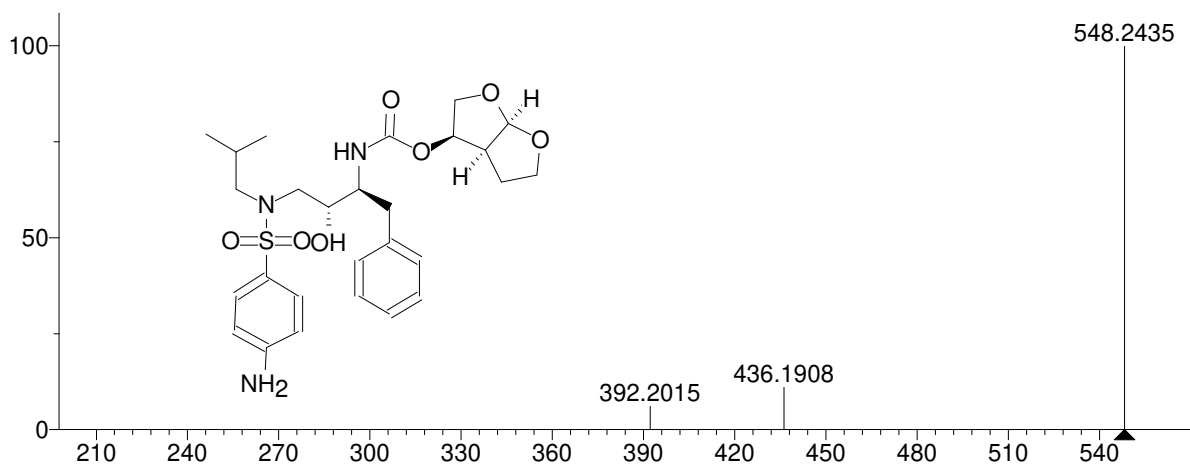

Hit 2 : Virginiamycin component b [M+Na]<sup>+</sup> HCD 32V P=548.2  
C28H35N3O7; MF: 21; RMF: 429; Prob 0.98%; Lib: nist\_msms; ID: 353177.

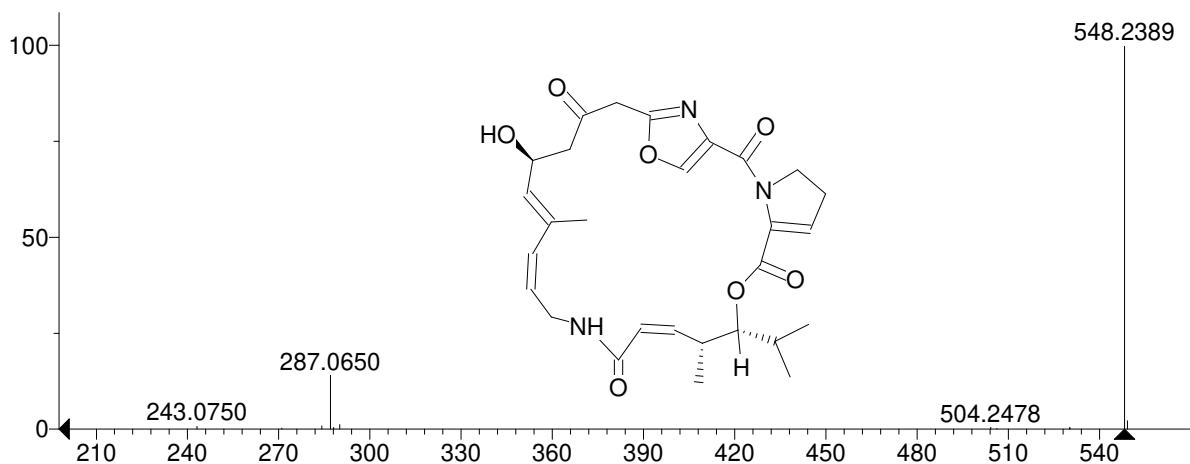

Hit 3 : Darunavir Ethanolate (Prezista) [M+H]<sup>+</sup> P=548.2  
C<sub>29</sub>H<sub>43</sub>N<sub>3</sub>O<sub>8</sub>S; MF: 0; RMF: 42; Prob 0.41%; Lib: mona-export-gnps; ID: 538.

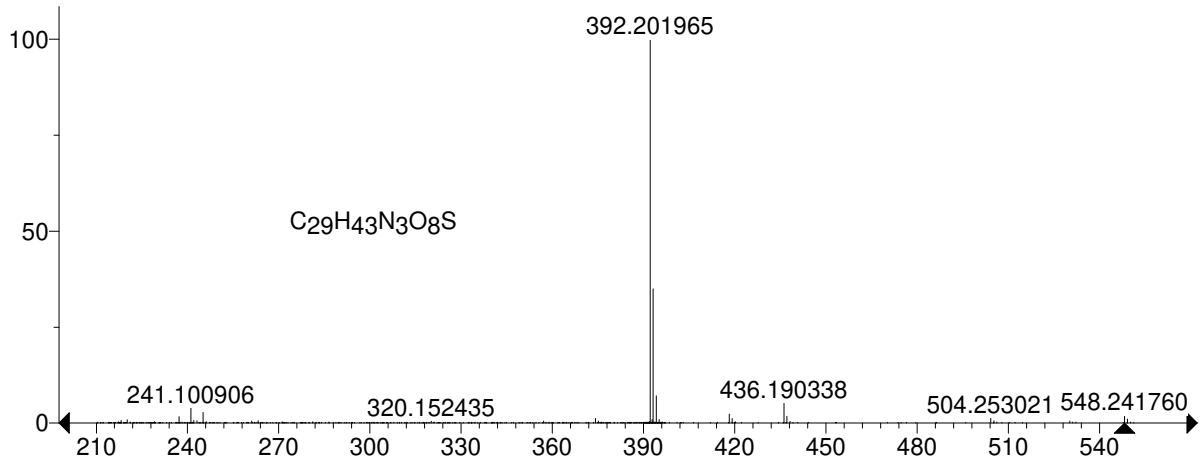

Unknown: Unknown (9.69\_760.3070m/z)  
Compound in Library Factor = 0

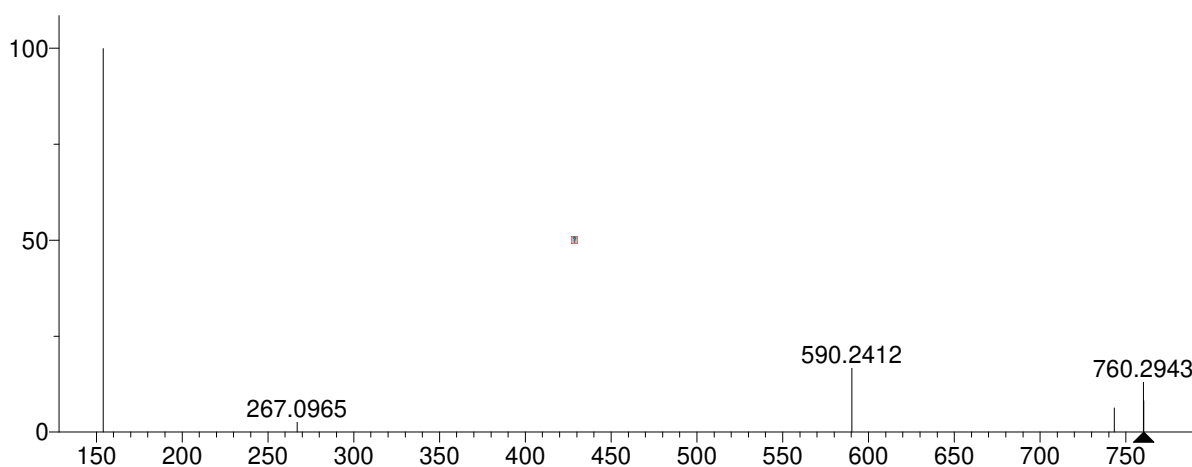

Hit 1 : NCGC00380723-01!(2S,3R,4S,5S,6R)-2-[4-[(3S,3aR,6S,6aR)-6-[3,5-dimethoxy-4-[(2S,3R,4S,5S,6R)-3,4,5

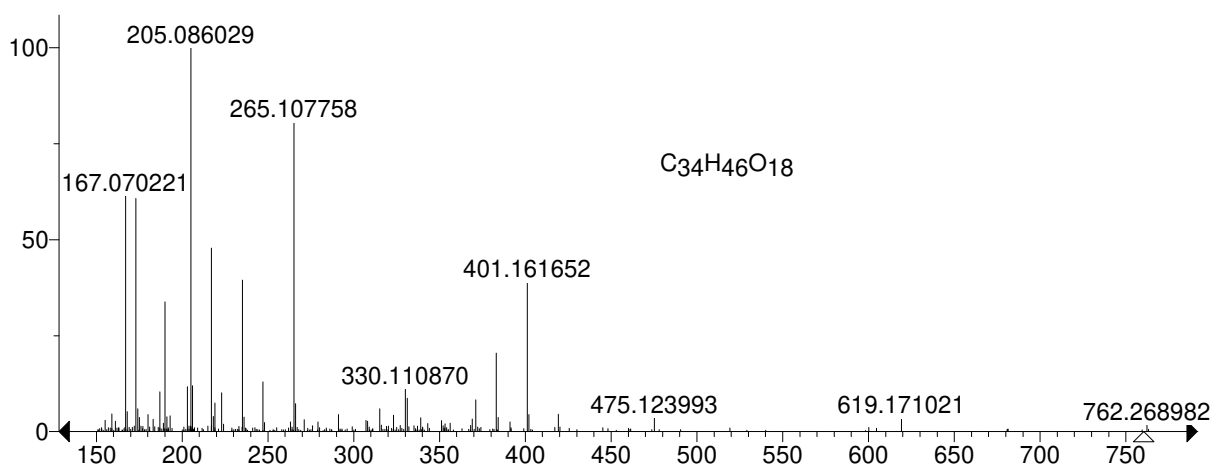

Unknown: Unknown (9.71\_401.1911m/z)  
Compound in Library Factor = 0

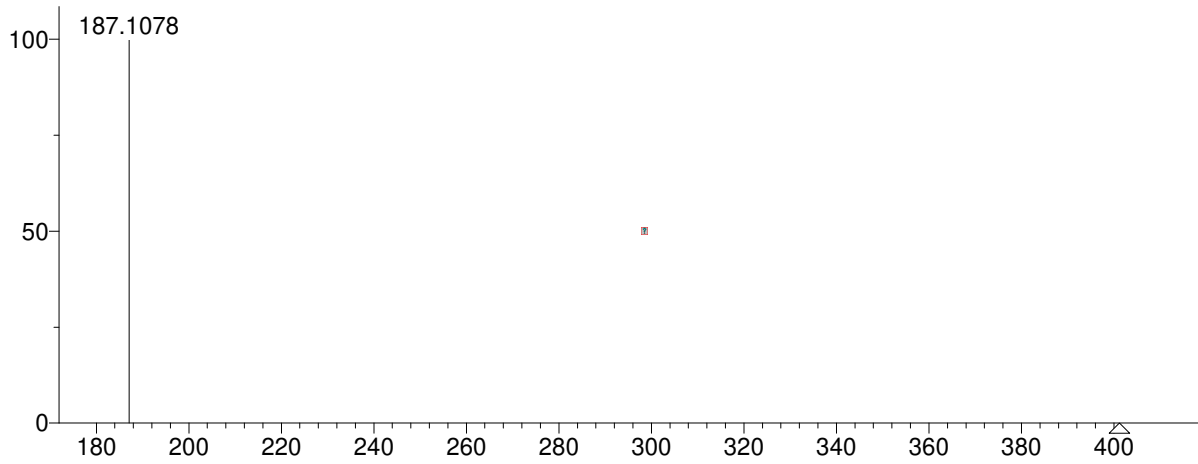

Hit 1 : NCGC00380382-01\_C23H30O7\_1-Phenanthrenecarboxylic acid, 10-(acetyloxy)-1,2,3,4,4a,9,10,10a-octa  
C23H30O7; MF: 0; RMF: 17; Prob 100.0%; Lib: mona-export-gnps; ID: 13719.

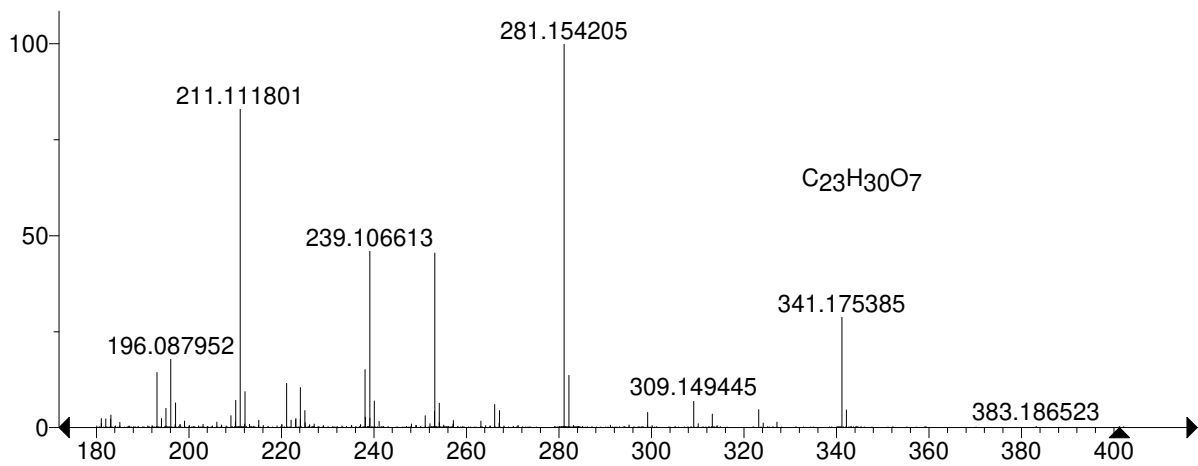

Unknown: Unknown (9.72\_576.2297m/z)  
Compound in Library Factor = 0

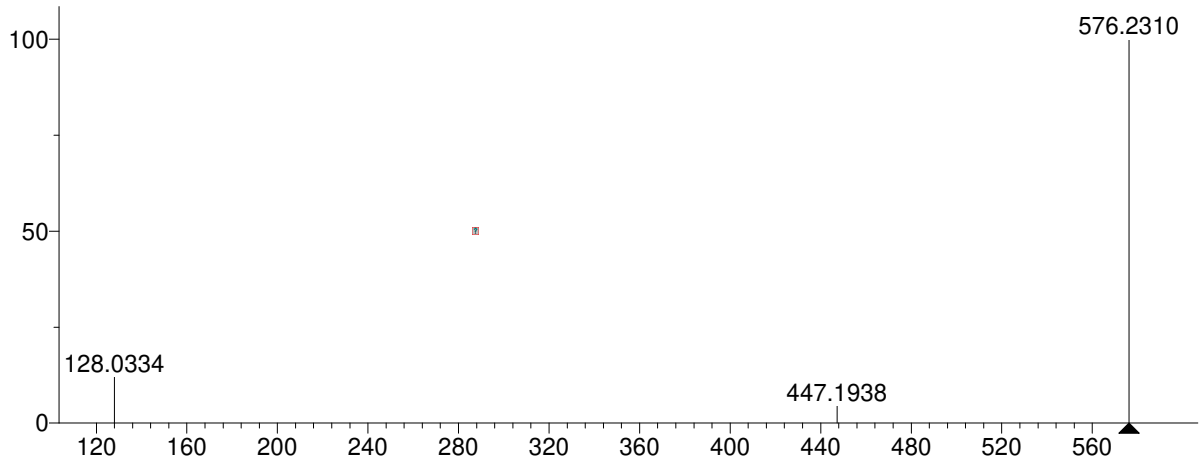

\*\* Search Report Page 1 of 2 \*\*

Unknown: Unknown (9.78\_399.2107m/z)  
Compound in Library Factor = 0

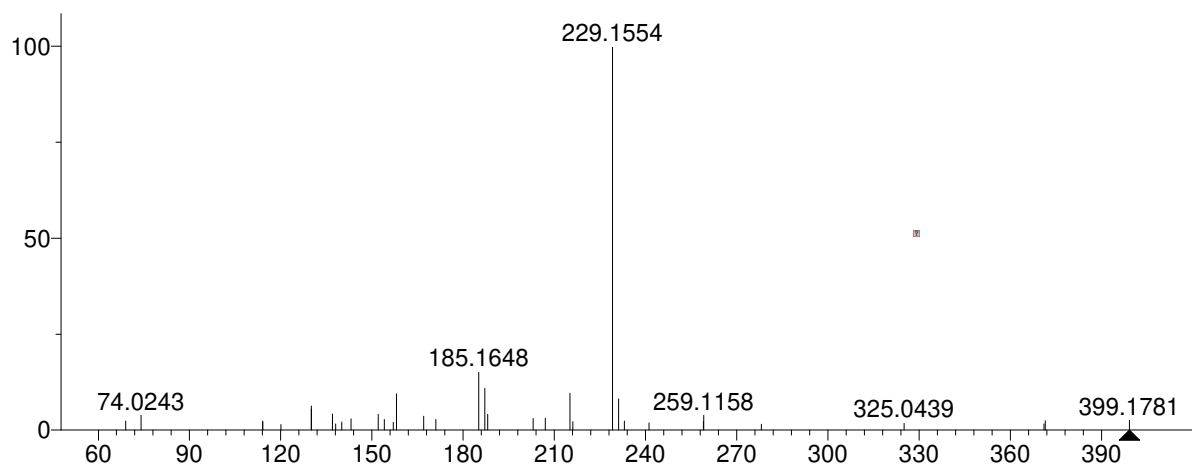

Hit 1 : N-Desmethylvinblastine [M+2H]<sup>2+</sup> HCD 14V P=399.2  
C<sub>45</sub>H<sub>56</sub>N<sub>4</sub>O<sub>9</sub>; MF: 0; RMF: 89; Prob 20.0%; CAS: 18172-50-4; Lib: nist\_msms; ID: 435586.

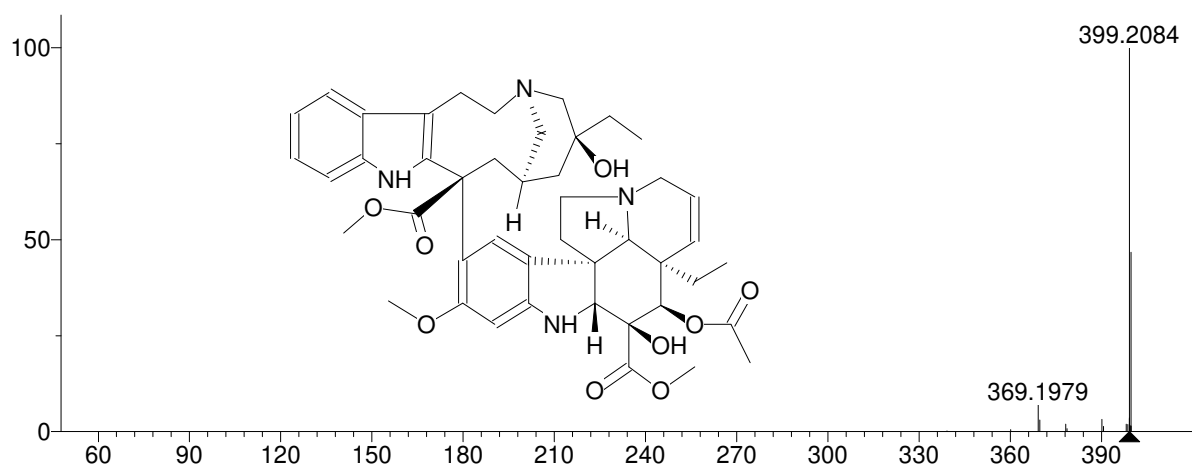

Hit 2 : Ser-His-Arg [M+H]<sup>+</sup> QTOF 30V P=399.2  
C<sub>15</sub>H<sub>26</sub>N<sub>8</sub>O<sub>5</sub>; MF: 0; RMF: 20; Prob 20.0%; Lib: nist\_msms; ID: 53772.

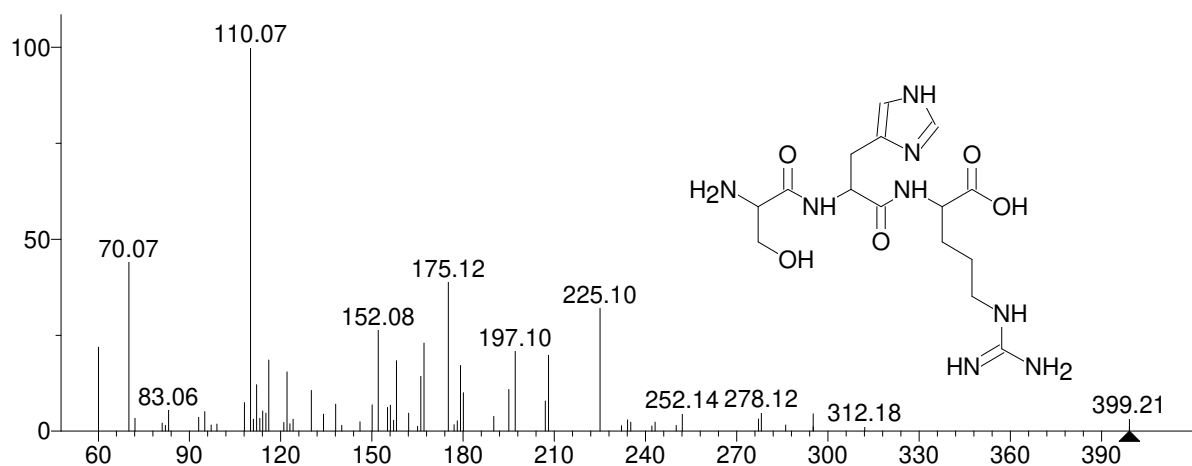

Hit 3 : His-Ser-Arg [M+H]<sup>+</sup> QTOF 30V P=399.2  
C<sub>15</sub>H<sub>26</sub>N<sub>8</sub>O<sub>5</sub>; MF: 0; RMF: 19; Prob 20.0%; Lib: nist\_msms; ID: 51160.

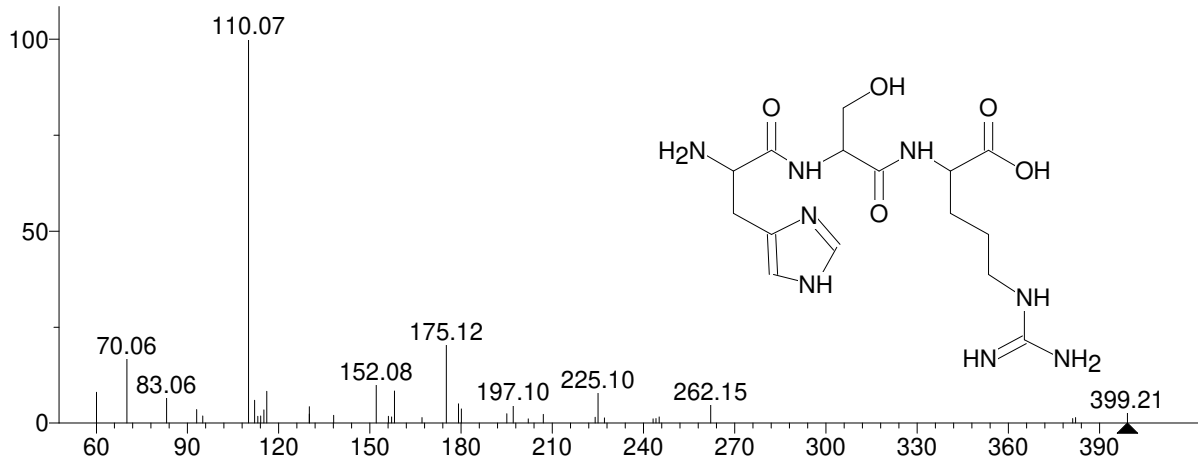

Hit 4 : NCGC00380576-01\_C<sub>22</sub>H<sub>32</sub>O<sub>5</sub>\_2-Pentenoic acid, 3-[(acetyloxy)methyl]-5-[(1S,4aR,8aR)-2-formyl-1,4,4a,

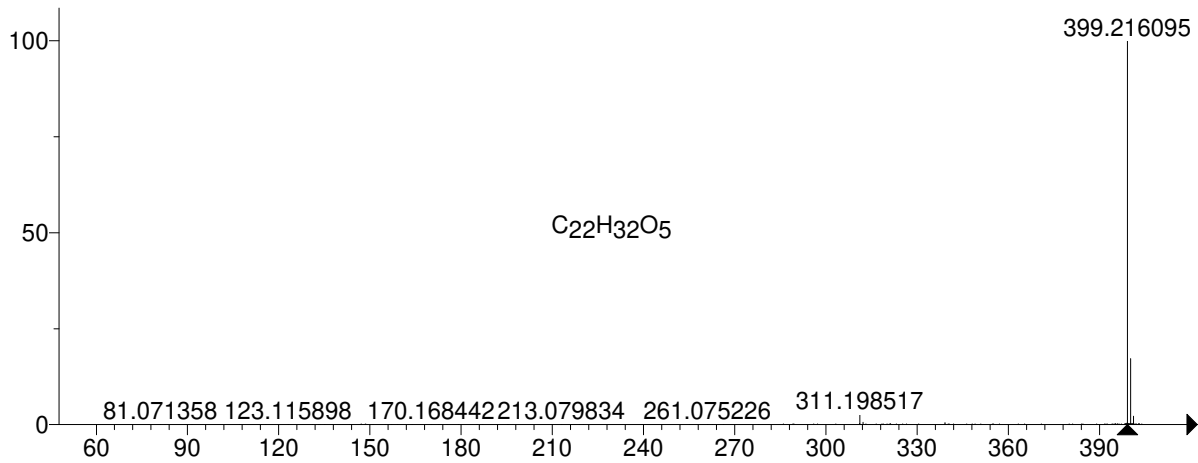

Hit 5 : 7S,8,17S-Trihydroxydocosa-4Z,9E,11E,13Z,15E,19Z-hexaenoic acid [M+Na]<sup>+</sup> HCD 31V P=399.2  
C<sub>22</sub>H<sub>32</sub>O<sub>5</sub>; MF: 0; RMF: 4; Prob 20.0%; CAS: 872993-05-0; Lib: nist\_msms; ID: 118172.

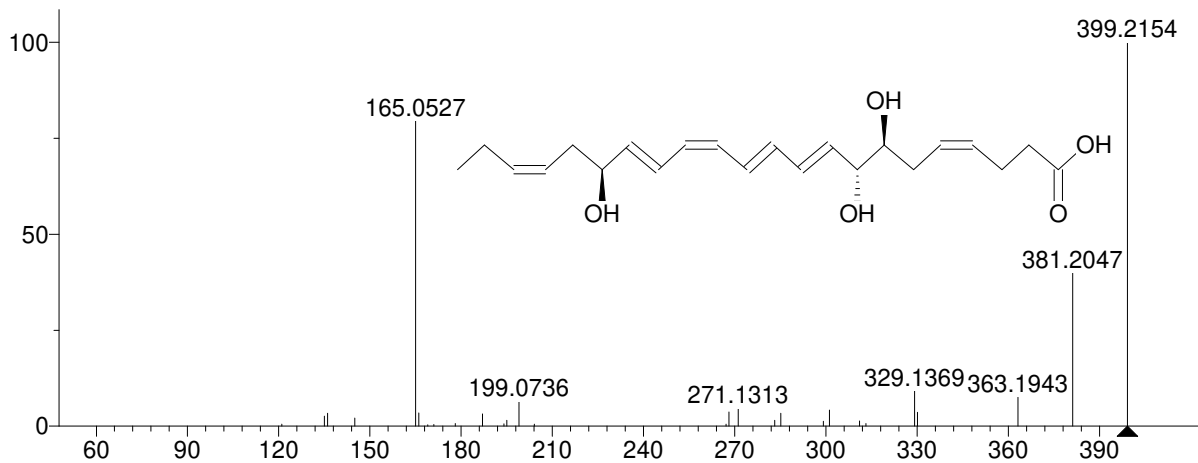

Unknown: Unknown (9.78\_506.1743m/z)  
Compound in Library Factor = 0

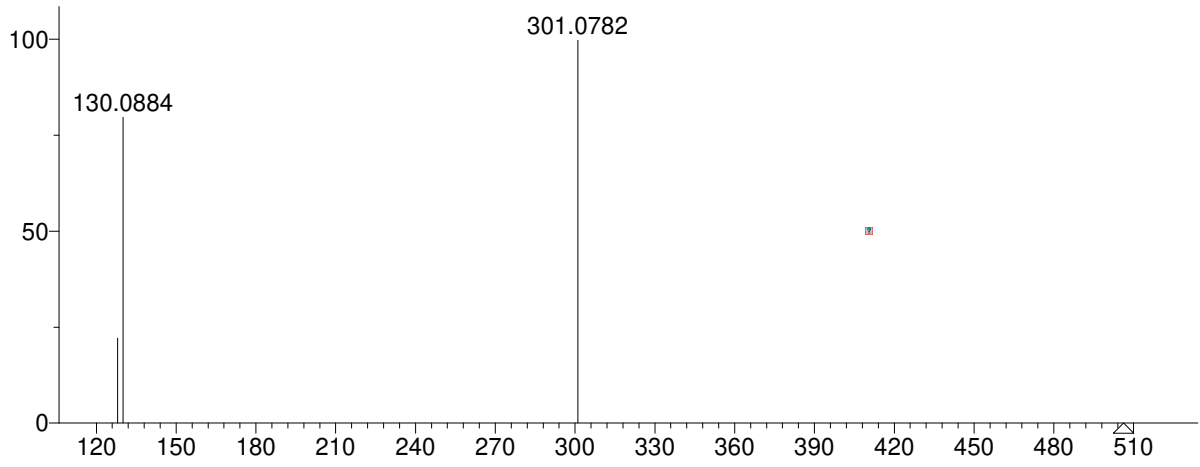



Unknown: Unknown (9.78\_563.2440m/z)  
Compound in Library Factor = 0

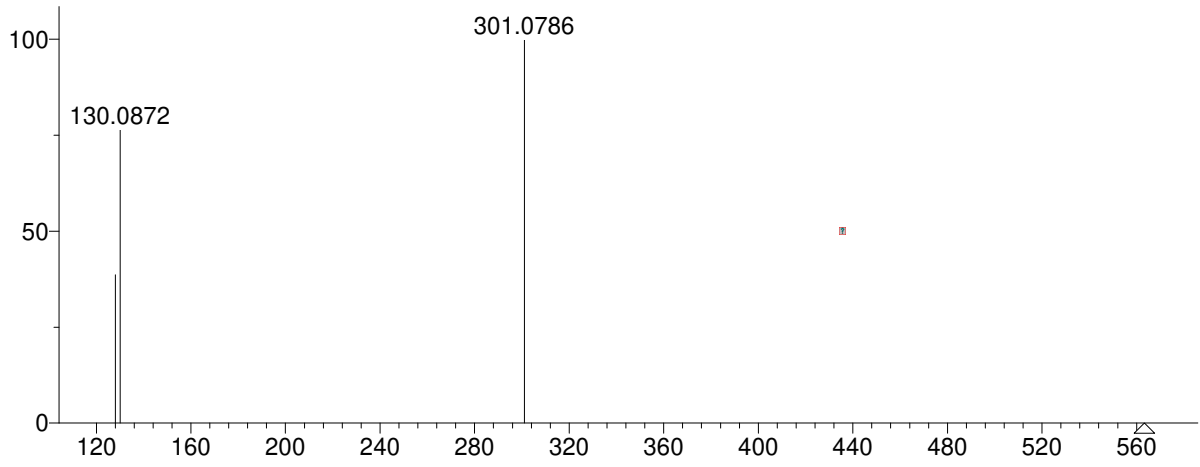

Unknown: Unknown (9.80\_203.0006m/z)  
Compound in Library Factor = 0

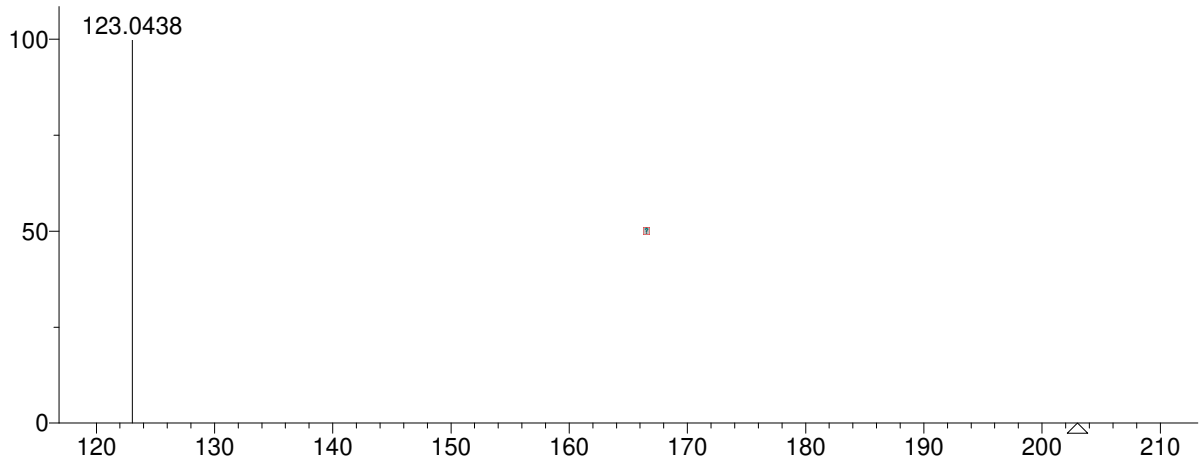

Unknown: Unknown (9.83\_415.1697m/z)  
Compound in Library Factor = 0

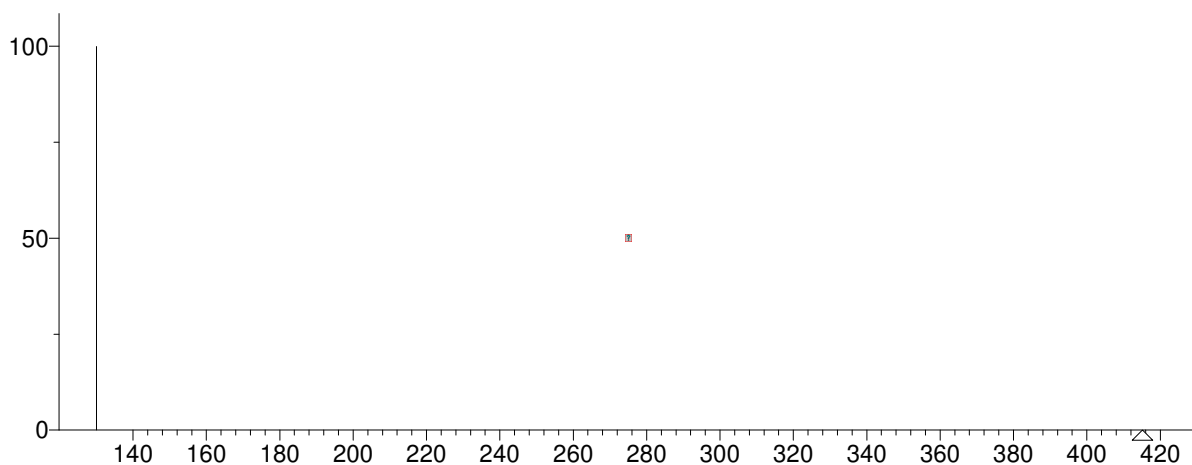

Hit 1 : NCGC00347525-02!2-amino-5-[2-[[2,3-dihydroxy-2-(1-hydroxyethyl)butanoyl]oxymethyl]-4-hydroxyanilino]-  
C<sub>18</sub>H<sub>26</sub>N<sub>2</sub>O<sub>9</sub>; MF: 0; RMF: 9; Prob 100.0%; Lib: mona-export-gnps; ID: 6270.

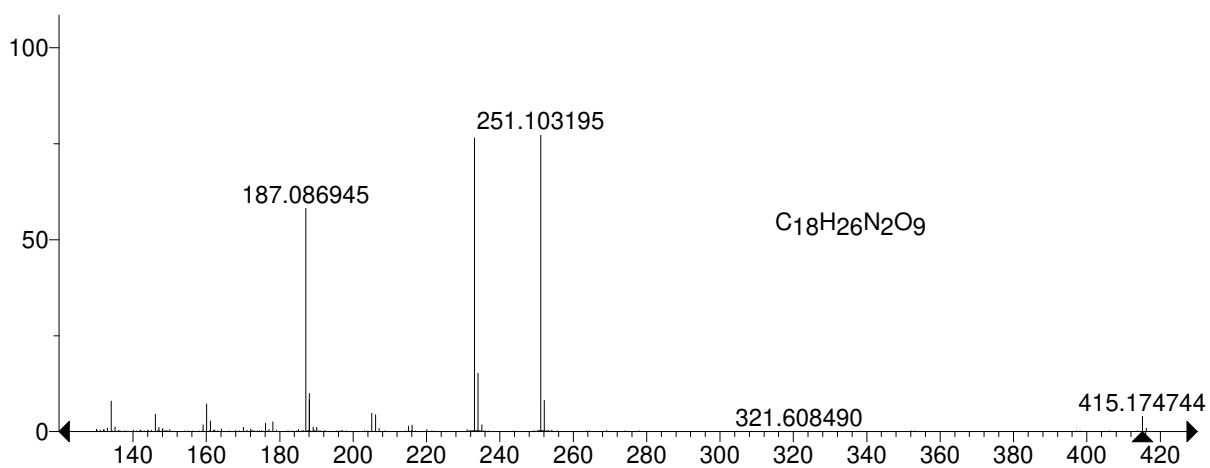

Unknown: Unknown (9.85\_508.1820m/z)  
Compound in Library Factor = 0

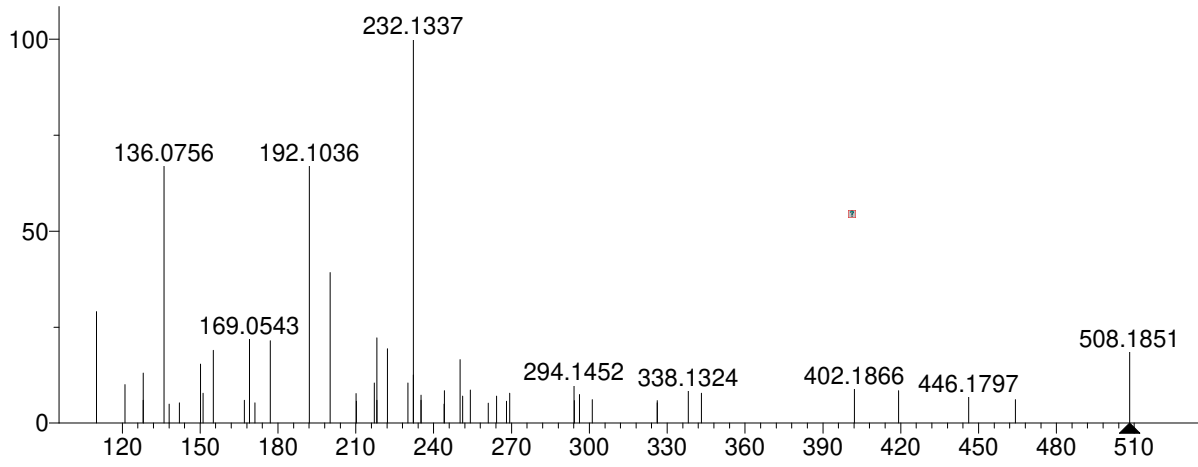

Unknown: Unknown (9.86\_358.1962m/z)  
Compound in Library Factor = 0

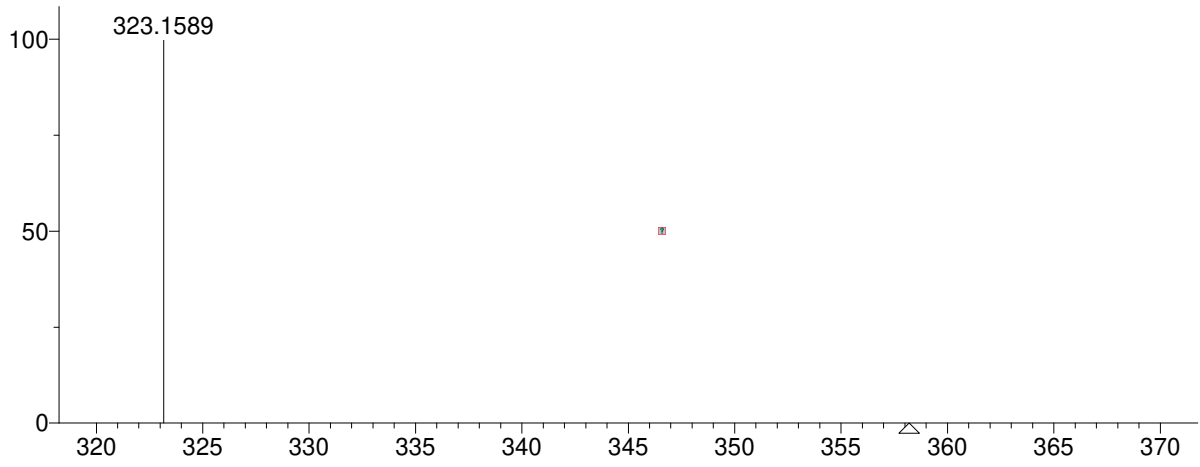

Unknown: Unknown (9.87\_760.3046m/z)  
Compound in Library Factor = 0

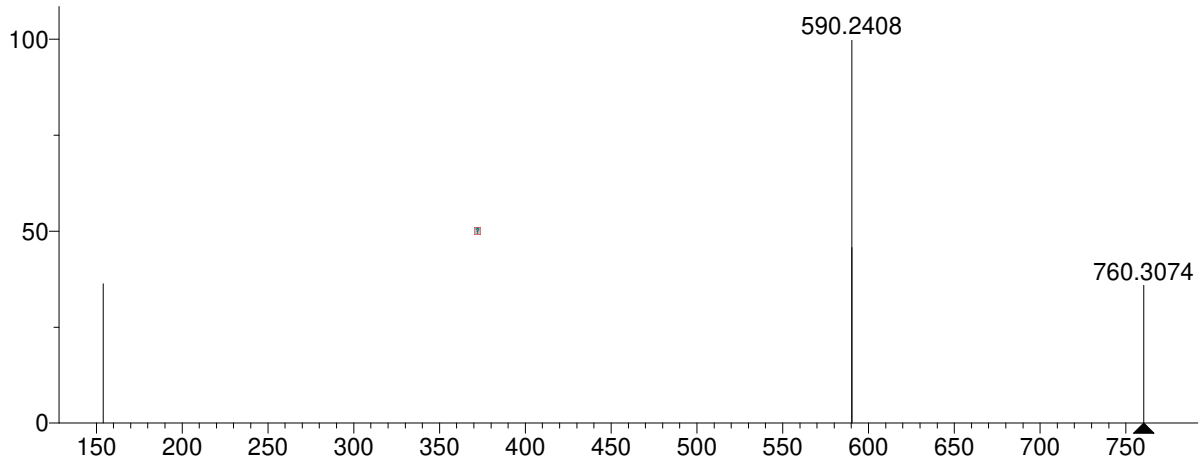

Unknown: Unknown (9.88\_605.2459m/z)  
Compound in Library Factor = 0

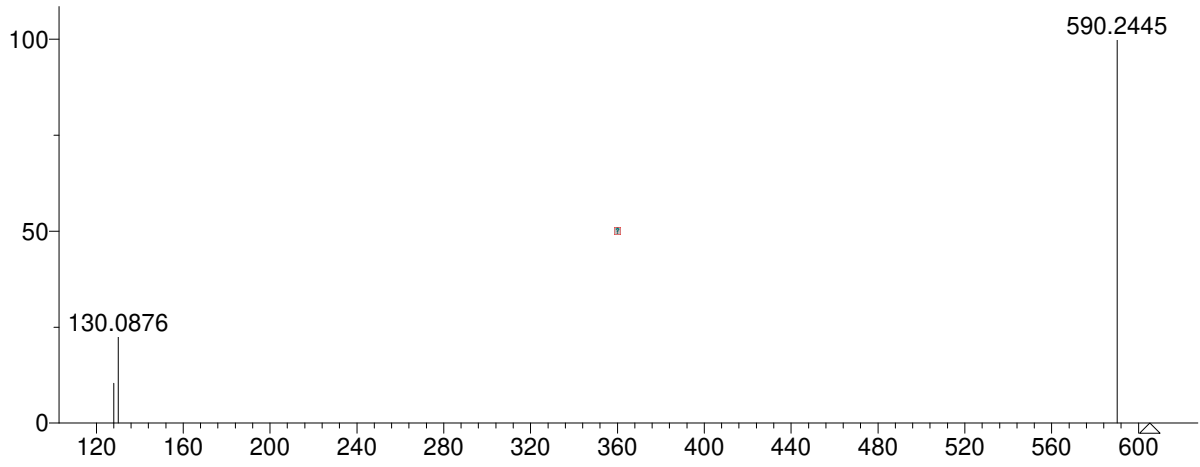

Unknown: Unknown (9.91\_283.1537m/z)  
Compound in Library Factor = -379

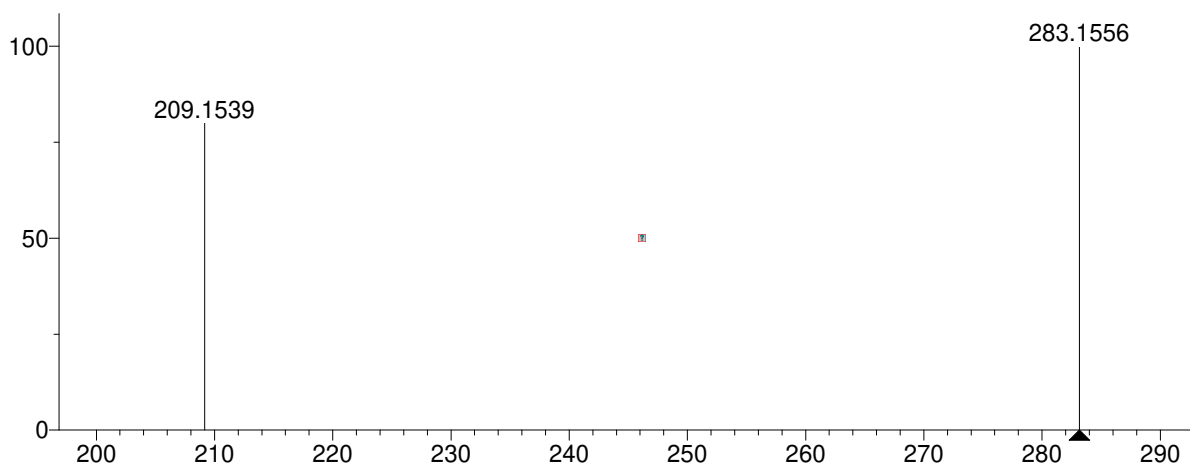

Hit 1 : Artemisinin [M+H]<sup>+</sup> HCD 2V P=283.2  
C<sub>15</sub>H<sub>22</sub>O<sub>5</sub>; MF: 302; RMF: 972; Prob 96.9%; CAS: 63968-64-9; Lib: nist\_msms; ID: 118848.

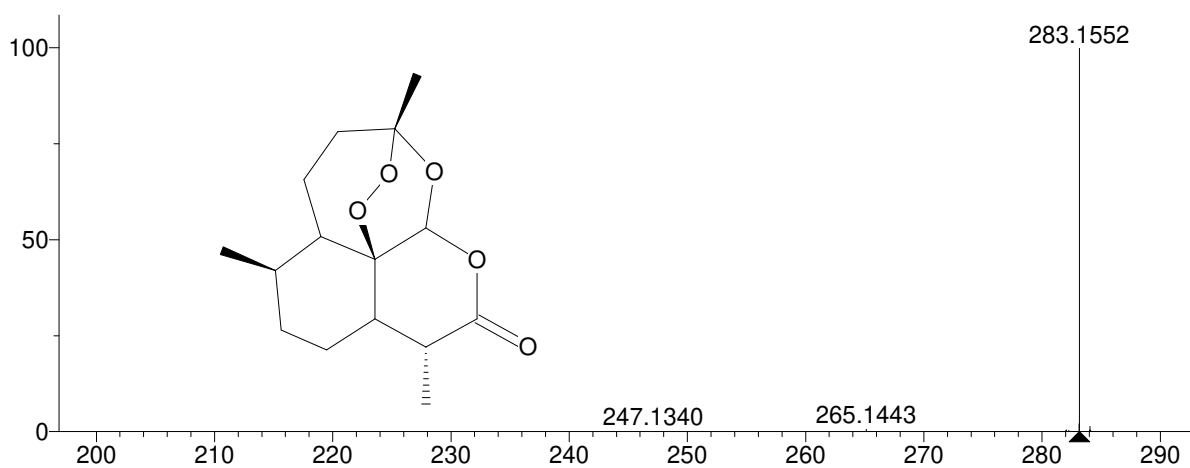

Hit 2 : Octyl gallate [M+H]<sup>+</sup> HCD 1V P=283.2  
C<sub>15</sub>H<sub>22</sub>O<sub>5</sub>; MF: 143; RMF: 705; Prob 2.44%; CAS: 1034-01-1; Lib: nist\_msms; ID: 138058.

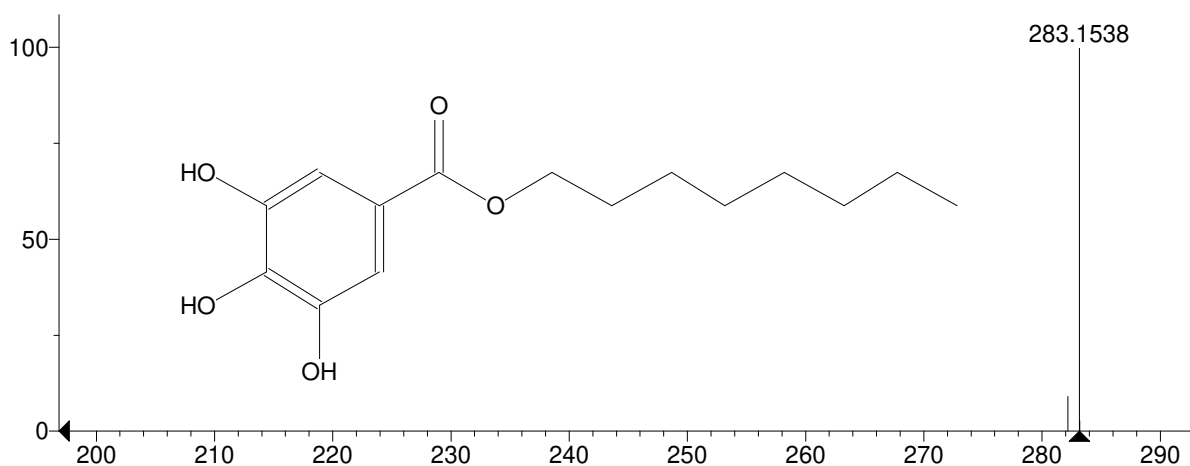



Hit 3 : NCGC00347773-0211-[4,5-bis(hydroxymethyl)-3-methoxy-2-methylphenoxy]-3-methylbutane-2,3-diol [M-H C<sub>15</sub>H<sub>24</sub>O<sub>6</sub>; MF: 51; RMF: 621; Prob 0.20%; Lib: mona-export-gnps; ID: 6416.

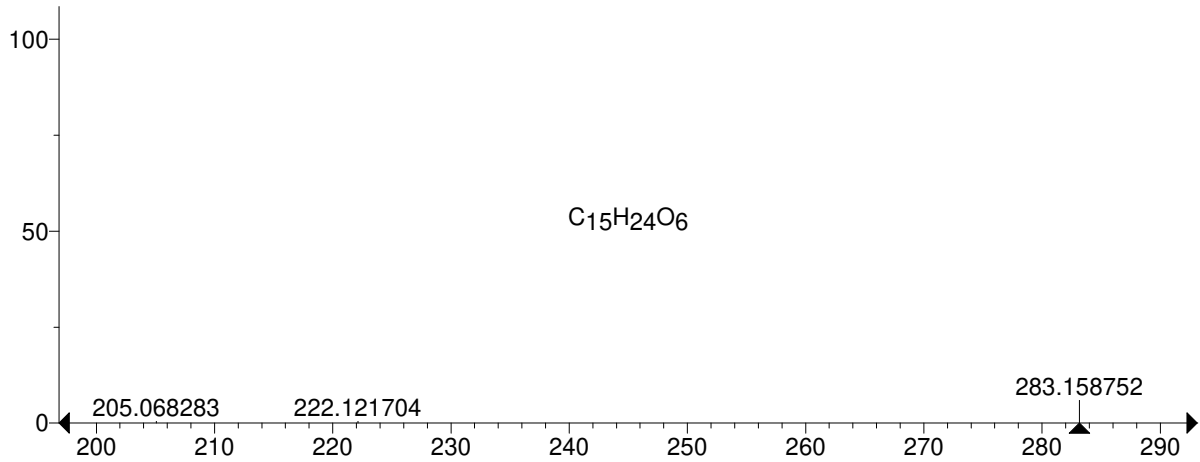

Hit 4 : isomer of dihydrophaseic acid [M+H]<sup>+</sup> P=283.2 C<sub>15</sub>H<sub>22</sub>O<sub>5</sub>; MF: 41; RMF: 586; Prob 0.14%; Lib: mona-export-gnps; ID: 14793.

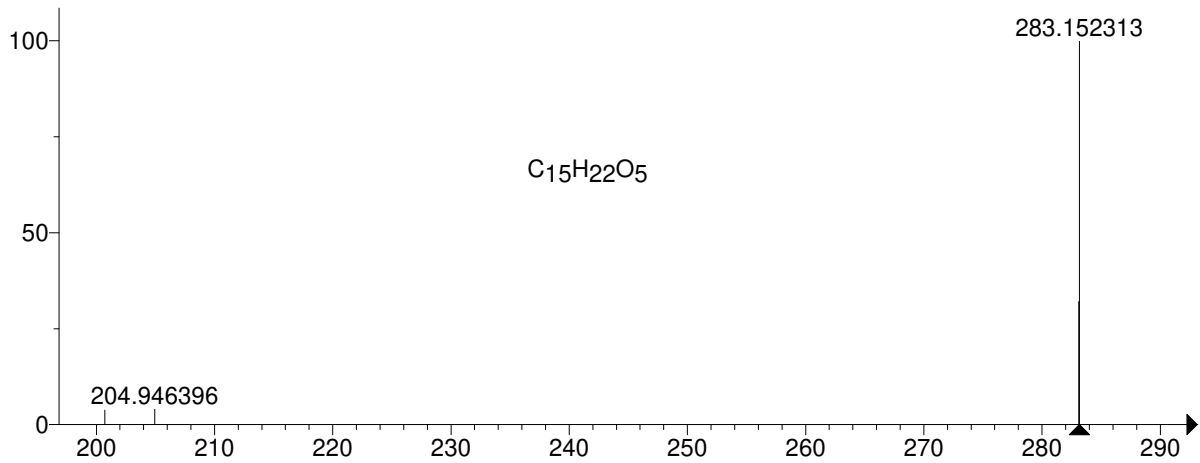

Hit 5 : Cyclopentanehexanoic acid, 2-[(2Z)-4-carboxy-2-buten-1-yl]-3,5-dihydroxy-γ-oxo-, (1R,2R,3S,5S)- [M-H-C C<sub>16</sub>H<sub>24</sub>O<sub>7</sub>; MF: 9; RMF: 366; Prob 0.03%; CAS: 133161-96-3; Lib: nist\_msms; ID: 264214.

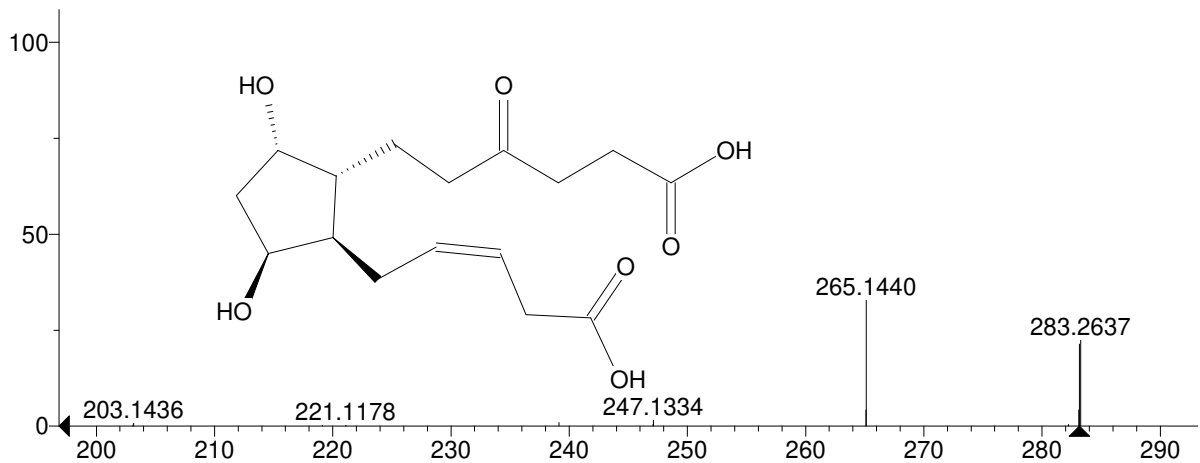

Unknown: Unknown (9.96\_923.4119m/z)  
Compound in Library Factor = 0

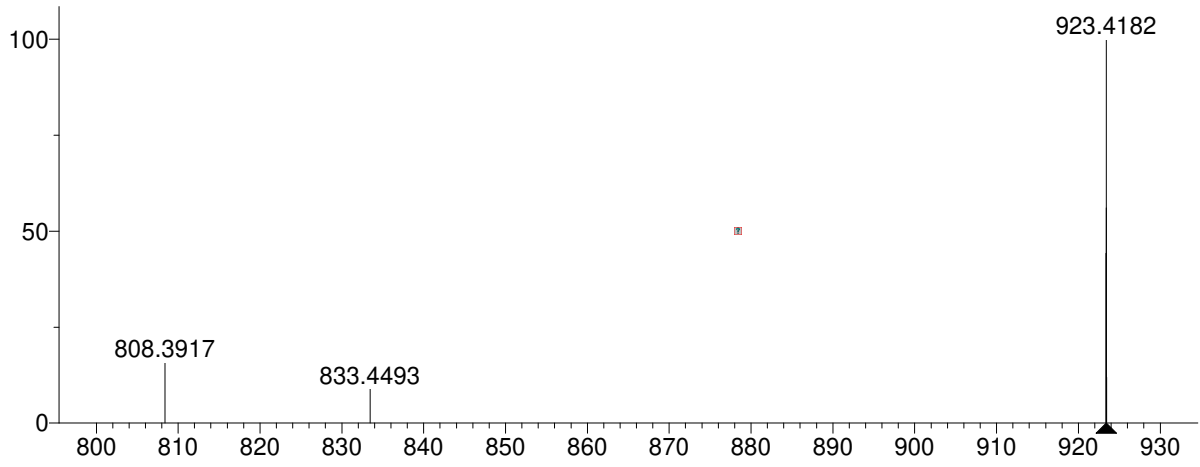

\*\* Search Report Page 1 of 2 \*\*

Unknown: Unknown (9.97\_433.0796m/z)  
Compound in Library Factor = 0

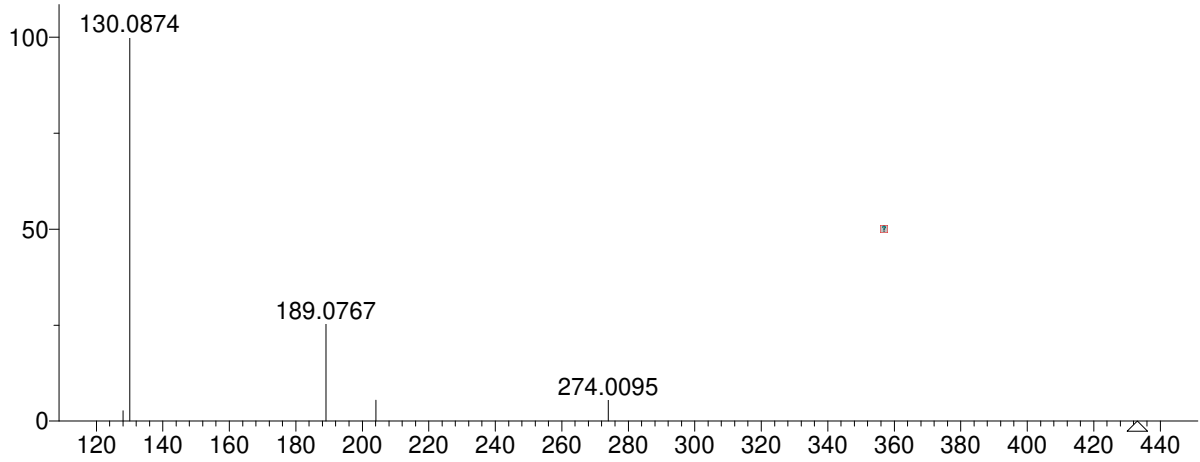

Hit 1 : Quercetin-3-O-xyloside [M-H]<sup>-</sup> 30eV P=433.1  
C<sub>20</sub>H<sub>18</sub>O<sub>11</sub>; MF: 0; RMF: 10; Prob 33.3%; Lib: mona anthocyanidin-o-glycosides; ID: 2991.

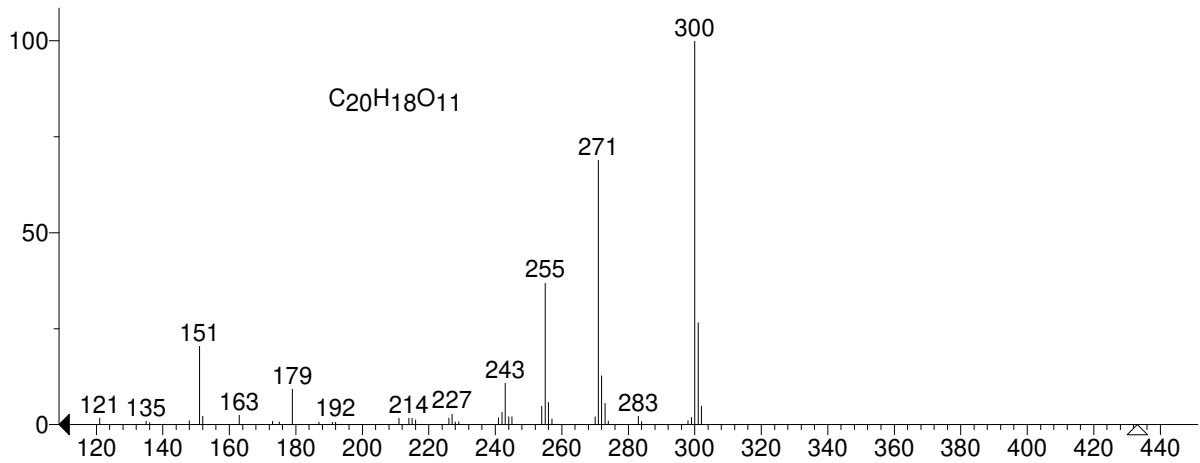

Hit 2 : guajavarin [M-H]<sup>-</sup> 25HCD P=433.1  
C<sub>20</sub>H<sub>18</sub>O<sub>11</sub>; MF: 0; RMF: 4; Prob 33.3%; Lib: mona anthocyanidin-o-glycosides; ID: 5117.

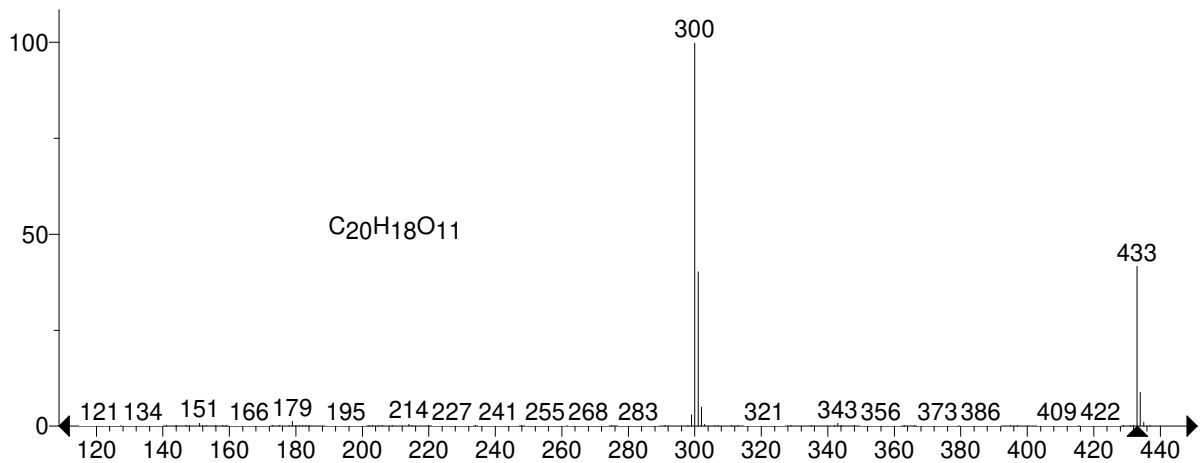

Hit 3 : avicularin [M-H]<sup>-</sup> 35HCD P=433.1  
C<sub>20</sub>H<sub>18</sub>O<sub>11</sub>; MF: 0; RMF: 4; Prob 33.3%; Lib: mona anthocyanidin-o-glycosides; ID: 5329.

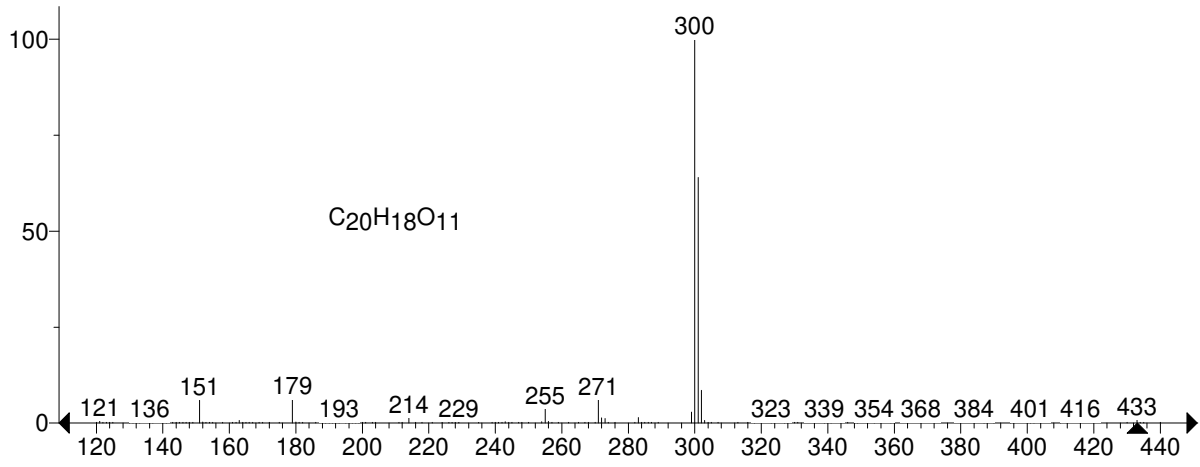

Unknown: Unknown (9.98\_372.2121m/z)  
Compound in Library Factor = -733

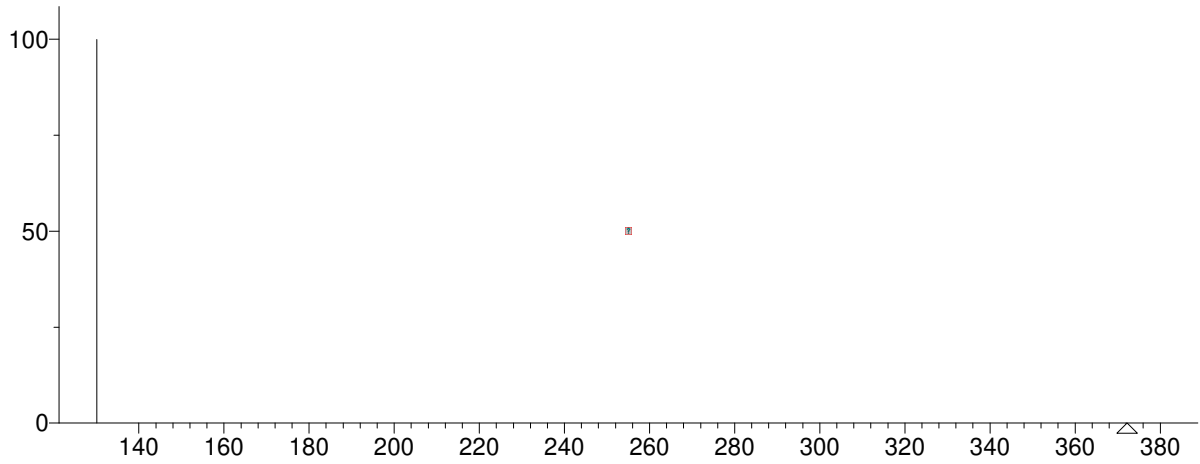

Hit 1 : Unknown (carbon number 17); PlaSMA ID-910 [M-H]<sup>-</sup> P=372.2  
C<sub>17</sub>H<sub>31</sub>N<sub>3</sub>O<sub>6</sub>; MF: 6; RMF: 309; Prob 100.0%; Lib: biomsms-neg-plasma; ID: 1304.

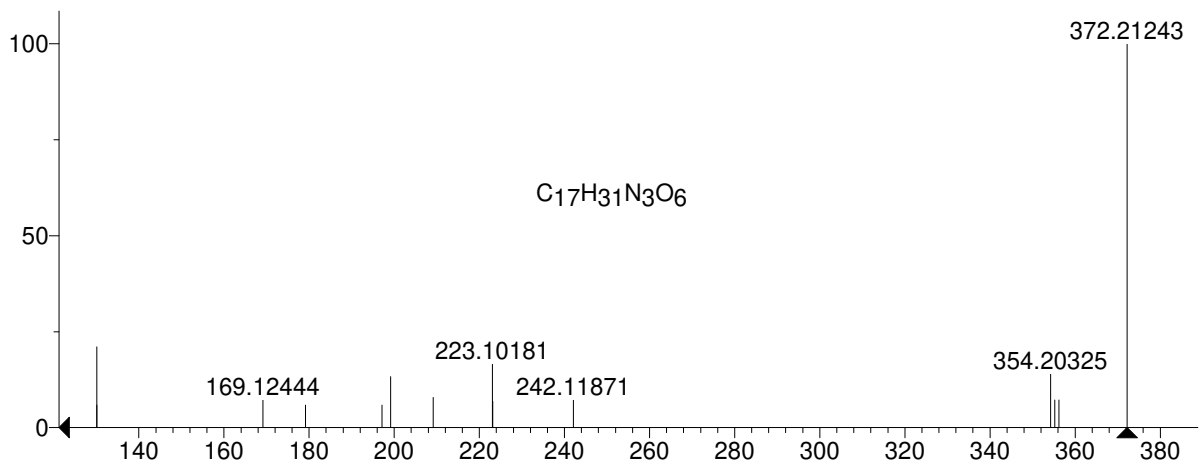

Unknown: Unknown (9.98\_494.1655m/z)  
Compound in Library Factor = 0

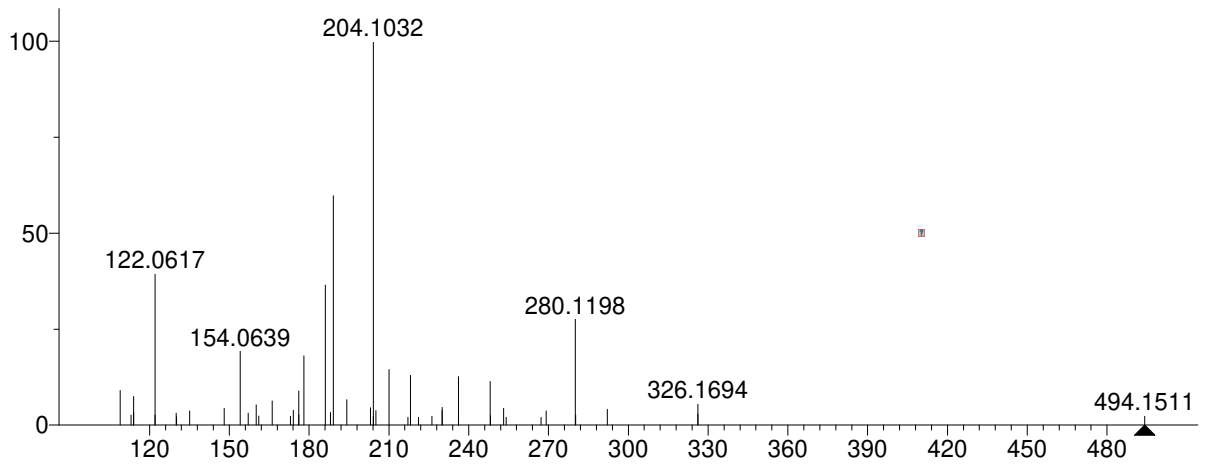

Supplement: s1 [file s1]
